# Supplementary material for: Conformational States of the CXCR4 Inhibitor Peptide EPI-X4—A Theoretical Analysis
Source: MDPI journal article supplement (doi:10.3390/ijms242216229), 2023-11-12
Supplement: s1 [file s1]

## Article

# Conformational states of the CXCR4 inhibitor peptide EPI-X4 - a theoretical analysis

Christoph Karsten Jung <sup>1,2,3\*</sup>, Jan Münch <sup>4</sup>, Timo Jacob <sup>1,2,3</sup>

<sup>1</sup> Helmholtz Institute Ulm (HIU) Electrochemical Energy Storage, Helmholtzstr. 11, D-89081 Ulm, Germany

<sup>2</sup> Karlsruhe Institute of Technology (KIT), P.O. Box 3640, D-76021 Karlsruhe, Germany

<sup>3</sup> Institute of Electrochemistry, Ulm University, Albert-Einstein-Allee 47, D-89081 Ulm, Germany

<sup>4</sup> Institute of Molecular Virology, Ulm University Medical Center, Meyerhofstr. 1, D-89081 Ulm, Germany

\* Correspondence: christoph.jung@kit.edu

## 1. SI

Here, the distance between all possible amino acid residue pairs of the three-dimensional peptide structure is represented using a two-dimensional matrix. The  $ij$  element of the matrix is colored darker, depending on how close the two residues are. The distance between atoms  $i$  and  $j$  (*i.e.* the bond  $C_i-C_j$ ) atom has been established at the threshold of 11 Å. Figure (see SI (f)) also shows the contact map for the published EPI-X4 structure (N1).

(a) Conformer C001

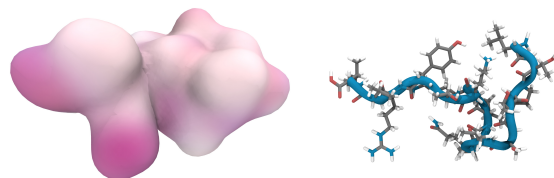

(b) Conformer C026

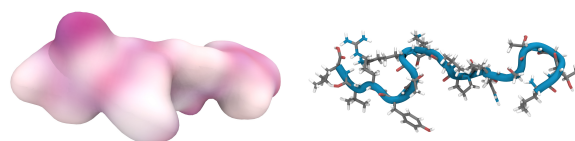

(c) Conformer C054

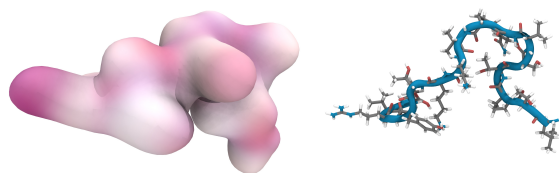

(d) Conformer C090

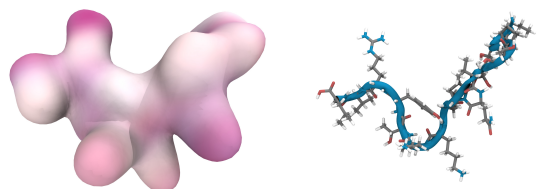

(e) Conformer C125

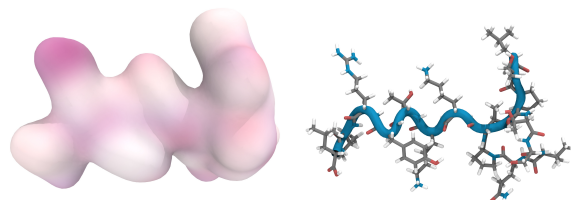

**Figure S1.** Charge distribution of selected conformers gained from ReaxFF structure optimizations.(a) Conformer 001 as the energetically favored conformer, (b)-(e) conformers C026, C054, C090 and C125. Red color refers to negatively charged areas, white represents charge neutrality and blue would refer to positively charged areas of the structures. On the right side are schematics of the conformers shown.

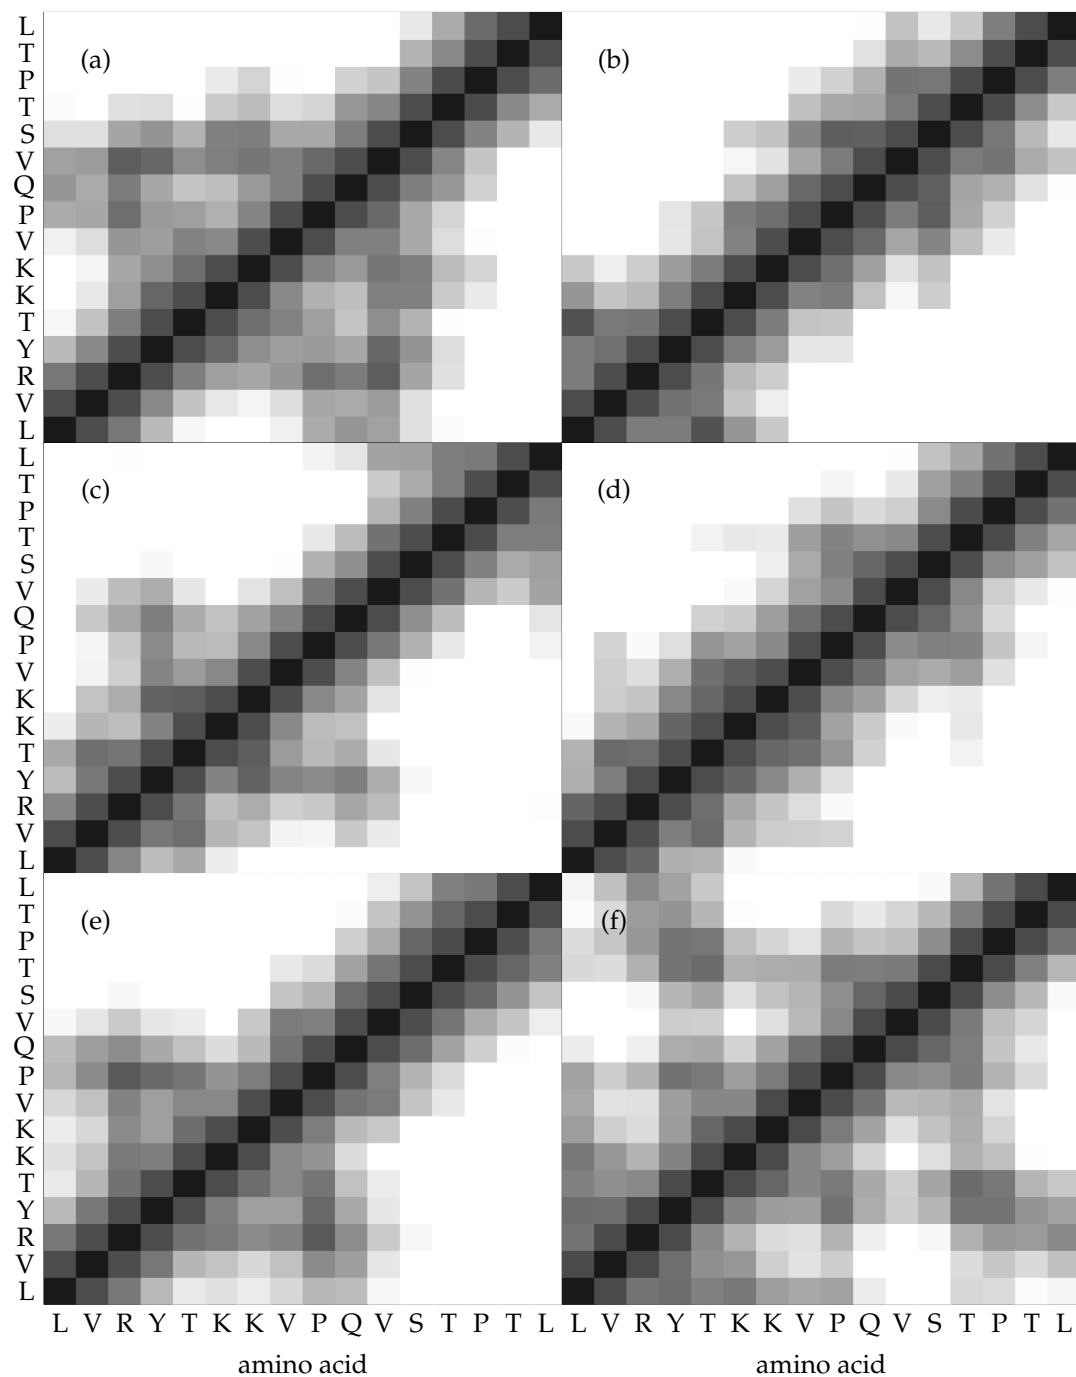

**Figure S2.** Contact maps of certain conformers: (a) Conformer 1 as the energetically favoured structure (b)-(e) conformers C026, C054, C090 and C125 (f) NMR conformer N1. White stands both for a distance of 11 Å and more, black for 0 Å. The gray tones are linearly interpolated between white and black.

# Contents

|   |                              |     |
|---|------------------------------|-----|
| 1 | EPI-X4 xyz structures        | 1   |
| 2 | control - SCM's ReaxFF Input | 637 |
| 3 | MD - CXCR4 + EPI-X4          | 638 |

## 1 EPI-X4 xyz structures

The stable structures in comparison with the NMR structure (and this one).

Listing 1: C00001.xmolout

|    |          |          |          |          |             |             |             |          |  |
|----|----------|----------|----------|----------|-------------|-------------|-------------|----------|--|
| 1  | 276      |          |          |          |             |             |             |          |  |
| 2  | 150.0000 | 150.0000 | 150.0000 | 0.0000   | 0.0000      | 0.0000***** | 1.7765      | 7106     |  |
|    | 0.2500   | 300.00   | 0.00     | 0.00     | 0.00        | -1295.6273  | 0.0000      | 300.0000 |  |
| 3  | H        | 67.50467 | 66.03206 | 73.75534 | -2043.14101 | -1757.64893 | 399.89339   | 1        |  |
| 4  | N        | 67.90687 | 66.60675 | 74.49259 | 426.75047   | 490.45733   | -334.42467  | 1        |  |
| 5  | H        | 67.09319 | 66.85163 | 75.05133 | 442.25559   | -1110.30854 | -2448.52907 | 1        |  |
| 6  | C        | 68.70489 | 67.69291 | 74.07796 | 415.32972   | -666.39213  | 83.73172    | 1        |  |
| 7  | H        | 69.30200 | 67.30130 | 73.22781 | 879.32219   | 2491.00447  | 667.35213   | 1        |  |
| 8  | C        | 67.74093 | 68.92001 | 73.68223 | 31.35357    | 477.41777   | 628.23362   | 1        |  |
| 9  | H        | 67.18670 | 69.25304 | 74.59262 | 1168.38489  | 2240.25337  | -1019.71136 | 1        |  |
| 10 | H        | 68.35145 | 69.79807 | 73.36012 | -360.43770  | 2534.90498  | 931.67112   | 1        |  |
| 11 | C        | 66.77373 | 68.51515 | 72.59811 | 463.18208   | 512.70242   | -382.34388  | 1        |  |
| 12 | H        | 66.25868 | 67.57969 | 72.91111 | 1725.29117  | 1863.52247  | -987.07854  | 1        |  |
| 13 | C        | 65.71525 | 69.59270 | 72.39998 | 710.42801   | -144.27427  | -313.15367  | 1        |  |
| 14 | H        | 64.97212 | 69.30247 | 71.61282 | 364.20195   | -1033.13725 | 2494.72524  | 1        |  |
| 15 | H        | 65.14128 | 69.78840 | 73.34251 | 2567.61904  | 335.80679   | 847.48802   | 1        |  |
| 16 | H        | 66.17203 | 70.56514 | 72.08157 | -2587.99029 | 680.92867   | -512.16411  | 1        |  |
| 17 | C        | 67.49361 | 68.25718 | 71.28184 | 268.17616   | 741.64379   | -40.42634   | 1        |  |
| 18 | H        | 66.77736 | 67.97373 | 70.46770 | 1283.54314  | -1945.37420 | -1411.27812 | 1        |  |
| 19 | H        | 68.05007 | 69.16522 | 70.93229 | -1258.57796 | 1317.15249  | -2026.02085 | 1        |  |
| 20 | H        | 68.23920 | 67.42568 | 71.37139 | -2502.84526 | 909.80597   | 575.92391   | 1        |  |
| 21 | C        | 69.58912 | 68.12512 | 75.37727 | 619.36578   | -458.64843  | -172.09273  | 1        |  |
| 22 | O        | 69.10705 | 68.76066 | 76.29653 | -81.40433   | 433.87611   | 522.34594   | 1        |  |
| 23 | N        | 70.85223 | 67.72967 | 75.22088 | 175.23996   | -622.20190  | 341.55523   | 1        |  |
| 24 | H        | 71.07607 | 67.17914 | 74.39208 | -876.57256  | -303.22879  | -2561.90213 | 1        |  |
| 25 | C        | 71.59349 | 67.54527 | 76.43883 | -571.88214  | -534.10783  | -106.15033  | 1        |  |
| 26 | H        | 70.79727 | 67.52437 | 77.21635 | -2713.20841 | -16.25800   | -248.80809  | 1        |  |
| 27 | C        | 72.44684 | 66.19917 | 76.31609 | 166.60354   | 288.16399   | -716.09568  | 1        |  |
| 28 | H        | 73.18667 | 66.31682 | 75.47840 | -2097.85574 | 1636.78449  | -586.18044  | 1        |  |
| 29 | O        | 71.69000 | 65.01068 | 76.03298 | -317.80580  | -363.38227  | 484.43082   | 1        |  |
| 30 | H        | 72.09925 | 64.71701 | 75.19455 | 1863.74748  | -1451.84923 | 1357.29467  | 1        |  |
| 31 | C        | 73.21840 | 66.20910 | 77.68776 | 503.80731   | 517.99032   | 318.51606   | 1        |  |
| 32 | H        | 73.94022 | 65.36244 | 77.75566 | 640.61020   | -2157.10410 | -1536.29104 | 1        |  |
| 33 | H        | 73.80150 | 67.15012 | 77.83254 | 1687.88455  | 465.60692   | 2087.56452  | 1        |  |
| 34 | H        | 72.51756 | 66.11527 | 78.54959 | -1293.07895 | -1899.88581 | -1463.57452 | 1        |  |
| 35 | C        | 72.63430 | 68.78404 | 76.59303 | -153.07550  | -733.68902  | 248.70981   | 1        |  |
| 36 | O        | 73.61624 | 68.87146 | 75.87299 | 186.15459   | -480.78787  | -449.34387  | 1        |  |
| 37 | N        | 72.27568 | 69.56283 | 77.61520 | -487.53139  | 543.18517   | 42.03850    | 1        |  |
| 38 | C        | 73.04234 | 70.72584 | 77.95789 | -699.35871  | 69.34393    | 360.10701   | 1        |  |
| 39 | H        | 73.39053 | 71.14887 | 76.98966 | 2.81126     | -221.99807  | -2715.58072 | 1        |  |
| 40 | C        | 71.98395 | 71.60116 | 78.74255 | -507.46439  | -592.59194  | 122.07761   | 1        |  |
| 41 | H        | 72.46211 | 72.36385 | 79.39667 | -1975.08116 | 525.87560   | -1801.71556 | 1        |  |
| 42 | H        | 71.32949 | 72.15301 | 78.03221 | 1588.27743  | -1913.22100 | 1113.83566  | 1        |  |
| 43 | C        | 71.18086 | 70.51101 | 79.52250 | -613.62442  | -457.55993  | -194.14490  | 1        |  |
| 44 | H        | 71.73160 | 70.19682 | 80.43719 | 1707.54637  | -721.27992  | 1996.92523  | 1        |  |
| 45 | H        | 70.17672 | 70.85174 | 79.86106 | 758.23357   | 2100.81767  | 1560.55011  | 1        |  |
| 46 | C        | 71.11360 | 69.33173 | 78.46295 | -352.41524  | 704.96076   | 49.21465    | 1        |  |



|     |   |          |          |          |             |             |             |   |
|-----|---|----------|----------|----------|-------------|-------------|-------------|---|
| 47  | H | 71.20805 | 68.30973 | 78.90104 | 1714.76886  | -2070.42778 | 443.35792   | 1 |
| 48  | H | 70.22412 | 69.35705 | 77.75695 | 1224.15040  | 1801.50881  | 1636.97633  | 1 |
| 49  | C | 74.29204 | 70.20397 | 78.88857 | 566.85117   | 537.05831   | 117.62814   | 1 |
| 50  | O | 74.35944 | 70.43024 | 80.06883 | -550.26779  | -406.08867  | 4.21666     | 1 |
| 51  | N | 75.10344 | 69.50789 | 78.09856 | 566.34832   | -425.77725  | 180.18749   | 1 |
| 52  | H | 74.85432 | 69.37418 | 77.09582 | 644.44502   | 2646.80550  | -52.73430   | 1 |
| 53  | C | 76.43380 | 69.26456 | 78.58789 | 612.34801   | -281.48662  | 411.56221   | 1 |
| 54  | H | 76.31023 | 68.72733 | 79.55389 | 1667.23498  | -1490.75142 | 1556.16753  | 1 |
| 55  | C | 77.13853 | 68.41691 | 77.43634 | -714.45746  | -175.43074  | 286.98927   | 1 |
| 56  | H | 77.02126 | 68.98044 | 76.47076 | -787.09484  | 1763.03619  | -1922.46060 | 1 |
| 57  | O | 76.57272 | 67.11432 | 77.18389 | -429.46514  | 516.51932   | -128.40526  | 1 |
| 58  | H | 76.19034 | 67.24455 | 76.29290 | 1981.82785  | 436.16847   | -1818.18182 | 1 |
| 59  | C | 78.64606 | 68.45608 | 77.88369 | 630.79189   | -468.94448  | 76.03230    | 1 |
| 60  | H | 79.30769 | 67.97335 | 77.12756 | -1775.71861 | 2062.30353  | 131.89849   | 1 |
| 61  | H | 79.00909 | 69.50177 | 78.02321 | -1855.14608 | 88.94118    | 1993.53760  | 1 |
| 62  | H | 78.79966 | 67.91953 | 78.84847 | -1504.82350 | -780.94249  | -2132.90992 | 1 |
| 63  | C | 77.11921 | 70.72276 | 78.76248 | 288.57638   | 618.62814   | -397.00270  | 1 |
| 64  | O | 77.24881 | 71.48979 | 77.81134 | 321.70495   | -185.26452  | 574.37218   | 1 |
| 65  | N | 77.55870 | 70.92090 | 80.03762 | -447.05792  | -446.53431  | 367.76425   | 1 |
| 66  | H | 77.33186 | 70.00450 | 80.45788 | 350.31316   | 1975.63644  | -1843.31522 | 1 |
| 67  | C | 76.90830 | 72.03780 | 80.72782 | -511.23061  | 374.03917   | -471.51480  | 1 |
| 68  | H | 75.91038 | 72.10271 | 80.23481 | 2234.79579  | -898.70890  | -1273.45190 | 1 |
| 69  | C | 76.81895 | 71.56396 | 82.24587 | 529.53781   | -159.34528  | 563.72604   | 1 |
| 70  | H | 76.32568 | 72.37159 | 82.84977 | 654.59388   | 2347.94251  | 1217.51488  | 1 |
| 71  | H | 76.12195 | 70.68409 | 82.26225 | -1526.55661 | 2103.42026  | 817.87394   | 1 |
| 72  | O | 78.07639 | 71.21624 | 82.89776 | -554.84278  | 14.12789    | 399.58769   | 1 |
| 73  | H | 78.36291 | 70.49401 | 82.31243 | 1297.06236  | 2061.84854  | 1220.68812  | 1 |
| 74  | C | 77.72757 | 73.39128 | 80.58280 | -662.15484  | -412.13544  | 123.62687   | 1 |
| 75  | O | 77.74185 | 74.22915 | 81.46761 | -540.01537  | -317.05804  | 274.91456   | 1 |
| 76  | N | 78.28211 | 73.47425 | 79.37147 | -202.76299  | -690.00100  | -131.49145  | 1 |
| 77  | H | 78.04981 | 72.74780 | 78.64765 | -702.62132  | -2617.37191 | 281.70413   | 1 |
| 78  | C | 79.12342 | 74.62070 | 79.00829 | -491.73914  | 576.34187   | 222.73509   | 1 |
| 79  | H | 79.66224 | 74.85073 | 79.95846 | 1977.17978  | -1823.58850 | -434.68928  | 1 |
| 80  | C | 80.00058 | 74.19279 | 77.84728 | -649.50797  | -328.66843  | 306.11224   | 1 |
| 81  | H | 79.33352 | 73.98493 | 76.97809 | 2075.07803  | 1452.16490  | -1004.45904 | 1 |
| 82  | C | 80.95990 | 75.29693 | 77.44242 | -615.18735  | -489.99689  | -70.96352   | 1 |
| 83  | H | 81.58311 | 75.00140 | 76.55391 | -1226.32661 | -1724.38906 | -1716.47170 | 1 |
| 84  | H | 80.40194 | 76.23622 | 77.16543 | 2381.64273  | -969.84735  | 900.46860   | 1 |
| 85  | H | 81.66821 | 75.55903 | 78.27621 | 2122.74991  | 1702.23946  | -141.36228  | 1 |
| 86  | C | 80.76566 | 72.91784 | 78.15280 | -501.86074  | -479.61276  | -376.42482  | 1 |
| 87  | H | 81.37147 | 72.57291 | 77.27062 | 993.79261   | -2246.95401 | -1177.81305 | 1 |
| 88  | H | 81.47600 | 73.05941 | 79.01298 | 42.71279    | -626.15391  | -2651.37258 | 1 |
| 89  | H | 80.07215 | 72.07731 | 78.43359 | -2026.39012 | -1590.33709 | -887.82922  | 1 |
| 90  | C | 78.08471 | 75.83580 | 78.55982 | -672.89153  | 382.57394   | -156.34072  | 1 |
| 91  | O | 78.13286 | 76.27196 | 77.44050 | 410.04627   | 221.86223   | 500.35950   | 1 |
| 92  | N | 77.40525 | 76.24963 | 79.61603 | -378.11782  | -443.79414  | -441.10984  | 1 |
| 93  | H | 77.57352 | 75.73793 | 80.51208 | 2404.15973  | -568.14894  | 1149.30085  | 1 |
| 94  | C | 76.09132 | 76.81654 | 79.46788 | -544.54484  | 466.16019   | 331.29119   | 1 |
| 95  | H | 76.02455 | 77.51722 | 80.32982 | -1409.80988 | -170.17955  | 2325.32679  | 1 |
| 96  | C | 75.97848 | 77.53701 | 78.07071 | -184.48284  | 116.78282   | -758.89137  | 1 |
| 97  | H | 76.90538 | 78.12634 | 77.87134 | 1893.78641  | 1861.14652  | 611.04528   | 1 |
| 98  | H | 75.92327 | 76.77468 | 77.25295 | -2170.79665 | -974.19311  | 1327.50117  | 1 |
| 99  | C | 74.73279 | 78.47818 | 78.01747 | 389.51668   | 672.81878   | -138.49152  | 1 |
| 100 | H | 73.79768 | 77.87495 | 78.05768 | 510.64577   | 1933.03327  | 1851.02484  | 1 |
| 101 | H | 74.70548 | 79.17087 | 78.88572 | -2302.30869 | -1105.72939 | -948.89774  | 1 |
| 102 | C | 74.85818 | 79.29245 | 76.64731 | -559.93427  | -126.34590  | 542.30857   | 1 |
| 103 | O | 75.09032 | 80.47114 | 76.58906 | -670.36003  | -111.83166  | 76.36448    | 1 |
| 104 | N | 74.72309 | 78.43315 | 75.62859 | -216.06729  | -537.07037  | 446.51379   | 1 |
| 105 | H | 74.58869 | 77.38111 | 75.74746 | -1251.96487 | 1074.12894  | -2168.52500 | 1 |
| 106 | H | 74.87042 | 78.62655 | 74.61232 | -2451.83023 | -720.73851  | 944.84612   | 1 |
| 107 | C | 75.01965 | 75.59585 | 79.61113 | 546.24052   | -563.88337  | -85.11809   | 1 |
| 108 | O | 75.11550 | 74.58121 | 78.97234 | 71.70702    | -307.40463  | 606.69673   | 1 |

|     |   |          |          |          |             |             |             |   |
|-----|---|----------|----------|----------|-------------|-------------|-------------|---|
| 109 | N | 74.06823 | 75.94915 | 80.50356 | 479.90863   | -504.50129  | 222.86849   | 1 |
| 110 | C | 73.04390 | 75.04331 | 80.87025 | 75.51268    | -600.91904  | 506.73700   | 1 |
| 111 | H | 73.40228 | 74.02297 | 80.60523 | -2033.61562 | 1795.30103  | 254.89480   | 1 |
| 112 | C | 72.87521 | 75.35797 | 82.41300 | 523.79067   | 517.99274   | 284.45581   | 1 |
| 113 | H | 71.90545 | 74.99835 | 82.82498 | 1599.61665  | -1127.00911 | 1895.98173  | 1 |
| 114 | H | 73.67974 | 74.88336 | 83.01810 | -1881.83093 | 1275.82488  | -1501.55016 | 1 |
| 115 | C | 73.00690 | 76.91416 | 82.41380 | -600.05639  | -404.05026  | 316.64485   | 1 |
| 116 | H | 72.05545 | 77.39463 | 82.08536 | -2597.05260 | 496.36221   | 657.73249   | 1 |
| 117 | H | 73.24746 | 77.34118 | 83.41351 | -1666.24518 | 1294.38985  | -1723.90591 | 1 |
| 118 | C | 74.15852 | 77.13912 | 81.34547 | 493.57570   | -129.95376  | -602.56394  | 1 |
| 119 | H | 74.01637 | 78.03004 | 80.68963 | -1469.08415 | -637.84797  | 2204.22581  | 1 |
| 120 | H | 75.19365 | 77.14515 | 81.76535 | -1038.97840 | 1068.88701  | -2280.71789 | 1 |
| 121 | C | 71.60616 | 75.44552 | 80.11771 | 188.88100   | 241.05089   | -727.87821  | 1 |
| 122 | O | 71.10559 | 76.54103 | 80.22188 | 531.88613   | -49.19943   | 427.07960   | 1 |
| 123 | N | 70.81306 | 74.24628 | 80.40650 | 708.14833   | 26.93417    | -179.73509  | 1 |
| 124 | H | 71.36353 | 73.42484 | 80.65918 | -2232.69501 | -1179.09831 | 1023.94816  | 1 |
| 125 | C | 69.81847 | 73.97521 | 79.35940 | -738.32412  | 259.92548   | 104.42456   | 1 |
| 126 | H | 69.55203 | 72.89351 | 79.41996 | 2028.89123  | 1260.02983  | 1311.33324  | 1 |
| 127 | C | 68.63477 | 74.91059 | 79.56705 | -258.65678  | -345.52513  | 661.28459   | 1 |
| 128 | H | 69.02888 | 75.95434 | 79.55278 | -1826.06090 | -1801.46097 | -918.64554  | 1 |
| 129 | C | 67.60443 | 74.76279 | 78.46439 | -541.23400  | 531.92970   | -218.41428  | 1 |
| 130 | H | 66.72750 | 75.44939 | 78.62063 | 1311.73218  | -2219.18200 | 882.19023   | 1 |
| 131 | H | 68.03982 | 75.00195 | 77.45500 | -1048.71298 | 1223.58118  | -2196.97971 | 1 |
| 132 | H | 67.20007 | 73.71433 | 78.41360 | 419.06414   | 1903.92898  | 1903.44670  | 1 |
| 133 | C | 67.99175 | 74.68767 | 80.92360 | -423.86431  | 152.66566   | -648.55262  | 1 |
| 134 | H | 67.14663 | 75.40575 | 81.10973 | 105.68386   | -2342.50080 | 1387.51238  | 1 |
| 135 | H | 67.57499 | 73.64762 | 81.01940 | -1695.63603 | -1484.73621 | -1531.02793 | 1 |
| 136 | H | 68.73971 | 74.82477 | 81.75275 | -1853.57121 | -487.39031  | 1936.59343  | 1 |
| 137 | C | 70.72318 | 74.37030 | 78.04811 | 539.71428   | -510.58232  | 267.58633   | 1 |
| 138 | O | 71.75078 | 75.13817 | 78.26745 | -15.93758   | -278.34085  | -624.49402  | 1 |
| 139 | N | 70.31587 | 73.90371 | 76.93477 | -676.81886  | 12.05292    | 276.17960   | 1 |
| 140 | H | 69.47463 | 73.35074 | 77.14182 | -1694.44250 | -373.84189  | -2100.66098 | 1 |
| 141 | C | 70.88770 | 74.15421 | 75.65605 | 412.33078   | -664.70360  | 108.35451   | 1 |
| 142 | H | 70.05658 | 73.92956 | 74.95122 | 1765.77476  | 1294.44366  | 1621.76594  | 1 |
| 143 | C | 71.37992 | 75.65935 | 75.64111 | -179.66635  | -721.95667  | -264.73915  | 1 |
| 144 | H | 70.79220 | 76.28138 | 76.35430 | -607.34922  | 2587.87032  | -598.10018  | 1 |
| 145 | H | 72.44011 | 75.72323 | 75.99688 | -359.69332  | -1479.13954 | -2259.74260 | 1 |
| 146 | C | 71.26055 | 76.19784 | 74.17569 | -240.01076  | 616.02425   | 431.85322   | 1 |
| 147 | H | 71.50853 | 75.40415 | 73.43528 | -1359.17131 | 782.54425   | 2227.99181  | 1 |
| 148 | H | 70.21480 | 76.50752 | 73.95427 | -820.36667  | 85.81767    | -2596.78715 | 1 |
| 149 | C | 72.26134 | 77.41004 | 74.03350 | -513.07015  | 236.18570   | -551.87280  | 1 |
| 150 | H | 72.20703 | 78.07682 | 74.92474 | 1816.11944  | -1183.11722 | -1650.94321 | 1 |
| 151 | H | 73.31584 | 77.03947 | 74.00514 | -1800.04429 | -1361.53473 | 1526.34643  | 1 |
| 152 | C | 71.91881 | 78.20583 | 72.74431 | 726.08972   | -253.19732  | -179.64713  | 1 |
| 153 | H | 71.80074 | 77.57268 | 71.84148 | 1224.27271  | -456.51798  | -2390.90304 | 1 |
| 154 | H | 71.04969 | 78.88987 | 72.83150 | 1206.40339  | -1150.93514 | -2154.90344 | 1 |
| 155 | N | 73.13772 | 79.10526 | 72.44847 | 329.70796   | -633.68968  | -155.67358  | 1 |
| 156 | H | 73.31814 | 79.35717 | 71.39023 | 1348.31305  | 1938.76845  | 1359.00643  | 1 |
| 157 | H | 73.12503 | 80.05203 | 72.93782 | 2096.92035  | 1446.54551  | -966.48890  | 1 |
| 158 | H | 74.09871 | 78.66677 | 72.76654 | -1197.07217 | -2303.53719 | 827.28733   | 1 |
| 159 | C | 72.18323 | 73.18300 | 75.40797 | -378.01186  | -556.17301  | -413.96481  | 1 |
| 160 | O | 72.14571 | 72.41107 | 74.47659 | -409.44433  | -307.55053  | -453.30833  | 1 |
| 161 | N | 73.14198 | 73.34845 | 76.31640 | -429.02477  | 524.70884   | 274.08502   | 1 |
| 162 | H | 72.94972 | 74.04291 | 77.04966 | 1706.34263  | -1425.96036 | 1574.38926  | 1 |
| 163 | C | 74.51473 | 73.25145 | 75.87094 | -45.25864   | -626.22952  | 478.93267   | 1 |
| 164 | H | 75.01963 | 73.12711 | 76.85761 | 1988.63164  | 570.90773   | 1772.87287  | 1 |
| 165 | C | 74.65264 | 71.99291 | 74.92501 | 551.77128   | -20.49526   | -564.54996  | 1 |
| 166 | H | 73.93594 | 71.19325 | 75.23223 | 1434.61535  | -1753.10253 | 1513.99471  | 1 |
| 167 | H | 74.34778 | 72.25075 | 73.88459 | -714.67738  | 1819.09770  | 1898.36494  | 1 |
| 168 | C | 76.12781 | 71.47209 | 74.96882 | 446.99263   | -555.77305  | 338.97221   | 1 |
| 169 | H | 76.83440 | 72.20421 | 74.51178 | 1953.68466  | 1892.25957  | -161.67766  | 1 |
| 170 | H | 76.48100 | 71.33424 | 76.03370 | -403.03785  | 2688.07032  | -188.43591  | 1 |

|     |   |          |          |          |             |             |             |   |
|-----|---|----------|----------|----------|-------------|-------------|-------------|---|
| 171 | C | 76.11684 | 70.10250 | 74.18033 | 567.86262   | 335.74681   | 434.04421   | 1 |
| 172 | H | 75.51781 | 69.33497 | 74.73000 | -1080.02275 | 1568.26081  | -1948.78900 | 1 |
| 173 | H | 75.61272 | 70.22116 | 73.19357 | -919.54108  | 2111.34692  | 1456.13463  | 1 |
| 174 | C | 77.58303 | 69.65084 | 73.98318 | 195.81897   | 173.33862   | -745.11536  | 1 |
| 175 | H | 78.18725 | 70.32227 | 73.34118 | 1405.67949  | -2301.21089 | -390.08113  | 1 |
| 176 | H | 78.13701 | 69.42822 | 74.91670 | -940.37328  | -1118.32446 | 2299.72133  | 1 |
| 177 | N | 77.54327 | 68.29176 | 73.20690 | 319.26422   | 656.36007   | -42.02424   | 1 |
| 178 | H | 78.48794 | 67.87119 | 72.97075 | 1961.03633  | 619.91968   | 1787.09422  | 1 |
| 179 | H | 77.06596 | 67.47360 | 73.68592 | 854.14343   | -2156.80752 | 1429.08711  | 1 |
| 180 | H | 77.07290 | 68.29418 | 72.25497 | 1237.02905  | -1378.50857 | -1998.28500 | 1 |
| 181 | C | 74.89673 | 74.67619 | 75.21959 | 532.53319   | -268.57236  | 517.55729   | 1 |
| 182 | O | 74.53502 | 75.71279 | 75.78518 | 266.16714   | -290.73804  | -558.88002  | 1 |
| 183 | N | 75.60224 | 74.59206 | 74.10686 | -226.25352  | 640.49678   | -270.32839  | 1 |
| 184 | H | 75.82237 | 73.65102 | 73.78665 | 2007.69063  | -1035.27229 | 1523.50231  | 1 |
| 185 | C | 76.56641 | 75.63785 | 73.86930 | -540.76542  | -573.33303  | 49.50000    | 1 |
| 186 | H | 76.63032 | 76.12822 | 74.86900 | -2374.20950 | -1036.76023 | 843.75774   | 1 |
| 187 | C | 77.91204 | 74.91408 | 73.40951 | -77.09082   | 666.87422   | -415.84136  | 1 |
| 188 | H | 77.76623 | 74.41621 | 72.40976 | -985.81834  | 617.19825   | 2463.91927  | 1 |
| 189 | O | 78.39053 | 73.84684 | 74.25592 | 293.29899   | -391.65602  | -477.80926  | 1 |
| 190 | H | 78.48742 | 73.12263 | 73.60614 | 2528.72714  | -681.76262  | -751.27122  | 1 |
| 191 | C | 78.85893 | 76.15837 | 73.24696 | 252.47363   | -605.14473  | 440.05134   | 1 |
| 192 | H | 79.84528 | 75.86684 | 72.81739 | -2052.65063 | 1456.49051  | -1043.51830 | 1 |
| 193 | H | 78.41763 | 76.93173 | 72.57468 | -2152.98800 | -1661.97574 | -161.70652  | 1 |
| 194 | H | 79.05683 | 76.64523 | 74.23039 | -473.12726  | -1584.27339 | 2165.61725  | 1 |
| 195 | C | 75.94142 | 76.64861 | 72.76363 | 360.36307   | 488.46713   | 505.10056   | 1 |
| 196 | O | 75.34729 | 77.66640 | 73.17503 | -200.08817  | -528.03552  | -385.82850  | 1 |
| 197 | N | 76.15797 | 76.27967 | 71.53397 | -597.54095  | -226.44775  | 355.20479   | 1 |
| 198 | H | 76.66025 | 75.39975 | 71.42034 | 2179.23655  | -1300.70981 | -991.33835  | 1 |
| 199 | C | 75.42998 | 76.81408 | 70.43759 | -687.68921  | 297.39807   | -249.45179  | 1 |
| 200 | H | 75.79384 | 76.24222 | 69.55428 | -349.16256  | -2467.37713 | -1101.72831 | 1 |
| 201 | C | 73.86611 | 76.63250 | 70.74662 | 672.47345   | 361.54328   | -201.62880  | 1 |
| 202 | H | 73.67030 | 76.97502 | 71.78822 | 1541.41502  | 582.18425   | 2169.97026  | 1 |
| 203 | H | 73.27228 | 77.27845 | 70.05690 | -2534.67717 | 60.25153    | 997.72295   | 1 |
| 204 | C | 73.47500 | 75.15803 | 70.58690 | 574.26774   | -389.43119  | -377.02542  | 1 |
| 205 | C | 73.25559 | 74.62065 | 69.28259 | 688.82679   | -287.33580  | -257.96133  | 1 |
| 206 | H | 73.37869 | 75.25160 | 68.38369 | 331.14182   | 1470.38163  | 2269.80013  | 1 |
| 207 | C | 73.33317 | 74.33863 | 71.74701 | -383.52382  | -675.04808  | 144.24917   | 1 |
| 208 | H | 73.52874 | 74.74663 | 72.75619 | 4.09847     | 1517.59662  | 2262.86397  | 1 |
| 209 | C | 72.87661 | 73.28352 | 69.16874 | -134.76730  | 428.45285   | -649.50303  | 1 |
| 210 | H | 72.70250 | 72.86648 | 68.16148 | -903.23433  | 1600.49020  | 2011.53387  | 1 |
| 211 | C | 72.93596 | 73.01034 | 71.57804 | -335.53281  | -615.00040  | -364.39058  | 1 |
| 212 | H | 72.78930 | 72.38465 | 72.48260 | 1596.45398  | -1369.33862 | 1732.02659  | 1 |
| 213 | C | 72.69529 | 72.43266 | 70.29780 | 585.48547   | -340.24194  | -406.23938  | 1 |
| 214 | O | 72.29911 | 71.08000 | 70.13044 | -419.15649  | -173.04408  | -511.94141  | 1 |
| 215 | H | 72.23047 | 70.80930 | 71.07714 | -1071.84350 | 1559.71507  | -1960.13012 | 1 |
| 216 | C | 75.58173 | 78.42432 | 70.30475 | 291.41878   | -183.13091  | 710.72246   | 1 |
| 217 | O | 74.57051 | 79.14052 | 70.32009 | 379.87695   | 523.47396   | -222.23622  | 1 |
| 218 | N | 76.83314 | 78.76757 | 70.12642 | 564.30591   | 373.09380   | 277.24371   | 1 |
| 219 | H | 77.53344 | 78.02609 | 70.14890 | -120.59931  | -2436.07824 | -1214.35098 | 1 |
| 220 | C | 77.18044 | 80.14755 | 70.27782 | 404.07514   | -299.37480  | 608.84009   | 1 |
| 221 | H | 76.24760 | 80.63642 | 69.91123 | -1071.07882 | -841.69025  | 2359.66467  | 1 |
| 222 | C | 77.38273 | 80.39032 | 71.83507 | -683.12807  | 68.71770    | -390.13096  | 1 |
| 223 | H | 76.65445 | 79.78476 | 72.42215 | 2068.88918  | 1596.58590  | 770.89603   | 1 |
| 224 | H | 78.38702 | 80.02666 | 72.14829 | 1379.86429  | 2342.49779  | -179.85638  | 1 |
| 225 | C | 77.21642 | 81.90638 | 72.14717 | -176.39967  | 537.49466   | 550.97268   | 1 |
| 226 | H | 77.63046 | 82.53943 | 71.33246 | -396.28051  | 1942.22168  | 1869.33314  | 1 |
| 227 | H | 76.14498 | 82.19358 | 72.22446 | -94.44700   | 586.00678   | -2659.20016 | 1 |
| 228 | C | 77.99881 | 82.16023 | 73.52912 | -291.69381  | -718.18079  | -150.72929  | 1 |
| 229 | H | 77.47587 | 81.81165 | 74.45510 | -2303.38776 | 1089.76242  | 964.62032   | 1 |
| 230 | H | 79.04778 | 81.77044 | 73.48823 | 884.16729   | 2568.80533  | -207.74283  | 1 |
| 231 | N | 78.08455 | 83.55033 | 73.51091 | -594.49522  | -252.81478  | 342.29276   | 1 |
| 232 | H | 78.51235 | 83.95122 | 72.68696 | -1735.17426 | 2084.05705  | -263.71605  | 1 |

|     |   |          |          |          |             |             |             |   |
|-----|---|----------|----------|----------|-------------|-------------|-------------|---|
| 233 | C | 77.72203 | 84.34529 | 74.44212 | 595.23177   | -271.52487  | 442.22352   | 1 |
| 234 | N | 77.15331 | 83.80832 | 75.59728 | 585.53813   | -424.79750  | -105.81303  | 1 |
| 235 | H | 76.94115 | 82.83854 | 75.83128 | 959.88797   | 1327.56823  | -2177.11905 | 1 |
| 236 | H | 76.83289 | 84.35161 | 76.40007 | 1578.48647  | 16.27378    | -2220.76233 | 1 |
| 237 | N | 78.00395 | 85.66779 | 74.08131 | -452.17763  | -390.33541  | -421.51853  | 1 |
| 238 | H | 78.43013 | 86.05368 | 73.23970 | 470.26107   | 1974.25629  | -1817.92087 | 1 |
| 239 | H | 77.81292 | 86.46775 | 74.68593 | 1856.67307  | -1573.97321 | -1224.35416 | 1 |
| 240 | C | 78.48465 | 80.41131 | 69.34286 | -531.47271  | -581.45780  | -55.06206   | 1 |
| 241 | O | 78.54742 | 79.92761 | 68.21156 | -243.00837  | 192.73507   | 609.52485   | 1 |
| 242 | N | 79.33313 | 81.24267 | 69.91093 | 343.49288   | -644.25607  | 38.09164    | 1 |
| 243 | H | 79.07475 | 81.53375 | 70.85040 | -1691.16043 | -1535.97525 | -1484.73099 | 1 |
| 244 | C | 80.61777 | 81.62827 | 69.35460 | 542.66492   | 350.14337   | 454.42563   | 1 |
| 245 | H | 81.11771 | 82.17100 | 70.19253 | 1209.57979  | -2396.95920 | 463.86744   | 1 |
| 246 | C | 81.36842 | 80.37797 | 68.91061 | -737.14309  | 145.93010   | 242.71942   | 1 |
| 247 | H | 80.71213 | 79.81671 | 68.20339 | -1050.18303 | 159.36419   | -2509.06125 | 1 |
| 248 | C | 82.65333 | 80.73495 | 68.18866 | -706.77696  | -252.88343  | -245.16230  | 1 |
| 249 | H | 83.18063 | 79.82082 | 67.79884 | -1624.64039 | -1665.49085 | 1417.86935  | 1 |
| 250 | H | 82.46040 | 81.41104 | 67.30955 | 2566.10521  | 598.51109   | 693.22305   | 1 |
| 251 | H | 83.37338 | 81.27215 | 68.86589 | -1972.69758 | 107.10018   | -1876.34312 | 1 |
| 252 | C | 81.65749 | 79.45539 | 70.07965 | 412.85148   | 672.58832   | -27.69222   | 1 |
| 253 | H | 82.16212 | 78.50680 | 69.74664 | 1447.02277  | 1762.76533  | -1490.78944 | 1 |
| 254 | H | 82.33114 | 79.94408 | 70.83634 | 1320.77379  | -145.20455  | 2378.68491  | 1 |
| 255 | H | 80.71107 | 79.16374 | 70.61396 | -1512.10848 | 1470.52031  | 1724.75147  | 1 |
| 256 | C | 80.31721 | 82.65121 | 68.06809 | -607.11113  | 499.56689   | 73.73769    | 1 |
| 257 | O | 80.66855 | 83.79339 | 68.17254 | 357.97126   | 460.81534   | 356.68785   | 1 |
| 258 | N | 79.76503 | 82.01138 | 67.04597 | 536.55407   | -368.62270  | 332.76306   | 1 |
| 259 | H | 79.49418 | 81.00967 | 67.19625 | 524.38866   | 2297.69985  | 1367.20941  | 1 |
| 260 | C | 78.94277 | 82.76052 | 66.14819 | 46.50277    | -774.29190  | -147.97904  | 1 |
| 261 | H | 78.38937 | 81.95505 | 65.61643 | 1676.51875  | 1883.29066  | 1032.55549  | 1 |
| 262 | C | 77.95706 | 83.73147 | 66.97650 | -559.41456  | -34.19198   | -556.30433  | 1 |
| 263 | H | 78.56704 | 84.45839 | 67.56767 | -64.66664   | 395.18769   | 2695.05373  | 1 |
| 264 | H | 77.33321 | 84.34581 | 66.28359 | -2703.44278 | -60.40056   | 333.79418   | 1 |
| 265 | C | 77.10355 | 82.88559 | 67.88273 | -519.76435  | 377.31045   | 459.42366   | 1 |
| 266 | H | 77.73907 | 82.06091 | 68.29506 | -1746.74323 | 1667.50644  | -1261.73691 | 1 |
| 267 | C | 76.57511 | 83.71218 | 69.04813 | 570.95554   | 16.46261    | -545.27700  | 1 |
| 268 | H | 75.93722 | 83.09873 | 69.73525 | 2391.58273  | 28.05277    | -1305.07271 | 1 |
| 269 | H | 77.40960 | 84.14057 | 69.66123 | 175.75588   | 917.63458   | 2559.43867  | 1 |
| 270 | H | 75.94936 | 84.57090 | 68.69299 | -1063.97851 | -2155.34650 | 1283.00462  | 1 |
| 271 | C | 75.94121 | 82.26462 | 67.11962 | 193.76014   | 2.62946     | -765.53141  | 1 |
| 272 | H | 75.30876 | 81.61981 | 67.78309 | 507.39394   | -846.55087  | 2539.60089  | 1 |
| 273 | H | 75.27094 | 83.04728 | 66.67941 | 1337.57841  | 1818.19054  | 1526.01994  | 1 |
| 274 | H | 76.29787 | 81.61956 | 66.27595 | 1100.88635  | -1172.91350 | -2199.08909 | 1 |
| 275 | C | 79.86837 | 83.61667 | 65.15852 | -549.21115  | 475.64486   | -309.38218  | 1 |
| 276 | O | 79.47313 | 84.62083 | 64.62520 | 556.06106   | -390.37755  | -78.24250   | 1 |
| 277 | O | 81.10253 | 83.03341 | 64.77164 | -572.27940  | -310.19032  | -209.75862  | 1 |
| 278 | H | 81.13914 | 82.29878 | 65.44502 | -1380.08193 | 2212.14486  | 790.85944   | 1 |

Listing 2: C00002.xmolout

|    |   |          |          |          |             |             |             |        |          |
|----|---|----------|----------|----------|-------------|-------------|-------------|--------|----------|
| 1  |   | 276      |          |          |             |             |             |        |          |
| 2  |   | 150.0000 | 150.0000 | 150.0000 | 0.0000      | 0.0000      | 0.0000***** | 1.1710 | 4684     |
|    |   | 0.2500   | 300.00   | 0.00     | 0.00        | 0.00        | -1294.9636  | 0.0000 | 300.0000 |
| 3  | H | 61.22334 | 76.68362 | 69.85415 | -2043.14101 | -1757.64893 | 399.89339   |        | 1        |
| 4  | N | 61.61283 | 77.38906 | 70.47541 | 426.75047   | 490.45733   | -334.42467  |        | 1        |
| 5  | H | 60.77473 | 77.83945 | 70.83632 | 442.25559   | -1110.30854 | -2448.52907 |        | 1        |
| 6  | C | 62.55780 | 78.25394 | 69.88593 | 415.32972   | -666.39213  | 83.73172    |        | 1        |
| 7  | H | 63.20906 | 77.56971 | 69.30234 | 879.32219   | 2491.00447  | 667.35213   |        | 1        |
| 8  | C | 61.83823 | 79.35068 | 68.95132 | 31.35357    | 477.41777   | 628.23362   |        | 1        |
| 9  | H | 61.01258 | 79.85053 | 69.51305 | 1168.38489  | 2240.25337  | -1019.71136 |        | 1        |
| 10 | H | 62.57375 | 80.15579 | 68.70867 | -360.43770  | 2534.90498  | 931.67112   |        | 1        |
| 11 | C | 61.31679 | 78.71576 | 67.68877 | 463.18208   | 512.70242   | -382.34388  |        | 1        |
| 12 | H | 60.57655 | 77.93104 | 67.96201 | 1725.29117  | 1863.52247  | -987.07854  |        | 1        |

|    |   |          |          |          |             |             |             |   |
|----|---|----------|----------|----------|-------------|-------------|-------------|---|
| 13 | C | 60.62069 | 79.76244 | 66.82667 | 710.42801   | -144.27427  | -313.15367  | 1 |
| 14 | H | 60.20629 | 79.31523 | 65.88648 | 364.20195   | -1033.13725 | 2494.72524  | 1 |
| 15 | H | 59.76885 | 80.24793 | 67.36891 | 2567.61904  | 335.80679   | 847.48802   | 1 |
| 16 | H | 61.32650 | 80.57769 | 66.52137 | -2587.99029 | 680.92867   | -512.16411  | 1 |
| 17 | C | 62.43470 | 78.07005 | 66.88100 | 268.17616   | 741.64379   | -40.42634   | 1 |
| 18 | H | 62.06577 | 77.69610 | 65.89125 | 1283.54314  | -1945.37420 | -1411.27812 | 1 |
| 19 | H | 63.26358 | 78.79522 | 66.67346 | -1258.57796 | 1317.15249  | -2026.02085 | 1 |
| 20 | H | 62.88526 | 77.19425 | 67.41433 | -2502.84526 | 909.80597   | 575.92391   | 1 |
| 21 | C | 63.36044 | 79.04730 | 71.04790 | 619.36578   | -458.64843  | -172.09273  | 1 |
| 22 | O | 63.85778 | 80.13073 | 70.81440 | -81.40433   | 433.87611   | 522.34594   | 1 |
| 23 | N | 63.47869 | 78.30939 | 72.15171 | 175.23996   | -622.20190  | 341.55523   | 1 |
| 24 | H | 63.00235 | 77.40806 | 72.16680 | -876.57256  | -303.22879  | -2561.90213 | 1 |
| 25 | C | 64.27440 | 78.79927 | 73.21833 | -571.88214  | -534.10783  | -106.15033  | 1 |
| 26 | H | 64.55346 | 79.83097 | 72.89583 | -2713.20841 | -16.25800   | -248.80809  | 1 |
| 27 | C | 63.41964 | 78.69872 | 74.57272 | 166.60354   | 288.16399   | -716.09568  | 1 |
| 28 | H | 63.31345 | 77.60945 | 74.83950 | -2097.85574 | 1636.78449  | -586.18044  | 1 |
| 29 | O | 62.08672 | 79.23331 | 74.51794 | -317.80580  | -363.38227  | 484.43082   | 1 |
| 30 | H | 61.55186 | 78.42999 | 74.68197 | 1863.74748  | -1451.84923 | 1357.29467  | 1 |
| 31 | C | 64.38005 | 79.39487 | 75.60595 | 503.80731   | 517.99032   | 318.51606   | 1 |
| 32 | H | 63.98128 | 79.32105 | 76.64430 | 640.61020   | -2157.10410 | -1536.29104 | 1 |
| 33 | H | 65.39626 | 78.93134 | 75.60677 | 1687.88455  | 465.60692   | 2087.56452  | 1 |
| 34 | H | 64.50664 | 80.47874 | 75.37788 | -1293.07895 | -1899.88581 | -1463.57452 | 1 |
| 35 | C | 65.53302 | 77.77394 | 73.43731 | -153.07550  | -733.68902  | 248.70981   | 1 |
| 36 | O | 65.46514 | 77.01201 | 74.36667 | 186.15459   | -480.78787  | -449.34387  | 1 |
| 37 | N | 66.48937 | 77.88136 | 72.49857 | -487.53139  | 543.18517   | 42.03850    | 1 |
| 38 | C | 67.78042 | 77.31179 | 72.70104 | -699.35871  | 69.34393    | 360.10701   | 1 |
| 39 | H | 67.67921 | 76.53089 | 73.48957 | 2.81126     | -221.99807  | -2715.58072 | 1 |
| 40 | C | 68.14202 | 76.79405 | 71.24356 | -507.46439  | -592.59194  | 122.07761   | 1 |
| 41 | H | 69.23345 | 76.62541 | 71.10277 | -1975.08116 | 525.87560   | -1801.71556 | 1 |
| 42 | H | 67.63713 | 75.82900 | 71.01443 | 1588.27743  | -1913.22100 | 1113.83566  | 1 |
| 43 | C | 67.57218 | 77.95530 | 70.36977 | -613.62442  | -457.55993  | -194.14490  | 1 |
| 44 | H | 68.25319 | 78.85074 | 70.39032 | 1707.54637  | -721.27992  | 1996.92523  | 1 |
| 45 | H | 67.43554 | 77.68392 | 69.29825 | 758.23357   | 2100.81767  | 1560.55011  | 1 |
| 46 | C | 66.20390 | 78.25352 | 71.11510 | -352.41524  | 704.96076   | 49.21465    | 1 |
| 47 | H | 65.87998 | 79.32355 | 71.09825 | 1714.76886  | -2070.42778 | 443.35792   | 1 |
| 48 | H | 65.34823 | 77.60855 | 70.80571 | 1224.15040  | 1801.50881  | 1636.97633  | 1 |
| 49 | C | 68.88370 | 78.47902 | 73.07452 | 566.85117   | 537.05831   | 117.62814   | 1 |
| 50 | O | 70.00329 | 78.14808 | 73.38001 | -550.26779  | -406.08867  | 4.21666     | 1 |
| 51 | N | 68.36295 | 79.69317 | 72.95767 | 566.34832   | -425.77725  | 180.18749   | 1 |
| 52 | H | 67.37962 | 79.71306 | 72.69380 | 644.44502   | 2646.80550  | -52.73430   | 1 |
| 53 | C | 69.16173 | 80.86973 | 72.84625 | 612.34801   | -281.48662  | 411.56221   | 1 |
| 54 | H | 68.37081 | 81.64380 | 72.72645 | 1667.23498  | -1490.75142 | 1556.16753  | 1 |
| 55 | C | 69.98475 | 81.05054 | 74.20373 | -714.45746  | -175.43074  | 286.98927   | 1 |
| 56 | H | 70.82589 | 80.30139 | 74.20748 | -787.09484  | 1763.03619  | -1922.46060 | 1 |
| 57 | O | 69.26810 | 80.81854 | 75.43197 | -429.46514  | 516.51932   | -128.40526  | 1 |
| 58 | H | 69.70037 | 79.99733 | 75.74220 | 1981.82785  | 436.16847   | -1818.18182 | 1 |
| 59 | C | 70.52674 | 82.51985 | 74.04425 | 630.79189   | -468.94448  | 76.03230    | 1 |
| 60 | H | 71.27368 | 82.76759 | 74.83258 | -1775.71861 | 2062.30353  | 131.89849   | 1 |
| 61 | H | 71.01363 | 82.69768 | 73.05775 | -1855.14608 | 88.94118    | 1993.53760  | 1 |
| 62 | H | 69.70020 | 83.26154 | 74.13368 | -1504.82350 | -780.94249  | -2132.90992 | 1 |
| 63 | C | 70.03949 | 80.70139 | 71.48813 | 288.57638   | 618.62814   | -397.00270  | 1 |
| 64 | O | 69.49100 | 80.46298 | 70.43630 | 321.70495   | -185.26452  | 574.37218   | 1 |
| 65 | N | 71.33083 | 80.97352 | 71.68846 | -447.05792  | -446.53431  | 367.76425   | 1 |
| 66 | H | 71.71345 | 81.06685 | 72.64906 | 350.31316   | 1975.63644  | -1843.31522 | 1 |
| 67 | C | 72.25035 | 80.34538 | 70.77862 | -511.23061  | 374.03917   | -471.51480  | 1 |
| 68 | H | 71.65858 | 79.64695 | 70.14272 | 2234.79579  | -898.70890  | -1273.45190 | 1 |
| 69 | C | 72.95581 | 81.52700 | 69.95325 | 529.53781   | -159.34528  | 563.72604   | 1 |
| 70 | H | 73.48566 | 81.06157 | 69.07791 | 654.59388   | 2347.94251  | 1217.51488  | 1 |
| 71 | H | 72.12590 | 82.15553 | 69.53663 | -1526.55661 | 2103.42026  | 817.87394   | 1 |
| 72 | O | 73.93473 | 82.32310 | 70.66847 | -554.84278  | 14.12789    | 399.58769   | 1 |
| 73 | H | 73.32749 | 82.90652 | 71.16291 | 1297.06236  | 2061.84854  | 1220.68812  | 1 |
| 74 | C | 73.28505 | 79.68447 | 71.82481 | -662.15484  | -412.13544  | 123.62687   | 1 |

|     |   |          |          |          |             |             |             |   |
|-----|---|----------|----------|----------|-------------|-------------|-------------|---|
| 75  | O | 73.15684 | 79.98381 | 73.02628 | -540.01537  | -317.05804  | 274.91456   | 1 |
| 76  | N | 74.17687 | 78.90739 | 71.26565 | -202.76299  | -690.00100  | -131.49145  | 1 |
| 77  | H | 74.09671 | 78.82558 | 70.25172 | -702.62132  | -2617.37191 | 281.70413   | 1 |
| 78  | C | 75.21957 | 78.22650 | 71.99872 | -491.73914  | 576.34187   | 222.73509   | 1 |
| 79  | H | 75.79294 | 77.69588 | 71.20091 | 1977.17978  | -1823.58850 | -434.68928  | 1 |
| 80  | C | 76.03897 | 79.23514 | 72.79920 | -649.50797  | -328.66843  | 306.11224   | 1 |
| 81  | H | 75.35569 | 79.68153 | 73.55991 | 2075.07803  | 1452.16490  | -1004.45904 | 1 |
| 82  | C | 77.17425 | 78.53444 | 73.52021 | -615.18735  | -489.99689  | -70.96352   | 1 |
| 83  | H | 77.70882 | 79.21966 | 74.23386 | -1226.32661 | -1724.38906 | -1716.47170 | 1 |
| 84  | H | 76.78881 | 77.65568 | 74.11288 | 2381.64273  | -969.84735  | 900.46860   | 1 |
| 85  | H | 77.94285 | 78.13443 | 72.80271 | 2122.74991  | 1702.23946  | -141.36228  | 1 |
| 86  | C | 76.55501 | 80.36619 | 71.93244 | -501.86074  | -479.61276  | -376.42482  | 1 |
| 87  | H | 77.15315 | 81.10964 | 72.52798 | 993.79261   | -2246.95401 | -1177.81305 | 1 |
| 88  | H | 77.22018 | 79.98596 | 71.10861 | 42.71279    | -626.15391  | -2651.37258 | 1 |
| 89  | H | 75.70638 | 80.92872 | 71.44479 | -2026.39012 | -1590.33709 | -887.82922  | 1 |
| 90  | C | 74.46021 | 77.18880 | 73.08090 | -672.89153  | 382.57394   | -156.34072  | 1 |
| 91  | O | 74.53077 | 77.34620 | 74.28976 | 410.04627   | 221.86223   | 500.35950   | 1 |
| 92  | N | 73.82516 | 76.28029 | 72.38695 | -378.11782  | -443.79414  | -441.10984  | 1 |
| 93  | H | 73.95864 | 76.37514 | 71.38303 | 2404.15973  | -568.14894  | 1149.30085  | 1 |
| 94  | C | 73.17517 | 75.16851 | 73.00514 | -544.54484  | 466.16019   | 331.29119   | 1 |
| 95  | H | 72.71310 | 75.56770 | 73.93535 | -1409.80988 | -170.17955  | 2325.32679  | 1 |
| 96  | C | 72.15620 | 74.64849 | 71.90199 | -184.48284  | 116.78282   | -758.89137  | 1 |
| 97  | H | 71.44276 | 75.45712 | 71.62486 | 1893.78641  | 1861.14652  | 611.04528   | 1 |
| 98  | H | 72.70364 | 74.39577 | 70.96613 | -2170.79665 | -974.19311  | 1327.50117  | 1 |
| 99  | C | 71.39358 | 73.39905 | 72.43716 | 389.51668   | 672.81878   | -138.49152  | 1 |
| 100 | H | 72.11387 | 72.64012 | 72.81612 | 510.64577   | 1933.03327  | 1851.02484  | 1 |
| 101 | H | 70.78655 | 73.67215 | 73.32797 | -2302.30869 | -1105.72939 | -948.89774  | 1 |
| 102 | C | 70.46223 | 72.74099 | 71.34776 | -559.93427  | -126.34590  | 542.30857   | 1 |
| 103 | O | 69.93065 | 71.68734 | 71.58510 | -670.36003  | -111.83166  | 76.36448    | 1 |
| 104 | N | 70.33309 | 73.46366 | 70.21452 | -216.06729  | -537.07037  | 446.51379   | 1 |
| 105 | H | 70.74239 | 74.37151 | 69.96499 | -1251.96487 | 1074.12894  | -2168.52500 | 1 |
| 106 | H | 69.74347 | 73.18586 | 69.42209 | -2451.83023 | -720.73851  | 944.84612   | 1 |
| 107 | C | 74.32086 | 74.05363 | 73.27751 | 546.24052   | -563.88337  | -85.11809   | 1 |
| 108 | O | 75.07989 | 73.72518 | 72.37282 | 71.70702    | -307.40463  | 606.69673   | 1 |
| 109 | N | 74.22248 | 73.55711 | 74.50237 | 479.90863   | -504.50129  | 222.86849   | 1 |
| 110 | C | 75.26002 | 72.72780 | 75.06974 | 75.51268    | -600.91904  | 506.73700   | 1 |
| 111 | H | 76.21230 | 73.20582 | 74.74133 | -2033.61562 | 1795.30103  | 254.89480   | 1 |
| 112 | C | 74.94849 | 72.80770 | 76.62778 | 523.79067   | 517.99274   | 284.45581   | 1 |
| 113 | H | 75.34912 | 71.93128 | 77.19145 | 1599.61665  | -1127.00911 | 1895.98173  | 1 |
| 114 | H | 75.39021 | 73.72301 | 77.08890 | -1881.83093 | 1275.82488  | -1501.55016 | 1 |
| 115 | C | 73.38917 | 72.88021 | 76.62129 | -600.05639  | -404.05026  | 316.64485   | 1 |
| 116 | H | 72.94386 | 71.88484 | 76.39584 | -2597.05260 | 496.36221   | 657.73249   | 1 |
| 117 | H | 72.95039 | 73.21840 | 77.58686 | -1666.24518 | 1294.38985  | -1723.90591 | 1 |
| 118 | C | 73.15606 | 73.90787 | 75.43102 | 493.57570   | -129.95376  | -602.56394  | 1 |
| 119 | H | 72.17604 | 73.81663 | 74.90757 | -1469.08415 | -637.84797  | 2204.22581  | 1 |
| 120 | H | 73.33245 | 74.97531 | 75.70713 | -1038.97840 | 1068.88701  | -2280.71789 | 1 |
| 121 | C | 75.12228 | 71.21298 | 74.52252 | 188.88100   | 241.05089   | -727.87821  | 1 |
| 122 | O | 74.85960 | 70.29945 | 75.27522 | 531.88613   | -49.19943   | 427.07960   | 1 |
| 123 | N | 75.40167 | 71.17057 | 73.22364 | 708.14833   | 26.93417    | -179.73509  | 1 |
| 124 | H | 75.55701 | 72.07708 | 72.71655 | -2232.69501 | -1179.09831 | 1023.94816  | 1 |
| 125 | C | 75.05557 | 69.95327 | 72.46245 | -738.32412  | 259.92548   | 104.42456   | 1 |
| 126 | H | 74.07894 | 69.65777 | 72.91234 | 2028.89123  | 1260.02983  | 1311.33324  | 1 |
| 127 | C | 74.98825 | 70.28982 | 70.99017 | -258.65678  | -345.52513  | 661.28459   | 1 |
| 128 | H | 75.96244 | 70.74702 | 70.70299 | -1826.06090 | -1801.46097 | -918.64554  | 1 |
| 129 | C | 74.78418 | 69.05263 | 70.13295 | -541.23400  | 531.92970   | -218.41428  | 1 |
| 130 | H | 74.76394 | 69.30575 | 69.03711 | 1311.73218  | -2219.18200 | 882.19023   | 1 |
| 131 | H | 75.61106 | 68.30287 | 70.28608 | -1048.71298 | 1223.58118  | -2196.97971 | 1 |
| 132 | H | 73.81457 | 68.53589 | 70.37310 | 419.06414   | 1903.92898  | 1903.44670  | 1 |
| 133 | C | 73.89526 | 71.29700 | 70.67943 | -423.86431  | 152.66566   | -648.55262  | 1 |
| 134 | H | 73.86281 | 71.55202 | 69.58441 | 105.68386   | -2342.50080 | 1387.51238  | 1 |
| 135 | H | 72.87730 | 70.90710 | 70.95900 | -1695.63603 | -1484.73621 | -1531.02793 | 1 |
| 136 | H | 74.05104 | 72.26279 | 71.24456 | -1853.57121 | -487.39031  | 1936.59343  | 1 |

|     |   |          |          |          |             |             |             |   |
|-----|---|----------|----------|----------|-------------|-------------|-------------|---|
| 137 | C | 76.24023 | 68.84572 | 72.79943 | 539.71428   | -510.58232  | 267.58633   | 1 |
| 138 | O | 77.10220 | 68.60723 | 71.99177 | -15.93758   | -278.34085  | -624.49402  | 1 |
| 139 | N | 76.03058 | 68.31581 | 73.98914 | -676.81886  | 12.05292    | 276.17960   | 1 |
| 140 | H | 75.27433 | 68.69947 | 74.59607 | -1694.44250 | -373.84189  | -2100.66098 | 1 |
| 141 | C | 76.85421 | 67.25384 | 74.45990 | 412.33078   | -664.70360  | 108.35451   | 1 |
| 142 | H | 76.21835 | 66.77262 | 75.23702 | 1765.77476  | 1294.44366  | 1621.76594  | 1 |
| 143 | C | 77.21182 | 66.29866 | 73.24588 | -179.66635  | -721.95667  | -264.73915  | 1 |
| 144 | H | 76.31442 | 66.12219 | 72.61077 | -607.34922  | 2587.87032  | -598.10018  | 1 |
| 145 | H | 77.96955 | 66.77720 | 72.57444 | -359.69332  | -1479.13954 | -2259.74260 | 1 |
| 146 | C | 77.76828 | 64.95473 | 73.82435 | -240.01076  | 616.02425   | 431.85322   | 1 |
| 147 | H | 78.71416 | 65.13920 | 74.38781 | -1359.17131 | 782.54425   | 2227.99181  | 1 |
| 148 | H | 77.05609 | 64.50658 | 74.55281 | -820.36667  | 85.81767    | -2596.78715 | 1 |
| 149 | C | 78.01218 | 63.97677 | 72.60548 | -513.07015  | 236.18570   | -551.87280  | 1 |
| 150 | H | 77.05591 | 63.75509 | 72.07810 | 1816.11944  | -1183.11722 | -1650.94321 | 1 |
| 151 | H | 78.67384 | 64.45081 | 71.84438 | -1800.04429 | -1361.53473 | 1526.34643  | 1 |
| 152 | C | 78.65211 | 62.67935 | 73.15135 | 726.08972   | -253.19732  | -179.64713  | 1 |
| 153 | H | 79.68063 | 62.80373 | 73.54508 | 1224.27271  | -456.51798  | -2390.90304 | 1 |
| 154 | H | 78.03005 | 62.12920 | 73.88522 | 1206.40339  | -1150.93514 | -2154.90344 | 1 |
| 155 | N | 78.80500 | 61.68984 | 71.94669 | 329.70796   | -633.68968  | -155.67358  | 1 |
| 156 | H | 79.26967 | 60.76286 | 72.17018 | 1348.31305  | 1938.76845  | 1359.00643  | 1 |
| 157 | H | 77.91262 | 61.36539 | 71.47214 | 2096.92035  | 1446.54551  | -966.48890  | 1 |
| 158 | H | 79.38479 | 62.02004 | 71.12126 | -1197.07217 | -2303.53719 | 827.28733   | 1 |
| 159 | C | 78.22700 | 67.86154 | 75.10515 | -378.01186  | -556.17301  | -413.96481  | 1 |
| 160 | O | 79.22343 | 67.17648 | 75.16118 | -409.44433  | -307.55053  | -453.30833  | 1 |
| 161 | N | 78.03199 | 69.06793 | 75.63941 | -429.02477  | 524.70884   | 274.08502   | 1 |
| 162 | H | 77.11636 | 69.49370 | 75.48328 | 1706.34263  | -1425.96036 | 1574.38926  | 1 |
| 163 | C | 79.20626 | 69.82188 | 75.96485 | -45.25864   | -626.22952  | 478.93267   | 1 |
| 164 | H | 80.02762 | 69.28613 | 75.43305 | 1988.63164  | 570.90773   | 1772.87287  | 1 |
| 165 | C | 78.97143 | 71.30876 | 75.47312 | 551.77128   | -20.49526   | -564.54996  | 1 |
| 166 | H | 78.59326 | 71.31347 | 74.42573 | 1434.61535  | -1753.10253 | 1513.99471  | 1 |
| 167 | H | 78.18327 | 71.81320 | 76.08343 | -714.67738  | 1819.09770  | 1898.36494  | 1 |
| 168 | C | 80.33443 | 72.07084 | 75.58543 | 446.99263   | -555.77305  | 338.97221   | 1 |
| 169 | H | 80.58657 | 72.26781 | 76.65386 | 1953.68466  | 1892.25957  | -161.67766  | 1 |
| 170 | H | 81.16502 | 71.44628 | 75.18577 | -403.03785  | 2688.07032  | -188.43591  | 1 |
| 171 | C | 80.23118 | 73.42317 | 74.77876 | 567.86262   | 335.74681   | 434.04421   | 1 |
| 172 | H | 80.00445 | 73.22461 | 73.70616 | -1080.02275 | 1568.26081  | -1948.78900 | 1 |
| 173 | H | 79.38785 | 74.05238 | 75.15354 | -919.54108  | 2111.34692  | 1456.13463  | 1 |
| 174 | C | 81.57289 | 74.19023 | 74.92323 | 195.81897   | 173.33862   | -745.11536  | 1 |
| 175 | H | 81.77296 | 74.57413 | 75.94573 | 1405.67949  | -2301.21089 | -390.08113  | 1 |
| 176 | H | 82.46592 | 73.65802 | 74.53550 | -940.37328  | -1118.32446 | 2299.72133  | 1 |
| 177 | N | 81.41702 | 75.45327 | 74.04327 | 319.26422   | 656.36007   | -42.02424   | 1 |
| 178 | H | 82.17970 | 76.18417 | 74.12376 | 1961.03633  | 619.91968   | 1787.09422  | 1 |
| 179 | H | 81.42425 | 75.28819 | 72.99684 | 854.14343   | -2156.80752 | 1429.08711  | 1 |
| 180 | H | 80.45606 | 76.00467 | 74.23665 | 1237.02905  | -1378.50857 | -1998.28500 | 1 |
| 181 | C | 79.46612 | 69.87102 | 77.57360 | 532.53319   | -268.57236  | 517.55729   | 1 |
| 182 | O | 80.48276 | 70.44572 | 77.97337 | 266.16714   | -290.73804  | -558.88002  | 1 |
| 183 | N | 78.51080 | 69.29273 | 78.26038 | -226.25352  | 640.49678   | -270.32839  | 1 |
| 184 | H | 77.78280 | 68.88954 | 77.67114 | 2007.69063  | -1035.27229 | 1523.50231  | 1 |
| 185 | C | 78.41220 | 69.24255 | 79.67209 | -540.76542  | -573.33303  | 49.50000    | 1 |
| 186 | H | 77.59912 | 68.50647 | 79.85655 | -2374.20950 | -1036.76023 | 843.75774   | 1 |
| 187 | C | 79.81913 | 68.81076 | 80.30081 | -77.09082   | 666.87422   | -415.84136  | 1 |
| 188 | H | 80.60442 | 69.54356 | 79.95528 | -985.81834  | 617.19825   | 2463.91927  | 1 |
| 189 | O | 80.29618 | 67.50488 | 79.93243 | 293.29899   | -391.65602  | -477.80926  | 1 |
| 190 | H | 81.05466 | 67.73817 | 79.35912 | 2528.72714  | -681.76262  | -751.27122  | 1 |
| 191 | C | 79.53570 | 69.04071 | 81.83048 | 252.47363   | -605.14473  | 440.05134   | 1 |
| 192 | H | 80.46504 | 68.95019 | 82.44028 | -2052.65063 | 1456.49051  | -1043.51830 | 1 |
| 193 | H | 79.10416 | 70.05667 | 82.02103 | -2152.98800 | -1661.97574 | -161.70652  | 1 |
| 194 | H | 78.80803 | 68.29389 | 82.22522 | -473.12726  | -1584.27339 | 2165.61725  | 1 |
| 195 | C | 78.02964 | 70.72448 | 80.26663 | 360.36307   | 488.46713   | 505.10056   | 1 |
| 196 | O | 77.15791 | 70.81919 | 81.09589 | -200.08817  | -528.03552  | -385.82850  | 1 |
| 197 | N | 78.87982 | 71.64264 | 79.82701 | -597.54095  | -226.44775  | 355.20479   | 1 |
| 198 | H | 79.65029 | 71.37654 | 79.16862 | 2179.23655  | -1300.70981 | -991.33835  | 1 |

|     |   |          |          |          |             |             |             |   |
|-----|---|----------|----------|----------|-------------|-------------|-------------|---|
| 199 | C | 78.53251 | 73.00653 | 79.99920 | -687.68921  | 297.39807   | -249.45179  | 1 |
| 200 | H | 77.70988 | 72.95334 | 80.74995 | -349.16256  | -2467.37713 | -1101.72831 | 1 |
| 201 | C | 79.84913 | 73.75399 | 80.52252 | 672.47345   | 361.54328   | -201.62880  | 1 |
| 202 | H | 80.61707 | 73.80749 | 79.71628 | 1541.41502  | 582.18425   | 2169.97026  | 1 |
| 203 | H | 79.61336 | 74.80165 | 80.82031 | -2534.67717 | 60.25153    | 997.72295   | 1 |
| 204 | C | 80.38520 | 72.95807 | 81.72053 | 574.26774   | -389.43119  | -377.02542  | 1 |
| 205 | C | 79.76104 | 73.10145 | 82.99601 | 688.82679   | -287.33580  | -257.96133  | 1 |
| 206 | H | 78.91963 | 73.80382 | 83.13695 | 331.14182   | 1470.38163  | 2269.80013  | 1 |
| 207 | C | 81.46037 | 72.03559 | 81.54160 | -383.52382  | -675.04808  | 144.24917   | 1 |
| 208 | H | 81.93431 | 71.91066 | 80.55115 | 4.09847     | 1517.59662  | 2262.86397  | 1 |
| 209 | C | 80.22722 | 72.32709 | 84.05766 | -134.76730  | 428.45285   | -649.50303  | 1 |
| 210 | H | 79.74301 | 72.43697 | 85.04373 | -903.23433  | 1600.49020  | 2011.53387  | 1 |
| 211 | C | 81.89338 | 71.28454 | 82.63687 | -335.53281  | -615.00040  | -364.39058  | 1 |
| 212 | H | 82.72557 | 70.57471 | 82.48754 | 1596.45398  | -1369.33862 | 1732.02659  | 1 |
| 213 | C | 81.30026 | 71.39848 | 83.92815 | 585.48547   | -340.24194  | -406.23938  | 1 |
| 214 | O | 81.72861 | 70.63629 | 85.04621 | -419.15649  | -173.04408  | -511.94141  | 1 |
| 215 | H | 82.47367 | 70.13941 | 84.63321 | -1071.84350 | 1559.71507  | -1960.13012 | 1 |
| 216 | C | 78.02645 | 73.53448 | 78.53827 | 291.41878   | -183.13091  | 710.72246   | 1 |
| 217 | O | 77.27561 | 72.88695 | 77.83571 | 379.87695   | 523.47396   | -222.23622  | 1 |
| 218 | N | 78.51208 | 74.74535 | 78.30252 | 564.30591   | 373.09380   | 277.24371   | 1 |
| 219 | H | 79.10575 | 75.16556 | 79.01497 | -120.59931  | -2436.07824 | -1214.35098 | 1 |
| 220 | C | 77.99750 | 75.48793 | 77.19713 | 404.07514   | -299.37480  | 608.84009   | 1 |
| 221 | H | 77.41676 | 74.76387 | 76.57735 | -1071.07882 | -841.69025  | 2359.66467  | 1 |
| 222 | C | 77.10216 | 76.62200 | 77.86620 | -683.12807  | 68.71770    | -390.13096  | 1 |
| 223 | H | 76.41305 | 76.17451 | 78.61629 | 2068.88918  | 1596.58590  | 770.89603   | 1 |
| 224 | H | 77.73989 | 77.33354 | 78.43692 | 1379.86429  | 2342.49779  | -179.85638  | 1 |
| 225 | C | 76.30253 | 77.37084 | 76.76008 | -176.39967  | 537.49466   | 550.97268   | 1 |
| 226 | H | 76.98175 | 77.86720 | 76.03324 | -396.28051  | 1942.22168  | 1869.33314  | 1 |
| 227 | H | 75.66283 | 76.68083 | 76.16032 | -94.44700   | 586.00678   | -2659.20016 | 1 |
| 228 | C | 75.42951 | 78.43498 | 77.57066 | -291.69381  | -718.18079  | -150.72929  | 1 |
| 229 | H | 74.73014 | 77.99024 | 78.32116 | -2303.38776 | 1089.76242  | 964.62032   | 1 |
| 230 | H | 76.00143 | 79.25273 | 78.07772 | 884.16729   | 2568.80533  | -207.74283  | 1 |
| 231 | N | 74.62355 | 79.00458 | 76.58748 | -594.49522  | -252.81478  | 342.29276   | 1 |
| 232 | H | 74.61583 | 78.51486 | 75.68478 | -1735.17426 | 2084.05705  | -263.71605  | 1 |
| 233 | C | 73.91705 | 80.04325 | 76.81551 | 595.23177   | -271.52487  | 442.22352   | 1 |
| 234 | N | 73.96270 | 80.63183 | 78.08563 | 585.53813   | -424.79750  | -105.81303  | 1 |
| 235 | H | 74.47856 | 80.34245 | 78.91534 | 959.88797   | 1327.56823  | -2177.11905 | 1 |
| 236 | H | 73.42120 | 81.44825 | 78.37074 | 1578.48647  | 16.27378    | -2220.76233 | 1 |
| 237 | N | 73.19624 | 80.40124 | 75.68088 | -452.17763  | -390.33541  | -421.51853  | 1 |
| 238 | H | 73.23344 | 79.96570 | 74.72494 | 470.26107   | 1974.25629  | -1817.92087 | 1 |
| 239 | H | 72.57633 | 81.21909 | 75.66629 | 1856.67307  | -1573.97321 | -1224.35416 | 1 |
| 240 | C | 79.22997 | 76.20786 | 76.42370 | -531.47271  | -581.45780  | -55.06206   | 1 |
| 241 | O | 79.21155 | 76.32977 | 75.19046 | -243.00837  | 192.73507   | 609.52485   | 1 |
| 242 | N | 80.11442 | 76.64855 | 77.26731 | 343.49288   | -644.25607  | 38.09164    | 1 |
| 243 | H | 79.95585 | 76.45900 | 78.25961 | -1691.16043 | -1535.97525 | -1484.73099 | 1 |
| 244 | C | 81.32035 | 77.36285 | 76.90022 | 542.66492   | 350.14337   | 454.42563   | 1 |
| 245 | H | 81.57830 | 77.04463 | 75.86365 | 1209.57979  | -2396.95920 | 463.86744   | 1 |
| 246 | C | 81.04840 | 78.86299 | 77.00928 | -737.14309  | 145.93010   | 242.71942   | 1 |
| 247 | H | 80.81346 | 79.08652 | 78.07338 | -1050.18303 | 159.36419   | -2509.06125 | 1 |
| 248 | C | 82.25552 | 79.68473 | 76.60814 | -706.77696  | -252.88343  | -245.16230  | 1 |
| 249 | H | 82.04909 | 80.78793 | 76.68766 | -1624.64039 | -1665.49085 | 1417.86935  | 1 |
| 250 | H | 83.16356 | 79.46890 | 77.26762 | 2566.10521  | 598.51109   | 693.22305   | 1 |
| 251 | H | 82.55953 | 79.48129 | 75.54413 | -1972.69758 | 107.10018   | -1876.34312 | 1 |
| 252 | C | 79.84369 | 79.27022 | 76.18137 | 412.85148   | 672.58832   | -27.69222   | 1 |
| 253 | H | 79.62561 | 80.37024 | 76.26646 | 1447.02277  | 1762.76533  | -1490.78944 | 1 |
| 254 | H | 79.99776 | 79.04003 | 75.09110 | 1320.77379  | -145.20455  | 2378.68491  | 1 |
| 255 | H | 78.91988 | 78.71654 | 76.50465 | -1512.10848 | 1470.52031  | 1724.75147  | 1 |
| 256 | C | 82.38328 | 76.87131 | 78.09163 | -607.11113  | 499.56689   | 73.73769    | 1 |
| 257 | O | 81.99301 | 76.47216 | 79.16250 | 357.97126   | 460.81534   | 356.68785   | 1 |
| 258 | N | 83.62145 | 77.01016 | 77.64795 | 536.55407   | -368.62270  | 332.76306   | 1 |
| 259 | H | 83.73942 | 77.40908 | 76.71833 | 524.38866   | 2297.69985  | 1367.20941  | 1 |
| 260 | C | 84.69226 | 76.88550 | 78.57078 | 46.50277    | -774.29190  | -147.97904  | 1 |



|     |   |          |          |          |             |             |             |   |
|-----|---|----------|----------|----------|-------------|-------------|-------------|---|
| 261 | H | 84.23989 | 76.37764 | 79.45400 | 1676.51875  | 1883.29066  | 1032.55549  | 1 |
| 262 | C | 85.88665 | 76.06015 | 77.85928 | -559.41456  | -34.19198   | -556.30433  | 1 |
| 263 | H | 86.32539 | 76.67930 | 77.04119 | -64.66664   | 395.18769   | 2695.05373  | 1 |
| 264 | H | 86.72057 | 75.86861 | 78.57541 | -2703.44278 | -60.40056   | 333.79418   | 1 |
| 265 | C | 85.33820 | 74.77298 | 77.30603 | -519.76435  | 377.31045   | 459.42366   | 1 |
| 266 | H | 84.41895 | 75.00799 | 76.72264 | -1746.74323 | 1667.50644  | -1261.73691 | 1 |
| 267 | C | 86.34959 | 74.12242 | 76.37036 | 570.95554   | 16.46261    | -545.27700  | 1 |
| 268 | H | 85.95281 | 73.17301 | 75.92714 | 2391.58273  | 28.05277    | -1305.07271 | 1 |
| 269 | H | 86.62116 | 74.79876 | 75.51922 | 175.75588   | 917.63458   | 2559.43867  | 1 |
| 270 | H | 87.30005 | 73.86640 | 76.90546 | -1063.97851 | -2155.34650 | 1283.00462  | 1 |
| 271 | C | 84.96608 | 73.80413 | 78.42035 | 193.76014   | 2.62946     | -765.53141  | 1 |
| 272 | H | 84.56312 | 72.84112 | 78.01313 | 507.39394   | -846.55087  | 2539.60089  | 1 |
| 273 | H | 85.85124 | 73.55043 | 79.05890 | 1337.57841  | 1818.19054  | 1526.01994  | 1 |
| 274 | H | 84.17996 | 74.23297 | 79.09433 | 1100.88635  | -1172.91350 | -2199.08909 | 1 |
| 275 | C | 85.23943 | 78.36301 | 78.89670 | -549.21115  | 475.64486   | -309.38218  | 1 |
| 276 | O | 84.78817 | 79.36918 | 78.40157 | 556.06106   | -390.37755  | -78.24250   | 1 |
| 277 | O | 86.32829 | 78.43394 | 79.79217 | -572.27940  | -310.19032  | -209.75862  | 1 |
| 278 | H | 86.39802 | 77.46408 | 80.02351 | -1380.08193 | 2212.14486  | 790.85944   | 1 |

Listing 3: C00003.xmolout

|    |   |          |          |          |             |             |             |        |          |
|----|---|----------|----------|----------|-------------|-------------|-------------|--------|----------|
| 1  |   | 276      |          |          |             |             |             |        |          |
| 2  |   | 150.0000 | 150.0000 | 150.0000 | 0.0000      | 0.0000      | 0.0000***** | 2.7750 | 11100    |
|    |   | 0.2500   | 300.00   | 0.00     | 0.00        | 0.00        | -1294.6210  | 0.0000 | 300.0000 |
| 3  | H | 71.77912 | 76.43050 | 82.74316 | -2043.14101 | -1757.64893 | 399.89339   |        | 1        |
| 4  | N | 72.75468 | 76.32011 | 83.01133 | 426.75047   | 490.45733   | -334.42467  |        | 1        |
| 5  | H | 73.02148 | 75.48974 | 82.49078 | 442.25559   | -1110.30854 | -2448.52907 |        | 1        |
| 6  | C | 73.56483 | 77.46236 | 82.83258 | 415.32972   | -666.39213  | 83.73172    |        | 1        |
| 7  | H | 73.13756 | 78.22538 | 83.51705 | 879.32219   | 2491.00447  | 667.35213   |        | 1        |
| 8  | C | 75.09137 | 77.07199 | 83.16290 | 31.35357    | 477.41777   | 628.23362   |        | 1        |
| 9  | H | 75.41966 | 76.25962 | 82.47031 | 1168.38489  | 2240.25337  | -1019.71136 |        | 1        |
| 10 | H | 75.76836 | 77.93790 | 82.96283 | -360.43770  | 2534.90498  | 931.67112   |        | 1        |
| 11 | C | 75.19765 | 76.62076 | 84.59832 | 463.18208   | 512.70242   | -382.34388  |        | 1        |
| 12 | H | 74.33912 | 75.94678 | 84.81867 | 1725.29117  | 1863.52247  | -987.07854  |        | 1        |
| 13 | C | 76.48919 | 75.84276 | 84.81442 | 710.42801   | -144.27427  | -313.15367  |        | 1        |
| 14 | H | 76.59169 | 75.49677 | 85.87535 | 364.20195   | -1033.13725 | 2494.72524  |        | 1        |
| 15 | H | 76.53957 | 74.93324 | 84.16136 | 2567.61904  | 335.80679   | 847.48802   |        | 1        |
| 16 | H | 77.38938 | 76.46811 | 84.58109 | -2587.99029 | 680.92867   | -512.16411  |        | 1        |
| 17 | C | 75.14559 | 77.80804 | 85.54967 | 268.17616   | 741.64379   | -40.42634   |        | 1        |
| 18 | H | 75.23623 | 77.48602 | 86.61933 | 1283.54314  | -1945.37420 | -1411.27812 |        | 1        |
| 19 | H | 75.97759 | 78.53198 | 85.34971 | -1258.57796 | 1317.15249  | -2026.02085 |        | 1        |
| 20 | H | 74.18374 | 78.37486 | 85.45383 | -2502.84526 | 909.80597   | 575.92391   |        | 1        |
| 21 | C | 73.50629 | 77.94797 | 81.28548 | 619.36578   | -458.64843  | -172.09273  |        | 1        |
| 22 | O | 73.70025 | 79.10643 | 81.00759 | -81.40433   | 433.87611   | 522.34594   |        | 1        |
| 23 | N | 73.36478 | 76.90946 | 80.45897 | 175.23996   | -622.20190  | 341.55523   |        | 1        |
| 24 | H | 73.11560 | 75.95588 | 80.77442 | -876.57256  | -303.22879  | -2561.90213 |        | 1        |
| 25 | C | 73.03596 | 77.17891 | 79.09421 | -571.88214  | -534.10783  | -106.15033  |        | 1        |
| 26 | H | 72.77501 | 78.25854 | 79.00565 | -2713.20841 | -16.25800   | -248.80809  |        | 1        |
| 27 | C | 74.35268 | 76.77910 | 78.25164 | 166.60354   | 288.16399   | -716.09568  |        | 1        |
| 28 | H | 74.89632 | 75.99848 | 78.85044 | -2097.85574 | 1636.78449  | -586.18044  |        | 1        |
| 29 | O | 75.29080 | 77.84593 | 78.06236 | -317.80580  | -363.38227  | 484.43082   |        | 1        |
| 30 | H | 76.09042 | 77.47512 | 78.50323 | 1863.74748  | -1451.84923 | 1357.29467  |        | 1        |
| 31 | C | 73.81915 | 76.11113 | 76.93491 | 503.80731   | 517.99032   | 318.51606   |        | 1        |
| 32 | H | 74.65583 | 75.70599 | 76.31874 | 640.61020   | -2157.10410 | -1536.29104 |        | 1        |
| 33 | H | 73.11940 | 75.26497 | 77.14547 | 1687.88455  | 465.60692   | 2087.56452  |        | 1        |
| 34 | H | 73.26539 | 76.84192 | 76.29851 | -1293.07895 | -1899.88581 | -1463.57452 |        | 1        |
| 35 | C | 71.82639 | 76.12004 | 78.92209 | -153.07550  | -733.68902  | 248.70981   |        | 1        |
| 36 | O | 71.81462 | 75.15474 | 79.65998 | 186.15459   | -480.78787  | -449.34387  |        | 1        |
| 37 | N | 71.01398 | 76.44598 | 77.91620 | -487.53139  | 543.18517   | 42.03850    |        | 1        |
| 38 | C | 69.92385 | 75.59205 | 77.53171 | -699.35871  | 69.34393    | 360.10701   |        | 1        |
| 39 | H | 69.31991 | 75.42302 | 78.45065 | 2.81126     | -221.99807  | -2715.58072 |        | 1        |
| 40 | C | 69.19019 | 76.41313 | 76.39836 | -507.46439  | -592.59194  | 122.07761   |        | 1        |

|     |   |          |          |          |             |             |             |   |
|-----|---|----------|----------|----------|-------------|-------------|-------------|---|
| 41  | H | 68.70934 | 75.75696 | 75.63656 | -1975.08116 | 525.87560   | -1801.71556 | 1 |
| 42  | H | 68.37770 | 77.04738 | 76.81912 | 1588.27743  | -1913.22100 | 1113.83566  | 1 |
| 43  | C | 70.34532 | 77.28773 | 75.81522 | -613.62442  | -457.55993  | -194.14490  | 1 |
| 44  | H | 70.98963 | 76.69043 | 75.13194 | 1707.54637  | -721.27992  | 1996.92523  | 1 |
| 45  | H | 69.99083 | 78.16995 | 75.23640 | 758.23357   | 2100.81767  | 1560.55011  | 1 |
| 46  | C | 71.11997 | 77.67818 | 77.14722 | -352.41524  | 704.96076   | 49.21465    | 1 |
| 47  | H | 72.19622 | 77.94411 | 77.01653 | 1714.76886  | -2070.42778 | 443.35792   | 1 |
| 48  | H | 70.61483 | 78.46376 | 77.75807 | 1224.15040  | 1801.50881  | 1636.97633  | 1 |
| 49  | C | 70.58426 | 74.19629 | 76.96745 | 566.85117   | 537.05831   | 117.62814   | 1 |
| 50  | O | 71.42291 | 74.14408 | 76.10025 | -550.26779  | -406.08867  | 4.21666     | 1 |
| 51  | N | 69.94137 | 73.22292 | 77.59625 | 566.34832   | -425.77725  | 180.18749   | 1 |
| 52  | H | 69.23502 | 73.47057 | 78.28826 | 644.44502   | 2646.80550  | -52.73430   | 1 |
| 53  | C | 70.35109 | 71.87513 | 77.42525 | 612.34801   | -281.48662  | 411.56221   | 1 |
| 54  | H | 71.17917 | 71.95883 | 76.68534 | 1667.23498  | -1490.75142 | 1556.16753  | 1 |
| 55  | C | 70.89155 | 71.49863 | 78.89372 | -714.45746  | -175.43074  | 286.98927   | 1 |
| 56  | H | 70.30785 | 72.10747 | 79.63997 | -787.09484  | 1763.03619  | -1922.46060 | 1 |
| 57  | O | 72.25491 | 71.92687 | 79.11010 | -429.46514  | 516.51932   | -128.40526  | 1 |
| 58  | H | 72.10430 | 72.83649 | 79.45604 | 1981.82785  | 436.16847   | -1818.18182 | 1 |
| 59  | C | 70.56304 | 69.98341 | 79.11749 | 630.79189   | -468.94448  | 76.03230    | 1 |
| 60  | H | 70.99439 | 69.60747 | 80.07545 | -1775.71861 | 2062.30353  | 131.89849   | 1 |
| 61  | H | 69.46041 | 69.80454 | 79.15589 | -1855.14608 | 88.94118    | 1993.53760  | 1 |
| 62  | H | 70.96009 | 69.34137 | 78.29188 | -1504.82350 | -780.94249  | -2132.90992 | 1 |
| 63  | C | 69.12498 | 70.97363 | 76.85106 | 288.57638   | 618.62814   | -397.00270  | 1 |
| 64  | O | 69.20622 | 69.74631 | 76.88590 | 321.70495   | -185.26452  | 574.37218   | 1 |
| 65  | N | 68.16264 | 71.71367 | 76.35279 | -447.05792  | -446.53431  | 367.76425   | 1 |
| 66  | H | 68.34165 | 72.71605 | 76.35154 | 350.31316   | 1975.63644  | -1843.31522 | 1 |
| 67  | C | 67.01339 | 71.19116 | 75.69536 | -511.23061  | 374.03917   | -471.51480  | 1 |
| 68  | H | 66.72640 | 70.31074 | 76.31352 | 2234.79579  | -898.70890  | -1273.45190 | 1 |
| 69  | C | 65.97478 | 72.41034 | 75.67613 | 529.53781   | -159.34528  | 563.72604   | 1 |
| 70  | H | 65.05717 | 72.03617 | 75.15308 | 654.59388   | 2347.94251  | 1217.51488  | 1 |
| 71  | H | 65.66767 | 72.64561 | 76.73048 | -1526.55661 | 2103.42026  | 817.87394   | 1 |
| 72  | O | 66.47313 | 73.64464 | 75.08819 | -554.84278  | 14.12789    | 399.58769   | 1 |
| 73  | H | 66.59340 | 73.33449 | 74.16665 | 1297.06236  | 2061.84854  | 1220.68812  | 1 |
| 74  | C | 67.42156 | 70.74871 | 74.18860 | -662.15484  | -412.13544  | 123.62687   | 1 |
| 75  | O | 66.96850 | 71.30507 | 73.22519 | -540.01537  | -317.05804  | 274.91456   | 1 |
| 76  | N | 68.31185 | 69.74449 | 74.26101 | -202.76299  | -690.00100  | -131.49145  | 1 |
| 77  | H | 68.61972 | 69.49197 | 75.23567 | -702.62132  | -2617.37191 | 281.70413   | 1 |
| 78  | C | 68.28684 | 68.61954 | 73.30473 | -491.73914  | 576.34187   | 222.73509   | 1 |
| 79  | H | 67.80407 | 67.79839 | 73.88208 | 1977.17978  | -1823.58850 | -434.68928  | 1 |
| 80  | C | 67.57000 | 68.94052 | 72.01937 | -649.50797  | -328.66843  | 306.11224   | 1 |
| 81  | H | 67.78089 | 70.00545 | 71.75247 | 2075.07803  | 1452.16490  | -1004.45904 | 1 |
| 82  | C | 68.05217 | 68.06395 | 70.87505 | -615.18735  | -489.99689  | -70.96352   | 1 |
| 83  | H | 67.51968 | 68.30137 | 69.91369 | -1226.32661 | -1724.38906 | -1716.47170 | 1 |
| 84  | H | 69.15406 | 68.19532 | 70.68986 | 2381.64273  | -969.84735  | 900.46860   | 1 |
| 85  | H | 67.88201 | 66.97364 | 71.09155 | 2122.74991  | 1702.23946  | -141.36228  | 1 |
| 86  | C | 66.06456 | 68.78200 | 72.15492 | -501.86074  | -479.61276  | -376.42482  | 1 |
| 87  | H | 65.53285 | 69.03665 | 71.19743 | 993.79261   | -2246.95401 | -1177.81305 | 1 |
| 88  | H | 65.77985 | 67.72814 | 72.42466 | 42.71279    | -626.15391  | -2651.37258 | 1 |
| 89  | H | 65.65013 | 69.45708 | 72.95492 | -2026.39012 | -1590.33709 | -887.82922  | 1 |
| 90  | C | 69.89286 | 68.28072 | 73.05772 | -672.89153  | 382.57394   | -156.34072  | 1 |
| 91  | O | 70.31828 | 67.17166 | 73.28438 | 410.04627   | 221.86223   | 500.35950   | 1 |
| 92  | N | 70.53569 | 69.31977 | 72.54473 | -378.11782  | -443.79414  | -441.10984  | 1 |
| 93  | H | 69.99725 | 70.18161 | 72.48390 | 2404.15973  | -568.14894  | 1149.30085  | 1 |
| 94  | C | 71.94668 | 69.24327 | 72.36096 | -544.54484  | 466.16019   | 331.29119   | 1 |
| 95  | H | 72.21085 | 68.19656 | 72.64059 | -1409.80988 | -170.17955  | 2325.32679  | 1 |
| 96  | C | 72.21456 | 69.59747 | 70.83097 | -184.48284  | 116.78282   | -758.89137  | 1 |
| 97  | H | 71.73657 | 68.84862 | 70.16034 | 1893.78641  | 1861.14652  | 611.04528   | 1 |
| 98  | H | 71.75455 | 70.57584 | 70.56937 | -2170.79665 | -974.19311  | 1327.50117  | 1 |
| 99  | C | 73.75806 | 69.64129 | 70.62615 | 389.51668   | 672.81878   | -138.49152  | 1 |
| 100 | H | 74.21973 | 70.29173 | 71.40033 | 510.64577   | 1933.03327  | 1851.02484  | 1 |
| 101 | H | 74.20094 | 68.63782 | 70.81192 | -2302.30869 | -1105.72939 | -948.89774  | 1 |
| 102 | C | 74.17685 | 70.16131 | 69.19708 | -559.93427  | -126.34590  | 542.30857   | 1 |

|     |   |          |          |          |             |             |             |   |
|-----|---|----------|----------|----------|-------------|-------------|-------------|---|
| 103 | O | 75.33440 | 70.40306 | 68.97417 | -670.36003  | -111.83166  | 76.36448    | 1 |
| 104 | N | 73.15137 | 70.27000 | 68.32650 | -216.06729  | -537.07037  | 446.51379   | 1 |
| 105 | H | 72.15468 | 70.06252 | 68.46100 | -1251.96487 | 1074.12894  | -2168.52500 | 1 |
| 106 | H | 73.25751 | 70.55922 | 67.34812 | -2451.83023 | -720.73851  | 944.84612   | 1 |
| 107 | C | 72.60422 | 70.39333 | 73.30180 | 546.24052   | -563.88337  | -85.11809   | 1 |
| 108 | O | 72.70719 | 71.53876 | 72.87822 | 71.70702    | -307.40463  | 606.69673   | 1 |
| 109 | N | 72.92535 | 69.91699 | 74.49934 | 479.90863   | -504.50129  | 222.86849   | 1 |
| 110 | C | 73.27882 | 70.81746 | 75.56127 | 75.51268    | -600.91904  | 506.73700   | 1 |
| 111 | H | 72.73622 | 71.76884 | 75.35499 | -2033.61562 | 1795.30103  | 254.89480   | 1 |
| 112 | C | 72.78865 | 69.97780 | 76.81384 | 523.79067   | 517.99274   | 284.45581   | 1 |
| 113 | H | 73.21897 | 70.34020 | 77.77860 | 1599.61665  | -1127.00911 | 1895.98173  | 1 |
| 114 | H | 71.68056 | 70.02055 | 76.91708 | -1881.83093 | 1275.82488  | -1501.55016 | 1 |
| 115 | C | 73.23505 | 68.53763 | 76.41467 | -600.05639  | -404.05026  | 316.64485   | 1 |
| 116 | H | 74.34113 | 68.41896 | 76.50622 | -2597.05260 | 496.36221   | 657.73249   | 1 |
| 117 | H | 72.76946 | 67.73418 | 77.02943 | -1666.24518 | 1294.38985  | -1723.90591 | 1 |
| 118 | C | 72.76570 | 68.52143 | 74.89805 | 493.57570   | -129.95376  | -602.56394  | 1 |
| 119 | H | 73.38535 | 67.88894 | 74.22024 | -1469.08415 | -637.84797  | 2204.22581  | 1 |
| 120 | H | 71.68430 | 68.28037 | 74.74450 | -1038.97840 | 1068.88701  | -2280.71789 | 1 |
| 121 | C | 74.90305 | 71.00006 | 75.56643 | 188.88100   | 241.05089   | -727.87821  | 1 |
| 122 | O | 75.65064 | 70.14661 | 75.97628 | 531.88613   | -49.19943   | 427.07960   | 1 |
| 123 | N | 75.22168 | 72.22720 | 75.11212 | 708.14833   | 26.93417    | -179.73509  | 1 |
| 124 | H | 74.42148 | 72.73395 | 74.72968 | -2232.69501 | -1179.09831 | 1023.94816  | 1 |
| 125 | C | 76.58440 | 72.42496 | 74.59569 | -738.32412  | 259.92548   | 104.42456   | 1 |
| 126 | H | 76.99592 | 71.38661 | 74.57060 | 2028.89123  | 1260.02983  | 1311.33324  | 1 |
| 127 | C | 76.48241 | 73.06755 | 73.22718 | -258.65678  | -345.52513  | 661.28459   | 1 |
| 128 | H | 75.95249 | 74.04053 | 73.33931 | -1826.06090 | -1801.46097 | -918.64554  | 1 |
| 129 | C | 77.86101 | 73.35129 | 72.65774 | -541.23400  | 531.92970   | -218.41428  | 1 |
| 130 | H | 77.80468 | 73.89858 | 71.67627 | 1311.73218  | -2219.18200 | 882.19023   | 1 |
| 131 | H | 78.45125 | 73.99520 | 73.37602 | -1048.71298 | 1223.58118  | -2196.97971 | 1 |
| 132 | H | 78.44910 | 72.40760 | 72.48712 | 419.06414   | 1903.92898  | 1903.44670  | 1 |
| 133 | C | 75.70011 | 72.21420 | 72.24698 | -423.86431  | 152.66566   | -648.55262  | 1 |
| 134 | H | 75.66103 | 72.68201 | 71.22573 | 105.68386   | -2342.50080 | 1387.51238  | 1 |
| 135 | H | 76.17043 | 71.19983 | 72.12189 | -1695.63603 | -1484.73621 | -1531.02793 | 1 |
| 136 | H | 74.62713 | 72.04825 | 72.58749 | -1853.57121 | -487.39031  | 1936.59343  | 1 |
| 137 | C | 77.42348 | 73.36377 | 75.67457 | 539.71428   | -510.58232  | 267.58633   | 1 |
| 138 | O | 78.64637 | 73.43868 | 75.57804 | -15.93758   | -278.34085  | -624.49402  | 1 |
| 139 | N | 76.62585 | 74.00756 | 76.51107 | -676.81886  | 12.05292    | 276.17960   | 1 |
| 140 | H | 75.67742 | 73.72813 | 76.24299 | -1694.44250 | -373.84189  | -2100.66098 | 1 |
| 141 | C | 76.91294 | 74.24577 | 77.88700 | 412.33078   | -664.70360  | 108.35451   | 1 |
| 142 | H | 75.90389 | 74.44876 | 78.30552 | 1765.77476  | 1294.44366  | 1621.76594  | 1 |
| 143 | C | 77.57381 | 72.94549 | 78.50029 | -179.66635  | -721.95667  | -264.73915  | 1 |
| 144 | H | 76.93559 | 72.04664 | 78.34290 | -607.34922  | 2587.87032  | -598.10018  | 1 |
| 145 | H | 78.54389 | 72.71909 | 78.00256 | -359.69332  | -1479.13954 | -2259.74260 | 1 |
| 146 | C | 77.76868 | 73.27283 | 80.01869 | -240.01076  | 616.02425   | 431.85322   | 1 |
| 147 | H | 78.33624 | 74.22710 | 80.12626 | -1359.17131 | 782.54425   | 2227.99181  | 1 |
| 148 | H | 76.78572 | 73.45245 | 80.50869 | -820.36667  | 85.81767    | -2596.78715 | 1 |
| 149 | C | 78.54297 | 72.10221 | 80.74481 | -513.07015  | 236.18570   | -551.87280  | 1 |
| 150 | H | 77.92720 | 71.17441 | 80.78844 | 1816.11944  | -1183.11722 | -1650.94321 | 1 |
| 151 | H | 79.47154 | 71.82765 | 80.19326 | -1800.04429 | -1361.53473 | 1526.34643  | 1 |
| 152 | C | 78.87416 | 72.63224 | 82.16051 | 726.08972   | -253.19732  | -179.64713  | 1 |
| 153 | H | 79.59569 | 73.47351 | 82.17751 | 1224.27271  | -456.51798  | -2390.90304 | 1 |
| 154 | H | 77.98841 | 72.88465 | 82.77696 | 1206.40339  | -1150.93514 | -2154.90344 | 1 |
| 155 | N | 79.58982 | 71.48858 | 82.95322 | 329.70796   | -633.68968  | -155.67358  | 1 |
| 156 | H | 79.89498 | 71.73942 | 83.93796 | 1348.31305  | 1938.76845  | 1359.00643  | 1 |
| 157 | H | 79.03527 | 70.60036 | 83.12726 | 2096.92035  | 1446.54551  | -966.48890  | 1 |
| 158 | H | 80.49340 | 71.10820 | 82.54635 | -1197.07217 | -2303.53719 | 827.28733   | 1 |
| 159 | C | 77.96962 | 75.46071 | 78.18913 | -378.01186  | -556.17301  | -413.96481  | 1 |
| 160 | O | 77.74457 | 76.19358 | 79.12283 | -409.44433  | -307.55053  | -453.30833  | 1 |
| 161 | N | 79.07300 | 75.35377 | 77.46420 | -429.02477  | 524.70884   | 274.08502   | 1 |
| 162 | H | 79.11570 | 74.65426 | 76.67754 | 1706.34263  | -1425.96036 | 1574.38926  | 1 |
| 163 | C | 79.99828 | 76.44883 | 77.51336 | -45.25864   | -626.22952  | 478.93267   | 1 |
| 164 | H | 79.84387 | 76.87936 | 78.53120 | 1988.63164  | 570.90773   | 1772.87287  | 1 |

|     |   |          |          |          |             |             |             |   |
|-----|---|----------|----------|----------|-------------|-------------|-------------|---|
| 165 | C | 81.41329 | 75.76615 | 77.29242 | 551.77128   | -20.49526   | -564.54996  | 1 |
| 166 | H | 81.58527 | 75.03045 | 78.10926 | 1434.61535  | -1753.10253 | 1513.99471  | 1 |
| 167 | H | 81.39138 | 75.15990 | 76.36139 | -714.67738  | 1819.09770  | 1898.36494  | 1 |
| 168 | C | 82.61664 | 76.76296 | 77.22908 | 446.99263   | -555.77305  | 338.97221   | 1 |
| 169 | H | 82.59115 | 77.34617 | 76.27832 | 1953.68466  | 1892.25957  | -161.67766  | 1 |
| 170 | H | 82.57920 | 77.49788 | 78.06526 | -403.03785  | 2688.07032  | -188.43591  | 1 |
| 171 | C | 83.95730 | 75.92585 | 77.28006 | 567.86262   | 335.74681   | 434.04421   | 1 |
| 172 | H | 84.07170 | 75.40237 | 78.25670 | -1080.02275 | 1568.26081  | -1948.78900 | 1 |
| 173 | H | 83.94982 | 75.12784 | 76.50499 | -919.54108  | 2111.34692  | 1456.13463  | 1 |
| 174 | C | 85.12489 | 76.91412 | 77.02486 | 195.81897   | 173.33862   | -745.11536  | 1 |
| 175 | H | 84.94563 | 77.62850 | 76.19554 | 1405.67949  | -2301.21089 | -390.08113  | 1 |
| 176 | H | 85.48243 | 77.45749 | 77.92340 | -940.37328  | -1118.32446 | 2299.72133  | 1 |
| 177 | N | 86.32928 | 76.07576 | 76.52136 | 319.26422   | 656.36007   | -42.02424   | 1 |
| 178 | H | 87.21462 | 76.62762 | 76.32510 | 1961.03633  | 619.91968   | 1787.09422  | 1 |
| 179 | H | 86.70763 | 75.34180 | 77.18780 | 854.14343   | -2156.80752 | 1429.08711  | 1 |
| 180 | H | 86.14128 | 75.52894 | 75.57743 | 1237.02905  | -1378.50857 | -1998.28500 | 1 |
| 181 | C | 79.53537 | 77.48110 | 76.35296 | 532.53319   | -268.57236  | 517.55729   | 1 |
| 182 | O | 78.41266 | 77.42778 | 75.84487 | 266.16714   | -290.73804  | -558.88002  | 1 |
| 183 | N | 80.46823 | 78.38079 | 76.15435 | -226.25352  | 640.49678   | -270.32839  | 1 |
| 184 | H | 81.30565 | 78.34466 | 76.73150 | 2007.69063  | -1035.27229 | 1523.50231  | 1 |
| 185 | C | 80.33337 | 79.33246 | 75.09544 | -540.76542  | -573.33303  | 49.50000    | 1 |
| 186 | H | 79.28048 | 79.66751 | 75.22793 | -2374.20950 | -1036.76023 | 843.75774   | 1 |
| 187 | C | 81.44047 | 80.45201 | 75.31765 | -77.09082   | 666.87422   | -415.84136  | 1 |
| 188 | H | 82.45192 | 80.00648 | 75.10982 | -985.81834  | 617.19825   | 2463.91927  | 1 |
| 189 | O | 81.51627 | 81.00857 | 76.64602 | 293.29899   | -391.65602  | -477.80926  | 1 |
| 190 | H | 82.43765 | 80.79562 | 76.89168 | 2528.72714  | -681.76262  | -751.27122  | 1 |
| 191 | C | 81.07744 | 81.47223 | 74.17517 | 252.47363   | -605.14473  | 440.05134   | 1 |
| 192 | H | 81.81108 | 82.31022 | 74.13188 | -2052.65063 | 1456.49051  | -1043.51830 | 1 |
| 193 | H | 81.06910 | 80.98800 | 73.16898 | -2152.98800 | -1661.97574 | -161.70652  | 1 |
| 194 | H | 80.07085 | 81.92279 | 74.33599 | -473.12726  | -1584.27339 | 2165.61725  | 1 |
| 195 | C | 80.53538 | 78.56014 | 73.66226 | 360.36307   | 488.46713   | 505.10056   | 1 |
| 196 | O | 81.48861 | 78.76495 | 72.95359 | -200.08817  | -528.03552  | -385.82850  | 1 |
| 197 | N | 79.47317 | 77.79608 | 73.45081 | -597.54095  | -226.44775  | 355.20479   | 1 |
| 198 | H | 78.73136 | 77.67637 | 74.19076 | 2179.23655  | -1300.70981 | -991.33835  | 1 |
| 199 | C | 79.49313 | 76.89726 | 72.35717 | -687.68921  | 297.39807   | -249.45179  | 1 |
| 200 | H | 80.11735 | 77.35365 | 71.55689 | -349.16256  | -2467.37713 | -1101.72831 | 1 |
| 201 | C | 80.02610 | 75.49211 | 72.88208 | 672.47345   | 361.54328   | -201.62880  | 1 |
| 202 | H | 79.42144 | 75.19024 | 73.77589 | 1541.41502  | 582.18425   | 2169.97026  | 1 |
| 203 | H | 79.82611 | 74.73065 | 72.09396 | -2534.67717 | 60.25153    | 997.72295   | 1 |
| 204 | C | 81.52321 | 75.38681 | 73.25409 | 574.26774   | -389.43119  | -377.02542  | 1 |
| 205 | C | 82.56416 | 76.13539 | 72.63848 | 688.82679   | -287.33580  | -257.96133  | 1 |
| 206 | H | 82.33290 | 76.92179 | 71.89748 | 331.14182   | 1470.38163  | 2269.80013  | 1 |
| 207 | C | 81.83290 | 74.37632 | 74.20696 | -383.52382  | -675.04808  | 144.24917   | 1 |
| 208 | H | 81.02799 | 73.78327 | 74.67609 | 4.09847     | 1517.59662  | 2262.86397  | 1 |
| 209 | C | 83.89976 | 75.85254 | 72.99871 | -134.76730  | 428.45285   | -649.50303  | 1 |
| 210 | H | 84.71695 | 76.42222 | 72.51817 | -903.23433  | 1600.49020  | 2011.53387  | 1 |
| 211 | C | 83.18638 | 74.13196 | 74.52545 | -335.53281  | -615.00040  | -364.39058  | 1 |
| 212 | H | 83.42317 | 73.33943 | 75.25968 | 1596.45398  | -1369.33862 | 1732.02659  | 1 |
| 213 | C | 84.24029 | 74.86233 | 73.94139 | 585.48547   | -340.24194  | -406.23938  | 1 |
| 214 | O | 85.69454 | 74.60185 | 74.28971 | -419.15649  | -173.04408  | -511.94141  | 1 |
| 215 | H | 85.54043 | 73.77649 | 74.77144 | -1071.84350 | 1559.71507  | -1960.13012 | 1 |
| 216 | C | 77.90359 | 76.62228 | 72.02665 | 291.41878   | -183.13091  | 710.72246   | 1 |
| 217 | O | 77.16190 | 76.18271 | 72.88178 | 379.87695   | 523.47396   | -222.23622  | 1 |
| 218 | N | 77.62021 | 76.96257 | 70.77958 | 564.30591   | 373.09380   | 277.24371   | 1 |
| 219 | H | 78.38170 | 77.33131 | 70.21054 | -120.59931  | -2436.07824 | -1214.35098 | 1 |
| 220 | C | 76.29496 | 76.94893 | 70.26773 | 404.07514   | -299.37480  | 608.84009   | 1 |
| 221 | H | 76.44414 | 77.04686 | 69.16901 | -1071.07882 | -841.69025  | 2359.66467  | 1 |
| 222 | C | 75.60070 | 75.58260 | 70.68902 | -683.12807  | 68.71770    | -390.13096  | 1 |
| 223 | H | 76.25603 | 74.72189 | 70.42822 | 2068.88918  | 1596.58590  | 770.89603   | 1 |
| 224 | H | 75.47671 | 75.53873 | 71.80054 | 1379.86429  | 2342.49779  | -179.85638  | 1 |
| 225 | C | 74.22087 | 75.46126 | 69.97453 | -176.39967  | 537.49466   | 550.97268   | 1 |
| 226 | H | 73.55887 | 76.31350 | 70.25181 | -396.28051  | 1942.22168  | 1869.33314  | 1 |

|     |   |          |          |          |             |             |             |   |
|-----|---|----------|----------|----------|-------------|-------------|-------------|---|
| 227 | H | 74.34964 | 75.53567 | 68.87213 | -94.44700   | 586.00678   | -2659.20016 | 1 |
| 228 | C | 73.52600 | 74.07520 | 70.37055 | -291.69381  | -718.18079  | -150.72929  | 1 |
| 229 | H | 74.05603 | 73.16663 | 69.98514 | -2303.38776 | 1089.76242  | 964.62032   | 1 |
| 230 | H | 73.28208 | 73.92375 | 71.45267 | 884.16729   | 2568.80533  | -207.74283  | 1 |
| 231 | N | 72.33172 | 74.20934 | 69.64461 | -594.49522  | -252.81478  | 342.29276   | 1 |
| 232 | H | 72.36110 | 74.82416 | 68.84494 | -1735.17426 | 2084.05705  | -263.71605  | 1 |
| 233 | C | 71.23646 | 73.60473 | 69.88445 | 595.23177   | -271.52487  | 442.22352   | 1 |
| 234 | N | 71.17140 | 72.73100 | 70.96618 | 585.53813   | -424.79750  | -105.81303  | 1 |
| 235 | H | 71.91856 | 72.49230 | 71.65960 | 959.88797   | 1327.56823  | -2177.11905 | 1 |
| 236 | H | 70.31179 | 72.23805 | 71.23390 | 1578.48647  | 16.27378    | -2220.76233 | 1 |
| 237 | N | 70.24878 | 73.95408 | 68.94655 | -452.17763  | -390.33541  | -421.51853  | 1 |
| 238 | H | 70.27129 | 74.61184 | 68.16975 | 470.26107   | 1974.25629  | -1817.92087 | 1 |
| 239 | H | 69.29416 | 73.59709 | 68.98420 | 1856.67307  | -1573.97321 | -1224.35416 | 1 |
| 240 | C | 75.37440 | 78.16946 | 70.84382 | -531.47271  | -581.45780  | -55.06206   | 1 |
| 241 | O | 74.36124 | 78.44158 | 70.24867 | -243.00837  | 192.73507   | 609.52485   | 1 |
| 242 | N | 75.86026 | 78.77183 | 71.94248 | 343.49288   | -644.25607  | 38.09164    | 1 |
| 243 | H | 76.70075 | 78.31539 | 72.29519 | -1691.16043 | -1535.97525 | -1484.73099 | 1 |
| 244 | C | 74.93519 | 79.44153 | 72.88481 | 542.66492   | 350.14337   | 454.42563   | 1 |
| 245 | H | 74.09615 | 78.72480 | 73.04289 | 1209.57979  | -2396.95920 | 463.86744   | 1 |
| 246 | C | 75.72987 | 79.74981 | 74.13594 | -737.14309  | 145.93010   | 242.71942   | 1 |
| 247 | H | 76.73833 | 80.10015 | 73.81857 | -1050.18303 | 159.36419   | -2509.06125 | 1 |
| 248 | C | 75.08650 | 80.86059 | 74.94693 | -706.77696  | -252.88343  | -245.16230  | 1 |
| 249 | H | 75.69854 | 81.12523 | 75.85320 | -1624.64039 | -1665.49085 | 1417.86935  | 1 |
| 250 | H | 74.96647 | 81.79899 | 74.33642 | 2566.10521  | 598.51109   | 693.22305   | 1 |
| 251 | H | 74.06191 | 80.56980 | 75.30891 | -1972.69758 | 107.10018   | -1876.34312 | 1 |
| 252 | C | 75.92417 | 78.52312 | 75.00768 | 412.85148   | 672.58832   | -27.69222   | 1 |
| 253 | H | 76.57518 | 78.74451 | 75.90216 | 1447.02277  | 1762.76533  | -1490.78944 | 1 |
| 254 | H | 74.94576 | 78.14065 | 75.41000 | 1320.77379  | -145.20455  | 2378.68491  | 1 |
| 255 | H | 76.41281 | 77.67335 | 74.44539 | -1512.10848 | 1470.52031  | 1724.75147  | 1 |
| 256 | C | 74.43888 | 80.80427 | 72.11204 | -607.11113  | 499.56689   | 73.73769    | 1 |
| 257 | O | 73.32089 | 81.21589 | 72.27664 | 357.97126   | 460.81534   | 356.68785   | 1 |
| 258 | N | 75.47077 | 81.39144 | 71.48159 | 536.55407   | -368.62270  | 332.76306   | 1 |
| 259 | H | 76.34473 | 80.83736 | 71.48968 | 524.38866   | 2297.69985  | 1367.20941  | 1 |
| 260 | C | 75.16134 | 81.88074 | 70.15564 | 46.50277    | -774.29190  | -147.97904  | 1 |
| 261 | H | 74.23785 | 81.34333 | 69.84685 | 1676.51875  | 1883.29066  | 1032.55549  | 1 |
| 262 | C | 74.96080 | 83.47753 | 70.18908 | -559.41456  | -34.19198   | -556.30433  | 1 |
| 263 | H | 75.89035 | 83.95177 | 70.58554 | -64.66664   | 395.18769   | 2695.05373  | 1 |
| 264 | H | 74.83038 | 83.87715 | 69.15471 | -2703.44278 | -60.40056   | 333.79418   | 1 |
| 265 | C | 73.78053 | 83.84731 | 71.04959 | -519.76435  | 377.31045   | 459.42366   | 1 |
| 266 | H | 73.90551 | 83.35758 | 72.04456 | -1746.74323 | 1667.50644  | -1261.73691 | 1 |
| 267 | C | 73.72194 | 85.35471 | 71.26084 | 570.95554   | 16.46261    | -545.27700  | 1 |
| 268 | H | 72.85751 | 85.64646 | 71.91160 | 2391.58273  | 28.05277    | -1305.07271 | 1 |
| 269 | H | 74.65212 | 85.73982 | 71.75276 | 175.75588   | 917.63458   | 2559.43867  | 1 |
| 270 | H | 73.60732 | 85.90370 | 70.29106 | -1063.97851 | -2155.34650 | 1283.00462  | 1 |
| 271 | C | 72.47428 | 83.36039 | 70.43803 | 193.76014   | 2.62946     | -765.53141  | 1 |
| 272 | H | 71.58602 | 83.73228 | 71.01104 | 507.39394   | -846.55087  | 2539.60089  | 1 |
| 273 | H | 72.35587 | 83.70387 | 69.37786 | 1337.57841  | 1818.19054  | 1526.01994  | 1 |
| 274 | H | 72.41866 | 82.23857 | 70.44163 | 1100.88635  | -1172.91350 | -2199.08909 | 1 |
| 275 | C | 76.45972 | 81.50748 | 69.31065 | -549.21115  | 475.64486   | -309.38218  | 1 |
| 276 | O | 77.40070 | 80.92064 | 69.79484 | 556.06106   | -390.37755  | -78.24250   | 1 |
| 277 | O | 76.48698 | 81.90403 | 67.95446 | -572.27940  | -310.19032  | -209.75862  | 1 |
| 278 | H | 75.57769 | 82.30803 | 67.89199 | -1380.08193 | 2212.14486  | 790.85944   | 1 |

Listing 4: C00004.xmolout

|   |   |          |          |          |             |             |             |        |          |
|---|---|----------|----------|----------|-------------|-------------|-------------|--------|----------|
| 1 |   | 276      |          |          |             |             |             |        |          |
| 2 |   | 150.0000 | 150.0000 | 150.0000 | 0.0000      | 0.0000      | 0.0000***** | 2.7750 | 11100    |
|   |   | 0.2500   | 300.00   | 0.00     | 0.00        | 0.00        | -1294.3757  | 0.0000 | 300.0000 |
| 3 | H | 77.81839 | 58.44812 | 77.61439 | -2043.14101 | -1757.64893 | 399.89339   |        | 1        |
| 4 | N | 77.51883 | 59.13719 | 76.92911 | 426.75047   | 490.45733   | -334.42467  |        | 1        |
| 5 | H | 76.97371 | 58.57081 | 76.28335 | 442.25559   | -1110.30854 | -2448.52907 |        | 1        |
| 6 | C | 78.54976 | 59.90111 | 76.34119 | 415.32972   | -666.39213  | 83.73172    |        | 1        |

|    |   |          |          |          |             |             |             |   |
|----|---|----------|----------|----------|-------------|-------------|-------------|---|
| 7  | H | 79.17710 | 60.18057 | 77.21432 | 879.32219   | 2491.00447  | 667.35213   | 1 |
| 8  | C | 79.36550 | 59.03481 | 75.25830 | 31.35357    | 477.41777   | 628.23362   | 1 |
| 9  | H | 78.68825 | 58.76305 | 74.41335 | 1168.38489  | 2240.25337  | -1019.71136 | 1 |
| 10 | H | 80.16368 | 59.67409 | 74.80997 | -360.43770  | 2534.90498  | 931.67112   | 1 |
| 11 | C | 79.96424 | 57.79406 | 75.86951 | 463.18208   | 512.70242   | -382.34388  | 1 |
| 12 | H | 79.13858 | 57.14407 | 76.23611 | 1725.29117  | 1863.52247  | -987.07854  | 1 |
| 13 | C | 80.75676 | 57.02638 | 74.81798 | 710.42801   | -144.27427  | -313.15367  | 1 |
| 14 | H | 81.18865 | 56.07966 | 75.23369 | 364.20195   | -1033.13725 | 2494.72524  | 1 |
| 15 | H | 80.11922 | 56.74502 | 73.94057 | 2567.61904  | 335.80679   | 847.48802   | 1 |
| 16 | H | 81.61198 | 57.63407 | 74.42394 | -2587.99029 | 680.92867   | -512.16411  | 1 |
| 17 | C | 80.87728 | 58.12211 | 77.04285 | 268.17616   | 741.64379   | -40.42634   | 1 |
| 18 | H | 81.37357 | 57.20296 | 77.44898 | 1283.54314  | -1945.37420 | -1411.27812 | 1 |
| 19 | H | 81.69031 | 58.83382 | 76.74585 | -1258.57796 | 1317.15249  | -2026.02085 | 1 |
| 20 | H | 80.31540 | 58.59381 | 77.88956 | -2502.84526 | 909.80597   | 575.92391   | 1 |
| 21 | C | 77.87242 | 61.17762 | 75.60520 | 619.36578   | -458.64843  | -172.09273  | 1 |
| 22 | O | 78.29060 | 61.58407 | 74.53370 | -81.40433   | 433.87611   | 522.34594   | 1 |
| 23 | N | 76.88932 | 61.66940 | 76.34805 | 175.23996   | -622.20190  | 341.55523   | 1 |
| 24 | H | 76.71099 | 61.19434 | 77.23248 | -876.57256  | -303.22879  | -2561.90213 | 1 |
| 25 | C | 76.32441 | 62.93561 | 76.00838 | -571.88214  | -534.10783  | -106.15033  | 1 |
| 26 | H | 76.23982 | 62.90828 | 74.90143 | -2713.20841 | -16.25800   | -248.80809  | 1 |
| 27 | C | 74.93450 | 63.04420 | 76.78460 | 166.60354   | 288.16399   | -716.09568  | 1 |
| 28 | H | 75.13228 | 62.96087 | 77.88838 | -2097.85574 | 1636.78449  | -586.18044  | 1 |
| 29 | O | 73.96214 | 62.02784 | 76.47574 | -317.80580  | -363.38227  | 484.43082   | 1 |
| 30 | H | 73.84909 | 61.59728 | 77.34580 | 1863.74748  | -1451.84923 | 1357.29467  | 1 |
| 31 | C | 74.51615 | 64.52097 | 76.43976 | 503.80731   | 517.99032   | 318.51606   | 1 |
| 32 | H | 73.57639 | 64.81050 | 76.96457 | 640.61020   | -2157.10410 | -1536.29104 | 1 |
| 33 | H | 75.30313 | 65.25304 | 76.73689 | 1687.88455  | 465.60692   | 2087.56452  | 1 |
| 34 | H | 74.33559 | 64.65079 | 75.34759 | -1293.07895 | -1899.88581 | -1463.57452 | 1 |
| 35 | C | 77.36041 | 64.08298 | 76.54361 | -153.07550  | -733.68902  | 248.70981   | 1 |
| 36 | O | 77.53546 | 64.20191 | 77.72656 | 186.15459   | -480.78787  | -449.34387  | 1 |
| 37 | N | 77.85726 | 64.82224 | 75.52690 | -487.53139  | 543.18517   | 42.03850    | 1 |
| 38 | C | 78.92849 | 65.72637 | 75.72731 | -699.35871  | 69.34393    | 360.10701   | 1 |
| 39 | H | 79.45616 | 65.41172 | 76.65429 | 2.81126     | -221.99807  | -2715.58072 | 1 |
| 40 | C | 79.73829 | 65.60984 | 74.38070 | -507.46439  | -592.59194  | 122.07761   | 1 |
| 41 | H | 80.40239 | 66.48510 | 74.19535 | -1975.08116 | 525.87560   | -1801.71556 | 1 |
| 42 | H | 80.38527 | 64.70358 | 74.36688 | 1588.27743  | -1913.22100 | 1113.83566  | 1 |
| 43 | C | 78.56801 | 65.48261 | 73.34968 | -613.62442  | -457.55993  | -194.14490  | 1 |
| 44 | H | 78.07293 | 66.46441 | 73.17692 | 1707.54637  | -721.27992  | 1996.92523  | 1 |
| 45 | H | 78.88612 | 65.10302 | 72.35273 | 758.23357   | 2100.81767  | 1560.55011  | 1 |
| 46 | C | 77.61741 | 64.48123 | 74.12514 | -352.41524  | 704.96076   | 49.21465    | 1 |
| 47 | H | 76.52876 | 64.59478 | 73.90785 | 1714.76886  | -2070.42778 | 443.35792   | 1 |
| 48 | H | 77.91674 | 63.38368 | 74.05261 | 1224.15040  | 1801.50881  | 1636.97633  | 1 |
| 49 | C | 78.40042 | 67.32679 | 75.80556 | 566.85117   | 537.05831   | 117.62814   | 1 |
| 50 | O | 79.20709 | 68.25353 | 75.96055 | -550.26779  | -406.08867  | 4.21666     | 1 |
| 51 | N | 77.14163 | 67.43054 | 75.64919 | 566.34832   | -425.77725  | 180.18749   | 1 |
| 52 | H | 76.66975 | 66.55495 | 75.52845 | 644.44502   | 2646.80550  | -52.73430   | 1 |
| 53 | C | 75.51595 | 69.59666 | 76.06148 | 612.34801   | -281.48662  | 411.56221   | 2 |
| 54 | H | 76.22583 | 68.77264 | 75.71585 | 1667.23498  | -1490.75142 | 1556.16753  | 2 |
| 55 | C | 74.50374 | 68.97590 | 77.06757 | -714.45746  | -175.43074  | 286.98927   | 2 |
| 56 | H | 75.05304 | 68.60857 | 77.97237 | -787.09484  | 1763.03619  | -1922.46060 | 2 |
| 57 | O | 73.76548 | 67.82967 | 76.50625 | -429.46514  | 516.51932   | -128.40526  | 2 |
| 58 | H | 74.02671 | 67.13678 | 77.12877 | 1981.82785  | 436.16847   | -1818.18182 | 2 |
| 59 | C | 73.61919 | 70.21436 | 77.45989 | 630.79189   | -468.94448  | 76.03230    | 2 |
| 60 | H | 72.84715 | 69.93799 | 78.21536 | -1775.71861 | 2062.30353  | 131.89849   | 2 |
| 61 | H | 74.23300 | 71.03908 | 77.89861 | -1855.14608 | 88.94118    | 1993.53760  | 2 |
| 62 | H | 73.08478 | 70.63184 | 76.57502 | -1504.82350 | -780.94249  | -2132.90992 | 2 |
| 63 | C | 76.35637 | 70.81232 | 76.64082 | 288.57638   | 618.62814   | -397.00270  | 2 |
| 64 | O | 76.47110 | 71.06953 | 77.82175 | 321.70495   | -185.26452  | 574.37218   | 2 |
| 65 | N | 76.89658 | 71.45599 | 75.59320 | -447.05792  | -446.53431  | 367.76425   | 2 |
| 66 | H | 76.79116 | 71.09529 | 74.64559 | 350.31316   | 1975.63644  | -1843.31522 | 2 |
| 67 | C | 77.66713 | 72.63345 | 75.84380 | -511.23061  | 374.03917   | -471.51480  | 2 |
| 68 | H | 77.01578 | 73.17388 | 76.56681 | 2234.79579  | -898.70890  | -1273.45190 | 2 |

|     |   |          |          |          |             |             |             |   |
|-----|---|----------|----------|----------|-------------|-------------|-------------|---|
| 69  | C | 79.00544 | 72.12939 | 76.56780 | 529.53781   | -159.34528  | 563.72604   | 2 |
| 70  | H | 79.49185 | 73.04194 | 77.00857 | 654.59388   | 2347.94251  | 1217.51488  | 2 |
| 71  | H | 78.68257 | 71.48557 | 77.43143 | -1526.55661 | 2103.42026  | 817.87394   | 2 |
| 72  | O | 79.96690 | 71.44134 | 75.73393 | -554.84278  | 14.12789    | 399.58769   | 2 |
| 73  | H | 79.66992 | 70.51174 | 75.86286 | 1297.06236  | 2061.84854  | 1220.68812  | 2 |
| 74  | C | 77.83024 | 73.38241 | 74.41884 | -662.15484  | -412.13544  | 123.62687   | 2 |
| 75  | O | 76.88657 | 73.49949 | 73.66287 | -540.01537  | -317.05804  | 274.91456   | 2 |
| 76  | N | 79.06534 | 73.85739 | 74.27301 | -202.76299  | -690.00100  | -131.49145  | 2 |
| 77  | H | 79.72762 | 73.58563 | 75.00178 | -702.62132  | -2617.37191 | 281.70413   | 2 |
| 78  | C | 79.49695 | 74.64146 | 73.12359 | -491.73914  | 576.34187   | 222.73509   | 2 |
| 79  | H | 80.60556 | 74.61285 | 73.24481 | 1977.17978  | -1823.58850 | -434.68928  | 2 |
| 80  | C | 79.03052 | 73.96689 | 71.84759 | -649.50797  | -328.66843  | 306.11224   | 2 |
| 81  | H | 77.91219 | 73.95466 | 71.84628 | 2075.07803  | 1452.16490  | -1004.45904 | 2 |
| 82  | C | 79.52011 | 74.69173 | 70.60807 | -615.18735  | -489.99689  | -70.96352   | 2 |
| 83  | H | 79.23572 | 74.13207 | 69.66657 | -1226.32661 | -1724.38906 | -1716.47170 | 2 |
| 84  | H | 79.09585 | 75.72983 | 70.52354 | 2381.64273  | -969.84735  | 900.46860   | 2 |
| 85  | H | 80.63970 | 74.79455 | 70.60749 | 2122.74991  | 1702.23946  | -141.36228  | 2 |
| 86  | C | 79.48706 | 72.51820 | 71.79291 | -501.86074  | -479.61276  | -376.42482  | 2 |
| 87  | H | 79.07680 | 71.98443 | 70.89260 | 993.79261   | -2246.95401 | -1177.81305 | 2 |
| 88  | H | 80.60753 | 72.43986 | 71.74766 | 42.71279    | -626.15391  | -2651.37258 | 2 |
| 89  | H | 79.15285 | 71.95014 | 72.70466 | -2026.39012 | -1590.33709 | -887.82922  | 2 |
| 90  | C | 78.93393 | 76.18744 | 73.41685 | -672.89153  | 382.57394   | -156.34072  | 2 |
| 91  | O | 79.42767 | 76.80471 | 74.33329 | 410.04627   | 221.86223   | 500.35950   | 2 |
| 92  | N | 78.07191 | 76.60414 | 72.51109 | -378.11782  | -443.79414  | -441.10984  | 2 |
| 93  | H | 77.73603 | 75.87813 | 71.88409 | 2404.15973  | -568.14894  | 1149.30085  | 2 |
| 94  | C | 77.26823 | 77.78639 | 72.72993 | -544.54484  | 466.16019   | 331.29119   | 2 |
| 95  | H | 76.48583 | 77.43757 | 73.44026 | -1409.80988 | -170.17955  | 2325.32679  | 2 |
| 96  | C | 78.17458 | 78.90920 | 73.37899 | -184.48284  | 116.78282   | -758.89137  | 2 |
| 97  | H | 78.45679 | 78.63496 | 74.42940 | 1893.78641  | 1861.14652  | 611.04528   | 2 |
| 98  | H | 79.14209 | 78.99491 | 72.83244 | -2170.79665 | -974.19311  | 1327.50117  | 2 |
| 99  | C | 77.39729 | 80.26407 | 73.37705 | 389.51668   | 672.81878   | -138.49152  | 2 |
| 100 | H | 77.10035 | 80.53661 | 72.33987 | 510.64577   | 1933.03327  | 1851.02484  | 2 |
| 101 | H | 76.43000 | 80.15873 | 73.91516 | -2302.30869 | -1105.72939 | -948.89774  | 2 |
| 102 | C | 78.23566 | 81.43376 | 74.01960 | -559.93427  | -126.34590  | 542.30857   | 2 |
| 103 | O | 77.71717 | 82.50626 | 74.19729 | -670.36003  | -111.83166  | 76.36448    | 2 |
| 104 | N | 79.51488 | 81.10888 | 74.30864 | -216.06729  | -537.07037  | 446.51379   | 2 |
| 105 | H | 80.01773 | 80.22587 | 74.16232 | -1251.96487 | 1074.12894  | -2168.52500 | 2 |
| 106 | H | 80.20565 | 81.77322 | 74.67367 | -2451.83023 | -720.73851  | 944.84612   | 2 |
| 107 | C | 76.62124 | 78.07911 | 71.28328 | 546.24052   | -563.88337  | -85.11809   | 2 |
| 108 | O | 75.51910 | 77.55843 | 71.09638 | 71.70702    | -307.40463  | 606.69673   | 2 |
| 109 | N | 77.38548 | 78.70094 | 70.39557 | 479.90863   | -504.50129  | 222.86849   | 2 |
| 110 | C | 76.86641 | 79.13409 | 69.12328 | 75.51268    | -600.91904  | 506.73700   | 2 |
| 111 | H | 75.88583 | 79.61891 | 69.33236 | -2033.61562 | 1795.30103  | 254.89480   | 2 |
| 112 | C | 78.00256 | 80.11112 | 68.60543 | 523.79067   | 517.99274   | 284.45581   | 2 |
| 113 | H | 77.98097 | 80.24781 | 67.50047 | 1599.61665  | -1127.00911 | 1895.98173  | 2 |
| 114 | H | 77.90865 | 81.12433 | 69.05645 | -1881.83093 | 1275.82488  | -1501.55016 | 2 |
| 115 | C | 79.28491 | 79.38055 | 69.11494 | -600.05639  | -404.05026  | 316.64485   | 2 |
| 116 | H | 79.52949 | 78.50233 | 68.47699 | -2597.05260 | 496.36221   | 657.73249   | 2 |
| 117 | H | 80.19092 | 80.02734 | 69.12682 | -1666.24518 | 1294.38985  | -1723.90591 | 2 |
| 118 | C | 78.81533 | 78.93685 | 70.56560 | 493.57570   | -129.95376  | -602.56394  | 2 |
| 119 | H | 79.27414 | 77.99900 | 70.95765 | -1469.08415 | -637.84797  | 2204.22581  | 2 |
| 120 | H | 78.90225 | 79.74442 | 71.33142 | -1038.97840 | 1068.88701  | -2280.71789 | 2 |
| 121 | C | 76.71628 | 77.89371 | 68.07888 | 188.88100   | 241.05089   | -727.87821  | 2 |
| 122 | O | 76.58862 | 78.11676 | 66.90039 | 531.88613   | -49.19943   | 427.07960   | 2 |
| 123 | N | 76.74601 | 76.70547 | 68.68527 | 708.14833   | 26.93417    | -179.73509  | 2 |
| 124 | H | 76.87970 | 76.72241 | 69.69873 | -2232.69501 | -1179.09831 | 1023.94816  | 2 |
| 125 | C | 76.57871 | 75.45986 | 67.92629 | -738.32412  | 259.92548   | 104.42456   | 2 |
| 126 | H | 75.98387 | 75.78467 | 67.03734 | 2028.89123  | 1260.02983  | 1311.33324  | 2 |
| 127 | C | 77.96703 | 74.98488 | 67.51832 | -258.65678  | -345.52513  | 661.28459   | 2 |
| 128 | H | 78.56216 | 74.86356 | 68.45724 | -1826.06090 | -1801.46097 | -918.64554  | 2 |
| 129 | C | 77.94470 | 73.65584 | 66.78963 | -541.23400  | 531.92970   | -218.41428  | 2 |
| 130 | H | 78.98154 | 73.31040 | 66.52135 | 1311.73218  | -2219.18200 | 882.19023   | 2 |

|     |   |          |          |          |             |             |             |   |
|-----|---|----------|----------|----------|-------------|-------------|-------------|---|
| 131 | H | 77.46892 | 72.84141 | 67.41448 | -1048.71298 | 1223.58118  | -2196.97971 | 2 |
| 132 | H | 77.35757 | 73.72092 | 65.83190 | 419.06414   | 1903.92898  | 1903.44670  | 2 |
| 133 | C | 78.67188 | 76.01389 | 66.65275 | -423.86431  | 152.66566   | -648.55262  | 2 |
| 134 | H | 79.76216 | 75.77366 | 66.51595 | 105.68386   | -2342.50080 | 1387.51238  | 2 |
| 135 | H | 78.21042 | 76.07447 | 65.62867 | -1695.63603 | -1484.73621 | -1531.02793 | 2 |
| 136 | H | 78.59959 | 77.04587 | 67.09882 | -1853.57121 | -487.39031  | 1936.59343  | 2 |
| 137 | C | 75.78423 | 74.39982 | 68.89814 | 539.71428   | -510.58232  | 267.58633   | 2 |
| 138 | O | 75.81731 | 73.21836 | 68.63813 | -15.93758   | -278.34085  | -624.49402  | 2 |
| 139 | N | 75.13176 | 74.97280 | 69.90216 | -676.81886  | 12.05292    | 276.17960   | 2 |
| 140 | H | 75.14173 | 75.99448 | 70.02281 | -1694.44250 | -373.84189  | -2100.66098 | 2 |
| 141 | C | 74.12613 | 74.11816 | 70.49267 | 412.33078   | -664.70360  | 108.35451   | 2 |
| 142 | H | 73.68556 | 73.60081 | 69.61041 | 1765.77476  | 1294.44366  | 1621.76594  | 2 |
| 143 | C | 74.88813 | 73.08351 | 71.41018 | -179.66635  | -721.95667  | -264.73915  | 2 |
| 144 | H | 75.67963 | 72.56064 | 70.82308 | -607.34922  | 2587.87032  | -598.10018  | 2 |
| 145 | H | 75.42705 | 73.58992 | 72.25955 | -359.69332  | -1479.13954 | -2259.74260 | 2 |
| 146 | C | 73.81625 | 72.06834 | 71.94864 | -240.01076  | 616.02425   | 431.85322   | 2 |
| 147 | H | 73.09856 | 72.58499 | 72.62849 | -1359.17131 | 782.54425   | 2227.99181  | 2 |
| 148 | H | 73.20684 | 71.65953 | 71.11028 | -820.36667  | 85.81767    | -2596.78715 | 2 |
| 149 | C | 74.57010 | 70.91891 | 72.69138 | -513.07015  | 236.18570   | -551.87280  | 2 |
| 150 | H | 75.29087 | 70.40958 | 72.01504 | 1816.11944  | -1183.11722 | -1650.94321 | 2 |
| 151 | H | 75.18037 | 71.32917 | 73.52471 | -1800.04429 | -1361.53473 | 1526.34643  | 2 |
| 152 | C | 73.46916 | 69.88608 | 73.22807 | 726.08972   | -253.19732  | -179.64713  | 2 |
| 153 | H | 72.92267 | 70.25389 | 74.13193 | 1224.27271  | -456.51798  | -2390.90304 | 2 |
| 154 | H | 72.73568 | 69.58276 | 72.44015 | 1206.40339  | -1150.93514 | -2154.90344 | 2 |
| 155 | N | 74.15748 | 68.69003 | 73.61006 | 329.70796   | -633.68968  | -155.67358  | 2 |
| 156 | H | 73.91042 | 68.30087 | 74.52238 | 1348.31305  | 1938.76845  | 1359.00643  | 2 |
| 157 | H | 74.01617 | 67.89514 | 72.99197 | 2096.92035  | 1446.54551  | -966.48890  | 2 |
| 158 | H | 74.99038 | 69.93007 | 75.14194 | -1197.07217 | -2303.53719 | 827.28733   | 2 |
| 159 | C | 73.03608 | 74.95469 | 71.37642 | -378.01186  | -556.17301  | -413.96481  | 2 |
| 160 | O | 71.91070 | 74.51994 | 71.44304 | -409.44433  | -307.55053  | -453.30833  | 2 |
| 161 | N | 73.58741 | 75.98863 | 71.98159 | -429.02477  | 524.70884   | 274.08502   | 2 |
| 162 | H | 74.58175 | 76.23995 | 71.78861 | 1706.34263  | -1425.96036 | 1574.38926  | 2 |
| 163 | C | 72.83818 | 76.90187 | 72.77157 | -45.25864   | -626.22952  | 478.93267   | 2 |
| 164 | H | 73.38580 | 77.86136 | 72.63483 | 1988.63164  | 570.90773   | 1772.87287  | 2 |
| 165 | C | 71.33241 | 76.94008 | 72.29356 | 551.77128   | -20.49526   | -564.54996  | 2 |
| 166 | H | 71.26780 | 77.11538 | 71.19518 | 1434.61535  | -1753.10253 | 1513.99471  | 2 |
| 167 | H | 70.82362 | 75.95700 | 72.47750 | -714.67738  | 1819.09770  | 1898.36494  | 2 |
| 168 | C | 70.64597 | 78.09095 | 73.10454 | 446.99263   | -555.77305  | 338.97221   | 2 |
| 169 | H | 70.66938 | 77.86114 | 74.19396 | 1953.68466  | 1892.25957  | -161.67766  | 2 |
| 170 | H | 71.20301 | 79.04640 | 72.98442 | -403.03785  | 2688.07032  | -188.43591  | 2 |
| 171 | C | 69.15755 | 78.25033 | 72.59852 | 567.86262   | 335.74681   | 434.04421   | 2 |
| 172 | H | 69.12838 | 78.67868 | 71.57001 | -1080.02275 | 1568.26081  | -1948.78900 | 2 |
| 173 | H | 68.64844 | 77.26126 | 72.53172 | -919.54108  | 2111.34692  | 1456.13463  | 2 |
| 174 | C | 68.43687 | 79.17031 | 73.61295 | 195.81897   | 173.33862   | -745.11536  | 2 |
| 175 | H | 68.19912 | 78.69044 | 74.58341 | 1405.67949  | -2301.21089 | -390.08113  | 2 |
| 176 | H | 68.93922 | 80.13978 | 73.78783 | -940.37328  | -1118.32446 | 2299.72133  | 2 |
| 177 | N | 67.05017 | 79.56218 | 73.00494 | 319.26422   | 656.36007   | -42.02424   | 2 |
| 178 | H | 66.44024 | 80.18045 | 73.61432 | 1961.03633  | 619.91968   | 1787.09422  | 2 |
| 179 | H | 67.05242 | 80.10301 | 72.09102 | 854.14343   | -2156.80752 | 1429.08711  | 2 |
| 180 | H | 66.38653 | 78.76385 | 72.78795 | 1237.02905  | -1378.50857 | -1998.28500 | 2 |
| 181 | C | 72.86251 | 76.40228 | 74.34475 | 532.53319   | -268.57236  | 517.55729   | 2 |
| 182 | O | 72.53166 | 75.30645 | 74.72575 | 266.16714   | -290.73804  | -558.88002  | 2 |
| 183 | N | 73.19468 | 77.47158 | 75.05543 | -226.25352  | 640.49678   | -270.32839  | 2 |
| 184 | H | 73.40822 | 78.34966 | 74.58457 | 2007.69063  | -1035.27229 | 1523.50231  | 2 |
| 185 | C | 73.24662 | 77.36895 | 76.46716 | -540.76542  | -573.33303  | 49.50000    | 2 |
| 186 | H | 72.85560 | 76.35743 | 76.73047 | -2374.20950 | -1036.76023 | 843.75774   | 2 |
| 187 | C | 74.79115 | 77.59417 | 76.86794 | -77.09082   | 666.87422   | -415.84136  | 2 |
| 188 | H | 75.12755 | 78.56999 | 76.42248 | -985.81834  | 617.19825   | 2463.91927  | 2 |
| 189 | O | 75.70622 | 76.59699 | 76.38977 | 293.29899   | -391.65602  | -477.80926  | 2 |
| 190 | H | 76.27584 | 77.12829 | 75.79734 | 2528.72714  | -681.76262  | -751.27122  | 2 |
| 191 | C | 74.71549 | 77.74050 | 78.43001 | 252.47363   | -605.14473  | 440.05134   | 2 |
| 192 | H | 75.71589 | 77.96568 | 78.86667 | -2052.65063 | 1456.49051  | -1043.51830 | 2 |



|     |   |          |          |          |             |             |             |   |
|-----|---|----------|----------|----------|-------------|-------------|-------------|---|
| 193 | H | 74.02627 | 78.56065 | 78.74150 | -2152.98800 | -1661.97574 | -161.70652  | 2 |
| 194 | H | 74.35165 | 76.80176 | 78.90853 | -473.12726  | -1584.27339 | 2165.61725  | 2 |
| 195 | C | 72.39680 | 78.63601 | 77.04659 | 360.36307   | 488.46713   | 505.10056   | 2 |
| 196 | O | 72.45922 | 79.75167 | 76.53736 | -200.08817  | -528.03552  | -385.82850  | 2 |
| 197 | N | 71.75839 | 78.26010 | 78.13389 | -597.54095  | -226.44775  | 355.20479   | 2 |
| 198 | H | 71.86322 | 77.29885 | 78.45178 | 2179.23655  | -1300.70981 | -991.33835  | 2 |
| 199 | C | 71.08439 | 79.25838 | 78.89473 | -687.68921  | 297.39807   | -249.45179  | 2 |
| 200 | H | 70.60028 | 79.89125 | 78.11631 | -349.16256  | -2467.37713 | -1101.72831 | 2 |
| 201 | C | 70.13143 | 78.62209 | 80.00257 | 672.47345   | 361.54328   | -201.62880  | 2 |
| 202 | H | 70.75825 | 78.19938 | 80.82495 | 1541.41502  | 582.18425   | 2169.97026  | 2 |
| 203 | H | 69.51477 | 79.43684 | 80.45271 | -2534.67717 | 60.25153    | 997.72295   | 2 |
| 204 | C | 69.22927 | 77.53711 | 79.39411 | 574.26774   | -389.43119  | -377.02542  | 2 |
| 205 | C | 68.03093 | 77.92898 | 78.72660 | 688.82679   | -287.33580  | -257.96133  | 2 |
| 206 | H | 67.75474 | 78.99951 | 78.64105 | 331.14182   | 1470.38163  | 2269.80013  | 2 |
| 207 | C | 69.59264 | 76.16085 | 79.49832 | -383.52382  | -675.04808  | 144.24917   | 2 |
| 208 | H | 70.52502 | 75.86037 | 80.01014 | 4.09847     | 1517.59662  | 2262.86397  | 2 |
| 209 | C | 67.21672 | 76.93062 | 78.19144 | -134.76730  | 428.45285   | -649.50303  | 2 |
| 210 | H | 66.28384 | 77.22797 | 77.68144 | -903.23433  | 1600.49020  | 2011.53387  | 2 |
| 211 | C | 68.74377 | 75.20014 | 78.94291 | -335.53281  | -615.00040  | -364.39058  | 2 |
| 212 | H | 69.02974 | 74.13720 | 79.02954 | 1596.45398  | -1369.33862 | 1732.02659  | 2 |
| 213 | C | 67.53165 | 75.54314 | 78.27569 | 585.48547   | -340.24194  | -406.23938  | 2 |
| 214 | O | 66.66166 | 74.57356 | 77.71164 | -419.15649  | -173.04408  | -511.94141  | 2 |
| 215 | H | 67.15452 | 73.75177 | 77.94523 | -1071.84350 | 1559.71507  | -1960.13012 | 2 |
| 216 | C | 72.19233 | 80.07112 | 79.78057 | 291.41878   | -183.13091  | 710.72246   | 2 |
| 217 | O | 72.24545 | 79.92888 | 80.97978 | 379.87695   | 523.47396   | -222.23622  | 2 |
| 218 | N | 72.94800 | 80.81606 | 78.97768 | 564.30591   | 373.09380   | 277.24371   | 2 |
| 219 | H | 72.80656 | 80.76960 | 77.94205 | -120.59931  | -2436.07824 | -1214.35098 | 2 |
| 220 | C | 73.94118 | 81.62199 | 79.59792 | 404.07514   | -299.37480  | 608.84009   | 2 |
| 221 | H | 74.00829 | 81.26256 | 80.65340 | -1071.07882 | -841.69025  | 2359.66467  | 2 |
| 222 | C | 75.27444 | 81.46476 | 78.74849 | -683.12807  | 68.71770    | -390.13096  | 2 |
| 223 | H | 75.53389 | 80.39212 | 78.60625 | 2068.88918  | 1596.58590  | 770.89603   | 2 |
| 224 | H | 75.13487 | 81.87649 | 77.72371 | 1379.86429  | 2342.49779  | -179.85638  | 2 |
| 225 | C | 76.40667 | 82.22208 | 79.50583 | -176.39967  | 537.49466   | 550.97268   | 2 |
| 226 | H | 76.10189 | 83.27067 | 79.73345 | -396.28051  | 1942.22168  | 1869.33314  | 2 |
| 227 | H | 76.61535 | 81.75093 | 80.49236 | -94.44700   | 586.00678   | -2659.20016 | 2 |
| 228 | C | 77.69163 | 82.18476 | 78.55693 | -291.69381  | -718.18079  | -150.72929  | 2 |
| 229 | H | 78.08168 | 81.16637 | 78.30297 | -2303.38776 | 1089.76242  | 964.62032   | 2 |
| 230 | H | 77.59968 | 82.76429 | 77.60261 | 884.16729   | 2568.80533  | -207.74283  | 2 |
| 231 | N | 78.65099 | 82.82390 | 79.35547 | -594.49522  | -252.81478  | 342.29276   | 2 |
| 232 | H | 78.32951 | 83.22152 | 80.22462 | -1735.17426 | 2084.05705  | -263.71605  | 2 |
| 233 | C | 79.88068 | 82.93561 | 79.05202 | 595.23177   | -271.52487  | 442.22352   | 2 |
| 234 | N | 80.29971 | 82.38189 | 77.83721 | 585.53813   | -424.79750  | -105.81303  | 2 |
| 235 | H | 79.75183 | 81.91445 | 77.11527 | 959.88797   | 1327.56823  | -2177.11905 | 2 |
| 236 | H | 81.25328 | 82.41913 | 77.47642 | 1578.48647  | 16.27378    | -2220.76233 | 2 |
| 237 | N | 80.58198 | 83.62135 | 80.05333 | -452.17763  | -390.33541  | -421.51853  | 2 |
| 238 | H | 80.26609 | 84.02221 | 80.93537 | 470.26107   | 1974.25629  | -1817.92087 | 2 |
| 239 | H | 81.58265 | 83.81621 | 80.00344 | 1856.67307  | -1573.97321 | -1224.35416 | 2 |
| 240 | C | 73.51274 | 83.20168 | 79.48615 | -531.47271  | -581.45780  | -55.06206   | 2 |
| 241 | O | 73.99972 | 84.01420 | 80.23560 | -243.00837  | 192.73507   | 609.52485   | 2 |
| 242 | N | 72.72827 | 83.42064 | 78.43377 | 343.49288   | -644.25607  | 38.09164    | 2 |
| 243 | H | 72.48785 | 82.59204 | 77.89465 | -1691.16043 | -1535.97525 | -1484.73099 | 2 |
| 244 | C | 72.05492 | 84.70896 | 78.23562 | 542.66492   | 350.14337   | 454.42563   | 2 |
| 245 | H | 71.90093 | 85.08209 | 79.27654 | 1209.57979  | -2396.95920 | 463.86744   | 2 |
| 246 | C | 72.98445 | 85.61824 | 77.44661 | -737.14309  | 145.93010   | 242.71942   | 2 |
| 247 | H | 73.15220 | 85.14828 | 76.45174 | -1050.18303 | 159.36419   | -2509.06125 | 2 |
| 248 | C | 72.37756 | 86.99022 | 77.22515 | -706.77696  | -252.88343  | -245.16230  | 2 |
| 249 | H | 73.03287 | 87.63851 | 76.58026 | -1624.64039 | -1665.49085 | 1417.86935  | 2 |
| 250 | H | 71.36624 | 86.91447 | 76.71764 | 2566.10521  | 598.51109   | 693.22305   | 2 |
| 251 | H | 72.22170 | 87.53634 | 78.19617 | -1972.69758 | 107.10018   | -1876.34312 | 2 |
| 252 | C | 74.33785 | 85.76122 | 78.11978 | 412.85148   | 672.58832   | -27.69222   | 2 |
| 253 | H | 75.03420 | 86.42247 | 77.53432 | 1447.02277  | 1762.76533  | -1490.78944 | 2 |
| 254 | H | 74.23854 | 86.19995 | 79.15137 | 1320.77379  | -145.20455  | 2378.68491  | 2 |

|     |   |          |          |          |             |             |             |   |
|-----|---|----------|----------|----------|-------------|-------------|-------------|---|
| 255 | H | 74.84180 | 84.76172 | 78.24534 | -1512.10848 | 1470.52031  | 1724.75147  | 2 |
| 256 | C | 70.65087 | 84.39596 | 77.42692 | -607.11113  | 499.56689   | 73.73769    | 2 |
| 257 | O | 70.13424 | 85.26606 | 76.75879 | 357.97126   | 460.81534   | 356.68785   | 2 |
| 258 | N | 70.19649 | 83.17845 | 77.66219 | 536.55407   | -368.62270  | 332.76306   | 2 |
| 259 | H | 70.72694 | 82.57466 | 78.28721 | 524.38866   | 2297.69985  | 1367.20941  | 2 |
| 260 | C | 69.03043 | 82.74078 | 76.97027 | 46.50277    | -774.29190  | -147.97904  | 2 |
| 261 | H | 68.48966 | 83.67894 | 76.70259 | 1676.51875  | 1883.29066  | 1032.55549  | 2 |
| 262 | C | 69.46518 | 81.89294 | 75.69090 | -559.41456  | -34.19198   | -556.30433  | 2 |
| 263 | H | 70.05736 | 81.00519 | 76.00652 | -64.66664   | 395.18769   | 2695.05373  | 2 |
| 264 | H | 68.56433 | 81.49542 | 75.17463 | -2703.44278 | -60.40056   | 333.79418   | 2 |
| 265 | C | 70.31348 | 82.77114 | 74.71334 | -519.76435  | 377.31045   | 459.42366   | 2 |
| 266 | H | 71.18532 | 83.20345 | 75.25223 | -1746.74323 | 1667.50644  | -1261.73691 | 2 |
| 267 | C | 70.79599 | 81.87244 | 73.51640 | 570.95554   | 16.46261    | -545.27700  | 2 |
| 268 | H | 71.48070 | 82.43051 | 72.83657 | 2391.58273  | 28.05277    | -1305.07271 | 2 |
| 269 | H | 71.34775 | 80.97418 | 73.87886 | 175.75588   | 917.63458   | 2559.43867  | 2 |
| 270 | H | 69.94123 | 81.51602 | 72.89637 | -1063.97851 | -2155.34650 | 1283.00462  | 2 |
| 271 | C | 69.41882 | 83.91200 | 74.10527 | 193.76014   | 2.62946     | -765.53141  | 2 |
| 272 | H | 69.94958 | 84.45809 | 73.29090 | 507.39394   | -846.55087  | 2539.60089  | 2 |
| 273 | H | 68.47278 | 83.50933 | 73.67399 | 1337.57841  | 1818.19054  | 1526.01994  | 2 |
| 274 | H | 69.14312 | 84.66816 | 74.88213 | 1100.88635  | -1172.91350 | -2199.08909 | 2 |
| 275 | C | 68.22474 | 81.70479 | 77.92184 | -549.21115  | 475.64486   | -309.38218  | 2 |
| 276 | O | 68.74920 | 81.05336 | 78.78778 | 556.06106   | -390.37755  | -78.24250   | 2 |
| 277 | O | 66.87903 | 81.46901 | 77.56241 | -572.27940  | -310.19032  | -209.75862  | 2 |
| 278 | H | 66.78980 | 82.16604 | 76.85032 | -1380.08193 | 2212.14486  | 790.85944   | 2 |

Listing 5: C00005.xmolout

|    |   |          |          |          |             |             |             |        |          |
|----|---|----------|----------|----------|-------------|-------------|-------------|--------|----------|
| 1  |   | 276      |          |          |             |             |             |        |          |
| 2  |   | 150.0000 | 150.0000 | 150.0000 | 0.0000      | 0.0000      | 0.0000***** | 2.7750 | 11100    |
|    |   | 0.2500   | 300.00   | 0.00     | 0.00        | 0.00        | -1294.3184  | 0.0000 | 300.0000 |
| 3  | H | 70.86210 | 62.77071 | 79.43633 | -2043.14101 | -1757.64893 | 399.89339   |        | 1        |
| 4  | N | 71.07610 | 62.99383 | 78.46748 | 426.75047   | 490.45733   | -334.42467  |        | 1        |
| 5  | H | 70.22577 | 63.44856 | 78.14689 | 442.25559   | -1110.30854 | -2448.52907 |        | 1        |
| 6  | C | 72.28532 | 63.67621 | 78.23128 | 415.32972   | -666.39213  | 83.73172    |        | 1        |
| 7  | H | 73.04240 | 63.13716 | 78.83873 | 879.32219   | 2491.00447  | 667.35213   |        | 1        |
| 8  | C | 72.59916 | 63.65851 | 76.64949 | 31.35357    | 477.41777   | 628.23362   |        | 1        |
| 9  | H | 71.69606 | 64.01455 | 76.09289 | 1168.38489  | 2240.25337  | -1019.71136 |        | 1        |
| 10 | H | 73.40661 | 64.39551 | 76.42848 | -360.43770  | 2534.90498  | 931.67112   |        | 1        |
| 11 | C | 72.99864 | 62.28180 | 76.18253 | 463.18208   | 512.70242   | -382.34388  |        | 1        |
| 12 | H | 72.21796 | 61.55828 | 76.50831 | 1725.29117  | 1863.52247  | -987.07854  |        | 1        |
| 13 | C | 73.08745 | 62.25901 | 74.66156 | 710.42801   | -144.27427  | -313.15367  |        | 1        |
| 14 | H | 73.29467 | 61.22877 | 74.27265 | 364.20195   | -1033.13725 | 2494.72524  |        | 1        |
| 15 | H | 72.13594 | 62.61211 | 74.18524 | 2567.61904  | 335.80679   | 847.48802   |        | 1        |
| 16 | H | 73.90987 | 62.92355 | 74.29047 | -2587.99029 | 680.92867   | -512.16411  |        | 1        |
| 17 | C | 74.33816 | 61.86699 | 76.77479 | 268.17616   | 741.64379   | -40.42634   |        | 1        |
| 18 | H | 74.67898 | 60.87729 | 76.37435 | 1283.54314  | -1945.37420 | -1411.27812 |        | 1        |
| 19 | H | 75.13994 | 62.61430 | 76.53882 | -1258.57796 | 1317.15249  | -2026.02085 |        | 1        |
| 20 | H | 74.29001 | 61.77416 | 77.89037 | -2502.84526 | 909.80597   | 575.92391   |        | 1        |
| 21 | C | 72.19985 | 65.24717 | 78.60636 | 619.36578   | -458.64843  | -172.09273  |        | 1        |
| 22 | O | 73.17326 | 65.95857 | 78.34761 | -81.40433   | 433.87611   | 522.34594   |        | 1        |
| 23 | N | 71.06168 | 65.56875 | 79.16943 | 175.23996   | -622.20190  | 341.55523   |        | 1        |
| 24 | H | 70.41754 | 64.79796 | 79.33097 | -876.57256  | -303.22879  | -2561.90213 |        | 1        |
| 25 | C | 70.60077 | 66.88582 | 79.46867 | -571.88214  | -534.10783  | -106.15033  |        | 1        |
| 26 | H | 69.50353 | 66.70141 | 79.47127 | -2713.20841 | -16.25800   | -248.80809  |        | 1        |
| 27 | C | 71.02945 | 67.20385 | 80.97300 | 166.60354   | 288.16399   | -716.09568  |        | 1        |
| 28 | H | 72.14754 | 67.28646 | 81.05363 | -2097.85574 | 1636.78449  | -586.18044  |        | 1        |
| 29 | O | 70.67218 | 66.20091 | 81.94875 | -317.80580  | -363.38227  | 484.43082   |        | 1        |
| 30 | H | 71.55217 | 65.94316 | 82.28243 | 1863.74748  | -1451.84923 | 1357.29467  |        | 1        |
| 31 | C | 70.35649 | 68.61040 | 81.17571 | 503.80731   | 517.99032   | 318.51606   |        | 1        |
| 32 | H | 70.65892 | 69.07113 | 82.14454 | 640.61020   | -2157.10410 | -1536.29104 |        | 1        |
| 33 | H | 70.62377 | 69.32638 | 80.36409 | 1687.88455  | 465.60692   | 2087.56452  |        | 1        |
| 34 | H | 69.24506 | 68.52650 | 81.18567 | -1293.07895 | -1899.88581 | -1463.57452 |        | 1        |

|    |   |          |          |          |             |             |             |   |
|----|---|----------|----------|----------|-------------|-------------|-------------|---|
| 35 | C | 70.98469 | 67.91199 | 78.25409 | -153.07550  | -733.68902  | 248.70981   | 1 |
| 36 | O | 70.21648 | 67.86483 | 77.32476 | 186.15459   | -480.78787  | -449.34387  | 1 |
| 37 | N | 72.07054 | 68.68472 | 78.38492 | -487.53139  | 543.18517   | 42.03850    | 1 |
| 38 | C | 72.38031 | 69.64698 | 77.36258 | -699.35871  | 69.34393    | 360.10701   | 1 |
| 39 | H | 71.45126 | 70.23712 | 77.19081 | 2.81126     | -221.99807  | -2715.58072 | 1 |
| 40 | C | 73.59337 | 70.46110 | 77.98629 | -507.46439  | -592.59194  | 122.07761   | 1 |
| 41 | H | 74.26505 | 70.90055 | 77.20876 | -1975.08116 | 525.87560   | -1801.71556 | 1 |
| 42 | H | 73.23619 | 71.30707 | 78.61467 | 1588.27743  | -1913.22100 | 1113.83566  | 1 |
| 43 | C | 74.30541 | 69.37525 | 78.85067 | -613.62442  | -457.55993  | -194.14490  | 1 |
| 44 | H | 74.92932 | 68.70463 | 78.21796 | 1707.54637  | -721.27992  | 1996.92523  | 1 |
| 45 | H | 74.98140 | 69.79497 | 79.62905 | 758.23357   | 2100.81767  | 1560.55011  | 1 |
| 46 | C | 73.05065 | 68.60644 | 79.45504 | -352.41524  | 704.96076   | 49.21465    | 1 |
| 47 | H | 73.22199 | 67.52138 | 79.68173 | 1714.76886  | -2070.42778 | 443.35792   | 1 |
| 48 | H | 72.60086 | 69.11268 | 80.34131 | 1224.15040  | 1801.50881  | 1636.97633  | 1 |
| 49 | C | 72.86060 | 68.89699 | 75.99510 | 566.85117   | 537.05831   | 117.62814   | 1 |
| 50 | O | 72.79350 | 69.51431 | 74.95856 | -550.26779  | -406.08867  | 4.21666     | 1 |
| 51 | N | 73.40063 | 67.71250 | 76.23714 | 566.34832   | -425.77725  | 180.18749   | 1 |
| 52 | H | 73.34834 | 67.29152 | 77.19346 | 644.44502   | 2646.80550  | -52.73430   | 1 |
| 53 | C | 73.83366 | 66.89460 | 75.15332 | 612.34801   | -281.48662  | 411.56221   | 1 |
| 54 | H | 74.18468 | 65.96765 | 75.65598 | 1667.23498  | -1490.75142 | 1556.16753  | 1 |
| 55 | C | 72.51380 | 66.60001 | 74.30478 | -714.45746  | -175.43074  | 286.98927   | 1 |
| 56 | H | 72.10073 | 67.58799 | 73.95905 | -787.09484  | 1763.03619  | -1922.46060 | 1 |
| 57 | O | 71.43828 | 65.98607 | 75.06251 | -429.46514  | 516.51932   | -128.40526  | 1 |
| 58 | H | 71.05838 | 66.76765 | 75.50992 | 1981.82785  | 436.16847   | -1818.18182 | 1 |
| 59 | C | 72.99311 | 65.75478 | 73.07572 | 630.79189   | -468.94448  | 76.03230    | 1 |
| 60 | H | 72.13655 | 65.46983 | 72.42060 | -1775.71861 | 2062.30353  | 131.89849   | 1 |
| 61 | H | 73.72882 | 66.31098 | 72.43942 | -1855.14608 | 88.94118    | 1993.53760  | 1 |
| 62 | H | 73.48611 | 64.80989 | 73.40258 | -1504.82350 | -780.94249  | -2132.90992 | 1 |
| 63 | C | 75.06223 | 67.61741 | 74.36100 | 288.57638   | 618.62814   | -397.00270  | 1 |
| 64 | O | 75.44811 | 67.15937 | 73.30759 | 321.70495   | -185.26452  | 574.37218   | 1 |
| 65 | N | 75.59261 | 68.61837 | 75.04631 | -447.05792  | -446.53431  | 367.76425   | 1 |
| 66 | H | 75.14022 | 68.93143 | 75.90470 | 350.31316   | 1975.63644  | -1843.31522 | 1 |
| 67 | C | 76.60656 | 69.43379 | 74.45100 | -511.23061  | 374.03917   | -471.51480  | 1 |
| 68 | H | 77.39720 | 68.74048 | 74.08881 | 2234.79579  | -898.70890  | -1273.45190 | 1 |
| 69 | C | 75.90174 | 70.15715 | 73.20650 | 529.53781   | -159.34528  | 563.72604   | 1 |
| 70 | H | 76.69970 | 70.66306 | 72.59728 | 654.59388   | 2347.94251  | 1217.51488  | 1 |
| 71 | H | 75.48973 | 69.32171 | 72.57580 | -1526.55661 | 2103.42026  | 817.87394   | 1 |
| 72 | O | 74.88992 | 71.14482 | 73.50390 | -554.84278  | 14.12789    | 399.58769   | 1 |
| 73 | H | 74.19663 | 70.56442 | 73.89281 | 1297.06236  | 2061.84854  | 1220.68812  | 1 |
| 74 | C | 77.06829 | 70.44893 | 75.62606 | -662.15484  | -412.13544  | 123.62687   | 1 |
| 75 | O | 76.36553 | 70.70117 | 76.57964 | -540.01537  | -317.05804  | 274.91456   | 1 |
| 76 | N | 78.26913 | 70.92031 | 75.31810 | -202.76299  | -690.00100  | -131.49145  | 1 |
| 77 | H | 78.80715 | 70.68059 | 74.46415 | -702.62132  | -2617.37191 | 281.70413   | 1 |
| 78 | C | 79.01620 | 71.65614 | 76.29276 | -491.73914  | 576.34187   | 222.73509   | 1 |
| 79 | H | 78.34144 | 72.41997 | 76.73949 | 1977.17978  | -1823.58850 | -434.68928  | 1 |
| 80 | C | 79.55413 | 70.63071 | 77.38321 | -649.50797  | -328.66843  | 306.11224   | 1 |
| 81 | H | 80.16064 | 69.83572 | 76.89891 | 2075.07803  | 1452.16490  | -1004.45904 | 1 |
| 82 | C | 80.40194 | 71.40881 | 78.44513 | -615.18735  | -489.99689  | -70.96352   | 1 |
| 83 | H | 80.75416 | 70.73913 | 79.26476 | -1226.32661 | -1724.38906 | -1716.47170 | 1 |
| 84 | H | 81.30855 | 71.87725 | 77.99031 | 2381.64273  | -969.84735  | 900.46860   | 1 |
| 85 | H | 79.81198 | 72.22912 | 78.91901 | 2122.74991  | 1702.23946  | -141.36228  | 1 |
| 86 | C | 78.35791 | 69.99292 | 78.17257 | -501.86074  | -479.61276  | -376.42482  | 1 |
| 87 | H | 78.70493 | 69.47267 | 79.09651 | 993.79261   | -2246.95401 | -1177.81305 | 1 |
| 88 | H | 77.61345 | 70.76595 | 78.48337 | 42.71279    | -626.15391  | -2651.37258 | 1 |
| 89 | H | 77.81582 | 69.23647 | 77.55497 | -2026.39012 | -1590.33709 | -887.82922  | 1 |
| 90 | C | 80.20202 | 72.21071 | 75.32351 | -672.89153  | 382.57394   | -156.34072  | 1 |
| 91 | O | 80.37830 | 71.64601 | 74.25143 | 410.04627   | 221.86223   | 500.35950   | 1 |
| 92 | N | 80.87544 | 73.17429 | 75.90919 | -378.11782  | -443.79414  | -441.10984  | 1 |
| 93 | H | 80.59463 | 73.45147 | 76.85730 | 2404.15973  | -568.14894  | 1149.30085  | 1 |
| 94 | C | 81.86289 | 73.97760 | 75.25461 | -544.54484  | 466.16019   | 331.29119   | 1 |
| 95 | H | 82.64671 | 74.11587 | 76.03105 | -1409.80988 | -170.17955  | 2325.32679  | 1 |
| 96 | C | 82.36554 | 73.24211 | 73.94250 | -184.48284  | 116.78282   | -758.89137  | 1 |

|     |   |          |          |          |             |             |             |   |
|-----|---|----------|----------|----------|-------------|-------------|-------------|---|
| 97  | H | 82.59985 | 72.17331 | 74.15845 | 1893.78641  | 1861.14652  | 611.04528   | 1 |
| 98  | H | 81.54526 | 73.22340 | 73.18479 | -2170.79665 | -974.19311  | 1327.50117  | 1 |
| 99  | C | 83.60903 | 73.99539 | 73.37558 | 389.51668   | 672.81878   | -138.49152  | 1 |
| 100 | H | 83.39891 | 75.08511 | 73.31170 | 510.64577   | 1933.03327  | 1851.02484  | 1 |
| 101 | H | 84.46236 | 73.92056 | 74.08484 | -2302.30869 | -1105.72939 | -948.89774  | 1 |
| 102 | C | 84.04920 | 73.46434 | 71.95834 | -559.93427  | -126.34590  | 542.30857   | 1 |
| 103 | O | 84.85750 | 74.08263 | 71.31341 | -670.36003  | -111.83166  | 76.36448    | 1 |
| 104 | N | 83.45848 | 72.30472 | 71.59919 | -216.06729  | -537.07037  | 446.51379   | 1 |
| 105 | H | 82.79668 | 71.72037 | 72.12345 | -1251.96487 | 1074.12894  | -2168.52500 | 1 |
| 106 | H | 83.67459 | 71.79342 | 70.73657 | -2451.83023 | -720.73851  | 944.84612   | 1 |
| 107 | C | 81.16524 | 75.37383 | 74.81371 | 546.24052   | -563.88337  | -85.11809   | 1 |
| 108 | O | 80.10241 | 75.37511 | 74.20540 | 71.70702    | -307.40463  | 606.69673   | 1 |
| 109 | N | 81.93925 | 76.40707 | 75.13054 | 479.90863   | -504.50129  | 222.86849   | 1 |
| 110 | C | 81.49130 | 77.76021 | 74.92130 | 75.51268    | -600.91904  | 506.73700   | 1 |
| 111 | H | 80.42715 | 77.76618 | 75.25396 | -2033.61562 | 1795.30103  | 254.89480   | 1 |
| 112 | C | 82.50316 | 78.60690 | 75.80314 | 523.79067   | 517.99274   | 284.45581   | 1 |
| 113 | H | 82.60425 | 79.65776 | 75.44911 | 1599.61665  | -1127.00911 | 1895.98173  | 1 |
| 114 | H | 82.18376 | 78.65542 | 76.86831 | -1881.83093 | 1275.82488  | -1501.55016 | 1 |
| 115 | C | 83.81331 | 77.77619 | 75.63832 | -600.05639  | -404.05026  | 316.64485   | 1 |
| 116 | H | 84.26641 | 77.94424 | 74.63487 | -2597.05260 | 496.36221   | 657.73249   | 1 |
| 117 | H | 84.59768 | 78.01766 | 76.39049 | -1666.24518 | 1294.38985  | -1723.90591 | 1 |
| 118 | C | 83.23922 | 76.30035 | 75.77914 | 493.57570   | -129.95376  | -602.56394  | 1 |
| 119 | H | 83.83994 | 75.51119 | 75.27316 | -1469.08415 | -637.84797  | 2204.22581  | 1 |
| 120 | H | 83.03902 | 75.98919 | 76.83151 | -1038.97840 | 1068.88701  | -2280.71789 | 1 |
| 121 | C | 81.63714 | 78.13509 | 73.34384 | 188.88100   | 241.05089   | -727.87821  | 1 |
| 122 | O | 82.44485 | 78.93604 | 72.96072 | 531.88613   | -49.19943   | 427.07960   | 1 |
| 123 | N | 80.72871 | 77.45834 | 72.62901 | 708.14833   | 26.93417    | -179.73509  | 1 |
| 124 | H | 80.13820 | 76.72193 | 73.08921 | -2232.69501 | -1179.09831 | 1023.94816  | 1 |
| 125 | C | 80.68392 | 77.66865 | 71.18057 | -738.32412  | 259.92548   | 104.42456   | 1 |
| 126 | H | 81.32411 | 78.56708 | 71.00143 | 2028.89123  | 1260.02983  | 1311.33324  | 1 |
| 127 | C | 81.20542 | 76.39550 | 70.52691 | -258.65678  | -345.52513  | 661.28459   | 1 |
| 128 | H | 80.67597 | 75.53756 | 70.99834 | -1826.06090 | -1801.46097 | -918.64554  | 1 |
| 129 | C | 80.92114 | 76.37081 | 69.03785 | -541.23400  | 531.92970   | -218.41428  | 1 |
| 130 | H | 81.27214 | 75.41271 | 68.56252 | 1311.73218  | -2219.18200 | 882.19023   | 1 |
| 131 | H | 79.81914 | 76.46704 | 68.82598 | -1048.71298 | 1223.58118  | -2196.97971 | 1 |
| 132 | H | 81.43649 | 77.21697 | 68.50357 | 419.06414   | 1903.92898  | 1903.44670  | 1 |
| 133 | C | 82.69063 | 76.21802 | 70.77814 | -423.86431  | 152.66566   | -648.55262  | 1 |
| 134 | H | 83.05911 | 75.20211 | 70.45333 | 105.68386   | -2342.50080 | 1387.51238  | 1 |
| 135 | H | 83.30040 | 76.98535 | 70.22464 | -1695.63603 | -1484.73621 | -1531.02793 | 1 |
| 136 | H | 82.93604 | 76.33275 | 71.87018 | -1853.57121 | -487.39031  | 1936.59343  | 1 |
| 137 | C | 79.08419 | 77.86198 | 70.79310 | 539.71428   | -510.58232  | 267.58633   | 1 |
| 138 | O | 78.24441 | 77.07258 | 71.22662 | -15.93758   | -278.34085  | -624.49402  | 1 |
| 139 | N | 78.95246 | 78.82319 | 69.92018 | -676.81886  | 12.05292    | 276.17960   | 1 |
| 140 | H | 79.82906 | 79.29856 | 69.71724 | -1694.44250 | -373.84189  | -2100.66098 | 1 |
| 141 | C | 77.69326 | 79.35592 | 69.52678 | 412.33078   | -664.70360  | 108.35451   | 1 |
| 142 | H | 77.99106 | 80.08402 | 68.73941 | 1765.77476  | 1294.44366  | 1621.76594  | 1 |
| 143 | C | 76.80083 | 78.17400 | 68.97464 | -179.66635  | -721.95667  | -264.73915  | 1 |
| 144 | H | 77.35289 | 77.59140 | 68.20348 | -607.34922  | 2587.87032  | -598.10018  | 1 |
| 145 | H | 76.57146 | 77.44037 | 69.78297 | -359.69332  | -1479.13954 | -2259.74260 | 1 |
| 146 | C | 75.49551 | 78.79848 | 68.37603 | -240.01076  | 616.02425   | 431.85322   | 1 |
| 147 | H | 74.98735 | 79.45088 | 69.12084 | -1359.17131 | 782.54425   | 2227.99181  | 1 |
| 148 | H | 75.72887 | 79.45581 | 67.50906 | -820.36667  | 85.81767    | -2596.78715 | 1 |
| 149 | C | 74.55131 | 77.60632 | 67.94449 | -513.07015  | 236.18570   | -551.87280  | 1 |
| 150 | H | 75.00651 | 77.01905 | 67.11416 | 1816.11944  | -1183.11722 | -1650.94321 | 1 |
| 151 | H | 74.41115 | 76.88594 | 68.78320 | -1800.04429 | -1361.53473 | 1526.34643  | 1 |
| 152 | C | 73.19591 | 78.21678 | 67.51658 | 726.08972   | -253.19732  | -179.64713  | 1 |
| 153 | H | 72.61256 | 78.66771 | 68.34420 | 1224.27271  | -456.51798  | -2390.90304 | 1 |
| 154 | H | 73.25582 | 78.92537 | 66.66658 | 1206.40339  | -1150.93514 | -2154.90344 | 1 |
| 155 | N | 72.30384 | 77.04497 | 66.98724 | 329.70796   | -633.68968  | -155.67358  | 1 |
| 156 | H | 71.32289 | 77.30874 | 66.68097 | 1348.31305  | 1938.76845  | 1359.00643  | 1 |
| 157 | H | 72.65934 | 76.53703 | 66.12670 | 2096.92035  | 1446.54551  | -966.48890  | 1 |
| 158 | H | 72.11053 | 76.24015 | 67.65204 | -1197.07217 | -2303.53719 | 827.28733   | 1 |

|     |   |          |          |          |             |             |             |   |
|-----|---|----------|----------|----------|-------------|-------------|-------------|---|
| 159 | C | 77.06716 | 80.13880 | 70.82838 | -378.01186  | -556.17301  | -413.96481  | 1 |
| 160 | O | 77.62695 | 81.13683 | 71.22193 | -409.44433  | -307.55053  | -453.30833  | 1 |
| 161 | N | 75.94350 | 79.59770 | 71.27830 | -429.02477  | 524.70884   | 274.08502   | 1 |
| 162 | H | 75.59462 | 78.73278 | 70.86772 | 1706.34263  | -1425.96036 | 1574.38926  | 1 |
| 163 | C | 75.29565 | 80.22496 | 72.37687 | -45.25864   | -626.22952  | 478.93267   | 1 |
| 164 | H | 75.80442 | 81.21370 | 72.48197 | 1988.63164  | 570.90773   | 1772.87287  | 1 |
| 165 | C | 73.74556 | 80.32271 | 72.04785 | 551.77128   | -20.49526   | -564.54996  | 1 |
| 166 | H | 73.57904 | 80.98497 | 71.16939 | 1434.61535  | -1753.10253 | 1513.99471  | 1 |
| 167 | H | 73.32716 | 79.33298 | 71.75868 | -714.67738  | 1819.09770  | 1898.36494  | 1 |
| 168 | C | 73.03338 | 80.88011 | 73.32352 | 446.99263   | -555.77305  | 338.97221   | 1 |
| 169 | H | 72.77474 | 80.04868 | 74.02363 | 1953.68466  | 1892.25957  | -161.67766  | 1 |
| 170 | H | 73.72451 | 81.54688 | 73.88925 | -403.03785  | 2688.07032  | -188.43591  | 1 |
| 171 | C | 71.73157 | 81.67114 | 72.89329 | 567.86262   | 335.74681   | 434.04421   | 1 |
| 172 | H | 71.97055 | 82.48040 | 72.16593 | -1080.02275 | 1568.26081  | -1948.78900 | 1 |
| 173 | H | 71.00241 | 81.00450 | 72.37814 | -919.54108  | 2111.34692  | 1456.13463  | 1 |
| 174 | C | 71.13618 | 82.25329 | 74.19697 | 195.81897   | 173.33862   | -745.11536  | 1 |
| 175 | H | 70.78209 | 81.48859 | 74.91649 | 1405.67949  | -2301.21089 | -390.08113  | 1 |
| 176 | H | 71.77812 | 82.99630 | 74.71213 | -940.37328  | -1118.32446 | 2299.72133  | 1 |
| 177 | N | 69.83347 | 83.03388 | 73.83172 | 319.26422   | 656.36007   | -42.02424   | 1 |
| 178 | H | 69.35280 | 83.51462 | 74.64551 | 1961.03633  | 619.91968   | 1787.09422  | 1 |
| 179 | H | 69.87671 | 83.80784 | 73.10638 | 854.14343   | -2156.80752 | 1429.08711  | 1 |
| 180 | H | 69.04493 | 82.42052 | 73.47692 | 1237.02905  | -1378.50857 | -1998.28500 | 1 |
| 181 | C | 75.43417 | 79.30537 | 73.73193 | 532.53319   | -268.57236  | 517.55729   | 1 |
| 182 | O | 74.91530 | 79.71758 | 74.74297 | 266.16714   | -290.73804  | -558.88002  | 1 |
| 183 | N | 76.18686 | 78.22718 | 73.54553 | -226.25352  | 640.49678   | -270.32839  | 1 |
| 184 | H | 76.52603 | 78.10834 | 72.58874 | 2007.69063  | -1035.27229 | 1523.50231  | 1 |
| 185 | C | 75.96040 | 77.05029 | 74.34748 | -540.76542  | -573.33303  | 49.50000    | 1 |
| 186 | H | 74.89739 | 76.76189 | 74.19923 | -2374.20950 | -1036.76023 | 843.75774   | 1 |
| 187 | C | 76.97644 | 75.99716 | 73.71186 | -77.09082   | 666.87422   | -415.84136  | 1 |
| 188 | H | 77.93480 | 76.54998 | 73.48155 | -985.81834  | 617.19825   | 2463.91927  | 1 |
| 189 | O | 76.54903 | 75.48098 | 72.45697 | 293.29899   | -391.65602  | -477.80926  | 1 |
| 190 | H | 77.19016 | 75.99676 | 71.82971 | 2528.72714  | -681.76262  | -751.27122  | 1 |
| 191 | C | 77.27469 | 74.94937 | 74.84500 | 252.47363   | -605.14473  | 440.05134   | 1 |
| 192 | H | 78.12562 | 74.28267 | 74.55740 | -2052.65063 | 1456.49051  | -1043.51830 | 1 |
| 193 | H | 77.55845 | 75.44262 | 75.80544 | -2152.98800 | -1661.97574 | -161.70652  | 1 |
| 194 | H | 76.39219 | 74.29845 | 75.04901 | -473.12726  | -1584.27339 | 2165.61725  | 1 |
| 195 | C | 76.27795 | 77.41046 | 75.89473 | 360.36307   | 488.46713   | 505.10056   | 1 |
| 196 | O | 77.21159 | 78.11912 | 76.22190 | -200.08817  | -528.03552  | -385.82850  | 1 |
| 197 | N | 75.49184 | 76.65615 | 76.64948 | -597.54095  | -226.44775  | 355.20479   | 1 |
| 198 | H | 74.83019 | 76.04124 | 76.17377 | 2179.23655  | -1300.70981 | -991.33835  | 1 |
| 199 | C | 75.28407 | 76.94128 | 78.02915 | -687.68921  | 297.39807   | -249.45179  | 1 |
| 200 | H | 75.03293 | 75.94538 | 78.45682 | -349.16256  | -2467.37713 | -1101.72831 | 1 |
| 201 | C | 76.56079 | 77.61996 | 78.71584 | 672.47345   | 361.54328   | -201.62880  | 1 |
| 202 | H | 76.80605 | 78.59323 | 78.21708 | 1541.41502  | 582.18425   | 2169.97026  | 1 |
| 203 | H | 76.30116 | 77.86486 | 79.77280 | -2534.67717 | 60.25153    | 997.72295   | 1 |
| 204 | C | 77.77196 | 76.67185 | 78.68179 | 574.26774   | -389.43119  | -377.02542  | 1 |
| 205 | C | 77.75215 | 75.47687 | 79.45908 | 688.82679   | -287.33580  | -257.96133  | 1 |
| 206 | H | 76.87065 | 75.21813 | 80.07279 | 331.14182   | 1470.38163  | 2269.80013  | 1 |
| 207 | C | 78.92017 | 77.00678 | 77.90085 | -383.52382  | -675.04808  | 144.24917   | 1 |
| 208 | H | 78.95159 | 77.94482 | 77.30512 | 4.09847     | 1517.59662  | 2262.86397  | 1 |
| 209 | C | 78.87837 | 74.64705 | 79.44072 | -134.76730  | 428.45285   | -649.50303  | 1 |
| 210 | H | 78.86655 | 73.73266 | 80.05884 | -903.23433  | 1600.49020  | 2011.53387  | 1 |
| 211 | C | 80.01883 | 76.13595 | 77.90797 | -335.53281  | -615.00040  | -364.39058  | 1 |
| 212 | H | 80.89725 | 76.39996 | 77.29317 | 1596.45398  | -1369.33862 | 1732.02659  | 1 |
| 213 | C | 80.04020 | 74.93824 | 78.67339 | 585.48547   | -340.24194  | -406.23938  | 1 |
| 214 | O | 81.17070 | 74.04961 | 78.68374 | -419.15649  | -173.04408  | -511.94141  | 1 |
| 215 | H | 81.78853 | 74.58442 | 78.13683 | -1071.84350 | 1559.71507  | -1960.13012 | 1 |
| 216 | C | 74.04347 | 77.96772 | 78.20826 | 291.41878   | -183.13091  | 710.72246   | 1 |
| 217 | O | 73.81633 | 78.42183 | 79.30475 | 379.87695   | 523.47396   | -222.23622  | 1 |
| 218 | N | 73.33880 | 78.14440 | 77.09529 | 564.30591   | 373.09380   | 277.24371   | 1 |
| 219 | H | 73.57198 | 77.76454 | 76.15896 | -120.59931  | -2436.07824 | -1214.35098 | 1 |
| 220 | C | 72.27202 | 79.10836 | 77.10113 | 404.07514   | -299.37480  | 608.84009   | 1 |

|     |   |          |          |          |             |             |             |   |
|-----|---|----------|----------|----------|-------------|-------------|-------------|---|
| 221 | H | 71.66259 | 78.93265 | 78.01590 | -1071.07882 | -841.69025  | 2359.66467  | 1 |
| 222 | C | 72.98121 | 80.52762 | 77.13766 | -683.12807  | 68.71770    | -390.13096  | 1 |
| 223 | H | 73.80934 | 80.50839 | 77.88215 | 2068.88918  | 1596.58590  | 770.89603   | 1 |
| 224 | H | 73.47059 | 80.74384 | 76.15906 | 1379.86429  | 2342.49779  | -179.85638  | 1 |
| 225 | C | 71.94438 | 81.62964 | 77.51568 | -176.39967  | 537.49466   | 550.97268   | 1 |
| 226 | H | 71.12744 | 81.70029 | 76.76572 | -396.28051  | 1942.22168  | 1869.33314  | 1 |
| 227 | H | 71.44195 | 81.39177 | 78.47940 | -94.44700   | 586.00678   | -2659.20016 | 1 |
| 228 | C | 72.76114 | 82.99938 | 77.62284 | -291.69381  | -718.18079  | -150.72929  | 1 |
| 229 | H | 73.54785 | 83.03725 | 78.41863 | -2303.38776 | 1089.76242  | 964.62032   | 1 |
| 230 | H | 73.22643 | 83.34637 | 76.66512 | 884.16729   | 2568.80533  | -207.74283  | 1 |
| 231 | N | 71.76031 | 83.91913 | 77.96827 | -594.49522  | -252.81478  | 342.29276   | 1 |
| 232 | H | 70.80694 | 83.59989 | 77.89322 | -1735.17426 | 2084.05705  | -263.71605  | 1 |
| 233 | C | 71.97257 | 85.11109 | 78.35472 | 595.23177   | -271.52487  | 442.22352   | 1 |
| 234 | N | 73.29968 | 85.54581 | 78.44330 | 585.53813   | -424.79750  | -105.81303  | 1 |
| 235 | H | 74.16276 | 85.04423 | 78.23801 | 959.88797   | 1327.56823  | -2177.11905 | 1 |
| 236 | H | 73.58793 | 86.47859 | 78.74067 | 1578.48647  | 16.27378    | -2220.76233 | 1 |
| 237 | N | 70.77014 | 85.78074 | 78.62309 | -452.17763  | -390.33541  | -421.51853  | 1 |
| 238 | H | 69.80249 | 85.46551 | 78.57491 | 470.26107   | 1974.25629  | -1817.92087 | 1 |
| 239 | H | 70.73280 | 86.74489 | 78.95647 | 1856.67307  | -1573.97321 | -1224.35416 | 1 |
| 240 | C | 71.57877 | 78.72731 | 75.68682 | -531.47271  | -581.45780  | -55.06206   | 1 |
| 241 | O | 72.20245 | 78.03014 | 74.90083 | -243.00837  | 192.73507   | 609.52485   | 1 |
| 242 | N | 70.37747 | 79.25339 | 75.57193 | 343.49288   | -644.25607  | 38.09164    | 1 |
| 243 | H | 69.91748 | 79.85080 | 76.28405 | -1691.16043 | -1535.97525 | -1484.73099 | 1 |
| 244 | C | 69.64181 | 79.10930 | 74.35211 | 542.66492   | 350.14337   | 454.42563   | 1 |
| 245 | H | 70.35859 | 79.26208 | 73.51577 | 1209.57979  | -2396.95920 | 463.86744   | 1 |
| 246 | C | 69.01675 | 77.64620 | 74.29996 | -737.14309  | 145.93010   | 242.71942   | 1 |
| 247 | H | 68.47916 | 77.41838 | 75.24503 | -1050.18303 | 159.36419   | -2509.06125 | 1 |
| 248 | C | 68.04735 | 77.52108 | 73.07709 | -706.77696  | -252.88343  | -245.16230  | 1 |
| 249 | H | 67.72544 | 76.46524 | 72.91535 | -1624.64039 | -1665.49085 | 1417.86935  | 1 |
| 250 | H | 67.10897 | 78.12964 | 73.24182 | 2566.10521  | 598.51109   | 693.22305   | 1 |
| 251 | H | 68.52444 | 77.87046 | 72.13101 | -1972.69758 | 107.10018   | -1876.34312 | 1 |
| 252 | C | 70.16157 | 76.60144 | 74.05587 | 412.85148   | 672.58832   | -27.69222   | 1 |
| 253 | H | 69.76569 | 75.63885 | 73.65365 | 1447.02277  | 1762.76533  | -1490.78944 | 1 |
| 254 | H | 70.91736 | 76.98389 | 73.32719 | 1320.77379  | -145.20455  | 2378.68491  | 1 |
| 255 | H | 70.70448 | 76.36233 | 75.00243 | -1512.10848 | 1470.52031  | 1724.75147  | 1 |
| 256 | C | 68.54649 | 80.29091 | 74.56634 | -607.11113  | 499.56689   | 73.73769    | 1 |
| 257 | O | 68.50603 | 80.86422 | 75.64646 | 357.97126   | 460.81534   | 356.68785   | 1 |
| 258 | N | 67.87042 | 80.53932 | 73.45211 | 536.55407   | -368.62270  | 332.76306   | 1 |
| 259 | H | 68.04031 | 79.92418 | 72.65745 | 524.38866   | 2297.69985  | 1367.20941  | 1 |
| 260 | C | 66.66096 | 81.28354 | 73.53249 | 46.50277    | -774.29190  | -147.97904  | 1 |
| 261 | H | 66.88105 | 82.10053 | 74.25420 | 1676.51875  | 1883.29066  | 1032.55549  | 1 |
| 262 | C | 66.23089 | 81.75747 | 72.05261 | -559.41456  | -34.19198   | -556.30433  | 1 |
| 263 | H | 65.99407 | 80.84979 | 71.44703 | -64.66664   | 395.18769   | 2695.05373  | 1 |
| 264 | H | 65.28386 | 82.34776 | 72.09354 | -2703.44278 | -60.40056   | 333.79418   | 1 |
| 265 | C | 67.32652 | 82.54890 | 71.38589 | -519.76435  | 377.31045   | 459.42366   | 1 |
| 266 | H | 68.29881 | 82.04690 | 71.58931 | -1746.74323 | 1667.50644  | -1261.73691 | 1 |
| 267 | C | 67.11311 | 82.57893 | 69.87743 | 570.95554   | 16.46261    | -545.27700  | 1 |
| 268 | H | 67.92839 | 83.14223 | 69.35452 | 2391.58273  | 28.05277    | -1305.07271 | 1 |
| 269 | H | 67.08862 | 81.54702 | 69.44107 | 175.75588   | 917.63458   | 2559.43867  | 1 |
| 270 | H | 66.14432 | 83.07406 | 69.60922 | -1063.97851 | -2155.34650 | 1283.00462  | 1 |
| 271 | C | 67.37960 | 83.97300 | 71.92165 | 193.76014   | 2.62946     | -765.53141  | 1 |
| 272 | H | 68.23180 | 84.54943 | 71.47732 | 507.39394   | -846.55087  | 2539.60089  | 1 |
| 273 | H | 66.44050 | 84.53628 | 71.68427 | 1337.57841  | 1818.19054  | 1526.01994  | 1 |
| 274 | H | 67.50500 | 83.99487 | 73.03464 | 1100.88635  | -1172.91350 | -2199.08909 | 1 |
| 275 | C | 65.49004 | 80.30857 | 74.05239 | -549.21115  | 475.64486   | -309.38218  | 1 |
| 276 | O | 65.49901 | 79.11028 | 73.89802 | 556.06106   | -390.37755  | -78.24250   | 1 |
| 277 | O | 64.34355 | 80.95569 | 74.56183 | -572.27940  | -310.19032  | -209.75862  | 1 |
| 278 | H | 64.67618 | 81.89790 | 74.53791 | -1380.08193 | 2212.14486  | 790.85944   | 1 |

Listing 6: C00006.xmolout

|    |   |          |          |          |             |             |             |        |          |
|----|---|----------|----------|----------|-------------|-------------|-------------|--------|----------|
| 2  |   | 150.0000 | 150.0000 | 150.0000 | 0.0000      | 0.0000      | 0.0000***** | 2.7750 | 11100    |
|    |   | 0.2500   | 300.00   | 0.00     | 0.00        | 0.00        | -1294.2957  | 0.0000 | 300.0000 |
| 3  | H | 68.71586 | 73.12670 | 87.63958 | -2043.14101 | -1757.64893 | 399.89339   | 1      |          |
| 4  | N | 69.69982 | 72.89536 | 87.76675 | 426.75047   | 490.45733   | -334.42467  | 1      |          |
| 5  | H | 69.77453 | 71.97324 | 87.32632 | 442.25559   | -1110.30854 | -2448.52907 | 1      |          |
| 6  | C | 70.60064 | 73.82037 | 87.19173 | 415.32972   | -666.39213  | 83.73172    | 1      |          |
| 7  | H | 70.06952 | 74.79272 | 87.09080 | 879.32219   | 2491.00447  | 667.35213   | 1      |          |
| 8  | C | 71.89726 | 73.91184 | 88.15399 | 31.35357    | 477.41777   | 628.23362   | 1      |          |
| 9  | H | 72.33084 | 72.89196 | 88.28333 | 1168.38489  | 2240.25337  | -1019.71136 | 1      |          |
| 10 | H | 72.69809 | 74.53150 | 87.68561 | -360.43770  | 2534.90498  | 931.67112   | 1      |          |
| 11 | C | 71.47677 | 74.48055 | 89.48159 | 463.18208   | 512.70242   | -382.34388  | 1      |          |
| 12 | H | 70.56731 | 73.93188 | 89.81759 | 1725.29117  | 1863.52247  | -987.07854  | 1      |          |
| 13 | C | 72.57305 | 74.27785 | 90.52052 | 710.42801   | -144.27427  | -313.15367  | 1      |          |
| 14 | H | 72.26330 | 74.65786 | 91.52802 | 364.20195   | -1033.13725 | 2494.72524  | 1      |          |
| 15 | H | 72.83441 | 73.19478 | 90.64038 | 2567.61904  | 335.80679   | 847.48802   | 1      |          |
| 16 | H | 73.51364 | 74.81683 | 90.23775 | -2587.99029 | 680.92867   | -512.16411  | 1      |          |
| 17 | C | 71.14426 | 75.96270 | 89.37375 | 268.17616   | 741.64379   | -40.42634   | 1      |          |
| 18 | H | 70.84191 | 76.39108 | 90.36411 | 1283.54314  | -1945.37420 | -1411.27812 | 1      |          |
| 19 | H | 72.01938 | 76.55961 | 89.00601 | -1258.57796 | 1317.15249  | -2026.02085 | 1      |          |
| 20 | H | 70.30037 | 76.14966 | 88.66134 | -2502.84526 | 909.80597   | 575.92391   | 1      |          |
| 21 | C | 71.03218 | 73.14590 | 85.78698 | 619.36578   | -458.64843  | -172.09273  | 1      |          |
| 22 | O | 70.76081 | 71.96616 | 85.51313 | -81.40433   | 433.87611   | 522.34594   | 1      |          |
| 23 | N | 71.62319 | 74.05010 | 85.04905 | 175.23996   | -622.20190  | 341.55523   | 1      |          |
| 24 | H | 71.74939 | 74.95829 | 85.49496 | -876.57256  | -303.22879  | -2561.90213 | 1      |          |
| 25 | C | 72.45813 | 73.70947 | 83.92647 | -571.88214  | -534.10783  | -106.15033  | 1      |          |
| 26 | H | 73.42167 | 73.40215 | 84.38907 | -2713.20841 | -16.25800   | -248.80809  | 1      |          |
| 27 | C | 71.80477 | 72.48761 | 83.12522 | 166.60354   | 288.16399   | -716.09568  | 1      |          |
| 28 | H | 70.69119 | 72.53526 | 83.30584 | -2097.85574 | 1636.78449  | -586.18044  | 1      |          |
| 29 | O | 72.18951 | 71.19537 | 83.59389 | -317.80580  | -363.38227  | 484.43082   | 1      |          |
| 30 | H | 71.51958 | 71.09623 | 84.37667 | 1863.74748  | -1451.84923 | 1357.29467  | 1      |          |
| 31 | C | 72.13108 | 72.80559 | 81.62241 | 503.80731   | 517.99032   | 318.51606   | 1      |          |
| 32 | H | 71.67047 | 72.05684 | 80.93679 | 640.61020   | -2157.10410 | -1536.29104 | 1      |          |
| 33 | H | 71.75966 | 73.81135 | 81.31500 | 1687.88455  | 465.60692   | 2087.56452  | 1      |          |
| 34 | H | 73.23054 | 72.79217 | 81.43657 | -1293.07895 | -1899.88581 | -1463.57452 | 1      |          |
| 35 | C | 72.65052 | 75.07021 | 83.07933 | -153.07550  | -733.68902  | 248.70981   | 1      |          |
| 36 | O | 73.79297 | 75.26855 | 82.70007 | 186.15459   | -480.78787  | -449.34387  | 1      |          |
| 37 | N | 71.55040 | 75.77496 | 82.81250 | -487.53139  | 543.18517   | 42.03850    | 1      |          |
| 38 | C | 71.59856 | 77.03954 | 82.13358 | -699.35871  | 69.34393    | 360.10701   | 1      |          |
| 39 | H | 72.32924 | 76.91098 | 81.30223 | 2.81126     | -221.99807  | -2715.58072 | 1      |          |
| 40 | C | 70.09541 | 77.27115 | 81.69720 | -507.46439  | -592.59194  | 122.07761   | 1      |          |
| 41 | H | 69.85295 | 78.35086 | 81.56442 | -1975.08116 | 525.87560   | -1801.71556 | 1      |          |
| 42 | H | 69.86783 | 76.76995 | 80.72948 | 1588.27743  | -1913.22100 | 1113.83566  | 1      |          |
| 43 | C | 69.32374 | 76.60408 | 82.88032 | -613.62442  | -457.55993  | -194.14490  | 1      |          |
| 44 | H | 69.32964 | 77.25990 | 83.77968 | 1707.54637  | -721.27992  | 1996.92523  | 1      |          |
| 45 | H | 68.25743 | 76.38111 | 82.65166 | 758.23357   | 2100.81767  | 1560.55011  | 1      |          |
| 46 | C | 70.20374 | 75.30106 | 83.10670 | -352.41524  | 704.96076   | 49.21465    | 1      |          |
| 47 | H | 70.20349 | 74.88836 | 84.14460 | 1714.76886  | -2070.42778 | 443.35792   | 1      |          |
| 48 | H | 69.99955 | 74.47534 | 82.38511 | 1224.15040  | 1801.50881  | 1636.97633  | 1      |          |
| 49 | C | 72.05888 | 78.21365 | 83.17870 | 566.85117   | 537.05831   | 117.62814   | 1      |          |
| 50 | O | 71.51446 | 79.29068 | 83.17675 | -550.26779  | -406.08867  | 4.21666     | 1      |          |
| 51 | N | 73.09589 | 77.79947 | 83.89728 | 566.34832   | -425.77725  | 180.18749   | 1      |          |
| 52 | H | 73.48488 | 76.85668 | 83.73309 | 644.44502   | 2646.80550  | -52.73430   | 1      |          |
| 53 | C | 73.62577 | 78.67076 | 84.88045 | 612.34801   | -281.48662  | 411.56221   | 1      |          |
| 54 | H | 73.01604 | 79.60360 | 84.82139 | 1667.23498  | -1490.75142 | 1556.16753  | 1      |          |
| 55 | C | 73.57367 | 77.91017 | 86.29081 | -714.45746  | -175.43074  | 286.98927   | 1      |          |
| 56 | H | 74.27422 | 77.03154 | 86.24003 | -787.09484  | 1763.03619  | -1922.46060 | 1      |          |
| 57 | O | 72.30028 | 77.37821 | 86.69044 | -429.46514  | 516.51932   | -128.40526  | 1      |          |
| 58 | H | 72.49218 | 76.41830 | 86.69993 | 1981.82785  | 436.16847   | -1818.18182 | 1      |          |
| 59 | C | 74.17993 | 79.01905 | 87.22723 | 630.79189   | -468.94448  | 76.03230    | 1      |          |
| 60 | H | 74.31587 | 78.64528 | 88.26822 | -1775.71861 | 2062.30353  | 131.89849   | 1      |          |
| 61 | H | 75.17543 | 79.36782 | 86.86513 | -1855.14608 | 88.94118    | 1993.53760  | 1      |          |
| 62 | H | 73.51429 | 79.91170 | 87.28245 | -1504.82350 | -780.94249  | -2132.90992 | 1      |          |

|     |   |          |          |          |             |             |             |   |
|-----|---|----------|----------|----------|-------------|-------------|-------------|---|
| 63  | C | 75.21167 | 78.81865 | 84.46830 | 288.57638   | 618.62814   | -397.00270  | 1 |
| 64  | O | 75.99092 | 77.88263 | 84.66973 | 321.70495   | -185.26452  | 574.37218   | 1 |
| 65  | N | 75.41637 | 79.97875 | 83.90055 | -447.05792  | -446.53431  | 367.76425   | 1 |
| 66  | H | 74.58367 | 80.56654 | 83.85513 | 350.31316   | 1975.63644  | -1843.31522 | 1 |
| 67  | C | 76.56429 | 80.36460 | 83.16319 | -511.23061  | 374.03917   | -471.51480  | 1 |
| 68  | H | 76.46498 | 81.47252 | 83.14001 | 2234.79579  | -898.70890  | -1273.45190 | 1 |
| 69  | C | 77.88146 | 79.86846 | 83.92281 | 529.53781   | -159.34528  | 563.72604   | 1 |
| 70  | H | 78.73985 | 80.53102 | 83.61934 | 654.59388   | 2347.94251  | 1217.51488  | 1 |
| 71  | H | 77.69014 | 80.05238 | 85.01405 | -1526.55661 | 2103.42026  | 817.87394   | 1 |
| 72  | O | 78.29853 | 78.52027 | 83.69052 | -554.84278  | 14.12789    | 399.58769   | 1 |
| 73  | H | 77.50217 | 78.03164 | 84.13853 | 1297.06236  | 2061.84854  | 1220.68812  | 1 |
| 74  | C | 76.56242 | 79.76427 | 81.65030 | -662.15484  | -412.13544  | 123.62687   | 1 |
| 75  | O | 77.13987 | 80.35981 | 80.77361 | -540.01537  | -317.05804  | 274.91456   | 1 |
| 76  | N | 75.86630 | 78.59228 | 81.52475 | -202.76299  | -690.00100  | -131.49145  | 1 |
| 77  | H | 75.57224 | 78.33417 | 82.47288 | -702.62132  | -2617.37191 | 281.70413   | 1 |
| 78  | C | 76.48512 | 77.52312 | 80.69611 | -491.73914  | 576.34187   | 222.73509   | 1 |
| 79  | H | 77.56719 | 77.54306 | 80.96236 | 1977.17978  | -1823.58850 | -434.68928  | 1 |
| 80  | C | 75.78220 | 76.23934 | 81.05329 | -649.50797  | -328.66843  | 306.11224   | 1 |
| 81  | H | 74.73404 | 76.48683 | 81.37650 | 2075.07803  | 1452.16490  | -1004.45904 | 1 |
| 82  | C | 75.67863 | 75.30147 | 79.86456 | -615.18735  | -489.99689  | -70.96352   | 1 |
| 83  | H | 75.11535 | 74.36183 | 80.12232 | -1226.32661 | -1724.38906 | -1716.47170 | 1 |
| 84  | H | 75.13428 | 75.79475 | 79.00558 | 2381.64273  | -969.84735  | 900.46860   | 1 |
| 85  | H | 76.69245 | 74.99573 | 79.48380 | 2122.74991  | 1702.23946  | -141.36228  | 1 |
| 86  | C | 76.46446 | 75.54184 | 82.21691 | -501.86074  | -479.61276  | -376.42482  | 1 |
| 87  | H | 75.93978 | 74.58094 | 82.48629 | 993.79261   | -2246.95401 | -1177.81305 | 1 |
| 88  | H | 77.53495 | 75.28575 | 81.98120 | 42.71279    | -626.15391  | -2651.37258 | 1 |
| 89  | H | 76.46578 | 76.19156 | 83.14048 | -2026.39012 | -1590.33709 | -887.82922  | 1 |
| 90  | C | 76.19777 | 77.89969 | 79.12383 | -672.89153  | 382.57394   | -156.34072  | 1 |
| 91  | O | 75.08336 | 78.05846 | 78.68718 | 410.04627   | 221.86223   | 500.35950   | 1 |
| 92  | N | 77.34136 | 77.80439 | 78.43389 | -378.11782  | -443.79414  | -441.10984  | 1 |
| 93  | H | 78.19641 | 77.71263 | 78.98275 | 2404.15973  | -568.14894  | 1149.30085  | 1 |
| 94  | C | 77.35545 | 78.56582 | 77.21362 | -544.54484  | 466.16019   | 331.29119   | 1 |
| 95  | H | 76.34310 | 78.38692 | 76.77986 | -1409.80988 | -170.17955  | 2325.32679  | 1 |
| 96  | C | 77.58973 | 80.06872 | 77.65372 | -184.48284  | 116.78282   | -758.89137  | 1 |
| 97  | H | 76.91016 | 80.33684 | 78.49919 | 1893.78641  | 1861.14652  | 611.04528   | 1 |
| 98  | H | 78.62493 | 80.20971 | 78.04147 | -2170.79665 | -974.19311  | 1327.50117  | 1 |
| 99  | C | 77.33024 | 80.96341 | 76.40230 | 389.51668   | 672.81878   | -138.49152  | 1 |
| 100 | H | 78.03543 | 80.69352 | 75.58403 | 510.64577   | 1933.03327  | 1851.02484  | 1 |
| 101 | H | 76.32602 | 80.74630 | 75.97533 | -2302.30869 | -1105.72939 | -948.89774  | 1 |
| 102 | C | 77.44469 | 82.50245 | 76.71944 | -559.93427  | -126.34590  | 542.30857   | 1 |
| 103 | O | 77.30385 | 83.30136 | 75.82998 | -670.36003  | -111.83166  | 76.36448    | 1 |
| 104 | N | 77.68488 | 82.78496 | 78.01805 | -216.06729  | -537.07037  | 446.51379   | 1 |
| 105 | H | 77.79062 | 82.15480 | 78.82262 | -1251.96487 | 1074.12894  | -2168.52500 | 1 |
| 106 | H | 77.76732 | 83.73730 | 78.39011 | -2451.83023 | -720.73851  | 944.84612   | 1 |
| 107 | C | 78.61675 | 77.99217 | 76.34891 | 546.24052   | -563.88337  | -85.11809   | 1 |
| 108 | O | 79.72848 | 78.38085 | 76.58865 | 71.70702    | -307.40463  | 606.69673   | 1 |
| 109 | N | 78.20882 | 77.04727 | 75.49055 | 479.90863   | -504.50129  | 222.86849   | 1 |
| 110 | C | 79.09489 | 76.54048 | 74.48533 | 75.51268    | -600.91904  | 506.73700   | 1 |
| 111 | H | 80.10972 | 76.47926 | 74.94209 | -2033.61562 | 1795.30103  | 254.89480   | 1 |
| 112 | C | 78.42340 | 75.14860 | 74.11639 | 523.79067   | 517.99274   | 284.45581   | 1 |
| 113 | H | 78.68008 | 74.81464 | 73.07625 | 1599.61665  | -1127.00911 | 1895.98173  | 1 |
| 114 | H | 78.75800 | 74.34017 | 74.80451 | -1881.83093 | 1275.82488  | -1501.55016 | 1 |
| 115 | C | 76.90461 | 75.45250 | 74.29814 | -600.05639  | -404.05026  | 316.64485   | 1 |
| 116 | H | 76.49932 | 75.99689 | 73.41736 | -2597.05260 | 496.36221   | 657.73249   | 1 |
| 117 | H | 76.28518 | 74.53561 | 74.41795 | -1666.24518 | 1294.38985  | -1723.90591 | 1 |
| 118 | C | 76.91950 | 76.37856 | 75.58981 | 493.57570   | -129.95376  | -602.56394  | 1 |
| 119 | H | 76.11871 | 77.15520 | 75.63009 | -1469.08415 | -637.84797  | 2204.22581  | 1 |
| 120 | H | 76.93832 | 75.83096 | 76.56216 | -1038.97840 | 1068.88701  | -2280.71789 | 1 |
| 121 | C | 79.04961 | 77.54183 | 73.20031 | 188.88100   | 241.05089   | -727.87821  | 1 |
| 122 | O | 78.13803 | 78.29830 | 72.95086 | 531.88613   | -49.19943   | 427.07960   | 1 |
| 123 | N | 80.19079 | 77.36884 | 72.45844 | 708.14833   | 26.93417    | -179.73509  | 1 |
| 124 | H | 80.60934 | 76.54684 | 72.90760 | -2232.69501 | -1179.09831 | 1023.94816  | 1 |



|     |   |          |          |          |             |             |             |   |
|-----|---|----------|----------|----------|-------------|-------------|-------------|---|
| 125 | C | 80.05306 | 77.41000 | 70.98864 | -738.32412  | 259.92548   | 104.42456   | 1 |
| 126 | H | 79.58915 | 78.40132 | 70.78014 | 2028.89123  | 1260.02983  | 1311.33324  | 1 |
| 127 | C | 81.43396 | 77.23756 | 70.40035 | -258.65678  | -345.52513  | 661.28459   | 1 |
| 128 | H | 81.78867 | 76.21454 | 70.66060 | -1826.06090 | -1801.46097 | -918.64554  | 1 |
| 129 | C | 81.42292 | 77.36787 | 68.88883 | -541.23400  | 531.92970   | -218.41428  | 1 |
| 130 | H | 82.44594 | 77.20477 | 68.45161 | 1311.73218  | -2219.18200 | 882.19023   | 1 |
| 131 | H | 80.72102 | 76.61047 | 68.39736 | -1048.71298 | 1223.58118  | -2196.97971 | 1 |
| 132 | H | 81.08558 | 78.39050 | 68.56566 | 419.06414   | 1903.92898  | 1903.44670  | 1 |
| 133 | C | 82.42737 | 78.22903 | 70.98386 | -423.86431  | 152.66566   | -648.55262  | 1 |
| 134 | H | 83.47068 | 78.04785 | 70.60663 | 105.68386   | -2342.50080 | 1387.51238  | 1 |
| 135 | H | 82.15588 | 79.28732 | 70.72006 | -1695.63603 | -1484.73621 | -1531.02793 | 1 |
| 136 | H | 82.45759 | 78.16737 | 72.10606 | -1853.57121 | -487.39031  | 1936.59343  | 1 |
| 137 | C | 79.07390 | 76.14246 | 70.57935 | 539.71428   | -510.58232  | 267.58633   | 1 |
| 138 | O | 79.14817 | 75.04977 | 71.10257 | -15.93758   | -278.34085  | -624.49402  | 1 |
| 139 | N | 78.25717 | 76.53348 | 69.61231 | -676.81886  | 12.05292    | 276.17960   | 1 |
| 140 | H | 78.42340 | 77.47101 | 69.25275 | -1694.44250 | -373.84189  | -2100.66098 | 1 |
| 141 | C | 77.62779 | 75.50492 | 68.83324 | 412.33078   | -664.70360  | 108.35451   | 1 |
| 142 | H | 77.12215 | 74.83478 | 69.56199 | 1765.77476  | 1294.44366  | 1621.76594  | 1 |
| 143 | C | 76.66526 | 76.24044 | 67.82389 | -179.66635  | -721.95667  | -264.73915  | 1 |
| 144 | H | 75.92395 | 76.87005 | 68.36466 | -607.34922  | 2587.87032  | -598.10018  | 1 |
| 145 | H | 77.24053 | 76.94061 | 67.17713 | -359.69332  | -1479.13954 | -2259.74260 | 1 |
| 146 | C | 75.94879 | 75.14716 | 66.96128 | -240.01076  | 616.02425   | 431.85322   | 1 |
| 147 | H | 76.68780 | 74.50387 | 66.43044 | -1359.17131 | 782.54425   | 2227.99181  | 1 |
| 148 | H | 75.34662 | 74.46010 | 67.60031 | -820.36667  | 85.81767    | -2596.78715 | 1 |
| 149 | C | 75.02700 | 75.92292 | 65.93814 | -513.07015  | 236.18570   | -551.87280  | 1 |
| 150 | H | 74.29301 | 76.56450 | 66.47806 | 1816.11944  | -1183.11722 | -1650.94321 | 1 |
| 151 | H | 75.62817 | 76.61398 | 65.30363 | -1800.04429 | -1361.53473 | 1526.34643  | 1 |
| 152 | C | 74.29819 | 74.86908 | 65.07044 | 726.08972   | -253.19732  | -179.64713  | 1 |
| 153 | H | 74.94787 | 74.33356 | 64.34807 | 1224.27271  | -456.51798  | -2390.90304 | 1 |
| 154 | H | 73.69454 | 74.12755 | 65.66100 | 1206.40339  | -1150.93514 | -2154.90344 | 1 |
| 155 | N | 73.25538 | 75.63389 | 64.19507 | 329.70796   | -633.68968  | -155.67358  | 1 |
| 156 | H | 72.65556 | 75.03376 | 63.55852 | 1348.31305  | 1938.76845  | 1359.00643  | 1 |
| 157 | H | 72.51637 | 76.18761 | 64.71756 | 2096.92035  | 1446.54551  | -966.48890  | 1 |
| 158 | H | 73.63127 | 76.35516 | 63.51245 | -1197.07217 | -2303.53719 | 827.28733   | 1 |
| 159 | C | 78.79941 | 74.73692 | 67.98285 | -378.01186  | -556.17301  | -413.96481  | 1 |
| 160 | O | 79.67195 | 75.31901 | 67.36789 | -409.44433  | -307.55053  | -453.30833  | 1 |
| 161 | N | 78.54835 | 73.44221 | 68.04445 | -429.02477  | 524.70884   | 274.08502   | 1 |
| 162 | H | 77.76783 | 73.10650 | 68.60627 | 1706.34263  | -1425.96036 | 1574.38926  | 1 |
| 163 | C | 79.37709 | 72.54999 | 67.30901 | -45.25864   | -626.22952  | 478.93267   | 1 |
| 164 | H | 79.93545 | 73.20726 | 66.60192 | 1988.63164  | 570.90773   | 1772.87287  | 1 |
| 165 | C | 80.32083 | 71.83440 | 68.36132 | 551.77128   | -20.49526   | -564.54996  | 1 |
| 166 | H | 80.96341 | 72.58306 | 68.87646 | 1434.61535  | -1753.10253 | 1513.99471  | 1 |
| 167 | H | 79.73155 | 71.35173 | 69.17229 | -714.67738  | 1819.09770  | 1898.36494  | 1 |
| 168 | C | 81.18846 | 70.78703 | 67.58882 | 446.99263   | -555.77305  | 338.97221   | 1 |
| 169 | H | 80.54474 | 70.02249 | 67.09553 | 1953.68466  | 1892.25957  | -161.67766  | 1 |
| 170 | H | 81.76066 | 71.27939 | 66.77095 | -403.03785  | 2688.07032  | -188.43591  | 1 |
| 171 | C | 82.16946 | 70.11241 | 68.63031 | 567.86262   | 335.74681   | 434.04421   | 1 |
| 172 | H | 82.72727 | 70.88564 | 69.20675 | -1080.02275 | 1568.26081  | -1948.78900 | 1 |
| 173 | H | 81.60245 | 69.52182 | 69.38667 | -919.54108  | 2111.34692  | 1456.13463  | 1 |
| 174 | C | 83.14911 | 69.21247 | 67.84194 | 195.81897   | 173.33862   | -745.11536  | 1 |
| 175 | H | 82.68032 | 68.33656 | 67.35065 | 1405.67949  | -2301.21089 | -390.08113  | 1 |
| 176 | H | 83.79000 | 69.75362 | 67.11739 | -940.37328  | -1118.32446 | 2299.72133  | 1 |
| 177 | N | 84.15922 | 68.60147 | 68.87139 | 319.26422   | 656.36007   | -42.02424   | 1 |
| 178 | H | 84.91161 | 67.97698 | 68.46002 | 1961.03633  | 619.91968   | 1787.09422  | 1 |
| 179 | H | 84.74276 | 69.28204 | 69.43985 | 854.14343   | -2156.80752 | 1429.08711  | 1 |
| 180 | H | 83.75744 | 67.97352 | 69.62685 | 1237.02905  | -1378.50857 | -1998.28500 | 1 |
| 181 | C | 78.32445 | 71.51417 | 66.58105 | 532.53319   | -268.57236  | 517.55729   | 1 |
| 182 | O | 77.89317 | 71.78097 | 65.48352 | 266.16714   | -290.73804  | -558.88002  | 1 |
| 183 | N | 78.01737 | 70.49629 | 67.37287 | -226.25352  | 640.49678   | -270.32839  | 1 |
| 184 | H | 78.43369 | 70.43554 | 68.30091 | 2007.69063  | -1035.27229 | 1523.50231  | 1 |
| 185 | C | 77.02630 | 69.57470 | 66.94700 | -540.76542  | -573.33303  | 49.50000    | 1 |
| 186 | H | 76.82438 | 69.88052 | 65.89215 | -2374.20950 | -1036.76023 | 843.75774   | 1 |

|     |   |          |          |          |             |             |             |   |
|-----|---|----------|----------|----------|-------------|-------------|-------------|---|
| 187 | C | 77.62531 | 68.09792 | 67.09945 | -77.09082   | 666.87422   | -415.84136  | 1 |
| 188 | H | 77.59858 | 67.80863 | 68.18546 | -985.81834  | 617.19825   | 2463.91927  | 1 |
| 189 | O | 78.98364 | 67.91099 | 66.66600 | 293.29899   | -391.65602  | -477.80926  | 1 |
| 190 | H | 79.40824 | 67.61581 | 67.49706 | 2528.72714  | -681.76262  | -751.27122  | 1 |
| 191 | C | 76.54646 | 67.27028 | 66.30888 | 252.47363   | -605.14473  | 440.05134   | 1 |
| 192 | H | 76.74921 | 66.17572 | 66.36586 | -2052.65063 | 1456.49051  | -1043.51830 | 1 |
| 193 | H | 75.51663 | 67.44187 | 66.71121 | -2152.98800 | -1661.97574 | -161.70652  | 1 |
| 194 | H | 76.53460 | 67.54609 | 65.22836 | -473.12726  | -1584.27339 | 2165.61725  | 1 |
| 195 | C | 75.74827 | 69.77619 | 67.96060 | 360.36307   | 488.46713   | 505.10056   | 1 |
| 196 | O | 75.08822 | 68.83325 | 68.33479 | -200.08817  | -528.03552  | -385.82850  | 1 |
| 197 | N | 75.57095 | 71.06580 | 68.22115 | -597.54095  | -226.44775  | 355.20479   | 1 |
| 198 | H | 76.21110 | 71.72167 | 67.77399 | 2179.23655  | -1300.70981 | -991.33835  | 1 |
| 199 | C | 74.54227 | 71.46815 | 69.10256 | -687.68921  | 297.39807   | -249.45179  | 1 |
| 200 | H | 74.10295 | 70.52133 | 69.49237 | -349.16256  | -2467.37713 | -1101.72831 | 1 |
| 201 | C | 75.17994 | 72.41861 | 70.23035 | 672.47345   | 361.54328   | -201.62880  | 1 |
| 202 | H | 75.50926 | 73.38824 | 69.79569 | 1541.41502  | 582.18425   | 2169.97026  | 1 |
| 203 | H | 74.40444 | 72.67213 | 70.99173 | -2534.67717 | 60.25153    | 997.72295   | 1 |
| 204 | C | 76.36879 | 71.68707 | 70.87043 | 574.26774   | -389.43119  | -377.02542  | 1 |
| 205 | C | 76.19809 | 70.33203 | 71.28926 | 688.82679   | -287.33580  | -257.96133  | 1 |
| 206 | H | 75.21144 | 69.84031 | 71.21535 | 331.14182   | 1470.38163  | 2269.80013  | 1 |
| 207 | C | 77.64343 | 72.31768 | 71.01321 | -383.52382  | -675.04808  | 144.24917   | 1 |
| 208 | H | 77.79593 | 73.38514 | 70.75107 | 4.09847     | 1517.59662  | 2262.86397  | 1 |
| 209 | C | 77.30274 | 69.62111 | 71.75689 | -134.76730  | 428.45285   | -649.50303  | 1 |
| 210 | H | 77.16349 | 68.56856 | 72.06016 | -903.23433  | 1600.49020  | 2011.53387  | 1 |
| 211 | C | 78.72068 | 71.56445 | 71.48463 | -335.53281  | -615.00040  | -364.39058  | 1 |
| 212 | H | 79.70106 | 72.06524 | 71.56763 | 1596.45398  | -1369.33862 | 1732.02659  | 1 |
| 213 | C | 78.60445 | 70.19295 | 71.85571 | 585.48547   | -340.24194  | -406.23938  | 1 |
| 214 | O | 79.70278 | 69.41886 | 72.31173 | -419.15649  | -173.04408  | -511.94141  | 1 |
| 215 | H | 80.40724 | 70.10975 | 72.30402 | -1071.84350 | 1559.71507  | -1960.13012 | 1 |
| 216 | C | 73.50095 | 72.37920 | 68.23862 | 291.41878   | -183.13091  | 710.72246   | 1 |
| 217 | O | 73.77968 | 72.88982 | 67.16807 | 379.87695   | 523.47396   | -222.23622  | 1 |
| 218 | N | 72.38246 | 72.50718 | 68.94155 | 564.30591   | 373.09380   | 277.24371   | 1 |
| 219 | H | 72.33871 | 72.02478 | 69.83805 | -120.59931  | -2436.07824 | -1214.35098 | 1 |
| 220 | C | 71.25044 | 73.06014 | 68.28645 | 404.07514   | -299.37480  | 608.84009   | 1 |
| 221 | H | 71.59697 | 73.33685 | 67.26242 | -1071.07882 | -841.69025  | 2359.66467  | 1 |
| 222 | C | 70.13826 | 71.92799 | 68.33635 | -683.12807  | 68.71770    | -390.13096  | 1 |
| 223 | H | 70.48401 | 71.00754 | 67.81492 | 2068.88918  | 1596.58590  | 770.89603   | 1 |
| 224 | H | 69.95249 | 71.61890 | 69.38925 | 1379.86429  | 2342.49779  | -179.85638  | 1 |
| 225 | C | 68.83107 | 72.48280 | 67.69487 | -176.39967  | 537.49466   | 550.97268   | 1 |
| 226 | H | 68.59721 | 73.49911 | 68.08546 | -396.28051  | 1942.22168  | 1869.33314  | 1 |
| 227 | H | 68.93438 | 72.59914 | 66.59317 | -94.44700   | 586.00678   | -2659.20016 | 1 |
| 228 | C | 67.67722 | 71.44316 | 68.07460 | -291.69381  | -718.18079  | -150.72929  | 1 |
| 229 | H | 67.79780 | 70.40311 | 67.67893 | -2303.38776 | 1089.76242  | 964.62032   | 1 |
| 230 | H | 67.45524 | 71.37692 | 69.17064 | 884.16729   | 2568.80533  | -207.74283  | 1 |
| 231 | N | 66.56728 | 72.02895 | 67.44977 | -594.49522  | -252.81478  | 342.29276   | 1 |
| 232 | H | 66.66763 | 72.99017 | 67.16113 | -1735.17426 | 2084.05705  | -263.71605  | 1 |
| 233 | C | 65.45568 | 71.44627 | 67.24373 | 595.23177   | -271.52487  | 442.22352   | 1 |
| 234 | N | 65.32259 | 70.11941 | 67.66526 | 585.53813   | -424.79750  | -105.81303  | 1 |
| 235 | H | 65.99417 | 69.52106 | 68.14458 | 959.88797   | 1327.56823  | -2177.11905 | 1 |
| 236 | H | 64.47912 | 69.55457 | 67.56072 | 1578.48647  | 16.27378    | -2220.76233 | 1 |
| 237 | N | 64.55361 | 72.30946 | 66.60676 | -452.17763  | -390.33541  | -421.51853  | 1 |
| 238 | H | 64.65790 | 73.27538 | 66.29960 | 470.26107   | 1974.25629  | -1817.92087 | 1 |
| 239 | H | 63.60531 | 72.03521 | 66.34755 | 1856.67307  | -1573.97321 | -1224.35416 | 1 |
| 240 | C | 70.65334 | 74.32966 | 69.14013 | -531.47271  | -581.45780  | -55.06206   | 1 |
| 241 | O | 70.29033 | 75.34285 | 68.59457 | -243.00837  | 192.73507   | 609.52485   | 1 |
| 242 | N | 70.39534 | 73.97044 | 70.44360 | 343.49288   | -644.25607  | 38.09164    | 1 |
| 243 | H | 71.00377 | 73.15141 | 70.55548 | -1691.16043 | -1535.97525 | -1484.73099 | 1 |
| 244 | C | 70.40512 | 75.03991 | 71.45849 | 542.66492   | 350.14337   | 454.42563   | 1 |
| 245 | H | 70.18657 | 75.97553 | 70.89186 | 1209.57979  | -2396.95920 | 463.86744   | 1 |
| 246 | C | 69.33040 | 74.66236 | 72.45309 | -737.14309  | 145.93010   | 242.71942   | 1 |
| 247 | H | 69.64830 | 73.72188 | 72.95693 | -1050.18303 | 159.36419   | -2509.06125 | 1 |
| 248 | C | 69.12892 | 75.72703 | 73.51629 | -706.77696  | -252.88343  | -245.16230  | 1 |

|     |   |          |          |          |             |             |             |   |
|-----|---|----------|----------|----------|-------------|-------------|-------------|---|
| 249 | H | 68.32395 | 75.43742 | 74.24645 | -1624.64039 | -1665.49085 | 1417.86935  | 1 |
| 250 | H | 70.06865 | 75.90284 | 74.11143 | 2566.10521  | 598.51109   | 693.22305   | 1 |
| 251 | H | 68.82944 | 76.71293 | 73.06529 | -1972.69758 | 107.10018   | -1876.34312 | 1 |
| 252 | C | 68.00735 | 74.38344 | 71.75860 | 412.85148   | 672.58832   | -27.69222   | 1 |
| 253 | H | 67.21934 | 74.03304 | 72.47942 | 1447.02277  | 1762.76533  | -1490.78944 | 1 |
| 254 | H | 67.60936 | 75.30216 | 71.24751 | 1320.77379  | -145.20455  | 2378.68491  | 1 |
| 255 | H | 68.11908 | 73.59176 | 70.96764 | -1512.10848 | 1470.52031  | 1724.75147  | 1 |
| 256 | C | 71.92503 | 74.99661 | 72.10841 | -607.11113  | 499.56689   | 73.73769    | 1 |
| 257 | O | 72.61721 | 74.00806 | 72.05694 | 357.97126   | 460.81534   | 356.68785   | 1 |
| 258 | N | 72.20331 | 76.17182 | 72.66217 | 536.55407   | -368.62270  | 332.76306   | 1 |
| 259 | H | 71.46934 | 76.87776 | 72.66429 | 524.38866   | 2297.69985  | 1367.20941  | 1 |
| 260 | C | 73.35139 | 76.25739 | 73.48879 | 46.50277    | -774.29190  | -147.97904  | 1 |
| 261 | H | 74.01804 | 75.44119 | 73.12892 | 1676.51875  | 1883.29066  | 1032.55549  | 1 |
| 262 | C | 73.96648 | 77.74533 | 73.39216 | -559.41456  | -34.19198   | -556.30433  | 1 |
| 263 | H | 73.23063 | 78.46528 | 73.82459 | -64.66664   | 395.18769   | 2695.05373  | 1 |
| 264 | H | 74.88434 | 77.83567 | 74.02069 | -2703.44278 | -60.40056   | 333.79418   | 1 |
| 265 | C | 74.25913 | 78.10101 | 71.95752 | -519.76435  | 377.31045   | 459.42366   | 1 |
| 266 | H | 73.38906 | 77.78636 | 71.33756 | -1746.74323 | 1667.50644  | -1261.73691 | 1 |
| 267 | C | 74.43462 | 79.60862 | 71.81848 | 570.95554   | 16.46261    | -545.27700  | 1 |
| 268 | H | 74.63123 | 79.90758 | 70.75683 | 2391.58273  | 28.05277    | -1305.07271 | 1 |
| 269 | H | 73.52318 | 80.16589 | 72.15715 | 175.75588   | 917.63458   | 2559.43867  | 1 |
| 270 | H | 75.29659 | 79.97932 | 72.43178 | -1063.97851 | -2155.34650 | 1283.00462  | 1 |
| 271 | C | 75.50435 | 77.39561 | 71.44224 | 193.76014   | 2.62946     | -765.53141  | 1 |
| 272 | H | 75.69689 | 77.63329 | 70.36452 | 507.39394   | -846.55087  | 2539.60089  | 1 |
| 273 | H | 76.42983 | 77.70778 | 72.01596 | 1337.57841  | 1818.19054  | 1526.01994  | 1 |
| 274 | H | 75.41516 | 76.28124 | 71.52176 | 1100.88635  | -1172.91350 | -2199.08909 | 1 |
| 275 | C | 72.87435 | 76.05752 | 75.02179 | -549.21115  | 475.64486   | -309.38218  | 1 |
| 276 | O | 71.80371 | 76.41503 | 75.43990 | 556.06106   | -390.37755  | -78.24250   | 1 |
| 277 | O | 73.86483 | 75.57257 | 75.90693 | -572.27940  | -310.19032  | -209.75862  | 1 |
| 278 | H | 74.59200 | 75.40628 | 75.24407 | -1380.08193 | 2212.14486  | 790.85944   | 1 |

Listing 7: C00007.xmolout

|    |   |          |          |          |             |             |             |        |          |
|----|---|----------|----------|----------|-------------|-------------|-------------|--------|----------|
| 1  |   | 276      |          |          |             |             |             |        |          |
| 2  |   | 150.0000 | 150.0000 | 150.0000 | 0.0000      | 0.0000      | 0.0000***** | 2.7750 | 11100    |
|    |   | 0.2500   | 300.00   | 0.00     | 0.00        | 0.00        | -1294.2954  | 0.0000 | 300.0000 |
| 3  | H | 75.03646 | 64.16014 | 76.53732 | -2043.14101 | -1757.64893 | 399.89339   |        | 1        |
| 4  | N | 75.65288 | 64.16294 | 75.72699 | 426.75047   | 490.45733   | -334.42467  |        | 1        |
| 5  | H | 74.98111 | 64.17967 | 74.96192 | 442.25559   | -1110.30854 | -2448.52907 |        | 1        |
| 6  | C | 76.60036 | 65.20996 | 75.71036 | 415.32972   | -666.39213  | 83.73172    |        | 1        |
| 7  | H | 76.75542 | 65.47264 | 76.77773 | 879.32219   | 2491.00447  | 667.35213   |        | 1        |
| 8  | C | 77.93731 | 64.66330 | 74.99741 | 31.35357    | 477.41777   | 628.23362   |        | 1        |
| 9  | H | 77.70598 | 64.33986 | 73.95420 | 1168.38489  | 2240.25337  | -1019.71136 |        | 1        |
| 10 | H | 78.69318 | 65.48011 | 74.90317 | -360.43770  | 2534.90498  | 931.67112   |        | 1        |
| 11 | C | 78.48518 | 63.50581 | 75.79367 | 463.18208   | 512.70242   | -382.34388  |        | 1        |
| 12 | H | 77.63470 | 62.84301 | 76.07197 | 1725.29117  | 1863.52247  | -987.07854  |        | 1        |
| 13 | C | 79.46837 | 62.69952 | 74.95479 | 710.42801   | -144.27427  | -313.15367  |        | 1        |
| 14 | H | 79.88193 | 61.82799 | 75.52524 | 364.20195   | -1033.13725 | 2494.72524  |        | 1        |
| 15 | H | 78.98620 | 62.29184 | 74.02889 | 2567.61904  | 335.80679   | 847.48802   |        | 1        |
| 16 | H | 80.33912 | 63.32437 | 74.62737 | -2587.99029 | 680.92867   | -512.16411  |        | 1        |
| 17 | C | 79.17220 | 63.98411 | 77.06514 | 268.17616   | 741.64379   | -40.42634   |        | 1        |
| 18 | H | 79.58707 | 63.12807 | 77.65784 | 1283.54314  | -1945.37420 | -1411.27812 |        | 1        |
| 19 | H | 80.02619 | 64.67318 | 76.83690 | -1258.57796 | 1317.15249  | -2026.02085 |        | 1        |
| 20 | H | 78.46729 | 64.54055 | 77.73501 | -2502.84526 | 909.80597   | 575.92391   |        | 1        |
| 21 | C | 75.97326 | 66.43891 | 74.83731 | 619.36578   | -458.64843  | -172.09273  |        | 1        |
| 22 | O | 75.78362 | 67.53800 | 75.32794 | -81.40433   | 433.87611   | 522.34594   |        | 1        |
| 23 | N | 75.74928 | 66.05285 | 73.59013 | 175.23996   | -622.20190  | 341.55523   |        | 1        |
| 24 | H | 75.91348 | 65.08106 | 73.33601 | -876.57256  | -303.22879  | -2561.90213 |        | 1        |
| 25 | C | 75.20402 | 67.01206 | 72.68867 | -571.88214  | -534.10783  | -106.15033  |        | 1        |
| 26 | H | 75.57714 | 67.98673 | 73.07565 | -2713.20841 | -16.25800   | -248.80809  |        | 1        |
| 27 | C | 75.66815 | 66.62984 | 71.20686 | 166.60354   | 288.16399   | -716.09568  |        | 1        |
| 28 | H | 75.19304 | 65.64902 | 70.92897 | -2097.85574 | 1636.78449  | -586.18044  |        | 1        |

|    |   |          |          |          |             |             |             |   |
|----|---|----------|----------|----------|-------------|-------------|-------------|---|
| 29 | O | 77.08188 | 66.45913 | 71.01179 | -317.80580  | -363.38227  | 484.43082   | 1 |
| 30 | H | 77.12323 | 65.52606 | 70.71939 | 1863.74748  | -1451.84923 | 1357.29467  | 1 |
| 31 | C | 74.99422 | 67.78938 | 70.38339 | 503.80731   | 517.99032   | 318.51606   | 1 |
| 32 | H | 75.10120 | 67.62591 | 69.28604 | 640.61020   | -2157.10410 | -1536.29104 | 1 |
| 33 | H | 73.90326 | 67.87712 | 70.60222 | 1687.88455  | 465.60692   | 2087.56452  | 1 |
| 34 | H | 75.45943 | 68.77754 | 70.61153 | -1293.07895 | -1899.88581 | -1463.57452 | 1 |
| 35 | C | 73.57525 | 66.83432 | 72.77348 | -153.07550  | -733.68902  | 248.70981   | 1 |
| 36 | O | 73.07724 | 65.79683 | 72.42858 | 186.15459   | -480.78787  | -449.34387  | 1 |
| 37 | N | 72.98880 | 67.96048 | 73.21114 | -487.53139  | 543.18517   | 42.03850    | 1 |
| 38 | C | 71.57205 | 68.04215 | 73.36008 | -699.35871  | 69.34393    | 360.10701   | 1 |
| 39 | H | 71.19483 | 67.01141 | 73.55029 | 2.81126     | -221.99807  | -2715.58072 | 1 |
| 40 | C | 71.45060 | 69.06796 | 74.56610 | -507.46439  | -592.59194  | 122.07761   | 1 |
| 41 | H | 70.43972 | 69.55975 | 74.61291 | -1975.08116 | 525.87560   | -1801.71556 | 1 |
| 42 | H | 71.61433 | 68.56676 | 75.54654 | 1588.27743  | -1913.22100 | 1113.83566  | 1 |
| 43 | C | 72.59974 | 70.07320 | 74.24435 | -613.62442  | -457.55993  | -194.14490  | 1 |
| 44 | H | 72.28308 | 70.78820 | 73.45101 | 1707.54637  | -721.27992  | 1996.92523  | 1 |
| 45 | H | 72.91645 | 70.68956 | 75.11954 | 758.23357   | 2100.81767  | 1560.55011  | 1 |
| 46 | C | 73.73873 | 69.10449 | 73.71435 | -352.41524  | 704.96076   | 49.21465    | 1 |
| 47 | H | 74.33808 | 69.51119 | 72.86533 | 1714.76886  | -2070.42778 | 443.35792   | 1 |
| 48 | H | 74.43784 | 68.68539 | 74.50488 | 1224.15040  | 1801.50881  | 1636.97633  | 1 |
| 49 | C | 70.91211 | 68.73191 | 72.02026 | 566.85117   | 537.05831   | 117.62814   | 1 |
| 50 | O | 71.46663 | 69.61759 | 71.41933 | -550.26779  | -406.08867  | 4.21666     | 1 |
| 51 | N | 69.67753 | 68.26090 | 71.88379 | 566.34832   | -425.77725  | 180.18749   | 1 |
| 52 | H | 69.40269 | 67.48953 | 72.48889 | 644.44502   | 2646.80550  | -52.73430   | 1 |
| 53 | C | 68.93463 | 68.56235 | 70.69044 | 612.34801   | -281.48662  | 411.56221   | 1 |
| 54 | H | 69.64783 | 68.41784 | 69.84835 | 1667.23498  | -1490.75142 | 1556.16753  | 1 |
| 55 | C | 67.69886 | 67.55270 | 70.67828 | -714.45746  | -175.43074  | 286.98927   | 1 |
| 56 | H | 67.09168 | 67.72067 | 71.60991 | -787.09484  | 1763.03619  | -1922.46060 | 1 |
| 57 | O | 68.05249 | 66.15571 | 70.68305 | -429.46514  | 516.51932   | -128.40526  | 1 |
| 58 | H | 67.63247 | 65.85397 | 71.51215 | 1981.82785  | 436.16847   | -1818.18182 | 1 |
| 59 | C | 66.86790 | 68.03912 | 69.43501 | 630.79189   | -468.94448  | 76.03230    | 1 |
| 60 | H | 65.93482 | 67.44195 | 69.31064 | -1775.71861 | 2062.30353  | 131.89849   | 1 |
| 61 | H | 66.56414 | 69.10928 | 69.52756 | -1855.14608 | 88.94118    | 1993.53760  | 1 |
| 62 | H | 67.45240 | 67.94054 | 68.49088 | -1504.82350 | -780.94249  | -2132.90992 | 1 |
| 63 | C | 68.42999 | 70.09773 | 70.77965 | 288.57638   | 618.62814   | -397.00270  | 1 |
| 64 | O | 68.17360 | 70.71370 | 69.77481 | 321.70495   | -185.26452  | 574.37218   | 1 |
| 65 | N | 68.18337 | 70.45551 | 72.05181 | -447.05792  | -446.53431  | 367.76425   | 1 |
| 66 | H | 68.48328 | 69.83890 | 72.83646 | 350.31316   | 1975.63644  | -1843.31522 | 1 |
| 67 | C | 68.41876 | 71.86326 | 72.31922 | -511.23061  | 374.03917   | -471.51480  | 1 |
| 68 | H | 69.28874 | 72.15426 | 71.68833 | 2234.79579  | -898.70890  | -1273.45190 | 1 |
| 69 | C | 67.08322 | 72.62409 | 71.87649 | 529.53781   | -159.34528  | 563.72604   | 1 |
| 70 | H | 67.31260 | 73.72327 | 71.82951 | 654.59388   | 2347.94251  | 1217.51488  | 1 |
| 71 | H | 66.88605 | 72.28259 | 70.82280 | -1526.55661 | 2103.42026  | 817.87394   | 1 |
| 72 | O | 65.92788 | 72.44868 | 72.73368 | -554.84278  | 14.12789    | 399.58769   | 1 |
| 73 | H | 65.63610 | 71.56902 | 72.42666 | 1297.06236  | 2061.84854  | 1220.68812  | 1 |
| 74 | C | 68.72319 | 71.80132 | 73.89065 | -662.15484  | -412.13544  | 123.62687   | 1 |
| 75 | O | 68.80002 | 70.69852 | 74.43738 | -540.01537  | -317.05804  | 274.91456   | 1 |
| 76 | N | 69.03497 | 73.00263 | 74.38199 | -202.76299  | -690.00100  | -131.49145  | 1 |
| 77 | H | 68.88699 | 73.74408 | 73.69085 | -702.62132  | -2617.37191 | 281.70413   | 1 |
| 78 | C | 68.61530 | 73.33799 | 75.73532 | -491.73914  | 576.34187   | 222.73509   | 1 |
| 79 | H | 67.53997 | 73.61820 | 75.66552 | 1977.17978  | -1823.58850 | -434.68928  | 1 |
| 80 | C | 68.86018 | 72.08845 | 76.68931 | -649.50797  | -328.66843  | 306.11224   | 1 |
| 81 | H | 69.65424 | 71.42515 | 76.27372 | 2075.07803  | 1452.16490  | -1004.45904 | 1 |
| 82 | C | 69.24979 | 72.59102 | 78.12261 | -615.18735  | -489.99689  | -70.96352   | 1 |
| 83 | H | 69.43059 | 71.74342 | 78.82417 | -1226.32661 | -1724.38906 | -1716.47170 | 1 |
| 84 | H | 70.17966 | 73.20928 | 78.09842 | 2381.64273  | -969.84735  | 900.46860   | 1 |
| 85 | H | 68.44708 | 73.22614 | 78.56540 | 2122.74991  | 1702.23946  | -141.36228  | 1 |
| 86 | C | 67.50041 | 71.33087 | 76.87818 | -501.86074  | -479.61276  | -376.42482  | 1 |
| 87 | H | 67.61964 | 70.42978 | 77.52420 | 993.79261   | -2246.95401 | -1177.81305 | 1 |
| 88 | H | 66.72897 | 71.98123 | 77.35329 | 42.71279    | -626.15391  | -2651.37258 | 1 |
| 89 | H | 67.08463 | 70.98587 | 75.90054 | -2026.39012 | -1590.33709 | -887.82922  | 1 |
| 90 | C | 69.54111 | 74.55152 | 76.17686 | -672.89153  | 382.57394   | -156.34072  | 1 |

|     |   |          |          |          |             |             |             |   |
|-----|---|----------|----------|----------|-------------|-------------|-------------|---|
| 91  | O | 70.77969 | 74.68781 | 75.87143 | 410.04627   | 221.86223   | 500.35950   | 1 |
| 92  | N | 68.91598 | 75.34184 | 77.00889 | -378.11782  | -443.79414  | -441.10984  | 1 |
| 93  | H | 67.92408 | 75.18499 | 77.17583 | 2404.15973  | -568.14894  | 1149.30085  | 1 |
| 94  | C | 69.60008 | 76.59231 | 77.19258 | -544.54484  | 466.16019   | 331.29119   | 1 |
| 95  | H | 69.19551 | 77.22153 | 76.37518 | -1409.80988 | -170.17955  | 2325.32679  | 1 |
| 96  | C | 69.25528 | 77.15914 | 78.60336 | -184.48284  | 116.78282   | -758.89137  | 1 |
| 97  | H | 68.15775 | 77.31199 | 78.72689 | 1893.78641  | 1861.14652  | 611.04528   | 1 |
| 98  | H | 69.56020 | 76.43699 | 79.39566 | -2170.79665 | -974.19311  | 1327.50117  | 1 |
| 99  | C | 70.04078 | 78.51028 | 78.73710 | 389.51668   | 672.81878   | -138.49152  | 1 |
| 100 | H | 71.12256 | 78.33895 | 78.53655 | 510.64577   | 1933.03327  | 1851.02484  | 1 |
| 101 | H | 69.72951 | 79.21980 | 77.94004 | -2302.30869 | -1105.72939 | -948.89774  | 1 |
| 102 | C | 69.86848 | 79.19327 | 80.14241 | -559.93427  | -126.34590  | 542.30857   | 1 |
| 103 | O | 70.40215 | 80.25320 | 80.35672 | -670.36003  | -111.83166  | 76.36448    | 1 |
| 104 | N | 69.10526 | 78.49424 | 81.01091 | -216.06729  | -537.07037  | 446.51379   | 1 |
| 105 | H | 68.63230 | 77.59144 | 80.88847 | -1251.96487 | 1074.12894  | -2168.52500 | 1 |
| 106 | H | 68.90282 | 78.79970 | 81.96867 | -2451.83023 | -720.73851  | 944.84612   | 1 |
| 107 | C | 71.24728 | 76.22040 | 77.03740 | 546.24052   | -563.88337  | -85.11809   | 1 |
| 108 | O | 71.84628 | 75.62057 | 77.93498 | 71.70702    | -307.40463  | 606.69673   | 1 |
| 109 | N | 71.80544 | 77.24209 | 76.28277 | 479.90863   | -504.50129  | 222.86849   | 1 |
| 110 | C | 73.20388 | 77.31384 | 76.12346 | 75.51268    | -600.91904  | 506.73700   | 1 |
| 111 | H | 73.52978 | 76.26392 | 76.33344 | -2033.61562 | 1795.30103  | 254.89480   | 1 |
| 112 | C | 73.37264 | 77.81140 | 74.61259 | 523.79067   | 517.99274   | 284.45581   | 1 |
| 113 | H | 74.34590 | 78.32652 | 74.43979 | 1599.61665  | -1127.00911 | 1895.98173  | 1 |
| 114 | H | 73.34758 | 76.95201 | 73.90669 | -1881.83093 | 1275.82488  | -1501.55016 | 1 |
| 115 | C | 72.13166 | 78.72821 | 74.41241 | -600.05639  | -404.05026  | 316.64485   | 1 |
| 116 | H | 72.30964 | 79.76163 | 74.78416 | -2597.05260 | 496.36221   | 657.73249   | 1 |
| 117 | H | 71.82751 | 78.83228 | 73.34746 | -1666.24518 | 1294.38985  | -1723.90591 | 1 |
| 118 | C | 71.03727 | 77.97473 | 75.30390 | 493.57570   | -129.95376  | -602.56394  | 1 |
| 119 | H | 70.34173 | 78.65822 | 75.84841 | -1469.08415 | -637.84797  | 2204.22581  | 1 |
| 120 | H | 70.44115 | 77.20451 | 74.75565 | -1038.97840 | 1068.88701  | -2280.71789 | 1 |
| 121 | C | 73.83049 | 78.33274 | 77.26259 | 188.88100   | 241.05089   | -727.87821  | 1 |
| 122 | O | 74.05730 | 77.87874 | 78.37904 | 531.88613   | -49.19943   | 427.07960   | 1 |
| 123 | N | 73.97143 | 79.56308 | 76.83475 | 708.14833   | 26.93417    | -179.73509  | 1 |
| 124 | H | 73.70680 | 79.73235 | 75.86773 | -2232.69501 | -1179.09831 | 1023.94816  | 1 |
| 125 | C | 74.82176 | 80.48115 | 77.52201 | -738.32412  | 259.92548   | 104.42456   | 1 |
| 126 | H | 74.67467 | 81.43090 | 76.96279 | 2028.89123  | 1260.02983  | 1311.33324  | 1 |
| 127 | C | 74.33057 | 80.56350 | 79.02958 | -258.65678  | -345.52513  | 661.28459   | 1 |
| 128 | H | 74.31421 | 79.54595 | 79.49973 | -1826.06090 | -1801.46097 | -918.64554  | 1 |
| 129 | C | 75.23732 | 81.54623 | 79.84645 | -541.23400  | 531.92970   | -218.41428  | 1 |
| 130 | H | 74.88911 | 81.63807 | 80.90226 | 1311.73218  | -2219.18200 | 882.19023   | 1 |
| 131 | H | 76.29797 | 81.20225 | 79.87653 | -1048.71298 | 1223.58118  | -2196.97971 | 1 |
| 132 | H | 75.23315 | 82.57010 | 79.40551 | 419.06414   | 1903.92898  | 1903.44670  | 1 |
| 133 | C | 72.88162 | 81.16221 | 79.02998 | -423.86431  | 152.66566   | -648.55262  | 1 |
| 134 | H | 72.45478 | 81.21446 | 80.06172 | 105.68386   | -2342.50080 | 1387.51238  | 1 |
| 135 | H | 72.85952 | 82.19323 | 78.60596 | -1695.63603 | -1484.73621 | -1531.02793 | 1 |
| 136 | H | 72.18672 | 80.53602 | 78.42166 | -1853.57121 | -487.39031  | 1936.59343  | 1 |
| 137 | C | 76.33300 | 79.89848 | 77.28360 | 539.71428   | -510.58232  | 267.58633   | 1 |
| 138 | O | 76.86393 | 80.08548 | 76.19227 | -15.93758   | -278.34085  | -624.49402  | 1 |
| 139 | N | 76.79591 | 79.27879 | 78.34338 | -676.81886  | 12.05292    | 276.17960   | 1 |
| 140 | H | 76.17396 | 79.21520 | 79.14715 | -1694.44250 | -373.84189  | -2100.66098 | 1 |
| 141 | C | 78.03696 | 78.58928 | 78.33560 | 412.33078   | -664.70360  | 108.35451   | 1 |
| 142 | H | 78.43342 | 78.72724 | 77.30353 | 1765.77476  | 1294.44366  | 1621.76594  | 1 |
| 143 | C | 78.92498 | 79.28172 | 79.46053 | -179.66635  | -721.95667  | -264.73915  | 1 |
| 144 | H | 78.91992 | 80.38758 | 79.33947 | -607.34922  | 2587.87032  | -598.10018  | 1 |
| 145 | H | 78.48380 | 79.09174 | 80.46403 | -359.69332  | -1479.13954 | -2259.74260 | 1 |
| 146 | C | 80.38208 | 78.72505 | 79.39083 | -240.01076  | 616.02425   | 431.85322   | 1 |
| 147 | H | 80.37227 | 77.60356 | 79.41503 | -1359.17131 | 782.54425   | 2227.99181  | 1 |
| 148 | H | 80.87107 | 79.01029 | 78.43306 | -820.36667  | 85.81767    | -2596.78715 | 1 |
| 149 | C | 81.18979 | 79.30171 | 80.62399 | -513.07015  | 236.18570   | -551.87280  | 1 |
| 150 | H | 81.27545 | 80.41090 | 80.55763 | 1816.11944  | -1183.11722 | -1650.94321 | 1 |
| 151 | H | 80.66038 | 79.09180 | 81.58167 | -1800.04429 | -1361.53473 | 1526.34643  | 1 |
| 152 | C | 82.58805 | 78.64221 | 80.61639 | 726.08972   | -253.19732  | -179.64713  | 1 |

|     |   |          |          |          |             |             |             |   |
|-----|---|----------|----------|----------|-------------|-------------|-------------|---|
| 153 | H | 82.58504 | 77.54922 | 80.80076 | 1224.27271  | -456.51798  | -2390.90304 | 1 |
| 154 | H | 83.19945 | 78.87481 | 79.72198 | 1206.40339  | -1150.93514 | -2154.90344 | 1 |
| 155 | N | 83.40122 | 79.24618 | 81.80954 | 329.70796   | -633.68968  | -155.67358  | 1 |
| 156 | H | 84.39244 | 78.88617 | 81.92458 | 1348.31305  | 1938.76845  | 1359.00643  | 1 |
| 157 | H | 83.56086 | 80.29436 | 81.78281 | 2096.92035  | 1446.54551  | -966.48890  | 1 |
| 158 | H | 83.01174 | 79.10477 | 82.78683 | -1197.07217 | -2303.53719 | 827.28733   | 1 |
| 159 | C | 77.81143 | 77.03066 | 78.75789 | -378.01186  | -556.17301  | -413.96481  | 1 |
| 160 | O | 78.75248 | 76.36107 | 79.12070 | -409.44433  | -307.55053  | -453.30833  | 1 |
| 161 | N | 76.53574 | 76.66383 | 78.68405 | -429.02477  | 524.70884   | 274.08502   | 1 |
| 162 | H | 75.81041 | 77.32650 | 78.35479 | 1706.34263  | -1425.96036 | 1574.38926  | 1 |
| 163 | C | 76.29153 | 75.25973 | 78.54494 | -45.25864   | -626.22952  | 478.93267   | 1 |
| 164 | H | 77.17416 | 74.74645 | 78.99753 | 1988.63164  | 570.90773   | 1772.87287  | 1 |
| 165 | C | 74.90933 | 74.98832 | 79.27231 | 551.77128   | -20.49526   | -564.54996  | 1 |
| 166 | H | 74.92827 | 75.41545 | 80.30004 | 1434.61535  | -1753.10253 | 1513.99471  | 1 |
| 167 | H | 74.05934 | 75.50047 | 78.75434 | -714.67738  | 1819.09770  | 1898.36494  | 1 |
| 168 | C | 74.71284 | 73.43795 | 79.31234 | 446.99263   | -555.77305  | 338.97221   | 1 |
| 169 | H | 74.43872 | 73.04511 | 78.30514 | 1953.68466  | 1892.25957  | -161.67766  | 1 |
| 170 | H | 75.66290 | 72.92981 | 79.59317 | -403.03785  | 2688.07032  | -188.43591  | 1 |
| 171 | C | 73.59110 | 73.11936 | 80.38057 | 567.86262   | 335.74681   | 434.04421   | 1 |
| 172 | H | 73.84177 | 73.57477 | 81.36641 | -1080.02275 | 1568.26081  | -1948.78900 | 1 |
| 173 | H | 72.61614 | 73.56615 | 80.07672 | -919.54108  | 2111.34692  | 1456.13463  | 1 |
| 174 | C | 73.49180 | 71.58061 | 80.50219 | 195.81897   | 173.33862   | -745.11536  | 1 |
| 175 | H | 73.07391 | 71.07349 | 79.60979 | 1405.67949  | -2301.21089 | -390.08113  | 1 |
| 176 | H | 74.43026 | 71.08092 | 80.81627 | -940.37328  | -1118.32446 | 2299.72133  | 1 |
| 177 | N | 72.48382 | 71.26675 | 81.65733 | 319.26422   | 656.36007   | -42.02424   | 1 |
| 178 | H | 72.30440 | 70.23840 | 81.84669 | 1961.03633  | 619.91968   | 1787.09422  | 1 |
| 179 | H | 72.73502 | 71.61605 | 82.62807 | 854.14343   | -2156.80752 | 1429.08711  | 1 |
| 180 | H | 71.49633 | 71.63491 | 81.53887 | 1237.02905  | -1378.50857 | -1998.28500 | 1 |
| 181 | C | 76.08660 | 74.93989 | 76.95521 | 532.53319   | -268.57236  | 517.55729   | 1 |
| 182 | O | 75.60740 | 75.76412 | 76.17533 | 266.16714   | -290.73804  | -558.88002  | 1 |
| 183 | N | 76.41833 | 73.68905 | 76.75764 | -226.25352  | 640.49678   | -270.32839  | 1 |
| 184 | H | 76.79813 | 73.21764 | 77.57767 | 2007.69063  | -1035.27229 | 1523.50231  | 1 |
| 185 | C | 76.20571 | 72.95837 | 75.56283 | -540.76542  | -573.33303  | 49.50000    | 1 |
| 186 | H | 76.45132 | 71.91257 | 75.85293 | -2374.20950 | -1036.76023 | 843.75774   | 1 |
| 187 | C | 74.68086 | 73.13486 | 75.09743 | -77.09082   | 666.87422   | -415.84136  | 1 |
| 188 | H | 74.45566 | 74.22855 | 74.95227 | -985.81834  | 617.19825   | 2463.91927  | 1 |
| 189 | O | 73.67420 | 72.63392 | 75.98994 | 293.29899   | -391.65602  | -477.80926  | 1 |
| 190 | H | 73.08417 | 73.41601 | 76.07915 | 2528.72714  | -681.76262  | -751.27122  | 1 |
| 191 | C | 74.80298 | 72.43549 | 73.69535 | 252.47363   | -605.14473  | 440.05134   | 1 |
| 192 | H | 73.88487 | 72.57571 | 73.07916 | -2052.65063 | 1456.49051  | -1043.51830 | 1 |
| 193 | H | 75.67313 | 72.84017 | 73.11306 | -2152.98800 | -1661.97574 | -161.70652  | 1 |
| 194 | H | 74.96933 | 71.33927 | 73.80236 | -473.12726  | -1584.27339 | 2165.61725  | 1 |
| 195 | C | 77.20640 | 73.49704 | 74.37291 | 360.36307   | 488.46713   | 505.10056   | 1 |
| 196 | O | 77.85679 | 72.68238 | 73.76661 | -200.08817  | -528.03552  | -385.82850  | 1 |
| 197 | N | 77.06792 | 74.79804 | 74.14824 | -597.54095  | -226.44775  | 355.20479   | 1 |
| 198 | H | 76.41700 | 75.37880 | 74.74183 | 2179.23655  | -1300.70981 | -991.33835  | 1 |
| 199 | C | 78.07654 | 75.43553 | 73.37730 | -687.68921  | 297.39807   | -249.45179  | 1 |
| 200 | H | 78.79238 | 74.60730 | 73.16693 | -349.16256  | -2467.37713 | -1101.72831 | 1 |
| 201 | C | 77.37581 | 75.99054 | 72.04627 | 672.47345   | 361.54328   | -201.62880  | 1 |
| 202 | H | 76.56116 | 76.70824 | 72.29612 | 1541.41502  | 582.18425   | 2169.97026  | 1 |
| 203 | H | 78.11768 | 76.53483 | 71.41801 | -2534.67717 | 60.25153    | 997.72295   | 1 |
| 204 | C | 76.82337 | 74.77793 | 71.28474 | 574.26774   | -389.43119  | -377.02542  | 1 |
| 205 | C | 77.74454 | 73.90019 | 70.63654 | 688.82679   | -287.33580  | -257.96133  | 1 |
| 206 | H | 78.82749 | 74.12045 | 70.63810 | 331.14182   | 1470.38163  | 2269.80013  | 1 |
| 207 | C | 75.42539 | 74.48681 | 71.27519 | -383.52382  | -675.04808  | 144.24917   | 1 |
| 208 | H | 74.70698 | 75.16130 | 71.77486 | 4.09847     | 1517.59662  | 2262.86397  | 1 |
| 209 | C | 77.25602 | 72.74392 | 70.02912 | -134.76730  | 428.45285   | -649.50303  | 1 |
| 210 | H | 77.97419 | 72.05913 | 69.54495 | -903.23433  | 1600.49020  | 2011.53387  | 1 |
| 211 | C | 74.98440 | 73.31955 | 70.64560 | -335.53281  | -615.00040  | -364.39058  | 1 |
| 212 | H | 73.90236 | 73.10084 | 70.65006 | 1596.45398  | -1369.33862 | 1732.02659  | 1 |
| 213 | C | 75.87243 | 72.40069 | 70.01327 | 585.48547   | -340.24194  | -406.23938  | 1 |
| 214 | O | 75.43364 | 71.20245 | 69.39095 | -419.15649  | -173.04408  | -511.94141  | 1 |

|     |   |          |          |          |             |             |             |   |
|-----|---|----------|----------|----------|-------------|-------------|-------------|---|
| 215 | H | 74.46205 | 71.28315 | 69.54090 | -1071.84350 | 1559.71507  | -1960.13012 | 1 |
| 216 | C | 78.69149 | 76.60955 | 74.32770 | 291.41878   | -183.13091  | 710.72246   | 1 |
| 217 | O | 79.04234 | 76.38051 | 75.46209 | 379.87695   | 523.47396   | -222.23622  | 1 |
| 218 | N | 78.86628 | 77.73572 | 73.63823 | 564.30591   | 373.09380   | 277.24371   | 1 |
| 219 | H | 78.54609 | 77.77358 | 72.67205 | -120.59931  | -2436.07824 | -1214.35098 | 1 |
| 220 | C | 78.91068 | 78.97567 | 74.38203 | 404.07514   | -299.37480  | 608.84009   | 1 |
| 221 | H | 78.12181 | 78.91110 | 75.17937 | -1071.07882 | -841.69025  | 2359.66467  | 1 |
| 222 | C | 80.36663 | 79.02826 | 74.99647 | -683.12807  | 68.71770    | -390.13096  | 1 |
| 223 | H | 80.58212 | 78.06932 | 75.52609 | 2068.88918  | 1596.58590  | 770.89603   | 1 |
| 224 | H | 81.12587 | 79.10353 | 74.18556 | 1379.86429  | 2342.49779  | -179.85638  | 1 |
| 225 | C | 80.47237 | 80.23814 | 75.97640 | -176.39967  | 537.49466   | 550.97268   | 1 |
| 226 | H | 80.24257 | 81.19684 | 75.46007 | -396.28051  | 1942.22168  | 1869.33314  | 1 |
| 227 | H | 79.72768 | 80.15877 | 76.79851 | -94.44700   | 586.00678   | -2659.20016 | 1 |
| 228 | C | 81.96796 | 80.22429 | 76.54110 | -291.69381  | -718.18079  | -150.72929  | 1 |
| 229 | H | 82.33226 | 79.24393 | 76.94099 | -2303.38776 | 1089.76242  | 964.62032   | 1 |
| 230 | H | 82.74344 | 80.60953 | 75.83120 | 884.16729   | 2568.80533  | -207.74283  | 1 |
| 231 | N | 81.88859 | 81.11544 | 77.62113 | -594.49522  | -252.81478  | 342.29276   | 1 |
| 232 | H | 81.04006 | 81.65359 | 77.70304 | -1735.17426 | 2084.05705  | -263.71605  | 1 |
| 233 | C | 82.80425 | 81.29047 | 78.48490 | 595.23177   | -271.52487  | 442.22352   | 1 |
| 234 | N | 83.98046 | 80.54364 | 78.35481 | 585.53813   | -424.79750  | -105.81303  | 1 |
| 235 | H | 84.24625 | 79.87371 | 77.63427 | 959.88797   | 1327.56823  | -2177.11905 | 1 |
| 236 | H | 84.78504 | 80.61268 | 78.97894 | 1578.48647  | 16.27378    | -2220.76233 | 1 |
| 237 | N | 82.42268 | 82.24204 | 79.44172 | -452.17763  | -390.33541  | -421.51853  | 1 |
| 238 | H | 81.57692 | 82.80353 | 79.52779 | 470.26107   | 1974.25629  | -1817.92087 | 1 |
| 239 | H | 83.03205 | 82.53617 | 80.20591 | 1856.67307  | -1573.97321 | -1224.35416 | 1 |
| 240 | C | 78.63418 | 80.10234 | 73.26267 | -531.47271  | -581.45780  | -55.06206   | 1 |
| 241 | O | 79.31655 | 80.18466 | 72.24452 | -243.00837  | 192.73507   | 609.52485   | 1 |
| 242 | N | 77.59406 | 80.85431 | 73.61269 | 343.49288   | -644.25607  | 38.09164    | 1 |
| 243 | H | 77.09617 | 80.67400 | 74.51420 | -1691.16043 | -1535.97525 | -1484.73099 | 1 |
| 244 | C | 76.92491 | 81.40840 | 72.45711 | 542.66492   | 350.14337   | 454.42563   | 1 |
| 245 | H | 77.14260 | 80.62763 | 71.69250 | 1209.57979  | -2396.95920 | 463.86744   | 1 |
| 246 | C | 75.38683 | 81.62234 | 72.75298 | -737.14309  | 145.93010   | 242.71942   | 1 |
| 247 | H | 75.23728 | 82.20384 | 73.68844 | -1050.18303 | 159.36419   | -2509.06125 | 1 |
| 248 | C | 74.76060 | 82.35864 | 71.51675 | -706.77696  | -252.88343  | -245.16230  | 1 |
| 249 | H | 73.65805 | 82.48484 | 71.62396 | -1624.64039 | -1665.49085 | 1417.86935  | 1 |
| 250 | H | 75.20100 | 83.37727 | 71.38608 | 2566.10521  | 598.51109   | 693.22305   | 1 |
| 251 | H | 74.94125 | 81.79685 | 70.57030 | -1972.69758 | 107.10018   | -1876.34312 | 1 |
| 252 | C | 74.68541 | 80.22232 | 72.84094 | 412.85148   | 672.58832   | -27.69222   | 1 |
| 253 | H | 73.58538 | 80.32470 | 72.98924 | 1447.02277  | 1762.76533  | -1490.78944 | 1 |
| 254 | H | 74.83803 | 79.62865 | 71.90913 | 1320.77379  | -145.20455  | 2378.68491  | 1 |
| 255 | H | 75.08670 | 79.61761 | 73.69055 | -1512.10848 | 1470.52031  | 1724.75147  | 1 |
| 256 | C | 77.65029 | 82.81972 | 72.05527 | -607.11113  | 499.56689   | 73.73769    | 1 |
| 257 | O | 77.20099 | 83.89502 | 72.36495 | 357.97126   | 460.81534   | 356.68785   | 1 |
| 258 | N | 78.72424 | 82.53450 | 71.32597 | 536.55407   | -368.62270  | 332.76306   | 1 |
| 259 | H | 79.07557 | 81.55054 | 71.20937 | 524.38866   | 2297.69985  | 1367.20941  | 1 |
| 260 | C | 79.52043 | 83.62594 | 70.89567 | 46.50277    | -774.29190  | -147.97904  | 1 |
| 261 | H | 78.84930 | 84.51535 | 70.91974 | 1676.51875  | 1883.29066  | 1032.55549  | 1 |
| 262 | C | 80.76680 | 83.76125 | 71.92024 | -559.41456  | -34.19198   | -556.30433  | 1 |
| 263 | H | 81.30427 | 82.78487 | 71.97560 | -64.66664   | 395.18769   | 2695.05373  | 1 |
| 264 | H | 81.50921 | 84.50322 | 71.54231 | -2703.44278 | -60.40056   | 333.79418   | 1 |
| 265 | C | 80.25273 | 84.15788 | 73.27632 | -519.76435  | 377.31045   | 459.42366   | 1 |
| 266 | H | 79.45082 | 83.44226 | 73.57122 | -1746.74323 | 1667.50644  | -1261.73691 | 1 |
| 267 | C | 81.36551 | 84.08663 | 74.31449 | 570.95554   | 16.46261    | -545.27700  | 1 |
| 268 | H | 80.99931 | 84.37604 | 75.33314 | 2391.58273  | 28.05277    | -1305.07271 | 1 |
| 269 | H | 81.79007 | 83.05270 | 74.39632 | 175.75588   | 917.63458   | 2559.43867  | 1 |
| 270 | H | 82.21191 | 84.77470 | 74.05844 | -1063.97851 | -2155.34650 | 1283.00462  | 1 |
| 271 | C | 79.65827 | 85.55978 | 73.24859 | 193.76014   | 2.62946     | -765.53141  | 1 |
| 272 | H | 79.40457 | 85.92300 | 74.27743 | 507.39394   | -846.55087  | 2539.60089  | 1 |
| 273 | H | 80.36572 | 86.30267 | 72.79750 | 1337.57841  | 1818.19054  | 1526.01994  | 1 |
| 274 | H | 78.70943 | 85.58888 | 72.64855 | 1100.88635  | -1172.91350 | -2199.08909 | 1 |
| 275 | C | 80.11279 | 83.25523 | 69.44340 | -549.21115  | 475.64486   | -309.38218  | 1 |
| 276 | O | 79.97609 | 82.18168 | 68.91827 | 556.06106   | -390.37755  | -78.24250   | 1 |

|     |   |          |          |          |             |            |            |   |
|-----|---|----------|----------|----------|-------------|------------|------------|---|
| 277 | O | 80.86744 | 84.27409 | 68.81103 | -572.27940  | -310.19032 | -209.75862 | 1 |
| 278 | H | 80.75806 | 84.99098 | 69.49435 | -1380.08193 | 2212.14486 | 790.85944  | 1 |

Listing 8: C00008.xmolout

|    |   |          |          |          |             |             |             |          |
|----|---|----------|----------|----------|-------------|-------------|-------------|----------|
| 1  |   | 276      |          |          |             |             |             |          |
| 2  |   | 150.0000 | 150.0000 | 150.0000 | 0.0000      | 0.0000      | 0.0000***** | 2.7750   |
|    |   | 0.2500   | 300.00   | 0.00     | 0.00        | 0.00        | -1294.2694  | 0.0000   |
|    |   |          |          |          |             |             |             | 300.0000 |
| 3  | H | 75.32361 | 62.83301 | 77.20589 | -2043.14101 | -1757.64893 | 399.89339   | 1        |
| 4  | N | 75.45345 | 63.21380 | 76.27261 | 426.75047   | 490.45733   | -334.42467  | 1        |
| 5  | H | 74.53795 | 63.60506 | 76.06979 | 442.25559   | -1110.30854 | -2448.52907 | 1        |
| 6  | C | 76.56277 | 64.07660 | 76.09664 | 415.32972   | -666.39213  | 83.73172    | 1        |
| 7  | H | 77.37782 | 63.57045 | 76.66102 | 879.32219   | 2491.00447  | 667.35213   | 1        |
| 8  | C | 76.89748 | 64.16346 | 74.51107 | 31.35357    | 477.41777   | 628.23362   | 1        |
| 9  | H | 76.04080 | 64.63315 | 73.97316 | 1168.38489  | 2240.25337  | -1019.71136 | 1        |
| 10 | H | 77.77343 | 64.83111 | 74.33509 | -360.43770  | 2534.90498  | 931.67112   | 1        |
| 11 | C | 77.15274 | 62.78050 | 73.98923 | 463.18208   | 512.70242   | -382.34388  | 1        |
| 12 | H | 76.31747 | 62.12412 | 74.32545 | 1725.29117  | 1863.52247  | -987.07854  | 1        |
| 13 | C | 77.19027 | 62.77222 | 72.46506 | 710.42801   | -144.27427  | -313.15367  | 1        |
| 14 | H | 77.36369 | 61.74130 | 72.06215 | 364.20195   | -1033.13725 | 2494.72524  | 1        |
| 15 | H | 76.23003 | 63.14348 | 72.02377 | 2567.61904  | 335.80679   | 847.48802   | 1        |
| 16 | H | 78.01110 | 63.42384 | 72.06984 | -2587.99029 | 680.92867   | -512.16411  | 1        |
| 17 | C | 78.46287 | 62.21336 | 74.52269 | 268.17616   | 741.64379   | -40.42634   | 1        |
| 18 | H | 78.67028 | 61.19338 | 74.10843 | 1283.54314  | -1945.37420 | -1411.27812 | 1        |
| 19 | H | 79.33360 | 62.86444 | 74.25313 | -1258.57796 | 1317.15249  | -2026.02085 | 1        |
| 20 | H | 78.45128 | 62.11995 | 75.63851 | -2502.84526 | 909.80597   | 575.92391   | 1        |
| 21 | C | 76.27261 | 65.52282 | 76.67263 | 619.36578   | -458.64843  | -172.09273  | 1        |
| 22 | O | 77.04869 | 66.52108 | 76.45343 | -81.40433   | 433.87611   | 522.34594   | 1        |
| 23 | N | 75.22302 | 65.60285 | 77.44337 | 175.23996   | -622.20190  | 341.55523   | 1        |
| 24 | H | 74.62034 | 64.79159 | 77.56017 | -876.57256  | -303.22879  | -2561.90213 | 1        |
| 25 | C | 74.78048 | 66.95451 | 77.63425 | -571.88214  | -534.10783  | -106.15033  | 1        |
| 26 | H | 74.06601 | 67.10613 | 76.80242 | -2713.20841 | -16.25800   | -248.80809  | 1        |
| 27 | C | 74.07100 | 66.99335 | 79.03659 | 166.60354   | 288.16399   | -716.09568  | 1        |
| 28 | H | 74.78776 | 66.61590 | 79.81665 | -2097.85574 | 1636.78449  | -586.18044  | 1        |
| 29 | O | 72.88585 | 66.16554 | 79.16514 | -317.80580  | -363.38227  | 484.43082   | 1        |
| 30 | H | 73.14689 | 65.56365 | 79.88488 | 1863.74748  | -1451.84923 | 1357.29467  | 1        |
| 31 | C | 73.87457 | 68.54647 | 79.21229 | 503.80731   | 517.99032   | 318.51606   | 1        |
| 32 | H | 73.47257 | 68.79681 | 80.22158 | 640.61020   | -2157.10410 | -1536.29104 | 1        |
| 33 | H | 74.84216 | 69.09524 | 79.09037 | 1687.88455  | 465.60692   | 2087.56452  | 1        |
| 34 | H | 73.15910 | 68.95316 | 78.46160 | -1293.07895 | -1899.88581 | -1463.57452 | 1        |
| 35 | C | 76.17223 | 67.91887 | 77.53622 | -153.07550  | -733.68902  | 248.70981   | 1        |
| 36 | O | 76.83238 | 68.09231 | 78.57543 | 186.15459   | -480.78787  | -449.34387  | 1        |
| 37 | N | 75.92251 | 68.93717 | 76.64073 | -487.53139  | 543.18517   | 42.03850    | 1        |
| 38 | C | 76.93249 | 69.88754 | 76.34999 | -699.35871  | 69.34393    | 360.10701   | 1        |
| 39 | H | 77.91741 | 69.38870 | 76.51361 | 2.81126     | -221.99807  | -2715.58072 | 1        |
| 40 | C | 76.58364 | 70.30644 | 74.84065 | -507.46439  | -592.59194  | 122.07761   | 1        |
| 41 | H | 77.00160 | 71.29811 | 74.55956 | -1975.08116 | 525.87560   | -1801.71556 | 1        |
| 42 | H | 76.98668 | 69.57020 | 74.11093 | 1588.27743  | -1913.22100 | 1113.83566  | 1        |
| 43 | C | 75.03130 | 70.28009 | 74.87462 | -613.62442  | -457.55993  | -194.14490  | 1        |
| 44 | H | 74.62833 | 71.18797 | 75.38013 | 1707.54637  | -721.27992  | 1996.92523  | 1        |
| 45 | H | 74.55947 | 70.23355 | 73.86808 | 758.23357   | 2100.81767  | 1560.55011  | 1        |
| 46 | C | 74.78302 | 68.96565 | 75.75561 | -352.41524  | 704.96076   | 49.21465    | 1        |
| 47 | H | 73.85303 | 68.98658 | 76.37357 | 1714.76886  | -2070.42778 | 443.35792   | 1        |
| 48 | H | 74.82215 | 68.00866 | 75.17969 | 1224.15040  | 1801.50881  | 1636.97633  | 1        |
| 49 | C | 76.68937 | 71.16304 | 77.34654 | 566.85117   | 537.05831   | 117.62814   | 1        |
| 50 | O | 75.61041 | 71.76833 | 77.34647 | -550.26779  | -406.08867  | 4.21666     | 1        |
| 51 | N | 77.77415 | 71.41546 | 78.02611 | 566.34832   | -425.77725  | 180.18749   | 1        |
| 52 | H | 78.57695 | 70.79889 | 77.90103 | 644.44502   | 2646.80550  | -52.73430   | 1        |
| 53 | C | 77.68780 | 72.37912 | 79.07349 | 612.34801   | -281.48662  | 411.56221   | 1        |
| 54 | H | 76.69392 | 72.86569 | 78.93081 | 1667.23498  | -1490.75142 | 1556.16753  | 1        |
| 55 | C | 77.76311 | 71.52943 | 80.42700 | -714.45746  | -175.43074  | 286.98927   | 1        |
| 56 | H | 78.72185 | 70.94393 | 80.41446 | -787.09484  | 1763.03619  | -1922.46060 | 1        |



|     |   |          |          |          |             |             |             |   |
|-----|---|----------|----------|----------|-------------|-------------|-------------|---|
| 57  | O | 76.71617 | 70.54881 | 80.60012 | -429.46514  | 516.51932   | -128.40526  | 1 |
| 58  | H | 77.06227 | 69.80331 | 80.06453 | 1981.82785  | 436.16847   | -1818.18182 | 1 |
| 59  | C | 77.82568 | 72.65746 | 81.51549 | 630.79189   | -468.94448  | 76.03230    | 1 |
| 60  | H | 78.02500 | 72.23986 | 82.52970 | -1775.71861 | 2062.30353  | 131.89849   | 1 |
| 61  | H | 78.62267 | 73.40541 | 81.30042 | -1855.14608 | 88.94118    | 1993.53760  | 1 |
| 62  | H | 76.86212 | 73.21602 | 81.57229 | -1504.82350 | -780.94249  | -2132.90992 | 1 |
| 63  | C | 78.94013 | 73.42241 | 78.88672 | 288.57638   | 618.62814   | -397.00270  | 1 |
| 64  | O | 78.66550 | 74.62349 | 78.81521 | 321.70495   | -185.26452  | 574.37218   | 1 |
| 65  | N | 80.10565 | 72.82853 | 78.88057 | -447.05792  | -446.53431  | 367.76425   | 1 |
| 66  | H | 80.00888 | 71.81549 | 78.93986 | 350.31316   | 1975.63644  | -1843.31522 | 1 |
| 67  | C | 81.35137 | 73.43003 | 78.56726 | -511.23061  | 374.03917   | -471.51480  | 1 |
| 68  | H | 81.96984 | 72.54563 | 78.29417 | 2234.79579  | -898.70890  | -1273.45190 | 1 |
| 69  | C | 81.16345 | 74.43375 | 77.34779 | 529.53781   | -159.34528  | 563.72604   | 1 |
| 70  | H | 82.14853 | 74.56255 | 76.82075 | 654.59388   | 2347.94251  | 1217.51488  | 1 |
| 71  | H | 80.47447 | 73.92075 | 76.62618 | -1526.55661 | 2103.42026  | 817.87394   | 1 |
| 72  | O | 80.68738 | 75.77171 | 77.62657 | -554.84278  | 14.12789    | 399.58769   | 1 |
| 73  | H | 79.81481 | 75.51173 | 78.12499 | 1297.06236  | 2061.84854  | 1220.68812  | 1 |
| 74  | C | 82.00790 | 74.22439 | 79.83589 | -662.15484  | -412.13544  | 123.62687   | 1 |
| 75  | O | 83.14418 | 74.63316 | 79.75364 | -540.01537  | -317.05804  | 274.91456   | 1 |
| 76  | N | 81.16016 | 74.36638 | 80.87075 | -202.76299  | -690.00100  | -131.49145  | 1 |
| 77  | H | 80.29035 | 73.89323 | 80.63060 | -702.62132  | -2617.37191 | 281.70413   | 1 |
| 78  | C | 81.62560 | 74.48965 | 82.26189 | -491.73914  | 576.34187   | 222.73509   | 1 |
| 79  | H | 80.73186 | 74.15500 | 82.84114 | 1977.17978  | -1823.58850 | -434.68928  | 1 |
| 80  | C | 82.83492 | 73.60568 | 82.49749 | -649.50797  | -328.66843  | 306.11224   | 1 |
| 81  | H | 83.60817 | 73.87680 | 81.73780 | 2075.07803  | 1452.16490  | -1004.45904 | 1 |
| 82  | C | 83.43802 | 73.81150 | 83.87410 | -615.18735  | -489.99689  | -70.96352   | 1 |
| 83  | H | 84.33578 | 73.15466 | 84.04085 | -1226.32661 | -1724.38906 | -1716.47170 | 1 |
| 84  | H | 83.77304 | 74.88544 | 84.01941 | 2381.64273  | -969.84735  | 900.46860   | 1 |
| 85  | H | 82.69960 | 73.58061 | 84.69025 | 2122.74991  | 1702.23946  | -141.36228  | 1 |
| 86  | C | 82.49136 | 72.13750 | 82.31241 | -501.86074  | -479.61276  | -376.42482  | 1 |
| 87  | H | 83.39535 | 71.47968 | 82.43129 | 993.79261   | -2246.95401 | -1177.81305 | 1 |
| 88  | H | 81.72976 | 71.79469 | 83.06519 | 42.71279    | -626.15391  | -2651.37258 | 1 |
| 89  | H | 82.06198 | 71.93985 | 81.29222 | -2026.39012 | -1590.33709 | -887.82922  | 1 |
| 90  | C | 81.91819 | 76.09443 | 82.47869 | -672.89153  | 382.57394   | -156.34072  | 1 |
| 91  | O | 82.86425 | 76.48577 | 83.11827 | 410.04627   | 221.86223   | 500.35950   | 1 |
| 92  | N | 80.93096 | 76.80487 | 81.96975 | -378.11782  | -443.79414  | -441.10984  | 1 |
| 93  | H | 80.16015 | 76.42025 | 81.39779 | 2404.15973  | -568.14894  | 1149.30085  | 1 |
| 94  | C | 80.98364 | 78.23780 | 82.08846 | -544.54484  | 466.16019   | 331.29119   | 1 |
| 95  | H | 81.22217 | 78.48887 | 83.14704 | -1409.80988 | -170.17955  | 2325.32679  | 1 |
| 96  | C | 82.17028 | 78.64906 | 81.11029 | -184.48284  | 116.78282   | -758.89137  | 1 |
| 97  | H | 83.10649 | 78.15600 | 81.46331 | 1893.78641  | 1861.14652  | 611.04528   | 1 |
| 98  | H | 81.98951 | 78.25091 | 80.08607 | -2170.79665 | -974.19311  | 1327.50117  | 1 |
| 99  | C | 82.33477 | 80.19762 | 81.08896 | 389.51668   | 672.81878   | -138.49152  | 1 |
| 100 | H | 81.42354 | 80.67799 | 80.66464 | 510.64577   | 1933.03327  | 1851.02484  | 1 |
| 101 | H | 82.39341 | 80.59175 | 82.12945 | -2302.30869 | -1105.72939 | -948.89774  | 1 |
| 102 | C | 83.61123 | 80.66908 | 80.29317 | -559.93427  | -126.34590  | 542.30857   | 1 |
| 103 | O | 83.84363 | 81.84585 | 80.19247 | -670.36003  | -111.83166  | 76.36448    | 1 |
| 104 | N | 84.36142 | 79.66136 | 79.79824 | -216.06729  | -537.07037  | 446.51379   | 1 |
| 105 | H | 84.22659 | 78.64516 | 79.85840 | -1251.96487 | 1074.12894  | -2168.52500 | 1 |
| 106 | H | 85.23948 | 79.80014 | 79.28626 | -2451.83023 | -720.73851  | 944.84612   | 1 |
| 107 | C | 79.49057 | 78.60408 | 81.59520 | 546.24052   | -563.88337  | -85.11809   | 1 |
| 108 | O | 78.89808 | 77.76602 | 80.94467 | 71.70702    | -307.40463  | 606.69673   | 1 |
| 109 | N | 79.08821 | 79.81428 | 81.98543 | 479.90863   | -504.50129  | 222.86849   | 1 |
| 110 | C | 77.86883 | 80.38112 | 81.48056 | 75.51268    | -600.91904  | 506.73700   | 1 |
| 111 | H | 77.10756 | 79.57049 | 81.53026 | -2033.61562 | 1795.30103  | 254.89480   | 1 |
| 112 | C | 77.62541 | 81.61032 | 82.44582 | 523.79067   | 517.99274   | 284.45581   | 1 |
| 113 | H | 77.03091 | 82.42233 | 81.96923 | 1599.61665  | -1127.00911 | 1895.98173  | 1 |
| 114 | H | 77.07116 | 81.30706 | 83.36251 | -1881.83093 | 1275.82488  | -1501.55016 | 1 |
| 115 | C | 79.08992 | 82.03470 | 82.78122 | -600.05639  | -404.05026  | 316.64485   | 1 |
| 116 | H | 79.55276 | 82.56683 | 81.91885 | -2597.05260 | 496.36221   | 657.73249   | 1 |
| 117 | H | 79.17334 | 82.70708 | 83.66443 | -1666.24518 | 1294.38985  | -1723.90591 | 1 |
| 118 | C | 79.75675 | 80.61008 | 83.00632 | 493.57570   | -129.95376  | -602.56394  | 1 |

|     |   |          |          |          |             |             |             |   |
|-----|---|----------|----------|----------|-------------|-------------|-------------|---|
| 119 | H | 80.85965 | 80.56674 | 82.84872 | -1469.08415 | -637.84797  | 2204.22581  | 1 |
| 120 | H | 79.50613 | 80.13007 | 83.98210 | -1038.97840 | 1068.88701  | -2280.71789 | 1 |
| 121 | C | 78.17494 | 80.85025 | 79.93641 | 188.88100   | 241.05089   | -727.87821  | 1 |
| 122 | O | 78.85115 | 81.81368 | 79.67740 | 531.88613   | -49.19943   | 427.07960   | 1 |
| 123 | N | 77.54738 | 80.01888 | 79.10979 | 708.14833   | 26.93417    | -179.73509  | 1 |
| 124 | H | 77.05088 | 79.23417 | 79.53386 | -2232.69501 | -1179.09831 | 1023.94816  | 1 |
| 125 | C | 77.69782 | 80.09787 | 77.66836 | -738.32412  | 259.92548   | 104.42456   | 1 |
| 126 | H | 78.26569 | 81.03817 | 77.46407 | 2028.89123  | 1260.02983  | 1311.33324  | 1 |
| 127 | C | 78.40797 | 78.82019 | 77.22280 | -258.65678  | -345.52513  | 661.28459   | 1 |
| 128 | H | 77.78626 | 77.95908 | 77.55741 | -1826.06090 | -1801.46097 | -918.64554  | 1 |
| 129 | C | 78.53378 | 78.75333 | 75.71344 | -541.23400  | 531.92970   | -218.41428  | 1 |
| 130 | H | 79.04305 | 77.80767 | 75.37855 | 1311.73218  | -2219.18200 | 882.19023   | 1 |
| 131 | H | 77.52534 | 78.78541 | 75.21278 | -1048.71298 | 1223.58118  | -2196.97971 | 1 |
| 132 | H | 79.13213 | 79.61518 | 75.30716 | 419.06414   | 1903.92898  | 1903.44670  | 1 |
| 133 | C | 79.75938 | 78.67306 | 77.88891 | -423.86431  | 152.66566   | -648.55262  | 1 |
| 134 | H | 80.21059 | 77.63401 | 77.70612 | 105.68386   | -2342.50080 | 1387.51238  | 1 |
| 135 | H | 80.49617 | 79.43681 | 77.51376 | -1695.63603 | -1484.73621 | -1531.02793 | 1 |
| 136 | H | 79.67655 | 78.80224 | 79.00725 | -1853.57121 | -487.39031  | 1936.59343  | 1 |
| 137 | C | 76.14094 | 80.06630 | 77.08343 | 539.71428   | -510.58232  | 267.58633   | 1 |
| 138 | O | 75.25646 | 79.44669 | 77.66558 | -15.93758   | -278.34085  | -624.49402  | 1 |
| 139 | N | 76.08286 | 80.69944 | 75.94172 | -676.81886  | 12.05292    | 276.17960   | 1 |
| 140 | H | 76.96069 | 81.09536 | 75.61838 | -1694.44250 | -373.84189  | -2100.66098 | 1 |
| 141 | C | 74.81520 | 80.90812 | 75.30346 | 412.33078   | -664.70360  | 108.35451   | 1 |
| 142 | H | 74.15311 | 81.12127 | 76.17374 | 1765.77476  | 1294.44366  | 1621.76594  | 1 |
| 143 | C | 74.97605 | 82.08718 | 74.26552 | -179.66635  | -721.95667  | -264.73915  | 1 |
| 144 | H | 75.52133 | 82.94823 | 74.71387 | -607.34922  | 2587.87032  | -598.10018  | 1 |
| 145 | H | 75.59318 | 81.75444 | 73.40063 | -359.69332  | -1479.13954 | -2259.74260 | 1 |
| 146 | C | 73.54371 | 82.51046 | 73.79474 | -240.01076  | 616.02425   | 431.85322   | 1 |
| 147 | H | 72.93884 | 81.62042 | 73.48399 | -1359.17131 | 782.54425   | 2227.99181  | 1 |
| 148 | H | 72.97571 | 82.99225 | 74.62218 | -820.36667  | 85.81767    | -2596.78715 | 1 |
| 149 | C | 73.72278 | 83.49817 | 72.57370 | -513.07015  | 236.18570   | -551.87280  | 1 |
| 150 | H | 74.23937 | 84.43530 | 72.88511 | 1816.11944  | -1183.11722 | -1650.94321 | 1 |
| 151 | H | 74.36670 | 83.04229 | 71.78666 | -1800.04429 | -1361.53473 | 1526.34643  | 1 |
| 152 | C | 72.30941 | 83.79205 | 72.01818 | 726.08972   | -253.19732  | -179.64713  | 1 |
| 153 | H | 71.77071 | 82.90046 | 71.63835 | 1224.27271  | -456.51798  | -2390.90304 | 1 |
| 154 | H | 71.65372 | 84.36571 | 72.70319 | 1206.40339  | -1150.93514 | -2154.90344 | 1 |
| 155 | N | 72.48619 | 84.71412 | 70.76606 | 329.70796   | -633.68968  | -155.67358  | 1 |
| 156 | H | 71.59078 | 84.99628 | 70.27240 | 1348.31305  | 1938.76845  | 1359.00643  | 1 |
| 157 | H | 72.94372 | 85.65895 | 70.92395 | 2096.92035  | 1446.54551  | -966.48890  | 1 |
| 158 | H | 73.05719 | 84.32677 | 69.95930 | -1197.07217 | -2303.53719 | 827.28733   | 1 |
| 159 | C | 74.37341 | 79.53685 | 74.53991 | -378.01186  | -556.17301  | -413.96481  | 1 |
| 160 | O | 74.36087 | 79.43158 | 73.32228 | -409.44433  | -307.55053  | -453.30833  | 1 |
| 161 | N | 74.01925 | 78.65506 | 75.44725 | -429.02477  | 524.70884   | 274.08502   | 1 |
| 162 | H | 74.11802 | 78.86528 | 76.46811 | 1706.34263  | -1425.96036 | 1574.38926  | 1 |
| 163 | C | 73.80121 | 77.31358 | 74.98669 | -45.25864   | -626.22952  | 478.93267   | 1 |
| 164 | H | 74.57496 | 77.18364 | 74.19574 | 1988.63164  | 570.90773   | 1772.87287  | 1 |
| 165 | C | 73.94500 | 76.37239 | 76.24420 | 551.77128   | -20.49526   | -564.54996  | 1 |
| 166 | H | 74.98197 | 76.40144 | 76.64983 | 1434.61535  | -1753.10253 | 1513.99471  | 1 |
| 167 | H | 73.29154 | 76.73436 | 77.07002 | -714.67738  | 1819.09770  | 1898.36494  | 1 |
| 168 | C | 73.54049 | 74.91860 | 75.82162 | 446.99263   | -555.77305  | 338.97221   | 1 |
| 169 | H | 72.51566 | 74.91669 | 75.38237 | 1953.68466  | 1892.25957  | -161.67766  | 1 |
| 170 | H | 74.21588 | 74.51743 | 75.03311 | -403.03785  | 2688.07032  | -188.43591  | 1 |
| 171 | C | 73.58101 | 74.02108 | 77.11837 | 567.86262   | 335.74681   | 434.04421   | 1 |
| 172 | H | 74.62367 | 73.67441 | 77.33547 | -1080.02275 | 1568.26081  | -1948.78900 | 1 |
| 173 | H | 73.25770 | 74.59932 | 78.01459 | -919.54108  | 2111.34692  | 1456.13463  | 1 |
| 174 | C | 72.63149 | 72.81655 | 76.88281 | 195.81897   | 173.33862   | -745.11536  | 1 |
| 175 | H | 71.55322 | 73.03331 | 77.02606 | 1405.67949  | -2301.21089 | -390.08113  | 1 |
| 176 | H | 72.78818 | 72.28692 | 75.92097 | -940.37328  | -1118.32446 | 2299.72133  | 1 |
| 177 | N | 73.01395 | 71.77048 | 77.96111 | 319.26422   | 656.36007   | -42.02424   | 1 |
| 178 | H | 72.48422 | 70.85169 | 77.93706 | 1961.03633  | 619.91968   | 1787.09422  | 1 |
| 179 | H | 74.07838 | 71.48268 | 77.90139 | 854.14343   | -2156.80752 | 1429.08711  | 1 |
| 180 | H | 72.87139 | 72.05438 | 78.97399 | 1237.02905  | -1378.50857 | -1998.28500 | 1 |

|     |   |          |          |          |             |             |             |   |
|-----|---|----------|----------|----------|-------------|-------------|-------------|---|
| 181 | C | 72.28984 | 77.24796 | 74.35169 | 532.53319   | -268.57236  | 517.55729   | 1 |
| 182 | O | 71.34807 | 76.78070 | 74.94461 | 266.16714   | -290.73804  | -558.88002  | 1 |
| 183 | N | 72.35204 | 77.72616 | 73.11476 | -226.25352  | 640.49678   | -270.32839  | 1 |
| 184 | H | 73.22542 | 78.18126 | 72.76449 | 2007.69063  | -1035.27229 | 1523.50231  | 1 |
| 185 | C | 71.12161 | 77.81092 | 72.39569 | -540.76542  | -573.33303  | 49.50000    | 1 |
| 186 | H | 70.36449 | 77.41767 | 73.11899 | -2374.20950 | -1036.76023 | 843.75774   | 1 |
| 187 | C | 70.90763 | 79.33788 | 72.01142 | -77.09082   | 666.87422   | -415.84136  | 1 |
| 188 | H | 71.60846 | 79.60330 | 71.17203 | -985.81834  | 617.19825   | 2463.91927  | 1 |
| 189 | O | 71.31489 | 80.32220 | 73.03168 | 293.29899   | -391.65602  | -477.80926  | 1 |
| 190 | H | 72.12650 | 79.88464 | 73.34640 | 2528.72714  | -681.76262  | -751.27122  | 1 |
| 191 | C | 69.42076 | 79.39480 | 71.53509 | 252.47363   | -605.14473  | 440.05134   | 1 |
| 192 | H | 69.12927 | 80.42514 | 71.22189 | -2052.65063 | 1456.49051  | -1043.51830 | 1 |
| 193 | H | 69.23486 | 78.71555 | 70.65887 | -2152.98800 | -1661.97574 | -161.70652  | 1 |
| 194 | H | 68.71928 | 79.08985 | 72.34827 | -473.12726  | -1584.27339 | 2165.61725  | 1 |
| 195 | C | 71.25583 | 76.91490 | 71.02931 | 360.36307   | 488.46713   | 505.10056   | 1 |
| 196 | O | 70.57663 | 77.17331 | 70.04979 | -200.08817  | -528.03552  | -385.82850  | 1 |
| 197 | N | 72.11307 | 75.92529 | 71.18324 | -597.54095  | -226.44775  | 355.20479   | 1 |
| 198 | H | 72.56187 | 75.83697 | 72.09225 | 2179.23655  | -1300.70981 | -991.33835  | 1 |
| 199 | C | 72.32836 | 75.04231 | 70.08137 | -687.68921  | 297.39807   | -249.45179  | 1 |
| 200 | H | 72.50181 | 75.69376 | 69.19753 | -349.16256  | -2467.37713 | -1101.72831 | 1 |
| 201 | C | 73.52448 | 74.05331 | 70.44176 | 672.47345   | 361.54328   | -201.62880  | 1 |
| 202 | H | 73.26647 | 73.47606 | 71.35862 | 1541.41502  | 582.18425   | 2169.97026  | 1 |
| 203 | H | 73.64335 | 73.31546 | 69.61497 | -2534.67717 | 60.25153    | 997.72295   | 1 |
| 204 | C | 74.84000 | 74.81867 | 70.65664 | 574.26774   | -389.43119  | -377.02542  | 1 |
| 205 | C | 75.60737 | 75.24998 | 69.53339 | 688.82679   | -287.33580  | -257.96133  | 1 |
| 206 | H | 75.24456 | 75.08370 | 68.50273 | 331.14182   | 1470.38163  | 2269.80013  | 1 |
| 207 | C | 75.30517 | 75.05521 | 71.98530 | -383.52382  | -675.04808  | 144.24917   | 1 |
| 208 | H | 74.70531 | 74.73525 | 72.85601 | 4.09847     | 1517.59662  | 2262.86397  | 1 |
| 209 | C | 76.83592 | 75.86996 | 69.76476 | -134.76730  | 428.45285   | -649.50303  | 1 |
| 210 | H | 77.43725 | 76.19258 | 68.89680 | -903.23433  | 1600.49020  | 2011.53387  | 1 |
| 211 | C | 76.54261 | 75.67918 | 72.16528 | -335.53281  | -615.00040  | -364.39058  | 1 |
| 212 | H | 76.89987 | 75.84382 | 73.19685 | 1596.45398  | -1369.33862 | 1732.02659  | 1 |
| 213 | C | 77.35533 | 76.09972 | 71.07198 | 585.48547   | -340.24194  | -406.23938  | 1 |
| 214 | O | 78.62014 | 76.72091 | 71.24460 | -419.15649  | -173.04408  | -511.94141  | 1 |
| 215 | H | 78.67552 | 76.71467 | 72.22919 | -1071.84350 | 1559.71507  | -1960.13012 | 1 |
| 216 | C | 70.98144 | 74.12767 | 69.92003 | 291.41878   | -183.13091  | 710.72246   | 1 |
| 217 | O | 70.41290 | 73.59958 | 70.85028 | 379.87695   | 523.47396   | -222.23622  | 1 |
| 218 | N | 70.75328 | 74.00777 | 68.61946 | 564.30591   | 373.09380   | 277.24371   | 1 |
| 219 | H | 71.36987 | 74.49586 | 67.97182 | -120.59931  | -2436.07824 | -1214.35098 | 1 |
| 220 | C | 69.60824 | 73.30337 | 68.14764 | 404.07514   | -299.37480  | 608.84009   | 1 |
| 221 | H | 69.79324 | 73.19824 | 67.05435 | -1071.07882 | -841.69025  | 2359.66467  | 1 |
| 222 | C | 69.56728 | 71.90951 | 68.91393 | -683.12807  | 68.71770    | -390.13096  | 1 |
| 223 | H | 70.58154 | 71.45002 | 68.91806 | 2068.88918  | 1596.58590  | 770.89603   | 1 |
| 224 | H | 69.30278 | 72.05949 | 69.99228 | 1379.86429  | 2342.49779  | -179.85638  | 1 |
| 225 | C | 68.53642 | 70.96872 | 68.22120 | -176.39967  | 537.49466   | 550.97268   | 1 |
| 226 | H | 67.50327 | 71.38042 | 68.30606 | -396.28051  | 1942.22168  | 1869.33314  | 1 |
| 227 | H | 68.73797 | 70.87783 | 67.13059 | -94.44700   | 586.00678   | -2659.20016 | 1 |
| 228 | C | 68.67566 | 69.55455 | 68.95388 | -291.69381  | -718.18079  | -150.72929  | 1 |
| 229 | H | 69.67262 | 69.05350 | 68.85969 | -2303.38776 | 1089.76242  | 964.62032   | 1 |
| 230 | H | 68.39673 | 69.55490 | 70.03841 | 884.16729   | 2568.80533  | -207.74283  | 1 |
| 231 | N | 67.73643 | 68.76443 | 68.27708 | -594.49522  | -252.81478  | 342.29276   | 1 |
| 232 | H | 67.12373 | 69.24111 | 67.63388 | -1735.17426 | 2084.05705  | -263.71605  | 1 |
| 233 | C | 67.60177 | 67.50980 | 68.43157 | 595.23177   | -271.52487  | 442.22352   | 1 |
| 234 | N | 68.45416 | 66.86686 | 69.33607 | 585.53813   | -424.79750  | -105.81303  | 1 |
| 235 | H | 69.19013 | 67.25870 | 69.92205 | 959.88797   | 1327.56823  | -2177.11905 | 1 |
| 236 | H | 68.43651 | 65.86859 | 69.54694 | 1578.48647  | 16.27378    | -2220.76233 | 1 |
| 237 | N | 66.57198 | 67.01014 | 67.62192 | -452.17763  | -390.33541  | -421.51853  | 1 |
| 238 | H | 65.94998 | 67.47989 | 66.96582 | 470.26107   | 1974.25629  | -1817.92087 | 1 |
| 239 | H | 66.30503 | 66.02515 | 67.60367 | 1856.67307  | -1573.97321 | -1224.35416 | 1 |
| 240 | C | 68.26355 | 74.16662 | 68.45505 | -531.47271  | -581.45780  | -55.06206   | 1 |
| 241 | O | 67.17980 | 73.64185 | 68.39210 | -243.00837  | 192.73507   | 609.52485   | 1 |
| 242 | N | 68.53159 | 75.48071 | 68.60067 | 343.49288   | -644.25607  | 38.09164    | 1 |

|     |   |          |          |          |             |             |             |   |
|-----|---|----------|----------|----------|-------------|-------------|-------------|---|
| 243 | H | 69.52255 | 75.70340 | 68.75339 | -1691.16043 | -1535.97525 | -1484.73099 | 1 |
| 244 | C | 67.51174 | 76.38171 | 69.14405 | 542.66492   | 350.14337   | 454.42563   | 1 |
| 245 | H | 66.56401 | 75.97086 | 68.71914 | 1209.57979  | -2396.95920 | 463.86744   | 1 |
| 246 | C | 67.56040 | 76.26296 | 70.65613 | -737.14309  | 145.93010   | 242.71942   | 1 |
| 247 | H | 68.57379 | 76.59354 | 70.98441 | -1050.18303 | 159.36419   | -2509.06125 | 1 |
| 248 | C | 66.52304 | 77.14070 | 71.32900 | -706.77696  | -252.88343  | -245.16230  | 1 |
| 249 | H | 66.62014 | 77.12263 | 72.44940 | -1624.64039 | -1665.49085 | 1417.86935  | 1 |
| 250 | H | 66.61902 | 78.21979 | 70.99351 | 2566.10521  | 598.51109   | 693.22305   | 1 |
| 251 | H | 65.47705 | 76.80985 | 71.07982 | -1972.69758 | 107.10018   | -1876.34312 | 1 |
| 252 | C | 67.38711 | 74.82074 | 71.09790 | 412.85148   | 672.58832   | -27.69222   | 1 |
| 253 | H | 67.55447 | 74.69227 | 72.20222 | 1447.02277  | 1762.76533  | -1490.78944 | 1 |
| 254 | H | 66.35381 | 74.44047 | 70.86607 | 1320.77379  | -145.20455  | 2378.68491  | 1 |
| 255 | H | 68.11542 | 74.14473 | 70.55697 | -1512.10848 | 1470.52031  | 1724.75147  | 1 |
| 256 | C | 67.86239 | 77.91197 | 68.62292 | -607.11113  | 499.56689   | 73.73769    | 1 |
| 257 | O | 67.45626 | 78.87606 | 69.23552 | 357.97126   | 460.81534   | 356.68785   | 1 |
| 258 | N | 68.56082 | 77.89882 | 67.49857 | 536.55407   | -368.62270  | 332.76306   | 1 |
| 259 | H | 68.78200 | 76.97948 | 67.11931 | 524.38866   | 2297.69985  | 1367.20941  | 1 |
| 260 | C | 68.79732 | 79.09970 | 66.79370 | 46.50277    | -774.29190  | -147.97904  | 1 |
| 261 | H | 68.21154 | 79.87926 | 67.33053 | 1676.51875  | 1883.29066  | 1032.55549  | 1 |
| 262 | C | 70.38899 | 79.39093 | 66.75572 | -559.41456  | -34.19198   | -556.30433  | 1 |
| 263 | H | 70.90392 | 78.53496 | 66.25865 | -64.66664   | 395.18769   | 2695.05373  | 1 |
| 264 | H | 70.60413 | 80.28685 | 66.12621 | -2703.44278 | -60.40056   | 333.79418   | 1 |
| 265 | C | 70.91213 | 79.57735 | 68.15253 | -519.76435  | 377.31045   | 459.42366   | 1 |
| 266 | H | 70.56544 | 78.70778 | 68.78047 | -1746.74323 | 1667.50644  | -1261.73691 | 1 |
| 267 | C | 72.43565 | 79.58745 | 68.15379 | 570.95554   | 16.46261    | -545.27700  | 1 |
| 268 | H | 72.84884 | 79.71083 | 69.18817 | 2391.58273  | 28.05277    | -1305.07271 | 1 |
| 269 | H | 72.85558 | 78.63334 | 67.74250 | 175.75588   | 917.63458   | 2559.43867  | 1 |
| 270 | H | 72.84326 | 80.42553 | 67.53166 | -1063.97851 | -2155.34650 | 1283.00462  | 1 |
| 271 | C | 70.39442 | 80.87025 | 68.76760 | 193.76014   | 2.62946     | -765.53141  | 1 |
| 272 | H | 70.84308 | 81.05988 | 69.77665 | 507.39394   | -846.55087  | 2539.60089  | 1 |
| 273 | H | 70.63666 | 81.75775 | 68.12788 | 1337.57841  | 1818.19054  | 1526.01994  | 1 |
| 274 | H | 69.28153 | 80.84624 | 68.89897 | 1100.88635  | -1172.91350 | -2199.08909 | 1 |
| 275 | C | 68.36659 | 78.83277 | 65.25899 | -549.21115  | 475.64486   | -309.38218  | 1 |
| 276 | O | 68.36783 | 77.73963 | 64.75493 | 556.06106   | -390.37755  | -78.24250   | 1 |
| 277 | O | 68.13136 | 79.98815 | 64.47846 | -572.27940  | -310.19032  | -209.75862  | 1 |
| 278 | H | 68.22753 | 80.67854 | 65.19159 | -1380.08193 | 2212.14486  | 790.85944   | 1 |

Listing 9: C00009.xmolout

|    |   |          |          |          |             |             |             |        |          |
|----|---|----------|----------|----------|-------------|-------------|-------------|--------|----------|
| 1  |   | 276      |          |          |             |             |             |        |          |
| 2  |   | 150.0000 | 150.0000 | 150.0000 | 0.0000      | 0.0000      | 0.0000***** | 1.8560 | 7424     |
|    |   | 0.2500   | 300.00   | 0.00     | 0.00        | 0.00        | -1294.2665  | 0.0000 | 300.0000 |
| 3  | H | 65.16994 | 75.22344 | 73.97829 | -2043.14101 | -1757.64893 | 399.89339   |        | 1        |
| 4  | N | 65.31837 | 75.30906 | 72.97283 | 426.75047   | 490.45733   | -334.42467  |        | 1        |
| 5  | H | 64.38062 | 75.53283 | 72.61417 | 442.25559   | -1110.30854 | -2448.52907 |        | 1        |
| 6  | C | 66.27337 | 76.28642 | 72.61039 | 415.32972   | -666.39213  | 83.73172    |        | 1        |
| 7  | H | 66.83387 | 76.54225 | 73.53671 | 879.32219   | 2491.00447  | 667.35213   |        | 1        |
| 8  | C | 67.23898 | 75.68363 | 71.46510 | 31.35357    | 477.41777   | 628.23362   |        | 1        |
| 9  | H | 66.62508 | 75.43729 | 70.56634 | 1168.38489  | 2240.25337  | -1019.71136 |        | 1        |
| 10 | H | 67.97708 | 76.45213 | 71.13368 | -360.43770  | 2534.90498  | 931.67112   |        | 1        |
| 11 | C | 67.93835 | 74.45309 | 71.97405 | 463.18208   | 512.70242   | -382.34388  |        | 1        |
| 12 | H | 67.15729 | 73.74142 | 72.32721 | 1725.29117  | 1863.52247  | -987.07854  |        | 1        |
| 13 | C | 68.74120 | 73.78352 | 70.86518 | 710.42801   | -144.27427  | -313.15367  |        | 1        |
| 14 | H | 69.17036 | 72.80558 | 71.20290 | 364.20195   | -1033.13725 | 2494.72524  |        | 1        |
| 15 | H | 68.11076 | 73.57519 | 69.96270 | 2567.61904  | 335.80679   | 847.48802   |        | 1        |
| 16 | H | 69.60682 | 74.41769 | 70.53135 | -2587.99029 | 680.92867   | -512.16411  |        | 1        |
| 17 | C | 68.87257 | 74.76858 | 73.13499 | 268.17616   | 741.64379   | -40.42634   |        | 1        |
| 18 | H | 69.44923 | 73.86233 | 73.45844 | 1283.54314  | -1945.37420 | -1411.27812 |        | 1        |
| 19 | H | 69.62384 | 75.55258 | 72.85888 | -1258.57796 | 1317.15249  | -2026.02085 |        | 1        |
| 20 | H | 68.31226 | 75.14246 | 74.03014 | -2502.84526 | 909.80597   | 575.92391   |        | 1        |
| 21 | C | 65.35983 | 77.48888 | 72.03333 | 619.36578   | -458.64843  | -172.09273  |        | 1        |
| 22 | O | 64.12204 | 77.35689 | 71.98045 | -81.40433   | 433.87611   | 522.34594   |        | 1        |

|    |   |          |          |          |             |             |             |   |
|----|---|----------|----------|----------|-------------|-------------|-------------|---|
| 23 | N | 66.10993 | 78.50463 | 71.70992 | 175.23996   | -622.20190  | 341.55523   | 1 |
| 24 | H | 67.11110 | 78.33601 | 71.80266 | -876.57256  | -303.22879  | -2561.90213 | 1 |
| 25 | C | 65.66437 | 79.78136 | 71.24613 | -571.88214  | -534.10783  | -106.15033  | 1 |
| 26 | H | 66.10565 | 79.83254 | 70.22664 | -2713.20841 | -16.25800   | -248.80809  | 1 |
| 27 | C | 64.07257 | 79.89600 | 71.20819 | 166.60354   | 288.16399   | -716.09568  | 1 |
| 28 | H | 63.68332 | 79.58082 | 72.21831 | -2097.85574 | 1636.78449  | -586.18044  | 1 |
| 29 | O | 63.42119 | 79.04499 | 70.26365 | -317.80580  | -363.38227  | 484.43082   | 1 |
| 30 | H | 63.31449 | 78.20349 | 70.84917 | 1863.74748  | -1451.84923 | 1357.29467  | 1 |
| 31 | C | 63.82730 | 81.43575 | 71.01346 | 503.80731   | 517.99032   | 318.51606   | 1 |
| 32 | H | 62.73936 | 81.67906 | 71.00553 | 640.61020   | -2157.10410 | -1536.29104 | 1 |
| 33 | H | 64.29931 | 82.04026 | 71.82554 | 1687.88455  | 465.60692   | 2087.56452  | 1 |
| 34 | H | 64.25358 | 81.79441 | 70.04730 | -1293.07895 | -1899.88581 | -1463.57452 | 1 |
| 35 | C | 66.35103 | 80.95450 | 72.14226 | -153.07550  | -733.68902  | 248.70981   | 1 |
| 36 | O | 66.56462 | 81.97250 | 71.53148 | 186.15459   | -480.78787  | -449.34387  | 1 |
| 37 | N | 66.50805 | 80.73533 | 73.45958 | -487.53139  | 543.18517   | 42.03850    | 1 |
| 38 | C | 67.07386 | 81.74372 | 74.29697 | -699.35871  | 69.34393    | 360.10701   | 1 |
| 39 | H | 66.85842 | 82.73005 | 73.82440 | 2.81126     | -221.99807  | -2715.58072 | 1 |
| 40 | C | 66.35323 | 81.45228 | 75.68396 | -507.46439  | -592.59194  | 122.07761   | 1 |
| 41 | H | 66.88379 | 81.90699 | 76.55043 | -1975.08116 | 525.87560   | -1801.71556 | 1 |
| 42 | H | 65.31207 | 81.84465 | 75.69915 | 1588.27743  | -1913.22100 | 1113.83566  | 1 |
| 43 | C | 66.37454 | 79.89246 | 75.69445 | -613.62442  | -457.55993  | -194.14490  | 1 |
| 44 | H | 67.38636 | 79.51179 | 75.96427 | 1707.54637  | -721.27992  | 1996.92523  | 1 |
| 45 | H | 65.66116 | 79.43834 | 76.41847 | 758.23357   | 2100.81767  | 1560.55011  | 1 |
| 46 | C | 66.02505 | 79.56372 | 74.18000 | -352.41524  | 704.96076   | 49.21465    | 1 |
| 47 | H | 66.55308 | 78.67252 | 73.77240 | 1714.76886  | -2070.42778 | 443.35792   | 1 |
| 48 | H | 64.93787 | 79.48038 | 73.94876 | 1224.15040  | 1801.50881  | 1636.97633  | 1 |
| 49 | C | 68.68111 | 81.47653 | 74.51894 | 566.85117   | 537.05831   | 117.62814   | 1 |
| 50 | O | 69.29948 | 82.15628 | 75.30315 | -550.26779  | -406.08867  | 4.21666     | 1 |
| 51 | N | 69.10759 | 80.45851 | 73.78179 | 566.34832   | -425.77725  | 180.18749   | 1 |
| 52 | H | 68.43955 | 80.02982 | 73.14324 | 644.44502   | 2646.80550  | -52.73430   | 1 |
| 53 | C | 70.44700 | 80.02015 | 73.90807 | 612.34801   | -281.48662  | 411.56221   | 1 |
| 54 | H | 70.88075 | 80.61745 | 74.74374 | 1667.23498  | -1490.75142 | 1556.16753  | 1 |
| 55 | C | 70.36926 | 78.44672 | 74.19912 | -714.45746  | -175.43074  | 286.98927   | 1 |
| 56 | H | 69.88887 | 77.94098 | 73.31740 | -787.09484  | 1763.03619  | -1922.46060 | 1 |
| 57 | O | 69.57214 | 78.07354 | 75.34057 | -429.46514  | 516.51932   | -128.40526  | 1 |
| 58 | H | 68.89158 | 77.51423 | 74.91643 | 1981.82785  | 436.16847   | -1818.18182 | 1 |
| 59 | C | 71.88053 | 78.02214 | 74.27149 | 630.79189   | -468.94448  | 76.03230    | 1 |
| 60 | H | 71.98260 | 76.93359 | 74.48816 | -1775.71861 | 2062.30353  | 131.89849   | 1 |
| 61 | H | 72.41597 | 78.21704 | 73.30693 | -1855.14608 | 88.94118    | 1993.53760  | 1 |
| 62 | H | 72.42450 | 78.56897 | 75.07733 | -1504.82350 | -780.94249  | -2132.90992 | 1 |
| 63 | C | 71.15223 | 80.29697 | 72.44885 | 288.57638   | 618.62814   | -397.00270  | 1 |
| 64 | O | 70.53773 | 80.34385 | 71.41128 | 321.70495   | -185.26452  | 574.37218   | 1 |
| 65 | N | 72.45453 | 80.40355 | 72.66074 | -447.05792  | -446.53431  | 367.76425   | 1 |
| 66 | H | 72.80688 | 80.29028 | 73.60938 | 350.31316   | 1975.63644  | -1843.31522 | 1 |
| 67 | C | 73.38465 | 80.36444 | 71.54853 | -511.23061  | 374.03917   | -471.51480  | 1 |
| 68 | H | 73.16486 | 81.28202 | 70.95349 | 2234.79579  | -898.70890  | -1273.45190 | 1 |
| 69 | C | 74.80487 | 80.33025 | 72.17232 | 529.53781   | -159.34528  | 563.72604   | 1 |
| 70 | H | 75.56326 | 80.23745 | 71.37165 | 654.59388   | 2347.94251  | 1217.51488  | 1 |
| 71 | H | 75.02552 | 81.25688 | 72.75052 | -1526.55661 | 2103.42026  | 817.87394   | 1 |
| 72 | O | 75.07393 | 79.27593 | 73.38285 | -554.84278  | 14.12789    | 399.58769   | 1 |
| 73 | H | 74.97865 | 78.51730 | 72.81081 | 1297.06236  | 2061.84854  | 1220.68812  | 1 |
| 74 | C | 73.13334 | 79.00661 | 70.66900 | -662.15484  | -412.13544  | 123.62687   | 1 |
| 75 | O | 72.82323 | 77.92555 | 71.15646 | -540.01537  | -317.05804  | 274.91456   | 1 |
| 76 | N | 73.47500 | 79.30078 | 69.42737 | -202.76299  | -690.00100  | -131.49145  | 1 |
| 77 | H | 73.75323 | 80.27286 | 69.30299 | -702.62132  | -2617.37191 | 281.70413   | 1 |
| 78 | C | 72.79260 | 78.64333 | 68.34546 | -491.73914  | 576.34187   | 222.73509   | 1 |
| 79 | H | 71.78018 | 78.45730 | 68.76686 | 1977.17978  | -1823.58850 | -434.68928  | 1 |
| 80 | C | 72.81882 | 79.62646 | 67.10789 | -649.50797  | -328.66843  | 306.11224   | 1 |
| 81 | H | 73.85986 | 79.96051 | 66.90640 | 2075.07803  | 1452.16490  | -1004.45904 | 1 |
| 82 | C | 72.21001 | 78.92589 | 65.84338 | -615.18735  | -489.99689  | -70.96352   | 1 |
| 83 | H | 72.16522 | 79.62002 | 64.97133 | -1226.32661 | -1724.38906 | -1716.47170 | 1 |
| 84 | H | 72.82302 | 78.04373 | 65.53273 | 2381.64273  | -969.84735  | 900.46860   | 1 |

|     |   |          |          |          |             |             |             |   |
|-----|---|----------|----------|----------|-------------|-------------|-------------|---|
| 85  | H | 71.17323 | 78.56195 | 66.03279 | 2122.74991  | 1702.23946  | -141.36228  | 1 |
| 86  | C | 71.88945 | 80.85434 | 67.41127 | -501.86074  | -479.61276  | -376.42482  | 1 |
| 87  | H | 71.88117 | 81.58219 | 66.56645 | 993.79261   | -2246.95401 | -1177.81305 | 1 |
| 88  | H | 70.83516 | 80.53515 | 67.58421 | 42.71279    | -626.15391  | -2651.37258 | 1 |
| 89  | H | 72.21684 | 81.40662 | 68.32257 | -2026.39012 | -1590.33709 | -887.82922  | 1 |
| 90  | C | 73.56802 | 77.24347 | 68.02517 | -672.89153  | 382.57394   | -156.34072  | 1 |
| 91  | O | 74.17162 | 77.04789 | 66.99710 | 410.04627   | 221.86223   | 500.35950   | 1 |
| 92  | N | 73.35228 | 76.40953 | 69.03621 | -378.11782  | -443.79414  | -441.10984  | 1 |
| 93  | H | 72.86300 | 76.71608 | 69.91337 | 2404.15973  | -568.14894  | 1149.30085  | 1 |
| 94  | C | 73.91962 | 75.10915 | 68.94874 | -544.54484  | 466.16019   | 331.29119   | 1 |
| 95  | H | 74.48236 | 75.07803 | 67.98653 | -1409.80988 | -170.17955  | 2325.32679  | 1 |
| 96  | C | 74.83464 | 75.03518 | 70.24722 | -184.48284  | 116.78282   | -758.89137  | 1 |
| 97  | H | 75.44810 | 75.96178 | 70.30085 | 1893.78641  | 1861.14652  | 611.04528   | 1 |
| 98  | H | 74.20679 | 75.04065 | 71.16633 | -2170.79665 | -974.19311  | 1327.50117  | 1 |
| 99  | C | 75.75311 | 73.77638 | 70.21724 | 389.51668   | 672.81878   | -138.49152  | 1 |
| 100 | H | 75.13429 | 72.85202 | 70.22540 | 510.64577   | 1933.03327  | 1851.02484  | 1 |
| 101 | H | 76.30669 | 73.73338 | 69.25361 | -2302.30869 | -1105.72939 | -948.89774  | 1 |
| 102 | C | 76.78680 | 73.73625 | 71.40958 | -559.93427  | -126.34590  | 542.30857   | 1 |
| 103 | O | 77.35001 | 72.70399 | 71.68551 | -670.36003  | -111.83166  | 76.36448    | 1 |
| 104 | N | 76.94128 | 74.91767 | 72.04390 | -216.06729  | -537.07037  | 446.51379   | 1 |
| 105 | H | 76.52041 | 75.83043 | 71.83632 | -1251.96487 | 1074.12894  | -2168.52500 | 1 |
| 106 | H | 77.62528 | 75.08451 | 72.78974 | -2451.83023 | -720.73851  | 944.84612   | 1 |
| 107 | C | 72.65183 | 74.07630 | 69.03885 | 546.24052   | -563.88337  | -85.11809   | 1 |
| 108 | O | 71.78421 | 74.25588 | 69.85652 | 71.70702    | -307.40463  | 606.69673   | 1 |
| 109 | N | 72.79871 | 73.06375 | 68.17483 | 479.90863   | -504.50129  | 222.86849   | 1 |
| 110 | C | 71.72448 | 72.15636 | 67.88366 | 75.51268    | -600.91904  | 506.73700   | 1 |
| 111 | H | 70.81345 | 72.78882 | 67.77722 | -2033.61562 | 1795.30103  | 254.89480   | 1 |
| 112 | C | 72.19419 | 71.44623 | 66.54395 | 523.79067   | 517.99274   | 284.45581   | 1 |
| 113 | H | 71.77354 | 70.42101 | 66.43369 | 1599.61665  | -1127.00911 | 1895.98173  | 1 |
| 114 | H | 71.87112 | 72.01798 | 65.64542 | -1881.83093 | 1275.82488  | -1501.55016 | 1 |
| 115 | C | 73.74731 | 71.46019 | 66.69113 | -600.05639  | -404.05026  | 316.64485   | 1 |
| 116 | H | 74.09423 | 70.65577 | 67.37752 | -2597.05260 | 496.36221   | 657.73249   | 1 |
| 117 | H | 74.28905 | 71.31607 | 65.72913 | -1666.24518 | 1294.38985  | -1723.90591 | 1 |
| 118 | C | 73.96860 | 72.90276 | 67.32398 | 493.57570   | -129.95376  | -602.56394  | 1 |
| 119 | H | 74.88548 | 73.01218 | 67.94721 | -1469.08415 | -637.84797  | 2204.22581  | 1 |
| 120 | H | 73.92263 | 73.73723 | 66.58368 | -1038.97840 | 1068.88701  | -2280.71789 | 1 |
| 121 | C | 71.52700 | 71.04658 | 69.05832 | 188.88100   | 241.05089   | -727.87821  | 1 |
| 122 | O | 70.82186 | 70.08309 | 68.85359 | 531.88613   | -49.19943   | 427.07960   | 1 |
| 123 | N | 72.25631 | 71.33039 | 70.14855 | 708.14833   | 26.93417    | -179.73509  | 1 |
| 124 | H | 72.69443 | 72.25824 | 70.08724 | -2232.69501 | -1179.09831 | 1023.94816  | 1 |
| 125 | C | 71.67809 | 70.94799 | 71.41469 | -738.32412  | 259.92548   | 104.42456   | 1 |
| 126 | H | 70.57944 | 71.06547 | 71.30507 | 2028.89123  | 1260.02983  | 1311.33324  | 1 |
| 127 | C | 72.10551 | 69.44405 | 71.65701 | -258.65678  | -345.52513  | 661.28459   | 1 |
| 128 | H | 72.97376 | 69.18785 | 71.01202 | -1826.06090 | -1801.46097 | -918.64554  | 1 |
| 129 | C | 72.43451 | 69.18708 | 73.16875 | -541.23400  | 531.92970   | -218.41428  | 1 |
| 130 | H | 72.65619 | 68.11217 | 73.36660 | 1311.73218  | -2219.18200 | 882.19023   | 1 |
| 131 | H | 73.32411 | 69.77614 | 73.50039 | -1048.71298 | 1223.58118  | -2196.97971 | 1 |
| 132 | H | 71.58561 | 69.48135 | 73.82952 | 419.06414   | 1903.92898  | 1903.44670  | 1 |
| 133 | C | 70.87503 | 68.53133 | 71.32250 | -423.86431  | 152.66566   | -648.55262  | 1 |
| 134 | H | 71.12603 | 67.44805 | 71.41210 | 105.68386   | -2342.50080 | 1387.51238  | 1 |
| 135 | H | 70.01618 | 68.73077 | 72.00599 | -1695.63603 | -1484.73621 | -1531.02793 | 1 |
| 136 | H | 70.51888 | 68.71476 | 70.26561 | -1853.57121 | -487.39031  | 1936.59343  | 1 |
| 137 | C | 72.33976 | 71.94928 | 72.51995 | 539.71428   | -510.58232  | 267.58633   | 1 |
| 138 | O | 71.66226 | 72.52265 | 73.34547 | -15.93758   | -278.34085  | -624.49402  | 1 |
| 139 | N | 73.65228 | 71.99010 | 72.32212 | -676.81886  | 12.05292    | 276.17960   | 1 |
| 140 | H | 74.00409 | 71.43596 | 71.54118 | -1694.44250 | -373.84189  | -2100.66098 | 1 |
| 141 | C | 74.55535 | 72.51748 | 73.28665 | 412.33078   | -664.70360  | 108.35451   | 1 |
| 142 | H | 75.45630 | 72.75071 | 72.67654 | 1765.77476  | 1294.44366  | 1621.76594  | 1 |
| 143 | C | 73.88755 | 73.76699 | 73.98461 | -179.66635  | -721.95667  | -264.73915  | 1 |
| 144 | H | 73.45138 | 74.45404 | 73.22389 | -607.34922  | 2587.87032  | -598.10018  | 1 |
| 145 | H | 73.03857 | 73.46535 | 74.65000 | -359.69332  | -1479.13954 | -2259.74260 | 1 |
| 146 | C | 75.04382 | 74.45028 | 74.79462 | -240.01076  | 616.02425   | 431.85322   | 1 |

|     |   |          |          |          |             |             |             |   |
|-----|---|----------|----------|----------|-------------|-------------|-------------|---|
| 147 | H | 75.24904 | 73.89562 | 75.74928 | -1359.17131 | 782.54425   | 2227.99181  | 1 |
| 148 | H | 75.99243 | 74.43439 | 74.21148 | -820.36667  | 85.81767    | -2596.78715 | 1 |
| 149 | C | 74.60421 | 75.93615 | 75.08139 | -513.07015  | 236.18570   | -551.87280  | 1 |
| 150 | H | 74.33121 | 76.45804 | 74.13553 | 1816.11944  | -1183.11722 | -1650.94321 | 1 |
| 151 | H | 73.69233 | 75.96460 | 75.72071 | -1800.04429 | -1361.53473 | 1526.34643  | 1 |
| 152 | C | 75.79580 | 76.65287 | 75.77672 | 726.08972   | -253.19732  | -179.64713  | 1 |
| 153 | H | 75.95841 | 76.36304 | 76.83635 | 1224.27271  | -456.51798  | -2390.90304 | 1 |
| 154 | H | 76.75497 | 76.60039 | 75.22004 | 1206.40339  | -1150.93514 | -2154.90344 | 1 |
| 155 | N | 75.44170 | 78.15012 | 75.79851 | 329.70796   | -633.68968  | -155.67358  | 1 |
| 156 | H | 76.15737 | 78.76324 | 76.27862 | 1348.31305  | 1938.76845  | 1359.00643  | 1 |
| 157 | H | 75.28853 | 78.64264 | 74.77411 | 2096.92035  | 1446.54551  | -966.48890  | 1 |
| 158 | H | 74.58093 | 78.40884 | 76.35508 | -1197.07217 | -2303.53719 | 827.28733   | 1 |
| 159 | C | 74.90096 | 71.36319 | 74.40947 | -378.01186  | -556.17301  | -413.96481  | 1 |
| 160 | O | 74.12674 | 70.99376 | 75.26062 | -409.44433  | -307.55053  | -453.30833  | 1 |
| 161 | N | 76.14777 | 70.96327 | 74.19087 | -429.02477  | 524.70884   | 274.08502   | 1 |
| 162 | H | 76.69297 | 71.37344 | 73.42873 | 1706.34263  | -1425.96036 | 1574.38926  | 1 |
| 163 | C | 76.64536 | 69.95457 | 75.07502 | -45.25864   | -626.22952  | 478.93267   | 1 |
| 164 | H | 75.73350 | 69.38747 | 75.37719 | 1988.63164  | 570.90773   | 1772.87287  | 1 |
| 165 | C | 77.71770 | 69.09487 | 74.29018 | 551.77128   | -20.49526   | -564.54996  | 1 |
| 166 | H | 77.30999 | 68.74196 | 73.31668 | 1434.61535  | -1753.10253 | 1513.99471  | 1 |
| 167 | H | 78.61075 | 69.70764 | 74.03540 | -714.67738  | 1819.09770  | 1898.36494  | 1 |
| 168 | C | 78.11076 | 67.89267 | 75.21213 | 446.99263   | -555.77305  | 338.97221   | 1 |
| 169 | H | 78.60975 | 68.26009 | 76.14002 | 1953.68466  | 1892.25957  | -161.67766  | 1 |
| 170 | H | 77.21413 | 67.32456 | 75.54815 | -403.03785  | 2688.07032  | -188.43591  | 1 |
| 171 | C | 79.07549 | 66.98180 | 74.35466 | 567.86262   | 335.74681   | 434.04421   | 1 |
| 172 | H | 78.50632 | 66.44946 | 73.55775 | -1080.02275 | 1568.26081  | -1948.78900 | 1 |
| 173 | H | 79.83440 | 67.61024 | 73.81109 | -919.54108  | 2111.34692  | 1456.13463  | 1 |
| 174 | C | 79.80691 | 65.97636 | 75.27391 | 195.81897   | 173.33862   | -745.11536  | 1 |
| 175 | H | 80.39105 | 66.43925 | 76.09451 | 1405.67949  | -2301.21089 | -390.08113  | 1 |
| 176 | H | 79.18005 | 65.15152 | 75.66828 | -940.37328  | -1118.32446 | 2299.72133  | 1 |
| 177 | N | 80.87811 | 65.30216 | 74.35191 | 319.26422   | 656.36007   | -42.02424   | 1 |
| 178 | H | 81.57285 | 64.64358 | 74.80996 | 1961.03633  | 619.91968   | 1787.09422  | 1 |
| 179 | H | 80.51340 | 64.70713 | 73.55265 | 854.14343   | -2156.80752 | 1429.08711  | 1 |
| 180 | H | 81.52108 | 65.97114 | 73.83705 | 1237.02905  | -1378.50857 | -1998.28500 | 1 |
| 181 | C | 77.36267 | 70.63228 | 76.38262 | 532.53319   | -268.57236  | 517.55729   | 1 |
| 182 | O | 77.57833 | 69.89970 | 77.35068 | 266.16714   | -290.73804  | -558.88002  | 1 |
| 183 | N | 77.69905 | 71.88964 | 76.19395 | -226.25352  | 640.49678   | -270.32839  | 1 |
| 184 | H | 77.40833 | 72.19120 | 75.26495 | 2007.69063  | -1035.27229 | 1523.50231  | 1 |
| 185 | C | 77.86662 | 72.83799 | 77.24267 | -540.76542  | -573.33303  | 49.50000    | 1 |
| 186 | H | 77.83621 | 73.81663 | 76.71534 | -2374.20950 | -1036.76023 | 843.75774   | 1 |
| 187 | C | 76.61613 | 72.65389 | 78.21267 | -77.09082   | 666.87422   | -415.84136  | 1 |
| 188 | H | 76.53840 | 71.56951 | 78.49867 | -985.81834  | 617.19825   | 2463.91927  | 1 |
| 189 | O | 75.34058 | 72.99680 | 77.60568 | 293.29899   | -391.65602  | -477.80926  | 1 |
| 190 | H | 74.98167 | 72.10928 | 77.41423 | 2528.72714  | -681.76262  | -751.27122  | 1 |
| 191 | C | 77.00831 | 73.49691 | 79.47532 | 252.47363   | -605.14473  | 440.05134   | 1 |
| 192 | H | 76.28109 | 73.34704 | 80.30771 | -2052.65063 | 1456.49051  | -1043.51830 | 1 |
| 193 | H | 78.01831 | 73.22840 | 79.86391 | -2152.98800 | -1661.97574 | -161.70652  | 1 |
| 194 | H | 77.02848 | 74.58835 | 79.24664 | -473.12726  | -1584.27339 | 2165.61725  | 1 |
| 195 | C | 79.30955 | 72.63472 | 77.99550 | 360.36307   | 488.46713   | 505.10056   | 1 |
| 196 | O | 79.99891 | 73.61670 | 78.10658 | -200.08817  | -528.03552  | -385.82850  | 1 |
| 197 | N | 79.48655 | 71.41154 | 78.47164 | -597.54095  | -226.44775  | 355.20479   | 1 |
| 198 | H | 78.76361 | 70.66725 | 78.26842 | 2179.23655  | -1300.70981 | -991.33835  | 1 |
| 199 | C | 80.76887 | 71.00050 | 78.92179 | -687.68921  | 297.39807   | -249.45179  | 1 |
| 200 | H | 80.66849 | 69.89692 | 79.02545 | -349.16256  | -2467.37713 | -1101.72831 | 1 |
| 201 | C | 81.88511 | 71.41780 | 77.84865 | 672.47345   | 361.54328   | -201.62880  | 1 |
| 202 | H | 81.83753 | 72.51679 | 77.66145 | 1541.41502  | 582.18425   | 2169.97026  | 1 |
| 203 | H | 82.89620 | 71.19679 | 78.26158 | -2534.67717 | 60.25153    | 997.72295   | 1 |
| 204 | C | 81.65832 | 70.65405 | 76.53689 | 574.26774   | -389.43119  | -377.02542  | 1 |
| 205 | C | 82.15591 | 69.32433 | 76.39227 | 688.82679   | -287.33580  | -257.96133  | 1 |
| 206 | H | 82.66617 | 68.81772 | 77.23112 | 331.14182   | 1470.38163  | 2269.80013  | 1 |
| 207 | C | 80.96812 | 71.28906 | 75.46033 | -383.52382  | -675.04808  | 144.24917   | 1 |
| 208 | H | 80.54398 | 72.30187 | 75.58499 | 4.09847     | 1517.59662  | 2262.86397  | 1 |

|     |   |          |          |          |             |             |             |   |
|-----|---|----------|----------|----------|-------------|-------------|-------------|---|
| 209 | C | 82.00199 | 68.68698 | 75.15872 | -134.76730  | 428.45285   | -649.50303  | 1 |
| 210 | H | 82.39748 | 67.66281 | 75.04320 | -903.23433  | 1600.49020  | 2011.53387  | 1 |
| 211 | C | 80.84921 | 70.61189 | 74.24202 | -335.53281  | -615.00040  | -364.39058  | 1 |
| 212 | H | 80.33215 | 71.12067 | 73.40874 | 1596.45398  | -1369.33862 | 1732.02659  | 1 |
| 213 | C | 81.36923 | 69.30189 | 74.04156 | 585.48547   | -340.24194  | -406.23938  | 1 |
| 214 | O | 81.25889 | 68.60456 | 72.79427 | -419.15649  | -173.04408  | -511.94141  | 1 |
| 215 | H | 80.83039 | 69.31112 | 72.25934 | -1071.84350 | 1559.71507  | -1960.13012 | 1 |
| 216 | C | 81.13743 | 71.73241 | 80.32255 | 291.41878   | -183.13091  | 710.72246   | 1 |
| 217 | O | 82.31517 | 71.85201 | 80.67119 | 379.87695   | 523.47396   | -222.23622  | 1 |
| 218 | N | 80.04547 | 72.03154 | 80.98917 | 564.30591   | 373.09380   | 277.24371   | 1 |
| 219 | H | 79.18542 | 71.80286 | 80.49303 | -120.59931  | -2436.07824 | -1214.35098 | 1 |
| 220 | C | 80.02994 | 72.80230 | 82.18338 | 404.07514   | -299.37480  | 608.84009   | 1 |
| 221 | H | 78.95740 | 72.80526 | 82.48117 | -1071.07882 | -841.69025  | 2359.66467  | 1 |
| 222 | C | 80.97935 | 72.07128 | 83.22464 | -683.12807  | 68.71770    | -390.13096  | 1 |
| 223 | H | 80.64133 | 71.02393 | 83.39216 | 2068.88918  | 1596.58590  | 770.89603   | 1 |
| 224 | H | 82.01439 | 71.98284 | 82.81485 | 1379.86429  | 2342.49779  | -179.85638  | 1 |
| 225 | C | 80.97924 | 72.87758 | 84.55873 | -176.39967  | 537.49466   | 550.97268   | 1 |
| 226 | H | 81.26766 | 73.93927 | 84.38505 | -396.28051  | 1942.22168  | 1869.33314  | 1 |
| 227 | H | 79.96373 | 72.90999 | 85.01212 | -94.44700   | 586.00678   | -2659.20016 | 1 |
| 228 | C | 82.02543 | 72.14420 | 85.52018 | -291.69381  | -718.18079  | -150.72929  | 1 |
| 229 | H | 81.83736 | 71.05782 | 85.71364 | -2303.38776 | 1089.76242  | 964.62032   | 1 |
| 230 | H | 83.09707 | 72.26154 | 85.21622 | 884.16729   | 2568.80533  | -207.74283  | 1 |
| 231 | N | 81.84626 | 72.83258 | 86.72801 | -594.49522  | -252.81478  | 342.29276   | 1 |
| 232 | H | 81.33901 | 73.70270 | 86.67959 | -1735.17426 | 2084.05705  | -263.71605  | 1 |
| 233 | C | 82.28770 | 72.44717 | 87.85626 | 595.23177   | -271.52487  | 442.22352   | 1 |
| 234 | N | 83.00580 | 71.24751 | 87.90473 | 585.53813   | -424.79750  | -105.81303  | 1 |
| 235 | H | 83.26285 | 70.61524 | 87.14784 | 959.88797   | 1327.56823  | -2177.11905 | 1 |
| 236 | H | 83.41675 | 70.84670 | 88.74845 | 1578.48647  | 16.27378    | -2220.76233 | 1 |
| 237 | N | 81.94416 | 73.35570 | 88.86695 | -452.17763  | -390.33541  | -421.51853  | 1 |
| 238 | H | 81.42034 | 74.22888 | 88.83052 | 470.26107   | 1974.25629  | -1817.92087 | 1 |
| 239 | H | 82.20363 | 73.22640 | 89.84566 | 1856.67307  | -1573.97321 | -1224.35416 | 1 |
| 240 | C | 80.57096 | 74.31751 | 81.87811 | -531.47271  | -581.45780  | -55.06206   | 1 |
| 241 | O | 79.79896 | 75.22608 | 82.00362 | -243.00837  | 192.73507   | 609.52485   | 1 |
| 242 | N | 81.88088 | 74.34142 | 81.61315 | 343.49288   | -644.25607  | 38.09164    | 1 |
| 243 | H | 82.36631 | 73.42173 | 81.47168 | -1691.16043 | -1535.97525 | -1484.73099 | 1 |
| 244 | C | 82.54039 | 75.57962 | 81.15482 | 542.66492   | 350.14337   | 454.42563   | 1 |
| 245 | H | 83.57924 | 75.38997 | 81.51189 | 1209.57979  | -2396.95920 | 463.86744   | 1 |
| 246 | C | 82.47322 | 75.64916 | 79.64519 | -737.14309  | 145.93010   | 242.71942   | 1 |
| 247 | H | 81.40138 | 75.70545 | 79.34735 | -1050.18303 | 159.36419   | -2509.06125 | 1 |
| 248 | C | 83.20770 | 76.86614 | 79.10807 | -706.77696  | -252.88343  | -245.16230  | 1 |
| 249 | H | 83.09658 | 76.95865 | 77.99341 | -1624.64039 | -1665.49085 | 1417.86935  | 1 |
| 250 | H | 82.83096 | 77.82326 | 79.56142 | 2566.10521  | 598.51109   | 693.22305   | 1 |
| 251 | H | 84.30878 | 76.81138 | 79.32831 | -1972.69758 | 107.10018   | -1876.34312 | 1 |
| 252 | C | 83.04850 | 74.40481 | 78.99024 | 412.85148   | 672.58832   | -27.69222   | 1 |
| 253 | H | 82.93910 | 74.43408 | 77.87138 | 1447.02277  | 1762.76533  | -1490.78944 | 1 |
| 254 | H | 84.14285 | 74.28179 | 79.21832 | 1320.77379  | -145.20455  | 2378.68491  | 1 |
| 255 | H | 82.52405 | 73.47588 | 79.36095 | -1512.10848 | 1470.52031  | 1724.75147  | 1 |
| 256 | C | 81.85467 | 76.85367 | 81.95018 | -607.11113  | 499.56689   | 73.73769    | 1 |
| 257 | O | 82.13012 | 77.02040 | 83.11201 | 357.97126   | 460.81534   | 356.68785   | 1 |
| 258 | N | 81.17573 | 77.66331 | 81.14092 | 536.55407   | -368.62270  | 332.76306   | 1 |
| 259 | H | 80.96893 | 77.38996 | 80.17352 | 524.38866   | 2297.69985  | 1367.20941  | 1 |
| 260 | C | 80.18844 | 78.51078 | 81.73676 | 46.50277    | -774.29190  | -147.97904  | 1 |
| 261 | H | 79.92735 | 78.03681 | 82.70942 | 1676.51875  | 1883.29066  | 1032.55549  | 1 |
| 262 | C | 80.79021 | 79.99873 | 81.91604 | -559.41456  | -34.19198   | -556.30433  | 1 |
| 263 | H | 81.08486 | 80.39163 | 80.91391 | -64.66664   | 395.18769   | 2695.05373  | 1 |
| 264 | H | 80.00662 | 80.69491 | 82.29941 | -2703.44278 | -60.40056   | 333.79418   | 1 |
| 265 | C | 81.98050 | 79.97613 | 82.83587 | -519.76435  | 377.31045   | 459.42366   | 1 |
| 266 | H | 82.66336 | 79.15782 | 82.50418 | -1746.74323 | 1667.50644  | -1261.73691 | 1 |
| 267 | C | 82.72982 | 81.30111 | 82.76765 | 570.95554   | 16.46261    | -545.27700  | 1 |
| 268 | H | 83.63350 | 81.29994 | 83.42998 | 2391.58273  | 28.05277    | -1305.07271 | 1 |
| 269 | H | 83.08061 | 81.52627 | 81.72766 | 175.75588   | 917.63458   | 2559.43867  | 1 |
| 270 | H | 82.08329 | 82.15684 | 83.09141 | -1063.97851 | -2155.34650 | 1283.00462  | 1 |



|     |   |          |          |          |             |             |             |   |
|-----|---|----------|----------|----------|-------------|-------------|-------------|---|
| 271 | C | 81.56812 | 79.69183 | 84.27379 | 193.76014   | 2.62946     | -765.53141  | 1 |
| 272 | H | 82.43896 | 79.76765 | 84.97494 | 507.39394   | -846.55087  | 2539.60089  | 1 |
| 273 | H | 80.78614 | 80.40941 | 84.63345 | 1337.57841  | 1818.19054  | 1526.01994  | 1 |
| 274 | H | 81.15291 | 78.65379 | 84.37755 | 1100.88635  | -1172.91350 | -2199.08909 | 1 |
| 275 | C | 79.02014 | 78.55962 | 80.64047 | -549.21115  | 475.64486   | -309.38218  | 1 |
| 276 | O | 79.15263 | 78.09426 | 79.53329 | 556.06106   | -390.37755  | -78.24250   | 1 |
| 277 | O | 77.84475 | 79.26033 | 80.98927 | -572.27940  | -310.19032  | -209.75862  | 1 |
| 278 | H | 78.07431 | 79.48643 | 81.93443 | -1380.08193 | 2212.14486  | 790.85944   | 1 |

Listing 10: C00010.xmolout

|    |   |          |          |          |             |             |             |        |          |
|----|---|----------|----------|----------|-------------|-------------|-------------|--------|----------|
| 1  |   | 276      |          |          |             |             |             |        |          |
| 2  |   | 150.0000 | 150.0000 | 150.0000 | 0.0000      | 0.0000      | 0.0000***** | 2.7750 | 11100    |
|    |   | 0.2500   | 300.00   | 0.00     | 0.00        | 0.00        | -1294.2214  | 0.0000 | 300.0000 |
| 3  | H | 71.61414 | 87.28463 | 75.84055 | -2043.14101 | -1757.64893 | 399.89339   |        | 1        |
| 4  | N | 72.42419 | 87.12158 | 75.24494 | 426.75047   | 490.45733   | -334.42467  |        | 1        |
| 5  | H | 71.96957 | 86.72832 | 74.42222 | 442.25559   | -1110.30854 | -2448.52907 |        | 1        |
| 6  | C | 73.17452 | 88.29579 | 74.98116 | 415.32972   | -666.39213  | 83.73172    |        | 1        |
| 7  | H | 72.48753 | 89.15564 | 75.13823 | 879.32219   | 2491.00447  | 667.35213   |        | 1        |
| 8  | C | 74.42430 | 88.30739 | 75.99907 | 31.35357    | 477.41777   | 628.23362   |        | 1        |
| 9  | H | 74.94679 | 87.32529 | 75.92213 | 1168.38489  | 2240.25337  | -1019.71136 |        | 1        |
| 10 | H | 75.16540 | 89.08760 | 75.69979 | -360.43770  | 2534.90498  | 931.67112   |        | 1        |
| 11 | C | 73.94652 | 88.53769 | 77.41044 | 463.18208   | 512.70242   | -382.34388  |        | 1        |
| 12 | H | 73.06655 | 87.88212 | 77.59695 | 1725.29117  | 1863.52247  | -987.07854  |        | 1        |
| 13 | C | 75.04035 | 88.16323 | 78.40261 | 710.42801   | -144.27427  | -313.15367  |        | 1        |
| 14 | H | 74.72261 | 88.35204 | 79.46049 | 364.20195   | -1033.13725 | 2494.72524  |        | 1        |
| 15 | H | 75.31401 | 87.07930 | 78.32614 | 2567.61904  | 335.80679   | 847.48802   |        | 1        |
| 16 | H | 75.97660 | 88.75366 | 78.22632 | -2587.99029 | 680.92867   | -512.16411  |        | 1        |
| 17 | C | 73.53363 | 89.98752 | 77.62208 | 268.17616   | 741.64379   | -40.42634   |        | 1        |
| 18 | H | 73.18411 | 90.16948 | 78.67126 | 1283.54314  | -1945.37420 | -1411.27812 |        | 1        |
| 19 | H | 74.38612 | 90.68956 | 77.43078 | -1258.57796 | 1317.15249  | -2026.02085 |        | 1        |
| 20 | H | 72.69875 | 90.28776 | 76.93784 | -2502.84526 | 909.80597   | 575.92391   |        | 1        |
| 21 | C | 73.71781 | 88.19152 | 73.45893 | 619.36578   | -458.64843  | -172.09273  |        | 1        |
| 22 | O | 73.78899 | 89.20302 | 72.75364 | -81.40433   | 433.87611   | 522.34594   |        | 1        |
| 23 | N | 74.17657 | 86.97935 | 73.23133 | 175.23996   | -622.20190  | 341.55523   |        | 1        |
| 24 | H | 74.00513 | 86.33728 | 74.00810 | -876.57256  | -303.22879  | -2561.90213 |        | 1        |
| 25 | C | 74.22312 | 86.39767 | 71.91571 | -571.88214  | -534.10783  | -106.15033  |        | 1        |
| 26 | H | 73.22879 | 85.91266 | 71.80919 | -2713.20841 | -16.25800   | -248.80809  |        | 1        |
| 27 | C | 74.45121 | 87.51368 | 70.80439 | 166.60354   | 288.16399   | -716.09568  |        | 1        |
| 28 | H | 75.18643 | 88.26896 | 71.21704 | -2097.85574 | 1636.78449  | -586.18044  |        | 1        |
| 29 | O | 73.30492 | 88.30213 | 70.47104 | -317.80580  | -363.38227  | 484.43082   |        | 1        |
| 30 | H | 73.40906 | 89.04688 | 71.17387 | 1863.74748  | -1451.84923 | 1357.29467  |        | 1        |
| 31 | C | 75.09961 | 86.70738 | 69.62145 | 503.80731   | 517.99032   | 318.51606   |        | 1        |
| 32 | H | 75.39382 | 87.38047 | 68.78307 | 640.61020   | -2157.10410 | -1536.29104 |        | 1        |
| 33 | H | 76.01480 | 86.15571 | 69.94095 | 1687.88455  | 465.60692   | 2087.56452  |        | 1        |
| 34 | H | 74.38855 | 85.95499 | 69.20763 | -1293.07895 | -1899.88581 | -1463.57452 |        | 1        |
| 35 | C | 75.35926 | 85.23428 | 71.99965 | -153.07550  | -733.68902  | 248.70981   |        | 1        |
| 36 | O | 74.93550 | 84.11810 | 71.84902 | 186.15459   | -480.78787  | -449.34387  |        | 1        |
| 37 | N | 76.62496 | 85.63935 | 72.19125 | -487.53139  | 543.18517   | 42.03850    |        | 1        |
| 38 | C | 77.71914 | 84.72727 | 72.08409 | -699.35871  | 69.34393    | 360.10701   |        | 1        |
| 39 | H | 77.43688 | 83.94098 | 71.34711 | 2.81126     | -221.99807  | -2715.58072 |        | 1        |
| 40 | C | 78.90732 | 85.69727 | 71.66514 | -507.46439  | -592.59194  | 122.07761   |        | 1        |
| 41 | H | 79.91146 | 85.25579 | 71.85332 | -1975.08116 | 525.87560   | -1801.71556 |        | 1        |
| 42 | H | 78.86617 | 85.95839 | 70.58434 | 1588.27743  | -1913.22100 | 1113.83566  |        | 1        |
| 43 | C | 78.59282 | 86.93181 | 72.56534 | -613.62442  | -457.55993  | -194.14490  |        | 1        |
| 44 | H | 78.86368 | 86.73873 | 73.62842 | 1707.54637  | -721.27992  | 1996.92523  |        | 1        |
| 45 | H | 79.13080 | 87.85750 | 72.26057 | 758.23357   | 2100.81767  | 1560.55011  |        | 1        |
| 46 | C | 77.01790 | 87.03065 | 72.37954 | -352.41524  | 704.96076   | 49.21465    |        | 1        |
| 47 | H | 76.45162 | 87.43669 | 73.25090 | 1714.76886  | -2070.42778 | 443.35792   |        | 1        |
| 48 | H | 76.70680 | 87.57086 | 71.45529 | 1224.15040  | 1801.50881  | 1636.97633  |        | 1        |
| 49 | C | 78.15043 | 84.10924 | 73.54141 | 566.85117   | 537.05831   | 117.62814   |        | 1        |
| 50 | O | 79.07137 | 83.32834 | 73.60416 | -550.26779  | -406.08867  | 4.21666     |        | 1        |

|     |   |          |          |          |             |             |             |   |
|-----|---|----------|----------|----------|-------------|-------------|-------------|---|
| 51  | N | 77.41246 | 84.59692 | 74.53951 | 566.34832   | -425.77725  | 180.18749   | 1 |
| 52  | H | 76.70252 | 85.27680 | 74.26861 | 644.44502   | 2646.80550  | -52.73430   | 1 |
| 53  | C | 78.02751 | 84.59099 | 75.83869 | 612.34801   | -281.48662  | 411.56221   | 1 |
| 54  | H | 79.11884 | 84.67985 | 75.64163 | 1667.23498  | -1490.75142 | 1556.16753  | 1 |
| 55  | C | 77.40085 | 85.82075 | 76.63288 | -714.45746  | -175.43074  | 286.98927   | 1 |
| 56  | H | 76.28111 | 85.74277 | 76.59497 | -787.09484  | 1763.03619  | -1922.46060 | 1 |
| 57  | O | 77.74920 | 87.11373 | 76.09601 | -429.46514  | 516.51932   | -128.40526  | 1 |
| 58  | H | 76.86893 | 87.48778 | 75.91026 | 1981.82785  | 436.16847   | -1818.18182 | 1 |
| 59  | C | 77.87820 | 85.53259 | 78.10380 | 630.79189   | -468.94448  | 76.03230    | 1 |
| 60  | H | 77.46948 | 86.28239 | 78.82022 | -1775.71861 | 2062.30353  | 131.89849   | 1 |
| 61  | H | 77.54844 | 84.52602 | 78.45360 | -1855.14608 | 88.94118    | 1993.53760  | 1 |
| 62  | H | 78.98898 | 85.56703 | 78.18704 | -1504.82350 | -780.94249  | -2132.90992 | 1 |
| 63  | C | 77.64399 | 83.15767 | 76.52177 | 288.57638   | 618.62814   | -397.00270  | 1 |
| 64  | O | 76.48521 | 82.88953 | 76.84105 | 321.70495   | -185.26452  | 574.37218   | 1 |
| 65  | N | 78.75054 | 82.49298 | 76.72185 | -447.05792  | -446.53431  | 367.76425   | 1 |
| 66  | H | 79.59083 | 82.94068 | 76.35689 | 350.31316   | 1975.63644  | -1843.31522 | 1 |
| 67  | C | 78.86020 | 81.17969 | 77.24750 | -511.23061  | 374.03917   | -471.51480  | 1 |
| 68  | H | 79.86916 | 81.21976 | 77.71344 | 2234.79579  | -898.70890  | -1273.45190 | 1 |
| 69  | C | 77.69364 | 80.90123 | 78.30011 | 529.53781   | -159.34528  | 563.72604   | 1 |
| 70  | H | 78.03477 | 80.06190 | 78.97012 | 654.59388   | 2347.94251  | 1217.51488  | 1 |
| 71  | H | 77.62689 | 81.82862 | 78.93049 | -1526.55661 | 2103.42026  | 817.87394   | 1 |
| 72  | O | 76.40611 | 80.52447 | 77.80053 | -554.84278  | 14.12789    | 399.58769   | 1 |
| 73  | H | 76.10624 | 81.44754 | 77.43373 | 1297.06236  | 2061.84854  | 1220.68812  | 1 |
| 74  | C | 78.92859 | 80.10463 | 76.01305 | -662.15484  | -412.13544  | 123.62687   | 1 |
| 75  | O | 80.00257 | 79.51413 | 75.88906 | -540.01537  | -317.05804  | 274.91456   | 1 |
| 76  | N | 77.83462 | 80.02924 | 75.30464 | -202.76299  | -690.00100  | -131.49145  | 1 |
| 77  | H | 77.08828 | 80.64887 | 75.62844 | -702.62132  | -2617.37191 | 281.70413   | 1 |
| 78  | C | 77.61877 | 79.14746 | 74.20979 | -491.73914  | 576.34187   | 222.73509   | 1 |
| 79  | H | 76.82004 | 79.64346 | 73.61362 | 1977.17978  | -1823.58850 | -434.68928  | 1 |
| 80  | C | 78.98229 | 78.97116 | 73.40617 | -649.50797  | -328.66843  | 306.11224   | 1 |
| 81  | H | 79.77479 | 78.54868 | 74.07106 | 2075.07803  | 1452.16490  | -1004.45904 | 1 |
| 82  | C | 78.77313 | 78.04860 | 72.15782 | -615.18735  | -489.99689  | -70.96352   | 1 |
| 83  | H | 79.71179 | 77.94407 | 71.56436 | -1226.32661 | -1724.38906 | -1716.47170 | 1 |
| 84  | H | 78.45553 | 77.02154 | 72.45672 | 2381.64273  | -969.84735  | 900.46860   | 1 |
| 85  | H | 77.99136 | 78.45333 | 71.47326 | 2122.74991  | 1702.23946  | -141.36228  | 1 |
| 86  | C | 79.41307 | 80.37880 | 72.86929 | -501.86074  | -479.61276  | -376.42482  | 1 |
| 87  | H | 80.37834 | 80.33185 | 72.31215 | 993.79261   | -2246.95401 | -1177.81305 | 1 |
| 88  | H | 78.64943 | 80.80971 | 72.17993 | 42.71279    | -626.15391  | -2651.37258 | 1 |
| 89  | H | 79.54610 | 81.10672 | 73.70800 | -2026.39012 | -1590.33709 | -887.82922  | 1 |
| 90  | C | 77.12375 | 77.70212 | 74.77586 | -672.89153  | 382.57394   | -156.34072  | 1 |
| 91  | O | 77.41918 | 77.25099 | 75.88521 | 410.04627   | 221.86223   | 500.35950   | 1 |
| 92  | N | 76.45132 | 77.10637 | 73.82297 | -378.11782  | -443.79414  | -441.10984  | 1 |
| 93  | H | 76.28630 | 77.62079 | 72.96254 | 2404.15973  | -568.14894  | 1149.30085  | 1 |
| 94  | C | 76.05308 | 75.73442 | 73.99622 | -544.54484  | 466.16019   | 331.29119   | 1 |
| 95  | H | 76.99531 | 75.18620 | 74.21095 | -1409.80988 | -170.17955  | 2325.32679  | 1 |
| 96  | C | 75.09842 | 75.75565 | 75.25813 | -184.48284  | 116.78282   | -758.89137  | 1 |
| 97  | H | 75.70117 | 75.95951 | 76.17657 | 1893.78641  | 1861.14652  | 611.04528   | 1 |
| 98  | H | 74.38692 | 76.60785 | 75.17019 | -2170.79665 | -974.19311  | 1327.50117  | 1 |
| 99  | C | 74.31378 | 74.41304 | 75.40369 | 389.51668   | 672.81878   | -138.49152  | 1 |
| 100 | H | 73.76098 | 74.18517 | 74.46678 | 510.64577   | 1933.03327  | 1851.02484  | 1 |
| 101 | H | 75.00881 | 73.55153 | 75.51162 | -2302.30869 | -1105.72939 | -948.89774  | 1 |
| 102 | C | 73.32172 | 74.48788 | 76.62469 | -559.93427  | -126.34590  | 542.30857   | 1 |
| 103 | O | 72.46066 | 73.65212 | 76.76537 | -670.36003  | -111.83166  | 76.36448    | 1 |
| 104 | N | 73.56861 | 75.51633 | 77.46017 | -216.06729  | -537.07037  | 446.51379   | 1 |
| 105 | H | 74.26708 | 76.26656 | 77.39899 | -1251.96487 | 1074.12894  | -2168.52500 | 1 |
| 106 | H | 73.01684 | 75.71980 | 78.30079 | -2451.83023 | -720.73851  | 944.84612   | 1 |
| 107 | C | 75.28336 | 75.25441 | 72.65022 | 546.24052   | -563.88337  | -85.11809   | 1 |
| 108 | O | 74.21330 | 75.74489 | 72.35276 | 71.70702    | -307.40463  | 606.69673   | 1 |
| 109 | N | 75.95111 | 74.27478 | 72.03704 | 479.90863   | -504.50129  | 222.86849   | 1 |
| 110 | C | 75.53555 | 73.77422 | 70.75635 | 75.51268    | -600.91904  | 506.73700   | 1 |
| 111 | H | 75.14452 | 74.64747 | 70.18390 | -2033.61562 | 1795.30103  | 254.89480   | 1 |
| 112 | C | 76.87345 | 73.09752 | 70.22235 | 523.79067   | 517.99274   | 284.45581   | 1 |

|     |   |          |          |          |             |             |             |   |
|-----|---|----------|----------|----------|-------------|-------------|-------------|---|
| 113 | H | 76.68681 | 72.35107 | 69.41810 | 1599.61665  | -1127.00911 | 1895.98173  | 1 |
| 114 | H | 77.58263 | 73.84846 | 69.80876 | -1881.83093 | 1275.82488  | -1501.55016 | 1 |
| 115 | C | 77.41557 | 72.46085 | 71.53907 | -600.05639  | -404.05026  | 316.64485   | 1 |
| 116 | H | 76.84709 | 71.53554 | 71.79194 | -2597.05260 | 496.36221   | 657.73249   | 1 |
| 117 | H | 78.48897 | 72.17037 | 71.48821 | -1666.24518 | 1294.38985  | -1723.90591 | 1 |
| 118 | C | 77.12488 | 73.61529 | 72.59210 | 493.57570   | -129.95376  | -602.56394  | 1 |
| 119 | H | 76.87122 | 73.26408 | 73.62062 | -1469.08415 | -637.84797  | 2204.22581  | 1 |
| 120 | H | 77.92084 | 74.39495 | 72.65069 | -1038.97840 | 1068.88701  | -2280.71789 | 1 |
| 121 | C | 74.42274 | 72.61514 | 71.01809 | 188.88100   | 241.05089   | -727.87821  | 1 |
| 122 | O | 74.74702 | 71.44915 | 70.89812 | 531.88613   | -49.19943   | 427.07960   | 1 |
| 123 | N | 73.22676 | 73.14344 | 71.27524 | 708.14833   | 26.93417    | -179.73509  | 1 |
| 124 | H | 73.30152 | 74.16278 | 71.41898 | -2232.69501 | -1179.09831 | 1023.94816  | 1 |
| 125 | C | 72.21963 | 72.37449 | 72.05524 | -738.32412  | 259.92548   | 104.42456   | 1 |
| 126 | H | 72.81020 | 72.04495 | 72.94483 | 2028.89123  | 1260.02983  | 1311.33324  | 1 |
| 127 | C | 71.08984 | 73.31747 | 72.39099 | -258.65678  | -345.52513  | 661.28459   | 1 |
| 128 | H | 70.75483 | 73.79447 | 71.44184 | -1826.06090 | -1801.46097 | -918.64554  | 1 |
| 129 | C | 69.90599 | 72.58899 | 73.00459 | -541.23400  | 531.92970   | -218.41428  | 1 |
| 130 | H | 69.10482 | 73.30346 | 73.33982 | 1311.73218  | -2219.18200 | 882.19023   | 1 |
| 131 | H | 69.43104 | 71.87613 | 72.27013 | -1048.71298 | 1223.58118  | -2196.97971 | 1 |
| 132 | H | 70.21806 | 71.98329 | 73.90099 | 419.06414   | 1903.92898  | 1903.44670  | 1 |
| 133 | C | 71.51848 | 74.42446 | 73.33789 | -423.86431  | 152.66566   | -648.55262  | 1 |
| 134 | H | 70.70752 | 75.19125 | 73.47450 | 105.68386   | -2342.50080 | 1387.51238  | 1 |
| 135 | H | 71.75995 | 74.01776 | 74.35913 | -1695.63603 | -1484.73621 | -1531.02793 | 1 |
| 136 | H | 72.44078 | 74.97131 | 72.95980 | -1853.57121 | -487.39031  | 1936.59343  | 1 |
| 137 | C | 71.71796 | 71.09350 | 71.16777 | 539.71428   | -510.58232  | 267.58633   | 1 |
| 138 | O | 70.60836 | 71.03755 | 70.66606 | -15.93758   | -278.34085  | -624.49402  | 1 |
| 139 | N | 72.64949 | 70.16334 | 71.15867 | -676.81886  | 12.05292    | 276.17960   | 1 |
| 140 | H | 73.57899 | 70.34434 | 71.59634 | -1694.44250 | -373.84189  | -2100.66098 | 1 |
| 141 | C | 72.53907 | 69.17530 | 70.12264 | 412.33078   | -664.70360  | 108.35451   | 1 |
| 142 | H | 71.88792 | 69.66540 | 69.36077 | 1765.77476  | 1294.44366  | 1621.76594  | 1 |
| 143 | C | 74.00733 | 68.82490 | 69.65623 | -179.66635  | -721.95667  | -264.73915  | 1 |
| 144 | H | 74.53344 | 69.73927 | 69.29381 | -607.34922  | 2587.87032  | -598.10018  | 1 |
| 145 | H | 74.61402 | 68.45377 | 70.51287 | -359.69332  | -1479.13954 | -2259.74260 | 1 |
| 146 | C | 73.89202 | 67.73208 | 68.54223 | -240.01076  | 616.02425   | 431.85322   | 1 |
| 147 | H | 73.37973 | 66.83052 | 68.95569 | -1359.17131 | 782.54425   | 2227.99181  | 1 |
| 148 | H | 73.26343 | 68.08790 | 67.69533 | -820.36667  | 85.81767    | -2596.78715 | 1 |
| 149 | C | 75.35198 | 67.37788 | 68.04838 | -513.07015  | 236.18570   | -551.87280  | 1 |
| 150 | H | 75.85503 | 68.27512 | 67.61983 | 1816.11944  | -1183.11722 | -1650.94321 | 1 |
| 151 | H | 75.98981 | 67.05189 | 68.90184 | -1800.04429 | -1361.53473 | 1526.34643  | 1 |
| 152 | C | 75.23625 | 66.25470 | 66.99180 | 726.08972   | -253.19732  | -179.64713  | 1 |
| 153 | H | 74.83310 | 65.29767 | 67.37886 | 1224.27271  | -456.51798  | -2390.90304 | 1 |
| 154 | H | 74.70025 | 66.54414 | 66.06594 | 1206.40339  | -1150.93514 | -2154.90344 | 1 |
| 155 | N | 76.68684 | 65.90543 | 66.51553 | 329.70796   | -633.68968  | -155.67358  | 1 |
| 156 | H | 76.75740 | 65.13445 | 65.79041 | 1348.31305  | 1938.76845  | 1359.00643  | 1 |
| 157 | H | 77.24334 | 66.68023 | 66.05005 | 2096.92035  | 1446.54551  | -966.48890  | 1 |
| 158 | H | 77.36662 | 65.55911 | 67.25351 | -1197.07217 | -2303.53719 | 827.28733   | 1 |
| 159 | C | 71.81330 | 67.88665 | 70.83110 | -378.01186  | -556.17301  | -413.96481  | 1 |
| 160 | O | 72.39049 | 66.83732 | 71.01624 | -409.44433  | -307.55053  | -453.30833  | 1 |
| 161 | N | 70.57309 | 68.25169 | 71.09695 | -429.02477  | 524.70884   | 274.08502   | 1 |
| 162 | H | 70.28470 | 69.22193 | 70.85798 | 1706.34263  | -1425.96036 | 1574.38926  | 1 |
| 163 | C | 69.68813 | 67.38479 | 71.79332 | -45.25864   | -626.22952  | 478.93267   | 1 |
| 164 | H | 68.69597 | 67.88359 | 71.71145 | 1988.63164  | 570.90773   | 1772.87287  | 1 |
| 165 | C | 69.74647 | 65.97695 | 71.06252 | 551.77128   | -20.49526   | -564.54996  | 1 |
| 166 | H | 69.61713 | 66.11096 | 69.96502 | 1434.61535  | -1753.10253 | 1513.99471  | 1 |
| 167 | H | 70.76034 | 65.51933 | 71.18974 | -714.67738  | 1819.09770  | 1898.36494  | 1 |
| 168 | C | 68.64512 | 65.02976 | 71.63801 | 446.99263   | -555.77305  | 338.97221   | 1 |
| 169 | H | 68.81901 | 64.83969 | 72.72537 | 1953.68466  | 1892.25957  | -161.67766  | 1 |
| 170 | H | 67.63443 | 65.49008 | 71.56144 | -403.03785  | 2688.07032  | -188.43591  | 1 |
| 171 | C | 68.72405 | 63.68735 | 70.80355 | 567.86262   | 335.74681   | 434.04421   | 1 |
| 172 | H | 68.46150 | 63.86851 | 69.73587 | -1080.02275 | 1568.26081  | -1948.78900 | 1 |
| 173 | H | 69.76459 | 63.28856 | 70.79552 | -919.54108  | 2111.34692  | 1456.13463  | 1 |
| 174 | C | 67.75764 | 62.66549 | 71.44461 | 195.81897   | 173.33862   | -745.11536  | 1 |

|     |   |          |          |          |             |             |             |   |
|-----|---|----------|----------|----------|-------------|-------------|-------------|---|
| 175 | H | 68.05495 | 62.32300 | 72.45595 | 1405.67949  | -2301.21089 | -390.08113  | 1 |
| 176 | H | 66.69292 | 62.97286 | 71.44643 | -940.37328  | -1118.32446 | 2299.72133  | 1 |
| 177 | N | 67.79628 | 61.37373 | 70.55929 | 319.26422   | 656.36007   | -42.02424   | 1 |
| 178 | H | 67.19407 | 60.56773 | 70.89486 | 1961.03633  | 619.91968   | 1787.09422  | 1 |
| 179 | H | 67.47404 | 61.46903 | 69.55240 | 854.14343   | -2156.80752 | 1429.08711  | 1 |
| 180 | H | 68.73759 | 60.89705 | 70.44394 | 1237.02905  | -1378.50857 | -1998.28500 | 1 |
| 181 | C | 70.16449 | 67.21755 | 73.34941 | 532.53319   | -268.57236  | 517.55729   | 1 |
| 182 | O | 69.64429 | 66.37289 | 74.03694 | 266.16714   | -290.73804  | -558.88002  | 1 |
| 183 | N | 71.03037 | 68.15566 | 73.70321 | -226.25352  | 640.49678   | -270.32839  | 1 |
| 184 | H | 71.33376 | 68.90367 | 73.06291 | 2007.69063  | -1035.27229 | 1523.50231  | 1 |
| 185 | C | 71.86429 | 67.95972 | 74.84400 | -540.76542  | -573.33303  | 49.50000    | 1 |
| 186 | H | 71.29000 | 67.39333 | 75.61186 | -2374.20950 | -1036.76023 | 843.75774   | 1 |
| 187 | C | 73.16614 | 67.18144 | 74.33134 | -77.09082   | 666.87422   | -415.84136  | 1 |
| 188 | H | 73.60780 | 67.78038 | 73.48563 | -985.81834  | 617.19825   | 2463.91927  | 1 |
| 189 | O | 72.94586 | 65.87879 | 73.76419 | 293.29899   | -391.65602  | -477.80926  | 1 |
| 190 | H | 72.85480 | 66.09612 | 72.80334 | 2528.72714  | -681.76262  | -751.27122  | 1 |
| 191 | C | 74.11104 | 67.22698 | 75.58292 | 252.47363   | -605.14473  | 440.05134   | 1 |
| 192 | H | 75.08379 | 66.72275 | 75.37757 | -2052.65063 | 1456.49051  | -1043.51830 | 1 |
| 193 | H | 74.34280 | 68.27346 | 75.89393 | -2152.98800 | -1661.97574 | -161.70652  | 1 |
| 194 | H | 73.65419 | 66.70870 | 76.45933 | -473.12726  | -1584.27339 | 2165.61725  | 1 |
| 195 | C | 72.20687 | 69.52354 | 75.16137 | 360.36307   | 488.46713   | 505.10056   | 1 |
| 196 | O | 72.06164 | 70.33207 | 74.26114 | -200.08817  | -528.03552  | -385.82850  | 1 |
| 197 | N | 72.64060 | 69.69867 | 76.40146 | -597.54095  | -226.44775  | 355.20479   | 1 |
| 198 | H | 72.69810 | 68.90019 | 77.03388 | 2179.23655  | -1300.70981 | -991.33835  | 1 |
| 199 | C | 73.19485 | 70.95639 | 76.75380 | -687.68921  | 297.39807   | -249.45179  | 1 |
| 200 | H | 72.68276 | 71.62915 | 76.02203 | -349.16256  | -2467.37713 | -1101.72831 | 1 |
| 201 | C | 72.87874 | 71.25482 | 78.29084 | 672.47345   | 361.54328   | -201.62880  | 1 |
| 202 | H | 73.51558 | 70.61729 | 78.94937 | 1541.41502  | 582.18425   | 2169.97026  | 1 |
| 203 | H | 73.13815 | 72.32215 | 78.49724 | -2534.67717 | 60.25153    | 997.72295   | 1 |
| 204 | C | 71.39943 | 70.99660 | 78.61097 | 574.26774   | -389.43119  | -377.02542  | 1 |
| 205 | C | 70.43446 | 71.99387 | 78.28020 | 688.82679   | -287.33580  | -257.96133  | 1 |
| 206 | H | 70.75120 | 72.92794 | 77.76309 | 331.14182   | 1470.38163  | 2269.80013  | 1 |
| 207 | C | 71.00643 | 69.77868 | 79.24446 | -383.52382  | -675.04808  | 144.24917   | 1 |
| 208 | H | 71.75325 | 68.99928 | 79.48278 | 4.09847     | 1517.59662  | 2262.86397  | 1 |
| 209 | C | 69.10183 | 71.76355 | 78.62515 | -134.76730  | 428.45285   | -649.50303  | 1 |
| 210 | H | 68.35107 | 72.53605 | 78.38390 | -903.23433  | 1600.49020  | 2011.53387  | 1 |
| 211 | C | 69.65921 | 69.59538 | 79.56351 | -335.53281  | -615.00040  | -364.39058  | 1 |
| 212 | H | 69.36412 | 68.65321 | 80.05809 | 1596.45398  | -1369.33862 | 1732.02659  | 1 |
| 213 | C | 68.66271 | 70.57460 | 79.27774 | 585.48547   | -340.24194  | -406.23938  | 1 |
| 214 | O | 67.29434 | 70.39784 | 79.61198 | -419.15649  | -173.04408  | -511.94141  | 1 |
| 215 | H | 67.33878 | 69.50436 | 80.02799 | -1071.84350 | 1559.71507  | -1960.13012 | 1 |
| 216 | C | 74.80615 | 70.88590 | 76.47604 | 291.41878   | -183.13091  | 710.72246   | 1 |
| 217 | O | 75.22609 | 70.71728 | 75.35435 | 379.87695   | 523.47396   | -222.23622  | 1 |
| 218 | N | 75.50958 | 71.00997 | 77.59790 | 564.30591   | 373.09380   | 277.24371   | 1 |
| 219 | H | 75.04776 | 71.18030 | 78.49102 | -120.59931  | -2436.07824 | -1214.35098 | 1 |
| 220 | C | 76.91590 | 71.20062 | 77.45774 | 404.07514   | -299.37480  | 608.84009   | 1 |
| 221 | H | 77.16229 | 70.70862 | 76.48815 | -1071.07882 | -841.69025  | 2359.66467  | 1 |
| 222 | C | 77.14939 | 72.76920 | 77.44793 | -683.12807  | 68.71770    | -390.13096  | 1 |
| 223 | H | 76.35253 | 73.28798 | 76.87136 | 2068.88918  | 1596.58590  | 770.89603   | 1 |
| 224 | H | 77.09302 | 73.18051 | 78.48154 | 1379.86429  | 2342.49779  | -179.85638  | 1 |
| 225 | C | 78.55379 | 73.01374 | 76.81656 | -176.39967  | 537.49466   | 550.97268   | 1 |
| 226 | H | 79.34883 | 72.54373 | 77.43764 | -396.28051  | 1942.22168  | 1869.33314  | 1 |
| 227 | H | 78.62812 | 72.53391 | 75.81537 | -94.44700   | 586.00678   | -2659.20016 | 1 |
| 228 | C | 78.76644 | 74.59276 | 76.70479 | -291.69381  | -718.18079  | -150.72929  | 1 |
| 229 | H | 78.09461 | 75.13416 | 75.98782 | -2303.38776 | 1089.76242  | 964.62032   | 1 |
| 230 | H | 78.75326 | 75.15525 | 77.67334 | 884.16729   | 2568.80533  | -207.74283  | 1 |
| 231 | N | 80.07562 | 74.62819 | 76.20138 | -594.49522  | -252.81478  | 342.29276   | 1 |
| 232 | H | 80.53815 | 73.74180 | 76.07379 | -1735.17426 | 2084.05705  | -263.71605  | 1 |
| 233 | C | 80.71629 | 75.69439 | 75.92120 | 595.23177   | -271.52487  | 442.22352   | 1 |
| 234 | N | 80.06748 | 76.90962 | 76.10254 | 585.53813   | -424.79750  | -105.81303  | 1 |
| 235 | H | 79.06955 | 77.03703 | 76.39071 | 959.88797   | 1327.56823  | -2177.11905 | 1 |
| 236 | H | 80.48030 | 77.85225 | 75.89621 | 1578.48647  | 16.27378    | -2220.76233 | 1 |

|     |   |          |          |          |             |             |             |   |
|-----|---|----------|----------|----------|-------------|-------------|-------------|---|
| 237 | N | 82.01604 | 75.41683 | 75.46178 | -452.17763  | -390.33541  | -421.51853  | 1 |
| 238 | H | 82.50604 | 74.53192 | 75.34736 | 470.26107   | 1974.25629  | -1817.92087 | 1 |
| 239 | H | 82.68581 | 76.14489 | 75.21369 | 1856.67307  | -1573.97321 | -1224.35416 | 1 |
| 240 | C | 77.64904 | 70.57445 | 78.78838 | -531.47271  | -581.45780  | -55.06206   | 1 |
| 241 | O | 77.77105 | 71.21851 | 79.80853 | -243.00837  | 192.73507   | 609.52485   | 1 |
| 242 | N | 77.99498 | 69.31307 | 78.55472 | 343.49288   | -644.25607  | 38.09164    | 1 |
| 243 | H | 77.76984 | 68.99589 | 77.61129 | -1691.16043 | -1535.97525 | -1484.73099 | 1 |
| 244 | C | 78.94363 | 68.57831 | 79.38818 | 542.66492   | 350.14337   | 454.42563   | 1 |
| 245 | H | 79.06102 | 67.60662 | 78.85123 | 1209.57979  | -2396.95920 | 463.86744   | 1 |
| 246 | C | 80.24498 | 69.36269 | 79.44627 | -737.14309  | 145.93010   | 242.71942   | 1 |
| 247 | H | 80.00932 | 70.36575 | 79.87024 | -1050.18303 | 159.36419   | -2509.06125 | 1 |
| 248 | C | 81.27541 | 68.69143 | 80.33333 | -706.77696  | -252.88343  | -245.16230  | 1 |
| 249 | H | 82.22465 | 69.29125 | 80.40174 | -1624.64039 | -1665.49085 | 1417.86935  | 1 |
| 250 | H | 80.88278 | 68.55084 | 81.38815 | 2566.10521  | 598.51109   | 693.22305   | 1 |
| 251 | H | 81.55369 | 67.67246 | 79.94605 | -1972.69758 | 107.10018   | -1876.34312 | 1 |
| 252 | C | 80.83093 | 69.56789 | 78.06012 | 412.85148   | 672.58832   | -27.69222   | 1 |
| 253 | H | 81.77829 | 70.17233 | 78.09151 | 1447.02277  | 1762.76533  | -1490.78944 | 1 |
| 254 | H | 81.07981 | 68.58659 | 77.57016 | 1320.77379  | -145.20455  | 2378.68491  | 1 |
| 255 | H | 80.11135 | 70.10353 | 77.38240 | -1512.10848 | 1470.52031  | 1724.75147  | 1 |
| 256 | C | 78.24165 | 68.37474 | 80.87604 | -607.11113  | 499.56689   | 73.73769    | 1 |
| 257 | O | 78.91433 | 68.25082 | 81.87990 | 357.97126   | 460.81534   | 356.68785   | 1 |
| 258 | N | 76.93043 | 68.26977 | 80.75244 | 536.55407   | -368.62270  | 332.76306   | 1 |
| 259 | H | 76.55578 | 68.40764 | 79.81609 | 524.38866   | 2297.69985  | 1367.20941  | 1 |
| 260 | C | 76.13352 | 68.02979 | 81.89489 | 46.50277    | -774.29190  | -147.97904  | 1 |
| 261 | H | 76.84730 | 67.69395 | 82.68191 | 1676.51875  | 1883.29066  | 1032.55549  | 1 |
| 262 | C | 75.34250 | 69.38375 | 82.28682 | -559.41456  | -34.19198   | -556.30433  | 1 |
| 263 | H | 74.60659 | 69.62177 | 81.48225 | -64.66664   | 395.18769   | 2695.05373  | 1 |
| 264 | H | 74.73963 | 69.21835 | 83.21151 | -2703.44278 | -60.40056   | 333.79418   | 1 |
| 265 | C | 76.29912 | 70.53132 | 82.46717 | -519.76435  | 377.31045   | 459.42366   | 1 |
| 266 | H | 76.88518 | 70.66946 | 81.51186 | -1746.74323 | 1667.50644  | -1261.73691 | 1 |
| 267 | C | 75.52148 | 71.81142 | 82.74648 | 570.95554   | 16.46261    | -545.27700  | 1 |
| 268 | H | 76.20464 | 72.69006 | 82.87590 | 2391.58273  | 28.05277    | -1305.07271 | 1 |
| 269 | H | 74.81878 | 72.05745 | 81.90869 | 175.75588   | 917.63458   | 2559.43867  | 1 |
| 270 | H | 74.90792 | 71.72655 | 83.68040 | -1063.97851 | -2155.34650 | 1283.00462  | 1 |
| 271 | C | 77.28118 | 70.26389 | 83.59710 | 193.76014   | 2.62946     | -765.53141  | 1 |
| 272 | H | 77.89964 | 71.16932 | 83.83023 | 507.39394   | -846.55087  | 2539.60089  | 1 |
| 273 | H | 76.75820 | 69.96593 | 84.54293 | 1337.57841  | 1818.19054  | 1526.01994  | 1 |
| 274 | H | 77.99761 | 69.43341 | 83.32282 | 1100.88635  | -1172.91350 | -2199.08909 | 1 |
| 275 | C | 74.99554 | 66.96562 | 81.47070 | -549.21115  | 475.64486   | -309.38218  | 1 |
| 276 | O | 74.58609 | 66.84934 | 80.34517 | 556.06106   | -390.37755  | -78.24250   | 1 |
| 277 | O | 74.37125 | 66.28032 | 82.53978 | -572.27940  | -310.19032  | -209.75862  | 1 |
| 278 | H | 74.93887 | 66.61410 | 83.28909 | -1380.08193 | 2212.14486  | 790.85944   | 1 |

Listing 11: C00011.xmolout

|    |   |          |          |          |             |             |             |        |          |
|----|---|----------|----------|----------|-------------|-------------|-------------|--------|----------|
| 1  |   | 276      |          |          |             |             |             |        |          |
| 2  |   | 150.0000 | 150.0000 | 150.0000 | 0.0000      | 0.0000      | 0.0000***** | 0.8412 | 3365     |
|    |   | 0.2500   | 300.00   | 0.00     | 0.00        | 0.00        | -1294.1729  | 0.0000 | 300.0000 |
| 3  | H | 77.10411 | 73.37372 | 81.69057 | -2043.14101 | -1757.64893 | 399.89339   |        | 1        |
| 4  | N | 77.99704 | 73.74902 | 82.00846 | 426.75047   | 490.45733   | -334.42467  |        | 1        |
| 5  | H | 78.51201 | 72.90672 | 82.29087 | 442.25559   | -1110.30854 | -2448.52907 |        | 1        |
| 6  | C | 78.70723 | 74.46890 | 81.02212 | 415.32972   | -666.39213  | 83.73172    |        | 1        |
| 7  | H | 77.98589 | 74.76090 | 80.22733 | 879.32219   | 2491.00447  | 667.35213   |        | 1        |
| 8  | C | 79.40510 | 75.74283 | 81.72733 | 31.35357    | 477.41777   | 628.23362   |        | 1        |
| 9  | H | 79.87051 | 75.42510 | 82.69046 | 1168.38489  | 2240.25337  | -1019.71136 |        | 1        |
| 10 | H | 80.23343 | 76.14703 | 81.09544 | -360.43770  | 2534.90498  | 931.67112   |        | 1        |
| 11 | C | 78.34191 | 76.78379 | 81.95649 | 463.18208   | 512.70242   | -382.34388  |        | 1        |
| 12 | H | 77.41065 | 76.26478 | 82.27868 | 1725.29117  | 1863.52247  | -987.07854  |        | 1        |
| 13 | C | 78.75812 | 77.74318 | 83.06444 | 710.42801   | -144.27427  | -313.15367  |        | 1        |
| 14 | H | 77.97008 | 78.51533 | 83.26077 | 364.20195   | -1033.13725 | 2494.72524  |        | 1        |
| 15 | H | 78.94251 | 77.20435 | 84.02969 | 2567.61904  | 335.80679   | 847.48802   |        | 1        |
| 16 | H | 79.70096 | 78.28967 | 82.80415 | -2587.99029 | 680.92867   | -512.16411  |        | 1        |

|    |   |          |          |          |             |             |             |   |
|----|---|----------|----------|----------|-------------|-------------|-------------|---|
| 17 | C | 78.06022 | 77.56451 | 80.67947 | 268.17616   | 741.64379   | -40.42634   | 1 |
| 18 | H | 77.24461 | 78.31837 | 80.82793 | 1283.54314  | -1945.37420 | -1411.27812 | 1 |
| 19 | H | 78.96683 | 78.12325 | 80.33102 | -1258.57796 | 1317.15249  | -2026.02085 | 1 |
| 20 | H | 77.74431 | 76.89334 | 79.84012 | -2502.84526 | 909.80597   | 575.92391   | 1 |
| 21 | C | 79.85352 | 73.42632 | 80.53399 | 619.36578   | -458.64843  | -172.09273  | 1 |
| 22 | O | 80.09312 | 72.38269 | 81.10689 | -81.40433   | 433.87611   | 522.34594   | 1 |
| 23 | N | 80.40253 | 73.92333 | 79.42258 | 175.23996   | -622.20190  | 341.55523   | 1 |
| 24 | H | 80.12009 | 74.86623 | 79.15553 | -876.57256  | -303.22879  | -2561.90213 | 1 |
| 25 | C | 81.67119 | 73.42021 | 79.01681 | -571.88214  | -534.10783  | -106.15033  | 1 |
| 26 | H | 81.76847 | 72.43964 | 79.53740 | -2713.20841 | -16.25800   | -248.80809  | 1 |
| 27 | C | 81.54513 | 73.31316 | 77.42037 | 166.60354   | 288.16399   | -716.09568  | 1 |
| 28 | H | 81.15004 | 74.29995 | 77.05835 | -2097.85574 | 1636.78449  | -586.18044  | 1 |
| 29 | O | 80.58234 | 72.33737 | 76.96377 | -317.80580  | -363.38227  | 484.43082   | 1 |
| 30 | H | 79.85704 | 72.92347 | 76.67959 | 1863.74748  | -1451.84923 | 1357.29467  | 1 |
| 31 | C | 82.99440 | 73.11972 | 76.85182 | 503.80731   | 517.99032   | 318.51606   | 1 |
| 32 | H | 82.99663 | 73.17148 | 75.73732 | 640.61020   | -2157.10410 | -1536.29104 | 1 |
| 33 | H | 83.71568 | 73.91484 | 77.21859 | 1687.88455  | 465.60692   | 2087.56452  | 1 |
| 34 | H | 83.41741 | 72.12683 | 77.13061 | -1293.07895 | -1899.88581 | -1463.57452 | 1 |
| 35 | C | 82.75179 | 74.54008 | 79.49014 | -153.07550  | -733.68902  | 248.70981   | 1 |
| 36 | O | 82.38847 | 75.67119 | 79.68462 | 186.15459   | -480.78787  | -449.34387  | 1 |
| 37 | N | 83.98370 | 74.02546 | 79.56261 | -487.53139  | 543.18517   | 42.03850    | 1 |
| 38 | C | 85.13340 | 74.87927 | 79.71822 | -699.35871  | 69.34393    | 360.10701   | 1 |
| 39 | H | 84.91803 | 75.52578 | 80.59943 | 2.81126     | -221.99807  | -2715.58072 | 1 |
| 40 | C | 86.31873 | 73.84559 | 79.93435 | -507.46439  | -592.59194  | 122.07761   | 1 |
| 41 | H | 87.27838 | 74.20266 | 79.49733 | -1975.08116 | 525.87560   | -1801.71556 | 1 |
| 42 | H | 86.51631 | 73.68093 | 81.01701 | 1588.27743  | -1913.22100 | 1113.83566  | 1 |
| 43 | C | 85.78846 | 72.54436 | 79.25817 | -613.62442  | -457.55993  | -194.14490  | 1 |
| 44 | H | 85.89844 | 72.59189 | 78.15150 | 1707.54637  | -721.27992  | 1996.92523  | 1 |
| 45 | H | 86.30678 | 71.61880 | 79.59593 | 758.23357   | 2100.81767  | 1560.55011  | 1 |
| 46 | C | 84.25788 | 72.60438 | 79.69340 | -352.41524  | 704.96076   | 49.21465    | 1 |
| 47 | H | 83.55674 | 72.01582 | 79.05923 | 1714.76886  | -2070.42778 | 443.35792   | 1 |
| 48 | H | 84.07443 | 72.35979 | 80.76735 | 1224.15040  | 1801.50881  | 1636.97633  | 1 |
| 49 | C | 85.35710 | 75.75612 | 78.36934 | 566.85117   | 537.05831   | 117.62814   | 1 |
| 50 | O | 85.02902 | 75.34406 | 77.25470 | -550.26779  | -406.08867  | 4.21666     | 1 |
| 51 | N | 85.98648 | 76.85518 | 78.70378 | 566.34832   | -425.77725  | 180.18749   | 1 |
| 52 | H | 86.17002 | 76.97368 | 79.69947 | 644.44502   | 2646.80550  | -52.73430   | 1 |
| 53 | C | 86.51274 | 77.78594 | 77.77421 | 612.34801   | -281.48662  | 411.56221   | 1 |
| 54 | H | 87.09742 | 78.48491 | 78.41142 | 1667.23498  | -1490.75142 | 1556.16753  | 1 |
| 55 | C | 87.43919 | 76.97646 | 76.74742 | -714.45746  | -175.43074  | 286.98927   | 1 |
| 56 | H | 86.83489 | 76.15502 | 76.26758 | -787.09484  | 1763.03619  | -1922.46060 | 1 |
| 57 | O | 88.58044 | 76.33217 | 77.34280 | -429.46514  | 516.51932   | -128.40526  | 1 |
| 58 | H | 88.39020 | 75.39363 | 77.14225 | 1981.82785  | 436.16847   | -1818.18182 | 1 |
| 59 | C | 87.75797 | 78.06864 | 75.66394 | 630.79189   | -468.94448  | 76.03230    | 1 |
| 60 | H | 88.42243 | 77.66369 | 74.86525 | -1775.71861 | 2062.30353  | 131.89849   | 1 |
| 61 | H | 86.82959 | 78.43500 | 75.16176 | -1855.14608 | 88.94118    | 1993.53760  | 1 |
| 62 | H | 88.27241 | 78.95255 | 76.10877 | -1504.82350 | -780.94249  | -2132.90992 | 1 |
| 63 | C | 85.29392 | 78.57253 | 77.01063 | 288.57638   | 618.62814   | -397.00270  | 1 |
| 64 | O | 85.24900 | 79.77469 | 77.10527 | 321.70495   | -185.26452  | 574.37218   | 1 |
| 65 | N | 84.49383 | 77.76775 | 76.31998 | -447.05792  | -446.53431  | 367.76425   | 1 |
| 66 | H | 84.63182 | 76.72578 | 76.29800 | 350.31316   | 1975.63644  | -1843.31522 | 1 |
| 67 | C | 83.62867 | 78.43194 | 75.39330 | -511.23061  | 374.03917   | -471.51480  | 1 |
| 68 | H | 83.20232 | 79.30260 | 75.94210 | 2234.79579  | -898.70890  | -1273.45190 | 1 |
| 69 | C | 84.55203 | 78.90286 | 74.17409 | 529.53781   | -159.34528  | 563.72604   | 1 |
| 70 | H | 83.86202 | 79.39235 | 73.43802 | 654.59388   | 2347.94251  | 1217.51488  | 1 |
| 71 | H | 85.24363 | 79.71775 | 74.51596 | -1526.55661 | 2103.42026  | 817.87394   | 1 |
| 72 | O | 85.35322 | 77.86989 | 73.52862 | -554.84278  | 14.12789    | 399.58769   | 1 |
| 73 | H | 84.67619 | 77.16646 | 73.46509 | 1297.06236  | 2061.84854  | 1220.68812  | 1 |
| 74 | C | 82.55031 | 77.34166 | 74.84917 | -662.15484  | -412.13544  | 123.62687   | 1 |
| 75 | O | 82.86602 | 76.23352 | 74.48378 | -540.01537  | -317.05804  | 274.91456   | 1 |
| 76 | N | 81.35401 | 77.93776 | 74.75887 | -202.76299  | -690.00100  | -131.49145  | 1 |
| 77 | H | 81.27151 | 78.89951 | 75.09040 | -702.62132  | -2617.37191 | 281.70413   | 1 |
| 78 | C | 80.21287 | 77.08170 | 74.86510 | -491.73914  | 576.34187   | 222.73509   | 1 |

|     |   |          |          |          |             |             |             |   |
|-----|---|----------|----------|----------|-------------|-------------|-------------|---|
| 79  | H | 80.58431 | 76.11239 | 74.46075 | 1977.17978  | -1823.58850 | -434.68928  | 1 |
| 80  | C | 79.80832 | 76.97316 | 76.39702 | -649.50797  | -328.66843  | 306.11224   | 1 |
| 81  | H | 79.20421 | 77.85260 | 76.70710 | 2075.07803  | 1452.16490  | -1004.45904 | 1 |
| 82  | C | 78.99009 | 75.65058 | 76.59190 | -615.18735  | -489.99689  | -70.96352   | 1 |
| 83  | H | 78.92636 | 75.35650 | 77.66466 | -1226.32661 | -1724.38906 | -1716.47170 | 1 |
| 84  | H | 77.94240 | 75.75093 | 76.22366 | 2381.64273  | -969.84735  | 900.46860   | 1 |
| 85  | H | 79.45287 | 74.80072 | 76.03907 | 2122.74991  | 1702.23946  | -141.36228  | 1 |
| 86  | C | 81.09465 | 76.88531 | 77.28826 | -501.86074  | -479.61276  | -376.42482  | 1 |
| 87  | H | 80.84826 | 76.66630 | 78.35471 | 993.79261   | -2246.95401 | -1177.81305 | 1 |
| 88  | H | 81.79377 | 76.09124 | 76.93421 | 42.71279    | -626.15391  | -2651.37258 | 1 |
| 89  | H | 81.66911 | 77.84121 | 77.27466 | -2026.39012 | -1590.33709 | -887.82922  | 1 |
| 90  | C | 79.02056 | 77.78776 | 73.99517 | -672.89153  | 382.57394   | -156.34072  | 1 |
| 91  | O | 79.14778 | 78.88784 | 73.50338 | 410.04627   | 221.86223   | 500.35950   | 1 |
| 92  | N | 77.97645 | 76.97310 | 73.96308 | -378.11782  | -443.79414  | -441.10984  | 1 |
| 93  | H | 78.07344 | 76.10926 | 74.49140 | 2404.15973  | -568.14894  | 1149.30085  | 1 |
| 94  | C | 76.86453 | 77.11272 | 73.07423 | -544.54484  | 466.16019   | 331.29119   | 1 |
| 95  | H | 76.01915 | 76.91399 | 73.76822 | -1409.80988 | -170.17955  | 2325.32679  | 1 |
| 96  | C | 76.82253 | 78.57659 | 72.47541 | -184.48284  | 116.78282   | -758.89137  | 1 |
| 97  | H | 76.97499 | 79.32912 | 73.28558 | 1893.78641  | 1861.14652  | 611.04528   | 1 |
| 98  | H | 77.67437 | 78.71714 | 71.76893 | -2170.79665 | -974.19311  | 1327.50117  | 1 |
| 99  | C | 75.46455 | 78.83235 | 71.74660 | 389.51668   | 672.81878   | -138.49152  | 1 |
| 100 | H | 75.27859 | 78.04674 | 70.97757 | 510.64577   | 1933.03327  | 1851.02484  | 1 |
| 101 | H | 74.61282 | 78.71841 | 72.45409 | -2302.30869 | -1105.72939 | -948.89774  | 1 |
| 102 | C | 75.42055 | 80.25766 | 71.07573 | -559.93427  | -126.34590  | 542.30857   | 1 |
| 103 | O | 74.43804 | 80.60223 | 70.47048 | -670.36003  | -111.83166  | 76.36448    | 1 |
| 104 | N | 76.54484 | 80.98692 | 71.24837 | -216.06729  | -537.07037  | 446.51379   | 1 |
| 105 | H | 77.40821 | 80.76525 | 71.75775 | -1251.96487 | 1074.12894  | -2168.52500 | 1 |
| 106 | H | 76.67299 | 81.93417 | 70.87692 | -2451.83023 | -720.73851  | 944.84612   | 1 |
| 107 | C | 76.83225 | 76.01112 | 71.87361 | 546.24052   | -563.88337  | -85.11809   | 1 |
| 108 | O | 75.73191 | 75.84706 | 71.39960 | 71.70702    | -307.40463  | 606.69673   | 1 |
| 109 | N | 77.97205 | 75.40884 | 71.50812 | 479.90863   | -504.50129  | 222.86849   | 1 |
| 110 | C | 78.04379 | 74.65223 | 70.29003 | 75.51268    | -600.91904  | 506.73700   | 1 |
| 111 | H | 77.38314 | 75.16835 | 69.55506 | -2033.61562 | 1795.30103  | 254.89480   | 1 |
| 112 | C | 79.59860 | 74.68663 | 69.95040 | 523.79067   | 517.99274   | 284.45581   | 1 |
| 113 | H | 79.90952 | 73.85990 | 69.27292 | 1599.61665  | -1127.00911 | 1895.98173  | 1 |
| 114 | H | 79.88846 | 75.63739 | 69.45027 | -1881.83093 | 1275.82488  | -1501.55016 | 1 |
| 115 | C | 80.22267 | 74.58606 | 71.37541 | -600.05639  | -404.05026  | 316.64485   | 1 |
| 116 | H | 80.18236 | 73.54248 | 71.76135 | -2597.05260 | 496.36221   | 657.73249   | 1 |
| 117 | H | 81.28900 | 74.90324 | 71.42346 | -1666.24518 | 1294.38985  | -1723.90591 | 1 |
| 118 | C | 79.24988 | 75.54498 | 72.19121 | 493.57570   | -129.95376  | -602.56394  | 1 |
| 119 | H | 79.10598 | 75.25840 | 73.25751 | -1469.08415 | -637.84797  | 2204.22581  | 1 |
| 120 | H | 79.50471 | 76.63030 | 72.13170 | -1038.97840 | 1068.88701  | -2280.71789 | 1 |
| 121 | C | 77.60303 | 73.10316 | 70.51637 | 188.88100   | 241.05089   | -727.87821  | 1 |
| 122 | O | 77.66610 | 72.31131 | 69.58434 | 531.88613   | -49.19943   | 427.07960   | 1 |
| 123 | N | 77.18755 | 72.87036 | 71.75290 | 708.14833   | 26.93417    | -179.73509  | 1 |
| 124 | H | 77.27112 | 73.70365 | 72.33040 | -2232.69501 | -1179.09831 | 1023.94816  | 1 |
| 125 | C | 77.15621 | 71.50700 | 72.31324 | -738.32412  | 259.92548   | 104.42456   | 1 |
| 126 | H | 78.03803 | 71.02571 | 71.82679 | 2028.89123  | 1260.02983  | 1311.33324  | 1 |
| 127 | C | 77.22831 | 71.58923 | 73.82371 | -258.65678  | -345.52513  | 661.28459   | 1 |
| 128 | H | 76.29525 | 72.10323 | 74.17661 | -1826.06090 | -1801.46097 | -918.64554  | 1 |
| 129 | C | 77.27493 | 70.20704 | 74.45051 | -541.23400  | 531.92970   | -218.41428  | 1 |
| 130 | H | 77.30394 | 70.25936 | 75.57341 | 1311.73218  | -2219.18200 | 882.19023   | 1 |
| 131 | H | 76.37075 | 69.59748 | 74.16599 | -1048.71298 | 1223.58118  | -2196.97971 | 1 |
| 132 | H | 78.18388 | 69.63234 | 74.12196 | 419.06414   | 1903.92898  | 1903.44670  | 1 |
| 133 | C | 78.40617 | 72.40901 | 74.31909 | -423.86431  | 152.66566   | -648.55262  | 1 |
| 134 | H | 78.43295 | 72.44279 | 75.44173 | 105.68386   | -2342.50080 | 1387.51238  | 1 |
| 135 | H | 79.38750 | 71.98126 | 73.97478 | -1695.63603 | -1484.73621 | -1531.02793 | 1 |
| 136 | H | 78.35987 | 73.47124 | 73.95672 | -1853.57121 | -487.39031  | 1936.59343  | 1 |
| 137 | C | 75.72958 | 70.82487 | 71.84336 | 539.71428   | -510.58232  | 267.58633   | 1 |
| 138 | O | 74.89667 | 70.51189 | 72.67946 | -15.93758   | -278.34085  | -624.49402  | 1 |
| 139 | N | 75.73117 | 70.64884 | 70.54931 | -676.81886  | 12.05292    | 276.17960   | 1 |
| 140 | H | 76.53658 | 71.02302 | 69.99382 | -1694.44250 | -373.84189  | -2100.66098 | 1 |

|     |   |          |          |          |             |             |             |   |
|-----|---|----------|----------|----------|-------------|-------------|-------------|---|
| 141 | C | 74.62758 | 70.09479 | 69.84875 | 412.33078   | -664.70360  | 108.35451   | 1 |
| 142 | H | 75.03453 | 69.94573 | 68.82308 | 1765.77476  | 1294.44366  | 1621.76594  | 1 |
| 143 | C | 74.17529 | 68.75008 | 70.55810 | -179.66635  | -721.95667  | -264.73915  | 1 |
| 144 | H | 75.04746 | 68.08275 | 70.73753 | -607.34922  | 2587.87032  | -598.10018  | 1 |
| 145 | H | 73.74729 | 68.95869 | 71.56679 | -359.69332  | -1479.13954 | -2259.74260 | 1 |
| 146 | C | 73.11774 | 68.06833 | 69.62987 | -240.01076  | 616.02425   | 431.85322   | 1 |
| 147 | H | 72.27271 | 68.76287 | 69.42240 | -1359.17131 | 782.54425   | 2227.99181  | 1 |
| 148 | H | 73.56322 | 67.82588 | 68.63924 | -820.36667  | 85.81767    | -2596.78715 | 1 |
| 149 | C | 72.59856 | 66.75620 | 70.34548 | -513.07015  | 236.18570   | -551.87280  | 1 |
| 150 | H | 73.44608 | 66.07781 | 70.59642 | 1816.11944  | -1183.11722 | -1650.94321 | 1 |
| 151 | H | 72.10776 | 66.99964 | 71.31582 | -1800.04429 | -1361.53473 | 1526.34643  | 1 |
| 152 | C | 71.60694 | 66.06256 | 69.38298 | 726.08972   | -253.19732  | -179.64713  | 1 |
| 153 | H | 70.68393 | 66.63997 | 69.17605 | 1224.27271  | -456.51798  | -2390.90304 | 1 |
| 154 | H | 72.05619 | 65.71539 | 68.43115 | 1206.40339  | -1150.93514 | -2154.90344 | 1 |
| 155 | N | 71.10610 | 64.75085 | 70.07746 | 329.70796   | -633.68968  | -155.67358  | 1 |
| 156 | H | 70.42769 | 64.16382 | 69.51130 | 1348.31305  | 1938.76845  | 1359.00643  | 1 |
| 157 | H | 71.84165 | 64.02892 | 70.33105 | 2096.92035  | 1446.54551  | -966.48890  | 1 |
| 158 | H | 70.57772 | 64.85570 | 70.99205 | -1197.07217 | -2303.53719 | 827.28733   | 1 |
| 159 | C | 73.35175 | 71.12678 | 69.83682 | -378.01186  | -556.17301  | -413.96481  | 1 |
| 160 | O | 72.83440 | 71.39400 | 68.77851 | -409.44433  | -307.55053  | -453.30833  | 1 |
| 161 | N | 72.96976 | 71.50956 | 71.04927 | -429.02477  | 524.70884   | 274.08502   | 1 |
| 162 | H | 73.44836 | 71.16681 | 71.91049 | 1706.34263  | -1425.96036 | 1574.38926  | 1 |
| 163 | C | 71.80832 | 72.36356 | 71.05679 | -45.25864   | -626.22952  | 478.93267   | 1 |
| 164 | H | 72.07452 | 73.06460 | 70.23231 | 1988.63164  | 570.90773   | 1772.87287  | 1 |
| 165 | C | 70.57398 | 71.46261 | 70.64481 | 551.77128   | -20.49526   | -564.54996  | 1 |
| 166 | H | 70.82884 | 70.85126 | 69.74667 | 1434.61535  | -1753.10253 | 1513.99471  | 1 |
| 167 | H | 70.31270 | 70.74161 | 71.45191 | -714.67738  | 1819.09770  | 1898.36494  | 1 |
| 168 | C | 69.39133 | 72.44229 | 70.35067 | 446.99263   | -555.77305  | 338.97221   | 1 |
| 169 | H | 69.15246 | 73.02424 | 71.26890 | 1953.68466  | 1892.25957  | -161.67766  | 1 |
| 170 | H | 69.68313 | 73.18975 | 69.57931 | -403.03785  | 2688.07032  | -188.43591  | 1 |
| 171 | C | 68.12904 | 71.62058 | 69.86846 | 567.86262   | 335.74681   | 434.04421   | 1 |
| 172 | H | 68.35702 | 71.04290 | 68.94335 | -1080.02275 | 1568.26081  | -1948.78900 | 1 |
| 173 | H | 67.81988 | 70.86909 | 70.63046 | -919.54108  | 2111.34692  | 1456.13463  | 1 |
| 174 | C | 67.00710 | 72.65497 | 69.61638 | 195.81897   | 173.33862   | -745.11536  | 1 |
| 175 | H | 66.66830 | 73.19500 | 70.52149 | 1405.67949  | -2301.21089 | -390.08113  | 1 |
| 176 | H | 67.22209 | 73.37876 | 68.80498 | -940.37328  | -1118.32446 | 2299.72133  | 1 |
| 177 | N | 65.74097 | 71.87782 | 69.12328 | 319.26422   | 656.36007   | -42.02424   | 1 |
| 178 | H | 64.88891 | 72.47600 | 68.91904 | 1961.03633  | 619.91968   | 1787.09422  | 1 |
| 179 | H | 65.83466 | 71.33572 | 68.21543 | 854.14343   | -2156.80752 | 1429.08711  | 1 |
| 180 | H | 65.33256 | 71.14682 | 69.77558 | 1237.02905  | -1378.50857 | -1998.28500 | 1 |
| 181 | C | 71.63775 | 73.07288 | 72.51308 | 532.53319   | -268.57236  | 517.55729   | 1 |
| 182 | O | 70.62757 | 72.90077 | 73.19114 | 266.16714   | -290.73804  | -558.88002  | 1 |
| 183 | N | 72.65675 | 73.86913 | 72.73588 | -226.25352  | 640.49678   | -270.32839  | 1 |
| 184 | H | 73.40012 | 73.86156 | 72.03961 | 2007.69063  | -1035.27229 | 1523.50231  | 1 |
| 185 | C | 72.82641 | 74.47609 | 74.02126 | -540.76542  | -573.33303  | 49.50000    | 1 |
| 186 | H | 72.52987 | 73.66002 | 74.71760 | -2374.20950 | -1036.76023 | 843.75774   | 1 |
| 187 | C | 74.34373 | 74.93251 | 74.11103 | -77.09082   | 666.87422   | -415.84136  | 1 |
| 188 | H | 74.50395 | 75.71681 | 73.31963 | -985.81834  | 617.19825   | 2463.91927  | 1 |
| 189 | O | 75.32539 | 73.89955 | 73.83997 | 293.29899   | -391.65602  | -477.80926  | 1 |
| 190 | H | 75.64768 | 74.18447 | 72.95920 | 2528.72714  | -681.76262  | -751.27122  | 1 |
| 191 | C | 74.45487 | 75.57134 | 75.54284 | 252.47363   | -605.14473  | 440.05134   | 1 |
| 192 | H | 75.46571 | 76.00880 | 75.71577 | -2052.65063 | 1456.49051  | -1043.51830 | 1 |
| 193 | H | 73.71018 | 76.38909 | 75.69970 | -2152.98800 | -1661.97574 | -161.70652  | 1 |
| 194 | H | 74.28511 | 74.80961 | 76.33917 | -473.12726  | -1584.27339 | 2165.61725  | 1 |
| 195 | C | 71.81497 | 75.75691 | 74.12742 | 360.36307   | 488.46713   | 505.10056   | 1 |
| 196 | O | 72.23376 | 76.89092 | 74.13150 | -200.08817  | -528.03552  | -385.82850  | 1 |
| 197 | N | 70.56036 | 75.33433 | 74.24402 | -597.54095  | -226.44775  | 355.20479   | 1 |
| 198 | H | 70.31347 | 74.31731 | 74.16107 | 2179.23655  | -1300.70981 | -991.33835  | 1 |
| 199 | C | 69.58442 | 76.33187 | 74.46668 | -687.68921  | 297.39807   | -249.45179  | 1 |
| 200 | H | 70.12685 | 77.30567 | 74.53498 | -349.16256  | -2467.37713 | -1101.72831 | 1 |
| 201 | C | 68.50314 | 76.25320 | 73.27981 | 672.47345   | 361.54328   | -201.62880  | 1 |
| 202 | H | 68.07921 | 75.22627 | 73.24233 | 1541.41502  | 582.18425   | 2169.97026  | 1 |



|     |   |          |          |          |             |             |             |   |
|-----|---|----------|----------|----------|-------------|-------------|-------------|---|
| 203 | H | 67.65674 | 76.94623 | 73.48846 | -2534.67717 | 60.25153    | 997.72295   | 1 |
| 204 | C | 69.17281 | 76.60016 | 71.94511 | 574.26774   | -389.43119  | -377.02542  | 1 |
| 205 | C | 69.01294 | 77.88977 | 71.35343 | 688.82679   | -287.33580  | -257.96133  | 1 |
| 206 | H | 68.41302 | 78.67069 | 71.85422 | 331.14182   | 1470.38163  | 2269.80013  | 1 |
| 207 | C | 69.98014 | 75.61392 | 71.30144 | -383.52382  | -675.04808  | 144.24917   | 1 |
| 208 | H | 70.14460 | 74.63381 | 71.78454 | 4.09847     | 1517.59662  | 2262.86397  | 1 |
| 209 | C | 69.62953 | 78.14228 | 70.12845 | -134.76730  | 428.45285   | -649.50303  | 1 |
| 210 | H | 69.50861 | 79.14077 | 69.67290 | -903.23433  | 1600.49020  | 2011.53387  | 1 |
| 211 | C | 70.57543 | 75.91034 | 70.07369 | -335.53281  | -615.00040  | -364.39058  | 1 |
| 212 | H | 71.19499 | 75.13468 | 69.59009 | 1596.45398  | -1369.33862 | 1732.02659  | 1 |
| 213 | C | 70.41640 | 77.17574 | 69.43646 | 585.48547   | -340.24194  | -406.23938  | 1 |
| 214 | O | 70.99712 | 77.48537 | 68.17920 | -419.15649  | -173.04408  | -511.94141  | 1 |
| 215 | H | 71.52053 | 76.66260 | 68.02946 | -1071.84350 | 1559.71507  | -1960.13012 | 1 |
| 216 | C | 68.73430 | 75.89346 | 75.79657 | 291.41878   | -183.13091  | 710.72246   | 1 |
| 217 | O | 68.24351 | 74.78141 | 75.91536 | 379.87695   | 523.47396   | -222.23622  | 1 |
| 218 | N | 68.58796 | 76.94637 | 76.58142 | 564.30591   | 373.09380   | 277.24371   | 1 |
| 219 | H | 69.03899 | 77.80889 | 76.28167 | -120.59931  | -2436.07824 | -1214.35098 | 1 |
| 220 | C | 68.19878 | 76.75682 | 77.94753 | 404.07514   | -299.37480  | 608.84009   | 1 |
| 221 | H | 68.55958 | 75.72934 | 78.18035 | -1071.07882 | -841.69025  | 2359.66467  | 1 |
| 222 | C | 68.88630 | 77.91020 | 78.78105 | -683.12807  | 68.71770    | -390.13096  | 1 |
| 223 | H | 69.98617 | 77.92013 | 78.60737 | 2068.88918  | 1596.58590  | 770.89603   | 1 |
| 224 | H | 68.52081 | 78.90389 | 78.43670 | 1379.86429  | 2342.49779  | -179.85638  | 1 |
| 225 | C | 68.56559 | 77.70564 | 80.29521 | -176.39967  | 537.49466   | 550.97268   | 1 |
| 226 | H | 67.45924 | 77.63334 | 80.45422 | -396.28051  | 1942.22168  | 1869.33314  | 1 |
| 227 | H | 68.99230 | 76.75029 | 80.67501 | -94.44700   | 586.00678   | -2659.20016 | 1 |
| 228 | C | 69.17079 | 78.96228 | 81.07317 | -291.69381  | -718.18079  | -150.72929  | 1 |
| 229 | H | 70.28596 | 79.06257 | 81.05612 | -2303.38776 | 1089.76242  | 964.62032   | 1 |
| 230 | H | 68.73082 | 79.95200 | 80.78825 | 884.16729   | 2568.80533  | -207.74283  | 1 |
| 231 | N | 68.77355 | 78.68768 | 82.39031 | -594.49522  | -252.81478  | 342.29276   | 1 |
| 232 | H | 68.13720 | 77.91634 | 82.52085 | -1735.17426 | 2084.05705  | -263.71605  | 1 |
| 233 | C | 69.14334 | 79.34721 | 83.41243 | 595.23177   | -271.52487  | 442.22352   | 1 |
| 234 | N | 70.01730 | 80.42189 | 83.21642 | 585.53813   | -424.79750  | -105.81303  | 1 |
| 235 | H | 70.40962 | 80.78661 | 82.34939 | 959.88797   | 1327.56823  | -2177.11905 | 1 |
| 236 | H | 70.37302 | 81.02836 | 83.95610 | 1578.48647  | 16.27378    | -2220.76233 | 1 |
| 237 | N | 68.56446 | 78.83003 | 84.57998 | -452.17763  | -390.33541  | -421.51853  | 1 |
| 238 | H | 67.92276 | 78.05074 | 84.71785 | 470.26107   | 1974.25629  | -1817.92087 | 1 |
| 239 | H | 68.73106 | 79.22173 | 85.50760 | 1856.67307  | -1573.97321 | -1224.35416 | 1 |
| 240 | C | 66.57319 | 76.84388 | 78.04372 | -531.47271  | -581.45780  | -55.06206   | 1 |
| 241 | O | 66.00416 | 77.37763 | 78.97152 | -243.00837  | 192.73507   | 609.52485   | 1 |
| 242 | N | 66.04308 | 76.18281 | 77.02409 | 343.49288   | -644.25607  | 38.09164    | 1 |
| 243 | H | 66.67571 | 75.73908 | 76.33669 | -1691.16043 | -1535.97525 | -1484.73099 | 1 |
| 244 | C | 64.63788 | 76.33521 | 76.78808 | 542.66492   | 350.14337   | 454.42563   | 1 |
| 245 | H | 64.21938 | 76.21571 | 77.81272 | 1209.57979  | -2396.95920 | 463.86744   | 1 |
| 246 | C | 64.31668 | 77.77757 | 76.21134 | -737.14309  | 145.93010   | 242.71942   | 1 |
| 247 | H | 64.80660 | 77.92134 | 75.22446 | -1050.18303 | 159.36419   | -2509.06125 | 1 |
| 248 | C | 62.75846 | 77.89422 | 76.09289 | -706.77696  | -252.88343  | -245.16230  | 1 |
| 249 | H | 62.44658 | 78.89765 | 75.71911 | -1624.64039 | -1665.49085 | 1417.86935  | 1 |
| 250 | H | 62.34796 | 77.13146 | 75.38548 | 2566.10521  | 598.51109   | 693.22305   | 1 |
| 251 | H | 62.25887 | 77.73797 | 77.07785 | -1972.69758 | 107.10018   | -1876.34312 | 1 |
| 252 | C | 64.76494 | 78.89729 | 77.21591 | 412.85148   | 672.58832   | -27.69222   | 1 |
| 253 | H | 64.41902 | 79.90678 | 76.88835 | 1447.02277  | 1762.76533  | -1490.78944 | 1 |
| 254 | H | 64.35077 | 78.71891 | 78.23850 | 1320.77379  | -145.20455  | 2378.68491  | 1 |
| 255 | H | 65.87653 | 78.94292 | 77.31133 | -1512.10848 | 1470.52031  | 1724.75147  | 1 |
| 256 | C | 64.24437 | 75.15941 | 75.73194 | -607.11113  | 499.56689   | 73.73769    | 1 |
| 257 | O | 63.57421 | 75.36641 | 74.74158 | 357.97126   | 460.81534   | 356.68785   | 1 |
| 258 | N | 64.75507 | 74.00952 | 76.16233 | 536.55407   | -368.62270  | 332.76306   | 1 |
| 259 | H | 65.30597 | 74.00724 | 77.02110 | 524.38866   | 2297.69985  | 1367.20941  | 1 |
| 260 | C | 64.44422 | 72.82006 | 75.46448 | 46.50277    | -774.29190  | -147.97904  | 1 |
| 261 | H | 63.66514 | 73.11131 | 74.72282 | 1676.51875  | 1883.29066  | 1032.55549  | 1 |
| 262 | C | 65.79411 | 72.24920 | 74.77810 | -559.41456  | -34.19198   | -556.30433  | 1 |
| 263 | H | 66.52819 | 71.97381 | 75.57292 | -64.66664   | 395.18769   | 2695.05373  | 1 |
| 264 | H | 65.57527 | 71.30678 | 74.22218 | -2703.44278 | -60.40056   | 333.79418   | 1 |

|     |   |          |          |          |             |             |             |   |
|-----|---|----------|----------|----------|-------------|-------------|-------------|---|
| 265 | C | 66.38268 | 73.28828 | 73.86528 | -519.76435  | 377.31045   | 459.42366   | 1 |
| 266 | H | 66.62378 | 74.19003 | 74.47729 | -1746.74323 | 1667.50644  | -1261.73691 | 1 |
| 267 | C | 67.66618 | 72.77031 | 73.22844 | 570.95554   | 16.46261    | -545.27700  | 1 |
| 268 | H | 68.03932 | 73.46710 | 72.43416 | 2391.58273  | 28.05277    | -1305.07271 | 1 |
| 269 | H | 68.49580 | 72.66003 | 73.97836 | 175.75588   | 917.63458   | 2559.43867  | 1 |
| 270 | H | 67.51638 | 71.76999 | 72.74670 | -1063.97851 | -2155.34650 | 1283.00462  | 1 |
| 271 | C | 65.40501 | 73.70793 | 72.77676 | 193.76014   | 2.62946     | -765.53141  | 1 |
| 272 | H | 65.87546 | 74.42234 | 72.05338 | 507.39394   | -846.55087  | 2539.60089  | 1 |
| 273 | H | 65.03573 | 72.83007 | 72.18584 | 1337.57841  | 1818.19054  | 1526.01994  | 1 |
| 274 | H | 64.50734 | 74.23060 | 73.21739 | 1100.88635  | -1172.91350 | -2199.08909 | 1 |
| 275 | C | 63.97463 | 71.71445 | 76.54246 | -549.21115  | 475.64486   | -309.38218  | 1 |
| 276 | O | 64.13322 | 71.82615 | 77.72961 | 556.06106   | -390.37755  | -78.24250   | 1 |
| 277 | O | 63.43517 | 70.52467 | 75.99603 | -572.27940  | -310.19032  | -209.75862  | 1 |
| 278 | H | 63.45086 | 70.77816 | 75.03216 | -1380.08193 | 2212.14486  | 790.85944   | 1 |

Listing 12: C00012.xmolout

|    |   |          |          |          |             |             |             |        |          |
|----|---|----------|----------|----------|-------------|-------------|-------------|--------|----------|
| 1  |   | 276      |          |          |             |             |             |        |          |
| 2  |   | 150.0000 | 150.0000 | 150.0000 | 0.0000      | 0.0000      | 0.0000***** | 2.7750 | 11100    |
|    |   | 0.2500   | 300.00   | 0.00     | 0.00        | 0.00        | -1294.1313  | 0.0000 | 300.0000 |
| 3  | H | 72.22800 | 83.22922 | 77.91478 | -2043.14101 | -1757.64893 | 399.89339   |        | 1        |
| 4  | N | 73.05475 | 82.87942 | 77.42850 | 426.75047   | 490.45733   | -334.42467  |        | 1        |
| 5  | H | 72.67606 | 82.41107 | 76.58675 | 442.25559   | -1110.30854 | -2448.52907 |        | 1        |
| 6  | C | 73.97302 | 83.89811 | 77.09135 | 415.32972   | -666.39213  | 83.73172    |        | 1        |
| 7  | H | 73.69882 | 84.81006 | 77.66589 | 879.32219   | 2491.00447  | 667.35213   |        | 1        |
| 8  | C | 75.47375 | 83.39081 | 77.39992 | 31.35357    | 477.41777   | 628.23362   |        | 1        |
| 9  | H | 75.68965 | 82.47917 | 76.79403 | 1168.38489  | 2240.25337  | -1019.71136 |        | 1        |
| 10 | H | 76.22244 | 84.15419 | 77.07955 | -360.43770  | 2534.90498  | 931.67112   |        | 1        |
| 11 | C | 75.59409 | 83.09545 | 78.87074 | 463.18208   | 512.70242   | -382.34388  |        | 1        |
| 12 | H | 74.70517 | 82.50045 | 79.18068 | 1725.29117  | 1863.52247  | -987.07854  |        | 1        |
| 13 | C | 76.84718 | 82.27629 | 79.15420 | 710.42801   | -144.27427  | -313.15367  |        | 1        |
| 14 | H | 76.94981 | 82.04341 | 80.24530 | 364.20195   | -1033.13725 | 2494.72524  |        | 1        |
| 15 | H | 76.84252 | 81.29693 | 78.60868 | 2567.61904  | 335.80679   | 847.48802   |        | 1        |
| 16 | H | 77.77459 | 82.82326 | 78.84455 | -2587.99029 | 680.92867   | -512.16411  |        | 1        |
| 17 | C | 75.62802 | 84.37814 | 79.69148 | 268.17616   | 741.64379   | -40.42634   |        | 1        |
| 18 | H | 75.72659 | 84.16476 | 80.78704 | 1283.54314  | -1945.37420 | -1411.27812 |        | 1        |
| 19 | H | 76.49204 | 85.03021 | 79.40260 | -1258.57796 | 1317.15249  | -2026.02085 |        | 1        |
| 20 | H | 74.69546 | 84.98355 | 79.55549 | -2502.84526 | 909.80597   | 575.92391   |        | 1        |
| 21 | C | 73.74348 | 84.00209 | 75.49012 | 619.36578   | -458.64843  | -172.09273  |        | 1        |
| 22 | O | 73.02744 | 83.18213 | 74.92449 | -81.40433   | 433.87611   | 522.34594   |        | 1        |
| 23 | N | 74.44879 | 84.99947 | 74.97420 | 175.23996   | -622.20190  | 341.55523   |        | 1        |
| 24 | H | 75.00105 | 85.57891 | 75.60693 | -876.57256  | -303.22879  | -2561.90213 |        | 1        |
| 25 | C | 74.57326 | 85.12414 | 73.56866 | -571.88214  | -534.10783  | -106.15033  |        | 1        |
| 26 | H | 73.89865 | 84.33417 | 73.16119 | -2713.20841 | -16.25800   | -248.80809  |        | 1        |
| 27 | C | 74.19591 | 86.62868 | 73.15513 | 166.60354   | 288.16399   | -716.09568  |        | 1        |
| 28 | H | 75.00031 | 87.30755 | 73.55269 | -2097.85574 | 1636.78449  | -586.18044  |        | 1        |
| 29 | O | 72.94525 | 87.12348 | 73.65827 | -317.80580  | -363.38227  | 484.43082   |        | 1        |
| 30 | H | 73.24546 | 87.86134 | 74.22717 | 1863.74748  | -1451.84923 | 1357.29467  |        | 1        |
| 31 | C | 74.30611 | 86.55874 | 71.58789 | 503.80731   | 517.99032   | 318.51606   |        | 1        |
| 32 | H | 74.14849 | 87.56059 | 71.12477 | 640.61020   | -2157.10410 | -1536.29104 |        | 1        |
| 33 | H | 75.30825 | 86.19249 | 71.25688 | 1687.88455  | 465.60692   | 2087.56452  |        | 1        |
| 34 | H | 73.54150 | 85.87100 | 71.15676 | -1293.07895 | -1899.88581 | -1463.57452 |        | 1        |
| 35 | C | 76.16688 | 84.94766 | 73.22910 | -153.07550  | -733.68902  | 248.70981   |        | 1        |
| 36 | O | 76.80036 | 85.93891 | 72.96930 | 186.15459   | -480.78787  | -449.34387  |        | 1        |
| 37 | N | 76.58479 | 83.67738 | 73.31952 | -487.53139  | 543.18517   | 42.03850    |        | 1        |
| 38 | C | 77.95999 | 83.32215 | 73.15354 | -699.35871  | 69.34393    | 360.10701   |        | 1        |
| 39 | H | 78.55698 | 84.20482 | 73.47950 | 2.81126     | -221.99807  | -2715.58072 |        | 1        |
| 40 | C | 78.03494 | 82.02109 | 74.06018 | -507.46439  | -592.59194  | 122.07761   |        | 1        |
| 41 | H | 78.93561 | 81.40090 | 73.85609 | -1975.08116 | 525.87560   | -1801.71556 |        | 1        |
| 42 | H | 78.05462 | 82.27760 | 75.14272 | 1588.27743  | -1913.22100 | 1113.83566  |        | 1        |
| 43 | C | 76.69729 | 81.31589 | 73.66485 | -613.62442  | -457.55993  | -194.14490  |        | 1        |
| 44 | H | 76.80557 | 80.78712 | 72.68752 | 1707.54637  | -721.27992  | 1996.92523  |        | 1        |

|     |   |          |          |          |             |             |             |   |
|-----|---|----------|----------|----------|-------------|-------------|-------------|---|
| 45  | H | 76.36159 | 80.55308 | 74.40530 | 758.23357   | 2100.81767  | 1560.55011  | 1 |
| 46  | C | 75.69694 | 82.54270 | 73.53177 | -352.41524  | 704.96076   | 49.21465    | 1 |
| 47  | H | 75.01758 | 82.50561 | 72.63245 | 1714.76886  | -2070.42778 | 443.35792   | 1 |
| 48  | H | 75.10177 | 82.77314 | 74.45036 | 1224.15040  | 1801.50881  | 1636.97633  | 1 |
| 49  | C | 78.16001 | 82.94289 | 71.56645 | 566.85117   | 537.05831   | 117.62814   | 1 |
| 50  | O | 78.26157 | 81.76756 | 71.22646 | -550.26779  | -406.08867  | 4.21666     | 1 |
| 51  | N | 78.17274 | 84.04515 | 70.85978 | 566.34832   | -425.77725  | 180.18749   | 1 |
| 52  | H | 78.00728 | 84.89367 | 71.40940 | 644.44502   | 2646.80550  | -52.73430   | 1 |
| 53  | C | 78.37813 | 84.12521 | 69.46200 | 612.34801   | -281.48662  | 411.56221   | 1 |
| 54  | H | 78.52380 | 85.21293 | 69.27815 | 1667.23498  | -1490.75142 | 1556.16753  | 1 |
| 55  | C | 79.65293 | 83.23767 | 69.06333 | -714.45746  | -175.43074  | 286.98927   | 1 |
| 56  | H | 79.49984 | 82.18955 | 69.45024 | -787.09484  | 1763.03619  | -1922.46060 | 1 |
| 57  | O | 80.91561 | 83.67607 | 69.58896 | -429.46514  | 516.51932   | -128.40526  | 1 |
| 58  | H | 81.15435 | 82.91881 | 70.16208 | 1981.82785  | 436.16847   | -1818.18182 | 1 |
| 59  | C | 79.50237 | 83.23566 | 67.49842 | 630.79189   | -468.94448  | 76.03230    | 1 |
| 60  | H | 80.19984 | 82.51093 | 67.01728 | -1775.71861 | 2062.30353  | 131.89849   | 1 |
| 61  | H | 78.45893 | 82.96281 | 67.19332 | -1855.14608 | 88.94118    | 1993.53760  | 1 |
| 62  | H | 79.71912 | 84.24098 | 67.06771 | -1504.82350 | -780.94249  | -2132.90992 | 1 |
| 63  | C | 77.07122 | 83.55448 | 68.65057 | 288.57638   | 618.62814   | -397.00270  | 1 |
| 64  | O | 76.62722 | 84.21528 | 67.74082 | 321.70495   | -185.26452  | 574.37218   | 1 |
| 65  | N | 76.74108 | 82.32247 | 69.02689 | -447.05792  | -446.53431  | 367.76425   | 1 |
| 66  | H | 77.25417 | 81.85775 | 69.81417 | 350.31316   | 1975.63644  | -1843.31522 | 1 |
| 67  | C | 75.44684 | 81.87392 | 68.62746 | -511.23061  | 374.03917   | -471.51480  | 1 |
| 68  | H | 75.10881 | 82.69587 | 67.95046 | 2234.79579  | -898.70890  | -1273.45190 | 1 |
| 69  | C | 75.69232 | 80.49666 | 67.85014 | 529.53781   | -159.34528  | 563.72604   | 1 |
| 70  | H | 74.74838 | 80.24712 | 67.29511 | 654.59388   | 2347.94251  | 1217.51488  | 1 |
| 71  | H | 76.47903 | 80.70230 | 67.07765 | -1526.55661 | 2103.42026  | 817.87394   | 1 |
| 72  | O | 76.05463 | 79.33640 | 68.65469 | -554.84278  | 14.12789    | 399.58769   | 1 |
| 73  | H | 76.99558 | 79.54083 | 68.80566 | 1297.06236  | 2061.84854  | 1220.68812  | 1 |
| 74  | C | 74.53913 | 81.77244 | 69.97365 | -662.15484  | -412.13544  | 123.62687   | 1 |
| 75  | O | 74.42420 | 82.71802 | 70.72747 | -540.01537  | -317.05804  | 274.91456   | 1 |
| 76  | N | 73.85783 | 80.62272 | 70.00418 | -202.76299  | -690.00100  | -131.49145  | 1 |
| 77  | H | 74.14645 | 79.91801 | 69.31929 | -702.62132  | -2617.37191 | 281.70413   | 1 |
| 78  | C | 73.38157 | 80.22113 | 71.29083 | -491.73914  | 576.34187   | 222.73509   | 1 |
| 79  | H | 73.26547 | 81.15899 | 71.88106 | 1977.17978  | -1823.58850 | -434.68928  | 1 |
| 80  | C | 72.03786 | 79.41007 | 71.06251 | -649.50797  | -328.66843  | 306.11224   | 1 |
| 81  | H | 72.17537 | 78.62805 | 70.28491 | 2075.07803  | 1452.16490  | -1004.45904 | 1 |
| 82  | C | 71.58855 | 78.76585 | 72.41860 | -615.18735  | -489.99689  | -70.96352   | 1 |
| 83  | H | 70.61182 | 78.23603 | 72.31723 | -1226.32661 | -1724.38906 | -1716.47170 | 1 |
| 84  | H | 72.33517 | 78.01227 | 72.77545 | 2381.64273  | -969.84735  | 900.46860   | 1 |
| 85  | H | 71.47433 | 79.53064 | 73.22238 | 2122.74991  | 1702.23946  | -141.36228  | 1 |
| 86  | C | 70.92912 | 80.42685 | 70.62170 | -501.86074  | -479.61276  | -376.42482  | 1 |
| 87  | H | 69.95823 | 79.91651 | 70.41955 | 993.79261   | -2246.95401 | -1177.81305 | 1 |
| 88  | H | 70.74530 | 81.19669 | 71.40745 | 42.71279    | -626.15391  | -2651.37258 | 1 |
| 89  | H | 71.22451 | 80.96741 | 69.69180 | -2026.39012 | -1590.33709 | -887.82922  | 1 |
| 90  | C | 74.51102 | 79.20374 | 71.91741 | -672.89153  | 382.57394   | -156.34072  | 1 |
| 91  | O | 74.99328 | 79.43213 | 73.00412 | 410.04627   | 221.86223   | 500.35950   | 1 |
| 92  | N | 74.74223 | 78.20232 | 71.08517 | -378.11782  | -443.79414  | -441.10984  | 1 |
| 93  | H | 74.24051 | 78.20483 | 70.20000 | 2404.15973  | -568.14894  | 1149.30085  | 1 |
| 94  | C | 75.54029 | 77.07462 | 71.47260 | -544.54484  | 466.16019   | 331.29119   | 1 |
| 95  | H | 75.53670 | 76.48741 | 70.52513 | -1409.80988 | -170.17955  | 2325.32679  | 1 |
| 96  | C | 76.97724 | 77.70490 | 71.77078 | -184.48284  | 116.78282   | -758.89137  | 1 |
| 97  | H | 77.00597 | 78.74241 | 71.36871 | 1893.78641  | 1861.14652  | 611.04528   | 1 |
| 98  | H | 77.16618 | 77.80346 | 72.86411 | -2170.79665 | -974.19311  | 1327.50117  | 1 |
| 99  | C | 78.05524 | 76.83031 | 71.06300 | 389.51668   | 672.81878   | -138.49152  | 1 |
| 100 | H | 78.04025 | 75.78362 | 71.43539 | 510.64577   | 1933.03327  | 1851.02484  | 1 |
| 101 | H | 77.80512 | 76.72932 | 69.98364 | -2302.30869 | -1105.72939 | -948.89774  | 1 |
| 102 | C | 79.51300 | 77.41087 | 71.20821 | -559.93427  | -126.34590  | 542.30857   | 1 |
| 103 | O | 80.45203 | 76.73731 | 70.87251 | -670.36003  | -111.83166  | 76.36448    | 1 |
| 104 | N | 79.56450 | 78.67701 | 71.67777 | -216.06729  | -537.07037  | 446.51379   | 1 |
| 105 | H | 78.81015 | 79.33869 | 71.89659 | -1251.96487 | 1074.12894  | -2168.52500 | 1 |
| 106 | H | 80.43432 | 79.21547 | 71.75056 | -2451.83023 | -720.73851  | 944.84612   | 1 |

|     |   |          |          |          |             |             |             |   |
|-----|---|----------|----------|----------|-------------|-------------|-------------|---|
| 107 | C | 74.68598 | 76.33309 | 72.60660 | 546.24052   | -563.88337  | -85.11809   | 1 |
| 108 | O | 73.47401 | 76.18807 | 72.41280 | 71.70702    | -307.40463  | 606.69673   | 1 |
| 109 | N | 75.39569 | 75.78947 | 73.58347 | 479.90863   | -504.50129  | 222.86849   | 1 |
| 110 | C | 74.70043 | 75.21822 | 74.70701 | 75.51268    | -600.91904  | 506.73700   | 1 |
| 111 | H | 73.66086 | 75.00909 | 74.36051 | -2033.61562 | 1795.30103  | 254.89480   | 1 |
| 112 | C | 75.58863 | 73.94395 | 75.02254 | 523.79067   | 517.99274   | 284.45581   | 1 |
| 113 | H | 75.44927 | 73.56948 | 76.06310 | 1599.61665  | -1127.00911 | 1895.98173  | 1 |
| 114 | H | 75.34191 | 73.10016 | 74.33943 | -1881.83093 | 1275.82488  | -1501.55016 | 1 |
| 115 | C | 77.02120 | 74.51404 | 74.75351 | -600.05639  | -404.05026  | 316.64485   | 1 |
| 116 | H | 77.33360 | 75.20784 | 75.56998 | -2597.05260 | 496.36221   | 657.73249   | 1 |
| 117 | H | 77.82494 | 73.73981 | 74.65779 | -1666.24518 | 1294.38985  | -1723.90591 | 1 |
| 118 | C | 76.76629 | 75.30450 | 73.40510 | 493.57570   | -129.95376  | -602.56394  | 1 |
| 119 | H | 77.44196 | 76.17736 | 73.25422 | -1469.08415 | -637.84797  | 2204.22581  | 1 |
| 120 | H | 76.75029 | 74.67367 | 72.48594 | -1038.97840 | 1068.88701  | -2280.71789 | 1 |
| 121 | C | 74.74472 | 76.14642 | 76.05211 | 188.88100   | 241.05089   | -727.87821  | 1 |
| 122 | O | 74.04638 | 75.80970 | 77.01225 | 531.88613   | -49.19943   | 427.07960   | 1 |
| 123 | N | 75.64811 | 77.10419 | 76.00018 | 708.14833   | 26.93417    | -179.73509  | 1 |
| 124 | H | 76.06016 | 77.09303 | 75.06734 | -2232.69501 | -1179.09831 | 1023.94816  | 1 |
| 125 | C | 75.71511 | 78.26701 | 76.86691 | -738.32412  | 259.92548   | 104.42456   | 1 |
| 126 | H | 76.42089 | 78.94158 | 76.32616 | 2028.89123  | 1260.02983  | 1311.33324  | 1 |
| 127 | C | 74.31574 | 78.85250 | 76.99152 | -258.65678  | -345.52513  | 661.28459   | 1 |
| 128 | H | 73.63702 | 78.02954 | 77.31486 | -1826.06090 | -1801.46097 | -918.64554  | 1 |
| 129 | C | 74.25605 | 79.95690 | 78.02996 | -541.23400  | 531.92970   | -218.41428  | 1 |
| 130 | H | 73.21004 | 80.34816 | 78.16655 | 1311.73218  | -2219.18200 | 882.19023   | 1 |
| 131 | H | 74.61969 | 79.60469 | 79.03521 | -1048.71298 | 1223.58118  | -2196.97971 | 1 |
| 132 | H | 74.89465 | 80.83236 | 77.73356 | 419.06414   | 1903.92898  | 1903.44670  | 1 |
| 133 | C | 73.80844 | 79.37280 | 75.65908 | -423.86431  | 152.66566   | -648.55262  | 1 |
| 134 | H | 72.72217 | 79.66002 | 75.70616 | 105.68386   | -2342.50080 | 1387.51238  | 1 |
| 135 | H | 74.37486 | 80.28546 | 75.32429 | -1695.63603 | -1484.73621 | -1531.02793 | 1 |
| 136 | H | 73.92037 | 78.60183 | 74.84441 | -1853.57121 | -487.39031  | 1936.59343  | 1 |
| 137 | C | 76.32240 | 77.85194 | 78.36607 | 539.71428   | -510.58232  | 267.58633   | 1 |
| 138 | O | 77.16319 | 78.56792 | 78.84143 | -15.93758   | -278.34085  | -624.49402  | 1 |
| 139 | N | 75.74025 | 76.78949 | 78.88514 | -676.81886  | 12.05292    | 276.17960   | 1 |
| 140 | H | 74.96214 | 76.30404 | 78.36981 | -1694.44250 | -373.84189  | -2100.66098 | 1 |
| 141 | C | 76.14471 | 76.36884 | 80.17998 | 412.33078   | -664.70360  | 108.35451   | 1 |
| 142 | H | 76.99397 | 77.03947 | 80.45777 | 1765.77476  | 1294.44366  | 1621.76594  | 1 |
| 143 | C | 74.88180 | 76.53163 | 81.13328 | -179.66635  | -721.95667  | -264.73915  | 1 |
| 144 | H | 74.39476 | 77.52072 | 80.98500 | -607.34922  | 2587.87032  | -598.10018  | 1 |
| 145 | H | 74.10842 | 75.77651 | 80.86911 | -359.69332  | -1479.13954 | -2259.74260 | 1 |
| 146 | C | 75.34599 | 76.35090 | 82.61399 | -240.01076  | 616.02425   | 431.85322   | 1 |
| 147 | H | 76.01690 | 75.45472 | 82.69829 | -1359.17131 | 782.54425   | 2227.99181  | 1 |
| 148 | H | 75.95099 | 77.22170 | 82.95392 | -820.36667  | 85.81767    | -2596.78715 | 1 |
| 149 | C | 74.07395 | 76.14801 | 83.53319 | -513.07015  | 236.18570   | -551.87280  | 1 |
| 150 | H | 73.45722 | 77.07462 | 83.57842 | 1816.11944  | -1183.11722 | -1650.94321 | 1 |
| 151 | H | 73.40703 | 75.35825 | 83.11721 | -1800.04429 | -1361.53473 | 1526.34643  | 1 |
| 152 | C | 74.58283 | 75.74042 | 84.93535 | 726.08972   | -253.19732  | -179.64713  | 1 |
| 153 | H | 75.13909 | 74.78187 | 84.96136 | 1224.27271  | -456.51798  | -2390.90304 | 1 |
| 154 | H | 75.15864 | 76.52517 | 85.46513 | 1206.40339  | -1150.93514 | -2154.90344 | 1 |
| 155 | N | 73.33286 | 75.48261 | 85.84294 | 329.70796   | -633.68968  | -155.67358  | 1 |
| 156 | H | 73.54570 | 75.17379 | 86.83525 | 1348.31305  | 1938.76845  | 1359.00643  | 1 |
| 157 | H | 72.68023 | 76.30163 | 86.01524 | 2096.92035  | 1446.54551  | -966.48890  | 1 |
| 158 | H | 72.65829 | 74.72473 | 85.53104 | -1197.07217 | -2303.53719 | 827.28733   | 1 |
| 159 | C | 76.50774 | 74.77604 | 80.19456 | -378.01186  | -556.17301  | -413.96481  | 1 |
| 160 | O | 76.66871 | 74.18743 | 81.24692 | -409.44433  | -307.55053  | -453.30833  | 1 |
| 161 | N | 76.53011 | 74.21285 | 78.96134 | -429.02477  | 524.70884   | 274.08502   | 1 |
| 162 | H | 76.59556 | 74.98613 | 78.29949 | 1706.34263  | -1425.96036 | 1574.38926  | 1 |
| 163 | C | 77.34451 | 73.00201 | 78.91075 | -45.25864   | -626.22952  | 478.93267   | 1 |
| 164 | H | 78.17289 | 73.29196 | 79.59501 | 1988.63164  | 570.90773   | 1772.87287  | 1 |
| 165 | C | 76.47858 | 71.83300 | 79.51645 | 551.77128   | -20.49526   | -564.54996  | 1 |
| 166 | H | 75.92375 | 72.19315 | 80.41473 | 1434.61535  | -1753.10253 | 1513.99471  | 1 |
| 167 | H | 75.69663 | 71.51020 | 78.79135 | -714.67738  | 1819.09770  | 1898.36494  | 1 |
| 168 | C | 77.42317 | 70.64066 | 79.89425 | 446.99263   | -555.77305  | 338.97221   | 1 |

|     |   |          |          |          |             |             |             |   |
|-----|---|----------|----------|----------|-------------|-------------|-------------|---|
| 169 | H | 78.09785 | 70.37520 | 79.05034 | 1953.68466  | 1892.25957  | -161.67766  | 1 |
| 170 | H | 78.09126 | 70.90946 | 80.74274 | -403.03785  | 2688.07032  | -188.43591  | 1 |
| 171 | C | 76.48532 | 69.42356 | 80.26417 | 567.86262   | 335.74681   | 434.04421   | 1 |
| 172 | H | 75.94032 | 69.62044 | 81.21605 | -1080.02275 | 1568.26081  | -1948.78900 | 1 |
| 173 | H | 75.69864 | 69.28456 | 79.48624 | -919.54108  | 2111.34692  | 1456.13463  | 1 |
| 174 | C | 77.35492 | 68.14898 | 80.37442 | 195.81897   | 173.33862   | -745.11536  | 1 |
| 175 | H | 77.74649 | 67.77731 | 79.40668 | 1405.67949  | -2301.21089 | -390.08113  | 1 |
| 176 | H | 78.17524 | 68.20668 | 81.11764 | -940.37328  | -1118.32446 | 2299.72133  | 1 |
| 177 | N | 76.41907 | 67.01374 | 80.90924 | 319.26422   | 656.36007   | -42.02424   | 1 |
| 178 | H | 76.84054 | 66.04789 | 81.03968 | 1961.03633  | 619.91968   | 1787.09422  | 1 |
| 179 | H | 75.99145 | 67.17910 | 81.86497 | 854.14343   | -2156.80752 | 1429.08711  | 1 |
| 180 | H | 75.55951 | 66.80013 | 80.32535 | 1237.02905  | -1378.50857 | -1998.28500 | 1 |
| 181 | C | 77.82392 | 72.80819 | 77.38518 | 532.53319   | -268.57236  | 517.55729   | 1 |
| 182 | O | 78.38482 | 73.73172 | 76.85118 | 266.16714   | -290.73804  | -558.88002  | 1 |
| 183 | N | 77.64880 | 71.55531 | 76.93265 | -226.25352  | 640.49678   | -270.32839  | 1 |
| 184 | H | 77.13997 | 70.85088 | 77.51793 | 2007.69063  | -1035.27229 | 1523.50231  | 1 |
| 185 | C | 77.31433 | 71.40887 | 75.53623 | -540.76542  | -573.33303  | 49.50000    | 1 |
| 186 | H | 76.98745 | 72.40321 | 75.16344 | -2374.20950 | -1036.76023 | 843.75774   | 1 |
| 187 | C | 78.63547 | 70.93352 | 74.77558 | -77.09082   | 666.87422   | -415.84136  | 1 |
| 188 | H | 79.20533 | 70.26918 | 75.47816 | -985.81834  | 617.19825   | 2463.91927  | 1 |
| 189 | O | 79.51301 | 72.02063 | 74.41521 | 293.29899   | -391.65602  | -477.80926  | 1 |
| 190 | H | 80.24633 | 71.88768 | 75.04455 | 2528.72714  | -681.76262  | -751.27122  | 1 |
| 191 | C | 78.14156 | 70.07734 | 73.55401 | 252.47363   | -605.14473  | 440.05134   | 1 |
| 192 | H | 78.99997 | 69.62554 | 73.00471 | -2052.65063 | 1456.49051  | -1043.51830 | 1 |
| 193 | H | 77.46808 | 69.23831 | 73.86446 | -2152.98800 | -1661.97574 | -161.70652  | 1 |
| 194 | H | 77.58202 | 70.70295 | 72.82056 | -473.12726  | -1584.27339 | 2165.61725  | 1 |
| 195 | C | 76.12039 | 70.32280 | 75.66118 | 360.36307   | 488.46713   | 505.10056   | 1 |
| 196 | O | 75.93292 | 69.77984 | 76.74592 | -200.08817  | -528.03552  | -385.82850  | 1 |
| 197 | N | 75.46317 | 70.19500 | 74.52457 | -597.54095  | -226.44775  | 355.20479   | 1 |
| 198 | H | 75.77223 | 70.73659 | 73.71888 | 2179.23655  | -1300.70981 | -991.33835  | 1 |
| 199 | C | 74.40538 | 69.24583 | 74.39537 | -687.68921  | 297.39807   | -249.45179  | 1 |
| 200 | H | 73.72066 | 69.41987 | 75.25506 | -349.16256  | -2467.37713 | -1101.72831 | 1 |
| 201 | C | 73.75664 | 69.45291 | 72.94891 | 672.47345   | 361.54328   | -201.62880  | 1 |
| 202 | H | 74.53800 | 69.35195 | 72.16092 | 1541.41502  | 582.18425   | 2169.97026  | 1 |
| 203 | H | 72.99685 | 68.65947 | 72.76222 | -2534.67717 | 60.25153    | 997.72295   | 1 |
| 204 | C | 73.11464 | 70.84624 | 72.90073 | 574.26774   | -389.43119  | -377.02542  | 1 |
| 205 | C | 71.82584 | 71.03733 | 73.47702 | 688.82679   | -287.33580  | -257.96133  | 1 |
| 206 | H | 71.27987 | 70.19306 | 73.93641 | 331.14182   | 1470.38163  | 2269.80013  | 1 |
| 207 | C | 73.81305 | 71.94254 | 72.31421 | -383.52382  | -675.04808  | 144.24917   | 1 |
| 208 | H | 74.81206 | 71.80228 | 71.86272 | 4.09847     | 1517.59662  | 2262.86397  | 1 |
| 209 | C | 71.27921 | 72.31602 | 73.45642 | -134.76730  | 428.45285   | -649.50303  | 1 |
| 210 | H | 70.28118 | 72.46034 | 73.90508 | -903.23433  | 1600.49020  | 2011.53387  | 1 |
| 211 | C | 73.20697 | 73.19826 | 72.32722 | -335.53281  | -615.00040  | -364.39058  | 1 |
| 212 | H | 73.76070 | 74.03517 | 71.86411 | 1596.45398  | -1369.33862 | 1732.02659  | 1 |
| 213 | C | 71.92930 | 73.44576 | 72.89739 | 585.48547   | -340.24194  | -406.23938  | 1 |
| 214 | O | 71.32595 | 74.69979 | 72.92911 | -419.15649  | -173.04408  | -511.94141  | 1 |
| 215 | H | 72.14642 | 75.32283 | 72.70952 | -1071.84350 | 1559.71507  | -1960.13012 | 1 |
| 216 | C | 75.03338 | 67.74869 | 74.39419 | 291.41878   | -183.13091  | 710.72246   | 1 |
| 217 | O | 76.06640 | 67.45271 | 73.84053 | 379.87695   | 523.47396   | -222.23622  | 1 |
| 218 | N | 74.11215 | 66.92284 | 74.92282 | 564.30591   | 373.09380   | 277.24371   | 1 |
| 219 | H | 73.30686 | 67.34168 | 75.39405 | -120.59931  | -2436.07824 | -1214.35098 | 1 |
| 220 | C | 74.64901 | 65.68802 | 75.42708 | 404.07514   | -299.37480  | 608.84009   | 1 |
| 221 | H | 75.38693 | 65.41941 | 74.63564 | -1071.07882 | -841.69025  | 2359.66467  | 1 |
| 222 | C | 75.35607 | 65.98184 | 76.81150 | -683.12807  | 68.71770    | -390.13096  | 1 |
| 223 | H | 75.99717 | 66.89162 | 76.75218 | 2068.88918  | 1596.58590  | 770.89603   | 1 |
| 224 | H | 74.60173 | 66.19208 | 77.60365 | 1379.86429  | 2342.49779  | -179.85638  | 1 |
| 225 | C | 76.19318 | 64.70867 | 77.14955 | -176.39967  | 537.49466   | 550.97268   | 1 |
| 226 | H | 75.54682 | 63.79833 | 77.11141 | -396.28051  | 1942.22168  | 1869.33314  | 1 |
| 227 | H | 76.99722 | 64.54366 | 76.39792 | -94.44700   | 586.00678   | -2659.20016 | 1 |
| 228 | C | 76.80221 | 64.90519 | 78.61335 | -291.69381  | -718.18079  | -150.72929  | 1 |
| 229 | H | 77.48640 | 65.77857 | 78.75413 | -2303.38776 | 1089.76242  | 964.62032   | 1 |
| 230 | H | 76.02563 | 64.91469 | 79.42003 | 884.16729   | 2568.80533  | -207.74283  | 1 |

|     |   |          |          |          |             |             |             |   |
|-----|---|----------|----------|----------|-------------|-------------|-------------|---|
| 231 | N | 77.54179 | 63.72325 | 78.75263 | -594.49522  | -252.81478  | 342.29276   | 1 |
| 232 | H | 77.23468 | 62.93529 | 78.20229 | -1735.17426 | 2084.05705  | -263.71605  | 1 |
| 233 | C | 78.53211 | 63.56434 | 79.53551 | 595.23177   | -271.52487  | 442.22352   | 1 |
| 234 | N | 78.93864 | 64.65027 | 80.31641 | 585.53813   | -424.79750  | -105.81303  | 1 |
| 235 | H | 78.56513 | 65.59703 | 80.36519 | 959.88797   | 1327.56823  | -2177.11905 | 1 |
| 236 | H | 79.71331 | 64.63010 | 80.98045 | 1578.48647  | 16.27378    | -2220.76233 | 1 |
| 237 | N | 79.02462 | 62.25530 | 79.44485 | -452.17763  | -390.33541  | -421.51853  | 1 |
| 238 | H | 78.72611 | 61.46647 | 78.87303 | 470.26107   | 1974.25629  | -1817.92087 | 1 |
| 239 | H | 79.81732 | 61.91680 | 79.99136 | 1856.67307  | -1573.97321 | -1224.35416 | 1 |
| 240 | C | 73.42630 | 64.62170 | 75.62482 | -531.47271  | -581.45780  | -55.06206   | 1 |
| 241 | O | 73.45859 | 63.81934 | 76.53797 | -243.00837  | 192.73507   | 609.52485   | 1 |
| 242 | N | 72.58121 | 64.69588 | 74.60997 | 343.49288   | -644.25607  | 38.09164    | 1 |
| 243 | H | 72.79159 | 65.42873 | 73.93348 | -1691.16043 | -1535.97525 | -1484.73099 | 1 |
| 244 | C | 71.39225 | 63.91994 | 74.54729 | 542.66492   | 350.14337   | 454.42563   | 1 |
| 245 | H | 71.18553 | 63.89565 | 73.45465 | 1209.57979  | -2396.95920 | 463.86744   | 1 |
| 246 | C | 71.62924 | 62.49301 | 75.19549 | -737.14309  | 145.93010   | 242.71942   | 1 |
| 247 | H | 71.85684 | 62.59014 | 76.28974 | -1050.18303 | 159.36419   | -2509.06125 | 1 |
| 248 | C | 70.35080 | 61.61023 | 74.97734 | -706.77696  | -252.88343  | -245.16230  | 1 |
| 249 | H | 70.49357 | 60.57827 | 75.37570 | -1624.64039 | -1665.49085 | 1417.86935  | 1 |
| 250 | H | 69.46346 | 62.04669 | 75.49800 | 2566.10521  | 598.51109   | 693.22305   | 1 |
| 251 | H | 70.09285 | 61.51727 | 73.89661 | -1972.69758 | 107.10018   | -1876.34312 | 1 |
| 252 | C | 72.81035 | 61.78473 | 74.44281 | 412.85148   | 672.58832   | -27.69222   | 1 |
| 253 | H | 73.00508 | 60.76439 | 74.84779 | 1447.02277  | 1762.76533  | -1490.78944 | 1 |
| 254 | H | 72.59929 | 61.67852 | 73.35326 | 1320.77379  | -145.20455  | 2378.68491  | 1 |
| 255 | H | 73.75467 | 62.36955 | 74.54530 | -1512.10848 | 1470.52031  | 1724.75147  | 1 |
| 256 | C | 70.19981 | 64.72130 | 75.34635 | -607.11113  | 499.56689   | 73.73769    | 1 |
| 257 | O | 69.57324 | 64.18946 | 76.23629 | 357.97126   | 460.81534   | 356.68785   | 1 |
| 258 | N | 69.98819 | 65.88193 | 74.74151 | 536.55407   | -368.62270  | 332.76306   | 1 |
| 259 | H | 70.65464 | 66.12137 | 74.00906 | 524.38866   | 2297.69985  | 1367.20941  | 1 |
| 260 | C | 69.10900 | 66.86251 | 75.27424 | 46.50277    | -774.29190  | -147.97904  | 1 |
| 261 | H | 68.99694 | 67.58159 | 74.43435 | 1676.51875  | 1883.29066  | 1032.55549  | 1 |
| 262 | C | 67.71036 | 66.17226 | 75.68836 | -559.41456  | -34.19198   | -556.30433  | 1 |
| 263 | H | 67.89960 | 65.39236 | 76.47577 | -64.66664   | 395.18769   | 2695.05373  | 1 |
| 264 | H | 67.00551 | 66.91067 | 76.13963 | -2703.44278 | -60.40056   | 333.79418   | 1 |
| 265 | C | 67.10464 | 65.54325 | 74.46378 | -519.76435  | 377.31045   | 459.42366   | 1 |
| 266 | H | 67.90087 | 64.96125 | 73.94639 | -1746.74323 | 1667.50644  | -1261.73691 | 1 |
| 267 | C | 65.98340 | 64.58408 | 74.84494 | 570.95554   | 16.46261    | -545.27700  | 1 |
| 268 | H | 65.53716 | 64.09083 | 73.94309 | 2391.58273  | 28.05277    | -1305.07271 | 1 |
| 269 | H | 66.34887 | 63.76999 | 75.52271 | 175.75588   | 917.63458   | 2559.43867  | 1 |
| 270 | H | 65.15156 | 65.11228 | 75.37797 | -1063.97851 | -2155.34650 | 1283.00462  | 1 |
| 271 | C | 66.56313 | 66.59717 | 73.50651 | 193.76014   | 2.62946     | -765.53141  | 1 |
| 272 | H | 66.11245 | 66.13196 | 72.59232 | 507.39394   | -846.55087  | 2539.60089  | 1 |
| 273 | H | 65.76535 | 67.21926 | 73.98784 | 1337.57841  | 1818.19054  | 1526.01994  | 1 |
| 274 | H | 67.36540 | 67.29724 | 73.15974 | 1100.88635  | -1172.91350 | -2199.08909 | 1 |
| 275 | C | 69.86677 | 67.57342 | 76.49781 | -549.21115  | 475.64486   | -309.38218  | 1 |
| 276 | O | 71.06449 | 67.69703 | 76.53389 | 556.06106   | -390.37755  | -78.24250   | 1 |
| 277 | O | 69.05637 | 68.24238 | 77.44940 | -572.27940  | -310.19032  | -209.75862  | 1 |
| 278 | H | 68.16266 | 67.98597 | 77.10201 | -1380.08193 | 2212.14486  | 790.85944   | 1 |

Listing 13: C00013.xmolout

|    |   |          |          |          |             |             |             |        |          |
|----|---|----------|----------|----------|-------------|-------------|-------------|--------|----------|
| 1  |   | 276      |          |          |             |             |             |        |          |
| 2  |   | 150.0000 | 150.0000 | 150.0000 | 0.0000      | 0.0000      | 0.0000***** | 2.7750 | 11100    |
|    |   | 0.2500   | 300.00   | 0.00     | 0.00        | 0.00        | -1294.1210  | 0.0000 | 300.0000 |
| 3  | H | 78.97967 | 60.06429 | 80.19138 | -2043.14101 | -1757.64893 | 399.89339   |        | 1        |
| 4  | N | 78.94044 | 60.45535 | 79.25218 | 426.75047   | 490.45733   | -334.42467  |        | 1        |
| 5  | H | 77.96928 | 60.75758 | 79.20454 | 442.25559   | -1110.30854 | -2448.52907 |        | 1        |
| 6  | C | 79.87231 | 61.49996 | 79.04045 | 415.32972   | -666.39213  | 83.73172    |        | 1        |
| 7  | H | 80.80267 | 61.05332 | 79.45327 | 879.32219   | 2491.00447  | 667.35213   |        | 1        |
| 8  | C | 79.98498 | 61.80571 | 77.46127 | 31.35357    | 477.41777   | 628.23362   |        | 1        |
| 9  | H | 79.04109 | 62.28645 | 77.10945 | 1168.38489  | 2240.25337  | -1019.71136 |        | 1        |
| 10 | H | 80.79998 | 62.54143 | 77.25902 | -360.43770  | 2534.90498  | 931.67112   |        | 1        |

|    |   |          |          |          |             |             |             |   |
|----|---|----------|----------|----------|-------------|-------------|-------------|---|
| 11 | C | 80.23276 | 60.52630 | 76.70743 | 463.18208   | 512.70242   | -382.34388  | 1 |
| 12 | H | 79.47307 | 59.77898 | 77.03061 | 1725.29117  | 1863.52247  | -987.07854  | 1 |
| 13 | C | 80.08424 | 60.75677 | 75.20835 | 710.42801   | -144.27427  | -313.15367  | 1 |
| 14 | H | 80.23931 | 59.81164 | 74.62686 | 364.20195   | -1033.13725 | 2494.72524  | 1 |
| 15 | H | 79.06627 | 61.14480 | 74.94679 | 2567.61904  | 335.80679   | 847.48802   | 1 |
| 16 | H | 80.83021 | 61.50304 | 74.83140 | -2587.99029 | 680.92867   | -512.16411  | 1 |
| 17 | C | 81.61929 | 59.96718 | 76.99749 | 268.17616   | 741.64379   | -40.42634   | 1 |
| 18 | H | 81.81686 | 59.03024 | 76.41537 | 1283.54314  | -1945.37420 | -1411.27812 | 1 |
| 19 | H | 82.42375 | 60.69988 | 76.72983 | -1258.57796 | 1317.15249  | -2026.02085 | 1 |
| 20 | H | 81.74579 | 59.71552 | 78.08173 | -2502.84526 | 909.80597   | 575.92391   | 1 |
| 21 | C | 79.35164 | 62.73416 | 79.94253 | 619.36578   | -458.64843  | -172.09273  | 1 |
| 22 | O | 78.86953 | 62.53698 | 81.06439 | -81.40433   | 433.87611   | 522.34594   | 1 |
| 23 | N | 79.65823 | 63.87832 | 79.38590 | 175.23996   | -622.20190  | 341.55523   | 1 |
| 24 | H | 80.10378 | 63.84312 | 78.47196 | -876.57256  | -303.22879  | -2561.90213 | 1 |
| 25 | C | 79.00696 | 65.11101 | 79.74412 | -571.88214  | -534.10783  | -106.15033  | 1 |
| 26 | H | 77.96523 | 65.03215 | 79.36703 | -2713.20841 | -16.25800   | -248.80809  | 1 |
| 27 | C | 79.04559 | 65.22908 | 81.33677 | 166.60354   | 288.16399   | -716.09568  | 1 |
| 28 | H | 79.91890 | 64.59636 | 81.66811 | -2097.85574 | 1636.78449  | -586.18044  | 1 |
| 29 | O | 77.91740 | 64.68153 | 82.01395 | -317.80580  | -363.38227  | 484.43082   | 1 |
| 30 | H | 78.16100 | 63.67180 | 81.95805 | 1863.74748  | -1451.84923 | 1357.29467  | 1 |
| 31 | C | 79.34646 | 66.75049 | 81.58857 | 503.80731   | 517.99032   | 318.51606   | 1 |
| 32 | H | 79.52970 | 66.95904 | 82.66844 | 640.61020   | -2157.10410 | -1536.29104 | 1 |
| 33 | H | 80.24809 | 67.09215 | 81.02210 | 1687.88455  | 465.60692   | 2087.56452  | 1 |
| 34 | H | 78.49831 | 67.40171 | 81.26465 | -1293.07895 | -1899.88581 | -1463.57452 | 1 |
| 35 | C | 79.87921 | 66.25359 | 78.99869 | -153.07550  | -733.68902  | 248.70981   | 1 |
| 36 | O | 81.08209 | 66.22715 | 79.07728 | 186.15459   | -480.78787  | -449.34387  | 1 |
| 37 | N | 79.09608 | 67.18520 | 78.43360 | -487.53139  | 543.18517   | 42.03850    | 1 |
| 38 | C | 79.66531 | 68.39356 | 77.91406 | -699.35871  | 69.34393    | 360.10701   | 1 |
| 39 | H | 80.65951 | 68.13554 | 77.47896 | 2.81126     | -221.99807  | -2715.58072 | 1 |
| 40 | C | 78.54402 | 68.81557 | 76.86290 | -507.46439  | -592.59194  | 122.07761   | 1 |
| 41 | H | 78.59488 | 69.89616 | 76.56993 | -1975.08116 | 525.87560   | -1801.71556 | 1 |
| 42 | H | 78.63179 | 68.22775 | 75.92171 | 1588.27743  | -1913.22100 | 1113.83566  | 1 |
| 43 | C | 77.24078 | 68.45205 | 77.63469 | -613.62442  | -457.55993  | -194.14490  | 1 |
| 44 | H | 77.00793 | 69.21902 | 78.40644 | 1707.54637  | -721.27992  | 1996.92523  | 1 |
| 45 | H | 76.34389 | 68.37600 | 76.98005 | 758.23357   | 2100.81767  | 1560.55011  | 1 |
| 46 | C | 77.65266 | 67.06773 | 78.30169 | -352.41524  | 704.96076   | 49.21465    | 1 |
| 47 | H | 77.22324 | 66.88972 | 79.31581 | 1714.76886  | -2070.42778 | 443.35792   | 1 |
| 48 | H | 77.47418 | 66.17074 | 77.66240 | 1224.15040  | 1801.50881  | 1636.97633  | 1 |
| 49 | C | 79.77729 | 69.45423 | 79.13581 | 566.85117   | 537.05831   | 117.62814   | 1 |
| 50 | O | 79.10281 | 69.38851 | 80.15252 | -550.26779  | -406.08867  | 4.21666     | 1 |
| 51 | N | 80.70988 | 70.42629 | 78.85387 | 566.34832   | -425.77725  | 180.18749   | 1 |
| 52 | H | 80.82108 | 70.24354 | 77.83702 | 644.44502   | 2646.80550  | -52.73430   | 1 |
| 53 | C | 81.97980 | 70.21605 | 79.54978 | 612.34801   | -281.48662  | 411.56221   | 1 |
| 54 | H | 82.23679 | 69.15294 | 79.34835 | 1667.23498  | -1490.75142 | 1556.16753  | 1 |
| 55 | C | 82.97810 | 71.21863 | 78.83815 | -714.45746  | -175.43074  | 286.98927   | 1 |
| 56 | H | 82.73971 | 72.26174 | 79.18249 | -787.09484  | 1763.03619  | -1922.46060 | 1 |
| 57 | O | 82.91244 | 71.26954 | 77.39320 | -429.46514  | 516.51932   | -128.40526  | 1 |
| 58 | H | 82.65836 | 72.20454 | 77.24969 | 1981.82785  | 436.16847   | -1818.18182 | 1 |
| 59 | C | 84.36870 | 70.77685 | 79.42872 | 630.79189   | -468.94448  | 76.03230    | 1 |
| 60 | H | 85.18143 | 71.47777 | 79.12666 | -1775.71861 | 2062.30353  | 131.89849   | 1 |
| 61 | H | 84.35601 | 70.73611 | 80.54774 | -1855.14608 | 88.94118    | 1993.53760  | 1 |
| 62 | H | 84.65733 | 69.76307 | 79.06516 | -1504.82350 | -780.94249  | -2132.90992 | 1 |
| 63 | C | 81.85272 | 70.52837 | 81.12444 | 288.57638   | 618.62814   | -397.00270  | 1 |
| 64 | O | 82.76301 | 70.22180 | 81.86809 | 321.70495   | -185.26452  | 574.37218   | 1 |
| 65 | N | 80.76454 | 71.24328 | 81.43771 | -447.05792  | -446.53431  | 367.76425   | 1 |
| 66 | H | 80.08366 | 71.38403 | 80.68919 | 350.31316   | 1975.63644  | -1843.31522 | 1 |
| 67 | C | 80.47010 | 71.35148 | 82.84746 | -511.23061  | 374.03917   | -471.51480  | 1 |
| 68 | H | 80.73694 | 70.34452 | 83.24275 | 2234.79579  | -898.70890  | -1273.45190 | 1 |
| 69 | C | 81.49330 | 72.45760 | 83.40188 | 529.53781   | -159.34528  | 563.72604   | 1 |
| 70 | H | 81.34099 | 72.57300 | 84.50773 | 654.59388   | 2347.94251  | 1217.51488  | 1 |
| 71 | H | 82.51782 | 72.01207 | 83.26441 | -1526.55661 | 2103.42026  | 817.87394   | 1 |
| 72 | O | 81.44251 | 73.76353 | 82.77173 | -554.84278  | 14.12789    | 399.58769   | 1 |

|     |   |          |          |          |             |             |             |   |
|-----|---|----------|----------|----------|-------------|-------------|-------------|---|
| 73  | H | 81.59775 | 73.49231 | 81.84548 | 1297.06236  | 2061.84854  | 1220.68812  | 1 |
| 74  | C | 78.92749 | 71.72515 | 83.03929 | -662.15484  | -412.13544  | 123.62687   | 1 |
| 75  | O | 78.57277 | 72.33081 | 84.01275 | -540.01537  | -317.05804  | 274.91456   | 1 |
| 76  | N | 78.15881 | 71.09816 | 82.11425 | -202.76299  | -690.00100  | -131.49145  | 1 |
| 77  | H | 78.65290 | 70.46492 | 81.42800 | -702.62132  | -2617.37191 | 281.70413   | 1 |
| 78  | C | 76.97694 | 71.79747 | 81.55576 | -491.73914  | 576.34187   | 222.73509   | 1 |
| 79  | H | 76.39197 | 70.95535 | 81.12121 | 1977.17978  | -1823.58850 | -434.68928  | 1 |
| 80  | C | 76.22924 | 72.59546 | 82.58878 | -649.50797  | -328.66843  | 306.11224   | 1 |
| 81  | H | 76.93169 | 73.35489 | 83.01420 | 2075.07803  | 1452.16490  | -1004.45904 | 1 |
| 82  | C | 75.05943 | 73.33850 | 81.96308 | -615.18735  | -489.99689  | -70.96352   | 1 |
| 83  | H | 74.51046 | 73.96252 | 82.71929 | -1226.32661 | -1724.38906 | -1716.47170 | 1 |
| 84  | H | 75.40410 | 74.03049 | 81.14636 | 2381.64273  | -969.84735  | 900.46860   | 1 |
| 85  | H | 74.31395 | 72.63169 | 81.50767 | 2122.74991  | 1702.23946  | -141.36228  | 1 |
| 86  | C | 75.73262 | 71.73073 | 83.73489 | -501.86074  | -479.61276  | -376.42482  | 1 |
| 87  | H | 75.19193 | 72.33790 | 84.51125 | 993.79261   | -2246.95401 | -1177.81305 | 1 |
| 88  | H | 75.02551 | 70.93266 | 83.37903 | 42.71279    | -626.15391  | -2651.37258 | 1 |
| 89  | H | 76.59147 | 71.21512 | 84.24957 | -2026.39012 | -1590.33709 | -887.82922  | 1 |
| 90  | C | 77.55108 | 72.82138 | 80.38904 | -672.89153  | 382.57394   | -156.34072  | 1 |
| 91  | O | 78.01406 | 73.90488 | 80.65590 | 410.04627   | 221.86223   | 500.35950   | 1 |
| 92  | N | 77.38717 | 72.27735 | 79.19457 | -378.11782  | -443.79414  | -441.10984  | 1 |
| 93  | H | 77.03011 | 71.32740 | 79.12245 | 2404.15973  | -568.14894  | 1149.30085  | 1 |
| 94  | C | 77.76953 | 73.07067 | 78.05558 | -544.54484  | 466.16019   | 331.29119   | 1 |
| 95  | H | 77.29935 | 74.05528 | 78.27303 | -1409.80988 | -170.17955  | 2325.32679  | 1 |
| 96  | C | 79.35028 | 73.17751 | 78.12042 | -184.48284  | 116.78282   | -758.89137  | 1 |
| 97  | H | 79.64584 | 73.68294 | 79.07039 | 1893.78641  | 1861.14652  | 611.04528   | 1 |
| 98  | H | 79.81164 | 72.16619 | 78.16039 | -2170.79665 | -974.19311  | 1327.50117  | 1 |
| 99  | C | 79.84631 | 73.95928 | 76.86416 | 389.51668   | 672.81878   | -138.49152  | 1 |
| 100 | H | 79.53646 | 73.42677 | 75.93520 | 510.64577   | 1933.03327  | 1851.02484  | 1 |
| 101 | H | 79.33757 | 74.94694 | 76.80633 | -2302.30869 | -1105.72939 | -948.89774  | 1 |
| 102 | C | 81.41318 | 74.15523 | 76.85347 | -559.93427  | -126.34590  | 542.30857   | 1 |
| 103 | O | 81.98860 | 74.34088 | 75.81345 | -670.36003  | -111.83166  | 76.36448    | 1 |
| 104 | N | 81.97764 | 74.13321 | 78.08524 | -216.06729  | -537.07037  | 446.51379   | 1 |
| 105 | H | 81.49090 | 74.13739 | 78.98736 | -1251.96487 | 1074.12894  | -2168.52500 | 1 |
| 106 | H | 82.93793 | 74.44095 | 78.27144 | -2451.83023 | -720.73851  | 944.84612   | 1 |
| 107 | C | 77.20168 | 72.32228 | 76.73565 | 546.24052   | -563.88337  | -85.11809   | 1 |
| 108 | O | 77.98145 | 71.75498 | 75.99536 | 71.70702    | -307.40463  | 606.69673   | 1 |
| 109 | N | 75.88208 | 72.46733 | 76.60799 | 479.90863   | -504.50129  | 222.86849   | 1 |
| 110 | C | 75.09680 | 71.60096 | 75.77512 | 75.51268    | -600.91904  | 506.73700   | 1 |
| 111 | H | 75.48192 | 70.56532 | 75.91416 | -2033.61562 | 1795.30103  | 254.89480   | 1 |
| 112 | C | 73.62664 | 71.86620 | 76.31487 | 523.79067   | 517.99274   | 284.45581   | 1 |
| 113 | H | 72.83886 | 71.58583 | 75.57958 | 1599.61665  | -1127.00911 | 1895.98173  | 1 |
| 114 | H | 73.41529 | 71.29720 | 77.24743 | -1881.83093 | 1275.82488  | -1501.55016 | 1 |
| 115 | C | 73.70912 | 73.40080 | 76.58468 | -600.05639  | -404.05026  | 316.64485   | 1 |
| 116 | H | 73.72639 | 73.96927 | 75.62109 | -2597.05260 | 496.36221   | 657.73249   | 1 |
| 117 | H | 72.86414 | 73.80572 | 77.18971 | -1666.24518 | 1294.38985  | -1723.90591 | 1 |
| 118 | C | 75.11718 | 73.48683 | 77.31691 | 493.57570   | -129.95376  | -602.56394  | 1 |
| 119 | H | 75.64455 | 74.46435 | 77.21946 | -1469.08415 | -637.84797  | 2204.22581  | 1 |
| 120 | H | 75.10789 | 73.17499 | 78.38843 | -1038.97840 | 1068.88701  | -2280.71789 | 1 |
| 121 | C | 75.14504 | 72.06886 | 74.21238 | 188.88100   | 241.05089   | -727.87821  | 1 |
| 122 | O | 74.64077 | 71.33406 | 73.36107 | 531.88613   | -49.19943   | 427.07960   | 1 |
| 123 | N | 75.62209 | 73.29066 | 74.06098 | 708.14833   | 26.93417    | -179.73509  | 1 |
| 124 | H | 75.91394 | 73.62937 | 74.97737 | -2232.69501 | -1179.09831 | 1023.94816  | 1 |
| 125 | C | 76.19633 | 73.83769 | 72.84262 | -738.32412  | 259.92548   | 104.42456   | 1 |
| 126 | H | 76.79116 | 74.71248 | 73.20009 | 2028.89123  | 1260.02983  | 1311.33324  | 1 |
| 127 | C | 77.04723 | 72.76666 | 72.17412 | -258.65678  | -345.52513  | 661.28459   | 1 |
| 128 | H | 76.41967 | 71.85074 | 72.07244 | -1826.06090 | -1801.46097 | -918.64554  | 1 |
| 129 | C | 77.48831 | 73.19926 | 70.78778 | -541.23400  | 531.92970   | -218.41428  | 1 |
| 130 | H | 78.08591 | 72.39888 | 70.27085 | 1311.73218  | -2219.18200 | 882.19023   | 1 |
| 131 | H | 76.60740 | 73.43910 | 70.12997 | -1048.71298 | 1223.58118  | -2196.97971 | 1 |
| 132 | H | 78.13120 | 74.12143 | 70.82848 | 419.06414   | 1903.92898  | 1903.44670  | 1 |
| 133 | C | 78.25943 | 72.40376 | 73.00793 | -423.86431  | 152.66566   | -648.55262  | 1 |
| 134 | H | 78.83711 | 71.55281 | 72.55255 | 105.68386   | -2342.50080 | 1387.51238  | 1 |



|     |   |          |          |          |             |             |             |   |
|-----|---|----------|----------|----------|-------------|-------------|-------------|---|
| 135 | H | 78.97017 | 73.27084 | 73.10216 | -1695.63603 | -1484.73621 | -1531.02793 | 1 |
| 136 | H | 77.97343 | 72.09060 | 74.07104 | -1853.57121 | -487.39031  | 1936.59343  | 1 |
| 137 | C | 74.96373 | 74.31567 | 71.82845 | 539.71428   | -510.58232  | 267.58633   | 1 |
| 138 | O | 75.00723 | 75.41394 | 71.33666 | -15.93758   | -278.34085  | -624.49402  | 1 |
| 139 | N | 74.08328 | 73.35511 | 71.64064 | -676.81886  | 12.05292    | 276.17960   | 1 |
| 140 | H | 74.17856 | 72.43164 | 72.13435 | -1694.44250 | -373.84189  | -2100.66098 | 1 |
| 141 | C | 73.00295 | 73.63041 | 70.74763 | 412.33078   | -664.70360  | 108.35451   | 1 |
| 142 | H | 73.44492 | 74.30052 | 69.97422 | 1765.77476  | 1294.44366  | 1621.76594  | 1 |
| 143 | C | 72.48496 | 72.23002 | 70.22029 | -179.66635  | -721.95667  | -264.73915  | 1 |
| 144 | H | 73.32867 | 71.60807 | 69.84582 | -607.34922  | 2587.87032  | -598.10018  | 1 |
| 145 | H | 72.04094 | 71.64942 | 71.05998 | -359.69332  | -1479.13954 | -2259.74260 | 1 |
| 146 | C | 71.42441 | 72.47087 | 69.09635 | -240.01076  | 616.02425   | 431.85322   | 1 |
| 147 | H | 70.68137 | 73.24020 | 69.41485 | -1359.17131 | 782.54425   | 2227.99181  | 1 |
| 148 | H | 71.90180 | 72.86871 | 68.17286 | -820.36667  | 85.81767    | -2596.78715 | 1 |
| 149 | C | 70.70782 | 71.08730 | 68.82228 | -513.07015  | 236.18570   | -551.87280  | 1 |
| 150 | H | 71.44354 | 70.31545 | 68.49909 | 1816.11944  | -1183.11722 | -1650.94321 | 1 |
| 151 | H | 70.24576 | 70.69168 | 69.75586 | -1800.04429 | -1361.53473 | 1526.34643  | 1 |
| 152 | C | 69.63048 | 71.31171 | 67.73629 | 726.08972   | -253.19732  | -179.64713  | 1 |
| 153 | H | 68.84441 | 72.04356 | 68.00997 | 1224.27271  | -456.51798  | -2390.90304 | 1 |
| 154 | H | 70.03036 | 71.54487 | 66.72937 | 1206.40339  | -1150.93514 | -2154.90344 | 1 |
| 155 | N | 68.85935 | 69.95981 | 67.55949 | 329.70796   | -633.68968  | -155.67358  | 1 |
| 156 | H | 68.09020 | 69.96205 | 66.82913 | 1348.31305  | 1938.76845  | 1359.00643  | 1 |
| 157 | H | 69.42646 | 69.11294 | 67.26332 | 2096.92035  | 1446.54551  | -966.48890  | 1 |
| 158 | H | 68.33892 | 69.58937 | 68.40726 | -1197.07217 | -2303.53719 | 827.28733   | 1 |
| 159 | C | 71.78218 | 74.37622 | 71.54502 | -378.01186  | -556.17301  | -413.96481  | 1 |
| 160 | O | 70.89650 | 74.88997 | 70.89561 | -409.44433  | -307.55053  | -453.30833  | 1 |
| 161 | N | 71.85865 | 74.25181 | 72.86566 | -429.02477  | 524.70884   | 274.08502   | 1 |
| 162 | H | 72.68173 | 73.78940 | 73.25058 | 1706.34263  | -1425.96036 | 1574.38926  | 1 |
| 163 | C | 70.95023 | 75.04099 | 73.63145 | -45.25864   | -626.22952  | 478.93267   | 1 |
| 164 | H | 70.41871 | 75.64850 | 72.85853 | 1988.63164  | 570.90773   | 1772.87287  | 1 |
| 165 | C | 69.99529 | 74.06247 | 74.43023 | 551.77128   | -20.49526   | -564.54996  | 1 |
| 166 | H | 69.61263 | 73.25539 | 73.76614 | 1434.61535  | -1753.10253 | 1513.99471  | 1 |
| 167 | H | 70.53800 | 73.54943 | 75.25575 | -714.67738  | 1819.09770  | 1898.36494  | 1 |
| 168 | C | 68.82963 | 74.95392 | 74.97264 | 446.99263   | -555.77305  | 338.97221   | 1 |
| 169 | H | 69.21181 | 75.67916 | 75.72585 | 1953.68466  | 1892.25957  | -161.67766  | 1 |
| 170 | H | 68.39920 | 75.56783 | 74.14989 | -403.03785  | 2688.07032  | -188.43591  | 1 |
| 171 | C | 67.71028 | 74.02924 | 75.59946 | 567.86262   | 335.74681   | 434.04421   | 1 |
| 172 | H | 67.35707 | 73.27336 | 74.86086 | -1080.02275 | 1568.26081  | -1948.78900 | 1 |
| 173 | H | 68.10587 | 73.44885 | 76.46441 | -919.54108  | 2111.34692  | 1456.13463  | 1 |
| 174 | C | 66.55137 | 74.95788 | 76.03198 | 195.81897   | 173.33862   | -745.11536  | 1 |
| 175 | H | 66.79978 | 75.64936 | 76.86165 | 1405.67949  | -2301.21089 | -390.08113  | 1 |
| 176 | H | 66.07795 | 75.51949 | 75.20192 | -940.37328  | -1118.32446 | 2299.72133  | 1 |
| 177 | N | 65.40007 | 74.05923 | 76.59612 | 319.26422   | 656.36007   | -42.02424   | 1 |
| 178 | H | 64.53555 | 74.57791 | 76.92641 | 1961.03633  | 619.91968   | 1787.09422  | 1 |
| 179 | H | 64.97393 | 73.34729 | 75.93404 | 854.14343   | -2156.80752 | 1429.08711  | 1 |
| 180 | H | 65.62279 | 73.46383 | 77.44603 | 1237.02905  | -1378.50857 | -1998.28500 | 1 |
| 181 | C | 71.82837 | 75.91579 | 74.71823 | 532.53319   | -268.57236  | 517.55729   | 1 |
| 182 | O | 72.22117 | 75.44920 | 75.75870 | 266.16714   | -290.73804  | -558.88002  | 1 |
| 183 | N | 71.92728 | 77.13687 | 74.23225 | -226.25352  | 640.49678   | -270.32839  | 1 |
| 184 | H | 71.45790 | 77.44312 | 73.36396 | 2007.69063  | -1035.27229 | 1523.50231  | 1 |
| 185 | C | 72.84864 | 78.08097 | 74.75968 | -540.76542  | -573.33303  | 49.50000    | 1 |
| 186 | H | 72.97951 | 77.89808 | 75.84933 | -2374.20950 | -1036.76023 | 843.75774   | 1 |
| 187 | C | 74.21083 | 77.89262 | 73.93130 | -77.09082   | 666.87422   | -415.84136  | 1 |
| 188 | H | 73.94682 | 77.80551 | 72.84014 | -985.81834  | 617.19825   | 2463.91927  | 1 |
| 189 | O | 74.95879 | 76.70005 | 74.22467 | 293.29899   | -391.65602  | -477.80926  | 1 |
| 190 | H | 74.92153 | 76.23748 | 73.35775 | 2528.72714  | -681.76262  | -751.27122  | 1 |
| 191 | C | 74.97983 | 79.24038 | 74.17304 | 252.47363   | -605.14473  | 440.05134   | 1 |
| 192 | H | 75.94929 | 79.25165 | 73.62208 | -2052.65063 | 1456.49051  | -1043.51830 | 1 |
| 193 | H | 74.39649 | 80.14472 | 73.82795 | -2152.98800 | -1661.97574 | -161.70652  | 1 |
| 194 | H | 75.21571 | 79.38619 | 75.25290 | -473.12726  | -1584.27339 | 2165.61725  | 1 |
| 195 | C | 72.06004 | 79.44336 | 74.32091 | 360.36307   | 488.46713   | 505.10056   | 1 |
| 196 | O | 71.25871 | 79.36683 | 73.40414 | -200.08817  | -528.03552  | -385.82850  | 1 |

|     |   |          |          |          |             |             |             |   |
|-----|---|----------|----------|----------|-------------|-------------|-------------|---|
| 197 | N | 72.44451 | 80.49282 | 75.02738 | -597.54095  | -226.44775  | 355.20479   | 1 |
| 198 | H | 73.16245 | 80.37552 | 75.74171 | 2179.23655  | -1300.70981 | -991.33835  | 1 |
| 199 | C | 71.96161 | 81.78656 | 74.67115 | -687.68921  | 297.39807   | -249.45179  | 1 |
| 200 | H | 70.86760 | 81.66816 | 74.50228 | -349.16256  | -2467.37713 | -1101.72831 | 1 |
| 201 | C | 72.36603 | 82.81248 | 75.82720 | 672.47345   | 361.54328   | -201.62880  | 1 |
| 202 | H | 73.46558 | 82.98890 | 75.80151 | 1541.41502  | 582.18425   | 2169.97026  | 1 |
| 203 | H | 71.88091 | 83.79575 | 75.62731 | -2534.67717 | 60.25153    | 997.72295   | 1 |
| 204 | C | 71.96053 | 82.28066 | 77.20959 | 574.26774   | -389.43119  | -377.02542  | 1 |
| 205 | C | 70.59051 | 82.26868 | 77.60886 | 688.82679   | -287.33580  | -257.96133  | 1 |
| 206 | H | 69.80008 | 82.62796 | 76.92516 | 331.14182   | 1470.38163  | 2269.80013  | 1 |
| 207 | C | 72.97565 | 81.80441 | 78.09368 | -383.52382  | -675.04808  | 144.24917   | 1 |
| 208 | H | 74.03661 | 81.80589 | 77.78474 | 4.09847     | 1517.59662  | 2262.86397  | 1 |
| 209 | C | 70.27234 | 81.79622 | 78.88226 | -134.76730  | 428.45285   | -649.50303  | 1 |
| 210 | H | 69.21353 | 81.79029 | 79.19450 | -903.23433  | 1600.49020  | 2011.53387  | 1 |
| 211 | C | 72.60639 | 81.34336 | 79.35941 | -335.53281  | -615.00040  | -364.39058  | 1 |
| 212 | H | 73.40089 | 80.98442 | 80.03685 | 1596.45398  | -1369.33862 | 1732.02659  | 1 |
| 213 | C | 71.25169 | 81.32281 | 79.80300 | 585.48547   | -340.24194  | -406.23938  | 1 |
| 214 | O | 70.86697 | 80.85781 | 81.08763 | -419.15649  | -173.04408  | -511.94141  | 1 |
| 215 | H | 71.75417 | 80.63659 | 81.45739 | -1071.84350 | 1559.71507  | -1960.13012 | 1 |
| 216 | C | 72.74586 | 82.27255 | 73.33209 | 291.41878   | -183.13091  | 710.72246   | 1 |
| 217 | O | 73.87501 | 81.94083 | 73.05007 | 379.87695   | 523.47396   | -222.23622  | 1 |
| 218 | N | 71.96060 | 83.15055 | 72.72700 | 564.30591   | 373.09380   | 277.24371   | 1 |
| 219 | H | 70.98963 | 83.39060 | 73.00193 | -120.59931  | -2436.07824 | -1214.35098 | 1 |
| 220 | C | 72.37664 | 83.68676 | 71.45683 | 404.07514   | -299.37480  | 608.84009   | 1 |
| 221 | H | 73.37173 | 84.16582 | 71.59352 | -1071.07882 | -841.69025  | 2359.66467  | 1 |
| 222 | C | 72.45754 | 82.44166 | 70.47578 | -683.12807  | 68.71770    | -390.13096  | 1 |
| 223 | H | 73.15723 | 81.67934 | 70.89546 | 2068.88918  | 1596.58590  | 770.89603   | 1 |
| 224 | H | 71.46626 | 81.93752 | 70.41835 | 1379.86429  | 2342.49779  | -179.85638  | 1 |
| 225 | C | 72.92458 | 82.90643 | 69.06832 | -176.39967  | 537.49466   | 550.97268   | 1 |
| 226 | H | 72.28717 | 83.75066 | 68.68216 | -396.28051  | 1942.22168  | 1869.33314  | 1 |
| 227 | H | 73.96715 | 83.29403 | 69.09250 | -94.44700   | 586.00678   | -2659.20016 | 1 |
| 228 | C | 72.79386 | 81.64349 | 68.07408 | -291.69381  | -718.18079  | -150.72929  | 1 |
| 229 | H | 73.46363 | 80.77640 | 68.30604 | -2303.38776 | 1089.76242  | 964.62032   | 1 |
| 230 | H | 71.72841 | 81.32945 | 67.91830 | 884.16729   | 2568.80533  | -207.74283  | 1 |
| 231 | N | 73.25142 | 82.34852 | 66.96008 | -594.49522  | -252.81478  | 342.29276   | 1 |
| 232 | H | 72.62558 | 83.06096 | 66.60294 | -1735.17426 | 2084.05705  | -263.71605  | 1 |
| 233 | C | 74.36835 | 82.16825 | 66.35599 | 595.23177   | -271.52487  | 442.22352   | 1 |
| 234 | N | 75.23016 | 81.18612 | 66.83737 | 585.53813   | -424.79750  | -105.81303  | 1 |
| 235 | H | 75.10833 | 80.56170 | 67.63459 | 959.88797   | 1327.56823  | -2177.11905 | 1 |
| 236 | H | 76.13860 | 80.94473 | 66.43848 | 1578.48647  | 16.27378    | -2220.76233 | 1 |
| 237 | N | 74.48129 | 83.04936 | 65.27942 | -452.17763  | -390.33541  | -421.51853  | 1 |
| 238 | H | 73.83900 | 83.76806 | 64.94653 | 470.26107   | 1974.25629  | -1817.92087 | 1 |
| 239 | H | 75.28628 | 83.08415 | 64.65224 | 1856.67307  | -1573.97321 | -1224.35416 | 1 |
| 240 | C | 71.14006 | 84.69390 | 71.19178 | -531.47271  | -581.45780  | -55.06206   | 1 |
| 241 | O | 70.13761 | 84.59369 | 71.88360 | -243.00837  | 192.73507   | 609.52485   | 1 |
| 242 | N | 71.40319 | 85.59130 | 70.24218 | 343.49288   | -644.25607  | 38.09164    | 1 |
| 243 | H | 72.30631 | 85.47292 | 69.77957 | -1691.16043 | -1535.97525 | -1484.73099 | 1 |
| 244 | C | 70.31045 | 86.26750 | 69.54650 | 542.66492   | 350.14337   | 454.42563   | 1 |
| 245 | H | 69.42427 | 86.12717 | 70.21180 | 1209.57979  | -2396.95920 | 463.86744   | 1 |
| 246 | C | 70.72350 | 87.71976 | 69.36201 | -737.14309  | 145.93010   | 242.71942   | 1 |
| 247 | H | 71.63933 | 87.73524 | 68.73003 | -1050.18303 | 159.36419   | -2509.06125 | 1 |
| 248 | C | 69.65721 | 88.54155 | 68.66724 | -706.77696  | -252.88343  | -245.16230  | 1 |
| 249 | H | 69.94864 | 89.62624 | 68.60104 | -1624.64039 | -1665.49085 | 1417.86935  | 1 |
| 250 | H | 69.47037 | 88.18059 | 67.59631 | 2566.10521  | 598.51109   | 693.22305   | 1 |
| 251 | H | 68.67530 | 88.49593 | 69.21477 | -1972.69758 | 107.10018   | -1876.34312 | 1 |
| 252 | C | 71.07336 | 88.36550 | 70.69165 | 412.85148   | 672.58832   | -27.69222   | 1 |
| 253 | H | 71.44937 | 89.41728 | 70.56098 | 1447.02277  | 1762.76533  | -1490.78944 | 1 |
| 254 | H | 70.18037 | 88.41212 | 71.37379 | 1320.77379  | -145.20455  | 2378.68491  | 1 |
| 255 | H | 71.87070 | 87.78519 | 71.23231 | -1512.10848 | 1470.52031  | 1724.75147  | 1 |
| 256 | C | 70.16233 | 85.50452 | 68.07838 | -607.11113  | 499.56689   | 73.73769    | 1 |
| 257 | O | 71.06275 | 84.85630 | 67.58698 | 357.97126   | 460.81534   | 356.68785   | 1 |
| 258 | N | 68.95198 | 85.72497 | 67.59601 | 536.55407   | -368.62270  | 332.76306   | 1 |

|     |   |          |          |          |             |             |             |   |
|-----|---|----------|----------|----------|-------------|-------------|-------------|---|
| 259 | H | 68.34965 | 86.33776 | 68.14075 | 524.38866   | 2297.69985  | 1367.20941  | 1 |
| 260 | C | 68.68617 | 85.35868 | 66.24875 | 46.50277    | -774.29190  | -147.97904  | 1 |
| 261 | H | 69.40650 | 84.53357 | 66.04477 | 1676.51875  | 1883.29066  | 1032.55549  | 1 |
| 262 | C | 67.12935 | 84.95480 | 66.10079 | -559.41456  | -34.19198   | -556.30433  | 1 |
| 263 | H | 66.49829 | 85.86040 | 66.26597 | -64.66664   | 395.18769   | 2695.05373  | 1 |
| 264 | H | 66.91008 | 84.61994 | 65.05894 | -2703.44278 | -60.40056   | 333.79418   | 1 |
| 265 | C | 66.77149 | 83.88246 | 67.09449 | -519.76435  | 377.31045   | 459.42366   | 1 |
| 266 | H | 67.06576 | 84.23297 | 68.10966 | -1746.74323 | 1667.50644  | -1261.73691 | 1 |
| 267 | C | 65.26790 | 83.63490 | 67.08147 | 570.95554   | 16.46261    | -545.27700  | 1 |
| 268 | H | 64.96874 | 82.86095 | 67.83435 | 2391.58273  | 28.05277    | -1305.07271 | 1 |
| 269 | H | 64.69217 | 84.56718 | 67.31600 | 175.75588   | 917.63458   | 2559.43867  | 1 |
| 270 | H | 64.91902 | 83.27444 | 66.07954 | -1063.97851 | -2155.34650 | 1283.00462  | 1 |
| 271 | C | 67.50844 | 82.58249 | 66.80226 | 193.76014   | 2.62946     | -765.53141  | 1 |
| 272 | H | 67.21673 | 81.77277 | 67.52000 | 507.39394   | -846.55087  | 2539.60089  | 1 |
| 273 | H | 67.28883 | 82.20638 | 65.76979 | 1337.57841  | 1818.19054  | 1526.01994  | 1 |
| 274 | H | 68.61891 | 82.71099 | 66.88218 | 1100.88635  | -1172.91350 | -2199.08909 | 1 |
| 275 | C | 68.93544 | 86.63649 | 65.30528 | -549.21115  | 475.64486   | -309.38218  | 1 |
| 276 | O | 69.18329 | 87.74519 | 65.72062 | 556.06106   | -390.37755  | -78.24250   | 1 |
| 277 | O | 68.79059 | 86.41014 | 63.91983 | -572.27940  | -310.19032  | -209.75862  | 1 |
| 278 | H | 68.61287 | 85.42634 | 63.94544 | -1380.08193 | 2212.14486  | 790.85944   | 1 |

Listing 14: C00014.xmolout

|    |   |          |          |          |             |             |             |        |          |
|----|---|----------|----------|----------|-------------|-------------|-------------|--------|----------|
| 1  |   | 276      |          |          |             |             |             |        |          |
| 2  |   | 150.0000 | 150.0000 | 150.0000 | 0.0000      | 0.0000      | 0.0000***** | 2.7750 | 11100    |
|    |   | 0.2500   | 300.00   | 0.00     | 0.00        | 0.00        | -1294.1102  | 0.0000 | 300.0000 |
| 3  | H | 67.49412 | 74.41689 | 73.80266 | -2043.14101 | -1757.64893 | 399.89339   |        | 1        |
| 4  | N | 67.69003 | 75.20669 | 74.41096 | 426.75047   | 490.45733   | -334.42467  |        | 1        |
| 5  | H | 67.80482 | 74.72324 | 75.30205 | 442.25559   | -1110.30854 | -2448.52907 |        | 1        |
| 6  | C | 68.85057 | 75.92805 | 74.02451 | 415.32972   | -666.39213  | 83.73172    |        | 1        |
| 7  | H | 69.63080 | 75.15281 | 73.86769 | 879.32219   | 2491.00447  | 667.35213   |        | 1        |
| 8  | C | 68.53017 | 76.74960 | 72.67794 | 31.35357    | 477.41777   | 628.23362   |        | 1        |
| 9  | H | 67.67588 | 77.44286 | 72.87121 | 1168.38489  | 2240.25337  | -1019.71136 |        | 1        |
| 10 | H | 69.39932 | 77.39947 | 72.41287 | -360.43770  | 2534.90498  | 931.67112   |        | 1        |
| 11 | C | 68.20199 | 75.81146 | 71.54360 | 463.18208   | 512.70242   | -382.34388  |        | 1        |
| 12 | H | 67.38354 | 75.13160 | 71.86934 | 1725.29117  | 1863.52247  | -987.07854  |        | 1        |
| 13 | C | 67.71070 | 76.60002 | 70.33608 | 710.42801   | -144.27427  | -313.15367  |        | 1        |
| 14 | H | 67.44024 | 75.92525 | 69.48317 | 364.20195   | -1033.13725 | 2494.72524  |        | 1        |
| 15 | H | 66.80116 | 77.20735 | 70.58150 | 2567.61904  | 335.80679   | 847.48802   |        | 1        |
| 16 | H | 68.49259 | 77.31049 | 69.96256 | -2587.99029 | 680.92867   | -512.16411  |        | 1        |
| 17 | C | 69.40891 | 74.97111 | 71.15067 | 268.17616   | 741.64379   | -40.42634   |        | 1        |
| 18 | H | 69.18138 | 74.30531 | 70.27842 | 1283.54314  | -1945.37420 | -1411.27812 |        | 1        |
| 19 | H | 70.28055 | 75.61281 | 70.86019 | -1258.57796 | 1317.15249  | -2026.02085 |        | 1        |
| 20 | H | 69.74865 | 74.31096 | 71.98963 | -2502.84526 | 909.80597   | 575.92391   |        | 1        |
| 21 | C | 69.26887 | 76.99094 | 75.17871 | 619.36578   | -458.64843  | -172.09273  |        | 1        |
| 22 | O | 70.47092 | 77.32732 | 75.25766 | -81.40433   | 433.87611   | 522.34594   |        | 1        |
| 23 | N | 68.23271 | 77.39720 | 75.84662 | 175.23996   | -622.20190  | 341.55523   |        | 1        |
| 24 | H | 67.38893 | 76.91970 | 75.52599 | -876.57256  | -303.22879  | -2561.90213 |        | 1        |
| 25 | C | 68.14706 | 78.31939 | 76.94759 | -571.88214  | -534.10783  | -106.15033  |        | 1        |
| 26 | H | 67.73624 | 77.71339 | 77.78583 | -2713.20841 | -16.25800   | -248.80809  |        | 1        |
| 27 | C | 69.54212 | 78.92206 | 77.28372 | 166.60354   | 288.16399   | -716.09568  |        | 1        |
| 28 | H | 70.04855 | 79.28101 | 76.35593 | -2097.85574 | 1636.78449  | -586.18044  |        | 1        |
| 29 | O | 70.55290 | 77.79674 | 77.81991 | -317.80580  | -363.38227  | 484.43082   |        | 1        |
| 30 | H | 70.86381 | 77.54051 | 76.92581 | 1863.74748  | -1451.84923 | 1357.29467  |        | 1        |
| 31 | C | 69.37388 | 80.06072 | 78.31010 | 503.80731   | 517.99032   | 318.51606   |        | 1        |
| 32 | H | 70.37699 | 80.47385 | 78.59194 | 640.61020   | -2157.10410 | -1536.29104 |        | 1        |
| 33 | H | 68.75258 | 80.90261 | 77.91053 | 1687.88455  | 465.60692   | 2087.56452  |        | 1        |
| 34 | H | 68.88867 | 79.70401 | 79.25145 | -1293.07895 | -1899.88581 | -1463.57452 |        | 1        |
| 35 | C | 67.07815 | 79.47429 | 76.46922 | -153.07550  | -733.68902  | 248.70981   |        | 1        |
| 36 | O | 67.06344 | 79.87683 | 75.33659 | 186.15459   | -480.78787  | -449.34387  |        | 1        |
| 37 | N | 66.35144 | 79.89229 | 77.51903 | -487.53139  | 543.18517   | 42.03850    |        | 1        |
| 38 | C | 65.50223 | 81.03472 | 77.39609 | -699.35871  | 69.34393    | 360.10701   |        | 1        |

|     |   |          |          |          |             |             |             |   |
|-----|---|----------|----------|----------|-------------|-------------|-------------|---|
| 39  | H | 65.22438 | 81.09119 | 76.31760 | 2.81126     | -221.99807  | -2715.58072 | 1 |
| 40  | C | 64.33906 | 80.72939 | 78.43258 | -507.46439  | -592.59194  | 122.07761   | 1 |
| 41  | H | 63.83264 | 81.65815 | 78.78608 | -1975.08116 | 525.87560   | -1801.71556 | 1 |
| 42  | H | 63.55307 | 80.07509 | 77.99279 | 1588.27743  | -1913.22100 | 1113.83566  | 1 |
| 43  | C | 65.12829 | 79.99578 | 79.56283 | -613.62442  | -457.55993  | -194.14490  | 1 |
| 44  | H | 65.68010 | 80.72746 | 80.19457 | 1707.54637  | -721.27992  | 1996.92523  | 1 |
| 45  | H | 64.48057 | 79.40646 | 80.25031 | 758.23357   | 2100.81767  | 1560.55011  | 1 |
| 46  | C | 66.12715 | 79.09490 | 78.71858 | -352.41524  | 704.96076   | 49.21465    | 1 |
| 47  | H | 67.10651 | 78.89775 | 79.21130 | 1714.76886  | -2070.42778 | 443.35792   | 1 |
| 48  | H | 65.69563 | 78.12946 | 78.36291 | 1224.15040  | 1801.50881  | 1636.97633  | 1 |
| 49  | C | 66.24110 | 82.39589 | 77.95068 | 566.85117   | 537.05831   | 117.62814   | 1 |
| 50  | O | 65.66286 | 83.02191 | 78.84685 | -550.26779  | -406.08867  | 4.21666     | 1 |
| 51  | N | 67.35909 | 82.64069 | 77.33926 | 566.34832   | -425.77725  | 180.18749   | 1 |
| 52  | H | 67.55331 | 81.96277 | 76.60164 | 644.44502   | 2646.80550  | -52.73430   | 1 |
| 53  | C | 68.18165 | 83.80393 | 77.50206 | 612.34801   | -281.48662  | 411.56221   | 1 |
| 54  | H | 68.02624 | 84.38509 | 76.56795 | 1667.23498  | -1490.75142 | 1556.16753  | 1 |
| 55  | C | 67.78113 | 84.60679 | 78.81568 | -714.45746  | -175.43074  | 286.98927   | 1 |
| 56  | H | 67.63917 | 83.84021 | 79.63004 | -787.09484  | 1763.03619  | -1922.46060 | 1 |
| 57  | O | 66.56407 | 85.34642 | 78.73506 | -429.46514  | 516.51932   | -128.40526  | 1 |
| 58  | H | 65.90717 | 84.61004 | 79.04045 | 1981.82785  | 436.16847   | -1818.18182 | 1 |
| 59  | C | 69.06592 | 85.46060 | 79.12315 | 630.79189   | -468.94448  | 76.03230    | 1 |
| 60  | H | 68.94418 | 86.05066 | 80.06109 | -1775.71861 | 2062.30353  | 131.89849   | 1 |
| 61  | H | 69.97204 | 84.82193 | 79.25154 | -1855.14608 | 88.94118    | 1993.53760  | 1 |
| 62  | H | 69.28099 | 86.18469 | 78.30364 | -1504.82350 | -780.94249  | -2132.90992 | 1 |
| 63  | C | 69.70254 | 83.23164 | 77.60766 | 288.57638   | 618.62814   | -397.00270  | 1 |
| 64  | O | 70.06944 | 82.62844 | 78.62220 | 321.70495   | -185.26452  | 574.37218   | 1 |
| 65  | N | 70.39387 | 83.63081 | 76.57070 | -447.05792  | -446.53431  | 367.76425   | 1 |
| 66  | H | 69.86126 | 84.16286 | 75.88148 | 350.31316   | 1975.63644  | -1843.31522 | 1 |
| 67  | C | 71.62626 | 83.05672 | 76.15225 | -511.23061  | 374.03917   | -471.51480  | 1 |
| 68  | H | 71.94354 | 83.78912 | 75.37613 | 2234.79579  | -898.70890  | -1273.45190 | 1 |
| 69  | C | 72.64572 | 82.99331 | 77.38299 | 529.53781   | -159.34528  | 563.72604   | 1 |
| 70  | H | 73.69754 | 82.99962 | 76.98301 | 654.59388   | 2347.94251  | 1217.51488  | 1 |
| 71  | H | 72.50274 | 83.95975 | 77.93741 | -1526.55661 | 2103.42026  | 817.87394   | 1 |
| 72  | O | 72.53540 | 81.87749 | 78.27113 | -554.84278  | 14.12789    | 399.58769   | 1 |
| 73  | H | 71.58026 | 82.05841 | 78.62527 | 1297.06236  | 2061.84854  | 1220.68812  | 1 |
| 74  | C | 71.32910 | 81.61118 | 75.47557 | -662.15484  | -412.13544  | 123.62687   | 1 |
| 75  | O | 70.21507 | 81.23249 | 75.18293 | -540.01537  | -317.05804  | 274.91456   | 1 |
| 76  | N | 72.48128 | 81.00558 | 75.19651 | -202.76299  | -690.00100  | -131.49145  | 1 |
| 77  | H | 73.36317 | 81.43671 | 75.46620 | -702.62132  | -2617.37191 | 281.70413   | 1 |
| 78  | C | 72.43572 | 79.85283 | 74.35930 | -491.73914  | 576.34187   | 222.73509   | 1 |
| 79  | H | 71.41878 | 79.41114 | 74.49896 | 1977.17978  | -1823.58850 | -434.68928  | 1 |
| 80  | C | 72.67979 | 80.38520 | 72.87356 | -649.50797  | -328.66843  | 306.11224   | 1 |
| 81  | H | 73.48437 | 81.15127 | 72.87086 | 2075.07803  | 1452.16490  | -1004.45904 | 1 |
| 82  | C | 73.03138 | 79.21029 | 71.90151 | -615.18735  | -489.99689  | -70.96352   | 1 |
| 83  | H | 73.05275 | 79.54809 | 70.83870 | -1226.32661 | -1724.38906 | -1716.47170 | 1 |
| 84  | H | 74.03672 | 78.78544 | 72.12847 | 2381.64273  | -969.84735  | 900.46860   | 1 |
| 85  | H | 72.28952 | 78.38010 | 71.97235 | 2122.74991  | 1702.23946  | -141.36228  | 1 |
| 86  | C | 71.32968 | 80.99057 | 72.36205 | -501.86074  | -479.61276  | -376.42482  | 1 |
| 87  | H | 71.44694 | 81.48105 | 71.36670 | 993.79261   | -2246.95401 | -1177.81305 | 1 |
| 88  | H | 70.54409 | 80.20563 | 72.25730 | 42.71279    | -626.15391  | -2651.37258 | 1 |
| 89  | H | 70.93232 | 81.75422 | 73.07530 | -2026.39012 | -1590.33709 | -887.82922  | 1 |
| 90  | C | 73.69098 | 78.91843 | 74.81156 | -672.89153  | 382.57394   | -156.34072  | 1 |
| 91  | O | 74.83353 | 79.29792 | 74.76763 | 410.04627   | 221.86223   | 500.35950   | 1 |
| 92  | N | 73.22501 | 77.68954 | 75.07896 | -378.11782  | -443.79414  | -441.10984  | 1 |
| 93  | H | 72.18940 | 77.51113 | 75.06390 | 2404.15973  | -568.14894  | 1149.30085  | 1 |
| 94  | C | 74.05981 | 76.92558 | 75.98452 | -544.54484  | 466.16019   | 331.29119   | 1 |
| 95  | H | 74.81565 | 77.66252 | 76.34719 | -1409.80988 | -170.17955  | 2325.32679  | 1 |
| 96  | C | 73.04872 | 76.45385 | 77.11599 | -184.48284  | 116.78282   | -758.89137  | 1 |
| 97  | H | 72.75269 | 77.34856 | 77.71286 | 1893.78641  | 1861.14652  | 611.04528   | 1 |
| 98  | H | 72.10854 | 76.07205 | 76.65691 | -2170.79665 | -974.19311  | 1327.50117  | 1 |
| 99  | C | 73.64179 | 75.35964 | 78.05303 | 389.51668   | 672.81878   | -138.49152  | 1 |
| 100 | H | 73.64875 | 74.36705 | 77.53819 | 510.64577   | 1933.03327  | 1851.02484  | 1 |

|     |   |          |          |          |             |             |             |   |
|-----|---|----------|----------|----------|-------------|-------------|-------------|---|
| 101 | H | 74.71912 | 75.55707 | 78.23791 | -2302.30869 | -1105.72939 | -948.89774  | 1 |
| 102 | C | 72.85918 | 75.25434 | 79.42456 | -559.93427  | -126.34590  | 542.30857   | 1 |
| 103 | O | 73.26436 | 74.52913 | 80.30113 | -670.36003  | -111.83166  | 76.36448    | 1 |
| 104 | N | 71.76819 | 76.03194 | 79.49490 | -216.06729  | -537.07037  | 446.51379   | 1 |
| 105 | H | 71.33217 | 76.68876 | 78.76822 | -1251.96487 | 1074.12894  | -2168.52500 | 1 |
| 106 | H | 71.17867 | 76.02517 | 80.33851 | -2451.83023 | -720.73851  | 944.84612   | 1 |
| 107 | C | 74.77252 | 75.64422 | 75.33915 | 546.24052   | -563.88337  | -85.11809   | 1 |
| 108 | O | 75.36884 | 74.91504 | 76.13657 | 71.70702    | -307.40463  | 606.69673   | 1 |
| 109 | N | 74.77584 | 75.54689 | 74.01335 | 479.90863   | -504.50129  | 222.86849   | 1 |
| 110 | C | 74.88983 | 74.30129 | 73.31293 | 75.51268    | -600.91904  | 506.73700   | 1 |
| 111 | H | 74.33152 | 73.54268 | 73.90626 | -2033.61562 | 1795.30103  | 254.89480   | 1 |
| 112 | C | 74.26688 | 74.65920 | 71.90223 | 523.79067   | 517.99274   | 284.45581   | 1 |
| 113 | H | 74.57354 | 73.94774 | 71.10228 | 1599.61665  | -1127.00911 | 1895.98173  | 1 |
| 114 | H | 73.15414 | 74.65510 | 71.92984 | -1881.83093 | 1275.82488  | -1501.55016 | 1 |
| 115 | C | 74.82079 | 76.10299 | 71.68261 | -600.05639  | -404.05026  | 316.64485   | 1 |
| 116 | H | 75.89483 | 76.08082 | 71.39141 | -2597.05260 | 496.36221   | 657.73249   | 1 |
| 117 | H | 74.28783 | 76.67386 | 70.88889 | -1666.24518 | 1294.38985  | -1723.90591 | 1 |
| 118 | C | 74.61145 | 76.70500 | 73.13574 | 493.57570   | -129.95376  | -602.56394  | 1 |
| 119 | H | 75.33609 | 77.49458 | 73.45538 | -1469.08415 | -637.84797  | 2204.22581  | 1 |
| 120 | H | 73.57218 | 77.05842 | 73.34098 | -1038.97840 | 1068.88701  | -2280.71789 | 1 |
| 121 | C | 76.44336 | 73.85005 | 73.03755 | 188.88100   | 241.05089   | -727.87821  | 1 |
| 122 | O | 76.65677 | 72.84445 | 72.40001 | 531.88613   | -49.19943   | 427.07960   | 1 |
| 123 | N | 77.31367 | 74.74536 | 73.49261 | 708.14833   | 26.93417    | -179.73509  | 1 |
| 124 | H | 76.90465 | 75.49621 | 74.04677 | -2232.69501 | -1179.09831 | 1023.94816  | 1 |
| 125 | C | 78.70964 | 74.43175 | 73.51682 | -738.32412  | 259.92548   | 104.42456   | 1 |
| 126 | H | 78.77957 | 73.78205 | 72.61345 | 2028.89123  | 1260.02983  | 1311.33324  | 1 |
| 127 | C | 79.47571 | 75.81640 | 73.38953 | -258.65678  | -345.52513  | 661.28459   | 1 |
| 128 | H | 79.24588 | 76.44198 | 74.27875 | -1826.06090 | -1801.46097 | -918.64554  | 1 |
| 129 | C | 81.02179 | 75.79583 | 73.13192 | -541.23400  | 531.92970   | -218.41428  | 1 |
| 130 | H | 81.40501 | 76.82813 | 72.95160 | 1311.73218  | -2219.18200 | 882.19023   | 1 |
| 131 | H | 81.60520 | 75.39097 | 73.99472 | -1048.71298 | 1223.58118  | -2196.97971 | 1 |
| 132 | H | 81.29549 | 75.18931 | 72.22383 | 419.06414   | 1903.92898  | 1903.44670  | 1 |
| 133 | C | 78.94281 | 76.48921 | 72.07714 | -423.86431  | 152.66566   | -648.55262  | 1 |
| 134 | H | 79.37957 | 77.50413 | 71.92502 | 105.68386   | -2342.50080 | 1387.51238  | 1 |
| 135 | H | 79.19408 | 75.87976 | 71.17605 | -1695.63603 | -1484.73621 | -1531.02793 | 1 |
| 136 | H | 77.83429 | 76.60269 | 72.09795 | -1853.57121 | -487.39031  | 1936.59343  | 1 |
| 137 | C | 78.92795 | 73.57102 | 74.87607 | 539.71428   | -510.58232  | 267.58633   | 1 |
| 138 | O | 78.10570 | 72.72354 | 75.23113 | -15.93758   | -278.34085  | -624.49402  | 1 |
| 139 | N | 80.05157 | 73.87745 | 75.48311 | -676.81886  | 12.05292    | 276.17960   | 1 |
| 140 | H | 80.63309 | 74.60759 | 75.08100 | -1694.44250 | -373.84189  | -2100.66098 | 1 |
| 141 | C | 80.57765 | 72.98918 | 76.48637 | 412.33078   | -664.70360  | 108.35451   | 1 |
| 142 | H | 80.53522 | 71.97602 | 76.02555 | 1765.77476  | 1294.44366  | 1621.76594  | 1 |
| 143 | C | 82.03616 | 73.49321 | 76.81891 | -179.66635  | -721.95667  | -264.73915  | 1 |
| 144 | H | 82.63887 | 73.67271 | 75.90095 | -607.34922  | 2587.87032  | -598.10018  | 1 |
| 145 | H | 81.97995 | 74.47980 | 77.33127 | -359.69332  | -1479.13954 | -2259.74260 | 1 |
| 146 | C | 82.70928 | 72.42751 | 77.74808 | -240.01076  | 616.02425   | 431.85322   | 1 |
| 147 | H | 81.95715 | 72.04406 | 78.49351 | -1359.17131 | 782.54425   | 2227.99181  | 1 |
| 148 | H | 83.05467 | 71.53939 | 77.17212 | -820.36667  | 85.81767    | -2596.78715 | 1 |
| 149 | C | 83.90441 | 73.12877 | 78.50819 | -513.07015  | 236.18570   | -551.87280  | 1 |
| 150 | H | 84.77818 | 73.28040 | 77.83394 | 1816.11944  | -1183.11722 | -1650.94321 | 1 |
| 151 | H | 83.60908 | 74.14478 | 78.85777 | -1800.04429 | -1361.53473 | 1526.34643  | 1 |
| 152 | C | 84.26499 | 72.23525 | 79.71839 | 726.08972   | -253.19732  | -179.64713  | 1 |
| 153 | H | 83.46545 | 72.15282 | 80.48216 | 1224.27271  | -456.51798  | -2390.90304 | 1 |
| 154 | H | 84.64076 | 71.22673 | 79.45484 | 1206.40339  | -1150.93514 | -2154.90344 | 1 |
| 155 | N | 85.45227 | 72.92395 | 80.47059 | 329.70796   | -633.68968  | -155.67358  | 1 |
| 156 | H | 85.79074 | 72.42833 | 81.34523 | 1348.31305  | 1938.76845  | 1359.00643  | 1 |
| 157 | H | 86.35969 | 73.04370 | 79.93320 | 2096.92035  | 1446.54551  | -966.48890  | 1 |
| 158 | H | 85.28419 | 73.90504 | 80.83956 | -1197.07217 | -2303.53719 | 827.28733   | 1 |
| 159 | C | 79.70142 | 73.04897 | 77.85293 | -378.01186  | -556.17301  | -413.96481  | 1 |
| 160 | O | 80.03478 | 72.40894 | 78.83159 | -409.44433  | -307.55053  | -453.30833  | 1 |
| 161 | N | 78.69551 | 73.91714 | 77.76409 | -429.02477  | 524.70884   | 274.08502   | 1 |
| 162 | H | 78.50120 | 74.30166 | 76.83733 | 1706.34263  | -1425.96036 | 1574.38926  | 1 |

|     |   |          |          |          |             |             |             |   |
|-----|---|----------|----------|----------|-------------|-------------|-------------|---|
| 163 | C | 77.80003 | 73.97939 | 78.87848 | -45.25864   | -626.22952  | 478.93267   | 1 |
| 164 | H | 78.44390 | 73.76144 | 79.76280 | 1988.63164  | 570.90773   | 1772.87287  | 1 |
| 165 | C | 77.17691 | 75.43522 | 78.85900 | 551.77128   | -20.49526   | -564.54996  | 1 |
| 166 | H | 77.97906 | 76.20585 | 78.82231 | 1434.61535  | -1753.10253 | 1513.99471  | 1 |
| 167 | H | 76.57943 | 75.58425 | 77.92884 | -714.67738  | 1819.09770  | 1898.36494  | 1 |
| 168 | C | 76.29797 | 75.60611 | 80.14134 | 446.99263   | -555.77305  | 338.97221   | 1 |
| 169 | H | 75.49088 | 74.83047 | 80.17268 | 1953.68466  | 1892.25957  | -161.67766  | 1 |
| 170 | H | 76.90011 | 75.45238 | 81.06494 | -403.03785  | 2688.07032  | -188.43591  | 1 |
| 171 | C | 75.70350 | 77.07151 | 80.09290 | 567.86262   | 335.74681   | 434.04421   | 1 |
| 172 | H | 76.51893 | 77.82844 | 80.15357 | -1080.02275 | 1568.26081  | -1948.78900 | 1 |
| 173 | H | 75.19261 | 77.26362 | 79.12204 | -919.54108  | 2111.34692  | 1456.13463  | 1 |
| 174 | C | 74.70656 | 77.24553 | 81.26227 | 195.81897   | 173.33862   | -745.11536  | 1 |
| 175 | H | 73.89791 | 76.48603 | 81.29802 | 1405.67949  | -2301.21089 | -390.08113  | 1 |
| 176 | H | 75.17323 | 77.34984 | 82.26260 | -940.37328  | -1118.32446 | 2299.72133  | 1 |
| 177 | N | 73.94436 | 78.58920 | 81.01101 | 319.26422   | 656.36007   | -42.02424   | 1 |
| 178 | H | 73.22700 | 78.86144 | 81.74314 | 1961.03633  | 619.91968   | 1787.09422  | 1 |
| 179 | H | 74.51969 | 79.47807 | 80.93641 | 854.14343   | -2156.80752 | 1429.08711  | 1 |
| 180 | H | 73.36037 | 78.63282 | 80.12615 | 1237.02905  | -1378.50857 | -1998.28500 | 1 |
| 181 | C | 76.63407 | 72.84599 | 78.71244 | 532.53319   | -268.57236  | 517.55729   | 1 |
| 182 | O | 75.90719 | 72.64116 | 79.65438 | 266.16714   | -290.73804  | -558.88002  | 1 |
| 183 | N | 76.58964 | 72.32515 | 77.49238 | -226.25352  | 640.49678   | -270.32839  | 1 |
| 184 | H | 77.28383 | 72.58105 | 76.75001 | 2007.69063  | -1035.27229 | 1523.50231  | 1 |
| 185 | C | 75.76829 | 71.17314 | 77.31469 | -540.76542  | -573.33303  | 49.50000    | 1 |
| 186 | H | 75.20643 | 71.06311 | 78.27552 | -2374.20950 | -1036.76023 | 843.75774   | 1 |
| 187 | C | 74.84829 | 71.51417 | 76.06281 | -77.09082   | 666.87422   | -415.84136  | 1 |
| 188 | H | 75.52011 | 71.85267 | 75.21887 | -985.81834  | 617.19825   | 2463.91927  | 1 |
| 189 | O | 73.97940 | 72.65438 | 76.21075 | 293.29899   | -391.65602  | -477.80926  | 1 |
| 190 | H | 74.67328 | 73.40165 | 76.17992 | 2528.72714  | -681.76262  | -751.27122  | 1 |
| 191 | C | 74.14590 | 70.15432 | 75.72444 | 252.47363   | -605.14473  | 440.05134   | 1 |
| 192 | H | 73.54470 | 70.22686 | 74.78825 | -2052.65063 | 1456.49051  | -1043.51830 | 1 |
| 193 | H | 74.88169 | 69.32974 | 75.58328 | -2152.98800 | -1661.97574 | -161.70652  | 1 |
| 194 | H | 73.45240 | 69.84417 | 76.54081 | -473.12726  | -1584.27339 | 2165.61725  | 1 |
| 195 | C | 76.82054 | 69.94174 | 77.03759 | 360.36307   | 488.46713   | 505.10056   | 1 |
| 196 | O | 77.27796 | 69.33625 | 77.97628 | -200.08817  | -528.03552  | -385.82850  | 1 |
| 197 | N | 77.09115 | 69.77713 | 75.74830 | -597.54095  | -226.44775  | 355.20479   | 1 |
| 198 | H | 76.65603 | 70.38151 | 75.05286 | 2179.23655  | -1300.70981 | -991.33835  | 1 |
| 199 | C | 77.66165 | 68.52378 | 75.36456 | -687.68921  | 297.39807   | -249.45179  | 1 |
| 200 | H | 78.54388 | 68.43111 | 76.03484 | -349.16256  | -2467.37713 | -1101.72831 | 1 |
| 201 | C | 76.61821 | 67.32690 | 75.54395 | 672.47345   | 361.54328   | -201.62880  | 1 |
| 202 | H | 75.72194 | 67.50980 | 74.90964 | 1541.41502  | 582.18425   | 2169.97026  | 1 |
| 203 | H | 77.08768 | 66.39428 | 75.15480 | -2534.67717 | 60.25153    | 997.72295   | 1 |
| 204 | C | 76.19994 | 67.12414 | 77.01275 | 574.26774   | -389.43119  | -377.02542  | 1 |
| 205 | C | 77.15914 | 66.69699 | 77.98211 | 688.82679   | -287.33580  | -257.96133  | 1 |
| 206 | H | 78.22005 | 66.56373 | 77.70278 | 331.14182   | 1470.38163  | 2269.80013  | 1 |
| 207 | C | 74.83372 | 67.29991 | 77.39069 | -383.52382  | -675.04808  | 144.24917   | 1 |
| 208 | H | 74.07999 | 67.61554 | 76.64724 | 4.09847     | 1517.59662  | 2262.86397  | 1 |
| 209 | C | 76.73562 | 66.46156 | 79.29176 | -134.76730  | 428.45285   | -649.50303  | 1 |
| 210 | H | 77.48151 | 66.14064 | 80.03984 | -903.23433  | 1600.49020  | 2011.53387  | 1 |
| 211 | C | 74.45774 | 67.05531 | 78.71432 | -335.53281  | -615.00040  | -364.39058  | 1 |
| 212 | H | 73.39864 | 67.19890 | 78.99117 | 1596.45398  | -1369.33862 | 1732.02659  | 1 |
| 213 | C | 75.38338 | 66.62571 | 79.71036 | 585.48547   | -340.24194  | -406.23938  | 1 |
| 214 | O | 75.00648 | 66.35626 | 81.05249 | -419.15649  | -173.04408  | -511.94141  | 1 |
| 215 | H | 74.05507 | 66.61159 | 81.01322 | -1071.84350 | 1559.71507  | -1960.13012 | 1 |
| 216 | C | 77.95896 | 68.54480 | 73.76728 | 291.41878   | -183.13091  | 710.72246   | 1 |
| 217 | O | 77.39221 | 67.72651 | 73.07205 | 379.87695   | 523.47396   | -222.23622  | 1 |
| 218 | N | 78.80996 | 69.49747 | 73.37929 | 564.30591   | 373.09380   | 277.24371   | 1 |
| 219 | H | 79.20082 | 70.12289 | 74.08459 | -120.59931  | -2436.07824 | -1214.35098 | 1 |
| 220 | C | 79.30167 | 69.35882 | 72.03313 | 404.07514   | -299.37480  | 608.84009   | 1 |
| 221 | H | 79.55236 | 68.27938 | 71.93333 | -1071.07882 | -841.69025  | 2359.66467  | 1 |
| 222 | C | 78.11365 | 69.76998 | 71.07669 | -683.12807  | 68.71770    | -390.13096  | 1 |
| 223 | H | 77.17495 | 69.24715 | 71.37944 | 2068.88918  | 1596.58590  | 770.89603   | 1 |
| 224 | H | 77.89529 | 70.86077 | 71.15895 | 1379.86429  | 2342.49779  | -179.85638  | 1 |

|     |   |          |          |          |             |             |             |   |
|-----|---|----------|----------|----------|-------------|-------------|-------------|---|
| 225 | C | 78.53824 | 69.38403 | 69.62455 | -176.39967  | 537.49466   | 550.97268   | 1 |
| 226 | H | 79.50715 | 69.85428 | 69.34276 | -396.28051  | 1942.22168  | 1869.33314  | 1 |
| 227 | H | 78.70004 | 68.28706 | 69.53071 | -94.44700   | 586.00678   | -2659.20016 | 1 |
| 228 | C | 77.34839 | 69.88529 | 68.68558 | -291.69381  | -718.18079  | -150.72929  | 1 |
| 229 | H | 76.34734 | 69.44106 | 68.91337 | -2303.38776 | 1089.76242  | 964.62032   | 1 |
| 230 | H | 77.22229 | 70.99554 | 68.60566 | 884.16729   | 2568.80533  | -207.74283  | 1 |
| 231 | N | 77.72508 | 69.38595 | 67.43176 | -594.49522  | -252.81478  | 342.29276   | 1 |
| 232 | H | 78.52969 | 68.77931 | 67.40770 | -1735.17426 | 2084.05705  | -263.71605  | 1 |
| 233 | C | 77.10746 | 69.63123 | 66.34754 | 595.23177   | -271.52487  | 442.22352   | 1 |
| 234 | N | 75.98421 | 70.46221 | 66.42206 | 585.53813   | -424.79750  | -105.81303  | 1 |
| 235 | H | 75.57416 | 70.92106 | 67.23465 | 959.88797   | 1327.56823  | -2177.11905 | 1 |
| 236 | H | 75.40093 | 70.73378 | 65.63030 | 1578.48647  | 16.27378    | -2220.76233 | 1 |
| 237 | N | 77.70876 | 68.98226 | 65.26059 | -452.17763  | -390.33541  | -421.51853  | 1 |
| 238 | H | 78.51492 | 68.36103 | 65.20949 | 470.26107   | 1974.25629  | -1817.92087 | 1 |
| 239 | H | 77.34733 | 69.04361 | 64.30777 | 1856.67307  | -1573.97321 | -1224.35416 | 1 |
| 240 | C | 80.54507 | 70.37827 | 71.73666 | -531.47271  | -581.45780  | -55.06206   | 1 |
| 241 | O | 81.44093 | 70.01543 | 71.00761 | -243.00837  | 192.73507   | 609.52485   | 1 |
| 242 | N | 80.30636 | 71.57746 | 72.25524 | 343.49288   | -644.25607  | 38.09164    | 1 |
| 243 | H | 79.45799 | 71.65663 | 72.81680 | -1691.16043 | -1535.97525 | -1484.73099 | 1 |
| 244 | C | 81.25472 | 72.62937 | 72.19922 | 542.66492   | 350.14337   | 454.42563   | 1 |
| 245 | H | 80.89004 | 73.35492 | 72.95837 | 1209.57979  | -2396.95920 | 463.86744   | 1 |
| 246 | C | 82.69090 | 72.04533 | 72.56282 | -737.14309  | 145.93010   | 242.71942   | 1 |
| 247 | H | 82.98846 | 71.26902 | 71.81765 | -1050.18303 | 159.36419   | -2509.06125 | 1 |
| 248 | C | 83.74415 | 73.20242 | 72.62123 | -706.77696  | -252.88343  | -245.16230  | 1 |
| 249 | H | 84.74562 | 72.83047 | 72.94266 | -1624.64039 | -1665.49085 | 1417.86935  | 1 |
| 250 | H | 83.87476 | 73.68720 | 71.62280 | 2566.10521  | 598.51109   | 693.22305   | 1 |
| 251 | H | 83.43888 | 73.99942 | 73.33897 | -1972.69758 | 107.10018   | -1876.34312 | 1 |
| 252 | C | 82.60999 | 71.42614 | 73.99988 | 412.85148   | 672.58832   | -27.69222   | 1 |
| 253 | H | 83.59967 | 71.04495 | 74.34452 | 1447.02277  | 1762.76533  | -1490.78944 | 1 |
| 254 | H | 82.26369 | 72.17850 | 74.74329 | 1320.77379  | -145.20455  | 2378.68491  | 1 |
| 255 | H | 81.89108 | 70.57416 | 74.03370 | -1512.10848 | 1470.52031  | 1724.75147  | 1 |
| 256 | C | 81.30058 | 73.27416 | 70.69662 | -607.11113  | 499.56689   | 73.73769    | 1 |
| 257 | O | 81.97749 | 74.26651 | 70.51107 | 357.97126   | 460.81534   | 356.68785   | 1 |
| 258 | N | 80.58007 | 72.60507 | 69.80395 | 536.55407   | -368.62270  | 332.76306   | 1 |
| 259 | H | 80.04402 | 71.81315 | 70.15644 | 524.38866   | 2297.69985  | 1367.20941  | 1 |
| 260 | C | 80.38530 | 73.20214 | 68.53148 | 46.50277    | -774.29190  | -147.97904  | 1 |
| 261 | H | 81.30109 | 73.81591 | 68.37650 | 1676.51875  | 1883.29066  | 1032.55549  | 1 |
| 262 | C | 80.10784 | 72.08549 | 67.40250 | -559.41456  | -34.19198   | -556.30433  | 1 |
| 263 | H | 79.19040 | 71.50692 | 67.66772 | -64.66664   | 395.18769   | 2695.05373  | 1 |
| 264 | H | 79.87584 | 72.58814 | 66.43275 | -2703.44278 | -60.40056   | 333.79418   | 1 |
| 265 | C | 81.27755 | 71.15076 | 67.23845 | -519.76435  | 377.31045   | 459.42366   | 1 |
| 266 | H | 81.45540 | 70.63519 | 68.20949 | -1746.74323 | 1667.50644  | -1261.73691 | 1 |
| 267 | C | 80.96015 | 70.11010 | 66.17049 | 570.95554   | 16.46261    | -545.27700  | 1 |
| 268 | H | 81.77681 | 69.34905 | 66.07381 | 2391.58273  | 28.05277    | -1305.07271 | 1 |
| 269 | H | 80.01389 | 69.55844 | 66.39889 | 175.75588   | 917.63458   | 2559.43867  | 1 |
| 270 | H | 80.82651 | 70.58210 | 65.16281 | -1063.97851 | -2155.34650 | 1283.00462  | 1 |
| 271 | C | 82.54696 | 71.89342 | 66.84495 | 193.76014   | 2.62946     | -765.53141  | 1 |
| 272 | H | 83.39650 | 71.18642 | 66.65762 | 507.39394   | -846.55087  | 2539.60089  | 1 |
| 273 | H | 82.40174 | 72.49218 | 65.90849 | 1337.57841  | 1818.19054  | 1526.01994  | 1 |
| 274 | H | 82.87774 | 72.60199 | 67.64775 | 1100.88635  | -1172.91350 | -2199.08909 | 1 |
| 275 | C | 79.04982 | 74.10850 | 68.60316 | -549.21115  | 475.64486   | -309.38218  | 1 |
| 276 | O | 78.10012 | 73.84405 | 69.29207 | 556.06106   | -390.37755  | -78.24250   | 1 |
| 277 | O | 78.98758 | 75.17320 | 67.7203  | -572.27940  | -310.19032  | -209.75862  | 1 |
| 278 | H | 79.89584 | 75.08040 | 67.27135 | -1380.08193 | 2212.14486  | 790.85944   | 1 |

Listing 15: C00015.xmolout

|   |   |          |          |          |             |             |             |        |          |
|---|---|----------|----------|----------|-------------|-------------|-------------|--------|----------|
| 1 |   | 276      |          |          |             |             |             |        |          |
| 2 |   | 150.0000 | 150.0000 | 150.0000 | 0.0000      | 0.0000      | 0.0000***** | 1.0837 | 4335     |
|   |   | 0.2500   | 300.00   | 0.00     | 0.00        | 0.00        | -1294.0898  | 0.0000 | 300.0000 |
| 3 | H | 74.40700 | 81.18762 | 86.05284 | -2043.14101 | -1757.64893 | 399.89339   |        | 1        |
| 4 | N | 74.98250 | 80.68799 | 85.37747 | 426.75047   | 490.45733   | -334.42467  |        | 1        |

|    |   |          |          |          |             |             |             |   |
|----|---|----------|----------|----------|-------------|-------------|-------------|---|
| 5  | H | 75.22072 | 79.83376 | 85.87685 | 442.25559   | -1110.30854 | -2448.52907 | 1 |
| 6  | C | 76.09979 | 81.40186 | 84.89445 | 415.32972   | -666.39213  | 83.73172    | 1 |
| 7  | H | 75.72219 | 82.41201 | 84.63075 | 879.32219   | 2491.00447  | 667.35213   | 1 |
| 8  | C | 77.24028 | 81.42918 | 86.03071 | 31.35357    | 477.41777   | 628.23362   | 1 |
| 9  | H | 77.56681 | 80.38413 | 86.24957 | 1168.38489  | 2240.25337  | -1019.71136 | 1 |
| 10 | H | 78.14366 | 81.95520 | 85.63853 | -360.43770  | 2534.90498  | 931.67112   | 1 |
| 11 | C | 76.74319 | 82.09630 | 87.28837 | 463.18208   | 512.70242   | -382.34388  | 1 |
| 12 | H | 75.84311 | 81.54977 | 87.64821 | 1725.29117  | 1863.52247  | -987.07854  | 1 |
| 13 | C | 77.80853 | 82.03151 | 88.37572 | 710.42801   | -144.27427  | -313.15367  | 1 |
| 14 | H | 77.45117 | 82.49168 | 89.33309 | 364.20195   | -1033.13725 | 2494.72524  | 1 |
| 15 | H | 78.10444 | 80.97502 | 88.60425 | 2567.61904  | 335.80679   | 847.48802   | 1 |
| 16 | H | 78.73886 | 82.57820 | 88.07308 | -2587.99029 | 680.92867   | -512.16411  | 1 |
| 17 | C | 76.36138 | 83.54870 | 87.03919 | 268.17616   | 741.64379   | -40.42634   | 1 |
| 18 | H | 76.02677 | 84.05492 | 87.98152 | 1283.54314  | -1945.37420 | -1411.27812 | 1 |
| 19 | H | 77.22494 | 84.13775 | 86.63503 | -1258.57796 | 1317.15249  | -2026.02085 | 1 |
| 20 | H | 75.52325 | 83.63836 | 86.30112 | -2502.84526 | 909.80597   | 575.92391   | 1 |
| 21 | C | 76.68700 | 80.54253 | 83.62682 | 619.36578   | -458.64843  | -172.09273  | 1 |
| 22 | O | 77.00451 | 79.37981 | 83.71900 | -81.40433   | 433.87611   | 522.34594   | 1 |
| 23 | N | 76.78765 | 81.37044 | 82.59242 | 175.23996   | -622.20190  | 341.55523   | 1 |
| 24 | H | 76.56728 | 82.35498 | 82.74035 | -876.57256  | -303.22879  | -2561.90213 | 1 |
| 25 | C | 77.19255 | 80.91318 | 81.30922 | -571.88214  | -534.10783  | -106.15033  | 1 |
| 26 | H | 77.14485 | 81.83007 | 80.67912 | -2713.20841 | -16.25800   | -248.80809  | 1 |
| 27 | C | 78.70022 | 80.39291 | 81.50756 | 166.60354   | 288.16399   | -716.09568  | 1 |
| 28 | H | 78.64050 | 79.45474 | 82.12845 | -2097.85574 | 1636.78449  | -586.18044  | 1 |
| 29 | O | 79.57270 | 81.29633 | 82.21061 | -317.80580  | -363.38227  | 484.43082   | 1 |
| 30 | H | 79.72381 | 80.79429 | 83.03681 | 1863.74748  | -1451.84923 | 1357.29467  | 1 |
| 31 | C | 79.18904 | 80.04094 | 80.05654 | 503.80731   | 517.99032   | 318.51606   | 1 |
| 32 | H | 80.22140 | 79.61921 | 80.06956 | 640.61020   | -2157.10410 | -1536.29104 | 1 |
| 33 | H | 78.52498 | 79.28160 | 79.55197 | 1687.88455  | 465.60692   | 2087.56452  | 1 |
| 34 | H | 79.21476 | 80.94703 | 79.40696 | -1293.07895 | -1899.88581 | -1463.57452 | 1 |
| 35 | C | 76.18938 | 79.74503 | 80.79682 | -153.07550  | -733.68902  | 248.70981   | 1 |
| 36 | O | 76.63741 | 78.94030 | 80.01202 | 186.15459   | -480.78787  | -449.34387  | 1 |
| 37 | N | 74.91444 | 79.88459 | 81.17888 | -487.53139  | 543.18517   | 42.03850    | 1 |
| 38 | C | 74.01559 | 78.77145 | 81.24464 | -699.35871  | 69.34393    | 360.10701   | 1 |
| 39 | H | 74.62238 | 77.87838 | 81.52245 | 2.81126     | -221.99807  | -2715.58072 | 1 |
| 40 | C | 72.99376 | 79.28942 | 82.35003 | -507.46439  | -592.59194  | 122.07761   | 1 |
| 41 | H | 72.04986 | 78.69989 | 82.37975 | -1975.08116 | 525.87560   | -1801.71556 | 1 |
| 42 | H | 73.43817 | 79.25266 | 83.37049 | 1588.27743  | -1913.22100 | 1113.83566  | 1 |
| 43 | C | 72.79868 | 80.76041 | 81.87165 | -613.62442  | -457.55993  | -194.14490  | 1 |
| 44 | H | 72.14845 | 80.80644 | 80.96905 | 1707.54637  | -721.27992  | 1996.92523  | 1 |
| 45 | H | 72.33124 | 81.42199 | 82.63531 | 758.23357   | 2100.81767  | 1560.55011  | 1 |
| 46 | C | 74.29901 | 81.15874 | 81.53202 | -352.41524  | 704.96076   | 49.21465    | 1 |
| 47 | H | 74.43042 | 81.84821 | 80.66099 | 1714.76886  | -2070.42778 | 443.35792   | 1 |
| 48 | H | 74.87625 | 81.54310 | 82.40377 | 1224.15040  | 1801.50881  | 1636.97633  | 1 |
| 49 | C | 73.19793 | 78.57658 | 79.84916 | 566.85117   | 537.05831   | 117.62814   | 1 |
| 50 | O | 72.16366 | 77.90693 | 79.84049 | -550.26779  | -406.08867  | 4.21666     | 1 |
| 51 | N | 73.79453 | 79.12645 | 78.77809 | 566.34832   | -425.77725  | 180.18749   | 1 |
| 52 | H | 74.61723 | 79.59264 | 79.18050 | 644.44502   | 2646.80550  | -52.73430   | 1 |
| 53 | C | 72.93122 | 79.90863 | 77.90894 | 612.34801   | -281.48662  | 411.56221   | 1 |
| 54 | H | 72.06722 | 80.19870 | 78.54621 | 1667.23498  | -1490.75142 | 1556.16753  | 1 |
| 55 | C | 73.80540 | 81.14949 | 77.44930 | -714.45746  | -175.43074  | 286.98927   | 1 |
| 56 | H | 74.60848 | 80.78690 | 76.75177 | -787.09484  | 1763.03619  | -1922.46060 | 1 |
| 57 | O | 74.50797 | 81.85870 | 78.50487 | -429.46514  | 516.51932   | -128.40526  | 1 |
| 58 | H | 75.43312 | 81.73194 | 78.22455 | 1981.82785  | 436.16847   | -1818.18182 | 1 |
| 59 | C | 72.77205 | 82.02416 | 76.65086 | 630.79189   | -468.94448  | 76.03230    | 1 |
| 60 | H | 73.25438 | 82.93417 | 76.22435 | -1775.71861 | 2062.30353  | 131.89849   | 1 |
| 61 | H | 72.31114 | 81.46346 | 75.80059 | -1855.14608 | 88.94118    | 1993.53760  | 1 |
| 62 | H | 71.94100 | 82.36918 | 77.30912 | -1504.82350 | -780.94249  | -2132.90992 | 1 |
| 63 | C | 72.48352 | 79.01939 | 76.64277 | 288.57638   | 618.62814   | -397.00270  | 1 |
| 64 | O | 71.59151 | 79.43141 | 75.89244 | 321.70495   | -185.26452  | 574.37218   | 1 |
| 65 | N | 73.28936 | 77.96313 | 76.43229 | -447.05792  | -446.53431  | 367.76425   | 1 |
| 66 | H | 73.98642 | 78.04791 | 77.18363 | 350.31316   | 1975.63644  | -1843.31522 | 1 |



|     |   |          |          |          |             |             |             |   |
|-----|---|----------|----------|----------|-------------|-------------|-------------|---|
| 67  | C | 72.78350 | 76.62493 | 76.23683 | -511.23061  | 374.03917   | -471.51480  | 1 |
| 68  | H | 73.73701 | 76.06283 | 76.12514 | 2234.79579  | -898.70890  | -1273.45190 | 1 |
| 69  | C | 72.07122 | 76.11712 | 77.57549 | 529.53781   | -159.34528  | 563.72604   | 1 |
| 70  | H | 71.91639 | 75.01298 | 77.42216 | 654.59388   | 2347.94251  | 1217.51488  | 1 |
| 71  | H | 72.80470 | 76.23859 | 78.42245 | -1526.55661 | 2103.42026  | 817.87394   | 1 |
| 72  | O | 70.81915 | 76.70490 | 77.94554 | -554.84278  | 14.12789    | 399.58769   | 1 |
| 73  | H | 71.13992 | 77.25779 | 78.75670 | 1297.06236  | 2061.84854  | 1220.68812  | 1 |
| 74  | C | 71.80883 | 76.40689 | 74.99303 | -662.15484  | -412.13544  | 123.62687   | 1 |
| 75  | O | 71.35235 | 75.31010 | 74.80971 | -540.01537  | -317.05804  | 274.91456   | 1 |
| 76  | N | 71.66634 | 77.50034 | 74.20077 | -202.76299  | -690.00100  | -131.49145  | 1 |
| 77  | H | 72.06674 | 78.38676 | 74.59273 | -702.62132  | -2617.37191 | 281.70413   | 1 |
| 78  | C | 70.37072 | 77.60841 | 73.45815 | -491.73914  | 576.34187   | 222.73509   | 1 |
| 79  | H | 70.28164 | 76.61729 | 72.94649 | 1977.17978  | -1823.58850 | -434.68928  | 1 |
| 80  | C | 69.24248 | 77.91242 | 74.43185 | -649.50797  | -328.66843  | 306.11224   | 1 |
| 81  | H | 69.57022 | 78.77724 | 75.05619 | 2075.07803  | 1452.16490  | -1004.45904 | 1 |
| 82  | C | 67.97623 | 78.30673 | 73.69271 | -615.18735  | -489.99689  | -70.96352   | 1 |
| 83  | H | 67.15765 | 78.61502 | 74.39981 | -1226.32661 | -1724.38906 | -1716.47170 | 1 |
| 84  | H | 68.15464 | 79.16830 | 72.99093 | 2381.64273  | -969.84735  | 900.46860   | 1 |
| 85  | H | 67.57889 | 77.45687 | 73.07237 | 2122.74991  | 1702.23946  | -141.36228  | 1 |
| 86  | C | 68.93924 | 76.76759 | 75.37826 | -501.86074  | -479.61276  | -376.42482  | 1 |
| 87  | H | 68.09181 | 77.01710 | 76.07617 | 993.79261   | -2246.95401 | -1177.81305 | 1 |
| 88  | H | 68.65485 | 75.83159 | 74.82184 | 42.71279    | -626.15391  | -2651.37258 | 1 |
| 89  | H | 69.83518 | 76.51418 | 76.02049 | -2026.39012 | -1590.33709 | -887.82922  | 1 |
| 90  | C | 70.48505 | 78.85871 | 72.46014 | -672.89153  | 382.57394   | -156.34072  | 1 |
| 91  | O | 70.07010 | 78.79623 | 71.25027 | 410.04627   | 221.86223   | 500.35950   | 1 |
| 92  | N | 70.97453 | 79.94055 | 72.99680 | -378.11782  | -443.79414  | -441.10984  | 1 |
| 93  | H | 71.19765 | 79.93716 | 74.00180 | 2404.15973  | -568.14894  | 1149.30085  | 1 |
| 94  | C | 70.56021 | 81.09491 | 72.24641 | -544.54484  | 466.16019   | 331.29119   | 1 |
| 95  | H | 69.50720 | 81.20399 | 72.57731 | -1409.80988 | -170.17955  | 2325.32679  | 1 |
| 96  | C | 71.39800 | 82.34769 | 72.65378 | -184.48284  | 116.78282   | -758.89137  | 1 |
| 97  | H | 70.98236 | 82.83271 | 73.56764 | 1893.78641  | 1861.14652  | 611.04528   | 1 |
| 98  | H | 72.44463 | 82.06940 | 72.92052 | -2170.79665 | -974.19311  | 1327.50117  | 1 |
| 99  | C | 71.34589 | 83.32753 | 71.42898 | 389.51668   | 672.81878   | -138.49152  | 1 |
| 100 | H | 71.56712 | 82.77895 | 70.48677 | 510.64577   | 1933.03327  | 1851.02484  | 1 |
| 101 | H | 70.30679 | 83.69298 | 71.27569 | -2302.30869 | -1105.72939 | -948.89774  | 1 |
| 102 | C | 72.33288 | 84.54543 | 71.54757 | -559.93427  | -126.34590  | 542.30857   | 1 |
| 103 | O | 72.48575 | 85.28414 | 70.60725 | -670.36003  | -111.83166  | 76.36448    | 1 |
| 104 | N | 72.93640 | 84.65382 | 72.75237 | -216.06729  | -537.07037  | 446.51379   | 1 |
| 105 | H | 72.81357 | 84.08453 | 73.59748 | -1251.96487 | 1074.12894  | -2168.52500 | 1 |
| 106 | H | 73.57566 | 85.41520 | 73.00435 | -2451.83023 | -720.73851  | 944.84612   | 1 |
| 107 | C | 70.53465 | 80.60501 | 70.61402 | 546.24052   | -563.88337  | -85.11809   | 1 |
| 108 | O | 69.62876 | 81.08327 | 69.92147 | 71.70702    | -307.40463  | 606.69673   | 1 |
| 109 | N | 71.81283 | 80.42461 | 70.11943 | 479.90863   | -504.50129  | 222.86849   | 1 |
| 110 | C | 72.03249 | 80.26554 | 68.73724 | 75.51268    | -600.91904  | 506.73700   | 1 |
| 111 | H | 71.19798 | 80.80302 | 68.22249 | -2033.61562 | 1795.30103  | 254.89480   | 1 |
| 112 | C | 73.50488 | 80.88175 | 68.59192 | 523.79067   | 517.99274   | 284.45581   | 1 |
| 113 | H | 74.00491 | 80.58689 | 67.64314 | 1599.61665  | -1127.00911 | 1895.98173  | 1 |
| 114 | H | 73.48756 | 81.99381 | 68.61742 | -1881.83093 | 1275.82488  | -1501.55016 | 1 |
| 115 | C | 74.18500 | 80.29505 | 69.86101 | -600.05639  | -404.05026  | 316.64485   | 1 |
| 116 | H | 74.45824 | 79.22532 | 69.72461 | -2597.05260 | 496.36221   | 657.73249   | 1 |
| 117 | H | 75.11868 | 80.82460 | 70.15317 | -1666.24518 | 1294.38985  | -1723.90591 | 1 |
| 118 | C | 73.00860 | 80.46149 | 70.93076 | 493.57570   | -129.95376  | -602.56394  | 1 |
| 119 | H | 72.93331 | 79.65186 | 71.69657 | -1469.08415 | -637.84797  | 2204.22581  | 1 |
| 120 | H | 73.00169 | 81.45161 | 71.44420 | -1038.97840 | 1068.88701  | -2280.71789 | 1 |
| 121 | C | 72.19607 | 78.70002 | 68.23516 | 188.88100   | 241.05089   | -727.87821  | 1 |
| 122 | O | 72.45506 | 78.49464 | 67.07492 | 531.88613   | -49.19943   | 427.07960   | 1 |
| 123 | N | 72.04423 | 77.80733 | 69.20689 | 708.14833   | 26.93417    | -179.73509  | 1 |
| 124 | H | 71.82197 | 78.20869 | 70.11916 | -2232.69501 | -1179.09831 | 1023.94816  | 1 |
| 125 | C | 72.50775 | 76.43041 | 69.04723 | -738.32412  | 259.92548   | 104.42456   | 1 |
| 126 | H | 72.33048 | 76.20054 | 67.96978 | 2028.89123  | 1260.02983  | 1311.33324  | 1 |
| 127 | C | 73.98145 | 76.40845 | 69.41939 | -258.65678  | -345.52513  | 661.28459   | 1 |
| 128 | H | 74.13808 | 77.14067 | 70.25578 | -1826.06090 | -1801.46097 | -918.64554  | 1 |

|     |   |          |          |          |             |             |             |   |
|-----|---|----------|----------|----------|-------------|-------------|-------------|---|
| 129 | C | 74.43565 | 75.05048 | 69.91761 | -541.23400  | 531.92970   | -218.41428  | 1 |
| 130 | H | 75.55141 | 75.01356 | 70.06297 | 1311.73218  | -2219.18200 | 882.19023   | 1 |
| 131 | H | 73.96794 | 74.79902 | 70.91200 | -1048.71298 | 1223.58118  | -2196.97971 | 1 |
| 132 | H | 74.16044 | 74.22820 | 69.19955 | 419.06414   | 1903.92898  | 1903.44670  | 1 |
| 133 | C | 74.84441 | 76.84398 | 68.25005 | -423.86431  | 152.66566   | -648.55262  | 1 |
| 134 | H | 75.92596 | 76.94808 | 68.54311 | 105.68386   | -2342.50080 | 1387.51238  | 1 |
| 135 | H | 74.79688 | 76.10395 | 67.40325 | -1695.63603 | -1484.73621 | -1531.02793 | 1 |
| 136 | H | 74.50816 | 77.83735 | 67.83555 | -1853.57121 | -487.39031  | 1936.59343  | 1 |
| 137 | C | 71.61716 | 75.50557 | 70.09921 | 539.71428   | -510.58232  | 267.58633   | 1 |
| 138 | O | 71.58644 | 75.74182 | 71.28587 | -15.93758   | -278.34085  | -624.49402  | 1 |
| 139 | N | 71.07927 | 74.48584 | 69.45551 | -676.81886  | 12.05292    | 276.17960   | 1 |
| 140 | H | 71.24717 | 74.40930 | 68.45500 | -1694.44250 | -373.84189  | -2100.66098 | 1 |
| 141 | C | 70.17876 | 73.63708 | 70.16437 | 412.33078   | -664.70360  | 108.35451   | 1 |
| 142 | H | 69.84609 | 74.28519 | 71.00906 | 1765.77476  | 1294.44366  | 1621.76594  | 1 |
| 143 | C | 69.05193 | 73.20948 | 69.14295 | -179.66635  | -721.95667  | -264.73915  | 1 |
| 144 | H | 68.62774 | 74.10524 | 68.63556 | -607.34922  | 2587.87032  | -598.10018  | 1 |
| 145 | H | 69.48447 | 72.58307 | 68.33074 | -359.69332  | -1479.13954 | -2259.74260 | 1 |
| 146 | C | 67.93221 | 72.42040 | 69.89988 | -240.01076  | 616.02425   | 431.85322   | 1 |
| 147 | H | 68.36184 | 71.51743 | 70.39485 | -1359.17131 | 782.54425   | 2227.99181  | 1 |
| 148 | H | 67.48479 | 73.03854 | 70.71019 | -820.36667  | 85.81767    | -2596.78715 | 1 |
| 149 | C | 66.84115 | 72.01979 | 68.82617 | -513.07015  | 236.18570   | -551.87280  | 1 |
| 150 | H | 66.46552 | 72.92271 | 68.29209 | 1816.11944  | -1183.11722 | -1650.94321 | 1 |
| 151 | H | 67.28719 | 71.36896 | 68.03936 | -1800.04429 | -1361.53473 | 1526.34643  | 1 |
| 152 | C | 65.67688 | 71.29128 | 69.53537 | 726.08972   | -253.19732  | -179.64713  | 1 |
| 153 | H | 65.95037 | 70.32016 | 69.99386 | 1224.27271  | -456.51798  | -2390.90304 | 1 |
| 154 | H | 65.11877 | 71.91136 | 70.26491 | 1206.40339  | -1150.93514 | -2154.90344 | 1 |
| 155 | N | 64.61560 | 70.92369 | 68.44182 | 329.70796   | -633.68968  | -155.67358  | 1 |
| 156 | H | 63.75788 | 70.40625 | 68.79067 | 1348.31305  | 1938.76845  | 1359.00643  | 1 |
| 157 | H | 64.17064 | 71.72608 | 67.90811 | 2096.92035  | 1446.54551  | -966.48890  | 1 |
| 158 | H | 64.93533 | 70.28757 | 67.65471 | -1197.07217 | -2303.53719 | 827.28733   | 1 |
| 159 | C | 71.01906 | 72.32900 | 70.69777 | -378.01186  | -556.17301  | -413.96481  | 1 |
| 160 | O | 70.62398 | 71.20363 | 70.50268 | -409.44433  | -307.55053  | -453.30833  | 1 |
| 161 | N | 72.08470 | 72.72481 | 71.38193 | -429.02477  | 524.70884   | 274.08502   | 1 |
| 162 | H | 72.25034 | 73.73074 | 71.47745 | 1706.34263  | -1425.96036 | 1574.38926  | 1 |
| 163 | C | 72.96575 | 71.73197 | 71.89685 | -45.25864   | -626.22952  | 478.93267   | 1 |
| 164 | H | 72.33731 | 70.82847 | 72.07844 | 1988.63164  | 570.90773   | 1772.87287  | 1 |
| 165 | C | 74.09329 | 71.48313 | 70.80503 | 551.77128   | -20.49526   | -564.54996  | 1 |
| 166 | H | 73.64617 | 71.34240 | 69.79622 | 1434.61535  | -1753.10253 | 1513.99471  | 1 |
| 167 | H | 74.74558 | 72.38053 | 70.71947 | -714.67738  | 1819.09770  | 1898.36494  | 1 |
| 168 | C | 74.91901 | 70.22935 | 71.23927 | 446.99263   | -555.77305  | 338.97221   | 1 |
| 169 | H | 74.60699 | 69.88618 | 72.25046 | 1953.68466  | 1892.25957  | -161.67766  | 1 |
| 170 | H | 74.72822 | 69.36953 | 70.55896 | -403.03785  | 2688.07032  | -188.43591  | 1 |
| 171 | C | 76.45400 | 70.60630 | 71.25859 | 567.86262   | 335.74681   | 434.04421   | 1 |
| 172 | H | 76.81468 | 70.86770 | 70.23789 | -1080.02275 | 1568.26081  | -1948.78900 | 1 |
| 173 | H | 76.63019 | 71.51249 | 71.87982 | -919.54108  | 2111.34692  | 1456.13463  | 1 |
| 174 | C | 77.22348 | 69.38461 | 71.82507 | 195.81897   | 173.33862   | -745.11536  | 1 |
| 175 | H | 76.92149 | 69.07632 | 72.84756 | 1405.67949  | -2301.21089 | -390.08113  | 1 |
| 176 | H | 77.22251 | 68.50303 | 71.15231 | -940.37328  | -1118.32446 | 2299.72133  | 1 |
| 177 | N | 78.71766 | 69.77201 | 71.95110 | 319.26422   | 656.36007   | -42.02424   | 1 |
| 178 | H | 79.43618 | 68.91429 | 71.97014 | 1961.03633  | 619.91968   | 1787.09422  | 1 |
| 179 | H | 79.09610 | 70.39846 | 71.18458 | 854.14343   | -2156.80752 | 1429.08711  | 1 |
| 180 | H | 78.97402 | 70.33808 | 72.81134 | 1237.02905  | -1378.50857 | -1998.28500 | 1 |
| 181 | C | 73.77089 | 72.35464 | 73.17713 | 532.53319   | -268.57236  | 517.55729   | 1 |
| 182 | O | 74.19509 | 73.48107 | 73.16062 | 266.16714   | -290.73804  | -558.88002  | 1 |
| 183 | N | 74.07226 | 71.35075 | 74.02492 | -226.25352  | 640.49678   | -270.32839  | 1 |
| 184 | H | 73.50745 | 70.50967 | 73.88734 | 2007.69063  | -1035.27229 | 1523.50231  | 1 |
| 185 | C | 74.33939 | 71.72363 | 75.39628 | -540.76542  | -573.33303  | 49.50000    | 1 |
| 186 | H | 73.56583 | 72.48466 | 75.63991 | -2374.20950 | -1036.76023 | 843.75774   | 1 |
| 187 | C | 74.19071 | 70.38186 | 76.22664 | -77.09082   | 666.87422   | -415.84136  | 1 |
| 188 | H | 75.08697 | 69.73123 | 76.03147 | -985.81834  | 617.19825   | 2463.91927  | 1 |
| 189 | O | 73.03847 | 69.56581 | 75.90403 | 293.29899   | -391.65602  | -477.80926  | 1 |
| 190 | H | 73.46540 | 68.72334 | 75.65993 | 2528.72714  | -681.76262  | -751.27122  | 1 |

|     |   |          |          |          |             |             |             |   |
|-----|---|----------|----------|----------|-------------|-------------|-------------|---|
| 191 | C | 74.24576 | 70.91470 | 77.70582 | 252.47363   | -605.14473  | 440.05134   | 1 |
| 192 | H | 74.23954 | 70.07661 | 78.44081 | -2052.65063 | 1456.49051  | -1043.51830 | 1 |
| 193 | H | 75.16372 | 71.52312 | 77.89765 | -2152.98800 | -1661.97574 | -161.70652  | 1 |
| 194 | H | 73.36578 | 71.55966 | 77.93553 | -473.12726  | -1584.27339 | 2165.61725  | 1 |
| 195 | C | 75.85060 | 72.31790 | 75.52118 | 360.36307   | 488.46713   | 505.10056   | 1 |
| 196 | O | 76.15661 | 72.92313 | 76.52947 | -200.08817  | -528.03552  | -385.82850  | 1 |
| 197 | N | 76.62385 | 71.92353 | 74.51151 | -597.54095  | -226.44775  | 355.20479   | 1 |
| 198 | H | 76.09014 | 71.44728 | 73.78478 | 2179.23655  | -1300.70981 | -991.33835  | 1 |
| 199 | C | 77.88124 | 72.51117 | 74.21257 | -687.68921  | 297.39807   | -249.45179  | 1 |
| 200 | H | 77.92902 | 72.47161 | 73.10238 | -349.16256  | -2467.37713 | -1101.72831 | 1 |
| 201 | C | 78.04263 | 73.99339 | 74.78905 | 672.47345   | 361.54328   | -201.62880  | 1 |
| 202 | H | 77.76587 | 74.00462 | 75.87803 | 1541.41502  | 582.18425   | 2169.97026  | 1 |
| 203 | H | 79.11801 | 74.28343 | 74.72229 | -2534.67717 | 60.25153    | 997.72295   | 1 |
| 204 | C | 77.17629 | 74.99563 | 74.00830 | 574.26774   | -389.43119  | -377.02542  | 1 |
| 205 | C | 77.64223 | 75.60480 | 72.80396 | 688.82679   | -287.33580  | -257.96133  | 1 |
| 206 | H | 78.63123 | 75.33954 | 72.38892 | 331.14182   | 1470.38163  | 2269.80013  | 1 |
| 207 | C | 75.89012 | 75.33064 | 74.52443 | -383.52382  | -675.04808  | 144.24917   | 1 |
| 208 | H | 75.51280 | 74.83062 | 75.43840 | 4.09847     | 1517.59662  | 2262.86397  | 1 |
| 209 | C | 76.83375 | 76.55353 | 72.16750 | -134.76730  | 428.45285   | -649.50303  | 1 |
| 210 | H | 77.20510 | 77.02473 | 71.24059 | -903.23433  | 1600.49020  | 2011.53387  | 1 |
| 211 | C | 75.11832 | 76.28259 | 73.84808 | -335.53281  | -615.00040  | -364.39058  | 1 |
| 212 | H | 74.11975 | 76.53412 | 74.24363 | 1596.45398  | -1369.33862 | 1732.02659  | 1 |
| 213 | C | 75.55361 | 76.93778 | 72.66269 | 585.48547   | -340.24194  | -406.23938  | 1 |
| 214 | O | 74.75162 | 77.93145 | 72.01136 | -419.15649  | -173.04408  | -511.94141  | 1 |
| 215 | H | 73.92747 | 77.83977 | 72.54909 | -1071.84350 | 1559.71507  | -1960.13012 | 1 |
| 216 | C | 79.08410 | 71.65510 | 74.88623 | 291.41878   | -183.13091  | 710.72246   | 1 |
| 217 | O | 80.18906 | 72.14761 | 74.96038 | 379.87695   | 523.47396   | -222.23622  | 1 |
| 218 | N | 78.73867 | 70.38725 | 75.16412 | 564.30591   | 373.09380   | 277.24371   | 1 |
| 219 | H | 77.74057 | 70.19171 | 75.08421 | -120.59931  | -2436.07824 | -1214.35098 | 1 |
| 220 | C | 79.59142 | 69.67717 | 76.07251 | 404.07514   | -299.37480  | 608.84009   | 1 |
| 221 | H | 80.55294 | 70.24569 | 76.06549 | -1071.07882 | -841.69025  | 2359.66467  | 1 |
| 222 | C | 78.88482 | 69.68575 | 77.49664 | -683.12807  | 68.71770    | -390.13096  | 1 |
| 223 | H | 78.55816 | 70.71414 | 77.76864 | 2068.88918  | 1596.58590  | 770.89603   | 1 |
| 224 | H | 77.95545 | 69.07387 | 77.47036 | 1379.86429  | 2342.49779  | -179.85638  | 1 |
| 225 | C | 79.88949 | 69.11758 | 78.54512 | -176.39967  | 537.49466   | 550.97268   | 1 |
| 226 | H | 80.23950 | 68.09555 | 78.24285 | -396.28051  | 1942.22168  | 1869.33314  | 1 |
| 227 | H | 80.80873 | 69.74363 | 78.59112 | -94.44700   | 586.00678   | -2659.20016 | 1 |
| 228 | C | 79.17173 | 69.05532 | 79.97005 | -291.69381  | -718.18079  | -150.72929  | 1 |
| 229 | H | 78.97366 | 70.04334 | 80.45811 | -2303.38776 | 1089.76242  | 964.62032   | 1 |
| 230 | H | 78.23208 | 68.44812 | 80.01981 | 884.16729   | 2568.80533  | -207.74283  | 1 |
| 231 | N | 80.15613 | 68.38265 | 80.71288 | -594.49522  | -252.81478  | 342.29276   | 1 |
| 232 | H | 81.01508 | 68.15646 | 80.23532 | -1735.17426 | 2084.05705  | -263.71605  | 1 |
| 233 | C | 80.03876 | 68.04211 | 81.93219 | 595.23177   | -271.52487  | 442.22352   | 1 |
| 234 | N | 78.84339 | 68.36313 | 82.58445 | 585.53813   | -424.79750  | -105.81303  | 1 |
| 235 | H | 78.02112 | 68.84520 | 82.22376 | 959.88797   | 1327.56823  | -2177.11905 | 1 |
| 236 | H | 78.63106 | 68.14481 | 83.55836 | 1578.48647  | 16.27378    | -2220.76233 | 1 |
| 237 | N | 81.19147 | 67.38582 | 82.38699 | -452.17763  | -390.33541  | -421.51853  | 1 |
| 238 | H | 82.05564 | 67.14346 | 81.90466 | 470.26107   | 1974.25629  | -1817.92087 | 1 |
| 239 | H | 81.29319 | 67.02650 | 83.33684 | 1856.67307  | -1573.97321 | -1224.35416 | 1 |
| 240 | C | 79.73670 | 68.12372 | 75.64735 | -531.47271  | -581.45780  | -55.06206   | 1 |
| 241 | O | 80.35423 | 67.34570 | 76.34310 | -243.00837  | 192.73507   | 609.52485   | 1 |
| 242 | N | 79.02858 | 67.81020 | 74.54913 | 343.49288   | -644.25607  | 38.09164    | 1 |
| 243 | H | 78.69011 | 68.61804 | 74.02988 | -1691.16043 | -1535.97525 | -1484.73099 | 1 |
| 244 | C | 79.27798 | 66.49576 | 73.93289 | 542.66492   | 350.14337   | 454.42563   | 1 |
| 245 | H | 79.58662 | 65.85056 | 74.79297 | 1209.57979  | -2396.95920 | 463.86744   | 1 |
| 246 | C | 78.00553 | 66.05992 | 73.22173 | -737.14309  | 145.93010   | 242.71942   | 1 |
| 247 | H | 77.76807 | 66.82844 | 72.45369 | -1050.18303 | 159.36419   | -2509.06125 | 1 |
| 248 | C | 78.20208 | 64.73150 | 72.51563 | -706.77696  | -252.88343  | -245.16230  | 1 |
| 249 | H | 77.28341 | 64.42090 | 71.94558 | -1624.64039 | -1665.49085 | 1417.86935  | 1 |
| 250 | H | 79.05414 | 64.77617 | 71.78146 | 2566.10521  | 598.51109   | 693.22305   | 1 |
| 251 | H | 78.43790 | 63.90712 | 73.24442 | -1972.69758 | 107.10018   | -1876.34312 | 1 |
| 252 | C | 76.82649 | 65.98259 | 74.17301 | 412.85148   | 672.58832   | -27.69222   | 1 |

|     |   |          |          |          |             |             |             |   |
|-----|---|----------|----------|----------|-------------|-------------|-------------|---|
| 253 | H | 75.87286 | 65.71897 | 73.63731 | 1447.02277  | 1762.76533  | -1490.78944 | 1 |
| 254 | H | 76.99024 | 65.20246 | 74.96735 | 1320.77379  | -145.20455  | 2378.68491  | 1 |
| 255 | H | 76.65923 | 66.96234 | 74.70094 | -1512.10848 | 1470.52031  | 1724.75147  | 1 |
| 256 | C | 80.46239 | 66.69328 | 72.80626 | -607.11113  | 499.56689   | 73.73769    | 1 |
| 257 | O | 80.44460 | 67.65924 | 72.03841 | 357.97126   | 460.81534   | 356.68785   | 1 |
| 258 | N | 81.30008 | 65.70082 | 72.86342 | 536.55407   | -368.62270  | 332.76306   | 1 |
| 259 | H | 81.14627 | 64.98911 | 73.57611 | 524.38866   | 2297.69985  | 1367.20941  | 1 |
| 260 | C | 82.12635 | 65.39275 | 71.72790 | 46.50277    | -774.29190  | -147.97904  | 1 |
| 261 | H | 81.38475 | 65.12502 | 70.94333 | 1676.51875  | 1883.29066  | 1032.55549  | 1 |
| 262 | C | 82.94296 | 66.71833 | 71.31932 | -559.41456  | -34.19198   | -556.30433  | 1 |
| 263 | H | 82.74048 | 67.51019 | 72.08339 | -64.66664   | 395.18769   | 2695.05373  | 1 |
| 264 | H | 84.04515 | 66.53761 | 71.32977 | -2703.44278 | -60.40056   | 333.79418   | 1 |
| 265 | C | 82.48154 | 67.17342 | 69.95848 | -519.76435  | 377.31045   | 459.42366   | 1 |
| 266 | H | 81.37049 | 67.27098 | 69.98803 | -1746.74323 | 1667.50644  | -1261.73691 | 1 |
| 267 | C | 83.07042 | 68.54170 | 69.63762 | 570.95554   | 16.46261    | -545.27700  | 1 |
| 268 | H | 82.71967 | 68.92027 | 68.64309 | 2391.58273  | 28.05277    | -1305.07271 | 1 |
| 269 | H | 82.77951 | 69.30437 | 70.40579 | 175.75588   | 917.63458   | 2559.43867  | 1 |
| 270 | H | 84.19002 | 68.51177 | 69.60580 | -1063.97851 | -2155.34650 | 1283.00462  | 1 |
| 271 | C | 82.85730 | 66.18325 | 68.86573 | 193.76014   | 2.62946     | -765.53141  | 1 |
| 272 | H | 82.50448 | 66.52840 | 67.85961 | 507.39394   | -846.55087  | 2539.60089  | 1 |
| 273 | H | 83.96727 | 66.04602 | 68.79681 | 1337.57841  | 1818.19054  | 1526.01994  | 1 |
| 274 | H | 82.40822 | 65.17207 | 69.04347 | 1100.88635  | -1172.91350 | -2199.08909 | 1 |
| 275 | C | 83.03585 | 64.15828 | 72.16682 | -549.21115  | 475.64486   | -309.38218  | 1 |
| 276 | O | 82.77863 | 63.46707 | 73.12032 | 556.06106   | -390.37755  | -78.24250   | 1 |
| 277 | O | 84.12741 | 63.83156 | 71.32007 | -572.27940  | -310.19032  | -209.75862  | 1 |
| 278 | H | 84.01138 | 64.54073 | 70.63466 | -1380.08193 | 2212.14486  | 790.85944   | 1 |

Listing 16: C00016.xmolout

|    |   |          |          |          |             |             |             |                 |
|----|---|----------|----------|----------|-------------|-------------|-------------|-----------------|
| 1  |   | 276      |          |          |             |             |             |                 |
| 2  |   | 150.0000 | 150.0000 | 150.0000 | 0.0000      | 0.0000      | 0.0000***** | 2.7750 11100    |
|    |   | 0.2500   | 300.00   | 0.00     | 0.00        | 0.00        | -1294.0794  | 0.0000 300.0000 |
| 3  | H | 73.51008 | 68.00272 | 85.91873 | -2043.14101 | -1757.64893 | 399.89339   | 1               |
| 4  | N | 74.37950 | 67.76352 | 85.44411 | 426.75047   | 490.45733   | -334.42467  | 1               |
| 5  | H | 74.05490 | 67.38443 | 84.54964 | 442.25559   | -1110.30854 | -2448.52907 | 1               |
| 6  | C | 75.24949 | 68.85554 | 85.24031 | 415.32972   | -666.39213  | 83.73172    | 1               |
| 7  | H | 75.06718 | 69.60390 | 86.04164 | 879.32219   | 2491.00447  | 667.35213   | 1               |
| 8  | C | 76.76091 | 68.28828 | 85.22154 | 31.35357    | 477.41777   | 628.23362   | 1               |
| 9  | H | 76.85394 | 67.54584 | 84.39280 | 1168.38489  | 2240.25337  | -1019.71136 | 1               |
| 10 | H | 77.48320 | 69.10935 | 84.98806 | -360.43770  | 2534.90498  | 931.67112   | 1               |
| 11 | C | 77.10442 | 67.63903 | 86.53644 | 463.18208   | 512.70242   | -382.34388  | 1               |
| 12 | H | 76.26026 | 66.97419 | 86.82841 | 1725.29117  | 1863.52247  | -987.07854  | 1               |
| 13 | C | 78.36202 | 66.79175 | 86.38525 | 710.42801   | -144.27427  | -313.15367  | 1               |
| 14 | H | 78.64021 | 66.28699 | 87.34604 | 364.20195   | -1033.13725 | 2494.72524  | 1               |
| 15 | H | 78.23008 | 65.98938 | 85.61409 | 2567.61904  | 335.80679   | 847.48802   | 1               |
| 16 | H | 79.24036 | 67.41222 | 86.07008 | -2587.99029 | 680.92867   | -512.16411  | 1               |
| 17 | C | 77.31541 | 68.67821 | 87.62873 | 268.17616   | 741.64379   | -40.42634   | 1               |
| 18 | H | 77.58415 | 68.20093 | 88.60651 | 1283.54314  | -1945.37420 | -1411.27812 | 1               |
| 19 | H | 78.14346 | 69.38697 | 87.36759 | -1258.57796 | 1317.15249  | -2026.02085 | 1               |
| 20 | H | 76.39418 | 69.29232 | 87.80044 | -2502.84526 | 909.80597   | 575.92391   | 1               |
| 21 | C | 74.90008 | 69.36208 | 83.73387 | 619.36578   | -458.64843  | -172.09273  | 1               |
| 22 | O | 74.47561 | 68.60167 | 82.88531 | -81.40433   | 433.87611   | 522.34594   | 1               |
| 23 | N | 75.26659 | 70.63353 | 83.59993 | 175.23996   | -622.20190  | 341.55523   | 1               |
| 24 | H | 75.64141 | 71.12784 | 84.40901 | -876.57256  | -303.22879  | -2561.90213 | 1               |
| 25 | C | 75.27334 | 71.20099 | 82.30027 | -571.88214  | -534.10783  | -106.15033  | 1               |
| 26 | H | 74.83011 | 70.40809 | 81.65141 | -2713.20841 | -16.25800   | -248.80809  | 1               |
| 27 | C | 74.47431 | 72.59246 | 82.33937 | 166.60354   | 288.16399   | -716.09568  | 1               |
| 28 | H | 75.08064 | 73.32554 | 82.94268 | -2097.85574 | 1636.78449  | -586.18044  | 1               |
| 29 | O | 73.16870 | 72.55429 | 82.93758 | -317.80580  | -363.38227  | 484.43082   | 1               |
| 30 | H | 73.29194 | 73.15247 | 83.70297 | 1863.74748  | -1451.84923 | 1357.29467  | 1               |
| 31 | C | 74.50987 | 73.01300 | 80.82388 | 503.80731   | 517.99032   | 318.51606   | 1               |
| 32 | H | 74.06967 | 74.02592 | 80.67223 | 640.61020   | -2157.10410 | -1536.29104 | 1               |

|    |   |          |          |          |             |             |             |   |
|----|---|----------|----------|----------|-------------|-------------|-------------|---|
| 33 | H | 75.55303 | 73.04096 | 80.42533 | 1687.88455  | 465.60692   | 2087.56452  | 1 |
| 34 | H | 73.92927 | 72.30287 | 80.18971 | -1293.07895 | -1899.88581 | -1463.57452 | 1 |
| 35 | C | 76.81649 | 71.62406 | 81.93992 | -153.07550  | -733.68902  | 248.70981   | 1 |
| 36 | O | 77.11848 | 72.78109 | 82.07155 | 186.15459   | -480.78787  | -449.34387  | 1 |
| 37 | N | 77.58508 | 70.57208 | 81.62892 | -487.53139  | 543.18517   | 42.03850    | 1 |
| 38 | C | 78.84231 | 70.74302 | 80.96483 | -699.35871  | 69.34393    | 360.10701   | 1 |
| 39 | H | 79.06304 | 71.83074 | 81.07181 | 2.81126     | -221.99807  | -2715.58072 | 1 |
| 40 | C | 79.75922 | 69.76556 | 81.82149 | -507.46439  | -592.59194  | 122.07761   | 1 |
| 41 | H | 80.71710 | 69.50456 | 81.31902 | -1975.08116 | 525.87560   | -1801.71556 | 1 |
| 42 | H | 80.03429 | 70.23000 | 82.79420 | 1588.27743  | -1913.22100 | 1113.83566  | 1 |
| 43 | C | 78.81002 | 68.54605 | 82.04105 | -613.62442  | -457.55993  | -194.14490  | 1 |
| 44 | H | 78.75585 | 67.89729 | 81.13930 | 1707.54637  | -721.27992  | 1996.92523  | 1 |
| 45 | H | 79.11846 | 67.88681 | 82.88384 | 758.23357   | 2100.81767  | 1560.55011  | 1 |
| 46 | C | 77.43214 | 69.28860 | 82.30739 | -352.41524  | 704.96076   | 49.21465    | 1 |
| 47 | H | 76.52952 | 68.77502 | 81.89638 | 1714.76886  | -2070.42778 | 443.35792   | 1 |
| 48 | H | 77.24681 | 69.56290 | 83.37215 | 1224.15040  | 1801.50881  | 1636.97633  | 1 |
| 49 | C | 78.60270 | 70.30087 | 79.41111 | 566.85117   | 537.05831   | 117.62814   | 1 |
| 50 | O | 77.78181 | 70.92951 | 78.74268 | -550.26779  | -406.08867  | 4.21666     | 1 |
| 51 | N | 79.31014 | 69.25740 | 79.07295 | 566.34832   | -425.77725  | 180.18749   | 1 |
| 52 | H | 79.97002 | 68.88358 | 79.75117 | 644.44502   | 2646.80550  | -52.73430   | 1 |
| 53 | C | 79.38377 | 68.81591 | 77.71055 | 612.34801   | -281.48662  | 411.56221   | 1 |
| 54 | H | 79.69928 | 69.70440 | 77.12081 | 1667.23498  | -1490.75142 | 1556.16753  | 1 |
| 55 | C | 80.44341 | 67.62853 | 77.72468 | -714.45746  | -175.43074  | 286.98927   | 1 |
| 56 | H | 80.05523 | 66.80452 | 78.38601 | -787.09484  | 1763.03619  | -1922.46060 | 1 |
| 57 | O | 81.74594 | 67.95611 | 78.25328 | -429.46514  | 516.51932   | -128.40526  | 1 |
| 58 | H | 81.82714 | 67.30845 | 78.98026 | 1981.82785  | 436.16847   | -1818.18182 | 1 |
| 59 | C | 80.39513 | 67.14900 | 76.22759 | 630.79189   | -468.94448  | 76.03230    | 1 |
| 60 | H | 80.99225 | 66.21919 | 76.07880 | -1775.71861 | 2062.30353  | 131.89849   | 1 |
| 61 | H | 79.34965 | 66.93350 | 75.89600 | -1855.14608 | 88.94118    | 1993.53760  | 1 |
| 62 | H | 80.80921 | 67.92205 | 75.53977 | -1504.82350 | -780.94249  | -2132.90992 | 1 |
| 63 | C | 77.90459 | 68.28806 | 77.25565 | 288.57638   | 618.62814   | -397.00270  | 1 |
| 64 | O | 77.58107 | 68.36858 | 76.09340 | 321.70495   | -185.26452  | 574.37218   | 1 |
| 65 | N | 77.33435 | 67.62602 | 78.26932 | -447.05792  | -446.53431  | 367.76425   | 1 |
| 66 | H | 77.88104 | 67.71199 | 79.12793 | 350.31316   | 1975.63644  | -1843.31522 | 1 |
| 67 | C | 75.90723 | 67.55549 | 78.40817 | -511.23061  | 374.03917   | -471.51480  | 1 |
| 68 | H | 75.83881 | 66.82199 | 79.24191 | 2234.79579  | -898.70890  | -1273.45190 | 1 |
| 69 | C | 75.41835 | 68.98570 | 78.91009 | 529.53781   | -159.34528  | 563.72604   | 1 |
| 70 | H | 74.37986 | 68.83498 | 79.31306 | 654.59388   | 2347.94251  | 1217.51488  | 1 |
| 71 | H | 76.07170 | 69.27956 | 79.77559 | -1526.55661 | 2103.42026  | 817.87394   | 1 |
| 72 | O | 75.37679 | 70.07086 | 77.96190 | -554.84278  | 14.12789    | 399.58769   | 1 |
| 73 | H | 76.28710 | 70.49593 | 78.15014 | 1297.06236  | 2061.84854  | 1220.68812  | 1 |
| 74 | C | 75.28544 | 66.95786 | 77.04371 | -662.15484  | -412.13544  | 123.62687   | 1 |
| 75 | O | 75.59402 | 65.84877 | 76.67748 | -540.01537  | -317.05804  | 274.91456   | 1 |
| 76 | N | 74.38241 | 67.79589 | 76.46709 | -202.76299  | -690.00100  | -131.49145  | 1 |
| 77 | H | 74.27040 | 68.68310 | 76.98124 | -702.62132  | -2617.37191 | 281.70413   | 1 |
| 78 | C | 74.72183 | 68.01919 | 75.06511 | -491.73914  | 576.34187   | 222.73509   | 1 |
| 79 | H | 75.82555 | 67.84320 | 75.01996 | 1977.17978  | -1823.58850 | -434.68928  | 1 |
| 80 | C | 73.87673 | 67.03280 | 74.17197 | -649.50797  | -328.66843  | 306.11224   | 1 |
| 81 | H | 72.80220 | 67.07168 | 74.45480 | 2075.07803  | 1452.16490  | -1004.45904 | 1 |
| 82 | C | 74.07200 | 67.47294 | 72.67822 | -615.18735  | -489.99689  | -70.96352   | 1 |
| 83 | H | 73.51930 | 66.80607 | 71.97589 | -1226.32661 | -1724.38906 | -1716.47170 | 1 |
| 84 | H | 73.70010 | 68.51208 | 72.51003 | 2381.64273  | -969.84735  | 900.46860   | 1 |
| 85 | H | 75.14635 | 67.45623 | 72.38033 | 2122.74991  | 1702.23946  | -141.36228  | 1 |
| 86 | C | 74.43340 | 65.57334 | 74.33138 | -501.86074  | -479.61276  | -376.42482  | 1 |
| 87 | H | 74.14885 | 64.92263 | 73.47090 | 993.79261   | -2246.95401 | -1177.81305 | 1 |
| 88 | H | 75.54848 | 65.56821 | 74.40915 | 42.71279    | -626.15391  | -2651.37258 | 1 |
| 89 | H | 74.04280 | 65.08876 | 75.25983 | -2026.39012 | -1590.33709 | -887.82922  | 1 |
| 90 | C | 74.27965 | 69.54618 | 74.71837 | -672.89153  | 382.57394   | -156.34072  | 1 |
| 91 | O | 73.12239 | 69.91523 | 74.65123 | 410.04627   | 221.86223   | 500.35950   | 1 |
| 92 | N | 75.38464 | 70.25036 | 74.51176 | -378.11782  | -443.79414  | -441.10984  | 1 |
| 93 | H | 76.29727 | 69.79953 | 74.59244 | 2404.15973  | -568.14894  | 1149.30085  | 1 |
| 94 | C | 75.21000 | 71.58465 | 74.02384 | -544.54484  | 466.16019   | 331.29119   | 1 |

|     |   |          |          |          |             |             |             |   |
|-----|---|----------|----------|----------|-------------|-------------|-------------|---|
| 95  | H | 74.28596 | 71.92448 | 74.54323 | -1409.80988 | -170.17955  | 2325.32679  | 1 |
| 96  | C | 76.52404 | 72.38244 | 74.38454 | -184.48284  | 116.78282   | -758.89137  | 1 |
| 97  | H | 76.74466 | 72.29047 | 75.47243 | 1893.78641  | 1861.14652  | 611.04528   | 1 |
| 98  | H | 77.41133 | 71.97020 | 73.85337 | -2170.79665 | -974.19311  | 1327.50117  | 1 |
| 99  | C | 76.24689 | 73.87585 | 73.98096 | 389.51668   | 672.81878   | -138.49152  | 1 |
| 100 | H | 76.32275 | 73.99280 | 72.87409 | 510.64577   | 1933.03327  | 1851.02484  | 1 |
| 101 | H | 75.18718 | 74.14001 | 74.19492 | -2302.30869 | -1105.72939 | -948.89774  | 1 |
| 102 | C | 77.14541 | 74.90865 | 74.69171 | -559.93427  | -126.34590  | 542.30857   | 1 |
| 103 | O | 76.76148 | 76.13740 | 74.73126 | -670.36003  | -111.83166  | 76.36448    | 1 |
| 104 | N | 78.23259 | 74.40058 | 75.19287 | -216.06729  | -537.07037  | 446.51379   | 1 |
| 105 | H | 78.46753 | 73.40047 | 75.10268 | -1251.96487 | 1074.12894  | -2168.52500 | 1 |
| 106 | H | 78.97357 | 74.90159 | 75.77677 | -2451.83023 | -720.73851  | 944.84612   | 1 |
| 107 | C | 75.03651 | 71.50171 | 72.39297 | 546.24052   | -563.88337  | -85.11809   | 1 |
| 108 | O | 75.91389 | 71.04020 | 71.71311 | 71.70702    | -307.40463  | 606.69673   | 1 |
| 109 | N | 73.85856 | 72.02928 | 72.02129 | 479.90863   | -504.50129  | 222.86849   | 1 |
| 110 | C | 73.52681 | 72.20717 | 70.64395 | 75.51268    | -600.91904  | 506.73700   | 1 |
| 111 | H | 74.05372 | 71.41759 | 70.06025 | -2033.61562 | 1795.30103  | 254.89480   | 1 |
| 112 | C | 71.93903 | 72.10108 | 70.68917 | 523.79067   | 517.99274   | 284.45581   | 1 |
| 113 | H | 71.44866 | 72.53855 | 69.79087 | 1599.61665  | -1127.00911 | 1895.98173  | 1 |
| 114 | H | 71.59790 | 71.04443 | 70.76100 | -1881.83093 | 1275.82488  | -1501.55016 | 1 |
| 115 | C | 71.63423 | 72.88908 | 71.99938 | -600.05639  | -404.05026  | 316.64485   | 1 |
| 116 | H | 71.70675 | 73.98401 | 71.81063 | -2597.05260 | 496.36221   | 657.73249   | 1 |
| 117 | H | 70.61772 | 72.70012 | 72.41284 | -1666.24518 | 1294.38985  | -1723.90591 | 1 |
| 118 | C | 72.80348 | 72.39852 | 72.95526 | 493.57570   | -129.95376  | -602.56394  | 1 |
| 119 | H | 73.20157 | 73.18841 | 73.63495 | -1469.08415 | -637.84797  | 2204.22581  | 1 |
| 120 | H | 72.59368 | 71.45809 | 73.55237 | -1038.97840 | 1068.88701  | -2280.71789 | 1 |
| 121 | C | 73.95461 | 73.72751 | 70.21443 | 188.88100   | 241.05089   | -727.87821  | 1 |
| 122 | O | 74.16011 | 74.60664 | 71.01315 | 531.88613   | -49.19943   | 427.07960   | 1 |
| 123 | N | 73.83096 | 73.87293 | 68.85185 | 708.14833   | 26.93417    | -179.73509  | 1 |
| 124 | H | 73.77854 | 72.89242 | 68.55337 | -2232.69501 | -1179.09831 | 1023.94816  | 1 |
| 125 | C | 74.74668 | 74.82670 | 68.17829 | -738.32412  | 259.92548   | 104.42456   | 1 |
| 126 | H | 75.74789 | 74.63469 | 68.62685 | 2028.89123  | 1260.02983  | 1311.33324  | 1 |
| 127 | C | 74.68442 | 74.54612 | 66.69776 | -258.65678  | -345.52513  | 661.28459   | 1 |
| 128 | H | 73.60992 | 74.48172 | 66.41179 | -1826.06090 | -1801.46097 | -918.64554  | 1 |
| 129 | C | 75.32095 | 75.66495 | 65.89071 | -541.23400  | 531.92970   | -218.41428  | 1 |
| 130 | H | 75.18676 | 75.51187 | 64.78471 | 1311.73218  | -2219.18200 | 882.19023   | 1 |
| 131 | H | 74.87281 | 76.66534 | 66.15332 | -1048.71298 | 1223.58118  | -2196.97971 | 1 |
| 132 | H | 76.42533 | 75.73886 | 66.08744 | 419.06414   | 1903.92898  | 1903.44670  | 1 |
| 133 | C | 75.33984 | 73.22504 | 66.33202 | -423.86431  | 152.66566   | -648.55262  | 1 |
| 134 | H | 75.26319 | 73.01441 | 65.23027 | 105.68386   | -2342.50080 | 1387.51238  | 1 |
| 135 | H | 76.43278 | 73.22122 | 66.59584 | -1695.63603 | -1484.73621 | -1531.02793 | 1 |
| 136 | H | 74.86717 | 72.35925 | 66.87049 | -1853.57121 | -487.39031  | 1936.59343  | 1 |
| 137 | C | 74.20831 | 76.34976 | 68.49562 | 539.71428   | -510.58232  | 267.58633   | 1 |
| 138 | O | 74.95511 | 77.29030 | 68.35123 | -15.93758   | -278.34085  | -624.49402  | 1 |
| 139 | N | 72.89595 | 76.36835 | 68.73640 | -676.81886  | 12.05292    | 276.17960   | 1 |
| 140 | H | 72.48093 | 75.43984 | 68.81219 | -1694.44250 | -373.84189  | -2100.66098 | 1 |
| 141 | C | 72.39301 | 77.44214 | 69.54198 | 412.33078   | -664.70360  | 108.35451   | 1 |
| 142 | H | 73.28726 | 77.97938 | 69.94416 | 1765.77476  | 1294.44366  | 1621.76594  | 1 |
| 143 | C | 71.52379 | 78.31164 | 68.54615 | -179.66635  | -721.95667  | -264.73915  | 1 |
| 144 | H | 72.13421 | 78.62517 | 67.66983 | -607.34922  | 2587.87032  | -598.10018  | 1 |
| 145 | H | 70.69491 | 77.69748 | 68.12742 | -359.69332  | -1479.13954 | -2259.74260 | 1 |
| 146 | C | 70.96051 | 79.55673 | 69.30713 | -240.01076  | 616.02425   | 431.85322   | 1 |
| 147 | H | 70.35809 | 79.24509 | 70.19003 | -1359.17131 | 782.54425   | 2227.99181  | 1 |
| 148 | H | 71.78243 | 80.19359 | 69.70372 | -820.36667  | 85.81767    | -2596.78715 | 1 |
| 149 | C | 70.07316 | 80.34973 | 68.26416 | -513.07015  | 236.18570   | -551.87280  | 1 |
| 150 | H | 70.68452 | 80.66693 | 67.38837 | 1816.11944  | -1183.11722 | -1650.94321 | 1 |
| 151 | H | 69.27328 | 79.69342 | 67.85038 | -1800.04429 | -1361.53473 | 1526.34643  | 1 |
| 152 | C | 69.45362 | 81.57775 | 68.96935 | 726.08972   | -253.19732  | -179.64713  | 1 |
| 153 | H | 68.73711 | 81.33378 | 69.77892 | 1224.27271  | -456.51798  | -2390.90304 | 1 |
| 154 | H | 70.18826 | 82.32635 | 69.32767 | 1206.40339  | -1150.93514 | -2154.90344 | 1 |
| 155 | N | 68.59878 | 82.33848 | 67.89890 | 329.70796   | -633.68968  | -155.67358  | 1 |
| 156 | H | 68.10372 | 83.21041 | 68.24442 | 1348.31305  | 1938.76845  | 1359.00643  | 1 |

|     |   |          |          |          |             |             |             |   |
|-----|---|----------|----------|----------|-------------|-------------|-------------|---|
| 157 | H | 69.11153 | 82.71446 | 67.04897 | 2096.92035  | 1446.54551  | -966.48890  | 1 |
| 158 | H | 67.79603 | 81.80616 | 67.45266 | -1197.07217 | -2303.53719 | 827.28733   | 1 |
| 159 | C | 71.38586 | 76.79954 | 70.65245 | -378.01186  | -556.17301  | -413.96481  | 1 |
| 160 | O | 70.48942 | 76.05724 | 70.33375 | -409.44433  | -307.55053  | -453.30833  | 1 |
| 161 | N | 71.71827 | 77.25175 | 71.86351 | -429.02477  | 524.70884   | 274.08502   | 1 |
| 162 | H | 72.52675 | 77.90769 | 71.97232 | 1706.34263  | -1425.96036 | 1574.38926  | 1 |
| 163 | C | 70.64784 | 77.21985 | 72.84002 | -45.25864   | -626.22952  | 478.93267   | 1 |
| 164 | H | 69.78123 | 77.71503 | 72.34938 | 1988.63164  | 570.90773   | 1772.87287  | 1 |
| 165 | C | 70.36182 | 75.69981 | 73.14880 | 551.77128   | -20.49526   | -564.54996  | 1 |
| 166 | H | 70.04090 | 75.17432 | 72.21476 | 1434.61535  | -1753.10253 | 1513.99471  | 1 |
| 167 | H | 71.29778 | 75.19408 | 73.47835 | -714.67738  | 1819.09770  | 1898.36494  | 1 |
| 168 | C | 69.25946 | 75.57514 | 74.25316 | 446.99263   | -555.77305  | 338.97221   | 1 |
| 169 | H | 69.59554 | 76.04763 | 75.20384 | 1953.68466  | 1892.25957  | -161.67766  | 1 |
| 170 | H | 68.32826 | 76.10731 | 73.95611 | -403.03785  | 2688.07032  | -188.43591  | 1 |
| 171 | C | 68.99608 | 74.02678 | 74.44218 | 567.86262   | 335.74681   | 434.04421   | 1 |
| 172 | H | 68.62555 | 73.57303 | 73.49433 | -1080.02275 | 1568.26081  | -1948.78900 | 1 |
| 173 | H | 69.94422 | 73.49238 | 74.68213 | -919.54108  | 2111.34692  | 1456.13463  | 1 |
| 174 | C | 67.96404 | 73.83505 | 75.57703 | 195.81897   | 173.33862   | -745.11536  | 1 |
| 175 | H | 68.32318 | 74.13154 | 76.58273 | 1405.67949  | -2301.21089 | -390.08113  | 1 |
| 176 | H | 66.97072 | 74.28574 | 75.38117 | -940.37328  | -1118.32446 | 2299.72133  | 1 |
| 177 | N | 67.68547 | 72.29747 | 75.69254 | 319.26422   | 656.36007   | -42.02424   | 1 |
| 178 | H | 67.00473 | 72.00735 | 76.45247 | 1961.03633  | 619.91968   | 1787.09422  | 1 |
| 179 | H | 67.26772 | 71.81666 | 74.84342 | 854.14343   | -2156.80752 | 1429.08711  | 1 |
| 180 | H | 68.51707 | 71.67453 | 75.90933 | 1237.02905  | -1378.50857 | -1998.28500 | 1 |
| 181 | C | 71.14098 | 77.95965 | 74.19348 | 532.53319   | -268.57236  | 517.55729   | 1 |
| 182 | O | 70.35631 | 78.61849 | 74.87200 | 266.16714   | -290.73804  | -558.88002  | 1 |
| 183 | N | 72.38969 | 77.64429 | 74.47619 | -226.25352  | 640.49678   | -270.32839  | 1 |
| 184 | H | 72.90728 | 77.09093 | 73.79581 | 2007.69063  | -1035.27229 | 1523.50231  | 1 |
| 185 | C | 72.93233 | 78.10745 | 75.71766 | -540.76542  | -573.33303  | 49.50000    | 1 |
| 186 | H | 72.04708 | 78.08152 | 76.39495 | -2374.20950 | -1036.76023 | 843.75774   | 1 |
| 187 | C | 74.10632 | 77.09373 | 76.09800 | -77.09082   | 666.87422   | -415.84136  | 1 |
| 188 | H | 74.83821 | 77.08989 | 75.24398 | -985.81834  | 617.19825   | 2463.91927  | 1 |
| 189 | O | 73.67319 | 75.73120 | 76.28689 | 293.29899   | -391.65602  | -477.80926  | 1 |
| 190 | H | 74.25372 | 75.26961 | 75.64890 | 2528.72714  | -681.76262  | -751.27122  | 1 |
| 191 | C | 74.81384 | 77.75016 | 77.34006 | 252.47363   | -605.14473  | 440.05134   | 1 |
| 192 | H | 75.63046 | 77.09275 | 77.72590 | -2052.65063 | 1456.49051  | -1043.51830 | 1 |
| 193 | H | 75.28811 | 78.72757 | 77.07232 | -2152.98800 | -1661.97574 | -161.70652  | 1 |
| 194 | H | 74.10239 | 77.93167 | 78.17964 | -473.12726  | -1584.27339 | 2165.61725  | 1 |
| 195 | C | 73.41320 | 79.63774 | 75.43534 | 360.36307   | 488.46713   | 505.10056   | 1 |
| 196 | O | 74.59706 | 79.93031 | 75.32532 | -200.08817  | -528.03552  | -385.82850  | 1 |
| 197 | N | 72.33539 | 80.38359 | 75.41838 | -597.54095  | -226.44775  | 355.20479   | 1 |
| 198 | H | 71.40024 | 79.91496 | 75.49180 | 2179.23655  | -1300.70981 | -991.33835  | 1 |
| 199 | C | 72.37184 | 81.76006 | 75.10046 | -687.68921  | 297.39807   | -249.45179  | 1 |
| 200 | H | 71.34531 | 82.10441 | 75.35343 | -349.16256  | -2467.37713 | -1101.72831 | 1 |
| 201 | C | 73.52567 | 82.51035 | 75.91878 | 672.47345   | 361.54328   | -201.62880  | 1 |
| 202 | H | 74.52834 | 82.16468 | 75.57281 | 1541.41502  | 582.18425   | 2169.97026  | 1 |
| 203 | H | 73.47287 | 83.60449 | 75.71520 | -2534.67717 | 60.25153    | 997.72295   | 1 |
| 204 | C | 73.36567 | 82.22416 | 77.41839 | 574.26774   | -389.43119  | -377.02542  | 1 |
| 205 | C | 72.36773 | 82.89245 | 78.18873 | 688.82679   | -287.33580  | -257.96133  | 1 |
| 206 | H | 71.70211 | 83.64198 | 77.72348 | 331.14182   | 1470.38163  | 2269.80013  | 1 |
| 207 | C | 74.22161 | 81.25645 | 78.02584 | -383.52382  | -675.04808  | 144.24917   | 1 |
| 208 | H | 74.99279 | 80.73939 | 77.42343 | 4.09847     | 1517.59662  | 2262.86397  | 1 |
| 209 | C | 72.25001 | 82.57210 | 79.54110 | -134.76730  | 428.45285   | -649.50303  | 1 |
| 210 | H | 71.47927 | 83.08796 | 80.13964 | -903.23433  | 1600.49020  | 2011.53387  | 1 |
| 211 | C | 74.06223 | 80.96654 | 79.38227 | -335.53281  | -615.00040  | -364.39058  | 1 |
| 212 | H | 74.72692 | 80.21168 | 79.83789 | 1596.45398  | -1369.33862 | 1732.02659  | 1 |
| 213 | C | 73.07707 | 81.60870 | 80.18826 | 585.48547   | -340.24194  | -406.23938  | 1 |
| 214 | O | 72.90457 | 81.32189 | 81.56745 | -419.15649  | -173.04408  | -511.94141  | 1 |
| 215 | H | 73.62348 | 80.65742 | 81.68974 | -1071.84350 | 1559.71507  | -1960.13012 | 1 |
| 216 | C | 72.68838 | 81.92957 | 73.50165 | 291.41878   | -183.13091  | 710.72246   | 1 |
| 217 | O | 71.91360 | 82.52639 | 72.79624 | 379.87695   | 523.47396   | -222.23622  | 1 |
| 218 | N | 73.87698 | 81.41662 | 73.19545 | 564.30591   | 373.09380   | 277.24371   | 1 |

|     |   |          |          |          |             |             |             |   |
|-----|---|----------|----------|----------|-------------|-------------|-------------|---|
| 219 | H | 74.45228 | 80.92459 | 73.92165 | -120.59931  | -2436.07824 | -1214.35098 | 1 |
| 220 | C | 74.11970 | 81.17619 | 71.80157 | 404.07514   | -299.37480  | 608.84009   | 1 |
| 221 | H | 73.09791 | 81.20253 | 71.35902 | -1071.07882 | -841.69025  | 2359.66467  | 1 |
| 222 | C | 74.96659 | 82.43483 | 71.34436 | -683.12807  | 68.71770    | -390.13096  | 1 |
| 223 | H | 74.52211 | 83.35146 | 71.79368 | 2068.88918  | 1596.58590  | 770.89603   | 1 |
| 224 | H | 76.00734 | 82.39587 | 71.73592 | 1379.86429  | 2342.49779  | -179.85638  | 1 |
| 225 | C | 74.95464 | 82.54463 | 69.78938 | -176.39967  | 537.49466   | 550.97268   | 1 |
| 226 | H | 75.49737 | 81.69075 | 69.31130 | -396.28051  | 1942.22168  | 1869.33314  | 1 |
| 227 | H | 73.91682 | 82.51324 | 69.38756 | -94.44700   | 586.00678   | -2659.20016 | 1 |
| 228 | C | 75.65313 | 83.94851 | 69.47733 | -291.69381  | -718.18079  | -150.72929  | 1 |
| 229 | H | 75.13562 | 84.84735 | 69.89927 | -2303.38776 | 1089.76242  | 964.62032   | 1 |
| 230 | H | 76.73163 | 84.01206 | 69.77173 | 884.16729   | 2568.80533  | -207.74283  | 1 |
| 231 | N | 75.59243 | 84.05285 | 68.08183 | -594.49522  | -252.81478  | 342.29276   | 1 |
| 232 | H | 75.27976 | 83.23717 | 67.57909 | -1735.17426 | 2084.05705  | -263.71605  | 1 |
| 233 | C | 75.90980 | 85.09377 | 67.42525 | 595.23177   | -271.52487  | 442.22352   | 1 |
| 234 | N | 76.34836 | 86.21125 | 68.14504 | 585.53813   | -424.79750  | -105.81303  | 1 |
| 235 | H | 76.46416 | 86.33100 | 69.15050 | 959.88797   | 1327.56823  | -2177.11905 | 1 |
| 236 | H | 76.63205 | 87.09854 | 67.72856 | 1578.48647  | 16.27378    | -2220.76233 | 1 |
| 237 | N | 75.74843 | 84.89576 | 66.04675 | -452.17763  | -390.33541  | -421.51853  | 1 |
| 238 | H | 75.43099 | 84.08409 | 65.51898 | 470.26107   | 1974.25629  | -1817.92087 | 1 |
| 239 | H | 75.95496 | 85.61663 | 65.35398 | 1856.67307  | -1573.97321 | -1224.35416 | 1 |
| 240 | C | 74.81471 | 79.70523 | 71.72642 | -531.47271  | -581.45780  | -55.06206   | 1 |
| 241 | O | 74.08151 | 78.72404 | 71.76392 | -243.00837  | 192.73507   | 609.52485   | 1 |
| 242 | N | 76.14168 | 79.73473 | 71.72342 | 343.49288   | -644.25607  | 38.09164    | 1 |
| 243 | H | 76.49407 | 80.69177 | 71.72408 | -1691.16043 | -1535.97525 | -1484.73099 | 1 |
| 244 | C | 76.90819 | 78.67389 | 71.06322 | 542.66492   | 350.14337   | 454.42563   | 1 |
| 245 | H | 76.12789 | 78.00440 | 70.62460 | 1209.57979  | -2396.95920 | 463.86744   | 1 |
| 246 | C | 77.80331 | 79.33874 | 70.03025 | -737.14309  | 145.93010   | 242.71942   | 1 |
| 247 | H | 78.14706 | 80.31407 | 70.44127 | -1050.18303 | 159.36419   | -2509.06125 | 1 |
| 248 | C | 79.04395 | 78.51678 | 69.72413 | -706.77696  | -252.88343  | -245.16230  | 1 |
| 249 | H | 79.60888 | 78.91222 | 68.83434 | -1624.64039 | -1665.49085 | 1417.86935  | 1 |
| 250 | H | 79.75741 | 78.50515 | 70.59892 | 2566.10521  | 598.51109   | 693.22305   | 1 |
| 251 | H | 78.77844 | 77.43947 | 69.51748 | -1972.69758 | 107.10018   | -1876.34312 | 1 |
| 252 | C | 77.04308 | 79.62482 | 68.75066 | 412.85148   | 672.58832   | -27.69222   | 1 |
| 253 | H | 77.70879 | 80.07369 | 67.96091 | 1447.02277  | 1762.76533  | -1490.78944 | 1 |
| 254 | H | 76.58529 | 78.68154 | 68.32109 | 1320.77379  | -145.20455  | 2378.68491  | 1 |
| 255 | H | 76.19379 | 80.35188 | 68.93081 | -1512.10848 | 1470.52031  | 1724.75147  | 1 |
| 256 | C | 77.87031 | 77.86509 | 72.14075 | -607.11113  | 499.56689   | 73.73769    | 1 |
| 257 | O | 78.54139 | 76.93919 | 71.73618 | 357.97126   | 460.81534   | 356.68785   | 1 |
| 258 | N | 77.85165 | 78.37684 | 73.36185 | 536.55407   | -368.62270  | 332.76306   | 1 |
| 259 | H | 77.19078 | 79.13024 | 73.54460 | 524.38866   | 2297.69985  | 1367.20941  | 1 |
| 260 | C | 78.73059 | 77.79058 | 74.30125 | 46.50277    | -774.29190  | -147.97904  | 1 |
| 261 | H | 79.23105 | 76.96538 | 73.73774 | 1676.51875  | 1883.29066  | 1032.55549  | 1 |
| 262 | C | 79.74314 | 78.90872 | 74.88036 | -559.41456  | -34.19198   | -556.30433  | 1 |
| 263 | H | 79.15873 | 79.78804 | 75.24253 | -64.66664   | 395.18769   | 2695.05373  | 1 |
| 264 | H | 80.27141 | 78.49390 | 75.77390 | -2703.44278 | -60.40056   | 333.79418   | 1 |
| 265 | C | 80.73037 | 79.32218 | 73.82190 | -519.76435  | 377.31045   | 459.42366   | 1 |
| 266 | H | 80.17133 | 79.56041 | 72.88903 | -1746.74323 | 1667.50644  | -1261.73691 | 1 |
| 267 | C | 81.48963 | 80.56606 | 74.26728 | 570.95554   | 16.46261    | -545.27700  | 1 |
| 268 | H | 82.23947 | 80.89130 | 73.50084 | 2391.58273  | 28.05277    | -1305.07271 | 1 |
| 269 | H | 80.80029 | 81.43094 | 74.44713 | 175.75588   | 917.63458   | 2559.43867  | 1 |
| 270 | H | 82.04932 | 80.38567 | 75.22127 | -1063.97851 | -2155.34650 | 1283.00462  | 1 |
| 271 | C | 81.71934 | 78.20143 | 73.53014 | 193.76014   | 2.62946     | -765.53141  | 1 |
| 272 | H | 82.49605 | 78.51692 | 72.78657 | 507.39394   | -846.55087  | 2539.60089  | 1 |
| 273 | H | 82.26017 | 77.87934 | 74.45768 | 1337.57841  | 1818.19054  | 1526.01994  | 1 |
| 274 | H | 81.20942 | 77.29516 | 73.11240 | 1100.88635  | -1172.91350 | -2199.08909 | 1 |
| 275 | C | 77.93656 | 77.26277 | 75.62103 | -549.21115  | 475.64486   | -309.38218  | 1 |
| 276 | O | 77.30984 | 77.90113 | 76.40118 | 556.06106   | -390.37755  | -78.24250   | 1 |
| 277 | O | 79.23324 | 76.46331 | 76.35169 | -572.27940  | -310.19032  | -209.75862  | 1 |
| 278 | H | 79.10041 | 76.79193 | 77.21994 | -1380.08193 | 2212.14486  | 790.85944   | 1 |



## Listing 17: C00017.xmolout

|    |   |          |          |          |             |             |             |        |          |
|----|---|----------|----------|----------|-------------|-------------|-------------|--------|----------|
| 1  |   | 276      |          |          |             |             |             |        |          |
| 2  |   | 150.0000 | 150.0000 | 150.0000 | 0.0000      | 0.0000      | 0.0000***** | 2.7750 | 11100    |
|    |   | 0.2500   | 300.00   | 0.00     | 0.00        | 0.00        | -1294.0761  | 0.0000 | 300.0000 |
| 3  | H | 68.01668 | 88.30775 | 68.92051 | -2043.14101 | -1757.64893 | 399.89339   |        | 1        |
| 4  | N | 68.77492 | 88.78997 | 69.39946 | 426.75047   | 490.45733   | -334.42467  |        | 1        |
| 5  | H | 69.10167 | 88.05903 | 70.02897 | 442.25559   | -1110.30854 | -2448.52907 |        | 1        |
| 6  | C | 69.75801 | 89.32942 | 68.53898 | 415.32972   | -666.39213  | 83.73172    |        | 1        |
| 7  | H | 69.37033 | 89.19704 | 67.50595 | 879.32219   | 2491.00447  | 667.35213   |        | 1        |
| 8  | C | 69.95625 | 90.88049 | 68.92487 | 31.35357    | 477.41777   | 628.23362   |        | 1        |
| 9  | H | 70.28243 | 90.95806 | 69.98956 | 1168.38489  | 2240.25337  | -1019.71136 |        | 1        |
| 10 | H | 70.77430 | 91.33790 | 68.31727 | -360.43770  | 2534.90498  | 931.67112   |        | 1        |
| 11 | C | 68.65113 | 91.60692 | 68.71661 | 463.18208   | 512.70242   | -382.34388  |        | 1        |
| 12 | H | 67.82892 | 90.95512 | 69.08962 | 1725.29117  | 1863.52247  | -987.07854  |        | 1        |
| 13 | C | 68.62674 | 92.90631 | 69.51101 | 710.42801   | -144.27427  | -313.15367  |        | 1        |
| 14 | H | 67.65847 | 93.45468 | 69.37729 | 364.20195   | -1033.13725 | 2494.72524  |        | 1        |
| 15 | H | 68.75527 | 92.72259 | 70.60908 | 2567.61904  | 335.80679   | 847.48802   |        | 1        |
| 16 | H | 69.44710 | 93.59991 | 69.19215 | -2587.99029 | 680.92867   | -512.16411  |        | 1        |
| 17 | C | 68.41361 | 91.90473 | 67.24270 | 268.17616   | 741.64379   | -40.42634   |        | 1        |
| 18 | H | 67.43571 | 92.42731 | 67.07887 | 1283.54314  | -1945.37420 | -1411.27812 |        | 1        |
| 19 | H | 69.21553 | 92.56522 | 66.82216 | -1258.57796 | 1317.15249  | -2026.02085 |        | 1        |
| 20 | H | 68.39800 | 90.96956 | 66.62587 | -2502.84526 | 909.80597   | 575.92391   |        | 1        |
| 21 | C | 71.13753 | 88.51167 | 68.81918 | 619.36578   | -458.64843  | -172.09273  |        | 1        |
| 22 | O | 71.81314 | 88.06746 | 67.90818 | -81.40433   | 433.87611   | 522.34594   |        | 1        |
| 23 | N | 71.40173 | 88.49679 | 70.12273 | 175.23996   | -622.20190  | 341.55523   |        | 1        |
| 24 | H | 70.69990 | 88.89389 | 70.74589 | -876.57256  | -303.22879  | -2561.90213 |        | 1        |
| 25 | C | 72.39742 | 87.58164 | 70.57843 | -571.88214  | -534.10783  | -106.15033  |        | 1        |
| 26 | H | 73.13086 | 87.53936 | 69.74307 | -2713.20841 | -16.25800   | -248.80809  |        | 1        |
| 27 | C | 72.97343 | 88.13466 | 71.96291 | 166.60354   | 288.16399   | -716.09568  |        | 1        |
| 28 | H | 72.12405 | 88.21899 | 72.69434 | -2097.85574 | 1636.78449  | -586.18044  |        | 1        |
| 29 | O | 73.57580 | 89.44036 | 71.89506 | -317.80580  | -363.38227  | 484.43082   |        | 1        |
| 30 | H | 72.98504 | 89.95307 | 72.48152 | 1863.74748  | -1451.84923 | 1357.29467  |        | 1        |
| 31 | C | 73.93199 | 86.97179 | 72.41413 | 503.80731   | 517.99032   | 318.51606   |        | 1        |
| 32 | H | 74.43941 | 87.21733 | 73.37578 | 640.61020   | -2157.10410 | -1536.29104 |        | 1        |
| 33 | H | 73.39261 | 86.00484 | 72.57616 | 1687.88455  | 465.60692   | 2087.56452  |        | 1        |
| 34 | H | 74.73177 | 86.78592 | 71.66029 | -1293.07895 | -1899.88581 | -1463.57452 |        | 1        |
| 35 | C | 71.60797 | 86.17328 | 70.84481 | -153.07550  | -733.68902  | 248.70981   |        | 1        |
| 36 | O | 70.76648 | 86.12932 | 71.70155 | 186.15459   | -480.78787  | -449.34387  |        | 1        |
| 37 | N | 72.05555 | 85.19714 | 70.03584 | -487.53139  | 543.18517   | 42.03850    |        | 1        |
| 38 | C | 71.49541 | 83.88631 | 70.09228 | -699.35871  | 69.34393    | 360.10701   |        | 1        |
| 39 | H | 70.46659 | 83.98249 | 70.50946 | 2.81126     | -221.99807  | -2715.58072 |        | 1        |
| 40 | C | 71.59105 | 83.43732 | 68.57064 | -507.46439  | -592.59194  | 122.07761   |        | 1        |
| 41 | H | 71.52876 | 82.33364 | 68.44090 | -1975.08116 | 525.87560   | -1801.71556 |        | 1        |
| 42 | H | 70.77114 | 83.87963 | 67.96174 | 1588.27743  | -1913.22100 | 1113.83566  |        | 1        |
| 43 | C | 72.97746 | 84.03090 | 68.16804 | -613.62442  | -457.55993  | -194.14490  |        | 1        |
| 44 | H | 73.80799 | 83.38808 | 68.53972 | 1707.54637  | -721.27992  | 1996.92523  |        | 1        |
| 45 | H | 73.11899 | 84.12608 | 67.06758 | 758.23357   | 2100.81767  | 1560.55011  |        | 1        |
| 46 | C | 72.96095 | 85.42965 | 68.91654 | -352.41524  | 704.96076   | 49.21465    |        | 1        |
| 47 | H | 73.94793 | 85.74621 | 69.32962 | 1714.76886  | -2070.42778 | 443.35792   |        | 1        |
| 48 | H | 72.51031 | 86.29019 | 68.33411 | 1224.15040  | 1801.50881  | 1636.97633  |        | 1        |
| 49 | C | 72.44986 | 82.89276 | 70.98700 | 566.85117   | 537.05831   | 117.62814   |        | 1        |
| 50 | O | 72.11266 | 81.74777 | 71.17755 | -550.26779  | -406.08867  | 4.21666     |        | 1        |
| 51 | N | 73.56588 | 83.49989 | 71.37252 | 566.34832   | -425.77725  | 180.18749   |        | 1        |
| 52 | H | 73.67283 | 84.48229 | 71.12943 | 644.44502   | 2646.80550  | -52.73430   |        | 1        |
| 53 | C | 74.52483 | 82.76522 | 72.11309 | 612.34801   | -281.48662  | 411.56221   |        | 1        |
| 54 | H | 74.25508 | 81.69151 | 71.97555 | 1667.23498  | -1490.75142 | 1556.16753  |        | 1        |
| 55 | C | 75.96081 | 83.20401 | 71.56102 | -714.45746  | -175.43074  | 286.98927   |        | 1        |
| 56 | H | 76.10540 | 84.29948 | 71.77224 | -787.09484  | 1763.03619  | -1922.46060 |        | 1        |
| 57 | O | 76.16635 | 83.04923 | 70.14504 | -429.46514  | 516.51932   | -128.40526  |        | 1        |
| 58 | H | 76.35086 | 83.97221 | 69.87777 | 1981.82785  | 436.16847   | -1818.18182 |        | 1        |
| 59 | C | 76.90922 | 82.36293 | 72.49211 | 630.79189   | -468.94448  | 76.03230    |        | 1        |

|     |   |          |          |          |             |             |             |   |
|-----|---|----------|----------|----------|-------------|-------------|-------------|---|
| 60  | H | 77.98137 | 82.60543 | 72.30804 | -1775.71861 | 2062.30353  | 131.89849   | 1 |
| 61  | H | 76.70703 | 82.55174 | 73.57225 | -1855.14608 | 88.94118    | 1993.53760  | 1 |
| 62  | H | 76.78401 | 81.26892 | 72.31777 | -1504.82350 | -780.94249  | -2132.90992 | 1 |
| 63  | C | 74.42973 | 83.29639 | 73.66972 | 288.57638   | 618.62814   | -397.00270  | 1 |
| 64  | O | 74.43679 | 84.47673 | 73.93304 | 321.70495   | -185.26452  | 574.37218   | 1 |
| 65  | N | 74.36127 | 82.23887 | 74.47697 | -447.05792  | -446.53431  | 367.76425   | 1 |
| 66  | H | 74.47797 | 81.34548 | 73.99752 | 350.31316   | 1975.63644  | -1843.31522 | 1 |
| 67  | C | 74.78557 | 82.38504 | 75.84355 | -511.23061  | 374.03917   | -471.51480  | 1 |
| 68  | H | 75.83267 | 82.75474 | 75.78986 | 2234.79579  | -898.70890  | -1273.45190 | 1 |
| 69  | C | 73.82421 | 83.45651 | 76.53375 | 529.53781   | -159.34528  | 563.72604   | 1 |
| 70  | H | 74.21389 | 83.61937 | 77.57553 | 654.59388   | 2347.94251  | 1217.51488  | 1 |
| 71  | H | 73.95548 | 84.43006 | 75.97627 | -1526.55661 | 2103.42026  | 817.87394   | 1 |
| 72  | O | 72.41787 | 83.09437 | 76.63735 | -554.84278  | 14.12789    | 399.58769   | 1 |
| 73  | H | 72.10843 | 83.42293 | 75.77240 | 1297.06236  | 2061.84854  | 1220.68812  | 1 |
| 74  | C | 74.65682 | 80.96749 | 76.60558 | -662.15484  | -412.13544  | 123.62687   | 1 |
| 75  | O | 75.28903 | 80.73767 | 77.60947 | -540.01537  | -317.05804  | 274.91456   | 1 |
| 76  | N | 73.76913 | 80.09964 | 75.99200 | -202.76299  | -690.00100  | -131.49145  | 1 |
| 77  | H | 73.34845 | 80.72163 | 75.29108 | -702.62132  | -2617.37191 | 281.70413   | 1 |
| 78  | C | 72.84261 | 79.35361 | 76.88705 | -491.73914  | 576.34187   | 222.73509   | 1 |
| 79  | H | 72.61857 | 80.06098 | 77.71859 | 1977.17978  | -1823.58850 | -434.68928  | 1 |
| 80  | C | 71.64220 | 79.00270 | 76.04134 | -649.50797  | -328.66843  | 306.11224   | 1 |
| 81  | H | 72.01793 | 78.54890 | 75.09577 | 2075.07803  | 1452.16490  | -1004.45904 | 1 |
| 82  | C | 70.74746 | 77.98841 | 76.73275 | -615.18735  | -489.99689  | -70.96352   | 1 |
| 83  | H | 69.86814 | 77.70385 | 76.09190 | -1226.32661 | -1724.38906 | -1716.47170 | 1 |
| 84  | H | 71.30673 | 77.04247 | 76.97436 | 2381.64273  | -969.84735  | 900.46860   | 1 |
| 85  | H | 70.34018 | 78.38882 | 77.70173 | 2122.74991  | 1702.23946  | -141.36228  | 1 |
| 86  | C | 70.82412 | 80.22966 | 75.67664 | -501.86074  | -479.61276  | -376.42482  | 1 |
| 87  | H | 69.95108 | 79.96744 | 75.01798 | 993.79261   | -2246.95401 | -1177.81305 | 1 |
| 88  | H | 70.41191 | 80.73737 | 76.59194 | 42.71279    | -626.15391  | -2651.37258 | 1 |
| 89  | H | 71.43551 | 80.99668 | 75.12631 | -2026.39012 | -1590.33709 | -887.82922  | 1 |
| 90  | C | 73.59319 | 77.98814 | 77.38892 | -672.89153  | 382.57394   | -156.34072  | 1 |
| 91  | O | 74.12105 | 77.21079 | 76.59507 | 410.04627   | 221.86223   | 500.35950   | 1 |
| 92  | N | 73.37977 | 77.81304 | 78.67237 | -378.11782  | -443.79414  | -441.10984  | 1 |
| 93  | H | 72.89726 | 78.56127 | 79.16578 | 2404.15973  | -568.14894  | 1149.30085  | 1 |
| 94  | C | 74.18091 | 76.85886 | 79.36594 | -544.54484  | 466.16019   | 331.29119   | 1 |
| 95  | H | 74.51014 | 76.14461 | 78.57693 | -1409.80988 | -170.17955  | 2325.32679  | 1 |
| 96  | C | 75.37273 | 77.70227 | 79.98912 | -184.48284  | 116.78282   | -758.89137  | 1 |
| 97  | H | 75.88771 | 78.28881 | 79.19383 | 1893.78641  | 1861.14652  | 611.04528   | 1 |
| 98  | H | 74.98561 | 78.45085 | 80.71756 | -2170.79665 | -974.19311  | 1327.50117  | 1 |
| 99  | C | 76.34540 | 76.69953 | 80.68122 | 389.51668   | 672.81878   | -138.49152  | 1 |
| 100 | H | 75.81191 | 76.14284 | 81.48389 | 510.64577   | 1933.03327  | 1851.02484  | 1 |
| 101 | H | 76.65836 | 75.90872 | 79.96419 | -2302.30869 | -1105.72939 | -948.89774  | 1 |
| 102 | C | 77.62096 | 77.40291 | 81.28311 | -559.93427  | -126.34590  | 542.30857   | 1 |
| 103 | O | 78.42217 | 76.74470 | 81.89451 | -670.36003  | -111.83166  | 76.36448    | 1 |
| 104 | N | 77.69788 | 78.72688 | 81.03004 | -216.06729  | -537.07037  | 446.51379   | 1 |
| 105 | H | 77.05727 | 79.33838 | 80.51002 | -1251.96487 | 1074.12894  | -2168.52500 | 1 |
| 106 | H | 78.47337 | 79.32366 | 81.33737 | -2451.83023 | -720.73851  | 944.84612   | 1 |
| 107 | C | 73.27936 | 76.21722 | 80.57470 | 546.24052   | -563.88337  | -85.11809   | 1 |
| 108 | O | 73.17920 | 76.80363 | 81.61965 | 71.70702    | -307.40463  | 606.69673   | 1 |
| 109 | N | 72.74158 | 75.04120 | 80.20602 | 479.90863   | -504.50129  | 222.86849   | 1 |
| 110 | C | 71.80631 | 74.36273 | 81.04247 | 75.51268    | -600.91904  | 506.73700   | 1 |
| 111 | H | 71.39472 | 75.11419 | 81.75611 | -2033.61562 | 1795.30103  | 254.89480   | 1 |
| 112 | C | 70.78430 | 73.78032 | 79.96934 | 523.79067   | 517.99274   | 284.45581   | 1 |
| 113 | H | 70.16863 | 72.94520 | 80.37242 | 1599.61665  | -1127.00911 | 1895.98173  | 1 |
| 114 | H | 70.07700 | 74.55960 | 79.60870 | -1881.83093 | 1275.82488  | -1501.55016 | 1 |
| 115 | C | 71.76943 | 73.33732 | 78.84456 | -600.05639  | -404.05026  | 316.64485   | 1 |
| 116 | H | 72.26222 | 72.37315 | 79.10088 | -2597.05260 | 496.36221   | 657.73249   | 1 |
| 117 | H | 71.27754 | 73.19157 | 77.85708 | -1666.24518 | 1294.38985  | -1723.90591 | 1 |
| 118 | C | 72.82472 | 74.52391 | 78.84499 | 493.57570   | -129.95376  | -602.56394  | 1 |
| 119 | H | 73.87693 | 74.20267 | 78.65786 | -1469.08415 | -637.84797  | 2204.22581  | 1 |
| 120 | H | 72.57299 | 75.37957 | 78.17445 | -1038.97840 | 1068.88701  | -2280.71789 | 1 |
| 121 | C | 72.45184 | 73.05092 | 81.78086 | 188.88100   | 241.05089   | -727.87821  | 1 |

|     |   |          |          |          |             |             |             |   |
|-----|---|----------|----------|----------|-------------|-------------|-------------|---|
| 122 | O | 71.70018 | 72.20760 | 82.25709 | 531.88613   | -49.19943   | 427.07960   | 1 |
| 123 | N | 73.77944 | 73.00564 | 81.71370 | 708.14833   | 26.93417    | -179.73509  | 1 |
| 124 | H | 74.07436 | 73.84788 | 81.21663 | -2232.69501 | -1179.09831 | 1023.94816  | 1 |
| 125 | C | 74.63866 | 72.38415 | 82.71780 | -738.32412  | 259.92548   | 104.42456   | 1 |
| 126 | H | 75.62973 | 72.87135 | 82.55551 | 2028.89123  | 1260.02983  | 1311.33324  | 1 |
| 127 | C | 74.07477 | 72.64565 | 84.10405 | -258.65678  | -345.52513  | 661.28459   | 1 |
| 128 | H | 73.02504 | 72.26931 | 84.11606 | -1826.06090 | -1801.46097 | -918.64554  | 1 |
| 129 | C | 74.85752 | 71.90239 | 85.17086 | -541.23400  | 531.92970   | -218.41428  | 1 |
| 130 | H | 74.38615 | 72.00630 | 86.18674 | 1311.73218  | -2219.18200 | 882.19023   | 1 |
| 131 | H | 74.92489 | 70.80068 | 84.94011 | -1048.71298 | 1223.58118  | -2196.97971 | 1 |
| 132 | H | 75.91245 | 72.28419 | 85.25133 | 419.06414   | 1903.92898  | 1903.44670  | 1 |
| 133 | C | 74.03651 | 74.12742 | 84.43084 | -423.86431  | 152.66566   | -648.55262  | 1 |
| 134 | H | 73.55866 | 74.32160 | 85.43039 | 105.68386   | -2342.50080 | 1387.51238  | 1 |
| 135 | H | 75.06991 | 74.57018 | 84.46518 | -1695.63603 | -1484.73621 | -1531.02793 | 1 |
| 136 | H | 73.45403 | 74.70683 | 83.66183 | -1853.57121 | -487.39031  | 1936.59343  | 1 |
| 137 | C | 74.72350 | 70.74351 | 82.47283 | 539.71428   | -510.58232  | 267.58633   | 1 |
| 138 | O | 75.68759 | 70.14781 | 82.88096 | -15.93758   | -278.34085  | -624.49402  | 1 |
| 139 | N | 73.61911 | 70.26032 | 81.93270 | -676.81886  | 12.05292    | 276.17960   | 1 |
| 140 | H | 72.83084 | 70.90703 | 81.73650 | -1694.44250 | -373.84189  | -2100.66098 | 1 |
| 141 | C | 73.61296 | 68.88879 | 81.55847 | 412.33078   | -664.70360  | 108.35451   | 1 |
| 142 | H | 74.44438 | 68.41741 | 82.13500 | 1765.77476  | 1294.44366  | 1621.76594  | 1 |
| 143 | C | 72.16068 | 68.34115 | 81.88436 | -179.66635  | -721.95667  | -264.73915  | 1 |
| 144 | H | 71.89288 | 68.53146 | 82.94757 | -607.34922  | 2587.87032  | -598.10018  | 1 |
| 145 | H | 71.39816 | 68.88791 | 81.28533 | -359.69332  | -1479.13954 | -2259.74260 | 1 |
| 146 | C | 72.13236 | 66.81275 | 81.55670 | -240.01076  | 616.02425   | 431.85322   | 1 |
| 147 | H | 72.48036 | 66.63456 | 80.51298 | -1359.17131 | 782.54425   | 2227.99181  | 1 |
| 148 | H | 72.83705 | 66.25340 | 82.21188 | -820.36667  | 85.81767    | -2596.78715 | 1 |
| 149 | C | 70.65301 | 66.28096 | 81.73270 | -513.07015  | 236.18570   | -551.87280  | 1 |
| 150 | H | 70.32237 | 66.35428 | 82.79420 | 1816.11944  | -1183.11722 | -1650.94321 | 1 |
| 151 | H | 69.93399 | 66.89876 | 81.14702 | -1800.04429 | -1361.53473 | 1526.34643  | 1 |
| 152 | C | 70.64339 | 64.81470 | 81.24089 | 726.08972   | -253.19732  | -179.64713  | 1 |
| 153 | H | 70.87656 | 64.68943 | 80.16451 | 1224.27271  | -456.51798  | -2390.90304 | 1 |
| 154 | H | 71.26311 | 64.12147 | 81.84379 | 1206.40339  | -1150.93514 | -2154.90344 | 1 |
| 155 | N | 69.18289 | 64.27041 | 81.38804 | 329.70796   | -633.68968  | -155.67358  | 1 |
| 156 | H | 69.03493 | 63.27013 | 81.06730 | 1348.31305  | 1938.76845  | 1359.00643  | 1 |
| 157 | H | 68.77443 | 64.23790 | 82.36714 | 2096.92035  | 1446.54551  | -966.48890  | 1 |
| 158 | H | 68.42163 | 64.77625 | 80.84830 | -1197.07217 | -2303.53719 | 827.28733   | 1 |
| 159 | C | 73.79740 | 68.70692 | 79.93531 | -378.01186  | -556.17301  | -413.96481  | 1 |
| 160 | O | 74.25452 | 67.66702 | 79.51469 | -409.44433  | -307.55053  | -453.30833  | 1 |
| 161 | N | 73.25746 | 69.70217 | 79.23822 | -429.02477  | 524.70884   | 274.08502   | 1 |
| 162 | H | 72.96085 | 70.52729 | 79.75455 | 1706.34263  | -1425.96036 | 1574.38926  | 1 |
| 163 | C | 73.40088 | 69.63584 | 77.82417 | -45.25864   | -626.22952  | 478.93267   | 1 |
| 164 | H | 73.64078 | 68.56558 | 77.61685 | 1988.63164  | 570.90773   | 1772.87287  | 1 |
| 165 | C | 72.06940 | 70.15795 | 77.14630 | 551.77128   | -20.49526   | -564.54996  | 1 |
| 166 | H | 71.18017 | 69.62727 | 77.55396 | 1434.61535  | -1753.10253 | 1513.99471  | 1 |
| 167 | H | 71.90562 | 71.23467 | 77.36647 | -714.67738  | 1819.09770  | 1898.36494  | 1 |
| 168 | C | 72.21452 | 69.92013 | 75.60619 | 446.99263   | -555.77305  | 338.97221   | 1 |
| 169 | H | 73.10445 | 70.46051 | 75.21409 | 1953.68466  | 1892.25957  | -161.67766  | 1 |
| 170 | H | 72.39099 | 68.84343 | 75.38673 | -403.03785  | 2688.07032  | -188.43591  | 1 |
| 171 | C | 70.90130 | 70.42755 | 74.88598 | 567.86262   | 335.74681   | 434.04421   | 1 |
| 172 | H | 70.00924 | 69.85829 | 75.23496 | -1080.02275 | 1568.26081  | -1948.78900 | 1 |
| 173 | H | 70.69789 | 71.49411 | 75.13602 | -919.54108  | 2111.34692  | 1456.13463  | 1 |
| 174 | C | 71.10988 | 70.25093 | 73.36358 | 195.81897   | 173.33862   | -745.11536  | 1 |
| 175 | H | 71.92274 | 70.87020 | 72.93422 | 1405.67949  | -2301.21089 | -390.08113  | 1 |
| 176 | H | 71.22170 | 69.19958 | 73.03098 | -940.37328  | -1118.32446 | 2299.72133  | 1 |
| 177 | N | 69.81173 | 70.75252 | 72.64596 | 319.26422   | 656.36007   | -42.02424   | 1 |
| 178 | H | 69.82461 | 70.68917 | 71.58716 | 1961.03633  | 619.91968   | 1787.09422  | 1 |
| 179 | H | 68.90698 | 70.24565 | 72.87240 | 854.14343   | -2156.80752 | 1429.08711  | 1 |
| 180 | H | 69.53785 | 71.76779 | 72.79077 | 1237.02905  | -1378.50857 | -1998.28500 | 1 |
| 181 | C | 74.60806 | 70.67512 | 77.38241 | 532.53319   | -268.57236  | 517.55729   | 1 |
| 182 | O | 74.61118 | 71.85286 | 77.63927 | 266.16714   | -290.73804  | -558.88002  | 1 |
| 183 | N | 75.40201 | 69.97654 | 76.57584 | -226.25352  | 640.49678   | -270.32839  | 1 |

|     |   |          |          |          |             |             |             |   |
|-----|---|----------|----------|----------|-------------|-------------|-------------|---|
| 184 | H | 75.20707 | 68.98094 | 76.47407 | 2007.69063  | -1035.27229 | 1523.50231  | 1 |
| 185 | C | 76.71331 | 70.46692 | 76.31350 | -540.76542  | -573.33303  | 49.50000    | 1 |
| 186 | H | 76.64663 | 71.52988 | 76.64377 | -2374.20950 | -1036.76023 | 843.75774   | 1 |
| 187 | C | 77.69392 | 69.60300 | 77.23538 | -77.09082   | 666.87422   | -415.84136  | 1 |
| 188 | H | 77.66719 | 68.54282 | 76.86518 | -985.81834  | 617.19825   | 2463.91927  | 1 |
| 189 | O | 77.33942 | 69.56087 | 78.63211 | 293.29899   | -391.65602  | -477.80926  | 1 |
| 190 | H | 77.00475 | 68.64825 | 78.72006 | 2528.72714  | -681.76262  | -751.27122  | 1 |
| 191 | C | 79.11127 | 70.21942 | 76.95520 | 252.47363   | -605.14473  | 440.05134   | 1 |
| 192 | H | 79.91412 | 69.65234 | 77.48181 | -2052.65063 | 1456.49051  | -1043.51830 | 1 |
| 193 | H | 79.35878 | 70.21299 | 75.85916 | -2152.98800 | -1661.97574 | -161.70652  | 1 |
| 194 | H | 79.17131 | 71.27580 | 77.30690 | -473.12726  | -1584.27339 | 2165.61725  | 1 |
| 195 | C | 76.99311 | 70.28872 | 74.71713 | 360.36307   | 488.46713   | 505.10056   | 1 |
| 196 | O | 78.13855 | 70.06045 | 74.27717 | -200.08817  | -528.03552  | -385.82850  | 1 |
| 197 | N | 75.89421 | 70.48239 | 74.02763 | -597.54095  | -226.44775  | 355.20479   | 1 |
| 198 | H | 75.13785 | 70.64648 | 74.69045 | 2179.23655  | -1300.70981 | -991.33835  | 1 |
| 199 | C | 75.80210 | 70.77449 | 72.64943 | -687.68921  | 297.39807   | -249.45179  | 1 |
| 200 | H | 74.73305 | 71.04164 | 72.50345 | -349.16256  | -2467.37713 | -1101.72831 | 1 |
| 201 | C | 76.79925 | 71.99473 | 72.36384 | 672.47345   | 361.54328   | -201.62880  | 1 |
| 202 | H | 77.76403 | 71.83726 | 72.90060 | 1541.41502  | 582.18425   | 2169.97026  | 1 |
| 203 | H | 77.02658 | 72.04992 | 71.27469 | -2534.67717 | 60.25153    | 997.72295   | 1 |
| 204 | C | 76.11527 | 73.28761 | 72.83283 | 574.26774   | -389.43119  | -377.02542  | 1 |
| 205 | C | 75.28022 | 73.98617 | 71.91239 | 688.82679   | -287.33580  | -257.96133  | 1 |
| 206 | H | 75.12122 | 73.59976 | 70.88953 | 331.14182   | 1470.38163  | 2269.80013  | 1 |
| 207 | C | 76.28423 | 73.79542 | 74.15539 | -383.52382  | -675.04808  | 144.24917   | 1 |
| 208 | H | 76.91391 | 73.25455 | 74.88462 | 4.09847     | 1517.59662  | 2262.86397  | 1 |
| 209 | C | 74.67547 | 75.16934 | 72.32580 | -134.76730  | 428.45285   | -649.50303  | 1 |
| 210 | H | 74.04058 | 75.70802 | 71.60114 | -903.23433  | 1600.49020  | 2011.53387  | 1 |
| 211 | C | 75.64477 | 74.98624 | 74.51345 | -335.53281  | -615.00040  | -364.39058  | 1 |
| 212 | H | 75.79074 | 75.36613 | 75.54058 | 1596.45398  | -1369.33862 | 1732.02659  | 1 |
| 213 | C | 74.82463 | 75.72981 | 73.62163 | 585.48547   | -340.24194  | -406.23938  | 1 |
| 214 | O | 74.18315 | 76.92417 | 73.95055 | -419.15649  | -173.04408  | -511.94141  | 1 |
| 215 | H | 74.27982 | 76.93480 | 74.99111 | -1071.84350 | 1559.71507  | -1960.13012 | 1 |
| 216 | C | 76.23747 | 69.48318 | 71.74453 | 291.41878   | -183.13091  | 710.72246   | 1 |
| 217 | O | 75.42382 | 68.96278 | 71.02133 | 379.87695   | 523.47396   | -222.23622  | 1 |
| 218 | N | 77.52844 | 69.19320 | 71.88205 | 564.30591   | 373.09380   | 277.24371   | 1 |
| 219 | H | 78.10874 | 69.72484 | 72.56793 | -120.59931  | -2436.07824 | -1214.35098 | 1 |
| 220 | C | 77.98904 | 67.99651 | 71.21856 | 404.07514   | -299.37480  | 608.84009   | 1 |
| 221 | H | 77.18213 | 67.25909 | 71.43421 | -1071.07882 | -841.69025  | 2359.66467  | 1 |
| 222 | C | 77.98568 | 68.34842 | 69.66624 | -683.12807  | 68.71770    | -390.13096  | 1 |
| 223 | H | 77.02251 | 68.83996 | 69.39197 | 2068.88918  | 1596.58590  | 770.89603   | 1 |
| 224 | H | 78.78011 | 69.09466 | 69.44235 | 1379.86429  | 2342.49779  | -179.85638  | 1 |
| 225 | C | 78.20190 | 67.05186 | 68.83041 | -176.39967  | 537.49466   | 550.97268   | 1 |
| 226 | H | 79.08081 | 66.47511 | 69.21748 | -396.28051  | 1942.22168  | 1869.33314  | 1 |
| 227 | H | 77.32811 | 66.36729 | 68.91906 | -94.44700   | 586.00678   | -2659.20016 | 1 |
| 228 | C | 78.44074 | 67.49204 | 67.31235 | -291.69381  | -718.18079  | -150.72929  | 1 |
| 229 | H | 77.56694 | 67.95996 | 66.79178 | -2303.38776 | 1089.76242  | 964.62032   | 1 |
| 230 | H | 79.33380 | 68.14571 | 67.14037 | 884.16729   | 2568.80533  | -207.74283  | 1 |
| 231 | N | 78.70305 | 66.25437 | 66.70527 | -594.49522  | -252.81478  | 342.29276   | 1 |
| 232 | H | 78.77694 | 65.45560 | 67.31629 | -1735.17426 | 2084.05705  | -263.71605  | 1 |
| 233 | C | 78.86480 | 66.07576 | 65.45717 | 595.23177   | -271.52487  | 442.22352   | 1 |
| 234 | N | 78.76935 | 67.19020 | 64.61686 | 585.53813   | -424.79750  | -105.81303  | 1 |
| 235 | H | 78.59098 | 68.16538 | 64.85325 | 959.88797   | 1327.56823  | -2177.11905 | 1 |
| 236 | H | 78.88578 | 67.16953 | 63.60316 | 1578.48647  | 16.27378    | -2220.76233 | 1 |
| 237 | N | 79.11989 | 64.72678 | 65.17151 | -452.17763  | -390.33541  | -421.51853  | 1 |
| 238 | H | 79.19851 | 63.91833 | 65.78661 | 470.26107   | 1974.25629  | -1817.92087 | 1 |
| 239 | H | 79.28612 | 64.37660 | 64.22737 | 1856.67307  | -1573.97321 | -1224.35416 | 1 |
| 240 | C | 79.44400 | 67.54432 | 71.72255 | -531.47271  | -581.45780  | -55.06206   | 1 |
| 241 | O | 80.05796 | 66.76394 | 71.03914 | -243.00837  | 192.73507   | 609.52485   | 1 |
| 242 | N | 79.82296 | 68.01916 | 72.92718 | 343.49288   | -644.25607  | 38.09164    | 1 |
| 243 | H | 79.19256 | 68.66892 | 73.42380 | -1691.16043 | -1535.97525 | -1484.73099 | 1 |
| 244 | C | 81.28773 | 68.16378 | 73.13884 | 542.66492   | 350.14337   | 454.42563   | 1 |
| 245 | H | 81.64911 | 68.63214 | 72.19500 | 1209.57979  | -2396.95920 | 463.86744   | 1 |

|     |   |          |          |          |             |             |             |   |
|-----|---|----------|----------|----------|-------------|-------------|-------------|---|
| 246 | C | 81.53103 | 69.01330 | 74.36250 | -737.14309  | 145.93010   | 242.71942   | 1 |
| 247 | H | 80.88163 | 68.62775 | 75.18050 | -1050.18303 | 159.36419   | -2509.06125 | 1 |
| 248 | C | 82.97411 | 68.92986 | 74.82971 | -706.77696  | -252.88343  | -245.16230  | 1 |
| 249 | H | 83.13979 | 69.50578 | 75.78148 | -1624.64039 | -1665.49085 | 1417.86935  | 1 |
| 250 | H | 83.28864 | 67.86448 | 75.01931 | 2566.10521  | 598.51109   | 693.22305   | 1 |
| 251 | H | 83.68008 | 69.34524 | 74.05876 | -1972.69758 | 107.10018   | -1876.34312 | 1 |
| 252 | C | 81.17083 | 70.46865 | 74.12314 | 412.85148   | 672.58832   | -27.69222   | 1 |
| 253 | H | 81.36896 | 71.10068 | 75.03243 | 1447.02277  | 1762.76533  | -1490.78944 | 1 |
| 254 | H | 81.76452 | 70.90884 | 73.27515 | 1320.77379  | -145.20455  | 2378.68491  | 1 |
| 255 | H | 80.07437 | 70.58426 | 73.86417 | -1512.10848 | 1470.52031  | 1724.75147  | 1 |
| 256 | C | 81.96156 | 66.67511 | 73.35077 | -607.11113  | 499.56689   | 73.73769    | 1 |
| 257 | O | 83.15544 | 66.53265 | 73.16622 | 357.97126   | 460.81534   | 356.68785   | 1 |
| 258 | N | 81.09543 | 65.79047 | 73.81163 | 536.55407   | -368.62270  | 332.76306   | 1 |
| 259 | H | 80.14150 | 66.13086 | 73.91701 | 524.38866   | 2297.69985  | 1367.20941  | 1 |
| 260 | C | 81.52193 | 64.45767 | 74.04555 | 46.50277    | -774.29190  | -147.97904  | 1 |
| 261 | H | 82.50673 | 64.39874 | 73.52612 | 1676.51875  | 1883.29066  | 1032.55549  | 1 |
| 262 | C | 81.64703 | 64.17732 | 75.63373 | -559.41456  | -34.19198   | -556.30433  | 1 |
| 263 | H | 80.64324 | 64.28601 | 76.10788 | -64.66664   | 395.18769   | 2695.05373  | 1 |
| 264 | H | 81.94399 | 63.11418 | 75.79651 | -2703.44278 | -60.40056   | 333.79418   | 1 |
| 265 | C | 82.63263 | 65.10717 | 76.28398 | -519.76435  | 377.31045   | 459.42366   | 1 |
| 266 | H | 82.26384 | 66.15085 | 76.16099 | -1746.74323 | 1667.50644  | -1261.73691 | 1 |
| 267 | C | 82.74745 | 64.80040 | 77.77321 | 570.95554   | 16.46261    | -545.27700  | 1 |
| 268 | H | 83.45200 | 65.50356 | 78.28728 | 2391.58273  | 28.05277    | -1305.07271 | 1 |
| 269 | H | 81.75822 | 64.88194 | 78.29216 | 175.75588   | 917.63458   | 2559.43867  | 1 |
| 270 | H | 83.12997 | 63.76250 | 77.95068 | -1063.97851 | -2155.34650 | 1283.00462  | 1 |
| 271 | C | 84.01031 | 65.00627 | 75.64566 | 193.76014   | 2.62946     | -765.53141  | 1 |
| 272 | H | 84.78053 | 65.57318 | 76.22977 | 507.39394   | -846.55087  | 2539.60089  | 1 |
| 273 | H | 84.36127 | 63.94422 | 75.57767 | 1337.57841  | 1818.19054  | 1526.01994  | 1 |
| 274 | H | 84.00426 | 65.43673 | 74.59530 | 1100.88635  | -1172.91350 | -2199.08909 | 1 |
| 275 | C | 80.38920 | 63.48592 | 73.45256 | -549.21115  | 475.64486   | -309.38218  | 1 |
| 276 | O | 80.11667 | 62.44103 | 73.98531 | 556.06106   | -390.37755  | -78.24250   | 1 |
| 277 | O | 79.79403 | 63.84460 | 72.22163 | -572.27940  | -310.19032  | -209.75862  | 1 |
| 278 | H | 80.19481 | 64.75251 | 72.10358 | -1380.08193 | 2212.14486  | 790.85944   | 1 |

Listing 18: C00018.xmolout

|    | 276      |          |          |          |             |             |             |          |   |
|----|----------|----------|----------|----------|-------------|-------------|-------------|----------|---|
|    | 150.0000 | 150.0000 | 150.0000 | 0.0000   | 0.0000      | 0.0000***** | 2.7750      | 11100    |   |
|    | 0.2500   | 300.00   | 0.00     | 0.00     | 0.00        | -1294.0746  | 0.0000      | 300.0000 |   |
| 3  | H        | 82.46862 | 61.03615 | 72.92558 | -2043.14101 | -1757.64893 | 399.89339   |          | 1 |
| 4  | N        | 82.53466 | 61.20196 | 71.92144 | 426.75047   | 490.45733   | -334.42467  |          | 1 |
| 5  | H        | 81.60387 | 61.56208 | 71.71056 | 442.25559   | -1110.30854 | -2448.52907 |          | 1 |
| 6  | C        | 83.59720 | 62.05695 | 71.54210 | 415.32972   | -666.39213  | 83.73172    |          | 1 |
| 7  | H        | 84.39788 | 61.81344 | 72.27293 | 879.32219   | 2491.00447  | 667.35213   |          | 1 |
| 8  | C        | 84.01145 | 61.70600 | 70.02462 | 31.35357    | 477.41777   | 628.23362   |          | 1 |
| 9  | H        | 83.12890 | 61.82920 | 69.35274 | 1168.38489  | 2240.25337  | -1019.71136 |          | 1 |
| 10 | H        | 84.77573 | 62.43659 | 69.66731 | -360.43770  | 2534.90498  | 931.67112   |          | 1 |
| 11 | C        | 84.52834 | 60.29687 | 69.89541 | 463.18208   | 512.70242   | -382.34388  |          | 1 |
| 12 | H        | 83.75696 | 59.60359 | 70.30061 | 1725.29117  | 1863.52247  | -987.07854  |          | 1 |
| 13 | C        | 84.75829 | 59.96828 | 68.42444 | 710.42801   | -144.27427  | -313.15367  |          | 1 |
| 14 | H        | 85.11436 | 58.91530 | 68.28337 | 364.20195   | -1033.13725 | 2494.72524  |          | 1 |
| 15 | H        | 83.82144 | 60.08639 | 67.82123 | 2567.61904  | 335.80679   | 847.48802   |          | 1 |
| 16 | H        | 85.53009 | 60.64166 | 67.96972 | -2587.99029 | 680.92867   | -512.16411  |          | 1 |
| 17 | C        | 85.82379 | 60.07982 | 70.66428 | 268.17616   | 741.64379   | -40.42634   |          | 1 |
| 18 | H        | 86.23775 | 59.05227 | 70.49130 | 1283.54314  | -1945.37420 | -1411.27812 |          | 1 |
| 19 | H        | 86.61487 | 60.81108 | 70.35543 | -1258.57796 | 1317.15249  | -2026.02085 |          | 1 |
| 20 | H        | 85.67602 | 60.19366 | 71.76904 | -2502.84526 | 909.80597   | 575.92391   |          | 1 |
| 21 | C        | 83.05603 | 63.59109 | 71.72360 | 619.36578   | -458.64843  | -172.09273  |          | 1 |
| 22 | O        | 83.21594 | 64.26122 | 72.91384 | -81.40433   | 433.87611   | 522.34594   |          | 1 |
| 23 | N        | 82.45865 | 64.05993 | 70.74600 | 175.23996   | -622.20190  | 341.55523   |          | 1 |
| 24 | H        | 82.42773 | 63.40092 | 69.97569 | -876.57256  | -303.22879  | -2561.90213 |          | 1 |
| 25 | C        | 83.87059 | 66.28440 | 71.39087 | -571.88214  | -534.10783  | -106.15033  |          | 1 |

|    |   |          |          |          |             |             |             |   |
|----|---|----------|----------|----------|-------------|-------------|-------------|---|
| 26 | H | 84.96888 | 66.19500 | 71.54866 | -2713.20841 | -16.25800   | -248.80809  | 1 |
| 27 | C | 80.90006 | 67.17024 | 69.91478 | 166.60354   | 288.16399   | -716.09568  | 1 |
| 28 | H | 81.25383 | 65.31339 | 72.01758 | -2097.85574 | 1636.78449  | -586.18044  | 1 |
| 29 | O | 83.37747 | 66.37513 | 67.78090 | -317.80580  | -363.38227  | 484.43082   | 2 |
| 30 | H | 82.71245 | 66.21938 | 68.43937 | 1863.74748  | -1451.84923 | 1357.29467  | 2 |
| 31 | C | 80.79417 | 68.31137 | 70.70769 | 503.80731   | 517.99032   | 318.51606   | 1 |
| 32 | H | 80.78062 | 69.18311 | 68.33914 | 640.61020   | -2157.10410 | -1536.29104 | 3 |
| 33 | H | 79.64966 | 69.02912 | 72.43645 | 1687.88455  | 465.60692   | 2087.56452  | 1 |
| 34 | H | 84.15078 | 68.04809 | 70.04585 | -1293.07895 | -1899.88581 | -1463.57452 | 1 |
| 35 | C | 83.09196 | 65.92318 | 72.66878 | -153.07550  | -733.68902  | 248.70981   | 1 |
| 36 | O | 81.27348 | 66.17139 | 72.52321 | 186.15459   | -480.78787  | -449.34387  | 1 |
| 37 | N | 83.53398 | 66.58592 | 73.65935 | -487.53139  | 543.18517   | 42.03850    | 1 |
| 38 | C | 82.72054 | 66.91384 | 74.81875 | -699.35871  | 69.34393    | 360.10701   | 1 |
| 39 | H | 81.76899 | 66.34315 | 74.74130 | 2.81126     | -221.99807  | -2715.58072 | 1 |
| 40 | C | 83.67974 | 66.45600 | 75.98549 | -507.46439  | -592.59194  | 122.07761   | 1 |
| 41 | H | 83.39888 | 66.89064 | 76.97170 | -1975.08116 | 525.87560   | -1801.71556 | 1 |
| 42 | H | 83.66387 | 65.34964 | 76.10742 | 1588.27743  | -1913.22100 | 1113.83566  | 1 |
| 43 | C | 85.07611 | 66.94489 | 75.47008 | -613.62442  | -457.55993  | -194.14490  | 1 |
| 44 | H | 85.20225 | 68.04031 | 75.63327 | 1707.54637  | -721.27992  | 1996.92523  | 1 |
| 45 | H | 85.93420 | 66.44899 | 75.97919 | 758.23357   | 2100.81767  | 1560.55011  | 1 |
| 46 | C | 84.99154 | 66.60633 | 73.93366 | -352.41524  | 704.96076   | 49.21465    | 1 |
| 47 | H | 85.45207 | 67.36443 | 73.26053 | 1714.76886  | -2070.42778 | 443.35792   | 1 |
| 48 | H | 85.34751 | 65.58652 | 73.65935 | 1224.15040  | 1801.50881  | 1636.97633  | 1 |
| 49 | C | 82.53148 | 68.52607 | 74.88723 | 566.85117   | 537.05831   | 117.62814   | 1 |
| 50 | O | 83.50779 | 69.26524 | 74.74265 | -550.26779  | -406.08867  | 4.21666     | 1 |
| 51 | N | 81.28033 | 68.83646 | 75.14169 | 566.34832   | -425.77725  | 180.18749   | 1 |
| 52 | H | 80.66565 | 68.02467 | 75.20264 | 644.44502   | 2646.80550  | -52.73430   | 1 |
| 53 | C | 80.82623 | 70.06421 | 75.68491 | 612.34801   | -281.48662  | 411.56221   | 1 |
| 54 | H | 79.78648 | 69.83127 | 76.00296 | 1667.23498  | -1490.75142 | 1556.16753  | 1 |
| 55 | C | 81.77398 | 70.46315 | 76.91048 | -714.45746  | -175.43074  | 286.98927   | 1 |
| 56 | H | 82.84026 | 70.48905 | 76.54761 | -787.09484  | 1763.03619  | -1922.46060 | 1 |
| 57 | O | 81.76229 | 69.56717 | 78.03569 | -429.46514  | 516.51932   | -128.40526  | 1 |
| 58 | H | 82.70405 | 69.30578 | 78.07884 | 1981.82785  | 436.16847   | -1818.18182 | 1 |
| 59 | C | 81.27954 | 71.93138 | 77.18278 | 630.79189   | -468.94448  | 76.03230    | 1 |
| 60 | H | 81.92337 | 72.45305 | 77.92844 | -1775.71861 | 2062.30353  | 131.89849   | 1 |
| 61 | H | 81.28262 | 72.54355 | 76.24453 | -1855.14608 | 88.94118    | 1993.53760  | 1 |
| 62 | H | 80.23740 | 71.94356 | 77.57882 | -1504.82350 | -780.94249  | -2132.90992 | 1 |
| 63 | C | 80.85879 | 71.30715 | 74.61074 | 288.57638   | 618.62814   | -397.00270  | 1 |
| 64 | O | 79.89437 | 72.02408 | 74.50553 | 321.70495   | -185.26452  | 574.37218   | 1 |
| 65 | N | 82.06603 | 71.43848 | 74.07146 | -447.05792  | -446.53431  | 367.76425   | 1 |
| 66 | H | 82.81651 | 70.73307 | 74.30617 | 350.31316   | 1975.63644  | -1843.31522 | 1 |
| 67 | C | 82.17027 | 72.20916 | 72.86732 | -511.23061  | 374.03917   | -471.51480  | 1 |
| 68 | H | 81.84437 | 73.23629 | 73.14123 | 2234.79579  | -898.70890  | -1273.45190 | 1 |
| 69 | C | 83.70761 | 72.07966 | 72.47696 | 529.53781   | -159.34528  | 563.72604   | 1 |
| 70 | H | 83.91193 | 72.77147 | 71.61721 | 654.59388   | 2347.94251  | 1217.51488  | 1 |
| 71 | H | 84.29679 | 72.46398 | 73.35098 | -1526.55661 | 2103.42026  | 817.87394   | 1 |
| 72 | O | 84.17200 | 70.74930 | 72.10291 | -554.84278  | 14.12789    | 399.58769   | 1 |
| 73 | H | 84.13421 | 70.31348 | 72.97684 | 1297.06236  | 2061.84854  | 1220.68812  | 1 |
| 74 | C | 81.20951 | 71.59168 | 71.70670 | -662.15484  | -412.13544  | 123.62687   | 1 |
| 75 | O | 80.87131 | 72.30398 | 70.75424 | -540.01537  | -317.05804  | 274.91456   | 1 |
| 76 | N | 81.02929 | 70.30739 | 71.90202 | -202.76299  | -690.00100  | -131.49145  | 1 |
| 77 | H | 81.52746 | 70.04048 | 72.75490 | -702.62132  | -2617.37191 | 281.70413   | 1 |
| 78 | C | 80.00754 | 69.39202 | 71.44201 | -491.73914  | 576.34187   | 222.73509   | 1 |
| 79 | H | 81.19198 | 69.66624 | 68.75394 | 1977.17978  | -1823.58850 | -434.68928  | 3 |
| 80 | C | 82.05063 | 67.73178 | 70.49562 | -649.50797  | -328.66843  | 306.11224   | 1 |
| 81 | H | 80.31448 | 66.43047 | 72.43414 | 2075.07803  | 1452.16490  | -1004.45904 | 1 |
| 82 | C | 80.19826 | 66.07580 | 69.15706 | -615.18735  | -489.99689  | -70.96352   | 1 |
| 83 | H | 80.41701 | 65.07075 | 69.59983 | -1226.32661 | -1724.38906 | -1716.47170 | 1 |
| 84 | H | 79.08806 | 66.21850 | 69.16457 | 2381.64273  | -969.84735  | 900.46860   | 1 |
| 85 | H | 80.52865 | 66.03103 | 68.08892 | 2122.74991  | 1702.23946  | -141.36228  | 1 |
| 86 | C | 83.49644 | 67.75361 | 70.89918 | -501.86074  | -479.61276  | -376.42482  | 1 |
| 87 | H | 83.60026 | 65.55345 | 70.59089 | 993.79261   | -2246.95401 | -1177.81305 | 1 |

|     |   |          |          |          |             |             |             |   |
|-----|---|----------|----------|----------|-------------|-------------|-------------|---|
| 88  | H | 83.70686 | 67.22557 | 68.04038 | 42.71279    | -626.15391  | -2651.37258 | 2 |
| 89  | H | 83.67244 | 68.51251 | 71.70247 | -2026.39012 | -1590.33709 | -887.82922  | 1 |
| 90  | C | 78.71856 | 69.76835 | 70.47107 | -672.89153  | 382.57394   | -156.34072  | 1 |
| 91  | O | 77.84486 | 68.93495 | 70.45390 | 410.04627   | 221.86223   | 500.35950   | 1 |
| 92  | N | 78.87838 | 70.83842 | 69.72688 | -378.11782  | -443.79414  | -441.10984  | 1 |
| 93  | H | 79.74165 | 71.43460 | 69.85768 | 2404.15973  | -568.14894  | 1149.30085  | 1 |
| 94  | C | 77.70142 | 71.48360 | 69.21807 | -544.54484  | 466.16019   | 331.29119   | 1 |
| 95  | H | 78.12209 | 72.24015 | 68.51971 | -1409.80988 | -170.17955  | 2325.32679  | 1 |
| 96  | C | 76.75850 | 70.41382 | 68.52890 | -184.48284  | 116.78282   | -758.89137  | 1 |
| 97  | H | 77.31654 | 69.84925 | 67.74643 | 1893.78641  | 1861.14652  | 611.04528   | 1 |
| 98  | H | 76.40856 | 69.64830 | 69.27736 | -2170.79665 | -974.19311  | 1327.50117  | 1 |
| 99  | C | 75.52219 | 71.15055 | 67.92297 | 389.51668   | 672.81878   | -138.49152  | 1 |
| 100 | H | 75.01849 | 71.75448 | 68.71304 | 510.64577   | 1933.03327  | 1851.02484  | 1 |
| 101 | H | 75.84102 | 71.89923 | 67.16501 | -2302.30869 | -1105.72939 | -948.89774  | 1 |
| 102 | C | 74.48297 | 70.14937 | 67.29089 | -559.93427  | -126.34590  | 542.30857   | 1 |
| 103 | O | 73.45899 | 70.57687 | 66.82348 | -670.36003  | -111.83166  | 76.36448    | 1 |
| 104 | N | 74.86377 | 68.85378 | 67.33297 | -216.06729  | -537.07037  | 446.51379   | 1 |
| 105 | H | 75.70319 | 68.42612 | 67.74133 | -1251.96487 | 1074.12894  | -2168.52500 | 1 |
| 106 | H | 74.28468 | 68.07685 | 66.99664 | -2451.83023 | -720.73851  | 944.84612   | 1 |
| 107 | C | 76.92095 | 72.15214 | 70.48080 | 546.24052   | -563.88337  | -85.11809   | 1 |
| 108 | O | 75.85327 | 71.70231 | 70.83924 | 71.70702    | -307.40463  | 606.69673   | 1 |
| 109 | N | 77.55145 | 73.24874 | 70.91322 | 479.90863   | -504.50129  | 222.86849   | 1 |
| 110 | C | 77.32864 | 73.79064 | 72.22202 | 75.51268    | -600.91904  | 506.73700   | 1 |
| 111 | H | 77.38365 | 72.93871 | 72.93787 | -2033.61562 | 1795.30103  | 254.89480   | 1 |
| 112 | C | 78.50572 | 74.84430 | 72.34532 | 523.79067   | 517.99274   | 284.45581   | 1 |
| 113 | H | 78.31535 | 75.61854 | 73.12299 | 1599.61665  | -1127.00911 | 1895.98173  | 1 |
| 114 | H | 79.46844 | 74.34937 | 72.60739 | -1881.83093 | 1275.82488  | -1501.55016 | 1 |
| 115 | C | 78.53776 | 75.41203 | 70.89193 | -600.05639  | -404.05026  | 316.64485   | 1 |
| 116 | H | 77.66933 | 76.08405 | 70.70140 | -2597.05260 | 496.36221   | 657.73249   | 1 |
| 117 | H | 79.45606 | 75.99512 | 70.65508 | -1666.24518 | 1294.38985  | -1723.90591 | 1 |
| 118 | C | 78.42396 | 74.05717 | 70.07004 | 493.57570   | -129.95376  | -602.56394  | 1 |
| 119 | H | 77.96929 | 74.14752 | 69.05511 | -1469.08415 | -637.84797  | 2204.22581  | 1 |
| 120 | H | 79.38749 | 73.47799 | 70.01406 | -1038.97840 | 1068.88701  | -2280.71789 | 1 |
| 121 | C | 75.87906 | 74.55592 | 72.29069 | 188.88100   | 241.05089   | -727.87821  | 1 |
| 122 | O | 75.58443 | 75.16255 | 73.29333 | 531.88613   | -49.19943   | 427.07960   | 1 |
| 123 | N | 75.20030 | 74.40761 | 71.16216 | 708.14833   | 26.93417    | -179.73509  | 1 |
| 124 | H | 75.63610 | 73.81651 | 70.44988 | -2232.69501 | -1179.09831 | 1023.94816  | 1 |
| 125 | C | 73.86298 | 74.86361 | 71.00748 | -738.32412  | 259.92548   | 104.42456   | 1 |
| 126 | H | 73.56307 | 74.43279 | 70.02584 | 2028.89123  | 1260.02983  | 1311.33324  | 1 |
| 127 | C | 73.04932 | 74.21129 | 72.20993 | -258.65678  | -345.52513  | 661.28459   | 1 |
| 128 | H | 73.54324 | 74.45285 | 73.18012 | -1826.06090 | -1801.46097 | -918.64554  | 1 |
| 129 | C | 71.52327 | 74.55828 | 72.27712 | -541.23400  | 531.92970   | -218.41428  | 1 |
| 130 | H | 70.95440 | 73.76902 | 72.82354 | 1311.73218  | -2219.18200 | 882.19023   | 1 |
| 131 | H | 71.33052 | 75.51602 | 72.82275 | -1048.71298 | 1223.58118  | -2196.97971 | 1 |
| 132 | H | 71.07276 | 74.64281 | 71.25945 | 419.06414   | 1903.92898  | 1903.44670  | 1 |
| 133 | C | 73.12532 | 72.67314 | 71.91698 | -423.86431  | 152.66566   | -648.55262  | 1 |
| 134 | H | 72.77393 | 72.06908 | 72.78635 | 105.68386   | -2342.50080 | 1387.51238  | 1 |
| 135 | H | 72.49121 | 72.39448 | 71.04228 | -1695.63603 | -1484.73621 | -1531.02793 | 1 |
| 136 | H | 74.18564 | 72.34324 | 71.67318 | -1853.57121 | -487.39031  | 1936.59343  | 1 |
| 137 | C | 74.00962 | 76.48600 | 70.90398 | 539.71428   | -510.58232  | 267.58633   | 1 |
| 138 | O | 74.96419 | 77.01396 | 70.37541 | -15.93758   | -278.34085  | -624.49402  | 1 |
| 139 | N | 72.89314 | 77.06844 | 71.33224 | -676.81886  | 12.05292    | 276.17960   | 1 |
| 140 | H | 72.13447 | 76.49975 | 71.70691 | -1694.44250 | -373.84189  | -2100.66098 | 1 |
| 141 | C | 72.87468 | 78.48803 | 71.40544 | 412.33078   | -664.70360  | 108.35451   | 1 |
| 142 | H | 73.87385 | 78.79780 | 71.01192 | 1765.77476  | 1294.44366  | 1621.76594  | 1 |
| 143 | C | 71.66471 | 78.98334 | 70.50570 | -179.66635  | -721.95667  | -264.73915  | 1 |
| 144 | H | 71.67873 | 78.48031 | 69.51310 | -607.34922  | 2587.87032  | -598.10018  | 1 |
| 145 | H | 70.69269 | 78.70558 | 70.97076 | -359.69332  | -1479.13954 | -2259.74260 | 1 |
| 146 | C | 71.78821 | 80.53382 | 70.35180 | -240.01076  | 616.02425   | 431.85322   | 1 |
| 147 | H | 71.82882 | 81.01619 | 71.36278 | -1359.17131 | 782.54425   | 2227.99181  | 1 |
| 148 | H | 72.73566 | 80.81127 | 69.83641 | -820.36667  | 85.81767    | -2596.78715 | 1 |
| 149 | C | 70.53227 | 81.04787 | 69.53897 | -513.07015  | 236.18570   | -551.87280  | 1 |

|     |   |          |          |          |             |             |             |   |
|-----|---|----------|----------|----------|-------------|-------------|-------------|---|
| 150 | H | 70.54281 | 80.65604 | 68.49591 | 1816.11944  | -1183.11722 | -1650.94321 | 1 |
| 151 | H | 69.58617 | 80.67514 | 69.99437 | -1800.04429 | -1361.53473 | 1526.34643  | 1 |
| 152 | C | 70.57276 | 82.59351 | 69.55572 | 726.08972   | -253.19732  | -179.64713  | 1 |
| 153 | H | 70.45525 | 83.04541 | 70.56097 | 1224.27271  | -456.51798  | -2390.90304 | 1 |
| 154 | H | 71.44683 | 83.03948 | 69.04065 | 1206.40339  | -1150.93514 | -2154.90344 | 1 |
| 155 | N | 69.33159 | 83.10238 | 68.74813 | 329.70796   | -633.68968  | -155.67358  | 1 |
| 156 | H | 69.21556 | 84.15565 | 68.70063 | 1348.31305  | 1938.76845  | 1359.00643  | 1 |
| 157 | H | 69.28357 | 82.84049 | 67.72064 | 2096.92035  | 1446.54551  | -966.48890  | 1 |
| 158 | H | 68.37450 | 82.80290 | 69.09596 | -1197.07217 | -2303.53719 | 827.28733   | 1 |
| 159 | C | 72.60041 | 78.92956 | 72.96435 | -378.01186  | -556.17301  | -413.96481  | 1 |
| 160 | O | 72.16127 | 80.04413 | 73.17417 | -409.44433  | -307.55053  | -453.30833  | 1 |
| 161 | N | 72.98286 | 77.99926 | 73.81371 | -429.02477  | 524.70884   | 274.08502   | 1 |
| 162 | H | 73.38931 | 77.16891 | 73.38586 | 1706.34263  | -1425.96036 | 1574.38926  | 1 |
| 163 | C | 72.87752 | 78.10056 | 75.23374 | -45.25864   | -626.22952  | 478.93267   | 1 |
| 164 | H | 73.82448 | 77.66032 | 75.61881 | 1988.63164  | 570.90773   | 1772.87287  | 1 |
| 165 | C | 72.66358 | 79.62141 | 75.60540 | 551.77128   | -20.49526   | -564.54996  | 1 |
| 166 | H | 73.42438 | 80.23567 | 75.06910 | 1434.61535  | -1753.10253 | 1513.99471  | 1 |
| 167 | H | 71.67251 | 79.96593 | 75.21137 | -714.67738  | 1819.09770  | 1898.36494  | 1 |
| 168 | C | 72.71840 | 79.90937 | 77.14276 | 446.99263   | -555.77305  | 338.97221   | 1 |
| 169 | H | 71.85241 | 79.44612 | 77.66981 | 1953.68466  | 1892.25957  | -161.67766  | 1 |
| 170 | H | 73.63762 | 79.49535 | 77.61392 | -403.03785  | 2688.07032  | -188.43591  | 1 |
| 171 | C | 72.67365 | 81.48812 | 77.23295 | 567.86262   | 335.74681   | 434.04421   | 1 |
| 172 | H | 73.57935 | 81.93932 | 76.76664 | -1080.02275 | 1568.26081  | -1948.78900 | 1 |
| 173 | H | 71.80316 | 81.88383 | 76.65980 | -919.54108  | 2111.34692  | 1456.13463  | 1 |
| 174 | C | 72.54871 | 81.89750 | 78.71987 | 195.81897   | 173.33862   | -745.11536  | 1 |
| 175 | H | 71.57953 | 81.60838 | 79.18624 | 1405.67949  | -2301.21089 | -390.08113  | 1 |
| 176 | H | 73.39657 | 81.59491 | 79.36861 | -940.37328  | -1118.32446 | 2299.72133  | 1 |
| 177 | N | 72.47240 | 83.44596 | 78.82035 | 319.26422   | 656.36007   | -42.02424   | 1 |
| 178 | H | 72.07639 | 83.76125 | 79.80711 | 1961.03633  | 619.91968   | 1787.09422  | 1 |
| 179 | H | 73.35918 | 84.01307 | 78.68262 | 854.14343   | -2156.80752 | 1429.08711  | 1 |
| 180 | H | 71.81452 | 83.90656 | 78.12780 | 1237.02905  | -1378.50857 | -1998.28500 | 1 |
| 181 | C | 71.57606 | 77.25429 | 75.74585 | 532.53319   | -268.57236  | 517.55729   | 1 |
| 182 | O | 70.59257 | 77.02306 | 75.06033 | 266.16714   | -290.73804  | -558.88002  | 1 |
| 183 | N | 71.76521 | 76.98681 | 77.02653 | -226.25352  | 640.49678   | -270.32839  | 1 |
| 184 | H | 72.64428 | 77.29276 | 77.43600 | 2007.69063  | -1035.27229 | 1523.50231  | 1 |
| 185 | C | 70.76014 | 76.33763 | 77.80237 | -540.76542  | -573.33303  | 49.50000    | 1 |
| 186 | H | 70.23559 | 75.71942 | 77.03772 | -2374.20950 | -1036.76023 | 843.75774   | 1 |
| 187 | C | 71.48973 | 75.51793 | 78.96211 | -77.09082   | 666.87422   | -415.84136  | 1 |
| 188 | H | 71.90589 | 76.24921 | 79.70755 | -985.81834  | 617.19825   | 2463.91927  | 1 |
| 189 | O | 72.59423 | 74.69360 | 78.54400 | 293.29899   | -391.65602  | -477.80926  | 1 |
| 190 | H | 73.32775 | 75.08168 | 79.06060 | 2528.72714  | -681.76262  | -751.27122  | 1 |
| 191 | C | 70.28977 | 74.74054 | 79.61784 | 252.47363   | -605.14473  | 440.05134   | 1 |
| 192 | H | 70.62243 | 74.16289 | 80.51149 | -2052.65063 | 1456.49051  | -1043.51830 | 1 |
| 193 | H | 69.47738 | 75.43138 | 79.95247 | -2152.98800 | -1661.97574 | -161.70652  | 1 |
| 194 | H | 69.83838 | 74.01221 | 78.90497 | -473.12726  | -1584.27339 | 2165.61725  | 1 |
| 195 | C | 69.79963 | 77.50965 | 78.40876 | 360.36307   | 488.46713   | 505.10056   | 1 |
| 196 | O | 69.51457 | 77.58929 | 79.59239 | -200.08817  | -528.03552  | -385.82850  | 1 |
| 197 | N | 69.40255 | 78.24449 | 77.39266 | -597.54095  | -226.44775  | 355.20479   | 1 |
| 198 | H | 69.70316 | 77.96640 | 76.44130 | 2179.23655  | -1300.70981 | -991.33835  | 1 |
| 199 | C | 68.51363 | 79.33108 | 77.55981 | -687.68921  | 297.39807   | -249.45179  | 1 |
| 200 | H | 68.36361 | 79.68963 | 76.51809 | -349.16256  | -2467.37713 | -1101.72831 | 1 |
| 201 | C | 67.16857 | 78.78297 | 78.23493 | 672.47345   | 361.54328   | -201.62880  | 1 |
| 202 | H | 67.38790 | 78.34447 | 79.23583 | 1541.41502  | 582.18425   | 2169.97026  | 1 |
| 203 | H | 66.45959 | 79.62768 | 78.39261 | -2534.67717 | 60.25153    | 997.72295   | 1 |
| 204 | C | 66.54791 | 77.70921 | 77.33090 | 574.26774   | -389.43119  | -377.02542  | 1 |
| 205 | C | 65.77989 | 78.07818 | 76.18594 | 688.82679   | -287.33580  | -257.96133  | 1 |
| 206 | H | 65.62924 | 79.14130 | 75.92497 | 331.14182   | 1470.38163  | 2269.80013  | 1 |
| 207 | C | 66.75601 | 76.33260 | 77.64882 | -383.52382  | -675.04808  | 144.24917   | 1 |
| 208 | H | 67.36821 | 76.04602 | 78.52326 | 4.09847     | 1517.59662  | 2262.86397  | 1 |
| 209 | C | 65.22157 | 77.06616 | 75.40522 | -134.76730  | 428.45285   | -649.50303  | 1 |
| 210 | H | 64.62362 | 77.34977 | 74.52168 | -903.23433  | 1600.49020  | 2011.53387  | 1 |
| 211 | C | 66.17352 | 75.35632 | 76.83760 | -335.53281  | -615.00040  | -364.39058  | 1 |



|     |   |          |          |          |             |             |             |   |
|-----|---|----------|----------|----------|-------------|-------------|-------------|---|
| 212 | H | 66.33496 | 74.29561 | 77.09808 | 1596.45398  | -1369.33862 | 1732.02659  | 1 |
| 213 | C | 65.38504 | 75.68031 | 75.69470 | 585.48547   | -340.24194  | -406.23938  | 1 |
| 214 | O | 64.78430 | 74.69655 | 74.86667 | -419.15649  | -173.04408  | -511.94141  | 1 |
| 215 | H | 65.08012 | 73.88092 | 75.33575 | -1071.84350 | 1559.71507  | -1960.13012 | 1 |
| 216 | C | 69.20124 | 80.47398 | 78.51612 | 291.41878   | -183.13091  | 710.72246   | 1 |
| 217 | O | 69.64670 | 81.45324 | 77.97983 | 379.87695   | 523.47396   | -222.23622  | 1 |
| 218 | N | 69.08196 | 80.17370 | 79.80630 | 564.30591   | 373.09380   | 277.24371   | 1 |
| 219 | H | 68.83210 | 79.18969 | 80.04801 | -120.59931  | -2436.07824 | -1214.35098 | 1 |
| 220 | C | 69.69954 | 80.95583 | 80.84282 | 404.07514   | -299.37480  | 608.84009   | 1 |
| 221 | H | 68.99288 | 80.76258 | 81.68116 | -1071.07882 | -841.69025  | 2359.66467  | 1 |
| 222 | C | 71.08838 | 80.25135 | 81.14865 | -683.12807  | 68.71770    | -390.13096  | 1 |
| 223 | H | 70.94373 | 79.15809 | 81.30304 | 2068.88918  | 1596.58590  | 770.89603   | 1 |
| 224 | H | 71.77670 | 80.32947 | 80.27798 | 1379.86429  | 2342.49779  | -179.85638  | 1 |
| 225 | C | 71.71152 | 80.91865 | 82.41346 | -176.39967  | 537.49466   | 550.97268   | 1 |
| 226 | H | 71.76914 | 82.02861 | 82.28578 | -396.28051  | 1942.22168  | 1869.33314  | 1 |
| 227 | H | 71.07167 | 80.75170 | 83.30910 | -94.44700   | 586.00678   | -2659.20016 | 1 |
| 228 | C | 73.17221 | 80.30865 | 82.62438 | -291.69381  | -718.18079  | -150.72929  | 1 |
| 229 | H | 73.21658 | 79.21115 | 82.84116 | -2303.38776 | 1089.76242  | 964.62032   | 1 |
| 230 | H | 73.90822 | 80.52817 | 81.80929 | 884.16729   | 2568.80533  | -207.74283  | 1 |
| 231 | N | 73.58903 | 80.99581 | 83.77560 | -594.49522  | -252.81478  | 342.29276   | 1 |
| 232 | H | 72.95064 | 81.67684 | 84.15707 | -1735.17426 | 2084.05705  | -263.71605  | 1 |
| 233 | C | 74.70384 | 80.82110 | 84.36058 | 595.23177   | -271.52487  | 442.22352   | 1 |
| 234 | N | 75.58261 | 79.87580 | 83.82002 | 585.53813   | -424.79750  | -105.81303  | 1 |
| 235 | H | 75.47022 | 79.28444 | 82.99767 | 959.88797   | 1327.56823  | -2177.11905 | 1 |
| 236 | H | 76.50285 | 79.65090 | 84.19949 | 1578.48647  | 16.27378    | -2220.76233 | 1 |
| 237 | N | 74.82355 | 81.65504 | 85.48168 | -452.17763  | -390.33541  | -421.51853  | 1 |
| 238 | H | 74.18167 | 82.34095 | 85.87630 | 470.26107   | 1974.25629  | -1817.92087 | 1 |
| 239 | H | 75.64546 | 81.66145 | 86.08685 | 1856.67307  | -1573.97321 | -1224.35416 | 1 |
| 240 | C | 69.81840 | 82.52333 | 80.49854 | -531.47271  | -581.45780  | -55.06206   | 1 |
| 241 | O | 70.87528 | 83.13028 | 80.73743 | -243.00837  | 192.73507   | 609.52485   | 1 |
| 242 | N | 68.67958 | 83.04456 | 80.09610 | 343.49288   | -644.25607  | 38.09164    | 1 |
| 243 | H | 67.95127 | 82.34527 | 79.94812 | -1691.16043 | -1535.97525 | -1484.73099 | 1 |
| 244 | C | 68.63590 | 84.37694 | 79.49355 | 542.66492   | 350.14337   | 454.42563   | 1 |
| 245 | H | 69.60819 | 84.46609 | 78.95383 | 1209.57979  | -2396.95920 | 463.86744   | 1 |
| 246 | C | 67.40740 | 84.48706 | 78.60637 | -737.14309  | 145.93010   | 242.71942   | 1 |
| 247 | H | 66.52467 | 84.16677 | 79.20343 | -1050.18303 | 159.36419   | -2509.06125 | 1 |
| 248 | C | 67.17484 | 85.91808 | 78.15701 | -706.77696  | -252.88343  | -245.16230  | 1 |
| 249 | H | 66.22502 | 86.02124 | 77.56309 | -1624.64039 | -1665.49085 | 1417.86935  | 1 |
| 250 | H | 67.10189 | 86.62066 | 79.03279 | 2566.10521  | 598.51109   | 693.22305   | 1 |
| 251 | H | 68.01651 | 86.28987 | 77.51015 | -1972.69758 | 107.10018   | -1876.34312 | 1 |
| 252 | C | 67.50300 | 83.57663 | 77.39618 | 412.85148   | 672.58832   | -27.69222   | 1 |
| 253 | H | 66.58430 | 83.64008 | 76.74987 | 1447.02277  | 1762.76533  | -1490.78944 | 1 |
| 254 | H | 68.38540 | 83.84338 | 76.75100 | 1320.77379  | -145.20455  | 2378.68491  | 1 |
| 255 | H | 67.63403 | 82.49902 | 77.69681 | -1512.10848 | 1470.52031  | 1724.75147  | 1 |
| 256 | C | 68.52439 | 85.49432 | 80.72063 | -607.11113  | 499.56689   | 73.73769    | 1 |
| 257 | O | 69.09097 | 86.55947 | 80.61036 | 357.97126   | 460.81534   | 356.68785   | 1 |
| 258 | N | 67.67325 | 85.10499 | 81.65450 | 536.55407   | -368.62270  | 332.76306   | 1 |
| 259 | H | 67.30995 | 84.15658 | 81.57198 | 524.38866   | 2297.69985  | 1367.20941  | 1 |
| 260 | C | 67.59921 | 85.85468 | 82.85594 | 46.50277    | -774.29190  | -147.97904  | 1 |
| 261 | H | 68.47261 | 86.54490 | 82.81112 | 1676.51875  | 1883.29066  | 1032.55549  | 1 |
| 262 | C | 66.19112 | 86.64580 | 82.92520 | -559.41456  | -34.19198   | -556.30433  | 1 |
| 263 | H | 65.35641 | 85.90643 | 82.96081 | -64.66664   | 395.18769   | 2695.05373  | 1 |
| 264 | H | 66.12536 | 87.22379 | 83.87753 | -2703.44278 | -60.40056   | 333.79418   | 1 |
| 265 | C | 66.02518 | 87.55646 | 81.73995 | -519.76435  | 377.31045   | 459.42366   | 1 |
| 266 | H | 66.07971 | 86.93602 | 80.81718 | -1746.74323 | 1667.50644  | -1261.73691 | 1 |
| 267 | C | 64.66671 | 88.24687 | 81.77845 | 570.95554   | 16.46261    | -545.27700  | 1 |
| 268 | H | 64.51833 | 88.91581 | 80.89193 | 2391.58273  | 28.05277    | -1305.07271 | 1 |
| 269 | H | 63.82540 | 87.50731 | 81.78076 | 175.75588   | 917.63458   | 2559.43867  | 1 |
| 270 | H | 64.55271 | 88.88207 | 82.69402 | -1063.97851 | -2155.34650 | 1283.00462  | 1 |
| 271 | C | 67.12387 | 88.60745 | 81.67736 | 193.76014   | 2.62946     | -765.53141  | 1 |
| 272 | H | 66.91227 | 89.38148 | 80.89510 | 507.39394   | -846.55087  | 2539.60089  | 1 |
| 273 | H | 67.24296 | 89.14585 | 82.65292 | 1337.57841  | 1818.19054  | 1526.01994  | 1 |

|     |   |          |          |          |             |             |             |   |
|-----|---|----------|----------|----------|-------------|-------------|-------------|---|
| 274 | H | 68.12074 | 88.13630 | 81.41649 | 1100.88635  | -1172.91350 | -2199.08909 | 1 |
| 275 | C | 67.61087 | 84.78877 | 84.06491 | -549.21115  | 475.64486   | -309.38218  | 1 |
| 276 | O | 67.31776 | 83.62981 | 83.92705 | 556.06106   | -390.37755  | -78.24250   | 1 |
| 277 | O | 67.87827 | 85.31842 | 85.35012 | -572.27940  | -310.19032  | -209.75862  | 1 |
| 278 | H | 68.05385 | 86.26561 | 85.09322 | -1380.08193 | 2212.14486  | 790.85944   | 1 |

Listing 19: C00019.xmolout

|    |          |          |          |          |             |             |             |          |
|----|----------|----------|----------|----------|-------------|-------------|-------------|----------|
| 1  | 276      |          |          |          |             |             |             |          |
| 2  | 150.0000 | 150.0000 | 150.0000 | 0.0000   | 0.0000      | 0.0000***** | 1.5875      | 6350     |
|    | 0.2500   | 300.00   | 0.00     | 0.00     | 0.00        | -1294.0657  | 0.0000      | 300.0000 |
| 3  | H        | 69.78210 | 73.61447 | 67.11124 | -2043.14101 | -1757.64893 | 399.89339   | 1        |
| 4  | N        | 70.77008 | 73.85433 | 67.04981 | 426.75047   | 490.45733   | -334.42467  | 1        |
| 5  | H        | 71.01159 | 73.51292 | 66.11992 | 442.25559   | -1110.30854 | -2448.52907 | 1        |
| 6  | C        | 71.06397 | 75.22668 | 67.22701 | 415.32972   | -666.39213  | 83.73172    | 1        |
| 7  | H        | 70.35683 | 75.63511 | 67.98304 | 879.32219   | 2491.00447  | 667.35213   | 1        |
| 8  | C        | 72.59742 | 75.32217 | 67.63800 | 31.35357    | 477.41777   | 628.23362   | 1        |
| 9  | H        | 73.20713 | 74.66050 | 66.98365 | 1168.38489  | 2240.25337  | -1019.71136 | 1        |
| 10 | H        | 72.98960 | 76.35342 | 67.48759 | -360.43770  | 2534.90498  | 931.67112   | 1        |
| 11 | C        | 72.73932 | 74.89609 | 69.13711 | 463.18208   | 512.70242   | -382.34388  | 1        |
| 12 | H        | 72.20146 | 73.94011 | 69.32339 | 1725.29117  | 1863.52247  | -987.07854  | 1        |
| 13 | C        | 74.27070 | 74.74100 | 69.45953 | 710.42801   | -144.27427  | -313.15367  | 1        |
| 14 | H        | 74.43192 | 74.31757 | 70.47704 | 364.20195   | -1033.13725 | 2494.72524  | 1        |
| 15 | H        | 74.77258 | 74.05430 | 68.73913 | 2567.61904  | 335.80679   | 847.48802   | 1        |
| 16 | H        | 74.81031 | 75.71905 | 69.41639 | -2587.99029 | 680.92867   | -512.16411  | 1        |
| 17 | C        | 72.16545 | 76.05420 | 70.03144 | 268.17616   | 741.64379   | -40.42634   | 1        |
| 18 | H        | 72.42223 | 75.90076 | 71.10310 | 1283.54314  | -1945.37420 | -1411.27812 | 1        |
| 19 | H        | 72.57743 | 77.04532 | 69.72931 | -1258.57796 | 1317.15249  | -2026.02085 | 1        |
| 20 | H        | 71.05503 | 76.12174 | 69.96364 | -2502.84526 | 909.80597   | 575.92391   | 1        |
| 21 | C        | 70.95202 | 75.92236 | 65.73956 | 619.36578   | -458.64843  | -172.09273  | 1        |
| 22 | O        | 71.42768 | 75.41965 | 64.74779 | -81.40433   | 433.87611   | 522.34594   | 1        |
| 23 | N        | 70.35118 | 77.09725 | 65.88204 | 175.23996   | -622.20190  | 341.55523   | 1        |
| 24 | H        | 69.97228 | 77.34230 | 66.79500 | -876.57256  | -303.22879  | -2561.90213 | 1        |
| 25 | C        | 70.24591 | 77.94617 | 64.74263 | -571.88214  | -534.10783  | -106.15033  | 1        |
| 26 | H        | 70.29492 | 77.21553 | 63.90078 | -2713.20841 | -16.25800   | -248.80809  | 1        |
| 27 | C        | 68.86081 | 78.74375 | 64.84773 | 166.60354   | 288.16399   | -716.09568  | 1        |
| 28 | H        | 68.94867 | 79.53770 | 65.63775 | -2097.85574 | 1636.78449  | -586.18044  | 1        |
| 29 | O        | 67.71053 | 77.95544 | 65.19788 | -317.80580  | -363.38227  | 484.43082   | 1        |
| 30 | H        | 67.41531 | 78.40571 | 66.01529 | 1863.74748  | -1451.84923 | 1357.29467  | 1        |
| 31 | C        | 68.79698 | 79.44330 | 63.44083 | 503.80731   | 517.99032   | 318.51606   | 1        |
| 32 | H        | 67.90140 | 80.10099 | 63.35326 | 640.61020   | -2157.10410 | -1536.29104 | 1        |
| 33 | H        | 69.69512 | 80.07733 | 63.24691 | 1687.88455  | 465.60692   | 2087.56452  | 1        |
| 34 | H        | 68.73743 | 78.69318 | 62.61815 | -1293.07895 | -1899.88581 | -1463.57452 | 1        |
| 35 | C        | 71.49283 | 79.00237 | 64.66745 | -153.07550  | -733.68902  | 248.70981   | 1        |
| 36 | O        | 71.82346 | 79.30726 | 63.54888 | 186.15459   | -480.78787  | -449.34387  | 1        |
| 37 | N        | 71.93257 | 79.52480 | 65.82386 | -487.53139  | 543.18517   | 42.03850    | 1        |
| 38 | C        | 73.04339 | 80.42549 | 65.81497 | -699.35871  | 69.34393    | 360.10701   | 1        |
| 39 | H        | 73.08274 | 80.90071 | 64.80635 | 2.81126     | -221.99807  | -2715.58072 | 1        |
| 40 | C        | 72.65488 | 81.37750 | 67.03364 | -507.46439  | -592.59194  | 122.07761   | 1        |
| 41 | H        | 73.52441 | 81.94908 | 67.42740 | -1975.08116 | 525.87560   | -1801.71556 | 1        |
| 42 | H        | 71.89278 | 82.12798 | 66.72812 | 1588.27743  | -1913.22100 | 1113.83566  | 1        |
| 43 | C        | 72.06740 | 80.37021 | 68.06791 | -613.62442  | -457.55993  | -194.14490  | 1        |
| 44 | H        | 72.87646 | 79.89165 | 68.66799 | 1707.54637  | -721.27992  | 1996.92523  | 1        |
| 45 | H        | 71.38008 | 80.84732 | 68.80220 | 758.23357   | 2100.81767  | 1560.55011  | 1        |
| 46 | C        | 71.33964 | 79.30856 | 67.13535 | -352.41524  | 704.96076   | 49.21465    | 1        |
| 47 | H        | 71.55189 | 78.24690 | 67.40107 | 1714.76886  | -2070.42778 | 443.35792   | 1        |
| 48 | H        | 70.24090 | 79.45306 | 67.02386 | 1224.15040  | 1801.50881  | 1636.97633  | 1        |
| 49 | C        | 74.40541 | 79.61807 | 66.21130 | 566.85117   | 537.05831   | 117.62814   | 1        |
| 50 | O        | 74.42597 | 78.69779 | 67.02304 | -550.26779  | -406.08867  | 4.21666     | 1        |
| 51 | N        | 75.41676 | 80.21151 | 65.61895 | 566.34832   | -425.77725  | 180.18749   | 1        |
| 52 | H        | 75.21960 | 80.98134 | 64.98381 | 644.44502   | 2646.80550  | -52.73430   | 1        |
| 53 | C        | 76.68878 | 79.55305 | 65.65615 | 612.34801   | -281.48662  | 411.56221   | 1        |

|     |   |          |          |          |             |             |             |   |
|-----|---|----------|----------|----------|-------------|-------------|-------------|---|
| 54  | H | 76.39932 | 78.47988 | 65.59110 | 1667.23498  | -1490.75142 | 1556.16753  | 1 |
| 55  | C | 77.58012 | 80.09019 | 64.45019 | -714.45746  | -175.43074  | 286.98927   | 1 |
| 56  | H | 77.78389 | 81.18401 | 64.60995 | -787.09484  | 1763.03619  | -1922.46060 | 1 |
| 57  | O | 76.99091 | 79.96795 | 63.14255 | -429.46514  | 516.51932   | -128.40526  | 1 |
| 58  | H | 76.96074 | 80.90115 | 62.85455 | 1981.82785  | 436.16847   | -1818.18182 | 1 |
| 59  | C | 78.90870 | 79.27598 | 64.67379 | 630.79189   | -468.94448  | 76.03230    | 1 |
| 60  | H | 79.69438 | 79.57125 | 63.94063 | -1775.71861 | 2062.30353  | 131.89849   | 1 |
| 61  | H | 79.33078 | 79.43825 | 65.69427 | -1855.14608 | 88.94118    | 1993.53760  | 1 |
| 62  | H | 78.73904 | 78.18098 | 64.55351 | -1504.82350 | -780.94249  | -2132.90992 | 1 |
| 63  | C | 77.36045 | 79.91671 | 67.10433 | 288.57638   | 618.62814   | -397.00270  | 1 |
| 64  | O | 78.23182 | 80.74486 | 67.21467 | 321.70495   | -185.26452  | 574.37218   | 1 |
| 65  | N | 76.81658 | 79.14011 | 68.03868 | -447.05792  | -446.53431  | 367.76425   | 1 |
| 66  | H | 75.98803 | 78.53591 | 67.82585 | 350.31316   | 1975.63644  | -1843.31522 | 1 |
| 67  | C | 77.23540 | 79.40357 | 69.37374 | -511.23061  | 374.03917   | -471.51480  | 1 |
| 68  | H | 78.16537 | 80.01534 | 69.28531 | 2234.79579  | -898.70890  | -1273.45190 | 1 |
| 69  | C | 76.02588 | 80.25846 | 69.98455 | 529.53781   | -159.34528  | 563.72604   | 1 |
| 70  | H | 76.31273 | 80.60902 | 71.00916 | 654.59388   | 2347.94251  | 1217.51488  | 1 |
| 71  | H | 75.96041 | 81.18508 | 69.35194 | -1526.55661 | 2103.42026  | 817.87394   | 1 |
| 72  | O | 74.71276 | 79.63181 | 70.00669 | -554.84278  | 14.12789    | 399.58769   | 1 |
| 73  | H | 74.66016 | 79.36491 | 69.06477 | 1297.06236  | 2061.84854  | 1220.68812  | 1 |
| 74  | C | 77.47168 | 77.94807 | 70.07390 | -662.15484  | -412.13544  | 123.62687   | 1 |
| 75  | O | 76.70255 | 77.02188 | 70.00232 | -540.01537  | -317.05804  | 274.91456   | 1 |
| 76  | N | 78.62644 | 78.02030 | 70.75851 | -202.76299  | -690.00100  | -131.49145  | 1 |
| 77  | H | 79.11254 | 78.91251 | 70.66587 | -702.62132  | -2617.37191 | 281.70413   | 1 |
| 78  | C | 79.35885 | 76.78673 | 71.06816 | -491.73914  | 576.34187   | 222.73509   | 1 |
| 79  | H | 78.85821 | 76.01607 | 70.43513 | 1977.17978  | -1823.58850 | -434.68928  | 1 |
| 80  | C | 80.82862 | 76.99170 | 70.76284 | -649.50797  | -328.66843  | 306.11224   | 1 |
| 81  | H | 81.20329 | 77.82336 | 71.40060 | 2075.07803  | 1452.16490  | -1004.45904 | 1 |
| 82  | C | 81.63933 | 75.75026 | 71.09218 | -615.18735  | -489.99689  | -70.96352   | 1 |
| 83  | H | 82.73507 | 75.90492 | 70.89329 | -1226.32661 | -1724.38906 | -1716.47170 | 1 |
| 84  | H | 81.53226 | 75.46190 | 72.17419 | 2381.64273  | -969.84735  | 900.46860   | 1 |
| 85  | H | 81.31182 | 74.86600 | 70.48020 | 2122.74991  | 1702.23946  | -141.36228  | 1 |
| 86  | C | 81.05892 | 77.39023 | 69.31549 | -501.86074  | -479.61276  | -376.42482  | 1 |
| 87  | H | 82.14978 | 77.55200 | 69.09716 | 993.79261   | -2246.95401 | -1177.81305 | 1 |
| 88  | H | 80.69032 | 76.60015 | 68.60608 | 42.71279    | -626.15391  | -2651.37258 | 1 |
| 89  | H | 80.52074 | 78.34250 | 69.05561 | -2026.39012 | -1590.33709 | -887.82922  | 1 |
| 90  | C | 79.14019 | 76.49031 | 72.68345 | -672.89153  | 382.57394   | -156.34072  | 1 |
| 91  | O | 78.83690 | 75.38410 | 73.06247 | 410.04627   | 221.86223   | 500.35950   | 1 |
| 92  | N | 79.38511 | 77.57930 | 73.49545 | -378.11782  | -443.79414  | -441.10984  | 1 |
| 93  | H | 79.53857 | 78.29564 | 72.76672 | 2404.15973  | -568.14894  | 1149.30085  | 1 |
| 94  | C | 78.24566 | 77.79284 | 74.37547 | -544.54484  | 466.16019   | 331.29119   | 1 |
| 95  | H | 77.88235 | 76.76659 | 74.61096 | -1409.80988 | -170.17955  | 2325.32679  | 1 |
| 96  | C | 78.68344 | 78.61913 | 75.63924 | -184.48284  | 116.78282   | -758.89137  | 1 |
| 97  | H | 79.63985 | 78.23896 | 76.06544 | 1893.78641  | 1861.14652  | 611.04528   | 1 |
| 98  | H | 78.85867 | 79.68803 | 75.37831 | -2170.79665 | -974.19311  | 1327.50117  | 1 |
| 99  | C | 77.49453 | 78.44852 | 76.64426 | 389.51668   | 672.81878   | -138.49152  | 1 |
| 100 | H | 76.55225 | 78.84493 | 76.18971 | 510.64577   | 1933.03327  | 1851.02484  | 1 |
| 101 | H | 77.27611 | 77.36020 | 76.80899 | -2302.30869 | -1105.72939 | -948.89774  | 1 |
| 102 | C | 77.74555 | 79.12837 | 78.04048 | -559.93427  | -126.34590  | 542.30857   | 1 |
| 103 | O | 77.07571 | 78.81798 | 78.99521 | -670.36003  | -111.83166  | 76.36448    | 1 |
| 104 | N | 78.73000 | 80.05249 | 78.02324 | -216.06729  | -537.07037  | 446.51379   | 1 |
| 105 | H | 79.25195 | 80.41243 | 77.21675 | -1251.96487 | 1074.12894  | -2168.52500 | 1 |
| 106 | H | 78.95112 | 80.66840 | 78.81322 | -2451.83023 | -720.73851  | 944.84612   | 1 |
| 107 | C | 77.20378 | 78.72570 | 73.53443 | 546.24052   | -563.88337  | -85.11809   | 1 |
| 108 | O | 77.49091 | 79.85756 | 73.24837 | 71.70702    | -307.40463  | 606.69673   | 1 |
| 109 | N | 76.10570 | 78.02111 | 73.23071 | 479.90863   | -504.50129  | 222.86849   | 1 |
| 110 | C | 74.91031 | 78.68370 | 72.80304 | 75.51268    | -600.91904  | 506.73700   | 1 |
| 111 | H | 75.23793 | 79.58138 | 72.22988 | -2033.61562 | 1795.30103  | 254.89480   | 1 |
| 112 | C | 74.22600 | 77.55137 | 71.92250 | 523.79067   | 517.99274   | 284.45581   | 1 |
| 113 | H | 73.12871 | 77.69572 | 71.81008 | 1599.61665  | -1127.00911 | 1895.98173  | 1 |
| 114 | H | 74.66231 | 77.53839 | 70.89317 | -1881.83093 | 1275.82488  | -1501.55016 | 1 |
| 115 | C | 74.60147 | 76.25039 | 72.69611 | -600.05639  | -404.05026  | 316.64485   | 1 |

|     |   |          |          |          |             |             |             |   |
|-----|---|----------|----------|----------|-------------|-------------|-------------|---|
| 116 | H | 73.94898 | 76.11317 | 73.58587 | -2597.05260 | 496.36221   | 657.73249   | 1 |
| 117 | H | 74.50813 | 75.32234 | 72.09113 | -1666.24518 | 1294.38985  | -1723.90591 | 1 |
| 118 | C | 76.09598 | 76.56752 | 73.12596 | 493.57570   | -129.95376  | -602.56394  | 1 |
| 119 | H | 76.39787 | 76.13522 | 74.11043 | -1469.08415 | -637.84797  | 2204.22581  | 1 |
| 120 | H | 76.87057 | 76.31791 | 72.35759 | -1038.97840 | 1068.88701  | -2280.71789 | 1 |
| 121 | C | 74.07922 | 79.10696 | 74.13692 | 188.88100   | 241.05089   | -727.87821  | 1 |
| 122 | O | 74.50695 | 78.98862 | 75.26170 | 531.88613   | -49.19943   | 427.07960   | 1 |
| 123 | N | 72.88650 | 79.70013 | 73.79572 | 708.14833   | 26.93417    | -179.73509  | 1 |
| 124 | H | 72.86259 | 79.54127 | 72.78326 | -2232.69501 | -1179.09831 | 1023.94816  | 1 |
| 125 | C | 71.72030 | 79.34161 | 74.63840 | -738.32412  | 259.92548   | 104.42456   | 1 |
| 126 | H | 72.15103 | 79.40868 | 75.66531 | 2028.89123  | 1260.02983  | 1311.33324  | 1 |
| 127 | C | 70.61558 | 80.32855 | 74.34652 | -258.65678  | -345.52513  | 661.28459   | 1 |
| 128 | H | 70.37071 | 80.25174 | 73.26255 | -1826.06090 | -1801.46097 | -918.64554  | 1 |
| 129 | C | 69.35624 | 80.00971 | 75.13270 | -541.23400  | 531.92970   | -218.41428  | 1 |
| 130 | H | 68.53600 | 80.75080 | 74.92599 | 1311.73218  | -2219.18200 | 882.19023   | 1 |
| 131 | H | 68.96129 | 78.98756 | 74.86799 | -1048.71298 | 1223.58118  | -2196.97971 | 1 |
| 132 | H | 69.54452 | 80.01864 | 76.24126 | 419.06414   | 1903.92898  | 1903.44670  | 1 |
| 133 | C | 71.05258 | 81.75827 | 74.61524 | -423.86431  | 152.66566   | -648.55262  | 1 |
| 134 | H | 70.26102 | 82.50091 | 74.32163 | 105.68386   | -2342.50080 | 1387.51238  | 1 |
| 135 | H | 71.28012 | 81.92342 | 75.70383 | -1695.63603 | -1484.73621 | -1531.02793 | 1 |
| 136 | H | 71.98582 | 82.01306 | 74.04113 | -1853.57121 | -487.39031  | 1936.59343  | 1 |
| 137 | C | 71.29366 | 77.80174 | 74.22615 | 539.71428   | -510.58232  | 267.58633   | 1 |
| 138 | O | 70.27839 | 77.60813 | 73.60771 | -15.93758   | -278.34085  | -624.49402  | 1 |
| 139 | N | 72.21782 | 76.93716 | 74.60300 | -676.81886  | 12.05292    | 276.17960   | 1 |
| 140 | H | 73.05349 | 77.23183 | 75.13400 | -1694.44250 | -373.84189  | -2100.66098 | 1 |
| 141 | C | 71.87944 | 75.53306 | 74.68505 | 412.33078   | -664.70360  | 108.35451   | 1 |
| 142 | H | 71.01753 | 75.53686 | 75.38831 | 1765.77476  | 1294.44366  | 1621.76594  | 1 |
| 143 | C | 71.46995 | 74.97686 | 73.26127 | -179.66635  | -721.95667  | -264.73915  | 1 |
| 144 | H | 71.11497 | 75.80379 | 72.60330 | -607.34922  | 2587.87032  | -598.10018  | 1 |
| 145 | H | 72.35094 | 74.53034 | 72.74760 | -359.69332  | -1479.13954 | -2259.74260 | 1 |
| 146 | C | 70.33917 | 73.91003 | 73.43845 | -240.01076  | 616.02425   | 431.85322   | 1 |
| 147 | H | 70.57170 | 73.20002 | 74.26271 | -1359.17131 | 782.54425   | 2227.99181  | 1 |
| 148 | H | 69.37812 | 74.39750 | 73.71775 | -820.36667  | 85.81767    | -2596.78715 | 1 |
| 149 | C | 70.21374 | 73.14480 | 72.05947 | -513.07015  | 236.18570   | -551.87280  | 1 |
| 150 | H | 70.01789 | 73.85589 | 71.22399 | 1816.11944  | -1183.11722 | -1650.94321 | 1 |
| 151 | H | 71.16884 | 72.63205 | 71.80138 | -1800.04429 | -1361.53473 | 1526.34643  | 1 |
| 152 | C | 69.05962 | 72.12537 | 72.19876 | 726.08972   | -253.19732  | -179.64713  | 1 |
| 153 | H | 69.20763 | 71.36620 | 72.99258 | 1224.27271  | -456.51798  | -2390.90304 | 1 |
| 154 | H | 68.05309 | 72.57947 | 72.29333 | 1206.40339  | -1150.93514 | -2154.90344 | 1 |
| 155 | N | 68.99999 | 71.29842 | 70.87026 | 329.70796   | -633.68968  | -155.67358  | 1 |
| 156 | H | 68.23645 | 70.56358 | 70.82111 | 1348.31305  | 1938.76845  | 1359.00643  | 1 |
| 157 | H | 68.82950 | 71.83847 | 69.97259 | 2096.92035  | 1446.54551  | -966.48890  | 1 |
| 158 | H | 69.85704 | 70.72416 | 70.62065 | -1197.07217 | -2303.53719 | 827.28733   | 1 |
| 159 | C | 73.24086 | 74.91932 | 75.28805 | -378.01186  | -556.17301  | -413.96481  | 1 |
| 160 | O | 74.06763 | 75.68475 | 75.81453 | -409.44433  | -307.55053  | -453.30833  | 1 |
| 161 | N | 73.30608 | 73.62044 | 75.12954 | -429.02477  | 524.70884   | 274.08502   | 1 |
| 162 | H | 72.51033 | 73.17835 | 74.67036 | 1706.34263  | -1425.96036 | 1574.38926  | 1 |
| 163 | C | 74.41767 | 72.84147 | 75.54472 | -45.25864   | -626.22952  | 478.93267   | 1 |
| 164 | H | 74.10420 | 71.81201 | 75.26043 | 1988.63164  | 570.90773   | 1772.87287  | 1 |
| 165 | C | 75.67251 | 73.35141 | 74.71669 | 551.77128   | -20.49526   | -564.54996  | 1 |
| 166 | H | 75.34503 | 73.91800 | 73.81678 | 1434.61535  | -1753.10253 | 1513.99471  | 1 |
| 167 | H | 76.26641 | 74.07534 | 75.32162 | -714.67738  | 1819.09770  | 1898.36494  | 1 |
| 168 | C | 76.55726 | 72.13165 | 74.29979 | 446.99263   | -555.77305  | 338.97221   | 1 |
| 169 | H | 76.70577 | 71.42726 | 75.14790 | 1953.68466  | 1892.25957  | -161.67766  | 1 |
| 170 | H | 76.06964 | 71.53918 | 73.49351 | -403.03785  | 2688.07032  | -188.43591  | 1 |
| 171 | C | 77.94468 | 72.72017 | 73.81825 | 567.86262   | 335.74681   | 434.04421   | 1 |
| 172 | H | 77.81050 | 73.38271 | 72.92967 | -1080.02275 | 1568.26081  | -1948.78900 | 1 |
| 173 | H | 78.39587 | 73.37047 | 74.60376 | -919.54108  | 2111.34692  | 1456.13463  | 1 |
| 174 | C | 78.88781 | 71.54054 | 73.48772 | 195.81897   | 173.33862   | -745.11536  | 1 |
| 175 | H | 79.14582 | 70.89862 | 74.35361 | 1405.67949  | -2301.21089 | -390.08113  | 1 |
| 176 | H | 78.56790 | 70.91293 | 72.63168 | -940.37328  | -1118.32446 | 2299.72133  | 1 |
| 177 | N | 80.25092 | 72.17045 | 73.04271 | 319.26422   | 656.36007   | -42.02424   | 1 |

|     |   |          |          |          |             |             |             |   |
|-----|---|----------|----------|----------|-------------|-------------|-------------|---|
| 178 | H | 81.04076 | 71.49778 | 72.81672 | 1961.03633  | 619.91968   | 1787.09422  | 1 |
| 179 | H | 80.23460 | 72.78618 | 72.17841 | 854.14343   | -2156.80752 | 1429.08711  | 1 |
| 180 | H | 80.71467 | 72.81240 | 73.74777 | 1237.02905  | -1378.50857 | -1998.28500 | 1 |
| 181 | C | 74.57718 | 73.02955 | 77.16401 | 532.53319   | -268.57236  | 517.55729   | 1 |
| 182 | O | 73.62525 | 73.27506 | 77.86552 | 266.16714   | -290.73804  | -558.88002  | 1 |
| 183 | N | 75.83264 | 72.71747 | 77.53912 | -226.25352  | 640.49678   | -270.32839  | 1 |
| 184 | H | 76.40772 | 72.51161 | 76.72121 | 2007.69063  | -1035.27229 | 1523.50231  | 1 |
| 185 | C | 76.48626 | 73.48808 | 78.56160 | -540.76542  | -573.33303  | 49.50000    | 1 |
| 186 | H | 77.56672 | 73.34693 | 78.33928 | -2374.20950 | -1036.76023 | 843.75774   | 1 |
| 187 | C | 76.07099 | 75.00062 | 78.29999 | -77.09082   | 666.87422   | -415.84136  | 1 |
| 188 | H | 74.94666 | 75.07531 | 78.33500 | -985.81834  | 617.19825   | 2463.91927  | 1 |
| 189 | O | 76.44318 | 75.50127 | 77.00427 | 293.29899   | -391.65602  | -477.80926  | 1 |
| 190 | H | 75.50714 | 75.62912 | 76.58043 | 2528.72714  | -681.76262  | -751.27122  | 1 |
| 191 | C | 76.68050 | 75.78503 | 79.51255 | 252.47363   | -605.14473  | 440.05134   | 1 |
| 192 | H | 76.43378 | 76.87979 | 79.45548 | -2052.65063 | 1456.49051  | -1043.51830 | 1 |
| 193 | H | 76.29792 | 75.40674 | 80.49003 | -2152.98800 | -1661.97574 | -161.70652  | 1 |
| 194 | H | 77.79332 | 75.70739 | 79.53385 | -473.12726  | -1584.27339 | 2165.61725  | 1 |
| 195 | C | 76.11329 | 72.88138 | 80.01884 | 360.36307   | 488.46713   | 505.10056   | 1 |
| 196 | O | 75.10317 | 72.26179 | 80.29069 | -200.08817  | -528.03552  | -385.82850  | 1 |
| 197 | N | 77.08101 | 73.25059 | 80.93094 | -597.54095  | -226.44775  | 355.20479   | 1 |
| 198 | H | 77.74294 | 73.72647 | 80.30065 | 2179.23655  | -1300.70981 | -991.33835  | 1 |
| 199 | C | 77.63430 | 72.10739 | 81.64178 | -687.68921  | 297.39807   | -249.45179  | 1 |
| 200 | H | 77.77907 | 71.31918 | 80.87254 | -349.16256  | -2467.37713 | -1101.72831 | 1 |
| 201 | C | 78.99745 | 72.61145 | 82.28216 | 672.47345   | 361.54328   | -201.62880  | 1 |
| 202 | H | 78.81695 | 73.50139 | 82.92826 | 1541.41502  | 582.18425   | 2169.97026  | 1 |
| 203 | H | 79.43143 | 71.81485 | 82.93012 | -2534.67717 | 60.25153    | 997.72295   | 1 |
| 204 | C | 79.94884 | 72.95851 | 81.12443 | 574.26774   | -389.43119  | -377.02542  | 1 |
| 205 | C | 80.61179 | 71.89724 | 80.44042 | 688.82679   | -287.33580  | -257.96133  | 1 |
| 206 | H | 80.47002 | 70.84724 | 80.75516 | 331.14182   | 1470.38163  | 2269.80013  | 1 |
| 207 | C | 80.12654 | 74.31279 | 80.71146 | -383.52382  | -675.04808  | 144.24917   | 1 |
| 208 | H | 79.60747 | 75.13490 | 81.23714 | 4.09847     | 1517.59662  | 2262.86397  | 1 |
| 209 | C | 81.44004 | 72.21484 | 79.36382 | -134.76730  | 428.45285   | -649.50303  | 1 |
| 210 | H | 81.95866 | 71.39508 | 78.83724 | -903.23433  | 1600.49020  | 2011.53387  | 1 |
| 211 | C | 80.96582 | 74.57928 | 79.62602 | -335.53281  | -615.00040  | -364.39058  | 1 |
| 212 | H | 81.09977 | 75.63008 | 79.31489 | 1596.45398  | -1369.33862 | 1732.02659  | 1 |
| 213 | C | 81.64968 | 73.55062 | 78.91468 | 585.48547   | -340.24194  | -406.23938  | 1 |
| 214 | O | 82.49949 | 73.80871 | 77.80682 | -419.15649  | -173.04408  | -511.94141  | 1 |
| 215 | H | 82.45883 | 74.79372 | 77.79225 | -1071.84350 | 1559.71507  | -1960.13012 | 1 |
| 216 | C | 76.64095 | 71.64342 | 82.82044 | 291.41878   | -183.13091  | 710.72246   | 1 |
| 217 | O | 76.67685 | 70.49688 | 83.22284 | 379.87695   | 523.47396   | -222.23622  | 1 |
| 218 | N | 75.94449 | 72.68107 | 83.31960 | 564.30591   | 373.09380   | 277.24371   | 1 |
| 219 | H | 76.05794 | 73.53579 | 82.77077 | -120.59931  | -2436.07824 | -1214.35098 | 1 |
| 220 | C | 74.67868 | 72.39088 | 83.93601 | 404.07514   | -299.37480  | 608.84009   | 1 |
| 221 | H | 74.18323 | 73.38709 | 83.93997 | -1071.07882 | -841.69025  | 2359.66467  | 1 |
| 222 | C | 73.97865 | 71.35141 | 82.96780 | -683.12807  | 68.71770    | -390.13096  | 1 |
| 223 | H | 74.24380 | 71.58960 | 81.88812 | 2068.88918  | 1596.58590  | 770.89603   | 1 |
| 224 | H | 74.39734 | 70.33144 | 83.15369 | 1379.86429  | 2342.49779  | -179.85638  | 1 |
| 225 | C | 72.44034 | 71.39009 | 83.19415 | -176.39967  | 537.49466   | 550.97268   | 1 |
| 226 | H | 72.18098 | 71.59187 | 84.25646 | -396.28051  | 1942.22168  | 1869.33314  | 1 |
| 227 | H | 71.96379 | 72.21165 | 82.61620 | -94.44700   | 586.00678   | -2659.20016 | 1 |
| 228 | C | 71.88624 | 69.94685 | 82.73771 | -291.69381  | -718.18079  | -150.72929  | 1 |
| 229 | H | 72.04073 | 69.74666 | 81.64552 | -2303.38776 | 1089.76242  | 964.62032   | 1 |
| 230 | H | 72.25125 | 69.09883 | 83.39445 | 884.16729   | 2568.80533  | -207.74283  | 1 |
| 231 | N | 70.54290 | 70.18676 | 82.99411 | -594.49522  | -252.81478  | 342.29276   | 1 |
| 232 | H | 70.19013 | 69.82444 | 83.87118 | -1735.17426 | 2084.05705  | -263.71605  | 1 |
| 233 | C | 69.72579 | 70.80782 | 82.22306 | 595.23177   | -271.52487  | 442.22352   | 1 |
| 234 | N | 70.21799 | 71.31701 | 81.02338 | 585.53813   | -424.79750  | -105.81303  | 1 |
| 235 | H | 71.17092 | 71.28900 | 80.66028 | 959.88797   | 1327.56823  | -2177.11905 | 1 |
| 236 | H | 69.68236 | 71.84520 | 80.33391 | 1578.48647  | 16.27378    | -2220.76233 | 1 |
| 237 | N | 68.45518 | 70.84027 | 82.80005 | -452.17763  | -390.33541  | -421.51853  | 1 |
| 238 | H | 68.11955 | 70.44771 | 83.67916 | 470.26107   | 1974.25629  | -1817.92087 | 1 |
| 239 | H | 67.64014 | 71.26762 | 82.35825 | 1856.67307  | -1573.97321 | -1224.35416 | 1 |

|     |   |          |          |          |             |             |             |   |
|-----|---|----------|----------|----------|-------------|-------------|-------------|---|
| 240 | C | 74.99098 | 71.83928 | 85.42649 | -531.47271  | -581.45780  | -55.06206   | 1 |
| 241 | O | 75.75240 | 72.40762 | 86.17011 | -243.00837  | 192.73507   | 609.52485   | 1 |
| 242 | N | 74.21574 | 70.75303 | 85.74544 | 343.49288   | -644.25607  | 38.09164    | 1 |
| 243 | H | 73.61717 | 70.52525 | 84.94345 | -1691.16043 | -1535.97525 | -1484.73099 | 1 |
| 244 | C | 74.95227 | 69.57408 | 86.27598 | 542.66492   | 350.14337   | 454.42563   | 1 |
| 245 | H | 76.02250 | 69.87899 | 86.32677 | 1209.57979  | -2396.95920 | 463.86744   | 1 |
| 246 | C | 74.35084 | 69.20410 | 87.61277 | -737.14309  | 145.93010   | 242.71942   | 1 |
| 247 | H | 73.27387 | 68.97553 | 87.44611 | -1050.18303 | 159.36419   | -2509.06125 | 1 |
| 248 | C | 75.01689 | 67.97148 | 88.19754 | -706.77696  | -252.88343  | -245.16230  | 1 |
| 249 | H | 74.51822 | 67.63821 | 89.14897 | -1624.64039 | -1665.49085 | 1417.86935  | 1 |
| 250 | H | 74.98902 | 67.10221 | 87.48150 | 2566.10521  | 598.51109   | 693.22305   | 1 |
| 251 | H | 76.09946 | 68.16059 | 88.43757 | -1972.69758 | 107.10018   | -1876.34312 | 1 |
| 252 | C | 74.42969 | 70.35731 | 88.59746 | 412.85148   | 672.58832   | -27.69222   | 1 |
| 253 | H | 73.89722 | 70.12685 | 89.56111 | 1447.02277  | 1762.76533  | -1490.78944 | 1 |
| 254 | H | 75.49619 | 70.60783 | 88.85299 | 1320.77379  | -145.20455  | 2378.68491  | 1 |
| 255 | H | 73.96936 | 71.29026 | 88.16772 | -1512.10848 | 1470.52031  | 1724.75147  | 1 |
| 256 | C | 74.62022 | 68.38397 | 85.19173 | -607.11113  | 499.56689   | 73.73769    | 1 |
| 257 | O | 73.50657 | 68.25080 | 84.70896 | 357.97126   | 460.81534   | 356.68785   | 1 |
| 258 | N | 75.69117 | 67.63835 | 85.00568 | 536.55407   | -368.62270  | 332.76306   | 1 |
| 259 | H | 76.54073 | 67.88858 | 85.50873 | 524.38866   | 2297.69985  | 1367.20941  | 1 |
| 260 | C | 75.56383 | 66.39577 | 84.33549 | 46.50277    | -774.29190  | -147.97904  | 1 |
| 261 | H | 74.46572 | 66.26158 | 84.19927 | 1676.51875  | 1883.29066  | 1032.55549  | 1 |
| 262 | C | 76.35904 | 66.45451 | 82.92851 | -559.41456  | -34.19198   | -556.30433  | 1 |
| 263 | H | 77.45703 | 66.45326 | 83.12625 | -64.66664   | 395.18769   | 2695.05373  | 1 |
| 264 | H | 76.15894 | 65.53266 | 82.33280 | -2703.44278 | -60.40056   | 333.79418   | 1 |
| 265 | C | 75.97457 | 67.68475 | 82.15554 | -519.76435  | 377.31045   | 459.42366   | 1 |
| 266 | H | 76.23033 | 68.59138 | 82.77537 | -1746.74323 | 1667.50644  | -1261.73691 | 1 |
| 267 | C | 76.75574 | 67.75941 | 80.84907 | 570.95554   | 16.46261    | -545.27700  | 1 |
| 268 | H | 76.52505 | 68.70110 | 80.28691 | 2391.58273  | 28.05277    | -1305.07271 | 1 |
| 269 | H | 77.86169 | 67.73997 | 81.02689 | 175.75588   | 917.63458   | 2559.43867  | 1 |
| 270 | H | 76.51229 | 66.89993 | 80.17273 | -1063.97851 | -2155.34650 | 1283.00462  | 1 |
| 271 | C | 74.48426 | 67.71854 | 81.85321 | 193.76014   | 2.62946     | -765.53141  | 1 |
| 272 | H | 74.21670 | 68.58565 | 81.19502 | 507.39394   | -846.55087  | 2539.60089  | 1 |
| 273 | H | 74.14055 | 66.78718 | 81.33340 | 1337.57841  | 1818.19054  | 1526.01994  | 1 |
| 274 | H | 73.88215 | 67.82248 | 82.81013 | 1100.88635  | -1172.91350 | -2199.08909 | 1 |
| 275 | C | 76.27440 | 65.29709 | 85.27417 | -549.21115  | 475.64486   | -309.38218  | 1 |
| 276 | O | 76.71072 | 65.54493 | 86.36814 | 556.06106   | -390.37755  | -78.24250   | 1 |
| 277 | O | 76.35066 | 63.98263 | 84.75229 | -572.27940  | -310.19032  | -209.75862  | 1 |
| 278 | H | 75.87977 | 64.13282 | 83.88813 | -1380.08193 | 2212.14486  | 790.85944   | 1 |

Listing 20: C00020.xmolout

|    |   |          |          |          |             |             |             |        |          |
|----|---|----------|----------|----------|-------------|-------------|-------------|--------|----------|
| 1  |   | 276      |          |          |             |             |             |        |          |
| 2  |   | 150.0000 | 150.0000 | 150.0000 | 0.0000      | 0.0000      | 0.0000***** | 0.8085 | 3234     |
|    |   | 0.2500   | 300.00   | 0.00     | 0.00        | 0.00        | -1294.0363  | 0.0000 | 300.0000 |
| 3  | H | 75.02491 | 70.21798 | 67.06212 | -2043.14101 | -1757.64893 | 399.89339   |        | 1        |
| 4  | N | 75.27755 | 70.77793 | 66.24906 | 426.75047   | 490.45733   | -334.42467  |        | 1        |
| 5  | H | 74.56010 | 71.50013 | 66.25008 | 442.25559   | -1110.30854 | -2448.52907 |        | 1        |
| 6  | C | 76.60637 | 71.25210 | 66.20595 | 415.32972   | -666.39213  | 83.73172    |        | 1        |
| 7  | H | 77.23499 | 70.36096 | 66.41421 | 879.32219   | 2491.00447  | 667.35213   |        | 1        |
| 8  | C | 76.88367 | 71.92619 | 64.77038 | 31.35357    | 477.41777   | 628.23362   |        | 1        |
| 9  | H | 76.03540 | 72.60534 | 64.51266 | 1168.38489  | 2240.25337  | -1019.71136 |        | 1        |
| 10 | H | 77.79382 | 72.57276 | 64.82154 | -360.43770  | 2534.90498  | 931.67112   |        | 1        |
| 11 | C | 77.05327 | 70.84892 | 63.72893 | 463.18208   | 512.70242   | -382.34388  |        | 1        |
| 12 | H | 76.24898 | 70.09278 | 63.87340 | 1725.29117  | 1863.52247  | -987.07854  |        | 1        |
| 13 | C | 76.92389 | 71.43090 | 62.32729 | 710.42801   | -144.27427  | -313.15367  |        | 1        |
| 14 | H | 77.05070 | 70.64378 | 61.53950 | 364.20195   | -1033.13725 | 2494.72524  |        | 1        |
| 15 | H | 75.92147 | 71.90521 | 62.16537 | 2567.61904  | 335.80679   | 847.48802   |        | 1        |
| 16 | H | 77.69795 | 72.21852 | 62.13554 | -2587.99029 | 680.92867   | -512.16411  |        | 1        |
| 17 | C | 78.40714 | 70.16588 | 63.86809 | 268.17616   | 741.64379   | -40.42634   |        | 1        |
| 18 | H | 78.54454 | 69.35906 | 63.10252 | 1283.54314  | -1945.37420 | -1411.27812 |        | 1        |
| 19 | H | 79.24957 | 70.89354 | 63.73656 | -1258.57796 | 1317.15249  | -2026.02085 |        | 1        |

|    |   |          |          |          |             |             |             |   |
|----|---|----------|----------|----------|-------------|-------------|-------------|---|
| 20 | H | 78.53479 | 69.69269 | 64.87543 | -2502.84526 | 909.80597   | 575.92391   | 1 |
| 21 | C | 76.83978 | 72.44725 | 67.33216 | 619.36578   | -458.64843  | -172.09273  | 1 |
| 22 | O | 78.09245 | 73.02542 | 67.31352 | -81.40433   | 433.87611   | 522.34594   | 1 |
| 23 | N | 75.73038 | 73.38413 | 67.10132 | 175.23996   | -622.20190  | 341.55523   | 1 |
| 24 | H | 74.82330 | 73.00393 | 67.37902 | -876.57256  | -303.22879  | -2561.90213 | 1 |
| 25 | C | 76.01478 | 74.64510 | 67.73108 | -571.88214  | -534.10783  | -106.15033  | 1 |
| 26 | H | 76.97320 | 74.96651 | 67.26537 | -2713.20841 | -16.25800   | -248.80809  | 1 |
| 27 | C | 74.78597 | 75.61009 | 67.41777 | 166.60354   | 288.16399   | -716.09568  | 1 |
| 28 | H | 73.88533 | 75.18551 | 67.93693 | -2097.85574 | 1636.78449  | -586.18044  | 1 |
| 29 | O | 74.44297 | 75.74856 | 66.02381 | -317.80580  | -363.38227  | 484.43082   | 1 |
| 30 | H | 73.60424 | 75.24869 | 65.98372 | 1863.74748  | -1451.84923 | 1357.29467  | 1 |
| 31 | C | 75.23751 | 76.93214 | 68.14074 | 503.80731   | 517.99032   | 318.51606   | 1 |
| 32 | H | 74.45044 | 77.71866 | 68.08490 | 640.61020   | -2157.10410 | -1536.29104 | 1 |
| 33 | H | 75.45984 | 76.76142 | 69.22197 | 1687.88455  | 465.60692   | 2087.56452  | 1 |
| 34 | H | 76.15798 | 77.35494 | 67.67542 | -1293.07895 | -1899.88581 | -1463.57452 | 1 |
| 35 | C | 76.11471 | 74.39852 | 69.33356 | -153.07550  | -733.68902  | 248.70981   | 1 |
| 36 | O | 75.14619 | 74.63755 | 70.00698 | 186.15459   | -480.78787  | -449.34387  | 1 |
| 37 | N | 77.30520 | 73.84849 | 69.71889 | -487.53139  | 543.18517   | 42.03850    | 1 |
| 38 | C | 77.57172 | 73.60477 | 71.12251 | -699.35871  | 69.34393    | 360.10701   | 1 |
| 39 | H | 76.62037 | 73.32712 | 71.62932 | 2.81126     | -221.99807  | -2715.58072 | 1 |
| 40 | C | 78.67062 | 72.47656 | 71.00902 | -507.46439  | -592.59194  | 122.07761   | 1 |
| 41 | H | 79.24981 | 72.33393 | 71.94935 | -1975.08116 | 525.87560   | -1801.71556 | 1 |
| 42 | H | 78.23008 | 71.49003 | 70.74478 | 1588.27743  | -1913.22100 | 1113.83566  | 1 |
| 43 | C | 79.51995 | 73.07197 | 69.82781 | -613.62442  | -457.55993  | -194.14490  | 1 |
| 44 | H | 80.20557 | 73.87225 | 70.19855 | 1707.54637  | -721.27992  | 1996.92523  | 1 |
| 45 | H | 80.16391 | 72.32038 | 69.31452 | 758.23357   | 2100.81767  | 1560.55011  | 1 |
| 46 | C | 78.42557 | 73.67518 | 68.88949 | -352.41524  | 704.96076   | 49.21465    | 1 |
| 47 | H | 78.66550 | 74.64245 | 68.37207 | 1714.76886  | -2070.42778 | 443.35792   | 1 |
| 48 | H | 76.53427 | 72.09330 | 68.35626 | 1224.15040  | 1801.50881  | 1636.97633  | 1 |
| 49 | C | 78.30312 | 74.93279 | 71.72832 | 566.85117   | 537.05831   | 117.62814   | 1 |
| 50 | O | 79.03634 | 75.63258 | 71.07095 | -550.26779  | -406.08867  | 4.21666     | 1 |
| 51 | N | 77.99555 | 75.04304 | 73.02975 | 566.34832   | -425.77725  | 180.18749   | 1 |
| 52 | H | 77.45236 | 74.26968 | 73.41818 | 644.44502   | 2646.80550  | -52.73430   | 1 |
| 53 | C | 79.00363 | 75.65090 | 73.85438 | 612.34801   | -281.48662  | 411.56221   | 1 |
| 54 | H | 79.63155 | 76.28012 | 73.18174 | 1667.23498  | -1490.75142 | 1556.16753  | 1 |
| 55 | C | 78.12072 | 76.52257 | 74.87230 | -714.45746  | -175.43074  | 286.98927   | 1 |
| 56 | H | 77.20449 | 75.92419 | 75.12549 | -787.09484  | 1763.03619  | -1922.46060 | 1 |
| 57 | O | 77.62354 | 77.75238 | 74.30522 | -429.46514  | 516.51932   | -128.40526  | 1 |
| 58 | H | 76.68520 | 77.52670 | 74.15598 | 1981.82785  | 436.16847   | -1818.18182 | 1 |
| 59 | C | 78.99964 | 76.67781 | 76.16187 | 630.79189   | -468.94448  | 76.03230    | 1 |
| 60 | H | 78.45655 | 77.25421 | 76.94734 | -1775.71861 | 2062.30353  | 131.89849   | 1 |
| 61 | H | 79.26941 | 75.68661 | 76.60086 | -1855.14608 | 88.94118    | 1993.53760  | 1 |
| 62 | H | 79.94925 | 77.22147 | 75.94963 | -1504.82350 | -780.94249  | -2132.90992 | 1 |
| 63 | C | 79.81875 | 74.42435 | 74.51279 | 288.57638   | 618.62814   | -397.00270  | 1 |
| 64 | O | 79.28947 | 73.30659 | 74.63102 | 321.70495   | -185.26452  | 574.37218   | 1 |
| 65 | N | 80.97999 | 74.83280 | 74.97406 | -447.05792  | -446.53431  | 367.76425   | 1 |
| 66 | H | 81.20411 | 75.80276 | 74.75428 | 350.31316   | 1975.63644  | -1843.31522 | 1 |
| 67 | C | 82.02640 | 73.86452 | 75.15057 | -511.23061  | 374.03917   | -471.51480  | 1 |
| 68 | H | 82.08883 | 73.31915 | 74.18327 | 2234.79579  | -898.70890  | -1273.45190 | 1 |
| 69 | C | 83.32954 | 74.71880 | 75.49260 | 529.53781   | -159.34528  | 563.72604   | 1 |
| 70 | H | 84.19574 | 74.00667 | 75.56824 | 654.59388   | 2347.94251  | 1217.51488  | 1 |
| 71 | H | 83.52971 | 75.38210 | 74.61095 | -1526.55661 | 2103.42026  | 817.87394   | 1 |
| 72 | O | 83.29781 | 75.48941 | 76.72989 | -554.84278  | 14.12789    | 399.58769   | 1 |
| 73 | H | 82.72921 | 76.22483 | 76.44258 | 1297.06236  | 2061.84854  | 1220.68812  | 1 |
| 74 | C | 81.66627 | 72.85056 | 76.36552 | -662.15484  | -412.13544  | 123.62687   | 1 |
| 75 | O | 82.02901 | 71.69898 | 76.29858 | -540.01537  | -317.05804  | 274.91456   | 1 |
| 76 | N | 81.13325 | 73.48792 | 77.42863 | -202.76299  | -690.00100  | -131.49145  | 1 |
| 77 | H | 80.90036 | 74.44598 | 77.16476 | -702.62132  | -2617.37191 | 281.70413   | 1 |
| 78 | C | 80.38615 | 72.73736 | 78.45771 | -491.73914  | 576.34187   | 222.73509   | 1 |
| 79 | H | 79.93522 | 71.91869 | 77.85108 | 1977.17978  | -1823.58850 | -434.68928  | 1 |
| 80 | C | 81.34659 | 72.22087 | 79.50392 | -649.50797  | -328.66843  | 306.11224   | 1 |
| 81 | H | 81.72765 | 73.09399 | 80.08044 | 2075.07803  | 1452.16490  | -1004.45904 | 1 |

|     |   |          |          |          |             |             |             |   |
|-----|---|----------|----------|----------|-------------|-------------|-------------|---|
| 82  | C | 80.65922 | 71.26290 | 80.46254 | -615.18735  | -489.99689  | -70.96352   | 1 |
| 83  | H | 81.33727 | 70.96324 | 81.30730 | -1226.32661 | -1724.38906 | -1716.47170 | 1 |
| 84  | H | 79.73468 | 71.71261 | 80.91698 | 2381.64273  | -969.84735  | 900.46860   | 1 |
| 85  | H | 80.34189 | 70.31885 | 79.94200 | 2122.74991  | 1702.23946  | -141.36228  | 1 |
| 86  | C | 82.56524 | 71.53867 | 78.90159 | -501.86074  | -479.61276  | -376.42482  | 1 |
| 87  | H | 83.27980 | 71.17805 | 79.69129 | 993.79261   | -2246.95401 | -1177.81305 | 1 |
| 88  | H | 82.27309 | 70.64766 | 78.27712 | 42.71279    | -626.15391  | -2651.37258 | 1 |
| 89  | H | 83.13238 | 72.23931 | 78.22557 | -2026.39012 | -1590.33709 | -887.82922  | 1 |
| 90  | C | 79.27556 | 73.83261 | 78.99369 | -672.89153  | 382.57394   | -156.34072  | 1 |
| 91  | O | 78.46337 | 74.27600 | 78.20852 | 410.04627   | 221.86223   | 500.35950   | 1 |
| 92  | N | 79.41220 | 74.13479 | 80.27098 | -378.11782  | -443.79414  | -441.10984  | 1 |
| 93  | H | 80.15649 | 73.70306 | 80.81341 | 2404.15973  | -568.14894  | 1149.30085  | 1 |
| 94  | C | 78.48160 | 75.02443 | 80.87452 | -544.54484  | 466.16019   | 331.29119   | 1 |
| 95  | H | 77.78943 | 75.34842 | 80.05962 | -1409.80988 | -170.17955  | 2325.32679  | 1 |
| 96  | C | 77.81476 | 74.19828 | 82.05719 | -184.48284  | 116.78282   | -758.89137  | 1 |
| 97  | H | 77.32145 | 73.28050 | 81.63665 | 1893.78641  | 1861.14652  | 611.04528   | 1 |
| 98  | H | 78.59200 | 73.83865 | 82.77018 | -2170.79665 | -974.19311  | 1327.50117  | 1 |
| 99  | C | 76.77924 | 75.10870 | 82.78431 | 389.51668   | 672.81878   | -138.49152  | 1 |
| 100 | H | 77.31426 | 75.94854 | 83.28897 | 510.64577   | 1933.03327  | 1851.02484  | 1 |
| 101 | H | 76.11210 | 75.60784 | 82.04722 | -2302.30869 | -1105.72939 | -948.89774  | 1 |
| 102 | C | 75.90561 | 74.31153 | 83.82562 | -559.93427  | -126.34590  | 542.30857   | 1 |
| 103 | O | 75.00536 | 74.86983 | 84.39613 | -670.36003  | -111.83166  | 76.36448    | 1 |
| 104 | N | 76.26669 | 73.01647 | 83.97431 | -216.06729  | -537.07037  | 446.51379   | 1 |
| 105 | H | 77.07890 | 72.52402 | 83.58589 | -1251.96487 | 1074.12894  | -2168.52500 | 1 |
| 106 | H | 75.87285 | 72.39462 | 84.68870 | -2451.83023 | -720.73851  | 944.84612   | 1 |
| 107 | C | 79.33141 | 76.22195 | 81.60223 | 546.24052   | -563.88337  | -85.11809   | 1 |
| 108 | O | 79.53588 | 76.13459 | 82.78373 | 71.70702    | -307.40463  | 606.69673   | 1 |
| 109 | N | 79.73054 | 77.15677 | 80.72300 | 479.90863   | -504.50129  | 222.86849   | 1 |
| 110 | C | 80.53495 | 78.25317 | 81.15023 | 75.51268    | -600.91904  | 506.73700   | 1 |
| 111 | H | 81.05439 | 77.90193 | 82.07145 | -2033.61562 | 1795.30103  | 254.89480   | 1 |
| 112 | C | 81.45256 | 78.48263 | 79.87941 | 523.79067   | 517.99274   | 284.45581   | 1 |
| 113 | H | 81.80775 | 79.53432 | 79.79791 | 1599.61665  | -1127.00911 | 1895.98173  | 1 |
| 114 | H | 82.36824 | 77.85316 | 79.94248 | -1881.83093 | 1275.82488  | -1501.55016 | 1 |
| 115 | C | 80.57590 | 78.04553 | 78.66004 | -600.05639  | -404.05026  | 316.64485   | 1 |
| 116 | H | 80.05619 | 78.91154 | 78.19125 | -2597.05260 | 496.36221   | 657.73249   | 1 |
| 117 | H | 81.18347 | 77.58998 | 77.84617 | -1666.24518 | 1294.38985  | -1723.90591 | 1 |
| 118 | C | 79.54428 | 77.01751 | 79.28412 | 493.57570   | -129.95376  | -602.56394  | 1 |
| 119 | H | 78.45306 | 77.24155 | 79.06427 | -1469.08415 | -637.84797  | 2204.22581  | 1 |
| 120 | H | 79.75581 | 75.94588 | 79.05002 | -1038.97840 | 1068.88701  | -2280.71789 | 1 |
| 121 | C | 79.57238 | 79.55008 | 81.47134 | 188.88100   | 241.05089   | -727.87821  | 1 |
| 122 | O | 79.60486 | 80.04561 | 82.57376 | 531.88613   | -49.19943   | 427.07960   | 1 |
| 123 | N | 78.92027 | 79.96096 | 80.39430 | 708.14833   | 26.93417    | -179.73509  | 1 |
| 124 | H | 79.02587 | 79.40736 | 79.54700 | -2232.69501 | -1179.09831 | 1023.94816  | 1 |
| 125 | C | 77.79627 | 80.83079 | 80.54480 | -738.32412  | 259.92548   | 104.42456   | 1 |
| 126 | H | 77.32538 | 80.56221 | 81.51610 | 2028.89123  | 1260.02983  | 1311.33324  | 1 |
| 127 | C | 78.33640 | 82.32026 | 80.52147 | -258.65678  | -345.52513  | 661.28459   | 1 |
| 128 | H | 78.81261 | 82.54105 | 79.54139 | -1826.06090 | -1801.46097 | -918.64554  | 1 |
| 129 | C | 77.10736 | 83.25939 | 80.77440 | -541.23400  | 531.92970   | -218.41428  | 1 |
| 130 | H | 77.40367 | 84.33448 | 80.76861 | 1311.73218  | -2219.18200 | 882.19023   | 1 |
| 131 | H | 76.32547 | 83.12565 | 79.98982 | -1048.71298 | 1223.58118  | -2196.97971 | 1 |
| 132 | H | 76.62853 | 83.05155 | 81.75989 | 419.06414   | 1903.92898  | 1903.44670  | 1 |
| 133 | C | 79.36428 | 82.53539 | 81.68748 | -423.86431  | 152.66566   | -648.55262  | 1 |
| 134 | H | 79.65858 | 83.60684 | 81.78707 | 105.68386   | -2342.50080 | 1387.51238  | 1 |
| 135 | H | 78.94376 | 82.20827 | 82.67010 | -1695.63603 | -1484.73621 | -1531.02793 | 1 |
| 136 | H | 80.29961 | 81.94901 | 81.51714 | -1853.57121 | -487.39031  | 1936.59343  | 1 |
| 137 | C | 76.88659 | 80.58109 | 79.20222 | 539.71428   | -510.58232  | 267.58633   | 1 |
| 138 | O | 77.29763 | 80.88673 | 78.10585 | -15.93758   | -278.34085  | -624.49402  | 1 |
| 139 | N | 75.69097 | 80.13189 | 79.56463 | -676.81886  | 12.05292    | 276.17960   | 1 |
| 140 | H | 75.53892 | 79.97335 | 80.56094 | -1694.44250 | -373.84189  | -2100.66098 | 1 |
| 141 | C | 74.85550 | 79.44430 | 78.63314 | 412.33078   | -664.70360  | 108.35451   | 1 |
| 142 | H | 73.84711 | 79.46958 | 79.10351 | 1765.77476  | 1294.44366  | 1621.76594  | 1 |
| 143 | C | 74.94862 | 80.22609 | 77.26065 | -179.66635  | -721.95667  | -264.73915  | 1 |



|     |   |          |          |          |             |             |             |   |
|-----|---|----------|----------|----------|-------------|-------------|-------------|---|
| 144 | H | 75.14168 | 81.30432 | 77.46950 | -607.34922  | 2587.87032  | -598.10018  | 1 |
| 145 | H | 75.83775 | 79.88600 | 76.67821 | -359.69332  | -1479.13954 | -2259.74260 | 1 |
| 146 | C | 73.64107 | 80.04803 | 76.41927 | -240.01076  | 616.02425   | 431.85322   | 1 |
| 147 | H | 73.58256 | 79.03210 | 75.96798 | -1359.17131 | 782.54425   | 2227.99181  | 1 |
| 148 | H | 72.73339 | 80.15726 | 77.05423 | -820.36667  | 85.81767    | -2596.78715 | 1 |
| 149 | C | 73.68026 | 81.17139 | 75.30591 | -513.07015  | 236.18570   | -551.87280  | 1 |
| 150 | H | 73.69403 | 82.18287 | 75.77366 | 1816.11944  | -1183.11722 | -1650.94321 | 1 |
| 151 | H | 74.62112 | 81.10228 | 74.71269 | -1800.04429 | -1361.53473 | 1526.34643  | 1 |
| 152 | C | 72.44847 | 81.02050 | 74.38372 | 726.08972   | -253.19732  | -179.64713  | 1 |
| 153 | H | 72.47569 | 80.13960 | 73.70910 | 1224.27271  | -456.51798  | -2390.90304 | 1 |
| 154 | H | 71.47087 | 81.06996 | 74.90382 | 1206.40339  | -1150.93514 | -2154.90344 | 1 |
| 155 | N | 72.44206 | 82.26234 | 73.42845 | 329.70796   | -633.68968  | -155.67358  | 1 |
| 156 | H | 71.65610 | 82.28940 | 72.71700 | 1348.31305  | 1938.76845  | 1359.00643  | 1 |
| 157 | H | 72.34739 | 83.21954 | 73.87813 | 2096.92035  | 1446.54551  | -966.48890  | 1 |
| 158 | H | 73.29137 | 82.39595 | 72.80619 | -1197.07217 | -2303.53719 | 827.28733   | 1 |
| 159 | C | 75.41071 | 77.91733 | 78.44032 | -378.01186  | -556.17301  | -413.96481  | 1 |
| 160 | O | 76.55409 | 77.55020 | 78.62632 | -409.44433  | -307.55053  | -453.30833  | 1 |
| 161 | N | 74.35103 | 77.13655 | 78.07021 | -429.02477  | 524.70884   | 274.08502   | 1 |
| 162 | H | 73.60368 | 77.83533 | 77.97096 | 1706.34263  | -1425.96036 | 1574.38926  | 1 |
| 163 | C | 74.59402 | 76.30651 | 76.89638 | -45.25864   | -626.22952  | 478.93267   | 1 |
| 164 | H | 74.88623 | 77.00557 | 76.08252 | 1988.63164  | 570.90773   | 1772.87287  | 1 |
| 165 | C | 75.72504 | 75.27108 | 77.24069 | 551.77128   | -20.49526   | -564.54996  | 1 |
| 166 | H | 76.73354 | 75.74877 | 77.24981 | 1434.61535  | -1753.10253 | 1513.99471  | 1 |
| 167 | H | 75.58994 | 74.85820 | 78.26604 | -714.67738  | 1819.09770  | 1898.36494  | 1 |
| 168 | C | 75.62954 | 74.13937 | 76.15720 | 446.99263   | -555.77305  | 338.97221   | 1 |
| 169 | H | 74.65102 | 73.60779 | 76.22747 | 1953.68466  | 1892.25957  | -161.67766  | 1 |
| 170 | H | 75.66776 | 74.55781 | 75.12606 | -403.03785  | 2688.07032  | -188.43591  | 1 |
| 171 | C | 76.84100 | 73.16691 | 76.42738 | 567.86262   | 335.74681   | 434.04421   | 1 |
| 172 | H | 77.81395 | 73.70291 | 76.27021 | -1080.02275 | 1568.26081  | -1948.78900 | 1 |
| 173 | H | 76.84554 | 72.83141 | 77.49212 | -919.54108  | 2111.34692  | 1456.13463  | 1 |
| 174 | C | 76.73172 | 71.95183 | 75.46549 | 195.81897   | 173.33862   | -745.11536  | 1 |
| 175 | H | 75.96005 | 71.20637 | 75.74130 | 1405.67949  | -2301.21089 | -390.08113  | 1 |
| 176 | H | 76.63391 | 72.21978 | 74.39319 | -940.37328  | -1118.32446 | 2299.72133  | 1 |
| 177 | N | 78.09219 | 71.22369 | 75.55541 | 319.26422   | 656.36007   | -42.02424   | 1 |
| 178 | H | 78.18176 | 70.32256 | 75.00573 | 1961.03633  | 619.91968   | 1787.09422  | 1 |
| 179 | H | 78.95167 | 71.86057 | 75.19724 | 854.14343   | -2156.80752 | 1429.08711  | 1 |
| 180 | H | 78.38398 | 70.89060 | 76.51741 | 1237.02905  | -1378.50857 | -1998.28500 | 1 |
| 181 | C | 73.23747 | 75.49394 | 76.56087 | 532.53319   | -268.57236  | 517.55729   | 1 |
| 182 | O | 73.09038 | 75.06346 | 75.41128 | 266.16714   | -290.73804  | -558.88002  | 1 |
| 183 | N | 72.50926 | 75.26568 | 77.63637 | -226.25352  | 640.49678   | -270.32839  | 1 |
| 184 | H | 72.91864 | 75.69688 | 78.46578 | 2007.69063  | -1035.27229 | 1523.50231  | 1 |
| 185 | C | 71.13128 | 74.92720 | 77.62800 | -540.76542  | -573.33303  | 49.50000    | 1 |
| 186 | H | 70.79970 | 75.16568 | 78.66249 | -2374.20950 | -1036.76023 | 843.75774   | 1 |
| 187 | C | 70.40989 | 75.81994 | 76.51430 | -77.09082   | 666.87422   | -415.84136  | 1 |
| 188 | H | 70.87060 | 75.57881 | 75.51367 | -985.81834  | 617.19825   | 2463.91927  | 1 |
| 189 | O | 70.53133 | 77.24551 | 76.66707 | 293.29899   | -391.65602  | -477.80926  | 1 |
| 190 | H | 71.01676 | 77.47967 | 75.84912 | 2528.72714  | -681.76262  | -751.27122  | 1 |
| 191 | C | 68.95323 | 75.23109 | 76.59417 | 252.47363   | -605.14473  | 440.05134   | 1 |
| 192 | H | 68.29601 | 75.64609 | 75.79583 | -2052.65063 | 1456.49051  | -1043.51830 | 1 |
| 193 | H | 68.95029 | 74.11824 | 76.49011 | -2152.98800 | -1661.97574 | -161.70652  | 1 |
| 194 | H | 68.47521 | 75.46813 | 77.57312 | -473.12726  | -1584.27339 | 2165.61725  | 1 |
| 195 | C | 70.88143 | 73.34519 | 77.26028 | 360.36307   | 488.46713   | 505.10056   | 1 |
| 196 | O | 70.07737 | 72.73498 | 77.91949 | -200.08817  | -528.03552  | -385.82850  | 1 |
| 197 | N | 71.54026 | 72.99030 | 76.17201 | -597.54095  | -226.44775  | 355.20479   | 1 |
| 198 | H | 72.15655 | 73.70162 | 75.68898 | 2179.23655  | -1300.70981 | -991.33835  | 1 |
| 199 | C | 71.66717 | 71.63018 | 75.79717 | -687.68921  | 297.39807   | -249.45179  | 1 |
| 200 | H | 72.57532 | 71.62778 | 75.15381 | -349.16256  | -2467.37713 | -1101.72831 | 1 |
| 201 | C | 71.79093 | 70.66048 | 77.06496 | 672.47345   | 361.54328   | -201.62880  | 1 |
| 202 | H | 70.82934 | 70.67801 | 77.63337 | 1541.41502  | 582.18425   | 2169.97026  | 1 |
| 203 | H | 71.93040 | 69.61490 | 76.70483 | -2534.67717 | 60.25153    | 997.72295   | 1 |
| 204 | C | 72.94878 | 71.06371 | 77.99119 | 574.26774   | -389.43119  | -377.02542  | 1 |
| 205 | C | 74.29971 | 70.73761 | 77.66738 | 688.82679   | -287.33580  | -257.96133  | 1 |

|     |   |          |          |          |             |             |             |   |
|-----|---|----------|----------|----------|-------------|-------------|-------------|---|
| 206 | H | 74.53988 | 70.22764 | 76.71778 | 331.14182   | 1470.38163  | 2269.80013  | 1 |
| 207 | C | 72.65145 | 71.73377 | 79.21615 | -383.52382  | -675.04808  | 144.24917   | 1 |
| 208 | H | 71.60794 | 72.01592 | 79.45655 | 4.09847     | 1517.59662  | 2262.86397  | 1 |
| 209 | C | 75.30506 | 71.04536 | 78.58940 | -134.76730  | 428.45285   | -649.50303  | 1 |
| 210 | H | 76.34701 | 70.77942 | 78.33869 | -903.23433  | 1600.49020  | 2011.53387  | 1 |
| 211 | C | 73.69038 | 72.01026 | 80.11175 | -335.53281  | -615.00040  | -364.39058  | 1 |
| 212 | H | 73.44012 | 72.50874 | 81.06505 | 1596.45398  | -1369.33862 | 1732.02659  | 1 |
| 213 | C | 75.04690 | 71.66738 | 79.84512 | 585.48547   | -340.24194  | -406.23938  | 1 |
| 214 | O | 76.10788 | 71.92731 | 80.77040 | -419.15649  | -173.04408  | -511.94141  | 1 |
| 215 | H | 75.57624 | 72.27088 | 81.52831 | -1071.84350 | 1559.71507  | -1960.13012 | 1 |
| 216 | C | 70.33454 | 71.17974 | 74.97911 | 291.41878   | -183.13091  | 710.72246   | 1 |
| 217 | O | 70.08535 | 70.00001 | 74.85188 | 379.87695   | 523.47396   | -222.23622  | 1 |
| 218 | N | 69.69223 | 72.21507 | 74.43113 | 564.30591   | 373.09380   | 277.24371   | 1 |
| 219 | H | 70.03402 | 73.14698 | 74.66211 | -120.59931  | -2436.07824 | -1214.35098 | 1 |
| 220 | C | 68.43685 | 71.94131 | 73.82024 | 404.07514   | -299.37480  | 608.84009   | 1 |
| 221 | H | 68.35688 | 70.82672 | 73.86355 | -1071.07882 | -841.69025  | 2359.66467  | 1 |
| 222 | C | 67.31553 | 72.68324 | 74.66869 | -683.12807  | 68.71770    | -390.13096  | 1 |
| 223 | H | 67.45902 | 72.50855 | 75.75866 | 2068.88918  | 1596.58590  | 770.89603   | 1 |
| 224 | H | 67.38477 | 73.78505 | 74.52838 | 1379.86429  | 2342.49779  | -179.85638  | 1 |
| 225 | C | 65.93329 | 72.14562 | 74.18831 | -176.39967  | 537.49466   | 550.97268   | 1 |
| 226 | H | 65.87485 | 72.16462 | 73.07290 | -396.28051  | 1942.22168  | 1869.33314  | 1 |
| 227 | H | 65.80458 | 71.07673 | 74.47090 | -94.44700   | 586.00678   | -2659.20016 | 1 |
| 228 | C | 64.77777 | 73.04556 | 74.82620 | -291.69381  | -718.18079  | -150.72929  | 1 |
| 229 | H | 64.58356 | 72.89826 | 75.91899 | -2303.38776 | 1089.76242  | 964.62032   | 1 |
| 230 | H | 64.86186 | 74.14565 | 74.63427 | 884.16729   | 2568.80533  | -207.74283  | 1 |
| 231 | N | 63.66734 | 72.57395 | 74.10667 | -594.49522  | -252.81478  | 342.29276   | 1 |
| 232 | H | 63.85047 | 71.90486 | 73.37479 | -1735.17426 | 2084.05705  | -263.71605  | 1 |
| 233 | C | 62.46363 | 72.93441 | 74.30097 | 595.23177   | -271.52487  | 442.22352   | 1 |
| 234 | N | 62.21322 | 73.86575 | 75.31447 | 585.53813   | -424.79750  | -105.81303  | 1 |
| 235 | H | 62.86677 | 74.31894 | 75.95150 | 959.88797   | 1327.56823  | -2177.11905 | 1 |
| 236 | H | 61.29096 | 74.22577 | 75.56183 | 1578.48647  | 16.27378    | -2220.76233 | 1 |
| 237 | N | 61.59535 | 72.28921 | 73.40800 | -452.17763  | -390.33541  | -421.51853  | 1 |
| 238 | H | 61.78013 | 71.61660 | 72.66557 | 470.26107   | 1974.25629  | -1817.92087 | 1 |
| 239 | H | 60.58722 | 72.44697 | 73.39645 | 1856.67307  | -1573.97321 | -1224.35416 | 1 |
| 240 | C | 68.33345 | 72.53498 | 72.29822 | -531.47271  | -581.45780  | -55.06206   | 1 |
| 241 | O | 67.42827 | 72.12612 | 71.59614 | -243.00837  | 192.73507   | 609.52485   | 1 |
| 242 | N | 69.21255 | 73.47868 | 72.00213 | 343.49288   | -644.25607  | 38.09164    | 1 |
| 243 | H | 69.90959 | 73.73610 | 72.69757 | -1691.16043 | -1535.97525 | -1484.73099 | 1 |
| 244 | C | 69.05858 | 74.10640 | 70.72539 | 542.66492   | 350.14337   | 454.42563   | 1 |
| 245 | H | 68.69727 | 73.26571 | 70.09088 | 1209.57979  | -2396.95920 | 463.86744   | 1 |
| 246 | C | 67.93128 | 75.21510 | 70.86711 | -737.14309  | 145.93010   | 242.71942   | 1 |
| 247 | H | 68.17548 | 75.93809 | 71.67396 | -1050.18303 | 159.36419   | -2509.06125 | 1 |
| 248 | C | 67.79566 | 75.92907 | 69.47939 | -706.77696  | -252.88343  | -245.16230  | 1 |
| 249 | H | 66.91664 | 76.61500 | 69.45104 | -1624.64039 | -1665.49085 | 1417.86935  | 1 |
| 250 | H | 68.70733 | 76.54285 | 69.25025 | 2566.10521  | 598.51109   | 693.22305   | 1 |
| 251 | H | 67.67025 | 75.19286 | 68.65037 | -1972.69758 | 107.10018   | -1876.34312 | 1 |
| 252 | C | 66.53217 | 74.55694 | 71.13841 | 412.85148   | 672.58832   | -27.69222   | 1 |
| 253 | H | 65.70342 | 75.29842 | 71.04503 | 1447.02277  | 1762.76533  | -1490.78944 | 1 |
| 254 | H | 66.32331 | 73.73000 | 70.41672 | 1320.77379  | -145.20455  | 2378.68491  | 1 |
| 255 | H | 66.47445 | 74.12288 | 72.16519 | -1512.10848 | 1470.52031  | 1724.75147  | 1 |
| 256 | C | 70.50259 | 74.71249 | 70.23754 | -607.11113  | 499.56689   | 73.73769    | 1 |
| 257 | O | 71.17213 | 74.04601 | 69.48183 | 357.97126   | 460.81534   | 356.68785   | 1 |
| 258 | N | 70.77508 | 75.91122 | 70.73562 | 536.55407   | -368.62270  | 332.76306   | 1 |
| 259 | H | 70.11556 | 76.35905 | 71.36961 | 524.38866   | 2297.69985  | 1367.20941  | 1 |
| 260 | C | 72.01246 | 76.52034 | 70.40020 | 46.50277    | -774.29190  | -147.97904  | 1 |
| 261 | H | 72.62114 | 75.73026 | 69.89807 | 1676.51875  | 1883.29066  | 1032.55549  | 1 |
| 262 | C | 71.74273 | 77.81185 | 69.50470 | -559.41456  | -34.19198   | -556.30433  | 1 |
| 263 | H | 71.19022 | 78.56551 | 70.10806 | -64.66664   | 395.18769   | 2695.05373  | 1 |
| 264 | H | 72.70758 | 78.29306 | 69.23467 | -2703.44278 | -60.40056   | 333.79418   | 1 |
| 265 | C | 70.92114 | 77.49308 | 68.21210 | -519.76435  | 377.31045   | 459.42366   | 1 |
| 266 | H | 69.91359 | 77.09055 | 68.48426 | -1746.74323 | 1667.50644  | -1261.73691 | 1 |
| 267 | C | 70.78828 | 78.82567 | 67.38676 | 570.95554   | 16.46261    | -545.27700  | 1 |

|     |   |          |          |          |             |             |             |   |
|-----|---|----------|----------|----------|-------------|-------------|-------------|---|
| 268 | H | 70.20114 | 78.67242 | 66.45158 | 2391.58273  | 28.05277    | -1305.07271 | 1 |
| 269 | H | 70.27496 | 79.62311 | 67.97256 | 175.75588   | 917.63458   | 2559.43867  | 1 |
| 270 | H | 71.78584 | 79.22334 | 67.08807 | -1063.97851 | -2155.34650 | 1283.00462  | 1 |
| 271 | C | 71.67746 | 76.45690 | 67.30558 | 193.76014   | 2.62946     | -765.53141  | 1 |
| 272 | H | 71.12399 | 76.26026 | 66.35777 | 507.39394   | -846.55087  | 2539.60089  | 1 |
| 273 | H | 72.69370 | 76.82399 | 67.02461 | 1337.57841  | 1818.19054  | 1526.01994  | 1 |
| 274 | H | 71.79554 | 75.47601 | 67.82891 | 1100.88635  | -1172.91350 | -2199.08909 | 1 |
| 275 | C | 72.63380 | 77.14195 | 71.77271 | -549.21115  | 475.64486   | -309.38218  | 1 |
| 276 | O | 71.99941 | 77.88263 | 72.47735 | 556.06106   | -390.37755  | -78.24250   | 1 |
| 277 | O | 73.99623 | 76.89395 | 72.02314 | -572.27940  | -310.19032  | -209.75862  | 1 |
| 278 | H | 74.17442 | 76.21257 | 71.31089 | -1380.08193 | 2212.14486  | 790.85944   | 1 |

Listing 21: C00021.xmolout

|    |   |          |          |          |             |             |             |        |          |
|----|---|----------|----------|----------|-------------|-------------|-------------|--------|----------|
| 1  |   | 276      |          |          |             |             |             |        |          |
| 2  |   | 150.0000 | 150.0000 | 150.0000 | 0.0000      | 0.0000      | 0.0000***** | 2.7750 | 11100    |
|    |   | 0.2500   | 300.00   | 0.00     | 0.00        | 0.00        | -1294.0188  | 0.0000 | 300.0000 |
| 3  | H | 74.92939 | 76.99095 | 81.98003 | -2043.14101 | -1757.64893 | 399.89339   |        | 1        |
| 4  | N | 74.85370 | 77.74287 | 81.29333 | 426.75047   | 490.45733   | -334.42467  |        | 1        |
| 5  | H | 73.97356 | 78.22362 | 81.56500 | 442.25559   | -1110.30854 | -2448.52907 |        | 1        |
| 6  | C | 76.01257 | 78.56109 | 81.27914 | 415.32972   | -666.39213  | 83.73172    |        | 1        |
| 7  | H | 76.41291 | 78.56091 | 82.31597 | 879.32219   | 2491.00447  | 667.35213   |        | 1        |
| 8  | C | 77.05677 | 77.98184 | 80.19701 | 31.35357    | 477.41777   | 628.23362   |        | 1        |
| 9  | H | 76.54281 | 77.91706 | 79.20810 | 1168.38489  | 2240.25337  | -1019.71136 |        | 1        |
| 10 | H | 77.89233 | 78.70989 | 80.06030 | -360.43770  | 2534.90498  | 931.67112   |        | 1        |
| 11 | C | 77.59894 | 76.63039 | 80.58742 | 463.18208   | 512.70242   | -382.34388  |        | 1        |
| 12 | H | 76.74894 | 75.97924 | 80.89015 | 1725.29117  | 1863.52247  | -987.07854  |        | 1        |
| 13 | C | 78.29898 | 75.98735 | 79.39628 | 710.42801   | -144.27427  | -313.15367  |        | 1        |
| 14 | H | 78.71362 | 74.97882 | 79.65388 | 364.20195   | -1033.13725 | 2494.72524  |        | 1        |
| 15 | H | 77.60167 | 75.84901 | 78.52988 | 2567.61904  | 335.80679   | 847.48802   |        | 1        |
| 16 | H | 79.15501 | 76.61436 | 79.03567 | -2587.99029 | 680.92867   | -512.16411  |        | 1        |
| 17 | C | 78.57578 | 76.74455 | 81.74938 | 268.17616   | 741.64379   | -40.42634   |        | 1        |
| 18 | H | 79.00304 | 75.74722 | 82.03060 | 1283.54314  | -1945.37420 | -1411.27812 |        | 1        |
| 19 | H | 79.43877 | 77.41353 | 81.49559 | -1258.57796 | 1317.15249  | -2026.02085 |        | 1        |
| 20 | H | 78.08772 | 77.16801 | 82.66469 | -2502.84526 | 909.80597   | 575.92391   |        | 1        |
| 21 | C | 75.57971 | 80.04526 | 80.74324 | 619.36578   | -458.64843  | -172.09273  |        | 1        |
| 22 | O | 76.07535 | 81.06334 | 81.17175 | -81.40433   | 433.87611   | 522.34594   |        | 1        |
| 23 | N | 74.76467 | 79.88835 | 79.69703 | 175.23996   | -622.20190  | 341.55523   |        | 1        |
| 24 | H | 74.47910 | 78.92652 | 79.51144 | -876.57256  | -303.22879  | -2561.90213 |        | 1        |
| 25 | C | 74.12604 | 81.03393 | 79.14868 | -571.88214  | -534.10783  | -106.15033  |        | 1        |
| 26 | H | 74.76101 | 81.87762 | 79.50979 | -2713.20841 | -16.25800   | -248.80809  |        | 1        |
| 27 | C | 74.11982 | 80.86754 | 77.55381 | 166.60354   | 288.16399   | -716.09568  |        | 1        |
| 28 | H | 73.55483 | 79.93528 | 77.27767 | -2097.85574 | 1636.78449  | -586.18044  |        | 1        |
| 29 | O | 75.40623 | 80.70675 | 76.92842 | -317.80580  | -363.38227  | 484.43082   |        | 1        |
| 30 | H | 75.30492 | 79.82106 | 76.52374 | 1863.74748  | -1451.84923 | 1357.29467  |        | 1        |
| 31 | C | 73.29213 | 82.12805 | 77.11126 | 503.80731   | 517.99032   | 318.51606   |        | 1        |
| 32 | H | 73.11138 | 82.13332 | 76.01143 | 640.61020   | -2157.10410 | -1536.29104 |        | 1        |
| 33 | H | 72.29500 | 82.16905 | 77.61292 | 1687.88455  | 465.60692   | 2087.56452  |        | 1        |
| 34 | H | 73.82659 | 83.07305 | 77.36550 | -1293.07895 | -1899.88581 | -1463.57452 |        | 1        |
| 35 | C | 72.60407 | 81.12541 | 79.73832 | -153.07550  | -733.68902  | 248.70981   |        | 1        |
| 36 | O | 72.18464 | 82.24324 | 79.89478 | 186.15459   | -480.78787  | -449.34387  |        | 1        |
| 37 | N | 71.93216 | 79.97200 | 79.83336 | -487.53139  | 543.18517   | 42.03850    |        | 1        |
| 38 | C | 70.80580 | 79.87977 | 80.71760 | -699.35871  | 69.34393    | 360.10701   |        | 1        |
| 39 | H | 70.42635 | 80.91727 | 80.87714 | 2.81126     | -221.99807  | -2715.58072 |        | 1        |
| 40 | C | 69.84464 | 78.88827 | 79.91673 | -507.46439  | -592.59194  | 122.07761   |        | 1        |
| 41 | H | 69.08445 | 78.39937 | 80.56526 | -1975.08116 | 525.87560   | -1801.71556 |        | 1        |
| 42 | H | 69.28808 | 79.41630 | 79.11149 | 1588.27743  | -1913.22100 | 1113.83566  |        | 1        |
| 43 | C | 70.88528 | 77.88971 | 79.32926 | -613.62442  | -457.55993  | -194.14490  |        | 1        |
| 44 | H | 71.28111 | 77.20856 | 80.11692 | 1707.54637  | -721.27992  | 1996.92523  |        | 1        |
| 45 | H | 70.48417 | 77.24501 | 78.51534 | 758.23357   | 2100.81767  | 1560.55011  |        | 1        |
| 46 | C | 71.98834 | 78.91802 | 78.82650 | -352.41524  | 704.96076   | 49.21465    |        | 1        |
| 47 | H | 73.02142 | 78.50199 | 78.78344 | 1714.76886  | -2070.42778 | 443.35792   |        | 1        |

|     |   |          |          |          |             |             |             |   |
|-----|---|----------|----------|----------|-------------|-------------|-------------|---|
| 48  | H | 71.74858 | 79.41325 | 77.85614 | 1224.15040  | 1801.50881  | 1636.97633  | 1 |
| 49  | C | 71.22344 | 79.11157 | 82.09059 | 566.85117   | 537.05831   | 117.62814   | 1 |
| 50  | O | 72.33354 | 78.60291 | 82.28164 | -550.26779  | -406.08867  | 4.21666     | 1 |
| 51  | N | 70.16775 | 79.11643 | 82.86215 | 566.34832   | -425.77725  | 180.18749   | 1 |
| 52  | H | 69.34543 | 79.58258 | 82.48706 | 644.44502   | 2646.80550  | -52.73430   | 1 |
| 53  | C | 70.11807 | 78.33773 | 84.05777 | 612.34801   | -281.48662  | 411.56221   | 1 |
| 54  | H | 71.09455 | 78.55170 | 84.54777 | 1667.23498  | -1490.75142 | 1556.16753  | 1 |
| 55  | C | 68.81211 | 78.73392 | 84.88272 | -714.45746  | -175.43074  | 286.98927   | 1 |
| 56  | H | 67.91481 | 78.36507 | 84.31213 | -787.09484  | 1763.03619  | -1922.46060 | 1 |
| 57  | O | 68.59773 | 80.13837 | 85.10669 | -429.46514  | 516.51932   | -128.40526  | 1 |
| 58  | H | 67.73873 | 80.27742 | 84.65847 | 1981.82785  | 436.16847   | -1818.18182 | 1 |
| 59  | C | 68.99845 | 77.85016 | 86.17257 | 630.79189   | -468.94448  | 76.03230    | 1 |
| 60  | H | 68.09007 | 77.87686 | 86.81839 | -1775.71861 | 2062.30353  | 131.89849   | 1 |
| 61  | H | 69.19979 | 76.77797 | 85.91957 | -1855.14608 | 88.94118    | 1993.53760  | 1 |
| 62  | H | 69.85250 | 78.21039 | 86.79157 | -1504.82350 | -780.94249  | -2132.90992 | 1 |
| 63  | C | 69.95547 | 76.76985 | 83.61804 | 288.57638   | 618.62814   | -397.00270  | 1 |
| 64  | O | 68.88274 | 76.23813 | 83.72098 | 321.70495   | -185.26452  | 574.37218   | 1 |
| 65  | N | 71.10514 | 76.32136 | 83.10333 | -447.05792  | -446.53431  | 367.76425   | 1 |
| 66  | H | 71.86005 | 77.03393 | 82.95237 | 350.31316   | 1975.63644  | -1843.31522 | 1 |
| 67  | C | 71.56498 | 75.01800 | 83.48147 | -511.23061  | 374.03917   | -471.51480  | 1 |
| 68  | H | 72.50226 | 74.96047 | 82.88452 | 2234.79579  | -898.70890  | -1273.45190 | 1 |
| 69  | C | 71.90712 | 75.01283 | 85.04731 | 529.53781   | -159.34528  | 563.72604   | 1 |
| 70  | H | 72.55977 | 74.11547 | 85.22100 | 654.59388   | 2347.94251  | 1217.51488  | 1 |
| 71  | H | 72.53045 | 75.92344 | 85.25969 | -1526.55661 | 2103.42026  | 817.87394   | 1 |
| 72  | O | 70.79224 | 75.01040 | 85.97596 | -554.84278  | 14.12789    | 399.58769   | 1 |
| 73  | H | 70.54493 | 74.06446 | 85.91818 | 1297.06236  | 2061.84854  | 1220.68812  | 1 |
| 74  | C | 70.51519 | 73.85837 | 83.09285 | -662.15484  | -412.13544  | 123.62687   | 1 |
| 75  | O | 70.48145 | 72.81682 | 83.71467 | -540.01537  | -317.05804  | 274.91456   | 1 |
| 76  | N | 69.84815 | 74.14306 | 81.95613 | -202.76299  | -690.00100  | -131.49145  | 1 |
| 77  | H | 69.91163 | 75.12059 | 81.66896 | -702.62132  | -2617.37191 | 281.70413   | 1 |
| 78  | C | 68.68147 | 73.33536 | 81.72790 | -491.73914  | 576.34187   | 222.73509   | 1 |
| 79  | H | 69.06239 | 72.32051 | 81.98654 | 1977.17978  | -1823.58850 | -434.68928  | 1 |
| 80  | C | 67.53430 | 73.81719 | 82.70944 | -649.50797  | -328.66843  | 306.11224   | 1 |
| 81  | H | 67.37643 | 74.91601 | 82.62091 | 2075.07803  | 1452.16490  | -1004.45904 | 1 |
| 82  | C | 66.23268 | 73.02754 | 82.33991 | -615.18735  | -489.99689  | -70.96352   | 1 |
| 83  | H | 65.38066 | 73.29929 | 83.00667 | -1226.32661 | -1724.38906 | -1716.47170 | 1 |
| 84  | H | 65.91926 | 73.24625 | 81.28888 | 2381.64273  | -969.84735  | 900.46860   | 1 |
| 85  | H | 66.38251 | 71.92521 | 82.42187 | 2122.74991  | 1702.23946  | -141.36228  | 1 |
| 86  | C | 67.94642 | 73.44778 | 84.17791 | -501.86074  | -479.61276  | -376.42482  | 1 |
| 87  | H | 67.09796 | 73.57276 | 84.89147 | 993.79261   | -2246.95401 | -1177.81305 | 1 |
| 88  | H | 68.30184 | 72.39092 | 84.25413 | 42.71279    | -626.15391  | -2651.37258 | 1 |
| 89  | H | 68.78078 | 74.10458 | 84.53412 | -2026.39012 | -1590.33709 | -887.82922  | 1 |
| 90  | C | 68.27642 | 73.54365 | 80.15864 | -672.89153  | 382.57394   | -156.34072  | 1 |
| 91  | O | 67.36017 | 74.25182 | 79.82557 | 410.04627   | 221.86223   | 500.35950   | 1 |
| 92  | N | 69.08713 | 72.80270 | 79.41853 | -378.11782  | -443.79414  | -441.10984  | 1 |
| 93  | H | 69.86385 | 72.23387 | 79.81346 | 2404.15973  | -568.14894  | 1149.30085  | 1 |
| 94  | C | 69.18610 | 73.01951 | 77.99525 | -544.54484  | 466.16019   | 331.29119   | 1 |
| 95  | H | 68.18437 | 72.78229 | 77.57196 | -1409.80988 | -170.17955  | 2325.32679  | 1 |
| 96  | C | 69.55526 | 74.54872 | 77.78503 | -184.48284  | 116.78282   | -758.89137  | 1 |
| 97  | H | 68.85752 | 75.18125 | 78.37992 | 1893.78641  | 1861.14652  | 611.04528   | 1 |
| 98  | H | 70.56999 | 74.76236 | 78.19092 | -2170.79665 | -974.19311  | 1327.50117  | 1 |
| 99  | C | 69.48120 | 74.92471 | 76.27264 | 389.51668   | 672.81878   | -138.49152  | 1 |
| 100 | H | 70.29518 | 74.41408 | 75.70996 | 510.64577   | 1933.03327  | 1851.02484  | 1 |
| 101 | H | 68.53077 | 74.54322 | 75.83936 | -2302.30869 | -1105.72939 | -948.89774  | 1 |
| 102 | C | 69.56059 | 76.49143 | 76.04101 | -559.93427  | -126.34590  | 542.30857   | 1 |
| 103 | O | 70.12236 | 76.94536 | 75.07830 | -670.36003  | -111.83166  | 76.36448    | 1 |
| 104 | N | 68.87848 | 77.19008 | 76.97507 | -216.06729  | -537.07037  | 446.51379   | 1 |
| 105 | H | 68.29854 | 76.83433 | 77.74329 | -1251.96487 | 1074.12894  | -2168.52500 | 1 |
| 106 | H | 68.70937 | 78.20044 | 76.92874 | -2451.83023 | -720.73851  | 944.84612   | 1 |
| 107 | C | 70.35817 | 71.97382 | 77.64481 | 546.24052   | -563.88337  | -85.11809   | 1 |
| 108 | O | 70.88158 | 71.36687 | 78.56381 | 71.70702    | -307.40463  | 606.69673   | 1 |
| 109 | N | 70.57528 | 71.84981 | 76.33582 | 479.90863   | -504.50129  | 222.86849   | 1 |

|     |   |          |          |          |             |             |             |   |
|-----|---|----------|----------|----------|-------------|-------------|-------------|---|
| 110 | C | 71.85916 | 71.43240 | 75.83467 | 75.51268    | -600.91904  | 506.73700   | 1 |
| 111 | H | 72.14262 | 70.60452 | 76.52444 | -2033.61562 | 1795.30103  | 254.89480   | 1 |
| 112 | C | 71.53402 | 70.97470 | 74.35167 | 523.79067   | 517.99274   | 284.45581   | 1 |
| 113 | H | 72.39239 | 71.11065 | 73.64875 | 1599.61665  | -1127.00911 | 1895.98173  | 1 |
| 114 | H | 71.27085 | 69.89346 | 74.31531 | -1881.83093 | 1275.82488  | -1501.55016 | 1 |
| 115 | C | 70.30322 | 71.86171 | 73.98666 | -600.05639  | -404.05026  | 316.64485   | 1 |
| 116 | H | 70.61750 | 72.89959 | 73.73352 | -2597.05260 | 496.36221   | 657.73249   | 1 |
| 117 | H | 69.72084 | 71.48087 | 73.11736 | -1666.24518 | 1294.38985  | -1723.90591 | 1 |
| 118 | C | 69.49717 | 71.80668 | 75.35606 | 493.57570   | -129.95376  | -602.56394  | 1 |
| 119 | H | 68.79502 | 72.65138 | 75.53511 | -1469.08415 | -637.84797  | 2204.22581  | 1 |
| 120 | H | 68.96189 | 70.84504 | 75.54091 | -1038.97840 | 1068.88701  | -2280.71789 | 1 |
| 121 | C | 72.91492 | 72.66296 | 75.95757 | 188.88100   | 241.05089   | -727.87821  | 1 |
| 122 | O | 72.76129 | 73.56969 | 76.74140 | 531.88613   | -49.19943   | 427.07960   | 1 |
| 123 | N | 73.98355 | 72.41854 | 75.19830 | 708.14833   | 26.93417    | -179.73509  | 1 |
| 124 | H | 74.01643 | 71.62907 | 74.55162 | -2232.69501 | -1179.09831 | 1023.94816  | 1 |
| 125 | C | 74.95086 | 73.47270 | 75.11250 | -738.32412  | 259.92548   | 104.42456   | 1 |
| 126 | H | 75.00942 | 73.85828 | 76.15661 | 2028.89123  | 1260.02983  | 1311.33324  | 1 |
| 127 | C | 76.29665 | 72.83857 | 74.55790 | -258.65678  | -345.52513  | 661.28459   | 1 |
| 128 | H | 76.18926 | 72.56475 | 73.48384 | -1826.06090 | -1801.46097 | -918.64554  | 1 |
| 129 | C | 77.51322 | 73.81288 | 74.73219 | -541.23400  | 531.92970   | -218.41428  | 1 |
| 130 | H | 78.48829 | 73.28430 | 74.57244 | 1311.73218  | -2219.18200 | 882.19023   | 1 |
| 131 | H | 77.47322 | 74.65097 | 73.99607 | -1048.71298 | 1223.58118  | -2196.97971 | 1 |
| 132 | H | 77.54290 | 74.25781 | 75.75542 | 419.06414   | 1903.92898  | 1903.44670  | 1 |
| 133 | C | 76.63540 | 71.55595 | 75.39166 | -423.86431  | 152.66566   | -648.55262  | 1 |
| 134 | H | 77.63301 | 71.13965 | 75.11673 | 105.68386   | -2342.50080 | 1387.51238  | 1 |
| 135 | H | 76.64626 | 71.76603 | 76.48709 | -1695.63603 | -1484.73621 | -1531.02793 | 1 |
| 136 | H | 75.88117 | 70.75151 | 75.20902 | -1853.57121 | -487.39031  | 1936.59343  | 1 |
| 137 | C | 74.34227 | 74.59435 | 74.09895 | 539.71428   | -510.58232  | 267.58633   | 1 |
| 138 | O | 73.35592 | 74.43876 | 73.37854 | -15.93758   | -278.34085  | -624.49402  | 1 |
| 139 | N | 75.16468 | 75.61962 | 74.12100 | -676.81886  | 12.05292    | 276.17960   | 1 |
| 140 | H | 75.93283 | 75.55558 | 74.78376 | -1694.44250 | -373.84189  | -2100.66098 | 1 |
| 141 | C | 74.87714 | 76.82543 | 73.40039 | 412.33078   | -664.70360  | 108.35451   | 1 |
| 142 | H | 73.78688 | 76.97762 | 73.57243 | 1765.77476  | 1294.44366  | 1621.76594  | 1 |
| 143 | C | 75.79790 | 77.94167 | 74.04206 | -179.66635  | -721.95667  | -264.73915  | 1 |
| 144 | H | 75.75505 | 77.91098 | 75.15356 | -607.34922  | 2587.87032  | -598.10018  | 1 |
| 145 | H | 76.86163 | 77.74696 | 73.78477 | -359.69332  | -1479.13954 | -2259.74260 | 1 |
| 146 | C | 75.35044 | 79.33977 | 73.50103 | -240.01076  | 616.02425   | 431.85322   | 1 |
| 147 | H | 75.08522 | 79.27309 | 72.41481 | -1359.17131 | 782.54425   | 2227.99181  | 1 |
| 148 | H | 74.44059 | 79.71022 | 74.02546 | -820.36667  | 85.81767    | -2596.78715 | 1 |
| 149 | C | 76.57978 | 80.31277 | 73.70329 | -513.07015  | 236.18570   | -551.87280  | 1 |
| 150 | H | 76.83566 | 80.41775 | 74.78311 | 1816.11944  | -1183.11722 | -1650.94321 | 1 |
| 151 | H | 77.48834 | 79.89236 | 73.21464 | -1800.04429 | -1361.53473 | 1526.34643  | 1 |
| 152 | C | 76.23497 | 81.68633 | 73.08101 | 726.08972   | -253.19732  | -179.64713  | 1 |
| 153 | H | 75.94568 | 81.64906 | 72.01147 | 1224.27271  | -456.51798  | -2390.90304 | 1 |
| 154 | H | 75.50099 | 82.28820 | 73.65430 | 1206.40339  | -1150.93514 | -2154.90344 | 1 |
| 155 | N | 77.56168 | 82.51301 | 73.09641 | 329.70796   | -633.68968  | -155.67358  | 1 |
| 156 | H | 77.52394 | 83.47725 | 72.65622 | 1348.31305  | 1938.76845  | 1359.00643  | 1 |
| 157 | H | 77.97222 | 82.72923 | 74.04979 | 2096.92035  | 1446.54551  | -966.48890  | 1 |
| 158 | H | 78.38878 | 82.07549 | 72.59322 | -1197.07217 | -2303.53719 | 827.28733   | 1 |
| 159 | C | 75.19176 | 76.65988 | 71.81970 | -378.01186  | -556.17301  | -413.96481  | 1 |
| 160 | O | 75.24770 | 77.64474 | 71.11317 | -409.44433  | -307.55053  | -453.30833  | 1 |
| 161 | N | 75.40079 | 75.38190 | 71.44399 | -429.02477  | 524.70884   | 274.08502   | 1 |
| 162 | H | 75.25656 | 74.72933 | 72.21917 | 1706.34263  | -1425.96036 | 1574.38926  | 1 |
| 163 | C | 74.73556 | 75.03558 | 70.18549 | -45.25864   | -626.22952  | 478.93267   | 1 |
| 164 | H | 73.75009 | 75.54564 | 70.27629 | 1988.63164  | 570.90773   | 1772.87287  | 1 |
| 165 | C | 75.63780 | 75.64159 | 69.04867 | 551.77128   | -20.49526   | -564.54996  | 1 |
| 166 | H | 75.80800 | 76.73130 | 69.23349 | 1434.61535  | -1753.10253 | 1513.99471  | 1 |
| 167 | H | 76.64671 | 75.17012 | 69.06550 | -714.67738  | 1819.09770  | 1898.36494  | 1 |
| 168 | C | 74.94571 | 75.40999 | 67.66212 | 446.99263   | -555.77305  | 338.97221   | 1 |
| 169 | H | 74.81255 | 74.32021 | 67.46865 | 1953.68466  | 1892.25957  | -161.67766  | 1 |
| 170 | H | 73.92696 | 75.85788 | 67.63518 | -403.03785  | 2688.07032  | -188.43591  | 1 |
| 171 | C | 75.89046 | 76.07069 | 66.58050 | 567.86262   | 335.74681   | 434.04421   | 1 |

|     |   |          |          |          |             |             |             |   |
|-----|---|----------|----------|----------|-------------|-------------|-------------|---|
| 172 | H | 75.93178 | 77.17609 | 66.71573 | -1080.02275 | 1568.26081  | -1948.78900 | 1 |
| 173 | H | 76.93846 | 75.71214 | 66.70237 | -919.54108  | 2111.34692  | 1456.13463  | 1 |
| 174 | C | 75.35599 | 75.70752 | 65.17562 | 195.81897   | 173.33862   | -745.11536  | 1 |
| 175 | H | 75.37632 | 74.62473 | 64.94005 | 1405.67949  | -2301.21089 | -390.08113  | 1 |
| 176 | H | 74.35983 | 76.12911 | 64.93431 | -940.37328  | -1118.32446 | 2299.72133  | 1 |
| 177 | N | 76.32958 | 76.35662 | 64.13474 | 319.26422   | 656.36007   | -42.02424   | 1 |
| 178 | H | 76.10759 | 76.16463 | 63.11554 | 1961.03633  | 619.91968   | 1787.09422  | 1 |
| 179 | H | 76.39930 | 77.41576 | 64.13661 | 854.14343   | -2156.80752 | 1429.08711  | 1 |
| 180 | H | 77.35039 | 76.06934 | 64.18365 | 1237.02905  | -1378.50857 | -1998.28500 | 1 |
| 181 | C | 74.61704 | 73.43172 | 70.11176 | 532.53319   | -268.57236  | 517.55729   | 1 |
| 182 | O | 75.11924 | 72.82482 | 69.16830 | 266.16714   | -290.73804  | -558.88002  | 1 |
| 183 | N | 73.87644 | 72.99471 | 71.10275 | -226.25352  | 640.49678   | -270.32839  | 1 |
| 184 | H | 73.47683 | 73.67250 | 71.79093 | 2007.69063  | -1035.27229 | 1523.50231  | 1 |
| 185 | C | 73.73677 | 71.62164 | 71.42733 | -540.76542  | -573.33303  | 49.50000    | 1 |
| 186 | H | 73.00574 | 71.63617 | 72.27232 | -2374.20950 | -1036.76023 | 843.75774   | 1 |
| 187 | C | 73.17761 | 70.82605 | 70.15502 | -77.09082   | 666.87422   | -415.84136  | 1 |
| 188 | H | 73.83345 | 71.05261 | 69.26697 | -985.81834  | 617.19825   | 2463.91927  | 1 |
| 189 | O | 71.83599 | 71.17519 | 69.76963 | 293.29899   | -391.65602  | -477.80926  | 1 |
| 190 | H | 71.99230 | 71.57066 | 68.88907 | 2528.72714  | -681.76262  | -751.27122  | 1 |
| 191 | C | 73.39736 | 69.33076 | 70.58796 | 252.47363   | -605.14473  | 440.05134   | 1 |
| 192 | H | 73.10343 | 68.62375 | 69.77785 | -2052.65063 | 1456.49051  | -1043.51830 | 1 |
| 193 | H | 74.46534 | 69.12102 | 70.83585 | -2152.98800 | -1661.97574 | -161.70652  | 1 |
| 194 | H | 72.79213 | 69.07288 | 71.48788 | -473.12726  | -1584.27339 | 2165.61725  | 1 |
| 195 | C | 75.18469 | 71.02699 | 71.92366 | 360.36307   | 488.46713   | 505.10056   | 1 |
| 196 | O | 75.24996 | 70.53216 | 73.02246 | -200.08817  | -528.03552  | -385.82850  | 1 |
| 197 | N | 76.09608 | 71.10829 | 70.96764 | -597.54095  | -226.44775  | 355.20479   | 1 |
| 198 | H | 75.86387 | 71.56033 | 70.04642 | 2179.23655  | -1300.70981 | -991.33835  | 1 |
| 199 | C | 77.44654 | 70.86514 | 71.31370 | -687.68921  | 297.39807   | -249.45179  | 1 |
| 200 | H | 77.39339 | 70.35052 | 72.29982 | -349.16256  | -2467.37713 | -1101.72831 | 1 |
| 201 | C | 78.07436 | 69.98932 | 70.12855 | 672.47345   | 361.54328   | -201.62880  | 1 |
| 202 | H | 77.97833 | 70.50586 | 69.14705 | 1541.41502  | 582.18425   | 2169.97026  | 1 |
| 203 | H | 79.16081 | 69.82189 | 70.30675 | -2534.67717 | 60.25153    | 997.72295   | 1 |
| 204 | C | 77.30877 | 68.65972 | 70.10501 | 574.26774   | -389.43119  | -377.02542  | 1 |
| 205 | C | 77.59513 | 67.67871 | 71.10107 | 688.82679   | -287.33580  | -257.96133  | 1 |
| 206 | H | 78.38062 | 67.85572 | 71.85808 | 331.14182   | 1470.38163  | 2269.80013  | 1 |
| 207 | C | 76.28643 | 68.43294 | 69.13412 | -383.52382  | -675.04808  | 144.24917   | 1 |
| 208 | H | 76.05555 | 69.19688 | 68.36982 | 4.09847     | 1517.59662  | 2262.86397  | 1 |
| 209 | C | 76.85212 | 66.49914 | 71.10454 | -134.76730  | 428.45285   | -649.50303  | 1 |
| 210 | H | 77.06884 | 65.74118 | 71.87731 | -903.23433  | 1600.49020  | 2011.53387  | 1 |
| 211 | C | 75.57335 | 67.23273 | 69.17774 | -335.53281  | -615.00040  | -364.39058  | 1 |
| 212 | H | 74.78464 | 67.06567 | 68.42345 | 1596.45398  | -1369.33862 | 1732.02659  | 1 |
| 213 | C | 75.82304 | 66.22740 | 70.15715 | 585.48547   | -340.24194  | -406.23938  | 1 |
| 214 | O | 75.09974 | 65.00785 | 70.21516 | -419.15649  | -173.04408  | -511.94141  | 1 |
| 215 | H | 74.50270 | 65.13135 | 69.44003 | -1071.84350 | 1559.71507  | -1960.13012 | 1 |
| 216 | C | 78.20061 | 72.32316 | 71.39626 | 291.41878   | -183.13091  | 710.72246   | 1 |
| 217 | O | 78.43977 | 72.78145 | 72.49427 | 379.87695   | 523.47396   | -222.23622  | 1 |
| 218 | N | 78.43796 | 72.84451 | 70.20555 | 564.30591   | 373.09380   | 277.24371   | 1 |
| 219 | H | 78.07459 | 72.34586 | 69.39558 | -120.59931  | -2436.07824 | -1214.35098 | 1 |
| 220 | C | 79.20375 | 74.03554 | 70.05356 | 404.07514   | -299.37480  | 608.84009   | 1 |
| 221 | H | 78.98862 | 74.35842 | 69.00894 | -1071.07882 | -841.69025  | 2359.66467  | 1 |
| 222 | C | 78.70162 | 75.07476 | 71.14767 | -683.12807  | 68.71770    | -390.13096  | 1 |
| 223 | H | 77.58767 | 75.08522 | 71.17355 | 2068.88918  | 1596.58590  | 770.89603   | 1 |
| 224 | H | 79.02235 | 74.75288 | 72.17207 | 1379.86429  | 2342.49779  | -179.85638  | 1 |
| 225 | C | 79.26445 | 76.48967 | 70.82207 | -176.39967  | 537.49466   | 550.97268   | 1 |
| 226 | H | 80.37075 | 76.52252 | 70.95823 | -396.28051  | 1942.22168  | 1869.33314  | 1 |
| 227 | H | 79.08390 | 76.76362 | 69.75929 | -94.44700   | 586.00678   | -2659.20016 | 1 |
| 228 | C | 78.51370 | 77.50260 | 71.81711 | -291.69381  | -718.18079  | -150.72929  | 1 |
| 229 | H | 77.42879 | 77.61910 | 71.54717 | -2303.38776 | 1089.76242  | 964.62032   | 1 |
| 230 | H | 78.63053 | 77.28161 | 72.90762 | 884.16729   | 2568.80533  | -207.74283  | 1 |
| 231 | N | 79.16129 | 78.70026 | 71.51602 | -594.49522  | -252.81478  | 342.29276   | 1 |
| 232 | H | 79.20825 | 78.93940 | 70.53567 | -1735.17426 | 2084.05705  | -263.71605  | 1 |
| 233 | C | 79.65420 | 79.52281 | 72.35672 | 595.23177   | -271.52487  | 442.22352   | 1 |

|     |   |          |          |          |             |             |             |   |
|-----|---|----------|----------|----------|-------------|-------------|-------------|---|
| 234 | N | 79.56892 | 79.22238 | 73.71716 | 585.53813   | -424.79750  | -105.81303  | 1 |
| 235 | H | 79.17015 | 78.40496 | 74.17768 | 959.88797   | 1327.56823  | -2177.11905 | 1 |
| 236 | H | 79.91897 | 79.81715 | 74.46951 | 1578.48647  | 16.27378    | -2220.76233 | 1 |
| 237 | N | 80.19458 | 80.63838 | 71.70350 | -452.17763  | -390.33541  | -421.51853  | 1 |
| 238 | H | 80.29781 | 80.83545 | 70.70926 | 470.26107   | 1974.25629  | -1817.92087 | 1 |
| 239 | H | 80.68494 | 81.39056 | 72.18868 | 1856.67307  | -1573.97321 | -1224.35416 | 1 |
| 240 | C | 80.78467 | 73.72488 | 70.26729 | -531.47271  | -581.45780  | -55.06206   | 1 |
| 241 | O | 81.57282 | 74.64789 | 70.44542 | -243.00837  | 192.73507   | 609.52485   | 1 |
| 242 | N | 81.06425 | 72.44088 | 70.15438 | 343.49288   | -644.25607  | 38.09164    | 1 |
| 243 | H | 80.25455 | 71.85775 | 69.95979 | -1691.16043 | -1535.97525 | -1484.73099 | 1 |
| 244 | C | 82.43397 | 71.93363 | 70.21696 | 542.66492   | 350.14337   | 454.42563   | 1 |
| 245 | H | 82.85790 | 72.49923 | 71.08106 | 1209.57979  | -2396.95920 | 463.86744   | 1 |
| 246 | C | 82.42682 | 70.42446 | 70.37662 | -737.14309  | 145.93010   | 242.71942   | 1 |
| 247 | H | 81.86908 | 69.99608 | 69.51352 | -1050.18303 | 159.36419   | -2509.06125 | 1 |
| 248 | C | 83.83669 | 69.86142 | 70.34810 | -706.77696  | -252.88343  | -245.16230  | 1 |
| 249 | H | 83.84144 | 68.73933 | 70.42272 | -1624.64039 | -1665.49085 | 1417.86935  | 1 |
| 250 | H | 84.36758 | 70.13548 | 69.39225 | 2566.10521  | 598.51109   | 693.22305   | 1 |
| 251 | H | 84.45894 | 70.25480 | 71.19843 | -1972.69758 | 107.10018   | -1876.34312 | 1 |
| 252 | C | 81.72238 | 69.98360 | 71.64698 | 412.85148   | 672.58832   | -27.69222   | 1 |
| 253 | H | 81.63159 | 68.86390 | 71.70541 | 1447.02277  | 1762.76533  | -1490.78944 | 1 |
| 254 | H | 82.27949 | 70.32067 | 72.56384 | 1320.77379  | -145.20455  | 2378.68491  | 1 |
| 255 | H | 80.68486 | 70.41133 | 71.71726 | -1512.10848 | 1470.52031  | 1724.75147  | 1 |
| 256 | C | 83.15443 | 72.37751 | 68.78564 | -607.11113  | 499.56689   | 73.73769    | 1 |
| 257 | O | 83.37007 | 71.57054 | 67.91835 | 357.97126   | 460.81534   | 356.68785   | 1 |
| 258 | N | 83.41986 | 73.67325 | 68.81319 | 536.55407   | -368.62270  | 332.76306   | 1 |
| 259 | H | 83.10614 | 74.27152 | 69.61085 | 524.38866   | 2297.69985  | 1367.20941  | 1 |
| 260 | C | 84.00861 | 74.23103 | 67.65524 | 46.50277    | -774.29190  | -147.97904  | 1 |
| 261 | H | 84.17388 | 73.37527 | 66.95886 | 1676.51875  | 1883.29066  | 1032.55549  | 1 |
| 262 | C | 83.01160 | 75.37243 | 67.08615 | -559.41456  | -34.19198   | -556.30433  | 1 |
| 263 | H | 82.83772 | 76.13409 | 67.88318 | -64.66664   | 395.18769   | 2695.05373  | 1 |
| 264 | H | 83.48306 | 75.91722 | 66.23393 | -2703.44278 | -60.40056   | 333.79418   | 1 |
| 265 | C | 81.71196 | 74.73888 | 66.67222 | -519.76435  | 377.31045   | 459.42366   | 1 |
| 266 | H | 81.38270 | 74.05419 | 67.48725 | -1746.74323 | 1667.50644  | -1261.73691 | 1 |
| 267 | C | 80.63775 | 75.80107 | 66.47332 | 570.95554   | 16.46261    | -545.27700  | 1 |
| 268 | H | 79.65987 | 75.34980 | 66.16398 | 2391.58273  | 28.05277    | -1305.07271 | 1 |
| 269 | H | 80.45324 | 76.38286 | 67.41310 | 175.75588   | 917.63458   | 2559.43867  | 1 |
| 270 | H | 80.92910 | 76.53616 | 65.67938 | -1063.97851 | -2155.34650 | 1283.00462  | 1 |
| 271 | C | 81.87950 | 73.93130 | 65.39186 | 193.76014   | 2.62946     | -765.53141  | 1 |
| 272 | H | 80.90739 | 73.49222 | 65.04895 | 507.39394   | -846.55087  | 2539.60089  | 1 |
| 273 | H | 82.27168 | 74.56315 | 64.55342 | 1337.57841  | 1818.19054  | 1526.01994  | 1 |
| 274 | H | 82.59544 | 73.08020 | 65.53048 | 1100.88635  | -1172.91350 | -2199.08909 | 1 |
| 275 | C | 85.36155 | 74.99622 | 68.10985 | -549.21115  | 475.64486   | -309.38218  | 1 |
| 276 | O | 85.54158 | 75.43436 | 69.21506 | 556.06106   | -390.37755  | -78.24250   | 1 |
| 277 | O | 86.28950 | 75.25206 | 67.07343 | -572.27940  | -310.19032  | -209.75862  | 1 |
| 278 | H | 85.82836 | 74.76884 | 66.33214 | -1380.08193 | 2212.14486  | 790.85944   | 1 |

Listing 22: C00022.xmolout

|    |   |          |          |          |             |             |             |             |          |
|----|---|----------|----------|----------|-------------|-------------|-------------|-------------|----------|
|    |   | 276      |          |          |             |             |             |             |          |
| 1  |   | 150.0000 | 150.0000 | 150.0000 | 0.0000      | 0.0000      | 0.0000***** | 1.0227      | 4091     |
| 2  |   | 0.2500   | 300.00   | 0.00     | 0.00        | 0.00        | -1293.9901  | 0.0000      | 300.0000 |
| 3  | H | 69.64461 | 64.28404 | 66.57395 | -2043.14101 | -1757.64893 |             | 399.89339   | 1        |
| 4  | N | 69.66103 | 65.29891 | 66.51328 | 426.75047   | 490.45733   |             | -334.42467  | 1        |
| 5  | H | 68.82788 | 65.49263 | 65.96341 | 442.25559   | -1110.30854 |             | -2448.52907 | 1        |
| 6  | C | 70.86071 | 65.86502 | 66.03854 | 415.32972   | -666.39213  |             | 83.73172    | 1        |
| 7  | H | 71.65041 | 65.28495 | 66.56193 | 879.32219   | 2491.00447  |             | 667.35213   | 1        |
| 8  | C | 70.97374 | 65.77580 | 64.43145 | 31.35357    | 477.41777   |             | 628.23362   | 1        |
| 9  | H | 70.01617 | 66.10902 | 63.96394 | 1168.38489  | 2240.25337  |             | -1019.71136 | 1        |
| 10 | H | 71.74824 | 66.51068 | 64.09656 | -360.43770  | 2534.90498  |             | 931.67112   | 1        |
| 11 | C | 71.33212 | 64.38703 | 63.97385 | 463.18208   | 512.70242   |             | -382.34388  | 1        |
| 12 | H | 70.55640 | 63.67788 | 64.33984 | 1725.29117  | 1863.52247  |             | -987.07854  | 1        |
| 13 | C | 71.36237 | 64.33381 | 62.45058 | 710.42801   | -144.27427  |             | -313.15367  | 1        |

|    |   |          |          |          |             |             |             |   |
|----|---|----------|----------|----------|-------------|-------------|-------------|---|
| 14 | H | 71.60904 | 63.30698 | 62.07605 | 364.20195   | -1033.13725 | 2494.72524  | 1 |
| 15 | H | 70.37629 | 64.62349 | 62.00443 | 2567.61904  | 335.80679   | 847.48802   | 1 |
| 16 | H | 72.13229 | 65.03201 | 62.03122 | -2587.99029 | 680.92867   | -512.16411  | 1 |
| 17 | C | 72.68756 | 63.94920 | 64.51245 | 268.17616   | 741.64379   | -40.42634   | 1 |
| 18 | H | 72.99435 | 62.95393 | 64.09856 | 1283.54314  | -1945.37420 | -1411.27812 | 1 |
| 19 | H | 73.49258 | 64.68184 | 64.24507 | -1258.57796 | 1317.15249  | -2026.02085 | 1 |
| 20 | H | 72.68450 | 63.85397 | 65.62847 | -2502.84526 | 909.80597   | 575.92391   | 1 |
| 21 | C | 70.88749 | 67.44245 | 66.37150 | 619.36578   | -458.64843  | -172.09273  | 1 |
| 22 | O | 71.44419 | 68.21155 | 65.59214 | -81.40433   | 433.87611   | 522.34594   | 1 |
| 23 | N | 70.39948 | 67.75795 | 67.60796 | 175.23996   | -622.20190  | 341.55523   | 1 |
| 24 | H | 70.02784 | 66.84382 | 67.91063 | -876.57256  | -303.22879  | -2561.90213 | 1 |
| 25 | C | 69.42582 | 68.84536 | 67.60185 | -571.88214  | -534.10783  | -106.15033  | 1 |
| 26 | H | 68.71352 | 68.55183 | 66.80067 | -2713.20841 | -16.25800   | -248.80809  | 1 |
| 27 | C | 68.75238 | 68.76021 | 69.03629 | 166.60354   | 288.16399   | -716.09568  | 1 |
| 28 | H | 69.54555 | 68.86868 | 69.82786 | -2097.85574 | 1636.78449  | -586.18044  | 1 |
| 29 | O | 68.09563 | 67.50593 | 69.33190 | -317.80580  | -363.38227  | 484.43082   | 1 |
| 30 | H | 68.59616 | 67.20782 | 70.11398 | 1863.74748  | -1451.84923 | 1357.29467  | 1 |
| 31 | C | 67.83832 | 70.04036 | 69.03518 | 503.80731   | 517.99032   | 318.51606   | 1 |
| 32 | H | 67.37014 | 70.21082 | 70.03247 | 640.61020   | -2157.10410 | -1536.29104 | 1 |
| 33 | H | 68.41441 | 70.96060 | 68.77097 | 1687.88455  | 465.60692   | 2087.56452  | 1 |
| 34 | H | 67.01237 | 69.94663 | 68.29234 | -1293.07895 | -1899.88581 | -1463.57452 | 1 |
| 35 | C | 70.08454 | 70.28543 | 67.27665 | -153.07550  | -733.68902  | 248.70981   | 1 |
| 36 | O | 69.34579 | 71.02990 | 66.68360 | 186.15459   | -480.78787  | -449.34387  | 1 |
| 37 | N | 71.27286 | 70.57163 | 67.82528 | -487.53139  | 543.18517   | 42.03850    | 1 |
| 38 | C | 72.01228 | 71.73959 | 67.43611 | -699.35871  | 69.34393    | 360.10701   | 1 |
| 39 | H | 71.30175 | 72.42082 | 66.90924 | 2.81126     | -221.99807  | -2715.58072 | 1 |
| 40 | C | 72.56222 | 72.24316 | 68.84811 | -507.46439  | -592.59194  | 122.07761   | 1 |
| 41 | H | 73.41652 | 72.94975 | 68.75110 | -1975.08116 | 525.87560   | -1801.71556 | 1 |
| 42 | H | 71.77431 | 72.76650 | 69.43372 | 1588.27743  | -1913.22100 | 1113.83566  | 1 |
| 43 | C | 72.95294 | 70.88182 | 69.49784 | -613.62442  | -457.55993  | -194.14490  | 1 |
| 44 | H | 73.91375 | 70.50560 | 69.07945 | 1707.54637  | -721.27992  | 1996.92523  | 1 |
| 45 | H | 73.08906 | 70.94136 | 70.60085 | 758.23357   | 2100.81767  | 1560.55011  | 1 |
| 46 | C | 71.73024 | 69.96075 | 69.06673 | -352.41524  | 704.96076   | 49.21465    | 1 |
| 47 | H | 71.99129 | 68.90100 | 68.83590 | 1714.76886  | -2070.42778 | 443.35792   | 1 |
| 48 | H | 70.85828 | 69.98558 | 69.76192 | 1224.15040  | 1801.50881  | 1636.97633  | 1 |
| 49 | C | 73.31366 | 71.31970 | 66.56514 | 566.85117   | 537.05831   | 117.62814   | 1 |
| 50 | O | 74.30992 | 72.04648 | 66.54715 | -550.26779  | -406.08867  | 4.21666     | 1 |
| 51 | N | 73.06417 | 70.23313 | 65.89256 | 566.34832   | -425.77725  | 180.18749   | 1 |
| 52 | H | 72.13380 | 69.75369 | 65.98679 | 644.44502   | 2646.80550  | -52.73430   | 1 |
| 53 | C | 74.09442 | 69.50694 | 65.23678 | 612.34801   | -281.48662  | 411.56221   | 1 |
| 54 | H | 73.53731 | 68.65180 | 64.78917 | 1667.23498  | -1490.75142 | 1556.16753  | 1 |
| 55 | C | 74.76755 | 70.45005 | 64.13081 | -714.45746  | -175.43074  | 286.98927   | 1 |
| 56 | H | 75.11579 | 71.40590 | 64.61778 | -787.09484  | 1763.03619  | -1922.46060 | 1 |
| 57 | O | 73.89892 | 70.85536 | 63.05816 | -429.46514  | 516.51932   | -128.40526  | 1 |
| 58 | H | 73.84088 | 71.81883 | 63.21739 | 1981.82785  | 436.16847   | -1818.18182 | 1 |
| 59 | C | 76.01807 | 69.59433 | 63.71339 | 630.79189   | -468.94448  | 76.03230    | 1 |
| 60 | H | 76.64283 | 70.12738 | 62.95985 | -1775.71861 | 2062.30353  | 131.89849   | 1 |
| 61 | H | 76.67458 | 69.36937 | 64.58658 | -1855.14608 | 88.94118    | 1993.53760  | 1 |
| 62 | H | 75.71456 | 68.62021 | 63.26438 | -1504.82350 | -780.94249  | -2132.90992 | 1 |
| 63 | C | 75.15288 | 68.99136 | 66.38094 | 288.57638   | 618.62814   | -397.00270  | 1 |
| 64 | O | 75.12950 | 67.82717 | 66.69232 | 321.70495   | -185.26452  | 574.37218   | 1 |
| 65 | N | 75.97817 | 69.96103 | 66.74956 | -447.05792  | -446.53431  | 367.76425   | 1 |
| 66 | H | 75.76873 | 70.94504 | 66.48520 | 350.31316   | 1975.63644  | -1843.31522 | 1 |
| 67 | C | 76.84283 | 69.73908 | 67.88032 | -511.23061  | 374.03917   | -471.51480  | 1 |
| 68 | H | 76.15614 | 69.59192 | 68.74378 | 2234.79579  | -898.70890  | -1273.45190 | 1 |
| 69 | C | 77.74908 | 68.44366 | 67.63286 | 529.53781   | -159.34528  | 563.72604   | 1 |
| 70 | H | 78.26490 | 68.21493 | 68.60747 | 654.59388   | 2347.94251  | 1217.51488  | 1 |
| 71 | H | 77.05204 | 67.58108 | 67.42032 | -1526.55661 | 2103.42026  | 817.87394   | 1 |
| 72 | O | 78.80787 | 68.55878 | 66.64429 | -554.84278  | 14.12789    | 399.58769   | 1 |
| 73 | H | 78.30354 | 68.32314 | 65.84397 | 1297.06236  | 2061.84854  | 1220.68812  | 1 |
| 74 | C | 77.76397 | 71.05291 | 68.00009 | -662.15484  | -412.13544  | 123.62687   | 1 |
| 75 | O | 77.88188 | 71.88211 | 67.13026 | -540.01537  | -317.05804  | 274.91456   | 1 |



|     |   |          |          |          |             |             |             |   |
|-----|---|----------|----------|----------|-------------|-------------|-------------|---|
| 76  | N | 78.41428 | 70.98247 | 69.17788 | -202.76299  | -690.00100  | -131.49145  | 1 |
| 77  | H | 78.14380 | 70.21475 | 69.79402 | -702.62132  | -2617.37191 | 281.70413   | 1 |
| 78  | C | 79.19745 | 72.11352 | 69.67622 | -491.73914  | 576.34187   | 222.73509   | 1 |
| 79  | H | 79.53104 | 71.76048 | 70.67991 | 1977.17978  | -1823.58850 | -434.68928  | 1 |
| 80  | C | 80.34992 | 72.33606 | 68.71965 | -649.50797  | -328.66843  | 306.11224   | 1 |
| 81  | H | 79.92630 | 72.69287 | 67.75116 | 2075.07803  | 1452.16490  | -1004.45904 | 1 |
| 82  | C | 81.34712 | 73.35816 | 69.23563 | -615.18735  | -489.99689  | -70.96352   | 1 |
| 83  | H | 82.23806 | 73.44376 | 68.55570 | -1226.32661 | -1724.38906 | -1716.47170 | 1 |
| 84  | H | 80.90383 | 74.38596 | 69.32253 | 2381.64273  | -969.84735  | 900.46860   | 1 |
| 85  | H | 81.73338 | 73.07984 | 70.25378 | 2122.74991  | 1702.23946  | -141.36228  | 1 |
| 86  | C | 81.07945 | 71.03680 | 68.41722 | -501.86074  | -479.61276  | -376.42482  | 1 |
| 87  | H | 81.91461 | 71.18786 | 67.68037 | 993.79261   | -2246.95401 | -1177.81305 | 1 |
| 88  | H | 81.52898 | 70.58903 | 69.34486 | 42.71279    | -626.15391  | -2651.37258 | 1 |
| 89  | H | 80.38082 | 70.26959 | 67.98003 | -2026.39012 | -1590.33709 | -887.82922  | 1 |
| 90  | C | 78.05808 | 73.32426 | 69.81403 | -672.89153  | 382.57394   | -156.34072  | 1 |
| 91  | O | 77.10993 | 73.14637 | 70.53755 | 410.04627   | 221.86223   | 500.35950   | 1 |
| 92  | N | 78.40658 | 74.41047 | 69.14559 | -378.11782  | -443.79414  | -441.10984  | 1 |
| 93  | H | 79.22716 | 74.32193 | 68.55107 | 2404.15973  | -568.14894  | 1149.30085  | 1 |
| 94  | C | 77.53081 | 75.52861 | 68.99131 | -544.54484  | 466.16019   | 331.29119   | 1 |
| 95  | H | 78.15377 | 76.24999 | 68.41267 | -1409.80988 | -170.17955  | 2325.32679  | 1 |
| 96  | C | 76.28332 | 75.00638 | 68.13734 | -184.48284  | 116.78282   | -758.89137  | 1 |
| 97  | H | 76.62314 | 74.32831 | 67.32155 | 1893.78641  | 1861.14652  | 611.04528   | 1 |
| 98  | H | 75.59816 | 74.39763 | 68.76976 | -2170.79665 | -974.19311  | 1327.50117  | 1 |
| 99  | C | 75.56716 | 76.26727 | 67.57383 | 389.51668   | 672.81878   | -138.49152  | 1 |
| 100 | H | 75.22081 | 76.90930 | 68.42096 | 510.64577   | 1933.03327  | 1851.02484  | 1 |
| 101 | H | 76.29859 | 76.90625 | 67.03097 | -2302.30869 | -1105.72939 | -948.89774  | 1 |
| 102 | C | 74.34695 | 75.96811 | 66.62048 | -559.93427  | -126.34590  | 542.30857   | 1 |
| 103 | O | 73.71990 | 76.89516 | 66.17266 | -670.36003  | -111.83166  | 76.36448    | 1 |
| 104 | N | 74.11501 | 74.66403 | 66.37739 | -216.06729  | -537.07037  | 446.51379   | 1 |
| 105 | H | 74.60668 | 73.78407 | 66.67345 | -1251.96487 | 1074.12894  | -2168.52500 | 1 |
| 106 | H | 73.34779 | 74.38483 | 65.74806 | -2451.83023 | -720.73851  | 944.84612   | 1 |
| 107 | C | 77.04363 | 76.10967 | 70.41280 | 546.24052   | -563.88337  | -85.11809   | 1 |
| 108 | O | 75.98343 | 76.72160 | 70.41840 | 71.70702    | -307.40463  | 606.69673   | 1 |
| 109 | N | 77.92768 | 75.99318 | 71.39542 | 479.90863   | -504.50129  | 222.86849   | 1 |
| 110 | C | 77.54069 | 75.83367 | 72.77409 | 75.51268    | -600.91904  | 506.73700   | 1 |
| 111 | H | 76.60132 | 75.23333 | 72.76059 | -2033.61562 | 1795.30103  | 254.89480   | 1 |
| 112 | C | 78.82000 | 75.12227 | 73.39678 | 523.79067   | 517.99274   | 284.45581   | 1 |
| 113 | H | 78.88098 | 75.23576 | 74.50276 | 1599.61665  | -1127.00911 | 1895.98173  | 1 |
| 114 | H | 78.82899 | 74.03020 | 73.18254 | -1881.83093 | 1275.82488  | -1501.55016 | 1 |
| 115 | C | 79.96612 | 75.86027 | 72.63810 | -600.05639  | -404.05026  | 316.64485   | 1 |
| 116 | H | 80.12716 | 76.88005 | 73.05491 | -2597.05260 | 496.36221   | 657.73249   | 1 |
| 117 | H | 80.94766 | 75.33724 | 72.69126 | -1666.24518 | 1294.38985  | -1723.90591 | 1 |
| 118 | C | 79.36649 | 75.91861 | 71.16790 | 493.57570   | -129.95376  | -602.56394  | 1 |
| 119 | H | 79.67442 | 76.79530 | 70.55128 | -1469.08415 | -637.84797  | 2204.22581  | 1 |
| 120 | H | 79.50783 | 74.98383 | 70.57628 | -1038.97840 | 1068.88701  | -2280.71789 | 1 |
| 121 | C | 77.36275 | 77.29013 | 73.46109 | 188.88100   | 241.05089   | -727.87821  | 1 |
| 122 | O | 77.87763 | 77.52071 | 74.52325 | 531.88613   | -49.19943   | 427.07960   | 1 |
| 123 | N | 76.54108 | 78.07120 | 72.74427 | 708.14833   | 26.93417    | -179.73509  | 1 |
| 124 | H | 76.16254 | 77.66541 | 71.84714 | -2232.69501 | -1179.09831 | 1023.94816  | 1 |
| 125 | C | 76.74938 | 79.53508 | 72.82502 | -738.32412  | 259.92548   | 104.42456   | 1 |
| 126 | H | 77.84849 | 79.65236 | 72.96887 | 2028.89123  | 1260.02983  | 1311.33324  | 1 |
| 127 | C | 76.24185 | 80.14490 | 71.53963 | -258.65678  | -345.52513  | 661.28459   | 1 |
| 128 | H | 75.21172 | 79.75957 | 71.36442 | -1826.06090 | -1801.46097 | -918.64554  | 1 |
| 129 | C | 76.17523 | 81.66000 | 71.61961 | -541.23400  | 531.92970   | -218.41428  | 1 |
| 130 | H | 75.74391 | 82.10894 | 70.68305 | 1311.73218  | -2219.18200 | 882.19023   | 1 |
| 131 | H | 75.53571 | 82.00078 | 72.48281 | -1048.71298 | 1223.58118  | -2196.97971 | 1 |
| 132 | H | 77.19507 | 82.11023 | 71.76866 | 419.06414   | 1903.92898  | 1903.44670  | 1 |
| 133 | C | 77.09415 | 79.74276 | 70.34774 | -423.86431  | 152.66566   | -648.55262  | 1 |
| 134 | H | 76.66949 | 80.13352 | 69.38277 | 105.68386   | -2342.50080 | 1387.51238  | 1 |
| 135 | H | 78.14254 | 80.13916 | 70.43703 | -1695.63603 | -1484.73621 | -1531.02793 | 1 |
| 136 | H | 77.17088 | 78.62398 | 70.25034 | -1853.57121 | -487.39031  | 1936.59343  | 1 |
| 137 | C | 75.91951 | 80.10109 | 74.12908 | 539.71428   | -510.58232  | 267.58633   | 1 |

|     |   |          |          |          |             |             |             |   |
|-----|---|----------|----------|----------|-------------|-------------|-------------|---|
| 138 | O | 76.09432 | 81.21943 | 74.55661 | -15.93758   | -278.34085  | -624.49402  | 1 |
| 139 | N | 74.96182 | 79.22092 | 74.56661 | -676.81886  | 12.05292    | 276.17960   | 1 |
| 140 | H | 75.20647 | 78.38104 | 74.02709 | -1694.44250 | -373.84189  | -2100.66098 | 1 |
| 141 | C | 74.97249 | 79.13325 | 76.02762 | 412.33078   | -664.70360  | 108.35451   | 1 |
| 142 | H | 76.04173 | 79.27557 | 76.29341 | 1765.77476  | 1294.44366  | 1621.76594  | 1 |
| 143 | C | 74.03812 | 80.29275 | 76.52357 | -179.66635  | -721.95667  | -264.73915  | 1 |
| 144 | H | 74.42688 | 81.27153 | 76.15270 | -607.34922  | 2587.87032  | -598.10018  | 1 |
| 145 | H | 73.02350 | 80.18090 | 76.07727 | -359.69332  | -1479.13954 | -2259.74260 | 1 |
| 146 | C | 73.95597 | 80.26393 | 78.08942 | -240.01076  | 616.02425   | 431.85322   | 1 |
| 147 | H | 73.55954 | 79.28605 | 78.44494 | -1359.17131 | 782.54425   | 2227.99181  | 1 |
| 148 | H | 74.96275 | 80.37468 | 78.54768 | -820.36667  | 85.81767    | -2596.78715 | 1 |
| 149 | C | 73.00318 | 81.44849 | 78.52191 | -513.07015  | 236.18570   | -551.87280  | 1 |
| 150 | H | 73.40042 | 82.42563 | 78.16239 | 1816.11944  | -1183.11722 | -1650.94321 | 1 |
| 151 | H | 72.00043 | 81.33942 | 78.04766 | -1800.04429 | -1361.53473 | 1526.34643  | 1 |
| 152 | C | 72.87902 | 81.44229 | 80.06371 | 726.08972   | -253.19732  | -179.64713  | 1 |
| 153 | H | 72.40148 | 80.53530 | 80.48251 | 1224.27271  | -456.51798  | -2390.90304 | 1 |
| 154 | H | 73.82037 | 81.65622 | 80.61002 | 1206.40339  | -1150.93514 | -2154.90344 | 1 |
| 155 | N | 71.91862 | 82.61787 | 80.44980 | 329.70796   | -633.68968  | -155.67358  | 1 |
| 156 | H | 71.72839 | 82.73693 | 81.48648 | 1348.31305  | 1938.76845  | 1359.00643  | 1 |
| 157 | H | 72.23174 | 83.59676 | 80.18347 | 2096.92035  | 1446.54551  | -966.48890  | 1 |
| 158 | H | 70.93238 | 82.59243 | 80.05736 | -1197.07217 | -2303.53719 | 827.28733   | 1 |
| 159 | C | 74.40323 | 77.66730 | 76.40212 | -378.01186  | -556.17301  | -413.96481  | 1 |
| 160 | O | 73.21330 | 77.47640 | 76.65002 | -409.44433  | -307.55053  | -453.30833  | 1 |
| 161 | N | 75.38829 | 76.79386 | 76.36033 | -429.02477  | 524.70884   | 274.08502   | 1 |
| 162 | H | 76.33148 | 77.10728 | 76.12548 | 1706.34263  | -1425.96036 | 1574.38926  | 1 |
| 163 | C | 75.09817 | 75.44633 | 76.73983 | -45.25864   | -626.22952  | 478.93267   | 1 |
| 164 | H | 74.08697 | 75.29441 | 76.29579 | 1988.63164  | 570.90773   | 1772.87287  | 1 |
| 165 | C | 76.24217 | 74.50701 | 76.18912 | 551.77128   | -20.49526   | -564.54996  | 1 |
| 166 | H | 76.39426 | 74.64303 | 75.09467 | 1434.61535  | -1753.10253 | 1513.99471  | 1 |
| 167 | H | 77.21751 | 74.75818 | 76.66517 | -714.67738  | 1819.09770  | 1898.36494  | 1 |
| 168 | C | 75.80597 | 73.04338 | 76.53513 | 446.99263   | -555.77305  | 338.97221   | 1 |
| 169 | H | 75.52934 | 72.97728 | 77.61351 | 1953.68466  | 1892.25957  | -161.67766  | 1 |
| 170 | H | 74.89541 | 72.75451 | 75.96386 | -403.03785  | 2688.07032  | -188.43591  | 1 |
| 171 | C | 77.00462 | 72.06132 | 76.22372 | 567.86262   | 335.74681   | 434.04421   | 1 |
| 172 | H | 77.28628 | 72.09799 | 75.14611 | -1080.02275 | 1568.26081  | -1948.78900 | 1 |
| 173 | H | 77.91779 | 72.35979 | 76.78857 | -919.54108  | 2111.34692  | 1456.13463  | 1 |
| 174 | C | 76.54237 | 70.64334 | 76.63511 | 195.81897   | 173.33862   | -745.11536  | 1 |
| 175 | H | 76.27251 | 70.53971 | 77.70516 | 1405.67949  | -2301.21089 | -390.08113  | 1 |
| 176 | H | 75.73975 | 70.21710 | 76.00080 | -940.37328  | -1118.32446 | 2299.72133  | 1 |
| 177 | N | 77.75658 | 69.67270 | 76.45002 | 319.26422   | 656.36007   | -42.02424   | 1 |
| 178 | H | 77.56866 | 68.65573 | 76.68676 | 1961.03633  | 619.91968   | 1787.09422  | 1 |
| 179 | H | 78.16838 | 69.58769 | 75.47551 | 854.14343   | -2156.80752 | 1429.08711  | 1 |
| 180 | H | 78.61932 | 69.86537 | 77.03778 | 1237.02905  | -1378.50857 | -1998.28500 | 1 |
| 181 | C | 75.04392 | 75.36630 | 78.38202 | 532.53319   | -268.57236  | 517.55729   | 1 |
| 182 | O | 75.87053 | 74.75639 | 79.00868 | 266.16714   | -290.73804  | -558.88002  | 1 |
| 183 | N | 73.98301 | 76.04811 | 78.79440 | -226.25352  | 640.49678   | -270.32839  | 1 |
| 184 | H | 73.35695 | 76.49759 | 78.08061 | 2007.69063  | -1035.27229 | 1523.50231  | 1 |
| 185 | C | 73.51100 | 75.87942 | 80.12614 | -540.76542  | -573.33303  | 49.50000    | 1 |
| 186 | H | 72.55171 | 76.44415 | 80.12160 | -2374.20950 | -1036.76023 | 843.75774   | 1 |
| 187 | C | 73.26548 | 74.31220 | 80.33915 | -77.09082   | 666.87422   | -415.84136  | 1 |
| 188 | H | 74.27096 | 73.80557 | 80.33086 | -985.81834  | 617.19825   | 2463.91927  | 1 |
| 189 | O | 72.47167 | 73.67093 | 79.32174 | 293.29899   | -391.65602  | -477.80926  | 1 |
| 190 | H | 73.12955 | 73.06412 | 78.92981 | 2528.72714  | -681.76262  | -751.27122  | 1 |
| 191 | C | 72.64660 | 74.24166 | 81.78185 | 252.47363   | -605.14473  | 440.05134   | 1 |
| 192 | H | 72.50202 | 73.18618 | 82.11136 | -2052.65063 | 1456.49051  | -1043.51830 | 1 |
| 193 | H | 73.30445 | 74.74883 | 82.54284 | -2152.98800 | -1661.97574 | -161.70652  | 1 |
| 194 | H | 71.64744 | 74.73555 | 81.81927 | -473.12726  | -1584.27339 | 2165.61725  | 1 |
| 195 | C | 74.60571 | 76.54095 | 81.13604 | 360.36307   | 488.46713   | 505.10056   | 1 |
| 196 | O | 74.70630 | 76.15366 | 82.28896 | -200.08817  | -528.03552  | -385.82850  | 1 |
| 197 | N | 75.20250 | 77.58881 | 80.57943 | -597.54095  | -226.44775  | 355.20479   | 1 |
| 198 | H | 74.97165 | 77.79222 | 79.60911 | 2179.23655  | -1300.70981 | -991.33835  | 1 |
| 199 | C | 76.03437 | 78.40826 | 81.39139 | -687.68921  | 297.39807   | -249.45179  | 1 |

|     |   |          |          |          |             |             |             |   |
|-----|---|----------|----------|----------|-------------|-------------|-------------|---|
| 200 | H | 76.51299 | 77.68657 | 82.09220 | -349.16256  | -2467.37713 | -1101.72831 | 1 |
| 201 | C | 77.01037 | 79.35195 | 80.55476 | 672.47345   | 361.54328   | -201.62880  | 1 |
| 202 | H | 76.41727 | 80.15550 | 80.06163 | 1541.41502  | 582.18425   | 2169.97026  | 1 |
| 203 | H | 77.69192 | 79.87451 | 81.26564 | -2534.67717 | 60.25153    | 997.72295   | 1 |
| 204 | C | 77.82393 | 78.58755 | 79.49593 | 574.26774   | -389.43119  | -377.02542  | 1 |
| 205 | C | 78.67176 | 77.49488 | 79.84413 | 688.82679   | -287.33580  | -257.96133  | 1 |
| 206 | H | 78.74697 | 77.14912 | 80.89120 | 331.14182   | 1470.38163  | 2269.80013  | 1 |
| 207 | C | 77.74196 | 79.04747 | 78.14840 | -383.52382  | -675.04808  | 144.24917   | 1 |
| 208 | H | 77.11015 | 79.91481 | 77.88441 | 4.09847     | 1517.59662  | 2262.86397  | 1 |
| 209 | C | 79.40002 | 76.86982 | 78.83062 | -134.76730  | 428.45285   | -649.50303  | 1 |
| 210 | H | 80.05506 | 76.02152 | 79.09534 | -903.23433  | 1600.49020  | 2011.53387  | 1 |
| 211 | C | 78.48768 | 78.38545 | 77.17126 | -335.53281  | -615.00040  | -364.39058  | 1 |
| 212 | H | 78.41591 | 78.74705 | 76.12323 | 1596.45398  | -1369.33862 | 1732.02659  | 1 |
| 213 | C | 79.32894 | 77.27388 | 77.46669 | 585.48547   | -340.24194  | -406.23938  | 1 |
| 214 | O | 80.08134 | 76.60462 | 76.46698 | -419.15649  | -173.04408  | -511.94141  | 1 |
| 215 | H | 79.65692 | 76.99318 | 75.65822 | -1071.84350 | 1559.71507  | -1960.13012 | 1 |
| 216 | C | 75.13168 | 79.53726 | 82.14567 | 291.41878   | -183.13091  | 710.72246   | 1 |
| 217 | O | 75.54098 | 80.66989 | 82.27432 | 379.87695   | 523.47396   | -222.23622  | 1 |
| 218 | N | 73.96419 | 79.02272 | 82.54154 | 564.30591   | 373.09380   | 277.24371   | 1 |
| 219 | H | 73.82560 | 78.01479 | 82.39882 | -120.59931  | -2436.07824 | -1214.35098 | 1 |
| 220 | C | 73.22728 | 79.73061 | 83.53701 | 404.07514   | -299.37480  | 608.84009   | 1 |
| 221 | H | 73.59455 | 80.78010 | 83.44656 | -1071.07882 | -841.69025  | 2359.66467  | 1 |
| 222 | C | 71.70137 | 79.51386 | 83.17856 | -683.12807  | 68.71770    | -390.13096  | 1 |
| 223 | H | 71.51075 | 79.77516 | 82.11409 | 2068.88918  | 1596.58590  | 770.89603   | 1 |
| 224 | H | 71.42743 | 78.43925 | 83.27579 | 1379.86429  | 2342.49779  | -179.85638  | 1 |
| 225 | C | 70.82850 | 80.39375 | 84.12531 | -176.39967  | 537.49466   | 550.97268   | 1 |
| 226 | H | 70.94677 | 80.07859 | 85.18927 | -396.28051  | 1942.22168  | 1869.33314  | 1 |
| 227 | H | 71.12338 | 81.46614 | 84.08375 | -94.44700   | 586.00678   | -2659.20016 | 1 |
| 228 | C | 69.34098 | 80.16596 | 83.58802 | -291.69381  | -718.18079  | -150.72929  | 1 |
| 229 | H | 69.16056 | 80.48474 | 82.53122 | -2303.38776 | 1089.76242  | 964.62032   | 1 |
| 230 | H | 68.95405 | 79.12062 | 83.69492 | 884.16729   | 2568.80533  | -207.74283  | 1 |
| 231 | N | 68.54725 | 80.99144 | 84.39159 | -594.49522  | -252.81478  | 342.29276   | 1 |
| 232 | H | 69.01201 | 81.48846 | 85.13523 | -1735.17426 | 2084.05705  | -263.71605  | 1 |
| 233 | C | 67.29297 | 81.13738 | 84.24085 | 595.23177   | -271.52487  | 442.22352   | 1 |
| 234 | N | 66.68127 | 80.42751 | 83.20079 | 585.53813   | -424.79750  | -105.81303  | 1 |
| 235 | H | 67.09160 | 79.78054 | 82.52859 | 959.88797   | 1327.56823  | -2177.11905 | 1 |
| 236 | H | 65.68479 | 80.45295 | 82.98367 | 1578.48647  | 16.27378    | -2220.76233 | 1 |
| 237 | N | 66.76592 | 82.02096 | 85.19260 | -452.17763  | -390.33541  | -421.51853  | 1 |
| 238 | H | 67.21348 | 82.52883 | 85.95417 | 470.26107   | 1974.25629  | -1817.92087 | 1 |
| 239 | H | 65.77488 | 82.26108 | 85.24092 | 1856.67307  | -1573.97321 | -1224.35416 | 1 |
| 240 | C | 73.57462 | 79.04202 | 84.98220 | -531.47271  | -581.45780  | -55.06206   | 1 |
| 241 | O | 72.70759 | 78.74039 | 85.76808 | -243.00837  | 192.73507   | 609.52485   | 1 |
| 242 | N | 74.89761 | 78.95663 | 85.14015 | 343.49288   | -644.25607  | 38.09164    | 1 |
| 243 | H | 75.43407 | 79.23760 | 84.31785 | -1691.16043 | -1535.97525 | -1484.73099 | 1 |
| 244 | C | 75.49301 | 78.13315 | 86.19206 | 542.66492   | 350.14337   | 454.42563   | 1 |
| 245 | H | 74.95201 | 78.42002 | 87.12424 | 1209.57979  | -2396.95920 | 463.86744   | 1 |
| 246 | C | 75.31635 | 76.66493 | 85.84676 | -737.14309  | 145.93010   | 242.71942   | 1 |
| 247 | H | 75.88326 | 76.45991 | 84.91051 | -1050.18303 | 159.36419   | -2509.06125 | 1 |
| 248 | C | 75.87081 | 75.78003 | 86.94804 | -706.77696  | -252.88343  | -245.16230  | 1 |
| 249 | H | 75.79698 | 74.68886 | 86.68579 | -1624.64039 | -1665.49085 | 1417.86935  | 1 |
| 250 | H | 76.95692 | 76.00143 | 87.15653 | 2566.10521  | 598.51109   | 693.22305   | 1 |
| 251 | H | 75.31602 | 75.92686 | 87.91558 | -1972.69758 | 107.10018   | -1876.34312 | 1 |
| 252 | C | 73.86214 | 76.31950 | 85.57883 | 412.85148   | 672.58832   | -27.69222   | 1 |
| 253 | H | 73.71501 | 75.22057 | 85.38791 | 1447.02277  | 1762.76533  | -1490.78944 | 1 |
| 254 | H | 73.20289 | 76.61308 | 86.44494 | 1320.77379  | -145.20455  | 2378.68491  | 1 |
| 255 | H | 73.47183 | 76.87843 | 84.68052 | -1512.10848 | 1470.52031  | 1724.75147  | 1 |
| 256 | C | 77.11042 | 78.51463 | 86.17056 | -607.11113  | 499.56689   | 73.73769    | 1 |
| 257 | O | 77.72717 | 78.61090 | 85.13830 | 357.97126   | 460.81534   | 356.68785   | 1 |
| 258 | N | 77.54411 | 78.63236 | 87.41893 | 536.55407   | -368.62270  | 332.76306   | 1 |
| 259 | H | 76.88310 | 78.45466 | 88.17363 | 524.38866   | 2297.69985  | 1367.20941  | 1 |
| 260 | C | 78.94108 | 78.67817 | 87.64550 | 46.50277    | -774.29190  | -147.97904  | 1 |
| 261 | H | 79.38965 | 78.84742 | 86.63937 | 1676.51875  | 1883.29066  | 1032.55549  | 1 |

|     |   |          |          |          |             |             |             |   |
|-----|---|----------|----------|----------|-------------|-------------|-------------|---|
| 262 | C | 79.26801 | 79.83626 | 88.72399 | -559.41456  | -34.19198   | -556.30433  | 1 |
| 263 | H | 78.88806 | 79.52345 | 89.72553 | -64.66664   | 395.18769   | 2695.05373  | 1 |
| 264 | H | 80.37055 | 79.96054 | 88.84393 | -2703.44278 | -60.40056   | 333.79418   | 1 |
| 265 | C | 78.61989 | 81.12703 | 88.30175 | -519.76435  | 377.31045   | 459.42366   | 1 |
| 266 | H | 77.54130 | 80.92707 | 88.10880 | -1746.74323 | 1667.50644  | -1261.73691 | 1 |
| 267 | C | 78.72981 | 82.16426 | 89.41260 | 570.95554   | 16.46261    | -545.27700  | 1 |
| 268 | H | 78.22387 | 83.12439 | 89.13411 | 2391.58273  | 28.05277    | -1305.07271 | 1 |
| 269 | H | 78.25918 | 81.80417 | 90.36360 | 175.75588   | 917.63458   | 2559.43867  | 1 |
| 270 | H | 79.79851 | 82.40817 | 89.64414 | -1063.97851 | -2155.34650 | 1283.00462  | 1 |
| 271 | C | 79.24076 | 81.67396 | 87.02356 | 193.76014   | 2.62946     | -765.53141  | 1 |
| 272 | H | 78.77515 | 82.64796 | 86.72262 | 507.39394   | -846.55087  | 2539.60089  | 1 |
| 273 | H | 80.34043 | 81.85410 | 87.14152 | 1337.57841  | 1818.19054  | 1526.01994  | 1 |
| 274 | H | 79.10703 | 80.96528 | 86.16515 | 1100.88635  | -1172.91350 | -2199.08909 | 1 |
| 275 | C | 79.36109 | 77.27264 | 88.32042 | -549.21115  | 475.64486   | -309.38218  | 1 |
| 276 | O | 78.56928 | 76.45586 | 88.71288 | 556.06106   | -390.37755  | -78.24250   | 1 |
| 277 | O | 80.75049 | 77.06789 | 88.49343 | -572.27940  | -310.19032  | -209.75862  | 1 |
| 278 | H | 81.08234 | 77.90702 | 88.06790 | -1380.08193 | 2212.14486  | 790.85944   | 1 |

Listing 23: C00023.xmolout

|    |   |          |          |          |             |             |             |        |          |
|----|---|----------|----------|----------|-------------|-------------|-------------|--------|----------|
| 1  |   | 276      |          |          |             |             |             |        |          |
| 2  |   | 150.0000 | 150.0000 | 150.0000 | 0.0000      | 0.0000      | 0.0000***** | 2.7750 | 11100    |
|    |   | 0.2500   | 300.00   | 0.00     | 0.00        | 0.00        | -1293.9865  | 0.0000 | 300.0000 |
| 3  | H | 70.24329 | 64.92098 | 78.43268 | -2043.14101 | -1757.64893 | 399.89339   |        | 1        |
| 4  | N | 70.07379 | 65.33491 | 77.51672 | 426.75047   | 490.45733   | -334.42467  |        | 1        |
| 5  | H | 69.12054 | 65.69838 | 77.61394 | 442.25559   | -1110.30854 | -2448.52907 |        | 1        |
| 6  | C | 70.99129 | 66.35360 | 77.16564 | 415.32972   | -666.39213  | 83.73172    |        | 1        |
| 7  | H | 71.78995 | 66.29215 | 77.93732 | 879.32219   | 2491.00447  | 667.35213   |        | 1        |
| 8  | C | 71.56401 | 66.08885 | 75.67739 | 31.35357    | 477.41777   | 628.23362   |        | 1        |
| 9  | H | 70.73310 | 66.19372 | 74.94031 | 1168.38489  | 2240.25337  | -1019.71136 |        | 1        |
| 10 | H | 72.32057 | 66.86010 | 75.40117 | -360.43770  | 2534.90498  | 931.67112   |        | 1        |
| 11 | C | 72.15519 | 64.70810 | 75.61729 | 463.18208   | 512.70242   | -382.34388  |        | 1        |
| 12 | H | 71.42469 | 64.00720 | 76.08191 | 1725.29117  | 1863.52247  | -987.07854  |        | 1        |
| 13 | C | 72.39302 | 64.27567 | 74.17538 | 710.42801   | -144.27427  | -313.15367  |        | 1        |
| 14 | H | 72.68189 | 63.19530 | 74.11206 | 364.20195   | -1033.13725 | 2494.72524  |        | 1        |
| 15 | H | 71.47779 | 64.41290 | 73.54397 | 2567.61904  | 335.80679   | 847.48802   |        | 1        |
| 16 | H | 73.21928 | 64.86245 | 73.69859 | -2587.99029 | 680.92867   | -512.16411  |        | 1        |
| 17 | C | 73.47079 | 64.63936 | 76.38257 | 268.17616   | 741.64379   | -40.42634   |        | 1        |
| 18 | H | 73.89520 | 63.60262 | 76.38268 | 1283.54314  | -1945.37420 | -1411.27812 |        | 1        |
| 19 | H | 74.24225 | 65.31298 | 75.92839 | -1258.57796 | 1317.15249  | -2026.02085 |        | 1        |
| 20 | H | 73.34675 | 64.94834 | 77.45217 | -2502.84526 | 909.80597   | 575.92391   |        | 1        |
| 21 | C | 70.12237 | 67.71303 | 77.22188 | 619.36578   | -458.64843  | -172.09273  |        | 1        |
| 22 | O | 68.98516 | 67.74802 | 77.71898 | -81.40433   | 433.87611   | 522.34594   |        | 1        |
| 23 | N | 70.86590 | 68.69376 | 76.78698 | 175.23996   | -622.20190  | 341.55523   |        | 1        |
| 24 | H | 71.77524 | 68.42529 | 76.41395 | -876.57256  | -303.22879  | -2561.90213 |        | 1        |
| 25 | C | 70.38060 | 70.00387 | 76.44592 | -571.88214  | -534.10783  | -106.15033  |        | 1        |
| 26 | H | 70.18069 | 69.95912 | 75.35282 | -2713.20841 | -16.25800   | -248.80809  |        | 1        |
| 27 | C | 69.05478 | 70.37017 | 77.25306 | 166.60354   | 288.16399   | -716.09568  |        | 1        |
| 28 | H | 69.15084 | 69.94716 | 78.29627 | -2097.85574 | 1636.78449  | -586.18044  |        | 1        |
| 29 | O | 67.85404 | 69.76936 | 76.76141 | -317.80580  | -363.38227  | 484.43082   |        | 1        |
| 30 | H | 67.90371 | 68.86881 | 77.26648 | 1863.74748  | -1451.84923 | 1357.29467  |        | 1        |
| 31 | C | 69.07887 | 71.94127 | 77.28066 | 503.80731   | 517.99032   | 318.51606   |        | 1        |
| 32 | H | 68.24453 | 72.34898 | 77.89747 | 640.61020   | -2157.10410 | -1536.29104 |        | 1        |
| 33 | H | 70.03004 | 72.34042 | 77.70346 | 1687.88455  | 465.60692   | 2087.56452  |        | 1        |
| 34 | H | 68.96849 | 72.36639 | 76.25602 | -1293.07895 | -1899.88581 | -1463.57452 |        | 1        |
| 35 | C | 71.70914 | 70.90449 | 76.68358 | -153.07550  | -733.68902  | 248.70981   |        | 1        |
| 36 | O | 72.28285 | 71.21223 | 75.65124 | 186.15459   | -480.78787  | -449.34387  |        | 1        |
| 37 | N | 72.07962 | 71.10282 | 77.94757 | -487.53139  | 543.18517   | 42.03850    |        | 1        |
| 38 | C | 73.19827 | 71.91992 | 78.32865 | -699.35871  | 69.34393    | 360.10701   |        | 1        |
| 39 | H | 73.13912 | 72.85827 | 77.73327 | 2.81126     | -221.99807  | -2715.58072 |        | 1        |
| 40 | C | 73.00268 | 72.07988 | 79.89402 | -507.46439  | -592.59194  | 122.07761   |        | 1        |
| 41 | H | 73.94872 | 72.34854 | 80.41699 | -1975.08116 | 525.87560   | -1801.71556 |        | 1        |

|     |   |          |          |          |             |             |             |   |
|-----|---|----------|----------|----------|-------------|-------------|-------------|---|
| 42  | H | 72.25514 | 72.86529 | 80.14547 | 1588.27743  | -1913.22100 | 1113.83566  | 1 |
| 43  | C | 72.48280 | 70.65365 | 80.25346 | -613.62442  | -457.55993  | -194.14490  | 1 |
| 44  | H | 73.30471 | 69.90222 | 80.21072 | 1707.54637  | -721.27992  | 1996.92523  | 1 |
| 45  | H | 72.02806 | 70.58032 | 81.26689 | 758.23357   | 2100.81767  | 1560.55011  | 1 |
| 46  | C | 71.43763 | 70.43719 | 79.07549 | -352.41524  | 704.96076   | 49.21465    | 1 |
| 47  | H | 71.24368 | 69.37599 | 78.79390 | 1714.76886  | -2070.42778 | 443.35792   | 1 |
| 48  | H | 70.46776 | 70.96297 | 79.23757 | 1224.15040  | 1801.50881  | 1636.97633  | 1 |
| 49  | C | 74.61496 | 71.12903 | 78.12453 | 566.85117   | 537.05831   | 117.62814   | 1 |
| 50  | O | 75.56252 | 71.37041 | 78.83570 | -550.26779  | -406.08867  | 4.21666     | 1 |
| 51  | N | 74.55054 | 70.34321 | 77.05887 | 566.34832   | -425.77725  | 180.18749   | 1 |
| 52  | H | 73.67340 | 70.30898 | 76.51410 | 644.44502   | 2646.80550  | -52.73430   | 1 |
| 53  | C | 75.48815 | 69.27576 | 76.94015 | 612.34801   | -281.48662  | 411.56221   | 1 |
| 54  | H | 76.26285 | 69.53574 | 77.69926 | 1667.23498  | -1490.75142 | 1556.16753  | 1 |
| 55  | C | 74.70168 | 67.92356 | 77.29390 | -714.45746  | -175.43074  | 286.98927   | 1 |
| 56  | H | 74.02434 | 67.67615 | 76.43180 | -787.09484  | 1763.03619  | -1922.46060 | 1 |
| 57  | O | 73.84816 | 67.97101 | 78.45171 | -429.46514  | 516.51932   | -128.40526  | 1 |
| 58  | H | 72.96704 | 68.05112 | 78.02953 | 1981.82785  | 436.16847   | -1818.18182 | 1 |
| 59  | C | 75.87904 | 66.88472 | 77.36153 | 630.79189   | -468.94448  | 76.03230    | 1 |
| 60  | H | 75.51229 | 65.85927 | 77.59837 | -1775.71861 | 2062.30353  | 131.89849   | 1 |
| 61  | H | 76.43601 | 66.82517 | 76.38662 | -1855.14608 | 88.94118    | 1993.53760  | 1 |
| 62  | H | 76.61836 | 67.15534 | 78.15146 | -1504.82350 | -780.94249  | -2132.90992 | 1 |
| 63  | C | 76.03079 | 69.26925 | 75.40503 | 288.57638   | 618.62814   | -397.00270  | 1 |
| 64  | O | 76.36221 | 68.19854 | 74.87810 | 321.70495   | -185.26452  | 574.37218   | 1 |
| 65  | N | 76.10414 | 70.48315 | 74.92130 | -447.05792  | -446.53431  | 367.76425   | 1 |
| 66  | H | 75.78880 | 71.18727 | 75.59024 | 350.31316   | 1975.63644  | -1843.31522 | 1 |
| 67  | C | 76.64236 | 70.87178 | 73.66966 | -511.23061  | 374.03917   | -471.51480  | 1 |
| 68  | H | 76.53773 | 71.98261 | 73.71600 | 2234.79579  | -898.70890  | -1273.45190 | 1 |
| 69  | C | 78.17421 | 70.41593 | 73.64141 | 529.53781   | -159.34528  | 563.72604   | 1 |
| 70  | H | 78.71571 | 70.95519 | 72.81591 | 654.59388   | 2347.94251  | 1217.51488  | 1 |
| 71  | H | 78.62636 | 70.79795 | 74.59670 | -1526.55661 | 2103.42026  | 817.87394   | 1 |
| 72  | O | 78.46986 | 69.01845 | 73.49019 | -554.84278  | 14.12789    | 399.58769   | 1 |
| 73  | H | 77.67048 | 68.62234 | 74.00074 | 1297.06236  | 2061.84854  | 1220.68812  | 1 |
| 74  | C | 75.77229 | 70.25700 | 72.44379 | -662.15484  | -412.13544  | 123.62687   | 1 |
| 75  | O | 76.26956 | 70.07908 | 71.35753 | -540.01537  | -317.05804  | 274.91456   | 1 |
| 76  | N | 74.48822 | 70.10631 | 72.78950 | -202.76299  | -690.00100  | -131.49145  | 1 |
| 77  | H | 74.26199 | 70.34202 | 73.75562 | -702.62132  | -2617.37191 | 281.70413   | 1 |
| 78  | C | 73.50364 | 69.71302 | 71.78247 | -491.73914  | 576.34187   | 222.73509   | 1 |
| 79  | H | 74.15847 | 69.28373 | 70.98440 | 1977.17978  | -1823.58850 | -434.68928  | 1 |
| 80  | C | 72.55775 | 68.71376 | 72.42217 | -649.50797  | -328.66843  | 306.11224   | 1 |
| 81  | H | 72.08254 | 69.18869 | 73.30861 | 2075.07803  | 1452.16490  | -1004.45904 | 1 |
| 82  | C | 71.46546 | 68.29121 | 71.45671 | -615.18735  | -489.99689  | -70.96352   | 1 |
| 83  | H | 70.74164 | 67.57436 | 71.93323 | -1226.32661 | -1724.38906 | -1716.47170 | 1 |
| 84  | H | 70.87285 | 69.17344 | 71.08828 | 2381.64273  | -969.84735  | 900.46860   | 1 |
| 85  | H | 71.89283 | 67.77935 | 70.55065 | 2122.74991  | 1702.23946  | -141.36228  | 1 |
| 86  | C | 73.30903 | 67.49176 | 72.92180 | -501.86074  | -479.61276  | -376.42482  | 1 |
| 87  | H | 72.62045 | 66.76293 | 73.42718 | 993.79261   | -2246.95401 | -1177.81305 | 1 |
| 88  | H | 73.81339 | 66.94438 | 72.07860 | 42.71279    | -626.15391  | -2651.37258 | 1 |
| 89  | H | 74.11386 | 67.77257 | 73.65789 | -2026.39012 | -1590.33709 | -887.82922  | 1 |
| 90  | C | 72.78502 | 71.11979 | 71.25332 | -672.89153  | 382.57394   | -156.34072  | 1 |
| 91  | O | 73.26980 | 71.69321 | 70.30739 | 410.04627   | 221.86223   | 500.35950   | 1 |
| 92  | N | 71.74779 | 71.49083 | 71.98458 | -378.11782  | -443.79414  | -441.10984  | 1 |
| 93  | H | 71.46298 | 70.89139 | 72.75571 | 2404.15973  | -568.14894  | 1149.30085  | 1 |
| 94  | C | 70.93106 | 72.55363 | 71.47926 | -544.54484  | 466.16019   | 331.29119   | 1 |
| 95  | H | 71.26938 | 72.65329 | 70.41958 | -1409.80988 | -170.17955  | 2325.32679  | 1 |
| 96  | C | 69.43523 | 72.02773 | 71.62749 | -184.48284  | 116.78282   | -758.89137  | 1 |
| 97  | H | 69.36572 | 70.96830 | 71.29373 | 1893.78641  | 1861.14652  | 611.04528   | 1 |
| 98  | H | 69.11663 | 72.03019 | 72.69415 | -2170.79665 | -974.19311  | 1327.50117  | 1 |
| 99  | C | 68.51187 | 72.94127 | 70.76706 | 389.51668   | 672.81878   | -138.49152  | 1 |
| 100 | H | 68.55237 | 73.98984 | 71.14445 | 510.64577   | 1933.03327  | 1851.02484  | 1 |
| 101 | H | 68.90772 | 73.01671 | 69.72993 | -2302.30869 | -1105.72939 | -948.89774  | 1 |
| 102 | C | 67.01730 | 72.44374 | 70.71533 | -559.93427  | -126.34590  | 542.30857   | 1 |
| 103 | O | 66.20754 | 73.07399 | 70.08623 | -670.36003  | -111.83166  | 76.36448    | 1 |

|     |   |          |          |          |             |             |             |   |
|-----|---|----------|----------|----------|-------------|-------------|-------------|---|
| 104 | N | 66.78536 | 71.30231 | 71.39855 | -216.06729  | -537.07037  | 446.51379   | 1 |
| 105 | H | 67.42162 | 70.73704 | 71.97268 | -1251.96487 | 1074.12894  | -2168.52500 | 1 |
| 106 | H | 65.86289 | 70.85983 | 71.47615 | -2451.83023 | -720.73851  | 944.84612   | 1 |
| 107 | C | 71.06794 | 73.96610 | 72.26131 | 546.24052   | -563.88337  | -85.11809   | 1 |
| 108 | O | 70.56050 | 74.92741 | 71.69798 | 71.70702    | -307.40463  | 606.69673   | 1 |
| 109 | N | 71.72774 | 73.95673 | 73.41975 | 479.90863   | -504.50129  | 222.86849   | 1 |
| 110 | C | 71.38315 | 74.81378 | 74.51774 | 75.51268    | -600.91904  | 506.73700   | 1 |
| 111 | H | 70.27060 | 74.85466 | 74.55186 | -2033.61562 | 1795.30103  | 254.89480   | 1 |
| 112 | C | 72.10344 | 74.12527 | 75.74812 | 523.79067   | 517.99274   | 284.45581   | 1 |
| 113 | H | 72.28442 | 74.83820 | 76.58747 | 1599.61665  | -1127.00911 | 1895.98173  | 1 |
| 114 | H | 71.49869 | 73.28464 | 76.15866 | -1881.83093 | 1275.82488  | -1501.55016 | 1 |
| 115 | C | 73.42036 | 73.61366 | 75.07810 | -600.05639  | -404.05026  | 316.64485   | 1 |
| 116 | H | 74.16821 | 74.43878 | 74.97997 | -2597.05260 | 496.36221   | 657.73249   | 1 |
| 117 | H | 73.92832 | 72.79684 | 75.64648 | -1666.24518 | 1294.38985  | -1723.90591 | 1 |
| 118 | C | 72.91290 | 73.13897 | 73.65147 | 493.57570   | -129.95376  | -602.56394  | 1 |
| 119 | H | 73.61755 | 73.30952 | 72.80033 | -1469.08415 | -637.84797  | 2204.22581  | 1 |
| 120 | H | 72.55728 | 72.08040 | 73.62247 | -1038.97840 | 1068.88701  | -2280.71789 | 1 |
| 121 | C | 72.07572 | 76.29720 | 74.41280 | 188.88100   | 241.05089   | -727.87821  | 1 |
| 122 | O | 72.47179 | 76.80381 | 75.43611 | 531.88613   | -49.19943   | 427.07960   | 1 |
| 123 | N | 71.97693 | 76.78549 | 73.19174 | 708.14833   | 26.93417    | -179.73509  | 1 |
| 124 | H | 71.47117 | 76.21775 | 72.47123 | -2232.69501 | -1179.09831 | 1023.94816  | 1 |
| 125 | C | 72.71233 | 77.92562 | 72.77670 | -738.32412  | 259.92548   | 104.42456   | 1 |
| 126 | H | 72.21889 | 78.22640 | 71.82637 | 2028.89123  | 1260.02983  | 1311.33324  | 1 |
| 127 | C | 72.64399 | 79.03427 | 73.91233 | -258.65678  | -345.52513  | 661.28459   | 1 |
| 128 | H | 73.09883 | 78.65837 | 74.86574 | -1826.06090 | -1801.46097 | -918.64554  | 1 |
| 129 | C | 73.36658 | 80.33506 | 73.42265 | -541.23400  | 531.92970   | -218.41428  | 1 |
| 130 | H | 73.15111 | 81.19422 | 74.10080 | 1311.73218  | -2219.18200 | 882.19023   | 1 |
| 131 | H | 74.48967 | 80.21214 | 73.38891 | -1048.71298 | 1223.58118  | -2196.97971 | 1 |
| 132 | H | 73.03017 | 80.63121 | 72.40119 | 419.06414   | 1903.92898  | 1903.44670  | 1 |
| 133 | C | 71.13753 | 79.41181 | 74.13081 | -423.86431  | 152.66566   | -648.55262  | 1 |
| 134 | H | 71.01877 | 80.20759 | 74.90308 | 105.68386   | -2342.50080 | 1387.51238  | 1 |
| 135 | H | 70.66602 | 79.78431 | 73.19148 | -1695.63603 | -1484.73621 | -1531.02793 | 1 |
| 136 | H | 70.54865 | 78.52729 | 74.47022 | -1853.57121 | -487.39031  | 1936.59343  | 1 |
| 137 | C | 74.28472 | 77.50825 | 72.54699 | 539.71428   | -510.58232  | 267.58633   | 1 |
| 138 | O | 74.97464 | 76.97899 | 73.38273 | -15.93758   | -278.34085  | -624.49402  | 1 |
| 139 | N | 74.66755 | 78.01976 | 71.36198 | -676.81886  | 12.05292    | 276.17960   | 1 |
| 140 | H | 73.88272 | 78.36577 | 70.80923 | -1694.44250 | -373.84189  | -2100.66098 | 1 |
| 141 | C | 75.72380 | 77.28734 | 70.68821 | 412.33078   | -664.70360  | 108.35451   | 1 |
| 142 | H | 75.43331 | 76.21452 | 70.72528 | 1765.77476  | 1294.44366  | 1621.76594  | 1 |
| 143 | C | 75.78682 | 77.88433 | 69.23445 | -179.66635  | -721.95667  | -264.73915  | 1 |
| 144 | H | 74.86451 | 77.64475 | 68.65851 | -607.34922  | 2587.87032  | -598.10018  | 1 |
| 145 | H | 75.82694 | 78.99592 | 69.28533 | -359.69332  | -1479.13954 | -2259.74260 | 1 |
| 146 | C | 77.06128 | 77.32654 | 68.51232 | -240.01076  | 616.02425   | 431.85322   | 1 |
| 147 | H | 77.95630 | 77.43488 | 69.16693 | -1359.17131 | 782.54425   | 2227.99181  | 1 |
| 148 | H | 76.96441 | 76.23765 | 68.30397 | -820.36667  | 85.81767    | -2596.78715 | 1 |
| 149 | C | 77.26033 | 78.15485 | 67.18105 | -513.07015  | 236.18570   | -551.87280  | 1 |
| 150 | H | 76.44531 | 77.94343 | 66.45111 | 1816.11944  | -1183.11722 | -1650.94321 | 1 |
| 151 | H | 77.20933 | 79.24933 | 67.38448 | -1800.04429 | -1361.53473 | 1526.34643  | 1 |
| 152 | C | 78.64453 | 77.77900 | 66.60197 | 726.08972   | -253.19732  | -179.64713  | 1 |
| 153 | H | 79.50073 | 78.02060 | 67.26318 | 1224.27271  | -456.51798  | -2390.90304 | 1 |
| 154 | H | 78.72764 | 76.73417 | 66.24223 | 1206.40339  | -1150.93514 | -2154.90344 | 1 |
| 155 | N | 78.87532 | 78.66266 | 65.33023 | 329.70796   | -633.68968  | -155.67358  | 1 |
| 156 | H | 79.79993 | 78.51725 | 64.83105 | 1348.31305  | 1938.76845  | 1359.00643  | 1 |
| 157 | H | 78.18673 | 78.54659 | 64.53100 | 2096.92035  | 1446.54551  | -966.48890  | 1 |
| 158 | H | 78.87615 | 79.71533 | 65.46778 | -1197.07217 | -2303.53719 | 827.28733   | 1 |
| 159 | C | 77.13393 | 77.57193 | 71.44559 | -378.01186  | -556.17301  | -413.96481  | 1 |
| 160 | O | 78.03859 | 76.77193 | 71.35218 | -409.44433  | -307.55053  | -453.30833  | 1 |
| 161 | N | 77.15561 | 78.81412 | 71.92035 | -429.02477  | 524.70884   | 274.08502   | 1 |
| 162 | H | 76.25746 | 79.30193 | 71.95656 | 1706.34263  | -1425.96036 | 1574.38926  | 1 |
| 163 | C | 78.19051 | 79.23954 | 72.83018 | -45.25864   | -626.22952  | 478.93267   | 1 |
| 164 | H | 78.18061 | 78.43082 | 73.59410 | 1988.63164  | 570.90773   | 1772.87287  | 1 |
| 165 | C | 79.55651 | 79.28661 | 72.04278 | 551.77128   | -20.49526   | -564.54996  | 1 |

|     |   |          |          |          |             |             |             |   |
|-----|---|----------|----------|----------|-------------|-------------|-------------|---|
| 166 | H | 79.62210 | 78.41621 | 71.34963 | 1434.61535  | -1753.10253 | 1513.99471  | 1 |
| 167 | H | 79.58769 | 80.18507 | 71.38590 | -714.67738  | 1819.09770  | 1898.36494  | 1 |
| 168 | C | 80.77273 | 79.28353 | 73.03131 | 446.99263   | -555.77305  | 338.97221   | 1 |
| 169 | H | 80.71613 | 80.11698 | 73.76786 | 1953.68466  | 1892.25957  | -161.67766  | 1 |
| 170 | H | 80.79818 | 78.35377 | 73.64326 | -403.03785  | 2688.07032  | -188.43591  | 1 |
| 171 | C | 82.06848 | 79.41792 | 72.13516 | 567.86262   | 335.74681   | 434.04421   | 1 |
| 172 | H | 82.17530 | 78.53980 | 71.45747 | -1080.02275 | 1568.26081  | -1948.78900 | 1 |
| 173 | H | 81.99520 | 80.30720 | 71.46762 | -919.54108  | 2111.34692  | 1456.13463  | 1 |
| 174 | C | 83.29083 | 79.54571 | 73.07346 | 195.81897   | 173.33862   | -745.11536  | 1 |
| 175 | H | 83.27335 | 80.43537 | 73.73419 | 1405.67949  | -2301.21089 | -390.08113  | 1 |
| 176 | H | 83.51498 | 78.63772 | 73.66792 | -940.37328  | -1118.32446 | 2299.72133  | 1 |
| 177 | N | 84.55281 | 79.75708 | 72.16980 | 319.26422   | 656.36007   | -42.02424   | 1 |
| 178 | H | 85.47130 | 79.87461 | 72.68711 | 1961.03633  | 619.91968   | 1787.09422  | 1 |
| 179 | H | 84.79618 | 78.98074 | 71.48820 | 854.14343   | -2156.80752 | 1429.08711  | 1 |
| 180 | H | 84.55930 | 80.61180 | 71.54014 | 1237.02905  | -1378.50857 | -1998.28500 | 1 |
| 181 | C | 77.61845 | 80.65651 | 73.36714 | 532.53319   | -268.57236  | 517.55729   | 1 |
| 182 | O | 76.41439 | 80.77165 | 73.57416 | 266.16714   | -290.73804  | -558.88002  | 1 |
| 183 | N | 78.58798 | 81.52244 | 73.58916 | -226.25352  | 640.49678   | -270.32839  | 1 |
| 184 | H | 79.52739 | 81.23059 | 73.32045 | 2007.69063  | -1035.27229 | 1523.50231  | 1 |
| 185 | C | 78.39345 | 82.89438 | 73.89280 | -540.76542  | -573.33303  | 49.50000    | 1 |
| 186 | H | 79.40614 | 83.33486 | 73.75290 | -2374.20950 | -1036.76023 | 843.75774   | 1 |
| 187 | C | 77.35724 | 83.51504 | 72.83360 | -77.09082   | 666.87422   | -415.84136  | 1 |
| 188 | H | 76.45765 | 82.84317 | 72.74411 | -985.81834  | 617.19825   | 2463.91927  | 1 |
| 189 | O | 77.88901 | 83.62891 | 71.50300 | 293.29899   | -391.65602  | -477.80926  | 1 |
| 190 | H | 77.29648 | 83.02316 | 71.01238 | 2528.72714  | -681.76262  | -751.27122  | 1 |
| 191 | C | 76.92104 | 84.85581 | 73.52607 | 252.47363   | -605.14473  | 440.05134   | 1 |
| 192 | H | 76.37484 | 85.52264 | 72.81845 | -2052.65063 | 1456.49051  | -1043.51830 | 1 |
| 193 | H | 76.24048 | 84.67440 | 74.39401 | -2152.98800 | -1661.97574 | -161.70652  | 1 |
| 194 | H | 77.80171 | 85.42198 | 73.91718 | -473.12726  | -1584.27339 | 2165.61725  | 1 |
| 195 | C | 77.90458 | 83.08947 | 75.43530 | 360.36307   | 488.46713   | 505.10056   | 1 |
| 196 | O | 77.90329 | 84.21902 | 75.88101 | -200.08817  | -528.03552  | -385.82850  | 1 |
| 197 | N | 77.58096 | 81.95977 | 76.06293 | -597.54095  | -226.44775  | 355.20479   | 1 |
| 198 | H | 77.59795 | 81.10647 | 75.50133 | 2179.23655  | -1300.70981 | -991.33835  | 1 |
| 199 | C | 76.89469 | 82.09466 | 77.29703 | -687.68921  | 297.39807   | -249.45179  | 1 |
| 200 | H | 76.91422 | 83.19187 | 77.50539 | -349.16256  | -2467.37713 | -1101.72831 | 1 |
| 201 | C | 75.41989 | 81.49900 | 77.08691 | 672.47345   | 361.54328   | -201.62880  | 1 |
| 202 | H | 75.45546 | 80.58142 | 76.45469 | 1541.41502  | 582.18425   | 2169.97026  | 1 |
| 203 | H | 74.97012 | 81.21504 | 78.06559 | -2534.67717 | 60.25153    | 997.72295   | 1 |
| 204 | C | 74.59761 | 82.60532 | 76.41341 | 574.26774   | -389.43119  | -377.02542  | 1 |
| 205 | C | 73.82174 | 83.51416 | 77.19430 | 688.82679   | -287.33580  | -257.96133  | 1 |
| 206 | H | 73.77936 | 83.42090 | 78.29458 | 331.14182   | 1470.38163  | 2269.80013  | 1 |
| 207 | C | 74.66568 | 82.74998 | 74.99636 | -383.52382  | -675.04808  | 144.24917   | 1 |
| 208 | H | 75.30431 | 82.04244 | 74.39319 | 4.09847     | 1517.59662  | 2262.86397  | 1 |
| 209 | C | 73.12642 | 84.52738 | 76.53629 | -134.76730  | 428.45285   | -649.50303  | 1 |
| 210 | H | 72.52771 | 85.23222 | 77.13908 | -903.23433  | 1600.49020  | 2011.53387  | 1 |
| 211 | C | 73.94797 | 83.77715 | 74.38104 | -335.53281  | -615.00040  | -364.39058  | 1 |
| 212 | H | 74.00946 | 83.87391 | 73.28288 | 1596.45398  | -1369.33862 | 1732.02659  | 1 |
| 213 | C | 73.15489 | 84.70110 | 75.12185 | 585.48547   | -340.24194  | -406.23938  | 1 |
| 214 | O | 72.42231 | 85.75167 | 74.51129 | -419.15649  | -173.04408  | -511.94141  | 1 |
| 215 | H | 72.66807 | 85.59940 | 73.56811 | -1071.84350 | 1559.71507  | -1960.13012 | 1 |
| 216 | C | 77.58164 | 81.21488 | 78.49064 | 291.41878   | -183.13091  | 710.72246   | 1 |
| 217 | O | 77.66521 | 81.70999 | 79.59450 | 379.87695   | 523.47396   | -222.23622  | 1 |
| 218 | N | 77.91781 | 79.97656 | 78.14764 | 564.30591   | 373.09380   | 277.24371   | 1 |
| 219 | H | 77.74842 | 79.63016 | 77.20434 | -120.59931  | -2436.07824 | -1214.35098 | 1 |
| 220 | C | 78.41449 | 79.17086 | 79.23238 | 404.07514   | -299.37480  | 608.84009   | 1 |
| 221 | H | 79.10176 | 79.90313 | 79.71574 | -1071.07882 | -841.69025  | 2359.66467  | 1 |
| 222 | C | 77.18774 | 78.87732 | 80.19081 | -683.12807  | 68.71770    | -390.13096  | 1 |
| 223 | H | 76.69550 | 79.83718 | 80.47625 | 2068.88918  | 1596.58590  | 770.89603   | 1 |
| 224 | H | 76.40056 | 78.28795 | 79.66861 | 1379.86429  | 2342.49779  | -179.85638  | 1 |
| 225 | C | 77.71967 | 78.13020 | 81.45399 | -176.39967  | 537.49466   | 550.97268   | 1 |
| 226 | H | 78.28927 | 77.22020 | 81.16375 | -396.28051  | 1942.22168  | 1869.33314  | 1 |
| 227 | H | 78.44459 | 78.76438 | 82.01053 | -94.44700   | 586.00678   | -2659.20016 | 1 |

|     |   |          |          |          |             |             |             |   |
|-----|---|----------|----------|----------|-------------|-------------|-------------|---|
| 228 | C | 76.47717 | 77.74375 | 82.38008 | -291.69381  | -718.18079  | -150.72929  | 1 |
| 229 | H | 75.96316 | 78.59544 | 82.89411 | -2303.38776 | 1089.76242  | 964.62032   | 1 |
| 230 | H | 75.69249 | 77.11138 | 81.89152 | 884.16729   | 2568.80533  | -207.74283  | 1 |
| 231 | N | 77.10819 | 76.95599 | 83.35656 | -594.49522  | -252.81478  | 342.29276   | 1 |
| 232 | H | 78.08526 | 76.75187 | 83.21389 | -1735.17426 | 2084.05705  | -263.71605  | 1 |
| 233 | C | 76.54106 | 76.48026 | 84.38982 | 595.23177   | -271.52487  | 442.22352   | 1 |
| 234 | N | 75.18382 | 76.76062 | 84.58187 | 585.53813   | -424.79750  | -105.81303  | 1 |
| 235 | H | 74.55032 | 77.31815 | 84.01069 | 959.88797   | 1327.56823  | -2177.11905 | 1 |
| 236 | H | 74.62972 | 76.44125 | 85.37717 | 1578.48647  | 16.27378    | -2220.76233 | 1 |
| 237 | N | 77.44329 | 75.73018 | 85.15858 | -452.17763  | -390.33541  | -421.51853  | 1 |
| 238 | H | 78.43226 | 75.52678 | 85.02292 | 470.26107   | 1974.25629  | -1817.92087 | 1 |
| 239 | H | 77.18176 | 75.26763 | 86.02991 | 1856.67307  | -1573.97321 | -1224.35416 | 1 |
| 240 | C | 79.17418 | 77.87409 | 78.60344 | -531.47271  | -581.45780  | -55.06206   | 1 |
| 241 | O | 80.23589 | 77.99209 | 78.04494 | -243.00837  | 192.73507   | 609.52485   | 1 |
| 242 | N | 78.53116 | 76.72306 | 78.91699 | 343.49288   | -644.25607  | 38.09164    | 1 |
| 243 | H | 77.60065 | 76.92423 | 79.28879 | -1691.16043 | -1535.97525 | -1484.73099 | 1 |
| 244 | C | 78.69310 | 75.54654 | 78.05065 | 542.66492   | 350.14337   | 454.42563   | 1 |
| 245 | H | 79.79585 | 75.42114 | 77.94535 | 1209.57979  | -2396.95920 | 463.86744   | 1 |
| 246 | C | 78.01208 | 74.40773 | 78.78036 | -737.14309  | 145.93010   | 242.71942   | 1 |
| 247 | H | 76.97128 | 74.72821 | 79.01393 | -1050.18303 | 159.36419   | -2509.06125 | 1 |
| 248 | C | 77.92536 | 73.13586 | 77.96195 | -706.77696  | -252.88343  | -245.16230  | 1 |
| 249 | H | 77.40738 | 72.30923 | 78.53869 | -1624.64039 | -1665.49085 | 1417.86935  | 1 |
| 250 | H | 77.31827 | 73.29684 | 77.00635 | 2566.10521  | 598.51109   | 693.22305   | 1 |
| 251 | H | 78.94187 | 72.75620 | 77.66408 | -1972.69758 | 107.10018   | -1876.34312 | 1 |
| 252 | C | 78.70314 | 74.10601 | 80.10054 | 412.85148   | 672.58832   | -27.69222   | 1 |
| 253 | H | 78.17242 | 73.29672 | 80.67294 | 1447.02277  | 1762.76533  | -1490.78944 | 1 |
| 254 | H | 79.76222 | 73.76310 | 79.94281 | 1320.77379  | -145.20455  | 2378.68491  | 1 |
| 255 | H | 78.74467 | 75.01438 | 80.76129 | -1512.10848 | 1470.52031  | 1724.75147  | 1 |
| 256 | C | 77.98903 | 75.93980 | 76.60338 | -607.11113  | 499.56689   | 73.73769    | 1 |
| 257 | O | 77.24855 | 76.88332 | 76.46621 | 357.97126   | 460.81534   | 356.68785   | 1 |
| 258 | N | 78.39246 | 75.07254 | 75.68239 | 536.55407   | -368.62270  | 332.76306   | 1 |
| 259 | H | 78.97396 | 74.30205 | 76.00399 | 524.38866   | 2297.69985  | 1367.20941  | 1 |
| 260 | C | 77.73407 | 75.09207 | 74.42040 | 46.50277    | -774.29190  | -147.97904  | 1 |
| 261 | H | 77.48078 | 76.16766 | 74.26611 | 1676.51875  | 1883.29066  | 1032.55549  | 1 |
| 262 | C | 78.67972 | 74.42096 | 73.29533 | -559.41456  | -34.19198   | -556.30433  | 1 |
| 263 | H | 78.56887 | 73.31246 | 73.36208 | -64.66664   | 395.18769   | 2695.05373  | 1 |
| 264 | H | 78.30799 | 74.69945 | 72.27725 | -2703.44278 | -60.40056   | 333.79418   | 1 |
| 265 | C | 80.13082 | 74.78961 | 73.44907 | -519.76435  | 377.31045   | 459.42366   | 1 |
| 266 | H | 80.40451 | 74.75263 | 74.52712 | -1746.74323 | 1667.50644  | -1261.73691 | 1 |
| 267 | C | 81.01048 | 73.79810 | 72.69666 | 570.95554   | 16.46261    | -545.27700  | 1 |
| 268 | H | 82.09698 | 74.05594 | 72.78857 | 2391.58273  | 28.05277    | -1305.07271 | 1 |
| 269 | H | 80.88309 | 72.75374 | 73.08221 | 175.75588   | 917.63458   | 2559.43867  | 1 |
| 270 | H | 80.76575 | 73.77909 | 71.60347 | -1063.97851 | -2155.34650 | 1283.00462  | 1 |
| 271 | C | 80.38721 | 76.19680 | 72.92909 | 193.76014   | 2.62946     | -765.53141  | 1 |
| 272 | H | 81.47675 | 76.46099 | 72.95303 | 507.39394   | -846.55087  | 2539.60089  | 1 |
| 273 | H | 80.03253 | 76.30888 | 71.86526 | 1337.57841  | 1818.19054  | 1526.01994  | 1 |
| 274 | H | 79.83759 | 76.96147 | 73.53991 | 1100.88635  | -1172.91350 | -2199.08909 | 1 |
| 275 | C | 76.43975 | 74.15178 | 74.50348 | -549.21115  | 475.64486   | -309.38218  | 1 |
| 276 | O | 76.16847 | 73.43530 | 75.44172 | 556.06106   | -390.37755  | -78.24250   | 1 |
| 277 | O | 75.68062 | 74.06053 | 73.31152 | -572.27940  | -310.19032  | -209.75862  | 1 |
| 278 | H | 75.91943 | 74.95593 | 72.92598 | -1380.08193 | 2212.14486  | 790.85944   | 1 |

Listing 24: C00024.xmolout

|   |   |          |          |          |             |             |             |                 |
|---|---|----------|----------|----------|-------------|-------------|-------------|-----------------|
| 1 |   | 276      |          |          |             |             |             |                 |
| 2 |   | 150.0000 | 150.0000 | 150.0000 | 0.0000      | 0.0000      | 0.0000***** | 2.7750 11100    |
|   |   | 0.2500   | 300.00   | 0.00     | 0.00        | 0.00        | -1293.9706  | 0.0000 300.0000 |
| 3 | H | 71.43720 | 78.94080 | 86.11812 | -2043.14101 | -1757.64893 | 399.89339   | 1               |
| 4 | N | 71.38973 | 79.41802 | 85.21883 | 426.75047   | 490.45733   | -334.42467  | 1               |
| 5 | H | 70.43836 | 79.78301 | 85.25721 | 442.25559   | -1110.30854 | -2448.52907 | 1               |
| 6 | C | 72.36730 | 80.43794 | 85.09025 | 415.32972   | -666.39213  | 83.73172    | 1               |
| 7 | H | 72.45879 | 80.90359 | 86.09531 | 879.32219   | 2491.00447  | 667.35213   | 1               |



|    |   |          |          |          |             |             |             |   |
|----|---|----------|----------|----------|-------------|-------------|-------------|---|
| 8  | C | 73.74606 | 79.76737 | 84.60098 | 31.35357    | 477.41777   | 628.23362   | 1 |
| 9  | H | 73.56990 | 79.25612 | 83.62384 | 1168.38489  | 2240.25337  | -1019.71136 | 1 |
| 10 | H | 74.50401 | 80.56287 | 84.40071 | -360.43770  | 2534.90498  | 931.67112   | 1 |
| 11 | C | 74.26231 | 78.78423 | 85.62231 | 463.18208   | 512.70242   | -382.34388  | 1 |
| 12 | H | 73.43357 | 78.09638 | 85.90197 | 1725.29117  | 1863.52247  | -987.07854  | 1 |
| 13 | C | 75.39268 | 77.95360 | 85.02796 | 710.42801   | -144.27427  | -313.15367  | 1 |
| 14 | H | 75.78599 | 77.20381 | 85.76220 | 364.20195   | -1033.13725 | 2494.72524  | 1 |
| 15 | H | 75.05788 | 77.38733 | 84.12057 | 2567.61904  | 335.80679   | 847.48802   | 1 |
| 16 | H | 76.25609 | 78.59704 | 84.71726 | -2587.99029 | 680.92867   | -512.16411  | 1 |
| 17 | C | 74.75576 | 79.49445 | 86.87492 | 268.17616   | 741.64379   | -40.42634   | 1 |
| 18 | H | 75.16067 | 78.77027 | 87.62849 | 1283.54314  | -1945.37420 | -1411.27812 | 1 |
| 19 | H | 75.57678 | 80.22028 | 86.63932 | -1258.57796 | 1317.15249  | -2026.02085 | 1 |
| 20 | H | 73.93759 | 80.07222 | 87.37696 | -2502.84526 | 909.80597   | 575.92391   | 1 |
| 21 | C | 71.89961 | 81.49962 | 83.95023 | 619.36578   | -458.64843  | -172.09273  | 1 |
| 22 | O | 72.32623 | 82.63380 | 83.95762 | -81.40433   | 433.87611   | 522.34594   | 1 |
| 23 | N | 71.14598 | 80.91290 | 83.01710 | 175.23996   | -622.20190  | 341.55523   | 1 |
| 24 | H | 70.85897 | 79.95138 | 83.19463 | -876.57256  | -303.22879  | -2561.90213 | 1 |
| 25 | C | 70.51891 | 81.74050 | 82.04268 | -571.88214  | -534.10783  | -106.15033  | 1 |
| 26 | H | 71.09741 | 82.69329 | 82.03688 | -2713.20841 | -16.25800   | -248.80809  | 1 |
| 27 | C | 70.55026 | 80.90531 | 80.66796 | 166.60354   | 288.16399   | -716.09568  | 1 |
| 28 | H | 70.04401 | 79.91601 | 80.85869 | -2097.85574 | 1636.78449  | -586.18044  | 1 |
| 29 | O | 71.85733 | 80.59563 | 80.16051 | -317.80580  | -363.38227  | 484.43082   | 1 |
| 30 | H | 71.82569 | 79.61728 | 80.14820 | 1863.74748  | -1451.84923 | 1357.29467  | 1 |
| 31 | C | 69.63464 | 81.75577 | 79.71460 | 503.80731   | 517.99032   | 318.51606   | 1 |
| 32 | H | 69.42327 | 81.20718 | 78.76733 | 640.61020   | -2157.10410 | -1536.29104 | 1 |
| 33 | H | 68.64992 | 81.99493 | 80.18245 | 1687.88455  | 465.60692   | 2087.56452  | 1 |
| 34 | H | 70.11728 | 82.72092 | 79.43645 | -1293.07895 | -1899.88581 | -1463.57452 | 1 |
| 35 | C | 68.96339 | 81.88184 | 82.48361 | -153.07550  | -733.68902  | 248.70981   | 1 |
| 36 | O | 68.33318 | 80.87188 | 82.75722 | 186.15459   | -480.78787  | -449.34387  | 1 |
| 37 | N | 68.53583 | 83.13434 | 82.37997 | -487.53139  | 543.18517   | 42.03850    | 1 |
| 38 | C | 67.20436 | 83.51347 | 82.78723 | -699.35871  | 69.34393    | 360.10701   | 1 |
| 39 | H | 67.03694 | 82.99484 | 83.75995 | 2.81126     | -221.99807  | -2715.58072 | 1 |
| 40 | C | 67.26527 | 85.10038 | 82.83889 | -507.46439  | -592.59194  | 122.07761   | 1 |
| 41 | H | 66.27203 | 85.56085 | 82.62374 | -1975.08116 | 525.87560   | -1801.71556 | 1 |
| 42 | H | 67.58624 | 85.47100 | 83.83823 | 1588.27743  | -1913.22100 | 1113.83566  | 1 |
| 43 | C | 68.33018 | 85.41756 | 81.74312 | -613.62442  | -457.55993  | -194.14490  | 1 |
| 44 | H | 67.88087 | 85.35530 | 80.72654 | 1707.54637  | -721.27992  | 1996.92523  | 1 |
| 45 | H | 68.77590 | 86.43381 | 81.83327 | 758.23357   | 2100.81767  | 1560.55011  | 1 |
| 46 | C | 69.38198 | 84.24934 | 81.97959 | -352.41524  | 704.96076   | 49.21465    | 1 |
| 47 | H | 69.97158 | 83.95726 | 81.08032 | 1714.76886  | -2070.42778 | 443.35792   | 1 |
| 48 | H | 70.07711 | 84.42170 | 82.83618 | 1224.15040  | 1801.50881  | 1636.97633  | 1 |
| 49 | C | 66.10695 | 83.11244 | 81.66851 | 566.85117   | 537.05831   | 117.62814   | 1 |
| 50 | O | 65.35545 | 83.98619 | 81.24515 | -550.26779  | -406.08867  | 4.21666     | 1 |
| 51 | N | 66.15866 | 81.83424 | 81.35295 | 566.34832   | -425.77725  | 180.18749   | 1 |
| 52 | H | 66.84195 | 81.22643 | 81.86364 | 644.44502   | 2646.80550  | -52.73430   | 1 |
| 53 | C | 64.91836 | 81.25123 | 80.90094 | 612.34801   | -281.48662  | 411.56221   | 1 |
| 54 | H | 64.12461 | 81.74373 | 81.50706 | 1667.23498  | -1490.75142 | 1556.16753  | 1 |
| 55 | C | 64.74403 | 81.52352 | 79.34532 | -714.45746  | -175.43074  | 286.98927   | 1 |
| 56 | H | 65.58821 | 81.04636 | 78.76417 | -787.09484  | 1763.03619  | -1922.46060 | 1 |
| 57 | O | 64.81882 | 82.88029 | 78.87649 | -429.46514  | 516.51932   | -128.40526  | 1 |
| 58 | H | 64.97366 | 83.37030 | 79.76229 | 1981.82785  | 436.16847   | -1818.18182 | 1 |
| 59 | C | 63.41534 | 80.74357 | 79.04404 | 630.79189   | -468.94448  | 76.03230    | 1 |
| 60 | H | 63.19364 | 80.72103 | 77.95158 | -1775.71861 | 2062.30353  | 131.89849   | 1 |
| 61 | H | 63.46615 | 79.68467 | 79.39881 | -1855.14608 | 88.94118    | 1993.53760  | 1 |
| 62 | H | 62.54180 | 81.21657 | 79.55049 | -1504.82350 | -780.94249  | -2132.90992 | 1 |
| 63 | C | 65.02243 | 79.63728 | 81.10658 | 288.57638   | 618.62814   | -397.00270  | 1 |
| 64 | O | 64.06110 | 79.02573 | 81.50513 | 321.70495   | -185.26452  | 574.37218   | 1 |
| 65 | N | 66.17574 | 79.16829 | 80.65185 | -447.05792  | -446.53431  | 367.76425   | 1 |
| 66 | H | 66.97102 | 79.72320 | 80.28047 | 350.31316   | 1975.63644  | -1843.31522 | 1 |
| 67 | C | 66.39657 | 77.75256 | 80.71344 | -511.23061  | 374.03917   | -471.51480  | 1 |
| 68 | H | 66.15490 | 77.42096 | 81.74804 | 2234.79579  | -898.70890  | -1273.45190 | 1 |
| 69 | C | 65.41210 | 77.08392 | 79.63905 | 529.53781   | -159.34528  | 563.72604   | 1 |

|     |   |          |          |          |             |             |             |   |
|-----|---|----------|----------|----------|-------------|-------------|-------------|---|
| 70  | H | 65.46865 | 75.96893 | 79.77200 | 654.59388   | 2347.94251  | 1217.51488  | 1 |
| 71  | H | 64.37407 | 77.39668 | 79.93606 | -1526.55661 | 2103.42026  | 817.87394   | 1 |
| 72  | O | 65.67648 | 77.36702 | 78.24217 | -554.84278  | 14.12789    | 399.58769   | 1 |
| 73  | H | 65.33013 | 78.27874 | 78.19810 | 1297.06236  | 2061.84854  | 1220.68812  | 1 |
| 74  | C | 67.96064 | 77.71440 | 80.30685 | -662.15484  | -412.13544  | 123.62687   | 1 |
| 75  | O | 68.47970 | 78.73336 | 79.86386 | -540.01537  | -317.05804  | 274.91456   | 1 |
| 76  | N | 68.49754 | 76.52970 | 80.55313 | -202.76299  | -690.00100  | -131.49145  | 1 |
| 77  | H | 67.91744 | 75.77947 | 80.93052 | -702.62132  | -2617.37191 | 281.70413   | 1 |
| 78  | C | 69.83321 | 76.27241 | 80.16410 | -491.73914  | 576.34187   | 222.73509   | 1 |
| 79  | H | 70.14546 | 77.16212 | 79.56967 | 1977.17978  | -1823.58850 | -434.68928  | 1 |
| 80  | C | 70.66106 | 76.06101 | 81.50894 | -649.50797  | -328.66843  | 306.11224   | 1 |
| 81  | H | 70.17110 | 75.28566 | 82.13627 | 2075.07803  | 1452.16490  | -1004.45904 | 1 |
| 82  | C | 72.12329 | 75.64232 | 81.13883 | -615.18735  | -489.99689  | -70.96352   | 1 |
| 83  | H | 72.75393 | 75.50691 | 82.04906 | -1226.32661 | -1724.38906 | -1716.47170 | 1 |
| 84  | H | 72.14074 | 74.67931 | 80.57460 | 2381.64273  | -969.84735  | 900.46860   | 1 |
| 85  | H | 72.62092 | 76.40953 | 80.50016 | 2122.74991  | 1702.23946  | -141.36228  | 1 |
| 86  | C | 70.73499 | 77.42258 | 82.28096 | -501.86074  | -479.61276  | -376.42482  | 1 |
| 87  | H | 71.21049 | 77.30861 | 83.28392 | 993.79261   | -2246.95401 | -1177.81305 | 1 |
| 88  | H | 71.32950 | 78.18021 | 81.71984 | 42.71279    | -626.15391  | -2651.37258 | 1 |
| 89  | H | 69.71797 | 77.85357 | 82.44139 | -2026.39012 | -1590.33709 | -887.82922  | 1 |
| 90  | C | 69.77745 | 74.84196 | 79.34896 | -672.89153  | 382.57394   | -156.34072  | 1 |
| 91  | O | 69.49314 | 73.80296 | 79.89981 | 410.04627   | 221.86223   | 500.35950   | 1 |
| 92  | N | 70.05367 | 75.05090 | 78.06702 | -378.11782  | -443.79414  | -441.10984  | 1 |
| 93  | H | 70.32955 | 75.98321 | 77.76172 | 2404.15973  | -568.14894  | 1149.30085  | 1 |
| 94  | C | 70.24411 | 73.88976 | 77.25802 | -544.54484  | 466.16019   | 331.29119   | 1 |
| 95  | H | 69.59130 | 73.11498 | 77.72101 | -1409.80988 | -170.17955  | 2325.32679  | 1 |
| 96  | C | 69.89108 | 74.27659 | 75.76264 | -184.48284  | 116.78282   | -758.89137  | 1 |
| 97  | H | 68.83266 | 74.61444 | 75.68944 | 1893.78641  | 1861.14652  | 611.04528   | 1 |
| 98  | H | 70.50890 | 75.14155 | 75.43143 | -2170.79665 | -974.19311  | 1327.50117  | 1 |
| 99  | C | 70.15018 | 73.03709 | 74.84868 | 389.51668   | 672.81878   | -138.49152  | 1 |
| 100 | H | 71.17287 | 72.62498 | 75.01868 | 510.64577   | 1933.03327  | 1851.02484  | 1 |
| 101 | H | 69.47571 | 72.20082 | 75.13768 | -2302.30869 | -1105.72939 | -948.89774  | 1 |
| 102 | C | 69.96628 | 73.37450 | 73.31826 | -559.93427  | -126.34590  | 542.30857   | 1 |
| 103 | O | 70.35835 | 72.60650 | 72.47761 | -670.36003  | -111.83166  | 76.36448    | 1 |
| 104 | N | 69.32122 | 74.54029 | 73.08967 | -216.06729  | -537.07037  | 446.51379   | 1 |
| 105 | H | 68.90363 | 75.19199 | 73.76331 | -1251.96487 | 1074.12894  | -2168.52500 | 1 |
| 106 | H | 69.02720 | 74.86005 | 72.16076 | -2451.83023 | -720.73851  | 944.84612   | 1 |
| 107 | C | 71.84259 | 73.52552 | 77.31639 | 546.24052   | -563.88337  | -85.11809   | 1 |
| 108 | O | 72.66995 | 74.34851 | 77.03259 | 71.70702    | -307.40463  | 606.69673   | 1 |
| 109 | N | 71.99479 | 72.23959 | 77.66821 | 479.90863   | -504.50129  | 222.86849   | 1 |
| 110 | C | 73.26201 | 71.58629 | 77.59493 | 75.51268    | -600.91904  | 506.73700   | 1 |
| 111 | H | 74.04657 | 72.36539 | 77.73783 | -2033.61562 | 1795.30103  | 254.89480   | 1 |
| 112 | C | 73.12125 | 70.50285 | 78.75276 | 523.79067   | 517.99274   | 284.45581   | 1 |
| 113 | H | 73.84575 | 69.66423 | 78.65252 | 1599.61665  | -1127.00911 | 1895.98173  | 1 |
| 114 | H | 73.28742 | 70.95248 | 79.75668 | -1881.83093 | 1275.82488  | -1501.55016 | 1 |
| 115 | C | 71.63770 | 70.05844 | 78.57007 | -600.05639  | -404.05026  | 316.64485   | 1 |
| 116 | H | 71.53340 | 69.36279 | 77.70713 | -2597.05260 | 496.36221   | 657.73249   | 1 |
| 117 | H | 71.21532 | 69.53172 | 79.45556 | -1666.24518 | 1294.38985  | -1723.90591 | 1 |
| 118 | C | 70.92926 | 71.44847 | 78.27260 | 493.57570   | -129.95376  | -602.56394  | 1 |
| 119 | H | 70.08347 | 71.39263 | 77.54719 | -1469.08415 | -637.84797  | 2204.22581  | 1 |
| 120 | H | 70.60434 | 72.02047 | 79.17893 | -1038.97840 | 1068.88701  | -2280.71789 | 1 |
| 121 | C | 73.38808 | 70.79777 | 76.16730 | 188.88100   | 241.05089   | -727.87821  | 1 |
| 122 | O | 72.46526 | 70.64635 | 75.40551 | 531.88613   | -49.19943   | 427.07960   | 1 |
| 123 | N | 74.60691 | 70.17254 | 76.11935 | 708.14833   | 26.93417    | -179.73509  | 1 |
| 124 | H | 75.12249 | 70.64100 | 76.87058 | -2232.69501 | -1179.09831 | 1023.94816  | 1 |
| 125 | C | 75.26480 | 69.93429 | 74.81542 | -738.32412  | 259.92548   | 104.42456   | 1 |
| 126 | H | 76.22648 | 69.49527 | 75.16739 | 2028.89123  | 1260.02983  | 1311.33324  | 1 |
| 127 | C | 74.44964 | 68.97195 | 73.99027 | -258.65678  | -345.52513  | 661.28459   | 1 |
| 128 | H | 73.66840 | 69.56288 | 73.45832 | -1826.06090 | -1801.46097 | -918.64554  | 1 |
| 129 | C | 75.29835 | 68.23836 | 72.96371 | -541.23400  | 531.92970   | -218.41428  | 1 |
| 130 | H | 74.66529 | 67.61899 | 72.27258 | 1311.73218  | -2219.18200 | 882.19023   | 1 |
| 131 | H | 75.90312 | 68.93868 | 72.32482 | -1048.71298 | 1223.58118  | -2196.97971 | 1 |

|     |   |          |          |          |             |             |             |   |
|-----|---|----------|----------|----------|-------------|-------------|-------------|---|
| 132 | H | 76.02625 | 67.54045 | 73.45854 | 419.06414   | 1903.92898  | 1903.44670  | 1 |
| 133 | C | 73.72254 | 67.93989 | 74.83875 | -423.86431  | 152.66566   | -648.55262  | 1 |
| 134 | H | 73.10275 | 67.24358 | 74.21179 | 105.68386   | -2342.50080 | 1387.51238  | 1 |
| 135 | H | 74.44099 | 67.31110 | 75.43078 | -1695.63603 | -1484.73621 | -1531.02793 | 1 |
| 136 | H | 73.03032 | 68.43789 | 75.57363 | -1853.57121 | -487.39031  | 1936.59343  | 1 |
| 137 | C | 75.49824 | 71.43563 | 74.16854 | 539.71428   | -510.58232  | 267.58633   | 1 |
| 138 | O | 75.76272 | 72.36218 | 74.89384 | -15.93758   | -278.34085  | -624.49402  | 1 |
| 139 | N | 75.49174 | 71.39741 | 72.84468 | -676.81886  | 12.05292    | 276.17960   | 1 |
| 140 | H | 75.26164 | 70.50472 | 72.41196 | -1694.44250 | -373.84189  | -2100.66098 | 1 |
| 141 | C | 75.50328 | 72.57074 | 72.04187 | 412.33078   | -664.70360  | 108.35451   | 1 |
| 142 | H | 75.52423 | 72.14742 | 71.01136 | 1765.77476  | 1294.44366  | 1621.76594  | 1 |
| 143 | C | 74.18792 | 73.41291 | 72.31887 | -179.66635  | -721.95667  | -264.73915  | 1 |
| 144 | H | 73.28318 | 72.76440 | 72.36880 | -607.34922  | 2587.87032  | -598.10018  | 1 |
| 145 | H | 74.24874 | 73.93106 | 73.30316 | -359.69332  | -1479.13954 | -2259.74260 | 1 |
| 146 | C | 74.10930 | 74.42950 | 71.13270 | -240.01076  | 616.02425   | 431.85322   | 1 |
| 147 | H | 75.05804 | 75.02102 | 71.08644 | -1359.17131 | 782.54425   | 2227.99181  | 1 |
| 148 | H | 74.03457 | 73.89160 | 70.16048 | -820.36667  | 85.81767    | -2596.78715 | 1 |
| 149 | C | 72.88157 | 75.40807 | 71.31465 | -513.07015  | 236.18570   | -551.87280  | 1 |
| 150 | H | 71.91182 | 74.86040 | 71.25812 | 1816.11944  | -1183.11722 | -1650.94321 | 1 |
| 151 | H | 72.90003 | 75.89781 | 72.31552 | -1800.04429 | -1361.53473 | 1526.34643  | 1 |
| 152 | C | 73.02115 | 76.45067 | 70.17959 | 726.08972   | -253.19732  | -179.64713  | 1 |
| 153 | H | 73.92316 | 77.08863 | 70.25313 | 1224.27271  | -456.51798  | -2390.90304 | 1 |
| 154 | H | 72.93850 | 76.03314 | 69.15631 | 1206.40339  | -1150.93514 | -2154.90344 | 1 |
| 155 | N | 71.83367 | 77.46258 | 70.29389 | 329.70796   | -633.68968  | -155.67358  | 1 |
| 156 | H | 71.83210 | 78.24506 | 69.57714 | 1348.31305  | 1938.76845  | 1359.00643  | 1 |
| 157 | H | 70.85339 | 77.07221 | 70.17922 | 2096.92035  | 1446.54551  | -966.48890  | 1 |
| 158 | H | 71.75047 | 78.01002 | 71.19952 | -1197.07217 | -2303.53719 | 827.28733   | 1 |
| 159 | C | 76.80589 | 73.50525 | 72.38173 | -378.01186  | -556.17301  | -413.96481  | 1 |
| 160 | O | 76.71726 | 74.72013 | 72.32371 | -409.44433  | -307.55053  | -453.30833  | 1 |
| 161 | N | 77.88202 | 72.76538 | 72.54919 | -429.02477  | 524.70884   | 274.08502   | 1 |
| 162 | H | 77.71864 | 71.76185 | 72.59207 | 1706.34263  | -1425.96036 | 1574.38926  | 1 |
| 163 | C | 79.15178 | 73.37429 | 72.85182 | -45.25864   | -626.22952  | 478.93267   | 1 |
| 164 | H | 79.37974 | 73.92405 | 71.90194 | 1988.63164  | 570.90773   | 1772.87287  | 1 |
| 165 | C | 78.97789 | 74.38783 | 74.05185 | 551.77128   | -20.49526   | -564.54996  | 1 |
| 166 | H | 78.14808 | 75.10993 | 73.84470 | 1434.61535  | -1753.10253 | 1513.99471  | 1 |
| 167 | H | 78.69945 | 73.85581 | 74.99018 | -714.67738  | 1819.09770  | 1898.36494  | 1 |
| 168 | C | 80.35265 | 75.12413 | 74.18990 | 446.99263   | -555.77305  | 338.97221   | 1 |
| 169 | H | 81.15371 | 74.39025 | 74.44317 | 1953.68466  | 1892.25957  | -161.67766  | 1 |
| 170 | H | 80.64840 | 75.58999 | 73.21940 | -403.03785  | 2688.07032  | -188.43591  | 1 |
| 171 | C | 80.21465 | 76.21888 | 75.32130 | 567.86262   | 335.74681   | 434.04421   | 1 |
| 172 | H | 79.54311 | 77.04562 | 74.99313 | -1080.02275 | 1568.26081  | -1948.78900 | 1 |
| 173 | H | 79.74066 | 75.78670 | 76.23235 | -919.54108  | 2111.34692  | 1456.13463  | 1 |
| 174 | C | 81.63062 | 76.74836 | 75.64940 | 195.81897   | 173.33862   | -745.11536  | 1 |
| 175 | H | 82.31805 | 75.98926 | 76.07343 | 1405.67949  | -2301.21089 | -390.08113  | 1 |
| 176 | H | 82.12979 | 77.28997 | 74.82087 | -940.37328  | -1118.32446 | 2299.72133  | 1 |
| 177 | N | 81.47605 | 77.81262 | 76.78752 | 319.26422   | 656.36007   | -42.02424   | 1 |
| 178 | H | 82.37987 | 78.23453 | 77.14859 | 1961.03633  | 619.91968   | 1787.09422  | 1 |
| 179 | H | 80.91448 | 78.68442 | 76.56110 | 854.14343   | -2156.80752 | 1429.08711  | 1 |
| 180 | H | 81.02289 | 77.48789 | 77.69083 | 1237.02905  | -1378.50857 | -1998.28500 | 1 |
| 181 | C | 80.20853 | 72.19859 | 73.19177 | 532.53319   | -268.57236  | 517.55729   | 1 |
| 182 | O | 80.76017 | 72.14477 | 74.29469 | 266.16714   | -290.73804  | -558.88002  | 1 |
| 183 | N | 80.39338 | 71.39743 | 72.16322 | -226.25352  | 640.49678   | -270.32839  | 1 |
| 184 | H | 79.84682 | 71.52853 | 71.31369 | 2007.69063  | -1035.27229 | 1523.50231  | 1 |
| 185 | C | 81.52095 | 70.52114 | 72.23240 | -540.76542  | -573.33303  | 49.50000    | 1 |
| 186 | H | 82.26814 | 71.09175 | 72.82927 | -2374.20950 | -1036.76023 | 843.75774   | 1 |
| 187 | C | 81.04483 | 69.22630 | 73.02300 | -77.09082   | 666.87422   | -415.84136  | 1 |
| 188 | H | 80.18828 | 68.72219 | 72.48986 | -985.81834  | 617.19825   | 2463.91927  | 1 |
| 189 | O | 80.49375 | 69.44777 | 74.33763 | 293.29899   | -391.65602  | -477.80926  | 1 |
| 190 | H | 80.62687 | 70.44959 | 74.42119 | 2528.72714  | -681.76262  | -751.27122  | 1 |
| 191 | C | 82.31053 | 68.30660 | 72.93004 | 252.47363   | -605.14473  | 440.05134   | 1 |
| 192 | H | 82.12731 | 67.30958 | 73.39517 | -2052.65063 | 1456.49051  | -1043.51830 | 1 |
| 193 | H | 82.60901 | 68.13132 | 71.86832 | -2152.98800 | -1661.97574 | -161.70652  | 1 |

|     |   |          |          |          |             |             |             |   |
|-----|---|----------|----------|----------|-------------|-------------|-------------|---|
| 194 | H | 83.18806 | 68.75806 | 73.45006 | -473.12726  | -1584.27339 | 2165.61725  | 1 |
| 195 | C | 81.97847 | 70.17947 | 70.68562 | 360.36307   | 488.46713   | 505.10056   | 1 |
| 196 | O | 81.27135 | 69.55621 | 69.93336 | -200.08817  | -528.03552  | -385.82850  | 1 |
| 197 | N | 83.18303 | 70.70333 | 70.50092 | -597.54095  | -226.44775  | 355.20479   | 1 |
| 198 | H | 83.60096 | 71.17625 | 71.30276 | 2179.23655  | -1300.70981 | -991.33835  | 1 |
| 199 | C | 83.97261 | 70.45811 | 69.35572 | -687.68921  | 297.39807   | -249.45179  | 1 |
| 200 | H | 84.96962 | 70.86442 | 69.63712 | -349.16256  | -2467.37713 | -1101.72831 | 1 |
| 201 | C | 84.01872 | 68.88952 | 69.01791 | 672.47345   | 361.54328   | -201.62880  | 1 |
| 202 | H | 82.99729 | 68.44091 | 69.06427 | 1541.41502  | 582.18425   | 2169.97026  | 1 |
| 203 | H | 84.39168 | 68.75324 | 67.97556 | -2534.67717 | 60.25153    | 997.72295   | 1 |
| 204 | C | 84.96942 | 68.22314 | 70.02141 | 574.26774   | -389.43119  | -377.02542  | 1 |
| 205 | C | 86.34683 | 68.59922 | 70.02196 | 688.82679   | -287.33580  | -257.96133  | 1 |
| 206 | H | 86.73028 | 69.33575 | 69.29275 | 331.14182   | 1470.38163  | 2269.80013  | 1 |
| 207 | C | 84.48727 | 67.25664 | 70.95442 | -383.52382  | -675.04808  | 144.24917   | 1 |
| 208 | H | 83.42327 | 66.95231 | 70.94945 | 4.09847     | 1517.59662  | 2262.86397  | 1 |
| 209 | C | 87.19670 | 68.02565 | 70.96618 | -134.76730  | 428.45285   | -649.50303  | 1 |
| 210 | H | 88.26010 | 68.32235 | 70.96914 | -903.23433  | 1600.49020  | 2011.53387  | 1 |
| 211 | C | 85.37743 | 66.71091 | 71.88257 | -335.53281  | -615.00040  | -364.39058  | 1 |
| 212 | H | 84.98948 | 65.97196 | 72.60521 | 1596.45398  | -1369.33862 | 1732.02659  | 1 |
| 213 | C | 86.75532 | 67.07245 | 71.92955 | 585.48547   | -340.24194  | -406.23938  | 1 |
| 214 | O | 87.66748 | 66.53008 | 72.87170 | -419.15649  | -173.04408  | -511.94141  | 1 |
| 215 | H | 87.06456 | 65.91598 | 73.35316 | -1071.84350 | 1559.71507  | -1960.13012 | 1 |
| 216 | C | 83.37974 | 71.17352 | 68.01789 | 291.41878   | -183.13091  | 710.72246   | 1 |
| 217 | O | 83.87019 | 70.91043 | 66.94196 | 379.87695   | 523.47396   | -222.23622  | 1 |
| 218 | N | 82.46312 | 72.10905 | 68.28926 | 564.30591   | 373.09380   | 277.24371   | 1 |
| 219 | H | 82.11175 | 72.10636 | 69.24706 | -120.59931  | -2436.07824 | -1214.35098 | 1 |
| 220 | C | 81.72692 | 72.63328 | 67.17622 | 404.07514   | -299.37480  | 608.84009   | 1 |
| 221 | H | 82.42921 | 72.51395 | 66.31655 | -1071.07882 | -841.69025  | 2359.66467  | 1 |
| 222 | C | 80.43005 | 71.72603 | 67.00328 | -683.12807  | 68.71770    | -390.13096  | 1 |
| 223 | H | 80.69586 | 70.64693 | 67.07376 | 2068.88918  | 1596.58590  | 770.89603   | 1 |
| 224 | H | 79.69696 | 71.90937 | 67.82515 | 1379.86429  | 2342.49779  | -179.85638  | 1 |
| 225 | C | 79.81414 | 72.07019 | 65.61515 | -176.39967  | 537.49466   | 550.97268   | 1 |
| 226 | H | 79.54507 | 73.15584 | 65.57121 | -396.28051  | 1942.22168  | 1869.33314  | 1 |
| 227 | H | 80.55607 | 71.91251 | 64.80028 | -94.44700   | 586.00678   | -2659.20016 | 1 |
| 228 | C | 78.51961 | 71.15581 | 65.38860 | -291.69381  | -718.18079  | -150.72929  | 1 |
| 229 | H | 78.69165 | 70.05165 | 65.32820 | -2303.38776 | 1089.76242  | 964.62032   | 1 |
| 230 | H | 77.69498 | 71.37346 | 66.11729 | 884.16729   | 2568.80533  | -207.74283  | 1 |
| 231 | N | 78.12961 | 71.63773 | 64.13139 | -594.49522  | -252.81478  | 342.29276   | 1 |
| 232 | H | 78.31209 | 72.61436 | 63.95238 | -1735.17426 | 2084.05705  | -263.71605  | 1 |
| 233 | C | 77.53356 | 70.97218 | 63.22425 | 595.23177   | -271.52487  | 442.22352   | 1 |
| 234 | N | 77.24120 | 69.62608 | 63.45967 | 585.53813   | -424.79750  | -105.81303  | 1 |
| 235 | H | 77.39972 | 69.06533 | 64.29560 | 959.88797   | 1327.56823  | -2177.11905 | 1 |
| 236 | H | 76.73891 | 69.01600 | 62.81355 | 1578.48647  | 16.27378    | -2220.76233 | 1 |
| 237 | N | 77.27320 | 71.77866 | 62.10798 | -452.17763  | -390.33541  | -421.51853  | 1 |
| 238 | H | 77.47131 | 72.76330 | 61.93659 | 470.26107   | 1974.25629  | -1817.92087 | 1 |
| 239 | H | 76.78447 | 71.44499 | 61.27642 | 1856.67307  | -1573.97321 | -1224.35416 | 1 |
| 240 | C | 81.26364 | 74.15799 | 67.45137 | -531.47271  | -581.45780  | -55.06206   | 1 |
| 241 | O | 80.45878 | 74.69193 | 66.68342 | -243.00837  | 192.73507   | 609.52485   | 1 |
| 242 | N | 81.87376 | 74.69656 | 68.48636 | 343.49288   | -644.25607  | 38.09164    | 1 |
| 243 | H | 82.51842 | 74.05221 | 68.94482 | -1691.16043 | -1535.97525 | -1484.73099 | 1 |
| 244 | C | 81.42696 | 75.90222 | 69.16912 | 542.66492   | 350.14337   | 454.42563   | 1 |
| 245 | H | 82.21632 | 76.09510 | 69.93416 | 1209.57979  | -2396.95920 | 463.86744   | 1 |
| 246 | C | 81.26511 | 77.02949 | 68.15742 | -737.14309  | 145.93010   | 242.71942   | 1 |
| 247 | H | 80.61188 | 76.65178 | 67.32894 | -1050.18303 | 159.36419   | -2509.06125 | 1 |
| 248 | C | 80.60007 | 78.24075 | 68.77978 | -706.77696  | -252.88343  | -245.16230  | 1 |
| 249 | H | 80.43833 | 79.06021 | 68.02592 | -1624.64039 | -1665.49085 | 1417.86935  | 1 |
| 250 | H | 79.58909 | 77.98031 | 69.21799 | 2566.10521  | 598.51109   | 693.22305   | 1 |
| 251 | H | 81.22170 | 78.67188 | 69.61270 | -1972.69758 | 107.10018   | -1876.34312 | 1 |
| 252 | C | 82.59596 | 77.41601 | 67.54044 | 412.85148   | 672.58832   | -27.69222   | 1 |
| 253 | H | 82.47522 | 78.20607 | 66.74871 | 1447.02277  | 1762.76533  | -1490.78944 | 1 |
| 254 | H | 83.30876 | 77.82083 | 68.31091 | 1320.77379  | -145.20455  | 2378.68491  | 1 |
| 255 | H | 83.09325 | 76.52881 | 67.05859 | -1512.10848 | 1470.52031  | 1724.75147  | 1 |

|     |   |          |          |          |             |             |             |   |
|-----|---|----------|----------|----------|-------------|-------------|-------------|---|
| 256 | C | 79.96330 | 75.55399 | 69.88488 | -607.11113  | 499.56689   | 73.73769    | 1 |
| 257 | O | 79.86237 | 75.71411 | 71.07675 | 357.97126   | 460.81534   | 356.68785   | 1 |
| 258 | N | 79.06549 | 75.17938 | 69.00135 | 536.55407   | -368.62270  | 332.76306   | 1 |
| 259 | H | 79.32159 | 75.11776 | 67.99401 | 524.38866   | 2297.69985  | 1367.20941  | 1 |
| 260 | C | 77.77607 | 74.78120 | 69.44148 | 46.50277    | -774.29190  | -147.97904  | 1 |
| 261 | H | 77.82319 | 74.82833 | 70.55900 | 1676.51875  | 1883.29066  | 1032.55549  | 1 |
| 262 | C | 76.71133 | 75.77271 | 68.79036 | -559.41456  | -34.19198   | -556.30433  | 1 |
| 263 | H | 76.75489 | 75.70288 | 67.68101 | -64.66664   | 395.18769   | 2695.05373  | 1 |
| 264 | H | 75.67429 | 75.48852 | 69.07293 | -2703.44278 | -60.40056   | 333.79418   | 1 |
| 265 | C | 77.03882 | 77.22996 | 69.25635 | -519.76435  | 377.31045   | 459.42366   | 1 |
| 266 | H | 78.10064 | 77.48057 | 69.00952 | -1746.74323 | 1667.50644  | -1261.73691 | 1 |
| 267 | C | 76.05693 | 78.21119 | 68.51824 | 570.95554   | 16.46261    | -545.27700  | 1 |
| 268 | H | 76.21070 | 79.26615 | 68.84395 | 2391.58273  | 28.05277    | -1305.07271 | 1 |
| 269 | H | 76.20373 | 78.18154 | 67.41354 | 175.75588   | 917.63458   | 2559.43867  | 1 |
| 270 | H | 74.99059 | 77.95589 | 68.71551 | -1063.97851 | -2155.34650 | 1283.00462  | 1 |
| 271 | C | 76.79976 | 77.35470 | 70.80520 | 193.76014   | 2.62946     | -765.53141  | 1 |
| 272 | H | 77.00440 | 78.38820 | 71.16945 | 507.39394   | -846.55087  | 2539.60089  | 1 |
| 273 | H | 75.75085 | 77.10669 | 71.08567 | 1337.57841  | 1818.19054  | 1526.01994  | 1 |
| 274 | H | 77.46397 | 76.66314 | 71.38024 | 1100.88635  | -1172.91350 | -2199.08909 | 1 |
| 275 | C | 77.52790 | 73.29673 | 68.81964 | -549.21115  | 475.64486   | -309.38218  | 1 |
| 276 | O | 76.97412 | 73.11532 | 67.76831 | 556.06106   | -390.37755  | -78.24250   | 1 |
| 277 | O | 78.08622 | 72.21807 | 69.53976 | -572.27940  | -310.19032  | -209.75862  | 1 |
| 278 | H | 78.33224 | 72.69964 | 70.38011 | -1380.08193 | 2212.14486  | 790.85944   | 1 |

Listing 25: C00025.xmolout

|    |   |          |          |          |             |             |             |        |          |
|----|---|----------|----------|----------|-------------|-------------|-------------|--------|----------|
| 1  |   | 276      |          |          |             |             |             |        |          |
| 2  |   | 150.0000 | 150.0000 | 150.0000 | 0.0000      | 0.0000      | 0.0000***** | 0.7890 | 3156     |
|    |   | 0.2500   | 300.00   | 0.00     | 0.00        | 0.00        | -1293.9590  | 0.0000 | 300.0000 |
| 3  | H | 66.80058 | 61.07021 | 72.04983 | -2043.14101 | -1757.64893 | 399.89339   |        | 1        |
| 4  | N | 66.86297 | 62.06785 | 72.25056 | 426.75047   | 490.45733   | -334.42467  |        | 1        |
| 5  | H | 66.83971 | 62.10426 | 73.27819 | 442.25559   | -1110.30854 | -2448.52907 |        | 1        |
| 6  | C | 68.03550 | 62.68018 | 71.75648 | 415.32972   | -666.39213  | 83.73172    |        | 1        |
| 7  | H | 68.42401 | 62.05782 | 70.92112 | 879.32219   | 2491.00447  | 667.35213   |        | 1        |
| 8  | C | 67.66151 | 64.18160 | 71.29986 | 31.35357    | 477.41777   | 628.23362   |        | 1        |
| 9  | H | 67.23850 | 64.73423 | 72.17253 | 1168.38489  | 2240.25337  | -1019.71136 |        | 1        |
| 10 | H | 68.57769 | 64.74048 | 70.99164 | -360.43770  | 2534.90498  | 931.67112   |        | 1        |
| 11 | C | 66.65769 | 64.12182 | 70.17853 | 463.18208   | 512.70242   | -382.34388  |        | 1        |
| 12 | H | 65.85822 | 63.40304 | 70.46960 | 1725.29117  | 1863.52247  | -987.07854  |        | 1        |
| 13 | C | 66.02132 | 65.48885 | 69.95963 | 710.42801   | -144.27427  | -313.15367  |        | 1        |
| 14 | H | 65.25378 | 65.46219 | 69.14361 | 364.20195   | -1033.13725 | 2494.72524  |        | 1        |
| 15 | H | 65.50996 | 65.86063 | 70.88487 | 2567.61904  | 335.80679   | 847.48802   |        | 1        |
| 16 | H | 66.78474 | 66.25672 | 69.67127 | -2587.99029 | 680.92867   | -512.16411  |        | 1        |
| 17 | C | 67.29541 | 63.64563 | 68.88053 | 268.17616   | 741.64379   | -40.42634   |        | 1        |
| 18 | H | 66.55099 | 63.61187 | 68.04344 | 1283.54314  | -1945.37420 | -1411.27812 |        | 1        |
| 19 | H | 68.12645 | 64.32409 | 68.55683 | -1258.57796 | 1317.15249  | -2026.02085 |        | 1        |
| 20 | H | 67.72648 | 62.61664 | 68.98141 | -2502.84526 | 909.80597   | 575.92391   |        | 1        |
| 21 | C | 68.99548 | 62.72613 | 73.06802 | 619.36578   | -458.64843  | -172.09273  |        | 1        |
| 22 | O | 68.54325 | 62.61061 | 74.19291 | -81.40433   | 433.87611   | 522.34594   |        | 1        |
| 23 | N | 70.24903 | 62.95593 | 72.69613 | 175.23996   | -622.20190  | 341.55523   |        | 1        |
| 24 | H | 70.45923 | 63.08166 | 71.70665 | -876.57256  | -303.22879  | -2561.90213 |        | 1        |
| 25 | C | 71.26758 | 62.92166 | 73.68644 | -571.88214  | -534.10783  | -106.15033  |        | 1        |
| 26 | H | 70.76401 | 62.55434 | 74.60995 | -2713.20841 | -16.25800   | -248.80809  |        | 1        |
| 27 | C | 72.43260 | 61.96339 | 73.12266 | 166.60354   | 288.16399   | -716.09568  |        | 1        |
| 28 | H | 72.76164 | 62.36547 | 72.12581 | -2097.85574 | 1636.78449  | -586.18044  |        | 1        |
| 29 | O | 72.04671 | 60.59944 | 72.89773 | -317.80580  | -363.38227  | 484.43082   |        | 1        |
| 30 | H | 72.19274 | 60.51940 | 71.93297 | 1863.74748  | -1451.84923 | 1357.29467  |        | 1        |
| 31 | C | 73.58979 | 62.18219 | 74.16310 | 503.80731   | 517.99032   | 318.51606   |        | 1        |
| 32 | H | 74.51987 | 61.65036 | 73.85395 | 640.61020   | -2157.10410 | -1536.29104 |        | 1        |
| 33 | H | 73.85474 | 63.26150 | 74.27633 | 1687.88455  | 465.60692   | 2087.56452  |        | 1        |
| 34 | H | 73.31183 | 61.79747 | 75.17147 | -1293.07895 | -1899.88581 | -1463.57452 |        | 1        |
| 35 | C | 71.88875 | 64.42062 | 73.78985 | -153.07550  | -733.68902  | 248.70981   |        | 1        |

|    |   |          |          |          |             |             |             |   |
|----|---|----------|----------|----------|-------------|-------------|-------------|---|
| 36 | O | 72.32365 | 64.96483 | 72.78702 | 186.15459   | -480.78787  | -449.34387  | 1 |
| 37 | N | 71.91628 | 64.84169 | 75.05266 | -487.53139  | 543.18517   | 42.03850    | 1 |
| 38 | C | 72.37182 | 66.16257 | 75.38731 | -699.35871  | 69.34393    | 360.10701   | 1 |
| 39 | H | 71.94397 | 66.82172 | 74.59771 | 2.81126     | -221.99807  | -2715.58072 | 1 |
| 40 | C | 71.80775 | 66.37587 | 76.84977 | -507.46439  | -592.59194  | 122.07761   | 1 |
| 41 | H | 72.39451 | 67.12251 | 77.43182 | -1975.08116 | 525.87560   | -1801.71556 | 1 |
| 42 | H | 70.75452 | 66.73595 | 76.83447 | 1588.27743  | -1913.22100 | 1113.83566  | 1 |
| 43 | C | 71.90517 | 64.92883 | 77.42973 | -613.62442  | -457.55993  | -194.14490  | 1 |
| 44 | H | 72.95498 | 64.68620 | 77.70952 | 1707.54637  | -721.27992  | 1996.92523  | 1 |
| 45 | H | 71.28530 | 64.76834 | 78.34038 | 758.23357   | 2100.81767  | 1560.55011  | 1 |
| 46 | C | 71.42565 | 64.06646 | 76.18548 | -352.41524  | 704.96076   | 49.21465    | 1 |
| 47 | H | 71.85367 | 63.03857 | 76.13252 | 1714.76886  | -2070.42778 | 443.35792   | 1 |
| 48 | H | 70.31777 | 64.01384 | 76.05684 | 1224.15040  | 1801.50881  | 1636.97633  | 1 |
| 49 | C | 74.01173 | 66.16825 | 75.35635 | 566.85117   | 537.05831   | 117.62814   | 1 |
| 50 | O | 74.67086 | 66.26097 | 76.36132 | -550.26779  | -406.08867  | 4.21666     | 1 |
| 51 | N | 74.40777 | 66.04431 | 74.09449 | 566.34832   | -425.77725  | 180.18749   | 1 |
| 52 | H | 73.71358 | 65.92696 | 73.32094 | 644.44502   | 2646.80550  | -52.73430   | 1 |
| 53 | C | 75.79632 | 66.21243 | 73.84018 | 612.34801   | -281.48662  | 411.56221   | 1 |
| 54 | H | 76.31493 | 65.99294 | 74.80219 | 1667.23498  | -1490.75142 | 1556.16753  | 1 |
| 55 | C | 76.13103 | 65.21853 | 72.63073 | -714.45746  | -175.43074  | 286.98927   | 1 |
| 56 | H | 75.50081 | 65.51787 | 71.74786 | -787.09484  | 1763.03619  | -1922.46060 | 1 |
| 57 | O | 75.83473 | 63.82818 | 72.86012 | -429.46514  | 516.51932   | -128.40526  | 1 |
| 58 | H | 75.09992 | 63.68851 | 72.22831 | 1981.82785  | 436.16847   | -1818.18182 | 1 |
| 59 | C | 77.63798 | 65.56033 | 72.34050 | 630.79189   | -468.94448  | 76.03230    | 1 |
| 60 | H | 78.01512 | 65.00999 | 71.44745 | -1775.71861 | 2062.30353  | 131.89849   | 1 |
| 61 | H | 77.78657 | 66.64869 | 72.14825 | -1855.14608 | 88.94118    | 1993.53760  | 1 |
| 62 | H | 78.29089 | 65.28107 | 73.19961 | -1504.82350 | -780.94249  | -2132.90992 | 1 |
| 63 | C | 75.99052 | 67.75987 | 73.32395 | 288.57638   | 618.62814   | -397.00270  | 1 |
| 64 | O | 75.39272 | 68.15461 | 72.32180 | 321.70495   | -185.26452  | 574.37218   | 1 |
| 65 | N | 76.90567 | 68.34725 | 74.04536 | -447.05792  | -446.53431  | 367.76425   | 1 |
| 66 | H | 77.26008 | 67.76669 | 74.80430 | 350.31316   | 1975.63644  | -1843.31522 | 1 |
| 67 | C | 77.28748 | 69.71442 | 73.96515 | -511.23061  | 374.03917   | -471.51480  | 1 |
| 68 | H | 78.27857 | 69.69558 | 74.47251 | 2234.79579  | -898.70890  | -1273.45190 | 1 |
| 69 | C | 77.39164 | 70.12198 | 72.42876 | 529.53781   | -159.34528  | 563.72604   | 1 |
| 70 | H | 78.12617 | 70.96737 | 72.33102 | 654.59388   | 2347.94251  | 1217.51488  | 1 |
| 71 | H | 77.83382 | 69.23873 | 71.89657 | -1526.55661 | 2103.42026  | 817.87394   | 1 |
| 72 | O | 76.18166 | 70.54983 | 71.76958 | -554.84278  | 14.12789    | 399.58769   | 1 |
| 73 | H | 75.67231 | 69.64724 | 71.79659 | 1297.06236  | 2061.84854  | 1220.68812  | 1 |
| 74 | C | 76.24618 | 70.65219 | 74.79662 | -662.15484  | -412.13544  | 123.62687   | 1 |
| 75 | O | 75.30632 | 70.22452 | 75.42277 | -540.01537  | -317.05804  | 274.91456   | 1 |
| 76 | N | 76.71187 | 71.91387 | 74.78123 | -202.76299  | -690.00100  | -131.49145  | 1 |
| 77 | H | 77.50785 | 72.02459 | 74.15396 | -702.62132  | -2617.37191 | 281.70413   | 1 |
| 78 | C | 75.89785 | 73.07004 | 75.16348 | -491.73914  | 576.34187   | 222.73509   | 1 |
| 79 | H | 76.52553 | 73.92780 | 74.82070 | 1977.17978  | -1823.58850 | -434.68928  | 1 |
| 80 | C | 74.55842 | 72.99961 | 74.45740 | -649.50797  | -328.66843  | 306.11224   | 1 |
| 81 | H | 74.08349 | 72.02876 | 74.73584 | 2075.07803  | 1452.16490  | -1004.45904 | 1 |
| 82 | C | 73.63086 | 74.12901 | 74.86752 | -615.18735  | -489.99689  | -70.96352   | 1 |
| 83 | H | 72.64877 | 74.08191 | 74.32168 | -1226.32661 | -1724.38906 | -1716.47170 | 1 |
| 84 | H | 73.40351 | 74.10189 | 75.97925 | 2381.64273  | -969.84735  | 900.46860   | 1 |
| 85 | H | 74.08753 | 75.13244 | 74.64877 | 2122.74991  | 1702.23946  | -141.36228  | 1 |
| 86 | C | 74.71182 | 73.02604 | 72.94720 | -501.86074  | -479.61276  | -376.42482  | 1 |
| 87 | H | 73.71621 | 72.97715 | 72.42677 | 993.79261   | -2246.95401 | -1177.81305 | 1 |
| 88 | H | 75.22104 | 73.96740 | 72.60096 | 42.71279    | -626.15391  | -2651.37258 | 1 |
| 89 | H | 75.33071 | 72.14789 | 72.57021 | -2026.39012 | -1590.33709 | -887.82922  | 1 |
| 90 | C | 75.74023 | 73.05441 | 76.81257 | -672.89153  | 382.57394   | -156.34072  | 1 |
| 91 | O | 74.74614 | 73.49817 | 77.35216 | 410.04627   | 221.86223   | 500.35950   | 1 |
| 92 | N | 76.85581 | 72.63695 | 77.38566 | -378.11782  | -443.79414  | -441.10984  | 1 |
| 93 | H | 77.57271 | 72.33528 | 76.73011 | 2404.15973  | -568.14894  | 1149.30085  | 1 |
| 94 | C | 76.81818 | 72.30826 | 78.77693 | -544.54484  | 466.16019   | 331.29119   | 1 |
| 95 | H | 75.94500 | 72.88999 | 79.15333 | -1409.80988 | -170.17955  | 2325.32679  | 1 |
| 96 | C | 76.54561 | 70.74764 | 78.84633 | -184.48284  | 116.78282   | -758.89137  | 1 |
| 97 | H | 75.55221 | 70.49771 | 78.40826 | 1893.78641  | 1861.14652  | 611.04528   | 1 |

|     |   |          |          |          |             |             |             |   |
|-----|---|----------|----------|----------|-------------|-------------|-------------|---|
| 98  | H | 77.27995 | 70.18649 | 78.22522 | -2170.79665 | -974.19311  | 1327.50117  | 1 |
| 99  | C | 76.63314 | 70.31979 | 80.34440 | 389.51668   | 672.81878   | -138.49152  | 1 |
| 100 | H | 77.51468 | 70.79444 | 80.83028 | 510.64577   | 1933.03327  | 1851.02484  | 1 |
| 101 | H | 75.76638 | 70.72261 | 80.91302 | -2302.30869 | -1105.72939 | -948.89774  | 1 |
| 102 | C | 76.72649 | 68.75817 | 80.52867 | -559.93427  | -126.34590  | 542.30857   | 1 |
| 103 | O | 76.94750 | 68.30336 | 81.62084 | -670.36003  | -111.83166  | 76.36448    | 1 |
| 104 | N | 76.53802 | 68.05143 | 79.39153 | -216.06729  | -537.07037  | 446.51379   | 1 |
| 105 | H | 76.25606 | 68.37292 | 78.45810 | -1251.96487 | 1074.12894  | -2168.52500 | 1 |
| 106 | H | 76.48606 | 67.02747 | 79.35980 | -2451.83023 | -720.73851  | 944.84612   | 1 |
| 107 | C | 78.22859 | 72.80937 | 79.43857 | 546.24052   | -563.88337  | -85.11809   | 1 |
| 108 | O | 78.13165 | 73.79526 | 80.12472 | 71.70702    | -307.40463  | 606.69673   | 1 |
| 109 | N | 79.32578 | 72.08219 | 79.18027 | 479.90863   | -504.50129  | 222.86849   | 1 |
| 110 | C | 80.61279 | 72.57342 | 79.56890 | 75.51268    | -600.91904  | 506.73700   | 1 |
| 111 | H | 80.47685 | 73.20265 | 80.47919 | -2033.61562 | 1795.30103  | 254.89480   | 1 |
| 112 | C | 81.40652 | 71.20681 | 79.77018 | 523.79067   | 517.99274   | 284.45581   | 1 |
| 113 | H | 82.51066 | 71.34254 | 79.78105 | 1599.61665  | -1127.00911 | 1895.98173  | 1 |
| 114 | H | 81.13295 | 70.71436 | 80.72994 | -1881.83093 | 1275.82488  | -1501.55016 | 1 |
| 115 | C | 80.89330 | 70.38944 | 78.54685 | -600.05639  | -404.05026  | 316.64485   | 1 |
| 116 | H | 81.39875 | 70.71632 | 77.61058 | -2597.05260 | 496.36221   | 657.73249   | 1 |
| 117 | H | 81.06858 | 69.29422 | 78.63982 | -1666.24518 | 1294.38985  | -1723.90591 | 1 |
| 118 | C | 79.35128 | 70.77850 | 78.53284 | 493.57570   | -129.95376  | -602.56394  | 1 |
| 119 | H | 78.90978 | 70.89905 | 77.51582 | -1469.08415 | -637.84797  | 2204.22581  | 1 |
| 120 | H | 78.70345 | 70.10798 | 79.14649 | -1038.97840 | 1068.88701  | -2280.71789 | 1 |
| 121 | C | 81.24541 | 73.39261 | 78.30248 | 188.88100   | 241.05089   | -727.87821  | 1 |
| 122 | O | 80.89583 | 73.18526 | 77.14557 | 531.88613   | -49.19943   | 427.07960   | 1 |
| 123 | N | 82.19506 | 74.18575 | 78.74419 | 708.14833   | 26.93417    | -179.73509  | 1 |
| 124 | H | 82.29918 | 74.16220 | 79.75709 | -2232.69501 | -1179.09831 | 1023.94816  | 1 |
| 125 | C | 83.01989 | 75.04743 | 77.91738 | -738.32412  | 259.92548   | 104.42456   | 1 |
| 126 | H | 83.81875 | 75.39990 | 78.61395 | 2028.89123  | 1260.02983  | 1311.33324  | 1 |
| 127 | C | 83.56045 | 74.24258 | 76.74048 | -258.65678  | -345.52513  | 661.28459   | 1 |
| 128 | H | 82.68178 | 73.82600 | 76.18811 | -1826.06090 | -1801.46097 | -918.64554  | 1 |
| 129 | C | 84.35652 | 75.11507 | 75.78948 | -541.23400  | 531.92970   | -218.41428  | 1 |
| 130 | H | 84.67661 | 74.54764 | 74.87208 | 1311.73218  | -2219.18200 | 882.19023   | 1 |
| 131 | H | 83.75800 | 76.00355 | 75.44418 | -1048.71298 | 1223.58118  | -2196.97971 | 1 |
| 132 | H | 85.28936 | 75.51375 | 76.27622 | 419.06414   | 1903.92898  | 1903.44670  | 1 |
| 133 | C | 84.40519 | 73.07022 | 77.20260 | -423.86431  | 152.66566   | -648.55262  | 1 |
| 134 | H | 84.76646 | 72.44875 | 76.33744 | 105.68386   | -2342.50080 | 1387.51238  | 1 |
| 135 | H | 85.31480 | 73.41246 | 77.76909 | -1695.63603 | -1484.73621 | -1531.02793 | 1 |
| 136 | H | 83.82391 | 72.39062 | 77.88510 | -1853.57121 | -487.39031  | 1936.59343  | 1 |
| 137 | C | 82.08913 | 76.32518 | 77.38484 | 539.71428   | -510.58232  | 267.58633   | 1 |
| 138 | O | 82.57198 | 77.42704 | 77.42776 | -15.93758   | -278.34085  | -624.49402  | 1 |
| 139 | N | 80.92361 | 75.95876 | 76.88301 | -676.81886  | 12.05292    | 276.17960   | 1 |
| 140 | H | 80.65785 | 74.95530 | 76.84040 | -1694.44250 | -373.84189  | -2100.66098 | 1 |
| 141 | C | 79.96791 | 77.02284 | 76.73231 | 412.33078   | -664.70360  | 108.35451   | 1 |
| 142 | H | 80.09778 | 77.66840 | 77.62969 | 1765.77476  | 1294.44366  | 1621.76594  | 1 |
| 143 | C | 80.42551 | 77.77868 | 75.42249 | -179.66635  | -721.95667  | -264.73915  | 1 |
| 144 | H | 81.52725 | 77.95071 | 75.46251 | -607.34922  | 2587.87032  | -598.10018  | 1 |
| 145 | H | 80.25234 | 77.13697 | 74.52945 | -359.69332  | -1479.13954 | -2259.74260 | 1 |
| 146 | C | 79.66505 | 79.13964 | 75.28210 | -240.01076  | 616.02425   | 431.85322   | 1 |
| 147 | H | 78.56839 | 78.98029 | 75.19982 | -1359.17131 | 782.54425   | 2227.99181  | 1 |
| 148 | H | 79.81137 | 79.78166 | 76.17951 | -820.36667  | 85.81767    | -2596.78715 | 1 |
| 149 | C | 80.23473 | 79.83977 | 73.98346 | -513.07015  | 236.18570   | -551.87280  | 1 |
| 150 | H | 81.23968 | 80.27648 | 74.18555 | 1816.11944  | -1183.11722 | -1650.94321 | 1 |
| 151 | H | 80.39056 | 79.09189 | 73.17268 | -1800.04429 | -1361.53473 | 1526.34643  | 1 |
| 152 | C | 79.24291 | 80.92970 | 73.51225 | 726.08972   | -253.19732  | -179.64713  | 1 |
| 153 | H | 78.30012 | 80.54086 | 73.06947 | 1224.27271  | -456.51798  | -2390.90304 | 1 |
| 154 | H | 79.01749 | 81.71432 | 74.26485 | 1206.40339  | -1150.93514 | -2154.90344 | 1 |
| 155 | N | 79.92154 | 81.70668 | 72.33233 | 329.70796   | -633.68968  | -155.67358  | 1 |
| 156 | H | 79.33964 | 82.48800 | 71.91324 | 1348.31305  | 1938.76845  | 1359.00643  | 1 |
| 157 | H | 80.82749 | 82.21495 | 72.54897 | 2096.92035  | 1446.54551  | -966.48890  | 1 |
| 158 | H | 80.18187 | 81.15180 | 71.46599 | -1197.07217 | -2303.53719 | 827.28733   | 1 |
| 159 | C | 78.46917 | 76.39519 | 76.54107 | -378.01186  | -556.17301  | -413.96481  | 1 |

|     |   |          |          |          |             |             |             |   |
|-----|---|----------|----------|----------|-------------|-------------|-------------|---|
| 160 | O | 78.23168 | 75.44412 | 75.83478 | -409.44433  | -307.55053  | -453.30833  | 1 |
| 161 | N | 77.61335 | 77.19561 | 77.16909 | -429.02477  | 524.70884   | 274.08502   | 1 |
| 162 | H | 77.97561 | 78.00052 | 77.67838 | 1706.34263  | -1425.96036 | 1574.38926  | 1 |
| 163 | C | 76.22028 | 76.92240 | 77.10054 | -45.25864   | -626.22952  | 478.93267   | 1 |
| 164 | H | 76.16492 | 75.88854 | 76.68370 | 1988.63164  | 570.90773   | 1772.87287  | 1 |
| 165 | C | 75.64124 | 77.08733 | 78.56340 | 551.77128   | -20.49526   | -564.54996  | 1 |
| 166 | H | 76.29054 | 76.57449 | 79.30907 | 1434.61535  | -1753.10253 | 1513.99471  | 1 |
| 167 | H | 75.63747 | 78.16346 | 78.85195 | -714.67738  | 1819.09770  | 1898.36494  | 1 |
| 168 | C | 74.18823 | 76.50991 | 78.59256 | 446.99263   | -555.77305  | 338.97221   | 1 |
| 169 | H | 73.58526 | 76.92613 | 77.75169 | 1953.68466  | 1892.25957  | -161.67766  | 1 |
| 170 | H | 74.18861 | 75.40080 | 78.46155 | -403.03785  | 2688.07032  | -188.43591  | 1 |
| 171 | C | 73.57695 | 76.94187 | 79.98611 | 567.86262   | 335.74681   | 434.04421   | 1 |
| 172 | H | 74.12990 | 76.46516 | 80.82824 | -1080.02275 | 1568.26081  | -1948.78900 | 1 |
| 173 | H | 73.69230 | 78.04101 | 80.14227 | -919.54108  | 2111.34692  | 1456.13463  | 1 |
| 174 | C | 72.08026 | 76.55630 | 80.01721 | 195.81897   | 173.33862   | -745.11536  | 1 |
| 175 | H | 71.46540 | 77.02583 | 79.22339 | 1405.67949  | -2301.21089 | -390.08113  | 1 |
| 176 | H | 71.87859 | 75.46709 | 80.06065 | -940.37328  | -1118.32446 | 2299.72133  | 1 |
| 177 | N | 71.50620 | 77.13784 | 81.35348 | 319.26422   | 656.36007   | -42.02424   | 1 |
| 178 | H | 70.47065 | 76.99237 | 81.53715 | 1961.03633  | 619.91968   | 1787.09422  | 1 |
| 179 | H | 71.93610 | 76.78034 | 82.25532 | 854.14343   | -2156.80752 | 1429.08711  | 1 |
| 180 | H | 71.59897 | 78.18702 | 81.47766 | 1237.02905  | -1378.50857 | -1998.28500 | 1 |
| 181 | C | 75.52485 | 78.06244 | 76.13971 | 532.53319   | -268.57236  | 517.55729   | 1 |
| 182 | O | 74.40729 | 78.51708 | 76.36209 | 266.16714   | -290.73804  | -558.88002  | 1 |
| 183 | N | 76.33642 | 78.31021 | 75.13704 | -226.25352  | 640.49678   | -270.32839  | 1 |
| 184 | H | 77.18155 | 77.74275 | 75.17212 | 2007.69063  | -1035.27229 | 1523.50231  | 1 |
| 185 | C | 76.03806 | 79.16565 | 74.04622 | -540.76542  | -573.33303  | 49.50000    | 1 |
| 186 | H | 76.91430 | 79.03287 | 73.37482 | -2374.20950 | -1036.76023 | 843.75774   | 1 |
| 187 | C | 74.67932 | 78.63713 | 73.38654 | -77.09082   | 666.87422   | -415.84136  | 1 |
| 188 | H | 73.85706 | 78.67624 | 74.15508 | -985.81834  | 617.19825   | 2463.91927  | 1 |
| 189 | O | 74.69810 | 77.27553 | 72.91634 | 293.29899   | -391.65602  | -477.80926  | 1 |
| 190 | H | 74.01947 | 76.87188 | 73.49334 | 2528.72714  | -681.76262  | -751.27122  | 1 |
| 191 | C | 74.43172 | 79.73932 | 72.29325 | 252.47363   | -605.14473  | 440.05134   | 1 |
| 192 | H | 73.46408 | 79.57858 | 71.76439 | -2052.65063 | 1456.49051  | -1043.51830 | 1 |
| 193 | H | 74.40000 | 80.75910 | 72.73830 | -2152.98800 | -1661.97574 | -161.70652  | 1 |
| 194 | H | 75.23613 | 79.73794 | 71.52177 | -473.12726  | -1584.27339 | 2165.61725  | 1 |
| 195 | C | 75.90970 | 80.70826 | 74.58709 | 360.36307   | 488.46713   | 505.10056   | 1 |
| 196 | O | 76.77826 | 81.48236 | 74.26334 | -200.08817  | -528.03552  | -385.82850  | 1 |
| 197 | N | 74.79389 | 80.92695 | 75.27228 | -597.54095  | -226.44775  | 355.20479   | 1 |
| 198 | H | 74.22827 | 80.09946 | 75.57810 | 2179.23655  | -1300.70981 | -991.33835  | 1 |
| 199 | C | 74.64844 | 82.14928 | 75.97183 | -687.68921  | 297.39807   | -249.45179  | 1 |
| 200 | H | 73.66451 | 82.03819 | 76.47800 | -349.16256  | -2467.37713 | -1101.72831 | 1 |
| 201 | C | 75.87273 | 82.30017 | 76.99008 | 672.47345   | 361.54328   | -201.62880  | 1 |
| 202 | H | 76.83029 | 82.03323 | 76.48154 | 1541.41502  | 582.18425   | 2169.97026  | 1 |
| 203 | H | 75.96402 | 83.36850 | 77.30424 | -2534.67717 | 60.25153    | 997.72295   | 1 |
| 204 | C | 75.63369 | 81.41727 | 78.22619 | 574.26774   | -389.43119  | -377.02542  | 1 |
| 205 | C | 74.38102 | 81.49834 | 78.90608 | 688.82679   | -287.33580  | -257.96133  | 1 |
| 206 | H | 73.57999 | 82.16513 | 78.53872 | 331.14182   | 1470.38163  | 2269.80013  | 1 |
| 207 | C | 76.66611 | 80.56788 | 78.72462 | -383.52382  | -675.04808  | 144.24917   | 1 |
| 208 | H | 77.64071 | 80.50421 | 78.20796 | 4.09847     | 1517.59662  | 2262.86397  | 1 |
| 209 | C | 74.18198 | 80.72299 | 80.04775 | -134.76730  | 428.45285   | -649.50303  | 1 |
| 210 | H | 73.20707 | 80.78345 | 80.56248 | -903.23433  | 1600.49020  | 2011.53387  | 1 |
| 211 | C | 76.42786 | 79.82633 | 79.88728 | -335.53281  | -615.00040  | -364.39058  | 1 |
| 212 | H | 77.23788 | 79.18130 | 80.27070 | 1596.45398  | -1369.33862 | 1732.02659  | 1 |
| 213 | C | 75.18554 | 79.86716 | 80.58582 | 585.48547   | -340.24194  | -406.23938  | 1 |
| 214 | O | 74.91967 | 79.09898 | 81.75193 | -419.15649  | -173.04408  | -511.94141  | 1 |
| 215 | H | 75.81046 | 78.70080 | 81.89282 | -1071.84350 | 1559.71507  | -1960.13012 | 1 |
| 216 | C | 74.75051 | 83.48990 | 75.04399 | 291.41878   | -183.13091  | 710.72246   | 1 |
| 217 | O | 75.19655 | 84.51509 | 75.51504 | 379.87695   | 523.47396   | -222.23622  | 1 |
| 218 | N | 74.13810 | 83.37206 | 73.81859 | 564.30591   | 373.09380   | 277.24371   | 1 |
| 219 | H | 73.99583 | 82.35582 | 73.77126 | -120.59931  | -2436.07824 | -1214.35098 | 1 |
| 220 | C | 74.84291 | 84.09547 | 72.77975 | 404.07514   | -299.37480  | 608.84009   | 1 |
| 221 | H | 75.66287 | 84.63637 | 73.30537 | -1071.07882 | -841.69025  | 2359.66467  | 1 |



|     |   |          |          |          |             |             |             |   |
|-----|---|----------|----------|----------|-------------|-------------|-------------|---|
| 222 | C | 75.37619 | 83.02937 | 71.74839 | -683.12807  | 68.71770    | -390.13096  | 1 |
| 223 | H | 75.97502 | 82.24125 | 72.26306 | 2068.88918  | 1596.58590  | 770.89603   | 1 |
| 224 | H | 74.52313 | 82.49856 | 71.26812 | 1379.86429  | 2342.49779  | -179.85638  | 1 |
| 225 | C | 76.23855 | 83.77100 | 70.67716 | -176.39967  | 537.49466   | 550.97268   | 1 |
| 226 | H | 75.72182 | 84.70858 | 70.34103 | -396.28051  | 1942.22168  | 1869.33314  | 1 |
| 227 | H | 77.20974 | 84.10524 | 71.10641 | -94.44700   | 586.00678   | -2659.20016 | 1 |
| 228 | C | 76.46003 | 82.77981 | 69.44572 | -291.69381  | -718.18079  | -150.72929  | 1 |
| 229 | H | 77.19400 | 81.95019 | 69.60967 | -2303.38776 | 1089.76242  | 964.62032   | 1 |
| 230 | H | 75.52958 | 82.33632 | 69.00745 | 884.16729   | 2568.80533  | -207.74283  | 1 |
| 231 | N | 76.98737 | 83.66985 | 68.49567 | -594.49522  | -252.81478  | 342.29276   | 1 |
| 232 | H | 77.08162 | 84.63445 | 68.77450 | -1735.17426 | 2084.05705  | -263.71605  | 1 |
| 233 | C | 77.33955 | 83.35349 | 67.31589 | 595.23177   | -271.52487  | 442.22352   | 1 |
| 234 | N | 77.20783 | 82.01565 | 66.92828 | 585.53813   | -424.79750  | -105.81303  | 1 |
| 235 | H | 76.85802 | 81.21963 | 67.45992 | 959.88797   | 1327.56823  | -2177.11905 | 1 |
| 236 | H | 77.45504 | 81.64763 | 66.00902 | 1578.48647  | 16.27378    | -2220.76233 | 1 |
| 237 | N | 77.81077 | 84.47244 | 66.61325 | -452.17763  | -390.33541  | -421.51853  | 1 |
| 238 | H | 77.88998 | 85.44959 | 66.89051 | 470.26107   | 1974.25629  | -1817.92087 | 1 |
| 239 | H | 78.12780 | 84.43130 | 65.64409 | 1856.67307  | -1573.97321 | -1224.35416 | 1 |
| 240 | C | 73.83081 | 85.10718 | 72.02066 | -531.47271  | -581.45780  | -55.06206   | 1 |
| 241 | O | 74.27202 | 85.86761 | 71.17611 | -243.00837  | 192.73507   | 609.52485   | 1 |
| 242 | N | 72.55621 | 84.94604 | 72.36234 | 343.49288   | -644.25607  | 38.09164    | 1 |
| 243 | H | 72.34852 | 84.27677 | 73.10261 | -1691.16043 | -1535.97525 | -1484.73099 | 1 |
| 244 | C | 71.60357 | 85.78999 | 71.71747 | 542.66492   | 350.14337   | 454.42563   | 1 |
| 245 | H | 72.17583 | 86.71034 | 71.45828 | 1209.57979  | -2396.95920 | 463.86744   | 1 |
| 246 | C | 71.07870 | 85.02945 | 70.42148 | -737.14309  | 145.93010   | 242.71942   | 1 |
| 247 | H | 70.74046 | 84.00451 | 70.68471 | -1050.18303 | 159.36419   | -2509.06125 | 1 |
| 248 | C | 69.90882 | 85.86404 | 69.79780 | -706.77696  | -252.88343  | -245.16230  | 1 |
| 249 | H | 69.49445 | 85.37558 | 68.88478 | -1624.64039 | -1665.49085 | 1417.86935  | 1 |
| 250 | H | 69.06711 | 85.99102 | 70.51941 | 2566.10521  | 598.51109   | 693.22305   | 1 |
| 251 | H | 70.24627 | 86.88607 | 69.50535 | -1972.69758 | 107.10018   | -1876.34312 | 1 |
| 252 | C | 72.22576 | 84.97506 | 69.35617 | 412.85148   | 672.58832   | -27.69222   | 1 |
| 253 | H | 71.91556 | 84.42147 | 68.43882 | 1447.02277  | 1762.76533  | -1490.78944 | 1 |
| 254 | H | 72.53640 | 85.99903 | 69.04101 | 1320.77379  | -145.20455  | 2378.68491  | 1 |
| 255 | H | 73.13629 | 84.47238 | 69.76441 | -1512.10848 | 1470.52031  | 1724.75147  | 1 |
| 256 | C | 70.30859 | 86.03309 | 72.68810 | -607.11113  | 499.56689   | 73.73769    | 1 |
| 257 | O | 69.84318 | 87.14259 | 72.80378 | 357.97126   | 460.81534   | 356.68785   | 1 |
| 258 | N | 69.81476 | 84.87565 | 73.13237 | 536.55407   | -368.62270  | 332.76306   | 1 |
| 259 | H | 70.33969 | 84.02261 | 72.93968 | 524.38866   | 2297.69985  | 1367.20941  | 1 |
| 260 | C | 68.91782 | 84.93148 | 74.22792 | 46.50277    | -774.29190  | -147.97904  | 1 |
| 261 | H | 68.73458 | 86.01644 | 74.40464 | 1676.51875  | 1883.29066  | 1032.55549  | 1 |
| 262 | C | 67.58368 | 84.09782 | 73.85988 | -559.41456  | -34.19198   | -556.30433  | 1 |
| 263 | H | 67.84156 | 83.01622 | 73.76604 | -64.66664   | 395.18769   | 2695.05373  | 1 |
| 264 | H | 66.84437 | 84.16353 | 74.69335 | -2703.44278 | -60.40056   | 333.79418   | 1 |
| 265 | C | 66.99116 | 84.60283 | 72.57212 | -519.76435  | 377.31045   | 459.42366   | 1 |
| 266 | H | 67.78358 | 84.57290 | 71.79029 | -1746.74323 | 1667.50644  | -1261.73691 | 1 |
| 267 | C | 65.83948 | 83.70866 | 72.12906 | 570.95554   | 16.46261    | -545.27700  | 1 |
| 268 | H | 65.39015 | 84.05889 | 71.16418 | 2391.58273  | 28.05277    | -1305.07271 | 1 |
| 269 | H | 66.17219 | 82.64984 | 71.97543 | 175.75588   | 917.63458   | 2559.43867  | 1 |
| 270 | H | 65.01647 | 83.68969 | 72.88905 | -1063.97851 | -2155.34650 | 1283.00462  | 1 |
| 271 | C | 66.50115 | 86.03837 | 72.70466 | 193.76014   | 2.62946     | -765.53141  | 1 |
| 272 | H | 66.00622 | 86.39505 | 71.76455 | 507.39394   | -846.55087  | 2539.60089  | 1 |
| 273 | H | 65.75438 | 86.14559 | 73.53333 | 1337.57841  | 1818.19054  | 1526.01994  | 1 |
| 274 | H | 67.34637 | 86.74308 | 72.92068 | 1100.88635  | -1172.91350 | -2199.08909 | 1 |
| 275 | C | 69.65247 | 84.15444 | 75.44055 | -549.21115  | 475.64486   | -309.38218  | 1 |
| 276 | O | 70.45461 | 83.27434 | 75.26857 | 556.06106   | -390.37755  | -78.24250   | 1 |
| 277 | O | 69.18811 | 84.46573 | 76.73921 | -572.27940  | -310.19032  | -209.75862  | 1 |
| 278 | H | 68.55724 | 85.20297 | 76.50532 | -1380.08193 | 2212.14486  | 790.85944   | 1 |

Listing 26: C00026.xmolout

|   |          |          |          |        |        |             |        |       |
|---|----------|----------|----------|--------|--------|-------------|--------|-------|
| 1 | 276      |          |          |        |        |             |        |       |
| 2 | 150.0000 | 150.0000 | 150.0000 | 0.0000 | 0.0000 | 0.0000***** | 2.7750 | 11100 |

|    |   | 0.2500   | 300.00   | 0.00     | 0.00        | 0.00        | -1293.9554 | 0.0000      | 300.0000 |   |
|----|---|----------|----------|----------|-------------|-------------|------------|-------------|----------|---|
| 3  | H | 72.57283 | 88.15144 | 73.34531 | -2043.14101 | -1757.64893 |            | 399.89339   |          | 1 |
| 4  | N | 73.38582 | 87.87093 | 72.80265 | 426.75047   | 490.45733   |            | -334.42467  |          | 1 |
| 5  | H | 72.96830 | 87.50991 | 71.94767 | 442.25559   | -1110.30854 |            | -2448.52907 |          | 1 |
| 6  | C | 74.37926 | 88.85863 | 72.63170 | 415.32972   | -666.39213  |            | 83.73172    |          | 1 |
| 7  | H | 74.41333 | 89.36381 | 73.62059 | 879.32219   | 2491.00447  |            | 667.35213   |          | 1 |
| 8  | C | 75.77006 | 88.12568 | 72.27449 | 31.35357    | 477.41777   |            | 628.23362   |          | 1 |
| 9  | H | 75.64421 | 87.52141 | 71.34449 | 1168.38489  | 2240.25337  |            | -1019.71136 |          | 1 |
| 10 | H | 76.56247 | 88.88015 | 72.05069 | -360.43770  | 2534.90498  |            | 931.67112   |          | 1 |
| 11 | C | 76.16563 | 87.24679 | 73.43245 | 463.18208   | 512.70242   |            | -382.34388  |          | 1 |
| 12 | H | 75.26959 | 86.66799 | 73.74814 | 1725.29117  | 1863.52247  |            | -987.07854  |          | 1 |
| 13 | C | 77.25055 | 86.26173 | 73.01591 | 710.42801   | -144.27427  |            | -313.15367  |          | 1 |
| 14 | H | 77.54190 | 85.58637 | 73.86139 | 364.20195   | -1033.13725 |            | 2494.72524  |          | 1 |
| 15 | H | 76.91510 | 85.60878 | 72.16934 | 2567.61904  | 335.80679   |            | 847.48802   |          | 1 |
| 16 | H | 78.17936 | 86.79107 | 72.68013 | -2587.99029 | 680.92867   |            | -512.16411  |          | 1 |
| 17 | C | 76.65411 | 88.07007 | 74.61670 | 268.17616   | 741.64379   |            | -40.42634   |          | 1 |
| 18 | H | 76.96996 | 87.41763 | 75.47129 | 1283.54314  | -1945.37420 |            | -1411.27812 |          | 1 |
| 19 | H | 77.53554 | 88.70500 | 74.34173 | -1258.57796 | 1317.15249  |            | -2026.02085 |          | 1 |
| 20 | H | 75.85866 | 88.75760 | 75.00305 | -2502.84526 | 909.80597   |            | 575.92391   |          | 1 |
| 21 | C | 74.00458 | 89.88902 | 71.44395 | 619.36578   | -458.64843  |            | -172.09273  |          | 1 |
| 22 | O | 74.90037 | 90.59616 | 70.96381 | -81.40433   | 433.87611   |            | 522.34594   |          | 1 |
| 23 | N | 72.72809 | 89.87916 | 71.17085 | 175.23996   | -622.20190  |            | 341.55523   |          | 1 |
| 24 | H | 72.17179 | 89.25105 | 71.74788 | -876.57256  | -303.22879  |            | -2561.90213 |          | 1 |
| 25 | C | 72.04889 | 90.61246 | 70.15074 | -571.88214  | -534.10783  |            | -106.15033  |          | 1 |
| 26 | H | 71.27402 | 91.16872 | 70.72337 | -2713.20841 | -16.25800   |            | -248.80809  |          | 1 |
| 27 | C | 73.02143 | 91.59010 | 69.35604 | 166.60354   | 288.16399   |            | -716.09568  |          | 1 |
| 28 | H | 73.89595 | 90.99173 | 68.95796 | -2097.85574 | 1636.78449  |            | -586.18044  |          | 1 |
| 29 | O | 73.65479 | 92.61364 | 70.12761 | -317.80580  | -363.38227  |            | 484.43082   |          | 1 |
| 30 | H | 74.47592 | 92.07533 | 70.45711 | 1863.74748  | -1451.84923 |            | 1357.29467  |          | 1 |
| 31 | C | 72.09646 | 92.06014 | 68.17489 | 503.80731   | 517.99032   |            | 318.51606   |          | 1 |
| 32 | H | 72.65886 | 92.67947 | 67.43825 | 640.61020   | -2157.10410 |            | -1536.29104 |          | 1 |
| 33 | H | 71.65633 | 91.19839 | 67.62002 | 1687.88455  | 465.60692   |            | 2087.56452  |          | 1 |
| 34 | H | 71.24829 | 92.68014 | 68.54765 | -1293.07895 | -1899.88581 |            | -1463.57452 |          | 1 |
| 35 | C | 71.25908 | 89.45544 | 69.30514 | -153.07550  | -733.68902  |            | 248.70981   |          | 1 |
| 36 | O | 70.09228 | 89.34938 | 69.58247 | 186.15459   | -480.78787  |            | -449.34387  |          | 1 |
| 37 | N | 71.98112 | 88.74568 | 68.42638 | -487.53139  | 543.18517   |            | 42.03850    |          | 1 |
| 38 | C | 71.38906 | 87.63986 | 67.73641 | -699.35871  | 69.34393    |            | 360.10701   |          | 1 |
| 39 | H | 70.32607 | 87.92070 | 67.55601 | 2.81126     | -221.99807  |            | -2715.58072 |          | 1 |
| 40 | C | 72.32233 | 87.52868 | 66.45897 | -507.46439  | -592.59194  |            | 122.07761   |          | 1 |
| 41 | H | 72.25485 | 86.53718 | 65.95785 | -1975.08116 | 525.87560   |            | -1801.71556 |          | 1 |
| 42 | H | 72.06200 | 88.29438 | 65.69435 | 1588.27743  | -1913.22100 |            | 1113.83566  |          | 1 |
| 43 | C | 73.72271 | 87.80715 | 67.09018 | -613.62442  | -457.55993  |            | -194.14490  |          | 1 |
| 44 | H | 74.10133 | 86.90442 | 67.62453 | 1707.54637  | -721.27992  |            | 1996.92523  |          | 1 |
| 45 | H | 74.50116 | 88.08688 | 66.34485 | 758.23357   | 2100.81767  |            | 1560.55011  |          | 1 |
| 46 | C | 73.38286 | 88.97783 | 68.10874 | -352.41524  | 704.96076   |            | 49.21465    |          | 1 |
| 47 | H | 73.95356 | 88.95904 | 69.06788 | 1714.76886  | -2070.42778 |            | 443.35792   |          | 1 |
| 48 | H | 73.43776 | 89.99864 | 67.66135 | 1224.15040  | 1801.50881  |            | 1636.97633  |          | 1 |
| 49 | C | 71.54589 | 86.31957 | 68.70516 | 566.85117   | 537.05831   |            | 117.62814   |          | 1 |
| 50 | O | 72.57824 | 85.65422 | 68.68068 | -550.26779  | -406.08867  |            | 4.21666     |          | 1 |
| 51 | N | 70.46855 | 86.18433 | 69.43717 | 566.34832   | -425.77725  |            | 180.18749   |          | 1 |
| 52 | H | 69.79336 | 86.93876 | 69.30641 | 644.44502   | 2646.80550  |            | -52.73430   |          | 1 |
| 53 | C | 70.10698 | 85.01923 | 70.16165 | 612.34801   | -281.48662  |            | 411.56221   |          | 1 |
| 54 | H | 69.03745 | 85.19385 | 70.41636 | 1667.23498  | -1490.75142 |            | 1556.16753  |          | 1 |
| 55 | C | 70.32893 | 83.73138 | 69.22468 | -714.45746  | -175.43074  |            | 286.98927   |          | 1 |
| 56 | H | 71.39468 | 83.72431 | 68.86030 | -787.09484  | 1763.03619  |            | -1922.46060 |          | 1 |
| 57 | O | 69.50484 | 83.65959 | 68.05312 | -429.46514  | 516.51932   |            | -128.40526  |          | 1 |
| 58 | H | 70.18198 | 83.67698 | 67.34473 | 1981.82785  | 436.16847   |            | -1818.18182 |          | 1 |
| 59 | C | 70.14873 | 82.58961 | 70.28978 | 630.79189   | -468.94448  |            | 76.03230    |          | 1 |
| 60 | H | 70.42303 | 81.59193 | 69.87413 | -1775.71861 | 2062.30353  |            | 131.89849   |          | 1 |
| 61 | H | 70.79653 | 82.76957 | 71.18818 | -1855.14608 | 88.94118    |            | 1993.53760  |          | 1 |
| 62 | H | 69.09428 | 82.52496 | 70.64638 | -1504.82350 | -780.94249  |            | -2132.90992 |          | 1 |
| 63 | C | 71.01926 | 84.82771 | 71.49874 | 288.57638   | 618.62814   |            | -397.00270  |          | 1 |

|     |   |          |          |          |             |             |             |   |
|-----|---|----------|----------|----------|-------------|-------------|-------------|---|
| 64  | O | 70.43462 | 84.66409 | 72.56818 | 321.70495   | -185.26452  | 574.37218   | 1 |
| 65  | N | 72.29726 | 84.82772 | 71.24359 | -447.05792  | -446.53431  | 367.76425   | 1 |
| 66  | H | 72.63562 | 84.98469 | 70.25942 | 350.31316   | 1975.63644  | -1843.31522 | 1 |
| 67  | C | 73.24373 | 84.45682 | 72.24065 | -511.23061  | 374.03917   | -471.51480  | 1 |
| 68  | H | 74.17535 | 84.89208 | 71.81129 | 2234.79579  | -898.70890  | -1273.45190 | 1 |
| 69  | C | 72.80314 | 85.13519 | 73.61579 | 529.53781   | -159.34528  | 563.72604   | 1 |
| 70  | H | 73.72923 | 85.45810 | 74.16324 | 654.59388   | 2347.94251  | 1217.51488  | 1 |
| 71  | H | 72.23359 | 86.06453 | 73.34661 | -1526.55661 | 2103.42026  | 817.87394   | 1 |
| 72  | O | 72.00504 | 84.36042 | 74.53331 | -554.84278  | 14.12789    | 399.58769   | 1 |
| 73  | H | 71.11497 | 84.39442 | 74.00905 | 1297.06236  | 2061.84854  | 1220.68812  | 1 |
| 74  | C | 73.32718 | 82.83173 | 72.30189 | -662.15484  | -412.13544  | 123.62687   | 1 |
| 75  | O | 72.97584 | 82.11373 | 71.36860 | -540.01537  | -317.05804  | 274.91456   | 1 |
| 76  | N | 73.93940 | 82.49147 | 73.41806 | -202.76299  | -690.00100  | -131.49145  | 1 |
| 77  | H | 74.13004 | 83.28229 | 74.03146 | -702.62132  | -2617.37191 | 281.70413   | 1 |
| 78  | C | 73.93745 | 81.17246 | 73.94474 | -491.73914  | 576.34187   | 222.73509   | 1 |
| 79  | H | 74.29971 | 81.31044 | 74.98722 | 1977.17978  | -1823.58850 | -434.68928  | 1 |
| 80  | C | 72.45203 | 80.60377 | 73.87251 | -649.50797  | -328.66843  | 306.11224   | 1 |
| 81  | H | 71.98996 | 80.81929 | 72.88269 | 2075.07803  | 1452.16490  | -1004.45904 | 1 |
| 82  | C | 72.45763 | 79.06681 | 74.17061 | -615.18735  | -489.99689  | -70.96352   | 1 |
| 83  | H | 71.42350 | 78.65091 | 74.21440 | -1226.32661 | -1724.38906 | -1716.47170 | 1 |
| 84  | H | 73.01601 | 78.48861 | 73.38153 | 2381.64273  | -969.84735  | 900.46860   | 1 |
| 85  | H | 72.94489 | 78.84959 | 75.14825 | 2122.74991  | 1702.23946  | -141.36228  | 1 |
| 86  | C | 71.64422 | 81.28909 | 75.02629 | -501.86074  | -479.61276  | -376.42482  | 1 |
| 87  | H | 70.56794 | 80.99643 | 75.00923 | 993.79261   | -2246.95401 | -1177.81305 | 1 |
| 88  | H | 72.04841 | 81.01501 | 76.02934 | 42.71279    | -626.15391  | -2651.37258 | 1 |
| 89  | H | 71.69517 | 82.41134 | 74.93926 | -2026.39012 | -1590.33709 | -887.82922  | 1 |
| 90  | C | 74.94955 | 80.21076 | 73.08491 | -672.89153  | 382.57394   | -156.34072  | 1 |
| 91  | O | 75.95300 | 79.82135 | 73.64103 | 410.04627   | 221.86223   | 500.35950   | 1 |
| 92  | N | 74.50209 | 79.98371 | 71.86903 | -378.11782  | -443.79414  | -441.10984  | 1 |
| 93  | H | 73.66462 | 80.51061 | 71.52252 | 2404.15973  | -568.14894  | 1149.30085  | 1 |
| 94  | C | 75.08020 | 78.96187 | 71.04759 | -544.54484  | 466.16019   | 331.29119   | 1 |
| 95  | H | 74.37252 | 78.98805 | 70.18815 | -1409.80988 | -170.17955  | 2325.32679  | 1 |
| 96  | C | 76.50516 | 79.51072 | 70.61166 | -184.48284  | 116.78282   | -758.89137  | 1 |
| 97  | H | 76.41915 | 80.55743 | 70.24143 | 1893.78641  | 1861.14652  | 611.04528   | 1 |
| 98  | H | 77.18721 | 79.57456 | 71.48983 | -2170.79665 | -974.19311  | 1327.50117  | 1 |
| 99  | C | 77.06448 | 78.57623 | 69.49399 | 389.51668   | 672.81878   | -138.49152  | 1 |
| 100 | H | 76.96442 | 77.50706 | 69.78612 | 510.64577   | 1933.03327  | 1851.02484  | 1 |
| 101 | H | 76.43835 | 78.65660 | 68.57813 | -2302.30869 | -1105.72939 | -948.89774  | 1 |
| 102 | C | 78.56753 | 78.88998 | 69.14037 | -559.93427  | -126.34590  | 542.30857   | 1 |
| 103 | O | 79.14808 | 78.19501 | 68.34680 | -670.36003  | -111.83166  | 76.36448    | 1 |
| 104 | N | 79.07580 | 79.95914 | 69.79091 | -216.06729  | -537.07037  | 446.51379   | 1 |
| 105 | H | 78.61960 | 80.60683 | 70.44390 | -1251.96487 | 1074.12894  | -2168.52500 | 1 |
| 106 | H | 80.02476 | 80.31955 | 69.64438 | -2451.83023 | -720.73851  | 944.84612   | 1 |
| 107 | C | 74.97570 | 77.53139 | 71.79998 | 546.24052   | -563.88337  | -85.11809   | 1 |
| 108 | O | 73.82906 | 77.16535 | 72.04973 | 71.70702    | -307.40463  | 606.69673   | 1 |
| 109 | N | 76.10881 | 76.89212 | 72.06025 | 479.90863   | -504.50129  | 222.86849   | 1 |
| 110 | C | 76.19260 | 75.45433 | 72.13444 | 75.51268    | -600.91904  | 506.73700   | 1 |
| 111 | H | 75.62850 | 75.07109 | 71.25320 | -2033.61562 | 1795.30103  | 254.89480   | 1 |
| 112 | C | 77.75938 | 75.19288 | 72.13833 | 523.79067   | 517.99274   | 284.45581   | 1 |
| 113 | H | 78.02455 | 74.19927 | 72.56997 | 1599.61665  | -1127.00911 | 1895.98173  | 1 |
| 114 | H | 78.19248 | 75.23230 | 71.11355 | -1881.83093 | 1275.82488  | -1501.55016 | 1 |
| 115 | C | 78.25100 | 76.38899 | 73.01196 | -600.05639  | -404.05026  | 316.64485   | 1 |
| 116 | H | 78.03276 | 76.21548 | 74.09004 | -2597.05260 | 496.36221   | 657.73249   | 1 |
| 117 | H | 79.34396 | 76.58604 | 72.93176 | -1666.24518 | 1294.38985  | -1723.90591 | 1 |
| 118 | C | 77.35735 | 77.55673 | 72.41153 | 493.57570   | -129.95376  | -602.56394  | 1 |
| 119 | H | 77.08848 | 78.39904 | 73.12480 | -1469.08415 | -637.84797  | 2204.22581  | 1 |
| 120 | H | 77.76807 | 77.98317 | 71.46384 | -1038.97840 | 1068.88701  | -2280.71789 | 1 |
| 121 | C | 75.66689 | 74.83167 | 73.53839 | 188.88100   | 241.05089   | -727.87821  | 1 |
| 122 | O | 76.34186 | 74.01105 | 74.10583 | 531.88613   | -49.19943   | 427.07960   | 1 |
| 123 | N | 74.46442 | 75.28991 | 73.89198 | 708.14833   | 26.93417    | -179.73509  | 1 |
| 124 | H | 73.95394 | 75.95597 | 73.25498 | -2232.69501 | -1179.09831 | 1023.94816  | 1 |
| 125 | C | 73.79679 | 74.68669 | 75.05118 | -738.32412  | 259.92548   | 104.42456   | 1 |

|     |   |          |          |          |             |             |             |   |
|-----|---|----------|----------|----------|-------------|-------------|-------------|---|
| 126 | H | 74.66652 | 74.29727 | 75.63499 | 2028.89123  | 1260.02983  | 1311.33324  | 1 |
| 127 | C | 72.99891 | 75.76824 | 75.75444 | -258.65678  | -345.52513  | 661.28459   | 1 |
| 128 | H | 72.30657 | 76.22848 | 75.01413 | -1826.06090 | -1801.46097 | -918.64554  | 1 |
| 129 | C | 72.16982 | 75.20428 | 76.89004 | -541.23400  | 531.92970   | -218.41428  | 1 |
| 130 | H | 71.70079 | 76.01524 | 77.51310 | 1311.73218  | -2219.18200 | 882.19023   | 1 |
| 131 | H | 71.33436 | 74.55221 | 76.50174 | -1048.71298 | 1223.58118  | -2196.97971 | 1 |
| 132 | H | 72.80597 | 74.55132 | 77.58454 | 419.06414   | 1903.92898  | 1903.44670  | 1 |
| 133 | C | 73.91379 | 76.86375 | 76.27451 | -423.86431  | 152.66566   | -648.55262  | 1 |
| 134 | H | 73.33720 | 77.69261 | 76.76927 | 105.68386   | -2342.50080 | 1387.51238  | 1 |
| 135 | H | 74.63961 | 76.46483 | 77.03522 | -1695.63603 | -1484.73621 | -1531.02793 | 1 |
| 136 | H | 74.52230 | 77.31848 | 75.44352 | -1853.57121 | -487.39031  | 1936.59343  | 1 |
| 137 | C | 72.85047 | 73.44910 | 74.47549 | 539.71428   | -510.58232  | 267.58633   | 1 |
| 138 | O | 71.65159 | 73.45213 | 74.62113 | -15.93758   | -278.34085  | -624.49402  | 1 |
| 139 | N | 73.60493 | 72.53497 | 73.88208 | -676.81886  | 12.05292    | 276.17960   | 1 |
| 140 | H | 74.61281 | 72.70783 | 73.87967 | -1694.44250 | -373.84189  | -2100.66098 | 1 |
| 141 | C | 73.03239 | 71.26158 | 73.62399 | 412.33078   | -664.70360  | 108.35451   | 1 |
| 142 | H | 71.92973 | 71.40219 | 73.71823 | 1765.77476  | 1294.44366  | 1621.76594  | 1 |
| 143 | C | 73.55136 | 70.75841 | 72.21690 | -179.66635  | -721.95667  | -264.73915  | 1 |
| 144 | H | 73.18693 | 71.41435 | 71.39471 | -607.34922  | 2587.87032  | -598.10018  | 1 |
| 145 | H | 74.66298 | 70.80474 | 72.17446 | -359.69332  | -1479.13954 | -2259.74260 | 1 |
| 146 | C | 73.04910 | 69.28668 | 72.04005 | -240.01076  | 616.02425   | 431.85322   | 1 |
| 147 | H | 73.40225 | 68.66341 | 72.89517 | -1359.17131 | 782.54425   | 2227.99181  | 1 |
| 148 | H | 71.93725 | 69.23883 | 72.05761 | -820.36667  | 85.81767    | -2596.78715 | 1 |
| 149 | C | 73.61755 | 68.72175 | 70.67708 | -513.07015  | 236.18570   | -551.87280  | 1 |
| 150 | H | 73.24562 | 69.31631 | 69.81121 | 1816.11944  | -1183.11722 | -1650.94321 | 1 |
| 151 | H | 74.72855 | 68.80305 | 70.64786 | -1800.04429 | -1361.53473 | 1526.34643  | 1 |
| 152 | C | 73.17456 | 67.24400 | 70.56717 | 726.08972   | -253.19732  | -179.64713  | 1 |
| 153 | H | 73.58556 | 66.58039 | 71.35401 | 1224.27271  | -456.51798  | -2390.90304 | 1 |
| 154 | H | 72.07975 | 67.09518 | 70.48090 | 1206.40339  | -1150.93514 | -2154.90344 | 1 |
| 155 | N | 73.75824 | 66.67408 | 69.23061 | 329.70796   | -633.68968  | -155.67358  | 1 |
| 156 | H | 73.53013 | 65.65837 | 69.02658 | 1348.31305  | 1938.76845  | 1359.00643  | 1 |
| 157 | H | 73.44863 | 67.14182 | 68.32955 | 2096.92035  | 1446.54551  | -966.48890  | 1 |
| 158 | H | 74.81464 | 66.67488 | 69.12686 | -1197.07217 | -2303.53719 | 827.28733   | 1 |
| 159 | C | 73.68606 | 70.21778 | 74.72783 | -378.01186  | -556.17301  | -413.96481  | 1 |
| 160 | O | 74.72653 | 69.64508 | 74.47987 | -409.44433  | -307.55053  | -453.30833  | 1 |
| 161 | N | 72.92934 | 70.16163 | 75.80972 | -429.02477  | 524.70884   | 274.08502   | 1 |
| 162 | H | 72.09339 | 70.74569 | 75.81508 | 1706.34263  | -1425.96036 | 1574.38926  | 1 |
| 163 | C | 73.25264 | 69.33305 | 76.91909 | -45.25864   | -626.22952  | 478.93267   | 1 |
| 164 | H | 72.27852 | 69.18180 | 77.43563 | 1988.63164  | 570.90773   | 1772.87287  | 1 |
| 165 | C | 73.89054 | 68.00670 | 76.36381 | 551.77128   | -20.49526   | -564.54996  | 1 |
| 166 | H | 73.32031 | 67.64504 | 75.47951 | 1434.61535  | -1753.10253 | 1513.99471  | 1 |
| 167 | H | 74.92651 | 68.20339 | 75.98609 | -714.67738  | 1819.09770  | 1898.36494  | 1 |
| 168 | C | 73.92279 | 66.90161 | 77.50752 | 446.99263   | -555.77305  | 338.97221   | 1 |
| 169 | H | 74.52061 | 67.28283 | 78.37740 | 1953.68466  | 1892.25957  | -161.67766  | 1 |
| 170 | H | 72.89262 | 66.70640 | 77.89636 | -403.03785  | 2688.07032  | -188.43591  | 1 |
| 171 | C | 74.53588 | 65.64324 | 76.93243 | 567.86262   | 335.74681   | 434.04421   | 1 |
| 172 | H | 73.85530 | 65.21240 | 76.16342 | -1080.02275 | 1568.26081  | -1948.78900 | 1 |
| 173 | H | 75.46800 | 65.90391 | 76.38010 | -919.54108  | 2111.34692  | 1456.13463  | 1 |
| 174 | C | 74.84815 | 64.63624 | 77.94652 | 195.81897   | 173.33862   | -745.11536  | 1 |
| 175 | H | 75.68859 | 64.91533 | 78.61264 | 1405.67949  | -2301.21089 | -390.08113  | 1 |
| 176 | H | 73.97893 | 64.29864 | 78.54682 | -940.37328  | -1118.32446 | 2299.72133  | 1 |
| 177 | N | 75.35958 | 63.30937 | 77.29535 | 319.26422   | 656.36007   | -42.02424   | 1 |
| 178 | H | 75.61331 | 62.56047 | 78.00634 | 1961.03633  | 619.91968   | 1787.09422  | 1 |
| 179 | H | 74.69347 | 62.77761 | 76.66174 | 854.14343   | -2156.80752 | 1429.08711  | 1 |
| 180 | H | 76.24595 | 63.36101 | 76.71265 | 1237.02905  | -1378.50857 | -1998.28500 | 1 |
| 181 | C | 74.32919 | 70.10267 | 77.90993 | 532.53319   | -268.57236  | 517.55729   | 1 |
| 182 | O | 74.37511 | 69.77167 | 79.07021 | 266.16714   | -290.73804  | -558.88002  | 1 |
| 183 | N | 75.05556 | 70.98877 | 77.25088 | -226.25352  | 640.49678   | -270.32839  | 1 |
| 184 | H | 74.86259 | 71.05583 | 76.24914 | 2007.69063  | -1035.27229 | 1523.50231  | 1 |
| 185 | C | 75.93756 | 71.91390 | 77.87228 | -540.76542  | -573.33303  | 49.50000    | 1 |
| 186 | H | 76.19377 | 72.59180 | 77.02693 | -2374.20950 | -1036.76023 | 843.75774   | 1 |
| 187 | C | 75.14918 | 72.65957 | 79.03248 | -77.09082   | 666.87422   | -415.84136  | 1 |

|     |   |          |          |          |             |             |             |   |
|-----|---|----------|----------|----------|-------------|-------------|-------------|---|
| 188 | H | 74.78817 | 71.90089 | 79.78058 | -985.81834  | 617.19825   | 2463.91927  | 1 |
| 189 | O | 73.93690 | 73.37493 | 78.62851 | 293.29899   | -391.65602  | -477.80926  | 1 |
| 190 | H | 73.26781 | 72.84283 | 79.09628 | 2528.72714  | -681.76262  | -751.27122  | 1 |
| 191 | C | 76.26880 | 73.55916 | 79.66026 | 252.47363   | -605.14473  | 440.05134   | 1 |
| 192 | H | 75.91394 | 74.06429 | 80.58874 | -2052.65063 | 1456.49051  | -1043.51830 | 1 |
| 193 | H | 77.17809 | 72.97141 | 79.92816 | -2152.98800 | -1661.97574 | -161.70652  | 1 |
| 194 | H | 76.59225 | 74.35718 | 78.95194 | -473.12726  | -1584.27339 | 2165.61725  | 1 |
| 195 | C | 77.26611 | 71.07899 | 78.36866 | 360.36307   | 488.46713   | 505.10056   | 1 |
| 196 | O | 78.13676 | 70.86486 | 77.55845 | -200.08817  | -528.03552  | -385.82850  | 1 |
| 197 | N | 77.24462 | 70.74712 | 79.65520 | -597.54095  | -226.44775  | 355.20479   | 1 |
| 198 | H | 76.41720 | 70.93023 | 80.22134 | 2179.23655  | -1300.70981 | -991.33835  | 1 |
| 199 | C | 78.36079 | 70.05570 | 80.16753 | -687.68921  | 297.39807   | -249.45179  | 1 |
| 200 | H | 79.05085 | 69.88508 | 79.30660 | -349.16256  | -2467.37713 | -1101.72831 | 1 |
| 201 | C | 78.97622 | 70.83147 | 81.42965 | 672.47345   | 361.54328   | -201.62880  | 1 |
| 202 | H | 78.18492 | 70.97836 | 82.20237 | 1541.41502  | 582.18425   | 2169.97026  | 1 |
| 203 | H | 79.76281 | 70.19558 | 81.89817 | -2534.67717 | 60.25153    | 997.72295   | 1 |
| 204 | C | 79.57982 | 72.16954 | 80.98438 | 574.26774   | -389.43119  | -377.02542  | 1 |
| 205 | C | 80.72702 | 72.16512 | 80.13457 | 688.82679   | -287.33580  | -257.96133  | 1 |
| 206 | H | 81.16755 | 71.21367 | 79.78522 | 331.14182   | 1470.38163  | 2269.80013  | 1 |
| 207 | C | 79.01118 | 73.40124 | 81.42851 | -383.52382  | -675.04808  | 144.24917   | 1 |
| 208 | H | 78.12318 | 73.40697 | 82.08618 | 4.09847     | 1517.59662  | 2262.86397  | 1 |
| 209 | C | 81.27957 | 73.38702 | 79.75416 | -134.76730  | 428.45285   | -649.50303  | 1 |
| 210 | H | 82.16779 | 73.38416 | 79.09833 | -903.23433  | 1600.49020  | 2011.53387  | 1 |
| 211 | C | 79.60151 | 74.59907 | 81.01887 | -335.53281  | -615.00040  | -364.39058  | 1 |
| 212 | H | 79.15589 | 75.54625 | 81.36924 | 1596.45398  | -1369.33862 | 1732.02659  | 1 |
| 213 | C | 80.75005 | 74.64123 | 80.17571 | 585.48547   | -340.24194  | -406.23938  | 1 |
| 214 | O | 81.35788 | 75.85341 | 79.75727 | -419.15649  | -173.04408  | -511.94141  | 1 |
| 215 | H | 80.78528 | 76.49970 | 80.23394 | -1071.84350 | 1559.71507  | -1960.13012 | 1 |
| 216 | C | 77.82848 | 68.71705 | 80.96735 | 291.41878   | -183.13091  | 710.72246   | 1 |
| 217 | O | 77.48472 | 68.79323 | 82.12334 | 379.87695   | 523.47396   | -222.23622  | 1 |
| 218 | N | 77.93439 | 67.66111 | 80.17570 | 564.30591   | 373.09380   | 277.24371   | 1 |
| 219 | H | 78.17919 | 67.75427 | 79.18655 | -120.59931  | -2436.07824 | -1214.35098 | 1 |
| 220 | C | 77.39853 | 66.40598 | 80.61176 | 404.07514   | -299.37480  | 608.84009   | 1 |
| 221 | H | 77.78998 | 66.20713 | 81.63477 | -1071.07882 | -841.69025  | 2359.66467  | 1 |
| 222 | C | 75.82359 | 66.59904 | 80.63130 | -683.12807  | 68.71770    | -390.13096  | 1 |
| 223 | H | 75.53986 | 67.41526 | 81.33489 | 2068.88918  | 1596.58590  | 770.89603   | 1 |
| 224 | H | 75.46500 | 66.93709 | 79.62846 | 1379.86429  | 2342.49779  | -179.85638  | 1 |
| 225 | C | 75.16891 | 65.24514 | 81.04312 | -176.39967  | 537.49466   | 550.97268   | 1 |
| 226 | H | 75.58090 | 64.40257 | 80.44367 | -396.28051  | 1942.22168  | 1869.33314  | 1 |
| 227 | H | 75.39779 | 64.99011 | 82.10158 | -94.44700   | 586.00678   | -2659.20016 | 1 |
| 228 | C | 73.59614 | 65.40736 | 80.80982 | -291.69381  | -718.18079  | -150.72929  | 1 |
| 229 | H | 73.01813 | 65.82942 | 81.67074 | -2303.38776 | 1089.76242  | 964.62032   | 1 |
| 230 | H | 73.29473 | 65.97066 | 79.89111 | 884.16729   | 2568.80533  | -207.74283  | 1 |
| 231 | N | 73.21761 | 64.07471 | 80.61769 | -594.49522  | -252.81478  | 342.29276   | 1 |
| 232 | H | 73.95760 | 63.37788 | 80.70945 | -1735.17426 | 2084.05705  | -263.71605  | 1 |
| 233 | C | 72.03056 | 63.70934 | 80.33115 | 595.23177   | -271.52487  | 442.22352   | 1 |
| 234 | N | 71.05530 | 64.69856 | 80.20019 | 585.53813   | -424.79750  | -105.81303  | 1 |
| 235 | H | 71.14454 | 65.71005 | 80.29623 | 959.88797   | 1327.56823  | -2177.11905 | 1 |
| 236 | H | 70.07584 | 64.53290 | 79.96408 | 1578.48647  | 16.27378    | -2220.76233 | 1 |
| 237 | N | 72.01407 | 62.31602 | 80.20475 | -452.17763  | -390.33541  | -421.51853  | 1 |
| 238 | H | 72.79854 | 61.65592 | 80.24675 | 470.26107   | 1974.25629  | -1817.92087 | 1 |
| 239 | H | 71.18221 | 61.77419 | 79.96326 | 1856.67307  | -1573.97321 | -1224.35416 | 1 |
| 240 | C | 77.88518 | 65.37285 | 79.45319 | -531.47271  | -581.45780  | -55.06206   | 1 |
| 241 | O | 78.06604 | 65.72694 | 78.31149 | -243.00837  | 192.73507   | 609.52485   | 1 |
| 242 | N | 77.92889 | 64.13670 | 79.95746 | 343.49288   | -644.25607  | 38.09164    | 1 |
| 243 | H | 77.75930 | 64.05158 | 80.96095 | -1691.16043 | -1535.97525 | -1484.73099 | 1 |
| 244 | C | 78.57658 | 63.04925 | 79.22930 | 542.66492   | 350.14337   | 454.42563   | 1 |
| 245 | H | 78.31510 | 63.20809 | 78.15725 | 1209.57979  | -2396.95920 | 463.86744   | 1 |
| 246 | C | 80.06972 | 63.11394 | 79.49951 | -737.14309  | 145.93010   | 242.71942   | 1 |
| 247 | H | 80.20629 | 63.17306 | 80.60241 | -1050.18303 | 159.36419   | -2509.06125 | 1 |
| 248 | C | 80.78465 | 61.87312 | 78.99711 | -706.77696  | -252.88343  | -245.16230  | 1 |
| 249 | H | 81.88517 | 61.90521 | 79.22889 | -1624.64039 | -1665.49085 | 1417.86935  | 1 |

|     |   |          |          |          |             |             |             |   |
|-----|---|----------|----------|----------|-------------|-------------|-------------|---|
| 250 | H | 80.37140 | 60.93820 | 79.46668 | 2566.10521  | 598.51109   | 693.22305   | 1 |
| 251 | H | 80.68238 | 61.75868 | 77.88263 | -1972.69758 | 107.10018   | -1876.34312 | 1 |
| 252 | C | 80.70088 | 64.35049 | 78.88659 | 412.85148   | 672.58832   | -27.69222   | 1 |
| 253 | H | 81.76977 | 64.48187 | 79.21224 | 1447.02277  | 1762.76533  | -1490.78944 | 1 |
| 254 | H | 80.69724 | 64.30091 | 77.76279 | 1320.77379  | -145.20455  | 2378.68491  | 1 |
| 255 | H | 80.13822 | 65.28547 | 79.17110 | -1512.10848 | 1470.52031  | 1724.75147  | 1 |
| 256 | C | 77.90539 | 61.69435 | 79.93583 | -607.11113  | 499.56689   | 73.73769    | 1 |
| 257 | O | 78.05467 | 61.48058 | 81.11395 | 357.97126   | 460.81534   | 356.68785   | 1 |
| 258 | N | 77.35189 | 60.94382 | 78.99688 | 536.55407   | -368.62270  | 332.76306   | 1 |
| 259 | H | 77.41651 | 61.30714 | 78.04643 | 524.38866   | 2297.69985  | 1367.20941  | 1 |
| 260 | C | 76.37861 | 59.95771 | 79.31073 | 46.50277    | -774.29190  | -147.97904  | 1 |
| 261 | H | 76.30469 | 59.36874 | 78.36988 | 1676.51875  | 1883.29066  | 1032.55549  | 1 |
| 262 | C | 76.83028 | 59.08389 | 80.58862 | -559.41456  | -34.19198   | -556.30433  | 1 |
| 263 | H | 76.70744 | 59.71638 | 81.50321 | -64.66664   | 395.18769   | 2695.05373  | 1 |
| 264 | H | 76.14439 | 58.21370 | 80.72531 | -2703.44278 | -60.40056   | 333.79418   | 1 |
| 265 | C | 78.26265 | 58.63147 | 80.48085 | -519.76435  | 377.31045   | 459.42366   | 1 |
| 266 | H | 78.88519 | 59.53003 | 80.26034 | -1746.74323 | 1667.50644  | -1261.73691 | 1 |
| 267 | C | 78.72856 | 58.04479 | 81.80808 | 570.95554   | 16.46261    | -545.27700  | 1 |
| 268 | H | 79.80231 | 57.72749 | 81.76757 | 2391.58273  | 28.05277    | -1305.07271 | 1 |
| 269 | H | 78.63366 | 58.78918 | 82.64067 | 175.75588   | 917.63458   | 2559.43867  | 1 |
| 270 | H | 78.12679 | 57.14488 | 82.09634 | -1063.97851 | -2155.34650 | 1283.00462  | 1 |
| 271 | C | 78.46347 | 57.61188 | 79.36913 | 193.76014   | 2.62946     | -765.53141  | 1 |
| 272 | H | 79.53072 | 57.27477 | 79.30749 | 507.39394   | -846.55087  | 2539.60089  | 1 |
| 273 | H | 77.83647 | 56.69717 | 79.52912 | 1337.57841  | 1818.19054  | 1526.01994  | 1 |
| 274 | H | 78.19036 | 58.03345 | 78.36768 | 1100.88635  | -1172.91350 | -2199.08909 | 1 |
| 275 | C | 74.99008 | 60.67670 | 79.67540 | -549.21115  | 475.64486   | -309.38218  | 1 |
| 276 | O | 74.87567 | 61.82714 | 80.04641 | 556.06106   | -390.37755  | -78.24250   | 1 |
| 277 | O | 73.84961 | 59.84866 | 79.62083 | -572.27940  | -310.19032  | -209.75862  | 1 |
| 278 | H | 74.30113 | 59.00354 | 79.32060 | -1380.08193 | 2212.14486  | 790.85944   | 1 |

Listing 27: C00027.xmolout

|    |   |          |          |          |             |             |             |        |          |
|----|---|----------|----------|----------|-------------|-------------|-------------|--------|----------|
| 1  |   | 276      |          |          |             |             |             |        |          |
| 2  |   | 150.0000 | 150.0000 | 150.0000 | 0.0000      | 0.0000      | 0.0000***** | 1.1695 | 4678     |
|    |   | 0.2500   | 300.00   | 0.00     | 0.00        | 0.00        | -1293.9452  | 0.0000 | 300.0000 |
| 3  | H | 66.79296 | 76.53065 | 74.29401 | -2043.14101 | -1757.64893 | 399.89339   |        | 1        |
| 4  | N | 66.68826 | 77.51405 | 74.05073 | 426.75047   | 490.45733   | -334.42467  |        | 1        |
| 5  | H | 66.09303 | 77.86696 | 74.80431 | 442.25559   | -1110.30854 | -2448.52907 |        | 1        |
| 6  | C | 67.90228 | 78.23254 | 73.97682 | 415.32972   | -666.39213  | 83.73172    |        | 1        |
| 7  | H | 68.70690 | 77.53404 | 73.65516 | 879.32219   | 2491.00447  | 667.35213   |        | 1        |
| 8  | C | 67.67988 | 79.45501 | 72.94403 | 31.35357    | 477.41777   | 628.23362   |        | 1        |
| 9  | H | 66.81731 | 80.07910 | 73.28054 | 1168.38489  | 2240.25337  | -1019.71136 |        | 1        |
| 10 | H | 68.57090 | 80.12832 | 72.93719 | -360.43770  | 2534.90498  | 931.67112   |        | 1        |
| 11 | C | 67.42055 | 78.88057 | 71.57714 | 463.18208   | 512.70242   | -382.34388  |        | 1        |
| 12 | H | 66.65934 | 78.07379 | 71.67989 | 1725.29117  | 1863.52247  | -987.07854  |        | 1        |
| 13 | C | 66.86629 | 79.94534 | 70.63913 | 710.42801   | -144.27427  | -313.15367  |        | 1        |
| 14 | H | 66.65025 | 79.52843 | 69.62158 | 364.20195   | -1033.13725 | 2494.72524  |        | 1        |
| 15 | H | 65.91074 | 80.38331 | 71.02781 | 2567.61904  | 335.80679   | 847.48802   |        | 1        |
| 16 | H | 67.58820 | 80.79153 | 70.50398 | -2587.99029 | 680.92867   | -512.16411  |        | 1        |
| 17 | C | 68.69147 | 78.28700 | 70.98406 | 268.17616   | 741.64379   | -40.42634   |        | 1        |
| 18 | H | 68.51567 | 77.86976 | 69.95892 | 1283.54314  | -1945.37420 | -1411.27812 |        | 1        |
| 19 | H | 69.50308 | 79.05501 | 70.89662 | -1258.57796 | 1317.15249  | -2026.02085 |        | 1        |
| 20 | H | 69.09806 | 77.45582 | 71.61628 | -2502.84526 | 909.80597   | 575.92391   |        | 1        |
| 21 | C | 68.10150 | 78.82359 | 75.47362 | 619.36578   | -458.64843  | -172.09273  |        | 1        |
| 22 | O | 67.17137 | 79.05395 | 76.21440 | -81.40433   | 433.87611   | 522.34594   |        | 1        |
| 23 | N | 69.40044 | 79.07210 | 75.65005 | 175.23996   | -622.20190  | 341.55523   |        | 1        |
| 24 | H | 70.10597 | 78.84411 | 74.90991 | -876.57256  | -303.22879  | -2561.90213 |        | 1        |
| 25 | C | 69.79696 | 79.40022 | 76.99436 | -571.88214  | -534.10783  | -106.15033  |        | 1        |
| 26 | H | 68.85520 | 79.37780 | 77.59525 | -2713.20841 | -16.25800   | -248.80809  |        | 1        |
| 27 | C | 70.82483 | 78.24824 | 77.40608 | 166.60354   | 288.16399   | -716.09568  |        | 1        |
| 28 | H | 71.65144 | 78.23908 | 76.63871 | -2097.85574 | 1636.78449  | -586.18044  |        | 1        |
| 29 | O | 70.33120 | 76.87182 | 77.26504 | -317.80580  | -363.38227  | 484.43082   |        | 1        |

|    |   |          |          |          |             |             |             |   |
|----|---|----------|----------|----------|-------------|-------------|-------------|---|
| 30 | H | 70.09199 | 76.68464 | 78.19075 | 1863.74748  | -1451.84923 | 1357.29467  | 1 |
| 31 | C | 71.37065 | 78.62685 | 78.81902 | 503.80731   | 517.99032   | 318.51606   | 1 |
| 32 | H | 72.17183 | 77.92163 | 79.14611 | 640.61020   | -2157.10410 | -1536.29104 | 1 |
| 33 | H | 71.81270 | 79.66194 | 78.83964 | 1687.88455  | 465.60692   | 2087.56452  | 1 |
| 34 | H | 70.56879 | 78.58558 | 79.59410 | -1293.07895 | -1899.88581 | -1463.57452 | 1 |
| 35 | C | 70.46685 | 80.86167 | 76.91275 | -153.07550  | -733.68902  | 248.70981   | 1 |
| 36 | O | 70.86464 | 81.32214 | 75.84648 | 186.15459   | -480.78787  | -449.34387  | 1 |
| 37 | N | 70.57902 | 81.42432 | 78.11249 | -487.53139  | 543.18517   | 42.03850    | 1 |
| 38 | C | 71.49434 | 82.53051 | 78.26237 | -699.35871  | 69.34393    | 360.10701   | 1 |
| 39 | H | 71.31823 | 83.18205 | 77.37602 | 2.81126     | -221.99807  | -2715.58072 | 1 |
| 40 | C | 71.06078 | 83.15189 | 79.65213 | -507.46439  | -592.59194  | 122.07761   | 1 |
| 41 | H | 71.91652 | 83.60373 | 80.20264 | -1975.08116 | 525.87560   | -1801.71556 | 1 |
| 42 | H | 70.31652 | 83.96737 | 79.51080 | 1588.27743  | -1913.22100 | 1113.83566  | 1 |
| 43 | C | 70.42728 | 81.93668 | 80.40041 | -613.62442  | -457.55993  | -194.14490  | 1 |
| 44 | H | 71.21588 | 81.26849 | 80.81314 | 1707.54637  | -721.27992  | 1996.92523  | 1 |
| 45 | H | 69.77127 | 82.22843 | 81.25108 | 758.23357   | 2100.81767  | 1560.55011  | 1 |
| 46 | C | 69.64065 | 81.23727 | 79.21015 | -352.41524  | 704.96076   | 49.21465    | 1 |
| 47 | H | 69.42656 | 80.15333 | 79.34685 | 1714.76886  | -2070.42778 | 443.35792   | 1 |
| 48 | H | 68.70427 | 81.75902 | 78.90005 | 1224.15040  | 1801.50881  | 1636.97633  | 1 |
| 49 | C | 73.01792 | 81.94971 | 78.29605 | 566.85117   | 537.05831   | 117.62814   | 1 |
| 50 | O | 73.33860 | 81.01917 | 79.04289 | -550.26779  | -406.08867  | 4.21666     | 1 |
| 51 | N | 73.74854 | 82.63407 | 77.46825 | 566.34832   | -425.77725  | 180.18749   | 1 |
| 52 | H | 73.27176 | 83.34659 | 76.91957 | 644.44502   | 2646.80550  | -52.73430   | 1 |
| 53 | C | 75.15299 | 82.43141 | 77.26177 | 612.34801   | -281.48662  | 411.56221   | 1 |
| 54 | H | 75.67757 | 82.90877 | 78.11791 | 1667.23498  | -1490.75142 | 1556.16753  | 1 |
| 55 | C | 75.40187 | 80.85345 | 77.27182 | -714.45746  | -175.43074  | 286.98927   | 1 |
| 56 | H | 74.41341 | 80.37019 | 77.02618 | -787.09484  | 1763.03619  | -1922.46060 | 1 |
| 57 | O | 75.75323 | 80.34471 | 78.55983 | -429.46514  | 516.51932   | -128.40526  | 1 |
| 58 | H | 74.81968 | 80.35849 | 79.00652 | 1981.82785  | 436.16847   | -1818.18182 | 1 |
| 59 | C | 76.42606 | 80.60177 | 76.10988 | 630.79189   | -468.94448  | 76.03230    | 1 |
| 60 | H | 76.63634 | 79.51485 | 75.97425 | -1775.71861 | 2062.30353  | 131.89849   | 1 |
| 61 | H | 76.05310 | 80.99047 | 75.13208 | -1855.14608 | 88.94118    | 1993.53760  | 1 |
| 62 | H | 77.40244 | 81.10118 | 76.31351 | -1504.82350 | -780.94249  | -2132.90992 | 1 |
| 63 | C | 75.45023 | 83.17985 | 75.85427 | 288.57638   | 618.62814   | -397.00270  | 1 |
| 64 | O | 74.66000 | 83.13931 | 74.94055 | 321.70495   | -185.26452  | 574.37218   | 1 |
| 65 | N | 76.70865 | 83.66095 | 75.85132 | -447.05792  | -446.53431  | 367.76425   | 1 |
| 66 | H | 77.21040 | 83.62096 | 76.73989 | 350.31316   | 1975.63644  | -1843.31522 | 1 |
| 67 | C | 76.94700 | 84.73979 | 74.92831 | -511.23061  | 374.03917   | -471.51480  | 1 |
| 68 | H | 76.03774 | 85.37762 | 74.98130 | 2234.79579  | -898.70890  | -1273.45190 | 1 |
| 69 | C | 78.27377 | 85.47286 | 75.41628 | 529.53781   | -159.34528  | 563.72604   | 1 |
| 70 | H | 78.38264 | 86.41026 | 74.80451 | 654.59388   | 2347.94251  | 1217.51488  | 1 |
| 71 | H | 78.10576 | 85.79219 | 76.47790 | -1526.55661 | 2103.42026  | 817.87394   | 1 |
| 72 | O | 79.51927 | 84.73141 | 75.26646 | -554.84278  | 14.12789    | 399.58769   | 1 |
| 73 | H | 79.48651 | 84.19594 | 76.07749 | 1297.06236  | 2061.84854  | 1220.68812  | 1 |
| 74 | C | 77.14682 | 84.13419 | 73.43619 | -662.15484  | -412.13544  | 123.62687   | 1 |
| 75 | O | 77.02210 | 84.86252 | 72.47554 | -540.01537  | -317.05804  | 274.91456   | 1 |
| 76 | N | 77.51633 | 82.85279 | 73.45212 | -202.76299  | -690.00100  | -131.49145  | 1 |
| 77 | H | 77.62849 | 82.39881 | 74.35731 | -702.62132  | -2617.37191 | 281.70413   | 1 |
| 78 | C | 77.72509 | 82.19702 | 72.21204 | -491.73914  | 576.34187   | 222.73509   | 1 |
| 79 | H | 77.19761 | 82.82368 | 71.45601 | 1977.17978  | -1823.58850 | -434.68928  | 1 |
| 80 | C | 79.30392 | 82.16587 | 71.99849 | -649.50797  | -328.66843  | 306.11224   | 1 |
| 81 | H | 79.80452 | 81.71374 | 72.88129 | 2075.07803  | 1452.16490  | -1004.45904 | 1 |
| 82 | C | 79.63031 | 81.35989 | 70.69626 | -615.18735  | -489.99689  | -70.96352   | 1 |
| 83 | H | 80.71728 | 81.40259 | 70.44996 | -1226.32661 | -1724.38906 | -1716.47170 | 1 |
| 84 | H | 79.35914 | 80.28386 | 70.80699 | 2381.64273  | -969.84735  | 900.46860   | 1 |
| 85 | H | 79.07299 | 81.75684 | 69.81555 | 2122.74991  | 1702.23946  | -141.36228  | 1 |
| 86 | C | 79.79675 | 83.63857 | 71.79022 | -501.86074  | -479.61276  | -376.42482  | 1 |
| 87 | H | 80.89610 | 83.68773 | 71.60815 | 993.79261   | -2246.95401 | -1177.81305 | 1 |
| 88 | H | 79.29055 | 84.12052 | 70.92065 | 42.71279    | -626.15391  | -2651.37258 | 1 |
| 89 | H | 79.57710 | 84.26721 | 72.68745 | -2026.39012 | -1590.33709 | -887.82922  | 1 |
| 90 | C | 77.17986 | 80.65770 | 72.38417 | -672.89153  | 382.57394   | -156.34072  | 1 |
| 91 | O | 77.62309 | 79.90863 | 73.22239 | 410.04627   | 221.86223   | 500.35950   | 1 |

|     |   |          |          |          |             |             |             |   |
|-----|---|----------|----------|----------|-------------|-------------|-------------|---|
| 92  | N | 76.30614 | 80.39316 | 71.41479 | -378.11782  | -443.79414  | -441.10984  | 1 |
| 93  | H | 76.00754 | 81.15957 | 70.81225 | 2404.15973  | -568.14894  | 1149.30085  | 1 |
| 94  | C | 75.54180 | 79.19047 | 71.53181 | -544.54484  | 466.16019   | 331.29119   | 1 |
| 95  | H | 76.21437 | 78.50194 | 72.09564 | -1409.80988 | -170.17955  | 2325.32679  | 1 |
| 96  | C | 74.21834 | 79.58680 | 72.31296 | -184.48284  | 116.78282   | -758.89137  | 1 |
| 97  | H | 74.48924 | 80.17185 | 73.22276 | 1893.78641  | 1861.14652  | 611.04528   | 1 |
| 98  | H | 73.60541 | 80.27745 | 71.69026 | -2170.79665 | -974.19311  | 1327.50117  | 1 |
| 99  | C | 73.37197 | 78.32574 | 72.69030 | 389.51668   | 672.81878   | -138.49152  | 1 |
| 100 | H | 73.00037 | 77.82021 | 71.76705 | 510.64577   | 1933.03327  | 1851.02484  | 1 |
| 101 | H | 74.01497 | 77.57618 | 73.20919 | -2302.30869 | -1105.72939 | -948.89774  | 1 |
| 102 | C | 72.16887 | 78.74111 | 73.62467 | -559.93427  | -126.34590  | 542.30857   | 1 |
| 103 | O | 71.03846 | 78.30836 | 73.49502 | -670.36003  | -111.83166  | 76.36448    | 1 |
| 104 | N | 72.59017 | 79.60339 | 74.56056 | -216.06729  | -537.07037  | 446.51379   | 1 |
| 105 | H | 73.53756 | 80.00397 | 74.60494 | -1251.96487 | 1074.12894  | -2168.52500 | 1 |
| 106 | H | 71.94371 | 80.16857 | 75.17474 | -2451.83023 | -720.73851  | 944.84612   | 1 |
| 107 | C | 75.06601 | 78.69262 | 70.05325 | 546.24052   | -563.88337  | -85.11809   | 1 |
| 108 | O | 73.88049 | 78.68912 | 69.84457 | 71.70702    | -307.40463  | 606.69673   | 1 |
| 109 | N | 76.07192 | 78.33561 | 69.23719 | 479.90863   | -504.50129  | 222.86849   | 1 |
| 110 | C | 75.84490 | 78.05046 | 67.85898 | 75.51268    | -600.91904  | 506.73700   | 1 |
| 111 | H | 74.84606 | 78.46866 | 67.59303 | -2033.61562 | 1795.30103  | 254.89480   | 1 |
| 112 | C | 77.11883 | 78.71721 | 67.17679 | 523.79067   | 517.99274   | 284.45581   | 1 |
| 113 | H | 77.30797 | 78.32189 | 66.15158 | 1599.61665  | -1127.00911 | 1895.98173  | 1 |
| 114 | H | 77.01156 | 79.82124 | 67.08823 | -1881.83093 | 1275.82488  | -1501.55016 | 1 |
| 115 | C | 78.23053 | 78.32869 | 68.20135 | -600.05639  | -404.05026  | 316.64485   | 1 |
| 116 | H | 78.54427 | 77.27008 | 68.06264 | -2597.05260 | 496.36221   | 657.73249   | 1 |
| 117 | H | 79.15346 | 78.94500 | 68.11242 | -1666.24518 | 1294.38985  | -1723.90591 | 1 |
| 118 | C | 77.47631 | 78.53077 | 69.58378 | 493.57570   | -129.95376  | -602.56394  | 1 |
| 119 | H | 77.74079 | 77.79691 | 70.38043 | -1469.08415 | -637.84797  | 2204.22581  | 1 |
| 120 | H | 77.54237 | 79.56173 | 69.99966 | -1038.97840 | 1068.88701  | -2280.71789 | 1 |
| 121 | C | 76.03434 | 76.46117 | 67.48557 | 188.88100   | 241.05089   | -727.87821  | 1 |
| 122 | O | 76.54725 | 76.18441 | 66.42832 | 531.88613   | -49.19943   | 427.07960   | 1 |
| 123 | N | 75.57319 | 75.64837 | 68.41805 | 708.14833   | 26.93417    | -179.73509  | 1 |
| 124 | H | 75.10155 | 75.96812 | 69.27954 | -2232.69501 | -1179.09831 | 1023.94816  | 1 |
| 125 | C | 75.55868 | 74.24315 | 68.15696 | -738.32412  | 259.92548   | 104.42456   | 1 |
| 126 | H | 75.47801 | 74.07785 | 67.05858 | 2028.89123  | 1260.02983  | 1311.33324  | 1 |
| 127 | C | 76.89596 | 73.63372 | 68.78491 | -258.65678  | -345.52513  | 661.28459   | 1 |
| 128 | H | 77.12199 | 74.13268 | 69.75138 | -1826.06090 | -1801.46097 | -918.64554  | 1 |
| 129 | C | 76.73989 | 72.08845 | 68.97854 | -541.23400  | 531.92970   | -218.41428  | 1 |
| 130 | H | 77.66928 | 71.62807 | 69.38853 | 1311.73218  | -2219.18200 | 882.19023   | 1 |
| 131 | H | 75.91078 | 71.84692 | 69.68648 | -1048.71298 | 1223.58118  | -2196.97971 | 1 |
| 132 | H | 76.51221 | 71.57502 | 68.01497 | 419.06414   | 1903.92898  | 1903.44670  | 1 |
| 133 | C | 78.05564 | 73.85622 | 67.75768 | -423.86431  | 152.66566   | -648.55262  | 1 |
| 134 | H | 79.04023 | 73.52703 | 68.16580 | 105.68386   | -2342.50080 | 1387.51238  | 1 |
| 135 | H | 77.87962 | 73.28961 | 66.81313 | -1695.63603 | -1484.73621 | -1531.02793 | 1 |
| 136 | H | 78.14669 | 74.93512 | 67.47943 | -1853.57121 | -487.39031  | 1936.59343  | 1 |
| 137 | C | 74.28427 | 73.82297 | 69.07007 | 539.71428   | -510.58232  | 267.58633   | 1 |
| 138 | O | 73.97555 | 74.57775 | 69.99821 | -15.93758   | -278.34085  | -624.49402  | 1 |
| 139 | N | 73.74687 | 72.68117 | 68.69957 | -676.81886  | 12.05292    | 276.17960   | 1 |
| 140 | H | 74.19194 | 72.18510 | 67.92801 | -1694.44250 | -373.84189  | -2100.66098 | 1 |
| 141 | C | 72.79768 | 72.03867 | 69.55247 | 412.33078   | -664.70360  | 108.35451   | 1 |
| 142 | H | 72.19764 | 72.89654 | 69.93437 | 1765.77476  | 1294.44366  | 1621.76594  | 1 |
| 143 | C | 72.01392 | 70.98468 | 68.67481 | -179.66635  | -721.95667  | -264.73915  | 1 |
| 144 | H | 71.57062 | 71.46526 | 67.77374 | -607.34922  | 2587.87032  | -598.10018  | 1 |
| 145 | H | 72.71651 | 70.21224 | 68.28890 | -359.69332  | -1479.13954 | -2259.74260 | 1 |
| 146 | C | 70.90751 | 70.32041 | 69.56064 | -240.01076  | 616.02425   | 431.85322   | 1 |
| 147 | H | 71.34538 | 69.95758 | 70.52041 | -1359.17131 | 782.54425   | 2227.99181  | 1 |
| 148 | H | 70.11475 | 71.05259 | 69.83338 | -820.36667  | 85.81767    | -2596.78715 | 1 |
| 149 | C | 70.31717 | 69.11386 | 68.72571 | -513.07015  | 236.18570   | -551.87280  | 1 |
| 150 | H | 69.96006 | 69.45969 | 67.72849 | 1816.11944  | -1183.11722 | -1650.94321 | 1 |
| 151 | H | 71.11082 | 68.35976 | 68.51783 | -1800.04429 | -1361.53473 | 1526.34643  | 1 |
| 152 | C | 69.15901 | 68.47513 | 69.52649 | 726.08972   | -253.19732  | -179.64713  | 1 |
| 153 | H | 69.44070 | 68.10373 | 70.53191 | 1224.27271  | -456.51798  | -2390.90304 | 1 |



|     |   |          |          |          |             |             |             |   |
|-----|---|----------|----------|----------|-------------|-------------|-------------|---|
| 154 | H | 68.24474 | 69.09788 | 69.59424 | 1206.40339  | -1150.93514 | -2154.90344 | 1 |
| 155 | N | 68.71577 | 67.19057 | 68.74698 | 329.70796   | -633.68968  | -155.67358  | 1 |
| 156 | H | 67.89654 | 66.65929 | 69.16113 | 1348.31305  | 1938.76845  | 1359.00643  | 1 |
| 157 | H | 68.39720 | 67.31753 | 67.74253 | 2096.92035  | 1446.54551  | -966.48890  | 1 |
| 158 | H | 69.43714 | 66.41765 | 68.65187 | -1197.07217 | -2303.53719 | 827.28733   | 1 |
| 159 | C | 73.61208 | 71.29086 | 70.76217 | -378.01186  | -556.17301  | -413.96481  | 1 |
| 160 | O | 73.59541 | 70.09433 | 70.90249 | -409.44433  | -307.55053  | -453.30833  | 1 |
| 161 | N | 74.26649 | 72.21322 | 71.46960 | -429.02477  | 524.70884   | 274.08502   | 1 |
| 162 | H | 74.12992 | 73.21754 | 71.22587 | 1706.34263  | -1425.96036 | 1574.38926  | 1 |
| 163 | C | 74.58055 | 71.87080 | 72.82460 | -45.25864   | -626.22952  | 478.93267   | 1 |
| 164 | H | 74.25608 | 70.81087 | 72.95515 | 1988.63164  | 570.90773   | 1772.87287  | 1 |
| 165 | C | 76.15112 | 72.06096 | 72.98148 | 551.77128   | -20.49526   | -564.54996  | 1 |
| 166 | H | 76.66895 | 71.55239 | 72.13855 | 1434.61535  | -1753.10253 | 1513.99471  | 1 |
| 167 | H | 76.42295 | 73.13520 | 72.88578 | -714.67738  | 1819.09770  | 1898.36494  | 1 |
| 168 | C | 76.65652 | 71.48453 | 74.34378 | 446.99263   | -555.77305  | 338.97221   | 1 |
| 169 | H | 76.30385 | 72.10782 | 75.19554 | 1953.68466  | 1892.25957  | -161.67766  | 1 |
| 170 | H | 76.23847 | 70.46625 | 74.51066 | -403.03785  | 2688.07032  | -188.43591  | 1 |
| 171 | C | 78.23618 | 71.42591 | 74.39630 | 567.86262   | 335.74681   | 434.04421   | 1 |
| 172 | H | 78.64842 | 70.78588 | 73.58297 | -1080.02275 | 1568.26081  | -1948.78900 | 1 |
| 173 | H | 78.68391 | 72.43594 | 74.25224 | -919.54108  | 2111.34692  | 1456.13463  | 1 |
| 174 | C | 78.57415 | 70.85370 | 75.79474 | 195.81897   | 173.33862   | -745.11536  | 1 |
| 175 | H | 78.23686 | 71.48245 | 76.64630 | 1405.67949  | -2301.21089 | -390.08113  | 1 |
| 176 | H | 78.25896 | 69.79947 | 75.94734 | -940.37328  | -1118.32446 | 2299.72133  | 1 |
| 177 | N | 80.13155 | 70.81852 | 75.94499 | 319.26422   | 656.36007   | -42.02424   | 1 |
| 178 | H | 80.49756 | 70.35781 | 76.82785 | 1961.03633  | 619.91968   | 1787.09422  | 1 |
| 179 | H | 80.67747 | 70.30011 | 75.19829 | 854.14343   | -2156.80752 | 1429.08711  | 1 |
| 180 | H | 80.63470 | 71.75290 | 75.97276 | 1237.02905  | -1378.50857 | -1998.28500 | 1 |
| 181 | C | 73.77522 | 72.95256 | 73.71896 | 532.53319   | -268.57236  | 517.55729   | 1 |
| 182 | O | 73.11137 | 73.87715 | 73.24055 | 266.16714   | -290.73804  | -558.88002  | 1 |
| 183 | N | 73.95926 | 72.71722 | 75.05073 | -226.25352  | 640.49678   | -270.32839  | 1 |
| 184 | H | 74.55827 | 71.87876 | 75.00521 | 2007.69063  | -1035.27229 | 1523.50231  | 1 |
| 185 | C | 74.46732 | 73.89108 | 75.75244 | -540.76542  | -573.33303  | 49.50000    | 1 |
| 186 | H | 75.31431 | 74.24118 | 75.12391 | -2374.20950 | -1036.76023 | 843.75774   | 1 |
| 187 | C | 73.27240 | 74.94212 | 75.68749 | -77.09082   | 666.87422   | -415.84136  | 1 |
| 188 | H | 72.35952 | 74.35827 | 75.36487 | -985.81834  | 617.19825   | 2463.91927  | 1 |
| 189 | O | 73.41231 | 75.93838 | 74.66504 | 293.29899   | -391.65602  | -477.80926  | 1 |
| 190 | H | 73.03985 | 75.41516 | 73.86901 | 2528.72714  | -681.76262  | -751.27122  | 1 |
| 191 | C | 73.08955 | 75.45320 | 77.15827 | 252.47363   | -605.14473  | 440.05134   | 1 |
| 192 | H | 72.12986 | 76.03751 | 77.27056 | -2052.65063 | 1456.49051  | -1043.51830 | 1 |
| 193 | H | 73.06306 | 74.60797 | 77.88996 | -2152.98800 | -1661.97574 | -161.70652  | 1 |
| 194 | H | 73.94208 | 76.10718 | 77.46789 | -473.12726  | -1584.27339 | 2165.61725  | 1 |
| 195 | C | 74.95917 | 73.49313 | 77.22730 | 360.36307   | 488.46713   | 505.10056   | 1 |
| 196 | O | 75.34257 | 74.37218 | 77.97492 | -200.08817  | -528.03552  | -385.82850  | 1 |
| 197 | N | 74.91702 | 72.18312 | 77.47558 | -597.54095  | -226.44775  | 355.20479   | 1 |
| 198 | H | 74.56662 | 71.53383 | 76.77417 | 2179.23655  | -1300.70981 | -991.33835  | 1 |
| 199 | C | 75.26177 | 71.72146 | 78.76961 | -687.68921  | 297.39807   | -249.45179  | 1 |
| 200 | H | 75.52903 | 72.62467 | 79.36860 | -349.16256  | -2467.37713 | -1101.72831 | 1 |
| 201 | C | 73.97117 | 70.93270 | 79.32379 | 672.47345   | 361.54328   | -201.62880  | 1 |
| 202 | H | 73.68657 | 70.11976 | 78.61815 | 1541.41502  | 582.18425   | 2169.97026  | 1 |
| 203 | H | 74.19736 | 70.45540 | 80.30412 | -2534.67717 | 60.25153    | 997.72295   | 1 |
| 204 | C | 72.84342 | 71.96220 | 79.45574 | 574.26774   | -389.43119  | -377.02542  | 1 |
| 205 | C | 72.62437 | 72.63115 | 80.69855 | 688.82679   | -287.33580  | -257.96133  | 1 |
| 206 | H | 73.22204 | 72.37066 | 81.59058 | 331.14182   | 1470.38163  | 2269.80013  | 1 |
| 207 | C | 72.05947 | 72.31170 | 78.31310 | -383.52382  | -675.04808  | 144.24917   | 1 |
| 208 | H | 72.23245 | 71.81266 | 77.34277 | 4.09847     | 1517.59662  | 2262.86397  | 1 |
| 209 | C | 71.65345 | 73.63163 | 80.76258 | -134.76730  | 428.45285   | -649.50303  | 1 |
| 210 | H | 71.49202 | 74.14643 | 81.72573 | -903.23433  | 1600.49020  | 2011.53387  | 1 |
| 211 | C | 71.10075 | 73.32107 | 78.42600 | -335.53281  | -615.00040  | -364.39058  | 1 |
| 212 | H | 70.51594 | 73.58857 | 77.52836 | 1596.45398  | -1369.33862 | 1732.02659  | 1 |
| 213 | C | 70.86349 | 74.02547 | 79.64296 | 585.48547   | -340.24194  | -406.23938  | 1 |
| 214 | O | 69.90227 | 75.06701 | 79.75556 | -419.15649  | -173.04408  | -511.94141  | 1 |
| 215 | H | 69.55706 | 75.06953 | 78.82990 | -1071.84350 | 1559.71507  | -1960.13012 | 1 |

|     |   |          |          |          |             |             |             |   |
|-----|---|----------|----------|----------|-------------|-------------|-------------|---|
| 216 | C | 76.47624 | 70.66162 | 78.56547 | 291.41878   | -183.13091  | 710.72246   | 1 |
| 217 | O | 76.69826 | 70.08403 | 77.49835 | 379.87695   | 523.47396   | -222.23622  | 1 |
| 218 | N | 77.08782 | 70.51915 | 79.71878 | 564.30591   | 373.09380   | 277.24371   | 1 |
| 219 | H | 76.73309 | 71.06797 | 80.49852 | -120.59931  | -2436.07824 | -1214.35098 | 1 |
| 220 | C | 78.37325 | 69.87800 | 79.75300 | 404.07514   | -299.37480  | 608.84009   | 1 |
| 221 | H | 78.84246 | 70.21637 | 78.80085 | -1071.07882 | -841.69025  | 2359.66467  | 1 |
| 222 | C | 79.11507 | 70.33696 | 81.07453 | -683.12807  | 68.71770    | -390.13096  | 1 |
| 223 | H | 79.21562 | 71.44493 | 81.11901 | 2068.88918  | 1596.58590  | 770.89603   | 1 |
| 224 | H | 78.52490 | 70.04826 | 81.97341 | 1379.86429  | 2342.49779  | -179.85638  | 1 |
| 225 | C | 80.50978 | 69.63680 | 81.07843 | -176.39967  | 537.49466   | 550.97268   | 1 |
| 226 | H | 80.38567 | 68.53389 | 80.97224 | -396.28051  | 1942.22168  | 1869.33314  | 1 |
| 227 | H | 81.11997 | 69.95787 | 80.20500 | -94.44700   | 586.00678   | -2659.20016 | 1 |
| 228 | C | 81.24378 | 69.98482 | 82.45329 | -291.69381  | -718.18079  | -150.72929  | 1 |
| 229 | H | 81.52287 | 71.05781 | 82.61039 | -2303.38776 | 1089.76242  | 964.62032   | 1 |
| 230 | H | 80.72931 | 69.61770 | 83.37810 | 884.16729   | 2568.80533  | -207.74283  | 1 |
| 231 | N | 82.42000 | 69.23494 | 82.28955 | -594.49522  | -252.81478  | 342.29276   | 1 |
| 232 | H | 82.46160 | 68.62910 | 81.48415 | -1735.17426 | 2084.05705  | -263.71605  | 1 |
| 233 | C | 83.41433 | 69.25292 | 83.08222 | 595.23177   | -271.52487  | 442.22352   | 1 |
| 234 | N | 83.34288 | 70.08687 | 84.20234 | 585.53813   | -424.79750  | -105.81303  | 1 |
| 235 | H | 82.58452 | 70.69710 | 84.50456 | 959.88797   | 1327.56823  | -2177.11905 | 1 |
| 236 | H | 84.07078 | 70.17995 | 84.91155 | 1578.48647  | 16.27378    | -2220.76233 | 1 |
| 237 | N | 84.41958 | 68.38444 | 82.63435 | -452.17763  | -390.33541  | -421.51853  | 1 |
| 238 | H | 84.45427 | 67.76800 | 81.82376 | 470.26107   | 1974.25629  | -1817.92087 | 1 |
| 239 | H | 85.29948 | 68.24093 | 83.13087 | 1856.67307  | -1573.97321 | -1224.35416 | 1 |
| 240 | C | 78.14011 | 68.27108 | 79.76136 | -531.47271  | -581.45780  | -55.06206   | 1 |
| 241 | O | 78.31598 | 67.59294 | 80.73430 | -243.00837  | 192.73507   | 609.52485   | 1 |
| 242 | N | 77.83954 | 67.87611 | 78.49768 | 343.49288   | -644.25607  | 38.09164    | 1 |
| 243 | H | 77.58041 | 68.63474 | 77.80954 | -1691.16043 | -1535.97525 | -1484.73099 | 1 |
| 244 | C | 77.16706 | 66.56642 | 78.35575 | 542.66492   | 350.14337   | 454.42563   | 1 |
| 245 | H | 77.48666 | 66.03306 | 79.28304 | 1209.57979  | -2396.95920 | 463.86744   | 1 |
| 246 | C | 75.67537 | 66.79559 | 78.26551 | -737.14309  | 145.93010   | 242.71942   | 1 |
| 247 | H | 75.48519 | 67.44673 | 77.38194 | -1050.18303 | 159.36419   | -2509.06125 | 1 |
| 248 | C | 74.92398 | 65.49142 | 78.06525 | -706.77696  | -252.88343  | -245.16230  | 1 |
| 249 | H | 73.81392 | 65.65585 | 77.99237 | -1624.64039 | -1665.49085 | 1417.86935  | 1 |
| 250 | H | 75.24994 | 64.97301 | 77.11895 | 2566.10521  | 598.51109   | 693.22305   | 1 |
| 251 | H | 75.10108 | 64.77636 | 78.91519 | -1972.69758 | 107.10018   | -1876.34312 | 1 |
| 252 | C | 75.13493 | 67.51813 | 79.48723 | 412.85148   | 672.58832   | -27.69222   | 1 |
| 253 | H | 74.03320 | 67.72523 | 79.40024 | 1447.02277  | 1762.76533  | -1490.78944 | 1 |
| 254 | H | 75.29071 | 66.91565 | 80.42412 | 1320.77379  | -145.20455  | 2378.68491  | 1 |
| 255 | H | 75.65290 | 68.50505 | 79.64117 | -1512.10848 | 1470.52031  | 1724.75147  | 1 |
| 256 | C | 77.78535 | 65.91330 | 76.97058 | -607.11113  | 499.56689   | 73.73769    | 1 |
| 257 | O | 77.09255 | 65.69718 | 76.00110 | 357.97126   | 460.81534   | 356.68785   | 1 |
| 258 | N | 79.08125 | 65.68767 | 77.12113 | 536.55407   | -368.62270  | 332.76306   | 1 |
| 259 | H | 79.50872 | 65.94178 | 78.01117 | 524.38866   | 2297.69985  | 1367.20941  | 1 |
| 260 | C | 79.76567 | 64.93490 | 76.13650 | 46.50277    | -774.29190  | -147.97904  | 1 |
| 261 | H | 78.96240 | 64.47385 | 75.51711 | 1676.51875  | 1883.29066  | 1032.55549  | 1 |
| 262 | C | 80.72575 | 65.91458 | 75.27888 | -559.41456  | -34.19198   | -556.30433  | 1 |
| 263 | H | 81.49362 | 66.35933 | 75.95488 | -64.66664   | 395.18769   | 2695.05373  | 1 |
| 264 | H | 81.29304 | 65.32742 | 74.51818 | -2703.44278 | -60.40056   | 333.79418   | 1 |
| 265 | C | 79.91910 | 67.00052 | 74.62175 | -519.76435  | 377.31045   | 459.42366   | 1 |
| 266 | H | 79.35767 | 67.54874 | 75.41264 | -1746.74323 | 1667.50644  | -1261.73691 | 1 |
| 267 | C | 80.84203 | 67.98177 | 73.90866 | 570.95554   | 16.46261    | -545.27700  | 1 |
| 268 | H | 80.26906 | 68.82518 | 73.44425 | 2391.58273  | 28.05277    | -1305.07271 | 1 |
| 269 | H | 81.58927 | 68.43121 | 74.61188 | 175.75588   | 917.63458   | 2559.43867  | 1 |
| 270 | H | 81.41958 | 67.48222 | 73.08896 | -1063.97851 | -2155.34650 | 1283.00462  | 1 |
| 271 | C | 78.91452 | 66.42908 | 73.63153 | 193.76014   | 2.62946     | -765.53141  | 1 |
| 272 | H | 78.42190 | 67.23594 | 73.02964 | 507.39394   | -846.55087  | 2539.60089  | 1 |
| 273 | H | 79.39853 | 65.72339 | 72.90742 | 1337.57841  | 1818.19054  | 1526.01994  | 1 |
| 274 | H | 78.09347 | 65.86701 | 74.16532 | 1100.88635  | -1172.91350 | -2199.08909 | 1 |
| 275 | C | 80.73083 | 63.90316 | 76.91324 | -549.21115  | 475.64486   | -309.38218  | 1 |
| 276 | O | 80.98923 | 63.99213 | 78.08502 | 556.06106   | -390.37755  | -78.24250   | 1 |
| 277 | O | 81.35637 | 62.91955 | 76.10980 | -572.27940  | -310.19032  | -209.75862  | 1 |

|     |   |          |          |          |             |            |           |   |
|-----|---|----------|----------|----------|-------------|------------|-----------|---|
| 278 | H | 80.93093 | 63.14148 | 75.23619 | -1380.08193 | 2212.14486 | 790.85944 | 1 |
|-----|---|----------|----------|----------|-------------|------------|-----------|---|

Listing 28: C00028.xmolout

|    |   |          |          |          |             |             |             |                 |
|----|---|----------|----------|----------|-------------|-------------|-------------|-----------------|
| 1  |   | 276      |          |          |             |             |             |                 |
| 2  |   | 150.0000 | 150.0000 | 150.0000 | 0.0000      | 0.0000      | 0.0000***** | 0.9687 3875     |
|    |   | 0.2500   | 300.00   | 0.00     | 0.00        | 0.00        | -1293.9439  | 0.0000 300.0000 |
| 3  | H | 65.84523 | 73.21692 | 90.01490 | -2043.14101 | -1757.64893 | 399.89339   | 1               |
| 4  | N | 66.67251 | 72.67887 | 90.26539 | 426.75047   | 490.45733   | -334.42467  | 1               |
| 5  | H | 66.50239 | 71.80438 | 89.77243 | 442.25559   | -1110.30854 | -2448.52907 | 1               |
| 6  | C | 67.88179 | 73.31427 | 89.90043 | 415.32972   | -666.39213  | 83.73172    | 1               |
| 7  | H | 67.71398 | 74.34169 | 90.28740 | 879.32219   | 2491.00447  | 667.35213   | 1               |
| 8  | C | 69.11706 | 72.57614 | 90.61870 | 31.35357    | 477.41777   | 628.23362   | 1               |
| 9  | H | 69.21220 | 71.53672 | 90.22135 | 1168.38489  | 2240.25337  | -1019.71136 | 1               |
| 10 | H | 70.07717 | 73.09308 | 90.37503 | -360.43770  | 2534.90498  | 931.67112   | 1               |
| 11 | C | 68.89394 | 72.54637 | 92.10968 | 463.18208   | 512.70242   | -382.34388  | 1               |
| 12 | H | 67.87822 | 72.13142 | 92.29992 | 1725.29117  | 1863.52247  | -987.07854  | 1               |
| 13 | C | 69.92247 | 71.64489 | 92.78070 | 710.42801   | -144.27427  | -313.15367  | 1               |
| 14 | H | 69.75887 | 71.58218 | 93.88754 | 364.20195   | -1033.13725 | 2494.72524  | 1               |
| 15 | H | 69.88294 | 70.59940 | 92.37929 | 2567.61904  | 335.80679   | 847.48802   | 1               |
| 16 | H | 70.96578 | 72.02173 | 92.62156 | -2587.99029 | 680.92867   | -512.16411  | 1               |
| 17 | C | 68.97078 | 73.94080 | 92.71553 | 268.17616   | 741.64379   | -40.42634   | 1               |
| 18 | H | 68.83830 | 73.91563 | 93.82812 | 1283.54314  | -1945.37420 | -1411.27812 | 1               |
| 19 | H | 69.95982 | 74.42630 | 92.51043 | -1258.57796 | 1317.15249  | -2026.02085 | 1               |
| 20 | H | 68.17740 | 74.61652 | 92.30442 | -2502.84526 | 909.80597   | 575.92391   | 1               |
| 21 | C | 67.91901 | 73.30041 | 88.27523 | 619.36578   | -458.64843  | -172.09273  | 1               |
| 22 | O | 66.97344 | 73.69005 | 87.62379 | -81.40433   | 433.87611   | 522.34594   | 1               |
| 23 | N | 69.10286 | 72.90122 | 87.81355 | 175.23996   | -622.20190  | 341.55523   | 1               |
| 24 | H | 69.82762 | 72.56132 | 88.44153 | -876.57256  | -303.22879  | -2561.90213 | 1               |
| 25 | C | 69.25252 | 72.85674 | 86.39121 | -571.88214  | -534.10783  | -106.15033  | 1               |
| 26 | H | 68.59261 | 73.67315 | 86.01097 | -2713.20841 | -16.25800   | -248.80809  | 1               |
| 27 | C | 70.81817 | 73.01453 | 86.07647 | 166.60354   | 288.16399   | -716.09568  | 1               |
| 28 | H | 71.35281 | 72.13591 | 86.53157 | -2097.85574 | 1636.78449  | -586.18044  | 1               |
| 29 | O | 71.44795 | 74.18856 | 86.61352 | -317.80580  | -363.38227  | 484.43082   | 1               |
| 30 | H | 72.11295 | 73.78874 | 87.21068 | 1863.74748  | -1451.84923 | 1357.29467  | 1               |
| 31 | C | 70.85734 | 72.87520 | 84.51045 | 503.80731   | 517.99032   | 318.51606   | 1               |
| 32 | H | 71.90524 | 72.84395 | 84.13171 | 640.61020   | -2157.10410 | -1536.29104 | 1               |
| 33 | H | 70.35269 | 71.94206 | 84.15667 | 1687.88455  | 465.60692   | 2087.56452  | 1               |
| 34 | H | 70.35264 | 73.73446 | 84.01107 | -1293.07895 | -1899.88581 | -1463.57452 | 1               |
| 35 | C | 68.82029 | 71.37759 | 85.88496 | -153.07550  | -733.68902  | 248.70981   | 1               |
| 36 | O | 69.29435 | 70.37407 | 86.40068 | 186.15459   | -480.78787  | -449.34387  | 1               |
| 37 | N | 68.03051 | 71.47187 | 84.81905 | -487.53139  | 543.18517   | 42.03850    | 1               |
| 38 | C | 67.65608 | 70.30977 | 84.06170 | -699.35871  | 69.34393    | 360.10701   | 1               |
| 39 | H | 67.40250 | 69.51011 | 84.79354 | 2.81126     | -221.99807  | -2715.58072 | 1               |
| 40 | C | 66.44987 | 70.84709 | 83.18617 | -507.46439  | -592.59194  | 122.07761   | 1               |
| 41 | H | 66.29479 | 70.25511 | 82.25582 | -1975.08116 | 525.87560   | -1801.71556 | 1               |
| 42 | H | 65.48903 | 70.81787 | 83.74736 | 1588.27743  | -1913.22100 | 1113.83566  | 1               |
| 43 | C | 66.90471 | 72.31477 | 82.91435 | -613.62442  | -457.55993  | -194.14490  | 1               |
| 44 | H | 67.72456 | 72.33997 | 82.16010 | 1707.54637  | -721.27992  | 1996.92523  | 1               |
| 45 | H | 66.09244 | 72.97705 | 82.53817 | 758.23357   | 2100.81767  | 1560.55011  | 1               |
| 46 | C | 67.43778 | 72.72086 | 84.35404 | -352.41524  | 704.96076   | 49.21465    | 1               |
| 47 | H | 68.21327 | 73.52324 | 84.36465 | 1714.76886  | -2070.42778 | 443.35792   | 1               |
| 48 | H | 66.64063 | 72.96830 | 85.09612 | 1224.15040  | 1801.50881  | 1636.97633  | 1               |
| 49 | C | 68.91445 | 69.90498 | 83.09512 | 566.85117   | 537.05831   | 117.62814   | 1               |
| 50 | O | 69.50829 | 70.71192 | 82.42428 | -550.26779  | -406.08867  | 4.21666     | 1               |
| 51 | N | 68.99832 | 68.56750 | 83.07922 | 566.34832   | -425.77725  | 180.18749   | 1               |
| 52 | H | 68.34962 | 68.08307 | 83.70272 | 644.44502   | 2646.80550  | -52.73430   | 1               |
| 53 | C | 70.31342 | 68.00324 | 82.97987 | 612.34801   | -281.48662  | 411.56221   | 1               |
| 54 | H | 70.89187 | 68.67296 | 82.30562 | 1667.23498  | -1490.75142 | 1556.16753  | 1               |
| 55 | C | 70.88242 | 67.97254 | 84.47332 | -714.45746  | -175.43074  | 286.98927   | 1               |
| 56 | H | 70.04955 | 67.64402 | 85.15704 | -787.09484  | 1763.03619  | -1922.46060 | 1               |
| 57 | O | 71.31822 | 69.22831 | 84.99501 | -429.46514  | 516.51932   | -128.40526  | 1               |

|     |   |          |          |          |             |             |             |   |
|-----|---|----------|----------|----------|-------------|-------------|-------------|---|
| 58  | H | 70.55379 | 69.47595 | 85.60710 | 1981.82785  | 436.16847   | -1818.18182 | 1 |
| 59  | C | 71.96517 | 66.83934 | 84.38507 | 630.79189   | -468.94448  | 76.03230    | 1 |
| 60  | H | 72.44163 | 66.65324 | 85.37582 | -1775.71861 | 2062.30353  | 131.89849   | 1 |
| 61  | H | 71.52268 | 65.87137 | 84.04322 | -1855.14608 | 88.94118    | 1993.53760  | 1 |
| 62  | H | 72.77816 | 67.10561 | 83.66975 | -1504.82350 | -780.94249  | -2132.90992 | 1 |
| 63  | C | 70.04025 | 66.50487 | 82.40400 | 288.57638   | 618.62814   | -397.00270  | 1 |
| 64  | O | 69.47135 | 65.66396 | 83.05651 | 321.70495   | -185.26452  | 574.37218   | 1 |
| 65  | N | 70.55567 | 66.39431 | 81.15779 | -447.05792  | -446.53431  | 367.76425   | 1 |
| 66  | H | 70.98072 | 67.25616 | 80.80399 | 350.31316   | 1975.63644  | -1843.31522 | 1 |
| 67  | C | 69.64008 | 65.75211 | 80.22783 | -511.23061  | 374.03917   | -471.51480  | 1 |
| 68  | H | 69.55266 | 64.70705 | 80.59991 | 2234.79579  | -898.70890  | -1273.45190 | 1 |
| 69  | C | 68.28351 | 66.55493 | 80.34966 | 529.53781   | -159.34528  | 563.72604   | 1 |
| 70  | H | 67.54706 | 66.10003 | 79.64067 | 654.59388   | 2347.94251  | 1217.51488  | 1 |
| 71  | H | 67.87270 | 66.40797 | 81.38050 | -1526.55661 | 2103.42026  | 817.87394   | 1 |
| 72  | O | 68.35844 | 68.02187 | 80.05130 | -554.84278  | 14.12789    | 399.58769   | 1 |
| 73  | H | 68.59845 | 68.32878 | 80.93855 | 1297.06236  | 2061.84854  | 1220.68812  | 1 |
| 74  | C | 70.32449 | 65.86441 | 78.75959 | -662.15484  | -412.13544  | 123.62687   | 1 |
| 75  | O | 70.75214 | 64.89145 | 78.19708 | -540.01537  | -317.05804  | 274.91456   | 1 |
| 76  | N | 70.27393 | 67.12971 | 78.32080 | -202.76299  | -690.00100  | -131.49145  | 1 |
| 77  | H | 69.84193 | 67.84313 | 78.93553 | -702.62132  | -2617.37191 | 281.70413   | 1 |
| 78  | C | 70.98867 | 67.51320 | 77.10619 | -491.73914  | 576.34187   | 222.73509   | 1 |
| 79  | H | 70.95784 | 66.60349 | 76.46006 | 1977.17978  | -1823.58850 | -434.68928  | 1 |
| 80  | C | 70.26847 | 68.72232 | 76.53963 | -649.50797  | -328.66843  | 306.11224   | 1 |
| 81  | H | 70.38584 | 69.55926 | 77.26472 | 2075.07803  | 1452.16490  | -1004.45904 | 1 |
| 82  | C | 70.84926 | 69.16336 | 75.21010 | -615.18735  | -489.99689  | -70.96352   | 1 |
| 83  | H | 70.28003 | 70.03200 | 74.77816 | -1226.32661 | -1724.38906 | -1716.47170 | 1 |
| 84  | H | 71.93558 | 69.49406 | 75.30855 | 2381.64273  | -969.84735  | 900.46860   | 1 |
| 85  | H | 70.81799 | 68.33551 | 74.44931 | 2122.74991  | 1702.23946  | -141.36228  | 1 |
| 86  | C | 68.77904 | 68.46454 | 76.38395 | -501.86074  | -479.61276  | -376.42482  | 1 |
| 87  | H | 68.23374 | 69.37462 | 76.01236 | 993.79261   | -2246.95401 | -1177.81305 | 1 |
| 88  | H | 68.57879 | 67.63348 | 75.65390 | 42.71279    | -626.15391  | -2651.37258 | 1 |
| 89  | H | 68.30857 | 68.16677 | 77.36176 | -2026.39012 | -1590.33709 | -887.82922  | 1 |
| 90  | C | 72.54141 | 67.91236 | 77.55967 | -672.89153  | 382.57394   | -156.34072  | 1 |
| 91  | O | 72.82144 | 68.32620 | 78.65787 | 410.04627   | 221.86223   | 500.35950   | 1 |
| 92  | N | 73.34899 | 67.72595 | 76.51930 | -378.11782  | -443.79414  | -441.10984  | 1 |
| 93  | H | 72.87925 | 67.45329 | 75.65920 | 2404.15973  | -568.14894  | 1149.30085  | 1 |
| 94  | C | 74.61697 | 68.40065 | 76.53814 | -544.54484  | 466.16019   | 331.29119   | 1 |
| 95  | H | 75.04440 | 68.18009 | 77.54031 | -1409.80988 | -170.17955  | 2325.32679  | 1 |
| 96  | C | 75.44586 | 67.85847 | 75.30430 | -184.48284  | 116.78282   | -758.89137  | 1 |
| 97  | H | 75.53009 | 66.74822 | 75.32311 | 1893.78641  | 1861.14652  | 611.04528   | 1 |
| 98  | H | 74.92016 | 68.11092 | 74.35534 | -2170.79665 | -974.19311  | 1327.50117  | 1 |
| 99  | C | 76.84976 | 68.53986 | 75.35820 | 389.51668   | 672.81878   | -138.49152  | 1 |
| 100 | H | 76.74330 | 69.61868 | 75.60668 | 510.64577   | 1933.03327  | 1851.02484  | 1 |
| 101 | H | 77.44487 | 68.12768 | 76.20201 | -2302.30869 | -1105.72939 | -948.89774  | 1 |
| 102 | C | 77.65579 | 68.40244 | 74.01177 | -559.93427  | -126.34590  | 542.30857   | 1 |
| 103 | O | 78.66856 | 69.03834 | 73.86138 | -670.36003  | -111.83166  | 76.36448    | 1 |
| 104 | N | 77.10845 | 67.54850 | 73.12085 | -216.06729  | -537.07037  | 446.51379   | 1 |
| 105 | H | 76.27659 | 66.95416 | 73.21458 | -1251.96487 | 1074.12894  | -2168.52500 | 1 |
| 106 | H | 77.53415 | 67.31139 | 72.21808 | -2451.83023 | -720.73851  | 944.84612   | 1 |
| 107 | C | 74.35064 | 69.98451 | 76.26895 | 546.24052   | -563.88337  | -85.11809   | 1 |
| 108 | O | 73.74891 | 70.32047 | 75.27318 | 71.70702    | -307.40463  | 606.69673   | 1 |
| 109 | N | 74.94314 | 70.75070 | 77.19008 | 479.90863   | -504.50129  | 222.86849   | 1 |
| 110 | C | 74.58150 | 72.13478 | 77.30913 | 75.51268    | -600.91904  | 506.73700   | 1 |
| 111 | H | 73.48085 | 72.14535 | 77.14560 | -2033.61562 | 1795.30103  | 254.89480   | 1 |
| 112 | C | 75.03822 | 72.49997 | 78.77866 | 523.79067   | 517.99274   | 284.45581   | 1 |
| 113 | H | 75.34673 | 73.56503 | 78.87876 | 1599.61665  | -1127.00911 | 1895.98173  | 1 |
| 114 | H | 74.20367 | 72.35003 | 79.50006 | -1881.83093 | 1275.82488  | -1501.55016 | 1 |
| 115 | C | 76.20244 | 71.49989 | 79.07098 | -600.05639  | -404.05026  | 316.64485   | 1 |
| 116 | H | 77.16488 | 71.85427 | 78.63901 | -2597.05260 | 496.36221   | 657.73249   | 1 |
| 117 | H | 76.38789 | 71.33737 | 80.15674 | -1666.24518 | 1294.38985  | -1723.90591 | 1 |
| 118 | C | 75.66516 | 70.20158 | 78.33169 | 493.57570   | -129.95376  | -602.56394  | 1 |
| 119 | H | 76.45507 | 69.50784 | 77.95901 | -1469.08415 | -637.84797  | 2204.22581  | 1 |

|     |   |          |          |          |             |             |             |   |
|-----|---|----------|----------|----------|-------------|-------------|-------------|---|
| 120 | H | 74.90085 | 69.62455 | 78.90822 | -1038.97840 | 1068.88701  | -2280.71789 | 1 |
| 121 | C | 75.31557 | 73.06441 | 76.17523 | 188.88100   | 241.05089   | -727.87821  | 1 |
| 122 | O | 74.64018 | 73.94294 | 75.63562 | 531.88613   | -49.19943   | 427.07960   | 1 |
| 123 | N | 76.60203 | 72.81795 | 76.05984 | 708.14833   | 26.93417    | -179.73509  | 1 |
| 124 | H | 76.84942 | 72.02847 | 76.65591 | -2232.69501 | -1179.09831 | 1023.94816  | 1 |
| 125 | C | 77.41325 | 73.22326 | 74.96804 | -738.32412  | 259.92548   | 104.42456   | 1 |
| 126 | H | 78.32869 | 72.60114 | 75.08317 | 2028.89123  | 1260.02983  | 1311.33324  | 1 |
| 127 | C | 76.60322 | 72.91850 | 73.63206 | -258.65678  | -345.52513  | 661.28459   | 1 |
| 128 | H | 75.65685 | 73.50575 | 73.61629 | -1826.06090 | -1801.46097 | -918.64554  | 1 |
| 129 | C | 77.53240 | 73.28993 | 72.42691 | -541.23400  | 531.92970   | -218.41428  | 1 |
| 130 | H | 77.02628 | 73.12188 | 71.44752 | 1311.73218  | -2219.18200 | 882.19023   | 1 |
| 131 | H | 77.84169 | 74.36168 | 72.46401 | -1048.71298 | 1223.58118  | -2196.97971 | 1 |
| 132 | H | 78.46421 | 72.67649 | 72.42946 | 419.06414   | 1903.92898  | 1903.44670  | 1 |
| 133 | C | 76.28425 | 71.38800 | 73.54276 | -423.86431  | 152.66566   | -648.55262  | 1 |
| 134 | H | 75.78016 | 71.12679 | 72.58265 | 105.68386   | -2342.50080 | 1387.51238  | 1 |
| 135 | H | 77.21394 | 70.77088 | 73.61066 | -1695.63603 | -1484.73621 | -1531.02793 | 1 |
| 136 | H | 75.60182 | 71.06753 | 74.37067 | -1853.57121 | -487.39031  | 1936.59343  | 1 |
| 137 | C | 77.75448 | 74.82380 | 74.95416 | 539.71428   | -510.58232  | 267.58633   | 1 |
| 138 | O | 78.92795 | 75.15417 | 74.88496 | -15.93758   | -278.34085  | -624.49402  | 1 |
| 139 | N | 76.67061 | 75.55213 | 74.94219 | -676.81886  | 12.05292    | 276.17960   | 1 |
| 140 | H | 75.73009 | 75.07945 | 75.01449 | -1694.44250 | -373.84189  | -2100.66098 | 1 |
| 141 | C | 76.68992 | 76.97307 | 74.98454 | 412.33078   | -664.70360  | 108.35451   | 1 |
| 142 | H | 75.62070 | 77.21570 | 75.18090 | 1765.77476  | 1294.44366  | 1621.76594  | 1 |
| 143 | C | 77.65865 | 77.43570 | 76.15391 | -179.66635  | -721.95667  | -264.73915  | 1 |
| 144 | H | 77.40027 | 76.91510 | 77.10297 | -607.34922  | 2587.87032  | -598.10018  | 1 |
| 145 | H | 78.71601 | 77.15593 | 75.94004 | -359.69332  | -1479.13954 | -2259.74260 | 1 |
| 146 | C | 77.50280 | 78.98448 | 76.29455 | -240.01076  | 616.02425   | 431.85322   | 1 |
| 147 | H | 77.88777 | 79.50829 | 75.38700 | -1359.17131 | 782.54425   | 2227.99181  | 1 |
| 148 | H | 76.42825 | 79.26352 | 76.37508 | -820.36667  | 85.81767    | -2596.78715 | 1 |
| 149 | C | 78.28972 | 79.44362 | 77.58802 | -513.07015  | 236.18570   | -551.87280  | 1 |
| 150 | H | 77.92574 | 78.90120 | 78.49065 | 1816.11944  | -1183.11722 | -1650.94321 | 1 |
| 151 | H | 79.37444 | 79.20232 | 77.50497 | -1800.04429 | -1361.53473 | 1526.34643  | 1 |
| 152 | C | 78.06817 | 80.96726 | 77.73173 | 726.08972   | -253.19732  | -179.64713  | 1 |
| 153 | H | 78.55718 | 81.57822 | 76.94509 | 1224.27271  | -456.51798  | -2390.90304 | 1 |
| 154 | H | 77.00700 | 81.26867 | 77.83976 | 1206.40339  | -1150.93514 | -2154.90344 | 1 |
| 155 | N | 78.73005 | 81.41693 | 79.07745 | 329.70796   | -633.68968  | -155.67358  | 1 |
| 156 | H | 78.62621 | 82.44488 | 79.31790 | 1348.31305  | 1938.76845  | 1359.00643  | 1 |
| 157 | H | 78.37239 | 80.96075 | 79.96706 | 2096.92035  | 1446.54551  | -966.48890  | 1 |
| 158 | H | 79.77913 | 81.28593 | 79.17037 | -1197.07217 | -2303.53719 | 827.28733   | 1 |
| 159 | C | 77.18443 | 77.62148 | 73.56332 | -378.01186  | -556.17301  | -413.96481  | 1 |
| 160 | O | 76.39592 | 78.34424 | 72.97226 | -409.44433  | -307.55053  | -453.30833  | 1 |
| 161 | N | 78.41314 | 77.28349 | 73.27567 | -429.02477  | 524.70884   | 274.08502   | 1 |
| 162 | H | 78.91713 | 76.62403 | 73.91350 | 1706.34263  | -1425.96036 | 1574.38926  | 1 |
| 163 | C | 79.02221 | 77.64074 | 72.04377 | -45.25864   | -626.22952  | 478.93267   | 1 |
| 164 | H | 79.95122 | 77.02843 | 72.05335 | 1988.63164  | 570.90773   | 1772.87287  | 1 |
| 165 | C | 78.03124 | 77.23889 | 70.87702 | 551.77128   | -20.49526   | -564.54996  | 1 |
| 166 | H | 77.68055 | 76.19403 | 71.03212 | 1434.61535  | -1753.10253 | 1513.99471  | 1 |
| 167 | H | 77.10704 | 77.86206 | 70.89243 | -714.67738  | 1819.09770  | 1898.36494  | 1 |
| 168 | C | 78.77673 | 77.38125 | 69.50931 | 446.99263   | -555.77305  | 338.97221   | 1 |
| 169 | H | 78.63435 | 78.41424 | 69.06351 | 1953.68466  | 1892.25957  | -161.67766  | 1 |
| 170 | H | 79.87431 | 77.24765 | 69.64268 | -403.03785  | 2688.07032  | -188.43591  | 1 |
| 171 | C | 78.20152 | 76.26164 | 68.55507 | 567.86262   | 335.74681   | 434.04421   | 1 |
| 172 | H | 78.24402 | 75.26133 | 69.04415 | -1080.02275 | 1568.26081  | -1948.78900 | 1 |
| 173 | H | 77.12580 | 76.44392 | 68.32919 | -919.54108  | 2111.34692  | 1456.13463  | 1 |
| 174 | C | 79.06252 | 76.27062 | 67.26505 | 195.81897   | 173.33862   | -745.11536  | 1 |
| 175 | H | 79.00645 | 77.21155 | 66.67585 | 1405.67949  | -2301.21089 | -390.08113  | 1 |
| 176 | H | 80.12429 | 75.98247 | 67.41137 | -940.37328  | -1118.32446 | 2299.72133  | 1 |
| 177 | N | 78.48713 | 75.24239 | 66.26476 | 319.26422   | 656.36007   | -42.02424   | 1 |
| 178 | H | 79.18507 | 74.53599 | 65.89492 | 1961.03633  | 619.91968   | 1787.09422  | 1 |
| 179 | H | 77.69028 | 74.60456 | 66.55464 | 854.14343   | -2156.80752 | 1429.08711  | 1 |
| 180 | H | 78.11774 | 75.76301 | 65.33204 | 1237.02905  | -1378.50857 | -1998.28500 | 1 |
| 181 | C | 79.38260 | 79.25281 | 72.00226 | 532.53319   | -268.57236  | 517.55729   | 1 |

|     |   |          |          |          |             |             |             |   |
|-----|---|----------|----------|----------|-------------|-------------|-------------|---|
| 182 | O | 80.54658 | 79.53680 | 71.89716 | 266.16714   | -290.73804  | -558.88002  | 1 |
| 183 | N | 78.30467 | 80.01209 | 72.05671 | -226.25352  | 640.49678   | -270.32839  | 1 |
| 184 | H | 77.37314 | 79.54660 | 72.18250 | 2007.69063  | -1035.27229 | 1523.50231  | 1 |
| 185 | C | 78.36937 | 81.42169 | 72.18228 | -540.76542  | -573.33303  | 49.50000    | 1 |
| 186 | H | 77.31557 | 81.67219 | 72.43540 | -2374.20950 | -1036.76023 | 843.75774   | 1 |
| 187 | C | 79.40222 | 81.81818 | 73.33007 | -77.09082   | 666.87422   | -415.84136  | 1 |
| 188 | H | 80.43151 | 81.51005 | 72.99319 | -985.81834  | 617.19825   | 2463.91927  | 1 |
| 189 | O | 79.18793 | 81.20661 | 74.62014 | 293.29899   | -391.65602  | -477.80926  | 1 |
| 190 | H | 79.97441 | 80.62790 | 74.67713 | 2528.72714  | -681.76262  | -751.27122  | 1 |
| 191 | C | 79.28879 | 83.38720 | 73.31272 | 252.47363   | -605.14473  | 440.05134   | 1 |
| 192 | H | 80.03078 | 83.85668 | 73.99895 | -2052.65063 | 1456.49051  | -1043.51830 | 1 |
| 193 | H | 79.46894 | 83.80459 | 72.29383 | -2152.98800 | -1661.97574 | -161.70652  | 1 |
| 194 | H | 78.27793 | 83.72764 | 73.63626 | -473.12726  | -1584.27339 | 2165.61725  | 1 |
| 195 | C | 78.83212 | 82.06832 | 70.73496 | 360.36307   | 488.46713   | 505.10056   | 1 |
| 196 | O | 79.96851 | 82.42790 | 70.53949 | -200.08817  | -528.03552  | -385.82850  | 1 |
| 197 | N | 77.75874 | 82.19371 | 69.96888 | -597.54095  | -226.44775  | 355.20479   | 1 |
| 198 | H | 76.88571 | 81.82265 | 70.34208 | 2179.23655  | -1300.70981 | -991.33835  | 1 |
| 199 | C | 77.85577 | 82.55514 | 68.59944 | -687.68921  | 297.39807   | -249.45179  | 1 |
| 200 | H | 76.79055 | 82.71485 | 68.32238 | -349.16256  | -2467.37713 | -1101.72831 | 1 |
| 201 | C | 78.74804 | 83.87410 | 68.43781 | 672.47345   | 361.54328   | -201.62880  | 1 |
| 202 | H | 79.80430 | 83.65132 | 68.72736 | 1541.41502  | 582.18425   | 2169.97026  | 1 |
| 203 | H | 78.76242 | 84.19435 | 67.36998 | -2534.67717 | 60.25153    | 997.72295   | 1 |
| 204 | C | 78.18834 | 85.00537 | 69.31267 | 574.26774   | -389.43119  | -377.02542  | 1 |
| 205 | C | 76.91441 | 85.58015 | 69.02371 | 688.82679   | -287.33580  | -257.96133  | 1 |
| 206 | H | 76.30885 | 85.21565 | 68.17422 | 331.14182   | 1470.38163  | 2269.80013  | 1 |
| 207 | C | 78.96639 | 85.48221 | 70.41013 | -383.52382  | -675.04808  | 144.24917   | 1 |
| 208 | H | 79.95379 | 85.03670 | 70.63010 | 4.09847     | 1517.59662  | 2262.86397  | 1 |
| 209 | C | 76.45219 | 86.61372 | 69.83775 | -134.76730  | 428.45285   | -649.50303  | 1 |
| 210 | H | 75.46775 | 87.06133 | 69.61554 | -903.23433  | 1600.49020  | 2011.53387  | 1 |
| 211 | C | 78.46007 | 86.51961 | 71.19657 | -335.53281  | -615.00040  | -364.39058  | 1 |
| 212 | H | 79.07083 | 86.88095 | 72.04242 | 1596.45398  | -1369.33862 | 1732.02659  | 1 |
| 213 | C | 77.19394 | 87.12343 | 70.94280 | 585.48547   | -340.24194  | -406.23938  | 1 |
| 214 | O | 76.66922 | 88.17801 | 71.73455 | -419.15649  | -173.04408  | -511.94141  | 1 |
| 215 | H | 77.41894 | 88.30318 | 72.36299 | -1071.84350 | 1559.71507  | -1960.13012 | 1 |
| 216 | C | 78.49985 | 81.28861 | 67.80494 | 291.41878   | -183.13091  | 710.72246   | 1 |
| 217 | O | 78.34028 | 80.14941 | 68.21153 | 379.87695   | 523.47396   | -222.23622  | 1 |
| 218 | N | 79.07723 | 81.70528 | 66.69638 | 564.30591   | 373.09380   | 277.24371   | 1 |
| 219 | H | 79.07475 | 82.70699 | 66.51860 | -120.59931  | -2436.07824 | -1214.35098 | 1 |
| 220 | C | 79.66904 | 80.84590 | 65.72260 | 404.07514   | -299.37480  | 608.84009   | 1 |
| 221 | H | 80.52125 | 81.44973 | 65.33693 | -1071.07882 | -841.69025  | 2359.66467  | 1 |
| 222 | C | 80.11991 | 79.52455 | 66.47368 | -683.12807  | 68.71770    | -390.13096  | 1 |
| 223 | H | 80.48178 | 79.80623 | 67.49108 | 2068.88918  | 1596.58590  | 770.89603   | 1 |
| 224 | H | 79.22296 | 78.88283 | 66.65048 | 1379.86429  | 2342.49779  | -179.85638  | 1 |
| 225 | C | 81.22586 | 78.71823 | 65.73104 | -176.39967  | 537.49466   | 550.97268   | 1 |
| 226 | H | 80.79861 | 77.85958 | 65.16569 | -396.28051  | 1942.22168  | 1869.33314  | 1 |
| 227 | H | 81.75888 | 79.34379 | 64.98141 | -94.44700   | 586.00678   | -2659.20016 | 1 |
| 228 | C | 82.23196 | 78.22565 | 66.88145 | -291.69381  | -718.18079  | -150.72929  | 1 |
| 229 | H | 82.90801 | 79.04673 | 67.23532 | -2303.38776 | 1089.76242  | 964.62032   | 1 |
| 230 | H | 81.76650 | 77.70121 | 67.75364 | 884.16729   | 2568.80533  | -207.74283  | 1 |
| 231 | N | 82.98261 | 77.31282 | 66.13786 | -594.49522  | -252.81478  | 342.29276   | 1 |
| 232 | H | 83.29410 | 77.62980 | 65.23046 | -1735.17426 | 2084.05705  | -263.71605  | 1 |
| 233 | C | 83.32744 | 76.14547 | 66.52111 | 595.23177   | -271.52487  | 442.22352   | 1 |
| 234 | N | 82.92337 | 75.71513 | 67.78672 | 585.53813   | -424.79750  | -105.81303  | 1 |
| 235 | H | 82.41885 | 76.22650 | 68.51042 | 959.88797   | 1327.56823  | -2177.11905 | 1 |
| 236 | H | 83.18063 | 74.82325 | 68.21151 | 1578.48647  | 16.27378    | -2220.76233 | 1 |
| 237 | N | 84.08709 | 75.51463 | 65.53021 | -452.17763  | -390.33541  | -421.51853  | 1 |
| 238 | H | 84.38188 | 75.83812 | 64.60968 | 470.26107   | 1974.25629  | -1817.92087 | 1 |
| 239 | H | 84.47585 | 74.57610 | 65.63071 | 1856.67307  | -1573.97321 | -1224.35416 | 1 |
| 240 | C | 78.56556 | 80.61343 | 64.55231 | -531.47271  | -581.45780  | -55.06206   | 1 |
| 241 | O | 77.51034 | 81.20306 | 64.48667 | -243.00837  | 192.73507   | 609.52485   | 1 |
| 242 | N | 79.08860 | 79.78764 | 63.62069 | 343.49288   | -644.25607  | 38.09164    | 1 |
| 243 | H | 79.95164 | 79.33396 | 63.91532 | -1691.16043 | -1535.97525 | -1484.73099 | 1 |

|     |   |          |          |          |             |             |             |   |
|-----|---|----------|----------|----------|-------------|-------------|-------------|---|
| 244 | C | 78.09440 | 79.01643 | 62.90920 | 542.66492   | 350.14337   | 454.42563   | 1 |
| 245 | H | 77.31823 | 79.75547 | 62.60697 | 1209.57979  | -2396.95920 | 463.86744   | 1 |
| 246 | C | 78.81973 | 78.26692 | 61.71683 | -737.14309  | 145.93010   | 242.71942   | 1 |
| 247 | H | 79.53920 | 77.51924 | 62.11599 | -1050.18303 | 159.36419   | -2509.06125 | 1 |
| 248 | C | 77.70665 | 77.57134 | 60.85926 | -706.77696  | -252.88343  | -245.16230  | 1 |
| 249 | H | 78.14178 | 76.99785 | 60.00752 | -1624.64039 | -1665.49085 | 1417.86935  | 1 |
| 250 | H | 77.10695 | 76.85562 | 61.47074 | 2566.10521  | 598.51109   | 693.22305   | 1 |
| 251 | H | 76.99619 | 78.31585 | 60.42948 | -1972.69758 | 107.10018   | -1876.34312 | 1 |
| 252 | C | 79.56354 | 79.30115 | 60.80329 | 412.85148   | 672.58832   | -27.69222   | 1 |
| 253 | H | 80.05322 | 78.80538 | 59.93228 | 1447.02277  | 1762.76533  | -1490.78944 | 1 |
| 254 | H | 78.86220 | 80.06895 | 60.40060 | 1320.77379  | -145.20455  | 2378.68491  | 1 |
| 255 | H | 80.35731 | 79.84376 | 61.36863 | -1512.10848 | 1470.52031  | 1724.75147  | 1 |
| 256 | C | 77.56212 | 77.90907 | 63.96746 | -607.11113  | 499.56689   | 73.73769    | 1 |
| 257 | O | 78.32668 | 77.08889 | 64.49948 | 357.97126   | 460.81534   | 356.68785   | 1 |
| 258 | N | 76.26349 | 78.00837 | 64.09505 | 536.55407   | -368.62270  | 332.76306   | 1 |
| 259 | H | 75.77833 | 78.71155 | 63.53732 | 524.38866   | 2297.69985  | 1367.20941  | 1 |
| 260 | C | 75.67574 | 77.51243 | 65.29610 | 46.50277    | -774.29190  | -147.97904  | 1 |
| 261 | H | 76.50784 | 77.50095 | 66.03415 | 1676.51875  | 1883.29066  | 1032.55549  | 1 |
| 262 | C | 74.43223 | 78.46515 | 65.66767 | -559.41456  | -34.19198   | -556.30433  | 1 |
| 263 | H | 73.72848 | 78.50166 | 64.80126 | -64.66664   | 395.18769   | 2695.05373  | 1 |
| 264 | H | 73.84991 | 78.03806 | 66.51973 | -2703.44278 | -60.40056   | 333.79418   | 1 |
| 265 | C | 74.93862 | 79.84628 | 66.00222 | -519.76435  | 377.31045   | 459.42366   | 1 |
| 266 | H | 75.75048 | 80.12286 | 65.28599 | -1746.74323 | 1667.50644  | -1261.73691 | 1 |
| 267 | C | 73.81602 | 80.86656 | 65.86707 | 570.95554   | 16.46261    | -545.27700  | 1 |
| 268 | H | 74.16948 | 81.90357 | 66.10210 | 2391.58273  | 28.05277    | -1305.07271 | 1 |
| 269 | H | 73.39902 | 80.88742 | 64.82682 | 175.75588   | 917.63458   | 2559.43867  | 1 |
| 270 | H | 72.96525 | 80.63904 | 66.55991 | -1063.97851 | -2155.34650 | 1283.00462  | 1 |
| 271 | C | 75.51066 | 79.87861 | 67.41242 | 193.76014   | 2.62946     | -765.53141  | 1 |
| 272 | H | 75.86974 | 80.90311 | 67.68795 | 507.39394   | -846.55087  | 2539.60089  | 1 |
| 273 | H | 74.75083 | 79.57500 | 68.17848 | 1337.57841  | 1818.19054  | 1526.01994  | 1 |
| 274 | H | 76.38768 | 79.18592 | 67.51862 | 1100.88635  | -1172.91350 | -2199.08909 | 1 |
| 275 | C | 75.10805 | 76.03329 | 64.98401 | -549.21115  | 475.64486   | -309.38218  | 1 |
| 276 | O | 74.28584 | 75.80077 | 64.13853 | 556.06106   | -390.37755  | -78.24250   | 1 |
| 277 | O | 75.55607 | 75.02106 | 65.86626 | -572.27940  | -310.19032  | -209.75862  | 1 |
| 278 | H | 76.26294 | 75.52927 | 66.34885 | -1380.08193 | 2212.14486  | 790.85944   | 1 |

Listing 29: C00029.xmolout

|    |   |          |          |          |             |             |             |        |          |
|----|---|----------|----------|----------|-------------|-------------|-------------|--------|----------|
| 1  |   | 276      |          |          |             |             |             |        |          |
| 2  |   | 150.0000 | 150.0000 | 150.0000 | 0.0000      | 0.0000      | 0.0000***** | 2.7750 | 11100    |
|    |   | 0.2500   | 300.00   | 0.00     | 0.00        | 0.00        | -1293.9222  | 0.0000 | 300.0000 |
| 3  | H | 73.83440 | 70.01963 | 87.99284 | -2043.14101 | -1757.64893 | 399.89339   |        | 1        |
| 4  | N | 74.78120 | 69.79032 | 87.69688 | 426.75047   | 490.45733   | -334.42467  |        | 1        |
| 5  | H | 75.14626 | 69.30328 | 88.51221 | 442.25559   | -1110.30854 | -2448.52907 |        | 1        |
| 6  | C | 75.54966 | 70.88451 | 87.25121 | 415.32972   | -666.39213  | 83.73172    |        | 1        |
| 7  | H | 74.82964 | 71.51831 | 86.69253 | 879.32219   | 2491.00447  | 667.35213   |        | 1        |
| 8  | C | 76.19753 | 71.66164 | 88.50589 | 31.35357    | 477.41777   | 628.23362   |        | 1        |
| 9  | H | 76.70398 | 70.93351 | 89.18436 | 1168.38489  | 2240.25337  | -1019.71136 |        | 1        |
| 10 | H | 76.99833 | 72.34949 | 88.14062 | -360.43770  | 2534.90498  | 931.67112   |        | 1        |
| 11 | C | 75.13385 | 72.43230 | 89.24405 | 463.18208   | 512.70242   | -382.34388  |        | 1        |
| 12 | H | 74.29215 | 71.74408 | 89.48125 | 1725.29117  | 1863.52247  | -987.07854  |        | 1        |
| 13 | C | 75.69353 | 72.97892 | 90.55172 | 710.42801   | -144.27427  | -313.15367  |        | 1        |
| 14 | H | 74.91991 | 73.55142 | 91.12576 | 364.20195   | -1033.13725 | 2494.72524  |        | 1        |
| 15 | H | 76.06501 | 72.15898 | 91.21915 | 2567.61904  | 335.80679   | 847.48802   |        | 1        |
| 16 | H | 76.55375 | 73.67422 | 90.37108 | -2587.99029 | 680.92867   | -512.16411  |        | 1        |
| 17 | C | 74.60375 | 73.58495 | 88.40182 | 268.17616   | 741.64379   | -40.42634   |        | 1        |
| 18 | H | 73.85450 | 74.19836 | 88.96568 | 1283.54314  | -1945.37420 | -1411.27812 |        | 1        |
| 19 | H | 75.42802 | 74.27603 | 88.08688 | -1258.57796 | 1317.15249  | -2026.02085 |        | 1        |
| 20 | H | 74.09974 | 73.22507 | 87.46851 | -2502.84526 | 909.80597   | 575.92391   |        | 1        |
| 21 | C | 76.78977 | 70.38921 | 86.33298 | 619.36578   | -458.64843  | -172.09273  |        | 1        |
| 22 | O | 77.64726 | 71.19038 | 86.01652 | -81.40433   | 433.87611   | 522.34594   |        | 1        |
| 23 | N | 76.69998 | 69.10797 | 85.96637 | 175.23996   | -622.20190  | 341.55523   |        | 1        |

|    |   |          |          |          |             |             |             |   |
|----|---|----------|----------|----------|-------------|-------------|-------------|---|
| 24 | H | 75.89340 | 68.57875 | 86.29661 | -876.57256  | -303.22879  | -2561.90213 | 1 |
| 25 | C | 77.63604 | 68.60542 | 85.02724 | -571.88214  | -534.10783  | -106.15033  | 1 |
| 26 | H | 78.39594 | 69.41934 | 84.93387 | -2713.20841 | -16.25800   | -248.80809  | 1 |
| 27 | C | 78.18424 | 67.19936 | 85.56670 | 166.60354   | 288.16399   | -716.09568  | 1 |
| 28 | H | 77.33681 | 66.46044 | 85.51265 | -2097.85574 | 1636.78449  | -586.18044  | 1 |
| 29 | O | 78.66401 | 67.19451 | 86.92187 | -317.80580  | -363.38227  | 484.43082   | 1 |
| 30 | H | 78.03126 | 66.58075 | 87.34652 | 1863.74748  | -1451.84923 | 1357.29467  | 1 |
| 31 | C | 79.25741 | 66.82810 | 84.47785 | 503.80731   | 517.99032   | 318.51606   | 1 |
| 32 | H | 79.68677 | 65.81562 | 84.66027 | 640.61020   | -2157.10410 | -1536.29104 | 1 |
| 33 | H | 78.82104 | 66.82371 | 83.44988 | 1687.88455  | 465.60692   | 2087.56452  | 1 |
| 34 | H | 80.10572 | 67.55138 | 84.47856 | -1293.07895 | -1899.88581 | -1463.57452 | 1 |
| 35 | C | 76.81650 | 68.25862 | 83.65244 | -153.07550  | -733.68902  | 248.70981   | 1 |
| 36 | O | 76.55261 | 67.10302 | 83.44458 | 186.15459   | -480.78787  | -449.34387  | 1 |
| 37 | N | 76.48598 | 69.34624 | 82.94217 | -487.53139  | 543.18517   | 42.03850    | 1 |
| 38 | C | 75.99671 | 69.24300 | 81.60262 | -699.35871  | 69.34393    | 360.10701   | 1 |
| 39 | H | 75.61298 | 68.20761 | 81.44860 | 2.81126     | -221.99807  | -2715.58072 | 1 |
| 40 | C | 74.90877 | 70.41137 | 81.61574 | -507.46439  | -592.59194  | 122.07761   | 1 |
| 41 | H | 74.59098 | 70.71984 | 80.59533 | -1975.08116 | 525.87560   | -1801.71556 | 1 |
| 42 | H | 73.98849 | 70.10640 | 82.16131 | 1588.27743  | -1913.22100 | 1113.83566  | 1 |
| 43 | C | 75.68374 | 71.52481 | 82.38212 | -613.62442  | -457.55993  | -194.14490  | 1 |
| 44 | H | 76.43090 | 72.01548 | 81.71416 | 1707.54637  | -721.27992  | 1996.92523  | 1 |
| 45 | H | 75.02968 | 72.33232 | 82.78348 | 758.23357   | 2100.81767  | 1560.55011  | 1 |
| 46 | C | 76.41108 | 70.68369 | 83.51652 | -352.41524  | 704.96076   | 49.21465    | 1 |
| 47 | H | 77.45375 | 71.01362 | 83.74610 | 1714.76886  | -2070.42778 | 443.35792   | 1 |
| 48 | H | 75.84325 | 70.57797 | 84.47336 | 1224.15040  | 1801.50881  | 1636.97633  | 1 |
| 49 | C | 77.17998 | 69.68466 | 80.57545 | 566.85117   | 537.05831   | 117.62814   | 1 |
| 50 | O | 77.97970 | 70.58166 | 80.83983 | -550.26779  | -406.08867  | 4.21666     | 1 |
| 51 | N | 77.07949 | 68.98197 | 79.46436 | 566.34832   | -425.77725  | 180.18749   | 1 |
| 52 | H | 76.31772 | 68.30502 | 79.43255 | 644.44502   | 2646.80550  | -52.73430   | 1 |
| 53 | C | 77.53432 | 69.62677 | 78.25874 | 612.34801   | -281.48662  | 411.56221   | 1 |
| 54 | H | 77.37079 | 70.71419 | 78.43534 | 1667.23498  | -1490.75142 | 1556.16753  | 1 |
| 55 | C | 79.08333 | 69.30362 | 78.11339 | -714.45746  | -175.43074  | 286.98927   | 1 |
| 56 | H | 79.26040 | 68.18967 | 78.06255 | -787.09484  | 1763.03619  | -1922.46060 | 1 |
| 57 | O | 79.92935 | 69.67437 | 79.22044 | -429.46514  | 516.51932   | -128.40526  | 1 |
| 58 | H | 79.23668 | 70.07157 | 79.85408 | 1981.82785  | 436.16847   | -1818.18182 | 1 |
| 59 | C | 79.42154 | 69.93545 | 76.71902 | 630.79189   | -468.94448  | 76.03230    | 1 |
| 60 | H | 80.47810 | 69.73093 | 76.42641 | -1775.71861 | 2062.30353  | 131.89849   | 1 |
| 61 | H | 78.76653 | 69.53413 | 75.90996 | -1855.14608 | 88.94118    | 1993.53760  | 1 |
| 62 | H | 79.28949 | 71.04280 | 76.73036 | -1504.82350 | -780.94249  | -2132.90992 | 1 |
| 63 | C | 76.65850 | 69.03256 | 77.02238 | 288.57638   | 618.62814   | -397.00270  | 1 |
| 64 | O | 76.05801 | 69.80845 | 76.29380 | 321.70495   | -185.26452  | 574.37218   | 1 |
| 65 | N | 76.62841 | 67.67114 | 76.98182 | -447.05792  | -446.53431  | 367.76425   | 1 |
| 66 | H | 77.21849 | 67.43864 | 77.79601 | 350.31316   | 1975.63644  | -1843.31522 | 1 |
| 67 | C | 77.02009 | 67.04442 | 75.73363 | -511.23061  | 374.03917   | -471.51480  | 1 |
| 68 | H | 78.02873 | 67.44578 | 75.49688 | 2234.79579  | -898.70890  | -1273.45190 | 1 |
| 69 | C | 77.03776 | 65.49060 | 76.06727 | 529.53781   | -159.34528  | 563.72604   | 1 |
| 70 | H | 77.34135 | 64.93963 | 75.13603 | 654.59388   | 2347.94251  | 1217.51488  | 1 |
| 71 | H | 77.84566 | 65.31991 | 76.82500 | -1526.55661 | 2103.42026  | 817.87394   | 1 |
| 72 | O | 75.76715 | 64.91267 | 76.50840 | -554.84278  | 14.12789    | 399.58769   | 1 |
| 73 | H | 75.73957 | 65.27759 | 77.40872 | 1297.06236  | 2061.84854  | 1220.68812  | 1 |
| 74 | C | 75.97780 | 67.23985 | 74.52642 | -662.15484  | -412.13544  | 123.62687   | 1 |
| 75 | O | 76.17964 | 66.66700 | 73.47690 | -540.01537  | -317.05804  | 274.91456   | 1 |
| 76 | N | 74.94770 | 68.02373 | 74.85700 | -202.76299  | -690.00100  | -131.49145  | 1 |
| 77 | H | 74.95178 | 68.52390 | 75.76888 | -702.62132  | -2617.37191 | 281.70413   | 1 |
| 78 | C | 73.85861 | 68.11998 | 73.95269 | -491.73914  | 576.34187   | 222.73509   | 1 |
| 79 | H | 74.19462 | 67.51863 | 73.07513 | 1977.17978  | -1823.58850 | -434.68928  | 1 |
| 80 | C | 72.62300 | 67.48107 | 74.71717 | -649.50797  | -328.66843  | 306.11224   | 1 |
| 81 | H | 72.42375 | 68.02616 | 75.66481 | 2075.07803  | 1452.16490  | -1004.45904 | 1 |
| 82 | C | 71.36124 | 67.47449 | 73.78844 | -615.18735  | -489.99689  | -70.96352   | 1 |
| 83 | H | 70.47654 | 67.03178 | 74.30377 | -1226.32661 | -1724.38906 | -1716.47170 | 1 |
| 84 | H | 71.07750 | 68.50365 | 73.46659 | 2381.64273  | -969.84735  | 900.46860   | 1 |
| 85 | H | 71.53907 | 66.87823 | 72.86326 | 2122.74991  | 1702.23946  | -141.36228  | 1 |



|     |   |          |          |          |             |             |             |   |
|-----|---|----------|----------|----------|-------------|-------------|-------------|---|
| 86  | C | 72.97347 | 65.98451 | 75.02940 | -501.86074  | -479.61276  | -376.42482  | 1 |
| 87  | H | 72.16944 | 65.48554 | 75.61993 | 993.79261   | -2246.95401 | -1177.81305 | 1 |
| 88  | H | 73.11422 | 65.39437 | 74.09363 | 42.71279    | -626.15391  | -2651.37258 | 1 |
| 89  | H | 73.92403 | 65.89635 | 75.61460 | -2026.39012 | -1590.33709 | -887.82922  | 1 |
| 90  | C | 73.74990 | 69.73244 | 73.62437 | -672.89153  | 382.57394   | -156.34072  | 1 |
| 91  | O | 74.58977 | 70.23138 | 72.91286 | 410.04627   | 221.86223   | 500.35950   | 1 |
| 92  | N | 72.70358 | 70.30556 | 74.20067 | -378.11782  | -443.79414  | -441.10984  | 1 |
| 93  | H | 72.11697 | 69.71625 | 74.78891 | 2404.15973  | -568.14894  | 1149.30085  | 1 |
| 94  | C | 72.58555 | 71.72540 | 74.28509 | -544.54484  | 466.16019   | 331.29119   | 1 |
| 95  | H | 71.69964 | 71.85925 | 74.94693 | -1409.80988 | -170.17955  | 2325.32679  | 1 |
| 96  | C | 73.93801 | 72.29037 | 74.90164 | -184.48284  | 116.78282   | -758.89137  | 1 |
| 97  | H | 74.20314 | 71.74957 | 75.83925 | 1893.78641  | 1861.14652  | 611.04528   | 1 |
| 98  | H | 74.78883 | 72.10886 | 74.20291 | -2170.79665 | -974.19311  | 1327.50117  | 1 |
| 99  | C | 73.69451 | 73.80899 | 75.16848 | 389.51668   | 672.81878   | -138.49152  | 1 |
| 100 | H | 73.82064 | 74.38407 | 74.22119 | 510.64577   | 1933.03327  | 1851.02484  | 1 |
| 101 | H | 72.63644 | 73.98012 | 75.46539 | -2302.30869 | -1105.72939 | -948.89774  | 1 |
| 102 | C | 74.62654 | 74.39330 | 76.30880 | -559.93427  | -126.34590  | 542.30857   | 1 |
| 103 | O | 74.28329 | 75.30987 | 77.01384 | -670.36003  | -111.83166  | 76.36448    | 1 |
| 104 | N | 75.85159 | 73.74894 | 76.37652 | -216.06729  | -537.07037  | 446.51379   | 1 |
| 105 | H | 76.26003 | 73.39304 | 75.49747 | -1251.96487 | 1074.12894  | -2168.52500 | 1 |
| 106 | H | 76.59851 | 74.31070 | 76.79914 | -2451.83023 | -720.73851  | 944.84612   | 1 |
| 107 | C | 72.41155 | 72.38313 | 72.80962 | 546.24052   | -563.88337  | -85.11809   | 1 |
| 108 | O | 73.28974 | 73.12464 | 72.39141 | 71.70702    | -307.40463  | 606.69673   | 1 |
| 109 | N | 71.22608 | 72.10160 | 72.27706 | 479.90863   | -504.50129  | 222.86849   | 1 |
| 110 | C | 70.95161 | 72.29597 | 70.87952 | 75.51268    | -600.91904  | 506.73700   | 1 |
| 111 | H | 71.81736 | 71.87398 | 70.32108 | -2033.61562 | 1795.30103  | 254.89480   | 1 |
| 112 | C | 69.58799 | 71.50859 | 70.69621 | 523.79067   | 517.99274   | 284.45581   | 1 |
| 113 | H | 69.01122 | 71.84757 | 69.80625 | 1599.61665  | -1127.00911 | 1895.98173  | 1 |
| 114 | H | 69.75945 | 70.41619 | 70.57110 | -1881.83093 | 1275.82488  | -1501.55016 | 1 |
| 115 | C | 68.87273 | 71.81618 | 72.04987 | -600.05639  | -404.05026  | 316.64485   | 1 |
| 116 | H | 68.45706 | 72.84870 | 72.05504 | -2597.05260 | 496.36221   | 657.73249   | 1 |
| 117 | H | 68.02469 | 71.13081 | 72.27447 | -1666.24518 | 1294.38985  | -1723.90591 | 1 |
| 118 | C | 70.07912 | 71.67439 | 73.07154 | 493.57570   | -129.95376  | -602.56394  | 1 |
| 119 | H | 70.01381 | 72.32286 | 73.97629 | -1469.08415 | -637.84797  | 2204.22581  | 1 |
| 120 | H | 70.30301 | 70.62696 | 73.38212 | -1038.97840 | 1068.88701  | -2280.71789 | 1 |
| 121 | C | 70.72803 | 73.87821 | 70.54317 | 188.88100   | 241.05089   | -727.87821  | 1 |
| 122 | O | 70.37627 | 74.22196 | 69.44180 | 531.88613   | -49.19943   | 427.07960   | 1 |
| 123 | N | 70.95353 | 74.64630 | 71.61132 | 708.14833   | 26.93417    | -179.73509  | 1 |
| 124 | H | 71.30086 | 74.13600 | 72.43017 | -2232.69501 | -1179.09831 | 1023.94816  | 1 |
| 125 | C | 70.80465 | 76.09419 | 71.56929 | -738.32412  | 259.92548   | 104.42456   | 1 |
| 126 | H | 70.00759 | 76.26184 | 70.80545 | 2028.89123  | 1260.02983  | 1311.33324  | 1 |
| 127 | C | 70.43352 | 76.55858 | 72.96784 | -258.65678  | -345.52513  | 661.28459   | 1 |
| 128 | H | 71.25357 | 76.25604 | 73.65722 | -1826.06090 | -1801.46097 | -918.64554  | 1 |
| 129 | C | 70.28819 | 78.06725 | 73.04408 | -541.23400  | 531.92970   | -218.41428  | 1 |
| 130 | H | 69.99516 | 78.40807 | 74.07501 | 1311.73218  | -2219.18200 | 882.19023   | 1 |
| 131 | H | 71.25231 | 78.58291 | 72.78091 | -1048.71298 | 1223.58118  | -2196.97971 | 1 |
| 132 | H | 69.50517 | 78.44608 | 72.33102 | 419.06414   | 1903.92898  | 1903.44670  | 1 |
| 133 | C | 69.15810 | 75.89138 | 73.45177 | -423.86431  | 152.66566   | -648.55262  | 1 |
| 134 | H | 68.90881 | 76.18155 | 74.50890 | 105.68386   | -2342.50080 | 1387.51238  | 1 |
| 135 | H | 68.27834 | 76.17483 | 72.81137 | -1695.63603 | -1484.73621 | -1531.02793 | 1 |
| 136 | H | 69.24101 | 74.77039 | 73.41963 | -1853.57121 | -487.39031  | 1936.59343  | 1 |
| 137 | C | 72.24321 | 76.77610 | 71.07638 | 539.71428   | -510.58232  | 267.58633   | 1 |
| 138 | O | 72.25388 | 77.95769 | 70.82344 | -15.93758   | -278.34085  | -624.49402  | 1 |
| 139 | N | 73.29067 | 75.93191 | 71.14338 | -676.81886  | 12.05292    | 276.17960   | 1 |
| 140 | H | 72.86375 | 75.04151 | 71.42743 | -1694.44250 | -373.84189  | -2100.66098 | 1 |
| 141 | C | 74.24656 | 75.87814 | 70.04378 | 412.33078   | -664.70360  | 108.35451   | 1 |
| 142 | H | 73.83907 | 75.02995 | 69.45049 | 1765.77476  | 1294.44366  | 1621.76594  | 1 |
| 143 | C | 74.19322 | 77.22506 | 69.23313 | -179.66635  | -721.95667  | -264.73915  | 1 |
| 144 | H | 73.16635 | 77.37957 | 68.82559 | -607.34922  | 2587.87032  | -598.10018  | 1 |
| 145 | H | 74.35613 | 78.07767 | 69.93421 | -359.69332  | -1479.13954 | -2259.74260 | 1 |
| 146 | C | 75.21478 | 77.25672 | 68.04472 | -240.01076  | 616.02425   | 431.85322   | 1 |
| 147 | H | 76.25464 | 77.10523 | 68.41510 | -1359.17131 | 782.54425   | 2227.99181  | 1 |

|     |   |          |          |          |             |             |             |   |
|-----|---|----------|----------|----------|-------------|-------------|-------------|---|
| 148 | H | 75.02425 | 76.43419 | 67.31983 | -820.36667  | 85.81767    | -2596.78715 | 1 |
| 149 | C | 75.04614 | 78.67286 | 67.36089 | -513.07015  | 236.18570   | -551.87280  | 1 |
| 150 | H | 74.07326 | 78.73538 | 66.82155 | 1816.11944  | -1183.11722 | -1650.94321 | 1 |
| 151 | H | 75.00905 | 79.48091 | 68.12595 | -1800.04429 | -1361.53473 | 1526.34643  | 1 |
| 152 | C | 76.23117 | 78.91553 | 66.39689 | 726.08972   | -253.19732  | -179.64713  | 1 |
| 153 | H | 77.23295 | 78.77721 | 66.85000 | 1224.27271  | -456.51798  | -2390.90304 | 1 |
| 154 | H | 76.17111 | 78.36957 | 65.43411 | 1206.40339  | -1150.93514 | -2154.90344 | 1 |
| 155 | N | 76.21082 | 80.43450 | 66.02027 | 329.70796   | -633.68968  | -155.67358  | 1 |
| 156 | H | 76.98292 | 80.75306 | 65.36667 | 1348.31305  | 1938.76845  | 1359.00643  | 1 |
| 157 | H | 75.34679 | 80.81561 | 65.53530 | 2096.92035  | 1446.54551  | -966.48890  | 1 |
| 158 | H | 76.33330 | 81.11289 | 66.82662 | -1197.07217 | -2303.53719 | 827.28733   | 1 |
| 159 | C | 75.66952 | 75.47564 | 70.66215 | -378.01186  | -556.17301  | -413.96481  | 1 |
| 160 | O | 76.72425 | 75.96385 | 70.23815 | -409.44433  | -307.55053  | -453.30833  | 1 |
| 161 | N | 75.50396 | 74.51371 | 71.53366 | -429.02477  | 524.70884   | 274.08502   | 1 |
| 162 | H | 74.53604 | 74.18572 | 71.76972 | 1706.34263  | -1425.96036 | 1574.38926  | 1 |
| 163 | C | 76.56662 | 73.85403 | 72.20096 | -45.25864   | -626.22952  | 478.93267   | 1 |
| 164 | H | 76.02842 | 73.06328 | 72.77055 | 1988.63164  | 570.90773   | 1772.87287  | 1 |
| 165 | C | 77.60765 | 73.26966 | 71.15738 | 551.77128   | -20.49526   | -564.54996  | 1 |
| 166 | H | 77.15516 | 72.45496 | 70.54903 | 1434.61535  | -1753.10253 | 1513.99471  | 1 |
| 167 | H | 77.92932 | 74.04702 | 70.42692 | -714.67738  | 1819.09770  | 1898.36494  | 1 |
| 168 | C | 78.81531 | 72.75034 | 72.00590 | 446.99263   | -555.77305  | 338.97221   | 1 |
| 169 | H | 79.21034 | 73.57314 | 72.64813 | 1953.68466  | 1892.25957  | -161.67766  | 1 |
| 170 | H | 78.48321 | 71.95226 | 72.70718 | -403.03785  | 2688.07032  | -188.43591  | 1 |
| 171 | C | 79.96838 | 72.21683 | 71.06532 | 567.86262   | 335.74681   | 434.04421   | 1 |
| 172 | H | 79.63493 | 71.33050 | 70.47825 | -1080.02275 | 1568.26081  | -1948.78900 | 1 |
| 173 | H | 80.26844 | 72.98614 | 70.31708 | -919.54108  | 2111.34692  | 1456.13463  | 1 |
| 174 | C | 81.14749 | 71.86407 | 72.00327 | 195.81897   | 173.33862   | -745.11536  | 1 |
| 175 | H | 81.58791 | 72.73300 | 72.53416 | 1405.67949  | -2301.21089 | -390.08113  | 1 |
| 176 | H | 80.93207 | 71.05169 | 72.72587 | -940.37328  | -1118.32446 | 2299.72133  | 1 |
| 177 | N | 82.31616 | 71.30412 | 71.12659 | 319.26422   | 656.36007   | -42.02424   | 1 |
| 178 | H | 83.18284 | 71.00716 | 71.66176 | 1961.03633  | 619.91968   | 1787.09422  | 1 |
| 179 | H | 82.11727 | 70.43277 | 70.55363 | 854.14343   | -2156.80752 | 1429.08711  | 1 |
| 180 | H | 82.73564 | 71.95513 | 70.40076 | 1237.02905  | -1378.50857 | -1998.28500 | 1 |
| 181 | C | 77.38962 | 74.86861 | 73.20547 | 532.53319   | -268.57236  | 517.55729   | 1 |
| 182 | O | 77.34117 | 74.67143 | 74.39800 | 266.16714   | -290.73804  | -558.88002  | 1 |
| 183 | N | 78.09845 | 75.73651 | 72.50921 | -226.25352  | 640.49678   | -270.32839  | 1 |
| 184 | H | 77.99774 | 75.75361 | 71.47160 | 2007.69063  | -1035.27229 | 1523.50231  | 1 |
| 185 | C | 78.93246 | 76.65196 | 73.19818 | -540.76542  | -573.33303  | 49.50000    | 1 |
| 186 | H | 78.83181 | 76.38270 | 74.27628 | -2374.20950 | -1036.76023 | 843.75774   | 1 |
| 187 | C | 80.41312 | 76.42384 | 72.61456 | -77.09082   | 666.87422   | -415.84136  | 1 |
| 188 | H | 80.39534 | 76.65057 | 71.51326 | -985.81834  | 617.19825   | 2463.91927  | 1 |
| 189 | O | 80.91740 | 75.07878 | 72.72569 | 293.29899   | -391.65602  | -477.80926  | 1 |
| 190 | H | 81.05092 | 74.85838 | 71.78115 | 2528.72714  | -681.76262  | -751.27122  | 1 |
| 191 | C | 81.27913 | 77.51299 | 73.34231 | 252.47363   | -605.14473  | 440.05134   | 1 |
| 192 | H | 82.35491 | 77.42808 | 73.06193 | -2052.65063 | 1456.49051  | -1043.51830 | 1 |
| 193 | H | 80.95701 | 78.55094 | 73.08358 | -2152.98800 | -1661.97574 | -161.70652  | 1 |
| 194 | H | 81.21709 | 77.41205 | 74.45104 | -473.12726  | -1584.27339 | 2165.61725  | 1 |
| 195 | C | 78.45790 | 78.17401 | 72.85502 | 360.36307   | 488.46713   | 505.10056   | 1 |
| 196 | O | 78.85441 | 79.08836 | 73.53686 | -200.08817  | -528.03552  | -385.82850  | 1 |
| 197 | N | 77.75376 | 78.24786 | 71.72210 | -597.54095  | -226.44775  | 355.20479   | 1 |
| 198 | H | 77.39248 | 77.39467 | 71.26655 | 2179.23655  | -1300.70981 | -991.33835  | 1 |
| 199 | C | 77.02373 | 79.45798 | 71.53337 | -687.68921  | 297.39807   | -249.45179  | 1 |
| 200 | H | 77.63768 | 80.26423 | 71.99924 | -349.16256  | -2467.37713 | -1101.72831 | 1 |
| 201 | C | 76.72152 | 79.62519 | 69.97270 | 672.47345   | 361.54328   | -201.62880  | 1 |
| 202 | H | 76.01186 | 78.82025 | 69.68508 | 1541.41502  | 582.18425   | 2169.97026  | 1 |
| 203 | H | 76.21039 | 80.59598 | 69.78080 | -2534.67717 | 60.25153    | 997.72295   | 1 |
| 204 | C | 77.97802 | 79.49940 | 69.10236 | 574.26774   | -389.43119  | -377.02542  | 1 |
| 205 | C | 78.57277 | 80.66871 | 68.53915 | 688.82679   | -287.33580  | -257.96133  | 1 |
| 206 | H | 78.18407 | 81.67489 | 68.77939 | 331.14182   | 1470.38163  | 2269.80013  | 1 |
| 207 | C | 78.49224 | 78.19914 | 68.80691 | -383.52382  | -675.04808  | 144.24917   | 1 |
| 208 | H | 78.03606 | 77.29277 | 69.26577 | 4.09847     | 1517.59662  | 2262.86397  | 1 |
| 209 | C | 79.64156 | 80.50697 | 67.65876 | -134.76730  | 428.45285   | -649.50303  | 1 |

|     |   |          |          |          |             |             |             |   |
|-----|---|----------|----------|----------|-------------|-------------|-------------|---|
| 210 | H | 80.09842 | 81.40696 | 67.21146 | -903.23433  | 1600.49020  | 2011.53387  | 1 |
| 211 | C | 79.56137 | 78.09375 | 67.91466 | -335.53281  | -615.00040  | -364.39058  | 1 |
| 212 | H | 79.94336 | 77.08617 | 67.67508 | 1596.45398  | -1369.33862 | 1732.02659  | 1 |
| 213 | C | 80.16812 | 79.23108 | 67.30429 | 585.48547   | -340.24194  | -406.23938  | 1 |
| 214 | O | 81.24818 | 79.13312 | 66.38904 | -419.15649  | -173.04408  | -511.94141  | 1 |
| 215 | H | 81.35280 | 78.15285 | 66.35976 | -1071.84350 | 1559.71507  | -1960.13012 | 1 |
| 216 | C | 75.57889 | 79.22279 | 72.24958 | 291.41878   | -183.13091  | 710.72246   | 1 |
| 217 | O | 75.25995 | 78.21185 | 72.83117 | 379.87695   | 523.47396   | -222.23622  | 1 |
| 218 | N | 74.85353 | 80.31895 | 72.05507 | 564.30591   | 373.09380   | 277.24371   | 1 |
| 219 | H | 75.22571 | 81.15242 | 71.59977 | -120.59931  | -2436.07824 | -1214.35098 | 1 |
| 220 | C | 73.54126 | 80.35906 | 72.64101 | 404.07514   | -299.37480  | 608.84009   | 1 |
| 221 | H | 73.03752 | 79.40426 | 72.35880 | -1071.07882 | -841.69025  | 2359.66467  | 1 |
| 222 | C | 73.83918 | 80.44252 | 74.19849 | -683.12807  | 68.71770    | -390.13096  | 1 |
| 223 | H | 74.54672 | 79.62703 | 74.47886 | 2068.88918  | 1596.58590  | 770.89603   | 1 |
| 224 | H | 74.37300 | 81.39078 | 74.43140 | 1379.86429  | 2342.49779  | -179.85638  | 1 |
| 225 | C | 72.53309 | 80.32623 | 75.03857 | -176.39967  | 537.49466   | 550.97268   | 1 |
| 226 | H | 71.82637 | 81.16167 | 74.83563 | -396.28051  | 1942.22168  | 1869.33314  | 1 |
| 227 | H | 71.97683 | 79.38956 | 74.81377 | -94.44700   | 586.00678   | -2659.20016 | 1 |
| 228 | C | 73.07760 | 80.34335 | 76.54304 | -291.69381  | -718.18079  | -150.72929  | 1 |
| 229 | H | 73.63766 | 79.41792 | 76.83572 | -2303.38776 | 1089.76242  | 964.62032   | 1 |
| 230 | H | 73.70960 | 81.23185 | 76.82235 | 884.16729   | 2568.80533  | -207.74283  | 1 |
| 231 | N | 71.91545 | 80.38144 | 77.32044 | -594.49522  | -252.81478  | 342.29276   | 1 |
| 232 | H | 71.05549 | 80.13141 | 76.85734 | -1735.17426 | 2084.05705  | -263.71605  | 1 |
| 233 | C | 71.88637 | 80.67532 | 78.55741 | 595.23177   | -271.52487  | 442.22352   | 1 |
| 234 | N | 73.09634 | 81.00448 | 79.17887 | 585.53813   | -424.79750  | -105.81303  | 1 |
| 235 | H | 74.04267 | 80.99638 | 78.80047 | 959.88797   | 1327.56823  | -2177.11905 | 1 |
| 236 | H | 73.20124 | 81.21906 | 80.17090 | 1578.48647  | 16.27378    | -2220.76233 | 1 |
| 237 | N | 70.57951 | 80.60770 | 79.05787 | -452.17763  | -390.33541  | -421.51853  | 1 |
| 238 | H | 69.70306 | 80.34731 | 78.60794 | 470.26107   | 1974.25629  | -1817.92087 | 1 |
| 239 | H | 70.34902 | 80.78342 | 80.03678 | 1856.67307  | -1573.97321 | -1224.35416 | 1 |
| 240 | C | 72.87322 | 81.71432 | 72.06387 | -531.47271  | -581.45780  | -55.06206   | 1 |
| 241 | O | 73.54541 | 82.70991 | 71.80742 | -243.00837  | 192.73507   | 609.52485   | 1 |
| 242 | N | 71.55968 | 81.57864 | 72.01003 | 343.49288   | -644.25607  | 38.09164    | 1 |
| 243 | H | 71.20411 | 80.67341 | 72.31054 | -1691.16043 | -1535.97525 | -1484.73099 | 1 |
| 244 | C | 70.73777 | 82.53251 | 71.26411 | 542.66492   | 350.14337   | 454.42563   | 1 |
| 245 | H | 71.45170 | 82.92185 | 70.49869 | 1209.57979  | -2396.95920 | 463.86744   | 1 |
| 246 | C | 69.54155 | 81.79727 | 70.68606 | -737.14309  | 145.93010   | 242.71942   | 1 |
| 247 | H | 68.93259 | 81.41366 | 71.53457 | -1050.18303 | 159.36419   | -2509.06125 | 1 |
| 248 | C | 68.67037 | 82.72417 | 69.85831 | -706.77696  | -252.88343  | -245.16230  | 1 |
| 249 | H | 67.74840 | 82.20292 | 69.47908 | -1624.64039 | -1665.49085 | 1417.86935  | 1 |
| 250 | H | 68.33213 | 83.61335 | 70.46106 | 2566.10521  | 598.51109   | 693.22305   | 1 |
| 251 | H | 69.22099 | 83.11932 | 68.96014 | -1972.69758 | 107.10018   | -1876.34312 | 1 |
| 252 | C | 69.97339 | 80.60700 | 69.84798 | 412.85148   | 672.58832   | -27.69222   | 1 |
| 253 | H | 69.09501 | 79.99985 | 69.49662 | 1447.02277  | 1762.76533  | -1490.78944 | 1 |
| 254 | H | 70.53974 | 80.93334 | 68.93298 | 1320.77379  | -145.20455  | 2378.68491  | 1 |
| 255 | H | 70.65186 | 79.91457 | 70.41988 | -1512.10848 | 1470.52031  | 1724.75147  | 1 |
| 256 | C | 70.37304 | 83.70583 | 72.38659 | -607.11113  | 499.56689   | 73.73769    | 1 |
| 257 | O | 69.24555 | 83.95714 | 72.72138 | 357.97126   | 460.81534   | 356.68785   | 1 |
| 258 | N | 71.50828 | 84.26996 | 72.75851 | 536.55407   | -368.62270  | 332.76306   | 1 |
| 259 | H | 72.41216 | 83.94094 | 72.34521 | 524.38866   | 2297.69985  | 1367.20941  | 1 |
| 260 | C | 71.48211 | 85.23256 | 73.79790 | 46.50277    | -774.29190  | -147.97904  | 1 |
| 261 | H | 70.52707 | 85.03757 | 74.33702 | 1676.51875  | 1883.29066  | 1032.55549  | 1 |
| 262 | C | 72.82837 | 85.11938 | 74.67975 | -559.41456  | -34.19198   | -556.30433  | 1 |
| 263 | H | 73.71100 | 85.25207 | 74.00863 | -64.66664   | 395.18769   | 2695.05373  | 1 |
| 264 | H | 72.87492 | 85.95943 | 75.41378 | -2703.44278 | -60.40056   | 333.79418   | 1 |
| 265 | C | 72.90709 | 83.79187 | 75.38601 | -519.76435  | 377.31045   | 459.42366   | 1 |
| 266 | H | 72.75539 | 82.98617 | 74.63320 | -1746.74323 | 1667.50644  | -1261.73691 | 1 |
| 267 | C | 74.28112 | 83.61616 | 76.02009 | 570.95554   | 16.46261    | -545.27700  | 1 |
| 268 | H | 74.35546 | 82.64759 | 76.59239 | 2391.58273  | 28.05277    | -1305.07271 | 1 |
| 269 | H | 75.09529 | 83.61450 | 75.24995 | 175.75588   | 917.63458   | 2559.43867  | 1 |
| 270 | H | 74.51004 | 84.44395 | 76.73998 | -1063.97851 | -2155.34650 | 1283.00462  | 1 |
| 271 | C | 71.83774 | 83.66772 | 76.46309 | 193.76014   | 2.62946     | -765.53141  | 1 |

|     |   |          |          |          |             |             |             |   |
|-----|---|----------|----------|----------|-------------|-------------|-------------|---|
| 272 | H | 71.94236 | 82.71414 | 77.04292 | 507.39394   | -846.55087  | 2539.60089  | 1 |
| 273 | H | 71.89623 | 84.50950 | 77.20060 | 1337.57841  | 1818.19054  | 1526.01994  | 1 |
| 274 | H | 70.80582 | 83.67734 | 76.02720 | 1100.88635  | -1172.91350 | -2199.08909 | 1 |
| 275 | C | 71.49093 | 86.66643 | 73.05543 | -549.21115  | 475.64486   | -309.38218  | 1 |
| 276 | O | 72.38312 | 87.46463 | 73.16343 | 556.06106   | -390.37755  | -78.24250   | 1 |
| 277 | O | 70.34789 | 86.94607 | 72.27252 | -572.27940  | -310.19032  | -209.75862  | 1 |
| 278 | H | 69.88056 | 86.06195 | 72.35948 | -1380.08193 | 2212.14486  | 790.85944   | 1 |

Listing 30: C00030.xmolout

|    |   |          |          |          |             |             |             |        |          |
|----|---|----------|----------|----------|-------------|-------------|-------------|--------|----------|
| 1  |   | 276      |          |          |             |             |             |        |          |
| 2  |   | 150.0000 | 150.0000 | 150.0000 | 0.0000      | 0.0000      | 0.0000***** | 0.7397 | 2959     |
|    |   | 0.2500   | 300.00   | 0.00     | 0.00        | 0.00        | -1293.9175  | 0.0000 | 300.0000 |
| 3  | H | 78.62264 | 63.84704 | 87.94986 | -2043.14101 | -1757.64893 | 399.89339   |        | 1        |
| 4  | N | 78.80462 | 64.55328 | 87.23881 | 426.75047   | 490.45733   | -334.42467  |        | 1        |
| 5  | H | 77.97384 | 65.13605 | 87.32135 | 442.25559   | -1110.30854 | -2448.52907 |        | 1        |
| 6  | C | 80.02957 | 65.23756 | 87.40265 | 415.32972   | -666.39213  | 83.73172    |        | 1        |
| 7  | H | 80.65037 | 64.57071 | 88.03759 | 879.32219   | 2491.00447  | 667.35213   |        | 1        |
| 8  | C | 80.66873 | 65.48275 | 85.94383 | 31.35357    | 477.41777   | 628.23362   |        | 1        |
| 9  | H | 80.00100 | 66.13560 | 85.33121 | 1168.38489  | 2240.25337  | -1019.71136 |        | 1        |
| 10 | H | 81.64006 | 66.02772 | 86.02156 | -360.43770  | 2534.90498  | 931.67112   |        | 1        |
| 11 | C | 80.84798 | 64.14299 | 85.27530 | 463.18208   | 512.70242   | -382.34388  |        | 1        |
| 12 | H | 79.95403 | 63.51880 | 85.50195 | 1725.29117  | 1863.52247  | -987.07854  |        | 1        |
| 13 | C | 80.94098 | 64.31424 | 83.76495 | 710.42801   | -144.27427  | -313.15367  |        | 1        |
| 14 | H | 81.07976 | 63.33318 | 83.24118 | 364.20195   | -1033.13725 | 2494.72524  |        | 1        |
| 15 | H | 80.01350 | 64.78934 | 83.34534 | 2567.61904  | 335.80679   | 847.48802   |        | 1        |
| 16 | H | 81.80065 | 64.97304 | 83.47507 | -2587.99029 | 680.92867   | -512.16411  |        | 1        |
| 17 | C | 82.08888 | 63.43087 | 85.79501 | 268.17616   | 741.64379   | -40.42634   |        | 1        |
| 18 | H | 82.22175 | 62.42742 | 85.31394 | 1283.54314  | -1945.37420 | -1411.27812 |        | 1        |
| 19 | H | 83.01884 | 64.02211 | 85.59024 | -1258.57796 | 1317.15249  | -2026.02085 |        | 1        |
| 20 | H | 82.03890 | 63.26436 | 86.90190 | -2502.84526 | 909.80597   | 575.92391   |        | 1        |
| 21 | C | 79.69309 | 66.66772 | 88.11414 | 619.36578   | -458.64843  | -172.09273  |        | 1        |
| 22 | O | 80.20702 | 66.96994 | 89.19762 | -81.40433   | 433.87611   | 522.34594   |        | 1        |
| 23 | N | 78.87909 | 67.34351 | 87.35504 | 175.23996   | -622.20190  | 341.55523   |        | 1        |
| 24 | H | 78.57444 | 66.84374 | 86.52174 | -876.57256  | -303.22879  | -2561.90213 |        | 1        |
| 25 | C | 78.45684 | 68.70215 | 87.54243 | -571.88214  | -534.10783  | -106.15033  |        | 1        |
| 26 | H | 77.36795 | 68.60161 | 87.74491 | -2713.20841 | -16.25800   | -248.80809  |        | 1        |
| 27 | C | 79.22574 | 69.39868 | 88.76163 | 166.60354   | 288.16399   | -716.09568  |        | 1        |
| 28 | H | 80.32794 | 69.17174 | 88.65973 | -2097.85574 | 1636.78449  | -586.18044  |        | 1        |
| 29 | O | 78.86735 | 68.91134 | 90.05247 | -317.80580  | -363.38227  | 484.43082   |        | 1        |
| 30 | H | 79.52871 | 68.11441 | 90.11419 | 1863.74748  | -1451.84923 | 1357.29467  |        | 1        |
| 31 | C | 78.97679 | 70.92629 | 88.49403 | 503.80731   | 517.99032   | 318.51606   |        | 1        |
| 32 | H | 79.49466 | 71.56042 | 89.25029 | 640.61020   | -2157.10410 | -1536.29104 |        | 1        |
| 33 | H | 79.34559 | 71.23889 | 87.48909 | 1687.88455  | 465.60692   | 2087.56452  |        | 1        |
| 34 | H | 77.89149 | 71.17584 | 88.54238 | -1293.07895 | -1899.88581 | -1463.57452 |        | 1        |
| 35 | C | 78.61735 | 69.39211 | 86.09339 | -153.07550  | -733.68902  | 248.70981   |        | 1        |
| 36 | O | 77.54996 | 69.61358 | 85.50258 | 186.15459   | -480.78787  | -449.34387  |        | 1        |
| 37 | N | 79.84785 | 69.63009 | 85.68120 | -487.53139  | 543.18517   | 42.03850    |        | 1        |
| 38 | C | 80.12171 | 70.44205 | 84.51955 | -699.35871  | 69.34393    | 360.10701   |        | 1        |
| 39 | H | 79.44303 | 71.32288 | 84.58983 | 2.81126     | -221.99807  | -2715.58072 |        | 1        |
| 40 | C | 81.67854 | 70.72156 | 84.62562 | -507.46439  | -592.59194  | 122.07761   |        | 1        |
| 41 | H | 82.13626 | 70.92433 | 83.62872 | -1975.08116 | 525.87560   | -1801.71556 |        | 1        |
| 42 | H | 81.90337 | 71.59761 | 85.27464 | 1588.27743  | -1913.22100 | 1113.83566  |        | 1        |
| 43 | C | 82.18325 | 69.38811 | 85.26463 | -613.62442  | -457.55993  | -194.14490  |        | 1        |
| 44 | H | 82.22632 | 68.57688 | 84.50315 | 1707.54637  | -721.27992  | 1996.92523  |        | 1        |
| 45 | H | 83.20038 | 69.46216 | 85.71150 | 758.23357   | 2100.81767  | 1560.55011  |        | 1        |
| 46 | C | 81.04579 | 69.11512 | 86.33715 | -352.41524  | 704.96076   | 49.21465    |        | 1        |
| 47 | H | 80.86962 | 68.04469 | 86.58973 | 1714.76886  | -2070.42778 | 443.35792   |        | 1        |
| 48 | H | 81.16162 | 69.70412 | 87.27785 | 1224.15040  | 1801.50881  | 1636.97633  |        | 1        |
| 49 | C | 79.93027 | 69.59125 | 83.14938 | 566.85117   | 537.05831   | 117.62814   |        | 1        |
| 50 | O | 80.89033 | 69.44944 | 82.39681 | -550.26779  | -406.08867  | 4.21666     |        | 1        |
| 51 | N | 78.69246 | 69.17712 | 82.99052 | 566.34832   | -425.77725  | 180.18749   |        | 1        |

|     |   |          |          |          |             |             |             |   |
|-----|---|----------|----------|----------|-------------|-------------|-------------|---|
| 52  | H | 77.99311 | 69.33588 | 83.73924 | 644.44502   | 2646.80550  | -52.73430   | 1 |
| 53  | C | 78.38218 | 68.52665 | 81.75072 | 612.34801   | -281.48662  | 411.56221   | 1 |
| 54  | H | 78.99422 | 69.13007 | 81.04032 | 1667.23498  | -1490.75142 | 1556.16753  | 1 |
| 55  | C | 78.89653 | 67.01900 | 81.79693 | -714.45746  | -175.43074  | 286.98927   | 1 |
| 56  | H | 78.20548 | 66.37928 | 82.41403 | -787.09484  | 1763.03619  | -1922.46060 | 1 |
| 57  | O | 80.18786 | 66.79610 | 82.39308 | -429.46514  | 516.51932   | -128.40526  | 1 |
| 58  | H | 80.56168 | 67.72812 | 82.34858 | 1981.82785  | 436.16847   | -1818.18182 | 1 |
| 59  | C | 78.75512 | 66.57453 | 80.29905 | 630.79189   | -468.94448  | 76.03230    | 1 |
| 60  | H | 79.01239 | 65.49760 | 80.16887 | -1775.71861 | 2062.30353  | 131.89849   | 1 |
| 61  | H | 77.71427 | 66.71541 | 79.91790 | -1855.14608 | 88.94118    | 1993.53760  | 1 |
| 62  | H | 79.43482 | 67.15798 | 79.63484 | -1504.82350 | -780.94249  | -2132.90992 | 1 |
| 63  | C | 76.77177 | 68.61099 | 81.52598 | 288.57638   | 618.62814   | -397.00270  | 1 |
| 64  | O | 76.13418 | 67.63289 | 81.21143 | 321.70495   | -185.26452  | 574.37218   | 1 |
| 65  | N | 76.32884 | 69.88555 | 81.62111 | -447.05792  | -446.53431  | 367.76425   | 1 |
| 66  | H | 77.04956 | 70.50945 | 81.99042 | 350.31316   | 1975.63644  | -1843.31522 | 1 |
| 67  | C | 74.98348 | 69.99534 | 82.12054 | -511.23061  | 374.03917   | -471.51480  | 1 |
| 68  | H | 74.48960 | 69.03704 | 81.83378 | 2234.79579  | -898.70890  | -1273.45190 | 1 |
| 69  | C | 75.10437 | 70.17757 | 83.70317 | 529.53781   | -159.34528  | 563.72604   | 1 |
| 70  | H | 74.05419 | 70.31281 | 84.07836 | 654.59388   | 2347.94251  | 1217.51488  | 1 |
| 71  | H | 75.47416 | 69.21387 | 84.14688 | -1526.55661 | 2103.42026  | 817.87394   | 1 |
| 72  | O | 75.92405 | 71.26292 | 84.16615 | -554.84278  | 14.12789    | 399.58769   | 1 |
| 73  | H | 76.62395 | 70.73598 | 84.67744 | 1297.06236  | 2061.84854  | 1220.68812  | 1 |
| 74  | C | 74.22632 | 71.30189 | 81.55090 | -662.15484  | -412.13544  | 123.62687   | 1 |
| 75  | O | 73.08199 | 71.51039 | 81.88006 | -540.01537  | -317.05804  | 274.91456   | 1 |
| 76  | N | 74.96346 | 72.03886 | 80.69424 | -202.76299  | -690.00100  | -131.49145  | 1 |
| 77  | H | 75.90940 | 71.67891 | 80.56321 | -702.62132  | -2617.37191 | 281.70413   | 1 |
| 78  | C | 74.64662 | 73.46783 | 80.56891 | -491.73914  | 576.34187   | 222.73509   | 1 |
| 79  | H | 73.72195 | 73.59308 | 81.18206 | 1977.17978  | -1823.58850 | -434.68928  | 1 |
| 80  | C | 75.83600 | 74.27082 | 81.05348 | -649.50797  | -328.66843  | 306.11224   | 1 |
| 81  | H | 76.71324 | 73.98489 | 80.43084 | 2075.07803  | 1452.16490  | -1004.45904 | 1 |
| 82  | C | 75.60593 | 75.76274 | 80.88893 | -615.18735  | -489.99689  | -70.96352   | 1 |
| 83  | H | 76.50229 | 76.35991 | 81.21261 | -1226.32661 | -1724.38906 | -1716.47170 | 1 |
| 84  | H | 75.39132 | 76.03207 | 79.81802 | 2381.64273  | -969.84735  | 900.46860   | 1 |
| 85  | H | 74.73162 | 76.11638 | 81.50135 | 2122.74991  | 1702.23946  | -141.36228  | 1 |
| 86  | C | 76.17379 | 73.95807 | 82.49998 | -501.86074  | -479.61276  | -376.42482  | 1 |
| 87  | H | 77.12143 | 74.46527 | 82.83133 | 993.79261   | -2246.95401 | -1177.81305 | 1 |
| 88  | H | 75.35552 | 74.28960 | 83.19706 | 42.71279    | -626.15391  | -2651.37258 | 1 |
| 89  | H | 76.30845 | 72.85124 | 82.66011 | -2026.39012 | -1590.33709 | -887.82922  | 1 |
| 90  | C | 74.41708 | 73.76022 | 78.94923 | -672.89153  | 382.57394   | -156.34072  | 1 |
| 91  | O | 75.31791 | 73.67970 | 78.14932 | 410.04627   | 221.86223   | 500.35950   | 1 |
| 92  | N | 73.17728 | 74.19428 | 78.75464 | -378.11782  | -443.79414  | -441.10984  | 1 |
| 93  | H | 72.56484 | 74.20186 | 79.56872 | 2404.15973  | -568.14894  | 1149.30085  | 1 |
| 94  | C | 72.64035 | 74.11072 | 77.43388 | -544.54484  | 466.16019   | 331.29119   | 1 |
| 95  | H | 73.53311 | 73.94809 | 76.78635 | -1409.80988 | -170.17955  | 2325.32679  | 1 |
| 96  | C | 71.62090 | 72.89552 | 77.45396 | -184.48284  | 116.78282   | -758.89137  | 1 |
| 97  | H | 72.12345 | 71.97112 | 77.81993 | 1893.78641  | 1861.14652  | 611.04528   | 1 |
| 98  | H | 70.78931 | 73.09344 | 78.16716 | -2170.79665 | -974.19311  | 1327.50117  | 1 |
| 99  | C | 71.07883 | 72.70885 | 76.00368 | 389.51668   | 672.81878   | -138.49152  | 1 |
| 100 | H | 70.56554 | 73.64232 | 75.67418 | 510.64577   | 1933.03327  | 1851.02484  | 1 |
| 101 | H | 71.92184 | 72.59172 | 75.28745 | -2302.30869 | -1105.72939 | -948.89774  | 1 |
| 102 | C | 70.09661 | 71.48514 | 75.86141 | -559.93427  | -126.34590  | 542.30857   | 1 |
| 103 | O | 69.64394 | 71.21633 | 74.77864 | -670.36003  | -111.83166  | 76.36448    | 1 |
| 104 | N | 69.84958 | 70.82993 | 77.01601 | -216.06729  | -537.07037  | 446.51379   | 1 |
| 105 | H | 70.19438 | 71.01515 | 77.96505 | -1251.96487 | 1074.12894  | -2168.52500 | 1 |
| 106 | H | 69.22362 | 70.02100 | 77.09172 | -2451.83023 | -720.73851  | 944.84612   | 1 |
| 107 | C | 71.82209 | 75.49413 | 77.13567 | 546.24052   | -563.88337  | -85.11809   | 1 |
| 108 | O | 70.62297 | 75.46773 | 77.04734 | 71.70702    | -307.40463  | 606.69673   | 1 |
| 109 | N | 72.65999 | 76.53099 | 76.97020 | 479.90863   | -504.50129  | 222.86849   | 1 |
| 110 | C | 72.22630 | 77.87522 | 77.17436 | 75.51268    | -600.91904  | 506.73700   | 1 |
| 111 | H | 71.36439 | 77.84305 | 77.87918 | -2033.61562 | 1795.30103  | 254.89480   | 1 |
| 112 | C | 73.56060 | 78.53705 | 77.73485 | 523.79067   | 517.99274   | 284.45581   | 1 |
| 113 | H | 73.55186 | 79.64759 | 77.66891 | 1599.61665  | -1127.00911 | 1895.98173  | 1 |

|     |   |          |          |          |             |             |             |   |
|-----|---|----------|----------|----------|-------------|-------------|-------------|---|
| 114 | H | 73.72912 | 78.27668 | 78.80352 | -1881.83093 | 1275.82488  | -1501.55016 | 1 |
| 115 | C | 74.62706 | 77.86800 | 76.81453 | -600.05639  | -404.05026  | 316.64485   | 1 |
| 116 | H | 74.62214 | 78.32455 | 75.79844 | -2597.05260 | 496.36221   | 657.73249   | 1 |
| 117 | H | 75.66851 | 77.95716 | 77.19791 | -1666.24518 | 1294.38985  | -1723.90591 | 1 |
| 118 | C | 74.09767 | 76.37082 | 76.78471 | 493.57570   | -129.95376  | -602.56394  | 1 |
| 119 | H | 74.26348 | 75.82831 | 75.82422 | -1469.08415 | -637.84797  | 2204.22581  | 1 |
| 120 | H | 74.45333 | 75.73199 | 77.62957 | -1038.97840 | 1068.88701  | -2280.71789 | 1 |
| 121 | C | 71.85853 | 78.64885 | 75.77724 | 188.88100   | 241.05089   | -727.87821  | 1 |
| 122 | O | 71.45431 | 79.79531 | 75.83091 | 531.88613   | -49.19943   | 427.07960   | 1 |
| 123 | N | 72.19130 | 77.96064 | 74.67117 | 708.14833   | 26.93417    | -179.73509  | 1 |
| 124 | H | 72.45818 | 77.03006 | 74.99563 | -2232.69501 | -1179.09831 | 1023.94816  | 1 |
| 125 | C | 71.54208 | 78.16173 | 73.37103 | -738.32412  | 259.92548   | 104.42456   | 1 |
| 126 | H | 71.73162 | 77.20872 | 72.82225 | 2028.89123  | 1260.02983  | 1311.33324  | 1 |
| 127 | C | 70.06304 | 78.42310 | 73.58898 | -258.65678  | -345.52513  | 661.28459   | 1 |
| 128 | H | 69.97416 | 79.32121 | 74.24617 | -1826.06090 | -1801.46097 | -918.64554  | 1 |
| 129 | C | 69.35288 | 78.72161 | 72.28104 | -541.23400  | 531.92970   | -218.41428  | 1 |
| 130 | H | 68.26241 | 78.94731 | 72.43708 | 1311.73218  | -2219.18200 | 882.19023   | 1 |
| 131 | H | 69.80964 | 79.61058 | 71.76164 | -1048.71298 | 1223.58118  | -2196.97971 | 1 |
| 132 | H | 69.41706 | 77.85402 | 71.56803 | 419.06414   | 1903.92898  | 1903.44670  | 1 |
| 133 | C | 69.38317 | 77.26745 | 74.30029 | -423.86431  | 152.66566   | -648.55262  | 1 |
| 134 | H | 68.30704 | 77.49748 | 74.53239 | 105.68386   | -2342.50080 | 1387.51238  | 1 |
| 135 | H | 69.39626 | 76.33176 | 73.67648 | -1695.63603 | -1484.73621 | -1531.02793 | 1 |
| 136 | H | 69.89077 | 77.02094 | 75.27554 | -1853.57121 | -487.39031  | 1936.59343  | 1 |
| 137 | C | 72.24301 | 79.45225 | 72.61461 | 539.71428   | -510.58232  | 267.58633   | 1 |
| 138 | O | 72.06828 | 79.61634 | 71.42526 | -15.93758   | -278.34085  | -624.49402  | 1 |
| 139 | N | 72.88968 | 80.22294 | 73.46319 | -676.81886  | 12.05292    | 276.17960   | 1 |
| 140 | H | 72.88218 | 79.95713 | 74.45497 | -1694.44250 | -373.84189  | -2100.66098 | 1 |
| 141 | C | 73.58684 | 81.35927 | 72.96660 | 412.33078   | -664.70360  | 108.35451   | 1 |
| 142 | H | 73.11367 | 81.56390 | 71.97821 | 1765.77476  | 1294.44366  | 1621.76594  | 1 |
| 143 | C | 73.44962 | 82.49080 | 74.06200 | -179.66635  | -721.95667  | -264.73915  | 1 |
| 144 | H | 72.38046 | 82.72399 | 74.26645 | -607.34922  | 2587.87032  | -598.10018  | 1 |
| 145 | H | 73.87165 | 82.14407 | 75.03239 | -359.69332  | -1479.13954 | -2259.74260 | 1 |
| 146 | C | 74.22104 | 83.74861 | 73.54238 | -240.01076  | 616.02425   | 431.85322   | 1 |
| 147 | H | 75.28236 | 83.47775 | 73.33213 | -1359.17131 | 782.54425   | 2227.99181  | 1 |
| 148 | H | 73.79476 | 84.11025 | 72.58069 | -820.36667  | 85.81767    | -2596.78715 | 1 |
| 149 | C | 74.15143 | 84.88137 | 74.64512 | -513.07015  | 236.18570   | -551.87280  | 1 |
| 150 | H | 73.09845 | 85.18957 | 74.84192 | 1816.11944  | -1183.11722 | -1650.94321 | 1 |
| 151 | H | 74.54907 | 84.51584 | 75.61991 | -1800.04429 | -1361.53473 | 1526.34643  | 1 |
| 152 | C | 74.99415 | 86.06189 | 74.11018 | 726.08972   | -253.19732  | -179.64713  | 1 |
| 153 | H | 76.07189 | 85.83572 | 73.98729 | 1224.27271  | -456.51798  | -2390.90304 | 1 |
| 154 | H | 74.59916 | 86.52862 | 73.18574 | 1206.40339  | -1150.93514 | -2154.90344 | 1 |
| 155 | N | 74.95773 | 87.20952 | 75.17453 | 329.70796   | -633.68968  | -155.67358  | 1 |
| 156 | H | 75.52016 | 88.07438 | 74.92746 | 1348.31305  | 1938.76845  | 1359.00643  | 1 |
| 157 | H | 74.01162 | 87.63467 | 75.40057 | 2096.92035  | 1446.54551  | -966.48890  | 1 |
| 158 | H | 75.33640 | 86.98565 | 76.14060 | -1197.07217 | -2303.53719 | 827.28733   | 1 |
| 159 | C | 75.18740 | 80.98189 | 72.84770 | -378.01186  | -556.17301  | -413.96481  | 1 |
| 160 | O | 75.96341 | 81.32740 | 73.70904 | -409.44433  | -307.55053  | -453.30833  | 1 |
| 161 | N | 75.43349 | 80.30229 | 71.73770 | -429.02477  | 524.70884   | 274.08502   | 1 |
| 162 | H | 74.65637 | 80.04557 | 71.13065 | 1706.34263  | -1425.96036 | 1574.38926  | 1 |
| 163 | C | 76.81694 | 80.11560 | 71.39271 | -45.25864   | -626.22952  | 478.93267   | 1 |
| 164 | H | 77.28013 | 81.11708 | 71.53727 | 1988.63164  | 570.90773   | 1772.87287  | 1 |
| 165 | C | 77.37727 | 79.06880 | 72.43406 | 551.77128   | -20.49526   | -564.54996  | 1 |
| 166 | H | 77.23718 | 79.44395 | 73.47608 | 1434.61535  | -1753.10253 | 1513.99471  | 1 |
| 167 | H | 76.81292 | 78.11153 | 72.37294 | -714.67738  | 1819.09770  | 1898.36494  | 1 |
| 168 | C | 78.89063 | 78.86241 | 72.09054 | 446.99263   | -555.77305  | 338.97221   | 1 |
| 169 | H | 79.00770 | 78.55265 | 71.02785 | 1953.68466  | 1892.25957  | -161.67766  | 1 |
| 170 | H | 79.45924 | 79.81345 | 72.19592 | -403.03785  | 2688.07032  | -188.43591  | 1 |
| 171 | C | 79.45726 | 77.75236 | 73.06303 | 567.86262   | 335.74681   | 434.04421   | 1 |
| 172 | H | 79.38995 | 78.08037 | 74.12599 | -1080.02275 | 1568.26081  | -1948.78900 | 1 |
| 173 | H | 78.85489 | 76.81708 | 72.99488 | -919.54108  | 2111.34692  | 1456.13463  | 1 |
| 174 | C | 80.92539 | 77.49328 | 72.65158 | 195.81897   | 173.33862   | -745.11536  | 1 |
| 175 | H | 81.04974 | 77.04595 | 71.64546 | 1405.67949  | -2301.21089 | -390.08113  | 1 |

|     |   |          |          |          |             |             |             |   |
|-----|---|----------|----------|----------|-------------|-------------|-------------|---|
| 176 | H | 81.59756 | 78.36766 | 72.76105 | -940.37328  | -1118.32446 | 2299.72133  | 1 |
| 177 | N | 81.49810 | 76.42312 | 73.63979 | 319.26422   | 656.36007   | -42.02424   | 1 |
| 178 | H | 82.50137 | 76.12604 | 73.46564 | 1961.03633  | 619.91968   | 1787.09422  | 1 |
| 179 | H | 81.53425 | 76.68847 | 74.66705 | 854.14343   | -2156.80752 | 1429.08711  | 1 |
| 180 | H | 81.00420 | 75.48408 | 73.67387 | 1237.02905  | -1378.50857 | -1998.28500 | 1 |
| 181 | C | 76.94805 | 79.50240 | 69.88169 | 532.53319   | -268.57236  | 517.55729   | 1 |
| 182 | O | 76.52801 | 78.37453 | 69.59443 | 266.16714   | -290.73804  | -558.88002  | 1 |
| 183 | N | 77.58638 | 80.37426 | 69.14825 | -226.25352  | 640.49678   | -270.32839  | 1 |
| 184 | H | 77.81367 | 81.22067 | 69.67154 | 2007.69063  | -1035.27229 | 1523.50231  | 1 |
| 185 | C | 78.13631 | 80.21395 | 67.85398 | -540.76542  | -573.33303  | 49.50000    | 1 |
| 186 | H | 78.45625 | 81.25217 | 67.61094 | -2374.20950 | -1036.76023 | 843.75774   | 1 |
| 187 | C | 79.38217 | 79.20376 | 67.90609 | -77.09082   | 666.87422   | -415.84136  | 1 |
| 188 | H | 79.01632 | 78.17240 | 68.16186 | -985.81834  | 617.19825   | 2463.91927  | 1 |
| 189 | O | 80.42284 | 79.51119 | 68.84334 | 293.29899   | -391.65602  | -477.80926  | 1 |
| 190 | H | 80.46240 | 78.68215 | 69.36395 | 2528.72714  | -681.76262  | -751.27122  | 1 |
| 191 | C | 79.77059 | 79.26053 | 66.38201 | 252.47363   | -605.14473  | 440.05134   | 1 |
| 192 | H | 80.56937 | 78.52620 | 66.12844 | -2052.65063 | 1456.49051  | -1043.51830 | 1 |
| 193 | H | 78.88689 | 79.04123 | 65.72868 | -2152.98800 | -1661.97574 | -161.70652  | 1 |
| 194 | H | 80.14952 | 80.26888 | 66.09468 | -473.12726  | -1584.27339 | 2165.61725  | 1 |
| 195 | C | 77.09693 | 79.59328 | 66.74512 | 360.36307   | 488.46713   | 505.10056   | 1 |
| 196 | O | 76.90410 | 80.22673 | 65.73683 | -200.08817  | -528.03552  | -385.82850  | 1 |
| 197 | N | 76.68152 | 78.37012 | 67.05419 | -597.54095  | -226.44775  | 355.20479   | 1 |
| 198 | H | 76.89884 | 77.93503 | 67.98466 | 2179.23655  | -1300.70981 | -991.33835  | 1 |
| 199 | C | 75.88658 | 77.70287 | 66.08434 | -687.68921  | 297.39807   | -249.45179  | 1 |
| 200 | H | 75.98716 | 78.29845 | 65.14553 | -349.16256  | -2467.37713 | -1101.72831 | 1 |
| 201 | C | 76.41979 | 76.18596 | 65.96923 | 672.47345   | 361.54328   | -201.62880  | 1 |
| 202 | H | 76.51158 | 75.72059 | 66.97644 | 1541.41502  | 582.18425   | 2169.97026  | 1 |
| 203 | H | 75.69205 | 75.57645 | 65.38701 | -2534.67717 | 60.25153    | 997.72295   | 1 |
| 204 | C | 77.77610 | 76.23874 | 65.25936 | 574.26774   | -389.43119  | -377.02542  | 1 |
| 205 | C | 77.77931 | 76.42470 | 63.84343 | 688.82679   | -287.33580  | -257.96133  | 1 |
| 206 | H | 76.85815 | 76.49058 | 63.26831 | 331.14182   | 1470.38163  | 2269.80013  | 1 |
| 207 | C | 78.99688 | 76.15716 | 65.99616 | -383.52382  | -675.04808  | 144.24917   | 1 |
| 208 | H | 78.98489 | 76.01951 | 67.09201 | 4.09847     | 1517.59662  | 2262.86397  | 1 |
| 209 | C | 79.03251 | 76.53383 | 63.20394 | -134.76730  | 428.45285   | -649.50303  | 1 |
| 210 | H | 79.04764 | 76.68200 | 62.10999 | -903.23433  | 1600.49020  | 2011.53387  | 1 |
| 211 | C | 80.20728 | 76.26707 | 65.30835 | -335.53281  | -615.00040  | -364.39058  | 1 |
| 212 | H | 81.14505 | 76.20434 | 65.88788 | 1596.45398  | -1369.33862 | 1732.02659  | 1 |
| 213 | C | 80.27547 | 76.46510 | 63.89801 | 585.48547   | -340.24194  | -406.23938  | 1 |
| 214 | O | 81.49889 | 76.59383 | 63.19097 | -419.15649  | -173.04408  | -511.94141  | 1 |
| 215 | H | 82.13495 | 76.49018 | 63.93773 | -1071.84350 | 1559.71507  | -1960.13012 | 1 |
| 216 | C | 74.35064 | 77.58737 | 66.59472 | 291.41878   | -183.13091  | 710.72246   | 1 |
| 217 | O | 73.48794 | 77.33546 | 65.76047 | 379.87695   | 523.47396   | -222.23622  | 1 |
| 218 | N | 74.25503 | 77.70669 | 67.89652 | 564.30591   | 373.09380   | 277.24371   | 1 |
| 219 | H | 75.11020 | 77.91060 | 68.44270 | -120.59931  | -2436.07824 | -1214.35098 | 1 |
| 220 | C | 73.00431 | 77.89865 | 68.55313 | 404.07514   | -299.37480  | 608.84009   | 1 |
| 221 | H | 73.31411 | 78.21495 | 69.57684 | -1071.07882 | -841.69025  | 2359.66467  | 1 |
| 222 | C | 72.20185 | 79.02501 | 67.77044 | -683.12807  | 68.71770    | -390.13096  | 1 |
| 223 | H | 72.82344 | 79.94092 | 67.65308 | 2068.88918  | 1596.58590  | 770.89603   | 1 |
| 224 | H | 71.93975 | 78.70323 | 66.73593 | 1379.86429  | 2342.49779  | -179.85638  | 1 |
| 225 | C | 70.93021 | 79.29974 | 68.62678 | -176.39967  | 537.49466   | 550.97268   | 1 |
| 226 | H | 70.23152 | 78.43286 | 68.59628 | -396.28051  | 1942.22168  | 1869.33314  | 1 |
| 227 | H | 71.22004 | 79.42640 | 69.71527 | -94.44700   | 586.00678   | -2659.20016 | 1 |
| 228 | C | 70.24205 | 80.63038 | 68.06885 | -291.69381  | -718.18079  | -150.72929  | 1 |
| 229 | H | 70.83714 | 81.55997 | 68.25888 | -2303.38776 | 1089.76242  | 964.62032   | 1 |
| 230 | H | 69.91804 | 80.61818 | 66.99900 | 884.16729   | 2568.80533  | -207.74283  | 1 |
| 231 | N | 69.11203 | 80.65836 | 68.89907 | -594.49522  | -252.81478  | 342.29276   | 1 |
| 232 | H | 69.20294 | 80.20741 | 69.79680 | -1735.17426 | 2084.05705  | -263.71605  | 1 |
| 233 | C | 68.00995 | 81.23571 | 68.62615 | 595.23177   | -271.52487  | 442.22352   | 1 |
| 234 | N | 67.89163 | 81.88476 | 67.39324 | 585.53813   | -424.79750  | -105.81303  | 1 |
| 235 | H | 68.58682 | 82.00861 | 66.65896 | 959.88797   | 1327.56823  | -2177.11905 | 1 |
| 236 | H | 67.07084 | 82.40461 | 67.08214 | 1578.48647  | 16.27378    | -2220.76233 | 1 |
| 237 | N | 67.10438 | 81.09048 | 69.68561 | -452.17763  | -390.33541  | -421.51853  | 1 |

|     |   |          |          |          |             |             |             |   |
|-----|---|----------|----------|----------|-------------|-------------|-------------|---|
| 238 | H | 67.20138 | 80.63032 | 70.58956 | 470.26107   | 1974.25629  | -1817.92087 | 1 |
| 239 | H | 66.16823 | 81.49687 | 69.67904 | 1856.67307  | -1573.97321 | -1224.35416 | 1 |
| 240 | C | 72.10246 | 76.53454 | 68.59867 | -531.47271  | -581.45780  | -55.06206   | 1 |
| 241 | O | 71.77185 | 76.13230 | 69.67740 | -243.00837  | 192.73507   | 609.52485   | 1 |
| 242 | N | 71.75579 | 76.09722 | 67.38064 | 343.49288   | -644.25607  | 38.09164    | 1 |
| 243 | H | 72.18230 | 76.60578 | 66.55445 | -1691.16043 | -1535.97525 | -1484.73099 | 1 |
| 244 | C | 71.44638 | 74.66771 | 67.16768 | 542.66492   | 350.14337   | 454.42563   | 1 |
| 245 | H | 71.59403 | 74.56972 | 66.06668 | 1209.57979  | -2396.95920 | 463.86744   | 1 |
| 246 | C | 72.39672 | 73.80830 | 67.97460 | -737.14309  | 145.93010   | 242.71942   | 1 |
| 247 | H | 72.21399 | 74.02629 | 69.05406 | -1050.18303 | 159.36419   | -2509.06125 | 1 |
| 248 | C | 72.12870 | 72.33155 | 67.74251 | -706.77696  | -252.88343  | -245.16230  | 1 |
| 249 | H | 72.79917 | 71.68202 | 68.36897 | -1624.64039 | -1665.49085 | 1417.86935  | 1 |
| 250 | H | 71.06520 | 72.06790 | 68.00411 | 2566.10521  | 598.51109   | 693.22305   | 1 |
| 251 | H | 72.29325 | 72.04251 | 66.66792 | -1972.69758 | 107.10018   | -1876.34312 | 1 |
| 252 | C | 73.84897 | 74.12896 | 67.67040 | 412.85148   | 672.58832   | -27.69222   | 1 |
| 253 | H | 74.55284 | 73.52570 | 68.30590 | 1447.02277  | 1762.76533  | -1490.78944 | 1 |
| 254 | H | 74.10305 | 73.91768 | 66.59573 | 1320.77379  | -145.20455  | 2378.68491  | 1 |
| 255 | H | 74.07722 | 75.21497 | 67.85534 | -1512.10848 | 1470.52031  | 1724.75147  | 1 |
| 256 | C | 69.88182 | 74.44300 | 67.61869 | -607.11113  | 499.56689   | 73.73769    | 1 |
| 257 | O | 69.60770 | 73.85443 | 68.66700 | 357.97126   | 460.81534   | 356.68785   | 1 |
| 258 | N | 69.02184 | 74.87180 | 66.68276 | 536.55407   | -368.62270  | 332.76306   | 1 |
| 259 | H | 69.65739 | 75.29325 | 65.98820 | 524.38866   | 2297.69985  | 1367.20941  | 1 |
| 260 | C | 67.91139 | 75.70047 | 67.10916 | 46.50277    | -774.29190  | -147.97904  | 1 |
| 261 | H | 68.36755 | 76.39848 | 67.84465 | 1676.51875  | 1883.29066  | 1032.55549  | 1 |
| 262 | C | 67.30955 | 76.42724 | 65.80451 | -559.41456  | -34.19198   | -556.30433  | 1 |
| 263 | H | 67.14403 | 75.64612 | 65.02251 | -64.66664   | 395.18769   | 2695.05373  | 1 |
| 264 | H | 66.29637 | 76.84208 | 66.03994 | -2703.44278 | -60.40056   | 333.79418   | 1 |
| 265 | C | 68.19061 | 77.52573 | 65.25854 | -519.76435  | 377.31045   | 459.42366   | 1 |
| 266 | H | 69.24521 | 77.17318 | 65.23172 | -1746.74323 | 1667.50644  | -1261.73691 | 1 |
| 267 | C | 67.75854 | 77.86639 | 63.83781 | 570.95554   | 16.46261    | -545.27700  | 1 |
| 268 | H | 68.38097 | 78.68875 | 63.39885 | 2391.58273  | 28.05277    | -1305.07271 | 1 |
| 269 | H | 67.84559 | 76.98228 | 63.15408 | 175.75588   | 917.63458   | 2559.43867  | 1 |
| 270 | H | 66.69014 | 78.20557 | 63.80337 | -1063.97851 | -2155.34650 | 1283.00462  | 1 |
| 271 | C | 68.11369 | 78.77723 | 66.12127 | 193.76014   | 2.62946     | -765.53141  | 1 |
| 272 | H | 68.68620 | 79.62601 | 65.66582 | 507.39394   | -846.55087  | 2539.60089  | 1 |
| 273 | H | 67.05690 | 79.12920 | 66.24937 | 1337.57841  | 1818.19054  | 1526.01994  | 1 |
| 274 | H | 68.52933 | 78.60803 | 67.14816 | 1100.88635  | -1172.91350 | -2199.08909 | 1 |
| 275 | C | 66.70924 | 74.86141 | 67.70429 | -549.21115  | 475.64486   | -309.38218  | 1 |
| 276 | O | 65.58573 | 75.21232 | 67.44433 | 556.06106   | -390.37755  | -78.24250   | 1 |
| 277 | O | 66.97158 | 73.81782 | 68.56465 | -572.27940  | -310.19032  | -209.75862  | 1 |
| 278 | H | 68.03754 | 73.85633 | 68.56446 | -1380.08193 | 2212.14486  | 790.85944   | 1 |

Listing 31: C00031.xmolout

|    |   |          |          |          |             |             |             |        |          |
|----|---|----------|----------|----------|-------------|-------------|-------------|--------|----------|
| 1  |   | 276      |          |          |             |             |             |        |          |
| 2  |   | 150.0000 | 150.0000 | 150.0000 | 0.0000      | 0.0000      | 0.0000***** | 2.7750 | 11100    |
|    |   | 0.2500   | 300.00   | 0.00     | 0.00        | 0.00        | -1293.9028  | 0.0000 | 300.0000 |
| 3  | H | 88.06052 | 71.69157 | 76.34736 | -2043.14101 | -1757.64893 | 399.89339   |        | 1        |
| 4  | N | 88.33511 | 71.92573 | 75.39598 | 426.75047   | 490.45733   | -334.42467  |        | 1        |
| 5  | H | 87.45597 | 72.21694 | 74.97664 | 442.25559   | -1110.30854 | -2448.52907 |        | 1        |
| 6  | C | 89.41160 | 72.82548 | 75.27339 | 415.32972   | -666.39213  | 83.73172    |        | 1        |
| 7  | H | 90.15425 | 72.45848 | 76.01249 | 879.32219   | 2491.00447  | 667.35213   |        | 1        |
| 8  | C | 89.96395 | 72.77494 | 73.76276 | 31.35357    | 477.41777   | 628.23362   |        | 1        |
| 9  | H | 89.22069 | 73.24324 | 73.07432 | 1168.38489  | 2240.25337  | -1019.71136 |        | 1        |
| 10 | H | 90.89088 | 73.39092 | 73.66708 | -360.43770  | 2534.90498  | 931.67112   |        | 1        |
| 11 | C | 90.21046 | 71.34184 | 73.35902 | 463.18208   | 512.70242   | -382.34388  |        | 1        |
| 12 | H | 89.34149 | 70.73231 | 73.69577 | 1725.29117  | 1863.52247  | -987.07854  |        | 1        |
| 13 | C | 90.31690 | 71.23003 | 71.84383 | 710.42801   | -144.27427  | -313.15367  |        | 1        |
| 14 | H | 90.47483 | 70.16974 | 71.51732 | 364.20195   | -1033.13725 | 2494.72524  |        | 1        |
| 15 | H | 89.38932 | 71.60007 | 71.33498 | 2567.61904  | 335.80679   | 847.48802   |        | 1        |
| 16 | H | 91.17526 | 71.83076 | 71.44627 | -2587.99029 | 680.92867   | -512.16411  |        | 1        |
| 17 | C | 91.47115 | 70.79267 | 74.01116 | 268.17616   | 741.64379   | -40.42634   |        | 1        |



|    |   |          |          |          |             |             |             |   |
|----|---|----------|----------|----------|-------------|-------------|-------------|---|
| 18 | H | 91.65780 | 69.72728 | 73.71734 | 1283.54314  | -1945.37420 | -1411.27812 | 1 |
| 19 | H | 92.37777 | 71.38211 | 73.71661 | -1258.57796 | 1317.15249  | -2026.02085 | 1 |
| 20 | H | 91.40434 | 70.82210 | 75.12941 | -2502.84526 | 909.80597   | 575.92391   | 1 |
| 21 | C | 88.95983 | 74.35894 | 75.56220 | 619.36578   | -458.64843  | -172.09273  | 1 |
| 22 | O | 89.76845 | 75.24612 | 75.39406 | -81.40433   | 433.87611   | 522.34594   | 1 |
| 23 | N | 87.67999 | 74.46231 | 75.91861 | 175.23996   | -622.20190  | 341.55523   | 1 |
| 24 | H | 87.16548 | 73.60084 | 76.08873 | -876.57256  | -303.22879  | -2561.90213 | 1 |
| 25 | C | 87.05139 | 75.71084 | 76.17669 | -571.88214  | -534.10783  | -106.15033  | 1 |
| 26 | H | 86.02975 | 75.40539 | 76.49609 | -2713.20841 | -16.25800   | -248.80809  | 1 |
| 27 | C | 87.89205 | 76.35109 | 77.38856 | 166.60354   | 288.16399   | -716.09568  | 1 |
| 28 | H | 88.89672 | 76.64438 | 76.97394 | -2097.85574 | 1636.78449  | -586.18044  | 1 |
| 29 | O | 88.14692 | 75.45504 | 78.48662 | -317.80580  | -363.38227  | 484.43082   | 1 |
| 30 | H | 89.11399 | 75.33551 | 78.39868 | 1863.74748  | -1451.84923 | 1357.29467  | 1 |
| 31 | C | 87.10553 | 77.64602 | 77.80322 | 503.80731   | 517.99032   | 318.51606   | 1 |
| 32 | H | 87.62785 | 78.18529 | 78.62824 | 640.61020   | -2157.10410 | -1536.29104 | 1 |
| 33 | H | 86.99359 | 78.37512 | 76.95030 | 1687.88455  | 465.60692   | 2087.56452  | 1 |
| 34 | H | 86.08207 | 77.39970 | 78.17107 | -1293.07895 | -1899.88581 | -1463.57452 | 1 |
| 35 | C | 87.02529 | 76.64479 | 74.85112 | -153.07550  | -733.68902  | 248.70981   | 1 |
| 36 | O | 87.10163 | 77.83734 | 75.05026 | 186.15459   | -480.78787  | -449.34387  | 1 |
| 37 | N | 86.81760 | 76.03712 | 73.67007 | -487.53139  | 543.18517   | 42.03850    | 1 |
| 38 | C | 86.83510 | 76.82762 | 72.48123 | -699.35871  | 69.34393    | 360.10701   | 1 |
| 39 | H | 87.49910 | 77.69712 | 72.69546 | 2.81126     | -221.99807  | -2715.58072 | 1 |
| 40 | C | 87.37092 | 75.78139 | 71.41572 | -507.46439  | -592.59194  | 122.07761   | 1 |
| 41 | H | 87.12981 | 76.07086 | 70.36842 | -1975.08116 | 525.87560   | -1801.71556 | 1 |
| 42 | H | 88.47792 | 75.68080 | 71.47301 | 1588.27743  | -1913.22100 | 1113.83566  | 1 |
| 43 | C | 86.66813 | 74.46302 | 71.86828 | -613.62442  | -457.55993  | -194.14490  | 1 |
| 44 | H | 85.60983 | 74.43107 | 71.52554 | 1707.54637  | -721.27992  | 1996.92523  | 1 |
| 45 | H | 87.15262 | 73.54065 | 71.47570 | 758.23357   | 2100.81767  | 1560.55011  | 1 |
| 46 | C | 86.77649 | 74.59787 | 73.44788 | -352.41524  | 704.96076   | 49.21465    | 1 |
| 47 | H | 85.92357 | 74.17494 | 74.02964 | 1714.76886  | -2070.42778 | 443.35792   | 1 |
| 48 | H | 87.73149 | 74.21311 | 73.87033 | 1224.15040  | 1801.50881  | 1636.97633  | 1 |
| 49 | C | 85.31195 | 77.31448 | 72.07237 | 566.85117   | 537.05831   | 117.62814   | 1 |
| 50 | O | 85.17231 | 78.34888 | 71.46828 | -550.26779  | -406.08867  | 4.21666     | 1 |
| 51 | N | 84.40750 | 76.41926 | 72.43061 | 566.34832   | -425.77725  | 180.18749   | 1 |
| 52 | H | 84.73106 | 75.61354 | 72.96339 | 644.44502   | 2646.80550  | -52.73430   | 1 |
| 53 | C | 83.04081 | 76.52617 | 72.06902 | 612.34801   | -281.48662  | 411.56221   | 1 |
| 54 | H | 82.82435 | 77.60364 | 71.88760 | 1667.23498  | -1490.75142 | 1556.16753  | 1 |
| 55 | C | 82.82148 | 75.62397 | 70.75418 | -714.45746  | -175.43074  | 286.98927   | 1 |
| 56 | H | 83.17330 | 74.57941 | 70.97630 | -787.09484  | 1763.03619  | -1922.46060 | 1 |
| 57 | O | 83.53324 | 76.04377 | 69.58155 | -429.46514  | 516.51932   | -128.40526  | 1 |
| 58 | H | 84.11214 | 75.26990 | 69.42261 | 1981.82785  | 436.16847   | -1818.18182 | 1 |
| 59 | C | 81.25532 | 75.61632 | 70.61244 | 630.79189   | -468.94448  | 76.03230    | 1 |
| 60 | H | 80.93628 | 75.07522 | 69.68839 | -1775.71861 | 2062.30353  | 131.89849   | 1 |
| 61 | H | 80.75910 | 75.11278 | 71.47946 | -1855.14608 | 88.94118    | 1993.53760  | 1 |
| 62 | H | 80.84156 | 76.64922 | 70.54399 | -1504.82350 | -780.94249  | -2132.90992 | 1 |
| 63 | C | 82.25235 | 75.80580 | 73.29541 | 288.57638   | 618.62814   | -397.00270  | 1 |
| 64 | O | 82.70638 | 74.81025 | 73.85132 | 321.70495   | -185.26452  | 574.37218   | 1 |
| 65 | N | 81.10045 | 76.41069 | 73.51272 | -447.05792  | -446.53431  | 367.76425   | 1 |
| 66 | H | 80.81569 | 77.19197 | 72.92426 | 350.31316   | 1975.63644  | -1843.31522 | 1 |
| 67 | C | 80.18702 | 75.76263 | 74.40205 | -511.23061  | 374.03917   | -471.51480  | 1 |
| 68 | H | 80.86412 | 75.37087 | 75.19650 | 2234.79579  | -898.70890  | -1273.45190 | 1 |
| 69 | C | 79.09053 | 76.82596 | 74.85930 | 529.53781   | -159.34528  | 563.72604   | 1 |
| 70 | H | 78.52512 | 76.34829 | 75.70445 | 654.59388   | 2347.94251  | 1217.51488  | 1 |
| 71 | H | 79.59482 | 77.72663 | 75.29782 | -1526.55661 | 2103.42026  | 817.87394   | 1 |
| 72 | O | 78.17116 | 77.23475 | 73.83276 | -554.84278  | 14.12789    | 399.58769   | 1 |
| 73 | H | 77.91360 | 76.31509 | 73.46924 | 1297.06236  | 2061.84854  | 1220.68812  | 1 |
| 74 | C | 79.42917 | 74.56691 | 73.58876 | -662.15484  | -412.13544  | 123.62687   | 1 |
| 75 | O | 78.25905 | 74.68062 | 73.25247 | -540.01537  | -317.05804  | 274.91456   | 1 |
| 76 | N | 80.28089 | 73.58655 | 73.42882 | -202.76299  | -690.00100  | -131.49145  | 1 |
| 77 | H | 81.26373 | 73.71603 | 73.75402 | -702.62132  | -2617.37191 | 281.70413   | 1 |
| 78 | C | 79.91112 | 72.38826 | 72.76176 | -491.73914  | 576.34187   | 222.73509   | 1 |
| 79 | H | 80.78451 | 71.73580 | 72.98433 | 1977.17978  | -1823.58850 | -434.68928  | 1 |

|     |   |          |          |          |             |             |             |   |
|-----|---|----------|----------|----------|-------------|-------------|-------------|---|
| 80  | C | 78.55412 | 71.83578 | 73.37461 | -649.50797  | -328.66843  | 306.11224   | 1 |
| 81  | H | 77.71593 | 72.54124 | 73.17132 | 2075.07803  | 1452.16490  | -1004.45904 | 1 |
| 82  | C | 78.27350 | 70.41587 | 72.77301 | -615.18735  | -489.99689  | -70.96352   | 1 |
| 83  | H | 77.31847 | 69.98886 | 73.15854 | -1226.32661 | -1724.38906 | -1716.47170 | 1 |
| 84  | H | 78.20083 | 70.44157 | 71.66037 | 2381.64273  | -969.84735  | 900.46860   | 1 |
| 85  | H | 79.08621 | 69.69756 | 73.03184 | 2122.74991  | 1702.23946  | -141.36228  | 1 |
| 86  | C | 78.73516 | 71.65557 | 74.92114 | -501.86074  | -479.61276  | -376.42482  | 1 |
| 87  | H | 77.81656 | 71.24129 | 75.39850 | 993.79261   | -2246.95401 | -1177.81305 | 1 |
| 88  | H | 79.57661 | 70.96306 | 75.15729 | 42.71279    | -626.15391  | -2651.37258 | 1 |
| 89  | H | 78.95892 | 72.62984 | 75.41593 | -2026.39012 | -1590.33709 | -887.82922  | 1 |
| 90  | C | 79.84270 | 72.72622 | 71.15564 | -672.89153  | 382.57394   | -156.34072  | 1 |
| 91  | O | 80.86772 | 73.01469 | 70.57703 | 410.04627   | 221.86223   | 500.35950   | 1 |
| 92  | N | 78.62899 | 72.60627 | 70.64719 | -378.11782  | -443.79414  | -441.10984  | 1 |
| 93  | H | 77.84060 | 72.39821 | 71.25470 | 2404.15973  | -568.14894  | 1149.30085  | 1 |
| 94  | C | 78.46643 | 72.80153 | 69.23363 | -544.54484  | 466.16019   | 331.29119   | 1 |
| 95  | H | 79.27519 | 73.53957 | 69.02284 | -1409.80988 | -170.17955  | 2325.32679  | 1 |
| 96  | C | 78.81946 | 71.41144 | 68.54976 | -184.48284  | 116.78282   | -758.89137  | 1 |
| 97  | H | 79.86284 | 71.10761 | 68.79332 | 1893.78641  | 1861.14652  | 611.04528   | 1 |
| 98  | H | 78.18397 | 70.59714 | 68.96506 | -2170.79665 | -974.19311  | 1327.50117  | 1 |
| 99  | C | 78.63408 | 71.57250 | 67.00766 | 389.51668   | 672.81878   | -138.49152  | 1 |
| 100 | H | 77.73632 | 72.19248 | 66.78705 | 510.64577   | 1933.03327  | 1851.02484  | 1 |
| 101 | H | 79.47278 | 72.16620 | 66.58190 | -2302.30869 | -1105.72939 | -948.89774  | 1 |
| 102 | C | 78.50846 | 70.19888 | 66.24501 | -559.93427  | -126.34590  | 542.30857   | 1 |
| 103 | O | 78.25138 | 70.19868 | 65.06965 | -670.36003  | -111.83166  | 76.36448    | 1 |
| 104 | N | 78.70070 | 69.11094 | 67.02235 | -216.06729  | -537.07037  | 446.51379   | 1 |
| 105 | H | 78.98838 | 69.05457 | 68.00613 | -1251.96487 | 1074.12894  | -2168.52500 | 1 |
| 106 | H | 78.70643 | 68.14885 | 66.66587 | -2451.83023 | -720.73851  | 944.84612   | 1 |
| 107 | C | 76.97698 | 73.41291 | 69.04389 | 546.24052   | -563.88337  | -85.11809   | 1 |
| 108 | O | 76.86496 | 74.59266 | 69.36024 | 71.70702    | -307.40463  | 606.69673   | 1 |
| 109 | N | 76.02616 | 72.59798 | 68.59802 | 479.90863   | -504.50129  | 222.86849   | 1 |
| 110 | C | 74.79404 | 73.12769 | 68.07111 | 75.51268    | -600.91904  | 506.73700   | 1 |
| 111 | H | 75.08344 | 74.04060 | 67.50077 | -2033.61562 | 1795.30103  | 254.89480   | 1 |
| 112 | C | 74.26488 | 71.90025 | 67.21045 | 523.79067   | 517.99274   | 284.45581   | 1 |
| 113 | H | 73.17529 | 71.96521 | 66.99205 | 1599.61665  | -1127.00911 | 1895.98173  | 1 |
| 114 | H | 74.78903 | 71.82496 | 66.23124 | -1881.83093 | 1275.82488  | -1501.55016 | 1 |
| 115 | C | 74.63436 | 70.70683 | 68.14405 | -600.05639  | -404.05026  | 316.64485   | 1 |
| 116 | H | 73.92341 | 70.63456 | 68.99770 | -2597.05260 | 496.36221   | 657.73249   | 1 |
| 117 | H | 74.62061 | 69.71812 | 67.63211 | -1666.24518 | 1294.38985  | -1723.90591 | 1 |
| 118 | C | 76.08704 | 71.14272 | 68.62006 | 493.57570   | -129.95376  | -602.56394  | 1 |
| 119 | H | 76.37558 | 70.81608 | 69.64712 | -1469.08415 | -637.84797  | 2204.22581  | 1 |
| 120 | H | 76.89428 | 70.85682 | 67.90058 | -1038.97840 | 1068.88701  | -2280.71789 | 1 |
| 121 | C | 73.76072 | 73.45222 | 69.28205 | 188.88100   | 241.05089   | -727.87821  | 1 |
| 122 | O | 72.67969 | 72.93431 | 69.30541 | 531.88613   | -49.19943   | 427.07960   | 1 |
| 123 | N | 74.25826 | 74.36916 | 70.13624 | 708.14833   | 26.93417    | -179.73509  | 1 |
| 124 | H | 75.23400 | 74.72609 | 69.96327 | -2232.69501 | -1179.09831 | 1023.94816  | 1 |
| 125 | C | 73.76899 | 74.30230 | 71.52360 | -738.32412  | 259.92548   | 104.42456   | 1 |
| 126 | H | 72.69797 | 74.00601 | 71.42553 | 2028.89123  | 1260.02983  | 1311.33324  | 1 |
| 127 | C | 74.60795 | 73.29394 | 72.28530 | -258.65678  | -345.52513  | 661.28459   | 1 |
| 128 | H | 75.65366 | 73.67821 | 72.30928 | -1826.06090 | -1801.46097 | -918.64554  | 1 |
| 129 | C | 74.12349 | 73.14286 | 73.71622 | -541.23400  | 531.92970   | -218.41428  | 1 |
| 130 | H | 74.74364 | 72.39956 | 74.28896 | 1311.73218  | -2219.18200 | 882.19023   | 1 |
| 131 | H | 74.17046 | 74.11939 | 74.27348 | -1048.71298 | 1223.58118  | -2196.97971 | 1 |
| 132 | H | 73.05657 | 72.78768 | 73.75576 | 419.06414   | 1903.92898  | 1903.44670  | 1 |
| 133 | C | 74.64107 | 71.93356 | 71.61325 | -423.86431  | 152.66566   | -648.55262  | 1 |
| 134 | H | 75.26530 | 71.19307 | 72.18581 | 105.68386   | -2342.50080 | 1387.51238  | 1 |
| 135 | H | 73.60807 | 71.49868 | 71.51019 | -1695.63603 | -1484.73621 | -1531.02793 | 1 |
| 136 | H | 75.07000 | 72.00760 | 70.57760 | -1853.57121 | -487.39031  | 1936.59343  | 1 |
| 137 | C | 74.03182 | 75.77766 | 72.22794 | 539.71428   | -510.58232  | 267.58633   | 1 |
| 138 | O | 75.05739 | 76.38908 | 72.05124 | -15.93758   | -278.34085  | -624.49402  | 1 |
| 139 | N | 73.04405 | 76.06096 | 73.06862 | -676.81886  | 12.05292    | 276.17960   | 1 |
| 140 | H | 72.22618 | 75.45552 | 73.04905 | -1694.44250 | -373.84189  | -2100.66098 | 1 |
| 141 | C | 73.15611 | 77.23550 | 73.86999 | 412.33078   | -664.70360  | 108.35451   | 1 |

|     |   |          |          |          |             |             |             |   |
|-----|---|----------|----------|----------|-------------|-------------|-------------|---|
| 142 | H | 74.24357 | 77.49037 | 73.83928 | 1765.77476  | 1294.44366  | 1621.76594  | 1 |
| 143 | C | 72.26452 | 78.36062 | 73.17999 | -179.66635  | -721.95667  | -264.73915  | 1 |
| 144 | H | 72.41891 | 78.36675 | 72.07836 | -607.34922  | 2587.87032  | -598.10018  | 1 |
| 145 | H | 71.18229 | 78.15254 | 73.33565 | -359.69332  | -1479.13954 | -2259.74260 | 1 |
| 146 | C | 72.67007 | 79.72766 | 73.81634 | -240.01076  | 616.02425   | 431.85322   | 1 |
| 147 | H | 72.54870 | 79.69017 | 74.92903 | -1359.17131 | 782.54425   | 2227.99181  | 1 |
| 148 | H | 73.74780 | 79.94139 | 73.63408 | -820.36667  | 85.81767    | -2596.78715 | 1 |
| 149 | C | 71.76254 | 80.86712 | 73.19953 | -513.07015  | 236.18570   | -551.87280  | 1 |
| 150 | H | 71.92518 | 80.95965 | 72.10139 | 1816.11944  | -1183.11722 | -1650.94321 | 1 |
| 151 | H | 70.68039 | 80.63426 | 73.32615 | -1800.04429 | -1361.53473 | 1526.34643  | 1 |
| 152 | C | 72.14479 | 82.17333 | 73.93509 | 726.08972   | -253.19732  | -179.64713  | 1 |
| 153 | H | 71.96349 | 82.15785 | 75.02843 | 1224.27271  | -456.51798  | -2390.90304 | 1 |
| 154 | H | 73.17454 | 82.52939 | 73.73241 | 1206.40339  | -1150.93514 | -2154.90344 | 1 |
| 155 | N | 71.21866 | 83.30920 | 73.39112 | 329.70796   | -633.68968  | -155.67358  | 1 |
| 156 | H | 71.40180 | 84.27709 | 73.78699 | 1348.31305  | 1938.76845  | 1359.00643  | 1 |
| 157 | H | 71.27403 | 83.50202 | 72.34907 | 2096.92035  | 1446.54551  | -966.48890  | 1 |
| 158 | H | 70.16993 | 83.21171 | 73.55009 | -1197.07217 | -2303.53719 | 827.28733   | 1 |
| 159 | C | 72.54137 | 77.02505 | 75.35807 | -378.01186  | -556.17301  | -413.96481  | 1 |
| 160 | O | 72.52797 | 77.98418 | 76.13999 | -409.44433  | -307.55053  | -453.30833  | 1 |
| 161 | N | 72.10608 | 75.81076 | 75.56505 | -429.02477  | 524.70884   | 274.08502   | 1 |
| 162 | H | 72.21938 | 75.15271 | 74.79746 | 1706.34263  | -1425.96036 | 1574.38926  | 1 |
| 163 | C | 71.37596 | 75.47090 | 76.74568 | -45.25864   | -626.22952  | 478.93267   | 1 |
| 164 | H | 71.15772 | 74.38619 | 76.61701 | 1988.63164  | 570.90773   | 1772.87287  | 1 |
| 165 | C | 72.40390 | 75.76405 | 77.92517 | 551.77128   | -20.49526   | -564.54996  | 1 |
| 166 | H | 73.42428 | 75.50172 | 77.56778 | 1434.61535  | -1753.10253 | 1513.99471  | 1 |
| 167 | H | 72.44770 | 76.85987 | 78.12489 | -714.67738  | 1819.09770  | 1898.36494  | 1 |
| 168 | C | 72.11119 | 74.99247 | 79.24926 | 446.99263   | -555.77305  | 338.97221   | 1 |
| 169 | H | 71.27609 | 75.45532 | 79.82501 | 1953.68466  | 1892.25957  | -161.67766  | 1 |
| 170 | H | 71.79787 | 73.94311 | 79.04841 | -403.03785  | 2688.07032  | -188.43591  | 1 |
| 171 | C | 73.44422 | 75.02739 | 80.10383 | 567.86262   | 335.74681   | 434.04421   | 1 |
| 172 | H | 74.27234 | 74.49875 | 79.57860 | -1080.02275 | 1568.26081  | -1948.78900 | 1 |
| 173 | H | 73.79613 | 76.07463 | 80.25110 | -919.54108  | 2111.34692  | 1456.13463  | 1 |
| 174 | C | 73.12299 | 74.35604 | 81.45930 | 195.81897   | 173.33862   | -745.11536  | 1 |
| 175 | H | 72.43687 | 74.93932 | 82.10804 | 1405.67949  | -2301.21089 | -390.08113  | 1 |
| 176 | H | 72.76458 | 73.30851 | 81.38080 | -940.37328  | -1118.32446 | 2299.72133  | 1 |
| 177 | N | 74.44942 | 74.24177 | 82.28318 | 319.26422   | 656.36007   | -42.02424   | 1 |
| 178 | H | 74.33877 | 73.84456 | 83.26041 | 1961.03633  | 619.91968   | 1787.09422  | 1 |
| 179 | H | 75.20875 | 73.61229 | 81.89129 | 854.14343   | -2156.80752 | 1429.08711  | 1 |
| 180 | H | 74.98358 | 75.13722 | 82.48076 | 1237.02905  | -1378.50857 | -1998.28500 | 1 |
| 181 | C | 70.03886 | 76.38305 | 76.73919 | 532.53319   | -268.57236  | 517.55729   | 1 |
| 182 | O | 69.55897 | 76.85196 | 75.71012 | 266.16714   | -290.73804  | -558.88002  | 1 |
| 183 | N | 69.54455 | 76.41365 | 77.96401 | -226.25352  | 640.49678   | -270.32839  | 1 |
| 184 | H | 69.98900 | 75.77718 | 78.63529 | 2007.69063  | -1035.27229 | 1523.50231  | 1 |
| 185 | C | 69.06705 | 77.63177 | 78.54086 | -540.76542  | -573.33303  | 49.50000    | 1 |
| 186 | H | 69.21260 | 77.47263 | 79.63201 | -2374.20950 | -1036.76023 | 843.75774   | 1 |
| 187 | C | 69.97333 | 78.82792 | 77.98610 | -77.09082   | 666.87422   | -415.84136  | 1 |
| 188 | H | 69.99888 | 78.77101 | 76.85960 | -985.81834  | 617.19825   | 2463.91927  | 1 |
| 189 | O | 71.33675 | 78.80018 | 78.38715 | 293.29899   | -391.65602  | -477.80926  | 1 |
| 190 | H | 71.80511 | 78.54325 | 77.49534 | 2528.72714  | -681.76262  | -751.27122  | 1 |
| 191 | C | 69.14329 | 80.08632 | 78.42843 | 252.47363   | -605.14473  | 440.05134   | 1 |
| 192 | H | 69.60181 | 81.03040 | 78.05208 | -2052.65063 | 1456.49051  | -1043.51830 | 1 |
| 193 | H | 68.09681 | 80.05184 | 78.04308 | -2152.98800 | -1661.97574 | -161.70652  | 1 |
| 194 | H | 69.08628 | 80.16502 | 79.53928 | -473.12726  | -1584.27339 | 2165.61725  | 1 |
| 195 | C | 67.48245 | 77.80488 | 78.19820 | 360.36307   | 488.46713   | 505.10056   | 1 |
| 196 | O | 66.71742 | 78.15767 | 79.07142 | -200.08817  | -528.03552  | -385.82850  | 1 |
| 197 | N | 67.22086 | 77.56691 | 76.91964 | -597.54095  | -226.44775  | 355.20479   | 1 |
| 198 | H | 67.98711 | 77.26927 | 76.26666 | 2179.23655  | -1300.70981 | -991.33835  | 1 |
| 199 | C | 65.92851 | 77.91933 | 76.43791 | -687.68921  | 297.39807   | -249.45179  | 1 |
| 200 | H | 65.57593 | 78.68842 | 77.16331 | -349.16256  | -2467.37713 | -1101.72831 | 1 |
| 201 | C | 66.09061 | 78.42921 | 74.93197 | 672.47345   | 361.54328   | -201.62880  | 1 |
| 202 | H | 66.62061 | 77.66218 | 74.32211 | 1541.41502  | 582.18425   | 2169.97026  | 1 |
| 203 | H | 65.09083 | 78.58806 | 74.46663 | -2534.67717 | 60.25153    | 997.72295   | 1 |

|     |   |          |          |          |             |             |             |   |
|-----|---|----------|----------|----------|-------------|-------------|-------------|---|
| 204 | C | 66.89280 | 79.73897 | 74.98318 | 574.26774   | -389.43119  | -377.02542  | 1 |
| 205 | C | 66.19884 | 80.98536 | 74.97478 | 688.82679   | -287.33580  | -257.96133  | 1 |
| 206 | H | 65.09731 | 81.01879 | 74.89344 | 331.14182   | 1470.38163  | 2269.80013  | 1 |
| 207 | C | 68.31494 | 79.70328 | 75.10183 | -383.52382  | -675.04808  | 144.24917   | 1 |
| 208 | H | 68.85319 | 78.72915 | 75.13008 | 4.09847     | 1517.59662  | 2262.86397  | 1 |
| 209 | C | 66.94212 | 82.16295 | 75.07585 | -134.76730  | 428.45285   | -649.50303  | 1 |
| 210 | H | 66.40644 | 83.12848 | 75.06439 | -903.23433  | 1600.49020  | 2011.53387  | 1 |
| 211 | C | 69.01206 | 80.91101 | 75.21590 | -335.53281  | -615.00040  | -364.39058  | 1 |
| 212 | H | 70.10916 | 80.87166 | 75.33287 | 1596.45398  | -1369.33862 | 1732.02659  | 1 |
| 213 | C | 68.36049 | 82.17733 | 75.19661 | 585.48547   | -340.24194  | -406.23938  | 1 |
| 214 | O | 69.05862 | 83.41945 | 75.29768 | -419.15649  | -173.04408  | -511.94141  | 1 |
| 215 | H | 69.98254 | 83.08245 | 75.33102 | -1071.84350 | 1559.71507  | -1960.13012 | 1 |
| 216 | C | 65.01199 | 76.57108 | 76.49942 | 291.41878   | -183.13091  | 710.72246   | 1 |
| 217 | O | 64.25932 | 76.25282 | 75.61240 | 379.87695   | 523.47396   | -222.23622  | 1 |
| 218 | N | 65.17651 | 76.01259 | 77.70484 | 564.30591   | 373.09380   | 277.24371   | 1 |
| 219 | H | 65.89339 | 76.44284 | 78.30690 | -120.59931  | -2436.07824 | -1214.35098 | 1 |
| 220 | C | 64.83993 | 74.61234 | 77.83023 | 404.07514   | -299.37480  | 608.84009   | 1 |
| 221 | H | 63.73962 | 74.63588 | 77.66588 | -1071.07882 | -841.69025  | 2359.66467  | 1 |
| 222 | C | 65.56774 | 73.79337 | 76.69277 | -683.12807  | 68.71770    | -390.13096  | 1 |
| 223 | H | 65.40272 | 74.27493 | 75.69912 | 2068.88918  | 1596.58590  | 770.89603   | 1 |
| 224 | H | 66.67017 | 73.77521 | 76.85151 | 1379.86429  | 2342.49779  | -179.85638  | 1 |
| 225 | C | 64.95723 | 72.35665 | 76.74151 | -176.39967  | 537.49466   | 550.97268   | 1 |
| 226 | H | 65.17517 | 71.87886 | 77.72574 | -396.28051  | 1942.22168  | 1869.33314  | 1 |
| 227 | H | 63.84800 | 72.39842 | 76.66418 | -94.44700   | 586.00678   | -2659.20016 | 1 |
| 228 | C | 65.57262 | 71.51001 | 75.53577 | -291.69381  | -718.18079  | -150.72929  | 1 |
| 229 | H | 65.45945 | 71.95494 | 74.51452 | -2303.38776 | 1089.76242  | 964.62032   | 1 |
| 230 | H | 66.64291 | 71.20783 | 75.66797 | 884.16729   | 2568.80533  | -207.74283  | 1 |
| 231 | N | 64.78088 | 70.35204 | 75.58434 | -594.49522  | -252.81478  | 342.29276   | 1 |
| 232 | H | 64.20130 | 70.23106 | 76.40059 | -1735.17426 | 2084.05705  | -263.71605  | 1 |
| 233 | C | 64.75043 | 69.45358 | 74.68589 | 595.23177   | -271.52487  | 442.22352   | 1 |
| 234 | N | 65.56833 | 69.62110 | 73.56323 | 585.53813   | -424.79750  | -105.81303  | 1 |
| 235 | H | 66.22201 | 70.37147 | 73.34320 | 959.88797   | 1327.56823  | -2177.11905 | 1 |
| 236 | H | 65.63208 | 68.96374 | 72.78518 | 1578.48647  | 16.27378    | -2220.76233 | 1 |
| 237 | N | 63.85694 | 68.42795 | 75.02662 | -452.17763  | -390.33541  | -421.51853  | 1 |
| 238 | H | 63.25526 | 68.30664 | 75.83993 | 470.26107   | 1974.25629  | -1817.92087 | 1 |
| 239 | H | 63.68572 | 67.61689 | 74.43096 | 1856.67307  | -1573.97321 | -1224.35416 | 1 |
| 240 | C | 65.28252 | 74.13198 | 79.31068 | -531.47271  | -581.45780  | -55.06206   | 1 |
| 241 | O | 65.96197 | 73.11861 | 79.47644 | -243.00837  | 192.73507   | 609.52485   | 1 |
| 242 | N | 64.80686 | 74.96389 | 80.22100 | 343.49288   | -644.25607  | 38.09164    | 1 |
| 243 | H | 64.31352 | 75.74505 | 79.78684 | -1691.16043 | -1535.97525 | -1484.73099 | 1 |
| 244 | C | 64.59585 | 74.63334 | 81.62044 | 542.66492   | 350.14337   | 454.42563   | 1 |
| 245 | H | 63.86189 | 75.39891 | 81.96968 | 1209.57979  | -2396.95920 | 463.86744   | 1 |
| 246 | C | 64.08940 | 73.20241 | 81.74196 | -737.14309  | 145.93010   | 242.71942   | 1 |
| 247 | H | 64.85807 | 72.53072 | 81.29061 | -1050.18303 | 159.36419   | -2509.06125 | 1 |
| 248 | C | 63.90745 | 72.80125 | 83.19311 | -706.77696  | -252.88343  | -245.16230  | 1 |
| 249 | H | 63.54771 | 71.73976 | 83.28929 | -1624.64039 | -1665.49085 | 1417.86935  | 1 |
| 250 | H | 64.87579 | 72.88330 | 83.77228 | 2566.10521  | 598.51109   | 693.22305   | 1 |
| 251 | H | 63.15447 | 73.45622 | 83.71185 | -1972.69758 | 107.10018   | -1876.34312 | 1 |
| 252 | C | 62.79903 | 72.98658 | 80.97311 | 412.85148   | 672.58832   | -27.69222   | 1 |
| 253 | H | 62.45575 | 71.91701 | 81.02836 | 1447.02277  | 1762.76533  | -1490.78944 | 1 |
| 254 | H | 61.96579 | 73.62595 | 81.37448 | 1320.77379  | -145.20455  | 2378.68491  | 1 |
| 255 | H | 62.92159 | 73.24307 | 79.88486 | -1512.10848 | 1470.52031  | 1724.75147  | 1 |
| 256 | C | 66.05046 | 74.76532 | 82.42287 | -607.11113  | 499.56689   | 73.73769    | 1 |
| 257 | O | 66.10131 | 75.39677 | 83.44653 | 357.97126   | 460.81534   | 356.68785   | 1 |
| 258 | N | 66.99388 | 74.06633 | 81.82045 | 536.55407   | -368.62270  | 332.76306   | 1 |
| 259 | H | 66.77125 | 73.51154 | 80.95744 | 524.38866   | 2297.69985  | 1367.20941  | 1 |
| 260 | C | 68.26009 | 74.00937 | 82.46300 | 46.50277    | -774.29190  | -147.97904  | 1 |
| 261 | H | 68.24112 | 74.85929 | 83.18571 | 1676.51875  | 1883.29066  | 1032.55549  | 1 |
| 262 | C | 68.42717 | 72.56967 | 83.19133 | -559.41456  | -34.19198   | -556.30433  | 1 |
| 263 | H | 68.25053 | 71.75613 | 82.44873 | -64.66664   | 395.18769   | 2695.05373  | 1 |
| 264 | H | 69.47990 | 72.44579 | 83.53929 | -2703.44278 | -60.40056   | 333.79418   | 1 |
| 265 | C | 67.46935 | 72.45103 | 84.34133 | -519.76435  | 377.31045   | 459.42366   | 1 |

|     |   |          |          |          |             |             |             |   |
|-----|---|----------|----------|----------|-------------|-------------|-------------|---|
| 266 | H | 66.42760 | 72.60324 | 83.95956 | -1746.74323 | 1667.50644  | -1261.73691 | 1 |
| 267 | C | 67.56561 | 71.05871 | 84.95447 | 570.95554   | 16.46261    | -545.27700  | 1 |
| 268 | H | 66.85808 | 70.93467 | 85.81405 | 2391.58273  | 28.05277    | -1305.07271 | 1 |
| 269 | H | 67.32395 | 70.26075 | 84.20596 | 175.75588   | 917.63458   | 2559.43867  | 1 |
| 270 | H | 68.59667 | 70.84987 | 85.34001 | -1063.97851 | -2155.34650 | 1283.00462  | 1 |
| 271 | C | 67.75218 | 73.50149 | 85.40685 | 193.76014   | 2.62946     | -765.53141  | 1 |
| 272 | H | 67.16018 | 73.31584 | 86.33966 | 507.39394   | -846.55087  | 2539.60089  | 1 |
| 273 | H | 68.83468 | 73.51572 | 85.69706 | 1337.57841  | 1818.19054  | 1526.01994  | 1 |
| 274 | H | 67.48498 | 74.53169 | 85.04750 | 1100.88635  | -1172.91350 | -2199.08909 | 1 |
| 275 | C | 69.42728 | 74.09140 | 81.36620 | -549.21115  | 475.64486   | -309.38218  | 1 |
| 276 | O | 70.55327 | 73.74016 | 81.61468 | 556.06106   | -390.37755  | -78.24250   | 1 |
| 277 | O | 69.13475 | 74.72082 | 80.12417 | -572.27940  | -310.19032  | -209.75862  | 1 |
| 278 | H | 68.14849 | 74.81136 | 80.23576 | -1380.08193 | 2212.14486  | 790.85944   | 1 |

Listing 32: C00032.xmolout

|    |   |          |          |          |             |             |             |        |          |
|----|---|----------|----------|----------|-------------|-------------|-------------|--------|----------|
| 1  |   | 276      |          |          |             |             |             |        |          |
| 2  |   | 150.0000 | 150.0000 | 150.0000 | 0.0000      | 0.0000      | 0.0000***** | 2.7750 | 11100    |
|    |   | 0.2500   | 300.00   | 0.00     | 0.00        | 0.00        | -1293.8923  | 0.0000 | 300.0000 |
| 3  | H | 75.92431 | 66.32038 | 83.84679 | -2043.14101 | -1757.64893 | 399.89339   |        | 1        |
| 4  | N | 76.30681 | 66.42121 | 82.90814 | 426.75047   | 490.45733   | -334.42467  |        | 1        |
| 5  | H | 75.47084 | 66.58558 | 82.34694 | 442.25559   | -1110.30854 | -2448.52907 |        | 1        |
| 6  | C | 77.23606 | 67.47390 | 82.76453 | 415.32972   | -666.39213  | 83.73172    |        | 1        |
| 7  | H | 77.83959 | 67.51467 | 83.69615 | 879.32219   | 2491.00447  | 667.35213   |        | 1        |
| 8  | C | 78.10009 | 67.16860 | 81.44120 | 31.35357    | 477.41777   | 628.23362   |        | 1        |
| 9  | H | 77.43072 | 67.22582 | 80.54873 | 1168.38489  | 2240.25337  | -1019.71136 |        | 1        |
| 10 | H | 78.88367 | 67.95014 | 81.28944 | -360.43770  | 2534.90498  | 931.67112   |        | 1        |
| 11 | C | 78.70873 | 65.79222 | 81.55144 | 463.18208   | 512.70242   | -382.34388  |        | 1        |
| 12 | H | 77.90940 | 65.08979 | 81.88058 | 1725.29117  | 1863.52247  | -987.07854  |        | 1        |
| 13 | C | 79.23045 | 65.32350 | 80.19968 | 710.42801   | -144.27427  | -313.15367  |        | 1        |
| 14 | H | 79.65889 | 64.28931 | 80.25769 | 364.20195   | -1033.13725 | 2494.72524  |        | 1        |
| 15 | H | 78.41917 | 65.30382 | 79.42641 | 2567.61904  | 335.80679   | 847.48802   |        | 1        |
| 16 | H | 80.03964 | 65.99620 | 79.81420 | -2587.99029 | 680.92867   | -512.16411  |        | 1        |
| 17 | C | 79.83439 | 65.75898 | 82.57529 | 268.17616   | 741.64379   | -40.42634   |        | 1        |
| 18 | H | 80.28456 | 64.73590 | 82.66077 | 1283.54314  | -1945.37420 | -1411.27812 |        | 1        |
| 19 | H | 80.66192 | 66.46362 | 82.30173 | -1258.57796 | 1317.15249  | -2026.02085 |        | 1        |
| 20 | H | 79.47415 | 66.04850 | 83.59608 | -2502.84526 | 909.80597   | 575.92391   |        | 1        |
| 21 | C | 76.30241 | 68.79353 | 82.50561 | 619.36578   | -458.64843  | -172.09273  |        | 1        |
| 22 | O | 75.41442 | 68.77615 | 81.67636 | -81.40433   | 433.87611   | 522.34594   |        | 1        |
| 23 | N | 76.68021 | 69.77483 | 83.30827 | 175.23996   | -622.20190  | 341.55523   |        | 1        |
| 24 | H | 77.48696 | 69.61887 | 83.91053 | -876.57256  | -303.22879  | -2561.90213 |        | 1        |
| 25 | C | 76.07206 | 71.06127 | 83.20234 | -571.88214  | -534.10783  | -106.15033  |        | 1        |
| 26 | H | 75.00387 | 70.87963 | 82.95100 | -2713.20841 | -16.25800   | -248.80809  |        | 1        |
| 27 | C | 76.32167 | 71.75734 | 84.62172 | 166.60354   | 288.16399   | -716.09568  |        | 1        |
| 28 | H | 77.42683 | 71.74458 | 84.82704 | -2097.85574 | 1636.78449  | -586.18044  |        | 1        |
| 29 | O | 75.70638 | 71.08144 | 85.73713 | -317.80580  | -363.38227  | 484.43082   |        | 1        |
| 30 | H | 76.49012 | 70.83797 | 86.26592 | 1863.74748  | -1451.84923 | 1357.29467  |        | 1        |
| 31 | C | 75.86924 | 73.24718 | 84.41326 | 503.80731   | 517.99032   | 318.51606   |        | 1        |
| 32 | H | 76.08150 | 73.86322 | 85.31851 | 640.61020   | -2157.10410 | -1536.29104 |        | 1        |
| 33 | H | 76.39401 | 73.74599 | 83.54394 | 1687.88455  | 465.60692   | 2087.56452  |        | 1        |
| 34 | H | 74.76996 | 73.31549 | 84.22643 | -1293.07895 | -1899.88581 | -1463.57452 |        | 1        |
| 35 | C | 76.86784 | 71.85845 | 82.02852 | -153.07550  | -733.68902  | 248.70981   |        | 1        |
| 36 | O | 78.05458 | 71.69952 | 81.91231 | 186.15459   | -480.78787  | -449.34387  |        | 1        |
| 37 | N | 76.06215 | 72.70355 | 81.36449 | -487.53139  | 543.18517   | 42.03850    |        | 1        |
| 38 | C | 76.58825 | 73.58375 | 80.36910 | -699.35871  | 69.34393    | 360.10701   |        | 1        |
| 39 | H | 77.50685 | 73.08667 | 79.97759 | 2.81126     | -221.99807  | -2715.58072 |        | 1        |
| 40 | C | 75.34695 | 73.67409 | 79.37598 | -507.46439  | -592.59194  | 122.07761   |        | 1        |
| 41 | H | 75.40753 | 74.51488 | 78.65200 | -1975.08116 | 525.87560   | -1801.71556 |        | 1        |
| 42 | H | 75.24029 | 72.74563 | 78.77304 | 1588.27743  | -1913.22100 | 1113.83566  |        | 1        |
| 43 | C | 74.19526 | 73.83236 | 80.41442 | -613.62442  | -457.55993  | -194.14490  |        | 1        |
| 44 | H | 74.16276 | 74.86878 | 80.81953 | 1707.54637  | -721.27992  | 1996.92523  |        | 1        |
| 45 | H | 73.18270 | 73.62971 | 79.99202 | 758.23357   | 2100.81767  | 1560.55011  |        | 1        |

|     |   |          |          |          |             |             |             |   |
|-----|---|----------|----------|----------|-------------|-------------|-------------|---|
| 46  | C | 74.61987 | 72.79466 | 81.54111 | -352.41524  | 704.96076   | 49.21465    | 1 |
| 47  | H | 74.40652 | 73.13351 | 82.58237 | 1714.76886  | -2070.42778 | 443.35792   | 1 |
| 48  | H | 74.20682 | 71.76390 | 81.41088 | 1224.15040  | 1801.50881  | 1636.97633  | 1 |
| 49  | C | 76.89437 | 75.03484 | 81.07342 | 566.85117   | 537.05831   | 117.62814   | 1 |
| 50  | O | 77.12453 | 75.10994 | 82.26098 | -550.26779  | -406.08867  | 4.21666     | 1 |
| 51  | N | 76.87925 | 75.99895 | 80.16971 | 566.34832   | -425.77725  | 180.18749   | 1 |
| 52  | H | 76.69909 | 75.75646 | 79.19875 | 644.44502   | 2646.80550  | -52.73430   | 1 |
| 53  | C | 77.07892 | 77.34703 | 80.60510 | 612.34801   | -281.48662  | 411.56221   | 1 |
| 54  | H | 77.95436 | 77.30605 | 81.29215 | 1667.23498  | -1490.75142 | 1556.16753  | 1 |
| 55  | C | 77.28473 | 78.24270 | 79.30179 | -714.45746  | -175.43074  | 286.98927   | 1 |
| 56  | H | 76.39968 | 78.08588 | 78.62755 | -787.09484  | 1763.03619  | -1922.46060 | 1 |
| 57  | O | 78.45467 | 77.94413 | 78.50958 | -429.46514  | 516.51932   | -128.40526  | 1 |
| 58  | H | 78.04797 | 77.63869 | 77.67777 | 1981.82785  | 436.16847   | -1818.18182 | 1 |
| 59  | C | 77.22172 | 79.69938 | 79.88943 | 630.79189   | -468.94448  | 76.03230    | 1 |
| 60  | H | 77.24407 | 80.46853 | 79.08319 | -1775.71861 | 2062.30353  | 131.89849   | 1 |
| 61  | H | 76.29175 | 79.87008 | 80.48340 | -1855.14608 | 88.94118    | 1993.53760  | 1 |
| 62  | H | 78.08526 | 79.90046 | 80.56516 | -1504.82350 | -780.94249  | -2132.90992 | 1 |
| 63  | C | 75.74296 | 77.85319 | 81.39596 | 288.57638   | 618.62814   | -397.00270  | 1 |
| 64  | O | 75.87447 | 78.59946 | 82.33784 | 321.70495   | -185.26452  | 574.37218   | 1 |
| 65  | N | 74.60700 | 77.44184 | 80.81210 | -447.05792  | -446.53431  | 367.76425   | 1 |
| 66  | H | 74.72149 | 76.85903 | 79.98131 | 350.31316   | 1975.63644  | -1843.31522 | 1 |
| 67  | C | 73.53078 | 78.38515 | 80.88277 | -511.23061  | 374.03917   | -471.51480  | 1 |
| 68  | H | 73.98401 | 79.30674 | 81.31559 | 2234.79579  | -898.70890  | -1273.45190 | 1 |
| 69  | C | 72.99004 | 78.55262 | 79.39034 | 529.53781   | -159.34528  | 563.72604   | 1 |
| 70  | H | 72.18868 | 79.33508 | 79.42647 | 654.59388   | 2347.94251  | 1217.51488  | 1 |
| 71  | H | 73.82963 | 78.97909 | 78.77804 | -1526.55661 | 2103.42026  | 817.87394   | 1 |
| 72  | O | 72.54078 | 77.33942 | 78.71657 | -554.84278  | 14.12789    | 399.58769   | 1 |
| 73  | H | 71.64874 | 77.26779 | 79.10188 | 1297.06236  | 2061.84854  | 1220.68812  | 1 |
| 74  | C | 72.36939 | 77.80151 | 81.86843 | -662.15484  | -412.13544  | 123.62687   | 1 |
| 75  | O | 72.00329 | 78.50240 | 82.78484 | -540.01537  | -317.05804  | 274.91456   | 1 |
| 76  | N | 71.83480 | 76.62581 | 81.45679 | -202.76299  | -690.00100  | -131.49145  | 1 |
| 77  | H | 72.42511 | 76.25041 | 80.70816 | -702.62132  | -2617.37191 | 281.70413   | 1 |
| 78  | C | 71.40720 | 75.77427 | 82.54682 | -491.73914  | 576.34187   | 222.73509   | 1 |
| 79  | H | 72.09129 | 76.00284 | 83.39254 | 1977.17978  | -1823.58850 | -434.68928  | 1 |
| 80  | C | 69.89097 | 76.07065 | 82.88013 | -649.50797  | -328.66843  | 306.11224   | 1 |
| 81  | H | 69.26455 | 75.90102 | 81.97762 | 2075.07803  | 1452.16490  | -1004.45904 | 1 |
| 82  | C | 69.49553 | 75.07982 | 84.03023 | -615.18735  | -489.99689  | -70.96352   | 1 |
| 83  | H | 68.41387 | 75.15753 | 84.29008 | -1226.32661 | -1724.38906 | -1716.47170 | 1 |
| 84  | H | 69.69721 | 74.01931 | 83.73821 | 2381.64273  | -969.84735  | 900.46860   | 1 |
| 85  | H | 70.07751 | 75.27907 | 84.96026 | 2122.74991  | 1702.23946  | -141.36228  | 1 |
| 86  | C | 69.65166 | 77.52149 | 83.42669 | -501.86074  | -479.61276  | -376.42482  | 1 |
| 87  | H | 68.62985 | 77.63944 | 83.85873 | 993.79261   | -2246.95401 | -1177.81305 | 1 |
| 88  | H | 70.38859 | 77.78326 | 84.22530 | 42.71279    | -626.15391  | -2651.37258 | 1 |
| 89  | H | 69.75926 | 78.28414 | 82.61721 | -2026.39012 | -1590.33709 | -887.82922  | 1 |
| 90  | C | 71.42079 | 74.22236 | 82.06461 | -672.89153  | 382.57394   | -156.34072  | 1 |
| 91  | O | 71.68715 | 73.33416 | 82.84516 | 410.04627   | 221.86223   | 500.35950   | 1 |
| 92  | N | 70.99817 | 74.11079 | 80.80315 | -378.11782  | -443.79414  | -441.10984  | 1 |
| 93  | H | 70.82100 | 74.96624 | 80.27774 | 2404.15973  | -568.14894  | 1149.30085  | 1 |
| 94  | C | 70.54188 | 72.83774 | 80.36871 | -544.54484  | 466.16019   | 331.29119   | 1 |
| 95  | H | 70.43825 | 72.21815 | 81.29066 | -1409.80988 | -170.17955  | 2325.32679  | 1 |
| 96  | C | 69.21462 | 73.11597 | 79.55304 | -184.48284  | 116.78282   | -758.89137  | 1 |
| 97  | H | 68.42479 | 73.53018 | 80.21975 | 1893.78641  | 1861.14652  | 611.04528   | 1 |
| 98  | H | 69.40218 | 73.89748 | 78.78249 | -2170.79665 | -974.19311  | 1327.50117  | 1 |
| 99  | C | 68.73176 | 71.79452 | 78.87426 | 389.51668   | 672.81878   | -138.49152  | 1 |
| 100 | H | 69.54042 | 71.39441 | 78.21869 | 510.64577   | 1933.03327  | 1851.02484  | 1 |
| 101 | H | 68.57063 | 71.00246 | 79.64144 | -2302.30869 | -1105.72939 | -948.89774  | 1 |
| 102 | C | 67.42341 | 71.95835 | 78.01056 | -559.93427  | -126.34590  | 542.30857   | 1 |
| 103 | O | 66.95035 | 70.98709 | 77.48104 | -670.36003  | -111.83166  | 76.36448    | 1 |
| 104 | N | 66.95507 | 73.22196 | 77.93647 | -216.06729  | -537.07037  | 446.51379   | 1 |
| 105 | H | 67.34197 | 74.08608 | 78.33355 | -1251.96487 | 1074.12894  | -2168.52500 | 1 |
| 106 | H | 66.14520 | 73.49920 | 77.37069 | -2451.83023 | -720.73851  | 944.84612   | 1 |
| 107 | C | 71.67498 | 72.26252 | 79.31547 | 546.24052   | -563.88337  | -85.11809   | 1 |

|     |   |          |          |          |             |             |             |   |
|-----|---|----------|----------|----------|-------------|-------------|-------------|---|
| 108 | O | 71.87839 | 72.94721 | 78.28559 | 71.70702    | -307.40463  | 606.69673   | 1 |
| 109 | N | 72.25988 | 71.12905 | 79.64931 | 479.90863   | -504.50129  | 222.86849   | 1 |
| 110 | C | 73.53364 | 70.51029 | 79.43135 | 75.51268    | -600.91904  | 506.73700   | 1 |
| 111 | H | 74.27553 | 71.19821 | 79.89774 | -2033.61562 | 1795.30103  | 254.89480   | 1 |
| 112 | C | 73.29493 | 69.15986 | 80.22576 | 523.79067   | 517.99274   | 284.45581   | 1 |
| 113 | H | 74.00566 | 68.35067 | 79.92665 | 1599.61665  | -1127.00911 | 1895.98173  | 1 |
| 114 | H | 73.44179 | 69.31927 | 81.32666 | -1881.83093 | 1275.82488  | -1501.55016 | 1 |
| 115 | C | 71.80460 | 68.85397 | 79.92593 | -600.05639  | -404.05026  | 316.64485   | 1 |
| 116 | H | 71.66800 | 68.48418 | 78.88869 | -2597.05260 | 496.36221   | 657.73249   | 1 |
| 117 | H | 71.36679 | 68.08555 | 80.59644 | -1666.24518 | 1294.38985  | -1723.90591 | 1 |
| 118 | C | 71.12111 | 70.32901 | 80.12521 | 493.57570   | -129.95376  | -602.56394  | 1 |
| 119 | H | 70.19756 | 70.52698 | 79.51225 | -1469.08415 | -637.84797  | 2204.22581  | 1 |
| 120 | H | 70.94009 | 70.60177 | 81.20239 | -1038.97840 | 1068.88701  | -2280.71789 | 1 |
| 121 | C | 73.88130 | 70.31447 | 77.85661 | 188.88100   | 241.05089   | -727.87821  | 1 |
| 122 | O | 74.19385 | 69.24702 | 77.39129 | 531.88613   | -49.19943   | 427.07960   | 1 |
| 123 | N | 73.88663 | 71.52443 | 77.28875 | 708.14833   | 26.93417    | -179.73509  | 1 |
| 124 | H | 73.47172 | 72.30963 | 77.83059 | -2232.69501 | -1179.09831 | 1023.94816  | 1 |
| 125 | C | 73.92073 | 71.59874 | 75.85691 | -738.32412  | 259.92548   | 104.42456   | 1 |
| 126 | H | 74.74884 | 70.92573 | 75.54041 | 2028.89123  | 1260.02983  | 1311.33324  | 1 |
| 127 | C | 72.50874 | 71.13529 | 75.28858 | -258.65678  | -345.52513  | 661.28459   | 1 |
| 128 | H | 71.68931 | 71.74363 | 75.72955 | -1826.06090 | -1801.46097 | -918.64554  | 1 |
| 129 | C | 72.57595 | 71.33367 | 73.73629 | -541.23400  | 531.92970   | -218.41428  | 1 |
| 130 | H | 71.62518 | 71.02945 | 73.23896 | 1311.73218  | -2219.18200 | 882.19023   | 1 |
| 131 | H | 72.76229 | 72.40257 | 73.47079 | -1048.71298 | 1223.58118  | -2196.97971 | 1 |
| 132 | H | 73.39866 | 70.73348 | 73.28119 | 419.06414   | 1903.92898  | 1903.44670  | 1 |
| 133 | C | 72.27049 | 69.61690 | 75.59482 | -423.86431  | 152.66566   | -648.55262  | 1 |
| 134 | H | 71.41898 | 69.20521 | 75.00269 | 105.68386   | -2342.50080 | 1387.51238  | 1 |
| 135 | H | 73.17494 | 69.00405 | 75.35916 | -1695.63603 | -1484.73621 | -1531.02793 | 1 |
| 136 | H | 72.03295 | 69.45236 | 76.67410 | -1853.57121 | -487.39031  | 1936.59343  | 1 |
| 137 | C | 74.09727 | 73.16178 | 75.45692 | 539.71428   | -510.58232  | 267.58633   | 1 |
| 138 | O | 74.93826 | 73.47921 | 74.62734 | -15.93758   | -278.34085  | -624.49402  | 1 |
| 139 | N | 73.22259 | 73.90678 | 76.09266 | -676.81886  | 12.05292    | 276.17960   | 1 |
| 140 | H | 72.55506 | 73.49774 | 76.79032 | -1694.44250 | -373.84189  | -2100.66098 | 1 |
| 141 | C | 73.08825 | 75.28872 | 75.79099 | 412.33078   | -664.70360  | 108.35451   | 1 |
| 142 | H | 72.37880 | 75.64668 | 76.57212 | 1765.77476  | 1294.44366  | 1621.76594  | 1 |
| 143 | C | 74.52518 | 75.94799 | 75.89189 | -179.66635  | -721.95667  | -264.73915  | 1 |
| 144 | H | 75.06876 | 75.56686 | 76.78483 | -607.34922  | 2587.87032  | -598.10018  | 1 |
| 145 | H | 75.15888 | 75.66864 | 75.01806 | -359.69332  | -1479.13954 | -2259.74260 | 1 |
| 146 | C | 74.33555 | 77.49826 | 75.97290 | -240.01076  | 616.02425   | 431.85322   | 1 |
| 147 | H | 73.71916 | 77.88414 | 75.13093 | -1359.17131 | 782.54425   | 2227.99181  | 1 |
| 148 | H | 73.79977 | 77.78229 | 76.90999 | -820.36667  | 85.81767    | -2596.78715 | 1 |
| 149 | C | 75.80181 | 78.08903 | 75.92997 | -513.07015  | 236.18570   | -551.87280  | 1 |
| 150 | H | 76.45222 | 77.54128 | 76.64666 | 1816.11944  | -1183.11722 | -1650.94321 | 1 |
| 151 | H | 76.26198 | 77.92466 | 74.92839 | -1800.04429 | -1361.53473 | 1526.34643  | 1 |
| 152 | C | 75.76408 | 79.59530 | 76.27596 | 726.08972   | -253.19732  | -179.64713  | 1 |
| 153 | H | 75.31216 | 80.23968 | 75.49505 | 1224.27271  | -456.51798  | -2390.90304 | 1 |
| 154 | H | 75.32629 | 79.83468 | 77.26538 | 1206.40339  | -1150.93514 | -2154.90344 | 1 |
| 155 | N | 77.25739 | 80.05635 | 76.38759 | 329.70796   | -633.68968  | -155.67358  | 1 |
| 156 | H | 77.41012 | 81.08389 | 76.60102 | 1348.31305  | 1938.76845  | 1359.00643  | 1 |
| 157 | H | 77.85161 | 79.59368 | 77.13828 | 2096.92035  | 1446.54551  | -966.48890  | 1 |
| 158 | H | 77.86207 | 79.93327 | 75.52422 | -1197.07217 | -2303.53719 | 827.28733   | 1 |
| 159 | C | 72.47076 | 75.45856 | 74.27277 | -378.01186  | -556.17301  | -413.96481  | 1 |
| 160 | O | 71.34403 | 75.87833 | 74.18191 | -409.44433  | -307.55053  | -453.30833  | 1 |
| 161 | N | 73.32901 | 75.12669 | 73.32640 | -429.02477  | 524.70884   | 274.08502   | 1 |
| 162 | H | 74.25994 | 74.70967 | 73.55631 | 1706.34263  | -1425.96036 | 1574.38926  | 1 |
| 163 | C | 72.93464 | 75.32041 | 71.95431 | -45.25864   | -626.22952  | 478.93267   | 1 |
| 164 | H | 72.05124 | 74.66498 | 71.78683 | 1988.63164  | 570.90773   | 1772.87287  | 1 |
| 165 | C | 72.56112 | 76.84711 | 71.80294 | 551.77128   | -20.49526   | -564.54996  | 1 |
| 166 | H | 71.74672 | 77.12966 | 72.51494 | 1434.61535  | -1753.10253 | 1513.99471  | 1 |
| 167 | H | 73.43900 | 77.48346 | 72.07421 | -714.67738  | 1819.09770  | 1898.36494  | 1 |
| 168 | C | 72.10872 | 77.12524 | 70.33088 | 446.99263   | -555.77305  | 338.97221   | 1 |
| 169 | H | 72.90526 | 76.83778 | 69.60815 | 1953.68466  | 1892.25957  | -161.67766  | 1 |

|     |   |          |          |          |             |             |             |   |
|-----|---|----------|----------|----------|-------------|-------------|-------------|---|
| 170 | H | 71.21103 | 76.52682 | 70.05780 | -403.03785  | 2688.07032  | -188.43591  | 1 |
| 171 | C | 71.81248 | 78.67667 | 70.26345 | 567.86262   | 335.74681   | 434.04421   | 1 |
| 172 | H | 70.87383 | 78.93194 | 70.80726 | -1080.02275 | 1568.26081  | -1948.78900 | 1 |
| 173 | H | 72.61476 | 79.25713 | 70.77163 | -919.54108  | 2111.34692  | 1456.13463  | 1 |
| 174 | C | 71.72331 | 79.04858 | 68.76483 | 195.81897   | 173.33862   | -745.11536  | 1 |
| 175 | H | 72.64357 | 78.84148 | 68.18231 | 1405.67949  | -2301.21089 | -390.08113  | 1 |
| 176 | H | 70.84049 | 78.63298 | 68.23911 | -940.37328  | -1118.32446 | 2299.72133  | 1 |
| 177 | N | 71.54781 | 80.60129 | 68.68491 | 319.26422   | 656.36007   | -42.02424   | 1 |
| 178 | H | 71.43700 | 80.99933 | 67.70789 | 1961.03633  | 619.91968   | 1787.09422  | 1 |
| 179 | H | 70.70371 | 81.01617 | 69.17689 | 854.14343   | -2156.80752 | 1429.08711  | 1 |
| 180 | H | 72.33889 | 81.19787 | 69.06579 | 1237.02905  | -1378.50857 | -1998.28500 | 1 |
| 181 | C | 74.21515 | 75.00122 | 71.00625 | 532.53319   | -268.57236  | 517.55729   | 1 |
| 182 | O | 75.34265 | 75.20518 | 71.38053 | 266.16714   | -290.73804  | -558.88002  | 1 |
| 183 | N | 73.78014 | 74.74635 | 69.74760 | -226.25352  | 640.49678   | -270.32839  | 1 |
| 184 | H | 72.77239 | 74.56683 | 69.73743 | 2007.69063  | -1035.27229 | 1523.50231  | 1 |
| 185 | C | 74.56919 | 73.81610 | 68.96802 | -540.76542  | -573.33303  | 49.50000    | 1 |
| 186 | H | 74.94998 | 73.08225 | 69.71113 | -2374.20950 | -1036.76023 | 843.75774   | 1 |
| 187 | C | 73.53197 | 73.21462 | 67.93307 | -77.09082   | 666.87422   | -415.84136  | 1 |
| 188 | H | 73.12294 | 74.03528 | 67.28035 | -985.81834  | 617.19825   | 2463.91927  | 1 |
| 189 | O | 72.35257 | 72.61367 | 68.52312 | 293.29899   | -391.65602  | -477.80926  | 1 |
| 190 | H | 71.64205 | 73.12290 | 68.09006 | 2528.72714  | -681.76262  | -751.27122  | 1 |
| 191 | C | 74.44753 | 72.27400 | 67.06654 | 252.47363   | -605.14473  | 440.05134   | 1 |
| 192 | H | 73.88080 | 71.82267 | 66.21914 | -2052.65063 | 1456.49051  | -1043.51830 | 1 |
| 193 | H | 75.31264 | 72.82561 | 66.62668 | -2152.98800 | -1661.97574 | -161.70652  | 1 |
| 194 | H | 74.86064 | 71.43460 | 67.67255 | -473.12726  | -1584.27339 | 2165.61725  | 1 |
| 195 | C | 75.78904 | 74.59778 | 68.22285 | 360.36307   | 488.46713   | 505.10056   | 1 |
| 196 | O | 76.91705 | 74.43182 | 68.62910 | -200.08817  | -528.03552  | -385.82850  | 1 |
| 197 | N | 75.39490 | 75.33210 | 67.18391 | -597.54095  | -226.44775  | 355.20479   | 1 |
| 198 | H | 74.40034 | 75.43247 | 66.98868 | 2179.23655  | -1300.70981 | -991.33835  | 1 |
| 199 | C | 76.38337 | 76.06849 | 66.47280 | -687.68921  | 297.39807   | -249.45179  | 1 |
| 200 | H | 77.33814 | 75.54459 | 66.71735 | -349.16256  | -2467.37713 | -1101.72831 | 1 |
| 201 | C | 76.01758 | 76.09575 | 64.91374 | 672.47345   | 361.54328   | -201.62880  | 1 |
| 202 | H | 75.01440 | 76.55184 | 64.75485 | 1541.41502  | 582.18425   | 2169.97026  | 1 |
| 203 | H | 76.75718 | 76.73186 | 64.37136 | -2534.67717 | 60.25153    | 997.72295   | 1 |
| 204 | C | 76.05317 | 74.65397 | 64.38842 | 574.26774   | -389.43119  | -377.02542  | 1 |
| 205 | C | 77.31074 | 74.04376 | 64.09907 | 688.82679   | -287.33580  | -257.96133  | 1 |
| 206 | H | 78.25732 | 74.60394 | 64.24446 | 331.14182   | 1470.38163  | 2269.80013  | 1 |
| 207 | C | 74.83938 | 73.92266 | 64.21586 | -383.52382  | -675.04808  | 144.24917   | 1 |
| 208 | H | 73.86521 | 74.38670 | 64.45250 | 4.09847     | 1517.59662  | 2262.86397  | 1 |
| 209 | C | 77.32401 | 72.72866 | 63.63492 | -134.76730  | 428.45285   | -649.50303  | 1 |
| 210 | H | 78.29751 | 72.25733 | 63.41151 | -903.23433  | 1600.49020  | 2011.53387  | 1 |
| 211 | C | 74.90460 | 72.60962 | 63.74337 | -335.53281  | -615.00040  | -364.39058  | 1 |
| 212 | H | 73.95911 | 72.05628 | 63.60701 | 1596.45398  | -1369.33862 | 1732.02659  | 1 |
| 213 | C | 76.13760 | 71.96456 | 63.43417 | 585.48547   | -340.24194  | -406.23938  | 1 |
| 214 | O | 76.21280 | 70.63075 | 62.95459 | -419.15649  | -173.04408  | -511.94141  | 1 |
| 215 | H | 75.25142 | 70.41501 | 62.91040 | -1071.84350 | 1559.71507  | -1960.13012 | 1 |
| 216 | C | 76.33938 | 77.58550 | 67.05237 | 291.41878   | -183.13091  | 710.72246   | 1 |
| 217 | O | 76.40127 | 78.58067 | 66.33545 | 379.87695   | 523.47396   | -222.23622  | 1 |
| 218 | N | 76.26707 | 77.53885 | 68.36847 | 564.30591   | 373.09380   | 277.24371   | 1 |
| 219 | H | 76.27289 | 76.61980 | 68.81681 | -120.59931  | -2436.07824 | -1214.35098 | 1 |
| 220 | C | 76.10526 | 78.78645 | 69.05580 | 404.07514   | -299.37480  | 608.84009   | 1 |
| 221 | H | 75.47504 | 79.37049 | 68.34442 | -1071.07882 | -841.69025  | 2359.66467  | 1 |
| 222 | C | 75.45580 | 78.48980 | 70.46858 | -683.12807  | 68.71770    | -390.13096  | 1 |
| 223 | H | 74.57882 | 77.81231 | 70.36743 | 2068.88918  | 1596.58590  | 770.89603   | 1 |
| 224 | H | 76.18010 | 77.94345 | 71.11564 | 1379.86429  | 2342.49779  | -179.85638  | 1 |
| 225 | C | 75.04990 | 79.85106 | 71.10926 | -176.39967  | 537.49466   | 550.97268   | 1 |
| 226 | H | 75.87071 | 80.59409 | 71.00569 | -396.28051  | 1942.22168  | 1869.33314  | 1 |
| 227 | H | 74.17922 | 80.30316 | 70.58650 | -94.44700   | 586.00678   | -2659.20016 | 1 |
| 228 | C | 74.73627 | 79.57596 | 72.66154 | -291.69381  | -718.18079  | -150.72929  | 1 |
| 229 | H | 74.07322 | 78.69726 | 72.88220 | -2303.38776 | 1089.76242  | 964.62032   | 1 |
| 230 | H | 75.67378 | 79.53577 | 73.27442 | 884.16729   | 2568.80533  | -207.74283  | 1 |
| 231 | N | 74.04970 | 80.75558 | 72.94854 | -594.49522  | -252.81478  | 342.29276   | 1 |



|     |   |          |          |          |             |             |             |   |
|-----|---|----------|----------|----------|-------------|-------------|-------------|---|
| 232 | H | 74.54054 | 81.61287 | 72.73368 | -1735.17426 | 2084.05705  | -263.71605  | 1 |
| 233 | C | 72.88949 | 80.84597 | 73.47534 | 595.23177   | -271.52487  | 442.22352   | 1 |
| 234 | N | 72.20353 | 79.67643 | 73.80337 | 585.53813   | -424.79750  | -105.81303  | 1 |
| 235 | H | 72.47998 | 78.70192 | 73.69749 | 959.88797   | 1327.56823  | -2177.11905 | 1 |
| 236 | H | 71.28029 | 79.64122 | 74.23790 | 1578.48647  | 16.27378    | -2220.76233 | 1 |
| 237 | N | 72.53100 | 82.18954 | 73.63015 | -452.17763  | -390.33541  | -421.51853  | 1 |
| 238 | H | 73.02902 | 83.04673 | 73.39331 | 470.26107   | 1974.25629  | -1817.92087 | 1 |
| 239 | H | 71.64506 | 82.48986 | 74.03921 | 1856.67307  | -1573.97321 | -1224.35416 | 1 |
| 240 | C | 77.59480 | 79.43860 | 69.22120 | -531.47271  | -581.45780  | -55.06206   | 1 |
| 241 | O | 78.18065 | 79.40809 | 70.26990 | -243.00837  | 192.73507   | 609.52485   | 1 |
| 242 | N | 77.93716 | 79.98957 | 68.05667 | 343.49288   | -644.25607  | 38.09164    | 1 |
| 243 | H | 77.30657 | 79.82105 | 67.23456 | -1691.16043 | -1535.97525 | -1484.73099 | 1 |
| 244 | C | 79.20753 | 80.68962 | 67.84469 | 542.66492   | 350.14337   | 454.42563   | 1 |
| 245 | H | 78.91642 | 81.48936 | 67.12298 | 1209.57979  | -2396.95920 | 463.86744   | 1 |
| 246 | C | 79.74911 | 81.25794 | 69.13952 | -737.14309  | 145.93010   | 242.71942   | 1 |
| 247 | H | 79.93458 | 80.40573 | 69.84457 | -1050.18303 | 159.36419   | -2509.06125 | 1 |
| 248 | C | 81.06503 | 81.99200 | 68.95327 | -706.77696  | -252.88343  | -245.16230  | 1 |
| 249 | H | 81.43631 | 82.42979 | 69.92056 | -1624.64039 | -1665.49085 | 1417.86935  | 1 |
| 250 | H | 81.87284 | 81.30942 | 68.56551 | 2566.10521  | 598.51109   | 693.22305   | 1 |
| 251 | H | 80.96667 | 82.83867 | 68.22014 | -1972.69758 | 107.10018   | -1876.34312 | 1 |
| 252 | C | 78.74946 | 82.18845 | 69.80590 | 412.85148   | 672.58832   | -27.69222   | 1 |
| 253 | H | 79.14209 | 82.59864 | 70.77591 | 1447.02277  | 1762.76533  | -1490.78944 | 1 |
| 254 | H | 78.49464 | 83.06467 | 69.14961 | 1320.77379  | -145.20455  | 2378.68491  | 1 |
| 255 | H | 77.78886 | 81.64867 | 70.03618 | -1512.10848 | 1470.52031  | 1724.75147  | 1 |
| 256 | C | 80.27127 | 79.65148 | 67.11704 | -607.11113  | 499.56689   | 73.73769    | 1 |
| 257 | O | 81.35105 | 80.07758 | 66.75760 | 357.97126   | 460.81534   | 356.68785   | 1 |
| 258 | N | 79.78983 | 78.43206 | 66.95680 | 536.55407   | -368.62270  | 332.76306   | 1 |
| 259 | H | 78.86478 | 78.27062 | 67.35021 | 524.38866   | 2297.69985  | 1367.20941  | 1 |
| 260 | C | 80.66036 | 77.40331 | 66.50203 | 46.50277    | -774.29190  | -147.97904  | 1 |
| 261 | H | 81.48818 | 77.95842 | 66.00284 | 1676.51875  | 1883.29066  | 1032.55549  | 1 |
| 262 | C | 81.17604 | 76.49700 | 67.73632 | -559.41456  | -34.19198   | -556.30433  | 1 |
| 263 | H | 80.29825 | 76.03013 | 68.24410 | -64.66664   | 395.18769   | 2695.05373  | 1 |
| 264 | H | 81.78291 | 75.64903 | 67.33808 | -2703.44278 | -60.40056   | 333.79418   | 1 |
| 265 | C | 81.97974 | 77.30694 | 68.71629 | -519.76435  | 377.31045   | 459.42366   | 1 |
| 266 | H | 81.31972 | 78.09473 | 69.14619 | -1746.74323 | 1667.50644  | -1261.73691 | 1 |
| 267 | C | 82.47530 | 76.40844 | 69.84395 | 570.95554   | 16.46261    | -545.27700  | 1 |
| 268 | H | 83.04982 | 76.98621 | 70.61282 | 2391.58273  | 28.05277    | -1305.07271 | 1 |
| 269 | H | 81.62628 | 75.90243 | 70.37203 | 175.75588   | 917.63458   | 2559.43867  | 1 |
| 270 | H | 83.15330 | 75.60307 | 69.45998 | -1063.97851 | -2155.34650 | 1283.00462  | 1 |
| 271 | C | 83.16830 | 77.98653 | 68.05258 | 193.76014   | 2.62946     | -765.53141  | 1 |
| 272 | H | 83.85680 | 78.44736 | 68.80729 | 507.39394   | -846.55087  | 2539.60089  | 1 |
| 273 | H | 83.77598 | 77.26578 | 67.44637 | 1337.57841  | 1818.19054  | 1526.01994  | 1 |
| 274 | H | 82.82972 | 78.81676 | 67.36162 | 1100.88635  | -1172.91350 | -2199.08909 | 1 |
| 275 | C | 79.81407 | 76.44563 | 65.53158 | -549.21115  | 475.64486   | -309.38218  | 1 |
| 276 | O | 79.91079 | 75.24566 | 65.55038 | 556.06106   | -390.37755  | -78.24250   | 1 |
| 277 | O | 79.00618 | 77.08614 | 64.55868 | -572.27940  | -310.19032  | -209.75862  | 1 |
| 278 | H | 79.10265 | 78.02774 | 64.88013 | -1380.08193 | 2212.14486  | 790.85944   | 1 |

Listing 33: C00033.xmolout

|    |   |          |          |          |             |             |             |        |          |
|----|---|----------|----------|----------|-------------|-------------|-------------|--------|----------|
| 1  |   | 276      |          |          |             |             |             |        |          |
| 2  |   | 150.0000 | 150.0000 | 150.0000 | 0.0000      | 0.0000      | 0.0000***** | 2.7750 | 11100    |
|    |   | 0.2500   | 300.00   | 0.00     | 0.00        | 0.00        | -1293.8604  | 0.0000 | 300.0000 |
| 3  | H | 74.98776 | 63.11486 | 86.00369 | -2043.14101 | -1757.64893 | 399.89339   |        | 1        |
| 4  | N | 75.69024 | 62.95080 | 85.28496 | 426.75047   | 490.45733   | -334.42467  |        | 1        |
| 5  | H | 75.11769 | 62.71686 | 84.47580 | 442.25559   | -1110.30854 | -2448.52907 |        | 1        |
| 6  | C | 76.55752 | 64.03842 | 85.04698 | 415.32972   | -666.39213  | 83.73172    |        | 1        |
| 7  | H | 76.76710 | 64.50496 | 86.03344 | 879.32219   | 2491.00447  | 667.35213   |        | 1        |
| 8  | C | 77.86406 | 63.46844 | 84.29594 | 31.35357    | 477.41777   | 628.23362   |        | 1        |
| 9  | H | 77.55714 | 63.04980 | 83.30707 | 1168.38489  | 2240.25337  | -1019.71136 |        | 1        |
| 10 | H | 78.58148 | 64.29476 | 84.07205 | -360.43770  | 2534.90498  | 931.67112   |        | 1        |
| 11 | C | 78.51001 | 62.39876 | 85.14051 | 463.18208   | 512.70242   | -382.34388  |        | 1        |

|    |   |          |          |          |             |             |             |   |
|----|---|----------|----------|----------|-------------|-------------|-------------|---|
| 12 | H | 77.71229 | 61.69925 | 85.47909 | 1725.29117  | 1863.52247  | -987.07854  | 1 |
| 13 | C | 79.52496 | 61.61222 | 84.32127 | 710.42801   | -144.27427  | -313.15367  | 1 |
| 14 | H | 79.99472 | 60.79097 | 84.92206 | 364.20195   | -1033.13725 | 2494.72524  | 1 |
| 15 | H | 79.05334 | 61.13789 | 83.42190 | 2567.61904  | 335.80679   | 847.48802   | 1 |
| 16 | H | 80.35467 | 62.26921 | 83.95267 | -2587.99029 | 680.92867   | -512.16411  | 1 |
| 17 | C | 79.19049 | 62.99296 | 86.36554 | 268.17616   | 741.64379   | -40.42634   | 1 |
| 18 | H | 79.67512 | 62.20109 | 86.99361 | 1283.54314  | -1945.37420 | -1411.27812 | 1 |
| 19 | H | 79.99001 | 63.72422 | 86.07869 | -1258.57796 | 1317.15249  | -2026.02085 | 1 |
| 20 | H | 78.46241 | 63.53681 | 87.02100 | -2502.84526 | 909.80597   | 575.92391   | 1 |
| 21 | C | 75.77734 | 65.01149 | 83.99498 | 619.36578   | -458.64843  | -172.09273  | 1 |
| 22 | O | 75.42135 | 64.62963 | 82.89395 | -81.40433   | 433.87611   | 522.34594   | 1 |
| 23 | N | 75.61879 | 66.21055 | 84.54110 | 175.23996   | -622.20190  | 341.55523   | 1 |
| 24 | H | 76.02900 | 66.39982 | 85.45465 | -876.57256  | -303.22879  | -2561.90213 | 1 |
| 25 | C | 75.20500 | 67.25915 | 83.66587 | -571.88214  | -534.10783  | -106.15033  | 1 |
| 26 | H | 74.55620 | 66.75515 | 82.91459 | -2713.20841 | -16.25800   | -248.80809  | 1 |
| 27 | C | 74.49391 | 68.40419 | 84.52780 | 166.60354   | 288.16399   | -716.09568  | 1 |
| 28 | H | 75.23390 | 68.78957 | 85.28135 | -2097.85574 | 1636.78449  | -586.18044  | 1 |
| 29 | O | 73.33257 | 67.99992 | 85.27225 | -317.80580  | -363.38227  | 484.43082   | 1 |
| 30 | H | 73.62250 | 68.17796 | 86.18926 | 1863.74748  | -1451.84923 | 1357.29467  | 1 |
| 31 | C | 74.24912 | 69.50509 | 83.43030 | 503.80731   | 517.99032   | 318.51606   | 1 |
| 32 | H | 73.86321 | 70.44921 | 83.88001 | 640.61020   | -2157.10410 | -1536.29104 | 1 |
| 33 | H | 75.18276 | 69.76288 | 82.86728 | 1687.88455  | 465.60692   | 2087.56452  | 1 |
| 34 | H | 73.49822 | 69.16855 | 82.67837 | -1293.07895 | -1899.88581 | -1463.57452 | 1 |
| 35 | C | 76.58689 | 67.88446 | 83.04676 | -153.07550  | -733.68902  | 248.70981   | 1 |
| 36 | O | 77.41336 | 68.34931 | 83.78449 | 186.15459   | -480.78787  | -449.34387  | 1 |
| 37 | N | 76.58140 | 67.81001 | 81.70443 | -487.53139  | 543.18517   | 42.03850    | 1 |
| 38 | C | 77.55351 | 68.49052 | 80.91524 | -699.35871  | 69.34393    | 360.10701   | 1 |
| 39 | H | 78.40285 | 68.72500 | 81.59916 | 2.81126     | -221.99807  | -2715.58072 | 1 |
| 40 | C | 77.81936 | 67.38166 | 79.80320 | -507.46439  | -592.59194  | 122.07761   | 1 |
| 41 | H | 78.35533 | 67.76628 | 78.90832 | -1975.08116 | 525.87560   | -1801.71556 | 1 |
| 42 | H | 78.43083 | 66.54485 | 80.20704 | 1588.27743  | -1913.22100 | 1113.83566  | 1 |
| 43 | C | 76.36006 | 66.92218 | 79.50044 | -613.62442  | -457.55993  | -194.14490  | 1 |
| 44 | H | 75.85407 | 67.63731 | 78.81301 | 1707.54637  | -721.27992  | 1996.92523  | 1 |
| 45 | H | 76.30491 | 65.92453 | 79.01029 | 758.23357   | 2100.81767  | 1560.55011  | 1 |
| 46 | C | 75.69189 | 66.94477 | 80.94056 | -352.41524  | 704.96076   | 49.21465    | 1 |
| 47 | H | 74.67774 | 67.40973 | 80.96873 | 1714.76886  | -2070.42778 | 443.35792   | 1 |
| 48 | H | 75.66732 | 65.95406 | 81.48994 | 1224.15040  | 1801.50881  | 1636.97633  | 1 |
| 49 | C | 76.82953 | 69.82675 | 80.29064 | 566.85117   | 537.05831   | 117.62814   | 1 |
| 50 | O | 75.86181 | 70.32463 | 80.81787 | -550.26779  | -406.08867  | 4.21666     | 1 |
| 51 | N | 77.49094 | 70.22177 | 79.21161 | 566.34832   | -425.77725  | 180.18749   | 1 |
| 52 | H | 78.31181 | 69.69278 | 78.92544 | 644.44502   | 2646.80550  | -52.73430   | 1 |
| 53 | C | 77.13979 | 71.46235 | 78.61153 | 612.34801   | -281.48662  | 411.56221   | 1 |
| 54 | H | 76.26200 | 71.80723 | 79.20818 | 1667.23498  | -1490.75142 | 1556.16753  | 1 |
| 55 | C | 78.42877 | 72.39591 | 78.78360 | -714.45746  | -175.43074  | 286.98927   | 1 |
| 56 | H | 79.29822 | 71.93677 | 78.23850 | -787.09484  | 1763.03619  | -1922.46060 | 1 |
| 57 | O | 78.89319 | 72.60782 | 80.13078 | -429.46514  | 516.51932   | -128.40526  | 1 |
| 58 | H | 79.78270 | 72.20796 | 80.09234 | 1981.82785  | 436.16847   | -1818.18182 | 1 |
| 59 | C | 77.93902 | 73.68606 | 78.03459 | 630.79189   | -468.94448  | 76.03230    | 1 |
| 60 | H | 78.79335 | 74.36795 | 77.79722 | -1775.71861 | 2062.30353  | 131.89849   | 1 |
| 61 | H | 77.41812 | 73.44881 | 77.07929 | -1855.14608 | 88.94118    | 1993.53760  | 1 |
| 62 | H | 77.21512 | 74.25487 | 78.66153 | -1504.82350 | -780.94249  | -2132.90992 | 1 |
| 63 | C | 76.75392 | 71.14081 | 77.04837 | 288.57638   | 618.62814   | -397.00270  | 1 |
| 64 | O | 75.55515 | 71.01754 | 76.79483 | 321.70495   | -185.26452  | 574.37218   | 1 |
| 65 | N | 77.79148 | 71.01807 | 76.26269 | -447.05792  | -446.53431  | 367.76425   | 1 |
| 66 | H | 78.69015 | 71.10372 | 76.73425 | 350.31316   | 1975.63644  | -1843.31522 | 1 |
| 67 | C | 77.72591 | 70.79093 | 74.86518 | -511.23061  | 374.03917   | -471.51480  | 1 |
| 68 | H | 78.79711 | 70.59196 | 74.63648 | 2234.79579  | -898.70890  | -1273.45190 | 1 |
| 69 | C | 76.81121 | 69.51017 | 74.60549 | 529.53781   | -159.34528  | 563.72604   | 1 |
| 70 | H | 77.10766 | 69.03623 | 73.62756 | 654.59388   | 2347.94251  | 1217.51488  | 1 |
| 71 | H | 77.08689 | 68.77875 | 75.41318 | -1526.55661 | 2103.42026  | 817.87394   | 1 |
| 72 | O | 75.38612 | 69.67114 | 74.55523 | -554.84278  | 14.12789    | 399.58769   | 1 |
| 73 | H | 75.24971 | 70.20786 | 75.42677 | 1297.06236  | 2061.84854  | 1220.68812  | 1 |

|     |   |          |          |          |             |             |             |   |
|-----|---|----------|----------|----------|-------------|-------------|-------------|---|
| 74  | C | 77.19222 | 72.10217 | 74.05257 | -662.15484  | -412.13544  | 123.62687   | 1 |
| 75  | O | 76.64878 | 72.00075 | 72.97437 | -540.01537  | -317.05804  | 274.91456   | 1 |
| 76  | N | 77.46104 | 73.25808 | 74.72489 | -202.76299  | -690.00100  | -131.49145  | 1 |
| 77  | H | 78.03173 | 72.91858 | 75.50832 | -702.62132  | -2617.37191 | 281.70413   | 1 |
| 78  | C | 77.94996 | 74.41571 | 74.01048 | -491.73914  | 576.34187   | 222.73509   | 1 |
| 79  | H | 79.05704 | 74.33717 | 74.05393 | 1977.17978  | -1823.58850 | -434.68928  | 1 |
| 80  | C | 77.42757 | 74.46929 | 72.52303 | -649.50797  | -328.66843  | 306.11224   | 1 |
| 81  | H | 76.38090 | 74.08905 | 72.46653 | 2075.07803  | 1452.16490  | -1004.45904 | 1 |
| 82  | C | 77.53804 | 75.95893 | 72.03771 | -615.18735  | -489.99689  | -70.96352   | 1 |
| 83  | H | 77.05793 | 76.10619 | 71.04150 | -1226.32661 | -1724.38906 | -1716.47170 | 1 |
| 84  | H | 77.05004 | 76.65559 | 72.76434 | 2381.64273  | -969.84735  | 900.46860   | 1 |
| 85  | H | 78.60082 | 76.28302 | 71.94621 | 2122.74991  | 1702.23946  | -141.36228  | 1 |
| 86  | C | 78.36862 | 73.70482 | 71.52283 | -501.86074  | -479.61276  | -376.42482  | 1 |
| 87  | H | 77.97104 | 73.74797 | 70.48185 | 993.79261   | -2246.95401 | -1177.81305 | 1 |
| 88  | H | 79.39438 | 74.14089 | 71.50546 | 42.71279    | -626.15391  | -2651.37258 | 1 |
| 89  | H | 78.47343 | 72.62630 | 71.78854 | -2026.39012 | -1590.33709 | -887.82922  | 1 |
| 90  | C | 77.43714 | 75.70060 | 74.85473 | -672.89153  | 382.57394   | -156.34072  | 1 |
| 91  | O | 78.07213 | 76.74351 | 74.80576 | 410.04627   | 221.86223   | 500.35950   | 1 |
| 92  | N | 76.22197 | 75.51769 | 75.41952 | -378.11782  | -443.79414  | -441.10984  | 1 |
| 93  | H | 75.96269 | 74.55131 | 75.19750 | 2404.15973  | -568.14894  | 1149.30085  | 1 |
| 94  | C | 76.00885 | 75.92549 | 76.79411 | -544.54484  | 466.16019   | 331.29119   | 1 |
| 95  | H | 75.72795 | 74.96297 | 77.27269 | -1409.80988 | -170.17955  | 2325.32679  | 1 |
| 96  | C | 77.33223 | 76.53685 | 77.40268 | -184.48284  | 116.78282   | -758.89137  | 1 |
| 97  | H | 78.17951 | 75.81010 | 77.37872 | 1893.78641  | 1861.14652  | 611.04528   | 1 |
| 98  | H | 77.69536 | 77.40722 | 76.80666 | -2170.79665 | -974.19311  | 1327.50117  | 1 |
| 99  | C | 76.99242 | 76.97923 | 78.86250 | 389.51668   | 672.81878   | -138.49152  | 1 |
| 100 | H | 75.97443 | 77.42497 | 78.88079 | 510.64577   | 1933.03327  | 1851.02484  | 1 |
| 101 | H | 76.90740 | 76.09798 | 79.53472 | -2302.30869 | -1105.72939 | -948.89774  | 1 |
| 102 | C | 78.02113 | 78.00802 | 79.45842 | -559.93427  | -126.34590  | 542.30857   | 1 |
| 103 | O | 77.82661 | 78.46544 | 80.55701 | -670.36003  | -111.83166  | 76.36448    | 1 |
| 104 | N | 79.04860 | 78.31320 | 78.63766 | -216.06729  | -537.07037  | 446.51379   | 1 |
| 105 | H | 79.30036 | 77.91914 | 77.72352 | -1251.96487 | 1074.12894  | -2168.52500 | 1 |
| 106 | H | 79.81619 | 78.94365 | 78.89541 | -2451.83023 | -720.73851  | 944.84612   | 1 |
| 107 | C | 74.74528 | 76.92503 | 76.87851 | 546.24052   | -563.88337  | -85.11809   | 1 |
| 108 | O | 73.84813 | 76.64109 | 77.67178 | 71.70702    | -307.40463  | 606.69673   | 1 |
| 109 | N | 74.87995 | 78.04717 | 76.19451 | 479.90863   | -504.50129  | 222.86849   | 1 |
| 110 | C | 73.73320 | 78.78650 | 75.71184 | 75.51268    | -600.91904  | 506.73700   | 1 |
| 111 | H | 72.88337 | 78.56376 | 76.39144 | -2033.61562 | 1795.30103  | 254.89480   | 1 |
| 112 | C | 74.31266 | 80.26245 | 75.90523 | 523.79067   | 517.99274   | 284.45581   | 1 |
| 113 | H | 73.71029 | 81.05655 | 75.40372 | 1599.61665  | -1127.00911 | 1895.98173  | 1 |
| 114 | H | 74.33624 | 80.53770 | 76.98390 | -1881.83093 | 1275.82488  | -1501.55016 | 1 |
| 115 | C | 75.75227 | 80.10206 | 75.33356 | -600.05639  | -404.05026  | 316.64485   | 1 |
| 116 | H | 75.74152 | 79.98298 | 74.22582 | -2597.05260 | 496.36221   | 657.73249   | 1 |
| 117 | H | 76.43264 | 80.95243 | 75.56474 | -1666.24518 | 1294.38985  | -1723.90591 | 1 |
| 118 | C | 76.15247 | 78.75319 | 76.06978 | 493.57570   | -129.95376  | -602.56394  | 1 |
| 119 | H | 76.85239 | 78.07520 | 75.48561 | -1469.08415 | -637.84797  | 2204.22581  | 1 |
| 120 | H | 76.53165 | 78.88639 | 77.11141 | -1038.97840 | 1068.88701  | -2280.71789 | 1 |
| 121 | C | 73.40102 | 78.31675 | 74.23039 | 188.88100   | 241.05089   | -727.87821  | 1 |
| 122 | O | 72.35318 | 79.28659 | 73.21895 | 531.88613   | -49.19943   | 427.07960   | 1 |
| 123 | N | 74.62636 | 78.08804 | 73.55669 | 708.14833   | 26.93417    | -179.73509  | 1 |
| 124 | H | 75.09076 | 77.46005 | 74.23439 | -2232.69501 | -1179.09831 | 1023.94816  | 1 |
| 125 | C | 74.59918 | 77.59181 | 72.21120 | -738.32412  | 259.92548   | 104.42456   | 1 |
| 126 | H | 75.45986 | 76.89238 | 72.23170 | 2028.89123  | 1260.02983  | 1311.33324  | 1 |
| 127 | C | 73.26944 | 76.80818 | 71.86053 | -258.65678  | -345.52513  | 661.28459   | 1 |
| 128 | H | 72.39502 | 77.21282 | 72.41356 | -1826.06090 | -1801.46097 | -918.64554  | 1 |
| 129 | C | 72.93673 | 76.79665 | 70.35757 | -541.23400  | 531.92970   | -218.41428  | 1 |
| 130 | H | 71.95289 | 76.31011 | 70.19378 | 1311.73218  | -2219.18200 | 882.19023   | 1 |
| 131 | H | 72.83286 | 77.83531 | 69.97284 | -1048.71298 | 1223.58118  | -2196.97971 | 1 |
| 132 | H | 75.08663 | 76.59199 | 69.55682 | 419.06414   | 1903.92898  | 1903.44670  | 1 |
| 133 | C | 73.54034 | 75.28369 | 72.22096 | -423.86431  | 152.66566   | -648.55262  | 1 |
| 134 | H | 72.98056 | 74.63699 | 71.49924 | 105.68386   | -2342.50080 | 1387.51238  | 1 |
| 135 | H | 74.61567 | 75.02924 | 72.07569 | -1695.63603 | -1484.73621 | -1531.02793 | 1 |

|     |   |          |          |          |             |             |             |   |
|-----|---|----------|----------|----------|-------------|-------------|-------------|---|
| 136 | H | 72.31661 | 75.52879 | 74.19839 | -1853.57121 | -487.39031  | 1936.59343  | 1 |
| 137 | C | 74.93423 | 78.89275 | 71.28029 | 539.71428   | -510.58232  | 267.58633   | 1 |
| 138 | O | 74.08152 | 79.57823 | 70.76431 | -15.93758   | -278.34085  | -624.49402  | 1 |
| 139 | N | 76.26108 | 78.95602 | 71.11949 | -676.81886  | 12.05292    | 276.17960   | 1 |
| 140 | H | 76.82563 | 78.33063 | 71.69262 | -1694.44250 | -373.84189  | -2100.66098 | 1 |
| 141 | C | 76.84876 | 80.15348 | 70.57077 | 412.33078   | -664.70360  | 108.35451   | 1 |
| 142 | H | 76.39498 | 80.98186 | 71.15989 | 1765.77476  | 1294.44366  | 1621.76594  | 1 |
| 143 | C | 78.40427 | 80.01114 | 70.79335 | -179.66635  | -721.95667  | -264.73915  | 1 |
| 144 | H | 78.63731 | 79.74926 | 71.85015 | -607.34922  | 2587.87032  | -598.10018  | 1 |
| 145 | H | 78.79857 | 79.16615 | 70.18533 | -359.69332  | -1479.13954 | -2259.74260 | 1 |
| 146 | C | 79.09949 | 81.35371 | 70.38468 | -240.01076  | 616.02425   | 431.85322   | 1 |
| 147 | H | 78.72738 | 81.69194 | 69.38432 | -1359.17131 | 782.54425   | 2227.99181  | 1 |
| 148 | H | 78.84449 | 82.17028 | 71.09694 | -820.36667  | 85.81767    | -2596.78715 | 1 |
| 149 | C | 80.66092 | 81.10949 | 70.33661 | -513.07015  | 236.18570   | -551.87280  | 1 |
| 150 | H | 81.06707 | 80.91071 | 71.35501 | 1816.11944  | -1183.11722 | -1650.94321 | 1 |
| 151 | H | 80.90277 | 80.20517 | 69.73218 | -1800.04429 | -1361.53473 | 1526.34643  | 1 |
| 152 | C | 81.30913 | 82.36633 | 69.71034 | 726.08972   | -253.19732  | -179.64713  | 1 |
| 153 | H | 81.03053 | 82.54839 | 68.65300 | 1224.27271  | -456.51798  | -2390.90304 | 1 |
| 154 | H | 81.18073 | 83.29578 | 70.29993 | 1206.40339  | -1150.93514 | -2154.90344 | 1 |
| 155 | N | 82.85698 | 82.13285 | 69.67019 | 329.70796   | -633.68968  | -155.67358  | 1 |
| 156 | H | 83.42668 | 82.91755 | 69.24009 | 1348.31305  | 1938.76845  | 1359.00643  | 1 |
| 157 | H | 83.35137 | 82.00218 | 70.60031 | 2096.92035  | 1446.54551  | -966.48890  | 1 |
| 158 | H | 83.20495 | 81.29662 | 69.11671 | -1197.07217 | -2303.53719 | 827.28733   | 1 |
| 159 | C | 76.51349 | 80.30636 | 68.99569 | -378.01186  | -556.17301  | -413.96481  | 1 |
| 160 | O | 76.96249 | 81.23438 | 68.35895 | -409.44433  | -307.55053  | -453.30833  | 1 |
| 161 | N | 75.80589 | 79.26096 | 68.51164 | -429.02477  | 524.70884   | 274.08502   | 1 |
| 162 | H | 75.45541 | 78.65876 | 69.26125 | 1706.34263  | -1425.96036 | 1574.38926  | 1 |
| 163 | C | 74.87852 | 79.62914 | 67.45647 | -45.25864   | -626.22952  | 478.93267   | 1 |
| 164 | H | 74.54691 | 80.66803 | 67.67596 | 1988.63164  | 570.90773   | 1772.87287  | 1 |
| 165 | C | 75.77882 | 79.52900 | 66.17250 | 551.77128   | -20.49526   | -564.54996  | 1 |
| 166 | H | 76.54639 | 80.33805 | 66.18742 | 1434.61535  | -1753.10253 | 1513.99471  | 1 |
| 167 | H | 76.35533 | 78.57668 | 66.18687 | -714.67738  | 1819.09770  | 1898.36494  | 1 |
| 168 | C | 74.89463 | 79.60798 | 64.88237 | 446.99263   | -555.77305  | 338.97221   | 1 |
| 169 | H | 74.08547 | 78.84252 | 64.90245 | 1953.68466  | 1892.25957  | -161.67766  | 1 |
| 170 | H | 74.39052 | 80.59564 | 64.78786 | -403.03785  | 2688.07032  | -188.43591  | 1 |
| 171 | C | 75.90727 | 79.34608 | 63.69607 | 567.86262   | 335.74681   | 434.04421   | 1 |
| 172 | H | 76.70815 | 80.12079 | 63.68668 | -1080.02275 | 1568.26081  | -1948.78900 | 1 |
| 173 | H | 76.43189 | 78.37335 | 63.83895 | -919.54108  | 2111.34692  | 1456.13463  | 1 |
| 174 | C | 75.13223 | 79.34631 | 62.35886 | 195.81897   | 173.33862   | -745.11536  | 1 |
| 175 | H | 74.39291 | 78.52751 | 62.25187 | 1405.67949  | -2301.21089 | -390.08113  | 1 |
| 176 | H | 74.66654 | 80.31615 | 62.09328 | -940.37328  | -1118.32446 | 2299.72133  | 1 |
| 177 | N | 76.18975 | 79.08351 | 61.23318 | 319.26422   | 656.36007   | -42.02424   | 1 |
| 178 | H | 75.81425 | 79.05860 | 60.24181 | 1961.03633  | 619.91968   | 1787.09422  | 1 |
| 179 | H | 76.97884 | 79.78749 | 61.14064 | 854.14343   | -2156.80752 | 1429.08711  | 1 |
| 180 | H | 76.72124 | 78.16575 | 61.27809 | 1237.02905  | -1378.50857 | -1998.28500 | 1 |
| 181 | C | 73.67159 | 78.53808 | 67.50837 | 532.53319   | -268.57236  | 517.55729   | 1 |
| 182 | O | 72.51686 | 78.89730 | 67.53514 | 266.16714   | -290.73804  | -558.88002  | 1 |
| 183 | N | 74.16164 | 77.29087 | 67.46419 | -226.25352  | 640.49678   | -270.32839  | 1 |
| 184 | H | 75.17729 | 77.19603 | 67.42442 | 2007.69063  | -1035.27229 | 1523.50231  | 1 |
| 185 | C | 73.35194 | 76.26932 | 67.99540 | -540.76542  | -573.33303  | 49.50000    | 1 |
| 186 | H | 72.33565 | 76.71688 | 68.06182 | -2374.20950 | -1036.76023 | 843.75774   | 1 |
| 187 | C | 73.43986 | 75.00427 | 67.05589 | -77.09082   | 666.87422   | -415.84136  | 1 |
| 188 | H | 74.48475 | 74.59434 | 67.09237 | -985.81834  | 617.19825   | 2463.91927  | 1 |
| 189 | O | 73.14713 | 75.23571 | 65.65411 | 293.29899   | -391.65602  | -477.80926  | 1 |
| 190 | H | 74.00143 | 75.02189 | 65.24092 | 2528.72714  | -681.76262  | -751.27122  | 1 |
| 191 | C | 72.44538 | 74.01280 | 67.76778 | 252.47363   | -605.14473  | 440.05134   | 1 |
| 192 | H | 72.44209 | 73.01425 | 67.27177 | -2052.65063 | 1456.49051  | -1043.51830 | 1 |
| 193 | H | 72.70616 | 73.84603 | 68.84113 | -2152.98800 | -1661.97574 | -161.70652  | 1 |
| 194 | H | 71.39895 | 74.39619 | 67.74084 | -473.12726  | -1584.27339 | 2165.61725  | 1 |
| 195 | C | 74.10534 | 75.97983 | 69.49897 | 360.36307   | 488.46713   | 505.10056   | 1 |
| 196 | O | 74.49788 | 74.83226 | 69.80204 | -200.08817  | -528.03552  | -385.82850  | 1 |
| 197 | N | 71.44721 | 73.26443 | 70.58358 | -597.54095  | -226.44775  | 355.20479   | 2 |

|     |   |          |          |          |             |             |             |   |
|-----|---|----------|----------|----------|-------------|-------------|-------------|---|
| 198 | H | 70.52172 | 73.60837 | 70.85780 | 2179.23655  | -1300.70981 | -991.33835  | 2 |
| 199 | C | 72.02747 | 72.74412 | 71.53329 | -687.68921  | 297.39807   | -249.45179  | 2 |
| 200 | H | 71.47921 | 72.74543 | 72.50004 | -349.16256  | -2467.37713 | -1101.72831 | 2 |
| 201 | C | 73.50421 | 72.19518 | 71.32290 | 672.47345   | 361.54328   | -201.62880  | 2 |
| 202 | H | 74.21944 | 73.04236 | 71.19577 | 1541.41502  | 582.18425   | 2169.97026  | 2 |
| 203 | H | 73.82815 | 71.64191 | 72.23642 | -2534.67717 | 60.25153    | 997.72295   | 2 |
| 204 | C | 73.57671 | 71.29555 | 70.07843 | 574.26774   | -389.43119  | -377.02542  | 2 |
| 205 | C | 72.92520 | 70.02605 | 70.06035 | 688.82679   | -287.33580  | -257.96133  | 2 |
| 206 | H | 72.33997 | 69.68072 | 70.93204 | 331.14182   | 1470.38163  | 2269.80013  | 2 |
| 207 | C | 74.32350 | 71.74215 | 68.94674 | -383.52382  | -675.04808  | 144.24917   | 2 |
| 208 | H | 74.82072 | 72.73196 | 68.95853 | 4.09847     | 1517.59662  | 2262.86397  | 2 |
| 209 | C | 73.04968 | 69.22923 | 68.92185 | -134.76730  | 428.45285   | -649.50303  | 2 |
| 210 | H | 72.55085 | 68.24437 | 68.90849 | -903.23433  | 1600.49020  | 2011.53387  | 2 |
| 211 | C | 74.41993 | 70.90702 | 67.83045 | -335.53281  | -615.00040  | -364.39058  | 2 |
| 212 | H | 75.00593 | 71.25893 | 66.96363 | 1596.45398  | -1369.33862 | 1732.02659  | 2 |
| 213 | C | 73.79719 | 69.62582 | 67.77513 | 585.48547   | -340.24194  | -406.23938  | 2 |
| 214 | O | 73.89398 | 68.76695 | 66.64875 | -419.15649  | -173.04408  | -511.94141  | 2 |
| 215 | H | 74.47320 | 69.31622 | 66.06991 | -1071.84350 | 1559.71507  | -1960.13012 | 2 |
| 216 | C | 73.12299 | 74.92834 | 73.66258 | 291.41878   | -183.13091  | 710.72246   | 1 |
| 217 | O | 73.42332 | 73.98951 | 74.35957 | 379.87695   | 523.47396   | -222.23622  | 1 |
| 218 | N | 70.06111 | 76.76292 | 72.17417 | 564.30591   | 373.09380   | 277.24371   | 1 |
| 219 | H | 70.13522 | 77.41632 | 71.40177 | -120.59931  | -2436.07824 | -1214.35098 | 1 |
| 220 | C | 70.32406 | 77.28453 | 73.26567 | 404.07514   | -299.37480  | 608.84009   | 1 |
| 221 | H | 72.86333 | 77.34948 | 74.18956 | -1071.07882 | -841.69025  | 2359.66467  | 1 |
| 222 | C | 70.72128 | 78.75831 | 73.40208 | -683.12807  | 68.71770    | -390.13096  | 1 |
| 223 | H | 70.28261 | 79.39033 | 72.60262 | 2068.88918  | 1596.58590  | 770.89603   | 1 |
| 224 | H | 70.44939 | 79.18255 | 74.38802 | 1379.86429  | 2342.49779  | -179.85638  | 1 |
| 225 | C | 72.40583 | 80.88593 | 73.79076 | -176.39967  | 537.49466   | 550.97268   | 1 |
| 226 | H | 72.13329 | 80.76388 | 74.86219 | -396.28051  | 1942.22168  | 1869.33314  | 1 |
| 227 | H | 73.49043 | 81.11907 | 73.73002 | -94.44700   | 586.00678   | -2659.20016 | 1 |
| 228 | C | 71.53921 | 81.97596 | 73.09636 | -291.69381  | -718.18079  | -150.72929  | 1 |
| 229 | H | 71.80965 | 82.21977 | 72.03398 | -2303.38776 | 1089.76242  | 964.62032   | 1 |
| 230 | H | 70.43316 | 81.79679 | 73.19321 | 884.16729   | 2568.80533  | -207.74283  | 1 |
| 231 | N | 71.89584 | 83.03672 | 73.94329 | -594.49522  | -252.81478  | 342.29276   | 1 |
| 232 | H | 71.94101 | 82.84417 | 74.93504 | -1735.17426 | 2084.05705  | -263.71605  | 1 |
| 233 | C | 72.12107 | 84.23406 | 73.56673 | 595.23177   | -271.52487  | 442.22352   | 1 |
| 234 | N | 72.03228 | 84.54336 | 72.20699 | 585.53813   | -424.79750  | -105.81303  | 1 |
| 235 | H | 71.79527 | 83.93708 | 71.42268 | 959.88797   | 1327.56823  | -2177.11905 | 1 |
| 236 | H | 72.17720 | 85.46769 | 71.79953 | 1578.48647  | 16.27378    | -2220.76233 | 1 |
| 237 | N | 72.42592 | 85.04622 | 74.66688 | -452.17763  | -390.33541  | -421.51853  | 1 |
| 238 | H | 72.46926 | 84.81536 | 75.65864 | 470.226107  | 1974.25629  | -1817.92087 | 1 |
| 239 | H | 72.62135 | 86.04563 | 74.60355 | 1856.67307  | -1573.97321 | -1224.35416 | 1 |
| 240 | C | 70.29100 | 76.37286 | 74.55937 | -531.47271  | -581.45780  | -55.06206   | 1 |
| 241 | O | 69.83994 | 75.24643 | 74.59214 | -243.00837  | 192.73507   | 609.52485   | 1 |
| 242 | N | 70.90906 | 77.02874 | 75.59150 | 343.49288   | -644.25607  | 38.09164    | 1 |
| 243 | H | 71.17122 | 77.98919 | 75.33933 | -1691.16043 | -1535.97525 | -1484.73099 | 1 |
| 244 | C | 70.24492 | 76.86381 | 76.87265 | 542.66492   | 350.14337   | 454.42563   | 1 |
| 245 | H | 69.18490 | 76.64467 | 76.61834 | 1209.57979  | -2396.95920 | 463.86744   | 1 |
| 246 | C | 70.94700 | 75.67813 | 77.64411 | -737.14309  | 145.93010   | 242.71942   | 1 |
| 247 | H | 72.05451 | 75.86458 | 77.71651 | -1050.18303 | 159.36419   | -2509.06125 | 1 |
| 248 | C | 70.29021 | 75.64277 | 79.06815 | -706.77696  | -252.88343  | -245.16230  | 1 |
| 249 | H | 70.70481 | 74.81902 | 79.69423 | -1624.64039 | -1665.49085 | 1417.86935  | 1 |
| 250 | H | 70.46673 | 76.59779 | 79.61765 | 2566.10521  | 598.51109   | 693.22305   | 1 |
| 251 | H | 69.18646 | 75.49661 | 79.00812 | -1972.69758 | 107.10018   | -1876.34312 | 1 |
| 252 | C | 70.67286 | 74.31849 | 76.91021 | 412.85148   | 672.58832   | -27.69222   | 1 |
| 253 | H | 70.93071 | 73.44443 | 77.55382 | 1447.02277  | 1762.76533  | -1490.78944 | 1 |
| 254 | H | 69.59827 | 74.21927 | 76.61957 | 1320.77379  | -145.20455  | 2378.68491  | 1 |
| 255 | H | 71.28083 | 74.23171 | 75.97475 | -1512.10848 | 1470.52031  | 1724.75147  | 1 |
| 256 | C | 70.44558 | 78.24156 | 77.70290 | -607.11113  | 499.56689   | 73.73769    | 1 |
| 257 | O | 69.47394 | 78.93752 | 77.87393 | 357.97126   | 460.81534   | 356.68785   | 1 |
| 258 | N | 71.70666 | 78.46432 | 78.10493 | 536.55407   | -368.62270  | 332.76306   | 1 |
| 259 | H | 72.47968 | 77.77432 | 77.96629 | 524.38866   | 2297.69985  | 1367.20941  | 1 |

|     |   |          |          |          |             |             |             |   |
|-----|---|----------|----------|----------|-------------|-------------|-------------|---|
| 260 | C | 71.80184 | 79.57998 | 79.02210 | 46.50277    | -774.29190  | -147.97904  | 1 |
| 261 | H | 70.95563 | 79.41530 | 79.72793 | 1676.51875  | 1883.29066  | 1032.55549  | 1 |
| 262 | C | 73.23152 | 79.65359 | 79.68889 | -559.41456  | -34.19198   | -556.30433  | 1 |
| 263 | H | 73.96795 | 79.97339 | 78.91890 | -64.66664   | 395.18769   | 2695.05373  | 1 |
| 264 | H | 73.24404 | 80.45240 | 80.46386 | -2703.44278 | -60.40056   | 333.79418   | 1 |
| 265 | C | 73.72139 | 78.29999 | 80.30866 | -519.76435  | 377.31045   | 459.42366   | 1 |
| 266 | H | 73.73863 | 77.49608 | 79.52871 | -1746.74323 | 1667.50644  | -1261.73691 | 1 |
| 267 | C | 75.16871 | 78.65074 | 80.81530 | 570.95554   | 16.46261    | -545.27700  | 1 |
| 268 | H | 75.73648 | 77.74368 | 81.13511 | 2391.58273  | 28.05277    | -1305.07271 | 1 |
| 269 | H | 75.76244 | 79.15492 | 80.01463 | 175.75588   | 917.63458   | 2559.43867  | 1 |
| 270 | H | 75.14311 | 79.34668 | 81.68572 | -1063.97851 | -2155.34650 | 1283.00462  | 1 |
| 271 | C | 72.84748 | 77.86947 | 81.53985 | 193.76014   | 2.62946     | -765.53141  | 1 |
| 272 | H | 73.25449 | 76.95277 | 82.02724 | 507.39394   | -846.55087  | 2539.60089  | 1 |
| 273 | H | 72.81127 | 78.66960 | 82.31527 | 1337.57841  | 1818.19054  | 1526.01994  | 1 |
| 274 | H | 71.79705 | 77.64738 | 81.24012 | 1100.88635  | -1172.91350 | -2199.08909 | 1 |
| 275 | C | 71.67903 | 80.97580 | 78.20883 | -549.21115  | 475.64486   | -309.38218  | 1 |
| 276 | O | 72.13948 | 81.15773 | 77.11041 | 556.06106   | -390.37755  | -78.24250   | 1 |
| 277 | O | 71.20984 | 82.06371 | 78.97705 | -572.27940  | -310.19032  | -209.75862  | 1 |
| 278 | H | 70.92027 | 81.56079 | 79.79176 | -1380.08193 | 2212.14486  | 790.85944   | 1 |

Listing 34: C00034.xmolout

|    |   |          |          |          |             |             |             |        |          |
|----|---|----------|----------|----------|-------------|-------------|-------------|--------|----------|
| 1  |   | 276      |          |          |             |             |             |        |          |
| 2  |   | 150.0000 | 150.0000 | 150.0000 | 0.0000      | 0.0000      | 0.0000***** | 1.2297 | 4919     |
|    |   | 0.2500   | 300.00   | 0.00     | 0.00        | 0.00        | -1293.8275  | 0.0000 | 300.0000 |
| 3  | H | 70.75458 | 82.90491 | 85.29892 | -2043.14101 | -1757.64893 | 399.89339   |        | 1        |
| 4  | N | 71.74711 | 82.75800 | 85.47461 | 426.75047   | 490.45733   | -334.42467  |        | 1        |
| 5  | H | 71.93991 | 81.90077 | 84.95087 | 442.25559   | -1110.30854 | -2448.52907 |        | 1        |
| 6  | C | 72.57548 | 83.82556 | 85.05684 | 415.32972   | -666.39213  | 83.73172    |        | 1        |
| 7  | H | 71.94553 | 84.74304 | 85.02769 | 879.32219   | 2491.00447  | 667.35213   |        | 1        |
| 8  | C | 73.79955 | 83.95179 | 86.10874 | 31.35357    | 477.41777   | 628.23362   |        | 1        |
| 9  | H | 74.36913 | 82.99042 | 86.13629 | 1168.38489  | 2240.25337  | -1019.71136 |        | 1        |
| 10 | H | 74.52841 | 84.72842 | 85.77534 | -360.43770  | 2534.90498  | 931.67112   |        | 1        |
| 11 | C | 73.24742 | 84.27501 | 87.46873 | 463.18208   | 512.70242   | -382.34388  |        | 1        |
| 12 | H | 72.32777 | 83.66593 | 87.62375 | 1725.29117  | 1863.52247  | -987.07854  |        | 1        |
| 13 | C | 74.25761 | 83.90609 | 88.54899 | 710.42801   | -144.27427  | -313.15367  |        | 1        |
| 14 | H | 73.86296 | 84.11904 | 89.57561 | 364.20195   | -1033.13725 | 2494.72524  |        | 1        |
| 15 | H | 74.52169 | 82.81776 | 88.51277 | 2567.61904  | 335.80679   | 847.48802   |        | 1        |
| 16 | H | 75.21163 | 84.48198 | 88.43370 | -2587.99029 | 680.92867   | -512.16411  |        | 1        |
| 17 | C | 72.88818 | 85.75035 | 87.58683 | 268.17616   | 741.64379   | -40.42634   |        | 1        |
| 18 | H | 72.45327 | 85.99052 | 88.59117 | 1283.54314  | -1945.37420 | -1411.27812 |        | 1        |
| 19 | H | 73.78731 | 86.40503 | 87.45126 | -1258.57796 | 1317.15249  | -2026.02085 |        | 1        |
| 20 | H | 72.13539 | 86.05844 | 86.81665 | -2502.84526 | 909.80597   | 575.92391   |        | 1        |
| 21 | C | 73.14422 | 83.36606 | 83.62263 | 619.36578   | -458.64843  | -172.09273  |        | 1        |
| 22 | O | 73.11213 | 82.20803 | 83.21919 | -81.40433   | 433.87611   | 522.34594   |        | 1        |
| 23 | N | 73.75218 | 84.41932 | 83.02660 | 175.23996   | -622.20190  | 341.55523   |        | 1        |
| 24 | H | 73.61816 | 85.26133 | 83.60039 | -876.57256  | -303.22879  | -2561.90213 |        | 1        |
| 25 | C | 73.32205 | 84.61364 | 81.64148 | -571.88214  | -534.10783  | -106.15033  |        | 1        |
| 26 | H | 72.22287 | 84.45265 | 81.69284 | -2713.20841 | -16.25800   | -248.80809  |        | 1        |
| 27 | C | 73.67756 | 86.12282 | 81.30269 | 166.60354   | 288.16399   | -716.09568  |        | 1        |
| 28 | H | 74.79338 | 86.23543 | 81.21023 | -2097.85574 | 1636.78449  | -586.18044  |        | 1        |
| 29 | O | 73.26238 | 87.09104 | 82.29476 | -317.80580  | -363.38227  | 484.43082   |        | 1        |
| 30 | H | 74.11382 | 87.52003 | 82.50312 | 1863.74748  | -1451.84923 | 1357.29467  |        | 1        |
| 31 | C | 73.02907 | 86.28130 | 79.87826 | 503.80731   | 517.99032   | 318.51606   |        | 1        |
| 32 | H | 73.27555 | 87.26894 | 79.42395 | 640.61020   | -2157.10410 | -1536.29104 |        | 1        |
| 33 | H | 73.37825 | 85.49019 | 79.17143 | 1687.88455  | 465.60692   | 2087.56452  |        | 1        |
| 34 | H | 71.91764 | 86.21027 | 79.92948 | -1293.07895 | -1899.88581 | -1463.57452 |        | 1        |
| 35 | C | 74.01552 | 83.54076 | 80.65009 | -153.07550  | -733.68902  | 248.70981   |        | 1        |
| 36 | O | 73.36498 | 83.26086 | 79.67618 | 186.15459   | -480.78787  | -449.34387  |        | 1        |
| 37 | N | 75.28430 | 83.20307 | 80.92320 | -487.53139  | 543.18517   | 42.03850    |        | 1        |
| 38 | C | 75.92211 | 82.12199 | 80.23298 | -699.35871  | 69.34393    | 360.10701   |        | 1        |
| 39 | H | 75.31977 | 81.90528 | 79.31851 | 2.81126     | -221.99807  | -2715.58072 |        | 1        |

|     |   |          |          |          |             |             |             |   |
|-----|---|----------|----------|----------|-------------|-------------|-------------|---|
| 40  | C | 77.38217 | 82.72690 | 79.99636 | -507.46439  | -592.59194  | 122.07761   | 1 |
| 41  | H | 78.13813 | 81.94229 | 79.77067 | -1975.08116 | 525.87560   | -1801.71556 | 1 |
| 42  | H | 77.39721 | 83.44596 | 79.14810 | 1588.27743  | -1913.22100 | 1113.83566  | 1 |
| 43  | C | 77.62370 | 83.44270 | 81.35927 | -613.62442  | -457.55993  | -194.14490  | 1 |
| 44  | H | 77.88672 | 82.71061 | 82.15598 | 1707.54637  | -721.27992  | 1996.92523  | 1 |
| 45  | H | 78.44830 | 84.18983 | 81.32933 | 758.23357   | 2100.81767  | 1560.55011  | 1 |
| 46  | C | 76.19930 | 84.09258 | 81.62954 | -352.41524  | 704.96076   | 49.21465    | 1 |
| 47  | H | 75.88959 | 84.11089 | 82.70099 | 1714.76886  | -2070.42778 | 443.35792   | 1 |
| 48  | H | 76.05356 | 85.10479 | 81.18357 | 1224.15040  | 1801.50881  | 1636.97633  | 1 |
| 49  | C | 76.14715 | 80.84241 | 81.20387 | 566.85117   | 537.05831   | 117.62814   | 1 |
| 50  | O | 76.99099 | 80.00774 | 80.90677 | -550.26779  | -406.08867  | 4.21666     | 1 |
| 51  | N | 75.35214 | 80.85111 | 82.25950 | 566.34832   | -425.77725  | 180.18749   | 1 |
| 52  | H | 74.63261 | 81.59015 | 82.38883 | 644.44502   | 2646.80550  | -52.73430   | 1 |
| 53  | C | 75.91565 | 80.20164 | 83.42170 | 612.34801   | -281.48662  | 411.56221   | 1 |
| 54  | H | 77.00532 | 80.20312 | 83.18405 | 1667.23498  | -1490.75142 | 1556.16753  | 1 |
| 55  | C | 75.52320 | 81.11762 | 84.66323 | -714.45746  | -175.43074  | 286.98927   | 1 |
| 56  | H | 74.40170 | 81.10993 | 84.74729 | -787.09484  | 1763.03619  | -1922.46060 | 1 |
| 57  | O | 75.90918 | 82.50724 | 84.52008 | -429.46514  | 516.51932   | -128.40526  | 1 |
| 58  | H | 75.08775 | 82.88034 | 84.13561 | 1981.82785  | 436.16847   | -1818.18182 | 1 |
| 59  | C | 76.14087 | 80.37651 | 85.90084 | 630.79189   | -468.94448  | 76.03230    | 1 |
| 60  | H | 75.86207 | 80.87995 | 86.85621 | -1775.71861 | 2062.30353  | 131.89849   | 1 |
| 61  | H | 75.79111 | 79.31799 | 85.96853 | -1855.14608 | 88.94118    | 1993.53760  | 1 |
| 62  | H | 77.25470 | 80.35886 | 85.85102 | -1504.82350 | -780.94249  | -2132.90992 | 1 |
| 63  | C | 75.32641 | 78.68724 | 83.44562 | 288.57638   | 618.62814   | -397.00270  | 1 |
| 64  | O | 74.57460 | 78.30637 | 84.33823 | 321.70495   | -185.26452  | 574.37218   | 1 |
| 65  | N | 75.83625 | 78.03079 | 82.44091 | -447.05792  | -446.53431  | 367.76425   | 1 |
| 66  | H | 76.44406 | 78.54493 | 81.76216 | 350.31316   | 1975.63644  | -1843.31522 | 1 |
| 67  | C | 75.59627 | 76.64110 | 82.22040 | -511.23061  | 374.03917   | -471.51480  | 1 |
| 68  | H | 76.59283 | 76.37378 | 81.80191 | 2234.79579  | -898.70890  | -1273.45190 | 1 |
| 69  | C | 75.29177 | 75.90783 | 83.60708 | 529.53781   | -159.34528  | 563.72604   | 1 |
| 70  | H | 75.62915 | 74.83896 | 83.50656 | 654.59388   | 2347.94251  | 1217.51488  | 1 |
| 71  | H | 75.95190 | 76.39642 | 84.37431 | -1526.55661 | 2103.42026  | 817.87394   | 1 |
| 72  | O | 73.92964 | 75.88307 | 84.06746 | -554.84278  | 14.12789    | 399.58769   | 1 |
| 73  | H | 73.88618 | 76.84485 | 84.43997 | 1297.06236  | 2061.84854  | 1220.68812  | 1 |
| 74  | C | 74.49455 | 76.47444 | 81.04896 | -662.15484  | -412.13544  | 123.62687   | 1 |
| 75  | O | 74.47483 | 77.20496 | 80.08988 | -540.01537  | -317.05804  | 274.91456   | 1 |
| 76  | N | 73.80188 | 75.31991 | 81.21257 | -202.76299  | -690.00100  | -131.49145  | 1 |
| 77  | H | 73.96953 | 74.92448 | 82.14438 | -702.62132  | -2617.37191 | 281.70413   | 1 |
| 78  | C | 72.43684 | 75.19014 | 80.66527 | -491.73914  | 576.34187   | 222.73509   | 1 |
| 79  | H | 71.99393 | 74.42723 | 81.34696 | 1977.17978  | -1823.58850 | -434.68928  | 1 |
| 80  | C | 71.71127 | 76.51426 | 80.76923 | -649.50797  | -328.66843  | 306.11224   | 1 |
| 81  | H | 72.27213 | 77.26453 | 80.16106 | 2075.07803  | 1452.16490  | -1004.45904 | 1 |
| 82  | C | 70.29369 | 76.43486 | 80.23240 | -615.18735  | -489.99689  | -70.96352   | 1 |
| 83  | H | 69.75453 | 77.41700 | 80.32995 | -1226.32661 | -1724.38906 | -1716.47170 | 1 |
| 84  | H | 70.28086 | 76.14874 | 79.13895 | 2381.64273  | -969.84735  | 900.46860   | 1 |
| 85  | H | 69.68602 | 75.66466 | 80.78194 | 2122.74991  | 1702.23946  | -141.36228  | 1 |
| 86  | C | 71.67588 | 77.01721 | 82.20269 | -501.86074  | -479.61276  | -376.42482  | 1 |
| 87  | H | 71.14284 | 78.00312 | 82.28870 | 993.79261   | -2246.95401 | -1177.81305 | 1 |
| 88  | H | 71.14974 | 76.29167 | 82.88174 | 42.71279    | -626.15391  | -2651.37258 | 1 |
| 89  | H | 72.71444 | 77.15967 | 82.61620 | -2026.39012 | -1590.33709 | -887.82922  | 1 |
| 90  | C | 72.55472 | 74.59623 | 79.13252 | -672.89153  | 382.57394   | -156.34072  | 1 |
| 91  | O | 71.61266 | 74.68262 | 78.37775 | 410.04627   | 221.86223   | 500.35950   | 1 |
| 92  | N | 73.69672 | 73.96115 | 78.92471 | -378.11782  | -443.79414  | -441.10984  | 1 |
| 93  | H | 74.40320 | 74.02013 | 79.65429 | 2404.15973  | -568.14894  | 1149.30085  | 1 |
| 94  | C | 73.88386 | 73.27423 | 77.68239 | -544.54484  | 466.16019   | 331.29119   | 1 |
| 95  | H | 72.90030 | 72.81428 | 77.43852 | -1409.80988 | -170.17955  | 2325.32679  | 1 |
| 96  | C | 74.26354 | 74.40440 | 76.63583 | -184.48284  | 116.78282   | -758.89137  | 1 |
| 97  | H | 73.45169 | 75.16485 | 76.57342 | 1893.78641  | 1861.14652  | 611.04528   | 1 |
| 98  | H | 75.16936 | 74.96029 | 76.96686 | -2170.79665 | -974.19311  | 1327.50117  | 1 |
| 99  | C | 74.49403 | 73.71836 | 75.25152 | 389.51668   | 672.81878   | -138.49152  | 1 |
| 100 | H | 75.32696 | 72.98104 | 75.30348 | 510.64577   | 1933.03327  | 1851.02484  | 1 |
| 101 | H | 73.58493 | 73.15498 | 74.94726 | -2302.30869 | -1105.72939 | -948.89774  | 1 |

|     |   |          |          |          |             |             |             |   |
|-----|---|----------|----------|----------|-------------|-------------|-------------|---|
| 102 | C | 74.81586 | 74.87135 | 74.20753 | -559.93427  | -126.34590  | 542.30857   | 1 |
| 103 | O | 75.92992 | 75.10561 | 73.80526 | -670.36003  | -111.83166  | 76.36448    | 1 |
| 104 | N | 73.67160 | 75.54458 | 73.91353 | -216.06729  | -537.07037  | 446.51379   | 1 |
| 105 | H | 72.74135 | 75.17834 | 74.14103 | -1251.96487 | 1074.12894  | -2168.52500 | 1 |
| 106 | H | 73.53550 | 76.09808 | 73.06293 | -2451.83023 | -720.73851  | 944.84612   | 1 |
| 107 | C | 75.14424 | 72.25258 | 77.81528 | 546.24052   | -563.88337  | -85.11809   | 1 |
| 108 | O | 76.14163 | 72.60558 | 78.38700 | 71.70702    | -307.40463  | 606.69673   | 1 |
| 109 | N | 74.91277 | 71.10766 | 77.14958 | 479.90863   | -504.50129  | 222.86849   | 1 |
| 110 | C | 75.95521 | 70.14493 | 76.98412 | 75.51268    | -600.91904  | 506.73700   | 1 |
| 111 | H | 76.66988 | 70.30754 | 77.82377 | -2033.61562 | 1795.30103  | 254.89480   | 1 |
| 112 | C | 75.12832 | 68.78642 | 77.00185 | 523.79067   | 517.99274   | 284.45581   | 1 |
| 113 | H | 75.68232 | 67.93781 | 76.54192 | 1599.61665  | -1127.00911 | 1895.98173  | 1 |
| 114 | H | 74.87307 | 68.47774 | 78.03991 | -1881.83093 | 1275.82488  | -1501.55016 | 1 |
| 115 | C | 73.85246 | 69.19394 | 76.20281 | -600.05639  | -404.05026  | 316.64485   | 1 |
| 116 | H | 74.06281 | 69.22062 | 75.10777 | -2597.05260 | 496.36221   | 657.73249   | 1 |
| 117 | H | 72.99308 | 68.50074 | 76.34691 | -1666.24518 | 1294.38985  | -1723.90591 | 1 |
| 118 | C | 73.58207 | 70.65396 | 76.76880 | 493.57570   | -129.95376  | -602.56394  | 1 |
| 119 | H | 73.16556 | 71.37209 | 76.02468 | -1469.08415 | -637.84797  | 2204.22581  | 1 |
| 120 | H | 72.96815 | 70.68993 | 77.69963 | -1038.97840 | 1068.88701  | -2280.71789 | 1 |
| 121 | C | 76.63916 | 70.31173 | 75.50420 | 188.88100   | 241.05089   | -727.87821  | 1 |
| 122 | O | 76.00867 | 70.13188 | 74.46866 | 531.88613   | -49.19943   | 427.07960   | 1 |
| 123 | N | 77.91155 | 70.60622 | 75.64165 | 708.14833   | 26.93417    | -179.73509  | 1 |
| 124 | H | 78.23247 | 70.68911 | 76.60295 | -2232.69501 | -1179.09831 | 1023.94816  | 1 |
| 125 | C | 78.77437 | 70.87748 | 74.49475 | -738.32412  | 259.92548   | 104.42456   | 1 |
| 126 | H | 78.09145 | 71.43997 | 73.81369 | 2028.89123  | 1260.02983  | 1311.33324  | 1 |
| 127 | C | 79.99775 | 71.65014 | 74.96047 | -258.65678  | -345.52513  | 661.28459   | 1 |
| 128 | H | 80.53396 | 71.01964 | 75.70489 | -1826.06090 | -1801.46097 | -918.64554  | 1 |
| 129 | C | 80.94916 | 71.92679 | 73.81108 | -541.23400  | 531.92970   | -218.41428  | 1 |
| 130 | H | 81.87257 | 72.46931 | 74.15476 | 1311.73218  | -2219.18200 | 882.19023   | 1 |
| 131 | H | 81.28612 | 70.97021 | 73.31853 | -1048.71298 | 1223.58118  | -2196.97971 | 1 |
| 132 | H | 80.46638 | 72.55887 | 73.01559 | 419.06414   | 1903.92898  | 1903.44670  | 1 |
| 133 | C | 79.61681 | 72.95034 | 75.64436 | -423.86431  | 152.66566   | -648.55262  | 1 |
| 134 | H | 80.51910 | 73.49621 | 76.03534 | 105.68386   | -2342.50080 | 1387.51238  | 1 |
| 135 | H | 79.08433 | 73.64606 | 74.93877 | -1695.63603 | -1484.73621 | -1531.02793 | 1 |
| 136 | H | 78.92620 | 72.77527 | 76.51509 | -1853.57121 | -487.39031  | 1936.59343  | 1 |
| 137 | C | 79.18388 | 69.39624 | 73.85659 | 539.71428   | -510.58232  | 267.58633   | 1 |
| 138 | O | 80.31412 | 68.98661 | 73.90476 | -15.93758   | -278.34085  | -624.49402  | 1 |
| 139 | N | 78.11466 | 68.84968 | 73.29990 | -676.81886  | 12.05292    | 276.17960   | 1 |
| 140 | H | 77.18405 | 69.31149 | 73.41531 | -1694.44250 | -373.84189  | -2100.66098 | 1 |
| 141 | C | 78.24373 | 67.51389 | 72.82680 | 412.33078   | -664.70360  | 108.35451   | 1 |
| 142 | H | 79.33018 | 67.26736 | 72.91212 | 1765.77476  | 1294.44366  | 1621.76594  | 1 |
| 143 | C | 77.32265 | 66.62502 | 73.76856 | -179.66635  | -721.95667  | -264.73915  | 1 |
| 144 | H | 77.55717 | 66.81710 | 74.83915 | -607.34922  | 2587.87032  | -598.10018  | 1 |
| 145 | H | 76.25395 | 66.90945 | 73.64472 | -359.69332  | -1479.13954 | -2259.74260 | 1 |
| 146 | C | 77.54443 | 65.12129 | 73.40746 | -240.01076  | 616.02425   | 431.85322   | 1 |
| 147 | H | 77.34886 | 64.95234 | 72.32033 | -1359.17131 | 782.54425   | 2227.99181  | 1 |
| 148 | H | 78.60380 | 64.82245 | 73.57496 | -820.36667  | 85.81767    | -2596.78715 | 1 |
| 149 | C | 76.56539 | 64.24230 | 74.28650 | -513.07015  | 236.18570   | -551.87280  | 1 |
| 150 | H | 76.87358 | 64.24733 | 75.35726 | 1816.11944  | -1183.11722 | -1650.94321 | 1 |
| 151 | H | 75.53100 | 64.65564 | 74.26615 | -1800.04429 | -1361.53473 | 1526.34643  | 1 |
| 152 | C | 76.59177 | 62.81210 | 73.69929 | 726.08972   | -253.19732  | -179.64713  | 1 |
| 153 | H | 76.19645 | 62.73314 | 72.66677 | 1224.27271  | -456.51798  | -2390.90304 | 1 |
| 154 | H | 77.57333 | 62.30215 | 73.76684 | 1206.40339  | -1150.93514 | -2154.90344 | 1 |
| 155 | N | 75.62405 | 61.92594 | 74.55383 | 329.70796   | -633.68968  | -155.67358  | 1 |
| 156 | H | 75.51787 | 60.92247 | 74.22667 | 1348.31305  | 1938.76845  | 1359.00643  | 1 |
| 157 | H | 75.87123 | 61.78578 | 75.57649 | 2096.92035  | 1446.54551  | -966.48890  | 1 |
| 158 | H | 74.60967 | 62.23312 | 74.61225 | -1197.07217 | -2303.53719 | 827.28733   | 1 |
| 159 | C | 77.65540 | 67.38529 | 71.30494 | -378.01186  | -556.17301  | -413.96481  | 1 |
| 160 | O | 77.73758 | 66.33015 | 70.71393 | -409.44433  | -307.55053  | -453.30833  | 1 |
| 161 | N | 77.10989 | 68.51306 | 70.86873 | -429.02477  | 524.70884   | 274.08502   | 1 |
| 162 | H | 77.09729 | 69.33301 | 71.47266 | 1706.34263  | -1425.96036 | 1574.38926  | 1 |
| 163 | C | 76.36204 | 68.44723 | 69.65862 | -45.25864   | -626.22952  | 478.93267   | 1 |



|     |   |          |          |          |             |             |             |   |
|-----|---|----------|----------|----------|-------------|-------------|-------------|---|
| 164 | H | 76.81439 | 67.61830 | 69.06555 | 1988.63164  | 570.90773   | 1772.87287  | 1 |
| 165 | C | 74.87970 | 68.11369 | 70.11171 | 551.77128   | -20.49526   | -564.54996  | 1 |
| 166 | H | 74.81318 | 67.06116 | 70.46799 | 1434.61535  | -1753.10253 | 1513.99471  | 1 |
| 167 | H | 74.58162 | 68.74855 | 70.97946 | -714.67738  | 1819.09770  | 1898.36494  | 1 |
| 168 | C | 73.90801 | 68.36315 | 68.91395 | 446.99263   | -555.77305  | 338.97221   | 1 |
| 169 | H | 73.81579 | 69.46530 | 68.75070 | 1953.68466  | 1892.25957  | -161.67766  | 1 |
| 170 | H | 74.30201 | 67.93640 | 67.96383 | -403.03785  | 2688.07032  | -188.43591  | 1 |
| 171 | C | 72.49633 | 67.74692 | 69.27360 | 567.86262   | 335.74681   | 434.04421   | 1 |
| 172 | H | 72.53754 | 66.63383 | 69.30489 | -1080.02275 | 1568.26081  | -1948.78900 | 1 |
| 173 | H | 72.18068 | 68.07280 | 70.29264 | -919.54108  | 2111.34692  | 1456.13463  | 1 |
| 174 | C | 71.48124 | 68.24532 | 68.21780 | 195.81897   | 173.33862   | -745.11536  | 1 |
| 175 | H | 71.41091 | 69.35035 | 68.13442 | 1405.67949  | -2301.21089 | -390.08113  | 1 |
| 176 | H | 71.59567 | 67.79574 | 67.21080 | -940.37328  | -1118.32446 | 2299.72133  | 1 |
| 177 | N | 70.05500 | 67.82711 | 68.70336 | 319.26422   | 656.36007   | -42.02424   | 1 |
| 178 | H | 69.25415 | 68.11357 | 68.06947 | 1961.03633  | 619.91968   | 1787.09422  | 1 |
| 179 | H | 69.86185 | 66.79130 | 68.83201 | 854.14343   | -2156.80752 | 1429.08711  | 1 |
| 180 | H | 69.73802 | 68.23118 | 69.63175 | 1237.02905  | -1378.50857 | -1998.28500 | 1 |
| 181 | C | 76.41010 | 69.93771 | 68.95668 | 532.53319   | -268.57236  | 517.55729   | 1 |
| 182 | O | 76.30589 | 70.95519 | 69.59574 | 266.16714   | -290.73804  | -558.88002  | 1 |
| 183 | N | 76.51966 | 69.74956 | 67.64996 | -226.25352  | 640.49678   | -270.32839  | 1 |
| 184 | H | 76.59371 | 68.78222 | 67.33674 | 2007.69063  | -1035.27229 | 1523.50231  | 1 |
| 185 | C | 76.33864 | 70.77099 | 66.67923 | -540.76542  | -573.33303  | 49.50000    | 1 |
| 186 | H | 76.64900 | 70.22746 | 65.75871 | -2374.20950 | -1036.76023 | 843.75774   | 1 |
| 187 | C | 74.79750 | 71.17757 | 66.61928 | -77.09082   | 666.87422   | -415.84136  | 1 |
| 188 | H | 74.51629 | 71.75437 | 67.54819 | -985.81834  | 617.19825   | 2463.91927  | 1 |
| 189 | O | 73.81411 | 70.13016 | 66.57064 | 293.29899   | -391.65602  | -477.80926  | 1 |
| 190 | H | 73.21076 | 70.40924 | 67.30763 | 2528.72714  | -681.76262  | -751.27122  | 1 |
| 191 | C | 74.83959 | 72.11524 | 65.35848 | 252.47363   | -605.14473  | 440.05134   | 1 |
| 192 | H | 73.88617 | 72.67831 | 65.23557 | -2052.65063 | 1456.49051  | -1043.51830 | 1 |
| 193 | H | 75.66507 | 72.85984 | 65.41959 | -2152.98800 | -1661.97574 | -161.70652  | 1 |
| 194 | H | 75.00003 | 71.52822 | 64.42476 | -473.12726  | -1584.27339 | 2165.61725  | 1 |
| 195 | C | 77.33837 | 72.03110 | 67.01790 | 360.36307   | 488.46713   | 505.10056   | 1 |
| 196 | O | 78.52599 | 71.88022 | 66.86409 | -200.08817  | -528.03552  | -385.82850  | 1 |
| 197 | N | 76.69266 | 73.11780 | 67.42905 | -597.54095  | -226.44775  | 355.20479   | 1 |
| 198 | H | 75.68224 | 73.09232 | 67.55692 | 2179.23655  | -1300.70981 | -991.33835  | 1 |
| 199 | C | 77.34888 | 74.37145 | 67.27707 | -687.68921  | 297.39807   | -249.45179  | 1 |
| 200 | H | 78.42967 | 74.10002 | 67.32023 | -349.16256  | -2467.37713 | -1101.72831 | 1 |
| 201 | C | 76.91920 | 75.05178 | 65.88642 | 672.47345   | 361.54328   | -201.62880  | 1 |
| 202 | H | 75.85765 | 74.83255 | 65.63296 | 1541.41502  | 582.18425   | 2169.97026  | 1 |
| 203 | H | 77.00035 | 76.16059 | 65.98569 | -2534.67717 | 60.25153    | 997.72295   | 1 |
| 204 | C | 77.87639 | 74.55272 | 64.79578 | 574.26774   | -389.43119  | -377.02542  | 1 |
| 205 | C | 79.27563 | 74.75357 | 64.99772 | 688.82679   | -287.33580  | -257.96133  | 1 |
| 206 | H | 79.64679 | 75.24819 | 65.91343 | 331.14182   | 1470.38163  | 2269.80013  | 1 |
| 207 | C | 77.40640 | 73.91693 | 63.60688 | -383.52382  | -675.04808  | 144.24917   | 1 |
| 208 | H | 76.32530 | 73.76541 | 63.43631 | 4.09847     | 1517.59662  | 2262.86397  | 1 |
| 209 | C | 80.16767 | 74.30589 | 64.02561 | -134.76730  | 428.45285   | -649.50303  | 1 |
| 210 | H | 81.24912 | 74.45106 | 64.19407 | -903.23433  | 1600.49020  | 2011.53387  | 1 |
| 211 | C | 78.33991 | 73.49499 | 62.65620 | -335.53281  | -615.00040  | -364.39058  | 1 |
| 212 | H | 77.96589 | 73.00928 | 61.73811 | 1596.45398  | -1369.33862 | 1732.02659  | 1 |
| 213 | C | 79.74503 | 73.66681 | 62.82406 | 585.48547   | -340.24194  | -406.23938  | 1 |
| 214 | O | 80.70191 | 73.24315 | 61.86555 | -419.15649  | -173.04408  | -511.94141  | 1 |
| 215 | H | 80.09974 | 72.84887 | 61.19181 | -1071.84350 | 1559.71507  | -1960.13012 | 1 |
| 216 | C | 76.84422 | 75.40083 | 68.41504 | 291.41878   | -183.13091  | 710.72246   | 1 |
| 217 | O | 76.56900 | 76.55460 | 68.19607 | 379.87695   | 523.47396   | -222.23622  | 1 |
| 218 | N | 76.99145 | 74.82245 | 69.74587 | 564.30591   | 373.09380   | 277.24371   | 1 |
| 219 | H | 76.79477 | 73.84350 | 69.39866 | -120.59931  | -2436.07824 | -1214.35098 | 1 |
| 220 | C | 76.05232 | 75.42759 | 70.67319 | 404.07514   | -299.37480  | 608.84009   | 1 |
| 221 | H | 76.35345 | 74.84800 | 71.57416 | -1071.07882 | -841.69025  | 2359.66467  | 1 |
| 222 | C | 76.36121 | 76.90051 | 70.83517 | -683.12807  | 68.71770    | -390.13096  | 1 |
| 223 | H | 77.39810 | 77.13625 | 70.48881 | 2068.88918  | 1596.58590  | 770.89603   | 1 |
| 224 | H | 75.68330 | 77.52879 | 70.20398 | 1379.86429  | 2342.49779  | -179.85638  | 1 |
| 225 | C | 76.18949 | 77.23291 | 72.37951 | -176.39967  | 537.49466   | 550.97268   | 1 |

|     |   |          |          |          |             |             |             |   |
|-----|---|----------|----------|----------|-------------|-------------|-------------|---|
| 226 | H | 75.23089 | 76.80649 | 72.75851 | -396.28051  | 1942.22168  | 1869.33314  | 1 |
| 227 | H | 76.99262 | 76.72754 | 72.97195 | -94.44700   | 586.00678   | -2659.20016 | 1 |
| 228 | C | 76.21038 | 78.80251 | 72.62837 | -291.69381  | -718.18079  | -150.72929  | 1 |
| 229 | H | 77.19442 | 79.31533 | 72.47346 | -2303.38776 | 1089.76242  | 964.62032   | 1 |
| 230 | H | 75.40557 | 79.39981 | 72.12720 | 884.16729   | 2568.80533  | -207.74283  | 1 |
| 231 | N | 75.93363 | 78.73304 | 74.00854 | -594.49522  | -252.81478  | 342.29276   | 1 |
| 232 | H | 75.88716 | 77.80823 | 74.41427 | -1735.17426 | 2084.05705  | -263.71605  | 1 |
| 233 | C | 75.74496 | 79.74059 | 74.76360 | 595.23177   | -271.52487  | 442.22352   | 1 |
| 234 | N | 75.81674 | 81.00925 | 74.18306 | 585.53813   | -424.79750  | -105.81303  | 1 |
| 235 | H | 76.00860 | 81.26130 | 73.21399 | 959.88797   | 1327.56823  | -2177.11905 | 1 |
| 236 | H | 75.68502 | 81.89194 | 74.67797 | 1578.48647  | 16.27378    | -2220.76233 | 1 |
| 237 | N | 75.49461 | 79.32921 | 76.07849 | -452.17763  | -390.33541  | -421.51853  | 1 |
| 238 | H | 75.43956 | 78.39763 | 76.48846 | 470.26107   | 1974.25629  | -1817.92087 | 1 |
| 239 | H | 75.30976 | 79.97336 | 76.84832 | 1856.67307  | -1573.97321 | -1224.35416 | 1 |
| 240 | C | 74.61390 | 75.09579 | 70.30395 | -531.47271  | -581.45780  | -55.06206   | 1 |
| 241 | O | 74.40617 | 74.04361 | 69.74679 | -243.00837  | 192.73507   | 609.52485   | 1 |
| 242 | N | 73.64163 | 75.98476 | 70.77645 | 343.49288   | -644.25607  | 38.09164    | 1 |
| 243 | H | 73.94111 | 76.88810 | 71.16589 | -1691.16043 | -1535.97525 | -1484.73099 | 1 |
| 244 | C | 72.26923 | 75.90991 | 70.23927 | 542.66492   | 350.14337   | 454.42563   | 1 |
| 245 | H | 71.82145 | 76.86321 | 70.60449 | 1209.57979  | -2396.95920 | 463.86744   | 1 |
| 246 | C | 72.35446 | 75.85142 | 68.73283 | -737.14309  | 145.93010   | 242.71942   | 1 |
| 247 | H | 72.85286 | 74.89371 | 68.44714 | -1050.18303 | 159.36419   | -2509.06125 | 1 |
| 248 | C | 70.97348 | 75.89457 | 68.10076 | -706.77696  | -252.88343  | -245.16230  | 1 |
| 249 | H | 71.02631 | 75.82119 | 66.98082 | -1624.64039 | -1665.49085 | 1417.86935  | 1 |
| 250 | H | 70.32346 | 75.05143 | 68.46127 | 2566.10521  | 598.51109   | 693.22305   | 1 |
| 251 | H | 70.43785 | 76.85167 | 68.34549 | -1972.69758 | 107.10018   | -1876.34312 | 1 |
| 252 | C | 73.21160 | 76.97373 | 68.17041 | 412.85148   | 672.58832   | -27.69222   | 1 |
| 253 | H | 73.20662 | 76.98022 | 67.04733 | 1447.02277  | 1762.76533  | -1490.78944 | 1 |
| 254 | H | 72.84903 | 77.98103 | 68.51148 | 1320.77379  | -145.20455  | 2378.68491  | 1 |
| 255 | H | 74.28649 | 76.87670 | 68.49560 | -1512.10848 | 1470.52031  | 1724.75147  | 1 |
| 256 | C | 71.58563 | 74.61240 | 71.00091 | -607.11113  | 499.56689   | 73.73769    | 1 |
| 257 | O | 71.27652 | 74.73816 | 72.16122 | 357.97126   | 460.81534   | 356.68785   | 1 |
| 258 | N | 71.39030 | 73.55333 | 70.21517 | 536.55407   | -368.62270  | 332.76306   | 1 |
| 259 | H | 71.76020 | 73.58282 | 69.26582 | 524.38866   | 2297.69985  | 1367.20941  | 1 |
| 260 | C | 71.37873 | 72.29132 | 70.88838 | 46.50277    | -774.29190  | -147.97904  | 1 |
| 261 | H | 71.72538 | 72.50936 | 71.92411 | 1676.51875  | 1883.29066  | 1032.55549  | 1 |
| 262 | C | 69.88574 | 71.67340 | 70.85178 | -559.41456  | -34.19198   | -556.30433  | 1 |
| 263 | H | 69.52959 | 71.63729 | 69.79488 | -64.66664   | 395.18769   | 2695.05373  | 1 |
| 264 | H | 69.90456 | 70.61483 | 71.20576 | -2703.44278 | -60.40056   | 333.79418   | 1 |
| 265 | C | 68.94747 | 72.49325 | 71.69497 | -519.76435  | 377.31045   | 459.42366   | 1 |
| 266 | H | 68.98174 | 73.54681 | 71.33516 | -1746.74323 | 1667.50644  | -1261.73691 | 1 |
| 267 | C | 67.52277 | 71.97015 | 71.55481 | 570.95554   | 16.46261    | -545.27700  | 1 |
| 268 | H | 66.79851 | 72.57403 | 72.15992 | 2391.58273  | 28.05277    | -1305.07271 | 1 |
| 269 | H | 67.17278 | 71.99966 | 70.49093 | 175.75588   | 917.63458   | 2559.43867  | 1 |
| 270 | H | 67.43806 | 70.90814 | 71.90183 | -1063.97851 | -2155.34650 | 1283.00462  | 1 |
| 271 | C | 69.35017 | 72.47855 | 73.16326 | 193.76014   | 2.62946     | -765.53141  | 1 |
| 272 | H | 68.57649 | 72.96996 | 73.80820 | 507.39394   | -846.55087  | 2539.60089  | 1 |
| 273 | H | 69.48789 | 71.43438 | 73.54643 | 1337.57841  | 1818.19054  | 1526.01994  | 1 |
| 274 | H | 70.31374 | 73.03140 | 73.32839 | 1100.88635  | -1172.91350 | -2199.08909 | 1 |
| 275 | C | 72.29872 | 71.26400 | 70.06816 | -549.21115  | 475.64486   | -309.38218  | 1 |
| 276 | O | 72.41778 | 71.26848 | 68.86350 | 556.06106   | -390.37755  | -78.24250   | 1 |
| 277 | O | 72.82171 | 70.19717 | 70.83317 | -572.27940  | -310.19032  | -209.75862  | 1 |
| 278 | H | 72.56753 | 70.52648 | 71.74292 | -1380.08193 | 2212.14486  | 790.85944   | 1 |

Listing 35: C00035.xmolout

|   |   |          |          |          |             |             |             |        |          |
|---|---|----------|----------|----------|-------------|-------------|-------------|--------|----------|
| 1 |   | 276      |          |          |             |             |             |        |          |
| 2 |   | 150.0000 | 150.0000 | 150.0000 | 0.0000      | 0.0000      | 0.0000***** | 2.7750 | 11100    |
|   |   | 0.2500   | 300.00   | 0.00     | 0.00        | 0.00        | -1293.8187  | 0.0000 | 300.0000 |
| 3 | H | 72.58912 | 77.53305 | 86.68238 | -2043.14101 | -1757.64893 | 399.89339   |        | 1        |
| 4 | N | 73.04082 | 77.64417 | 85.77786 | 426.75047   | 490.45733   | -334.42467  |        | 1        |
| 5 | H | 72.25209 | 77.87636 | 85.17693 | 442.25559   | -1110.30854 | -2448.52907 |        | 1        |

|    |   |          |          |          |             |             |             |   |
|----|---|----------|----------|----------|-------------|-------------|-------------|---|
| 6  | C | 74.08827 | 78.59942 | 85.73578 | 415.32972   | -666.39213  | 83.73172    | 1 |
| 7  | H | 74.47423 | 78.70371 | 86.77682 | 879.32219   | 2491.00447  | 667.35213   | 1 |
| 8  | C | 75.22677 | 78.03089 | 84.71661 | 31.35357    | 477.41777   | 628.23362   | 1 |
| 9  | H | 74.76157 | 77.83165 | 83.72336 | 1168.38489  | 2240.25337  | -1019.71136 | 1 |
| 10 | H | 76.01081 | 78.80337 | 84.54068 | -360.43770  | 2534.90498  | 931.67112   | 1 |
| 11 | C | 75.82504 | 76.77910 | 85.27840 | 463.18208   | 512.70242   | -382.34388  | 1 |
| 12 | H | 74.99372 | 76.11075 | 85.60049 | 1725.29117  | 1863.52247  | -987.07854  | 1 |
| 13 | C | 76.64842 | 76.05476 | 84.21797 | 710.42801   | -144.27427  | -313.15367  | 1 |
| 14 | H | 77.08858 | 75.10411 | 84.61455 | 364.20195   | -1033.13725 | 2494.72524  | 1 |
| 15 | H | 76.02970 | 75.78657 | 83.32372 | 2567.61904  | 335.80679   | 847.48802   | 1 |
| 16 | H | 77.49927 | 76.68616 | 83.85469 | -2587.99029 | 680.92867   | -512.16411  | 1 |
| 17 | C | 76.71593 | 77.07312 | 86.47993 | 268.17616   | 741.64379   | -40.42634   | 1 |
| 18 | H | 77.18093 | 76.13871 | 86.88689 | 1283.54314  | -1945.37420 | -1411.27812 | 1 |
| 19 | H | 77.55202 | 77.76884 | 86.21225 | -1258.57796 | 1317.15249  | -2026.02085 | 1 |
| 20 | H | 76.14364 | 77.54872 | 87.31650 | -2502.84526 | 909.80597   | 575.92391   | 1 |
| 21 | C | 73.49025 | 79.92748 | 85.13115 | 619.36578   | -458.64843  | -172.09273  | 1 |
| 22 | O | 72.32934 | 80.06920 | 84.49629 | -81.40433   | 433.87611   | 522.34594   | 1 |
| 23 | N | 74.33213 | 80.95395 | 85.15794 | 175.23996   | -622.20190  | 341.55523   | 1 |
| 24 | H | 75.04286 | 80.61945 | 85.82668 | -876.57256  | -303.22879  | -2561.90213 | 1 |
| 25 | C | 73.59920 | 82.23293 | 85.02769 | -571.88214  | -534.10783  | -106.15033  | 1 |
| 26 | H | 73.28848 | 82.52218 | 86.05564 | -2713.20841 | -16.25800   | -248.80809  | 1 |
| 27 | C | 74.64927 | 83.25333 | 84.37804 | 166.60354   | 288.16399   | -716.09568  | 1 |
| 28 | H | 75.14426 | 82.72579 | 83.51579 | -2097.85574 | 1636.78449  | -586.18044  | 1 |
| 29 | O | 75.71791 | 83.66014 | 85.24869 | -317.80580  | -363.38227  | 484.43082   | 1 |
| 30 | H | 76.49595 | 83.30461 | 84.77248 | 1863.74748  | -1451.84923 | 1357.29467  | 1 |
| 31 | C | 73.74740 | 84.40062 | 83.79296 | 503.80731   | 517.99032   | 318.51606   | 1 |
| 32 | H | 74.34503 | 85.10548 | 83.16811 | 640.61020   | -2157.10410 | -1536.29104 | 1 |
| 33 | H | 72.93447 | 83.99464 | 83.14137 | 1687.88455  | 465.60692   | 2087.56452  | 1 |
| 34 | H | 73.26555 | 84.99882 | 84.59992 | -1293.07895 | -1899.88581 | -1463.57452 | 1 |
| 35 | C | 72.43434 | 81.76130 | 84.08635 | -153.07550  | -733.68902  | 248.70981   | 1 |
| 36 | O | 73.16324 | 81.81904 | 82.48953 | 186.15459   | -480.78787  | -449.34387  | 1 |
| 37 | N | 71.34939 | 82.37389 | 84.22943 | -487.53139  | 543.18517   | 42.03850    | 1 |
| 38 | C | 70.19026 | 82.05432 | 83.40295 | -699.35871  | 69.34393    | 360.10701   | 1 |
| 39 | H | 70.33565 | 80.99966 | 83.08624 | 2.81126     | -221.99807  | -2715.58072 | 1 |
| 40 | C | 68.99407 | 82.26237 | 84.40109 | -507.46439  | -592.59194  | 122.07761   | 1 |
| 41 | H | 68.03407 | 82.47864 | 83.87930 | -1975.08116 | 525.87560   | -1801.71556 | 1 |
| 42 | H | 68.82160 | 81.34498 | 85.00800 | 1588.27743  | -1913.22100 | 1113.83566  | 1 |
| 43 | C | 69.47685 | 83.44293 | 85.31529 | -613.62442  | -457.55993  | -194.14490  | 1 |
| 44 | H | 69.31679 | 84.43678 | 84.82261 | 1707.54637  | -721.27992  | 1996.92523  | 1 |
| 45 | H | 68.93730 | 83.49357 | 86.28896 | 758.23357   | 2100.81767  | 1560.55011  | 1 |
| 46 | C | 71.00441 | 83.10359 | 85.48024 | -352.41524  | 704.96076   | 49.21465    | 1 |
| 47 | H | 71.67567 | 83.98725 | 85.56034 | 1714.76886  | -2070.42778 | 443.35792   | 1 |
| 48 | H | 71.22930 | 82.38722 | 86.30208 | 1224.15040  | 1801.50881  | 1636.97633  | 1 |
| 49 | C | 70.05078 | 83.06402 | 82.13721 | 566.85117   | 537.05831   | 117.62814   | 1 |
| 50 | O | 69.62749 | 82.65066 | 81.07756 | -550.26779  | -406.08867  | 4.21666     | 1 |
| 51 | N | 70.43350 | 84.35592 | 82.40473 | 566.34832   | -425.77725  | 180.18749   | 1 |
| 52 | H | 70.60484 | 84.31628 | 83.41447 | 644.44502   | 2646.80550  | -52.73430   | 1 |
| 53 | C | 69.52131 | 85.34193 | 81.84519 | 612.34801   | -281.48662  | 411.56221   | 1 |
| 54 | H | 68.51371 | 84.87208 | 81.85804 | 1667.23498  | -1490.75142 | 1556.16753  | 1 |
| 55 | C | 69.63390 | 86.62280 | 82.76836 | -714.45746  | -175.43074  | 286.98927   | 1 |
| 56 | H | 70.70987 | 86.94114 | 82.82972 | -787.09484  | 1763.03619  | -1922.46060 | 1 |
| 57 | O | 69.21729 | 86.42169 | 84.14845 | -429.46514  | 516.51932   | -128.40526  | 1 |
| 58 | H | 70.00945 | 86.72950 | 84.62445 | 1981.82785  | 436.16847   | -1818.18182 | 1 |
| 59 | C | 68.82844 | 87.69100 | 81.94439 | 630.79189   | -468.94448  | 76.03230    | 1 |
| 60 | H | 68.84963 | 88.69049 | 82.43804 | -1775.71861 | 2062.30353  | 131.89849   | 1 |
| 61 | H | 69.24459 | 87.82198 | 80.91573 | -1855.14608 | 88.94118    | 1993.53760  | 1 |
| 62 | H | 67.75835 | 87.39891 | 81.83069 | -1504.82350 | -780.94249  | -2132.90992 | 1 |
| 63 | C | 70.02751 | 85.67452 | 80.34659 | 288.57638   | 618.62814   | -397.00270  | 1 |
| 64 | O | 69.25854 | 86.03615 | 79.48743 | 321.70495   | -185.26452  | 574.37218   | 1 |
| 65 | N | 71.39207 | 85.67538 | 80.29198 | -447.05792  | -446.53431  | 367.76425   | 1 |
| 66 | H | 71.76271 | 85.29440 | 81.16809 | 350.31316   | 1975.63644  | -1843.31522 | 1 |
| 67 | C | 71.88589 | 85.02308 | 79.09412 | -511.23061  | 374.03917   | -471.51480  | 1 |

|     |   |          |          |          |             |             |             |   |
|-----|---|----------|----------|----------|-------------|-------------|-------------|---|
| 68  | H | 71.02022 | 84.45948 | 78.68231 | 2234.79579  | -898.70890  | -1273.45190 | 1 |
| 69  | C | 72.30315 | 86.23777 | 78.15712 | 529.53781   | -159.34528  | 563.72604   | 1 |
| 70  | H | 72.69449 | 85.84122 | 77.18363 | 654.59388   | 2347.94251  | 1217.51488  | 1 |
| 71  | H | 71.34700 | 86.77876 | 77.91674 | -1526.55661 | 2103.42026  | 817.87394   | 1 |
| 72  | O | 73.24969 | 87.20598 | 78.70272 | -554.84278  | 14.12789    | 399.58769   | 1 |
| 73  | H | 72.78997 | 87.41389 | 79.53652 | 1297.06236  | 2061.84854  | 1220.68812  | 1 |
| 74  | C | 73.07500 | 84.06511 | 79.63311 | -662.15484  | -412.13544  | 123.62687   | 1 |
| 75  | O | 74.07797 | 84.46259 | 80.17323 | -540.01537  | -317.05804  | 274.91456   | 1 |
| 76  | N | 72.68927 | 82.79202 | 79.44847 | -202.76299  | -690.00100  | -131.49145  | 1 |
| 77  | H | 71.81847 | 82.60534 | 78.94892 | -702.62132  | -2617.37191 | 281.70413   | 1 |
| 78  | C | 73.68871 | 81.74731 | 79.65139 | -491.73914  | 576.34187   | 222.73509   | 1 |
| 79  | H | 74.43700 | 82.21057 | 80.34135 | 1977.17978  | -1823.58850 | -434.68928  | 1 |
| 80  | C | 72.99002 | 80.50583 | 80.21543 | -649.50797  | -328.66843  | 306.11224   | 1 |
| 81  | H | 72.29180 | 80.10916 | 79.43907 | 2075.07803  | 1452.16490  | -1004.45904 | 1 |
| 82  | C | 74.03272 | 79.42885 | 80.51995 | -615.18735  | -489.99689  | -70.96352   | 1 |
| 83  | H | 73.55203 | 78.47447 | 80.86355 | -1226.32661 | -1724.38906 | -1716.47170 | 1 |
| 84  | H | 74.66179 | 79.17793 | 79.62354 | 2381.64273  | -969.84735  | 900.46860   | 1 |
| 85  | H | 74.73638 | 79.75331 | 81.33154 | 2122.74991  | 1702.23946  | -141.36228  | 1 |
| 86  | C | 72.23683 | 80.80555 | 81.39100 | -501.86074  | -479.61276  | -376.42482  | 1 |
| 87  | H | 71.91943 | 79.89821 | 81.93389 | 993.79261   | -2246.95401 | -1177.81305 | 1 |
| 88  | H | 73.78260 | 81.07786 | 82.71467 | 42.71279    | -626.15391  | -2651.37258 | 1 |
| 89  | H | 71.33942 | 81.42473 | 81.18097 | -2026.39012 | -1590.33709 | -887.82922  | 1 |
| 90  | C | 74.28157 | 81.41896 | 78.13340 | -672.89153  | 382.57394   | -156.34072  | 1 |
| 91  | O | 73.58204 | 81.39941 | 77.14699 | 410.04627   | 221.86223   | 500.35950   | 1 |
| 92  | N | 75.53774 | 81.02197 | 78.26144 | -378.11782  | -443.79414  | -441.10984  | 1 |
| 93  | H | 75.94869 | 81.03809 | 79.19291 | 2404.15973  | -568.14894  | 1149.30085  | 1 |
| 94  | C | 76.18973 | 80.43868 | 77.14037 | -544.54484  | 466.16019   | 331.29119   | 1 |
| 95  | H | 75.54235 | 80.69413 | 76.26940 | -1409.80988 | -170.17955  | 2325.32679  | 1 |
| 96  | C | 77.63181 | 81.10324 | 77.16853 | -184.48284  | 116.78282   | -758.89137  | 1 |
| 97  | H | 77.53271 | 82.20616 | 77.28800 | 1893.78641  | 1861.14652  | 611.04528   | 1 |
| 98  | H | 78.19212 | 80.74882 | 78.06394 | -2170.79665 | -974.19311  | 1327.50117  | 1 |
| 99  | C | 78.42573 | 80.76597 | 75.87089 | 389.51668   | 672.81878   | -138.49152  | 1 |
| 100 | H | 78.59252 | 79.66762 | 75.80054 | 510.64577   | 1933.03327  | 1851.02484  | 1 |
| 101 | H | 77.82119 | 81.01163 | 74.97026 | -2302.30869 | -1105.72939 | -948.89774  | 1 |
| 102 | C | 79.80712 | 81.52355 | 75.80025 | -559.93427  | -126.34590  | 542.30857   | 1 |
| 103 | O | 80.50769 | 81.37765 | 74.83249 | -670.36003  | -111.83166  | 76.36448    | 1 |
| 104 | N | 80.07760 | 82.30031 | 76.87127 | -216.06729  | -537.07037  | 446.51379   | 1 |
| 105 | H | 79.53409 | 82.46023 | 77.72753 | -1251.96487 | 1074.12894  | -2168.52500 | 1 |
| 106 | H | 80.93751 | 82.85057 | 76.97524 | -2451.83023 | -720.73851  | 944.84612   | 1 |
| 107 | C | 76.35552 | 78.82886 | 77.40235 | 546.24052   | -563.88337  | -85.11809   | 1 |
| 108 | O | 77.38354 | 78.46358 | 77.90997 | 71.70702    | -307.40463  | 606.69673   | 1 |
| 109 | N | 75.26262 | 78.10915 | 77.08182 | 479.90863   | -504.50129  | 222.86849   | 1 |
| 110 | C | 75.32543 | 76.68641 | 77.17517 | 75.51268    | -600.91904  | 506.73700   | 1 |
| 111 | H | 76.24910 | 76.49437 | 77.77002 | -2033.61562 | 1795.30103  | 254.89480   | 1 |
| 112 | C | 73.95901 | 76.33801 | 77.90262 | 523.79067   | 517.99274   | 284.45581   | 1 |
| 113 | H | 73.60183 | 75.31172 | 77.66267 | 1599.61665  | -1127.00911 | 1895.98173  | 1 |
| 114 | H | 74.09056 | 76.36817 | 79.00704 | -1881.83093 | 1275.82488  | -1501.55016 | 1 |
| 115 | C | 72.95271 | 77.44485 | 77.45116 | -600.05639  | -404.05026  | 316.64485   | 1 |
| 116 | H | 72.38428 | 77.16336 | 76.53514 | -2597.05260 | 496.36221   | 657.73249   | 1 |
| 117 | H | 72.17786 | 77.66377 | 78.22030 | -1666.24518 | 1294.38985  | -1723.90591 | 1 |
| 118 | C | 73.92254 | 78.67600 | 77.20512 | 493.57570   | -129.95376  | -602.56394  | 1 |
| 119 | H | 73.70705 | 79.28272 | 76.29192 | -1469.08415 | -637.84797  | 2204.22581  | 1 |
| 120 | H | 73.98569 | 79.35602 | 78.08266 | -1038.97840 | 1068.88701  | -2280.71789 | 1 |
| 121 | C | 75.39926 | 75.94342 | 75.71090 | 188.88100   | 241.05089   | -727.87821  | 1 |
| 122 | O | 76.40153 | 75.30050 | 75.41689 | 531.88613   | -49.19943   | 427.07960   | 1 |
| 123 | N | 74.30199 | 76.11328 | 75.01552 | 708.14833   | 26.93417    | -179.73509  | 1 |
| 124 | H | 73.63359 | 76.72384 | 75.48067 | -2232.69501 | -1179.09831 | 1023.94816  | 1 |
| 125 | C | 74.00287 | 75.51316 | 73.73222 | -738.32412  | 259.92548   | 104.42456   | 1 |
| 126 | H | 73.02434 | 75.97586 | 73.46033 | 2028.89123  | 1260.02983  | 1311.33324  | 1 |
| 127 | C | 75.12863 | 75.87675 | 72.77048 | -258.65678  | -345.52513  | 661.28459   | 1 |
| 128 | H | 76.06645 | 75.41425 | 73.15665 | -1826.06090 | -1801.46097 | -918.64554  | 1 |
| 129 | C | 74.85671 | 75.35453 | 71.37292 | -541.23400  | 531.92970   | -218.41428  | 1 |

|     |   |          |          |          |             |             |             |   |
|-----|---|----------|----------|----------|-------------|-------------|-------------|---|
| 130 | H | 75.64021 | 75.69643 | 70.63883 | 1311.73218  | -2219.18200 | 882.19023   | 1 |
| 131 | H | 74.84327 | 74.23174 | 71.33608 | -1048.71298 | 1223.58118  | -2196.97971 | 1 |
| 132 | H | 73.86239 | 75.70908 | 70.98472 | 419.06414   | 1903.92898  | 1903.44670  | 1 |
| 133 | C | 75.36041 | 77.37631 | 72.72832 | -423.86431  | 152.66566   | -648.55262  | 1 |
| 134 | H | 76.23388 | 77.64582 | 72.07287 | 105.68386   | -2342.50080 | 1387.51238  | 1 |
| 135 | H | 74.46202 | 77.92349 | 72.33069 | -1695.63603 | -1484.73621 | -1531.02793 | 1 |
| 136 | H | 75.57147 | 77.78554 | 73.75532 | -1853.57121 | -487.39031  | 1936.59343  | 1 |
| 137 | C | 73.84729 | 73.85721 | 73.93634 | 539.71428   | -510.58232  | 267.58633   | 1 |
| 138 | O | 72.77968 | 73.36444 | 73.69301 | -15.93758   | -278.34085  | -624.49402  | 1 |
| 139 | N | 74.98397 | 73.28900 | 74.28966 | -676.81886  | 12.05292    | 276.17960   | 1 |
| 140 | H | 75.80182 | 73.89712 | 74.52265 | -1694.44250 | -373.84189  | -2100.66098 | 1 |
| 141 | C | 75.03591 | 71.89751 | 74.58501 | 412.33078   | -664.70360  | 108.35451   | 1 |
| 142 | H | 76.07505 | 71.76086 | 74.96068 | 1765.77476  | 1294.44366  | 1621.76594  | 1 |
| 143 | C | 73.95348 | 71.61593 | 75.70727 | -179.66635  | -721.95667  | -264.73915  | 1 |
| 144 | H | 74.03631 | 72.36639 | 76.52535 | -607.34922  | 2587.87032  | -598.10018  | 1 |
| 145 | H | 72.92490 | 71.73757 | 75.29221 | -359.69332  | -1479.13954 | -2259.74260 | 1 |
| 146 | C | 74.19236 | 70.16783 | 76.24708 | -240.01076  | 616.02425   | 431.85322   | 1 |
| 147 | H | 73.99876 | 69.42824 | 75.43609 | -1359.17131 | 782.54425   | 2227.99181  | 1 |
| 148 | H | 75.25835 | 70.02643 | 76.53497 | -820.36667  | 85.81767    | -2596.78715 | 1 |
| 149 | C | 73.25205 | 69.89093 | 77.48818 | -513.07015  | 236.18570   | -551.87280  | 1 |
| 150 | H | 73.52937 | 70.53949 | 78.35074 | 1816.11944  | -1183.11722 | -1650.94321 | 1 |
| 151 | H | 72.19175 | 70.13742 | 77.25065 | -1800.04429 | -1361.53473 | 1526.34643  | 1 |
| 152 | C | 73.40218 | 68.39354 | 77.84649 | 726.08972   | -253.19732  | -179.64713  | 1 |
| 153 | H | 72.94210 | 67.69726 | 77.11806 | 1224.27271  | -456.51798  | -2390.90304 | 1 |
| 154 | H | 74.43939 | 68.07326 | 78.06984 | 1206.40339  | -1150.93514 | -2154.90344 | 1 |
| 155 | N | 72.61641 | 68.13287 | 79.17525 | 329.70796   | -633.68968  | -155.67358  | 1 |
| 156 | H | 72.60772 | 67.12614 | 79.50982 | 1348.31305  | 1938.76845  | 1359.00643  | 1 |
| 157 | H | 72.95647 | 68.63666 | 80.04541 | 2096.92035  | 1446.54551  | -966.48890  | 1 |
| 158 | H | 71.58003 | 68.36208 | 79.17868 | -1197.07217 | -2303.53719 | 827.28733   | 1 |
| 159 | C | 74.73711 | 70.98291 | 73.26089 | -378.01186  | -556.17301  | -413.96481  | 1 |
| 160 | O | 74.52191 | 69.77356 | 73.34928 | -409.44433  | -307.55053  | -453.30833  | 1 |
| 161 | N | 74.89920 | 71.70504 | 72.17033 | -429.02477  | 524.70884   | 274.08502   | 1 |
| 162 | H | 75.05147 | 72.68137 | 72.41070 | 1706.34263  | -1425.96036 | 1574.38926  | 1 |
| 163 | C | 74.45289 | 71.26673 | 70.89399 | -45.25864   | -626.22952  | 478.93267   | 1 |
| 164 | H | 74.47729 | 70.15452 | 70.95545 | 1988.63164  | 570.90773   | 1772.87287  | 1 |
| 165 | C | 72.97426 | 71.81964 | 70.75093 | 551.77128   | -20.49526   | -564.54996  | 1 |
| 166 | H | 72.38795 | 71.61143 | 71.67498 | 1434.61535  | -1753.10253 | 1513.99471  | 1 |
| 167 | H | 72.98020 | 72.92852 | 70.65384 | -714.67738  | 1819.09770  | 1898.36494  | 1 |
| 168 | C | 72.31383 | 71.15712 | 69.49838 | 446.99263   | -555.77305  | 338.97221   | 1 |
| 169 | H | 72.93781 | 71.34546 | 68.59034 | 1953.68466  | 1892.25957  | -161.67766  | 1 |
| 170 | H | 72.26007 | 70.05100 | 69.61282 | -403.03785  | 2688.07032  | -188.43591  | 1 |
| 171 | C | 70.86818 | 71.77355 | 69.31480 | 567.86262   | 335.74681   | 434.04421   | 1 |
| 172 | H | 70.21645 | 71.52928 | 70.18504 | -1080.02275 | 1568.26081  | -1948.78900 | 1 |
| 173 | H | 70.91401 | 72.88611 | 69.27432 | -919.54108  | 2111.34692  | 1456.13463  | 1 |
| 174 | C | 70.27985 | 71.20443 | 68.00309 | 195.81897   | 173.33862   | -745.11536  | 1 |
| 175 | H | 70.83041 | 71.49714 | 67.08676 | 1405.67949  | -2301.21089 | -390.08113  | 1 |
| 176 | H | 70.11149 | 70.10905 | 68.00867 | -940.37328  | -1118.32446 | 2299.72133  | 1 |
| 177 | N | 68.85390 | 71.82603 | 67.81733 | 319.26422   | 656.36007   | -42.02424   | 1 |
| 178 | H | 68.33524 | 71.53084 | 66.94032 | 1961.03633  | 619.91968   | 1787.09422  | 1 |
| 179 | H | 68.13232 | 71.61544 | 68.56675 | 854.14343   | -2156.80752 | 1429.08711  | 1 |
| 180 | H | 68.79419 | 72.88346 | 67.74680 | 1237.02905  | -1378.50857 | -1998.28500 | 1 |
| 181 | C | 75.37533 | 71.91059 | 69.70722 | 532.53319   | -268.57236  | 517.55729   | 1 |
| 182 | O | 75.05057 | 71.76086 | 68.55122 | 266.16714   | -290.73804  | -558.88002  | 1 |
| 183 | N | 76.39809 | 72.62965 | 70.18911 | -226.25352  | 640.49678   | -270.32839  | 1 |
| 184 | H | 76.51372 | 72.51489 | 71.19555 | 2007.69063  | -1035.27229 | 1523.50231  | 1 |
| 185 | C | 77.56372 | 72.80608 | 69.37900 | -540.76542  | -573.33303  | 49.50000    | 1 |
| 186 | H | 77.20665 | 73.13312 | 68.37798 | -2374.20950 | -1036.76023 | 843.75774   | 1 |
| 187 | C | 78.44927 | 73.87613 | 70.15879 | -77.09082   | 666.87422   | -415.84136  | 1 |
| 188 | H | 78.69169 | 73.46453 | 71.17754 | -985.81834  | 617.19825   | 2463.91927  | 1 |
| 189 | O | 77.83001 | 75.15773 | 70.41140 | 293.29899   | -391.65602  | -477.80926  | 1 |
| 190 | H | 77.84487 | 75.18335 | 71.38830 | 2528.72714  | -681.76262  | -751.27122  | 1 |
| 191 | C | 79.76137 | 73.92506 | 69.29437 | 252.47363   | -605.14473  | 440.05134   | 1 |

|     |   |          |          |          |             |             |             |   |
|-----|---|----------|----------|----------|-------------|-------------|-------------|---|
| 192 | H | 80.51971 | 74.60617 | 69.74491 | -2052.65063 | 1456.49051  | -1043.51830 | 1 |
| 193 | H | 80.23251 | 72.91854 | 69.20430 | -2152.98800 | -1661.97574 | -161.70652  | 1 |
| 194 | H | 79.55798 | 74.29311 | 68.26173 | -473.12726  | -1584.27339 | 2165.61725  | 1 |
| 195 | C | 78.32820 | 71.35951 | 69.34174 | 360.36307   | 488.46713   | 505.10056   | 1 |
| 196 | O | 78.25179 | 70.58278 | 70.27188 | -200.08817  | -528.03552  | -385.82850  | 1 |
| 197 | N | 79.06229 | 71.30585 | 68.24807 | -597.54095  | -226.44775  | 355.20479   | 1 |
| 198 | H | 78.94651 | 72.06194 | 67.57579 | 2179.23655  | -1300.70981 | -991.33835  | 1 |
| 199 | C | 79.88977 | 70.19866 | 67.89046 | -687.68921  | 297.39807   | -249.45179  | 1 |
| 200 | H | 79.43279 | 69.84092 | 66.94275 | -349.16256  | -2467.37713 | -1101.72831 | 1 |
| 201 | C | 81.36769 | 70.75368 | 67.67389 | 672.47345   | 361.54328   | -201.62880  | 1 |
| 202 | H | 81.74885 | 71.18835 | 68.62630 | 1541.41502  | 582.18425   | 2169.97026  | 1 |
| 203 | H | 82.04025 | 69.90048 | 67.42334 | -2534.67717 | 60.25153    | 997.72295   | 1 |
| 204 | C | 81.40483 | 71.80484 | 66.55222 | 574.26774   | -389.43119  | -377.02542  | 1 |
| 205 | C | 81.16875 | 71.41083 | 65.20141 | 688.82679   | -287.33580  | -257.96133  | 1 |
| 206 | H | 80.94802 | 70.35730 | 64.95099 | 331.14182   | 1470.38163  | 2269.80013  | 1 |
| 207 | C | 81.69814 | 73.16567 | 66.86608 | -383.52382  | -675.04808  | 144.24917   | 1 |
| 208 | H | 81.89539 | 73.47327 | 67.90852 | 4.09847     | 1517.59662  | 2262.86397  | 1 |
| 209 | C | 81.22991 | 72.38286 | 64.20248 | -134.76730  | 428.45285   | -649.50303  | 1 |
| 210 | H | 81.05375 | 72.07794 | 63.15617 | -903.23433  | 1600.49020  | 2011.53387  | 1 |
| 211 | C | 81.74368 | 74.10353 | 65.83149 | -335.53281  | -615.00040  | -364.39058  | 1 |
| 212 | H | 81.97102 | 75.15303 | 66.08784 | 1596.45398  | -1369.33862 | 1732.02659  | 1 |
| 213 | C | 81.51485 | 73.75337 | 64.46903 | 585.48547   | -340.24194  | -406.23938  | 1 |
| 214 | O | 81.56168 | 74.69766 | 63.41023 | -419.15649  | -173.04408  | -511.94141  | 1 |
| 215 | H | 81.79974 | 75.50780 | 63.91942 | -1071.84350 | 1559.71507  | -1960.13012 | 1 |
| 216 | C | 80.00606 | 69.06530 | 69.05710 | 291.41878   | -183.13091  | 710.72246   | 1 |
| 217 | O | 80.86473 | 69.12214 | 69.90852 | 379.87695   | 523.47396   | -222.23622  | 1 |
| 218 | N | 79.18059 | 68.05261 | 68.76688 | 564.30591   | 373.09380   | 277.24371   | 1 |
| 219 | H | 78.49791 | 68.18351 | 68.02000 | -120.59931  | -2436.07824 | -1214.35098 | 1 |
| 220 | C | 78.96218 | 67.08653 | 69.80278 | 404.07514   | -299.37480  | 608.84009   | 1 |
| 221 | H | 79.90738 | 67.16352 | 70.39091 | -1071.07882 | -841.69025  | 2359.66467  | 1 |
| 222 | C | 77.71143 | 67.62035 | 70.61438 | -683.12807  | 68.71770    | -390.13096  | 1 |
| 223 | H | 77.84223 | 68.72798 | 70.80057 | 2068.88918  | 1596.58590  | 770.89603   | 1 |
| 224 | H | 76.77591 | 67.53023 | 70.01646 | 1379.86429  | 2342.49779  | -179.85638  | 1 |
| 225 | C | 77.60792 | 66.82020 | 71.94904 | -176.39967  | 537.49466   | 550.97268   | 1 |
| 226 | H | 77.56589 | 65.72542 | 71.75286 | -396.28051  | 1942.22168  | 1869.33314  | 1 |
| 227 | H | 78.51273 | 66.97515 | 72.57787 | -94.44700   | 586.00678   | -2659.20016 | 1 |
| 228 | C | 76.28921 | 67.31296 | 72.70421 | -291.69381  | -718.18079  | -150.72929  | 1 |
| 229 | H | 76.30432 | 68.36763 | 73.08887 | -2303.38776 | 1089.76242  | 964.62032   | 1 |
| 230 | H | 75.32953 | 67.17454 | 72.14341 | 884.16729   | 2568.80533  | -207.74283  | 1 |
| 231 | N | 76.25936 | 66.44118 | 73.80288 | -594.49522  | -252.81478  | 342.29276   | 1 |
| 232 | H | 77.01494 | 65.77907 | 73.88532 | -1735.17426 | 2084.05705  | -263.71605  | 1 |
| 233 | C | 75.33546 | 66.41907 | 74.67860 | 595.23177   | -271.52487  | 442.22352   | 1 |
| 234 | N | 74.30328 | 67.34782 | 74.54090 | 585.53813   | -424.79750  | -105.81303  | 1 |
| 235 | H | 74.25292 | 68.13637 | 73.85131 | 959.88797   | 1327.56823  | -2177.11905 | 1 |
| 236 | H | 73.51268 | 67.41115 | 75.18957 | 1578.48647  | 16.27378    | -2220.76233 | 1 |
| 237 | N | 75.55391 | 65.42144 | 75.64244 | -452.17763  | -390.33541  | -421.51853  | 1 |
| 238 | H | 76.30248 | 64.73674 | 75.73376 | 470.26107   | 1974.25629  | -1817.92087 | 1 |
| 239 | H | 74.91743 | 65.24208 | 76.41949 | 1856.67307  | -1573.97321 | -1224.35416 | 1 |
| 240 | C | 78.79495 | 65.65582 | 69.03959 | -531.47271  | -581.45780  | -55.06206   | 1 |
| 241 | O | 79.73331 | 65.18338 | 68.44280 | -243.00837  | 192.73507   | 609.52485   | 1 |
| 242 | N | 77.58730 | 65.11035 | 69.19843 | 343.49288   | -644.25607  | 38.09164    | 1 |
| 243 | H | 76.89088 | 65.63206 | 69.72813 | -1691.16043 | -1535.97525 | -1484.73099 | 1 |
| 244 | C | 77.21215 | 63.94751 | 68.38717 | 542.66492   | 350.14337   | 454.42563   | 1 |
| 245 | H | 77.86743 | 64.04534 | 67.48832 | 1209.57979  | -2396.95920 | 463.86744   | 1 |
| 246 | C | 77.48454 | 62.69203 | 69.19652 | -737.14309  | 145.93010   | 242.71942   | 1 |
| 247 | H | 76.99378 | 62.81950 | 70.18746 | -1050.18303 | 159.36419   | -2509.06125 | 1 |
| 248 | C | 76.88735 | 61.46891 | 68.52676 | -706.77696  | -252.88343  | -245.16230  | 1 |
| 249 | H | 77.04498 | 60.53705 | 69.13739 | -1624.64039 | -1665.49085 | 1417.86935  | 1 |
| 250 | H | 75.77537 | 61.59574 | 68.37868 | 2566.10521  | 598.51109   | 693.22305   | 1 |
| 251 | H | 77.34207 | 61.28654 | 67.51339 | -1972.69758 | 107.10018   | -1876.34312 | 1 |
| 252 | C | 78.96949 | 62.49253 | 69.43482 | 412.85148   | 672.58832   | -27.69222   | 1 |
| 253 | H | 79.17375 | 61.64115 | 70.14140 | 1447.02277  | 1762.76533  | -1490.78944 | 1 |

|     |   |          |          |          |             |             |             |   |
|-----|---|----------|----------|----------|-------------|-------------|-------------|---|
| 254 | H | 79.51525 | 62.27218 | 68.47577 | 1320.77379  | -145.20455  | 2378.68491  | 1 |
| 255 | H | 79.44179 | 63.42040 | 69.86837 | -1512.10848 | 1470.52031  | 1724.75147  | 1 |
| 256 | C | 75.58829 | 64.12575 | 68.08896 | -607.11113  | 499.56689   | 73.73769    | 1 |
| 257 | O | 74.76523 | 63.60333 | 68.80009 | 357.97126   | 460.81534   | 356.68785   | 1 |
| 258 | N | 75.40398 | 64.94638 | 67.06046 | 536.55407   | -368.62270  | 332.76306   | 1 |
| 259 | H | 76.23509 | 65.27043 | 66.56639 | 524.38866   | 2297.69985  | 1367.20941  | 1 |
| 260 | C | 74.12851 | 64.95217 | 66.44268 | 46.50277    | -774.29190  | -147.97904  | 1 |
| 261 | H | 73.44556 | 64.47433 | 67.18182 | 1676.51875  | 1883.29066  | 1032.55549  | 1 |
| 262 | C | 73.73969 | 66.46962 | 66.05127 | -559.41456  | -34.19198   | -556.30433  | 1 |
| 263 | H | 74.43220 | 66.83009 | 65.25360 | -64.66664   | 395.18769   | 2695.05373  | 1 |
| 264 | H | 72.71701 | 66.50742 | 65.60569 | -2703.44278 | -60.40056   | 333.79418   | 1 |
| 265 | C | 73.83691 | 67.35508 | 67.26502 | -519.76435  | 377.31045   | 459.42366   | 1 |
| 266 | H | 74.84016 | 67.20167 | 67.72396 | -1746.74323 | 1667.50644  | -1261.73691 | 1 |
| 267 | C | 73.70349 | 68.82124 | 66.87277 | 570.95554   | 16.46261    | -545.27700  | 1 |
| 268 | H | 73.85989 | 69.50142 | 67.74963 | 2391.58273  | 28.05277    | -1305.07271 | 1 |
| 269 | H | 74.45440 | 69.11228 | 66.09379 | 175.75588   | 917.63458   | 2559.43867  | 1 |
| 270 | H | 72.68859 | 69.04643 | 66.45442 | -1063.97851 | -2155.34650 | 1283.00462  | 1 |
| 271 | C | 72.77433 | 67.00449 | 68.29775 | 193.76014   | 2.62946     | -765.53141  | 1 |
| 272 | H | 72.82325 | 67.68302 | 69.18820 | 507.39394   | -846.55087  | 2539.60089  | 1 |
| 273 | H | 71.74103 | 67.08881 | 67.87226 | 1337.57841  | 1818.19054  | 1526.01994  | 1 |
| 274 | H | 72.89614 | 65.95548 | 68.67381 | 1100.88635  | -1172.91350 | -2199.08909 | 1 |
| 275 | C | 74.27181 | 64.13126 | 65.05731 | -549.21115  | 475.64486   | -309.38218  | 1 |
| 276 | O | 75.31483 | 63.98725 | 64.47574 | 556.06106   | -390.37755  | -78.24250   | 1 |
| 277 | O | 73.05756 | 63.69382 | 64.47822 | -572.27940  | -310.19032  | -209.75862  | 1 |
| 278 | H | 72.43158 | 63.97481 | 65.20190 | -1380.08193 | 2212.14486  | 790.85944   | 1 |

Listing 36: C00036.xmolout

|    |   |          |          |          |             |             |             |        |          |
|----|---|----------|----------|----------|-------------|-------------|-------------|--------|----------|
| 1  |   | 276      |          |          |             |             |             |        |          |
| 2  |   | 150.0000 | 150.0000 | 150.0000 | 0.0000      | 0.0000      | 0.0000***** | 0.8737 | 3495     |
|    |   | 0.2500   | 300.00   | 0.00     | 0.00        | 0.00        | -1293.8160  | 0.0000 | 300.0000 |
| 3  | H | 74.95760 | 72.39181 | 92.82325 | -2043.14101 | -1757.64893 | 399.89339   |        | 1        |
| 4  | N | 75.71557 | 72.13772 | 93.45260 | 426.75047   | 490.45733   | -334.42467  |        | 1        |
| 5  | H | 75.72624 | 71.12585 | 93.34543 | 442.25559   | -1110.30854 | -2448.52907 |        | 1        |
| 6  | C | 76.95423 | 72.76685 | 93.15826 | 415.32972   | -666.39213  | 83.73172    |        | 1        |
| 7  | H | 76.61511 | 73.81502 | 92.99580 | 879.32219   | 2491.00447  | 667.35213   |        | 1        |
| 8  | C | 77.95357 | 72.63705 | 94.42693 | 31.35357    | 477.41777   | 628.23362   |        | 1        |
| 9  | H | 78.33618 | 71.59138 | 94.49355 | 1168.38489  | 2240.25337  | -1019.71136 |        | 1        |
| 10 | H | 78.85176 | 73.28165 | 94.27952 | -360.43770  | 2534.90498  | 931.67112   |        | 1        |
| 11 | C | 77.23211 | 73.00836 | 95.68940 | 463.18208   | 512.70242   | -382.34388  |        | 1        |
| 12 | H | 76.32567 | 72.36600 | 95.77142 | 1725.29117  | 1863.52247  | -987.07854  |        | 1        |
| 13 | C | 78.12077 | 72.76144 | 96.90373 | 710.42801   | -144.27427  | -313.15367  |        | 1        |
| 14 | H | 77.58699 | 72.99415 | 97.86066 | 364.20195   | -1033.13725 | 2494.72524  |        | 1        |
| 15 | H | 78.45779 | 71.69490 | 96.96172 | 2567.61904  | 335.80679   | 847.48802   |        | 1        |
| 16 | H | 79.04146 | 73.39881 | 96.87579 | -2587.99029 | 680.92867   | -512.16411  |        | 1        |
| 17 | C | 76.79024 | 74.46665 | 95.68233 | 268.17616   | 741.64379   | -40.42634   |        | 1        |
| 18 | H | 76.28284 | 74.74841 | 96.64056 | 1283.54314  | -1945.37420 | -1411.27812 |        | 1        |
| 19 | H | 77.65868 | 75.16149 | 95.54976 | -1258.57796 | 1317.15249  | -2026.02085 |        | 1        |
| 20 | H | 76.06663 | 74.67424 | 94.85306 | -2502.84526 | 909.80597   | 575.92391   |        | 1        |
| 21 | C | 77.47577 | 72.10164 | 91.81527 | 619.36578   | -458.64843  | -172.09273  |        | 1        |
| 22 | O | 76.69949 | 71.75871 | 90.85235 | -81.40433   | 433.87611   | 522.34594   |        | 1        |
| 23 | N | 78.77126 | 71.97010 | 91.76296 | 175.23996   | -622.20190  | 341.55523   |        | 1        |
| 24 | H | 79.35666 | 72.31555 | 92.51935 | -876.57256  | -303.22879  | -2561.90213 |        | 1        |
| 25 | C | 79.25519 | 71.76865 | 90.42552 | -571.88214  | -534.10783  | -106.15033  |        | 1        |
| 26 | H | 79.44631 | 72.80048 | 90.06531 | -2713.20841 | -16.25800   | -248.80809  |        | 1        |
| 27 | C | 80.57506 | 70.92166 | 90.50454 | 166.60354   | 288.16399   | -716.09568  |        | 1        |
| 28 | H | 80.33515 | 69.91600 | 90.94650 | -2097.85574 | 1636.78449  | -586.18044  |        | 1        |
| 29 | O | 81.63503 | 71.47129 | 91.32933 | -317.80580  | -363.38227  | 484.43082   |        | 1        |
| 30 | H | 81.75781 | 70.76127 | 91.98445 | 1863.74748  | -1451.84923 | 1357.29467  |        | 1        |
| 31 | C | 80.90886 | 70.76064 | 88.97193 | 503.80731   | 517.99032   | 318.51606   |        | 1        |
| 32 | H | 81.77329 | 70.07555 | 88.81194 | 640.61020   | -2157.10410 | -1536.29104 |        | 1        |
| 33 | H | 80.04582 | 70.34487 | 88.39778 | 1687.88455  | 465.60692   | 2087.56452  |        | 1        |

|    |   |          |          |          |             |             |             |   |
|----|---|----------|----------|----------|-------------|-------------|-------------|---|
| 34 | H | 81.17403 | 71.73761 | 88.50594 | -1293.07895 | -1899.88581 | -1463.57452 | 1 |
| 35 | C | 78.00295 | 70.97716 | 89.59757 | -153.07550  | -733.68902  | 248.70981   | 1 |
| 36 | O | 77.88965 | 69.74923 | 89.69655 | 186.15459   | -480.78787  | -449.34387  | 1 |
| 37 | N | 77.85843 | 71.65667 | 88.39792 | -487.53139  | 543.18517   | 42.03850    | 1 |
| 38 | C | 77.00531 | 71.16800 | 87.39056 | -699.35871  | 69.34393    | 360.10701   | 1 |
| 39 | H | 76.25537 | 70.49734 | 87.87253 | 2.81126     | -221.99807  | -2715.58072 | 1 |
| 40 | C | 76.45250 | 72.51226 | 86.71737 | -507.46439  | -592.59194  | 122.07761   | 1 |
| 41 | H | 76.07170 | 72.35376 | 85.68390 | -1975.08116 | 525.87560   | -1801.71556 | 1 |
| 42 | H | 75.61669 | 72.95204 | 87.30477 | 1588.27743  | -1913.22100 | 1113.83566  | 1 |
| 43 | C | 77.72484 | 73.40161 | 86.77959 | -613.62442  | -457.55993  | -194.14490  | 1 |
| 44 | H | 78.46409 | 73.09727 | 86.00239 | 1707.54637  | -721.27992  | 1996.92523  | 1 |
| 45 | H | 77.52572 | 74.48616 | 86.63374 | 758.23357   | 2100.81767  | 1560.55011  | 1 |
| 46 | C | 78.24838 | 73.04032 | 88.24955 | -352.41524  | 704.96076   | 49.21465    | 1 |
| 47 | H | 79.35476 | 73.11723 | 88.39481 | 1714.76886  | -2070.42778 | 443.35792   | 1 |
| 48 | H | 77.73136 | 73.58692 | 89.07676 | 1224.15040  | 1801.50881  | 1636.97633  | 1 |
| 49 | C | 77.90912 | 70.40431 | 86.22834 | 566.85117   | 537.05831   | 117.62814   | 1 |
| 50 | O | 78.93082 | 70.86931 | 85.78828 | -550.26779  | -406.08867  | 4.21666     | 1 |
| 51 | N | 77.23352 | 69.33606 | 85.83852 | 566.34832   | -425.77725  | 180.18749   | 1 |
| 52 | H | 76.35418 | 69.10438 | 86.29855 | 644.44502   | 2646.80550  | -52.73430   | 1 |
| 53 | C | 77.74257 | 68.54916 | 84.77777 | 612.34801   | -281.48662  | 411.56221   | 1 |
| 54 | H | 78.67361 | 69.05211 | 84.42428 | 1667.23498  | -1490.75142 | 1556.16753  | 1 |
| 55 | C | 77.98045 | 67.08860 | 85.40887 | -714.45746  | -175.43074  | 286.98927   | 1 |
| 56 | H | 77.02992 | 66.77983 | 85.92404 | -787.09484  | 1763.03619  | -1922.46060 | 1 |
| 57 | O | 79.01464 | 67.00687 | 86.40313 | -429.46514  | 516.51932   | -128.40526  | 1 |
| 58 | H | 78.48919 | 66.83350 | 87.20998 | 1981.82785  | 436.16847   | -1818.18182 | 1 |
| 59 | C | 78.19242 | 66.19079 | 84.13739 | 630.79189   | -468.94448  | 76.03230    | 1 |
| 60 | H | 78.29748 | 65.11516 | 84.41034 | -1775.71861 | 2062.30353  | 131.89849   | 1 |
| 61 | H | 77.33584 | 66.26967 | 83.42959 | -1855.14608 | 88.94118    | 1993.53760  | 1 |
| 62 | H | 79.11260 | 66.48226 | 83.58008 | -1504.82350 | -780.94249  | -2132.90992 | 1 |
| 63 | C | 76.53329 | 68.43241 | 83.68097 | 288.57638   | 618.62814   | -397.00270  | 1 |
| 64 | O | 75.35783 | 68.26375 | 84.04640 | 321.70495   | -185.26452  | 574.37218   | 1 |
| 65 | N | 77.03106 | 68.47015 | 82.47528 | -447.05792  | -446.53431  | 367.76425   | 1 |
| 66 | H | 78.04379 | 68.58547 | 82.50613 | 350.31316   | 1975.63644  | -1843.31522 | 1 |
| 67 | C | 76.36417 | 68.20928 | 81.25235 | -511.23061  | 374.03917   | -471.51480  | 1 |
| 68 | H | 77.22151 | 68.00895 | 80.57048 | 2234.79579  | -898.70890  | -1273.45190 | 1 |
| 69 | C | 75.39928 | 66.93777 | 81.40547 | 529.53781   | -159.34528  | 563.72604   | 1 |
| 70 | H | 75.18548 | 66.51822 | 80.38208 | 654.59388   | 2347.94251  | 1217.51488  | 1 |
| 71 | H | 75.99788 | 66.15905 | 81.94663 | -1526.55661 | 2103.42026  | 817.87394   | 1 |
| 72 | O | 74.12628 | 67.15410 | 82.01921 | -554.84278  | 14.12789    | 399.58769   | 1 |
| 73 | H | 74.44601 | 67.58028 | 82.90721 | 1297.06236  | 2061.84854  | 1220.68812  | 1 |
| 74 | C | 75.46381 | 69.43576 | 80.70313 | -662.15484  | -412.13544  | 123.62687   | 1 |
| 75 | O | 75.02971 | 69.37108 | 79.55921 | -540.01537  | -317.05804  | 274.91456   | 1 |
| 76 | N | 75.35421 | 70.49260 | 81.54470 | -202.76299  | -690.00100  | -131.49145  | 1 |
| 77 | H | 75.74977 | 70.12487 | 82.41590 | -702.62132  | -2617.37191 | 281.70413   | 1 |
| 78 | C | 74.10030 | 71.29743 | 81.50244 | -491.73914  | 576.34187   | 222.73509   | 1 |
| 79 | H | 73.34881 | 70.53127 | 81.20120 | 1977.17978  | -1823.58850 | -434.68928  | 1 |
| 80 | C | 73.86391 | 71.87328 | 82.87276 | -649.50797  | -328.66843  | 306.11224   | 1 |
| 81 | H | 74.80428 | 72.37295 | 83.19846 | 2075.07803  | 1452.16490  | -1004.45904 | 1 |
| 82 | C | 72.75001 | 72.90820 | 82.88116 | -615.18735  | -489.99689  | -70.96352   | 1 |
| 83 | H | 72.55914 | 73.30701 | 83.91472 | -1226.32661 | -1724.38906 | -1716.47170 | 1 |
| 84 | H | 72.99890 | 73.79185 | 82.22464 | 2381.64273  | -969.84735  | 900.46860   | 1 |
| 85 | H | 71.78141 | 72.47738 | 82.50711 | 2122.74991  | 1702.23946  | -141.36228  | 1 |
| 86 | C | 73.52163 | 70.80574 | 83.89869 | -501.86074  | -479.61276  | -376.42482  | 1 |
| 87 | H | 73.45856 | 71.23424 | 84.93649 | 993.79261   | -2246.95401 | -1177.81305 | 1 |
| 88 | H | 72.52668 | 70.33075 | 83.67799 | 42.71279    | -626.15391  | -2651.37258 | 1 |
| 89 | H | 74.28751 | 69.96656 | 83.92606 | -2026.39012 | -1590.33709 | -887.82922  | 1 |
| 90 | C | 74.31028 | 72.43207 | 80.33858 | -672.89153  | 382.57394   | -156.34072  | 1 |
| 91 | O | 74.38616 | 73.60575 | 80.60660 | 410.04627   | 221.86223   | 500.35950   | 1 |
| 92 | N | 74.28566 | 71.88077 | 79.12679 | -378.11782  | -443.79414  | -441.10984  | 1 |
| 93 | H | 74.31729 | 70.83546 | 79.01640 | 2404.15973  | -568.14894  | 1149.30085  | 1 |
| 94 | C | 74.78319 | 72.71995 | 78.07037 | -544.54484  | 466.16019   | 331.29119   | 1 |
| 95 | H | 74.33743 | 73.71384 | 78.30542 | -1409.80988 | -170.17955  | 2325.32679  | 1 |



|     |   |          |          |          |             |             |             |   |
|-----|---|----------|----------|----------|-------------|-------------|-------------|---|
| 96  | C | 76.36169 | 72.71655 | 78.20929 | -184.48284  | 116.78282   | -758.89137  | 1 |
| 97  | H | 76.66052 | 73.09383 | 79.21412 | 1893.78641  | 1861.14652  | 611.04528   | 1 |
| 98  | H | 76.75332 | 71.67563 | 78.14472 | -2170.79665 | -974.19311  | 1327.50117  | 1 |
| 99  | C | 76.95542 | 73.60631 | 77.07313 | 389.51668   | 672.81878   | -138.49152  | 1 |
| 100 | H | 76.66014 | 73.19801 | 76.07828 | 510.64577   | 1933.03327  | 1851.02484  | 1 |
| 101 | H | 76.49561 | 74.61928 | 77.09719 | -2302.30869 | -1105.72939 | -948.89774  | 1 |
| 102 | C | 78.52383 | 73.73977 | 77.14176 | -559.93427  | -126.34590  | 542.30857   | 1 |
| 103 | O | 79.10163 | 74.37952 | 76.30114 | -670.36003  | -111.83166  | 76.36448    | 1 |
| 104 | N | 79.08965 | 73.10368 | 78.19016 | -216.06729  | -537.07037  | 446.51379   | 1 |
| 105 | H | 78.65595 | 72.54688 | 78.93575 | -1251.96487 | 1074.12894  | -2168.52500 | 1 |
| 106 | H | 80.09801 | 73.10065 | 78.37951 | -2451.83023 | -720.73851  | 944.84612   | 1 |
| 107 | C | 74.31858 | 72.04653 | 76.66059 | 546.24052   | -563.88337  | -85.11809   | 1 |
| 108 | O | 75.14574 | 71.48827 | 75.98926 | 71.70702    | -307.40463  | 606.69673   | 1 |
| 109 | N | 73.00745 | 72.21017 | 76.41630 | 479.90863   | -504.50129  | 222.86849   | 1 |
| 110 | C | 72.34568 | 71.41793 | 75.42899 | 75.51268    | -600.91904  | 506.73700   | 1 |
| 111 | H | 72.96383 | 70.50014 | 75.29213 | -2033.61562 | 1795.30103  | 254.89480   | 1 |
| 112 | C | 70.92332 | 71.19705 | 76.10620 | 523.79067   | 517.99274   | 284.45581   | 1 |
| 113 | H | 70.13829 | 70.90615 | 75.37275 | 1599.61665  | -1127.00911 | 1895.98173  | 1 |
| 114 | H | 70.95830 | 70.39337 | 76.87542 | -1881.83093 | 1275.82488  | -1501.55016 | 1 |
| 115 | C | 70.67612 | 72.59225 | 76.75814 | -600.05639  | -404.05026  | 316.64485   | 1 |
| 116 | H | 70.35683 | 73.33961 | 75.99871 | -2597.05260 | 496.36221   | 657.73249   | 1 |
| 117 | H | 69.88822 | 72.58197 | 77.54418 | -1666.24518 | 1294.38985  | -1723.90591 | 1 |
| 118 | C | 72.12133 | 72.92603 | 77.32683 | 493.57570   | -129.95376  | -602.56394  | 1 |
| 119 | H | 72.40048 | 74.00555 | 77.30643 | -1469.08415 | -637.84797  | 2204.22581  | 1 |
| 120 | H | 72.33022 | 72.51261 | 78.34164 | -1038.97840 | 1068.88701  | -2280.71789 | 1 |
| 121 | C | 72.09611 | 72.21551 | 74.02162 | 188.88100   | 241.05089   | -727.87821  | 1 |
| 122 | O | 71.43759 | 71.68868 | 73.15633 | 531.88613   | -49.19943   | 427.07960   | 1 |
| 123 | N | 72.62391 | 73.44038 | 73.99915 | 708.14833   | 26.93417    | -179.73509  | 1 |
| 124 | H | 73.17903 | 73.67768 | 74.82030 | -2232.69501 | -1179.09831 | 1023.94816  | 1 |
| 125 | C | 72.64210 | 74.21276 | 72.76226 | -738.32412  | 259.92548   | 104.42456   | 1 |
| 126 | H | 72.27157 | 73.50575 | 71.97970 | 2028.89123  | 1260.02983  | 1311.33324  | 1 |
| 127 | C | 71.75593 | 75.43585 | 72.95389 | -258.65678  | -345.52513  | 661.28459   | 1 |
| 128 | H | 72.11007 | 75.96870 | 73.86414 | -1826.06090 | -1801.46097 | -918.64554  | 1 |
| 129 | C | 71.85405 | 76.39025 | 71.77905 | -541.23400  | 531.92970   | -218.41428  | 1 |
| 130 | H | 71.23070 | 77.31394 | 71.93648 | 1311.73218  | -2219.18200 | 882.19023   | 1 |
| 131 | H | 72.91448 | 76.72743 | 71.60657 | -1048.71298 | 1223.58118  | -2196.97971 | 1 |
| 132 | H | 71.50250 | 75.90940 | 70.82456 | 419.06414   | 1903.92898  | 1903.44670  | 1 |
| 133 | C | 70.30952 | 75.03956 | 73.18474 | -423.86431  | 152.66566   | -648.55262  | 1 |
| 134 | H | 69.65609 | 75.93330 | 73.38535 | 105.68386   | -2342.50080 | 1387.51238  | 1 |
| 135 | H | 69.88170 | 74.50400 | 72.29229 | -1695.63603 | -1484.73621 | -1531.02793 | 1 |
| 136 | H | 70.21131 | 74.34263 | 74.06227 | -1853.57121 | -487.39031  | 1936.59343  | 1 |
| 137 | C | 74.20235 | 74.74644 | 72.54958 | 539.71428   | -510.58232  | 267.58633   | 1 |
| 138 | O | 74.87254 | 75.11097 | 73.48448 | -15.93758   | -278.34085  | -624.49402  | 1 |
| 139 | N | 74.48207 | 74.80772 | 71.25555 | -676.81886  | 12.05292    | 276.17960   | 1 |
| 140 | H | 73.77706 | 74.49322 | 70.59219 | -1694.44250 | -373.84189  | -2100.66098 | 1 |
| 141 | C | 75.80335 | 75.15830 | 70.87576 | 412.33078   | -664.70360  | 108.35451   | 1 |
| 142 | H | 76.34563 | 75.32065 | 71.83843 | 1765.77476  | 1294.44366  | 1621.76594  | 1 |
| 143 | C | 76.37031 | 73.97382 | 69.98300 | -179.66635  | -721.95667  | -264.73915  | 1 |
| 144 | H | 76.19224 | 72.98745 | 70.46629 | -607.34922  | 2587.87032  | -598.10018  | 1 |
| 145 | H | 75.84109 | 73.93220 | 69.00498 | -359.69332  | -1479.13954 | -2259.74260 | 1 |
| 146 | C | 77.89794 | 74.23986 | 69.78617 | -240.01076  | 616.02425   | 431.85322   | 1 |
| 147 | H | 78.07594 | 75.27652 | 69.42026 | -1359.17131 | 782.54425   | 2227.99181  | 1 |
| 148 | H | 78.44292 | 74.15906 | 70.75354 | -820.36667  | 85.81767    | -2596.78715 | 1 |
| 149 | C | 78.44161 | 73.18746 | 68.73859 | -513.07015  | 236.18570   | -551.87280  | 1 |
| 150 | H | 78.27566 | 72.14488 | 69.09506 | 1816.11944  | -1183.11722 | -1650.94321 | 1 |
| 151 | H | 77.89357 | 73.26800 | 67.77168 | -1800.04429 | -1361.53473 | 1526.34643  | 1 |
| 152 | C | 79.95021 | 73.47883 | 68.55628 | 726.08972   | -253.19732  | -179.64713  | 1 |
| 153 | H | 80.19716 | 74.53353 | 68.30407 | 1224.27271  | -456.51798  | -2390.90304 | 1 |
| 154 | H | 80.59064 | 73.13898 | 69.39439 | 1206.40339  | -1150.93514 | -2154.90344 | 1 |
| 155 | N | 80.43279 | 72.65968 | 67.31315 | 329.70796   | -633.68968  | -155.67358  | 1 |
| 156 | H | 81.46360 | 72.76642 | 67.08738 | 1348.31305  | 1938.76845  | 1359.00643  | 1 |
| 157 | H | 80.34238 | 71.60291 | 67.36590 | 2096.92035  | 1446.54551  | -966.48890  | 1 |

|     |   |          |          |          |             |             |             |   |
|-----|---|----------|----------|----------|-------------|-------------|-------------|---|
| 158 | H | 79.99715 | 72.87231 | 66.36840 | -1197.07217 | -2303.53719 | 827.28733   | 1 |
| 159 | C | 75.79341 | 76.45166 | 69.85471 | -378.01186  | -556.17301  | -413.96481  | 1 |
| 160 | O | 75.11871 | 76.53798 | 68.82630 | -409.44433  | -307.55053  | -453.30833  | 1 |
| 161 | N | 76.76253 | 77.22660 | 70.26768 | -429.02477  | 524.70884   | 274.08502   | 1 |
| 162 | H | 77.23852 | 76.90475 | 71.10834 | 1706.34263  | -1425.96036 | 1574.38926  | 1 |
| 163 | C | 76.95649 | 78.56212 | 69.78966 | -45.25864   | -626.22952  | 478.93267   | 1 |
| 164 | H | 75.92594 | 78.96524 | 69.66523 | 1988.63164  | 570.90773   | 1772.87287  | 1 |
| 165 | C | 77.81613 | 79.28506 | 70.90322 | 551.77128   | -20.49526   | -564.54996  | 1 |
| 166 | H | 77.36466 | 79.13794 | 71.91013 | 1434.61535  | -1753.10253 | 1513.99471  | 1 |
| 167 | H | 78.82417 | 78.81614 | 70.96060 | -714.67738  | 1819.09770  | 1898.36494  | 1 |
| 168 | C | 77.94838 | 80.80874 | 70.57391 | 446.99263   | -555.77305  | 338.97221   | 1 |
| 169 | H | 78.27518 | 80.94815 | 69.51053 | 1953.68466  | 1892.25957  | -161.67766  | 1 |
| 170 | H | 76.97011 | 81.33125 | 70.67129 | -403.03785  | 2688.07032  | -188.43591  | 1 |
| 171 | C | 79.02187 | 81.40833 | 71.56948 | 567.86262   | 335.74681   | 434.04421   | 1 |
| 172 | H | 78.67233 | 81.33576 | 72.62505 | -1080.02275 | 1568.26081  | -1948.78900 | 1 |
| 173 | H | 79.96906 | 80.82302 | 71.52465 | -919.54108  | 2111.34692  | 1456.13463  | 1 |
| 174 | C | 79.28067 | 82.87928 | 71.17030 | 195.81897   | 173.33862   | -745.11536  | 1 |
| 175 | H | 79.71171 | 83.01183 | 70.15778 | 1405.67949  | -2301.21089 | -390.08113  | 1 |
| 176 | H | 78.41297 | 83.55542 | 71.30417 | -940.37328  | -1118.32446 | 2299.72133  | 1 |
| 177 | N | 80.37827 | 83.44213 | 72.13612 | 319.26422   | 656.36007   | -42.02424   | 1 |
| 178 | H | 80.67062 | 84.44663 | 71.96133 | 1961.03633  | 619.91968   | 1787.09422  | 1 |
| 179 | H | 80.14626 | 83.46947 | 73.17146 | 854.14343   | -2156.80752 | 1429.08711  | 1 |
| 180 | H | 81.31847 | 82.94952 | 72.13461 | 1237.02905  | -1378.50857 | -1998.28500 | 1 |
| 181 | C | 77.75135 | 78.54370 | 68.37335 | 532.53319   | -268.57236  | 517.55729   | 1 |
| 182 | O | 78.36784 | 79.51916 | 68.00464 | 266.16714   | -290.73804  | -558.88002  | 1 |
| 183 | N | 77.61695 | 77.37369 | 67.74066 | -226.25352  | 640.49678   | -270.32839  | 1 |
| 184 | H | 76.99207 | 76.67501 | 68.15995 | 2007.69063  | -1035.27229 | 1523.50231  | 1 |
| 185 | C | 77.85482 | 77.40561 | 66.32659 | -540.76542  | -573.33303  | 49.50000    | 1 |
| 186 | H | 78.66500 | 78.16146 | 66.19408 | -2374.20950 | -1036.76023 | 843.75774   | 1 |
| 187 | C | 78.29231 | 75.92805 | 65.88656 | -77.09082   | 666.87422   | -415.84136  | 1 |
| 188 | H | 77.56262 | 75.18798 | 66.31311 | -985.81834  | 617.19825   | 2463.91927  | 1 |
| 189 | O | 79.59769 | 75.53707 | 66.34656 | 293.29899   | -391.65602  | -477.80926  | 1 |
| 190 | H | 79.39248 | 74.72267 | 66.84627 | 2528.72714  | -681.76262  | -751.27122  | 1 |
| 191 | C | 78.12360 | 75.96393 | 64.32608 | 252.47363   | -605.14473  | 440.05134   | 1 |
| 192 | H | 78.45042 | 75.00601 | 63.85777 | -2052.65063 | 1456.49051  | -1043.51830 | 1 |
| 193 | H | 77.05988 | 76.12452 | 64.02516 | -2152.98800 | -1661.97574 | -161.70652  | 1 |
| 194 | H | 78.72744 | 76.78248 | 63.86913 | -473.12726  | -1584.27339 | 2165.61725  | 1 |
| 195 | C | 76.49186 | 77.87899 | 65.58121 | 360.36307   | 488.46713   | 505.10056   | 1 |
| 196 | O | 76.61392 | 78.31702 | 64.45722 | -200.08817  | -528.03552  | -385.82850  | 1 |
| 197 | N | 75.37004 | 77.67826 | 66.26842 | -597.54095  | -226.44775  | 355.20479   | 1 |
| 198 | H | 75.33569 | 77.28919 | 67.24146 | 2179.23655  | -1300.70981 | -991.33835  | 1 |
| 199 | C | 74.17805 | 77.83323 | 65.49344 | -687.68921  | 297.39807   | -249.45179  | 1 |
| 200 | H | 74.57354 | 78.23382 | 64.52324 | -349.16256  | -2467.37713 | -1101.72831 | 1 |
| 201 | C | 73.49736 | 76.38915 | 65.32779 | 672.47345   | 361.54328   | -201.62880  | 1 |
| 202 | H | 73.31622 | 75.92375 | 66.32384 | 1541.41502  | 582.18425   | 2169.97026  | 1 |
| 203 | H | 72.51127 | 76.49082 | 64.81700 | -2534.67717 | 60.25153    | 997.72295   | 1 |
| 204 | C | 74.42552 | 75.51079 | 64.47851 | 574.26774   | -389.43119  | -377.02542  | 1 |
| 205 | C | 74.47605 | 75.72696 | 63.06816 | 688.82679   | -287.33580  | -257.96133  | 1 |
| 206 | H | 73.85412 | 76.50715 | 62.59333 | 331.14182   | 1470.38163  | 2269.80013  | 1 |
| 207 | C | 75.23774 | 74.50859 | 65.08997 | -383.52382  | -675.04808  | 144.24917   | 1 |
| 208 | H | 75.20835 | 74.35046 | 66.18324 | 4.09847     | 1517.59662  | 2262.86397  | 1 |
| 209 | C | 75.33209 | 74.93619 | 62.30357 | -134.76730  | 428.45285   | -649.50303  | 1 |
| 210 | H | 75.37384 | 75.10421 | 61.21311 | -903.23433  | 1600.49020  | 2011.53387  | 1 |
| 211 | C | 76.07361 | 73.73706 | 64.27883 | -335.53281  | -615.00040  | -364.39058  | 1 |
| 212 | H | 76.69843 | 72.96400 | 64.75879 | 1596.45398  | -1369.33862 | 1732.02659  | 1 |
| 213 | C | 76.15523 | 73.91820 | 62.86708 | 585.48547   | -340.24194  | -406.23938  | 1 |
| 214 | O | 77.01353 | 73.15066 | 62.03718 | -419.15649  | -173.04408  | -511.94141  | 1 |
| 215 | H | 77.38707 | 72.53388 | 62.70989 | -1071.84350 | 1559.71507  | -1960.13012 | 1 |
| 216 | C | 73.21528 | 78.90396 | 66.24279 | 291.41878   | -183.13091  | 710.72246   | 1 |
| 217 | O | 73.62978 | 80.03706 | 66.47925 | 379.87695   | 523.47396   | -222.23622  | 1 |
| 218 | N | 72.01488 | 78.40596 | 66.43050 | 564.30591   | 373.09380   | 277.24371   | 1 |
| 219 | H | 71.86492 | 77.43981 | 66.13985 | -120.59931  | -2436.07824 | -1214.35098 | 1 |

|     |   |          |          |          |             |             |             |   |
|-----|---|----------|----------|----------|-------------|-------------|-------------|---|
| 220 | C | 71.06155 | 79.00438 | 67.30870 | 404.07514   | -299.37480  | 608.84009   | 1 |
| 221 | H | 70.33752 | 78.18128 | 67.50511 | -1071.07882 | -841.69025  | 2359.66467  | 1 |
| 222 | C | 71.86527 | 79.45677 | 68.60460 | -683.12807  | 68.71770    | -390.13096  | 1 |
| 223 | H | 72.53658 | 78.63694 | 68.94742 | 2068.88918  | 1596.58590  | 770.89603   | 1 |
| 224 | H | 72.54075 | 80.31334 | 68.37007 | 1379.86429  | 2342.49779  | -179.85638  | 1 |
| 225 | C | 70.84831 | 79.84895 | 69.71683 | -176.39967  | 537.49466   | 550.97268   | 1 |
| 226 | H | 70.19885 | 80.69130 | 69.38814 | -396.28051  | 1942.22168  | 1869.33314  | 1 |
| 227 | H | 70.15862 | 79.00771 | 69.95121 | -94.44700   | 586.00678   | -2659.20016 | 1 |
| 228 | C | 71.73073 | 80.24980 | 70.98852 | -291.69381  | -718.18079  | -150.72929  | 1 |
| 229 | H | 72.34765 | 79.42634 | 71.43047 | -2303.38776 | 1089.76242  | 964.62032   | 1 |
| 230 | H | 72.39813 | 81.13852 | 70.85133 | 884.16729   | 2568.80533  | -207.74283  | 1 |
| 231 | N | 70.74071 | 80.59690 | 71.91918 | -594.49522  | -252.81478  | 342.29276   | 1 |
| 232 | H | 69.78460 | 80.54319 | 71.60325 | -1735.17426 | 2084.05705  | -263.71605  | 1 |
| 233 | C | 70.96768 | 80.97456 | 73.11192 | 595.23177   | -271.52487  | 442.22352   | 1 |
| 234 | N | 72.30061 | 81.04491 | 73.53013 | 585.53813   | -424.79750  | -105.81303  | 1 |
| 235 | H | 73.15273 | 80.82965 | 73.01386 | 959.88797   | 1327.56823  | -2177.11905 | 1 |
| 236 | H | 72.60652 | 81.33160 | 74.46057 | 1578.48647  | 16.27378    | -2220.76233 | 1 |
| 237 | N | 69.76799 | 81.25290 | 73.78154 | -452.17763  | -390.33541  | -421.51853  | 1 |
| 238 | H | 68.80044 | 81.21020 | 73.46493 | 470.26107   | 1974.25629  | -1817.92087 | 1 |
| 239 | H | 69.73026 | 81.58248 | 74.74674 | 1856.67307  | -1573.97321 | -1224.35416 | 1 |
| 240 | C | 70.34211 | 80.26274 | 66.57440 | -531.47271  | -581.45780  | -55.06206   | 1 |
| 241 | O | 69.13326 | 80.26510 | 66.46292 | -243.00837  | 192.73507   | 609.52485   | 1 |
| 242 | N | 71.19927 | 81.20819 | 66.22129 | 343.49288   | -644.25607  | 38.09164    | 1 |
| 243 | H | 72.22974 | 81.04746 | 66.34757 | -1691.16043 | -1535.97525 | -1484.73099 | 1 |
| 244 | C | 70.68672 | 82.41118 | 65.54832 | 542.66492   | 350.14337   | 454.42563   | 1 |
| 245 | H | 69.75357 | 82.60652 | 66.12841 | 1209.57979  | -2396.95920 | 463.86744   | 1 |
| 246 | C | 71.72741 | 83.51257 | 65.61301 | -737.14309  | 145.93010   | 242.71942   | 1 |
| 247 | H | 72.65109 | 83.13667 | 65.11706 | -1050.18303 | 159.36419   | -2509.06125 | 1 |
| 248 | C | 71.26686 | 84.75242 | 64.86772 | -706.77696  | -252.88343  | -245.16230  | 1 |
| 249 | H | 72.04355 | 85.56585 | 64.89017 | -1624.64039 | -1665.49085 | 1417.86935  | 1 |
| 250 | H | 71.05275 | 84.52384 | 63.78514 | 2566.10521  | 598.51109   | 693.22305   | 1 |
| 251 | H | 70.32454 | 85.17777 | 65.31131 | -1972.69758 | 107.10018   | -1876.34312 | 1 |
| 252 | C | 72.08595 | 83.87460 | 67.04268 | 412.85148   | 672.58832   | -27.69222   | 1 |
| 253 | H | 72.88550 | 84.66479 | 67.08374 | 1447.02277  | 1762.76533  | -1490.78944 | 1 |
| 254 | H | 71.19525 | 84.27228 | 67.60296 | 1320.77379  | -145.20455  | 2378.68491  | 1 |
| 255 | H | 72.46511 | 82.98201 | 67.61264 | -1512.10848 | 1470.52031  | 1724.75147  | 1 |
| 256 | C | 70.34380 | 81.98989 | 63.98191 | -607.11113  | 499.56689   | 73.73769    | 1 |
| 257 | O | 71.04679 | 82.35192 | 63.07190 | 357.97126   | 460.81534   | 356.68785   | 1 |
| 258 | N | 69.23817 | 81.26653 | 63.93841 | 536.55407   | -368.62270  | 332.76306   | 1 |
| 259 | H | 68.76450 | 80.95801 | 64.81165 | 524.38866   | 2297.69985  | 1367.20941  | 1 |
| 260 | C | 68.78046 | 80.88181 | 62.64767 | 46.50277    | -774.29190  | -147.97904  | 1 |
| 261 | H | 69.16504 | 81.67469 | 61.96635 | 1676.51875  | 1883.29066  | 1032.55549  | 1 |
| 262 | C | 69.40895 | 79.43620 | 62.27985 | -559.41456  | -34.19198   | -556.30433  | 1 |
| 263 | H | 69.21214 | 78.72616 | 63.11754 | -64.66664   | 395.18769   | 2695.05373  | 1 |
| 264 | H | 68.90148 | 79.00510 | 61.38447 | -2703.44278 | -60.40056   | 333.79418   | 1 |
| 265 | C | 70.88496 | 79.57135 | 62.03502 | -519.76435  | 377.31045   | 459.42366   | 1 |
| 266 | H | 71.34273 | 80.09143 | 62.91092 | -1746.74323 | 1667.50644  | -1261.73691 | 1 |
| 267 | C | 71.52770 | 78.19782 | 61.88397 | 570.95554   | 16.46261    | -545.27700  | 1 |
| 268 | H | 72.63098 | 78.27655 | 61.70583 | 2391.58273  | 28.05277    | -1305.07271 | 1 |
| 269 | H | 71.38209 | 77.56854 | 62.79931 | 175.75588   | 917.63458   | 2559.43867  | 1 |
| 270 | H | 71.09238 | 77.63303 | 61.01953 | -1063.97851 | -2155.34650 | 1283.00462  | 1 |
| 271 | C | 71.17130 | 80.40522 | 60.79289 | 193.76014   | 2.62946     | -765.53141  | 1 |
| 272 | H | 72.25549 | 80.36925 | 60.51215 | 507.39394   | -846.55087  | 2539.60089  | 1 |
| 273 | H | 70.58505 | 80.05026 | 59.90606 | 1337.57841  | 1818.19054  | 1526.01994  | 1 |
| 274 | H | 70.91448 | 81.48523 | 60.96056 | 1100.88635  | -1172.91350 | -2199.08909 | 1 |
| 275 | C | 67.17852 | 80.75210 | 62.69294 | -549.21115  | 475.64486   | -309.38218  | 1 |
| 276 | O | 66.52181 | 80.90927 | 63.68848 | 556.06106   | -390.37755  | -78.24250   | 1 |
| 277 | O | 66.55295 | 80.42032 | 61.46422 | -572.27940  | -310.19032  | -209.75862  | 1 |
| 278 | H | 67.35966 | 80.40298 | 60.88147 | -1380.08193 | 2212.14486  | 790.85944   | 1 |

Listing 37: C00037.xmolout

|    |   |          |          |          |             |             |             |        |          |
|----|---|----------|----------|----------|-------------|-------------|-------------|--------|----------|
| 1  |   | 276      |          |          |             |             |             |        |          |
| 2  |   | 150.0000 | 150.0000 | 150.0000 | 0.0000      | 0.0000      | 0.0000***** | 1.8545 | 7418     |
|    |   | 0.2500   | 300.00   | 0.00     | 0.00        | 0.00        | -1293.8088  | 0.0000 | 300.0000 |
| 3  | H | 69.44136 | 77.30548 | 71.89115 | -2043.14101 | -1757.64893 | 399.89339   |        | 1        |
| 4  | N | 69.29526 | 78.30699 | 71.75896 | 426.75047   | 490.45733   | -334.42467  |        | 1        |
| 5  | H | 68.83847 | 78.55911 | 72.63808 | 442.25559   | -1110.30854 | -2448.52907 |        | 1        |
| 6  | C | 70.50450 | 79.02763 | 71.57384 | 415.32972   | -666.39213  | 83.73172    |        | 1        |
| 7  | H | 71.31273 | 78.32704 | 71.87470 | 879.32219   | 2491.00447  | 667.35213   |        | 1        |
| 8  | C | 70.63020 | 79.46530 | 70.02785 | 31.35357    | 477.41777   | 628.23362   |        | 1        |
| 9  | H | 69.77767 | 80.13400 | 69.76085 | 1168.38489  | 2240.25337  | -1019.71136 |        | 1        |
| 10 | H | 71.55907 | 80.06157 | 69.86180 | -360.43770  | 2534.90498  | 931.67112   |        | 1        |
| 11 | C | 70.62396 | 78.23140 | 69.16351 | 463.18208   | 512.70242   | -382.34388  |        | 1        |
| 12 | H | 69.78803 | 77.57673 | 69.49936 | 1725.29117  | 1863.52247  | -987.07854  |        | 1        |
| 13 | C | 70.38555 | 78.60479 | 67.70572 | 710.42801   | -144.27427  | -313.15367  |        | 1        |
| 14 | H | 70.35091 | 77.69919 | 67.04679 | 364.20195   | -1033.13725 | 2494.72524  |        | 1        |
| 15 | H | 69.41568 | 79.14990 | 67.57155 | 2567.61904  | 335.80679   | 847.48802   |        | 1        |
| 16 | H | 71.19677 | 79.27008 | 67.31246 | -2587.99029 | 680.92867   | -512.16411  |        | 1        |
| 17 | C | 71.93088 | 77.46030 | 69.28797 | 268.17616   | 741.64379   | -40.42634   |        | 1        |
| 18 | H | 71.92214 | 76.52892 | 68.66484 | 1283.54314  | -1945.37420 | -1411.27812 |        | 1        |
| 19 | H | 72.80585 | 78.07501 | 68.95338 | -1258.57796 | 1317.15249  | -2026.02085 |        | 1        |
| 20 | H | 72.13477 | 77.14873 | 70.34526 | -2502.84526 | 909.80597   | 575.92391   |        | 1        |
| 21 | C | 70.35967 | 80.33389 | 72.55998 | 619.36578   | -458.64843  | -172.09273  |        | 1        |
| 22 | O | 69.95450 | 80.12056 | 73.87222 | -81.40433   | 433.87611   | 522.34594   |        | 1        |
| 23 | N | 71.66909 | 80.99314 | 72.43702 | 175.23996   | -622.20190  | 341.55523   |        | 1        |
| 24 | H | 71.84368 | 81.37762 | 71.50605 | -876.57256  | -303.22879  | -2561.90213 |        | 1        |
| 25 | C | 71.81801 | 81.96868 | 73.48467 | -571.88214  | -534.10783  | -106.15033  |        | 1        |
| 26 | H | 71.70029 | 81.38287 | 74.42468 | -2713.20841 | -16.25800   | -248.80809  |        | 1        |
| 27 | C | 73.27172 | 82.60073 | 73.31152 | 166.60354   | 288.16399   | -716.09568  |        | 1        |
| 28 | H | 73.27558 | 83.24523 | 72.39026 | -2097.85574 | 1636.78449  | -586.18044  |        | 1        |
| 29 | O | 74.35295 | 81.66248 | 73.15294 | -317.80580  | -363.38227  | 484.43082   |        | 1        |
| 30 | H | 74.69254 | 81.90931 | 72.26978 | 1863.74748  | -1451.84923 | 1357.29467  |        | 1        |
| 31 | C | 73.33337 | 83.51807 | 74.58850 | 503.80731   | 517.99032   | 318.51606   |        | 1        |
| 32 | H | 74.26302 | 84.13301 | 74.60190 | 640.61020   | -2157.10410 | -1536.29104 |        | 1        |
| 33 | H | 72.46825 | 84.22295 | 74.63292 | 1687.88455  | 465.60692   | 2087.56452  |        | 1        |
| 34 | H | 73.32314 | 82.91228 | 75.52478 | -1293.07895 | -1899.88581 | -1463.57452 |        | 1        |
| 35 | C | 70.67457 | 83.10310 | 73.29023 | -153.07550  | -733.68902  | 248.70981   |        | 1        |
| 36 | O | 71.01396 | 84.17720 | 72.86976 | 186.15459   | -480.78787  | -449.34387  |        | 1        |
| 37 | N | 69.40352 | 82.68141 | 73.59615 | -487.53139  | 543.18517   | 42.03850    |        | 1        |
| 38 | C | 68.24024 | 83.37059 | 73.06318 | -699.35871  | 69.34393    | 360.10701   |        | 1        |
| 39 | H | 68.52410 | 83.78762 | 72.07117 | 2.81126     | -221.99807  | -2715.58072 |        | 1        |
| 40 | C | 67.18672 | 82.19848 | 73.05083 | -507.46439  | -592.59194  | 122.07761   |        | 1        |
| 41 | H | 66.13551 | 82.55530 | 72.96862 | -1975.08116 | 525.87560   | -1801.71556 |        | 1        |
| 42 | H | 67.35832 | 81.48653 | 72.21297 | 1588.27743  | -1913.22100 | 1113.83566  |        | 1        |
| 43 | C | 67.53252 | 81.55697 | 74.44125 | -613.62442  | -457.55993  | -194.14490  |        | 1        |
| 44 | H | 67.16484 | 82.18628 | 75.28879 | 1707.54637  | -721.27992  | 1996.92523  |        | 1        |
| 45 | H | 67.09608 | 80.54065 | 74.58133 | 758.23357   | 2100.81767  | 1560.55011  |        | 1        |
| 46 | C | 69.09762 | 81.55818 | 74.36121 | -352.41524  | 704.96076   | 49.21465    |        | 1        |
| 47 | H | 69.69690 | 81.53852 | 75.30624 | 1714.76886  | -2070.42778 | 443.35792   |        | 1        |
| 48 | H | 69.69829 | 81.10678 | 72.07371 | 1224.15040  | 1801.50881  | 1636.97633  |        | 1        |
| 49 | C | 67.64535 | 84.48556 | 74.09345 | 566.85117   | 537.05831   | 117.62814   |        | 1        |
| 50 | O | 66.51425 | 84.93961 | 73.88520 | -550.26779  | -406.08867  | 4.21666     |        | 1        |
| 51 | N | 68.49465 | 84.81136 | 75.04339 | 566.34832   | -425.77725  | 180.18749   |        | 1        |
| 52 | H | 69.36962 | 84.30751 | 74.89808 | 644.44502   | 2646.80550  | -52.73430   |        | 1        |
| 53 | C | 68.11028 | 85.15707 | 76.38280 | 612.34801   | -281.48662  | 411.56221   |        | 1        |
| 54 | H | 68.80758 | 85.98423 | 76.63545 | 1667.23498  | -1490.75142 | 1556.16753  |        | 1        |
| 55 | C | 66.57964 | 85.55657 | 76.48041 | -714.45746  | -175.43074  | 286.98927   |        | 1        |
| 56 | H | 65.98190 | 84.68411 | 76.08671 | -787.09484  | 1763.03619  | -1922.46060 |        | 1        |
| 57 | O | 66.19172 | 86.68106 | 75.69049 | -429.46514  | 516.51932   | -128.40526  |        | 1        |
| 58 | H | 66.03475 | 86.19457 | 74.79015 | 1981.82785  | 436.16847   | -1818.18182 |        | 1        |
| 59 | C | 66.35996 | 85.68246 | 78.03370 | 630.79189   | -468.94448  | 76.03230    |        | 1        |
| 60 | H | 65.29023 | 85.88056 | 78.27836 | -1775.71861 | 2062.30353  | 131.89849   |        | 1        |

|     |   |          |          |          |             |             |             |   |
|-----|---|----------|----------|----------|-------------|-------------|-------------|---|
| 61  | H | 66.65891 | 84.74969 | 78.57387 | -1855.14608 | 88.94118    | 1993.53760  | 1 |
| 62  | H | 66.95511 | 86.52071 | 78.46469 | -1504.82350 | -780.94249  | -2132.90992 | 1 |
| 63  | C | 68.43112 | 83.81012 | 77.25531 | 288.57638   | 618.62814   | -397.00270  | 1 |
| 64  | O | 67.55680 | 82.98110 | 77.43429 | 321.70495   | -185.26452  | 574.37218   | 1 |
| 65  | N | 69.72639 | 83.76438 | 77.53463 | -447.05792  | -446.53431  | 367.76425   | 1 |
| 66  | H | 70.24185 | 84.56217 | 77.15508 | 350.31316   | 1975.63644  | -1843.31522 | 1 |
| 67  | C | 70.26915 | 83.17485 | 78.71129 | -511.23061  | 374.03917   | -471.51480  | 1 |
| 68  | H | 71.35301 | 83.33323 | 78.51221 | 2234.79579  | -898.70890  | -1273.45190 | 1 |
| 69  | C | 69.84629 | 84.01751 | 80.01346 | 529.53781   | -159.34528  | 563.72604   | 1 |
| 70  | H | 70.47949 | 83.62448 | 80.85424 | 654.59388   | 2347.94251  | 1217.51488  | 1 |
| 71  | H | 70.15450 | 85.08451 | 79.83865 | -1526.55661 | 2103.42026  | 817.87394   | 1 |
| 72  | O | 68.44652 | 84.01833 | 80.38322 | -554.84278  | 14.12789    | 399.58769   | 1 |
| 73  | H | 68.39640 | 83.15020 | 80.83213 | 1297.06236  | 2061.84854  | 1220.68812  | 1 |
| 74  | C | 69.92212 | 81.60990 | 78.90713 | -662.15484  | -412.13544  | 123.62687   | 1 |
| 75  | O | 70.05228 | 81.08601 | 79.98720 | -540.01537  | -317.05804  | 274.91456   | 1 |
| 76  | N | 69.75524 | 80.94694 | 77.70316 | -202.76299  | -690.00100  | -131.49145  | 1 |
| 77  | H | 69.37268 | 81.69707 | 77.11824 | -702.62132  | -2617.37191 | 281.70413   | 1 |
| 78  | C | 69.26282 | 79.55601 | 77.77210 | -491.73914  | 576.34187   | 222.73509   | 1 |
| 79  | H | 68.96143 | 79.43448 | 78.84068 | 1977.17978  | -1823.58850 | -434.68928  | 1 |
| 80  | C | 68.14124 | 79.38520 | 76.77256 | -649.50797  | -328.66843  | 306.11224   | 1 |
| 81  | H | 68.46046 | 79.87186 | 75.82455 | 2075.07803  | 1452.16490  | -1004.45904 | 1 |
| 82  | C | 67.86769 | 77.92486 | 76.45599 | -615.18735  | -489.99689  | -70.96352   | 1 |
| 83  | H | 67.03766 | 77.81130 | 75.70574 | -1226.32661 | -1724.38906 | -1716.47170 | 1 |
| 84  | H | 68.77792 | 77.42204 | 76.02620 | 2381.64273  | -969.84735  | 900.46860   | 1 |
| 85  | H | 67.57190 | 77.34975 | 77.37554 | 2122.74991  | 1702.23946  | -141.36228  | 1 |
| 86  | C | 66.86710 | 80.05260 | 77.25083 | -501.86074  | -479.61276  | -376.42482  | 1 |
| 87  | H | 66.03297 | 79.94855 | 76.50414 | 993.79261   | -2246.95401 | -1177.81305 | 1 |
| 88  | H | 66.50384 | 79.60934 | 78.21822 | 42.71279    | -626.15391  | -2651.37258 | 1 |
| 89  | H | 67.03404 | 81.17928 | 77.42728 | -2026.39012 | -1590.33709 | -887.82922  | 1 |
| 90  | C | 70.53239 | 78.58274 | 77.36918 | -672.89153  | 382.57394   | -156.34072  | 1 |
| 91  | O | 70.76718 | 77.61340 | 78.05929 | 410.04627   | 221.86223   | 500.35950   | 1 |
| 92  | N | 71.10284 | 78.92841 | 76.23204 | -378.11782  | -443.79414  | -441.10984  | 1 |
| 93  | H | 70.76979 | 79.74415 | 75.71097 | 2404.15973  | -568.14894  | 1149.30085  | 1 |
| 94  | C | 72.28548 | 78.20591 | 75.86483 | -544.54484  | 466.16019   | 331.29119   | 1 |
| 95  | H | 72.02917 | 77.15168 | 76.11036 | -1409.80988 | -170.17955  | 2325.32679  | 1 |
| 96  | C | 72.57170 | 78.51068 | 74.33912 | -184.48284  | 116.78282   | -758.89137  | 1 |
| 97  | H | 71.62218 | 78.56431 | 73.75707 | 1893.78641  | 1861.14652  | 611.04528   | 1 |
| 98  | H | 73.06036 | 79.50610 | 74.21823 | -2170.79665 | -974.19311  | 1327.50117  | 1 |
| 99  | C | 73.49993 | 77.35183 | 73.85597 | 389.51668   | 672.81878   | -138.49152  | 1 |
| 100 | H | 74.33947 | 77.22305 | 74.57325 | 510.64577   | 1933.03327  | 1851.02484  | 1 |
| 101 | H | 72.95690 | 76.38241 | 73.90311 | -2302.30869 | -1105.72939 | -948.89774  | 1 |
| 102 | C | 74.08935 | 77.55193 | 72.41018 | -559.93427  | -126.34590  | 542.30857   | 1 |
| 103 | O | 74.77298 | 76.68541 | 71.92826 | -670.36003  | -111.83166  | 76.36448    | 1 |
| 104 | N | 73.77764 | 78.73584 | 71.84014 | -216.06729  | -537.07037  | 446.51379   | 1 |
| 105 | H | 73.26179 | 79.53543 | 72.22923 | -1251.96487 | 1074.12894  | -2168.52500 | 1 |
| 106 | H | 74.13647 | 79.04516 | 70.93155 | -2451.83023 | -720.73851  | 944.84612   | 1 |
| 107 | C | 73.55916 | 78.78306 | 76.71975 | 546.24052   | -563.88337  | -85.11809   | 1 |
| 108 | O | 73.88914 | 79.93490 | 76.61851 | 71.70702    | -307.40463  | 606.69673   | 1 |
| 109 | N | 74.15124 | 77.78363 | 77.39469 | 479.90863   | -504.50129  | 222.86849   | 1 |
| 110 | C | 75.27333 | 78.04067 | 78.24053 | 75.51268    | -600.91904  | 506.73700   | 1 |
| 111 | H | 75.15916 | 79.08935 | 78.59915 | -2033.61562 | 1795.30103  | 254.89480   | 1 |
| 112 | C | 75.12741 | 76.91850 | 79.35227 | 523.79067   | 517.99274   | 284.45581   | 1 |
| 113 | H | 76.09330 | 76.67821 | 79.85072 | 1599.61665  | -1127.00911 | 1895.98173  | 1 |
| 114 | H | 74.42524 | 77.23619 | 80.15533 | -1881.83093 | 1275.82488  | -1501.55016 | 1 |
| 115 | C | 74.53893 | 75.72313 | 78.53826 | -600.05639  | -404.05026  | 316.64485   | 1 |
| 116 | H | 75.33333 | 75.20102 | 77.95939 | -2597.05260 | 496.36221   | 657.73249   | 1 |
| 117 | H | 74.04757 | 74.95041 | 79.17149 | -1666.24518 | 1294.38985  | -1723.90591 | 1 |
| 118 | C | 73.52517 | 76.47988 | 77.57967 | 493.57570   | -129.95376  | -602.56394  | 1 |
| 119 | H | 73.38542 | 76.00717 | 76.57859 | -1469.08415 | -637.84797  | 2204.22581  | 1 |
| 120 | H | 72.51117 | 76.71423 | 78.02969 | -1038.97840 | 1068.88701  | -2280.71789 | 1 |
| 121 | C | 76.68980 | 77.83310 | 77.43391 | 188.88100   | 241.05089   | -727.87821  | 1 |
| 122 | O | 77.69718 | 78.29914 | 77.91106 | 531.88613   | -49.19943   | 427.07960   | 1 |

|     |   |          |          |          |             |             |             |   |
|-----|---|----------|----------|----------|-------------|-------------|-------------|---|
| 123 | N | 76.56391 | 77.03286 | 76.37048 | 708.14833   | 26.93417    | -179.73509  | 1 |
| 124 | H | 75.59202 | 76.78431 | 76.18878 | -2232.69501 | -1179.09831 | 1023.94816  | 1 |
| 125 | C | 77.50685 | 77.12428 | 75.30073 | -738.32412  | 259.92548   | 104.42456   | 1 |
| 126 | H | 77.01249 | 76.56874 | 74.47312 | 2028.89123  | 1260.02983  | 1311.33324  | 1 |
| 127 | C | 77.69546 | 78.66107 | 74.94685 | -258.65678  | -345.52513  | 661.28459   | 1 |
| 128 | H | 78.04496 | 79.21708 | 75.84715 | -1826.06090 | -1801.46097 | -918.64554  | 1 |
| 129 | C | 78.70491 | 78.81417 | 73.75886 | -541.23400  | 531.92970   | -218.41428  | 1 |
| 130 | H | 78.81961 | 79.87994 | 73.44928 | 1311.73218  | -2219.18200 | 882.19023   | 1 |
| 131 | H | 79.72298 | 78.43363 | 74.03670 | -1048.71298 | 1223.58118  | -2196.97971 | 1 |
| 132 | H | 78.37118 | 78.24058 | 72.86188 | 419.06414   | 1903.92898  | 1903.44670  | 1 |
| 133 | C | 76.32636 | 79.23326 | 74.43935 | -423.86431  | 152.66566   | -648.55262  | 1 |
| 134 | H | 76.40589 | 80.30475 | 74.13762 | 105.68386   | -2342.50080 | 1387.51238  | 1 |
| 135 | H | 75.95013 | 78.67093 | 73.55179 | -1695.63603 | -1484.73621 | -1531.02793 | 1 |
| 136 | H | 75.53869 | 79.17523 | 75.23013 | -1853.57121 | -487.39031  | 1936.59343  | 1 |
| 137 | C | 78.89703 | 76.41802 | 75.76794 | 539.71428   | -510.58232  | 267.58633   | 1 |
| 138 | O | 79.94782 | 76.70259 | 75.23700 | -15.93758   | -278.34085  | -624.49402  | 1 |
| 139 | N | 78.65938 | 75.39381 | 76.60347 | -676.81886  | 12.05292    | 276.17960   | 1 |
| 140 | H | 77.70290 | 75.38592 | 76.95471 | -1694.44250 | -373.84189  | -2100.66098 | 1 |
| 141 | C | 79.76877 | 74.92914 | 77.39691 | 412.33078   | -664.70360  | 108.35451   | 1 |
| 142 | H | 80.39706 | 75.83674 | 77.53921 | 1765.77476  | 1294.44366  | 1621.76594  | 1 |
| 143 | C | 79.17873 | 74.34806 | 78.73748 | -179.66635  | -721.95667  | -264.73915  | 1 |
| 144 | H | 78.47247 | 75.06788 | 79.20978 | -607.34922  | 2587.87032  | -598.10018  | 1 |
| 145 | H | 78.57844 | 73.43507 | 78.52439 | -359.69332  | -1479.13954 | -2259.74260 | 1 |
| 146 | C | 80.36454 | 74.01239 | 79.70586 | -240.01076  | 616.02425   | 431.85322   | 1 |
| 147 | H | 81.17533 | 73.47262 | 79.14542 | -1359.17131 | 782.54425   | 2227.99181  | 1 |
| 148 | H | 80.83316 | 74.94200 | 80.10065 | -820.36667  | 85.81767    | -2596.78715 | 1 |
| 149 | C | 79.83066 | 73.10263 | 80.88296 | -513.07015  | 236.18570   | -551.87280  | 1 |
| 150 | H | 79.13196 | 73.66817 | 81.54128 | 1816.11944  | -1183.11722 | -1650.94321 | 1 |
| 151 | H | 79.24514 | 72.24222 | 80.48495 | -1800.04429 | -1361.53473 | 1526.34643  | 1 |
| 152 | C | 81.06107 | 72.59713 | 81.67277 | 726.08972   | -253.19732  | -179.64713  | 1 |
| 153 | H | 81.74795 | 71.95034 | 81.09067 | 1224.27271  | -456.51798  | -2390.90304 | 1 |
| 154 | H | 81.63677 | 73.39112 | 82.18883 | 1206.40339  | -1150.93514 | -2154.90344 | 1 |
| 155 | N | 80.54702 | 71.66825 | 82.82364 | 329.70796   | -633.68968  | -155.67358  | 1 |
| 156 | H | 81.30165 | 71.26216 | 83.44871 | 1348.31305  | 1938.76845  | 1359.00643  | 1 |
| 157 | H | 79.89079 | 72.09611 | 83.54004 | 2096.92035  | 1446.54551  | -966.48890  | 1 |
| 158 | H | 80.02449 | 70.78967 | 82.53715 | -1197.07217 | -2303.53719 | 827.28733   | 1 |
| 159 | C | 80.58144 | 73.76186 | 76.61094 | -378.01186  | -556.17301  | -413.96481  | 1 |
| 160 | O | 81.46753 | 73.14826 | 77.18139 | -409.44433  | -307.55053  | -453.30833  | 1 |
| 161 | N | 80.06801 | 73.48280 | 75.38819 | -429.02477  | 524.70884   | 274.08502   | 1 |
| 162 | H | 79.40282 | 74.24484 | 75.22848 | 1706.34263  | -1425.96036 | 1574.38926  | 1 |
| 163 | C | 80.98645 | 73.12850 | 74.31900 | -45.25864   | -626.22952  | 478.93267   | 1 |
| 164 | H | 81.34007 | 74.11781 | 73.95591 | 1988.63164  | 570.90773   | 1772.87287  | 1 |
| 165 | C | 82.13737 | 72.23082 | 74.89634 | 551.77128   | -20.49526   | -564.54996  | 1 |
| 166 | H | 82.83738 | 72.85285 | 75.50568 | 1434.61535  | -1753.10253 | 1513.99471  | 1 |
| 167 | H | 81.69613 | 71.50130 | 75.61584 | -714.67738  | 1819.09770  | 1898.36494  | 1 |
| 168 | C | 82.96166 | 71.48861 | 73.78645 | 446.99263   | -555.77305  | 338.97221   | 1 |
| 169 | H | 82.28837 | 70.89583 | 73.11482 | 1953.68466  | 1892.25957  | -161.67766  | 1 |
| 170 | H | 83.50166 | 72.20939 | 73.13194 | -403.03785  | 2688.07032  | -188.43591  | 1 |
| 171 | C | 83.96665 | 70.53523 | 74.54750 | 567.86262   | 335.74681   | 434.04421   | 1 |
| 172 | H | 84.65983 | 71.12363 | 75.19169 | -1080.02275 | 1568.26081  | -1948.78900 | 1 |
| 173 | H | 83.41537 | 69.85663 | 75.23860 | -919.54108  | 2111.34692  | 1456.13463  | 1 |
| 174 | C | 84.75403 | 69.71279 | 73.50108 | 195.81897   | 173.33862   | -745.11536  | 1 |
| 175 | H | 84.13192 | 69.03451 | 72.88350 | 1405.67949  | -2301.21089 | -390.08113  | 1 |
| 176 | H | 85.42467 | 70.30971 | 72.85135 | -940.37328  | -1118.32446 | 2299.72133  | 1 |
| 177 | N | 85.71021 | 68.75640 | 74.29140 | 319.26422   | 656.36007   | -42.02424   | 1 |
| 178 | H | 86.32270 | 68.12533 | 73.69842 | 1961.03633  | 619.91968   | 1787.09422  | 1 |
| 179 | H | 86.42976 | 69.20825 | 74.92769 | 854.14343   | -2156.80752 | 1429.08711  | 1 |
| 180 | H | 85.25355 | 68.05174 | 74.94075 | 1237.02905  | -1378.50857 | -1998.28500 | 1 |
| 181 | C | 80.05332 | 72.38367 | 73.22650 | 532.53319   | -268.57236  | 517.55729   | 1 |
| 182 | O | 80.27424 | 71.22431 | 72.89013 | 266.16714   | -290.73804  | -558.88002  | 1 |
| 183 | N | 79.08605 | 73.18705 | 72.81391 | -226.25352  | 640.49678   | -270.32839  | 1 |
| 184 | H | 79.08621 | 74.13217 | 73.19559 | 2007.69063  | -1035.27229 | 1523.50231  | 1 |

|     |   |          |          |          |             |             |             |   |
|-----|---|----------|----------|----------|-------------|-------------|-------------|---|
| 185 | C | 78.23591 | 72.83770 | 71.73327 | -540.76542  | -573.33303  | 49.50000    | 1 |
| 186 | H | 77.62388 | 73.75577 | 71.58715 | -2374.20950 | -1036.76023 | 843.75774   | 1 |
| 187 | C | 79.15683 | 72.50099 | 70.47251 | -77.09082   | 666.87422   | -415.84136  | 1 |
| 188 | H | 79.72593 | 71.55665 | 70.70012 | -985.81834  | 617.19825   | 2463.91927  | 1 |
| 189 | O | 80.13955 | 73.49993 | 70.13523 | 293.29899   | -391.65602  | -477.80926  | 1 |
| 190 | H | 80.96836 | 73.01245 | 70.31105 | 2528.72714  | -681.76262  | -751.27122  | 1 |
| 191 | C | 78.09104 | 72.21991 | 69.35114 | 252.47363   | -605.14473  | 440.05134   | 1 |
| 192 | H | 78.57792 | 71.91878 | 68.39452 | -2052.65063 | 1456.49051  | -1043.51830 | 1 |
| 193 | H | 77.38821 | 71.39556 | 69.64294 | -2152.98800 | -1661.97574 | -161.70652  | 1 |
| 194 | H | 77.47714 | 73.12570 | 69.13673 | -473.12726  | -1584.27339 | 2165.61725  | 1 |
| 195 | C | 77.34970 | 71.54361 | 72.22130 | 360.36307   | 488.46713   | 505.10056   | 1 |
| 196 | O | 77.19565 | 70.55920 | 71.52743 | -200.08817  | -528.03552  | -385.82850  | 1 |
| 197 | N | 76.81849 | 71.83293 | 73.39948 | -597.54095  | -226.44775  | 355.20479   | 1 |
| 198 | H | 77.08665 | 72.74644 | 73.76750 | 2179.23655  | -1300.70981 | -991.33835  | 1 |
| 199 | C | 76.14006 | 70.89451 | 74.21285 | -687.68921  | 297.39807   | -249.45179  | 1 |
| 200 | H | 75.61213 | 71.51736 | 74.96727 | -349.16256  | -2467.37713 | -1101.72831 | 1 |
| 201 | C | 75.15468 | 69.97965 | 73.34192 | 672.47345   | 361.54328   | -201.62880  | 1 |
| 202 | H | 75.73499 | 69.44640 | 72.54535 | 1541.41502  | 582.18425   | 2169.97026  | 1 |
| 203 | H | 74.69730 | 69.20138 | 73.99576 | -2534.67717 | 60.25153    | 997.72295   | 1 |
| 204 | C | 74.07048 | 70.86521 | 72.71200 | 574.26774   | -389.43119  | -377.02542  | 1 |
| 205 | C | 72.94266 | 71.28039 | 73.48149 | 688.82679   | -287.33580  | -257.96133  | 1 |
| 206 | H | 72.82653 | 70.95769 | 74.53201 | 331.14182   | 1470.38163  | 2269.80013  | 1 |
| 207 | C | 74.20945 | 71.28535 | 71.35471 | -383.52382  | -675.04808  | 144.24917   | 1 |
| 208 | H | 75.08592 | 70.96759 | 70.75785 | 4.09847     | 1517.59662  | 2262.86397  | 1 |
| 209 | C | 71.99126 | 72.10378 | 72.87916 | -134.76730  | 428.45285   | -649.50303  | 1 |
| 210 | H | 71.11793 | 72.42242 | 73.47403 | -903.23433  | 1600.49020  | 2011.53387  | 1 |
| 211 | C | 73.23109 | 72.11054 | 70.79620 | -335.53281  | -615.00040  | -364.39058  | 1 |
| 212 | H | 73.35445 | 72.42925 | 69.74628 | 1596.45398  | -1369.33862 | 1732.02659  | 1 |
| 213 | C | 72.09198 | 72.55325 | 71.53036 | 585.48547   | -340.24194  | -406.23938  | 1 |
| 214 | O | 71.09577 | 73.39699 | 70.97296 | -419.15649  | -173.04408  | -511.94141  | 1 |
| 215 | H | 71.45808 | 73.49956 | 70.06069 | -1071.84350 | 1559.71507  | -1960.13012 | 1 |
| 216 | C | 77.19144 | 69.86958 | 74.91769 | 291.41878   | -183.13091  | 710.72246   | 1 |
| 217 | O | 76.76877 | 69.07658 | 75.72945 | 379.87695   | 523.47396   | -222.23622  | 1 |
| 218 | N | 78.43512 | 70.03946 | 74.49125 | 564.30591   | 373.09380   | 277.24371   | 1 |
| 219 | H | 78.65510 | 70.76846 | 73.79444 | -120.59931  | -2436.07824 | -1214.35098 | 1 |
| 220 | C | 79.50432 | 69.19524 | 74.89893 | 404.07514   | -299.37480  | 608.84009   | 1 |
| 221 | H | 80.40671 | 69.81758 | 74.68863 | -1071.07882 | -841.69025  | 2359.66467  | 1 |
| 222 | C | 79.28917 | 68.83875 | 76.42809 | -683.12807  | 68.71770    | -390.13096  | 1 |
| 223 | H | 78.95203 | 69.74150 | 76.98666 | 2068.88918  | 1596.58590  | 770.89603   | 1 |
| 224 | H | 78.46298 | 68.09042 | 76.53533 | 1379.86429  | 2342.49779  | -179.85638  | 1 |
| 225 | C | 80.61502 | 68.27637 | 77.03035 | -176.39967  | 537.49466   | 550.97268   | 1 |
| 226 | H | 80.92848 | 67.34339 | 76.50754 | -396.28051  | 1942.22168  | 1869.33314  | 1 |
| 227 | H | 81.45782 | 68.99333 | 76.90733 | -94.44700   | 586.00678   | -2659.20016 | 1 |
| 228 | C | 80.28932 | 68.01707 | 78.57397 | -291.69381  | -718.18079  | -150.72929  | 1 |
| 229 | H | 79.98098 | 68.91677 | 79.16465 | -2303.38776 | 1089.76242  | 964.62032   | 1 |
| 230 | H | 79.53107 | 67.21134 | 78.75044 | 884.16729   | 2568.80533  | -207.74283  | 1 |
| 231 | N | 81.50634 | 67.56061 | 79.09485 | -594.49522  | -252.81478  | 342.29276   | 1 |
| 232 | H | 82.18468 | 67.22850 | 78.42709 | -1735.17426 | 2084.05705  | -263.71605  | 1 |
| 233 | C | 81.79331 | 67.51370 | 80.33227 | 595.23177   | -271.52487  | 442.22352   | 1 |
| 234 | N | 80.83543 | 67.95998 | 81.24964 | 585.53813   | -424.79750  | -105.81303  | 1 |
| 235 | H | 79.89082 | 68.30466 | 81.08382 | 959.88797   | 1327.56823  | -2177.11905 | 1 |
| 236 | H | 80.94925 | 67.94602 | 82.26366 | 1578.48647  | 16.27378    | -2220.76233 | 1 |
| 237 | N | 83.07881 | 66.99183 | 80.53293 | -452.17763  | -390.33541  | -421.51853  | 1 |
| 238 | H | 83.77577 | 66.65390 | 79.87095 | 470.26107   | 1974.25629  | -1817.92087 | 1 |
| 239 | H | 83.48742 | 66.86028 | 81.45915 | 1856.67307  | -1573.97321 | -1224.35416 | 1 |
| 240 | C | 79.52018 | 67.81056 | 74.02276 | -531.47271  | -581.45780  | -55.06206   | 1 |
| 241 | O | 80.50906 | 67.11223 | 74.05231 | -243.00837  | 192.73507   | 609.52485   | 1 |
| 242 | N | 78.39653 | 67.64482 | 73.33238 | 343.49288   | -644.25607  | 38.09164    | 1 |
| 243 | H | 77.72297 | 68.39379 | 73.50188 | -1691.16043 | -1535.97525 | -1484.73099 | 1 |
| 244 | C | 77.98545 | 66.40384 | 72.69013 | 542.66492   | 350.14337   | 454.42563   | 1 |
| 245 | H | 77.12594 | 66.70546 | 72.04396 | 1209.57979  | -2396.95920 | 463.86744   | 1 |
| 246 | C | 79.16730 | 65.88494 | 71.88967 | -737.14309  | 145.93010   | 242.71942   | 1 |

|     |   |          |          |          |             |             |             |   |
|-----|---|----------|----------|----------|-------------|-------------|-------------|---|
| 247 | H | 80.03014 | 65.76681 | 72.59973 | -1050.18303 | 159.36419   | -2509.06125 | 1 |
| 248 | C | 78.90403 | 64.54794 | 71.22870 | -706.77696  | -252.88343  | -245.16230  | 1 |
| 249 | H | 79.79473 | 64.19908 | 70.63644 | -1624.64039 | -1665.49085 | 1417.86935  | 1 |
| 250 | H | 78.67151 | 63.72808 | 71.99111 | 2566.10521  | 598.51109   | 693.22305   | 1 |
| 251 | H | 78.03512 | 64.60111 | 70.51600 | -1972.69758 | 107.10018   | -1876.34312 | 1 |
| 252 | C | 79.57910 | 66.89498 | 70.83138 | 412.85148   | 672.58832   | -27.69222   | 1 |
| 253 | H | 80.50843 | 66.57567 | 70.28537 | 1447.02277  | 1762.76533  | -1490.78944 | 1 |
| 254 | H | 78.77213 | 67.04032 | 70.06204 | 1320.77379  | -145.20455  | 2378.68491  | 1 |
| 255 | H | 79.78443 | 67.90216 | 71.28938 | -1512.10848 | 1470.52031  | 1724.75147  | 1 |
| 256 | C | 77.47708 | 65.37382 | 73.89447 | -607.11113  | 499.56689   | 73.73769    | 1 |
| 257 | O | 77.72227 | 65.53290 | 75.06534 | 357.97126   | 460.81534   | 356.68785   | 1 |
| 258 | N | 76.74693 | 64.41600 | 73.33746 | 536.55407   | -368.62270  | 332.76306   | 1 |
| 259 | H | 76.68005 | 64.41193 | 72.32260 | 524.38866   | 2297.69985  | 1367.20941  | 1 |
| 260 | C | 76.39341 | 63.30637 | 74.15434 | 46.50277    | -774.29190  | -147.97904  | 1 |
| 261 | H | 76.30530 | 63.74177 | 75.17598 | 1676.51875  | 1883.29066  | 1032.55549  | 1 |
| 262 | C | 75.04864 | 62.62843 | 73.57481 | -559.41456  | -34.19198   | -556.30433  | 1 |
| 263 | H | 75.26609 | 62.18378 | 72.57424 | -64.66664   | 395.18769   | 2695.05373  | 1 |
| 264 | H | 74.73328 | 61.77548 | 74.22222 | -2703.44278 | -60.40056   | 333.79418   | 1 |
| 265 | C | 73.94941 | 63.65138 | 73.46026 | -519.76435  | 377.31045   | 459.42366   | 1 |
| 266 | H | 74.33793 | 64.52101 | 72.88374 | -1746.74323 | 1667.50644  | -1261.73691 | 1 |
| 267 | C | 72.75898 | 63.06575 | 72.71081 | 570.95554   | 16.46261    | -545.27700  | 1 |
| 268 | H | 71.93423 | 63.81487 | 72.59209 | 2391.58273  | 28.05277    | -1305.07271 | 1 |
| 269 | H | 73.04422 | 62.71974 | 71.68388 | 175.75588   | 917.63458   | 2559.43867  | 1 |
| 270 | H | 72.32821 | 62.18247 | 73.24903 | -1063.97851 | -2155.34650 | 1283.00462  | 1 |
| 271 | C | 73.50203 | 64.14285 | 74.83011 | 193.76014   | 2.62946     | -765.53141  | 1 |
| 272 | H | 72.65884 | 64.87677 | 74.75046 | 507.39394   | -846.55087  | 2539.60089  | 1 |
| 273 | H | 73.14713 | 63.29862 | 75.47592 | 1337.57841  | 1818.19054  | 1526.01994  | 1 |
| 274 | H | 74.33551 | 64.65464 | 75.37742 | 1100.88635  | -1172.91350 | -2199.08909 | 1 |
| 275 | C | 77.56351 | 62.20484 | 74.06143 | -549.21115  | 475.64486   | -309.38218  | 1 |
| 276 | O | 78.40818 | 62.18984 | 73.19683 | 556.06106   | -390.37755  | -78.24250   | 1 |
| 277 | O | 77.47658 | 61.15008 | 74.99505 | -572.27940  | -310.19032  | -209.75862  | 1 |
| 278 | H | 76.71355 | 61.49463 | 75.54249 | -1380.08193 | 2212.14486  | 790.85944   | 1 |

Listing 38: C00038.xmolout

|    |   |          |          |          |             |             |             |        |          |
|----|---|----------|----------|----------|-------------|-------------|-------------|--------|----------|
| 1  |   | 276      |          |          |             |             |             |        |          |
| 2  |   | 150.0000 | 150.0000 | 150.0000 | 0.0000      | 0.0000      | 0.0000***** | 1.1302 | 4521     |
|    |   | 0.2500   | 300.00   | 0.00     | 0.00        | 0.00        | -1293.8079  | 0.0000 | 300.0000 |
| 3  | H | 65.35693 | 62.33953 | 70.99840 | -2043.14101 | -1757.64893 | 399.89339   |        | 1        |
| 4  | N | 65.64673 | 62.81309 | 70.14344 | 426.75047   | 490.45733   | -334.42467  |        | 1        |
| 5  | H | 64.91415 | 63.52074 | 70.01103 | 442.25559   | -1110.30854 | -2448.52907 |        | 1        |
| 6  | C | 66.91889 | 63.42016 | 70.22570 | 415.32972   | -666.39213  | 83.73172    |        | 1        |
| 7  | H | 67.49704 | 62.90581 | 71.02404 | 879.32219   | 2491.00447  | 667.35213   |        | 1        |
| 8  | C | 67.61703 | 63.31349 | 68.77442 | 31.35357    | 477.41777   | 628.23362   |        | 1        |
| 9  | H | 66.90322 | 63.67297 | 67.99536 | 1168.38489  | 2240.25337  | -1019.71136 |        | 1        |
| 10 | H | 68.51056 | 63.98082 | 68.71393 | -360.43770  | 2534.90498  | 931.67112   |        | 1        |
| 11 | C | 67.99771 | 61.87748 | 68.52782 | 463.18208   | 512.70242   | -382.34388  |        | 1        |
| 12 | H | 67.14927 | 61.23302 | 68.85209 | 1725.29117  | 1863.52247  | -987.07854  |        | 1        |
| 13 | C | 68.24430 | 61.63595 | 67.04382 | 710.42801   | -144.27427  | -313.15367  |        | 1        |
| 14 | H | 68.51435 | 60.56804 | 66.83773 | 364.20195   | -1033.13725 | 2494.72524  |        | 1        |
| 15 | H | 67.33778 | 61.87383 | 66.42942 | 2567.61904  | 335.80679   | 847.48802   |        | 1        |
| 16 | H | 69.08323 | 62.27033 | 66.65726 | -2587.99029 | 680.92867   | -512.16411  |        | 1        |
| 17 | C | 69.24149 | 61.49305 | 69.31789 | 268.17616   | 741.64379   | -40.42634   |        | 1        |
| 18 | H | 69.52852 | 60.42414 | 69.14224 | 1283.54314  | -1945.37420 | -1411.27812 |        | 1        |
| 19 | H | 70.12222 | 62.12332 | 69.02971 | -1258.57796 | 1317.15249  | -2026.02085 |        | 1        |
| 20 | H | 69.09116 | 61.61908 | 70.42071 | -2502.84526 | 909.80597   | 575.92391   |        | 1        |
| 21 | C | 66.57111 | 64.97729 | 70.54359 | 619.36578   | -458.64843  | -172.09273  |        | 1        |
| 22 | O | 65.47171 | 65.45378 | 70.33706 | -81.40433   | 433.87611   | 522.34594   |        | 1        |
| 23 | N | 67.66656 | 65.57378 | 71.00159 | 175.23996   | -622.20190  | 341.55523   |        | 1        |
| 24 | H | 68.53486 | 65.04203 | 71.05762 | -876.57256  | -303.22879  | -2561.90213 |        | 1        |
| 25 | C | 67.63083 | 66.96839 | 71.25404 | -571.88214  | -534.10783  | -106.15033  |        | 1        |
| 26 | H | 66.55366 | 67.25509 | 71.23837 | -2713.20841 | -16.25800   | -248.80809  |        | 1        |



|    |   |          |          |          |             |             |             |   |
|----|---|----------|----------|----------|-------------|-------------|-------------|---|
| 27 | C | 68.38918 | 67.19545 | 72.65224 | 166.60354   | 288.16399   | -716.09568  | 1 |
| 28 | H | 69.44996 | 66.84229 | 72.53115 | -2097.85574 | 1636.78449  | -586.18044  | 1 |
| 29 | O | 67.85726 | 66.48306 | 73.78057 | -317.80580  | -363.38227  | 484.43082   | 1 |
| 30 | H | 68.61379 | 65.90736 | 74.01419 | 1863.74748  | -1451.84923 | 1357.29467  | 1 |
| 31 | C | 68.37844 | 68.76208 | 72.77462 | 503.80731   | 517.99032   | 318.51606   | 1 |
| 32 | H | 68.98959 | 69.11309 | 73.63822 | 640.61020   | -2157.10410 | -1536.29104 | 1 |
| 33 | H | 68.79264 | 69.25266 | 71.86082 | 1687.88455  | 465.60692   | 2087.56452  | 1 |
| 34 | H | 67.34595 | 69.15379 | 72.92671 | -1293.07895 | -1899.88581 | -1463.57452 | 1 |
| 35 | C | 68.55555 | 67.64964 | 70.08631 | -153.07550  | -733.68902  | 248.70981   | 1 |
| 36 | O | 69.64053 | 67.17684 | 69.87773 | 186.15459   | -480.78787  | -449.34387  | 1 |
| 37 | N | 67.99174 | 68.74693 | 69.56524 | -487.53139  | 543.18517   | 42.03850    | 1 |
| 38 | C | 68.58193 | 69.38419 | 68.42379 | -699.35871  | 69.34393    | 360.10701   | 1 |
| 39 | H | 68.88432 | 68.55124 | 67.74941 | 2.81126     | -221.99807  | -2715.58072 | 1 |
| 40 | C | 67.41043 | 70.29534 | 67.87292 | -507.46439  | -592.59194  | 122.07761   | 1 |
| 41 | H | 67.78489 | 71.21589 | 67.37073 | -1975.08116 | 525.87560   | -1801.71556 | 1 |
| 42 | H | 66.80405 | 69.75266 | 67.11340 | 1588.27743  | -1913.22100 | 1113.83566  | 1 |
| 43 | C | 66.56053 | 70.59857 | 69.14765 | -613.62442  | -457.55993  | -194.14490  | 1 |
| 44 | H | 67.01023 | 71.42044 | 69.74822 | 1707.54637  | -721.27992  | 1996.92523  | 1 |
| 45 | H | 65.51447 | 70.90717 | 68.92402 | 758.23357   | 2100.81767  | 1560.55011  | 1 |
| 46 | C | 66.65087 | 69.20349 | 69.90319 | -352.41524  | 704.96076   | 49.21465    | 1 |
| 47 | H | 66.55173 | 69.25915 | 71.01160 | 1714.76886  | -2070.42778 | 443.35792   | 1 |
| 48 | H | 65.95839 | 68.42034 | 69.51093 | 1224.15040  | 1801.50881  | 1636.97633  | 1 |
| 49 | C | 69.90319 | 70.26523 | 68.84131 | 566.85117   | 537.05831   | 117.62814   | 1 |
| 50 | O | 70.83791 | 70.24771 | 68.08296 | -550.26779  | -406.08867  | 4.21666     | 1 |
| 51 | N | 69.72488 | 70.96647 | 69.94722 | 566.34832   | -425.77725  | 180.18749   | 1 |
| 52 | H | 68.88438 | 70.86757 | 70.53983 | 644.44502   | 2646.80550  | -52.73430   | 1 |
| 53 | C | 70.73792 | 71.83473 | 70.44360 | 612.34801   | -281.48662  | 411.56221   | 1 |
| 54 | H | 71.73309 | 71.44403 | 70.13241 | 1667.23498  | -1490.75142 | 1556.16753  | 1 |
| 55 | C | 70.42994 | 73.29521 | 69.84572 | -714.45746  | -175.43074  | 286.98927   | 1 |
| 56 | H | 69.34739 | 73.52304 | 70.04876 | -787.09484  | 1763.03619  | -1922.46060 | 1 |
| 57 | O | 70.60499 | 73.45805 | 68.42957 | -429.46514  | 516.51932   | -128.40526  | 1 |
| 58 | H | 69.68217 | 73.60242 | 68.13789 | 1981.82785  | 436.16847   | -1818.18182 | 1 |
| 59 | C | 71.33660 | 74.22529 | 70.72899 | 630.79189   | -468.94448  | 76.03230    | 1 |
| 60 | H | 71.19104 | 75.29990 | 70.47241 | -1775.71861 | 2062.30353  | 131.89849   | 1 |
| 61 | H | 71.11267 | 74.11003 | 71.81589 | -1855.14608 | 88.94118    | 1993.53760  | 1 |
| 62 | H | 72.41840 | 73.99742 | 70.58723 | -1504.82350 | -780.94249  | -2132.90992 | 1 |
| 63 | C | 70.37088 | 71.78202 | 72.02615 | 288.57638   | 618.62814   | -397.00270  | 1 |
| 64 | O | 69.23395 | 71.44682 | 72.32222 | 321.70495   | -185.26452  | 574.37218   | 1 |
| 65 | N | 71.37706 | 72.13158 | 72.82487 | -447.05792  | -446.53431  | 367.76425   | 1 |
| 66 | H | 72.24453 | 72.44478 | 72.39008 | 350.31316   | 1975.63644  | -1843.31522 | 1 |
| 67 | C | 71.03284 | 72.65972 | 74.10270 | -511.23061  | 374.03917   | -471.51480  | 1 |
| 68 | H | 69.91918 | 72.62427 | 74.13577 | 2234.79579  | -898.70890  | -1273.45190 | 1 |
| 69 | C | 71.69917 | 71.69836 | 75.19613 | 529.53781   | -159.34528  | 563.72604   | 1 |
| 70 | H | 71.12401 | 71.84481 | 76.15264 | 654.59388   | 2347.94251  | 1217.51488  | 1 |
| 71 | H | 71.51483 | 70.64663 | 74.85295 | -1526.55661 | 2103.42026  | 817.87394   | 1 |
| 72 | O | 73.09097 | 71.91898 | 75.52836 | -554.84278  | 14.12789    | 399.58769   | 1 |
| 73 | H | 73.51423 | 71.36284 | 74.84159 | 1297.06236  | 2061.84854  | 1220.68812  | 1 |
| 74 | C | 71.67160 | 74.15819 | 74.21613 | -662.15484  | -412.13544  | 123.62687   | 1 |
| 75 | O | 72.58474 | 74.53603 | 73.51075 | -540.01537  | -317.05804  | 274.91456   | 1 |
| 76 | N | 71.04956 | 74.79680 | 75.19367 | -202.76299  | -690.00100  | -131.49145  | 1 |
| 77 | H | 70.27344 | 74.32023 | 75.64900 | -702.62132  | -2617.37191 | 281.70413   | 1 |
| 78 | C | 71.31876 | 76.16488 | 75.48009 | -491.73914  | 576.34187   | 222.73509   | 1 |
| 79 | H | 72.41223 | 76.31162 | 75.32470 | 1977.17978  | -1823.58850 | -434.68928  | 1 |
| 80 | C | 70.45490 | 77.07784 | 74.50497 | -649.50797  | -328.66843  | 306.11224   | 1 |
| 81 | H | 69.38306 | 76.78647 | 74.54633 | 2075.07803  | 1452.16490  | -1004.45904 | 1 |
| 82 | C | 70.66318 | 78.55751 | 74.97641 | -615.18735  | -489.99689  | -70.96352   | 1 |
| 83 | H | 70.16470 | 79.28483 | 74.29375 | -1226.32661 | -1724.38906 | -1716.47170 | 1 |
| 84 | H | 70.24615 | 78.71932 | 75.99909 | 2381.64273  | -969.84735  | 900.46860   | 1 |
| 85 | H | 71.74478 | 78.82201 | 75.01842 | 2122.74991  | 1702.23946  | -141.36228  | 1 |
| 86 | C | 71.00345 | 76.96300 | 73.04220 | -501.86074  | -479.61276  | -376.42482  | 1 |
| 87 | H | 70.42044 | 77.59105 | 72.32837 | 993.79261   | -2246.95401 | -1177.81305 | 1 |
| 88 | H | 72.06988 | 77.27968 | 72.97546 | 42.71279    | -626.15391  | -2651.37258 | 1 |

|     |   |          |          |          |             |             |             |   |
|-----|---|----------|----------|----------|-------------|-------------|-------------|---|
| 89  | H | 70.95590 | 75.90871 | 72.68119 | -2026.39012 | -1590.33709 | -887.82922  | 1 |
| 90  | C | 70.76327 | 76.43135 | 76.99508 | -672.89153  | 382.57394   | -156.34072  | 1 |
| 91  | O | 69.57871 | 76.50728 | 77.21142 | 410.04627   | 221.86223   | 500.35950   | 1 |
| 92  | N | 71.78232 | 76.58136 | 77.84325 | -378.11782  | -443.79414  | -441.10984  | 1 |
| 93  | H | 72.77246 | 76.37094 | 77.54971 | 2404.15973  | -568.14894  | 1149.30085  | 1 |
| 94  | C | 71.41322 | 76.84070 | 79.20124 | -544.54484  | 466.16019   | 331.29119   | 1 |
| 95  | H | 70.40840 | 77.31630 | 79.10347 | -1409.80988 | -170.17955  | 2325.32679  | 1 |
| 96  | C | 71.30636 | 75.43236 | 79.93453 | -184.48284  | 116.78282   | -758.89137  | 1 |
| 97  | H | 70.57736 | 74.76892 | 79.41629 | 1893.78641  | 1861.14652  | 611.04528   | 1 |
| 98  | H | 72.28223 | 74.88920 | 79.90142 | -2170.79665 | -974.19311  | 1327.50117  | 1 |
| 99  | C | 70.87460 | 75.71417 | 81.40540 | 389.51668   | 672.81878   | -138.49152  | 1 |
| 100 | H | 71.51741 | 76.51313 | 81.84417 | 510.64577   | 1933.03327  | 1851.02484  | 1 |
| 101 | H | 69.85352 | 76.15567 | 81.42818 | -2302.30869 | -1105.72939 | -948.89774  | 1 |
| 102 | C | 70.92416 | 74.43818 | 82.32816 | -559.93427  | -126.34590  | 542.30857   | 1 |
| 103 | O | 70.65752 | 74.54349 | 83.49733 | -670.36003  | -111.83166  | 76.36448    | 1 |
| 104 | N | 71.27650 | 73.30270 | 81.68780 | -216.06729  | -537.07037  | 446.51379   | 1 |
| 105 | H | 71.49602 | 73.14851 | 80.69679 | -1251.96487 | 1074.12894  | -2168.52500 | 1 |
| 106 | H | 71.34321 | 72.38606 | 82.14396 | -2451.83023 | -720.73851  | 944.84612   | 1 |
| 107 | C | 72.47793 | 77.76610 | 80.02142 | 546.24052   | -563.88337  | -85.11809   | 1 |
| 108 | O | 71.96445 | 78.50929 | 80.82287 | 71.70702    | -307.40463  | 606.69673   | 1 |
| 109 | N | 73.79354 | 77.52795 | 79.85608 | 479.90863   | -504.50129  | 222.86849   | 1 |
| 110 | C | 74.72030 | 78.28351 | 80.63544 | 75.51268    | -600.91904  | 506.73700   | 1 |
| 111 | H | 74.12649 | 78.92035 | 81.33362 | -2033.61562 | 1795.30103  | 254.89480   | 1 |
| 112 | C | 75.53337 | 77.07879 | 81.28824 | 523.79067   | 517.99274   | 284.45581   | 1 |
| 113 | H | 76.50241 | 77.40060 | 81.72958 | 1599.61665  | -1127.00911 | 1895.98173  | 1 |
| 114 | H | 74.95180 | 76.60016 | 82.10697 | -1881.83093 | 1275.82488  | -1501.55016 | 1 |
| 115 | C | 75.70449 | 76.10822 | 80.07945 | -600.05639  | -404.05026  | 316.64485   | 1 |
| 116 | H | 76.60504 | 76.37120 | 79.47399 | -2597.05260 | 496.36221   | 657.73249   | 1 |
| 117 | H | 75.84050 | 75.04748 | 80.38882 | -1666.24518 | 1294.38985  | -1723.90591 | 1 |
| 118 | C | 74.37344 | 76.34190 | 79.24340 | 493.57570   | -129.95376  | -602.56394  | 1 |
| 119 | H | 74.56331 | 76.61086 | 78.17389 | -1469.08415 | -637.84797  | 2204.22581  | 1 |
| 120 | H | 73.62158 | 75.51749 | 79.30478 | -1038.97840 | 1068.88701  | -2280.71789 | 1 |
| 121 | C | 75.73843 | 79.10531 | 79.64119 | 188.88100   | 241.05089   | -727.87821  | 1 |
| 122 | O | 76.59348 | 78.51018 | 79.02911 | 531.88613   | -49.19943   | 427.07960   | 1 |
| 123 | N | 75.57019 | 80.43013 | 79.77891 | 708.14833   | 26.93417    | -179.73509  | 1 |
| 124 | H | 74.74241 | 80.60327 | 80.35502 | -2232.69501 | -1179.09831 | 1023.94816  | 1 |
| 125 | C | 75.85602 | 81.38108 | 78.68996 | -738.32412  | 259.92548   | 104.42456   | 1 |
| 126 | H | 76.01787 | 82.34178 | 79.23246 | 2028.89123  | 1260.02983  | 1311.33324  | 1 |
| 127 | C | 77.07669 | 80.94302 | 77.91648 | -258.65678  | -345.52513  | 661.28459   | 1 |
| 128 | H | 76.86201 | 79.93420 | 77.47041 | -1826.06090 | -1801.46097 | -918.64554  | 1 |
| 129 | C | 77.43782 | 81.87627 | 76.77521 | -541.23400  | 531.92970   | -218.41428  | 1 |
| 130 | H | 78.40412 | 81.57276 | 76.28699 | 1311.73218  | -2219.18200 | 882.19023   | 1 |
| 131 | H | 76.64769 | 81.87674 | 75.96000 | -1048.71298 | 1223.58118  | -2196.97971 | 1 |
| 132 | H | 77.56499 | 82.93669 | 77.12701 | 419.06414   | 1903.92898  | 1903.44670  | 1 |
| 133 | C | 78.28648 | 80.80509 | 78.82771 | -423.86431  | 152.66566   | -648.55262  | 1 |
| 134 | H | 79.16703 | 80.36735 | 78.28549 | 105.68386   | -2342.50080 | 1387.51238  | 1 |
| 135 | H | 78.60858 | 81.79688 | 79.24718 | -1695.63603 | -1484.73621 | -1531.02793 | 1 |
| 136 | H | 78.06133 | 80.12941 | 79.69933 | -1853.57121 | -487.39031  | 1936.59343  | 1 |
| 137 | C | 74.48284 | 81.46928 | 77.77556 | 539.71428   | -510.58232  | 267.58633   | 1 |
| 138 | O | 73.58884 | 80.66028 | 77.82655 | -15.93758   | -278.34085  | -624.49402  | 1 |
| 139 | N | 74.52519 | 82.59224 | 77.05184 | -676.81886  | 12.05292    | 276.17960   | 1 |
| 140 | H | 75.39784 | 83.11021 | 77.12579 | -1694.44250 | -373.84189  | -2100.66098 | 1 |
| 141 | C | 73.75195 | 82.59737 | 75.84438 | 412.33078   | -664.70360  | 108.35451   | 1 |
| 142 | H | 72.75257 | 82.21154 | 76.14571 | 1765.77476  | 1294.44366  | 1621.76594  | 1 |
| 143 | C | 73.78524 | 84.07609 | 75.30594 | -179.66635  | -721.95667  | -264.73915  | 1 |
| 144 | H | 73.40638 | 84.78616 | 76.07542 | -607.34922  | 2587.87032  | -598.10018  | 1 |
| 145 | H | 74.83600 | 84.38508 | 75.10472 | -359.69332  | -1479.13954 | -2259.74260 | 1 |
| 146 | C | 72.92964 | 84.16369 | 73.99609 | -240.01076  | 616.02425   | 431.85322   | 1 |
| 147 | H | 73.26525 | 83.40386 | 73.25505 | -1359.17131 | 782.54425   | 2227.99181  | 1 |
| 148 | H | 71.85852 | 83.94396 | 74.20218 | -820.36667  | 85.81767    | -2596.78715 | 1 |
| 149 | C | 73.11114 | 85.62534 | 73.42033 | -513.07015  | 236.18570   | -551.87280  | 1 |
| 150 | H | 72.82202 | 86.38813 | 74.17932 | 1816.11944  | -1183.11722 | -1650.94321 | 1 |

|     |   |          |          |          |             |             |             |   |
|-----|---|----------|----------|----------|-------------|-------------|-------------|---|
| 151 | H | 74.18194 | 85.82514 | 73.18480 | -1800.04429 | -1361.53473 | 1526.34643  | 1 |
| 152 | C | 72.23964 | 85.76337 | 72.15064 | 726.08972   | -253.19732  | -179.64713  | 1 |
| 153 | H | 72.54173 | 85.10871 | 71.30901 | 1224.27271  | -456.51798  | -2390.90304 | 1 |
| 154 | H | 71.14926 | 85.67432 | 72.32737 | 1206.40339  | -1150.93514 | -2154.90344 | 1 |
| 155 | N | 72.43165 | 87.21968 | 71.60585 | 329.70796   | -633.68968  | -155.67358  | 1 |
| 156 | H | 71.87496 | 87.46094 | 70.73578 | 1348.31305  | 1938.76845  | 1359.00643  | 1 |
| 157 | H | 72.16261 | 88.01736 | 72.25235 | 2096.92035  | 1446.54551  | -966.48890  | 1 |
| 158 | H | 73.41188 | 87.49871 | 71.30934 | -1197.07217 | -2303.53719 | 827.28733   | 1 |
| 159 | C | 74.51734 | 81.60932 | 74.77084 | -378.01186  | -556.17301  | -413.96481  | 1 |
| 160 | O | 75.54334 | 81.94969 | 74.21993 | -409.44433  | -307.55053  | -453.30833  | 1 |
| 161 | N | 73.78163 | 80.52600 | 74.60046 | -429.02477  | 524.70884   | 274.08502   | 1 |
| 162 | H | 72.94742 | 80.46443 | 75.18343 | 1706.34263  | -1425.96036 | 1574.38926  | 1 |
| 163 | C | 74.26445 | 79.35641 | 73.95006 | -45.25864   | -626.22952  | 478.93267   | 1 |
| 164 | H | 73.34617 | 78.80488 | 73.65269 | 1988.63164  | 570.90773   | 1772.87287  | 1 |
| 165 | C | 75.17659 | 79.80954 | 72.74172 | 551.77128   | -20.49526   | -564.54996  | 1 |
| 166 | H | 74.72105 | 80.67459 | 72.20862 | 1434.61535  | -1753.10253 | 1513.99471  | 1 |
| 167 | H | 76.16745 | 80.17335 | 73.11002 | -714.67738  | 1819.09770  | 1898.36494  | 1 |
| 168 | C | 75.34663 | 78.57490 | 71.79345 | 446.99263   | -555.77305  | 338.97221   | 1 |
| 169 | H | 75.87738 | 77.72742 | 72.32803 | 1953.68466  | 1892.25957  | -161.67766  | 1 |
| 170 | H | 74.35517 | 78.17712 | 71.47932 | -403.03785  | 2688.07032  | -188.43591  | 1 |
| 171 | C | 76.18247 | 79.05175 | 70.54008 | 567.86262   | 335.74681   | 434.04421   | 1 |
| 172 | H | 75.69706 | 79.92411 | 70.04492 | -1080.02275 | 1568.26081  | -1948.78900 | 1 |
| 173 | H | 77.19445 | 79.40187 | 70.84932 | -919.54108  | 2111.34692  | 1456.13463  | 1 |
| 174 | C | 76.28855 | 77.85522 | 69.56561 | 195.81897   | 173.33862   | -745.11536  | 1 |
| 175 | H | 76.87029 | 76.99503 | 69.95348 | 1405.67949  | -2301.21089 | -390.08113  | 1 |
| 176 | H | 75.31908 | 77.50443 | 69.15864 | -940.37328  | -1118.32446 | 2299.72133  | 1 |
| 177 | N | 77.08701 | 78.34420 | 68.31068 | 319.26422   | 656.36007   | -42.02424   | 1 |
| 178 | H | 77.21232 | 77.62816 | 67.53819 | 1961.03633  | 619.91968   | 1787.09422  | 1 |
| 179 | H | 76.68678 | 79.16572 | 67.77038 | 854.14343   | -2156.80752 | 1429.08711  | 1 |
| 180 | H | 78.08934 | 78.65404 | 68.47178 | 1237.02905  | -1378.50857 | -1998.28500 | 1 |
| 181 | C | 75.19890 | 78.49016 | 74.99212 | 532.53319   | -268.57236  | 517.55729   | 1 |
| 182 | O | 76.07795 | 78.96634 | 75.67139 | 266.16714   | -290.73804  | -558.88002  | 1 |
| 183 | N | 74.83170 | 77.21806 | 74.88880 | -226.25352  | 640.49678   | -270.32839  | 1 |
| 184 | H | 74.12774 | 76.97567 | 74.19379 | 2007.69063  | -1035.27229 | 1523.50231  | 1 |
| 185 | C | 75.70753 | 76.22436 | 75.45118 | -540.76542  | -573.33303  | 49.50000    | 1 |
| 186 | H | 76.09597 | 76.68088 | 76.39323 | -2374.20950 | -1036.76023 | 843.75774   | 1 |
| 187 | C | 74.84891 | 74.93932 | 75.64994 | -77.09082   | 666.87422   | -415.84136  | 1 |
| 188 | H | 74.21190 | 74.73877 | 74.74718 | -985.81834  | 617.19825   | 2463.91927  | 1 |
| 189 | O | 73.70798 | 75.18091 | 76.76571 | 293.29899   | -391.65602  | -477.80926  | 1 |
| 190 | H | 72.99513 | 74.76525 | 76.28943 | 2528.72714  | -681.76262  | -751.27122  | 1 |
| 191 | C | 75.73887 | 73.72046 | 75.97732 | 252.47363   | -605.14473  | 440.05134   | 1 |
| 192 | H | 75.11794 | 72.79139 | 76.06956 | -2052.65063 | 1456.49051  | -1043.51830 | 1 |
| 193 | H | 76.49904 | 73.53501 | 75.17850 | -2152.98800 | -1661.97574 | -161.70652  | 1 |
| 194 | H | 76.28644 | 73.85886 | 76.94203 | -473.12726  | -1584.27339 | 2165.61725  | 1 |
| 195 | C | 76.92759 | 75.97205 | 74.36009 | 360.36307   | 488.46713   | 505.10056   | 1 |
| 196 | O | 76.85725 | 76.30022 | 73.18962 | -200.08817  | -528.03552  | -385.82850  | 1 |
| 197 | N | 77.90085 | 75.37356 | 75.01772 | -597.54095  | -226.44775  | 355.20479   | 1 |
| 198 | H | 77.68401 | 75.24226 | 76.00461 | 2179.23655  | -1300.70981 | -991.33835  | 1 |
| 199 | C | 78.89513 | 74.56203 | 74.40496 | -687.68921  | 297.39807   | -249.45179  | 1 |
| 200 | H | 78.94076 | 73.70117 | 75.10725 | -349.16256  | -2467.37713 | -1101.72831 | 1 |
| 201 | C | 78.52781 | 74.15692 | 72.90922 | 672.47345   | 361.54328   | -201.62880  | 1 |
| 202 | H | 78.28293 | 75.06738 | 72.30192 | 1541.41502  | 582.18425   | 2169.97026  | 1 |
| 203 | H | 79.41471 | 73.67849 | 72.43135 | -2534.67717 | 60.25153    | 997.72295   | 1 |
| 204 | C | 77.34453 | 73.17193 | 72.94131 | 574.26774   | -389.43119  | -377.02542  | 1 |
| 205 | C | 77.52313 | 71.87012 | 73.49553 | 688.82679   | -287.33580  | -257.96133  | 1 |
| 206 | H | 78.50399 | 71.55929 | 73.89843 | 331.14182   | 1470.38163  | 2269.80013  | 1 |
| 207 | C | 76.06788 | 73.56333 | 72.44053 | -383.52382  | -675.04808  | 144.24917   | 1 |
| 208 | H | 75.91530 | 74.57629 | 72.02238 | 4.09847     | 1517.59662  | 2262.86397  | 1 |
| 209 | C | 76.43329 | 70.99632 | 73.52125 | -134.76730  | 428.45285   | -649.50303  | 1 |
| 210 | H | 76.57697 | 69.98975 | 73.95103 | -903.23433  | 1600.49020  | 2011.53387  | 1 |
| 211 | C | 75.00650 | 72.65296 | 72.49369 | -335.53281  | -615.00040  | -364.39058  | 1 |
| 212 | H | 74.02831 | 72.98463 | 72.10670 | 1596.45398  | -1369.33862 | 1732.02659  | 1 |

|     |   |          |          |          |             |             |             |   |
|-----|---|----------|----------|----------|-------------|-------------|-------------|---|
| 213 | C | 75.14316 | 71.33810 | 73.02329 | 585.48547   | -340.24194  | -406.23938  | 1 |
| 214 | O | 74.07790 | 70.38862 | 73.07337 | -419.15649  | -173.04408  | -511.94141  | 1 |
| 215 | H | 73.33439 | 70.95500 | 72.76568 | -1071.84350 | 1559.71507  | -1960.13012 | 1 |
| 216 | C | 80.30675 | 75.38750 | 74.42825 | 291.41878   | -183.13091  | 710.72246   | 1 |
| 217 | O | 80.86201 | 75.78420 | 73.43002 | 379.87695   | 523.47396   | -222.23622  | 1 |
| 218 | N | 80.74163 | 75.42519 | 75.68734 | 564.30591   | 373.09380   | 277.24371   | 1 |
| 219 | H | 80.13478 | 75.08095 | 76.43066 | -120.59931  | -2436.07824 | -1214.35098 | 1 |
| 220 | C | 81.86808 | 76.25128 | 75.97036 | 404.07514   | -299.37480  | 608.84009   | 1 |
| 221 | H | 82.43562 | 76.32317 | 75.01188 | -1071.07882 | -841.69025  | 2359.66467  | 1 |
| 222 | C | 81.25431 | 77.63461 | 76.45578 | -683.12807  | 68.71770    | -390.13096  | 1 |
| 223 | H | 80.51678 | 78.01254 | 75.71189 | 2068.88918  | 1596.58590  | 770.89603   | 1 |
| 224 | H | 80.67933 | 77.48797 | 77.39772 | 1379.86429  | 2342.49779  | -179.85638  | 1 |
| 225 | C | 82.40815 | 78.65980 | 76.66602 | -176.39967  | 537.49466   | 550.97268   | 1 |
| 226 | H | 83.17949 | 78.26726 | 77.36849 | -396.28051  | 1942.22168  | 1869.33314  | 1 |
| 227 | H | 82.94441 | 78.86964 | 75.71369 | -94.44700   | 586.00678   | -2659.20016 | 1 |
| 228 | C | 81.70853 | 79.97619 | 77.24644 | -291.69381  | -718.18079  | -150.72929  | 1 |
| 229 | H | 80.92229 | 80.44321 | 76.60070 | -2303.38776 | 1089.76242  | 964.62032   | 1 |
| 230 | H | 81.29093 | 79.85455 | 78.27845 | 884.16729   | 2568.80533  | -207.74283  | 1 |
| 231 | N | 82.78931 | 80.86312 | 77.33353 | -594.49522  | -252.81478  | 342.29276   | 1 |
| 232 | H | 83.70964 | 80.45003 | 77.32173 | -1735.17426 | 2084.05705  | -263.71605  | 1 |
| 233 | C | 82.68782 | 82.12518 | 77.45245 | 595.23177   | -271.52487  | 442.22352   | 1 |
| 234 | N | 81.40479 | 82.68030 | 77.49237 | 585.53813   | -424.79750  | -105.81303  | 1 |
| 235 | H | 80.49563 | 82.22063 | 77.46053 | 959.88797   | 1327.56823  | -2177.11905 | 1 |
| 236 | H | 81.20385 | 83.67528 | 77.59812 | 1578.48647  | 16.27378    | -2220.76233 | 1 |
| 237 | N | 83.95534 | 82.71830 | 77.52454 | -452.17763  | -390.33541  | -421.51853  | 1 |
| 238 | H | 84.88602 | 82.30317 | 77.51153 | 470.26107   | 1974.25629  | -1817.92087 | 1 |
| 239 | H | 84.10050 | 83.72257 | 77.63490 | 1856.67307  | -1573.97321 | -1224.35416 | 1 |
| 240 | C | 82.62904 | 75.55389 | 77.23259 | -531.47271  | -581.45780  | -55.06206   | 1 |
| 241 | O | 82.11419 | 75.47217 | 78.33888 | -243.00837  | 192.73507   | 609.52485   | 1 |
| 242 | N | 83.88632 | 75.18018 | 76.89511 | 343.49288   | -644.25607  | 38.09164    | 1 |
| 243 | H | 83.93052 | 75.39523 | 75.89479 | -1691.16043 | -1535.97525 | -1484.73099 | 1 |
| 244 | C | 84.36846 | 73.85860 | 77.39345 | 542.66492   | 350.14337   | 454.42563   | 1 |
| 245 | H | 83.41939 | 73.32493 | 77.62930 | 1209.57979  | -2396.95920 | 463.86744   | 1 |
| 246 | C | 85.18691 | 73.19745 | 76.31661 | -737.14309  | 145.93010   | 242.71942   | 1 |
| 247 | H | 86.00804 | 73.89549 | 76.03606 | -1050.18303 | 159.36419   | -2509.06125 | 1 |
| 248 | C | 85.81424 | 71.89868 | 76.79518 | -706.77696  | -252.88343  | -245.16230  | 1 |
| 249 | H | 86.42238 | 71.40732 | 75.98707 | -1624.64039 | -1665.49085 | 1417.86935  | 1 |
| 250 | H | 86.50157 | 72.07280 | 77.67316 | 2566.10521  | 598.51109   | 693.22305   | 1 |
| 251 | H | 85.03513 | 71.15705 | 77.12271 | -1972.69758 | 107.10018   | -1876.34312 | 1 |
| 252 | C | 84.36695 | 72.91347 | 75.06808 | 412.85148   | 672.58832   | -27.69222   | 1 |
| 253 | H | 84.99522 | 72.46232 | 74.25248 | 1447.02277  | 1762.76533  | -1490.78944 | 1 |
| 254 | H | 83.53129 | 72.19239 | 75.28086 | 1320.77379  | -145.20455  | 2378.68491  | 1 |
| 255 | H | 83.89781 | 73.84505 | 74.65020 | -1512.10848 | 1470.52031  | 1724.75147  | 1 |
| 256 | C | 85.22997 | 74.22281 | 78.74252 | -607.11113  | 499.56689   | 73.73769    | 1 |
| 257 | O | 86.38070 | 73.88624 | 78.86408 | 357.97126   | 460.81534   | 356.68785   | 1 |
| 258 | N | 84.42838 | 74.81423 | 79.62033 | 536.55407   | -368.62270  | 332.76306   | 1 |
| 259 | H | 83.42414 | 74.98064 | 79.35993 | 524.38866   | 2297.69985  | 1367.20941  | 1 |
| 260 | C | 85.00364 | 75.65569 | 80.61655 | 46.50277    | -774.29190  | -147.97904  | 1 |
| 261 | H | 84.11454 | 75.94445 | 81.21923 | 1676.51875  | 1883.29066  | 1032.55549  | 1 |
| 262 | C | 86.10954 | 74.84731 | 81.46593 | -559.41456  | -34.19198   | -556.30433  | 1 |
| 263 | H | 87.00569 | 74.66384 | 80.81944 | -64.66664   | 395.18769   | 2695.05373  | 1 |
| 264 | H | 86.47078 | 75.45905 | 82.32745 | -2703.44278 | -60.40056   | 333.79418   | 1 |
| 265 | C | 85.51788 | 73.54067 | 81.92286 | -519.76435  | 377.31045   | 459.42366   | 1 |
| 266 | H | 85.05444 | 73.05352 | 81.03431 | -1746.74323 | 1667.50644  | -1261.73691 | 1 |
| 267 | C | 86.59934 | 72.61454 | 82.46475 | 570.95554   | 16.46261    | -545.27700  | 1 |
| 268 | H | 86.17908 | 71.61940 | 82.76258 | 2391.58273  | 28.05277    | -1305.07271 | 1 |
| 269 | H | 87.39773 | 72.42325 | 81.70191 | 175.75588   | 917.63458   | 2559.43867  | 1 |
| 270 | H | 87.09949 | 73.04724 | 83.36893 | -1063.97851 | -2155.34650 | 1283.00462  | 1 |
| 271 | C | 84.44167 | 73.74862 | 82.97978 | 193.76014   | 2.62946     | -765.53141  | 1 |
| 272 | H | 83.98535 | 72.77680 | 83.30032 | 507.39394   | -846.55087  | 2539.60089  | 1 |
| 273 | H | 84.85344 | 74.24077 | 83.89804 | 1337.57841  | 1818.19054  | 1526.01994  | 1 |
| 274 | H | 83.60890 | 74.39479 | 82.60061 | 1100.88635  | -1172.91350 | -2199.08909 | 1 |

|     |   |          |          |          |             |            |            |   |
|-----|---|----------|----------|----------|-------------|------------|------------|---|
| 275 | C | 85.65495 | 76.93046 | 79.88873 | -549.21115  | 475.64486  | -309.38218 | 1 |
| 276 | O | 86.53875 | 77.56439 | 80.40568 | 556.06106   | -390.37755 | -78.24250  | 1 |
| 277 | O | 85.03380 | 77.40368 | 78.70586 | -572.27940  | -310.19032 | -209.75862 | 1 |
| 278 | H | 84.46709 | 76.60986 | 78.49902 | -1380.08193 | 2212.14486 | 790.85944  | 1 |

Listing 39: C00039.xmolout

|    |          |          |          |          |             |             |             |          |
|----|----------|----------|----------|----------|-------------|-------------|-------------|----------|
| 1  | 276      |          |          |          |             |             |             |          |
| 2  | 150.0000 | 150.0000 | 150.0000 | 0.0000   | 0.0000      | 0.0000***** | 2.7750      | 11100    |
|    | 0.2500   | 300.00   | 0.00     | 0.00     | 0.00        | -1293.8012  | 0.0000      | 300.0000 |
| 3  | H        | 79.56307 | 71.49838 | 77.05859 | -2043.14101 | -1757.64893 | 399.89339   | 1        |
| 4  | N        | 79.42056 | 72.50538 | 77.13012 | 426.75047   | 490.45733   | -334.42467  | 1        |
| 5  | H        | 79.31074 | 72.62630 | 78.13889 | 442.25559   | -1110.30854 | -2448.52907 | 1        |
| 6  | C        | 80.54121 | 73.22787 | 76.67060 | 415.32972   | -666.39213  | 83.73172    | 1        |
| 7  | H        | 81.35306 | 72.49281 | 76.49126 | 879.32219   | 2491.00447  | 667.35213   | 1        |
| 8  | C        | 80.14231 | 74.11334 | 75.39398 | 31.35357    | 477.41777   | 628.23362   | 1        |
| 9  | H        | 79.35720 | 74.83785 | 75.73299 | 1168.38489  | 2240.25337  | -1019.71136 | 1        |
| 10 | H        | 81.01567 | 74.73540 | 75.07777 | -360.43770  | 2534.90498  | 931.67112   | 1        |
| 11 | C        | 79.63760 | 73.28301 | 74.23444 | 463.18208   | 512.70242   | -382.34388  | 1        |
| 12 | H        | 78.84190 | 72.59610 | 74.60084 | 1725.29117  | 1863.52247  | -987.07854  | 1        |
| 13 | C        | 79.04204 | 74.19702 | 73.17170 | 710.42801   | -144.27427  | -313.15367  | 1        |
| 14 | H        | 78.71742 | 73.60828 | 72.27340 | 364.20195   | -1033.13725 | 2494.72524  | 1        |
| 15 | H        | 78.14851 | 74.75514 | 73.55622 | 2567.61904  | 335.80679   | 847.48802   | 1        |
| 16 | H        | 79.78361 | 74.95894 | 72.81610 | -2587.99029 | 680.92867   | -512.16411  | 1        |
| 17 | C        | 80.74998 | 72.45250 | 73.61308 | 268.17616   | 741.64379   | -40.42634   | 1        |
| 18 | H        | 80.36854 | 71.85317 | 72.74151 | 1283.54314  | -1945.37420 | -1411.27812 | 1        |
| 19 | H        | 81.58440 | 73.09898 | 73.23377 | -1258.57796 | 1317.15249  | -2026.02085 | 1        |
| 20 | H        | 81.19428 | 71.73208 | 74.34810 | -2502.84526 | 909.80597   | 575.92391   | 1        |
| 21 | C        | 80.87729 | 74.39358 | 77.80527 | 619.36578   | -458.64843  | -172.09273  | 1        |
| 22 | O        | 80.28667 | 75.45563 | 77.74003 | -81.40433   | 433.87611   | 522.34594   | 1        |
| 23 | N        | 82.34460 | 74.33609 | 77.71105 | 175.23996   | -622.20190  | 341.55523   | 1        |
| 24 | H        | 82.75050 | 74.84560 | 76.92398 | -876.57256  | -303.22879  | -2561.90213 | 1        |
| 25 | C        | 82.92889 | 74.79363 | 78.96619 | -571.88214  | -534.10783  | -106.15033  | 1        |
| 26 | H        | 83.96544 | 74.38786 | 79.00755 | -2713.20841 | -16.25800   | -248.80809  | 1        |
| 27 | C        | 82.93255 | 76.40015 | 78.79698 | 166.60354   | 288.16399   | -716.09568  | 1        |
| 28 | H        | 81.86503 | 76.74667 | 78.70313 | -2097.85574 | 1636.78449  | -586.18044  | 1        |
| 29 | O        | 83.61388 | 76.84253 | 77.61208 | -317.80580  | -363.38227  | 484.43082   | 1        |
| 30 | H        | 82.88234 | 77.29324 | 77.14028 | 1863.74748  | -1451.84923 | 1357.29467  | 1        |
| 31 | C        | 83.51280 | 76.91461 | 80.15996 | 503.80731   | 517.99032   | 318.51606   | 1        |
| 32 | H        | 83.50802 | 78.02909 | 80.20473 | 640.61020   | -2157.10410 | -1536.29104 | 1        |
| 33 | H        | 82.91452 | 76.54563 | 81.03611 | 1687.88455  | 465.60692   | 2087.56452  | 1        |
| 34 | H        | 84.56885 | 76.58765 | 80.30509 | -1293.07895 | -1899.88581 | -1463.57452 | 1        |
| 35 | C        | 81.94789 | 74.19291 | 80.03764 | -153.07550  | -733.68902  | 248.70981   | 1        |
| 36 | O        | 80.81093 | 73.79611 | 79.58802 | 186.15459   | -480.78787  | -449.34387  | 1        |
| 37 | N        | 82.37833 | 74.18919 | 81.26330 | -487.53139  | 543.18517   | 42.03850    | 1        |
| 38 | C        | 81.45590 | 74.21514 | 82.38487 | -699.35871  | 69.34393    | 360.10701   | 1        |
| 39 | H        | 80.64620 | 73.48718 | 82.15429 | 2.81126     | -221.99807  | -2715.58072 | 1        |
| 40 | C        | 82.40942 | 73.82838 | 83.58841 | -507.46439  | -592.59194  | 122.07761   | 1        |
| 41 | H        | 82.02762 | 74.18315 | 84.57202 | -1975.08116 | 525.87560   | -1801.71556 | 1        |
| 42 | H        | 82.53740 | 72.72637 | 83.67423 | 1588.27743  | -1913.22100 | 1113.83566  | 1        |
| 43 | C        | 83.74013 | 74.52361 | 83.15930 | -613.62442  | -457.55993  | -194.14490  | 1        |
| 44 | H        | 83.65823 | 75.63111 | 83.26974 | 1707.54637  | -721.27992  | 1996.92523  | 1        |
| 45 | H        | 84.63052 | 74.19729 | 83.74293 | 758.23357   | 2100.81767  | 1560.55011  | 1        |
| 46 | C        | 83.79330 | 74.09772 | 81.63422 | -352.41524  | 704.96076   | 49.21465    | 1        |
| 47 | H        | 84.39711 | 74.75731 | 80.97256 | 1714.76886  | -2070.42778 | 443.35792   | 1        |
| 48 | H        | 84.08498 | 73.03602 | 81.45873 | 1224.15040  | 1801.50881  | 1636.97633  | 1        |
| 49 | C        | 80.91665 | 75.72989 | 82.57307 | 566.85117   | 537.05831   | 117.62814   | 1        |
| 50 | O        | 81.69631 | 76.66899 | 82.73226 | -550.26779  | -406.08867  | 4.21666     | 1        |
| 51 | N        | 79.61280 | 75.73133 | 82.56504 | 566.34832   | -425.77725  | 180.18749   | 1        |
| 52 | H        | 79.05294 | 74.87397 | 82.41024 | 644.44502   | 2646.80550  | -52.73430   | 1        |
| 53 | C        | 78.86544 | 76.87521 | 83.02297 | 612.34801   | -281.48662  | 411.56221   | 1        |
| 54 | H        | 79.36822 | 77.27459 | 83.93543 | 1667.23498  | -1490.75142 | 1556.16753  | 1        |

|     |   |          |          |          |             |             |             |   |
|-----|---|----------|----------|----------|-------------|-------------|-------------|---|
| 55  | C | 78.90726 | 77.95247 | 81.83463 | -714.45746  | -175.43074  | 286.98927   | 1 |
| 56  | H | 78.70250 | 77.42924 | 80.85483 | -787.09484  | 1763.03619  | -1922.46060 | 1 |
| 57  | O | 80.18867 | 78.55207 | 81.57008 | -429.46514  | 516.51932   | -128.40526  | 1 |
| 58  | H | 80.80048 | 77.87041 | 82.02345 | 1981.82785  | 436.16847   | -1818.18182 | 1 |
| 59  | C | 77.73360 | 78.93101 | 82.16057 | 630.79189   | -468.94448  | 76.03230    | 1 |
| 60  | H | 77.59882 | 79.68734 | 81.35099 | -1775.71861 | 2062.30353  | 131.89849   | 1 |
| 61  | H | 76.76071 | 78.38942 | 82.26069 | -1855.14608 | 88.94118    | 1993.53760  | 1 |
| 62  | H | 77.90920 | 79.48660 | 83.11223 | -1504.82350 | -780.94249  | -2132.90992 | 1 |
| 63  | C | 77.46298 | 76.15713 | 83.28360 | 288.57638   | 618.62814   | -397.00270  | 1 |
| 64  | O | 77.27185 | 75.01477 | 82.90900 | 321.70495   | -185.26452  | 574.37218   | 1 |
| 65  | N | 76.56688 | 76.93195 | 83.94321 | -447.05792  | -446.53431  | 367.76425   | 1 |
| 66  | H | 76.63731 | 77.91488 | 84.27846 | 350.31316   | 1975.63644  | -1843.31522 | 1 |
| 67  | C | 75.37541 | 76.53250 | 84.28752 | -511.23061  | 374.03917   | -471.51480  | 1 |
| 68  | H | 75.14600 | 75.48490 | 84.01456 | 2234.79579  | -898.70890  | -1273.45190 | 1 |
| 69  | C | 74.44116 | 77.47000 | 84.96845 | 529.53781   | -159.34528  | 563.72604   | 1 |
| 70  | H | 73.44323 | 77.00656 | 85.11118 | 654.59388   | 2347.94251  | 1217.51488  | 1 |
| 71  | H | 74.82184 | 77.84959 | 85.97169 | -1526.55661 | 2103.42026  | 817.87394   | 1 |
| 72  | O | 74.51405 | 79.12031 | 84.56610 | -554.84278  | 14.12789    | 399.58769   | 1 |
| 73  | H | 73.78064 | 79.39346 | 85.09207 | 1297.06236  | 2061.84854  | 1220.68812  | 1 |
| 74  | C | 74.57068 | 78.95406 | 81.18421 | -662.15484  | -412.13544  | 123.62687   | 2 |
| 75  | O | 75.43792 | 78.71841 | 80.42570 | -540.01537  | -317.05804  | 274.91456   | 2 |
| 76  | N | 73.64532 | 79.20747 | 81.99485 | -202.76299  | -690.00100  | -131.49145  | 2 |
| 77  | H | 73.81324 | 79.11580 | 83.04767 | -702.62132  | -2617.37191 | 281.70413   | 2 |
| 78  | C | 72.49187 | 79.89371 | 81.52474 | -491.73914  | 576.34187   | 222.73509   | 2 |
| 79  | H | 71.92306 | 80.06053 | 82.46726 | 1977.17978  | -1823.58850 | -434.68928  | 2 |
| 80  | C | 72.98975 | 81.25787 | 80.87220 | -649.50797  | -328.66843  | 306.11224   | 2 |
| 81  | H | 73.59408 | 81.05958 | 79.96131 | 2075.07803  | 1452.16490  | -1004.45904 | 2 |
| 82  | C | 71.76959 | 82.18577 | 80.55195 | -615.18735  | -489.99689  | -70.96352   | 2 |
| 83  | H | 72.09641 | 83.13593 | 80.06755 | -1226.32661 | -1724.38906 | -1716.47170 | 2 |
| 84  | H | 71.04026 | 81.69669 | 79.86455 | 2381.64273  | -969.84735  | 900.46860   | 2 |
| 85  | H | 71.21335 | 82.46098 | 81.47834 | 2122.74991  | 1702.23946  | -141.36228  | 2 |
| 86  | C | 73.85797 | 82.01788 | 81.93250 | -501.86074  | -479.61276  | -376.42482  | 2 |
| 87  | H | 74.26307 | 82.97458 | 81.52729 | 993.79261   | -2246.95401 | -1177.81305 | 2 |
| 88  | H | 73.26575 | 82.26520 | 82.84446 | 42.71279    | -626.15391  | -2651.37258 | 2 |
| 89  | H | 74.72662 | 81.39981 | 82.26222 | -2026.39012 | -1590.33709 | -887.82922  | 2 |
| 90  | C | 71.69050 | 78.86928 | 80.51136 | -672.89153  | 382.57394   | -156.34072  | 2 |
| 91  | O | 71.23353 | 77.84090 | 80.95655 | 410.04627   | 221.86223   | 500.35950   | 2 |
| 92  | N | 71.60373 | 79.32547 | 79.27233 | -378.11782  | -443.79414  | -441.10984  | 2 |
| 93  | H | 72.02511 | 80.22402 | 79.05165 | 2404.15973  | -568.14894  | 1149.30085  | 2 |
| 94  | C | 71.00830 | 78.49034 | 78.27764 | -544.54484  | 466.16019   | 331.29119   | 2 |
| 95  | H | 70.28458 | 77.88935 | 78.87699 | -1409.80988 | -170.17955  | 2325.32679  | 2 |
| 96  | C | 70.34504 | 79.46849 | 77.21846 | -184.48284  | 116.78282   | -758.89137  | 2 |
| 97  | H | 69.67284 | 80.19057 | 77.73369 | 1893.78641  | 1861.14652  | 611.04528   | 2 |
| 98  | H | 71.12157 | 80.08947 | 76.71843 | -2170.79665 | -974.19311  | 1327.50117  | 2 |
| 99  | C | 69.56128 | 78.63069 | 76.16078 | 389.51668   | 672.81878   | -138.49152  | 2 |
| 100 | H | 70.23541 | 77.87931 | 75.68778 | 510.64577   | 1933.03327  | 1851.02484  | 2 |
| 101 | H | 68.78441 | 78.01256 | 76.66325 | -2302.30869 | -1105.72939 | -948.89774  | 2 |
| 102 | C | 68.89343 | 79.51297 | 75.03650 | -559.93427  | -126.34590  | 542.30857   | 2 |
| 103 | O | 68.44320 | 78.98754 | 74.05099 | -670.36003  | -111.83166  | 76.36448    | 2 |
| 104 | N | 68.86725 | 80.83385 | 75.31714 | -216.06729  | -537.07037  | 446.51379   | 2 |
| 105 | H | 69.19772 | 81.33205 | 76.15129 | -1251.96487 | 1074.12894  | -2168.52500 | 2 |
| 106 | H | 68.41784 | 81.53802 | 74.72151 | -2451.83023 | -720.73851  | 944.84612   | 2 |
| 107 | C | 72.04732 | 77.49861 | 77.50110 | 546.24052   | -563.88337  | -85.11809   | 2 |
| 108 | O | 71.53817 | 76.52821 | 76.99073 | 71.70702    | -307.40463  | 606.69673   | 2 |
| 109 | N | 73.33169 | 77.87580 | 77.42267 | 479.90863   | -504.50129  | 222.86849   | 2 |
| 110 | C | 74.28329 | 77.06199 | 76.72758 | 75.51268    | -600.91904  | 506.73700   | 2 |
| 111 | H | 73.70851 | 76.51164 | 75.94716 | -2033.61562 | 1795.30103  | 254.89480   | 2 |
| 112 | C | 75.32370 | 78.14357 | 76.20025 | 523.79067   | 517.99274   | 284.45581   | 2 |
| 113 | H | 76.31223 | 77.69761 | 75.94823 | 1599.61665  | -1127.00911 | 1895.98173  | 2 |
| 114 | H | 74.95570 | 78.65926 | 75.28546 | -1881.83093 | 1275.82488  | -1501.55016 | 2 |
| 115 | C | 75.38233 | 79.11556 | 77.41848 | -600.05639  | -404.05026  | 316.64485   | 2 |
| 116 | H | 76.03530 | 78.70136 | 78.22214 | -2597.05260 | 496.36221   | 657.73249   | 2 |

|     |   |          |          |          |             |             |             |   |
|-----|---|----------|----------|----------|-------------|-------------|-------------|---|
| 117 | H | 75.78783 | 80.12233 | 77.16997 | -1666.24518 | 1294.38985  | -1723.90591 | 2 |
| 118 | C | 73.86257 | 79.15096 | 77.88225 | 493.57570   | -129.95376  | -602.56394  | 2 |
| 119 | H | 73.71932 | 79.17404 | 78.98837 | -1469.08415 | -637.84797  | 2204.22581  | 2 |
| 120 | H | 73.23922 | 79.94326 | 77.40506 | -1038.97840 | 1068.88701  | -2280.71789 | 2 |
| 121 | C | 75.06719 | 76.06128 | 77.75619 | 188.88100   | 241.05089   | -727.87821  | 2 |
| 122 | O | 76.24074 | 75.78209 | 77.52014 | 531.88613   | -49.19943   | 427.07960   | 2 |
| 123 | N | 74.29604 | 75.60830 | 78.71587 | 708.14833   | 26.93417    | -179.73509  | 2 |
| 124 | H | 73.33111 | 75.93205 | 78.70495 | -2232.69501 | -1179.09831 | 1023.94816  | 2 |
| 125 | C | 74.87331 | 74.79665 | 79.74129 | -738.32412  | 259.92548   | 104.42456   | 2 |
| 126 | H | 75.85550 | 75.29030 | 79.91816 | 2028.89123  | 1260.02983  | 1311.33324  | 2 |
| 127 | C | 73.90314 | 74.73078 | 80.99001 | -258.65678  | -345.52513  | 661.28459   | 2 |
| 128 | H | 72.91351 | 74.32217 | 80.68896 | -1826.06090 | -1801.46097 | -918.64554  | 2 |
| 129 | C | 74.56290 | 73.83741 | 82.09717 | -541.23400  | 531.92970   | -218.41428  | 2 |
| 130 | H | 73.93352 | 73.79175 | 83.01716 | 1311.73218  | -2219.18200 | 882.19023   | 2 |
| 131 | H | 74.70502 | 72.78703 | 81.74435 | -1048.71298 | 1223.58118  | -2196.97971 | 2 |
| 132 | H | 75.58350 | 74.23445 | 82.39896 | 419.06414   | 1903.92898  | 1903.44670  | 2 |
| 133 | C | 73.74520 | 76.16451 | 81.60417 | -423.86431  | 152.66566   | -648.55262  | 2 |
| 134 | H | 73.08224 | 76.16353 | 82.50158 | 105.68386   | -2342.50080 | 1387.51238  | 2 |
| 135 | H | 74.72941 | 76.58871 | 81.91605 | -1695.63603 | -1484.73621 | -1531.02793 | 2 |
| 136 | H | 73.30003 | 76.87592 | 80.86732 | -1853.57121 | -487.39031  | 1936.59343  | 2 |
| 137 | C | 75.05871 | 73.27494 | 79.15108 | 539.71428   | -510.58232  | 267.58633   | 2 |
| 138 | O | 74.33273 | 72.38863 | 79.52468 | -15.93758   | -278.34085  | -624.49402  | 2 |
| 139 | N | 76.07734 | 73.25816 | 78.30645 | -676.81886  | 12.05292    | 276.17960   | 2 |
| 140 | H | 76.55887 | 74.15947 | 78.06066 | -1694.44250 | -373.84189  | -2100.66098 | 2 |
| 141 | C | 76.63222 | 72.03882 | 77.84300 | 412.33078   | -664.70360  | 108.35451   | 2 |
| 142 | H | 77.56077 | 72.39344 | 77.33839 | 1765.77476  | 1294.44366  | 1621.76594  | 2 |
| 143 | C | 76.86866 | 71.07820 | 79.08056 | -179.66635  | -721.95667  | -264.73915  | 2 |
| 144 | H | 77.44456 | 71.59165 | 79.88335 | -607.34922  | 2587.87032  | -598.10018  | 2 |
| 145 | H | 75.88644 | 70.80582 | 79.53686 | -359.69332  | -1479.13954 | -2259.74260 | 2 |
| 146 | C | 77.61380 | 69.79942 | 78.57467 | -240.01076  | 616.02425   | 431.85322   | 2 |
| 147 | H | 77.08139 | 69.36916 | 77.69542 | -1359.17131 | 782.54425   | 2227.99181  | 2 |
| 148 | H | 78.64057 | 70.04287 | 78.22330 | -820.36667  | 85.81767    | -2596.78715 | 2 |
| 149 | C | 77.65434 | 68.74053 | 79.74872 | -513.07015  | 236.18570   | -551.87280  | 2 |
| 150 | H | 78.32375 | 69.07671 | 80.57366 | 1816.11944  | -1183.11722 | -1650.94321 | 2 |
| 151 | H | 76.64581 | 68.61298 | 80.20565 | -1800.04429 | -1361.53473 | 1526.34643  | 2 |
| 152 | C | 78.14211 | 67.41081 | 79.12738 | 726.08972   | -253.19732  | -179.64713  | 2 |
| 153 | H | 77.44463 | 66.96798 | 78.38828 | 1224.27271  | -456.51798  | -2390.90304 | 2 |
| 154 | H | 79.16657 | 67.44559 | 78.70630 | 1206.40339  | -1150.93514 | -2154.90344 | 2 |
| 155 | N | 78.21977 | 66.34610 | 80.27236 | 329.70796   | -633.68968  | -155.67358  | 2 |
| 156 | H | 78.52107 | 65.37468 | 79.97082 | 1348.31305  | 1938.76845  | 1359.00643  | 2 |
| 157 | H | 78.89578 | 66.53626 | 81.06828 | 2096.92035  | 1446.54551  | -966.48890  | 2 |
| 158 | H | 77.31951 | 66.13188 | 80.79232 | -1197.07217 | -2303.53719 | 827.28733   | 2 |
| 159 | C | 75.61840 | 71.26327 | 76.80658 | -378.01186  | -556.17301  | -413.96481  | 2 |
| 160 | O | 75.04699 | 70.24795 | 77.13559 | -409.44433  | -307.55053  | -453.30833  | 2 |
| 161 | N | 75.63116 | 71.84419 | 75.61063 | -429.02477  | 524.70884   | 274.08502   | 2 |
| 162 | H | 76.14570 | 72.71740 | 75.50954 | 1706.34263  | -1425.96036 | 1574.38926  | 2 |
| 163 | C | 74.81394 | 71.21930 | 74.61719 | -45.25864   | -626.22952  | 478.93267   | 2 |
| 164 | H | 74.79431 | 70.14865 | 74.93104 | 1988.63164  | 570.90773   | 1772.87287  | 2 |
| 165 | C | 73.37534 | 71.87460 | 74.71985 | 551.77128   | -20.49526   | -564.54996  | 2 |
| 166 | H | 73.03817 | 71.94328 | 75.77851 | 1434.61535  | -1753.10253 | 1513.99471  | 2 |
| 167 | H | 73.38254 | 72.91873 | 74.33480 | -714.67738  | 1819.09770  | 1898.36494  | 2 |
| 168 | C | 72.42545 | 70.96039 | 73.86660 | 446.99263   | -555.77305  | 338.97221   | 2 |
| 169 | H | 72.85019 | 70.79786 | 72.84771 | 1953.68466  | 1892.25957  | -161.67766  | 2 |
| 170 | H | 72.32891 | 69.95004 | 74.32646 | -403.03785  | 2688.07032  | -188.43591  | 2 |
| 171 | C | 71.03794 | 71.67184 | 73.76871 | 567.86262   | 335.74681   | 434.04421   | 2 |
| 172 | H | 70.57753 | 71.80690 | 74.77213 | -1080.02275 | 1568.26081  | -1948.78900 | 2 |
| 173 | H | 71.15844 | 72.69486 | 73.35472 | -919.54108  | 2111.34692  | 1456.13463  | 2 |
| 174 | C | 70.10743 | 70.78465 | 72.81689 | 195.81897   | 173.33862   | -745.11536  | 2 |
| 175 | H | 70.44359 | 70.76494 | 71.75040 | 1405.67949  | -2301.21089 | -390.08113  | 2 |
| 176 | H | 69.97559 | 69.73549 | 73.18175 | -940.37328  | -1118.32446 | 2299.72133  | 2 |
| 177 | N | 68.80180 | 71.38310 | 72.82173 | 319.26422   | 656.36007   | -42.02424   | 2 |
| 178 | H | 68.18427 | 71.04005 | 72.09093 | 1961.03633  | 619.91968   | 1787.09422  | 2 |

|     |   |          |          |          |             |             |             |   |
|-----|---|----------|----------|----------|-------------|-------------|-------------|---|
| 179 | H | 68.25233 | 71.17413 | 73.65117 | 854.14343   | -2156.80752 | 1429.08711  | 2 |
| 180 | H | 68.65822 | 74.90668 | 72.56344 | 1237.02905  | -1378.50857 | -1998.28500 | 2 |
| 181 | C | 75.30428 | 71.45510 | 73.06913 | 532.53319   | -268.57236  | 517.55729   | 2 |
| 182 | O | 75.04827 | 70.55645 | 72.27229 | 266.16714   | -290.73804  | -558.88002  | 2 |
| 183 | N | 75.78564 | 72.65457 | 72.84361 | -226.25352  | 640.49678   | -270.32839  | 2 |
| 184 | H | 75.85494 | 73.22552 | 73.68461 | 2007.69063  | -1035.27229 | 1523.50231  | 2 |
| 185 | C | 76.33414 | 73.09781 | 71.60985 | -540.76542  | -573.33303  | 49.50000    | 2 |
| 186 | H | 76.90014 | 74.01144 | 71.89338 | -2374.20950 | -1036.76023 | 843.75774   | 2 |
| 187 | C | 77.26137 | 71.93853 | 71.00978 | -77.09082   | 666.87422   | -415.84136  | 2 |
| 188 | H | 76.60845 | 71.04841 | 70.78034 | -985.81834  | 617.19825   | 2463.91927  | 2 |
| 189 | O | 78.30488 | 71.43815 | 71.87316 | 293.29899   | -391.65602  | -477.80926  | 2 |
| 190 | H | 77.96320 | 70.54082 | 72.06103 | 2528.72714  | -681.76262  | -751.27122  | 2 |
| 191 | C | 77.74942 | 72.58646 | 69.66466 | 252.47363   | -605.14473  | 440.05134   | 2 |
| 192 | H | 78.33125 | 71.86047 | 69.05037 | -2052.65063 | 1456.49051  | -1043.51830 | 2 |
| 193 | H | 76.89427 | 72.94441 | 69.04085 | -2152.98800 | -1661.97574 | -161.70652  | 2 |
| 194 | H | 78.41075 | 73.46425 | 69.85150 | -473.12726  | -1584.27339 | 2165.61725  | 2 |
| 195 | C | 75.15866 | 73.47426 | 70.54317 | 360.36307   | 488.46713   | 505.10056   | 2 |
| 196 | O | 75.34844 | 74.43768 | 69.81335 | -200.08817  | -528.03552  | -385.82850  | 2 |
| 197 | N | 74.18027 | 72.60494 | 70.56408 | -597.54095  | -226.44775  | 355.20479   | 2 |
| 198 | H | 74.27880 | 71.78706 | 71.19847 | 2179.23655  | -1300.70981 | -991.33835  | 2 |
| 199 | C | 72.90983 | 72.85189 | 69.98322 | -687.68921  | 297.39807   | -249.45179  | 2 |
| 200 | H | 72.25582 | 72.10208 | 70.48141 | -349.16256  | -2467.37713 | -1101.72831 | 2 |
| 201 | C | 72.45151 | 74.35371 | 70.21987 | 672.47345   | 361.54328   | -201.62880  | 2 |
| 202 | H | 73.32627 | 75.04467 | 70.22340 | 1541.41502  | 582.18425   | 2169.97026  | 2 |
| 203 | H | 71.79258 | 74.67638 | 69.38291 | -2534.67717 | 60.25153    | 997.72295   | 2 |
| 204 | C | 71.66422 | 74.44506 | 71.56783 | 574.26774   | -389.43119  | -377.02542  | 2 |
| 205 | C | 70.33967 | 74.06674 | 71.53902 | 688.82679   | -287.33580  | -257.96133  | 2 |
| 206 | H | 69.89025 | 73.67591 | 70.61843 | 331.14182   | 1470.38163  | 2269.80013  | 2 |
| 207 | C | 72.31353 | 74.93860 | 72.75076 | -383.52382  | -675.04808  | 144.24917   | 2 |
| 208 | H | 73.38051 | 75.20943 | 72.71983 | 4.09847     | 1517.59662  | 2262.86397  | 2 |
| 209 | C | 69.52104 | 74.23213 | 72.79739 | -134.76730  | 428.45285   | -649.50303  | 2 |
| 210 | H | 69.03887 | 73.24131 | 73.01976 | -903.23433  | 1600.49020  | 2011.53387  | 2 |
| 211 | C | 71.59021 | 75.07622 | 73.93431 | -335.53281  | -615.00040  | -364.39058  | 2 |
| 212 | H | 72.12540 | 75.46410 | 74.82183 | 1596.45398  | -1369.33862 | 1732.02659  | 2 |
| 213 | C | 70.23655 | 74.76064 | 74.08495 | 585.48547   | -340.24194  | -406.23938  | 2 |
| 214 | O | 69.48043 | 74.85316 | 75.20468 | -419.15649  | -173.04408  | -511.94141  | 2 |
| 215 | H | 70.17107 | 75.30143 | 75.82916 | -1071.84350 | 1559.71507  | -1960.13012 | 2 |
| 216 | C | 72.94043 | 72.61958 | 68.35515 | 291.41878   | -183.13091  | 710.72246   | 2 |
| 217 | O | 72.11911 | 71.87911 | 67.87617 | 379.87695   | 523.47396   | -222.23622  | 2 |
| 218 | N | 73.79196 | 73.45126 | 67.76898 | 564.30591   | 373.09380   | 277.24371   | 2 |
| 219 | H | 74.39675 | 74.02658 | 68.40591 | -120.59931  | -2436.07824 | -1214.35098 | 2 |
| 220 | C | 74.37024 | 73.10459 | 66.49400 | 404.07514   | -299.37480  | 608.84009   | 2 |
| 221 | H | 75.40986 | 72.78869 | 66.73056 | -1071.07882 | -841.69025  | 2359.66467  | 2 |
| 222 | C | 73.53720 | 72.01075 | 65.72833 | -683.12807  | 68.71770    | -390.13096  | 2 |
| 223 | H | 73.52672 | 71.04737 | 66.29114 | 2068.88918  | 1596.58590  | 770.89603   | 2 |
| 224 | H | 72.46923 | 72.32758 | 65.66233 | 1379.86429  | 2342.49779  | -179.85638  | 2 |
| 225 | C | 74.14929 | 71.81326 | 64.30272 | -176.39967  | 537.49466   | 550.97268   | 2 |
| 226 | H | 74.30102 | 72.79414 | 63.79638 | -396.28051  | 1942.22168  | 1869.33314  | 2 |
| 227 | H | 75.15864 | 71.34954 | 64.36093 | -94.44700   | 586.00678   | -2659.20016 | 2 |
| 228 | C | 73.13458 | 70.90235 | 63.47316 | -291.69381  | -718.18079  | -150.72929  | 2 |
| 229 | H | 72.92762 | 69.88761 | 63.89883 | -2303.38776 | 1089.76242  | 964.62032   | 2 |
| 230 | H | 72.15028 | 71.38006 | 63.23248 | 884.16729   | 2568.80533  | -207.74283  | 2 |
| 231 | N | 73.83290 | 70.72833 | 62.26860 | -594.49522  | -252.81478  | 342.29276   | 2 |
| 232 | H | 74.69502 | 71.24073 | 62.16422 | -1735.17426 | 2084.05705  | -263.71605  | 2 |
| 233 | C | 73.45430 | 69.98018 | 61.31328 | 595.23177   | -271.52487  | 442.22352   | 2 |
| 234 | N | 72.25203 | 69.28125 | 61.46776 | 585.53813   | -424.79750  | -105.81303  | 2 |
| 235 | H | 71.60081 | 69.28097 | 62.25178 | 959.88797   | 1327.56823  | -2177.11905 | 2 |
| 236 | H | 71.84676 | 68.65451 | 60.77182 | 1578.48647  | 16.27378    | -2220.76233 | 2 |
| 237 | N | 74.36858 | 70.01536 | 60.25067 | -452.17763  | -390.33541  | -421.51853  | 2 |
| 238 | H | 75.24772 | 70.51878 | 60.14197 | 470.26107   | 1974.25629  | -1817.92087 | 2 |
| 239 | H | 74.24915 | 69.47467 | 59.39323 | 1856.67307  | -1573.97321 | -1224.35416 | 2 |
| 240 | C | 74.35546 | 74.45487 | 65.58384 | -531.47271  | -581.45780  | -55.06206   | 2 |



|     |   |          |          |          |             |             |             |   |
|-----|---|----------|----------|----------|-------------|-------------|-------------|---|
| 241 | O | 75.20127 | 74.66778 | 64.74852 | -243.00837  | 192.73507   | 609.52485   | 2 |
| 242 | N | 73.14585 | 75.11208 | 65.70918 | 343.49288   | -644.25607  | 38.09164    | 2 |
| 243 | H | 72.83128 | 74.74659 | 66.61748 | -1691.16043 | -1535.97525 | -1484.73099 | 2 |
| 244 | C | 73.12189 | 76.56092 | 65.40590 | 542.66492   | 350.14337   | 454.42563   | 2 |
| 245 | H | 74.18277 | 76.89044 | 65.48379 | 1209.57979  | -2396.95920 | 463.86744   | 2 |
| 246 | C | 72.53899 | 76.74376 | 64.02286 | -737.14309  | 145.93010   | 242.71942   | 2 |
| 247 | H | 71.58025 | 76.17429 | 63.98160 | -1050.18303 | 159.36419   | -2509.06125 | 2 |
| 248 | C | 72.21368 | 78.19875 | 63.73267 | -706.77696  | -252.88343  | -245.16230  | 2 |
| 249 | H | 71.82838 | 78.33750 | 62.68525 | -1624.64039 | -1665.49085 | 1417.86935  | 2 |
| 250 | H | 71.41679 | 78.58299 | 64.43203 | 2566.10521  | 598.51109   | 693.22305   | 2 |
| 251 | H | 73.11402 | 78.86144 | 63.85257 | -1972.69758 | 107.10018   | -1876.34312 | 2 |
| 252 | C | 73.45428 | 76.20070 | 62.94038 | 412.85148   | 672.58832   | -27.69222   | 2 |
| 253 | H | 73.00226 | 76.30498 | 61.91593 | 1447.02277  | 1762.76533  | -1490.78944 | 2 |
| 254 | H | 74.44237 | 76.73811 | 62.92781 | 1320.77379  | -145.20455  | 2378.68491  | 2 |
| 255 | H | 73.67778 | 75.10904 | 63.10201 | -1512.10848 | 1470.52031  | 1724.75147  | 2 |
| 256 | C | 72.12902 | 77.27540 | 66.51028 | -607.11113  | 499.56689   | 73.73769    | 2 |
| 257 | O | 72.35131 | 78.41491 | 66.84413 | 357.97126   | 460.81534   | 356.68785   | 2 |
| 258 | N | 71.15205 | 76.45656 | 66.92281 | 536.55407   | -368.62270  | 332.76306   | 2 |
| 259 | H | 71.16889 | 75.56565 | 66.42545 | 524.38866   | 2297.69985  | 1367.20941  | 2 |
| 260 | C | 69.86720 | 77.02185 | 67.21797 | 46.50277    | -774.29190  | -147.97904  | 2 |
| 261 | H | 69.29543 | 76.14898 | 67.60103 | 1676.51875  | 1883.29066  | 1032.55549  | 2 |
| 262 | C | 70.01347 | 78.19672 | 68.30825 | -559.41456  | -34.19198   | -556.30433  | 2 |
| 263 | H | 70.58810 | 79.04745 | 67.85603 | -64.66664   | 395.18769   | 2695.05373  | 2 |
| 264 | H | 69.01842 | 78.61378 | 68.59619 | -2703.44278 | -60.40056   | 333.79418   | 2 |
| 265 | C | 70.74104 | 77.66366 | 69.51515 | -519.76435  | 377.31045   | 459.42366   | 2 |
| 266 | H | 71.59740 | 77.04820 | 69.15641 | -1746.74323 | 1667.50644  | -1261.73691 | 2 |
| 267 | C | 71.29510 | 78.80744 | 70.35553 | 570.95554   | 16.46261    | -545.27700  | 2 |
| 268 | H | 71.87063 | 78.42879 | 71.23946 | 2391.58273  | 28.05277    | -1305.07271 | 2 |
| 269 | H | 71.98714 | 79.45794 | 69.75992 | 175.75588   | 917.63458   | 2559.43867  | 2 |
| 270 | H | 70.47621 | 79.46310 | 70.75008 | -1063.97851 | -2155.34650 | 1283.00462  | 2 |
| 271 | C | 69.82952 | 76.80011 | 70.37614 | 193.76014   | 2.62946     | -765.53141  | 2 |
| 272 | H | 70.35766 | 76.43687 | 71.29556 | 507.39394   | -846.55087  | 2539.60089  | 2 |
| 273 | H | 68.92620 | 77.36681 | 70.72086 | 1337.57841  | 1818.19054  | 1526.01994  | 2 |
| 274 | H | 69.46624 | 75.89714 | 69.82128 | 1100.88635  | -1172.91350 | -2199.08909 | 2 |
| 275 | C | 69.25075 | 77.55949 | 65.84539 | -549.21115  | 475.64486   | -309.38218  | 2 |
| 276 | O | 69.63049 | 77.18532 | 64.76380 | 556.06106   | -390.37755  | -78.24250   | 2 |
| 277 | O | 68.13245 | 78.42752 | 65.94162 | -572.27940  | -310.19032  | -209.75862  | 2 |
| 278 | H | 68.04316 | 78.45714 | 66.92967 | -1380.08193 | 2212.14486  | 790.85944   | 2 |

Listing 40: C00040.xmolout

|    |   |          |          |          |             |             |             |        |          |
|----|---|----------|----------|----------|-------------|-------------|-------------|--------|----------|
| 1  |   | 276      |          |          |             |             |             |        |          |
| 2  |   | 150.0000 | 150.0000 | 150.0000 | 0.0000      | 0.0000      | 0.0000***** | 2.3537 | 9415     |
|    |   | 0.2500   | 300.00   | 0.00     | 0.00        | 0.00        | -1293.7932  | 0.0000 | 300.0000 |
| 3  | H | 85.65516 | 69.35480 | 80.41490 | -2043.14101 | -1757.64893 | 399.89339   |        | 1        |
| 4  | N | 85.74069 | 69.77449 | 79.48950 | 426.75047   | 490.45733   | -334.42467  |        | 1        |
| 5  | H | 84.80943 | 70.17133 | 79.30544 | 442.25559   | -1110.30854 | -2448.52907 |        | 1        |
| 6  | C | 86.83618 | 70.65016 | 79.33944 | 415.32972   | -666.39213  | 83.73172    |        | 1        |
| 7  | H | 87.69461 | 70.14115 | 79.82907 | 879.32219   | 2491.00447  | 667.35213   |        | 1        |
| 8  | C | 87.06199 | 70.90420 | 77.76049 | 31.35357    | 477.41777   | 628.23362   |        | 1        |
| 9  | H | 86.14217 | 71.36999 | 77.33309 | 1168.38489  | 2240.25337  | -1019.71136 |        | 1        |
| 10 | H | 87.88732 | 71.63600 | 77.59267 | -360.43770  | 2534.90498  | 931.67112   |        | 1        |
| 11 | C | 87.36030 | 69.59576 | 77.07836 | 463.18208   | 512.70242   | -382.34388  |        | 1        |
| 12 | H | 86.57895 | 68.86219 | 77.38146 | 1725.29117  | 1863.52247  | -987.07854  |        | 1        |
| 13 | C | 87.30969 | 69.76557 | 75.56480 | 710.42801   | -144.27427  | -313.15367  |        | 1        |
| 14 | H | 87.49684 | 68.79671 | 75.03372 | 364.20195   | -1033.13725 | 2494.72524  |        | 1        |
| 15 | H | 86.31214 | 70.14508 | 75.22371 | 2567.61904  | 335.80679   | 847.48802   |        | 1        |
| 16 | H | 88.08219 | 70.49384 | 75.20634 | -2587.99029 | 680.92867   | -512.16411  |        | 1        |
| 17 | C | 88.72341 | 69.04858 | 77.47975 | 268.17616   | 741.64379   | -40.42634   |        | 1        |
| 18 | H | 88.95101 | 68.08434 | 76.95579 | 1283.54314  | -1945.37420 | -1411.27812 |        | 1        |
| 19 | H | 89.54714 | 69.76486 | 77.22677 | -1258.57796 | 1317.15249  | -2026.02085 |        | 1        |
| 20 | H | 88.78380 | 68.84778 | 78.58018 | -2502.84526 | 909.80597   | 575.92391   |        | 1        |

|    |   |          |          |          |             |             |             |   |
|----|---|----------|----------|----------|-------------|-------------|-------------|---|
| 21 | C | 86.45564 | 72.05891 | 80.04207 | 619.36578   | -458.64843  | -172.09273  | 1 |
| 22 | O | 85.31809 | 72.36712 | 80.39858 | -81.40433   | 433.87611   | 522.34594   | 1 |
| 23 | N | 87.55285 | 72.78116 | 80.03384 | 175.23996   | -622.20190  | 341.55523   | 1 |
| 24 | H | 88.40750 | 72.31771 | 79.73088 | -876.57256  | -303.22879  | -2561.90213 | 1 |
| 25 | C | 87.60448 | 74.07037 | 80.65539 | -571.88214  | -534.10783  | -106.15033  | 1 |
| 26 | H | 87.19912 | 73.87777 | 81.67399 | -2713.20841 | -16.25800   | -248.80809  | 1 |
| 27 | C | 89.14648 | 74.48479 | 80.65712 | 166.60354   | 288.16399   | -716.09568  | 1 |
| 28 | H | 89.49046 | 74.63076 | 79.59678 | -2097.85574 | 1636.78449  | -586.18044  | 1 |
| 29 | O | 90.03274 | 73.49916 | 81.22487 | -317.80580  | -363.38227  | 484.43082   | 1 |
| 30 | H | 90.64734 | 73.34738 | 80.48034 | 1863.74748  | -1451.84923 | 1357.29467  | 1 |
| 31 | C | 89.13894 | 75.88294 | 81.37629 | 503.80731   | 517.99032   | 318.51606   | 1 |
| 32 | H | 90.16976 | 76.29678 | 81.47036 | 640.61020   | -2157.10410 | -1536.29104 | 1 |
| 33 | H | 88.53277 | 76.63815 | 80.82079 | 1687.88455  | 465.60692   | 2087.56452  | 1 |
| 34 | H | 88.71598 | 75.81015 | 82.40535 | -1293.07895 | -1899.88581 | -1463.57452 | 1 |
| 35 | C | 86.66167 | 75.15244 | 79.88649 | -153.07550  | -733.68902  | 248.70981   | 1 |
| 36 | O | 86.34737 | 76.10353 | 80.55348 | 186.15459   | -480.78787  | -449.34387  | 1 |
| 37 | N | 86.49699 | 74.97081 | 78.57120 | -487.53139  | 543.18517   | 42.03850    | 1 |
| 38 | C | 85.33788 | 75.48795 | 77.90022 | -699.35871  | 69.34393    | 360.10701   | 1 |
| 39 | H | 85.21079 | 76.50769 | 78.32831 | 2.81126     | -221.99807  | -2715.58072 | 1 |
| 40 | C | 85.74378 | 75.44635 | 76.37494 | -507.46439  | -592.59194  | 122.07761   | 1 |
| 41 | H | 84.87323 | 75.25705 | 75.70628 | -1975.08116 | 525.87560   | -1801.71556 | 1 |
| 42 | H | 86.16505 | 76.42460 | 76.05213 | 1588.27743  | -1913.22100 | 1113.83566  | 1 |
| 43 | C | 86.83448 | 74.32704 | 76.30554 | -613.62442  | -457.55993  | -194.14490  | 1 |
| 44 | H | 86.38433 | 73.31198 | 76.24795 | 1707.54637  | -721.27992  | 1996.92523  | 1 |
| 45 | H | 87.50917 | 74.41897 | 75.42520 | 758.23357   | 2100.81767  | 1560.55011  | 1 |
| 46 | C | 87.57963 | 74.55052 | 77.68920 | -352.41524  | 704.96076   | 49.21465    | 1 |
| 47 | H | 88.05711 | 73.64443 | 78.12498 | 1714.76886  | -2070.42778 | 443.35792   | 1 |
| 48 | H | 88.31495 | 75.38965 | 77.69142 | 1224.15040  | 1801.50881  | 1636.97633  | 1 |
| 49 | C | 84.04944 | 74.55147 | 78.30928 | 566.85117   | 537.05831   | 117.62814   | 1 |
| 50 | O | 83.46278 | 74.82283 | 79.33192 | -550.26779  | -406.08867  | 4.21666     | 1 |
| 51 | N | 83.87784 | 73.54304 | 77.46711 | 566.34832   | -425.77725  | 180.18749   | 1 |
| 52 | H | 84.54446 | 73.48231 | 76.70044 | 644.44502   | 2646.80550  | -52.73430   | 1 |
| 53 | C | 82.61969 | 72.88433 | 77.31963 | 612.34801   | -281.48662  | 411.56221   | 1 |
| 54 | H | 82.77892 | 72.09231 | 76.55285 | 1667.23498  | -1490.75142 | 1556.16753  | 1 |
| 55 | C | 82.31356 | 72.26101 | 78.75668 | -714.45746  | -175.43074  | 286.98927   | 1 |
| 56 | H | 82.41498 | 73.08736 | 79.52782 | -787.09484  | 1763.03619  | -1922.46060 | 1 |
| 57 | O | 83.25595 | 71.24394 | 79.16958 | -429.46514  | 516.51932   | -128.40526  | 1 |
| 58 | H | 83.88476 | 71.81053 | 79.74786 | 1981.82785  | 436.16847   | -1818.18182 | 1 |
| 59 | C | 80.81586 | 71.82539 | 78.67645 | 630.79189   | -468.94448  | 76.03230    | 1 |
| 60 | H | 80.45098 | 71.44376 | 79.65938 | -1775.71861 | 2062.30353  | 131.89849   | 1 |
| 61 | H | 80.15345 | 72.67426 | 78.38463 | -1855.14608 | 88.94118    | 1993.53760  | 1 |
| 62 | H | 80.66531 | 71.01114 | 77.92915 | -1504.82350 | -780.94249  | -2132.90992 | 1 |
| 63 | C | 81.57340 | 74.01251 | 76.79256 | 288.57638   | 618.62814   | -397.00270  | 1 |
| 64 | O | 81.71551 | 75.22707 | 77.03963 | 321.70495   | -185.26452  | 574.37218   | 1 |
| 65 | N | 80.61985 | 73.42328 | 76.12985 | -447.05792  | -446.53431  | 367.76425   | 1 |
| 66 | H | 80.73166 | 72.41204 | 76.07643 | 350.31316   | 1975.63644  | -1843.31522 | 1 |
| 67 | C | 79.47421 | 74.06575 | 75.58777 | -511.23061  | 374.03917   | -471.51480  | 1 |
| 68 | H | 78.83559 | 73.19483 | 75.31916 | 2234.79579  | -898.70890  | -1273.45190 | 1 |
| 69 | C | 78.84086 | 74.94889 | 76.75498 | 529.53781   | -159.34528  | 563.72604   | 1 |
| 70 | H | 77.72953 | 75.01301 | 76.60363 | 654.59388   | 2347.94251  | 1217.51488  | 1 |
| 71 | H | 79.00248 | 74.36821 | 77.70195 | -1526.55661 | 2103.42026  | 817.87394   | 1 |
| 72 | O | 79.32274 | 76.29555 | 76.93437 | -554.84278  | 14.12789    | 399.58769   | 1 |
| 73 | H | 80.31055 | 76.09207 | 77.08396 | 1297.06236  | 2061.84854  | 1220.68812  | 1 |
| 74 | C | 79.86855 | 74.91675 | 74.25219 | -662.15484  | -412.13544  | 123.62687   | 1 |
| 75 | O | 79.24174 | 74.66156 | 73.23359 | -540.01537  | -317.05804  | 274.91456   | 1 |
| 76 | N | 80.79431 | 75.81869 | 74.47398 | -202.76299  | -690.00100  | -131.49145  | 1 |
| 77 | H | 81.15769 | 75.88872 | 75.44552 | -702.62132  | -2617.37191 | 281.70413   | 1 |
| 78 | C | 81.62691 | 76.32624 | 73.43778 | -491.73914  | 576.34187   | 222.73509   | 1 |
| 79 | H | 82.45012 | 76.81449 | 74.00494 | 1977.17978  | -1823.58850 | -434.68928  | 1 |
| 80 | C | 82.13315 | 75.09908 | 72.56263 | -649.50797  | -328.66843  | 306.11224   | 1 |
| 81 | H | 81.27687 | 74.47043 | 72.23165 | 2075.07803  | 1452.16490  | -1004.45904 | 1 |
| 82 | C | 82.92555 | 75.65638 | 71.33172 | -615.18735  | -489.99689  | -70.96352   | 1 |

|     |   |          |          |          |             |             |             |   |
|-----|---|----------|----------|----------|-------------|-------------|-------------|---|
| 83  | H | 83.34410 | 74.83478 | 70.70433 | -1226.32661 | -1724.38906 | -1716.47170 | 1 |
| 84  | H | 82.27085 | 76.27692 | 70.67469 | 2381.64273  | -969.84735  | 900.46860   | 1 |
| 85  | H | 83.77796 | 76.30106 | 71.65068 | 2122.74991  | 1702.23946  | -141.36228  | 1 |
| 86  | C | 83.12195 | 74.26399 | 73.44697 | -501.86074  | -479.61276  | -376.42482  | 1 |
| 87  | H | 83.48328 | 73.35343 | 72.91450 | 993.79261   | -2246.95401 | -1177.81305 | 1 |
| 88  | H | 84.01959 | 74.86120 | 73.73086 | 42.71279    | -626.15391  | -2651.37258 | 1 |
| 89  | H | 82.63372 | 73.92810 | 74.39261 | -2026.39012 | -1590.33709 | -887.82922  | 1 |
| 90  | C | 80.85795 | 77.41261 | 72.48073 | -672.89153  | 382.57394   | -156.34072  | 1 |
| 91  | O | 81.36910 | 78.49453 | 72.33018 | 410.04627   | 221.86223   | 500.35950   | 1 |
| 92  | N | 79.76209 | 76.92914 | 71.91201 | -378.11782  | -443.79414  | -441.10984  | 1 |
| 93  | H | 79.41712 | 75.95805 | 72.12195 | 2404.15973  | -568.14894  | 1149.30085  | 1 |
| 94  | C | 78.92841 | 77.87421 | 71.21886 | -544.54484  | 466.16019   | 331.29119   | 1 |
| 95  | H | 79.24110 | 78.85675 | 71.64585 | -1409.80988 | -170.17955  | 2325.32679  | 1 |
| 96  | C | 79.32725 | 77.76184 | 69.68050 | -184.48284  | 116.78282   | -758.89137  | 1 |
| 97  | H | 80.43300 | 77.83005 | 69.57155 | 1893.78641  | 1861.14652  | 611.04528   | 1 |
| 98  | H | 79.04110 | 76.76787 | 69.26927 | -2170.79665 | -974.19311  | 1327.50117  | 1 |
| 99  | C | 78.61993 | 78.91039 | 68.90148 | 389.51668   | 672.81878   | -138.49152  | 1 |
| 100 | H | 77.51377 | 78.79760 | 68.98305 | 510.64577   | 1933.03327  | 1851.02484  | 1 |
| 101 | H | 78.83179 | 79.88700 | 69.39037 | -2302.30869 | -1105.72939 | -948.89774  | 1 |
| 102 | C | 79.02261 | 78.99658 | 67.38008 | -559.93427  | -126.34590  | 542.30857   | 1 |
| 103 | O | 78.46587 | 79.79564 | 66.67266 | -670.36003  | -111.83166  | 76.36448    | 1 |
| 104 | N | 80.00404 | 78.14703 | 67.00957 | -216.06729  | -537.07037  | 446.51379   | 1 |
| 105 | H | 80.52089 | 77.45686 | 67.56673 | -1251.96487 | 1074.12894  | -2168.52500 | 1 |
| 106 | H | 80.39267 | 78.10050 | 66.06086 | -2451.83023 | -720.73851  | 944.84612   | 1 |
| 107 | C | 77.38666 | 77.49283 | 71.48699 | 546.24052   | -563.88337  | -85.11809   | 1 |
| 108 | O | 76.59306 | 77.50597 | 70.55320 | 71.70702    | -307.40463  | 606.69673   | 1 |
| 109 | N | 77.12206 | 77.29263 | 72.77329 | 479.90863   | -504.50129  | 222.86849   | 1 |
| 110 | C | 75.92022 | 76.61012 | 73.18111 | 75.51268    | -600.91904  | 506.73700   | 1 |
| 111 | H | 75.75498 | 75.80415 | 72.42811 | -2033.61562 | 1795.30103  | 254.89480   | 1 |
| 112 | C | 76.31550 | 76.14313 | 74.64797 | 523.79067   | 517.99274   | 284.45581   | 1 |
| 113 | H | 75.43364 | 75.86744 | 75.26989 | 1599.61665  | -1127.00911 | 1895.98173  | 1 |
| 114 | H | 76.99294 | 75.26007 | 74.62359 | -1881.83093 | 1275.82488  | -1501.55016 | 1 |
| 115 | C | 77.05627 | 77.42266 | 75.14382 | -600.05639  | -404.05026  | 316.64485   | 1 |
| 116 | H | 76.33063 | 78.24408 | 75.35201 | -2597.05260 | 496.36221   | 657.73249   | 1 |
| 117 | H | 77.65250 | 77.26707 | 76.07593 | -1666.24518 | 1294.38985  | -1723.90591 | 1 |
| 118 | C | 77.96139 | 77.74090 | 73.87700 | 493.57570   | -129.95376  | -602.56394  | 1 |
| 119 | H | 78.21652 | 78.81488 | 73.71900 | -1469.08415 | -637.84797  | 2204.22581  | 1 |
| 120 | H | 78.89333 | 77.13050 | 73.82575 | -1038.97840 | 1068.88701  | -2280.71789 | 1 |
| 121 | C | 74.72605 | 77.71374 | 73.20604 | 188.88100   | 241.05089   | -727.87821  | 1 |
| 122 | O | 74.34468 | 78.22506 | 74.21975 | 531.88613   | -49.19943   | 427.07960   | 1 |
| 123 | N | 74.24068 | 77.84996 | 71.94309 | 708.14833   | 26.93417    | -179.73509  | 1 |
| 124 | H | 74.86740 | 77.51815 | 71.17622 | -2232.69501 | -1179.09831 | 1023.94816  | 1 |
| 125 | C | 73.24736 | 78.92953 | 71.71382 | -738.32412  | 259.92548   | 104.42456   | 1 |
| 126 | H | 73.67505 | 79.77490 | 72.30157 | 2028.89123  | 1260.02983  | 1311.33324  | 1 |
| 127 | C | 73.17543 | 79.23345 | 70.23794 | -258.65678  | -345.52513  | 661.28459   | 1 |
| 128 | H | 72.83749 | 78.30950 | 69.71640 | -1826.06090 | -1801.46097 | -918.64554  | 1 |
| 129 | C | 72.19136 | 80.34850 | 69.92260 | -541.23400  | 531.92970   | -218.41428  | 1 |
| 130 | H | 72.18424 | 80.59996 | 68.82721 | 1311.73218  | -2219.18200 | 882.19023   | 1 |
| 131 | H | 71.13699 | 80.07377 | 70.20810 | -1048.71298 | 1223.58118  | -2196.97971 | 1 |
| 132 | H | 72.44747 | 81.29160 | 70.47831 | 419.06414   | 1903.92898  | 1903.44670  | 1 |
| 133 | C | 74.52794 | 79.62023 | 69.66440 | -423.86431  | 152.66566   | -648.55262  | 1 |
| 134 | H | 74.48743 | 79.75398 | 68.54890 | 105.68386   | -2342.50080 | 1387.51238  | 1 |
| 135 | H | 74.90071 | 80.58663 | 70.10128 | -1695.63603 | -1484.73621 | -1531.02793 | 1 |
| 136 | H | 75.31340 | 78.82525 | 69.88712 | -1853.57121 | -487.39031  | 1936.59343  | 1 |
| 137 | C | 71.79133 | 78.48334 | 72.32999 | 539.71428   | -510.58232  | 267.58633   | 1 |
| 138 | O | 70.84824 | 79.23131 | 72.20898 | -15.93758   | -278.34085  | -624.49402  | 1 |
| 139 | N | 71.75058 | 77.25399 | 72.94250 | -676.81886  | 12.05292    | 276.17960   | 1 |
| 140 | H | 72.71578 | 76.93738 | 72.77297 | -1694.44250 | -373.84189  | -2100.66098 | 1 |
| 141 | C | 71.37271 | 77.34502 | 74.35453 | 412.33078   | -664.70360  | 108.35451   | 1 |
| 142 | H | 72.14265 | 78.01700 | 74.79702 | 1765.77476  | 1294.44366  | 1621.76594  | 1 |
| 143 | C | 69.94266 | 77.99211 | 74.32139 | -179.66635  | -721.95667  | -264.73915  | 1 |
| 144 | H | 70.03611 | 79.10325 | 74.34102 | -607.34922  | 2587.87032  | -598.10018  | 1 |

|     |   |          |          |          |             |             |             |   |
|-----|---|----------|----------|----------|-------------|-------------|-------------|---|
| 145 | H | 69.50382 | 77.76058 | 73.32467 | -359.69332  | -1479.13954 | -2259.74260 | 1 |
| 146 | C | 68.93092 | 77.55407 | 75.43420 | -240.01076  | 616.02425   | 431.85322   | 1 |
| 147 | H | 68.97944 | 76.45923 | 75.63709 | -1359.17131 | 782.54425   | 2227.99181  | 1 |
| 148 | H | 69.10712 | 78.08133 | 76.39765 | -820.36667  | 85.81767    | -2596.78715 | 1 |
| 149 | C | 67.55990 | 77.95293 | 74.75208 | -513.07015  | 236.18570   | -551.87280  | 1 |
| 150 | H | 67.63653 | 78.97894 | 74.32449 | 1816.11944  | -1183.11722 | -1650.94321 | 1 |
| 151 | H | 67.39473 | 77.26941 | 73.88620 | -1800.04429 | -1361.53473 | 1526.34643  | 1 |
| 152 | C | 66.32645 | 77.88370 | 75.67730 | 726.08972   | -253.19732  | -179.64713  | 1 |
| 153 | H | 66.02316 | 76.86085 | 75.97618 | 1224.27271  | -456.51798  | -2390.90304 | 1 |
| 154 | H | 66.34819 | 78.56287 | 76.55341 | 1206.40339  | -1150.93514 | -2154.90344 | 1 |
| 155 | N | 65.11893 | 78.39476 | 74.80900 | 329.70796   | -633.68968  | -155.67358  | 1 |
| 156 | H | 64.15662 | 78.31005 | 75.24740 | 1348.31305  | 1938.76845  | 1359.00643  | 1 |
| 157 | H | 65.13297 | 79.41853 | 74.53307 | 2096.92035  | 1446.54551  | -966.48890  | 1 |
| 158 | H | 64.96805 | 77.92423 | 73.87024 | -1197.07217 | -2303.53719 | 827.28733   | 1 |
| 159 | C | 71.47195 | 75.85910 | 74.98020 | -378.01186  | -556.17301  | -413.96481  | 1 |
| 160 | O | 72.30536 | 75.65163 | 75.85489 | -409.44433  | -307.55053  | -453.30833  | 1 |
| 161 | N | 70.57044 | 75.05354 | 74.47067 | -429.02477  | 524.70884   | 274.08502   | 1 |
| 162 | H | 69.87421 | 75.42993 | 73.78702 | 1706.34263  | -1425.96036 | 1574.38926  | 1 |
| 163 | C | 70.60708 | 73.63974 | 74.58648 | -45.25864   | -626.22952  | 478.93267   | 1 |
| 164 | H | 69.89276 | 73.32730 | 73.79133 | 1988.63164  | 570.90773   | 1772.87287  | 1 |
| 165 | C | 72.08690 | 73.11976 | 74.36600 | 551.77128   | -20.49526   | -564.54996  | 1 |
| 166 | H | 72.49518 | 73.46223 | 73.38543 | 1434.61535  | -1753.10253 | 1513.99471  | 1 |
| 167 | H | 72.77361 | 73.53129 | 75.14333 | -714.67738  | 1819.09770  | 1898.36494  | 1 |
| 168 | C | 71.99187 | 71.55949 | 74.43603 | 446.99263   | -555.77305  | 338.97221   | 1 |
| 169 | H | 71.61850 | 71.23650 | 75.43541 | 1953.68466  | 1892.25957  | -161.67766  | 1 |
| 170 | H | 71.24791 | 71.18186 | 73.69921 | -403.03785  | 2688.07032  | -188.43591  | 1 |
| 171 | C | 73.41748 | 70.94730 | 74.13386 | 567.86262   | 335.74681   | 434.04421   | 1 |
| 172 | H | 73.75771 | 71.23975 | 73.11096 | -1080.02275 | 1568.26081  | -1948.78900 | 1 |
| 173 | H | 74.18302 | 71.34350 | 74.84029 | -919.54108  | 2111.34692  | 1456.13463  | 1 |
| 174 | C | 73.28816 | 69.41108 | 74.26011 | 195.81897   | 173.33862   | -745.11536  | 1 |
| 175 | H | 73.01386 | 69.05302 | 75.27260 | 1405.67949  | -2301.21089 | -390.08113  | 1 |
| 176 | H | 72.63037 | 68.94064 | 73.50223 | -940.37328  | -1118.32446 | 2299.72133  | 1 |
| 177 | N | 74.70105 | 68.79020 | 73.99675 | 319.26422   | 656.36007   | -42.02424   | 1 |
| 178 | H | 74.75164 | 67.73151 | 74.04354 | 1961.03633  | 619.91968   | 1787.09422  | 1 |
| 179 | H | 75.14224 | 68.97808 | 73.04976 | 854.14343   | -2156.80752 | 1429.08711  | 1 |
| 180 | H | 75.48153 | 69.06390 | 74.66206 | 1237.02905  | -1378.50857 | -1998.28500 | 1 |
| 181 | C | 70.14416 | 73.07429 | 76.06227 | 532.53319   | -268.57236  | 517.55729   | 1 |
| 182 | O | 69.48157 | 72.07035 | 76.12505 | 266.16714   | -290.73804  | -558.88002  | 1 |
| 183 | N | 70.67400 | 73.79692 | 77.03694 | -226.25352  | 640.49678   | -270.32839  | 1 |
| 184 | H | 71.35459 | 74.56072 | 76.81081 | 2007.69063  | -1035.27229 | 1523.50231  | 1 |
| 185 | C | 70.43113 | 73.37316 | 78.38328 | -540.76542  | -573.33303  | 49.50000    | 1 |
| 186 | H | 70.58061 | 72.27004 | 78.37822 | -2374.20950 | -1036.76023 | 843.75774   | 1 |
| 187 | C | 71.49248 | 74.17453 | 79.26223 | -77.09082   | 666.87422   | -415.84136  | 1 |
| 188 | H | 71.32204 | 75.27463 | 79.10138 | -985.81834  | 617.19825   | 2463.91927  | 1 |
| 189 | O | 72.87003 | 73.93532 | 78.89927 | 293.29899   | -391.65602  | -477.80926  | 1 |
| 190 | H | 73.09778 | 74.78012 | 78.46340 | 2528.72714  | -681.76262  | -751.27122  | 1 |
| 191 | C | 71.10559 | 73.80298 | 80.73945 | 252.47363   | -605.14473  | 440.05134   | 1 |
| 192 | H | 71.77639 | 74.30620 | 81.47414 | -2052.65063 | 1456.49051  | -1043.51830 | 1 |
| 193 | H | 70.05989 | 74.10645 | 80.98758 | -2152.98800 | -1661.97574 | -161.70652  | 1 |
| 194 | H | 71.18391 | 72.70484 | 80.91699 | -473.12726  | -1584.27339 | 2165.61725  | 1 |
| 195 | C | 68.89145 | 73.73608 | 78.77686 | 360.36307   | 488.46713   | 505.10056   | 1 |
| 196 | O | 68.38904 | 73.19901 | 79.74053 | -200.08817  | -528.03552  | -385.82850  | 1 |
| 197 | N | 68.37389 | 74.69524 | 78.00889 | -597.54095  | -226.44775  | 355.20479   | 1 |
| 198 | H | 68.94719 | 75.04081 | 77.24047 | 2179.23655  | -1300.70981 | -991.33835  | 1 |
| 199 | C | 67.04274 | 75.08749 | 78.28340 | -687.68921  | 297.39807   | -249.45179  | 1 |
| 200 | H | 66.78332 | 74.59177 | 79.25018 | -349.16256  | -2467.37713 | -1101.72831 | 1 |
| 201 | C | 66.98611 | 76.69198 | 78.30787 | 672.47345   | 361.54328   | -201.62880  | 1 |
| 202 | H | 67.38268 | 77.09206 | 77.34599 | 1541.41502  | 582.18425   | 2169.97026  | 1 |
| 203 | H | 65.92293 | 77.01589 | 78.38756 | -2534.67717 | 60.25153    | 997.72295   | 1 |
| 204 | C | 67.79310 | 77.25450 | 79.48266 | 574.26774   | -389.43119  | -377.02542  | 1 |
| 205 | C | 67.17604 | 77.34864 | 80.76725 | 688.82679   | -287.33580  | -257.96133  | 1 |
| 206 | H | 66.14812 | 76.97616 | 80.92806 | 331.14182   | 1470.38163  | 2269.80013  | 1 |

|     |   |          |          |          |             |             |             |   |
|-----|---|----------|----------|----------|-------------|-------------|-------------|---|
| 207 | C | 69.13283 | 77.71199 | 79.28926 | -383.52382  | -675.04808  | 144.24917   | 1 |
| 208 | H | 69.62547 | 77.61452 | 78.30584 | 4.09847     | 1517.59662  | 2262.86397  | 1 |
| 209 | C | 67.89170 | 77.93546 | 81.80960 | -134.76730  | 428.45285   | -649.50303  | 1 |
| 210 | H | 67.41032 | 78.01904 | 82.79974 | -903.23433  | 1600.49020  | 2011.53387  | 1 |
| 211 | C | 69.80453 | 78.29954 | 80.36349 | -335.53281  | -615.00040  | -364.39058  | 1 |
| 212 | H | 70.83147 | 78.66938 | 80.19742 | 1596.45398  | -1369.33862 | 1732.02659  | 1 |
| 213 | C | 69.21505 | 78.44197 | 81.65410 | 585.48547   | -340.24194  | -406.23938  | 1 |
| 214 | O | 69.88682 | 79.04196 | 82.75057 | -419.15649  | -173.04408  | -511.94141  | 1 |
| 215 | H | 70.72605 | 79.30882 | 82.30646 | -1071.84350 | 1559.71507  | -1960.13012 | 1 |
| 216 | C | 66.02527 | 74.70155 | 77.06158 | 291.41878   | -183.13091  | 710.72246   | 1 |
| 217 | O | 64.85141 | 74.58105 | 77.32976 | 379.87695   | 523.47396   | -222.23622  | 1 |
| 218 | N | 66.61573 | 74.74036 | 75.88695 | 564.30591   | 373.09380   | 277.24371   | 1 |
| 219 | H | 67.63679 | 74.85603 | 75.77743 | -120.59931  | -2436.07824 | -1214.35098 | 1 |
| 220 | C | 65.91923 | 74.39970 | 74.66494 | 404.07514   | -299.37480  | 608.84009   | 1 |
| 221 | H | 65.91325 | 73.28787 | 74.71756 | -1071.07882 | -841.69025  | 2359.66467  | 1 |
| 222 | C | 64.45659 | 74.99275 | 74.59486 | -683.12807  | 68.71770    | -390.13096  | 1 |
| 223 | H | 63.96193 | 74.95468 | 75.60606 | 2068.88918  | 1596.58590  | 770.89603   | 1 |
| 224 | H | 64.49460 | 76.06942 | 74.31776 | 1379.86429  | 2342.49779  | -179.85638  | 1 |
| 225 | C | 63.60568 | 74.18763 | 73.56137 | -176.39967  | 537.49466   | 550.97268   | 1 |
| 226 | H | 64.12451 | 74.08036 | 72.58271 | -396.28051  | 1942.22168  | 1869.33314  | 1 |
| 227 | H | 63.41462 | 73.14938 | 73.91311 | -94.44700   | 586.00678   | -2659.20016 | 1 |
| 228 | C | 62.25035 | 75.02026 | 73.41715 | -291.69381  | -718.18079  | -150.72929  | 1 |
| 229 | H | 61.60920 | 75.05674 | 74.33458 | -2303.38776 | 1089.76242  | 964.62032   | 1 |
| 230 | H | 62.37315 | 76.07130 | 73.05009 | 884.16729   | 2568.80533  | -207.74283  | 1 |
| 231 | N | 61.54469 | 74.31480 | 72.43344 | -594.49522  | -252.81478  | 342.29276   | 1 |
| 232 | H | 62.00115 | 73.50862 | 72.03591 | -1735.17426 | 2084.05705  | -263.71605  | 1 |
| 233 | C | 60.38454 | 74.62855 | 72.01936 | 595.23177   | -271.52487  | 442.22352   | 1 |
| 234 | N | 59.77489 | 75.75324 | 72.58705 | 585.53813   | -424.79750  | -105.81303  | 1 |
| 235 | H | 60.12088 | 76.38011 | 73.31241 | 959.88797   | 1327.56823  | -2177.11905 | 1 |
| 236 | H | 58.84703 | 76.10049 | 72.34280 | 1578.48647  | 16.27378    | -2220.76233 | 1 |
| 237 | N | 59.94174 | 73.73781 | 71.03165 | -452.17763  | -390.33541  | -421.51853  | 1 |
| 238 | H | 60.38738 | 72.91972 | 70.61887 | 470.26107   | 1974.25629  | -1817.92087 | 1 |
| 239 | H | 59.03337 | 73.82103 | 70.57340 | 1856.67307  | -1573.97321 | -1224.35416 | 1 |
| 240 | C | 66.97523 | 74.98852 | 73.60321 | -531.47271  | -581.45780  | -55.06206   | 1 |
| 241 | O | 68.14923 | 75.11472 | 73.98632 | -243.00837  | 192.73507   | 609.52485   | 1 |
| 242 | N | 66.45658 | 75.32436 | 72.44140 | 343.49288   | -644.25607  | 38.09164    | 1 |
| 243 | H | 65.45462 | 75.17230 | 72.32411 | -1691.16043 | -1535.97525 | -1484.73099 | 1 |
| 244 | C | 67.26776 | 75.37225 | 71.26643 | 542.66492   | 350.14337   | 454.42563   | 1 |
| 245 | H | 66.52291 | 75.60426 | 70.47350 | 1209.57979  | -2396.95920 | 463.86744   | 1 |
| 246 | C | 68.34594 | 76.52399 | 71.43785 | -737.14309  | 145.93010   | 242.71942   | 1 |
| 247 | H | 68.93514 | 76.34130 | 72.36396 | -1050.18303 | 159.36419   | -2509.06125 | 1 |
| 248 | C | 69.29178 | 76.70883 | 70.20196 | -706.77696  | -252.88343  | -245.16230  | 1 |
| 249 | H | 70.00926 | 77.54723 | 70.37203 | -1624.64039 | -1665.49085 | 1417.86935  | 1 |
| 250 | H | 69.90094 | 75.79876 | 69.98983 | 2566.10521  | 598.51109   | 693.22305   | 1 |
| 251 | H | 68.71649 | 76.94287 | 69.27600 | -1972.69758 | 107.10018   | -1876.34312 | 1 |
| 252 | C | 67.58208 | 77.89234 | 71.51024 | 412.85148   | 672.58832   | -27.69222   | 1 |
| 253 | H | 68.27076 | 78.73350 | 71.76237 | 1447.02277  | 1762.76533  | -1490.78944 | 1 |
| 254 | H | 67.09872 | 78.14147 | 70.53708 | 1320.77379  | -145.20455  | 2378.68491  | 1 |
| 255 | H | 66.77442 | 77.87461 | 72.27808 | -1512.10848 | 1470.52031  | 1724.75147  | 1 |
| 256 | C | 67.83230 | 73.84576 | 71.10548 | -607.11113  | 499.56689   | 73.73769    | 1 |
| 257 | O | 67.02153 | 72.95695 | 70.94990 | 357.97126   | 460.81534   | 356.68785   | 1 |
| 258 | N | 69.14719 | 73.78453 | 71.09344 | 536.55407   | -368.62270  | 332.76306   | 1 |
| 259 | H | 69.74974 | 74.60254 | 71.26779 | 524.38866   | 2297.69985  | 1367.20941  | 1 |
| 260 | C | 69.81668 | 72.51615 | 71.20086 | 46.50277    | -774.29190  | -147.97904  | 1 |
| 261 | H | 69.39286 | 72.03261 | 72.10822 | 1676.51875  | 1883.29066  | 1032.55549  | 1 |
| 262 | C | 69.59654 | 71.60417 | 69.88801 | -559.41456  | -34.19198   | -556.30433  | 1 |
| 263 | H | 69.35725 | 72.26135 | 69.01839 | -64.66664   | 395.18769   | 2695.05373  | 1 |
| 264 | H | 70.53947 | 71.06917 | 69.62172 | -2703.44278 | -60.40056   | 333.79418   | 1 |
| 265 | C | 68.49466 | 70.61099 | 70.13047 | -519.76435  | 377.31045   | 459.42366   | 1 |
| 266 | H | 67.56994 | 71.18321 | 70.44892 | -1746.74323 | 1667.50644  | -1261.73691 | 1 |
| 267 | C | 68.18402 | 69.84907 | 68.84790 | 570.95554   | 16.46261    | -545.27700  | 1 |
| 268 | H | 67.34258 | 69.12299 | 68.99097 | 2391.58273  | 28.05277    | -1305.07271 | 1 |

|     |   |          |          |          |             |             |             |   |
|-----|---|----------|----------|----------|-------------|-------------|-------------|---|
| 269 | H | 67.88877 | 70.54003 | 68.01659 | 175.75588   | 917.63458   | 2559.43867  | 1 |
| 270 | H | 69.07038 | 69.26260 | 68.49277 | -1063.97851 | -2155.34650 | 1283.00462  | 1 |
| 271 | C | 68.85953 | 69.61882 | 71.22604 | 193.76014   | 2.62946     | -765.53141  | 1 |
| 272 | H | 68.06571 | 68.83828 | 71.35398 | 507.39394   | -846.55087  | 2539.60089  | 1 |
| 273 | H | 69.81684 | 69.08387 | 70.99662 | 1337.57841  | 1818.19054  | 1526.01994  | 1 |
| 274 | H | 68.98914 | 70.11893 | 72.21994 | 1100.88635  | -1172.91350 | -2199.08909 | 1 |
| 275 | C | 71.33018 | 72.98479 | 71.33800 | -549.21115  | 475.64486   | -309.38218  | 1 |
| 276 | O | 71.61324 | 74.16397 | 71.39673 | 556.06106   | -390.37755  | -78.24250   | 1 |
| 277 | O | 72.33748 | 72.00157 | 71.42234 | -572.27940  | -310.19032  | -209.75862  | 1 |
| 278 | H | 71.76226 | 71.18617 | 71.34912 | -1380.08193 | 2212.14486  | 790.85944   | 1 |

Listing 41: C00041.xmolout

|    |   |          |          |          |             |             |             |        |          |
|----|---|----------|----------|----------|-------------|-------------|-------------|--------|----------|
| 1  |   | 276      |          |          |             |             |             |        |          |
| 2  |   | 150.0000 | 150.0000 | 150.0000 | 0.0000      | 0.0000      | 0.0000***** | 2.7750 | 11100    |
|    |   | 0.2500   | 300.00   | 0.00     | 0.00        | 0.00        | -1293.7837  | 0.0000 | 300.0000 |
| 3  | H | 72.71198 | 65.91386 | 64.16711 | -2043.14101 | -1757.64893 | 399.89339   |        | 1        |
| 4  | N | 73.60896 | 65.85551 | 64.64405 | 426.75047   | 490.45733   | -334.42467  |        | 1        |
| 5  | H | 73.35058 | 66.04976 | 65.60924 | 442.25559   | -1110.30854 | -2448.52907 |        | 1        |
| 6  | C | 74.62171 | 66.68077 | 64.11745 | 415.32972   | -666.39213  | 83.73172    |        | 1        |
| 7  | H | 74.45128 | 66.65369 | 63.02074 | 879.32219   | 2491.00447  | 667.35213   |        | 1        |
| 8  | C | 74.45543 | 68.16569 | 64.71505 | 31.35357    | 477.41777   | 628.23362   |        | 1        |
| 9  | H | 74.55820 | 68.13076 | 65.82741 | 1168.38489  | 2240.25337  | -1019.71136 |        | 1        |
| 10 | H | 75.29152 | 68.81099 | 64.35246 | -360.43770  | 2534.90498  | 931.67112   |        | 1        |
| 11 | C | 73.12189 | 68.74903 | 64.32009 | 463.18208   | 512.70242   | -382.34388  |        | 1        |
| 12 | H | 72.31925 | 68.03524 | 64.61074 | 1725.29117  | 1863.52247  | -987.07854  |        | 1        |
| 13 | C | 72.87695 | 70.06301 | 65.05112 | 710.42801   | -144.27427  | -313.15367  |        | 1        |
| 14 | H | 71.88321 | 70.50610 | 64.78181 | 364.20195   | -1033.13725 | 2494.72524  |        | 1        |
| 15 | H | 72.89165 | 69.92828 | 66.16359 | 2567.61904  | 335.80679   | 847.48802   |        | 1        |
| 16 | H | 73.65799 | 70.82569 | 64.79815 | -2587.99029 | 680.92867   | -512.16411  |        | 1        |
| 17 | C | 73.04140 | 68.98472 | 62.81804 | 268.17616   | 741.64379   | -40.42634   |        | 1        |
| 18 | H | 72.06950 | 69.46017 | 62.52565 | 1283.54314  | -1945.37420 | -1411.27812 |        | 1        |
| 19 | H | 73.86085 | 69.66220 | 62.46369 | -1258.57796 | 1317.15249  | -2026.02085 |        | 1        |
| 20 | H | 73.12816 | 68.02928 | 62.23957 | -2502.84526 | 909.80597   | 575.92391   |        | 1        |
| 21 | C | 76.10806 | 66.15996 | 64.52750 | 619.36578   | -458.64843  | -172.09273  |        | 1        |
| 22 | O | 77.06634 | 66.84759 | 64.19953 | -81.40433   | 433.87611   | 522.34594   |        | 1        |
| 23 | N | 76.08594 | 65.01418 | 65.17989 | 175.23996   | -622.20190  | 341.55523   |        | 1        |
| 24 | H | 75.13578 | 64.66800 | 65.31052 | -876.57256  | -303.22879  | -2561.90213 |        | 1        |
| 25 | C | 77.18226 | 64.18303 | 65.53632 | -571.88214  | -534.10783  | -106.15033  |        | 1        |
| 26 | H | 76.72386 | 63.17120 | 65.47710 | -2713.20841 | -16.25800   | -248.80809  |        | 1        |
| 27 | C | 78.39827 | 64.34289 | 64.51446 | 166.60354   | 288.16399   | -716.09568  |        | 1        |
| 28 | H | 78.72831 | 65.41968 | 64.47711 | -2097.85574 | 1636.78449  | -586.18044  |        | 1        |
| 29 | O | 78.10161 | 64.00119 | 63.14377 | -317.80580  | -363.38227  | 484.43082   |        | 1        |
| 30 | H | 78.07087 | 64.89372 | 62.74228 | 1863.74748  | -1451.84923 | 1357.29467  |        | 1        |
| 31 | C | 79.50083 | 63.47496 | 65.22322 | 503.80731   | 517.99032   | 318.51606   |        | 1        |
| 32 | H | 80.48191 | 63.55359 | 64.70018 | 640.61020   | -2157.10410 | -1536.29104 |        | 1        |
| 33 | H | 79.66009 | 63.78594 | 66.28241 | 1687.88455  | 465.60692   | 2087.56452  |        | 1        |
| 34 | H | 79.21834 | 62.39660 | 65.23720 | -1293.07895 | -1899.88581 | -1463.57452 |        | 1        |
| 35 | C | 77.50601 | 64.40311 | 67.12977 | -153.07550  | -733.68902  | 248.70981   |        | 1        |
| 36 | O | 77.38427 | 63.40168 | 67.78671 | 186.15459   | -480.78787  | -449.34387  |        | 1        |
| 37 | N | 77.94955 | 65.60625 | 67.51674 | -487.53139  | 543.18517   | 42.03850    |        | 1        |
| 38 | C | 77.71907 | 66.07920 | 68.85064 | -699.35871  | 69.34393    | 360.10701   |        | 1        |
| 39 | H | 77.73789 | 65.20469 | 69.54092 | 2.81126     | -221.99807  | -2715.58072 |        | 1        |
| 40 | C | 78.89402 | 67.14049 | 69.01931 | -507.46439  | -592.59194  | 122.07761   |        | 1        |
| 41 | H | 78.70480 | 67.87247 | 69.83805 | -1975.08116 | 525.87560   | -1801.71556 |        | 1        |
| 42 | H | 79.86535 | 66.64790 | 69.24804 | 1588.27743  | -1913.22100 | 1113.83566  |        | 1        |
| 43 | C | 78.89996 | 67.78732 | 67.60095 | -613.62442  | -457.55993  | -194.14490  |        | 1        |
| 44 | H | 78.03121 | 68.47726 | 67.48154 | 1707.54637  | -721.27992  | 1996.92523  |        | 1        |
| 45 | H | 79.81896 | 68.37506 | 67.37680 | 758.23357   | 2100.81767  | 1560.55011  |        | 1        |
| 46 | C | 78.73156 | 66.50442 | 66.68009 | -352.41524  | 704.96076   | 49.21465    |        | 1        |
| 47 | H | 78.13103 | 66.67092 | 65.72710 | 1714.76886  | -2070.42778 | 443.35792   |        | 1        |
| 48 | H | 79.68054 | 65.96967 | 66.43793 | 1224.15040  | 1801.50881  | 1636.97633  |        | 1        |

|     |   |          |          |          |             |             |             |   |
|-----|---|----------|----------|----------|-------------|-------------|-------------|---|
| 49  | C | 76.30413 | 66.89123 | 68.85240 | 566.85117   | 537.05831   | 117.62814   | 1 |
| 50  | O | 75.96297 | 67.60632 | 67.91338 | -550.26779  | -406.08867  | 4.21666     | 1 |
| 51  | N | 75.70964 | 66.71307 | 70.00837 | 566.34832   | -425.77725  | 180.18749   | 1 |
| 52  | H | 76.15722 | 66.10907 | 70.69323 | 644.44502   | 2646.80550  | -52.73430   | 1 |
| 53  | C | 74.40549 | 67.27199 | 70.20443 | 612.34801   | -281.48662  | 411.56221   | 1 |
| 54  | H | 73.99223 | 67.22973 | 69.16973 | 1667.23498  | -1490.75142 | 1556.16753  | 1 |
| 55  | C | 73.63440 | 66.37270 | 71.27641 | -714.45746  | -175.43074  | 286.98927   | 1 |
| 56  | H | 74.11206 | 66.52466 | 72.28192 | -787.09484  | 1763.03619  | -1922.46060 | 1 |
| 57  | O | 73.64621 | 64.95805 | 71.01656 | -429.46514  | 516.51932   | -128.40526  | 1 |
| 58  | H | 74.10858 | 64.62110 | 71.80918 | 1981.82785  | 436.16847   | -1818.18182 | 1 |
| 59  | C | 72.21048 | 67.04138 | 71.27020 | 630.79189   | -468.94448  | 76.03230    | 1 |
| 60  | H | 71.53658 | 66.56775 | 72.02096 | -1775.71861 | 2062.30353  | 131.89849   | 1 |
| 61  | H | 72.26132 | 68.13078 | 71.50896 | -1855.14608 | 88.94118    | 1993.53760  | 1 |
| 62  | H | 71.71801 | 66.93945 | 70.27534 | -1504.82350 | -780.94249  | -2132.90992 | 1 |
| 63  | C | 74.61910 | 68.80994 | 70.70443 | 288.57638   | 618.62814   | -397.00270  | 1 |
| 64  | O | 74.26750 | 69.17622 | 71.81896 | 321.70495   | -185.26452  | 574.37218   | 1 |
| 65  | N | 75.08813 | 69.47978 | 69.68916 | -447.05792  | -446.53431  | 367.76425   | 1 |
| 66  | H | 75.28090 | 68.95399 | 68.80185 | 350.31316   | 1975.63644  | -1843.31522 | 1 |
| 67  | C | 75.72353 | 70.75538 | 69.80824 | -511.23061  | 374.03917   | -471.51480  | 1 |
| 68  | H | 75.86806 | 71.04392 | 68.73990 | 2234.79579  | -898.70890  | -1273.45190 | 1 |
| 69  | C | 74.69930 | 71.74763 | 70.56218 | 529.53781   | -159.34528  | 563.72604   | 1 |
| 70  | H | 74.90704 | 72.80053 | 70.22366 | 654.59388   | 2347.94251  | 1217.51488  | 1 |
| 71  | H | 73.68610 | 71.47532 | 70.16222 | -1526.55661 | 2103.42026  | 817.87394   | 1 |
| 72  | O | 74.71248 | 71.74867 | 71.98482 | -554.84278  | 14.12789    | 399.58769   | 1 |
| 73  | H | 74.48995 | 70.74895 | 72.15120 | 1297.06236  | 2061.84854  | 1220.68812  | 1 |
| 74  | C | 77.11791 | 70.63974 | 70.56963 | -662.15484  | -412.13544  | 123.62687   | 1 |
| 75  | O | 77.52160 | 69.71851 | 71.38578 | -540.01537  | -317.05804  | 274.91456   | 1 |
| 76  | N | 77.84053 | 71.67721 | 70.28542 | -202.76299  | -690.00100  | -131.49145  | 1 |
| 77  | H | 77.45369 | 72.32941 | 69.60992 | -702.62132  | -2617.37191 | 281.70413   | 1 |
| 78  | C | 79.23124 | 71.48992 | 70.60734 | -491.73914  | 576.34187   | 222.73509   | 1 |
| 79  | H | 79.63310 | 70.98472 | 69.70513 | 1977.17978  | -1823.58850 | -434.68928  | 1 |
| 80  | C | 79.85833 | 72.91287 | 70.81272 | -649.50797  | -328.66843  | 306.11224   | 1 |
| 81  | H | 79.19181 | 73.53253 | 71.45165 | 2075.07803  | 1452.16490  | -1004.45904 | 1 |
| 82  | C | 81.27666 | 72.76155 | 71.47103 | -615.18735  | -489.99689  | -70.96352   | 1 |
| 83  | H | 81.75628 | 73.75274 | 71.64639 | -1226.32661 | -1724.38906 | -1716.47170 | 1 |
| 84  | H | 81.20900 | 72.24345 | 72.45699 | 2381.64273  | -969.84735  | 900.46860   | 1 |
| 85  | H | 81.96645 | 72.16471 | 70.83039 | 2122.74991  | 1702.23946  | -141.36228  | 1 |
| 86  | C | 80.05493 | 73.58780 | 69.40658 | -501.86074  | -479.61276  | -376.42482  | 1 |
| 87  | H | 80.47471 | 74.61609 | 69.49983 | 993.79261   | -2246.95401 | -1177.81305 | 1 |
| 88  | H | 80.75324 | 73.00135 | 68.76554 | 42.71279    | -626.15391  | -2651.37258 | 1 |
| 89  | H | 79.09055 | 73.67204 | 68.85415 | -2026.39012 | -1590.33709 | -887.82922  | 1 |
| 90  | C | 79.20977 | 70.44164 | 71.91925 | -672.89153  | 382.57394   | -156.34072  | 1 |
| 91  | O | 80.04738 | 69.57528 | 72.04134 | 410.04627   | 221.86223   | 500.35950   | 1 |
| 92  | N | 78.95640 | 71.37971 | 73.00339 | -378.11782  | -443.79414  | -441.10984  | 1 |
| 93  | H | 78.09960 | 71.92714 | 72.87456 | 2404.15973  | -568.14894  | 1149.30085  | 1 |
| 94  | C | 79.00717 | 70.76035 | 74.29972 | -544.54484  | 466.16019   | 331.29119   | 1 |
| 95  | H | 79.72680 | 69.91313 | 74.24417 | -1409.80988 | -170.17955  | 2325.32679  | 1 |
| 96  | C | 79.38859 | 71.90494 | 75.33296 | -184.48284  | 116.78282   | -758.89137  | 1 |
| 97  | H | 80.40065 | 72.32338 | 75.13285 | 1893.78641  | 1861.14652  | 611.04528   | 1 |
| 98  | H | 78.67831 | 72.75614 | 75.22839 | -2170.79665 | -974.19311  | 1327.50117  | 1 |
| 99  | C | 79.29146 | 71.28011 | 76.75898 | 389.51668   | 672.81878   | -138.49152  | 1 |
| 100 | H | 78.43029 | 70.57813 | 76.81476 | 510.64577   | 1933.03327  | 1851.02484  | 1 |
| 101 | H | 80.18213 | 70.64541 | 76.96048 | -2302.30869 | -1105.72939 | -948.89774  | 1 |
| 102 | C | 79.10607 | 72.35194 | 77.89996 | -559.93427  | -126.34590  | 542.30857   | 1 |
| 103 | O | 78.63807 | 72.00996 | 78.95773 | -670.36003  | -111.83166  | 76.36448    | 1 |
| 104 | N | 79.51720 | 73.59015 | 77.55955 | -216.06729  | -537.07037  | 446.51379   | 1 |
| 105 | H | 79.98537 | 73.88940 | 76.69581 | -1251.96487 | 1074.12894  | -2168.52500 | 1 |
| 106 | H | 79.55501 | 74.38444 | 78.20798 | -2451.83023 | -720.73851  | 944.84612   | 1 |
| 107 | C | 77.49108 | 70.37738 | 74.71831 | 546.24052   | -563.88337  | -85.11809   | 1 |
| 108 | O | 76.67560 | 71.28510 | 74.78388 | 71.70702    | -307.40463  | 606.69673   | 1 |
| 109 | N | 77.37840 | 69.11261 | 75.10384 | 479.90863   | -504.50129  | 222.86849   | 1 |
| 110 | C | 76.10100 | 68.47084 | 75.27699 | 75.51268    | -600.91904  | 506.73700   | 1 |

|     |   |          |          |          |             |             |             |   |
|-----|---|----------|----------|----------|-------------|-------------|-------------|---|
| 111 | H | 75.45859 | 68.86486 | 74.45426 | -2033.61562 | 1795.30103  | 254.89480   | 1 |
| 112 | C | 76.47959 | 66.93196 | 75.18211 | 523.79067   | 517.99274   | 284.45581   | 1 |
| 113 | H | 75.73095 | 66.27684 | 75.68218 | 1599.61665  | -1127.00911 | 1895.98173  | 1 |
| 114 | H | 76.55611 | 66.59099 | 74.12526 | -1881.83093 | 1275.82488  | -1501.55016 | 1 |
| 115 | C | 77.87292 | 66.92028 | 75.88466 | -600.05639  | -404.05026  | 316.64485   | 1 |
| 116 | H | 77.76516 | 67.01461 | 76.98864 | -2597.05260 | 496.36221   | 657.73249   | 1 |
| 117 | H | 78.46473 | 65.99605 | 75.69779 | -1666.24518 | 1294.38985  | -1723.90591 | 1 |
| 118 | C | 78.52509 | 68.22249 | 75.25053 | 493.57570   | -129.95376  | -602.56394  | 1 |
| 119 | H | 79.29402 | 68.72593 | 75.88231 | -1469.08415 | -637.84797  | 2204.22581  | 1 |
| 120 | H | 78.92653 | 68.07962 | 74.21855 | -1038.97840 | 1068.88701  | -2280.71789 | 1 |
| 121 | C | 75.49265 | 68.77774 | 76.75258 | 188.88100   | 241.05089   | -727.87821  | 1 |
| 122 | O | 74.98589 | 67.90197 | 77.39551 | 531.88613   | -49.19943   | 427.07960   | 1 |
| 123 | N | 75.67406 | 70.06984 | 77.07364 | 708.14833   | 26.93417    | -179.73509  | 1 |
| 124 | H | 76.00963 | 70.69510 | 76.29993 | -2232.69501 | -1179.09831 | 1023.94816  | 1 |
| 125 | C | 74.87322 | 70.67973 | 78.14855 | -738.32412  | 259.92548   | 104.42456   | 1 |
| 126 | H | 73.90378 | 70.13090 | 78.14099 | 2028.89123  | 1260.02983  | 1311.33324  | 1 |
| 127 | C | 75.61752 | 70.57447 | 79.46135 | -258.65678  | -345.52513  | 661.28459   | 1 |
| 128 | H | 76.68564 | 70.85196 | 79.28924 | -1826.06090 | -1801.46097 | -918.64554  | 1 |
| 129 | C | 75.04789 | 71.52345 | 80.49726 | -541.23400  | 531.92970   | -218.41428  | 1 |
| 130 | H | 75.56070 | 71.40743 | 81.49144 | 1311.73218  | -2219.18200 | 882.19023   | 1 |
| 131 | H | 75.16743 | 72.62705 | 80.18237 | -1048.71298 | 1223.58118  | -2196.97971 | 1 |
| 132 | H | 73.95048 | 71.34251 | 80.66555 | 419.06414   | 1903.92898  | 1903.44670  | 1 |
| 133 | C | 75.59909 | 69.15888 | 80.01197 | -423.86431  | 152.66566   | -648.55262  | 1 |
| 134 | H | 76.12887 | 69.08730 | 81.00154 | 105.68386   | -2342.50080 | 1387.51238  | 1 |
| 135 | H | 74.54784 | 68.78900 | 80.16656 | -1695.63603 | -1484.73621 | -1531.02793 | 1 |
| 136 | H | 76.10184 | 68.43746 | 79.30853 | -1853.57121 | -487.39031  | 1936.59343  | 1 |
| 137 | C | 74.76332 | 72.25984 | 77.65815 | 539.71428   | -510.58232  | 267.58633   | 1 |
| 138 | O | 73.69333 | 72.71855 | 77.33439 | -15.93758   | -278.34085  | -624.49402  | 1 |
| 139 | N | 75.95842 | 72.81910 | 77.64405 | -676.81886  | 12.05292    | 276.17960   | 1 |
| 140 | H | 76.75500 | 72.24783 | 77.92842 | -1694.44250 | -373.84189  | -2100.66098 | 1 |
| 141 | C | 76.13603 | 74.20901 | 77.40575 | 412.33078   | -664.70360  | 108.35451   | 1 |
| 142 | H | 77.21948 | 74.29420 | 77.16142 | 1765.77476  | 1294.44366  | 1621.76594  | 1 |
| 143 | C | 75.17414 | 74.56893 | 76.19549 | -179.66635  | -721.95667  | -264.73915  | 1 |
| 144 | H | 75.22806 | 73.75844 | 75.43138 | -607.34922  | 2587.87032  | -598.10018  | 1 |
| 145 | H | 74.10361 | 74.60026 | 76.52651 | -359.69332  | -1479.13954 | -2259.74260 | 1 |
| 146 | C | 75.59543 | 75.94428 | 75.58047 | -240.01076  | 616.02425   | 431.85322   | 1 |
| 147 | H | 75.22971 | 76.78404 | 76.22047 | -1359.17131 | 782.54425   | 2227.99181  | 1 |
| 148 | H | 76.70475 | 76.03444 | 75.53691 | -820.36667  | 85.81767    | -2596.78715 | 1 |
| 149 | C | 74.98428 | 76.06272 | 74.12873 | -513.07015  | 236.18570   | -551.87280  | 1 |
| 150 | H | 75.33166 | 75.22930 | 73.47492 | 1816.11944  | -1183.11722 | -1650.94321 | 1 |
| 151 | H | 73.87252 | 75.98721 | 74.15445 | -1800.04429 | -1361.53473 | 1526.34643  | 1 |
| 152 | C | 75.43502 | 77.43736 | 73.57295 | 726.08972   | -253.19732  | -179.64713  | 1 |
| 153 | H | 74.99605 | 78.30980 | 74.09887 | 1224.27271  | -456.51798  | -2390.90304 | 1 |
| 154 | H | 76.53292 | 77.56438 | 73.47971 | 1206.40339  | -1150.93514 | -2154.90344 | 1 |
| 155 | N | 74.89328 | 77.54230 | 72.11893 | 329.70796   | -633.68968  | -155.67358  | 1 |
| 156 | H | 75.11308 | 78.45427 | 71.61843 | 1348.31305  | 1938.76845  | 1359.00643  | 1 |
| 157 | H | 75.27067 | 76.83803 | 71.41870 | 2096.92035  | 1446.54551  | -966.48890  | 1 |
| 158 | H | 73.81519 | 77.45429 | 72.02864 | -1197.07217 | -2303.53719 | 827.28733   | 1 |
| 159 | C | 75.76567 | 75.00816 | 78.78491 | -378.01186  | -556.17301  | -413.96481  | 1 |
| 160 | O | 75.38416 | 74.48274 | 79.81347 | -409.44433  | -307.55053  | -453.30833  | 1 |
| 161 | N | 76.07136 | 76.28255 | 78.57461 | -429.02477  | 524.70884   | 274.08502   | 1 |
| 162 | H | 76.38475 | 76.50972 | 77.63415 | 1706.34263  | -1425.96036 | 1574.38926  | 1 |
| 163 | C | 75.44137 | 77.27501 | 79.38568 | -45.25864   | -626.22952  | 478.93267   | 1 |
| 164 | H | 75.44264 | 76.86811 | 80.42221 | 1988.63164  | 570.90773   | 1772.87287  | 1 |
| 165 | C | 76.29149 | 78.58451 | 79.15617 | 551.77128   | -20.49526   | -564.54996  | 1 |
| 166 | H | 77.37930 | 78.34947 | 79.17566 | 1434.61535  | -1753.10253 | 1513.99471  | 1 |
| 167 | H | 76.09356 | 78.99735 | 78.14095 | -714.67738  | 1819.09770  | 1898.36494  | 1 |
| 168 | C | 75.93629 | 79.64407 | 80.25224 | 446.99263   | -555.77305  | 338.97221   | 1 |
| 169 | H | 74.84488 | 79.88470 | 80.25162 | 1953.68466  | 1892.25957  | -161.67766  | 1 |
| 170 | H | 76.18200 | 79.26992 | 81.27167 | -403.03785  | 2688.07032  | -188.43591  | 1 |
| 171 | C | 76.79236 | 80.91916 | 79.87779 | 567.86262   | 335.74681   | 434.04421   | 1 |
| 172 | H | 77.86286 | 80.64827 | 79.72743 | -1080.02275 | 1568.26081  | -1948.78900 | 1 |



|     |   |          |          |          |             |             |             |   |
|-----|---|----------|----------|----------|-------------|-------------|-------------|---|
| 173 | H | 76.44580 | 81.34409 | 78.90497 | -919.54108  | 2111.34692  | 1456.13463  | 1 |
| 174 | C | 76.65429 | 81.97217 | 81.00157 | 195.81897   | 173.33862   | -745.11536  | 1 |
| 175 | H | 75.61253 | 82.29098 | 81.20425 | 1405.67949  | -2301.21089 | -390.08113  | 1 |
| 176 | H | 77.16793 | 81.71644 | 81.95043 | -940.37328  | -1118.32446 | 2299.72133  | 1 |
| 177 | N | 77.38061 | 83.25083 | 80.46455 | 319.26422   | 656.36007   | -42.02424   | 1 |
| 178 | H | 77.40924 | 84.10493 | 81.09344 | 1961.03633  | 619.91968   | 1787.09422  | 1 |
| 179 | H | 78.40207 | 83.15315 | 80.19426 | 854.14343   | -2156.80752 | 1429.08711  | 1 |
| 180 | H | 76.95739 | 83.65167 | 79.57752 | 1237.02905  | -1378.50857 | -1998.28500 | 1 |
| 181 | C | 73.92836 | 77.55491 | 78.80229 | 532.53319   | -268.57236  | 517.55729   | 1 |
| 182 | O | 73.63380 | 77.45199 | 77.63495 | 266.16714   | -290.73804  | -558.88002  | 1 |
| 183 | N | 73.19331 | 77.97738 | 79.82241 | -226.25352  | 640.49678   | -270.32839  | 1 |
| 184 | H | 73.64488 | 78.04873 | 80.73210 | 2007.69063  | -1035.27229 | 1523.50231  | 1 |
| 185 | C | 71.90686 | 78.54016 | 79.57578 | -540.76542  | -573.33303  | 49.50000    | 1 |
| 186 | H | 71.44730 | 77.92572 | 78.76903 | -2374.20950 | -1036.76023 | 843.75774   | 1 |
| 187 | C | 71.13412 | 78.53864 | 80.97665 | -77.09082   | 666.87422   | -415.84136  | 1 |
| 188 | H | 71.75787 | 79.11326 | 81.71548 | -985.81834  | 617.19825   | 2463.91927  | 1 |
| 189 | O | 70.91248 | 77.24588 | 81.56866 | 293.29899   | -391.65602  | -477.80926  | 1 |
| 190 | H | 71.45453 | 77.31146 | 77.37982 | 2528.72714  | -681.76262  | -751.27122  | 1 |
| 191 | C | 69.83781 | 79.36767 | 80.65051 | 252.47363   | -605.14473  | 440.05134   | 1 |
| 192 | H | 69.23342 | 79.55964 | 81.56700 | -2052.65063 | 1456.49051  | -1043.51830 | 1 |
| 193 | H | 70.08068 | 80.35858 | 80.20099 | -2152.98800 | -1661.97574 | -161.70652  | 1 |
| 194 | H | 69.18205 | 78.82843 | 79.92866 | -473.12726  | -1584.27339 | 2165.61725  | 1 |
| 195 | C | 72.12683 | 80.09821 | 79.14269 | 360.36307   | 488.46713   | 505.10056   | 1 |
| 196 | O | 72.89300 | 80.83505 | 79.76134 | -200.08817  | -528.03552  | -385.82850  | 1 |
| 197 | N | 71.24234 | 80.38817 | 78.21828 | -597.54095  | -226.44775  | 355.20479   | 1 |
| 198 | H | 70.67178 | 79.61359 | 77.88479 | 2179.23655  | -1300.70981 | -991.33835  | 1 |
| 199 | C | 71.36195 | 81.57866 | 77.43371 | -687.68921  | 297.39807   | -249.45179  | 1 |
| 200 | H | 72.44687 | 81.64804 | 77.19607 | -349.16256  | -2467.37713 | -1101.72831 | 1 |
| 201 | C | 70.36502 | 81.48492 | 76.19521 | 672.47345   | 361.54328   | -201.62880  | 1 |
| 202 | H | 69.34323 | 81.22671 | 76.55663 | 1541.41502  | 582.18425   | 2169.97026  | 1 |
| 203 | H | 70.28961 | 82.49212 | 75.72071 | -2534.67717 | 60.25153    | 997.72295   | 1 |
| 204 | C | 70.84709 | 80.43825 | 75.17079 | 574.26774   | -389.43119  | -377.02542  | 1 |
| 205 | C | 71.85311 | 80.79741 | 74.22898 | 688.82679   | -287.33580  | -257.96133  | 1 |
| 206 | H | 72.31482 | 81.80046 | 74.25030 | 331.14182   | 1470.38163  | 2269.80013  | 1 |
| 207 | C | 70.26965 | 79.13627 | 75.15500 | -383.52382  | -675.04808  | 144.24917   | 1 |
| 208 | H | 69.49964 | 78.85136 | 75.89323 | 4.09847     | 1517.59662  | 2262.86397  | 1 |
| 209 | C | 72.23283 | 79.84933 | 73.26448 | -134.76730  | 428.45285   | -649.50303  | 1 |
| 210 | H | 73.00707 | 80.12407 | 72.52535 | -903.23433  | 1600.49020  | 2011.53387  | 1 |
| 211 | C | 70.69000 | 78.22544 | 74.16883 | -335.53281  | -615.00040  | -364.39058  | 1 |
| 212 | H | 70.23587 | 77.21784 | 74.15476 | 1596.45398  | -1369.33862 | 1732.02659  | 1 |
| 213 | C | 71.66437 | 78.55414 | 73.19556 | 585.48547   | -340.24194  | -406.23938  | 1 |
| 214 | O | 72.08853 | 77.61165 | 72.14487 | -419.15649  | -173.04408  | -511.94141  | 1 |
| 215 | H | 71.59526 | 76.82993 | 72.45798 | -1071.84350 | 1559.71507  | -1960.13012 | 1 |
| 216 | C | 70.80585 | 82.87017 | 78.24304 | 291.41878   | -183.13091  | 710.72246   | 1 |
| 217 | O | 69.89406 | 83.51637 | 77.78216 | 379.87695   | 523.47396   | -222.23622  | 1 |
| 218 | N | 71.53802 | 83.12056 | 79.33669 | 564.30591   | 373.09380   | 277.24371   | 1 |
| 219 | H | 72.28072 | 82.42973 | 79.63091 | -120.59931  | -2436.07824 | -1214.35098 | 1 |
| 220 | C | 70.87664 | 83.93573 | 80.32089 | 404.07514   | -299.37480  | 608.84009   | 1 |
| 221 | H | 70.27136 | 84.64338 | 79.70742 | -1071.07882 | -841.69025  | 2359.66467  | 1 |
| 222 | C | 69.93326 | 82.97944 | 81.16506 | -683.12807  | 68.71770    | -390.13096  | 1 |
| 223 | H | 69.30055 | 82.35737 | 80.49293 | 2068.88918  | 1596.58590  | 770.89603   | 1 |
| 224 | H | 70.53512 | 82.26058 | 81.76510 | 1379.86429  | 2342.49779  | -179.85638  | 1 |
| 225 | C | 69.05393 | 83.88224 | 82.08367 | -176.39967  | 537.49466   | 550.97268   | 1 |
| 226 | H | 69.70601 | 84.54044 | 82.71619 | -396.28051  | 1942.22168  | 1869.33314  | 1 |
| 227 | H | 68.42852 | 84.57418 | 81.47561 | -94.44700   | 586.00678   | -2659.20016 | 1 |
| 228 | C | 68.13762 | 82.94638 | 82.99711 | -291.69381  | -718.18079  | -150.72929  | 1 |
| 229 | H | 67.32105 | 82.39061 | 82.46955 | -2303.38776 | 1089.76242  | 964.62032   | 1 |
| 230 | H | 68.68301 | 82.22326 | 83.65566 | 884.16729   | 2568.80533  | -207.74283  | 1 |
| 231 | N | 67.55484 | 83.92567 | 83.81905 | -594.49522  | -252.81478  | 342.29276   | 1 |
| 232 | H | 67.84869 | 84.87889 | 83.66903 | -1735.17426 | 2084.05705  | -263.71605  | 1 |
| 233 | C | 66.70069 | 83.69627 | 84.73289 | 595.23177   | -271.52487  | 442.22352   | 1 |
| 234 | N | 66.30122 | 82.37130 | 84.93440 | 585.53813   | -424.79750  | -105.81303  | 1 |

|     |   |          |          |          |             |             |             |   |
|-----|---|----------|----------|----------|-------------|-------------|-------------|---|
| 235 | H | 66.59786 | 81.52676 | 84.44694 | 959.88797   | 1327.56823  | -2177.11905 | 1 |
| 236 | H | 65.62613 | 82.06331 | 85.63501 | 1578.48647  | 16.27378    | -2220.76233 | 1 |
| 237 | N | 66.32582 | 84.88540 | 85.37404 | -452.17763  | -390.33541  | -421.51853  | 1 |
| 238 | H | 66.63173 | 85.84631 | 85.22817 | 470.26107   | 1974.25629  | -1817.92087 | 1 |
| 239 | H | 65.65799 | 84.92031 | 86.14492 | 1856.67307  | -1573.97321 | -1224.35416 | 1 |
| 240 | C | 71.96969 | 84.66163 | 81.27189 | -531.47271  | -581.45780  | -55.06206   | 1 |
| 241 | O | 71.63772 | 85.14314 | 82.33705 | -243.00837  | 192.73507   | 609.52485   | 1 |
| 242 | N | 73.19737 | 84.66185 | 80.73595 | 343.49288   | -644.25607  | 38.09164    | 1 |
| 243 | H | 73.26383 | 84.25455 | 79.80232 | -1691.16043 | -1535.97525 | -1484.73099 | 1 |
| 244 | C | 74.02635 | 85.76759 | 81.12714 | 542.66492   | 350.14337   | 454.42563   | 1 |
| 245 | H | 73.34126 | 86.49143 | 81.62545 | 1209.57979  | -2396.95920 | 463.86744   | 1 |
| 246 | C | 75.11043 | 85.17004 | 82.12317 | -737.14309  | 145.93010   | 242.71942   | 1 |
| 247 | H | 75.47214 | 84.19084 | 81.74812 | -1050.18303 | 159.36419   | -2509.06125 | 1 |
| 248 | C | 76.29558 | 86.18155 | 82.28571 | -706.77696  | -252.88343  | -245.16230  | 1 |
| 249 | H | 77.04838 | 85.81844 | 83.02409 | -1624.64039 | -1665.49085 | 1417.86935  | 1 |
| 250 | H | 76.82828 | 86.34207 | 81.31892 | 2566.10521  | 598.51109   | 693.22305   | 1 |
| 251 | H | 75.93773 | 87.17829 | 82.63501 | -1972.69758 | 107.10018   | -1876.34312 | 1 |
| 252 | C | 74.42896 | 85.00152 | 83.52409 | 412.85148   | 672.58832   | -27.69222   | 1 |
| 253 | H | 75.10143 | 84.49313 | 84.25435 | 1447.02277  | 1762.76533  | -1490.78944 | 1 |
| 254 | H | 74.14398 | 85.98718 | 83.96128 | 1320.77379  | -145.20455  | 2378.68491  | 1 |
| 255 | H | 73.49256 | 84.39606 | 83.44476 | -1512.10848 | 1470.52031  | 1724.75147  | 1 |
| 256 | C | 74.74951 | 86.33057 | 79.77630 | -607.11113  | 499.56689   | 73.73769    | 1 |
| 257 | O | 74.75743 | 87.51417 | 79.54537 | 357.97126   | 460.81534   | 356.68785   | 1 |
| 258 | N | 75.35646 | 85.33756 | 79.13276 | 536.55407   | -368.62270  | 332.76306   | 1 |
| 259 | H | 75.23233 | 84.35280 | 79.42328 | 524.38866   | 2297.69985  | 1367.20941  | 1 |
| 260 | C | 75.80731 | 85.55496 | 77.79222 | 46.50277    | -774.29190  | -147.97904  | 1 |
| 261 | H | 75.12852 | 86.31156 | 77.34002 | 1676.51875  | 1883.29066  | 1032.55549  | 1 |
| 262 | C | 77.35149 | 86.03308 | 77.77458 | -559.41456  | -34.19198   | -556.30433  | 1 |
| 263 | H | 77.97140 | 85.29421 | 78.33485 | -64.66664   | 395.18769   | 2695.05373  | 1 |
| 264 | H | 77.74265 | 86.03120 | 76.72963 | -2703.44278 | -60.40056   | 333.79418   | 1 |
| 265 | C | 77.49289 | 87.39865 | 78.38556 | -519.76435  | 377.31045   | 459.42366   | 1 |
| 266 | H | 77.03391 | 87.38113 | 79.40159 | -1746.74323 | 1667.50644  | -1261.73691 | 1 |
| 267 | C | 78.96501 | 87.76852 | 78.52452 | 570.95554   | 16.46261    | -545.27700  | 1 |
| 268 | H | 79.09451 | 88.77838 | 78.99191 | 2391.58273  | 28.05277    | -1305.07271 | 1 |
| 269 | H | 79.51838 | 87.03325 | 79.16327 | 175.75588   | 917.63458   | 2559.43867  | 1 |
| 270 | H | 79.47833 | 87.79598 | 77.52933 | -1063.97851 | -2155.34650 | 1283.00462  | 1 |
| 271 | C | 76.77402 | 88.45735 | 77.55973 | 193.76014   | 2.62946     | -765.53141  | 1 |
| 272 | H | 76.99081 | 89.49072 | 77.93432 | 507.39394   | -846.55087  | 2539.60089  | 1 |
| 273 | H | 77.07665 | 88.42226 | 76.48151 | 1337.57841  | 1818.19054  | 1526.01994  | 1 |
| 274 | H | 75.66062 | 88.31997 | 77.60637 | 1100.88635  | -1172.91350 | -2199.08909 | 1 |
| 275 | C | 75.68600 | 84.06886 | 77.22397 | -549.21115  | 475.64486   | -309.38218  | 1 |
| 276 | O | 75.40572 | 83.15250 | 77.97202 | 556.06106   | -390.37755  | -78.24250   | 1 |
| 277 | O | 75.96161 | 83.83529 | 75.86793 | -572.27940  | -310.19032  | -209.75862  | 1 |
| 278 | H | 76.15301 | 84.77823 | 75.58271 | -1380.08193 | 2212.14486  | 790.85944   | 1 |

Listing 42: C00042.xmolout

|    |   |          |          |          |             |             |             |        |          |  |
|----|---|----------|----------|----------|-------------|-------------|-------------|--------|----------|--|
| 1  |   | 276      |          |          |             |             |             |        |          |  |
| 2  |   | 150.0000 | 150.0000 | 150.0000 | 0.0000      | 0.0000      | 0.0000***** | 2.7750 | 11100    |  |
|    |   | 0.2500   | 300.00   | 0.00     | 0.00        | 0.00        | -1293.7837  | 0.0000 | 300.0000 |  |
| 3  | H | 80.35535 | 77.07638 | 75.71892 | -2043.14101 | -1757.64893 | 399.89339   |        | 1        |  |
| 4  | N | 80.21278 | 78.08263 | 75.65226 | 426.75047   | 490.45733   | -334.42467  |        | 1        |  |
| 5  | H | 79.46964 | 78.14117 | 74.95902 | 442.25559   | -1110.30854 | -2448.52907 |        | 1        |  |
| 6  | C | 81.36687 | 78.84714 | 75.38252 | 415.32972   | -666.39213  | 83.73172    |        | 1        |  |
| 7  | H | 82.11386 | 78.44032 | 76.09563 | 879.32219   | 2491.00447  | 667.35213   |        | 1        |  |
| 8  | C | 81.83344 | 78.67083 | 73.85281 | 31.35357    | 477.41777   | 628.23362   |        | 1        |  |
| 9  | H | 80.99527 | 78.94382 | 73.16735 | 1168.38489  | 2240.25337  | -1019.71136 |        | 1        |  |
| 10 | H | 82.65371 | 79.39730 | 73.63562 | -360.43770  | 2534.90498  | 931.67112   |        | 1        |  |
| 11 | C | 82.29608 | 77.26173 | 73.58656 | 463.18208   | 512.70242   | -382.34388  |        | 1        |  |
| 12 | H | 81.44036 | 76.57259 | 73.75876 | 1725.29117  | 1863.52247  | -987.07854  |        | 1        |  |
| 13 | C | 82.75561 | 77.12601 | 72.13945 | 710.42801   | -144.27427  | -313.15367  |        | 1        |  |
| 14 | H | 83.14485 | 76.09755 | 71.92713 | 364.20195   | -1033.13725 | 2494.72524  |        | 1        |  |

|    |   |          |          |          |             |             |             |   |
|----|---|----------|----------|----------|-------------|-------------|-------------|---|
| 15 | H | 81.92274 | 77.32658 | 71.41750 | 2567.61904  | 335.80679   | 847.48802   | 1 |
| 16 | H | 83.58167 | 77.84463 | 71.90088 | -2587.99029 | 680.92867   | -512.16411  | 1 |
| 17 | C | 83.44115 | 76.85209 | 74.50303 | 268.17616   | 741.64379   | -40.42634   | 1 |
| 18 | H | 83.83198 | 75.83395 | 74.24495 | 1283.54314  | -1945.37420 | -1411.27812 | 1 |
| 19 | H | 84.30211 | 77.56582 | 74.42880 | -1258.57796 | 1317.15249  | -2026.02085 | 1 |
| 20 | H | 83.12709 | 76.82024 | 75.57764 | -2502.84526 | 909.80597   | 575.92391   | 1 |
| 21 | C | 81.02553 | 80.41176 | 75.64625 | 619.36578   | -458.64843  | -172.09273  | 1 |
| 22 | O | 81.54218 | 81.28769 | 74.98627 | -81.40433   | 433.87611   | 522.34594   | 1 |
| 23 | N | 80.20577 | 80.54397 | 76.68986 | 175.23996   | -622.20190  | 341.55523   | 1 |
| 24 | H | 79.90510 | 79.69330 | 77.16314 | -876.57256  | -303.22879  | -2561.90213 | 1 |
| 25 | C | 79.80644 | 81.85978 | 77.07061 | -571.88214  | -534.10783  | -106.15033  | 1 |
| 26 | H | 80.00577 | 82.49482 | 76.17464 | -2713.20841 | -16.25800   | -248.80809  | 1 |
| 27 | C | 78.26054 | 81.72829 | 77.49462 | 166.60354   | 288.16399   | -716.09568  | 1 |
| 28 | H | 78.18627 | 80.91037 | 78.26667 | -2097.85574 | 1636.78449  | -586.18044  | 1 |
| 29 | O | 77.35907 | 81.33898 | 76.44599 | -317.80580  | -363.38227  | 484.43082   | 1 |
| 30 | H | 77.07204 | 80.45815 | 76.76189 | 1863.74748  | -1451.84923 | 1357.29467  | 1 |
| 31 | C | 77.96582 | 83.11548 | 78.17155 | 503.80731   | 517.99032   | 318.51606   | 1 |
| 32 | H | 76.96581 | 83.12553 | 78.66354 | 640.61020   | -2157.10410 | -1536.29104 | 1 |
| 33 | H | 78.72292 | 83.37326 | 78.95137 | 1687.88455  | 465.60692   | 2087.56452  | 1 |
| 34 | H | 77.96682 | 83.94072 | 77.42277 | -1293.07895 | -1899.88581 | -1463.57452 | 1 |
| 35 | C | 80.67727 | 82.26325 | 78.36814 | -153.07550  | -733.68902  | 248.70981   | 1 |
| 36 | O | 80.64813 | 81.55036 | 79.37192 | 186.15459   | -480.78787  | -449.34387  | 1 |
| 37 | N | 81.22491 | 83.46080 | 78.22468 | -487.53139  | 543.18517   | 42.03850    | 1 |
| 38 | C | 82.06744 | 83.99564 | 79.26496 | -699.35871  | 69.34393    | 360.10701   | 1 |
| 39 | H | 82.84243 | 83.23040 | 79.49022 | 2.81126     | -221.99807  | -2715.58072 | 1 |
| 40 | C | 82.59622 | 85.34142 | 78.62473 | -507.46439  | -592.59194  | 122.07761   | 1 |
| 41 | H | 82.90469 | 86.09112 | 79.38832 | -1975.08116 | 525.87560   | -1801.71556 | 1 |
| 42 | H | 83.47805 | 85.17055 | 77.96759 | 1588.27743  | -1913.22100 | 1113.83566  | 1 |
| 43 | C | 81.34213 | 85.77500 | 77.80257 | -613.62442  | -457.55993  | -194.14490  | 1 |
| 44 | H | 80.53513 | 86.13593 | 78.48332 | 1707.54637  | -721.27992  | 1996.92523  | 1 |
| 45 | H | 81.54157 | 86.58466 | 77.06513 | 758.23357   | 2100.81767  | 1560.55011  | 1 |
| 46 | C | 80.94766 | 84.38978 | 77.13437 | -352.41524  | 704.96076   | 49.21465    | 1 |
| 47 | H | 79.88069 | 84.29802 | 76.82891 | 1714.76886  | -2070.42778 | 443.35792   | 1 |
| 48 | H | 81.60895 | 84.07877 | 76.29070 | 1224.15040  | 1801.50881  | 1636.97633  | 1 |
| 49 | C | 81.07811 | 84.29756 | 80.54328 | 566.85117   | 537.05831   | 117.62814   | 1 |
| 50 | O | 80.10728 | 85.00490 | 80.42514 | -550.26779  | -406.08867  | 4.21666     | 1 |
| 51 | N | 81.57675 | 83.68505 | 81.60615 | 566.34832   | -425.77725  | 180.18749   | 1 |
| 52 | H | 82.43766 | 83.15177 | 81.48523 | 644.44502   | 2646.80550  | -52.73430   | 1 |
| 53 | C | 81.01542 | 83.82878 | 82.90241 | 612.34801   | -281.48662  | 411.56221   | 1 |
| 54 | H | 81.77867 | 83.35556 | 83.56112 | 1667.23498  | -1490.75142 | 1556.16753  | 1 |
| 55 | C | 80.87967 | 85.40219 | 83.19110 | -714.45746  | -175.43074  | 286.98927   | 1 |
| 56 | H | 80.05601 | 85.80150 | 82.53530 | -787.09484  | 1763.03619  | -1922.46060 | 1 |
| 57 | O | 82.05108 | 86.18714 | 82.89840 | -429.46514  | 516.51932   | -128.40526  | 1 |
| 58 | H | 81.72982 | 86.70962 | 82.13551 | 1981.82785  | 436.16847   | -1818.18182 | 1 |
| 59 | C | 80.42153 | 85.46723 | 84.69232 | 630.79189   | -468.94448  | 76.03230    | 1 |
| 60 | H | 80.17852 | 86.51222 | 84.99760 | -1775.71861 | 2062.30353  | 131.89849   | 1 |
| 61 | H | 79.50689 | 84.83791 | 84.87880 | -1855.14608 | 88.94118    | 1993.53760  | 1 |
| 62 | H | 81.22350 | 85.10472 | 85.37715 | -1504.82350 | -780.94249  | -2132.90992 | 1 |
| 63 | C | 79.60851 | 83.01669 | 82.93652 | 288.57638   | 618.62814   | -397.00270  | 1 |
| 64 | O | 78.79963 | 83.29019 | 83.79933 | 321.70495   | -185.26452  | 574.37218   | 1 |
| 65 | N | 79.50868 | 82.07197 | 82.00504 | -447.05792  | -446.53431  | 367.76425   | 1 |
| 66 | H | 80.25540 | 81.91974 | 81.31342 | 350.31316   | 1975.63644  | -1843.31522 | 1 |
| 67 | C | 78.48349 | 81.10205 | 82.21765 | -511.23061  | 374.03917   | -471.51480  | 1 |
| 68 | H | 77.69769 | 81.65963 | 82.78156 | 2234.79579  | -898.70890  | -1273.45190 | 1 |
| 69 | C | 78.02091 | 80.59484 | 80.77406 | 529.53781   | -159.34528  | 563.72604   | 1 |
| 70 | H | 77.03210 | 80.06936 | 80.89609 | 654.59388   | 2347.94251  | 1217.51488  | 1 |
| 71 | H | 77.82870 | 81.53591 | 80.19490 | -1526.55661 | 2103.42026  | 817.87394   | 1 |
| 72 | O | 78.87259 | 79.68662 | 80.06474 | -554.84278  | 14.12789    | 399.58769   | 1 |
| 73 | H | 79.60896 | 80.33693 | 79.77916 | 1297.06236  | 2061.84854  | 1220.68812  | 1 |
| 74 | C | 79.07992 | 79.85795 | 83.08352 | -662.15484  | -412.13544  | 123.62687   | 1 |
| 75 | O | 80.24820 | 79.58579 | 83.20403 | -540.01537  | -317.05804  | 274.91456   | 1 |
| 76 | N | 78.02588 | 79.23624 | 83.67762 | -202.76299  | -690.00100  | -131.49145  | 1 |

|     |   |          |          |          |             |             |             |   |
|-----|---|----------|----------|----------|-------------|-------------|-------------|---|
| 77  | H | 77.15457 | 79.62846 | 83.31418 | -702.62132  | -2617.37191 | 281.70413   | 1 |
| 78  | C | 78.10244 | 77.79057 | 83.91486 | -491.73914  | 576.34187   | 222.73509   | 1 |
| 79  | H | 79.17309 | 77.58034 | 84.14522 | 1977.17978  | -1823.58850 | -434.68928  | 1 |
| 80  | C | 77.13299 | 77.46330 | 85.03172 | -649.50797  | -328.66843  | 306.11224   | 1 |
| 81  | H | 76.13154 | 77.84558 | 84.72982 | 2075.07803  | 1452.16490  | -1004.45904 | 1 |
| 82  | C | 77.01167 | 75.96788 | 85.26266 | -615.18735  | -489.99689  | -70.96352   | 1 |
| 83  | H | 76.27283 | 75.73004 | 86.07637 | -1226.32661 | -1724.38906 | -1716.47170 | 1 |
| 84  | H | 76.66684 | 75.43416 | 84.33295 | 2381.64273  | -969.84735  | 900.46860   | 1 |
| 85  | H | 77.99560 | 75.51260 | 85.56117 | 2122.74991  | 1702.23946  | -141.36228  | 1 |
| 86  | C | 77.51563 | 78.15634 | 86.32763 | -501.86074  | -479.61276  | -376.42482  | 1 |
| 87  | H | 76.75530 | 77.97888 | 87.13715 | 993.79261   | -2246.95401 | -1177.81305 | 1 |
| 88  | H | 78.50694 | 77.79180 | 86.71366 | 42.71279    | -626.15391  | -2651.37258 | 1 |
| 89  | H | 77.60506 | 79.26858 | 86.18409 | -2026.39012 | -1590.33709 | -887.82922  | 1 |
| 90  | C | 77.54808 | 77.06093 | 82.52977 | -672.89153  | 382.57394   | -156.34072  | 1 |
| 91  | O | 76.68033 | 77.55494 | 81.85188 | 410.04627   | 221.86223   | 500.35950   | 1 |
| 92  | N | 78.00325 | 75.77561 | 82.47375 | -378.11782  | -443.79414  | -441.10984  | 1 |
| 93  | H | 78.81171 | 75.81581 | 83.10355 | 2404.15973  | -568.14894  | 1149.30085  | 1 |
| 94  | C | 78.10933 | 75.20335 | 81.14412 | -544.54484  | 466.16019   | 331.29119   | 1 |
| 95  | H | 78.94479 | 75.74287 | 80.65112 | -1409.80988 | -170.17955  | 2325.32679  | 1 |
| 96  | C | 78.42084 | 73.68638 | 81.41715 | -184.48284  | 116.78282   | -758.89137  | 1 |
| 97  | H | 79.35403 | 73.57705 | 82.01559 | 1893.78641  | 1861.14652  | 611.04528   | 1 |
| 98  | H | 77.60830 | 73.24129 | 82.03607 | -2170.79665 | -974.19311  | 1327.50117  | 1 |
| 99  | C | 78.54673 | 72.93555 | 80.05161 | 389.51668   | 672.81878   | -138.49152  | 1 |
| 100 | H | 77.58853 | 73.00495 | 79.48755 | 510.64577   | 1933.03327  | 1851.02484  | 1 |
| 101 | H | 79.28521 | 73.44328 | 79.39355 | -2302.30869 | -1105.72939 | -948.89774  | 1 |
| 102 | C | 78.95457 | 71.42400 | 80.23021 | -559.93427  | -126.34590  | 542.30857   | 1 |
| 103 | O | 79.23553 | 70.76451 | 79.26246 | -670.36003  | -111.83166  | 76.36448    | 1 |
| 104 | N | 78.94505 | 70.99330 | 81.51115 | -216.06729  | -537.07037  | 446.51379   | 1 |
| 105 | H | 78.67209 | 71.48793 | 82.36802 | -1251.96487 | 1074.12894  | -2168.52500 | 1 |
| 106 | H | 79.14037 | 70.02537 | 81.78959 | -2451.83023 | -720.73851  | 944.84612   | 1 |
| 107 | C | 76.67618 | 75.37294 | 80.40254 | 546.24052   | -563.88337  | -85.11809   | 1 |
| 108 | O | 75.73825 | 74.74531 | 80.82530 | 71.70702    | -307.40463  | 606.69673   | 1 |
| 109 | N | 76.75395 | 76.14320 | 79.30205 | 479.90863   | -504.50129  | 222.86849   | 1 |
| 110 | C | 75.56683 | 76.59116 | 78.64807 | 75.51268    | -600.91904  | 506.73700   | 1 |
| 111 | H | 74.77576 | 76.51419 | 79.43018 | -2033.61562 | 1795.30103  | 254.89480   | 1 |
| 112 | C | 76.00978 | 78.06640 | 78.23835 | 523.79067   | 517.99274   | 284.45581   | 1 |
| 113 | H | 75.34412 | 78.54208 | 77.48337 | 1599.61665  | -1127.00911 | 1895.98173  | 1 |
| 114 | H | 76.03354 | 78.74313 | 79.12138 | -1881.83093 | 1275.82488  | -1501.55016 | 1 |
| 115 | C | 77.44738 | 77.78306 | 77.71292 | -600.05639  | -404.05026  | 316.64485   | 1 |
| 116 | H | 77.41709 | 77.26437 | 76.70937 | -2597.05260 | 496.36221   | 657.73249   | 1 |
| 117 | H | 78.07171 | 78.69579 | 77.58542 | -1666.24518 | 1294.38985  | -1723.90591 | 1 |
| 118 | C | 77.96371 | 76.84282 | 78.88823 | 493.57570   | -129.95376  | -602.56394  | 1 |
| 119 | H | 78.72687 | 76.08451 | 78.59162 | -1469.08415 | -637.84797  | 2204.22581  | 1 |
| 120 | H | 78.31639 | 77.40439 | 79.78970 | -1038.97840 | 1068.88701  | -2280.71789 | 1 |
| 121 | C | 75.26190 | 75.62230 | 77.35943 | 188.88100   | 241.05089   | -727.87821  | 1 |
| 122 | O | 75.44238 | 74.42951 | 77.39245 | 531.88613   | -49.19943   | 427.07960   | 1 |
| 123 | N | 74.66517 | 76.33606 | 76.40745 | 708.14833   | 26.93417    | -179.73509  | 1 |
| 124 | H | 74.60565 | 77.34690 | 76.52346 | -2232.69501 | -1179.09831 | 1023.94816  | 1 |
| 125 | C | 74.58567 | 75.75284 | 75.10468 | -738.32412  | 259.92548   | 104.42456   | 1 |
| 126 | H | 74.50274 | 74.66194 | 75.32130 | 2028.89123  | 1260.02983  | 1311.33324  | 1 |
| 127 | C | 73.29654 | 76.39630 | 74.43660 | -258.65678  | -345.52513  | 661.28459   | 1 |
| 128 | H | 73.46265 | 77.48176 | 74.26824 | -1826.06090 | -1801.46097 | -918.64554  | 1 |
| 129 | C | 72.86171 | 75.70606 | 73.09610 | -541.23400  | 531.92970   | -218.41428  | 1 |
| 130 | H | 71.87300 | 76.08288 | 72.74292 | 1311.73218  | -2219.18200 | 882.19023   | 1 |
| 131 | H | 73.59415 | 75.90479 | 72.27413 | -1048.71298 | 1223.58118  | -2196.97971 | 1 |
| 132 | H | 72.76250 | 74.60039 | 73.20430 | 419.06414   | 1903.92898  | 1903.44670  | 1 |
| 133 | C | 72.09446 | 76.17437 | 75.41774 | -423.86431  | 152.66566   | -648.55262  | 1 |
| 134 | H | 71.14779 | 76.60979 | 75.02030 | 105.68386   | -2342.50080 | 1387.51238  | 1 |
| 135 | H | 71.91249 | 75.08955 | 75.60172 | -1695.63603 | -1484.73621 | -1531.02793 | 1 |
| 136 | H | 72.28895 | 76.64627 | 76.40934 | -1853.57121 | -487.39031  | 1936.59343  | 1 |
| 137 | C | 75.98419 | 76.11957 | 74.34644 | 539.71428   | -510.58232  | 267.58633   | 1 |
| 138 | O | 76.91751 | 76.69228 | 74.87426 | -15.93758   | -278.34085  | -624.49402  | 1 |

|     |   |          |          |          |             |             |             |   |
|-----|---|----------|----------|----------|-------------|-------------|-------------|---|
| 139 | N | 75.93469 | 75.58925 | 73.13155 | -676.81886  | 12.05292    | 276.17960   | 1 |
| 140 | H | 75.05726 | 75.16075 | 72.84632 | -1694.44250 | -373.84189  | -2100.66098 | 1 |
| 141 | C | 76.93498 | 75.99193 | 72.17856 | 412.33078   | -664.70360  | 108.35451   | 1 |
| 142 | H | 76.99742 | 77.09996 | 72.26033 | 1765.77476  | 1294.44366  | 1621.76594  | 1 |
| 143 | C | 78.28294 | 75.33041 | 72.67287 | -179.66635  | -721.95667  | -264.73915  | 1 |
| 144 | H | 78.61441 | 75.80381 | 73.62823 | -607.34922  | 2587.87032  | -598.10018  | 1 |
| 145 | H | 78.10129 | 74.25481 | 72.92435 | -359.69332  | -1479.13954 | -2259.74260 | 1 |
| 146 | C | 79.38485 | 75.43707 | 71.56818 | -240.01076  | 616.02425   | 431.85322   | 1 |
| 147 | H | 78.97372 | 75.14524 | 70.57178 | -1359.17131 | 782.54425   | 2227.99181  | 1 |
| 148 | H | 79.76094 | 76.47874 | 71.45555 | -820.36667  | 85.81767    | -2596.78715 | 1 |
| 149 | C | 80.51996 | 74.44116 | 72.04155 | -513.07015  | 236.18570   | -551.87280  | 1 |
| 150 | H | 81.00468 | 74.81360 | 72.97190 | 1816.11944  | -1183.11722 | -1650.94321 | 1 |
| 151 | H | 80.08098 | 73.45329 | 72.31281 | -1800.04429 | -1361.53473 | 1526.34643  | 1 |
| 152 | C | 81.56517 | 74.25861 | 70.91801 | 726.08972   | -253.19732  | -179.64713  | 1 |
| 153 | H | 81.23038 | 73.62832 | 70.07037 | 1224.27271  | -456.51798  | -2390.90304 | 1 |
| 154 | H | 82.00731 | 75.19870 | 70.53487 | 1206.40339  | -1150.93514 | -2154.90344 | 1 |
| 155 | N | 82.76375 | 73.47895 | 71.56097 | 329.70796   | -633.68968  | -155.67358  | 1 |
| 156 | H | 83.59545 | 73.28019 | 70.93237 | 1348.31305  | 1938.76845  | 1359.00643  | 1 |
| 157 | H | 83.23644 | 73.92418 | 72.40078 | 2096.92035  | 1446.54551  | -966.48890  | 1 |
| 158 | H | 82.54371 | 72.50945 | 71.92992 | -1197.07217 | -2303.53719 | 827.28733   | 1 |
| 159 | C | 76.51227 | 75.47865 | 70.69756 | -378.01186  | -556.17301  | -413.96481  | 1 |
| 160 | O | 77.02800 | 76.00504 | 69.73670 | -409.44433  | -307.55053  | -453.30833  | 1 |
| 161 | N | 75.68484 | 74.43042 | 70.70137 | -429.02477  | 524.70884   | 274.08502   | 1 |
| 162 | H | 75.36610 | 74.05247 | 71.59279 | 1706.34263  | -1425.96036 | 1574.38926  | 1 |
| 163 | C | 74.91014 | 74.24269 | 69.50481 | -45.25864   | -626.22952  | 478.93267   | 1 |
| 164 | H | 74.97657 | 75.25974 | 69.05182 | 1988.63164  | 570.90773   | 1772.87287  | 1 |
| 165 | C | 75.66744 | 73.17833 | 68.61868 | 551.77128   | -20.49526   | -564.54996  | 1 |
| 166 | H | 76.75439 | 73.41720 | 68.58234 | 1434.61535  | -1753.10253 | 1513.99471  | 1 |
| 167 | H | 75.60338 | 72.16526 | 69.07537 | -714.67738  | 1819.09770  | 1898.36494  | 1 |
| 168 | C | 75.05268 | 73.19637 | 67.17800 | 446.99263   | -555.77305  | 338.97221   | 1 |
| 169 | H | 73.94986 | 73.04520 | 67.20309 | 1953.68466  | 1892.25957  | -161.67766  | 1 |
| 170 | H | 75.20866 | 74.18546 | 66.69223 | -403.03785  | 2688.07032  | -188.43591  | 1 |
| 171 | C | 75.76521 | 72.04577 | 66.36029 | 567.86262   | 335.74681   | 434.04421   | 1 |
| 172 | H | 76.86375 | 72.22465 | 66.30752 | -1080.02275 | 1568.26081  | -1948.78900 | 1 |
| 173 | H | 75.64357 | 71.06303 | 66.87119 | -919.54108  | 2111.34692  | 1456.13463  | 1 |
| 174 | C | 75.15083 | 72.00297 | 64.94196 | 195.81897   | 173.33862   | -745.11536  | 1 |
| 175 | H | 74.09217 | 71.67723 | 64.90595 | 1405.67949  | -2301.21089 | -390.08113  | 1 |
| 176 | H | 75.28009 | 72.93345 | 64.35407 | -940.37328  | -1118.32446 | 2299.72133  | 1 |
| 177 | N | 75.93385 | 70.91596 | 64.12969 | 319.26422   | 656.36007   | -42.02424   | 1 |
| 178 | H | 75.60921 | 70.76638 | 63.13103 | 1961.03633  | 619.91968   | 1787.09422  | 1 |
| 179 | H | 76.97265 | 71.08059 | 63.98603 | 854.14343   | -2156.80752 | 1429.08711  | 1 |
| 180 | H | 75.92017 | 69.92300 | 64.50459 | 1237.02905  | -1378.50857 | -1998.28500 | 1 |
| 181 | C | 73.40994 | 73.81884 | 69.98439 | 532.53319   | -268.57236  | 517.55729   | 1 |
| 182 | O | 72.80026 | 74.55495 | 70.73621 | 266.16714   | -290.73804  | -558.88002  | 1 |
| 183 | N | 73.00330 | 72.65779 | 69.47887 | -226.25352  | 640.49678   | -270.32839  | 1 |
| 184 | H | 73.62513 | 72.13772 | 68.86432 | 2007.69063  | -1035.27229 | 1523.50231  | 1 |
| 185 | C | 71.61517 | 72.35919 | 69.58781 | -540.76542  | -573.33303  | 49.50000    | 1 |
| 186 | H | 71.15771 | 73.28948 | 70.00203 | -2374.20950 | -1036.76023 | 843.75774   | 1 |
| 187 | C | 71.06810 | 71.92146 | 68.14546 | -77.09082   | 666.87422   | -415.84136  | 1 |
| 188 | H | 71.47406 | 70.90314 | 67.89269 | -985.81834  | 617.19825   | 2463.91927  | 1 |
| 189 | O | 71.42581 | 72.76882 | 67.04337 | 293.29899   | -391.65602  | -477.80926  | 1 |
| 190 | H | 71.86454 | 72.12738 | 66.44606 | 2528.72714  | -681.76262  | -751.27122  | 1 |
| 191 | C | 69.53140 | 71.79848 | 68.45934 | 252.47363   | -605.14473  | 440.05134   | 1 |
| 192 | H | 68.96804 | 71.37473 | 67.59504 | -2052.65063 | 1456.49051  | -1043.51830 | 1 |
| 193 | H | 69.33455 | 71.13288 | 69.34424 | -2152.98800 | -1661.97574 | -161.70652  | 1 |
| 194 | H | 69.08127 | 72.79391 | 68.68331 | -473.12726  | -1584.27339 | 2165.61725  | 1 |
| 195 | C | 71.42607 | 71.05629 | 70.56448 | 360.36307   | 488.46713   | 505.10056   | 1 |
| 196 | O | 70.50252 | 71.07963 | 71.38693 | -200.08817  | -528.03552  | -385.82850  | 1 |
| 197 | N | 72.24777 | 70.08929 | 70.24353 | -597.54095  | -226.44775  | 355.20479   | 1 |
| 198 | H | 72.88269 | 70.37840 | 69.49965 | 2179.23655  | -1300.70981 | -991.33835  | 1 |
| 199 | C | 72.44674 | 68.88859 | 70.95574 | -687.68921  | 297.39807   | -249.45179  | 1 |
| 200 | H | 73.38940 | 68.47946 | 70.53148 | -349.16256  | -2467.37713 | -1101.72831 | 1 |

|     |   |          |          |          |             |             |             |   |
|-----|---|----------|----------|----------|-------------|-------------|-------------|---|
| 201 | C | 72.51771 | 69.20509 | 72.52274 | 672.47345   | 361.54328   | -201.62880  | 1 |
| 202 | H | 71.56916 | 69.69131 | 72.85274 | 1541.41502  | 582.18425   | 2169.97026  | 1 |
| 203 | H | 72.61630 | 68.25138 | 73.09050 | -2534.67717 | 60.25153    | 997.72295   | 1 |
| 204 | C | 73.71067 | 70.12872 | 72.80392 | 574.26774   | -389.43119  | -377.02542  | 1 |
| 205 | C | 75.02633 | 69.58712 | 72.91202 | 688.82679   | -287.33580  | -257.96133  | 1 |
| 206 | H | 75.20659 | 68.50514 | 72.77748 | 331.14182   | 1470.38163  | 2269.80013  | 1 |
| 207 | C | 73.47841 | 71.52794 | 72.96274 | -383.52382  | -675.04808  | 144.24917   | 1 |
| 208 | H | 72.46164 | 71.94761 | 72.85069 | 4.09847     | 1517.59662  | 2262.86397  | 1 |
| 209 | C | 76.07770 | 70.45723 | 73.20337 | -134.76730  | 428.45285   | -649.50303  | 1 |
| 210 | H | 77.09706 | 70.04370 | 73.29878 | -903.23433  | 1600.49020  | 2011.53387  | 1 |
| 211 | C | 74.56405 | 72.35268 | 73.26587 | -335.53281  | -615.00040  | -364.39058  | 1 |
| 212 | H | 74.37601 | 73.42850 | 73.41377 | 1596.45398  | -1369.33862 | 1732.02659  | 1 |
| 213 | C | 75.89188 | 71.85563 | 73.39434 | 585.48547   | -340.24194  | -406.23938  | 1 |
| 214 | O | 77.00334 | 72.69748 | 73.69379 | -419.15649  | -173.04408  | -511.94141  | 1 |
| 215 | H | 76.53045 | 73.56303 | 73.76359 | -1071.84350 | 1559.71507  | -1960.13012 | 1 |
| 216 | C | 71.19215 | 67.84289 | 70.80753 | 291.41878   | -183.13091  | 710.72246   | 1 |
| 217 | O | 71.40298 | 66.69563 | 70.49756 | 379.87695   | 523.47396   | -222.23622  | 1 |
| 218 | N | 70.05125 | 68.41464 | 71.16547 | 564.30591   | 373.09380   | 277.24371   | 1 |
| 219 | H | 70.01010 | 69.43718 | 71.40234 | -120.59931  | -2436.07824 | -1214.35098 | 1 |
| 220 | C | 68.86571 | 67.62702 | 71.13917 | 404.07514   | -299.37480  | 608.84009   | 1 |
| 221 | H | 69.17967 | 66.60099 | 70.82833 | -1071.07882 | -841.69025  | 2359.66467  | 1 |
| 222 | C | 68.29971 | 67.70237 | 72.62905 | -683.12807  | 68.71770    | -390.13096  | 1 |
| 223 | H | 69.13241 | 67.54072 | 73.34914 | 2068.88918  | 1596.58590  | 770.89603   | 1 |
| 224 | H | 67.90888 | 68.71918 | 72.85472 | 1379.86429  | 2342.49779  | -179.85638  | 1 |
| 225 | C | 67.19529 | 66.62493 | 72.83189 | -176.39967  | 537.49466   | 550.97268   | 1 |
| 226 | H | 66.26719 | 66.89365 | 72.27924 | -396.28051  | 1942.22168  | 1869.33314  | 1 |
| 227 | H | 67.52021 | 65.64193 | 72.42360 | -94.44700   | 586.00678   | -2659.20016 | 1 |
| 228 | C | 66.91663 | 66.51476 | 74.40291 | -291.69381  | -718.18079  | -150.72929  | 1 |
| 229 | H | 67.79004 | 66.21334 | 75.03534 | -2303.38776 | 1089.76242  | 964.62032   | 1 |
| 230 | H | 66.45158 | 67.42056 | 74.86866 | 884.16729   | 2568.80533  | -207.74283  | 1 |
| 231 | N | 65.97610 | 65.47429 | 74.44940 | -594.49522  | -252.81478  | 342.29276   | 1 |
| 232 | H | 65.61819 | 65.14889 | 73.56477 | -1735.17426 | 2084.05705  | -263.71605  | 1 |
| 233 | C | 65.54426 | 64.93022 | 75.51379 | 595.23177   | -271.52487  | 442.22352   | 1 |
| 234 | N | 66.04110 | 65.39778 | 76.73514 | 585.53813   | -424.79750  | -105.81303  | 1 |
| 235 | H | 66.71498 | 66.13941 | 76.92094 | 959.88797   | 1327.56823  | -2177.11905 | 1 |
| 236 | H | 65.76496 | 65.04159 | 77.65080 | 1578.48647  | 16.27378    | -2220.76233 | 1 |
| 237 | N | 64.61159 | 63.92464 | 75.22206 | -452.17763  | -390.33541  | -421.51853  | 1 |
| 238 | H | 64.24870 | 63.58431 | 74.33292 | 470.26107   | 1974.25629  | -1817.92087 | 1 |
| 239 | H | 64.14811 | 63.36927 | 75.94221 | 1856.67307  | -1573.97321 | -1224.35416 | 1 |
| 240 | C | 67.84373 | 68.36184 | 70.11385 | -531.47271  | -581.45780  | -55.06206   | 1 |
| 241 | O | 68.04353 | 69.49201 | 69.66314 | -243.00837  | 192.73507   | 609.52485   | 1 |
| 242 | N | 66.80820 | 67.58793 | 69.88487 | 343.49288   | -644.25607  | 38.09164    | 1 |
| 243 | H | 66.83658 | 66.68863 | 70.35529 | -1691.16043 | -1535.97525 | -1484.73099 | 1 |
| 244 | C | 65.75749 | 67.98976 | 68.94576 | 542.66492   | 350.14337   | 454.42563   | 1 |
| 245 | H | 66.35283 | 68.28893 | 68.05113 | 1209.57979  | -2396.95920 | 463.86744   | 1 |
| 246 | C | 64.81472 | 66.82105 | 68.71645 | -737.14309  | 145.93010   | 242.71942   | 1 |
| 247 | H | 64.43084 | 66.49319 | 69.70826 | -1050.18303 | 159.36419   | -2509.06125 | 1 |
| 248 | C | 63.62813 | 67.23914 | 67.86795 | -706.77696  | -252.88343  | -245.16230  | 1 |
| 249 | H | 62.90546 | 66.39144 | 67.71187 | -1624.64039 | -1665.49085 | 1417.86935  | 1 |
| 250 | H | 63.05936 | 68.08349 | 68.35335 | 2566.10521  | 598.51109   | 693.22305   | 1 |
| 251 | H | 63.95039 | 67.59561 | 66.85059 | -1972.69758 | 107.10018   | -1876.34312 | 1 |
| 252 | C | 65.52151 | 65.63975 | 68.07806 | 412.85148   | 672.58832   | -27.69222   | 1 |
| 253 | H | 64.82912 | 64.76433 | 67.93962 | 1447.02277  | 1762.76533  | -1490.78944 | 1 |
| 254 | H | 65.93092 | 65.90384 | 67.06417 | 1320.77379  | -145.20455  | 2378.68491  | 1 |
| 255 | H | 66.38870 | 65.28714 | 68.70146 | -1512.10848 | 1470.52031  | 1724.75147  | 1 |
| 256 | C | 64.99769 | 69.30685 | 69.61994 | -607.11113  | 499.56689   | 73.73769    | 1 |
| 257 | O | 63.92622 | 69.19628 | 70.15343 | 357.97126   | 460.81534   | 356.68785   | 1 |
| 258 | N | 65.74629 | 70.38219 | 69.44856 | 536.55407   | -368.62270  | 332.76306   | 1 |
| 259 | H | 66.70557 | 70.34348 | 69.01699 | 524.38866   | 2297.69985  | 1367.20941  | 1 |
| 260 | C | 65.24698 | 71.61555 | 69.92329 | 46.50277    | -774.29190  | -147.97904  | 1 |
| 261 | H | 64.26502 | 71.39365 | 70.40274 | 1676.51875  | 1883.29066  | 1032.55549  | 1 |
| 262 | C | 66.35399 | 72.26826 | 70.90784 | -559.41456  | -34.19198   | -556.30433  | 1 |

|     |   |          |          |          |             |             |             |   |
|-----|---|----------|----------|----------|-------------|-------------|-------------|---|
| 263 | H | 67.26282 | 72.53046 | 70.31587 | -64.66664   | 395.18769   | 2695.05373  | 1 |
| 264 | H | 65.97952 | 73.22855 | 71.33509 | -2703.44278 | -60.40056   | 333.79418   | 1 |
| 265 | C | 66.70886 | 71.28823 | 71.99215 | -519.76435  | 377.31045   | 459.42366   | 1 |
| 266 | H | 66.97831 | 70.31887 | 71.50577 | -1746.74323 | 1667.50644  | -1261.73691 | 1 |
| 267 | C | 67.90677 | 71.77654 | 72.79175 | 570.95554   | 16.46261    | -545.27700  | 1 |
| 268 | H | 68.03844 | 71.19127 | 73.73808 | 2391.58273  | 28.05277    | -1305.07271 | 1 |
| 269 | H | 68.87748 | 71.66873 | 72.19704 | 175.75588   | 917.63458   | 2559.43867  | 1 |
| 270 | H | 67.80232 | 72.85454 | 73.08027 | -1063.97851 | -2155.34650 | 1283.00462  | 1 |
| 271 | C | 65.53221 | 71.05639 | 72.93117 | 193.76014   | 2.62946     | -765.53141  | 1 |
| 272 | H | 65.79884 | 70.35549 | 73.76374 | 507.39394   | -846.55087  | 2539.60089  | 1 |
| 273 | H | 65.18470 | 72.01274 | 73.40077 | 1337.57841  | 1818.19054  | 1526.01994  | 1 |
| 274 | H | 64.65648 | 70.61039 | 72.39202 | 1100.88635  | -1172.91350 | -2199.08909 | 1 |
| 275 | C | 65.17001 | 72.61117 | 68.64776 | -549.21115  | 475.64486   | -309.38218  | 1 |
| 276 | O | 65.78220 | 72.43457 | 67.62784 | 556.06106   | -390.37755  | -78.24250   | 1 |
| 277 | O | 64.43323 | 73.80122 | 68.84951 | -572.27940  | -310.19032  | -209.75862  | 1 |
| 278 | H | 64.08585 | 73.61192 | 69.76591 | -1380.08193 | 2212.14486  | 790.85944   | 1 |

Listing 43: C00043.xmolout

|    |   |          |          |          |             |             |             |        |          |
|----|---|----------|----------|----------|-------------|-------------|-------------|--------|----------|
| 1  |   | 276      |          |          |             |             |             |        |          |
| 2  |   | 150.0000 | 150.0000 | 150.0000 | 0.0000      | 0.0000      | 0.0000***** | 2.7750 | 11100    |
|    |   | 0.2500   | 300.00   | 0.00     | 0.00        | 0.00        | -1293.7815  | 0.0000 | 300.0000 |
| 3  | H | 65.75450 | 67.48575 | 76.09365 | -2043.14101 | -1757.64893 | 399.89339   |        | 1        |
| 4  | N | 66.51773 | 67.71593 | 76.72913 | 426.75047   | 490.45733   | -334.42467  |        | 1        |
| 5  | H | 66.85335 | 66.79428 | 77.03788 | 442.25559   | -1110.30854 | -2448.52907 |        | 1        |
| 6  | C | 67.56031 | 68.45672 | 76.12960 | 415.32972   | -666.39213  | 83.73172    |        | 1        |
| 7  | H | 67.15071 | 68.92167 | 75.20600 | 879.32219   | 2491.00447  | 667.35213   |        | 1        |
| 8  | C | 68.09278 | 69.55151 | 77.18911 | 31.35357    | 477.41777   | 628.23362   |        | 1        |
| 9  | H | 68.45826 | 69.02695 | 78.10394 | 1168.38489  | 2240.25337  | -1019.71136 |        | 1        |
| 10 | H | 68.97143 | 70.10300 | 76.77655 | -360.43770  | 2534.90498  | 931.67112   |        | 1        |
| 11 | C | 66.97504 | 70.49807 | 77.53673 | 463.18208   | 512.70242   | -382.34388  |        | 1        |
| 12 | H | 66.07995 | 69.89060 | 77.80166 | 1725.29117  | 1863.52247  | -987.07854  |        | 1        |
| 13 | C | 67.35588 | 71.35233 | 78.73991 | 710.42801   | -144.27427  | -313.15367  |        | 1        |
| 14 | H | 66.52391 | 72.04106 | 79.03825 | 364.20195   | -1033.13725 | 2494.72524  |        | 1        |
| 15 | H | 67.60354 | 70.72306 | 79.63334 | 2567.61904  | 335.80679   | 847.48802   |        | 1        |
| 16 | H | 68.25177 | 71.98993 | 78.52469 | -2587.99029 | 680.92867   | -512.16411  |        | 1        |
| 17 | C | 66.62197 | 71.40579 | 76.36616 | 268.17616   | 741.64379   | -40.42634   |        | 1        |
| 18 | H | 65.79696 | 72.11685 | 76.63006 | 1283.54314  | -1945.37420 | -1411.27812 |        | 1        |
| 19 | H | 67.49970 | 72.02338 | 76.04394 | -1258.57796 | 1317.15249  | -2026.02085 |        | 1        |
| 20 | H | 66.28134 | 70.82108 | 75.47357 | -2502.84526 | 909.80597   | 575.92391   |        | 1        |
| 21 | C | 68.70320 | 67.33425 | 75.86416 | 619.36578   | -458.64843  | -172.09273  |        | 1        |
| 22 | O | 68.62910 | 66.21449 | 76.32961 | -81.40433   | 433.87611   | 522.34594   |        | 1        |
| 23 | N | 69.69661 | 67.89257 | 75.16917 | 175.23996   | -622.20190  | 341.55523   |        | 1        |
| 24 | H | 69.52689 | 68.83899 | 74.82719 | -876.57256  | -303.22879  | -2561.90213 |        | 1        |
| 25 | C | 70.58003 | 67.01960 | 74.43198 | -571.88214  | -534.10783  | -106.15033  |        | 1        |
| 26 | H | 69.93104 | 66.22951 | 73.99655 | -2713.20841 | -16.25800   | -248.80809  |        | 1        |
| 27 | C | 71.26812 | 67.97966 | 73.35928 | 166.60354   | 288.16399   | -716.09568  |        | 1        |
| 28 | H | 71.83599 | 68.78467 | 73.90229 | -2097.85574 | 1636.78449  | -586.18044  |        | 1        |
| 29 | O | 70.35920 | 68.67006 | 72.47864 | -317.80580  | -363.38227  | 484.43082   |        | 1        |
| 30 | H | 70.62184 | 69.60057 | 72.62540 | 1863.74748  | -1451.84923 | 1357.29467  |        | 1        |
| 31 | C | 72.29755 | 67.00720 | 72.67688 | 503.80731   | 517.99032   | 318.51606   |        | 1        |
| 32 | H | 72.89321 | 67.53339 | 71.89222 | 640.61020   | -2157.10410 | -1536.29104 |        | 1        |
| 33 | H | 73.01992 | 66.59785 | 73.42037 | 1687.88455  | 465.60692   | 2087.56452  |        | 1        |
| 34 | H | 71.79081 | 66.14148 | 72.18685 | -1293.07895 | -1899.88581 | -1463.57452 |        | 1        |
| 35 | C | 71.67790 | 66.44360 | 75.46534 | -153.07550  | -733.68902  | 248.70981   |        | 1        |
| 36 | O | 72.33994 | 67.23154 | 76.12072 | 186.15459   | -480.78787  | -449.34387  |        | 1        |
| 37 | N | 71.82368 | 65.12426 | 75.35784 | -487.53139  | 543.18517   | 42.03850    |        | 1        |
| 38 | C | 72.38815 | 64.34657 | 76.42577 | -699.35871  | 69.34393    | 360.10701   |        | 1        |
| 39 | H | 71.91221 | 64.72851 | 77.35616 | 2.81126     | -221.99807  | -2715.58072 |        | 1        |
| 40 | C | 72.00614 | 62.86745 | 76.02265 | -507.46439  | -592.59194  | 122.07761   |        | 1        |
| 41 | H | 72.69653 | 62.10814 | 76.45526 | -1975.08116 | 525.87560   | -1801.71556 |        | 1        |
| 42 | H | 70.98099 | 62.60008 | 76.36507 | 1588.27743  | -1913.22100 | 1113.83566  |        | 1        |

|     |   |          |          |          |             |             |             |   |
|-----|---|----------|----------|----------|-------------|-------------|-------------|---|
| 43  | C | 72.07895 | 62.95042 | 74.46533 | -613.62442  | -457.55993  | -194.14490  | 1 |
| 44  | H | 73.13867 | 62.98657 | 74.12657 | 1707.54637  | -721.27992  | 1996.92523  | 1 |
| 45  | H | 71.59610 | 62.09449 | 73.94261 | 758.23357   | 2100.81767  | 1560.55011  | 1 |
| 46  | C | 71.33454 | 64.33475 | 74.23342 | -352.41524  | 704.96076   | 49.21465    | 1 |
| 47  | H | 71.57827 | 64.86198 | 73.28032 | 1714.76886  | -2070.42778 | 443.35792   | 1 |
| 48  | H | 70.22680 | 64.27969 | 74.35752 | 1224.15040  | 1801.50881  | 1636.97633  | 1 |
| 49  | C | 74.02070 | 64.56556 | 76.43117 | 566.85117   | 537.05831   | 117.62814   | 1 |
| 50  | O | 74.72822 | 64.04240 | 75.60294 | -550.26779  | -406.08867  | 4.21666     | 1 |
| 51  | N | 74.33373 | 65.33593 | 77.45979 | 566.34832   | -425.77725  | 180.18749   | 1 |
| 52  | H | 73.56454 | 65.66020 | 78.04520 | 644.44502   | 2646.80550  | -52.73430   | 1 |
| 53  | C | 75.65768 | 65.81057 | 77.69444 | 612.34801   | -281.48662  | 411.56221   | 1 |
| 54  | H | 75.55220 | 66.33830 | 78.67005 | 1667.23498  | -1490.75142 | 1556.16753  | 1 |
| 55  | C | 76.58645 | 64.50542 | 77.83143 | -714.45746  | -175.43074  | 286.98927   | 1 |
| 56  | H | 76.66730 | 64.04495 | 76.80757 | -787.09484  | 1763.03619  | -1922.46060 | 1 |
| 57  | O | 76.07771 | 63.48187 | 78.70607 | -429.46514  | 516.51932   | -128.40526  | 1 |
| 58  | H | 75.85240 | 62.78676 | 78.05521 | 1981.82785  | 436.16847   | -1818.18182 | 1 |
| 59  | C | 77.98295 | 65.07603 | 78.26881 | 630.79189   | -468.94448  | 76.03230    | 1 |
| 60  | H | 78.75018 | 64.26913 | 78.32885 | -1775.71861 | 2062.30353  | 131.89849   | 1 |
| 61  | H | 78.36839 | 65.85340 | 77.55360 | -1855.14608 | 88.94118    | 1993.53760  | 1 |
| 62  | H | 77.92739 | 65.54979 | 79.27675 | -1504.82350 | -780.94249  | -2132.90992 | 1 |
| 63  | C | 76.09484 | 66.82577 | 76.52104 | 288.57638   | 618.62814   | -397.00270  | 1 |
| 64  | O | 77.30156 | 67.03141 | 76.31768 | 321.70495   | -185.26452  | 574.37218   | 1 |
| 65  | N | 75.06179 | 67.39124 | 75.96398 | -447.05792  | -446.53431  | 367.76425   | 1 |
| 66  | H | 74.10748 | 67.11073 | 76.28555 | 350.31316   | 1975.63644  | -1843.31522 | 1 |
| 67  | C | 75.10311 | 68.35468 | 74.92414 | -511.23061  | 374.03917   | -471.51480  | 1 |
| 68  | H | 74.05183 | 68.72132 | 74.92765 | 2234.79579  | -898.70890  | -1273.45190 | 1 |
| 69  | C | 76.16968 | 69.49165 | 75.28034 | 529.53781   | -159.34528  | 563.72604   | 1 |
| 70  | H | 75.86672 | 70.44801 | 74.77130 | 654.59388   | 2347.94251  | 1217.51488  | 1 |
| 71  | H | 76.06299 | 69.66571 | 76.38374 | -1526.55661 | 2103.42026  | 817.87394   | 1 |
| 72  | O | 77.53287 | 69.23661 | 74.91562 | -554.84278  | 14.12789    | 399.58769   | 1 |
| 73  | H | 77.67402 | 68.36984 | 75.44454 | 1297.06236  | 2061.84854  | 1220.68812  | 1 |
| 74  | C | 75.49039 | 67.70104 | 73.47724 | -662.15484  | -412.13544  | 123.62687   | 1 |
| 75  | O | 74.98384 | 68.16249 | 72.48649 | -540.01537  | -317.05804  | 274.91456   | 1 |
| 76  | N | 76.41800 | 66.75097 | 73.58038 | -202.76299  | -690.00100  | -131.49145  | 1 |
| 77  | H | 76.71263 | 66.51363 | 74.54010 | -702.62132  | -2617.37191 | 281.70413   | 1 |
| 78  | C | 76.78210 | 65.88731 | 72.46459 | -491.73914  | 576.34187   | 222.73509   | 1 |
| 79  | H | 77.41684 | 65.10146 | 72.93905 | 1977.17978  | -1823.58850 | -434.68928  | 1 |
| 80  | C | 75.51251 | 65.31341 | 71.85721 | -649.50797  | -328.66843  | 306.11224   | 1 |
| 81  | H | 74.93076 | 66.16618 | 71.43414 | 2075.07803  | 1452.16490  | -1004.45904 | 1 |
| 82  | C | 75.80624 | 64.33395 | 70.73734 | -615.18735  | -489.99689  | -70.96352   | 1 |
| 83  | H | 74.86386 | 63.96245 | 70.24829 | -1226.32661 | -1724.38906 | -1716.47170 | 1 |
| 84  | H | 76.44444 | 64.80935 | 69.93118 | 2381.64273  | -969.84735  | 900.46860   | 1 |
| 85  | H | 76.36459 | 63.43226 | 71.11206 | 2122.74991  | 1702.23946  | -141.36228  | 1 |
| 86  | C | 74.64915 | 64.63894 | 72.90879 | -501.86074  | -479.61276  | -376.42482  | 1 |
| 87  | H | 73.68054 | 64.26502 | 72.47767 | 993.79261   | -2246.95401 | -1177.81305 | 1 |
| 88  | H | 75.17323 | 63.75954 | 73.37900 | 42.71279    | -626.15391  | -2651.37258 | 1 |
| 89  | H | 74.39902 | 65.34244 | 73.75143 | -2026.39012 | -1590.33709 | -887.82922  | 1 |
| 90  | C | 77.64778 | 66.79142 | 71.36080 | -672.89153  | 382.57394   | -156.34072  | 1 |
| 91  | O | 77.81409 | 66.33429 | 70.24884 | 410.04627   | 221.86223   | 500.35950   | 1 |
| 92  | N | 78.09215 | 67.91401 | 71.87173 | -378.11782  | -443.79414  | -441.10984  | 1 |
| 93  | H | 77.80717 | 68.06323 | 72.83780 | 2404.15973  | -568.14894  | 1149.30085  | 1 |
| 94  | C | 79.09708 | 68.74754 | 71.26870 | -544.54484  | 466.16019   | 331.29119   | 1 |
| 95  | H | 79.99134 | 68.60461 | 71.91070 | -1409.80988 | -170.17955  | 2325.32679  | 1 |
| 96  | C | 79.31248 | 68.33470 | 69.76346 | -184.48284  | 116.78282   | -758.89137  | 1 |
| 97  | H | 79.70696 | 67.29208 | 69.68733 | 1893.78641  | 1861.14652  | 611.04528   | 1 |
| 98  | H | 78.32326 | 68.32388 | 69.24549 | -2170.79665 | -974.19311  | 1327.50117  | 1 |
| 99  | C | 80.30104 | 69.33505 | 69.08002 | 389.51668   | 672.81878   | -138.49152  | 1 |
| 100 | H | 79.97650 | 70.38425 | 69.25570 | 510.64577   | 1933.03327  | 1851.02484  | 1 |
| 101 | H | 81.30352 | 69.27962 | 69.55810 | -2302.30869 | -1105.72939 | -948.89774  | 1 |
| 102 | C | 80.43227 | 69.07327 | 67.53243 | -559.93427  | -126.34590  | 542.30857   | 1 |
| 103 | O | 81.13695 | 69.78706 | 66.86547 | -670.36003  | -111.83166  | 76.36448    | 1 |
| 104 | N | 79.71026 | 68.02229 | 67.08549 | -216.06729  | -537.07037  | 446.51379   | 1 |



|     |   |          |          |          |             |             |             |   |
|-----|---|----------|----------|----------|-------------|-------------|-------------|---|
| 105 | H | 79.09458 | 67.37856 | 67.59660 | -1251.96487 | 1074.12894  | -2168.52500 | 1 |
| 106 | H | 79.68785 | 67.71893 | 66.10606 | -2451.83023 | -720.73851  | 944.84612   | 1 |
| 107 | C | 78.51171 | 70.26823 | 71.34049 | 546.24052   | -563.88337  | -85.11809   | 1 |
| 108 | O | 77.54268 | 70.56685 | 70.68963 | 71.70702    | -307.40463  | 606.69673   | 1 |
| 109 | N | 79.30219 | 71.05985 | 72.07825 | 479.90863   | -504.50129  | 222.86849   | 1 |
| 110 | C | 78.83935 | 72.34190 | 72.52219 | 75.51268    | -600.91904  | 506.73700   | 1 |
| 111 | H | 77.77765 | 72.21351 | 72.83286 | -2033.61562 | 1795.30103  | 254.89480   | 1 |
| 112 | C | 79.86831 | 72.67884 | 73.68275 | 523.79067   | 517.99274   | 284.45581   | 1 |
| 113 | H | 79.93381 | 73.76856 | 73.90047 | 1599.61665  | -1127.00911 | 1895.98173  | 1 |
| 114 | H | 79.59170 | 72.17653 | 74.63684 | -1881.83093 | 1275.82488  | -1501.55016 | 1 |
| 115 | C | 81.18189 | 72.08678 | 73.08602 | -600.05639  | -404.05026  | 316.64485   | 1 |
| 116 | H | 81.56865 | 72.73238 | 72.26273 | -2597.05260 | 496.36221   | 657.73249   | 1 |
| 117 | H | 82.00448 | 71.97375 | 73.82744 | -1666.24518 | 1294.38985  | -1723.90591 | 1 |
| 118 | C | 80.63995 | 70.70093 | 72.52533 | 493.57570   | -129.95376  | -602.56394  | 1 |
| 119 | H | 81.20459 | 70.27815 | 71.66118 | -1469.08415 | -637.84797  | 2204.22581  | 1 |
| 120 | H | 80.50280 | 69.91497 | 73.30597 | -1038.97840 | 1068.88701  | -2280.71789 | 1 |
| 121 | C | 79.01984 | 73.41046 | 71.29374 | 188.88100   | 241.05089   | -727.87821  | 1 |
| 122 | O | 80.08683 | 73.65608 | 70.78693 | 531.88613   | -49.19943   | 427.07960   | 1 |
| 123 | N | 77.83740 | 74.02507 | 71.09040 | 708.14833   | 26.93417    | -179.73509  | 1 |
| 124 | H | 77.06070 | 73.53534 | 71.53839 | -2232.69501 | -1179.09831 | 1023.94816  | 1 |
| 125 | C | 77.61782 | 74.82326 | 69.88101 | -738.32412  | 259.92548   | 104.42456   | 1 |
| 126 | H | 78.55813 | 75.41837 | 69.80171 | 2028.89123  | 1260.02983  | 1311.33324  | 1 |
| 127 | C | 77.46799 | 73.88162 | 68.70168 | -258.65678  | -345.52513  | 661.28459   | 1 |
| 128 | H | 76.51906 | 73.31461 | 68.83496 | -1826.06090 | -1801.46097 | -918.64554  | 1 |
| 129 | C | 77.38762 | 74.63742 | 67.38827 | -541.23400  | 531.92970   | -218.41428  | 1 |
| 130 | H | 77.18015 | 73.95104 | 66.52175 | 1311.73218  | -2219.18200 | 882.19023   | 1 |
| 131 | H | 76.56618 | 75.41513 | 67.41278 | -1048.71298 | 1223.58118  | -2196.97971 | 1 |
| 132 | H | 78.34811 | 75.17695 | 67.16172 | 419.06414   | 1903.92898  | 1903.44670  | 1 |
| 133 | C | 78.59935 | 72.87009 | 68.64658 | -423.86431  | 152.66566   | -648.55262  | 1 |
| 134 | H | 78.50215 | 72.16586 | 67.77484 | 105.68386   | -2342.50080 | 1387.51238  | 1 |
| 135 | H | 79.60326 | 73.37732 | 68.56984 | -1695.63603 | -1484.73621 | -1531.02793 | 1 |
| 136 | H | 78.63118 | 72.24902 | 69.59149 | -1853.57121 | -487.39031  | 1936.59343  | 1 |
| 137 | C | 76.26830 | 75.76400 | 70.10735 | 539.71428   | -510.58232  | 267.58633   | 1 |
| 138 | O | 75.77050 | 76.31439 | 69.14833 | -15.93758   | -278.34085  | -624.49402  | 1 |
| 139 | N | 75.87514 | 75.80014 | 71.36306 | -676.81886  | 12.05292    | 276.17960   | 1 |
| 140 | H | 76.47271 | 75.27834 | 71.99661 | -1694.44250 | -373.84189  | -2100.66098 | 1 |
| 141 | C | 74.90784 | 76.74836 | 71.84885 | 412.33078   | -664.70360  | 108.35451   | 1 |
| 142 | H | 75.39559 | 77.72844 | 71.65348 | 1765.77476  | 1294.44366  | 1621.76594  | 1 |
| 143 | C | 73.58013 | 76.57552 | 71.02081 | -179.66635  | -721.95667  | -264.73915  | 1 |
| 144 | H | 73.78580 | 76.64938 | 69.92357 | -607.34922  | 2587.87032  | -598.10018  | 1 |
| 145 | H | 73.15258 | 75.55989 | 71.18265 | -359.69332  | -1479.13954 | -2259.74260 | 1 |
| 146 | C | 72.57872 | 77.68610 | 71.49085 | -240.01076  | 616.02425   | 431.85322   | 1 |
| 147 | H | 72.45953 | 77.65770 | 72.59962 | -1359.17131 | 782.54425   | 2227.99181  | 1 |
| 148 | H | 72.96232 | 78.70243 | 71.24763 | -820.36667  | 85.81767    | -2596.78715 | 1 |
| 149 | C | 71.19544 | 77.41081 | 70.77845 | -513.07015  | 236.18570   | -551.87280  | 1 |
| 150 | H | 71.29350 | 77.49113 | 69.67120 | 1816.11944  | -1183.11722 | -1650.94321 | 1 |
| 151 | H | 70.84984 | 76.37030 | 70.97791 | -1800.04429 | -1361.53473 | 1526.34643  | 1 |
| 152 | C | 70.17270 | 78.43580 | 71.32345 | 726.08972   | -253.19732  | -179.64713  | 1 |
| 153 | H | 69.98352 | 78.36195 | 72.41322 | 1224.27271  | -456.51798  | -2390.90304 | 1 |
| 154 | H | 70.37995 | 79.48853 | 71.04577 | 1206.40339  | -1150.93514 | -2154.90344 | 1 |
| 155 | N | 68.79178 | 78.10805 | 70.66476 | 329.70796   | -633.68968  | -155.67358  | 1 |
| 156 | H | 67.98314 | 78.73341 | 70.94829 | 1348.31305  | 1938.76845  | 1359.00643  | 1 |
| 157 | H | 68.73077 | 78.14824 | 69.60543 | 2096.92035  | 1446.54551  | -966.48890  | 1 |
| 158 | H | 68.39152 | 77.14803 | 70.87250 | -1197.07217 | -2303.53719 | 827.28733   | 1 |
| 159 | C | 74.71147 | 76.41320 | 73.43035 | -378.01186  | -556.17301  | -413.96481  | 1 |
| 160 | O | 73.61078 | 76.20370 | 73.89572 | -409.44433  | -307.55053  | -453.30833  | 1 |
| 161 | N | 75.88062 | 76.41185 | 74.06728 | -429.02477  | 524.70884   | 274.08502   | 1 |
| 162 | H | 76.72514 | 76.64851 | 73.54833 | 1706.34263  | -1425.96036 | 1574.38926  | 1 |
| 163 | C | 75.87490 | 76.14334 | 75.46291 | -45.25864   | -626.22952  | 478.93267   | 1 |
| 164 | H | 74.84488 | 75.75049 | 75.64269 | 1988.63164  | 570.90773   | 1772.87287  | 1 |
| 165 | C | 77.05102 | 75.13331 | 75.78201 | 551.77128   | -20.49526   | -564.54996  | 1 |
| 166 | H | 77.01841 | 74.24879 | 75.10665 | 1434.61535  | -1753.10253 | 1513.99471  | 1 |

|     |   |          |          |          |             |             |             |   |
|-----|---|----------|----------|----------|-------------|-------------|-------------|---|
| 167 | H | 78.03772 | 75.61562 | 75.60103 | -714.67738  | 1819.09770  | 1898.36494  | 1 |
| 168 | C | 76.90614 | 74.70954 | 77.28152 | 446.99263   | -555.77305  | 338.97221   | 1 |
| 169 | H | 76.86329 | 75.61446 | 77.93088 | 1953.68466  | 1892.25957  | -161.67766  | 1 |
| 170 | H | 75.95228 | 74.16261 | 77.45425 | -403.03785  | 2688.07032  | -188.43591  | 1 |
| 171 | C | 78.15052 | 73.81802 | 77.67739 | 567.86262   | 335.74681   | 434.04421   | 1 |
| 172 | H | 78.12424 | 72.83299 | 77.15669 | -1080.02275 | 1568.26081  | -1948.78900 | 1 |
| 173 | H | 79.10312 | 74.30360 | 77.36373 | -919.54108  | 2111.34692  | 1456.13463  | 1 |
| 174 | C | 78.10838 | 73.64774 | 79.21429 | 195.81897   | 173.33862   | -745.11536  | 1 |
| 175 | H | 78.22437 | 74.59172 | 79.78385 | 1405.67949  | -2301.21089 | -390.08113  | 1 |
| 176 | H | 77.23332 | 73.08347 | 79.59372 | -940.37328  | -1118.32446 | 2299.72133  | 1 |
| 177 | N | 79.34926 | 72.78988 | 79.63176 | 319.26422   | 656.36007   | -42.02424   | 1 |
| 178 | H | 79.45080 | 72.60864 | 80.67210 | 1961.03633  | 619.91968   | 1787.09422  | 1 |
| 179 | H | 79.41295 | 71.80530 | 79.24036 | 854.14343   | -2156.80752 | 1429.08711  | 1 |
| 180 | H | 80.30662 | 73.18306 | 79.39597 | 1237.02905  | -1378.50857 | -1998.28500 | 1 |
| 181 | C | 76.18436 | 77.54238 | 76.27886 | 532.53319   | -268.57236  | 517.55729   | 1 |
| 182 | O | 77.22030 | 77.64284 | 76.94628 | 266.16714   | -290.73804  | -558.88002  | 1 |
| 183 | N | 75.21937 | 78.39394 | 76.10852 | -226.25352  | 640.49678   | -270.32839  | 1 |
| 184 | H | 74.50108 | 78.02749 | 75.48543 | 2007.69063  | -1035.27229 | 1523.50231  | 1 |
| 185 | C | 75.10526 | 79.70360 | 76.67813 | -540.76542  | -573.33303  | 49.50000    | 1 |
| 186 | H | 74.45568 | 79.60223 | 77.57497 | -2374.20950 | -1036.76023 | 843.75774   | 1 |
| 187 | C | 76.55930 | 80.21407 | 77.08236 | -77.09082   | 666.87422   | -415.84136  | 1 |
| 188 | H | 77.26420 | 79.82453 | 76.29491 | -985.81834  | 617.19825   | 2463.91927  | 1 |
| 189 | O | 77.01887 | 79.71652 | 78.33866 | 293.29899   | -391.65602  | -477.80926  | 1 |
| 190 | H | 77.43958 | 78.82765 | 78.01640 | 2528.72714  | -681.76262  | -751.27122  | 1 |
| 191 | C | 76.50217 | 81.77990 | 76.97487 | 252.47363   | -605.14473  | 440.05134   | 1 |
| 192 | H | 77.49813 | 82.23792 | 77.19115 | -2052.65063 | 1456.49051  | -1043.51830 | 1 |
| 193 | H | 76.19131 | 82.12057 | 75.95606 | -2152.98800 | -1661.97574 | -161.70652  | 1 |
| 194 | H | 75.78209 | 82.21283 | 77.70872 | -473.12726  | -1584.27339 | 2165.61725  | 1 |
| 195 | C | 74.35591 | 80.55933 | 75.52048 | 360.36307   | 488.46713   | 505.10056   | 1 |
| 196 | O | 74.50680 | 80.30725 | 74.34472 | -200.08817  | -528.03552  | -385.82850  | 1 |
| 197 | N | 73.66272 | 81.56715 | 76.06100 | -597.54095  | -226.44775  | 355.20479   | 1 |
| 198 | H | 73.63186 | 81.69987 | 77.07305 | 2179.23655  | -1300.70981 | -991.33835  | 1 |
| 199 | C | 72.88884 | 82.35119 | 75.16562 | -687.68921  | 297.39807   | -249.45179  | 1 |
| 200 | H | 72.74794 | 81.71193 | 74.26388 | -349.16256  | -2467.37713 | -1101.72831 | 1 |
| 201 | C | 71.53459 | 82.79910 | 75.89169 | 672.47345   | 361.54328   | -201.62880  | 1 |
| 202 | H | 71.75285 | 83.26683 | 76.87958 | 1541.41502  | 582.18425   | 2169.97026  | 1 |
| 203 | H | 71.01235 | 83.56347 | 75.27098 | -2534.67717 | 60.25153    | 997.72295   | 1 |
| 204 | C | 70.66075 | 81.54788 | 76.05445 | 574.26774   | -389.43119  | -377.02542  | 1 |
| 205 | C | 69.98022 | 81.01465 | 74.91821 | 688.82679   | -287.33580  | -257.96133  | 1 |
| 206 | H | 70.06872 | 81.49823 | 73.92841 | 331.14182   | 1470.38163  | 2269.80013  | 1 |
| 207 | C | 70.55688 | 80.91110 | 77.32759 | -383.52382  | -675.04808  | 144.24917   | 1 |
| 208 | H | 71.09483 | 81.31479 | 78.20509 | 4.09847     | 1517.59662  | 2262.86397  | 1 |
| 209 | C | 69.20289 | 79.86894 | 75.08361 | -134.76730  | 428.45285   | -649.50303  | 1 |
| 210 | H | 68.67469 | 79.45668 | 74.20616 | -903.23433  | 1600.49020  | 2011.53387  | 1 |
| 211 | C | 69.76243 | 79.76768 | 77.44218 | -335.53281  | -615.00040  | -364.39058  | 1 |
| 212 | H | 69.68344 | 79.28593 | 78.43240 | 1596.45398  | -1369.33862 | 1732.02659  | 1 |
| 213 | C | 69.05833 | 79.20598 | 76.33726 | 585.48547   | -340.24194  | -406.23938  | 1 |
| 214 | O | 68.24804 | 78.04588 | 76.44774 | -419.15649  | -173.04408  | -511.94141  | 1 |
| 215 | H | 68.36670 | 77.85151 | 77.40760 | -1071.84350 | 1559.71507  | -1960.13012 | 1 |
| 216 | C | 73.68627 | 83.73301 | 74.79818 | 291.41878   | -183.13091  | 710.72246   | 1 |
| 217 | O | 73.41682 | 84.32751 | 73.77883 | 379.87695   | 523.47396   | -222.23622  | 1 |
| 218 | N | 74.52225 | 84.09259 | 75.76432 | 564.30591   | 373.09380   | 277.24371   | 1 |
| 219 | H | 74.56799 | 83.52199 | 76.60674 | -120.59931  | -2436.07824 | -1214.35098 | 1 |
| 220 | C | 75.36704 | 85.22350 | 75.53580 | 404.07514   | -299.37480  | 608.84009   | 1 |
| 221 | H | 75.39266 | 85.26592 | 74.42208 | -1071.07882 | -841.69025  | 2359.66467  | 1 |
| 222 | C | 74.59696 | 86.47176 | 76.13529 | -683.12807  | 68.71770    | -390.13096  | 1 |
| 223 | H | 73.54439 | 86.47407 | 75.77231 | 2068.88918  | 1596.58590  | 770.89603   | 1 |
| 224 | H | 74.52292 | 86.40567 | 77.24383 | 1379.86429  | 2342.49779  | -179.85638  | 1 |
| 225 | C | 75.33336 | 87.77195 | 75.68594 | -176.39967  | 537.49466   | 550.97268   | 1 |
| 226 | H | 76.37951 | 87.79892 | 76.06204 | -396.28051  | 1942.22168  | 1869.33314  | 1 |
| 227 | H | 75.41321 | 87.82528 | 74.57736 | -94.44700   | 586.00678   | -2659.20016 | 1 |
| 228 | C | 74.47347 | 88.98933 | 76.26092 | -291.69381  | -718.18079  | -150.72929  | 1 |

|     |   |          |          |          |             |             |             |   |
|-----|---|----------|----------|----------|-------------|-------------|-------------|---|
| 229 | H | 73.43668 | 89.08291 | 75.84833 | -2303.38776 | 1089.76242  | 964.62032   | 1 |
| 230 | H | 74.39865 | 89.03668 | 77.37716 | 884.16729   | 2568.80533  | -207.74283  | 1 |
| 231 | N | 75.19819 | 90.11256 | 75.83777 | -594.49522  | -252.81478  | 342.29276   | 1 |
| 232 | H | 76.05841 | 89.93894 | 75.34172 | -1735.17426 | 2084.05705  | -263.71605  | 1 |
| 233 | C | 74.84134 | 91.31535 | 76.03945 | 595.23177   | -271.52487  | 442.22352   | 1 |
| 234 | N | 73.64418 | 91.53021 | 76.73174 | 585.53813   | -424.79750  | -105.81303  | 1 |
| 235 | H | 72.98505 | 90.85190 | 77.11175 | 959.88797   | 1327.56823  | -2177.11905 | 1 |
| 236 | H | 73.25311 | 92.44686 | 76.95125 | 1578.48647  | 16.27378    | -2220.76233 | 1 |
| 237 | N | 75.76875 | 92.21804 | 75.50062 | -452.17763  | -390.33541  | -421.51853  | 1 |
| 238 | H | 76.63897 | 92.06362 | 74.99338 | 470.26107   | 1974.25629  | -1817.92087 | 1 |
| 239 | H | 75.65678 | 93.23114 | 75.55875 | 1856.67307  | -1573.97321 | -1224.35416 | 1 |
| 240 | C | 76.81117 | 84.87001 | 76.21086 | -531.47271  | -581.45780  | -55.06206   | 1 |
| 241 | O | 77.48505 | 83.99103 | 75.72613 | -243.00837  | 192.73507   | 609.52485   | 1 |
| 242 | N | 77.12188 | 85.64770 | 77.24765 | 343.49288   | -644.25607  | 38.09164    | 1 |
| 243 | H | 76.42782 | 86.33378 | 77.53843 | -1691.16043 | -1535.97525 | -1484.73099 | 1 |
| 244 | C | 78.31742 | 85.36258 | 78.04120 | 542.66492   | 350.14337   | 454.42563   | 1 |
| 245 | H | 79.03277 | 84.92441 | 77.30375 | 1209.57979  | -2396.95920 | 463.86744   | 1 |
| 246 | C | 78.78634 | 86.65547 | 78.69028 | -737.14309  | 145.93010   | 242.71942   | 1 |
| 247 | H | 77.93622 | 87.06798 | 79.27827 | -1050.18303 | 159.36419   | -2509.06125 | 1 |
| 248 | C | 79.94231 | 86.41249 | 79.64200 | -706.77696  | -252.88343  | -245.16230  | 1 |
| 249 | H | 80.24086 | 87.35091 | 80.18619 | -1624.64039 | -1665.49085 | 1417.86935  | 1 |
| 250 | H | 79.68127 | 85.63717 | 80.41838 | 2566.10521  | 598.51109   | 693.22305   | 1 |
| 251 | H | 80.85286 | 86.03769 | 79.09778 | -1972.69758 | 107.10018   | -1876.34312 | 1 |
| 252 | C | 79.17341 | 87.69346 | 77.65288 | 412.85148   | 672.58832   | -27.69222   | 1 |
| 253 | H | 79.45856 | 88.67292 | 78.12655 | 1447.02277  | 1762.76533  | -1490.78944 | 1 |
| 254 | H | 80.05094 | 87.35213 | 77.03728 | 1320.77379  | -145.20455  | 2378.68491  | 1 |
| 255 | H | 78.32942 | 87.89784 | 76.93872 | -1512.10848 | 1470.52031  | 1724.75147  | 1 |
| 256 | C | 77.92481 | 84.26252 | 79.22123 | -607.11113  | 499.56689   | 73.73769    | 1 |
| 257 | O | 78.81140 | 83.63039 | 79.75407 | 357.97126   | 460.81534   | 356.68785   | 1 |
| 258 | N | 76.63778 | 84.27902 | 79.51269 | 536.55407   | -368.62270  | 332.76306   | 1 |
| 259 | H | 76.03509 | 84.87544 | 78.94944 | 524.38866   | 2297.69985  | 1367.20941  | 1 |
| 260 | C | 76.12484 | 83.28963 | 80.39183 | 46.50277    | -774.29190  | -147.97904  | 1 |
| 261 | H | 76.93324 | 82.52372 | 80.44170 | 1676.51875  | 1883.29066  | 1032.55549  | 1 |
| 262 | C | 75.82155 | 83.94466 | 81.83847 | -559.41456  | -34.19198   | -556.30433  | 1 |
| 263 | H | 74.97247 | 84.66099 | 81.73784 | -64.66664   | 395.18769   | 2695.05373  | 1 |
| 264 | H | 75.46824 | 83.15738 | 82.54588 | -2703.44278 | -60.40056   | 333.79418   | 1 |
| 265 | C | 77.02257 | 84.65449 | 82.39894 | -519.76435  | 377.31045   | 459.42366   | 1 |
| 266 | H | 77.36898 | 85.39954 | 81.64681 | -1746.74323 | 1667.50644  | -1261.73691 | 1 |
| 267 | C | 76.65598 | 85.39338 | 83.68148 | 570.95554   | 16.46261    | -545.27700  | 1 |
| 268 | H | 77.52888 | 85.96004 | 84.09651 | 2391.58273  | 28.05277    | -1305.07271 | 1 |
| 269 | H | 75.83029 | 86.13155 | 83.51487 | 175.75588   | 917.63458   | 2559.43867  | 1 |
| 270 | H | 76.31246 | 84.68690 | 84.47999 | -1063.97851 | -2155.34650 | 1283.00462  | 1 |
| 271 | C | 78.16935 | 83.69708 | 82.68899 | 193.76014   | 2.62946     | -765.53141  | 1 |
| 272 | H | 79.00464 | 84.20713 | 83.23542 | 507.39394   | -846.55087  | 2539.60089  | 1 |
| 273 | H | 77.84158 | 82.83079 | 83.31958 | 1337.57841  | 1818.19054  | 1526.01994  | 1 |
| 274 | H | 78.60532 | 83.28159 | 81.72970 | 1100.88635  | -1172.91350 | -2199.08909 | 1 |
| 275 | C | 74.73008 | 82.79369 | 79.76078 | -549.21115  | 475.64486   | -309.38218  | 1 |
| 276 | O | 74.17200 | 83.36028 | 78.85505 | 556.06106   | -390.37755  | -78.24250   | 1 |
| 277 | O | 74.13545 | 81.66083 | 80.36518 | -572.27940  | -310.19032  | -209.75862  | 1 |
| 278 | H | 74.85013 | 81.45180 | 81.02960 | -1380.08193 | 2212.14486  | 790.85944   | 1 |

Listing 44: C00044.xmolout

|   |   |          |          |          |             |             |                   |              |
|---|---|----------|----------|----------|-------------|-------------|-------------------|--------------|
| 1 |   | 276      |          |          |             |             |                   |              |
| 2 |   | 150.0000 | 150.0000 | 150.0000 | 0.0000      | 0.0000      | 0.0000*****       | 2.7750 11100 |
|   |   | 0.2500   | 300.00   | 0.00     | 0.00        | 0.00        | -1293.7722 0.0000 | 300.0000     |
| 3 | H | 65.03120 | 79.95604 | 82.05380 | -2043.14101 | -1757.64893 | 399.89339         | 1            |
| 4 | N | 64.97378 | 80.60698 | 82.83598 | 426.75047   | 490.45733   | -334.42467        | 1            |
| 5 | H | 64.82898 | 79.97577 | 83.62896 | 442.25559   | -1110.30854 | -2448.52907       | 1            |
| 6 | C | 66.12690 | 81.41037 | 83.00294 | 415.32972   | -666.39213  | 83.73172          | 1            |
| 7 | H | 66.68481 | 81.27106 | 82.05167 | 879.32219   | 2491.00447  | 667.35213         | 1            |
| 8 | C | 65.70781 | 82.95337 | 83.22529 | 31.35357    | 477.41777   | 628.23362         | 1            |

|    |   |          |          |          |             |             |             |   |
|----|---|----------|----------|----------|-------------|-------------|-------------|---|
| 9  | H | 65.33133 | 83.08305 | 84.26782 | 1168.38489  | 2240.25337  | -1019.71136 | 1 |
| 10 | H | 66.60407 | 83.61356 | 83.14245 | -360.43770  | 2534.90498  | 931.67112   | 1 |
| 11 | C | 64.65296 | 83.37007 | 82.23717 | 463.18208   | 512.70242   | -382.34388  | 1 |
| 12 | H | 63.78093 | 82.68725 | 82.35357 | 1725.29117  | 1863.52247  | -987.07854  | 1 |
| 13 | C | 64.20427 | 84.79795 | 82.52595 | 710.42801   | -144.27427  | -313.15367  | 1 |
| 14 | H | 63.38021 | 85.12096 | 81.83942 | 364.20195   | -1033.13725 | 2494.72524  | 1 |
| 15 | H | 63.82684 | 84.90974 | 83.57493 | 2567.61904  | 335.80679   | 847.48802   | 1 |
| 16 | H | 65.04579 | 85.52661 | 82.39838 | -2587.99029 | 680.92867   | -512.16411  | 1 |
| 17 | C | 65.15515 | 83.27353 | 80.80278 | 268.17616   | 741.64379   | -40.42634   | 1 |
| 18 | H | 64.37841 | 83.61401 | 80.07051 | 1283.54314  | -1945.37420 | -1411.27812 | 1 |
| 19 | H | 66.06540 | 83.90608 | 80.64015 | -1258.57796 | 1317.15249  | -2026.02085 | 1 |
| 20 | H | 65.42809 | 82.22139 | 80.53102 | -2502.84526 | 909.80597   | 575.92391   | 1 |
| 21 | C | 66.87647 | 80.78444 | 84.28757 | 619.36578   | -458.64843  | -172.09273  | 1 |
| 22 | O | 66.54856 | 79.68210 | 84.75154 | -81.40433   | 433.87611   | 522.34594   | 1 |
| 23 | N | 67.78490 | 81.62874 | 84.71772 | 175.23996   | -622.20190  | 341.55523   | 1 |
| 24 | H | 67.83878 | 82.47593 | 84.14868 | -876.57256  | -303.22879  | -2561.90213 | 1 |
| 25 | C | 69.00998 | 81.26722 | 85.37686 | -571.88214  | -534.10783  | -106.15033  | 1 |
| 26 | H | 69.02877 | 81.88095 | 86.30394 | -2713.20841 | -16.25800   | -248.80809  | 1 |
| 27 | C | 69.04154 | 79.70808 | 85.70384 | 166.60354   | 288.16399   | -716.09568  | 1 |
| 28 | H | 68.76963 | 79.17746 | 84.74405 | -2097.85574 | 1636.78449  | -586.18044  | 1 |
| 29 | O | 68.09876 | 79.30205 | 86.69543 | -317.80580  | -363.38227  | 484.43082   | 1 |
| 30 | H | 67.27784 | 79.14344 | 86.08732 | 1863.74748  | -1451.84923 | 1357.29467  | 1 |
| 31 | C | 70.53470 | 79.37705 | 86.06422 | 503.80731   | 517.99032   | 318.51606   | 1 |
| 32 | H | 70.69263 | 78.27703 | 86.15455 | 640.61020   | -2157.10410 | -1536.29104 | 1 |
| 33 | H | 71.26197 | 79.75268 | 85.29311 | 1687.88455  | 465.60692   | 2087.56452  | 1 |
| 34 | H | 70.82697 | 79.82996 | 87.04173 | -1293.07895 | -1899.88581 | -1463.57452 | 1 |
| 35 | C | 70.11631 | 81.78367 | 84.31224 | -153.07550  | -733.68902  | 248.70981   | 1 |
| 36 | O | 69.81468 | 81.90739 | 83.15113 | 186.15459   | -480.78787  | -449.34387  | 1 |
| 37 | N | 71.29830 | 82.02072 | 84.90129 | -487.53139  | 543.18517   | 42.03850    | 1 |
| 38 | C | 72.46994 | 82.23933 | 84.10423 | -699.35871  | 69.34393    | 360.10701   | 1 |
| 39 | H | 72.17613 | 82.95031 | 83.29970 | 2.81126     | -221.99807  | -2715.58072 | 1 |
| 40 | C | 73.50187 | 82.81141 | 85.16141 | -507.46439  | -592.59194  | 122.07761   | 1 |
| 41 | H | 74.55803 | 82.57905 | 84.89925 | -1975.08116 | 525.87560   | -1801.71556 | 1 |
| 42 | H | 73.43509 | 83.92040 | 85.22933 | 1588.27743  | -1913.22100 | 1113.83566  | 1 |
| 43 | C | 73.03809 | 82.14128 | 86.49195 | -613.62442  | -457.55993  | -194.14490  | 1 |
| 44 | H | 73.36323 | 81.07776 | 86.54108 | 1707.54637  | -721.27992  | 1996.92523  | 1 |
| 45 | H | 73.42507 | 82.64232 | 87.40765 | 758.23357   | 2100.81767  | 1560.55011  | 1 |
| 46 | C | 71.46065 | 82.26144 | 86.32676 | -352.41524  | 704.96076   | 49.21465    | 1 |
| 47 | H | 70.86274 | 81.51926 | 86.90676 | 1714.76886  | -2070.42778 | 443.35792   | 1 |
| 48 | H | 71.05270 | 83.28387 | 86.51207 | 1224.15040  | 1801.50881  | 1636.97633  | 1 |
| 49 | C | 72.95420 | 80.79762 | 83.49183 | 566.85117   | 537.05831   | 117.62814   | 1 |
| 50 | O | 72.99315 | 79.79950 | 84.17404 | -550.26779  | -406.08867  | 4.21666     | 1 |
| 51 | N | 73.24105 | 80.95112 | 82.20011 | 566.34832   | -425.77725  | 180.18749   | 1 |
| 52 | H | 73.13688 | 81.90695 | 81.85751 | 644.44502   | 2646.80550  | -52.73430   | 1 |
| 53 | C | 74.22599 | 80.12769 | 81.56591 | 612.34801   | -281.48662  | 411.56221   | 1 |
| 54 | H | 74.32459 | 80.62045 | 80.57257 | 1667.23498  | -1490.75142 | 1556.16753  | 1 |
| 55 | C | 75.59064 | 80.21985 | 82.39230 | -714.45746  | -175.43074  | 286.98927   | 1 |
| 56 | H | 75.46408 | 79.65329 | 83.35420 | -787.09484  | 1763.03619  | -1922.46060 | 1 |
| 57 | O | 76.01763 | 81.54912 | 82.74367 | -429.46514  | 516.51932   | -128.40526  | 1 |
| 58 | H | 76.05921 | 81.47905 | 83.71803 | 1981.82785  | 436.16847   | -1818.18182 | 1 |
| 59 | C | 76.57837 | 79.44215 | 81.44637 | 630.79189   | -468.94448  | 76.03230    | 1 |
| 60 | H | 77.59569 | 79.36280 | 81.89524 | -1775.71861 | 2062.30353  | 131.89849   | 1 |
| 61 | H | 76.21898 | 78.39538 | 81.23969 | -1855.14608 | 88.94118    | 1993.53760  | 1 |
| 62 | H | 76.69303 | 79.95679 | 80.46377 | -1504.82350 | -780.94249  | -2132.90992 | 1 |
| 63 | C | 73.64929 | 78.61490 | 81.45296 | 288.57638   | 618.62814   | -397.00270  | 1 |
| 64 | O | 74.37367 | 77.63408 | 81.48306 | 321.70495   | -185.26452  | 574.37218   | 1 |
| 65 | N | 72.35543 | 78.65909 | 81.13604 | -447.05792  | -446.53431  | 367.76425   | 1 |
| 66 | H | 71.92174 | 79.57526 | 81.24860 | 350.31316   | 1975.63644  | -1843.31522 | 1 |
| 67 | C | 71.61948 | 77.44259 | 81.21197 | -511.23061  | 374.03917   | -471.51480  | 1 |
| 68 | H | 72.36844 | 76.64107 | 81.01555 | 2234.79579  | -898.70890  | -1273.45190 | 1 |
| 69 | C | 71.08344 | 77.38157 | 82.72759 | 529.53781   | -159.34528  | 563.72604   | 1 |
| 70 | H | 70.51466 | 76.42014 | 82.83753 | 654.59388   | 2347.94251  | 1217.51488  | 1 |

|     |   |          |          |          |             |             |             |   |
|-----|---|----------|----------|----------|-------------|-------------|-------------|---|
| 71  | H | 71.99351 | 77.30499 | 83.38225 | -1526.55661 | 2103.42026  | 817.87394   | 1 |
| 72  | O | 70.25716 | 78.48816 | 83.15761 | -554.84278  | 14.12789    | 399.58769   | 1 |
| 73  | H | 70.96930 | 79.13824 | 83.35860 | 1297.06236  | 2061.84854  | 1220.68812  | 1 |
| 74  | C | 70.38394 | 77.45249 | 80.16423 | -662.15484  | -412.13544  | 123.62687   | 1 |
| 75  | O | 69.65291 | 76.49082 | 80.09595 | -540.01537  | -317.05804  | 274.91456   | 1 |
| 76  | N | 70.33225 | 78.55795 | 79.41536 | -202.76299  | -690.00100  | -131.49145  | 1 |
| 77  | H | 71.06373 | 79.24626 | 79.58129 | -702.62132  | -2617.37191 | 281.70413   | 1 |
| 78  | C | 69.26255 | 78.76410 | 78.45421 | -491.73914  | 576.34187   | 222.73509   | 1 |
| 79  | H | 68.55013 | 77.94440 | 78.71728 | 1977.17978  | -1823.58850 | -434.68928  | 1 |
| 80  | C | 68.72295 | 80.17094 | 78.63531 | -649.50797  | -328.66843  | 306.11224   | 1 |
| 81  | H | 69.56204 | 80.88102 | 78.45840 | 2075.07803  | 1452.16490  | -1004.45904 | 1 |
| 82  | C | 67.62703 | 80.48284 | 77.63292 | -615.18735  | -489.99689  | -70.96352   | 1 |
| 83  | H | 67.23442 | 81.52956 | 77.75703 | -1226.32661 | -1724.38906 | -1716.47170 | 1 |
| 84  | H | 68.00474 | 80.38836 | 76.57508 | 2381.64273  | -969.84735  | 900.46860   | 1 |
| 85  | H | 66.75308 | 79.78326 | 77.74098 | 2122.74991  | 1702.23946  | -141.36228  | 1 |
| 86  | C | 68.21756 | 80.40260 | 80.04805 | -501.86074  | -479.61276  | -376.42482  | 1 |
| 87  | H | 67.89521 | 81.46826 | 80.20609 | 993.79261   | -2246.95401 | -1177.81305 | 1 |
| 88  | H | 67.33460 | 79.74696 | 80.28298 | 42.71279    | -626.15391  | -2651.37258 | 1 |
| 89  | H | 69.00922 | 80.17358 | 80.81539 | -2026.39012 | -1590.33709 | -887.82922  | 1 |
| 90  | C | 69.96769 | 78.55836 | 76.94363 | -672.89153  | 382.57394   | -156.34072  | 1 |
| 91  | O | 70.06768 | 79.48653 | 76.17685 | 410.04627   | 221.86223   | 500.35950   | 1 |
| 92  | N | 70.33292 | 77.30011 | 76.78658 | -378.11782  | -443.79414  | -441.10984  | 1 |
| 93  | H | 70.11436 | 76.71499 | 77.59184 | 2404.15973  | -568.14894  | 1149.30085  | 1 |
| 94  | C | 70.92843 | 76.79899 | 75.59384 | -544.54484  | 466.16019   | 331.29119   | 1 |
| 95  | H | 70.98853 | 75.70183 | 75.78091 | -1409.80988 | -170.17955  | 2325.32679  | 1 |
| 96  | C | 69.93035 | 77.18939 | 74.41186 | -184.48284  | 116.78282   | -758.89137  | 1 |
| 97  | H | 68.88051 | 76.97544 | 74.71325 | 1893.78641  | 1861.14652  | 611.04528   | 1 |
| 98  | H | 69.97420 | 78.28993 | 74.23113 | -2170.79665 | -974.19311  | 1327.50117  | 1 |
| 99  | C | 70.30780 | 76.39324 | 73.12788 | 389.51668   | 672.81878   | -138.49152  | 1 |
| 100 | H | 71.33287 | 76.68480 | 72.78303 | 510.64577   | 1933.03327  | 1851.02484  | 1 |
| 101 | H | 70.39533 | 75.30884 | 73.36101 | -2302.30869 | -1105.72939 | -948.89774  | 1 |
| 102 | C | 69.28735 | 76.58844 | 71.94262 | -559.93427  | -126.34590  | 542.30857   | 1 |
| 103 | O | 69.45306 | 75.97631 | 70.91988 | -670.36003  | -111.83166  | 76.36448    | 1 |
| 104 | N | 68.28813 | 77.45830 | 72.20351 | -216.06729  | -537.07037  | 446.51379   | 1 |
| 105 | H | 68.12912 | 78.04182 | 73.03331 | -1251.96487 | 1074.12894  | -2168.52500 | 1 |
| 106 | H | 67.57065 | 77.72628 | 71.52070 | -2451.83023 | -720.73851  | 944.84612   | 1 |
| 107 | C | 72.36540 | 77.46322 | 75.26894 | 546.24052   | -563.88337  | -85.11809   | 1 |
| 108 | O | 72.64171 | 77.62360 | 74.08677 | 71.70702    | -307.40463  | 606.69673   | 1 |
| 109 | N | 73.15506 | 77.64419 | 76.31961 | 479.90863   | -504.50129  | 222.86849   | 1 |
| 110 | C | 74.29447 | 78.52448 | 76.25217 | 75.51268    | -600.91904  | 506.73700   | 1 |
| 111 | H | 73.94482 | 79.40274 | 75.66195 | -2033.61562 | 1795.30103  | 254.89480   | 1 |
| 112 | C | 74.58964 | 78.78641 | 77.78942 | 523.79067   | 517.99274   | 284.45581   | 1 |
| 113 | H | 75.62564 | 79.14702 | 77.97840 | 1599.61665  | -1127.00911 | 1895.98173  | 1 |
| 114 | H | 73.89656 | 79.54029 | 78.22667 | -1881.83093 | 1275.82488  | -1501.55016 | 1 |
| 115 | C | 74.31654 | 77.36195 | 78.36141 | -600.05639  | -404.05026  | 316.64485   | 1 |
| 116 | H | 75.13127 | 76.65878 | 78.07188 | -2597.05260 | 496.36221   | 657.73249   | 1 |
| 117 | H | 74.24079 | 77.33435 | 79.48028 | -1666.24518 | 1294.38985  | -1723.90591 | 1 |
| 118 | C | 72.95181 | 77.02177 | 77.62214 | 493.57570   | -129.95376  | -602.56394  | 1 |
| 119 | H | 72.73278 | 75.93864 | 77.47250 | -1469.08415 | -637.84797  | 2204.22581  | 1 |
| 120 | H | 72.05869 | 77.52543 | 78.06191 | -1038.97840 | 1068.88701  | -2280.71789 | 1 |
| 121 | C | 75.54073 | 77.75349 | 75.53554 | 188.88100   | 241.05089   | -727.87821  | 1 |
| 122 | O | 76.50791 | 77.45170 | 76.17972 | 531.88613   | -49.19943   | 427.07960   | 1 |
| 123 | N | 75.29839 | 77.59317 | 74.23385 | 708.14833   | 26.93417    | -179.73509  | 1 |
| 124 | H | 74.35006 | 77.85616 | 73.86178 | -2232.69501 | -1179.09831 | 1023.94816  | 1 |
| 125 | C | 76.30241 | 77.04329 | 73.32097 | -738.32412  | 259.92548   | 104.42456   | 1 |
| 126 | H | 75.86763 | 77.30009 | 72.32645 | 2028.89123  | 1260.02983  | 1311.33324  | 1 |
| 127 | C | 77.63820 | 77.71545 | 73.56643 | -258.65678  | -345.52513  | 661.28459   | 1 |
| 128 | H | 77.94112 | 77.49043 | 74.62049 | -1826.06090 | -1801.46097 | -918.64554  | 1 |
| 129 | C | 78.72371 | 77.19888 | 72.64087 | -541.23400  | 531.92970   | -218.41428  | 1 |
| 130 | H | 79.71484 | 77.68930 | 72.84542 | 1311.73218  | -2219.18200 | 882.19023   | 1 |
| 131 | H | 78.86745 | 76.08180 | 72.76007 | -1048.71298 | 1223.58118  | -2196.97971 | 1 |
| 132 | H | 78.47429 | 77.38971 | 71.56112 | 419.06414   | 1903.92898  | 1903.44670  | 1 |

|     |   |          |          |          |             |             |             |   |
|-----|---|----------|----------|----------|-------------|-------------|-------------|---|
| 133 | C | 77.53678 | 79.22503 | 73.42655 | -423.86431  | 152.66566   | -648.55262  | 1 |
| 134 | H | 78.51097 | 79.73320 | 73.66348 | 105.68386   | -2342.50080 | 1387.51238  | 1 |
| 135 | H | 77.24973 | 79.52445 | 72.38176 | -1695.63603 | -1484.73621 | -1531.02793 | 1 |
| 136 | H | 76.75884 | 79.64907 | 74.11851 | -1853.57121 | -487.39031  | 1936.59343  | 1 |
| 137 | C | 76.35805 | 75.39925 | 73.53319 | 539.71428   | -510.58232  | 267.58633   | 1 |
| 138 | O | 77.37791 | 74.77769 | 73.34043 | -15.93758   | -278.34085  | -624.49402  | 1 |
| 139 | N | 75.10719 | 74.87635 | 73.66422 | -676.81886  | 12.05292    | 276.17960   | 1 |
| 140 | H | 74.55755 | 75.72618 | 73.84940 | -1694.44250 | -373.84189  | -2100.66098 | 1 |
| 141 | C | 74.98597 | 73.77966 | 74.60842 | 412.33078   | -664.70360  | 108.35451   | 1 |
| 142 | H | 75.24566 | 74.20787 | 75.60051 | 1765.77476  | 1294.44366  | 1621.76594  | 1 |
| 143 | C | 73.47640 | 73.36603 | 74.47988 | -179.66635  | -721.95667  | -264.73915  | 1 |
| 144 | H | 72.80653 | 74.11094 | 74.96631 | -607.34922  | 2587.87032  | -598.10018  | 1 |
| 145 | H | 73.18622 | 73.36751 | 73.40482 | -359.69332  | -1479.13954 | -2259.74260 | 1 |
| 146 | C | 73.27550 | 71.93543 | 75.08972 | -240.01076  | 616.02425   | 431.85322   | 1 |
| 147 | H | 74.14088 | 71.28046 | 74.83286 | -1359.17131 | 782.54425   | 2227.99181  | 1 |
| 148 | H | 73.23437 | 71.96529 | 76.20122 | -820.36667  | 85.81767    | -2596.78715 | 1 |
| 149 | C | 71.95270 | 71.33449 | 74.46847 | -513.07015  | 236.18570   | -551.87280  | 1 |
| 150 | H | 71.04977 | 71.86869 | 74.84417 | 1816.11944  | -1183.11722 | -1650.94321 | 1 |
| 151 | H | 71.94556 | 71.46086 | 73.36077 | -1800.04429 | -1361.53473 | 1526.34643  | 1 |
| 152 | C | 71.91237 | 69.82927 | 74.82460 | 726.08972   | -253.19732  | -179.64713  | 1 |
| 153 | H | 72.75497 | 69.23934 | 74.41043 | 1224.27271  | -456.51798  | -2390.90304 | 1 |
| 154 | H | 71.78704 | 69.60796 | 75.90368 | 1206.40339  | -1150.93514 | -2154.90344 | 1 |
| 155 | N | 70.64819 | 69.22060 | 74.13368 | 329.70796   | -633.68968  | -155.67358  | 1 |
| 156 | H | 70.49416 | 68.18158 | 74.28258 | 1348.31305  | 1938.76845  | 1359.00643  | 1 |
| 157 | H | 69.70046 | 69.61611 | 74.40257 | 2096.92035  | 1446.54551  | -966.48890  | 1 |
| 158 | H | 70.62427 | 69.28514 | 73.07518 | -1197.07217 | -2303.53719 | 827.28733   | 1 |
| 159 | C | 75.93365 | 72.52163 | 74.21556 | -378.01186  | -556.17301  | -413.96481  | 1 |
| 160 | O | 76.35431 | 71.79138 | 75.08614 | -409.44433  | -307.55053  | -453.30833  | 1 |
| 161 | N | 75.91204 | 72.24871 | 72.86437 | -429.02477  | 524.70884   | 274.08502   | 1 |
| 162 | H | 75.49225 | 73.12454 | 72.51383 | 1706.34263  | -1425.96036 | 1574.38926  | 1 |
| 163 | C | 77.20026 | 71.90929 | 72.28002 | -45.25864   | -626.22952  | 478.93267   | 1 |
| 164 | H | 77.63074 | 72.90911 | 72.04718 | 1988.63164  | 570.90773   | 1772.87287  | 1 |
| 165 | C | 78.07795 | 71.08463 | 73.28126 | 551.77128   | -20.49526   | -564.54996  | 1 |
| 166 | H | 78.42534 | 71.73251 | 74.12121 | 1434.61535  | -1753.10253 | 1513.99471  | 1 |
| 167 | H | 77.46967 | 70.28932 | 73.77295 | -714.67738  | 1819.09770  | 1898.36494  | 1 |
| 168 | C | 79.29150 | 70.47439 | 72.49168 | 446.99263   | -555.77305  | 338.97221   | 1 |
| 169 | H | 78.93704 | 69.89636 | 71.60917 | 1953.68466  | 1892.25957  | -161.67766  | 1 |
| 170 | H | 79.95272 | 71.27162 | 72.08534 | -403.03785  | 2688.07032  | -188.43591  | 1 |
| 171 | C | 80.08062 | 69.53532 | 73.48517 | 567.86262   | 335.74681   | 434.04421   | 1 |
| 172 | H | 80.50348 | 70.12060 | 74.33389 | -1080.02275 | 1568.26081  | -1948.78900 | 1 |
| 173 | H | 79.40009 | 68.78234 | 73.94621 | -919.54108  | 2111.34692  | 1456.13463  | 1 |
| 174 | C | 81.20103 | 68.83678 | 72.67616 | 195.81897   | 173.33862   | -745.11536  | 1 |
| 175 | H | 80.84145 | 68.09448 | 71.93317 | 1405.67949  | -2301.21089 | -390.08113  | 1 |
| 176 | H | 81.93854 | 69.52463 | 72.20410 | -940.37328  | -1118.32446 | 2299.72133  | 1 |
| 177 | N | 82.03274 | 67.97664 | 73.68200 | 319.26422   | 656.36007   | -42.02424   | 1 |
| 178 | H | 82.83411 | 67.44269 | 73.23762 | 1961.03633  | 619.91968   | 1787.09422  | 1 |
| 179 | H | 82.52767 | 68.48497 | 74.47147 | 854.14343   | -2156.80752 | 1429.08711  | 1 |
| 180 | H | 81.52628 | 67.19934 | 74.19862 | 1237.02905  | -1378.50857 | -1998.28500 | 1 |
| 181 | C | 76.81633 | 71.06685 | 70.93829 | 532.53319   | -268.57236  | 517.55729   | 1 |
| 182 | O | 76.81193 | 71.62840 | 69.86940 | 266.16714   | -290.73804  | -558.88002  | 1 |
| 183 | N | 76.57747 | 69.77067 | 71.22163 | -226.25352  | 640.49678   | -270.32839  | 1 |
| 184 | H | 76.57032 | 69.57683 | 72.22415 | 2007.69063  | -1035.27229 | 1523.50231  | 1 |
| 185 | C | 75.61676 | 69.05356 | 70.43229 | -540.76542  | -573.33303  | 49.50000    | 1 |
| 186 | H | 75.44053 | 68.13115 | 71.02762 | -2374.20950 | -1036.76023 | 843.75774   | 1 |
| 187 | C | 74.31048 | 69.96006 | 70.40691 | -77.09082   | 666.87422   | -415.84136  | 1 |
| 188 | H | 74.60107 | 70.92973 | 69.91667 | -985.81834  | 617.19825   | 2463.91927  | 1 |
| 189 | O | 73.79639 | 70.30787 | 71.72070 | 293.29899   | -391.65602  | -477.80926  | 1 |
| 190 | H | 74.35702 | 71.07445 | 71.93399 | 2528.72714  | -681.76262  | -751.27122  | 1 |
| 191 | C | 73.29911 | 69.16956 | 69.50404 | 252.47363   | -605.14473  | 440.05134   | 1 |
| 192 | H | 72.36821 | 69.75650 | 69.32223 | -2052.65063 | 1456.49051  | -1043.51830 | 1 |
| 193 | H | 73.74567 | 68.91844 | 68.49945 | -2152.98800 | -1661.97574 | -161.70652  | 1 |
| 194 | H | 72.99263 | 68.20982 | 69.98313 | -473.12726  | -1584.27339 | 2165.61725  | 1 |

|     |   |          |          |          |             |             |             |   |
|-----|---|----------|----------|----------|-------------|-------------|-------------|---|
| 195 | C | 76.31824 | 68.71908 | 68.99988 | 360.36307   | 488.46713   | 505.10056   | 1 |
| 196 | O | 75.65784 | 68.67956 | 67.97923 | -200.08817  | -528.03552  | -385.82850  | 1 |
| 197 | N | 77.58398 | 68.37706 | 69.19601 | -597.54095  | -226.44775  | 355.20479   | 1 |
| 198 | H | 77.89838 | 68.44948 | 70.16379 | 2179.23655  | -1300.70981 | -991.33835  | 1 |
| 199 | C | 78.46282 | 67.97788 | 68.16959 | -687.68921  | 297.39807   | -249.45179  | 1 |
| 200 | H | 79.32469 | 67.53232 | 68.71523 | -349.16256  | -2467.37713 | -1101.72831 | 1 |
| 201 | C | 77.74312 | 67.01282 | 67.11365 | 672.47345   | 361.54328   | -201.62880  | 1 |
| 202 | H | 76.80032 | 67.49550 | 66.73867 | 1541.41502  | 582.18425   | 2169.97026  | 1 |
| 203 | H | 78.41459 | 66.88236 | 66.23030 | -2534.67717 | 60.25153    | 997.72295   | 1 |
| 204 | C | 77.43938 | 65.66643 | 67.78455 | 574.26774   | -389.43119  | -377.02542  | 1 |
| 205 | C | 78.49239 | 64.73511 | 68.02880 | 688.82679   | -287.33580  | -257.96133  | 1 |
| 206 | H | 79.53416 | 64.97074 | 67.74407 | 331.14182   | 1470.38163  | 2269.80013  | 1 |
| 207 | C | 76.09813 | 65.36734 | 68.16969 | -383.52382  | -675.04808  | 144.24917   | 1 |
| 208 | H | 75.28834 | 66.09941 | 67.99345 | 4.09847     | 1517.59662  | 2262.86397  | 1 |
| 209 | C | 78.17496 | 63.52089 | 68.63604 | -134.76730  | 428.45285   | -649.50303  | 1 |
| 210 | H | 78.98666 | 62.79697 | 68.82555 | -903.23433  | 1600.49020  | 2011.53387  | 1 |
| 211 | C | 75.83071 | 64.13481 | 68.76996 | -335.53281  | -615.00040  | -364.39058  | 1 |
| 212 | H | 74.78899 | 63.90703 | 69.05608 | 1596.45398  | -1369.33862 | 1732.02659  | 1 |
| 213 | C | 76.84895 | 63.16951 | 69.02261 | 585.48547   | -340.24194  | -406.23938  | 1 |
| 214 | O | 76.58975 | 61.91467 | 69.63293 | -419.15649  | -173.04408  | -511.94141  | 1 |
| 215 | H | 75.61244 | 61.98306 | 69.74528 | -1071.84350 | 1559.71507  | -1960.13012 | 1 |
| 216 | C | 78.89349 | 69.24315 | 67.22431 | 291.41878   | -183.13091  | 710.72246   | 1 |
| 217 | O | 78.79609 | 69.14883 | 66.01918 | 379.87695   | 523.47396   | -222.23622  | 1 |
| 218 | N | 79.42986 | 70.22630 | 67.93848 | 564.30591   | 373.09380   | 277.24371   | 1 |
| 219 | H | 79.44260 | 70.13444 | 68.95410 | -120.59931  | -2436.07824 | -1214.35098 | 1 |
| 220 | C | 79.75677 | 71.43060 | 67.24749 | 404.07514   | -299.37480  | 608.84009   | 1 |
| 221 | H | 79.82087 | 71.11861 | 66.17752 | -1071.07882 | -841.69025  | 2359.66467  | 1 |
| 222 | C | 78.54656 | 72.42285 | 67.52178 | -683.12807  | 68.71770    | -390.13096  | 1 |
| 223 | H | 77.58321 | 71.95348 | 67.21771 | 2068.88918  | 1596.58590  | 770.89603   | 1 |
| 224 | H | 78.42857 | 72.64067 | 68.60883 | 1379.86429  | 2342.49779  | -179.85638  | 1 |
| 225 | C | 78.83556 | 73.71687 | 66.70283 | -176.39967  | 537.49466   | 550.97268   | 1 |
| 226 | H | 79.79346 | 74.18420 | 67.02469 | -396.28051  | 1942.22168  | 1869.33314  | 1 |
| 227 | H | 78.96545 | 73.48050 | 65.62313 | -94.44700   | 586.00678   | -2659.20016 | 1 |
| 228 | C | 77.60442 | 74.71058 | 66.92429 | -291.69381  | -718.18079  | -150.72929  | 1 |
| 229 | H | 76.60052 | 74.32192 | 66.61640 | -2303.38776 | 1089.76242  | 964.62032   | 1 |
| 230 | H | 77.50965 | 75.13002 | 67.95831 | 884.16729   | 2568.80533  | -207.74283  | 1 |
| 231 | N | 77.94263 | 75.75933 | 66.05510 | -594.49522  | -252.81478  | 342.29276   | 1 |
| 232 | H | 78.85445 | 75.71908 | 65.62639 | -1735.17426 | 2084.05705  | -263.71605  | 1 |
| 233 | C | 77.18766 | 76.74388 | 65.77818 | 595.23177   | -271.52487  | 442.22352   | 1 |
| 234 | N | 75.92910 | 76.78972 | 66.38765 | 585.53813   | -424.79750  | -105.81303  | 1 |
| 235 | H | 75.50376 | 76.13646 | 67.04426 | 959.88797   | 1327.56823  | -2177.11905 | 1 |
| 236 | H | 75.23652 | 77.52514 | 66.24367 | 1578.48647  | 16.27378    | -2220.76233 | 1 |
| 237 | N | 77.81004 | 77.61921 | 64.87684 | -452.17763  | -390.33541  | -421.51853  | 1 |
| 238 | H | 78.72391 | 77.57922 | 64.42799 | 470.26107   | 1974.25629  | -1817.92087 | 1 |
| 239 | H | 77.36442 | 78.46712 | 64.52426 | 1856.67307  | -1573.97321 | -1224.35416 | 1 |
| 240 | C | 81.16105 | 72.01303 | 67.84950 | -531.47271  | -581.45780  | -55.06206   | 1 |
| 241 | O | 82.14660 | 72.06448 | 67.12552 | -243.00837  | 192.73507   | 609.52485   | 1 |
| 242 | N | 81.05308 | 72.43184 | 69.09745 | 343.49288   | -644.25607  | 38.09164    | 1 |
| 243 | H | 80.15686 | 72.23287 | 69.53407 | -1691.16043 | -1535.97525 | -1484.73099 | 1 |
| 244 | C | 82.21221 | 72.94737 | 69.81925 | 542.66492   | 350.14337   | 454.42563   | 1 |
| 245 | H | 82.76521 | 73.46580 | 68.99920 | 1209.57979  | -2396.95920 | 463.86744   | 1 |
| 246 | C | 81.74837 | 73.85469 | 70.94741 | -737.14309  | 145.93010   | 242.71942   | 1 |
| 247 | H | 81.14685 | 73.24369 | 71.65639 | -1050.18303 | 159.36419   | -2509.06125 | 1 |
| 248 | C | 82.93240 | 74.42457 | 71.70620 | -706.77696  | -252.88343  | -245.16230  | 1 |
| 249 | H | 82.60578 | 75.07248 | 72.56567 | -1624.64039 | -1665.49085 | 1417.86935  | 1 |
| 250 | H | 83.57725 | 73.60056 | 72.12770 | 2566.10521  | 598.51109   | 693.22305   | 1 |
| 251 | H | 83.58667 | 75.05513 | 71.04264 | -1972.69758 | 107.10018   | -1876.34312 | 1 |
| 252 | C | 80.86175 | 74.97564 | 70.43695 | 412.85148   | 672.58832   | -27.69222   | 1 |
| 253 | H | 80.49142 | 75.62867 | 71.27350 | 1447.02277  | 1762.76533  | -1490.78944 | 1 |
| 254 | H | 81.41192 | 75.63940 | 69.71458 | 1320.77379  | -145.20455  | 2378.68491  | 1 |
| 255 | H | 79.95994 | 74.57631 | 69.89593 | -1512.10848 | 1470.52031  | 1724.75147  | 1 |
| 256 | C | 83.05882 | 71.61491 | 70.36310 | -607.11113  | 499.56689   | 73.73769    | 1 |

|     |   |          |          |          |             |             |             |   |
|-----|---|----------|----------|----------|-------------|-------------|-------------|---|
| 257 | O | 83.22287 | 71.42117 | 71.53740 | 357.97126   | 460.81534   | 356.68785   | 1 |
| 258 | N | 83.51792 | 70.96897 | 69.30707 | 536.55407   | -368.62270  | 332.76306   | 1 |
| 259 | H | 83.26083 | 71.32721 | 68.36342 | 524.38866   | 2297.69985  | 1367.20941  | 1 |
| 260 | C | 84.07205 | 69.67012 | 69.43173 | 46.50277    | -774.29190  | -147.97904  | 1 |
| 261 | H | 84.37111 | 69.42340 | 68.38896 | 1676.51875  | 1883.29066  | 1032.55549  | 1 |
| 262 | C | 85.33000 | 69.72520 | 70.44461 | -559.41456  | -34.19198   | -556.30433  | 1 |
| 263 | H | 84.96524 | 70.04571 | 71.45257 | -64.66664   | 395.18769   | 2695.05373  | 1 |
| 264 | H | 85.78246 | 68.71502 | 70.58461 | -2703.44278 | -60.40056   | 333.79418   | 1 |
| 265 | C | 86.35281 | 70.69796 | 69.92686 | -519.76435  | 377.31045   | 459.42366   | 1 |
| 266 | H | 85.82557 | 71.64012 | 69.65310 | -1746.74323 | 1667.50644  | -1261.73691 | 1 |
| 267 | C | 87.38077 | 71.01604 | 71.00656 | 570.95554   | 16.46261    | -545.27700  | 1 |
| 268 | H | 88.13794 | 71.76139 | 70.65077 | 2391.58273  | 28.05277    | -1305.07271 | 1 |
| 269 | H | 86.89862 | 71.44337 | 71.92322 | 175.75588   | 917.63458   | 2559.43867  | 1 |
| 270 | H | 87.94258 | 70.09999 | 71.32338 | -1063.97851 | -2155.34650 | 1283.00462  | 1 |
| 271 | C | 87.06904 | 70.16231 | 68.69401 | 193.76014   | 2.62946     | -765.53141  | 1 |
| 272 | H | 87.84115 | 70.88320 | 68.31999 | 507.39394   | -846.55087  | 2539.60089  | 1 |
| 273 | H | 87.59541 | 69.19696 | 68.90921 | 1337.57841  | 1818.19054  | 1526.01994  | 1 |
| 274 | H | 86.35849 | 69.97263 | 67.84924 | 1100.88635  | -1172.91350 | -2199.08909 | 1 |
| 275 | C | 82.94606 | 68.66221 | 69.98014 | -549.21115  | 475.64486   | -309.38218  | 1 |
| 276 | O | 81.76680 | 68.90987 | 70.00801 | 556.06106   | -390.37755  | -78.24250   | 1 |
| 277 | O | 83.40385 | 67.37905 | 70.37164 | -572.27940  | -310.19032  | -209.75862  | 1 |
| 278 | H | 84.36135 | 67.47863 | 70.11653 | -1380.08193 | 2212.14486  | 790.85944   | 1 |

Listing 45: C00045.xmolout

|    |   |          |          |          |             |             |             |        |          |
|----|---|----------|----------|----------|-------------|-------------|-------------|--------|----------|
| 1  |   | 276      |          |          |             |             |             |        |          |
| 2  |   | 150.0000 | 150.0000 | 150.0000 | 0.0000      | 0.0000      | 0.0000***** | 1.7062 | 6825     |
|    |   | 0.2500   | 300.00   | 0.00     | 0.00        | 0.00        | -1293.7502  | 0.0000 | 300.0000 |
| 3  | H | 79.81510 | 83.67426 | 78.64968 | -2043.14101 | -1757.64893 | 399.89339   |        | 1        |
| 4  | N | 80.48079 | 83.44081 | 77.91540 | 426.75047   | 490.45733   | -334.42467  |        | 1        |
| 5  | H | 80.78883 | 82.51091 | 78.19175 | 442.25559   | -1110.30854 | -2448.52907 |        | 1        |
| 6  | C | 81.52316 | 84.37474 | 77.73452 | 415.32972   | -666.39213  | 83.73172    |        | 1        |
| 7  | H | 81.01395 | 85.35656 | 77.82982 | 879.32219   | 2491.00447  | 667.35213   |        | 1        |
| 8  | C | 82.67335 | 84.13389 | 78.83060 | 31.35357    | 477.41777   | 628.23362   |        | 1        |
| 9  | H | 83.10774 | 83.11525 | 78.68514 | 1168.38489  | 2240.25337  | -1019.71136 |        | 1        |
| 10 | H | 83.51399 | 84.84836 | 78.65774 | -360.43770  | 2534.90498  | 931.67112   |        | 1        |
| 11 | C | 82.13054 | 84.28012 | 80.23128 | 463.18208   | 512.70242   | -382.34388  |        | 1        |
| 12 | H | 81.24365 | 83.61705 | 80.33979 | 1725.29117  | 1863.52247  | -987.07854  |        | 1        |
| 13 | C | 83.17679 | 83.84821 | 81.25085 | 710.42801   | -144.27427  | -313.15367  |        | 1        |
| 14 | H | 82.78808 | 83.92251 | 82.29940 | 364.20195   | -1033.13725 | 2494.72524  |        | 1        |
| 15 | H | 83.49955 | 82.78707 | 81.09011 | 2567.61904  | 335.80679   | 847.48802   |        | 1        |
| 16 | H | 84.09619 | 84.48638 | 81.19296 | -2587.99029 | 680.92867   | -512.16411  |        | 1        |
| 17 | C | 81.70459 | 85.71359 | 80.51542 | 268.17616   | 741.64379   | -40.42634   |        | 1        |
| 18 | H | 81.31824 | 85.82990 | 81.56110 | 1283.54314  | -1945.37420 | -1411.27812 |        | 1        |
| 19 | H | 82.55978 | 86.42828 | 80.39713 | -1258.57796 | 1317.15249  | -2026.02085 |        | 1        |
| 20 | H | 80.89146 | 86.05181 | 79.82287 | -2502.84526 | 909.80597   | 575.92391   |        | 1        |
| 21 | C | 82.15241 | 84.09692 | 76.24359 | 619.36578   | -458.64843  | -172.09273  |        | 1        |
| 22 | O | 83.19054 | 83.49314 | 76.10104 | -81.40433   | 433.87611   | 522.34594   |        | 1        |
| 23 | N | 81.33807 | 84.61524 | 75.33173 | 175.23996   | -622.20190  | 341.55523   |        | 1        |
| 24 | H | 80.52245 | 85.11651 | 75.68322 | -876.57256  | -303.22879  | -2561.90213 |        | 1        |
| 25 | C | 81.63483 | 84.59875 | 73.94445 | -571.88214  | -534.10783  | -106.15033  |        | 1        |
| 26 | H | 80.80131 | 85.19364 | 73.50824 | -2713.20841 | -16.25800   | -248.80809  |        | 1        |
| 27 | C | 83.06028 | 85.31737 | 73.79223 | 166.60354   | 288.16399   | -716.09568  |        | 1        |
| 28 | H | 83.82831 | 84.60890 | 74.21454 | -2097.85574 | 1636.78449  | -586.18044  |        | 1        |
| 29 | O | 83.21004 | 86.56041 | 74.50296 | -317.80580  | -363.38227  | 484.43082   |        | 1        |
| 30 | H | 83.87091 | 86.30483 | 75.17809 | 1863.74748  | -1451.84923 | 1357.29467  |        | 1        |
| 31 | C | 83.24378 | 85.44418 | 72.23616 | 503.80731   | 517.99032   | 318.51606   |        | 1        |
| 32 | H | 84.24054 | 85.87374 | 71.98085 | 640.61020   | -2157.10410 | -1536.29104 |        | 1        |
| 33 | H | 83.16795 | 84.45312 | 71.71889 | 1687.88455  | 465.60692   | 2087.56452  |        | 1        |
| 34 | H | 82.47384 | 86.11551 | 71.78936 | -1293.07895 | -1899.88581 | -1463.57452 |        | 1        |
| 35 | C | 81.66085 | 83.05908 | 73.40927 | -153.07550  | -733.68902  | 248.70981   |        | 1        |
| 36 | O | 82.61655 | 82.71742 | 72.75732 | 186.15459   | -480.78787  | -449.34387  |        | 1        |



|    |   |          |          |          |             |             |             |   |
|----|---|----------|----------|----------|-------------|-------------|-------------|---|
| 37 | N | 80.55510 | 82.35355 | 73.68671 | -487.53139  | 543.18517   | 42.03850    | 1 |
| 38 | C | 80.42589 | 80.98994 | 73.26950 | -699.35871  | 69.34393    | 360.10701   | 1 |
| 39 | H | 81.44086 | 80.52928 | 73.29481 | 2.81126     | -221.99807  | -2715.58072 | 1 |
| 40 | C | 79.37033 | 80.43228 | 74.32309 | -507.46439  | -592.59194  | 122.07761   | 1 |
| 41 | H | 78.86834 | 79.50001 | 73.98005 | -1975.08116 | 525.87560   | -1801.71556 | 1 |
| 42 | H | 79.84766 | 80.20141 | 75.30127 | 1588.27743  | -1913.22100 | 1113.83566  | 1 |
| 43 | C | 78.40075 | 81.64710 | 74.43264 | -613.62442  | -457.55993  | -194.14490  | 1 |
| 44 | H | 77.74794 | 81.71285 | 73.53222 | 1707.54637  | -721.27992  | 1996.92523  | 1 |
| 45 | H | 77.72538 | 81.60553 | 75.31664 | 758.23357   | 2100.81767  | 1560.55011  | 1 |
| 46 | C | 79.44611 | 82.84466 | 74.49252 | -352.41524  | 704.96076   | 49.21465    | 1 |
| 47 | H | 79.09577 | 83.81052 | 74.05896 | 1714.76886  | -2070.42778 | 443.35792   | 1 |
| 48 | H | 79.87782 | 83.02908 | 75.50534 | 1224.15040  | 1801.50881  | 1636.97633  | 1 |
| 49 | C | 79.71829 | 80.91930 | 71.79727 | 566.85117   | 537.05831   | 117.62814   | 1 |
| 50 | O | 79.06537 | 81.82023 | 71.33976 | -550.26779  | -406.08867  | 4.21666     | 1 |
| 51 | N | 79.81070 | 79.64288 | 71.37857 | 566.34832   | -425.77725  | 180.18749   | 1 |
| 52 | H | 80.50038 | 79.08613 | 71.88840 | 644.44502   | 2646.80550  | -52.73430   | 1 |
| 53 | C | 79.72704 | 79.41644 | 69.94860 | 612.34801   | -281.48662  | 411.56221   | 1 |
| 54 | H | 80.42092 | 80.15858 | 69.49578 | 1667.23498  | -1490.75142 | 1556.16753  | 1 |
| 55 | C | 80.19249 | 77.91123 | 69.74377 | -714.45746  | -175.43074  | 286.98927   | 1 |
| 56 | H | 79.36449 | 77.22842 | 70.07965 | -787.09484  | 1763.03619  | -1922.46060 | 1 |
| 57 | O | 81.36051 | 77.50532 | 70.49314 | -429.46514  | 516.51932   | -128.40526  | 1 |
| 58 | H | 81.00591 | 76.75003 | 71.00060 | 1981.82785  | 436.16847   | -1818.18182 | 1 |
| 59 | C | 80.32399 | 77.83564 | 68.17800 | 630.79189   | -468.94448  | 76.03230    | 1 |
| 60 | H | 80.53630 | 76.79591 | 67.83637 | -1775.71861 | 2062.30353  | 131.89849   | 1 |
| 61 | H | 79.39154 | 78.17321 | 67.66316 | -1855.14608 | 88.94118    | 1993.53760  | 1 |
| 62 | H | 81.15703 | 78.47899 | 67.81027 | -1504.82350 | -780.94249  | -2132.90992 | 1 |
| 63 | C | 78.19870 | 79.61535 | 69.46576 | 288.57638   | 618.62814   | -397.00270  | 1 |
| 64 | O | 77.94825 | 79.76895 | 68.29374 | 321.70495   | -185.26452  | 574.37218   | 1 |
| 65 | N | 77.31524 | 79.39399 | 70.47488 | -447.05792  | -446.53431  | 367.76425   | 1 |
| 66 | H | 77.79577 | 79.33978 | 71.37642 | 350.31316   | 1975.63644  | -1843.31522 | 1 |
| 67 | C | 76.17979 | 80.30800 | 70.45473 | -511.23061  | 374.03917   | -471.51480  | 1 |
| 68 | H | 76.56964 | 81.26659 | 70.04248 | 2234.79579  | -898.70890  | -1273.45190 | 1 |
| 69 | C | 75.13713 | 79.61316 | 69.45885 | 529.53781   | -159.34528  | 563.72604   | 1 |
| 70 | H | 74.30802 | 80.34214 | 69.25159 | 654.59388   | 2347.94251  | 1217.51488  | 1 |
| 71 | H | 75.69357 | 79.46541 | 68.49263 | -1526.55661 | 2103.42026  | 817.87394   | 1 |
| 72 | O | 74.54367 | 78.36863 | 69.91244 | -554.84278  | 14.12789    | 399.58769   | 1 |
| 73 | H | 75.33063 | 77.79303 | 69.85282 | 1297.06236  | 2061.84854  | 1220.68812  | 1 |
| 74 | C | 75.64942 | 80.42218 | 71.95285 | -662.15484  | -412.13544  | 123.62687   | 1 |
| 75 | O | 75.99650 | 79.64830 | 72.86173 | -540.01537  | -317.05804  | 274.91456   | 1 |
| 76 | N | 74.80093 | 81.42537 | 72.03314 | -202.76299  | -690.00100  | -131.49145  | 1 |
| 77 | H | 74.59068 | 81.92487 | 71.17008 | -702.62132  | -2617.37191 | 281.70413   | 1 |
| 78 | C | 74.21369 | 81.80860 | 73.29811 | -491.73914  | 576.34187   | 222.73509   | 1 |
| 79 | H | 74.78651 | 81.21843 | 74.05567 | 1977.17978  | -1823.58850 | -434.68928  | 1 |
| 80 | C | 74.33889 | 83.32470 | 73.42542 | -649.50797  | -328.66843  | 306.11224   | 1 |
| 81 | H | 73.83238 | 83.77893 | 72.54500 | 2075.07803  | 1452.16490  | -1004.45904 | 1 |
| 82 | C | 73.65249 | 83.83047 | 74.67897 | -615.18735  | -489.99689  | -70.96352   | 1 |
| 83 | H | 73.69916 | 84.95227 | 74.75572 | -1226.32661 | -1724.38906 | -1716.47170 | 1 |
| 84 | H | 72.56537 | 83.53711 | 74.70123 | 2381.64273  | -969.84735  | 900.46860   | 1 |
| 85 | H | 74.12822 | 83.41160 | 75.60881 | 2122.74991  | 1702.23946  | -141.36228  | 1 |
| 86 | C | 75.78983 | 83.76549 | 73.39803 | -501.86074  | -479.61276  | -376.42482  | 1 |
| 87 | H | 75.88747 | 84.88588 | 73.37407 | 993.79261   | -2246.95401 | -1177.81305 | 1 |
| 88 | H | 76.34858 | 83.40207 | 74.30413 | 42.71279    | -626.15391  | -2651.37258 | 1 |
| 89 | H | 76.32639 | 83.36135 | 72.49446 | -2026.39012 | -1590.33709 | -887.82922  | 1 |
| 90 | C | 72.58661 | 81.39750 | 73.22030 | -672.89153  | 382.57394   | -156.34072  | 1 |
| 91 | O | 71.85517 | 81.85436 | 72.37787 | 410.04627   | 221.86223   | 500.35950   | 1 |
| 92 | N | 72.29741 | 80.61157 | 74.24178 | -378.11782  | -443.79414  | -441.10984  | 1 |
| 93 | H | 73.05063 | 80.35371 | 74.87578 | 2404.15973  | -568.14894  | 1149.30085  | 1 |
| 94 | C | 70.98747 | 80.07892 | 74.36761 | -544.54484  | 466.16019   | 331.29119   | 1 |
| 95 | H | 70.41312 | 80.52460 | 73.52431 | -1409.80988 | -170.17955  | 2325.32679  | 1 |
| 96 | C | 71.16652 | 78.50329 | 74.27742 | -184.48284  | 116.78282   | -758.89137  | 1 |
| 97 | H | 71.68772 | 78.26135 | 73.32403 | 1893.78641  | 1861.14652  | 611.04528   | 1 |
| 98 | H | 71.83455 | 78.13568 | 75.08890 | -2170.79665 | -974.19311  | 1327.50117  | 1 |

|     |   |          |          |          |             |             |             |   |
|-----|---|----------|----------|----------|-------------|-------------|-------------|---|
| 99  | C | 69.78587 | 77.78159 | 74.34177 | 389.51668   | 672.81878   | -138.49152  | 1 |
| 100 | H | 69.35345 | 77.85477 | 75.36771 | 510.64577   | 1933.03327  | 1851.02484  | 1 |
| 101 | H | 69.04656 | 78.30464 | 73.69549 | -2302.30869 | -1105.72939 | -948.89774  | 1 |
| 102 | C | 69.87230 | 76.26613 | 73.91154 | -559.93427  | -126.34590  | 542.30857   | 1 |
| 103 | O | 68.88016 | 75.58308 | 73.90702 | -670.36003  | -111.83166  | 76.36448    | 1 |
| 104 | N | 71.11434 | 75.85860 | 73.56822 | -216.06729  | -537.07037  | 446.51379   | 1 |
| 105 | H | 71.97530 | 76.40994 | 73.48759 | -1251.96487 | 1074.12894  | -2168.52500 | 1 |
| 106 | H | 71.32685 | 74.93354 | 73.17933 | -2451.83023 | -720.73851  | 944.84612   | 1 |
| 107 | C | 70.46882 | 80.48972 | 75.86972 | 546.24052   | -563.88337  | -85.11809   | 1 |
| 108 | O | 70.98602 | 79.97820 | 76.83045 | 71.70702    | -307.40463  | 606.69673   | 1 |
| 109 | N | 69.46314 | 81.37589 | 75.81811 | 479.90863   | -504.50129  | 222.86849   | 1 |
| 110 | C | 68.98147 | 82.04572 | 76.98902 | 75.51268    | -600.91904  | 506.73700   | 1 |
| 111 | H | 69.87092 | 82.24598 | 77.62961 | -2033.61562 | 1795.30103  | 254.89480   | 1 |
| 112 | C | 68.26697 | 83.33288 | 76.39230 | 523.79067   | 517.99274   | 284.45581   | 1 |
| 113 | H | 67.49866 | 83.75429 | 77.07945 | 1599.61665  | -1127.00911 | 1895.98173  | 1 |
| 114 | H | 68.99463 | 84.14930 | 76.18541 | -1881.83093 | 1275.82488  | -1501.55016 | 1 |
| 115 | C | 67.66652 | 82.75928 | 75.07158 | -600.05639  | -404.05026  | 316.64485   | 1 |
| 116 | H | 66.74505 | 82.16974 | 75.27653 | -2597.05260 | 496.36221   | 657.73249   | 1 |
| 117 | H | 67.38555 | 83.54221 | 74.33157 | -1666.24518 | 1294.38985  | -1723.90591 | 1 |
| 118 | C | 68.85272 | 81.82455 | 74.57454 | 493.57570   | -129.95376  | -602.56394  | 1 |
| 119 | H | 68.53470 | 80.92613 | 73.99493 | -1469.08415 | -637.84797  | 2204.22581  | 1 |
| 120 | H | 69.65988 | 82.35878 | 74.01758 | -1038.97840 | 1068.88701  | -2280.71789 | 1 |
| 121 | C | 67.87176 | 81.12447 | 77.75756 | 188.88100   | 241.05089   | -727.87821  | 1 |
| 122 | O | 67.06227 | 81.64281 | 78.49497 | 531.88613   | -49.19943   | 427.07960   | 1 |
| 123 | N | 68.00351 | 79.83879 | 77.43208 | 708.14833   | 26.93417    | -179.73509  | 1 |
| 124 | H | 68.80397 | 79.62870 | 76.82545 | -2232.69501 | -1179.09831 | 1023.94816  | 1 |
| 125 | C | 67.56242 | 78.87015 | 78.39755 | -738.32412  | 259.92548   | 104.42456   | 1 |
| 126 | H | 67.62318 | 79.38599 | 79.38113 | 2028.89123  | 1260.02983  | 1311.33324  | 1 |
| 127 | C | 66.06845 | 78.50553 | 78.00271 | -258.65678  | -345.52513  | 661.28459   | 1 |
| 128 | H | 65.90823 | 78.68417 | 76.91760 | -1826.06090 | -1801.46097 | -918.64554  | 1 |
| 129 | C | 65.73719 | 77.02260 | 78.38570 | -541.23400  | 531.92970   | -218.41428  | 1 |
| 130 | H | 64.66967 | 76.77308 | 78.18003 | 1311.73218  | -2219.18200 | 882.19023   | 1 |
| 131 | H | 66.36485 | 76.30511 | 77.80277 | -1048.71298 | 1223.58118  | -2196.97971 | 1 |
| 132 | H | 65.92481 | 76.82556 | 79.46729 | 419.06414   | 1903.92898  | 1903.44670  | 1 |
| 133 | C | 65.12763 | 79.40830 | 78.87244 | -423.86431  | 152.66566   | -648.55262  | 1 |
| 134 | H | 64.06817 | 79.36183 | 78.52603 | 105.68386   | -2342.50080 | 1387.51238  | 1 |
| 135 | H | 65.13944 | 79.09954 | 79.94449 | -1695.63603 | -1484.73621 | -1531.02793 | 1 |
| 136 | H | 65.45879 | 80.48715 | 78.83400 | -1853.57121 | -487.39031  | 1936.59343  | 1 |
| 137 | C | 68.53624 | 77.57320 | 78.24368 | 539.71428   | -510.58232  | 267.58633   | 1 |
| 138 | O | 68.50882 | 76.86203 | 77.24338 | -15.93758   | -278.34085  | -624.49402  | 1 |
| 139 | N | 69.24319 | 77.45293 | 79.34472 | -676.81886  | 12.05292    | 276.17960   | 1 |
| 140 | H | 69.11775 | 78.18674 | 80.04184 | -1694.44250 | -373.84189  | -2100.66098 | 1 |
| 141 | C | 69.95375 | 76.27482 | 79.68984 | 412.33078   | -664.70360  | 108.35451   | 1 |
| 142 | H | 70.28686 | 76.46963 | 80.73388 | 1765.77476  | 1294.44366  | 1621.76594  | 1 |
| 143 | C | 68.94217 | 75.06113 | 79.56358 | -179.66635  | -721.95667  | -264.73915  | 1 |
| 144 | H | 68.04803 | 75.20808 | 80.20962 | -607.34922  | 2587.87032  | -598.10018  | 1 |
| 145 | H | 68.54602 | 74.98459 | 78.52494 | -359.69332  | -1479.13954 | -2259.74260 | 1 |
| 146 | C | 69.73032 | 73.76777 | 79.95615 | -240.01076  | 616.02425   | 431.85322   | 1 |
| 147 | H | 70.71152 | 73.73235 | 79.42425 | -1359.17131 | 782.54425   | 2227.99181  | 1 |
| 148 | H | 69.96847 | 73.75379 | 81.04354 | -820.36667  | 85.81767    | -2596.78715 | 1 |
| 149 | C | 68.84993 | 72.52570 | 79.54270 | -513.07015  | 236.18570   | -551.87280  | 1 |
| 150 | H | 67.89907 | 72.49016 | 80.12194 | 1816.11944  | -1183.11722 | -1650.94321 | 1 |
| 151 | H | 68.55425 | 72.58698 | 78.47008 | -1800.04429 | -1361.53473 | 1526.34643  | 1 |
| 152 | C | 69.71971 | 71.26184 | 79.79579 | 726.08972   | -253.19732  | -179.64713  | 1 |
| 153 | H | 70.66984 | 71.24231 | 79.22001 | 1224.27271  | -456.51798  | -2390.90304 | 1 |
| 154 | H | 69.92036 | 71.04452 | 80.86595 | 1206.40339  | -1150.93514 | -2154.90344 | 1 |
| 155 | N | 68.92269 | 70.06329 | 79.26543 | 329.70796   | -633.68968  | -155.67358  | 1 |
| 156 | H | 69.37277 | 69.12372 | 79.43415 | 1348.31305  | 1938.76845  | 1359.00643  | 1 |
| 157 | H | 67.96991 | 69.89414 | 79.68563 | 2096.92035  | 1446.54551  | -966.48890  | 1 |
| 158 | H | 68.75055 | 70.08316 | 78.11416 | -1197.07217 | -2303.53719 | 827.28733   | 1 |
| 159 | C | 71.22821 | 75.99142 | 78.68401 | -378.01186  | -556.17301  | -413.96481  | 1 |
| 160 | O | 72.33404 | 76.11059 | 79.14375 | -409.44433  | -307.55053  | -453.30833  | 1 |

|     |   |          |          |          |             |             |             |   |
|-----|---|----------|----------|----------|-------------|-------------|-------------|---|
| 161 | N | 70.84518 | 75.64678 | 77.46473 | -429.02477  | 524.70884   | 274.08502   | 1 |
| 162 | H | 69.84173 | 75.76610 | 77.17490 | 1706.34263  | -1425.96036 | 1574.38926  | 1 |
| 163 | C | 71.71563 | 74.89736 | 76.62719 | -45.25864   | -626.22952  | 478.93267   | 1 |
| 164 | H | 71.20864 | 74.96814 | 75.63963 | 1988.63164  | 570.90773   | 1772.87287  | 1 |
| 165 | C | 73.13002 | 75.60150 | 76.69326 | 551.77128   | -20.49526   | -564.54996  | 1 |
| 166 | H | 72.99130 | 76.69972 | 76.81851 | 1434.61535  | -1753.10253 | 1513.99471  | 1 |
| 167 | H | 73.70138 | 75.27146 | 77.59445 | -714.67738  | 1819.09770  | 1898.36494  | 1 |
| 168 | C | 73.91969 | 75.27794 | 75.37970 | 446.99263   | -555.77305  | 338.97221   | 1 |
| 169 | H | 74.39166 | 74.27023 | 75.43263 | 1953.68466  | 1892.25957  | -161.67766  | 1 |
| 170 | H | 73.23711 | 75.24513 | 74.50332 | -403.03785  | 2688.07032  | -188.43591  | 1 |
| 171 | C | 74.99890 | 76.41764 | 75.19837 | 567.86262   | 335.74681   | 434.04421   | 1 |
| 172 | H | 74.52102 | 77.42419 | 75.22619 | -1080.02275 | 1568.26081  | -1948.78900 | 1 |
| 173 | H | 75.72460 | 76.40172 | 76.04981 | -919.54108  | 2111.34692  | 1456.13463  | 1 |
| 174 | C | 75.73007 | 76.20469 | 73.84691 | 195.81897   | 173.33862   | -745.11536  | 1 |
| 175 | H | 76.24846 | 75.22787 | 73.76330 | 1405.67949  | -2301.21089 | -390.08113  | 1 |
| 176 | H | 75.10126 | 76.37487 | 72.94812 | -940.37328  | -1118.32446 | 2299.72133  | 1 |
| 177 | N | 76.85831 | 77.25785 | 73.74465 | 319.26422   | 656.36007   | -42.02424   | 1 |
| 178 | H | 77.57055 | 77.06056 | 72.98521 | 1961.03633  | 619.91968   | 1787.09422  | 1 |
| 179 | H | 76.53240 | 78.31893 | 73.53205 | 854.14343   | -2156.80752 | 1429.08711  | 1 |
| 180 | H | 77.49674 | 77.33304 | 74.58584 | 1237.02905  | -1378.50857 | -1998.28500 | 1 |
| 181 | C | 71.83172 | 73.34618 | 77.16109 | 532.53319   | -268.57236  | 517.55729   | 1 |
| 182 | O | 72.42096 | 73.02310 | 78.16587 | 266.16714   | -290.73804  | -558.88002  | 1 |
| 183 | N | 71.13652 | 72.54963 | 76.33690 | -226.25352  | 640.49678   | -270.32839  | 1 |
| 184 | H | 70.76587 | 73.01187 | 75.50602 | 2007.69063  | -1035.27229 | 1523.50231  | 1 |
| 185 | C | 71.66416 | 71.20290 | 76.22483 | -540.76542  | -573.33303  | 49.50000    | 1 |
| 186 | H | 72.00868 | 70.93438 | 77.25207 | -2374.20950 | -1036.76023 | 843.75774   | 1 |
| 187 | C | 70.53861 | 70.29663 | 75.66509 | -77.09082   | 666.87422   | -415.84136  | 1 |
| 188 | H | 70.01584 | 70.76868 | 74.80676 | -985.81834  | 617.19825   | 2463.91927  | 1 |
| 189 | O | 69.23875 | 70.08246 | 76.68861 | 293.29899   | -391.65602  | -477.80926  | 1 |
| 190 | H | 68.62027 | 70.64641 | 76.22888 | 2528.72714  | -681.76262  | -751.27122  | 1 |
| 191 | C | 71.13702 | 68.92400 | 75.30270 | 252.47363   | -605.14473  | 440.05134   | 1 |
| 192 | H | 70.36355 | 68.24741 | 74.86134 | -2052.65063 | 1456.49051  | -1043.51830 | 1 |
| 193 | H | 71.97051 | 69.01391 | 74.55989 | -2152.98800 | -1661.97574 | -161.70652  | 1 |
| 194 | H | 71.55273 | 68.41284 | 76.20670 | -473.12726  | -1584.27339 | 2165.61725  | 1 |
| 195 | C | 72.90841 | 71.27359 | 75.13755 | 360.36307   | 488.46713   | 505.10056   | 1 |
| 196 | O | 72.93296 | 72.05248 | 74.21654 | -200.08817  | -528.03552  | -385.82850  | 1 |
| 197 | N | 73.74611 | 70.28895 | 75.43917 | -597.54095  | -226.44775  | 355.20479   | 1 |
| 198 | H | 73.53907 | 69.72238 | 76.26010 | 2179.23655  | -1300.70981 | -991.33835  | 1 |
| 199 | C | 74.84062 | 70.03714 | 74.58489 | -687.68921  | 297.39807   | -249.45179  | 1 |
| 200 | H | 74.78866 | 70.83355 | 73.80764 | -349.16256  | -2467.37713 | -1101.72831 | 1 |
| 201 | C | 76.16762 | 70.07021 | 75.48238 | 672.47345   | 361.54328   | -201.62880  | 1 |
| 202 | H | 76.11194 | 69.30105 | 76.28584 | 1541.41502  | 582.18425   | 2169.97026  | 1 |
| 203 | H | 77.05652 | 69.82061 | 74.85849 | -2534.67717 | 60.25153    | 997.72295   | 1 |
| 204 | C | 76.28867 | 71.47674 | 76.08536 | 574.26774   | -389.43119  | -377.02542  | 1 |
| 205 | C | 77.00281 | 72.49433 | 75.38463 | 688.82679   | -287.33580  | -257.96133  | 1 |
| 206 | H | 77.48223 | 72.27815 | 74.41291 | 331.14182   | 1470.38163  | 2269.80013  | 1 |
| 207 | C | 75.64756 | 71.77541 | 77.32556 | -383.52382  | -675.04808  | 144.24917   | 1 |
| 208 | H | 75.06643 | 71.00053 | 77.85705 | 4.09847     | 1517.59662  | 2262.86397  | 1 |
| 209 | C | 77.08802 | 73.76565 | 75.95491 | -134.76730  | 428.45285   | -649.50303  | 1 |
| 210 | H | 77.65049 | 74.54799 | 75.41657 | -903.23433  | 1600.49020  | 2011.53387  | 1 |
| 211 | C | 75.75437 | 73.06601 | 77.85157 | -335.53281  | -615.00040  | -364.39058  | 1 |
| 212 | H | 75.24517 | 73.28198 | 78.80773 | 1596.45398  | -1369.33862 | 1732.02659  | 1 |
| 213 | C | 76.48477 | 74.10201 | 77.20094 | 585.48547   | -340.24194  | -406.23938  | 1 |
| 214 | O | 76.61176 | 75.41718 | 77.73558 | -419.15649  | -173.04408  | -511.94141  | 1 |
| 215 | H | 76.10525 | 75.30091 | 78.57303 | -1071.84350 | 1559.71507  | -1960.13012 | 1 |
| 216 | C | 74.72359 | 68.51228 | 73.97669 | 291.41878   | -183.13091  | 710.72246   | 1 |
| 217 | O | 74.77887 | 68.36756 | 72.77664 | 379.87695   | 523.47396   | -222.23622  | 1 |
| 218 | N | 74.53273 | 67.60078 | 74.92267 | 564.30591   | 373.09380   | 277.24371   | 1 |
| 219 | H | 74.48559 | 67.96430 | 75.87313 | -120.59931  | -2436.07824 | -1214.35098 | 1 |
| 220 | C | 74.86264 | 66.22892 | 74.71450 | 404.07514   | -299.37480  | 608.84009   | 1 |
| 221 | H | 74.33544 | 65.68740 | 75.53113 | -1071.07882 | -841.69025  | 2359.66467  | 1 |
| 222 | C | 74.36306 | 65.85888 | 73.25939 | -683.12807  | 68.71770    | -390.13096  | 1 |

|     |   |          |          |          |             |             |             |   |
|-----|---|----------|----------|----------|-------------|-------------|-------------|---|
| 223 | H | 73.48364 | 66.49873 | 73.01180 | 2068.88918  | 1596.58590  | 770.89603   | 1 |
| 224 | H | 75.14019 | 66.13872 | 72.50944 | 1379.86429  | 2342.49779  | -179.85638  | 1 |
| 225 | C | 73.99217 | 64.35099 | 73.11025 | -176.39967  | 537.49466   | 550.97268   | 1 |
| 226 | H | 74.88894 | 63.69395 | 73.15800 | -396.28051  | 1942.22168  | 1869.33314  | 1 |
| 227 | H | 73.31824 | 64.00972 | 73.92667 | -94.44700   | 586.00678   | -2659.20016 | 1 |
| 228 | C | 73.26814 | 64.26452 | 71.68469 | -291.69381  | -718.18079  | -150.72929  | 1 |
| 229 | H | 72.36803 | 64.91642 | 71.55635 | -2303.38776 | 1089.76242  | 964.62032   | 1 |
| 230 | H | 73.96243 | 64.44491 | 70.82437 | 884.16729   | 2568.80533  | -207.74283  | 1 |
| 231 | N | 72.85160 | 62.93113 | 71.61039 | -594.49522  | -252.81478  | 342.29276   | 1 |
| 232 | H | 73.39207 | 62.26513 | 72.14090 | -1735.17426 | 2084.05705  | -263.71605  | 1 |
| 233 | C | 71.88103 | 62.50563 | 70.90722 | 595.23177   | -271.52487  | 442.22352   | 1 |
| 234 | N | 71.15066 | 63.42923 | 70.15194 | 585.53813   | -424.79750  | -105.81303  | 1 |
| 235 | H | 71.28327 | 64.43363 | 70.04261 | 959.88797   | 1327.56823  | -2177.11905 | 1 |
| 236 | H | 70.36596 | 63.19149 | 69.54433 | 1578.48647  | 16.27378    | -2220.76233 | 1 |
| 237 | N | 71.73666 | 61.11726 | 71.03510 | -452.17763  | -390.33541  | -421.51853  | 1 |
| 238 | H | 72.26714 | 60.43477 | 71.57432 | 470.26107   | 1974.25629  | -1817.92087 | 1 |
| 239 | H | 71.01724 | 60.58603 | 70.54278 | 1856.67307  | -1573.97321 | -1224.35416 | 1 |
| 240 | C | 76.48557 | 66.05806 | 74.80792 | -531.47271  | -581.45780  | -55.06206   | 1 |
| 241 | O | 77.28247 | 66.96814 | 74.76144 | -243.00837  | 192.73507   | 609.52485   | 1 |
| 242 | N | 76.79304 | 64.72586 | 74.97814 | 343.49288   | -644.25607  | 38.09164    | 1 |
| 243 | H | 75.85136 | 64.31259 | 74.94398 | -1691.16043 | -1535.97525 | -1484.73099 | 1 |
| 244 | C | 77.74111 | 64.21309 | 73.99926 | 542.66492   | 350.14337   | 454.42563   | 1 |
| 245 | H | 77.28506 | 64.41599 | 73.00721 | 1209.57979  | -2396.95920 | 463.86744   | 1 |
| 246 | C | 79.10005 | 64.98655 | 74.21751 | -737.14309  | 145.93010   | 242.71942   | 1 |
| 247 | H | 79.05350 | 65.57967 | 75.15897 | -1050.18303 | 159.36419   | -2509.06125 | 1 |
| 248 | C | 80.31999 | 63.99906 | 74.23534 | -706.77696  | -252.88343  | -245.16230  | 1 |
| 249 | H | 81.28845 | 64.54197 | 74.33978 | -1624.64039 | -1665.49085 | 1417.86935  | 1 |
| 250 | H | 80.25046 | 63.27960 | 75.08511 | 2566.10521  | 598.51109   | 693.22305   | 1 |
| 251 | H | 80.37284 | 63.39729 | 73.29803 | -1972.69758 | 107.10018   | -1876.34312 | 1 |
| 252 | C | 79.34698 | 65.91588 | 72.97719 | 412.85148   | 672.58832   | -27.69222   | 1 |
| 253 | H | 80.30555 | 66.47801 | 73.07116 | 1447.02277  | 1762.76533  | -1490.78944 | 1 |
| 254 | H | 79.39433 | 65.33342 | 72.02748 | 1320.77379  | -145.20455  | 2378.68491  | 1 |
| 255 | H | 78.53056 | 66.67071 | 72.86871 | -1512.10848 | 1470.52031  | 1724.75147  | 1 |
| 256 | C | 77.82637 | 62.63005 | 74.32625 | -607.11113  | 499.56689   | 73.73769    | 1 |
| 257 | O | 77.72573 | 61.80471 | 73.44407 | 357.97126   | 460.81534   | 356.68785   | 1 |
| 258 | N | 78.10496 | 62.46648 | 75.61580 | 536.55407   | -368.62270  | 332.76306   | 1 |
| 259 | H | 78.13545 | 63.28227 | 76.25564 | 524.38866   | 2297.69985  | 1367.20941  | 1 |
| 260 | C | 77.85758 | 61.19934 | 76.24970 | 46.50277    | -774.29190  | -147.97904  | 1 |
| 261 | H | 76.84016 | 60.89218 | 75.92210 | 1676.51875  | 1883.29066  | 1032.55549  | 1 |
| 262 | C | 78.97079 | 60.10565 | 75.83734 | -559.41456  | -34.19198   | -556.30433  | 1 |
| 263 | H | 79.90779 | 60.62306 | 75.52055 | -64.66664   | 395.18769   | 2695.05373  | 1 |
| 264 | H | 79.24701 | 59.46817 | 76.71128 | -2703.44278 | -60.40056   | 333.79418   | 1 |
| 265 | C | 78.41698 | 59.25734 | 74.72733 | -519.76435  | 377.31045   | 459.42366   | 1 |
| 266 | H | 78.01041 | 59.95316 | 73.93086 | -1746.74323 | 1667.50644  | -1261.73691 | 1 |
| 267 | C | 79.51134 | 58.39632 | 74.10919 | 570.95554   | 16.46261    | -545.27700  | 1 |
| 268 | H | 79.11506 | 57.76289 | 73.27389 | 2391.58273  | 28.05277    | -1305.07271 | 1 |
| 269 | H | 80.34093 | 59.02045 | 73.68760 | 175.75588   | 917.63458   | 2559.43867  | 1 |
| 270 | H | 79.96613 | 57.70314 | 74.86313 | -1063.97851 | -2155.34650 | 1283.00462  | 1 |
| 271 | C | 77.29942 | 58.35363 | 75.23141 | 193.76014   | 2.62946     | -765.53141  | 1 |
| 272 | H | 76.86665 | 57.73294 | 74.40515 | 507.39394   | -846.55087  | 2539.60089  | 1 |
| 273 | H | 77.66709 | 57.64599 | 76.01864 | 1337.57841  | 1818.19054  | 1526.01994  | 1 |
| 274 | H | 76.45661 | 58.93745 | 75.68185 | 1100.88635  | -1172.91350 | -2199.08909 | 1 |
| 275 | C | 77.96341 | 61.63438 | 77.77407 | -549.21115  | 475.64486   | -309.38218  | 1 |
| 276 | O | 78.10419 | 62.80561 | 78.06622 | 556.06106   | -390.37755  | -78.24250   | 1 |
| 277 | O | 77.86954 | 60.64843 | 78.77202 | -572.27940  | -310.19032  | -209.75862  | 1 |
| 278 | H | 77.73779 | 59.84515 | 78.18968 | -1380.08193 | 2212.14486  | 790.85944   | 1 |

Listing 46: C00046.xmolout

|   |          |          |          |        |        |             |        |          |  |
|---|----------|----------|----------|--------|--------|-------------|--------|----------|--|
| 1 | 276      |          |          |        |        |             |        |          |  |
| 2 | 150.0000 | 150.0000 | 150.0000 | 0.0000 | 0.0000 | 0.0000***** | 0.7550 | 3020     |  |
|   | 0.2500   | 300.00   | 0.00     | 0.00   | 0.00   | -1293.7445  | 0.0000 | 300.0000 |  |

|    |   |          |          |          |             |             |             |   |
|----|---|----------|----------|----------|-------------|-------------|-------------|---|
| 3  | H | 87.38199 | 78.63726 | 71.23284 | -2043.14101 | -1757.64893 | 399.89339   | 1 |
| 4  | N | 87.26963 | 78.73093 | 70.22582 | 426.75047   | 490.45733   | -334.42467  | 1 |
| 5  | H | 86.26341 | 78.86670 | 70.15689 | 442.25559   | -1110.30854 | -2448.52907 | 1 |
| 6  | C | 88.04032 | 79.77897 | 69.65540 | 415.32972   | -666.39213  | 83.73172    | 1 |
| 7  | H | 89.03757 | 79.55975 | 70.09902 | 879.32219   | 2491.00447  | 667.35213   | 1 |
| 8  | C | 88.03448 | 79.66078 | 68.04247 | 31.35357    | 477.41777   | 628.23362   | 1 |
| 9  | H | 87.03891 | 79.97152 | 67.64606 | 1168.38489  | 2240.25337  | -1019.71136 | 1 |
| 10 | H | 88.77469 | 80.37219 | 67.60513 | -360.43770  | 2534.90498  | 931.67112   | 1 |
| 11 | C | 88.33299 | 78.24841 | 67.62728 | 463.18208   | 512.70242   | -382.34388  | 1 |
| 12 | H | 87.57039 | 77.58373 | 68.09375 | 1725.29117  | 1863.52247  | -987.07854  | 1 |
| 13 | C | 88.23856 | 78.12170 | 66.11063 | 710.42801   | -144.27427  | -313.15367  | 1 |
| 14 | H | 88.38582 | 77.06391 | 65.77328 | 364.20195   | -1033.13725 | 2494.72524  | 1 |
| 15 | H | 87.24087 | 78.45825 | 65.72836 | 2567.61904  | 335.80679   | 847.48802   | 1 |
| 16 | H | 89.01618 | 78.74424 | 65.59809 | -2587.99029 | 680.92867   | -512.16411  | 1 |
| 17 | C | 89.71118 | 77.79236 | 68.08808 | 268.17616   | 741.64379   | -40.42634   | 1 |
| 18 | H | 89.93384 | 76.74784 | 67.74934 | 1283.54314  | -1945.37420 | -1411.27812 | 1 |
| 19 | H | 90.52199 | 78.45225 | 67.68574 | -1258.57796 | 1317.15249  | -2026.02085 | 1 |
| 20 | H | 89.79652 | 77.80123 | 69.20505 | -2502.84526 | 909.80597   | 575.92391   | 1 |
| 21 | C | 87.42201 | 81.12261 | 70.23958 | 619.36578   | -458.64843  | -172.09273  | 1 |
| 22 | O | 87.27320 | 81.29788 | 71.50661 | -81.40433   | 433.87611   | 522.34594   | 1 |
| 23 | N | 87.09350 | 82.00872 | 69.35253 | 175.23996   | -622.20190  | 341.55523   | 1 |
| 24 | H | 87.26665 | 81.85438 | 68.36306 | -876.57256  | -303.22879  | -2561.90213 | 1 |
| 25 | C | 86.75403 | 83.28795 | 69.90692 | -571.88214  | -534.10783  | -106.15033  | 1 |
| 26 | H | 87.66148 | 83.90490 | 69.74573 | -2713.20841 | -16.25800   | -248.80809  | 1 |
| 27 | C | 85.50300 | 83.83748 | 69.12791 | 166.60354   | 288.16399   | -716.09568  | 1 |
| 28 | H | 84.65696 | 83.10832 | 69.26384 | -2097.85574 | 1636.78449  | -586.18044  | 1 |
| 29 | O | 85.66451 | 83.98910 | 67.69617 | -317.80580  | -363.38227  | 484.43082   | 1 |
| 30 | H | 84.95992 | 83.40502 | 67.35966 | 1863.74748  | -1451.84923 | 1357.29467  | 1 |
| 31 | C | 85.17497 | 85.15664 | 69.92823 | 503.80731   | 517.99032   | 318.51606   | 1 |
| 32 | H | 84.23427 | 85.62975 | 69.56301 | 640.61020   | -2157.10410 | -1536.29104 | 1 |
| 33 | H | 85.03962 | 84.96098 | 71.01985 | 1687.88455  | 465.60692   | 2087.56452  | 1 |
| 34 | H | 85.98618 | 85.91285 | 69.82434 | -1293.07895 | -1899.88581 | -1463.57452 | 1 |
| 35 | C | 86.35484 | 83.01086 | 71.52722 | -153.07550  | -733.68902  | 248.70981   | 1 |
| 36 | O | 85.11550 | 82.79822 | 71.71878 | 186.15459   | -480.78787  | -449.34387  | 1 |
| 37 | N | 87.14549 | 83.82227 | 72.28988 | -487.53139  | 543.18517   | 42.03850    | 1 |
| 38 | C | 87.21104 | 83.65144 | 73.70138 | -699.35871  | 69.34393    | 360.10701   | 1 |
| 39 | H | 87.20376 | 82.54979 | 73.87817 | 2.81126     | -221.99807  | -2715.58072 | 1 |
| 40 | C | 88.55237 | 84.39925 | 74.13278 | -507.46439  | -592.59194  | 122.07761   | 1 |
| 41 | H | 88.46560 | 84.88625 | 75.12990 | -1975.08116 | 525.87560   | -1801.71556 | 1 |
| 42 | H | 89.40406 | 83.68737 | 74.20878 | 1588.27743  | -1913.22100 | 1113.83566  | 1 |
| 43 | C | 88.77647 | 85.42211 | 72.98118 | -613.62442  | -457.55993  | -194.14490  | 1 |
| 44 | H | 88.17493 | 86.34557 | 73.13509 | 1707.54637  | -721.27992  | 1996.92523  | 1 |
| 45 | H | 89.83511 | 85.74665 | 72.87329 | 758.23357   | 2100.81767  | 1560.55011  | 1 |
| 46 | C | 88.25019 | 84.57250 | 71.73235 | -352.41524  | 704.96076   | 49.21465    | 1 |
| 47 | H | 87.87679 | 85.17063 | 70.86423 | 1714.76886  | -2070.42778 | 443.35792   | 1 |
| 48 | H | 88.97514 | 83.80431 | 71.36582 | 1224.15040  | 1801.50881  | 1636.97633  | 1 |
| 49 | C | 85.89679 | 84.35839 | 74.37279 | 566.85117   | 537.05831   | 117.62814   | 1 |
| 50 | O | 85.37234 | 83.88082 | 75.37143 | -550.26779  | -406.08867  | 4.21666     | 1 |
| 51 | N | 85.60187 | 85.48439 | 73.75584 | 566.34832   | -425.77725  | 180.18749   | 1 |
| 52 | H | 86.14575 | 85.70303 | 72.92474 | 644.44502   | 2646.80550  | -52.73430   | 1 |
| 53 | C | 84.51868 | 86.26090 | 74.26756 | 612.34801   | -281.48662  | 411.56221   | 1 |
| 54 | H | 84.57627 | 86.02336 | 75.35630 | 1667.23498  | -1490.75142 | 1556.16753  | 1 |
| 55 | C | 84.73307 | 87.79548 | 73.88532 | -714.45746  | -175.43074  | 286.98927   | 1 |
| 56 | H | 84.56234 | 87.92297 | 72.78175 | -787.09484  | 1763.03619  | -1922.46060 | 1 |
| 57 | O | 86.03436 | 88.33825 | 74.16687 | -429.46514  | 516.51932   | -128.40526  | 1 |
| 58 | H | 86.31082 | 88.64333 | 73.27930 | 1981.82785  | 436.16847   | -1818.18182 | 1 |
| 59 | C | 83.53231 | 88.43747 | 74.67510 | 630.79189   | -468.94448  | 76.03230    | 1 |
| 60 | H | 83.44605 | 89.52970 | 74.47181 | -1775.71861 | 2062.30353  | 131.89849   | 1 |
| 61 | H | 82.55832 | 87.96693 | 74.39607 | -1855.14608 | 88.94118    | 1993.53760  | 1 |
| 62 | H | 83.65917 | 88.31620 | 75.77614 | -1504.82350 | -780.94249  | -2132.90992 | 1 |
| 63 | C | 83.15972 | 85.65156 | 73.58014 | 288.57638   | 618.62814   | -397.00270  | 1 |
| 64 | O | 82.46148 | 86.29814 | 72.83688 | 321.70495   | -185.26452  | 574.37218   | 1 |

|     |   |          |          |          |             |             |             |   |
|-----|---|----------|----------|----------|-------------|-------------|-------------|---|
| 65  | N | 83.01286 | 84.39503 | 73.98570 | -447.05792  | -446.53431  | 367.76425   | 1 |
| 66  | H | 83.71686 | 83.94841 | 74.60731 | 350.31316   | 1975.63644  | -1843.31522 | 1 |
| 67  | C | 81.78128 | 83.76969 | 73.62772 | -511.23061  | 374.03917   | -471.51480  | 1 |
| 68  | H | 81.01577 | 84.55944 | 73.79260 | 2234.79579  | -898.70890  | -1273.45190 | 1 |
| 69  | C | 81.91486 | 83.44114 | 72.06321 | 529.53781   | -159.34528  | 563.72604   | 1 |
| 70  | H | 80.87361 | 83.37099 | 71.63486 | 654.59388   | 2347.94251  | 1217.51488  | 1 |
| 71  | H | 82.39152 | 84.36286 | 71.62491 | -1526.55661 | 2103.42026  | 817.87394   | 1 |
| 72  | O | 82.59216 | 82.24847 | 71.69538 | -554.84278  | 14.12789    | 399.58769   | 1 |
| 73  | H | 83.57975 | 82.53424 | 71.95489 | 1297.06236  | 2061.84854  | 1220.68812  | 1 |
| 74  | C | 81.63462 | 82.44987 | 74.56741 | -662.15484  | -412.13544  | 123.62687   | 1 |
| 75  | O | 82.46740 | 81.57489 | 74.65195 | -540.01537  | -317.05804  | 274.91456   | 1 |
| 76  | N | 80.47630 | 82.54335 | 75.21487 | -202.76299  | -690.00100  | -131.49145  | 1 |
| 77  | H | 79.84067 | 83.33413 | 75.09720 | -702.62132  | -2617.37191 | 281.70413   | 1 |
| 78  | C | 79.95286 | 81.33130 | 75.76614 | -491.73914  | 576.34187   | 222.73509   | 1 |
| 79  | H | 80.33009 | 80.50226 | 75.12615 | 1977.17978  | -1823.58850 | -434.68928  | 1 |
| 80  | C | 80.50871 | 81.20967 | 77.24975 | -649.50797  | -328.66843  | 306.11224   | 1 |
| 81  | H | 80.19043 | 82.08173 | 77.86040 | 2075.07803  | 1452.16490  | -1004.45904 | 1 |
| 82  | C | 79.95857 | 79.86799 | 77.84147 | -615.18735  | -489.99689  | -70.96352   | 1 |
| 83  | H | 80.32262 | 79.69719 | 78.88177 | -1226.32661 | -1724.38906 | -1716.47170 | 1 |
| 84  | H | 78.84281 | 79.86147 | 77.87212 | 2381.64273  | -969.84735  | 900.46860   | 1 |
| 85  | H | 80.27635 | 78.99065 | 77.23028 | 2122.74991  | 1702.23946  | -141.36228  | 1 |
| 86  | C | 82.07379 | 81.11035 | 77.21318 | -501.86074  | -479.61276  | -376.42482  | 1 |
| 87  | H | 82.49982 | 80.87248 | 78.21609 | 993.79261   | -2246.95401 | -1177.81305 | 1 |
| 88  | H | 82.41846 | 80.31604 | 76.50448 | 42.71279    | -626.15391  | -2651.37258 | 1 |
| 89  | H | 82.53628 | 82.07085 | 76.87578 | -2026.39012 | -1590.33709 | -887.82922  | 1 |
| 90  | C | 78.33480 | 81.57763 | 75.73965 | -672.89153  | 382.57394   | -156.34072  | 1 |
| 91  | O | 77.83718 | 82.64486 | 76.01892 | 410.04627   | 221.86223   | 500.35950   | 1 |
| 92  | N | 77.73845 | 80.44358 | 75.38721 | -378.11782  | -443.79414  | -441.10984  | 1 |
| 93  | H | 78.29722 | 79.60489 | 75.22956 | 2404.15973  | -568.14894  | 1149.30085  | 1 |
| 94  | C | 76.32001 | 80.38549 | 75.42108 | -544.54484  | 466.16019   | 331.29119   | 1 |
| 95  | H | 75.96310 | 81.41490 | 75.65883 | -1409.80988 | -170.17955  | 2325.32679  | 1 |
| 96  | C | 75.87553 | 79.82722 | 73.99666 | -184.48284  | 116.78282   | -758.89137  | 1 |
| 97  | H | 76.21026 | 80.50682 | 73.18136 | 1893.78641  | 1861.14652  | 611.04528   | 1 |
| 98  | H | 76.36891 | 78.84941 | 73.79812 | -2170.79665 | -974.19311  | 1327.50117  | 1 |
| 99  | C | 74.32569 | 79.67133 | 74.00476 | 389.51668   | 672.81878   | -138.49152  | 1 |
| 100 | H | 73.99089 | 79.17930 | 74.94395 | 510.64577   | 1933.03327  | 1851.02484  | 1 |
| 101 | H | 73.83843 | 80.67096 | 74.02625 | -2302.30869 | -1105.72939 | -948.89774  | 1 |
| 102 | C | 73.80526 | 78.83207 | 72.77326 | -559.93427  | -126.34590  | 542.30857   | 1 |
| 103 | O | 72.70320 | 78.34879 | 72.81270 | -670.36003  | -111.83166  | 76.36448    | 1 |
| 104 | N | 74.68367 | 78.75180 | 71.75252 | -216.06729  | -537.07037  | 446.51379   | 1 |
| 105 | H | 75.61573 | 79.17356 | 71.66255 | -1251.96487 | 1074.12894  | -2168.52500 | 1 |
| 106 | H | 74.48315 | 78.29698 | 70.85527 | -2451.83023 | -720.73851  | 944.84612   | 1 |
| 107 | C | 75.94173 | 79.22550 | 76.51191 | 546.24052   | -563.88337  | -85.11809   | 1 |
| 108 | O | 76.50890 | 78.16322 | 76.46013 | 71.70702    | -307.40463  | 606.69673   | 1 |
| 109 | N | 74.93103 | 79.61127 | 77.29864 | 479.90863   | -504.50129  | 222.86849   | 1 |
| 110 | C | 74.61245 | 78.84770 | 78.47119 | 75.51268    | -600.91904  | 506.73700   | 1 |
| 111 | H | 75.59813 | 78.55642 | 78.89953 | -2033.61562 | 1795.30103  | 254.89480   | 1 |
| 112 | C | 73.78083 | 79.86433 | 79.35412 | 523.79067   | 517.99274   | 284.45581   | 1 |
| 113 | H | 73.00865 | 79.35645 | 79.97484 | 1599.61665  | -1127.00911 | 1895.98173  | 1 |
| 114 | H | 74.44311 | 80.40494 | 80.06680 | -1881.83093 | 1275.82488  | -1501.55016 | 1 |
| 115 | C | 73.16664 | 80.85114 | 78.30992 | -600.05639  | -404.05026  | 316.64485   | 1 |
| 116 | H | 72.23930 | 80.43705 | 77.85566 | -2597.05260 | 496.36221   | 657.73249   | 1 |
| 117 | H | 72.89149 | 81.83985 | 78.74197 | -1666.24518 | 1294.38985  | -1723.90591 | 1 |
| 118 | C | 74.34461 | 80.94455 | 77.24945 | 493.57570   | -129.95376  | -602.56394  | 1 |
| 119 | H | 74.02437 | 81.16083 | 76.20366 | -1469.08415 | -637.84797  | 2204.22581  | 1 |
| 120 | H | 75.16658 | 81.64361 | 77.53591 | -1038.97840 | 1068.88701  | -2280.71789 | 1 |
| 121 | C | 73.74849 | 77.50141 | 78.12156 | 188.88100   | 241.05089   | -727.87821  | 1 |
| 122 | O | 73.93468 | 76.50788 | 78.82680 | 531.88613   | -49.19943   | 427.07960   | 1 |
| 123 | N | 72.82034 | 77.68741 | 77.19871 | 708.14833   | 26.93417    | -179.73509  | 1 |
| 124 | H | 72.95255 | 78.64126 | 76.85554 | -2232.69501 | -1179.09831 | 1023.94816  | 1 |
| 125 | C | 72.19308 | 76.65364 | 76.39213 | -738.32412  | 259.92548   | 104.42456   | 1 |
| 126 | H | 71.72426 | 77.23020 | 75.55824 | 2028.89123  | 1260.02983  | 1311.33324  | 1 |

|     |   |          |          |          |             |             |             |   |
|-----|---|----------|----------|----------|-------------|-------------|-------------|---|
| 127 | C | 73.25911 | 75.68074 | 75.91430 | -258.65678  | -345.52513  | 661.28459   | 1 |
| 128 | H | 73.77793 | 75.27867 | 76.81498 | -1826.06090 | -1801.46097 | -918.64554  | 1 |
| 129 | C | 72.64557 | 74.52113 | 75.15092 | -541.23400  | 531.92970   | -218.41428  | 1 |
| 130 | H | 73.41532 | 73.75055 | 74.87059 | 1311.73218  | -2219.18200 | 882.19023   | 1 |
| 131 | H | 71.85000 | 73.99898 | 75.75226 | -1048.71298 | 1223.58118  | -2196.97971 | 1 |
| 132 | H | 72.16005 | 74.87012 | 74.19778 | 419.06414   | 1903.92898  | 1903.44670  | 1 |
| 133 | C | 74.29913 | 76.36922 | 75.05111 | -423.86431  | 152.66566   | -648.55262  | 1 |
| 134 | H | 75.05477 | 75.64081 | 74.64685 | 105.68386   | -2342.50080 | 1387.51238  | 1 |
| 135 | H | 73.82559 | 76.88924 | 74.16814 | -1695.63603 | -1484.73621 | -1531.02793 | 1 |
| 136 | H | 74.87220 | 77.14906 | 75.63848 | -1853.57121 | -487.39031  | 1936.59343  | 1 |
| 137 | C | 71.04498 | 75.80164 | 77.25851 | 539.71428   | -510.58232  | 267.58633   | 1 |
| 138 | O | 69.99343 | 75.58786 | 76.71773 | -15.93758   | -278.34085  | -624.49402  | 1 |
| 139 | N | 71.50328 | 75.37967 | 78.41479 | -676.81886  | 12.05292    | 276.17960   | 1 |
| 140 | H | 72.47819 | 75.65150 | 78.70695 | -1694.44250 | -373.84189  | -2100.66098 | 1 |
| 141 | C | 70.64292 | 74.79237 | 79.39235 | 412.33078   | -664.70360  | 108.35451   | 1 |
| 142 | H | 71.08726 | 75.15051 | 80.34895 | 1765.77476  | 1294.44366  | 1621.76594  | 1 |
| 143 | C | 69.14480 | 75.26647 | 79.18594 | -179.66635  | -721.95667  | -264.73915  | 1 |
| 144 | H | 69.00456 | 76.35452 | 78.95504 | -607.34922  | 2587.87032  | -598.10018  | 1 |
| 145 | H | 68.69705 | 74.75147 | 78.30120 | -359.69332  | -1479.13954 | -2259.74260 | 1 |
| 146 | C | 68.35679 | 74.91708 | 80.49122 | -240.01076  | 616.02425   | 431.85322   | 1 |
| 147 | H | 68.53532 | 73.84342 | 80.76644 | -1359.17131 | 782.54425   | 2227.99181  | 1 |
| 148 | H | 68.72013 | 75.52082 | 81.35342 | -820.36667  | 85.81767    | -2596.78715 | 1 |
| 149 | C | 66.81621 | 75.16554 | 80.23735 | -513.07015  | 236.18570   | -551.87280  | 1 |
| 150 | H | 66.59522 | 76.25217 | 80.12737 | 1816.11944  | -1183.11722 | -1650.94321 | 1 |
| 151 | H | 66.48665 | 74.69000 | 79.28485 | -1800.04429 | -1361.53473 | 1526.34643  | 1 |
| 152 | C | 66.06449 | 74.55350 | 81.44272 | 726.08972   | -253.19732  | -179.64713  | 1 |
| 153 | H | 66.14875 | 73.45120 | 81.52434 | 1224.27271  | -456.51798  | -2390.90304 | 1 |
| 154 | H | 66.29790 | 75.02278 | 82.41912 | 1206.40339  | -1150.93514 | -2154.90344 | 1 |
| 155 | N | 64.53591 | 74.81747 | 81.23213 | 329.70796   | -633.68968  | -155.67358  | 1 |
| 156 | H | 63.89539 | 74.43363 | 81.98574 | 1348.31305  | 1938.76845  | 1359.00643  | 1 |
| 157 | H | 64.22400 | 75.83121 | 81.19164 | 2096.92035  | 1446.54551  | -966.48890  | 1 |
| 158 | H | 64.09186 | 74.41639 | 80.35530 | -1197.07217 | -2303.53719 | 827.28733   | 1 |
| 159 | C | 70.68463 | 73.16745 | 79.30759 | -378.01186  | -556.17301  | -413.96481  | 1 |
| 160 | O | 69.89307 | 72.52152 | 80.00309 | -409.44433  | -307.55053  | -453.30833  | 1 |
| 161 | N | 71.61528 | 72.73296 | 78.49297 | -429.02477  | 524.70884   | 274.08502   | 1 |
| 162 | H | 72.11376 | 73.49100 | 78.02875 | 1706.34263  | -1425.96036 | 1574.38926  | 1 |
| 163 | C | 72.03389 | 71.38245 | 78.36968 | -45.25864   | -626.22952  | 478.93267   | 1 |
| 164 | H | 72.98377 | 71.45566 | 77.79382 | 1988.63164  | 570.90773   | 1772.87287  | 1 |
| 165 | C | 72.21377 | 70.77284 | 79.82099 | 551.77128   | -20.49526   | -564.54996  | 1 |
| 166 | H | 72.97801 | 71.34087 | 80.39791 | 1434.61535  | -1753.10253 | 1513.99471  | 1 |
| 167 | H | 71.26791 | 70.86728 | 80.40725 | -714.67738  | 1819.09770  | 1898.36494  | 1 |
| 168 | C | 72.62233 | 69.27115 | 79.66495 | 446.99263   | -555.77305  | 338.97221   | 1 |
| 169 | H | 71.86827 | 68.71950 | 79.06042 | 1953.68466  | 1892.25957  | -161.67766  | 1 |
| 170 | H | 73.58419 | 69.17622 | 79.11311 | -403.03785  | 2688.07032  | -188.43591  | 1 |
| 171 | C | 72.73572 | 68.64407 | 81.11255 | 567.86262   | 335.74681   | 434.04421   | 1 |
| 172 | H | 73.48840 | 69.19111 | 81.72543 | -1080.02275 | 1568.26081  | -1948.78900 | 1 |
| 173 | H | 71.77070 | 68.73810 | 81.66191 | -919.54108  | 2111.34692  | 1456.13463  | 1 |
| 174 | C | 73.13334 | 67.15888 | 80.94621 | 195.81897   | 173.33862   | -745.11536  | 1 |
| 175 | H | 72.33510 | 66.50900 | 80.53544 | 1405.67949  | -2301.21089 | -390.08113  | 1 |
| 176 | H | 74.07804 | 66.99373 | 80.39056 | -940.37328  | -1118.32446 | 2299.72133  | 1 |
| 177 | N | 73.42359 | 66.59434 | 82.37763 | 319.26422   | 656.36007   | -42.02424   | 1 |
| 178 | H | 73.71575 | 65.57545 | 82.42166 | 1961.03633  | 619.91968   | 1787.09422  | 1 |
| 179 | H | 74.20719 | 67.05773 | 82.92382 | 854.14343   | -2156.80752 | 1429.08711  | 1 |
| 180 | H | 72.62704 | 66.61687 | 83.07866 | 1237.02905  | -1378.50857 | -1998.28500 | 1 |
| 181 | C | 70.92782 | 70.45849 | 77.58284 | 532.53319   | -268.57236  | 517.55729   | 1 |
| 182 | O | 71.34179 | 69.70824 | 76.72499 | 266.16714   | -290.73804  | -558.88002  | 1 |
| 183 | N | 69.72481 | 70.57000 | 78.10743 | -226.25352  | 640.49678   | -270.32839  | 1 |
| 184 | H | 69.61076 | 71.22368 | 78.92442 | 2007.69063  | -1035.27229 | 1523.50231  | 1 |
| 185 | C | 68.54528 | 70.18425 | 77.41110 | -540.76542  | -573.33303  | 49.50000    | 1 |
| 186 | H | 67.76273 | 70.83794 | 77.85639 | -2374.20950 | -1036.76023 | 843.75774   | 1 |
| 187 | C | 68.72274 | 70.42780 | 75.83993 | -77.09082   | 666.87422   | -415.84136  | 1 |
| 188 | H | 69.56290 | 69.77158 | 75.47139 | -985.81834  | 617.19825   | 2463.91927  | 1 |

|     |   |          |          |          |             |             |             |   |
|-----|---|----------|----------|----------|-------------|-------------|-------------|---|
| 189 | O | 69.04971 | 71.78055 | 75.47066 | 293.29899   | -391.65602  | -477.80926  | 1 |
| 190 | H | 69.98178 | 71.67285 | 75.19279 | 2528.72714  | -681.76262  | -751.27122  | 1 |
| 191 | C | 67.36998 | 69.88863 | 75.24791 | 252.47363   | -605.14473  | 440.05134   | 1 |
| 192 | H | 67.35694 | 69.96126 | 74.13615 | -2052.65063 | 1456.49051  | -1043.51830 | 1 |
| 193 | H | 67.19818 | 68.81731 | 75.50834 | -2152.98800 | -1661.97574 | -161.70652  | 1 |
| 194 | H | 66.49823 | 70.46963 | 75.62915 | -473.12726  | -1584.27339 | 2165.61725  | 1 |
| 195 | C | 68.23416 | 68.61292 | 77.72142 | 360.36307   | 488.46713   | 505.10056   | 1 |
| 196 | O | 67.07415 | 68.23100 | 77.71293 | -200.08817  | -528.03552  | -385.82850  | 1 |
| 197 | N | 69.34988 | 67.92163 | 77.86377 | -597.54095  | -226.44775  | 355.20479   | 1 |
| 198 | H | 70.22390 | 68.45419 | 77.73901 | 2179.23655  | -1300.70981 | -991.33835  | 1 |
| 199 | C | 69.41663 | 66.61308 | 78.39222 | -687.68921  | 297.39807   | -249.45179  | 1 |
| 200 | H | 70.46940 | 66.51275 | 78.73594 | -349.16256  | -2467.37713 | -1101.72831 | 1 |
| 201 | C | 68.33322 | 66.39225 | 79.54894 | 672.47345   | 361.54328   | -201.62880  | 1 |
| 202 | H | 67.30982 | 66.49764 | 79.11452 | 1541.41502  | 582.18425   | 2169.97026  | 1 |
| 203 | H | 68.41807 | 65.34969 | 79.93357 | -2534.67717 | 60.25153    | 997.72295   | 1 |
| 204 | C | 68.51895 | 67.39940 | 80.69225 | 574.26774   | -389.43119  | -377.02542  | 1 |
| 205 | C | 69.49726 | 67.18359 | 81.70887 | 688.82679   | -287.33580  | -257.96133  | 1 |
| 206 | H | 70.16427 | 66.30317 | 81.67559 | 331.14182   | 1470.38163  | 2269.80013  | 1 |
| 207 | C | 67.66989 | 68.54643 | 80.73779 | -383.52382  | -675.04808  | 144.24917   | 1 |
| 208 | H | 66.92216 | 68.72040 | 79.93985 | 4.09847     | 1517.59662  | 2262.86397  | 1 |
| 209 | C | 69.57985 | 68.10179 | 82.75558 | -134.76730  | 428.45285   | -649.50303  | 1 |
| 210 | H | 70.32515 | 67.92872 | 83.55109 | -903.23433  | 1600.49020  | 2011.53387  | 1 |
| 211 | C | 67.79387 | 69.43933 | 81.80385 | -335.53281  | -615.00040  | -364.39058  | 1 |
| 212 | H | 67.12666 | 70.31886 | 81.82974 | 1596.45398  | -1369.33862 | 1732.02659  | 1 |
| 213 | C | 68.74197 | 69.25074 | 82.85162 | 585.48547   | -340.24194  | -406.23938  | 1 |
| 214 | O | 68.86757 | 70.14613 | 83.94543 | -419.15649  | -173.04408  | -511.94141  | 1 |
| 215 | H | 68.15808 | 70.79157 | 83.71349 | -1071.84350 | 1559.71507  | -1960.13012 | 1 |
| 216 | C | 69.02806 | 65.49696 | 77.26302 | 291.41878   | -183.13091  | 710.72246   | 1 |
| 217 | O | 69.47405 | 64.37670 | 77.32426 | 379.87695   | 523.47396   | -222.23622  | 1 |
| 218 | N | 68.08533 | 65.96816 | 76.44573 | 564.30591   | 373.09380   | 277.24371   | 1 |
| 219 | H | 67.77965 | 66.95000 | 76.55700 | -120.59931  | -2436.07824 | -1214.35098 | 1 |
| 220 | C | 67.91125 | 65.28132 | 75.20349 | 404.07514   | -299.37480  | 608.84009   | 1 |
| 221 | H | 68.06180 | 64.20147 | 75.43537 | -1071.07882 | -841.69025  | 2359.66467  | 1 |
| 222 | C | 66.46375 | 65.68504 | 74.70563 | -683.12807  | 68.71770    | -390.13096  | 1 |
| 223 | H | 65.73150 | 65.57130 | 75.53661 | 2068.88918  | 1596.58590  | 770.89603   | 1 |
| 224 | H | 66.42780 | 66.76130 | 74.42253 | 1379.86429  | 2342.49779  | -179.85638  | 1 |
| 225 | C | 66.07416 | 64.77886 | 73.49745 | -176.39967  | 537.49466   | 550.97268   | 1 |
| 226 | H | 66.70708 | 64.99665 | 72.60178 | -396.28051  | 1942.22168  | 1869.33314  | 1 |
| 227 | H | 66.23856 | 63.70474 | 73.73737 | -94.44700   | 586.00678   | -2659.20016 | 1 |
| 228 | C | 64.53120 | 65.07761 | 73.20769 | -291.69381  | -718.18079  | -150.72929  | 1 |
| 229 | H | 63.85612 | 65.02627 | 74.10006 | -2303.38776 | 1089.76242  | 964.62032   | 1 |
| 230 | H | 64.31612 | 66.03788 | 72.67359 | 884.16729   | 2568.80533  | -207.74283  | 1 |
| 231 | N | 64.17349 | 64.01547 | 72.36504 | -594.49522  | -252.81478  | 342.29276   | 1 |
| 232 | H | 64.89814 | 63.35164 | 72.14009 | -1735.17426 | 2084.05705  | -263.71605  | 1 |
| 233 | C | 63.01209 | 63.83627 | 71.88104 | 595.23177   | -271.52487  | 442.22352   | 1 |
| 234 | N | 62.02113 | 64.77036 | 72.20189 | 585.53813   | -424.79750  | -105.81303  | 1 |
| 235 | H | 62.08587 | 65.61294 | 72.77189 | 959.88797   | 1327.56823  | -2177.11905 | 1 |
| 236 | H | 61.05781 | 64.73791 | 71.86648 | 1578.48647  | 16.27378    | -2220.76233 | 1 |
| 237 | N | 62.96969 | 62.67738 | 71.09349 | -452.17763  | -390.33541  | -421.51853  | 1 |
| 238 | H | 63.69368 | 61.99842 | 70.86277 | 470.26107   | 1974.25629  | -1817.92087 | 1 |
| 239 | H | 62.12569 | 62.35720 | 70.61695 | 1856.67307  | -1573.97321 | -1224.35416 | 1 |
| 240 | C | 69.00416 | 65.86829 | 74.13636 | -531.47271  | -581.45780  | -55.06206   | 1 |
| 241 | O | 69.40745 | 67.00397 | 74.14027 | -243.00837  | 192.73507   | 609.52485   | 1 |
| 242 | N | 69.28434 | 64.88417 | 73.27072 | 343.49288   | -644.25607  | 38.09164    | 1 |
| 243 | H | 68.74763 | 64.02896 | 73.41044 | -1691.16043 | -1535.97525 | -1484.73099 | 1 |
| 244 | C | 69.98245 | 65.17569 | 72.01646 | 542.66492   | 350.14337   | 454.42563   | 1 |
| 245 | H | 70.90312 | 65.72310 | 72.32654 | 1209.57979  | -2396.95920 | 463.86744   | 1 |
| 246 | C | 70.22847 | 63.88081 | 71.26977 | -737.14309  | 145.93010   | 242.71942   | 1 |
| 247 | H | 69.23568 | 63.43460 | 71.03419 | -1050.18303 | 159.36419   | -2509.06125 | 1 |
| 248 | C | 70.95390 | 64.13874 | 69.96034 | -706.77696  | -252.88343  | -245.16230  | 1 |
| 249 | H | 71.05496 | 63.20219 | 69.34647 | -1624.64039 | -1665.49085 | 1417.86935  | 1 |
| 250 | H | 70.41461 | 64.89810 | 69.32855 | 2566.10521  | 598.51109   | 693.22305   | 1 |



|     |   |          |          |          |             |             |             |   |
|-----|---|----------|----------|----------|-------------|-------------|-------------|---|
| 251 | H | 71.99103 | 64.53781 | 70.13269 | -1972.69758 | 107.10018   | -1876.34312 | 1 |
| 252 | C | 71.00046 | 62.86804 | 72.09602 | 412.85148   | 672.58832   | -27.69222   | 1 |
| 253 | H | 71.13392 | 61.89623 | 71.54587 | 1447.02277  | 1762.76533  | -1490.78944 | 1 |
| 254 | H | 72.02610 | 63.24662 | 72.35852 | 1320.77379  | -145.20455  | 2378.68491  | 1 |
| 255 | H | 70.47718 | 62.63717 | 73.06413 | -1512.10848 | 1470.52031  | 1724.75147  | 1 |
| 256 | C | 68.95127 | 66.11702 | 71.10908 | -607.11113  | 499.56689   | 73.73769    | 1 |
| 257 | O | 67.82492 | 65.77390 | 70.84617 | 357.97126   | 460.81534   | 356.68785   | 1 |
| 258 | N | 69.60133 | 67.21442 | 70.73932 | 536.55407   | -368.62270  | 332.76306   | 1 |
| 259 | H | 70.56737 | 67.31432 | 71.05120 | 524.38866   | 2297.69985  | 1367.20941  | 1 |
| 260 | C | 69.18749 | 67.86581 | 69.54511 | 46.50277    | -774.29190  | -147.97904  | 1 |
| 261 | H | 68.33672 | 67.24993 | 69.17227 | 1676.51875  | 1883.29066  | 1032.55549  | 1 |
| 262 | C | 68.75939 | 69.38058 | 69.91914 | -559.41456  | -34.19198   | -556.30433  | 1 |
| 263 | H | 69.57704 | 69.86551 | 70.50377 | -64.66664   | 395.18769   | 2695.05373  | 1 |
| 264 | H | 68.62153 | 70.00198 | 69.00286 | -2703.44278 | -60.40056   | 333.79418   | 1 |
| 265 | C | 67.49082 | 69.31869 | 70.72422 | -519.76435  | 377.31045   | 459.42366   | 1 |
| 266 | H | 67.59500 | 68.50041 | 71.47378 | -1746.74323 | 1667.50644  | -1261.73691 | 1 |
| 267 | C | 67.26080 | 70.62984 | 71.46556 | 570.95554   | 16.46261    | -545.27700  | 1 |
| 268 | H | 66.32315 | 70.60011 | 72.07820 | 2391.58273  | 28.05277    | -1305.07271 | 1 |
| 269 | H | 68.10642 | 70.86626 | 72.16217 | 175.75588   | 917.63458   | 2559.43867  | 1 |
| 270 | H | 67.16524 | 71.49223 | 70.75674 | -1063.97851 | -2155.34650 | 1283.00462  | 1 |
| 271 | C | 66.29272 | 69.01955 | 69.83226 | 193.76014   | 2.62946     | -765.53141  | 1 |
| 272 | H | 65.33612 | 69.00497 | 70.41507 | 507.39394   | -846.55087  | 2539.60089  | 1 |
| 273 | H | 66.17742 | 69.78825 | 69.02503 | 1337.57841  | 1818.19054  | 1526.01994  | 1 |
| 274 | H | 66.38762 | 68.02232 | 69.33042 | 1100.88635  | -1172.91350 | -2199.08909 | 1 |
| 275 | C | 70.47675 | 67.90316 | 68.58413 | -549.21115  | 475.64486   | -309.38218  | 1 |
| 276 | O | 71.51716 | 67.36543 | 68.86271 | 556.06106   | -390.37755  | -78.24250   | 1 |
| 277 | O | 70.33161 | 68.59552 | 67.35710 | -572.27940  | -310.19032  | -209.75862  | 1 |
| 278 | H | 69.37586 | 68.86151 | 67.44273 | -1380.08193 | 2212.14486  | 790.85944   | 1 |

Listing 47: C00047.xmolout

|    |   |          |          |          |             |             |             |        |          |
|----|---|----------|----------|----------|-------------|-------------|-------------|--------|----------|
| 1  |   | 276      |          |          |             |             |             |        |          |
| 2  |   | 150.0000 | 150.0000 | 150.0000 | 0.0000      | 0.0000      | 0.0000***** | 2.7750 | 11100    |
|    |   | 0.2500   | 300.00   | 0.00     | 0.00        | 0.00        | -1293.7078  | 0.0000 | 300.0000 |
| 3  | H | 76.71315 | 73.25631 | 82.38942 | -2043.14101 | -1757.64893 | 399.89339   |        | 1        |
| 4  | N | 77.61161 | 72.89208 | 82.07683 | 426.75047   | 490.45733   | -334.42467  |        | 1        |
| 5  | H | 77.32416 | 72.32704 | 81.27854 | 442.25559   | -1110.30854 | -2448.52907 |        | 1        |
| 6  | C | 78.54684 | 73.90031 | 81.72965 | 415.32972   | -666.39213  | 83.73172    |        | 1        |
| 7  | H | 77.89164 | 74.72760 | 81.38330 | 879.32219   | 2491.00447  | 667.35213   |        | 1        |
| 8  | C | 79.37578 | 74.31727 | 83.04416 | 31.35357    | 477.41777   | 628.23362   |        | 1        |
| 9  | H | 79.89793 | 73.41561 | 83.44579 | 1168.38489  | 2240.25337  | -1019.71136 |        | 1        |
| 10 | H | 80.17602 | 75.04920 | 82.77590 | -360.43770  | 2534.90498  | 931.67112   |        | 1        |
| 11 | C | 78.48071 | 74.90339 | 84.10654 | 463.18208   | 512.70242   | -382.34388  |        | 1        |
| 12 | H | 77.65750 | 74.18264 | 84.30967 | 1725.29117  | 1863.52247  | -987.07854  |        | 1        |
| 13 | C | 79.26264 | 75.11867 | 85.39692 | 710.42801   | -144.27427  | -313.15367  |        | 1        |
| 14 | H | 78.61438 | 75.53700 | 86.20985 | 364.20195   | -1033.13725 | 2494.72524  |        | 1        |
| 15 | H | 79.70179 | 74.16238 | 85.78186 | 2567.61904  | 335.80679   | 847.48802   |        | 1        |
| 16 | H | 80.11051 | 75.83663 | 85.25025 | -2587.99029 | 680.92867   | -512.16411  |        | 1        |
| 17 | C | 77.87494 | 76.22915 | 83.66693 | 268.17616   | 741.64379   | -40.42634   |        | 1        |
| 18 | H | 77.25296 | 76.68773 | 84.47894 | 1283.54314  | -1945.37420 | -1411.27812 |        | 1        |
| 19 | H | 78.66755 | 76.97458 | 83.39809 | -1258.57796 | 1317.15249  | -2026.02085 |        | 1        |
| 20 | H | 77.21269 | 76.10974 | 82.77138 | -2502.84526 | 909.80597   | 575.92391   |        | 1        |
| 21 | C | 79.41965 | 73.27712 | 80.50520 | 619.36578   | -458.64843  | -172.09273  |        | 1        |
| 22 | O | 78.88612 | 72.90865 | 79.47654 | -81.40433   | 433.87611   | 522.34594   |        | 1        |
| 23 | N | 80.71533 | 73.27954 | 80.79156 | 175.23996   | -622.20190  | 341.55523   |        | 1        |
| 24 | H | 81.03178 | 73.59340 | 81.70639 | -876.57256  | -303.22879  | -2561.90213 |        | 1        |
| 25 | C | 81.63591 | 72.72131 | 79.86072 | -571.88214  | -534.10783  | -106.15033  |        | 1        |
| 26 | H | 81.03800 | 72.54026 | 78.93911 | -2713.20841 | -16.25800   | -248.80809  |        | 1        |
| 27 | C | 82.83023 | 73.78150 | 79.70289 | 166.60354   | 288.16399   | -716.09568  |        | 1        |
| 28 | H | 83.33753 | 73.88913 | 80.69980 | -2097.85574 | 1636.78449  | -586.18044  |        | 1        |
| 29 | O | 82.42125 | 75.10943 | 79.31616 | -317.80580  | -363.38227  | 484.43082   |        | 1        |
| 30 | H | 82.71196 | 75.62416 | 80.09493 | 1863.74748  | -1451.84923 | 1357.29467  |        | 1        |

|    |   |          |          |          |             |             |             |   |
|----|---|----------|----------|----------|-------------|-------------|-------------|---|
| 31 | C | 83.80025 | 73.04361 | 78.71306 | 503.80731   | 517.99032   | 318.51606   | 1 |
| 32 | H | 84.71925 | 73.64487 | 78.52023 | 640.61020   | -2157.10410 | -1536.29104 | 1 |
| 33 | H | 84.12982 | 72.05430 | 79.11460 | 1687.88455  | 465.60692   | 2087.56452  | 1 |
| 34 | H | 83.31766 | 72.84806 | 77.72214 | -1293.07895 | -1899.88581 | -1463.57452 | 1 |
| 35 | C | 82.25374 | 71.37402 | 80.53557 | -153.07550  | -733.68902  | 248.70981   | 1 |
| 36 | O | 83.29937 | 71.46316 | 81.15942 | 186.15459   | -480.78787  | -449.34387  | 1 |
| 37 | N | 81.49819 | 70.29989 | 80.31469 | -487.53139  | 543.18517   | 42.03850    | 1 |
| 38 | C | 81.86865 | 69.00916 | 80.82400 | -699.35871  | 69.34393    | 360.10701   | 1 |
| 39 | H | 82.27816 | 69.19515 | 81.84322 | 2.81126     | -221.99807  | -2715.58072 | 1 |
| 40 | C | 80.50560 | 68.20572 | 80.75292 | -507.46439  | -592.59194  | 122.07761   | 1 |
| 41 | H | 80.65624 | 67.10250 | 80.72826 | -1975.08116 | 525.87560   | -1801.71556 | 1 |
| 42 | H | 79.85385 | 68.42300 | 81.62885 | 1588.27743  | -1913.22100 | 1113.83566  | 1 |
| 43 | C | 79.89449 | 68.77871 | 79.43545 | -613.62442  | -457.55993  | -194.14490  | 1 |
| 44 | H | 80.41103 | 68.35676 | 78.54301 | 1707.54637  | -721.27992  | 1996.92523  | 1 |
| 45 | H | 78.80955 | 68.56583 | 79.31115 | 758.23357   | 2100.81767  | 1560.55011  | 1 |
| 46 | C | 80.21565 | 70.32367 | 79.62224 | -352.41524  | 704.96076   | 49.21465    | 1 |
| 47 | H | 80.33169 | 70.90160 | 78.67992 | 1714.76886  | -2070.42778 | 443.35792   | 1 |
| 48 | H | 79.51400 | 70.87043 | 80.29849 | 1224.15040  | 1801.50881  | 1636.97633  | 1 |
| 49 | C | 82.99703 | 68.39564 | 79.80081 | 566.85117   | 537.05831   | 117.62814   | 1 |
| 50 | O | 82.75467 | 67.39945 | 79.16674 | -550.26779  | -406.08867  | 4.21666     | 1 |
| 51 | N | 84.07891 | 69.15282 | 79.85725 | 566.34832   | -425.77725  | 180.18749   | 1 |
| 52 | H | 84.07302 | 69.97783 | 80.49669 | 644.44502   | 2646.80550  | -52.73430   | 1 |
| 53 | C | 85.22429 | 68.92116 | 79.04723 | 612.34801   | -281.48662  | 411.56221   | 1 |
| 54 | H | 86.04670 | 69.37111 | 79.64686 | 1667.23498  | -1490.75142 | 1556.16753  | 1 |
| 55 | C | 85.42883 | 67.35130 | 78.83070 | -714.45746  | -175.43074  | 286.98927   | 1 |
| 56 | H | 84.56276 | 66.96615 | 78.21424 | -787.09484  | 1763.03619  | -1922.46060 | 1 |
| 57 | O | 85.44985 | 66.58405 | 80.05665 | -429.46514  | 516.51932   | -128.40526  | 1 |
| 58 | H | 84.51932 | 66.27272 | 80.07078 | 1981.82785  | 436.16847   | -1818.18182 | 1 |
| 59 | C | 86.73533 | 67.23270 | 77.96632 | 630.79189   | -468.94448  | 76.03230    | 1 |
| 60 | H | 86.97610 | 66.16672 | 77.74436 | -1775.71861 | 2062.30353  | 131.89849   | 1 |
| 61 | H | 86.64156 | 67.76071 | 76.98585 | -1855.14608 | 88.94118    | 1993.53760  | 1 |
| 62 | H | 87.61536 | 67.66632 | 78.49589 | -1504.82350 | -780.94249  | -2132.90992 | 1 |
| 63 | C | 85.05396 | 69.73969 | 77.64866 | 288.57638   | 618.62814   | -397.00270  | 1 |
| 64 | O | 86.02481 | 69.86589 | 76.93168 | 321.70495   | -185.26452  | 574.37218   | 1 |
| 65 | N | 83.83055 | 70.23311 | 77.44563 | -447.05792  | -446.53431  | 367.76425   | 1 |
| 66 | H | 83.10539 | 69.98526 | 78.11809 | 350.31316   | 1975.63644  | -1843.31522 | 1 |
| 67 | C | 83.57187 | 70.69161 | 76.12216 | -511.23061  | 374.03917   | -471.51480  | 1 |
| 68 | H | 84.56882 | 71.04316 | 75.76738 | 2234.79579  | -898.70890  | -1273.45190 | 1 |
| 69 | C | 83.07037 | 69.40963 | 75.31028 | 529.53781   | -159.34528  | 563.72604   | 1 |
| 70 | H | 83.15047 | 69.66926 | 74.22212 | 654.59388   | 2347.94251  | 1217.51488  | 1 |
| 71 | H | 83.80927 | 68.58480 | 75.50740 | -1526.55661 | 2103.42026  | 817.87394   | 1 |
| 72 | O | 81.75761 | 68.89116 | 75.63951 | -554.84278  | 14.12789    | 399.58769   | 1 |
| 73 | H | 81.19376 | 69.53460 | 75.15777 | 1297.06236  | 2061.84854  | 1220.68812  | 1 |
| 74 | C | 82.41301 | 71.85433 | 76.10008 | -662.15484  | -412.13544  | 123.62687   | 1 |
| 75 | O | 82.67285 | 72.89530 | 75.53071 | -540.01537  | -317.05804  | 274.91456   | 1 |
| 76 | N | 81.32388 | 71.51768 | 76.77824 | -202.76299  | -690.00100  | -131.49145  | 1 |
| 77 | H | 81.36535 | 70.56128 | 77.13511 | -702.62132  | -2617.37191 | 281.70413   | 1 |
| 78 | C | 80.06501 | 72.17530 | 76.62628 | -491.73914  | 576.34187   | 222.73509   | 1 |
| 79 | H | 79.56360 | 72.11576 | 77.62652 | 1977.17978  | -1823.58850 | -434.68928  | 1 |
| 80 | C | 80.23032 | 73.66573 | 76.12418 | -649.50797  | -328.66843  | 306.11224   | 1 |
| 81 | H | 80.75716 | 73.70364 | 75.13897 | 2075.07803  | 1452.16490  | -1004.45904 | 1 |
| 82 | C | 78.78430 | 74.26538 | 76.01936 | -615.18735  | -489.99689  | -70.96352   | 1 |
| 83 | H | 78.80331 | 75.33485 | 75.70422 | -1226.32661 | -1724.38906 | -1716.47170 | 1 |
| 84 | H | 78.16408 | 73.71195 | 75.27541 | 2381.64273  | -969.84735  | 900.46860   | 1 |
| 85 | H | 78.25069 | 74.21530 | 76.99778 | 2122.74991  | 1702.23946  | -141.36228  | 1 |
| 86 | C | 80.97889 | 74.54805 | 77.18725 | -501.86074  | -479.61276  | -376.42482  | 1 |
| 87 | H | 80.93531 | 75.63247 | 76.93039 | 993.79261   | -2246.95401 | -1177.81305 | 1 |
| 88 | H | 80.54229 | 74.43108 | 78.20975 | 42.71279    | -626.15391  | -2651.37258 | 1 |
| 89 | H | 82.05980 | 74.27182 | 77.24668 | -2026.39012 | -1590.33709 | -887.82922  | 1 |
| 90 | C | 79.23581 | 71.32798 | 75.49387 | -672.89153  | 382.57394   | -156.34072  | 1 |
| 91 | O | 79.72850 | 70.89961 | 74.47059 | 410.04627   | 221.86223   | 500.35950   | 1 |
| 92 | N | 77.98805 | 71.22965 | 75.92685 | -378.11782  | -443.79414  | -441.10984  | 1 |

|     |   |          |          |          |             |             |             |   |
|-----|---|----------|----------|----------|-------------|-------------|-------------|---|
| 93  | H | 77.75742 | 71.73028 | 76.78370 | 2404.15973  | -568.14894  | 1149.30085  | 1 |
| 94  | C | 76.94262 | 70.80104 | 75.03133 | -544.54484  | 466.16019   | 331.29119   | 1 |
| 95  | H | 76.92818 | 71.58505 | 74.24234 | -1409.80988 | -170.17955  | 2325.32679  | 1 |
| 96  | C | 77.33026 | 69.38989 | 74.42882 | -184.48284  | 116.78282   | -758.89137  | 1 |
| 97  | H | 78.33283 | 69.43221 | 73.92926 | 1893.78641  | 1861.14652  | 611.04528   | 1 |
| 98  | H | 77.42293 | 68.62857 | 75.23796 | -2170.79665 | -974.19311  | 1327.50117  | 1 |
| 99  | C | 76.20294 | 68.99933 | 73.42143 | 389.51668   | 672.81878   | -138.49152  | 1 |
| 100 | H | 75.20649 | 69.07251 | 73.91750 | 510.64577   | 1933.03327  | 1851.02484  | 1 |
| 101 | H | 76.14470 | 69.74716 | 72.59992 | -2302.30869 | -1105.72939 | -948.89774  | 1 |
| 102 | C | 76.39001 | 67.55896 | 72.81223 | -559.93427  | -126.34590  | 542.30857   | 1 |
| 103 | O | 75.55613 | 67.11558 | 72.06509 | -670.36003  | -111.83166  | 76.36448    | 1 |
| 104 | N | 77.52563 | 66.93901 | 73.20042 | -216.06729  | -537.07037  | 446.51379   | 1 |
| 105 | H | 78.28613 | 67.27578 | 73.80234 | -1251.96487 | 1074.12894  | -2168.52500 | 1 |
| 106 | H | 77.81336 | 66.01225 | 72.86811 | -2451.83023 | -720.73851  | 944.84612   | 1 |
| 107 | C | 75.53623 | 70.68105 | 75.82621 | 546.24052   | -563.88337  | -85.11809   | 1 |
| 108 | O | 74.54519 | 70.87032 | 75.16445 | 71.70702    | -307.40463  | 606.69673   | 1 |
| 109 | N | 75.60587 | 70.23347 | 77.09054 | 479.90863   | -504.50129  | 222.86849   | 1 |
| 110 | C | 74.39933 | 70.17850 | 77.85817 | 75.51268    | -600.91904  | 506.73700   | 1 |
| 111 | H | 73.57495 | 70.15265 | 77.10620 | -2033.61562 | 1795.30103  | 254.89480   | 1 |
| 112 | C | 74.62426 | 68.86474 | 78.71928 | 523.79067   | 517.99274   | 284.45581   | 1 |
| 113 | H | 73.99567 | 68.83589 | 79.63719 | 1599.61665  | -1127.00911 | 1895.98173  | 1 |
| 114 | H | 74.38527 | 67.94727 | 78.13642 | -1881.83093 | 1275.82488  | -1501.55016 | 1 |
| 115 | C | 76.15175 | 68.96307 | 79.02249 | -600.05639  | -404.05026  | 316.64485   | 1 |
| 116 | H | 76.34875 | 69.73448 | 79.80372 | -2597.05260 | 496.36221   | 657.73249   | 1 |
| 117 | H | 76.60119 | 68.01081 | 79.38408 | -1666.24518 | 1294.38985  | -1723.90591 | 1 |
| 118 | C | 76.70295 | 69.42267 | 77.60627 | 493.57570   | -129.95376  | -602.56394  | 1 |
| 119 | H | 77.62654 | 70.04407 | 77.64720 | -1469.08415 | -637.84797  | 2204.22581  | 1 |
| 120 | H | 76.84916 | 68.60138 | 76.86453 | -1038.97840 | 1068.88701  | -2280.71789 | 1 |
| 121 | C | 74.33572 | 71.49433 | 78.84233 | 188.88100   | 241.05089   | -727.87821  | 1 |
| 122 | O | 74.93199 | 71.52620 | 79.89641 | 531.88613   | -49.19943   | 427.07960   | 1 |
| 123 | N | 73.57581 | 72.43686 | 78.29968 | 708.14833   | 26.93417    | -179.73509  | 1 |
| 124 | H | 73.19652 | 72.27646 | 77.36783 | -2232.69501 | -1179.09831 | 1023.94816  | 1 |
| 125 | C | 73.39041 | 73.61542 | 79.08058 | -738.32412  | 259.92548   | 104.42456   | 1 |
| 126 | H | 73.41659 | 73.22658 | 80.12452 | 2028.89123  | 1260.02983  | 1311.33324  | 1 |
| 127 | C | 74.61955 | 74.59144 | 78.82207 | -258.65678  | -345.52513  | 661.28459   | 1 |
| 128 | H | 74.66897 | 74.88622 | 77.75155 | -1826.06090 | -1801.46097 | -918.64554  | 1 |
| 129 | C | 74.40731 | 75.83623 | 79.74883 | -541.23400  | 531.92970   | -218.41428  | 1 |
| 130 | H | 75.19588 | 76.60935 | 79.59413 | 1311.73218  | -2219.18200 | 882.19023   | 1 |
| 131 | H | 73.41677 | 76.31882 | 79.55734 | -1048.71298 | 1223.58118  | -2196.97971 | 1 |
| 132 | H | 74.42739 | 75.55014 | 80.82694 | 419.06414   | 1903.92898  | 1903.44670  | 1 |
| 133 | C | 75.94811 | 73.88902 | 79.26929 | -423.86431  | 152.66566   | -648.55262  | 1 |
| 134 | H | 76.82903 | 74.56911 | 79.18964 | 105.68386   | -2342.50080 | 1387.51238  | 1 |
| 135 | H | 75.88459 | 73.54817 | 80.33056 | -1695.63603 | -1484.73621 | -1531.02793 | 1 |
| 136 | H | 76.16918 | 72.98660 | 78.64789 | -1853.57121 | -487.39031  | 1936.59343  | 1 |
| 137 | C | 72.02076 | 74.43007 | 78.67750 | 539.71428   | -510.58232  | 267.58633   | 1 |
| 138 | O | 71.49497 | 75.08089 | 79.55508 | -15.93758   | -278.34085  | -624.49402  | 1 |
| 139 | N | 71.76353 | 74.42277 | 77.37777 | -676.81886  | 12.05292    | 276.17960   | 1 |
| 140 | H | 72.38883 | 73.81370 | 76.85404 | -1694.44250 | -373.84189  | -2100.66098 | 1 |
| 141 | C | 70.47221 | 74.75365 | 76.83841 | 412.33078   | -664.70360  | 108.35451   | 1 |
| 142 | H | 70.09245 | 73.80393 | 76.40032 | 1765.77476  | 1294.44366  | 1621.76594  | 1 |
| 143 | C | 69.52541 | 75.36737 | 77.93882 | -179.66635  | -721.95667  | -264.73915  | 1 |
| 144 | H | 69.38646 | 74.65275 | 78.78388 | -607.34922  | 2587.87032  | -598.10018  | 1 |
| 145 | H | 70.00589 | 76.26698 | 78.39280 | -359.69332  | -1479.13954 | -2259.74260 | 1 |
| 146 | C | 68.15142 | 75.75585 | 77.29264 | -240.01076  | 616.02425   | 431.85322   | 1 |
| 147 | H | 68.30814 | 76.43024 | 76.41991 | -1359.17131 | 782.54425   | 2227.99181  | 1 |
| 148 | H | 67.62120 | 74.86119 | 76.89724 | -820.36667  | 85.81767    | -2596.78715 | 1 |
| 149 | C | 67.30542 | 76.47119 | 78.42100 | -513.07015  | 236.18570   | -551.87280  | 1 |
| 150 | H | 67.09274 | 75.76787 | 79.25879 | 1816.11944  | -1183.11722 | -1650.94321 | 1 |
| 151 | H | 67.88349 | 77.30938 | 78.87380 | -1800.04429 | -1361.53473 | 1526.34643  | 1 |
| 152 | C | 65.99022 | 76.99902 | 77.80294 | 726.08972   | -253.19732  | -179.64713  | 1 |
| 153 | H | 66.12360 | 77.79873 | 77.04735 | 1224.27271  | -456.51798  | -2390.90304 | 1 |
| 154 | H | 65.31559 | 76.21346 | 77.40838 | 1206.40339  | -1150.93514 | -2154.90344 | 1 |

|     |   |          |          |          |             |             |             |   |
|-----|---|----------|----------|----------|-------------|-------------|-------------|---|
| 155 | N | 65.17424 | 77.67875 | 78.95540 | 329.70796   | -633.68968  | -155.67358  | 1 |
| 156 | H | 64.24413 | 78.10358 | 78.67323 | 1348.31305  | 1938.76845  | 1359.00643  | 1 |
| 157 | H | 64.88290 | 77.06161 | 79.76829 | 2096.92035  | 1446.54551  | -966.48890  | 1 |
| 158 | H | 65.63323 | 78.49521 | 79.45473 | -1197.07217 | -2303.53719 | 827.28733   | 1 |
| 159 | C | 70.69986 | 75.87776 | 75.68339 | -378.01186  | -556.17301  | -413.96481  | 1 |
| 160 | O | 69.96744 | 75.91487 | 74.69462 | -409.44433  | -307.55053  | -453.30833  | 1 |
| 161 | N | 71.66117 | 76.70805 | 76.02893 | -429.02477  | 524.70884   | 274.08502   | 1 |
| 162 | H | 72.15487 | 76.46964 | 76.88728 | 1706.34263  | -1425.96036 | 1574.38926  | 1 |
| 163 | C | 71.91952 | 77.87766 | 75.25338 | -45.25864   | -626.22952  | 478.93267   | 1 |
| 164 | H | 70.90313 | 78.15346 | 74.89017 | 1988.63164  | 570.90773   | 1772.87287  | 1 |
| 165 | C | 72.61661 | 78.94511 | 76.18505 | 551.77128   | -20.49526   | -564.54996  | 1 |
| 166 | H | 71.96903 | 79.18796 | 77.05756 | 1434.61535  | -1753.10253 | 1513.99471  | 1 |
| 167 | H | 73.56320 | 78.54443 | 76.61167 | -714.67738  | 1819.09770  | 1898.36494  | 1 |
| 168 | C | 72.88802 | 80.21693 | 75.31286 | 446.99263   | -555.77305  | 338.97221   | 1 |
| 169 | H | 73.61762 | 79.98329 | 74.50191 | 1953.68466  | 1892.25957  | -161.67766  | 1 |
| 170 | H | 71.95049 | 80.56037 | 74.79930 | -403.03785  | 2688.07032  | -188.43591  | 1 |
| 171 | C | 73.43428 | 81.36837 | 76.24730 | 567.86262   | 335.74681   | 434.04421   | 1 |
| 172 | H | 72.70466 | 81.60271 | 77.05657 | -1080.02275 | 1568.26081  | -1948.78900 | 1 |
| 173 | H | 74.37474 | 81.06079 | 76.75951 | -919.54108  | 2111.34692  | 1456.13463  | 1 |
| 174 | C | 73.66234 | 82.60290 | 75.34252 | 195.81897   | 173.33862   | -745.11536  | 1 |
| 175 | H | 74.45001 | 82.47182 | 74.57344 | 1405.67949  | -2301.21089 | -390.08113  | 1 |
| 176 | H | 72.73876 | 83.00802 | 74.87666 | -940.37328  | -1118.32446 | 2299.72133  | 1 |
| 177 | N | 74.17741 | 83.76471 | 76.25194 | 319.26422   | 656.36007   | -42.02424   | 1 |
| 178 | H | 74.41189 | 84.67188 | 75.75443 | 1961.03633  | 619.91968   | 1787.09422  | 1 |
| 179 | H | 73.50115 | 84.10665 | 76.99406 | 854.14343   | -2156.80752 | 1429.08711  | 1 |
| 180 | H | 75.06139 | 83.59570 | 76.81546 | 1237.02905  | -1378.50857 | -1998.28500 | 1 |
| 181 | C | 72.88600 | 77.44030 | 73.99970 | 532.53319   | -268.57236  | 517.55729   | 1 |
| 182 | O | 74.01102 | 77.84135 | 73.84668 | 266.16714   | -290.73804  | -558.88002  | 1 |
| 183 | N | 72.12655 | 76.69216 | 73.19923 | -226.25352  | 640.49678   | -270.32839  | 1 |
| 184 | H | 71.16541 | 76.42435 | 73.53281 | 2007.69063  | -1035.27229 | 1523.50231  | 1 |
| 185 | C | 72.82075 | 75.83775 | 72.29123 | -540.76542  | -573.33303  | 49.50000    | 1 |
| 186 | H | 73.86390 | 76.23066 | 72.25345 | -2374.20950 | -1036.76023 | 843.75774   | 1 |
| 187 | C | 72.73255 | 74.39805 | 72.98444 | -77.09082   | 666.87422   | -415.84136  | 1 |
| 188 | H | 71.64355 | 74.13580 | 73.08669 | -985.81834  | 617.19825   | 2463.91927  | 1 |
| 189 | O | 73.26076 | 74.33480 | 74.32810 | 293.29899   | -391.65602  | -477.80926  | 1 |
| 190 | H | 72.45557 | 74.51274 | 74.85436 | 2528.72714  | -681.76262  | -751.27122  | 1 |
| 191 | C | 73.41918 | 73.43592 | 71.95216 | 252.47363   | -605.14473  | 440.05134   | 1 |
| 192 | H | 73.43451 | 72.38450 | 72.32454 | -2052.65063 | 1456.49051  | -1043.51830 | 1 |
| 193 | H | 72.89260 | 73.42986 | 70.96641 | -2152.98800 | -1661.97574 | -161.70652  | 1 |
| 194 | H | 74.47712 | 73.73291 | 71.76037 | -473.12726  | -1584.27339 | 2165.61725  | 1 |
| 195 | C | 72.06586 | 75.85856 | 70.84601 | 360.36307   | 488.46713   | 505.10056   | 1 |
| 196 | O | 72.59997 | 75.35156 | 69.88499 | -200.08817  | -528.03552  | -385.82850  | 1 |
| 197 | N | 70.83394 | 76.37561 | 70.90094 | -597.54095  | -226.44775  | 355.20479   | 1 |
| 198 | H | 70.57126 | 76.82551 | 71.77644 | 2179.23655  | -1300.70981 | -991.33835  | 1 |
| 199 | C | 70.25490 | 76.78044 | 69.66735 | -687.68921  | 297.39807   | -249.45179  | 1 |
| 200 | H | 70.66257 | 76.07877 | 68.90229 | -349.16256  | -2467.37713 | -1101.72831 | 1 |
| 201 | C | 68.66466 | 76.78387 | 69.83987 | 672.47345   | 361.54328   | -201.62880  | 1 |
| 202 | H | 68.39864 | 77.55627 | 70.59277 | 1541.41502  | 582.18425   | 2169.97026  | 1 |
| 203 | H | 68.18785 | 77.08731 | 68.87983 | -2534.67717 | 60.25153    | 997.72295   | 1 |
| 204 | C | 68.12895 | 75.42109 | 70.29703 | 574.26774   | -389.43119  | -377.02542  | 1 |
| 205 | C | 67.82525 | 74.40615 | 69.34008 | 688.82679   | -287.33580  | -257.96133  | 1 |
| 206 | H | 68.01298 | 74.56975 | 68.26347 | 331.14182   | 1470.38163  | 2269.80013  | 1 |
| 207 | C | 67.90647 | 75.19296 | 71.68959 | -383.52382  | -675.04808  | 144.24917   | 1 |
| 208 | H | 68.16564 | 75.96596 | 72.43599 | 4.09847     | 1517.59662  | 2262.86397  | 1 |
| 209 | C | 67.27268 | 73.20841 | 69.79331 | -134.76730  | 428.45285   | -649.50303  | 1 |
| 210 | H | 67.02777 | 72.42618 | 69.05372 | -903.23433  | 1600.49020  | 2011.53387  | 1 |
| 211 | C | 67.34668 | 73.97849 | 72.09201 | -335.53281  | -615.00040  | -364.39058  | 1 |
| 212 | H | 67.16635 | 73.81967 | 73.16966 | 1596.45398  | -1369.33862 | 1732.02659  | 1 |
| 213 | C | 67.00232 | 72.94814 | 71.16835 | 585.48547   | -340.24194  | -406.23938  | 1 |
| 214 | O | 66.42664 | 71.71389 | 71.56741 | -419.15649  | -173.04408  | -511.94141  | 1 |
| 215 | H | 66.35334 | 71.87050 | 72.53851 | -1071.84350 | 1559.71507  | -1960.13012 | 1 |
| 216 | C | 70.63209 | 78.34893 | 69.40818 | 291.41878   | -183.13091  | 710.72246   | 1 |

|     |   |          |          |          |             |             |             |   |
|-----|---|----------|----------|----------|-------------|-------------|-------------|---|
| 217 | O | 70.99169 | 79.11093 | 70.27262 | 379.87695   | 523.47396   | -222.23622  | 1 |
| 218 | N | 70.25160 | 78.62206 | 68.14479 | 564.30591   | 373.09380   | 277.24371   | 1 |
| 219 | H | 70.04818 | 77.77239 | 67.61699 | -120.59931  | -2436.07824 | -1214.35098 | 1 |
| 220 | C | 70.92042 | 79.71924 | 67.47427 | 404.07514   | -299.37480  | 608.84009   | 1 |
| 221 | H | 72.00767 | 79.48868 | 67.50427 | -1071.07882 | -841.69025  | 2359.66467  | 1 |
| 222 | C | 70.30548 | 79.74028 | 66.02721 | -683.12807  | 68.71770    | -390.13096  | 1 |
| 223 | H | 70.47487 | 78.77305 | 65.50177 | 2068.88918  | 1596.58590  | 770.89603   | 1 |
| 224 | H | 69.19973 | 79.85494 | 66.09677 | 1379.86429  | 2342.49779  | -179.85638  | 1 |
| 225 | C | 70.92846 | 80.92792 | 65.22347 | -176.39967  | 537.49466   | 550.97268   | 1 |
| 226 | H | 70.91510 | 81.86761 | 65.82016 | -396.28051  | 1942.22168  | 1869.33314  | 1 |
| 227 | H | 71.99722 | 80.73845 | 64.97996 | -94.44700   | 586.00678   | -2659.20016 | 1 |
| 228 | C | 70.03687 | 81.08139 | 63.90782 | -291.69381  | -718.18079  | -150.72929  | 1 |
| 229 | H | 70.02242 | 80.18664 | 63.23441 | -2303.38776 | 1089.76242  | 964.62032   | 1 |
| 230 | H | 68.97534 | 81.39528 | 64.07810 | 884.16729   | 2568.80533  | -207.74283  | 1 |
| 231 | N | 70.67815 | 82.11852 | 63.21633 | -594.49522  | -252.81478  | 342.29276   | 1 |
| 232 | H | 71.53981 | 82.46265 | 63.61026 | -1735.17426 | 2084.05705  | -263.71605  | 1 |
| 233 | C | 70.25033 | 82.63828 | 62.13793 | 595.23177   | -271.52487  | 442.22352   | 1 |
| 234 | N | 69.05357 | 82.14488 | 61.60559 | 585.53813   | -424.79750  | -105.81303  | 1 |
| 235 | H | 68.44429 | 81.40794 | 61.95786 | 959.88797   | 1327.56823  | -2177.11905 | 1 |
| 236 | H | 68.61250 | 82.48149 | 60.74936 | 1578.48647  | 16.27378    | -2220.76233 | 1 |
| 237 | N | 71.11388 | 83.64600 | 61.68473 | -452.17763  | -390.33541  | -421.51853  | 1 |
| 238 | H | 71.98549 | 84.00426 | 62.07166 | 470.26107   | 1974.25629  | -1817.92087 | 1 |
| 239 | H | 70.94644 | 84.18090 | 60.83179 | 1856.67307  | -1573.97321 | -1224.35416 | 1 |
| 240 | C | 70.51872 | 81.10245 | 68.22465 | -531.47271  | -581.45780  | -55.06206   | 1 |
| 241 | O | 69.38191 | 81.38869 | 68.51637 | -243.00837  | 192.73507   | 609.52485   | 1 |
| 242 | N | 71.62100 | 81.93788 | 68.31484 | 343.49288   | -644.25607  | 38.09164    | 1 |
| 243 | H | 72.31069 | 81.36954 | 67.79575 | -1691.16043 | -1535.97525 | -1484.73099 | 1 |
| 244 | C | 72.05779 | 82.32593 | 69.68171 | 542.66492   | 350.14337   | 454.42563   | 1 |
| 245 | H | 72.43032 | 81.36788 | 70.11113 | 1209.57979  | -2396.95920 | 463.86744   | 1 |
| 246 | C | 73.12976 | 83.36780 | 69.49363 | -737.14309  | 145.93010   | 242.71942   | 1 |
| 247 | H | 72.76727 | 84.07755 | 68.71494 | -1050.18303 | 159.36419   | -2509.06125 | 1 |
| 248 | C | 73.37968 | 84.15797 | 70.76665 | -706.77696  | -252.88343  | -245.16230  | 1 |
| 249 | H | 74.15758 | 84.95613 | 70.61606 | -1624.64039 | -1665.49085 | 1417.86935  | 1 |
| 250 | H | 72.43807 | 84.66872 | 71.11943 | 2566.10521  | 598.51109   | 693.22305   | 1 |
| 251 | H | 73.73447 | 83.49700 | 71.60454 | -1972.69758 | 107.10018   | -1876.34312 | 1 |
| 252 | C | 74.43772 | 82.77045 | 69.00360 | 412.85148   | 672.58832   | -27.69222   | 1 |
| 253 | H | 75.21449 | 83.56375 | 68.82440 | 1447.02277  | 1762.76533  | -1490.78944 | 1 |
| 254 | H | 74.86731 | 82.04767 | 69.75050 | 1320.77379  | -145.20455  | 2378.68491  | 1 |
| 255 | H | 74.30409 | 82.21076 | 68.03781 | -1512.10848 | 1470.52031  | 1724.75147  | 1 |
| 256 | C | 70.79755 | 82.94925 | 70.54416 | -607.11113  | 499.56689   | 73.73769    | 1 |
| 257 | O | 70.38118 | 84.06145 | 70.32662 | 357.97126   | 460.81534   | 356.68785   | 1 |
| 258 | N | 70.44326 | 82.10072 | 71.50085 | 536.55407   | -368.62270  | 332.76306   | 1 |
| 259 | H | 70.90251 | 81.19106 | 71.55897 | 524.38866   | 2297.69985  | 1367.20941  | 1 |
| 260 | C | 69.34327 | 82.45504 | 72.31756 | 46.50277    | -774.29190  | -147.97904  | 1 |
| 261 | H | 68.86402 | 83.31901 | 71.80226 | 1676.51875  | 1883.29066  | 1032.55549  | 1 |
| 262 | C | 68.40461 | 81.15680 | 72.52845 | -559.41456  | -34.19198   | -556.30433  | 1 |
| 263 | H | 68.93551 | 80.42293 | 73.18183 | -64.66664   | 395.18769   | 2695.05373  | 1 |
| 264 | H | 67.48039 | 81.44470 | 73.08442 | -2703.44278 | -60.40056   | 333.79418   | 1 |
| 265 | C | 68.06472 | 80.51927 | 71.20834 | -519.76435  | 377.31045   | 459.42366   | 1 |
| 266 | H | 69.00831 | 80.14581 | 70.73989 | -1746.74323 | 1667.50644  | -1261.73691 | 1 |
| 267 | C | 67.11563 | 79.34868 | 71.42967 | 570.95554   | 16.46261    | -545.27700  | 1 |
| 268 | H | 66.84580 | 78.84523 | 70.46524 | 2391.58273  | 28.05277    | -1305.07271 | 1 |
| 269 | H | 67.56391 | 78.57332 | 72.10428 | 175.75588   | 917.63458   | 2559.43867  | 1 |
| 270 | H | 66.15725 | 79.68147 | 71.90566 | -1063.97851 | -2155.34650 | 1283.00462  | 1 |
| 271 | C | 67.43441 | 81.51972 | 70.24679 | 193.76014   | 2.62946     | -765.53141  | 1 |
| 272 | H | 67.23953 | 81.05505 | 69.24283 | 507.39394   | -846.55087  | 2539.60089  | 1 |
| 273 | H | 66.45930 | 81.91692 | 70.63425 | 1337.57841  | 1818.19054  | 1526.01994  | 1 |
| 274 | H | 68.11208 | 82.39939 | 70.06732 | 1100.88635  | -1172.91350 | -2199.08909 | 1 |
| 275 | C | 69.92105 | 82.81853 | 73.78446 | -549.21115  | 475.64486   | -309.38218  | 1 |
| 276 | O | 70.69985 | 82.10639 | 74.37166 | 556.06106   | -390.37755  | -78.24250   | 1 |
| 277 | O | 69.35515 | 83.94172 | 74.41819 | -572.27940  | -310.19032  | -209.75862  | 1 |
| 278 | H | 68.77531 | 84.26934 | 73.67158 | -1380.08193 | 2212.14486  | 790.85944   | 1 |

Listing 48: C00048.xmolout

|    |          |          |          |          |             |             |             |          |
|----|----------|----------|----------|----------|-------------|-------------|-------------|----------|
| 1  | 276      |          |          |          |             |             |             |          |
| 2  | 150.0000 | 150.0000 | 150.0000 | 0.0000   | 0.0000      | 0.0000***** | 2.7750      | 11100    |
|    | 0.2500   | 300.00   | 0.00     | 0.00     | 0.00        | -1293.7071  | 0.0000      | 300.0000 |
| 3  | H        | 60.08894 | 78.48963 | 69.93480 | -2043.14101 | -1757.64893 | 399.89339   | 1        |
| 4  | N        | 59.97632 | 79.50315 | 69.93002 | 426.75047   | 490.45733   | -334.42467  | 1        |
| 5  | H        | 59.71229 | 79.72098 | 70.90112 | 442.25559   | -1110.30854 | -2448.52907 | 1        |
| 6  | C        | 61.14284 | 80.20622 | 69.56222 | 415.32972   | -666.39213  | 83.73172    | 1        |
| 7  | H        | 61.78246 | 79.52905 | 68.95599 | 879.32219   | 2491.00447  | 667.35213   | 1        |
| 8  | C        | 60.70163 | 81.54069 | 68.77378 | 31.35357    | 477.41777   | 628.23362   | 1        |
| 9  | H        | 60.07683 | 82.17260 | 69.44967 | 1168.38489  | 2240.25337  | -1019.71136 | 1        |
| 10 | H        | 61.59548 | 82.15722 | 68.51309 | -360.43770  | 2534.90498  | 931.67112   | 1        |
| 11 | C        | 59.92105 | 81.16474 | 67.54034 | 463.18208   | 512.70242   | -382.34388  | 1        |
| 12 | H        | 59.13179 | 80.43833 | 67.83990 | 1725.29117  | 1863.52247  | -987.07854  | 1        |
| 13 | C        | 59.24685 | 82.39459 | 66.94540 | 710.42801   | -144.27427  | -313.15367  | 1        |
| 14 | H        | 58.63795 | 82.13623 | 66.04085 | 364.20195   | -1033.13725 | 2494.72524  | 1        |
| 15 | H        | 58.55834 | 82.88595 | 67.68056 | 2567.61904  | 335.80679   | 847.48802   | 1        |
| 16 | H        | 59.99835 | 83.16377 | 66.63023 | -2587.99029 | 680.92867   | -512.16411  | 1        |
| 17 | C        | 60.81099 | 80.51254 | 66.49155 | 268.17616   | 741.64379   | -40.42634   | 1        |
| 18 | H        | 60.23535 | 80.25430 | 65.56522 | 1283.54314  | -1945.37420 | -1411.27812 | 1        |
| 19 | H        | 61.64881 | 81.18971 | 66.18287 | -1258.57796 | 1317.15249  | -2026.02085 | 1        |
| 20 | H        | 61.27162 | 79.56393 | 66.86990 | -2502.84526 | 909.80597   | 575.92391   | 1        |
| 21 | C        | 61.77046 | 80.63628 | 71.00728 | 619.36578   | -458.64843  | -172.09273  | 1        |
| 22 | O        | 61.05916 | 80.66637 | 71.99599 | -81.40433   | 433.87611   | 522.34594   | 1        |
| 23 | N        | 63.03400 | 80.98329 | 70.83993 | 175.23996   | -622.20190  | 341.55523   | 1        |
| 24 | H        | 63.37978 | 80.92707 | 69.88157 | -876.57256  | -303.22879  | -2561.90213 | 1        |
| 25 | C        | 63.91854 | 81.38846 | 71.86915 | -571.88214  | -534.10783  | -106.15033  | 1        |
| 26 | H        | 64.75117 | 81.86083 | 71.30529 | -2713.20841 | -16.25800   | -248.80809  | 1        |
| 27 | C        | 63.16351 | 82.39827 | 72.85617 | 166.60354   | 288.16399   | -716.09568  | 1        |
| 28 | H        | 62.25203 | 81.86930 | 73.26565 | -2097.85574 | 1636.78449  | -586.18044  | 1        |
| 29 | O        | 62.70850 | 83.62153 | 72.25236 | -317.80580  | -363.38227  | 484.43082   | 1        |
| 30 | H        | 61.73792 | 83.49335 | 72.28842 | 1863.74748  | -1451.84923 | 1357.29467  | 1        |
| 31 | C        | 64.22822 | 82.55029 | 74.00344 | 503.80731   | 517.99032   | 318.51606   | 1        |
| 32 | H        | 63.84474 | 83.18756 | 74.83397 | 640.61020   | -2157.10410 | -1536.29104 | 1        |
| 33 | H        | 64.50265 | 81.55930 | 74.44364 | 1687.88455  | 465.60692   | 2087.56452  | 1        |
| 34 | H        | 65.16751 | 83.02208 | 73.63131 | -1293.07895 | -1899.88581 | -1463.57452 | 1        |
| 35 | C        | 64.40027 | 80.06844 | 72.71390 | -153.07550  | -733.68902  | 248.70981   | 1        |
| 36 | O        | 63.67946 | 79.61557 | 73.56451 | 186.15459   | -480.78787  | -449.34387  | 1        |
| 37 | N        | 65.63438 | 79.67921 | 72.35887 | -487.53139  | 543.18517   | 42.03850    | 1        |
| 38 | C        | 66.24665 | 78.54103 | 72.96937 | -699.35871  | 69.34393    | 360.10701   | 1        |
| 39 | H        | 65.44806 | 77.78980 | 73.16418 | 2.81126     | -221.99807  | -2715.58072 | 1        |
| 40 | C        | 67.33167 | 78.14999 | 71.87771 | -507.46439  | -592.59194  | 122.07761   | 1        |
| 41 | H        | 68.14251 | 77.50503 | 72.28440 | -1975.08116 | 525.87560   | -1801.71556 | 1        |
| 42 | H        | 66.87879 | 77.59838 | 71.02377 | 1588.27743  | -1913.22100 | 1113.83566  | 1        |
| 43 | C        | 67.82451 | 79.56553 | 71.44701 | -613.62442  | -457.55993  | -194.14490  | 1        |
| 44 | H        | 68.48247 | 80.00688 | 72.23263 | 1707.54637  | -721.27992  | 1996.92523  | 1        |
| 45 | H        | 68.40317 | 79.57242 | 70.49581 | 758.23357   | 2100.81767  | 1560.55011  | 1        |
| 46 | C        | 66.44713 | 80.35198 | 71.35439 | -352.41524  | 704.96076   | 49.21465    | 1        |
| 47 | H        | 66.50627 | 81.43401 | 71.61847 | 1714.76886  | -2070.42778 | 443.35792   | 1        |
| 48 | H        | 65.90356 | 80.23422 | 70.38685 | 1224.15040  | 1801.50881  | 1636.97633  | 1        |
| 49 | C        | 67.02221 | 79.02197 | 74.33761 | 566.85117   | 537.05831   | 117.62814   | 1        |
| 50 | O        | 67.69588 | 80.02345 | 74.37934 | -550.26779  | -406.08867  | 4.21666     | 1        |
| 51 | N        | 66.85032 | 78.09007 | 75.26519 | 566.34832   | -425.77725  | 180.18749   | 1        |
| 52 | H        | 66.28971 | 77.26725 | 75.04744 | 644.44502   | 2646.80550  | -52.73430   | 1        |
| 53 | C        | 67.50215 | 78.23880 | 76.51389 | 612.34801   | -281.48662  | 411.56221   | 1        |
| 54 | H        | 67.96305 | 79.25473 | 76.51679 | 1667.23498  | -1490.75142 | 1556.16753  | 1        |
| 55 | C        | 66.37290 | 78.00247 | 77.63373 | -714.45746  | -175.43074  | 286.98927   | 1        |
| 56 | H        | 65.86166 | 77.02788 | 77.40366 | -787.09484  | 1763.03619  | -1922.46060 | 1        |
| 57 | O        | 65.33682 | 78.99737 | 77.67580 | -429.46514  | 516.51932   | -128.40526  | 1        |

|     |   |          |          |          |             |             |             |   |
|-----|---|----------|----------|----------|-------------|-------------|-------------|---|
| 58  | H | 64.56691 | 78.48235 | 77.36078 | 1981.82785  | 436.16847   | -1818.18182 | 1 |
| 59  | C | 67.21218 | 77.84227 | 78.95234 | 630.79189   | -468.94448  | 76.03230    | 1 |
| 60  | H | 66.56080 | 77.59444 | 79.82222 | -1775.71861 | 2062.30353  | 131.89849   | 1 |
| 61  | H | 67.97208 | 77.02951 | 78.86666 | -1855.14608 | 88.94118    | 1993.53760  | 1 |
| 62  | H | 67.75838 | 78.78065 | 79.20420 | -1504.82350 | -780.94249  | -2132.90992 | 1 |
| 63  | C | 68.56672 | 77.00241 | 76.62729 | 288.57638   | 618.62814   | -397.00270  | 1 |
| 64  | O | 68.28845 | 75.87859 | 76.28642 | 321.70495   | -185.26452  | 574.37218   | 1 |
| 65  | N | 69.64043 | 77.42048 | 77.31598 | -447.05792  | -446.53431  | 367.76425   | 1 |
| 66  | H | 69.72187 | 78.42858 | 77.45238 | 350.31316   | 1975.63644  | -1843.31522 | 1 |
| 67  | C | 70.83906 | 76.63004 | 77.10265 | -511.23061  | 374.03917   | -471.51480  | 1 |
| 68  | H | 70.42966 | 75.59423 | 77.03653 | 2234.79579  | -898.70890  | -1273.45190 | 1 |
| 69  | C | 71.45262 | 77.10710 | 75.74924 | 529.53781   | -159.34528  | 563.72604   | 1 |
| 70  | H | 72.15705 | 76.32721 | 75.36459 | 654.59388   | 2347.94251  | 1217.51488  | 1 |
| 71  | H | 70.65768 | 77.25538 | 74.98026 | -1526.55661 | 2103.42026  | 817.87394   | 1 |
| 72  | O | 72.17057 | 78.53293 | 75.64668 | -554.84278  | 14.12789    | 399.58769   | 1 |
| 73  | H | 73.01929 | 78.18800 | 75.38590 | 1297.06236  | 2061.84854  | 1220.68812  | 1 |
| 74  | C | 71.77275 | 76.87276 | 78.42081 | -662.15484  | -412.13544  | 123.62687   | 1 |
| 75  | O | 71.70547 | 76.08925 | 79.33034 | -540.01537  | -317.05804  | 274.91456   | 1 |
| 76  | N | 72.57021 | 77.92866 | 78.25618 | -202.76299  | -690.00100  | -131.49145  | 1 |
| 77  | H | 72.46875 | 78.43151 | 77.33326 | -702.62132  | -2617.37191 | 281.70413   | 1 |
| 78  | C | 73.09255 | 78.72673 | 79.38394 | -491.73914  | 576.34187   | 222.73509   | 1 |
| 79  | H | 72.44589 | 79.63085 | 79.30714 | 1977.17978  | -1823.58850 | -434.68928  | 1 |
| 80  | C | 72.96522 | 78.04521 | 80.72055 | -649.50797  | -328.66843  | 306.11224   | 1 |
| 81  | H | 73.18655 | 76.95820 | 80.58649 | 2075.07803  | 1452.16490  | -1004.45904 | 1 |
| 82  | C | 73.92586 | 78.58933 | 81.76415 | -615.18735  | -489.99689  | -70.96352   | 1 |
| 83  | H | 73.76878 | 78.10526 | 82.76707 | -1226.32661 | -1724.38906 | -1716.47170 | 1 |
| 84  | H | 75.00588 | 78.41091 | 81.47192 | 2381.64273  | -969.84735  | 900.46860   | 1 |
| 85  | H | 73.79802 | 79.69756 | 81.90553 | 2122.74991  | 1702.23946  | -141.36228  | 1 |
| 86  | C | 71.55406 | 78.17366 | 81.27535 | -501.86074  | -479.61276  | -376.42482  | 1 |
| 87  | H | 71.43023 | 77.59181 | 82.22907 | 993.79261   | -2246.95401 | -1177.81305 | 1 |
| 88  | H | 71.29342 | 79.24330 | 81.50192 | 42.71279    | -626.15391  | -2651.37258 | 1 |
| 89  | H | 70.78534 | 77.79022 | 80.54835 | -2026.39012 | -1590.33709 | -887.82922  | 1 |
| 90  | C | 74.62907 | 79.09666 | 78.88903 | -672.89153  | 382.57394   | -156.34072  | 1 |
| 91  | O | 75.60032 | 78.75674 | 79.54705 | 410.04627   | 221.86223   | 500.35950   | 1 |
| 92  | N | 74.58610 | 79.79671 | 77.78020 | -378.11782  | -443.79414  | -441.10984  | 1 |
| 93  | H | 73.64471 | 79.93254 | 77.41960 | 2404.15973  | -568.14894  | 1149.30085  | 1 |
| 94  | C | 75.71445 | 80.36831 | 77.12430 | -544.54484  | 466.16019   | 331.29119   | 1 |
| 95  | H | 75.21907 | 81.03616 | 76.38615 | -1409.80988 | -170.17955  | 2325.32679  | 1 |
| 96  | C | 76.52763 | 81.19621 | 78.20151 | -184.48284  | 116.78282   | -758.89137  | 1 |
| 97  | H | 75.86269 | 81.90754 | 78.74193 | 1893.78641  | 1861.14652  | 611.04528   | 1 |
| 98  | H | 76.93087 | 80.52999 | 78.99619 | -2170.79665 | -974.19311  | 1327.50117  | 1 |
| 99  | C | 77.66012 | 81.95754 | 77.44239 | 389.51668   | 672.81878   | -138.49152  | 1 |
| 100 | H | 78.13147 | 81.29541 | 76.68281 | 510.64577   | 1933.03327  | 1851.02484  | 1 |
| 101 | H | 77.22733 | 82.78273 | 76.83549 | -2302.30869 | -1105.72939 | -948.89774  | 1 |
| 102 | C | 78.77521 | 82.52600 | 78.39791 | -559.93427  | -126.34590  | 542.30857   | 1 |
| 103 | O | 79.74209 | 83.06584 | 77.92487 | -670.36003  | -111.83166  | 76.36448    | 1 |
| 104 | N | 78.52733 | 82.34318 | 79.71339 | -216.06729  | -537.07037  | 446.51379   | 1 |
| 105 | H | 77.70995 | 81.93071 | 80.17758 | -1251.96487 | 1074.12894  | -2168.52500 | 1 |
| 106 | H | 79.14020 | 82.68344 | 80.46252 | -2451.83023 | -720.73851  | 944.84612   | 1 |
| 107 | C | 76.47378 | 79.18120 | 76.28868 | 546.24052   | -563.88337  | -85.11809   | 1 |
| 108 | O | 75.98427 | 78.97151 | 75.20123 | 71.70702    | -307.40463  | 606.69673   | 1 |
| 109 | N | 77.50584 | 78.54584 | 76.84747 | 479.90863   | -504.50129  | 222.86849   | 1 |
| 110 | C | 78.06451 | 77.38833 | 76.18137 | 75.51268    | -600.91904  | 506.73700   | 1 |
| 111 | H | 77.96251 | 77.63636 | 75.09910 | -2033.61562 | 1795.30103  | 254.89480   | 1 |
| 112 | C | 79.56416 | 77.37070 | 76.75105 | 523.79067   | 517.99274   | 284.45581   | 1 |
| 113 | H | 80.05685 | 76.38044 | 76.63529 | 1599.61665  | -1127.00911 | 1895.98173  | 1 |
| 114 | H | 80.20617 | 78.11559 | 76.23174 | -1881.83093 | 1275.82488  | -1501.55016 | 1 |
| 115 | C | 79.31250 | 77.76921 | 78.23374 | -600.05639  | -404.05026  | 316.64485   | 1 |
| 116 | H | 78.95576 | 76.89575 | 78.82429 | -2597.05260 | 496.36221   | 657.73249   | 1 |
| 117 | H | 80.22288 | 78.14949 | 78.74922 | -1666.24518 | 1294.38985  | -1723.90591 | 1 |
| 118 | C | 78.17168 | 78.87163 | 78.09302 | 493.57570   | -129.95376  | -602.56394  | 1 |
| 119 | H | 77.36119 | 78.81980 | 78.88907 | -1469.08415 | -637.84797  | 2204.22581  | 1 |

|     |   |          |          |          |             |             |             |   |
|-----|---|----------|----------|----------|-------------|-------------|-------------|---|
| 120 | H | 78.55268 | 79.91483 | 78.00237 | -1038.97840 | 1068.88701  | -2280.71789 | 1 |
| 121 | C | 77.31553 | 76.04584 | 76.59106 | 188.88100   | 241.05089   | -727.87821  | 1 |
| 122 | O | 77.80987 | 74.82113 | 76.32565 | 531.88613   | -49.19943   | 427.07960   | 1 |
| 123 | N | 76.20006 | 76.23459 | 77.19436 | 708.14833   | 26.93417    | -179.73509  | 1 |
| 124 | H | 76.07939 | 77.24385 | 77.33272 | -2232.69501 | -1179.09831 | 1023.94816  | 1 |
| 125 | C | 75.21887 | 75.21565 | 77.28875 | -738.32412  | 259.92548   | 104.42456   | 1 |
| 126 | H | 75.78293 | 74.26035 | 77.20100 | 2028.89123  | 1260.02983  | 1311.33324  | 1 |
| 127 | C | 74.43446 | 75.39171 | 78.64219 | -258.65678  | -345.52513  | 661.28459   | 1 |
| 128 | H | 73.87041 | 76.35217 | 78.64448 | -1826.06090 | -1801.46097 | -918.64554  | 1 |
| 129 | C | 73.44624 | 74.18259 | 78.81080 | -541.23400  | 531.92970   | -218.41428  | 1 |
| 130 | H | 72.92260 | 74.21294 | 79.79760 | 1311.73218  | -2219.18200 | 882.19023   | 1 |
| 131 | H | 72.65571 | 74.19455 | 78.01791 | -1048.71298 | 1223.58118  | -2196.97971 | 1 |
| 132 | H | 73.97444 | 73.20322 | 78.74027 | 419.06414   | 1903.92898  | 1903.44670  | 1 |
| 133 | C | 75.45602 | 75.37201 | 79.83418 | -423.86431  | 152.66566   | -648.55262  | 1 |
| 134 | H | 74.94089 | 75.44232 | 80.82064 | 105.68386   | -2342.50080 | 1387.51238  | 1 |
| 135 | H | 76.06233 | 74.43618 | 79.83796 | -1695.63603 | -1484.73621 | -1531.02793 | 1 |
| 136 | H | 76.16590 | 76.23033 | 79.76581 | -1853.57121 | -487.39031  | 1936.59343  | 1 |
| 137 | C | 74.12484 | 75.42883 | 76.03403 | 539.71428   | -510.58232  | 267.58633   | 1 |
| 138 | O | 73.18642 | 74.61972 | 75.90693 | -15.93758   | -278.34085  | -624.49402  | 1 |
| 139 | N | 74.34638 | 76.44841 | 75.29407 | -676.81886  | 12.05292    | 276.17960   | 1 |
| 140 | H | 75.14667 | 76.99915 | 75.54905 | -1694.44250 | -373.84189  | -2100.66098 | 1 |
| 141 | C | 74.93767 | 74.86294 | 72.52554 | 412.33078   | -664.70360  | 108.35451   | 1 |
| 142 | H | 74.60439 | 75.04681 | 71.47913 | 1765.77476  | 1294.44366  | 1621.76594  | 1 |
| 143 | C | 77.23500 | 74.48708 | 71.64100 | -179.66635  | -721.95667  | -264.73915  | 1 |
| 144 | H | 78.28497 | 74.86230 | 71.64756 | -607.34922  | 2587.87032  | -598.10018  | 1 |
| 145 | H | 77.30226 | 73.39434 | 71.83948 | -359.69332  | -1479.13954 | -2259.74260 | 1 |
| 146 | C | 76.58691 | 74.73363 | 70.22569 | -240.01076  | 616.02425   | 431.85322   | 1 |
| 147 | H | 75.88509 | 73.90797 | 69.97141 | -1359.17131 | 782.54425   | 2227.99181  | 1 |
| 148 | H | 75.98068 | 75.66691 | 70.22677 | -820.36667  | 85.81767    | -2596.78715 | 1 |
| 149 | C | 77.73376 | 74.85524 | 69.15005 | -513.07015  | 236.18570   | -551.87280  | 1 |
| 150 | H | 78.23617 | 75.84742 | 69.22682 | 1816.11944  | -1183.11722 | -1650.94321 | 1 |
| 151 | H | 78.53135 | 74.09644 | 69.32185 | -1800.04429 | -1361.53473 | 1526.34643  | 1 |
| 152 | C | 77.09194 | 74.66523 | 67.75368 | 726.08972   | -253.19732  | -179.64713  | 1 |
| 153 | H | 76.83475 | 73.61612 | 67.50564 | 1224.27271  | -456.51798  | -2390.90304 | 1 |
| 154 | H | 76.22640 | 75.32589 | 67.54577 | 1206.40339  | -1150.93514 | -2154.90344 | 1 |
| 155 | N | 78.15421 | 75.08355 | 66.68301 | 329.70796   | -633.68968  | -155.67358  | 1 |
| 156 | H | 77.87400 | 74.92175 | 65.67262 | 1348.31305  | 1938.76845  | 1359.00643  | 1 |
| 157 | H | 78.42855 | 76.10900 | 66.65833 | 2096.92035  | 1446.54551  | -966.48890  | 1 |
| 158 | H | 79.10001 | 74.60309 | 66.71786 | -1197.07217 | -2303.53719 | 827.28733   | 1 |
| 159 | C | 74.87939 | 73.32295 | 72.95043 | -378.01186  | -556.17301  | -413.96481  | 1 |
| 160 | O | 75.74859 | 72.97353 | 73.88301 | -409.44433  | -307.55053  | -453.30833  | 1 |
| 161 | N | 74.08341 | 72.57149 | 72.29491 | -429.02477  | 524.70884   | 274.08502   | 1 |
| 162 | H | 73.56871 | 73.15538 | 71.63116 | 1706.34263  | -1425.96036 | 1574.38926  | 1 |
| 163 | C | 73.86170 | 71.18029 | 72.54649 | -45.25864   | -626.22952  | 478.93267   | 1 |
| 164 | H | 73.64325 | 71.12753 | 73.63632 | 1988.63164  | 570.90773   | 1772.87287  | 1 |
| 165 | C | 72.63481 | 70.80172 | 71.63111 | 551.77128   | -20.49526   | -564.54996  | 1 |
| 166 | H | 71.78513 | 71.49627 | 71.81907 | 1434.61535  | -1753.10253 | 1513.99471  | 1 |
| 167 | H | 72.90503 | 70.94953 | 70.56128 | -714.67738  | 1819.09770  | 1898.36494  | 1 |
| 168 | C | 72.18893 | 69.31985 | 71.87096 | 446.99263   | -555.77305  | 338.97221   | 1 |
| 169 | H | 73.03704 | 68.61687 | 71.69735 | 1953.68466  | 1892.25957  | -161.67766  | 1 |
| 170 | H | 71.86211 | 69.15775 | 72.92249 | -403.03785  | 2688.07032  | -188.43591  | 1 |
| 171 | C | 71.00940 | 69.05150 | 70.85165 | 567.86262   | 335.74681   | 434.04421   | 1 |
| 172 | H | 70.13603 | 69.70502 | 71.07943 | -1080.02275 | 1568.26081  | -1948.78900 | 1 |
| 173 | H | 71.32147 | 69.31731 | 69.81560 | -919.54108  | 2111.34692  | 1456.13463  | 1 |
| 174 | C | 70.60908 | 67.56007 | 70.92015 | 195.81897   | 173.33862   | -745.11536  | 1 |
| 175 | H | 71.40879 | 66.85350 | 70.62085 | 1405.67949  | -2301.21089 | -390.08113  | 1 |
| 176 | H | 70.16278 | 67.24236 | 71.88343 | -940.37328  | -1118.32446 | 2299.72133  | 1 |
| 177 | N | 69.47563 | 67.34156 | 69.86012 | 319.26422   | 656.36007   | -42.02424   | 1 |
| 178 | H | 69.10610 | 66.35089 | 69.77728 | 1961.03633  | 619.91968   | 1787.09422  | 1 |
| 179 | H | 68.57621 | 67.88915 | 69.99352 | 854.14343   | -2156.80752 | 1429.08711  | 1 |
| 180 | H | 69.71557 | 67.55882 | 68.84920 | 1237.02905  | -1378.50857 | -1998.28500 | 1 |
| 181 | C | 75.18340 | 70.28991 | 72.18898 | 532.53319   | -268.57236  | 517.55729   | 1 |



|     |   |          |          |          |             |             |             |   |
|-----|---|----------|----------|----------|-------------|-------------|-------------|---|
| 182 | O | 75.14441 | 69.09364 | 72.37761 | 266.16714   | -290.73804  | -558.88002  | 1 |
| 183 | N | 76.16267 | 71.00294 | 71.63004 | -226.25352  | 640.49678   | -270.32839  | 1 |
| 184 | H | 75.99067 | 72.00642 | 71.59678 | 2007.69063  | -1035.27229 | 1523.50231  | 1 |
| 185 | C | 77.47146 | 70.44314 | 71.59914 | -540.76542  | -573.33303  | 49.50000    | 1 |
| 186 | H | 77.28985 | 69.35518 | 71.75974 | -2374.20950 | -1036.76023 | 843.75774   | 1 |
| 187 | C | 78.08170 | 70.79734 | 70.17153 | -77.09082   | 666.87422   | -415.84136  | 1 |
| 188 | H | 78.09423 | 71.91573 | 70.03314 | -985.81834  | 617.19825   | 2463.91927  | 1 |
| 189 | O | 77.33734 | 70.32010 | 69.02865 | 293.29899   | -391.65602  | -477.80926  | 1 |
| 190 | H | 77.05981 | 71.16223 | 68.61989 | 2528.72714  | -681.76262  | -751.27122  | 1 |
| 191 | C | 79.54825 | 70.24634 | 70.31111 | 252.47363   | -605.14473  | 440.05134   | 1 |
| 192 | H | 80.15671 | 70.48632 | 69.40853 | -2052.65063 | 1456.49051  | -1043.51830 | 1 |
| 193 | H | 80.09092 | 70.67052 | 71.20048 | -2152.98800 | -1661.97574 | -161.70652  | 1 |
| 194 | H | 79.55148 | 69.13698 | 70.42225 | -473.12726  | -1584.27339 | 2165.61725  | 1 |
| 195 | C | 78.32943 | 71.12483 | 72.83016 | 360.36307   | 488.46713   | 505.10056   | 1 |
| 196 | O | 78.31752 | 70.58066 | 73.90722 | -200.08817  | -528.03552  | -385.82850  | 1 |
| 197 | N | 78.92748 | 72.24477 | 72.45363 | -597.54095  | -226.44775  | 355.20479   | 1 |
| 198 | H | 78.83957 | 72.54387 | 71.48390 | 2179.23655  | -1300.70981 | -991.33835  | 1 |
| 199 | C | 79.82564 | 72.93654 | 73.30635 | -687.68921  | 297.39807   | -249.45179  | 1 |
| 200 | H | 80.14648 | 73.80167 | 72.68431 | -349.16256  | -2467.37713 | -1101.72831 | 1 |
| 201 | C | 79.03197 | 73.37938 | 74.61772 | 672.47345   | 361.54328   | -201.62880  | 1 |
| 202 | H | 78.41053 | 72.52087 | 74.97224 | 1541.41502  | 582.18425   | 2169.97026  | 1 |
| 203 | H | 79.75708 | 73.60716 | 75.43510 | -2534.67717 | 60.25153    | 997.72295   | 1 |
| 204 | C | 78.14684 | 74.63540 | 74.54769 | 574.26774   | -389.43119  | -377.02542  | 1 |
| 205 | C | 78.86209 | 75.79330 | 73.94009 | 688.82679   | -287.33580  | -257.96133  | 1 |
| 206 | H | 79.92556 | 75.95719 | 74.16618 | 331.14182   | 1470.38163  | 2269.80013  | 1 |
| 207 | C | 76.72214 | 74.49846 | 74.06792 | -383.52382  | -675.04808  | 144.24917   | 1 |
| 208 | H | 75.99717 | 74.77017 | 74.87436 | 4.09847     | 1517.59662  | 2262.86397  | 1 |
| 209 | C | 78.18452 | 76.73388 | 73.20064 | -134.76730  | 428.45285   | -649.50303  | 1 |
| 210 | H | 78.73109 | 77.65355 | 72.92583 | -903.23433  | 1600.49020  | 2011.53387  | 1 |
| 211 | C | 76.43182 | 75.16646 | 72.77640 | -335.53281  | -615.00040  | -364.39058  | 1 |
| 212 | H | 74.29220 | 75.50018 | 73.17722 | 1596.45398  | -1369.33862 | 1732.02659  | 1 |
| 213 | C | 76.78857 | 76.59519 | 72.79314 | 585.48547   | -340.24194  | -406.23938  | 1 |
| 214 | O | 75.95107 | 77.51143 | 72.23025 | -419.15649  | -173.04408  | -511.94141  | 1 |
| 215 | H | 75.84402 | 78.12459 | 73.06116 | -1071.84350 | 1559.71507  | -1960.13012 | 1 |
| 216 | C | 81.06141 | 71.91209 | 73.60171 | 291.41878   | -183.13091  | 710.72246   | 1 |
| 217 | O | 81.48406 | 71.18609 | 72.73003 | 379.87695   | 523.47396   | -222.23622  | 1 |
| 218 | N | 81.57155 | 72.11546 | 74.80996 | 564.30591   | 373.09380   | 277.24371   | 1 |
| 219 | H | 81.15546 | 72.77238 | 75.47029 | -120.59931  | -2436.07824 | -1214.35098 | 1 |
| 220 | C | 82.54647 | 71.21719 | 75.31569 | 404.07514   | -299.37480  | 608.84009   | 1 |
| 221 | H | 82.70658 | 70.42979 | 74.54246 | -1071.07882 | -841.69025  | 2359.66467  | 1 |
| 222 | C | 83.81083 | 72.13926 | 75.59911 | -683.12807  | 68.71770    | -390.13096  | 1 |
| 223 | H | 84.11241 | 72.67523 | 74.67166 | 2068.88918  | 1596.58590  | 770.89603   | 1 |
| 224 | H | 83.54005 | 72.93578 | 76.32791 | 1379.86429  | 2342.49779  | -179.85638  | 1 |
| 225 | C | 84.99082 | 71.28318 | 76.14499 | -176.39967  | 537.49466   | 550.97268   | 1 |
| 226 | H | 84.68145 | 70.71575 | 77.05425 | -396.28051  | 1942.22168  | 1869.33314  | 1 |
| 227 | H | 85.31190 | 70.51506 | 75.40652 | -94.44700   | 586.00678   | -2659.20016 | 1 |
| 228 | C | 86.17978 | 72.30302 | 76.47619 | -291.69381  | -718.18079  | -150.72929  | 1 |
| 229 | H | 86.60683 | 72.87190 | 75.61291 | -2303.38776 | 1089.76242  | 964.62032   | 1 |
| 230 | H | 85.94465 | 73.02227 | 77.30007 | 884.16729   | 2568.80533  | -207.74283  | 1 |
| 231 | N | 87.14857 | 71.43304 | 76.97609 | -594.49522  | -252.81478  | 342.29276   | 1 |
| 232 | H | 86.77006 | 70.53842 | 77.32364 | -1735.17426 | 2084.05705  | -263.71605  | 1 |
| 233 | C | 88.39093 | 71.70227 | 77.05434 | 595.23177   | -271.52487  | 442.22352   | 1 |
| 234 | N | 88.84151 | 72.93605 | 76.59522 | 585.53813   | -424.79750  | -105.81303  | 1 |
| 235 | H | 88.30815 | 73.71763 | 76.21355 | 959.88797   | 1327.56823  | -2177.11905 | 1 |
| 236 | H | 89.80947 | 73.26081 | 76.63316 | 1578.48647  | 16.27378    | -2220.76233 | 1 |
| 237 | N | 89.03307 | 70.60217 | 77.63148 | -452.17763  | -390.33541  | -421.51853  | 1 |
| 238 | H | 88.63374 | 69.74868 | 78.02336 | 470.26107   | 1974.25629  | -1817.92087 | 1 |
| 239 | H | 90.02845 | 70.57716 | 77.85636 | 1856.67307  | -1573.97321 | -1224.35416 | 1 |
| 240 | C | 81.99786 | 70.70738 | 76.77746 | -531.47271  | -581.45780  | -55.06206   | 1 |
| 241 | O | 81.40586 | 71.46513 | 77.51178 | -243.00837  | 192.73507   | 609.52485   | 1 |
| 242 | N | 82.40544 | 69.46246 | 77.03032 | 343.49288   | -644.25607  | 38.09164    | 1 |
| 243 | H | 82.90369 | 68.97942 | 76.28360 | -1691.16043 | -1535.97525 | -1484.73099 | 1 |

|     |   |          |          |          |             |             |             |   |
|-----|---|----------|----------|----------|-------------|-------------|-------------|---|
| 244 | C | 81.72338 | 68.77175 | 78.07211 | 542.66492   | 350.14337   | 454.42563   | 1 |
| 245 | H | 81.06503 | 69.54157 | 78.54023 | 1209.57979  | -2396.95920 | 463.86744   | 1 |
| 246 | C | 80.93446 | 67.56171 | 77.40094 | -737.14309  | 145.93010   | 242.71942   | 1 |
| 247 | H | 81.62066 | 66.95970 | 76.76737 | -1050.18303 | 159.36419   | -2509.06125 | 1 |
| 248 | C | 80.31021 | 66.67924 | 78.53423 | -706.77696  | -252.88343  | -245.16230  | 1 |
| 249 | H | 79.75369 | 65.80559 | 78.12086 | -1624.64039 | -1665.49085 | 1417.86935  | 1 |
| 250 | H | 81.09797 | 66.27950 | 79.21960 | 2566.10521  | 598.51109   | 693.22305   | 1 |
| 251 | H | 79.59781 | 67.26390 | 79.16244 | -1972.69758 | 107.10018   | -1876.34312 | 1 |
| 252 | C | 79.75489 | 68.13555 | 76.54496 | 412.85148   | 672.58832   | -27.69222   | 1 |
| 253 | H | 79.17548 | 67.32395 | 76.04494 | 1447.02277  | 1762.76533  | -1490.78944 | 1 |
| 254 | H | 79.03864 | 68.71620 | 77.17282 | 1320.77379  | -145.20455  | 2378.68491  | 1 |
| 255 | H | 80.12246 | 68.82412 | 75.74702 | -1512.10848 | 1470.52031  | 1724.75147  | 1 |
| 256 | C | 82.74483 | 68.07099 | 79.14219 | -607.11113  | 499.56689   | 73.73769    | 1 |
| 257 | O | 82.35936 | 67.86950 | 80.27195 | 357.97126   | 460.81534   | 356.68785   | 1 |
| 258 | N | 83.86697 | 67.61160 | 78.57319 | 536.55407   | -368.62270  | 332.76306   | 1 |
| 259 | H | 84.03663 | 67.94681 | 77.62494 | 524.38866   | 2297.69985  | 1367.20941  | 1 |
| 260 | C | 84.96158 | 67.39483 | 79.46740 | 46.50277    | -774.29190  | -147.97904  | 1 |
| 261 | H | 84.51679 | 67.36573 | 80.49015 | 1676.51875  | 1883.29066  | 1032.55549  | 1 |
| 262 | C | 85.74806 | 66.04538 | 79.05042 | -559.41456  | -34.19198   | -556.30433  | 1 |
| 263 | H | 86.19801 | 66.18283 | 78.03861 | -64.66664   | 395.18769   | 2695.05373  | 1 |
| 264 | H | 86.60482 | 65.86773 | 79.74352 | -2703.44278 | -60.40056   | 333.79418   | 1 |
| 265 | C | 84.80700 | 64.87161 | 79.04663 | -519.76435  | 377.31045   | 459.42366   | 1 |
| 266 | H | 83.92285 | 65.13550 | 78.42302 | -1746.74323 | 1667.50644  | -1261.73691 | 1 |
| 267 | C | 85.49307 | 63.65563 | 78.43534 | 570.95554   | 16.46261    | -545.27700  | 1 |
| 268 | H | 84.80884 | 62.76957 | 78.39471 | 2391.58273  | 28.05277    | -1305.07271 | 1 |
| 269 | H | 85.83866 | 63.85767 | 77.38881 | 175.75588   | 917.63458   | 2559.43867  | 1 |
| 270 | H | 86.39431 | 63.35126 | 79.02742 | -1063.97851 | -2155.34650 | 1283.00462  | 1 |
| 271 | C | 84.32453 | 64.53706 | 80.45146 | 193.76014   | 2.62946     | -765.53141  | 1 |
| 272 | H | 83.65858 | 63.63578 | 80.45566 | 507.39394   | -846.55087  | 2539.60089  | 1 |
| 273 | H | 85.18047 | 64.31994 | 81.14147 | 1337.57841  | 1818.19054  | 1526.01994  | 1 |
| 274 | H | 83.74015 | 65.38253 | 80.89912 | 1100.88635  | -1172.91350 | -2199.08909 | 1 |
| 275 | C | 85.98697 | 68.59812 | 79.21864 | -549.21115  | 475.64486   | -309.38218  | 1 |
| 276 | O | 86.00333 | 69.22660 | 78.17403 | 556.06106   | -390.37755  | -78.24250   | 1 |
| 277 | O | 86.96129 | 68.83394 | 80.19431 | -572.27940  | -310.19032  | -209.75862  | 1 |
| 278 | H | 86.63401 | 68.18706 | 80.89439 | -1380.08193 | 2212.14486  | 790.85944   | 1 |

Listing 49: C00049.xmolout

|    |   |          |          |          |             |             |             |        |          |
|----|---|----------|----------|----------|-------------|-------------|-------------|--------|----------|
| 1  |   | 276      |          |          |             |             |             |        |          |
| 2  |   | 150.0000 | 150.0000 | 150.0000 | 0.0000      | 0.0000      | 0.0000***** | 2.7750 | 11100    |
|    |   | 0.2500   | 300.00   | 0.00     | 0.00        | 0.00        | -1293.7032  | 0.0000 | 300.0000 |
| 3  | H | 79.11725 | 85.79260 | 78.33612 | -2043.14101 | -1757.64893 | 399.89339   |        | 1        |
| 4  | N | 79.94656 | 85.78227 | 78.92696 | 426.75047   | 490.45733   | -334.42467  |        | 1        |
| 5  | H | 79.62704 | 86.30149 | 79.74227 | 442.25559   | -1110.30854 | -2448.52907 |        | 1        |
| 6  | C | 81.10257 | 86.30588 | 78.31318 | 415.32972   | -666.39213  | 83.73172    |        | 1        |
| 7  | H | 80.95392 | 86.13786 | 77.22600 | 879.32219   | 2491.00447  | 667.35213   |        | 1        |
| 8  | C | 81.23918 | 87.86571 | 78.68611 | 31.35357    | 477.41777   | 628.23362   |        | 1        |
| 9  | H | 81.33613 | 87.97056 | 79.79367 | 1168.38489  | 2240.25337  | -1019.71136 |        | 1        |
| 10 | H | 82.18366 | 88.28165 | 78.25825 | -360.43770  | 2534.90498  | 931.67112   |        | 1        |
| 11 | C | 80.04241 | 88.63516 | 78.18538 | 463.18208   | 512.70242   | -382.34388  |        | 1        |
| 12 | H | 79.11860 | 88.08067 | 78.46322 | 1725.29117  | 1863.52247  | -987.07854  |        | 1        |
| 13 | C | 79.98363 | 90.01048 | 78.83791 | 710.42801   | -144.27427  | -313.15367  |        | 1        |
| 14 | H | 79.09136 | 90.59425 | 78.49277 | 364.20195   | -1033.13725 | 2494.72524  |        | 1        |
| 15 | H | 79.92157 | 89.93754 | 79.95453 | 2567.61904  | 335.80679   | 847.48802   |        | 1        |
| 16 | H | 80.89226 | 90.62006 | 78.59592 | -2587.99029 | 680.92867   | -512.16411  |        | 1        |
| 17 | C | 80.08076 | 88.78979 | 76.67133 | 268.17616   | 741.64379   | -40.42634   |        | 1        |
| 18 | H | 79.19530 | 89.36272 | 76.29200 | 1283.54314  | -1945.37420 | -1411.27812 |        | 1        |
| 19 | H | 80.99851 | 89.33968 | 76.33738 | -1258.57796 | 1317.15249  | -2026.02085 |        | 1        |
| 20 | H | 80.08171 | 87.79764 | 76.15095 | -2502.84526 | 909.80597   | 575.92391   |        | 1        |
| 21 | C | 82.43932 | 85.56211 | 78.87537 | 619.36578   | -458.64843  | -172.09273  |        | 1        |
| 22 | O | 83.48224 | 85.66381 | 78.26400 | -81.40433   | 433.87611   | 522.34594   |        | 1        |
| 23 | N | 82.22939 | 84.95033 | 80.03998 | 175.23996   | -622.20190  | 341.55523   |        | 1        |

|    |   |          |          |          |             |             |             |   |
|----|---|----------|----------|----------|-------------|-------------|-------------|---|
| 24 | H | 81.28797 | 85.03800 | 80.41677 | -876.57256  | -303.22879  | -2561.90213 | 1 |
| 25 | C | 83.31955 | 84.33941 | 80.71428 | -571.88214  | -534.10783  | -106.15033  | 1 |
| 26 | H | 84.20797 | 84.75830 | 80.18324 | -2713.20841 | -16.25800   | -248.80809  | 1 |
| 27 | C | 83.22048 | 84.74468 | 82.26200 | 166.60354   | 288.16399   | -716.09568  | 1 |
| 28 | H | 82.29780 | 84.28117 | 82.70525 | -2097.85574 | 1636.78449  | -586.18044  | 1 |
| 29 | O | 83.12504 | 86.15355 | 82.53179 | -317.80580  | -363.38227  | 484.43082   | 1 |
| 30 | H | 82.26614 | 86.19872 | 82.99839 | 1863.74748  | -1451.84923 | 1357.29467  | 1 |
| 31 | C | 84.48123 | 84.01775 | 82.85720 | 503.80731   | 517.99032   | 318.51606   | 1 |
| 32 | H | 84.51748 | 84.10545 | 83.96787 | 640.61020   | -2157.10410 | -1536.29104 | 1 |
| 33 | H | 84.49105 | 82.92896 | 82.60709 | 1687.88455  | 465.60692   | 2087.56452  | 1 |
| 34 | H | 85.42616 | 84.45582 | 82.45956 | -1293.07895 | -1899.88581 | -1463.57452 | 1 |
| 35 | C | 83.27592 | 82.70590 | 80.61124 | -153.07550  | -733.68902  | 248.70981   | 1 |
| 36 | O | 84.35554 | 82.19575 | 80.44678 | 186.15459   | -480.78787  | -449.34387  | 1 |
| 37 | N | 82.10071 | 82.09733 | 80.84582 | -487.53139  | 543.18517   | 42.03850    | 1 |
| 38 | C | 82.07121 | 80.69731 | 81.12669 | -699.35871  | 69.34393    | 360.10701   | 1 |
| 39 | H | 83.02814 | 80.44699 | 81.63878 | 2.81126     | -221.99807  | -2715.58072 | 1 |
| 40 | C | 80.75500 | 80.57982 | 82.00760 | -507.46439  | -592.59194  | 122.07761   | 1 |
| 41 | H | 80.36194 | 79.53998 | 82.06295 | -1975.08116 | 525.87560   | -1801.71556 | 1 |
| 42 | H | 80.92746 | 80.91729 | 83.05414 | 1588.27743  | -1913.22100 | 1113.83566  | 1 |
| 43 | C | 79.80932 | 81.55689 | 81.24345 | -613.62442  | -457.55993  | -194.14490  | 1 |
| 44 | H | 79.42647 | 81.08123 | 80.30791 | 1707.54637  | -721.27992  | 1996.92523  | 1 |
| 45 | H | 78.91679 | 81.86883 | 81.83145 | 758.23357   | 2100.81767  | 1560.55011  | 1 |
| 46 | C | 80.80463 | 82.75689 | 80.93442 | -352.41524  | 704.96076   | 49.21465    | 1 |
| 47 | H | 80.62214 | 83.28647 | 79.96965 | 1714.76886  | -2070.42778 | 443.35792   | 1 |
| 48 | H | 80.88863 | 83.50802 | 81.75268 | 1224.15040  | 1801.50881  | 1636.97633  | 1 |
| 49 | C | 81.85644 | 79.80709 | 79.75525 | 566.85117   | 537.05831   | 117.62814   | 1 |
| 50 | O | 82.04188 | 78.61315 | 79.80706 | -550.26779  | -406.08867  | 4.21666     | 1 |
| 51 | N | 81.44033 | 80.55868 | 78.74910 | 566.34832   | -425.77725  | 180.18749   | 1 |
| 52 | H | 81.40290 | 81.55592 | 78.94803 | 644.44502   | 2646.80550  | -52.73430   | 1 |
| 53 | C | 81.00048 | 80.03220 | 77.50585 | 612.34801   | -281.48662  | 411.56221   | 1 |
| 54 | H | 80.79149 | 80.94100 | 76.90000 | 1667.23498  | -1490.75142 | 1556.16753  | 1 |
| 55 | C | 82.28289 | 79.26127 | 76.94362 | -714.45746  | -175.43074  | 286.98927   | 1 |
| 56 | H | 82.54591 | 78.45904 | 77.68915 | -787.09484  | 1763.03619  | -1922.46060 | 1 |
| 57 | O | 83.44862 | 80.11703 | 76.83860 | -429.46514  | 516.51932   | -128.40526  | 1 |
| 58 | H | 83.93466 | 79.85940 | 77.64242 | 1981.82785  | 436.16847   | -1818.18182 | 1 |
| 59 | C | 81.90632 | 78.58571 | 75.57953 | 630.79189   | -468.94448  | 76.03230    | 1 |
| 60 | H | 82.80578 | 78.13295 | 75.10091 | -1775.71861 | 2062.30353  | 131.89849   | 1 |
| 61 | H | 81.16449 | 77.76333 | 75.69892 | -1855.14608 | 88.94118    | 1993.53760  | 1 |
| 62 | H | 81.48944 | 79.32457 | 74.85544 | -1504.82350 | -780.94249  | -2132.90992 | 1 |
| 63 | C | 79.61832 | 79.23257 | 77.82290 | 288.57638   | 618.62814   | -397.00270  | 1 |
| 64 | O | 79.03114 | 79.34185 | 78.87824 | 321.70495   | -185.26452  | 574.37218   | 1 |
| 65 | N | 79.20876 | 78.57965 | 76.74107 | -447.05792  | -446.53431  | 367.76425   | 1 |
| 66 | H | 79.72543 | 78.63706 | 75.86587 | 350.31316   | 1975.63644  | -1843.31522 | 1 |
| 67 | C | 78.00318 | 77.83290 | 76.81159 | -511.23061  | 374.03917   | -471.51480  | 1 |
| 68 | H | 77.42219 | 78.27983 | 77.65239 | 2234.79579  | -898.70890  | -1273.45190 | 1 |
| 69 | C | 77.32661 | 77.95734 | 75.35934 | 529.53781   | -159.34528  | 563.72604   | 1 |
| 70 | H | 76.33630 | 77.43639 | 75.42427 | 654.59388   | 2347.94251  | 1217.51488  | 1 |
| 71 | H | 77.11353 | 79.04624 | 75.17876 | -1526.55661 | 2103.42026  | 817.87394   | 1 |
| 72 | O | 78.12511 | 77.49340 | 74.24264 | -554.84278  | 14.12789    | 399.58769   | 1 |
| 73 | H | 77.95580 | 76.53426 | 74.30555 | 1297.06236  | 2061.84854  | 1220.68812  | 1 |
| 74 | C | 78.24845 | 76.24011 | 77.01991 | -662.15484  | -412.13544  | 123.62687   | 1 |
| 75 | O | 77.29052 | 75.50873 | 77.22150 | -540.01537  | -317.05804  | 274.91456   | 1 |
| 76 | N | 79.52308 | 75.84118 | 76.78637 | -202.76299  | -690.00100  | -131.49145  | 1 |
| 77 | H | 80.00766 | 76.73343 | 76.64093 | -702.62132  | -2617.37191 | 281.70413   | 1 |
| 78 | C | 80.17073 | 74.80363 | 77.61106 | -491.73914  | 576.34187   | 222.73509   | 1 |
| 79 | H | 81.25883 | 75.01803 | 77.49707 | 1977.17978  | -1823.58850 | -434.68928  | 1 |
| 80 | C | 79.69525 | 74.94913 | 79.03967 | -649.50797  | -328.66843  | 306.11224   | 1 |
| 81 | H | 78.58345 | 74.84854 | 79.02767 | 2075.07803  | 1452.16490  | -1004.45904 | 1 |
| 82 | C | 80.26774 | 73.85883 | 79.92880 | -615.18735  | -489.99689  | -70.96352   | 1 |
| 83 | H | 79.87228 | 73.92397 | 80.97893 | -1226.32661 | -1724.38906 | -1716.47170 | 1 |
| 84 | H | 80.01680 | 72.83273 | 79.53812 | 2381.64273  | -969.84735  | 900.46860   | 1 |
| 85 | H | 81.38864 | 73.92156 | 79.98902 | 2122.74991  | 1702.23946  | -141.36228  | 1 |

|     |   |          |          |          |             |             |             |   |
|-----|---|----------|----------|----------|-------------|-------------|-------------|---|
| 86  | C | 80.02405 | 76.30976 | 79.62807 | -501.86074  | -479.61276  | -376.42482  | 1 |
| 87  | H | 79.69149 | 76.39082 | 80.69879 | 993.79261   | -2246.95401 | -1177.81305 | 1 |
| 88  | H | 81.12992 | 76.52618 | 79.60798 | 42.71279    | -626.15391  | -2651.37258 | 1 |
| 89  | H | 79.51999 | 77.14280 | 79.06166 | -2026.39012 | -1590.33709 | -887.82922  | 1 |
| 90  | C | 79.77782 | 73.30319 | 77.05124 | -672.89153  | 382.57394   | -156.34072  | 1 |
| 91  | O | 80.44906 | 72.34535 | 77.34677 | 410.04627   | 221.86223   | 500.35950   | 1 |
| 92  | N | 78.66444 | 73.33122 | 76.33356 | -378.11782  | -443.79414  | -441.10984  | 1 |
| 93  | H | 78.15328 | 74.22675 | 76.23957 | 2404.15973  | -568.14894  | 1149.30085  | 1 |
| 94  | C | 78.05162 | 72.06057 | 76.06342 | -544.54484  | 466.16019   | 331.29119   | 1 |
| 95  | H | 78.29626 | 71.43503 | 76.95025 | -1409.80988 | -170.17955  | 2325.32679  | 1 |
| 96  | C | 76.52287 | 72.35493 | 75.81409 | -184.48284  | 116.78282   | -758.89137  | 1 |
| 97  | H | 76.09894 | 73.01395 | 76.60607 | 1893.78641  | 1861.14652  | 611.04528   | 1 |
| 98  | H | 76.40303 | 72.91025 | 74.85660 | -2170.79665 | -974.19311  | 1327.50117  | 1 |
| 99  | C | 75.78552 | 70.97220 | 75.76683 | 389.51668   | 672.81878   | -138.49152  | 1 |
| 100 | H | 76.31377 | 70.28744 | 75.06567 | 510.64577   | 1933.03327  | 1851.02484  | 1 |
| 101 | H | 75.85157 | 70.45866 | 76.75197 | -2302.30869 | -1105.72939 | -948.89774  | 1 |
| 102 | C | 74.29173 | 71.09570 | 75.33747 | -559.93427  | -126.34590  | 542.30857   | 1 |
| 103 | O | 73.54467 | 70.13347 | 75.45868 | -670.36003  | -111.83166  | 76.36448    | 1 |
| 104 | N | 73.97793 | 72.27437 | 74.78738 | -216.06729  | -537.07037  | 446.51379   | 1 |
| 105 | H | 74.57413 | 73.09720 | 74.63863 | -1251.96487 | 1074.12894  | -2168.52500 | 1 |
| 106 | H | 73.08863 | 72.48954 | 74.32182 | -2451.83023 | -720.73851  | 944.84612   | 1 |
| 107 | C | 78.66183 | 71.48540 | 74.65478 | 546.24052   | -563.88337  | -85.11809   | 1 |
| 108 | O | 78.40385 | 72.04719 | 73.62328 | 71.70702    | -307.40463  | 606.69673   | 1 |
| 109 | N | 79.29795 | 70.32560 | 74.85405 | 479.90863   | -504.50129  | 222.86849   | 1 |
| 110 | C | 80.28773 | 69.84278 | 73.93196 | 75.51268    | -600.91904  | 506.73700   | 1 |
| 111 | H | 80.92632 | 70.71979 | 73.68013 | -2033.61562 | 1795.30103  | 254.89480   | 1 |
| 112 | C | 81.02351 | 68.70517 | 74.75459 | 523.79067   | 517.99274   | 284.45581   | 1 |
| 113 | H | 81.43533 | 67.90188 | 74.10279 | 1599.61665  | -1127.00911 | 1895.98173  | 1 |
| 114 | H | 81.88397 | 69.11539 | 75.32922 | -1881.83093 | 1275.82488  | -1501.55016 | 1 |
| 115 | C | 79.90177 | 68.20246 | 75.71626 | -600.05639  | -404.05026  | 316.64485   | 1 |
| 116 | H | 79.18353 | 67.53500 | 75.19010 | -2597.05260 | 496.36221   | 657.73249   | 1 |
| 117 | H | 80.28412 | 67.63362 | 76.59335 | -1666.24518 | 1294.38985  | -1723.90591 | 1 |
| 118 | C | 79.23104 | 69.58970 | 76.10912 | 493.57570   | -129.95376  | -602.56394  | 1 |
| 119 | H | 78.16755 | 69.52969 | 76.44130 | -1469.08415 | -637.84797  | 2204.22581  | 1 |
| 120 | H | 79.82422 | 70.20359 | 76.83515 | -1038.97840 | 1068.88701  | -2280.71789 | 1 |
| 121 | C | 79.59823 | 69.22402 | 72.58921 | 188.88100   | 241.05089   | -727.87821  | 1 |
| 122 | O | 80.27887 | 68.98692 | 71.61855 | 531.88613   | -49.19943   | 427.07960   | 1 |
| 123 | N | 78.29886 | 68.96593 | 72.75654 | 708.14833   | 26.93417    | -179.73509  | 1 |
| 124 | H | 77.94596 | 69.19491 | 73.68435 | -2232.69501 | -1179.09831 | 1023.94816  | 1 |
| 125 | C | 77.51573 | 68.36263 | 71.68974 | -738.32412  | 259.92548   | 104.42456   | 1 |
| 126 | H | 78.25491 | 68.24163 | 70.85877 | 2028.89123  | 1260.02983  | 1311.33324  | 1 |
| 127 | C | 76.98201 | 67.03679 | 72.21299 | -258.65678  | -345.52513  | 661.28459   | 1 |
| 128 | H | 76.39936 | 67.24650 | 73.13731 | -1826.06090 | -1801.46097 | -918.64554  | 1 |
| 129 | C | 76.06430 | 66.34670 | 71.22241 | -541.23400  | 531.92970   | -218.41428  | 1 |
| 130 | H | 75.72856 | 65.33995 | 71.59654 | 1311.73218  | -2219.18200 | 882.19023   | 1 |
| 131 | H | 75.13646 | 66.95273 | 71.01825 | -1048.71298 | 1223.58118  | -2196.97971 | 1 |
| 132 | H | 76.57494 | 66.18210 | 70.23309 | 419.06414   | 1903.92898  | 1903.44670  | 1 |
| 133 | C | 78.11888 | 66.10253 | 72.58842 | -423.86431  | 152.66566   | -648.55262  | 1 |
| 134 | H | 77.74550 | 65.16099 | 73.07730 | 105.68386   | -2342.50080 | 1387.51238  | 1 |
| 135 | H | 78.71376 | 65.79622 | 71.68402 | -1695.63603 | -1484.73621 | -1531.02793 | 1 |
| 136 | H | 78.83708 | 66.59354 | 73.30073 | -1853.57121 | -487.39031  | 1936.59343  | 1 |
| 137 | C | 76.26668 | 69.39704 | 71.28688 | 539.71428   | -510.58232  | 267.58633   | 1 |
| 138 | O | 75.55885 | 69.07880 | 70.36463 | -15.93758   | -278.34085  | -624.49402  | 1 |
| 139 | N | 76.16822 | 70.43416 | 72.09658 | -676.81886  | 12.05292    | 276.17960   | 1 |
| 140 | H | 76.91822 | 70.52558 | 72.78223 | -1694.44250 | -373.84189  | -2100.66098 | 1 |
| 141 | C | 75.29519 | 71.53692 | 71.86854 | 412.33078   | -664.70360  | 108.35451   | 1 |
| 142 | H | 75.31913 | 72.06823 | 72.84678 | 1765.77476  | 1294.44366  | 1621.76594  | 1 |
| 143 | C | 75.83130 | 72.40799 | 70.65644 | -179.66635  | -721.95667  | -264.73915  | 1 |
| 144 | H | 76.92888 | 72.58176 | 70.73176 | -607.34922  | 2587.87032  | -598.10018  | 1 |
| 145 | H | 75.65733 | 71.87590 | 69.69147 | -359.69332  | -1479.13954 | -2259.74260 | 1 |
| 146 | C | 75.01933 | 73.74479 | 70.72398 | -240.01076  | 616.02425   | 431.85322   | 1 |
| 147 | H | 73.92745 | 73.52524 | 70.66820 | -1359.17131 | 782.54425   | 2227.99181  | 1 |

|     |   |          |          |          |             |             |             |   |
|-----|---|----------|----------|----------|-------------|-------------|-------------|---|
| 148 | H | 75.17796 | 74.25452 | 71.70086 | -820.36667  | 85.81767    | -2596.78715 | 1 |
| 149 | C | 75.46396 | 74.68129 | 69.53105 | -513.07015  | 236.18570   | -551.87280  | 1 |
| 150 | H | 76.54831 | 74.92823 | 69.60388 | 1816.11944  | -1183.11722 | -1650.94321 | 1 |
| 151 | H | 75.33320 | 74.16800 | 68.55062 | -1800.04429 | -1361.53473 | 1526.34643  | 1 |
| 152 | C | 74.60024 | 75.96273 | 69.60345 | 726.08972   | -253.19732  | -179.64713  | 1 |
| 153 | H | 73.52815 | 75.81294 | 69.36781 | 1224.27271  | -456.51798  | -2390.90304 | 1 |
| 154 | H | 74.70235 | 76.53462 | 70.54730 | 1206.40339  | -1150.93514 | -2154.90344 | 1 |
| 155 | N | 75.11784 | 76.94214 | 68.49721 | 329.70796   | -633.68968  | -155.67358  | 1 |
| 156 | H | 74.60153 | 77.86599 | 68.42568 | 1348.31305  | 1938.76845  | 1359.00643  | 1 |
| 157 | H | 76.12241 | 77.27414 | 68.58512 | 2096.92035  | 1446.54551  | -966.48890  | 1 |
| 158 | H | 75.08429 | 76.60391 | 67.49155 | -1197.07217 | -2303.53719 | 827.28733   | 1 |
| 159 | C | 73.81471 | 71.08056 | 71.35357 | -378.01186  | -556.17301  | -413.96481  | 1 |
| 160 | O | 73.47502 | 71.33634 | 70.19664 | -409.44433  | -307.55053  | -453.30833  | 1 |
| 161 | N | 73.10379 | 70.57957 | 72.34421 | -429.02477  | 524.70884   | 274.08502   | 1 |
| 162 | H | 73.63894 | 70.56279 | 73.21887 | 1706.34263  | -1425.96036 | 1574.38926  | 1 |
| 163 | C | 72.30432 | 69.39858 | 72.10030 | -45.25864   | -626.22952  | 478.93267   | 1 |
| 164 | H | 72.99078 | 68.74860 | 71.51390 | 1988.63164  | 570.90773   | 1772.87287  | 1 |
| 165 | C | 71.99149 | 68.86955 | 73.54666 | 551.77128   | -20.49526   | -564.54996  | 1 |
| 166 | H | 72.91387 | 68.46838 | 74.02862 | 1434.61535  | -1753.10253 | 1513.99471  | 1 |
| 167 | H | 71.68965 | 69.73006 | 74.18876 | -714.67738  | 1819.09770  | 1898.36494  | 1 |
| 168 | C | 70.86416 | 67.78224 | 73.53117 | 446.99263   | -555.77305  | 338.97221   | 1 |
| 169 | H | 70.35711 | 67.74045 | 72.54001 | 1953.68466  | 1892.25957  | -161.67766  | 1 |
| 170 | H | 71.26496 | 66.76052 | 73.71783 | -403.03785  | 2688.07032  | -188.43591  | 1 |
| 171 | C | 69.85017 | 68.23689 | 74.65693 | 567.86262   | 335.74681   | 434.04421   | 1 |
| 172 | H | 70.30601 | 68.13391 | 75.66898 | -1080.02275 | 1568.26081  | -1948.78900 | 1 |
| 173 | H | 69.60756 | 69.31898 | 74.54308 | -919.54108  | 2111.34692  | 1456.13463  | 1 |
| 174 | C | 68.55771 | 67.39765 | 74.53705 | 195.81897   | 173.33862   | -745.11536  | 1 |
| 175 | H | 68.00101 | 67.54477 | 73.58986 | 1405.67949  | -2301.21089 | -390.08113  | 1 |
| 176 | H | 68.68124 | 66.31516 | 74.74134 | -940.37328  | -1118.32446 | 2299.72133  | 1 |
| 177 | N | 67.58378 | 67.91397 | 75.65055 | 319.26422   | 656.36007   | -42.02424   | 1 |
| 178 | H | 66.62032 | 67.46942 | 75.68415 | 1961.03633  | 619.91968   | 1787.09422  | 1 |
| 179 | H | 67.90185 | 67.80289 | 76.65691 | 854.14343   | -2156.80752 | 1429.08711  | 1 |
| 180 | H | 67.33767 | 68.94505 | 75.61786 | 1237.02905  | -1378.50857 | -1998.28500 | 1 |
| 181 | C | 70.96433 | 69.77961 | 71.24716 | 532.53319   | -268.57236  | 517.55729   | 1 |
| 182 | O | 69.87553 | 69.83493 | 71.76139 | 266.16714   | -290.73804  | -558.88002  | 1 |
| 183 | N | 71.30406 | 69.87609 | 69.96279 | -226.25352  | 640.49678   | -270.32839  | 1 |
| 184 | H | 72.31088 | 69.88431 | 69.73507 | 2007.69063  | -1035.27229 | 1523.50231  | 1 |
| 185 | C | 70.36985 | 70.36167 | 68.99731 | -540.76542  | -573.33303  | 49.50000    | 1 |
| 186 | H | 70.96996 | 70.35630 | 68.05891 | -2374.20950 | -1036.76023 | 843.75774   | 1 |
| 187 | C | 69.11082 | 69.37534 | 68.94384 | -77.09082   | 666.87422   | -415.84136  | 1 |
| 188 | H | 68.56861 | 69.46397 | 69.92668 | -985.81834  | 617.19825   | 2463.91927  | 1 |
| 189 | O | 69.41841 | 67.98344 | 68.75508 | 293.29899   | -391.65602  | -477.80926  | 1 |
| 190 | H | 69.11798 | 67.60981 | 69.60807 | 2528.72714  | -681.76262  | -751.27122  | 1 |
| 191 | C | 68.25437 | 70.01964 | 67.79232 | 252.47363   | -605.14473  | 440.05134   | 1 |
| 192 | H | 67.29035 | 69.47844 | 67.65112 | -2052.65063 | 1456.49051  | -1043.51830 | 1 |
| 193 | H | 68.00783 | 71.08957 | 68.00282 | -2152.98800 | -1661.97574 | -161.70652  | 1 |
| 194 | H | 68.79484 | 69.98756 | 66.81758 | -473.12726  | -1584.27339 | 2165.61725  | 1 |
| 195 | C | 69.98119 | 71.86229 | 69.48829 | 360.36307   | 488.46713   | 505.10056   | 1 |
| 196 | O | 68.82490 | 72.23046 | 69.64184 | -200.08817  | -528.03552  | -385.82850  | 1 |
| 197 | N | 71.10771 | 72.53277 | 69.57147 | -597.54095  | -226.44775  | 355.20479   | 1 |
| 198 | H | 72.01328 | 72.02410 | 69.45217 | 2179.23655  | -1300.70981 | -991.33835  | 1 |
| 199 | C | 71.15057 | 73.86356 | 70.05100 | -687.68921  | 297.39807   | -249.45179  | 1 |
| 200 | H | 72.17496 | 74.19603 | 69.77926 | -349.16256  | -2467.37713 | -1101.72831 | 1 |
| 201 | C | 69.99408 | 74.75224 | 69.39531 | 672.47345   | 361.54328   | -201.62880  | 1 |
| 202 | H | 68.99392 | 74.43107 | 69.77337 | 1541.41502  | 582.18425   | 2169.97026  | 1 |
| 203 | H | 70.12499 | 75.81416 | 69.70768 | -2534.67717 | 60.25153    | 997.72295   | 1 |
| 204 | C | 70.04210 | 74.62235 | 67.86516 | 574.26774   | -389.43119  | -377.02542  | 1 |
| 205 | C | 71.09897 | 75.21703 | 67.11334 | 688.82679   | -287.33580  | -257.96133  | 1 |
| 206 | H | 71.89300 | 75.79872 | 67.61584 | 331.14182   | 1470.38163  | 2269.80013  | 1 |
| 207 | C | 69.02124 | 73.87387 | 67.20492 | -383.52382  | -675.04808  | 144.24917   | 1 |
| 208 | H | 68.20256 | 73.41073 | 67.78757 | 4.09847     | 1517.59662  | 2262.86397  | 1 |
| 209 | C | 71.10962 | 75.04148 | 65.72923 | -134.76730  | 428.45285   | -649.50303  | 1 |

|     |   |          |          |          |             |             |             |   |
|-----|---|----------|----------|----------|-------------|-------------|-------------|---|
| 210 | H | 71.92617 | 75.50093 | 65.14584 | -903.23433  | 1600.49020  | 2011.53387  | 1 |
| 211 | C | 69.07647 | 73.72282 | 65.81783 | -335.53281  | -615.00040  | -364.39058  | 1 |
| 212 | H | 68.28279 | 73.13604 | 65.32273 | 1596.45398  | -1369.33862 | 1732.02659  | 1 |
| 213 | C | 70.11649 | 74.29644 | 65.02959 | 585.48547   | -340.24194  | -406.23938  | 1 |
| 214 | O | 70.18587 | 74.14762 | 63.61980 | -419.15649  | -173.04408  | -511.94141  | 1 |
| 215 | H | 69.36656 | 73.61979 | 63.46759 | -1071.84350 | 1559.71507  | -1960.13012 | 1 |
| 216 | C | 70.94862 | 73.81069 | 71.67944 | 291.41878   | -183.13091  | 710.72246   | 1 |
| 217 | O | 71.85989 | 74.17524 | 72.38405 | 379.87695   | 523.47396   | -222.23622  | 1 |
| 218 | N | 69.75781 | 73.32794 | 71.98863 | 564.30591   | 373.09380   | 277.24371   | 1 |
| 219 | H | 69.13169 | 72.99835 | 71.22205 | -120.59931  | -2436.07824 | -1214.35098 | 1 |
| 220 | C | 69.28007 | 73.35011 | 73.32632 | 404.07514   | -299.37480  | 608.84009   | 1 |
| 221 | H | 68.43642 | 72.62355 | 73.33056 | -1071.07882 | -841.69025  | 2359.66467  | 1 |
| 222 | C | 70.50042 | 72.91003 | 74.24052 | -683.12807  | 68.71770    | -390.13096  | 1 |
| 223 | H | 71.03385 | 72.06597 | 73.74363 | 2068.88918  | 1596.58590  | 770.89603   | 1 |
| 224 | H | 71.24754 | 73.74465 | 74.30275 | 1379.86429  | 2342.49779  | -179.85638  | 1 |
| 225 | C | 70.06063 | 72.49935 | 75.67827 | -176.39967  | 537.49466   | 550.97268   | 1 |
| 226 | H | 69.56076 | 73.33733 | 76.21268 | -396.28051  | 1942.22168  | 1869.33314  | 1 |
| 227 | H | 69.32730 | 71.66261 | 75.66959 | -94.44700   | 586.00678   | -2659.20016 | 1 |
| 228 | C | 71.42213 | 72.08288 | 76.41245 | -291.69381  | -718.18079  | -150.72929  | 1 |
| 229 | H | 71.94297 | 71.15635 | 76.02371 | -2303.38776 | 1089.76242  | 964.62032   | 1 |
| 230 | H | 72.15827 | 72.92513 | 76.45981 | 884.16729   | 2568.80533  | -207.74283  | 1 |
| 231 | N | 70.99282 | 71.87280 | 77.72152 | -594.49522  | -252.81478  | 342.29276   | 1 |
| 232 | H | 70.27107 | 72.50013 | 78.05007 | -1735.17426 | 2084.05705  | -263.71605  | 1 |
| 233 | C | 71.45563 | 71.00809 | 78.53858 | 595.23177   | -271.52487  | 442.22352   | 1 |
| 234 | N | 72.46025 | 70.14831 | 78.09850 | 585.53813   | -424.79750  | -105.81303  | 1 |
| 235 | H | 72.86297 | 70.07324 | 77.14688 | 959.88797   | 1327.56823  | -2177.11905 | 1 |
| 236 | H | 72.88538 | 69.42130 | 78.68239 | 1578.48647  | 16.27378    | -2220.76233 | 1 |
| 237 | N | 70.81272 | 71.14263 | 79.77595 | -452.17763  | -390.33541  | -421.51853  | 1 |
| 238 | H | 70.06180 | 71.78481 | 80.04622 | 470.26107   | 1974.25629  | -1817.92087 | 1 |
| 239 | H | 71.01374 | 70.55796 | 80.58913 | 1856.67307  | -1573.97321 | -1224.35416 | 1 |
| 240 | C | 68.77546 | 74.87225 | 73.64448 | -531.47271  | -581.45780  | -55.06206   | 1 |
| 241 | O | 68.93284 | 75.82551 | 72.91082 | -243.00837  | 192.73507   | 609.52485   | 1 |
| 242 | N | 68.13450 | 74.85752 | 74.80989 | 343.49288   | -644.25607  | 38.09164    | 1 |
| 243 | H | 68.03266 | 73.97057 | 75.29896 | -1691.16043 | -1535.97525 | -1484.73099 | 1 |
| 244 | C | 67.75950 | 76.13411 | 75.33373 | 542.66492   | 350.14337   | 454.42563   | 1 |
| 245 | H | 68.52690 | 76.83106 | 74.92394 | 1209.57979  | -2396.95920 | 463.86744   | 1 |
| 246 | C | 66.31272 | 76.49047 | 74.76966 | -737.14309  | 145.93010   | 242.71942   | 1 |
| 247 | H | 65.57408 | 75.71399 | 75.06272 | -1050.18303 | 159.36419   | -2509.06125 | 1 |
| 248 | C | 65.91794 | 77.88882 | 75.35204 | -706.77696  | -252.88343  | -245.16230  | 1 |
| 249 | H | 64.88434 | 78.18523 | 75.05536 | -1624.64039 | -1665.49085 | 1417.86935  | 1 |
| 250 | H | 65.96244 | 77.88900 | 76.46954 | 2566.10521  | 598.51109   | 693.22305   | 1 |
| 251 | H | 66.60995 | 78.68862 | 74.99730 | -1972.69758 | 107.10018   | -1876.34312 | 1 |
| 252 | C | 66.40763 | 76.60513 | 73.20933 | 412.85148   | 672.58832   | -27.69222   | 1 |
| 253 | H | 65.44746 | 76.95219 | 72.75921 | 1447.02277  | 1762.76533  | -1490.78944 | 1 |
| 254 | H | 67.20614 | 77.32376 | 72.90139 | 1320.77379  | -145.20455  | 2378.68491  | 1 |
| 255 | H | 66.66174 | 75.62161 | 72.74414 | -1512.10848 | 1470.52031  | 1724.75147  | 1 |
| 256 | C | 67.65671 | 76.08835 | 76.96115 | -607.11113  | 499.56689   | 73.73769    | 1 |
| 257 | O | 67.79365 | 77.11176 | 77.59584 | 357.97126   | 460.81534   | 356.68785   | 1 |
| 258 | N | 67.31125 | 74.88498 | 77.39944 | 536.55407   | -368.62270  | 332.76306   | 1 |
| 259 | H | 67.17543 | 74.11332 | 76.74692 | 524.38866   | 2297.69985  | 1367.20941  | 1 |
| 260 | C | 67.20930 | 74.67544 | 78.79601 | 46.50277    | -774.29190  | -147.97904  | 1 |
| 261 | H | 67.62806 | 75.59492 | 79.26659 | 1676.51875  | 1883.29066  | 1032.55549  | 1 |
| 262 | C | 65.65581 | 74.41283 | 79.16296 | -559.41456  | -34.19198   | -556.30433  | 1 |
| 263 | H | 65.36508 | 73.39710 | 78.80448 | -64.66664   | 395.18769   | 2695.05373  | 1 |
| 264 | H | 65.51581 | 74.39473 | 80.26967 | -2703.44278 | -60.40056   | 333.79418   | 1 |
| 265 | C | 64.78447 | 75.45638 | 78.51951 | -519.76435  | 377.31045   | 459.42366   | 1 |
| 266 | H | 65.02705 | 75.48940 | 77.43281 | -1746.74323 | 1667.50644  | -1261.73691 | 1 |
| 267 | C | 63.31313 | 75.09056 | 78.67292 | 570.95554   | 16.46261    | -545.27700  | 1 |
| 268 | H | 62.64613 | 75.84034 | 78.17476 | 2391.58273  | 28.05277    | -1305.07271 | 1 |
| 269 | H | 63.08606 | 74.09120 | 78.21996 | 175.75588   | 917.63458   | 2559.43867  | 1 |
| 270 | H | 63.01065 | 75.04197 | 79.75042 | -1063.97851 | -2155.34650 | 1283.00462  | 1 |
| 271 | C | 65.03868 | 76.83824 | 79.10485 | 193.76014   | 2.62946     | -765.53141  | 1 |

|     |   |          |          |          |             |             |             |   |
|-----|---|----------|----------|----------|-------------|-------------|-------------|---|
| 272 | H | 64.35124 | 77.60625 | 78.66489 | 507.39394   | -846.55087  | 2539.60089  | 1 |
| 273 | H | 64.88679 | 76.85352 | 80.21493 | 1337.57841  | 1818.19054  | 1526.01994  | 1 |
| 274 | H | 66.09285 | 77.17964 | 78.90047 | 1100.88635  | -1172.91350 | -2199.08909 | 1 |
| 275 | C | 68.01606 | 73.30734 | 79.07995 | -549.21115  | 475.64486   | -309.38218  | 1 |
| 276 | O | 68.00603 | 72.37342 | 78.32228 | 556.06106   | -390.37755  | -78.24250   | 1 |
| 277 | O | 68.69014 | 73.21582 | 80.33052 | -572.27940  | -310.19032  | -209.75862  | 1 |
| 278 | H | 68.44464 | 74.11113 | 80.69302 | -1380.08193 | 2212.14486  | 790.85944   | 1 |

Listing 50: C00050.xmolout

|    |   |          |          |          |             |             |             |        |          |
|----|---|----------|----------|----------|-------------|-------------|-------------|--------|----------|
| 1  |   | 276      |          |          |             |             |             |        |          |
| 2  |   | 150.0000 | 150.0000 | 150.0000 | 0.0000      | 0.0000      | 0.0000***** | 2.7750 | 11100    |
|    |   | 0.2500   | 300.00   | 0.00     | 0.00        | 0.00        | -1293.6872  | 0.0000 | 300.0000 |
| 3  | H | 61.16985 | 80.83259 | 69.48001 | -2043.14101 | -1757.64893 | 399.89339   |        | 1        |
| 4  | N | 62.12888 | 80.50896 | 69.61162 | 426.75047   | 490.45733   | -334.42467  |        | 1        |
| 5  | H | 62.20793 | 79.68091 | 68.99573 | 442.25559   | -1110.30854 | -2448.52907 |        | 1        |
| 6  | C | 63.10329 | 81.48350 | 69.30867 | 415.32972   | -666.39213  | 83.73172    |        | 1        |
| 7  | H | 62.63764 | 82.49151 | 69.36073 | 879.32219   | 2491.00447  | 667.35213   |        | 1        |
| 8  | C | 64.34844 | 81.29317 | 70.31870 | 31.35357    | 477.41777   | 628.23362   |        | 1        |
| 9  | H | 64.73368 | 80.24967 | 70.22318 | 1168.38489  | 2240.25337  | -1019.71136 |        | 1        |
| 10 | H | 65.19229 | 81.96625 | 70.02632 | -360.43770  | 2534.90498  | 931.67112   |        | 1        |
| 11 | C | 63.92514 | 81.54983 | 71.74042 | 463.18208   | 512.70242   | -382.34388  |        | 1        |
| 12 | H | 63.00945 | 80.94968 | 71.94434 | 1725.29117  | 1863.52247  | -987.07854  |        | 1        |
| 13 | C | 65.02548 | 81.10247 | 72.69544 | 710.42801   | -144.27427  | -313.15367  |        | 1        |
| 14 | H | 64.73283 | 81.25511 | 73.76608 | 364.20195   | -1033.13725 | 2494.72524  |        | 1        |
| 15 | H | 65.26849 | 80.01541 | 72.56930 | 2567.61904  | 335.80679   | 847.48802   |        | 1        |
| 16 | H | 65.97434 | 81.67402 | 72.52650 | -2587.99029 | 680.92867   | -512.16411  |        | 1        |
| 17 | C | 63.60926 | 83.02084 | 71.97234 | 268.17616   | 741.64379   | -40.42634   |        | 1        |
| 18 | H | 63.31798 | 83.21735 | 73.03650 | 1283.54314  | -1945.37420 | -1411.27812 |        | 1        |
| 19 | H | 64.49171 | 83.67277 | 71.74415 | -1258.57796 | 1317.15249  | -2026.02085 |        | 1        |
| 20 | H | 62.76231 | 83.36981 | 71.32724 | -2502.84526 | 909.80597   | 575.92391   |        | 1        |
| 21 | C | 63.55442 | 81.00194 | 67.82950 | 619.36578   | -458.64843  | -172.09273  |        | 1        |
| 22 | O | 63.25721 | 79.87023 | 67.46349 | -81.40433   | 433.87611   | 522.34594   |        | 1        |
| 23 | N | 64.30842 | 81.90308 | 67.21579 | 175.23996   | -622.20190  | 341.55523   |        | 1        |
| 24 | H | 64.47509 | 82.80181 | 67.66836 | -876.57256  | -303.22879  | -2561.90213 |        | 1        |
| 25 | C | 64.90282 | 81.55689 | 65.97551 | -571.88214  | -534.10783  | -106.15033  |        | 1        |
| 26 | H | 64.45678 | 80.55605 | 65.75477 | -2713.20841 | -16.25800   | -248.80809  |        | 1        |
| 27 | C | 64.56767 | 82.71205 | 64.91234 | 166.60354   | 288.16399   | -716.09568  |        | 1        |
| 28 | H | 65.23168 | 83.59522 | 65.13080 | -2097.85574 | 1636.78449  | -586.18044  |        | 1        |
| 29 | O | 63.21890 | 83.20807 | 64.92094 | -317.80580  | -363.38227  | 484.43082   |        | 1        |
| 30 | H | 63.36361 | 84.14898 | 65.14945 | 1863.74748  | -1451.84923 | 1357.29467  |        | 1        |
| 31 | C | 65.02120 | 82.04716 | 63.56082 | 503.80731   | 517.99032   | 318.51606   |        | 1        |
| 32 | H | 64.95401 | 82.76720 | 62.71238 | 640.61020   | -2157.10410 | -1536.29104 |        | 1        |
| 33 | H | 66.07666 | 81.68500 | 63.60704 | 1687.88455  | 465.60692   | 2087.56452  |        | 1        |
| 34 | H | 64.37867 | 81.17327 | 63.30297 | -1293.07895 | -1899.88581 | -1463.57452 |        | 1        |
| 35 | C | 66.53420 | 81.56215 | 66.12717 | -153.07550  | -733.68902  | 248.70981   |        | 1        |
| 36 | O | 67.13758 | 82.39536 | 65.50266 | 186.15459   | -480.78787  | -449.34387  |        | 1        |
| 37 | N | 67.00394 | 80.66518 | 67.01023 | -487.53139  | 543.18517   | 42.03850    |        | 1        |
| 38 | C | 68.33207 | 80.14871 | 66.94693 | -699.35871  | 69.34393    | 360.10701   |        | 1        |
| 39 | H | 68.87898 | 80.80338 | 66.22894 | 2.81126     | -221.99807  | -2715.58072 |        | 1        |
| 40 | C | 68.75825 | 80.26518 | 68.47549 | -507.46439  | -592.59194  | 122.07761   |        | 1        |
| 41 | H | 69.67352 | 79.68116 | 68.72643 | -1975.08116 | 525.87560   | -1801.71556 |        | 1        |
| 42 | H | 68.96688 | 81.32120 | 68.75634 | 1588.27743  | -1913.22100 | 1113.83566  |        | 1        |
| 43 | C | 67.46751 | 79.73761 | 69.17612 | -613.62442  | -457.55993  | -194.14490  |        | 1        |
| 44 | H | 67.40943 | 78.62718 | 69.13716 | 1707.54637  | -721.27992  | 1996.92523  |        | 1        |
| 45 | H | 67.39706 | 80.01763 | 70.25158 | 758.23357   | 2100.81767  | 1560.55011  |        | 1        |
| 46 | C | 66.33653 | 80.40214 | 68.28154 | -352.41524  | 704.96076   | 49.21465    |        | 1        |
| 47 | H | 65.45991 | 79.74372 | 68.06241 | 1714.76886  | -2070.42778 | 443.35792   |        | 1        |
| 48 | H | 65.97991 | 81.39868 | 68.63679 | 1224.15040  | 1801.50881  | 1636.97633  |        | 1        |
| 49 | C | 68.21302 | 78.58539 | 66.45544 | 566.85117   | 537.05831   | 117.62814   |        | 1        |
| 50 | O | 67.56094 | 78.32174 | 65.47461 | -550.26779  | -406.08867  | 4.21666     |        | 1        |
| 51 | N | 68.95763 | 77.77095 | 67.19986 | 566.34832   | -425.77725  | 180.18749   |        | 1        |

|     |   |          |          |          |             |             |             |   |
|-----|---|----------|----------|----------|-------------|-------------|-------------|---|
| 52  | H | 69.48029 | 78.16149 | 67.98380 | 644.44502   | 2646.80550  | -52.73430   | 1 |
| 53  | C | 68.66267 | 76.38176 | 67.12954 | 612.34801   | -281.48662  | 411.56221   | 1 |
| 54  | H | 68.22923 | 76.23260 | 66.11341 | 1667.23498  | -1490.75142 | 1556.16753  | 1 |
| 55  | C | 70.01057 | 75.58173 | 67.43604 | -714.45746  | -175.43074  | 286.98927   | 1 |
| 56  | H | 70.35338 | 75.83500 | 68.47890 | -787.09484  | 1763.03619  | -1922.46060 | 1 |
| 57  | O | 71.14333 | 75.87455 | 66.59766 | -429.46514  | 516.51932   | -128.40526  | 1 |
| 58  | H | 71.76391 | 76.26308 | 67.24764 | 1981.82785  | 436.16847   | -1818.18182 | 1 |
| 59  | C | 69.47928 | 74.10114 | 67.39617 | 630.79189   | -468.94448  | 76.03230    | 1 |
| 60  | H | 70.24826 | 73.37937 | 67.75663 | -1775.71861 | 2062.30353  | 131.89849   | 1 |
| 61  | H | 68.56828 | 73.96922 | 68.02984 | -1855.14608 | 88.94118    | 1993.53760  | 1 |
| 62  | H | 69.20262 | 73.80002 | 66.35915 | -1504.82350 | -780.94249  | -2132.90992 | 1 |
| 63  | C | 67.61342 | 75.99050 | 68.34254 | 288.57638   | 618.62814   | -397.00270  | 1 |
| 64  | O | 66.68152 | 75.25912 | 68.10186 | 321.70495   | -185.26452  | 574.37218   | 1 |
| 65  | N | 68.05321 | 76.43720 | 69.50672 | -447.05792  | -446.53431  | 367.76425   | 1 |
| 66  | H | 68.87251 | 77.03870 | 69.47927 | 350.31316   | 1975.63644  | -1843.31522 | 1 |
| 67  | C | 67.31519 | 76.20177 | 70.70998 | -511.23061  | 374.03917   | -471.51480  | 1 |
| 68  | H | 66.31279 | 76.65084 | 70.53732 | 2234.79579  | -898.70890  | -1273.45190 | 1 |
| 69  | C | 67.21478 | 74.61892 | 70.90928 | 529.53781   | -159.34528  | 563.72604   | 1 |
| 70  | H | 66.51718 | 74.43242 | 71.77147 | 654.59388   | 2347.94251  | 1217.51488  | 1 |
| 71  | H | 66.71754 | 74.20394 | 69.98808 | -1526.55661 | 2103.42026  | 817.87394   | 1 |
| 72  | O | 68.45141 | 73.91139 | 71.20829 | -554.84278  | 14.12789    | 399.58769   | 1 |
| 73  | H | 68.82523 | 73.86146 | 70.31025 | 1297.06236  | 2061.84854  | 1220.68812  | 1 |
| 74  | C | 68.13521 | 76.86003 | 71.94683 | -662.15484  | -412.13544  | 123.62687   | 1 |
| 75  | O | 67.53920 | 77.26252 | 72.91667 | -540.01537  | -317.05804  | 274.91456   | 1 |
| 76  | N | 69.44296 | 76.77582 | 71.73607 | -202.76299  | -690.00100  | -131.49145  | 1 |
| 77  | H | 69.84190 | 76.40148 | 70.85877 | -702.62132  | -2617.37191 | 281.70413   | 1 |
| 78  | C | 70.40188 | 77.29867 | 72.64461 | -491.73914  | 576.34187   | 222.73509   | 1 |
| 79  | H | 69.93942 | 78.14745 | 73.19735 | 1977.17978  | -1823.58850 | -434.68928  | 1 |
| 80  | C | 70.81459 | 76.10545 | 73.61639 | -649.50797  | -328.66843  | 306.11224   | 1 |
| 81  | H | 70.96035 | 75.17228 | 73.03003 | 2075.07803  | 1452.16490  | -1004.45904 | 1 |
| 82  | C | 72.09587 | 76.44782 | 74.44711 | -615.18735  | -489.99689  | -70.96352   | 1 |
| 83  | H | 72.29355 | 75.67709 | 75.22851 | -1226.32661 | -1724.38906 | -1716.47170 | 1 |
| 84  | H | 73.01756 | 76.49417 | 73.78230 | 2381.64273  | -969.84735  | 900.46860   | 1 |
| 85  | H | 72.00111 | 77.42928 | 74.96902 | 2122.74991  | 1702.23946  | -141.36228  | 1 |
| 86  | C | 69.66817 | 75.91835 | 74.66765 | -501.86074  | -479.61276  | -376.42482  | 1 |
| 87  | H | 69.86831 | 75.05864 | 75.35018 | 993.79261   | -2246.95401 | -1177.81305 | 1 |
| 88  | H | 69.54241 | 76.82678 | 75.30266 | 42.71279    | -626.15391  | -2651.37258 | 1 |
| 89  | H | 68.68800 | 75.72944 | 74.16458 | -2026.39012 | -1590.33709 | -887.82922  | 1 |
| 90  | C | 71.56558 | 77.67605 | 71.56313 | -672.89153  | 382.57394   | -156.34072  | 1 |
| 91  | O | 71.46634 | 77.28497 | 70.40967 | 410.04627   | 221.86223   | 500.35950   | 1 |
| 92  | N | 72.49010 | 78.44674 | 72.11963 | -378.11782  | -443.79414  | -441.10984  | 1 |
| 93  | H | 72.39497 | 78.60443 | 73.12265 | 2404.15973  | -568.14894  | 1149.30085  | 1 |
| 94  | C | 73.76381 | 78.59081 | 71.47326 | -544.54484  | 466.16019   | 331.29119   | 1 |
| 95  | H | 73.52893 | 78.89344 | 70.42896 | -1409.80988 | -170.17955  | 2325.32679  | 1 |
| 96  | C | 74.52429 | 79.68062 | 72.33541 | -184.48284  | 116.78282   | -758.89137  | 1 |
| 97  | H | 73.91279 | 80.60838 | 72.40530 | 1893.78641  | 1861.14652  | 611.04528   | 1 |
| 98  | H | 74.64729 | 79.32151 | 73.38201 | -2170.79665 | -974.19311  | 1327.50117  | 1 |
| 99  | C | 75.91628 | 79.99068 | 71.70235 | 389.51668   | 672.81878   | -138.49152  | 1 |
| 100 | H | 76.53589 | 79.06496 | 71.66470 | 510.64577   | 1933.03327  | 1851.02484  | 1 |
| 101 | H | 75.79915 | 80.28539 | 70.63461 | -2302.30869 | -1105.72939 | -948.89774  | 1 |
| 102 | C | 76.69909 | 81.12529 | 72.46689 | -559.93427  | -126.34590  | 542.30857   | 1 |
| 103 | O | 77.75567 | 81.50950 | 72.03624 | -670.36003  | -111.83166  | 76.36448    | 1 |
| 104 | N | 76.07845 | 81.57795 | 73.57755 | -216.06729  | -537.07037  | 446.51379   | 1 |
| 105 | H | 75.18943 | 81.28476 | 73.99881 | -1251.96487 | 1074.12894  | -2168.52500 | 1 |
| 106 | H | 76.46011 | 82.30757 | 74.18958 | -2451.83023 | -720.73851  | 944.84612   | 1 |
| 107 | C | 74.54399 | 77.16836 | 71.55015 | 546.24052   | -563.88337  | -85.11809   | 1 |
| 108 | O | 74.49877 | 76.49993 | 72.55860 | 71.70702    | -307.40463  | 606.69673   | 1 |
| 109 | N | 75.24074 | 76.95850 | 70.43124 | 479.90863   | -504.50129  | 222.86849   | 1 |
| 110 | C | 75.94222 | 75.72151 | 70.21969 | 75.51268    | -600.91904  | 506.73700   | 1 |
| 111 | H | 75.22642 | 74.90183 | 70.45666 | -2033.61562 | 1795.30103  | 254.89480   | 1 |
| 112 | C | 76.36498 | 75.82042 | 68.69368 | 523.79067   | 517.99274   | 284.45581   | 1 |
| 113 | H | 77.28109 | 75.23202 | 68.46210 | 1599.61665  | -1127.00911 | 1895.98173  | 1 |



|     |   |          |          |          |             |             |             |   |
|-----|---|----------|----------|----------|-------------|-------------|-------------|---|
| 114 | H | 75.56440 | 75.43466 | 68.02365 | -1881.83093 | 1275.82488  | -1501.55016 | 1 |
| 115 | C | 76.55937 | 77.35665 | 68.50848 | -600.05639  | -404.05026  | 316.64485   | 1 |
| 116 | H | 77.51197 | 77.70129 | 68.97108 | -2597.05260 | 496.36221   | 657.73249   | 1 |
| 117 | H | 76.57617 | 77.68478 | 67.44473 | -1666.24518 | 1294.38985  | -1723.90591 | 1 |
| 118 | C | 75.29614 | 77.89036 | 69.31426 | 493.57570   | -129.95376  | -602.56394  | 1 |
| 119 | H | 75.38588 | 78.93246 | 69.70151 | -1469.08415 | -637.84797  | 2204.22581  | 1 |
| 120 | H | 74.32614 | 77.77708 | 68.77301 | -1038.97840 | 1068.88701  | -2280.71789 | 1 |
| 121 | C | 77.25851 | 75.67887 | 71.18357 | 188.88100   | 241.05089   | -727.87821  | 1 |
| 122 | O | 77.86209 | 76.67828 | 71.49308 | 531.88613   | -49.19943   | 427.07960   | 1 |
| 123 | N | 77.61388 | 74.39646 | 71.34832 | 708.14833   | 26.93417    | -179.73509  | 1 |
| 124 | H | 76.92513 | 73.76900 | 70.92860 | -2232.69501 | -1179.09831 | 1023.94816  | 1 |
| 125 | C | 78.40051 | 73.90278 | 72.48329 | -738.32412  | 259.92548   | 104.42456   | 1 |
| 126 | H | 78.92517 | 73.02971 | 72.03186 | 2028.89123  | 1260.02983  | 1311.33324  | 1 |
| 127 | C | 79.34635 | 74.95729 | 73.00871 | -258.65678  | -345.52513  | 661.28459   | 1 |
| 128 | H | 78.76265 | 75.88205 | 73.24359 | -1826.06090 | -1801.46097 | -918.64554  | 1 |
| 129 | C | 80.03809 | 74.50673 | 74.28155 | -541.23400  | 531.92970   | -218.41428  | 1 |
| 130 | H | 80.78757 | 75.26583 | 74.63665 | 1311.73218  | -2219.18200 | 882.19023   | 1 |
| 131 | H | 79.29184 | 74.35017 | 75.13252 | -1048.71298 | 1223.58118  | -2196.97971 | 1 |
| 132 | H | 80.58782 | 73.53726 | 74.13479 | 419.06414   | 1903.92898  | 1903.44670  | 1 |
| 133 | C | 80.38660 | 75.33698 | 71.96763 | -423.86431  | 152.66566   | -648.55262  | 1 |
| 134 | H | 81.08104 | 76.13616 | 72.34475 | 105.68386   | -2342.50080 | 1387.51238  | 1 |
| 135 | H | 81.01747 | 74.45671 | 71.66720 | -1695.63603 | -1484.73621 | -1531.02793 | 1 |
| 136 | H | 79.89389 | 75.73380 | 71.03596 | -1853.57121 | -487.39031  | 1936.59343  | 1 |
| 137 | C | 77.30929 | 73.34974 | 73.61665 | 539.71428   | -510.58232  | 267.58633   | 1 |
| 138 | O | 77.17508 | 72.15533 | 73.73131 | -15.93758   | -278.34085  | -624.49402  | 1 |
| 139 | N | 76.68442 | 74.32458 | 74.25351 | -676.81886  | 12.05292    | 276.17960   | 1 |
| 140 | H | 76.90814 | 75.27365 | 73.96039 | -1694.44250 | -373.84189  | -2100.66098 | 1 |
| 141 | C | 75.96515 | 74.05518 | 75.45622 | 412.33078   | -664.70360  | 108.35451   | 1 |
| 142 | H | 75.57179 | 75.06627 | 75.70557 | 1765.77476  | 1294.44366  | 1621.76594  | 1 |
| 143 | C | 74.82349 | 73.02871 | 75.07504 | -179.66635  | -721.95667  | -264.73915  | 1 |
| 144 | H | 74.41270 | 73.28238 | 74.07165 | -607.34922  | 2587.87032  | -598.10018  | 1 |
| 145 | H | 75.25355 | 72.00539 | 74.96139 | -359.69332  | -1479.13954 | -2259.74260 | 1 |
| 146 | C | 73.68129 | 73.06046 | 76.14494 | -240.01076  | 616.02425   | 431.85322   | 1 |
| 147 | H | 74.06565 | 72.83341 | 77.16439 | -1359.17131 | 782.54425   | 2227.99181  | 1 |
| 148 | H | 73.22864 | 74.07389 | 76.21492 | -820.36667  | 85.81767    | -2596.78715 | 1 |
| 149 | C | 72.60226 | 71.99084 | 75.70491 | -513.07015  | 236.18570   | -551.87280  | 1 |
| 150 | H | 72.12772 | 72.28033 | 74.73897 | 1816.11944  | -1183.11722 | -1650.94321 | 1 |
| 151 | H | 73.07919 | 71.00016 | 75.52303 | -1800.04429 | -1361.53473 | 1526.34643  | 1 |
| 152 | C | 71.54619 | 71.88359 | 76.82905 | 726.08972   | -253.19732  | -179.64713  | 1 |
| 153 | H | 71.93279 | 71.48183 | 77.78700 | 1224.27271  | -456.51798  | -2390.90304 | 1 |
| 154 | H | 70.96878 | 72.81155 | 77.01250 | 1206.40339  | -1150.93514 | -2154.90344 | 1 |
| 155 | N | 70.47747 | 70.83563 | 76.36646 | 329.70796   | -633.68968  | -155.67358  | 1 |
| 156 | H | 69.69732 | 70.63537 | 77.05676 | 1348.31305  | 1938.76845  | 1359.00643  | 1 |
| 157 | H | 69.92521 | 71.06707 | 75.49007 | 2096.92035  | 1446.54551  | -966.48890  | 1 |
| 158 | H | 70.82407 | 69.85514 | 76.15374 | -1197.07217 | -2303.53719 | 827.28733   | 1 |
| 159 | C | 77.05762 | 73.54582 | 76.56050 | -378.01186  | -556.17301  | -413.96481  | 1 |
| 160 | O | 78.11234 | 74.16650 | 76.68977 | -409.44433  | -307.55053  | -453.30833  | 1 |
| 161 | N | 76.60882 | 72.55495 | 77.30119 | -429.02477  | 524.70884   | 274.08502   | 1 |
| 162 | H | 75.69902 | 72.20909 | 77.00239 | 1706.34263  | -1425.96036 | 1574.38926  | 1 |
| 163 | C | 77.40720 | 71.71290 | 78.12709 | -45.25864   | -626.22952  | 478.93267   | 1 |
| 164 | H | 76.71395 | 70.86290 | 78.33283 | 1988.63164  | 570.90773   | 1772.87287  | 1 |
| 165 | C | 78.69051 | 71.25375 | 77.31360 | 551.77128   | -20.49526   | -564.54996  | 1 |
| 166 | H | 78.44068 | 71.04561 | 76.24855 | 1434.61535  | -1753.10253 | 1513.99471  | 1 |
| 167 | H | 79.45854 | 72.05975 | 77.29483 | -714.67738  | 1819.09770  | 1898.36494  | 1 |
| 168 | C | 79.21127 | 69.97518 | 78.04852 | 446.99263   | -555.77305  | 338.97221   | 1 |
| 169 | H | 79.34901 | 70.18143 | 79.13602 | 1953.68466  | 1892.25957  | -161.67766  | 1 |
| 170 | H | 78.45176 | 69.15567 | 77.99131 | -403.03785  | 2688.07032  | -188.43591  | 1 |
| 171 | C | 80.58152 | 69.50272 | 77.42021 | 567.86262   | 335.74681   | 434.04421   | 1 |
| 172 | H | 80.47475 | 69.28078 | 76.33356 | -1080.02275 | 1568.26081  | -1948.78900 | 1 |
| 173 | H | 81.35929 | 70.30005 | 77.49750 | -919.54108  | 2111.34692  | 1456.13463  | 1 |
| 174 | C | 80.98594 | 68.23807 | 78.21701 | 195.81897   | 173.33862   | -745.11536  | 1 |
| 175 | H | 81.16714 | 68.41048 | 79.29938 | 1405.67949  | -2301.21089 | -390.08113  | 1 |

|     |   |          |          |          |             |             |             |   |
|-----|---|----------|----------|----------|-------------|-------------|-------------|---|
| 176 | H | 80.30589 | 67.37111 | 78.08615 | -940.37328  | -1118.32446 | 2299.72133  | 1 |
| 177 | N | 82.36937 | 67.76076 | 77.67221 | 319.26422   | 656.36007   | -42.02424   | 1 |
| 178 | H | 82.80857 | 66.95773 | 78.20857 | 1961.03633  | 619.91968   | 1787.09422  | 1 |
| 179 | H | 82.41023 | 67.40118 | 76.67398 | 854.14343   | -2156.80752 | 1429.08711  | 1 |
| 180 | H | 83.15570 | 68.47100 | 77.68608 | 1237.02905  | -1378.50857 | -1998.28500 | 1 |
| 181 | C | 77.94946 | 72.40464 | 79.50158 | 532.53319   | -268.57236  | 517.55729   | 1 |
| 182 | O | 78.31459 | 71.66292 | 80.40577 | 266.16714   | -290.73804  | -558.88002  | 1 |
| 183 | N | 77.97611 | 73.70696 | 79.41792 | -226.25352  | 640.49678   | -270.32839  | 1 |
| 184 | H | 77.71683 | 74.12941 | 78.50975 | 2007.69063  | -1035.27229 | 1523.50231  | 1 |
| 185 | C | 78.15862 | 74.57134 | 80.53486 | -540.76542  | -573.33303  | 49.50000    | 1 |
| 186 | H | 77.52924 | 75.44209 | 80.24601 | -2374.20950 | -1036.76023 | 843.75774   | 1 |
| 187 | C | 77.69160 | 73.88293 | 81.89030 | -77.09082   | 666.87422   | -415.84136  | 1 |
| 188 | H | 78.37554 | 73.01344 | 82.11649 | -985.81834  | 617.19825   | 2463.91927  | 1 |
| 189 | O | 76.36360 | 73.29602 | 81.90294 | 293.29899   | -391.65602  | -477.80926  | 1 |
| 190 | H | 76.59852 | 72.36668 | 81.69476 | 2528.72714  | -681.76262  | -751.27122  | 1 |
| 191 | C | 77.94582 | 75.04669 | 82.91587 | 252.47363   | -605.14473  | 440.05134   | 1 |
| 192 | H | 77.81641 | 74.70182 | 83.96770 | -2052.65063 | 1456.49051  | -1043.51830 | 1 |
| 193 | H | 78.97681 | 75.46314 | 82.82509 | -2152.98800 | -1661.97574 | -161.70652  | 1 |
| 194 | H | 77.23573 | 75.89071 | 82.75471 | -473.12726  | -1584.27339 | 2165.61725  | 1 |
| 195 | C | 79.74445 | 75.00124 | 80.50170 | 360.36307   | 488.46713   | 505.10056   | 1 |
| 196 | O | 80.11374 | 75.84264 | 79.71719 | -200.08817  | -528.03552  | -385.82850  | 1 |
| 197 | N | 80.46445 | 74.32209 | 81.38806 | -597.54095  | -226.44775  | 355.20479   | 1 |
| 198 | H | 80.02681 | 73.60845 | 81.96897 | 2179.23655  | -1300.70981 | -991.33835  | 1 |
| 199 | C | 81.85794 | 74.54008 | 81.43007 | -687.68921  | 297.39807   | -249.45179  | 1 |
| 200 | H | 82.06512 | 75.30005 | 80.63955 | -349.16256  | -2467.37713 | -1101.72831 | 1 |
| 201 | C | 82.33985 | 74.95307 | 82.90508 | 672.47345   | 361.54328   | -201.62880  | 1 |
| 202 | H | 82.06826 | 74.16507 | 83.64248 | 1541.41502  | 582.18425   | 2169.97026  | 1 |
| 203 | H | 83.45187 | 75.03175 | 82.91711 | -2534.67717 | 60.25153    | 997.72295   | 1 |
| 204 | C | 81.68789 | 76.29093 | 83.28162 | 574.26774   | -389.43119  | -377.02542  | 1 |
| 205 | C | 82.08249 | 77.49031 | 82.61575 | 688.82679   | -287.33580  | -257.96133  | 1 |
| 206 | H | 82.86558 | 77.47217 | 81.83619 | 331.14182   | 1470.38163  | 2269.80013  | 1 |
| 207 | C | 80.67054 | 76.32227 | 84.28255 | -383.52382  | -675.04808  | 144.24917   | 1 |
| 208 | H | 80.36082 | 75.39557 | 84.79859 | 4.09847     | 1517.59662  | 2262.86397  | 1 |
| 209 | C | 81.45201 | 78.68482 | 82.96201 | -134.76730  | 428.45285   | -649.50303  | 1 |
| 210 | H | 81.75475 | 79.61192 | 82.44429 | -903.23433  | 1600.49020  | 2011.53387  | 1 |
| 211 | C | 80.06810 | 77.54367 | 84.59351 | -335.53281  | -615.00040  | -364.39058  | 1 |
| 212 | H | 79.28068 | 77.55506 | 85.36713 | 1596.45398  | -1369.33862 | 1732.02659  | 1 |
| 213 | C | 80.43082 | 78.76431 | 83.95289 | 585.48547   | -340.24194  | -406.23938  | 1 |
| 214 | O | 79.82561 | 80.01030 | 84.26178 | -419.15649  | -173.04408  | -511.94141  | 1 |
| 215 | H | 79.19879 | 79.72128 | 84.96605 | -1071.84350 | 1559.71507  | -1960.13012 | 1 |
| 216 | C | 82.57772 | 73.07909 | 81.23507 | 291.41878   | -183.13091  | 710.72246   | 1 |
| 217 | O | 83.53147 | 72.79819 | 81.93210 | 379.87695   | 523.47396   | -222.23622  | 1 |
| 218 | N | 81.98376 | 72.36998 | 80.28387 | 564.30591   | 373.09380   | 277.24371   | 1 |
| 219 | H | 81.19774 | 72.82287 | 79.81575 | -120.59931  | -2436.07824 | -1214.35098 | 1 |
| 220 | C | 82.52049 | 71.12710 | 79.83846 | 404.07514   | -299.37480  | 608.84009   | 1 |
| 221 | H | 82.12666 | 71.03178 | 78.79970 | -1071.07882 | -841.69025  | 2359.66467  | 1 |
| 222 | C | 84.10665 | 71.20134 | 79.92598 | -683.12807  | 68.71770    | -390.13096  | 1 |
| 223 | H | 84.47342 | 72.18133 | 79.54531 | 2068.88918  | 1596.58590  | 770.89603   | 1 |
| 224 | H | 84.43319 | 71.15219 | 80.99678 | 1379.86429  | 2342.49779  | -179.85638  | 1 |
| 225 | C | 84.72555 | 70.02028 | 79.11788 | -176.39967  | 537.49466   | 550.97268   | 1 |
| 226 | H | 84.30249 | 69.04623 | 79.45951 | -396.28051  | 1942.22168  | 1869.33314  | 1 |
| 227 | H | 84.48394 | 70.09951 | 78.03479 | -94.44700   | 586.00678   | -2659.20016 | 1 |
| 228 | C | 86.30460 | 70.07824 | 79.36682 | -291.69381  | -718.18079  | -150.72929  | 1 |
| 229 | H | 86.82575 | 71.00937 | 79.02985 | -2303.38776 | 1089.76242  | 964.62032   | 1 |
| 230 | H | 86.60297 | 69.86480 | 80.42538 | 884.16729   | 2568.80533  | -207.74283  | 1 |
| 231 | N | 86.74688 | 69.00763 | 78.57861 | -594.49522  | -252.81478  | 342.29276   | 1 |
| 232 | H | 86.06985 | 68.28669 | 78.38073 | -1735.17426 | 2084.05705  | -263.71605  | 1 |
| 233 | C | 87.92943 | 68.86671 | 78.13018 | 595.23177   | -271.52487  | 442.22352   | 1 |
| 234 | N | 88.87393 | 69.85464 | 78.42807 | 585.53813   | -424.79750  | -105.81303  | 1 |
| 235 | H | 88.77558 | 70.69747 | 78.99191 | 959.88797   | 1327.56823  | -2177.11905 | 1 |
| 236 | H | 89.85059 | 69.83540 | 78.13347 | 1578.48647  | 16.27378    | -2220.76233 | 1 |
| 237 | N | 88.04495 | 67.67939 | 77.39338 | -452.17763  | -390.33541  | -421.51853  | 1 |

|     |   |          |          |          |             |             |             |   |
|-----|---|----------|----------|----------|-------------|-------------|-------------|---|
| 238 | H | 87.36097 | 66.95579 | 77.17890 | 470.26107   | 1974.25629  | -1817.92087 | 1 |
| 239 | H | 88.91532 | 67.38009 | 76.95263 | 1856.67307  | -1573.97321 | -1224.35416 | 1 |
| 240 | C | 81.99731 | 69.93313 | 80.80503 | -531.47271  | -581.45780  | -55.06206   | 1 |
| 241 | O | 82.65074 | 68.92907 | 80.95949 | -243.00837  | 192.73507   | 609.52485   | 1 |
| 242 | N | 80.73448 | 70.14710 | 81.23651 | 343.49288   | -644.25607  | 38.09164    | 1 |
| 243 | H | 80.40035 | 71.08273 | 80.98905 | -1691.16043 | -1535.97525 | -1484.73099 | 1 |
| 244 | C | 80.36164 | 69.54425 | 82.53079 | 542.66492   | 350.14337   | 454.42563   | 1 |
| 245 | H | 81.27591 | 68.97971 | 82.83511 | 1209.57979  | -2396.95920 | 463.86744   | 1 |
| 246 | C | 79.96163 | 70.66586 | 83.46932 | -737.14309  | 145.93010   | 242.71942   | 1 |
| 247 | H | 79.12854 | 71.22491 | 82.98683 | -1050.18303 | 159.36419   | -2509.06125 | 1 |
| 248 | C | 79.45552 | 70.11943 | 84.79214 | -706.77696  | -252.88343  | -245.16230  | 1 |
| 249 | H | 79.06376 | 70.93473 | 85.46051 | -1624.64039 | -1665.49085 | 1417.86935  | 1 |
| 250 | H | 78.62236 | 69.37732 | 84.64000 | 2566.10521  | 598.51109   | 693.22305   | 1 |
| 251 | H | 80.26982 | 69.58634 | 85.35625 | -1972.69758 | 107.10018   | -1876.34312 | 1 |
| 252 | C | 81.09761 | 71.64335 | 83.70498 | 412.85148   | 672.58832   | -27.69222   | 1 |
| 253 | H | 80.76323 | 72.52918 | 84.31222 | 1447.02277  | 1762.76533  | -1490.78944 | 1 |
| 254 | H | 81.94673 | 71.15874 | 84.26107 | 1320.77379  | -145.20455  | 2378.68491  | 1 |
| 255 | H | 81.52978 | 72.03615 | 82.73569 | -1512.10848 | 1470.52031  | 1724.75147  | 1 |
| 256 | C | 79.05384 | 68.56292 | 82.29224 | -607.11113  | 499.56689   | 73.73769    | 1 |
| 257 | O | 78.94003 | 67.54737 | 82.93107 | 357.97126   | 460.81534   | 356.68785   | 1 |
| 258 | N | 78.20428 | 69.10408 | 81.43499 | 536.55407   | -368.62270  | 332.76306   | 1 |
| 259 | H | 78.39832 | 70.03056 | 80.98405 | 524.38866   | 2297.69985  | 1367.20941  | 1 |
| 260 | C | 77.00624 | 68.39186 | 81.17484 | 46.50277    | -774.29190  | -147.97904  | 1 |
| 261 | H | 77.05619 | 67.47886 | 81.81571 | 1676.51875  | 1883.29066  | 1032.55549  | 1 |
| 262 | C | 75.74625 | 69.35265 | 81.48975 | -559.41456  | -34.19198   | -556.30433  | 1 |
| 263 | H | 75.81335 | 70.26910 | 80.85670 | -64.66664   | 395.18769   | 2695.05373  | 1 |
| 264 | H | 74.79284 | 68.84812 | 81.20298 | -2703.44278 | -60.40056   | 333.79418   | 1 |
| 265 | C | 75.74828 | 69.71169 | 82.95078 | -519.76435  | 377.31045   | 459.42366   | 1 |
| 266 | H | 76.75712 | 70.10266 | 83.21488 | -1746.74323 | 1667.50644  | -1261.73691 | 1 |
| 267 | C | 74.71748 | 70.79674 | 83.23611 | 570.95554   | 16.46261    | -545.27700  | 1 |
| 268 | H | 74.67512 | 71.04931 | 84.32693 | 2391.58273  | 28.05277    | -1305.07271 | 1 |
| 269 | H | 74.94841 | 71.74857 | 82.68543 | 175.75588   | 917.63458   | 2559.43867  | 1 |
| 270 | H | 73.68790 | 70.47701 | 82.93059 | -1063.97851 | -2155.34650 | 1283.00462  | 1 |
| 271 | C | 75.45849 | 68.49628 | 83.82199 | 193.76014   | 2.62946     | -765.53141  | 1 |
| 272 | H | 75.37980 | 68.77277 | 84.90497 | 507.39394   | -846.55087  | 2539.60089  | 1 |
| 273 | H | 74.49383 | 68.00302 | 83.53590 | 1337.57841  | 1818.19054  | 1526.01994  | 1 |
| 274 | H | 76.26593 | 67.72351 | 83.73788 | 1100.88635  | -1172.91350 | -2199.08909 | 1 |
| 275 | C | 77.05520 | 68.08740 | 79.58882 | -549.21115  | 475.64486   | -309.38218  | 1 |
| 276 | O | 76.36386 | 68.64800 | 78.77958 | 556.06106   | -390.37755  | -78.24250   | 1 |
| 277 | O | 78.04116 | 67.15744 | 79.18406 | -572.27940  | -310.19032  | -209.75862  | 1 |
| 278 | H | 78.43162 | 66.94896 | 80.08314 | -1380.08193 | 2212.14486  | 790.85944   | 1 |

Listing 51: C00051.xmolout

|    |   |          |          |          |             |             |             |        |          |
|----|---|----------|----------|----------|-------------|-------------|-------------|--------|----------|
| 1  |   | 276      |          |          |             |             |             |        |          |
| 2  |   | 150.0000 | 150.0000 | 150.0000 | 0.0000      | 0.0000      | 0.0000***** | 2.7750 | 11100    |
|    |   | 0.2500   | 300.00   | 0.00     | 0.00        | 0.00        | -1293.6855  | 0.0000 | 300.0000 |
| 3  | H | 64.75932 | 75.73609 | 74.33608 | -2043.14101 | -1757.64893 | 399.89339   |        | 1        |
| 4  | N | 65.63330 | 75.22322 | 74.22643 | 426.75047   | 490.45733   | -334.42467  |        | 1        |
| 5  | H | 65.38206 | 74.48753 | 73.55695 | 442.25559   | -1110.30854 | -2448.52907 |        | 1        |
| 6  | C | 66.71825 | 76.00602 | 73.76681 | 415.32972   | -666.39213  | 83.73172    |        | 1        |
| 7  | H | 66.38018 | 77.06232 | 73.84907 | 879.32219   | 2491.00447  | 667.35213   |        | 1        |
| 8  | C | 68.01162 | 75.71433 | 74.68881 | 31.35357    | 477.41777   | 628.23362   |        | 1        |
| 9  | H | 68.33869 | 74.65790 | 74.54022 | 1168.38489  | 2240.25337  | -1019.71136 |        | 1        |
| 10 | H | 68.87167 | 76.35110 | 74.37173 | -360.43770  | 2534.90498  | 931.67112   |        | 1        |
| 11 | C | 67.66386 | 75.95876 | 76.13193 | 463.18208   | 512.70242   | -382.34388  |        | 1        |
| 12 | H | 66.76618 | 75.34739 | 76.37914 | 1725.29117  | 1863.52247  | -987.07854  |        | 1        |
| 13 | C | 68.81414 | 75.52599 | 77.03321 | 710.42801   | -144.27427  | -313.15367  |        | 1        |
| 14 | H | 68.56387 | 75.66009 | 78.11704 | 364.20195   | -1033.13725 | 2494.72524  |        | 1        |
| 15 | H | 69.07520 | 74.44669 | 76.88322 | 2567.61904  | 335.80679   | 847.48802   |        | 1        |
| 16 | H | 69.74065 | 76.12290 | 76.83149 | -2587.99029 | 680.92867   | -512.16411  |        | 1        |
| 17 | C | 67.34078 | 77.42421 | 76.39135 | 268.17616   | 741.64379   | -40.42634   |        | 1        |

|    |   |          |          |          |             |             |             |   |
|----|---|----------|----------|----------|-------------|-------------|-------------|---|
| 18 | H | 67.12697 | 77.61440 | 77.47472 | 1283.54314  | -1945.37420 | -1411.27812 | 1 |
| 19 | H | 68.19123 | 78.09303 | 76.09870 | -1258.57796 | 1317.15249  | -2026.02085 | 1 |
| 20 | H | 66.44101 | 77.75916 | 75.81424 | -2502.84526 | 909.80597   | 575.92391   | 1 |
| 21 | C | 66.95551 | 75.50732 | 72.24907 | 619.36578   | -458.64843  | -172.09273  | 1 |
| 22 | O | 66.20626 | 74.66413 | 71.72628 | -81.40433   | 433.87611   | 522.34594   | 1 |
| 23 | N | 67.95142 | 76.16497 | 71.72572 | 175.23996   | -622.20190  | 341.55523   | 1 |
| 24 | H | 68.44181 | 76.80282 | 72.35058 | -876.57256  | -303.22879  | -2561.90213 | 1 |
| 25 | C | 68.44205 | 75.98997 | 70.38854 | -571.88214  | -534.10783  | -106.15033  | 1 |
| 26 | H | 69.28162 | 75.26918 | 70.50302 | -2713.20841 | -16.25800   | -248.80809  | 1 |
| 27 | C | 67.30732 | 75.38505 | 69.43362 | 166.60354   | 288.16399   | -716.09568  | 1 |
| 28 | H | 66.31835 | 75.81627 | 69.76244 | -2097.85574 | 1636.78449  | -586.18044  | 1 |
| 29 | O | 67.15769 | 73.96974 | 69.51229 | -317.80580  | -363.38227  | 484.43082   | 1 |
| 30 | H | 66.52327 | 73.91471 | 70.33026 | 1863.74748  | -1451.84923 | 1357.29467  | 1 |
| 31 | C | 67.70255 | 75.97018 | 68.02955 | 503.80731   | 517.99032   | 318.51606   | 1 |
| 32 | H | 67.01538 | 75.61335 | 67.22717 | 640.61020   | -2157.10410 | -1536.29104 | 1 |
| 33 | H | 67.67689 | 77.08740 | 68.02133 | 1687.88455  | 465.60692   | 2087.56452  | 1 |
| 34 | H | 68.74051 | 75.66948 | 67.74406 | -1293.07895 | -1899.88581 | -1463.57452 | 1 |
| 35 | C | 69.00174 | 77.41443 | 69.86366 | -153.07550  | -733.68902  | 248.70981   | 1 |
| 36 | O | 69.76062 | 77.33735 | 68.92697 | 186.15459   | -480.78787  | -449.34387  | 1 |
| 37 | N | 68.45245 | 78.51598 | 70.39143 | -487.53139  | 543.18517   | 42.03850    | 1 |
| 38 | C | 69.06570 | 79.78961 | 70.14416 | -699.35871  | 69.34393    | 360.10701   | 1 |
| 39 | H | 69.64838 | 79.60366 | 69.21018 | 2.81126     | -221.99807  | -2715.58072 | 1 |
| 40 | C | 67.79024 | 80.72459 | 69.98250 | -507.46439  | -592.59194  | 122.07761   | 1 |
| 41 | H | 68.01549 | 81.80936 | 70.10070 | -1975.08116 | 525.87560   | -1801.71556 | 1 |
| 42 | H | 67.32866 | 80.60850 | 68.97686 | 1588.27743  | -1913.22100 | 1113.83566  | 1 |
| 43 | C | 66.85757 | 80.14842 | 71.09171 | -613.62442  | -457.55993  | -194.14490  | 1 |
| 44 | H | 67.19738 | 80.45729 | 72.10624 | 1707.54637  | -721.27992  | 1996.92523  | 1 |
| 45 | H | 65.79518 | 80.46772 | 70.99884 | 758.23357   | 2100.81767  | 1560.55011  | 1 |
| 46 | C | 67.07035 | 78.59198 | 70.85221 | -352.41524  | 704.96076   | 49.21465    | 1 |
| 47 | H | 66.96369 | 77.97018 | 71.76906 | 1714.76886  | -2070.42778 | 443.35792   | 1 |
| 48 | H | 66.45061 | 78.14825 | 70.03840 | 1224.15040  | 1801.50881  | 1636.97633  | 1 |
| 49 | C | 70.04645 | 80.14588 | 71.40284 | 566.85117   | 537.05831   | 117.62814   | 1 |
| 50 | O | 70.94068 | 79.38172 | 71.69814 | -550.26779  | -406.08867  | 4.21666     | 1 |
| 51 | N | 69.70502 | 81.28850 | 71.98966 | 566.34832   | -425.77725  | 180.18749   | 1 |
| 52 | H | 68.94629 | 81.80852 | 71.54506 | 644.44502   | 2646.80550  | -52.73430   | 1 |
| 53 | C | 70.77429 | 82.09589 | 72.54010 | 612.34801   | -281.48662  | 411.56221   | 1 |
| 54 | H | 71.57034 | 82.11590 | 71.76292 | 1667.23498  | -1490.75142 | 1556.16753  | 1 |
| 55 | C | 70.10144 | 83.51292 | 72.80324 | -714.45746  | -175.43074  | 286.98927   | 1 |
| 56 | H | 69.30022 | 83.39949 | 73.58420 | -787.09484  | 1763.03619  | -1922.46060 | 1 |
| 57 | O | 69.45219 | 84.10614 | 71.65856 | -429.46514  | 516.51932   | -128.40526  | 1 |
| 58 | H | 68.54729 | 84.24198 | 72.00054 | 1981.82785  | 436.16847   | -1818.18182 | 1 |
| 59 | C | 71.31359 | 84.30894 | 73.41351 | 630.79189   | -468.94448  | 76.03230    | 1 |
| 60 | H | 71.01172 | 85.33537 | 73.72638 | -1775.71861 | 2062.30353  | 131.89849   | 1 |
| 61 | H | 71.73330 | 83.79717 | 74.31091 | -1855.14608 | 88.94118    | 1993.53760  | 1 |
| 62 | H | 72.14320 | 84.41659 | 72.67642 | -1504.82350 | -780.94249  | -2132.90992 | 1 |
| 63 | C | 71.26354 | 81.41413 | 73.92607 | 288.57638   | 618.62814   | -397.00270  | 1 |
| 64 | O | 70.52060 | 81.13180 | 74.83033 | 321.70495   | -185.26452  | 574.37218   | 1 |
| 65 | N | 72.61521 | 81.41796 | 73.91395 | -447.05792  | -446.53431  | 367.76425   | 1 |
| 66 | H | 73.06728 | 81.70227 | 73.02373 | 350.31316   | 1975.63644  | -1843.31522 | 1 |
| 67 | C | 73.18695 | 80.29204 | 74.62833 | -511.23061  | 374.03917   | -471.51480  | 1 |
| 68 | H | 72.42012 | 80.03060 | 75.39520 | 2234.79579  | -898.70890  | -1273.45190 | 1 |
| 69 | C | 73.36432 | 79.15257 | 73.53094 | 529.53781   | -159.34528  | 563.72604   | 1 |
| 70 | H | 73.42199 | 78.14485 | 73.99914 | 654.59388   | 2347.94251  | 1217.51488  | 1 |
| 71 | H | 72.46144 | 79.15225 | 72.84077 | -1526.55661 | 2103.42026  | 817.87394   | 1 |
| 72 | O | 74.30993 | 82.41244 | 71.85120 | -554.84278  | 14.12789    | 399.58769   | 2 |
| 73 | H | 74.62929 | 80.51703 | 72.34469 | 1297.06236  | 2061.84854  | 1220.68812  | 1 |
| 74 | C | 74.60087 | 80.71579 | 75.25664 | -662.15484  | -412.13544  | 123.62687   | 1 |
| 75 | O | 75.02850 | 80.09199 | 76.21965 | -540.01537  | -317.05804  | 274.91456   | 1 |
| 76 | N | 75.19966 | 81.66858 | 74.55221 | -202.76299  | -690.00100  | -131.49145  | 1 |
| 77 | H | 74.67675 | 81.97303 | 73.71421 | -702.62132  | -2617.37191 | 281.70413   | 1 |
| 78 | C | 76.02683 | 82.71219 | 75.17291 | -491.73914  | 576.34187   | 222.73509   | 1 |
| 79 | H | 76.01274 | 83.52631 | 74.41053 | 1977.17978  | -1823.58850 | -434.68928  | 1 |

|     |   |          |          |          |             |             |             |   |
|-----|---|----------|----------|----------|-------------|-------------|-------------|---|
| 80  | C | 75.37144 | 83.12060 | 76.47896 | -649.50797  | -328.66843  | 306.11224   | 1 |
| 81  | H | 75.22150 | 82.19600 | 77.08481 | 2075.07803  | 1452.16490  | -1004.45904 | 1 |
| 82  | C | 76.24949 | 84.07339 | 77.26843 | -615.18735  | -489.99689  | -70.96352   | 1 |
| 83  | H | 75.77733 | 84.36449 | 78.24706 | -1226.32661 | -1724.38906 | -1716.47170 | 1 |
| 84  | H | 77.25080 | 83.61451 | 77.50074 | 2381.64273  | -969.84735  | 900.46860   | 1 |
| 85  | H | 76.44758 | 85.02230 | 76.69726 | 2122.74991  | 1702.23946  | -141.36228  | 1 |
| 86  | C | 74.00586 | 83.74033 | 76.24280 | -501.86074  | -479.61276  | -376.42482  | 1 |
| 87  | H | 73.49594 | 84.01055 | 77.20797 | 993.79261   | -2246.95401 | -1177.81305 | 1 |
| 88  | H | 74.07797 | 84.68026 | 75.62893 | 42.71279    | -626.15391  | -2651.37258 | 1 |
| 89  | H | 73.32652 | 83.03359 | 75.68946 | -2026.39012 | -1590.33709 | -887.82922  | 1 |
| 90  | C | 77.57693 | 82.17898 | 75.42662 | -672.89153  | 382.57394   | -156.34072  | 1 |
| 91  | O | 78.49118 | 82.92290 | 75.17954 | 410.04627   | 221.86223   | 500.35950   | 1 |
| 92  | N | 77.60207 | 80.98748 | 75.99295 | -378.11782  | -443.79414  | -441.10984  | 1 |
| 93  | H | 76.70283 | 80.48780 | 76.18862 | 2404.15973  | -568.14894  | 1149.30085  | 1 |
| 94  | C | 78.87226 | 80.43098 | 76.30935 | -544.54484  | 466.16019   | 331.29119   | 1 |
| 95  | H | 79.59424 | 81.25783 | 76.10129 | -1409.80988 | -170.17955  | 2325.32679  | 1 |
| 96  | C | 78.78224 | 80.02700 | 77.84657 | -184.48284  | 116.78282   | -758.89137  | 1 |
| 97  | H | 78.60796 | 80.92168 | 78.48532 | 1893.78641  | 1861.14652  | 611.04528   | 1 |
| 98  | H | 77.89855 | 79.37613 | 78.02743 | -2170.79665 | -974.19311  | 1327.50117  | 1 |
| 99  | C | 80.11460 | 79.31392 | 78.23278 | 389.51668   | 672.81878   | -138.49152  | 1 |
| 100 | H | 80.41725 | 78.63472 | 77.40163 | 510.64577   | 1933.03327  | 1851.02484  | 1 |
| 101 | H | 80.93967 | 80.05668 | 78.30328 | -2302.30869 | -1105.72939 | -948.89774  | 1 |
| 102 | C | 80.03903 | 78.47637 | 79.57196 | -559.93427  | -126.34590  | 542.30857   | 1 |
| 103 | O | 81.03334 | 78.29183 | 80.22364 | -670.36003  | -111.83166  | 76.36448    | 1 |
| 104 | N | 78.81258 | 77.92354 | 79.81000 | -216.06729  | -537.07037  | 446.51379   | 1 |
| 105 | H | 78.05720 | 77.93584 | 79.11788 | -1251.96487 | 1074.12894  | -2168.52500 | 1 |
| 106 | H | 78.72510 | 77.03374 | 80.32967 | -2451.83023 | -720.73851  | 944.84612   | 1 |
| 107 | C | 79.18823 | 79.11241 | 75.39006 | 546.24052   | -563.88337  | -85.11809   | 1 |
| 108 | O | 80.35273 | 78.93497 | 75.13678 | 71.70702    | -307.40463  | 606.69673   | 1 |
| 109 | N | 78.15905 | 78.27564 | 75.17283 | 479.90863   | -504.50129  | 222.86849   | 1 |
| 110 | C | 78.26757 | 77.30771 | 74.12391 | 75.51268    | -600.91904  | 506.73700   | 1 |
| 111 | H | 79.32191 | 77.41468 | 73.77520 | -2033.61562 | 1795.30103  | 254.89480   | 1 |
| 112 | C | 77.94864 | 75.96887 | 74.91181 | 523.79067   | 517.99274   | 284.45581   | 1 |
| 113 | H | 77.68321 | 75.11704 | 74.24580 | 1599.61665  | -1127.00911 | 1895.98173  | 1 |
| 114 | H | 78.82963 | 75.63718 | 75.50561 | -1881.83093 | 1275.82488  | -1501.55016 | 1 |
| 115 | C | 76.78858 | 76.42133 | 75.85582 | -600.05639  | -404.05026  | 316.64485   | 1 |
| 116 | H | 75.80983 | 76.45964 | 75.32840 | -2597.05260 | 496.36221   | 657.73249   | 1 |
| 117 | H | 76.64610 | 75.74688 | 76.72994 | -1666.24518 | 1294.38985  | -1723.90591 | 1 |
| 118 | C | 77.27473 | 77.87392 | 76.26497 | 493.57570   | -129.95376  | -602.56394  | 1 |
| 119 | H | 76.45142 | 78.63809 | 76.32976 | -1469.08415 | -637.84797  | 2204.22581  | 1 |
| 120 | H | 77.90594 | 77.90665 | 77.18319 | -1038.97840 | 1068.88701  | -2280.71789 | 1 |
| 121 | C | 77.17845 | 77.68030 | 72.94499 | 188.88100   | 241.05089   | -727.87821  | 1 |
| 122 | O | 77.39564 | 78.66361 | 72.27378 | 531.88613   | -49.19943   | 427.07960   | 1 |
| 123 | N | 76.15994 | 76.84389 | 72.89662 | 708.14833   | 26.93417    | -179.73509  | 1 |
| 124 | H | 76.15245 | 76.07794 | 73.56563 | -2232.69501 | -1179.09831 | 1023.94816  | 1 |
| 125 | C | 75.09501 | 76.97148 | 71.96510 | -738.32412  | 259.92548   | 104.42456   | 1 |
| 126 | H | 74.23596 | 76.50940 | 72.49962 | 2028.89123  | 1260.02983  | 1311.33324  | 1 |
| 127 | C | 74.88723 | 78.47506 | 71.51419 | -258.65678  | -345.52513  | 661.28459   | 1 |
| 128 | H | 75.78313 | 78.80689 | 70.93144 | -1826.06090 | -1801.46097 | -918.64554  | 1 |
| 129 | C | 73.61126 | 78.50442 | 70.60148 | -541.23400  | 531.92970   | -218.41428  | 1 |
| 130 | H | 73.34090 | 79.54417 | 70.30173 | 1311.73218  | -2219.18200 | 882.19023   | 1 |
| 131 | H | 73.77415 | 77.91545 | 69.66519 | -1048.71298 | 1223.58118  | -2196.97971 | 1 |
| 132 | H | 72.71894 | 78.07003 | 71.11436 | 419.06414   | 1903.92898  | 1903.44670  | 1 |
| 133 | C | 74.66873 | 79.45426 | 72.72281 | -423.86431  | 152.66566   | -648.55262  | 1 |
| 134 | H | 74.26655 | 82.10899 | 70.94358 | 105.68386   | -2342.50080 | 1387.51238  | 2 |
| 135 | H | 75.55338 | 79.40826 | 73.40351 | -1695.63603 | -1484.73621 | -1531.02793 | 1 |
| 136 | H | 75.15299 | 82.86807 | 71.84342 | -1853.57121 | -487.39031  | 1936.59343  | 2 |
| 137 | C | 75.49880 | 76.13396 | 70.60298 | 539.71428   | -510.58232  | 267.58633   | 1 |
| 138 | O | 75.72575 | 76.72851 | 69.57175 | -15.93758   | -278.34085  | -624.49402  | 1 |
| 139 | N | 75.42385 | 74.83604 | 70.83348 | -676.81886  | 12.05292    | 276.17960   | 1 |
| 140 | H | 75.18346 | 74.55938 | 71.78467 | -1694.44250 | -373.84189  | -2100.66098 | 1 |
| 141 | C | 75.76704 | 73.86425 | 69.85375 | 412.33078   | -664.70360  | 108.35451   | 1 |

|     |   |          |          |          |             |             |             |   |
|-----|---|----------|----------|----------|-------------|-------------|-------------|---|
| 142 | H | 75.19525 | 72.96977 | 70.18840 | 1765.77476  | 1294.44366  | 1621.76594  | 1 |
| 143 | C | 75.40711 | 74.39294 | 68.40807 | -179.66635  | -721.95667  | -264.73915  | 1 |
| 144 | H | 74.36785 | 74.79271 | 68.37769 | -607.34922  | 2587.87032  | -598.10018  | 1 |
| 145 | H | 76.07318 | 75.25241 | 68.13137 | -359.69332  | -1479.13954 | -2259.74260 | 1 |
| 146 | C | 75.59669 | 73.20649 | 67.40243 | -240.01076  | 616.02425   | 431.85322   | 1 |
| 147 | H | 76.64549 | 72.82914 | 67.44667 | -1359.17131 | 782.54425   | 2227.99181  | 1 |
| 148 | H | 74.94492 | 72.34564 | 67.67140 | -820.36667  | 85.81767    | -2596.78715 | 1 |
| 149 | C | 75.25903 | 73.73951 | 65.95327 | -513.07015  | 236.18570   | -551.87280  | 1 |
| 150 | H | 74.21155 | 74.11618 | 65.90157 | 1816.11944  | -1183.11722 | -1650.94321 | 1 |
| 151 | H | 75.90681 | 74.60777 | 65.69091 | -1800.04429 | -1361.53473 | 1526.34643  | 1 |
| 152 | C | 75.47636 | 72.57450 | 64.95933 | 726.08972   | -253.19732  | -179.64713  | 1 |
| 153 | H | 76.52821 | 72.23773 | 64.86609 | 1224.27271  | -456.51798  | -2390.90304 | 1 |
| 154 | H | 74.81254 | 71.70149 | 65.11870 | 1206.40339  | -1150.93514 | -2154.90344 | 1 |
| 155 | N | 75.10118 | 73.09819 | 63.53200 | 329.70796   | -633.68968  | -155.67358  | 1 |
| 156 | H | 75.19983 | 72.39419 | 62.74464 | 1348.31305  | 1938.76845  | 1359.00643  | 1 |
| 157 | H | 74.10499 | 73.43466 | 63.38662 | 2096.92035  | 1446.54551  | -966.48890  | 1 |
| 158 | H | 75.66589 | 73.91352 | 63.15387 | -1197.07217 | -2303.53719 | 827.28733   | 1 |
| 159 | C | 77.38770 | 73.59420 | 69.87714 | -378.01186  | -556.17301  | -413.96481  | 1 |
| 160 | O | 78.07441 | 73.84674 | 68.91207 | -409.44433  | -307.55053  | -453.30833  | 1 |
| 161 | N | 77.74754 | 73.03439 | 71.02459 | -429.02477  | 524.70884   | 274.08502   | 1 |
| 162 | H | 77.03506 | 72.88351 | 71.73690 | 1706.34263  | -1425.96036 | 1574.38926  | 1 |
| 163 | C | 79.08394 | 72.54418 | 71.12305 | -45.25864   | -626.22952  | 478.93267   | 1 |
| 164 | H | 79.51632 | 72.70280 | 70.10471 | 1988.63164  | 570.90773   | 1772.87287  | 1 |
| 165 | C | 79.78448 | 73.42089 | 72.25049 | 551.77128   | -20.49526   | -564.54996  | 1 |
| 166 | H | 79.69921 | 74.50297 | 72.00497 | 1434.61535  | -1753.10253 | 1513.99471  | 1 |
| 167 | H | 79.28001 | 73.29883 | 73.23461 | -714.67738  | 1819.09770  | 1898.36494  | 1 |
| 168 | C | 81.27901 | 72.97529 | 72.32779 | 446.99263   | -555.77305  | 338.97221   | 1 |
| 169 | H | 81.35853 | 71.93343 | 72.71265 | 1953.68466  | 1892.25957  | -161.67766  | 1 |
| 170 | H | 81.74292 | 72.96431 | 71.31594 | -403.03785  | 2688.07032  | -188.43591  | 1 |
| 171 | C | 82.03586 | 73.99239 | 73.27511 | 567.86262   | 335.74681   | 434.04421   | 1 |
| 172 | H | 82.00632 | 75.02473 | 72.85663 | -1080.02275 | 1568.26081  | -1948.78900 | 1 |
| 173 | H | 81.54082 | 74.06050 | 74.27069 | -919.54108  | 2111.34692  | 1456.13463  | 1 |
| 174 | C | 83.49226 | 73.48887 | 73.40484 | 195.81897   | 173.33862   | -745.11536  | 1 |
| 175 | H | 83.59251 | 72.45449 | 73.78870 | 1405.67949  | -2301.21089 | -390.08113  | 1 |
| 176 | H | 84.10473 | 73.60917 | 72.48903 | -940.37328  | -1118.32446 | 2299.72133  | 1 |
| 177 | N | 84.19954 | 74.37816 | 74.48174 | 319.26422   | 656.36007   | -42.02424   | 1 |
| 178 | H | 85.21645 | 74.14573 | 74.67396 | 1961.03633  | 619.91968   | 1787.09422  | 1 |
| 179 | H | 84.25990 | 75.41819 | 74.27683 | 854.14343   | -2156.80752 | 1429.08711  | 1 |
| 180 | H | 83.79467 | 74.37281 | 75.46303 | 1237.02905  | -1378.50857 | -1998.28500 | 1 |
| 181 | C | 79.05258 | 70.97944 | 71.58846 | 532.53319   | -268.57236  | 517.55729   | 1 |
| 182 | O | 79.65454 | 70.15493 | 70.90858 | 266.16714   | -290.73804  | -558.88002  | 1 |
| 183 | N | 78.42200 | 70.82935 | 72.71091 | -226.25352  | 640.49678   | -270.32839  | 1 |
| 184 | H | 77.97978 | 71.62560 | 73.21291 | 2007.69063  | -1035.27229 | 1523.50231  | 1 |
| 185 | C | 78.25914 | 69.56143 | 73.36412 | -540.76542  | -573.33303  | 49.50000    | 1 |
| 186 | H | 77.46801 | 69.03055 | 72.78971 | -2374.20950 | -1036.76023 | 843.75774   | 1 |
| 187 | C | 79.64317 | 68.77310 | 73.21037 | -77.09082   | 666.87422   | -415.84136  | 1 |
| 188 | H | 80.41062 | 69.56562 | 72.97694 | -985.81834  | 617.19825   | 2463.91927  | 1 |
| 189 | O | 79.64412 | 67.89785 | 72.07962 | 293.29899   | -391.65602  | -477.80926  | 1 |
| 190 | H | 79.81020 | 68.58980 | 71.32977 | 2528.72714  | -681.76262  | -751.27122  | 1 |
| 191 | C | 80.03369 | 68.12123 | 74.58178 | 252.47363   | -605.14473  | 440.05134   | 1 |
| 192 | H | 81.07056 | 67.71166 | 74.55312 | -2052.65063 | 1456.49051  | -1043.51830 | 1 |
| 193 | H | 79.98933 | 68.85619 | 75.42064 | -2152.98800 | -1661.97574 | -161.70652  | 1 |
| 194 | H | 79.35996 | 67.27049 | 74.83772 | -473.12726  | -1584.27339 | 2165.61725  | 1 |
| 195 | C | 77.72230 | 70.08282 | 74.79805 | 360.36307   | 488.46713   | 505.10056   | 1 |
| 196 | O | 77.44484 | 71.27473 | 74.92344 | -200.08817  | -528.03552  | -385.82850  | 1 |
| 197 | N | 77.60077 | 69.09003 | 75.65980 | -597.54095  | -226.44775  | 355.20479   | 1 |
| 198 | H | 77.83523 | 68.16228 | 75.30638 | 2179.23655  | -1300.70981 | -991.33835  | 1 |
| 199 | C | 77.47407 | 69.26139 | 77.06071 | -687.68921  | 297.39807   | -249.45179  | 1 |
| 200 | H | 78.01407 | 68.39363 | 77.49980 | -349.16256  | -2467.37713 | -1101.72831 | 1 |
| 201 | C | 78.07050 | 70.67398 | 77.51615 | 672.47345   | 361.54328   | -201.62880  | 1 |
| 202 | H | 77.53570 | 71.50735 | 76.98984 | 1541.41502  | 582.18425   | 2169.97026  | 1 |
| 203 | H | 77.88967 | 70.81676 | 78.60760 | -2534.67717 | 60.25153    | 997.72295   | 1 |

|     |   |          |          |          |             |             |             |   |
|-----|---|----------|----------|----------|-------------|-------------|-------------|---|
| 204 | C | 79.57833 | 70.73008 | 77.22084 | 574.26774   | -389.43119  | -377.02542  | 1 |
| 205 | C | 80.48593 | 69.92328 | 77.97036 | 688.82679   | -287.33580  | -257.96133  | 1 |
| 206 | H | 80.11504 | 69.24740 | 78.76192 | 331.14182   | 1470.38163  | 2269.80013  | 1 |
| 207 | C | 80.07483 | 71.59818 | 76.20193 | -383.52382  | -675.04808  | 144.24917   | 1 |
| 208 | H | 79.38129 | 72.22608 | 75.61153 | 4.09847     | 1517.59662  | 2262.86397  | 1 |
| 209 | C | 81.85201 | 70.01464 | 77.69733 | -134.76730  | 428.45285   | -649.50303  | 1 |
| 210 | H | 82.55079 | 69.39884 | 78.28981 | -903.23433  | 1600.49020  | 2011.53387  | 1 |
| 211 | C | 81.44922 | 71.65255 | 75.96122 | -335.53281  | -615.00040  | -364.39058  | 1 |
| 212 | H | 81.81598 | 72.32910 | 75.17173 | 1596.45398  | -1369.33862 | 1732.02659  | 1 |
| 213 | C | 82.39043 | 70.87696 | 76.69824 | 585.48547   | -340.24194  | -406.23938  | 1 |
| 214 | O | 83.78840 | 70.93843 | 76.45890 | -419.15649  | -173.04408  | -511.94141  | 1 |
| 215 | H | 83.81336 | 71.67419 | 75.80143 | -1071.84350 | 1559.71507  | -1960.13012 | 1 |
| 216 | C | 75.88231 | 69.21869 | 77.42712 | 291.41878   | -183.13091  | 710.72246   | 1 |
| 217 | O | 75.00172 | 69.66341 | 76.72745 | 379.87695   | 523.47396   | -222.23622  | 1 |
| 218 | N | 75.77598 | 68.72018 | 78.66229 | 564.30591   | 373.09380   | 277.24371   | 1 |
| 219 | H | 76.62321 | 68.39158 | 79.12450 | -120.59931  | -2436.07824 | -1214.35098 | 1 |
| 220 | C | 74.48413 | 68.26682 | 79.06914 | 404.07514   | -299.37480  | 608.84009   | 1 |
| 221 | H | 73.79292 | 68.79615 | 78.36996 | -1071.07882 | -841.69025  | 2359.66467  | 1 |
| 222 | C | 74.42715 | 66.68873 | 78.90387 | -683.12807  | 68.71770    | -390.13096  | 1 |
| 223 | H | 74.79975 | 66.37977 | 77.90151 | 2068.88918  | 1596.58590  | 770.89603   | 1 |
| 224 | H | 75.09169 | 66.18762 | 79.64279 | 1379.86429  | 2342.49779  | -179.85638  | 1 |
| 225 | C | 72.94083 | 66.26401 | 79.10925 | -176.39967  | 537.49466   | 550.97268   | 1 |
| 226 | H | 72.57616 | 66.61778 | 80.10663 | -396.28051  | 1942.22168  | 1869.33314  | 1 |
| 227 | H | 72.28420 | 66.75303 | 78.35506 | -94.44700   | 586.00678   | -2659.20016 | 1 |
| 228 | C | 72.83376 | 64.67382 | 79.00549 | -291.69381  | -718.18079  | -150.72929  | 1 |
| 229 | H | 73.12306 | 64.22011 | 78.02359 | -2303.38776 | 1089.76242  | 964.62032   | 1 |
| 230 | H | 73.34973 | 64.10367 | 79.81980 | 884.16729   | 2568.80533  | -207.74283  | 1 |
| 231 | N | 71.44828 | 64.51388 | 79.17283 | -594.49522  | -252.81478  | 342.29276   | 1 |
| 232 | H | 70.92342 | 65.33868 | 79.42045 | -1735.17426 | 2084.05705  | -263.71605  | 1 |
| 233 | C | 70.81923 | 63.41607 | 79.04567 | 595.23177   | -271.52487  | 442.22352   | 1 |
| 234 | N | 71.55496 | 62.27412 | 78.71251 | 585.53813   | -424.79750  | -105.81303  | 1 |
| 235 | H | 72.55787 | 62.17253 | 78.56294 | 959.88797   | 1327.56823  | -2177.11905 | 1 |
| 236 | H | 71.16230 | 61.33984 | 78.59282 | 1578.48647  | 16.27378    | -2220.76233 | 1 |
| 237 | N | 69.44834 | 63.59534 | 79.27937 | -452.17763  | -390.33541  | -421.51853  | 1 |
| 238 | H | 68.91625 | 64.42879 | 79.52475 | 470.26107   | 1974.25629  | -1817.92087 | 1 |
| 239 | H | 68.76813 | 62.83628 | 79.22840 | 1856.67307  | -1573.97321 | -1224.35416 | 1 |
| 240 | C | 74.27589 | 68.65054 | 80.64049 | -531.47271  | -581.45780  | -55.06206   | 1 |
| 241 | O | 73.59460 | 67.96792 | 81.38064 | -243.00837  | 192.73507   | 609.52485   | 1 |
| 242 | N | 74.89974 | 69.78510 | 80.93007 | 343.49288   | -644.25607  | 38.09164    | 1 |
| 243 | H | 75.42805 | 70.24679 | 80.19143 | -1691.16043 | -1535.97525 | -1484.73099 | 1 |
| 244 | C | 74.66016 | 70.34100 | 82.22534 | 542.66492   | 350.14337   | 454.42563   | 1 |
| 245 | H | 73.63448 | 69.97966 | 82.46658 | 1209.57979  | -2396.95920 | 463.86744   | 1 |
| 246 | C | 75.72807 | 69.69855 | 83.20940 | -737.14309  | 145.93010   | 242.71942   | 1 |
| 247 | H | 76.76557 | 69.87121 | 82.85227 | -1050.18303 | 159.36419   | -2509.06125 | 1 |
| 248 | C | 75.51199 | 70.31424 | 84.63340 | -706.77696  | -252.88343  | -245.16230  | 1 |
| 249 | H | 76.18606 | 69.84782 | 85.38962 | -1624.64039 | -1665.49085 | 1417.86935  | 1 |
| 250 | H | 75.71678 | 71.41028 | 84.63885 | 2566.10521  | 598.51109   | 693.22305   | 1 |
| 251 | H | 74.46419 | 70.16908 | 84.98710 | -1972.69758 | 107.10018   | -1876.34312 | 1 |
| 252 | C | 75.43350 | 68.15976 | 83.29697 | 412.85148   | 672.58832   | -27.69222   | 1 |
| 253 | H | 76.05076 | 67.66277 | 84.08226 | 1447.02277  | 1762.76533  | -1490.78944 | 1 |
| 254 | H | 74.35972 | 67.96150 | 83.53419 | 1320.77379  | -145.20455  | 2378.68491  | 1 |
| 255 | H | 75.64965 | 67.64841 | 82.32763 | -1512.10848 | 1470.52031  | 1724.75147  | 1 |
| 256 | C | 74.77489 | 71.96941 | 82.07462 | -607.11113  | 499.56689   | 73.73769    | 1 |
| 257 | O | 73.75729 | 72.61098 | 81.94580 | 357.97126   | 460.81534   | 356.68785   | 1 |
| 258 | N | 76.02868 | 72.40299 | 82.09357 | 536.55407   | -368.62270  | 332.76306   | 1 |
| 259 | H | 76.80186 | 71.74624 | 82.18840 | 524.38866   | 2297.69985  | 1367.20941  | 1 |
| 260 | C | 76.25709 | 73.79079 | 81.89508 | 46.50277    | -774.29190  | -147.97904  | 1 |
| 261 | H | 75.31243 | 74.17429 | 81.44496 | 1676.51875  | 1883.29066  | 1032.55549  | 1 |
| 262 | C | 76.58012 | 74.49077 | 83.32175 | -559.41456  | -34.19198   | -556.30433  | 1 |
| 263 | H | 77.44635 | 73.97583 | 83.80006 | -64.66664   | 395.18769   | 2695.05373  | 1 |
| 264 | H | 76.90220 | 75.54774 | 83.16869 | -2703.44278 | -60.40056   | 333.79418   | 1 |
| 265 | C | 75.37496 | 74.43270 | 84.21514 | -519.76435  | 377.31045   | 459.42366   | 1 |

|     |   |          |          |          |             |             |             |   |
|-----|---|----------|----------|----------|-------------|-------------|-------------|---|
| 266 | H | 75.05619 | 73.37037 | 84.31067 | -1746.74323 | 1667.50644  | -1261.73691 | 1 |
| 267 | C | 75.71874 | 74.96771 | 85.60075 | 570.95554   | 16.46261    | -545.27700  | 1 |
| 268 | H | 74.83820 | 74.92276 | 86.29185 | 2391.58273  | 28.05277    | -1305.07271 | 1 |
| 269 | H | 76.54633 | 74.38242 | 86.07771 | 175.75588   | 917.63458   | 2559.43867  | 1 |
| 270 | H | 76.05145 | 76.03663 | 85.55793 | -1063.97851 | -2155.34650 | 1283.00462  | 1 |
| 271 | C | 74.20939 | 75.22600 | 83.63868 | 193.76014   | 2.62946     | -765.53141  | 1 |
| 272 | H | 73.35521 | 75.28803 | 84.36101 | 507.39394   | -846.55087  | 2539.60089  | 1 |
| 273 | H | 74.50665 | 76.27574 | 83.38329 | 1337.57841  | 1818.19054  | 1526.01994  | 1 |
| 274 | H | 73.81215 | 74.74824 | 82.70305 | 1100.88635  | -1172.91350 | -2199.08909 | 1 |
| 275 | C | 77.56235 | 73.96490 | 80.98040 | -549.21115  | 475.64486   | -309.38218  | 1 |
| 276 | O | 78.27330 | 73.06469 | 80.62703 | 556.06106   | -390.37755  | -78.24250   | 1 |
| 277 | O | 77.88085 | 75.32379 | 80.64253 | -572.27940  | -310.19032  | -209.75862  | 1 |
| 278 | H | 77.07296 | 75.75121 | 81.03340 | -1380.08193 | 2212.14486  | 790.85944   | 1 |

Listing 52: C00052.xmolout

|    |   |          |          |          |             |             |             |        |          |
|----|---|----------|----------|----------|-------------|-------------|-------------|--------|----------|
| 1  |   | 276      |          |          |             |             |             |        |          |
| 2  |   | 150.0000 | 150.0000 | 150.0000 | 0.0000      | 0.0000      | 0.0000***** | 2.7750 | 11100    |
|    |   | 0.2500   | 300.00   | 0.00     | 0.00        | 0.00        | -1293.6794  | 0.0000 | 300.0000 |
| 3  | H | 77.25715 | 83.10635 | 78.88329 | -2043.14101 | -1757.64893 | 399.89339   | 1      |          |
| 4  | N | 78.26404 | 82.96360 | 78.86084 | 426.75047   | 490.45733   | -334.42467  | 1      |          |
| 5  | H | 78.35030 | 82.14461 | 78.26200 | 442.25559   | -1110.30854 | -2448.52907 | 1      |          |
| 6  | C | 79.03086 | 84.06656 | 78.41456 | 415.32972   | -666.39213  | 83.73172    | 1      |          |
| 7  | H | 78.52172 | 84.99785 | 78.75252 | 879.32219   | 2491.00447  | 667.35213   | 1      |          |
| 8  | C | 80.52273 | 83.88592 | 79.03341 | 31.35357    | 477.41777   | 628.23362   | 1      |          |
| 9  | H | 80.94988 | 82.92364 | 78.66483 | 1168.38489  | 2240.25337  | -1019.71136 | 1      |          |
| 10 | H | 81.20029 | 84.68814 | 78.65725 | -360.43770  | 2534.90498  | 931.67112   | 1      |          |
| 11 | C | 80.45509 | 83.89149 | 80.53269 | 463.18208   | 512.70242   | -382.34388  | 1      |          |
| 12 | H | 79.61299 | 83.23203 | 80.84458 | 1725.29117  | 1863.52247  | -987.07854  | 1      |          |
| 13 | C | 81.74710 | 83.33857 | 81.12372 | 710.42801   | -144.27427  | -313.15367  | 1      |          |
| 14 | H | 81.71478 | 83.31752 | 82.24333 | 364.20195   | -1033.13725 | 2494.72524  | 1      |          |
| 15 | H | 81.94542 | 82.29169 | 80.77692 | 2567.61904  | 335.80679   | 847.48802   | 1      |          |
| 16 | H | 82.63278 | 83.95812 | 80.82899 | -2587.99029 | 680.92867   | -512.16411  | 1      |          |
| 17 | C | 80.20877 | 85.29394 | 81.07400 | 268.17616   | 741.64379   | -40.42634   | 1      |          |
| 18 | H | 80.16592 | 85.30252 | 82.19363 | 1283.54314  | -1945.37420 | -1411.27812 | 1      |          |
| 19 | H | 81.02157 | 86.00204 | 80.76849 | -1258.57796 | 1317.15249  | -2026.02085 | 1      |          |
| 20 | H | 79.24136 | 85.71858 | 80.70188 | -2502.84526 | 909.80597   | 575.92391   | 1      |          |
| 21 | C | 79.16631 | 83.91840 | 76.83373 | 619.36578   | -458.64843  | -172.09273  | 1      |          |
| 22 | O | 79.23645 | 82.80007 | 76.20587 | -81.40433   | 433.87611   | 522.34594   | 1      |          |
| 23 | N | 79.30665 | 85.07515 | 76.25249 | 175.23996   | -622.20190  | 341.55523   | 1      |          |
| 24 | H | 79.21058 | 85.92549 | 76.80370 | -876.57256  | -303.22879  | -2561.90213 | 1      |          |
| 25 | C | 79.08958 | 85.00110 | 74.83449 | -571.88214  | -534.10783  | -106.15033  | 1      |          |
| 26 | H | 78.00090 | 85.17175 | 74.73045 | -2713.20841 | -16.25800   | -248.80809  | 1      |          |
| 27 | C | 79.93202 | 86.15489 | 74.17748 | 166.60354   | 288.16399   | -716.09568  | 1      |          |
| 28 | H | 81.00199 | 86.06071 | 74.51138 | -2097.85574 | 1636.78449  | -586.18044  | 1      |          |
| 29 | O | 79.53490 | 87.50500 | 74.52770 | -317.80580  | -363.38227  | 484.43082   | 1      |          |
| 30 | H | 80.34975 | 87.84873 | 74.93614 | 1863.74748  | -1451.84923 | 1357.29467  | 1      |          |
| 31 | C | 79.82018 | 85.75882 | 72.65650 | 503.80731   | 517.99032   | 318.51606   | 1      |          |
| 32 | H | 80.44164 | 86.42425 | 72.01339 | 640.61020   | -2157.10410 | -1536.29104 | 1      |          |
| 33 | H | 80.16405 | 84.70785 | 72.48345 | 1687.88455  | 465.60692   | 2087.56452  | 1      |          |
| 34 | H | 78.77034 | 85.83028 | 72.28857 | -1293.07895 | -1899.88581 | -1463.57452 | 1      |          |
| 35 | C | 79.59178 | 83.44634 | 74.38047 | -153.07550  | -733.68902  | 248.70981   | 1      |          |
| 36 | O | 80.79547 | 83.27002 | 74.14622 | 186.15459   | -480.78787  | -449.34387  | 1      |          |
| 37 | N | 78.59008 | 82.87855 | 73.60650 | -487.53139  | 543.18517   | 42.03850    | 1      |          |
| 38 | C | 78.78882 | 81.62308 | 73.00367 | -699.35871  | 69.34393    | 360.10701   | 1      |          |
| 39 | H | 79.65606 | 81.13232 | 73.50613 | 2.81126     | -221.99807  | -2715.58072 | 1      |          |
| 40 | C | 77.35328 | 80.93123 | 73.18518 | -507.46439  | -592.59194  | 122.07761   | 1      |          |
| 41 | H | 77.19119 | 80.07962 | 72.48793 | -1975.08116 | 525.87560   | -1801.71556 | 1      |          |
| 42 | H | 77.21227 | 80.53803 | 74.21616 | 1588.27743  | -1913.22100 | 1113.83566  | 1      |          |
| 43 | C | 76.42898 | 82.14712 | 72.90237 | -613.62442  | -457.55993  | -194.14490  | 1      |          |
| 44 | H | 76.38379 | 82.36255 | 71.80859 | 1707.54637  | -721.27992  | 1996.92523  | 1      |          |
| 45 | H | 75.38210 | 82.00836 | 73.25271 | 758.23357   | 2100.81767  | 1560.55011  | 1      |          |



|     |   |          |          |          |             |             |             |   |
|-----|---|----------|----------|----------|-------------|-------------|-------------|---|
| 46  | C | 77.21225 | 83.30678 | 73.67925 | -352.41524  | 704.96076   | 49.21465    | 1 |
| 47  | H | 77.13528 | 84.31620 | 73.20710 | 1714.76886  | -2070.42778 | 443.35792   | 1 |
| 48  | H | 76.97476 | 83.38764 | 74.76831 | 1224.15040  | 1801.50881  | 1636.97633  | 1 |
| 49  | C | 78.99928 | 81.83040 | 71.37130 | 566.85117   | 537.05831   | 117.62814   | 1 |
| 50  | O | 78.38628 | 82.66091 | 70.74746 | -550.26779  | -406.08867  | 4.21666     | 1 |
| 51  | N | 79.80821 | 80.87878 | 70.93534 | 566.34832   | -425.77725  | 180.18749   | 1 |
| 52  | H | 80.22989 | 80.25240 | 71.61914 | 644.44502   | 2646.80550  | -52.73430   | 1 |
| 53  | C | 80.12056 | 80.84140 | 69.54439 | 612.34801   | -281.48662  | 411.56221   | 1 |
| 54  | H | 80.11508 | 81.90524 | 69.21483 | 1667.23498  | -1490.75142 | 1556.16753  | 1 |
| 55  | C | 81.52882 | 80.10172 | 69.41588 | -714.45746  | -175.43074  | 286.98927   | 1 |
| 56  | H | 81.43279 | 79.07384 | 69.86170 | -787.09484  | 1763.03619  | -1922.46060 | 1 |
| 57  | O | 82.61955 | 80.73918 | 70.11022 | -429.46514  | 516.51932   | -128.40526  | 1 |
| 58  | H | 82.85532 | 80.05548 | 70.76643 | 1981.82785  | 436.16847   | -1818.18182 | 1 |
| 59  | C | 81.70953 | 79.96854 | 67.85991 | 630.79189   | -468.94448  | 76.03230    | 1 |
| 60  | H | 82.63984 | 79.40900 | 67.60601 | -1775.71861 | 2062.30353  | 131.89849   | 1 |
| 61  | H | 80.85704 | 79.42593 | 67.38562 | -1855.14608 | 88.94118    | 1993.53760  | 1 |
| 62  | H | 81.77957 | 80.96818 | 67.37136 | -1504.82350 | -780.94249  | -2132.90992 | 1 |
| 63  | C | 78.94952 | 79.98761 | 68.78259 | 288.57638   | 618.62814   | -397.00270  | 1 |
| 64  | O | 78.71566 | 80.19113 | 67.61350 | 321.70495   | -185.26452  | 574.37218   | 1 |
| 65  | N | 78.40956 | 79.07123 | 69.58530 | -447.05792  | -446.53431  | 367.76425   | 1 |
| 66  | H | 78.80893 | 78.99398 | 70.51896 | 350.31316   | 1975.63644  | -1843.31522 | 1 |
| 67  | C | 77.68916 | 78.00005 | 68.95732 | -511.23061  | 374.03917   | -471.51480  | 1 |
| 68  | H | 76.92895 | 78.53436 | 68.34478 | 2234.79579  | -898.70890  | -1273.45190 | 1 |
| 69  | C | 78.72883 | 77.17623 | 68.07429 | 529.53781   | -159.34528  | 563.72604   | 1 |
| 70  | H | 78.12057 | 76.48124 | 67.43396 | 654.59388   | 2347.94251  | 1217.51488  | 1 |
| 71  | H | 79.24335 | 77.87088 | 67.35929 | -1526.55661 | 2103.42026  | 817.87394   | 1 |
| 72  | O | 79.69023 | 76.41416 | 68.82388 | -554.84278  | 14.12789    | 399.58769   | 1 |
| 73  | H | 79.05759 | 76.02240 | 69.53468 | 1297.06236  | 2061.84854  | 1220.68812  | 1 |
| 74  | C | 77.10498 | 77.04516 | 70.13037 | -662.15484  | -412.13544  | 123.62687   | 1 |
| 75  | O | 77.68101 | 76.00179 | 70.44839 | -540.01537  | -317.05804  | 274.91456   | 1 |
| 76  | N | 76.01920 | 77.57553 | 70.64371 | -202.76299  | -690.00100  | -131.49145  | 1 |
| 77  | H | 75.69751 | 78.47712 | 70.29275 | -702.62132  | -2617.37191 | 281.70413   | 1 |
| 78  | C | 75.35753 | 76.86429 | 71.68437 | -491.73914  | 576.34187   | 222.73509   | 1 |
| 79  | H | 75.66626 | 75.80784 | 71.50702 | 1977.17978  | -1823.58850 | -434.68928  | 1 |
| 80  | C | 75.91786 | 77.40574 | 73.07329 | -649.50797  | -328.66843  | 306.11224   | 1 |
| 81  | H | 75.72367 | 78.49029 | 73.21378 | 2075.07803  | 1452.16490  | -1004.45904 | 1 |
| 82  | C | 75.19231 | 76.56443 | 74.17546 | -615.18735  | -489.99689  | -70.96352   | 1 |
| 83  | H | 75.68817 | 76.66702 | 75.17473 | -1226.32661 | -1724.38906 | -1716.47170 | 1 |
| 84  | H | 74.12255 | 76.88415 | 74.28963 | 2381.64273  | -969.84735  | 900.46860   | 1 |
| 85  | H | 75.18902 | 75.47867 | 73.91960 | 2122.74991  | 1702.23946  | -141.36228  | 1 |
| 86  | C | 77.45760 | 77.12224 | 73.13000 | -501.86074  | -479.61276  | -376.42482  | 1 |
| 87  | H | 77.85722 | 77.18706 | 74.16911 | 993.79261   | -2246.95401 | -1177.81305 | 1 |
| 88  | H | 77.69791 | 76.10575 | 72.73052 | 42.71279    | -626.15391  | -2651.37258 | 1 |
| 89  | H | 78.02522 | 77.85162 | 72.50595 | -2026.39012 | -1590.33709 | -887.82922  | 1 |
| 90  | C | 73.74464 | 77.13853 | 71.52088 | -672.89153  | 382.57394   | -156.34072  | 1 |
| 91  | O | 73.04654 | 76.24041 | 71.11029 | 410.04627   | 221.86223   | 500.35950   | 1 |
| 92  | N | 73.41581 | 78.39765 | 71.78244 | -378.11782  | -443.79414  | -441.10984  | 1 |
| 93  | H | 74.15841 | 79.00788 | 72.11889 | 2404.15973  | -568.14894  | 1149.30085  | 1 |
| 94  | C | 72.03472 | 78.73385 | 71.97486 | -544.54484  | 466.16019   | 331.29119   | 1 |
| 95  | H | 72.08644 | 79.84540 | 71.99236 | -1409.80988 | -170.17955  | 2325.32679  | 1 |
| 96  | C | 71.32007 | 78.17346 | 70.66932 | -184.48284  | 116.78282   | -758.89137  | 1 |
| 97  | H | 72.09477 | 77.86758 | 69.92767 | 1893.78641  | 1861.14652  | 611.04528   | 1 |
| 98  | H | 70.72869 | 77.25407 | 70.89124 | -2170.79665 | -974.19311  | 1327.50117  | 1 |
| 99  | C | 70.43710 | 79.29344 | 70.03497 | 389.51668   | 672.81878   | -138.49152  | 1 |
| 100 | H | 69.55824 | 79.52951 | 70.67143 | 510.64577   | 1933.03327  | 1851.02484  | 1 |
| 101 | H | 71.00373 | 80.24986 | 70.00113 | -2302.30869 | -1105.72939 | -948.89774  | 1 |
| 102 | C | 69.94545 | 78.94130 | 68.58072 | -559.93427  | -126.34590  | 542.30857   | 1 |
| 103 | O | 69.26089 | 79.73102 | 67.98244 | -670.36003  | -111.83166  | 76.36448    | 1 |
| 104 | N | 70.36861 | 77.74361 | 68.12133 | -216.06729  | -537.07037  | 446.51379   | 1 |
| 105 | H | 70.92724 | 77.01714 | 68.58451 | -1251.96487 | 1074.12894  | -2168.52500 | 1 |
| 106 | H | 70.13382 | 77.37328 | 67.19374 | -2451.83023 | -720.73851  | 944.84612   | 1 |
| 107 | C | 71.63211 | 78.16959 | 73.43640 | 546.24052   | -563.88337  | -85.11809   | 1 |

|     |   |          |          |          |             |             |             |   |
|-----|---|----------|----------|----------|-------------|-------------|-------------|---|
| 108 | O | 72.46909 | 78.24237 | 74.30538 | 71.70702    | -307.40463  | 606.69673   | 1 |
| 109 | N | 70.34028 | 77.83075 | 73.58595 | 479.90863   | -504.50129  | 222.86849   | 1 |
| 110 | C | 69.90549 | 77.34125 | 74.85760 | 75.51268    | -600.91904  | 506.73700   | 1 |
| 111 | H | 70.68623 | 77.63309 | 75.59987 | -2033.61562 | 1795.30103  | 254.89480   | 1 |
| 112 | C | 68.49297 | 78.06006 | 74.99772 | 523.79067   | 517.99274   | 284.45581   | 1 |
| 113 | H | 67.83188 | 77.57139 | 75.74762 | 1599.61665  | -1127.00911 | 1895.98173  | 1 |
| 114 | H | 68.60099 | 79.12280 | 75.30875 | -1881.83093 | 1275.82488  | -1501.55016 | 1 |
| 115 | C | 67.95741 | 77.94680 | 73.53807 | -600.05639  | -404.05026  | 316.64485   | 1 |
| 116 | H | 67.61707 | 76.90763 | 73.31792 | -2597.05260 | 496.36221   | 657.73249   | 1 |
| 117 | H | 67.09994 | 78.62224 | 73.31724 | -1666.24518 | 1294.38985  | -1723.90591 | 1 |
| 118 | C | 69.26901 | 78.30456 | 72.71720 | 493.57570   | -129.95376  | -602.56394  | 1 |
| 119 | H | 69.35569 | 77.77489 | 71.73923 | -1469.08415 | -637.84797  | 2204.22581  | 1 |
| 120 | H | 69.45436 | 79.39542 | 72.57716 | -1038.97840 | 1068.88701  | -2280.71789 | 1 |
| 121 | C | 69.58524 | 75.73394 | 74.82130 | 188.88100   | 241.05089   | -727.87821  | 1 |
| 122 | O | 69.00787 | 75.19290 | 73.91080 | 531.88613   | -49.19943   | 427.07960   | 1 |
| 123 | N | 69.82375 | 75.20601 | 76.06513 | 708.14833   | 26.93417    | -179.73509  | 1 |
| 124 | H | 70.36058 | 75.95184 | 76.51994 | -2232.69501 | -1179.09831 | 1023.94816  | 1 |
| 125 | C | 70.34204 | 73.81792 | 76.15543 | -738.32412  | 259.92548   | 104.42456   | 1 |
| 126 | H | 70.56861 | 73.79716 | 77.24494 | 2028.89123  | 1260.02983  | 1311.33324  | 1 |
| 127 | C | 69.28568 | 72.81905 | 75.75435 | -258.65678  | -345.52513  | 661.28459   | 1 |
| 128 | H | 69.30133 | 72.76060 | 74.64085 | -1826.06090 | -1801.46097 | -918.64554  | 1 |
| 129 | C | 69.54063 | 71.42961 | 76.31407 | -541.23400  | 531.92970   | -218.41428  | 1 |
| 130 | H | 69.03733 | 70.63585 | 75.69844 | 1311.73218  | -2219.18200 | 882.19023   | 1 |
| 131 | H | 70.63776 | 71.17857 | 76.35271 | -1048.71298 | 1223.58118  | -2196.97971 | 1 |
| 132 | H | 69.14720 | 71.30951 | 77.36249 | 419.06414   | 1903.92898  | 1903.44670  | 1 |
| 133 | C | 67.88750 | 73.26354 | 76.15467 | -423.86431  | 152.66566   | -648.55262  | 1 |
| 134 | H | 67.10295 | 72.53255 | 75.81972 | 105.68386   | -2342.50080 | 1387.51238  | 1 |
| 135 | H | 67.79046 | 73.37346 | 77.26805 | -1695.63603 | -1484.73621 | -1531.02793 | 1 |
| 136 | H | 67.63980 | 74.26091 | 75.69708 | -1853.57121 | -487.39031  | 1936.59343  | 1 |
| 137 | C | 71.72897 | 73.82390 | 75.26960 | 539.71428   | -510.58232  | 267.58633   | 1 |
| 138 | O | 72.45075 | 74.80743 | 75.30926 | -15.93758   | -278.34085  | -624.49402  | 1 |
| 139 | N | 71.96002 | 72.66520 | 74.70720 | -676.81886  | 12.05292    | 276.17960   | 1 |
| 140 | H | 71.22285 | 71.97396 | 74.79859 | -1694.44250 | -373.84189  | -2100.66098 | 1 |
| 141 | C | 73.07130 | 72.38768 | 73.83903 | 412.33078   | -664.70360  | 108.35451   | 1 |
| 142 | H | 72.60699 | 72.33503 | 72.82975 | 1765.77476  | 1294.44366  | 1621.76594  | 1 |
| 143 | C | 74.17952 | 73.49644 | 73.95868 | -179.66635  | -721.95667  | -264.73915  | 1 |
| 144 | H | 73.80132 | 74.47434 | 73.57023 | -607.34922  | 2587.87032  | -598.10018  | 1 |
| 145 | H | 74.41681 | 73.67192 | 75.03276 | -359.69332  | -1479.13954 | -2259.74260 | 1 |
| 146 | C | 75.44407 | 73.02419 | 73.16023 | -240.01076  | 616.02425   | 431.85322   | 1 |
| 147 | H | 75.48763 | 71.91294 | 73.11204 | -1359.17131 | 782.54425   | 2227.99181  | 1 |
| 148 | H | 75.40467 | 73.37574 | 72.10504 | -820.36667  | 85.81767    | -2596.78715 | 1 |
| 149 | C | 76.72026 | 73.58039 | 73.90806 | -513.07015  | 236.18570   | -551.87280  | 1 |
| 150 | H | 76.67566 | 74.68893 | 74.01823 | 1816.11944  | -1183.11722 | -1650.94321 | 1 |
| 151 | H | 76.77617 | 73.17605 | 74.94535 | -1800.04429 | -1361.53473 | 1526.34643  | 1 |
| 152 | C | 77.96231 | 73.16729 | 73.08407 | 726.08972   | -253.19732  | -179.64713  | 1 |
| 153 | H | 78.11916 | 72.07299 | 73.00190 | 1224.27271  | -456.51798  | -2390.90304 | 1 |
| 154 | H | 78.03004 | 73.63822 | 72.08224 | 1206.40339  | -1150.93514 | -2154.90344 | 1 |
| 155 | N | 79.21945 | 73.69378 | 73.85298 | 329.70796   | -633.68968  | -155.67358  | 1 |
| 156 | H | 80.15223 | 73.46829 | 73.40143 | 1348.31305  | 1938.76845  | 1359.00643  | 1 |
| 157 | H | 79.30164 | 74.74394 | 73.98398 | 2096.92035  | 1446.54551  | -966.48890  | 1 |
| 158 | H | 79.37171 | 73.33299 | 74.83991 | -1197.07217 | -2303.53719 | 827.28733   | 1 |
| 159 | C | 73.62785 | 70.92650 | 74.33803 | -378.01186  | -556.17301  | -413.96481  | 1 |
| 160 | O | 74.28813 | 70.75602 | 75.36643 | -409.44433  | -307.55053  | -453.30833  | 1 |
| 161 | N | 73.22270 | 70.08964 | 73.42334 | -429.02477  | 524.70884   | 274.08502   | 1 |
| 162 | H | 72.67242 | 70.50791 | 72.67339 | 1706.34263  | -1425.96036 | 1574.38926  | 1 |
| 163 | C | 73.35279 | 68.67491 | 73.45650 | -45.25864   | -626.22952  | 478.93267   | 1 |
| 164 | H | 72.50642 | 68.36269 | 72.80513 | 1988.63164  | 570.90773   | 1772.87287  | 1 |
| 165 | C | 74.73555 | 68.31055 | 72.77727 | 551.77128   | -20.49526   | -564.54996  | 1 |
| 166 | H | 74.83620 | 68.81915 | 71.79263 | 1434.61535  | -1753.10253 | 1513.99471  | 1 |
| 167 | H | 75.59235 | 68.67794 | 73.38274 | -714.67738  | 1819.09770  | 1898.36494  | 1 |
| 168 | C | 74.77070 | 66.75447 | 72.60963 | 446.99263   | -555.77305  | 338.97221   | 1 |
| 169 | H | 74.68324 | 66.24737 | 73.59804 | 1953.68466  | 1892.25957  | -161.67766  | 1 |

|     |   |          |          |          |             |             |             |   |
|-----|---|----------|----------|----------|-------------|-------------|-------------|---|
| 170 | H | 73.90053 | 66.39990 | 72.01348 | -403.03785  | 2688.07032  | -188.43591  | 1 |
| 171 | C | 76.12783 | 66.37041 | 71.89474 | 567.86262   | 335.74681   | 434.04421   | 1 |
| 172 | H | 76.16656 | 66.79178 | 70.86394 | -1080.02275 | 1568.26081  | -1948.78900 | 1 |
| 173 | H | 76.99616 | 66.81185 | 72.43229 | -919.54108  | 2111.34692  | 1456.13463  | 1 |
| 174 | C | 76.23059 | 64.82763 | 71.86437 | 195.81897   | 173.33862   | -745.11536  | 1 |
| 175 | H | 76.31883 | 64.35147 | 72.86114 | 1405.67949  | -2301.21089 | -390.08113  | 1 |
| 176 | H | 75.43947 | 64.32385 | 71.27394 | -940.37328  | -1118.32446 | 2299.72133  | 1 |
| 177 | N | 77.56439 | 64.45605 | 71.13191 | 319.26422   | 656.36007   | -42.02424   | 1 |
| 178 | H | 77.76578 | 63.41785 | 71.04904 | 1961.03633  | 619.91968   | 1787.09422  | 1 |
| 179 | H | 77.66334 | 64.76642 | 70.12159 | 854.14343   | -2156.80752 | 1429.08711  | 1 |
| 180 | H | 78.46921 | 64.80900 | 71.56032 | 1237.02905  | -1378.50857 | -1998.28500 | 1 |
| 181 | C | 73.16211 | 68.15289 | 75.00195 | 532.53319   | -268.57236  | 517.55729   | 1 |
| 182 | O | 72.07977 | 68.21150 | 75.53703 | 266.16714   | -290.73804  | -558.88002  | 1 |
| 183 | N | 74.30857 | 67.69709 | 75.48591 | -226.25352  | 640.49678   | -270.32839  | 1 |
| 184 | H | 75.15462 | 67.74431 | 74.92136 | 2007.69063  | -1035.27229 | 1523.50231  | 1 |
| 185 | C | 74.32818 | 67.10910 | 76.77934 | -540.76542  | -573.33303  | 49.50000    | 1 |
| 186 | H | 73.27143 | 67.20225 | 77.12866 | -2374.20950 | -1036.76023 | 843.75774   | 1 |
| 187 | C | 74.80328 | 65.58162 | 76.59901 | -77.09082   | 666.87422   | -415.84136  | 1 |
| 188 | H | 75.91300 | 65.56845 | 76.41877 | -985.81834  | 617.19825   | 2463.91927  | 1 |
| 189 | O | 74.21139 | 64.86396 | 75.50620 | 293.29899   | -391.65602  | -477.80926  | 1 |
| 190 | H | 75.01003 | 64.58198 | 75.01345 | 2528.72714  | -681.76262  | -751.27122  | 1 |
| 191 | C | 74.50473 | 64.99530 | 78.02609 | 252.47363   | -605.14473  | 440.05134   | 1 |
| 192 | H | 74.79495 | 63.92089 | 78.09259 | -2052.65063 | 1456.49051  | -1043.51830 | 1 |
| 193 | H | 75.07051 | 65.54472 | 78.82472 | -2152.98800 | -1661.97574 | -161.70652  | 1 |
| 194 | H | 73.41966 | 65.05934 | 78.27586 | -473.12726  | -1584.27339 | 2165.61725  | 1 |
| 195 | C | 75.40680 | 67.94361 | 77.66441 | 360.36307   | 488.46713   | 505.10056   | 1 |
| 196 | O | 75.95744 | 67.39519 | 78.59826 | -200.08817  | -528.03552  | -385.82850  | 1 |
| 197 | N | 75.49659 | 69.22005 | 77.30362 | -597.54095  | -226.44775  | 355.20479   | 1 |
| 198 | H | 74.97735 | 69.60935 | 76.47579 | 2179.23655  | -1300.70981 | -991.33835  | 1 |
| 199 | C | 76.51506 | 69.95627 | 77.96721 | -687.68921  | 297.39807   | -249.45179  | 1 |
| 200 | H | 76.97342 | 69.24027 | 78.69543 | -349.16256  | -2467.37713 | -1101.72831 | 1 |
| 201 | C | 77.54631 | 70.50229 | 76.85980 | 672.47345   | 361.54328   | -201.62880  | 1 |
| 202 | H | 77.00755 | 71.01823 | 76.03264 | 1541.41502  | 582.18425   | 2169.97026  | 1 |
| 203 | H | 78.23902 | 71.24288 | 77.32115 | -2534.67717 | 60.25153    | 997.72295   | 1 |
| 204 | C | 78.31445 | 69.27822 | 76.35020 | 574.26774   | -389.43119  | -377.02542  | 1 |
| 205 | C | 79.28652 | 68.66394 | 77.19769 | 688.82679   | -287.33580  | -257.96133  | 1 |
| 206 | H | 79.51881 | 69.08810 | 78.19154 | 331.14182   | 1470.38163  | 2269.80013  | 1 |
| 207 | C | 78.00974 | 68.72241 | 75.07105 | -383.52382  | -675.04808  | 144.24917   | 1 |
| 208 | H | 77.25732 | 69.19851 | 74.41787 | 4.09847     | 1517.59662  | 2262.86397  | 1 |
| 209 | C | 79.92159 | 67.50610 | 76.75255 | -134.76730  | 428.45285   | -649.50303  | 1 |
| 210 | H | 80.66740 | 67.02569 | 77.41009 | -903.23433  | 1600.49020  | 2011.53387  | 1 |
| 211 | C | 78.67700 | 67.56294 | 74.67032 | -335.53281  | -615.00040  | -364.39058  | 1 |
| 212 | H | 78.44135 | 67.13791 | 73.68041 | 1596.45398  | -1369.33862 | 1732.02659  | 1 |
| 213 | C | 79.64652 | 66.91112 | 75.48671 | 585.48547   | -340.24194  | -406.23938  | 1 |
| 214 | O | 80.32094 | 65.72908 | 75.08521 | -419.15649  | -173.04408  | -511.94141  | 1 |
| 215 | H | 79.91608 | 65.60172 | 74.19446 | -1071.84350 | 1559.71507  | -1960.13012 | 1 |
| 216 | C | 75.89225 | 71.28227 | 78.68442 | 291.41878   | -183.13091  | 710.72246   | 1 |
| 217 | O | 76.38600 | 71.66885 | 79.72047 | 379.87695   | 523.47396   | -222.23622  | 1 |
| 218 | N | 74.93235 | 71.86498 | 77.97166 | 564.30591   | 373.09380   | 277.24371   | 1 |
| 219 | H | 74.59785 | 71.47694 | 77.06944 | -120.59931  | -2436.07824 | -1214.35098 | 1 |
| 220 | C | 74.29685 | 72.96623 | 78.62720 | 404.07514   | -299.37480  | 608.84009   | 1 |
| 221 | H | 74.83960 | 73.12175 | 79.59370 | -1071.07882 | -841.69025  | 2359.66467  | 1 |
| 222 | C | 74.41799 | 74.17061 | 77.59954 | -683.12807  | 68.71770    | -390.13096  | 1 |
| 223 | H | 75.45816 | 74.24432 | 77.20876 | 2068.88918  | 1596.58590  | 770.89603   | 1 |
| 224 | H | 73.77405 | 73.95649 | 76.71277 | 1379.86429  | 2342.49779  | -179.85638  | 1 |
| 225 | C | 73.98656 | 75.50930 | 78.26797 | -176.39967  | 537.49466   | 550.97268   | 1 |
| 226 | H | 72.96939 | 75.43072 | 78.71161 | -396.28051  | 1942.22168  | 1869.33314  | 1 |
| 227 | H | 74.66402 | 75.79128 | 79.10417 | -94.44700   | 586.00678   | -2659.20016 | 1 |
| 228 | C | 74.03286 | 76.58605 | 77.08137 | -291.69381  | -718.18079  | -150.72929  | 1 |
| 229 | H | 75.04622 | 76.77045 | 76.63463 | -2303.38776 | 1089.76242  | 964.62032   | 1 |
| 230 | H | 73.29444 | 76.33585 | 76.25789 | 884.16729   | 2568.80533  | -207.74283  | 1 |
| 231 | N | 73.58801 | 77.75546 | 77.69812 | -594.49522  | -252.81478  | 342.29276   | 1 |

|     |   |          |          |          |             |             |             |   |
|-----|---|----------|----------|----------|-------------|-------------|-------------|---|
| 232 | H | 72.83529 | 77.64045 | 78.36085 | -1735.17426 | 2084.05705  | -263.71605  | 1 |
| 233 | C | 74.01365 | 78.93281 | 77.46521 | 595.23177   | -271.52487  | 442.22352   | 1 |
| 234 | N | 75.03809 | 79.12443 | 76.53356 | 585.53813   | -424.79750  | -105.81303  | 1 |
| 235 | H | 75.49041 | 78.45267 | 75.91685 | 959.88797   | 1327.56823  | -2177.11905 | 1 |
| 236 | H | 75.41033 | 80.03263 | 76.25373 | 1578.48647  | 16.27378    | -2220.76233 | 1 |
| 237 | N | 73.31987 | 79.86289 | 78.24938 | -452.17763  | -390.33541  | -421.51853  | 1 |
| 238 | H | 72.56955 | 79.74117 | 78.92791 | 470.26107   | 1974.25629  | -1817.92087 | 1 |
| 239 | H | 73.50105 | 80.86664 | 78.21020 | 1856.67307  | -1573.97321 | -1224.35416 | 1 |
| 240 | C | 72.71367 | 72.58733 | 78.77642 | -531.47271  | -581.45780  | -55.06206   | 1 |
| 241 | O | 72.06955 | 72.18305 | 77.80914 | -243.00837  | 192.73507   | 609.52485   | 1 |
| 242 | N | 72.29173 | 72.85902 | 79.98879 | 343.49288   | -644.25607  | 38.09164    | 1 |
| 243 | H | 73.02704 | 73.19638 | 80.61100 | -1691.16043 | -1535.97525 | -1484.73099 | 1 |
| 244 | C | 71.02373 | 72.41751 | 80.54307 | 542.66492   | 350.14337   | 454.42563   | 1 |
| 245 | H | 70.98265 | 72.90171 | 81.54801 | 1209.57979  | -2396.95920 | 463.86744   | 1 |
| 246 | C | 69.88595 | 72.82841 | 79.61819 | -737.14309  | 145.93010   | 242.71942   | 1 |
| 247 | H | 70.14407 | 72.45743 | 78.59598 | -1050.18303 | 159.36419   | -2509.06125 | 1 |
| 248 | C | 68.57194 | 72.19693 | 80.03531 | -706.77696  | -252.88343  | -245.16230  | 1 |
| 249 | H | 67.73477 | 72.46930 | 79.33521 | -1624.64039 | -1665.49085 | 1417.86935  | 1 |
| 250 | H | 68.63993 | 71.07080 | 80.04921 | 2566.10521  | 598.51109   | 693.22305   | 1 |
| 251 | H | 68.26366 | 72.52257 | 81.06736 | -1972.69758 | 107.10018   | -1876.34312 | 1 |
| 252 | C | 69.73917 | 74.33589 | 79.53503 | 412.85148   | 672.58832   | -27.69222   | 1 |
| 253 | H | 68.97229 | 74.63953 | 78.76960 | 1447.02277  | 1762.76533  | -1490.78944 | 1 |
| 254 | H | 69.41994 | 74.77533 | 80.52007 | 1320.77379  | -145.20455  | 2378.68491  | 1 |
| 255 | H | 70.71000 | 74.82726 | 79.24976 | -1512.10848 | 1470.52031  | 1724.75147  | 1 |
| 256 | C | 71.04104 | 70.74923 | 80.67798 | -607.11113  | 499.56689   | 73.73769    | 1 |
| 257 | O | 70.79403 | 70.27401 | 81.75406 | 357.97126   | 460.81534   | 356.68785   | 1 |
| 258 | N | 71.34482 | 70.17146 | 79.53685 | 536.55407   | -368.62270  | 332.76306   | 1 |
| 259 | H | 71.50709 | 70.76779 | 78.69738 | 524.38866   | 2297.69985  | 1367.20941  | 1 |
| 260 | C | 71.23183 | 68.76800 | 79.34721 | 46.50277    | -774.29190  | -147.97904  | 1 |
| 261 | H | 71.91664 | 68.58614 | 78.48891 | 1676.51875  | 1883.29066  | 1032.55549  | 1 |
| 262 | C | 71.64522 | 67.95373 | 80.67654 | -559.41456  | -34.19198   | -556.30433  | 1 |
| 263 | H | 70.84040 | 68.08628 | 81.44335 | -64.66664   | 395.18769   | 2695.05373  | 1 |
| 264 | H | 71.69432 | 66.85735 | 80.47173 | -2703.44278 | -60.40056   | 333.79418   | 1 |
| 265 | C | 72.95464 | 68.45560 | 81.22235 | -519.76435  | 377.31045   | 459.42366   | 1 |
| 266 | H | 72.91026 | 69.56947 | 81.25683 | -1746.74323 | 1667.50644  | -1261.73691 | 1 |
| 267 | C | 73.17482 | 67.94679 | 82.64153 | 570.95554   | 16.46261    | -545.27700  | 1 |
| 268 | H | 74.14568 | 68.31266 | 83.06548 | 2391.58273  | 28.05277    | -1305.07271 | 1 |
| 269 | H | 72.36078 | 68.29151 | 83.33084 | 175.75588   | 917.63458   | 2559.43867  | 1 |
| 270 | H | 73.19560 | 66.82732 | 82.68242 | -1063.97851 | -2155.34650 | 1283.00462  | 1 |
| 271 | C | 74.13216 | 68.04088 | 80.34834 | 193.76014   | 2.62946     | -765.53141  | 1 |
| 272 | H | 75.10945 | 68.40420 | 80.76245 | 507.39394   | -846.55087  | 2539.60089  | 1 |
| 273 | H | 74.21205 | 66.92629 | 80.25593 | 1337.57841  | 1818.19054  | 1526.01994  | 1 |
| 274 | H | 74.05476 | 68.45068 | 79.30430 | 1100.88635  | -1172.91350 | -2199.08909 | 1 |
| 275 | C | 69.70718 | 68.49469 | 78.92506 | -549.21115  | 475.64486   | -309.38218  | 1 |
| 276 | O | 68.95015 | 69.36025 | 78.56378 | 556.06106   | -390.37755  | -78.24250   | 1 |
| 277 | O | 69.29789 | 67.13848 | 78.90698 | -572.27940  | -310.19032  | -209.75862  | 1 |
| 278 | H | 70.17100 | 66.71169 | 79.12145 | -1380.08193 | 2212.14486  | 790.85944   | 1 |

Listing 53: C00053.xmolout

|    |   |          |          |          |             |             |             |        |          |
|----|---|----------|----------|----------|-------------|-------------|-------------|--------|----------|
| 1  |   | 276      |          |          |             |             |             |        |          |
| 2  |   | 150.0000 | 150.0000 | 150.0000 | 0.0000      | 0.0000      | 0.0000***** | 1.4410 | 5764     |
|    |   | 0.2500   | 300.00   | 0.00     | 0.00        | 0.00        | -1293.6730  | 0.0000 | 300.0000 |
| 3  | H | 80.89357 | 79.22160 | 85.63356 | -2043.14101 | -1757.64893 | 399.89339   |        | 1        |
| 4  | N | 81.43146 | 79.31452 | 84.77479 | 426.75047   | 490.45733   | -334.42467  |        | 1        |
| 5  | H | 80.71450 | 79.60539 | 84.11376 | 442.25559   | -1110.30854 | -2448.52907 |        | 1        |
| 6  | C | 82.53701 | 80.19070 | 84.86681 | 415.32972   | -666.39213  | 83.73172    |        | 1        |
| 7  | H | 82.93187 | 80.03662 | 85.89339 | 879.32219   | 2491.00447  | 667.35213   |        | 1        |
| 8  | C | 83.58697 | 79.77982 | 83.71308 | 31.35357    | 477.41777   | 628.23362   |        | 1        |
| 9  | H | 83.07093 | 79.73479 | 82.72427 | 1168.38489  | 2240.25337  | -1019.71136 |        | 1        |
| 10 | H | 84.38357 | 80.55599 | 83.61411 | -360.43770  | 2534.90498  | 931.67112   |        | 1        |
| 11 | C | 84.18105 | 78.43766 | 84.05211 | 463.18208   | 512.70242   | -382.34388  |        | 1        |

|    |   |          |          |          |             |             |             |   |
|----|---|----------|----------|----------|-------------|-------------|-------------|---|
| 12 | H | 83.35283 | 77.75753 | 84.35494 | 1725.29117  | 1863.52247  | -987.07854  | 1 |
| 13 | C | 84.87359 | 77.84177 | 82.83267 | 710.42801   | -144.27427  | -313.15367  | 1 |
| 14 | H | 85.31309 | 76.83556 | 83.05647 | 364.20195   | -1033.13725 | 2494.72524  | 1 |
| 15 | H | 84.16330 | 77.71110 | 81.97569 | 2567.61904  | 335.80679   | 847.48802   | 1 |
| 16 | H | 85.70960 | 78.49585 | 82.47355 | -2587.99029 | 680.92867   | -512.16411  | 1 |
| 17 | C | 85.17651 | 78.54373 | 85.19929 | 268.17616   | 741.64379   | -40.42634   | 1 |
| 18 | H | 85.63507 | 77.55024 | 85.44142 | 1283.54314  | -1945.37420 | -1411.27812 | 1 |
| 19 | H | 86.01575 | 79.24412 | 84.95213 | -1258.57796 | 1317.15249  | -2026.02085 | 1 |
| 20 | H | 84.69451 | 78.92306 | 86.13669 | -2502.84526 | 909.80597   | 575.92391   | 1 |
| 21 | C | 81.97767 | 81.69878 | 84.64661 | 619.36578   | -458.64843  | -172.09273  | 1 |
| 22 | O | 81.89481 | 82.47794 | 85.59268 | -81.40433   | 433.87611   | 522.34594   | 1 |
| 23 | N | 81.65100 | 81.89942 | 83.39484 | 175.23996   | -622.20190  | 341.55523   | 1 |
| 24 | H | 81.76290 | 81.19518 | 82.64732 | -876.57256  | -303.22879  | -2561.90213 | 1 |
| 25 | C | 80.96381 | 83.10073 | 83.01343 | -571.88214  | -534.10783  | -106.15033  | 1 |
| 26 | H | 80.23308 | 83.36010 | 83.81364 | -2713.20841 | -16.25800   | -248.80809  | 1 |
| 27 | C | 82.11209 | 84.20371 | 82.87169 | 166.60354   | 288.16399   | -716.09568  | 1 |
| 28 | H | 82.92610 | 83.80399 | 82.19942 | -2097.85574 | 1636.78449  | -586.18044  | 1 |
| 29 | O | 82.86880 | 84.49931 | 84.06470 | -317.80580  | -363.38227  | 484.43082   | 1 |
| 30 | H | 82.49434 | 83.80251 | 84.69441 | 1863.74748  | -1451.84923 | 1357.29467  | 1 |
| 31 | C | 81.42370 | 85.42062 | 82.16916 | 503.80731   | 517.99032   | 318.51606   | 1 |
| 32 | H | 82.17472 | 86.19025 | 81.86313 | 640.61020   | -2157.10410 | -1536.29104 | 1 |
| 33 | H | 80.86443 | 85.11278 | 81.24991 | 1687.88455  | 465.60692   | 2087.56452  | 1 |
| 34 | H | 80.70083 | 85.92879 | 82.85005 | -1293.07895 | -1899.88581 | -1463.57452 | 1 |
| 35 | C | 80.34160 | 82.59985 | 81.60670 | -153.07550  | -733.68902  | 248.70981   | 1 |
| 36 | O | 80.94238 | 81.70444 | 81.03489 | 186.15459   | -480.78787  | -449.34387  | 1 |
| 37 | N | 79.23811 | 83.24285 | 81.24262 | -487.53139  | 543.18517   | 42.03850    | 1 |
| 38 | C | 78.53538 | 82.92160 | 80.02516 | -699.35871  | 69.34393    | 360.10701   | 1 |
| 39 | H | 78.55330 | 81.80868 | 79.96935 | 2.81126     | -221.99807  | -2715.58072 | 1 |
| 40 | C | 77.10249 | 83.56628 | 80.23699 | -507.46439  | -592.59194  | 122.07761   | 1 |
| 41 | H | 76.63977 | 83.88262 | 79.27326 | -1975.08116 | 525.87560   | -1801.71556 | 1 |
| 42 | H | 76.39553 | 82.84825 | 80.70963 | 1588.27743  | -1913.22100 | 1113.83566  | 1 |
| 43 | C | 77.41682 | 84.76281 | 81.18895 | -613.62442  | -457.55993  | -194.14490  | 1 |
| 44 | H | 77.85911 | 85.61660 | 80.62871 | 1707.54637  | -721.27992  | 1996.92523  | 1 |
| 45 | H | 76.52366 | 85.15734 | 81.72366 | 758.23357   | 2100.81767  | 1560.55011  | 1 |
| 46 | C | 78.48283 | 84.09091 | 82.15758 | -352.41524  | 704.96076   | 49.21465    | 1 |
| 47 | H | 79.17455 | 84.79785 | 82.66728 | 1714.76886  | -2070.42778 | 443.35792   | 1 |
| 48 | H | 78.04467 | 83.40085 | 82.91720 | 1224.15040  | 1801.50881  | 1636.97633  | 1 |
| 49 | C | 79.21360 | 83.59922 | 78.71565 | 566.85117   | 537.05831   | 117.62814   | 1 |
| 50 | O | 78.49166 | 83.97750 | 77.79413 | -550.26779  | -406.08867  | 4.21666     | 1 |
| 51 | N | 80.52566 | 83.58913 | 78.77830 | 566.34832   | -425.77725  | 180.18749   | 1 |
| 52 | H | 80.95655 | 83.17709 | 79.61266 | 644.44502   | 2646.80550  | -52.73430   | 1 |
| 53 | C | 81.25301 | 84.39215 | 77.84348 | 612.34801   | -281.48662  | 411.56221   | 1 |
| 54 | H | 80.55482 | 85.24401 | 77.68042 | 1667.23498  | -1490.75142 | 1556.16753  | 1 |
| 55 | C | 82.65677 | 84.77932 | 78.48076 | -714.45746  | -175.43074  | 286.98927   | 1 |
| 56 | H | 83.28674 | 83.85223 | 78.56436 | -787.09484  | 1763.03619  | -1922.46060 | 1 |
| 57 | O | 82.61278 | 85.34640 | 79.81127 | -429.46514  | 516.51932   | -128.40526  | 1 |
| 58 | H | 83.21666 | 84.74297 | 80.28631 | 1981.82785  | 436.16847   | -1818.18182 | 1 |
| 59 | C | 83.26287 | 85.71710 | 77.37264 | 630.79189   | -468.94448  | 76.03230    | 1 |
| 60 | H | 84.29916 | 86.03481 | 77.63320 | -1775.71861 | 2062.30353  | 131.89849   | 1 |
| 61 | H | 83.31296 | 85.21025 | 76.37901 | -1855.14608 | 88.94118    | 1993.53760  | 1 |
| 62 | H | 82.65659 | 86.64354 | 77.24426 | -1504.82350 | -780.94249  | -2132.90992 | 1 |
| 63 | C | 81.44621 | 83.50561 | 76.47655 | 288.57638   | 618.62814   | -397.00270  | 1 |
| 64 | O | 82.52440 | 83.09164 | 76.13015 | 321.70495   | -185.26452  | 574.37218   | 1 |
| 65 | N | 80.26666 | 83.39787 | 75.87550 | -447.05792  | -446.53431  | 367.76425   | 1 |
| 66 | H | 79.40996 | 83.78810 | 76.34022 | 350.31316   | 1975.63644  | -1843.31522 | 1 |
| 67 | C | 80.18879 | 82.48781 | 74.77511 | -511.23061  | 374.03917   | -471.51480  | 1 |
| 68 | H | 80.99454 | 82.82318 | 74.08654 | 2234.79579  | -898.70890  | -1273.45190 | 1 |
| 69 | C | 80.50857 | 81.02519 | 75.34498 | 529.53781   | -159.34528  | 563.72604   | 1 |
| 70 | H | 80.58878 | 80.34462 | 74.45391 | 654.59388   | 2347.94251  | 1217.51488  | 1 |
| 71 | H | 81.52848 | 81.06996 | 75.81558 | -1526.55661 | 2103.42026  | 817.87394   | 1 |
| 72 | O | 79.54427 | 80.45249 | 76.26457 | -554.84278  | 14.12789    | 399.58769   | 1 |
| 73 | H | 79.83986 | 80.88045 | 77.09134 | 1297.06236  | 2061.84854  | 1220.68812  | 1 |

|     |   |          |          |          |             |             |             |   |
|-----|---|----------|----------|----------|-------------|-------------|-------------|---|
| 74  | C | 78.69666 | 82.53218 | 74.13163 | -662.15484  | -412.13544  | 123.62687   | 1 |
| 75  | O | 78.59694 | 82.41567 | 72.93083 | -540.01537  | -317.05804  | 274.91456   | 1 |
| 76  | N | 77.72949 | 82.56029 | 75.04868 | -202.76299  | -690.00100  | -131.49145  | 1 |
| 77  | H | 78.08047 | 82.61009 | 76.00921 | -702.62132  | -2617.37191 | 281.70413   | 1 |
| 78  | C | 76.33442 | 82.91240 | 74.79567 | -491.73914  | 576.34187   | 222.73509   | 1 |
| 79  | H | 76.18789 | 83.82969 | 75.41287 | 1977.17978  | -1823.58850 | -434.68928  | 1 |
| 80  | C | 76.01719 | 83.11293 | 73.33238 | -649.50797  | -328.66843  | 306.11224   | 1 |
| 81  | H | 76.52111 | 82.30532 | 72.74291 | 2075.07803  | 1452.16490  | -1004.45904 | 1 |
| 82  | C | 74.52340 | 83.02239 | 73.07213 | -615.18735  | -489.99689  | -70.96352   | 1 |
| 83  | H | 74.28156 | 83.15156 | 71.98188 | -1226.32661 | -1724.38906 | -1716.47170 | 1 |
| 84  | H | 74.10419 | 82.02597 | 73.39195 | 2381.64273  | -969.84735  | 900.46860   | 1 |
| 85  | H | 73.95690 | 83.81312 | 73.63594 | 2122.74991  | 1702.23946  | -141.36228  | 1 |
| 86  | C | 76.54287 | 84.44437 | 72.82386 | -501.86074  | -479.61276  | -376.42482  | 1 |
| 87  | H | 76.30288 | 84.59953 | 71.73654 | 993.79261   | -2246.95401 | -1177.81305 | 1 |
| 88  | H | 76.10422 | 85.31068 | 73.39084 | 42.71279    | -626.15391  | -2651.37258 | 1 |
| 89  | H | 77.66288 | 84.50237 | 72.93031 | -2026.39012 | -1590.33709 | -887.82922  | 1 |
| 90  | C | 75.44100 | 81.65359 | 75.45045 | -672.89153  | 382.57394   | -156.34072  | 1 |
| 91  | O | 74.70617 | 81.92147 | 76.37620 | 410.04627   | 221.86223   | 500.35950   | 1 |
| 92  | N | 75.64419 | 80.51222 | 74.82705 | -378.11782  | -443.79414  | -441.10984  | 1 |
| 93  | H | 76.38140 | 80.58765 | 74.12928 | 2404.15973  | -568.14894  | 1149.30085  | 1 |
| 94  | C | 75.00029 | 79.27729 | 75.13198 | -544.54484  | 466.16019   | 331.29119   | 1 |
| 95  | H | 75.79809 | 78.51558 | 75.00119 | -1409.80988 | -170.17955  | 2325.32679  | 1 |
| 96  | C | 74.45545 | 79.40909 | 76.60749 | -184.48284  | 116.78282   | -758.89137  | 1 |
| 97  | H | 75.24834 | 79.87525 | 77.23940 | 1893.78641  | 1861.14652  | 611.04528   | 1 |
| 98  | H | 73.59706 | 80.12889 | 76.61546 | -2170.79665 | -974.19311  | 1327.50117  | 1 |
| 99  | C | 74.00003 | 78.05249 | 77.24089 | 389.51668   | 672.81878   | -138.49152  | 1 |
| 100 | H | 73.17411 | 77.59638 | 76.64799 | 510.64577   | 1933.03327  | 1851.02484  | 1 |
| 101 | H | 74.81350 | 77.29423 | 77.19265 | -2302.30869 | -1105.72939 | -948.89774  | 1 |
| 102 | C | 73.55575 | 78.27327 | 78.72399 | -559.93427  | -126.34590  | 542.30857   | 1 |
| 103 | O | 73.23237 | 77.31666 | 79.40775 | -670.36003  | -111.83166  | 76.36448    | 1 |
| 104 | N | 73.61433 | 79.55345 | 79.11750 | -216.06729  | -537.07037  | 446.51379   | 1 |
| 105 | H | 73.87470 | 80.40404 | 78.60156 | -1251.96487 | 1074.12894  | -2168.52500 | 1 |
| 106 | H | 73.36439 | 79.86713 | 80.06283 | -2451.83023 | -720.73851  | 944.84612   | 1 |
| 107 | C | 73.74165 | 79.05842 | 74.10827 | 546.24052   | -563.88337  | -85.11809   | 1 |
| 108 | O | 72.90389 | 79.91476 | 73.98898 | 71.70702    | -307.40463  | 606.69673   | 1 |
| 109 | N | 73.79508 | 77.84954 | 73.52274 | 479.90863   | -504.50129  | 222.86849   | 1 |
| 110 | C | 72.74651 | 77.39778 | 72.66200 | 75.51268    | -600.91904  | 506.73700   | 1 |
| 111 | H | 72.20102 | 78.30607 | 72.31240 | -2033.61562 | 1795.30103  | 254.89480   | 1 |
| 112 | C | 73.58269 | 76.61175 | 71.55255 | 523.79067   | 517.99274   | 284.45581   | 1 |
| 113 | H | 72.96041 | 75.91021 | 70.95375 | 1599.61665  | -1127.00911 | 1895.98173  | 1 |
| 114 | H | 74.06427 | 77.30957 | 70.83228 | -1881.83093 | 1275.82488  | -1501.55016 | 1 |
| 115 | C | 74.63899 | 75.89113 | 72.44185 | -600.05639  | -404.05026  | 316.64485   | 1 |
| 116 | H | 74.19276 | 75.00834 | 72.95193 | -2597.05260 | 496.36221   | 657.73249   | 1 |
| 117 | H | 75.52040 | 75.51958 | 71.87232 | -1666.24518 | 1294.38985  | -1723.90591 | 1 |
| 118 | C | 75.00256 | 77.03637 | 73.48374 | 493.57570   | -129.95376  | -602.56394  | 1 |
| 119 | H | 75.20700 | 76.67341 | 74.51872 | -1469.08415 | -637.84797  | 2204.22581  | 1 |
| 120 | H | 75.82318 | 77.71927 | 73.15852 | -1038.97840 | 1068.88701  | -2280.71789 | 1 |
| 121 | C | 71.79026 | 76.31500 | 73.41175 | 188.88100   | 241.05089   | -727.87821  | 1 |
| 122 | O | 72.04391 | 75.85130 | 74.50905 | 531.88613   | -49.19943   | 427.07960   | 1 |
| 123 | N | 70.79173 | 75.91112 | 72.57596 | 708.14833   | 26.93417    | -179.73509  | 1 |
| 124 | H | 70.88837 | 76.59739 | 71.81498 | -2232.69501 | -1179.09831 | 1023.94816  | 1 |
| 125 | C | 69.45704 | 75.61954 | 73.15297 | -738.32412  | 259.92548   | 104.42456   | 1 |
| 126 | H | 69.28067 | 76.43266 | 73.89290 | 2028.89123  | 1260.02983  | 1311.33324  | 1 |
| 127 | C | 68.45812 | 75.59557 | 72.02615 | -258.65678  | -345.52513  | 661.28459   | 1 |
| 128 | H | 68.87407 | 74.94768 | 71.22096 | -1826.06090 | -1801.46097 | -918.64554  | 1 |
| 129 | C | 67.12806 | 75.00426 | 72.46409 | -541.23400  | 531.92970   | -218.41428  | 1 |
| 130 | H | 66.41513 | 74.89402 | 71.60183 | 1311.73218  | -2219.18200 | 882.19023   | 1 |
| 131 | H | 67.25891 | 73.98485 | 72.92541 | -1048.71298 | 1223.58118  | -2196.97971 | 1 |
| 132 | H | 66.62446 | 75.64884 | 73.23519 | 419.06414   | 1903.92898  | 1903.44670  | 1 |
| 133 | C | 68.21557 | 76.97346 | 71.43258 | -423.86431  | 152.66566   | -648.55262  | 1 |
| 134 | H | 67.47901 | 76.93497 | 70.58397 | 105.68386   | -2342.50080 | 1387.51238  | 1 |
| 135 | H | 67.80165 | 77.68469 | 72.19870 | -1695.63603 | -1484.73621 | -1531.02793 | 1 |

|     |   |          |          |          |             |             |             |   |
|-----|---|----------|----------|----------|-------------|-------------|-------------|---|
| 136 | H | 69.16073 | 77.43087 | 71.03258 | -1853.57121 | -487.39031  | 1936.59343  | 1 |
| 137 | C | 69.49158 | 74.12850 | 73.86142 | 539.71428   | -510.58232  | 267.58633   | 1 |
| 138 | O | 68.67276 | 73.87117 | 74.71836 | -15.93758   | -278.34085  | -624.49402  | 1 |
| 139 | N | 70.34787 | 73.30837 | 73.26839 | -676.81886  | 12.05292    | 276.17960   | 1 |
| 140 | H | 70.92567 | 73.78554 | 72.57758 | -1694.44250 | -373.84189  | -2100.66098 | 1 |
| 141 | C | 70.72628 | 72.06419 | 73.84632 | 412.33078   | -664.70360  | 108.35451   | 1 |
| 142 | H | 71.78598 | 71.93408 | 73.52409 | 1765.77476  | 1294.44366  | 1621.76594  | 1 |
| 143 | C | 70.52759 | 72.14277 | 75.41588 | -179.66635  | -721.95667  | -264.73915  | 1 |
| 144 | H | 70.98142 | 73.07336 | 75.82414 | -607.34922  | 2587.87032  | -598.10018  | 1 |
| 145 | H | 69.43996 | 72.20214 | 75.68229 | -359.69332  | -1479.13954 | -2259.74260 | 1 |
| 146 | C | 71.17888 | 70.86493 | 76.04390 | -240.01076  | 616.02425   | 431.85322   | 1 |
| 147 | H | 70.56957 | 69.95819 | 75.82232 | -1359.17131 | 782.54425   | 2227.99181  | 1 |
| 148 | H | 72.18291 | 70.66748 | 75.60345 | -820.36667  | 85.81767    | -2596.78715 | 1 |
| 149 | C | 71.28601 | 71.11225 | 77.60111 | -513.07015  | 236.18570   | -551.87280  | 1 |
| 150 | H | 71.89153 | 72.02232 | 77.82323 | 1816.11944  | -1183.11722 | -1650.94321 | 1 |
| 151 | H | 70.28170 | 71.30133 | 78.04534 | -1800.04429 | -1361.53473 | 1526.34643  | 1 |
| 152 | C | 71.93484 | 69.84520 | 78.20698 | 726.08972   | -253.19732  | -179.64713  | 1 |
| 153 | H | 71.34393 | 68.91682 | 78.07407 | 1224.27271  | -456.51798  | -2390.90304 | 1 |
| 154 | H | 72.98507 | 69.67180 | 77.89803 | 1206.40339  | -1150.93514 | -2154.90344 | 1 |
| 155 | N | 71.99769 | 70.05584 | 79.75543 | 329.70796   | -633.68968  | -155.67358  | 1 |
| 156 | H | 72.41712 | 69.25968 | 80.31746 | 1348.31305  | 1938.76845  | 1359.00643  | 1 |
| 157 | H | 72.55943 | 70.88456 | 80.10851 | 2096.92035  | 1446.54551  | -966.48890  | 1 |
| 158 | H | 71.06935 | 70.19463 | 80.24944 | -1197.07217 | -2303.53719 | 827.28733   | 1 |
| 159 | C | 69.78558 | 70.82878 | 73.33847 | -378.01186  | -556.17301  | -413.96481  | 1 |
| 160 | O | 70.09271 | 69.68899 | 73.61480 | -409.44433  | -307.55053  | -453.30833  | 1 |
| 161 | N | 68.66466 | 71.24551 | 72.74409 | -429.02477  | 524.70884   | 274.08502   | 1 |
| 162 | H | 68.61317 | 72.24287 | 72.54079 | 1706.34263  | -1425.96036 | 1574.38926  | 1 |
| 163 | C | 67.93763 | 70.24073 | 72.03165 | -45.25864   | -626.22952  | 478.93267   | 1 |
| 164 | H | 68.07046 | 69.31236 | 72.63454 | 1988.63164  | 570.90773   | 1772.87287  | 1 |
| 165 | C | 66.44646 | 70.74748 | 71.93177 | 551.77128   | -20.49526   | -564.54996  | 1 |
| 166 | H | 66.10143 | 71.12276 | 72.92182 | 1434.61535  | -1753.10253 | 1513.99471  | 1 |
| 167 | H | 66.35998 | 71.61311 | 71.23725 | -714.67738  | 1819.09770  | 1898.36494  | 1 |
| 168 | C | 65.56070 | 69.54703 | 71.45558 | 446.99263   | -555.77305  | 338.97221   | 1 |
| 169 | H | 65.80260 | 69.27080 | 70.40456 | 1953.68466  | 1892.25957  | -161.67766  | 1 |
| 170 | H | 65.76644 | 68.63946 | 72.06602 | -403.03785  | 2688.07032  | -188.43591  | 1 |
| 171 | C | 64.04421 | 69.97239 | 71.60033 | 567.86262   | 335.74681   | 434.04421   | 1 |
| 172 | H | 63.81212 | 70.25243 | 72.65370 | -1080.02275 | 1568.26081  | -1948.78900 | 1 |
| 173 | H | 63.82779 | 70.88012 | 70.99179 | -919.54108  | 2111.34692  | 1456.13463  | 1 |
| 174 | C | 63.16116 | 68.78636 | 71.14809 | 195.81897   | 173.33862   | -745.11536  | 1 |
| 175 | H | 63.24395 | 68.53338 | 70.07232 | 1405.67949  | -2301.21089 | -390.08113  | 1 |
| 176 | H | 63.26825 | 67.86960 | 71.76167 | -940.37328  | -1118.32446 | 2299.72133  | 1 |
| 177 | N | 61.66474 | 69.20972 | 71.33914 | 319.26422   | 656.36007   | -42.02424   | 1 |
| 178 | H | 60.94451 | 68.48580 | 71.05200 | 1961.03633  | 619.91968   | 1787.09422  | 1 |
| 179 | H | 61.34714 | 69.43710 | 72.32619 | 854.14343   | -2156.80752 | 1429.08711  | 1 |
| 180 | H | 61.33027 | 70.05991 | 70.79900 | 1237.02905  | -1378.50857 | -1998.28500 | 1 |
| 181 | C | 68.64344 | 70.12059 | 70.54590 | 532.53319   | -268.57236  | 517.55729   | 1 |
| 182 | O | 68.98395 | 71.08361 | 69.89725 | 266.16714   | -290.73804  | -558.88002  | 1 |
| 183 | N | 68.64258 | 68.83854 | 70.22812 | -226.25352  | 640.49678   | -270.32839  | 1 |
| 184 | H | 68.27518 | 68.20240 | 70.93410 | 2007.69063  | -1035.27229 | 1523.50231  | 1 |
| 185 | C | 69.26826 | 68.29904 | 69.07410 | -540.76542  | -573.33303  | 49.50000    | 1 |
| 186 | H | 68.75955 | 67.31741 | 68.95195 | -2374.20950 | -1036.76023 | 843.75774   | 1 |
| 187 | C | 69.05693 | 69.28653 | 67.83962 | -77.09082   | 666.87422   | -415.84136  | 1 |
| 188 | H | 69.62924 | 70.23988 | 68.03947 | -985.81834  | 617.19825   | 2463.91927  | 1 |
| 189 | O | 67.68887 | 69.69156 | 67.60222 | 293.29899   | -391.65602  | -477.80926  | 1 |
| 190 | H | 67.68126 | 70.54019 | 68.09860 | 2528.72714  | -681.76262  | -751.27122  | 1 |
| 191 | C | 69.76324 | 68.49201 | 66.68184 | 252.47363   | -605.14473  | 440.05134   | 1 |
| 192 | H | 69.83279 | 69.10138 | 65.75075 | -2052.65063 | 1456.49051  | -1043.51830 | 1 |
| 193 | H | 70.79967 | 68.18883 | 66.96234 | -2152.98800 | -1661.97574 | -161.70652  | 1 |
| 194 | H | 69.20631 | 67.56079 | 66.42654 | -473.12726  | -1584.27339 | 2165.61725  | 1 |
| 195 | C | 70.86759 | 68.07215 | 69.38792 | 360.36307   | 488.46713   | 505.10056   | 1 |
| 196 | O | 71.29541 | 66.95452 | 69.21746 | -200.08817  | -528.03552  | -385.82850  | 1 |
| 197 | N | 71.53324 | 69.16751 | 69.73439 | -597.54095  | -226.44775  | 355.20479   | 1 |

|     |   |          |          |          |             |             |             |   |
|-----|---|----------|----------|----------|-------------|-------------|-------------|---|
| 198 | H | 71.02549 | 70.05012 | 69.82867 | 2179.23655  | -1300.70981 | -991.33835  | 1 |
| 199 | C | 72.91983 | 69.00951 | 69.99652 | -687.68921  | 297.39807   | -249.45179  | 1 |
| 200 | H | 73.07792 | 67.93578 | 70.26075 | -349.16256  | -2467.37713 | -1101.72831 | 1 |
| 201 | C | 73.73855 | 69.47375 | 68.68917 | 672.47345   | 361.54328   | -201.62880  | 1 |
| 202 | H | 73.45800 | 70.51678 | 68.42046 | 1541.41502  | 582.18425   | 2169.97026  | 1 |
| 203 | H | 74.82380 | 69.48889 | 68.94074 | -2534.67717 | 60.25153    | 997.72295   | 1 |
| 204 | C | 73.49751 | 68.54021 | 67.49993 | 574.26774   | -389.43119  | -377.02542  | 1 |
| 205 | C | 73.92799 | 67.17965 | 67.56346 | 688.82679   | -287.33580  | -257.96133  | 1 |
| 206 | H | 74.42374 | 66.78552 | 68.46937 | 331.14182   | 1470.38163  | 2269.80013  | 1 |
| 207 | C | 72.85404 | 69.04210 | 66.32712 | -383.52382  | -675.04808  | 144.24917   | 1 |
| 208 | H | 72.52270 | 70.09469 | 66.27316 | 4.09847     | 1517.59662  | 2262.86397  | 1 |
| 209 | C | 73.69013 | 66.35439 | 66.46610 | -134.76730  | 428.45285   | -649.50303  | 1 |
| 210 | H | 74.01273 | 65.29971 | 66.51971 | -903.23433  | 1600.49020  | 2011.53387  | 1 |
| 211 | C | 72.64026 | 68.17488 | 65.25414 | -335.53281  | -615.00040  | -364.39058  | 1 |
| 212 | H | 72.13505 | 68.57094 | 64.35596 | 1596.45398  | -1369.33862 | 1732.02659  | 1 |
| 213 | C | 73.04239 | 66.80719 | 65.27977 | 585.48547   | -340.24194  | -406.23938  | 1 |
| 214 | O | 72.82580 | 65.91840 | 64.19549 | -419.15649  | -173.04408  | -511.94141  | 1 |
| 215 | H | 72.37131 | 66.52936 | 63.56805 | -1071.84350 | 1559.71507  | -1960.13012 | 1 |
| 216 | C | 73.46359 | 70.11692 | 71.04880 | 291.41878   | -183.13091  | 710.72246   | 1 |
| 217 | O | 73.15715 | 71.28226 | 70.97937 | 379.87695   | 523.47396   | -222.23622  | 1 |
| 218 | N | 74.42862 | 69.56577 | 71.81188 | 564.30591   | 373.09380   | 277.24371   | 1 |
| 219 | H | 74.52929 | 68.53395 | 71.91178 | -120.59931  | -2436.07824 | -1214.35098 | 1 |
| 220 | C | 75.15161 | 70.53711 | 72.58896 | 404.07514   | -299.37480  | 608.84009   | 1 |
| 221 | H | 75.26846 | 71.37205 | 71.85994 | -1071.07882 | -841.69025  | 2359.66467  | 1 |
| 222 | C | 74.18222 | 70.99173 | 73.75271 | -683.12807  | 68.71770    | -390.13096  | 1 |
| 223 | H | 73.15482 | 71.14289 | 73.33790 | 2068.88918  | 1596.58590  | 770.89603   | 1 |
| 224 | H | 74.08690 | 70.19503 | 74.52487 | 1379.86429  | 2342.49779  | -179.85638  | 1 |
| 225 | C | 74.74387 | 72.31013 | 74.37707 | -176.39967  | 537.49466   | 550.97268   | 1 |
| 226 | H | 75.71376 | 72.12131 | 74.89783 | -396.28051  | 1942.22168  | 1869.33314  | 1 |
| 227 | H | 74.96465 | 73.06443 | 73.58957 | -94.44700   | 586.00678   | -2659.20016 | 1 |
| 228 | C | 73.63250 | 72.84633 | 75.37913 | -291.69381  | -718.18079  | -150.72929  | 1 |
| 229 | H | 72.84208 | 73.48715 | 74.91958 | -2303.38776 | 1089.76242  | 964.62032   | 1 |
| 230 | H | 73.13351 | 72.02707 | 75.94996 | 884.16729   | 2568.80533  | -207.74283  | 1 |
| 231 | N | 74.26770 | 73.60644 | 76.42940 | -594.49522  | -252.81478  | 342.29276   | 1 |
| 232 | H | 75.23138 | 73.50979 | 76.72745 | -1735.17426 | 2084.05705  | -263.71605  | 1 |
| 233 | C | 73.61806 | 74.41407 | 77.21464 | 595.23177   | -271.52487  | 442.22352   | 1 |
| 234 | N | 72.20524 | 74.65484 | 76.97257 | 585.53813   | -424.79750  | -105.81303  | 1 |
| 235 | H | 71.93644 | 74.93071 | 76.00170 | 959.88797   | 1327.56823  | -2177.11905 | 1 |
| 236 | H | 71.90391 | 75.41783 | 77.58051 | 1578.48647  | 16.27378    | -2220.76233 | 1 |
| 237 | N | 74.22656 | 75.05835 | 78.29287 | -452.17763  | -390.33541  | -421.51853  | 1 |
| 238 | H | 75.21310 | 74.98927 | 78.56538 | 470.26107   | 1974.25629  | -1817.92087 | 1 |
| 239 | H | 73.71946 | 75.74493 | 78.91111 | 1856.67307  | -1573.97321 | -1224.35416 | 1 |
| 240 | C | 76.55438 | 69.98445 | 73.21951 | -531.47271  | -581.45780  | -55.06206   | 1 |
| 241 | O | 77.09241 | 70.66371 | 74.07164 | -243.00837  | 192.73507   | 609.52485   | 1 |
| 242 | N | 76.95996 | 68.85245 | 72.68293 | 343.49288   | -644.25607  | 38.09164    | 1 |
| 243 | H | 76.37695 | 68.48487 | 71.93413 | -1691.16043 | -1535.97525 | -1484.73099 | 1 |
| 244 | C | 78.12224 | 68.12339 | 73.10018 | 542.66492   | 350.14337   | 454.42563   | 1 |
| 245 | H | 78.76982 | 68.11795 | 72.19629 | 1209.57979  | -2396.95920 | 463.86744   | 1 |
| 246 | C | 78.84701 | 68.72993 | 74.37455 | -737.14309  | 145.93010   | 242.71942   | 1 |
| 247 | H | 78.11452 | 69.13387 | 75.11453 | -1050.18303 | 159.36419   | -2509.06125 | 1 |
| 248 | C | 79.69211 | 67.57010 | 75.01192 | -706.77696  | -252.88343  | -245.16230  | 1 |
| 249 | H | 80.38953 | 67.94555 | 75.79809 | -1624.64039 | -1665.49085 | 1417.86935  | 1 |
| 250 | H | 79.03451 | 66.80118 | 75.48642 | 2566.10521  | 598.51109   | 693.22305   | 1 |
| 251 | H | 80.29828 | 67.03644 | 74.24069 | -1972.69758 | 107.10018   | -1876.34312 | 1 |
| 252 | C | 79.83450 | 69.84916 | 73.89485 | 412.85148   | 672.58832   | -27.69222   | 1 |
| 253 | H | 80.40688 | 70.28567 | 74.74662 | 1447.02277  | 1762.76533  | -1490.78944 | 1 |
| 254 | H | 80.57579 | 69.45848 | 73.15888 | 1320.77379  | -145.20455  | 2378.68491  | 1 |
| 255 | H | 79.27865 | 70.68515 | 73.40437 | -1512.10848 | 1470.52031  | 1724.75147  | 1 |
| 256 | C | 77.68964 | 66.60656 | 73.47682 | -607.11113  | 499.56689   | 73.73769    | 1 |
| 257 | O | 78.52964 | 65.73195 | 73.53060 | 357.97126   | 460.81534   | 356.68785   | 1 |
| 258 | N | 76.40732 | 66.53874 | 73.86659 | 536.55407   | -368.62270  | 332.76306   | 1 |
| 259 | H | 75.86153 | 67.39281 | 73.72590 | 524.38866   | 2297.69985  | 1367.20941  | 1 |



|     |   |          |          |          |             |             |             |   |
|-----|---|----------|----------|----------|-------------|-------------|-------------|---|
| 260 | C | 75.75478 | 65.28632 | 73.60415 | 46.50277    | -774.29190  | -147.97904  | 1 |
| 261 | H | 76.55735 | 64.62204 | 73.20656 | 1676.51875  | 1883.29066  | 1032.55549  | 1 |
| 262 | C | 75.14977 | 64.74166 | 74.99868 | -559.41456  | -34.19198   | -556.30433  | 1 |
| 263 | H | 74.28227 | 65.37433 | 75.30139 | -64.66664   | 395.18769   | 2695.05373  | 1 |
| 264 | H | 74.74792 | 63.70731 | 74.88190 | -2703.44278 | -60.40056   | 333.79418   | 1 |
| 265 | C | 76.22925 | 64.79538 | 76.04583 | -519.76435  | 377.31045   | 459.42366   | 1 |
| 266 | H | 76.65877 | 65.82353 | 76.04267 | -1746.74323 | 1667.50644  | -1261.73691 | 1 |
| 267 | C | 75.65870 | 64.52033 | 77.43130 | 570.95554   | 16.46261    | -545.27700  | 1 |
| 268 | H | 76.44988 | 64.58037 | 78.22257 | 2391.58273  | 28.05277    | -1305.07271 | 1 |
| 269 | H | 74.86090 | 65.25834 | 77.70354 | 175.75588   | 917.63458   | 2559.43867  | 1 |
| 270 | H | 75.20300 | 63.49918 | 77.49571 | -1063.97851 | -2155.34650 | 1283.00462  | 1 |
| 271 | C | 77.35380 | 63.81509 | 75.74323 | 193.76014   | 2.62946     | -765.53141  | 1 |
| 272 | H | 78.10994 | 63.78527 | 76.56970 | 507.39394   | -846.55087  | 2539.60089  | 1 |
| 273 | H | 76.97053 | 62.77091 | 75.60717 | 1337.57841  | 1818.19054  | 1526.01994  | 1 |
| 274 | H | 77.90383 | 64.10466 | 74.80318 | 1100.88635  | -1172.91350 | -2199.08909 | 1 |
| 275 | C | 74.60709 | 65.63443 | 72.55236 | -549.21115  | 475.64486   | -309.38218  | 1 |
| 276 | O | 74.40982 | 66.76778 | 72.14655 | 556.06106   | -390.37755  | -78.24250   | 1 |
| 277 | O | 73.82293 | 64.56446 | 72.09383 | -572.27940  | -310.19032  | -209.75862  | 1 |
| 278 | H | 74.25177 | 63.82389 | 72.61939 | -1380.08193 | 2212.14486  | 790.85944   | 1 |

Listing 54: C00054.xmolout

|    |   |          |          |          |             |             |             |        |          |
|----|---|----------|----------|----------|-------------|-------------|-------------|--------|----------|
| 1  |   | 276      |          |          |             |             |             |        |          |
| 2  |   | 150.0000 | 150.0000 | 150.0000 | 0.0000      | 0.0000      | 0.0000***** | 0.9262 | 3705     |
|    |   | 0.2500   | 300.00   | 0.00     | 0.00        | 0.00        | -1293.6558  | 0.0000 | 300.0000 |
| 3  | H | 72.18135 | 64.80745 | 83.08062 | -2043.14101 | -1757.64893 | 399.89339   |        | 1        |
| 4  | N | 73.10615 | 64.54146 | 82.74919 | 426.75047   | 490.45733   | -334.42467  |        | 1        |
| 5  | H | 72.90729 | 64.25040 | 81.79388 | 442.25559   | -1110.30854 | -2448.52907 |        | 1        |
| 6  | C | 74.09936 | 65.53669 | 82.86639 | 415.32972   | -666.39213  | 83.73172    |        | 1        |
| 7  | H | 73.84715 | 66.04987 | 83.81830 | 879.32219   | 2491.00447  | 667.35213   |        | 1        |
| 8  | C | 75.54475 | 64.83151 | 82.86168 | 31.35357    | 477.41777   | 628.23362   |        | 1        |
| 9  | H | 75.65045 | 64.22251 | 81.93143 | 1168.38489  | 2240.25337  | -1019.71136 |        | 1        |
| 10 | H | 76.35715 | 65.59740 | 82.82361 | -360.43770  | 2534.90498  | 931.67112   |        | 1        |
| 11 | C | 75.67384 | 63.96171 | 84.08845 | 463.18208   | 512.70242   | -382.34388  |        | 1        |
| 12 | H | 74.72476 | 63.39258 | 84.21200 | 1725.29117  | 1863.52247  | -987.07854  |        | 1        |
| 13 | C | 76.81406 | 62.96655 | 83.91836 | 710.42801   | -144.27427  | -313.15367  |        | 1        |
| 14 | H | 76.92433 | 62.30589 | 84.81705 | 364.20195   | -1033.13725 | 2494.72524  |        | 1        |
| 15 | H | 76.65173 | 62.29907 | 83.03263 | 2567.61904  | 335.80679   | 847.48802   |        | 1        |
| 16 | H | 77.79537 | 63.48651 | 83.76657 | -2587.99029 | 680.92867   | -512.16411  |        | 1        |
| 17 | C | 75.90952 | 64.80247 | 85.33529 | 268.17616   | 741.64379   | -40.42634   |        | 1        |
| 18 | H | 76.00457 | 64.16476 | 86.25201 | 1283.54314  | -1945.37420 | -1411.27812 |        | 1        |
| 19 | H | 76.85069 | 65.40552 | 85.25286 | -1258.57796 | 1317.15249  | -2026.02085 |        | 1        |
| 20 | H | 75.07015 | 65.52185 | 85.51749 | -2502.84526 | 909.80597   | 575.92391   |        | 1        |
| 21 | C | 73.98482 | 66.50533 | 81.55782 | 619.36578   | -458.64843  | -172.09273  |        | 1        |
| 22 | O | 74.83596 | 66.52393 | 80.69145 | -81.40433   | 433.87611   | 522.34594   |        | 1        |
| 23 | N | 72.86497 | 67.21470 | 81.62577 | 175.23996   | -622.20190  | 341.55523   |        | 1        |
| 24 | H | 72.26201 | 67.10963 | 82.44039 | -876.57256  | -303.22879  | -2561.90213 |        | 1        |
| 25 | C | 72.55476 | 68.07906 | 80.53422 | -571.88214  | -534.10783  | -106.15033  |        | 1        |
| 26 | H | 73.15294 | 67.68831 | 79.67596 | -2713.20841 | -16.25800   | -248.80809  |        | 1        |
| 27 | C | 70.95996 | 68.06765 | 80.33235 | 166.60354   | 288.16399   | -716.09568  |        | 1        |
| 28 | H | 70.48231 | 68.32741 | 81.31710 | -2097.85574 | 1636.78449  | -586.18044  |        | 1        |
| 29 | O | 70.37142 | 66.81969 | 79.94499 | -317.80580  | -363.38227  | 484.43082   |        | 1        |
| 30 | H | 69.80069 | 66.62877 | 80.71936 | 1863.74748  | -1451.84923 | 1357.29467  |        | 1        |
| 31 | C | 70.81731 | 69.27251 | 79.33131 | 503.80731   | 517.99032   | 318.51606   |        | 1        |
| 32 | H | 69.75293 | 69.56681 | 79.18034 | 640.61020   | -2157.10410 | -1536.29104 |        | 1        |
| 33 | H | 71.37374 | 70.17308 | 79.70348 | 1687.88455  | 465.60692   | 2087.56452  |        | 1        |
| 34 | H | 71.23400 | 69.02145 | 78.32832 | -1293.07895 | -1899.88581 | -1463.57452 |        | 1        |
| 35 | C | 72.94649 | 69.59448 | 80.97657 | -153.07550  | -733.68902  | 248.70981   |        | 1        |
| 36 | O | 72.26774 | 70.18881 | 81.80454 | 186.15459   | -480.78787  | -449.34387  |        | 1        |
| 37 | N | 73.98672 | 70.02301 | 80.26916 | -487.53139  | 543.18517   | 42.03850    |        | 1        |
| 38 | C | 74.48390 | 71.36054 | 80.41235 | -699.35871  | 69.34393    | 360.10701   |        | 1        |
| 39 | H | 74.44905 | 71.61109 | 81.49602 | 2.81126     | -221.99807  | -2715.58072 |        | 1        |

|     |   |          |          |          |             |             |             |   |
|-----|---|----------|----------|----------|-------------|-------------|-------------|---|
| 40  | C | 75.92561 | 71.24192 | 79.77154 | -507.46439  | -592.59194  | 122.07761   | 1 |
| 41  | H | 76.33619 | 72.22388 | 79.44401 | -1975.08116 | 525.87560   | -1801.71556 | 1 |
| 42  | H | 76.65964 | 70.81207 | 80.48988 | 1588.27743  | -1913.22100 | 1113.83566  | 1 |
| 43  | C | 75.64913 | 70.26231 | 78.58708 | -613.62442  | -457.55993  | -194.14490  | 1 |
| 44  | H | 75.13249 | 70.79347 | 77.75358 | 1707.54637  | -721.27992  | 1996.92523  | 1 |
| 45  | H | 76.56800 | 69.80286 | 78.15742 | 758.23357   | 2100.81767  | 1560.55011  | 1 |
| 46  | C | 74.68170 | 69.21050 | 79.27445 | -352.41524  | 704.96076   | 49.21465    | 1 |
| 47  | H | 73.91707 | 68.75749 | 78.59746 | 1714.76886  | -2070.42778 | 443.35792   | 1 |
| 48  | H | 75.19377 | 68.39334 | 79.85217 | 1224.15040  | 1801.50881  | 1636.97633  | 1 |
| 49  | C | 73.50723 | 72.32463 | 79.50187 | 566.85117   | 537.05831   | 117.62814   | 1 |
| 50  | O | 73.36228 | 72.12472 | 78.32060 | -550.26779  | -406.08867  | 4.21666     | 1 |
| 51  | N | 73.05346 | 73.30493 | 80.26874 | 566.34832   | -425.77725  | 180.18749   | 1 |
| 52  | H | 73.34482 | 73.30799 | 81.24631 | 644.44502   | 2646.80550  | -52.73430   | 1 |
| 53  | C | 71.99766 | 74.16274 | 79.86765 | 612.34801   | -281.48662  | 411.56221   | 1 |
| 54  | H | 71.94095 | 74.86948 | 80.72575 | 1667.23498  | -1490.75142 | 1556.16753  | 1 |
| 55  | C | 72.37223 | 74.85905 | 78.48086 | -714.45746  | -175.43074  | 286.98927   | 1 |
| 56  | H | 72.35272 | 74.06737 | 77.67913 | -787.09484  | 1763.03619  | -1922.46060 | 1 |
| 57  | O | 73.66330 | 75.49043 | 78.41592 | -429.46514  | 516.51932   | -128.40526  | 1 |
| 58  | H | 74.09817 | 74.95812 | 77.71934 | 1981.82785  | 436.16847   | -1818.18182 | 1 |
| 59  | C | 71.15068 | 75.83571 | 78.30952 | 630.79189   | -468.94448  | 76.03230    | 1 |
| 60  | H | 71.14207 | 76.32365 | 77.29200 | -1775.71861 | 2062.30353  | 131.89849   | 1 |
| 61  | H | 70.16940 | 75.30918 | 78.42039 | -1855.14608 | 88.94118    | 1993.53760  | 1 |
| 62  | H | 71.17779 | 76.65700 | 79.06207 | -1504.82350 | -780.94249  | -2132.90992 | 1 |
| 63  | C | 70.64253 | 73.24075 | 79.71123 | 288.57638   | 618.62814   | -397.00270  | 1 |
| 64  | O | 70.10282 | 73.05586 | 78.64577 | 321.70495   | -185.26452  | 574.37218   | 1 |
| 65  | N | 70.28791 | 72.79096 | 80.90591 | -447.05792  | -446.53431  | 367.76425   | 1 |
| 66  | H | 70.84838 | 73.03118 | 81.72227 | 350.31316   | 1975.63644  | -1843.31522 | 1 |
| 67  | C | 69.05324 | 72.10827 | 81.04317 | -511.23061  | 374.03917   | -471.51480  | 1 |
| 68  | H | 68.75951 | 71.80692 | 80.01004 | 2234.79579  | -898.70890  | -1273.45190 | 1 |
| 69  | C | 69.37724 | 70.89292 | 82.03747 | 529.53781   | -159.34528  | 563.72604   | 1 |
| 70  | H | 68.37775 | 70.48777 | 82.34910 | 654.59388   | 2347.94251  | 1217.51488  | 1 |
| 71  | H | 69.86742 | 70.09724 | 81.41453 | -1526.55661 | 2103.42026  | 817.87394   | 1 |
| 72  | O | 70.20659 | 71.14317 | 83.17328 | -554.84278  | 14.12789    | 399.58769   | 1 |
| 73  | H | 71.11276 | 70.82490 | 82.79725 | 1297.06236  | 2061.84854  | 1220.68812  | 1 |
| 74  | C | 67.98391 | 73.13774 | 81.72735 | -662.15484  | -412.13544  | 123.62687   | 1 |
| 75  | O | 68.20484 | 73.73516 | 82.77767 | -540.01537  | -317.05804  | 274.91456   | 1 |
| 76  | N | 66.91826 | 73.20444 | 80.96173 | -202.76299  | -690.00100  | -131.49145  | 1 |
| 77  | H | 66.95828 | 72.61063 | 80.13395 | -702.62132  | -2617.37191 | 281.70413   | 1 |
| 78  | C | 65.69089 | 73.88467 | 81.32622 | -491.73914  | 576.34187   | 222.73509   | 1 |
| 79  | H | 65.00464 | 73.61532 | 80.48728 | 1977.17978  | -1823.58850 | -434.68928  | 1 |
| 80  | C | 65.22991 | 73.35936 | 82.67773 | -649.50797  | -328.66843  | 306.11224   | 1 |
| 81  | H | 66.01635 | 73.62732 | 83.42231 | 2075.07803  | 1452.16490  | -1004.45904 | 1 |
| 82  | C | 63.91913 | 73.98757 | 83.10976 | -615.18735  | -489.99689  | -70.96352   | 1 |
| 83  | H | 63.57844 | 73.60202 | 84.10995 | -1226.32661 | -1724.38906 | -1716.47170 | 1 |
| 84  | H | 64.01134 | 75.11189 | 83.19598 | 2381.64273  | -969.84735  | 900.46860   | 1 |
| 85  | H | 63.09514 | 73.77577 | 82.37337 | 2122.74991  | 1702.23946  | -141.36228  | 1 |
| 86  | C | 65.09966 | 71.84669 | 82.66817 | -501.86074  | -479.61276  | -376.42482  | 1 |
| 87  | H | 64.79486 | 71.44482 | 83.67302 | 993.79261   | -2246.95401 | -1177.81305 | 1 |
| 88  | H | 64.33059 | 71.50328 | 81.92240 | 42.71279    | -626.15391  | -2651.37258 | 1 |
| 89  | H | 66.07314 | 71.35580 | 82.39200 | -2026.39012 | -1590.33709 | -887.82922  | 1 |
| 90  | C | 65.98547 | 75.52835 | 81.39244 | -672.89153  | 382.57394   | -156.34072  | 1 |
| 91  | O | 65.54988 | 76.22876 | 82.27792 | 410.04627   | 221.86223   | 500.35950   | 1 |
| 92  | N | 66.60374 | 75.94661 | 80.26617 | -378.11782  | -443.79414  | -441.10984  | 1 |
| 93  | H | 66.83571 | 75.07296 | 79.78553 | 2404.15973  | -568.14894  | 1149.30085  | 1 |
| 94  | C | 67.63090 | 76.94694 | 80.45221 | -544.54484  | 466.16019   | 331.29119   | 1 |
| 95  | H | 67.17087 | 77.76085 | 81.05188 | -1409.80988 | -170.17955  | 2325.32679  | 1 |
| 96  | C | 68.75341 | 76.16696 | 81.24494 | -184.48284  | 116.78282   | -758.89137  | 1 |
| 97  | H | 68.30736 | 75.76483 | 82.18835 | 1893.78641  | 1861.14652  | 611.04528   | 1 |
| 98  | H | 69.08571 | 75.27422 | 80.66639 | -2170.79665 | -974.19311  | 1327.50117  | 1 |
| 99  | C | 69.97129 | 77.07476 | 81.59740 | 389.51668   | 672.81878   | -138.49152  | 1 |
| 100 | H | 70.41867 | 77.51210 | 80.67810 | 510.64577   | 1933.03327  | 1851.02484  | 1 |
| 101 | H | 69.63078 | 77.95736 | 82.18132 | -2302.30869 | -1105.72939 | -948.89774  | 1 |

|     |   |          |          |          |             |             |             |   |
|-----|---|----------|----------|----------|-------------|-------------|-------------|---|
| 102 | C | 71.06945 | 76.29612 | 82.42078 | -559.93427  | -126.34590  | 542.30857   | 1 |
| 103 | O | 72.13845 | 76.82073 | 82.60400 | -670.36003  | -111.83166  | 76.36448    | 1 |
| 104 | N | 70.69466 | 75.08543 | 82.88553 | -216.06729  | -537.07037  | 446.51379   | 1 |
| 105 | H | 69.77399 | 74.58460 | 82.84357 | -1251.96487 | 1074.12894  | -2168.52500 | 1 |
| 106 | H | 71.30766 | 74.55805 | 83.52339 | -2451.83023 | -720.73851  | 944.84612   | 1 |
| 107 | C | 68.06201 | 77.36003 | 78.94588 | 546.24052   | -563.88337  | -85.11809   | 1 |
| 108 | O | 68.22929 | 76.48227 | 78.13842 | 71.70702    | -307.40463  | 606.69673   | 1 |
| 109 | N | 68.24547 | 78.68190 | 78.80296 | 479.90863   | -504.50129  | 222.86849   | 1 |
| 110 | C | 68.32157 | 79.28349 | 77.50725 | 75.51268    | -600.91904  | 506.73700   | 1 |
| 111 | H | 67.66479 | 78.69290 | 76.82803 | -2033.61562 | 1795.30103  | 254.89480   | 1 |
| 112 | C | 67.85606 | 80.77201 | 77.82086 | 523.79067   | 517.99274   | 284.45581   | 1 |
| 113 | H | 68.17447 | 81.49869 | 77.04015 | 1599.61665  | -1127.00911 | 1895.98173  | 1 |
| 114 | H | 66.74950 | 80.85151 | 77.90285 | -1881.83093 | 1275.82488  | -1501.55016 | 1 |
| 115 | C | 68.54902 | 81.00015 | 79.19766 | -600.05639  | -404.05026  | 316.64485   | 1 |
| 116 | H | 69.64957 | 81.12337 | 79.07419 | -2597.05260 | 496.36221   | 657.73249   | 1 |
| 117 | H | 68.17822 | 81.89376 | 79.74864 | -1666.24518 | 1294.38985  | -1723.90591 | 1 |
| 118 | C | 68.19875 | 79.62391 | 79.91287 | 493.57570   | -129.95376  | -602.56394  | 1 |
| 119 | H | 68.92375 | 79.29190 | 80.69162 | -1469.08415 | -637.84797  | 2204.22581  | 1 |
| 120 | H | 67.16269 | 79.57246 | 80.32417 | -1038.97840 | 1068.88701  | -2280.71789 | 1 |
| 121 | C | 69.86760 | 79.38479 | 76.97659 | 188.88100   | 241.05089   | -727.87821  | 1 |
| 122 | O | 70.80688 | 79.45871 | 77.73415 | 531.88613   | -49.19943   | 427.07960   | 1 |
| 123 | N | 69.85156 | 79.64521 | 75.64577 | 708.14833   | 26.93417    | -179.73509  | 1 |
| 124 | H | 68.87658 | 79.49586 | 75.37425 | -2232.69501 | -1179.09831 | 1023.94816  | 1 |
| 125 | C | 70.92897 | 79.19775 | 74.74074 | -738.32412  | 259.92548   | 104.42456   | 1 |
| 126 | H | 70.68694 | 79.68379 | 73.76700 | 2028.89123  | 1260.02983  | 1311.33324  | 1 |
| 127 | C | 72.25410 | 79.64637 | 75.31200 | -258.65678  | -345.52513  | 661.28459   | 1 |
| 128 | H | 72.32762 | 79.26086 | 76.36378 | -1826.06090 | -1801.46097 | -918.64554  | 1 |
| 129 | C | 73.43241 | 79.10771 | 74.52224 | -541.23400  | 531.92970   | -218.41428  | 1 |
| 130 | H | 74.41181 | 79.46425 | 74.94411 | 1311.73218  | -2219.18200 | 882.19023   | 1 |
| 131 | H | 73.46152 | 77.97377 | 74.52739 | -1048.71298 | 1223.58118  | -2196.97971 | 1 |
| 132 | H | 73.39585 | 79.43479 | 73.44678 | 419.06414   | 1903.92898  | 1903.44670  | 1 |
| 133 | C | 72.34366 | 81.16197 | 75.38027 | -423.86431  | 152.66566   | -648.55262  | 1 |
| 134 | H | 73.30742 | 81.50170 | 75.84869 | 105.68386   | -2342.50080 | 1387.51238  | 1 |
| 135 | H | 72.28485 | 81.62873 | 74.35907 | -1695.63603 | -1484.73621 | -1531.02793 | 1 |
| 136 | H | 71.50299 | 81.58907 | 75.99303 | -1853.57121 | -487.39031  | 1936.59343  | 1 |
| 137 | C | 70.83156 | 77.55907 | 74.63326 | 539.71428   | -510.58232  | 267.58633   | 1 |
| 138 | O | 70.40045 | 76.87708 | 75.54275 | -15.93758   | -278.34085  | -624.49402  | 1 |
| 139 | N | 71.29804 | 77.14053 | 73.46666 | -676.81886  | 12.05292    | 276.17960   | 1 |
| 140 | H | 71.64966 | 77.84923 | 72.82645 | -1694.44250 | -373.84189  | -2100.66098 | 1 |
| 141 | C | 71.70267 | 75.76880 | 73.39740 | 412.33078   | -664.70360  | 108.35451   | 1 |
| 142 | H | 71.38469 | 75.35522 | 74.38583 | 1765.77476  | 1294.44366  | 1621.76594  | 1 |
| 143 | C | 70.91611 | 75.13124 | 72.18376 | -179.66635  | -721.95667  | -264.73915  | 1 |
| 144 | H | 69.82428 | 75.31153 | 72.30379 | -607.34922  | 2587.87032  | -598.10018  | 1 |
| 145 | H | 71.18655 | 75.61852 | 71.22094 | -359.69332  | -1479.13954 | -2259.74260 | 1 |
| 146 | C | 71.21856 | 73.59571 | 72.15507 | -240.01076  | 616.02425   | 431.85322   | 1 |
| 147 | H | 72.29882 | 73.40044 | 71.97030 | -1359.17131 | 782.54425   | 2227.99181  | 1 |
| 148 | H | 70.98458 | 73.12810 | 73.13770 | -820.36667  | 85.81767    | -2596.78715 | 1 |
| 149 | C | 70.32081 | 72.97472 | 71.01042 | -513.07015  | 236.18570   | -551.87280  | 1 |
| 150 | H | 69.24974 | 73.23929 | 71.16611 | 1816.11944  | -1183.11722 | -1650.94321 | 1 |
| 151 | H | 70.59611 | 73.40061 | 70.01834 | -1800.04429 | -1361.53473 | 1526.34643  | 1 |
| 152 | C | 70.50261 | 71.43942 | 71.01945 | 726.08972   | -253.19732  | -179.64713  | 1 |
| 153 | H | 71.51924 | 71.09174 | 70.74836 | 1224.27271  | -456.51798  | -2390.90304 | 1 |
| 154 | H | 70.16680 | 70.94008 | 71.95021 | 1206.40339  | -1150.93514 | -2154.90344 | 1 |
| 155 | N | 69.56926 | 70.85730 | 69.90381 | 329.70796   | -633.68968  | -155.67358  | 1 |
| 156 | H | 69.58582 | 69.80267 | 69.79115 | 1348.31305  | 1938.76845  | 1359.00643  | 1 |
| 157 | H | 68.52813 | 71.03852 | 70.00412 | 2096.92035  | 1446.54551  | -966.48890  | 1 |
| 158 | H | 69.75135 | 71.17678 | 68.90808 | -1197.07217 | -2303.53719 | 827.28733   | 1 |
| 159 | C | 73.33360 | 75.80164 | 73.22325 | -378.01186  | -556.17301  | -413.96481  | 1 |
| 160 | O | 74.02183 | 76.01719 | 74.19805 | -409.44433  | -307.55053  | -453.30833  | 1 |
| 161 | N | 73.72601 | 75.61410 | 71.97583 | -429.02477  | 524.70884   | 274.08502   | 1 |
| 162 | H | 73.06486 | 75.42964 | 71.22357 | 1706.34263  | -1425.96036 | 1574.38926  | 1 |
| 163 | C | 75.10318 | 75.83914 | 71.66790 | -45.25864   | -626.22952  | 478.93267   | 1 |

|     |   |          |          |          |             |             |             |   |
|-----|---|----------|----------|----------|-------------|-------------|-------------|---|
| 164 | H | 75.46638 | 76.62334 | 72.37064 | 1988.63164  | 570.90773   | 1772.87287  | 1 |
| 165 | C | 75.82049 | 74.44864 | 71.92452 | 551.77128   | -20.49526   | -564.54996  | 1 |
| 166 | H | 75.70163 | 74.14903 | 72.99027 | 1434.61535  | -1753.10253 | 1513.99471  | 1 |
| 167 | H | 75.34525 | 73.63772 | 71.32878 | -714.67738  | 1819.09770  | 1898.36494  | 1 |
| 168 | C | 77.33022 | 74.61227 | 71.55357 | 446.99263   | -555.77305  | 338.97221   | 1 |
| 169 | H | 77.45577 | 74.76484 | 70.45732 | 1953.68466  | 1892.25957  | -161.67766  | 1 |
| 170 | H | 77.76497 | 75.51236 | 72.04469 | -403.03785  | 2688.07032  | -188.43591  | 1 |
| 171 | C | 78.08008 | 73.30469 | 72.03054 | 567.86262   | 335.74681   | 434.04421   | 1 |
| 172 | H | 77.89817 | 73.11065 | 73.11270 | -1080.02275 | 1568.26081  | -1948.78900 | 1 |
| 173 | H | 77.70268 | 72.40528 | 71.49054 | -919.54108  | 2111.34692  | 1456.13463  | 1 |
| 174 | C | 79.58580 | 73.52795 | 71.75714 | 195.81897   | 173.33862   | -745.11536  | 1 |
| 175 | H | 79.84642 | 73.61684 | 70.68400 | 1405.67949  | -2301.21089 | -390.08113  | 1 |
| 176 | H | 80.04779 | 74.35808 | 72.33093 | -940.37328  | -1118.32446 | 2299.72133  | 1 |
| 177 | N | 80.31881 | 72.23552 | 72.24297 | 319.26422   | 656.36007   | -42.02424   | 1 |
| 178 | H | 81.36036 | 72.18104 | 72.04957 | 1961.03633  | 619.91968   | 1787.09422  | 1 |
| 179 | H | 80.28343 | 72.02283 | 73.28243 | 854.14343   | -2156.80752 | 1429.08711  | 1 |
| 180 | H | 79.97625 | 71.32360 | 71.82324 | 1237.02905  | -1378.50857 | -1998.28500 | 1 |
| 181 | C | 75.16527 | 76.21207 | 70.07559 | 532.53319   | -268.57236  | 517.55729   | 1 |
| 182 | O | 74.45658 | 75.66150 | 69.26403 | 266.16714   | -290.73804  | -558.88002  | 1 |
| 183 | N | 76.12571 | 77.10852 | 69.86370 | -226.25352  | 640.49678   | -270.32839  | 1 |
| 184 | H | 76.65479 | 77.47902 | 70.65262 | 2007.69063  | -1035.27229 | 1523.50231  | 1 |
| 185 | C | 76.38744 | 77.45141 | 68.50640 | -540.76542  | -573.33303  | 49.50000    | 1 |
| 186 | H | 75.41093 | 77.30235 | 67.98910 | -2374.20950 | -1036.76023 | 843.75774   | 1 |
| 187 | C | 76.98510 | 78.93373 | 68.46046 | -77.09082   | 666.87422   | -415.84136  | 1 |
| 188 | H | 77.95951 | 78.94564 | 69.02327 | -985.81834  | 617.19825   | 2463.91927  | 1 |
| 189 | O | 76.17000 | 79.95744 | 69.05619 | 293.29899   | -391.65602  | -477.80926  | 1 |
| 190 | H | 76.76501 | 80.28721 | 69.75999 | 2528.72714  | -681.76262  | -751.27122  | 1 |
| 191 | C | 77.28678 | 79.09278 | 66.92466 | 252.47363   | -605.14473  | 440.05134   | 1 |
| 192 | H | 77.80049 | 80.05876 | 66.71010 | -2052.65063 | 1456.49051  | -1043.51830 | 1 |
| 193 | H | 77.95103 | 78.27258 | 66.54718 | -2152.98800 | -1661.97574 | -161.70652  | 1 |
| 194 | H | 76.35117 | 79.07009 | 66.31845 | -473.12726  | -1584.27339 | 2165.61725  | 1 |
| 195 | C | 77.54747 | 76.43159 | 67.94346 | 360.36307   | 488.46713   | 505.10056   | 1 |
| 196 | O | 77.48824 | 76.04961 | 66.79591 | -200.08817  | -528.03552  | -385.82850  | 1 |
| 197 | N | 78.44836 | 76.18843 | 68.88394 | -597.54095  | -226.44775  | 355.20479   | 1 |
| 198 | H | 78.26184 | 76.62418 | 69.78693 | 2179.23655  | -1300.70981 | -991.33835  | 1 |
| 199 | C | 79.76556 | 75.75385 | 68.60519 | -687.68921  | 297.39807   | -249.45179  | 1 |
| 200 | H | 80.19306 | 75.47755 | 69.59347 | -349.16256  | -2467.37713 | -1101.72831 | 1 |
| 201 | C | 79.72908 | 74.55570 | 67.54602 | 672.47345   | 361.54328   | -201.62880  | 1 |
| 202 | H | 79.14650 | 74.87881 | 66.63984 | 1541.41502  | 582.18425   | 2169.97026  | 1 |
| 203 | H | 80.76304 | 74.31419 | 67.20737 | -2534.67717 | 60.25153    | 997.72295   | 1 |
| 204 | C | 79.07147 | 73.32431 | 68.18510 | 574.26774   | -389.43119  | -377.02542  | 1 |
| 205 | C | 79.87331 | 72.28270 | 68.74094 | 688.82679   | -287.33580  | -257.96133  | 1 |
| 206 | H | 80.97664 | 72.34558 | 68.72305 | 331.14182   | 1470.38163  | 2269.80013  | 1 |
| 207 | C | 77.64735 | 73.23097 | 68.21261 | -383.52382  | -675.04808  | 144.24917   | 1 |
| 208 | H | 77.02640 | 74.03761 | 67.77700 | 4.09847     | 1517.59662  | 2262.86397  | 1 |
| 209 | C | 79.23265 | 71.18293 | 69.31043 | -134.76730  | 428.45285   | -649.50303  | 1 |
| 210 | H | 79.85232 | 70.37452 | 69.73580 | -903.23433  | 1600.49020  | 2011.53387  | 1 |
| 211 | C | 77.05231 | 72.11126 | 68.79748 | -335.53281  | -615.00040  | -364.39058  | 1 |
| 212 | H | 75.94965 | 72.05406 | 68.80999 | 1596.45398  | -1369.33862 | 1732.02659  | 1 |
| 213 | C | 77.81488 | 71.05162 | 69.36950 | 585.48547   | -340.24194  | -406.23938  | 1 |
| 214 | O | 77.21999 | 69.91690 | 69.98001 | -419.15649  | -173.04408  | -511.94141  | 1 |
| 215 | H | 76.27155 | 70.09807 | 69.77674 | -1071.84350 | 1559.71507  | -1960.13012 | 1 |
| 216 | C | 80.59169 | 76.98081 | 67.89435 | 291.41878   | -183.13091  | 710.72246   | 1 |
| 217 | O | 80.07394 | 77.85971 | 67.24114 | 379.87695   | 523.47396   | -222.23622  | 1 |
| 218 | N | 81.87450 | 76.70090 | 68.06418 | 564.30591   | 373.09380   | 277.24371   | 1 |
| 219 | H | 82.08808 | 75.87057 | 68.61455 | -120.59931  | -2436.07824 | -1214.35098 | 1 |
| 220 | C | 82.92566 | 77.56379 | 67.64905 | 404.07514   | -299.37480  | 608.84009   | 1 |
| 221 | H | 83.81694 | 76.90060 | 67.58177 | -1071.07882 | -841.69025  | 2359.66467  | 1 |
| 222 | C | 82.48785 | 78.22155 | 66.27583 | -683.12807  | 68.71770    | -390.13096  | 1 |
| 223 | H | 81.99606 | 77.46105 | 65.62783 | 2068.88918  | 1596.58590  | 770.89603   | 1 |
| 224 | H | 81.70980 | 79.00415 | 66.45877 | 1379.86429  | 2342.49779  | -179.85638  | 1 |
| 225 | C | 83.73338 | 78.83561 | 65.56406 | -176.39967  | 537.49466   | 550.97268   | 1 |

|     |   |          |          |          |             |             |             |   |
|-----|---|----------|----------|----------|-------------|-------------|-------------|---|
| 226 | H | 84.20994 | 79.62694 | 66.18474 | -396.28051  | 1942.22168  | 1869.33314  | 1 |
| 227 | H | 84.52264 | 78.07136 | 65.38693 | -94.44700   | 586.00678   | -2659.20016 | 1 |
| 228 | C | 83.16250 | 79.42107 | 64.19158 | -291.69381  | -718.18079  | -150.72929  | 1 |
| 229 | H | 82.71275 | 78.66654 | 63.49693 | -2303.38776 | 1089.76242  | 964.62032   | 1 |
| 230 | H | 82.42639 | 80.25740 | 64.30239 | 884.16729   | 2568.80533  | -207.74283  | 1 |
| 231 | N | 84.30203 | 79.94291 | 63.56549 | -594.49522  | -252.81478  | 342.29276   | 1 |
| 232 | H | 85.16096 | 79.91750 | 64.09146 | -1735.17426 | 2084.05705  | -263.71605  | 1 |
| 233 | C | 84.31472 | 80.44195 | 62.39606 | 595.23177   | -271.52487  | 442.22352   | 1 |
| 234 | N | 83.10899 | 80.46989 | 61.68556 | 585.53813   | -424.79750  | -105.81303  | 1 |
| 235 | H | 82.18456 | 80.14598 | 61.96531 | 959.88797   | 1327.56823  | -2177.11905 | 1 |
| 236 | H | 82.99627 | 80.84523 | 60.74350 | 1578.48647  | 16.27378    | -2220.76233 | 1 |
| 237 | N | 85.59954 | 80.88183 | 62.04721 | -452.17763  | -390.33541  | -421.51853  | 1 |
| 238 | H | 86.47897 | 80.85691 | 62.56030 | 470.26107   | 1974.25629  | -1817.92087 | 1 |
| 239 | H | 85.81423 | 81.30802 | 61.14488 | 1856.67307  | -1573.97321 | -1224.35416 | 1 |
| 240 | C | 83.11197 | 78.75998 | 68.75487 | -531.47271  | -581.45780  | -55.06206   | 1 |
| 241 | O | 82.20609 | 79.48739 | 69.15069 | -243.00837  | 192.73507   | 609.52485   | 1 |
| 242 | N | 84.39711 | 78.84333 | 69.01951 | 343.49288   | -644.25607  | 38.09164    | 1 |
| 243 | H | 84.96555 | 78.13898 | 68.55042 | -1691.16043 | -1535.97525 | -1484.73099 | 1 |
| 244 | C | 84.95371 | 79.62584 | 70.11150 | 542.66492   | 350.14337   | 454.42563   | 1 |
| 245 | H | 86.05681 | 79.51432 | 69.98241 | 1209.57979  | -2396.95920 | 463.86744   | 1 |
| 246 | C | 84.47349 | 81.06701 | 69.99153 | -737.14309  | 145.93010   | 242.71942   | 1 |
| 247 | H | 83.35713 | 81.06099 | 70.04286 | -1050.18303 | 159.36419   | -2509.06125 | 1 |
| 248 | C | 85.00096 | 81.92890 | 71.12128 | -706.77696  | -252.88343  | -245.16230  | 1 |
| 249 | H | 84.64026 | 82.99131 | 71.03728 | -1624.64039 | -1665.49085 | 1417.86935  | 1 |
| 250 | H | 84.67174 | 81.53974 | 72.13332 | 2566.10521  | 598.51109   | 693.22305   | 1 |
| 251 | H | 86.12546 | 81.96049 | 71.12557 | -1972.69758 | 107.10018   | -1876.34312 | 1 |
| 252 | C | 84.85766 | 81.67378 | 68.65452 | 412.85148   | 672.58832   | -27.69222   | 1 |
| 253 | H | 84.47884 | 82.72770 | 68.54851 | 1447.02277  | 1762.76533  | -1490.78944 | 1 |
| 254 | H | 85.97386 | 81.70402 | 68.51862 | 1320.77379  | -145.20455  | 2378.68491  | 1 |
| 255 | H | 84.43304 | 81.07744 | 67.80089 | -1512.10848 | 1470.52031  | 1724.75147  | 1 |
| 256 | C | 84.44185 | 78.92499 | 71.53646 | -607.11113  | 499.56689   | 73.73769    | 1 |
| 257 | O | 85.28555 | 78.53663 | 72.30253 | 357.97126   | 460.81534   | 356.68785   | 1 |
| 258 | N | 83.12787 | 78.90982 | 71.66170 | 536.55407   | -368.62270  | 332.76306   | 1 |
| 259 | H | 82.50831 | 79.27586 | 70.90787 | 524.38866   | 2297.69985  | 1367.20941  | 1 |
| 260 | C | 82.61442 | 78.39715 | 72.88106 | 46.50277    | -774.29190  | -147.97904  | 1 |
| 261 | H | 83.43790 | 77.76904 | 73.29162 | 1676.51875  | 1883.29066  | 1032.55549  | 1 |
| 262 | C | 82.27323 | 79.64357 | 73.85422 | -559.41456  | -34.19198   | -556.30433  | 1 |
| 263 | H | 81.54397 | 80.31367 | 73.34113 | -64.66664   | 395.18769   | 2695.05373  | 1 |
| 264 | H | 81.76382 | 79.28485 | 74.78001 | -2703.44278 | -60.40056   | 333.79418   | 1 |
| 265 | C | 83.52329 | 80.40342 | 74.19843 | -519.76435  | 377.31045   | 459.42366   | 1 |
| 266 | H | 84.06040 | 80.64823 | 73.24410 | -1746.74323 | 1667.50644  | -1261.73691 | 1 |
| 267 | C | 83.18093 | 81.70518 | 74.91308 | 570.95554   | 16.46261    | -545.27700  | 1 |
| 268 | H | 84.10023 | 82.30008 | 75.15117 | 2391.58273  | 28.05277    | -1305.07271 | 1 |
| 269 | H | 82.51480 | 82.35748 | 74.29196 | 175.75588   | 917.63458   | 2559.43867  | 1 |
| 270 | H | 82.65076 | 81.51508 | 75.88141 | -1063.97851 | -2155.34650 | 1283.00462  | 1 |
| 271 | C | 84.45934 | 79.58599 | 75.07843 | 193.76014   | 2.62946     | -765.53141  | 1 |
| 272 | H | 85.34928 | 80.18580 | 75.40140 | 507.39394   | -846.55087  | 2539.60089  | 1 |
| 273 | H | 83.94697 | 79.22479 | 76.00710 | 1337.57841  | 1818.19054  | 1526.01994  | 1 |
| 274 | H | 84.85192 | 78.68558 | 74.53477 | 1100.88635  | -1172.91350 | -2199.08909 | 1 |
| 275 | C | 81.24151 | 77.60119 | 72.58473 | -549.21115  | 475.64486   | -309.38218  | 1 |
| 276 | O | 80.52288 | 77.81639 | 71.64449 | 556.06106   | -390.37755  | -78.24250   | 1 |
| 277 | O | 80.84952 | 76.67412 | 73.58267 | -572.27940  | -310.19032  | -209.75862  | 1 |
| 278 | H | 81.61820 | 76.79284 | 74.20711 | -1380.08193 | 2212.14486  | 790.85944   | 1 |

Listing 55: C00055.xmolout

|   |   |          |          |          |             |             |             |        |          |
|---|---|----------|----------|----------|-------------|-------------|-------------|--------|----------|
| 1 |   | 276      |          |          |             |             |             |        |          |
| 2 |   | 150.0000 | 150.0000 | 150.0000 | 0.0000      | 0.0000      | 0.0000***** | 2.7750 | 11100    |
|   |   | 0.2500   | 300.00   | 0.00     | 0.00        | 0.00        | -1293.6534  | 0.0000 | 300.0000 |
| 3 | H | 71.37730 | 64.98872 | 62.03234 | -2043.14101 | -1757.64893 | 399.89339   |        | 1        |
| 4 | N | 71.39791 | 65.91270 | 62.46494 | 426.75047   | 490.45733   | -334.42467  |        | 1        |
| 5 | H | 71.53437 | 65.70940 | 63.46823 | 442.25559   | -1110.30854 | -2448.52907 |        | 1        |

|    |   |          |          |          |             |             |             |   |
|----|---|----------|----------|----------|-------------|-------------|-------------|---|
| 6  | C | 72.41840 | 66.75283 | 61.96331 | 415.32972   | -666.39213  | 83.73172    | 1 |
| 7  | H | 72.92220 | 66.16850 | 61.16353 | 879.32219   | 2491.00447  | 667.35213   | 1 |
| 8  | C | 71.77798 | 68.12007 | 61.39828 | 31.35357    | 477.41777   | 628.23362   | 1 |
| 9  | H | 71.17617 | 68.60529 | 62.20364 | 1168.38489  | 2240.25337  | -1019.71136 | 1 |
| 10 | H | 72.58014 | 68.84889 | 61.13162 | -360.43770  | 2534.90498  | 931.67112   | 1 |
| 11 | C | 70.91693 | 67.82211 | 60.19997 | 463.18208   | 512.70242   | -382.34388  | 1 |
| 12 | H | 70.15777 | 67.06334 | 60.49615 | 1725.29117  | 1863.52247  | -987.07854  | 1 |
| 13 | C | 70.19564 | 69.08501 | 59.74359 | 710.42801   | -144.27427  | -313.15367  | 1 |
| 14 | H | 69.52819 | 68.88664 | 58.86568 | 364.20195   | -1033.13725 | 2494.72524  | 1 |
| 15 | H | 69.55688 | 69.51516 | 60.55739 | 2567.61904  | 335.80679   | 847.48802   | 1 |
| 16 | H | 70.91949 | 69.88259 | 59.43453 | -2587.99029 | 680.92867   | -512.16411  | 1 |
| 17 | C | 71.73247 | 67.26808 | 59.03924 | 268.17616   | 741.64379   | -40.42634   | 1 |
| 18 | H | 71.09995 | 67.11480 | 58.12702 | 1283.54314  | -1945.37420 | -1411.27812 | 1 |
| 19 | H | 72.56473 | 67.96107 | 58.75203 | -1258.57796 | 1317.15249  | -2026.02085 | 1 |
| 20 | H | 72.19468 | 66.27870 | 59.28789 | -2502.84526 | 909.80597   | 575.92391   | 1 |
| 21 | C | 73.33603 | 66.98586 | 63.27851 | 619.36578   | -458.64843  | -172.09273  | 1 |
| 22 | O | 73.13617 | 66.33332 | 64.29105 | -81.40433   | 433.87611   | 522.34594   | 1 |
| 23 | N | 74.28845 | 67.87474 | 63.03146 | 175.23996   | -622.20190  | 341.55523   | 1 |
| 24 | H | 74.29180 | 68.34498 | 62.12785 | -876.57256  | -303.22879  | -2561.90213 | 1 |
| 25 | C | 75.14052 | 68.30156 | 64.09471 | -571.88214  | -534.10783  | -106.15033  | 1 |
| 26 | H | 75.38711 | 67.36739 | 64.64390 | -2713.20841 | -16.25800   | -248.80809  | 1 |
| 27 | C | 76.37712 | 69.03912 | 63.40357 | 166.60354   | 288.16399   | -716.09568  | 1 |
| 28 | H | 75.97440 | 69.90885 | 62.81565 | -2097.85574 | 1636.78449  | -586.18044  | 1 |
| 29 | O | 77.11922 | 68.23774 | 62.46185 | -317.80580  | -363.38227  | 484.43082   | 1 |
| 30 | H | 76.97688 | 68.73845 | 61.63550 | 1863.74748  | -1451.84923 | 1357.29467  | 1 |
| 31 | C | 77.21272 | 69.59313 | 64.61510 | 503.80731   | 517.99032   | 318.51606   | 1 |
| 32 | H | 78.04151 | 70.25131 | 64.26453 | 640.61020   | -2157.10410 | -1536.29104 | 1 |
| 33 | H | 76.59220 | 70.19977 | 65.33550 | 1687.88455  | 465.60692   | 2087.56452  | 1 |
| 34 | H | 77.68382 | 68.76630 | 65.19508 | -1293.07895 | -1899.88581 | -1463.57452 | 1 |
| 35 | C | 74.30527 | 69.37200 | 64.99883 | -153.07550  | -733.68902  | 248.70981   | 1 |
| 36 | O | 73.63415 | 70.21016 | 64.45892 | 186.15459   | -480.78787  | -449.34387  | 1 |
| 37 | N | 74.59982 | 69.22195 | 66.29752 | -487.53139  | 543.18517   | 42.03850    | 1 |
| 38 | C | 74.09621 | 70.12664 | 67.28737 | -699.35871  | 69.34393    | 360.10701   | 1 |
| 39 | H | 73.04388 | 70.35729 | 67.00194 | 2.81126     | -221.99807  | -2715.58072 | 1 |
| 40 | C | 74.28127 | 69.30409 | 68.63374 | -507.46439  | -592.59194  | 122.07761   | 1 |
| 41 | H | 74.35152 | 69.95574 | 69.53366 | -1975.08116 | 525.87560   | -1801.71556 | 1 |
| 42 | H | 73.43245 | 68.60630 | 68.80963 | 1588.27743  | -1913.22100 | 1113.83566  | 1 |
| 43 | C | 75.59999 | 68.52725 | 68.33679 | -613.62442  | -457.55993  | -194.14490  | 1 |
| 44 | H | 76.48589 | 69.19822 | 68.41236 | 1707.54637  | -721.27992  | 1996.92523  | 1 |
| 45 | H | 75.78403 | 67.67145 | 69.02466 | 758.23357   | 2100.81767  | 1560.55011  | 1 |
| 46 | C | 75.33215 | 68.08279 | 66.83347 | -352.41524  | 704.96076   | 49.21465    | 1 |
| 47 | H | 76.24922 | 67.90913 | 66.22589 | 1714.76886  | -2070.42778 | 443.35792   | 1 |
| 48 | H | 74.64604 | 67.20882 | 66.72218 | 1224.15040  | 1801.50881  | 1636.97633  | 1 |
| 49 | C | 75.02936 | 71.46647 | 67.35422 | 566.85117   | 537.05831   | 117.62814   | 1 |
| 50 | O | 76.10007 | 71.56720 | 66.79898 | -550.26779  | -406.08867  | 4.21666     | 1 |
| 51 | N | 74.48082 | 72.33647 | 68.26172 | 566.34832   | -425.77725  | 180.18749   | 1 |
| 52 | H | 73.54415 | 71.93600 | 68.39161 | 644.44502   | 2646.80550  | -52.73430   | 1 |
| 53 | C | 74.56213 | 73.73275 | 67.88085 | 612.34801   | -281.48662  | 411.56221   | 1 |
| 54 | H | 74.61343 | 73.74924 | 66.77072 | 1667.23498  | -1490.75142 | 1556.16753  | 1 |
| 55 | C | 73.24793 | 74.38621 | 68.47868 | -714.45746  | -175.43074  | 286.98927   | 1 |
| 56 | H | 73.29357 | 74.33128 | 69.60139 | -787.09484  | 1763.03619  | -1922.46060 | 1 |
| 57 | O | 72.01000 | 73.72894 | 68.11613 | -429.46514  | 516.51932   | -128.40526  | 1 |
| 58 | H | 71.64308 | 73.51667 | 68.99492 | 1981.82785  | 436.16847   | -1818.18182 | 1 |
| 59 | C | 73.38237 | 75.88817 | 68.03020 | 630.79189   | -468.94448  | 76.03230    | 1 |
| 60 | H | 72.54735 | 76.50807 | 68.43185 | -1775.71861 | 2062.30353  | 131.89849   | 1 |
| 61 | H | 74.33589 | 76.34775 | 68.38515 | -1855.14608 | 88.94118    | 1993.53760  | 1 |
| 62 | H | 73.36125 | 75.98423 | 66.91975 | -1504.82350 | -780.94249  | -2132.90992 | 1 |
| 63 | C | 75.86542 | 74.38937 | 68.58789 | 288.57638   | 618.62814   | -397.00270  | 1 |
| 64 | O | 76.37957 | 75.38454 | 68.12472 | 321.70495   | -185.26452  | 574.37218   | 1 |
| 65 | N | 76.13160 | 73.80065 | 69.75404 | -447.05792  | -446.53431  | 367.76425   | 1 |
| 66 | H | 75.60626 | 72.96490 | 70.00701 | 350.31316   | 1975.63644  | -1843.31522 | 1 |
| 67 | C | 77.23373 | 74.31546 | 70.51249 | -511.23061  | 374.03917   | -471.51480  | 1 |

|     |   |          |          |          |             |             |             |   |
|-----|---|----------|----------|----------|-------------|-------------|-------------|---|
| 68  | H | 77.90908 | 74.72500 | 69.72375 | 2234.79579  | -898.70890  | -1273.45190 | 1 |
| 69  | C | 76.62773 | 75.46531 | 71.42205 | 529.53781   | -159.34528  | 563.72604   | 1 |
| 70  | H | 77.45995 | 75.93412 | 72.00464 | 654.59388   | 2347.94251  | 1217.51488  | 1 |
| 71  | H | 76.21245 | 76.26297 | 70.75810 | -1526.55661 | 2103.42026  | 817.87394   | 1 |
| 72  | O | 75.58831 | 75.02559 | 72.41483 | -554.84278  | 14.12789    | 399.58769   | 1 |
| 73  | H | 74.84125 | 74.96035 | 71.80495 | 1297.06236  | 2061.84854  | 1220.68812  | 1 |
| 74  | C | 77.84999 | 73.05562 | 71.34164 | -662.15484  | -412.13544  | 123.62687   | 1 |
| 75  | O | 78.82623 | 72.48762 | 70.92720 | -540.01537  | -317.05804  | 274.91456   | 1 |
| 76  | N | 77.13034 | 72.77283 | 72.43458 | -202.76299  | -690.00100  | -131.49145  | 1 |
| 77  | H | 76.31958 | 73.37289 | 72.67643 | -702.62132  | -2617.37191 | 281.70413   | 1 |
| 78  | C | 77.52801 | 71.62148 | 73.24746 | -491.73914  | 576.34187   | 222.73509   | 1 |
| 79  | H | 78.11974 | 71.01027 | 72.52297 | 1977.17978  | -1823.58850 | -434.68928  | 1 |
| 80  | C | 78.35244 | 72.11493 | 74.42572 | -649.50797  | -328.66843  | 306.11224   | 1 |
| 81  | H | 77.73698 | 72.84529 | 74.99621 | 2075.07803  | 1452.16490  | -1004.45904 | 1 |
| 82  | C | 78.71226 | 70.97198 | 75.35674 | -615.18735  | -489.99689  | -70.96352   | 1 |
| 83  | H | 79.28392 | 71.33015 | 76.25687 | -1226.32661 | -1724.38906 | -1716.47170 | 1 |
| 84  | H | 77.79376 | 70.43982 | 75.73101 | 2381.64273  | -969.84735  | 900.46860   | 1 |
| 85  | H | 79.35056 | 70.20366 | 74.83883 | 2122.74991  | 1702.23946  | -141.36228  | 1 |
| 86  | C | 79.60716 | 72.83743 | 73.97197 | -501.86074  | -479.61276  | -376.42482  | 1 |
| 87  | H | 80.21186 | 73.21711 | 74.84134 | 993.79261   | -2246.95401 | -1177.81305 | 1 |
| 88  | H | 80.27377 | 72.16306 | 73.36571 | 42.71279    | -626.15391  | -2651.37258 | 1 |
| 89  | H | 79.35785 | 73.72116 | 73.32128 | -2026.39012 | -1590.33709 | -887.82922  | 1 |
| 90  | C | 76.15023 | 70.87256 | 73.79900 | -672.89153  | 382.57394   | -156.34072  | 1 |
| 91  | O | 75.99410 | 69.69853 | 73.56564 | 410.04627   | 221.86223   | 500.35950   | 1 |
| 92  | N | 75.36808 | 71.68368 | 74.49106 | -378.11782  | -443.79414  | -441.10984  | 1 |
| 93  | H | 75.63853 | 72.66001 | 74.58909 | 2404.15973  | -568.14894  | 1149.30085  | 1 |
| 94  | C | 74.26444 | 71.11750 | 75.19327 | -544.54484  | 466.16019   | 331.29119   | 1 |
| 95  | H | 74.17468 | 70.07281 | 74.81042 | -1409.80988 | -170.17955  | 2325.32679  | 1 |
| 96  | C | 74.62714 | 71.20494 | 76.74641 | -184.48284  | 116.78282   | -758.89137  | 1 |
| 97  | H | 75.70276 | 70.97194 | 76.91008 | 1893.78641  | 1861.14652  | 611.04528   | 1 |
| 98  | H | 74.47644 | 72.23867 | 77.13613 | -2170.79665 | -974.19311  | 1327.50117  | 1 |
| 99  | C | 73.72204 | 70.17959 | 77.49370 | 389.51668   | 672.81878   | -138.49152  | 1 |
| 100 | H | 72.65697 | 70.49507 | 77.41509 | 510.64577   | 1933.03327  | 1851.02484  | 1 |
| 101 | H | 73.76413 | 69.18976 | 76.98819 | -2302.30869 | -1105.72939 | -948.89774  | 1 |
| 102 | C | 74.11771 | 69.97072 | 79.00509 | -559.93427  | -126.34590  | 542.30857   | 1 |
| 103 | O | 73.78377 | 68.96323 | 79.58671 | -670.36003  | -111.83166  | 76.36448    | 1 |
| 104 | N | 74.80514 | 71.00727 | 79.52975 | -216.06729  | -537.07037  | 446.51379   | 1 |
| 105 | H | 74.88084 | 71.96945 | 79.11515 | -1251.96487 | 1074.12894  | -2168.52500 | 1 |
| 106 | H | 74.99699 | 71.06559 | 80.53921 | -2451.83023 | -720.73851  | 944.84612   | 1 |
| 107 | C | 72.97797 | 72.08097 | 74.96730 | 546.24052   | -563.88337  | -85.11809   | 1 |
| 108 | O | 73.09594 | 73.29496 | 75.05280 | 71.70702    | -307.40463  | 606.69673   | 1 |
| 109 | N | 71.87763 | 71.36373 | 74.76008 | 479.90863   | -504.50129  | 222.86849   | 1 |
| 110 | C | 70.61649 | 72.00918 | 74.50043 | 75.51268    | -600.91904  | 506.73700   | 1 |
| 111 | H | 70.87180 | 72.85764 | 73.82416 | -2033.61562 | 1795.30103  | 254.89480   | 1 |
| 112 | C | 69.75417 | 70.84804 | 73.84844 | 523.79067   | 517.99274   | 284.45581   | 1 |
| 113 | H | 68.65943 | 70.99782 | 73.98414 | 1599.61665  | -1127.00911 | 1895.98173  | 1 |
| 114 | H | 69.93280 | 70.77214 | 72.75248 | -1881.83093 | 1275.82488  | -1501.55016 | 1 |
| 115 | C | 70.29868 | 69.59245 | 74.59827 | -600.05639  | -404.05026  | 316.64485   | 1 |
| 116 | H | 69.87321 | 69.53013 | 75.62506 | -2597.05260 | 496.36221   | 657.73249   | 1 |
| 117 | H | 70.06045 | 68.62927 | 74.09302 | -1666.24518 | 1294.38985  | -1723.90591 | 1 |
| 118 | C | 71.85475 | 69.91255 | 74.63593 | 493.57570   | -129.95376  | -602.56394  | 1 |
| 119 | H | 72.40434 | 69.46462 | 75.49459 | -1469.08415 | -637.84797  | 2204.22581  | 1 |
| 120 | H | 72.39851 | 69.67855 | 73.68975 | -1038.97840 | 1068.88701  | -2280.71789 | 1 |
| 121 | C | 69.99552 | 72.53602 | 75.91108 | 188.88100   | 241.05089   | -727.87821  | 1 |
| 122 | O | 69.04989 | 71.99181 | 76.40925 | 531.88613   | -49.19943   | 427.07960   | 1 |
| 123 | N | 70.72828 | 73.56313 | 76.36020 | 708.14833   | 26.93417    | -179.73509  | 1 |
| 124 | H | 71.58783 | 73.80355 | 75.80293 | -2232.69501 | -1179.09831 | 1023.94816  | 1 |
| 125 | C | 70.14898 | 74.65208 | 77.16613 | -738.32412  | 259.92548   | 104.42456   | 1 |
| 126 | H | 70.37780 | 75.57172 | 76.57673 | 2028.89123  | 1260.02983  | 1311.33324  | 1 |
| 127 | C | 68.67594 | 74.48048 | 77.46500 | -258.65678  | -345.52513  | 661.28459   | 1 |
| 128 | H | 68.52545 | 73.45253 | 77.87917 | -1826.06090 | -1801.46097 | -918.64554  | 1 |
| 129 | C | 68.21750 | 75.48468 | 78.50904 | -541.23400  | 531.92970   | -218.41428  | 1 |

|     |   |          |          |          |             |             |             |   |
|-----|---|----------|----------|----------|-------------|-------------|-------------|---|
| 130 | H | 67.15941 | 75.29475 | 78.83788 | 1311.73218  | -2219.18200 | 882.19023   | 1 |
| 131 | H | 68.87124 | 75.44851 | 79.42693 | -1048.71298 | 1223.58118  | -2196.97971 | 1 |
| 132 | H | 68.26333 | 76.53719 | 78.11707 | 419.06414   | 1903.92898  | 1903.44670  | 1 |
| 133 | C | 67.80965 | 74.60775 | 76.22525 | -423.86431  | 152.66566   | -648.55262  | 1 |
| 134 | H | 66.71742 | 74.48500 | 76.46363 | 105.68386   | -2342.50080 | 1387.51238  | 1 |
| 135 | H | 67.93695 | 75.61357 | 75.73410 | -1695.63603 | -1484.73621 | -1531.02793 | 1 |
| 136 | H | 68.07508 | 73.82690 | 75.45772 | -1853.57121 | -487.39031  | 1936.59343  | 1 |
| 137 | C | 70.97529 | 74.62989 | 78.59354 | 539.71428   | -510.58232  | 267.58633   | 1 |
| 138 | O | 71.13892 | 75.66825 | 79.22520 | -15.93758   | -278.34085  | -624.49402  | 1 |
| 139 | N | 71.28193 | 73.40793 | 78.96002 | -676.81886  | 12.05292    | 276.17960   | 1 |
| 140 | H | 71.08243 | 72.67964 | 78.27895 | -1694.44250 | -373.84189  | -2100.66098 | 1 |
| 141 | C | 71.91064 | 73.23736 | 80.24027 | 412.33078   | -664.70360  | 108.35451   | 1 |
| 142 | H | 71.29741 | 73.84575 | 80.94376 | 1765.77476  | 1294.44366  | 1621.76594  | 1 |
| 143 | C | 71.96731 | 71.69792 | 80.58916 | -179.66635  | -721.95667  | -264.73915  | 1 |
| 144 | H | 70.95382 | 71.23769 | 80.58112 | -607.34922  | 2587.87032  | -598.10018  | 1 |
| 145 | H | 72.56100 | 71.13766 | 79.82733 | -359.69332  | -1479.13954 | -2259.74260 | 1 |
| 146 | C | 72.63371 | 71.59378 | 82.00351 | -240.01076  | 616.02425   | 431.85322   | 1 |
| 147 | H | 73.58780 | 72.16721 | 82.01333 | -1359.17131 | 782.54425   | 2227.99181  | 1 |
| 148 | H | 71.99491 | 72.05245 | 82.79079 | -820.36667  | 85.81767    | -2596.78715 | 1 |
| 149 | C | 72.90998 | 70.06858 | 82.30602 | -513.07015  | 236.18570   | -551.87280  | 1 |
| 150 | H | 71.97414 | 69.54408 | 82.60972 | 1816.11944  | -1183.11722 | -1650.94321 | 1 |
| 151 | H | 73.26822 | 69.53860 | 81.36961 | -1800.04429 | -1361.53473 | 1526.34643  | 1 |
| 152 | C | 73.98265 | 69.99048 | 83.41816 | 726.08972   | -253.19732  | -179.64713  | 1 |
| 153 | H | 74.92296 | 70.53140 | 83.19008 | 1224.27271  | -456.51798  | -2390.90304 | 1 |
| 154 | H | 73.62655 | 70.25984 | 84.43287 | 1206.40339  | -1150.93514 | -2154.90344 | 1 |
| 155 | N | 74.41894 | 68.49149 | 83.51237 | 329.70796   | -633.68968  | -155.67358  | 1 |
| 156 | H | 75.19017 | 68.26827 | 84.20602 | 1348.31305  | 1938.76845  | 1359.00643  | 1 |
| 157 | H | 73.67611 | 67.78351 | 83.78327 | 2096.92035  | 1446.54551  | -966.48890  | 1 |
| 158 | H | 74.80720 | 68.06761 | 82.62062 | -1197.07217 | -2303.53719 | 827.28733   | 1 |
| 159 | C | 73.42280 | 73.84022 | 80.08525 | -378.01186  | -556.17301  | -413.96481  | 1 |
| 160 | O | 74.17698 | 73.58614 | 79.14521 | -409.44433  | -307.55053  | -453.30833  | 1 |
| 161 | N | 73.67130 | 74.49836 | 81.19119 | -429.02477  | 524.70884   | 274.08502   | 1 |
| 162 | H | 72.91042 | 74.53739 | 81.86748 | 1706.34263  | -1425.96036 | 1574.38926  | 1 |
| 163 | C | 74.81648 | 75.33322 | 81.34623 | -45.25864   | -626.22952  | 478.93267   | 1 |
| 164 | H | 74.91586 | 75.45431 | 82.44882 | 1988.63164  | 570.90773   | 1772.87287  | 1 |
| 165 | C | 76.05495 | 74.59881 | 80.68099 | 551.77128   | -20.49526   | -564.54996  | 1 |
| 166 | H | 76.09204 | 73.53828 | 81.01971 | 1434.61535  | -1753.10253 | 1513.99471  | 1 |
| 167 | H | 75.93200 | 74.55413 | 79.56625 | -714.67738  | 1819.09770  | 1898.36494  | 1 |
| 168 | C | 77.38376 | 75.34441 | 81.02846 | 446.99263   | -555.77305  | 338.97221   | 1 |
| 169 | H | 77.38286 | 76.37316 | 80.59592 | 1953.68466  | 1892.25957  | -161.67766  | 1 |
| 170 | H | 77.51678 | 75.46728 | 82.12683 | -403.03785  | 2688.07032  | -188.43591  | 1 |
| 171 | C | 78.52444 | 74.44201 | 80.40399 | 567.86262   | 335.74681   | 434.04421   | 1 |
| 172 | H | 78.59375 | 73.46908 | 80.94259 | -1080.02275 | 1568.26081  | -1948.78900 | 1 |
| 173 | H | 78.28366 | 74.18482 | 79.34689 | -919.54108  | 2111.34692  | 1456.13463  | 1 |
| 174 | C | 79.86681 | 75.20396 | 80.47056 | 195.81897   | 173.33862   | -745.11536  | 1 |
| 175 | H | 79.93193 | 76.07286 | 79.78698 | 1405.67949  | -2301.21089 | -390.08113  | 1 |
| 176 | H | 80.18759 | 75.49150 | 81.49181 | -940.37328  | -1118.32446 | 2299.72133  | 1 |
| 177 | N | 80.98586 | 74.23445 | 79.95833 | 319.26422   | 656.36007   | -42.02424   | 1 |
| 178 | H | 81.96758 | 74.63551 | 79.94379 | 1961.03633  | 619.91968   | 1787.09422  | 1 |
| 179 | H | 81.13550 | 73.33580 | 80.50274 | 854.14343   | -2156.80752 | 1429.08711  | 1 |
| 180 | H | 80.89243 | 73.87761 | 78.96315 | 1237.02905  | -1378.50857 | -1998.28500 | 1 |
| 181 | C | 74.54972 | 76.77237 | 80.62432 | 532.53319   | -268.57236  | 517.55729   | 1 |
| 182 | O | 75.44302 | 77.57991 | 80.67402 | 266.16714   | -290.73804  | -558.88002  | 1 |
| 183 | N | 73.35521 | 76.87305 | 80.05764 | -226.25352  | 640.49678   | -270.32839  | 1 |
| 184 | H | 72.66432 | 76.09003 | 80.07055 | 2007.69063  | -1035.27229 | 1523.50231  | 1 |
| 185 | C | 72.87030 | 78.13617 | 79.60667 | -540.76542  | -573.33303  | 49.50000    | 1 |
| 186 | H | 71.80733 | 77.88808 | 79.37497 | -2374.20950 | -1036.76023 | 843.75774   | 1 |
| 187 | C | 73.00904 | 79.17374 | 80.82097 | -77.09082   | 666.87422   | -415.84136  | 1 |
| 188 | H | 74.10458 | 79.40905 | 80.94172 | -985.81834  | 617.19825   | 2463.91927  | 1 |
| 189 | O | 72.54297 | 78.69709 | 82.09679 | 293.29899   | -391.65602  | -477.80926  | 1 |
| 190 | H | 73.38136 | 78.68058 | 82.60059 | 2528.72714  | -681.76262  | -751.27122  | 1 |
| 191 | C | 72.25712 | 80.45505 | 80.30816 | 252.47363   | -605.14473  | 440.05134   | 1 |



|     |   |          |          |          |             |             |             |   |
|-----|---|----------|----------|----------|-------------|-------------|-------------|---|
| 192 | H | 72.33439 | 81.28959 | 81.04407 | -2052.65063 | 1456.49051  | -1043.51830 | 1 |
| 193 | H | 72.67583 | 80.83039 | 79.33043 | -2152.98800 | -1661.97574 | -161.70652  | 1 |
| 194 | H | 71.17107 | 80.25458 | 80.15326 | -473.12726  | -1584.27339 | 2165.61725  | 1 |
| 195 | C | 73.69789 | 78.61834 | 78.29637 | 360.36307   | 488.46713   | 505.10056   | 1 |
| 196 | O | 73.66032 | 79.80518 | 77.96171 | -200.08817  | -528.03552  | -385.82850  | 1 |
| 197 | N | 74.26239 | 77.60528 | 77.68046 | -597.54095  | -226.44775  | 355.20479   | 1 |
| 198 | H | 74.12915 | 76.70681 | 78.14510 | 2179.23655  | -1300.70981 | -991.33835  | 1 |
| 199 | C | 75.03384 | 77.69690 | 76.50178 | -687.68921  | 297.39807   | -249.45179  | 1 |
| 200 | H | 75.17726 | 76.63476 | 76.20423 | -349.16256  | -2467.37713 | -1101.72831 | 1 |
| 201 | C | 74.25558 | 78.57670 | 75.41715 | 672.47345   | 361.54328   | -201.62880  | 1 |
| 202 | H | 74.15718 | 79.62713 | 75.78152 | 1541.41502  | 582.18425   | 2169.97026  | 1 |
| 203 | H | 74.85740 | 78.61684 | 74.47999 | -2534.67717 | 60.25153    | 997.72295   | 1 |
| 204 | C | 72.86185 | 77.99668 | 75.13310 | 574.26774   | -389.43119  | -377.02542  | 1 |
| 205 | C | 72.70985 | 76.77235 | 74.41469 | 688.82679   | -287.33580  | -257.96133  | 1 |
| 206 | H | 73.59309 | 76.18362 | 74.10435 | 331.14182   | 1470.38163  | 2269.80013  | 1 |
| 207 | C | 71.71404 | 78.72493 | 75.57090 | -383.52382  | -675.04808  | 144.24917   | 1 |
| 208 | H | 71.83103 | 79.65092 | 76.16332 | 4.09847     | 1517.59662  | 2262.86397  | 1 |
| 209 | C | 71.41983 | 76.34324 | 74.09750 | -134.76730  | 428.45285   | -649.50303  | 1 |
| 210 | H | 71.30276 | 75.40252 | 73.53204 | -903.23433  | 1600.49020  | 2011.53387  | 1 |
| 211 | C | 70.44394 | 78.25904 | 75.22049 | -335.53281  | -615.00040  | -364.39058  | 1 |
| 212 | H | 69.56409 | 78.84274 | 75.54399 | 1596.45398  | -1369.33862 | 1732.02659  | 1 |
| 213 | C | 70.24853 | 77.07051 | 74.45862 | 585.48547   | -340.24194  | -406.23938  | 1 |
| 214 | O | 68.95737 | 76.60399 | 74.08038 | -419.15649  | -173.04408  | -511.94141  | 1 |
| 215 | H | 68.41296 | 77.36584 | 74.39292 | -1071.84350 | 1559.71507  | -1960.13012 | 1 |
| 216 | C | 76.46002 | 78.45916 | 76.77222 | 291.41878   | -183.13091  | 710.72246   | 1 |
| 217 | O | 77.48311 | 77.92931 | 76.40916 | 379.87695   | 523.47396   | -222.23622  | 1 |
| 218 | N | 76.29178 | 79.67272 | 77.28632 | 564.30591   | 373.09380   | 277.24371   | 1 |
| 219 | H | 75.33516 | 80.00610 | 77.55635 | -120.59931  | -2436.07824 | -1214.35098 | 1 |
| 220 | C | 77.45828 | 80.37806 | 77.67903 | 404.07514   | -299.37480  | 608.84009   | 1 |
| 221 | H | 78.32911 | 79.80804 | 77.27602 | -1071.07882 | -841.69025  | 2359.66467  | 1 |
| 222 | C | 77.31065 | 81.85737 | 77.12090 | -683.12807  | 68.71770    | -390.13096  | 1 |
| 223 | H | 77.06748 | 81.84298 | 76.03493 | 2068.88918  | 1596.58590  | 770.89603   | 1 |
| 224 | H | 76.45845 | 82.37798 | 77.61271 | 1379.86429  | 2342.49779  | -179.85638  | 1 |
| 225 | C | 78.65167 | 82.60916 | 77.38143 | -176.39967  | 537.49466   | 550.97268   | 1 |
| 226 | H | 78.88752 | 82.63717 | 78.46893 | -396.28051  | 1942.22168  | 1869.33314  | 1 |
| 227 | H | 79.50299 | 82.07758 | 76.90105 | -94.44700   | 586.00678   | -2659.20016 | 1 |
| 228 | C | 78.49203 | 84.08773 | 76.79807 | -291.69381  | -718.18079  | -150.72929  | 1 |
| 229 | H | 78.22168 | 84.14165 | 75.71257 | -2303.38776 | 1089.76242  | 964.62032   | 1 |
| 230 | H | 77.79362 | 84.76078 | 77.35693 | 884.16729   | 2568.80533  | -207.74283  | 1 |
| 231 | N | 79.79450 | 84.59490 | 76.92214 | -594.49522  | -252.81478  | 342.29276   | 1 |
| 232 | H | 80.50988 | 83.94776 | 77.21476 | -1735.17426 | 2084.05705  | -263.71605  | 1 |
| 233 | C | 80.13030 | 85.79397 | 76.66874 | 595.23177   | -271.52487  | 442.22352   | 1 |
| 234 | N | 79.12443 | 86.67820 | 76.26307 | 585.53813   | -424.79750  | -105.81303  | 1 |
| 235 | H | 78.13223 | 86.50380 | 76.10869 | 959.88797   | 1327.56823  | -2177.11905 | 1 |
| 236 | H | 79.27482 | 87.65624 | 76.01400 | 1578.48647  | 16.27378    | -2220.76233 | 1 |
| 237 | N | 81.50626 | 85.98806 | 76.86121 | -452.17763  | -390.33541  | -421.51853  | 1 |
| 238 | H | 82.24763 | 85.33354 | 77.10660 | 470.26107   | 1974.25629  | -1817.92087 | 1 |
| 239 | H | 81.97133 | 86.87752 | 76.67676 | 1856.67307  | -1573.97321 | -1224.35416 | 1 |
| 240 | C | 77.44039 | 80.53935 | 79.31883 | -531.47271  | -581.45780  | -55.06206   | 1 |
| 241 | O | 76.42442 | 80.69047 | 79.95390 | -243.00837  | 192.73507   | 609.52485   | 1 |
| 242 | N | 78.70057 | 80.59958 | 79.73253 | 343.49288   | -644.25607  | 38.09164    | 1 |
| 243 | H | 79.44603 | 80.48671 | 79.04755 | -1691.16043 | -1535.97525 | -1484.73099 | 1 |
| 244 | C | 78.94289 | 80.55920 | 81.13637 | 542.66492   | 350.14337   | 454.42563   | 1 |
| 245 | H | 77.98978 | 80.12875 | 81.52339 | 1209.57979  | -2396.95920 | 463.86744   | 1 |
| 246 | C | 80.23843 | 79.67529 | 81.37218 | -737.14309  | 145.93010   | 242.71942   | 1 |
| 247 | H | 81.13599 | 80.16671 | 80.93449 | -1050.18303 | 159.36419   | -2509.06125 | 1 |
| 248 | C | 80.40920 | 79.44730 | 82.91299 | -706.77696  | -252.88343  | -245.16230  | 1 |
| 249 | H | 81.34137 | 78.87930 | 83.14338 | -1624.64039 | -1665.49085 | 1417.86935  | 1 |
| 250 | H | 80.45879 | 80.42692 | 83.47929 | 2566.10521  | 598.51109   | 693.22305   | 1 |
| 251 | H | 79.55536 | 78.86661 | 83.33501 | -1972.69758 | 107.10018   | -1876.34312 | 1 |
| 252 | C | 80.04354 | 78.26330 | 80.72039 | 412.85148   | 672.58832   | -27.69222   | 1 |
| 253 | H | 80.93566 | 77.61365 | 80.88235 | 1447.02277  | 1762.76533  | -1490.78944 | 1 |

|     |   |          |          |          |             |             |             |   |
|-----|---|----------|----------|----------|-------------|-------------|-------------|---|
| 254 | H | 79.15917 | 77.73679 | 81.14899 | 1320.77379  | -145.20455  | 2378.68491  | 1 |
| 255 | H | 79.88051 | 78.33971 | 79.61964 | -1512.10848 | 1470.52031  | 1724.75147  | 1 |
| 256 | C | 79.13589 | 82.10981 | 81.64844 | -607.11113  | 499.56689   | 73.73769    | 1 |
| 257 | O | 78.15399 | 82.80362 | 81.77826 | 357.97126   | 460.81534   | 356.68785   | 1 |
| 258 | N | 80.41230 | 82.43992 | 81.78869 | 536.55407   | -368.62270  | 332.76306   | 1 |
| 259 | H | 81.11771 | 81.72460 | 81.61411 | 524.38866   | 2297.69985  | 1367.20941  | 1 |
| 260 | C | 80.76442 | 83.58572 | 82.56113 | 46.50277    | -774.29190  | -147.97904  | 1 |
| 261 | H | 81.85255 | 83.70141 | 82.36104 | 1676.51875  | 1883.29066  | 1032.55549  | 1 |
| 262 | C | 79.89599 | 84.85544 | 82.07170 | -559.41456  | -34.19198   | -556.30433  | 1 |
| 263 | H | 78.82197 | 84.70442 | 82.36330 | -64.66664   | 395.18769   | 2695.05373  | 1 |
| 264 | H | 80.22631 | 85.79330 | 82.57883 | -2703.44278 | -60.40056   | 333.79418   | 1 |
| 265 | C | 80.01479 | 84.98116 | 80.57692 | -519.76435  | 377.31045   | 459.42366   | 1 |
| 266 | H | 79.87330 | 83.96999 | 80.13145 | -1746.74323 | 1667.50644  | -1261.73691 | 1 |
| 267 | C | 78.92772 | 85.89319 | 80.02228 | 570.95554   | 16.46261    | -545.27700  | 1 |
| 268 | H | 79.00406 | 85.99337 | 78.90837 | 2391.58273  | 28.05277    | -1305.07271 | 1 |
| 269 | H | 77.90433 | 85.49778 | 80.25251 | 175.75588   | 917.63458   | 2559.43867  | 1 |
| 270 | H | 78.99281 | 86.92480 | 80.45425 | -1063.97851 | -2155.34650 | 1283.00462  | 1 |
| 271 | C | 81.38553 | 85.50861 | 80.17456 | 193.76014   | 2.62946     | -765.53141  | 1 |
| 272 | H | 81.46018 | 85.64338 | 79.06562 | 507.39394   | -846.55087  | 2539.60089  | 1 |
| 273 | H | 81.59950 | 86.50339 | 80.64332 | 1337.57841  | 1818.19054  | 1526.01994  | 1 |
| 274 | H | 82.20629 | 84.81112 | 80.48272 | 1100.88635  | -1172.91350 | -2199.08909 | 1 |
| 275 | C | 80.49244 | 83.23835 | 84.10117 | -549.21115  | 475.64486   | -309.38218  | 1 |
| 276 | O | 80.46308 | 82.10416 | 84.52213 | 556.06106   | -390.37755  | -78.24250   | 1 |
| 277 | O | 80.43217 | 84.32628 | 85.00047 | -572.27940  | -310.19032  | -209.75862  | 1 |
| 278 | H | 80.53748 | 85.07178 | 84.34841 | -1380.08193 | 2212.14486  | 790.85944   | 1 |

Listing 56: C00056.xmolout

|    |   |          |          |          |             |             |             |        |          |
|----|---|----------|----------|----------|-------------|-------------|-------------|--------|----------|
| 1  |   | 276      |          |          |             |             |             |        |          |
| 2  |   | 150.0000 | 150.0000 | 150.0000 | 0.0000      | 0.0000      | 0.0000***** | 2.7750 | 11100    |
|    |   | 0.2500   | 300.00   | 0.00     | 0.00        | 0.00        | -1293.6502  | 0.0000 | 300.0000 |
| 3  | H | 72.77505 | 69.33813 | 69.64068 | -2043.14101 | -1757.64893 | 399.89339   |        | 1        |
| 4  | N | 73.53534 | 68.77266 | 69.26137 | 426.75047   | 490.45733   | -334.42467  |        | 1        |
| 5  | H | 73.07585 | 68.19540 | 68.53833 | 442.25559   | -1110.30854 | -2448.52907 |        | 1        |
| 6  | C | 74.59368 | 69.53908 | 68.72342 | 415.32972   | -666.39213  | 83.73172    |        | 1        |
| 7  | H | 74.38038 | 70.59958 | 68.98400 | 879.32219   | 2491.00447  | 667.35213   |        | 1        |
| 8  | C | 76.00682 | 69.03949 | 69.31837 | 31.35357    | 477.41777   | 628.23362   |        | 1        |
| 9  | H | 76.20649 | 68.00141 | 68.96012 | 1168.38489  | 2240.25337  | -1019.71136 |        | 1        |
| 10 | H | 76.84049 | 69.66558 | 68.91913 | -360.43770  | 2534.90498  | 931.67112   |        | 1        |
| 11 | C | 75.98591 | 69.07711 | 70.82308 | 463.18208   | 512.70242   | -382.34388  |        | 1        |
| 12 | H | 75.11799 | 68.47237 | 71.17112 | 1725.29117  | 1863.52247  | -987.07854  |        | 1        |
| 13 | C | 77.26698 | 68.46467 | 71.37726 | 710.42801   | -144.27427  | -313.15367  |        | 1        |
| 14 | H | 77.26164 | 68.43402 | 72.49709 | 364.20195   | -1033.13725 | 2494.72524  |        | 1        |
| 15 | H | 77.41448 | 67.41439 | 71.01586 | 2567.61904  | 335.80679   | 847.48802   |        | 1        |
| 16 | H | 78.17015 | 69.05090 | 71.06702 | -2587.99029 | 680.92867   | -512.16411  |        | 1        |
| 17 | C | 75.83354 | 70.49652 | 71.35268 | 268.17616   | 741.64379   | -40.42634   |        | 1        |
| 18 | H | 75.84612 | 70.52219 | 72.47286 | 1283.54314  | -1945.37420 | -1411.27812 |        | 1        |
| 19 | H | 76.66266 | 71.16148 | 70.99770 | -1258.57796 | 1317.15249  | -2026.02085 |        | 1        |
| 20 | H | 74.86948 | 70.96181 | 71.02246 | -2502.84526 | 909.80597   | 575.92391   |        | 1        |
| 21 | C | 74.47449 | 69.20022 | 67.14226 | 619.36578   | -458.64843  | -172.09273  |        | 1        |
| 22 | O | 73.58612 | 68.45713 | 66.73136 | -81.40433   | 433.87611   | 522.34594   |        | 1        |
| 23 | N | 75.46704 | 69.77693 | 66.49669 | 175.23996   | -622.20190  | 341.55523   |        | 1        |
| 24 | H | 76.09087 | 70.34876 | 67.06598 | -876.57256  | -303.22879  | -2561.90213 |        | 1        |
| 25 | C | 75.52612 | 69.90893 | 65.07413 | -571.88214  | -534.10783  | -106.15033  |        | 1        |
| 26 | H | 76.54844 | 70.32975 | 64.94886 | -2713.20841 | -16.25800   | -248.80809  |        | 1        |
| 27 | C | 75.44648 | 68.44785 | 64.42575 | 166.60354   | 288.16399   | -716.09568  |        | 1        |
| 28 | H | 74.45290 | 67.97917 | 64.67733 | -2097.85574 | 1636.78449  | -586.18044  |        | 1        |
| 29 | O | 76.40843 | 67.48839 | 64.90507 | -317.80580  | -363.38227  | 484.43082   |        | 1        |
| 30 | H | 75.82228 | 66.86681 | 65.38203 | 1863.74748  | -1451.84923 | 1357.29467  |        | 1        |
| 31 | C | 75.54789 | 68.78491 | 62.89253 | 503.80731   | 517.99032   | 318.51606   |        | 1        |
| 32 | H | 75.34448 | 67.88756 | 62.26270 | 640.61020   | -2157.10410 | -1536.29104 |        | 1        |
| 33 | H | 74.83127 | 69.58464 | 62.58458 | 1687.88455  | 465.60692   | 2087.56452  |        | 1        |

|    |   |          |          |          |             |             |             |   |
|----|---|----------|----------|----------|-------------|-------------|-------------|---|
| 34 | H | 76.56947 | 69.14469 | 62.62915 | -1293.07895 | -1899.88581 | -1463.57452 | 1 |
| 35 | C | 74.46182 | 71.08040 | 64.72264 | -153.07550  | -733.68902  | 248.70981   | 1 |
| 36 | O | 74.81607 | 72.19881 | 65.08459 | 186.15459   | -480.78787  | -449.34387  | 1 |
| 37 | N | 73.33636 | 70.74783 | 64.10037 | -487.53139  | 543.18517   | 42.03850    | 1 |
| 38 | C | 72.41696 | 71.76106 | 63.66083 | -699.35871  | 69.34393    | 360.10701   | 1 |
| 39 | H | 73.01636 | 72.61868 | 63.27842 | 2.81126     | -221.99807  | -2715.58072 | 1 |
| 40 | C | 71.56965 | 70.96160 | 62.58359 | -507.46439  | -592.59194  | 122.07761   | 1 |
| 41 | H | 70.61514 | 71.46706 | 62.31502 | -1975.08116 | 525.87560   | -1801.71556 | 1 |
| 42 | H | 72.13744 | 70.81643 | 61.63739 | 1588.27743  | -1913.22100 | 1113.83566  | 1 |
| 43 | C | 71.36160 | 69.61305 | 63.34185 | -613.62442  | -457.55993  | -194.14490  | 1 |
| 44 | H | 70.58117 | 69.71257 | 64.12883 | 1707.54637  | -721.27992  | 1996.92523  | 1 |
| 45 | H | 71.04290 | 68.77525 | 62.68129 | 758.23357   | 2100.81767  | 1560.55011  | 1 |
| 46 | C | 72.79918 | 69.39632 | 63.97591 | -352.41524  | 704.96076   | 49.21465    | 1 |
| 47 | H | 72.82101 | 68.94869 | 65.01660 | 1714.76886  | -2070.42778 | 443.35792   | 1 |
| 48 | H | 73.49526 | 68.83391 | 63.30881 | 1224.15040  | 1801.50881  | 1636.97633  | 1 |
| 49 | C | 71.43198 | 72.17057 | 64.90730 | 566.85117   | 537.05831   | 117.62814   | 1 |
| 50 | O | 71.47913 | 71.62451 | 65.98324 | -550.26779  | -406.08867  | 4.21666     | 1 |
| 51 | N | 70.62006 | 73.13183 | 64.48506 | 566.34832   | -425.77725  | 180.18749   | 1 |
| 52 | H | 70.71654 | 73.43448 | 63.51755 | 644.44502   | 2646.80550  | -52.73430   | 1 |
| 53 | C | 69.63911 | 73.69889 | 65.34045 | 612.34801   | -281.48662  | 411.56221   | 1 |
| 54 | H | 69.10526 | 74.41697 | 64.67894 | 1667.23498  | -1490.75142 | 1556.16753  | 1 |
| 55 | C | 68.68573 | 72.50232 | 65.81182 | -714.45746  | -175.43074  | 286.98927   | 1 |
| 56 | H | 69.29083 | 71.81499 | 66.46745 | -787.09484  | 1763.03619  | -1922.46060 | 1 |
| 57 | O | 68.15625 | 71.68477 | 64.74858 | -429.46514  | 516.51932   | -128.40526  | 1 |
| 58 | H | 68.58495 | 70.82919 | 64.94605 | 1981.82785  | 436.16847   | -1818.18182 | 1 |
| 59 | C | 67.59041 | 73.21360 | 66.68534 | 630.79189   | -468.94448  | 76.03230    | 1 |
| 60 | H | 66.91643 | 72.47180 | 67.17497 | -1775.71861 | 2062.30353  | 131.89849   | 1 |
| 61 | H | 68.04952 | 73.84314 | 67.50081 | -1855.14608 | 88.94118    | 1993.53760  | 1 |
| 62 | H | 66.94689 | 73.88197 | 66.06680 | -1504.82350 | -780.94249  | -2132.90992 | 1 |
| 63 | C | 70.41449 | 74.44928 | 66.56426 | 288.57638   | 618.62814   | -397.00270  | 1 |
| 64 | O | 69.88041 | 74.59697 | 67.64499 | 321.70495   | -185.26452  | 574.37218   | 1 |
| 65 | N | 71.57536 | 74.94746 | 66.15678 | -447.05792  | -446.53431  | 367.76425   | 1 |
| 66 | H | 71.87311 | 74.76238 | 65.20032 | 350.31316   | 1975.63644  | -1843.31522 | 1 |
| 67 | C | 72.47823 | 75.46084 | 67.11894 | -511.23061  | 374.03917   | -471.51480  | 1 |
| 68 | H | 71.97927 | 75.30067 | 68.10278 | 2234.79579  | -898.70890  | -1273.45190 | 1 |
| 69 | C | 73.83667 | 74.63328 | 66.93689 | 529.53781   | -159.34528  | 563.72604   | 1 |
| 70 | H | 74.50102 | 74.94615 | 67.78903 | 654.59388   | 2347.94251  | 1217.51488  | 1 |
| 71 | H | 73.60535 | 73.54556 | 67.10501 | -1526.55661 | 2103.42026  | 817.87394   | 1 |
| 72 | O | 74.56571 | 74.77975 | 65.71440 | -554.84278  | 14.12789    | 399.58769   | 1 |
| 73 | H | 74.65305 | 73.79662 | 65.42892 | 1297.06236  | 2061.84854  | 1220.68812  | 1 |
| 74 | C | 72.69413 | 77.04287 | 66.75004 | -662.15484  | -412.13544  | 123.62687   | 1 |
| 75 | O | 72.91183 | 77.48686 | 65.64986 | -540.01537  | -317.05804  | 274.91456   | 1 |
| 76 | N | 72.65311 | 77.70984 | 67.91744 | -202.76299  | -690.00100  | -131.49145  | 1 |
| 77 | H | 72.33088 | 77.13489 | 68.69387 | -702.62132  | -2617.37191 | 281.70413   | 1 |
| 78 | C | 72.54472 | 79.16830 | 67.92065 | -491.73914  | 576.34187   | 222.73509   | 1 |
| 79 | H | 73.19281 | 79.45686 | 67.05992 | 1977.17978  | -1823.58850 | -434.68928  | 1 |
| 80 | C | 71.09312 | 79.56163 | 67.72137 | -649.50797  | -328.66843  | 306.11224   | 1 |
| 81 | H | 70.50427 | 79.18790 | 68.58806 | 2075.07803  | 1452.16490  | -1004.45904 | 1 |
| 82 | C | 70.94752 | 81.07253 | 67.67302 | -615.18735  | -489.99689  | -70.96352   | 1 |
| 83 | H | 69.87340 | 81.38517 | 67.56013 | -1226.32661 | -1724.38906 | -1716.47170 | 1 |
| 84 | H | 71.34176 | 81.55461 | 68.60988 | 2381.64273  | -969.84735  | 900.46860   | 1 |
| 85 | H | 71.51606 | 81.51390 | 66.80891 | 2122.74991  | 1702.23946  | -141.36228  | 1 |
| 86 | C | 70.49481 | 78.93863 | 66.47319 | -501.86074  | -479.61276  | -376.42482  | 1 |
| 87 | H | 69.45617 | 79.31769 | 66.26866 | 993.79261   | -2246.95401 | -1177.81305 | 1 |
| 88 | H | 71.12282 | 79.15772 | 65.56501 | 42.71279    | -626.15391  | -2651.37258 | 1 |
| 89 | H | 70.43340 | 77.81839 | 66.56052 | -2026.39012 | -1590.33709 | -887.82922  | 1 |
| 90 | C | 73.11339 | 79.69357 | 69.39562 | -672.89153  | 382.57394   | -156.34072  | 1 |
| 91 | O | 74.06595 | 80.43542 | 69.43078 | 410.04627   | 221.86223   | 500.35950   | 1 |
| 92 | N | 72.40084 | 79.22711 | 70.40686 | -378.11782  | -443.79414  | -441.10984  | 1 |
| 93 | H | 71.62367 | 78.61579 | 70.16950 | 2404.15973  | -568.14894  | 1149.30085  | 1 |
| 94 | C | 72.77977 | 79.56897 | 71.74203 | -544.54484  | 466.16019   | 331.29119   | 1 |
| 95 | H | 73.30633 | 80.54064 | 71.58571 | -1409.80988 | -170.17955  | 2325.32679  | 1 |

|     |   |          |          |          |             |             |             |   |
|-----|---|----------|----------|----------|-------------|-------------|-------------|---|
| 96  | C | 71.40592 | 79.68839 | 72.53347 | -184.48284  | 116.78282   | -758.89137  | 1 |
| 97  | H | 70.68675 | 80.30126 | 71.94676 | 1893.78641  | 1861.14652  | 611.04528   | 1 |
| 98  | H | 70.92629 | 78.68995 | 72.64186 | -2170.79665 | -974.19311  | 1327.50117  | 1 |
| 99  | C | 71.67083 | 80.31969 | 73.93773 | 389.51668   | 672.81878   | -138.49152  | 1 |
| 100 | H | 72.37357 | 79.67839 | 74.51800 | 510.64577   | 1933.03327  | 1851.02484  | 1 |
| 101 | H | 72.21669 | 81.28169 | 73.81251 | -2302.30869 | -1105.72939 | -948.89774  | 1 |
| 102 | C | 70.37525 | 80.55808 | 74.78698 | -559.93427  | -126.34590  | 542.30857   | 1 |
| 103 | O | 70.46972 | 80.65636 | 75.99642 | -670.36003  | -111.83166  | 76.36448    | 1 |
| 104 | N | 69.26225 | 80.67066 | 74.05043 | -216.06729  | -537.07037  | 446.51379   | 1 |
| 105 | H | 69.14617 | 80.61704 | 73.03135 | -1251.96487 | 1074.12894  | -2168.52500 | 1 |
| 106 | H | 68.32870 | 80.85847 | 74.43641 | -2451.83023 | -720.73851  | 944.84612   | 1 |
| 107 | C | 73.75961 | 78.52626 | 72.50767 | 546.24052   | -563.88337  | -85.11809   | 1 |
| 108 | O | 74.30056 | 78.98425 | 73.50971 | 71.70702    | -307.40463  | 606.69673   | 1 |
| 109 | N | 73.85925 | 77.28711 | 72.03160 | 479.90863   | -504.50129  | 222.86849   | 1 |
| 110 | C | 74.43179 | 76.22632 | 72.81628 | 75.51268    | -600.91904  | 506.73700   | 1 |
| 111 | H | 74.00914 | 76.36378 | 73.83752 | -2033.61562 | 1795.30103  | 254.89480   | 1 |
| 112 | C | 73.98647 | 74.91901 | 72.04189 | 523.79067   | 517.99274   | 284.45581   | 1 |
| 113 | H | 74.66485 | 74.05704 | 72.23424 | 1599.61665  | -1127.00911 | 1895.98173  | 1 |
| 114 | H | 72.96256 | 74.59566 | 72.33475 | -1881.83093 | 1275.82488  | -1501.55016 | 1 |
| 115 | C | 74.02518 | 75.40430 | 70.55828 | -600.05639  | -404.05026  | 316.64485   | 1 |
| 116 | H | 75.07008 | 75.44403 | 70.17694 | -2597.05260 | 496.36221   | 657.73249   | 1 |
| 117 | H | 73.45095 | 74.75618 | 69.85876 | -1666.24518 | 1294.38985  | -1723.90591 | 1 |
| 118 | C | 73.41046 | 76.86192 | 70.71251 | 493.57570   | -129.95376  | -602.56394  | 1 |
| 119 | H | 73.77840 | 77.61558 | 69.97703 | -1469.08415 | -637.84797  | 2204.22581  | 1 |
| 120 | H | 72.29557 | 76.88669 | 70.75854 | -1038.97840 | 1068.88701  | -2280.71789 | 1 |
| 121 | C | 76.06463 | 76.33190 | 72.80931 | 188.88100   | 241.05089   | -727.87821  | 1 |
| 122 | O | 76.72410 | 75.46943 | 72.28496 | 531.88613   | -49.19943   | 427.07960   | 1 |
| 123 | N | 76.46600 | 77.40368 | 73.48810 | 708.14833   | 26.93417    | -179.73509  | 1 |
| 124 | H | 75.77590 | 78.10971 | 73.84485 | -2232.69501 | -1179.09831 | 1023.94816  | 1 |
| 125 | C | 77.85283 | 77.70132 | 73.43751 | -738.32412  | 259.92548   | 104.42456   | 1 |
| 126 | H | 78.37054 | 76.76926 | 73.11056 | 2028.89123  | 1260.02983  | 1311.33324  | 1 |
| 127 | C | 78.01643 | 78.90374 | 72.40425 | -258.65678  | -345.52513  | 661.28459   | 1 |
| 128 | H | 77.37671 | 79.76116 | 72.70611 | -1826.06090 | -1801.46097 | -918.64554  | 1 |
| 129 | C | 79.52573 | 79.31717 | 72.35308 | -541.23400  | 531.92970   | -218.41428  | 1 |
| 130 | H | 79.70430 | 80.13478 | 71.61568 | 1311.73218  | -2219.18200 | 882.19023   | 1 |
| 131 | H | 79.88167 | 79.68129 | 73.34599 | -1048.71298 | 1223.58118  | -2196.97971 | 1 |
| 132 | H | 80.17669 | 78.45926 | 72.06275 | 419.06414   | 1903.92898  | 1903.44670  | 1 |
| 133 | C | 77.61670 | 78.40861 | 70.97325 | -423.86431  | 152.66566   | -648.55262  | 1 |
| 134 | H | 77.75713 | 79.20558 | 70.20509 | 105.68386   | -2342.50080 | 1387.51238  | 1 |
| 135 | H | 78.22747 | 77.52928 | 70.65922 | -1695.63603 | -1484.73621 | -1531.02793 | 1 |
| 136 | H | 76.54537 | 78.09638 | 70.93766 | -1853.57121 | -487.39031  | 1936.59343  | 1 |
| 137 | C | 78.29336 | 78.27787 | 74.91503 | 539.71428   | -510.58232  | 267.58633   | 1 |
| 138 | O | 77.57244 | 78.99824 | 75.56599 | -15.93758   | -278.34085  | -624.49402  | 1 |
| 139 | N | 79.54796 | 77.91548 | 75.13185 | -676.81886  | 12.05292    | 276.17960   | 1 |
| 140 | H | 79.97960 | 77.31308 | 74.43319 | -1694.44250 | -373.84189  | -2100.66098 | 1 |
| 141 | C | 80.23059 | 78.21660 | 76.34314 | 412.33078   | -664.70360  | 108.35451   | 1 |
| 142 | H | 81.26727 | 77.87514 | 76.12582 | 1765.77476  | 1294.44366  | 1621.76594  | 1 |
| 143 | C | 80.12814 | 79.77888 | 76.57120 | -179.66635  | -721.95667  | -264.73915  | 1 |
| 144 | H | 80.55669 | 80.33079 | 75.70455 | -607.34922  | 2587.87032  | -598.10018  | 1 |
| 145 | H | 79.05800 | 80.10086 | 76.61701 | -359.69332  | -1479.13954 | -2259.74260 | 1 |
| 146 | C | 80.88923 | 80.13762 | 77.89053 | -240.01076  | 616.02425   | 431.85322   | 1 |
| 147 | H | 80.53854 | 79.50423 | 78.73640 | -1359.17131 | 782.54425   | 2227.99181  | 1 |
| 148 | H | 81.97939 | 79.93670 | 77.79238 | -820.36667  | 85.81767    | -2596.78715 | 1 |
| 149 | C | 80.61450 | 81.66689 | 78.18631 | -513.07015  | 236.18570   | -551.87280  | 1 |
| 150 | H | 81.03567 | 82.31074 | 77.38025 | 1816.11944  | -1183.11722 | -1650.94321 | 1 |
| 151 | H | 79.52032 | 81.87771 | 78.20064 | -1800.04429 | -1361.53473 | 1526.34643  | 1 |
| 152 | C | 81.25193 | 82.00120 | 79.55481 | 726.08972   | -253.19732  | -179.64713  | 1 |
| 153 | H | 80.78603 | 81.48480 | 80.41776 | 1224.27271  | -456.51798  | -2390.90304 | 1 |
| 154 | H | 82.35305 | 81.88239 | 79.59324 | 1206.40339  | -1150.93514 | -2154.90344 | 1 |
| 155 | N | 81.00851 | 83.52432 | 79.82604 | 329.70796   | -633.68968  | -155.67358  | 1 |
| 156 | H | 81.37657 | 83.88936 | 80.75146 | 1348.31305  | 1938.76845  | 1359.00643  | 1 |
| 157 | H | 81.44350 | 84.21165 | 79.14408 | 2096.92035  | 1446.54551  | -966.48890  | 1 |

|     |   |          |          |          |             |             |             |   |
|-----|---|----------|----------|----------|-------------|-------------|-------------|---|
| 158 | H | 80.00055 | 83.85556 | 79.85756 | -1197.07217 | -2303.53719 | 827.28733   | 1 |
| 159 | C | 79.56506 | 77.29471 | 77.52816 | -378.01186  | -556.17301  | -413.96481  | 1 |
| 160 | O | 79.92271 | 76.12173 | 77.59764 | -409.44433  | -307.55053  | -453.30833  | 1 |
| 161 | N | 78.73418 | 77.96051 | 78.29663 | -429.02477  | 524.70884   | 274.08502   | 1 |
| 162 | H | 78.59210 | 78.92886 | 78.01456 | 1706.34263  | -1425.96036 | 1574.38926  | 1 |
| 163 | C | 77.74503 | 77.33699 | 79.11116 | -45.25864   | -626.22952  | 478.93267   | 1 |
| 164 | H | 77.02775 | 78.16067 | 79.32670 | 1988.63164  | 570.90773   | 1772.87287  | 1 |
| 165 | C | 77.11797 | 76.16391 | 78.24650 | 551.77128   | -20.49526   | -564.54996  | 1 |
| 166 | H | 76.71123 | 76.55016 | 77.28431 | 1434.61535  | -1753.10253 | 1513.99471  | 1 |
| 167 | H | 77.89779 | 75.41837 | 77.96114 | -714.67738  | 1819.09770  | 1898.36494  | 1 |
| 168 | C | 76.00719 | 75.48987 | 79.11424 | 446.99263   | -555.77305  | 338.97221   | 1 |
| 169 | H | 76.39462 | 75.26408 | 80.13386 | 1953.68466  | 1892.25957  | -161.67766  | 1 |
| 170 | H | 75.14489 | 76.18112 | 79.24931 | -403.03785  | 2688.07032  | -188.43591  | 1 |
| 171 | C | 75.55730 | 74.15600 | 78.39630 | 567.86262   | 335.74681   | 434.04421   | 1 |
| 172 | H | 75.18033 | 74.35828 | 77.36763 | -1080.02275 | 1568.26081  | -1948.78900 | 1 |
| 173 | H | 76.41358 | 73.45324 | 78.27752 | -919.54108  | 2111.34692  | 1456.13463  | 1 |
| 174 | C | 74.45027 | 73.54724 | 79.29489 | 195.81897   | 173.33862   | -745.11536  | 1 |
| 175 | H | 74.78555 | 73.25287 | 80.31078 | 1405.67949  | -2301.21089 | -390.08113  | 1 |
| 176 | H | 73.53489 | 74.16990 | 79.37241 | -940.37328  | -1118.32446 | 2299.72133  | 1 |
| 177 | N | 73.95182 | 72.23477 | 78.64496 | 319.26422   | 656.36007   | -42.02424   | 1 |
| 178 | H | 73.00101 | 71.86644 | 79.12954 | 1961.03633  | 619.91968   | 1787.09422  | 1 |
| 179 | H | 73.71464 | 72.28130 | 77.61377 | 854.14343   | -2156.80752 | 1429.08711  | 1 |
| 180 | H | 74.60753 | 71.40338 | 78.66392 | 1237.02905  | -1378.50857 | -1998.28500 | 1 |
| 181 | C | 78.37506 | 76.71453 | 80.48647 | 532.53319   | -268.57236  | 517.55729   | 1 |
| 182 | O | 77.91965 | 77.10103 | 81.55320 | 266.16714   | -290.73804  | -558.88002  | 1 |
| 183 | N | 79.27319 | 75.80313 | 80.22457 | -226.25352  | 640.49678   | -270.32839  | 1 |
| 184 | H | 79.54800 | 75.64118 | 79.22402 | 2007.69063  | -1035.27229 | 1523.50231  | 1 |
| 185 | C | 80.05786 | 75.18690 | 81.23426 | -540.76542  | -573.33303  | 49.50000    | 1 |
| 186 | H | 80.79175 | 74.59431 | 80.64291 | -2374.20950 | -1036.76023 | 843.75774   | 1 |
| 187 | C | 80.75634 | 76.33922 | 82.10164 | -77.09082   | 666.87422   | -415.84136  | 1 |
| 188 | H | 79.94901 | 76.95605 | 82.58661 | -985.81834  | 617.19825   | 2463.91927  | 1 |
| 189 | O | 81.58439 | 77.26184 | 81.37345 | 293.29899   | -391.65602  | -477.80926  | 1 |
| 190 | H | 81.07184 | 78.08953 | 81.47095 | 2528.72714  | -681.76262  | -751.27122  | 1 |
| 191 | C | 81.49771 | 75.47314 | 83.18454 | 252.47363   | -605.14473  | 440.05134   | 1 |
| 192 | H | 81.97845 | 76.11157 | 83.96111 | -2052.65063 | 1456.49051  | -1043.51830 | 1 |
| 193 | H | 80.80176 | 74.77738 | 83.71052 | -2152.98800 | -1661.97574 | -161.70652  | 1 |
| 194 | H | 82.30143 | 74.85023 | 82.72752 | -473.12726  | -1584.27339 | 2165.61725  | 1 |
| 195 | C | 79.13956 | 74.22781 | 82.19520 | 360.36307   | 488.46713   | 505.10056   | 1 |
| 196 | O | 79.36290 | 73.03676 | 82.17018 | -200.08817  | -528.03552  | -385.82850  | 1 |
| 197 | N | 78.26552 | 74.89463 | 82.93010 | -597.54095  | -226.44775  | 355.20479   | 1 |
| 198 | H | 78.13393 | 75.92954 | 82.80826 | 2179.23655  | -1300.70981 | -991.33835  | 1 |
| 199 | C | 77.63814 | 74.18523 | 83.97748 | -687.68921  | 297.39807   | -249.45179  | 1 |
| 200 | H | 78.01949 | 73.13931 | 83.90083 | -349.16256  | -2467.37713 | -1101.72831 | 1 |
| 201 | C | 77.98175 | 74.88975 | 85.37914 | 672.47345   | 361.54328   | -201.62880  | 1 |
| 202 | H | 77.91374 | 75.99788 | 85.29561 | 1541.41502  | 582.18425   | 2169.97026  | 1 |
| 203 | H | 77.22188 | 74.57145 | 86.13090 | -2534.67717 | 60.25153    | 997.72295   | 1 |
| 204 | C | 79.38100 | 74.46003 | 85.83725 | 574.26774   | -389.43119  | -377.02542  | 1 |
| 205 | C | 79.62264 | 73.08361 | 86.13119 | 688.82679   | -287.33580  | -257.96133  | 1 |
| 206 | H | 78.81298 | 72.33766 | 86.04222 | 331.14182   | 1470.38163  | 2269.80013  | 1 |
| 207 | C | 80.42985 | 75.41839 | 85.98073 | -383.52382  | -675.04808  | 144.24917   | 1 |
| 208 | H | 80.24917 | 76.48650 | 85.76390 | 4.09847     | 1517.59662  | 2262.86397  | 1 |
| 209 | C | 80.89994 | 72.69669 | 86.53286 | -134.76730  | 428.45285   | -649.50303  | 1 |
| 210 | H | 81.08429 | 71.63052 | 86.75275 | -903.23433  | 1600.49020  | 2011.53387  | 1 |
| 211 | C | 81.69267 | 74.98225 | 86.38996 | -335.53281  | -615.00040  | -364.39058  | 1 |
| 212 | H | 82.49637 | 75.73222 | 86.49215 | 1596.45398  | -1369.33862 | 1732.02659  | 1 |
| 213 | C | 81.98008 | 73.61557 | 86.67562 | 585.48547   | -340.24194  | -406.23938  | 1 |
| 214 | O | 83.25979 | 73.15978 | 87.08612 | -419.15649  | -173.04408  | -511.94141  | 1 |
| 215 | H | 83.74674 | 74.01711 | 87.09777 | -1071.84350 | 1559.71507  | -1960.13012 | 1 |
| 216 | C | 76.00778 | 74.30580 | 83.92592 | 291.41878   | -183.13091  | 710.72246   | 1 |
| 217 | O | 75.32824 | 73.83348 | 84.81011 | 379.87695   | 523.47396   | -222.23622  | 1 |
| 218 | N | 75.53937 | 74.90017 | 82.77748 | 564.30591   | 373.09380   | 277.24371   | 1 |
| 219 | H | 76.42287 | 75.17253 | 82.32751 | -120.59931  | -2436.07824 | -1214.35098 | 1 |

|     |   |          |          |          |             |             |             |   |
|-----|---|----------|----------|----------|-------------|-------------|-------------|---|
| 220 | C | 74.59501 | 75.97758 | 83.04551 | 404.07514   | -299.37480  | 608.84009   | 1 |
| 221 | H | 74.96563 | 76.50363 | 83.95079 | -1071.07882 | -841.69025  | 2359.66467  | 1 |
| 222 | C | 74.66807 | 76.81360 | 81.72108 | -683.12807  | 68.71770    | -390.13096  | 1 |
| 223 | H | 75.64932 | 77.34036 | 81.63850 | 2068.88918  | 1596.58590  | 770.89603   | 1 |
| 224 | H | 74.63649 | 76.10301 | 80.86474 | 1379.86429  | 2342.49779  | -179.85638  | 1 |
| 225 | C | 73.47541 | 77.81565 | 81.58652 | -176.39967  | 537.49466   | 550.97268   | 1 |
| 226 | H | 72.50083 | 77.32171 | 81.79896 | -396.28051  | 1942.22168  | 1869.33314  | 1 |
| 227 | H | 73.55299 | 78.66611 | 82.29895 | -94.44700   | 586.00678   | -2659.20016 | 1 |
| 228 | C | 73.58073 | 78.27852 | 80.06106 | -291.69381  | -718.18079  | -150.72929  | 1 |
| 229 | H | 74.48796 | 78.88255 | 79.80651 | -2303.38776 | 1089.76242  | 964.62032   | 1 |
| 230 | H | 73.51696 | 77.44740 | 79.31636 | 884.16729   | 2568.80533  | -207.74283  | 1 |
| 231 | N | 72.45154 | 79.06083 | 79.79145 | -594.49522  | -252.81478  | 342.29276   | 1 |
| 232 | H | 71.77066 | 79.16632 | 80.52645 | -1735.17426 | 2084.05705  | -263.71605  | 1 |
| 233 | C | 72.24010 | 79.61580 | 78.66639 | 595.23177   | -271.52487  | 442.22352   | 1 |
| 234 | N | 73.20284 | 79.44815 | 77.65939 | 585.53813   | -424.79750  | -105.81303  | 1 |
| 235 | H | 74.09354 | 78.95359 | 77.66843 | 959.88797   | 1327.56823  | -2177.11905 | 1 |
| 236 | H | 73.12812 | 79.86577 | 76.73180 | 1578.48647  | 16.27378    | -2220.76233 | 1 |
| 237 | N | 71.03212 | 80.32011 | 78.62147 | -452.17763  | -390.33541  | -421.51853  | 1 |
| 238 | H | 70.30493 | 80.40934 | 79.33653 | 470.26107   | 1974.25629  | -1817.92087 | 1 |
| 239 | H | 70.69275 | 80.74084 | 77.72106 | 1856.67307  | -1573.97321 | -1224.35416 | 1 |
| 240 | C | 73.08624 | 75.40054 | 83.22947 | -531.47271  | -581.45780  | -55.06206   | 1 |
| 241 | O | 72.33918 | 75.87340 | 84.05440 | -243.00837  | 192.73507   | 609.52485   | 1 |
| 242 | N | 72.78152 | 74.57905 | 82.20517 | 343.49288   | -644.25607  | 38.09164    | 1 |
| 243 | H | 73.62189 | 74.32841 | 81.68204 | -1691.16043 | -1535.97525 | -1484.73099 | 1 |
| 244 | C | 71.76155 | 73.58266 | 82.41755 | 542.66492   | 350.14337   | 454.42563   | 1 |
| 245 | H | 71.64392 | 73.48682 | 83.51967 | 1209.57979  | -2396.95920 | 463.86744   | 1 |
| 246 | C | 70.46014 | 74.08482 | 81.66414 | -737.14309  | 145.93010   | 242.71942   | 1 |
| 247 | H | 70.72430 | 74.39760 | 80.63063 | -1050.18303 | 159.36419   | -2509.06125 | 1 |
| 248 | C | 69.43010 | 72.90344 | 81.64314 | -706.77696  | -252.88343  | -245.16230  | 1 |
| 249 | H | 68.49841 | 73.17722 | 81.09442 | -1624.64039 | -1665.49085 | 1417.86935  | 1 |
| 250 | H | 69.86394 | 72.00517 | 81.13848 | 2566.10521  | 598.51109   | 693.22305   | 1 |
| 251 | H | 69.13303 | 72.59610 | 82.67330 | -1972.69758 | 107.10018   | -1876.34312 | 1 |
| 252 | C | 69.82797 | 75.28184 | 82.45411 | 412.85148   | 672.58832   | -27.69222   | 1 |
| 253 | H | 68.96045 | 75.72496 | 81.91077 | 1447.02277  | 1762.76533  | -1490.78944 | 1 |
| 254 | H | 69.46724 | 74.96398 | 83.46030 | 1320.77379  | -145.20455  | 2378.68491  | 1 |
| 255 | H | 70.57610 | 76.09555 | 82.61789 | -1512.10848 | 1470.52031  | 1724.75147  | 1 |
| 256 | C | 72.34081 | 72.28483 | 81.64624 | -607.11113  | 499.56689   | 73.73769    | 1 |
| 257 | O | 72.13033 | 72.12626 | 80.42893 | 357.97126   | 460.81534   | 356.68785   | 1 |
| 258 | N | 73.05292 | 71.53916 | 82.44964 | 536.55407   | -368.62270  | 332.76306   | 1 |
| 259 | H | 73.13617 | 71.78669 | 83.43693 | 524.38866   | 2297.69985  | 1367.20941  | 1 |
| 260 | C | 73.81002 | 70.48366 | 81.86096 | 46.50277    | -774.29190  | -147.97904  | 1 |
| 261 | H | 74.17811 | 70.92219 | 80.90778 | 1676.51875  | 1883.29066  | 1032.55549  | 1 |
| 262 | C | 74.95924 | 70.01208 | 82.88372 | -559.41456  | -34.19198   | -556.30433  | 1 |
| 263 | H | 74.48826 | 69.70249 | 83.84776 | -64.66664   | 395.18769   | 2695.05373  | 1 |
| 264 | H | 75.47576 | 69.10358 | 82.48910 | -2703.44278 | -60.40056   | 333.79418   | 1 |
| 265 | C | 75.94976 | 71.12649 | 83.11392 | -519.76435  | 377.31045   | 459.42366   | 1 |
| 266 | H | 75.39278 | 72.05722 | 83.37488 | -1746.74323 | 1667.50644  | -1261.73691 | 1 |
| 267 | C | 76.86559 | 70.77032 | 84.27835 | 570.95554   | 16.46261    | -545.27700  | 1 |
| 268 | H | 77.65706 | 71.54830 | 84.43577 | 2391.58273  | 28.05277    | -1305.07271 | 1 |
| 269 | H | 76.29493 | 70.67767 | 85.23875 | 175.75588   | 917.63458   | 2559.43867  | 1 |
| 270 | H | 77.39026 | 69.79501 | 84.10733 | -1063.97851 | -2155.34650 | 1283.00462  | 1 |
| 271 | C | 76.77751 | 71.38396 | 81.86472 | 193.76014   | 2.62946     | -765.53141  | 1 |
| 272 | H | 77.60428 | 72.14100 | 82.05104 | 507.39394   | -846.55087  | 2539.60089  | 1 |
| 273 | H | 77.27426 | 70.44709 | 81.50216 | 1337.57841  | 1818.19054  | 1526.01994  | 1 |
| 274 | H | 76.15023 | 71.77478 | 81.02265 | 1100.88635  | -1172.91350 | -2199.08909 | 1 |
| 275 | C | 72.82589 | 69.23288 | 81.58650 | -549.21115  | 475.64486   | -309.38218  | 1 |
| 276 | O | 71.89186 | 68.94056 | 82.28497 | 556.06106   | -390.37755  | -78.24250   | 1 |
| 277 | O | 73.24510 | 68.37250 | 80.54269 | -572.27940  | -310.19032  | -209.75862  | 1 |
| 278 | H | 74.02261 | 68.90032 | 80.20973 | -1380.08193 | 2212.14486  | 790.85944   | 1 |

Listing 57: C00057.xmolout

|    |   |          |          |          |             |             |             |        |          |
|----|---|----------|----------|----------|-------------|-------------|-------------|--------|----------|
| 1  |   | 276      |          |          |             |             |             |        |          |
| 2  |   | 150.0000 | 150.0000 | 150.0000 | 0.0000      | 0.0000      | 0.0000***** | 2.7750 | 11100    |
|    |   | 0.2500   | 300.00   | 0.00     | 0.00        | 0.00        | -1293.6500  | 0.0000 | 300.0000 |
| 3  | H | 72.99638 | 72.88041 | 69.49698 | -2043.14101 | -1757.64893 | 399.89339   |        | 1        |
| 4  | N | 73.08255 | 73.87711 | 69.31273 | 426.75047   | 490.45733   | -334.42467  |        | 1        |
| 5  | H | 72.67322 | 74.27735 | 70.15403 | 442.25559   | -1110.30854 | -2448.52907 |        | 1        |
| 6  | C | 74.37967 | 74.32038 | 68.98704 | 415.32972   | -666.39213  | 83.73172    |        | 1        |
| 7  | H | 74.92774 | 73.40416 | 68.68160 | 879.32219   | 2491.00447  | 667.35213   |        | 1        |
| 8  | C | 74.30040 | 75.46107 | 67.84977 | 31.35357    | 477.41777   | 628.23362   |        | 1        |
| 9  | H | 73.70777 | 76.32292 | 68.24073 | 1168.38489  | 2240.25337  | -1019.71136 |        | 1        |
| 10 | H | 75.31825 | 75.87210 | 67.64045 | -360.43770  | 2534.90498  | 931.67112   |        | 1        |
| 11 | C | 73.66897 | 74.91033 | 66.59380 | 463.18208   | 512.70242   | -382.34388  |        | 1        |
| 12 | H | 72.83091 | 74.23939 | 66.88853 | 1725.29117  | 1863.52247  | -987.07854  |        | 1        |
| 13 | C | 73.10251 | 76.04018 | 65.74442 | 710.42801   | -144.27427  | -313.15367  |        | 1        |
| 14 | H | 72.63175 | 75.65500 | 64.80300 | 364.20195   | -1033.13725 | 2494.72524  |        | 1        |
| 15 | H | 72.31719 | 76.61964 | 66.29595 | 2567.61904  | 335.80679   | 847.48802   |        | 1        |
| 16 | H | 73.89982 | 76.76789 | 65.44265 | -2587.99029 | 680.92867   | -512.16411  |        | 1        |
| 17 | C | 74.68177 | 74.11349 | 65.78403 | 268.17616   | 741.64379   | -40.42634   |        | 1        |
| 18 | H | 74.22509 | 73.68719 | 64.85342 | 1283.54314  | -1945.37420 | -1411.27812 |        | 1        |
| 19 | H | 75.54621 | 74.75251 | 65.46553 | -1258.57796 | 1317.15249  | -2026.02085 |        | 1        |
| 20 | H | 75.10195 | 73.25737 | 66.37251 | -2502.84526 | 909.80597   | 575.92391   |        | 1        |
| 21 | C | 74.98968 | 75.08688 | 70.28250 | 619.36578   | -458.64843  | -172.09273  |        | 1        |
| 22 | O | 75.03399 | 76.31434 | 70.22811 | -81.40433   | 433.87611   | 522.34594   |        | 1        |
| 23 | N | 75.36273 | 74.28218 | 71.25178 | 175.23996   | -622.20190  | 341.55523   |        | 1        |
| 24 | H | 75.19525 | 73.28294 | 71.13537 | -876.57256  | -303.22879  | -2561.90213 |        | 1        |
| 25 | C | 75.82285 | 74.82645 | 72.48833 | -571.88214  | -534.10783  | -106.15033  |        | 1        |
| 26 | H | 75.09072 | 75.61973 | 72.77556 | -2713.20841 | -16.25800   | -248.80809  |        | 1        |
| 27 | C | 75.96830 | 73.63589 | 73.52693 | 166.60354   | 288.16399   | -716.09568  |        | 1        |
| 28 | H | 76.50947 | 72.78342 | 73.02160 | -2097.85574 | 1636.78449  | -586.18044  |        | 1        |
| 29 | O | 74.72335 | 72.93600 | 73.87880 | -317.80580  | -363.38227  | 484.43082   |        | 1        |
| 30 | H | 74.66398 | 73.13342 | 74.83141 | 1863.74748  | -1451.84923 | 1357.29467  |        | 1        |
| 31 | C | 76.83586 | 74.24588 | 74.67582 | 503.80731   | 517.99032   | 318.51606   |        | 1        |
| 32 | H | 77.06649 | 73.49047 | 75.46389 | 640.61020   | -2157.10410 | -1536.29104 |        | 1        |
| 33 | H | 77.80830 | 74.63760 | 74.29220 | 1687.88455  | 465.60692   | 2087.56452  |        | 1        |
| 34 | H | 76.31790 | 75.09998 | 75.17310 | -1293.07895 | -1899.88581 | -1463.57452 |        | 1        |
| 35 | C | 77.04728 | 75.91377 | 72.30897 | -153.07550  | -733.68902  | 248.70981   |        | 1        |
| 36 | O | 76.99177 | 76.85362 | 73.05792 | 186.15459   | -480.78787  | -449.34387  |        | 1        |
| 37 | N | 78.01220 | 75.58668 | 71.44355 | -487.53139  | 543.18517   | 42.03850    |        | 1        |
| 38 | C | 79.00919 | 76.54750 | 71.07023 | -699.35871  | 69.34393    | 360.10701   |        | 1        |
| 39 | H | 79.25465 | 77.09527 | 72.00939 | 2.81126     | -221.99807  | -2715.58072 |        | 1        |
| 40 | C | 80.15399 | 75.65144 | 70.44352 | -507.46439  | -592.59194  | 122.07761   |        | 1        |
| 41 | H | 80.75674 | 76.20809 | 69.68861 | -1975.08116 | 525.87560   | -1801.71556 |        | 1        |
| 42 | H | 80.86357 | 75.28641 | 71.21976 | 1588.27743  | -1913.22100 | 1113.83566  |        | 1        |
| 43 | C | 79.33770 | 74.47456 | 69.81820 | -613.62442  | -457.55993  | -194.14490  |        | 1        |
| 44 | H | 78.88585 | 74.78218 | 68.84849 | 1707.54637  | -721.27992  | 1996.92523  |        | 1        |
| 45 | H | 79.94768 | 73.56638 | 69.61186 | 758.23357   | 2100.81767  | 1560.55011  |        | 1        |
| 46 | C | 78.22099 | 74.24195 | 70.92214 | -352.41524  | 704.96076   | 49.21465    |        | 1        |
| 47 | H | 77.24921 | 73.85758 | 70.53803 | 1714.76886  | -2070.42778 | 443.35792   |        | 1        |
| 48 | H | 78.54227 | 73.62228 | 71.79263 | 1224.15040  | 1801.50881  | 1636.97633  |        | 1        |
| 49 | C | 78.45670 | 77.54322 | 69.89020 | 566.85117   | 537.05831   | 117.62814   |        | 1        |
| 50 | O | 79.03128 | 77.52988 | 68.82463 | -550.26779  | -406.08867  | 4.21666     |        | 1        |
| 51 | N | 77.45574 | 78.32968 | 70.27062 | 566.34832   | -425.77725  | 180.18749   |        | 1        |
| 52 | H | 77.11260 | 78.22100 | 71.22695 | 644.44502   | 2646.80550  | -52.73430   |        | 1        |
| 53 | C | 77.10363 | 79.40504 | 69.37764 | 612.34801   | -281.48662  | 411.56221   |        | 1        |
| 54 | H | 77.34770 | 78.96655 | 68.37917 | 1667.23498  | -1490.75142 | 1556.16753  |        | 1        |
| 55 | C | 75.63927 | 79.86521 | 69.55529 | -714.45746  | -175.43074  | 286.98927   |        | 1        |
| 56 | H | 75.46174 | 80.39421 | 70.52452 | -787.09484  | 1763.03619  | -1922.46060 |        | 1        |
| 57 | O | 74.36752 | 78.80285 | 69.89674 | -429.46514  | 516.51932   | -128.40526  |        | 1        |
| 58 | H | 74.96388 | 78.00233 | 69.96208 | 1981.82785  | 436.16847   | -1818.18182 |        | 1        |
| 59 | C | 75.25059 | 80.69898 | 68.31937 | 630.79189   | -468.94448  | 76.03230    |        | 1        |
| 60 | H | 74.22492 | 81.12937 | 68.43672 | -1775.71861 | 2062.30353  | 131.89849   |        | 1        |

|     |   |          |          |          |             |             |             |   |
|-----|---|----------|----------|----------|-------------|-------------|-------------|---|
| 61  | H | 75.95318 | 81.55996 | 68.13652 | -1855.14608 | 88.94118    | 1993.53760  | 1 |
| 62  | H | 75.24846 | 80.07304 | 67.39231 | -1504.82350 | -780.94249  | -2132.90992 | 1 |
| 63  | C | 77.99712 | 80.77298 | 69.69974 | 288.57638   | 618.62814   | -397.00270  | 1 |
| 64  | O | 77.38712 | 81.84711 | 69.58708 | 321.70495   | -185.26452  | 574.37218   | 1 |
| 65  | N | 79.24608 | 80.54781 | 69.98704 | -447.05792  | -446.53431  | 367.76425   | 1 |
| 66  | H | 79.35413 | 79.52767 | 69.99369 | 350.31316   | 1975.63644  | -1843.31522 | 1 |
| 67  | C | 80.36026 | 81.40685 | 70.13566 | -511.23061  | 374.03917   | -471.51480  | 1 |
| 68  | H | 81.16031 | 80.68116 | 70.40531 | 2234.79579  | -898.70890  | -1273.45190 | 1 |
| 69  | C | 80.63341 | 82.08080 | 68.70603 | 529.53781   | -159.34528  | 563.72604   | 1 |
| 70  | H | 81.65388 | 82.55252 | 68.70790 | 654.59388   | 2347.94251  | 1217.51488  | 1 |
| 71  | H | 80.67251 | 81.23808 | 67.96682 | -1526.55661 | 2103.42026  | 817.87394   | 1 |
| 72  | O | 79.70581 | 83.10541 | 68.26060 | -554.84278  | 14.12789    | 399.58769   | 1 |
| 73  | H | 78.86542 | 82.60980 | 68.34756 | 1297.06236  | 2061.84854  | 1220.68812  | 1 |
| 74  | C | 80.22180 | 82.56810 | 71.26413 | -662.15484  | -412.13544  | 123.62687   | 1 |
| 75  | O | 81.17094 | 82.81196 | 71.98295 | -540.01537  | -317.05804  | 274.91456   | 1 |
| 76  | N | 79.07590 | 83.20764 | 71.16599 | -202.76299  | -690.00100  | -131.49145  | 1 |
| 77  | H | 78.37126 | 82.87569 | 70.45028 | -702.62132  | -2617.37191 | 281.70413   | 1 |
| 78  | C | 78.62854 | 84.19753 | 72.14608 | -491.73914  | 576.34187   | 222.73509   | 1 |
| 79  | H | 79.51102 | 84.87072 | 72.26330 | 1977.17978  | -1823.58850 | -434.68928  | 1 |
| 80  | C | 77.39594 | 84.83742 | 71.53762 | -649.50797  | -328.66843  | 306.11224   | 1 |
| 81  | H | 76.65831 | 84.01992 | 71.36181 | 2075.07803  | 1452.16490  | -1004.45904 | 1 |
| 82  | C | 76.74791 | 85.85573 | 72.45688 | -615.18735  | -489.99689  | -70.96352   | 1 |
| 83  | H | 75.81716 | 86.29163 | 71.99893 | -1226.32661 | -1724.38906 | -1716.47170 | 1 |
| 84  | H | 76.44894 | 85.39257 | 73.44002 | 2381.64273  | -969.84735  | 900.46860   | 1 |
| 85  | H | 77.44047 | 86.71177 | 72.68528 | 2122.74991  | 1702.23946  | -141.36228  | 1 |
| 86  | C | 77.69088 | 85.47567 | 70.19151 | -501.86074  | -479.61276  | -376.42482  | 1 |
| 87  | H | 76.75184 | 85.82925 | 69.68363 | 993.79261   | -2246.95401 | -1177.81305 | 1 |
| 88  | H | 78.36970 | 86.36572 | 70.29574 | 42.71279    | -626.15391  | -2651.37258 | 1 |
| 89  | H | 78.19953 | 84.75513 | 69.49177 | -2026.39012 | -1590.33709 | -887.82922  | 1 |
| 90  | C | 78.28084 | 83.37800 | 73.55396 | -672.89153  | 382.57394   | -156.34072  | 1 |
| 91  | O | 77.13886 | 83.30691 | 73.93192 | 410.04627   | 221.86223   | 500.35950   | 1 |
| 92  | N | 79.38468 | 82.90363 | 74.07742 | -378.11782  | -443.79414  | -441.10984  | 1 |
| 93  | H | 80.27452 | 83.02995 | 73.55561 | 2404.15973  | -568.14894  | 1149.30085  | 1 |
| 94  | C | 79.44832 | 82.33341 | 75.39576 | -544.54484  | 466.16019   | 331.29119   | 1 |
| 95  | H | 79.98469 | 83.09332 | 76.00364 | -1409.80988 | -170.17955  | 2325.32679  | 1 |
| 96  | C | 78.00407 | 82.01098 | 75.93849 | -184.48284  | 116.78282   | -758.89137  | 1 |
| 97  | H | 77.40740 | 82.94520 | 76.07882 | 1893.78641  | 1861.14652  | 611.04528   | 1 |
| 98  | H | 77.44602 | 81.41481 | 75.17823 | -2170.79665 | -974.19311  | 1327.50117  | 1 |
| 99  | C | 78.14337 | 81.25549 | 77.30212 | 389.51668   | 672.81878   | -138.49152  | 1 |
| 100 | H | 78.76386 | 80.34094 | 77.14808 | 510.64577   | 1933.03327  | 1851.02484  | 1 |
| 101 | H | 78.70670 | 81.87578 | 78.03740 | -2302.30869 | -1105.72939 | -948.89774  | 1 |
| 102 | C | 76.74332 | 80.85010 | 77.92337 | -559.93427  | -126.34590  | 542.30857   | 1 |
| 103 | O | 76.54250 | 80.85267 | 79.11202 | -670.36003  | -111.83166  | 76.36448    | 1 |
| 104 | N | 75.87745 | 80.42869 | 76.96275 | -216.06729  | -537.07037  | 446.51379   | 1 |
| 105 | H | 76.22958 | 80.22063 | 76.02026 | -1251.96487 | 1074.12894  | -2168.52500 | 1 |
| 106 | H | 75.05946 | 79.78377 | 77.15802 | -2451.83023 | -720.73851  | 944.84612   | 1 |
| 107 | C | 80.32961 | 80.97175 | 75.21704 | 546.24052   | -563.88337  | -85.11809   | 1 |
| 108 | O | 79.98668 | 80.14724 | 74.41032 | 71.70702    | -307.40463  | 606.69673   | 1 |
| 109 | N | 81.30387 | 80.90234 | 76.13232 | 479.90863   | -504.50129  | 222.86849   | 1 |
| 110 | C | 82.48550 | 80.11390 | 75.90610 | 75.51268    | -600.91904  | 506.73700   | 1 |
| 111 | H | 82.86762 | 80.44010 | 74.91210 | -2033.61562 | 1795.30103  | 254.89480   | 1 |
| 112 | C | 83.42092 | 80.50100 | 77.12620 | 523.79067   | 517.99274   | 284.45581   | 1 |
| 113 | H | 84.05134 | 79.64870 | 77.46590 | 1599.61665  | -1127.00911 | 1895.98173  | 1 |
| 114 | H | 84.12647 | 81.31490 | 76.84664 | -1881.83093 | 1275.82488  | -1501.55016 | 1 |
| 115 | C | 82.41681 | 80.98450 | 78.21878 | -600.05639  | -404.05026  | 316.64485   | 1 |
| 116 | H | 81.95117 | 80.12668 | 78.75357 | -2597.05260 | 496.36221   | 657.73249   | 1 |
| 117 | H | 82.87865 | 81.63262 | 78.99700 | -1666.24518 | 1294.38985  | -1723.90591 | 1 |
| 118 | C | 81.35901 | 81.75210 | 77.31086 | 493.57570   | -129.95376  | -602.56394  | 1 |
| 119 | H | 80.33354 | 81.84940 | 77.74290 | -1469.08415 | -637.84797  | 2204.22581  | 1 |
| 120 | H | 81.71103 | 82.75072 | 76.95688 | -1038.97840 | 1068.88701  | -2280.71789 | 1 |
| 121 | C | 82.13910 | 78.52159 | 75.87656 | 188.88100   | 241.05089   | -727.87821  | 1 |
| 122 | O | 82.79713 | 77.80174 | 75.16196 | 531.88613   | -49.19943   | 427.07960   | 1 |



|     |   |          |          |          |             |             |             |   |
|-----|---|----------|----------|----------|-------------|-------------|-------------|---|
| 123 | N | 81.24655 | 78.20072 | 76.80280 | 708.14833   | 26.93417    | -179.73509  | 1 |
| 124 | H | 80.81169 | 78.94554 | 77.38576 | -2232.69501 | -1179.09831 | 1023.94816  | 1 |
| 125 | C | 80.36849 | 77.08622 | 76.55438 | -738.32412  | 259.92548   | 104.42456   | 1 |
| 126 | H | 80.22302 | 76.98646 | 75.45606 | 2028.89123  | 1260.02983  | 1311.33324  | 1 |
| 127 | C | 81.05920 | 75.80702 | 77.19905 | -258.65678  | -345.52513  | 661.28459   | 1 |
| 128 | H | 81.66559 | 76.11818 | 78.07677 | -1826.06090 | -1801.46097 | -918.64554  | 1 |
| 129 | C | 79.99902 | 74.72693 | 77.60447 | -541.23400  | 531.92970   | -218.41428  | 1 |
| 130 | H | 80.48382 | 73.81803 | 78.03200 | 1311.73218  | -2219.18200 | 882.19023   | 1 |
| 131 | H | 79.29195 | 75.11817 | 78.37296 | -1048.71298 | 1223.58118  | -2196.97971 | 1 |
| 132 | H | 79.39073 | 74.39796 | 76.72958 | 419.06414   | 1903.92898  | 1903.44670  | 1 |
| 133 | C | 81.95804 | 75.12726 | 76.11101 | -423.86431  | 152.66566   | -648.55262  | 1 |
| 134 | H | 82.62785 | 74.35094 | 76.55131 | 105.68386   | -2342.50080 | 1387.51238  | 1 |
| 135 | H | 81.34439 | 74.62929 | 75.32356 | -1695.63603 | -1484.73621 | -1531.02793 | 1 |
| 136 | H | 82.60884 | 75.89437 | 75.59219 | -1853.57121 | -487.39031  | 1936.59343  | 1 |
| 137 | C | 79.07225 | 77.57421 | 77.39299 | 539.71428   | -510.58232  | 267.58633   | 1 |
| 138 | O | 79.22506 | 78.48794 | 78.19881 | -15.93758   | -278.34085  | -624.49402  | 1 |
| 139 | N | 77.95788 | 76.95203 | 77.02333 | -676.81886  | 12.05292    | 276.17960   | 1 |
| 140 | H | 78.12509 | 76.24152 | 76.30698 | -1694.44250 | -373.84189  | -2100.66098 | 1 |
| 141 | C | 76.92635 | 76.64273 | 77.98709 | 412.33078   | -664.70360  | 108.35451   | 1 |
| 142 | H | 77.05840 | 75.55705 | 78.19394 | 1765.77476  | 1294.44366  | 1621.76594  | 1 |
| 143 | C | 77.05112 | 77.55974 | 79.25893 | -179.66635  | -721.95667  | -264.73915  | 1 |
| 144 | H | 78.01746 | 77.38290 | 79.78731 | -607.34922  | 2587.87032  | -598.10018  | 1 |
| 145 | H | 77.07235 | 78.63567 | 78.95178 | -359.69332  | -1479.13954 | -2259.74260 | 1 |
| 146 | C | 75.84028 | 77.26467 | 80.21007 | -240.01076  | 616.02425   | 431.85322   | 1 |
| 147 | H | 74.87396 | 77.34537 | 79.66282 | -1359.17131 | 782.54425   | 2227.99181  | 1 |
| 148 | H | 75.88450 | 76.22702 | 80.61023 | -820.36667  | 85.81767    | -2596.78715 | 1 |
| 149 | C | 75.91864 | 78.33513 | 81.36968 | -513.07015  | 236.18570   | -551.87280  | 1 |
| 150 | H | 76.91485 | 78.31030 | 81.86854 | 1816.11944  | -1183.11722 | -1650.94321 | 1 |
| 151 | H | 75.81188 | 79.36775 | 80.95865 | -1800.04429 | -1361.53473 | 1526.34643  | 1 |
| 152 | C | 74.79190 | 78.01141 | 82.37967 | 726.08972   | -253.19732  | -179.64713  | 1 |
| 153 | H | 73.76120 | 78.12386 | 81.98151 | 1224.27271  | -456.51798  | -2390.90304 | 1 |
| 154 | H | 74.89621 | 77.03223 | 82.88798 | 1206.40339  | -1150.93514 | -2154.90344 | 1 |
| 155 | N | 74.87112 | 79.06400 | 83.53196 | 329.70796   | -633.68968  | -155.67358  | 1 |
| 156 | H | 74.10874 | 78.97695 | 84.26440 | 1348.31305  | 1938.76845  | 1359.00643  | 1 |
| 157 | H | 75.74730 | 79.08505 | 84.13149 | 2096.92035  | 1446.54551  | -966.48890  | 1 |
| 158 | H | 74.76872 | 80.08026 | 83.24693 | -1197.07217 | -2303.53719 | 827.28733   | 1 |
| 159 | C | 75.50739 | 76.95290 | 77.25596 | -378.01186  | -556.17301  | -413.96481  | 1 |
| 160 | O | 75.05947 | 78.08892 | 77.11351 | -409.44433  | -307.55053  | -453.30833  | 1 |
| 161 | N | 74.95342 | 75.81351 | 76.92473 | -429.02477  | 524.70884   | 274.08502   | 1 |
| 162 | H | 75.38260 | 74.90120 | 77.09528 | 1706.34263  | -1425.96036 | 1574.38926  | 1 |
| 163 | C | 73.64003 | 75.84975 | 76.35905 | -45.25864   | -626.22952  | 478.93267   | 1 |
| 164 | H | 73.11758 | 76.73949 | 76.78156 | 1988.63164  | 570.90773   | 1772.87287  | 1 |
| 165 | C | 73.85865 | 75.95781 | 74.79093 | 551.77128   | -20.49526   | -564.54996  | 1 |
| 166 | H | 74.60936 | 76.75170 | 74.57257 | 1434.61535  | -1753.10253 | 1513.99471  | 1 |
| 167 | H | 74.29479 | 75.00752 | 74.40535 | -714.67738  | 1819.09770  | 1898.36494  | 1 |
| 168 | C | 72.50857 | 76.25623 | 74.06108 | 446.99263   | -555.77305  | 338.97221   | 1 |
| 169 | H | 71.79439 | 75.40294 | 74.16737 | 1953.68466  | 1892.25957  | -161.67766  | 1 |
| 170 | H | 72.00621 | 77.15208 | 74.49071 | -403.03785  | 2688.07032  | -188.43591  | 1 |
| 171 | C | 72.91357 | 76.49307 | 72.55432 | 567.86262   | 335.74681   | 434.04421   | 1 |
| 172 | H | 73.77161 | 77.20119 | 72.48534 | -1080.02275 | 1568.26081  | -1948.78900 | 1 |
| 173 | H | 73.27605 | 75.54234 | 72.10074 | -919.54108  | 2111.34692  | 1456.13463  | 1 |
| 174 | C | 71.72315 | 77.05537 | 71.72541 | 195.81897   | 173.33862   | -745.11536  | 1 |
| 175 | H | 70.86695 | 76.35582 | 71.61696 | 1405.67949  | -2301.21089 | -390.08113  | 1 |
| 176 | H | 71.35955 | 78.05418 | 72.04808 | -940.37328  | -1118.32446 | 2299.72133  | 1 |
| 177 | N | 72.28606 | 77.25295 | 70.31883 | 319.26422   | 656.36007   | -42.02424   | 1 |
| 178 | H | 71.58438 | 77.46341 | 69.56423 | 1961.03633  | 619.91968   | 1787.09422  | 1 |
| 179 | H | 73.12886 | 78.08203 | 70.17588 | 854.14343   | -2156.80752 | 1429.08711  | 1 |
| 180 | H | 72.73669 | 76.38568 | 69.92870 | 1237.02905  | -1378.50857 | -1998.28500 | 1 |
| 181 | C | 73.05675 | 74.37980 | 76.76504 | 532.53319   | -268.57236  | 517.55729   | 1 |
| 182 | O | 73.81971 | 73.42046 | 76.87753 | 266.16714   | -290.73804  | -558.88002  | 1 |
| 183 | N | 71.75215 | 74.45266 | 76.93327 | -226.25352  | 640.49678   | -270.32839  | 1 |
| 184 | H | 71.36816 | 75.38512 | 76.77545 | 2007.69063  | -1035.27229 | 1523.50231  | 1 |

|     |   |          |          |          |             |             |             |   |
|-----|---|----------|----------|----------|-------------|-------------|-------------|---|
| 185 | C | 70.88279 | 73.33225 | 76.85550 | -540.76542  | -573.33303  | 49.50000    | 1 |
| 186 | H | 69.88536 | 73.79322 | 76.68191 | -2374.20950 | -1036.76023 | 843.75774   | 1 |
| 187 | C | 71.36265 | 72.44577 | 75.61358 | -77.09082   | 666.87422   | -415.84136  | 1 |
| 188 | H | 72.36866 | 71.99387 | 75.84688 | -985.81834  | 617.19825   | 2463.91927  | 1 |
| 189 | O | 71.52586 | 73.14271 | 74.36408 | 293.29899   | -391.65602  | -477.80926  | 1 |
| 190 | H | 72.48972 | 73.01676 | 74.20387 | 2528.72714  | -681.76262  | -751.27122  | 1 |
| 191 | C | 70.26573 | 71.32136 | 75.63843 | 252.47363   | -605.14473  | 440.05134   | 1 |
| 192 | H | 70.47507 | 70.54299 | 74.87030 | -2052.65063 | 1456.49051  | -1043.51830 | 1 |
| 193 | H | 70.21564 | 70.80906 | 76.63118 | -2152.98800 | -1661.97574 | -161.70652  | 1 |
| 194 | H | 69.25155 | 71.73341 | 75.42689 | -473.12726  | -1584.27339 | 2165.61725  | 1 |
| 195 | C | 70.90362 | 72.48454 | 78.26172 | 360.36307   | 488.46713   | 505.10056   | 1 |
| 196 | O | 69.88488 | 71.93169 | 78.59479 | -200.08817  | -528.03552  | -385.82850  | 1 |
| 197 | N | 72.10499 | 72.46479 | 78.81290 | -597.54095  | -226.44775  | 355.20479   | 1 |
| 198 | H | 72.88079 | 72.95291 | 78.31863 | 2179.23655  | -1300.70981 | -991.33835  | 1 |
| 199 | C | 72.37283 | 71.85276 | 80.05694 | -687.68921  | 297.39807   | -249.45179  | 1 |
| 200 | H | 73.36506 | 72.26206 | 80.34913 | -349.16256  | -2467.37713 | -1101.72831 | 1 |
| 201 | C | 71.22226 | 72.16640 | 81.12505 | 672.47345   | 361.54328   | -201.62880  | 1 |
| 202 | H | 70.21680 | 71.92346 | 80.69563 | 1541.41502  | 582.18425   | 2169.97026  | 1 |
| 203 | H | 71.36597 | 71.51679 | 82.02019 | -2534.67717 | 60.25153    | 997.72295   | 1 |
| 204 | C | 71.31401 | 73.64858 | 81.51390 | 574.26774   | -389.43119  | -377.02542  | 1 |
| 205 | C | 72.37319 | 74.08370 | 82.36589 | 688.82679   | -287.33580  | -257.96133  | 1 |
| 206 | H | 73.12193 | 73.36581 | 82.74709 | 331.14182   | 1470.38163  | 2269.80013  | 1 |
| 207 | C | 70.35223 | 74.57963 | 81.01929 | -383.52382  | -675.04808  | 144.24917   | 1 |
| 208 | H | 69.53743 | 74.24341 | 80.35226 | 4.09847     | 1517.59662  | 2262.86397  | 1 |
| 209 | C | 72.43854 | 75.43331 | 82.71154 | -134.76730  | 428.45285   | -649.50303  | 1 |
| 210 | H | 73.25055 | 75.76597 | 83.38041 | -903.23433  | 1600.49020  | 2011.53387  | 1 |
| 211 | C | 70.45947 | 75.92073 | 81.39751 | -335.53281  | -615.00040  | -364.39058  | 1 |
| 212 | H | 69.70477 | 76.63162 | 81.01820 | 1596.45398  | -1369.33862 | 1732.02659  | 1 |
| 213 | C | 71.49718 | 76.39852 | 82.24971 | 585.48547   | -340.24194  | -406.23938  | 1 |
| 214 | O | 71.61645 | 77.76252 | 82.63275 | -419.15649  | -173.04408  | -511.94141  | 1 |
| 215 | H | 70.80818 | 78.12517 | 82.19956 | -1071.84350 | 1559.71507  | -1960.13012 | 1 |
| 216 | C | 72.40104 | 70.22172 | 79.94112 | 291.41878   | -183.13091  | 710.72246   | 1 |
| 217 | O | 72.52236 | 69.55823 | 80.95132 | 379.87695   | 523.47396   | -222.23622  | 1 |
| 218 | N | 72.27639 | 69.82269 | 78.69149 | 564.30591   | 373.09380   | 277.24371   | 1 |
| 219 | H | 72.21982 | 70.55169 | 77.98321 | -120.59931  | -2436.07824 | -1214.35098 | 1 |
| 220 | C | 72.40380 | 68.44919 | 78.28363 | 404.07514   | -299.37480  | 608.84009   | 1 |
| 221 | H | 73.48729 | 68.26440 | 78.45181 | -1071.07882 | -841.69025  | 2359.66467  | 1 |
| 222 | C | 71.51681 | 67.54564 | 79.22646 | -683.12807  | 68.71770    | -390.13096  | 1 |
| 223 | H | 71.66781 | 67.85489 | 80.29751 | 2068.88918  | 1596.58590  | 770.89603   | 1 |
| 224 | H | 70.43382 | 67.70938 | 79.02012 | 1379.86429  | 2342.49779  | -179.85638  | 1 |
| 225 | C | 71.90272 | 66.04377 | 79.04351 | -176.39967  | 537.49466   | 550.97268   | 1 |
| 226 | H | 71.78639 | 65.71143 | 77.98816 | -396.28051  | 1942.22168  | 1869.33314  | 1 |
| 227 | H | 72.97055 | 65.86437 | 79.29776 | -94.44700   | 586.00678   | -2659.20016 | 1 |
| 228 | C | 70.92683 | 65.23507 | 80.02156 | -291.69381  | -718.18079  | -150.72929  | 1 |
| 229 | H | 71.01628 | 65.47293 | 81.11116 | -2303.38776 | 1089.76242  | 964.62032   | 1 |
| 230 | H | 69.85165 | 65.30146 | 79.71219 | 884.16729   | 2568.80533  | -207.74283  | 1 |
| 231 | N | 71.34407 | 63.91825 | 79.80339 | -594.49522  | -252.81478  | 342.29276   | 1 |
| 232 | H | 71.64485 | 63.70092 | 78.86455 | -1735.17426 | 2084.05705  | -263.71605  | 1 |
| 233 | C | 71.32950 | 62.98059 | 80.66399 | 595.23177   | -271.52487  | 442.22352   | 1 |
| 234 | N | 70.88239 | 63.26270 | 81.95741 | 585.53813   | -424.79750  | -105.81303  | 1 |
| 235 | H | 70.51956 | 64.13199 | 82.34646 | 959.88797   | 1327.56823  | -2177.11905 | 1 |
| 236 | H | 70.80942 | 62.57865 | 82.71153 | 1578.48647  | 16.27378    | -2220.76233 | 1 |
| 237 | N | 71.79011 | 61.78508 | 80.09609 | -452.17763  | -390.33541  | -421.51853  | 1 |
| 238 | H | 72.07474 | 61.57110 | 79.14137 | 470.26107   | 1974.25629  | -1817.92087 | 1 |
| 239 | H | 71.82207 | 60.89933 | 80.60205 | 1856.67307  | -1573.97321 | -1224.35416 | 1 |
| 240 | C | 72.01170 | 68.51287 | 76.70698 | -531.47271  | -581.45780  | -55.06206   | 1 |
| 241 | O | 72.59345 | 69.28603 | 75.97814 | -243.00837  | 192.73507   | 609.52485   | 1 |
| 242 | N | 71.09572 | 67.60315 | 76.41880 | 343.49288   | -644.25607  | 38.09164    | 1 |
| 243 | H | 70.62809 | 67.06017 | 77.17098 | -1691.16043 | -1535.97525 | -1484.73099 | 1 |
| 244 | C | 70.36070 | 67.61906 | 75.18227 | 542.66492   | 350.14337   | 454.42563   | 1 |
| 245 | H | 69.99778 | 68.66481 | 75.09784 | 1209.57979  | -2396.95920 | 463.86744   | 1 |
| 246 | C | 71.35435 | 67.29314 | 73.98887 | -737.14309  | 145.93010   | 242.71942   | 1 |

|     |   |          |          |          |             |             |             |   |
|-----|---|----------|----------|----------|-------------|-------------|-------------|---|
| 247 | H | 72.24777 | 66.77254 | 74.39510 | -1050.18303 | 159.36419   | -2509.06125 | 1 |
| 248 | C | 70.75783 | 66.47822 | 72.78664 | -706.77696  | -252.88343  | -245.16230  | 1 |
| 249 | H | 71.50565 | 66.35638 | 71.96760 | -1624.64039 | -1665.49085 | 1417.86935  | 1 |
| 250 | H | 70.44981 | 65.45126 | 73.10189 | 2566.10521  | 598.51109   | 693.22305   | 1 |
| 251 | H | 69.86869 | 66.98656 | 72.34118 | -1972.69758 | 107.10018   | -1876.34312 | 1 |
| 252 | C | 71.74873 | 68.65417 | 73.31803 | 412.85148   | 672.58832   | -27.69222   | 1 |
| 253 | H | 72.44557 | 68.50583 | 72.45969 | 1447.02277  | 1762.76533  | -1490.78944 | 1 |
| 254 | H | 70.85608 | 69.19710 | 72.92623 | 1320.77379  | -145.20455  | 2378.68491  | 1 |
| 255 | H | 72.26653 | 69.33740 | 74.05922 | -1512.10848 | 1470.52031  | 1724.75147  | 1 |
| 256 | C | 69.19147 | 66.58597 | 75.60377 | -607.11113  | 499.56689   | 73.73769    | 1 |
| 257 | O | 68.94431 | 66.44342 | 76.79809 | 357.97126   | 460.81534   | 356.68785   | 1 |
| 258 | N | 68.54608 | 66.05400 | 74.56885 | 536.55407   | -368.62270  | 332.76306   | 1 |
| 259 | H | 68.89442 | 66.25423 | 73.63035 | 524.38866   | 2297.69985  | 1367.20941  | 1 |
| 260 | C | 67.83937 | 64.83340 | 74.81300 | 46.50277    | -774.29190  | -147.97904  | 1 |
| 261 | H | 67.10097 | 65.11264 | 75.59498 | 1676.51875  | 1883.29066  | 1032.55549  | 1 |
| 262 | C | 67.20667 | 64.29742 | 73.43904 | -559.41456  | -34.19198   | -556.30433  | 1 |
| 263 | H | 68.03429 | 63.87306 | 72.81976 | -64.66664   | 395.18769   | 2695.05373  | 1 |
| 264 | H | 66.51826 | 63.44181 | 73.64317 | -2703.44278 | -60.40056   | 333.79418   | 1 |
| 265 | C | 66.50017 | 65.38486 | 72.66304 | -519.76435  | 377.31045   | 459.42366   | 1 |
| 266 | H | 67.14128 | 66.29398 | 72.65625 | -1746.74323 | 1667.50644  | -1261.73691 | 1 |
| 267 | C | 66.29521 | 64.93749 | 71.22144 | 570.95554   | 16.46261    | -545.27700  | 1 |
| 268 | H | 65.79770 | 65.73115 | 70.60667 | 2391.58273  | 28.05277    | -1305.07271 | 1 |
| 269 | H | 67.26868 | 64.69185 | 70.72287 | 175.75588   | 917.63458   | 2559.43867  | 1 |
| 270 | H | 65.65361 | 64.02068 | 71.16257 | -1063.97851 | -2155.34650 | 1283.00462  | 1 |
| 271 | C | 65.16529 | 65.74397 | 73.29814 | 193.76014   | 2.62946     | -765.53141  | 1 |
| 272 | H | 64.63739 | 66.54760 | 72.72167 | 507.39394   | -846.55087  | 2539.60089  | 1 |
| 273 | H | 64.47734 | 64.86015 | 73.34078 | 1337.57841  | 1818.19054  | 1526.01994  | 1 |
| 274 | H | 65.29543 | 66.11691 | 74.34719 | 1100.88635  | -1172.91350 | -2199.08909 | 1 |
| 275 | C | 68.88339 | 63.72134 | 75.33104 | -549.21115  | 475.64486   | -309.38218  | 1 |
| 276 | O | 70.02805 | 63.65530 | 74.96586 | 556.06106   | -390.37755  | -78.24250   | 1 |
| 277 | O | 68.31859 | 62.68566 | 76.11587 | -572.27940  | -310.19032  | -209.75862  | 1 |
| 278 | H | 67.39595 | 63.04836 | 76.21122 | -1380.08193 | 2212.14486  | 790.85944   | 1 |

Listing 58: C00058.xmolout

|    |   |          |          |          |             |             |             |        |          |
|----|---|----------|----------|----------|-------------|-------------|-------------|--------|----------|
| 1  |   | 276      |          |          |             |             |             |        |          |
| 2  |   | 150.0000 | 150.0000 | 150.0000 | 0.0000      | 0.0000      | 0.0000***** | 2.7750 | 11100    |
|    |   | 0.2500   | 300.00   | 0.00     | 0.00        | 0.00        | -1293.6480  | 0.0000 | 300.0000 |
| 3  | H | 74.65997 | 81.04377 | 73.22073 | -2043.14101 | -1757.64893 | 399.89339   |        | 1        |
| 4  | N | 74.74850 | 81.53136 | 72.33032 | 426.75047   | 490.45733   | -334.42467  |        | 1        |
| 5  | H | 73.77435 | 81.78300 | 72.16680 | 442.25559   | -1110.30854 | -2448.52907 |        | 1        |
| 6  | C | 75.58823 | 82.67195 | 72.42155 | 415.32972   | -666.39213  | 83.73172    |        | 1        |
| 7  | H | 75.19848 | 83.24987 | 73.28718 | 879.32219   | 2491.00447  | 667.35213   |        | 1        |
| 8  | C | 77.10207 | 82.17923 | 72.67998 | 31.35357    | 477.41777   | 628.23362   |        | 1        |
| 9  | H | 77.36797 | 81.40843 | 71.92053 | 1168.38489  | 2240.25337  | -1019.71136 |        | 1        |
| 10 | H | 77.80926 | 83.02867 | 72.52084 | -360.43770  | 2534.90498  | 931.67112   |        | 1        |
| 11 | C | 77.27797 | 81.60214 | 74.06006 | 463.18208   | 512.70242   | -382.34388  |        | 1        |
| 12 | H | 76.40469 | 80.95371 | 74.29364 | 1725.29117  | 1863.52247  | -987.07854  |        | 1        |
| 13 | C | 78.53449 | 80.73999 | 74.10510 | 710.42801   | -144.27427  | -313.15367  |        | 1        |
| 14 | H | 78.69892 | 80.30234 | 75.12377 | 364.20195   | -1033.13725 | 2494.72524  |        | 1        |
| 15 | H | 78.47739 | 79.88691 | 73.38040 | 2567.61904  | 335.80679   | 847.48802   |        | 1        |
| 16 | H | 79.44971 | 81.33258 | 73.84702 | -2587.99029 | 680.92867   | -512.16411  |        | 1        |
| 17 | C | 77.37785 | 82.69395 | 75.11627 | 268.17616   | 741.64379   | -40.42634   |        | 1        |
| 18 | H | 77.52085 | 82.26335 | 76.14200 | 1283.54314  | -1945.37420 | -1411.27812 |        | 1        |
| 19 | H | 78.24529 | 83.37619 | 74.92056 | -1258.57796 | 1317.15249  | -2026.02085 |        | 1        |
| 20 | H | 76.45676 | 83.33093 | 75.14652 | -2502.84526 | 909.80597   | 575.92391   |        | 1        |
| 21 | C | 75.51182 | 83.52692 | 71.05056 | 619.36578   | -458.64843  | -172.09273  |        | 1        |
| 22 | O | 75.90072 | 84.70183 | 71.09586 | -81.40433   | 433.87611   | 522.34594   |        | 1        |
| 23 | N | 75.09274 | 82.83297 | 70.02403 | 175.23996   | -622.20190  | 341.55523   |        | 1        |
| 24 | H | 74.77158 | 81.89417 | 70.25767 | -876.57256  | -303.22879  | -2561.90213 |        | 1        |
| 25 | C | 75.09280 | 83.25959 | 68.66036 | -571.88214  | -534.10783  | -106.15033  |        | 1        |
| 26 | H | 74.02949 | 83.09631 | 68.37775 | -2713.20841 | -16.25800   | -248.80809  |        | 1        |

|    |   |          |          |          |             |             |             |   |
|----|---|----------|----------|----------|-------------|-------------|-------------|---|
| 27 | C | 75.53459 | 84.78678 | 68.51340 | 166.60354   | 288.16399   | -716.09568  | 1 |
| 28 | H | 76.55228 | 84.90691 | 68.98694 | -2097.85574 | 1636.78449  | -586.18044  | 1 |
| 29 | O | 74.68064 | 85.72009 | 69.17408 | -317.80580  | -363.38227  | 484.43082   | 1 |
| 30 | H | 75.15105 | 85.73902 | 70.09464 | 1863.74748  | -1451.84923 | 1357.29467  | 1 |
| 31 | C | 75.68625 | 84.96217 | 66.95685 | 503.80731   | 517.99032   | 318.51606   | 1 |
| 32 | H | 75.76636 | 86.03852 | 66.67468 | 640.61020   | -2157.10410 | -1536.29104 | 1 |
| 33 | H | 76.60019 | 84.45191 | 66.56807 | 1687.88455  | 465.60692   | 2087.56452  | 1 |
| 34 | H | 74.81338 | 84.53288 | 66.40856 | -1293.07895 | -1899.88581 | -1463.57452 | 1 |
| 35 | C | 76.00860 | 82.32826 | 67.68649 | -153.07550  | -733.68902  | 248.70981   | 1 |
| 36 | O | 75.66920 | 82.36817 | 66.52776 | 186.15459   | -480.78787  | -449.34387  | 1 |
| 37 | N | 77.07069 | 81.70230 | 68.21003 | -487.53139  | 543.18517   | 42.03850    | 1 |
| 38 | C | 78.00836 | 80.99217 | 67.38709 | -699.35871  | 69.34393    | 360.10701   | 1 |
| 39 | H | 78.07950 | 81.54750 | 66.42301 | 2.81126     | -221.99807  | -2715.58072 | 1 |
| 40 | C | 79.32256 | 81.01683 | 68.28850 | -507.46439  | -592.59194  | 122.07761   | 1 |
| 41 | H | 80.05163 | 80.22526 | 68.00481 | -1975.08116 | 525.87560   | -1801.71556 | 1 |
| 42 | H | 79.85650 | 81.98939 | 68.20598 | 1588.27743  | -1913.22100 | 1113.83566  | 1 |
| 43 | C | 78.72670 | 80.82088 | 69.71561 | -613.62442  | -457.55993  | -194.14490  | 1 |
| 44 | H | 78.48640 | 79.75066 | 69.90559 | 1707.54637  | -721.27992  | 1996.92523  | 1 |
| 45 | H | 79.40993 | 81.14055 | 70.53483 | 758.23357   | 2100.81767  | 1560.55011  | 1 |
| 46 | C | 77.40403 | 81.69973 | 69.62641 | -352.41524  | 704.96076   | 49.21465    | 1 |
| 47 | H | 76.52729 | 81.27241 | 70.16622 | 1714.76886  | -2070.42778 | 443.35792   | 1 |
| 48 | H | 77.52647 | 82.77164 | 69.91266 | 1224.15040  | 1801.50881  | 1636.97633  | 1 |
| 49 | C | 77.56034 | 79.44627 | 67.17268 | 566.85117   | 537.05831   | 117.62814   | 1 |
| 50 | O | 78.36468 | 78.65588 | 66.69176 | -550.26779  | -406.08867  | 4.21666     | 1 |
| 51 | N | 76.35871 | 79.23653 | 67.62702 | 566.34832   | -425.77725  | 180.18749   | 1 |
| 52 | H | 75.80771 | 80.02156 | 68.03494 | 644.44502   | 2646.80550  | -52.73430   | 1 |
| 53 | C | 75.56691 | 78.08300 | 67.29508 | 612.34801   | -281.48662  | 411.56221   | 1 |
| 54 | H | 75.51845 | 78.05198 | 66.18350 | 1667.23498  | -1490.75142 | 1556.16753  | 1 |
| 55 | C | 76.37115 | 76.80619 | 67.82601 | -714.45746  | -175.43074  | 286.98927   | 1 |
| 56 | H | 77.02596 | 77.19797 | 68.65452 | -787.09484  | 1763.03619  | -1922.46060 | 1 |
| 57 | O | 77.28763 | 76.27428 | 66.86113 | -429.46514  | 516.51932   | -128.40526  | 1 |
| 58 | H | 77.88960 | 77.10024 | 66.71234 | 1981.82785  | 436.16847   | -1818.18182 | 1 |
| 59 | C | 75.35761 | 75.77337 | 68.42367 | 630.79189   | -468.94448  | 76.03230    | 1 |
| 60 | H | 75.89140 | 74.95458 | 68.96223 | -1775.71861 | 2062.30353  | 131.89849   | 1 |
| 61 | H | 74.65762 | 76.25168 | 69.14866 | -1855.14608 | 88.94118    | 1993.53760  | 1 |
| 62 | H | 74.74351 | 75.29011 | 67.62727 | -1504.82350 | -780.94249  | -2132.90992 | 1 |
| 63 | C | 74.17764 | 78.52382 | 67.97772 | 288.57638   | 618.62814   | -397.00270  | 1 |
| 64 | O | 74.09061 | 79.66949 | 68.46991 | 321.70495   | -185.26452  | 574.37218   | 1 |
| 65 | N | 73.25970 | 77.59699 | 67.90987 | -447.05792  | -446.53431  | 367.76425   | 1 |
| 66 | H | 73.51046 | 76.72287 | 67.45333 | 350.31316   | 1975.63644  | -1843.31522 | 1 |
| 67 | C | 71.93477 | 77.75619 | 68.41982 | -511.23061  | 374.03917   | -471.51480  | 1 |
| 68 | H | 71.61956 | 78.73778 | 68.00012 | 2234.79579  | -898.70890  | -1273.45190 | 1 |
| 69 | C | 71.12755 | 76.48233 | 67.88445 | 529.53781   | -159.34528  | 563.72604   | 1 |
| 70 | H | 70.04731 | 76.66344 | 68.12468 | 654.59388   | 2347.94251  | 1217.51488  | 1 |
| 71 | H | 71.21249 | 76.45000 | 66.76570 | -1526.55661 | 2103.42026  | 817.87394   | 1 |
| 72 | O | 71.57072 | 75.19657 | 68.40541 | -554.84278  | 14.12789    | 399.58769   | 1 |
| 73 | H | 71.22482 | 75.28068 | 69.31887 | 1297.06236  | 2061.84854  | 1220.68812  | 1 |
| 74 | C | 71.84834 | 77.74248 | 70.03570 | -662.15484  | -412.13544  | 123.62687   | 1 |
| 75 | O | 70.95154 | 77.15753 | 70.58398 | -540.01537  | -317.05804  | 274.91456   | 1 |
| 76 | N | 72.82413 | 78.47460 | 70.58742 | -202.76299  | -690.00100  | -131.49145  | 1 |
| 77 | H | 73.43255 | 79.04094 | 69.95178 | -702.62132  | -2617.37191 | 281.70413   | 1 |
| 78 | C | 72.92417 | 78.68341 | 72.02948 | -491.73914  | 576.34187   | 222.73509   | 1 |
| 79 | H | 73.77891 | 79.39469 | 72.11059 | 1977.17978  | -1823.58850 | -434.68928  | 1 |
| 80 | C | 71.61649 | 79.28273 | 72.51594 | -649.50797  | -328.66843  | 306.11224   | 1 |
| 81 | H | 70.84210 | 78.48156 | 72.44404 | 2075.07803  | 1452.16490  | -1004.45904 | 1 |
| 82 | C | 71.72510 | 79.73459 | 73.96026 | -615.18735  | -489.99689  | -70.96352   | 1 |
| 83 | H | 70.73966 | 80.10003 | 74.35962 | -1226.32661 | -1724.38906 | -1716.47170 | 1 |
| 84 | H | 72.07242 | 78.89018 | 74.62532 | 2381.64273  | -969.84735  | 900.46860   | 1 |
| 85 | H | 72.46323 | 80.57533 | 74.07576 | 2122.74991  | 1702.23946  | -141.36228  | 1 |
| 86 | C | 71.15442 | 80.43832 | 71.64603 | -501.86074  | -479.61276  | -376.42482  | 1 |
| 87 | H | 70.17735 | 80.86517 | 72.00144 | 993.79261   | -2246.95401 | -1177.81305 | 1 |
| 88 | H | 71.90077 | 81.27773 | 71.63597 | 42.71279    | -626.15391  | -2651.37258 | 1 |

|     |   |          |          |          |             |             |             |   |
|-----|---|----------|----------|----------|-------------|-------------|-------------|---|
| 89  | H | 71.01122 | 80.11498 | 70.57872 | -2026.39012 | -1590.33709 | -887.82922  | 1 |
| 90  | C | 73.25240 | 77.23438 | 72.77835 | -672.89153  | 382.57394   | -156.34072  | 1 |
| 91  | O | 73.16448 | 77.14079 | 73.98829 | 410.04627   | 221.86223   | 500.35950   | 1 |
| 92  | N | 73.65146 | 76.32702 | 71.91545 | -378.11782  | -443.79414  | -441.10984  | 1 |
| 93  | H | 73.68101 | 76.65851 | 70.95564 | 2404.15973  | -568.14894  | 1149.30085  | 1 |
| 94  | C | 74.00600 | 75.00880 | 72.32936 | -544.54484  | 466.16019   | 331.29119   | 1 |
| 95  | H | 73.34008 | 74.79389 | 73.19312 | -1409.80988 | -170.17955  | 2325.32679  | 1 |
| 96  | C | 73.78278 | 74.09173 | 71.06325 | -184.48284  | 116.78282   | -758.89137  | 1 |
| 97  | H | 72.70829 | 74.08805 | 70.76877 | 1893.78641  | 1861.14652  | 611.04528   | 1 |
| 98  | H | 74.33427 | 74.49059 | 70.18521 | -2170.79665 | -974.19311  | 1327.50117  | 1 |
| 99  | C | 74.27338 | 72.64855 | 71.41581 | 389.51668   | 672.81878   | -138.49152  | 1 |
| 100 | H | 75.35840 | 72.67642 | 71.67051 | 510.64577   | 1933.03327  | 1851.02484  | 1 |
| 101 | H | 73.77707 | 72.29520 | 72.37012 | -2302.30869 | -1105.72939 | -948.89774  | 1 |
| 102 | C | 74.03398 | 71.62933 | 70.25616 | -559.93427  | -126.34590  | 542.30857   | 1 |
| 103 | O | 74.25963 | 70.44477 | 70.43479 | -670.36003  | -111.83166  | 76.36448    | 1 |
| 104 | N | 73.56436 | 72.19003 | 69.13317 | -216.06729  | -537.07037  | 446.51379   | 1 |
| 105 | H | 73.32695 | 73.17013 | 68.93082 | -1251.96487 | 1074.12894  | -2168.52500 | 1 |
| 106 | H | 73.33217 | 71.66721 | 68.27974 | -2451.83023 | -720.73851  | 944.84612   | 1 |
| 107 | C | 75.59272 | 75.07179 | 72.74041 | 546.24052   | -563.88337  | -85.11809   | 1 |
| 108 | O | 76.41266 | 75.23951 | 71.87731 | 71.70702    | -307.40463  | 606.69673   | 1 |
| 109 | N | 75.76328 | 74.89076 | 74.05815 | 479.90863   | -504.50129  | 222.86849   | 1 |
| 110 | C | 76.94327 | 75.38216 | 74.71091 | 75.51268    | -600.91904  | 506.73700   | 1 |
| 111 | H | 77.19440 | 76.33230 | 74.18660 | -2033.61562 | 1795.30103  | 254.89480   | 1 |
| 112 | C | 76.48781 | 75.54579 | 76.21904 | 523.79067   | 517.99274   | 284.45581   | 1 |
| 113 | H | 77.32535 | 75.37249 | 76.93209 | 1599.61665  | -1127.00911 | 1895.98173  | 1 |
| 114 | H | 76.11217 | 76.57480 | 76.41531 | -1881.83093 | 1275.82488  | -1501.55016 | 1 |
| 115 | C | 75.34075 | 74.49622 | 76.36581 | -600.05639  | -404.05026  | 316.64485   | 1 |
| 116 | H | 75.74434 | 73.46790 | 76.50866 | -2597.05260 | 496.36221   | 657.73249   | 1 |
| 117 | H | 74.65423 | 74.69179 | 77.22063 | -1666.24518 | 1294.38985  | -1723.90591 | 1 |
| 118 | C | 74.63778 | 74.65810 | 74.95256 | 493.57570   | -129.95376  | -602.56394  | 1 |
| 119 | H | 74.05228 | 73.74202 | 74.60260 | -1469.08415 | -637.84797  | 2204.22581  | 1 |
| 120 | H | 73.99791 | 75.59057 | 74.83943 | -1038.97840 | 1068.88701  | -2280.71789 | 1 |
| 121 | C | 78.21729 | 74.35827 | 74.68283 | 188.88100   | 241.05089   | -727.87821  | 1 |
| 122 | O | 79.32925 | 74.80123 | 74.85218 | 531.88613   | -49.19943   | 427.07960   | 1 |
| 123 | N | 77.85838 | 73.06685 | 74.64221 | 708.14833   | 26.93417    | -179.73509  | 1 |
| 124 | H | 76.86181 | 72.95780 | 74.45610 | -2232.69501 | -1179.09831 | 1023.94816  | 1 |
| 125 | C | 78.87450 | 72.04446 | 74.39301 | -738.32412  | 259.92548   | 104.42456   | 1 |
| 126 | H | 79.76318 | 72.62154 | 74.04176 | 2028.89123  | 1260.02983  | 1311.33324  | 1 |
| 127 | C | 79.11034 | 71.29883 | 75.69377 | -258.65678  | -345.52513  | 661.28459   | 1 |
| 128 | H | 78.11814 | 71.01839 | 76.11331 | -1826.06090 | -1801.46097 | -918.64554  | 1 |
| 129 | C | 79.90142 | 70.02277 | 75.47410 | -541.23400  | 531.92970   | -218.41428  | 1 |
| 130 | H | 80.04907 | 69.45349 | 76.43339 | 1311.73218  | -2219.18200 | 882.19023   | 1 |
| 131 | H | 79.37780 | 69.33334 | 74.75413 | -1048.71298 | 1223.58118  | -2196.97971 | 1 |
| 132 | H | 80.92156 | 70.23398 | 75.04929 | 419.06414   | 1903.92898  | 1903.44670  | 1 |
| 133 | C | 79.80093 | 72.17160 | 76.72573 | -423.86431  | 152.66566   | -648.55262  | 1 |
| 134 | H | 79.89323 | 71.65158 | 77.71956 | 105.68386   | -2342.50080 | 1387.51238  | 1 |
| 135 | H | 80.83910 | 72.45669 | 76.39855 | -1695.63603 | -1484.73621 | -1531.02793 | 1 |
| 136 | H | 79.23487 | 73.12985 | 76.89747 | -1853.57121 | -487.39031  | 1936.59343  | 1 |
| 137 | C | 78.22973 | 71.01914 | 73.24996 | 539.71428   | -510.58232  | 267.58633   | 1 |
| 138 | O | 78.85092 | 70.75753 | 72.24756 | -15.93758   | -278.34085  | -624.49402  | 1 |
| 139 | N | 77.09311 | 70.51429 | 73.68597 | -676.81886  | 12.05292    | 276.17960   | 1 |
| 140 | H | 76.76546 | 70.86504 | 74.58313 | -1694.44250 | -373.84189  | -2100.66098 | 1 |
| 141 | C | 76.18871 | 69.84119 | 72.79223 | 412.33078   | -664.70360  | 108.35451   | 1 |
| 142 | H | 75.93874 | 70.56103 | 71.97989 | 1765.77476  | 1294.44366  | 1621.76594  | 1 |
| 143 | C | 76.94845 | 68.57625 | 72.23352 | -179.66635  | -721.95667  | -264.73915  | 1 |
| 144 | H | 77.92335 | 68.87787 | 71.77497 | -607.34922  | 2587.87032  | -598.10018  | 1 |
| 145 | H | 77.20237 | 67.86760 | 73.05442 | -359.69332  | -1479.13954 | -2259.74260 | 1 |
| 146 | C | 76.00304 | 67.91560 | 71.17437 | -240.01076  | 616.02425   | 431.85322   | 1 |
| 147 | H | 75.06380 | 67.55496 | 71.65120 | -1359.17131 | 782.54425   | 2227.99181  | 1 |
| 148 | H | 75.68726 | 68.66097 | 70.40610 | -820.36667  | 85.81767    | -2596.78715 | 1 |
| 149 | C | 76.80697 | 66.72330 | 70.51732 | -513.07015  | 236.18570   | -551.87280  | 1 |
| 150 | H | 77.75399 | 67.09108 | 70.05915 | 1816.11944  | -1183.11722 | -1650.94321 | 1 |

|     |   |          |          |          |             |             |             |   |
|-----|---|----------|----------|----------|-------------|-------------|-------------|---|
| 151 | H | 77.11365 | 65.97997 | 71.28887 | -1800.04429 | -1361.53473 | 1526.34643  | 1 |
| 152 | C | 75.90432 | 66.06454 | 69.44853 | 726.08972   | -253.19732  | -179.64713  | 1 |
| 153 | H | 74.99371 | 65.57647 | 69.84950 | 1224.27271  | -456.51798  | -2390.90304 | 1 |
| 154 | H | 75.63702 | 66.72503 | 68.59963 | 1206.40339  | -1150.93514 | -2154.90344 | 1 |
| 155 | N | 76.72783 | 64.90083 | 68.80002 | 329.70796   | -633.68968  | -155.67358  | 1 |
| 156 | H | 76.22900 | 64.35223 | 68.04160 | 1348.31305  | 1938.76845  | 1359.00643  | 1 |
| 157 | H | 77.62888 | 65.16661 | 68.30583 | 2096.92035  | 1446.54551  | -966.48890  | 1 |
| 158 | H | 77.05227 | 64.12068 | 69.44255 | -1197.07217 | -2303.53719 | 827.28733   | 1 |
| 159 | C | 74.93417 | 69.42455 | 73.74199 | -378.01186  | -556.17301  | -413.96481  | 1 |
| 160 | O | 75.09334 | 68.89299 | 74.81573 | -409.44433  | -307.55053  | -453.30833  | 1 |
| 161 | N | 73.80552 | 69.66295 | 73.07323 | -429.02477  | 524.70884   | 274.08502   | 1 |
| 162 | H | 73.84585 | 70.07363 | 72.11337 | 1706.34263  | -1425.96036 | 1574.38926  | 1 |
| 163 | C | 72.60385 | 69.76866 | 73.84612 | -45.25864   | -626.22952  | 478.93267   | 1 |
| 164 | H | 71.83313 | 69.83664 | 73.04603 | 1988.63164  | 570.90773   | 1772.87287  | 1 |
| 165 | C | 72.50552 | 68.45209 | 74.71825 | 551.77128   | -20.49526   | -564.54996  | 1 |
| 166 | H | 72.94302 | 67.59685 | 74.15492 | 1434.61535  | -1753.10253 | 1513.99471  | 1 |
| 167 | H | 73.14269 | 68.54734 | 75.63366 | -714.67738  | 1819.09770  | 1898.36494  | 1 |
| 168 | C | 71.02108 | 68.14100 | 75.10541 | 446.99263   | -555.77305  | 338.97221   | 1 |
| 169 | H | 70.52599 | 69.01160 | 75.59033 | 1953.68466  | 1892.25957  | -161.67766  | 1 |
| 170 | H | 70.41099 | 67.90594 | 74.20485 | -403.03785  | 2688.07032  | -188.43591  | 1 |
| 171 | C | 71.09529 | 66.90500 | 76.08974 | 567.86262   | 335.74681   | 434.04421   | 1 |
| 172 | H | 71.58242 | 66.03596 | 75.59041 | -1080.02275 | 1568.26081  | -1948.78900 | 1 |
| 173 | H | 71.73531 | 67.14158 | 76.97102 | -919.54108  | 2111.34692  | 1456.13463  | 1 |
| 174 | C | 69.66368 | 66.53840 | 76.54288 | 195.81897   | 173.33862   | -745.11536  | 1 |
| 175 | H | 69.17276 | 67.29677 | 77.18459 | 1405.67949  | -2301.21089 | -390.08113  | 1 |
| 176 | H | 68.98187 | 66.23630 | 75.72318 | -940.37328  | -1118.32446 | 2299.72133  | 1 |
| 177 | N | 69.78488 | 65.26223 | 77.44464 | 319.26422   | 656.36007   | -42.02424   | 1 |
| 178 | H | 68.87606 | 64.89253 | 77.84736 | 1961.03633  | 619.91968   | 1787.09422  | 1 |
| 179 | H | 70.17874 | 64.38869 | 76.98770 | 854.14343   | -2156.80752 | 1429.08711  | 1 |
| 180 | H | 70.38433 | 65.34068 | 78.31706 | 1237.02905  | -1378.50857 | -1998.28500 | 1 |
| 181 | C | 72.70055 | 71.15182 | 74.70468 | 532.53319   | -268.57236  | 517.55729   | 1 |
| 182 | O | 73.09163 | 72.18886 | 74.18350 | 266.16714   | -290.73804  | -558.88002  | 1 |
| 183 | N | 72.24595 | 70.96381 | 75.92367 | -226.25352  | 640.49678   | -270.32839  | 1 |
| 184 | H | 72.00331 | 70.01354 | 76.19298 | 2007.69063  | -1035.27229 | 1523.50231  | 1 |
| 185 | C | 72.03325 | 72.03364 | 76.82617 | -540.76542  | -573.33303  | 49.50000    | 1 |
| 186 | H | 72.24512 | 72.96757 | 76.25705 | -2374.20950 | -1036.76023 | 843.75774   | 1 |
| 187 | C | 70.49073 | 71.85706 | 77.23031 | -77.09082   | 666.87422   | -415.84136  | 1 |
| 188 | H | 70.34338 | 70.80311 | 77.59318 | -985.81834  | 617.19825   | 2463.91927  | 1 |
| 189 | O | 69.57309 | 72.01306 | 76.12633 | 293.29899   | -391.65602  | -477.80926  | 1 |
| 190 | H | 69.17355 | 71.12345 | 76.08922 | 2528.72714  | -681.76262  | -751.27122  | 1 |
| 191 | C | 70.22903 | 72.82908 | 78.43399 | 252.47363   | -605.14473  | 440.05134   | 1 |
| 192 | H | 69.16742 | 72.77385 | 78.77032 | -2052.65063 | 1456.49051  | -1043.51830 | 1 |
| 193 | H | 70.86299 | 72.57761 | 79.31604 | -2152.98800 | -1661.97574 | -161.70652  | 1 |
| 194 | H | 70.42845 | 73.89045 | 78.15597 | -473.12726  | -1584.27339 | 2165.61725  | 1 |
| 195 | C | 73.06995 | 71.77186 | 78.06132 | 360.36307   | 488.46713   | 505.10056   | 1 |
| 196 | O | 73.74809 | 70.76506 | 78.11813 | -200.08817  | -528.03552  | -385.82850  | 1 |
| 197 | N | 73.06681 | 72.81343 | 78.89111 | -597.54095  | -226.44775  | 355.20479   | 1 |
| 198 | H | 72.42416 | 73.55261 | 78.60844 | 2179.23655  | -1300.70981 | -991.33835  | 1 |
| 199 | C | 73.36777 | 72.64552 | 80.27661 | -687.68921  | 297.39807   | -249.45179  | 1 |
| 200 | H | 72.55974 | 73.22875 | 80.77026 | -349.16256  | -2467.37713 | -1101.72831 | 1 |
| 201 | C | 73.48129 | 71.13145 | 80.77277 | 672.47345   | 361.54328   | -201.62880  | 1 |
| 202 | H | 74.13456 | 70.52948 | 80.08048 | 1541.41502  | 582.18425   | 2169.97026  | 1 |
| 203 | H | 73.97920 | 71.11504 | 81.78511 | -2534.67717 | 60.25153    | 997.72295   | 1 |
| 204 | C | 72.06760 | 70.53257 | 80.87003 | 574.26774   | -389.43119  | -377.02542  | 1 |
| 205 | C | 71.27151 | 70.87017 | 82.00411 | 688.82679   | -287.33580  | -257.96133  | 1 |
| 206 | H | 71.66837 | 71.53794 | 82.79079 | 331.14182   | 1470.38163  | 2269.80013  | 1 |
| 207 | C | 71.55495 | 69.65271 | 79.87013 | -383.52382  | -675.04808  | 144.24917   | 1 |
| 208 | H | 72.17036 | 69.37952 | 78.99211 | 4.09847     | 1517.59662  | 2262.86397  | 1 |
| 209 | C | 69.99198 | 70.32474 | 82.11115 | -134.76730  | 428.45285   | -649.50303  | 1 |
| 210 | H | 69.38195 | 70.57908 | 82.99547 | -903.23433  | 1600.49020  | 2011.53387  | 1 |
| 211 | C | 70.26726 | 69.13082 | 80.01912 | -335.53281  | -615.00040  | -364.39058  | 1 |
| 212 | H | 69.88676 | 68.44618 | 79.24082 | 1596.45398  | -1369.33862 | 1732.02659  | 1 |

|     |   |          |          |          |             |             |             |   |
|-----|---|----------|----------|----------|-------------|-------------|-------------|---|
| 213 | C | 69.44033 | 69.44309 | 81.13734 | 585.48547   | -340.24194  | -406.23938  | 1 |
| 214 | O | 68.13040 | 68.92069 | 81.30180 | -419.15649  | -173.04408  | -511.94141  | 1 |
| 215 | H | 68.08321 | 68.33652 | 80.50902 | -1071.84350 | 1559.71507  | -1960.13012 | 1 |
| 216 | C | 74.83207 | 73.26128 | 80.59304 | 291.41878   | -183.13091  | 710.72246   | 1 |
| 217 | O | 75.65096 | 72.60748 | 81.22267 | 379.87695   | 523.47396   | -222.23622  | 1 |
| 218 | N | 74.88492 | 74.58236 | 80.29091 | 564.30591   | 373.09380   | 277.24371   | 1 |
| 219 | H | 74.02051 | 74.76058 | 79.76514 | -120.59931  | -2436.07824 | -1214.35098 | 1 |
| 220 | C | 76.10221 | 75.04020 | 79.63977 | 404.07514   | -299.37480  | 608.84009   | 1 |
| 221 | H | 76.13005 | 74.51094 | 78.66437 | -1071.07882 | -841.69025  | 2359.66467  | 1 |
| 222 | C | 75.86025 | 76.58784 | 79.50604 | -683.12807  | 68.71770    | -390.13096  | 1 |
| 223 | H | 75.01350 | 76.79453 | 78.81293 | 2068.88918  | 1596.58590  | 770.89603   | 1 |
| 224 | H | 75.53884 | 76.99218 | 80.49260 | 1379.86429  | 2342.49779  | -179.85638  | 1 |
| 225 | C | 77.15319 | 77.32628 | 79.03032 | -176.39967  | 537.49466   | 550.97268   | 1 |
| 226 | H | 78.03224 | 77.04021 | 79.65027 | -396.28051  | 1942.22168  | 1869.33314  | 1 |
| 227 | H | 77.42502 | 77.06162 | 77.98647 | -94.44700   | 586.00678   | -2659.20016 | 1 |
| 228 | C | 76.81713 | 78.88110 | 79.17539 | -291.69381  | -718.18079  | -150.72929  | 1 |
| 229 | H | 75.92248 | 79.23330 | 78.60409 | -2303.38776 | 1089.76242  | 964.62032   | 1 |
| 230 | H | 76.71481 | 79.25381 | 80.22657 | 884.16729   | 2568.80533  | -207.74283  | 1 |
| 231 | N | 77.92626 | 79.51345 | 78.59948 | -594.49522  | -252.81478  | 342.29276   | 1 |
| 232 | H | 78.65115 | 78.91597 | 78.23366 | -1735.17426 | 2084.05705  | -263.71605  | 1 |
| 233 | C | 78.06874 | 80.77328 | 78.50924 | 595.23177   | -271.52487  | 442.22352   | 1 |
| 234 | N | 77.04954 | 81.58347 | 79.02275 | 585.53813   | -424.79750  | -105.81303  | 1 |
| 235 | H | 76.18879 | 81.31443 | 79.49776 | 959.88797   | 1327.56823  | -2177.11905 | 1 |
| 236 | H | 77.06097 | 82.60376 | 79.03173 | 1578.48647  | 16.27378    | -2220.76233 | 1 |
| 237 | N | 79.27585 | 81.10473 | 77.87771 | -452.17763  | -390.33541  | -421.51853  | 1 |
| 238 | H | 80.02896 | 80.51442 | 77.52778 | 470.26107   | 1974.25629  | -1817.92087 | 1 |
| 239 | H | 79.58651 | 82.06698 | 77.73802 | 1856.67307  | -1573.97321 | -1224.35416 | 1 |
| 240 | C | 77.43736 | 74.75571 | 80.51088 | -531.47271  | -581.45780  | -55.06206   | 1 |
| 241 | O | 78.48608 | 74.56307 | 79.94223 | -243.00837  | 192.73507   | 609.52485   | 1 |
| 242 | N | 77.27878 | 75.00881 | 81.86179 | 343.49288   | -644.25607  | 38.09164    | 1 |
| 243 | H | 76.24956 | 74.98863 | 81.92544 | -1691.16043 | -1535.97525 | -1484.73099 | 1 |
| 244 | C | 78.05500 | 74.13551 | 82.78297 | 542.66492   | 350.14337   | 454.42563   | 1 |
| 245 | H | 78.12175 | 73.18585 | 82.20261 | 1209.57979  | -2396.95920 | 463.86744   | 1 |
| 246 | C | 79.38611 | 74.76008 | 83.11206 | -737.14309  | 145.93010   | 242.71942   | 1 |
| 247 | H | 79.18322 | 75.72362 | 83.63428 | -1050.18303 | 159.36419   | -2509.06125 | 1 |
| 248 | C | 80.18681 | 73.87944 | 84.05772 | -706.77696  | -252.88343  | -245.16230  | 1 |
| 249 | H | 81.17160 | 74.34781 | 84.33005 | -1624.64039 | -1665.49085 | 1417.86935  | 1 |
| 250 | H | 79.62508 | 73.69905 | 85.01752 | 2566.10521  | 598.51109   | 693.22305   | 1 |
| 251 | H | 80.40786 | 72.87496 | 83.60456 | -1972.69758 | 107.10018   | -1876.34312 | 1 |
| 252 | C | 80.22496 | 75.07878 | 81.88503 | 412.85148   | 672.58832   | -27.69222   | 1 |
| 253 | H | 81.25677 | 75.43085 | 82.16103 | 1447.02277  | 1762.76533  | -1490.78944 | 1 |
| 254 | H | 80.34204 | 74.17716 | 81.21990 | 1320.77379  | -145.20455  | 2378.68491  | 1 |
| 255 | H | 79.74978 | 75.88882 | 81.26302 | -1512.10848 | 1470.52031  | 1724.75147  | 1 |
| 256 | C | 77.17210 | 74.00867 | 84.16295 | -607.11113  | 499.56689   | 73.73769    | 1 |
| 257 | O | 77.52208 | 74.58219 | 85.16822 | 357.97126   | 460.81534   | 356.68785   | 1 |
| 258 | N | 76.09937 | 73.24532 | 83.98635 | 536.55407   | -368.62270  | 332.76306   | 1 |
| 259 | H | 75.90350 | 72.81910 | 83.06392 | 524.38866   | 2297.69985  | 1367.20941  | 1 |
| 260 | C | 75.48049 | 72.78601 | 85.18590 | 46.50277    | -774.29190  | -147.97904  | 1 |
| 261 | H | 76.29443 | 72.81651 | 85.94569 | 1676.51875  | 1883.29066  | 1032.55549  | 1 |
| 262 | C | 74.25142 | 73.75365 | 85.59407 | -559.41456  | -34.19198   | -556.30433  | 1 |
| 263 | H | 73.54081 | 73.81356 | 84.73613 | -64.66664   | 395.18769   | 2695.05373  | 1 |
| 264 | H | 73.67638 | 73.30227 | 86.43794 | -2703.44278 | -60.40056   | 333.79418   | 1 |
| 265 | C | 74.73829 | 75.12618 | 85.96864 | -519.76435  | 377.31045   | 459.42366   | 1 |
| 266 | H | 75.42275 | 75.48640 | 85.16374 | -1746.74323 | 1667.50644  | -1261.73691 | 1 |
| 267 | C | 73.55641 | 76.08144 | 86.08988 | 570.95554   | 16.46261    | -545.27700  | 1 |
| 268 | H | 73.88891 | 77.12474 | 86.32636 | 2391.58273  | 28.05277    | -1305.07271 | 1 |
| 269 | H | 72.96088 | 76.12800 | 85.14224 | 175.75588   | 917.63458   | 2559.43867  | 1 |
| 270 | H | 72.85599 | 75.76532 | 86.90544 | -1063.97851 | -2155.34650 | 1283.00462  | 1 |
| 271 | C | 75.51277 | 75.11951 | 87.27967 | 193.76014   | 2.62946     | -765.53141  | 1 |
| 272 | H | 75.78597 | 76.15799 | 87.60079 | 507.39394   | -846.55087  | 2539.60089  | 1 |
| 273 | H | 74.92134 | 74.65823 | 88.11219 | 1337.57841  | 1818.19054  | 1526.01994  | 1 |
| 274 | H | 76.47181 | 74.54377 | 87.18522 | 1100.88635  | -1172.91350 | -2199.08909 | 1 |

|     |   |          |          |          |             |            |            |   |
|-----|---|----------|----------|----------|-------------|------------|------------|---|
| 275 | C | 74.83189 | 71.33892 | 84.91460 | -549.21115  | 475.64486  | -309.38218 | 1 |
| 276 | O | 74.42528 | 70.98382 | 83.83629 | 556.06106   | -390.37755 | -78.24250  | 1 |
| 277 | O | 74.59818 | 70.55200 | 86.06626 | -572.27940  | -310.19032 | -209.75862 | 1 |
| 278 | H | 75.00540 | 71.15421 | 86.75012 | -1380.08193 | 2212.14486 | 790.85944  | 1 |

Listing 59: C00059.xmolout

|    |   |          |          |          |             |             |             |        |
|----|---|----------|----------|----------|-------------|-------------|-------------|--------|
| 1  |   | 276      |          |          |             |             |             |        |
| 2  |   | 150.0000 | 150.0000 | 150.0000 | 0.0000      | 0.0000      | 0.0000***** | 1.5102 |
|    |   | 0.2500   | 300.00   | 0.00     | 0.00        | 0.00        | -1293.6332  | 0.0000 |
| 3  | H | 73.97867 | 76.67287 | 82.18158 | -2043.14101 | -1757.64893 | 399.89339   | 1      |
| 4  | N | 74.98291 | 76.60699 | 82.33795 | 426.75047   | 490.45733   | -334.42467  | 1      |
| 5  | H | 75.18724 | 75.64694 | 82.06382 | 442.25559   | -1110.30854 | -2448.52907 | 1      |
| 6  | C | 75.76083 | 77.54555 | 81.62857 | 415.32972   | -666.39213  | 83.73172    | 1      |
| 7  | H | 75.14980 | 78.46710 | 81.51134 | 879.32219   | 2491.00447  | 667.35213   | 1      |
| 8  | C | 77.13634 | 77.77437 | 82.43997 | 31.35357    | 477.41777   | 628.23362   | 1      |
| 9  | H | 77.71833 | 76.81865 | 82.45082 | 1168.38489  | 2240.25337  | -1019.71136 | 1      |
| 10 | H | 77.78355 | 78.51737 | 81.91474 | -360.43770  | 2534.90498  | 931.67112   | 1      |
| 11 | C | 76.82609 | 78.21652 | 83.84716 | 463.18208   | 512.70242   | -382.34388  | 1      |
| 12 | H | 75.99579 | 77.58306 | 84.23422 | 1725.29117  | 1863.52247  | -987.07854  | 1      |
| 13 | C | 78.04549 | 78.01106 | 84.73699 | 710.42801   | -144.27427  | -313.15367  | 1      |
| 14 | H | 77.83689 | 78.29666 | 85.80026 | 364.20195   | -1033.13725 | 2494.72524  | 1      |
| 15 | H | 78.37932 | 76.94083 | 84.73763 | 2567.61904  | 335.80679   | 847.48802   | 1      |
| 16 | H | 78.91512 | 78.62734 | 84.39093 | -2587.99029 | 680.92867   | -512.16411  | 1      |
| 17 | C | 76.39050 | 79.67413 | 83.89072 | 268.17616   | 741.64379   | -40.42634   | 1      |
| 18 | H | 76.14979 | 80.00192 | 84.93517 | 1283.54314  | -1945.37420 | -1411.27812 | 1      |
| 19 | H | 77.19323 | 80.35554 | 83.50688 | -1258.57796 | 1317.15249  | -2026.02085 | 1      |
| 20 | H | 75.47648 | 79.85274 | 83.26757 | -2502.84526 | 909.80597   | 575.92391   | 1      |
| 21 | C | 76.19044 | 76.81845 | 80.23516 | 619.36578   | -458.64843  | -172.09273  | 1      |
| 22 | O | 76.58242 | 75.67783 | 80.19115 | -81.40433   | 433.87611   | 522.34594   | 1      |
| 23 | N | 76.21610 | 77.76127 | 79.27347 | 175.23996   | -622.20190  | 341.55523   | 1      |
| 24 | H | 75.75001 | 78.63052 | 79.54021 | -876.57256  | -303.22879  | -2561.90213 | 1      |
| 25 | C | 76.08493 | 77.29120 | 77.89560 | -571.88214  | -534.10783  | -106.15033  | 1      |
| 26 | H | 75.36663 | 76.44222 | 77.96666 | -2713.20841 | -16.25800   | -248.80809  | 1      |
| 27 | C | 75.51177 | 78.48520 | 77.07862 | 166.60354   | 288.16399   | -716.09568  | 1      |
| 28 | H | 76.05526 | 79.43135 | 77.28984 | -2097.85574 | 1636.78449  | -586.18044  | 1      |
| 29 | O | 74.01451 | 78.84478 | 77.57482 | -317.80580  | -363.38227  | 484.43082   | 1      |
| 30 | H | 74.16202 | 79.76824 | 77.75088 | 1863.74748  | -1451.84923 | 1357.29467  | 1      |
| 31 | C | 75.55667 | 78.13378 | 75.57596 | 503.80731   | 517.99032   | 318.51606   | 1      |
| 32 | H | 75.16637 | 78.97021 | 74.94332 | 640.61020   | -2157.10410 | -1536.29104 | 1      |
| 33 | H | 76.60335 | 77.91449 | 75.24018 | 1687.88455  | 465.60692   | 2087.56452  | 1      |
| 34 | H | 74.94138 | 77.22832 | 75.35323 | -1293.07895 | -1899.88581 | -1463.57452 | 1      |
| 35 | C | 77.49945 | 76.77463 | 77.27872 | -153.07550  | -733.68902  | 248.70981   | 1      |
| 36 | O | 77.37654 | 76.05032 | 76.31403 | 186.15459   | -480.78787  | -449.34387  | 1      |
| 37 | N | 78.61545 | 77.33995 | 77.74801 | -487.53139  | 543.18517   | 42.03850    | 1      |
| 38 | C | 79.89762 | 76.81981 | 77.38033 | -699.35871  | 69.34393    | 360.10701   | 1      |
| 39 | H | 79.70455 | 76.31996 | 76.40307 | 2.81126     | -221.99807  | -2715.58072 | 1      |
| 40 | C | 80.76034 | 78.14501 | 77.32018 | -507.46439  | -592.59194  | 122.07761   | 1      |
| 41 | H | 81.85610 | 77.95844 | 77.38445 | -1975.08116 | 525.87560   | -1801.71556 | 1      |
| 42 | H | 80.59344 | 78.68555 | 76.36196 | 1588.27743  | -1913.22100 | 1113.83566  | 1      |
| 43 | C | 80.18979 | 78.96621 | 78.52220 | -613.62442  | -457.55993  | -194.14490  | 1      |
| 44 | H | 80.59883 | 78.61474 | 79.49526 | 1707.54637  | -721.27992  | 1996.92523  | 1      |
| 45 | H | 80.41566 | 80.05468 | 78.46337 | 758.23357   | 2100.81767  | 1560.55011  | 1      |
| 46 | C | 78.64198 | 78.64285 | 78.40782 | -352.41524  | 704.96076   | 49.21465    | 1      |
| 47 | H | 78.11719 | 78.52981 | 79.38447 | 1714.76886  | -2070.42778 | 443.35792   | 1      |
| 48 | H | 78.06197 | 79.33330 | 77.75251 | 1224.15040  | 1801.50881  | 1636.97633  | 1      |
| 49 | C | 80.36746 | 75.72169 | 78.51570 | 566.85117   | 537.05831   | 117.62814   | 1      |
| 50 | O | 79.81506 | 74.64780 | 78.51816 | -550.26779  | -406.08867  | 4.21666     | 1      |
| 51 | N | 81.33510 | 76.16829 | 79.29567 | 566.34832   | -425.77725  | 180.18749   | 1      |
| 52 | H | 81.69206 | 77.10478 | 79.12435 | 644.44502   | 2646.80550  | -52.73430   | 1      |
| 53 | C | 81.85566 | 75.41289 | 80.38341 | 612.34801   | -281.48662  | 411.56221   | 1      |
| 54 | H | 82.43844 | 76.18264 | 80.93658 | 1667.23498  | -1490.75142 | 1556.16753  | 1      |



|     |   |          |          |          |             |             |             |   |
|-----|---|----------|----------|----------|-------------|-------------|-------------|---|
| 55  | C | 80.63997 | 74.83241 | 81.24215 | -714.45746  | -175.43074  | 286.98927   | 1 |
| 56  | H | 80.06431 | 74.08838 | 80.61765 | -787.09484  | 1763.03619  | -1922.46060 | 1 |
| 57  | O | 79.65434 | 75.78601 | 81.68548 | -429.46514  | 516.51932   | -128.40526  | 1 |
| 58  | H | 78.89171 | 75.54434 | 81.11233 | 1981.82785  | 436.16847   | -1818.18182 | 1 |
| 59  | C | 81.44021 | 74.08813 | 82.37261 | 630.79189   | -468.94448  | 76.03230    | 1 |
| 60  | H | 80.76007 | 73.52142 | 83.04921 | -1775.71861 | 2062.30353  | 131.89849   | 1 |
| 61  | H | 82.17444 | 73.35922 | 81.95571 | -1855.14608 | 88.94118    | 1993.53760  | 1 |
| 62  | H | 82.01338 | 74.80513 | 83.00517 | -1504.82350 | -780.94249  | -2132.90992 | 1 |
| 63  | C | 82.86685 | 74.30884 | 79.71306 | 288.57638   | 618.62814   | -397.00270  | 1 |
| 64  | O | 83.95003 | 74.69143 | 79.34654 | 321.70495   | -185.26452  | 574.37218   | 1 |
| 65  | N | 82.38331 | 73.07606 | 79.70358 | -447.05792  | -446.53431  | 367.76425   | 1 |
| 66  | H | 81.41642 | 72.79358 | 79.95361 | 350.31316   | 1975.63644  | -1843.31522 | 1 |
| 67  | C | 83.12025 | 72.07893 | 78.96493 | -511.23061  | 374.03917   | -471.51480  | 1 |
| 68  | H | 83.29800 | 72.52517 | 77.95992 | 2234.79579  | -898.70890  | -1273.45190 | 1 |
| 69  | C | 84.49632 | 71.76948 | 79.72078 | 529.53781   | -159.34528  | 563.72604   | 1 |
| 70  | H | 85.11849 | 71.13947 | 79.02899 | 654.59388   | 2347.94251  | 1217.51488  | 1 |
| 71  | H | 85.03683 | 72.74538 | 79.84371 | -1526.55661 | 2103.42026  | 817.87394   | 1 |
| 72  | O | 84.39071 | 71.04583 | 80.98530 | -554.84278  | 14.12789    | 399.58769   | 1 |
| 73  | H | 84.30534 | 71.80623 | 81.58822 | 1297.06236  | 2061.84854  | 1220.68812  | 1 |
| 74  | C | 82.06082 | 70.87157 | 79.00037 | -662.15484  | -412.13544  | 123.62687   | 1 |
| 75  | O | 80.94420 | 71.07464 | 79.48349 | -540.01537  | -317.05804  | 274.91456   | 1 |
| 76  | N | 82.52395 | 69.77867 | 78.40942 | -202.76299  | -690.00100  | -131.49145  | 1 |
| 77  | H | 83.49186 | 69.87043 | 78.09385 | -702.62132  | -2617.37191 | 281.70413   | 1 |
| 78  | C | 81.94466 | 68.45194 | 78.56693 | -491.73914  | 576.34187   | 222.73509   | 1 |
| 79  | H | 82.77534 | 67.75743 | 78.29441 | 1977.17978  | -1823.58850 | -434.68928  | 1 |
| 80  | C | 81.45951 | 68.25882 | 79.99770 | -649.50797  | -328.66843  | 306.11224   | 1 |
| 81  | H | 80.72470 | 69.07309 | 80.21453 | 2075.07803  | 1452.16490  | -1004.45904 | 1 |
| 82  | C | 80.75813 | 66.92269 | 80.15236 | -615.18735  | -489.99689  | -70.96352   | 1 |
| 83  | H | 80.24784 | 66.82851 | 81.15054 | -1226.32661 | -1724.38906 | -1716.47170 | 1 |
| 84  | H | 79.97744 | 66.77701 | 79.35043 | 2381.64273  | -969.84735  | 900.46860   | 1 |
| 85  | H | 81.48019 | 66.06457 | 80.06548 | 2122.74991  | 1702.23946  | -141.36228  | 1 |
| 86  | C | 82.58928 | 68.37937 | 81.00134 | -501.86074  | -479.61276  | -376.42482  | 1 |
| 87  | H | 82.21623 | 68.30821 | 82.06014 | 993.79261   | -2246.95401 | -1177.81305 | 1 |
| 88  | H | 83.35290 | 67.56501 | 80.86383 | 42.71279    | -626.15391  | -2651.37258 | 1 |
| 89  | H | 83.13662 | 69.36751 | 80.90131 | -2026.39012 | -1590.33709 | -887.82922  | 1 |
| 90  | C | 80.66567 | 68.30664 | 77.51332 | -672.89153  | 382.57394   | -156.34072  | 1 |
| 91  | O | 80.34764 | 67.20700 | 77.13446 | 410.04627   | 221.86223   | 500.35950   | 1 |
| 92  | N | 80.08250 | 69.46222 | 77.25031 | -378.11782  | -443.79414  | -441.10984  | 1 |
| 93  | H | 80.40194 | 70.31130 | 77.73314 | 2404.15973  | -568.14894  | 1149.30085  | 1 |
| 94  | C | 79.11615 | 69.47157 | 76.19587 | -544.54484  | 466.16019   | 331.29119   | 1 |
| 95  | H | 79.34441 | 68.56377 | 75.58899 | -1409.80988 | -170.17955  | 2325.32679  | 1 |
| 96  | C | 77.70694 | 69.38213 | 76.93427 | -184.48284  | 116.78282   | -758.89137  | 1 |
| 97  | H | 77.71149 | 68.53683 | 77.65881 | 1893.78641  | 1861.14652  | 611.04528   | 1 |
| 98  | H | 77.52662 | 70.30017 | 77.53823 | -2170.79665 | -974.19311  | 1327.50117  | 1 |
| 99  | C | 76.59623 | 69.18345 | 75.85974 | 389.51668   | 672.81878   | -138.49152  | 1 |
| 100 | H | 76.46325 | 70.12677 | 75.27872 | 510.64577   | 1933.03327  | 1851.02484  | 1 |
| 101 | H | 76.91424 | 68.42774 | 75.10866 | -2302.30869 | -1105.72939 | -948.89774  | 1 |
| 102 | C | 75.21721 | 68.72875 | 76.48347 | -559.93427  | -126.34590  | 542.30857   | 1 |
| 103 | O | 74.38823 | 68.18668 | 75.79667 | -670.36003  | -111.83166  | 76.36448    | 1 |
| 104 | N | 75.09657 | 69.04023 | 77.78960 | -216.06729  | -537.07037  | 446.51379   | 1 |
| 105 | H | 75.74843 | 69.56619 | 78.38344 | -1251.96487 | 1074.12894  | -2168.52500 | 1 |
| 106 | H | 74.24751 | 68.89096 | 78.34520 | -2451.83023 | -720.73851  | 944.84612   | 1 |
| 107 | C | 79.18291 | 70.90349 | 75.43337 | 546.24052   | -563.88337  | -85.11809   | 1 |
| 108 | O | 79.05585 | 71.92606 | 76.08959 | 71.70702    | -307.40463  | 606.69673   | 1 |
| 109 | N | 79.31350 | 70.77479 | 74.11606 | 479.90863   | -504.50129  | 222.86849   | 1 |
| 110 | C | 79.50069 | 71.92386 | 73.26776 | 75.51268    | -600.91904  | 506.73700   | 1 |
| 111 | H | 80.17920 | 72.59613 | 73.84202 | -2033.61562 | 1795.30103  | 254.89480   | 1 |
| 112 | C | 80.10981 | 71.28715 | 71.95048 | 523.79067   | 517.99274   | 284.45581   | 1 |
| 113 | H | 79.92754 | 71.91327 | 71.04792 | 1599.61665  | -1127.00911 | 1895.98173  | 1 |
| 114 | H | 81.21211 | 71.15554 | 72.03141 | -1881.83093 | 1275.82488  | -1501.55016 | 1 |
| 115 | C | 79.37548 | 69.91026 | 71.90041 | -600.05639  | -404.05026  | 316.64485   | 1 |
| 116 | H | 78.33416 | 70.03120 | 71.52668 | -2597.05260 | 496.36221   | 657.73249   | 1 |

|     |   |          |          |          |             |             |             |   |
|-----|---|----------|----------|----------|-------------|-------------|-------------|---|
| 117 | H | 79.86952 | 69.16543 | 71.23667 | -1666.24518 | 1294.38985  | -1723.90591 | 1 |
| 118 | C | 79.39361 | 69.49105 | 73.43288 | 493.57570   | -129.95376  | -602.56394  | 1 |
| 119 | H | 78.53657 | 68.85810 | 73.76090 | -1469.08415 | -637.84797  | 2204.22581  | 1 |
| 120 | H | 80.34892 | 69.02514 | 73.77378 | -1038.97840 | 1068.88701  | -2280.71789 | 1 |
| 121 | C | 78.05520 | 72.61987 | 72.98052 | 188.88100   | 241.05089   | -727.87821  | 1 |
| 122 | O | 77.61527 | 72.70680 | 71.84617 | 531.88613   | -49.19943   | 427.07960   | 1 |
| 123 | N | 77.58511 | 73.10469 | 74.10726 | 708.14833   | 26.93417    | -179.73509  | 1 |
| 124 | H | 78.12886 | 72.95844 | 74.99023 | -2232.69501 | -1179.09831 | 1023.94816  | 1 |
| 125 | C | 76.22049 | 73.49491 | 74.21583 | -738.32412  | 259.92548   | 104.42456   | 1 |
| 126 | H | 76.16067 | 73.85905 | 75.26711 | 2028.89123  | 1260.02983  | 1311.33324  | 1 |
| 127 | C | 75.87144 | 74.61573 | 73.13691 | -258.65678  | -345.52513  | 661.28459   | 1 |
| 128 | H | 75.91997 | 74.21772 | 72.09965 | -1826.06090 | -1801.46097 | -918.64554  | 1 |
| 129 | C | 74.43482 | 75.15459 | 73.45266 | -541.23400  | 531.92970   | -218.41428  | 1 |
| 130 | H | 74.15979 | 76.02527 | 72.80368 | 1311.73218  | -2219.18200 | 882.19023   | 1 |
| 131 | H | 73.65572 | 74.36939 | 73.29708 | -1048.71298 | 1223.58118  | -2196.97971 | 1 |
| 132 | H | 74.34786 | 75.49079 | 74.51210 | 419.06414   | 1903.92898  | 1903.44670  | 1 |
| 133 | C | 76.90956 | 75.77603 | 73.28928 | -423.86431  | 152.66566   | -648.55262  | 1 |
| 134 | H | 76.56698 | 76.71372 | 72.78998 | 105.68386   | -2342.50080 | 1387.51238  | 1 |
| 135 | H | 77.09698 | 76.00454 | 74.38059 | -1695.63603 | -1484.73621 | -1531.02793 | 1 |
| 136 | H | 77.89262 | 75.49461 | 72.84167 | -1853.57121 | -487.39031  | 1936.59343  | 1 |
| 137 | C | 75.29136 | 72.17217 | 73.96849 | 539.71428   | -510.58232  | 267.58633   | 1 |
| 138 | O | 74.78159 | 71.63613 | 74.94059 | -15.93758   | -278.34085  | -624.49402  | 1 |
| 139 | N | 75.25040 | 71.86012 | 72.69926 | -676.81886  | 12.05292    | 276.17960   | 1 |
| 140 | H | 75.86892 | 72.37508 | 72.03457 | -1694.44250 | -373.84189  | -2100.66098 | 1 |
| 141 | C | 74.51608 | 70.75665 | 72.18834 | 412.33078   | -664.70360  | 108.35451   | 1 |
| 142 | H | 74.77550 | 70.77654 | 71.10529 | 1765.77476  | 1294.44366  | 1621.76594  | 1 |
| 143 | C | 75.03378 | 69.44853 | 72.92702 | -179.66635  | -721.95667  | -264.73915  | 1 |
| 144 | H | 76.14592 | 69.40205 | 72.93339 | -607.34922  | 2587.87032  | -598.10018  | 1 |
| 145 | H | 74.72235 | 69.44274 | 73.99927 | -359.69332  | -1479.13954 | -2259.74260 | 1 |
| 146 | C | 74.40776 | 68.24815 | 72.14708 | -240.01076  | 616.02425   | 431.85322   | 1 |
| 147 | H | 73.29896 | 68.34599 | 72.11716 | -1359.17131 | 782.54425   | 2227.99181  | 1 |
| 148 | H | 74.74355 | 68.25133 | 71.08583 | -820.36667  | 85.81767    | -2596.78715 | 1 |
| 149 | C | 74.82202 | 66.89760 | 72.85852 | -513.07015  | 236.18570   | -551.87280  | 1 |
| 150 | H | 75.92898 | 66.76958 | 72.87153 | 1816.11944  | -1183.11722 | -1650.94321 | 1 |
| 151 | H | 74.50028 | 66.89424 | 73.92882 | -1800.04429 | -1361.53473 | 1526.34643  | 1 |
| 152 | C | 74.13440 | 65.76851 | 72.05541 | 726.08972   | -253.19732  | -179.64713  | 1 |
| 153 | H | 73.02922 | 65.75424 | 72.13750 | 1224.27271  | -456.51798  | -2390.90304 | 1 |
| 154 | H | 74.43294 | 65.71477 | 70.98934 | 1206.40339  | -1150.93514 | -2154.90344 | 1 |
| 155 | N | 74.59192 | 64.39678 | 72.65390 | 329.70796   | -633.68968  | -155.67358  | 1 |
| 156 | H | 74.17049 | 63.53700 | 72.19674 | 1348.31305  | 1938.76845  | 1359.00643  | 1 |
| 157 | H | 75.62777 | 64.16894 | 72.61101 | 2096.92035  | 1446.54551  | -966.48890  | 1 |
| 158 | H | 74.36960 | 64.21985 | 73.67644 | -1197.07217 | -2303.53719 | 827.28733   | 1 |
| 159 | C | 72.90463 | 70.90232 | 72.43291 | -378.01186  | -556.17301  | -413.96481  | 1 |
| 160 | O | 72.16108 | 70.94993 | 71.46639 | -409.44433  | -307.55053  | -453.30833  | 1 |
| 161 | N | 72.58376 | 70.88076 | 73.70619 | -429.02477  | 524.70884   | 274.08502   | 1 |
| 162 | H | 73.30339 | 70.90060 | 74.47024 | 1706.34263  | -1425.96036 | 1574.38926  | 1 |
| 163 | C | 71.18586 | 70.80772 | 73.99392 | -45.25864   | -626.22952  | 478.93267   | 1 |
| 164 | H | 70.79544 | 70.20455 | 73.14055 | 1988.63164  | 570.90773   | 1772.87287  | 1 |
| 165 | C | 71.01927 | 70.16996 | 75.42947 | 551.77128   | -20.49526   | -564.54996  | 1 |
| 166 | H | 71.49598 | 69.16469 | 75.48633 | 1434.61535  | -1753.10253 | 1513.99471  | 1 |
| 167 | H | 71.53964 | 70.79266 | 76.19213 | -714.67738  | 1819.09770  | 1898.36494  | 1 |
| 168 | C | 69.48302 | 70.09848 | 75.72289 | 446.99263   | -555.77305  | 338.97221   | 1 |
| 169 | H | 69.01926 | 71.09573 | 75.53962 | 1953.68466  | 1892.25957  | -161.67766  | 1 |
| 170 | H | 68.97257 | 69.38850 | 75.03424 | -403.03785  | 2688.07032  | -188.43591  | 1 |
| 171 | C | 69.28296 | 69.67557 | 77.23269 | 567.86262   | 335.74681   | 434.04421   | 1 |
| 172 | H | 69.64968 | 68.63864 | 77.41178 | -1080.02275 | 1568.26081  | -1948.78900 | 1 |
| 173 | H | 69.88095 | 70.33045 | 77.90719 | -919.54108  | 2111.34692  | 1456.13463  | 1 |
| 174 | C | 67.77430 | 69.80177 | 77.55222 | 195.81897   | 173.33862   | -745.11536  | 1 |
| 175 | H | 67.35374 | 70.81436 | 77.38951 | 1405.67949  | -2301.21089 | -390.08113  | 1 |
| 176 | H | 67.13007 | 69.04281 | 77.06443 | -940.37328  | -1118.32446 | 2299.72133  | 1 |
| 177 | N | 67.59871 | 69.55706 | 79.08767 | 319.26422   | 656.36007   | -42.02424   | 1 |
| 178 | H | 66.60651 | 69.63145 | 79.45585 | 1961.03633  | 619.91968   | 1787.09422  | 1 |

|     |   |          |          |          |             |             |             |   |
|-----|---|----------|----------|----------|-------------|-------------|-------------|---|
| 179 | H | 67.89472 | 68.61183 | 79.46943 | 854.14343   | -2156.80752 | 1429.08711  | 1 |
| 180 | H | 68.11005 | 70.22596 | 79.73302 | 1237.02905  | -1378.50857 | -1998.28500 | 1 |
| 181 | C | 70.56790 | 72.34117 | 73.97288 | 532.53319   | -268.57236  | 517.55729   | 1 |
| 182 | O | 70.30159 | 72.90951 | 74.99976 | 266.16714   | -290.73804  | -558.88002  | 1 |
| 183 | N | 70.43623 | 72.69331 | 72.70833 | -226.25352  | 640.49678   | -270.32839  | 1 |
| 184 | H | 70.79913 | 72.03816 | 71.98209 | 2007.69063  | -1035.27229 | 1523.50231  | 1 |
| 185 | C | 69.66331 | 73.80355 | 72.27881 | -540.76542  | -573.33303  | 49.50000    | 1 |
| 186 | H | 69.32226 | 73.50095 | 71.26434 | -2374.20950 | -1036.76023 | 843.75774   | 1 |
| 187 | C | 68.46175 | 74.07180 | 73.29692 | -77.09082   | 666.87422   | -415.84136  | 1 |
| 188 | H | 68.90104 | 74.32625 | 74.30663 | -985.81834  | 617.19825   | 2463.91927  | 1 |
| 189 | O | 67.55839 | 72.96574 | 73.49569 | 293.29899   | -391.65602  | -477.80926  | 1 |
| 190 | H | 67.78691 | 72.71660 | 74.41523 | 2528.72714  | -681.76262  | -751.27122  | 1 |
| 191 | C | 67.81501 | 75.37251 | 72.69325 | 252.47363   | -605.14473  | 440.05134   | 1 |
| 192 | H | 66.99159 | 75.75392 | 73.34059 | -2052.65063 | 1456.49051  | -1043.51830 | 1 |
| 193 | H | 68.56083 | 76.19468 | 72.58408 | -2152.98800 | -1661.97574 | -161.70652  | 1 |
| 194 | H | 67.38036 | 75.18077 | 71.68522 | -473.12726  | -1584.27339 | 2165.61725  | 1 |
| 195 | C | 70.63798 | 75.11930 | 72.22530 | 360.36307   | 488.46713   | 505.10056   | 1 |
| 196 | O | 71.19325 | 75.55919 | 73.20063 | -200.08817  | -528.03552  | -385.82850  | 1 |
| 197 | N | 70.53182 | 75.67886 | 70.99521 | -597.54095  | -226.44775  | 355.20479   | 1 |
| 198 | H | 70.03501 | 75.05598 | 70.35424 | 2179.23655  | -1300.70981 | -991.33835  | 1 |
| 199 | C | 71.78506 | 76.20625 | 70.49346 | -687.68921  | 297.39807   | -249.45179  | 1 |
| 200 | H | 72.53114 | 75.39914 | 70.65211 | -349.16256  | -2467.37713 | -1101.72831 | 1 |
| 201 | C | 71.55437 | 76.58195 | 68.96905 | 672.47345   | 361.54328   | -201.62880  | 1 |
| 202 | H | 70.68662 | 77.27498 | 68.87916 | 1541.41502  | 582.18425   | 2169.97026  | 1 |
| 203 | H | 72.44832 | 77.13059 | 68.59206 | -2534.67717 | 60.25153    | 997.72295   | 1 |
| 204 | C | 71.31208 | 75.32882 | 68.10921 | 574.26774   | -389.43119  | -377.02542  | 1 |
| 205 | C | 72.43246 | 74.55613 | 67.68213 | 688.82679   | -287.33580  | -257.96133  | 1 |
| 206 | H | 73.45622 | 74.82597 | 67.99885 | 331.14182   | 1470.38163  | 2269.80013  | 1 |
| 207 | C | 69.99117 | 74.96408 | 67.70992 | -383.52382  | -675.04808  | 144.24917   | 1 |
| 208 | H | 69.11825 | 75.55141 | 68.04795 | 4.09847     | 1517.59662  | 2262.86397  | 1 |
| 209 | C | 72.21134 | 73.46320 | 66.84316 | -134.76730  | 428.45285   | -649.50303  | 1 |
| 210 | H | 73.08012 | 72.87252 | 66.50428 | -903.23433  | 1600.49020  | 2011.53387  | 1 |
| 211 | C | 69.82071 | 73.86072 | 66.86827 | -335.53281  | -615.00040  | -364.39058  | 1 |
| 212 | H | 68.79570 | 73.59487 | 66.55583 | 1596.45398  | -1369.33862 | 1732.02659  | 1 |
| 213 | C | 70.91426 | 73.07669 | 66.39769 | 585.48547   | -340.24194  | -406.23938  | 1 |
| 214 | O | 70.75457 | 71.96180 | 65.53283 | -419.15649  | -173.04408  | -511.94141  | 1 |
| 215 | H | 69.77532 | 71.97618 | 65.42100 | -1071.84350 | 1559.71507  | -1960.13012 | 1 |
| 216 | C | 72.15293 | 77.57175 | 71.29208 | 291.41878   | -183.13091  | 710.72246   | 1 |
| 217 | O | 73.29070 | 77.79011 | 71.63874 | 379.87695   | 523.47396   | -222.23622  | 1 |
| 218 | N | 71.08962 | 78.40216 | 71.29951 | 564.30591   | 373.09380   | 277.24371   | 1 |
| 219 | H | 70.25016 | 77.91330 | 70.97980 | -120.59931  | -2436.07824 | -1214.35098 | 1 |
| 220 | C | 70.96316 | 79.38047 | 72.34023 | 404.07514   | -299.37480  | 608.84009   | 1 |
| 221 | H | 69.86780 | 79.57854 | 72.33212 | -1071.07882 | -841.69025  | 2359.66467  | 1 |
| 222 | C | 71.47559 | 78.74622 | 73.69388 | -683.12807  | 68.71770    | -390.13096  | 1 |
| 223 | H | 71.02639 | 77.73730 | 73.85815 | 2068.88918  | 1596.58590  | 770.89603   | 1 |
| 224 | H | 72.58062 | 78.58496 | 73.66139 | 1379.86429  | 2342.49779  | -179.85638  | 1 |
| 225 | C | 71.05454 | 79.76135 | 74.80251 | -176.39967  | 537.49466   | 550.97268   | 1 |
| 226 | H | 71.64128 | 80.70539 | 74.71444 | -396.28051  | 1942.22168  | 1869.33314  | 1 |
| 227 | H | 69.99233 | 80.06211 | 74.66234 | -94.44700   | 586.00678   | -2659.20016 | 1 |
| 228 | C | 71.26053 | 79.09523 | 76.23933 | -291.69381  | -718.18079  | -150.72929  | 1 |
| 229 | H | 70.64029 | 78.17602 | 76.40249 | -2303.38776 | 1089.76242  | 964.62032   | 1 |
| 230 | H | 72.32777 | 78.89866 | 76.57025 | 884.16729   | 2568.80533  | -207.74283  | 1 |
| 231 | N | 70.73215 | 80.13402 | 77.01906 | -594.49522  | -252.81478  | 342.29276   | 1 |
| 232 | H | 70.01542 | 80.70181 | 76.59162 | -1735.17426 | 2084.05705  | -263.71605  | 1 |
| 233 | C | 71.05664 | 80.39860 | 78.22465 | 595.23177   | -271.52487  | 442.22352   | 1 |
| 234 | N | 72.02325 | 79.61166 | 78.84277 | 585.53813   | -424.79750  | -105.81303  | 1 |
| 235 | H | 72.55722 | 78.80789 | 78.41445 | 959.88797   | 1327.56823  | -2177.11905 | 1 |
| 236 | H | 72.34307 | 79.75735 | 79.80677 | 1578.48647  | 16.27378    | -2220.76233 | 1 |
| 237 | N | 70.32273 | 81.49198 | 78.71396 | -452.17763  | -390.33541  | -421.51853  | 1 |
| 238 | H | 69.62946 | 82.08073 | 78.25597 | 470.26107   | 1974.25629  | -1817.92087 | 1 |
| 239 | H | 70.43700 | 81.87295 | 79.65301 | 1856.67307  | -1573.97321 | -1224.35416 | 1 |
| 240 | C | 71.83741 | 80.70770 | 71.97733 | -531.47271  | -581.45780  | -55.06206   | 1 |

|     |   |          |          |          |             |             |             |   |
|-----|---|----------|----------|----------|-------------|-------------|-------------|---|
| 241 | O | 72.66855 | 81.15956 | 72.72775 | -243.00837  | 192.73507   | 609.52485   | 1 |
| 242 | N | 71.37940 | 81.25960 | 70.83553 | 343.49288   | -644.25607  | 38.09164    | 1 |
| 243 | H | 70.72973 | 80.63886 | 70.35155 | -1691.16043 | -1535.97525 | -1484.73099 | 1 |
| 244 | C | 72.21709 | 82.24900 | 70.14569 | 542.66492   | 350.14337   | 454.42563   | 1 |
| 245 | H | 73.16966 | 82.24445 | 70.73013 | 1209.57979  | -2396.95920 | 463.86744   | 1 |
| 246 | C | 72.36563 | 81.81138 | 68.69935 | -737.14309  | 145.93010   | 242.71942   | 1 |
| 247 | H | 71.34748 | 81.77427 | 68.25056 | -1050.18303 | 159.36419   | -2509.06125 | 1 |
| 248 | C | 73.19442 | 82.80004 | 67.90076 | -706.77696  | -252.88343  | -245.16230  | 1 |
| 249 | H | 73.25411 | 82.51547 | 66.81426 | -1624.64039 | -1665.49085 | 1417.86935  | 1 |
| 250 | H | 72.76109 | 83.83941 | 67.95468 | 2566.10521  | 598.51109   | 693.22305   | 1 |
| 251 | H | 74.24834 | 82.86325 | 68.28863 | -1972.69758 | 107.10018   | -1876.34312 | 1 |
| 252 | C | 72.96246 | 80.41933 | 68.59699 | 412.85148   | 672.58832   | -27.69222   | 1 |
| 253 | H | 72.99370 | 80.05367 | 67.53412 | 1447.02277  | 1762.76533  | -1490.78944 | 1 |
| 254 | H | 74.01534 | 80.39415 | 68.99121 | 1320.77379  | -145.20455  | 2378.68491  | 1 |
| 255 | H | 72.37287 | 79.67059 | 69.19563 | -1512.10848 | 1470.52031  | 1724.75147  | 1 |
| 256 | C | 71.45183 | 83.71396 | 70.20613 | -607.11113  | 499.56689   | 73.73769    | 1 |
| 257 | O | 72.07217 | 84.72369 | 69.94679 | 357.97126   | 460.81534   | 356.68785   | 1 |
| 258 | N | 70.15460 | 83.59002 | 70.44196 | 536.55407   | -368.62270  | 332.76306   | 1 |
| 259 | H | 69.82405 | 82.65442 | 70.67383 | 524.38866   | 2297.69985  | 1367.20941  | 1 |
| 260 | C | 69.43718 | 84.74838 | 70.85002 | 46.50277    | -774.29190  | -147.97904  | 1 |
| 261 | H | 70.22312 | 85.51713 | 71.03228 | 1676.51875  | 1883.29066  | 1032.55549  | 1 |
| 262 | C | 68.40393 | 85.19003 | 69.68961 | -559.41456  | -34.19198   | -556.30433  | 1 |
| 263 | H | 67.62699 | 84.39810 | 69.57080 | -64.66664   | 395.18769   | 2695.05373  | 1 |
| 264 | H | 67.85273 | 86.11072 | 69.99617 | -2703.44278 | -60.40056   | 333.79418   | 1 |
| 265 | C | 69.12146 | 85.41090 | 68.38547 | -519.76435  | 377.31045   | 459.42366   | 1 |
| 266 | H | 69.65898 | 84.47191 | 68.12003 | -1746.74323 | 1667.50644  | -1261.73691 | 1 |
| 267 | C | 68.12217 | 85.73009 | 67.27978 | 570.95554   | 16.46261    | -545.27700  | 1 |
| 268 | H | 68.62919 | 85.86181 | 66.28944 | 2391.58273  | 28.05277    | -1305.07271 | 1 |
| 269 | H | 67.36329 | 84.91493 | 67.15881 | 175.75588   | 917.63458   | 2559.43867  | 1 |
| 270 | H | 67.56109 | 86.67611 | 67.49232 | -1063.97851 | -2155.34650 | 1283.00462  | 1 |
| 271 | C | 70.14463 | 86.53170 | 68.48708 | 193.76014   | 2.62946     | -765.53141  | 1 |
| 272 | H | 70.54929 | 86.81545 | 67.48118 | 507.39394   | -846.55087  | 2539.60089  | 1 |
| 273 | H | 69.70737 | 87.45785 | 68.94198 | 1337.57841  | 1818.19054  | 1526.01994  | 1 |
| 274 | H | 71.02865 | 86.21443 | 69.12436 | 1100.88635  | -1172.91350 | -2199.08909 | 1 |
| 275 | C | 68.57010 | 84.31987 | 72.13507 | -549.21115  | 475.64486   | -309.38218  | 1 |
| 276 | O | 68.44392 | 83.17896 | 72.49763 | 556.06106   | -390.37755  | -78.24250   | 1 |
| 277 | O | 67.88009 | 85.36605 | 72.79514 | -572.27940  | -310.19032  | -209.75862  | 1 |
| 278 | H | 68.20149 | 86.13278 | 72.24582 | -1380.08193 | 2212.14486  | 790.85944   | 1 |

Listing 60: C00060.xmolout

|    |   |          |          |          |             |             |             |        |          |
|----|---|----------|----------|----------|-------------|-------------|-------------|--------|----------|
| 1  |   | 276      |          |          |             |             |             |        |          |
| 2  |   | 150.0000 | 150.0000 | 150.0000 | 0.0000      | 0.0000      | 0.0000***** | 2.7750 | 11100    |
|    |   | 0.2500   | 300.00   | 0.00     | 0.00        | 0.00        | -1293.6324  | 0.0000 | 300.0000 |
| 3  | H | 61.06076 | 70.95545 | 83.37899 | -2043.14101 | -1757.64893 | 399.89339   |        | 1        |
| 4  | N | 61.65840 | 70.74764 | 82.58071 | 426.75047   | 490.45733   | -334.42467  |        | 1        |
| 5  | H | 60.99405 | 70.72897 | 81.80654 | 442.25559   | -1110.30854 | -2448.52907 |        | 1        |
| 6  | C | 62.69569 | 71.67690 | 82.35951 | 415.32972   | -666.39213  | 83.73172    |        | 1        |
| 7  | H | 63.00447 | 72.08448 | 83.34614 | 879.32219   | 2491.00447  | 667.35213   |        | 1        |
| 8  | C | 63.87867 | 70.92111 | 81.56693 | 31.35357    | 477.41777   | 628.23362   |        | 1        |
| 9  | H | 63.48494 | 70.58175 | 80.57862 | 1168.38489  | 2240.25337  | -1019.71136 |        | 1        |
| 10 | H | 64.70975 | 71.63204 | 81.34081 | -360.43770  | 2534.90498  | 931.67112   |        | 1        |
| 11 | C | 64.37747 | 69.73906 | 82.35945 | 463.18208   | 512.70242   | -382.34388  |        | 1        |
| 12 | H | 63.49555 | 69.14010 | 82.68130 | 1725.29117  | 1863.52247  | -987.07854  |        | 1        |
| 13 | C | 65.26712 | 68.86235 | 81.48718 | 710.42801   | -144.27427  | -313.15367  |        | 1        |
| 14 | H | 65.63628 | 67.96228 | 82.04333 | 364.20195   | -1033.13725 | 2494.72524  |        | 1        |
| 15 | H | 64.72222 | 68.49256 | 80.58020 | 2567.61904  | 335.80679   | 847.48802   |        | 1        |
| 16 | H | 66.16866 | 69.42182 | 81.12640 | -2587.99029 | 680.92867   | -512.16411  |        | 1        |
| 17 | C | 65.14601 | 70.17922 | 83.59711 | 268.17616   | 741.64379   | -40.42634   |        | 1        |
| 18 | H | 65.54655 | 69.30167 | 84.16812 | 1283.54314  | -1945.37420 | -1411.27812 |        | 1        |
| 19 | H | 66.02016 | 70.82807 | 83.33034 | -1258.57796 | 1317.15249  | -2026.02085 |        | 1        |
| 20 | H | 64.49906 | 70.76502 | 84.29995 | -2502.84526 | 909.80597   | 575.92391   |        | 1        |

|    |   |          |          |          |             |             |             |   |
|----|---|----------|----------|----------|-------------|-------------|-------------|---|
| 21 | C | 62.09099 | 72.77975 | 81.31821 | 619.36578   | -458.64843  | -172.09273  | 1 |
| 22 | O | 61.39462 | 72.46521 | 80.37772 | -81.40433   | 433.87611   | 522.34594   | 1 |
| 23 | N | 62.58402 | 73.97637 | 81.62648 | 175.23996   | -622.20190  | 341.55523   | 1 |
| 24 | H | 63.19902 | 74.07683 | 82.43359 | -876.57256  | -303.22879  | -2561.90213 | 1 |
| 25 | C | 62.29899 | 75.06668 | 80.76987 | -571.88214  | -534.10783  | -106.15033  | 1 |
| 26 | H | 61.68675 | 74.65077 | 79.93602 | -2713.20841 | -16.25800   | -248.80809  | 1 |
| 27 | C | 61.55564 | 76.20089 | 81.63572 | 166.60354   | 288.16399   | -716.09568  | 1 |
| 28 | H | 62.18516 | 76.42224 | 82.54086 | -2097.85574 | 1636.78449  | -586.18044  | 1 |
| 29 | O | 60.24828 | 75.87393 | 82.12289 | -317.80580  | -363.38227  | 484.43082   | 1 |
| 30 | H | 60.38795 | 75.91244 | 83.09195 | 1863.74748  | -1451.84923 | 1357.29467  | 1 |
| 31 | C | 61.65325 | 77.40282 | 80.62712 | 503.80731   | 517.99032   | 318.51606   | 1 |
| 32 | H | 61.29855 | 78.35581 | 81.08390 | 640.61020   | -2157.10410 | -1536.29104 | 1 |
| 33 | H | 62.71206 | 77.55748 | 80.29165 | 1687.88455  | 465.60692   | 2087.56452  | 1 |
| 34 | H | 61.03870 | 77.22221 | 79.71413 | -1293.07895 | -1899.88581 | -1463.57452 | 1 |
| 35 | C | 63.74166 | 75.73009 | 80.34877 | -153.07550  | -733.68902  | 248.70981   | 1 |
| 36 | O | 64.39217 | 76.29392 | 81.18812 | 186.15459   | -480.78787  | -449.34387  | 1 |
| 37 | N | 64.01020 | 75.54346 | 79.04517 | -487.53139  | 543.18517   | 42.03850    | 1 |
| 38 | C | 65.12884 | 76.17250 | 78.42322 | -699.35871  | 69.34393    | 360.10701   | 1 |
| 39 | H | 65.85133 | 76.45287 | 79.22513 | 2.81126     | -221.99807  | -2715.58072 | 1 |
| 40 | C | 65.59376 | 75.02596 | 77.42007 | -507.46439  | -592.59194  | 122.07761   | 1 |
| 41 | H | 66.25260 | 75.40366 | 76.60671 | -1975.08116 | 525.87560   | -1801.71556 | 1 |
| 42 | H | 66.16093 | 74.22714 | 77.94698 | 1588.27743  | -1913.22100 | 1113.83566  | 1 |
| 43 | C | 64.21655 | 74.50414 | 76.90838 | -613.62442  | -457.55993  | -194.14490  | 1 |
| 44 | H | 63.79032 | 75.19366 | 76.14524 | 1707.54637  | -721.27992  | 1996.92523  | 1 |
| 45 | H | 64.26967 | 73.49871 | 76.43419 | 758.23357   | 2100.81767  | 1560.55011  | 1 |
| 46 | C | 63.34908 | 74.52400 | 78.23917 | -352.41524  | 704.96076   | 49.21465    | 1 |
| 47 | H | 62.28841 | 74.83603 | 78.09325 | 1714.76886  | -2070.42778 | 443.35792   | 1 |
| 48 | H | 63.37893 | 73.58525 | 78.84240 | 1224.15040  | 1801.50881  | 1636.97633  | 1 |
| 49 | C | 64.64115 | 77.43643 | 77.49957 | 566.85117   | 537.05831   | 117.62814   | 1 |
| 50 | O | 63.50380 | 77.58443 | 77.12729 | -550.26779  | -406.08867  | 4.21666     | 1 |
| 51 | N | 65.73100 | 78.10898 | 77.12363 | 566.34832   | -425.77725  | 180.18749   | 1 |
| 52 | H | 66.60065 | 77.86695 | 77.59573 | 644.44502   | 2646.80550  | -52.73430   | 1 |
| 53 | C | 65.54158 | 79.42850 | 76.56044 | 612.34801   | -281.48662  | 411.56221   | 1 |
| 54 | H | 64.53497 | 79.74635 | 76.92301 | 1667.23498  | -1490.75142 | 1556.16753  | 1 |
| 55 | C | 66.72265 | 80.31125 | 77.05639 | -714.45746  | -175.43074  | 286.98927   | 1 |
| 56 | H | 67.68538 | 79.95757 | 76.62052 | -787.09484  | 1763.03619  | -1922.46060 | 1 |
| 57 | O | 67.03716 | 80.05767 | 78.60521 | -429.46514  | 516.51932   | -128.40526  | 1 |
| 58 | H | 67.08571 | 80.96305 | 78.89516 | 1981.82785  | 436.16847   | -1818.18182 | 1 |
| 59 | C | 66.45378 | 81.79508 | 76.71698 | 630.79189   | -468.94448  | 76.03230    | 1 |
| 60 | H | 67.30635 | 82.44871 | 77.02849 | -1775.71861 | 2062.30353  | 131.89849   | 1 |
| 61 | H | 66.29966 | 81.94416 | 75.61500 | -1855.14608 | 88.94118    | 1993.53760  | 1 |
| 62 | H | 65.53512 | 82.17073 | 77.23272 | -1504.82350 | -780.94249  | -2132.90992 | 1 |
| 63 | C | 65.62292 | 79.37011 | 74.92212 | 288.57638   | 618.62814   | -397.00270  | 1 |
| 64 | O | 65.51105 | 80.43651 | 74.27904 | 321.70495   | -185.26452  | 574.37218   | 1 |
| 65 | N | 65.85838 | 78.16910 | 74.47503 | -447.05792  | -446.53431  | 367.76425   | 1 |
| 66 | H | 65.89239 | 77.53280 | 75.27334 | 350.31316   | 1975.63644  | -1843.31522 | 1 |
| 67 | C | 65.93741 | 77.71794 | 73.13555 | -511.23061  | 374.03917   | -471.51480  | 1 |
| 68 | H | 65.81008 | 76.61711 | 73.23410 | 2234.79579  | -898.70890  | -1273.45190 | 1 |
| 69 | C | 64.78048 | 78.42543 | 72.29361 | 529.53781   | -159.34528  | 563.72604   | 1 |
| 70 | H | 64.52835 | 77.78140 | 71.40769 | 654.59388   | 2347.94251  | 1217.51488  | 1 |
| 71 | H | 63.87591 | 78.43391 | 72.95784 | -1526.55661 | 2103.42026  | 817.87394   | 1 |
| 72 | O | 65.05513 | 79.74658 | 71.79391 | -554.84278  | 14.12789    | 399.58769   | 1 |
| 73 | H | 65.21544 | 80.21776 | 72.69625 | 1297.06236  | 2061.84854  | 1220.68812  | 1 |
| 74 | C | 67.38439 | 78.10166 | 72.48535 | -662.15484  | -412.13544  | 123.62687   | 1 |
| 75 | O | 67.93172 | 77.34687 | 71.72222 | -540.01537  | -317.05804  | 274.91456   | 1 |
| 76 | N | 67.76342 | 79.32442 | 72.85978 | -202.76299  | -690.00100  | -131.49145  | 1 |
| 77 | H | 67.12951 | 79.85665 | 73.47556 | -702.62132  | -2617.37191 | 281.70413   | 1 |
| 78 | C | 69.05670 | 79.85433 | 72.44066 | -491.73914  | 576.34187   | 222.73509   | 1 |
| 79 | H | 69.39782 | 79.11913 | 71.66798 | 1977.17978  | -1823.58850 | -434.68928  | 1 |
| 80 | C | 68.81423 | 81.25612 | 71.89590 | -649.50797  | -328.66843  | 306.11224   | 1 |
| 81 | H | 68.44442 | 81.88189 | 72.73904 | 2075.07803  | 1452.16490  | -1004.45904 | 1 |
| 82 | C | 70.08247 | 81.89032 | 71.35787 | -615.18735  | -489.99689  | -70.96352   | 1 |

|     |   |          |          |          |             |             |             |   |
|-----|---|----------|----------|----------|-------------|-------------|-------------|---|
| 83  | H | 69.90348 | 82.94063 | 70.99642 | -1226.32661 | -1724.38906 | -1716.47170 | 1 |
| 84  | H | 70.88983 | 81.93808 | 72.14611 | 2381.64273  | -969.84735  | 900.46860   | 1 |
| 85  | H | 70.50145 | 81.30696 | 70.49205 | 2122.74991  | 1702.23946  | -141.36228  | 1 |
| 86  | C | 67.74252 | 81.26093 | 70.82188 | -501.86074  | -479.61276  | -376.42482  | 1 |
| 87  | H | 67.45662 | 82.30657 | 70.52148 | 993.79261   | -2246.95401 | -1177.81305 | 1 |
| 88  | H | 68.08914 | 80.73063 | 69.89258 | 42.71279    | -626.15391  | -2651.37258 | 1 |
| 89  | H | 66.79963 | 80.73526 | 71.16871 | -2026.39012 | -1590.33709 | -887.82922  | 1 |
| 90  | C | 70.05307 | 79.90423 | 73.76302 | -672.89153  | 382.57394   | -156.34072  | 1 |
| 91  | O | 71.14438 | 80.43127 | 73.66108 | 410.04627   | 221.86223   | 500.35950   | 1 |
| 92  | N | 69.51126 | 79.39308 | 74.86624 | -378.11782  | -443.79414  | -441.10984  | 1 |
| 93  | H | 68.63402 | 78.90995 | 74.68150 | 2404.15973  | -568.14894  | 1149.30085  | 1 |
| 94  | C | 70.44603 | 78.98352 | 75.87507 | -544.54484  | 466.16019   | 331.29119   | 1 |
| 95  | H | 71.21990 | 79.78173 | 75.85155 | -1409.80988 | -170.17955  | 2325.32679  | 1 |
| 96  | C | 69.68980 | 78.82653 | 77.25668 | -184.48284  | 116.78282   | -758.89137  | 1 |
| 97  | H | 69.17708 | 79.77346 | 77.54440 | 1893.78641  | 1861.14652  | 611.04528   | 1 |
| 98  | H | 68.88952 | 78.05513 | 77.18464 | -2170.79665 | -974.19311  | 1327.50117  | 1 |
| 99  | C | 70.76207 | 78.43222 | 78.31932 | 389.51668   | 672.81878   | -138.49152  | 1 |
| 100 | H | 71.32035 | 77.50835 | 78.00254 | 510.64577   | 1933.03327  | 1851.02484  | 1 |
| 101 | H | 71.55246 | 79.21408 | 78.35687 | -2302.30869 | -1105.72939 | -948.89774  | 1 |
| 102 | C | 70.18029 | 78.21606 | 79.77174 | -559.93427  | -126.34590  | 542.30857   | 1 |
| 103 | O | 70.89135 | 77.74827 | 80.62791 | -670.36003  | -111.83166  | 76.36448    | 1 |
| 104 | N | 68.91101 | 78.62350 | 79.94316 | -216.06729  | -537.07037  | 446.51379   | 1 |
| 105 | H | 68.21403 | 79.08372 | 79.27919 | -1251.96487 | 1074.12894  | -2168.52500 | 1 |
| 106 | H | 68.46135 | 78.52658 | 80.86483 | -2451.83023 | -720.73851  | 944.84612   | 1 |
| 107 | C | 71.01221 | 77.50474 | 75.45701 | 546.24052   | -563.88337  | -85.11809   | 1 |
| 108 | O | 70.25084 | 76.58342 | 75.33354 | 71.70702    | -307.40463  | 606.69673   | 1 |
| 109 | N | 72.35144 | 77.52907 | 75.35596 | 479.90863   | -504.50129  | 222.86849   | 1 |
| 110 | C | 73.12822 | 76.33490 | 75.26423 | 75.51268    | -600.91904  | 506.73700   | 1 |
| 111 | H | 72.46750 | 75.56171 | 74.80708 | -2033.61562 | 1795.30103  | 254.89480   | 1 |
| 112 | C | 74.34325 | 76.84251 | 74.36749 | 523.79067   | 517.99274   | 284.45581   | 1 |
| 113 | H | 75.22982 | 76.17126 | 74.39886 | 1599.61665  | -1127.00911 | 1895.98173  | 1 |
| 114 | H | 74.04869 | 76.92977 | 73.29769 | -1881.83093 | 1275.82488  | -1501.55016 | 1 |
| 115 | C | 74.60786 | 78.24236 | 75.00107 | -600.05639  | -404.05026  | 316.64485   | 1 |
| 116 | H | 75.19752 | 78.14701 | 75.94049 | -2597.05260 | 496.36221   | 657.73249   | 1 |
| 117 | H | 75.18297 | 78.92707 | 74.33843 | -1666.24518 | 1294.38985  | -1723.90591 | 1 |
| 118 | C | 73.13462 | 78.75627 | 75.30021 | 493.57570   | -129.95376  | -602.56394  | 1 |
| 119 | H | 73.01872 | 79.27403 | 76.28171 | -1469.08415 | -637.84797  | 2204.22581  | 1 |
| 120 | H | 72.66405 | 79.38140 | 74.49000 | -1038.97840 | 1068.88701  | -2280.71789 | 1 |
| 121 | C | 73.60783 | 75.95747 | 76.78323 | 188.88100   | 241.05089   | -727.87821  | 1 |
| 122 | O | 73.02086 | 76.38483 | 77.75348 | 531.88613   | -49.19943   | 427.07960   | 1 |
| 123 | N | 74.63096 | 75.11688 | 76.74488 | 708.14833   | 26.93417    | -179.73509  | 1 |
| 124 | H | 75.00928 | 74.80940 | 75.85057 | -2232.69501 | -1179.09831 | 1023.94816  | 1 |
| 125 | C | 75.20541 | 74.69515 | 77.97135 | -738.32412  | 259.92548   | 104.42456   | 1 |
| 126 | H | 74.79664 | 75.36112 | 78.76688 | 2028.89123  | 1260.02983  | 1311.33324  | 1 |
| 127 | C | 74.78005 | 73.16688 | 78.14145 | -258.65678  | -345.52513  | 661.28459   | 1 |
| 128 | H | 75.08072 | 72.58330 | 77.24487 | -1826.06090 | -1801.46097 | -918.64554  | 1 |
| 129 | C | 75.45359 | 72.59439 | 79.43281 | -541.23400  | 531.92970   | -218.41428  | 1 |
| 130 | H | 75.17404 | 71.52802 | 79.60384 | 1311.73218  | -2219.18200 | 882.19023   | 1 |
| 131 | H | 76.56725 | 72.64062 | 79.36462 | -1048.71298 | 1223.58118  | -2196.97971 | 1 |
| 132 | H | 75.15251 | 73.16787 | 80.34083 | 419.06414   | 1903.92898  | 1903.44670  | 1 |
| 133 | C | 73.22723 | 73.11510 | 78.33769 | -423.86431  | 152.66566   | -648.55262  | 1 |
| 134 | H | 72.85868 | 72.07047 | 78.46735 | 105.68386   | -2342.50080 | 1387.51238  | 1 |
| 135 | H | 72.90972 | 73.69780 | 79.23452 | -1695.63603 | -1484.73621 | -1531.02793 | 1 |
| 136 | H | 72.69494 | 73.55304 | 77.46007 | -1853.57121 | -487.39031  | 1936.59343  | 1 |
| 137 | C | 76.83389 | 74.72168 | 77.76569 | 539.71428   | -510.58232  | 267.58633   | 1 |
| 138 | O | 77.33549 | 74.22683 | 76.78765 | -15.93758   | -278.34085  | -624.49402  | 1 |
| 139 | N | 77.42820 | 75.18621 | 78.88029 | -676.81886  | 12.05292    | 276.17960   | 1 |
| 140 | H | 76.75153 | 75.58231 | 79.53559 | -1694.44250 | -373.84189  | -2100.66098 | 1 |
| 141 | C | 78.68506 | 75.88752 | 78.69511 | 412.33078   | -664.70360  | 108.35451   | 1 |
| 142 | H | 78.49712 | 76.66963 | 77.92844 | 1765.77476  | 1294.44366  | 1621.76594  | 1 |
| 143 | C | 79.03090 | 76.44995 | 80.12055 | -179.66635  | -721.95667  | -264.73915  | 1 |
| 144 | H | 78.32553 | 77.25751 | 80.42075 | -607.34922  | 2587.87032  | -598.10018  | 1 |

|     |   |          |          |          |             |             |             |   |
|-----|---|----------|----------|----------|-------------|-------------|-------------|---|
| 145 | H | 78.89695 | 75.64043 | 80.87322 | -359.69332  | -1479.13954 | -2259.74260 | 1 |
| 146 | C | 80.51200 | 76.96508 | 80.14255 | -240.01076  | 616.02425   | 431.85322   | 1 |
| 147 | H | 81.18321 | 76.23926 | 79.63078 | -1359.17131 | 782.54425   | 2227.99181  | 1 |
| 148 | H | 80.62033 | 77.92538 | 79.59120 | -820.36667  | 85.81767    | -2596.78715 | 1 |
| 149 | C | 80.92893 | 77.11321 | 81.66010 | -513.07015  | 236.18570   | -551.87280  | 1 |
| 150 | H | 80.34120 | 77.91786 | 82.15869 | 1816.11944  | -1183.11722 | -1650.94321 | 1 |
| 151 | H | 80.69815 | 76.17833 | 82.22100 | -1800.04429 | -1361.53473 | 1526.34643  | 1 |
| 152 | C | 82.44525 | 77.40994 | 81.72639 | 726.08972   | -253.19732  | -179.64713  | 1 |
| 153 | H | 83.08895 | 76.61866 | 81.29276 | 1224.27271  | -456.51798  | -2390.90304 | 1 |
| 154 | H | 82.74236 | 78.40063 | 81.32874 | 1206.40339  | -1150.93514 | -2154.90344 | 1 |
| 155 | N | 82.84588 | 77.44599 | 83.24038 | 329.70796   | -633.68968  | -155.67358  | 1 |
| 156 | H | 83.87049 | 77.63302 | 83.44121 | 1348.31305  | 1938.76845  | 1359.00643  | 1 |
| 157 | H | 82.37636 | 78.17845 | 83.84823 | 2096.92035  | 1446.54551  | -966.48890  | 1 |
| 158 | H | 82.68338 | 76.55910 | 83.80067 | -1197.07217 | -2303.53719 | 827.28733   | 1 |
| 159 | C | 79.86049 | 74.84290 | 78.26819 | -378.01186  | -556.17301  | -413.96481  | 1 |
| 160 | O | 80.06850 | 73.84221 | 78.91820 | -409.44433  | -307.55053  | -453.30833  | 1 |
| 161 | N | 80.61455 | 75.41440 | 77.33392 | -429.02477  | 524.70884   | 274.08502   | 1 |
| 162 | H | 80.25499 | 76.28952 | 76.95629 | 1706.34263  | -1425.96036 | 1574.38926  | 1 |
| 163 | C | 81.52934 | 74.67318 | 76.49751 | -45.25864   | -626.22952  | 478.93267   | 1 |
| 164 | H | 82.52422 | 75.14739 | 76.64962 | 1988.63164  | 570.90773   | 1772.87287  | 1 |
| 165 | C | 81.48357 | 73.15672 | 76.91902 | 551.77128   | -20.49526   | -564.54996  | 1 |
| 166 | H | 81.82748 | 73.04439 | 77.97766 | 1434.61535  | -1753.10253 | 1513.99471  | 1 |
| 167 | H | 80.42454 | 72.80257 | 76.91292 | -714.67738  | 1819.09770  | 1898.36494  | 1 |
| 168 | C | 82.36741 | 72.26987 | 75.97709 | 446.99263   | -555.77305  | 338.97221   | 1 |
| 169 | H | 82.00192 | 72.28793 | 74.92108 | 1953.68466  | 1892.25957  | -161.67766  | 1 |
| 170 | H | 83.42252 | 72.62362 | 75.94907 | -403.03785  | 2688.07032  | -188.43591  | 1 |
| 171 | C | 82.25545 | 70.82069 | 76.59997 | 567.86262   | 335.74681   | 434.04421   | 1 |
| 172 | H | 82.60502 | 70.81030 | 77.65822 | -1080.02275 | 1568.26081  | -1948.78900 | 1 |
| 173 | H | 81.19146 | 70.48989 | 76.63048 | -919.54108  | 2111.34692  | 1456.13463  | 1 |
| 174 | C | 83.09782 | 69.86010 | 75.72948 | 195.81897   | 173.33862   | -745.11536  | 1 |
| 175 | H | 82.77682 | 69.82250 | 74.65369 | 1405.67949  | -2301.21089 | -390.08113  | 1 |
| 176 | H | 84.19339 | 70.01805 | 75.79354 | -940.37328  | -1118.32446 | 2299.72133  | 1 |
| 177 | N | 82.86771 | 68.41932 | 76.29424 | 319.26422   | 656.36007   | -42.02424   | 1 |
| 178 | H | 83.40046 | 67.63087 | 75.82364 | 1961.03633  | 619.91968   | 1787.09422  | 1 |
| 179 | H | 83.12526 | 68.26709 | 77.31221 | 854.14343   | -2156.80752 | 1429.08711  | 1 |
| 180 | H | 81.87408 | 68.04685 | 76.26576 | 1237.02905  | -1378.50857 | -1998.28500 | 1 |
| 181 | C | 81.00758 | 74.84868 | 74.97237 | 532.53319   | -268.57236  | 517.55729   | 1 |
| 182 | O | 79.83076 | 74.66063 | 74.66841 | 266.16714   | -290.73804  | -558.88002  | 1 |
| 183 | N | 82.01105 | 75.12721 | 74.16510 | -226.25352  | 640.49678   | -270.32839  | 1 |
| 184 | H | 82.95465 | 75.21922 | 74.53444 | 2007.69063  | -1035.27229 | 1523.50231  | 1 |
| 185 | C | 81.68279 | 75.50168 | 72.81794 | -540.76542  | -573.33303  | 49.50000    | 1 |
| 186 | H | 80.65399 | 75.91526 | 72.94509 | -2374.20950 | -1036.76023 | 843.75774   | 1 |
| 187 | C | 82.75876 | 76.55630 | 72.28349 | -77.09082   | 666.87422   | -415.84136  | 1 |
| 188 | H | 83.73684 | 76.02253 | 72.12636 | -985.81834  | 617.19825   | 2463.91927  | 1 |
| 189 | O | 83.03830 | 77.66905 | 73.14591 | 293.29899   | -391.65602  | -477.80926  | 1 |
| 190 | H | 83.99139 | 77.52814 | 73.33494 | 2528.72714  | -681.76262  | -751.27122  | 1 |
| 191 | C | 82.10408 | 76.89863 | 70.89312 | 252.47363   | -605.14473  | 440.05134   | 1 |
| 192 | H | 82.70789 | 77.64840 | 70.32064 | -2052.65063 | 1456.49051  | -1043.51830 | 1 |
| 193 | H | 82.00823 | 75.98478 | 70.25692 | -2152.98800 | -1661.97574 | -161.70652  | 1 |
| 194 | H | 81.08361 | 77.32952 | 71.01928 | -473.12726  | -1584.27339 | 2165.61725  | 1 |
| 195 | C | 81.67715 | 74.13376 | 71.92759 | 360.36307   | 488.46713   | 505.10056   | 1 |
| 196 | O | 82.50081 | 73.89969 | 71.04864 | -200.08817  | -528.03552  | -385.82850  | 1 |
| 197 | N | 80.65431 | 73.44634 | 72.35342 | -597.54095  | -226.44775  | 355.20479   | 1 |
| 198 | H | 80.06911 | 73.83212 | 73.13271 | 2179.23655  | -1300.70981 | -991.33835  | 1 |
| 199 | C | 80.33475 | 72.16889 | 71.83534 | -687.68921  | 297.39807   | -249.45179  | 1 |
| 200 | H | 79.47767 | 71.86373 | 72.47512 | -349.16256  | -2467.37713 | -1101.72831 | 1 |
| 201 | C | 79.91529 | 72.36496 | 70.30009 | 672.47345   | 361.54328   | -201.62880  | 1 |
| 202 | H | 80.67593 | 72.96903 | 69.75259 | 1541.41502  | 582.18425   | 2169.97026  | 1 |
| 203 | H | 79.82870 | 71.37853 | 69.78851 | -2534.67717 | 60.25153    | 997.72295   | 1 |
| 204 | C | 78.55790 | 73.07974 | 70.33986 | 574.26774   | -389.43119  | -377.02542  | 1 |
| 205 | C | 77.41175 | 72.35699 | 70.79046 | 688.82679   | -287.33580  | -257.96133  | 1 |
| 206 | H | 77.48871 | 71.28810 | 71.06022 | 331.14182   | 1470.38163  | 2269.80013  | 1 |

|     |   |          |          |          |             |             |             |   |
|-----|---|----------|----------|----------|-------------|-------------|-------------|---|
| 207 | C | 78.45334 | 74.46231 | 70.00019 | -383.52382  | -675.04808  | 144.24917   | 1 |
| 208 | H | 79.34032 | 75.02643 | 69.65933 | 4.09847     | 1517.59662  | 2262.86397  | 1 |
| 209 | C | 76.19751 | 73.03245 | 70.90396 | -134.76730  | 428.45285   | -649.50303  | 1 |
| 210 | H | 75.31452 | 72.47472 | 71.26178 | -903.23433  | 1600.49020  | 2011.53387  | 1 |
| 211 | C | 77.21165 | 75.09164 | 70.12168 | -335.53281  | -615.00040  | -364.39058  | 1 |
| 212 | H | 77.14026 | 76.16037 | 69.85475 | 1596.45398  | -1369.33862 | 1732.02659  | 1 |
| 213 | C | 76.04551 | 74.41255 | 70.58126 | 585.48547   | -340.24194  | -406.23938  | 1 |
| 214 | O | 74.78508 | 75.04944 | 70.72553 | -419.15649  | -173.04408  | -511.94141  | 1 |
| 215 | H | 75.01186 | 75.94580 | 70.38221 | -1071.84350 | 1559.71507  | -1960.13012 | 1 |
| 216 | C | 81.63510 | 71.20186 | 72.06328 | 291.41878   | -183.13091  | 710.72246   | 1 |
| 217 | O | 81.93037 | 70.81305 | 73.17682 | 379.87695   | 523.47396   | -222.23622  | 1 |
| 218 | N | 82.21564 | 70.91693 | 70.90966 | 564.30591   | 373.09380   | 277.24371   | 1 |
| 219 | H | 81.84394 | 71.32346 | 70.05417 | -120.59931  | -2436.07824 | -1214.35098 | 1 |
| 220 | C | 83.46022 | 70.21268 | 70.92534 | 404.07514   | -299.37480  | 608.84009   | 1 |
| 221 | H | 83.81033 | 70.29592 | 71.98271 | -1071.07882 | -841.69025  | 2359.66467  | 1 |
| 222 | C | 83.09270 | 68.70888 | 70.53141 | -683.12807  | 68.71770    | -390.13096  | 1 |
| 223 | H | 82.26422 | 68.33797 | 71.17480 | 2068.88918  | 1596.58590  | 770.89603   | 1 |
| 224 | H | 82.70341 | 68.66563 | 69.49026 | 1379.86429  | 2342.49779  | -179.85638  | 1 |
| 225 | C | 84.35393 | 67.81143 | 70.68475 | -176.39967  | 537.49466   | 550.97268   | 1 |
| 226 | H | 85.17179 | 68.15804 | 70.00744 | -396.28051  | 1942.22168  | 1869.33314  | 1 |
| 227 | H | 84.76875 | 67.86868 | 71.71619 | -94.44700   | 586.00678   | -2659.20016 | 1 |
| 228 | C | 83.89158 | 66.32235 | 70.32821 | -291.69381  | -718.18079  | -150.72929  | 1 |
| 229 | H | 83.15464 | 65.85531 | 71.02969 | -2303.38776 | 1089.76242  | 964.62032   | 1 |
| 230 | H | 83.50859 | 66.18402 | 69.28503 | 884.16729   | 2568.80533  | -207.74283  | 1 |
| 231 | N | 85.10012 | 65.61878 | 70.43003 | -594.49522  | -252.81478  | 342.29276   | 1 |
| 232 | H | 85.93840 | 66.17044 | 70.52803 | -1735.17426 | 2084.05705  | -263.71605  | 1 |
| 233 | C | 85.20719 | 64.35217 | 70.38795 | 595.23177   | -271.52487  | 442.22352   | 1 |
| 234 | N | 84.03561 | 63.60198 | 70.23941 | 585.53813   | -424.79750  | -105.81303  | 1 |
| 235 | H | 83.07237 | 63.91994 | 70.14154 | 959.88797   | 1327.56823  | -2177.11905 | 1 |
| 236 | H | 83.99624 | 62.58397 | 70.18304 | 1578.48647  | 16.27378    | -2220.76233 | 1 |
| 237 | N | 86.54853 | 63.96098 | 70.50412 | -452.17763  | -390.33541  | -421.51853  | 1 |
| 238 | H | 87.39883 | 64.51367 | 70.60110 | 470.26107   | 1974.25629  | -1817.92087 | 1 |
| 239 | H | 86.84984 | 62.98619 | 70.48343 | 1856.67307  | -1573.97321 | -1224.35416 | 1 |
| 240 | C | 84.43162 | 70.88546 | 69.82595 | -531.47271  | -581.45780  | -55.06206   | 1 |
| 241 | O | 85.30581 | 70.22860 | 69.32735 | -243.00837  | 192.73507   | 609.52485   | 1 |
| 242 | N | 84.17274 | 72.19298 | 69.63760 | 343.49288   | -644.25607  | 38.09164    | 1 |
| 243 | H | 83.39272 | 72.66038 | 70.16052 | -1691.16043 | -1535.97525 | -1484.73099 | 1 |
| 244 | C | 84.76813 | 72.81665 | 68.43414 | 542.66492   | 350.14337   | 454.42563   | 1 |
| 245 | H | 85.57381 | 72.09216 | 68.15714 | 1209.57979  | -2396.95920 | 463.86744   | 1 |
| 246 | C | 83.70543 | 72.90792 | 67.34991 | -737.14309  | 145.93010   | 242.71942   | 1 |
| 247 | H | 82.82790 | 73.44469 | 67.77223 | -1050.18303 | 159.36419   | -2509.06125 | 1 |
| 248 | C | 84.20379 | 73.68189 | 66.14438 | -706.77696  | -252.88343  | -245.16230  | 1 |
| 249 | H | 83.42314 | 73.75019 | 65.33673 | -1624.64039 | -1665.49085 | 1417.86935  | 1 |
| 250 | H | 84.49941 | 74.73451 | 66.42047 | 2566.10521  | 598.51109   | 693.22305   | 1 |
| 251 | H | 85.11236 | 73.19680 | 65.69013 | -1972.69758 | 107.10018   | -1876.34312 | 1 |
| 252 | C | 83.24133 | 71.53052 | 66.91289 | 412.85148   | 672.58832   | -27.69222   | 1 |
| 253 | H | 82.43176 | 71.58739 | 66.13377 | 1447.02277  | 1762.76533  | -1490.78944 | 1 |
| 254 | H | 84.08782 | 70.93471 | 66.47048 | 1320.77379  | -145.20455  | 2378.68491  | 1 |
| 255 | H | 82.83864 | 70.93477 | 67.77820 | -1512.10848 | 1470.52031  | 1724.75147  | 1 |
| 256 | C | 85.38995 | 74.28822 | 68.81500 | -607.11113  | 499.56689   | 73.73769    | 1 |
| 257 | O | 86.13319 | 74.80821 | 68.01618 | 357.97126   | 460.81534   | 356.68785   | 1 |
| 258 | N | 84.96734 | 74.78602 | 69.97189 | 536.55407   | -368.62270  | 332.76306   | 1 |
| 259 | H | 84.26075 | 74.28874 | 70.54295 | 524.38866   | 2297.69985  | 1367.20941  | 1 |
| 260 | C | 85.88898 | 75.69966 | 70.57923 | 46.50277    | -774.29190  | -147.97904  | 1 |
| 261 | H | 86.85192 | 75.52986 | 70.04440 | 1676.51875  | 1883.29066  | 1032.55549  | 1 |
| 262 | C | 85.35291 | 77.20801 | 70.35018 | -559.41456  | -34.19198   | -556.30433  | 1 |
| 263 | H | 84.23591 | 77.21683 | 70.40515 | -64.66664   | 395.18769   | 2695.05373  | 1 |
| 264 | H | 85.70577 | 77.88369 | 71.16555 | -2703.44278 | -60.40056   | 333.79418   | 1 |
| 265 | C | 85.81719 | 77.71903 | 69.01466 | -519.76435  | 377.31045   | 459.42366   | 1 |
| 266 | H | 85.64894 | 76.92188 | 68.25000 | -1746.74323 | 1667.50644  | -1261.73691 | 1 |
| 267 | C | 85.01898 | 78.95520 | 68.61792 | 570.95554   | 16.46261    | -545.27700  | 1 |
| 268 | H | 85.35573 | 79.36686 | 67.63175 | 2391.58273  | 28.05277    | -1305.07271 | 1 |



|     |   |          |          |          |             |             |             |   |
|-----|---|----------|----------|----------|-------------|-------------|-------------|---|
| 269 | H | 83.92467 | 78.73215 | 68.52866 | 175.75588   | 917.63458   | 2559.43867  | 1 |
| 270 | H | 85.12878 | 79.77471 | 69.37416 | -1063.97851 | -2155.34650 | 1283.00462  | 1 |
| 271 | C | 87.30128 | 78.06064 | 69.04524 | 193.76014   | 2.62946     | -765.53141  | 1 |
| 272 | H | 87.64539 | 78.49121 | 68.06967 | 507.39394   | -846.55087  | 2539.60089  | 1 |
| 273 | H | 87.53495 | 78.81354 | 69.84158 | 1337.57841  | 1818.19054  | 1526.01994  | 1 |
| 274 | H | 87.93140 | 77.15658 | 69.24683 | 1100.88635  | -1172.91350 | -2199.08909 | 1 |
| 275 | C | 85.95883 | 75.42369 | 72.15595 | -549.21115  | 475.64486   | -309.38218  | 1 |
| 276 | O | 85.36595 | 74.53626 | 72.71300 | 556.06106   | -390.37755  | -78.24250   | 1 |
| 277 | O | 86.76105 | 76.32433 | 72.90538 | -572.27940  | -310.19032  | -209.75862  | 1 |
| 278 | H | 87.15810 | 76.83641 | 72.14972 | -1380.08193 | 2212.14486  | 790.85944   | 1 |

Listing 61: C00061.xmolout

|    |   |          |          |          |             |             |             |        |          |   |
|----|---|----------|----------|----------|-------------|-------------|-------------|--------|----------|---|
| 1  |   | 276      |          |          |             |             |             |        |          |   |
| 2  |   | 150.0000 | 150.0000 | 150.0000 | 0.0000      | 0.0000      | 0.0000***** | 1.1117 | 4447     |   |
|    |   | 0.2500   | 300.00   | 0.00     | 0.00        | 0.00        | -1293.6252  | 0.0000 | 300.0000 |   |
| 3  | H | 83.51876 | 65.34336 | 81.39617 | -2043.14101 | -1757.64893 | 399.89339   |        |          | 1 |
| 4  | N | 83.61168 | 65.30731 | 80.38272 | 426.75047   | 490.45733   | -334.42467  |        |          | 1 |
| 5  | H | 82.63503 | 65.30755 | 80.09399 | 442.25559   | -1110.30854 | -2448.52907 |        |          | 1 |
| 6  | C | 84.35497 | 66.38232 | 79.84253 | 415.32972   | -666.39213  | 83.73172    |        |          | 1 |
| 7  | H | 85.13301 | 66.53827 | 80.62064 | 879.32219   | 2491.00447  | 667.35213   |        |          | 1 |
| 8  | C | 84.98596 | 65.95044 | 78.42562 | 31.35357    | 477.41777   | 628.23362   |        |          | 1 |
| 9  | H | 84.18226 | 65.93996 | 77.65075 | 1168.38489  | 2240.25337  | -1019.71136 |        |          | 1 |
| 10 | H | 85.73156 | 66.70733 | 78.08227 | -360.43770  | 2534.90498  | 931.67112   |        |          | 1 |
| 11 | C | 85.62102 | 64.58846 | 78.53629 | 463.18208   | 512.70242   | -382.34388  |        |          | 1 |
| 12 | H | 84.85691 | 63.88244 | 78.93364 | 1725.29117  | 1863.52247  | -987.07854  |        |          | 1 |
| 13 | C | 86.07046 | 64.10177 | 77.16421 | 710.42801   | -144.27427  | -313.15367  |        |          | 1 |
| 14 | H | 86.51143 | 63.07287 | 77.21377 | 364.20195   | -1033.13725 | 2494.72524  |        |          | 1 |
| 15 | H | 85.21803 | 64.06409 | 76.43794 | 2567.61904  | 335.80679   | 847.48802   |        |          | 1 |
| 16 | H | 86.85050 | 64.77521 | 76.72431 | -2587.99029 | 680.92867   | -512.16411  |        |          | 1 |
| 17 | C | 86.80926 | 64.59665 | 79.48815 | 268.17616   | 741.64379   | -40.42634   |        |          | 1 |
| 18 | H | 87.29953 | 63.59050 | 79.54499 | 1283.54314  | -1945.37420 | -1411.27812 |        |          | 1 |
| 19 | H | 87.59254 | 65.33015 | 79.16591 | -1258.57796 | 1317.15249  | -2026.02085 |        |          | 1 |
| 20 | H | 86.50138 | 64.87320 | 80.52940 | -2502.84526 | 909.80597   | 575.92391   |        |          | 1 |
| 21 | C | 83.31565 | 67.62217 | 79.75044 | 619.36578   | -458.64843  | -172.09273  |        |          | 1 |
| 22 | O | 82.40227 | 67.74351 | 80.54775 | -81.40433   | 433.87611   | 522.34594   |        |          | 1 |
| 23 | N | 83.65860 | 68.45563 | 78.77580 | 175.23996   | -622.20190  | 341.55523   |        |          | 1 |
| 24 | H | 84.44604 | 68.22366 | 78.17431 | -876.57256  | -303.22879  | -2561.90213 |        |          | 1 |
| 25 | C | 82.93695 | 69.66573 | 78.60845 | -571.88214  | -534.10783  | -106.15033  |        |          | 1 |
| 26 | H | 82.33677 | 69.79385 | 79.53869 | -2713.20841 | -16.25800   | -248.80809  |        |          | 1 |
| 27 | C | 84.01947 | 70.81031 | 78.30485 | 166.60354   | 288.16399   | -716.09568  |        |          | 1 |
| 28 | H | 84.60945 | 70.49961 | 77.39875 | -2097.85574 | 1636.78449  | -586.18044  |        |          | 1 |
| 29 | O | 84.98294 | 71.04993 | 79.34308 | -317.80580  | -363.38227  | 484.43082   |        |          | 1 |
| 30 | H | 85.81775 | 70.81626 | 78.88776 | 1863.74748  | -1451.84923 | 1357.29467  |        |          | 1 |
| 31 | C | 83.09814 | 72.02427 | 77.91814 | 503.80731   | 517.99032   | 318.51606   |        |          | 1 |
| 32 | H | 83.70001 | 72.90544 | 77.59528 | 640.61020   | -2157.10410 | -1536.29104 |        |          | 1 |
| 33 | H | 82.41183 | 71.76321 | 77.07455 | 1687.88455  | 465.60692   | 2087.56452  |        |          | 1 |
| 34 | H | 82.46723 | 72.35083 | 78.77710 | -1293.07895 | -1899.88581 | -1463.57452 |        |          | 1 |
| 35 | C | 82.05366 | 69.52568 | 77.23589 | -153.07550  | -733.68902  | 248.70981   |        |          | 1 |
| 36 | O | 82.61892 | 69.66692 | 76.18318 | 186.15459   | -480.78787  | -449.34387  |        |          | 1 |
| 37 | N | 80.75186 | 69.28118 | 77.47551 | -487.53139  | 543.18517   | 42.03850    |        |          | 1 |
| 38 | C | 79.85665 | 69.07844 | 76.38673 | -699.35871  | 69.34393    | 360.10701   |        |          | 1 |
| 39 | H | 80.48705 | 68.87273 | 75.49066 | 2.81126     | -221.99807  | -2715.58072 |        |          | 1 |
| 40 | C | 78.99633 | 67.85966 | 76.93231 | -507.46439  | -592.59194  | 122.07761   |        |          | 1 |
| 41 | H | 78.02695 | 67.74179 | 76.39816 | -1975.08116 | 525.87560   | -1801.71556 |        |          | 1 |
| 42 | H | 79.54219 | 66.89611 | 76.82573 | 1588.27743  | -1913.22100 | 1113.83566  |        |          | 1 |
| 43 | C | 78.82639 | 68.24759 | 78.43463 | -613.62442  | -457.55993  | -194.14490  |        |          | 1 |
| 44 | H | 78.00918 | 69.01176 | 78.55356 | 1707.54637  | -721.27992  | 1996.92523  |        |          | 1 |
| 45 | H | 78.55131 | 67.38908 | 79.08913 | 758.23357   | 2100.81767  | 1560.55011  |        |          | 1 |
| 46 | C | 80.25002 | 68.85604 | 78.77838 | -352.41524  | 704.96076   | 49.21465    |        |          | 1 |
| 47 | H | 80.22729 | 69.74377 | 79.45375 | 1714.76886  | -2070.42778 | 443.35792   |        |          | 1 |
| 48 | H | 81.00563 | 68.12008 | 79.17132 | 1224.15040  | 1801.50881  | 1636.97633  |        |          | 1 |

|     |   |          |          |          |             |             |             |   |
|-----|---|----------|----------|----------|-------------|-------------|-------------|---|
| 49  | C | 78.82656 | 70.34788 | 76.16323 | 566.85117   | 537.05831   | 117.62814   | 1 |
| 50  | O | 78.18441 | 70.40879 | 75.14219 | -550.26779  | -406.08867  | 4.21666     | 1 |
| 51  | N | 78.81600 | 71.16745 | 77.20700 | 566.34832   | -425.77725  | 180.18749   | 1 |
| 52  | H | 79.46582 | 70.90453 | 77.94488 | 644.44502   | 2646.80550  | -52.73430   | 1 |
| 53  | C | 77.71551 | 72.03839 | 77.47262 | 612.34801   | -281.48662  | 411.56221   | 1 |
| 54  | H | 78.00929 | 72.45035 | 78.46388 | 1667.23498  | -1490.75142 | 1556.16753  | 1 |
| 55  | C | 77.68136 | 73.16241 | 76.33960 | -714.45746  | -175.43074  | 286.98927   | 1 |
| 56  | H | 77.33797 | 72.68050 | 75.38098 | -787.09484  | 1763.03619  | -1922.46060 | 1 |
| 57  | O | 78.94052 | 73.78026 | 76.00320 | -429.46514  | 516.51932   | -128.40526  | 1 |
| 58  | H | 79.10153 | 73.39462 | 75.11918 | 1981.82785  | 436.16847   | -1818.18182 | 1 |
| 59  | C | 76.59648 | 74.15318 | 76.90495 | 630.79189   | -468.94448  | 76.03230    | 1 |
| 60  | H | 76.23717 | 74.86212 | 76.12384 | -1775.71861 | 2062.30353  | 131.89849   | 1 |
| 61  | H | 75.69895 | 73.62851 | 77.32084 | -1855.14608 | 88.94118    | 1993.53760  | 1 |
| 62  | H | 77.01275 | 74.77101 | 77.73409 | -1504.82350 | -780.94249  | -2132.90992 | 1 |
| 63  | C | 76.38962 | 71.10497 | 77.58952 | 288.57638   | 618.62814   | -397.00270  | 1 |
| 64  | O | 76.38447 | 70.18588 | 78.41688 | 321.70495   | -185.26452  | 574.37218   | 1 |
| 65  | N | 75.45422 | 71.44902 | 76.74037 | -447.05792  | -446.53431  | 367.76425   | 1 |
| 66  | H | 75.70515 | 72.18197 | 76.07952 | 350.31316   | 1975.63644  | -1843.31522 | 1 |
| 67  | C | 74.06313 | 71.27341 | 77.00511 | -511.23061  | 374.03917   | -471.51480  | 1 |
| 68  | H | 73.59504 | 71.78844 | 76.13494 | 2234.79579  | -898.70890  | -1273.45190 | 1 |
| 69  | C | 73.77674 | 69.70705 | 77.01213 | 529.53781   | -159.34528  | 563.72604   | 1 |
| 70  | H | 72.70769 | 69.52182 | 76.72490 | 654.59388   | 2347.94251  | 1217.51488  | 1 |
| 71  | H | 74.40294 | 69.27095 | 76.18951 | -1526.55661 | 2103.42026  | 817.87394   | 1 |
| 72  | O | 74.03399 | 69.00039 | 78.24690 | -554.84278  | 14.12789    | 399.58769   | 1 |
| 73  | H | 74.99015 | 69.34373 | 78.41867 | 1297.06236  | 2061.84854  | 1220.68812  | 1 |
| 74  | C | 73.70539 | 72.01243 | 78.40968 | -662.15484  | -412.13544  | 123.62687   | 1 |
| 75  | O | 74.50290 | 72.76458 | 78.97869 | -540.01537  | -317.05804  | 274.91456   | 1 |
| 76  | N | 72.44562 | 71.78553 | 78.72568 | -202.76299  | -690.00100  | -131.49145  | 1 |
| 77  | H | 72.04374 | 71.14112 | 78.04768 | -702.62132  | -2617.37191 | 281.70413   | 1 |
| 78  | C | 71.85370 | 71.98591 | 80.03759 | -491.73914  | 576.34187   | 222.73509   | 1 |
| 79  | H | 70.88220 | 71.44192 | 79.96427 | 1977.17978  | -1823.58850 | -434.68928  | 1 |
| 80  | C | 72.78841 | 71.40737 | 81.09229 | -649.50797  | -328.66843  | 306.11224   | 1 |
| 81  | H | 73.80836 | 71.81680 | 80.90531 | 2075.07803  | 1452.16490  | -1004.45904 | 1 |
| 82  | C | 72.36555 | 71.80762 | 82.49329 | -615.18735  | -489.99689  | -70.96352   | 1 |
| 83  | H | 73.06731 | 71.40066 | 83.27275 | -1226.32661 | -1724.38906 | -1716.47170 | 1 |
| 84  | H | 72.34163 | 72.92636 | 82.61399 | 2381.64273  | -969.84735  | 900.46860   | 1 |
| 85  | H | 71.33631 | 71.42589 | 82.73924 | 2122.74991  | 1702.23946  | -141.36228  | 1 |
| 86  | C | 72.87826 | 69.89755 | 80.99231 | -501.86074  | -479.61276  | -376.42482  | 1 |
| 87  | H | 73.58819 | 69.47073 | 81.75364 | 993.79261   | -2246.95401 | -1177.81305 | 1 |
| 88  | H | 71.87840 | 69.40959 | 81.15933 | 42.71279    | -626.15391  | -2651.37258 | 1 |
| 89  | H | 73.24825 | 69.57097 | 79.96363 | -2026.39012 | -1590.33709 | -887.82922  | 1 |
| 90  | C | 71.61485 | 73.61334 | 80.30491 | -672.89153  | 382.57394   | -156.34072  | 1 |
| 91  | O | 70.50245 | 73.99394 | 80.56106 | 410.04627   | 221.86223   | 500.35950   | 1 |
| 92  | N | 72.74195 | 74.29790 | 80.27633 | -378.11782  | -443.79414  | -441.10984  | 1 |
| 93  | H | 73.64720 | 73.85004 | 79.97676 | 2404.15973  | -568.14894  | 1149.30085  | 1 |
| 94  | C | 72.64647 | 75.71140 | 80.39607 | -544.54484  | 466.16019   | 331.29119   | 1 |
| 95  | H | 71.59581 | 75.92716 | 80.70074 | -1409.80988 | -170.17955  | 2325.32679  | 1 |
| 96  | C | 73.75196 | 76.13551 | 81.45506 | -184.48284  | 116.78282   | -758.89137  | 1 |
| 97  | H | 73.64201 | 75.54044 | 82.38974 | 1893.78641  | 1861.14652  | 611.04528   | 1 |
| 98  | H | 74.77228 | 75.91219 | 81.06827 | -2170.79665 | -974.19311  | 1327.50117  | 1 |
| 99  | C | 73.57950 | 77.65878 | 81.73792 | 389.51668   | 672.81878   | -138.49152  | 1 |
| 100 | H | 73.74564 | 78.24220 | 80.80397 | 510.64577   | 1933.03327  | 1851.02484  | 1 |
| 101 | H | 72.52450 | 77.88137 | 82.01141 | -2302.30869 | -1105.72939 | -948.89774  | 1 |
| 102 | C | 74.53348 | 78.18800 | 82.87554 | -559.93427  | -126.34590  | 542.30857   | 1 |
| 103 | O | 74.47093 | 79.34371 | 83.20635 | -670.36003  | -111.83166  | 76.36448    | 1 |
| 104 | N | 75.35494 | 77.25103 | 83.39575 | -216.06729  | -537.07037  | 446.51379   | 1 |
| 105 | H | 75.46577 | 76.26172 | 83.14467 | -1251.96487 | 1074.12894  | -2168.52500 | 1 |
| 106 | H | 76.03881 | 77.43792 | 84.13734 | -2451.83023 | -720.73851  | 944.84612   | 1 |
| 107 | C | 73.09607 | 76.33054 | 78.94095 | 546.24052   | -563.88337  | -85.11809   | 1 |
| 108 | O | 74.24040 | 76.24134 | 78.58325 | 71.70702    | -307.40463  | 606.69673   | 1 |
| 109 | N | 72.04298 | 76.85851 | 78.30108 | 479.90863   | -504.50129  | 222.86849   | 1 |
| 110 | C | 72.21637 | 77.52434 | 77.04541 | 75.51268    | -600.91904  | 506.73700   | 1 |

|     |   |          |          |          |             |             |             |   |
|-----|---|----------|----------|----------|-------------|-------------|-------------|---|
| 111 | H | 73.18053 | 77.11321 | 76.66440 | -2033.61562 | 1795.30103  | 254.89480   | 1 |
| 112 | C | 70.91351 | 77.02470 | 76.28432 | 523.79067   | 517.99274   | 284.45581   | 1 |
| 113 | H | 70.67257 | 77.62321 | 75.37770 | 1599.61665  | -1127.00911 | 1895.98173  | 1 |
| 114 | H | 71.03556 | 75.97202 | 75.94589 | -1881.83093 | 1275.82488  | -1501.55016 | 1 |
| 115 | C | 69.83817 | 77.11627 | 77.41036 | -600.05639  | -404.05026  | 316.64485   | 1 |
| 116 | H | 69.49705 | 78.16457 | 77.56093 | -2597.05260 | 496.36221   | 657.73249   | 1 |
| 117 | H | 68.92359 | 76.51855 | 77.19861 | -1666.24518 | 1294.38985  | -1723.90591 | 1 |
| 118 | C | 70.65951 | 76.57486 | 78.65896 | 493.57570   | -129.95376  | -602.56394  | 1 |
| 119 | H | 70.43707 | 77.09469 | 79.62047 | -1469.08415 | -637.84797  | 2204.22581  | 1 |
| 120 | H | 70.60513 | 75.46942 | 78.81764 | -1038.97840 | 1068.88701  | -2280.71789 | 1 |
| 121 | C | 72.32884 | 79.12849 | 77.34424 | 188.88100   | 241.05089   | -727.87821  | 1 |
| 122 | O | 73.24947 | 79.52245 | 78.05680 | 531.88613   | -49.19943   | 427.07960   | 1 |
| 123 | N | 71.43059 | 79.83953 | 76.70436 | 708.14833   | 26.93417    | -179.73509  | 1 |
| 124 | H | 70.79532 | 79.27349 | 76.14411 | -2232.69501 | -1179.09831 | 1023.94816  | 1 |
| 125 | C | 71.06952 | 81.20811 | 77.02550 | -738.32412  | 259.92548   | 104.42456   | 1 |
| 126 | H | 70.07216 | 81.34540 | 76.51648 | 2028.89123  | 1260.02983  | 1311.33324  | 1 |
| 127 | C | 71.00399 | 81.40914 | 78.53376 | -258.65678  | -345.52513  | 661.28459   | 1 |
| 128 | H | 71.98229 | 81.09549 | 78.96784 | -1826.06090 | -1801.46097 | -918.64554  | 1 |
| 129 | C | 70.77845 | 82.87027 | 78.87494 | -541.23400  | 531.92970   | -218.41428  | 1 |
| 130 | H | 70.75487 | 83.04265 | 79.98631 | 1311.73218  | -2219.18200 | 882.19023   | 1 |
| 131 | H | 71.59153 | 83.52337 | 78.45121 | -1048.71298 | 1223.58118  | -2196.97971 | 1 |
| 132 | H | 69.80328 | 83.24528 | 78.45672 | 419.06414   | 1903.92898  | 1903.44670  | 1 |
| 133 | C | 69.92814 | 80.55208 | 79.17344 | -423.86431  | 152.66566   | -648.55262  | 1 |
| 134 | H | 69.85506 | 80.73370 | 80.28141 | 105.68386   | -2342.50080 | 1387.51238  | 1 |
| 135 | H | 68.91494 | 80.76471 | 78.73190 | -1695.63603 | -1484.73621 | -1531.02793 | 1 |
| 136 | H | 70.13609 | 79.45679 | 79.02685 | -1853.57121 | -487.39031  | 1936.59343  | 1 |
| 137 | C | 72.21218 | 82.24458 | 76.38211 | 539.71428   | -510.58232  | 267.58633   | 1 |
| 138 | O | 71.85239 | 83.14975 | 75.67877 | -15.93758   | -278.34085  | -624.49402  | 1 |
| 139 | N | 73.41828 | 81.93185 | 76.80570 | -676.81886  | 12.05292    | 276.17960   | 1 |
| 140 | H | 73.56285 | 81.10440 | 77.43268 | -1694.44250 | -373.84189  | -2100.66098 | 1 |
| 141 | C | 74.51732 | 82.73001 | 76.34874 | 412.33078   | -664.70360  | 108.35451   | 1 |
| 142 | H | 74.23846 | 83.78370 | 76.57450 | 1765.77476  | 1294.44366  | 1621.76594  | 1 |
| 143 | C | 75.78176 | 82.19419 | 77.12533 | -179.66635  | -721.95667  | -264.73915  | 1 |
| 144 | H | 75.65069 | 82.28991 | 78.22694 | -607.34922  | 2587.87032  | -598.10018  | 1 |
| 145 | H | 75.90929 | 81.10355 | 76.93623 | -359.69332  | -1479.13954 | -2259.74260 | 1 |
| 146 | C | 77.03760 | 82.98778 | 76.63052 | -240.01076  | 616.02425   | 431.85322   | 1 |
| 147 | H | 77.06409 | 83.01744 | 75.51643 | -1359.17131 | 782.54425   | 2227.99181  | 1 |
| 148 | H | 77.00517 | 84.04868 | 76.96537 | -820.36667  | 85.81767    | -2596.78715 | 1 |
| 149 | C | 78.31492 | 82.24254 | 77.18900 | -513.07015  | 236.18570   | -551.87280  | 1 |
| 150 | H | 78.36600 | 82.31007 | 78.30017 | 1816.11944  | -1183.11722 | -1650.94321 | 1 |
| 151 | H | 78.27126 | 81.15406 | 76.95295 | -1800.04429 | -1361.53473 | 1526.34643  | 1 |
| 152 | C | 79.55499 | 82.88904 | 76.52754 | 726.08972   | -253.19732  | -179.64713  | 1 |
| 153 | H | 79.58302 | 82.80215 | 75.42277 | 1224.27271  | -456.51798  | -2390.90304 | 1 |
| 154 | H | 79.75020 | 83.93773 | 76.82939 | 1206.40339  | -1150.93514 | -2154.90344 | 1 |
| 155 | N | 80.80855 | 82.08725 | 77.01054 | 329.70796   | -633.68968  | -155.67358  | 1 |
| 156 | H | 81.74023 | 82.40202 | 76.61271 | 1348.31305  | 1938.76845  | 1359.00643  | 1 |
| 157 | H | 81.01405 | 82.08269 | 78.05197 | 2096.92035  | 1446.54551  | -966.48890  | 1 |
| 158 | H | 80.82128 | 81.05218 | 76.77848 | -1197.07217 | -2303.53719 | 827.28733   | 1 |
| 159 | C | 74.72616 | 82.52468 | 74.73704 | -378.01186  | -556.17301  | -413.96481  | 1 |
| 160 | O | 75.30066 | 83.38798 | 74.11080 | -409.44433  | -307.55053  | -453.30833  | 1 |
| 161 | N | 74.41127 | 81.27142 | 74.32945 | -429.02477  | 524.70884   | 274.08502   | 1 |
| 162 | H | 73.96054 | 80.84426 | 75.14374 | 1706.34263  | -1425.96036 | 1574.38926  | 1 |
| 163 | C | 73.75029 | 81.10587 | 73.05012 | -45.25864   | -626.22952  | 478.93267   | 1 |
| 164 | H | 72.67232 | 81.07675 | 73.31985 | 1988.63164  | 570.90773   | 1772.87287  | 1 |
| 165 | C | 74.13834 | 82.26838 | 72.07361 | 551.77128   | -20.49526   | -564.54996  | 1 |
| 166 | H | 73.73948 | 83.24109 | 72.44834 | 1434.61535  | -1753.10253 | 1513.99471  | 1 |
| 167 | H | 75.24865 | 82.38497 | 72.06649 | -714.67738  | 1819.09770  | 1898.36494  | 1 |
| 168 | C | 73.61416 | 81.98774 | 70.62090 | 446.99263   | -555.77305  | 338.97221   | 1 |
| 169 | H | 74.00465 | 81.01437 | 70.24347 | 1953.68466  | 1892.25957  | -161.67766  | 1 |
| 170 | H | 72.50431 | 81.91300 | 70.59036 | -403.03785  | 2688.07032  | -188.43591  | 1 |
| 171 | C | 74.14137 | 83.18437 | 69.73350 | 567.86262   | 335.74681   | 434.04421   | 1 |
| 172 | H | 73.64648 | 84.14008 | 70.02266 | -1080.02275 | 1568.26081  | -1948.78900 | 1 |

|     |   |          |          |          |             |             |             |   |
|-----|---|----------|----------|----------|-------------|-------------|-------------|---|
| 173 | H | 75.23065 | 83.34642 | 69.90465 | -919.54108  | 2111.34692  | 1456.13463  | 1 |
| 174 | C | 73.88216 | 82.85395 | 68.24509 | 195.81897   | 173.33862   | -745.11536  | 1 |
| 175 | H | 74.42854 | 81.96599 | 67.86889 | 1405.67949  | -2301.21089 | -390.08113  | 1 |
| 176 | H | 72.81268 | 82.78964 | 67.96110 | -940.37328  | -1118.32446 | 2299.72133  | 1 |
| 177 | N | 74.45047 | 84.04722 | 67.40412 | 319.26422   | 656.36007   | -42.02424   | 1 |
| 178 | H | 74.35846 | 83.95461 | 66.35148 | 1961.03633  | 619.91968   | 1787.09422  | 1 |
| 179 | H | 74.01905 | 85.00301 | 67.56820 | 854.14343   | -2156.80752 | 1429.08711  | 1 |
| 180 | H | 75.48660 | 84.25514 | 67.50452 | 1237.02905  | -1378.50857 | -1998.28500 | 1 |
| 181 | C | 74.29109 | 79.67068 | 72.50404 | 532.53319   | -268.57236  | 517.55729   | 1 |
| 182 | O | 75.13554 | 79.60209 | 71.63555 | 266.16714   | -290.73804  | -558.88002  | 1 |
| 183 | N | 73.66323 | 78.66232 | 73.11736 | -226.25352  | 640.49678   | -270.32839  | 1 |
| 184 | H | 73.02892 | 78.89183 | 73.88313 | 2007.69063  | -1035.27229 | 1523.50231  | 1 |
| 185 | C | 74.25387 | 77.36364 | 72.99637 | -540.76542  | -573.33303  | 49.50000    | 1 |
| 186 | H | 74.66222 | 77.38946 | 71.95356 | -2374.20950 | -1036.76023 | 843.75774   | 1 |
| 187 | C | 75.41011 | 77.20600 | 74.07825 | -77.09082   | 666.87422   | -415.84136  | 1 |
| 188 | H | 74.99245 | 76.98521 | 75.10133 | -985.81834  | 617.19825   | 2463.91927  | 1 |
| 189 | O | 76.24038 | 78.36958 | 74.32576 | 293.29899   | -391.65602  | -477.80926  | 1 |
| 190 | H | 76.00877 | 78.91602 | 73.54328 | 2528.72714  | -681.76262  | -751.27122  | 1 |
| 191 | C | 76.14568 | 75.92019 | 73.55740 | 252.47363   | -605.14473  | 440.05134   | 1 |
| 192 | H | 76.99688 | 75.63783 | 74.22120 | -2052.65063 | 1456.49051  | -1043.51830 | 1 |
| 193 | H | 75.45487 | 75.04293 | 73.50361 | -2152.98800 | -1661.97574 | -161.70652  | 1 |
| 194 | H | 76.56582 | 76.07538 | 72.52973 | -473.12726  | -1584.27339 | 2165.61725  | 1 |
| 195 | C | 73.05464 | 76.28054 | 73.24638 | 360.36307   | 488.46713   | 505.10056   | 1 |
| 196 | O | 73.21671 | 75.27843 | 73.90244 | -200.08817  | -528.03552  | -385.82850  | 1 |
| 197 | N | 71.98457 | 76.66228 | 72.54537 | -597.54095  | -226.44775  | 355.20479   | 1 |
| 198 | H | 72.06222 | 77.56521 | 72.07731 | 2179.23655  | -1300.70981 | -991.33835  | 1 |
| 199 | C | 70.72433 | 76.07259 | 72.86805 | -687.68921  | 297.39807   | -249.45179  | 1 |
| 200 | H | 70.73105 | 75.90979 | 73.96618 | -349.16256  | -2467.37713 | -1101.72831 | 1 |
| 201 | C | 69.57054 | 77.03815 | 72.34262 | 672.47345   | 361.54328   | -201.62880  | 1 |
| 202 | H | 69.77831 | 77.33167 | 71.28839 | 1541.41502  | 582.18425   | 2169.97026  | 1 |
| 203 | H | 68.60870 | 76.47478 | 72.34163 | -2534.67717 | 60.25153    | 997.72295   | 1 |
| 204 | C | 69.42524 | 78.28927 | 73.22424 | 574.26774   | -389.43119  | -377.02542  | 1 |
| 205 | C | 68.60595 | 78.20012 | 74.38987 | 688.82679   | -287.33580  | -257.96133  | 1 |
| 206 | H | 68.17564 | 77.23257 | 74.70508 | 331.14182   | 1470.38163  | 2269.80013  | 1 |
| 207 | C | 70.02401 | 79.53150 | 72.85394 | -383.52382  | -675.04808  | 144.24917   | 1 |
| 208 | H | 70.68972 | 79.59732 | 71.97471 | 4.09847     | 1517.59662  | 2262.86397  | 1 |
| 209 | C | 68.33006 | 79.37011 | 75.10299 | -134.76730  | 428.45285   | -649.50303  | 1 |
| 210 | H | 67.67869 | 79.30697 | 75.99230 | -903.23433  | 1600.49020  | 2011.53387  | 1 |
| 211 | C | 69.71216 | 80.67561 | 73.60083 | -335.53281  | -615.00040  | -364.39058  | 1 |
| 212 | H | 70.15518 | 81.63967 | 73.29335 | 1596.45398  | -1369.33862 | 1732.02659  | 1 |
| 213 | C | 68.83755 | 80.64424 | 74.72327 | 585.48547   | -340.24194  | -406.23938  | 1 |
| 214 | O | 68.47633 | 81.81504 | 75.47551 | -419.15649  | -173.04408  | -511.94141  | 1 |
| 215 | H | 68.98469 | 82.48619 | 74.96569 | -1071.84350 | 1559.71507  | -1960.13012 | 1 |
| 216 | C | 70.51920 | 74.66814 | 72.07834 | 291.41878   | -183.13091  | 710.72246   | 1 |
| 217 | O | 69.63326 | 73.91157 | 72.42212 | 379.87695   | 523.47396   | -222.23622  | 1 |
| 218 | N | 71.26188 | 74.58457 | 70.92534 | 564.30591   | 373.09380   | 277.24371   | 1 |
| 219 | H | 71.96433 | 75.31686 | 71.08108 | -120.59931  | -2436.07824 | -1214.35098 | 1 |
| 220 | C | 71.71381 | 73.23427 | 70.62390 | 404.07514   | -299.37480  | 608.84009   | 1 |
| 221 | H | 72.18755 | 72.86190 | 71.55795 | -1071.07882 | -841.69025  | 2359.66467  | 1 |
| 222 | C | 70.43831 | 72.41210 | 70.21211 | -683.12807  | 68.71770    | -390.13096  | 1 |
| 223 | H | 69.66957 | 72.44337 | 71.03218 | 2068.88918  | 1596.58590  | 770.89603   | 1 |
| 224 | H | 69.95027 | 72.88401 | 69.32840 | 1379.86429  | 2342.49779  | -179.85638  | 1 |
| 225 | C | 70.84189 | 70.93705 | 69.88913 | -176.39967  | 537.49466   | 550.97268   | 1 |
| 226 | H | 71.57988 | 70.89303 | 69.05689 | -396.28051  | 1942.22168  | 1869.33314  | 1 |
| 227 | H | 71.33734 | 70.44907 | 70.75749 | -94.44700   | 586.00678   | -2659.20016 | 1 |
| 228 | C | 69.47317 | 70.20720 | 69.50866 | -291.69381  | -718.18079  | -150.72929  | 1 |
| 229 | H | 68.72767 | 70.11641 | 70.33940 | -2303.38776 | 1089.76242  | 964.62032   | 1 |
| 230 | H | 68.93857 | 70.63497 | 68.62228 | 884.16729   | 2568.80533  | -207.74283  | 1 |
| 231 | N | 69.88156 | 68.91249 | 69.16195 | -594.49522  | -252.81478  | 342.29276   | 1 |
| 232 | H | 70.87427 | 68.73813 | 69.14433 | -1735.17426 | 2084.05705  | -263.71605  | 1 |
| 233 | C | 69.08854 | 67.96467 | 68.86470 | 595.23177   | -271.52487  | 442.22352   | 1 |
| 234 | N | 67.71500 | 68.23231 | 68.89031 | 585.53813   | -424.79750  | -105.81303  | 1 |

|     |   |          |          |          |             |             |             |   |
|-----|---|----------|----------|----------|-------------|-------------|-------------|---|
| 235 | H | 67.22808 | 69.09735 | 69.12145 | 959.88797   | 1327.56823  | -2177.11905 | 1 |
| 236 | H | 66.98369 | 67.55438 | 68.67392 | 1578.48647  | 16.27378    | -2220.76233 | 1 |
| 237 | N | 69.79266 | 66.79252 | 68.55526 | -452.17763  | -390.33541  | -421.51853  | 1 |
| 238 | H | 70.79269 | 66.59824 | 68.53493 | 470.26107   | 1974.25629  | -1817.92087 | 1 |
| 239 | H | 69.33338 | 65.92052 | 68.28932 | 1856.67307  | -1573.97321 | -1224.35416 | 1 |
| 240 | C | 72.73264 | 73.29475 | 69.37011 | -531.47271  | -581.45780  | -55.06206   | 1 |
| 241 | O | 73.58209 | 72.44552 | 69.23370 | -243.00837  | 192.73507   | 609.52485   | 1 |
| 242 | N | 72.46335 | 74.34074 | 68.55494 | 343.49288   | -644.25607  | 38.09164    | 1 |
| 243 | H | 71.62247 | 74.84765 | 68.83704 | -1691.16043 | -1535.97525 | -1484.73099 | 1 |
| 244 | C | 72.77692 | 74.12670 | 67.15574 | 542.66492   | 350.14337   | 454.42563   | 1 |
| 245 | H | 72.50022 | 73.07032 | 66.94402 | 1209.57979  | -2396.95920 | 463.86744   | 1 |
| 246 | C | 71.91667 | 75.17656 | 66.33902 | -737.14309  | 145.93010   | 242.71942   | 1 |
| 247 | H | 71.90341 | 76.15969 | 66.85740 | -1050.18303 | 159.36419   | -2509.06125 | 1 |
| 248 | C | 72.50681 | 75.31581 | 64.89334 | -706.77696  | -252.88343  | -245.16230  | 1 |
| 249 | H | 71.90347 | 76.01283 | 64.26557 | -1624.64039 | -1665.49085 | 1417.86935  | 1 |
| 250 | H | 73.55183 | 75.70670 | 64.91749 | 2566.10521  | 598.51109   | 693.22305   | 1 |
| 251 | H | 72.53811 | 74.33275 | 64.36778 | -1972.69758 | 107.10018   | -1876.34312 | 1 |
| 252 | C | 70.46472 | 74.60108 | 66.19339 | 412.85148   | 672.58832   | -27.69222   | 1 |
| 253 | H | 69.80037 | 75.29884 | 65.63210 | 1447.02277  | 1762.76533  | -1490.78944 | 1 |
| 254 | H | 70.46444 | 73.63061 | 65.64402 | 1320.77379  | -145.20455  | 2378.68491  | 1 |
| 255 | H | 69.99335 | 74.41876 | 67.18733 | -1512.10848 | 1470.52031  | 1724.75147  | 1 |
| 256 | C | 74.35886 | 74.36110 | 66.94811 | -607.11113  | 499.56689   | 73.73769    | 1 |
| 257 | O | 74.91882 | 73.83819 | 66.01092 | 357.97126   | 460.81534   | 356.68785   | 1 |
| 258 | N | 74.84546 | 75.27554 | 67.80794 | 536.55407   | -368.62270  | 332.76306   | 1 |
| 259 | H | 74.18916 | 75.59774 | 68.54129 | 524.38866   | 2297.69985  | 1367.20941  | 1 |
| 260 | C | 76.14361 | 74.93584 | 68.36620 | 46.50277    | -774.29190  | -147.97904  | 1 |
| 261 | H | 76.13145 | 73.82545 | 68.43265 | 1676.51875  | 1883.29066  | 1032.55549  | 1 |
| 262 | C | 77.31010 | 75.46349 | 67.38919 | -559.41456  | -34.19198   | -556.30433  | 1 |
| 263 | H | 76.91283 | 76.28488 | 66.74576 | -64.66664   | 395.18769   | 2695.05373  | 1 |
| 264 | H | 78.15776 | 75.90252 | 67.96826 | -2703.44278 | -60.40056   | 333.79418   | 1 |
| 265 | C | 77.78568 | 74.30407 | 66.55520 | -519.76435  | 377.31045   | 459.42366   | 1 |
| 266 | H | 76.87560 | 73.80514 | 66.10712 | -1746.74323 | 1667.50644  | -1261.73691 | 1 |
| 267 | C | 78.67833 | 74.78074 | 65.41719 | 570.95554   | 16.46261    | -545.27700  | 1 |
| 268 | H | 79.03797 | 73.92437 | 64.78969 | 2391.58273  | 28.05277    | -1305.07271 | 1 |
| 269 | H | 78.13768 | 75.48685 | 64.73528 | 175.75588   | 917.63458   | 2559.43867  | 1 |
| 270 | H | 79.58580 | 75.31546 | 65.79959 | -1063.97851 | -2155.34650 | 1283.00462  | 1 |
| 271 | C | 78.54930 | 73.29760 | 67.40513 | 193.76014   | 2.62946     | -765.53141  | 1 |
| 272 | H | 78.89061 | 72.41978 | 66.79813 | 507.39394   | -846.55087  | 2539.60089  | 1 |
| 273 | H | 79.46196 | 73.75689 | 67.86551 | 1337.57841  | 1818.19054  | 1526.01994  | 1 |
| 274 | H | 77.92416 | 72.89512 | 68.24306 | 1100.88635  | -1172.91350 | -2199.08909 | 1 |
| 275 | C | 76.11052 | 75.65607 | 69.77842 | -549.21115  | 475.64486   | -309.38218  | 1 |
| 276 | O | 75.08325 | 76.10392 | 70.24007 | 556.06106   | -390.37755  | -78.24250   | 1 |
| 277 | O | 77.30689 | 75.69028 | 70.53490 | -572.27940  | -310.19032  | -209.75862  | 1 |
| 278 | H | 77.90638 | 75.21787 | 69.89336 | -1380.08193 | 2212.14486  | 790.85944   | 1 |

Listing 62: C00062.xmolout

|    |   |          |          |          |             |             |             |        |          |
|----|---|----------|----------|----------|-------------|-------------|-------------|--------|----------|
| 1  |   | 276      |          |          |             |             |             |        |          |
| 2  |   | 150.0000 | 150.0000 | 150.0000 | 0.0000      | 0.0000      | 0.0000***** | 2.7750 | 11100    |
|    |   | 0.2500   | 300.00   | 0.00     | 0.00        | 0.00        | -1293.6237  | 0.0000 | 300.0000 |
| 3  | H | 56.91105 | 76.10418 | 68.20016 | -2043.14101 | -1757.64893 | 399.89339   |        | 1        |
| 4  | N | 57.44298 | 76.31099 | 69.04273 | 426.75047   | 490.45733   | -334.42467  |        | 1        |
| 5  | H | 56.70990 | 76.56972 | 69.69955 | 442.25559   | -1110.30854 | -2448.52907 |        | 1        |
| 6  | C | 58.47584 | 77.25812 | 68.89167 | 415.32972   | -666.39213  | 83.73172    |        | 1        |
| 7  | H | 58.94971 | 76.96582 | 67.93033 | 879.32219   | 2491.00447  | 667.35213   |        | 1        |
| 8  | C | 57.86162 | 78.74344 | 68.83012 | 31.35357    | 477.41777   | 628.23362   |        | 1        |
| 9  | H | 57.45543 | 79.01552 | 69.83401 | 1168.38489  | 2240.25337  | -1019.71136 |        | 1        |
| 10 | H | 58.68321 | 79.47334 | 68.63209 | -360.43770  | 2534.90498  | 931.67112   |        | 1        |
| 11 | C | 56.78174 | 78.85833 | 67.78390 | 463.18208   | 512.70242   | -382.34388  |        | 1        |
| 12 | H | 55.97233 | 78.13487 | 68.02905 | 1725.29117  | 1863.52247  | -987.07854  |        | 1        |
| 13 | C | 56.18879 | 80.26201 | 67.79173 | 710.42801   | -144.27427  | -313.15367  |        | 1        |
| 14 | H | 55.35713 | 80.36430 | 67.04759 | 364.20195   | -1033.13725 | 2494.72524  |        | 1        |

|    |   |          |          |          |             |             |             |   |
|----|---|----------|----------|----------|-------------|-------------|-------------|---|
| 15 | H | 55.77168 | 80.53091 | 68.79643 | 2567.61904  | 335.80679   | 847.48802   | 1 |
| 16 | H | 56.95863 | 81.03491 | 67.53524 | -2587.99029 | 680.92867   | -512.16411  | 1 |
| 17 | C | 57.30741 | 78.54065 | 66.39099 | 268.17616   | 741.64379   | -40.42634   | 1 |
| 18 | H | 56.51055 | 78.66089 | 65.61203 | 1283.54314  | -1945.37420 | -1411.27812 | 1 |
| 19 | H | 58.15423 | 79.21699 | 66.10605 | -1258.57796 | 1317.15249  | -2026.02085 | 1 |
| 20 | H | 57.68403 | 77.48801 | 66.31771 | -2502.84526 | 909.80597   | 575.92391   | 1 |
| 21 | C | 59.49019 | 77.16854 | 70.15521 | 619.36578   | -458.64843  | -172.09273  | 1 |
| 22 | O | 60.14366 | 78.13315 | 70.49232 | -81.40433   | 433.87611   | 522.34594   | 1 |
| 23 | N | 59.51495 | 75.94595 | 70.68948 | 175.23996   | -622.20190  | 341.55523   | 1 |
| 24 | H | 58.94195 | 75.23208 | 70.24069 | -876.57256  | -303.22879  | -2561.90213 | 1 |
| 25 | C | 60.46814 | 75.68198 | 71.71283 | -571.88214  | -534.10783  | -106.15033  | 1 |
| 26 | H | 60.61822 | 76.66767 | 72.20867 | -2713.20841 | -16.25800   | -248.80809  | 1 |
| 27 | C | 59.82936 | 74.53415 | 72.62647 | 166.60354   | 288.16399   | -716.09568  | 1 |
| 28 | H | 59.61817 | 73.64642 | 71.96892 | -2097.85574 | 1636.78449  | -586.18044  | 1 |
| 29 | O | 58.57569 | 74.86703 | 73.25212 | -317.80580  | -363.38227  | 484.43082   | 1 |
| 30 | H | 57.97433 | 74.22738 | 72.82272 | 1863.74748  | -1451.84923 | 1357.29467  | 1 |
| 31 | C | 61.00270 | 74.17494 | 73.60927 | 503.80731   | 517.99032   | 318.51606   | 1 |
| 32 | H | 60.75589 | 73.27889 | 74.22498 | 640.61020   | -2157.10410 | -1536.29104 | 1 |
| 33 | H | 61.95332 | 73.95226 | 73.06687 | 1687.88455  | 465.60692   | 2087.56452  | 1 |
| 34 | H | 61.21095 | 75.00958 | 74.31776 | -1293.07895 | -1899.88581 | -1463.57452 | 1 |
| 35 | C | 61.80906 | 75.10912 | 70.97471 | -153.07550  | -733.68902  | 248.70981   | 1 |
| 36 | O | 61.70118 | 74.24083 | 70.15053 | 186.15459   | -480.78787  | -449.34387  | 1 |
| 37 | N | 62.91878 | 75.66051 | 71.48776 | -487.53139  | 543.18517   | 42.03850    | 1 |
| 38 | C | 64.21711 | 75.28127 | 71.02356 | -699.35871  | 69.34393    | 360.10701   | 1 |
| 39 | H | 64.13517 | 75.05849 | 69.93567 | 2.81126     | -221.99807  | -2715.58072 | 1 |
| 40 | C | 65.08691 | 76.54875 | 71.42142 | -507.46439  | -592.59194  | 122.07761   | 1 |
| 41 | H | 66.17566 | 76.32272 | 71.48717 | -1975.08116 | 525.87560   | -1801.71556 | 1 |
| 42 | H | 64.97463 | 77.37631 | 70.68576 | 1588.27743  | -1913.22100 | 1113.83566  | 1 |
| 43 | C | 64.44678 | 76.91652 | 72.79473 | -613.62442  | -457.55993  | -194.14490  | 1 |
| 44 | H | 64.75198 | 76.18597 | 73.58113 | 1707.54637  | -721.27992  | 1996.92523  | 1 |
| 45 | H | 64.71862 | 77.93072 | 73.16496 | 758.23357   | 2100.81767  | 1560.55011  | 1 |
| 46 | C | 62.90536 | 76.76401 | 72.43973 | -352.41524  | 704.96076   | 49.21465    | 1 |
| 47 | H | 62.24816 | 76.49532 | 73.29888 | 1714.76886  | -2070.42778 | 443.35792   | 1 |
| 48 | H | 62.46371 | 77.63135 | 71.89206 | 1224.15040  | 1801.50881  | 1636.97633  | 1 |
| 49 | C | 64.77866 | 74.00993 | 71.90143 | 566.85117   | 537.05831   | 117.62814   | 1 |
| 50 | O | 64.64174 | 73.95431 | 73.09995 | -550.26779  | -406.08867  | 4.21666     | 1 |
| 51 | N | 65.50164 | 73.23944 | 71.09792 | 566.34832   | -425.77725  | 180.18749   | 1 |
| 52 | H | 65.53155 | 73.47018 | 70.10587 | 644.44502   | 2646.80550  | -52.73430   | 1 |
| 53 | C | 65.97855 | 71.99259 | 71.57928 | 612.34801   | -281.48662  | 411.56221   | 1 |
| 54 | H | 65.79866 | 72.05468 | 72.67806 | 1667.23498  | -1490.75142 | 1556.16753  | 1 |
| 55 | C | 65.14791 | 70.83604 | 70.84883 | -714.45746  | -175.43074  | 286.98927   | 1 |
| 56 | H | 65.37576 | 70.88873 | 69.74962 | -787.09484  | 1763.03619  | -1922.46060 | 1 |
| 57 | O | 63.71777 | 70.92371 | 70.97690 | -429.46514  | 516.51932   | -128.40526  | 1 |
| 58 | H | 63.45419 | 71.12132 | 70.05668 | 1981.82785  | 436.16847   | -1818.18182 | 1 |
| 59 | C | 65.78387 | 69.53006 | 71.45130 | 630.79189   | -468.94448  | 76.03230    | 1 |
| 60 | H | 65.35954 | 68.61674 | 70.97332 | -1775.71861 | 2062.30353  | 131.89849   | 1 |
| 61 | H | 66.89090 | 69.49346 | 71.30548 | -1855.14608 | 88.94118    | 1993.53760  | 1 |
| 62 | H | 65.58890 | 69.45015 | 72.54579 | -1504.82350 | -780.94249  | -2132.90992 | 1 |
| 63 | C | 67.55433 | 71.90604 | 71.13798 | 288.57638   | 618.62814   | -397.00270  | 1 |
| 64 | O | 67.93976 | 71.14719 | 70.27783 | 321.70495   | -185.26452  | 574.37218   | 1 |
| 65 | N | 68.29341 | 72.72725 | 71.89280 | -447.05792  | -446.53431  | 367.76425   | 1 |
| 66 | H | 67.78842 | 73.40094 | 72.46922 | 350.31316   | 1975.63644  | -1843.31522 | 1 |
| 67 | C | 69.61268 | 72.96771 | 71.38694 | -511.23061  | 374.03917   | -471.51480  | 1 |
| 68 | H | 69.94608 | 71.96389 | 71.03397 | 2234.79579  | -898.70890  | -1273.45190 | 1 |
| 69 | C | 69.45390 | 74.03544 | 70.21126 | 529.53781   | -159.34528  | 563.72604   | 1 |
| 70 | H | 70.46225 | 74.12236 | 69.72389 | 654.59388   | 2347.94251  | 1217.51488  | 1 |
| 71 | H | 68.77964 | 73.62484 | 69.41489 | -1526.55661 | 2103.42026  | 817.87394   | 1 |
| 72 | O | 68.99992 | 75.33574 | 70.62488 | -554.84278  | 14.12789    | 399.58769   | 1 |
| 73 | H | 69.50778 | 75.40538 | 71.51296 | 1297.06236  | 2061.84854  | 1220.68812  | 1 |
| 74 | C | 70.50525 | 73.65547 | 72.56235 | -662.15484  | -412.13544  | 123.62687   | 1 |
| 75 | O | 70.40534 | 74.85693 | 72.80437 | -540.01537  | -317.05804  | 274.91456   | 1 |
| 76 | N | 71.28209 | 72.75788 | 73.11357 | -202.76299  | -690.00100  | -131.49145  | 1 |

|     |   |          |          |          |             |             |             |   |
|-----|---|----------|----------|----------|-------------|-------------|-------------|---|
| 77  | H | 71.21039 | 71.78422 | 72.82006 | -702.62132  | -2617.37191 | 281.70413   | 1 |
| 78  | C | 72.19192 | 73.13494 | 74.14148 | -491.73914  | 576.34187   | 222.73509   | 1 |
| 79  | H | 72.55332 | 74.15617 | 73.88650 | 1977.17978  | -1823.58850 | -434.68928  | 1 |
| 80  | C | 71.36845 | 73.12737 | 75.50229 | -649.50797  | -328.66843  | 306.11224   | 1 |
| 81  | H | 70.91342 | 72.12897 | 75.67887 | 2075.07803  | 1452.16490  | -1004.45904 | 1 |
| 82  | C | 72.34644 | 73.50581 | 76.66544 | -615.18735  | -489.99689  | -70.96352   | 1 |
| 83  | H | 71.82621 | 73.52283 | 77.65205 | -1226.32661 | -1724.38906 | -1716.47170 | 1 |
| 84  | H | 73.18532 | 72.77390 | 76.74619 | 2381.64273  | -969.84735  | 900.46860   | 1 |
| 85  | H | 72.79958 | 74.51285 | 76.51067 | 2122.74991  | 1702.23946  | -141.36228  | 1 |
| 86  | C | 70.25613 | 74.22781 | 75.40185 | -501.86074  | -479.61276  | -376.42482  | 1 |
| 87  | H | 69.75802 | 74.40827 | 76.38384 | 993.79261   | -2246.95401 | -1177.81305 | 1 |
| 88  | H | 70.67476 | 75.20113 | 75.04669 | 42.71279    | -626.15391  | -2651.37258 | 1 |
| 89  | H | 69.46296 | 73.93664 | 74.67063 | -2026.39012 | -1590.33709 | -887.82922  | 1 |
| 90  | C | 73.33680 | 71.95885 | 74.21512 | -672.89153  | 382.57394   | -156.34072  | 1 |
| 91  | O | 73.01230 | 70.79175 | 74.22484 | 410.04627   | 221.86223   | 500.35950   | 1 |
| 92  | N | 74.52055 | 72.51478 | 74.40992 | -378.11782  | -443.79414  | -441.10984  | 1 |
| 93  | H | 74.53723 | 73.53300 | 74.43653 | 2404.15973  | -568.14894  | 1149.30085  | 1 |
| 94  | C | 75.75263 | 71.79667 | 74.31743 | -544.54484  | 466.16019   | 331.29119   | 1 |
| 95  | H | 76.40280 | 72.30007 | 75.06484 | -1409.80988 | -170.17955  | 2325.32679  | 1 |
| 96  | C | 75.47510 | 70.27115 | 74.61466 | -184.48284  | 116.78282   | -758.89137  | 1 |
| 97  | H | 74.80504 | 70.17577 | 75.50213 | 1893.78641  | 1861.14652  | 611.04528   | 1 |
| 98  | H | 74.91475 | 69.81033 | 73.76271 | -2170.79665 | -974.19311  | 1327.50117  | 1 |
| 99  | C | 76.83205 | 69.53018 | 74.83934 | 389.51668   | 672.81878   | -138.49152  | 1 |
| 100 | H | 77.45527 | 69.57866 | 73.91801 | 510.64577   | 1933.03327  | 1851.02484  | 1 |
| 101 | H | 77.44375 | 70.05570 | 75.60697 | -2302.30869 | -1105.72939 | -948.89774  | 1 |
| 102 | C | 76.61787 | 68.02809 | 75.26465 | -559.93427  | -126.34590  | 542.30857   | 1 |
| 103 | O | 77.57348 | 67.32823 | 75.48193 | -670.36003  | -111.83166  | 76.36448    | 1 |
| 104 | N | 75.32160 | 67.65811 | 75.35632 | -216.06729  | -537.07037  | 446.51379   | 1 |
| 105 | H | 74.46584 | 68.19320 | 75.16687 | -1251.96487 | 1074.12894  | -2168.52500 | 1 |
| 106 | H | 75.01317 | 66.71454 | 75.61431 | -2451.83023 | -720.73851  | 944.84612   | 1 |
| 107 | C | 76.32649 | 71.94413 | 72.79116 | 546.24052   | -563.88337  | -85.11809   | 1 |
| 108 | O | 75.82488 | 71.31227 | 71.89739 | 71.70702    | -307.40463  | 606.69673   | 1 |
| 109 | N | 77.34682 | 72.81732 | 72.73325 | 479.90863   | -504.50129  | 222.86849   | 1 |
| 110 | C | 78.00601 | 73.08515 | 71.49420 | 75.51268    | -600.91904  | 506.73700   | 1 |
| 111 | H | 77.33878 | 72.72863 | 70.67328 | -2033.61562 | 1795.30103  | 254.89480   | 1 |
| 112 | C | 78.19102 | 74.66574 | 71.63110 | 523.79067   | 517.99274   | 284.45581   | 1 |
| 113 | H | 78.93062 | 75.08346 | 70.90866 | 1599.61665  | -1127.00911 | 1895.98173  | 1 |
| 114 | H | 77.23239 | 75.19810 | 71.44768 | -1881.83093 | 1275.82488  | -1501.55016 | 1 |
| 115 | C | 78.63560 | 74.80014 | 73.11742 | -600.05639  | -404.05026  | 316.64485   | 1 |
| 116 | H | 79.71227 | 74.54444 | 73.23764 | -2597.05260 | 496.36221   | 657.73249   | 1 |
| 117 | H | 78.50986 | 75.82870 | 73.52662 | -1666.24518 | 1294.38985  | -1723.90591 | 1 |
| 118 | C | 77.69578 | 73.72477 | 73.81770 | 493.57570   | -129.95376  | -602.56394  | 1 |
| 119 | H | 78.19761 | 73.11419 | 74.60589 | -1469.08415 | -637.84797  | 2204.22581  | 1 |
| 120 | H | 76.73388 | 74.12965 | 74.21129 | -1038.97840 | 1068.88701  | -2280.71789 | 1 |
| 121 | C | 79.50174 | 72.44507 | 71.46478 | 188.88100   | 241.05089   | -727.87821  | 1 |
| 122 | O | 79.99168 | 71.81816 | 72.39002 | 531.88613   | -49.19943   | 427.07960   | 1 |
| 123 | N | 80.04845 | 72.70744 | 70.27584 | 708.14833   | 26.93417    | -179.73509  | 1 |
| 124 | H | 79.45310 | 73.31941 | 69.71974 | -2232.69501 | -1179.09831 | 1023.94816  | 1 |
| 125 | C | 81.51066 | 72.69255 | 70.11700 | -738.32412  | 259.92548   | 104.42456   | 1 |
| 126 | H | 81.76260 | 71.68752 | 70.52895 | 2028.89123  | 1260.02983  | 1311.33324  | 1 |
| 127 | C | 81.87357 | 72.89328 | 68.65904 | -258.65678  | -345.52513  | 661.28459   | 1 |
| 128 | H | 81.46932 | 73.88096 | 68.34086 | -1826.06090 | -1801.46097 | -918.64554  | 1 |
| 129 | C | 83.38043 | 72.92335 | 68.47405 | -541.23400  | 531.92970   | -218.41428  | 1 |
| 130 | H | 83.66675 | 73.10598 | 67.40219 | 1311.73218  | -2219.18200 | 882.19023   | 1 |
| 131 | H | 83.84818 | 73.74207 | 69.09167 | -1048.71298 | 1223.58118  | -2196.97971 | 1 |
| 132 | H | 83.85721 | 71.95391 | 68.78675 | 419.06414   | 1903.92898  | 1903.44670  | 1 |
| 133 | C | 81.26034 | 71.83226 | 67.76371 | -423.86431  | 152.66566   | -648.55262  | 1 |
| 134 | H | 81.50088 | 72.01182 | 66.67982 | 105.68386   | -2342.50080 | 1387.51238  | 1 |
| 135 | H | 81.63683 | 70.80491 | 68.02353 | -1695.63603 | -1484.73621 | -1531.02793 | 1 |
| 136 | H | 80.14018 | 71.80840 | 67.86152 | -1853.57121 | -487.39031  | 1936.59343  | 1 |
| 137 | C | 82.13386 | 73.91175 | 71.05092 | 539.71428   | -510.58232  | 267.58633   | 1 |
| 138 | O | 82.56142 | 74.92626 | 70.56505 | -15.93758   | -278.34085  | -624.49402  | 1 |

|     |   |          |          |          |             |             |             |   |
|-----|---|----------|----------|----------|-------------|-------------|-------------|---|
| 139 | N | 82.04467 | 73.56791 | 72.33031 | -676.81886  | 12.05292    | 276.17960   | 1 |
| 140 | H | 81.60593 | 72.65428 | 72.56554 | -1694.44250 | -373.84189  | -2100.66098 | 1 |
| 141 | C | 83.03417 | 74.15983 | 73.19749 | 412.33078   | -664.70360  | 108.35451   | 1 |
| 142 | H | 84.00129 | 74.08068 | 72.65418 | 1765.77476  | 1294.44366  | 1621.76594  | 1 |
| 143 | C | 82.61341 | 75.66150 | 73.42998 | -179.66635  | -721.95667  | -264.73915  | 1 |
| 144 | H | 82.52675 | 76.20402 | 72.45896 | -607.34922  | 2587.87032  | -598.10018  | 1 |
| 145 | H | 81.60386 | 75.71365 | 73.89863 | -359.69332  | -1479.13954 | -2259.74260 | 1 |
| 146 | C | 83.68948 | 76.31014 | 74.36591 | -240.01076  | 616.02425   | 431.85322   | 1 |
| 147 | H | 83.85956 | 75.66575 | 75.26157 | -1359.17131 | 782.54425   | 2227.99181  | 1 |
| 148 | H | 84.67477 | 76.40168 | 73.85665 | -820.36667  | 85.81767    | -2596.78715 | 1 |
| 149 | C | 83.11344 | 77.72145 | 74.78268 | -513.07015  | 236.18570   | -551.87280  | 1 |
| 150 | H | 82.97339 | 78.37106 | 73.88721 | 1816.11944  | -1183.11722 | -1650.94321 | 1 |
| 151 | H | 82.09362 | 77.58068 | 75.23919 | -1800.04429 | -1361.53473 | 1526.34643  | 1 |
| 152 | C | 84.03808 | 78.40364 | 75.81626 | 726.08972   | -253.19732  | -179.64713  | 1 |
| 153 | H | 84.07909 | 77.89770 | 76.80179 | 1224.27271  | -456.51798  | -2390.90304 | 1 |
| 154 | H | 85.06330 | 78.62300 | 75.45632 | 1206.40339  | -1150.93514 | -2154.90344 | 1 |
| 155 | N | 83.39951 | 79.80268 | 76.11925 | 329.70796   | -633.68968  | -155.67358  | 1 |
| 156 | H | 83.89545 | 80.38927 | 76.85003 | 1348.31305  | 1938.76845  | 1359.00643  | 1 |
| 157 | H | 83.33554 | 80.48856 | 75.31181 | 2096.92035  | 1446.54551  | -966.48890  | 1 |
| 158 | H | 82.40282 | 79.81105 | 76.48841 | -1197.07217 | -2303.53719 | 827.28733   | 1 |
| 159 | C | 82.99779 | 73.37413 | 74.63056 | -378.01186  | -556.17301  | -413.96481  | 1 |
| 160 | O | 84.00658 | 73.34937 | 75.30376 | -409.44433  | -307.55053  | -453.30833  | 1 |
| 161 | N | 81.76459 | 73.00974 | 74.93027 | -429.02477  | 524.70884   | 274.08502   | 1 |
| 162 | H | 81.06365 | 73.16733 | 74.20763 | 1706.34263  | -1425.96036 | 1574.38926  | 1 |
| 163 | C | 81.40574 | 72.14733 | 76.02492 | -45.25864   | -626.22952  | 478.93267   | 1 |
| 164 | H | 81.25486 | 71.14368 | 75.56609 | 1988.63164  | 570.90773   | 1772.87287  | 1 |
| 165 | C | 82.55045 | 72.17170 | 77.10919 | 551.77128   | -20.49526   | -564.54996  | 1 |
| 166 | H | 83.51351 | 71.81230 | 76.66506 | 1434.61535  | -1753.10253 | 1513.99471  | 1 |
| 167 | H | 82.75044 | 73.22052 | 77.42951 | -714.67738  | 1819.09770  | 1898.36494  | 1 |
| 168 | C | 82.17116 | 71.27519 | 78.33646 | 446.99263   | -555.77305  | 338.97221   | 1 |
| 169 | H | 81.24924 | 71.64468 | 78.83979 | 1953.68466  | 1892.25957  | -161.67766  | 1 |
| 170 | H | 81.95276 | 70.23274 | 78.01366 | -403.03785  | 2688.07032  | -188.43591  | 1 |
| 171 | C | 83.41867 | 71.32005 | 79.30836 | 567.86262   | 335.74681   | 434.04421   | 1 |
| 172 | H | 84.36069 | 71.12317 | 78.74640 | -1080.02275 | 1568.26081  | -1948.78900 | 1 |
| 173 | H | 83.53827 | 72.33734 | 79.74786 | -919.54108  | 2111.34692  | 1456.13463  | 1 |
| 174 | C | 83.23307 | 70.25980 | 80.41742 | 195.81897   | 173.33862   | -745.11536  | 1 |
| 175 | H | 82.39050 | 70.45690 | 81.10850 | 1405.67949  | -2301.21089 | -390.08113  | 1 |
| 176 | H | 83.18508 | 69.21409 | 80.05378 | -940.37328  | -1118.32446 | 2299.72133  | 1 |
| 177 | N | 84.51989 | 70.29997 | 81.31242 | 319.26422   | 656.36007   | -42.02424   | 1 |
| 178 | H | 84.54023 | 69.63995 | 82.14382 | 1961.03633  | 619.91968   | 1787.09422  | 1 |
| 179 | H | 85.43027 | 70.04902 | 80.83021 | 854.14343   | -2156.80752 | 1429.08711  | 1 |
| 180 | H | 84.76790 | 71.22541 | 81.76948 | 1237.02905  | -1378.50857 | -1998.28500 | 1 |
| 181 | C | 80.00194 | 72.75136 | 76.57100 | 532.53319   | -268.57236  | 517.55729   | 1 |
| 182 | O | 79.04869 | 72.02065 | 76.82397 | 266.16714   | -290.73804  | -558.88002  | 1 |
| 183 | N | 80.12960 | 74.04232 | 76.74527 | -226.25352  | 640.49678   | -270.32839  | 1 |
| 184 | H | 81.02679 | 74.52128 | 76.50915 | 2007.69063  | -1035.27229 | 1523.50231  | 1 |
| 185 | C | 78.99659 | 74.91998 | 76.80108 | -540.76542  | -573.33303  | 49.50000    | 1 |
| 186 | H | 78.21167 | 74.54433 | 76.11056 | -2374.20950 | -1036.76023 | 843.75774   | 1 |
| 187 | C | 78.49246 | 74.83068 | 78.31271 | -77.09082   | 666.87422   | -415.84136  | 1 |
| 188 | H | 79.39566 | 74.83444 | 78.99782 | -985.81834  | 617.19825   | 2463.91927  | 1 |
| 189 | O | 77.85093 | 73.58238 | 78.65370 | 293.29899   | -391.65602  | -477.80926  | 1 |
| 190 | H | 78.28060 | 72.96439 | 77.96570 | 2528.72714  | -681.76262  | -751.27122  | 1 |
| 191 | C | 77.65119 | 76.13030 | 78.53277 | 252.47363   | -605.14473  | 440.05134   | 1 |
| 192 | H | 77.29368 | 76.20304 | 79.58715 | -2052.65063 | 1456.49051  | -1043.51830 | 1 |
| 193 | H | 78.24290 | 77.05094 | 78.31944 | -2152.98800 | -1661.97574 | -161.70652  | 1 |
| 194 | H | 76.75143 | 76.15244 | 77.87426 | -473.12726  | -1584.27339 | 2165.61725  | 1 |
| 195 | C | 79.71615 | 76.29016 | 76.31743 | 360.36307   | 488.46713   | 505.10056   | 1 |
| 196 | O | 80.95032 | 76.32723 | 76.27838 | -200.08817  | -528.03552  | -385.82850  | 1 |
| 197 | N | 78.87138 | 77.25557 | 76.00215 | -597.54095  | -226.44775  | 355.20479   | 1 |
| 198 | H | 77.86827 | 77.09888 | 76.09321 | 2179.23655  | -1300.70981 | -991.33835  | 1 |
| 199 | C | 79.42514 | 78.46853 | 75.50029 | -687.68921  | 297.39807   | -249.45179  | 1 |
| 200 | H | 80.34513 | 78.11258 | 74.98636 | -349.16256  | -2467.37713 | -1101.72831 | 1 |



|     |   |          |          |          |             |             |             |   |
|-----|---|----------|----------|----------|-------------|-------------|-------------|---|
| 201 | C | 78.37778 | 79.21567 | 74.55521 | 672.47345   | 361.54328   | -201.62880  | 1 |
| 202 | H | 77.35846 | 79.22958 | 75.00425 | 1541.41502  | 582.18425   | 2169.97026  | 1 |
| 203 | H | 78.68784 | 80.28148 | 74.44166 | -2534.67717 | 60.25153    | 997.72295   | 1 |
| 204 | C | 78.36839 | 78.51906 | 73.18356 | 574.26774   | -389.43119  | -377.02542  | 1 |
| 205 | C | 79.59997 | 78.24431 | 72.51598 | 688.82679   | -287.33580  | -257.96133  | 1 |
| 206 | H | 80.56686 | 78.51110 | 72.97921 | 331.14182   | 1470.38163  | 2269.80013  | 1 |
| 207 | C | 77.12501 | 78.18501 | 72.56899 | -383.52382  | -675.04808  | 144.24917   | 1 |
| 208 | H | 76.16842 | 78.40048 | 73.07843 | 4.09847     | 1517.59662  | 2262.86397  | 1 |
| 209 | C | 79.56259 | 77.63176 | 71.26320 | -134.76730  | 428.45285   | -649.50303  | 1 |
| 210 | H | 80.51638 | 77.40680 | 70.75371 | -903.23433  | 1600.49020  | 2011.53387  | 1 |
| 211 | C | 77.13716 | 77.59064 | 71.30379 | -335.53281  | -615.00040  | -364.39058  | 1 |
| 212 | H | 76.16922 | 77.34327 | 70.83396 | 1596.45398  | -1369.33862 | 1732.02659  | 1 |
| 213 | C | 78.34402 | 77.28972 | 70.60865 | 585.48547   | -340.24194  | -406.23938  | 1 |
| 214 | O | 78.36462 | 76.64598 | 69.34086 | -419.15649  | -173.04408  | -511.94141  | 1 |
| 215 | H | 77.39748 | 76.63269 | 69.14859 | -1071.84350 | 1559.71507  | -1960.13012 | 1 |
| 216 | C | 79.81233 | 79.48065 | 76.71873 | 291.41878   | -183.13091  | 710.72246   | 1 |
| 217 | O | 79.90599 | 80.67318 | 76.53348 | 379.87695   | 523.47396   | -222.23622  | 1 |
| 218 | N | 80.13596 | 78.79647 | 77.81827 | 564.30591   | 373.09380   | 277.24371   | 1 |
| 219 | H | 80.00342 | 77.78312 | 77.76423 | -120.59931  | -2436.07824 | -1214.35098 | 1 |
| 220 | C | 80.16255 | 79.51506 | 79.05435 | 404.07514   | -299.37480  | 608.84009   | 1 |
| 221 | H | 80.47384 | 80.54027 | 78.74464 | -1071.07882 | -841.69025  | 2359.66467  | 1 |
| 222 | C | 78.68148 | 79.52335 | 79.62986 | -683.12807  | 68.71770    | -390.13096  | 1 |
| 223 | H | 77.95334 | 79.74117 | 78.81645 | 2068.88918  | 1596.58590  | 770.89603   | 1 |
| 224 | H | 78.40443 | 78.51987 | 80.02375 | 1379.86429  | 2342.49779  | -179.85638  | 1 |
| 225 | C | 78.59573 | 80.59812 | 80.75525 | -176.39967  | 537.49466   | 550.97268   | 1 |
| 226 | H | 79.26422 | 80.32805 | 81.60651 | -396.28051  | 1942.22168  | 1869.33314  | 1 |
| 227 | H | 78.95480 | 81.58684 | 80.39204 | -94.44700   | 586.00678   | -2659.20016 | 1 |
| 228 | C | 77.06823 | 80.68803 | 81.22155 | -291.69381  | -718.18079  | -150.72929  | 1 |
| 229 | H | 76.32890 | 80.99542 | 80.43952 | -2303.38776 | 1089.76242  | 964.62032   | 1 |
| 230 | H | 76.69172 | 79.76124 | 81.72569 | 884.16729   | 2568.80533  | -207.74283  | 1 |
| 231 | N | 77.13540 | 81.69925 | 82.19043 | -594.49522  | -252.81478  | 342.29276   | 1 |
| 232 | H | 78.03804 | 81.85578 | 82.61254 | -1735.17426 | 2084.05705  | -263.71605  | 1 |
| 233 | C | 76.15335 | 82.39837 | 82.59476 | 595.23177   | -271.52487  | 442.22352   | 1 |
| 234 | N | 74.89468 | 82.16663 | 82.03078 | 585.53813   | -424.79750  | -105.81303  | 1 |
| 235 | H | 74.61240 | 81.48242 | 81.33040 | 959.88797   | 1327.56823  | -2177.11905 | 1 |
| 236 | H | 74.03945 | 82.65840 | 82.29250 | 1578.48647  | 16.27378    | -2220.76233 | 1 |
| 237 | N | 76.55695 | 83.30719 | 83.58317 | -452.17763  | -390.33541  | -421.51853  | 1 |
| 238 | H | 77.46938 | 83.47392 | 84.00471 | 470.26107   | 1974.25629  | -1817.92087 | 1 |
| 239 | H | 75.91452 | 83.95332 | 84.04324 | 1856.67307  | -1573.97321 | -1224.35416 | 1 |
| 240 | C | 81.16318 | 78.79260 | 80.11224 | -531.47271  | -581.45780  | -55.06206   | 1 |
| 241 | O | 81.21823 | 79.22480 | 81.24362 | -243.00837  | 192.73507   | 609.52485   | 1 |
| 242 | N | 81.88652 | 77.81774 | 79.56971 | 343.49288   | -644.25607  | 38.09164    | 1 |
| 243 | H | 81.68519 | 77.63461 | 78.58698 | -1691.16043 | -1535.97525 | -1484.73099 | 1 |
| 244 | C | 82.75010 | 76.92036 | 80.33799 | 542.66492   | 350.14337   | 454.42563   | 1 |
| 245 | H | 83.34834 | 76.45441 | 79.52053 | 1209.57979  | -2396.95920 | 463.86744   | 1 |
| 246 | C | 83.60110 | 77.75454 | 81.27789 | -737.14309  | 145.93010   | 242.71942   | 1 |
| 247 | H | 82.91415 | 78.34223 | 81.94386 | -1050.18303 | 159.36419   | -2509.06125 | 1 |
| 248 | C | 84.51569 | 76.91006 | 82.14416 | -706.77696  | -252.88343  | -245.16230  | 1 |
| 249 | H | 85.27849 | 77.54241 | 82.67666 | -1624.64039 | -1665.49085 | 1417.86935  | 1 |
| 250 | H | 83.94596 | 76.34326 | 82.93360 | 2566.10521  | 598.51109   | 693.22305   | 1 |
| 251 | H | 85.07929 | 76.15183 | 81.53453 | -1972.69758 | 107.10018   | -1876.34312 | 1 |
| 252 | C | 84.43207 | 78.75857 | 80.49609 | 412.85148   | 672.58832   | -27.69222   | 1 |
| 253 | H | 85.00185 | 79.44952 | 81.17521 | 1447.02277  | 1762.76533  | -1490.78944 | 1 |
| 254 | H | 85.18126 | 78.24823 | 79.83143 | 1320.77379  | -145.20455  | 2378.68491  | 1 |
| 255 | H | 83.78292 | 79.39668 | 79.83554 | -1512.10848 | 1470.52031  | 1724.75147  | 1 |
| 256 | C | 81.74187 | 75.77053 | 80.98962 | -607.11113  | 499.56689   | 73.73769    | 1 |
| 257 | O | 81.15488 | 75.03680 | 80.23012 | 357.97126   | 460.81534   | 356.68785   | 1 |
| 258 | N | 81.76091 | 75.73804 | 82.31219 | 536.55407   | -368.62270  | 332.76306   | 1 |
| 259 | H | 82.25218 | 76.47278 | 82.81976 | 524.38866   | 2297.69985  | 1367.20941  | 1 |
| 260 | C | 80.90196 | 74.82180 | 82.96544 | 46.50277    | -774.29190  | -147.97904  | 1 |
| 261 | H | 80.60109 | 74.08692 | 82.18370 | 1676.51875  | 1883.29066  | 1032.55549  | 1 |
| 262 | C | 81.66427 | 74.19264 | 84.24400 | -559.41456  | -34.19198   | -556.30433  | 1 |

|     |   |          |          |          |             |             |             |   |
|-----|---|----------|----------|----------|-------------|-------------|-------------|---|
| 263 | H | 82.06177 | 75.02247 | 84.87558 | -64.66664   | 395.18769   | 2695.05373  | 1 |
| 264 | H | 80.94529 | 73.63301 | 84.88954 | -2703.44278 | -60.40056   | 333.79418   | 1 |
| 265 | C | 82.78111 | 73.29088 | 83.79155 | -519.76435  | 377.31045   | 459.42366   | 1 |
| 266 | H | 83.29695 | 73.77201 | 82.93014 | -1746.74323 | 1667.50644  | -1261.73691 | 1 |
| 267 | C | 83.79512 | 73.09276 | 84.91171 | 570.95554   | 16.46261    | -545.27700  | 1 |
| 268 | H | 84.64274 | 72.43314 | 84.59215 | 2391.58273  | 28.05277    | -1305.07271 | 1 |
| 269 | H | 84.23878 | 74.06566 | 85.24671 | 175.75588   | 917.63458   | 2559.43867  | 1 |
| 270 | H | 83.32669 | 72.61571 | 85.81102 | -1063.97851 | -2155.34650 | 1283.00462  | 1 |
| 271 | C | 82.24295 | 71.93482 | 83.35375 | 193.76014   | 2.62946     | -765.53141  | 1 |
| 272 | H | 83.06849 | 71.24309 | 83.04740 | 507.39394   | -846.55087  | 2539.60089  | 1 |
| 273 | H | 81.68151 | 71.42762 | 84.18042 | 1337.57841  | 1818.19054  | 1526.01994  | 1 |
| 274 | H | 81.54323 | 72.02704 | 82.48369 | 1100.88635  | -1172.91350 | -2199.08909 | 1 |
| 275 | C | 79.65988 | 75.66161 | 83.57499 | -549.21115  | 475.64486   | -309.38218  | 1 |
| 276 | O | 79.76222 | 76.78323 | 83.99651 | 556.06106   | -390.37755  | -78.24250   | 1 |
| 277 | O | 78.46214 | 74.93153 | 83.75588 | -572.27940  | -310.19032  | -209.75862  | 1 |
| 278 | H | 78.73042 | 74.08027 | 83.31106 | -1380.08193 | 2212.14486  | 790.85944   | 1 |

Listing 63: C00063.xmolout

|    |   |          |          |          |             |             |             |        |          |
|----|---|----------|----------|----------|-------------|-------------|-------------|--------|----------|
| 1  |   | 276      |          |          |             |             |             |        |          |
| 2  |   | 150.0000 | 150.0000 | 150.0000 | 0.0000      | 0.0000      | 0.0000***** | 0.8935 | 3574     |
|    |   | 0.2500   | 300.00   | 0.00     | 0.00        | 0.00        | -1293.6126  | 0.0000 | 300.0000 |
| 3  | H | 72.13158 | 63.34573 | 73.50435 | -2043.14101 | -1757.64893 | 399.89339   |        | 1        |
| 4  | N | 72.14281 | 64.34379 | 73.70612 | 426.75047   | 490.45733   | -334.42467  |        | 1        |
| 5  | H | 72.25416 | 64.34471 | 74.71876 | 442.25559   | -1110.30854 | -2448.52907 |        | 1        |
| 6  | C | 73.11976 | 65.07655 | 72.99760 | 415.32972   | -666.39213  | 83.73172    |        | 1        |
| 7  | H | 73.24409 | 64.53631 | 72.03596 | 879.32219   | 2491.00447  | 667.35213   |        | 1        |
| 8  | C | 72.58535 | 66.58440 | 72.81604 | 31.35357    | 477.41777   | 628.23362   |        | 1        |
| 9  | H | 72.35426 | 67.02494 | 73.81493 | 1168.38489  | 2240.25337  | -1019.71136 |        | 1        |
| 10 | H | 73.37868 | 67.23157 | 72.36946 | -360.43770  | 2534.90498  | 931.67112   |        | 1        |
| 11 | C | 71.34835 | 66.56779 | 71.95218 | 463.18208   | 512.70242   | -382.34388  |        | 1        |
| 12 | H | 70.72253 | 65.69909 | 72.25808 | 1725.29117  | 1863.52247  | -987.07854  |        | 1        |
| 13 | C | 70.53730 | 67.84002 | 72.16102 | 710.42801   | -144.27427  | -313.15367  |        | 1        |
| 14 | H | 69.60990 | 67.84761 | 71.53193 | 364.20195   | -1033.13725 | 2494.72524  |        | 1        |
| 15 | H | 70.21540 | 67.95484 | 73.22842 | 2567.61904  | 335.80679   | 847.48802   |        | 1        |
| 16 | H | 71.12779 | 68.75374 | 71.89215 | -2587.99029 | 680.92867   | -512.16411  |        | 1        |
| 17 | C | 71.70954 | 66.42397 | 70.48049 | 268.17616   | 741.64379   | -40.42634   |        | 1        |
| 18 | H | 70.79675 | 66.40582 | 69.83042 | 1283.54314  | -1945.37420 | -1411.27812 |        | 1        |
| 19 | H | 72.34890 | 67.27504 | 70.12935 | -1258.57796 | 1317.15249  | -2026.02085 |        | 1        |
| 20 | H | 72.27841 | 65.47927 | 70.28197 | -2502.84526 | 909.80597   | 575.92391   |        | 1        |
| 21 | C | 74.48515 | 65.09018 | 73.90148 | 619.36578   | -458.64843  | -172.09273  |        | 1        |
| 22 | O | 75.51991 | 64.60834 | 73.49906 | -81.40433   | 433.87611   | 522.34594   |        | 1        |
| 23 | N | 74.26223 | 65.73131 | 75.04873 | 175.23996   | -622.20190  | 341.55523   |        | 1        |
| 24 | H | 73.30878 | 66.02186 | 75.25958 | -876.57256  | -303.22879  | -2561.90213 |        | 1        |
| 25 | C | 75.25520 | 65.64846 | 76.06294 | -571.88214  | -534.10783  | -106.15033  |        | 1        |
| 26 | H | 76.19985 | 65.37761 | 75.53836 | -2713.20841 | -16.25800   | -248.80809  |        | 1        |
| 27 | C | 75.26842 | 67.08448 | 76.77726 | 166.60354   | 288.16399   | -716.09568  |        | 1        |
| 28 | H | 74.23651 | 67.29814 | 77.16863 | -2097.85574 | 1636.78449  | -586.18044  |        | 1        |
| 29 | O | 75.60980 | 68.18634 | 75.91871 | -317.80580  | -363.38227  | 484.43082   |        | 1        |
| 30 | H | 74.80752 | 68.74039 | 75.99645 | 1863.74748  | -1451.84923 | 1357.29467  |        | 1        |
| 31 | C | 76.23198 | 66.86950 | 78.00213 | 503.80731   | 517.99032   | 318.51606   |        | 1        |
| 32 | H | 76.32907 | 67.81346 | 78.59850 | 640.61020   | -2157.10410 | -1536.29104 |        | 1        |
| 33 | H | 75.86307 | 66.07013 | 78.69387 | 1687.88455  | 465.60692   | 2087.56452  |        | 1        |
| 34 | H | 77.26160 | 66.58414 | 77.68235 | -1293.07895 | -1899.88581 | -1463.57452 |        | 1        |
| 35 | C | 74.71164 | 64.51991 | 77.11241 | -153.07550  | -733.68902  | 248.70981   |        | 1        |
| 36 | O | 73.56468 | 64.55215 | 77.47052 | 186.15459   | -480.78787  | -449.34387  |        | 1        |
| 37 | N | 75.69678 | 63.69412 | 77.49245 | -487.53139  | 543.18517   | 42.03850    |        | 1        |
| 38 | C | 75.49306 | 62.77183 | 78.56850 | -699.35871  | 69.34393    | 360.10701   |        | 1        |
| 39 | H | 74.42808 | 62.44908 | 78.52201 | 2.81126     | -221.99807  | -2715.58072 |        | 1        |
| 40 | C | 76.57757 | 61.65722 | 78.24548 | -507.46439  | -592.59194  | 122.07761   |        | 1        |
| 41 | H | 76.85264 | 61.05075 | 79.13737 | -1975.08116 | 525.87560   | -1801.71556 |        | 1        |
| 42 | H | 76.21137 | 60.94280 | 77.47485 | 1588.27743  | -1913.22100 | 1113.83566  |        | 1        |

|     |   |          |          |          |             |             |             |   |
|-----|---|----------|----------|----------|-------------|-------------|-------------|---|
| 43  | C | 77.75569 | 62.52248 | 77.70080 | -613.62442  | -457.55993  | -194.14490  | 1 |
| 44  | H | 78.29366 | 63.02638 | 78.53746 | 1707.54637  | -721.27992  | 1996.92523  | 1 |
| 45  | H | 78.51612 | 61.94043 | 77.13258 | 758.23357   | 2100.81767  | 1560.55011  | 1 |
| 46  | C | 76.97635 | 63.57993 | 76.80690 | -352.41524  | 704.96076   | 49.21465    | 1 |
| 47  | H | 77.44933 | 64.58832 | 76.75997 | 1714.76886  | -2070.42778 | 443.35792   | 1 |
| 48  | H | 76.73672 | 63.23615 | 75.77201 | 1224.15040  | 1801.50881  | 1636.97633  | 1 |
| 49  | C | 75.86692 | 63.55365 | 79.95986 | 566.85117   | 537.05831   | 117.62814   | 1 |
| 50  | O | 76.98806 | 64.03265 | 80.11892 | -550.26779  | -406.08867  | 4.21666     | 1 |
| 51  | N | 74.82378 | 63.54005 | 80.75355 | 566.34832   | -425.77725  | 180.18749   | 1 |
| 52  | H | 73.99708 | 63.10552 | 80.34327 | 644.44502   | 2646.80550  | -52.73430   | 1 |
| 53  | C | 74.84560 | 63.75483 | 82.15452 | 612.34801   | -281.48662  | 411.56221   | 1 |
| 54  | H | 73.86193 | 63.36029 | 82.49274 | 1667.23498  | -1490.75142 | 1556.16753  | 1 |
| 55  | C | 76.08722 | 62.94391 | 82.75718 | -714.45746  | -175.43074  | 286.98927   | 1 |
| 56  | H | 77.03151 | 63.34868 | 82.29444 | -787.09484  | 1763.03619  | -1922.46060 | 1 |
| 57  | O | 76.09940 | 61.52707 | 82.50817 | -429.46514  | 516.51932   | -128.40526  | 1 |
| 58  | H | 76.91264 | 61.43909 | 81.97067 | 1981.82785  | 436.16847   | -1818.18182 | 1 |
| 59  | C | 76.00880 | 63.37767 | 84.26674 | 630.79189   | -468.94448  | 76.03230    | 1 |
| 60  | H | 76.90060 | 63.03279 | 84.83983 | -1775.71861 | 2062.30353  | 131.89849   | 1 |
| 61  | H | 75.94484 | 64.48832 | 84.37596 | -1855.14608 | 88.94118    | 1993.53760  | 1 |
| 62  | H | 75.10953 | 62.94642 | 84.76496 | -1504.82350 | -780.94249  | -2132.90992 | 1 |
| 63  | C | 75.01954 | 65.34237 | 82.53113 | 288.57638   | 618.62814   | -397.00270  | 1 |
| 64  | O | 74.34957 | 65.81703 | 83.41840 | 321.70495   | -185.26452  | 574.37218   | 1 |
| 65  | N | 76.03413 | 65.87701 | 81.87463 | -447.05792  | -446.53431  | 367.76425   | 1 |
| 66  | H | 76.54083 | 65.30651 | 81.15226 | 350.31316   | 1975.63644  | -1843.31522 | 1 |
| 67  | C | 76.16661 | 67.29800 | 81.90445 | -511.23061  | 374.03917   | -471.51480  | 1 |
| 68  | H | 76.02336 | 67.58729 | 82.96977 | 2234.79579  | -898.70890  | -1273.45190 | 1 |
| 69  | C | 77.63735 | 67.55108 | 81.33887 | 529.53781   | -159.34528  | 563.72604   | 1 |
| 70  | H | 77.83657 | 68.65606 | 81.36389 | 654.59388   | 2347.94251  | 1217.51488  | 1 |
| 71  | H | 78.34417 | 67.07897 | 82.07198 | -1526.55661 | 2103.42026  | 817.87394   | 1 |
| 72  | O | 77.93432 | 67.07579 | 79.99467 | -554.84278  | 14.12789    | 399.58769   | 1 |
| 73  | H | 77.87876 | 66.11250 | 80.14644 | 1297.06236  | 2061.84854  | 1220.68812  | 1 |
| 74  | C | 74.99039 | 67.94846 | 80.98003 | -662.15484  | -412.13544  | 123.62687   | 1 |
| 75  | O | 74.56998 | 67.47442 | 79.94849 | -540.01537  | -317.05804  | 274.91456   | 1 |
| 76  | N | 74.66198 | 69.11142 | 81.53977 | -202.76299  | -690.00100  | -131.49145  | 1 |
| 77  | H | 75.09207 | 69.39462 | 82.41929 | -702.62132  | -2617.37191 | 281.70413   | 1 |
| 78  | C | 73.44408 | 69.71394 | 81.11604 | -491.73914  | 576.34187   | 222.73509   | 1 |
| 79  | H | 73.30222 | 69.39770 | 80.05619 | 1977.17978  | -1823.58850 | -434.68928  | 1 |
| 80  | C | 72.29584 | 69.17445 | 82.08045 | -649.50797  | -328.66843  | 306.11224   | 1 |
| 81  | H | 72.51816 | 69.45486 | 83.13257 | 2075.07803  | 1452.16490  | -1004.45904 | 1 |
| 82  | C | 70.93163 | 69.78600 | 81.61466 | -615.18735  | -489.99689  | -70.96352   | 1 |
| 83  | H | 70.08663 | 69.44087 | 82.25560 | -1226.32661 | -1724.38906 | -1716.47170 | 1 |
| 84  | H | 70.94826 | 70.90081 | 81.65994 | 2381.64273  | -969.84735  | 900.46860   | 1 |
| 85  | H | 70.69067 | 69.49938 | 80.56408 | 2122.74991  | 1702.23946  | -141.36228  | 1 |
| 86  | C | 72.16300 | 67.61951 | 81.95322 | -501.86074  | -479.61276  | -376.42482  | 1 |
| 87  | H | 71.30048 | 67.22952 | 82.54376 | 993.79261   | -2246.95401 | -1177.81305 | 1 |
| 88  | H | 72.01238 | 67.30745 | 80.89228 | 42.71279    | -626.15391  | -2651.37258 | 1 |
| 89  | H | 73.08395 | 67.09525 | 82.32627 | -2026.39012 | -1590.33709 | -887.82922  | 1 |
| 90  | C | 73.57726 | 71.32524 | 81.39003 | -672.89153  | 382.57394   | -156.34072  | 1 |
| 91  | O | 74.12048 | 71.75509 | 82.38087 | 410.04627   | 221.86223   | 500.35950   | 1 |
| 92  | N | 72.81951 | 71.96625 | 80.49754 | -378.11782  | -443.79414  | -441.10984  | 1 |
| 93  | H | 72.41827 | 71.34780 | 79.79158 | 2404.15973  | -568.14894  | 1149.30085  | 1 |
| 94  | C | 73.14598 | 73.30135 | 80.06397 | -544.54484  | 466.16019   | 331.29119   | 1 |
| 95  | H | 72.16063 | 73.75077 | 79.81901 | -1409.80988 | -170.17955  | 2325.32679  | 1 |
| 96  | C | 73.92904 | 74.05616 | 81.20543 | -184.48284  | 116.78282   | -758.89137  | 1 |
| 97  | H | 73.40823 | 73.91771 | 82.18285 | 1893.78641  | 1861.14652  | 611.04528   | 1 |
| 98  | H | 74.94034 | 73.60153 | 81.33696 | -2170.79665 | -974.19311  | 1327.50117  | 1 |
| 99  | C | 74.05829 | 75.57092 | 80.84088 | 389.51668   | 672.81878   | -138.49152  | 1 |
| 100 | H | 74.59380 | 75.69821 | 79.86880 | 510.64577   | 1933.03327  | 1851.02484  | 1 |
| 101 | H | 73.05550 | 76.01374 | 80.65394 | -2302.30869 | -1105.72939 | -948.89774  | 1 |
| 102 | C | 74.79079 | 76.38804 | 81.97162 | -559.93427  | -126.34590  | 542.30857   | 1 |
| 103 | O | 74.93617 | 77.57782 | 81.85250 | -670.36003  | -111.83166  | 76.36448    | 1 |
| 104 | N | 75.19305 | 75.63877 | 83.02168 | -216.06729  | -537.07037  | 446.51379   | 1 |

|     |   |          |          |          |             |             |             |   |
|-----|---|----------|----------|----------|-------------|-------------|-------------|---|
| 105 | H | 75.11108 | 74.62802 | 83.18292 | -1251.96487 | 1074.12894  | -2168.52500 | 1 |
| 106 | H | 75.68826 | 76.01588 | 83.83682 | -2451.83023 | -720.73851  | 944.84612   | 1 |
| 107 | C | 74.12525 | 73.17291 | 78.77118 | 546.24052   | -563.88337  | -85.11809   | 1 |
| 108 | O | 75.07701 | 72.43649 | 78.79232 | 71.70702    | -307.40463  | 606.69673   | 1 |
| 109 | N | 73.73147 | 74.01108 | 77.79407 | 479.90863   | -504.50129  | 222.86849   | 1 |
| 110 | C | 74.58933 | 74.28371 | 76.68838 | 75.51268    | -600.91904  | 506.73700   | 1 |
| 111 | H | 75.25521 | 73.39875 | 76.55816 | -2033.61562 | 1795.30103  | 254.89480   | 1 |
| 112 | C | 73.52354 | 74.54339 | 75.53524 | 523.79067   | 517.99274   | 284.45581   | 1 |
| 113 | H | 73.94634 | 75.10406 | 74.67214 | 1599.61665  | -1127.00911 | 1895.98173  | 1 |
| 114 | H | 73.12474 | 73.58705 | 75.13033 | -1881.83093 | 1275.82488  | -1501.55016 | 1 |
| 115 | C | 72.42069 | 75.33607 | 76.30188 | -600.05639  | -404.05026  | 316.64485   | 1 |
| 116 | H | 72.70299 | 76.40756 | 76.40894 | -2597.05260 | 496.36221   | 657.73249   | 1 |
| 117 | H | 71.43110 | 75.32099 | 75.79216 | -1666.24518 | 1294.38985  | -1723.90591 | 1 |
| 118 | C | 72.40481 | 74.60676 | 77.71308 | 493.57570   | -129.95376  | -602.56394  | 1 |
| 119 | H | 72.28453 | 75.29213 | 78.58458 | -1469.08415 | -637.84797  | 2204.22581  | 1 |
| 120 | H | 71.67857 | 73.76449 | 77.80064 | -1038.97840 | 1068.88701  | -2280.71789 | 1 |
| 121 | C | 75.40483 | 75.67551 | 76.97820 | 188.88100   | 241.05089   | -727.87821  | 1 |
| 122 | O | 75.03113 | 76.50171 | 77.77427 | 531.88613   | -49.19943   | 427.07960   | 1 |
| 123 | N | 76.53638 | 75.72355 | 76.21100 | 708.14833   | 26.93417    | -179.73509  | 1 |
| 124 | H | 76.44479 | 74.86647 | 75.65197 | -2232.69501 | -1179.09831 | 1023.94816  | 1 |
| 125 | C | 76.92784 | 76.97343 | 75.51326 | -738.32412  | 259.92548   | 104.42456   | 1 |
| 126 | H | 76.16147 | 77.11811 | 74.71900 | 2028.89123  | 1260.02983  | 1311.33324  | 1 |
| 127 | C | 76.96983 | 78.09384 | 76.51481 | -258.65678  | -345.52513  | 661.28459   | 1 |
| 128 | H | 77.00223 | 77.62899 | 77.52965 | -1826.06090 | -1801.46097 | -918.64554  | 1 |
| 129 | C | 78.19436 | 78.97890 | 76.35359 | -541.23400  | 531.92970   | -218.41428  | 1 |
| 130 | H | 78.20388 | 79.81889 | 77.10157 | 1311.73218  | -2219.18200 | 882.19023   | 1 |
| 131 | H | 79.14816 | 78.39563 | 76.49497 | -1048.71298 | 1223.58118  | -2196.97971 | 1 |
| 132 | H | 78.24153 | 79.44148 | 75.32970 | 419.06414   | 1903.92898  | 1903.44670  | 1 |
| 133 | C | 75.72824 | 78.96826 | 76.44012 | -423.86431  | 152.66566   | -648.55262  | 1 |
| 134 | H | 75.68415 | 79.69585 | 77.29679 | 105.68386   | -2342.50080 | 1387.51238  | 1 |
| 135 | H | 75.69214 | 79.56739 | 75.48973 | -1695.63603 | -1484.73621 | -1531.02793 | 1 |
| 136 | H | 74.78497 | 78.35407 | 76.47849 | -1853.57121 | -487.39031  | 1936.59343  | 1 |
| 137 | C | 78.41051 | 76.58195 | 74.90397 | 539.71428   | -510.58232  | 267.58633   | 1 |
| 138 | O | 79.32284 | 76.29094 | 75.64312 | -15.93758   | -278.34085  | -624.49402  | 1 |
| 139 | N | 78.43479 | 76.67923 | 73.58019 | -676.81886  | 12.05292    | 276.17960   | 1 |
| 140 | H | 77.58228 | 76.94901 | 73.09245 | -1694.44250 | -373.84189  | -2100.66098 | 1 |
| 141 | C | 79.60661 | 76.19084 | 72.92598 | 412.33078   | -664.70360  | 108.35451   | 1 |
| 142 | H | 80.07843 | 75.50671 | 73.67008 | 1765.77476  | 1294.44366  | 1621.76594  | 1 |
| 143 | C | 79.17382 | 75.48867 | 71.57491 | -179.66635  | -721.95667  | -264.73915  | 1 |
| 144 | H | 78.36314 | 74.74651 | 71.74895 | -607.34922  | 2587.87032  | -598.10018  | 1 |
| 145 | H | 78.75231 | 76.22866 | 70.86008 | -359.69332  | -1479.13954 | -2259.74260 | 1 |
| 146 | C | 80.45317 | 74.80391 | 70.98903 | -240.01076  | 616.02425   | 431.85322   | 1 |
| 147 | H | 81.27948 | 75.54812 | 70.89239 | -1359.17131 | 782.54425   | 2227.99181  | 1 |
| 148 | H | 80.83141 | 74.02265 | 71.68587 | -820.36667  | 85.81767    | -2596.78715 | 1 |
| 149 | C | 80.12013 | 74.17606 | 69.57671 | -513.07015  | 236.18570   | -551.87280  | 1 |
| 150 | H | 79.34107 | 73.38402 | 69.66152 | 1816.11944  | -1183.11722 | -1650.94321 | 1 |
| 151 | H | 79.70209 | 74.94305 | 68.88475 | -1800.04429 | -1361.53473 | 1526.34643  | 1 |
| 152 | C | 81.44777 | 73.60025 | 69.02984 | 726.08972   | -253.19732  | -179.64713  | 1 |
| 153 | H | 82.23387 | 74.35829 | 68.84036 | 1224.27271  | -456.51798  | -2390.90304 | 1 |
| 154 | H | 81.86685 | 72.76432 | 69.62472 | 1206.40339  | -1150.93514 | -2154.90344 | 1 |
| 155 | N | 81.16165 | 72.97584 | 67.62329 | 329.70796   | -633.68968  | -155.67358  | 1 |
| 156 | H | 82.00175 | 72.55147 | 67.13364 | 1348.31305  | 1938.76845  | 1359.00643  | 1 |
| 157 | H | 80.46996 | 72.17179 | 67.58255 | 2096.92035  | 1446.54551  | -966.48890  | 1 |
| 158 | H | 80.78878 | 73.62576 | 66.87142 | -1197.07217 | -2303.53719 | 827.28733   | 1 |
| 159 | C | 80.60758 | 77.43346 | 72.54714 | -378.01186  | -556.17301  | -413.96481  | 1 |
| 160 | O | 81.75759 | 77.21218 | 72.23195 | -409.44433  | -307.55053  | -453.30833  | 1 |
| 161 | N | 79.98168 | 78.60449 | 72.54578 | -429.02477  | 524.70884   | 274.08502   | 1 |
| 162 | H | 79.00948 | 78.60252 | 72.84762 | 1706.34263  | -1425.96036 | 1574.38926  | 1 |
| 163 | C | 80.80232 | 79.76243 | 72.32194 | -45.25864   | -626.22952  | 478.93267   | 1 |
| 164 | H | 81.77923 | 79.49426 | 72.78619 | 1988.63164  | 570.90773   | 1772.87287  | 1 |
| 165 | C | 80.93988 | 79.91591 | 70.75051 | 551.77128   | -20.49526   | -564.54996  | 1 |
| 166 | H | 81.23911 | 78.94705 | 70.29109 | 1434.61535  | -1753.10253 | 1513.99471  | 1 |

|     |   |          |          |          |             |             |             |   |
|-----|---|----------|----------|----------|-------------|-------------|-------------|---|
| 167 | H | 79.95679 | 80.17397 | 70.29811 | -714.67738  | 1819.09770  | 1898.36494  | 1 |
| 168 | C | 81.99178 | 81.03102 | 70.44410 | 446.99263   | -555.77305  | 338.97221   | 1 |
| 169 | H | 81.68961 | 81.99602 | 70.91076 | 1953.68466  | 1892.25957  | -161.67766  | 1 |
| 170 | H | 82.98564 | 80.77630 | 70.87590 | -403.03785  | 2688.07032  | -188.43591  | 1 |
| 171 | C | 82.06974 | 81.15731 | 68.86868 | 567.86262   | 335.74681   | 434.04421   | 1 |
| 172 | H | 82.39745 | 80.19502 | 68.41204 | -1080.02275 | 1568.26081  | -1948.78900 | 1 |
| 173 | H | 81.05946 | 81.36074 | 68.43935 | -919.54108  | 2111.34692  | 1456.13463  | 1 |
| 174 | C | 83.05259 | 82.29465 | 68.50902 | 195.81897   | 173.33862   | -745.11536  | 1 |
| 175 | H | 82.73589 | 83.30255 | 68.84379 | 1405.67949  | -2301.21089 | -390.08113  | 1 |
| 176 | H | 84.10482 | 82.11007 | 68.80405 | -940.37328  | -1118.32446 | 2299.72133  | 1 |
| 177 | N | 83.08437 | 82.38691 | 66.94527 | 319.26422   | 656.36007   | -42.02424   | 1 |
| 178 | H | 83.70282 | 83.14565 | 66.53660 | 1961.03633  | 619.91968   | 1787.09422  | 1 |
| 179 | H | 83.42697 | 81.53123 | 66.41914 | 854.14343   | -2156.80752 | 1429.08711  | 1 |
| 180 | H | 82.16158 | 82.58296 | 66.45888 | 1237.02905  | -1378.50857 | -1998.28500 | 1 |
| 181 | C | 80.07955 | 81.08107 | 72.94184 | 532.53319   | -268.57236  | 517.55729   | 1 |
| 182 | O | 80.78364 | 81.99246 | 73.38487 | 266.16714   | -290.73804  | -558.88002  | 1 |
| 183 | N | 78.79074 | 81.04970 | 72.74031 | -226.25352  | 640.49678   | -270.32839  | 1 |
| 184 | H | 78.44310 | 80.20596 | 72.28442 | 2007.69063  | -1035.27229 | 1523.50231  | 1 |
| 185 | C | 77.84218 | 81.82996 | 73.48760 | -540.76542  | -573.33303  | 49.50000    | 1 |
| 186 | H | 77.58694 | 81.20102 | 74.36754 | -2374.20950 | -1036.76023 | 843.75774   | 1 |
| 187 | C | 78.48820 | 83.21680 | 73.91267 | -77.09082   | 666.87422   | -415.84136  | 1 |
| 188 | H | 79.13934 | 83.54343 | 73.05088 | -985.81834  | 617.19825   | 2463.91927  | 1 |
| 189 | O | 79.35119 | 83.16446 | 75.05090 | 293.29899   | -391.65602  | -477.80926  | 1 |
| 190 | H | 80.23918 | 82.95190 | 74.57200 | 2528.72714  | -681.76262  | -751.27122  | 1 |
| 191 | C | 77.25205 | 84.17627 | 74.07001 | 252.47363   | -605.14473  | 440.05134   | 1 |
| 192 | H | 77.57307 | 85.20803 | 74.34371 | -2052.65063 | 1456.49051  | -1043.51830 | 1 |
| 193 | H | 76.65703 | 84.25556 | 73.12683 | -2152.98800 | -1661.97574 | -161.70652  | 1 |
| 194 | H | 76.56286 | 83.82244 | 74.87161 | -473.12726  | -1584.27339 | 2165.61725  | 1 |
| 195 | C | 76.58996 | 81.90947 | 72.44780 | 360.36307   | 488.46713   | 505.10056   | 1 |
| 196 | O | 76.48996 | 82.76159 | 71.57940 | -200.08817  | -528.03552  | -385.82850  | 1 |
| 197 | N | 75.76272 | 80.91619 | 72.73157 | -597.54095  | -226.44775  | 355.20479   | 1 |
| 198 | H | 75.99018 | 80.24899 | 73.46882 | 2179.23655  | -1300.70981 | -991.33835  | 1 |
| 199 | C | 74.61611 | 80.73869 | 71.92774 | -687.68921  | 297.39807   | -249.45179  | 1 |
| 200 | H | 74.47736 | 81.67935 | 71.34560 | -349.16256  | -2467.37713 | -1101.72831 | 1 |
| 201 | C | 74.84848 | 79.43337 | 71.02157 | 672.47345   | 361.54328   | -201.62880  | 1 |
| 202 | H | 74.89438 | 78.52931 | 71.66929 | 1541.41502  | 582.18425   | 2169.97026  | 1 |
| 203 | H | 73.96702 | 79.29808 | 70.35393 | -2534.67717 | 60.25153    | 997.72295   | 1 |
| 204 | C | 76.13361 | 79.53936 | 70.19026 | 574.26774   | -389.43119  | -377.02542  | 1 |
| 205 | C | 76.29552 | 80.59652 | 69.24425 | 688.82679   | -287.33580  | -257.96133  | 1 |
| 206 | H | 75.52018 | 81.37572 | 69.13344 | 331.14182   | 1470.38163  | 2269.80013  | 1 |
| 207 | C | 77.15482 | 78.55281 | 70.34792 | -383.52382  | -675.04808  | 144.24917   | 1 |
| 208 | H | 77.04368 | 77.74131 | 71.08873 | 4.09847     | 1517.59662  | 2262.86397  | 1 |
| 209 | C | 77.45292 | 80.62850 | 68.46611 | -134.76730  | 428.45285   | -649.50303  | 1 |
| 210 | H | 77.57620 | 81.44795 | 67.73669 | -903.23433  | 1600.49020  | 2011.53387  | 1 |
| 211 | C | 78.29018 | 78.62116 | 69.53733 | -335.53281  | -615.00040  | -364.39058  | 1 |
| 212 | H | 79.07044 | 77.85016 | 69.66141 | 1596.45398  | -1369.33862 | 1732.02659  | 1 |
| 213 | C | 78.48069 | 79.64639 | 68.56530 | 585.48547   | -340.24194  | -406.23938  | 1 |
| 214 | O | 79.63507 | 79.71798 | 67.73943 | -419.15649  | -173.04408  | -511.94141  | 1 |
| 215 | H | 80.08738 | 78.88633 | 68.01873 | -1071.84350 | 1559.71507  | -1960.13012 | 1 |
| 216 | C | 73.40062 | 80.28209 | 72.92738 | 291.41878   | -183.13091  | 710.72246   | 1 |
| 217 | O | 73.56772 | 79.44910 | 73.78863 | 379.87695   | 523.47396   | -222.23622  | 1 |
| 218 | N | 72.26369 | 80.85023 | 72.52800 | 564.30591   | 373.09380   | 277.24371   | 1 |
| 219 | H | 72.29119 | 81.57335 | 71.80779 | -120.59931  | -2436.07824 | -1214.35098 | 1 |
| 220 | C | 71.11344 | 80.64275 | 73.34280 | 404.07514   | -299.37480  | 608.84009   | 1 |
| 221 | H | 71.37949 | 79.76654 | 73.98166 | -1071.07882 | -841.69025  | 2359.66467  | 1 |
| 222 | C | 70.90356 | 81.97311 | 74.19055 | -683.12807  | 68.71770    | -390.13096  | 1 |
| 223 | H | 71.87592 | 82.33919 | 74.59008 | 2068.88918  | 1596.58590  | 770.89603   | 1 |
| 224 | H | 70.51444 | 82.79128 | 73.53553 | 1379.86429  | 2342.49779  | -179.85638  | 1 |
| 225 | C | 69.90854 | 81.65490 | 75.34379 | -176.39967  | 537.49466   | 550.97268   | 1 |
| 226 | H | 68.91773 | 81.35275 | 74.93073 | -396.28051  | 1942.22168  | 1869.33314  | 1 |
| 227 | H | 70.25805 | 80.78685 | 75.94547 | -94.44700   | 586.00678   | -2659.20016 | 1 |
| 228 | C | 69.77974 | 82.96462 | 76.26197 | -291.69381  | -718.18079  | -150.72929  | 1 |

|     |   |          |          |          |             |             |             |   |
|-----|---|----------|----------|----------|-------------|-------------|-------------|---|
| 229 | H | 70.71390 | 83.30382 | 76.77513 | -2303.38776 | 1089.76242  | 964.62032   | 1 |
| 230 | H | 69.29598 | 83.82136 | 75.72581 | 884.16729   | 2568.80533  | -207.74283  | 1 |
| 231 | N | 68.87574 | 82.45655 | 77.20169 | -594.49522  | -252.81478  | 342.29276   | 1 |
| 232 | H | 68.10750 | 81.91836 | 76.82618 | -1735.17426 | 2084.05705  | -263.71605  | 1 |
| 233 | C | 68.91134 | 82.63851 | 78.46393 | 595.23177   | -271.52487  | 442.22352   | 1 |
| 234 | N | 69.94196 | 83.40520 | 79.01132 | 585.53813   | -424.79750  | -105.81303  | 1 |
| 235 | H | 70.70825 | 83.89281 | 78.54997 | 959.88797   | 1327.56823  | -2177.11905 | 1 |
| 236 | H | 70.04368 | 83.62069 | 80.00382 | 1578.48647  | 16.27378    | -2220.76233 | 1 |
| 237 | N | 67.83003 | 81.99222 | 79.07699 | -452.17763  | -390.33541  | -421.51853  | 1 |
| 238 | H | 67.07426 | 81.43568 | 78.68107 | 470.26107   | 1974.25629  | -1817.92087 | 1 |
| 239 | H | 67.66079 | 82.01621 | 80.08295 | 1856.67307  | -1573.97321 | -1224.35416 | 1 |
| 240 | C | 69.78715 | 80.43518 | 72.41978 | -531.47271  | -581.45780  | -55.06206   | 1 |
| 241 | O | 68.68411 | 80.39820 | 72.91088 | -243.00837  | 192.73507   | 609.52485   | 1 |
| 242 | N | 70.08581 | 80.25074 | 71.08967 | 343.49288   | -644.25607  | 38.09164    | 1 |
| 243 | H | 71.11298 | 80.21634 | 71.11907 | -1691.16043 | -1535.97525 | -1484.73099 | 1 |
| 244 | C | 69.49242 | 81.18599 | 70.10119 | 542.66492   | 350.14337   | 454.42563   | 1 |
| 245 | H | 69.79705 | 80.75227 | 69.12226 | 1209.57979  | -2396.95920 | 463.86744   | 1 |
| 246 | C | 68.00038 | 81.26233 | 70.28758 | -737.14309  | 145.93010   | 242.71942   | 1 |
| 247 | H | 67.80403 | 81.73444 | 71.27940 | -1050.18303 | 159.36419   | -2509.06125 | 1 |
| 248 | C | 67.35273 | 82.11779 | 69.21121 | -706.77696  | -252.88343  | -245.16230  | 1 |
| 249 | H | 66.24638 | 82.22789 | 69.37563 | -1624.64039 | -1665.49085 | 1417.86935  | 1 |
| 250 | H | 67.79295 | 83.15254 | 69.18108 | 2566.10521  | 598.51109   | 693.22305   | 1 |
| 251 | H | 67.49391 | 81.67410 | 68.18815 | -1972.69758 | 107.10018   | -1876.34312 | 1 |
| 252 | C | 67.36056 | 79.88409 | 70.30754 | 412.85148   | 672.58832   | -27.69222   | 1 |
| 253 | H | 66.24969 | 79.93828 | 70.46846 | 1447.02277  | 1762.76533  | -1490.78944 | 1 |
| 254 | H | 67.53496 | 79.32948 | 69.34562 | 1320.77379  | -145.20455  | 2378.68491  | 1 |
| 255 | H | 67.79234 | 79.25944 | 71.14022 | -1512.10848 | 1470.52031  | 1724.75147  | 1 |
| 256 | C | 70.17872 | 82.66196 | 70.37064 | -607.11113  | 499.56689   | 73.73769    | 1 |
| 257 | O | 70.13512 | 83.23291 | 71.43759 | 357.97126   | 460.81534   | 356.68785   | 1 |
| 258 | N | 70.76831 | 83.06272 | 69.24887 | 536.55407   | -368.62270  | 332.76306   | 1 |
| 259 | H | 70.66937 | 82.47659 | 68.42071 | 524.38866   | 2297.69985  | 1367.20941  | 1 |
| 260 | C | 70.99339 | 84.45969 | 69.10101 | 46.50277    | -774.29190  | -147.97904  | 1 |
| 261 | H | 70.68260 | 84.91408 | 70.07107 | 1676.51875  | 1883.29066  | 1032.55549  | 1 |
| 262 | C | 72.55443 | 84.70153 | 68.76688 | -559.41456  | -34.19198   | -556.30433  | 1 |
| 263 | H | 72.77447 | 84.35763 | 67.72842 | -64.66664   | 395.18769   | 2695.05373  | 1 |
| 264 | H | 72.79118 | 85.79185 | 68.78106 | -2703.44278 | -60.40056   | 333.79418   | 1 |
| 265 | C | 73.40426 | 83.94923 | 69.75654 | -519.76435  | 377.31045   | 459.42366   | 1 |
| 266 | H | 73.14145 | 82.86869 | 69.69200 | -1746.74323 | 1667.50644  | -1261.73691 | 1 |
| 267 | C | 74.87822 | 84.11307 | 69.42192 | 570.95554   | 16.46261    | -545.27700  | 1 |
| 268 | H | 75.54224 | 83.60483 | 70.21316 | 2391.58273  | 28.05277    | -1305.07271 | 1 |
| 269 | H | 75.13210 | 83.66701 | 68.42579 | 175.75588   | 917.63458   | 2559.43867  | 1 |
| 270 | H | 75.17489 | 85.19290 | 69.38473 | -1063.97851 | -2155.34650 | 1283.00462  | 1 |
| 271 | C | 73.14553 | 84.41145 | 71.18413 | 193.76014   | 2.62946     | -765.53141  | 1 |
| 272 | H | 73.83375 | 83.90908 | 71.91241 | 507.39394   | -846.55087  | 2539.60089  | 1 |
| 273 | H | 73.29637 | 85.51622 | 71.29443 | 1337.57841  | 1818.19054  | 1526.01994  | 1 |
| 274 | H | 72.09050 | 84.17754 | 71.50378 | 1100.88635  | -1172.91350 | -2199.08909 | 1 |
| 275 | C | 70.11097 | 84.92201 | 67.83503 | -549.21115  | 475.64486   | -309.38218  | 1 |
| 276 | O | 69.44846 | 84.16226 | 67.17751 | 556.06106   | -390.37755  | -78.24250   | 1 |
| 277 | O | 70.16243 | 86.29892 | 67.50972 | -572.27940  | -310.19032  | -209.75862  | 1 |
| 278 | H | 70.76145 | 86.60782 | 68.24360 | -1380.08193 | 2212.14486  | 790.85944   | 1 |

Listing 64: C00064.xmolout

|   |   |          |          |          |             |             |             |        |          |
|---|---|----------|----------|----------|-------------|-------------|-------------|--------|----------|
| 1 |   | 276      |          |          |             |             |             |        |          |
| 2 |   | 150.0000 | 150.0000 | 150.0000 | 0.0000      | 0.0000      | 0.0000***** | 2.7750 | 11100    |
|   |   | 0.2500   | 300.00   | 0.00     | 0.00        | 0.00        | -1293.6118  | 0.0000 | 300.0000 |
| 3 | H | 70.86456 | 70.38264 | 90.46485 | -2043.14101 | -1757.64893 | 399.89339   |        | 1        |
| 4 | N | 71.80658 | 69.99925 | 90.47458 | 426.75047   | 490.45733   | -334.42467  |        | 1        |
| 5 | H | 71.71069 | 69.16223 | 89.90548 | 442.25559   | -1110.30854 | -2448.52907 |        | 1        |
| 6 | C | 72.83715 | 70.88415 | 90.09649 | 415.32972   | -666.39213  | 83.73172    |        | 1        |
| 7 | H | 72.57003 | 71.84158 | 90.59306 | 879.32219   | 2491.00447  | 667.35213   |        | 1        |
| 8 | C | 74.24872 | 70.29569 | 90.60647 | 31.35357    | 477.41777   | 628.23362   |        | 1        |

|    |   |          |          |          |             |             |             |   |
|----|---|----------|----------|----------|-------------|-------------|-------------|---|
| 9  | H | 74.46175 | 69.33946 | 90.07081 | 1168.38489  | 2240.25337  | -1019.71136 | 1 |
| 10 | H | 75.07730 | 70.99155 | 90.32944 | -360.43770  | 2534.90498  | 931.67112   | 1 |
| 11 | C | 74.20722 | 70.06533 | 92.09506 | 463.18208   | 512.70242   | -382.34388  | 1 |
| 12 | H | 73.30501 | 69.45528 | 92.32770 | 1725.29117  | 1863.52247  | -987.07854  | 1 |
| 13 | C | 75.44389 | 69.29722 | 92.54439 | 710.42801   | -144.27427  | -313.15367  | 1 |
| 14 | H | 75.42718 | 69.09280 | 93.64602 | 364.20195   | -1033.13725 | 2494.72524  | 1 |
| 15 | H | 75.52980 | 68.30863 | 92.02356 | 2567.61904  | 335.80679   | 847.48802   | 1 |
| 16 | H | 76.38344 | 69.86829 | 92.32759 | -2587.99029 | 680.92867   | -512.16411  | 1 |
| 17 | C | 74.11602 | 71.37792 | 92.86090 | 268.17616   | 741.64379   | -40.42634   | 1 |
| 18 | H | 74.13110 | 71.21158 | 93.96911 | 1283.54314  | -1945.37420 | -1411.27812 | 1 |
| 19 | H | 74.97178 | 72.05872 | 92.61556 | -1258.57796 | 1317.15249  | -2026.02085 | 1 |
| 20 | H | 73.17161 | 71.93183 | 92.62279 | -2502.84526 | 909.80597   | 575.92391   | 1 |
| 21 | C | 72.93921 | 71.03142 | 88.49148 | 619.36578   | -458.64843  | -172.09273  | 1 |
| 22 | O | 73.89841 | 71.60576 | 88.00006 | -81.40433   | 433.87611   | 522.34594   | 1 |
| 23 | N | 71.91748 | 70.48047 | 87.84853 | 175.23996   | -622.20190  | 341.55523   | 1 |
| 24 | H | 71.13713 | 70.09702 | 88.37724 | -876.57256  | -303.22879  | -2561.90213 | 1 |
| 25 | C | 71.87538 | 70.62607 | 86.43096 | -571.88214  | -534.10783  | -106.15033  | 1 |
| 26 | H | 72.94571 | 70.69310 | 86.13271 | -2713.20841 | -16.25800   | -248.80809  | 1 |
| 27 | C | 71.06905 | 69.37766 | 85.83846 | 166.60354   | 288.16399   | -716.09568  | 1 |
| 28 | H | 70.03775 | 69.37040 | 86.28520 | -2097.85574 | 1636.78449  | -586.18044  | 1 |
| 29 | O | 71.63676 | 68.08280 | 86.09796 | -317.80580  | -363.38227  | 484.43082   | 1 |
| 30 | H | 70.92395 | 67.66267 | 86.62009 | 1863.74748  | -1451.84923 | 1357.29467  | 1 |
| 31 | C | 70.98097 | 69.79086 | 84.32236 | 503.80731   | 517.99032   | 318.51606   | 1 |
| 32 | H | 70.41117 | 69.04037 | 83.72779 | 640.61020   | -2157.10410 | -1536.29104 | 1 |
| 33 | H | 70.47909 | 70.77936 | 84.17740 | 1687.88455  | 465.60692   | 2087.56452  | 1 |
| 34 | H | 71.99790 | 69.87582 | 83.87123 | -1293.07895 | -1899.88581 | -1463.57452 | 1 |
| 35 | C | 71.01673 | 71.99345 | 86.14453 | -153.07550  | -733.68902  | 248.70981   | 1 |
| 36 | O | 69.84411 | 71.99966 | 86.40537 | 186.15459   | -480.78787  | -449.34387  | 1 |
| 37 | N | 71.77443 | 72.95137 | 85.58836 | -487.53139  | 543.18517   | 42.03850    | 1 |
| 38 | C | 71.26571 | 74.27826 | 85.43054 | -699.35871  | 69.34393    | 360.10701   | 1 |
| 39 | H | 70.56548 | 74.45232 | 86.27904 | 2.81126     | -221.99807  | -2715.58072 | 1 |
| 40 | C | 72.59200 | 75.14778 | 85.44988 | -507.46439  | -592.59194  | 122.07761   | 1 |
| 41 | H | 72.47090 | 76.12642 | 84.93320 | -1975.08116 | 525.87560   | -1801.71556 | 1 |
| 42 | H | 72.90738 | 75.37711 | 86.49217 | 1588.27743  | -1913.22100 | 1113.83566  | 1 |
| 43 | C | 73.62525 | 74.20842 | 84.75019 | -613.62442  | -457.55993  | -194.14490  | 1 |
| 44 | H | 73.52017 | 74.25409 | 83.64295 | 1707.54637  | -721.27992  | 1996.92523  | 1 |
| 45 | H | 74.68503 | 74.46487 | 84.97584 | 758.23357   | 2100.81767  | 1560.55011  | 1 |
| 46 | C | 73.19632 | 72.78923 | 85.31474 | -352.41524  | 704.96076   | 49.21465    | 1 |
| 47 | H | 73.31806 | 71.94167 | 84.59864 | 1714.76886  | -2070.42778 | 443.35792   | 1 |
| 48 | H | 73.65640 | 72.50352 | 86.31431 | 1224.15040  | 1801.50881  | 1636.97633  | 1 |
| 49 | C | 70.49232 | 74.41864 | 83.98911 | 566.85117   | 537.05831   | 117.62814   | 1 |
| 50 | O | 69.61955 | 75.24188 | 83.87131 | -550.26779  | -406.08867  | 4.21666     | 1 |
| 51 | N | 71.04299 | 73.64020 | 83.06356 | 566.34832   | -425.77725  | 180.18749   | 1 |
| 52 | H | 71.76211 | 72.97441 | 83.35590 | 644.44502   | 2646.80550  | -52.73430   | 1 |
| 53 | C | 70.35344 | 73.38809 | 81.84843 | 612.34801   | -281.48662  | 411.56221   | 1 |
| 54 | H | 69.33779 | 73.83699 | 81.93959 | 1667.23498  | -1490.75142 | 1556.16753  | 1 |
| 55 | C | 71.23003 | 74.02952 | 80.66832 | -714.45746  | -175.43074  | 286.98927   | 1 |
| 56 | H | 72.23688 | 73.52868 | 80.65504 | -787.09484  | 1763.03619  | -1922.46060 | 1 |
| 57 | O | 71.49262 | 75.43930 | 80.76356 | -429.46514  | 516.51932   | -128.40526  | 1 |
| 58 | H | 72.46938 | 75.44900 | 80.82268 | 1981.82785  | 436.16847   | -1818.18182 | 1 |
| 59 | C | 70.40297 | 73.58661 | 79.40730 | 630.79189   | -468.94448  | 76.03230    | 1 |
| 60 | H | 70.87680 | 73.96100 | 78.47142 | -1775.71861 | 2062.30353  | 131.89849   | 1 |
| 61 | H | 70.32519 | 72.47637 | 79.32115 | -1855.14608 | 88.94118    | 1993.53760  | 1 |
| 62 | H | 69.36585 | 73.99492 | 79.43500 | -1504.82350 | -780.94249  | -2132.90992 | 1 |
| 63 | C | 70.44136 | 71.75692 | 81.71863 | 288.57638   | 618.62814   | -397.00270  | 1 |
| 64 | O | 71.42235 | 71.17467 | 82.13326 | 321.70495   | -185.26452  | 574.37218   | 1 |
| 65 | N | 69.38622 | 71.27097 | 81.08526 | -447.05792  | -446.53431  | 367.76425   | 1 |
| 66 | H | 68.65698 | 71.89210 | 80.73746 | 350.31316   | 1975.63644  | -1843.31522 | 1 |
| 67 | C | 69.33793 | 69.86448 | 80.84077 | -511.23061  | 374.03917   | -471.51480  | 1 |
| 68 | H | 69.65877 | 69.39671 | 81.79656 | 2234.79579  | -898.70890  | -1273.45190 | 1 |
| 69 | C | 67.84026 | 69.55292 | 80.39652 | 529.53781   | -159.34528  | 563.72604   | 1 |
| 70 | H | 67.77978 | 68.44342 | 80.24799 | 654.59388   | 2347.94251  | 1217.51488  | 1 |

|     |   |          |          |          |             |             |             |   |
|-----|---|----------|----------|----------|-------------|-------------|-------------|---|
| 71  | H | 67.13277 | 69.78347 | 81.23660 | -1526.55661 | 2103.42026  | 817.87394   | 1 |
| 72  | O | 67.35719 | 70.25934 | 79.21203 | -554.84278  | 14.12789    | 399.58769   | 1 |
| 73  | H | 68.13813 | 70.15177 | 78.63353 | 1297.06236  | 2061.84854  | 1220.68812  | 1 |
| 74  | C | 70.36599 | 69.52392 | 79.61843 | -662.15484  | -412.13544  | 123.62687   | 1 |
| 75  | O | 70.28974 | 70.03039 | 78.51951 | -540.01537  | -317.05804  | 274.91456   | 1 |
| 76  | N | 71.17105 | 68.50980 | 80.01761 | -202.76299  | -690.00100  | -131.49145  | 1 |
| 77  | H | 70.95772 | 68.30967 | 80.99866 | -702.62132  | -2617.37191 | 281.70413   | 1 |
| 78  | C | 72.58477 | 68.74254 | 79.75966 | -491.73914  | 576.34187   | 222.73509   | 1 |
| 79  | H | 72.74597 | 69.82679 | 79.94255 | 1977.17978  | -1823.58850 | -434.68928  | 1 |
| 80  | C | 73.36632 | 67.78524 | 80.74063 | -649.50797  | -328.66843  | 306.11224   | 1 |
| 81  | H | 72.87599 | 66.78786 | 80.78024 | 2075.07803  | 1452.16490  | -1004.45904 | 1 |
| 82  | C | 74.83710 | 67.65340 | 80.21030 | -615.18735  | -489.99689  | -70.96352   | 1 |
| 83  | H | 75.45900 | 67.00559 | 80.87139 | -1226.32661 | -1724.38906 | -1716.47170 | 1 |
| 84  | H | 74.84846 | 67.19892 | 79.18787 | 2381.64273  | -969.84735  | 900.46860   | 1 |
| 85  | H | 75.34149 | 68.64524 | 80.13983 | 2122.74991  | 1702.23946  | -141.36228  | 1 |
| 86  | C | 73.41860 | 68.43022 | 82.16985 | -501.86074  | -479.61276  | -376.42482  | 1 |
| 87  | H | 74.04616 | 67.83216 | 82.87151 | 993.79261   | -2246.95401 | -1177.81305 | 1 |
| 88  | H | 73.83983 | 69.46247 | 82.14092 | 42.71279    | -626.15391  | -2651.37258 | 1 |
| 89  | H | 72.40080 | 68.49971 | 82.61632 | -2026.39012 | -1590.33709 | -887.82922  | 1 |
| 90  | C | 72.92788 | 68.28369 | 78.24307 | -672.89153  | 382.57394   | -156.34072  | 1 |
| 91  | O | 72.94825 | 67.11948 | 77.91553 | 410.04627   | 221.86223   | 500.35950   | 1 |
| 92  | N | 73.30033 | 69.35110 | 77.50832 | -378.11782  | -443.79414  | -441.10984  | 1 |
| 93  | H | 73.16135 | 70.26510 | 77.94214 | 2404.15973  | -568.14894  | 1149.30085  | 1 |
| 94  | C | 73.03250 | 69.18519 | 76.09329 | -544.54484  | 466.16019   | 331.29119   | 1 |
| 95  | H | 73.64813 | 68.29759 | 75.82917 | -1409.80988 | -170.17955  | 2325.32679  | 1 |
| 96  | C | 71.49530 | 68.83108 | 76.01146 | -184.48284  | 116.78282   | -758.89137  | 1 |
| 97  | H | 71.29745 | 67.85416 | 76.51556 | 1893.78641  | 1861.14652  | 611.04528   | 1 |
| 98  | H | 70.89062 | 69.57433 | 76.59427 | -2170.79665 | -974.19311  | 1327.50117  | 1 |
| 99  | C | 71.06354 | 68.76828 | 74.51288 | 389.51668   | 672.81878   | -138.49152  | 1 |
| 100 | H | 71.38573 | 69.68842 | 73.97692 | 510.64577   | 1933.03327  | 1851.02484  | 1 |
| 101 | H | 71.60378 | 67.94933 | 73.98827 | -2302.30869 | -1105.72939 | -948.89774  | 1 |
| 102 | C | 69.50869 | 68.57287 | 74.35103 | -559.93427  | -126.34590  | 542.30857   | 1 |
| 103 | O | 69.04382 | 68.42014 | 73.25101 | -670.36003  | -111.83166  | 76.36448    | 1 |
| 104 | N | 68.81899 | 68.62124 | 75.51158 | -216.06729  | -537.07037  | 446.51379   | 1 |
| 105 | H | 69.14865 | 68.74737 | 76.47624 | -1251.96487 | 1074.12894  | -2168.52500 | 1 |
| 106 | H | 67.80022 | 68.51851 | 75.57461 | -2451.83023 | -720.73851  | 944.84612   | 1 |
| 107 | C | 73.52057 | 70.53115 | 75.32167 | 546.24052   | -563.88337  | -85.11809   | 1 |
| 108 | O | 74.46588 | 70.37881 | 74.59005 | 71.70702    | -307.40463  | 606.69673   | 1 |
| 109 | N | 72.82462 | 71.65638 | 75.54689 | 479.90863   | -504.50129  | 222.86849   | 1 |
| 110 | C | 73.25025 | 72.87587 | 74.92959 | 75.51268    | -600.91904  | 506.73700   | 1 |
| 111 | H | 73.74690 | 72.60639 | 73.96915 | -2033.61562 | 1795.30103  | 254.89480   | 1 |
| 112 | C | 71.87339 | 73.66429 | 74.81747 | 523.79067   | 517.99274   | 284.45581   | 1 |
| 113 | H | 72.01109 | 74.75963 | 74.67814 | 1599.61665  | -1127.00911 | 1895.98173  | 1 |
| 114 | H | 71.25748 | 73.30413 | 73.96359 | -1881.83093 | 1275.82488  | -1501.55016 | 1 |
| 115 | C | 71.22596 | 73.29196 | 76.18497 | -600.05639  | -404.05026  | 316.64485   | 1 |
| 116 | H | 71.73054 | 73.84126 | 77.01538 | -2597.05260 | 496.36221   | 657.73249   | 1 |
| 117 | H | 70.13778 | 73.51995 | 76.25070 | -1666.24518 | 1294.38985  | -1723.90591 | 1 |
| 118 | C | 71.54869 | 71.73674 | 76.24323 | 493.57570   | -129.95376  | -602.56394  | 1 |
| 119 | H | 71.67107 | 71.31707 | 77.27062 | -1469.08415 | -637.84797  | 2204.22581  | 1 |
| 120 | H | 70.83719 | 71.10094 | 75.66547 | -1038.97840 | 1068.88701  | -2280.71789 | 1 |
| 121 | C | 74.23160 | 73.69640 | 75.95558 | 188.88100   | 241.05089   | -727.87821  | 1 |
| 122 | O | 74.01036 | 73.78333 | 77.14287 | 531.88613   | -49.19943   | 427.07960   | 1 |
| 123 | N | 75.19414 | 74.28684 | 75.25669 | 708.14833   | 26.93417    | -179.73509  | 1 |
| 124 | H | 75.26426 | 74.09409 | 74.25823 | -2232.69501 | -1179.09831 | 1023.94816  | 1 |
| 125 | C | 76.16143 | 75.02020 | 76.00974 | -738.32412  | 259.92548   | 104.42456   | 1 |
| 126 | H | 75.56366 | 75.46243 | 76.83960 | 2028.89123  | 1260.02983  | 1311.33324  | 1 |
| 127 | C | 77.22828 | 73.98640 | 76.58309 | -258.65678  | -345.52513  | 661.28459   | 1 |
| 128 | H | 77.72359 | 73.43711 | 75.75391 | -1826.06090 | -1801.46097 | -918.64554  | 1 |
| 129 | C | 78.27123 | 74.79954 | 77.42130 | -541.23400  | 531.92970   | -218.41428  | 1 |
| 130 | H | 79.06904 | 74.14240 | 77.84056 | 1311.73218  | -2219.18200 | 882.19023   | 1 |
| 131 | H | 78.77241 | 75.58101 | 76.79858 | -1048.71298 | 1223.58118  | -2196.97971 | 1 |
| 132 | H | 77.78693 | 75.32527 | 78.27756 | 419.06414   | 1903.92898  | 1903.44670  | 1 |



|     |   |          |          |          |             |             |             |   |
|-----|---|----------|----------|----------|-------------|-------------|-------------|---|
| 133 | C | 76.50898 | 72.98646 | 77.55295 | -423.86431  | 152.66566   | -648.55262  | 1 |
| 134 | H | 77.23554 | 72.31052 | 78.06305 | 105.68386   | -2342.50080 | 1387.51238  | 1 |
| 135 | H | 75.93708 | 73.52760 | 78.34577 | -1695.63603 | -1484.73621 | -1531.02793 | 1 |
| 136 | H | 75.77821 | 72.34083 | 77.00613 | -1853.57121 | -487.39031  | 1936.59343  | 1 |
| 137 | C | 76.95137 | 76.10095 | 75.07354 | 539.71428   | -510.58232  | 267.58633   | 1 |
| 138 | O | 77.48513 | 77.04718 | 75.60684 | -15.93758   | -278.34085  | -624.49402  | 1 |
| 139 | N | 77.03864 | 75.72479 | 73.80210 | -676.81886  | 12.05292    | 276.17960   | 1 |
| 140 | H | 76.55311 | 74.88034 | 73.50215 | -1694.44250 | -373.84189  | -2100.66098 | 1 |
| 141 | C | 77.45878 | 76.72616 | 72.85851 | 412.33078   | -664.70360  | 108.35451   | 1 |
| 142 | H | 76.88512 | 77.63730 | 73.13428 | 1765.77476  | 1294.44366  | 1621.76594  | 1 |
| 143 | C | 79.00443 | 76.92566 | 73.10148 | -179.66635  | -721.95667  | -264.73915  | 1 |
| 144 | H | 79.16428 | 77.39179 | 74.10225 | -607.34922  | 2587.87032  | -598.10018  | 1 |
| 145 | H | 79.53920 | 75.95052 | 73.14348 | -359.69332  | -1479.13954 | -2259.74260 | 1 |
| 146 | C | 79.57390 | 77.82823 | 71.95651 | -240.01076  | 616.02425   | 431.85322   | 1 |
| 147 | H | 79.96766 | 77.21307 | 71.11484 | -1359.17131 | 782.54425   | 2227.99181  | 1 |
| 148 | H | 78.50351 | 80.01396 | 71.66786 | -820.36667  | 85.81767    | -2596.78715 | 1 |
| 149 | C | 80.70422 | 78.73401 | 72.59157 | -513.07015  | 236.18570   | -551.87280  | 1 |
| 150 | H | 80.29974 | 79.33752 | 73.43658 | 1816.11944  | -1183.11722 | -1650.94321 | 1 |
| 151 | H | 81.51349 | 78.10533 | 73.02868 | -1800.04429 | -1361.53473 | 1526.34643  | 1 |
| 152 | C | 81.26652 | 79.65575 | 71.48439 | 726.08972   | -253.19732  | -179.64713  | 1 |
| 153 | H | 81.77082 | 79.11493 | 70.63843 | 1224.27271  | -456.51798  | -2390.90304 | 1 |
| 154 | H | 80.54160 | 80.39751 | 71.08077 | 1206.40339  | -1150.93514 | -2154.90344 | 1 |
| 155 | N | 82.39197 | 80.54094 | 72.11005 | 329.70796   | -633.68968  | -155.67358  | 1 |
| 156 | H | 82.83120 | 81.23570 | 71.43962 | 1348.31305  | 1938.76845  | 1359.00643  | 1 |
| 157 | H | 82.12680 | 81.17309 | 72.92079 | 2096.92035  | 1446.54551  | -966.48890  | 1 |
| 158 | H | 83.25169 | 80.04255 | 72.48304 | -1197.07217 | -2303.53719 | 827.28733   | 1 |
| 159 | C | 77.14163 | 76.18115 | 71.34663 | -378.01186  | -556.17301  | -413.96481  | 1 |
| 160 | O | 76.42174 | 76.84008 | 70.62768 | -409.44433  | -307.55053  | -453.30833  | 1 |
| 161 | N | 77.75040 | 75.02719 | 71.11443 | -429.02477  | 524.70884   | 274.08502   | 1 |
| 162 | H | 78.27676 | 74.64319 | 71.89888 | 1706.34263  | -1425.96036 | 1574.38926  | 1 |
| 163 | C | 77.87596 | 74.48267 | 69.80886 | -45.25864   | -626.22952  | 478.93267   | 1 |
| 164 | H | 78.33908 | 73.48958 | 70.00695 | 1988.63164  | 570.90773   | 1772.87287  | 1 |
| 165 | C | 76.42735 | 74.41161 | 69.17912 | 551.77128   | -20.49526   | -564.54996  | 1 |
| 166 | H | 75.69159 | 74.06654 | 69.94012 | 1434.61535  | -1753.10253 | 1513.99471  | 1 |
| 167 | H | 76.08863 | 75.43064 | 68.87420 | -714.67738  | 1819.09770  | 1898.36494  | 1 |
| 168 | C | 76.46992 | 73.43245 | 67.95939 | 446.99263   | -555.77305  | 338.97221   | 1 |
| 169 | H | 77.10873 | 73.84207 | 67.14498 | 1953.68466  | 1892.25957  | -161.67766  | 1 |
| 170 | H | 76.92532 | 72.45908 | 68.24957 | -403.03785  | 2688.07032  | -188.43591  | 1 |
| 171 | C | 74.98014 | 73.22347 | 67.47040 | 567.86262   | 335.74681   | 434.04421   | 1 |
| 172 | H | 74.33479 | 72.87487 | 68.30931 | -1080.02275 | 1568.26081  | -1948.78900 | 1 |
| 173 | H | 74.53626 | 74.18700 | 67.12910 | -919.54108  | 2111.34692  | 1456.13463  | 1 |
| 174 | C | 74.98777 | 72.18312 | 66.32667 | 195.81897   | 173.33862   | -745.11536  | 1 |
| 175 | H | 75.51926 | 72.50748 | 65.41001 | 1405.67949  | -2301.21089 | -390.08113  | 1 |
| 176 | H | 75.32920 | 71.17145 | 66.62411 | -940.37328  | -1118.32446 | 2299.72133  | 1 |
| 177 | N | 73.50179 | 71.97901 | 65.87457 | 319.26422   | 656.36007   | -42.02424   | 1 |
| 178 | H | 73.35227 | 71.29206 | 65.08026 | 1961.03633  | 619.91968   | 1787.09422  | 1 |
| 179 | H | 72.82283 | 71.60769 | 66.60108 | 854.14343   | -2156.80752 | 1429.08711  | 1 |
| 180 | H | 72.98700 | 72.83342 | 65.51182 | 1237.02905  | -1378.50857 | -1998.28500 | 1 |
| 181 | C | 78.84812 | 75.46136 | 68.91098 | 532.53319   | -268.57236  | 517.55729   | 1 |
| 182 | O | 78.42026 | 76.10016 | 67.95050 | 266.16714   | -290.73804  | -558.88002  | 1 |
| 183 | N | 80.06126 | 75.40095 | 69.40783 | -226.25352  | 640.49678   | -270.32839  | 1 |
| 184 | H | 80.10556 | 74.80873 | 70.23620 | 2007.69063  | -1035.27229 | 1523.50231  | 1 |
| 185 | C | 81.24469 | 75.80510 | 68.74013 | -540.76542  | -573.33303  | 49.50000    | 1 |
| 186 | H | 82.05677 | 75.36362 | 69.35921 | -2374.20950 | -1036.76023 | 843.75774   | 1 |
| 187 | C | 81.21265 | 75.21324 | 67.25115 | -77.09082   | 666.87422   | -415.84136  | 1 |
| 188 | H | 80.26895 | 75.55534 | 66.74165 | -985.81834  | 617.19825   | 2463.91927  | 1 |
| 189 | O | 81.20852 | 73.77727 | 67.16472 | 293.29899   | -391.65602  | -477.80926  | 1 |
| 190 | H | 80.34367 | 73.61768 | 66.73586 | 2528.72714  | -681.76262  | -751.27122  | 1 |
| 191 | C | 82.44203 | 75.94130 | 66.59574 | 252.47363   | -605.14473  | 440.05134   | 1 |
| 192 | H | 82.54344 | 75.68057 | 65.51672 | -2052.65063 | 1456.49051  | -1043.51830 | 1 |
| 193 | H | 82.34983 | 77.05201 | 66.65808 | -2152.98800 | -1661.97574 | -161.70652  | 1 |
| 194 | H | 83.39781 | 75.65907 | 67.09554 | -473.12726  | -1584.27339 | 2165.61725  | 1 |

|     |   |          |          |          |             |             |             |   |
|-----|---|----------|----------|----------|-------------|-------------|-------------|---|
| 195 | C | 81.34416 | 77.43652 | 68.69921 | 360.36307   | 488.46713   | 505.10056   | 1 |
| 196 | O | 82.33643 | 77.96842 | 69.15313 | -200.08817  | -528.03552  | -385.82850  | 1 |
| 197 | N | 80.31400 | 77.98483 | 68.08081 | -597.54095  | -226.44775  | 355.20479   | 1 |
| 198 | H | 79.50811 | 77.39593 | 67.74165 | 2179.23655  | -1300.70981 | -991.33835  | 1 |
| 199 | C | 80.34050 | 79.39014 | 67.90800 | -687.68921  | 297.39807   | -249.45179  | 1 |
| 200 | H | 81.40417 | 79.70190 | 68.02817 | -349.16256  | -2467.37713 | -1101.72831 | 1 |
| 201 | C | 79.68332 | 79.71578 | 66.48075 | 672.47345   | 361.54328   | -201.62880  | 1 |
| 202 | H | 78.72992 | 79.15365 | 66.35108 | 1541.41502  | 582.18425   | 2169.97026  | 1 |
| 203 | H | 79.43617 | 80.80028 | 66.41479 | -2534.67717 | 60.25153    | 997.72295   | 1 |
| 204 | C | 80.71384 | 79.32330 | 65.41541 | 574.26774   | -389.43119  | -377.02542  | 1 |
| 205 | C | 81.74971 | 80.25341 | 65.09948 | 688.82679   | -287.33580  | -257.96133  | 1 |
| 206 | H | 81.78840 | 81.24265 | 65.59057 | 331.14182   | 1470.38163  | 2269.80013  | 1 |
| 207 | C | 80.67730 | 78.03979 | 64.79069 | -383.52382  | -675.04808  | 144.24917   | 1 |
| 208 | H | 79.88613 | 77.31192 | 65.04578 | 4.09847     | 1517.59662  | 2262.86397  | 1 |
| 209 | C | 82.71534 | 79.88441 | 64.16480 | -134.76730  | 428.45285   | -649.50303  | 1 |
| 210 | H | 83.51629 | 80.60398 | 63.92044 | -903.23433  | 1600.49020  | 2011.53387  | 1 |
| 211 | C | 81.66795 | 77.71805 | 63.85959 | -335.53281  | -615.00040  | -364.39058  | 1 |
| 212 | H | 81.63199 | 76.72394 | 63.38079 | 1596.45398  | -1369.33862 | 1732.02659  | 1 |
| 213 | C | 82.71702 | 78.61818 | 63.51080 | 585.48547   | -340.24194  | -406.23938  | 1 |
| 214 | O | 83.72978 | 78.30213 | 62.56829 | -419.15649  | -173.04408  | -511.94141  | 1 |
| 215 | H | 83.43950 | 77.39623 | 62.30894 | -1071.84350 | 1559.71507  | -1960.13012 | 1 |
| 216 | C | 79.35244 | 80.09377 | 69.00926 | 291.41878   | -183.13091  | 710.72246   | 1 |
| 217 | O | 79.56941 | 81.22431 | 69.38360 | 379.87695   | 523.47396   | -222.23622  | 1 |
| 218 | N | 78.37435 | 79.26611 | 69.35772 | 564.30591   | 373.09380   | 277.24371   | 1 |
| 219 | H | 78.37909 | 78.33789 | 68.93341 | -120.59931  | -2436.07824 | -1214.35098 | 1 |
| 220 | C | 77.16003 | 79.77629 | 69.90498 | 404.07514   | -299.37480  | 608.84009   | 1 |
| 221 | H | 76.56024 | 78.83686 | 70.02201 | -1071.07882 | -841.69025  | 2359.66467  | 1 |
| 222 | C | 77.54459 | 80.44839 | 71.29101 | -683.12807  | 68.71770    | -390.13096  | 1 |
| 223 | H | 78.76365 | 78.45571 | 71.51077 | 2068.88918  | 1596.58590  | 770.89603   | 1 |
| 224 | H | 77.74824 | 81.54289 | 71.17131 | 1379.86429  | 2342.49779  | -179.85638  | 1 |
| 225 | C | 76.40163 | 80.19253 | 72.31903 | -176.39967  | 537.49466   | 550.97268   | 1 |
| 226 | H | 75.58947 | 80.94771 | 72.23367 | -396.28051  | 1942.22168  | 1869.33314  | 1 |
| 227 | H | 75.91662 | 79.20722 | 72.13994 | -94.44700   | 586.00678   | -2659.20016 | 1 |
| 228 | C | 77.08737 | 80.23753 | 73.76186 | -291.69381  | -718.18079  | -150.72929  | 1 |
| 229 | H | 77.84555 | 79.43692 | 73.95985 | -2303.38776 | 1089.76242  | 964.62032   | 1 |
| 230 | H | 77.53351 | 81.21846 | 74.06560 | 884.16729   | 2568.80533  | -207.74283  | 1 |
| 231 | N | 75.97630 | 79.98189 | 74.57973 | -594.49522  | -252.81478  | 342.29276   | 1 |
| 232 | H | 75.11666 | 79.73367 | 74.11446 | -1735.17426 | 2084.05705  | -263.71605  | 1 |
| 233 | C | 75.98728 | 80.02570 | 75.85065 | 595.23177   | -271.52487  | 442.22352   | 1 |
| 234 | N | 77.18873 | 80.36823 | 76.48135 | 585.53813   | -424.79750  | -105.81303  | 1 |
| 235 | H | 78.10663 | 80.52638 | 76.06803 | 959.88797   | 1327.56823  | -2177.11905 | 1 |
| 236 | H | 77.33433 | 80.38739 | 77.49095 | 1578.48647  | 16.27378    | -2220.76233 | 1 |
| 237 | N | 74.72183 | 79.71754 | 76.36750 | -452.17763  | -390.33541  | -421.51853  | 1 |
| 238 | H | 73.85560 | 79.45243 | 75.90108 | 470.26107   | 1974.25629  | -1817.92087 | 1 |
| 239 | H | 74.52080 | 79.67859 | 77.36734 | 1856.67307  | -1573.97321 | -1224.35416 | 1 |
| 240 | C | 76.51377 | 80.80924 | 68.82491 | -531.47271  | -581.45780  | -55.06206   | 1 |
| 241 | O | 76.84467 | 80.82771 | 67.65255 | -243.00837  | 192.73507   | 609.52485   | 1 |
| 242 | N | 75.48392 | 81.46956 | 69.37117 | 343.49288   | -644.25607  | 38.09164    | 1 |
| 243 | H | 75.44927 | 81.24043 | 70.36284 | -1691.16043 | -1535.97525 | -1484.73099 | 1 |
| 244 | C | 75.02242 | 82.77321 | 68.87553 | 542.66492   | 350.14337   | 454.42563   | 1 |
| 245 | H | 74.29348 | 83.09371 | 69.65745 | 1209.57979  | -2396.95920 | 463.86744   | 1 |
| 246 | C | 76.19669 | 83.72696 | 68.77306 | -737.14309  | 145.93010   | 242.71942   | 1 |
| 247 | H | 76.89520 | 83.31398 | 68.00973 | -1050.18303 | 159.36419   | -2509.06125 | 1 |
| 248 | C | 75.76567 | 85.11542 | 68.33644 | -706.77696  | -252.88343  | -245.16230  | 1 |
| 249 | H | 76.64672 | 85.79441 | 68.17167 | -1624.64039 | -1665.49085 | 1417.86935  | 1 |
| 250 | H | 75.17337 | 85.08217 | 67.36943 | 2566.10521  | 598.51109   | 693.22305   | 1 |
| 251 | H | 75.11039 | 85.60537 | 69.10792 | -1972.69758 | 107.10018   | -1876.34312 | 1 |
| 252 | C | 76.96117 | 83.84490 | 70.08019 | 412.85148   | 672.58832   | -27.69222   | 1 |
| 253 | H | 77.83786 | 84.54292 | 69.98830 | 1447.02277  | 1762.76533  | -1490.78944 | 1 |
| 254 | H | 76.30839 | 84.23708 | 70.90774 | 1320.77379  | -145.20455  | 2378.68491  | 1 |
| 255 | H | 77.36297 | 82.84305 | 70.41452 | -1512.10848 | 1470.52031  | 1724.75147  | 1 |
| 256 | C | 74.29857 | 82.55026 | 67.41043 | -607.11113  | 499.56689   | 73.73769    | 1 |

|     |   |          |          |          |             |             |             |   |
|-----|---|----------|----------|----------|-------------|-------------|-------------|---|
| 257 | O | 74.10518 | 83.50150 | 66.67486 | 357.97126   | 460.81534   | 356.68785   | 1 |
| 258 | N | 73.92231 | 81.29805 | 67.22877 | 536.55407   | -368.62270  | 332.76306   | 1 |
| 259 | H | 74.17778 | 80.64215 | 67.96397 | 524.38866   | 2297.69985  | 1367.20941  | 1 |
| 260 | C | 73.33011 | 80.91390 | 66.00170 | 46.50277    | -774.29190  | -147.97904  | 1 |
| 261 | H | 73.00478 | 81.86919 | 65.52954 | 1676.51875  | 1883.29066  | 1032.55549  | 1 |
| 262 | C | 74.40270 | 80.10272 | 65.10374 | -559.41456  | -34.19198   | -556.30433  | 1 |
| 263 | H | 74.64420 | 79.13918 | 65.61264 | -64.66664   | 395.18769   | 2695.05373  | 1 |
| 264 | H | 73.94684 | 79.82391 | 64.12412 | -2703.44278 | -60.40056   | 333.79418   | 1 |
| 265 | C | 75.66037 | 80.90102 | 64.89974 | -519.76435  | 377.31045   | 459.42366   | 1 |
| 266 | H | 76.10350 | 81.12088 | 65.92255 | -1746.74323 | 1667.50644  | -1261.73691 | 1 |
| 267 | C | 76.67938 | 80.09272 | 64.10645 | 570.95554   | 16.46261    | -545.27700  | 1 |
| 268 | H | 77.64161 | 80.65262 | 63.97766 | 2391.58273  | 28.05277    | -1305.07271 | 1 |
| 269 | H | 76.92588 | 79.12591 | 64.61661 | 175.75588   | 917.63458   | 2559.43867  | 1 |
| 270 | H | 76.30119 | 79.84181 | 63.08210 | -1063.97851 | -2155.34650 | 1283.00462  | 1 |
| 271 | C | 75.38253 | 82.21663 | 64.19021 | 193.76014   | 2.62946     | -765.53141  | 1 |
| 272 | H | 76.33080 | 82.74671 | 63.91417 | 507.39394   | -846.55087  | 2539.60089  | 1 |
| 273 | H | 74.79890 | 82.06563 | 63.24520 | 1337.57841  | 1818.19054  | 1526.01994  | 1 |
| 274 | H | 74.78928 | 82.91751 | 64.85317 | 1100.88635  | -1172.91350 | -2199.08909 | 1 |
| 275 | C | 72.15230 | 79.86710 | 66.34205 | -549.21115  | 475.64486   | -309.38218  | 1 |
| 276 | O | 72.06381 | 79.27848 | 67.38750 | 556.06106   | -390.37755  | -78.24250   | 1 |
| 277 | O | 71.27354 | 79.57012 | 65.27177 | -572.27940  | -310.19032  | -209.75862  | 1 |
| 278 | H | 71.62382 | 80.21887 | 64.60119 | -1380.08193 | 2212.14486  | 790.85944   | 1 |

Listing 65: C00065.xmolout

|    |   |          |          |          |             |             |             |        |          |   |
|----|---|----------|----------|----------|-------------|-------------|-------------|--------|----------|---|
| 1  |   | 276      |          |          |             |             |             |        |          |   |
| 2  |   | 150.0000 | 150.0000 | 150.0000 | 0.0000      | 0.0000      | 0.0000***** | 2.7750 | 11100    |   |
|    |   | 0.2500   | 300.00   | 0.00     | 0.00        | 0.00        | -1293.6047  | 0.0000 | 300.0000 |   |
| 3  | H | 77.68201 | 85.57534 | 79.91449 | -2043.14101 | -1757.64893 | 399.89339   |        |          | 1 |
| 4  | N | 78.18837 | 86.21783 | 80.52109 | 426.75047   | 490.45733   | -334.42467  |        |          | 1 |
| 5  | H | 78.65034 | 85.58419 | 81.17055 | 442.25559   | -1110.30854 | -2448.52907 |        |          | 1 |
| 6  | C | 79.06743 | 87.11451 | 79.87739 | 415.32972   | -666.39213  | 83.73172    |        |          | 1 |
| 7  | H | 78.61109 | 87.32671 | 78.88829 | 879.32219   | 2491.00447  | 667.35213   |        |          | 1 |
| 8  | C | 79.20590 | 88.40956 | 80.82071 | 31.35357    | 477.41777   | 628.23362   |        |          | 1 |
| 9  | H | 79.60463 | 88.09689 | 81.81617 | 1168.38489  | 2240.25337  | -1019.71136 |        |          | 1 |
| 10 | H | 79.94675 | 89.13219 | 80.40016 | -360.43770  | 2534.90498  | 931.67112   |        |          | 1 |
| 11 | C | 77.84304 | 89.04307 | 80.96662 | 463.18208   | 512.70242   | -382.34388  |        |          | 1 |
| 12 | H | 77.11046 | 88.23434 | 81.18950 | 1725.29117  | 1863.52247  | -987.07854  |        |          | 1 |
| 13 | C | 77.82974 | 90.03299 | 82.12342 | 710.42801   | -144.27427  | -313.15367  |        |          | 1 |
| 14 | H | 76.81887 | 90.49870 | 82.25719 | 364.20195   | -1033.13725 | 2494.72524  |        |          | 1 |
| 15 | H | 78.09925 | 89.54016 | 83.09351 | 2567.61904  | 335.80679   | 847.48802   |        |          | 1 |
| 16 | H | 78.56002 | 90.86741 | 81.96048 | -2587.99029 | 680.92867   | -512.16411  |        |          | 1 |
| 17 | C | 77.41851 | 89.74546 | 79.68490 | 268.17616   | 741.64379   | -40.42634   |        |          | 1 |
| 18 | H | 76.41156 | 90.22632 | 79.79122 | 1283.54314  | -1945.37420 | -1411.27812 |        |          | 1 |
| 19 | H | 78.14231 | 90.55163 | 79.39768 | -1258.57796 | 1317.15249  | -2026.02085 |        |          | 1 |
| 20 | H | 77.35556 | 89.03354 | 78.82192 | -2502.84526 | 909.80597   | 575.92391   |        |          | 1 |
| 21 | C | 80.52176 | 86.35302 | 79.79438 | 619.36578   | -458.64843  | -172.09273  |        |          | 1 |
| 22 | O | 81.17408 | 86.08732 | 80.77790 | -81.40433   | 433.87611   | 522.34594   |        |          | 1 |
| 23 | N | 80.78194 | 86.10612 | 78.51304 | 175.23996   | -622.20190  | 341.55523   |        |          | 1 |
| 24 | H | 80.13981 | 86.47716 | 77.81298 | -876.57256  | -303.22879  | -2561.90213 |        |          | 1 |
| 25 | C | 81.93392 | 85.38037 | 78.10396 | -571.88214  | -534.10783  | -106.15033  |        |          | 1 |
| 26 | H | 81.84768 | 85.36415 | 76.99422 | -2713.20841 | -16.25800   | -248.80809  |        |          | 1 |
| 27 | C | 83.18004 | 86.27414 | 78.58477 | 166.60354   | 288.16399   | -716.09568  |        |          | 1 |
| 28 | H | 83.18639 | 86.24471 | 79.71055 | -2097.85574 | 1636.78449  | -586.18044  |        |          | 1 |
| 29 | O | 83.10444 | 87.66268 | 78.21002 | -317.80580  | -363.38227  | 484.43082   |        |          | 1 |
| 30 | H | 82.98190 | 88.07862 | 79.08650 | 1863.74748  | -1451.84923 | 1357.29467  |        |          | 1 |
| 31 | C | 84.45583 | 85.54436 | 78.03034 | 503.80731   | 517.99032   | 318.51606   |        |          | 1 |
| 32 | H | 85.38802 | 86.07046 | 78.34410 | 640.61020   | -2157.10410 | -1536.29104 |        |          | 1 |
| 33 | H | 84.53902 | 84.47884 | 78.38961 | 1687.88455  | 465.60692   | 2087.56452  |        |          | 1 |
| 34 | H | 84.45551 | 85.51796 | 76.91545 | -1293.07895 | -1899.88581 | -1463.57452 |        |          | 1 |
| 35 | C | 81.93123 | 83.89141 | 78.74506 | -153.07550  | -733.68902  | 248.70981   |        |          | 1 |
| 36 | O | 82.99269 | 83.31042 | 78.77366 | 186.15459   | -480.78787  | -449.34387  |        |          | 1 |

|    |   |          |          |          |             |             |             |   |
|----|---|----------|----------|----------|-------------|-------------|-------------|---|
| 37 | N | 80.72706 | 83.39898 | 79.06749 | -487.53139  | 543.18517   | 42.03850    | 1 |
| 38 | C | 80.58736 | 82.40227 | 80.08542 | -699.35871  | 69.34393    | 360.10701   | 1 |
| 39 | H | 81.31831 | 82.64841 | 80.88877 | 2.81126     | -221.99807  | -2715.58072 | 1 |
| 40 | C | 79.05843 | 82.53815 | 80.47932 | -507.46439  | -592.59194  | 122.07761   | 1 |
| 41 | H | 78.65445 | 81.61825 | 80.95943 | -1975.08116 | 525.87560   | -1801.71556 | 1 |
| 42 | H | 78.89632 | 83.37136 | 81.19861 | 1588.27743  | -1913.22100 | 1113.83566  | 1 |
| 43 | C | 78.40382 | 82.84768 | 79.09557 | -613.62442  | -457.55993  | -194.14490  | 1 |
| 44 | H | 78.30260 | 81.92002 | 78.48830 | 1707.54637  | -721.27992  | 1996.92523  | 1 |
| 45 | H | 77.38490 | 83.28914 | 79.17182 | 758.23357   | 2100.81767  | 1560.55011  | 1 |
| 46 | C | 79.47241 | 83.84323 | 78.47192 | -352.41524  | 704.96076   | 49.21465    | 1 |
| 47 | H | 79.57293 | 83.82086 | 77.36118 | 1714.76886  | -2070.42778 | 443.35792   | 1 |
| 48 | H | 79.37019 | 84.90316 | 78.81132 | 1224.15040  | 1801.50881  | 1636.97633  | 1 |
| 49 | C | 80.85861 | 80.91119 | 79.45245 | 566.85117   | 537.05831   | 117.62814   | 1 |
| 50 | O | 81.12174 | 79.98418 | 80.18258 | -550.26779  | -406.08867  | 4.21666     | 1 |
| 51 | N | 80.63670 | 80.90629 | 78.14058 | 566.34832   | -425.77725  | 180.18749   | 1 |
| 52 | H | 80.43316 | 81.81514 | 77.73043 | 644.44502   | 2646.80550  | -52.73430   | 1 |
| 53 | C | 80.85348 | 79.71950 | 77.40392 | 612.34801   | -281.48662  | 411.56221   | 1 |
| 54 | H | 81.26837 | 78.99645 | 78.14497 | 1667.23498  | -1490.75142 | 1556.16753  | 1 |
| 55 | C | 79.45959 | 79.25782 | 76.75807 | -714.45746  | -175.43074  | 286.98927   | 1 |
| 56 | H | 79.12417 | 80.03369 | 76.01617 | -787.09484  | 1763.03619  | -1922.46060 | 1 |
| 57 | O | 78.36519 | 79.08624 | 77.67155 | -429.46514  | 516.51932   | -128.40526  | 1 |
| 58 | H | 77.71200 | 79.72016 | 77.31200 | 1981.82785  | 436.16847   | -1818.18182 | 1 |
| 59 | C | 79.91921 | 77.96638 | 75.98782 | 630.79189   | -468.94448  | 76.03230    | 1 |
| 60 | H | 79.08674 | 77.53232 | 75.38387 | -1775.71861 | 2062.30353  | 131.89849   | 1 |
| 61 | H | 80.77013 | 78.17325 | 75.29334 | -1855.14608 | 88.94118    | 1993.53760  | 1 |
| 62 | H | 80.25753 | 77.17470 | 76.69589 | -1504.82350 | -780.94249  | -2132.90992 | 1 |
| 63 | C | 81.84806 | 80.08588 | 76.14065 | 288.57638   | 618.62814   | -397.00270  | 1 |
| 64 | O | 82.69763 | 79.26844 | 75.85209 | 321.70495   | -185.26452  | 574.37218   | 1 |
| 65 | N | 81.42302 | 81.15082 | 75.47621 | -447.05792  | -446.53431  | 367.76425   | 1 |
| 66 | H | 80.61966 | 81.59376 | 75.92217 | 350.31316   | 1975.63644  | -1843.31522 | 1 |
| 67 | C | 82.20399 | 81.95156 | 74.59608 | -511.23061  | 374.03917   | -471.51480  | 1 |
| 68 | H | 81.42995 | 82.64023 | 74.18814 | 2234.79579  | -898.70890  | -1273.45190 | 1 |
| 69 | C | 83.24603 | 82.82266 | 75.45802 | 529.53781   | -159.34528  | 563.72604   | 1 |
| 70 | H | 83.72323 | 83.53164 | 74.72690 | 654.59388   | 2347.94251  | 1217.51488  | 1 |
| 71 | H | 82.65171 | 83.44430 | 76.17974 | -1526.55661 | 2103.42026  | 817.87394   | 1 |
| 72 | O | 84.29597 | 82.11039 | 76.15264 | -554.84278  | 14.12789    | 399.58769   | 1 |
| 73 | H | 83.94490 | 82.15838 | 77.06980 | 1297.06236  | 2061.84854  | 1220.68812  | 1 |
| 74 | C | 82.93153 | 81.12029 | 73.42244 | -662.15484  | -412.13544  | 123.62687   | 1 |
| 75 | O | 83.74718 | 81.65421 | 72.71223 | -540.01537  | -317.05804  | 274.91456   | 1 |
| 76 | N | 82.38044 | 79.89005 | 73.25838 | -202.76299  | -690.00100  | -131.49145  | 1 |
| 77 | H | 81.77357 | 79.65189 | 74.05658 | -702.62132  | -2617.37191 | 281.70413   | 1 |
| 78 | C | 83.19339 | 78.79681 | 72.69232 | -491.73914  | 576.34187   | 222.73509   | 1 |
| 79 | H | 83.56478 | 79.23491 | 71.73660 | 1977.17978  | -1823.58850 | -434.68928  | 1 |
| 80 | C | 84.31996 | 78.46126 | 73.64310 | -649.50797  | -328.66843  | 306.11224   | 1 |
| 81 | H | 83.86518 | 78.02828 | 74.57038 | 2075.07803  | 1452.16490  | -1004.45904 | 1 |
| 82 | C | 85.26380 | 77.42964 | 73.05187 | -615.18735  | -489.99689  | -70.96352   | 1 |
| 83 | H | 86.06678 | 77.13237 | 73.78065 | -1226.32661 | -1724.38906 | -1716.47170 | 1 |
| 84 | H | 84.70575 | 76.48982 | 72.75827 | 2381.64273  | -969.84735  | 900.46860   | 1 |
| 85 | H | 85.77741 | 77.81648 | 72.12970 | 2122.74991  | 1702.23946  | -141.36228  | 1 |
| 86 | C | 85.10731 | 79.68589 | 74.07448 | -501.86074  | -479.61276  | -376.42482  | 1 |
| 87 | H | 85.98567 | 79.41987 | 74.72366 | 993.79261   | -2246.95401 | -1177.81305 | 1 |
| 88 | H | 85.49784 | 80.26259 | 73.18861 | 42.71279    | -626.15391  | -2651.37258 | 1 |
| 89 | H | 84.45234 | 80.39662 | 74.66551 | -2026.39012 | -1590.33709 | -887.82922  | 1 |
| 90 | C | 82.18701 | 77.50276 | 72.48940 | -672.89153  | 382.57394   | -156.34072  | 1 |
| 91 | O | 82.63072 | 76.36722 | 72.50185 | 410.04627   | 221.86223   | 500.35950   | 1 |
| 92 | N | 80.93923 | 77.87592 | 72.28965 | -378.11782  | -443.79414  | -441.10984  | 1 |
| 93 | H | 80.81086 | 78.88355 | 72.23629 | 2404.15973  | -568.14894  | 1149.30085  | 1 |
| 94 | C | 79.89109 | 76.92567 | 72.14359 | -544.54484  | 466.16019   | 331.29119   | 1 |
| 95 | H | 80.23917 | 76.02806 | 72.69908 | -1409.80988 | -170.17955  | 2325.32679  | 1 |
| 96 | C | 78.59443 | 77.63200 | 72.71292 | -184.48284  | 116.78282   | -758.89137  | 1 |
| 97 | H | 78.75706 | 77.93747 | 73.77176 | 1893.78641  | 1861.14652  | 611.04528   | 1 |
| 98 | H | 78.38935 | 78.57355 | 72.15431 | -2170.79665 | -974.19311  | 1327.50117  | 1 |

|     |   |          |          |          |             |             |             |   |
|-----|---|----------|----------|----------|-------------|-------------|-------------|---|
| 99  | C | 77.38628 | 76.64983 | 72.59058 | 389.51668   | 672.81878   | -138.49152  | 1 |
| 100 | H | 77.21309 | 76.38318 | 71.52169 | 510.64577   | 1933.03327  | 1851.02484  | 1 |
| 101 | H | 77.62412 | 75.67483 | 73.07167 | -2302.30869 | -1105.72939 | -948.89774  | 1 |
| 102 | C | 76.06567 | 77.23755 | 73.20747 | -559.93427  | -126.34590  | 542.30857   | 1 |
| 103 | O | 75.02451 | 76.64074 | 73.06825 | -670.36003  | -111.83166  | 76.36448    | 1 |
| 104 | N | 76.23539 | 78.39484 | 73.87710 | -216.06729  | -537.07037  | 446.51379   | 1 |
| 105 | H | 77.09552 | 78.92468 | 74.06045 | -1251.96487 | 1074.12894  | -2168.52500 | 1 |
| 106 | H | 75.48840 | 78.87773 | 74.38889 | -2451.83023 | -720.73851  | 944.84612   | 1 |
| 107 | C | 79.70937 | 76.67429 | 70.53222 | 546.24052   | -563.88337  | -85.11809   | 1 |
| 108 | O | 79.24032 | 77.54367 | 69.84732 | 71.70702    | -307.40463  | 606.69673   | 1 |
| 109 | N | 80.11440 | 75.44231 | 70.18913 | 479.90863   | -504.50129  | 222.86849   | 1 |
| 110 | C | 80.30526 | 75.09049 | 68.81432 | 75.51268    | -600.91904  | 506.73700   | 1 |
| 111 | H | 80.65754 | 76.01150 | 68.29539 | -2033.61562 | 1795.30103  | 254.89480   | 1 |
| 112 | C | 81.36935 | 73.91411 | 68.90630 | 523.79067   | 517.99274   | 284.45581   | 1 |
| 113 | H | 81.33060 | 73.22957 | 68.02940 | 1599.61665  | -1127.00911 | 1895.98173  | 1 |
| 114 | H | 82.40831 | 74.30970 | 68.95335 | -1881.83093 | 1275.82488  | -1501.55016 | 1 |
| 115 | C | 80.97358 | 73.22080 | 70.24711 | -600.05639  | -404.05026  | 316.64485   | 1 |
| 116 | H | 80.08188 | 72.56804 | 70.11179 | -2597.05260 | 496.36221   | 657.73249   | 1 |
| 117 | H | 81.77679 | 72.57839 | 70.67369 | -1666.24518 | 1294.38985  | -1723.90591 | 1 |
| 118 | C | 80.63308 | 74.48057 | 71.15201 | 493.57570   | -129.95376  | -602.56394  | 1 |
| 119 | H | 79.84964 | 74.30298 | 71.92674 | -1469.08415 | -637.84797  | 2204.22581  | 1 |
| 120 | H | 81.52658 | 74.99436 | 71.62731 | -1038.97840 | 1068.88701  | -2280.71789 | 1 |
| 121 | C | 78.91641 | 74.53250 | 68.15614 | 188.88100   | 241.05089   | -727.87821  | 1 |
| 122 | O | 78.84314 | 74.44566 | 66.95632 | 531.88613   | -49.19943   | 427.07960   | 1 |
| 123 | N | 78.05703 | 74.11369 | 69.07337 | 708.14833   | 26.93417    | -179.73509  | 1 |
| 124 | H | 78.19889 | 74.24214 | 70.09333 | -2232.69501 | -1179.09831 | 1023.94816  | 1 |
| 125 | C | 76.72740 | 73.77302 | 68.67476 | -738.32412  | 259.92548   | 104.42456   | 1 |
| 126 | H | 76.46596 | 74.36585 | 67.77007 | 2028.89123  | 1260.02983  | 1311.33324  | 1 |
| 127 | C | 76.70314 | 72.20388 | 68.40460 | -258.65678  | -345.52513  | 661.28459   | 1 |
| 128 | H | 77.17164 | 71.66303 | 69.25480 | -1826.06090 | -1801.46097 | -918.64554  | 1 |
| 129 | C | 75.22677 | 71.73315 | 68.18538 | -541.23400  | 531.92970   | -218.41428  | 1 |
| 130 | H | 75.17838 | 70.65083 | 67.91840 | 1311.73218  | -2219.18200 | 882.19023   | 1 |
| 131 | H | 74.60057 | 71.87570 | 69.12027 | -1048.71298 | 1223.58118  | -2196.97971 | 1 |
| 132 | H | 74.73370 | 72.29931 | 67.36003 | 419.06414   | 1903.92898  | 1903.44670  | 1 |
| 133 | C | 77.46378 | 71.89120 | 67.07092 | -423.86431  | 152.66566   | -648.55262  | 1 |
| 134 | H | 77.43085 | 70.80513 | 66.81888 | 105.68386   | -2342.50080 | 1387.51238  | 1 |
| 135 | H | 77.02506 | 72.44853 | 66.20994 | -1695.63603 | -1484.73621 | -1531.02793 | 1 |
| 136 | H | 78.53868 | 72.18793 | 67.13749 | -1853.57121 | -487.39031  | 1936.59343  | 1 |
| 137 | C | 75.94799 | 74.14918 | 70.05609 | 539.71428   | -510.58232  | 267.58633   | 1 |
| 138 | O | 76.61462 | 74.22377 | 71.07969 | -15.93758   | -278.34085  | -624.49402  | 1 |
| 139 | N | 74.65696 | 74.35377 | 69.86357 | -676.81886  | 12.05292    | 276.17960   | 1 |
| 140 | H | 74.29606 | 74.22334 | 68.91828 | -1694.44250 | -373.84189  | -2100.66098 | 1 |
| 141 | C | 73.77145 | 74.45827 | 70.97286 | 412.33078   | -664.70360  | 108.35451   | 1 |
| 142 | H | 74.48732 | 74.61971 | 71.81653 | 1765.77476  | 1294.44366  | 1621.76594  | 1 |
| 143 | C | 72.81425 | 75.68749 | 70.68161 | -179.66635  | -721.95667  | -264.73915  | 1 |
| 144 | H | 73.36100 | 76.47021 | 70.10992 | -607.34922  | 2587.87032  | -598.10018  | 1 |
| 145 | H | 71.97647 | 75.36916 | 70.02179 | -359.69332  | -1479.13954 | -2259.74260 | 1 |
| 146 | C | 72.26660 | 76.28911 | 72.01809 | -240.01076  | 616.02425   | 431.85322   | 1 |
| 147 | H | 71.88285 | 75.49782 | 72.70246 | -1359.17131 | 782.54425   | 2227.99181  | 1 |
| 148 | H | 73.08546 | 76.80551 | 72.59245 | -820.36667  | 85.81767    | -2596.78715 | 1 |
| 149 | C | 71.10702 | 77.28670 | 71.61655 | -513.07015  | 236.18570   | -551.87280  | 1 |
| 150 | H | 71.52309 | 78.23955 | 71.21553 | 1816.11944  | -1183.11722 | -1650.94321 | 1 |
| 151 | H | 70.48645 | 76.85940 | 70.79562 | -1800.04429 | -1361.53473 | 1526.34643  | 1 |
| 152 | C | 70.22650 | 77.53644 | 72.86267 | 726.08972   | -253.19732  | -179.64713  | 1 |
| 153 | H | 69.69464 | 76.63824 | 73.23636 | 1224.27271  | -456.51798  | -2390.90304 | 1 |
| 154 | H | 70.73795 | 78.05123 | 73.70053 | 1206.40339  | -1150.93514 | -2154.90344 | 1 |
| 155 | N | 69.08133 | 78.51077 | 72.42333 | 329.70796   | -633.68968  | -155.67358  | 1 |
| 156 | H | 68.36235 | 78.74549 | 73.16677 | 1348.31305  | 1938.76845  | 1359.00643  | 1 |
| 157 | H | 69.36677 | 79.47828 | 72.09261 | 2096.92035  | 1446.54551  | -966.48890  | 1 |
| 158 | H | 68.45621 | 78.18321 | 71.63042 | -1197.07217 | -2303.53719 | 827.28733   | 1 |
| 159 | C | 72.95154 | 73.04563 | 71.05753 | -378.01186  | -556.17301  | -413.96481  | 1 |
| 160 | O | 73.47470 | 72.00067 | 70.71829 | -409.44433  | -307.55053  | -453.30833  | 1 |

|     |   |          |          |          |             |             |             |   |
|-----|---|----------|----------|----------|-------------|-------------|-------------|---|
| 161 | N | 71.75592 | 73.21220 | 71.59063 | -429.02477  | 524.70884   | 274.08502   | 1 |
| 162 | H | 71.41943 | 74.14747 | 71.79740 | 1706.34263  | -1425.96036 | 1574.38926  | 1 |
| 163 | C | 70.84714 | 72.09589 | 71.59859 | -45.25864   | -626.22952  | 478.93267   | 1 |
| 164 | H | 70.83818 | 71.75006 | 70.54159 | 1988.63164  | 570.90773   | 1772.87287  | 1 |
| 165 | C | 71.47621 | 71.01484 | 72.55624 | 551.77128   | -20.49526   | -564.54996  | 1 |
| 166 | H | 72.45469 | 70.65802 | 72.15504 | 1434.61535  | -1753.10253 | 1513.99471  | 1 |
| 167 | H | 71.71233 | 71.45156 | 73.55168 | -714.67738  | 1819.09770  | 1898.36494  | 1 |
| 168 | C | 70.45208 | 69.82830 | 72.68603 | 446.99263   | -555.77305  | 338.97221   | 1 |
| 169 | H | 69.43583 | 70.19658 | 72.95686 | 1953.68466  | 1892.25957  | -161.67766  | 1 |
| 170 | H | 70.33988 | 69.29425 | 71.71492 | -403.03785  | 2688.07032  | -188.43591  | 1 |
| 171 | C | 71.02077 | 68.88476 | 73.79366 | 567.86262   | 335.74681   | 434.04421   | 1 |
| 172 | H | 72.08936 | 68.64681 | 73.59953 | -1080.02275 | 1568.26081  | -1948.78900 | 1 |
| 173 | H | 71.00153 | 69.37324 | 74.79191 | -919.54108  | 2111.34692  | 1456.13463  | 1 |
| 174 | C | 70.13965 | 67.54866 | 73.78452 | 195.81897   | 173.33862   | -745.11536  | 1 |
| 175 | H | 69.06870 | 67.69660 | 74.07538 | 1405.67949  | -2301.21089 | -390.08113  | 1 |
| 176 | H | 70.20201 | 67.00173 | 72.81091 | -940.37328  | -1118.32446 | 2299.72133  | 1 |
| 177 | N | 70.71149 | 66.68206 | 74.76888 | 319.26422   | 656.36007   | -42.02424   | 1 |
| 178 | H | 69.36968 | 64.43813 | 75.97378 | 1961.03633  | 619.91968   | 1787.09422  | 2 |
| 179 | H | 71.71655 | 66.71511 | 74.89840 | 854.14343   | -2156.80752 | 1429.08711  | 1 |
| 180 | H | 70.36109 | 66.79144 | 75.71517 | 1237.02905  | -1378.50857 | -1998.28500 | 1 |
| 181 | C | 69.38636 | 72.60996 | 72.12492 | 532.53319   | -268.57236  | 517.55729   | 1 |
| 182 | O | 68.48443 | 72.73030 | 71.29127 | 266.16714   | -290.73804  | -558.88002  | 1 |
| 183 | N | 69.35743 | 72.78956 | 73.41653 | -226.25352  | 640.49678   | -270.32839  | 1 |
| 184 | H | 70.26802 | 72.70196 | 73.86156 | 2007.69063  | -1035.27229 | 1523.50231  | 1 |
| 185 | C | 68.18979 | 73.12644 | 74.17599 | -540.76542  | -573.33303  | 49.50000    | 1 |
| 186 | H | 68.23381 | 74.23298 | 74.27097 | -2374.20950 | -1036.76023 | 843.75774   | 1 |
| 187 | C | 66.87061 | 72.67747 | 73.39650 | -77.09082   | 666.87422   | -415.84136  | 1 |
| 188 | H | 67.11955 | 71.73858 | 72.82498 | -985.81834  | 617.19825   | 2463.91927  | 1 |
| 189 | O | 66.42371 | 73.62563 | 72.42839 | 293.29899   | -391.65602  | -477.80926  | 1 |
| 190 | H | 67.03220 | 73.35093 | 71.63564 | 2528.72714  | -681.76262  | -751.27122  | 1 |
| 191 | C | 65.86192 | 72.32027 | 74.54866 | 252.47363   | -605.14473  | 440.05134   | 1 |
| 192 | H | 64.87100 | 72.00550 | 74.14493 | -2052.65063 | 1456.49051  | -1043.51830 | 1 |
| 193 | H | 66.24202 | 71.48803 | 75.19049 | -2152.98800 | -1661.97574 | -161.70652  | 1 |
| 194 | H | 65.68988 | 73.19555 | 75.22130 | -473.12726  | -1584.27339 | 2165.61725  | 1 |
| 195 | C | 68.31149 | 72.43287 | 75.63771 | 360.36307   | 488.46713   | 505.10056   | 1 |
| 196 | O | 67.54912 | 72.82976 | 76.49891 | -200.08817  | -528.03552  | -385.82850  | 1 |
| 197 | N | 69.20135 | 71.45215 | 75.69875 | -597.54095  | -226.44775  | 355.20479   | 1 |
| 198 | H | 69.74292 | 71.26786 | 74.85577 | 2179.23655  | -1300.70981 | -991.33835  | 1 |
| 199 | C | 69.44164 | 70.71299 | 76.88021 | -687.68921  | 297.39807   | -249.45179  | 1 |
| 200 | H | 70.46221 | 70.29049 | 76.74738 | -349.16256  | -2467.37713 | -1101.72831 | 1 |
| 201 | C | 69.24727 | 71.57263 | 78.21815 | 672.47345   | 361.54328   | -201.62880  | 1 |
| 202 | H | 68.21497 | 72.01859 | 78.24553 | 1541.41502  | 582.18425   | 2169.97026  | 1 |
| 203 | H | 69.32797 | 70.88891 | 79.09838 | -2534.67717 | 60.25153    | 997.72295   | 1 |
| 204 | C | 70.31189 | 72.67731 | 78.27614 | 574.26774   | -389.43119  | -377.02542  | 1 |
| 205 | C | 71.66003 | 72.36055 | 78.61857 | 688.82679   | -287.33580  | -257.96133  | 1 |
| 206 | H | 71.95884 | 71.32016 | 78.84065 | 331.14182   | 1470.38163  | 2269.80013  | 1 |
| 207 | C | 69.92986 | 74.01910 | 77.97538 | -383.52382  | -675.04808  | 144.24917   | 1 |
| 208 | H | 68.88507 | 74.25233 | 77.69070 | 4.09847     | 1517.59662  | 2262.86397  | 1 |
| 209 | C | 72.58841 | 73.39934 | 78.67078 | -134.76730  | 428.45285   | -649.50303  | 1 |
| 210 | H | 73.63244 | 73.16133 | 78.93891 | -903.23433  | 1600.49020  | 2011.53387  | 1 |
| 211 | C | 70.89662 | 75.02461 | 78.04638 | -335.53281  | -615.00040  | -364.39058  | 1 |
| 212 | H | 70.59147 | 76.06169 | 77.82196 | 1596.45398  | -1369.33862 | 1732.02659  | 1 |
| 213 | C | 72.25184 | 74.75670 | 78.39767 | 585.48547   | -340.24194  | -406.23938  | 1 |
| 214 | O | 73.24390 | 75.76817 | 78.47557 | -419.15649  | -173.04408  | -511.94141  | 1 |
| 215 | H | 72.69809 | 76.55612 | 78.24511 | -1071.84350 | 1559.71507  | -1960.13012 | 1 |
| 216 | C | 68.31105 | 69.56338 | 77.11521 | 291.41878   | -183.13091  | 710.72246   | 1 |
| 217 | O | 68.13735 | 69.13546 | 78.24061 | 379.87695   | 523.47396   | -222.23622  | 1 |
| 218 | N | 67.72316 | 69.16979 | 75.98817 | 564.30591   | 373.09380   | 277.24371   | 1 |
| 219 | H | 68.01930 | 69.60872 | 75.11675 | -120.59931  | -2436.07824 | -1214.35098 | 1 |
| 220 | C | 66.77763 | 68.12165 | 76.07354 | 404.07514   | -299.37480  | 608.84009   | 1 |
| 221 | H | 66.37966 | 68.20869 | 77.10964 | -1071.07882 | -841.69025  | 2359.66467  | 1 |
| 222 | C | 65.74459 | 68.29209 | 74.90426 | -683.12807  | 68.71770    | -390.13096  | 1 |

|     |   |          |          |          |             |             |             |   |
|-----|---|----------|----------|----------|-------------|-------------|-------------|---|
| 223 | H | 65.26876 | 69.29891 | 74.93456 | 2068.88918  | 1596.58590  | 770.89603   | 1 |
| 224 | H | 66.26060 | 68.23065 | 73.91882 | 1379.86429  | 2342.49779  | -179.85638  | 1 |
| 225 | C | 64.67414 | 67.15867 | 75.03780 | -176.39967  | 537.49466   | 550.97268   | 1 |
| 226 | H | 65.16563 | 66.15722 | 75.05131 | -396.28051  | 1942.22168  | 1869.33314  | 1 |
| 227 | H | 64.11473 | 67.23931 | 75.99617 | -94.44700   | 586.00678   | -2659.20016 | 1 |
| 228 | C | 63.70342 | 67.31095 | 73.77958 | -291.69381  | -718.18079  | -150.72929  | 1 |
| 229 | H | 63.22980 | 68.31645 | 73.64578 | -2303.38776 | 1089.76242  | 964.62032   | 1 |
| 230 | H | 64.16233 | 67.01185 | 72.80245 | 884.16729   | 2568.80533  | -207.74283  | 1 |
| 231 | N | 62.68246 | 66.39459 | 74.06660 | -594.49522  | -252.81478  | 342.29276   | 1 |
| 232 | H | 62.86670 | 65.72164 | 74.79423 | -1735.17426 | 2084.05705  | -263.71605  | 1 |
| 233 | C | 61.56292 | 66.34766 | 73.46520 | 595.23177   | -271.52487  | 442.22352   | 1 |
| 234 | N | 61.32878 | 67.27734 | 72.44492 | 585.53813   | -424.79750  | -105.81303  | 1 |
| 235 | H | 61.94183 | 68.00078 | 72.07260 | 959.88797   | 1327.56823  | -2177.11905 | 1 |
| 236 | H | 60.47640 | 67.32571 | 71.88664 | 1578.48647  | 16.27378    | -2220.76233 | 1 |
| 237 | N | 60.75455 | 65.32072 | 73.97430 | -452.17763  | -390.33541  | -421.51853  | 1 |
| 238 | H | 60.92052 | 64.64425 | 74.71740 | 470.26107   | 1974.25629  | -1817.92087 | 1 |
| 239 | H | 59.81637 | 65.12568 | 73.62322 | 1856.67307  | -1573.97321 | -1224.35416 | 1 |
| 240 | C | 67.60134 | 66.66576 | 75.84146 | -531.47271  | -581.45780  | -55.06206   | 1 |
| 241 | O | 67.43176 | 65.99267 | 74.80161 | -243.00837  | 192.73507   | 609.52485   | 1 |
| 242 | N | 68.37081 | 66.38429 | 76.82074 | 343.49288   | -644.25607  | 38.09164    | 1 |
| 243 | H | 68.35903 | 67.08075 | 77.54994 | -1691.16043 | -1535.97525 | -1484.73099 | 1 |
| 244 | C | 70.17755 | 63.75833 | 75.60728 | 542.66492   | 350.14337   | 454.42563   | 2 |
| 245 | H | 69.87712 | 62.73400 | 75.93316 | 1209.57979  | -2396.95920 | 463.86744   | 2 |
| 246 | C | 70.28462 | 63.81329 | 74.10441 | -737.14309  | 145.93010   | 242.71942   | 2 |
| 247 | H | 70.75756 | 64.78284 | 73.82621 | -1050.18303 | 159.36419   | -2509.06125 | 2 |
| 248 | C | 71.15257 | 62.68517 | 73.56704 | -706.77696  | -252.88343  | -245.16230  | 2 |
| 249 | H | 71.26948 | 62.74305 | 72.45356 | -1624.64039 | -1665.49085 | 1417.86935  | 2 |
| 250 | H | 72.18353 | 62.72206 | 74.01903 | 2566.10521  | 598.51109   | 693.22305   | 2 |
| 251 | H | 70.71946 | 61.67907 | 73.80508 | -1972.69758 | 107.10018   | -1876.34312 | 2 |
| 252 | C | 68.90060 | 63.76768 | 73.48105 | 412.85148   | 672.58832   | -27.69222   | 2 |
| 253 | H | 68.93746 | 63.89804 | 72.36855 | 1447.02277  | 1762.76533  | -1490.78944 | 2 |
| 254 | H | 68.38476 | 62.79378 | 73.68492 | 1320.77379  | -145.20455  | 2378.68491  | 2 |
| 255 | H | 68.23399 | 64.61306 | 73.91356 | -1512.10848 | 1470.52031  | 1724.75147  | 2 |
| 256 | C | 71.59563 | 64.17000 | 76.29125 | -607.11113  | 499.56689   | 73.73769    | 2 |
| 257 | O | 72.65739 | 63.90179 | 75.77358 | 357.97126   | 460.81534   | 356.68785   | 2 |
| 258 | N | 71.37744 | 64.81990 | 77.43393 | 536.55407   | -368.62270  | 332.76306   | 2 |
| 259 | H | 70.41192 | 64.95285 | 77.73849 | 524.38866   | 2297.69985  | 1367.20941  | 2 |
| 260 | C | 72.43636 | 64.82573 | 78.38041 | 46.50277    | -774.29190  | -147.97904  | 2 |
| 261 | H | 73.29437 | 64.33959 | 77.86042 | 1676.51875  | 1883.29066  | 1032.55549  | 2 |
| 262 | C | 72.73832 | 66.34921 | 78.82514 | -559.41456  | -34.19198   | -556.30433  | 2 |
| 263 | H | 71.85779 | 66.76343 | 79.37195 | -64.66664   | 395.18769   | 2695.05373  | 2 |
| 264 | H | 73.58861 | 66.37860 | 79.54744 | -2703.44278 | -60.40056   | 333.79418   | 2 |
| 265 | C | 73.03574 | 67.18000 | 77.60569 | -519.76435  | 377.31045   | 459.42366   | 2 |
| 266 | H | 72.13683 | 67.16467 | 76.94976 | -1746.74323 | 1667.50644  | -1261.73691 | 2 |
| 267 | C | 73.31776 | 68.62368 | 78.00209 | 570.95554   | 16.46261    | -545.27700  | 2 |
| 268 | H | 73.52377 | 69.26706 | 77.10822 | 2391.58273  | 28.05277    | -1305.07271 | 2 |
| 269 | H | 72.45005 | 69.07772 | 78.54636 | 175.75588   | 917.63458   | 2559.43867  | 2 |
| 270 | H | 74.20875 | 68.69914 | 78.67729 | -1063.97851 | -2155.34650 | 1283.00462  | 2 |
| 271 | C | 74.20795 | 66.61036 | 76.81945 | 193.76014   | 2.62946     | -765.53141  | 2 |
| 272 | H | 74.50511 | 67.28078 | 75.97234 | 507.39394   | -846.55087  | 2539.60089  | 2 |
| 273 | H | 75.11268 | 66.47311 | 77.46663 | 1337.57841  | 1818.19054  | 1526.01994  | 2 |
| 274 | H | 73.95373 | 65.60701 | 76.37573 | 1100.88635  | -1172.91350 | -2199.08909 | 2 |
| 275 | C | 71.91894 | 64.03707 | 79.68923 | -549.21115  | 475.64486   | -309.38218  | 2 |
| 276 | O | 70.76289 | 63.77686 | 79.89604 | 556.06106   | -390.37755  | -78.24250   | 2 |
| 277 | O | 72.90984 | 63.73737 | 80.65494 | -572.27940  | -310.19032  | -209.75862  | 2 |
| 278 | H | 73.70904 | 64.07738 | 80.16564 | -1380.08193 | 2212.14486  | 790.85944   | 2 |

Listing 66: C00066.xmolout

|   |          |          |          |        |        |             |        |          |  |
|---|----------|----------|----------|--------|--------|-------------|--------|----------|--|
| 1 | 276      |          |          |        |        |             |        |          |  |
| 2 | 150.0000 | 150.0000 | 150.0000 | 0.0000 | 0.0000 | 0.0000***** | 2.7750 | 11100    |  |
|   | 0.2500   | 300.00   | 0.00     | 0.00   | 0.00   | -1293.6022  | 0.0000 | 300.0000 |  |

|    |   |          |          |          |             |             |             |   |
|----|---|----------|----------|----------|-------------|-------------|-------------|---|
| 3  | H | 79.78072 | 61.88150 | 67.99571 | -2043.14101 | -1757.64893 | 399.89339   | 1 |
| 4  | N | 79.48041 | 62.84407 | 67.84501 | 426.75047   | 490.45733   | -334.42467  | 1 |
| 5  | H | 79.07510 | 63.05209 | 68.75748 | 442.25559   | -1110.30854 | -2448.52907 | 1 |
| 6  | C | 80.54964 | 63.70911 | 67.49957 | 415.32972   | -666.39213  | 83.73172    | 1 |
| 7  | H | 81.42382 | 63.36009 | 68.09132 | 879.32219   | 2491.00447  | 667.35213   | 1 |
| 8  | C | 80.81239 | 63.61287 | 65.91464 | 31.35357    | 477.41777   | 628.23362   | 1 |
| 9  | H | 79.92400 | 64.02815 | 65.38013 | 1168.38489  | 2240.25337  | -1019.71136 | 1 |
| 10 | H | 81.67028 | 64.27175 | 65.63703 | -360.43770  | 2534.90498  | 931.67112   | 1 |
| 11 | C | 81.06401 | 62.19297 | 65.47205 | 463.18208   | 512.70242   | -382.34388  | 1 |
| 12 | H | 80.21818 | 61.56013 | 65.82255 | 1725.29117  | 1863.52247  | -987.07854  | 1 |
| 13 | C | 81.12022 | 62.12159 | 63.95112 | 710.42801   | -144.27427  | -313.15367  | 1 |
| 14 | H | 81.28436 | 61.07325 | 63.59079 | 364.20195   | -1033.13725 | 2494.72524  | 1 |
| 15 | H | 80.17035 | 62.48936 | 63.48358 | 2567.61904  | 335.80679   | 847.48802   | 1 |
| 16 | H | 81.95460 | 62.74719 | 63.54069 | -2587.99029 | 680.92867   | -512.16411  | 1 |
| 17 | C | 82.35899 | 61.64620 | 66.05570 | 268.17616   | 741.64379   | -40.42634   | 1 |
| 18 | H | 82.56368 | 60.60273 | 65.70120 | 1283.54314  | -1945.37420 | -1411.27812 | 1 |
| 19 | H | 83.23977 | 62.27435 | 65.76256 | -1258.57796 | 1317.15249  | -2026.02085 | 1 |
| 20 | H | 82.33075 | 61.61630 | 67.17541 | -2502.84526 | 909.80597   | 575.92391   | 1 |
| 21 | C | 80.13574 | 65.24317 | 67.83333 | 619.36578   | -458.64843  | -172.09273  | 1 |
| 22 | O | 80.98812 | 66.08670 | 67.99831 | -81.40433   | 433.87611   | 522.34594   | 1 |
| 23 | N | 78.80946 | 65.42940 | 67.73192 | 175.23996   | -622.20190  | 341.55523   | 1 |
| 24 | H | 78.25386 | 64.58026 | 67.62970 | -876.57256  | -303.22879  | -2561.90213 | 1 |
| 25 | C | 78.28745 | 66.59864 | 68.37442 | -571.88214  | -534.10783  | -106.15033  | 1 |
| 26 | H | 79.04382 | 67.39505 | 68.18287 | -2713.20841 | -16.25800   | -248.80809  | 1 |
| 27 | C | 76.85194 | 66.86054 | 67.72744 | 166.60354   | 288.16399   | -716.09568  | 1 |
| 28 | H | 76.18980 | 65.98738 | 67.97910 | -2097.85574 | 1636.78449  | -586.18044  | 1 |
| 29 | O | 76.82704 | 66.97458 | 66.28985 | -317.80580  | -363.38227  | 484.43082   | 1 |
| 30 | H | 76.29225 | 66.19424 | 66.04757 | 1863.74748  | -1451.84923 | 1357.29467  | 1 |
| 31 | C | 76.34939 | 68.13428 | 68.49945 | 503.80731   | 517.99032   | 318.51606   | 1 |
| 32 | H | 75.30802 | 68.40002 | 68.20219 | 640.61020   | -2157.10410 | -1536.29104 | 1 |
| 33 | H | 76.34712 | 67.99202 | 69.62531 | 1687.88455  | 465.60692   | 2087.56452  | 1 |
| 34 | H | 76.98630 | 69.02143 | 68.27566 | -1293.07895 | -1899.88581 | -1463.57452 | 1 |
| 35 | C | 78.12296 | 66.22180 | 69.95269 | -153.07550  | -733.68902  | 248.70981   | 1 |
| 36 | O | 77.70207 | 65.14092 | 70.26625 | 186.15459   | -480.78787  | -449.34387  | 1 |
| 37 | N | 78.43823 | 67.27270 | 70.72002 | -487.53139  | 543.18517   | 42.03850    | 1 |
| 38 | C | 78.14729 | 67.29117 | 72.12528 | -699.35871  | 69.34393    | 360.10701   | 1 |
| 39 | H | 78.45663 | 66.29805 | 72.52436 | 2.81126     | -221.99807  | -2715.58072 | 1 |
| 40 | C | 79.00547 | 68.51913 | 72.64737 | -507.46439  | -592.59194  | 122.07761   | 1 |
| 41 | H | 78.56031 | 69.00238 | 73.54650 | -1975.08116 | 525.87560   | -1801.71556 | 1 |
| 42 | H | 80.03117 | 68.20042 | 72.93873 | 1588.27743  | -1913.22100 | 1113.83566  | 1 |
| 43 | C | 79.04262 | 69.45998 | 71.40336 | -613.62442  | -457.55993  | -194.14490  | 1 |
| 44 | H | 78.08564 | 70.01716 | 71.29326 | 1707.54637  | -721.27992  | 1996.92523  | 1 |
| 45 | H | 79.85579 | 70.21954 | 71.43969 | 758.23357   | 2100.81767  | 1560.55011  | 1 |
| 46 | C | 79.22942 | 68.39471 | 70.23753 | -352.41524  | 704.96076   | 49.21465    | 1 |
| 47 | H | 78.85107 | 68.71007 | 69.23599 | 1714.76886  | -2070.42778 | 443.35792   | 1 |
| 48 | H | 80.26905 | 68.00137 | 70.12800 | 1224.15040  | 1801.50881  | 1636.97633  | 1 |
| 49 | C | 76.55384 | 67.55559 | 72.35516 | 566.85117   | 537.05831   | 117.62814   | 1 |
| 50 | O | 75.82470 | 68.03082 | 71.50891 | -550.26779  | -406.08867  | 4.21666     | 1 |
| 51 | N | 76.27148 | 67.24824 | 73.61543 | 566.34832   | -425.77725  | 180.18749   | 1 |
| 52 | H | 77.02560 | 66.89181 | 74.20022 | 644.44502   | 2646.80550  | -52.73430   | 1 |
| 53 | C | 74.90320 | 67.03208 | 73.95379 | 612.34801   | -281.48662  | 411.56221   | 1 |
| 54 | H | 74.38935 | 66.78108 | 72.99833 | 1667.23498  | -1490.75142 | 1556.16753  | 1 |
| 55 | C | 74.88319 | 65.89300 | 75.07247 | -714.45746  | -175.43074  | 286.98927   | 1 |
| 56 | H | 75.47980 | 66.25105 | 75.95631 | -787.09484  | 1763.03619  | -1922.46060 | 1 |
| 57 | O | 75.46387 | 64.63290 | 74.68888 | -429.46514  | 516.51932   | -128.40526  | 1 |
| 58 | H | 76.18901 | 64.54840 | 75.33931 | 1981.82785  | 436.16847   | -1818.18182 | 1 |
| 59 | C | 73.35891 | 65.85807 | 75.46060 | 630.79189   | -468.94448  | 76.03230    | 1 |
| 60 | H | 73.16746 | 65.15141 | 76.30086 | -1775.71861 | 2062.30353  | 131.89849   | 1 |
| 61 | H | 72.99154 | 66.86086 | 75.78040 | -1855.14608 | 88.94118    | 1993.53760  | 1 |
| 62 | H | 72.72695 | 65.53140 | 74.60249 | -1504.82350 | -780.94249  | -2132.90992 | 1 |
| 63 | C | 74.32988 | 68.40521 | 74.64455 | 288.57638   | 618.62814   | -397.00270  | 1 |
| 64 | O | 74.86931 | 68.95071 | 75.57780 | 321.70495   | -185.26452  | 574.37218   | 1 |



|     |   |          |          |          |             |             |             |   |
|-----|---|----------|----------|----------|-------------|-------------|-------------|---|
| 65  | N | 73.14640 | 68.66914 | 74.10292 | -447.05792  | -446.53431  | 367.76425   | 1 |
| 66  | H | 72.78744 | 68.13374 | 73.31357 | 350.31316   | 1975.63644  | -1843.31522 | 1 |
| 67  | C | 72.44176 | 69.80145 | 74.59687 | -511.23061  | 374.03917   | -471.51480  | 1 |
| 68  | H | 72.82024 | 69.96420 | 75.63391 | 2234.79579  | -898.70890  | -1273.45190 | 1 |
| 69  | C | 72.90290 | 71.00065 | 73.62455 | 529.53781   | -159.34528  | 563.72604   | 1 |
| 70  | H | 72.44913 | 71.95135 | 74.01466 | 654.59388   | 2347.94251  | 1217.51488  | 1 |
| 71  | H | 74.01421 | 71.08989 | 73.76250 | -1526.55661 | 2103.42026  | 817.87394   | 1 |
| 72  | O | 72.58010 | 70.87620 | 72.22087 | -554.84278  | 14.12789    | 399.58769   | 1 |
| 73  | H | 73.19525 | 70.15287 | 71.98158 | 1297.06236  | 2061.84854  | 1220.68812  | 1 |
| 74  | C | 70.86231 | 69.45074 | 74.48458 | -662.15484  | -412.13544  | 123.62687   | 1 |
| 75  | O | 70.36755 | 68.82173 | 73.58161 | -540.01537  | -317.05804  | 274.91456   | 1 |
| 76  | N | 70.20942 | 70.06117 | 75.50718 | -202.76299  | -690.00100  | -131.49145  | 1 |
| 77  | H | 70.86274 | 70.44962 | 76.19000 | -702.62132  | -2617.37191 | 281.70413   | 1 |
| 78  | C | 68.94322 | 69.45472 | 75.95604 | -491.73914  | 576.34187   | 222.73509   | 1 |
| 79  | H | 68.57644 | 69.01964 | 74.99535 | 1977.17978  | -1823.58850 | -434.68928  | 1 |
| 80  | C | 69.21088 | 68.40548 | 77.01248 | -649.50797  | -328.66843  | 306.11224   | 1 |
| 81  | H | 69.79332 | 68.88236 | 77.83232 | 2075.07803  | 1452.16490  | -1004.45904 | 1 |
| 82  | C | 67.92290 | 67.86342 | 77.60477 | -615.18735  | -489.99689  | -70.96352   | 1 |
| 83  | H | 68.11779 | 67.08513 | 78.39294 | -1226.32661 | -1724.38906 | -1716.47170 | 1 |
| 84  | H | 67.31533 | 68.69171 | 78.08635 | 2381.64273  | -969.84735  | 900.46860   | 1 |
| 85  | H | 67.27355 | 67.38757 | 76.81922 | 2122.74991  | 1702.23946  | -141.36228  | 1 |
| 86  | C | 70.03753 | 67.25309 | 76.46754 | -501.86074  | -479.61276  | -376.42482  | 1 |
| 87  | H | 70.26359 | 66.48657 | 77.25849 | 993.79261   | -2246.95401 | -1177.81305 | 1 |
| 88  | H | 69.50225 | 66.72340 | 75.63208 | 42.71279    | -626.15391  | -2651.37258 | 1 |
| 89  | H | 71.01913 | 67.60969 | 76.05212 | -2026.39012 | -1590.33709 | -887.82922  | 1 |
| 90  | C | 68.02954 | 70.72736 | 76.49708 | -672.89153  | 382.57394   | -156.34072  | 1 |
| 91  | O | 67.37825 | 70.66305 | 77.51668 | 410.04627   | 221.86223   | 500.35950   | 1 |
| 92  | N | 68.08488 | 71.70634 | 75.61083 | -378.11782  | -443.79414  | -441.10984  | 1 |
| 93  | H | 68.67587 | 71.48864 | 74.80957 | 2404.15973  | -568.14894  | 1149.30085  | 1 |
| 94  | C | 67.43278 | 72.95702 | 75.78207 | -544.54484  | 466.16019   | 331.29119   | 1 |
| 95  | H | 67.66831 | 73.50625 | 74.84140 | -1409.80988 | -170.17955  | 2325.32679  | 1 |
| 96  | C | 65.88095 | 72.65850 | 76.00201 | -184.48284  | 116.78282   | -758.89137  | 1 |
| 97  | H | 65.54913 | 71.82567 | 75.34220 | 1893.78641  | 1861.14652  | 611.04528   | 1 |
| 98  | H | 65.71687 | 72.30660 | 77.04857 | -2170.79665 | -974.19311  | 1327.50117  | 1 |
| 99  | C | 65.07102 | 73.95774 | 75.70946 | 389.51668   | 672.81878   | -138.49152  | 1 |
| 100 | H | 65.38461 | 74.77106 | 76.40445 | 510.64577   | 1933.03327  | 1851.02484  | 1 |
| 101 | H | 65.32788 | 74.34936 | 74.70060 | -2302.30869 | -1105.72939 | -948.89774  | 1 |
| 102 | C | 63.51050 | 73.76698 | 75.81096 | -559.93427  | -126.34590  | 542.30857   | 1 |
| 103 | O | 62.78859 | 74.70898 | 75.60798 | -670.36003  | -111.83166  | 76.36448    | 1 |
| 104 | N | 63.12060 | 72.51063 | 76.11612 | -216.06729  | -537.07037  | 446.51379   | 1 |
| 105 | H | 63.68798 | 71.68389 | 76.33625 | -1251.96487 | 1074.12894  | -2168.52500 | 1 |
| 106 | H | 62.14202 | 72.23173 | 76.24729 | -2451.83023 | -720.73851  | 944.84612   | 1 |
| 107 | C | 67.90217 | 73.72076 | 77.13364 | 546.24052   | -563.88337  | -85.11809   | 1 |
| 108 | O | 67.00467 | 74.18068 | 77.82858 | 71.70702    | -307.40463  | 606.69673   | 1 |
| 109 | N | 69.21583 | 73.86393 | 77.27003 | 479.90863   | -504.50129  | 222.86849   | 1 |
| 110 | C | 69.82984 | 74.23531 | 78.51807 | 75.51268    | -600.91904  | 506.73700   | 1 |
| 111 | H | 69.25457 | 73.67931 | 79.29394 | -2033.61562 | 1795.30103  | 254.89480   | 1 |
| 112 | C | 71.33469 | 73.77419 | 78.33361 | 523.79067   | 517.99274   | 284.45581   | 1 |
| 113 | H | 72.04059 | 74.38631 | 78.94049 | 1599.61665  | -1127.00911 | 1895.98173  | 1 |
| 114 | H | 71.47502 | 72.71728 | 78.65354 | -1881.83093 | 1275.82488  | -1501.55016 | 1 |
| 115 | C | 71.56180 | 73.92684 | 76.79618 | -600.05639  | -404.05026  | 316.64485   | 1 |
| 116 | H | 71.77857 | 74.99952 | 76.49930 | -2597.05260 | 496.36221   | 657.73249   | 1 |
| 117 | H | 72.40872 | 73.31399 | 76.40995 | -1666.24518 | 1294.38985  | -1723.90591 | 1 |
| 118 | C | 70.15440 | 73.46597 | 76.22648 | 493.57570   | -129.95376  | -602.56394  | 1 |
| 119 | H | 69.84341 | 73.94780 | 75.26982 | -1469.08415 | -637.84797  | 2204.22581  | 1 |
| 120 | H | 70.03826 | 72.36135 | 76.13567 | -1038.97840 | 1068.88701  | -2280.71789 | 1 |
| 121 | C | 69.79203 | 75.83861 | 78.78009 | 188.88100   | 241.05089   | -727.87821  | 1 |
| 122 | O | 70.71783 | 76.38927 | 79.31230 | 531.88613   | -49.19943   | 427.07960   | 1 |
| 123 | N | 68.63663 | 76.36392 | 78.34733 | 708.14833   | 26.93417    | -179.73509  | 1 |
| 124 | H | 67.90605 | 75.69423 | 78.01974 | -2232.69501 | -1179.09831 | 1023.94816  | 1 |
| 125 | C | 68.26291 | 77.75944 | 78.58954 | -738.32412  | 259.92548   | 104.42456   | 1 |
| 126 | H | 67.23684 | 77.82767 | 78.15591 | 2028.89123  | 1260.02983  | 1311.33324  | 1 |

|     |   |          |          |          |             |             |             |   |
|-----|---|----------|----------|----------|-------------|-------------|-------------|---|
| 127 | C | 68.24868 | 77.97095 | 80.09214 | -258.65678  | -345.52513  | 661.28459   | 1 |
| 128 | H | 69.26041 | 77.70614 | 80.47961 | -1826.06090 | -1801.46097 | -918.64554  | 1 |
| 129 | C | 67.94654 | 79.40778 | 80.47326 | -541.23400  | 531.92970   | -218.41428  | 1 |
| 130 | H | 67.86950 | 79.53652 | 81.58819 | 1311.73218  | -2219.18200 | 882.19023   | 1 |
| 131 | H | 68.74692 | 80.11220 | 80.10903 | -1048.71298 | 1223.58118  | -2196.97971 | 1 |
| 132 | H | 66.97358 | 79.75679 | 80.02903 | 419.06414   | 1903.92898  | 1903.44670  | 1 |
| 133 | C | 67.24123 | 77.04765 | 80.75658 | -423.86431  | 152.66566   | -648.55262  | 1 |
| 134 | H | 67.24913 | 77.15154 | 81.87578 | 105.68386   | -2342.50080 | 1387.51238  | 1 |
| 135 | H | 66.19358 | 77.26328 | 80.40911 | -1695.63603 | -1484.73621 | -1531.02793 | 1 |
| 136 | H | 67.45134 | 75.96916 | 80.51531 | -1853.57121 | -487.39031  | 1936.59343  | 1 |
| 137 | C | 69.30558 | 78.76399 | 77.78342 | 539.71428   | -510.58232  | 267.58633   | 1 |
| 138 | O | 69.17704 | 79.95977 | 77.88150 | -15.93758   | -278.34085  | -624.49402  | 1 |
| 139 | N | 70.14331 | 78.09582 | 76.99898 | -676.81886  | 12.05292    | 276.17960   | 1 |
| 140 | H | 70.13488 | 77.08175 | 77.12220 | -1694.44250 | -373.84189  | -2100.66098 | 1 |
| 141 | C | 71.29839 | 78.77607 | 76.49872 | 412.33078   | -664.70360  | 108.35451   | 1 |
| 142 | H | 70.96017 | 79.78183 | 76.16013 | 1765.77476  | 1294.44366  | 1621.76594  | 1 |
| 143 | C | 72.32747 | 78.85397 | 77.70192 | -179.66635  | -721.95667  | -264.73915  | 1 |
| 144 | H | 71.90448 | 79.42972 | 78.55535 | -607.34922  | 2587.87032  | -598.10018  | 1 |
| 145 | H | 72.53824 | 77.83662 | 78.10301 | -359.69332  | -1479.13954 | -2259.74260 | 1 |
| 146 | C | 73.61923 | 79.53179 | 77.13474 | -240.01076  | 616.02425   | 431.85322   | 1 |
| 147 | H | 73.97541 | 78.99632 | 76.22517 | -1359.17131 | 782.54425   | 2227.99181  | 1 |
| 148 | H | 73.40758 | 80.57486 | 76.80892 | -820.36667  | 85.81767    | -2596.78715 | 1 |
| 149 | C | 74.73417 | 79.50567 | 78.25109 | -513.07015  | 236.18570   | -551.87280  | 1 |
| 150 | H | 74.39606 | 80.03599 | 79.17088 | 1816.11944  | -1183.11722 | -1650.94321 | 1 |
| 151 | H | 74.95859 | 78.46175 | 78.56983 | -1800.04429 | -1361.53473 | 1526.34643  | 1 |
| 152 | C | 75.99222 | 80.18514 | 77.64614 | 726.08972   | -253.19732  | -179.64713  | 1 |
| 153 | H | 76.39923 | 79.69319 | 76.73787 | 1224.27271  | -456.51798  | -2390.90304 | 1 |
| 154 | H | 75.88574 | 81.27464 | 77.46536 | 1206.40339  | -1150.93514 | -2154.90344 | 1 |
| 155 | N | 77.09987 | 80.05299 | 78.71480 | 329.70796   | -633.68968  | -155.67358  | 1 |
| 156 | H | 78.00498 | 80.56236 | 78.49214 | 1348.31305  | 1938.76845  | 1359.00643  | 1 |
| 157 | H | 76.85981 | 80.41255 | 79.74528 | 2096.92035  | 1446.54551  | -966.48890  | 1 |
| 158 | H | 77.48396 | 79.07331 | 78.87061 | -1197.07217 | -2303.53719 | 827.28733   | 1 |
| 159 | C | 71.97794 | 77.81717 | 75.36611 | -378.01186  | -556.17301  | -413.96481  | 1 |
| 160 | O | 72.07162 | 76.61282 | 75.49692 | -409.44433  | -307.55053  | -453.30833  | 1 |
| 161 | N | 72.47629 | 78.59104 | 74.41512 | -429.02477  | 524.70884   | 274.08502   | 1 |
| 162 | H | 72.33905 | 79.60134 | 74.44118 | 1706.34263  | -1425.96036 | 1574.38926  | 1 |
| 163 | C | 73.32298 | 77.99833 | 73.44437 | -45.25864   | -626.22952  | 478.93267   | 1 |
| 164 | H | 73.58663 | 76.98395 | 73.82628 | 1988.63164  | 570.90773   | 1772.87287  | 1 |
| 165 | C | 72.47009 | 77.96973 | 72.10820 | 551.77128   | -20.49526   | -564.54996  | 1 |
| 166 | H | 71.48014 | 77.49869 | 72.29968 | 1434.61535  | -1753.10253 | 1513.99471  | 1 |
| 167 | H | 72.24625 | 79.00402 | 71.76361 | -714.67738  | 1819.09770  | 1898.36494  | 1 |
| 168 | C | 73.25964 | 77.17453 | 71.01862 | 446.99263   | -555.77305  | 338.97221   | 1 |
| 169 | H | 74.19656 | 77.70685 | 70.72632 | 1953.68466  | 1892.25957  | -161.67766  | 1 |
| 170 | H | 73.57540 | 76.17754 | 71.40002 | -403.03785  | 2688.07032  | -188.43591  | 1 |
| 171 | C | 72.26899 | 77.02098 | 69.79397 | 567.86262   | 335.74681   | 434.04421   | 1 |
| 172 | H | 71.33150 | 76.50887 | 70.11122 | -1080.02275 | 1568.26081  | -1948.78900 | 1 |
| 173 | H | 71.95325 | 78.02009 | 69.41516 | -919.54108  | 2111.34692  | 1456.13463  | 1 |
| 174 | C | 72.97342 | 76.21254 | 68.68095 | 195.81897   | 173.33862   | -745.11536  | 1 |
| 175 | H | 73.82642 | 76.73249 | 68.20094 | 1405.67949  | -2301.21089 | -390.08113  | 1 |
| 176 | H | 73.26989 | 75.18507 | 68.97234 | -940.37328  | -1118.32446 | 2299.72133  | 1 |
| 177 | N | 71.92700 | 76.00657 | 67.53312 | 319.26422   | 656.36007   | -42.02424   | 1 |
| 178 | H | 72.27383 | 75.47159 | 66.68572 | 1961.03633  | 619.91968   | 1787.09422  | 1 |
| 179 | H | 71.04863 | 75.46225 | 67.77624 | 854.14343   | -2156.80752 | 1429.08711  | 1 |
| 180 | H | 71.52669 | 76.87905 | 67.08030 | 1237.02905  | -1378.50857 | -1998.28500 | 1 |
| 181 | C | 74.57947 | 79.04963 | 73.21376 | 532.53319   | -268.57236  | 517.55729   | 1 |
| 182 | O | 74.37986 | 80.23625 | 73.11790 | 266.16714   | -290.73804  | -558.88002  | 1 |
| 183 | N | 75.69182 | 78.33853 | 73.11935 | -226.25352  | 640.49678   | -270.32839  | 1 |
| 184 | H | 75.56975 | 77.32959 | 73.20669 | 2007.69063  | -1035.27229 | 1523.50231  | 1 |
| 185 | C | 76.92784 | 78.82641 | 72.62873 | -540.76542  | -573.33303  | 49.50000    | 1 |
| 186 | H | 77.47862 | 77.90322 | 72.34319 | -2374.20950 | -1036.76023 | 843.75774   | 1 |
| 187 | C | 76.62672 | 79.78798 | 71.38848 | -77.09082   | 666.87422   | -415.84136  | 1 |
| 188 | H | 76.02811 | 80.66906 | 71.75978 | -985.81834  | 617.19825   | 2463.91927  | 1 |

|     |   |          |          |          |             |             |             |   |
|-----|---|----------|----------|----------|-------------|-------------|-------------|---|
| 189 | O | 75.86366 | 79.20198 | 70.31271 | 293.29899   | -391.65602  | -477.80926  | 1 |
| 190 | H | 75.05260 | 79.74887 | 70.35040 | 2528.72714  | -681.76262  | -751.27122  | 1 |
| 191 | C | 78.07483 | 80.27151 | 71.01364 | 252.47363   | -605.14473  | 440.05134   | 1 |
| 192 | H | 78.05036 | 81.03972 | 70.20593 | -2052.65063 | 1456.49051  | -1043.51830 | 1 |
| 193 | H | 78.60170 | 80.72392 | 71.88735 | -2152.98800 | -1661.97574 | -161.70652  | 1 |
| 194 | H | 78.70427 | 79.42796 | 70.64654 | -473.12726  | -1584.27339 | 2165.61725  | 1 |
| 195 | C | 77.69032 | 79.65570 | 73.82519 | 360.36307   | 488.46713   | 505.10056   | 1 |
| 196 | O | 77.27606 | 80.71072 | 74.24696 | -200.08817  | -528.03552  | -385.82850  | 1 |
| 197 | N | 78.84024 | 79.04141 | 74.09931 | -597.54095  | -226.44775  | 355.20479   | 1 |
| 198 | H | 78.98490 | 78.12934 | 73.66795 | 2179.23655  | -1300.70981 | -991.33835  | 1 |
| 199 | C | 79.41762 | 79.31870 | 75.39124 | -687.68921  | 297.39807   | -249.45179  | 1 |
| 200 | H | 78.62029 | 79.12834 | 76.14182 | -349.16256  | -2467.37713 | -1101.72831 | 1 |
| 201 | C | 80.71347 | 78.41331 | 75.56137 | 672.47345   | 361.54328   | -201.62880  | 1 |
| 202 | H | 81.42070 | 78.61656 | 74.72403 | 1541.41502  | 582.18425   | 2169.97026  | 1 |
| 203 | H | 81.23005 | 78.70431 | 76.50616 | -2534.67717 | 60.25153    | 997.72295   | 1 |
| 204 | C | 80.35652 | 76.91911 | 75.60337 | 574.26774   | -389.43119  | -377.02542  | 1 |
| 205 | C | 79.86741 | 76.35031 | 76.81713 | 688.82679   | -287.33580  | -257.96133  | 1 |
| 206 | H | 79.70888 | 76.98021 | 77.71494 | 331.14182   | 1470.38163  | 2269.80013  | 1 |
| 207 | C | 80.55719 | 76.11424 | 74.44190 | -383.52382  | -675.04808  | 144.24917   | 1 |
| 208 | H | 80.93211 | 76.56126 | 73.50316 | 4.09847     | 1517.59662  | 2262.86397  | 1 |
| 209 | C | 79.61510 | 74.97800 | 76.84412 | -134.76730  | 428.45285   | -649.50303  | 1 |
| 210 | H | 79.24957 | 74.52664 | 77.78316 | -903.23433  | 1600.49020  | 2011.53387  | 1 |
| 211 | C | 80.28951 | 74.74557 | 74.52270 | -335.53281  | -615.00040  | -364.39058  | 1 |
| 212 | H | 80.45971 | 74.12544 | 73.62517 | 1596.45398  | -1369.33862 | 1732.02659  | 1 |
| 213 | C | 79.81738 | 74.12816 | 75.71766 | 585.48547   | -340.24194  | -406.23938  | 1 |
| 214 | O | 79.54788 | 72.73714 | 75.80643 | -419.15649  | -173.04408  | -511.94141  | 1 |
| 215 | H | 79.81807 | 72.45721 | 74.89997 | -1071.84350 | 1559.71507  | -1960.13012 | 1 |
| 216 | C | 79.97273 | 80.84028 | 75.40371 | 291.41878   | -183.13091  | 710.72246   | 1 |
| 217 | O | 80.74406 | 81.26850 | 74.57685 | 379.87695   | 523.47396   | -222.23622  | 1 |
| 218 | N | 79.58818 | 81.42482 | 76.56024 | 564.30591   | 373.09380   | 277.24371   | 1 |
| 219 | H | 78.87747 | 80.92800 | 77.10261 | -120.59931  | -2436.07824 | -1214.35098 | 1 |
| 220 | C | 79.54733 | 82.86245 | 76.47426 | 404.07514   | -299.37480  | 608.84009   | 1 |
| 221 | H | 80.45052 | 83.11253 | 75.87193 | -1071.07882 | -841.69025  | 2359.66467  | 1 |
| 222 | C | 78.19628 | 83.21332 | 75.73257 | -683.12807  | 68.71770    | -390.13096  | 1 |
| 223 | H | 78.03077 | 82.52107 | 74.86246 | 2068.88918  | 1596.58590  | 770.89603   | 1 |
| 224 | H | 77.31576 | 83.06242 | 76.39665 | 1379.86429  | 2342.49779  | -179.85638  | 1 |
| 225 | C | 78.30604 | 84.70534 | 75.28943 | -176.39967  | 537.49466   | 550.97268   | 1 |
| 226 | H | 78.51559 | 85.35866 | 76.16596 | -396.28051  | 1942.22168  | 1869.33314  | 1 |
| 227 | H | 79.16233 | 84.85230 | 74.59401 | -94.44700   | 586.00678   | -2659.20016 | 1 |
| 228 | C | 76.92621 | 85.10583 | 74.59220 | -291.69381  | -718.18079  | -150.72929  | 1 |
| 229 | H | 76.69343 | 84.58953 | 73.62612 | -2303.38776 | 1089.76242  | 964.62032   | 1 |
| 230 | H | 76.02026 | 85.04131 | 75.24762 | 884.16729   | 2568.80533  | -207.74283  | 1 |
| 231 | N | 77.17094 | 86.46214 | 74.32356 | -594.49522  | -252.81478  | 342.29276   | 1 |
| 232 | H | 78.02515 | 86.85005 | 74.69387 | -1735.17426 | 2084.05705  | -263.71605  | 1 |
| 233 | C | 76.39740 | 87.22608 | 73.66403 | 595.23177   | -271.52487  | 442.22352   | 1 |
| 234 | N | 75.21312 | 86.67776 | 73.16167 | 585.53813   | -424.79750  | -105.81303  | 1 |
| 235 | H | 74.85564 | 85.72666 | 73.24346 | 959.88797   | 1327.56823  | -2177.11905 | 1 |
| 236 | H | 74.51449 | 87.18881 | 72.62108 | 1578.48647  | 16.27378    | -2220.76233 | 1 |
| 237 | N | 76.92816 | 88.52098 | 73.58220 | -452.17763  | -390.33541  | -421.51853  | 1 |
| 238 | H | 77.79300 | 88.91309 | 73.95185 | 470.26107   | 1974.25629  | -1817.92087 | 1 |
| 239 | H | 76.46222 | 89.28747 | 73.09530 | 1856.67307  | -1573.97321 | -1224.35416 | 1 |
| 240 | C | 79.57194 | 83.46068 | 77.99595 | -531.47271  | -581.45780  | -55.06206   | 1 |
| 241 | O | 80.54618 | 84.05073 | 78.40155 | -243.00837  | 192.73507   | 609.52485   | 1 |
| 242 | N | 78.41720 | 83.24060 | 78.62241 | 343.49288   | -644.25607  | 38.09164    | 1 |
| 243 | H | 77.71291 | 82.67092 | 78.15536 | -1691.16043 | -1535.97525 | -1484.73099 | 1 |
| 244 | C | 78.40137 | 83.40571 | 80.04152 | 542.66492   | 350.14337   | 454.42563   | 1 |
| 245 | H | 79.31458 | 84.00656 | 80.26813 | 1209.57979  | -2396.95920 | 463.86744   | 1 |
| 246 | C | 77.02097 | 84.10292 | 80.41607 | -737.14309  | 145.93010   | 242.71942   | 1 |
| 247 | H | 76.16925 | 83.44054 | 80.14949 | -1050.18303 | 159.36419   | -2509.06125 | 1 |
| 248 | C | 77.02393 | 84.41689 | 81.95003 | -706.77696  | -252.88343  | -245.16230  | 1 |
| 249 | H | 76.09043 | 84.94123 | 82.26311 | -1624.64039 | -1665.49085 | 1417.86935  | 1 |
| 250 | H | 77.09954 | 83.48171 | 82.55434 | 2566.10521  | 598.51109   | 693.22305   | 1 |

|     |   |          |          |          |             |             |             |   |
|-----|---|----------|----------|----------|-------------|-------------|-------------|---|
| 251 | H | 77.88291 | 85.06926 | 82.23406 | -1972.69758 | 107.10018   | -1876.34312 | 1 |
| 252 | C | 76.92910 | 85.45642 | 79.63184 | 412.85148   | 672.58832   | -27.69222   | 1 |
| 253 | H | 75.98006 | 85.99972 | 79.85057 | 1447.02277  | 1762.76533  | -1490.78944 | 1 |
| 254 | H | 77.77262 | 86.13722 | 79.89412 | 1320.77379  | -145.20455  | 2378.68491  | 1 |
| 255 | H | 76.97354 | 85.28857 | 78.52955 | -1512.10848 | 1470.52031  | 1724.75147  | 1 |
| 256 | C | 78.43523 | 81.88498 | 80.63045 | -607.11113  | 499.56689   | 73.73769    | 1 |
| 257 | O | 77.38640 | 81.31967 | 80.98318 | 357.97126   | 460.81534   | 356.68785   | 1 |
| 258 | N | 79.65695 | 81.43054 | 80.57702 | 536.55407   | -368.62270  | 332.76306   | 1 |
| 259 | H | 80.36255 | 82.07385 | 80.21071 | 524.38866   | 2297.69985  | 1367.20941  | 1 |
| 260 | C | 80.03699 | 80.18857 | 81.14889 | 46.50277    | -774.29190  | -147.97904  | 1 |
| 261 | H | 81.14791 | 80.23606 | 81.13080 | 1676.51875  | 1883.29066  | 1032.55549  | 1 |
| 262 | C | 79.43613 | 80.07162 | 82.64398 | -559.41456  | -34.19198   | -556.30433  | 1 |
| 263 | H | 78.32387 | 80.19816 | 82.60988 | -64.66664   | 395.18769   | 2695.05373  | 1 |
| 264 | H | 79.62082 | 79.05433 | 83.06492 | -2703.44278 | -60.40056   | 333.79418   | 1 |
| 265 | C | 80.06998 | 81.13626 | 83.49530 | -519.76435  | 377.31045   | 459.42366   | 1 |
| 266 | H | 79.97901 | 82.10848 | 82.95930 | -1746.74323 | 1667.50644  | -1261.73691 | 1 |
| 267 | C | 79.35898 | 81.26058 | 84.83738 | 570.95554   | 16.46261    | -545.27700  | 1 |
| 268 | H | 79.81736 | 82.06076 | 85.47419 | 2391.58273  | 28.05277    | -1305.07271 | 1 |
| 269 | H | 78.27545 | 81.51617 | 84.71103 | 175.75588   | 917.63458   | 2559.43867  | 1 |
| 270 | H | 79.40958 | 80.30535 | 85.42061 | -1063.97851 | -2155.34650 | 1283.00462  | 1 |
| 271 | C | 81.54611 | 80.84465 | 83.73560 | 193.76014   | 2.62946     | -765.53141  | 1 |
| 272 | H | 82.01768 | 81.61611 | 84.39691 | 507.39394   | -846.55087  | 2539.60089  | 1 |
| 273 | H | 81.69378 | 79.84986 | 84.22924 | 1337.57841  | 1818.19054  | 1526.01994  | 1 |
| 274 | H | 82.12960 | 80.82985 | 82.78000 | 1100.88635  | -1172.91350 | -2199.08909 | 1 |
| 275 | C | 79.48525 | 79.01035 | 80.20565 | -549.21115  | 475.64486   | -309.38218  | 1 |
| 276 | O | 78.96240 | 78.01454 | 80.63131 | 556.06106   | -390.37755  | -78.24250   | 1 |
| 277 | O | 79.75394 | 79.14023 | 78.81466 | -572.27940  | -310.19032  | -209.75862  | 1 |
| 278 | H | 80.08981 | 80.07988 | 78.81857 | -1380.08193 | 2212.14486  | 790.85944   | 1 |

Listing 67: C00067.xmolout

|    |   |          |          |          |             |             |             |        |          |
|----|---|----------|----------|----------|-------------|-------------|-------------|--------|----------|
| 1  |   | 276      |          |          |             |             |             |        |          |
| 2  |   | 150.0000 | 150.0000 | 150.0000 | 0.0000      | 0.0000      | 0.0000***** | 2.7750 | 11100    |
|    |   | 0.2500   | 300.00   | 0.00     | 0.00        | 0.00        | -1293.6016  | 0.0000 | 300.0000 |
| 3  | H | 56.82512 | 72.04113 | 75.69816 | -2043.14101 | -1757.64893 | 399.89339   |        | 1        |
| 4  | N | 57.31295 | 72.25636 | 76.56732 | 426.75047   | 490.45733   | -334.42467  |        | 1        |
| 5  | H | 57.45118 | 71.32655 | 76.98118 | 442.25559   | -1110.30854 | -2448.52907 |        | 1        |
| 6  | C | 58.54639 | 72.92617 | 76.38301 | 415.32972   | -666.39213  | 83.73172    |        | 1        |
| 7  | H | 58.62160 | 73.04659 | 75.28013 | 879.32219   | 2491.00447  | 667.35213   |        | 1        |
| 8  | C | 58.53295 | 74.35071 | 77.13764 | 31.35357    | 477.41777   | 628.23362   |        | 1        |
| 9  | H | 58.53729 | 74.17884 | 78.24043 | 1168.38489  | 2240.25337  | -1019.71136 |        | 1        |
| 10 | H | 59.46556 | 74.92153 | 76.91306 | -360.43770  | 2534.90498  | 931.67112   |        | 1        |
| 11 | C | 57.32020 | 75.14809 | 76.73812 | 463.18208   | 512.70242   | -382.34388  |        | 1        |
| 12 | H | 56.41732 | 74.52234 | 76.92028 | 1725.29117  | 1863.52247  | -987.07854  |        | 1        |
| 13 | C | 57.22550 | 76.40944 | 77.58873 | 710.42801   | -144.27427  | -313.15367  |        | 1        |
| 14 | H | 56.31364 | 77.01061 | 77.33951 | 364.20195   | -1033.13725 | 2494.72524  |        | 1        |
| 15 | H | 57.17780 | 76.16878 | 78.68198 | 2567.61904  | 335.80679   | 847.48802   |        | 1        |
| 16 | H | 58.11335 | 77.07562 | 77.43551 | -2587.99029 | 680.92867   | -512.16411  |        | 1        |
| 17 | C | 57.35760 | 75.53272 | 75.26531 | 268.17616   | 741.64379   | -40.42634   |        | 1        |
| 18 | H | 56.47254 | 76.15792 | 74.97974 | 1283.54314  | -1945.37420 | -1411.27812 |        | 1        |
| 19 | H | 58.27558 | 76.12497 | 75.01633 | -1258.57796 | 1317.15249  | -2026.02085 |        | 1        |
| 20 | H | 57.35319 | 74.63102 | 74.60061 | -2502.84526 | 909.80597   | 575.92391   |        | 1        |
| 21 | C | 59.63309 | 71.89669 | 76.99581 | 619.36578   | -458.64843  | -172.09273  |        | 1        |
| 22 | O | 59.35383 | 70.71489 | 77.17075 | -81.40433   | 433.87611   | 522.34594   |        | 1        |
| 23 | N | 60.77256 | 72.52537 | 77.22141 | 175.23996   | -622.20190  | 341.55523   |        | 1        |
| 24 | H | 60.79504 | 73.52647 | 77.03823 | -876.57256  | -303.22879  | -2561.90213 |        | 1        |
| 25 | C | 61.99138 | 71.81908 | 77.40706 | -571.88214  | -534.10783  | -106.15033  |        | 1        |
| 26 | H | 61.80858 | 70.78859 | 77.03159 | -2713.20841 | -16.25800   | -248.80809  |        | 1        |
| 27 | C | 63.05658 | 72.66949 | 76.56704 | 166.60354   | 288.16399   | -716.09568  |        | 1        |
| 28 | H | 62.98637 | 73.74380 | 76.89194 | -2097.85574 | 1636.78449  | -586.18044  |        | 1        |
| 29 | O | 62.84454 | 72.67575 | 75.14251 | -317.80580  | -363.38227  | 484.43082   |        | 1        |
| 30 | H | 62.66899 | 73.62353 | 74.97947 | 1863.74748  | -1451.84923 | 1357.29467  |        | 1        |

|    |   |          |          |          |             |             |             |   |
|----|---|----------|----------|----------|-------------|-------------|-------------|---|
| 31 | C | 64.42999 | 72.08515 | 77.05901 | 503.80731   | 517.99032   | 318.51606   | 1 |
| 32 | H | 65.29169 | 72.61912 | 76.59404 | 640.61020   | -2157.10410 | -1536.29104 | 1 |
| 33 | H | 64.53453 | 72.18568 | 78.17018 | 1687.88455  | 465.60692   | 2087.56452  | 1 |
| 34 | H | 64.52960 | 71.00305 | 76.79605 | -1293.07895 | -1899.88581 | -1463.57452 | 1 |
| 35 | C | 62.34141 | 71.87408 | 79.00367 | -153.07550  | -733.68902  | 248.70981   | 1 |
| 36 | O | 62.78685 | 72.89572 | 79.45899 | 186.15459   | -480.78787  | -449.34387  | 1 |
| 37 | N | 62.09418 | 70.70682 | 79.63199 | -487.53139  | 543.18517   | 42.03850    | 1 |
| 38 | C | 62.11025 | 70.64147 | 81.05445 | -699.35871  | 69.34393    | 360.10701   | 1 |
| 39 | H | 62.10518 | 71.68797 | 81.43696 | 2.81126     | -221.99807  | -2715.58072 | 1 |
| 40 | C | 60.80200 | 69.77747 | 81.32096 | -507.46439  | -592.59194  | 122.07761   | 1 |
| 41 | H | 60.77507 | 69.33865 | 82.34328 | -1975.08116 | 525.87560   | -1801.71556 | 1 |
| 42 | H | 59.88105 | 70.39187 | 81.21073 | 1588.27743  | -1913.22100 | 1113.83566  | 1 |
| 43 | C | 60.90294 | 68.70490 | 80.19234 | -613.62442  | -457.55993  | -194.14490  | 1 |
| 44 | H | 61.62008 | 67.89645 | 80.46746 | 1707.54637  | -721.27992  | 1996.92523  | 1 |
| 45 | H | 59.93415 | 68.20400 | 79.96591 | 758.23357   | 2100.81767  | 1560.55011  | 1 |
| 46 | C | 61.45262 | 69.57115 | 78.98207 | -352.41524  | 704.96076   | 49.21465    | 1 |
| 47 | H | 62.22420 | 69.06187 | 78.35688 | 1714.76886  | -2070.42778 | 443.35792   | 1 |
| 48 | H | 60.64301 | 70.00985 | 78.30667 | 1224.15040  | 1801.50881  | 1636.97633  | 1 |
| 49 | C | 63.38358 | 69.73585 | 81.58283 | 566.85117   | 537.05831   | 117.62814   | 1 |
| 50 | O | 63.64175 | 68.66813 | 81.08282 | -550.26779  | -406.08867  | 4.21666     | 1 |
| 51 | N | 63.96750 | 70.36478 | 82.59107 | 566.34832   | -425.77725  | 180.18749   | 1 |
| 52 | H | 63.56169 | 71.25382 | 82.87980 | 644.44502   | 2646.80550  | -52.73430   | 1 |
| 53 | C | 64.96926 | 69.74582 | 83.38791 | 612.34801   | -281.48662  | 411.56221   | 1 |
| 54 | H | 65.25126 | 70.55323 | 84.09998 | 1667.23498  | -1490.75142 | 1556.16753  | 1 |
| 55 | C | 64.30463 | 68.50203 | 84.14483 | -714.45746  | -175.43074  | 286.98927   | 1 |
| 56 | H | 64.08762 | 67.70471 | 83.38350 | -787.09484  | 1763.03619  | -1922.46060 | 1 |
| 57 | O | 63.06335 | 68.77873 | 84.81955 | -429.46514  | 516.51932   | -128.40526  | 1 |
| 58 | H | 62.45479 | 68.18193 | 84.34068 | 1981.82785  | 436.16847   | -1818.18182 | 1 |
| 59 | C | 65.46892 | 68.02874 | 85.09003 | 630.79189   | -468.94448  | 76.03230    | 1 |
| 60 | H | 65.18304 | 67.11748 | 85.66529 | -1775.71861 | 2062.30353  | 131.89849   | 1 |
| 61 | H | 66.40509 | 67.78145 | 84.51080 | -1855.14608 | 88.94118    | 1993.53760  | 1 |
| 62 | H | 65.73495 | 68.81557 | 85.83426 | -1504.82350 | -780.94249  | -2132.90992 | 1 |
| 63 | C | 66.20028 | 69.29611 | 82.41476 | 288.57638   | 618.62814   | -397.00270  | 1 |
| 64 | O | 66.91470 | 68.35043 | 82.67986 | 321.70495   | -185.26452  | 574.37218   | 1 |
| 65 | N | 66.35052 | 70.19098 | 81.44536 | -447.05792  | -446.53431  | 367.76425   | 1 |
| 66 | H | 65.63176 | 70.90956 | 81.37301 | 350.31316   | 1975.63644  | -1843.31522 | 1 |
| 67 | C | 67.18978 | 69.85678 | 80.34109 | -511.23061  | 374.03917   | -471.51480  | 1 |
| 68 | H | 67.88107 | 69.09359 | 80.76915 | 2234.79579  | -898.70890  | -1273.45190 | 1 |
| 69 | C | 66.22755 | 69.23978 | 79.23831 | 529.53781   | -159.34528  | 563.72604   | 1 |
| 70 | H | 66.87015 | 68.90097 | 78.38564 | 654.59388   | 2347.94251  | 1217.51488  | 1 |
| 71 | H | 65.74166 | 68.32601 | 79.67045 | -1526.55661 | 2103.42026  | 817.87394   | 1 |
| 72 | O | 65.16674 | 70.12861 | 78.71175 | -554.84278  | 14.12789    | 399.58769   | 1 |
| 73 | H | 64.46627 | 69.91277 | 79.35791 | 1297.06236  | 2061.84854  | 1220.68812  | 1 |
| 74 | C | 67.94518 | 71.27321 | 79.99272 | -662.15484  | -412.13544  | 123.62687   | 1 |
| 75 | O | 68.87564 | 71.58660 | 80.70280 | -540.01537  | -317.05804  | 274.91456   | 1 |
| 76 | N | 67.38309 | 71.91619 | 78.98480 | -202.76299  | -690.00100  | -131.49145  | 1 |
| 77 | H | 66.55746 | 71.48691 | 78.54764 | -702.62132  | -2617.37191 | 281.70413   | 1 |
| 78 | C | 67.79808 | 73.20807 | 78.57761 | -491.73914  | 576.34187   | 222.73509   | 1 |
| 79 | H | 66.96853 | 73.55464 | 77.92276 | 1977.17978  | -1823.58850 | -434.68928  | 1 |
| 80 | C | 68.02807 | 74.11201 | 79.86374 | -649.50797  | -328.66843  | 306.11224   | 1 |
| 81 | H | 68.69125 | 73.58059 | 80.59751 | 2075.07803  | 1452.16490  | -1004.45904 | 1 |
| 82 | C | 68.66203 | 75.48828 | 79.46682 | -615.18735  | -489.99689  | -70.96352   | 1 |
| 83 | H | 68.69654 | 76.19008 | 80.33288 | -1226.32661 | -1724.38906 | -1716.47170 | 1 |
| 84 | H | 69.71168 | 75.35458 | 79.11312 | 2381.64273  | -969.84735  | 900.46860   | 1 |
| 85 | H | 68.08974 | 75.99082 | 78.65210 | 2122.74991  | 1702.23946  | -141.36228  | 1 |
| 86 | C | 66.62137 | 74.40315 | 80.49129 | -501.86074  | -479.61276  | -376.42482  | 1 |
| 87 | H | 66.70385 | 75.01002 | 81.42337 | 993.79261   | -2246.95401 | -1177.81305 | 1 |
| 88 | H | 65.96488 | 74.96420 | 79.78569 | 42.71279    | -626.15391  | -2651.37258 | 1 |
| 89 | H | 66.09225 | 73.45662 | 80.75389 | -2026.39012 | -1590.33709 | -887.82922  | 1 |
| 90 | C | 69.21692 | 73.07153 | 77.75501 | -672.89153  | 382.57394   | -156.34072  | 1 |
| 91 | O | 70.29606 | 73.05319 | 78.30577 | 410.04627   | 221.86223   | 500.35950   | 1 |
| 92 | N | 68.96266 | 73.04935 | 76.45034 | -378.11782  | -443.79414  | -441.10984  | 1 |

|     |   |          |          |          |             |             |             |   |
|-----|---|----------|----------|----------|-------------|-------------|-------------|---|
| 93  | H | 67.99889 | 73.09645 | 76.12249 | 2404.15973  | -568.14894  | 1149.30085  | 1 |
| 94  | C | 70.06869 | 72.93781 | 75.56483 | -544.54484  | 466.16019   | 331.29119   | 1 |
| 95  | H | 70.93905 | 72.73833 | 76.23681 | -1409.80988 | -170.17955  | 2325.32679  | 1 |
| 96  | C | 69.71073 | 71.79071 | 74.52342 | -184.48284  | 116.78282   | -758.89137  | 1 |
| 97  | H | 69.32886 | 70.88988 | 75.05493 | 1893.78641  | 1861.14652  | 611.04528   | 1 |
| 98  | H | 68.88921 | 72.12649 | 73.84866 | -2170.79665 | -974.19311  | 1327.50117  | 1 |
| 99  | C | 70.99034 | 71.45373 | 73.69760 | 389.51668   | 672.81878   | -138.49152  | 1 |
| 100 | H | 71.29927 | 72.35179 | 73.11278 | 510.64577   | 1933.03327  | 1851.02484  | 1 |
| 101 | H | 71.84890 | 71.25687 | 74.37683 | -2302.30869 | -1105.72939 | -948.89774  | 1 |
| 102 | C | 70.79963 | 70.22460 | 72.72972 | -559.93427  | -126.34590  | 542.30857   | 1 |
| 103 | O | 71.73349 | 69.84013 | 72.07515 | -670.36003  | -111.83166  | 76.36448    | 1 |
| 104 | N | 69.55557 | 69.69939 | 72.73610 | -216.06729  | -537.07037  | 446.51379   | 1 |
| 105 | H | 68.71525 | 70.00790 | 73.23913 | -1251.96487 | 1074.12894  | -2168.52500 | 1 |
| 106 | H | 69.26164 | 68.91705 | 72.14121 | -2451.83023 | -720.73851  | 944.84612   | 1 |
| 107 | C | 70.21947 | 74.28721 | 74.64658 | 546.24052   | -563.88337  | -85.11809   | 1 |
| 108 | O | 69.98088 | 74.18477 | 73.47146 | 71.70702    | -307.40463  | 606.69673   | 1 |
| 109 | N | 70.59958 | 75.36677 | 75.34834 | 479.90863   | -504.50129  | 222.86849   | 1 |
| 110 | C | 70.97556 | 76.59480 | 74.72774 | 75.51268    | -600.91904  | 506.73700   | 1 |
| 111 | H | 70.58732 | 76.60453 | 73.68269 | -2033.61562 | 1795.30103  | 254.89480   | 1 |
| 112 | C | 70.31709 | 77.63015 | 75.74966 | 523.79067   | 517.99274   | 284.45581   | 1 |
| 113 | H | 70.69474 | 78.66816 | 75.62086 | 1599.61665  | -1127.00911 | 1895.98173  | 1 |
| 114 | H | 69.21156 | 77.67232 | 75.63575 | -1881.83093 | 1275.82488  | -1501.55016 | 1 |
| 115 | C | 70.72862 | 76.98573 | 77.10671 | -600.05639  | -404.05026  | 316.64485   | 1 |
| 116 | H | 71.79758 | 77.19821 | 77.33915 | -2597.05260 | 496.36221   | 657.73249   | 1 |
| 117 | H | 70.13342 | 77.35170 | 77.97320 | -1666.24518 | 1294.38985  | -1723.90591 | 1 |
| 118 | C | 70.51667 | 75.44050 | 76.80207 | 493.57570   | -129.95376  | -602.56394  | 1 |
| 119 | H | 71.30944 | 74.77051 | 77.21603 | -1469.08415 | -637.84797  | 2204.22581  | 1 |
| 120 | H | 69.51212 | 75.03056 | 77.06851 | -1038.97840 | 1068.88701  | -2280.71789 | 1 |
| 121 | C | 72.59222 | 76.79560 | 74.86464 | 188.88100   | 241.05089   | -727.87821  | 1 |
| 122 | O | 73.26102 | 76.21967 | 75.71887 | 531.88613   | -49.19943   | 427.07960   | 1 |
| 123 | N | 72.97291 | 77.71976 | 74.01448 | 708.14833   | 26.93417    | -179.73509  | 1 |
| 124 | H | 72.22365 | 78.06046 | 73.41581 | -2232.69501 | -1179.09831 | 1023.94816  | 1 |
| 125 | C | 74.32092 | 78.24788 | 73.93102 | -738.32412  | 259.92548   | 104.42456   | 1 |
| 126 | H | 74.24504 | 79.09450 | 73.20727 | 2028.89123  | 1260.02983  | 1311.33324  | 1 |
| 127 | C | 74.76639 | 78.67347 | 75.32762 | -258.65678  | -345.52513  | 661.28459   | 1 |
| 128 | H | 74.63223 | 77.79955 | 76.01211 | -1826.06090 | -1801.46097 | -918.64554  | 1 |
| 129 | C | 76.22503 | 79.07366 | 75.35895 | -541.23400  | 531.92970   | -218.41428  | 1 |
| 130 | H | 76.55168 | 79.36598 | 76.39546 | 1311.73218  | -2219.18200 | 882.19023   | 1 |
| 131 | H | 76.91482 | 78.21396 | 75.01578 | -1048.71298 | 1223.58118  | -2196.97971 | 1 |
| 132 | H | 76.42841 | 79.95270 | 74.68707 | 419.06414   | 1903.92898  | 1903.44670  | 1 |
| 133 | C | 73.90210 | 79.79625 | 75.87128 | -423.86431  | 152.66566   | -648.55262  | 1 |
| 134 | H | 74.18981 | 80.07119 | 76.92344 | 105.68386   | -2342.50080 | 1387.51238  | 1 |
| 135 | H | 73.99029 | 80.72763 | 75.24725 | -1695.63603 | -1484.73621 | -1531.02793 | 1 |
| 136 | H | 72.81573 | 79.50575 | 75.88600 | -1853.57121 | -487.39031  | 1936.59343  | 1 |
| 137 | C | 75.26683 | 77.00906 | 73.33491 | 539.71428   | -510.58232  | 267.58633   | 1 |
| 138 | O | 75.65311 | 77.06749 | 72.19777 | -15.93758   | -278.34085  | -624.49402  | 1 |
| 139 | N | 75.45486 | 76.06252 | 74.23642 | -676.81886  | 12.05292    | 276.17960   | 1 |
| 140 | H | 74.92885 | 76.07324 | 75.13892 | -1694.44250 | -373.84189  | -2100.66098 | 1 |
| 141 | C | 76.42318 | 75.05875 | 73.95394 | 412.33078   | -664.70360  | 108.35451   | 1 |
| 142 | H | 76.29592 | 74.33524 | 74.79106 | 1765.77476  | 1294.44366  | 1621.76594  | 1 |
| 143 | C | 76.02361 | 74.48511 | 72.52693 | -179.66635  | -721.95667  | -264.73915  | 1 |
| 144 | H | 74.94666 | 74.68192 | 72.32430 | -607.34922  | 2587.87032  | -598.10018  | 1 |
| 145 | H | 76.57693 | 75.03035 | 71.72733 | -359.69332  | -1479.13954 | -2259.74260 | 1 |
| 146 | C | 76.32209 | 72.95049 | 72.46770 | -240.01076  | 616.02425   | 431.85322   | 1 |
| 147 | H | 77.38230 | 72.73238 | 72.73043 | -1359.17131 | 782.54425   | 2227.99181  | 1 |
| 148 | H | 75.70356 | 72.38975 | 73.20385 | -820.36667  | 85.81767    | -2596.78715 | 1 |
| 149 | C | 76.00626 | 72.48817 | 70.98804 | -513.07015  | 236.18570   | -551.87280  | 1 |
| 150 | H | 74.90838 | 72.49254 | 70.79597 | 1816.11944  | -1183.11722 | -1650.94321 | 1 |
| 151 | H | 76.44510 | 73.19833 | 70.25020 | -1800.04429 | -1361.53473 | 1526.34643  | 1 |
| 152 | C | 76.60129 | 71.07437 | 70.79260 | 726.08972   | -253.19732  | -179.64713  | 1 |
| 153 | H | 77.70489 | 71.02276 | 70.88375 | 1224.27271  | -456.51798  | -2390.90304 | 1 |
| 154 | H | 76.13158 | 70.28316 | 71.41061 | 1206.40339  | -1150.93514 | -2154.90344 | 1 |

|     |   |          |          |          |             |             |             |   |
|-----|---|----------|----------|----------|-------------|-------------|-------------|---|
| 155 | N | 76.30745 | 70.65312 | 69.31448 | 329.70796   | -633.68968  | -155.67358  | 1 |
| 156 | H | 76.69939 | 69.71431 | 69.01457 | 1348.31305  | 1938.76845  | 1359.00643  | 1 |
| 157 | H | 75.28471 | 70.54370 | 69.05584 | 2096.92035  | 1446.54551  | -966.48890  | 1 |
| 158 | H | 76.66608 | 71.28841 | 68.54301 | -1197.07217 | -2303.53719 | 827.28733   | 1 |
| 159 | C | 77.89928 | 75.76582 | 73.93454 | -378.01186  | -556.17301  | -413.96481  | 1 |
| 160 | O | 78.10632 | 76.86133 | 74.42607 | -409.44433  | -307.55053  | -453.30833  | 1 |
| 161 | N | 78.74984 | 74.96001 | 73.33083 | -429.02477  | 524.70884   | 274.08502   | 1 |
| 162 | H | 78.38841 | 74.07521 | 72.98121 | 1706.34263  | -1425.96036 | 1574.38926  | 1 |
| 163 | C | 80.14837 | 75.23024 | 73.32250 | -45.25864   | -626.22952  | 478.93267   | 1 |
| 164 | H | 80.54370 | 74.54611 | 72.53788 | 1988.63164  | 570.90773   | 1772.87287  | 1 |
| 165 | C | 80.29491 | 76.76727 | 72.97153 | 551.77128   | -20.49526   | -564.54996  | 1 |
| 166 | H | 79.44797 | 77.06355 | 72.31184 | 1434.61535  | -1753.10253 | 1513.99471  | 1 |
| 167 | H | 80.17882 | 77.39371 | 73.88897 | -714.67738  | 1819.09770  | 1898.36494  | 1 |
| 168 | C | 81.66455 | 77.06807 | 72.26532 | 446.99263   | -555.77305  | 338.97221   | 1 |
| 169 | H | 82.47025 | 77.27212 | 73.00885 | 1953.68466  | 1892.25957  | -161.67766  | 1 |
| 170 | H | 82.00811 | 76.19835 | 71.65932 | -403.03785  | 2688.07032  | -188.43591  | 1 |
| 171 | C | 81.43115 | 78.31289 | 71.34783 | 567.86262   | 335.74681   | 434.04421   | 1 |
| 172 | H | 80.68412 | 78.09782 | 70.55248 | -1080.02275 | 1568.26081  | -1948.78900 | 1 |
| 173 | H | 81.01490 | 79.16564 | 71.92778 | -919.54108  | 2111.34692  | 1456.13463  | 1 |
| 174 | C | 82.84325 | 78.70480 | 70.71147 | 195.81897   | 173.33862   | -745.11536  | 1 |
| 175 | H | 83.60579 | 78.97811 | 71.49348 | 1405.67949  | -2301.21089 | -390.08113  | 1 |
| 176 | H | 83.27836 | 77.91348 | 70.00834 | -940.37328  | -1118.32446 | 2299.72133  | 1 |
| 177 | N | 82.62189 | 79.86612 | 69.90225 | 319.26422   | 656.36007   | -42.02424   | 1 |
| 178 | H | 85.09872 | 80.66994 | 69.97350 | 1961.03633  | 619.91968   | 1787.09422  | 2 |
| 179 | H | 83.22757 | 79.94131 | 69.08987 | 854.14343   | -2156.80752 | 1429.08711  | 1 |
| 180 | H | 82.79869 | 80.75072 | 70.36968 | 1237.02905  | -1378.50857 | -1998.28500 | 1 |
| 181 | C | 80.72361 | 74.86082 | 74.80774 | 532.53319   | -268.57236  | 517.55729   | 1 |
| 182 | O | 80.07884 | 74.27730 | 75.64811 | 266.16714   | -290.73804  | -558.88002  | 1 |
| 183 | N | 82.02117 | 75.18528 | 74.84733 | -226.25352  | 640.49678   | -270.32839  | 1 |
| 184 | H | 82.39451 | 75.65427 | 74.02421 | 2007.69063  | -1035.27229 | 1523.50231  | 1 |
| 185 | C | 82.56310 | 75.46967 | 76.13844 | -540.76542  | -573.33303  | 49.50000    | 1 |
| 186 | H | 81.81978 | 75.04511 | 76.85259 | -2374.20950 | -1036.76023 | 843.75774   | 1 |
| 187 | C | 83.99242 | 74.76431 | 76.20198 | -77.09082   | 666.87422   | -415.84136  | 1 |
| 188 | H | 84.63585 | 75.15030 | 75.36338 | -985.81834  | 617.19825   | 2463.91927  | 1 |
| 189 | O | 84.01037 | 73.33142 | 76.04424 | 293.29899   | -391.65602  | -477.80926  | 1 |
| 190 | H | 84.49602 | 73.23701 | 75.20195 | 2528.72714  | -681.76262  | -751.27122  | 1 |
| 191 | C | 84.51717 | 75.30683 | 77.58144 | 252.47363   | -605.14473  | 440.05134   | 1 |
| 192 | H | 85.58385 | 75.03223 | 77.75131 | -2052.65063 | 1456.49051  | -1043.51830 | 1 |
| 193 | H | 84.44113 | 76.41734 | 77.64231 | -2152.98800 | -1661.97574 | -161.70652  | 1 |
| 194 | H | 83.92840 | 74.88978 | 78.43107 | -473.12726  | -1584.27339 | 2165.61725  | 1 |
| 195 | C | 82.67649 | 77.10703 | 76.21318 | 360.36307   | 488.46713   | 505.10056   | 1 |
| 196 | O | 81.82904 | 77.73539 | 76.79823 | -200.08817  | -528.03552  | -385.82850  | 1 |
| 197 | N | 83.74091 | 77.55681 | 75.55337 | -597.54095  | -226.44775  | 355.20479   | 1 |
| 198 | H | 84.36517 | 76.91560 | 75.06537 | 2179.23655  | -1300.70981 | -991.33835  | 1 |
| 199 | C | 83.94335 | 78.94103 | 75.45441 | -687.68921  | 297.39807   | -249.45179  | 1 |
| 200 | H | 83.08214 | 79.44714 | 75.94506 | -349.16256  | -2467.37713 | -1101.72831 | 1 |
| 201 | C | 85.37211 | 79.27619 | 76.08828 | 672.47345   | 361.54328   | -201.62880  | 1 |
| 202 | H | 86.14235 | 78.54983 | 75.74119 | 1541.41502  | 582.18425   | 2169.97026  | 1 |
| 203 | H | 85.70203 | 80.28945 | 75.76221 | -2534.67717 | 60.25153    | 997.72295   | 1 |
| 204 | C | 85.21418 | 79.22846 | 77.61517 | 574.26774   | -389.43119  | -377.02542  | 1 |
| 205 | C | 84.46908 | 80.26287 | 78.25712 | 688.82679   | -287.33580  | -257.96133  | 1 |
| 206 | H | 84.06125 | 81.10865 | 77.67440 | 331.14182   | 1470.38163  | 2269.80013  | 1 |
| 207 | C | 85.75578 | 78.14951 | 78.37705 | -383.52382  | -675.04808  | 144.24917   | 1 |
| 208 | H | 86.35240 | 77.35859 | 77.88758 | 4.09847     | 1517.59662  | 2262.86397  | 1 |
| 209 | C | 84.24926 | 80.17362 | 79.63101 | -134.76730  | 428.45285   | -649.50303  | 1 |
| 210 | H | 83.66367 | 80.96857 | 80.12494 | -903.23433  | 1600.49020  | 2011.53387  | 1 |
| 211 | C | 85.50009 | 78.09969 | 79.74993 | -335.53281  | -615.00040  | -364.39058  | 1 |
| 212 | H | 85.90549 | 77.24968 | 80.32606 | 1596.45398  | -1369.33862 | 1732.02659  | 1 |
| 213 | C | 84.73847 | 79.09699 | 80.42621 | 585.48547   | -340.24194  | -406.23938  | 1 |
| 214 | O | 84.46975 | 79.05585 | 81.81921 | -419.15649  | -173.04408  | -511.94141  | 1 |
| 215 | H | 84.91903 | 78.20939 | 82.05092 | -1071.84350 | 1559.71507  | -1960.13012 | 1 |
| 216 | C | 84.16035 | 79.24959 | 73.82545 | 291.41878   | -183.13091  | 710.72246   | 1 |

|     |   |          |          |          |             |             |             |   |
|-----|---|----------|----------|----------|-------------|-------------|-------------|---|
| 217 | O | 84.82116 | 78.44401 | 73.09547 | 379.87695   | 523.47396   | -222.23622  | 1 |
| 218 | N | 83.67426 | 80.36592 | 73.46439 | 564.30591   | 373.09380   | 277.24371   | 1 |
| 219 | H | 83.21383 | 80.84455 | 74.21942 | -120.59931  | -2436.07824 | -1214.35098 | 1 |
| 220 | C | 85.91716 | 80.23777 | 70.58827 | 404.07514   | -299.37480  | 608.84009   | 2 |
| 221 | H | 85.47338 | 80.03499 | 71.59108 | -1071.07882 | -841.69025  | 2359.66467  | 2 |
| 222 | C | 87.07571 | 81.28282 | 70.69979 | -683.12807  | 68.71770    | -390.13096  | 2 |
| 223 | H | 86.78033 | 82.12591 | 71.36607 | 2068.88918  | 1596.58590  | 770.89603   | 2 |
| 224 | H | 87.97996 | 80.82227 | 71.16007 | 1379.86429  | 2342.49779  | -179.85638  | 2 |
| 225 | C | 87.38284 | 81.80895 | 69.25599 | -176.39967  | 537.49466   | 550.97268   | 2 |
| 226 | H | 87.69579 | 80.97323 | 68.58702 | -396.28051  | 1942.22168  | 1869.33314  | 2 |
| 227 | H | 86.47347 | 82.24616 | 68.78739 | -94.44700   | 586.00678   | -2659.20016 | 2 |
| 228 | C | 88.53595 | 82.90019 | 69.40946 | -291.69381  | -718.18079  | -150.72929  | 2 |
| 229 | H | 88.29034 | 83.76838 | 70.07339 | -2303.38776 | 1089.76242  | 964.62032   | 2 |
| 230 | H | 89.53672 | 82.50590 | 69.72130 | 884.16729   | 2568.80533  | -207.74283  | 2 |
| 231 | N | 88.65444 | 83.39434 | 68.10238 | -594.49522  | -252.81478  | 342.29276   | 2 |
| 232 | H | 88.03682 | 83.00299 | 67.40827 | -1735.17426 | 2084.05705  | -263.71605  | 2 |
| 233 | C | 89.47775 | 84.29458 | 67.74519 | 595.23177   | -271.52487  | 442.22352   | 2 |
| 234 | N | 90.32678 | 84.82472 | 68.72328 | 585.53813   | -424.79750  | -105.81303  | 2 |
| 235 | H | 90.39739 | 84.59240 | 69.71311 | 959.88797   | 1327.56823  | -2177.11905 | 2 |
| 236 | H | 91.02919 | 85.54637 | 68.55900 | 1578.48647  | 16.27378    | -2220.76233 | 2 |
| 237 | N | 89.35169 | 84.58080 | 66.37840 | -452.17763  | -390.33541  | -421.51853  | 2 |
| 238 | H | 88.73012 | 84.19557 | 65.66893 | 470.26107   | 1974.25629  | -1817.92087 | 2 |
| 239 | H | 89.92219 | 85.27875 | 65.89965 | 1856.67307  | -1573.97321 | -1224.35416 | 2 |
| 240 | C | 86.44742 | 78.88946 | 69.93573 | -531.47271  | -581.45780  | -55.06206   | 2 |
| 241 | O | 87.08342 | 78.83124 | 68.91782 | -243.00837  | 192.73507   | 609.52485   | 2 |
| 242 | N | 86.04707 | 77.88222 | 70.74986 | 343.49288   | -644.25607  | 38.09164    | 2 |
| 243 | H | 85.49501 | 78.10091 | 71.64120 | -1691.16043 | -1535.97525 | -1484.73099 | 2 |
| 244 | C | 86.25617 | 76.47693 | 70.35573 | 542.66492   | 350.14337   | 454.42563   | 2 |
| 245 | H | 87.34241 | 76.39792 | 70.11862 | 1209.57979  | -2396.95920 | 463.86744   | 2 |
| 246 | C | 85.79947 | 75.60730 | 71.50541 | -737.14309  | 145.93010   | 242.71942   | 2 |
| 247 | H | 84.72842 | 75.84097 | 71.70368 | -1050.18303 | 159.36419   | -2509.06125 | 2 |
| 248 | C | 85.90520 | 74.13155 | 71.16228 | -706.77696  | -252.88343  | -245.16230  | 2 |
| 249 | H | 85.50567 | 73.48282 | 71.98915 | -1624.64039 | -1665.49085 | 1417.86935  | 2 |
| 250 | H | 85.32915 | 73.87497 | 70.22703 | 2566.10521  | 598.51109   | 693.22305   | 2 |
| 251 | H | 86.97190 | 73.82399 | 70.98549 | -1972.69758 | 107.10018   | -1876.34312 | 2 |
| 252 | C | 86.56596 | 75.89430 | 72.78455 | 412.85148   | 672.58832   | -27.69222   | 2 |
| 253 | H | 86.25447 | 75.21116 | 73.62118 | 1447.02277  | 1762.76533  | -1490.78944 | 2 |
| 254 | H | 87.67354 | 75.76401 | 72.64172 | 1320.77379  | -145.20455  | 2378.68491  | 2 |
| 255 | H | 86.39461 | 76.95344 | 73.13589 | -1512.10848 | 1470.52031  | 1724.75147  | 2 |
| 256 | C | 85.30176 | 76.20101 | 69.03822 | -607.11113  | 499.56689   | 73.73769    | 2 |
| 257 | O | 84.18160 | 76.66058 | 68.92543 | 357.97126   | 460.81534   | 356.68785   | 2 |
| 258 | N | 85.93462 | 75.35994 | 68.24272 | 536.55407   | -368.62270  | 332.76306   | 2 |
| 259 | H | 86.84215 | 75.00316 | 68.53520 | 524.38866   | 2297.69985  | 1367.20941  | 2 |
| 260 | C | 85.31967 | 75.01554 | 67.01285 | 46.50277    | -774.29190  | -147.97904  | 2 |
| 261 | H | 84.59733 | 75.84434 | 66.83069 | 1676.51875  | 1883.29066  | 1032.55549  | 2 |
| 262 | C | 86.46515 | 74.83656 | 65.89137 | -559.41456  | -34.19198   | -556.30433  | 2 |
| 263 | H | 87.03478 | 73.89949 | 66.09976 | -64.66664   | 395.18769   | 2695.05373  | 2 |
| 264 | H | 86.00703 | 74.69346 | 64.88373 | -2703.44278 | -60.40056   | 333.79418   | 2 |
| 265 | C | 87.39606 | 76.02055 | 65.90292 | -519.76435  | 377.31045   | 459.42366   | 2 |
| 266 | H | 87.74808 | 76.18356 | 66.94691 | -1746.74323 | 1667.50644  | -1261.73691 | 2 |
| 267 | C | 88.61091 | 75.74805 | 65.02481 | 570.95554   | 16.46261    | -545.27700  | 2 |
| 268 | H | 89.33193 | 76.60574 | 65.03873 | 2391.58273  | 28.05277    | -1305.07271 | 2 |
| 269 | H | 89.17092 | 74.83835 | 65.36342 | 175.75588   | 917.63458   | 2559.43867  | 2 |
| 270 | H | 88.31827 | 75.57813 | 63.95680 | -1063.97851 | -2155.34650 | 1283.00462  | 2 |
| 271 | C | 86.69506 | 77.29045 | 65.44089 | 193.76014   | 2.62946     | -765.53141  | 2 |
| 272 | H | 87.39694 | 78.16425 | 65.42352 | 507.39394   | -846.55087  | 2539.60089  | 2 |
| 273 | H | 86.27374 | 77.17986 | 64.40840 | 1337.57841  | 1818.19054  | 1526.01994  | 2 |
| 274 | H | 85.84828 | 77.56257 | 66.12335 | 1100.88635  | -1172.91350 | -2199.08909 | 2 |
| 275 | C | 84.58421 | 73.59202 | 67.22977 | -549.21115  | 475.64486   | -309.38218  | 2 |
| 276 | O | 84.83013 | 72.83694 | 68.13340 | 556.06106   | -390.37755  | -78.24250   | 2 |
| 277 | O | 83.67522 | 73.22445 | 66.20965 | -572.27940  | -310.19032  | -209.75862  | 2 |
| 278 | H | 83.71738 | 74.05642 | 65.66027 | -1380.08193 | 2212.14486  | 790.85944   | 2 |



Listing 68: C00068.xmolout

|    |          |          |          |          |             |             |             |          |
|----|----------|----------|----------|----------|-------------|-------------|-------------|----------|
| 1  | 276      |          |          |          |             |             |             |          |
| 2  | 150.0000 | 150.0000 | 150.0000 | 0.0000   | 0.0000      | 0.0000***** | 2.7750      | 11100    |
|    | 0.2500   | 300.00   | 0.00     | 0.00     | 0.00        | -1293.6004  | 0.0000      | 300.0000 |
| 3  | H        | 60.36614 | 78.27556 | 70.64603 | -2043.14101 | -1757.64893 | 399.89339   | 1        |
| 4  | N        | 60.50544 | 79.18841 | 71.07076 | 426.75047   | 490.45733   | -334.42467  | 1        |
| 5  | H        | 60.49184 | 78.96866 | 72.06287 | 442.25559   | -1110.30854 | -2448.52907 | 1        |
| 6  | C        | 61.61101 | 79.93883 | 70.60383 | 415.32972   | -666.39213  | 83.73172    | 1        |
| 7  | H        | 61.65826 | 79.68466 | 69.52035 | 879.32219   | 2491.00447  | 667.35213   | 1        |
| 8  | C        | 61.33517 | 81.51980 | 70.84406 | 31.35357    | 477.41777   | 628.23362   | 1        |
| 9  | H        | 61.22878 | 81.71685 | 71.93664 | 1168.38489  | 2240.25337  | -1019.71136 | 1        |
| 10 | H        | 62.21575 | 82.11718 | 70.50896 | -360.43770  | 2534.90498  | 931.67112   | 1        |
| 11 | C        | 60.09234 | 81.92926 | 70.11074 | 463.18208   | 512.70242   | -382.34388  | 1        |
| 12 | H        | 59.28061 | 81.21346 | 70.37523 | 1725.29117  | 1863.52247  | -987.07854  | 1        |
| 13 | C        | 59.66322 | 83.33092 | 70.53097 | 710.42801   | -144.27427  | -313.15367  | 1        |
| 14 | H        | 58.72358 | 83.64917 | 70.01082 | 364.20195   | -1033.13725 | 2494.72524  | 1        |
| 15 | H        | 59.47070 | 83.39285 | 71.63269 | 2567.61904  | 335.80679   | 847.48802   | 1        |
| 16 | H        | 60.44936 | 84.09125 | 70.28871 | -2587.99029 | 680.92867   | -512.16411  | 1        |
| 17 | C        | 60.29671 | 81.90108 | 68.60089 | 268.17616   | 741.64379   | -40.42634   | 1        |
| 18 | H        | 59.37999 | 82.24071 | 68.05387 | 1283.54314  | -1945.37420 | -1411.27812 | 1        |
| 19 | H        | 61.13776 | 82.57099 | 68.28658 | -1258.57796 | 1317.15249  | -2026.02085 | 1        |
| 20 | H        | 60.53789 | 80.87132 | 68.23293 | -2502.84526 | 909.80597   | 575.92391   | 1        |
| 21 | C        | 62.92879 | 79.52656 | 71.38078 | 619.36578   | -458.64843  | -172.09273  | 1        |
| 22 | O        | 63.96294 | 80.28460 | 71.44491 | -81.40433   | 433.87611   | 522.34594   | 1        |
| 23 | N        | 62.89634 | 78.32644 | 71.88457 | 175.23996   | -622.20190  | 341.55523   | 1        |
| 24 | H        | 62.04554 | 77.77143 | 71.82930 | -876.57256  | -303.22879  | -2561.90213 | 1        |
| 25 | C        | 63.95344 | 78.07927 | 72.82363 | -571.88214  | -534.10783  | -106.15033  | 1        |
| 26 | H        | 63.48755 | 78.30574 | 73.80165 | -2713.20841 | -16.25800   | -248.80809  | 1        |
| 27 | C        | 64.29733 | 76.55171 | 72.68262 | 166.60354   | 288.16399   | -716.09568  | 1        |
| 28 | H        | 64.58199 | 76.34142 | 71.61507 | -2097.85574 | 1636.78449  | -586.18044  | 1        |
| 29 | O        | 63.21970 | 75.62764 | 72.98430 | -317.80580  | -363.38227  | 484.43082   | 1        |
| 30 | H        | 63.11990 | 75.16104 | 72.13534 | 1863.74748  | -1451.84923 | 1357.29467  | 1        |
| 31 | C        | 65.57728 | 76.46565 | 73.59671 | 503.80731   | 517.99032   | 318.51606   | 1        |
| 32 | H        | 66.05045 | 75.45797 | 73.54124 | 640.61020   | -2157.10410 | -1536.29104 | 1        |
| 33 | H        | 66.34474 | 77.21755 | 73.28888 | 1687.88455  | 465.60692   | 2087.56452  | 1        |
| 34 | H        | 65.33098 | 76.65765 | 74.66664 | -1293.07895 | -1899.88581 | -1463.57452 | 1        |
| 35 | C        | 65.22465 | 79.11571 | 72.39881 | -153.07550  | -733.68902  | 248.70981   | 1        |
| 36 | O        | 66.05359 | 78.69803 | 71.56901 | 186.15459   | -480.78787  | -449.34387  | 1        |
| 37 | N        | 65.59203 | 79.84244 | 73.51506 | -487.53139  | 543.18517   | 42.03850    | 1        |
| 38 | C        | 66.56748 | 80.85732 | 73.41381 | -699.35871  | 69.34393    | 360.10701   | 1        |
| 39 | H        | 66.60823 | 81.10163 | 72.32605 | 2.81126     | -221.99807  | -2715.58072 | 1        |
| 40 | C        | 66.00027 | 81.99100 | 74.38392 | -507.46439  | -592.59194  | 122.07761   | 1        |
| 41 | H        | 66.78889 | 82.69685 | 74.72836 | -1975.08116 | 525.87560   | -1801.71556 | 1        |
| 42 | H        | 65.21204 | 82.59934 | 73.88650 | 1588.27743  | -1913.22100 | 1113.83566  | 1        |
| 43 | C        | 65.40939 | 81.12217 | 75.53087 | -613.62442  | -457.55993  | -194.14490  | 1        |
| 44 | H        | 66.21408 | 80.74557 | 76.20153 | 1707.54637  | -721.27992  | 1996.92523  | 1        |
| 45 | H        | 64.68109 | 81.66386 | 76.17441 | 758.23357   | 2100.81767  | 1560.55011  | 1        |
| 46 | C        | 64.74661 | 79.93770 | 74.68489 | -352.41524  | 704.96076   | 49.21465    | 1        |
| 47 | H        | 64.73995 | 78.94398 | 75.19532 | 1714.76886  | -2070.42778 | 443.35792   | 1        |
| 48 | H        | 63.72162 | 80.16326 | 74.29996 | 1224.15040  | 1801.50881  | 1636.97633  | 1        |
| 49 | C        | 68.03567 | 80.34815 | 73.99521 | 566.85117   | 537.05831   | 117.62814   | 1        |
| 50 | O        | 68.57207 | 80.93858 | 74.89904 | -550.26779  | -406.08867  | 4.21666     | 1        |
| 51 | N        | 68.47506 | 79.32033 | 73.28851 | 566.34832   | -425.77725  | 180.18749   | 1        |
| 52 | H        | 67.89766 | 78.97398 | 72.51698 | 644.44502   | 2646.80550  | -52.73430   | 1        |
| 53 | C        | 69.75523 | 78.78507 | 73.57698 | 612.34801   | -281.48662  | 411.56221   | 1        |
| 54 | H        | 70.14018 | 79.33026 | 74.47079 | 1667.23498  | -1490.75142 | 1556.16753  | 1        |
| 55 | C        | 69.51570 | 77.21442 | 73.81817 | -714.45746  | -175.43074  | 286.98927   | 1        |
| 56 | H        | 68.94295 | 76.80946 | 72.93987 | -787.09484  | 1763.03619  | -1922.46060 | 1        |
| 57 | O        | 68.73900 | 76.89184 | 74.98564 | -429.46514  | 516.51932   | -128.40526  | 1        |

|     |   |          |          |          |             |             |             |   |
|-----|---|----------|----------|----------|-------------|-------------|-------------|---|
| 58  | H | 67.94952 | 76.48524 | 74.57795 | 1981.82785  | 436.16847   | -1818.18182 | 1 |
| 59  | C | 70.97057 | 76.62209 | 73.80277 | 630.79189   | -468.94448  | 76.03230    | 1 |
| 60  | H | 70.96655 | 75.51933 | 73.96409 | -1775.71861 | 2062.30353  | 131.89849   | 1 |
| 61  | H | 71.49327 | 76.81302 | 72.83632 | -1855.14608 | 88.94118    | 1993.53760  | 1 |
| 62  | H | 71.59648 | 77.07101 | 74.60543 | -1504.82350 | -780.94249  | -2132.90992 | 1 |
| 63  | C | 70.65698 | 78.97222 | 72.22782 | 288.57638   | 618.62814   | -397.00270  | 1 |
| 64  | O | 70.17327 | 78.97911 | 71.11874 | 321.70495   | -185.26452  | 574.37218   | 1 |
| 65  | N | 71.95116 | 79.03309 | 72.55063 | -447.05792  | -446.53431  | 367.76425   | 1 |
| 66  | H | 72.22584 | 78.96200 | 73.52892 | 350.31316   | 1975.63644  | -1843.31522 | 1 |
| 67  | C | 72.85417 | 78.80533 | 71.45373 | -511.23061  | 374.03917   | -471.51480  | 1 |
| 68  | H | 72.25980 | 78.08667 | 70.84281 | 2234.79579  | -898.70890  | -1273.45190 | 1 |
| 69  | C | 72.97987 | 80.20344 | 70.68273 | 529.53781   | -159.34528  | 563.72604   | 1 |
| 70  | H | 73.41275 | 79.97965 | 69.67043 | 654.59388   | 2347.94251  | 1217.51488  | 1 |
| 71  | H | 71.93074 | 80.56244 | 70.51363 | -1526.55661 | 2103.42026  | 817.87394   | 1 |
| 72  | O | 73.80803 | 81.21749 | 71.31758 | -554.84278  | 14.12789    | 399.58769   | 1 |
| 73  | H | 73.12789 | 81.65320 | 71.86427 | 1297.06236  | 2061.84854  | 1220.68812  | 1 |
| 74  | C | 74.23037 | 78.17728 | 72.01672 | -662.15484  | -412.13544  | 123.62687   | 1 |
| 75  | O | 74.21723 | 77.24561 | 72.78212 | -540.01537  | -317.05804  | 274.91456   | 1 |
| 76  | N | 75.29264 | 78.71351 | 71.37731 | -202.76299  | -690.00100  | -131.49145  | 1 |
| 77  | H | 75.07883 | 79.57214 | 70.85824 | -702.62132  | -2617.37191 | 281.70413   | 1 |
| 78  | C | 76.66328 | 78.46726 | 71.83979 | -491.73914  | 576.34187   | 222.73509   | 1 |
| 79  | H | 76.71687 | 77.35948 | 71.93431 | 1977.17978  | -1823.58850 | -434.68928  | 1 |
| 80  | C | 77.58288 | 79.02957 | 70.77853 | -649.50797  | -328.66843  | 306.11224   | 1 |
| 81  | H | 77.33688 | 80.10874 | 70.65408 | 2075.07803  | 1452.16490  | -1004.45904 | 1 |
| 82  | C | 79.05143 | 78.92623 | 71.14922 | -615.18735  | -489.99689  | -70.96352   | 1 |
| 83  | H | 79.71391 | 79.33419 | 70.33706 | -1226.32661 | -1724.38906 | -1716.47170 | 1 |
| 84  | H | 79.28533 | 79.50205 | 72.08866 | 2381.64273  | -969.84735  | 900.46860   | 1 |
| 85  | H | 79.35765 | 77.85878 | 71.32434 | 2122.74991  | 1702.23946  | -141.36228  | 1 |
| 86  | C | 77.35991 | 78.35324 | 69.43541 | -501.86074  | -479.61276  | -376.42482  | 1 |
| 87  | H | 77.98109 | 78.82124 | 68.62384 | 993.79261   | -2246.95401 | -1177.81305 | 1 |
| 88  | H | 77.62918 | 77.26258 | 69.47430 | 42.71279    | -626.15391  | -2651.37258 | 1 |
| 89  | H | 76.28430 | 78.41679 | 69.11515 | -2026.39012 | -1590.33709 | -887.82922  | 1 |
| 90  | C | 76.89960 | 79.18487 | 73.32238 | -672.89153  | 382.57394   | -156.34072  | 1 |
| 91  | O | 77.97124 | 79.07051 | 73.86729 | 410.04627   | 221.86223   | 500.35950   | 1 |
| 92  | N | 75.82297 | 79.81905 | 73.73990 | -378.11782  | -443.79414  | -441.10984  | 1 |
| 93  | H | 75.02854 | 79.79369 | 73.09915 | 2404.15973  | -568.14894  | 1149.30085  | 1 |
| 94  | C | 75.81428 | 80.55580 | 74.96890 | -544.54484  | 466.16019   | 331.29119   | 1 |
| 95  | H | 76.69564 | 81.23106 | 74.89331 | -1409.80988 | -170.17955  | 2325.32679  | 1 |
| 96  | C | 74.41863 | 81.30288 | 74.97771 | -184.48284  | 116.78282   | -758.89137  | 1 |
| 97  | H | 74.38165 | 82.10399 | 74.20491 | 1893.78641  | 1861.14652  | 611.04528   | 1 |
| 98  | H | 73.60714 | 80.59599 | 74.69613 | -2170.79665 | -974.19311  | 1327.50117  | 1 |
| 99  | C | 74.17795 | 81.88207 | 76.40642 | 389.51668   | 672.81878   | -138.49152  | 1 |
| 100 | H | 74.57216 | 81.17536 | 77.17409 | 510.64577   | 1933.03327  | 1851.02484  | 1 |
| 101 | H | 74.78382 | 82.80174 | 76.56294 | -2302.30869 | -1105.72939 | -948.89774  | 1 |
| 102 | C | 72.65857 | 82.17342 | 76.70332 | -559.93427  | -126.34590  | 542.30857   | 1 |
| 103 | O | 72.35541 | 82.69873 | 77.74334 | -670.36003  | -111.83166  | 76.36448    | 1 |
| 104 | N | 71.80616 | 81.75527 | 75.74225 | -216.06729  | -537.07037  | 446.51379   | 1 |
| 105 | H | 71.99208 | 81.30993 | 74.83590 | -1251.96487 | 1074.12894  | -2168.52500 | 1 |
| 106 | H | 70.78430 | 81.83507 | 75.81120 | -2451.83023 | -720.73851  | 944.84612   | 1 |
| 107 | C | 76.00230 | 79.57336 | 76.25434 | 546.24052   | -563.88337  | -85.11809   | 1 |
| 108 | O | 76.57340 | 80.06964 | 77.19160 | 71.70702    | -307.40463  | 606.69673   | 1 |
| 109 | N | 75.31841 | 78.41977 | 76.21651 | 479.90863   | -504.50129  | 222.86849   | 1 |
| 110 | C | 75.67088 | 77.38620 | 77.14694 | 75.51268    | -600.91904  | 506.73700   | 1 |
| 111 | H | 76.09056 | 77.94792 | 78.01409 | -2033.61562 | 1795.30103  | 254.89480   | 1 |
| 112 | C | 74.30650 | 76.63625 | 77.43003 | 523.79067   | 517.99274   | 284.45581   | 1 |
| 113 | H | 74.44441 | 75.53812 | 77.56495 | 1599.61665  | -1127.00911 | 1895.98173  | 1 |
| 114 | H | 73.83653 | 77.00576 | 78.36907 | -1881.83093 | 1275.82488  | -1501.55016 | 1 |
| 115 | C | 73.41737 | 76.97317 | 76.18864 | -600.05639  | -404.05026  | 316.64485   | 1 |
| 116 | H | 73.57050 | 76.23146 | 75.36977 | -2597.05260 | 496.36221   | 657.73249   | 1 |
| 117 | H | 72.32924 | 76.95910 | 76.42592 | -1666.24518 | 1294.38985  | -1723.90591 | 1 |
| 118 | C | 73.93712 | 78.40032 | 75.74144 | 493.57570   | -129.95376  | -602.56394  | 1 |
| 119 | H | 73.97212 | 78.55896 | 74.63728 | -1469.08415 | -637.84797  | 2204.22581  | 1 |

|     |   |          |          |          |             |             |             |   |
|-----|---|----------|----------|----------|-------------|-------------|-------------|---|
| 120 | H | 73.42546 | 79.26206 | 76.23191 | -1038.97840 | 1068.88701  | -2280.71789 | 1 |
| 121 | C | 76.77020 | 76.33209 | 76.55033 | 188.88100   | 241.05089   | -727.87821  | 1 |
| 122 | O | 77.52669 | 75.77870 | 77.31114 | 531.88613   | -49.19943   | 427.07960   | 1 |
| 123 | N | 76.71938 | 76.16952 | 75.19363 | 708.14833   | 26.93417    | -179.73509  | 1 |
| 124 | H | 75.87624 | 76.68283 | 74.92290 | -2232.69501 | -1179.09831 | 1023.94816  | 1 |
| 125 | C | 77.09213 | 74.83766 | 74.64782 | -738.32412  | 259.92548   | 104.42456   | 1 |
| 126 | H | 76.60349 | 74.10964 | 75.33583 | 2028.89123  | 1260.02983  | 1311.33324  | 1 |
| 127 | C | 76.60474 | 74.74840 | 73.22268 | -258.65678  | -345.52513  | 661.28459   | 1 |
| 128 | H | 76.83339 | 75.71919 | 72.73003 | -1826.06090 | -1801.46097 | -918.64554  | 1 |
| 129 | C | 77.30595 | 73.64772 | 72.44490 | -541.23400  | 531.92970   | -218.41428  | 1 |
| 130 | H | 76.98396 | 73.62624 | 71.36773 | 1311.73218  | -2219.18200 | 882.19023   | 1 |
| 131 | H | 78.42437 | 73.77996 | 72.45905 | -1048.71298 | 1223.58118  | -2196.97971 | 1 |
| 132 | H | 77.09103 | 72.63356 | 72.88065 | 419.06414   | 1903.92898  | 1903.44670  | 1 |
| 133 | C | 75.10402 | 74.52813 | 73.14633 | -423.86431  | 152.66566   | -648.55262  | 1 |
| 134 | H | 74.73257 | 74.55594 | 72.08488 | 105.68386   | -2342.50080 | 1387.51238  | 1 |
| 135 | H | 74.80976 | 73.53260 | 73.58301 | -1695.63603 | -1484.73621 | -1531.02793 | 1 |
| 136 | H | 74.53781 | 75.31913 | 73.72249 | -1853.57121 | -487.39031  | 1936.59343  | 1 |
| 137 | C | 78.72886 | 74.70548 | 74.66923 | 539.71428   | -510.58232  | 267.58633   | 1 |
| 138 | O | 79.24066 | 73.58994 | 74.58617 | -15.93758   | -278.34085  | -624.49402  | 1 |
| 139 | N | 79.31615 | 75.87583 | 74.68132 | -676.81886  | 12.05292    | 276.17960   | 1 |
| 140 | H | 78.68011 | 76.66266 | 74.79297 | -1694.44250 | -373.84189  | -2100.66098 | 1 |
| 141 | C | 80.72119 | 76.01679 | 74.45181 | 412.33078   | -664.70360  | 108.35451   | 1 |
| 142 | H | 80.91788 | 75.28131 | 73.63859 | 1765.77476  | 1294.44366  | 1621.76594  | 1 |
| 143 | C | 80.94046 | 77.53148 | 74.06804 | -179.66635  | -721.95667  | -264.73915  | 1 |
| 144 | H | 80.30022 | 77.81681 | 73.20410 | -607.34922  | 2587.87032  | -598.10018  | 1 |
| 145 | H | 80.61722 | 78.19380 | 74.90388 | -359.69332  | -1479.13954 | -2259.74260 | 1 |
| 146 | C | 82.45775 | 77.74379 | 73.74508 | -240.01076  | 616.02425   | 431.85322   | 1 |
| 147 | H | 83.07943 | 77.49624 | 74.63706 | -1359.17131 | 782.54425   | 2227.99181  | 1 |
| 148 | H | 82.80024 | 77.06670 | 72.93077 | -820.36667  | 85.81767    | -2596.78715 | 1 |
| 149 | C | 82.63741 | 79.26128 | 73.33938 | -513.07015  | 236.18570   | -551.87280  | 1 |
| 150 | H | 82.15515 | 79.47266 | 72.35708 | 1816.11944  | -1183.11722 | -1650.94321 | 1 |
| 151 | H | 82.13192 | 79.92867 | 74.07484 | -1800.04429 | -1361.53473 | 1526.34643  | 1 |
| 152 | C | 84.15525 | 79.55500 | 73.29650 | 726.08972   | -253.19732  | -179.64713  | 1 |
| 153 | H | 84.67037 | 79.45192 | 74.27260 | 1224.27271  | -456.51798  | -2390.90304 | 1 |
| 154 | H | 84.71325 | 79.00261 | 72.51442 | 1206.40339  | -1150.93514 | -2154.90344 | 1 |
| 155 | N | 84.32657 | 81.06562 | 72.92306 | 329.70796   | -633.68968  | -155.67358  | 1 |
| 156 | H | 85.32583 | 81.42010 | 72.89215 | 1348.31305  | 1938.76845  | 1359.00643  | 1 |
| 157 | H | 83.96581 | 81.37396 | 71.97362 | 2096.92035  | 1446.54551  | -966.48890  | 1 |
| 158 | H | 83.87443 | 81.77447 | 73.57110 | -1197.07217 | -2303.53719 | 827.28733   | 1 |
| 159 | C | 81.53007 | 75.61132 | 75.81098 | -378.01186  | -556.17301  | -413.96481  | 1 |
| 160 | O | 82.17888 | 76.41237 | 76.43591 | -409.44433  | -307.55053  | -453.30833  | 1 |
| 161 | N | 81.43556 | 74.28815 | 75.98723 | -429.02477  | 524.70884   | 274.08502   | 1 |
| 162 | H | 80.75926 | 73.74088 | 75.39265 | 1706.34263  | -1425.96036 | 1574.38926  | 1 |
| 163 | C | 81.76079 | 73.83695 | 77.30663 | -45.25864   | -626.22952  | 478.93267   | 1 |
| 164 | H | 82.36234 | 74.66207 | 77.76018 | 1988.63164  | 570.90773   | 1772.87287  | 1 |
| 165 | C | 80.38372 | 73.59071 | 78.05787 | 551.77128   | -20.49526   | -564.54996  | 1 |
| 166 | H | 79.67287 | 74.43362 | 77.89348 | 1434.61535  | -1753.10253 | 1513.99471  | 1 |
| 167 | H | 79.87661 | 72.69072 | 77.64332 | -714.67738  | 1819.09770  | 1898.36494  | 1 |
| 168 | C | 80.71165 | 73.40218 | 79.57410 | 446.99263   | -555.77305  | 338.97221   | 1 |
| 169 | H | 81.66142 | 72.81673 | 79.69126 | 1953.68466  | 1892.25957  | -161.67766  | 1 |
| 170 | H | 80.89287 | 74.38302 | 80.06917 | -403.03785  | 2688.07032  | -188.43591  | 1 |
| 171 | C | 79.51430 | 72.62811 | 80.25910 | 567.86262   | 335.74681   | 434.04421   | 1 |
| 172 | H | 78.58602 | 73.24443 | 80.25096 | -1080.02275 | 1568.26081  | -1948.78900 | 1 |
| 173 | H | 79.26648 | 71.69929 | 79.69532 | -919.54108  | 2111.34692  | 1456.13463  | 1 |
| 174 | C | 79.94880 | 72.28735 | 81.70391 | 195.81897   | 173.33862   | -745.11536  | 1 |
| 175 | H | 80.78025 | 71.55810 | 81.78077 | 1405.67949  | -2301.21089 | -390.08113  | 1 |
| 176 | H | 80.16045 | 73.16766 | 82.34279 | -940.37328  | -1118.32446 | 2299.72133  | 1 |
| 177 | N | 78.74191 | 71.57319 | 82.40009 | 319.26422   | 656.36007   | -42.02424   | 1 |
| 178 | H | 78.91472 | 71.25252 | 83.39640 | 1961.03633  | 619.91968   | 1787.09422  | 1 |
| 179 | H | 77.85026 | 72.13765 | 82.51454 | 854.14343   | -2156.80752 | 1429.08711  | 1 |
| 180 | H | 78.38188 | 70.68065 | 81.95224 | 1237.02905  | -1378.50857 | -1998.28500 | 1 |
| 181 | C | 82.52553 | 72.39820 | 77.25188 | 532.53319   | -268.57236  | 517.55729   | 1 |

|     |   |          |          |          |             |             |             |   |
|-----|---|----------|----------|----------|-------------|-------------|-------------|---|
| 182 | O | 82.81701 | 71.84842 | 78.31183 | 266.16714   | -290.73804  | -558.88002  | 1 |
| 183 | N | 82.69129 | 71.94992 | 76.02379 | -226.25352  | 640.49678   | -270.32839  | 1 |
| 184 | H | 82.38079 | 72.60622 | 75.31014 | 2007.69063  | -1035.27229 | 1523.50231  | 1 |
| 185 | C | 83.51325 | 70.84602 | 75.67498 | -540.76542  | -573.33303  | 49.50000    | 1 |
| 186 | H | 83.62532 | 70.94239 | 74.57236 | -2374.20950 | -1036.76023 | 843.75774   | 1 |
| 187 | C | 84.91602 | 71.01952 | 76.42507 | -77.09082   | 666.87422   | -415.84136  | 1 |
| 188 | H | 84.72724 | 71.04640 | 77.53541 | -985.81834  | 617.19825   | 2463.91927  | 1 |
| 189 | O | 85.62471 | 72.23166 | 76.10049 | 293.29899   | -391.65602  | -477.80926  | 1 |
| 190 | H | 85.60549 | 72.69362 | 76.96155 | 2528.72714  | -681.76262  | -751.27122  | 1 |
| 191 | C | 85.67752 | 69.69095 | 76.07209 | 252.47363   | -605.14473  | 440.05134   | 1 |
| 192 | H | 86.68437 | 69.66077 | 76.55035 | -2052.65063 | 1456.49051  | -1043.51830 | 1 |
| 193 | H | 85.12089 | 68.78553 | 76.41509 | -2152.98800 | -1661.97574 | -161.70652  | 1 |
| 194 | H | 85.83112 | 69.58920 | 74.97242 | -473.12726  | -1584.27339 | 2165.61725  | 1 |
| 195 | C | 82.78607 | 69.43787 | 76.06456 | 360.36307   | 488.46713   | 505.10056   | 1 |
| 196 | O | 83.08501 | 68.44853 | 75.43529 | -200.08817  | -528.03552  | -385.82850  | 1 |
| 197 | N | 81.94738 | 69.52590 | 77.09443 | -597.54095  | -226.44775  | 355.20479   | 1 |
| 198 | H | 81.85560 | 70.41643 | 77.61033 | 2179.23655  | -1300.70981 | -991.33835  | 1 |
| 199 | C | 81.33607 | 68.30159 | 77.48880 | -687.68921  | 297.39807   | -249.45179  | 1 |
| 200 | H | 82.13332 | 67.54211 | 77.32165 | -349.16256  | -2467.37713 | -1101.72831 | 1 |
| 201 | C | 80.78207 | 68.42862 | 78.97894 | 672.47345   | 361.54328   | -201.62880  | 1 |
| 202 | H | 80.08561 | 69.29557 | 79.05091 | 1541.41502  | 582.18425   | 2169.97026  | 1 |
| 203 | H | 80.19287 | 67.51557 | 79.22684 | -2534.67717 | 60.25153    | 997.72295   | 1 |
| 204 | C | 81.94009 | 68.59501 | 79.97393 | 574.26774   | -389.43119  | -377.02542  | 1 |
| 205 | C | 82.64814 | 67.45106 | 80.44987 | 688.82679   | -287.33580  | -257.96133  | 1 |
| 206 | H | 82.38990 | 66.43766 | 80.09239 | 331.14182   | 1470.38163  | 2269.80013  | 1 |
| 207 | C | 82.28975 | 69.90189 | 80.42681 | -383.52382  | -675.04808  | 144.24917   | 1 |
| 208 | H | 81.75721 | 70.78842 | 80.03674 | 4.09847     | 1517.59662  | 2262.86397  | 1 |
| 209 | C | 83.66787 | 67.64174 | 81.38199 | -134.76730  | 428.45285   | -649.50303  | 1 |
| 210 | H | 84.21216 | 66.75759 | 81.75695 | -903.23433  | 1600.49020  | 2011.53387  | 1 |
| 211 | C | 83.31786 | 70.04184 | 81.36195 | -335.53281  | -615.00040  | -364.39058  | 1 |
| 212 | H | 83.57641 | 71.05875 | 81.70550 | 1596.45398  | -1369.33862 | 1732.02659  | 1 |
| 213 | C | 84.03940 | 68.92570 | 81.87677 | 585.48547   | -340.24194  | -406.23938  | 1 |
| 214 | O | 85.08338 | 69.05403 | 82.82968 | -419.15649  | -173.04408  | -511.94141  | 1 |
| 215 | H | 85.07223 | 70.03184 | 82.95800 | -1071.84350 | 1559.71507  | -1960.13012 | 1 |
| 216 | C | 80.01580 | 67.97113 | 76.57026 | 291.41878   | -183.13091  | 710.72246   | 1 |
| 217 | O | 79.81891 | 66.81822 | 76.25273 | 379.87695   | 523.47396   | -222.23622  | 1 |
| 218 | N | 79.24694 | 69.03516 | 76.38817 | 564.30591   | 373.09380   | 277.24371   | 1 |
| 219 | H | 79.64644 | 69.91188 | 76.72225 | -120.59931  | -2436.07824 | -1214.35098 | 1 |
| 220 | C | 78.10144 | 69.01030 | 75.55183 | 404.07514   | -299.37480  | 608.84009   | 1 |
| 221 | H | 77.96532 | 70.07161 | 75.24593 | -1071.07882 | -841.69025  | 2359.66467  | 1 |
| 222 | C | 78.40457 | 67.99141 | 74.37852 | -683.12807  | 68.71770    | -390.13096  | 1 |
| 223 | H | 79.43974 | 68.13785 | 73.99324 | 2068.88918  | 1596.58590  | 770.89603   | 1 |
| 224 | H | 78.37123 | 66.94012 | 74.77235 | 1379.86429  | 2342.49779  | -179.85638  | 1 |
| 225 | C | 77.34961 | 68.18059 | 73.24198 | -176.39967  | 537.49466   | 550.97268   | 1 |
| 226 | H | 76.31391 | 68.04832 | 73.62670 | -396.28051  | 1942.22168  | 1869.33314  | 1 |
| 227 | H | 77.38837 | 69.20663 | 72.81392 | -94.44700   | 586.00678   | -2659.20016 | 1 |
| 228 | C | 77.71369 | 67.07262 | 72.14963 | -291.69381  | -718.18079  | -150.72929  | 1 |
| 229 | H | 78.72733 | 67.16849 | 71.68349 | -2303.38776 | 1089.76242  | 964.62032   | 1 |
| 230 | H | 77.60161 | 66.01341 | 72.49633 | 884.16729   | 2568.80533  | -207.74283  | 1 |
| 231 | N | 76.76389 | 67.28352 | 71.14166 | -594.49522  | -252.81478  | 342.29276   | 1 |
| 232 | H | 76.04666 | 67.96664 | 71.32877 | -1735.17426 | 2084.05705  | -263.71605  | 1 |
| 233 | C | 76.74818 | 66.66896 | 70.02929 | 595.23177   | -271.52487  | 442.22352   | 1 |
| 234 | N | 77.75047 | 65.72027 | 69.79574 | 585.53813   | -424.79750  | -105.81303  | 1 |
| 235 | H | 78.51495 | 65.42308 | 70.40080 | 959.88797   | 1327.56823  | -2177.11905 | 1 |
| 236 | H | 77.83806 | 65.16163 | 68.94635 | 1578.48647  | 16.27378    | -2220.76233 | 1 |
| 237 | N | 75.67599 | 67.09166 | 69.23083 | -452.17763  | -390.33541  | -421.51853  | 1 |
| 238 | H | 74.94378 | 67.77989 | 69.39895 | 470.26107   | 1974.25629  | -1817.92087 | 1 |
| 239 | H | 75.49327 | 66.71343 | 68.30042 | 1856.67307  | -1573.97321 | -1224.35416 | 1 |
| 240 | C | 76.80644 | 68.39926 | 76.36206 | -531.47271  | -581.45780  | -55.06206   | 1 |
| 241 | O | 76.64586 | 67.21117 | 76.53447 | -243.00837  | 192.73507   | 609.52485   | 1 |
| 242 | N | 75.99672 | 69.38677 | 76.71549 | 343.49288   | -644.25607  | 38.09164    | 1 |
| 243 | H | 76.26789 | 70.35741 | 76.56041 | -1691.16043 | -1535.97525 | -1484.73099 | 1 |

|     |   |          |          |          |             |             |             |   |
|-----|---|----------|----------|----------|-------------|-------------|-------------|---|
| 244 | C | 74.86207 | 69.03357 | 77.51428 | 542.66492   | 350.14337   | 454.42563   | 1 |
| 245 | H | 74.59284 | 68.02399 | 77.12689 | 1209.57979  | -2396.95920 | 463.86744   | 1 |
| 246 | C | 75.32909 | 68.92464 | 79.02949 | -737.14309  | 145.93010   | 242.71942   | 1 |
| 247 | H | 75.80636 | 69.86964 | 79.36700 | -1050.18303 | 159.36419   | -2509.06125 | 1 |
| 248 | C | 74.08741 | 68.57496 | 79.91753 | -706.77696  | -252.88343  | -245.16230  | 1 |
| 249 | H | 74.36914 | 68.43553 | 80.98797 | -1624.64039 | -1665.49085 | 1417.86935  | 1 |
| 250 | H | 73.31775 | 69.39100 | 79.87440 | 2566.10521  | 598.51109   | 693.22305   | 1 |
| 251 | H | 73.59220 | 67.63462 | 79.57823 | -1972.69758 | 107.10018   | -1876.34312 | 1 |
| 252 | C | 76.33120 | 67.72160 | 79.13091 | 412.85148   | 672.58832   | -27.69222   | 1 |
| 253 | H | 76.57934 | 67.47435 | 80.18997 | 1447.02277  | 1762.76533  | -1490.78944 | 1 |
| 254 | H | 75.90983 | 66.79975 | 78.65967 | 1320.77379  | -145.20455  | 2378.68491  | 1 |
| 255 | H | 77.29119 | 67.94126 | 78.60260 | -1512.10848 | 1470.52031  | 1724.75147  | 1 |
| 256 | C | 73.71956 | 70.17126 | 77.25293 | -607.11113  | 499.56689   | 73.73769    | 1 |
| 257 | O | 72.97265 | 70.54101 | 78.13564 | 357.97126   | 460.81534   | 356.68785   | 1 |
| 258 | N | 73.67703 | 70.42173 | 75.94853 | 536.55407   | -368.62270  | 332.76306   | 1 |
| 259 | H | 74.39834 | 69.94144 | 75.40942 | 524.38866   | 2297.69985  | 1367.20941  | 1 |
| 260 | C | 73.06999 | 71.59172 | 75.41743 | 46.50277    | -774.29190  | -147.97904  | 1 |
| 261 | H | 73.10179 | 71.42356 | 74.31910 | 1676.51875  | 1883.29066  | 1032.55549  | 1 |
| 262 | C | 71.57158 | 71.75824 | 75.99607 | -559.41456  | -34.19198   | -556.30433  | 1 |
| 263 | H | 71.59180 | 71.62750 | 77.11506 | -64.66664   | 395.18769   | 2695.05373  | 1 |
| 264 | H | 71.16868 | 72.78174 | 75.80434 | -2703.44278 | -60.40056   | 333.79418   | 1 |
| 265 | C | 70.70317 | 70.71319 | 75.35344 | -519.76435  | 377.31045   | 459.42366   | 1 |
| 266 | H | 71.21818 | 69.72995 | 75.44628 | -1746.74323 | 1667.50644  | -1261.73691 | 1 |
| 267 | C | 69.35920 | 70.62611 | 76.06680 | 570.95554   | 16.46261    | -545.27700  | 1 |
| 268 | H | 68.70371 | 69.83555 | 75.61882 | 2391.58273  | 28.05277    | -1305.07271 | 1 |
| 269 | H | 69.48328 | 70.38044 | 77.15311 | 175.75588   | 917.63458   | 2559.43867  | 1 |
| 270 | H | 68.79856 | 71.59442 | 76.00777 | -1063.97851 | -2155.34650 | 1283.00462  | 1 |
| 271 | C | 70.47525 | 71.01637 | 73.87799 | 193.76014   | 2.62946     | -765.53141  | 1 |
| 272 | H | 69.80723 | 70.25534 | 73.39916 | 507.33994   | -846.55087  | 2539.60089  | 1 |
| 273 | H | 69.99418 | 72.01782 | 73.73388 | 1337.57841  | 1818.19054  | 1526.01994  | 1 |
| 274 | H | 71.43383 | 71.02387 | 73.29931 | 1100.88635  | -1172.91350 | -2199.08909 | 1 |
| 275 | C | 73.95331 | 72.87015 | 75.80735 | -549.21115  | 475.64486   | -309.38218  | 1 |
| 276 | O | 75.01455 | 72.83227 | 76.37093 | 556.06106   | -390.37755  | -78.24250   | 1 |
| 277 | O | 73.44466 | 74.11142 | 75.32129 | -572.27940  | -310.19032  | -209.75862  | 1 |
| 278 | H | 72.62021 | 73.76730 | 74.88476 | -1380.08193 | 2212.14486  | 790.85944   | 1 |

Listing 69: C00069.xmolout

|    |   |          |          |          |             |             |             |        |          |
|----|---|----------|----------|----------|-------------|-------------|-------------|--------|----------|
| 1  |   | 276      |          |          |             |             |             |        |          |
| 2  |   | 150.0000 | 150.0000 | 150.0000 | 0.0000      | 0.0000      | 0.0000***** | 1.0580 | 4232     |
|    |   | 0.2500   | 300.00   | 0.00     | 0.00        | 0.00        | -1293.5989  | 0.0000 | 300.0000 |
| 3  | H | 73.71273 | 64.84398 | 68.89238 | -2043.14101 | -1757.64893 | 399.89339   |        | 1        |
| 4  | N | 74.70404 | 64.68363 | 68.71632 | 426.75047   | 490.45733   | -334.42467  |        | 1        |
| 5  | H | 74.69908 | 64.18461 | 67.81947 | 442.25559   | -1110.30854 | -2448.52907 |        | 1        |
| 6  | C | 75.46415 | 65.87047 | 68.62716 | 415.32972   | -666.39213  | 83.73172    |        | 1        |
| 7  | H | 74.91973 | 66.66471 | 69.18367 | 879.32219   | 2491.00447  | 667.35213   |        | 1        |
| 8  | C | 76.93896 | 65.58563 | 69.22041 | 31.35357    | 477.41777   | 628.23362   |        | 1        |
| 9  | H | 77.36024 | 64.66912 | 68.74308 | 1168.38489  | 2240.25337  | -1019.71136 |        | 1        |
| 10 | H | 77.63519 | 66.41994 | 68.96175 | -360.43770  | 2534.90498  | 931.67112   |        | 1        |
| 11 | C | 76.83969 | 65.41320 | 70.71226 | 463.18208   | 512.70242   | -382.34388  |        | 1        |
| 12 | H | 75.96959 | 64.75286 | 70.92929 | 1725.29117  | 1863.52247  | -987.07854  |        | 1        |
| 13 | C | 78.09699 | 64.74882 | 71.25954 | 710.42801   | -144.27427  | -313.15367  |        | 1        |
| 14 | H | 78.03729 | 64.59883 | 72.36836 | 364.20195   | -1033.13725 | 2494.72524  |        | 1        |
| 15 | H | 78.26820 | 63.74251 | 70.79724 | 2567.61904  | 335.80679   | 847.48802   |        | 1        |
| 16 | H | 79.01032 | 65.36571 | 71.05752 | -2587.99029 | 680.92867   | -512.16411  |        | 1        |
| 17 | C | 76.62911 | 66.75435 | 71.40270 | 268.17616   | 741.64379   | -40.42634   |        | 1        |
| 18 | H | 76.55154 | 66.64009 | 72.51462 | 1283.54314  | -1945.37420 | -1411.27812 |        | 1        |
| 19 | H | 77.47710 | 67.45849 | 71.20014 | -1258.57796 | 1317.15249  | -2026.02085 |        | 1        |
| 20 | H | 75.69161 | 67.25932 | 71.05495 | -2502.84526 | 909.80597   | 575.92391   |        | 1        |
| 21 | C | 75.57772 | 66.13423 | 67.02650 | 619.36578   | -458.64843  | -172.09273  |        | 1        |
| 22 | O | 75.33472 | 65.28014 | 66.19862 | -81.40433   | 433.87611   | 522.34594   |        | 1        |
| 23 | N | 76.08116 | 67.35354 | 66.85261 | 175.23996   | -622.20190  | 341.55523   |        | 1        |

|    |   |          |          |          |             |             |             |   |
|----|---|----------|----------|----------|-------------|-------------|-------------|---|
| 24 | H | 76.20829 | 67.94147 | 67.67683 | -876.57256  | -303.22879  | -2561.90213 | 1 |
| 25 | C | 75.99066 | 67.96611 | 65.56349 | -571.88214  | -534.10783  | -106.15033  | 1 |
| 26 | H | 75.97819 | 67.05868 | 64.91378 | -2713.20841 | -16.25800   | -248.80809  | 1 |
| 27 | C | 74.60288 | 68.78487 | 65.51840 | 166.60354   | 288.16399   | -716.09568  | 1 |
| 28 | H | 74.82342 | 69.85257 | 65.22865 | -2097.85574 | 1636.78449  | -586.18044  | 1 |
| 29 | O | 73.85823 | 68.89187 | 66.73712 | -317.80580  | -363.38227  | 484.43082   | 1 |
| 30 | H | 73.90086 | 69.85714 | 66.90345 | 1863.74748  | -1451.84923 | 1357.29467  | 1 |
| 31 | C | 73.90215 | 68.04606 | 64.31952 | 503.80731   | 517.99032   | 318.51606   | 1 |
| 32 | H | 73.61946 | 67.00519 | 64.60263 | 640.61020   | -2157.10410 | -1536.29104 | 1 |
| 33 | H | 72.96907 | 68.56693 | 64.00365 | 1687.88455  | 465.60692   | 2087.56452  | 1 |
| 34 | H | 74.56121 | 67.97243 | 63.42325 | -1293.07895 | -1899.88581 | -1463.57452 | 1 |
| 35 | C | 77.32073 | 68.87380 | 65.43304 | -153.07550  | -733.68902  | 248.70981   | 1 |
| 36 | O | 78.31573 | 68.52232 | 66.01975 | 186.15459   | -480.78787  | -449.34387  | 1 |
| 37 | N | 77.21669 | 69.89953 | 64.56988 | -487.53139  | 543.18517   | 42.03850    | 1 |
| 38 | C | 78.29485 | 70.84801 | 64.56360 | -699.35871  | 69.34393    | 360.10701   | 1 |
| 39 | H | 79.20526 | 70.24898 | 64.80474 | 2.81126     | -221.99807  | -2715.58072 | 1 |
| 40 | C | 78.24767 | 71.45567 | 63.09817 | -507.46439  | -592.59194  | 122.07761   | 1 |
| 41 | H | 78.62190 | 72.50319 | 63.05432 | -1975.08116 | 525.87560   | -1801.71556 | 1 |
| 42 | H | 78.87956 | 70.86741 | 62.39592 | 1588.27743  | -1913.22100 | 1113.83566  | 1 |
| 43 | C | 76.73475 | 71.32821 | 62.73951 | -613.62442  | -457.55993  | -194.14490  | 1 |
| 44 | H | 76.13869 | 72.13080 | 63.22857 | 1707.54637  | -721.27992  | 1996.92523  | 1 |
| 45 | H | 76.52510 | 71.39326 | 61.64813 | 758.23357   | 2100.81767  | 1560.55011  | 1 |
| 46 | C | 76.40548 | 69.90225 | 63.36102 | -352.41524  | 704.96076   | 49.21465    | 1 |
| 47 | H | 75.33351 | 69.75500 | 63.62098 | 1714.76886  | -2070.42778 | 443.35792   | 1 |
| 48 | H | 76.75580 | 69.03391 | 62.75487 | 1224.15040  | 1801.50881  | 1636.97633  | 1 |
| 49 | C | 78.05327 | 72.02618 | 65.67838 | 566.85117   | 537.05831   | 117.62814   | 1 |
| 50 | O | 79.02520 | 72.69542 | 66.03293 | -550.26779  | -406.08867  | 4.21666     | 1 |
| 51 | N | 76.78408 | 72.16939 | 65.98752 | 566.34832   | -425.77725  | 180.18749   | 1 |
| 52 | H | 76.23254 | 71.46498 | 65.50136 | 644.44502   | 2646.80550  | -52.73430   | 1 |
| 53 | C | 76.29100 | 72.85550 | 67.13094 | 612.34801   | -281.48662  | 411.56221   | 1 |
| 54 | H | 75.22534 | 72.54031 | 67.18299 | 1667.23498  | -1490.75142 | 1556.16753  | 1 |
| 55 | C | 77.12939 | 72.29716 | 68.37839 | -714.45746  | -175.43074  | 286.98927   | 1 |
| 56 | H | 78.22883 | 72.36051 | 68.14383 | -787.09484  | 1763.03619  | -1922.46060 | 1 |
| 57 | O | 76.87988 | 70.91141 | 68.68509 | -429.46514  | 516.51932   | -128.40526  | 1 |
| 58 | H | 77.73559 | 70.50709 | 68.43884 | 1981.82785  | 436.16847   | -1818.18182 | 1 |
| 59 | C | 76.77457 | 73.32898 | 69.50664 | 630.79189   | -468.94448  | 76.03230    | 1 |
| 60 | H | 77.24697 | 73.04293 | 70.47554 | -1775.71861 | 2062.30353  | 131.89849   | 1 |
| 61 | H | 77.13188 | 74.37695 | 69.25937 | -1855.14608 | 88.94118    | 1993.53760  | 1 |
| 62 | H | 75.67342 | 73.38014 | 69.67905 | -1504.82350 | -780.94249  | -2132.90992 | 1 |
| 63 | C | 76.40745 | 74.46712 | 66.92410 | 288.57638   | 618.62814   | -397.00270  | 1 |
| 64 | O | 75.36487 | 75.10997 | 66.98289 | 321.70495   | -185.26452  | 574.37218   | 1 |
| 65 | N | 77.63471 | 74.86031 | 66.73706 | -447.05792  | -446.53431  | 367.76425   | 1 |
| 66 | H | 78.40611 | 74.14296 | 66.67196 | 350.31316   | 1975.63644  | -1843.31522 | 1 |
| 67 | C | 78.00539 | 76.22876 | 66.67813 | -511.23061  | 374.03917   | -471.51480  | 1 |
| 68 | H | 79.05436 | 76.13843 | 66.31500 | 2234.79579  | -898.70890  | -1273.45190 | 1 |
| 69 | C | 77.05587 | 76.98961 | 65.63621 | 529.53781   | -159.34528  | 563.72604   | 1 |
| 70 | H | 77.63158 | 77.83142 | 65.16138 | 654.59388   | 2347.94251  | 1217.51488  | 1 |
| 71 | H | 76.85219 | 76.24633 | 64.81940 | -1526.55661 | 2103.42026  | 817.87394   | 1 |
| 72 | O | 75.84251 | 77.53801 | 66.15657 | -554.84278  | 14.12789    | 399.58769   | 1 |
| 73 | H | 75.42216 | 76.66724 | 66.52353 | 1297.06236  | 2061.84854  | 1220.68812  | 1 |
| 74 | C | 77.95152 | 76.86556 | 68.17369 | -662.15484  | -412.13544  | 123.62687   | 1 |
| 75 | O | 77.90801 | 76.19450 | 69.18866 | -540.01537  | -317.05804  | 274.91456   | 1 |
| 76 | N | 78.11074 | 78.17584 | 68.07500 | -202.76299  | -690.00100  | -131.49145  | 1 |
| 77 | H | 78.16084 | 78.60365 | 67.15301 | -702.62132  | -2617.37191 | 281.70413   | 1 |
| 78 | C | 78.02729 | 78.96473 | 69.25920 | -491.73914  | 576.34187   | 222.73509   | 1 |
| 79 | H | 77.33110 | 78.42218 | 69.93743 | 1977.17978  | -1823.58850 | -434.68928  | 1 |
| 80 | C | 79.49677 | 79.02812 | 69.86436 | -649.50797  | -328.66843  | 306.11224   | 1 |
| 81 | H | 80.21005 | 79.45570 | 69.12687 | 2075.07803  | 1452.16490  | -1004.45904 | 1 |
| 82 | C | 79.44259 | 79.89452 | 71.16755 | -615.18735  | -489.99689  | -70.96352   | 1 |
| 83 | H | 80.44350 | 79.97277 | 71.65358 | -1226.32661 | -1724.38906 | -1716.47170 | 1 |
| 84 | H | 79.09479 | 80.93274 | 70.95171 | 2381.64273  | -969.84735  | 900.46860   | 1 |
| 85 | H | 78.74058 | 79.46091 | 71.91747 | 2122.74991  | 1702.23946  | -141.36228  | 1 |

|     |   |          |          |          |             |             |             |   |
|-----|---|----------|----------|----------|-------------|-------------|-------------|---|
| 86  | C | 79.92168 | 77.57438 | 70.27122 | -501.86074  | -479.61276  | -376.42482  | 1 |
| 87  | H | 80.87630 | 77.56482 | 70.84897 | 993.79261   | -2246.95401 | -1177.81305 | 1 |
| 88  | H | 79.13860 | 77.08317 | 70.89823 | 42.71279    | -626.15391  | -2651.37258 | 1 |
| 89  | H | 80.06551 | 76.92621 | 69.37286 | -2026.39012 | -1590.33709 | -887.82922  | 1 |
| 90  | C | 77.54921 | 80.46035 | 68.78815 | -672.89153  | 382.57394   | -156.34072  | 1 |
| 91  | O | 78.08948 | 81.03091 | 67.86998 | 410.04627   | 221.86223   | 500.35950   | 1 |
| 92  | N | 76.60496 | 80.89724 | 69.61026 | -378.11782  | -443.79414  | -441.10984  | 1 |
| 93  | H | 76.30709 | 80.30083 | 70.38156 | 2404.15973  | -568.14894  | 1149.30085  | 1 |
| 94  | C | 75.73768 | 81.97387 | 69.20343 | -544.54484  | 466.16019   | 331.29119   | 1 |
| 95  | H | 76.37164 | 82.88541 | 69.27555 | -1409.80988 | -170.17955  | 2325.32679  | 1 |
| 96  | C | 75.26404 | 81.74887 | 67.70979 | -184.48284  | 116.78282   | -758.89137  | 1 |
| 97  | H | 76.14134 | 81.59992 | 67.03393 | 1893.78641  | 1861.14652  | 611.04528   | 1 |
| 98  | H | 74.64962 | 80.82495 | 67.61732 | -2170.79665 | -974.19311  | 1327.50117  | 1 |
| 99  | C | 74.43697 | 83.00527 | 67.29080 | 389.51668   | 672.81878   | -138.49152  | 1 |
| 100 | H | 73.61257 | 83.18221 | 68.02070 | 510.64577   | 1933.03327  | 1851.02484  | 1 |
| 101 | H | 75.06062 | 83.92330 | 67.36820 | -2302.30869 | -1105.72939 | -948.89774  | 1 |
| 102 | C | 73.83878 | 82.89234 | 65.83902 | -559.93427  | -126.34590  | 542.30857   | 1 |
| 103 | O | 73.16107 | 83.78968 | 65.40825 | -670.36003  | -111.83166  | 76.36448    | 1 |
| 104 | N | 74.15795 | 81.75106 | 65.19002 | -216.06729  | -537.07037  | 446.51379   | 1 |
| 105 | H | 74.72829 | 80.95237 | 65.49198 | -1251.96487 | 1074.12894  | -2168.52500 | 1 |
| 106 | H | 73.84338 | 81.53025 | 64.23888 | -2451.83023 | -720.73851  | 944.84612   | 1 |
| 107 | C | 74.46391 | 81.99057 | 70.20640 | 546.24052   | -563.88337  | -85.11809   | 1 |
| 108 | O | 73.84645 | 83.02146 | 70.28828 | 71.70702    | -307.40463  | 606.69673   | 1 |
| 109 | N | 74.14075 | 80.78514 | 70.69176 | 479.90863   | -504.50129  | 222.86849   | 1 |
| 110 | C | 73.50609 | 80.65824 | 71.97755 | 75.51268    | -600.91904  | 506.73700   | 1 |
| 111 | H | 72.66257 | 81.38689 | 71.97521 | -2033.61562 | 1795.30103  | 254.89480   | 1 |
| 112 | C | 73.05874 | 79.13861 | 72.02254 | 523.79067   | 517.99274   | 284.45581   | 1 |
| 113 | H | 73.17092 | 78.69512 | 73.03784 | 1599.61665  | -1127.00911 | 1895.98173  | 1 |
| 114 | H | 71.98298 | 79.03179 | 71.75813 | -1881.83093 | 1275.82488  | -1501.55016 | 1 |
| 115 | C | 73.96864 | 78.45076 | 70.95642 | -600.05639  | -404.05026  | 316.64485   | 1 |
| 116 | H | 74.97296 | 78.21637 | 71.37444 | -2597.05260 | 496.36221   | 657.73249   | 1 |
| 117 | H | 73.55413 | 77.49576 | 70.56251 | -1666.24518 | 1294.38985  | -1723.90591 | 1 |
| 118 | C | 74.04816 | 79.59591 | 69.85630 | 493.57570   | -129.95376  | -602.56394  | 1 |
| 119 | H | 74.92680 | 79.54396 | 69.17226 | -1469.08415 | -637.84797  | 2204.22581  | 1 |
| 120 | H | 73.11991 | 79.72106 | 69.24930 | -1038.97840 | 1068.88701  | -2280.71789 | 1 |
| 121 | C | 74.58316 | 81.00099 | 73.14855 | 188.88100   | 241.05089   | -727.87821  | 1 |
| 122 | O | 75.77712 | 81.02177 | 72.98991 | 531.88613   | -49.19943   | 427.07960   | 1 |
| 123 | N | 73.88321 | 81.23697 | 74.27361 | 708.14833   | 26.93417    | -179.73509  | 1 |
| 124 | H | 72.88309 | 81.06005 | 74.17466 | -2232.69501 | -1179.09831 | 1023.94816  | 1 |
| 125 | C | 74.54579 | 81.22001 | 75.58257 | -738.32412  | 259.92548   | 104.42456   | 1 |
| 126 | H | 75.41545 | 81.90766 | 75.46326 | 2028.89123  | 1260.02983  | 1311.33324  | 1 |
| 127 | C | 73.52703 | 81.63902 | 76.61973 | -258.65678  | -345.52513  | 661.28459   | 1 |
| 128 | H | 72.63919 | 80.97422 | 76.49697 | -1826.06090 | -1801.46097 | -918.64554  | 1 |
| 129 | C | 74.04822 | 81.44839 | 78.03289 | -541.23400  | 531.92970   | -218.41428  | 1 |
| 130 | H | 73.25551 | 81.67196 | 78.79957 | 1311.73218  | -2219.18200 | 882.19023   | 1 |
| 131 | H | 74.38355 | 80.38539 | 78.19770 | -1048.71298 | 1223.58118  | -2196.97971 | 1 |
| 132 | H | 74.92647 | 82.11623 | 78.25001 | 419.06414   | 1903.92898  | 1903.44670  | 1 |
| 133 | C | 73.05502 | 83.06897 | 76.42780 | -423.86431  | 152.66566   | -648.55262  | 1 |
| 134 | H | 72.22586 | 83.32862 | 77.14252 | 105.68386   | -2342.50080 | 1387.51238  | 1 |
| 135 | H | 73.88659 | 83.80700 | 76.59542 | -1695.63603 | -1484.73621 | -1531.02793 | 1 |
| 136 | H | 72.66596 | 83.23694 | 75.38594 | -1853.57121 | -487.39031  | 1936.59343  | 1 |
| 137 | C | 75.00675 | 79.64986 | 75.86750 | 539.71428   | -510.58232  | 267.58633   | 1 |
| 138 | O | 74.19060 | 78.78372 | 76.16384 | -15.93758   | -278.34085  | -624.49402  | 1 |
| 139 | N | 76.30684 | 79.55697 | 75.75045 | -676.81886  | 12.05292    | 276.17960   | 1 |
| 140 | H | 76.79305 | 80.41156 | 75.49110 | -1694.44250 | -373.84189  | -2100.66098 | 1 |
| 141 | C | 76.96695 | 78.29703 | 75.87508 | 412.33078   | -664.70360  | 108.35451   | 1 |
| 142 | H | 76.24330 | 77.58571 | 75.41651 | 1765.77476  | 1294.44366  | 1621.76594  | 1 |
| 143 | C | 78.34310 | 78.45286 | 75.11860 | -179.66635  | -721.95667  | -264.73915  | 1 |
| 144 | H | 78.18089 | 78.76588 | 74.06218 | -607.34922  | 2587.87032  | -598.10018  | 1 |
| 145 | H | 78.95226 | 79.26194 | 75.58122 | -359.69332  | -1479.13954 | -2259.74260 | 1 |
| 146 | C | 79.09658 | 77.08341 | 75.19344 | -240.01076  | 616.02425   | 431.85322   | 1 |
| 147 | H | 79.25831 | 76.79210 | 76.25853 | -1359.17131 | 782.54425   | 2227.99181  | 1 |

|     |   |          |          |          |             |             |             |   |
|-----|---|----------|----------|----------|-------------|-------------|-------------|---|
| 148 | H | 78.49726 | 76.26597 | 74.73347 | -820.36667  | 85.81767    | -2596.78715 | 1 |
| 149 | C | 80.47401 | 77.27243 | 74.43954 | -513.07015  | 236.18570   | -551.87280  | 1 |
| 150 | H | 80.31195 | 77.53533 | 73.36841 | 1816.11944  | -1183.11722 | -1650.94321 | 1 |
| 151 | H | 81.05191 | 78.11939 | 74.87569 | -1800.04429 | -1361.53473 | 1526.34643  | 1 |
| 152 | C | 81.25731 | 75.94652 | 74.57750 | 726.08972   | -253.19732  | -179.64713  | 1 |
| 153 | H | 81.51157 | 75.67024 | 75.62049 | 1224.27271  | -456.51798  | -2390.90304 | 1 |
| 154 | H | 80.79741 | 75.08169 | 74.05917 | 1206.40339  | -1150.93514 | -2154.90344 | 1 |
| 155 | N | 82.64274 | 76.14498 | 73.87589 | 329.70796   | -633.68968  | -155.67358  | 1 |
| 156 | H | 83.29053 | 75.30542 | 73.89962 | 1348.31305  | 1938.76845  | 1359.00643  | 1 |
| 157 | H | 82.63519 | 76.37399 | 72.83938 | 2096.92035  | 1446.54551  | -966.48890  | 1 |
| 158 | H | 83.27435 | 76.90433 | 74.26498 | -1197.07217 | -2303.53719 | 827.28733   | 1 |
| 159 | C | 77.16216 | 77.98843 | 77.47495 | -378.01186  | -556.17301  | -413.96481  | 1 |
| 160 | O | 78.25096 | 77.90100 | 77.98601 | -409.44433  | -307.55053  | -453.30833  | 1 |
| 161 | N | 75.96063 | 77.81861 | 78.01708 | -429.02477  | 524.70884   | 274.08502   | 1 |
| 162 | H | 75.10422 | 77.95785 | 77.43197 | 1706.34263  | -1425.96036 | 1574.38926  | 1 |
| 163 | C | 75.89909 | 77.64755 | 79.42559 | -45.25864   | -626.22952  | 478.93267   | 1 |
| 164 | H | 76.91835 | 77.88527 | 79.81265 | 1988.63164  | 570.90773   | 1772.87287  | 1 |
| 165 | C | 74.73441 | 78.58695 | 79.95407 | 551.77128   | -20.49526   | -564.54996  | 1 |
| 166 | H | 74.87597 | 79.63490 | 79.60367 | 1434.61535  | -1753.10253 | 1513.99471  | 1 |
| 167 | H | 73.76040 | 78.25823 | 79.52435 | -714.67738  | 1819.09770  | 1898.36494  | 1 |
| 168 | C | 74.69260 | 78.53094 | 81.51533 | 446.99263   | -555.77305  | 338.97221   | 1 |
| 169 | H | 74.86276 | 77.48622 | 81.87935 | 1953.68466  | 1892.25957  | -161.67766  | 1 |
| 170 | H | 75.50307 | 79.14822 | 81.96425 | -403.03785  | 2688.07032  | -188.43591  | 1 |
| 171 | C | 73.26319 | 79.03979 | 81.96256 | 567.86262   | 335.74681   | 434.04421   | 1 |
| 172 | H | 73.11031 | 80.10774 | 81.68321 | -1080.02275 | 1568.26081  | -1948.78900 | 1 |
| 173 | H | 72.46444 | 78.47259 | 81.43345 | -919.54108  | 2111.34692  | 1456.13463  | 1 |
| 174 | C | 73.15498 | 78.83599 | 83.49160 | 195.81897   | 173.33862   | -745.11536  | 1 |
| 175 | H | 73.15619 | 77.77680 | 83.81954 | 1405.67949  | -2301.21089 | -390.08113  | 1 |
| 176 | H | 73.88734 | 79.41602 | 84.08784 | -940.37328  | -1118.32446 | 2299.72133  | 1 |
| 177 | N | 71.76031 | 79.38994 | 83.93778 | 319.26422   | 656.36007   | -42.02424   | 1 |
| 178 | H | 71.55907 | 79.32560 | 84.97718 | 1961.03633  | 619.91968   | 1787.09422  | 1 |
| 179 | H | 71.56525 | 80.41660 | 83.74994 | 854.14343   | -2156.80752 | 1429.08711  | 1 |
| 180 | H | 70.89868 | 78.92314 | 83.53173 | 1237.02905  | -1378.50857 | -1998.28500 | 1 |
| 181 | C | 75.40231 | 76.12761 | 79.80346 | 532.53319   | -268.57236  | 517.55729   | 1 |
| 182 | O | 75.53649 | 75.73518 | 80.96252 | 266.16714   | -290.73804  | -558.88002  | 1 |
| 183 | N | 74.79965 | 75.54221 | 78.79266 | -226.25352  | 640.49678   | -270.32839  | 1 |
| 184 | H | 74.85143 | 76.10199 | 77.94439 | 2007.69063  | -1035.27229 | 1523.50231  | 1 |
| 185 | C | 74.06451 | 74.33240 | 78.81684 | -540.76542  | -573.33303  | 49.50000    | 1 |
| 186 | H | 73.88574 | 74.11360 | 77.74107 | -2374.20950 | -1036.76023 | 843.75774   | 1 |
| 187 | C | 74.93493 | 73.19923 | 79.53659 | -77.09082   | 666.87422   | -415.84136  | 1 |
| 188 | H | 75.27177 | 73.58827 | 80.54026 | -985.81834  | 617.19825   | 2463.91927  | 1 |
| 189 | O | 76.12357 | 72.80477 | 78.82955 | 293.29899   | -391.65602  | -477.80926  | 1 |
| 190 | H | 76.80737 | 72.95283 | 79.52037 | 2528.72714  | -681.76262  | -751.27122  | 1 |
| 191 | C | 73.87487 | 72.06218 | 79.76439 | 252.47363   | -605.14473  | 440.05134   | 1 |
| 192 | H | 74.29865 | 71.23274 | 80.37841 | -2052.65063 | 1456.49051  | -1043.51830 | 1 |
| 193 | H | 72.96421 | 72.44141 | 80.29643 | -2152.98800 | -1661.97574 | -161.70652  | 1 |
| 194 | H | 73.53532 | 71.62300 | 78.79793 | -473.12726  | -1584.27339 | 2165.61725  | 1 |
| 195 | C | 72.64031 | 74.53488 | 79.60370 | 360.36307   | 488.46713   | 505.10056   | 1 |
| 196 | O | 71.67693 | 73.95262 | 79.16470 | -200.08817  | -528.03552  | -385.82850  | 1 |
| 197 | N | 72.75715 | 75.31350 | 80.66563 | -597.54095  | -226.44775  | 355.20479   | 1 |
| 198 | H | 73.69806 | 75.65710 | 80.92821 | 2179.23655  | -1300.70981 | -991.33835  | 1 |
| 199 | C | 71.69794 | 75.44427 | 81.60620 | -687.68921  | 297.39807   | -249.45179  | 1 |
| 200 | H | 72.03214 | 76.29422 | 82.24291 | -349.16256  | -2467.37713 | -1101.72831 | 1 |
| 201 | C | 70.32352 | 75.74515 | 80.83374 | 672.47345   | 361.54328   | -201.62880  | 1 |
| 202 | H | 70.05731 | 74.86909 | 80.18948 | 1541.41502  | 582.18425   | 2169.97026  | 1 |
| 203 | H | 69.48988 | 75.88181 | 81.55999 | -2534.67717 | 60.25153    | 997.72295   | 1 |
| 204 | C | 70.49597 | 77.00478 | 79.97461 | 574.26774   | -389.43119  | -377.02542  | 1 |
| 205 | C | 70.37358 | 78.30614 | 80.54792 | 688.82679   | -287.33580  | -257.96133  | 1 |
| 206 | H | 70.19103 | 78.43153 | 81.62993 | 331.14182   | 1470.38163  | 2269.80013  | 1 |
| 207 | C | 70.78391 | 76.85621 | 78.58378 | -383.52382  | -675.04808  | 144.24917   | 1 |
| 208 | H | 70.91832 | 75.84979 | 78.14364 | 4.09847     | 1517.59662  | 2262.86397  | 1 |
| 209 | C | 70.47820 | 79.41750 | 79.71047 | -134.76730  | 428.45285   | -649.50303  | 1 |



|     |   |          |          |          |             |             |             |   |
|-----|---|----------|----------|----------|-------------|-------------|-------------|---|
| 210 | H | 70.36902 | 80.42393 | 80.15055 | -903.23433  | 1600.49020  | 2011.53387  | 1 |
| 211 | C | 70.88106 | 77.99740 | 77.78538 | -335.53281  | -615.00040  | -364.39058  | 1 |
| 212 | H | 71.09756 | 77.86781 | 76.71026 | 1596.45398  | -1369.33862 | 1732.02659  | 1 |
| 213 | C | 70.70734 | 79.31192 | 78.30831 | 585.48547   | -340.24194  | -406.23938  | 1 |
| 214 | O | 70.76828 | 80.47392 | 77.48947 | -419.15649  | -173.04408  | -511.94141  | 1 |
| 215 | H | 70.87087 | 80.04010 | 76.60694 | -1071.84350 | 1559.71507  | -1960.13012 | 1 |
| 216 | C | 71.63726 | 74.05843 | 82.43864 | 291.41878   | -183.13091  | 710.72246   | 1 |
| 217 | O | 72.52400 | 73.20150 | 82.34213 | 379.87695   | 523.47396   | -222.23622  | 1 |
| 218 | N | 70.58408 | 74.07290 | 83.21954 | 564.30591   | 373.09380   | 277.24371   | 1 |
| 219 | H | 70.01161 | 74.91343 | 83.17068 | -120.59931  | -2436.07824 | -1214.35098 | 1 |
| 220 | C | 70.16239 | 72.97721 | 84.02131 | 404.07514   | -299.37480  | 608.84009   | 1 |
| 221 | H | 69.12154 | 73.24445 | 84.31389 | -1071.07882 | -841.69025  | 2359.66467  | 1 |
| 222 | C | 70.26096 | 71.65678 | 83.14234 | -683.12807  | 68.71770    | -390.13096  | 1 |
| 223 | H | 69.64698 | 71.74744 | 82.21794 | 2068.88918  | 1596.58590  | 770.89603   | 1 |
| 224 | H | 71.31013 | 71.50324 | 82.78830 | 1379.86429  | 2342.49779  | -179.85638  | 1 |
| 225 | C | 69.79109 | 70.45959 | 84.02270 | -176.39967  | 537.49466   | 550.97268   | 1 |
| 226 | H | 70.36428 | 70.42217 | 84.97596 | -396.28051  | 1942.22168  | 1869.33314  | 1 |
| 227 | H | 68.72437 | 70.57073 | 84.31893 | -94.44700   | 586.00678   | -2659.20016 | 1 |
| 228 | C | 70.02027 | 69.13038 | 83.16625 | -291.69381  | -718.18079  | -150.72929  | 1 |
| 229 | H | 69.40149 | 69.03632 | 82.23802 | -2303.38776 | 1089.76242  | 964.62032   | 1 |
| 230 | H | 71.08384 | 68.90963 | 82.89373 | 884.16729   | 2568.80533  | -207.74283  | 1 |
| 231 | N | 69.59823 | 68.14541 | 84.07157 | -594.49522  | -252.81478  | 342.29276   | 1 |
| 232 | H | 69.31329 | 68.46063 | 84.98595 | -1735.17426 | 2084.05705  | -263.71605  | 1 |
| 233 | C | 69.55623 | 66.89962 | 83.81778 | 595.23177   | -271.52487  | 442.22352   | 1 |
| 234 | N | 69.95912 | 66.48341 | 82.54394 | 585.53813   | -424.79750  | -105.81303  | 1 |
| 235 | H | 70.29363 | 67.04070 | 81.75935 | 959.88797   | 1327.56823  | -2177.11905 | 1 |
| 236 | H | 69.96830 | 65.51634 | 82.21952 | 1578.48647  | 16.27378    | -2220.76233 | 1 |
| 237 | N | 69.09263 | 66.18138 | 84.92947 | -452.17763  | -390.33541  | -421.51853  | 1 |
| 238 | H | 68.79591 | 66.49624 | 85.85157 | 470.26107   | 1974.25629  | -1817.92087 | 1 |
| 239 | H | 68.97878 | 65.16747 | 84.93091 | 1856.67307  | -1573.97321 | -1224.35416 | 1 |
| 240 | C | 71.13050 | 72.82105 | 85.32651 | -531.47271  | -581.45780  | -55.06206   | 1 |
| 241 | O | 70.64332 | 72.76139 | 86.42151 | -243.00837  | 192.73507   | 609.52485   | 1 |
| 242 | N | 72.41342 | 72.64914 | 84.97672 | 343.49288   | -644.25607  | 38.09164    | 1 |
| 243 | H | 72.66329 | 72.69658 | 83.94880 | -1691.16043 | -1535.97525 | -1484.73099 | 1 |
| 244 | C | 73.44568 | 73.03321 | 85.95987 | 542.66492   | 350.14337   | 454.42563   | 1 |
| 245 | H | 72.87220 | 73.61454 | 86.71889 | 1209.57979  | -2396.95920 | 463.86744   | 1 |
| 246 | C | 74.00874 | 71.73946 | 86.50973 | -737.14309  | 145.93010   | 242.71942   | 1 |
| 247 | H | 74.28052 | 71.08970 | 85.64827 | -1050.18303 | 159.36419   | -2509.06125 | 1 |
| 248 | C | 75.24975 | 71.96254 | 87.35326 | -706.77696  | -252.88343  | -245.16230  | 1 |
| 249 | H | 75.65103 | 70.99538 | 87.76467 | -1624.64039 | -1665.49085 | 1417.86935  | 1 |
| 250 | H | 76.07750 | 72.43978 | 86.75897 | 2566.10521  | 598.51109   | 693.22305   | 1 |
| 251 | H | 75.03951 | 72.63567 | 88.22974 | -1972.69758 | 107.10018   | -1876.34312 | 1 |
| 252 | C | 72.95790 | 70.99575 | 87.31631 | 412.85148   | 672.58832   | -27.69222   | 1 |
| 253 | H | 73.27837 | 69.94572 | 87.55995 | 1447.02277  | 1762.76533  | -1490.78944 | 1 |
| 254 | H | 72.73933 | 71.51573 | 88.28892 | 1320.77379  | -145.20455  | 2378.68491  | 1 |
| 255 | H | 71.98226 | 70.93825 | 86.75385 | -1512.10848 | 1470.52031  | 1724.75147  | 1 |
| 256 | C | 74.50054 | 73.96528 | 85.08846 | -607.11113  | 499.56689   | 73.73769    | 1 |
| 257 | O | 74.33570 | 75.16049 | 85.04399 | 357.97126   | 460.81534   | 356.68785   | 1 |
| 258 | N | 75.43657 | 73.24289 | 84.49563 | 536.55407   | -368.62270  | 332.76306   | 1 |
| 259 | H | 75.45166 | 72.22849 | 84.58607 | 524.38866   | 2297.69985  | 1367.20941  | 1 |
| 260 | C | 76.39133 | 73.91163 | 83.68745 | 46.50277    | -774.29190  | -147.97904  | 1 |
| 261 | H | 75.89353 | 74.86006 | 83.37606 | 1676.51875  | 1883.29066  | 1032.55549  | 1 |
| 262 | C | 77.74372 | 74.15996 | 84.54398 | -559.41456  | -34.19198   | -556.30433  | 1 |
| 263 | H | 78.18561 | 73.16946 | 84.80582 | -64.66664   | 395.18769   | 2695.05373  | 1 |
| 264 | H | 78.50723 | 74.67483 | 83.91381 | -2703.44278 | -60.40056   | 333.79418   | 1 |
| 265 | C | 77.46450 | 74.94608 | 85.79374 | -519.76435  | 377.31045   | 459.42366   | 1 |
| 266 | H | 76.58818 | 74.49082 | 86.30820 | -1746.74323 | 1667.50644  | -1261.73691 | 1 |
| 267 | C | 78.66186 | 74.88520 | 86.73509 | 570.95554   | 16.46261    | -545.27700  | 1 |
| 268 | H | 78.46855 | 75.44101 | 87.68833 | 2391.58273  | 28.05277    | -1305.07271 | 1 |
| 269 | H | 78.91762 | 73.83009 | 87.01207 | 175.75588   | 917.63458   | 2559.43867  | 1 |
| 270 | H | 79.57544 | 75.33537 | 86.26861 | -1063.97851 | -2155.34650 | 1283.00462  | 1 |
| 271 | C | 77.13142 | 76.39748 | 85.47556 | 193.76014   | 2.62946     | -765.53141  | 1 |

|     |   |          |          |          |             |             |             |   |
|-----|---|----------|----------|----------|-------------|-------------|-------------|---|
| 272 | H | 76.98204 | 77.00060 | 86.40814 | 507.39394   | -846.55087  | 2539.60089  | 1 |
| 273 | H | 77.94708 | 76.89099 | 84.88668 | 1337.57841  | 1818.19054  | 1526.01994  | 1 |
| 274 | H | 76.18522 | 76.47643 | 84.87574 | 1100.88635  | -1172.91350 | -2199.08909 | 1 |
| 275 | C | 76.80098 | 72.88529 | 82.51796 | -549.21115  | 475.64486   | -309.38218  | 1 |
| 276 | O | 76.64066 | 71.69636 | 82.59518 | 556.06106   | -390.37755  | -78.24250   | 1 |
| 277 | O | 77.54464 | 73.44693 | 81.44383 | -572.27940  | -310.19032  | -209.75862  | 1 |
| 278 | H | 77.27641 | 74.40084 | 81.56152 | -1380.08193 | 2212.14486  | 790.85944   | 1 |

Listing 70: C00070.xmolout

|    |   |          |          |          |             |             |             |        |          |
|----|---|----------|----------|----------|-------------|-------------|-------------|--------|----------|
| 1  |   | 276      |          |          |             |             |             |        |          |
| 2  |   | 150.0000 | 150.0000 | 150.0000 | 0.0000      | 0.0000      | 0.0000***** | 2.7750 | 11100    |
|    |   | 0.2500   | 300.00   | 0.00     | 0.00        | 0.00        | -1293.5878  | 0.0000 | 300.0000 |
| 3  | H | 67.86796 | 69.34608 | 69.51791 | -2043.14101 | -1757.64893 | 399.89339   |        | 1        |
| 4  | N | 68.05051 | 70.34421 | 69.41266 | 426.75047   | 490.45733   | -334.42467  |        | 1        |
| 5  | H | 68.06388 | 70.71096 | 70.37677 | 442.25559   | -1110.30854 | -2448.52907 |        | 1        |
| 6  | C | 69.19287 | 70.63909 | 68.63437 | 415.32972   | -666.39213  | 83.73172    |        | 1        |
| 7  | H | 68.90938 | 70.29183 | 67.61768 | 879.32219   | 2491.00447  | 667.35213   |        | 1        |
| 8  | C | 69.45866 | 72.22865 | 68.69826 | 31.35357    | 477.41777   | 628.23362   |        | 1        |
| 9  | H | 69.67214 | 72.53721 | 69.75077 | 1168.38489  | 2240.25337  | -1019.71136 |        | 1        |
| 10 | H | 70.36575 | 72.50521 | 68.10886 | -360.43770  | 2534.90498  | 931.67112   |        | 1        |
| 11 | C | 68.23119 | 72.93254 | 68.18244 | 463.18208   | 512.70242   | -382.34388  |        | 1        |
| 12 | H | 67.33601 | 72.35781 | 68.51282 | 1725.29117  | 1863.52247  | -987.07854  |        | 1        |
| 13 | C | 68.12932 | 74.33917 | 68.75808 | 710.42801   | -144.27427  | -313.15367  |        | 1        |
| 14 | H | 67.21207 | 74.86927 | 68.39252 | 364.20195   | -1033.13725 | 2494.72524  |        | 1        |
| 15 | H | 68.08261 | 74.32641 | 69.87744 | 2567.61904  | 335.80679   | 847.48802   |        | 1        |
| 16 | H | 69.01201 | 74.96683 | 68.47175 | -2587.99029 | 680.92867   | -512.16411  |        | 1        |
| 17 | C | 68.24235 | 72.99521 | 66.66084 | 268.17616   | 741.64379   | -40.42634   |        | 1        |
| 18 | H | 67.31259 | 73.47395 | 66.25857 | 1283.54314  | -1945.37420 | -1411.27812 |        | 1        |
| 19 | H | 69.11227 | 73.59059 | 66.28077 | -1258.57796 | 1317.15249  | -2026.02085 |        | 1        |
| 20 | H | 68.31549 | 71.97465 | 66.20442 | -2502.84526 | 909.80597   | 575.92391   |        | 1        |
| 21 | C | 70.48417 | 69.82917 | 69.16417 | 619.36578   | -458.64843  | -172.09273  |        | 1        |
| 22 | O | 71.42176 | 69.70408 | 68.42147 | -81.40433   | 433.87611   | 522.34594   |        | 1        |
| 23 | N | 70.31339 | 69.31273 | 70.40253 | 175.23996   | -622.20190  | 341.55523   |        | 1        |
| 24 | H | 69.55378 | 69.75638 | 70.95734 | -876.57256  | -303.22879  | -2561.90213 |        | 1        |
| 25 | C | 71.51371 | 68.98747 | 71.15706 | -571.88214  | -534.10783  | -106.15033  |        | 1        |
| 26 | H | 71.82025 | 69.96152 | 71.58705 | -2713.20841 | -16.25800   | -248.80809  |        | 1        |
| 27 | C | 71.03152 | 67.96610 | 72.26632 | 166.60354   | 288.16399   | -716.09568  |        | 1        |
| 28 | H | 70.62698 | 67.04886 | 71.75776 | -2097.85574 | 1636.78449  | -586.18044  |        | 1        |
| 29 | O | 69.95940 | 68.41479 | 73.14172 | -317.80580  | -363.38227  | 484.43082   |        | 1        |
| 30 | H | 69.26645 | 67.76323 | 72.93216 | 1863.74748  | -1451.84923 | 1357.29467  |        | 1        |
| 31 | C | 72.39224 | 67.61518 | 72.97068 | 503.80731   | 517.99032   | 318.51606   |        | 1        |
| 32 | H | 72.25214 | 66.84339 | 73.76277 | 640.61020   | -2157.10410 | -1536.29104 |        | 1        |
| 33 | H | 73.13755 | 67.21248 | 72.24244 | 1687.88455  | 465.60692   | 2087.56452  |        | 1        |
| 34 | H | 72.84910 | 68.50737 | 73.45752 | -1293.07895 | -1899.88581 | -1463.57452 |        | 1        |
| 35 | C | 72.67475 | 68.31215 | 70.25498 | -153.07550  | -733.68902  | 248.70981   |        | 1        |
| 36 | O | 72.57068 | 67.15399 | 69.94153 | 186.15459   | -480.78787  | -449.34387  |        | 1        |
| 37 | N | 73.74486 | 69.13223 | 70.12714 | -487.53139  | 543.18517   | 42.03850    |        | 1        |
| 38 | C | 74.84869 | 68.71143 | 69.33836 | -699.35871  | 69.34393    | 360.10701   |        | 1        |
| 39 | H | 74.59121 | 67.69900 | 68.94379 | 2.81126     | -221.99807  | -2715.58072 |        | 1        |
| 40 | C | 74.87179 | 69.88766 | 68.26505 | -507.46439  | -592.59194  | 122.07761   |        | 1        |
| 41 | H | 75.81710 | 69.92266 | 67.67829 | -1975.08116 | 525.87560   | -1801.71556 |        | 1        |
| 42 | H | 74.03564 | 69.78001 | 67.53765 | 1588.27743  | -1913.22100 | 1113.83566  |        | 1        |
| 43 | C | 74.65749 | 71.13206 | 69.17988 | -613.62442  | -457.55993  | -194.14490  |        | 1        |
| 44 | H | 75.61985 | 71.46191 | 69.65990 | 1707.54637  | -721.27992  | 1996.92523  |        | 1        |
| 45 | H | 74.26724 | 72.01827 | 68.62933 | 758.23357   | 2100.81767  | 1560.55011  |        | 1        |
| 46 | C | 73.62861 | 70.58098 | 70.25637 | -352.41524  | 704.96076   | 49.21465    |        | 1        |
| 47 | H | 73.88173 | 70.84650 | 71.31029 | 1714.76886  | -2070.42778 | 443.35792   |        | 1        |
| 48 | H | 72.56224 | 70.83711 | 70.04534 | 1224.15040  | 1801.50881  | 1636.97633  |        | 1        |
| 49 | C | 76.27009 | 68.77788 | 70.17921 | 566.85117   | 537.05831   | 117.62814   |        | 1        |
| 50 | O | 77.30768 | 68.82612 | 69.56364 | -550.26779  | -406.08867  | 4.21666     |        | 1        |
| 51 | N | 76.07265 | 68.79284 | 71.49659 | 566.34832   | -425.77725  | 180.18749   |        | 1        |

|     |   |          |          |          |             |             |             |   |
|-----|---|----------|----------|----------|-------------|-------------|-------------|---|
| 52  | H | 75.08533 | 68.70082 | 71.73432 | 644.44502   | 2646.80550  | -52.73430   | 1 |
| 53  | C | 77.09249 | 68.36020 | 72.40053 | 612.34801   | -281.48662  | 411.56221   | 1 |
| 54  | H | 76.52071 | 68.21355 | 73.34352 | 1667.23498  | -1490.75142 | 1556.16753  | 1 |
| 55  | C | 77.67997 | 66.97445 | 71.86332 | -714.45746  | -175.43074  | 286.98927   | 1 |
| 56  | H | 78.14908 | 67.15284 | 70.85660 | -787.09484  | 1763.03619  | -1922.46060 | 1 |
| 57  | O | 76.68242 | 65.94851 | 71.68336 | -429.46514  | 516.51932   | -128.40526  | 1 |
| 58  | H | 76.72679 | 65.81422 | 70.71724 | 1981.82785  | 436.16847   | -1818.18182 | 1 |
| 59  | C | 78.81098 | 66.60109 | 72.88864 | 630.79189   | -468.94448  | 76.03230    | 1 |
| 60  | H | 79.30588 | 65.64035 | 72.61273 | -1775.71861 | 2062.30353  | 131.89849   | 1 |
| 61  | H | 79.61729 | 67.38835 | 72.93845 | -1855.14608 | 88.94118    | 1993.53760  | 1 |
| 62  | H | 78.40273 | 66.47618 | 73.91866 | -1504.82350 | -780.94249  | -2132.90992 | 1 |
| 63  | C | 78.17034 | 69.56045 | 72.54498 | 288.57638   | 618.62814   | -397.00270  | 1 |
| 64  | O | 79.35090 | 69.33910 | 72.72664 | 321.70495   | -185.26452  | 574.37218   | 1 |
| 65  | N | 77.54113 | 70.74467 | 72.64830 | -447.05792  | -446.53431  | 367.76425   | 1 |
| 66  | H | 76.56345 | 70.71854 | 72.35689 | 350.31316   | 1975.63644  | -1843.31522 | 1 |
| 67  | C | 78.35827 | 71.89366 | 72.39767 | -511.23061  | 374.03917   | -471.51480  | 1 |
| 68  | H | 79.37344 | 71.57205 | 72.73055 | 2234.79579  | -898.70890  | -1273.45190 | 1 |
| 69  | C | 78.30239 | 72.14610 | 70.81947 | 529.53781   | -159.34528  | 563.72604   | 1 |
| 70  | H | 79.17769 | 72.79585 | 70.55987 | 654.59388   | 2347.94251  | 1217.51488  | 1 |
| 71  | H | 78.45471 | 71.15522 | 70.31090 | -1526.55661 | 2103.42026  | 817.87394   | 1 |
| 72  | O | 77.05466 | 72.70639 | 70.29477 | -554.84278  | 14.12789    | 399.58769   | 1 |
| 73  | H | 77.20466 | 73.64313 | 70.52054 | 1297.06236  | 2061.84854  | 1220.68812  | 1 |
| 74  | C | 77.78560 | 73.19168 | 73.18306 | -662.15484  | -412.13544  | 123.62687   | 1 |
| 75  | O | 78.19270 | 74.29202 | 72.89367 | -540.01537  | -317.05804  | 274.91456   | 1 |
| 76  | N | 76.88086 | 72.86539 | 74.11988 | -202.76299  | -690.00100  | -131.49145  | 1 |
| 77  | H | 76.76449 | 71.85601 | 74.21288 | -702.62132  | -2617.37191 | 281.70413   | 1 |
| 78  | C | 76.46251 | 73.79164 | 75.17769 | -491.73914  | 576.34187   | 222.73509   | 1 |
| 79  | H | 75.90261 | 73.13205 | 75.88313 | 1977.17978  | -1823.58850 | -434.68928  | 1 |
| 80  | C | 77.68627 | 74.41077 | 75.82483 | -649.50797  | -328.66843  | 306.11224   | 1 |
| 81  | H | 78.28106 | 74.90077 | 75.01728 | 2075.07803  | 1452.16490  | -1004.45904 | 1 |
| 82  | C | 77.33212 | 75.46371 | 76.85742 | -615.18735  | -489.99689  | -70.96352   | 1 |
| 83  | H | 78.25057 | 75.96217 | 77.27238 | -1226.32661 | -1724.38906 | -1716.47170 | 1 |
| 84  | H | 76.67802 | 76.27964 | 76.41420 | 2381.64273  | -969.84735  | 900.46860   | 1 |
| 85  | H | 76.76811 | 75.02041 | 77.72394 | 2122.74991  | 1702.23946  | -141.36228  | 1 |
| 86  | C | 78.56157 | 73.35380 | 76.47748 | -501.86074  | -479.61276  | -376.42482  | 1 |
| 87  | H | 79.48892 | 73.79972 | 76.92977 | 993.79261   | -2246.95401 | -1177.81305 | 1 |
| 88  | H | 78.01483 | 72.81841 | 77.30136 | 42.71279    | -626.15391  | -2651.37258 | 1 |
| 89  | H | 78.88845 | 72.57462 | 75.73587 | -2026.39012 | -1590.33709 | -887.82922  | 1 |
| 90  | C | 75.45897 | 74.89842 | 74.47220 | -672.89153  | 382.57394   | -156.34072  | 1 |
| 91  | O | 75.35480 | 76.02586 | 74.90834 | 410.04627   | 221.86223   | 500.35950   | 1 |
| 92  | N | 74.75699 | 74.34493 | 73.49999 | -378.11782  | -443.79414  | -441.10984  | 1 |
| 93  | H | 75.00875 | 73.39753 | 73.23130 | 2404.15973  | -568.14894  | 1149.30085  | 1 |
| 94  | C | 73.71741 | 75.13536 | 72.90143 | -544.54484  | 466.16019   | 331.29119   | 1 |
| 95  | H | 73.23891 | 75.56496 | 73.81043 | -1409.80988 | -170.17955  | 2325.32679  | 1 |
| 96  | C | 74.48236 | 76.25465 | 72.08012 | -184.48284  | 116.78282   | -758.89137  | 1 |
| 97  | H | 75.22907 | 76.75267 | 72.74487 | 1893.78641  | 1861.14652  | 611.04528   | 1 |
| 98  | H | 75.06718 | 75.80277 | 71.24649 | -2170.79665 | -974.19311  | 1327.50117  | 1 |
| 99  | C | 73.43779 | 77.27702 | 71.53708 | 389.51668   | 672.81878   | -138.49152  | 1 |
| 100 | H | 72.74677 | 76.76112 | 70.83063 | 510.64577   | 1933.03327  | 1851.02484  | 1 |
| 101 | H | 72.77950 | 77.63290 | 72.35828 | -2302.30869 | -1105.72939 | -948.89774  | 1 |
| 102 | C | 74.09179 | 78.53323 | 70.84657 | -559.93427  | -126.34590  | 542.30857   | 1 |
| 103 | O | 73.37763 | 79.38733 | 70.38783 | -670.36003  | -111.83166  | 76.36448    | 1 |
| 104 | N | 75.44190 | 78.54052 | 70.86205 | -216.06729  | -537.07037  | 446.51379   | 1 |
| 105 | H | 76.10099 | 77.84522 | 71.23171 | -1251.96487 | 1074.12894  | -2168.52500 | 1 |
| 106 | H | 76.01421 | 79.29018 | 70.45864 | -2451.83023 | -720.73851  | 944.84612   | 1 |
| 107 | C | 72.74190 | 74.17603 | 72.02457 | 546.24052   | -563.88337  | -85.11809   | 1 |
| 108 | O | 72.58069 | 74.42570 | 70.85935 | 71.70702    | -307.40463  | 606.69673   | 1 |
| 109 | N | 72.13980 | 73.23972 | 72.78217 | 479.90863   | -504.50129  | 222.86849   | 1 |
| 110 | C | 71.47689 | 72.10425 | 72.23882 | 75.51268    | -600.91904  | 506.73700   | 1 |
| 111 | H | 71.93233 | 71.89426 | 71.24362 | -2033.61562 | 1795.30103  | 254.89480   | 1 |
| 112 | C | 71.74509 | 71.03499 | 73.39185 | 523.79067   | 517.99274   | 284.45581   | 1 |
| 113 | H | 71.05024 | 70.15656 | 73.34263 | 1599.61665  | -1127.00911 | 1895.98173  | 1 |

|     |   |          |          |          |             |             |             |   |
|-----|---|----------|----------|----------|-------------|-------------|-------------|---|
| 114 | H | 72.78295 | 70.63626 | 73.34052 | -1881.83093 | 1275.82488  | -1501.55016 | 1 |
| 115 | C | 71.54058 | 71.88631 | 74.68167 | -600.05639  | -404.05026  | 316.64485   | 1 |
| 116 | H | 70.46673 | 71.93804 | 74.96891 | -2597.05260 | 496.36221   | 657.73249   | 1 |
| 117 | H | 72.07612 | 71.47745 | 75.56779 | -1666.24518 | 1294.38985  | -1723.90591 | 1 |
| 118 | C | 72.07821 | 73.31481 | 74.23835 | 493.57570   | -129.95376  | -602.56394  | 1 |
| 119 | H | 71.36683 | 74.15913 | 74.45601 | -1469.08415 | -637.84797  | 2204.22581  | 1 |
| 120 | H | 73.09322 | 73.58136 | 74.61967 | -1038.97840 | 1068.88701  | -2280.71789 | 1 |
| 121 | C | 69.85732 | 72.32036 | 72.14911 | 188.88100   | 241.05089   | -727.87821  | 1 |
| 122 | O | 69.15146 | 71.42985 | 71.66872 | 531.88613   | -49.19943   | 427.07960   | 1 |
| 123 | N | 69.49258 | 73.47800 | 72.63743 | 708.14833   | 26.93417    | -179.73509  | 1 |
| 124 | H | 70.29719 | 73.99338 | 72.98363 | -2232.69501 | -1179.09831 | 1023.94816  | 1 |
| 125 | C | 68.12473 | 73.90763 | 72.87851 | -738.32412  | 259.92548   | 104.42456   | 1 |
| 126 | H | 67.62179 | 73.70380 | 71.90336 | 2028.89123  | 1260.02983  | 1311.33324  | 1 |
| 127 | C | 67.48004 | 73.12167 | 74.01152 | -258.65678  | -345.52513  | 661.28459   | 1 |
| 128 | H | 67.99799 | 73.40421 | 74.95538 | -1826.06090 | -1801.46097 | -918.64554  | 1 |
| 129 | C | 66.01247 | 73.48246 | 74.15322 | -541.23400  | 531.92970   | -218.41428  | 1 |
| 130 | H | 65.52778 | 72.93898 | 75.00988 | 1311.73218  | -2219.18200 | 882.19023   | 1 |
| 131 | H | 65.88023 | 74.59242 | 74.33773 | -1048.71298 | 1223.58118  | -2196.97971 | 1 |
| 132 | H | 65.43067 | 73.22588 | 73.22555 | 419.06414   | 1903.92898  | 1903.44670  | 1 |
| 133 | C | 67.61195 | 71.61725 | 73.85291 | -423.86431  | 152.66566   | -648.55262  | 1 |
| 134 | H | 67.05400 | 71.06049 | 74.65553 | 105.68386   | -2342.50080 | 1387.51238  | 1 |
| 135 | H | 67.20837 | 71.27191 | 72.85953 | -1695.63603 | -1484.73621 | -1531.02793 | 1 |
| 136 | H | 68.68626 | 71.28378 | 73.90069 | -1853.57121 | -487.39031  | 1936.59343  | 1 |
| 137 | C | 68.23015 | 75.51993 | 73.28271 | 539.71428   | -510.58232  | 267.58633   | 1 |
| 138 | O | 67.35748 | 75.99830 | 73.97711 | -15.93758   | -278.34085  | -624.49402  | 1 |
| 139 | N | 69.26301 | 76.11813 | 72.72331 | -676.81886  | 12.05292    | 276.17960   | 1 |
| 140 | H | 69.81329 | 75.52635 | 72.10499 | -1694.44250 | -373.84189  | -2100.66098 | 1 |
| 141 | C | 69.51606 | 77.50734 | 72.86922 | 412.33078   | -664.70360  | 108.35451   | 1 |
| 142 | H | 70.14736 | 77.72861 | 71.97968 | 1765.77476  | 1294.44366  | 1621.76594  | 1 |
| 143 | C | 68.13692 | 78.27235 | 72.91845 | -179.66635  | -721.95667  | -264.73915  | 1 |
| 144 | H | 67.45173 | 77.89407 | 72.12547 | -607.34922  | 2587.87032  | -598.10018  | 1 |
| 145 | H | 67.61823 | 78.06679 | 73.89215 | -359.69332  | -1479.13954 | -2259.74260 | 1 |
| 146 | C | 68.38988 | 79.81056 | 72.76075 | -240.01076  | 616.02425   | 431.85322   | 1 |
| 147 | H | 69.05867 | 80.17804 | 73.57407 | -1359.17131 | 782.54425   | 2227.99181  | 1 |
| 148 | H | 68.90514 | 80.04257 | 71.80186 | -820.36667  | 85.81767    | -2596.78715 | 1 |
| 149 | C | 66.97285 | 80.50799 | 72.83384 | -513.07015  | 236.18570   | -551.87280  | 1 |
| 150 | H | 66.31897 | 80.16399 | 71.99964 | 1816.11944  | -1183.11722 | -1650.94321 | 1 |
| 151 | H | 66.44258 | 80.21975 | 73.77077 | -1800.04429 | -1361.53473 | 1526.34643  | 1 |
| 152 | C | 67.17391 | 82.04024 | 72.77692 | 726.08972   | -253.19732  | -179.64713  | 1 |
| 153 | H | 67.73404 | 82.46357 | 73.63448 | 1224.27271  | -456.51798  | -2390.90304 | 1 |
| 154 | H | 67.59743 | 82.41689 | 71.82454 | 1206.40339  | -1150.93514 | -2154.90344 | 1 |
| 155 | N | 65.75545 | 82.69617 | 72.87079 | 329.70796   | -633.68968  | -155.67358  | 1 |
| 156 | H | 65.73346 | 83.75675 | 72.86343 | 1348.31305  | 1938.76845  | 1359.00643  | 1 |
| 157 | H | 65.06145 | 82.46664 | 72.10099 | 2096.92035  | 1446.54551  | -966.48890  | 1 |
| 158 | H | 65.19297 | 82.48183 | 73.74416 | -1197.07217 | -2303.53719 | 827.28733   | 1 |
| 159 | C | 70.30288 | 77.84818 | 74.28197 | -378.01186  | -556.17301  | -413.96481  | 1 |
| 160 | O | 69.81495 | 78.62665 | 75.07315 | -409.44433  | -307.55053  | -453.30833  | 1 |
| 161 | N | 71.48370 | 77.25714 | 74.30607 | -429.02477  | 524.70884   | 274.08502   | 1 |
| 162 | H | 71.63594 | 76.63226 | 73.51727 | 1706.34263  | -1425.96036 | 1574.38926  | 1 |
| 163 | C | 72.49613 | 77.54024 | 75.28011 | -45.25864   | -626.22952  | 478.93267   | 1 |
| 164 | H | 73.42291 | 77.47974 | 74.66222 | 1988.63164  | 570.90773   | 1772.87287  | 1 |
| 165 | C | 72.25198 | 78.97969 | 75.89105 | 551.77128   | -20.49526   | -564.54996  | 1 |
| 166 | H | 71.84814 | 79.67037 | 75.11448 | 1434.61535  | -1753.10253 | 1513.99471  | 1 |
| 167 | H | 71.44101 | 78.91397 | 76.65428 | -714.67738  | 1819.09770  | 1898.36494  | 1 |
| 168 | C | 73.57060 | 79.55520 | 76.50618 | 446.99263   | -555.77305  | 338.97221   | 1 |
| 169 | H | 74.21106 | 78.74640 | 76.93507 | 1953.68466  | 1892.25957  | -161.67766  | 1 |
| 170 | H | 74.20227 | 80.04667 | 75.73256 | -403.03785  | 2688.07032  | -188.43591  | 1 |
| 171 | C | 73.14014 | 80.57608 | 77.63460 | 567.86262   | 335.74681   | 434.04421   | 1 |
| 172 | H | 72.81061 | 81.54535 | 77.19470 | -1080.02275 | 1568.26081  | -1948.78900 | 1 |
| 173 | H | 72.26621 | 80.19334 | 78.21036 | -919.54108  | 2111.34692  | 1456.13463  | 1 |
| 174 | C | 74.35564 | 80.75905 | 78.57500 | 195.81897   | 173.33862   | -745.11536  | 1 |
| 175 | H | 74.58938 | 79.87033 | 79.19775 | 1405.67949  | -2301.21089 | -390.08113  | 1 |

|     |   |          |          |          |             |             |             |   |
|-----|---|----------|----------|----------|-------------|-------------|-------------|---|
| 176 | H | 75.28061 | 81.11520 | 78.07502 | -940.37328  | -1118.32446 | 2299.72133  | 1 |
| 177 | N | 73.98285 | 81.87961 | 79.60127 | 319.26422   | 656.36007   | -42.02424   | 1 |
| 178 | H | 74.72156 | 82.11100 | 80.32639 | 1961.03633  | 619.91968   | 1787.09422  | 1 |
| 179 | H | 73.76112 | 82.84252 | 79.21280 | 854.14343   | -2156.80752 | 1429.08711  | 1 |
| 180 | H | 73.13901 | 81.69299 | 80.21631 | 1237.02905  | -1378.50857 | -1998.28500 | 1 |
| 181 | C | 72.48146 | 76.33296 | 76.35522 | 532.53319   | -268.57236  | 517.55729   | 1 |
| 182 | O | 72.19925 | 75.18590 | 75.97668 | 266.16714   | -290.73804  | -558.88002  | 1 |
| 183 | N | 72.93529 | 76.69272 | 77.52127 | -226.25352  | 640.49678   | -270.32839  | 1 |
| 184 | H | 73.11793 | 77.68176 | 77.67251 | 2007.69063  | -1035.27229 | 1523.50231  | 1 |
| 185 | C | 72.97218 | 75.81143 | 78.65301 | -540.76542  | -573.33303  | 49.50000    | 1 |
| 186 | H | 71.94071 | 75.80579 | 79.06645 | -2374.20950 | -1036.76023 | 843.75774   | 1 |
| 187 | C | 73.41088 | 74.36369 | 78.15578 | -77.09082   | 666.87422   | -415.84136  | 1 |
| 188 | H | 73.99842 | 74.51692 | 77.20604 | -985.81834  | 617.19825   | 2463.91927  | 1 |
| 189 | O | 72.33022 | 73.48526 | 77.82222 | 293.29899   | -391.65602  | -477.80926  | 1 |
| 190 | H | 72.11168 | 73.84613 | 76.88507 | 2528.72714  | -681.76262  | -751.27122  | 1 |
| 191 | C | 74.36942 | 73.83239 | 79.27974 | 252.47363   | -605.14473  | 440.05134   | 1 |
| 192 | H | 74.80404 | 72.84151 | 79.01112 | -2052.65063 | 1456.49051  | -1043.51830 | 1 |
| 193 | H | 75.22472 | 74.52672 | 79.46583 | -2152.98800 | -1661.97574 | -161.70652  | 1 |
| 194 | H | 73.83294 | 73.70506 | 80.24943 | -473.12726  | -1584.27339 | 2165.61725  | 1 |
| 195 | C | 74.01990 | 76.54597 | 79.66638 | 360.36307   | 488.46713   | 505.10056   | 1 |
| 196 | O | 73.71252 | 76.73705 | 80.82116 | -200.08817  | -528.03552  | -385.82850  | 1 |
| 197 | N | 75.16740 | 76.81363 | 79.04283 | -597.54095  | -226.44775  | 355.20479   | 1 |
| 198 | H | 75.22422 | 76.60100 | 78.04704 | 2179.23655  | -1300.70981 | -991.33835  | 1 |
| 199 | C | 76.22196 | 77.44136 | 79.75100 | -687.68921  | 297.39807   | -249.45179  | 1 |
| 200 | H | 75.68765 | 77.87166 | 80.62918 | -349.16256  | -2467.37713 | -1101.72831 | 1 |
| 201 | C | 77.34691 | 76.38315 | 80.19207 | 672.47345   | 361.54328   | -201.62880  | 1 |
| 202 | H | 77.87914 | 75.99057 | 79.29860 | 1541.41502  | 582.18425   | 2169.97026  | 1 |
| 203 | H | 78.11561 | 76.90881 | 80.80653 | -2534.67717 | 60.25153    | 997.72295   | 1 |
| 204 | C | 76.76293 | 75.21447 | 80.99498 | 574.26774   | -389.43119  | -377.02542  | 1 |
| 205 | C | 76.05587 | 75.45169 | 82.21197 | 688.82679   | -287.33580  | -257.96133  | 1 |
| 206 | H | 75.90512 | 76.48072 | 82.58528 | 331.14182   | 1470.38163  | 2269.80013  | 1 |
| 207 | C | 76.94498 | 73.88081 | 80.51421 | -383.52382  | -675.04808  | 144.24917   | 1 |
| 208 | H | 77.49755 | 73.69005 | 79.57635 | 4.09847     | 1517.59662  | 2262.86397  | 1 |
| 209 | C | 75.53695 | 74.36097 | 82.90798 | -134.76730  | 428.45285   | -649.50303  | 1 |
| 210 | H | 74.97945 | 74.54791 | 83.84253 | -903.23433  | 1600.49020  | 2011.53387  | 1 |
| 211 | C | 76.40934 | 72.82037 | 81.25107 | -335.53281  | -615.00040  | -364.39058  | 1 |
| 212 | H | 76.55096 | 71.79482 | 80.86835 | 1596.45398  | -1369.33862 | 1732.02659  | 1 |
| 213 | C | 75.68762 | 73.01501 | 82.46465 | 585.48547   | -340.24194  | -406.23938  | 1 |
| 214 | O | 75.13659 | 71.94621 | 83.21860 | -419.15649  | -173.04408  | -511.94141  | 1 |
| 215 | H | 75.39418 | 71.18719 | 82.64424 | -1071.84350 | 1559.71507  | -1960.13012 | 1 |
| 216 | C | 76.88550 | 78.51930 | 78.73629 | 291.41878   | -183.13091  | 710.72246   | 1 |
| 217 | O | 76.24814 | 79.05596 | 77.85175 | 379.87695   | 523.47396   | -222.23622  | 1 |
| 218 | N | 78.14470 | 78.76222 | 79.09403 | 564.30591   | 373.09380   | 277.24371   | 1 |
| 219 | H | 78.54606 | 78.28997 | 79.90439 | -120.59931  | -2436.07824 | -1214.35098 | 1 |
| 220 | C | 78.91923 | 79.63162 | 78.28256 | 404.07514   | -299.37480  | 608.84009   | 1 |
| 221 | H | 78.24438 | 79.91635 | 77.43962 | -1071.07882 | -841.69025  | 2359.66467  | 1 |
| 222 | C | 79.30072 | 80.85591 | 79.22097 | -683.12807  | 68.71770    | -390.13096  | 1 |
| 223 | H | 78.40169 | 81.20668 | 79.77568 | 2068.88918  | 1596.58590  | 770.89603   | 1 |
| 224 | H | 80.02807 | 80.53688 | 80.00053 | 1379.86429  | 2342.49779  | -179.85638  | 1 |
| 225 | C | 79.89377 | 82.00510 | 78.35188 | -176.39967  | 537.49466   | 550.97268   | 1 |
| 226 | H | 80.80716 | 81.66586 | 77.80584 | -396.28051  | 1942.22168  | 1869.33314  | 1 |
| 227 | H | 79.17466 | 82.33642 | 77.56937 | -94.44700   | 586.00678   | -2659.20016 | 1 |
| 228 | C | 80.22584 | 83.18449 | 79.37849 | -291.69381  | -718.18079  | -150.72929  | 1 |
| 229 | H | 79.35456 | 83.58659 | 79.95546 | -2303.38776 | 1089.76242  | 964.62032   | 1 |
| 230 | H | 81.04256 | 82.95436 | 80.10941 | 884.16729   | 2568.80533  | -207.74283  | 1 |
| 231 | N | 80.69003 | 84.20766 | 78.54114 | -594.49522  | -252.81478  | 342.29276   | 1 |
| 232 | H | 80.84929 | 83.96607 | 77.57536 | -1735.17426 | 2084.05705  | -263.71605  | 1 |
| 233 | C | 80.93413 | 85.39461 | 78.92440 | 595.23177   | -271.52487  | 442.22352   | 1 |
| 234 | N | 80.71644 | 85.70087 | 80.27233 | 585.53813   | -424.79750  | -105.81303  | 1 |
| 235 | H | 80.40088 | 85.09715 | 81.03060 | 959.88797   | 1327.56823  | -2177.11905 | 1 |
| 236 | H | 80.88847 | 86.61118 | 80.70024 | 1578.48647  | 16.27378    | -2220.76233 | 1 |
| 237 | N | 81.39228 | 86.18448 | 77.86121 | -452.17763  | -390.33541  | -421.51853  | 1 |

|     |   |          |          |          |             |             |             |   |
|-----|---|----------|----------|----------|-------------|-------------|-------------|---|
| 238 | H | 81.55833 | 85.95666 | 76.88189 | 470.26107   | 1974.25629  | -1817.92087 | 1 |
| 239 | H | 81.64963 | 87.16677 | 77.96668 | 1856.67307  | -1573.97321 | -1224.35416 | 1 |
| 240 | C | 80.30678 | 78.89196 | 77.81248 | -531.47271  | -581.45780  | -55.06206   | 1 |
| 241 | O | 81.16833 | 79.55670 | 77.27062 | -243.00837  | 192.73507   | 609.52485   | 1 |
| 242 | N | 80.31233 | 77.59817 | 78.09025 | 343.49288   | -644.25607  | 38.09164    | 1 |
| 243 | H | 79.43400 | 77.29437 | 78.50547 | -1691.16043 | -1535.97525 | -1484.73099 | 1 |
| 244 | C | 81.38163 | 76.66326 | 77.80385 | 542.66492   | 350.14337   | 454.42563   | 1 |
| 245 | H | 80.86397 | 75.67514 | 77.81653 | 1209.57979  | -2396.95920 | 463.86744   | 1 |
| 246 | C | 81.98139 | 76.98741 | 76.44632 | -737.14309  | 145.93010   | 242.71942   | 1 |
| 247 | H | 82.19224 | 78.09427 | 76.42181 | -1050.18303 | 159.36419   | -2509.06125 | 1 |
| 248 | C | 83.28596 | 76.26020 | 76.18755 | -706.77696  | -252.88343  | -245.16230  | 1 |
| 249 | H | 83.68152 | 76.46811 | 75.15465 | -1624.64039 | -1665.49085 | 1417.86935  | 1 |
| 250 | H | 84.08563 | 76.57272 | 76.91904 | 2566.10521  | 598.51109   | 693.22305   | 1 |
| 251 | H | 83.16657 | 75.14554 | 76.28363 | -1972.69758 | 107.10018   | -1876.34312 | 1 |
| 252 | C | 80.99183 | 76.68096 | 75.33602 | 412.85148   | 672.58832   | -27.69222   | 1 |
| 253 | H | 81.38511 | 76.98816 | 74.32844 | 1447.02277  | 1762.76533  | -1490.78944 | 1 |
| 254 | H | 80.75556 | 75.58263 | 75.28118 | 1320.77379  | -145.20455  | 2378.68491  | 1 |
| 255 | H | 80.01824 | 77.22150 | 75.49590 | -1512.10848 | 1470.52031  | 1724.75147  | 1 |
| 256 | C | 82.52302 | 76.70465 | 79.03332 | -607.11113  | 499.56689   | 73.73769    | 1 |
| 257 | O | 83.42484 | 75.89690 | 78.99887 | 357.97126   | 460.81534   | 356.68785   | 1 |
| 258 | N | 82.23119 | 77.58932 | 79.96609 | 536.55407   | -368.62270  | 332.76306   | 1 |
| 259 | H | 81.39647 | 78.12525 | 79.73925 | 524.38866   | 2297.69985  | 1367.20941  | 1 |
| 260 | C | 83.07813 | 77.91774 | 81.05305 | 46.50277    | -774.29190  | -147.97904  | 1 |
| 261 | H | 82.38978 | 78.40725 | 81.77567 | 1676.51875  | 1883.29066  | 1032.55549  | 1 |
| 262 | C | 83.81905 | 76.61292 | 81.64164 | -559.41456  | -34.19198   | -556.30433  | 1 |
| 263 | H | 84.41351 | 76.13076 | 80.81857 | -64.66664   | 395.18769   | 2695.05373  | 1 |
| 264 | H | 84.55778 | 76.90099 | 82.42836 | -2703.44278 | -60.40056   | 333.79418   | 1 |
| 265 | C | 82.81346 | 75.63618 | 82.19142 | -519.76435  | 377.31045   | 459.42366   | 1 |
| 266 | H | 82.04417 | 75.45211 | 81.40768 | -1746.74323 | 1667.50644  | -1261.73691 | 1 |
| 267 | C | 83.49612 | 74.31397 | 82.52101 | 570.95554   | 16.46261    | -545.27700  | 1 |
| 268 | H | 82.76828 | 73.55710 | 82.91191 | 2391.58273  | 28.05277    | -1305.07271 | 1 |
| 269 | H | 83.98832 | 73.86755 | 81.61842 | 175.75588   | 917.63458   | 2559.43867  | 1 |
| 270 | H | 84.29003 | 74.44336 | 83.30121 | -1063.97851 | -2155.34650 | 1283.00462  | 1 |
| 271 | C | 82.12802 | 76.17865 | 83.43790 | 193.76014   | 2.62946     | -765.53141  | 1 |
| 272 | H | 81.40876 | 75.43541 | 83.86934 | 507.39394   | -846.55087  | 2539.60089  | 1 |
| 273 | H | 82.86971 | 76.42578 | 84.24084 | 1337.57841  | 1818.19054  | 1526.01994  | 1 |
| 274 | H | 81.54887 | 77.11261 | 83.22125 | 1100.88635  | -1172.91350 | -2199.08909 | 1 |
| 275 | C | 84.22542 | 78.93798 | 80.57192 | -549.21115  | 475.64486   | -309.38218  | 1 |
| 276 | O | 84.44449 | 79.24276 | 79.42942 | 556.06106   | -390.37755  | -78.24250   | 1 |
| 277 | O | 85.02194 | 79.47048 | 81.61934 | -572.27940  | -310.19032  | -209.75862  | 1 |
| 278 | H | 84.56361 | 79.04120 | 82.39133 | -1380.08193 | 2212.14486  | 790.85944   | 1 |

Listing 71: C00071.xmolout

|    |   |          |          |          |             |             |             |        |          |
|----|---|----------|----------|----------|-------------|-------------|-------------|--------|----------|
| 1  |   | 276      |          |          |             |             |             |        |          |
| 2  |   | 150.0000 | 150.0000 | 150.0000 | 0.0000      | 0.0000      | 0.0000***** | 2.7750 | 11100    |
|    |   | 0.2500   | 300.00   | 0.00     | 0.00        | 0.00        | -1293.5846  | 0.0000 | 300.0000 |
| 3  | H | 70.98780 | 76.29341 | 64.63402 | -2043.14101 | -1757.64893 | 399.89339   |        | 1        |
| 4  | N | 71.34539 | 77.14752 | 65.05520 | 426.75047   | 490.45733   | -334.42467  |        | 1        |
| 5  | H | 71.65383 | 76.82109 | 65.96787 | 442.25559   | -1110.30854 | -2448.52907 |        | 1        |
| 6  | C | 72.34935 | 77.81718 | 64.31655 | 415.32972   | -666.39213  | 83.73172    |        | 1        |
| 7  | H | 72.11617 | 77.68635 | 63.23580 | 879.32219   | 2491.00447  | 667.35213   |        | 1        |
| 8  | C | 72.33001 | 79.36200 | 64.81388 | 31.35357    | 477.41777   | 628.23362   |        | 1        |
| 9  | H | 72.41254 | 79.38452 | 65.92659 | 1168.38489  | 2240.25337  | -1019.71136 |        | 1        |
| 10 | H | 73.22141 | 79.91187 | 64.42882 | -360.43770  | 2534.90498  | 931.67112   |        | 1        |
| 11 | C | 71.05564 | 80.02195 | 64.36833 | 463.18208   | 512.70242   | -382.34388  |        | 1        |
| 12 | H | 70.21382 | 79.31369 | 64.54202 | 1725.29117  | 1863.52247  | -987.07854  |        | 1        |
| 13 | C | 70.80817 | 81.28205 | 65.19013 | 710.42801   | -144.27427  | -313.15367  |        | 1        |
| 14 | H | 69.87269 | 81.81206 | 64.87417 | 364.20195   | -1033.13725 | 2494.72524  |        | 1        |
| 15 | H | 70.71101 | 81.04959 | 66.28378 | 2567.61904  | 335.80679   | 847.48802   |        | 1        |
| 16 | H | 71.65817 | 82.00933 | 65.09324 | -2587.99029 | 680.92867   | -512.16411  |        | 1        |
| 17 | C | 71.10746 | 80.37763 | 62.88856 | 268.17616   | 741.64379   | -40.42634   |        | 1        |

|    |   |          |          |          |             |             |             |   |
|----|---|----------|----------|----------|-------------|-------------|-------------|---|
| 18 | H | 70.16082 | 80.87171 | 62.54870 | 1283.54314  | -1945.37420 | -1411.27812 | 1 |
| 19 | H | 71.94838 | 81.08428 | 62.66569 | -1258.57796 | 1317.15249  | -2026.02085 | 1 |
| 20 | H | 71.25800 | 79.47077 | 62.24811 | -2502.84526 | 909.80597   | 575.92391   | 1 |
| 21 | C | 73.75441 | 77.20763 | 64.77144 | 619.36578   | -458.64843  | -172.09273  | 1 |
| 22 | O | 74.14010 | 77.09688 | 65.98904 | -81.40433   | 433.87611   | 522.34594   | 1 |
| 23 | N | 74.50868 | 76.92023 | 63.74922 | 175.23996   | -622.20190  | 341.55523   | 1 |
| 24 | H | 74.12569 | 76.99460 | 62.80879 | -876.57256  | -303.22879  | -2561.90213 | 1 |
| 25 | C | 75.58037 | 76.03161 | 64.10757 | -571.88214  | -534.10783  | -106.15033  | 1 |
| 26 | H | 75.13509 | 75.02385 | 63.99863 | -2713.20841 | -16.25800   | -248.80809  | 1 |
| 27 | C | 76.75098 | 76.27197 | 63.08410 | 166.60354   | 288.16399   | -716.09568  | 1 |
| 28 | H | 77.00519 | 77.36766 | 63.06775 | -2097.85574 | 1636.78449  | -586.18044  | 1 |
| 29 | O | 76.47163 | 75.92053 | 61.70598 | -317.80580  | -363.38227  | 484.43082   | 1 |
| 30 | H | 76.61962 | 76.77073 | 61.25329 | 1863.74748  | -1451.84923 | 1357.29467  | 1 |
| 31 | C | 77.90695 | 75.47675 | 63.80093 | 503.80731   | 517.99032   | 318.51606   | 1 |
| 32 | H | 78.87910 | 75.59659 | 63.26866 | 640.61020   | -2157.10410 | -1536.29104 | 1 |
| 33 | H | 78.04923 | 75.83437 | 64.85257 | 1687.88455  | 465.60692   | 2087.56452  | 1 |
| 34 | H | 77.69052 | 74.38392 | 63.84709 | -1293.07895 | -1899.88581 | -1463.57452 | 1 |
| 35 | C | 75.97843 | 76.44125 | 65.70320 | -153.07550  | -733.68902  | 248.70981   | 1 |
| 36 | O | 76.73967 | 77.39963 | 65.88605 | 186.15459   | -480.78787  | -449.34387  | 1 |
| 37 | N | 76.05560 | 75.26566 | 66.44108 | -487.53139  | 543.18517   | 42.03850    | 1 |
| 38 | C | 76.52869 | 75.31001 | 67.76540 | -699.35871  | 69.34393    | 360.10701   | 1 |
| 39 | H | 76.42532 | 76.37907 | 68.06716 | 2.81126     | -221.99807  | -2715.58072 | 1 |
| 40 | C | 75.58502 | 74.27502 | 68.53054 | -507.46439  | -592.59194  | 122.07761   | 1 |
| 41 | H | 76.07673 | 73.82601 | 69.42275 | -1975.08116 | 525.87560   | -1801.71556 | 1 |
| 42 | H | 74.66890 | 74.78285 | 68.90525 | 1588.27743  | -1913.22100 | 1113.83566  | 1 |
| 43 | C | 75.22413 | 73.22846 | 67.43596 | -613.62442  | -457.55993  | -194.14490  | 1 |
| 44 | H | 75.96502 | 72.39780 | 67.39655 | 1707.54637  | -721.27992  | 1996.92523  | 1 |
| 45 | H | 74.23677 | 72.74378 | 67.60387 | 758.23357   | 2100.81767  | 1560.55011  | 1 |
| 46 | C | 75.25792 | 74.11062 | 66.10313 | -352.41524  | 704.96076   | 49.21465    | 1 |
| 47 | H | 75.74085 | 73.60715 | 65.23028 | 1714.76886  | -2070.42778 | 443.35792   | 1 |
| 48 | H | 74.26599 | 74.51834 | 65.78820 | 1224.15040  | 1801.50881  | 1636.97633  | 1 |
| 49 | C | 78.13133 | 74.86876 | 67.80239 | 566.85117   | 537.05831   | 117.62814   | 1 |
| 50 | O | 78.92782 | 75.72425 | 68.09704 | -550.26779  | -406.08867  | 4.21666     | 1 |
| 51 | N | 78.33493 | 73.59944 | 67.49447 | 566.34832   | -425.77725  | 180.18749   | 1 |
| 52 | H | 77.51885 | 73.06418 | 67.20351 | 644.44502   | 2646.80550  | -52.73430   | 1 |
| 53 | C | 79.60600 | 72.98914 | 67.68317 | 612.34801   | -281.48662  | 411.56221   | 1 |
| 54 | H | 79.43143 | 71.93205 | 67.38160 | 1667.23498  | -1490.75142 | 1556.16753  | 1 |
| 55 | C | 80.64684 | 73.73710 | 66.72685 | -714.45746  | -175.43074  | 286.98927   | 1 |
| 56 | H | 80.75771 | 74.79425 | 67.09877 | -787.09484  | 1763.03619  | -1922.46060 | 1 |
| 57 | O | 80.25589 | 73.83110 | 65.34279 | -429.46514  | 516.51932   | -128.40526  | 1 |
| 58 | H | 80.14085 | 74.79781 | 65.25160 | 1981.82785  | 436.16847   | -1818.18182 | 1 |
| 59 | C | 81.98295 | 72.94596 | 66.97321 | 630.79189   | -468.94448  | 76.03230    | 1 |
| 60 | H | 82.82741 | 73.38642 | 66.39353 | -1775.71861 | 2062.30353  | 131.89849   | 1 |
| 61 | H | 82.28064 | 72.95621 | 68.05529 | -1855.14608 | 88.94118    | 1993.53760  | 1 |
| 62 | H | 81.89073 | 71.87999 | 66.65937 | -1504.82350 | -780.94249  | -2132.90992 | 1 |
| 63 | C | 79.95888 | 73.14827 | 69.26910 | 288.57638   | 618.62814   | -397.00270  | 1 |
| 64 | O | 81.08932 | 73.47359 | 69.65452 | 321.70495   | -185.26452  | 574.37218   | 1 |
| 65 | N | 78.90644 | 72.82049 | 69.96516 | -447.05792  | -446.53431  | 367.76425   | 1 |
| 66 | H | 78.09977 | 72.58555 | 69.38891 | 350.31316   | 1975.63644  | -1843.31522 | 1 |
| 67 | C | 78.81480 | 72.74628 | 71.38587 | -511.23061  | 374.03917   | -471.51480  | 1 |
| 68 | H | 78.45253 | 71.70803 | 71.54813 | 2234.79579  | -898.70890  | -1273.45190 | 1 |
| 69 | C | 80.22445 | 73.02635 | 72.07101 | 529.53781   | -159.34528  | 563.72604   | 1 |
| 70 | H | 80.12525 | 72.75431 | 73.15802 | 654.59388   | 2347.94251  | 1217.51488  | 1 |
| 71 | H | 80.95561 | 72.30476 | 71.60945 | -1526.55661 | 2103.42026  | 817.87394   | 1 |
| 72 | O | 80.74599 | 74.36383 | 71.99355 | -554.84278  | 14.12789    | 399.58769   | 1 |
| 73 | H | 81.17017 | 74.29965 | 71.05937 | 1297.06236  | 2061.84854  | 1220.68812  | 1 |
| 74 | C | 77.62132 | 73.76924 | 71.82521 | -662.15484  | -412.13544  | 123.62687   | 1 |
| 75 | O | 76.61020 | 73.29552 | 72.28677 | -540.01537  | -317.05804  | 274.91456   | 1 |
| 76 | N | 77.89797 | 75.05556 | 71.59707 | -202.76299  | -690.00100  | -131.49145  | 1 |
| 77 | H | 78.83516 | 75.26130 | 71.24341 | -702.62132  | -2617.37191 | 281.70413   | 1 |
| 78 | C | 76.95669 | 76.09825 | 71.98675 | -491.73914  | 576.34187   | 222.73509   | 1 |
| 79 | H | 75.94803 | 75.64560 | 71.83682 | 1977.17978  | -1823.58850 | -434.68928  | 1 |

|     |   |          |          |          |             |             |             |   |
|-----|---|----------|----------|----------|-------------|-------------|-------------|---|
| 80  | C | 77.21675 | 76.48421 | 73.43385 | -649.50797  | -328.66843  | 306.11224   | 1 |
| 81  | H | 78.30615 | 76.69807 | 73.54561 | 2075.07803  | 1452.16490  | -1004.45904 | 1 |
| 82  | C | 76.44303 | 77.73506 | 73.80628 | -615.18735  | -489.99689  | -70.96352   | 1 |
| 83  | H | 76.61842 | 78.03238 | 74.87943 | -1226.32661 | -1724.38906 | -1716.47170 | 1 |
| 84  | H | 76.74617 | 78.60768 | 73.16095 | 2381.64273  | -969.84735  | 900.46860   | 1 |
| 85  | H | 75.33430 | 77.59378 | 73.67776 | 2122.74991  | 1702.23946  | -141.36228  | 1 |
| 86  | C | 76.86911 | 75.35727 | 74.38796 | -501.86074  | -479.61276  | -376.42482  | 1 |
| 87  | H | 77.13349 | 75.61278 | 75.45164 | 993.79261   | -2246.95401 | -1177.81305 | 1 |
| 88  | H | 75.77003 | 75.11943 | 74.36364 | 42.71279    | -626.15391  | -2651.37258 | 1 |
| 89  | H | 77.41320 | 74.40745 | 74.11635 | -2026.39012 | -1590.33709 | -887.82922  | 1 |
| 90  | C | 77.28705 | 77.42224 | 71.02495 | -672.89153  | 382.57394   | -156.34072  | 1 |
| 91  | O | 78.40530 | 77.85949 | 70.92052 | 410.04627   | 221.86223   | 500.35950   | 1 |
| 92  | N | 76.14598 | 77.91156 | 70.57422 | -378.11782  | -443.79414  | -441.10984  | 1 |
| 93  | H | 75.30951 | 77.37689 | 70.79896 | 2404.15973  | -568.14894  | 1149.30085  | 1 |
| 94  | C | 76.15252 | 78.97701 | 69.61205 | -544.54484  | 466.16019   | 331.29119   | 1 |
| 95  | H | 76.87900 | 78.64716 | 68.83342 | -1409.80988 | -170.17955  | 2325.32679  | 1 |
| 96  | C | 74.65872 | 79.07065 | 69.09808 | -184.48284  | 116.78282   | -758.89137  | 1 |
| 97  | H | 74.32041 | 78.09547 | 68.67853 | 1893.78641  | 1861.14652  | 611.04528   | 1 |
| 98  | H | 73.97648 | 79.28144 | 69.95149 | -2170.79665 | -974.19311  | 1327.50117  | 1 |
| 99  | C | 74.54680 | 80.19758 | 68.02361 | 389.51668   | 672.81878   | -138.49152  | 1 |
| 100 | H | 75.10694 | 81.10485 | 68.34815 | 510.64577   | 1933.03327  | 1851.02484  | 1 |
| 101 | H | 75.05925 | 79.88261 | 67.08647 | -2302.30869 | -1105.72939 | -948.89774  | 1 |
| 102 | C | 73.05449 | 80.59956 | 67.72191 | -559.93427  | -126.34590  | 542.30857   | 1 |
| 103 | O | 72.82528 | 81.53843 | 67.00146 | -670.36003  | -111.83166  | 76.36448    | 1 |
| 104 | N | 72.13608 | 79.80138 | 68.30557 | -216.06729  | -537.07037  | 446.51379   | 1 |
| 105 | H | 72.27779 | 78.96839 | 68.88820 | -1251.96487 | 1074.12894  | -2168.52500 | 1 |
| 106 | H | 71.12139 | 79.90967 | 68.20405 | -2451.83023 | -720.73851  | 944.84612   | 1 |
| 107 | C | 76.65777 | 80.37602 | 70.27223 | 546.24052   | -563.88337  | -85.11809   | 1 |
| 108 | O | 77.08878 | 81.17740 | 69.48262 | 71.70702    | -307.40463  | 606.69673   | 1 |
| 109 | N | 76.36502 | 80.57172 | 71.56627 | 479.90863   | -504.50129  | 222.86849   | 1 |
| 110 | C | 77.07337 | 81.60359 | 72.27288 | 75.51268    | -600.91904  | 506.73700   | 1 |
| 111 | H | 77.26258 | 82.35360 | 71.46960 | -2033.61562 | 1795.30103  | 254.89480   | 1 |
| 112 | C | 76.05990 | 82.05524 | 73.39790 | 523.79067   | 517.99274   | 284.45581   | 1 |
| 113 | H | 76.57264 | 82.34073 | 74.34428 | 1599.61665  | -1127.00911 | 1895.98173  | 1 |
| 114 | H | 75.49393 | 82.95789 | 73.07523 | -1881.83093 | 1275.82488  | -1501.55016 | 1 |
| 115 | C | 75.09696 | 80.83605 | 73.57485 | -600.05639  | -404.05026  | 316.64485   | 1 |
| 116 | H | 75.50682 | 80.08665 | 74.28770 | -2597.05260 | 496.36221   | 657.73249   | 1 |
| 117 | H | 74.09778 | 81.12199 | 73.97277 | -1666.24518 | 1294.38985  | -1723.90591 | 1 |
| 118 | C | 75.03585 | 80.27422 | 72.09210 | 493.57570   | -129.95376  | -602.56394  | 1 |
| 119 | H | 74.86530 | 79.17641 | 72.00812 | -1469.08415 | -637.84797  | 2204.22581  | 1 |
| 120 | H | 74.32405 | 80.81025 | 71.42069 | -1038.97840 | 1068.88701  | -2280.71789 | 1 |
| 121 | C | 78.49506 | 81.02819 | 72.85275 | 188.88100   | 241.05089   | -727.87821  | 1 |
| 122 | O | 79.51859 | 81.29191 | 72.25904 | 531.88613   | -49.19943   | 427.07960   | 1 |
| 123 | N | 78.36800 | 80.35182 | 73.98528 | 708.14833   | 26.93417    | -179.73509  | 1 |
| 124 | H | 77.45020 | 80.22534 | 74.40553 | -2232.69501 | -1179.09831 | 1023.94816  | 1 |
| 125 | C | 79.56498 | 79.76216 | 74.49662 | -738.32412  | 259.92548   | 104.42456   | 1 |
| 126 | H | 80.14840 | 79.50898 | 73.58080 | 2028.89123  | 1260.02983  | 1311.33324  | 1 |
| 127 | C | 80.29310 | 80.86452 | 75.38325 | -258.65678  | -345.52513  | 661.28459   | 1 |
| 128 | H | 79.59893 | 81.28194 | 76.14355 | -1826.06090 | -1801.46097 | -918.64554  | 1 |
| 129 | C | 81.52463 | 80.18761 | 76.07387 | -541.23400  | 531.92970   | -218.41428  | 1 |
| 130 | H | 82.09506 | 80.91194 | 76.70167 | 1311.73218  | -2219.18200 | 882.19023   | 1 |
| 131 | H | 81.20637 | 79.34959 | 76.73889 | -1048.71298 | 1223.58118  | -2196.97971 | 1 |
| 132 | H | 82.23321 | 79.76358 | 75.32421 | 419.06414   | 1903.92898  | 1903.44670  | 1 |
| 133 | C | 80.82294 | 82.00622 | 74.44817 | -423.86431  | 152.66566   | -648.55262  | 1 |
| 134 | H | 81.52057 | 82.69059 | 74.98678 | 105.68386   | -2342.50080 | 1387.51238  | 1 |
| 135 | H | 81.37027 | 81.59190 | 73.56615 | -1695.63603 | -1484.73621 | -1531.02793 | 1 |
| 136 | H | 79.98614 | 82.63125 | 74.05265 | -1853.57121 | -487.39031  | 1936.59343  | 1 |
| 137 | C | 79.16652 | 78.49159 | 75.45121 | 539.71428   | -510.58232  | 267.58633   | 1 |
| 138 | O | 79.65268 | 77.40249 | 75.25222 | -15.93758   | -278.34085  | -624.49402  | 1 |
| 139 | N | 78.36389 | 78.87007 | 76.44047 | -676.81886  | 12.05292    | 276.17960   | 1 |
| 140 | H | 78.02259 | 79.83027 | 76.44616 | -1694.44250 | -373.84189  | -2100.66098 | 1 |
| 141 | C | 77.80288 | 77.86433 | 77.27733 | 412.33078   | -664.70360  | 108.35451   | 1 |



|     |   |          |          |          |             |             |             |   |
|-----|---|----------|----------|----------|-------------|-------------|-------------|---|
| 142 | H | 78.29152 | 76.90377 | 76.98424 | 1765.77476  | 1294.44366  | 1621.76594  | 1 |
| 143 | C | 78.06906 | 78.29205 | 78.77340 | -179.66635  | -721.95667  | -264.73915  | 1 |
| 144 | H | 79.15350 | 78.47352 | 78.93622 | -607.34922  | 2587.87032  | -598.10018  | 1 |
| 145 | H | 77.57205 | 79.25894 | 79.00438 | -359.69332  | -1479.13954 | -2259.74260 | 1 |
| 146 | C | 77.53964 | 77.13539 | 79.72767 | -240.01076  | 616.02425   | 431.85322   | 1 |
| 147 | H | 76.42859 | 77.03521 | 79.63273 | -1359.17131 | 782.54425   | 2227.99181  | 1 |
| 148 | H | 77.96010 | 76.14896 | 79.40947 | -820.36667  | 85.81767    | -2596.78715 | 1 |
| 149 | C | 77.92986 | 77.44576 | 81.15730 | -513.07015  | 236.18570   | -551.87280  | 1 |
| 150 | H | 79.03891 | 77.50277 | 81.24025 | 1816.11944  | -1183.11722 | -1650.94321 | 1 |
| 151 | H | 77.57027 | 78.46378 | 81.43026 | -1800.04429 | -1361.53473 | 1526.34643  | 1 |
| 152 | C | 77.40815 | 76.46860 | 82.11233 | 726.08972   | -253.19732  | -179.64713  | 1 |
| 153 | H | 76.29513 | 76.45041 | 82.18222 | 1224.27271  | -456.51798  | -2390.90304 | 1 |
| 154 | H | 77.79072 | 75.43711 | 81.97046 | 1206.40339  | -1150.93514 | -2154.90344 | 1 |
| 155 | N | 77.88807 | 76.86109 | 83.54661 | 329.70796   | -633.68968  | -155.67358  | 1 |
| 156 | H | 77.56750 | 76.22612 | 84.33625 | 1348.31305  | 1938.76845  | 1359.00643  | 1 |
| 157 | H | 78.93716 | 76.89067 | 83.71708 | 2096.92035  | 1446.54551  | -966.48890  | 1 |
| 158 | H | 77.58151 | 77.81066 | 83.91216 | -1197.07217 | -2303.53719 | 827.28733   | 1 |
| 159 | C | 76.17309 | 77.90607 | 77.03990 | -378.01186  | -556.17301  | -413.96481  | 1 |
| 160 | O | 75.55796 | 78.88878 | 76.71570 | -409.44433  | -307.55053  | -453.30833  | 1 |
| 161 | N | 75.74705 | 76.67967 | 77.29500 | -429.02477  | 524.70884   | 274.08502   | 1 |
| 162 | H | 76.36278 | 75.90065 | 77.60380 | 1706.34263  | -1425.96036 | 1574.38926  | 1 |
| 163 | C | 74.35617 | 76.45730 | 77.53811 | -45.25864   | -626.22952  | 478.93267   | 1 |
| 164 | H | 73.88433 | 77.41940 | 77.84069 | 1988.63164  | 570.90773   | 1772.87287  | 1 |
| 165 | C | 73.82338 | 75.90841 | 76.15030 | 551.77128   | -20.49526   | -564.54996  | 1 |
| 166 | H | 74.20678 | 76.55241 | 75.32769 | 1434.61535  | -1753.10253 | 1513.99471  | 1 |
| 167 | H | 74.24478 | 74.89715 | 75.95529 | -714.67738  | 1819.09770  | 1898.36494  | 1 |
| 168 | C | 72.26197 | 75.86715 | 76.11303 | 446.99263   | -555.77305  | 338.97221   | 1 |
| 169 | H | 71.85594 | 75.18519 | 76.89298 | 1953.68466  | 1892.25957  | -161.67766  | 1 |
| 170 | H | 71.82348 | 76.87101 | 76.30993 | -403.03785  | 2688.07032  | -188.43591  | 1 |
| 171 | C | 71.90107 | 75.35962 | 74.65712 | 567.86262   | 335.74681   | 434.04421   | 1 |
| 172 | H | 72.33642 | 76.03705 | 73.88687 | -1080.02275 | 1568.26081  | -1948.78900 | 1 |
| 173 | H | 72.35668 | 74.36038 | 74.46885 | -919.54108  | 2111.34692  | 1456.13463  | 1 |
| 174 | C | 70.36476 | 75.28850 | 74.50946 | 195.81897   | 173.33862   | -745.11536  | 1 |
| 175 | H | 69.86689 | 74.57770 | 75.19860 | 1405.67949  | -2301.21089 | -390.08113  | 1 |
| 176 | H | 69.84935 | 76.26916 | 74.53881 | -940.37328  | -1118.32446 | 2299.72133  | 1 |
| 177 | N | 70.07137 | 74.72123 | 73.07760 | 319.26422   | 656.36007   | -42.02424   | 1 |
| 178 | H | 69.04726 | 74.59901 | 72.83046 | 1961.03633  | 619.91968   | 1787.09422  | 1 |
| 179 | H | 70.42112 | 75.28462 | 72.24879 | 854.14343   | -2156.80752 | 1429.08711  | 1 |
| 180 | H | 70.45364 | 73.75518 | 72.86026 | 1237.02905  | -1378.50857 | -1998.28500 | 1 |
| 181 | C | 74.51219 | 75.30913 | 78.69010 | 532.53319   | -268.57236  | 517.55729   | 1 |
| 182 | O | 75.55809 | 74.67046 | 78.72699 | 266.16714   | -290.73804  | -558.88002  | 1 |
| 183 | N | 73.43361 | 75.19770 | 79.44307 | -226.25352  | 640.49678   | -270.32839  | 1 |
| 184 | H | 72.66022 | 75.83804 | 79.26484 | 2007.69063  | -1035.27229 | 1523.50231  | 1 |
| 185 | C | 73.51734 | 74.45521 | 80.65710 | -540.76542  | -573.33303  | 49.50000    | 1 |
| 186 | H | 74.51473 | 73.96815 | 80.54322 | -2374.20950 | -1036.76023 | 843.75774   | 1 |
| 187 | C | 73.47729 | 75.48772 | 81.86972 | -77.09082   | 666.87422   | -415.84136  | 1 |
| 188 | H | 72.42154 | 75.85080 | 82.00259 | -985.81834  | 617.19825   | 2463.91927  | 1 |
| 189 | O | 74.26606 | 76.69558 | 81.71688 | 293.29899   | -391.65602  | -477.80926  | 1 |
| 190 | H | 73.56294 | 77.37104 | 81.73247 | 2528.72714  | -681.76262  | -751.27122  | 1 |
| 191 | C | 73.90492 | 74.58393 | 83.08198 | 252.47363   | -605.14473  | 440.05134   | 1 |
| 192 | H | 73.79692 | 75.12492 | 84.05137 | -2052.65063 | 1456.49051  | -1043.51830 | 1 |
| 193 | H | 73.29270 | 73.64938 | 83.16198 | -2152.98800 | -1661.97574 | -161.70652  | 1 |
| 194 | H | 74.97068 | 74.26996 | 82.99762 | -473.12726  | -1584.27339 | 2165.61725  | 1 |
| 195 | C | 72.27435 | 73.38561 | 80.59616 | 360.36307   | 488.46713   | 505.10056   | 1 |
| 196 | O | 72.16759 | 72.66295 | 79.63219 | -200.08817  | -528.03552  | -385.82850  | 1 |
| 197 | N | 71.55254 | 73.38717 | 81.70755 | -597.54095  | -226.44775  | 355.20479   | 1 |
| 198 | H | 71.78551 | 74.05693 | 82.44027 | 2179.23655  | -1300.70981 | -991.33835  | 1 |
| 199 | C | 70.31465 | 72.70536 | 81.84201 | -687.68921  | 297.39807   | -249.45179  | 1 |
| 200 | H | 69.86617 | 73.15739 | 82.75510 | -349.16256  | -2467.37713 | -1101.72831 | 1 |
| 201 | C | 69.42108 | 72.93528 | 80.52596 | 672.47345   | 361.54328   | -201.62880  | 1 |
| 202 | H | 69.89546 | 72.41238 | 79.66243 | 1541.41502  | 582.18425   | 2169.97026  | 1 |
| 203 | H | 68.41452 | 72.48114 | 80.67267 | -2534.67717 | 60.25153    | 997.72295   | 1 |

|     |   |          |          |          |             |             |             |   |
|-----|---|----------|----------|----------|-------------|-------------|-------------|---|
| 204 | C | 69.31297 | 74.43748 | 80.23727 | 574.26774   | -389.43119  | -377.02542  | 1 |
| 205 | C | 68.38005 | 75.25954 | 80.93865 | 688.82679   | -287.33580  | -257.96133  | 1 |
| 206 | H | 67.69036 | 74.82315 | 81.68364 | 331.14182   | 1470.38163  | 2269.80013  | 1 |
| 207 | C | 70.20007 | 75.01226 | 79.27713 | -383.52382  | -675.04808  | 144.24917   | 1 |
| 208 | H | 70.93469 | 74.37312 | 78.74911 | 4.09847     | 1517.59662  | 2262.86397  | 1 |
| 209 | C | 68.36600 | 76.62780 | 80.66919 | -134.76730  | 428.45285   | -649.50303  | 1 |
| 210 | H | 67.64615 | 77.26486 | 81.21206 | -903.23433  | 1600.49020  | 2011.53387  | 1 |
| 211 | C | 70.14961 | 76.38784 | 79.04275 | -335.53281  | -615.00040  | -364.39058  | 1 |
| 212 | H | 70.84578 | 76.82223 | 78.30455 | 1596.45398  | -1369.33862 | 1732.02659  | 1 |
| 213 | C | 69.23909 | 77.24533 | 79.72674 | 585.48547   | -340.24194  | -406.23938  | 1 |
| 214 | O | 69.18518 | 78.64591 | 79.50358 | -419.15649  | -173.04408  | -511.94141  | 1 |
| 215 | H | 69.88229 | 78.73048 | 78.81047 | -1071.84350 | 1559.71507  | -1960.13012 | 1 |
| 216 | C | 70.52000 | 71.10713 | 81.99138 | 291.41878   | -183.13091  | 710.72246   | 1 |
| 217 | O | 69.57275 | 70.39317 | 82.31204 | 379.87695   | 523.47396   | -222.23622  | 1 |
| 218 | N | 71.75985 | 70.72652 | 81.72571 | 564.30591   | 373.09380   | 277.24371   | 1 |
| 219 | H | 72.40162 | 71.45871 | 81.41830 | -120.59931  | -2436.07824 | -1214.35098 | 1 |
| 220 | C | 71.92580 | 69.35363 | 81.31664 | 404.07514   | -299.37480  | 608.84009   | 1 |
| 221 | H | 70.91936 | 69.10582 | 80.90590 | -1071.07882 | -841.69025  | 2359.66467  | 1 |
| 222 | C | 73.11694 | 69.27496 | 80.27985 | -683.12807  | 68.71770    | -390.13096  | 1 |
| 223 | H | 72.92804 | 69.93254 | 79.40049 | 2068.88918  | 1596.58590  | 770.89603   | 1 |
| 224 | H | 74.06222 | 69.64418 | 80.73777 | 1379.86429  | 2342.49779  | -179.85638  | 1 |
| 225 | C | 73.24647 | 67.77613 | 79.86134 | -176.39967  | 537.49466   | 550.97268   | 1 |
| 226 | H | 73.38933 | 67.13632 | 80.76281 | -396.28051  | 1942.22168  | 1869.33314  | 1 |
| 227 | H | 72.31079 | 67.41349 | 79.38032 | -94.44700   | 586.00678   | -2659.20016 | 1 |
| 228 | C | 74.49262 | 67.63465 | 78.87394 | -291.69381  | -718.18079  | -150.72929  | 1 |
| 229 | H | 74.35986 | 68.08689 | 77.85803 | -2303.38776 | 1089.76242  | 964.62032   | 1 |
| 230 | H | 75.47892 | 67.97650 | 79.27938 | 884.16729   | 2568.80533  | -207.74283  | 1 |
| 231 | N | 74.54922 | 66.23872 | 78.73329 | -594.49522  | -252.81478  | 342.29276   | 1 |
| 232 | H | 73.82085 | 65.70437 | 79.18123 | -1735.17426 | 2084.05705  | -263.71605  | 1 |
| 233 | C | 75.44724 | 65.60867 | 78.08963 | 595.23177   | -271.52487  | 442.22352   | 1 |
| 234 | N | 76.45119 | 66.35930 | 77.46765 | 585.53813   | -424.79750  | -105.81303  | 1 |
| 235 | H | 76.57779 | 67.36994 | 77.44117 | 959.88797   | 1327.56823  | -2177.11905 | 1 |
| 236 | H | 77.21983 | 65.96897 | 76.92213 | 1578.48647  | 16.27378    | -2220.76233 | 1 |
| 237 | N | 75.22628 | 64.22446 | 78.14395 | -452.17763  | -390.33541  | -421.51853  | 1 |
| 238 | H | 74.49963 | 63.68182 | 78.60758 | 470.26107   | 1974.25629  | -1817.92087 | 1 |
| 239 | H | 75.84088 | 63.54306 | 77.69786 | 1856.67307  | -1573.97321 | -1224.35416 | 1 |
| 240 | C | 72.25886 | 68.49635 | 82.65886 | -531.47271  | -581.45780  | -55.06206   | 1 |
| 241 | O | 73.34079 | 68.01497 | 82.87212 | -243.00837  | 192.73507   | 609.52485   | 1 |
| 242 | N | 71.13516 | 68.42339 | 83.37696 | 343.49288   | -644.25607  | 38.09164    | 1 |
| 243 | H | 70.29915 | 68.96636 | 83.04693 | -1691.16043 | -1535.97525 | -1484.73099 | 1 |
| 244 | C | 71.13963 | 67.84274 | 84.72386 | 542.66492   | 350.14337   | 454.42563   | 1 |
| 245 | H | 70.06288 | 67.84260 | 85.01555 | 1209.57979  | -2396.95920 | 463.86744   | 1 |
| 246 | C | 71.71602 | 66.44053 | 84.61814 | -737.14309  | 145.93010   | 242.71942   | 1 |
| 247 | H | 72.76751 | 66.53885 | 84.24471 | -1050.18303 | 159.36419   | -2509.06125 | 1 |
| 248 | C | 71.75236 | 65.71996 | 85.95159 | -706.77696  | -252.88343  | -245.16230  | 1 |
| 249 | H | 72.20891 | 64.69568 | 85.85779 | -1624.64039 | -1665.49085 | 1417.86935  | 1 |
| 250 | H | 72.35713 | 66.29131 | 86.71614 | 2566.10521  | 598.51109   | 693.22305   | 1 |
| 251 | H | 70.72015 | 65.58666 | 86.37830 | -1972.69758 | 107.10018   | -1876.34312 | 1 |
| 252 | C | 70.95308 | 65.60150 | 83.60791 | 412.85148   | 672.58832   | -27.69222   | 1 |
| 253 | H | 71.41988 | 64.58842 | 83.46721 | 1447.02277  | 1762.76533  | -1490.78944 | 1 |
| 254 | H | 69.88765 | 65.43721 | 83.92740 | 1320.77379  | -145.20455  | 2378.68491  | 1 |
| 255 | H | 70.92387 | 66.10141 | 82.60087 | -1512.10848 | 1470.52031  | 1724.75147  | 1 |
| 256 | C | 72.03147 | 68.82721 | 85.71016 | -607.11113  | 499.56689   | 73.73769    | 1 |
| 257 | O | 72.35504 | 68.42772 | 86.80993 | 357.97126   | 460.81534   | 356.68785   | 1 |
| 258 | N | 72.23720 | 70.02602 | 85.19147 | 536.55407   | -368.62270  | 332.76306   | 1 |
| 259 | H | 71.88519 | 70.19060 | 84.24843 | 524.38866   | 2297.69985  | 1367.20941  | 1 |
| 260 | C | 73.13324 | 70.90979 | 85.83818 | 46.50277    | -774.29190  | -147.97904  | 1 |
| 261 | H | 73.16066 | 70.56505 | 86.89761 | 1676.51875  | 1883.29066  | 1032.55549  | 1 |
| 262 | C | 74.58030 | 70.84020 | 85.12020 | -559.41456  | -34.19198   | -556.30433  | 1 |
| 263 | H | 74.47305 | 71.17117 | 84.05975 | -64.66664   | 395.18769   | 2695.05373  | 1 |
| 264 | H | 75.27354 | 71.57209 | 85.59949 | -2703.44278 | -60.40056   | 333.79418   | 1 |
| 265 | C | 75.16447 | 69.45457 | 85.16759 | -519.76435  | 377.31045   | 459.42366   | 1 |

|     |   |          |          |          |             |             |             |   |
|-----|---|----------|----------|----------|-------------|-------------|-------------|---|
| 266 | H | 74.46476 | 68.75898 | 84.64315 | -1746.74323 | 1667.50644  | -1261.73691 | 1 |
| 267 | C | 76.50720 | 69.42836 | 84.44494 | 570.95554   | 16.46261    | -545.27700  | 1 |
| 268 | H | 76.95942 | 68.40330 | 84.45152 | 2391.58273  | 28.05277    | -1305.07271 | 1 |
| 269 | H | 76.40488 | 69.73934 | 83.37354 | 175.75588   | 917.63458   | 2559.43867  | 1 |
| 270 | H | 77.24695 | 70.12017 | 84.92416 | -1063.97851 | -2155.34650 | 1283.00462  | 1 |
| 271 | C | 75.35483 | 68.96967 | 86.59742 | 193.76014   | 2.62946     | -765.53141  | 1 |
| 272 | H | 75.92893 | 68.00777 | 86.63460 | 507.39394   | -846.55087  | 2539.60089  | 1 |
| 273 | H | 75.91538 | 69.71477 | 87.21935 | 1337.57841  | 1818.19054  | 1526.01994  | 1 |
| 274 | H | 74.36018 | 68.78185 | 87.10008 | 1100.88635  | -1172.91350 | -2199.08909 | 1 |
| 275 | C | 72.62444 | 72.42035 | 85.60590 | -549.21115  | 475.64486   | -309.38218  | 1 |
| 276 | O | 71.88027 | 72.75057 | 84.71884 | 556.06106   | -390.37755  | -78.24250   | 1 |
| 277 | O | 73.24872 | 73.40157 | 86.41574 | -572.27940  | -310.19032  | -209.75862  | 1 |
| 278 | H | 73.75663 | 72.79431 | 87.02282 | -1380.08193 | 2212.14486  | 790.85944   | 1 |

Listing 72: C00072.xmolout

|    |   |          |          |          |             |             |             |        |          |
|----|---|----------|----------|----------|-------------|-------------|-------------|--------|----------|
| 1  |   | 276      |          |          |             |             |             |        |          |
| 2  |   | 150.0000 | 150.0000 | 150.0000 | 0.0000      | 0.0000      | 0.0000***** | 2.7750 | 11100    |
|    |   | 0.2500   | 300.00   | 0.00     | 0.00        | 0.00        | -1293.5749  | 0.0000 | 300.0000 |
| 3  | H | 68.66714 | 81.15212 | 64.89523 | -2043.14101 | -1757.64893 | 399.89339   |        | 1        |
| 4  | N | 69.57019 | 80.79999 | 65.20851 | 426.75047   | 490.45733   | -334.42467  |        | 1        |
| 5  | H | 69.63235 | 79.89153 | 64.74438 | 442.25559   | -1110.30854 | -2448.52907 |        | 1        |
| 6  | C | 70.66804 | 81.62300 | 64.87644 | 415.32972   | -666.39213  | 83.73172    |        | 1        |
| 7  | H | 70.31647 | 82.67763 | 64.84612 | 879.32219   | 2491.00447  | 667.35213   |        | 1        |
| 8  | C | 71.82668 | 81.36129 | 65.97109 | 31.35357    | 477.41777   | 628.23362   |        | 1        |
| 9  | H | 72.11397 | 80.25793 | 65.94740 | 1168.38489  | 2240.25337  | -1019.71136 |        | 1        |
| 10 | H | 72.74768 | 81.93459 | 65.70815 | -360.43770  | 2534.90498  | 931.67112   |        | 1        |
| 11 | C | 71.36148 | 81.73223 | 67.35208 | 463.18208   | 512.70242   | -382.34388  |        | 1        |
| 12 | H | 70.39258 | 81.21837 | 67.54487 | 1725.29117  | 1863.52247  | -987.07854  |        | 1        |
| 13 | C | 72.38247 | 81.25723 | 68.37976 | 710.42801   | -144.27427  | -313.15367  |        | 1        |
| 14 | H | 72.05282 | 81.47943 | 69.42718 | 364.20195   | -1033.13725 | 2494.72524  |        | 1        |
| 15 | H | 72.55409 | 80.15166 | 68.30882 | 2567.61904  | 335.80679   | 847.48802   |        | 1        |
| 16 | H | 73.37541 | 81.75530 | 68.23215 | -2587.99029 | 680.92867   | -512.16411  |        | 1        |
| 17 | C | 71.15713 | 83.23448 | 67.49092 | 268.17616   | 741.64379   | -40.42634   |        | 1        |
| 18 | H | 70.86146 | 83.51619 | 68.53459 | 1283.54314  | -1945.37420 | -1411.27812 |        | 1        |
| 19 | H | 72.09206 | 83.80210 | 67.24665 | -1258.57796 | 1317.15249  | -2026.02085 |        | 1        |
| 20 | H | 70.35266 | 83.60806 | 66.80635 | -2502.84526 | 909.80597   | 575.92391   |        | 1        |
| 21 | C | 71.21423 | 81.04400 | 63.46114 | 619.36578   | -458.64843  | -172.09273  |        | 1        |
| 22 | O | 71.08796 | 79.86458 | 63.14191 | -81.40433   | 433.87611   | 522.34594   |        | 1        |
| 23 | N | 71.90943 | 81.99242 | 62.86926 | 175.23996   | -622.20190  | 341.55523   |        | 1        |
| 24 | H | 71.86104 | 82.92800 | 63.27093 | -876.57256  | -303.22879  | -2561.90213 |        | 1        |
| 25 | C | 72.37845 | 81.82556 | 61.52108 | -571.88214  | -534.10783  | -106.15033  |        | 1        |
| 26 | H | 71.44983 | 81.56337 | 60.96666 | -2713.20841 | -16.25800   | -248.80809  |        | 1        |
| 27 | C | 72.97335 | 83.24524 | 61.10582 | 166.60354   | 288.16399   | -716.09568  |        | 1        |
| 28 | H | 73.92447 | 83.42864 | 61.67631 | -2097.85574 | 1636.78449  | -586.18044  |        | 1        |
| 29 | O | 72.12012 | 84.37255 | 61.39477 | -317.80580  | -363.38227  | 484.43082   |        | 1        |
| 30 | H | 72.71227 | 84.92075 | 61.94573 | 1863.74748  | -1451.84923 | 1357.29467  |        | 1        |
| 31 | C | 73.33095 | 83.02970 | 59.58969 | 503.80731   | 517.99032   | 318.51606   |        | 1        |
| 32 | H | 73.81074 | 83.93572 | 59.15178 | 640.61020   | -2157.10410 | -1536.29104 |        | 1        |
| 33 | H | 74.03747 | 82.17783 | 59.44278 | 1687.88455  | 465.60692   | 2087.56452  |        | 1        |
| 34 | H | 72.42047 | 82.81270 | 58.98399 | -1293.07895 | -1899.88581 | -1463.57452 |        | 1        |
| 35 | C | 73.47091 | 80.62848 | 61.38763 | -153.07550  | -733.68902  | 248.70981   |        | 1        |
| 36 | O | 73.52949 | 80.12861 | 60.29338 | 186.15459   | -480.78787  | -449.34387  |        | 1        |
| 37 | N | 74.26290 | 80.40113 | 62.44515 | -487.53139  | 543.18517   | 42.03850    |        | 1        |
| 38 | C | 75.16408 | 79.28968 | 62.48007 | -699.35871  | 69.34393    | 360.10701   |        | 1        |
| 39 | H | 75.53650 | 79.14076 | 61.44035 | 2.81126     | -221.99807  | -2715.58072 |        | 1        |
| 40 | C | 76.24343 | 79.76368 | 63.54652 | -507.46439  | -592.59194  | 122.07761   |        | 1        |
| 41 | H | 76.81092 | 78.91536 | 63.99046 | -1975.08116 | 525.87560   | -1801.71556 |        | 1        |
| 42 | H | 76.99312 | 80.45208 | 63.09656 | 1588.27743  | -1913.22100 | 1113.83566  |        | 1        |
| 43 | C | 75.33582 | 80.50676 | 64.57452 | -613.62442  | -457.55993  | -194.14490  |        | 1        |
| 44 | H | 74.75959 | 79.78602 | 65.19874 | 1707.54637  | -721.27992  | 1996.92523  |        | 1        |
| 45 | H | 75.89415 | 81.16689 | 65.27574 | 758.23357   | 2100.81767  | 1560.55011  |        | 1        |

|     |   |          |          |          |             |             |             |   |
|-----|---|----------|----------|----------|-------------|-------------|-------------|---|
| 46  | C | 74.38262 | 81.30390 | 63.58360 | -352.41524  | 704.96076   | 49.21465    | 1 |
| 47  | H | 73.35358 | 81.49050 | 63.96513 | 1714.76886  | -2070.42778 | 443.35792   | 1 |
| 48  | H | 74.80611 | 82.25646 | 63.18778 | 1224.15040  | 1801.50881  | 1636.97633  | 1 |
| 49  | C | 74.43657 | 77.95044 | 63.08102 | 566.85117   | 537.05831   | 117.62814   | 1 |
| 50  | O | 75.12399 | 76.98474 | 63.29670 | -550.26779  | -406.08867  | 4.21666     | 1 |
| 51  | N | 73.13325 | 78.11348 | 63.23451 | 566.34832   | -425.77725  | 180.18749   | 1 |
| 52  | H | 72.66633 | 79.00897 | 62.97835 | 644.44502   | 2646.80550  | -52.73430   | 1 |
| 53  | C | 72.34690 | 77.14616 | 63.93041 | 612.34801   | -281.48662  | 411.56221   | 1 |
| 54  | H | 71.33471 | 77.55022 | 63.69570 | 1667.23498  | -1490.75142 | 1556.16753  | 1 |
| 55  | C | 72.60722 | 75.70199 | 63.30311 | -714.45746  | -175.43074  | 286.98927   | 1 |
| 56  | H | 73.61937 | 75.35008 | 63.65445 | -787.09484  | 1763.03619  | -1922.46060 | 1 |
| 57  | O | 72.67463 | 75.64066 | 61.86018 | -429.46514  | 516.51932   | -128.40526  | 1 |
| 58  | H | 73.64340 | 75.71140 | 61.73297 | 1981.82785  | 436.16847   | -1818.18182 | 1 |
| 59  | C | 71.46962 | 74.82373 | 63.94086 | 630.79189   | -468.94448  | 76.03230    | 1 |
| 60  | H | 71.62290 | 73.74208 | 63.71857 | -1775.71861 | 2062.30353  | 131.89849   | 1 |
| 61  | H | 71.41532 | 74.92889 | 65.04938 | -1855.14608 | 88.94118    | 1993.53760  | 1 |
| 62  | H | 70.47025 | 75.10360 | 63.53451 | -1504.82350 | -780.94249  | -2132.90992 | 1 |
| 63  | C | 72.70223 | 77.31819 | 65.51041 | 288.57638   | 618.62814   | -397.00270  | 1 |
| 64  | O | 72.58277 | 78.40925 | 66.03105 | 321.70495   | -185.26452  | 574.37218   | 1 |
| 65  | N | 73.05081 | 76.18185 | 66.07682 | -447.05792  | -446.53431  | 367.76425   | 1 |
| 66  | H | 73.18590 | 75.26414 | 65.61401 | 350.31316   | 1975.63644  | -1843.31522 | 1 |
| 67  | C | 73.14593 | 76.13122 | 67.51110 | -511.23061  | 374.03917   | -471.51480  | 1 |
| 68  | H | 73.87303 | 76.92105 | 67.80737 | 2234.79579  | -898.70890  | -1273.45190 | 1 |
| 69  | C | 71.68749 | 76.42989 | 68.11318 | 529.53781   | -159.34528  | 563.72604   | 1 |
| 70  | H | 71.81268 | 76.57833 | 69.22068 | 654.59388   | 2347.94251  | 1217.51488  | 1 |
| 71  | H | 71.36114 | 77.41614 | 67.68503 | -1526.55661 | 2103.42026  | 817.87394   | 1 |
| 72  | O | 70.68181 | 75.40586 | 67.92306 | -554.84278  | 14.12789    | 399.58769   | 1 |
| 73  | H | 70.39215 | 75.63178 | 67.01847 | 1297.06236  | 2061.84854  | 1220.68812  | 1 |
| 74  | C | 73.64525 | 74.61472 | 67.70135 | -662.15484  | -412.13544  | 123.62687   | 1 |
| 75  | O | 73.74878 | 73.89693 | 66.71546 | -540.01537  | -317.05804  | 274.91456   | 1 |
| 76  | N | 73.88905 | 74.30602 | 68.97736 | -202.76299  | -690.00100  | -131.49145  | 1 |
| 77  | H | 73.81955 | 75.08991 | 69.62757 | -702.62132  | -2617.37191 | 281.70413   | 1 |
| 78  | C | 74.49953 | 73.02577 | 69.31580 | -491.73914  | 576.34187   | 222.73509   | 1 |
| 79  | H | 74.16162 | 72.37783 | 68.47126 | 1977.17978  | -1823.58850 | -434.68928  | 1 |
| 80  | C | 76.00783 | 73.22007 | 69.30466 | -649.50797  | -328.66843  | 306.11224   | 1 |
| 81  | H | 76.23349 | 74.13773 | 69.89202 | 2075.07803  | 1452.16490  | -1004.45904 | 1 |
| 82  | C | 76.74784 | 72.06087 | 69.94346 | -615.18735  | -489.99689  | -70.96352   | 1 |
| 83  | H | 77.86406 | 72.19377 | 69.88671 | -1226.32661 | -1724.38906 | -1716.47170 | 1 |
| 84  | H | 76.47845 | 71.94582 | 71.03319 | 2381.64273  | -969.84735  | 900.46860   | 1 |
| 85  | H | 76.49983 | 71.08535 | 69.43917 | 2122.74991  | 1702.23946  | -141.36228  | 1 |
| 86  | C | 76.52265 | 73.43606 | 67.89300 | -501.86074  | -479.61276  | -376.42482  | 1 |
| 87  | H | 77.59962 | 73.76119 | 67.88207 | 993.79261   | -2246.95401 | -1177.81305 | 1 |
| 88  | H | 76.45171 | 72.49481 | 67.28063 | 42.71279    | -626.15391  | -2651.37258 | 1 |
| 89  | H | 75.92171 | 74.22091 | 67.34988 | -2026.39012 | -1590.33709 | -887.82922  | 1 |
| 90  | C | 73.98923 | 72.46715 | 70.80329 | -672.89153  | 382.57394   | -156.34072  | 1 |
| 91  | O | 74.27936 | 71.32429 | 71.08480 | 410.04627   | 221.86223   | 500.35950   | 1 |
| 92  | N | 73.29055 | 73.33620 | 71.50246 | -378.11782  | -443.79414  | -441.10984  | 1 |
| 93  | H | 73.11084 | 74.20185 | 71.00230 | 2404.15973  | -568.14894  | 1149.30085  | 1 |
| 94  | C | 73.08024 | 73.24410 | 72.91435 | -544.54484  | 466.16019   | 331.29119   | 1 |
| 95  | H | 72.09792 | 73.73746 | 73.07232 | -1409.80988 | -170.17955  | 2325.32679  | 1 |
| 96  | C | 73.13146 | 71.72148 | 73.32253 | -184.48284  | 116.78282   | -758.89137  | 1 |
| 97  | H | 72.56187 | 71.11624 | 72.57825 | 1893.78641  | 1861.14652  | 611.04528   | 1 |
| 98  | H | 74.18951 | 71.36146 | 73.26096 | -2170.79665 | -974.19311  | 1327.50117  | 1 |
| 99  | C | 72.58497 | 71.48298 | 74.76980 | 389.51668   | 672.81878   | -138.49152  | 1 |
| 100 | H | 73.09076 | 72.15663 | 75.49828 | 510.64577   | 1933.03327  | 1851.02484  | 1 |
| 101 | H | 71.51223 | 71.77138 | 74.83334 | -2302.30869 | -1105.72939 | -948.89774  | 1 |
| 102 | C | 72.78235 | 69.98528 | 75.19653 | -559.93427  | -126.34590  | 542.30857   | 1 |
| 103 | O | 72.59620 | 69.63719 | 76.34475 | -670.36003  | -111.83166  | 76.36448    | 1 |
| 104 | N | 73.13440 | 69.17888 | 74.17929 | -216.06729  | -537.07037  | 446.51379   | 1 |
| 105 | H | 73.34582 | 69.40397 | 73.19936 | -1251.96487 | 1074.12894  | -2168.52500 | 1 |
| 106 | H | 73.33878 | 68.17863 | 74.28516 | -2451.83023 | -720.73851  | 944.84612   | 1 |
| 107 | C | 74.30972 | 74.02202 | 73.66155 | 546.24052   | -563.88337  | -85.11809   | 1 |

|     |   |          |          |          |             |             |             |   |
|-----|---|----------|----------|----------|-------------|-------------|-------------|---|
| 108 | O | 75.41339 | 73.53983 | 73.65216 | 71.70702    | -307.40463  | 606.69673   | 1 |
| 109 | N | 73.90734 | 75.17886 | 74.21742 | 479.90863   | -504.50129  | 222.86849   | 1 |
| 110 | C | 74.86475 | 76.00061 | 74.88828 | 75.51268    | -600.91904  | 506.73700   | 1 |
| 111 | H | 75.85527 | 75.73380 | 74.45109 | -2033.61562 | 1795.30103  | 254.89480   | 1 |
| 112 | C | 74.32465 | 77.45864 | 74.55385 | 523.79067   | 517.99274   | 284.45581   | 1 |
| 113 | H | 74.67489 | 78.22331 | 75.28249 | 1599.61665  | -1127.00911 | 1895.98173  | 1 |
| 114 | H | 74.66848 | 77.79565 | 73.55105 | -1881.83093 | 1275.82488  | -1501.55016 | 1 |
| 115 | C | 72.77826 | 77.25266 | 74.57623 | -600.05639  | -404.05026  | 316.64485   | 1 |
| 116 | H | 72.38908 | 77.25679 | 75.61899 | -2597.05260 | 496.36221   | 657.73249   | 1 |
| 117 | H | 72.21763 | 78.04437 | 74.03075 | -1666.24518 | 1294.38985  | -1723.90591 | 1 |
| 118 | C | 72.63456 | 75.81744 | 73.91039 | 493.57570   | -129.95376  | -602.56394  | 1 |
| 119 | H | 71.81908 | 75.18694 | 74.33742 | -1469.08415 | -637.84797  | 2204.22581  | 1 |
| 120 | H | 72.55293 | 75.82225 | 72.79775 | -1038.97840 | 1068.88701  | -2280.71789 | 1 |
| 121 | C | 74.84375 | 75.77800 | 76.51221 | 188.88100   | 241.05089   | -727.87821  | 1 |
| 122 | O | 75.83546 | 76.03344 | 77.14480 | 531.88613   | -49.19943   | 427.07960   | 1 |
| 123 | N | 73.62607 | 75.47625 | 76.95145 | 708.14833   | 26.93417    | -179.73509  | 1 |
| 124 | H | 72.86070 | 75.25969 | 76.28107 | -2232.69501 | -1179.09831 | 1023.94816  | 1 |
| 125 | C | 73.50359 | 74.82502 | 78.22399 | -738.32412  | 259.92548   | 104.42456   | 1 |
| 126 | H | 74.48393 | 74.35771 | 78.46323 | 2028.89123  | 1260.02983  | 1311.33324  | 1 |
| 127 | C | 73.07743 | 75.91477 | 79.30108 | -258.65678  | -345.52513  | 661.28459   | 1 |
| 128 | H | 72.32336 | 76.60495 | 78.86542 | -1826.06090 | -1801.46097 | -918.64554  | 1 |
| 129 | C | 72.53065 | 75.22659 | 80.59805 | -541.23400  | 531.92970   | -218.41428  | 1 |
| 130 | H | 72.25695 | 75.97729 | 81.37645 | 1311.73218  | -2219.18200 | 882.19023   | 1 |
| 131 | H | 71.61803 | 74.62026 | 80.38812 | -1048.71298 | 1223.58118  | -2196.97971 | 1 |
| 132 | H | 73.28743 | 74.54473 | 81.05281 | 419.06414   | 1903.92898  | 1903.44670  | 1 |
| 133 | C | 74.35795 | 76.69628 | 79.75351 | -423.86431  | 152.66566   | -648.55262  | 1 |
| 134 | H | 74.11175 | 77.51079 | 80.47513 | 105.68386   | -2342.50080 | 1387.51238  | 1 |
| 135 | H | 75.09408 | 76.02397 | 80.25499 | -1695.63603 | -1484.73621 | -1531.02793 | 1 |
| 136 | H | 74.87813 | 77.16381 | 78.88204 | -1853.57121 | -487.39031  | 1936.59343  | 1 |
| 137 | C | 72.28399 | 73.80977 | 77.87065 | 539.71428   | -510.58232  | 267.58633   | 1 |
| 138 | O | 71.62941 | 74.02028 | 76.85032 | -15.93758   | -278.34085  | -624.49402  | 1 |
| 139 | N | 72.22057 | 72.81606 | 78.73393 | -676.81886  | 12.05292    | 276.17960   | 1 |
| 140 | H | 72.86444 | 72.89156 | 79.52271 | -1694.44250 | -373.84189  | -2100.66098 | 1 |
| 141 | C | 71.01807 | 72.03823 | 78.89353 | 412.33078   | -664.70360  | 108.35451   | 1 |
| 142 | H | 70.28163 | 72.72122 | 79.37114 | 1765.77476  | 1294.44366  | 1621.76594  | 1 |
| 143 | C | 70.55346 | 71.56998 | 77.46637 | -179.66635  | -721.95667  | -264.73915  | 1 |
| 144 | H | 70.42575 | 72.45386 | 76.77973 | -607.34922  | 2587.87032  | -598.10018  | 1 |
| 145 | H | 71.37464 | 70.93562 | 77.00824 | -359.69332  | -1479.13954 | -2259.74260 | 1 |
| 146 | C | 69.22366 | 70.74465 | 77.52715 | -240.01076  | 616.02425   | 431.85322   | 1 |
| 147 | H | 69.34984 | 69.81642 | 78.12994 | -1359.17131 | 782.54425   | 2227.99181  | 1 |
| 148 | H | 68.40173 | 71.32080 | 78.00756 | -820.36667  | 85.81767    | -2596.78715 | 1 |
| 149 | C | 68.90486 | 70.42854 | 76.01012 | -513.07015  | 236.18570   | -551.87280  | 1 |
| 150 | H | 68.78585 | 71.37490 | 75.43398 | 1816.11944  | -1183.11722 | -1650.94321 | 1 |
| 151 | H | 69.76158 | 69.89502 | 75.53645 | -1800.04429 | -1361.53473 | 1526.34643  | 1 |
| 152 | C | 67.61917 | 69.57675 | 75.91169 | 726.08972   | -253.19732  | -179.64713  | 1 |
| 153 | H | 67.72641 | 68.53327 | 76.26918 | 1224.27271  | -456.51798  | -2390.90304 | 1 |
| 154 | H | 66.71880 | 70.04145 | 76.36048 | 1206.40339  | -1150.93514 | -2154.90344 | 1 |
| 155 | N | 67.27834 | 69.45103 | 74.38681 | 329.70796   | -633.68968  | -155.67358  | 1 |
| 156 | H | 66.42833 | 68.86268 | 74.15017 | 1348.31305  | 1938.76845  | 1359.00643  | 1 |
| 157 | H | 67.05846 | 70.35061 | 73.86782 | 2096.92035  | 1446.54551  | -966.48890  | 1 |
| 158 | H | 68.01599 | 69.01352 | 73.76156 | -1197.07217 | -2303.53719 | 827.28733   | 1 |
| 159 | C | 71.36028 | 70.73988 | 79.81594 | -378.01186  | -556.17301  | -413.96481  | 1 |
| 160 | O | 70.46523 | 70.17821 | 80.40664 | -409.44433  | -307.55053  | -453.30833  | 1 |
| 161 | N | 72.65518 | 70.41298 | 79.77737 | -429.02477  | 524.70884   | 274.08502   | 1 |
| 162 | H | 73.23945 | 70.97409 | 79.15941 | 1706.34263  | -1425.96036 | 1574.38926  | 1 |
| 163 | C | 73.06363 | 69.13737 | 80.24232 | -45.25864   | -626.22952  | 478.93267   | 1 |
| 164 | H | 72.17930 | 68.75868 | 80.80682 | 1988.63164  | 570.90773   | 1772.87287  | 1 |
| 165 | C | 73.40016 | 68.26855 | 78.95907 | 551.77128   | -20.49526   | -564.54996  | 1 |
| 166 | H | 72.62211 | 68.39859 | 78.16757 | 1434.61535  | -1753.10253 | 1513.99471  | 1 |
| 167 | H | 74.35527 | 68.60088 | 78.49221 | -714.67738  | 1819.09770  | 1898.36494  | 1 |
| 168 | C | 73.49602 | 66.78583 | 79.44611 | 446.99263   | -555.77305  | 338.97221   | 1 |
| 169 | H | 74.25792 | 66.71163 | 80.26568 | 1953.68466  | 1892.25957  | -161.67766  | 1 |

|     |   |          |          |          |             |             |             |   |
|-----|---|----------|----------|----------|-------------|-------------|-------------|---|
| 170 | H | 72.53110 | 66.45459 | 79.89233 | -403.03785  | 2688.07032  | -188.43591  | 1 |
| 171 | C | 73.89651 | 65.84721 | 78.23820 | 567.86262   | 335.74681   | 434.04421   | 1 |
| 172 | H | 73.08353 | 65.79823 | 77.47752 | -1080.02275 | 1568.26081  | -1948.78900 | 1 |
| 173 | H | 74.79182 | 66.24092 | 77.70372 | -919.54108  | 2111.34692  | 1456.13463  | 1 |
| 174 | C | 74.18543 | 64.45598 | 78.84969 | 195.81897   | 173.33862   | -745.11536  | 1 |
| 175 | H | 75.08368 | 64.41923 | 79.49816 | 1405.67949  | -2301.21089 | -390.08113  | 1 |
| 176 | H | 73.32452 | 63.99314 | 79.37213 | -940.37328  | -1118.32446 | 2299.72133  | 1 |
| 177 | N | 74.50906 | 63.46755 | 77.67988 | 319.26422   | 656.36007   | -42.02424   | 1 |
| 178 | H | 74.77181 | 62.48296 | 77.97526 | 1961.03633  | 619.91968   | 1787.09422  | 1 |
| 179 | H | 73.73510 | 63.27449 | 76.97957 | 854.14343   | -2156.80752 | 1429.08711  | 1 |
| 180 | H | 75.32297 | 63.71903 | 77.04676 | 1237.02905  | -1378.50857 | -1998.28500 | 1 |
| 181 | C | 74.43800 | 69.26177 | 81.14068 | 532.53319   | -268.57236  | 517.55729   | 1 |
| 182 | O | 75.03346 | 68.24520 | 81.43520 | 266.16714   | -290.73804  | -558.88002  | 1 |
| 183 | N | 74.68158 | 70.51259 | 81.48225 | -226.25352  | 640.49678   | -270.32839  | 1 |
| 184 | H | 73.97273 | 71.16634 | 81.15371 | 2007.69063  | -1035.27229 | 1523.50231  | 1 |
| 185 | C | 75.75827 | 70.97345 | 82.28050 | -540.76542  | -573.33303  | 49.50000    | 1 |
| 186 | H | 75.37355 | 71.91365 | 82.73389 | -2374.20950 | -1036.76023 | 843.75774   | 1 |
| 187 | C | 76.18845 | 69.85636 | 83.33487 | -77.09082   | 666.87422   | -415.84136  | 1 |
| 188 | H | 76.57523 | 68.96792 | 82.75399 | -985.81834  | 617.19825   | 2463.91927  | 1 |
| 189 | O | 75.13515 | 69.35772 | 84.18773 | 293.29899   | -391.65602  | -477.80926  | 1 |
| 190 | H | 74.88621 | 68.54773 | 83.69049 | 2528.72714  | -681.76262  | -751.27122  | 1 |
| 191 | C | 77.38537 | 70.56780 | 84.06700 | 252.47363   | -605.14473  | 440.05134   | 1 |
| 192 | H | 77.88189 | 69.88349 | 84.79343 | -2052.65063 | 1456.49051  | -1043.51830 | 1 |
| 193 | H | 78.16713 | 70.91518 | 83.34992 | -2152.98800 | -1661.97574 | -161.70652  | 1 |
| 194 | H | 77.04051 | 71.46184 | 84.63668 | -473.12726  | -1584.27339 | 2165.61725  | 1 |
| 195 | C | 77.05998 | 71.23568 | 81.30924 | 360.36307   | 488.46713   | 505.10056   | 1 |
| 196 | O | 77.64224 | 70.35453 | 80.72726 | -200.08817  | -528.03552  | -385.82850  | 1 |
| 197 | N | 77.35438 | 72.52506 | 81.40972 | -597.54095  | -226.44775  | 355.20479   | 1 |
| 198 | H | 76.77154 | 73.18115 | 81.94330 | 2179.23655  | -1300.70981 | -991.33835  | 1 |
| 199 | C | 78.47741 | 73.01267 | 80.69226 | -687.68921  | 297.39807   | -249.45179  | 1 |
| 200 | H | 78.98226 | 72.07554 | 80.35777 | -349.16256  | -2467.37713 | -1101.72831 | 1 |
| 201 | C | 77.89344 | 73.85266 | 79.45410 | 672.47345   | 361.54328   | -201.62880  | 1 |
| 202 | H | 77.14180 | 74.59747 | 79.80237 | 1541.41502  | 582.18425   | 2169.97026  | 1 |
| 203 | H | 78.70696 | 74.41732 | 78.94380 | -2534.67717 | 60.25153    | 997.72295   | 1 |
| 204 | C | 77.26661 | 72.83733 | 78.48935 | 574.26774   | -389.43119  | -377.02542  | 1 |
| 205 | C | 78.13848 | 72.15251 | 77.59010 | 688.82679   | -287.33580  | -257.96133  | 1 |
| 206 | H | 79.21986 | 72.37916 | 77.57030 | 331.14182   | 1470.38163  | 2269.80013  | 1 |
| 207 | C | 75.87454 | 72.51933 | 78.51126 | -383.52382  | -675.04808  | 144.24917   | 1 |
| 208 | H | 75.19936 | 73.02434 | 79.22762 | 4.09847     | 1517.59662  | 2262.86397  | 1 |
| 209 | C | 77.60296 | 71.17826 | 76.75117 | -134.76730  | 428.45285   | -649.50303  | 1 |
| 210 | H | 78.28387 | 70.64386 | 76.06610 | -903.23433  | 1600.49020  | 2011.53387  | 1 |
| 211 | C | 75.38076 | 71.55224 | 77.62846 | -335.53281  | -615.00040  | -364.39058  | 1 |
| 212 | H | 74.29811 | 71.33618 | 77.63424 | 1596.45398  | -1369.33862 | 1732.02659  | 1 |
| 213 | C | 76.22071 | 70.83242 | 76.72946 | 585.48547   | -340.24194  | -406.23938  | 1 |
| 214 | O | 75.76789 | 69.81881 | 75.84928 | -419.15649  | -173.04408  | -511.94141  | 1 |
| 215 | H | 74.79710 | 69.84673 | 76.02934 | -1071.84350 | 1559.71507  | -1960.13012 | 1 |
| 216 | C | 79.36423 | 73.87969 | 81.74750 | 291.41878   | -183.13091  | 710.72246   | 1 |
| 217 | O | 79.49789 | 73.54298 | 82.90446 | 379.87695   | 523.47396   | -222.23622  | 1 |
| 218 | N | 79.98542 | 74.88242 | 81.13151 | 564.30591   | 373.09380   | 277.24371   | 1 |
| 219 | H | 79.77134 | 75.11992 | 80.16541 | -120.59931  | -2436.07824 | -1214.35098 | 1 |
| 220 | C | 80.95450 | 75.59699 | 81.89977 | 404.07514   | -299.37480  | 608.84009   | 1 |
| 221 | H | 81.37863 | 74.84762 | 82.60792 | -1071.07882 | -841.69025  | 2359.66467  | 1 |
| 222 | C | 81.96004 | 76.22600 | 80.85462 | -683.12807  | 68.71770    | -390.13096  | 1 |
| 223 | H | 82.31131 | 75.45860 | 80.12867 | 2068.88918  | 1596.58590  | 770.89603   | 1 |
| 224 | H | 81.42762 | 76.99116 | 80.24537 | 1379.86429  | 2342.49779  | -179.85638  | 1 |
| 225 | C | 83.16824 | 76.87123 | 81.60246 | -176.39967  | 537.49466   | 550.97268   | 1 |
| 226 | H | 82.83471 | 77.45079 | 82.49053 | -396.28051  | 1942.22168  | 1869.33314  | 1 |
| 227 | H | 83.86986 | 76.10088 | 81.99232 | -94.44700   | 586.00678   | -2659.20016 | 1 |
| 228 | C | 83.86383 | 77.81869 | 80.51921 | -291.69381  | -718.18079  | -150.72929  | 1 |
| 229 | H | 84.29917 | 77.28981 | 79.63341 | -2303.38776 | 1089.76242  | 964.62032   | 1 |
| 230 | H | 83.22622 | 78.65214 | 80.13242 | 884.16729   | 2568.80533  | -207.74283  | 1 |
| 231 | N | 84.92079 | 78.42116 | 81.21221 | -594.49522  | -252.81478  | 342.29276   | 1 |

|     |   |          |          |          |             |             |             |   |
|-----|---|----------|----------|----------|-------------|-------------|-------------|---|
| 232 | H | 85.06120 | 78.13189 | 82.16744 | -1735.17426 | 2084.05705  | -263.71605  | 1 |
| 233 | C | 85.70148 | 79.29118 | 80.71333 | 595.23177   | -271.52487  | 442.22352   | 1 |
| 234 | N | 85.48693 | 79.67364 | 79.38425 | 585.53813   | -424.79750  | -105.81303  | 1 |
| 235 | H | 84.78007 | 79.35220 | 78.72393 | 959.88797   | 1327.56823  | -2177.11905 | 1 |
| 236 | H | 86.04783 | 80.35767 | 78.87538 | 1578.48647  | 16.27378    | -2220.76233 | 1 |
| 237 | N | 86.66310 | 79.70729 | 81.64448 | -452.17763  | -390.33541  | -421.51853  | 1 |
| 238 | H | 86.82619 | 79.42692 | 82.61049 | 470.26107   | 1974.25629  | -1817.92087 | 1 |
| 239 | H | 87.38373 | 80.39772 | 81.42906 | 1856.67307  | -1573.97321 | -1224.35416 | 1 |
| 240 | C | 80.19174 | 76.83711 | 82.66754 | -531.47271  | -581.45780  | -55.06206   | 1 |
| 241 | O | 79.49356 | 77.63675 | 82.09190 | -243.00837  | 192.73507   | 609.52485   | 1 |
| 242 | N | 80.60326 | 76.84421 | 83.93283 | 343.49288   | -644.25607  | 38.09164    | 1 |
| 243 | H | 81.23394 | 76.08282 | 84.18292 | -1691.16043 | -1535.97525 | -1484.73099 | 1 |
| 244 | C | 80.02672 | 77.70690 | 84.95207 | 542.66492   | 350.14337   | 454.42563   | 1 |
| 245 | H | 80.68624 | 77.53638 | 85.83653 | 1209.57979  | -2396.95920 | 463.86744   | 1 |
| 246 | C | 80.04272 | 79.14730 | 84.46958 | -737.14309  | 145.93010   | 242.71942   | 1 |
| 247 | H | 79.35137 | 79.21012 | 83.59291 | -1050.18303 | 159.36419   | -2509.06125 | 1 |
| 248 | C | 79.55395 | 80.10588 | 85.53861 | -706.77696  | -252.88343  | -245.16230  | 1 |
| 249 | H | 79.50335 | 81.16361 | 85.15976 | -1624.64039 | -1665.49085 | 1417.86935  | 1 |
| 250 | H | 78.51639 | 79.82312 | 85.89827 | 2566.10521  | 598.51109   | 693.22305   | 1 |
| 251 | H | 80.23111 | 80.10751 | 86.43665 | -1972.69758 | 107.10018   | -1876.34312 | 1 |
| 252 | C | 81.41790 | 79.58158 | 83.99377 | 412.85148   | 672.58832   | -27.69222   | 1 |
| 253 | H | 81.42517 | 80.65566 | 83.66178 | 1447.02277  | 1762.76533  | -1490.78944 | 1 |
| 254 | H | 82.19060 | 79.47696 | 84.80373 | 1320.77379  | -145.20455  | 2378.68491  | 1 |
| 255 | H | 81.76115 | 78.96233 | 83.12167 | -1512.10848 | 1470.52031  | 1724.75147  | 1 |
| 256 | C | 78.46617 | 77.18215 | 85.24483 | -607.11113  | 499.56689   | 73.73769    | 1 |
| 257 | O | 77.64425 | 77.97973 | 85.64753 | 357.97126   | 460.81534   | 356.68785   | 1 |
| 258 | N | 78.35319 | 75.87874 | 85.09316 | 536.55407   | -368.62270  | 332.76306   | 1 |
| 259 | H | 79.21175 | 75.44533 | 84.76056 | 524.38866   | 2297.69985  | 1367.20941  | 1 |
| 260 | C | 77.22197 | 75.13111 | 85.52053 | 46.50277    | -774.29190  | -147.97904  | 1 |
| 261 | H | 77.65086 | 74.11633 | 85.67777 | 1676.51875  | 1883.29066  | 1032.55549  | 1 |
| 262 | C | 76.53425 | 75.75636 | 86.84095 | -559.41456  | -34.19198   | -556.30433  | 1 |
| 263 | H | 76.21912 | 76.81281 | 86.62520 | -64.66664   | 395.18769   | 2695.05373  | 1 |
| 264 | H | 75.59620 | 75.20019 | 87.08180 | -2703.44278 | -60.40056   | 333.79418   | 1 |
| 265 | C | 77.48831 | 75.71988 | 88.00239 | -519.76435  | 377.31045   | 459.42366   | 1 |
| 266 | H | 78.45009 | 76.17967 | 87.68049 | -1746.74323 | 1667.50644  | -1261.73691 | 1 |
| 267 | C | 76.93094 | 76.52954 | 89.16756 | 570.95554   | 16.46261    | -545.27700  | 1 |
| 268 | H | 77.62777 | 76.52811 | 90.04480 | 2391.58273  | 28.05277    | -1305.07271 | 1 |
| 269 | H | 76.75765 | 77.59903 | 88.88156 | 175.75588   | 917.63458   | 2559.43867  | 1 |
| 270 | H | 75.95100 | 76.11881 | 89.52288 | -1063.97851 | -2155.34650 | 1283.00462  | 1 |
| 271 | C | 77.75263 | 74.29100 | 88.45894 | 193.76014   | 2.62946     | -765.53141  | 1 |
| 272 | H | 78.42805 | 74.26071 | 89.35232 | 507.39394   | -846.55087  | 2539.60089  | 1 |
| 273 | H | 76.80339 | 73.76829 | 88.74379 | 1337.57841  | 1818.19054  | 1526.01994  | 1 |
| 274 | H | 78.23881 | 73.68074 | 87.65543 | 1100.88635  | -1172.91350 | -2199.08909 | 1 |
| 275 | C | 76.13854 | 75.12422 | 84.34631 | -549.21115  | 475.64486   | -309.38218  | 1 |
| 276 | O | 74.95973 | 75.25429 | 84.53639 | 556.06106   | -390.37755  | -78.24250   | 1 |
| 277 | O | 76.62613 | 74.75909 | 83.04663 | -572.27940  | -310.19032  | -209.75862  | 1 |
| 278 | H | 77.59974 | 74.75724 | 83.25697 | -1380.08193 | 2212.14486  | 790.85944   | 1 |

Listing 73: C00073.xmolout

|    |   |          |          |          |             |             |             |        |          |
|----|---|----------|----------|----------|-------------|-------------|-------------|--------|----------|
| 1  |   | 276      |          |          |             |             |             |        |          |
| 2  |   | 150.0000 | 150.0000 | 150.0000 | 0.0000      | 0.0000      | 0.0000***** | 2.7750 | 11100    |
|    |   | 0.2500   | 300.00   | 0.00     | 0.00        | 0.00        | -1293.5588  | 0.0000 | 300.0000 |
| 3  | H | 79.75613 | 61.21994 | 84.47265 | -2043.14101 | -1757.64893 | 399.89339   | 1      |          |
| 4  | N | 80.09836 | 61.17527 | 83.51549 | 426.75047   | 490.45733   | -334.42467  | 1      |          |
| 5  | H | 79.24356 | 61.32853 | 82.98166 | 442.25559   | -1110.30854 | -2448.52907 | 1      |          |
| 6  | C | 81.13097 | 62.09573 | 83.20085 | 415.32972   | -666.39213  | 83.73172    | 1      |          |
| 7  | H | 81.60806 | 62.35867 | 84.17376 | 879.32219   | 2491.00447  | 667.35213   | 1      |          |
| 8  | C | 82.18023 | 61.36810 | 82.19465 | 31.35357    | 477.41777   | 628.23362   | 1      |          |
| 9  | H | 81.65730 | 61.10729 | 81.24503 | 1168.38489  | 2240.25337  | -1019.71136 | 1      |          |
| 10 | H | 82.99827 | 62.07047 | 81.91120 | -360.43770  | 2534.90498  | 931.67112   | 1      |          |
| 11 | C | 82.73275 | 60.13568 | 82.84384 | 463.18208   | 512.70242   | -382.34388  | 1      |          |

|    |   |          |          |          |             |             |             |   |
|----|---|----------|----------|----------|-------------|-------------|-------------|---|
| 12 | H | 81.87642 | 59.50382 | 83.17366 | 1725.29117  | 1863.52247  | -987.07854  | 1 |
| 13 | C | 83.57284 | 59.34212 | 81.84835 | 710.42801   | -144.27427  | -313.15367  | 1 |
| 14 | H | 83.97527 | 58.40143 | 82.30419 | 364.20195   | -1033.13725 | 2494.72524  | 1 |
| 15 | H | 82.97797 | 59.04658 | 80.94653 | 2567.61904  | 335.80679   | 847.48802   | 1 |
| 16 | H | 84.45095 | 59.93588 | 81.48640 | -2587.99029 | 680.92867   | -512.16411  | 1 |
| 17 | C | 83.58773 | 60.47108 | 84.06005 | 268.17616   | 741.64379   | -40.42634   | 1 |
| 18 | H | 84.03976 | 59.55132 | 84.51242 | 1283.54314  | -1945.37420 | -1411.27812 | 1 |
| 19 | H | 84.43112 | 61.15871 | 83.79457 | -1258.57796 | 1317.15249  | -2026.02085 | 1 |
| 20 | H | 82.98929 | 60.97256 | 84.86269 | -2502.84526 | 909.80597   | 575.92391   | 1 |
| 21 | C | 80.42916 | 63.32653 | 82.48721 | 619.36578   | -458.64843  | -172.09273  | 1 |
| 22 | O | 79.16296 | 63.45391 | 82.30490 | -81.40433   | 433.87611   | 522.34594   | 1 |
| 23 | N | 81.29636 | 64.21967 | 82.12290 | 175.23996   | -622.20190  | 341.55523   | 1 |
| 24 | H | 82.28598 | 64.08714 | 82.31663 | -876.57256  | -303.22879  | -2561.90213 | 1 |
| 25 | C | 80.74377 | 65.38753 | 81.51002 | -571.88214  | -534.10783  | -106.15033  | 1 |
| 26 | H | 81.09219 | 66.21203 | 82.16257 | -2713.20841 | -16.25800   | -248.80809  | 1 |
| 27 | C | 81.39692 | 65.49014 | 80.08183 | 166.60354   | 288.16399   | -716.09568  | 1 |
| 28 | H | 81.03301 | 64.63265 | 79.45297 | -2097.85574 | 1636.78449  | -586.18044  | 1 |
| 29 | O | 82.84502 | 65.43382 | 80.03919 | -317.80580  | -363.38227  | 484.43082   | 1 |
| 30 | H | 82.99068 | 64.64052 | 79.49295 | 1863.74748  | -1451.84923 | 1357.29467  | 1 |
| 31 | C | 80.75494 | 66.83693 | 79.57361 | 503.80731   | 517.99032   | 318.51606   | 1 |
| 32 | H | 81.04503 | 67.05325 | 78.51962 | 640.61020   | -2157.10410 | -1536.29104 | 1 |
| 33 | H | 79.63827 | 66.80710 | 79.61168 | 1687.88455  | 465.60692   | 2087.56452  | 1 |
| 34 | H | 81.08508 | 67.70422 | 80.19083 | -1293.07895 | -1899.88581 | -1463.57452 | 1 |
| 35 | C | 79.06319 | 65.20009 | 81.42682 | -153.07550  | -733.68902  | 248.70981   | 1 |
| 36 | O | 78.51039 | 65.02243 | 80.33169 | 186.15459   | -480.78787  | -449.34387  | 1 |
| 37 | N | 78.52848 | 66.04362 | 82.39911 | -487.53139  | 543.18517   | 42.03850    | 1 |
| 38 | C | 77.13133 | 66.17842 | 82.47204 | -699.35871  | 69.34393    | 360.10701   | 1 |
| 39 | H | 76.73392 | 65.40801 | 81.76666 | 2.81126     | -221.99807  | -2715.58072 | 1 |
| 40 | C | 76.87627 | 65.93667 | 84.03863 | -507.46439  | -592.59194  | 122.07761   | 1 |
| 41 | H | 75.89028 | 66.32038 | 84.38126 | -1975.08116 | 525.87560   | -1801.71556 | 1 |
| 42 | H | 76.90749 | 64.85375 | 84.29082 | 1588.27743  | -1913.22100 | 1113.83566  | 1 |
| 43 | C | 78.08037 | 66.69531 | 84.66078 | -613.62442  | -457.55993  | -194.14490  | 1 |
| 44 | H | 77.88921 | 67.79404 | 84.68766 | 1707.54637  | -721.27992  | 1996.92523  | 1 |
| 45 | H | 78.31439 | 66.38616 | 85.70387 | 758.23357   | 2100.81767  | 1560.55011  | 1 |
| 46 | C | 79.24215 | 66.33542 | 83.61943 | -352.41524  | 704.96076   | 49.21465    | 1 |
| 47 | H | 79.95081 | 67.17435 | 83.41550 | 1714.76886  | -2070.42778 | 443.35792   | 1 |
| 48 | H | 79.82263 | 65.41091 | 83.85947 | 1224.15040  | 1801.50881  | 1636.97633  | 1 |
| 49 | C | 76.68104 | 67.72653 | 82.08988 | 566.85117   | 537.05831   | 117.62814   | 1 |
| 50 | O | 76.87120 | 68.63608 | 82.89740 | -550.26779  | -406.08867  | 4.21666     | 1 |
| 51 | N | 76.19729 | 67.76101 | 80.88416 | 566.34832   | -425.77725  | 180.18749   | 1 |
| 52 | H | 76.17151 | 66.84768 | 80.43046 | 644.44502   | 2646.80550  | -52.73430   | 1 |
| 53 | C | 75.33491 | 68.79095 | 80.37691 | 612.34801   | -281.48662  | 411.56221   | 1 |
| 54 | H | 74.32021 | 68.34242 | 80.44857 | 1667.23498  | -1490.75142 | 1556.16753  | 1 |
| 55 | C | 75.46896 | 70.13228 | 81.21699 | -714.45746  | -175.43074  | 286.98927   | 1 |
| 56 | H | 76.56849 | 70.31847 | 81.38889 | -787.09484  | 1763.03619  | -1922.46060 | 1 |
| 57 | O | 74.88927 | 70.10769 | 82.52503 | -429.46514  | 516.51932   | -128.40526  | 1 |
| 58 | H | 75.70082 | 69.77421 | 83.05497 | 1981.82785  | 436.16847   | -1818.18182 | 1 |
| 59 | C | 74.88477 | 71.21648 | 80.23941 | 630.79189   | -468.94448  | 76.03230    | 1 |
| 60 | H | 74.95012 | 72.23798 | 80.67976 | -1775.71861 | 2062.30353  | 131.89849   | 1 |
| 61 | H | 75.43054 | 71.24232 | 79.26783 | -1855.14608 | 88.94118    | 1993.53760  | 1 |
| 62 | H | 73.81084 | 71.02210 | 80.01252 | -1504.82350 | -780.94249  | -2132.90992 | 1 |
| 63 | C | 75.73719 | 68.97102 | 78.80512 | 288.57638   | 618.62814   | -397.00270  | 1 |
| 64 | O | 74.91499 | 68.60400 | 77.96083 | 321.70495   | -185.26452  | 574.37218   | 1 |
| 65 | N | 76.90605 | 69.53380 | 78.64653 | -447.05792  | -446.53431  | 367.76425   | 1 |
| 66 | H | 77.40075 | 69.71562 | 79.51937 | 350.31316   | 1975.63644  | -1843.31522 | 1 |
| 67 | C | 77.49045 | 69.88643 | 77.40316 | -511.23061  | 374.03917   | -471.51480  | 1 |
| 68 | H | 78.56693 | 69.70231 | 77.61213 | 2234.79579  | -898.70890  | -1273.45190 | 1 |
| 69 | C | 76.91091 | 68.96273 | 76.24341 | 529.53781   | -159.34528  | 563.72604   | 1 |
| 70 | H | 77.66170 | 68.97148 | 75.40246 | 654.59388   | 2347.94251  | 1217.51488  | 1 |
| 71 | H | 76.88110 | 67.92200 | 76.66787 | -1526.55661 | 2103.42026  | 817.87394   | 1 |
| 72 | O | 75.64805 | 69.29900 | 75.64978 | -554.84278  | 14.12789    | 399.58769   | 1 |
| 73 | H | 75.02974 | 68.92566 | 76.39121 | 1297.06236  | 2061.84854  | 1220.68812  | 1 |



|     |   |          |          |          |             |             |             |   |
|-----|---|----------|----------|----------|-------------|-------------|-------------|---|
| 74  | C | 77.28613 | 71.50113 | 77.16199 | -662.15484  | -412.13544  | 123.62687   | 1 |
| 75  | O | 78.28976 | 72.18105 | 77.18052 | -540.01537  | -317.05804  | 274.91456   | 1 |
| 76  | N | 76.01948 | 71.87354 | 77.05136 | -202.76299  | -690.00100  | -131.49145  | 1 |
| 77  | H | 75.38599 | 71.07216 | 77.05731 | -702.62132  | -2617.37191 | 281.70413   | 1 |
| 78  | C | 75.53611 | 73.22540 | 76.81432 | -491.73914  | 576.34187   | 222.73509   | 1 |
| 79  | H | 74.59275 | 73.27681 | 77.40741 | 1977.17978  | -1823.58850 | -434.68928  | 1 |
| 80  | C | 76.57022 | 74.25286 | 77.22751 | -649.50797  | -328.66843  | 306.11224   | 1 |
| 81  | H | 77.51753 | 74.03403 | 76.66744 | 2075.07803  | 1452.16490  | -1004.45904 | 1 |
| 82  | C | 76.14416 | 75.66957 | 76.89852 | -615.18735  | -489.99689  | -70.96352   | 1 |
| 83  | H | 76.87879 | 76.42157 | 77.29793 | -1226.32661 | -1724.38906 | -1716.47170 | 1 |
| 84  | H | 76.06548 | 75.85170 | 75.76433 | 2381.64273  | -969.84735  | 900.46860   | 1 |
| 85  | H | 75.14445 | 75.91679 | 77.34804 | 2122.74991  | 1702.23946  | -141.36228  | 1 |
| 86  | C | 76.88393 | 74.16264 | 78.71203 | -501.86074  | -479.61276  | -376.42482  | 1 |
| 87  | H | 77.67674 | 74.89959 | 79.01489 | 993.79261   | -2246.95401 | -1177.81305 | 1 |
| 88  | H | 75.97719 | 74.36615 | 79.34368 | 42.71279    | -626.15391  | -2651.37258 | 1 |
| 89  | H | 77.26131 | 73.13754 | 78.98434 | -2026.39012 | -1590.33709 | -887.82922  | 1 |
| 90  | C | 75.22030 | 73.34260 | 75.17631 | -672.89153  | 382.57394   | -156.34072  | 1 |
| 91  | O | 76.09201 | 73.23348 | 74.35111 | 410.04627   | 221.86223   | 500.35950   | 1 |
| 92  | N | 73.94260 | 73.63012 | 74.99831 | -378.11782  | -443.79414  | -441.10984  | 1 |
| 93  | H | 73.32925 | 73.64794 | 75.80910 | 2404.15973  | -568.14894  | 1149.30085  | 1 |
| 94  | C | 73.46095 | 73.79959 | 73.66091 | -544.54484  | 466.16019   | 331.29119   | 1 |
| 95  | H | 74.26433 | 74.40327 | 73.18230 | -1409.80988 | -170.17955  | 2325.32679  | 1 |
| 96  | C | 73.37792 | 72.35157 | 73.02524 | -184.48284  | 116.78282   | -758.89137  | 1 |
| 97  | H | 74.34580 | 71.81318 | 73.15424 | 1893.78641  | 1861.14652  | 611.04528   | 1 |
| 98  | H | 72.60973 | 71.73494 | 73.54555 | -2170.79665 | -974.19311  | 1327.50117  | 1 |
| 99  | C | 73.02530 | 72.53871 | 71.51642 | 389.51668   | 672.81878   | -138.49152  | 1 |
| 100 | H | 72.06825 | 73.09796 | 71.41874 | 510.64577   | 1933.03327  | 1851.02484  | 1 |
| 101 | H | 73.77603 | 73.19751 | 71.02647 | -2302.30869 | -1105.72939 | -948.89774  | 1 |
| 102 | C | 72.92201 | 71.18301 | 70.72115 | -559.93427  | -126.34590  | 542.30857   | 1 |
| 103 | O | 72.60747 | 71.20505 | 69.55907 | -670.36003  | -111.83166  | 76.36448    | 1 |
| 104 | N | 73.21830 | 70.08538 | 71.44969 | -216.06729  | -537.07037  | 446.51379   | 1 |
| 105 | H | 73.50511 | 70.00261 | 72.43232 | -1251.96487 | 1074.12894  | -2168.52500 | 1 |
| 106 | H | 73.21116 | 69.13079 | 71.07448 | -2451.83023 | -720.73851  | 944.84612   | 1 |
| 107 | C | 71.98981 | 74.50860 | 73.72498 | 546.24052   | -563.88337  | -85.11809   | 1 |
| 108 | O | 71.00334 | 73.82194 | 73.75381 | 71.70702    | -307.40463  | 606.69673   | 1 |
| 109 | N | 72.09181 | 75.85318 | 73.78036 | 479.90863   | -504.50129  | 222.86849   | 1 |
| 110 | C | 70.96124 | 76.71187 | 73.74716 | 75.51268    | -600.91904  | 506.73700   | 1 |
| 111 | H | 70.07406 | 76.12693 | 74.07969 | -2033.61562 | 1795.30103  | 254.89480   | 1 |
| 112 | C | 71.38540 | 77.96892 | 74.61683 | 523.79067   | 517.99274   | 284.45581   | 1 |
| 113 | H | 71.00920 | 78.92115 | 74.17841 | 1599.61665  | -1127.00911 | 1895.98173  | 1 |
| 114 | H | 70.95614 | 77.92939 | 75.64198 | -1881.83093 | 1275.82488  | -1501.55016 | 1 |
| 115 | C | 72.94611 | 77.90869 | 74.63113 | -600.05639  | -404.05026  | 316.64485   | 1 |
| 116 | H | 73.40030 | 78.75328 | 74.06423 | -2597.05260 | 496.36221   | 657.73249   | 1 |
| 117 | H | 73.33816 | 77.99755 | 75.66926 | -1666.24518 | 1294.38985  | -1723.90591 | 1 |
| 118 | C | 73.37074 | 76.51422 | 74.00682 | 493.57570   | -129.95376  | -602.56394  | 1 |
| 119 | H | 73.87389 | 76.59226 | 73.01297 | -1469.08415 | -637.84797  | 2204.22581  | 1 |
| 120 | H | 73.97218 | 75.85673 | 74.68062 | -1038.97840 | 1068.88701  | -2280.71789 | 1 |
| 121 | C | 70.79303 | 77.44728 | 72.27987 | 188.88100   | 241.05089   | -727.87821  | 1 |
| 122 | O | 71.71658 | 78.01700 | 71.74281 | 531.88613   | -49.19943   | 427.07960   | 1 |
| 123 | N | 69.52019 | 77.36035 | 71.91548 | 708.14833   | 26.93417    | -179.73509  | 1 |
| 124 | H | 68.88345 | 76.85410 | 72.52997 | -2232.69501 | -1179.09831 | 1023.94816  | 1 |
| 125 | C | 69.02156 | 78.05983 | 70.78405 | -738.32412  | 259.92548   | 104.42456   | 1 |
| 126 | H | 67.96111 | 77.73276 | 70.70501 | 2028.89123  | 1260.02983  | 1311.33324  | 1 |
| 127 | C | 69.11408 | 79.61084 | 71.14420 | -258.65678  | -345.52513  | 661.28459   | 1 |
| 128 | H | 70.16206 | 79.86214 | 71.40987 | -1826.06090 | -1801.46097 | -918.64554  | 1 |
| 129 | C | 68.58711 | 80.50544 | 69.97274 | -541.23400  | 531.92970   | -218.41428  | 1 |
| 130 | H | 68.55525 | 81.58369 | 70.25952 | 1311.73218  | -2219.18200 | 882.19023   | 1 |
| 131 | H | 69.23462 | 80.42208 | 69.06420 | -1048.71298 | 1223.58118  | -2196.97971 | 1 |
| 132 | H | 67.55451 | 80.21331 | 69.66912 | 419.06414   | 1903.92898  | 1903.44670  | 1 |
| 133 | C | 68.16791 | 79.91871 | 72.35423 | -423.86431  | 152.66566   | -648.55262  | 1 |
| 134 | H | 68.20322 | 80.99669 | 72.63932 | 105.68386   | -2342.50080 | 1387.51238  | 1 |
| 135 | H | 67.10628 | 79.67415 | 72.11570 | -1695.63603 | -1484.73621 | -1531.02793 | 1 |

|     |   |          |          |          |             |             |             |   |
|-----|---|----------|----------|----------|-------------|-------------|-------------|---|
| 136 | H | 68.45221 | 79.32602 | 73.25504 | -1853.57121 | -487.39031  | 1936.59343  | 1 |
| 137 | C | 69.88921 | 77.69581 | 69.45365 | 539.71428   | -510.58232  | 267.58633   | 1 |
| 138 | O | 69.74764 | 78.38310 | 68.44152 | -15.93758   | -278.34085  | -624.49402  | 1 |
| 139 | N | 70.61535 | 76.61602 | 69.62477 | -676.81886  | 12.05292    | 276.17960   | 1 |
| 140 | H | 70.57363 | 76.24545 | 70.57653 | -1694.44250 | -373.84189  | -2100.66098 | 1 |
| 141 | C | 71.42557 | 75.98295 | 68.65086 | 412.33078   | -664.70360  | 108.35451   | 1 |
| 142 | H | 71.75315 | 75.04635 | 69.15604 | 1765.77476  | 1294.44366  | 1621.76594  | 1 |
| 143 | C | 70.49245 | 75.73334 | 67.39511 | -179.66635  | -721.95667  | -264.73915  | 1 |
| 144 | H | 69.56818 | 75.19035 | 67.69561 | -607.34922  | 2587.87032  | -598.10018  | 1 |
| 145 | H | 70.14243 | 76.69797 | 66.95905 | -359.69332  | -1479.13954 | -2259.74260 | 1 |
| 146 | C | 71.32639 | 74.90752 | 66.36241 | -240.01076  | 616.02425   | 431.85322   | 1 |
| 147 | H | 72.19917 | 75.49699 | 66.00127 | -1359.17131 | 782.54425   | 2227.99181  | 1 |
| 148 | H | 71.74824 | 73.99230 | 66.83584 | -820.36667  | 85.81767    | -2596.78715 | 1 |
| 149 | C | 70.36224 | 74.52428 | 65.16830 | -513.07015  | 236.18570   | -551.87280  | 1 |
| 150 | H | 69.50870 | 73.90475 | 65.52837 | 1816.11944  | -1183.11722 | -1650.94321 | 1 |
| 151 | H | 69.90674 | 75.43346 | 64.71264 | -1800.04429 | -1361.53473 | 1526.34643  | 1 |
| 152 | C | 71.21109 | 73.74912 | 64.13417 | 726.08972   | -253.19732  | -179.64713  | 1 |
| 153 | H | 72.00300 | 74.35080 | 63.64520 | 1224.27271  | -456.51798  | -2390.90304 | 1 |
| 154 | H | 71.63712 | 72.79698 | 64.50894 | 1206.40339  | -1150.93514 | -2154.90344 | 1 |
| 155 | N | 70.25634 | 73.32173 | 62.96937 | 329.70796   | -633.68968  | -155.67358  | 1 |
| 156 | H | 70.71501 | 72.79590 | 62.17049 | 1348.31305  | 1938.76845  | 1359.00643  | 1 |
| 157 | H | 69.45910 | 72.66665 | 63.21836 | 2096.92035  | 1446.54551  | -966.48890  | 1 |
| 158 | H | 69.75013 | 74.09545 | 62.44799 | -1197.07217 | -2303.53719 | 827.28733   | 1 |
| 159 | C | 72.71405 | 76.91166 | 68.21998 | -378.01186  | -556.17301  | -413.96481  | 1 |
| 160 | O | 73.82097 | 76.44123 | 68.30039 | -409.44433  | -307.55053  | -453.30833  | 1 |
| 161 | N | 72.34307 | 78.10154 | 67.77192 | -429.02477  | 524.70884   | 274.08502   | 1 |
| 162 | H | 71.33044 | 78.38416 | 67.77467 | 1706.34263  | -1425.96036 | 1574.38926  | 1 |
| 163 | C | 73.34917 | 78.92465 | 67.18790 | -45.25864   | -626.22952  | 478.93267   | 1 |
| 164 | H | 74.15943 | 78.21478 | 66.89740 | 1988.63164  | 570.90773   | 1772.87287  | 1 |
| 165 | C | 72.65111 | 79.67227 | 65.97834 | 551.77128   | -20.49526   | -564.54996  | 1 |
| 166 | H | 72.13564 | 78.94324 | 65.31366 | 1434.61535  | -1753.10253 | 1513.99471  | 1 |
| 167 | H | 71.84815 | 80.34387 | 66.35714 | -714.67738  | 1819.09770  | 1898.36494  | 1 |
| 168 | C | 73.71729 | 80.49121 | 65.17969 | 446.99263   | -555.77305  | 338.97221   | 1 |
| 169 | H | 74.26679 | 81.18450 | 65.86482 | 1953.68466  | 1892.25957  | -161.67766  | 1 |
| 170 | H | 74.48929 | 79.82188 | 64.73739 | -403.03785  | 2688.07032  | -188.43591  | 1 |
| 171 | C | 72.95731 | 81.30442 | 64.05499 | 567.86262   | 335.74681   | 434.04421   | 1 |
| 172 | H | 72.53009 | 80.61907 | 63.28734 | -1080.02275 | 1568.26081  | -1948.78900 | 1 |
| 173 | H | 72.08947 | 81.85640 | 64.48369 | -919.54108  | 2111.34692  | 1456.13463  | 1 |
| 174 | C | 73.96367 | 82.29227 | 63.42148 | 195.81897   | 173.33862   | -745.11536  | 1 |
| 175 | H | 74.32812 | 83.08119 | 64.10950 | 1405.67949  | -2301.21089 | -390.08113  | 1 |
| 176 | H | 74.82042 | 81.81408 | 62.90645 | -940.37328  | -1118.32446 | 2299.72133  | 1 |
| 177 | N | 73.21064 | 83.07666 | 62.29356 | 319.26422   | 656.36007   | -42.02424   | 1 |
| 178 | H | 73.78157 | 83.81542 | 61.79015 | 1961.03633  | 619.91968   | 1787.09422  | 1 |
| 179 | H | 72.83640 | 82.51122 | 61.47699 | 854.14343   | -2156.80752 | 1429.08711  | 1 |
| 180 | H | 72.35654 | 83.63647 | 62.58299 | 1237.02905  | -1378.50857 | -1998.28500 | 1 |
| 181 | C | 73.88122 | 80.03611 | 68.26802 | 532.53319   | -268.57236  | 517.55729   | 1 |
| 182 | O | 74.67565 | 80.88208 | 67.91383 | 266.16714   | -290.73804  | -558.88002  | 1 |
| 183 | N | 73.34900 | 79.87347 | 69.47064 | -226.25352  | 640.49678   | -270.32839  | 1 |
| 184 | H | 72.68933 | 79.10545 | 69.59282 | 2007.69063  | -1035.27229 | 1523.50231  | 1 |
| 185 | C | 73.74752 | 80.77243 | 70.50209 | -540.76542  | -573.33303  | 49.50000    | 1 |
| 186 | H | 74.16713 | 81.66234 | 69.97616 | -2374.20950 | -1036.76023 | 843.75774   | 1 |
| 187 | C | 72.41108 | 81.08031 | 71.33635 | -77.09082   | 666.87422   | -415.84136  | 1 |
| 188 | H | 71.87749 | 80.09116 | 71.44884 | -985.81834  | 617.19825   | 2463.91927  | 1 |
| 189 | O | 71.53002 | 82.01230 | 70.68531 | 293.29899   | -391.65602  | -477.80926  | 1 |
| 190 | H | 70.80370 | 81.42297 | 70.40990 | 2528.72714  | -681.76262  | -751.27122  | 1 |
| 191 | C | 72.92685 | 81.51832 | 72.75341 | 252.47363   | -605.14473  | 440.05134   | 1 |
| 192 | H | 72.08300 | 81.70369 | 73.45830 | -2052.65063 | 1456.49051  | -1043.51830 | 1 |
| 193 | H | 73.57787 | 80.73757 | 73.22018 | -2152.98800 | -1661.97574 | -161.70652  | 1 |
| 194 | H | 73.52822 | 82.45557 | 72.69779 | -473.12726  | -1584.27339 | 2165.61725  | 1 |
| 195 | C | 74.86949 | 80.07385 | 71.45459 | 360.36307   | 488.46713   | 505.10056   | 1 |
| 196 | O | 75.57888 | 80.82644 | 72.12361 | -200.08817  | -528.03552  | -385.82850  | 1 |
| 197 | N | 74.79755 | 78.76193 | 71.46687 | -597.54095  | -226.44775  | 355.20479   | 1 |

|     |   |          |          |          |             |             |             |   |
|-----|---|----------|----------|----------|-------------|-------------|-------------|---|
| 198 | H | 74.06947 | 78.38963 | 70.85649 | 2179.23655  | -1300.70981 | -991.33835  | 1 |
| 199 | C | 75.83063 | 77.91602 | 71.93903 | -687.68921  | 297.39807   | -249.45179  | 1 |
| 200 | H | 75.58061 | 76.92808 | 71.49344 | -349.16256  | -2467.37713 | -1101.72831 | 1 |
| 201 | C | 77.25755 | 78.47564 | 71.47390 | 672.47345   | 361.54328   | -201.62880  | 1 |
| 202 | H | 77.38239 | 79.53094 | 71.81491 | 1541.41502  | 582.18425   | 2169.97026  | 1 |
| 203 | H | 78.06272 | 77.87548 | 71.95684 | -2534.67717 | 60.25153    | 997.72295   | 1 |
| 204 | C | 77.37114 | 78.38723 | 69.94594 | 574.26774   | -389.43119  | -377.02542  | 1 |
| 205 | C | 77.70162 | 77.14729 | 69.32039 | 688.82679   | -287.33580  | -257.96133  | 1 |
| 206 | H | 77.85305 | 76.23394 | 69.92391 | 331.14182   | 1470.38163  | 2269.80013  | 1 |
| 207 | C | 77.14798 | 79.55382 | 69.15435 | -383.52382  | -675.04808  | 144.24917   | 1 |
| 208 | H | 76.85510 | 80.50836 | 69.62910 | 4.09847     | 1517.59662  | 2262.86397  | 1 |
| 209 | C | 77.83459 | 77.11243 | 67.93230 | -134.76730  | 428.45285   | -649.50303  | 1 |
| 210 | H | 78.09563 | 76.15373 | 67.45103 | -903.23433  | 1600.49020  | 2011.53387  | 1 |
| 211 | C | 77.29594 | 79.46867 | 67.76845 | -335.53281  | -615.00040  | -364.39058  | 1 |
| 212 | H | 77.11709 | 80.38067 | 67.17202 | 1596.45398  | -1369.33862 | 1732.02659  | 1 |
| 213 | C | 77.65069 | 78.25834 | 67.10468 | 585.48547   | -340.24194  | -406.23938  | 1 |
| 214 | O | 77.81047 | 78.16987 | 65.69726 | -419.15649  | -173.04408  | -511.94141  | 1 |
| 215 | H | 77.64441 | 79.11096 | 65.45163 | -1071.84350 | 1559.71507  | -1960.13012 | 1 |
| 216 | C | 75.88467 | 77.85771 | 73.56784 | 291.41878   | -183.13091  | 710.72246   | 1 |
| 217 | O | 75.97234 | 76.76351 | 74.09517 | 379.87695   | 523.47396   | -222.23622  | 1 |
| 218 | N | 75.87354 | 79.04374 | 74.14155 | 564.30591   | 373.09380   | 277.24371   | 1 |
| 219 | H | 75.83057 | 79.91853 | 73.56084 | -120.59931  | -2436.07824 | -1214.35098 | 1 |
| 220 | C | 75.83446 | 79.09797 | 75.56157 | 404.07514   | -299.37480  | 608.84009   | 1 |
| 221 | H | 76.00983 | 78.05947 | 75.92751 | -1071.07882 | -841.69025  | 2359.66467  | 1 |
| 222 | C | 76.93808 | 80.16183 | 75.98357 | -683.12807  | 68.71770    | -390.13096  | 1 |
| 223 | H | 77.90773 | 79.94887 | 75.48075 | 2068.88918  | 1596.58590  | 770.89603   | 1 |
| 224 | H | 76.64084 | 81.18111 | 75.64821 | 1379.86429  | 2342.49779  | -179.85638  | 1 |
| 225 | C | 77.08114 | 80.10175 | 77.53322 | -176.39967  | 537.49466   | 550.97268   | 1 |
| 226 | H | 76.09206 | 80.23980 | 78.02940 | -396.28051  | 1942.22168  | 1869.33314  | 1 |
| 227 | H | 77.45186 | 79.10742 | 77.86847 | -94.44700   | 586.00678   | -2659.20016 | 1 |
| 228 | C | 78.09297 | 81.27400 | 77.93636 | -291.69381  | -718.18079  | -150.72929  | 1 |
| 229 | H | 79.11973 | 81.21903 | 77.49435 | -2303.38776 | 1089.76242  | 964.62032   | 1 |
| 230 | H | 77.68095 | 82.30165 | 77.77233 | 884.16729   | 2568.80533  | -207.74283  | 1 |
| 231 | N | 78.18336 | 81.11950 | 79.32467 | -594.49522  | -252.81478  | 342.29276   | 1 |
| 232 | H | 77.40918 | 80.64378 | 79.76363 | -1735.17426 | 2084.05705  | -263.71605  | 1 |
| 233 | C | 79.11578 | 81.58042 | 80.05657 | 595.23177   | -271.52487  | 442.22352   | 1 |
| 234 | N | 80.15583 | 82.27538 | 79.43137 | 585.53813   | -424.79750  | -105.81303  | 1 |
| 235 | H | 80.25687 | 82.53960 | 78.45232 | 959.88797   | 1327.56823  | -2177.11905 | 1 |
| 236 | H | 80.92534 | 82.73507 | 79.91881 | 1578.48647  | 16.27378    | -2220.76233 | 1 |
| 237 | N | 78.88255 | 81.27161 | 81.40274 | -452.17763  | -390.33541  | -421.51853  | 1 |
| 238 | H | 78.09483 | 80.80263 | 81.84766 | 470.26107   | 1974.25629  | -1817.92087 | 1 |
| 239 | H | 79.48722 | 81.58521 | 82.16283 | 1856.67307  | -1573.97321 | -1224.35416 | 1 |
| 240 | C | 74.41198 | 79.75496 | 76.04130 | -531.47271  | -581.45780  | -55.06206   | 1 |
| 241 | O | 73.90849 | 80.72138 | 75.47679 | -243.00837  | 192.73507   | 609.52485   | 1 |
| 242 | N | 73.96096 | 79.08508 | 77.08034 | 343.49288   | -644.25607  | 38.09164    | 1 |
| 243 | H | 74.53285 | 78.33551 | 77.46276 | -1691.16043 | -1535.97525 | -1484.73099 | 1 |
| 244 | C | 72.62369 | 79.33878 | 77.51603 | 542.66492   | 350.14337   | 454.42563   | 1 |
| 245 | H | 72.09497 | 79.57640 | 76.56554 | 1209.57979  | -2396.95920 | 463.86744   | 1 |
| 246 | C | 72.04817 | 78.11641 | 78.34092 | -737.14309  | 145.93010   | 242.71942   | 1 |
| 247 | H | 72.62715 | 78.01437 | 79.28401 | -1050.18303 | 159.36419   | -2509.06125 | 1 |
| 248 | C | 70.54726 | 78.46334 | 78.63809 | -706.77696  | -252.88343  | -245.16230  | 1 |
| 249 | H | 70.03553 | 77.64276 | 79.19291 | -1624.64039 | -1665.49085 | 1417.86935  | 1 |
| 250 | H | 70.46283 | 79.38827 | 79.25968 | 2566.10521  | 598.51109   | 693.22305   | 1 |
| 251 | H | 69.96993 | 78.64014 | 77.70036 | -1972.69758 | 107.10018   | -1876.34312 | 1 |
| 252 | C | 72.04668 | 76.74151 | 77.58559 | 412.85148   | 672.58832   | -27.69222   | 1 |
| 253 | H | 71.80724 | 75.90013 | 78.27699 | 1447.02277  | 1762.76533  | -1490.78944 | 1 |
| 254 | H | 71.28664 | 76.70938 | 76.77028 | 1320.77379  | -145.20455  | 2378.68491  | 1 |
| 255 | H | 73.03547 | 76.51862 | 77.12297 | -1512.10848 | 1470.52031  | 1724.75147  | 1 |
| 256 | C | 72.65989 | 80.64166 | 78.51889 | -607.11113  | 499.56689   | 73.73769    | 1 |
| 257 | O | 72.39779 | 80.52662 | 79.69026 | 357.97126   | 460.81534   | 356.68785   | 1 |
| 258 | N | 72.87270 | 81.71620 | 77.77655 | 536.55407   | -368.62270  | 332.76306   | 1 |
| 259 | H | 73.07634 | 81.58747 | 76.75523 | 524.38866   | 2297.69985  | 1367.20941  | 1 |

|     |   |          |          |          |             |             |             |   |
|-----|---|----------|----------|----------|-------------|-------------|-------------|---|
| 260 | C | 73.16286 | 82.96912 | 78.36959 | 46.50277    | -774.29190  | -147.97904  | 1 |
| 261 | H | 72.99766 | 83.68396 | 77.53433 | 1676.51875  | 1883.29066  | 1032.55549  | 1 |
| 262 | C | 72.23148 | 83.24251 | 79.65450 | -559.41456  | -34.19198   | -556.30433  | 1 |
| 263 | H | 72.48461 | 82.49392 | 80.45227 | -64.66664   | 395.18769   | 2695.05373  | 1 |
| 264 | H | 72.45263 | 84.24625 | 80.09192 | -2703.44278 | -60.40056   | 333.79418   | 1 |
| 265 | C | 70.77677 | 83.12327 | 79.27916 | -519.76435  | 377.31045   | 459.42366   | 1 |
| 266 | H | 70.64322 | 82.16869 | 78.72119 | -1746.74323 | 1667.50644  | -1261.73691 | 1 |
| 267 | C | 69.91396 | 83.06803 | 80.53377 | 570.95554   | 16.46261    | -545.27700  | 1 |
| 268 | H | 68.82740 | 82.95305 | 80.28566 | 2391.58273  | 28.05277    | -1305.07271 | 1 |
| 269 | H | 70.19886 | 82.20488 | 81.18983 | 175.75588   | 917.63458   | 2559.43867  | 1 |
| 270 | H | 70.01761 | 83.99993 | 81.14718 | -1063.97851 | -2155.34650 | 1283.00462  | 1 |
| 271 | C | 70.32777 | 84.27596 | 78.39248 | 193.76014   | 2.62946     | -765.53141  | 1 |
| 272 | H | 69.24189 | 84.19408 | 78.12773 | 507.39394   | -846.55087  | 2539.60089  | 1 |
| 273 | H | 70.47130 | 85.26539 | 78.89844 | 1337.57841  | 1818.19054  | 1526.01994  | 1 |
| 274 | H | 70.90192 | 84.30737 | 77.43093 | 1100.88635  | -1172.91350 | -2199.08909 | 1 |
| 275 | C | 74.70442 | 82.98316 | 78.85400 | -549.21115  | 475.64486   | -309.38218  | 1 |
| 276 | O | 75.31162 | 82.01785 | 79.23644 | 556.06106   | -390.37755  | -78.24250   | 1 |
| 277 | O | 75.29615 | 84.26831 | 78.91178 | -572.27940  | -310.19032  | -209.75862  | 1 |
| 278 | H | 74.52408 | 84.80659 | 78.58213 | -1380.08193 | 2212.14486  | 790.85944   | 1 |

Listing 74: C00074.xmolout

|    |   |          |          |          |             |             |             |        |          |
|----|---|----------|----------|----------|-------------|-------------|-------------|--------|----------|
| 1  |   | 276      |          |          |             |             |             |        |          |
| 2  |   | 150.0000 | 150.0000 | 150.0000 | 0.0000      | 0.0000      | 0.0000***** | 2.7750 | 11100    |
|    |   | 0.2500   | 300.00   | 0.00     | 0.00        | 0.00        | -1293.5562  | 0.0000 | 300.0000 |
| 3  | H | 79.43042 | 79.80407 | 82.18581 | -2043.14101 | -1757.64893 | 399.89339   |        | 1        |
| 4  | N | 80.26650 | 79.38661 | 81.78143 | 426.75047   | 490.45733   | -334.42467  |        | 1        |
| 5  | H | 79.90413 | 78.93429 | 80.94196 | 442.25559   | -1110.30854 | -2448.52907 |        | 1        |
| 6  | C | 81.30797 | 80.29430 | 81.49116 | 415.32972   | -666.39213  | 83.73172    |        | 1        |
| 7  | H | 81.24935 | 81.12174 | 82.23039 | 879.32219   | 2491.00447  | 667.35213   |        | 1        |
| 8  | C | 82.69400 | 79.47212 | 81.55588 | 31.35357    | 477.41777   | 628.23362   |        | 1        |
| 9  | H | 82.68350 | 78.67332 | 80.77600 | 1168.38489  | 2240.25337  | -1019.71136 |        | 1        |
| 10 | H | 83.55386 | 80.13860 | 81.30431 | -360.43770  | 2534.90498  | 931.67112   |        | 1        |
| 11 | C | 82.85990 | 78.86376 | 82.92471 | 463.18208   | 512.70242   | -382.34388  |        | 1        |
| 12 | H | 81.94590 | 78.26892 | 83.15119 | 1725.29117  | 1863.52247  | -987.07854  |        | 1        |
| 13 | C | 84.06452 | 77.93187 | 82.95511 | 710.42801   | -144.27427  | -313.15367  |        | 1        |
| 14 | H | 84.19266 | 77.45453 | 83.96106 | 364.20195   | -1033.13725 | 2494.72524  |        | 1        |
| 15 | H | 83.96934 | 77.10468 | 82.20501 | 2567.61904  | 335.80679   | 847.48802   |        | 1        |
| 16 | H | 85.01480 | 78.47993 | 82.72595 | -2587.99029 | 680.92867   | -512.16411  |        | 1        |
| 17 | C | 83.01880 | 79.93348 | 83.99628 | 268.17616   | 741.64379   | -40.42634   |        | 1        |
| 18 | H | 83.19137 | 79.48242 | 85.00772 | 1283.54314  | -1945.37420 | -1411.27812 |        | 1        |
| 19 | H | 83.88771 | 80.60752 | 83.78029 | -1258.57796 | 1317.15249  | -2026.02085 |        | 1        |
| 20 | H | 82.10685 | 80.57972 | 84.07428 | -2502.84526 | 909.80597   | 575.92391   |        | 1        |
| 21 | C | 81.05263 | 80.74878 | 79.94941 | 619.36578   | -458.64843  | -172.09273  |        | 1        |
| 22 | O | 80.68275 | 79.92695 | 79.10840 | -81.40433   | 433.87611   | 522.34594   |        | 1        |
| 23 | N | 81.30237 | 82.03184 | 79.82100 | 175.23996   | -622.20190  | 341.55523   |        | 1        |
| 24 | H | 81.62246 | 82.51181 | 80.66221 | -876.57256  | -303.22879  | -2561.90213 |        | 1        |
| 25 | C | 81.24324 | 82.74736 | 78.60124 | -571.88214  | -534.10783  | -106.15033  |        | 1        |
| 26 | H | 81.34104 | 83.79476 | 78.96188 | -2713.20841 | -16.25800   | -248.80809  |        | 1        |
| 27 | C | 82.50487 | 82.29904 | 77.73648 | 166.60354   | 288.16399   | -716.09568  |        | 1        |
| 28 | H | 82.39760 | 81.20911 | 77.48762 | -2097.85574 | 1636.78449  | -586.18044  |        | 1        |
| 29 | O | 83.77645 | 82.44873 | 78.40333 | -317.80580  | -363.38227  | 484.43082   |        | 1        |
| 30 | H | 84.07392 | 81.52105 | 78.45321 | 1863.74748  | -1451.84923 | 1357.29467  |        | 1        |
| 31 | C | 82.34209 | 83.16092 | 76.43103 | 503.80731   | 517.99032   | 318.51606   |        | 1        |
| 32 | H | 83.18156 | 82.98169 | 75.71968 | 640.61020   | -2157.10410 | -1536.29104 |        | 1        |
| 33 | H | 81.39201 | 82.92384 | 75.88838 | 1687.88455  | 465.60692   | 2087.56452  |        | 1        |
| 34 | H | 82.33234 | 84.25228 | 76.65960 | -1293.07895 | -1899.88581 | -1463.57452 |        | 1        |
| 35 | C | 79.81008 | 82.48902 | 77.82833 | -153.07550  | -733.68902  | 248.70981   |        | 1        |
| 36 | O | 79.75397 | 81.86289 | 76.74434 | 186.15459   | -480.78787  | -449.34387  |        | 1        |
| 37 | N | 78.85080 | 83.06507 | 78.49313 | -487.53139  | 543.18517   | 42.03850    |        | 1        |
| 38 | C | 77.06835 | 80.51926 | 77.75918 | -699.35871  | 69.34393    | 360.10701   |        | 1        |
| 39 | H | 76.93050 | 79.44883 | 77.49281 | 2.81126     | -221.99807  | -2715.58072 |        | 1        |

|     |   |          |          |          |             |             |             |   |
|-----|---|----------|----------|----------|-------------|-------------|-------------|---|
| 40  | C | 76.54539 | 80.74655 | 79.21764 | -507.46439  | -592.59194  | 122.07761   | 1 |
| 41  | H | 75.44570 | 80.56559 | 79.25980 | -1975.08116 | 525.87560   | -1801.71556 | 1 |
| 42  | H | 77.01233 | 80.01071 | 79.91370 | 1588.27743  | -1913.22100 | 1113.83566  | 1 |
| 43  | C | 76.87831 | 82.20063 | 79.66767 | -613.62442  | -457.55993  | -194.14490  | 1 |
| 44  | H | 76.40520 | 82.94273 | 78.98951 | 1707.54637  | -721.27992  | 1996.92523  | 1 |
| 45  | H | 76.45718 | 82.38694 | 80.67820 | 758.23357   | 2100.81767  | 1560.55011  | 1 |
| 46  | C | 78.49328 | 82.39621 | 79.68196 | -352.41524  | 704.96076   | 49.21465    | 1 |
| 47  | H | 78.82778 | 83.09133 | 80.49635 | 1714.76886  | -2070.42778 | 443.35792   | 1 |
| 48  | H | 79.08108 | 81.43401 | 79.72575 | 1224.15040  | 1801.50881  | 1636.97633  | 1 |
| 49  | C | 76.29413 | 81.43799 | 76.71439 | 566.85117   | 537.05831   | 117.62814   | 1 |
| 50  | O | 75.09111 | 81.56553 | 76.69783 | -550.26779  | -406.08867  | 4.21666     | 1 |
| 51  | N | 77.19850 | 81.94790 | 75.85510 | 566.34832   | -425.77725  | 180.18749   | 1 |
| 52  | H | 78.23677 | 81.78047 | 75.96937 | 644.44502   | 2646.80550  | -52.73430   | 1 |
| 53  | C | 76.67762 | 82.83065 | 74.85258 | 612.34801   | -281.48662  | 411.56221   | 1 |
| 54  | H | 75.76246 | 83.26215 | 75.31983 | 1667.23498  | -1490.75142 | 1556.16753  | 1 |
| 55  | C | 77.83089 | 83.89382 | 74.61047 | -714.45746  | -175.43074  | 286.98927   | 1 |
| 56  | H | 78.73767 | 83.33583 | 74.24823 | -787.09484  | 1763.03619  | -1922.46060 | 1 |
| 57  | O | 78.30242 | 84.56060 | 75.82271 | -429.46514  | 516.51932   | -128.40526  | 1 |
| 58  | H | 78.62776 | 83.79217 | 76.32721 | 1981.82785  | 436.16847   | -1818.18182 | 1 |
| 59  | C | 77.31108 | 84.86636 | 73.49788 | 630.79189   | -468.94448  | 76.03230    | 1 |
| 60  | H | 78.06113 | 85.66060 | 73.27143 | -1775.71861 | 2062.30353  | 131.89849   | 1 |
| 61  | H | 77.09284 | 84.33551 | 72.53680 | -1855.14608 | 88.94118    | 1993.53760  | 1 |
| 62  | H | 76.37289 | 85.38048 | 73.81488 | -1504.82350 | -780.94249  | -2132.90992 | 1 |
| 63  | C | 76.29197 | 81.99315 | 73.50599 | 288.57638   | 618.62814   | -397.00270  | 1 |
| 64  | O | 75.81011 | 82.62093 | 72.55137 | 321.70495   | -185.26452  | 574.37218   | 1 |
| 65  | N | 76.52947 | 80.71281 | 73.60509 | -447.05792  | -446.53431  | 367.76425   | 1 |
| 66  | H | 76.91472 | 80.49758 | 74.52308 | 350.31316   | 1975.63644  | -1843.31522 | 1 |
| 67  | C | 76.43218 | 79.71433 | 72.60070 | -511.23061  | 374.03917   | -471.51480  | 1 |
| 68  | H | 76.04569 | 78.83578 | 73.16232 | 2234.79579  | -898.70890  | -1273.45190 | 1 |
| 69  | C | 75.44795 | 80.16074 | 71.42590 | 529.53781   | -159.34528  | 563.72604   | 1 |
| 70  | H | 75.17531 | 79.23540 | 70.82834 | 654.59388   | 2347.94251  | 1217.51488  | 1 |
| 71  | H | 74.51249 | 80.51553 | 71.93866 | -1526.55661 | 2103.42026  | 817.87394   | 1 |
| 72  | O | 75.91286 | 81.13359 | 70.48768 | -554.84278  | 14.12789    | 399.58769   | 1 |
| 73  | H | 75.82994 | 81.97590 | 71.08579 | 1297.06236  | 2061.84854  | 1220.68812  | 1 |
| 74  | C | 77.95192 | 79.40692 | 72.09031 | -662.15484  | -412.13544  | 123.62687   | 1 |
| 75  | O | 78.89301 | 80.16105 | 72.19530 | -540.01537  | -317.05804  | 274.91456   | 1 |
| 76  | N | 77.92273 | 78.17943 | 71.57869 | -202.76299  | -690.00100  | -131.49145  | 1 |
| 77  | H | 77.03790 | 77.67291 | 71.57259 | -702.62132  | -2617.37191 | 281.70413   | 1 |
| 78  | C | 79.10642 | 77.62388 | 71.02613 | -491.73914  | 576.34187   | 222.73509   | 1 |
| 79  | H | 79.83715 | 78.46675 | 71.03065 | 1977.17978  | -1823.58850 | -434.68928  | 1 |
| 80  | C | 79.54173 | 76.45252 | 72.01980 | -649.50797  | -328.66843  | 306.11224   | 1 |
| 81  | H | 78.67978 | 75.78091 | 72.22341 | 2075.07803  | 1452.16490  | -1004.45904 | 1 |
| 82  | C | 80.77566 | 75.63731 | 71.50912 | -615.18735  | -489.99689  | -70.96352   | 1 |
| 83  | H | 81.13509 | 74.91489 | 72.28016 | -1226.32661 | -1724.38906 | -1716.47170 | 1 |
| 84  | H | 80.53097 | 75.04636 | 70.59201 | 2381.64273  | -969.84735  | 900.46860   | 1 |
| 85  | H | 81.63082 | 76.30695 | 71.25414 | 2122.74991  | 1702.23946  | -141.36228  | 1 |
| 86  | C | 80.03826 | 77.14824 | 73.33208 | -501.86074  | -479.61276  | -376.42482  | 1 |
| 87  | H | 80.21523 | 76.41099 | 74.15028 | 993.79261   | -2246.95401 | -1177.81305 | 1 |
| 88  | H | 80.99191 | 77.70255 | 73.16845 | 42.71279    | -626.15391  | -2651.37258 | 1 |
| 89  | H | 79.28923 | 77.89104 | 73.69766 | -2026.39012 | -1590.33709 | -887.82922  | 1 |
| 90  | C | 78.81158 | 77.02559 | 69.53595 | -672.89153  | 382.57394   | -156.34072  | 1 |
| 91  | O | 79.62884 | 76.31261 | 69.00544 | 410.04627   | 221.86223   | 500.35950   | 1 |
| 92  | N | 77.66179 | 77.44622 | 69.04478 | -378.11782  | -443.79414  | -441.10984  | 1 |
| 93  | H | 77.00756 | 78.07135 | 69.56210 | 2404.15973  | -568.14894  | 1149.30085  | 1 |
| 94  | C | 77.18030 | 76.98414 | 67.76648 | -544.54484  | 466.16019   | 331.29119   | 1 |
| 95  | H | 77.92868 | 77.32845 | 67.01713 | -1409.80988 | -170.17955  | 2325.32679  | 1 |
| 96  | C | 77.15815 | 75.39618 | 67.85892 | -184.48284  | 116.78282   | -758.89137  | 1 |
| 97  | H | 77.67365 | 75.06778 | 68.79160 | 1893.78641  | 1861.14652  | 611.04528   | 1 |
| 98  | H | 76.11430 | 75.01351 | 67.92538 | -2170.79665 | -974.19311  | 1327.50117  | 1 |
| 99  | C | 77.89149 | 74.81887 | 66.60978 | 389.51668   | 672.81878   | -138.49152  | 1 |
| 100 | H | 77.47739 | 75.23835 | 65.66827 | 510.64577   | 1933.03327  | 1851.02484  | 1 |
| 101 | H | 78.95131 | 75.15901 | 66.61323 | -2302.30869 | -1105.72939 | -948.89774  | 1 |

|     |   |          |          |          |             |             |             |   |
|-----|---|----------|----------|----------|-------------|-------------|-------------|---|
| 102 | C | 77.84049 | 73.24458 | 66.53773 | -559.93427  | -126.34590  | 542.30857   | 1 |
| 103 | O | 78.18821 | 72.68599 | 65.52973 | -670.36003  | -111.83166  | 76.36448    | 1 |
| 104 | N | 77.42040 | 72.65355 | 67.67654 | -216.06729  | -537.07037  | 446.51379   | 1 |
| 105 | H | 77.14521 | 73.07308 | 68.57239 | -1251.96487 | 1074.12894  | -2168.52500 | 1 |
| 106 | H | 77.37159 | 71.63776 | 67.81054 | -2451.83023 | -720.73851  | 944.84612   | 1 |
| 107 | C | 75.77690 | 77.75995 | 67.72802 | 546.24052   | -563.88337  | -85.11809   | 1 |
| 108 | O | 75.44220 | 78.38934 | 68.72002 | 71.70702    | -307.40463  | 606.69673   | 1 |
| 109 | N | 75.13017 | 77.63809 | 66.56614 | 479.90863   | -504.50129  | 222.86849   | 1 |
| 110 | C | 73.95904 | 78.41927 | 66.30095 | 75.51268    | -600.91904  | 506.73700   | 1 |
| 111 | H | 74.13515 | 79.40982 | 66.77747 | -2033.61562 | 1795.30103  | 254.89480   | 1 |
| 112 | C | 73.91207 | 78.39797 | 64.71902 | 523.79067   | 517.99274   | 284.45581   | 1 |
| 113 | H | 72.90353 | 78.63553 | 64.31204 | 1599.61665  | -1127.00911 | 1895.98173  | 1 |
| 114 | H | 74.61915 | 79.13564 | 64.27770 | -1881.83093 | 1275.82488  | -1501.55016 | 1 |
| 115 | C | 74.36424 | 76.93145 | 64.42792 | -600.05639  | -404.05026  | 316.64485   | 1 |
| 116 | H | 73.52768 | 76.21927 | 64.62112 | -2597.05260 | 496.36221   | 657.73249   | 1 |
| 117 | H | 74.69384 | 76.76308 | 63.37784 | -1666.24518 | 1294.38985  | -1723.90591 | 1 |
| 118 | C | 75.52875 | 76.73941 | 65.48829 | 493.57570   | -129.95376  | -602.56394  | 1 |
| 119 | H | 75.60717 | 75.71403 | 65.91743 | -1469.08415 | -637.84797  | 2204.22581  | 1 |
| 120 | H | 76.53428 | 77.08395 | 65.15027 | -1038.97840 | 1068.88701  | -2280.71789 | 1 |
| 121 | C | 72.66966 | 77.62325 | 66.95393 | 188.88100   | 241.05089   | -727.87821  | 1 |
| 122 | O | 72.13340 | 76.72780 | 66.34125 | 531.88613   | -49.19943   | 427.07960   | 1 |
| 123 | N | 72.34540 | 78.18904 | 68.10020 | 708.14833   | 26.93417    | -179.73509  | 1 |
| 124 | H | 72.96117 | 78.93401 | 68.42677 | -2232.69501 | -1179.09831 | 1023.94816  | 1 |
| 125 | C | 71.33641 | 77.69216 | 68.96693 | -738.32412  | 259.92548   | 104.42456   | 1 |
| 126 | H | 70.96398 | 78.59473 | 69.49912 | 2028.89123  | 1260.02983  | 1311.33324  | 1 |
| 127 | C | 70.23188 | 76.90271 | 68.14903 | -258.65678  | -345.52513  | 661.28459   | 1 |
| 128 | H | 70.68010 | 75.99801 | 67.66550 | -1826.06090 | -1801.46097 | -918.64554  | 1 |
| 129 | C | 69.10860 | 76.49546 | 69.16527 | -541.23400  | 531.92970   | -218.41428  | 1 |
| 130 | H | 68.29752 | 75.91284 | 68.66962 | 1311.73218  | -2219.18200 | 882.19023   | 1 |
| 131 | H | 69.51541 | 75.86389 | 69.99001 | -1048.71298 | 1223.58118  | -2196.97971 | 1 |
| 132 | H | 68.63681 | 77.38966 | 69.63514 | 419.06414   | 1903.92898  | 1903.44670  | 1 |
| 133 | C | 69.57763 | 77.82878 | 67.06541 | -423.86431  | 152.66566   | -648.55262  | 1 |
| 134 | H | 68.74892 | 77.31043 | 66.52832 | 105.68386   | -2342.50080 | 1387.51238  | 1 |
| 135 | H | 69.15716 | 78.75866 | 67.51462 | -1695.63603 | -1484.73621 | -1531.02793 | 1 |
| 136 | H | 70.33041 | 78.13388 | 66.29841 | -1853.57121 | -487.39031  | 1936.59343  | 1 |
| 137 | C | 72.00790 | 76.59866 | 70.00539 | 539.71428   | -510.58232  | 267.58633   | 1 |
| 138 | O | 72.64298 | 75.63700 | 69.64098 | -15.93758   | -278.34085  | -624.49402  | 1 |
| 139 | N | 71.55371 | 76.90941 | 71.21036 | -676.81886  | 12.05292    | 276.17960   | 1 |
| 140 | H | 70.98494 | 77.75101 | 71.28704 | -1694.44250 | -373.84189  | -2100.66098 | 1 |
| 141 | C | 72.02030 | 76.26582 | 72.38890 | 412.33078   | -664.70360  | 108.35451   | 1 |
| 142 | H | 71.37336 | 76.68868 | 73.19064 | 1765.77476  | 1294.44366  | 1621.76594  | 1 |
| 143 | C | 71.79281 | 74.70857 | 72.17575 | -179.66635  | -721.95667  | -264.73915  | 1 |
| 144 | H | 70.73091 | 74.52223 | 71.89901 | -607.34922  | 2587.87032  | -598.10018  | 1 |
| 145 | H | 72.39247 | 74.34745 | 71.30251 | -359.69332  | -1479.13954 | -2259.74260 | 1 |
| 146 | C | 72.16465 | 73.91003 | 73.46725 | -240.01076  | 616.02425   | 431.85322   | 1 |
| 147 | H | 73.27325 | 73.89262 | 73.59322 | -1359.17131 | 782.54425   | 2227.99181  | 1 |
| 148 | H | 71.74509 | 74.41537 | 74.36697 | -820.36667  | 85.81767    | -2596.78715 | 1 |
| 149 | C | 71.65127 | 72.41467 | 73.42152 | -513.07015  | 236.18570   | -551.87280  | 1 |
| 150 | H | 70.53993 | 72.35428 | 73.35714 | 1816.11944  | -1183.11722 | -1650.94321 | 1 |
| 151 | H | 72.04564 | 71.87142 | 72.53234 | -1800.04429 | -1361.53473 | 1526.34643  | 1 |
| 152 | C | 72.18750 | 71.81370 | 74.74443 | 726.08972   | -253.19732  | -179.64713  | 1 |
| 153 | H | 73.28480 | 71.90295 | 74.88322 | 1224.27271  | -456.51798  | -2390.90304 | 1 |
| 154 | H | 71.66719 | 72.16697 | 75.66060 | 1206.40339  | -1150.93514 | -2154.90344 | 1 |
| 155 | N | 71.93043 | 70.27576 | 74.73034 | 329.70796   | -633.68968  | -155.67358  | 1 |
| 156 | H | 72.18556 | 69.82149 | 75.65429 | 1348.31305  | 1938.76845  | 1359.00643  | 1 |
| 157 | H | 70.93241 | 69.93894 | 74.60157 | 2096.92035  | 1446.54551  | -966.48890  | 1 |
| 158 | H | 72.46661 | 69.67867 | 74.03520 | -1197.07217 | -2303.53719 | 827.28733   | 1 |
| 159 | C | 73.58362 | 76.68050 | 72.61243 | -378.01186  | -556.17301  | -413.96481  | 1 |
| 160 | O | 74.18032 | 77.51396 | 71.97136 | -409.44433  | -307.55053  | -453.30833  | 1 |
| 161 | N | 74.00891 | 76.04052 | 73.70299 | -429.02477  | 524.70884   | 274.08502   | 1 |
| 162 | H | 73.35860 | 75.45708 | 74.22802 | 1706.34263  | -1425.96036 | 1574.38926  | 1 |
| 163 | C | 75.41730 | 75.79428 | 73.78889 | -45.25864   | -626.22952  | 478.93267   | 1 |

|     |   |          |          |          |             |             |             |   |
|-----|---|----------|----------|----------|-------------|-------------|-------------|---|
| 164 | H | 75.81598 | 76.16465 | 72.81639 | 1988.63164  | 570.90773   | 1772.87287  | 1 |
| 165 | C | 75.85802 | 76.68985 | 75.01129 | 551.77128   | -20.49526   | -564.54996  | 1 |
| 166 | H | 75.39713 | 77.69996 | 74.93423 | 1434.61535  | -1753.10253 | 1513.99471  | 1 |
| 167 | H | 75.49378 | 76.27732 | 75.97719 | -714.67738  | 1819.09770  | 1898.36494  | 1 |
| 168 | C | 77.42502 | 76.78416 | 74.98435 | 446.99263   | -555.77305  | 338.97221   | 1 |
| 169 | H | 77.89726 | 75.78633 | 75.13198 | 1953.68466  | 1892.25957  | -161.67766  | 1 |
| 170 | H | 77.78655 | 77.16821 | 74.00211 | -403.03785  | 2688.07032  | -188.43591  | 1 |
| 171 | C | 77.75285 | 77.76886 | 76.15295 | 567.86262   | 335.74681   | 434.04421   | 1 |
| 172 | H | 77.25562 | 78.75057 | 75.98288 | -1080.02275 | 1568.26081  | -1948.78900 | 1 |
| 173 | H | 77.33201 | 77.38470 | 77.10784 | -919.54108  | 2111.34692  | 1456.13463  | 1 |
| 174 | C | 79.33053 | 77.97237 | 76.29762 | 195.81897   | 173.33862   | -745.11536  | 1 |
| 175 | H | 79.89077 | 77.01871 | 76.46130 | 1405.67949  | -2301.21089 | -390.08113  | 1 |
| 176 | H | 79.78998 | 78.55658 | 75.46321 | -940.37328  | -1118.32446 | 2299.72133  | 1 |
| 177 | N | 79.47842 | 78.76340 | 77.48120 | 319.26422   | 656.36007   | -42.02424   | 1 |
| 178 | H | 79.89185 | 79.70482 | 77.39253 | 1961.03633  | 619.91968   | 1787.09422  | 1 |
| 179 | H | 78.16439 | 80.70846 | 77.69985 | 854.14343   | -2156.80752 | 1429.08711  | 1 |
| 180 | H | 79.99288 | 78.35878 | 78.27457 | 1237.02905  | -1378.50857 | -1998.28500 | 1 |
| 181 | C | 75.66447 | 74.18550 | 74.02522 | 532.53319   | -268.57236  | 517.55729   | 1 |
| 182 | O | 75.88616 | 73.51310 | 73.05142 | 266.16714   | -290.73804  | -558.88002  | 1 |
| 183 | N | 75.49742 | 73.80767 | 75.28247 | -226.25352  | 640.49678   | -270.32839  | 1 |
| 184 | H | 75.17331 | 74.42952 | 76.03671 | 2007.69063  | -1035.27229 | 1523.50231  | 1 |
| 185 | C | 75.97865 | 72.54330 | 75.72102 | -540.76542  | -573.33303  | 49.50000    | 1 |
| 186 | H | 75.93360 | 71.82612 | 74.87149 | -2374.20950 | -1036.76023 | 843.75774   | 1 |
| 187 | C | 77.46711 | 72.75979 | 76.28225 | -77.09082   | 666.87422   | -415.84136  | 1 |
| 188 | H | 77.44663 | 73.62444 | 77.00158 | -985.81834  | 617.19825   | 2463.91927  | 1 |
| 189 | O | 78.46709 | 73.09757 | 75.30597 | 293.29899   | -391.65602  | -477.80926  | 1 |
| 190 | H | 78.78206 | 73.95815 | 75.64799 | 2528.72714  | -681.76262  | -751.27122  | 1 |
| 191 | C | 77.74371 | 71.43835 | 77.08707 | 252.47363   | -605.14473  | 440.05134   | 1 |
| 192 | H | 78.74362 | 71.46531 | 77.57908 | -2052.65063 | 1456.49051  | -1043.51830 | 1 |
| 193 | H | 76.98884 | 71.27331 | 77.89146 | -2152.98800 | -1661.97574 | -161.70652  | 1 |
| 194 | H | 77.72849 | 70.54385 | 76.42216 | -473.12726  | -1584.27339 | 2165.61725  | 1 |
| 195 | C | 74.94936 | 72.30502 | 76.97250 | 360.36307   | 488.46713   | 505.10056   | 1 |
| 196 | O | 74.48816 | 73.31253 | 77.48467 | -200.08817  | -528.03552  | -385.82850  | 1 |
| 197 | N | 74.83371 | 71.03004 | 77.28408 | -597.54095  | -226.44775  | 355.20479   | 1 |
| 198 | H | 75.36757 | 70.38184 | 76.70296 | 2179.23655  | -1300.70981 | -991.33835  | 1 |
| 199 | C | 74.13440 | 70.51678 | 78.39967 | -687.68921  | 297.39807   | -249.45179  | 1 |
| 200 | H | 74.62124 | 69.53908 | 78.60742 | -349.16256  | -2467.37713 | -1101.72831 | 1 |
| 201 | C | 74.17392 | 71.55099 | 79.61779 | 672.47345   | 361.54328   | -201.62880  | 1 |
| 202 | H | 73.79205 | 72.54949 | 79.27451 | 1541.41502  | 582.18425   | 2169.97026  | 1 |
| 203 | H | 73.48674 | 71.19640 | 80.42089 | -2534.67717 | 60.25153    | 997.72295   | 1 |
| 204 | C | 75.60217 | 71.68081 | 80.16905 | 574.26774   | -389.43119  | -377.02542  | 1 |
| 205 | C | 76.14546 | 70.65776 | 81.00250 | 688.82679   | -287.33580  | -257.96133  | 1 |
| 206 | H | 75.55937 | 69.75101 | 81.23815 | 331.14182   | 1470.38163  | 2269.80013  | 1 |
| 207 | C | 76.37219 | 72.84328 | 79.86329 | -383.52382  | -675.04808  | 144.24917   | 1 |
| 208 | H | 75.95713 | 73.63082 | 79.20548 | 4.09847     | 1517.59662  | 2262.86397  | 1 |
| 209 | C | 77.42635 | 70.83403 | 81.52670 | -134.76730  | 428.45285   | -649.50303  | 1 |
| 210 | H | 77.84230 | 70.04843 | 82.18144 | -903.23433  | 1600.49020  | 2011.53387  | 1 |
| 211 | C | 77.65033 | 72.97487 | 80.41176 | -335.53281  | -615.00040  | -364.39058  | 1 |
| 212 | H | 78.23080 | 73.88364 | 80.17506 | 1596.45398  | -1369.33862 | 1732.02659  | 1 |
| 213 | C | 78.22255 | 71.98668 | 81.26503 | 585.48547   | -340.24194  | -406.23938  | 1 |
| 214 | O | 79.51734 | 72.11236 | 81.83348 | -419.15649  | -173.04408  | -511.94141  | 1 |
| 215 | H | 79.75950 | 73.00836 | 81.50053 | -1071.84350 | 1559.71507  | -1960.13012 | 1 |
| 216 | C | 72.55197 | 70.34502 | 78.00265 | 291.41878   | -183.13091  | 710.72246   | 1 |
| 217 | O | 71.84181 | 71.29798 | 77.76591 | 379.87695   | 523.47396   | -222.23622  | 1 |
| 218 | N | 72.22011 | 69.05698 | 78.02673 | 564.30591   | 373.09380   | 277.24371   | 1 |
| 219 | H | 72.92580 | 68.35742 | 78.25181 | -120.59931  | -2436.07824 | -1214.35098 | 1 |
| 220 | C | 70.89992 | 68.73812 | 77.60985 | 404.07514   | -299.37480  | 608.84009   | 1 |
| 221 | H | 70.47349 | 69.73237 | 77.32460 | -1071.07882 | -841.69025  | 2359.66467  | 1 |
| 222 | C | 71.01200 | 67.69837 | 76.41536 | -683.12807  | 68.71770    | -390.13096  | 1 |
| 223 | H | 71.86114 | 67.95367 | 75.74424 | 2068.88918  | 1596.58590  | 770.89603   | 1 |
| 224 | H | 71.22901 | 66.67160 | 76.78490 | 1379.86429  | 2342.49779  | -179.85638  | 1 |
| 225 | C | 69.65569 | 67.73755 | 75.64728 | -176.39967  | 537.49466   | 550.97268   | 1 |

|     |   |          |          |          |             |             |             |   |
|-----|---|----------|----------|----------|-------------|-------------|-------------|---|
| 226 | H | 68.84981 | 67.23302 | 76.22598 | -396.28051  | 1942.22168  | 1869.33314  | 1 |
| 227 | H | 69.30608 | 68.78332 | 75.49821 | -94.44700   | 586.00678   | -2659.20016 | 1 |
| 228 | C | 69.92234 | 67.01912 | 74.24526 | -291.69381  | -718.18079  | -150.72929  | 1 |
| 229 | H | 70.69904 | 67.50051 | 73.59743 | -2303.38776 | 1089.76242  | 964.62032   | 1 |
| 230 | H | 70.15757 | 65.92595 | 74.30157 | 884.16729   | 2568.80533  | -207.74283  | 1 |
| 231 | N | 68.68681 | 67.15985 | 73.59723 | -594.49522  | -252.81478  | 342.29276   | 1 |
| 232 | H | 67.95070 | 67.61392 | 74.11517 | -1735.17426 | 2084.05705  | -263.71605  | 1 |
| 233 | C | 68.44264 | 66.75335 | 72.41776 | 595.23177   | -271.52487  | 442.22352   | 1 |
| 234 | N | 69.47904 | 66.12515 | 71.71808 | 585.53813   | -424.79750  | -105.81303  | 1 |
| 235 | H | 70.43307 | 65.92518 | 72.01570 | 959.88797   | 1327.56823  | -2177.11905 | 1 |
| 236 | H | 69.40251 | 65.75205 | 70.77139 | 1578.48647  | 16.27378    | -2220.76233 | 1 |
| 237 | N | 67.11970 | 67.03656 | 72.05030 | -452.17763  | -390.33541  | -421.51853  | 1 |
| 238 | H | 66.36483 | 67.49282 | 72.56035 | 470.26107   | 1974.25629  | -1817.92087 | 1 |
| 239 | H | 66.72954 | 66.78605 | 71.14086 | 1856.67307  | -1573.97321 | -1224.35416 | 1 |
| 240 | C | 70.02964 | 67.99167 | 78.79586 | -531.47271  | -581.45780  | -55.06206   | 1 |
| 241 | O | 68.91640 | 68.41247 | 79.03078 | -243.00837  | 192.73507   | 609.52485   | 1 |
| 242 | N | 70.60821 | 66.88405 | 79.25282 | 343.49288   | -644.25607  | 38.09164    | 1 |
| 243 | H | 71.54945 | 66.81074 | 78.86762 | -1691.16043 | -1535.97525 | -1484.73099 | 1 |
| 244 | C | 70.24203 | 66.22389 | 80.50873 | 542.66492   | 350.14337   | 454.42563   | 1 |
| 245 | H | 70.83862 | 65.28539 | 80.42705 | 1209.57979  | -2396.95920 | 463.86744   | 1 |
| 246 | C | 70.68519 | 67.08545 | 81.67530 | -737.14309  | 145.93010   | 242.71942   | 1 |
| 247 | H | 70.16317 | 68.06525 | 81.59408 | -1050.18303 | 159.36419   | -2509.06125 | 1 |
| 248 | C | 70.31440 | 66.45409 | 83.00502 | -706.77696  | -252.88343  | -245.16230  | 1 |
| 249 | H | 70.68565 | 67.06088 | 83.87551 | -1624.64039 | -1665.49085 | 1417.86935  | 1 |
| 250 | H | 69.19291 | 66.35872 | 83.11518 | 2566.10521  | 598.51109   | 693.22305   | 1 |
| 251 | H | 70.74790 | 65.42159 | 83.10935 | -1972.69758 | 107.10018   | -1876.34312 | 1 |
| 252 | C | 72.18091 | 67.34844 | 81.64204 | 412.85148   | 672.58832   | -27.69222   | 1 |
| 253 | H | 72.51389 | 67.97190 | 82.51596 | 1447.02277  | 1762.76533  | -1490.78944 | 1 |
| 254 | H | 72.76773 | 66.38978 | 81.67582 | 1320.77379  | -145.20455  | 2378.68491  | 1 |
| 255 | H | 72.48411 | 67.89293 | 80.70640 | -1512.10848 | 1470.52031  | 1724.75147  | 1 |
| 256 | C | 68.61173 | 65.92091 | 80.53057 | -607.11113  | 499.56689   | 73.73769    | 1 |
| 257 | O | 67.90969 | 66.29394 | 81.44454 | 357.97126   | 460.81534   | 356.68785   | 1 |
| 258 | N | 68.27252 | 65.17110 | 79.49534 | 536.55407   | -368.62270  | 332.76306   | 1 |
| 259 | H | 69.00027 | 64.94679 | 78.81941 | 524.38866   | 2297.69985  | 1367.20941  | 1 |
| 260 | C | 66.93590 | 64.71700 | 79.39555 | 46.50277    | -774.29190  | -147.97904  | 1 |
| 261 | H | 66.47218 | 64.95166 | 80.38168 | 1676.51875  | 1883.29066  | 1032.55549  | 1 |
| 262 | C | 66.22111 | 65.48199 | 78.16284 | -559.41456  | -34.19198   | -556.30433  | 1 |
| 263 | H | 66.74635 | 65.22309 | 77.21296 | -64.66664   | 395.18769   | 2695.05373  | 1 |
| 264 | H | 65.17101 | 65.12458 | 78.03994 | -2703.44278 | -60.40056   | 333.79418   | 1 |
| 265 | C | 66.26252 | 66.96670 | 78.39835 | -519.76435  | 377.31045   | 459.42366   | 1 |
| 266 | H | 67.32848 | 67.27922 | 78.59047 | -1746.74323 | 1667.50644  | -1261.73691 | 1 |
| 267 | C | 65.76057 | 67.70561 | 77.16446 | 570.95554   | 16.46261    | -545.27700  | 1 |
| 268 | H | 65.81481 | 68.81666 | 77.29980 | 2391.58273  | 28.05277    | -1305.07271 | 1 |
| 269 | H | 66.36642 | 67.45205 | 76.25626 | 175.75588   | 917.63458   | 2559.43867  | 1 |
| 270 | H | 64.69441 | 67.44914 | 76.93425 | -1063.97851 | -2155.34650 | 1283.00462  | 1 |
| 271 | C | 65.44431 | 67.36168 | 79.61912 | 193.76014   | 2.62946     | -765.53141  | 1 |
| 272 | H | 65.37595 | 68.47541 | 79.72562 | 507.39394   | -846.55087  | 2539.60089  | 1 |
| 273 | H | 64.39703 | 66.96564 | 79.56678 | 1337.57841  | 1818.19054  | 1526.01994  | 1 |
| 274 | H | 65.91162 | 66.97069 | 80.56457 | 1100.88635  | -1172.91350 | -2199.08909 | 1 |
| 275 | C | 66.97030 | 63.14873 | 79.01302 | -549.21115  | 475.64486   | -309.38218  | 1 |
| 276 | O | 67.91458 | 62.60906 | 78.49949 | 556.06106   | -390.37755  | -78.24250   | 1 |
| 277 | O | 65.75429 | 62.44972 | 79.20411 | -572.27940  | -310.19032  | -209.75862  | 1 |
| 278 | H | 65.22067 | 63.18042 | 79.62310 | -1380.08193 | 2212.14486  | 790.85944   | 1 |

Listing 75: C00075.xmolout

|   |   |          |          |          |             |             |             |        |          |
|---|---|----------|----------|----------|-------------|-------------|-------------|--------|----------|
| 1 |   | 276      |          |          |             |             |             |        |          |
| 2 |   | 150.0000 | 150.0000 | 150.0000 | 0.0000      | 0.0000      | 0.0000***** | 2.7750 | 11100    |
|   |   | 0.2500   | 300.00   | 0.00     | 0.00        | 0.00        | -1293.5493  | 0.0000 | 300.0000 |
| 3 | H | 64.05977 | 78.49321 | 79.57454 | -2043.14101 | -1757.64893 | 399.89339   |        | 1        |
| 4 | N | 64.19204 | 78.57048 | 78.56809 | 426.75047   | 490.45733   | -334.42467  |        | 1        |
| 5 | H | 63.23825 | 78.74533 | 78.25760 | 442.25559   | -1110.30854 | -2448.52907 |        | 1        |



|    |   |          |          |          |             |             |             |   |
|----|---|----------|----------|----------|-------------|-------------|-------------|---|
| 6  | C | 65.10950 | 79.58213 | 78.19322 | 415.32972   | -666.39213  | 83.73172    | 1 |
| 7  | H | 65.94767 | 79.39620 | 78.89930 | 879.32219   | 2491.00447  | 667.35213   | 1 |
| 8  | C | 65.54297 | 79.37197 | 76.65398 | 31.35357    | 477.41777   | 628.23362   | 1 |
| 9  | H | 64.67813 | 79.60721 | 75.98862 | 1168.38489  | 2240.25337  | -1019.71136 | 1 |
| 10 | H | 66.35249 | 80.08583 | 76.36953 | -360.43770  | 2534.90498  | 931.67112   | 1 |
| 11 | C | 65.99447 | 77.95149 | 76.44319 | 463.18208   | 512.70242   | -382.34388  | 1 |
| 12 | H | 65.19541 | 77.27202 | 76.81777 | 1725.29117  | 1863.52247  | -987.07854  | 1 |
| 13 | C | 66.20926 | 77.68478 | 74.95826 | 710.42801   | -144.27427  | -313.15367  | 1 |
| 14 | H | 66.53579 | 76.62964 | 74.76967 | 364.20195   | -1033.13725 | 2494.72524  | 1 |
| 15 | H | 65.27229 | 77.85348 | 74.36731 | 2567.61904  | 335.80679   | 847.48802   | 1 |
| 16 | H | 66.99562 | 78.35869 | 74.52919 | -2587.99029 | 680.92867   | -512.16411  | 1 |
| 17 | C | 67.27890 | 77.65386 | 77.20513 | 268.17616   | 741.64379   | -40.42634   | 1 |
| 18 | H | 67.63637 | 76.60837 | 77.01873 | 1283.54314  | -1945.37420 | -1411.27812 | 1 |
| 19 | H | 68.10680 | 78.34727 | 76.90615 | -1258.57796 | 1317.15249  | -2026.02085 | 1 |
| 20 | H | 67.13736 | 77.76138 | 78.31123 | -2502.84526 | 909.80597   | 575.92391   | 1 |
| 21 | C | 64.36599 | 80.97893 | 78.50354 | 619.36578   | -458.64843  | -172.09273  | 1 |
| 22 | O | 63.66861 | 81.10847 | 79.51751 | -81.40433   | 433.87611   | 522.34594   | 1 |
| 23 | N | 64.75409 | 81.91078 | 77.66518 | 175.23996   | -622.20190  | 341.55523   | 1 |
| 24 | H | 65.34990 | 81.60214 | 76.89866 | -876.57256  | -303.22879  | -2561.90213 | 1 |
| 25 | C | 63.96541 | 83.09142 | 77.42217 | -571.88214  | -534.10783  | -106.15033  | 1 |
| 26 | H | 63.14439 | 82.74984 | 76.75381 | -2713.20841 | -16.25800   | -248.80809  | 1 |
| 27 | C | 63.37291 | 83.63369 | 78.80279 | 166.60354   | 288.16399   | -716.09568  | 1 |
| 28 | H | 64.10601 | 83.34400 | 79.61126 | -2097.85574 | 1636.78449  | -586.18044  | 1 |
| 29 | O | 62.13524 | 83.04931 | 79.21079 | -317.80580  | -363.38227  | 484.43082   | 1 |
| 30 | H | 62.49864 | 82.20776 | 79.69148 | 1863.74748  | -1451.84923 | 1357.29467  | 1 |
| 31 | C | 63.35412 | 85.19314 | 78.61040 | 503.80731   | 517.99032   | 318.51606   | 1 |
| 32 | H | 63.04068 | 85.71598 | 79.54366 | 640.61020   | -2157.10410 | -1536.29104 | 1 |
| 33 | H | 64.35345 | 85.59481 | 78.32212 | 1687.88455  | 465.60692   | 2087.56452  | 1 |
| 34 | H | 62.63844 | 85.48982 | 77.80822 | -1293.07895 | -1899.88581 | -1463.57452 | 1 |
| 35 | C | 64.94496 | 84.11118 | 76.62942 | -153.07550  | -733.68902  | 248.70981   | 1 |
| 36 | O | 64.41881 | 84.72306 | 75.73612 | 186.15459   | -480.78787  | -449.34387  | 1 |
| 37 | N | 66.18941 | 84.25087 | 77.11961 | -487.53139  | 543.18517   | 42.03850    | 1 |
| 38 | C | 67.17076 | 84.98667 | 76.39111 | -699.35871  | 69.34393    | 360.10701   | 1 |
| 39 | H | 66.62624 | 85.72994 | 75.76359 | 2.81126     | -221.99807  | -2715.58072 | 1 |
| 40 | C | 68.06986 | 85.57141 | 77.56268 | -507.46439  | -592.59194  | 122.07761   | 1 |
| 41 | H | 69.07950 | 85.88674 | 77.21561 | -1975.08116 | 525.87560   | -1801.71556 | 1 |
| 42 | H | 67.59917 | 86.46274 | 78.03464 | 1588.27743  | -1913.22100 | 1113.83566  | 1 |
| 43 | C | 68.09767 | 84.35796 | 78.54346 | -613.62442  | -457.55993  | -194.14490  | 1 |
| 44 | H | 68.78134 | 83.55386 | 78.17593 | 1707.54637  | -721.27992  | 1996.92523  | 1 |
| 45 | H | 68.43714 | 84.62042 | 79.57066 | 758.23357   | 2100.81767  | 1560.55011  | 1 |
| 46 | C | 66.57579 | 83.90702 | 78.48404 | -352.41524  | 704.96076   | 49.21465    | 1 |
| 47 | H | 66.39854 | 82.81738 | 78.63668 | 1714.76886  | -2070.42778 | 443.35792   | 1 |
| 48 | H | 65.89481 | 84.48168 | 79.15343 | 1224.15040  | 1801.50881  | 1636.97633  | 1 |
| 49 | C | 68.14009 | 83.98951 | 75.50739 | 566.85117   | 537.05831   | 117.62814   | 1 |
| 50 | O | 68.92882 | 84.47716 | 74.73263 | -550.26779  | -406.08867  | 4.21666     | 1 |
| 51 | N | 67.93219 | 82.71271 | 75.80683 | 566.34832   | -425.77725  | 180.18749   | 1 |
| 52 | H | 67.20051 | 82.56279 | 76.49934 | 644.44502   | 2646.80550  | -52.73430   | 1 |
| 53 | C | 68.91440 | 81.71185 | 75.55604 | 612.34801   | -281.48662  | 411.56221   | 1 |
| 54 | H | 68.43071 | 80.79271 | 75.95243 | 1667.23498  | -1490.75142 | 1556.16753  | 1 |
| 55 | C | 69.13249 | 81.64719 | 73.97828 | -714.45746  | -175.43074  | 286.98927   | 1 |
| 56 | H | 69.48654 | 82.65521 | 73.61486 | -787.09484  | 1763.03619  | -1922.46060 | 1 |
| 57 | O | 67.94422 | 81.37933 | 73.19859 | -429.46514  | 516.51932   | -128.40526  | 1 |
| 58 | H | 67.80816 | 82.24602 | 72.77023 | 1981.82785  | 436.16847   | -1818.18182 | 1 |
| 59 | C | 70.27667 | 80.58036 | 73.82884 | 630.79189   | -468.94448  | 76.03230    | 1 |
| 60 | H | 70.64955 | 80.53370 | 72.77893 | -1775.71861 | 2062.30353  | 131.89849   | 1 |
| 61 | H | 71.16966 | 80.78931 | 74.49289 | -1855.14608 | 88.94118    | 1993.53760  | 1 |
| 62 | H | 69.90895 | 79.56080 | 74.08953 | -1504.82350 | -780.94249  | -2132.90992 | 1 |
| 63 | C | 70.22118 | 82.10297 | 76.46031 | 288.57638   | 618.62814   | -397.00270  | 1 |
| 64 | O | 70.18270 | 81.82503 | 77.66047 | 321.70495   | -185.26452  | 574.37218   | 1 |
| 65 | N | 71.14327 | 82.73117 | 75.78010 | -447.05792  | -446.53431  | 367.76425   | 1 |
| 66 | H | 70.89332 | 82.94535 | 74.81619 | 350.31316   | 1975.63644  | -1843.31522 | 1 |
| 67 | C | 72.49032 | 82.90826 | 76.19821 | -511.23061  | 374.03917   | -471.51480  | 1 |

|     |   |          |          |          |             |             |             |   |
|-----|---|----------|----------|----------|-------------|-------------|-------------|---|
| 68  | H | 72.86107 | 83.62165 | 75.42721 | 2234.79579  | -898.70890  | -1273.45190 | 1 |
| 69  | C | 72.49048 | 83.52624 | 77.67367 | 529.53781   | -159.34528  | 563.72604   | 1 |
| 70  | H | 73.41508 | 84.15091 | 77.80427 | 654.59388   | 2347.94251  | 1217.51488  | 1 |
| 71  | H | 71.61954 | 84.23411 | 77.69659 | -1526.55661 | 2103.42026  | 817.87394   | 1 |
| 72  | O | 72.42384 | 82.58602 | 78.75386 | -554.84278  | 14.12789    | 399.58769   | 1 |
| 73  | H | 71.49006 | 82.18594 | 78.54397 | 1297.06236  | 2061.84854  | 1220.68812  | 1 |
| 74  | C | 73.27510 | 81.48967 | 76.11282 | -662.15484  | -412.13544  | 123.62687   | 1 |
| 75  | O | 72.86873 | 80.53260 | 75.48605 | -540.01537  | -317.05804  | 274.91456   | 1 |
| 76  | N | 74.45666 | 81.62243 | 76.71274 | -202.76299  | -690.00100  | -131.49145  | 1 |
| 77  | H | 74.62382 | 82.51720 | 77.16696 | -702.62132  | -2617.37191 | 281.70413   | 1 |
| 78  | C | 75.40080 | 80.51399 | 76.79050 | -491.73914  | 576.34187   | 222.73509   | 1 |
| 79  | H | 74.77996 | 79.65614 | 76.43175 | 1977.17978  | -1823.58850 | -434.68928  | 1 |
| 80  | C | 76.58959 | 80.80457 | 75.88027 | -649.50797  | -328.66843  | 306.11224   | 1 |
| 81  | H | 77.10086 | 81.70914 | 76.27949 | 2075.07803  | 1452.16490  | -1004.45904 | 1 |
| 82  | C | 77.59430 | 79.67054 | 75.86694 | -615.18735  | -489.99689  | -70.96352   | 1 |
| 83  | H | 78.51140 | 79.93385 | 75.27121 | -1226.32661 | -1724.38906 | -1716.47170 | 1 |
| 84  | H | 77.93638 | 79.40830 | 76.91709 | 2381.64273  | -969.84735  | 900.46860   | 1 |
| 85  | H | 77.17078 | 78.72456 | 75.41595 | 2122.74991  | 1702.23946  | -141.36228  | 1 |
| 86  | C | 76.14110 | 81.11896 | 74.46560 | -501.86074  | -479.61276  | -376.42482  | 1 |
| 87  | H | 77.00847 | 81.37563 | 73.79761 | 993.79261   | -2246.95401 | -1177.81305 | 1 |
| 88  | H | 75.60350 | 80.23860 | 73.99957 | 42.71279    | -626.15391  | -2651.37258 | 1 |
| 89  | H | 75.42800 | 81.98855 | 74.44514 | -2026.39012 | -1590.33709 | -887.82922  | 1 |
| 90  | C | 75.88854 | 80.39021 | 78.36930 | -672.89153  | 382.57394   | -156.34072  | 1 |
| 91  | O | 76.92467 | 79.82517 | 78.64186 | 410.04627   | 221.86223   | 500.35950   | 1 |
| 92  | N | 74.98586 | 80.87087 | 79.20654 | -378.11782  | -443.79414  | -441.10984  | 1 |
| 93  | H | 74.14375 | 81.31224 | 78.83189 | 2404.15973  | -568.14894  | 1149.30085  | 1 |
| 94  | C | 75.18906 | 80.63819 | 80.60366 | -544.54484  | 466.16019   | 331.29119   | 1 |
| 95  | H | 76.30229 | 80.66621 | 80.67473 | -1409.80988 | -170.17955  | 2325.32679  | 1 |
| 96  | C | 74.45541 | 81.83342 | 81.34637 | -184.48284  | 116.78282   | -758.89137  | 1 |
| 97  | H | 74.60123 | 82.78376 | 80.78433 | 1893.78641  | 1861.14652  | 611.04528   | 1 |
| 98  | H | 73.35444 | 81.66545 | 81.36683 | -2170.79665 | -974.19311  | 1327.50117  | 1 |
| 99  | C | 75.02407 | 81.95261 | 82.79421 | 389.51668   | 672.81878   | -138.49152  | 1 |
| 100 | H | 74.84457 | 81.00682 | 83.35813 | 510.64577   | 1933.03327  | 1851.02484  | 1 |
| 101 | H | 76.13297 | 82.03756 | 82.76358 | -2302.30869 | -1105.72939 | -948.89774  | 1 |
| 102 | C | 74.43462 | 83.16698 | 83.60670 | -559.93427  | -126.34590  | 542.30857   | 1 |
| 103 | O | 74.81349 | 83.36612 | 84.73220 | -670.36003  | -111.83166  | 76.36448    | 1 |
| 104 | N | 73.52685 | 83.90121 | 82.92814 | -216.06729  | -537.07037  | 446.51379   | 1 |
| 105 | H | 73.15260 | 83.77029 | 81.98106 | -1251.96487 | 1074.12894  | -2168.52500 | 1 |
| 106 | H | 73.04215 | 84.71620 | 83.32008 | -2451.83023 | -720.73851  | 944.84612   | 1 |
| 107 | C | 74.63247 | 79.21799 | 81.18250 | 546.24052   | -563.88337  | -85.11809   | 1 |
| 108 | O | 74.89403 | 79.02838 | 82.34701 | 71.70702    | -307.40463  | 606.69673   | 1 |
| 109 | N | 73.95541 | 78.39255 | 80.36656 | 479.90863   | -504.50129  | 222.86849   | 1 |
| 110 | C | 73.34692 | 77.21289 | 80.89918 | 75.51268    | -600.91904  | 506.73700   | 1 |
| 111 | H | 73.03038 | 77.45445 | 81.94028 | -2033.61562 | 1795.30103  | 254.89480   | 1 |
| 112 | C | 72.17584 | 76.94738 | 79.85686 | 523.79067   | 517.99274   | 284.45581   | 1 |
| 113 | H | 71.79090 | 75.90376 | 79.89745 | 1599.61665  | -1127.00911 | 1895.98173  | 1 |
| 114 | H | 71.30734 | 77.62044 | 80.03371 | -1881.83093 | 1275.82488  | -1501.55016 | 1 |
| 115 | C | 72.89657 | 77.29036 | 78.51682 | -600.05639  | -404.05026  | 316.64485   | 1 |
| 116 | H | 73.56546 | 76.45874 | 78.19796 | -2597.05260 | 496.36221   | 657.73249   | 1 |
| 117 | H | 72.20117 | 77.48375 | 77.66907 | -1666.24518 | 1294.38985  | -1723.90591 | 1 |
| 118 | C | 73.73734 | 78.57175 | 78.93816 | 493.57570   | -129.95376  | -602.56394  | 1 |
| 119 | H | 74.74047 | 78.64013 | 78.45622 | -1469.08415 | -637.84797  | 2204.22581  | 1 |
| 120 | H | 73.19953 | 79.54285 | 78.82652 | -1038.97840 | 1068.88701  | -2280.71789 | 1 |
| 121 | C | 74.36977 | 75.92969 | 80.84412 | 188.88100   | 241.05089   | -727.87821  | 1 |
| 122 | O | 73.95597 | 74.84711 | 81.18980 | 531.88613   | -49.19943   | 427.07960   | 1 |
| 123 | N | 75.60228 | 76.25310 | 80.45973 | 708.14833   | 26.93417    | -179.73509  | 1 |
| 124 | H | 75.68763 | 77.24635 | 80.24642 | -2232.69501 | -1179.09831 | 1023.94816  | 1 |
| 125 | C | 76.58061 | 75.28018 | 79.97729 | -738.32412  | 259.92548   | 104.42456   | 1 |
| 126 | H | 77.53093 | 75.86256 | 80.02485 | 2028.89123  | 1260.02983  | 1311.33324  | 1 |
| 127 | C | 76.56171 | 74.02875 | 80.83401 | -258.65678  | -345.52513  | 661.28459   | 1 |
| 128 | H | 75.58617 | 73.51245 | 80.64784 | -1826.06090 | -1801.46097 | -918.64554  | 1 |
| 129 | C | 77.67813 | 73.07450 | 80.45035 | -541.23400  | 531.92970   | -218.41428  | 1 |

|     |   |          |          |          |             |             |             |   |
|-----|---|----------|----------|----------|-------------|-------------|-------------|---|
| 130 | H | 77.64333 | 72.12771 | 81.05548 | 1311.73218  | -2219.18200 | 882.19023   | 1 |
| 131 | H | 77.60681 | 72.78019 | 79.36511 | -1048.71298 | 1223.58118  | -2196.97971 | 1 |
| 132 | H | 78.69209 | 73.53363 | 80.60730 | 419.06414   | 1903.92898  | 1903.44670  | 1 |
| 133 | C | 76.62183 | 74.34414 | 82.31739 | -423.86431  | 152.66566   | -648.55262  | 1 |
| 134 | H | 76.61588 | 73.41145 | 82.94498 | 105.68386   | -2342.50080 | 1387.51238  | 1 |
| 135 | H | 77.54595 | 74.92562 | 82.58432 | -1695.63603 | -1484.73621 | -1531.02793 | 1 |
| 136 | H | 75.73109 | 74.96286 | 82.62583 | -1853.57121 | -487.39031  | 1936.59343  | 1 |
| 137 | C | 76.16594 | 74.87248 | 78.42060 | 539.71428   | -510.58232  | 267.58633   | 1 |
| 138 | O | 75.92835 | 73.72321 | 78.13222 | -15.93758   | -278.34085  | -624.49402  | 1 |
| 139 | N | 76.15838 | 75.93273 | 77.62571 | -676.81886  | 12.05292    | 276.17960   | 1 |
| 140 | H | 76.43846 | 76.82558 | 78.02829 | -1694.44250 | -373.84189  | -2100.66098 | 1 |
| 141 | C | 76.07398 | 75.68627 | 76.22617 | 412.33078   | -664.70360  | 108.35451   | 1 |
| 142 | H | 75.58493 | 74.68926 | 76.12098 | 1765.77476  | 1294.44366  | 1621.76594  | 1 |
| 143 | C | 75.29608 | 76.90249 | 75.58171 | -179.66635  | -721.95667  | -264.73915  | 1 |
| 144 | H | 74.29071 | 77.03355 | 76.04116 | -607.34922  | 2587.87032  | -598.10018  | 1 |
| 145 | H | 75.84070 | 77.85864 | 75.76938 | -359.69332  | -1479.13954 | -2259.74260 | 1 |
| 146 | C | 75.18785 | 76.60171 | 74.04941 | -240.01076  | 616.02425   | 431.85322   | 1 |
| 147 | H | 76.18828 | 76.36139 | 73.62109 | -1359.17131 | 782.54425   | 2227.99181  | 1 |
| 148 | H | 74.55442 | 75.70652 | 73.85939 | -820.36667  | 85.81767    | -2596.78715 | 1 |
| 149 | C | 74.58176 | 77.88816 | 73.36008 | -513.07015  | 236.18570   | -551.87280  | 1 |
| 150 | H | 73.56586 | 78.11754 | 73.75865 | 1816.11944  | -1183.11722 | -1650.94321 | 1 |
| 151 | H | 75.20750 | 78.79192 | 73.58533 | -1800.04429 | -1361.53473 | 1526.34643  | 1 |
| 152 | C | 74.53607 | 77.61065 | 71.83897 | 726.08972   | -253.19732  | -179.64713  | 1 |
| 153 | H | 75.52820 | 77.46618 | 71.36565 | 1224.27271  | -456.51798  | -2390.90304 | 1 |
| 154 | H | 73.85273 | 76.79154 | 71.53811 | 1206.40339  | -1150.93514 | -2154.90344 | 1 |
| 155 | N | 73.95154 | 78.89247 | 71.15865 | 329.70796   | -633.68968  | -155.67358  | 1 |
| 156 | H | 73.85533 | 78.84553 | 70.10333 | 1348.31305  | 1938.76845  | 1359.00643  | 1 |
| 157 | H | 72.97395 | 79.19018 | 71.44637 | 2096.92035  | 1446.54551  | -966.48890  | 1 |
| 158 | H | 74.49958 | 79.79365 | 71.27839 | -1197.07217 | -2303.53719 | 827.28733   | 1 |
| 159 | C | 77.59862 | 75.74118 | 75.58877 | -378.01186  | -556.17301  | -413.96481  | 1 |
| 160 | O | 78.33368 | 76.68539 | 75.74691 | -409.44433  | -307.55053  | -453.30833  | 1 |
| 161 | N | 77.76864 | 74.65322 | 74.85359 | -429.02477  | 524.70884   | 274.08502   | 1 |
| 162 | H | 77.02264 | 73.96039 | 74.82316 | 1706.34263  | -1425.96036 | 1574.38926  | 1 |
| 163 | C | 78.91146 | 74.54362 | 74.01054 | -45.25864   | -626.22952  | 478.93267   | 1 |
| 164 | H | 79.26148 | 75.60140 | 73.96045 | 1988.63164  | 570.90773   | 1772.87287  | 1 |
| 165 | C | 79.94076 | 73.59967 | 74.75440 | 551.77128   | -20.49526   | -564.54996  | 1 |
| 166 | H | 79.90601 | 73.78087 | 75.85215 | 1434.61535  | -1753.10253 | 1513.99471  | 1 |
| 167 | H | 79.63825 | 72.53728 | 74.61916 | -714.67738  | 1819.09770  | 1898.36494  | 1 |
| 168 | C | 81.39459 | 73.81484 | 74.21801 | 446.99263   | -555.77305  | 338.97221   | 1 |
| 169 | H | 81.43600 | 73.78833 | 73.10603 | 1953.68466  | 1892.25957  | -161.67766  | 1 |
| 170 | H | 81.79556 | 74.80898 | 74.51719 | -403.03785  | 2688.07032  | -188.43591  | 1 |
| 171 | C | 82.23298 | 72.63176 | 74.85160 | 567.86262   | 335.74681   | 434.04421   | 1 |
| 172 | H | 82.20464 | 72.68423 | 75.96510 | -1080.02275 | 1568.26081  | -1948.78900 | 1 |
| 173 | H | 81.77956 | 71.64757 | 74.59071 | -919.54108  | 2111.34692  | 1456.13463  | 1 |
| 174 | C | 83.68850 | 72.70557 | 74.33762 | 195.81897   | 173.33862   | -745.11536  | 1 |
| 175 | H | 83.81354 | 72.46404 | 73.26318 | 1405.67949  | -2301.21089 | -390.08113  | 1 |
| 176 | H | 84.21967 | 73.64769 | 74.57951 | -940.37328  | -1118.32446 | 2299.72133  | 1 |
| 177 | N | 84.48734 | 71.59494 | 75.10210 | 319.26422   | 656.36007   | -42.02424   | 1 |
| 178 | H | 85.51319 | 71.48823 | 74.85050 | 1961.03633  | 619.91968   | 1787.09422  | 1 |
| 179 | H | 84.54305 | 71.70866 | 76.15498 | 854.14343   | -2156.80752 | 1429.08711  | 1 |
| 180 | H | 84.14006 | 70.59603 | 75.01185 | 1237.02905  | -1378.50857 | -1998.28500 | 1 |
| 181 | C | 78.36746 | 73.92110 | 72.59420 | 532.53319   | -268.57236  | 517.55729   | 1 |
| 182 | O | 77.34764 | 74.34823 | 72.10401 | 266.16714   | -290.73804  | -558.88002  | 1 |
| 183 | N | 79.19524 | 73.00197 | 72.11109 | -226.25352  | 640.49678   | -270.32839  | 1 |
| 184 | H | 80.01762 | 72.73690 | 72.64764 | 2007.69063  | -1035.27229 | 1523.50231  | 1 |
| 185 | C | 78.88488 | 72.37313 | 70.88184 | -540.76542  | -573.33303  | 49.50000    | 1 |
| 186 | H | 77.90039 | 72.80210 | 70.58185 | -2374.20950 | -1036.76023 | 843.75774   | 1 |
| 187 | C | 80.07354 | 72.71572 | 69.86544 | -77.09082   | 666.87422   | -415.84136  | 1 |
| 188 | H | 81.05005 | 72.37069 | 70.30473 | -985.81834  | 617.19825   | 2463.91927  | 1 |
| 189 | O | 80.27093 | 74.11178 | 69.57525 | 293.29899   | -391.65602  | -477.80926  | 1 |
| 190 | H | 81.18106 | 74.24836 | 69.90583 | 2528.72714  | -681.76262  | -751.27122  | 1 |
| 191 | C | 79.70603 | 71.80542 | 68.63782 | 252.47363   | -605.14473  | 440.05134   | 1 |

|     |   |          |          |          |             |             |             |   |
|-----|---|----------|----------|----------|-------------|-------------|-------------|---|
| 192 | H | 80.48284 | 71.86649 | 67.84044 | -2052.65063 | 1456.49051  | -1043.51830 | 1 |
| 193 | H | 79.61616 | 70.72994 | 68.92919 | -2152.98800 | -1661.97574 | -161.70652  | 1 |
| 194 | H | 78.73643 | 72.11056 | 68.17976 | -473.12726  | -1584.27339 | 2165.61725  | 1 |
| 195 | C | 78.85893 | 70.74483 | 71.15458 | 360.36307   | 488.46713   | 505.10056   | 1 |
| 196 | O | 77.82312 | 70.14795 | 70.98584 | -200.08817  | -528.03552  | -385.82850  | 1 |
| 197 | N | 80.04475 | 70.29186 | 71.53188 | -597.54095  | -226.44775  | 355.20479   | 1 |
| 198 | H | 80.79274 | 70.97393 | 71.64061 | 2179.23655  | -1300.70981 | -991.33835  | 1 |
| 199 | C | 80.29615 | 68.90155 | 71.68472 | -687.68921  | 297.39807   | -249.45179  | 1 |
| 200 | H | 81.35601 | 68.89846 | 72.02308 | -349.16256  | -2467.37713 | -1101.72831 | 1 |
| 201 | C | 79.30085 | 68.34730 | 72.81198 | 672.47345   | 361.54328   | -201.62880  | 1 |
| 202 | H | 78.23831 | 68.48577 | 72.49963 | 1541.41502  | 582.18425   | 2169.97026  | 1 |
| 203 | H | 79.46239 | 67.25593 | 72.97567 | -2534.67717 | 60.25153    | 997.72295   | 1 |
| 204 | C | 79.59826 | 69.12790 | 74.10023 | 574.26774   | -389.43119  | -377.02542  | 1 |
| 205 | C | 80.80520 | 68.86131 | 74.81484 | 688.82679   | -287.33580  | -257.96133  | 1 |
| 206 | H | 81.49851 | 68.07115 | 74.47346 | 331.14182   | 1470.38163  | 2269.80013  | 1 |
| 207 | C | 78.69524 | 70.13269 | 74.56021 | -383.52382  | -675.04808  | 144.24917   | 1 |
| 208 | H | 77.76299 | 70.34604 | 74.00607 | 4.09847     | 1517.59662  | 2262.86397  | 1 |
| 209 | C | 81.09206 | 69.61765 | 75.95090 | -134.76730  | 428.45285   | -649.50303  | 1 |
| 210 | H | 82.02920 | 69.41349 | 76.49757 | -903.23433  | 1600.49020  | 2011.53387  | 1 |
| 211 | C | 79.01514 | 70.84706 | 75.71790 | -335.53281  | -615.00040  | -364.39058  | 1 |
| 212 | H | 78.30329 | 71.61450 | 76.07122 | 1596.45398  | -1369.33862 | 1732.02659  | 1 |
| 213 | C | 80.22441 | 70.63563 | 76.44382 | 585.48547   | -340.24194  | -406.23938  | 1 |
| 214 | O | 80.57473 | 71.39307 | 77.59188 | -419.15649  | -173.04408  | -511.94141  | 1 |
| 215 | H | 79.75761 | 71.93918 | 77.68457 | -1071.84350 | 1559.71507  | -1960.13012 | 1 |
| 216 | C | 80.14180 | 68.21058 | 70.22393 | 291.41878   | -183.13091  | 710.72246   | 1 |
| 217 | O | 80.66236 | 68.73604 | 69.26364 | 379.87695   | 523.47396   | -222.23622  | 1 |
| 218 | N | 79.60632 | 66.97643 | 70.28955 | 564.30591   | 373.09380   | 277.24371   | 1 |
| 219 | H | 79.23003 | 66.77488 | 71.21615 | -120.59931  | -2436.07824 | -1214.35098 | 1 |
| 220 | C | 78.73639 | 66.59838 | 69.18306 | 404.07514   | -299.37480  | 608.84009   | 1 |
| 221 | H | 77.82714 | 67.22008 | 69.33387 | -1071.07882 | -841.69025  | 2359.66467  | 1 |
| 222 | C | 79.48061 | 66.88434 | 67.82976 | -683.12807  | 68.71770    | -390.13096  | 1 |
| 223 | H | 79.55796 | 67.98576 | 67.64209 | 2068.88918  | 1596.58590  | 770.89603   | 1 |
| 224 | H | 80.52973 | 66.51637 | 67.90571 | 1379.86429  | 2342.49779  | -179.85638  | 1 |
| 225 | C | 78.74498 | 66.20432 | 66.62631 | -176.39967  | 537.49466   | 550.97268   | 1 |
| 226 | H | 78.63225 | 65.10737 | 66.78475 | -396.28051  | 1942.22168  | 1869.33314  | 1 |
| 227 | H | 77.71391 | 66.60143 | 66.49745 | -94.44700   | 586.00678   | -2659.20016 | 1 |
| 228 | C | 79.66259 | 66.51226 | 65.35674 | -291.69381  | -718.18079  | -150.72929  | 1 |
| 229 | H | 79.78721 | 67.59794 | 65.11164 | -2303.38776 | 1089.76242  | 964.62032   | 1 |
| 230 | H | 80.68514 | 66.05620 | 65.38494 | 884.16729   | 2568.80533  | -207.74283  | 1 |
| 231 | N | 78.97411 | 65.92211 | 64.28874 | -594.49522  | -252.81478  | 342.29276   | 1 |
| 232 | H | 78.09175 | 65.48369 | 64.50084 | -1735.17426 | 2084.05705  | -263.71605  | 1 |
| 233 | C | 79.38979 | 65.90993 | 63.08792 | 595.23177   | -271.52487  | 442.22352   | 1 |
| 234 | N | 80.61778 | 66.52571 | 62.81812 | 585.53813   | -424.79750  | -105.81303  | 1 |
| 235 | H | 81.25958 | 66.99783 | 63.45367 | 959.88797   | 1327.56823  | -2177.11905 | 1 |
| 236 | H | 81.05384 | 66.57815 | 61.89711 | 1578.48647  | 16.27378    | -2220.76233 | 1 |
| 237 | N | 78.48756 | 65.25188 | 62.23994 | -452.17763  | -390.33541  | -421.51853  | 1 |
| 238 | H | 77.59362 | 64.80217 | 62.43156 | 470.26107   | 1974.25629  | -1817.92087 | 1 |
| 239 | H | 78.64630 | 65.14094 | 61.23760 | 1856.67307  | -1573.97321 | -1224.35416 | 1 |
| 240 | C | 78.45340 | 65.01166 | 69.37509 | -531.47271  | -581.45780  | -55.06206   | 1 |
| 241 | O | 79.12932 | 64.17293 | 68.80987 | -243.00837  | 192.73507   | 609.52485   | 1 |
| 242 | N | 77.41784 | 64.81327 | 70.18823 | 343.49288   | -644.25607  | 38.09164    | 1 |
| 243 | H | 76.98323 | 65.65644 | 70.56434 | -1691.16043 | -1535.97525 | -1484.73099 | 1 |
| 244 | C | 77.06627 | 63.48761 | 70.68756 | 542.66492   | 350.14337   | 454.42563   | 1 |
| 245 | H | 76.13701 | 63.65994 | 71.28140 | 1209.57979  | -2396.95920 | 463.86744   | 1 |
| 246 | C | 76.85802 | 62.55663 | 69.50452 | -737.14309  | 145.93010   | 242.71942   | 1 |
| 247 | H | 77.82622 | 62.51678 | 68.94231 | -1050.18303 | 159.36419   | -2509.06125 | 1 |
| 248 | C | 76.49724 | 61.15048 | 69.94105 | -706.77696  | -252.88343  | -245.16230  | 1 |
| 249 | H | 76.41461 | 60.44878 | 69.06554 | -1624.64039 | -1665.49085 | 1417.86935  | 1 |
| 250 | H | 77.27985 | 60.72665 | 70.64571 | 2566.10521  | 598.51109   | 693.22305   | 1 |
| 251 | H | 75.51156 | 61.12347 | 70.48255 | -1972.69758 | 107.10018   | -1876.34312 | 1 |
| 252 | C | 75.79839 | 63.08367 | 68.55335 | 412.85148   | 672.58832   | -27.69222   | 1 |
| 253 | H | 75.68611 | 62.42677 | 67.64768 | 1447.02277  | 1762.76533  | -1490.78944 | 1 |

|     |   |          |          |          |             |             |             |   |
|-----|---|----------|----------|----------|-------------|-------------|-------------|---|
| 254 | H | 74.79078 | 63.14332 | 69.04898 | 1320.77379  | -145.20455  | 2378.68491  | 1 |
| 255 | H | 76.05278 | 64.11732 | 68.19062 | -1512.10848 | 1470.52031  | 1724.75147  | 1 |
| 256 | C | 78.33253 | 62.98603 | 71.63908 | -607.11113  | 499.56689   | 73.73769    | 1 |
| 257 | O | 78.60352 | 61.80924 | 71.76204 | 357.97126   | 460.81534   | 356.68785   | 1 |
| 258 | N | 78.87253 | 64.01869 | 72.26219 | 536.55407   | -368.62270  | 332.76306   | 1 |
| 259 | H | 78.48599 | 64.92962 | 72.02764 | 524.38866   | 2297.69985  | 1367.20941  | 1 |
| 260 | C | 80.03525 | 63.83602 | 73.04786 | 46.50277    | -774.29190  | -147.97904  | 1 |
| 261 | H | 80.09807 | 62.73675 | 73.21940 | 1676.51875  | 1883.29066  | 1032.55549  | 1 |
| 262 | C | 81.31281 | 64.43100 | 72.25435 | -559.41456  | -34.19198   | -556.30433  | 1 |
| 263 | H | 81.19266 | 65.53434 | 72.13713 | -64.66664   | 395.18769   | 2695.05373  | 1 |
| 264 | H | 82.23976 | 64.28744 | 72.85886 | -2703.44278 | -60.40056   | 333.79418   | 1 |
| 265 | C | 81.45013 | 63.78332 | 70.90389 | -519.76435  | 377.31045   | 459.42366   | 1 |
| 266 | H | 80.50879 | 63.96601 | 70.31973 | -1746.74323 | 1667.50644  | -1261.73691 | 1 |
| 267 | C | 82.61180 | 64.40835 | 70.14134 | 570.95554   | 16.46261    | -545.27700  | 1 |
| 268 | H | 82.72538 | 63.95845 | 69.12136 | 2391.58273  | 28.05277    | -1305.07271 | 1 |
| 269 | H | 82.46537 | 65.51112 | 70.00257 | 175.75588   | 917.63458   | 2559.43867  | 1 |
| 270 | H | 83.58471 | 64.26532 | 70.67867 | -1063.97851 | -2155.34650 | 1283.00462  | 1 |
| 271 | C | 81.64941 | 62.27931 | 71.01785 | 193.76014   | 2.62946     | -765.53141  | 1 |
| 272 | H | 81.86964 | 61.81595 | 70.02127 | 507.39394   | -846.55087  | 2539.60089  | 1 |
| 273 | H | 82.49965 | 62.02118 | 71.70093 | 1337.57841  | 1818.19054  | 1526.01994  | 1 |
| 274 | H | 80.72398 | 61.77534 | 71.41808 | 1100.88635  | -1172.91350 | -2199.08909 | 1 |
| 275 | C | 79.88309 | 64.73622 | 74.37537 | -549.21115  | 475.64486   | -309.38218  | 1 |
| 276 | O | 79.05873 | 65.60400 | 74.50368 | 556.06106   | -390.37755  | -78.24250   | 1 |
| 277 | O | 80.87919 | 64.53908 | 75.36254 | -572.27940  | -310.19032  | -209.75862  | 1 |
| 278 | H | 81.34123 | 63.75356 | 74.95758 | -1380.08193 | 2212.14486  | 790.85944   | 1 |

Listing 76: C00076.xmolout

|    |   |          |          |          |             |             |             |        |          |
|----|---|----------|----------|----------|-------------|-------------|-------------|--------|----------|
| 1  |   | 276      |          |          |             |             |             |        |          |
| 2  |   | 150.0000 | 150.0000 | 150.0000 | 0.0000      | 0.0000      | 0.0000***** | 1.7470 | 6988     |
|    |   | 0.2500   | 300.00   | 0.00     | 0.00        | 0.00        | -1293.5411  | 0.0000 | 300.0000 |
| 3  | H | 82.71846 | 80.50228 | 86.82710 | -2043.14101 | -1757.64893 | 399.89339   |        | 1        |
| 4  | N | 83.20327 | 80.18903 | 85.98727 | 426.75047   | 490.45733   | -334.42467  |        | 1        |
| 5  | H | 82.46463 | 80.25172 | 85.28124 | 442.25559   | -1110.30854 | -2448.52907 |        | 1        |
| 6  | C | 84.32230 | 80.98340 | 85.63981 | 415.32972   | -666.39213  | 83.73172    |        | 1        |
| 7  | H | 84.35508 | 81.74596 | 86.44761 | 879.32219   | 2491.00447  | 667.35213   |        | 1        |
| 8  | C | 85.65567 | 80.07852 | 85.63149 | 31.35357    | 477.41777   | 628.23362   |        | 1        |
| 9  | H | 85.57642 | 79.31052 | 84.82512 | 1168.38489  | 2240.25337  | -1019.71136 |        | 1        |
| 10 | H | 86.55106 | 80.69688 | 85.38294 | -360.43770  | 2534.90498  | 931.67112   |        | 1        |
| 11 | C | 85.82969 | 79.41976 | 86.97436 | 463.18208   | 512.70242   | -382.34388  |        | 1        |
| 12 | H | 84.89645 | 78.86003 | 87.21005 | 1725.29117  | 1863.52247  | -987.07854  |        | 1        |
| 13 | C | 86.99359 | 78.43673 | 86.93555 | 710.42801   | -144.27427  | -313.15367  |        | 1        |
| 14 | H | 87.12839 | 77.91616 | 87.91860 | 364.20195   | -1033.13725 | 2494.72524  |        | 1        |
| 15 | H | 86.84217 | 77.64485 | 86.15753 | 2567.61904  | 335.80679   | 847.48802   |        | 1        |
| 16 | H | 87.95995 | 78.95260 | 86.69982 | -2587.99029 | 680.92867   | -512.16411  |        | 1        |
| 17 | C | 86.07546 | 80.44361 | 88.07467 | 268.17616   | 741.64379   | -40.42634   |        | 1        |
| 18 | H | 86.25963 | 79.95046 | 89.06381 | 1283.54314  | -1945.37420 | -1411.27812 |        | 1        |
| 19 | H | 86.96857 | 81.08238 | 87.85160 | -1258.57796 | 1317.15249  | -2026.02085 |        | 1        |
| 20 | H | 85.20067 | 81.13041 | 88.20723 | -2502.84526 | 909.80597   | 575.92391   |        | 1        |
| 21 | C | 83.92933 | 81.61237 | 84.20086 | 619.36578   | -458.64843  | -172.09273  |        | 1        |
| 22 | O | 82.76967 | 81.79074 | 83.88325 | -81.40433   | 433.87611   | 522.34594   |        | 1        |
| 23 | N | 85.02193 | 81.98345 | 83.53277 | 175.23996   | -622.20190  | 341.55523   |        | 1        |
| 24 | H | 85.94257 | 81.74182 | 83.89326 | -876.57256  | -303.22879  | -2561.90213 |        | 1        |
| 25 | C | 84.83570 | 82.44999 | 82.19266 | -571.88214  | -534.10783  | -106.15033  |        | 1        |
| 26 | H | 83.94294 | 83.10927 | 82.25891 | -2713.20841 | -16.25800   | -248.80809  |        | 1        |
| 27 | C | 86.19571 | 83.17189 | 81.76776 | 166.60354   | 288.16399   | -716.09568  |        | 1        |
| 28 | H | 87.02926 | 82.42146 | 81.85017 | -2097.85574 | 1636.78449  | -586.18044  |        | 1        |
| 29 | O | 86.58726 | 84.28871 | 82.58908 | -317.80580  | -363.38227  | 484.43082   |        | 1        |
| 30 | H | 87.43776 | 83.96939 | 82.94931 | 1863.74748  | -1451.84923 | 1357.29467  |        | 1        |
| 31 | C | 85.95435 | 83.49548 | 80.24739 | 503.80731   | 517.99032   | 318.51606   |        | 1        |
| 32 | H | 86.88224 | 83.87848 | 79.76258 | 640.61020   | -2157.10410 | -1536.29104 |        | 1        |
| 33 | H | 85.62918 | 82.59541 | 79.67182 | 1687.88455  | 465.60692   | 2087.56452  |        | 1        |

|    |   |          |          |          |             |             |             |   |
|----|---|----------|----------|----------|-------------|-------------|-------------|---|
| 34 | H | 85.17060 | 84.27659 | 80.11529 | -1293.07895 | -1899.88581 | -1463.57452 | 1 |
| 35 | C | 84.59125 | 81.13902 | 81.25190 | -153.07550  | -733.68902  | 248.70981   | 1 |
| 36 | O | 85.38137 | 80.23152 | 81.27980 | 186.15459   | -480.78787  | -449.34387  | 1 |
| 37 | N | 83.53579 | 81.32552 | 80.44897 | -487.53139  | 543.18517   | 42.03850    | 1 |
| 38 | C | 83.15750 | 80.33659 | 79.48375 | -699.35871  | 69.34393    | 360.10701   | 1 |
| 39 | H | 83.21999 | 79.34548 | 79.98653 | 2.81126     | -221.99807  | -2715.58072 | 1 |
| 40 | C | 81.70983 | 80.80658 | 79.04439 | -507.46439  | -592.59194  | 122.07761   | 1 |
| 41 | H | 81.42327 | 80.43393 | 78.03465 | -1975.08116 | 525.87560   | -1801.71556 | 1 |
| 42 | H | 80.92588 | 80.45413 | 79.75186 | 1588.27743  | -1913.22100 | 1113.83566  | 1 |
| 43 | C | 81.88329 | 82.35560 | 79.10608 | -613.62442  | -457.55993  | -194.14490  | 1 |
| 44 | H | 82.49610 | 82.71371 | 78.24502 | 1707.54637  | -721.27992  | 1996.92523  | 1 |
| 45 | H | 80.92404 | 82.92016 | 79.08676 | 758.23357   | 2100.81767  | 1560.55011  | 1 |
| 46 | C | 82.67874 | 82.50220 | 80.47489 | -352.41524  | 704.96076   | 49.21465    | 1 |
| 47 | H | 83.30864 | 83.41762 | 80.55995 | 1714.76886  | -2070.42778 | 443.35792   | 1 |
| 48 | H | 82.05116 | 82.39470 | 81.39267 | 1224.15040  | 1801.50881  | 1636.97633  | 1 |
| 49 | C | 84.21539 | 80.48292 | 78.23052 | 566.85117   | 537.05831   | 117.62814   | 1 |
| 50 | O | 84.30325 | 81.48804 | 77.56684 | -550.26779  | -406.08867  | 4.21666     | 1 |
| 51 | N | 84.85100 | 79.32741 | 78.10700 | 566.34832   | -425.77725  | 180.18749   | 1 |
| 52 | H | 84.64010 | 78.56045 | 78.74529 | 644.44502   | 2646.80550  | -52.73430   | 1 |
| 53 | C | 85.93172 | 79.23619 | 77.19238 | 612.34801   | -281.48662  | 411.56221   | 1 |
| 54 | H | 85.91117 | 80.18092 | 76.59870 | 1667.23498  | -1490.75142 | 1556.16753  | 1 |
| 55 | C | 87.21916 | 79.07488 | 78.13795 | -714.45746  | -175.43074  | 286.98927   | 1 |
| 56 | H | 87.00054 | 78.23550 | 78.85443 | -787.09484  | 1763.03619  | -1922.46060 | 1 |
| 57 | O | 87.51401 | 80.21158 | 78.97382 | -429.46514  | 516.51932   | -128.40526  | 1 |
| 58 | H | 86.94787 | 80.02233 | 79.75468 | 1981.82785  | 436.16847   | -1818.18182 | 1 |
| 59 | C | 88.33608 | 78.63944 | 77.12672 | 630.79189   | -468.94448  | 76.03230    | 1 |
| 60 | H | 89.28860 | 78.39577 | 77.65289 | -1775.71861 | 2062.30353  | 131.89849   | 1 |
| 61 | H | 88.03651 | 77.73585 | 76.54431 | -1855.14608 | 88.94118    | 1993.53760  | 1 |
| 62 | H | 88.56107 | 79.44982 | 76.39450 | -1504.82350 | -780.94249  | -2132.90992 | 1 |
| 63 | C | 85.63978 | 77.85813 | 76.35790 | 288.57638   | 618.62814   | -397.00270  | 1 |
| 64 | O | 85.68334 | 76.76710 | 76.92373 | 321.70495   | -185.26452  | 574.37218   | 1 |
| 65 | N | 85.47961 | 78.15195 | 75.08911 | -447.05792  | -446.53431  | 367.76425   | 1 |
| 66 | H | 85.54078 | 79.15131 | 74.88378 | 350.31316   | 1975.63644  | -1843.31522 | 1 |
| 67 | C | 84.67403 | 77.37111 | 74.20896 | -511.23061  | 374.03917   | -471.51480  | 1 |
| 68 | H | 84.87347 | 77.84491 | 73.22153 | 2234.79579  | -898.70890  | -1273.45190 | 1 |
| 69 | C | 85.15340 | 75.84719 | 74.26481 | 529.53781   | -159.34528  | 563.72604   | 1 |
| 70 | H | 84.88059 | 75.34756 | 73.29296 | 654.59388   | 2347.94251  | 1217.51488  | 1 |
| 71 | H | 86.27497 | 75.88794 | 74.30959 | -1526.55661 | 2103.42026  | 817.87394   | 1 |
| 72 | O | 84.62643 | 75.02506 | 75.30976 | -554.84278  | 14.12789    | 399.58769   | 1 |
| 73 | H | 85.03772 | 75.51833 | 76.12212 | 1297.06236  | 2061.84854  | 1220.68812  | 1 |
| 74 | C | 83.11402 | 77.54014 | 74.63051 | -662.15484  | -412.13544  | 123.62687   | 1 |
| 75 | O | 82.71840 | 78.11662 | 75.61432 | -540.01537  | -317.05804  | 274.91456   | 1 |
| 76 | N | 82.38447 | 77.00162 | 73.65002 | -202.76299  | -690.00100  | -131.49145  | 1 |
| 77 | H | 82.88339 | 76.55389 | 72.88112 | -702.62132  | -2617.37191 | 281.70413   | 1 |
| 78 | C | 80.92580 | 76.96985 | 73.69906 | -491.73914  | 576.34187   | 222.73509   | 1 |
| 79 | H | 80.65302 | 76.85436 | 74.77457 | 1977.17978  | -1823.58850 | -434.68928  | 1 |
| 80 | C | 80.39607 | 78.25533 | 73.08515 | -649.50797  | -328.66843  | 306.11224   | 1 |
| 81 | H | 80.83556 | 78.34443 | 72.06652 | 2075.07803  | 1452.16490  | -1004.45904 | 1 |
| 82 | C | 78.88504 | 78.23022 | 72.95172 | -615.18735  | -489.99689  | -70.96352   | 1 |
| 83 | H | 78.49333 | 79.17719 | 72.48784 | -1226.32661 | -1724.38906 | -1716.47170 | 1 |
| 84 | H | 78.53621 | 77.36899 | 72.30362 | 2381.64273  | -969.84735  | 900.46860   | 1 |
| 85 | H | 78.38327 | 78.11845 | 73.95221 | 2122.74991  | 1702.23946  | -141.36228  | 1 |
| 86 | C | 80.81749 | 79.48046 | 73.87562 | -501.86074  | -479.61276  | -376.42482  | 1 |
| 87 | H | 80.48748 | 80.43507 | 73.38052 | 993.79261   | -2246.95401 | -1177.81305 | 1 |
| 88 | H | 80.38171 | 79.47130 | 74.91261 | 42.71279    | -626.15391  | -2651.37258 | 1 |
| 89 | H | 81.93688 | 79.52907 | 73.99513 | -2026.39012 | -1590.33709 | -887.82922  | 1 |
| 90 | C | 80.52407 | 75.69031 | 72.71646 | -672.89153  | 382.57394   | -156.34072  | 1 |
| 91 | O | 81.06557 | 75.52743 | 71.64944 | 410.04627   | 221.86223   | 500.35950   | 1 |
| 92 | N | 79.50687 | 75.02675 | 73.24090 | -378.11782  | -443.79414  | -441.10984  | 1 |
| 93 | H | 79.15316 | 75.32523 | 74.14759 | 2404.15973  | -568.14894  | 1149.30085  | 1 |
| 94 | C | 79.03467 | 73.86245 | 72.57621 | -544.54484  | 466.16019   | 331.29119   | 1 |
| 95 | H | 79.59373 | 73.84387 | 71.61155 | -1409.80988 | -170.17955  | 2325.32679  | 1 |

|     |   |          |          |          |             |             |             |   |
|-----|---|----------|----------|----------|-------------|-------------|-------------|---|
| 96  | C | 79.34158 | 72.62961 | 73.53187 | -184.48284  | 116.78282   | -758.89137  | 1 |
| 97  | H | 80.43779 | 72.52819 | 73.69917 | 1893.78641  | 1861.14652  | 611.04528   | 1 |
| 98  | H | 78.89102 | 72.78788 | 74.53766 | -2170.79665 | -974.19311  | 1327.50117  | 1 |
| 99  | C | 78.74965 | 71.35892 | 72.85057 | 389.51668   | 672.81878   | -138.49152  | 1 |
| 100 | H | 77.64650 | 71.47957 | 72.74868 | 510.64577   | 1933.03327  | 1851.02484  | 1 |
| 101 | H | 79.11565 | 71.27575 | 71.80339 | -2302.30869 | -1105.72939 | -948.89774  | 1 |
| 102 | C | 79.06181 | 70.02119 | 73.62239 | -559.93427  | -126.34590  | 542.30857   | 1 |
| 103 | O | 78.64857 | 68.98030 | 73.18087 | -670.36003  | -111.83166  | 76.36448    | 1 |
| 104 | N | 79.79422 | 70.18348 | 74.74467 | -216.06729  | -537.07037  | 446.51379   | 1 |
| 105 | H | 80.16815 | 71.04199 | 75.16628 | -1251.96487 | 1074.12894  | -2168.52500 | 1 |
| 106 | H | 80.08248 | 69.41242 | 75.35667 | -2451.83023 | -720.73851  | 944.84612   | 1 |
| 107 | C | 77.40726 | 74.00102 | 72.43341 | 546.24052   | -563.88337  | -85.11809   | 1 |
| 108 | O | 76.70091 | 73.49548 | 73.26534 | 71.70702    | -307.40463  | 606.69673   | 1 |
| 109 | N | 77.06918 | 74.72791 | 71.35615 | 479.90863   | -504.50129  | 222.86849   | 1 |
| 110 | C | 75.70453 | 74.85771 | 70.95954 | 75.51268    | -600.91904  | 506.73700   | 1 |
| 111 | H | 75.09061 | 74.76506 | 71.88423 | -2033.61562 | 1795.30103  | 254.89480   | 1 |
| 112 | C | 75.72257 | 76.28137 | 70.25961 | 523.79067   | 517.99274   | 284.45581   | 1 |
| 113 | H | 74.85771 | 76.43964 | 69.57708 | 1599.61665  | -1127.00911 | 1895.98173  | 1 |
| 114 | H | 75.69343 | 77.10339 | 71.00933 | -1881.83093 | 1275.82488  | -1501.55016 | 1 |
| 115 | C | 77.09436 | 76.24308 | 69.51528 | -600.05639  | -404.05026  | 316.64485   | 1 |
| 116 | H | 77.01370 | 75.65147 | 68.57322 | -2597.05260 | 496.36221   | 657.73249   | 1 |
| 117 | H | 77.47562 | 77.24908 | 69.22751 | -1666.24518 | 1294.38985  | -1723.90591 | 1 |
| 118 | C | 78.02071 | 75.50341 | 70.57044 | 493.57570   | -129.95376  | -602.56394  | 1 |
| 119 | H | 78.76404 | 74.80103 | 70.12587 | -1469.08415 | -637.84797  | 2204.22581  | 1 |
| 120 | H | 78.54278 | 76.17542 | 71.30238 | -1038.97840 | 1068.88701  | -2280.71789 | 1 |
| 121 | C | 75.41040 | 73.65888 | 69.86928 | 188.88100   | 241.05089   | -727.87821  | 1 |
| 122 | O | 75.90956 | 73.67457 | 68.76894 | 531.88613   | -49.19943   | 427.07960   | 1 |
| 123 | N | 74.61510 | 72.74743 | 70.41054 | 708.14833   | 26.93417    | -179.73509  | 1 |
| 124 | H | 74.26637 | 72.87959 | 71.35935 | -2232.69501 | -1179.09831 | 1023.94816  | 1 |
| 125 | C | 74.16127 | 71.68446 | 69.57609 | -738.32412  | 259.92548   | 104.42456   | 1 |
| 126 | H | 74.82955 | 71.68754 | 68.68184 | 2028.89123  | 1260.02983  | 1311.33324  | 1 |
| 127 | C | 74.24285 | 70.35121 | 70.45099 | -258.65678  | -345.52513  | 661.28459   | 1 |
| 128 | H | 73.60944 | 70.44383 | 71.36987 | -1826.06090 | -1801.46097 | -918.64554  | 1 |
| 129 | C | 73.78998 | 69.12926 | 69.58592 | -541.23400  | 531.92970   | -218.41428  | 1 |
| 130 | H | 73.87625 | 68.17411 | 70.15650 | 1311.73218  | -2219.18200 | 882.19023   | 1 |
| 131 | H | 72.71150 | 69.22135 | 69.25011 | -1048.71298 | 1223.58118  | -2196.97971 | 1 |
| 132 | H | 74.41610 | 69.02363 | 68.66850 | 419.06414   | 1903.92898  | 1903.44670  | 1 |
| 133 | C | 75.74556 | 70.14083 | 70.83804 | -423.86431  | 152.66566   | -648.55262  | 1 |
| 134 | H | 75.88679 | 69.25398 | 71.50042 | 105.68386   | -2342.50080 | 1387.51238  | 1 |
| 135 | H | 76.38500 | 69.98979 | 69.93668 | -1695.63603 | -1484.73621 | -1531.02793 | 1 |
| 136 | H | 76.14559 | 71.02985 | 71.38020 | -1853.57121 | -487.39031  | 1936.59343  | 1 |
| 137 | C | 72.60825 | 72.01786 | 69.21855 | 539.71428   | -510.58232  | 267.58633   | 1 |
| 138 | O | 71.82052 | 72.58918 | 69.97973 | -15.93758   | -278.34085  | -624.49402  | 1 |
| 139 | N | 72.35468 | 71.47698 | 68.05513 | -676.81886  | 12.05292    | 276.17960   | 1 |
| 140 | H | 73.10152 | 70.97533 | 67.57493 | -1694.44250 | -373.84189  | -2100.66098 | 1 |
| 141 | C | 70.99630 | 71.43328 | 67.61299 | 412.33078   | -664.70360  | 108.35451   | 1 |
| 142 | H | 70.56134 | 72.41954 | 67.89357 | 1765.77476  | 1294.44366  | 1621.76594  | 1 |
| 143 | C | 71.07301 | 71.14318 | 66.06297 | -179.66635  | -721.95667  | -264.73915  | 1 |
| 144 | H | 71.80724 | 71.82610 | 65.57905 | -607.34922  | 2587.87032  | -598.10018  | 1 |
| 145 | H | 71.45423 | 70.11424 | 65.87467 | -359.69332  | -1479.13954 | -2259.74260 | 1 |
| 146 | C | 69.65064 | 71.33277 | 65.43811 | -240.01076  | 616.02425   | 431.85322   | 1 |
| 147 | H | 68.92589 | 70.60140 | 65.86118 | -1359.17131 | 782.54425   | 2227.99181  | 1 |
| 148 | H | 69.24434 | 72.34247 | 65.67019 | -820.36667  | 85.81767    | -2596.78715 | 1 |
| 149 | C | 69.82237 | 71.13855 | 63.87753 | -513.07015  | 236.18570   | -551.87280  | 1 |
| 150 | H | 70.58965 | 71.84024 | 63.47686 | 1816.11944  | -1183.11722 | -1650.94321 | 1 |
| 151 | H | 70.19968 | 70.11603 | 63.64609 | -1800.04429 | -1361.53473 | 1526.34643  | 1 |
| 152 | C | 68.45682 | 71.38631 | 63.19673 | 726.08972   | -253.19732  | -179.64713  | 1 |
| 153 | H | 67.67237 | 70.64561 | 63.44962 | 1224.27271  | -456.51798  | -2390.90304 | 1 |
| 154 | H | 68.06050 | 72.41432 | 63.31664 | 1206.40339  | -1150.93514 | -2154.90344 | 1 |
| 155 | N | 68.67590 | 71.22680 | 61.65361 | 329.70796   | -633.68968  | -155.67358  | 1 |
| 156 | H | 67.81600 | 71.37097 | 61.04974 | 1348.31305  | 1938.76845  | 1359.00643  | 1 |
| 157 | H | 69.36619 | 71.88934 | 61.19396 | 2096.92035  | 1446.54551  | -966.48890  | 1 |

|     |   |          |          |          |             |             |             |   |
|-----|---|----------|----------|----------|-------------|-------------|-------------|---|
| 158 | H | 69.01685 | 70.28240 | 61.30953 | -1197.07217 | -2303.53719 | 827.28733   | 1 |
| 159 | C | 70.25761 | 70.19058 | 68.40037 | -378.01186  | -556.17301  | -413.96481  | 1 |
| 160 | O | 70.81183 | 69.13903 | 68.64626 | -409.44433  | -307.55053  | -453.30833  | 1 |
| 161 | N | 69.00482 | 70.55417 | 68.60850 | -429.02477  | 524.70884   | 274.08502   | 1 |
| 162 | H | 68.74154 | 71.47727 | 68.26639 | 1706.34263  | -1425.96036 | 1574.38926  | 1 |
| 163 | C | 68.06640 | 69.72279 | 69.27365 | -45.25864   | -626.22952  | 478.93267   | 1 |
| 164 | H | 67.09310 | 70.22199 | 69.06569 | 1988.63164  | 570.90773   | 1772.87287  | 1 |
| 165 | C | 68.16289 | 68.26722 | 68.65787 | 551.77128   | -20.49526   | -564.54996  | 1 |
| 166 | H | 68.21695 | 68.31181 | 67.54671 | 1434.61535  | -1753.10253 | 1513.99471  | 1 |
| 167 | H | 69.10739 | 67.76876 | 68.98383 | -714.67738  | 1819.09770  | 1898.36494  | 1 |
| 168 | C | 66.90645 | 67.46391 | 69.13082 | 446.99263   | -555.77305  | 338.97221   | 1 |
| 169 | H | 66.86541 | 67.43421 | 70.24836 | 1953.68466  | 1892.25957  | -161.67766  | 1 |
| 170 | H | 65.96849 | 67.96500 | 68.80132 | -403.03785  | 2688.07032  | -188.43591  | 1 |
| 171 | C | 66.99814 | 66.00396 | 68.52943 | 567.86262   | 335.74681   | 434.04421   | 1 |
| 172 | H | 67.05330 | 66.03486 | 67.41691 | -1080.02275 | 1568.26081  | -1948.78900 | 1 |
| 173 | H | 67.93128 | 65.49546 | 68.86448 | -919.54108  | 2111.34692  | 1456.13463  | 1 |
| 174 | C | 65.74805 | 65.22190 | 68.99531 | 195.81897   | 173.33862   | -745.11536  | 1 |
| 175 | H | 65.68354 | 65.06524 | 70.09055 | 1405.67949  | -2301.21089 | -390.08113  | 1 |
| 176 | H | 64.78599 | 65.61864 | 68.61399 | -940.37328  | -1118.32446 | 2299.72133  | 1 |
| 177 | N | 65.84367 | 63.77864 | 68.39459 | 319.26422   | 656.36007   | -42.02424   | 1 |
| 178 | H | 65.04269 | 63.12759 | 68.63921 | 1961.03633  | 619.91968   | 1787.09422  | 1 |
| 179 | H | 65.86356 | 63.69474 | 67.33662 | 854.14343   | -2156.80752 | 1429.08711  | 1 |
| 180 | H | 66.68235 | 63.19245 | 68.67683 | 1237.02905  | -1378.50857 | -1998.28500 | 1 |
| 181 | C | 68.38232 | 69.66161 | 70.88425 | 532.53319   | -268.57236  | 517.55729   | 1 |
| 182 | O | 67.90354 | 68.78199 | 71.56453 | 266.16714   | -290.73804  | -558.88002  | 1 |
| 183 | N | 69.07247 | 70.72275 | 71.27631 | -226.25352  | 640.49678   | -270.32839  | 1 |
| 184 | H | 69.40227 | 71.34352 | 70.53935 | 2007.69063  | -1035.27229 | 1523.50231  | 1 |
| 185 | C | 69.42065 | 70.87555 | 72.65537 | -540.76542  | -573.33303  | 49.50000    | 1 |
| 186 | H | 69.61698 | 69.84244 | 73.02269 | -2374.20950 | -1036.76023 | 843.75774   | 1 |
| 187 | C | 70.70417 | 71.83184 | 72.67648 | -77.09082   | 666.87422   | -415.84136  | 1 |
| 188 | H | 70.55082 | 72.66234 | 71.92443 | -985.81834  | 617.19825   | 2463.91927  | 1 |
| 189 | O | 71.91834 | 71.21509 | 72.24172 | 293.29899   | -391.65602  | -477.80926  | 1 |
| 190 | H | 72.03580 | 71.70008 | 71.33518 | 2528.72714  | -681.76262  | -751.27122  | 1 |
| 191 | C | 70.70844 | 72.43811 | 74.12365 | 252.47363   | -605.14473  | 440.05134   | 1 |
| 192 | H | 71.65788 | 72.98559 | 74.33294 | -2052.65063 | 1456.49051  | -1043.51830 | 1 |
| 193 | H | 69.87333 | 73.16416 | 74.27782 | -2152.98800 | -1661.97574 | -161.70652  | 1 |
| 194 | H | 70.60267 | 71.63868 | 74.89299 | -473.12726  | -1584.27339 | 2165.61725  | 1 |
| 195 | C | 68.19804 | 71.53908 | 73.48445 | 360.36307   | 488.46713   | 505.10056   | 1 |
| 196 | O | 68.29365 | 71.58657 | 74.71883 | -200.08817  | -528.03552  | -385.82850  | 1 |
| 197 | N | 67.24762 | 71.99853 | 72.70900 | -597.54095  | -226.44775  | 355.20479   | 1 |
| 198 | H | 67.39629 | 71.82733 | 71.71480 | 2179.23655  | -1300.70981 | -991.33835  | 1 |
| 199 | C | 66.13516 | 72.74409 | 73.16223 | -687.68921  | 297.39807   | -249.45179  | 1 |
| 200 | H | 65.47005 | 72.80395 | 72.27330 | -349.16256  | -2467.37713 | -1101.72831 | 1 |
| 201 | C | 65.46132 | 72.04435 | 74.43563 | 672.47345   | 361.54328   | -201.62880  | 1 |
| 202 | H | 66.23389 | 71.86155 | 75.22338 | 1541.41502  | 582.18425   | 2169.97026  | 1 |
| 203 | H | 64.69843 | 72.72918 | 74.87256 | -2534.67717 | 60.25153    | 997.72295   | 1 |
| 204 | C | 64.81047 | 70.71874 | 74.01993 | 574.26774   | -389.43119  | -377.02542  | 1 |
| 205 | C | 63.48989 | 70.70348 | 73.47829 | 688.82679   | -287.33580  | -257.96133  | 1 |
| 206 | H | 62.93142 | 71.64436 | 73.32259 | 331.14182   | 1470.38163  | 2269.80013  | 1 |
| 207 | C | 65.53667 | 69.50289 | 74.19973 | -383.52382  | -675.04808  | 144.24917   | 1 |
| 208 | H | 66.56986 | 69.52001 | 74.59313 | 4.09847     | 1517.59662  | 2262.86397  | 1 |
| 209 | C | 62.91729 | 69.47225 | 73.16103 | -134.76730  | 428.45285   | -649.50303  | 1 |
| 210 | H | 61.89284 | 69.45695 | 72.75006 | -903.23433  | 1600.49020  | 2011.53387  | 1 |
| 211 | C | 64.91648 | 68.29556 | 73.87145 | -335.53281  | -615.00040  | -364.39058  | 1 |
| 212 | H | 65.48301 | 67.36031 | 74.02411 | 1596.45398  | -1369.33862 | 1732.02659  | 1 |
| 213 | C | 63.59182 | 68.23066 | 73.34852 | 585.48547   | -340.24194  | -406.23938  | 1 |
| 214 | O | 62.95396 | 67.00730 | 73.01562 | -419.15649  | -173.04408  | -511.94141  | 1 |
| 215 | H | 63.66100 | 66.37359 | 73.28397 | -1071.84350 | 1559.71507  | -1960.13012 | 1 |
| 216 | C | 66.63754 | 74.22088 | 73.65485 | 291.41878   | -183.13091  | 710.72246   | 1 |
| 217 | O | 66.24245 | 75.19805 | 73.06927 | 379.87695   | 523.47396   | -222.23622  | 1 |
| 218 | N | 67.38176 | 74.14008 | 74.75977 | 564.30591   | 373.09380   | 277.24371   | 1 |
| 219 | H | 67.71238 | 73.19964 | 75.08291 | -120.59931  | -2436.07824 | -1214.35098 | 1 |



|     |   |          |          |          |             |             |             |   |
|-----|---|----------|----------|----------|-------------|-------------|-------------|---|
| 220 | C | 68.10928 | 75.33851 | 75.11096 | 404.07514   | -299.37480  | 608.84009   | 1 |
| 221 | H | 68.61887 | 75.66117 | 74.17670 | -1071.07882 | -841.69025  | 2359.66467  | 1 |
| 222 | C | 67.03680 | 76.39259 | 75.59455 | -683.12807  | 68.71770    | -390.13096  | 1 |
| 223 | H | 66.17273 | 76.41130 | 74.88740 | 2068.88918  | 1596.58590  | 770.89603   | 1 |
| 224 | H | 66.61192 | 76.09014 | 76.57853 | 1379.86429  | 2342.49779  | -179.85638  | 1 |
| 225 | C | 67.68649 | 77.80817 | 75.68981 | -176.39967  | 537.49466   | 550.97268   | 1 |
| 226 | H | 68.51967 | 77.82983 | 76.42968 | -396.28051  | 1942.22168  | 1869.33314  | 1 |
| 227 | H | 68.13291 | 78.11679 | 74.71829 | -94.44700   | 586.00678   | -2659.20016 | 1 |
| 228 | C | 66.48654 | 78.77830 | 76.11212 | -291.69381  | -718.18079  | -150.72929  | 1 |
| 229 | H | 65.59825 | 78.78256 | 75.43108 | -2303.38776 | 1089.76242  | 964.62032   | 1 |
| 230 | H | 66.12725 | 78.62057 | 77.16125 | 884.16729   | 2568.80533  | -207.74283  | 1 |
| 231 | N | 67.07901 | 80.04523 | 76.05677 | -594.49522  | -252.81478  | 342.29276   | 1 |
| 232 | H | 68.08364 | 80.07249 | 76.14314 | -1735.17426 | 2084.05705  | -263.71605  | 1 |
| 233 | C | 66.44605 | 81.14193 | 75.93951 | 595.23177   | -271.52487  | 442.22352   | 1 |
| 234 | N | 65.05106 | 81.09701 | 75.84818 | 585.53813   | -424.79750  | -105.81303  | 1 |
| 235 | H | 64.42282 | 80.29521 | 75.88077 | 959.88797   | 1327.56823  | -2177.11905 | 1 |
| 236 | H | 64.44472 | 81.91385 | 75.76620 | 1578.48647  | 16.27378    | -2220.76233 | 1 |
| 237 | N | 67.32768 | 82.23133 | 75.92939 | -452.17763  | -390.33541  | -421.51853  | 1 |
| 238 | H | 68.34216 | 82.26543 | 76.01832 | 470.26107   | 1974.25629  | -1817.92087 | 1 |
| 239 | H | 67.01839 | 83.20185 | 75.86293 | 1856.67307  | -1573.97321 | -1224.35416 | 1 |
| 240 | C | 69.11551 | 74.97135 | 76.33036 | -531.47271  | -581.45780  | -55.06206   | 1 |
| 241 | O | 70.22151 | 75.50797 | 76.37889 | -243.00837  | 192.73507   | 609.52485   | 1 |
| 242 | N | 68.53146 | 74.16043 | 77.18766 | 343.49288   | -644.25607  | 38.09164    | 1 |
| 243 | H | 67.58053 | 73.89800 | 76.92859 | -1691.16043 | -1535.97525 | -1484.73099 | 1 |
| 244 | C | 69.20269 | 73.47251 | 78.22897 | 542.66492   | 350.14337   | 454.42563   | 1 |
| 245 | H | 68.44369 | 72.73492 | 78.57109 | 1209.57979  | -2396.95920 | 463.86744   | 1 |
| 246 | C | 70.48962 | 72.77804 | 77.59537 | -737.14309  | 145.93010   | 242.71942   | 1 |
| 247 | H | 70.84846 | 73.34337 | 76.70726 | -1050.18303 | 159.36419   | -2509.06125 | 1 |
| 248 | C | 71.63986 | 72.62855 | 78.64632 | -706.77696  | -252.88343  | -245.16230  | 1 |
| 249 | H | 72.48119 | 72.01230 | 78.24987 | -1624.64039 | -1665.49085 | 1417.86935  | 1 |
| 250 | H | 72.06421 | 73.63121 | 78.92378 | 2566.10521  | 598.51109   | 693.22305   | 1 |
| 251 | H | 71.27889 | 72.14161 | 79.58334 | -1972.69758 | 107.10018   | -1876.34312 | 1 |
| 252 | C | 70.04665 | 71.32898 | 77.19986 | 412.85148   | 672.58832   | -27.69222   | 1 |
| 253 | H | 70.90744 | 70.72332 | 76.82964 | 1447.02277  | 1762.76533  | -1490.78944 | 1 |
| 254 | H | 69.60582 | 70.78065 | 78.06554 | 1320.77379  | -145.20455  | 2378.68491  | 1 |
| 255 | H | 69.26786 | 71.35766 | 76.37391 | -1512.10848 | 1470.52031  | 1724.75147  | 1 |
| 256 | C | 69.61289 | 74.47247 | 79.46097 | -607.11113  | 499.56689   | 73.73769    | 1 |
| 257 | O | 69.31567 | 74.13435 | 80.58334 | 357.97126   | 460.81534   | 356.68785   | 1 |
| 258 | N | 70.30302 | 75.53648 | 79.07419 | 536.55407   | -368.62270  | 332.76306   | 1 |
| 259 | H | 70.52752 | 75.71127 | 78.06059 | 524.38866   | 2297.69985  | 1367.20941  | 1 |
| 260 | C | 70.66424 | 76.44066 | 80.10609 | 46.50277    | -774.29190  | -147.97904  | 1 |
| 261 | H | 70.01620 | 76.16140 | 80.97017 | 1676.51875  | 1883.29066  | 1032.55549  | 1 |
| 262 | C | 72.23636 | 76.26196 | 80.44762 | -559.41456  | -34.19198   | -556.30433  | 1 |
| 263 | H | 72.82889 | 76.37001 | 79.50875 | -64.66664   | 395.18769   | 2695.05373  | 1 |
| 264 | H | 72.57668 | 77.08341 | 81.12155 | -2703.44278 | -60.40056   | 333.79418   | 1 |
| 265 | C | 72.49784 | 74.92469 | 81.08096 | -519.76435  | 377.31045   | 459.42366   | 1 |
| 266 | H | 72.10105 | 74.12417 | 80.40606 | -1746.74323 | 1667.50644  | -1261.73691 | 1 |
| 267 | C | 73.99638 | 74.70943 | 81.25817 | 570.95554   | 16.46261    | -545.27700  | 1 |
| 268 | H | 74.22059 | 73.70476 | 81.70044 | 2391.58273  | 28.05277    | -1305.07271 | 1 |
| 269 | H | 74.54180 | 74.77125 | 80.28153 | 175.75588   | 917.63458   | 2559.43867  | 1 |
| 270 | H | 74.44569 | 75.47795 | 81.93813 | -1063.97851 | -2155.34650 | 1283.00462  | 1 |
| 271 | C | 71.79998 | 74.78397 | 82.42672 | 193.76014   | 2.62946     | -765.53141  | 1 |
| 272 | H | 72.09604 | 73.83643 | 82.94685 | 507.39394   | -846.55087  | 2539.60089  | 1 |
| 273 | H | 72.04684 | 75.63272 | 83.11528 | 1337.57841  | 1818.19054  | 1526.01994  | 1 |
| 274 | H | 70.68358 | 74.75589 | 82.30628 | 1100.88635  | -1172.91350 | -2199.08909 | 1 |
| 275 | C | 70.46377 | 77.95330 | 79.57915 | -549.21115  | 475.64486   | -309.38218  | 1 |
| 276 | O | 70.38766 | 78.26167 | 78.41947 | 556.06106   | -390.37755  | -78.24250   | 1 |
| 277 | O | 70.48265 | 78.94852 | 80.58751 | -572.27940  | -310.19032  | -209.75862  | 1 |
| 278 | H | 70.55141 | 78.35478 | 81.38547 | -1380.08193 | 2212.14486  | 790.85944   | 1 |

Listing 77: C00077.xmolout

|    |   |          |          |          |             |             |             |        |          |
|----|---|----------|----------|----------|-------------|-------------|-------------|--------|----------|
| 1  |   | 276      |          |          |             |             |             |        |          |
| 2  |   | 150.0000 | 150.0000 | 150.0000 | 0.0000      | 0.0000      | 0.0000***** | 0.9895 | 3958     |
|    |   | 0.2500   | 300.00   | 0.00     | 0.00        | 0.00        | -1293.5337  | 0.0000 | 300.0000 |
| 3  | H | 60.27662 | 77.58934 | 65.25431 | -2043.14101 | -1757.64893 | 399.89339   |        | 1        |
| 4  | N | 60.57299 | 78.39843 | 65.79713 | 426.75047   | 490.45733   | -334.42467  |        | 1        |
| 5  | H | 60.91634 | 77.97449 | 66.66003 | 442.25559   | -1110.30854 | -2448.52907 |        | 1        |
| 6  | C | 61.55314 | 79.20249 | 65.17606 | 415.32972   | -666.39213  | 83.73172    |        | 1        |
| 7  | H | 61.42972 | 79.10115 | 64.07536 | 879.32219   | 2491.00447  | 667.35213   |        | 1        |
| 8  | C | 61.35094 | 80.71706 | 65.70533 | 31.35357    | 477.41777   | 628.23362   |        | 1        |
| 9  | H | 61.48197 | 80.72715 | 66.81420 | 1168.38489  | 2240.25337  | -1019.71136 |        | 1        |
| 10 | H | 62.14094 | 81.38798 | 65.29256 | -360.43770  | 2534.90498  | 931.67112   |        | 1        |
| 11 | C | 59.98500 | 81.22970 | 65.33484 | 463.18208   | 512.70242   | -382.34388  |        | 1        |
| 12 | H | 59.24155 | 80.42906 | 65.54941 | 1725.29117  | 1863.52247  | -987.07854  |        | 1        |
| 13 | C | 59.63926 | 82.45167 | 66.17737 | 710.42801   | -144.27427  | -313.15367  |        | 1        |
| 14 | H | 58.62469 | 82.85545 | 65.92669 | 364.20195   | -1033.13725 | 2494.72524  |        | 1        |
| 15 | H | 59.64143 | 82.21244 | 67.27235 | 2567.61904  | 335.80679   | 847.48802   |        | 1        |
| 16 | H | 60.37486 | 83.28207 | 66.01970 | -2587.99029 | 680.92867   | -512.16411  |        | 1        |
| 17 | C | 59.91114 | 81.59135 | 63.85763 | 268.17616   | 741.64379   | -40.42634   |        | 1        |
| 18 | H | 58.89999 | 81.98648 | 63.57931 | 1283.54314  | -1945.37420 | -1411.27812 |        | 1        |
| 19 | H | 60.65926 | 82.38116 | 63.58881 | -1258.57796 | 1317.15249  | -2026.02085 |        | 1        |
| 20 | H | 60.11382 | 80.70559 | 63.20228 | -2502.84526 | 909.80597   | 575.92391   |        | 1        |
| 21 | C | 62.97488 | 78.67632 | 65.75271 | 619.36578   | -458.64843  | -172.09273  |        | 1        |
| 22 | O | 63.11212 | 78.21689 | 66.88982 | -81.40433   | 433.87611   | 522.34594   |        | 1        |
| 23 | N | 63.90201 | 78.97195 | 64.87047 | 175.23996   | -622.20190  | 341.55523   |        | 1        |
| 24 | H | 63.58864 | 79.33259 | 63.97134 | -876.57256  | -303.22879  | -2561.90213 |        | 1        |
| 25 | C | 65.24128 | 78.48452 | 65.05159 | -571.88214  | -534.10783  | -106.15033  |        | 1        |
| 26 | H | 65.07726 | 77.43237 | 65.37798 | -2713.20841 | -16.25800   | -248.80809  |        | 1        |
| 27 | C | 65.98755 | 78.62543 | 63.64232 | 166.60354   | 288.16399   | -716.09568  |        | 1        |
| 28 | H | 66.18886 | 79.71349 | 63.44383 | -2097.85574 | 1636.78449  | -586.18044  |        | 1        |
| 29 | O | 65.26987 | 78.12807 | 62.50112 | -317.80580  | -363.38227  | 484.43082   |        | 1        |
| 30 | H | 65.24655 | 78.92311 | 61.93032 | 1863.74748  | -1451.84923 | 1357.29467  |        | 1        |
| 31 | C | 67.35083 | 77.91074 | 63.96752 | 503.80731   | 517.99032   | 318.51606   |        | 1        |
| 32 | H | 68.08028 | 78.01984 | 63.13178 | 640.61020   | -2157.10410 | -1536.29104 |        | 1        |
| 33 | H | 67.82734 | 78.32648 | 64.88910 | 1687.88455  | 465.60692   | 2087.56452  |        | 1        |
| 34 | H | 67.20446 | 76.81859 | 64.13657 | -1293.07895 | -1899.88581 | -1463.57452 |        | 1        |
| 35 | C | 66.04322 | 79.31877 | 66.18504 | -153.07550  | -733.68902  | 248.70981   |        | 1        |
| 36 | O | 66.78128 | 78.64817 | 66.89489 | 186.15459   | -480.78787  | -449.34387  |        | 1        |
| 37 | N | 65.91245 | 80.64465 | 66.14932 | -487.53139  | 543.18517   | 42.03850    |        | 1        |
| 38 | C | 66.77979 | 81.50571 | 66.90199 | -699.35871  | 69.34393    | 360.10701   |        | 1        |
| 39 | H | 67.79750 | 81.06215 | 66.81306 | 2.81126     | -221.99807  | -2715.58072 |        | 1        |
| 40 | C | 66.55704 | 82.90518 | 66.19087 | -507.46439  | -592.59194  | 122.07761   |        | 1        |
| 41 | H | 66.86583 | 83.76575 | 66.82630 | -1975.08116 | 525.87560   | -1801.71556 |        | 1        |
| 42 | H | 67.13072 | 82.98105 | 65.24007 | 1588.27743  | -1913.22100 | 1113.83566  |        | 1        |
| 43 | C | 65.01926 | 82.85728 | 65.92665 | -613.62442  | -457.55993  | -194.14490  |        | 1        |
| 44 | H | 64.45341 | 83.07087 | 66.86171 | 1707.54637  | -721.27992  | 1996.92523  |        | 1        |
| 45 | H | 64.67041 | 83.59322 | 65.16755 | 758.23357   | 2100.81767  | 1560.55011  |        | 1        |
| 46 | C | 64.82914 | 81.34712 | 65.47181 | -352.41524  | 704.96076   | 49.21465    |        | 1        |
| 47 | H | 63.88579 | 80.86507 | 65.81452 | 1714.76886  | -2070.42778 | 443.35792   |        | 1        |
| 48 | H | 64.96370 | 81.16637 | 64.37971 | 1224.15040  | 1801.50881  | 1636.97633  |        | 1        |
| 49 | C | 66.24475 | 81.53292 | 68.45095 | 566.85117   | 537.05831   | 117.62814   |        | 1        |
| 50 | O | 65.82379 | 82.55189 | 68.93902 | -550.26779  | -406.08867  | 4.21666     |        | 1        |
| 51 | N | 66.42222 | 80.33371 | 69.00031 | 566.34832   | -425.77725  | 180.18749   |        | 1        |
| 52 | H | 66.76796 | 79.53863 | 68.41241 | 644.44502   | 2646.80550  | -52.73430   |        | 1        |
| 53 | C | 65.77969 | 80.11887 | 70.25623 | 612.34801   | -281.48662  | 411.56221   |        | 1        |
| 54 | H | 65.29387 | 81.10034 | 70.47371 | 1667.23498  | -1490.75142 | 1556.16753  |        | 1        |
| 55 | C | 64.71246 | 78.94982 | 70.01115 | -714.45746  | -175.43074  | 286.98927   |        | 1        |
| 56 | H | 65.20001 | 78.11451 | 69.43704 | -787.09484  | 1763.03619  | -1922.46060 |        | 1        |
| 57 | O | 63.57628 | 79.35684 | 69.25648 | -429.46514  | 516.51932   | -128.40526  |        | 1        |
| 58 | H | 63.61933 | 78.76316 | 68.43316 | 1981.82785  | 436.16847   | -1818.18182 |        | 1        |
| 59 | C | 64.40676 | 78.47276 | 71.47479 | 630.79189   | -468.94448  | 76.03230    |        | 1        |
| 60 | H | 63.67485 | 77.63193 | 71.48314 | -1775.71861 | 2062.30353  | 131.89849   |        | 1        |

|     |   |          |          |          |             |             |             |   |
|-----|---|----------|----------|----------|-------------|-------------|-------------|---|
| 61  | H | 65.32253 | 78.11555 | 72.00041 | -1855.14608 | 88.94118    | 1993.53760  | 1 |
| 62  | H | 63.97170 | 79.29640 | 72.08717 | -1504.82350 | -780.94249  | -2132.90992 | 1 |
| 63  | C | 66.98015 | 79.81903 | 71.33243 | 288.57638   | 618.62814   | -397.00270  | 1 |
| 64  | O | 67.36229 | 80.75769 | 71.98786 | 321.70495   | -185.26452  | 574.37218   | 1 |
| 65  | N | 67.38314 | 78.56398 | 71.37801 | -447.05792  | -446.53431  | 367.76425   | 1 |
| 66  | H | 67.06298 | 77.79454 | 70.76337 | 350.31316   | 1975.63644  | -1843.31522 | 1 |
| 67  | C | 68.48348 | 78.22452 | 72.25100 | -511.23061  | 374.03917   | -471.51480  | 1 |
| 68  | H | 69.33780 | 78.82860 | 71.86892 | 2234.79579  | -898.70890  | -1273.45190 | 1 |
| 69  | C | 68.14667 | 78.61796 | 73.77115 | 529.53781   | -159.34528  | 563.72604   | 1 |
| 70  | H | 69.09764 | 78.49378 | 74.35911 | 654.59388   | 2347.94251  | 1217.51488  | 1 |
| 71  | H | 67.90463 | 79.71841 | 73.77921 | -1526.55661 | 2103.42026  | 817.87394   | 1 |
| 72  | O | 67.12511 | 77.83265 | 74.43309 | -554.84278  | 14.12789    | 399.58769   | 1 |
| 73  | H | 66.33304 | 78.32746 | 74.14787 | 1297.06236  | 2061.84854  | 1220.68812  | 1 |
| 74  | C | 68.60086 | 76.65644 | 71.96341 | -662.15484  | -412.13544  | 123.62687   | 1 |
| 75  | O | 67.97602 | 76.18756 | 71.02659 | -540.01537  | -317.05804  | 274.91456   | 1 |
| 76  | N | 69.50693 | 76.04477 | 72.74795 | -202.76299  | -690.00100  | -131.49145  | 1 |
| 77  | H | 69.85685 | 76.62084 | 73.51678 | -702.62132  | -2617.37191 | 281.70413   | 1 |
| 78  | C | 69.45512 | 74.57861 | 72.88726 | -491.73914  | 576.34187   | 222.73509   | 1 |
| 79  | H | 68.40310 | 74.33257 | 72.61157 | 1977.17978  | -1823.58850 | -434.68928  | 1 |
| 80  | C | 70.46656 | 73.99220 | 71.92528 | -649.50797  | -328.66843  | 306.11224   | 1 |
| 81  | H | 71.45677 | 74.45156 | 72.14089 | 2075.07803  | 1452.16490  | -1004.45904 | 1 |
| 82  | C | 70.59491 | 72.48911 | 72.09585 | -615.18735  | -489.99689  | -70.96352   | 1 |
| 83  | H | 71.30707 | 72.04667 | 71.34672 | -1226.32661 | -1724.38906 | -1716.47170 | 1 |
| 84  | H | 70.97155 | 72.21933 | 73.12155 | 2381.64273  | -969.84735  | 900.46860   | 1 |
| 85  | H | 69.60552 | 71.97234 | 71.95841 | 2122.74991  | 1702.23946  | -141.36228  | 1 |
| 86  | C | 70.11835 | 74.32009 | 70.48385 | -501.86074  | -479.61276  | -376.42482  | 1 |
| 87  | H | 70.89753 | 73.94561 | 69.76480 | 993.79261   | -2246.95401 | -1177.81305 | 1 |
| 88  | H | 69.13469 | 73.86394 | 70.18492 | 42.71279    | -626.15391  | -2651.37258 | 1 |
| 89  | H | 70.01781 | 75.43204 | 70.33114 | -2026.39012 | -1590.33709 | -887.82922  | 1 |
| 90  | C | 69.82058 | 74.19694 | 74.45731 | -672.89153  | 382.57394   | -156.34072  | 1 |
| 91  | O | 69.00924 | 73.57608 | 75.10154 | 410.04627   | 221.86223   | 500.35950   | 1 |
| 92  | N | 71.02478 | 74.59072 | 74.83497 | -378.11782  | -443.79414  | -441.10984  | 1 |
| 93  | H | 71.61348 | 75.08926 | 74.17196 | 2404.15973  | -568.14894  | 1149.30085  | 1 |
| 94  | C | 71.40152 | 74.30364 | 76.19522 | -544.54484  | 466.16019   | 331.29119   | 1 |
| 95  | H | 70.47260 | 74.52913 | 76.76883 | -1409.80988 | -170.17955  | 2325.32679  | 1 |
| 96  | C | 71.75531 | 72.75614 | 76.26937 | -184.48284  | 116.78282   | -758.89137  | 1 |
| 97  | H | 70.88406 | 72.16029 | 75.91352 | 1893.78641  | 1861.14652  | 611.04528   | 1 |
| 98  | H | 72.60160 | 72.49996 | 75.59361 | -2170.79665 | -974.19311  | 1327.50117  | 1 |
| 99  | C | 72.09318 | 72.42877 | 77.75794 | 389.51668   | 672.81878   | -138.49152  | 1 |
| 100 | H | 73.06593 | 72.90257 | 78.06188 | 510.64577   | 1933.03327  | 1851.02484  | 1 |
| 101 | H | 71.34440 | 72.90412 | 78.43075 | -2302.30869 | -1105.72939 | -948.89774  | 1 |
| 102 | C | 72.13650 | 70.89009 | 78.05918 | -559.93427  | -126.34590  | 542.30857   | 1 |
| 103 | O | 72.28031 | 70.51381 | 79.20059 | -670.36003  | -111.83166  | 76.36448    | 1 |
| 104 | N | 72.00483 | 70.11269 | 76.96803 | -216.06729  | -537.07037  | 446.51379   | 1 |
| 105 | H | 71.80916 | 70.38251 | 75.99715 | -1251.96487 | 1074.12894  | -2168.52500 | 1 |
| 106 | H | 71.96769 | 69.08735 | 76.99209 | -2451.83023 | -720.73851  | 944.84612   | 1 |
| 107 | C | 72.69893 | 75.18859 | 76.57533 | 546.24052   | -563.88337  | -85.11809   | 1 |
| 108 | O | 73.78177 | 74.95302 | 76.05056 | 71.70702    | -307.40463  | 606.69673   | 1 |
| 109 | N | 72.38301 | 76.11127 | 77.47479 | 479.90863   | -504.50129  | 222.86849   | 1 |
| 110 | C | 73.38238 | 76.89974 | 78.13592 | 75.51268    | -600.91904  | 506.73700   | 1 |
| 111 | H | 74.21693 | 77.04351 | 77.40774 | -2033.61562 | 1795.30103  | 254.89480   | 1 |
| 112 | C | 72.56081 | 78.20039 | 78.51382 | 523.79067   | 517.99274   | 284.45581   | 1 |
| 113 | H | 73.02926 | 78.78468 | 79.33717 | 1599.61665  | -1127.00911 | 1895.98173  | 1 |
| 114 | H | 72.46747 | 78.88941 | 77.64517 | -1881.83093 | 1275.82488  | -1501.55016 | 1 |
| 115 | C | 71.17816 | 77.58751 | 78.90397 | -600.05639  | -404.05026  | 316.64485   | 1 |
| 116 | H | 71.22397 | 77.12341 | 79.91682 | -2597.05260 | 496.36221   | 657.73249   | 1 |
| 117 | H | 70.34713 | 78.32801 | 78.92567 | -1666.24518 | 1294.38985  | -1723.90591 | 1 |
| 118 | C | 71.00217 | 76.48194 | 77.78232 | 493.57570   | -129.95376  | -602.56394  | 1 |
| 119 | H | 70.45738 | 75.56474 | 78.11091 | -1469.08415 | -637.84797  | 2204.22581  | 1 |
| 120 | H | 70.56597 | 76.84745 | 76.82242 | -1038.97840 | 1068.88701  | -2280.71789 | 1 |
| 121 | C | 73.85068 | 76.12316 | 79.50272 | 188.88100   | 241.05089   | -727.87821  | 1 |
| 122 | O | 73.05640 | 75.84599 | 80.37189 | 531.88613   | -49.19943   | 427.07960   | 1 |

|     |   |          |          |          |             |             |             |   |
|-----|---|----------|----------|----------|-------------|-------------|-------------|---|
| 123 | N | 75.17723 | 76.02799 | 79.51199 | 708.14833   | 26.93417    | -179.73509  | 1 |
| 124 | H | 75.61676 | 76.35504 | 78.65056 | -2232.69501 | -1179.09831 | 1023.94816  | 1 |
| 125 | C | 75.92698 | 75.18003 | 80.43122 | -738.32412  | 259.92548   | 104.42456   | 1 |
| 126 | H | 76.99022 | 75.46582 | 80.24597 | 2028.89123  | 1260.02983  | 1311.33324  | 1 |
| 127 | C | 75.46092 | 75.50000 | 81.83926 | -258.65678  | -345.52513  | 661.28459   | 1 |
| 128 | H | 74.35470 | 75.31473 | 81.87475 | -1826.06090 | -1801.46097 | -918.64554  | 1 |
| 129 | C | 76.11883 | 74.64897 | 82.90899 | -541.23400  | 531.92970   | -218.41428  | 1 |
| 130 | H | 75.76535 | 74.93551 | 83.93768 | 1311.73218  | -2219.18200 | 882.19023   | 1 |
| 131 | H | 75.89168 | 73.55597 | 82.77645 | -1048.71298 | 1223.58118  | -2196.97971 | 1 |
| 132 | H | 77.23791 | 74.76322 | 82.90204 | 419.06414   | 1903.92898  | 1903.44670  | 1 |
| 133 | C | 75.68566 | 76.96607 | 82.17009 | -423.86431  | 152.66566   | -648.55262  | 1 |
| 134 | H | 75.28675 | 77.22956 | 83.18768 | 105.68386   | -2342.50080 | 1387.51238  | 1 |
| 135 | H | 76.77864 | 77.22985 | 82.16115 | -1695.63603 | -1484.73621 | -1531.02793 | 1 |
| 136 | H | 75.17445 | 77.63477 | 81.42450 | -1853.57121 | -487.39031  | 1936.59343  | 1 |
| 137 | C | 75.65485 | 73.59622 | 80.00344 | 539.71428   | -510.58232  | 267.58633   | 1 |
| 138 | O | 74.79921 | 73.26471 | 79.18233 | -15.93758   | -278.34085  | -624.49402  | 1 |
| 139 | N | 76.52384 | 72.81183 | 80.61634 | -676.81886  | 12.05292    | 276.17960   | 1 |
| 140 | H | 77.13262 | 73.43031 | 81.15178 | -1694.44250 | -373.84189  | -2100.66098 | 1 |
| 141 | C | 76.25039 | 71.47891 | 81.03232 | 412.33078   | -664.70360  | 108.35451   | 1 |
| 142 | H | 76.92163 | 71.31785 | 81.90524 | 1765.77476  | 1294.44366  | 1621.76594  | 1 |
| 143 | C | 74.71089 | 71.37245 | 81.37547 | -179.66635  | -721.95667  | -264.73915  | 1 |
| 144 | H | 74.37831 | 72.19848 | 82.04313 | -607.34922  | 2587.87032  | -598.10018  | 1 |
| 145 | H | 74.10764 | 71.48612 | 80.43986 | -359.69332  | -1479.13954 | -2259.74260 | 1 |
| 146 | C | 74.47879 | 69.97288 | 82.03809 | -240.01076  | 616.02425   | 431.85322   | 1 |
| 147 | H | 75.00198 | 69.17581 | 81.45936 | -1359.17131 | 782.54425   | 2227.99181  | 1 |
| 148 | H | 74.89768 | 69.93196 | 83.06866 | -820.36667  | 85.81767    | -2596.78715 | 1 |
| 149 | C | 72.92038 | 69.71756 | 82.03346 | -513.07015  | 236.18570   | -551.87280  | 1 |
| 150 | H | 72.39665 | 70.41729 | 82.72567 | 1816.11944  | -1183.11722 | -1650.94321 | 1 |
| 151 | H | 72.50483 | 69.93190 | 80.99518 | -1800.04429 | -1361.53473 | 1526.34643  | 1 |
| 152 | C | 72.67045 | 68.24501 | 82.43395 | 726.08972   | -253.19732  | -179.64713  | 1 |
| 153 | H | 73.11873 | 67.49797 | 81.74858 | 1224.27271  | -456.51798  | -2390.90304 | 1 |
| 154 | H | 72.92699 | 67.99878 | 83.48345 | 1206.40339  | -1150.93514 | -2154.90344 | 1 |
| 155 | N | 71.12892 | 68.00527 | 82.32060 | 329.70796   | -633.68968  | -155.67358  | 1 |
| 156 | H | 70.78714 | 67.03188 | 82.56791 | 1348.31305  | 1938.76845  | 1359.00643  | 1 |
| 157 | H | 70.49518 | 68.61169 | 82.91849 | 2096.92035  | 1446.54551  | -966.48890  | 1 |
| 158 | H | 70.70968 | 68.13668 | 81.35509 | -1197.07217 | -2303.53719 | 827.28733   | 1 |
| 159 | C | 76.51031 | 70.39288 | 79.83157 | -378.01186  | -556.17301  | -413.96481  | 1 |
| 160 | O | 76.81891 | 69.25540 | 80.08904 | -409.44433  | -307.55053  | -453.30833  | 1 |
| 161 | N | 76.15687 | 70.92562 | 78.66920 | -429.02477  | 524.70884   | 274.08502   | 1 |
| 162 | H | 75.81512 | 71.90923 | 78.65403 | 1706.34263  | -1425.96036 | 1574.38926  | 1 |
| 163 | C | 76.61650 | 70.29372 | 77.46684 | -45.25864   | -626.22952  | 478.93267   | 1 |
| 164 | H | 76.59295 | 69.22251 | 77.77917 | 1988.63164  | 570.90773   | 1772.87287  | 1 |
| 165 | C | 75.53155 | 70.71418 | 76.39390 | 551.77128   | -20.49526   | -564.54996  | 1 |
| 166 | H | 74.53250 | 70.76209 | 76.88431 | 1434.61535  | -1753.10253 | 1513.99471  | 1 |
| 167 | H | 75.73006 | 71.75024 | 76.03843 | -714.67738  | 1819.09770  | 1898.36494  | 1 |
| 168 | C | 75.46380 | 69.72759 | 75.18258 | 446.99263   | -555.77305  | 338.97221   | 1 |
| 169 | H | 76.43892 | 69.64374 | 74.64684 | 1953.68466  | 1892.25957  | -161.67766  | 1 |
| 170 | H | 75.20336 | 68.69588 | 75.50957 | -403.03785  | 2688.07032  | -188.43591  | 1 |
| 171 | C | 74.33972 | 70.33945 | 74.25093 | 567.86262   | 335.74681   | 434.04421   | 1 |
| 172 | H | 73.36200 | 70.35420 | 74.78217 | -1080.02275 | 1568.26081  | -1948.78900 | 1 |
| 173 | H | 74.56383 | 71.40448 | 74.00983 | -919.54108  | 2111.34692  | 1456.13463  | 1 |
| 174 | C | 74.23665 | 69.50140 | 72.95689 | 195.81897   | 173.33862   | -745.11536  | 1 |
| 175 | H | 75.11875 | 69.57127 | 72.28965 | 1405.67949  | -2301.21089 | -390.08113  | 1 |
| 176 | H | 73.95965 | 68.43941 | 73.11070 | -940.37328  | -1118.32446 | 2299.72133  | 1 |
| 177 | N | 73.05333 | 70.10649 | 72.12644 | 319.26422   | 656.36007   | -42.02424   | 1 |
| 178 | H | 72.87745 | 69.67989 | 71.17054 | 1961.03633  | 619.91968   | 1787.09422  | 1 |
| 179 | H | 72.08503 | 70.05522 | 72.55867 | 854.14343   | -2156.80752 | 1429.08711  | 1 |
| 180 | H | 73.13216 | 71.13596 | 71.88571 | 1237.02905  | -1378.50857 | -1998.28500 | 1 |
| 181 | C | 78.13363 | 70.80246 | 77.19675 | 532.53319   | -268.57236  | 517.55729   | 1 |
| 182 | O | 78.94332 | 70.91087 | 78.11458 | 266.16714   | -290.73804  | -558.88002  | 1 |
| 183 | N | 78.33588 | 71.04936 | 75.91352 | -226.25352  | 640.49678   | -270.32839  | 1 |
| 184 | H | 77.54775 | 70.86872 | 75.29499 | 2007.69063  | -1035.27229 | 1523.50231  | 1 |

|     |   |          |          |          |             |             |             |   |
|-----|---|----------|----------|----------|-------------|-------------|-------------|---|
| 185 | C | 79.65604 | 70.77361 | 75.39786 | -540.76542  | -573.33303  | 49.50000    | 1 |
| 186 | H | 79.99699 | 69.92590 | 76.03326 | -2374.20950 | -1036.76023 | 843.75774   | 1 |
| 187 | C | 79.47576 | 70.42733 | 73.85836 | -77.09082   | 666.87422   | -415.84136  | 1 |
| 188 | H | 79.23216 | 71.36888 | 73.29349 | -985.81834  | 617.19825   | 2463.91927  | 1 |
| 189 | O | 78.41039 | 69.50239 | 73.54504 | 293.29899   | -391.65602  | -477.80926  | 1 |
| 190 | H | 77.89975 | 70.01905 | 72.89102 | 2528.72714  | -681.76262  | -751.27122  | 1 |
| 191 | C | 80.93805 | 69.97203 | 73.49669 | 252.47363   | -605.14473  | 440.05134   | 1 |
| 192 | H | 81.04323 | 69.76108 | 72.40745 | -2052.65063 | 1456.49051  | -1043.51830 | 1 |
| 193 | H | 81.68803 | 70.75844 | 73.75692 | -2152.98800 | -1661.97574 | -161.70652  | 1 |
| 194 | H | 81.22405 | 69.04338 | 74.04313 | -473.12726  | -1584.27339 | 2165.61725  | 1 |
| 195 | C | 80.58330 | 72.10074 | 75.59128 | 360.36307   | 488.46713   | 505.10056   | 1 |
| 196 | O | 80.96045 | 72.73805 | 74.63884 | -200.08817  | -528.03552  | -385.82850  | 1 |
| 197 | N | 80.88325 | 72.26139 | 76.88321 | -597.54095  | -226.44775  | 355.20479   | 1 |
| 198 | H | 80.41117 | 71.65746 | 77.60456 | 2179.23655  | -1300.70981 | -991.33835  | 1 |
| 199 | C | 81.36584 | 73.55519 | 77.23297 | -687.68921  | 297.39807   | -249.45179  | 1 |
| 200 | H | 81.27730 | 74.16829 | 76.30554 | -349.16256  | -2467.37713 | -1101.72831 | 1 |
| 201 | C | 80.47255 | 74.05582 | 78.46388 | 672.47345   | 361.54328   | -201.62880  | 1 |
| 202 | H | 80.20881 | 73.21086 | 79.14070 | 1541.41502  | 582.18425   | 2169.97026  | 1 |
| 203 | H | 81.03973 | 74.80294 | 79.06497 | -2534.67717 | 60.25153    | 997.72295   | 1 |
| 204 | C | 79.21174 | 74.69468 | 77.86592 | 574.26774   | -389.43119  | -377.02542  | 1 |
| 205 | C | 79.31342 | 76.02280 | 77.36152 | 688.82679   | -287.33580  | -257.96133  | 1 |
| 206 | H | 80.27050 | 76.57429 | 77.40390 | 331.14182   | 1470.38163  | 2269.80013  | 1 |
| 207 | C | 77.98002 | 73.98242 | 77.78122 | -383.52382  | -675.04808  | 144.24917   | 1 |
| 208 | H | 77.90385 | 72.94507 | 78.16338 | 4.09847     | 1517.59662  | 2262.86397  | 1 |
| 209 | C | 78.17895 | 76.60248 | 76.80878 | -134.76730  | 428.45285   | -649.50303  | 1 |
| 210 | H | 78.25863 | 77.63360 | 76.42268 | -903.23433  | 1600.49020  | 2011.53387  | 1 |
| 211 | C | 76.87590 | 74.62150 | 77.21226 | -335.53281  | -615.00040  | -364.39058  | 1 |
| 212 | H | 75.91695 | 74.07133 | 77.17360 | 1596.45398  | -1369.33862 | 1732.02659  | 1 |
| 213 | C | 76.92785 | 75.94736 | 76.70864 | 585.48547   | -340.24194  | -406.23938  | 1 |
| 214 | O | 75.83668 | 76.61608 | 76.14883 | -419.15649  | -173.04408  | -511.94141  | 1 |
| 215 | H | 75.13683 | 75.83112 | 76.07475 | -1071.84350 | 1559.71507  | -1960.13012 | 1 |
| 216 | C | 82.91645 | 73.45577 | 77.74080 | 291.41878   | -183.13091  | 710.72246   | 1 |
| 217 | O | 83.75186 | 74.17838 | 77.19541 | 379.87695   | 523.47396   | -222.23622  | 1 |
| 218 | N | 83.05905 | 72.64011 | 78.75870 | 564.30591   | 373.09380   | 277.24371   | 1 |
| 219 | H | 82.18965 | 72.17623 | 79.02035 | -120.59931  | -2436.07824 | -1214.35098 | 1 |
| 220 | C | 84.31294 | 72.17921 | 79.24208 | 404.07514   | -299.37480  | 608.84009   | 1 |
| 221 | H | 84.03314 | 71.32140 | 79.89377 | -1071.07882 | -841.69025  | 2359.66467  | 1 |
| 222 | C | 85.19364 | 71.76625 | 77.98725 | -683.12807  | 68.71770    | -390.13096  | 1 |
| 223 | H | 84.62400 | 71.10079 | 77.29999 | 2068.88918  | 1596.58590  | 770.89603   | 1 |
| 224 | H | 85.45458 | 72.66682 | 77.38288 | 1379.86429  | 2342.49779  | -179.85638  | 1 |
| 225 | C | 86.47221 | 71.06452 | 78.53345 | -176.39967  | 537.49466   | 550.97268   | 1 |
| 226 | H | 86.95066 | 71.68652 | 79.32344 | -396.28051  | 1942.22168  | 1869.33314  | 1 |
| 227 | H | 86.22208 | 70.09849 | 79.02520 | -94.44700   | 586.00678   | -2659.20016 | 1 |
| 228 | C | 87.47756 | 70.84438 | 77.30309 | -291.69381  | -718.18079  | -150.72929  | 1 |
| 229 | H | 87.08195 | 70.26369 | 76.43253 | -2303.38776 | 1089.76242  | 964.62032   | 1 |
| 230 | H | 87.94472 | 71.80207 | 76.95483 | 884.16729   | 2568.80533  | -207.74283  | 1 |
| 231 | N | 88.44350 | 70.08992 | 77.97996 | -594.49522  | -252.81478  | 342.29276   | 1 |
| 232 | H | 88.67617 | 70.40956 | 78.90993 | -1735.17426 | 2084.05705  | -263.71605  | 1 |
| 233 | C | 89.06800 | 69.07475 | 77.52688 | 595.23177   | -271.52487  | 442.22352   | 1 |
| 234 | N | 88.79572 | 68.62839 | 76.23257 | 585.53813   | -424.79750  | -105.81303  | 1 |
| 235 | H | 88.16382 | 69.00765 | 75.52856 | 959.88797   | 1327.56823  | -2177.11905 | 1 |
| 236 | H | 89.26077 | 67.83955 | 75.78114 | 1578.48647  | 16.27378    | -2220.76233 | 1 |
| 237 | N | 89.96545 | 68.58907 | 78.48606 | -452.17763  | -390.33541  | -421.51853  | 1 |
| 238 | H | 90.16205 | 68.90419 | 79.43501 | 470.26107   | 1974.25629  | -1817.92087 | 1 |
| 239 | H | 90.56711 | 67.77962 | 78.32990 | 1856.67307  | -1573.97321 | -1224.35416 | 1 |
| 240 | C | 85.14174 | 73.32775 | 80.06896 | -531.47271  | -581.45780  | -55.06206   | 1 |
| 241 | O | 85.50908 | 73.04282 | 81.17839 | -243.00837  | 192.73507   | 609.52485   | 1 |
| 242 | N | 85.32989 | 74.43236 | 79.36434 | 343.49288   | -644.25607  | 38.09164    | 1 |
| 243 | H | 84.92349 | 74.47978 | 78.38972 | -1691.16043 | -1535.97525 | -1484.73099 | 1 |
| 244 | C | 86.06908 | 75.59882 | 79.83484 | 542.66492   | 350.14337   | 454.42563   | 1 |
| 245 | H | 85.50722 | 76.45118 | 79.38296 | 1209.57979  | -2396.95920 | 463.86744   | 1 |
| 246 | C | 86.12640 | 75.65995 | 81.34686 | -737.14309  | 145.93010   | 242.71942   | 1 |

|     |   |          |          |          |             |             |             |   |
|-----|---|----------|----------|----------|-------------|-------------|-------------|---|
| 247 | H | 86.61841 | 74.72343 | 81.71589 | -1050.18303 | 159.36419   | -2509.06125 | 1 |
| 248 | C | 86.94550 | 76.84159 | 81.83532 | -706.77696  | -252.88343  | -245.16230  | 1 |
| 249 | H | 87.00274 | 76.87294 | 82.95748 | -1624.64039 | -1665.49085 | 1417.86935  | 1 |
| 250 | H | 88.00127 | 76.80190 | 81.44940 | 2566.10521  | 598.51109   | 693.22305   | 1 |
| 251 | H | 86.50508 | 77.81935 | 81.49786 | -1972.69758 | 107.10018   | -1876.34312 | 1 |
| 252 | C | 84.73842 | 75.71989 | 81.96101 | 412.85148   | 672.58832   | -27.69222   | 1 |
| 253 | H | 84.78118 | 75.78221 | 83.08259 | 1447.02277  | 1762.76533  | -1490.78944 | 1 |
| 254 | H | 84.15939 | 76.61167 | 81.59630 | 1320.77379  | -145.20455  | 2378.68491  | 1 |
| 255 | H | 84.14301 | 74.80026 | 81.69867 | -1512.10848 | 1470.52031  | 1724.75147  | 1 |
| 256 | C | 87.60164 | 75.49985 | 79.18690 | -607.11113  | 499.56689   | 73.73769    | 1 |
| 257 | O | 88.17996 | 74.45314 | 79.01098 | 357.97126   | 460.81534   | 356.68785   | 1 |
| 258 | N | 88.12316 | 76.74620 | 79.09128 | 536.55407   | -368.62270  | 332.76306   | 1 |
| 259 | H | 87.34228 | 77.36267 | 79.32768 | 524.38866   | 2297.69985  | 1367.20941  | 1 |
| 260 | C | 88.88525 | 77.06947 | 77.91098 | 46.50277    | -774.29190  | -147.97904  | 1 |
| 261 | H | 89.27367 | 78.08085 | 78.15436 | 1676.51875  | 1883.29066  | 1032.55549  | 1 |
| 262 | C | 90.05973 | 76.00155 | 77.67179 | -559.41456  | -34.19198   | -556.30433  | 1 |
| 263 | H | 89.61070 | 75.03641 | 77.32746 | -64.66664   | 395.18769   | 2695.05373  | 1 |
| 264 | H | 90.74604 | 76.33590 | 76.85599 | -2703.44278 | -60.40056   | 333.79418   | 1 |
| 265 | C | 90.81976 | 75.78552 | 78.95773 | -519.76435  | 377.31045   | 459.42366   | 1 |
| 266 | H | 90.07572 | 75.50217 | 79.73972 | -1746.74323 | 1667.50644  | -1261.73691 | 1 |
| 267 | C | 91.81542 | 74.64395 | 78.79941 | 570.95554   | 16.46261    | -545.27700  | 1 |
| 268 | H | 92.37210 | 74.44451 | 79.75145 | 2391.58273  | 28.05277    | -1305.07271 | 1 |
| 269 | H | 91.30403 | 73.69026 | 78.50677 | 175.75588   | 917.63458   | 2559.43867  | 1 |
| 270 | H | 92.57881 | 74.86846 | 78.01008 | -1063.97851 | -2155.34650 | 1283.00462  | 1 |
| 271 | C | 91.55022 | 77.04599 | 79.39761 | 193.76014   | 2.62946     | -765.53141  | 1 |
| 272 | H | 92.12713 | 76.88112 | 80.34412 | 507.39394   | -846.55087  | 2539.60089  | 1 |
| 273 | H | 92.28040 | 77.39164 | 78.62086 | 1337.57841  | 1818.19054  | 1526.01994  | 1 |
| 274 | H | 90.84013 | 77.89182 | 79.58647 | 1100.88635  | -1172.91350 | -2199.08909 | 1 |
| 275 | C | 87.85971 | 77.14378 | 76.69621 | -549.21115  | 475.64486   | -309.38218  | 1 |
| 276 | O | 86.68691 | 77.37238 | 76.85118 | 556.06106   | -390.37755  | -78.24250   | 1 |
| 277 | O | 88.40460 | 77.07246 | 75.38559 | -572.27940  | -310.19032  | -209.75862  | 1 |
| 278 | H | 89.36217 | 76.97121 | 75.61661 | -1380.08193 | 2212.14486  | 790.85944   | 1 |

Listing 78: C00078.xmolout

|    |   |          |          |          |             |             |             |        |          |
|----|---|----------|----------|----------|-------------|-------------|-------------|--------|----------|
| 1  |   | 276      |          |          |             |             |             |        |          |
| 2  |   | 150.0000 | 150.0000 | 150.0000 | 0.0000      | 0.0000      | 0.0000***** | 2.7750 | 11100    |
|    |   | 0.2500   | 300.00   | 0.00     | 0.00        | 0.00        | -1293.5304  | 0.0000 | 300.0000 |
| 3  | H | 80.62860 | 79.47171 | 76.41020 | -2043.14101 | -1757.64893 | 399.89339   |        | 1        |
| 4  | N | 81.21464 | 78.78709 | 75.93443 | 426.75047   | 490.45733   | -334.42467  |        | 1        |
| 5  | H | 80.55577 | 78.36630 | 75.27195 | 442.25559   | -1110.30854 | -2448.52907 |        | 1        |
| 6  | C | 82.33167 | 79.34976 | 75.26651 | 415.32972   | -666.39213  | 83.73172    |        | 1        |
| 7  | H | 82.18571 | 80.44353 | 75.40299 | 879.32219   | 2491.00447  | 667.35213   |        | 1        |
| 8  | C | 83.70431 | 78.83508 | 75.93764 | 31.35357    | 477.41777   | 628.23362   |        | 1        |
| 9  | H | 83.84318 | 77.75017 | 75.71411 | 1168.38489  | 2240.25337  | -1019.71136 |        | 1        |
| 10 | H | 84.58151 | 79.35720 | 75.48563 | -360.43770  | 2534.90498  | 931.67112   |        | 1        |
| 11 | C | 83.66163 | 79.06328 | 77.42506 | 463.18208   | 512.70242   | -382.34388  |        | 1        |
| 12 | H | 82.74218 | 78.57767 | 77.82282 | 1725.29117  | 1863.52247  | -987.07854  |        | 1        |
| 13 | C | 84.88235 | 78.43246 | 78.08424 | 710.42801   | -144.27427  | -313.15367  |        | 1        |
| 14 | H | 84.88283 | 78.58304 | 79.19415 | 364.20195   | -1033.13725 | 2494.72524  |        | 1        |
| 15 | H | 84.93039 | 77.32883 | 77.89733 | 2567.61904  | 335.80679   | 847.48802   |        | 1        |
| 16 | H | 85.83387 | 78.87526 | 77.69207 | -2587.99029 | 680.92867   | -512.16411  |        | 1        |
| 17 | C | 83.61093 | 80.54829 | 77.75856 | 268.17616   | 741.64379   | -40.42634   |        | 1        |
| 18 | H | 83.63157 | 80.72471 | 78.86442 | 1283.54314  | -1945.37420 | -1411.27812 |        | 1        |
| 19 | H | 84.48108 | 81.09971 | 77.31812 | -1258.57796 | 1317.15249  | -2026.02085 |        | 1        |
| 20 | H | 82.67873 | 81.02918 | 77.36569 | -2502.84526 | 909.80597   | 575.92391   |        | 1        |
| 21 | C | 82.14841 | 78.86276 | 73.73987 | 619.36578   | -458.64843  | -172.09273  |        | 1        |
| 22 | O | 81.02567 | 78.63393 | 73.29226 | -81.40433   | 433.87611   | 522.34594   |        | 1        |
| 23 | N | 83.31171 | 78.73462 | 73.12298 | 175.23996   | -622.20190  | 341.55523   |        | 1        |
| 24 | H | 84.17253 | 78.94439 | 73.62501 | -876.57256  | -303.22879  | -2561.90213 |        | 1        |
| 25 | C | 83.34730 | 78.21419 | 71.80282 | -571.88214  | -534.10783  | -106.15033  |        | 1        |
| 26 | H | 82.30508 | 78.34600 | 71.43262 | -2713.20841 | -16.25800   | -248.80809  |        | 1        |

|    |   |          |          |          |             |             |             |   |
|----|---|----------|----------|----------|-------------|-------------|-------------|---|
| 27 | C | 84.50019 | 78.99899 | 71.01073 | 166.60354   | 288.16399   | -716.09568  | 1 |
| 28 | H | 85.49412 | 78.67263 | 71.42972 | -2097.85574 | 1636.78449  | -586.18044  | 1 |
| 29 | O | 84.47005 | 80.43259 | 71.11690 | -317.80580  | -363.38227  | 484.43082   | 1 |
| 30 | H | 85.32956 | 80.61048 | 71.55078 | 1863.74748  | -1451.84923 | 1357.29467  | 1 |
| 31 | C | 84.35002 | 78.42724 | 69.55318 | 503.80731   | 517.99032   | 318.51606   | 1 |
| 32 | H | 85.15685 | 78.80828 | 68.88456 | 640.61020   | -2157.10410 | -1536.29104 | 1 |
| 33 | H | 84.40638 | 77.31168 | 69.53952 | 1687.88455  | 465.60692   | 2087.56452  | 1 |
| 34 | H | 83.37679 | 78.72227 | 69.09705 | -1293.07895 | -1899.88581 | -1463.57452 | 1 |
| 35 | C | 83.85187 | 76.65648 | 71.84261 | -153.07550  | -733.68902  | 248.70981   | 1 |
| 36 | O | 85.00590 | 76.44746 | 71.56877 | 186.15459   | -480.78787  | -449.34387  | 1 |
| 37 | N | 82.89847 | 75.77961 | 72.21340 | -487.53139  | 543.18517   | 42.03850    | 1 |
| 38 | C | 83.08330 | 74.38307 | 72.02373 | -699.35871  | 69.34393    | 360.10701   | 1 |
| 39 | H | 84.14785 | 74.22641 | 71.73100 | 2.81126     | -221.99807  | -2715.58072 | 1 |
| 40 | C | 82.65620 | 73.81175 | 73.44641 | -507.46439  | -592.59194  | 122.07761   | 1 |
| 41 | H | 82.42576 | 72.72337 | 73.42314 | -1975.08116 | 525.87560   | -1801.71556 | 1 |
| 42 | H | 83.45740 | 73.95722 | 74.20473 | 1588.27743  | -1913.22100 | 1113.83566  | 1 |
| 43 | C | 81.41019 | 74.69689 | 73.75750 | -613.62442  | -457.55993  | -194.14490  | 1 |
| 44 | H | 80.49401 | 74.32202 | 73.21220 | 1707.54637  | -721.27992  | 1996.92523  | 1 |
| 45 | H | 81.14612 | 74.72925 | 74.83961 | 758.23357   | 2100.81767  | 1560.55011  | 1 |
| 46 | C | 81.85237 | 76.10785 | 73.18026 | -352.41524  | 704.96076   | 49.21465    | 1 |
| 47 | H | 81.04572 | 76.65027 | 72.62147 | 1714.76886  | -2070.42778 | 443.35792   | 1 |
| 48 | H | 82.32628 | 76.78658 | 73.92743 | 1224.15040  | 1801.50881  | 1636.97633  | 1 |
| 49 | C | 81.98592 | 73.77088 | 70.94912 | 566.85117   | 537.05831   | 117.62814   | 1 |
| 50 | O | 81.86819 | 72.56645 | 70.90291 | -550.26779  | -406.08867  | 4.21666     | 1 |
| 51 | N | 81.42108 | 74.71134 | 70.20880 | 566.34832   | -425.77725  | 180.18749   | 1 |
| 52 | H | 81.75197 | 75.64447 | 70.45161 | 644.44502   | 2646.80550  | -52.73430   | 1 |
| 53 | C | 80.18576 | 74.55436 | 69.51484 | 612.34801   | -281.48662  | 411.56221   | 1 |
| 54 | H | 80.15201 | 75.41718 | 68.81399 | 1667.23498  | -1490.75142 | 1556.16753  | 1 |
| 55 | C | 80.23955 | 73.16296 | 68.73016 | -714.45746  | -175.43074  | 286.98927   | 1 |
| 56 | H | 80.45083 | 72.33930 | 69.48012 | -787.09484  | 1763.03619  | -1922.46060 | 1 |
| 57 | O | 81.28710 | 73.11128 | 67.73623 | -429.46514  | 516.51932   | -128.40526  | 1 |
| 58 | H | 81.92680 | 72.52554 | 68.18819 | 1981.82785  | 436.16847   | -1818.18182 | 1 |
| 59 | C | 78.79106 | 72.93359 | 68.16819 | 630.79189   | -468.94448  | 76.03230    | 1 |
| 60 | H | 78.71445 | 71.95692 | 67.63601 | -1775.71861 | 2062.30353  | 131.89849   | 1 |
| 61 | H | 78.02539 | 72.92506 | 68.97943 | -1855.14608 | 88.94118    | 1993.53760  | 1 |
| 62 | H | 78.50294 | 73.72611 | 67.43893 | -1504.82350 | -780.94249  | -2132.90992 | 1 |
| 63 | C | 78.99534 | 74.67742 | 70.61054 | 288.57638   | 618.62814   | -397.00270  | 1 |
| 64 | O | 79.16688 | 74.54791 | 71.80917 | 321.70495   | -185.26452  | 574.37218   | 1 |
| 65 | N | 77.85714 | 74.98628 | 69.99581 | -447.05792  | -446.53431  | 367.76425   | 1 |
| 66 | H | 77.84101 | 75.05348 | 68.97988 | 350.31316   | 1975.63644  | -1843.31522 | 1 |
| 67 | C | 76.65364 | 74.73265 | 70.72834 | -511.23061  | 374.03917   | -471.51480  | 1 |
| 68 | H | 76.93512 | 74.96440 | 71.78253 | 2234.79579  | -898.70890  | -1273.45190 | 1 |
| 69 | C | 75.50898 | 75.63937 | 70.08241 | 529.53781   | -159.34528  | 563.72604   | 1 |
| 70 | H | 74.60718 | 75.52849 | 70.74411 | 654.59388   | 2347.94251  | 1217.51488  | 1 |
| 71 | H | 75.80247 | 76.71958 | 70.14362 | -1526.55661 | 2103.42026  | 817.87394   | 1 |
| 72 | O | 75.15962 | 75.30212 | 68.72944 | -554.84278  | 14.12789    | 399.58769   | 1 |
| 73 | H | 75.01877 | 74.29923 | 68.85072 | 1297.06236  | 2061.84854  | 1220.68812  | 1 |
| 74 | C | 76.21624 | 73.17939 | 70.52017 | -662.15484  | -412.13544  | 123.62687   | 1 |
| 75 | O | 75.34387 | 72.89169 | 69.70602 | -540.01537  | -317.05804  | 274.91456   | 1 |
| 76 | N | 76.96246 | 72.40206 | 71.25595 | -202.76299  | -690.00100  | -131.49145  | 1 |
| 77 | H | 77.73007 | 72.78169 | 71.85138 | -702.62132  | -2617.37191 | 281.70413   | 1 |
| 78 | C | 76.47556 | 71.11310 | 71.66145 | -491.73914  | 576.34187   | 222.73509   | 1 |
| 79 | H | 75.38116 | 71.20880 | 71.84040 | 1977.17978  | -1823.58850 | -434.68928  | 1 |
| 80 | C | 76.78591 | 70.08252 | 70.48551 | -649.50797  | -328.66843  | 306.11224   | 1 |
| 81 | H | 77.64946 | 70.44695 | 69.88901 | 2075.07803  | 1452.16490  | -1004.45904 | 1 |
| 82 | C | 77.04485 | 68.63087 | 71.01330 | -615.18735  | -489.99689  | -70.96352   | 1 |
| 83 | H | 77.26412 | 67.92366 | 70.17921 | -1226.32661 | -1724.38906 | -1716.47170 | 1 |
| 84 | H | 77.91248 | 68.59787 | 71.71296 | 2381.64273  | -969.84735  | 900.46860   | 1 |
| 85 | H | 76.16125 | 68.22812 | 71.56169 | 2122.74991  | 1702.23946  | -141.36228  | 1 |
| 86 | C | 75.49890 | 69.95078 | 69.60294 | -501.86074  | -479.61276  | -376.42482  | 1 |
| 87 | H | 75.67716 | 69.32001 | 68.69995 | 993.79261   | -2246.95401 | -1177.81305 | 1 |
| 88 | H | 74.65826 | 69.48522 | 70.17042 | 42.71279    | -626.15391  | -2651.37258 | 1 |

|     |   |          |          |          |             |             |             |   |
|-----|---|----------|----------|----------|-------------|-------------|-------------|---|
| 89  | H | 75.14469 | 70.96380 | 69.25207 | -2026.39012 | -1590.33709 | -887.82922  | 1 |
| 90  | C | 77.37350 | 70.87263 | 72.98665 | -672.89153  | 382.57394   | -156.34072  | 1 |
| 91  | O | 78.28434 | 71.67656 | 73.21258 | 410.04627   | 221.86223   | 500.35950   | 1 |
| 92  | N | 76.97385 | 69.83774 | 73.69469 | -378.11782  | -443.79414  | -441.10984  | 1 |
| 93  | H | 76.14543 | 69.36984 | 73.32423 | 2404.15973  | -568.14894  | 1149.30085  | 1 |
| 94  | C | 77.84218 | 69.07534 | 74.53502 | -544.54484  | 466.16019   | 331.29119   | 1 |
| 95  | H | 77.54693 | 68.03195 | 74.28714 | -1409.80988 | -170.17955  | 2325.32679  | 1 |
| 96  | C | 79.35454 | 69.37633 | 74.18409 | -184.48284  | 116.78282   | -758.89137  | 1 |
| 97  | H | 79.59150 | 69.07275 | 73.13847 | 1893.78641  | 1861.14652  | 611.04528   | 1 |
| 98  | H | 79.56724 | 70.47617 | 74.21951 | -2170.79665 | -974.19311  | 1327.50117  | 1 |
| 99  | C | 80.25370 | 68.61646 | 75.21128 | 389.51668   | 672.81878   | -138.49152  | 1 |
| 100 | H | 79.80493 | 68.65839 | 76.22869 | 510.64577   | 1933.03327  | 1851.02484  | 1 |
| 101 | H | 80.28221 | 67.52918 | 74.97928 | -2302.30869 | -1105.72939 | -948.89774  | 1 |
| 102 | C | 81.71188 | 69.20871 | 75.26574 | -559.93427  | -126.34590  | 542.30857   | 1 |
| 103 | O | 82.48098 | 68.81859 | 76.10587 | -670.36003  | -111.83166  | 76.36448    | 1 |
| 104 | N | 81.97058 | 70.14145 | 74.32087 | -216.06729  | -537.07037  | 446.51379   | 1 |
| 105 | H | 81.39577 | 70.46090 | 73.53230 | -1251.96487 | 1074.12894  | -2168.52500 | 1 |
| 106 | H | 82.89668 | 70.55840 | 74.17881 | -2451.83023 | -720.73851  | 944.84612   | 1 |
| 107 | C | 77.41086 | 69.30046 | 76.10106 | 546.24052   | -563.88337  | -85.11809   | 1 |
| 108 | O | 76.96742 | 68.31343 | 76.63145 | 71.70702    | -307.40463  | 606.69673   | 1 |
| 109 | N | 77.68156 | 70.49239 | 76.65120 | 479.90863   | -504.50129  | 222.86849   | 1 |
| 110 | C | 77.10189 | 70.87434 | 77.90307 | 75.51268    | -600.91904  | 506.73700   | 1 |
| 111 | H | 76.86369 | 69.91359 | 78.41802 | -2033.61562 | 1795.30103  | 254.89480   | 1 |
| 112 | C | 78.29247 | 71.73223 | 78.51923 | 523.79067   | 517.99274   | 284.45581   | 1 |
| 113 | H | 77.99190 | 72.35460 | 79.39241 | 1599.61665  | -1127.00911 | 1895.98173  | 1 |
| 114 | H | 79.12879 | 71.08326 | 78.86261 | -1881.83093 | 1275.82488  | -1501.55016 | 1 |
| 115 | C | 78.69968 | 72.56366 | 77.26543 | -600.05639  | -404.05026  | 316.64485   | 1 |
| 116 | H | 77.93656 | 73.35040 | 77.03317 | -2597.05260 | 496.36221   | 657.73249   | 1 |
| 117 | H | 79.67882 | 73.08389 | 77.36778 | -1666.24518 | 1294.38985  | -1723.90591 | 1 |
| 118 | C | 78.71637 | 71.40328 | 76.17943 | 493.57570   | -129.95376  | -602.56394  | 1 |
| 119 | H | 78.43279 | 71.70757 | 75.12539 | -1469.08415 | -637.84797  | 2204.22581  | 1 |
| 120 | H | 79.66221 | 70.81193 | 76.15585 | -1038.97840 | 1068.88701  | -2280.71789 | 1 |
| 121 | C | 75.76967 | 71.77604 | 77.59208 | 188.88100   | 241.05089   | -727.87821  | 1 |
| 122 | O | 74.99836 | 71.46453 | 76.71704 | 531.88613   | -49.19943   | 427.07960   | 1 |
| 123 | N | 75.63797 | 72.73954 | 78.50332 | 708.14833   | 26.93417    | -179.73509  | 1 |
| 124 | H | 76.37909 | 72.85740 | 79.19341 | -2232.69501 | -1179.09831 | 1023.94816  | 1 |
| 125 | C | 74.82316 | 73.86280 | 78.14388 | -738.32412  | 259.92548   | 104.42456   | 1 |
| 126 | H | 74.37890 | 73.53531 | 77.17449 | 2028.89123  | 1260.02983  | 1311.33324  | 1 |
| 127 | C | 73.73139 | 74.01634 | 79.28683 | -258.65678  | -345.52513  | 661.28459   | 1 |
| 128 | H | 74.20773 | 74.17392 | 80.27815 | -1826.06090 | -1801.46097 | -918.64554  | 1 |
| 129 | C | 72.73754 | 75.17540 | 78.92748 | -541.23400  | 531.92970   | -218.41428  | 1 |
| 130 | H | 71.93218 | 75.28059 | 79.69219 | 1311.73218  | -2219.18200 | 882.19023   | 1 |
| 131 | H | 73.25037 | 76.16766 | 78.85248 | -1048.71298 | 1223.58118  | -2196.97971 | 1 |
| 132 | H | 72.24301 | 74.99599 | 77.94375 | 419.06414   | 1903.92898  | 1903.44670  | 1 |
| 133 | C | 72.87332 | 72.70413 | 79.28571 | -423.86431  | 152.66566   | -648.55262  | 1 |
| 134 | H | 72.07598 | 72.72908 | 80.06457 | 105.68386   | -2342.50080 | 1387.51238  | 1 |
| 135 | H | 72.37626 | 72.54668 | 78.30011 | -1695.63603 | -1484.73621 | -1531.02793 | 1 |
| 136 | H | 73.50720 | 71.80682 | 79.47842 | -1853.57121 | -487.39031  | 1936.59343  | 1 |
| 137 | C | 75.84036 | 75.12419 | 77.95917 | 539.71428   | -510.58232  | 267.58633   | 1 |
| 138 | O | 76.67898 | 75.06804 | 77.05708 | -15.93758   | -278.34085  | -624.49402  | 1 |
| 139 | N | 75.61052 | 76.07861 | 78.82541 | -676.81886  | 12.05292    | 276.17960   | 1 |
| 140 | H | 74.88107 | 75.89188 | 79.51233 | -1694.44250 | -373.84189  | -2100.66098 | 1 |
| 141 | C | 76.28765 | 77.32250 | 78.88708 | 412.33078   | -664.70360  | 108.35451   | 1 |
| 142 | H | 75.91633 | 77.76463 | 79.83870 | 1765.77476  | 1294.44366  | 1621.76594  | 1 |
| 143 | C | 77.84569 | 77.03713 | 78.88572 | -179.66635  | -721.95667  | -264.73915  | 1 |
| 144 | H | 78.10793 | 76.29542 | 79.67286 | -607.34922  | 2587.87032  | -598.10018  | 1 |
| 145 | H | 78.16305 | 76.57403 | 77.92190 | -359.69332  | -1479.13954 | -2259.74260 | 1 |
| 146 | C | 78.56198 | 78.40571 | 79.13441 | -240.01076  | 616.02425   | 431.85322   | 1 |
| 147 | H | 78.42338 | 79.08854 | 78.26610 | -1359.17131 | 782.54425   | 2227.99181  | 1 |
| 148 | H | 78.10239 | 78.92635 | 80.00429 | -820.36667  | 85.81767    | -2596.78715 | 1 |
| 149 | C | 80.09619 | 78.13991 | 79.41082 | -513.07015  | 236.18570   | -551.87280  | 1 |
| 150 | H | 80.22514 | 77.38711 | 80.22189 | 1816.11944  | -1183.11722 | -1650.94321 | 1 |



|     |   |          |          |          |             |             |             |   |
|-----|---|----------|----------|----------|-------------|-------------|-------------|---|
| 151 | H | 80.59587 | 77.71017 | 78.51199 | -1800.04429 | -1361.53473 | 1526.34643  | 1 |
| 152 | C | 80.74029 | 79.48665 | 79.81660 | 726.08972   | -253.19732  | -179.64713  | 1 |
| 153 | H | 80.96037 | 80.16877 | 78.97139 | 1224.27271  | -456.51798  | -2390.90304 | 1 |
| 154 | H | 80.19967 | 80.03422 | 80.61433 | 1206.40339  | -1150.93514 | -2154.90344 | 1 |
| 155 | N | 82.12947 | 79.17098 | 80.46743 | 329.70796   | -633.68968  | -155.67358  | 1 |
| 156 | H | 82.69008 | 80.01385 | 80.78474 | 1348.31305  | 1938.76845  | 1359.00643  | 1 |
| 157 | H | 82.12329 | 78.58404 | 81.35175 | 2096.92035  | 1446.54551  | -966.48890  | 1 |
| 158 | H | 82.84111 | 78.65742 | 79.87273 | -1197.07217 | -2303.53719 | 827.28733   | 1 |
| 159 | C | 75.95214 | 78.29954 | 77.60393 | -378.01186  | -556.17301  | -413.96481  | 1 |
| 160 | O | 75.68413 | 79.45811 | 77.80071 | -409.44433  | -307.55053  | -453.30833  | 1 |
| 161 | N | 76.11816 | 77.66415 | 76.45609 | -429.02477  | 524.70884   | 274.08502   | 1 |
| 162 | H | 76.42253 | 76.66127 | 76.44537 | 1706.34263  | -1425.96036 | 1574.38926  | 1 |
| 163 | C | 75.93861 | 78.39666 | 75.24966 | -45.25864   | -626.22952  | 478.93267   | 1 |
| 164 | H | 76.06001 | 79.46547 | 75.54575 | 1988.63164  | 570.90773   | 1772.87287  | 1 |
| 165 | C | 77.05743 | 77.83593 | 74.27905 | 551.77128   | -20.49526   | -564.54996  | 1 |
| 166 | H | 78.05245 | 77.89105 | 74.77547 | 1434.61535  | -1753.10253 | 1513.99471  | 1 |
| 167 | H | 76.88786 | 76.75277 | 74.08509 | -714.67738  | 1819.09770  | 1898.36494  | 1 |
| 168 | C | 77.07747 | 78.62981 | 72.93218 | 446.99263   | -555.77305  | 338.97221   | 1 |
| 169 | H | 76.11177 | 78.50946 | 72.38728 | 1953.68466  | 1892.25957  | -161.67766  | 1 |
| 170 | H | 77.20102 | 79.72256 | 73.10618 | -403.03785  | 2688.07032  | -188.43591  | 1 |
| 171 | C | 78.28857 | 78.04275 | 72.10238 | 567.86262   | 335.74681   | 434.04421   | 1 |
| 172 | H | 79.28404 | 78.28028 | 72.60523 | -1080.02275 | 1568.26081  | -1948.78900 | 1 |
| 173 | H | 78.23213 | 76.92938 | 72.05559 | -919.54108  | 2111.34692  | 1456.13463  | 1 |
| 174 | C | 78.25903 | 78.63370 | 70.67455 | 195.81897   | 173.33862   | -745.11536  | 1 |
| 175 | H | 77.42947 | 78.27108 | 70.03471 | 1405.67949  | -2301.21089 | -390.08113  | 1 |
| 176 | H | 78.32742 | 79.73928 | 70.62287 | -940.37328  | -1118.32446 | 2299.72133  | 1 |
| 177 | N | 79.56719 | 78.11715 | 69.98910 | 319.26422   | 656.36007   | -42.02424   | 1 |
| 178 | H | 79.71503 | 78.36422 | 68.96752 | 1961.03633  | 619.91968   | 1787.09422  | 1 |
| 179 | H | 80.47460 | 78.44938 | 70.42425 | 854.14343   | -2156.80752 | 1429.08711  | 1 |
| 180 | H | 79.69728 | 77.06526 | 69.98246 | 1237.02905  | -1378.50857 | -1998.28500 | 1 |
| 181 | C | 74.45118 | 78.10896 | 74.61744 | 532.53319   | -268.57236  | 517.55729   | 1 |
| 182 | O | 74.15347 | 78.61255 | 73.55882 | 266.16714   | -290.73804  | -558.88002  | 1 |
| 183 | N | 73.72147 | 77.30309 | 75.37851 | -226.25352  | 640.49678   | -270.32839  | 1 |
| 184 | H | 74.12566 | 77.00207 | 76.26590 | 2007.69063  | -1035.27229 | 1523.50231  | 1 |
| 185 | C | 72.36713 | 77.06312 | 75.03915 | -540.76542  | -573.33303  | 49.50000    | 1 |
| 186 | H | 72.15025 | 77.66921 | 74.12873 | -2374.20950 | -1036.76023 | 843.75774   | 1 |
| 187 | C | 72.24730 | 75.47872 | 74.80661 | -77.09082   | 666.87422   | -415.84136  | 1 |
| 188 | H | 72.55157 | 74.95833 | 75.75574 | -985.81834  | 617.19825   | 2463.91927  | 1 |
| 189 | O | 73.09322 | 74.93374 | 73.77871 | 293.29899   | -391.65602  | -477.80926  | 1 |
| 190 | H | 73.66423 | 74.33596 | 74.30234 | 2528.72714  | -681.76262  | -751.27122  | 1 |
| 191 | C | 70.70294 | 75.29280 | 74.58088 | 252.47363   | -605.14473  | 440.05134   | 1 |
| 192 | H | 70.43441 | 74.21753 | 74.46439 | -2052.65063 | 1456.49051  | -1043.51830 | 1 |
| 193 | H | 70.10383 | 75.69202 | 75.43222 | -2152.98800 | -1661.97574 | -161.70652  | 1 |
| 194 | H | 70.36080 | 75.81877 | 73.65967 | -473.12726  | -1584.27339 | 2165.61725  | 1 |
| 195 | C | 71.48652 | 77.43742 | 76.36584 | 360.36307   | 488.46713   | 505.10056   | 1 |
| 196 | O | 71.92329 | 77.20859 | 77.47433 | -200.08817  | -528.03552  | -385.82850  | 1 |
| 197 | N | 70.27502 | 77.87103 | 76.03485 | -597.54095  | -226.44775  | 355.20479   | 1 |
| 198 | H | 70.03428 | 77.99677 | 75.05268 | 2179.23655  | -1300.70981 | -991.33835  | 1 |
| 199 | C | 69.41004 | 78.21098 | 77.10979 | -687.68921  | 297.39807   | -249.45179  | 1 |
| 200 | H | 70.09826 | 78.40935 | 77.96406 | -349.16256  | -2467.37713 | -1101.72831 | 1 |
| 201 | C | 68.49575 | 79.45160 | 76.67469 | 672.47345   | 361.54328   | -201.62880  | 1 |
| 202 | H | 67.98611 | 79.25256 | 75.70460 | 1541.41502  | 582.18425   | 2169.97026  | 1 |
| 203 | H | 67.70019 | 79.61514 | 77.43776 | -2534.67717 | 60.25153    | 997.72295   | 1 |
| 204 | C | 69.41110 | 80.67957 | 76.57765 | 574.26774   | -389.43119  | -377.02542  | 1 |
| 205 | C | 69.84343 | 81.32014 | 77.77789 | 688.82679   | -287.33580  | -257.96133  | 1 |
| 206 | H | 69.51704 | 80.94748 | 78.76593 | 331.14182   | 1470.38163  | 2269.80013  | 1 |
| 207 | C | 69.85502 | 81.15026 | 75.30539 | -383.52382  | -675.04808  | 144.24917   | 1 |
| 208 | H | 69.53612 | 80.64551 | 74.37567 | 4.09847     | 1517.59662  | 2262.86397  | 1 |
| 209 | C | 70.69311 | 82.42087 | 77.67759 | -134.76730  | 428.45285   | -649.50303  | 1 |
| 210 | H | 71.03180 | 82.91390 | 78.60567 | -903.23433  | 1600.49020  | 2011.53387  | 1 |
| 211 | C | 70.70476 | 82.25799 | 75.25795 | -335.53281  | -615.00040  | -364.39058  | 1 |
| 212 | H | 71.04175 | 82.61435 | 74.26887 | 1596.45398  | -1369.33862 | 1732.02659  | 1 |

|     |   |          |          |          |             |             |             |   |
|-----|---|----------|----------|----------|-------------|-------------|-------------|---|
| 213 | C | 71.15121 | 82.93546 | 76.42991 | 585.48547   | -340.24194  | -406.23938  | 1 |
| 214 | O | 72.00475 | 84.06834 | 76.39071 | -419.15649  | -173.04408  | -511.94141  | 1 |
| 215 | H | 72.16626 | 84.12241 | 75.41943 | -1071.84350 | 1559.71507  | -1960.13012 | 1 |
| 216 | C | 68.39279 | 76.97852 | 77.45311 | 291.41878   | -183.13091  | 710.72246   | 1 |
| 217 | O | 68.22070 | 76.66253 | 78.60955 | 379.87695   | 523.47396   | -222.23622  | 1 |
| 218 | N | 67.80327 | 76.44098 | 76.36999 | 564.30591   | 373.09380   | 277.24371   | 1 |
| 219 | H | 68.02051 | 76.92135 | 75.49634 | -120.59931  | -2436.07824 | -1214.35098 | 1 |
| 220 | C | 66.50019 | 75.89096 | 76.66329 | 404.07514   | -299.37480  | 608.84009   | 1 |
| 221 | H | 66.18661 | 76.41996 | 77.59320 | -1071.07882 | -841.69025  | 2359.66467  | 1 |
| 222 | C | 65.57974 | 76.15815 | 75.41129 | -683.12807  | 68.71770    | -390.13096  | 1 |
| 223 | H | 65.50971 | 77.24912 | 75.19888 | 2068.88918  | 1596.58590  | 770.89603   | 1 |
| 224 | H | 66.01901 | 75.70283 | 74.49505 | 1379.86429  | 2342.49779  | -179.85638  | 1 |
| 225 | C | 64.16813 | 75.55471 | 75.70218 | -176.39967  | 537.49466   | 550.97268   | 1 |
| 226 | H | 64.23932 | 74.46029 | 75.89342 | -396.28051  | 1942.22168  | 1869.33314  | 1 |
| 227 | H | 63.72649 | 75.98979 | 76.62606 | -94.44700   | 586.00678   | -2659.20016 | 1 |
| 228 | C | 63.25643 | 75.86416 | 74.42742 | -291.69381  | -718.18079  | -150.72929  | 1 |
| 229 | H | 63.01603 | 76.94244 | 74.24556 | -2303.38776 | 1089.76242  | 964.62032   | 1 |
| 230 | H | 63.62834 | 75.42826 | 73.46671 | 884.16729   | 2568.80533  | -207.74283  | 1 |
| 231 | N | 62.06344 | 75.19311 | 74.72884 | -594.49522  | -252.81478  | 342.29276   | 1 |
| 232 | H | 62.08216 | 74.56950 | 75.52092 | -1735.17426 | 2084.05705  | -263.71605  | 1 |
| 233 | C | 60.98296 | 75.30026 | 74.06805 | 595.23177   | -271.52487  | 442.22352   | 1 |
| 234 | N | 60.97143 | 76.15867 | 72.96319 | 585.53813   | -424.79750  | -105.81303  | 1 |
| 235 | H | 61.72171 | 76.73108 | 72.57845 | 959.88797   | 1327.56823  | -2177.11905 | 1 |
| 236 | H | 60.16587 | 76.31934 | 72.35757 | 1578.48647  | 16.27378    | -2220.76233 | 1 |
| 237 | N | 59.97511 | 74.49011 | 74.61044 | -452.17763  | -390.33541  | -421.51853  | 1 |
| 238 | H | 59.98437 | 73.85443 | 75.40665 | 470.26107   | 1974.25629  | -1817.92087 | 1 |
| 239 | H | 59.03587 | 74.42872 | 74.21548 | 1856.67307  | -1573.97321 | -1224.35416 | 1 |
| 240 | C | 66.64467 | 74.28664 | 76.94019 | -531.47271  | -581.45780  | -55.06206   | 1 |
| 241 | O | 65.94099 | 73.78404 | 77.81751 | -243.00837  | 192.73507   | 609.52485   | 1 |
| 242 | N | 67.43669 | 73.69165 | 76.06047 | 343.49288   | -644.25607  | 38.09164    | 1 |
| 243 | H | 67.81237 | 74.42517 | 75.45506 | -1691.16043 | -1535.97525 | -1484.73099 | 1 |
| 244 | C | 68.25191 | 72.55765 | 76.35956 | 542.66492   | 350.14337   | 454.42563   | 1 |
| 245 | H | 68.99050 | 72.55449 | 75.52724 | 1209.57979  | -2396.95920 | 463.86744   | 1 |
| 246 | C | 68.92843 | 72.82066 | 77.77849 | -737.14309  | 145.93010   | 242.71942   | 1 |
| 247 | H | 68.14734 | 72.97361 | 78.55427 | -1050.18303 | 159.36419   | -2509.06125 | 1 |
| 248 | C | 69.83440 | 71.58824 | 78.11442 | -706.77696  | -252.88343  | -245.16230  | 1 |
| 249 | H | 70.32007 | 71.69223 | 79.11246 | -1624.64039 | -1665.49085 | 1417.86935  | 1 |
| 250 | H | 69.24617 | 70.64056 | 78.12772 | 2566.10521  | 598.51109   | 693.22305   | 1 |
| 251 | H | 70.64448 | 71.45916 | 77.35826 | -1972.69758 | 107.10018   | -1876.34312 | 1 |
| 252 | C | 69.85331 | 74.08066 | 77.69058 | 412.85148   | 672.58832   | -27.69222   | 1 |
| 253 | H | 70.36642 | 74.27511 | 78.66049 | 1447.02277  | 1762.76533  | -1490.78944 | 1 |
| 254 | H | 70.64017 | 73.96072 | 76.90932 | 1320.77379  | -145.20455  | 2378.68491  | 1 |
| 255 | H | 69.26625 | 74.99961 | 77.44095 | -1512.10848 | 1470.52031  | 1724.75147  | 1 |
| 256 | C | 67.46605 | 71.14819 | 76.47156 | -607.11113  | 499.56689   | 73.73769    | 1 |
| 257 | O | 67.96620 | 70.15559 | 75.93713 | 357.97126   | 460.81534   | 356.68785   | 1 |
| 258 | N | 66.38652 | 71.19857 | 77.21365 | 536.55407   | -368.62270  | 332.76306   | 1 |
| 259 | H | 66.05675 | 72.11971 | 77.61181 | 524.38866   | 2297.69985  | 1367.20941  | 1 |
| 260 | C | 66.06178 | 69.99212 | 77.92739 | 46.50277    | -774.29190  | -147.97904  | 1 |
| 261 | H | 67.05023 | 69.51108 | 78.10195 | 1676.51875  | 1883.29066  | 1032.55549  | 1 |
| 262 | C | 65.26333 | 70.38865 | 79.27166 | -559.41456  | -34.19198   | -556.30433  | 1 |
| 263 | H | 64.39803 | 71.04228 | 79.00613 | -64.66664   | 395.18769   | 2695.05373  | 1 |
| 264 | H | 64.82456 | 69.47463 | 79.73961 | -2703.44278 | -60.40056   | 333.79418   | 1 |
| 265 | C | 66.18115 | 71.09070 | 80.23649 | -519.76435  | 377.31045   | 459.42366   | 1 |
| 266 | H | 66.70736 | 71.90891 | 79.69584 | -1746.74323 | 1667.50644  | -1261.73691 | 1 |
| 267 | C | 65.38088 | 71.71115 | 81.37539 | 570.95554   | 16.46261    | -545.27700  | 1 |
| 268 | H | 66.04581 | 72.23147 | 82.11226 | 2391.58273  | 28.05277    | -1305.07271 | 1 |
| 269 | H | 64.64697 | 72.46976 | 80.99877 | 175.75588   | 917.63458   | 2559.43867  | 1 |
| 270 | H | 64.79982 | 70.93801 | 81.94144 | -1063.97851 | -2155.34650 | 1283.00462  | 1 |
| 271 | C | 67.21786 | 70.13277 | 80.80845 | 193.76014   | 2.62946     | -765.53141  | 1 |
| 272 | H | 67.88484 | 70.64149 | 81.55127 | 507.39394   | -846.55087  | 2539.60089  | 1 |
| 273 | H | 66.73356 | 69.27018 | 81.33507 | 1337.57841  | 1818.19054  | 1526.01994  | 1 |
| 274 | H | 67.87728 | 69.70558 | 80.01033 | 1100.88635  | -1172.91350 | -2199.08909 | 1 |

|     |   |          |          |          |             |            |            |   |
|-----|---|----------|----------|----------|-------------|------------|------------|---|
| 275 | C | 65.14165 | 69.09743 | 76.97395 | -549.21115  | 475.64486  | -309.38218 | 1 |
| 276 | O | 64.05253 | 68.73092 | 77.32493 | 556.06106   | -390.37755 | -78.24250  | 1 |
| 277 | O | 65.71674 | 68.72433 | 75.77121 | -572.27940  | -310.19032 | -209.75862 | 1 |
| 278 | H | 66.62853 | 69.27183 | 75.81667 | -1380.08193 | 2212.14486 | 790.85944  | 1 |

Listing 79: C00079.xmolout

|    |   |          |          |          |             |             |             |        |          |
|----|---|----------|----------|----------|-------------|-------------|-------------|--------|----------|
| 1  |   | 276      |          |          |             |             |             |        |          |
| 2  |   | 150.0000 | 150.0000 | 150.0000 | 0.0000      | 0.0000      | 0.0000***** | 0.6012 | 2405     |
|    |   | 0.2500   | 300.00   | 0.00     | 0.00        | 0.00        | -1293.5268  | 0.0000 | 300.0000 |
| 3  | H | 75.57644 | 83.27698 | 68.29153 | -2043.14101 | -1757.64893 | 399.89339   |        | 1        |
| 4  | N | 75.74152 | 83.95922 | 69.03344 | 426.75047   | 490.45733   | -334.42467  |        | 1        |
| 5  | H | 75.87190 | 83.38944 | 69.88857 | 442.25559   | -1110.30854 | -2448.52907 |        | 1        |
| 6  | C | 76.83404 | 84.81634 | 68.77747 | 415.32972   | -666.39213  | 83.73172    |        | 1        |
| 7  | H | 77.14503 | 84.64159 | 67.72401 | 879.32219   | 2491.00447  | 667.35213   |        | 1        |
| 8  | C | 76.40396 | 86.34689 | 69.04126 | 31.35357    | 477.41777   | 628.23362   |        | 1        |
| 9  | H | 76.18776 | 86.48428 | 70.12771 | 1168.38489  | 2240.25337  | -1019.71136 |        | 1        |
| 10 | H | 77.25091 | 87.03565 | 68.80758 | -360.43770  | 2534.90498  | 931.67112   |        | 1        |
| 11 | C | 75.18852 | 86.69121 | 68.22131 | 463.18208   | 512.70242   | -382.34388  |        | 1        |
| 12 | H | 74.38974 | 85.95382 | 68.46328 | 1725.29117  | 1863.52247  | -987.07854  |        | 1        |
| 13 | C | 74.69096 | 88.08680 | 68.57778 | 710.42801   | -144.27427  | -313.15367  |        | 1        |
| 14 | H | 73.76286 | 88.35336 | 68.00951 | 364.20195   | -1033.13725 | 2494.72524  |        | 1        |
| 15 | H | 74.45033 | 88.17505 | 69.66854 | 2567.61904  | 335.80679   | 847.48802   |        | 1        |
| 16 | H | 75.45805 | 88.86926 | 68.34369 | -2587.99029 | 680.92867   | -512.16411  |        | 1        |
| 17 | C | 75.47425 | 86.62155 | 66.72749 | 268.17616   | 741.64379   | -40.42634   |        | 1        |
| 18 | H | 74.57847 | 86.91659 | 66.12215 | 1283.54314  | -1945.37420 | -1411.27812 |        | 1        |
| 19 | H | 76.31222 | 87.30517 | 66.43449 | -1258.57796 | 1317.15249  | -2026.02085 |        | 1        |
| 20 | H | 75.76145 | 85.58669 | 66.40866 | -2502.84526 | 909.80597   | 575.92391   |        | 1        |
| 21 | C | 77.89338 | 84.29995 | 69.89291 | 619.36578   | -458.64843  | -172.09273  |        | 1        |
| 22 | O | 77.54047 | 83.39157 | 70.64918 | -81.40433   | 433.87611   | 522.34594   |        | 1        |
| 23 | N | 79.00642 | 84.99163 | 69.82843 | 175.23996   | -622.20190  | 341.55523   |        | 1        |
| 24 | H | 79.01382 | 85.72077 | 69.11420 | -876.57256  | -303.22879  | -2561.90213 |        | 1        |
| 25 | C | 80.17415 | 84.81022 | 70.61741 | -571.88214  | -534.10783  | -106.15033  |        | 1        |
| 26 | H | 80.56874 | 85.84392 | 70.71247 | -2713.20841 | -16.25800   | -248.80809  |        | 1        |
| 27 | C | 79.79376 | 84.15378 | 72.02412 | 166.60354   | 288.16399   | -716.09568  |        | 1        |
| 28 | H | 79.27701 | 83.17053 | 71.82272 | -2097.85574 | 1636.78449  | -586.18044  |        | 1        |
| 29 | O | 78.86909 | 84.94054 | 72.80602 | -317.80580  | -363.38227  | 484.43082   |        | 1        |
| 30 | H | 78.03248 | 84.46795 | 72.59717 | 1863.74748  | -1451.84923 | 1357.29467  |        | 1        |
| 31 | C | 81.18459 | 83.85494 | 72.69363 | 503.80731   | 517.99032   | 318.51606   |        | 1        |
| 32 | H | 81.07595 | 83.26238 | 73.63533 | 640.61020   | -2157.10410 | -1536.29104 |        | 1        |
| 33 | H | 81.85946 | 83.27655 | 72.01716 | 1687.88455  | 465.60692   | 2087.56452  |        | 1        |
| 34 | H | 81.71524 | 84.79568 | 72.96659 | -1293.07895 | -1899.88581 | -1463.57452 |        | 1        |
| 35 | C | 81.19342 | 83.85517 | 69.77161 | -153.07550  | -733.68902  | 248.70981   |        | 1        |
| 36 | O | 80.79299 | 82.83661 | 69.27087 | 186.15459   | -480.78787  | -449.34387  |        | 1        |
| 37 | N | 82.44222 | 84.34061 | 69.81716 | -487.53139  | 543.18517   | 42.03850    |        | 1        |
| 38 | C | 83.52915 | 83.62350 | 69.21995 | -699.35871  | 69.34393    | 360.10701   |        | 1        |
| 39 | H | 83.14448 | 83.17947 | 68.27407 | 2.81126     | -221.99807  | -2715.58072 |        | 1        |
| 40 | C | 84.62650 | 84.76032 | 69.05552 | -507.46439  | -592.59194  | 122.07761   |        | 1        |
| 41 | H | 85.66147 | 84.35545 | 68.99570 | -1975.08116 | 525.87560   | -1801.71556 |        | 1        |
| 42 | H | 84.46524 | 85.35662 | 68.12979 | 1588.27743  | -1913.22100 | 1113.83566  |        | 1        |
| 43 | C | 84.37597 | 85.61963 | 70.33209 | -613.62442  | -457.55993  | -194.14490  |        | 1        |
| 44 | H | 84.77622 | 85.10909 | 71.23825 | 1707.54637  | -721.27992  | 1996.92523  |        | 1        |
| 45 | H | 84.83779 | 86.63231 | 70.29406 | 758.23357   | 2100.81767  | 1560.55011  |        | 1        |
| 46 | C | 82.78658 | 85.65207 | 70.34766 | -352.41524  | 704.96076   | 49.21465    |        | 1        |
| 47 | H | 82.33125 | 85.77172 | 71.35732 | 1714.76886  | -2070.42778 | 443.35792   |        | 1        |
| 48 | H | 82.33134 | 86.39316 | 69.64794 | 1224.15040  | 1801.50881  | 1636.97633  |        | 1        |
| 49 | C | 84.07191 | 82.49440 | 70.27505 | 566.85117   | 537.05831   | 117.62814   |        | 1        |
| 50 | O | 84.32402 | 82.79073 | 71.43937 | -550.26779  | -406.08867  | 4.21666     |        | 1        |
| 51 | N | 84.20321 | 81.35285 | 69.63784 | 566.34832   | -425.77725  | 180.18749   |        | 1        |
| 52 | H | 83.87905 | 81.38642 | 68.67113 | 644.44502   | 2646.80550  | -52.73430   |        | 1        |
| 53 | C | 85.06094 | 80.28637 | 70.00954 | 612.34801   | -281.48662  | 411.56221   |        | 1        |
| 54 | H | 85.10479 | 79.66542 | 69.08701 | 1667.23498  | -1490.75142 | 1556.16753  |        | 1        |

|     |   |          |          |          |             |             |             |   |
|-----|---|----------|----------|----------|-------------|-------------|-------------|---|
| 55  | C | 86.47995 | 80.92334 | 70.38804 | -714.45746  | -175.43074  | 286.98927   | 1 |
| 56  | H | 86.32705 | 81.62782 | 71.25327 | -787.09484  | 1763.03619  | -1922.46060 | 1 |
| 57  | O | 87.11583 | 81.69481 | 69.35231 | -429.46514  | 516.51932   | -128.40526  | 1 |
| 58  | H | 87.16288 | 82.57425 | 69.77774 | 1981.82785  | 436.16847   | -1818.18182 | 1 |
| 59  | C | 87.26932 | 79.65098 | 70.86818 | 630.79189   | -468.94448  | 76.03230    | 1 |
| 60  | H | 88.27729 | 79.91832 | 71.26208 | -1775.71861 | 2062.30353  | 131.89849   | 1 |
| 61  | H | 86.72809 | 79.10464 | 71.67768 | -1855.14608 | 88.94118    | 1993.53760  | 1 |
| 62  | H | 87.42283 | 78.92996 | 70.03160 | -1504.82350 | -780.94249  | -2132.90992 | 1 |
| 63  | C | 84.48867 | 79.42322 | 71.27802 | 288.57638   | 618.62814   | -397.00270  | 1 |
| 64  | O | 84.65272 | 78.22817 | 71.28218 | 321.70495   | -185.26452  | 574.37218   | 1 |
| 65  | N | 84.06264 | 80.20619 | 72.26556 | -447.05792  | -446.53431  | 367.76425   | 1 |
| 66  | H | 84.05139 | 81.24901 | 72.12221 | 350.31316   | 1975.63644  | -1843.31522 | 1 |
| 67  | C | 83.11960 | 79.60992 | 73.16140 | -511.23061  | 374.03917   | -471.51480  | 1 |
| 68  | H | 83.48389 | 78.55821 | 73.21891 | 2234.79579  | -898.70890  | -1273.45190 | 1 |
| 69  | C | 83.27282 | 80.45119 | 74.51106 | 529.53781   | -159.34528  | 563.72604   | 1 |
| 70  | H | 82.83773 | 79.84377 | 75.34903 | 654.59388   | 2347.94251  | 1217.51488  | 1 |
| 71  | H | 84.37339 | 80.53028 | 74.71317 | -1526.55661 | 2103.42026  | 817.87394   | 1 |
| 72  | O | 82.64422 | 81.76200 | 74.50558 | -554.84278  | 14.12789    | 399.58769   | 1 |
| 73  | H | 83.31931 | 82.25795 | 74.00359 | 1297.06236  | 2061.84854  | 1220.68812  | 1 |
| 74  | C | 81.65122 | 79.69790 | 72.47480 | -662.15484  | -412.13544  | 123.62687   | 1 |
| 75  | O | 81.51203 | 79.56833 | 71.27430 | -540.01537  | -317.05804  | 274.91456   | 1 |
| 76  | N | 80.64165 | 79.68466 | 73.40277 | -202.76299  | -690.00100  | -131.49145  | 1 |
| 77  | H | 81.16359 | 79.88666 | 74.26581 | -702.62132  | -2617.37191 | 281.70413   | 1 |
| 78  | C | 79.53883 | 80.59182 | 73.12658 | -491.73914  | 576.34187   | 222.73509   | 1 |
| 79  | H | 80.00636 | 81.57931 | 72.93756 | 1977.17978  | -1823.58850 | -434.68928  | 1 |
| 80  | C | 78.66898 | 80.07286 | 71.91969 | -649.50797  | -328.66843  | 306.11224   | 1 |
| 81  | H | 78.61982 | 78.96290 | 71.95162 | 2075.07803  | 1452.16490  | -1004.45904 | 1 |
| 82  | C | 77.24396 | 80.71841 | 72.04948 | -615.18735  | -489.99689  | -70.96352   | 1 |
| 83  | H | 76.50809 | 80.22485 | 71.37230 | -1226.32661 | -1724.38906 | -1716.47170 | 1 |
| 84  | H | 76.84564 | 80.63892 | 73.09083 | 2381.64273  | -969.84735  | 900.46860   | 1 |
| 85  | H | 77.26840 | 81.81739 | 71.77261 | 2122.74991  | 1702.23946  | -141.36228  | 1 |
| 86  | C | 79.10629 | 80.57408 | 70.49665 | -501.86074  | -479.61276  | -376.42482  | 1 |
| 87  | H | 78.29828 | 80.41626 | 69.74357 | 993.79261   | -2246.95401 | -1177.81305 | 1 |
| 88  | H | 79.33891 | 81.66812 | 70.49449 | 42.71279    | -626.15391  | -2651.37258 | 1 |
| 89  | H | 80.02514 | 80.03688 | 70.11248 | -2026.39012 | -1590.33709 | -887.82922  | 1 |
| 90  | C | 78.61309 | 80.56490 | 74.45865 | -672.89153  | 382.57394   | -156.34072  | 1 |
| 91  | O | 78.01649 | 81.55497 | 74.82702 | 410.04627   | 221.86223   | 500.35950   | 1 |
| 92  | N | 78.45410 | 79.29801 | 74.87981 | -378.11782  | -443.79414  | -441.10984  | 1 |
| 93  | H | 79.11455 | 78.65852 | 74.43496 | 2404.15973  | -568.14894  | 1149.30085  | 1 |
| 94  | C | 78.06542 | 79.07061 | 76.25493 | -544.54484  | 466.16019   | 331.29119   | 1 |
| 95  | H | 78.84035 | 79.61518 | 76.83605 | -1409.80988 | -170.17955  | 2325.32679  | 1 |
| 96  | C | 76.65006 | 79.73583 | 76.44288 | -184.48284  | 116.78282   | -758.89137  | 1 |
| 97  | H | 76.70768 | 80.84213 | 76.26101 | 1893.78641  | 1861.14652  | 611.04528   | 1 |
| 98  | H | 75.94761 | 79.35578 | 75.66548 | -2170.79665 | -974.19311  | 1327.50117  | 1 |
| 99  | C | 76.11212 | 79.44328 | 77.88324 | 389.51668   | 672.81878   | -138.49152  | 1 |
| 100 | H | 76.37550 | 78.40987 | 78.20198 | 510.64577   | 1933.03327  | 1851.02484  | 1 |
| 101 | H | 76.62578 | 80.08910 | 78.62869 | -2302.30869 | -1105.72939 | -948.89774  | 1 |
| 102 | C | 74.55003 | 79.63498 | 77.97473 | -559.93427  | -126.34590  | 542.30857   | 1 |
| 103 | O | 73.95356 | 79.26332 | 78.95228 | -670.36003  | -111.83166  | 76.36448    | 1 |
| 104 | N | 74.00804 | 80.23039 | 76.88832 | -216.06729  | -537.07037  | 446.51379   | 1 |
| 105 | H | 74.47691 | 80.64679 | 76.07582 | -1251.96487 | 1074.12894  | -2168.52500 | 1 |
| 106 | H | 73.02059 | 80.49737 | 76.81691 | -2451.83023 | -720.73851  | 944.84612   | 1 |
| 107 | C | 78.21178 | 77.46168 | 76.43021 | 546.24052   | -563.88337  | -85.11809   | 1 |
| 108 | O | 79.32852 | 77.09321 | 76.69650 | 71.70702    | -307.40463  | 606.69673   | 1 |
| 109 | N | 77.12084 | 76.70512 | 76.21944 | 479.90863   | -504.50129  | 222.86849   | 1 |
| 110 | C | 77.23992 | 75.28058 | 76.20564 | 75.51268    | -600.91904  | 506.73700   | 1 |
| 111 | H | 78.07419 | 74.99413 | 76.88701 | -2033.61562 | 1795.30103  | 254.89480   | 1 |
| 112 | C | 75.76456 | 74.86687 | 76.64134 | 523.79067   | 517.99274   | 284.45581   | 1 |
| 113 | H | 75.52205 | 73.80414 | 76.41392 | 1599.61665  | -1127.00911 | 1895.98173  | 1 |
| 114 | H | 75.60567 | 75.00273 | 77.73656 | -1881.83093 | 1275.82488  | -1501.55016 | 1 |
| 115 | C | 74.90454 | 75.87828 | 75.82377 | -600.05639  | -404.05026  | 316.64485   | 1 |
| 116 | H | 74.71907 | 75.50515 | 74.78782 | -2597.05260 | 496.36221   | 657.73249   | 1 |

|     |   |          |          |          |             |             |             |   |
|-----|---|----------|----------|----------|-------------|-------------|-------------|---|
| 117 | H | 73.90166 | 76.05248 | 76.27446 | -1666.24518 | 1294.38985  | -1723.90591 | 1 |
| 118 | C | 75.81067 | 77.18487 | 75.80761 | 493.57570   | -129.95376  | -602.56394  | 1 |
| 119 | H | 75.94987 | 77.64096 | 74.79831 | -1469.08415 | -637.84797  | 2204.22581  | 1 |
| 120 | H | 75.50259 | 77.97358 | 76.53669 | -1038.97840 | 1068.88701  | -2280.71789 | 1 |
| 121 | C | 77.46562 | 74.84910 | 74.64315 | 188.88100   | 241.05089   | -727.87821  | 1 |
| 122 | O | 76.62973 | 75.11192 | 73.78821 | 531.88613   | -49.19943   | 427.07960   | 1 |
| 123 | N | 78.60099 | 74.20322 | 74.48523 | 708.14833   | 26.93417    | -179.73509  | 1 |
| 124 | H | 79.15535 | 74.06555 | 75.32678 | -2232.69501 | -1179.09831 | 1023.94816  | 1 |
| 125 | C | 79.00465 | 73.72338 | 73.16520 | -738.32412  | 259.92548   | 104.42456   | 1 |
| 126 | H | 78.54666 | 74.49746 | 72.50291 | 2028.89123  | 1260.02983  | 1311.33324  | 1 |
| 127 | C | 80.52333 | 73.65779 | 73.11156 | -258.65678  | -345.52513  | 661.28459   | 1 |
| 128 | H | 80.86198 | 72.94239 | 73.89379 | -1826.06090 | -1801.46097 | -918.64554  | 1 |
| 129 | C | 81.01284 | 73.15040 | 71.76820 | -541.23400  | 531.92970   | -218.41428  | 1 |
| 130 | H | 82.13559 | 73.08702 | 71.73040 | 1311.73218  | -2219.18200 | 882.19023   | 1 |
| 131 | H | 80.60961 | 72.12089 | 71.54700 | -1048.71298 | 1223.58118  | -2196.97971 | 1 |
| 132 | H | 80.68902 | 73.82455 | 70.92758 | 419.06414   | 1903.92898  | 1903.44670  | 1 |
| 133 | C | 81.14930 | 75.00623 | 73.41647 | -423.86431  | 152.66566   | -648.55262  | 1 |
| 134 | H | 82.27240 | 74.95030 | 73.44392 | 105.68386   | -2342.50080 | 1387.51238  | 1 |
| 135 | H | 80.87441 | 75.77398 | 72.64127 | -1695.63603 | -1484.73621 | -1531.02793 | 1 |
| 136 | H | 80.80696 | 75.40759 | 74.41067 | -1853.57121 | -487.39031  | 1936.59343  | 1 |
| 137 | C | 78.24914 | 72.25122 | 72.97338 | 539.71428   | -510.58232  | 267.58633   | 1 |
| 138 | O | 78.90009 | 71.25715 | 72.77154 | -15.93758   | -278.34085  | -624.49402  | 1 |
| 139 | N | 76.95117 | 72.40914 | 73.09051 | -676.81886  | 12.05292    | 276.17960   | 1 |
| 140 | H | 76.57825 | 73.36976 | 73.21540 | -1694.44250 | -373.84189  | -2100.66098 | 1 |
| 141 | C | 76.04686 | 71.33103 | 72.78991 | 412.33078   | -664.70360  | 108.35451   | 1 |
| 142 | H | 76.11231 | 71.27737 | 71.68162 | 1765.77476  | 1294.44366  | 1621.76594  | 1 |
| 143 | C | 76.55470 | 70.00373 | 73.46469 | -179.66635  | -721.95667  | -264.73915  | 1 |
| 144 | H | 77.59782 | 69.75427 | 73.12829 | -607.34922  | 2587.87032  | -598.10018  | 1 |
| 145 | H | 76.62455 | 70.12385 | 74.56998 | -359.69332  | -1479.13954 | -2259.74260 | 1 |
| 146 | C | 75.56711 | 68.84863 | 73.07596 | -240.01076  | 616.02425   | 431.85322   | 1 |
| 147 | H | 74.52326 | 69.09530 | 73.37257 | -1359.17131 | 782.54425   | 2227.99181  | 1 |
| 148 | H | 75.54427 | 68.69924 | 71.97362 | -820.36667  | 85.81767    | -2596.78715 | 1 |
| 149 | C | 76.06994 | 67.54477 | 73.81356 | -513.07015  | 236.18570   | -551.87280  | 1 |
| 150 | H | 77.11097 | 67.29329 | 73.50537 | 1816.11944  | -1183.11722 | -1650.94321 | 1 |
| 151 | H | 76.11143 | 67.70524 | 74.91562 | -1800.04429 | -1361.53473 | 1526.34643  | 1 |
| 152 | C | 75.10126 | 66.39036 | 73.46541 | 726.08972   | -253.19732  | -179.64713  | 1 |
| 153 | H | 74.07720 | 66.50823 | 73.87244 | 1224.27271  | -456.51798  | -2390.90304 | 1 |
| 154 | H | 75.05382 | 66.13609 | 72.38781 | 1206.40339  | -1150.93514 | -2154.90344 | 1 |
| 155 | N | 75.65754 | 65.09600 | 74.14978 | 329.70796   | -633.68968  | -155.67358  | 1 |
| 156 | H | 75.08564 | 64.21451 | 74.00410 | 1348.31305  | 1938.76845  | 1359.00643  | 1 |
| 157 | H | 76.62169 | 64.77001 | 73.84818 | 2096.92035  | 1446.54551  | -966.48890  | 1 |
| 158 | H | 75.75313 | 65.11153 | 75.20679 | -1197.07217 | -2303.53719 | 827.28733   | 1 |
| 159 | C | 74.57872 | 71.84772 | 73.29033 | -378.01186  | -556.17301  | -413.96481  | 1 |
| 160 | O | 74.00063 | 72.69579 | 72.65086 | -409.44433  | -307.55053  | -453.30833  | 1 |
| 161 | N | 74.17781 | 71.24843 | 74.40541 | -429.02477  | 524.70884   | 274.08502   | 1 |
| 162 | H | 74.75652 | 70.55744 | 74.88026 | 1706.34263  | -1425.96036 | 1574.38926  | 1 |
| 163 | C | 72.92414 | 71.60772 | 74.96892 | -45.25864   | -626.22952  | 478.93267   | 1 |
| 164 | H | 72.65441 | 72.59946 | 74.53600 | 1988.63164  | 570.90773   | 1772.87287  | 1 |
| 165 | C | 71.91732 | 70.45267 | 74.55091 | 551.77128   | -20.49526   | -564.54996  | 1 |
| 166 | H | 71.90951 | 70.33061 | 73.44496 | 1434.61535  | -1753.10253 | 1513.99471  | 1 |
| 167 | H | 72.25861 | 69.47427 | 74.95645 | -714.67738  | 1819.09770  | 1898.36494  | 1 |
| 168 | C | 70.48914 | 70.80519 | 75.07908 | 446.99263   | -555.77305  | 338.97221   | 1 |
| 169 | H | 70.49736 | 70.87187 | 76.19345 | 1953.68466  | 1892.25957  | -161.67766  | 1 |
| 170 | H | 70.16991 | 71.80713 | 74.71407 | -403.03785  | 2688.07032  | -188.43591  | 1 |
| 171 | C | 69.47128 | 69.69373 | 74.60032 | 567.86262   | 335.74681   | 434.04421   | 1 |
| 172 | H | 69.38798 | 69.67750 | 73.48968 | -1080.02275 | 1568.26081  | -1948.78900 | 1 |
| 173 | H | 69.82279 | 68.67864 | 74.89347 | -919.54108  | 2111.34692  | 1456.13463  | 1 |
| 174 | C | 68.10064 | 69.99995 | 75.25858 | 195.81897   | 173.33862   | -745.11536  | 1 |
| 175 | H | 68.09895 | 69.91634 | 76.37894 | 1405.67949  | -2301.21089 | -390.08113  | 1 |
| 176 | H | 67.64361 | 70.96359 | 74.94850 | -940.37328  | -1118.32446 | 2299.72133  | 1 |
| 177 | N | 67.07814 | 68.93367 | 74.80435 | 319.26422   | 656.36007   | -42.02424   | 1 |
| 178 | H | 66.05613 | 69.22288 | 75.05206 | 1961.03633  | 619.91968   | 1787.09422  | 1 |

|     |   |          |          |          |             |             |             |   |
|-----|---|----------|----------|----------|-------------|-------------|-------------|---|
| 179 | H | 67.02800 | 68.76674 | 73.75262 | 854.14343   | -2156.80752 | 1429.08711  | 1 |
| 180 | H | 67.20976 | 67.93279 | 75.24021 | 1237.02905  | -1378.50857 | -1998.28500 | 1 |
| 181 | C | 73.15094 | 71.55048 | 76.59427 | 532.53319   | -268.57236  | 517.55729   | 1 |
| 182 | O | 73.81414 | 70.67588 | 77.10350 | 266.16714   | -290.73804  | -558.88002  | 1 |
| 183 | N | 72.47957 | 72.53338 | 77.18462 | -226.25352  | 640.49678   | -270.32839  | 1 |
| 184 | H | 71.92107 | 73.17388 | 76.62299 | 2007.69063  | -1035.27229 | 1523.50231  | 1 |
| 185 | C | 72.54751 | 72.60443 | 78.60197 | -540.76542  | -573.33303  | 49.50000    | 1 |
| 186 | H | 73.48941 | 72.06418 | 78.85180 | -2374.20950 | -1036.76023 | 843.75774   | 1 |
| 187 | C | 72.48848 | 74.12552 | 79.07038 | -77.09082   | 666.87422   | -415.84136  | 1 |
| 188 | H | 71.47493 | 74.54453 | 78.82462 | -985.81834  | 617.19825   | 2463.91927  | 1 |
| 189 | O | 73.45074 | 75.01891 | 78.47543 | 293.29899   | -391.65602  | -477.80926  | 1 |
| 190 | H | 72.87107 | 75.74575 | 78.17317 | 2528.72714  | -681.76262  | -751.27122  | 1 |
| 191 | C | 72.61101 | 73.94404 | 80.62925 | 252.47363   | -605.14473  | 440.05134   | 1 |
| 192 | H | 72.46818 | 74.91095 | 81.16480 | -2052.65063 | 1456.49051  | -1043.51830 | 1 |
| 193 | H | 71.85317 | 73.22885 | 81.02375 | -2152.98800 | -1661.97574 | -161.70652  | 1 |
| 194 | H | 73.61410 | 73.55304 | 80.91692 | -473.12726  | -1584.27339 | 2165.61725  | 1 |
| 195 | C | 71.18924 | 71.84098 | 79.17558 | 360.36307   | 488.46713   | 505.10056   | 1 |
| 196 | O | 70.12579 | 72.40920 | 79.22451 | -200.08817  | -528.03552  | -385.82850  | 1 |
| 197 | N | 71.56362 | 70.64867 | 79.60333 | -597.54095  | -226.44775  | 355.20479   | 1 |
| 198 | H | 72.54854 | 70.42007 | 79.46303 | 2179.23655  | -1300.70981 | -991.33835  | 1 |
| 199 | C | 70.68104 | 69.60656 | 79.97484 | -687.68921  | 297.39807   | -249.45179  | 1 |
| 200 | H | 71.31756 | 68.87829 | 80.52362 | -349.16256  | -2467.37713 | -1101.72831 | 1 |
| 201 | C | 69.46048 | 70.18970 | 80.83018 | 672.47345   | 361.54328   | -201.62880  | 1 |
| 202 | H | 68.89308 | 70.94288 | 80.22829 | 1541.41502  | 582.18425   | 2169.97026  | 1 |
| 203 | H | 68.74450 | 69.37359 | 81.08518 | -2534.67717 | 60.25153    | 997.72295   | 1 |
| 204 | C | 70.05895 | 70.82527 | 82.09364 | 574.26774   | -389.43119  | -377.02542  | 1 |
| 205 | C | 70.64897 | 70.00850 | 83.10453 | 688.82679   | -287.33580  | -257.96133  | 1 |
| 206 | H | 70.63920 | 68.90671 | 83.01911 | 331.14182   | 1470.38163  | 2269.80013  | 1 |
| 207 | C | 70.08166 | 72.24755 | 82.20626 | -383.52382  | -675.04808  | 144.24917   | 1 |
| 208 | H | 69.64181 | 72.87763 | 81.40952 | 4.09847     | 1517.59662  | 2262.86397  | 1 |
| 209 | C | 71.25625 | 70.63476 | 84.19264 | -134.76730  | 428.45285   | -649.50303  | 1 |
| 210 | H | 71.72035 | 70.00612 | 84.97250 | -903.23433  | 1600.49020  | 2011.53387  | 1 |
| 211 | C | 70.70034 | 72.82772 | 83.31603 | -335.53281  | -615.00040  | -364.39058  | 1 |
| 212 | H | 70.72033 | 73.92924 | 83.38733 | 1596.45398  | -1369.33862 | 1732.02659  | 1 |
| 213 | C | 71.31024 | 72.05093 | 84.34356 | 585.48547   | -340.24194  | -406.23938  | 1 |
| 214 | O | 71.95091 | 72.62996 | 85.46998 | -419.15649  | -173.04408  | -511.94141  | 1 |
| 215 | H | 71.79779 | 73.58473 | 85.27570 | -1071.84350 | 1559.71507  | -1960.13012 | 1 |
| 216 | C | 70.02945 | 68.96454 | 78.61864 | 291.41878   | -183.13091  | 710.72246   | 1 |
| 217 | O | 69.49705 | 69.63136 | 77.75411 | 379.87695   | 523.47396   | -222.23622  | 1 |
| 218 | N | 70.09302 | 67.64474 | 78.71573 | 564.30591   | 373.09380   | 277.24371   | 1 |
| 219 | H | 70.56935 | 67.22725 | 79.51373 | -120.59931  | -2436.07824 | -1214.35098 | 1 |
| 220 | C | 69.73448 | 66.88959 | 77.54083 | 404.07514   | -299.37480  | 608.84009   | 1 |
| 221 | H | 70.21256 | 67.43223 | 76.69371 | -1071.07882 | -841.69025  | 2359.66467  | 1 |
| 222 | C | 70.26268 | 65.40902 | 77.73935 | -683.12807  | 68.71770    | -390.13096  | 1 |
| 223 | H | 71.35035 | 65.39566 | 77.97604 | 2068.88918  | 1596.58590  | 770.89603   | 1 |
| 224 | H | 69.75850 | 64.92562 | 78.60624 | 1379.86429  | 2342.49779  | -179.85638  | 1 |
| 225 | C | 69.96053 | 64.63897 | 76.41666 | -176.39967  | 537.49466   | 550.97268   | 1 |
| 226 | H | 68.88501 | 64.74542 | 76.14053 | -396.28051  | 1942.22168  | 1869.33314  | 1 |
| 227 | H | 70.53204 | 65.06775 | 75.56358 | -94.44700   | 586.00678   | -2659.20016 | 1 |
| 228 | C | 70.35103 | 63.10979 | 76.66397 | -291.69381  | -718.18079  | -150.72929  | 1 |
| 229 | H | 71.43568 | 62.91180 | 76.86017 | -2303.38776 | 1089.76242  | 964.62032   | 1 |
| 230 | H | 69.76062 | 62.58411 | 77.45710 | 884.16729   | 2568.80533  | -207.74283  | 1 |
| 231 | N | 70.02330 | 62.52305 | 75.43266 | -594.49522  | -252.81478  | 342.29276   | 1 |
| 232 | H | 69.62558 | 63.12974 | 74.73259 | -1735.17426 | 2084.05705  | -263.71605  | 1 |
| 233 | C | 70.18660 | 61.29464 | 75.14972 | 595.23177   | -271.52487  | 442.22352   | 1 |
| 234 | N | 70.73705 | 60.46495 | 76.13286 | 585.53813   | -424.79750  | -105.81303  | 1 |
| 235 | H | 71.03298 | 60.69462 | 77.08064 | 959.88797   | 1327.56823  | -2177.11905 | 1 |
| 236 | H | 70.90843 | 59.46480 | 76.02490 | 1578.48647  | 16.27378    | -2220.76233 | 1 |
| 237 | N | 69.75921 | 61.01734 | 73.84328 | -452.17763  | -390.33541  | -421.51853  | 1 |
| 238 | H | 69.34884 | 61.62097 | 73.13254 | 470.26107   | 1974.25629  | -1817.92087 | 1 |
| 239 | H | 69.79802 | 60.08531 | 73.42917 | 1856.67307  | -1573.97321 | -1224.35416 | 1 |
| 240 | C | 68.12279 | 66.88707 | 77.39414 | -531.47271  | -581.45780  | -55.06206   | 1 |

|     |   |          |          |          |             |             |             |   |
|-----|---|----------|----------|----------|-------------|-------------|-------------|---|
| 241 | O | 67.60643 | 66.68840 | 76.28761 | -243.00837  | 192.73507   | 609.52485   | 1 |
| 242 | N | 67.52320 | 66.97413 | 78.56491 | 343.49288   | -644.25607  | 38.09164    | 1 |
| 243 | H | 68.17877 | 67.13755 | 79.33146 | -1691.16043 | -1535.97525 | -1484.73099 | 1 |
| 244 | C | 66.14259 | 67.41727 | 78.67332 | 542.66492   | 350.14337   | 454.42563   | 1 |
| 245 | H | 65.67331 | 67.09995 | 77.71067 | 1209.57979  | -2396.95920 | 463.86744   | 1 |
| 246 | C | 65.51232 | 66.85493 | 79.93874 | -737.14309  | 145.93010   | 242.71942   | 1 |
| 247 | H | 66.09916 | 67.24470 | 80.80160 | -1050.18303 | 159.36419   | -2509.06125 | 1 |
| 248 | C | 64.08087 | 67.33629 | 80.08908 | -706.77696  | -252.88343  | -245.16230  | 1 |
| 249 | H | 63.61956 | 66.98164 | 81.05137 | -1624.64039 | -1665.49085 | 1417.86935  | 1 |
| 250 | H | 64.02336 | 68.46031 | 80.08521 | 2566.10521  | 598.51109   | 693.22305   | 1 |
| 251 | H | 63.42940 | 66.96709 | 79.24987 | -1972.69758 | 107.10018   | -1876.34312 | 1 |
| 252 | C | 65.56756 | 65.34038 | 79.99303 | 412.85148   | 672.58832   | -27.69222   | 1 |
| 253 | H | 65.18164 | 64.94488 | 80.97338 | 1447.02277  | 1762.76533  | -1490.78944 | 1 |
| 254 | H | 64.94697 | 64.87542 | 79.17813 | 1320.77379  | -145.20455  | 2378.68491  | 1 |
| 255 | H | 66.61947 | 64.96187 | 79.86594 | -1512.10848 | 1470.52031  | 1724.75147  | 1 |
| 256 | C | 66.19185 | 69.07504 | 78.90192 | -607.11113  | 499.56689   | 73.73769    | 1 |
| 257 | O | 66.44759 | 69.54419 | 79.98570 | 357.97126   | 460.81534   | 356.68785   | 1 |
| 258 | N | 65.93392 | 69.68708 | 77.75387 | 536.55407   | -368.62270  | 332.76306   | 1 |
| 259 | H | 65.76741 | 69.04840 | 76.97472 | 524.38866   | 2297.69985  | 1367.20941  | 1 |
| 260 | C | 65.12731 | 70.88497 | 77.81090 | 46.50277    | -774.29190  | -147.97904  | 1 |
| 261 | H | 64.33600 | 70.65921 | 78.56012 | 1676.51875  | 1883.29066  | 1032.55549  | 1 |
| 262 | C | 66.06775 | 72.10306 | 78.29307 | -559.41456  | -34.19198   | -556.30433  | 1 |
| 263 | H | 67.13869 | 71.81397 | 78.15881 | -64.66664   | 395.18769   | 2695.05373  | 1 |
| 264 | H | 65.90064 | 73.00829 | 77.66091 | -2703.44278 | -60.40056   | 333.79418   | 1 |
| 265 | C | 65.77253 | 72.40818 | 79.73778 | -519.76435  | 377.31045   | 459.42366   | 1 |
| 266 | H | 65.81037 | 71.44253 | 80.31282 | -1746.74323 | 1667.50644  | -1261.73691 | 1 |
| 267 | C | 66.83967 | 73.33692 | 80.30318 | 570.95554   | 16.46261    | -545.27700  | 1 |
| 268 | H | 66.69589 | 73.51305 | 81.40076 | 2391.58273  | 28.05277    | -1305.07271 | 1 |
| 269 | H | 67.86863 | 72.91369 | 80.16256 | 175.75588   | 917.63458   | 2559.43867  | 1 |
| 270 | H | 66.82271 | 74.33788 | 79.80013 | -1063.97851 | -2155.34650 | 1283.00462  | 1 |
| 271 | C | 64.39951 | 73.04446 | 79.89932 | 193.76014   | 2.62946     | -765.53141  | 1 |
| 272 | H | 64.18591 | 73.30367 | 80.96837 | 507.39394   | -846.55087  | 2539.60089  | 1 |
| 273 | H | 64.31402 | 73.99215 | 79.30695 | 1337.57841  | 1818.19054  | 1526.01994  | 1 |
| 274 | H | 63.57761 | 72.36579 | 79.55416 | 1100.88635  | -1172.91350 | -2199.08909 | 1 |
| 275 | C | 64.56320 | 71.12702 | 76.35038 | -549.21115  | 475.64486   | -309.38218  | 1 |
| 276 | O | 64.92153 | 70.45966 | 75.38859 | 556.06106   | -390.37755  | -78.24250   | 1 |
| 277 | O | 63.63119 | 72.16416 | 76.18959 | -572.27940  | -310.19032  | -209.75862  | 1 |
| 278 | H | 63.58045 | 72.47397 | 77.14328 | -1380.08193 | 2212.14486  | 790.85944   | 1 |

Listing 80: C00080.xmolout

|    |   |          |          |          |             |             |             |        |          |
|----|---|----------|----------|----------|-------------|-------------|-------------|--------|----------|
| 1  |   | 276      |          |          |             |             |             |        |          |
| 2  |   | 150.0000 | 150.0000 | 150.0000 | 0.0000      | 0.0000      | 0.0000***** | 2.7750 | 11100    |
|    |   | 0.2500   | 300.00   | 0.00     | 0.00        | 0.00        | -1293.5263  | 0.0000 | 300.0000 |
| 3  | H | 79.02095 | 77.29813 | 83.72580 | -2043.14101 | -1757.64893 | 399.89339   |        | 1        |
| 4  | N | 79.97342 | 77.03808 | 83.47662 | 426.75047   | 490.45733   | -334.42467  |        | 1        |
| 5  | H | 79.83678 | 76.53445 | 82.60082 | 442.25559   | -1110.30854 | -2448.52907 |        | 1        |
| 6  | C | 80.86905 | 78.12254 | 83.34954 | 415.32972   | -666.39213  | 83.73172    |        | 1        |
| 7  | H | 80.53529 | 78.92242 | 84.04633 | 879.32219   | 2491.00447  | 667.35213   |        | 1        |
| 8  | C | 82.35210 | 77.56385 | 83.66986 | 31.35357    | 477.41777   | 628.23362   |        | 1        |
| 9  | H | 82.52957 | 76.63876 | 83.07163 | 1168.38489  | 2240.25337  | -1019.71136 |        | 1        |
| 10 | H | 83.13159 | 78.30125 | 83.35513 | -360.43770  | 2534.90498  | 931.67112   |        | 1        |
| 11 | C | 82.43414 | 77.27966 | 85.14531 | 463.18208   | 512.70242   | -382.34388  |        | 1        |
| 12 | H | 81.49781 | 76.75553 | 85.44473 | 1725.29117  | 1863.52247  | -987.07854  |        | 1        |
| 13 | C | 83.61015 | 76.36667 | 85.46815 | 710.42801   | -144.27427  | -313.15367  |        | 1        |
| 14 | H | 83.61630 | 76.07052 | 86.54875 | 364.20195   | -1033.13725 | 2494.72524  |        | 1        |
| 15 | H | 83.58049 | 75.42249 | 84.86526 | 2567.61904  | 335.80679   | 847.48802   |        | 1        |
| 16 | H | 84.59191 | 76.86300 | 85.26138 | -2587.99029 | 680.92867   | -512.16411  |        | 1        |
| 17 | C | 82.55670 | 78.57079 | 85.94400 | 268.17616   | 741.64379   | -40.42634   |        | 1        |
| 18 | H | 82.64891 | 78.36928 | 87.04235 | 1283.54314  | -1945.37420 | -1411.27812 |        | 1        |
| 19 | H | 83.45943 | 79.16011 | 85.63820 | -1258.57796 | 1317.15249  | -2026.02085 |        | 1        |
| 20 | H | 81.66516 | 79.23412 | 85.80319 | -2502.84526 | 909.80597   | 575.92391   |        | 1        |

|    |   |          |          |          |             |             |             |   |
|----|---|----------|----------|----------|-------------|-------------|-------------|---|
| 21 | C | 80.85277 | 78.54700 | 81.78483 | 619.36578   | -458.64843  | -172.09273  | 1 |
| 22 | O | 80.78575 | 77.72534 | 80.86771 | -81.40433   | 433.87611   | 522.34594   | 1 |
| 23 | N | 81.00521 | 79.84985 | 81.72878 | 175.23996   | -622.20190  | 341.55523   | 1 |
| 24 | H | 81.01675 | 80.37759 | 82.60007 | -876.57256  | -303.22879  | -2561.90213 | 1 |
| 25 | C | 81.06251 | 80.48489 | 80.45296 | -571.88214  | -534.10783  | -106.15033  | 1 |
| 26 | H | 80.40883 | 79.81556 | 79.84879 | -2713.20841 | -16.25800   | -248.80809  | 1 |
| 27 | C | 80.48240 | 81.96823 | 80.63144 | 166.60354   | 288.16399   | -716.09568  | 1 |
| 28 | H | 81.21341 | 82.57499 | 81.23105 | -2097.85574 | 1636.78449  | -586.18044  | 1 |
| 29 | O | 79.22000 | 82.05018 | 81.31557 | -317.80580  | -363.38227  | 484.43082   | 1 |
| 30 | H | 79.45284 | 82.62570 | 82.07108 | 1863.74748  | -1451.84923 | 1357.29467  | 1 |
| 31 | C | 80.47248 | 82.50298 | 79.15317 | 503.80731   | 517.99032   | 318.51606   | 1 |
| 32 | H | 80.10472 | 83.55417 | 79.10443 | 640.61020   | -2157.10410 | -1536.29104 | 1 |
| 33 | H | 81.48935 | 82.48637 | 78.69350 | 1687.88455  | 465.60692   | 2087.56452  | 1 |
| 34 | H | 79.80433 | 81.89041 | 78.50418 | -1293.07895 | -1899.88581 | -1463.57452 | 1 |
| 35 | C | 82.58136 | 80.48249 | 79.85394 | -153.07550  | -733.68902  | 248.70981   | 1 |
| 36 | O | 82.64083 | 80.52345 | 78.64810 | 186.15459   | -480.78787  | -449.34387  | 1 |
| 37 | N | 83.60448 | 80.51901 | 80.72177 | -487.53139  | 543.18517   | 42.03850    | 1 |
| 38 | C | 84.94189 | 80.55371 | 80.21470 | -699.35871  | 69.34393    | 360.10701   | 1 |
| 39 | H | 84.89953 | 81.08552 | 79.23573 | 2.81126     | -221.99807  | -2715.58072 | 1 |
| 40 | C | 85.71644 | 81.30616 | 81.38177 | -507.46439  | -592.59194  | 122.07761   | 1 |
| 41 | H | 86.81437 | 81.12352 | 81.35854 | -1975.08116 | 525.87560   | -1801.71556 | 1 |
| 42 | H | 85.57154 | 82.40823 | 81.33059 | 1588.27743  | -1913.22100 | 1113.83566  | 1 |
| 43 | C | 85.01761 | 80.69841 | 82.63657 | -613.62442  | -457.55993  | -194.14490  | 1 |
| 44 | H | 85.40730 | 79.66652 | 82.83408 | 1707.54637  | -721.27992  | 1996.92523  | 1 |
| 45 | H | 85.17556 | 81.28559 | 83.56956 | 758.23357   | 2100.81767  | 1560.55011  | 1 |
| 46 | C | 83.50030 | 80.66078 | 82.16796 | -352.41524  | 704.96076   | 49.21465    | 1 |
| 47 | H | 82.92028 | 79.79206 | 82.56003 | 1714.76886  | -2070.42778 | 443.35792   | 1 |
| 48 | H | 82.92602 | 81.59958 | 82.34708 | 1224.15040  | 1801.50881  | 1636.97633  | 1 |
| 49 | C | 85.54549 | 79.03505 | 80.06185 | 566.85117   | 537.05831   | 117.62814   | 1 |
| 50 | O | 86.61251 | 78.88714 | 79.51312 | -550.26779  | -406.08867  | 4.21666     | 1 |
| 51 | N | 84.75252 | 78.10707 | 80.58995 | 566.34832   | -425.77725  | 180.18749   | 1 |
| 52 | H | 83.88747 | 78.43254 | 81.01887 | 644.44502   | 2646.80550  | -52.73430   | 1 |
| 53 | C | 85.29596 | 76.80804 | 80.81076 | 612.34801   | -281.48662  | 411.56221   | 1 |
| 54 | H | 86.24556 | 76.83858 | 80.22260 | 1667.23498  | -1490.75142 | 1556.16753  | 1 |
| 55 | C | 85.55672 | 76.60282 | 82.37525 | -714.45746  | -175.43074  | 286.98927   | 1 |
| 56 | H | 84.58162 | 76.35744 | 82.87338 | -787.09484  | 1763.03619  | -1922.46060 | 1 |
| 57 | O | 86.10098 | 77.73074 | 83.10067 | -429.46514  | 516.51932   | -128.40526  | 1 |
| 58 | H | 85.42457 | 77.83644 | 83.79736 | 1981.82785  | 436.16847   | -1818.18182 | 1 |
| 59 | C | 86.46706 | 75.32357 | 82.37170 | 630.79189   | -468.94448  | 76.03230    | 1 |
| 60 | H | 86.68928 | 74.97854 | 83.40856 | -1775.71861 | 2062.30353  | 131.89849   | 1 |
| 61 | H | 85.97866 | 74.46833 | 81.82995 | -1855.14608 | 88.94118    | 1993.53760  | 1 |
| 62 | H | 87.44602 | 75.52153 | 81.87488 | -1504.82350 | -780.94249  | -2132.90992 | 1 |
| 63 | C | 84.21825 | 75.69757 | 80.29642 | 288.57638   | 618.62814   | -397.00270  | 1 |
| 64 | O | 84.25121 | 74.56212 | 80.72802 | 321.70495   | -185.26452  | 574.37218   | 1 |
| 65 | N | 83.38784 | 76.17849 | 79.37827 | -447.05792  | -446.53431  | 367.76425   | 1 |
| 66 | H | 83.51705 | 77.14564 | 79.08494 | 350.31316   | 1975.63644  | -1843.31522 | 1 |
| 67 | C | 82.62169 | 75.20577 | 78.63780 | -511.23061  | 374.03917   | -471.51480  | 1 |
| 68 | H | 83.40666 | 74.42307 | 78.52019 | 2234.79579  | -898.70890  | -1273.45190 | 1 |
| 69 | C | 81.48862 | 74.68069 | 79.62204 | 529.53781   | -159.34528  | 563.72604   | 1 |
| 70 | H | 81.23638 | 73.63143 | 79.30910 | 654.59388   | 2347.94251  | 1217.51488  | 1 |
| 71 | H | 81.97004 | 74.61097 | 80.63502 | -1526.55661 | 2103.42026  | 817.87394   | 1 |
| 72 | O | 80.24406 | 75.40826 | 79.68971 | -554.84278  | 14.12789    | 399.58769   | 1 |
| 73 | H | 80.57249 | 76.25943 | 80.16355 | 1297.06236  | 2061.84854  | 1220.68812  | 1 |
| 74 | C | 82.19266 | 75.88713 | 77.23729 | -662.15484  | -412.13544  | 123.62687   | 1 |
| 75 | O | 83.07810 | 76.34210 | 76.51443 | -540.01537  | -317.05804  | 274.91456   | 1 |
| 76 | N | 80.90397 | 75.74723 | 76.99471 | -202.76299  | -690.00100  | -131.49145  | 1 |
| 77 | H | 80.34172 | 75.29631 | 77.72777 | -702.62132  | -2617.37191 | 281.70413   | 1 |
| 78 | C | 80.20375 | 76.58771 | 76.08590 | -491.73914  | 576.34187   | 222.73509   | 1 |
| 79 | H | 79.14462 | 76.48765 | 76.41054 | 1977.17978  | -1823.58850 | -434.68928  | 1 |
| 80 | C | 80.75549 | 78.07172 | 76.21815 | -649.50797  | -328.66843  | 306.11224   | 1 |
| 81 | H | 81.84780 | 78.10458 | 75.99920 | 2075.07803  | 1452.16490  | -1004.45904 | 1 |
| 82 | C | 79.96124 | 78.99614 | 75.23326 | -615.18735  | -489.99689  | -70.96352   | 1 |



|     |   |          |          |          |             |             |             |   |
|-----|---|----------|----------|----------|-------------|-------------|-------------|---|
| 83  | H | 80.31590 | 80.05253 | 75.28718 | -1226.32661 | -1724.38906 | -1716.47170 | 1 |
| 84  | H | 80.07625 | 78.65971 | 74.17572 | 2381.64273  | -969.84735  | 900.46860   | 1 |
| 85  | H | 78.87006 | 78.99958 | 75.46326 | 2122.74991  | 1702.23946  | -141.36228  | 1 |
| 86  | C | 80.48022 | 78.60014 | 77.66742 | -501.86074  | -479.61276  | -376.42482  | 1 |
| 87  | H | 80.83930 | 79.65328 | 77.78477 | 993.79261   | -2246.95401 | -1177.81305 | 1 |
| 88  | H | 79.39251 | 78.58582 | 77.91390 | 42.71279    | -626.15391  | -2651.37258 | 1 |
| 89  | H | 81.00316 | 77.98217 | 78.43845 | -2026.39012 | -1590.33709 | -887.82922  | 1 |
| 90  | C | 80.40021 | 76.07089 | 74.54046 | -672.89153  | 382.57394   | -156.34072  | 1 |
| 91  | O | 79.42836 | 75.96677 | 73.83595 | 410.04627   | 221.86223   | 500.35950   | 1 |
| 92  | N | 81.68139 | 75.92587 | 74.22737 | -378.11782  | -443.79414  | -441.10984  | 1 |
| 93  | H | 82.42389 | 76.13114 | 74.94273 | 2404.15973  | -568.14894  | 1149.30085  | 1 |
| 94  | C | 81.98351 | 75.21802 | 73.01542 | -544.54484  | 466.16019   | 331.29119   | 1 |
| 95  | H | 81.32248 | 75.71133 | 72.26780 | -1409.80988 | -170.17955  | 2325.32679  | 1 |
| 96  | C | 83.53504 | 75.40493 | 72.76317 | -184.48284  | 116.78282   | -758.89137  | 1 |
| 97  | H | 83.82338 | 76.47997 | 72.80546 | 1893.78641  | 1861.14652  | 611.04528   | 1 |
| 98  | H | 84.12358 | 74.90237 | 73.56952 | -2170.79665 | -974.19311  | 1327.50117  | 1 |
| 99  | C | 83.86781 | 74.78076 | 71.37175 | 389.51668   | 672.81878   | -138.49152  | 1 |
| 100 | H | 83.45692 | 73.74558 | 71.31147 | 510.64577   | 1933.03327  | 1851.02484  | 1 |
| 101 | H | 83.32972 | 75.32628 | 70.56555 | -2302.30869 | -1105.72939 | -948.89774  | 1 |
| 102 | C | 85.41066 | 74.75444 | 71.05633 | -559.93427  | -126.34590  | 542.30857   | 1 |
| 103 | O | 85.79257 | 74.29459 | 70.01107 | -670.36003  | -111.83166  | 76.36448    | 1 |
| 104 | N | 86.18865 | 75.27056 | 72.03244 | -216.06729  | -537.07037  | 446.51379   | 1 |
| 105 | H | 85.92635 | 75.68761 | 72.93313 | -1251.96487 | 1074.12894  | -2168.52500 | 1 |
| 106 | H | 87.21131 | 75.33113 | 71.97625 | -2451.83023 | -720.73851  | 944.84612   | 1 |
| 107 | C | 81.65276 | 73.62310 | 73.08558 | 546.24052   | -563.88337  | -85.11809   | 1 |
| 108 | O | 81.38154 | 73.11037 | 72.02868 | 71.70702    | -307.40463  | 606.69673   | 1 |
| 109 | N | 81.85915 | 73.01454 | 74.26677 | 479.90863   | -504.50129  | 222.86849   | 1 |
| 110 | C | 81.48433 | 71.64982 | 74.44965 | 75.51268    | -600.91904  | 506.73700   | 1 |
| 111 | H | 81.33783 | 71.22247 | 73.42892 | -2033.61562 | 1795.30103  | 254.89480   | 1 |
| 112 | C | 82.71289 | 71.08666 | 75.28867 | 523.79067   | 517.99274   | 284.45581   | 1 |
| 113 | H | 82.46449 | 70.14327 | 75.82524 | 1599.61665  | -1127.00911 | 1895.98173  | 1 |
| 114 | H | 83.58806 | 70.86859 | 74.63699 | -1881.83093 | 1275.82488  | -1501.55016 | 1 |
| 115 | C | 83.00177 | 72.28240 | 76.24901 | -600.05639  | -404.05026  | 316.64485   | 1 |
| 116 | H | 82.30506 | 72.27609 | 77.11624 | -2597.05260 | 496.36221   | 657.73249   | 1 |
| 117 | H | 84.02910 | 72.26656 | 76.67680 | -1666.24518 | 1294.38985  | -1723.90591 | 1 |
| 118 | C | 82.73862 | 73.53366 | 75.30773 | 493.57570   | -129.95376  | -602.56394  | 1 |
| 119 | H | 82.18149 | 74.36786 | 75.79727 | -1469.08415 | -637.84797  | 2204.22581  | 1 |
| 120 | H | 83.64238 | 73.93981 | 74.78930 | -1038.97840 | 1068.88701  | -2280.71789 | 1 |
| 121 | C | 80.16339 | 71.53605 | 75.41676 | 188.88100   | 241.05089   | -727.87821  | 1 |
| 122 | O | 80.05876 | 70.58927 | 76.16684 | 531.88613   | -49.19943   | 427.07960   | 1 |
| 123 | N | 79.32228 | 72.54586 | 75.25715 | 708.14833   | 26.93417    | -179.73509  | 1 |
| 124 | H | 79.55672 | 73.26220 | 74.57034 | -2232.69501 | -1179.09831 | 1023.94816  | 1 |
| 125 | C | 78.03464 | 72.43127 | 75.88342 | -738.32412  | 259.92548   | 104.42456   | 1 |
| 126 | H | 77.91359 | 71.32318 | 75.87393 | 2028.89123  | 1260.02983  | 1311.33324  | 1 |
| 127 | C | 78.12643 | 72.94631 | 77.38390 | -258.65678  | -345.52513  | 661.28459   | 1 |
| 128 | H | 78.27213 | 74.04746 | 77.41748 | -1826.06090 | -1801.46097 | -918.64554  | 1 |
| 129 | C | 76.83747 | 72.50070 | 78.15654 | -541.23400  | 531.92970   | -218.41428  | 1 |
| 130 | H | 76.85099 | 72.85758 | 79.21291 | 1311.73218  | -2219.18200 | 882.19023   | 1 |
| 131 | H | 75.90528 | 72.89229 | 77.68618 | -1048.71298 | 1223.58118  | -2196.97971 | 1 |
| 132 | H | 76.74479 | 71.38969 | 78.18384 | 419.06414   | 1903.92898  | 1903.44670  | 1 |
| 133 | C | 79.31440 | 72.21223 | 78.09857 | -423.86431  | 152.66566   | -648.55262  | 1 |
| 134 | H | 79.44053 | 72.56220 | 79.15056 | 105.68386   | -2342.50080 | 1387.51238  | 1 |
| 135 | H | 79.15320 | 71.10592 | 78.12805 | -1695.63603 | -1484.73621 | -1531.02793 | 1 |
| 136 | H | 80.27702 | 72.38752 | 77.56108 | -1853.57121 | -487.39031  | 1936.59343  | 1 |
| 137 | C | 76.98346 | 73.20155 | 74.91675 | 539.71428   | -510.58232  | 267.58633   | 1 |
| 138 | O | 76.93274 | 72.86709 | 73.73116 | -15.93758   | -278.34085  | -624.49402  | 1 |
| 139 | N | 76.25733 | 74.08635 | 75.55810 | -676.81886  | 12.05292    | 276.17960   | 1 |
| 140 | H | 76.47522 | 74.23259 | 76.54056 | -1694.44250 | -373.84189  | -2100.66098 | 1 |
| 141 | C | 75.18528 | 74.80301 | 74.96368 | 412.33078   | -664.70360  | 108.35451   | 1 |
| 142 | H | 74.93267 | 75.57195 | 75.72741 | 1765.77476  | 1294.44366  | 1621.76594  | 1 |
| 143 | C | 75.74458 | 75.41387 | 73.61412 | -179.66635  | -721.95667  | -264.73915  | 1 |
| 144 | H | 76.76333 | 75.83393 | 73.78148 | -607.34922  | 2587.87032  | -598.10018  | 1 |

|     |   |          |          |          |             |             |             |   |
|-----|---|----------|----------|----------|-------------|-------------|-------------|---|
| 145 | H | 75.87912 | 74.62554 | 72.83520 | -359.69332  | -1479.13954 | -2259.74260 | 1 |
| 146 | C | 74.74930 | 76.51810 | 73.12829 | -240.01076  | 616.02425   | 431.85322   | 1 |
| 147 | H | 73.82812 | 76.06347 | 72.69746 | -1359.17131 | 782.54425   | 2227.99181  | 1 |
| 148 | H | 74.40941 | 77.15239 | 73.97785 | -820.36667  | 85.81767    | -2596.78715 | 1 |
| 149 | C | 75.51698 | 77.39518 | 72.05832 | -513.07015  | 236.18570   | -551.87280  | 1 |
| 150 | H | 76.45387 | 77.81529 | 72.49199 | 1816.11944  | -1183.11722 | -1650.94321 | 1 |
| 151 | H | 75.83950 | 76.77163 | 71.19276 | -1800.04429 | -1361.53473 | 1526.34643  | 1 |
| 152 | C | 74.57411 | 78.53175 | 71.60087 | 726.08972   | -253.19732  | -179.64713  | 1 |
| 153 | H | 73.70276 | 78.19643 | 71.00388 | 1224.27271  | -456.51798  | -2390.90304 | 1 |
| 154 | H | 74.24011 | 79.20882 | 72.41216 | 1206.40339  | -1150.93514 | -2154.90344 | 1 |
| 155 | N | 75.39135 | 79.45908 | 70.63794 | 329.70796   | -633.68968  | -155.67358  | 1 |
| 156 | H | 74.85767 | 80.27497 | 70.21981 | 1348.31305  | 1938.76845  | 1359.00643  | 1 |
| 157 | H | 76.23504 | 79.95441 | 71.04989 | 2096.92035  | 1446.54551  | -966.48890  | 1 |
| 158 | H | 75.80490 | 79.01144 | 69.76899 | -1197.07217 | -2303.53719 | 827.28733   | 1 |
| 159 | C | 73.91255 | 73.79218 | 74.69683 | -378.01186  | -556.17301  | -413.96481  | 1 |
| 160 | O | 72.85858 | 74.04511 | 75.22187 | -409.44433  | -307.55053  | -453.30833  | 1 |
| 161 | N | 74.25550 | 72.76644 | 73.93616 | -429.02477  | 524.70884   | 274.08502   | 1 |
| 162 | H | 75.23179 | 72.70886 | 73.55044 | 1706.34263  | -1425.96036 | 1574.38926  | 1 |
| 163 | C | 73.24567 | 71.92485 | 73.37981 | -45.25864   | -626.22952  | 478.93267   | 1 |
| 164 | H | 73.86759 | 71.08550 | 72.99402 | 1988.63164  | 570.90773   | 1772.87287  | 1 |
| 165 | C | 72.22560 | 71.48234 | 74.50757 | 551.77128   | -20.49526   | -564.54996  | 1 |
| 166 | H | 72.75251 | 71.29988 | 75.47085 | 1434.61535  | -1753.10253 | 1513.99471  | 1 |
| 167 | H | 71.49865 | 72.30129 | 74.72221 | -714.67738  | 1819.09770  | 1898.36494  | 1 |
| 168 | C | 71.50276 | 70.18591 | 74.00939 | 446.99263   | -555.77305  | 338.97221   | 1 |
| 169 | H | 71.13395 | 70.31450 | 72.96750 | 1953.68466  | 1892.25957  | -161.67766  | 1 |
| 170 | H | 72.21326 | 69.33061 | 73.96925 | -403.03785  | 2688.07032  | -188.43591  | 1 |
| 171 | C | 70.29491 | 69.86525 | 74.97852 | 567.86262   | 335.74681   | 434.04421   | 1 |
| 172 | H | 70.65756 | 69.62968 | 76.00553 | -1080.02275 | 1568.26081  | -1948.78900 | 1 |
| 173 | H | 69.62581 | 70.75018 | 75.08717 | -919.54108  | 2111.34692  | 1456.13463  | 1 |
| 174 | C | 69.52276 | 68.67036 | 74.37189 | 195.81897   | 173.33862   | -745.11536  | 1 |
| 175 | H | 68.99102 | 68.89974 | 73.42686 | 1405.67949  | -2301.21089 | -390.08113  | 1 |
| 176 | H | 70.12204 | 67.74564 | 74.25363 | -940.37328  | -1118.32446 | 2299.72133  | 1 |
| 177 | N | 68.38638 | 68.26923 | 75.37277 | 319.26422   | 656.36007   | -42.02424   | 1 |
| 178 | H | 67.76492 | 67.46742 | 75.06211 | 1961.03633  | 619.91968   | 1787.09422  | 1 |
| 179 | H | 68.68690 | 67.93595 | 76.33473 | 854.14343   | -2156.80752 | 1429.08711  | 1 |
| 180 | H | 67.66588 | 69.01135 | 75.61111 | 1237.02905  | -1378.50857 | -1998.28500 | 1 |
| 181 | C | 72.58084 | 72.77146 | 72.15224 | 532.53319   | -268.57236  | 517.55729   | 1 |
| 182 | O | 73.26681 | 73.39758 | 71.38196 | 266.16714   | -290.73804  | -558.88002  | 1 |
| 183 | N | 71.26491 | 72.59278 | 72.11966 | -226.25352  | 640.49678   | -270.32839  | 1 |
| 184 | H | 70.69429 | 72.14601 | 72.84825 | 2007.69063  | -1035.27229 | 1523.50231  | 1 |
| 185 | C | 70.55860 | 72.98769 | 70.95279 | -540.76542  | -573.33303  | 49.50000    | 1 |
| 186 | H | 71.16078 | 73.76762 | 70.43186 | -2374.20950 | -1036.76023 | 843.75774   | 1 |
| 187 | C | 70.31636 | 71.66035 | 70.08191 | -77.09082   | 666.87422   | -415.84136  | 1 |
| 188 | H | 69.63780 | 70.97716 | 70.66395 | -985.81834  | 617.19825   | 2463.91927  | 1 |
| 189 | O | 71.47931 | 70.87301 | 69.77410 | 293.29899   | -391.65602  | -477.80926  | 1 |
| 190 | H | 71.26556 | 70.03276 | 70.22806 | 2528.72714  | -681.76262  | -751.27122  | 1 |
| 191 | C | 69.55120 | 72.22484 | 68.83227 | 252.47363   | -605.14473  | 440.05134   | 1 |
| 192 | H | 69.28151 | 71.40677 | 68.12392 | -2052.65063 | 1456.49051  | -1043.51830 | 1 |
| 193 | H | 68.58449 | 72.75213 | 69.11563 | -2152.98800 | -1661.97574 | -161.70652  | 1 |
| 194 | H | 70.17911 | 72.95210 | 68.26623 | -473.12726  | -1584.27339 | 2165.61725  | 1 |
| 195 | C | 69.15982 | 73.43650 | 71.68257 | 360.36307   | 488.46713   | 505.10056   | 1 |
| 196 | O | 68.82023 | 72.84298 | 72.68938 | -200.08817  | -528.03552  | -385.82850  | 1 |
| 197 | N | 68.55636 | 74.42233 | 71.03400 | -597.54095  | -226.44775  | 355.20479   | 1 |
| 198 | H | 68.98128 | 74.78079 | 70.17793 | 2179.23655  | -1300.70981 | -991.33835  | 1 |
| 199 | C | 67.21032 | 74.72464 | 71.36284 | -687.68921  | 297.39807   | -249.45179  | 1 |
| 200 | H | 67.04970 | 74.25169 | 72.36196 | -349.16256  | -2467.37713 | -1101.72831 | 1 |
| 201 | C | 67.01303 | 76.31752 | 71.33432 | 672.47345   | 361.54328   | -201.62880  | 1 |
| 202 | H | 66.89909 | 76.66063 | 70.28113 | 1541.41502  | 582.18425   | 2169.97026  | 1 |
| 203 | H | 66.06611 | 76.57877 | 71.86412 | -2534.67717 | 60.25153    | 997.72295   | 1 |
| 204 | C | 68.20868 | 77.02210 | 71.98591 | 574.26774   | -389.43119  | -377.02542  | 1 |
| 205 | C | 68.28013 | 77.16107 | 73.40511 | 688.82679   | -287.33580  | -257.96133  | 1 |
| 206 | H | 67.48033 | 76.75503 | 74.05287 | 331.14182   | 1470.38163  | 2269.80013  | 1 |

|     |   |          |          |          |             |             |             |   |
|-----|---|----------|----------|----------|-------------|-------------|-------------|---|
| 207 | C | 69.25547 | 77.52793 | 71.15577 | -383.52382  | -675.04808  | 144.24917   | 1 |
| 208 | H | 69.21105 | 77.40527 | 70.05872 | 4.09847     | 1517.59662  | 2262.86397  | 1 |
| 209 | C | 69.38066 | 77.82063 | 73.95335 | -134.76730  | 428.45285   | -649.50303  | 1 |
| 210 | H | 69.43440 | 77.93394 | 75.05037 | -903.23433  | 1600.49020  | 2011.53387  | 1 |
| 211 | C | 70.33582 | 78.18027 | 71.75261 | -335.53281  | -615.00040  | -364.39058  | 1 |
| 212 | H | 71.13592 | 78.57168 | 71.10003 | 1596.45398  | -1369.33862 | 1732.02659  | 1 |
| 213 | C | 70.43982 | 78.35693 | 73.16375 | 585.48547   | -340.24194  | -406.23938  | 1 |
| 214 | O | 71.53455 | 79.02527 | 73.77186 | -419.15649  | -173.04408  | -511.94141  | 1 |
| 215 | H | 72.03262 | 79.29478 | 72.96329 | -1071.84350 | 1559.71507  | -1960.13012 | 1 |
| 216 | C | 66.30237 | 74.09672 | 70.16492 | 291.41878   | -183.13091  | 710.72246   | 1 |
| 217 | O | 66.80670 | 73.45432 | 69.26232 | 379.87695   | 523.47396   | -222.23622  | 1 |
| 218 | N | 65.04434 | 74.41069 | 70.38938 | 564.30591   | 373.09380   | 277.24371   | 1 |
| 219 | H | 64.81266 | 74.94919 | 71.24237 | -120.59931  | -2436.07824 | -1214.35098 | 1 |
| 220 | C | 64.00155 | 74.14627 | 69.44810 | 404.07514   | -299.37480  | 608.84009   | 1 |
| 221 | H | 63.46499 | 75.11671 | 69.36638 | -1071.07882 | -841.69025  | 2359.66467  | 1 |
| 222 | C | 64.57180 | 73.58946 | 68.08844 | -683.12807  | 68.71770    | -390.13096  | 1 |
| 223 | H | 65.36395 | 74.26402 | 67.68595 | 2068.88918  | 1596.58590  | 770.89603   | 1 |
| 224 | H | 65.07394 | 72.60674 | 68.27294 | 1379.86429  | 2342.49779  | -179.85638  | 1 |
| 225 | C | 63.41080 | 73.41390 | 67.05772 | -176.39967  | 537.49466   | 550.97268   | 1 |
| 226 | H | 62.57990 | 72.81100 | 67.48663 | -396.28051  | 1942.22168  | 1869.33314  | 1 |
| 227 | H | 62.96380 | 74.39102 | 66.76953 | -94.44700   | 586.00678   | -2659.20016 | 1 |
| 228 | C | 64.08146 | 72.67598 | 65.80978 | -291.69381  | -718.18079  | -150.72929  | 1 |
| 229 | H | 64.85763 | 73.26431 | 65.25704 | -2303.38776 | 1089.76242  | 964.62032   | 1 |
| 230 | H | 64.51512 | 71.66715 | 66.03140 | 884.16729   | 2568.80533  | -207.74283  | 1 |
| 231 | N | 62.99342 | 72.48004 | 64.94888 | -594.49522  | -252.81478  | 342.29276   | 1 |
| 232 | H | 62.08823 | 72.76105 | 65.29245 | -1735.17426 | 2084.05705  | -263.71605  | 1 |
| 233 | C | 63.07623 | 71.96931 | 63.78745 | 595.23177   | -271.52487  | 442.22352   | 1 |
| 234 | N | 64.34257 | 71.58266 | 63.33543 | 585.53813   | -424.79750  | -105.81303  | 1 |
| 235 | H | 65.24384 | 71.64365 | 63.80761 | 959.88797   | 1327.56823  | -2177.11905 | 1 |
| 236 | H | 64.53627 | 71.16196 | 62.42616 | 1578.48647  | 16.27378    | -2220.76233 | 1 |
| 237 | N | 61.81420 | 71.89964 | 63.18151 | -452.17763  | -390.33541  | -421.51853  | 1 |
| 238 | H | 60.89473 | 72.18200 | 63.51775 | 470.26107   | 1974.25629  | -1817.92087 | 1 |
| 239 | H | 61.66416 | 71.51998 | 62.24602 | 1856.67307  | -1573.97321 | -1224.35416 | 1 |
| 240 | C | 63.06089 | 72.97848 | 70.12055 | -531.47271  | -581.45780  | -55.06206   | 1 |
| 241 | O | 63.39825 | 71.81677 | 70.18200 | -243.00837  | 192.73507   | 609.52485   | 1 |
| 242 | N | 61.92782 | 73.54736 | 70.52973 | 343.49288   | -644.25607  | 38.09164    | 1 |
| 243 | H | 61.88095 | 74.55616 | 70.38115 | -1691.16043 | -1535.97525 | -1484.73099 | 1 |
| 244 | C | 60.97283 | 72.90342 | 71.42562 | 542.66492   | 350.14337   | 454.42563   | 1 |
| 245 | H | 60.06177 | 73.54413 | 71.34962 | 1209.57979  | -2396.95920 | 463.86744   | 1 |
| 246 | C | 60.72671 | 71.47999 | 70.95491 | -737.14309  | 145.93010   | 242.71942   | 1 |
| 247 | H | 61.72110 | 70.95803 | 70.90942 | -1050.18303 | 159.36419   | -2509.06125 | 1 |
| 248 | C | 59.82789 | 70.71360 | 71.90591 | -706.77696  | -252.88343  | -245.16230  | 1 |
| 249 | H | 59.68662 | 69.64663 | 71.57768 | -1624.64039 | -1665.49085 | 1417.86935  | 1 |
| 250 | H | 60.25156 | 70.69264 | 72.95006 | 2566.10521  | 598.51109   | 693.22305   | 1 |
| 251 | H | 58.80633 | 71.17984 | 71.97450 | -1972.69758 | 107.10018   | -1876.34312 | 1 |
| 252 | C | 60.14082 | 71.45274 | 69.55453 | 412.85148   | 672.58832   | -27.69222   | 1 |
| 253 | H | 60.01792 | 70.40219 | 69.17283 | 1447.02277  | 1762.76533  | -1490.78944 | 1 |
| 254 | H | 59.12927 | 71.94265 | 69.51795 | 1320.77379  | -145.20455  | 2378.68491  | 1 |
| 255 | H | 60.80208 | 71.99853 | 68.82669 | -1512.10848 | 1470.52031  | 1724.75147  | 1 |
| 256 | C | 61.57407 | 72.94525 | 72.97399 | -607.11113  | 499.56689   | 73.73769    | 1 |
| 257 | O | 60.82569 | 72.69547 | 73.89069 | 357.97126   | 460.81534   | 356.68785   | 1 |
| 258 | N | 62.85956 | 73.23637 | 73.02863 | 536.55407   | -368.62270  | 332.76306   | 1 |
| 259 | H | 63.36754 | 73.40373 | 72.16160 | 524.38866   | 2297.69985  | 1367.20941  | 1 |
| 260 | C | 63.47712 | 73.40111 | 74.29739 | 46.50277    | -774.29190  | -147.97904  | 1 |
| 261 | H | 62.62940 | 73.55291 | 75.00483 | 1676.51875  | 1883.29066  | 1032.55549  | 1 |
| 262 | C | 64.33417 | 72.07022 | 74.63937 | -559.41456  | -34.19198   | -556.30433  | 1 |
| 263 | H | 65.11720 | 71.92996 | 73.85683 | -64.66664   | 395.18769   | 2695.05373  | 1 |
| 264 | H | 64.88257 | 72.20142 | 75.60194 | -2703.44278 | -60.40056   | 333.79418   | 1 |
| 265 | C | 63.43617 | 70.86687 | 74.69726 | -519.76435  | 377.31045   | 459.42366   | 1 |
| 266 | H | 62.88184 | 70.79972 | 73.73296 | -1746.74323 | 1667.50644  | -1261.73691 | 1 |
| 267 | C | 64.26099 | 69.59703 | 74.87386 | 570.95554   | 16.46261    | -545.27700  | 1 |
| 268 | H | 63.61276 | 68.68355 | 74.89723 | 2391.58273  | 28.05277    | -1305.07271 | 1 |

|     |   |          |          |          |             |             |             |   |
|-----|---|----------|----------|----------|-------------|-------------|-------------|---|
| 269 | H | 64.99582 | 69.46200 | 74.03899 | 175.75588   | 917.63458   | 2559.43867  | 1 |
| 270 | H | 64.84436 | 69.61374 | 75.83004 | -1063.97851 | -2155.34650 | 1283.00462  | 1 |
| 271 | C | 62.42158 | 70.97227 | 75.82755 | 193.76014   | 2.62946     | -765.53141  | 1 |
| 272 | H | 61.84911 | 70.01810 | 75.95947 | 507.39394   | -846.55087  | 2539.60089  | 1 |
| 273 | H | 62.91230 | 71.20348 | 76.80804 | 1337.57841  | 1818.19054  | 1526.01994  | 1 |
| 274 | H | 61.66571 | 71.78256 | 75.62407 | 1100.88635  | -1172.91350 | -2199.08909 | 1 |
| 275 | C | 64.50838 | 74.62364 | 74.17064 | -549.21115  | 475.64486   | -309.38218  | 1 |
| 276 | O | 64.88288 | 75.06694 | 73.10387 | 556.06106   | -390.37755  | -78.24250   | 1 |
| 277 | O | 65.04237 | 75.11804 | 75.37502 | -572.27940  | -310.19032  | -209.75862  | 1 |
| 278 | H | 64.53322 | 74.53693 | 76.01521 | -1380.08193 | 2212.14486  | 790.85944   | 1 |

Listing 81: C00081.xmolout

|    |   |          |          |          |             |             |             |        |          |
|----|---|----------|----------|----------|-------------|-------------|-------------|--------|----------|
| 1  |   | 276      |          |          |             |             |             |        |          |
| 2  |   | 150.0000 | 150.0000 | 150.0000 | 0.0000      | 0.0000      | 0.0000***** | 0.2750 | 1100     |
|    |   | 0.2500   | 300.00   | 0.00     | 0.00        | 0.00        | -1293.5211  | 0.0000 | 300.0000 |
| 3  | H | 74.17324 | 77.32821 | 70.79415 | -2043.14101 | -1757.64893 | 399.89339   |        | 1        |
| 4  | N | 74.49287 | 77.73899 | 69.90037 | 426.75047   | 490.45733   | -334.42467  |        | 1        |
| 5  | H | 73.63175 | 78.04654 | 69.43224 | 442.25559   | -1110.30854 | -2448.52907 |        | 1        |
| 6  | C | 75.47937 | 78.75883 | 69.96965 | 415.32972   | -666.39213  | 83.73172    |        | 1        |
| 7  | H | 75.60893 | 79.00154 | 71.05019 | 879.32219   | 2491.00447  | 667.35213   |        | 1        |
| 8  | C | 76.84202 | 78.12605 | 69.34476 | 31.35357    | 477.41777   | 628.23362   |        | 1        |
| 9  | H | 76.66678 | 77.83199 | 68.28329 | 1168.38489  | 2240.25337  | -1019.71136 |        | 1        |
| 10 | H | 77.66430 | 78.87748 | 69.32788 | -360.43770  | 2534.90498  | 931.67112   |        | 1        |
| 11 | C | 77.20127 | 76.92789 | 70.16848 | 463.18208   | 512.70242   | -382.34388  |        | 1        |
| 12 | H | 76.27862 | 76.32468 | 70.32906 | 1725.29117  | 1863.52247  | -987.07854  |        | 1        |
| 13 | C | 78.21257 | 76.04510 | 69.44504 | 710.42801   | -144.27427  | -313.15367  |        | 1        |
| 14 | H | 78.50395 | 75.16027 | 70.06842 | 364.20195   | -1033.13725 | 2494.72524  |        | 1        |
| 15 | H | 77.80216 | 75.65105 | 68.47988 | 2567.61904  | 335.80679   | 847.48802   |        | 1        |
| 16 | H | 79.15247 | 76.60424 | 69.20470 | -2587.99029 | 680.92867   | -512.16411  |        | 1        |
| 17 | C | 77.75814 | 77.31986 | 71.53218 | 268.17616   | 741.64379   | -40.42634   |        | 1        |
| 18 | H | 78.17611 | 76.43340 | 72.07554 | 1283.54314  | -1945.37420 | -1411.27812 |        | 1        |
| 19 | H | 78.58667 | 78.06703 | 71.44174 | -1258.57796 | 1317.15249  | -2026.02085 |        | 1        |
| 20 | H | 76.97261 | 77.77134 | 72.19086 | -2502.84526 | 909.80597   | 575.92391   |        | 1        |
| 21 | C | 74.86742 | 79.93108 | 69.11174 | 619.36578   | -458.64843  | -172.09273  |        | 1        |
| 22 | O | 73.64699 | 79.91459 | 68.64311 | -81.40433   | 433.87611   | 522.34594   |        | 1        |
| 23 | N | 75.68246 | 80.90619 | 68.86402 | 175.23996   | -622.20190  | 341.55523   |        | 1        |
| 24 | H | 76.61718 | 80.91017 | 69.26534 | -876.57256  | -303.22879  | -2561.90213 |        | 1        |
| 25 | C | 75.04456 | 81.98278 | 68.16751 | -571.88214  | -534.10783  | -106.15033  |        | 1        |
| 26 | H | 74.51772 | 82.50064 | 68.99331 | -2713.20841 | -16.25800   | -248.80809  |        | 1        |
| 27 | C | 76.12225 | 82.94138 | 67.54742 | 166.60354   | 288.16399   | -716.09568  |        | 1        |
| 28 | H | 76.90816 | 82.35411 | 66.99656 | -2097.85574 | 1636.78449  | -586.18044  |        | 1        |
| 29 | O | 76.88913 | 83.71109 | 68.51892 | -317.80580  | -363.38227  | 484.43082   |        | 1        |
| 30 | H | 77.79863 | 83.49284 | 68.25948 | 1863.74748  | -1451.84923 | 1357.29467  |        | 1        |
| 31 | C | 75.27029 | 83.78576 | 66.52861 | 503.80731   | 517.99032   | 318.51606   |        | 1        |
| 32 | H | 75.90442 | 84.51734 | 65.97501 | 640.61020   | -2157.10410 | -1536.29104 |        | 1        |
| 33 | H | 74.76736 | 83.13989 | 65.77023 | 1687.88455  | 465.60692   | 2087.56452  |        | 1        |
| 34 | H | 74.47356 | 84.36591 | 67.05019 | -1293.07895 | -1899.88581 | -1463.57452 |        | 1        |
| 35 | C | 73.82357 | 81.26402 | 67.20996 | -153.07550  | -733.68902  | 248.70981   |        | 1        |
| 36 | O | 72.80099 | 81.94669 | 67.08633 | 186.15459   | -480.78787  | -449.34387  |        | 1        |
| 37 | N | 74.35213 | 80.51860 | 66.17862 | -487.53139  | 543.18517   | 42.03850    |        | 1        |
| 38 | C | 73.57971 | 80.04334 | 65.09536 | -699.35871  | 69.34393    | 360.10701   |        | 1        |
| 39 | H | 72.92234 | 80.89404 | 64.80268 | 2.81126     | -221.99807  | -2715.58072 |        | 1        |
| 40 | C | 74.67551 | 79.59085 | 64.02998 | -507.46439  | -592.59194  | 122.07761   |        | 1        |
| 41 | H | 74.28648 | 78.82628 | 63.32006 | -1975.08116 | 525.87560   | -1801.71556 |        | 1        |
| 42 | H | 75.04037 | 80.44363 | 63.41623 | 1588.27743  | -1913.22100 | 1113.83566  |        | 1        |
| 43 | C | 75.78991 | 79.04216 | 64.96715 | -613.62442  | -457.55993  | -194.14490  |        | 1        |
| 44 | H | 75.52698 | 78.03571 | 65.36157 | 1707.54637  | -721.27992  | 1996.92523  |        | 1        |
| 45 | H | 76.78529 | 78.94713 | 64.47986 | 758.23357   | 2100.81767  | 1560.55011  |        | 1        |
| 46 | C | 75.74969 | 80.15221 | 66.11848 | -352.41524  | 704.96076   | 49.21465    |        | 1        |
| 47 | H | 76.07191 | 79.80491 | 67.12758 | 1714.76886  | -2070.42778 | 443.35792   |        | 1        |
| 48 | H | 76.30173 | 81.08923 | 65.86349 | 1224.15040  | 1801.50881  | 1636.97633  |        | 1        |

|     |   |          |          |          |             |             |             |   |
|-----|---|----------|----------|----------|-------------|-------------|-------------|---|
| 49  | C | 72.69819 | 78.66054 | 65.32483 | 566.85117   | 537.05831   | 117.62814   | 1 |
| 50  | O | 72.08722 | 78.22384 | 64.38110 | -550.26779  | -406.08867  | 4.21666     | 1 |
| 51  | N | 72.84164 | 78.15753 | 66.53694 | 566.34832   | -425.77725  | 180.18749   | 1 |
| 52  | H | 73.37707 | 78.70558 | 67.22300 | 644.44502   | 2646.80550  | -52.73430   | 1 |
| 53  | C | 72.12839 | 76.97629 | 66.89561 | 612.34801   | -281.48662  | 411.56221   | 1 |
| 54  | H | 71.60777 | 76.69982 | 65.94894 | 1667.23498  | -1490.75142 | 1556.16753  | 1 |
| 55  | C | 73.29808 | 75.93069 | 67.20212 | -714.45746  | -175.43074  | 286.98927   | 1 |
| 56  | H | 74.04857 | 76.43903 | 67.86618 | -787.09484  | 1763.03619  | -1922.46060 | 1 |
| 57  | O | 74.04625 | 75.57110 | 66.01382 | -429.46514  | 516.51932   | -128.40526  | 1 |
| 58  | H | 74.90821 | 75.97957 | 66.20977 | 1981.82785  | 436.16847   | -1818.18182 | 1 |
| 59  | C | 72.75325 | 74.66266 | 67.95244 | 630.79189   | -468.94448  | 76.03230    | 1 |
| 60  | H | 73.45823 | 73.80872 | 67.82133 | -1775.71861 | 2062.30353  | 131.89849   | 1 |
| 61  | H | 72.66979 | 74.82170 | 69.05697 | -1855.14608 | 88.94118    | 1993.53760  | 1 |
| 62  | H | 71.76195 | 74.32560 | 67.56169 | -1504.82350 | -780.94249  | -2132.90992 | 1 |
| 63  | C | 71.04719 | 77.46226 | 68.00551 | 288.57638   | 618.62814   | -397.00270  | 1 |
| 64  | O | 70.52423 | 78.54912 | 67.91162 | 321.70495   | -185.26452  | 574.37218   | 1 |
| 65  | N | 70.69046 | 76.49251 | 68.85558 | -447.05792  | -446.53431  | 367.76425   | 1 |
| 66  | H | 71.18598 | 75.60073 | 68.87280 | 350.31316   | 1975.63644  | -1843.31522 | 1 |
| 67  | C | 70.14941 | 76.94643 | 70.11503 | -511.23061  | 374.03917   | -471.51480  | 1 |
| 68  | H | 69.28286 | 77.60888 | 69.88324 | 2234.79579  | -898.70890  | -1273.45190 | 1 |
| 69  | C | 69.82086 | 75.58191 | 70.86233 | 529.53781   | -159.34528  | 563.72604   | 1 |
| 70  | H | 69.41201 | 75.85366 | 71.86838 | 654.59388   | 2347.94251  | 1217.51488  | 1 |
| 71  | H | 68.99327 | 75.02980 | 70.34302 | -1526.55661 | 2103.42026  | 817.87394   | 1 |
| 72  | O | 70.94569 | 74.66333 | 70.98012 | -554.84278  | 14.12789    | 399.58769   | 1 |
| 73  | H | 71.66108 | 75.30816 | 71.18995 | 1297.06236  | 2061.84854  | 1220.68812  | 1 |
| 74  | C | 71.33968 | 77.68937 | 70.92138 | -662.15484  | -412.13544  | 123.62687   | 1 |
| 75  | O | 72.42410 | 77.09816 | 71.11505 | -540.01537  | -317.05804  | 274.91456   | 1 |
| 76  | N | 70.95262 | 78.83305 | 71.42004 | -202.76299  | -690.00100  | -131.49145  | 1 |
| 77  | H | 69.99609 | 79.08188 | 71.16699 | -702.62132  | -2617.37191 | 281.70413   | 1 |
| 78  | C | 71.91754 | 79.85374 | 71.72306 | -491.73914  | 576.34187   | 222.73509   | 1 |
| 79  | H | 72.71421 | 79.67587 | 70.96556 | 1977.17978  | -1823.58850 | -434.68928  | 1 |
| 80  | C | 71.15966 | 81.23299 | 71.55244 | -649.50797  | -328.66843  | 306.11224   | 1 |
| 81  | H | 70.15524 | 81.17875 | 72.02604 | 2075.07803  | 1452.16490  | -1004.45904 | 1 |
| 82  | C | 71.98264 | 82.42779 | 72.14885 | -615.18735  | -489.99689  | -70.96352   | 1 |
| 83  | H | 71.53522 | 83.41325 | 71.87862 | -1226.32661 | -1724.38906 | -1716.47170 | 1 |
| 84  | H | 72.02517 | 82.38707 | 73.27235 | 2381.64273  | -969.84735  | 900.46860   | 1 |
| 85  | H | 73.03386 | 82.42539 | 71.77590 | 2122.74991  | 1702.23946  | -141.36228  | 1 |
| 86  | C | 71.03706 | 81.51904 | 70.01458 | -501.86074  | -479.61276  | -376.42482  | 1 |
| 87  | H | 70.46460 | 82.45563 | 69.81524 | 993.79261   | -2246.95401 | -1177.81305 | 1 |
| 88  | H | 72.03828 | 81.63371 | 69.53330 | 42.71279    | -626.15391  | -2651.37258 | 1 |
| 89  | H | 70.51846 | 80.68936 | 69.47750 | -2026.39012 | -1590.33709 | -887.82922  | 1 |
| 90  | C | 72.51437 | 79.66531 | 73.22627 | -672.89153  | 382.57394   | -156.34072  | 1 |
| 91  | O | 72.40745 | 80.54636 | 74.05183 | 410.04627   | 221.86223   | 500.35950   | 1 |
| 92  | N | 73.16870 | 78.52109 | 73.32163 | -378.11782  | -443.79414  | -441.10984  | 1 |
| 93  | H | 73.12996 | 77.81364 | 72.55506 | 2404.15973  | -568.14894  | 1149.30085  | 1 |
| 94  | C | 73.79564 | 78.18502 | 74.57749 | -544.54484  | 466.16019   | 331.29119   | 1 |
| 95  | H | 74.52756 | 78.99154 | 74.80297 | -1409.80988 | -170.17955  | 2325.32679  | 1 |
| 96  | C | 72.59949 | 78.17614 | 75.62305 | -184.48284  | 116.78282   | -758.89137  | 1 |
| 97  | H | 72.12370 | 79.18915 | 75.65090 | 1893.78641  | 1861.14652  | 611.04528   | 1 |
| 98  | H | 71.80386 | 77.47601 | 75.28148 | -2170.79665 | -974.19311  | 1327.50117  | 1 |
| 99  | C | 73.09017 | 77.79979 | 77.05425 | 389.51668   | 672.81878   | -138.49152  | 1 |
| 100 | H | 73.45673 | 76.75027 | 77.06523 | 510.64577   | 1933.03327  | 1851.02484  | 1 |
| 101 | H | 73.97069 | 78.41027 | 77.34640 | -2302.30869 | -1105.72939 | -948.89774  | 1 |
| 102 | C | 71.95170 | 78.00757 | 78.12311 | -559.93427  | -126.34590  | 542.30857   | 1 |
| 103 | O | 72.23217 | 78.02789 | 79.29778 | -670.36003  | -111.83166  | 76.36448    | 1 |
| 104 | N | 70.71585 | 78.10660 | 77.59644 | -216.06729  | -537.07037  | 446.51379   | 1 |
| 105 | H | 70.42264 | 78.13168 | 76.61213 | -1251.96487 | 1074.12894  | -2168.52500 | 1 |
| 106 | H | 69.86920 | 78.28172 | 78.14844 | -2451.83023 | -720.73851  | 944.84612   | 1 |
| 107 | C | 74.43573 | 76.72634 | 74.36020 | 546.24052   | -563.88337  | -85.11809   | 1 |
| 108 | O | 73.75764 | 75.88657 | 73.77672 | 71.70702    | -307.40463  | 606.69673   | 1 |
| 109 | N | 75.64503 | 76.58626 | 74.89872 | 479.90863   | -504.50129  | 222.86849   | 1 |
| 110 | C | 76.37732 | 75.35763 | 74.75144 | 75.51268    | -600.91904  | 506.73700   | 1 |

|     |   |          |          |          |             |             |             |   |
|-----|---|----------|----------|----------|-------------|-------------|-------------|---|
| 111 | H | 76.20706 | 75.05322 | 73.69475 | -2033.61562 | 1795.30103  | 254.89480   | 1 |
| 112 | C | 77.85840 | 75.78385 | 75.10834 | 523.79067   | 517.99274   | 284.45581   | 1 |
| 113 | H | 78.46782 | 74.93288 | 75.48938 | 1599.61665  | -1127.00911 | 1895.98173  | 1 |
| 114 | H | 78.39726 | 76.18211 | 74.21671 | -1881.83093 | 1275.82488  | -1501.55016 | 1 |
| 115 | C | 77.62782 | 76.89933 | 76.17752 | -600.05639  | -404.05026  | 316.64485   | 1 |
| 116 | H | 77.37981 | 76.45302 | 77.16703 | -2597.05260 | 496.36221   | 657.73249   | 1 |
| 117 | H | 78.51146 | 77.55779 | 76.33314 | -1666.24518 | 1294.38985  | -1723.90591 | 1 |
| 118 | C | 76.37829 | 77.65948 | 75.55731 | 493.57570   | -129.95376  | -602.56394  | 1 |
| 119 | H | 75.70403 | 78.14507 | 76.29993 | -1469.08415 | -637.84797  | 2204.22581  | 1 |
| 120 | H | 76.63674 | 78.39236 | 74.75598 | -1038.97840 | 1068.88701  | -2280.71789 | 1 |
| 121 | C | 75.77834 | 74.24867 | 75.80141 | 188.88100   | 241.05089   | -727.87821  | 1 |
| 122 | O | 76.45599 | 73.88069 | 76.73437 | 531.88613   | -49.19943   | 427.07960   | 1 |
| 123 | N | 74.55518 | 73.94517 | 75.43653 | 708.14833   | 26.93417    | -179.73509  | 1 |
| 124 | H | 74.14553 | 74.43814 | 74.60230 | -2232.69501 | -1179.09831 | 1023.94816  | 1 |
| 125 | C | 73.73578 | 72.94707 | 76.03268 | -738.32412  | 259.92548   | 104.42456   | 1 |
| 126 | H | 72.73578 | 73.30657 | 75.70006 | 2028.89123  | 1260.02983  | 1311.33324  | 1 |
| 127 | C | 74.04376 | 71.53254 | 75.36390 | -258.65678  | -345.52513  | 661.28459   | 1 |
| 128 | H | 75.13013 | 71.30506 | 75.38376 | -1826.06090 | -1801.46097 | -918.64554  | 1 |
| 129 | C | 73.19439 | 70.46089 | 76.13225 | -541.23400  | 531.92970   | -218.41428  | 1 |
| 130 | H | 72.92601 | 69.58711 | 75.49385 | 1311.73218  | -2219.18200 | 882.19023   | 1 |
| 131 | H | 73.74946 | 70.06715 | 77.02221 | -1048.71298 | 1223.58118  | -2196.97971 | 1 |
| 132 | H | 72.23896 | 70.89844 | 76.50451 | 419.06414   | 1903.92898  | 1903.44670  | 1 |
| 133 | C | 73.51248 | 71.56059 | 73.89265 | -423.86431  | 152.66566   | -648.55262  | 1 |
| 134 | H | 73.70487 | 70.59783 | 73.36531 | 105.68386   | -2342.50080 | 1387.51238  | 1 |
| 135 | H | 72.41341 | 71.74469 | 73.85871 | -1695.63603 | -1484.73621 | -1531.02793 | 1 |
| 136 | H | 74.00046 | 72.36811 | 73.29994 | -1853.57121 | -487.39031  | 1936.59343  | 1 |
| 137 | C | 73.87311 | 72.88092 | 77.64932 | 539.71428   | -510.58232  | 267.58633   | 1 |
| 138 | O | 74.09029 | 71.79625 | 78.21287 | -15.93758   | -278.34085  | -624.49402  | 1 |
| 139 | N | 73.51557 | 74.02924 | 78.19669 | -676.81886  | 12.05292    | 276.17960   | 1 |
| 140 | H | 73.48571 | 74.74498 | 77.46752 | -1694.44250 | -373.84189  | -2100.66098 | 1 |
| 141 | C | 73.97842 | 74.30417 | 79.53502 | 412.33078   | -664.70360  | 108.35451   | 1 |
| 142 | H | 75.08036 | 74.15956 | 79.48915 | 1765.77476  | 1294.44366  | 1621.76594  | 1 |
| 143 | C | 73.53670 | 75.78145 | 79.85538 | -179.66635  | -721.95667  | -264.73915  | 1 |
| 144 | H | 73.90388 | 76.48953 | 79.07899 | -607.34922  | 2587.87032  | -598.10018  | 1 |
| 145 | H | 72.42369 | 75.84505 | 79.81917 | -359.69332  | -1479.13954 | -2259.74260 | 1 |
| 146 | C | 74.06551 | 76.20081 | 81.26984 | -240.01076  | 616.02425   | 431.85322   | 1 |
| 147 | H | 73.78071 | 75.44605 | 82.03942 | -1359.17131 | 782.54425   | 2227.99181  | 1 |
| 148 | H | 75.17663 | 76.25292 | 81.28569 | -820.36667  | 85.81767    | -2596.78715 | 1 |
| 149 | C | 73.43106 | 77.61180 | 81.59324 | -513.07015  | 236.18570   | -551.87280  | 1 |
| 150 | H | 73.79329 | 78.38373 | 80.87306 | 1816.11944  | -1183.11722 | -1650.94321 | 1 |
| 151 | H | 72.32105 | 77.57981 | 81.47009 | -1800.04429 | -1361.53473 | 1526.34643  | 1 |
| 152 | C | 73.80826 | 77.99695 | 83.04506 | 726.08972   | -253.19732  | -179.64713  | 1 |
| 153 | H | 73.20784 | 77.49495 | 83.82936 | 1224.27271  | -456.51798  | -2390.90304 | 1 |
| 154 | H | 74.88595 | 77.91342 | 83.28246 | 1206.40339  | -1150.93514 | -2154.90344 | 1 |
| 155 | N | 73.51864 | 79.52367 | 83.20921 | 329.70796   | -633.68968  | -155.67358  | 1 |
| 156 | H | 73.64961 | 79.91026 | 84.18775 | 1348.31305  | 1938.76845  | 1359.00643  | 1 |
| 157 | H | 74.13206 | 80.17839 | 82.64287 | 2096.92035  | 1446.54551  | -966.48890  | 1 |
| 158 | H | 72.54502 | 79.87104 | 82.96815 | -1197.07217 | -2303.53719 | 827.28733   | 1 |
| 159 | C | 73.25004 | 73.30939 | 80.59742 | -378.01186  | -556.17301  | -413.96481  | 1 |
| 160 | O | 73.68814 | 73.21686 | 81.72435 | -409.44433  | -307.55053  | -453.30833  | 1 |
| 161 | N | 72.12868 | 72.78096 | 80.11009 | -429.02477  | 524.70884   | 274.08502   | 1 |
| 162 | H | 71.91346 | 72.96074 | 79.13095 | 1706.34263  | -1425.96036 | 1574.38926  | 1 |
| 163 | C | 71.29880 | 72.03377 | 80.99752 | -45.25864   | -626.22952  | 478.93267   | 1 |
| 164 | H | 71.54466 | 72.46261 | 81.99806 | 1988.63164  | 570.90773   | 1772.87287  | 1 |
| 165 | C | 69.80152 | 72.26062 | 80.52459 | 551.77128   | -20.49526   | -564.54996  | 1 |
| 166 | H | 69.57903 | 73.34770 | 80.43421 | 1434.61535  | -1753.10253 | 1513.99471  | 1 |
| 167 | H | 69.64745 | 71.84161 | 79.50474 | -714.67738  | 1819.09770  | 1898.36494  | 1 |
| 168 | C | 68.82451 | 71.58433 | 81.53956 | 446.99263   | -555.77305  | 338.97221   | 1 |
| 169 | H | 69.03781 | 70.49068 | 81.60401 | 1953.68466  | 1892.25957  | -161.67766  | 1 |
| 170 | H | 68.97497 | 71.98673 | 82.56624 | -403.03785  | 2688.07032  | -188.43591  | 1 |
| 171 | C | 67.34368 | 71.84682 | 81.04393 | 567.86262   | 335.74681   | 434.04421   | 1 |
| 172 | H | 67.10231 | 72.93385 | 81.07982 | -1080.02275 | 1568.26081  | -1948.78900 | 1 |

|     |   |          |          |          |             |             |             |   |
|-----|---|----------|----------|----------|-------------|-------------|-------------|---|
| 173 | H | 67.22177 | 71.54700 | 79.97825 | -919.54108  | 2111.34692  | 1456.13463  | 1 |
| 174 | C | 66.38027 | 71.03477 | 81.93882 | 195.81897   | 173.33862   | -745.11536  | 1 |
| 175 | H | 66.50931 | 69.93618 | 81.87238 | 1405.67949  | -2301.21089 | -390.08113  | 1 |
| 176 | H | 66.35864 | 71.35066 | 83.00003 | -940.37328  | -1118.32446 | 2299.72133  | 1 |
| 177 | N | 64.92022 | 71.28554 | 81.42762 | 319.26422   | 656.36007   | -42.02424   | 1 |
| 178 | H | 64.15956 | 70.75850 | 81.94571 | 1961.03633  | 619.91968   | 1787.09422  | 1 |
| 179 | H | 64.54935 | 72.27896 | 81.47168 | 854.14343   | -2156.80752 | 1429.08711  | 1 |
| 180 | H | 64.70964 | 71.01660 | 80.42308 | 1237.02905  | -1378.50857 | -1998.28500 | 1 |
| 181 | C | 71.69657 | 70.45209 | 80.93790 | 532.53319   | -268.57236  | 517.55729   | 1 |
| 182 | O | 71.18038 | 69.70813 | 81.74077 | 266.16714   | -290.73804  | -558.88002  | 1 |
| 183 | N | 72.57709 | 70.15491 | 79.98566 | -226.25352  | 640.49678   | -270.32839  | 1 |
| 184 | H | 72.92686 | 70.90372 | 79.36456 | 2007.69063  | -1035.27229 | 1523.50231  | 1 |
| 185 | C | 72.80019 | 68.76370 | 79.76362 | -540.76542  | -573.33303  | 49.50000    | 1 |
| 186 | H | 72.36382 | 68.26585 | 80.66527 | -2374.20950 | -1036.76023 | 843.75774   | 1 |
| 187 | C | 72.00458 | 68.37078 | 78.42458 | -77.09082   | 666.87422   | -415.84136  | 1 |
| 188 | H | 72.22672 | 69.13975 | 77.63833 | -985.81834  | 617.19825   | 2463.91927  | 1 |
| 189 | O | 70.57127 | 68.37423 | 78.54640 | 293.29899   | -391.65602  | -477.80926  | 1 |
| 190 | H | 70.33494 | 69.12002 | 77.95836 | 2528.72714  | -681.76262  | -751.27122  | 1 |
| 191 | C | 72.64656 | 67.00357 | 77.99120 | 252.47363   | -605.14473  | 440.05134   | 1 |
| 192 | H | 72.07587 | 66.53256 | 77.15759 | -2052.65063 | 1456.49051  | -1043.51830 | 1 |
| 193 | H | 73.69592 | 67.12833 | 77.62839 | -2152.98800 | -1661.97574 | -161.70652  | 1 |
| 194 | H | 72.66568 | 66.27602 | 78.83726 | -473.12726  | -1584.27339 | 2165.61725  | 1 |
| 195 | C | 74.38708 | 68.45105 | 79.55891 | 360.36307   | 488.46713   | 505.10056   | 1 |
| 196 | O | 74.75824 | 67.30409 | 79.63906 | -200.08817  | -528.03552  | -385.82850  | 1 |
| 197 | N | 75.08966 | 69.53783 | 79.27484 | -597.54095  | -226.44775  | 355.20479   | 1 |
| 198 | H | 74.65486 | 70.48588 | 79.21044 | 2179.23655  | -1300.70981 | -991.33835  | 1 |
| 199 | C | 76.46594 | 69.38622 | 78.95767 | -687.68921  | 297.39807   | -249.45179  | 1 |
| 200 | H | 76.71117 | 68.38442 | 79.37521 | -349.16256  | -2467.37713 | -1101.72831 | 1 |
| 201 | C | 76.62910 | 69.45163 | 77.36698 | 672.47345   | 361.54328   | -201.62880  | 1 |
| 202 | H | 76.08121 | 70.33408 | 76.96656 | 1541.41502  | 582.18425   | 2169.97026  | 1 |
| 203 | H | 77.70497 | 69.59671 | 77.11739 | -2534.67717 | 60.25153    | 997.72295   | 1 |
| 204 | C | 76.16225 | 68.17291 | 76.64985 | 574.26774   | -389.43119  | -377.02542  | 1 |
| 205 | C | 76.71391 | 66.90102 | 76.99109 | 688.82679   | -287.33580  | -257.96133  | 1 |
| 206 | H | 77.40764 | 66.79750 | 77.84580 | 331.14182   | 1470.38163  | 2269.80013  | 1 |
| 207 | C | 75.26095 | 68.27808 | 75.54806 | -383.52382  | -675.04808  | 144.24917   | 1 |
| 208 | H | 74.84275 | 69.25616 | 75.25696 | 4.09847     | 1517.59662  | 2262.86397  | 1 |
| 209 | C | 76.37468 | 65.79189 | 76.21460 | -134.76730  | 428.45285   | -649.50303  | 1 |
| 210 | H | 76.80719 | 64.81064 | 76.47577 | -903.23433  | 1600.49020  | 2011.53387  | 1 |
| 211 | C | 74.94261 | 67.13931 | 74.80343 | -335.53281  | -615.00040  | -364.39058  | 1 |
| 212 | H | 74.24387 | 67.24579 | 73.95584 | 1596.45398  | -1369.33862 | 1732.02659  | 1 |
| 213 | C | 75.49729 | 65.85766 | 75.09216 | 585.48547   | -340.24194  | -406.23938  | 1 |
| 214 | O | 75.20289 | 64.69672 | 74.33169 | -419.15649  | -173.04408  | -511.94141  | 1 |
| 215 | H | 74.63324 | 65.09418 | 73.63180 | -1071.84350 | 1559.71507  | -1960.13012 | 1 |
| 216 | C | 77.22828 | 70.62736 | 79.69498 | 291.41878   | -183.13091  | 710.72246   | 1 |
| 217 | O | 77.25395 | 70.65646 | 80.90186 | 379.87695   | 523.47396   | -222.23622  | 1 |
| 218 | N | 77.86451 | 71.42804 | 78.82764 | 564.30591   | 373.09380   | 277.24371   | 1 |
| 219 | H | 77.67151 | 71.21772 | 77.84341 | -120.59931  | -2436.07824 | -1214.35098 | 1 |
| 220 | C | 77.97375 | 72.83709 | 79.11144 | 404.07514   | -299.37480  | 608.84009   | 1 |
| 221 | H | 77.44045 | 73.29473 | 78.21539 | -1071.07882 | -841.69025  | 2359.66467  | 1 |
| 222 | C | 77.39897 | 73.23905 | 80.52066 | -683.12807  | 68.71770    | -390.13096  | 1 |
| 223 | H | 76.37024 | 72.82777 | 80.67316 | 2068.88918  | 1596.58590  | 770.89603   | 1 |
| 224 | H | 78.03448 | 72.75962 | 81.30622 | 1379.86429  | 2342.49779  | -179.85638  | 1 |
| 225 | C | 77.42806 | 74.79544 | 80.68450 | -176.39967  | 537.49466   | 550.97268   | 1 |
| 226 | H | 78.41993 | 75.21320 | 80.39938 | -396.28051  | 1942.22168  | 1869.33314  | 1 |
| 227 | H | 76.68688 | 75.30260 | 80.02661 | -94.44700   | 586.00678   | -2659.20016 | 1 |
| 228 | C | 77.12798 | 75.03788 | 82.23267 | -291.69381  | -718.18079  | -150.72929  | 1 |
| 229 | H | 76.10230 | 74.75548 | 82.58337 | -2303.38776 | 1089.76242  | 964.62032   | 1 |
| 230 | H | 77.86395 | 74.55415 | 82.92306 | 884.16729   | 2568.80533  | -207.74283  | 1 |
| 231 | N | 77.29873 | 76.42017 | 82.38172 | -594.49522  | -252.81478  | 342.29276   | 1 |
| 232 | H | 77.75010 | 76.91700 | 81.62983 | -1735.17426 | 2084.05705  | -263.71605  | 1 |
| 233 | C | 76.95474 | 77.08618 | 83.40735 | 595.23177   | -271.52487  | 442.22352   | 1 |
| 234 | N | 76.33650 | 76.38396 | 84.44921 | 585.53813   | -424.79750  | -105.81303  | 1 |

|     |   |          |          |          |             |             |             |   |
|-----|---|----------|----------|----------|-------------|-------------|-------------|---|
| 235 | H | 76.13039 | 75.38862 | 84.52947 | 959.88797   | 1327.56823  | -2177.11905 | 1 |
| 236 | H | 76.02371 | 76.79691 | 85.32787 | 1578.48647  | 16.27378    | -2220.76233 | 1 |
| 237 | N | 77.26501 | 78.44766 | 83.26286 | -452.17763  | -390.33541  | -421.51853  | 1 |
| 238 | H | 77.74288 | 78.94750 | 82.51393 | 470.26107   | 1974.25629  | -1817.92087 | 1 |
| 239 | H | 77.05743 | 79.15070 | 83.97385 | 1856.67307  | -1573.97321 | -1224.35416 | 1 |
| 240 | C | 79.55329 | 73.20777 | 79.20409 | -531.47271  | -581.45780  | -55.06206   | 1 |
| 241 | O | 80.00920 | 73.57864 | 80.26650 | -243.00837  | 192.73507   | 609.52485   | 1 |
| 242 | N | 80.19986 | 73.09666 | 78.03146 | 343.49288   | -644.25607  | 38.09164    | 1 |
| 243 | H | 79.66697 | 72.64613 | 77.28613 | -1691.16043 | -1535.97525 | -1484.73099 | 1 |
| 244 | C | 81.63075 | 73.00371 | 78.15565 | 542.66492   | 350.14337   | 454.42563   | 1 |
| 245 | H | 81.86585 | 73.71221 | 78.98334 | 1209.57979  | -2396.95920 | 463.86744   | 1 |
| 246 | C | 82.00390 | 71.51139 | 78.56965 | -737.14309  | 145.93010   | 242.71942   | 1 |
| 247 | H | 81.51311 | 70.77046 | 77.90369 | -1050.18303 | 159.36419   | -2509.06125 | 1 |
| 248 | C | 83.56337 | 71.37906 | 78.48335 | -706.77696  | -252.88343  | -245.16230  | 1 |
| 249 | H | 83.93943 | 70.49495 | 79.05066 | -1624.64039 | -1665.49085 | 1417.86935  | 1 |
| 250 | H | 83.90493 | 71.25788 | 77.42647 | 2566.10521  | 598.51109   | 693.22305   | 1 |
| 251 | H | 84.07562 | 72.28506 | 78.88850 | -1972.69758 | 107.10018   | -1876.34312 | 1 |
| 252 | C | 81.51839 | 71.31556 | 80.04591 | 412.85148   | 672.58832   | -27.69222   | 1 |
| 253 | H | 81.86659 | 70.34748 | 80.48164 | 1447.02277  | 1762.76533  | -1490.78944 | 1 |
| 254 | H | 81.88218 | 72.13966 | 80.70439 | 1320.77379  | -145.20455  | 2378.68491  | 1 |
| 255 | H | 80.40236 | 71.33048 | 80.10834 | -1512.10848 | 1470.52031  | 1724.75147  | 1 |
| 256 | C | 82.42020 | 73.35121 | 76.78326 | -607.11113  | 499.56689   | 73.73769    | 1 |
| 257 | O | 83.63300 | 73.44284 | 76.84059 | 357.97126   | 460.81534   | 356.68785   | 1 |
| 258 | N | 81.63829 | 73.39825 | 75.70844 | 536.55407   | -368.62270  | 332.76306   | 1 |
| 259 | H | 80.63746 | 73.26893 | 75.86576 | 524.38866   | 2297.69985  | 1367.20941  | 1 |
| 260 | C | 82.01312 | 74.31522 | 74.66802 | 46.50277    | -774.29190  | -147.97904  | 1 |
| 261 | H | 82.49731 | 75.17112 | 75.18533 | 1676.51875  | 1883.29066  | 1032.55549  | 1 |
| 262 | C | 83.02404 | 73.59076 | 73.64492 | -559.41456  | -34.19198   | -556.30433  | 1 |
| 263 | H | 82.76890 | 72.50424 | 73.60209 | -64.66664   | 395.18769   | 2695.05373  | 1 |
| 264 | H | 82.87460 | 73.98860 | 72.61183 | -2703.44278 | -60.40056   | 333.79418   | 1 |
| 265 | C | 84.46095 | 73.78933 | 74.05360 | -519.76435  | 377.31045   | 459.42366   | 1 |
| 266 | H | 84.56498 | 73.52575 | 75.14943 | -1746.74323 | 1667.50644  | -1261.73691 | 1 |
| 267 | C | 85.35503 | 72.87491 | 73.22643 | 570.95554   | 16.46261    | -545.27700  | 1 |
| 268 | H | 86.43232 | 72.96302 | 73.52267 | 2391.58273  | 28.05277    | -1305.07271 | 1 |
| 269 | H | 85.06514 | 71.79828 | 73.34078 | 175.75588   | 917.63458   | 2559.43867  | 1 |
| 270 | H | 85.29122 | 73.11944 | 72.13425 | -1063.97851 | -2155.34650 | 1283.00462  | 1 |
| 271 | C | 84.89749 | 75.23442 | 73.86626 | 193.76014   | 2.62946     | -765.53141  | 1 |
| 272 | H | 85.99237 | 75.36664 | 74.06848 | 507.39394   | -846.55087  | 2539.60089  | 1 |
| 273 | H | 84.70862 | 75.58944 | 72.82025 | 1337.57841  | 1818.19054  | 1526.01994  | 1 |
| 274 | H | 84.35146 | 75.92864 | 74.55608 | 1100.88635  | -1172.91350 | -2199.08909 | 1 |
| 275 | C | 80.66561 | 74.68519 | 73.88763 | -549.21115  | 475.64486   | -309.38218  | 1 |
| 276 | O | 79.71166 | 73.95140 | 73.83519 | 556.06106   | -390.37755  | -78.24250   | 1 |
| 277 | O | 80.67303 | 75.90369 | 73.16361 | -572.27940  | -310.19032  | -209.75862  | 1 |
| 278 | H | 81.59889 | 76.20287 | 73.37560 | -1380.08193 | 2212.14486  | 790.85944   | 1 |

Listing 82: C00082.xmolout

|    |   |          |          |          |             |             |             |        |          |  |
|----|---|----------|----------|----------|-------------|-------------|-------------|--------|----------|--|
| 1  |   | 276      |          |          |             |             |             |        |          |  |
| 2  |   | 150.0000 | 150.0000 | 150.0000 | 0.0000      | 0.0000      | 0.0000***** | 2.7750 | 11100    |  |
|    |   | 0.2500   | 300.00   | 0.00     | 0.00        | 0.00        | -1293.5150  | 0.0000 | 300.0000 |  |
| 3  | H | 68.47668 | 71.60640 | 66.00199 | -2043.14101 | -1757.64893 | 399.89339   |        | 1        |  |
| 4  | N | 68.39853 | 72.62203 | 66.01249 | 426.75047   | 490.45733   | -334.42467  |        | 1        |  |
| 5  | H | 68.04860 | 72.81031 | 66.95495 | 442.25559   | -1110.30854 | -2448.52907 |        | 1        |  |
| 6  | C | 69.61628 | 73.30066 | 65.78637 | 415.32972   | -666.39213  | 83.73172    |        | 1        |  |
| 7  | H | 70.19153 | 72.72999 | 65.02594 | 879.32219   | 2491.00447  | 667.35213   |        | 1        |  |
| 8  | C | 69.24416 | 74.80102 | 65.33003 | 31.35357    | 477.41777   | 628.23362   |        | 1        |  |
| 9  | H | 68.83606 | 75.35502 | 66.20934 | 1168.38489  | 2240.25337  | -1019.71136 |        | 1        |  |
| 10 | H | 70.15844 | 75.35871 | 65.01428 | -360.43770  | 2534.90498  | 931.67112   |        | 1        |  |
| 11 | C | 68.21772 | 74.75343 | 64.22681 | 463.18208   | 512.70242   | -382.34388  |        | 1        |  |
| 12 | H | 67.42317 | 74.03379 | 64.52977 | 1725.29117  | 1863.52247  | -987.07854  |        | 1        |  |
| 13 | C | 67.57280 | 76.11893 | 64.02856 | 710.42801   | -144.27427  | -313.15367  |        | 1        |  |
| 14 | H | 66.78631 | 76.09256 | 63.23051 | 364.20195   | -1033.13725 | 2494.72524  |        | 1        |  |



|    |   |          |          |          |             |             |             |   |
|----|---|----------|----------|----------|-------------|-------------|-------------|---|
| 15 | H | 67.08071 | 76.48491 | 64.96662 | 2567.61904  | 335.80679   | 847.48802   | 1 |
| 16 | H | 68.32599 | 76.89124 | 63.72581 | -2587.99029 | 680.92867   | -512.16411  | 1 |
| 17 | C | 68.82684 | 74.27636 | 62.91594 | 268.17616   | 741.64379   | -40.42634   | 1 |
| 18 | H | 68.06173 | 74.23103 | 62.09802 | 1283.54314  | -1945.37420 | -1411.27812 | 1 |
| 19 | H | 69.64452 | 74.95894 | 62.56784 | -1258.57796 | 1317.15249  | -2026.02085 | 1 |
| 20 | H | 69.26743 | 73.25086 | 63.01518 | -2502.84526 | 909.80597   | 575.92391   | 1 |
| 21 | C | 70.28916 | 73.32770 | 67.26943 | 619.36578   | -458.64843  | -172.09273  | 1 |
| 22 | O | 69.58245 | 73.53122 | 68.24685 | -81.40433   | 433.87611   | 522.34594   | 1 |
| 23 | N | 71.60212 | 73.18811 | 67.19968 | 175.23996   | -622.20190  | 341.55523   | 1 |
| 24 | H | 72.00188 | 73.02229 | 66.27683 | -876.57256  | -303.22879  | -2561.90213 | 1 |
| 25 | C | 72.32301 | 72.80463 | 68.37912 | -571.88214  | -534.10783  | -106.15033  | 1 |
| 26 | H | 71.63020 | 72.13691 | 68.93387 | -2713.20841 | -16.25800   | -248.80809  | 1 |
| 27 | C | 73.67838 | 72.11058 | 67.90638 | 166.60354   | 288.16399   | -716.09568  | 1 |
| 28 | H | 74.22235 | 72.80894 | 67.21286 | -2097.85574 | 1636.78449  | -586.18044  | 1 |
| 29 | O | 73.52537 | 70.87274 | 67.18805 | -317.80580  | -363.38227  | 484.43082   | 1 |
| 30 | H | 73.98342 | 71.07682 | 66.34876 | 1863.74748  | -1451.84923 | 1357.29467  | 1 |
| 31 | C | 74.45544 | 72.04424 | 69.27356 | 503.80731   | 517.99032   | 318.51606   | 1 |
| 32 | H | 75.49209 | 71.65771 | 69.13847 | 640.61020   | -2157.10410 | -1536.29104 | 1 |
| 33 | H | 74.53185 | 73.05667 | 69.74425 | 1687.88455  | 465.60692   | 2087.56452  | 1 |
| 34 | H | 73.94377 | 71.37474 | 70.00312 | -1293.07895 | -1899.88581 | -1463.57452 | 1 |
| 35 | C | 72.71650 | 74.15089 | 69.21387 | -153.07550  | -733.68902  | 248.70981   | 1 |
| 36 | O | 73.56328 | 74.88641 | 68.77493 | 186.15459   | -480.78787  | -449.34387  | 1 |
| 37 | N | 72.06903 | 74.22047 | 70.38855 | -487.53139  | 543.18517   | 42.03850    | 1 |
| 38 | C | 72.11549 | 75.42304 | 71.16184 | -699.35871  | 69.34393    | 360.10701   | 1 |
| 39 | H | 72.37103 | 76.23482 | 70.44144 | 2.81126     | -221.99807  | -2715.58072 | 1 |
| 40 | C | 70.64675 | 75.44796 | 71.76731 | -507.46439  | -592.59194  | 122.07761   | 1 |
| 41 | H | 70.57067 | 76.14351 | 72.65659 | -1975.08116 | 525.87560   | -1801.71556 | 1 |
| 42 | H | 69.89643 | 75.79090 | 71.01864 | 1588.27743  | -1913.22100 | 1113.83566  | 1 |
| 43 | C | 70.44142 | 73.94435 | 72.12262 | -613.62442  | -457.55993  | -194.14490  | 1 |
| 44 | H | 71.01846 | 73.66464 | 73.03589 | 1707.54637  | -721.27992  | 1996.92523  | 1 |
| 45 | H | 69.38066 | 73.66441 | 72.30964 | 758.23357   | 2100.81767  | 1560.55011  | 1 |
| 46 | C | 71.04348 | 73.27715 | 70.81234 | -352.41524  | 704.96076   | 49.21465    | 1 |
| 47 | H | 71.50525 | 72.27113 | 70.95366 | 1714.76886  | -2070.42778 | 443.35792   | 1 |
| 48 | H | 70.32577 | 73.26201 | 69.92664 | 1224.15040  | 1801.50881  | 1636.97633  | 1 |
| 49 | C | 73.22931 | 75.24678 | 72.35432 | 566.85117   | 537.05831   | 117.62814   | 1 |
| 50 | O | 72.94865 | 74.70932 | 73.42596 | -550.26779  | -406.08867  | 4.21666     | 1 |
| 51 | N | 74.38637 | 75.66280 | 71.91337 | 566.34832   | -425.77725  | 180.18749   | 1 |
| 52 | H | 74.35544 | 76.01817 | 70.95595 | 644.44502   | 2646.80550  | -52.73430   | 1 |
| 53 | C | 75.38603 | 76.22181 | 72.78794 | 612.34801   | -281.48662  | 411.56221   | 1 |
| 54 | H | 75.04893 | 77.25831 | 73.00663 | 1667.23498  | -1490.75142 | 1556.16753  | 1 |
| 55 | C | 75.44500 | 75.34983 | 74.12089 | -714.45746  | -175.43074  | 286.98927   | 1 |
| 56 | H | 75.15244 | 74.29674 | 73.84050 | -787.09484  | 1763.03619  | -1922.46060 | 1 |
| 57 | O | 74.50007 | 75.74677 | 75.11833 | -429.46514  | 516.51932   | -128.40526  | 1 |
| 58 | H | 73.68702 | 75.20219 | 74.80076 | 1981.82785  | 436.16847   | -1818.18182 | 1 |
| 59 | C | 76.95302 | 75.38070 | 74.55578 | 630.79189   | -468.94448  | 76.03230    | 1 |
| 60 | H | 77.10644 | 74.85277 | 75.52609 | -1775.71861 | 2062.30353  | 131.89849   | 1 |
| 61 | H | 77.60673 | 74.88092 | 73.80352 | -1855.14608 | 88.94118    | 1993.53760  | 1 |
| 62 | H | 77.32173 | 76.42511 | 74.67942 | -1504.82350 | -780.94249  | -2132.90992 | 1 |
| 63 | C | 76.69993 | 76.24784 | 71.84112 | 288.57638   | 618.62814   | -397.00270  | 1 |
| 64 | O | 77.33959 | 77.31089 | 71.76761 | 321.70495   | -185.26452  | 574.37218   | 1 |
| 65 | N | 76.93461 | 75.07700 | 71.29494 | -447.05792  | -446.53431  | 367.76425   | 1 |
| 66 | H | 76.20815 | 74.39341 | 71.52015 | 350.31316   | 1975.63644  | -1843.31522 | 1 |
| 67 | C | 77.82851 | 74.82847 | 70.22519 | -511.23061  | 374.03917   | -471.51480  | 1 |
| 68 | H | 77.57941 | 73.77862 | 69.95030 | 2234.79579  | -898.70890  | -1273.45190 | 1 |
| 69 | C | 77.46333 | 75.84440 | 69.04893 | 529.53781   | -159.34528  | 563.72604   | 1 |
| 70 | H | 77.87454 | 75.46007 | 68.07453 | 654.59388   | 2347.94251  | 1217.51488  | 1 |
| 71 | H | 76.34450 | 75.80670 | 68.94594 | -1526.55661 | 2103.42026  | 817.87394   | 1 |
| 72 | O | 77.90152 | 77.20754 | 69.17416 | -554.84278  | 14.12789    | 399.58769   | 1 |
| 73 | H | 77.72836 | 77.34543 | 70.17519 | 1297.06236  | 2061.84854  | 1220.68812  | 1 |
| 74 | C | 79.39258 | 74.97623 | 70.66721 | -662.15484  | -412.13544  | 123.62687   | 1 |
| 75 | O | 80.26522 | 74.94120 | 69.83166 | -540.01537  | -317.05804  | 274.91456   | 1 |
| 76 | N | 79.52591 | 74.96339 | 71.99610 | -202.76299  | -690.00100  | -131.49145  | 1 |

|     |   |          |          |          |             |             |             |   |
|-----|---|----------|----------|----------|-------------|-------------|-------------|---|
| 77  | H | 78.65244 | 74.99746 | 72.52027 | -702.62132  | -2617.37191 | 281.70413   | 1 |
| 78  | C | 80.76388 | 75.40344 | 72.55461 | -491.73914  | 576.34187   | 222.73509   | 1 |
| 79  | H | 81.22858 | 76.05727 | 71.78318 | 1977.17978  | -1823.58850 | -434.68928  | 1 |
| 80  | C | 80.41063 | 76.12396 | 73.92292 | -649.50797  | -328.66843  | 306.11224   | 1 |
| 81  | H | 79.67003 | 75.53011 | 74.49935 | 2075.07803  | 1452.16490  | -1004.45904 | 1 |
| 82  | C | 81.71864 | 76.33504 | 74.76000 | -615.18735  | -489.99689  | -70.96352   | 1 |
| 83  | H | 81.50406 | 76.81181 | 75.74526 | -1226.32661 | -1724.38906 | -1716.47170 | 1 |
| 84  | H | 82.23409 | 75.36241 | 74.95836 | 2381.64273  | -969.84735  | 900.46860   | 1 |
| 85  | H | 82.44642 | 76.98742 | 74.22331 | 2122.74991  | 1702.23946  | -141.36228  | 1 |
| 86  | C | 79.82181 | 77.54104 | 73.60696 | -501.86074  | -479.61276  | -376.42482  | 1 |
| 87  | H | 79.50921 | 78.06549 | 74.53923 | 993.79261   | -2246.95401 | -1177.81305 | 1 |
| 88  | H | 80.56752 | 78.19119 | 73.09200 | 42.71279    | -626.15391  | -2651.37258 | 1 |
| 89  | H | 78.91660 | 77.46833 | 72.93214 | -2026.39012 | -1590.33709 | -887.82922  | 1 |
| 90  | C | 81.71381 | 74.10754 | 72.87422 | -672.89153  | 382.57394   | -156.34072  | 1 |
| 91  | O | 82.89829 | 74.27076 | 73.06123 | 410.04627   | 221.86223   | 500.35950   | 1 |
| 92  | N | 81.00130 | 72.99218 | 72.98559 | -378.11782  | -443.79414  | -441.10984  | 1 |
| 93  | H | 80.01574 | 73.07550 | 72.74011 | 2404.15973  | -568.14894  | 1149.30085  | 1 |
| 94  | C | 81.56726 | 71.78059 | 73.46322 | -544.54484  | 466.16019   | 331.29119   | 1 |
| 95  | H | 80.71291 | 71.06652 | 73.43736 | -1409.80988 | -170.17955  | 2325.32679  | 1 |
| 96  | C | 82.73493 | 71.42208 | 72.44553 | -184.48284  | 116.78282   | -758.89137  | 1 |
| 97  | H | 82.39803 | 71.60460 | 71.39992 | 1893.78641  | 1861.14652  | 611.04528   | 1 |
| 98  | H | 83.60199 | 72.10707 | 72.60825 | -2170.79665 | -974.19311  | 1327.50117  | 1 |
| 99  | C | 83.13291 | 69.92840 | 72.64840 | 389.51668   | 672.81878   | -138.49152  | 1 |
| 100 | H | 83.58932 | 69.78877 | 73.65796 | 510.64577   | 1933.03327  | 1851.02484  | 1 |
| 101 | H | 82.22181 | 69.29033 | 72.67303 | -2302.30869 | -1105.72939 | -948.89774  | 1 |
| 102 | C | 84.11186 | 69.37753 | 71.54378 | -559.93427  | -126.34590  | 542.30857   | 1 |
| 103 | O | 84.43466 | 68.21779 | 71.56471 | -670.36003  | -111.83166  | 76.36448    | 1 |
| 104 | N | 84.50249 | 70.29948 | 70.63768 | -216.06729  | -537.07037  | 446.51379   | 1 |
| 105 | H | 84.28773 | 71.30206 | 70.58491 | -1251.96487 | 1074.12894  | -2168.52500 | 1 |
| 106 | H | 85.14868 | 70.10419 | 69.86511 | -2451.83023 | -720.73851  | 944.84612   | 1 |
| 107 | C | 82.23543 | 71.93869 | 74.94471 | 546.24052   | -563.88337  | -85.11809   | 1 |
| 108 | O | 83.29243 | 71.38944 | 75.12606 | 71.70702    | -307.40463  | 606.69673   | 1 |
| 109 | N | 81.47126 | 72.59104 | 75.83348 | 479.90863   | -504.50129  | 222.86849   | 1 |
| 110 | C | 81.90691 | 72.81523 | 77.17635 | 75.51268    | -600.91904  | 506.73700   | 1 |
| 111 | H | 83.01519 | 72.93299 | 77.16630 | -2033.61562 | 1795.30103  | 254.89480   | 1 |
| 112 | C | 81.06635 | 74.10991 | 77.56612 | 523.79067   | 517.99274   | 284.45581   | 1 |
| 113 | H | 80.97884 | 74.25500 | 78.66608 | 1599.61665  | -1127.00911 | 1895.98173  | 1 |
| 114 | H | 81.53459 | 75.03338 | 77.16102 | -1881.83093 | 1275.82488  | -1501.55016 | 1 |
| 115 | C | 79.69659 | 73.81969 | 76.87899 | -600.05639  | -404.05026  | 316.64485   | 1 |
| 116 | H | 79.06357 | 73.15697 | 77.51308 | -2597.05260 | 496.36221   | 657.73249   | 1 |
| 117 | H | 79.09710 | 74.74415 | 76.68859 | -1666.24518 | 1294.38985  | -1723.90591 | 1 |
| 118 | C | 80.13160 | 73.08366 | 75.54094 | 493.57570   | -129.95376  | -602.56394  | 1 |
| 119 | H | 79.50398 | 72.20738 | 75.25460 | -1469.08415 | -637.84797  | 2204.22581  | 1 |
| 120 | H | 80.25007 | 73.75208 | 74.65976 | -1038.97840 | 1068.88701  | -2280.71789 | 1 |
| 121 | C | 81.39643 | 71.57388 | 78.10861 | 188.88100   | 241.05089   | -727.87821  | 1 |
| 122 | O | 80.49290 | 70.84272 | 77.79243 | 531.88613   | -49.19943   | 427.07960   | 1 |
| 123 | N | 82.01069 | 71.67140 | 79.29676 | 708.14833   | 26.93417    | -179.73509  | 1 |
| 124 | H | 82.76361 | 72.35739 | 79.31837 | -2232.69501 | -1179.09831 | 1023.94816  | 1 |
| 125 | C | 81.86154 | 70.61648 | 80.31301 | -738.32412  | 259.92548   | 104.42456   | 1 |
| 126 | H | 82.13336 | 69.67454 | 79.78156 | 2028.89123  | 1260.02983  | 1311.33324  | 1 |
| 127 | C | 82.77846 | 70.94029 | 81.47121 | -258.65678  | -345.52513  | 661.28459   | 1 |
| 128 | H | 82.57950 | 71.99212 | 81.77743 | -1826.06090 | -1801.46097 | -918.64554  | 1 |
| 129 | C | 82.51313 | 70.04419 | 82.66875 | -541.23400  | 531.92970   | -218.41428  | 1 |
| 130 | H | 83.17085 | 70.30711 | 83.54198 | 1311.73218  | -2219.18200 | 882.19023   | 1 |
| 131 | H | 81.44462 | 70.12344 | 83.01675 | -1048.71298 | 1223.58118  | -2196.97971 | 1 |
| 132 | H | 82.69857 | 68.96256 | 82.42405 | 419.06414   | 1903.92898  | 1903.44670  | 1 |
| 133 | C | 84.24499 | 70.84009 | 81.08705 | -423.86431  | 152.66566   | -648.55262  | 1 |
| 134 | H | 84.91814 | 71.13848 | 81.93671 | 105.68386   | -2342.50080 | 1387.51238  | 1 |
| 135 | H | 84.52282 | 69.79020 | 80.79646 | -1695.63603 | -1484.73621 | -1531.02793 | 1 |
| 136 | H | 84.49486 | 71.50117 | 80.21335 | -1853.57121 | -487.39031  | 1936.59343  | 1 |
| 137 | C | 80.28467 | 70.58784 | 80.80413 | 539.71428   | -510.58232  | 267.58633   | 1 |
| 138 | O | 79.86432 | 69.64481 | 81.43559 | -15.93758   | -278.34085  | -624.49402  | 1 |

|     |   |          |          |          |             |             |             |   |
|-----|---|----------|----------|----------|-------------|-------------|-------------|---|
| 139 | N | 79.62976 | 71.76746 | 80.57438 | -676.81886  | 12.05292    | 276.17960   | 1 |
| 140 | H | 80.31142 | 72.24442 | 79.96755 | -1694.44250 | -373.84189  | -2100.66098 | 1 |
| 141 | C | 78.29069 | 71.57375 | 80.03619 | 412.33078   | -664.70360  | 108.35451   | 1 |
| 142 | H | 78.42007 | 70.85142 | 79.20032 | 1765.77476  | 1294.44366  | 1621.76594  | 1 |
| 143 | C | 77.46197 | 70.96900 | 81.22330 | -179.66635  | -721.95667  | -264.73915  | 1 |
| 144 | H | 77.79768 | 69.91825 | 81.42323 | -607.34922  | 2587.87032  | -598.10018  | 1 |
| 145 | H | 77.68711 | 71.53114 | 82.15868 | -359.69332  | -1479.13954 | -2259.74260 | 1 |
| 146 | C | 75.91986 | 70.98776 | 80.94305 | -240.01076  | 616.02425   | 431.85322   | 1 |
| 147 | H | 75.51883 | 72.02669 | 80.98664 | -1359.17131 | 782.54425   | 2227.99181  | 1 |
| 148 | H | 75.67952 | 70.60110 | 79.92741 | -820.36667  | 85.81767    | -2596.78715 | 1 |
| 149 | C | 75.31028 | 70.06562 | 82.07442 | -513.07015  | 236.18570   | -551.87280  | 1 |
| 150 | H | 75.67848 | 69.01981 | 81.96061 | 1816.11944  | -1183.11722 | -1650.94321 | 1 |
| 151 | H | 75.66497 | 70.39893 | 83.07684 | -1800.04429 | -1361.53473 | 1526.34643  | 1 |
| 152 | C | 73.76614 | 70.09850 | 82.02237 | 726.08972   | -253.19732  | -179.64713  | 1 |
| 153 | H | 73.31396 | 71.07586 | 82.28468 | 1224.27271  | -456.51798  | -2390.90304 | 1 |
| 154 | H | 73.32294 | 69.71386 | 81.08232 | 1206.40339  | -1150.93514 | -2154.90344 | 1 |
| 155 | N | 73.26021 | 69.11514 | 83.13342 | 329.70796   | -633.68968  | -155.67358  | 1 |
| 156 | H | 72.20740 | 69.05534 | 83.24534 | 1348.31305  | 1938.76845  | 1359.00643  | 1 |
| 157 | H | 73.51868 | 68.09079 | 83.02922 | 2096.92035  | 1446.54551  | -966.48890  | 1 |
| 158 | H | 73.56366 | 69.31675 | 84.13029 | -1197.07217 | -2303.53719 | 827.28733   | 1 |
| 159 | C | 77.71522 | 73.00216 | 79.51891 | -378.01186  | -556.17301  | -413.96481  | 1 |
| 160 | O | 76.84930 | 73.01071 | 78.67359 | -409.44433  | -307.55053  | -453.30833  | 1 |
| 161 | N | 78.32444 | 74.04114 | 80.09761 | -429.02477  | 524.70884   | 274.08502   | 1 |
| 162 | H | 79.00925 | 73.78540 | 80.80978 | 1706.34263  | -1425.96036 | 1574.38926  | 1 |
| 163 | C | 77.73779 | 75.34041 | 80.10016 | -45.25864   | -626.22952  | 478.93267   | 1 |
| 164 | H | 78.52419 | 75.92798 | 80.62478 | 1988.63164  | 570.90773   | 1772.87287  | 1 |
| 165 | C | 77.51307 | 75.79242 | 78.59990 | 551.77128   | -20.49526   | -564.54996  | 1 |
| 166 | H | 78.22585 | 75.26193 | 77.92443 | 1434.61535  | -1753.10253 | 1513.99471  | 1 |
| 167 | H | 76.49896 | 75.49001 | 78.25058 | -714.67738  | 1819.09770  | 1898.36494  | 1 |
| 168 | C | 77.70601 | 77.34189 | 78.48870 | 446.99263   | -555.77305  | 338.97221   | 1 |
| 169 | H | 77.02710 | 77.88736 | 79.18408 | 1953.68466  | 1892.25957  | -161.67766  | 1 |
| 170 | H | 78.73894 | 77.63597 | 78.78084 | -403.03785  | 2688.07032  | -188.43591  | 1 |
| 171 | C | 77.41040 | 77.74469 | 76.98853 | 567.86262   | 335.74681   | 434.04421   | 1 |
| 172 | H | 78.19844 | 77.34095 | 76.31259 | -1080.02275 | 1568.26081  | -1948.78900 | 1 |
| 173 | H | 76.44845 | 77.29875 | 76.64130 | -919.54108  | 2111.34692  | 1456.13463  | 1 |
| 174 | C | 77.34478 | 79.28808 | 76.90715 | 195.81897   | 173.33862   | -745.11536  | 1 |
| 175 | H | 76.39416 | 79.72493 | 77.27389 | 1405.67949  | -2301.21089 | -390.08113  | 1 |
| 176 | H | 78.20549 | 79.81779 | 77.36273 | -940.37328  | -1118.32446 | 2299.72133  | 1 |
| 177 | N | 77.41333 | 79.67593 | 75.39146 | 319.26422   | 656.36007   | -42.02424   | 1 |
| 178 | H | 77.22759 | 80.69210 | 75.14124 | 1961.03633  | 619.91968   | 1787.09422  | 1 |
| 179 | H | 78.34662 | 79.53305 | 74.91264 | 854.14343   | -2156.80752 | 1429.08711  | 1 |
| 180 | H | 76.75564 | 79.16408 | 74.73421 | 1237.02905  | -1378.50857 | -1998.28500 | 1 |
| 181 | C | 76.35811 | 75.27662 | 80.96925 | 532.53319   | -268.57236  | 517.55729   | 1 |
| 182 | O | 76.17589 | 74.47789 | 81.85824 | 266.16714   | -290.73804  | -558.88002  | 1 |
| 183 | N | 75.54247 | 76.25005 | 80.56010 | -226.25352  | 640.49678   | -270.32839  | 1 |
| 184 | H | 75.83938 | 76.84652 | 79.78888 | 2007.69063  | -1035.27229 | 1523.50231  | 1 |
| 185 | C | 74.57560 | 76.75159 | 81.47688 | -540.76542  | -573.33303  | 49.50000    | 1 |
| 186 | H | 74.49040 | 75.93883 | 82.23543 | -2374.20950 | -1036.76023 | 843.75774   | 1 |
| 187 | C | 75.14109 | 78.11714 | 82.08882 | -77.09082   | 666.87422   | -415.84136  | 1 |
| 188 | H | 75.05029 | 78.92181 | 81.30843 | -985.81834  | 617.19825   | 2463.91927  | 1 |
| 189 | O | 76.52105 | 78.11519 | 82.49594 | 293.29899   | -391.65602  | -477.80926  | 1 |
| 190 | H | 76.88639 | 78.82498 | 81.93071 | 2528.72714  | -681.76262  | -751.27122  | 1 |
| 191 | C | 74.11010 | 78.39604 | 83.24353 | 252.47363   | -605.14473  | 440.05134   | 1 |
| 192 | H | 74.32219 | 79.36476 | 83.75314 | -2052.65063 | 1456.49051  | -1043.51830 | 1 |
| 193 | H | 73.05556 | 78.44590 | 82.85559 | -2152.98800 | -1661.97574 | -161.70652  | 1 |
| 194 | H | 74.14552 | 77.60034 | 84.02389 | -473.12726  | -1584.27339 | 2165.61725  | 1 |
| 195 | C | 73.20877 | 77.05267 | 80.62700 | 360.36307   | 488.46713   | 505.10056   | 1 |
| 196 | O | 72.44636 | 77.92893 | 80.98878 | -200.08817  | -528.03552  | -385.82850  | 1 |
| 197 | N | 73.04850 | 76.15546 | 79.66702 | -597.54095  | -226.44775  | 355.20479   | 1 |
| 198 | H | 73.81680 | 75.48974 | 79.58714 | 2179.23655  | -1300.70981 | -991.33835  | 1 |
| 199 | C | 72.09284 | 76.29503 | 78.62719 | -687.68921  | 297.39807   | -249.45179  | 1 |
| 200 | H | 72.12668 | 75.32243 | 78.08635 | -349.16256  | -2467.37713 | -1101.72831 | 1 |

|     |   |          |          |          |             |             |             |   |
|-----|---|----------|----------|----------|-------------|-------------|-------------|---|
| 201 | C | 70.66290 | 76.60637 | 79.29082 | 672.47345   | 361.54328   | -201.62880  | 1 |
| 202 | H | 70.71098 | 77.58058 | 79.84159 | 1541.41502  | 582.18425   | 2169.97026  | 1 |
| 203 | H | 69.88414 | 76.71281 | 78.49939 | -2534.67717 | 60.25153    | 997.72295   | 1 |
| 204 | C | 70.30285 | 75.46723 | 80.25255 | 574.26774   | -389.43119  | -377.02542  | 1 |
| 205 | C | 69.72871 | 74.25381 | 79.76655 | 688.82679   | -287.33580  | -257.96133  | 1 |
| 206 | H | 69.48728 | 74.13384 | 78.69348 | 331.14182   | 1470.38163  | 2269.80013  | 1 |
| 207 | C | 70.57830 | 75.62316 | 81.64549 | -383.52382  | -675.04808  | 144.24917   | 1 |
| 208 | H | 71.00980 | 76.56724 | 82.02860 | 4.09847     | 1517.59662  | 2262.86397  | 1 |
| 209 | C | 69.47916 | 73.22555 | 80.67632 | -134.76730  | 428.45285   | -649.50303  | 1 |
| 210 | H | 69.03664 | 72.28629 | 80.30145 | -903.23433  | 1600.49020  | 2011.53387  | 1 |
| 211 | C | 70.31162 | 74.56639 | 82.51669 | -335.53281  | -615.00040  | -364.39058  | 1 |
| 212 | H | 70.53920 | 74.70283 | 83.58859 | 1596.45398  | -1369.33862 | 1732.02659  | 1 |
| 213 | C | 69.76280 | 73.32877 | 82.06971 | 585.48547   | -340.24194  | -406.23938  | 1 |
| 214 | O | 69.50464 | 72.24455 | 82.94819 | -419.15649  | -173.04408  | -511.94141  | 1 |
| 215 | H | 69.75421 | 72.66383 | 83.80646 | -1071.84350 | 1559.71507  | -1960.13012 | 1 |
| 216 | C | 72.53357 | 77.53462 | 77.68386 | 291.41878   | -183.13091  | 710.72246   | 1 |
| 217 | O | 73.49026 | 78.24285 | 77.90437 | 379.87695   | 523.47396   | -222.23622  | 1 |
| 218 | N | 71.70885 | 77.56314 | 76.63809 | 564.30591   | 373.09380   | 277.24371   | 1 |
| 219 | H | 70.90799 | 76.90582 | 76.53692 | -120.59931  | -2436.07824 | -1214.35098 | 1 |
| 220 | C | 71.68493 | 78.80145 | 75.88227 | 404.07514   | -299.37480  | 608.84009   | 1 |
| 221 | H | 71.32980 | 79.59103 | 76.58066 | -1071.07882 | -841.69025  | 2359.66467  | 1 |
| 222 | C | 73.15681 | 79.04861 | 75.36877 | -683.12807  | 68.71770    | -390.13096  | 1 |
| 223 | H | 73.85442 | 79.27686 | 76.22135 | 2068.88918  | 1596.58590  | 770.89603   | 1 |
| 224 | H | 73.55848 | 78.12463 | 74.88965 | 1379.86429  | 2342.49779  | -179.85638  | 1 |
| 225 | C | 73.11282 | 80.24650 | 74.36379 | -176.39967  | 537.49466   | 550.97268   | 1 |
| 226 | H | 72.52080 | 79.98979 | 73.45836 | -396.28051  | 1942.22168  | 1869.33314  | 1 |
| 227 | H | 72.61474 | 81.13488 | 74.81157 | -94.44700   | 586.00678   | -2659.20016 | 1 |
| 228 | C | 74.62830 | 80.55905 | 73.99948 | -291.69381  | -718.18079  | -150.72929  | 1 |
| 229 | H | 75.26989 | 80.75105 | 74.89334 | -2303.38776 | 1089.76242  | 964.62032   | 1 |
| 230 | H | 75.13309 | 79.77865 | 73.38004 | 884.16729   | 2568.80533  | -207.74283  | 1 |
| 231 | N | 74.66412 | 81.78840 | 73.24912 | -594.49522  | -252.81478  | 342.29276   | 1 |
| 232 | H | 73.89909 | 82.44016 | 73.09858 | -1735.17426 | 2084.05705  | -263.71605  | 1 |
| 233 | C | 75.70945 | 82.29104 | 72.69995 | 595.23177   | -271.52487  | 442.22352   | 1 |
| 234 | N | 76.95633 | 81.56431 | 72.78877 | 585.53813   | -424.79750  | -105.81303  | 1 |
| 235 | H | 76.93200 | 80.54898 | 72.82486 | 959.88797   | 1327.56823  | -2177.11905 | 1 |
| 236 | H | 77.60993 | 81.76367 | 72.03571 | 1578.48647  | 16.27378    | -2220.76233 | 1 |
| 237 | N | 75.67549 | 83.51837 | 72.03425 | -452.17763  | -390.33541  | -421.51853  | 1 |
| 238 | H | 74.89657 | 84.16960 | 71.92229 | 470.26107   | 1974.25629  | -1817.92087 | 1 |
| 239 | H | 76.50604 | 83.95673 | 71.63402 | 1856.67307  | -1573.97321 | -1224.35416 | 1 |
| 240 | C | 70.71310 | 78.54206 | 74.61635 | -531.47271  | -581.45780  | -55.06206   | 1 |
| 241 | O | 70.89395 | 77.55802 | 73.88640 | -243.00837  | 192.73507   | 609.52485   | 1 |
| 242 | N | 69.86703 | 79.52949 | 74.45043 | 343.49288   | -644.25607  | 38.09164    | 1 |
| 243 | H | 69.92358 | 80.24715 | 75.17272 | -1691.16043 | -1535.97525 | -1484.73099 | 1 |
| 244 | C | 68.79987 | 79.55414 | 73.46678 | 542.66492   | 350.14337   | 454.42563   | 1 |
| 245 | H | 68.39272 | 80.59189 | 73.53765 | 1209.57979  | -2396.95920 | 463.86744   | 1 |
| 246 | C | 69.38483 | 79.22760 | 72.09837 | -737.14309  | 145.93010   | 242.71942   | 1 |
| 247 | H | 70.04100 | 78.32579 | 72.21941 | -1050.18303 | 159.36419   | -2509.06125 | 1 |
| 248 | C | 68.30840 | 78.89606 | 71.08350 | -706.77696  | -252.88343  | -245.16230  | 1 |
| 249 | H | 68.74854 | 78.59191 | 70.09304 | -1624.64039 | -1665.49085 | 1417.86935  | 1 |
| 250 | H | 67.65481 | 78.05016 | 71.43399 | 2566.10521  | 598.51109   | 693.22305   | 1 |
| 251 | H | 67.63357 | 79.77651 | 70.89398 | -1972.69758 | 107.10018   | -1876.34312 | 1 |
| 252 | C | 70.25315 | 80.35811 | 71.57899 | 412.85148   | 672.58832   | -27.69222   | 1 |
| 253 | H | 70.80368 | 80.06524 | 70.64222 | 1447.02277  | 1762.76533  | -1490.78944 | 1 |
| 254 | H | 69.64165 | 81.27037 | 71.33442 | 1320.77379  | -145.20455  | 2378.68491  | 1 |
| 255 | H | 71.02222 | 80.66975 | 72.33745 | -1512.10848 | 1470.52031  | 1724.75147  | 1 |
| 256 | C | 67.63818 | 78.43873 | 73.90010 | -607.11113  | 499.56689   | 73.73769    | 1 |
| 257 | O | 66.48343 | 78.78648 | 73.91181 | 357.97126   | 460.81534   | 356.68785   | 1 |
| 258 | N | 68.14674 | 77.23800 | 74.09708 | 536.55407   | -368.62270  | 332.76306   | 1 |
| 259 | H | 69.17310 | 77.09314 | 74.00707 | 524.38866   | 2297.69985  | 1367.20941  | 1 |
| 260 | C | 67.33534 | 76.29837 | 74.79283 | 46.50277    | -774.29190  | -147.97904  | 1 |
| 261 | H | 66.39118 | 76.84815 | 75.01853 | 1676.51875  | 1883.29066  | 1032.55549  | 1 |
| 262 | C | 67.09338 | 75.01218 | 73.83802 | -559.41456  | -34.19198   | -556.30433  | 1 |

|     |   |          |          |          |             |             |             |   |
|-----|---|----------|----------|----------|-------------|-------------|-------------|---|
| 263 | H | 68.05809 | 74.47178 | 73.69910 | -64.66664   | 395.18769   | 2695.05373  | 1 |
| 264 | H | 66.40680 | 74.28599 | 74.33323 | -2703.44278 | -60.40056   | 333.79418   | 1 |
| 265 | C | 66.54156 | 75.44756 | 72.51006 | -519.76435  | 377.31045   | 459.42366   | 1 |
| 266 | H | 67.27169 | 76.14686 | 72.04423 | -1746.74323 | 1667.50644  | -1261.73691 | 1 |
| 267 | C | 66.36163 | 74.25220 | 71.58182 | 570.95554   | 16.46261    | -545.27700  | 1 |
| 268 | H | 65.93984 | 74.55898 | 70.59026 | 2391.58273  | 28.05277    | -1305.07271 | 1 |
| 269 | H | 67.33374 | 73.73340 | 71.38042 | 175.75588   | 917.63458   | 2559.43867  | 1 |
| 270 | H | 65.66312 | 73.49262 | 72.01773 | -1063.97851 | -2155.34650 | 1283.00462  | 1 |
| 271 | C | 65.21473 | 76.17645 | 72.67174 | 193.76014   | 2.62946     | -765.53141  | 1 |
| 272 | H | 64.74062 | 76.40035 | 71.68154 | 507.39394   | -846.55087  | 2539.60089  | 1 |
| 273 | H | 64.47827 | 75.57253 | 73.26225 | 1337.57841  | 1818.19054  | 1526.01994  | 1 |
| 274 | H | 65.35399 | 77.16265 | 73.20412 | 1100.88635  | -1172.91350 | -2199.08909 | 1 |
| 275 | C | 68.13896 | 75.80112 | 76.08782 | -549.21115  | 475.64486   | -309.38218  | 1 |
| 276 | O | 69.26229 | 76.17461 | 76.36887 | 556.06106   | -390.37755  | -78.24250   | 1 |
| 277 | O | 67.47955 | 74.87180 | 76.91116 | -572.27940  | -310.19032  | -209.75862  | 1 |
| 278 | H | 66.60255 | 74.83765 | 76.42227 | -1380.08193 | 2212.14486  | 790.85944   | 1 |

Listing 83: C00083.xmolout

|    |   |          |          |          |             |             |             |        |          |
|----|---|----------|----------|----------|-------------|-------------|-------------|--------|----------|
| 1  |   | 276      |          |          |             |             |             |        |          |
| 2  |   | 150.0000 | 150.0000 | 150.0000 | 0.0000      | 0.0000      | 0.0000***** | 2.7750 | 11100    |
|    |   | 0.2500   | 300.00   | 0.00     | 0.00        | 0.00        | -1293.5132  | 0.0000 | 300.0000 |
| 3  | H | 60.66996 | 78.22632 | 70.47444 | -2043.14101 | -1757.64893 | 399.89339   |        | 1        |
| 4  | N | 61.44609 | 78.22228 | 71.13595 | 426.75047   | 490.45733   | -334.42467  |        | 1        |
| 5  | H | 61.84231 | 77.27864 | 71.02556 | 442.25559   | -1110.30854 | -2448.52907 |        | 1        |
| 6  | C | 62.42125 | 79.21167 | 70.87528 | 415.32972   | -666.39213  | 83.73172    |        | 1        |
| 7  | H | 61.98947 | 79.89384 | 70.11024 | 879.32219   | 2491.00447  | 667.35213   |        | 1        |
| 8  | C | 62.77628 | 79.98422 | 72.24645 | 31.35357    | 477.41777   | 628.23362   |        | 1        |
| 9  | H | 63.10441 | 79.24138 | 73.01196 | 1168.38489  | 2240.25337  | -1019.71136 |        | 1        |
| 10 | H | 63.64116 | 80.67364 | 80.67364 | -360.43770  | 2534.90498  | 931.67112   |        | 1        |
| 11 | C | 61.56993 | 80.74274 | 72.73125 | 463.18208   | 512.70242   | -382.34388  |        | 1        |
| 12 | H | 60.71778 | 80.02971 | 72.80487 | 1725.29117  | 1863.52247  | -987.07854  |        | 1        |
| 13 | C | 61.83799 | 81.32958 | 74.11224 | 710.42801   | -144.27427  | -313.15367  |        | 1        |
| 14 | H | 60.94564 | 81.87854 | 74.50954 | 364.20195   | -1033.13725 | 2494.72524  |        | 1        |
| 15 | H | 62.09882 | 80.53446 | 74.85729 | 2567.61904  | 335.80679   | 847.48802   |        | 1        |
| 16 | H | 62.69079 | 82.05621 | 74.09140 | -2587.99029 | 680.92867   | -512.16411  |        | 1        |
| 17 | C | 61.18477 | 81.86566 | 71.77745 | 268.17616   | 741.64379   | -40.42634   |        | 1        |
| 18 | H | 60.32460 | 82.46530 | 72.17291 | 1283.54314  | -1945.37420 | -1411.27812 |        | 1        |
| 19 | H | 62.03510 | 82.57633 | 71.61216 | -1258.57796 | 1317.15249  | -2026.02085 |        | 1        |
| 20 | H | 60.87846 | 81.47412 | 70.77377 | -2502.84526 | 909.80597   | 575.92391   |        | 1        |
| 21 | C | 63.68875 | 78.34928 | 70.34545 | 619.36578   | -458.64843  | -172.09273  |        | 1        |
| 22 | O | 63.65895 | 77.13509 | 70.24279 | -81.40433   | 433.87611   | 522.34594   |        | 1        |
| 23 | N | 64.67925 | 79.17933 | 70.03615 | 175.23996   | -622.20190  | 341.55523   |        | 1        |
| 24 | H | 64.56886 | 80.17548 | 70.21921 | -876.57256  | -303.22879  | -2561.90213 |        | 1        |
| 25 | C | 65.90185 | 78.61250 | 69.57759 | -571.88214  | -534.10783  | -106.15033  |        | 1        |
| 26 | H | 65.58446 | 77.66559 | 69.08715 | -2713.20841 | -16.25800   | -248.80809  |        | 1        |
| 27 | C | 66.53215 | 79.70913 | 68.59558 | 166.60354   | 288.16399   | -716.09568  |        | 1        |
| 28 | H | 66.54892 | 80.69796 | 69.13009 | -2097.85574 | 1636.78449  | -586.18044  |        | 1        |
| 29 | O | 65.78300 | 79.92738 | 67.38432 | -317.80580  | -363.38227  | 484.43082   |        | 1        |
| 30 | H | 65.53112 | 80.86623 | 67.48413 | 1863.74748  | -1451.84923 | 1357.29467  |        | 1        |
| 31 | C | 68.01289 | 79.22248 | 68.40147 | 503.80731   | 517.99032   | 318.51606   |        | 1        |
| 32 | H | 68.57308 | 79.89541 | 67.71110 | 640.61020   | -2157.10410 | -1536.29104 |        | 1        |
| 33 | H | 68.57452 | 79.21552 | 69.36785 | 1687.88455  | 465.60692   | 2087.56452  |        | 1        |
| 34 | H | 68.05789 | 78.19519 | 67.97088 | -1293.07895 | -1899.88581 | -1463.57452 |        | 1        |
| 35 | C | 66.83816 | 78.36044 | 70.89563 | -153.07550  | -733.68902  | 248.70981   |        | 1        |
| 36 | O | 67.06332 | 79.27586 | 71.64034 | 186.15459   | -480.78787  | -449.34387  |        | 1        |
| 37 | N | 67.32041 | 77.10964 | 70.91110 | -487.53139  | 543.18517   | 42.03850    |        | 1        |
| 38 | C | 68.15296 | 76.63275 | 71.97555 | -699.35871  | 69.34393    | 360.10701   |        | 1        |
| 39 | H | 67.78295 | 77.10117 | 72.91598 | 2.81126     | -221.99807  | -2715.58072 |        | 1        |
| 40 | C | 67.96532 | 75.05786 | 71.87478 | -507.46439  | -592.59194  | 122.07761   |        | 1        |
| 41 | H | 68.80960 | 74.49151 | 72.32702 | -1975.08116 | 525.87560   | -1801.71556 |        | 1        |
| 42 | H | 67.03940 | 74.72079 | 72.39211 | 1588.27743  | -1913.22100 | 1113.83566  |        | 1        |

|     |   |          |          |          |             |             |             |   |
|-----|---|----------|----------|----------|-------------|-------------|-------------|---|
| 43  | C | 67.85448 | 74.86259 | 70.33146 | -613.62442  | -457.55993  | -194.14490  | 1 |
| 44  | H | 68.85347 | 74.94383 | 69.84470 | 1707.54637  | -721.27992  | 1996.92523  | 1 |
| 45  | H | 67.43133 | 73.87746 | 70.03181 | 758.23357   | 2100.81767  | 1560.55011  | 1 |
| 46  | C | 66.92020 | 76.09069 | 69.94945 | -352.41524  | 704.96076   | 49.21465    | 1 |
| 47  | H | 67.06685 | 76.48716 | 68.91745 | 1714.76886  | -2070.42778 | 443.35792   | 1 |
| 48  | H | 65.83037 | 75.92239 | 70.13117 | 1224.15040  | 1801.50881  | 1636.97633  | 1 |
| 49  | C | 69.72573 | 76.97347 | 71.70144 | 566.85117   | 537.05831   | 117.62814   | 1 |
| 50  | O | 70.56749 | 76.76224 | 72.57298 | -550.26779  | -406.08867  | 4.21666     | 1 |
| 51  | N | 69.90084 | 77.36612 | 70.46015 | 566.34832   | -425.77725  | 180.18749   | 1 |
| 52  | H | 69.04478 | 77.44805 | 69.91814 | 644.44502   | 2646.80550  | -52.73430   | 1 |
| 53  | C | 71.17520 | 77.78996 | 69.99879 | 612.34801   | -281.48662  | 411.56221   | 1 |
| 54  | H | 71.90506 | 77.22651 | 70.62287 | 1667.23498  | -1490.75142 | 1556.16753  | 1 |
| 55  | C | 71.22036 | 77.52375 | 68.42448 | -714.45746  | -175.43074  | 286.98927   | 1 |
| 56  | H | 70.48776 | 78.21735 | 67.92661 | -787.09484  | 1763.03619  | -1922.46060 | 1 |
| 57  | O | 70.86660 | 76.19856 | 67.99094 | -429.46514  | 516.51932   | -128.40526  | 1 |
| 58  | H | 70.09584 | 76.38490 | 67.41626 | 1981.82785  | 436.16847   | -1818.18182 | 1 |
| 59  | C | 72.68472 | 78.00035 | 68.10030 | 630.79189   | -468.94448  | 76.03230    | 1 |
| 60  | H | 72.87890 | 78.00191 | 67.00282 | -1775.71861 | 2062.30353  | 131.89849   | 1 |
| 61  | H | 72.87624 | 79.03395 | 68.47271 | -1855.14608 | 88.94118    | 1993.53760  | 1 |
| 62  | H | 73.44354 | 77.33171 | 68.56883 | -1504.82350 | -780.94249  | -2132.90992 | 1 |
| 63  | C | 71.24499 | 79.41919 | 70.20392 | 288.57638   | 618.62814   | -397.00270  | 1 |
| 64  | O | 70.65099 | 80.16692 | 69.46215 | 321.70495   | -185.26452  | 574.37218   | 1 |
| 65  | N | 71.98692 | 79.70751 | 71.27732 | -447.05792  | -446.53431  | 367.76425   | 1 |
| 66  | H | 72.40701 | 78.88749 | 71.71857 | 350.31316   | 1975.63644  | -1843.31522 | 1 |
| 67  | C | 72.79760 | 80.92168 | 71.17695 | -511.23061  | 374.03917   | -471.51480  | 1 |
| 68  | H | 73.33499 | 80.78745 | 70.21111 | 2234.79579  | -898.70890  | -1273.45190 | 1 |
| 69  | C | 71.83277 | 82.14190 | 71.14373 | 529.53781   | -159.34528  | 563.72604   | 1 |
| 70  | H | 72.39301 | 83.09650 | 70.98629 | 654.59388   | 2347.94251  | 1217.51488  | 1 |
| 71  | H | 71.08681 | 82.02144 | 70.31972 | -1526.55661 | 2103.42026  | 817.87394   | 1 |
| 72  | O | 71.03628 | 82.64390 | 72.46256 | -554.84278  | 14.12789    | 399.58769   | 1 |
| 73  | H | 70.38098 | 81.96073 | 72.41916 | 1297.06236  | 2061.84854  | 1220.68812  | 1 |
| 74  | C | 73.79824 | 80.85856 | 72.45276 | -662.15484  | -412.13544  | 123.62687   | 1 |
| 75  | O | 74.81402 | 80.21055 | 72.40056 | -540.01537  | -317.05804  | 274.91456   | 1 |
| 76  | N | 73.29759 | 81.57224 | 73.45854 | -202.76299  | -690.00100  | -131.49145  | 1 |
| 77  | H | 72.35525 | 82.03329 | 73.34180 | -702.62132  | -2617.37191 | 281.70413   | 1 |
| 78  | C | 73.97676 | 81.58389 | 74.77070 | -491.73914  | 576.34187   | 222.73509   | 1 |
| 79  | H | 75.02732 | 81.87890 | 74.54289 | 1977.17978  | -1823.58850 | -434.68928  | 1 |
| 80  | C | 73.24283 | 82.57469 | 75.65641 | -649.50797  | -328.66843  | 306.11224   | 1 |
| 81  | H | 72.21860 | 82.17977 | 75.84096 | 2075.07803  | 1452.16490  | -1004.45904 | 1 |
| 82  | C | 73.94072 | 82.71929 | 76.99739 | -615.18735  | -489.99689  | -70.96352   | 1 |
| 83  | H | 73.37639 | 83.40248 | 77.68904 | -1226.32661 | -1724.38906 | -1716.47170 | 1 |
| 84  | H | 74.04699 | 81.72712 | 77.51634 | 2381.64273  | -969.84735  | 900.46860   | 1 |
| 85  | H | 74.97489 | 83.14403 | 76.88055 | 2122.74991  | 1702.23946  | -141.36228  | 1 |
| 86  | C | 73.08808 | 83.93249 | 74.99527 | -501.86074  | -479.61276  | -376.42482  | 1 |
| 87  | H | 72.55152 | 84.66135 | 75.66170 | 993.79261   | -2246.95401 | -1177.81305 | 1 |
| 88  | H | 74.08552 | 84.38366 | 74.74086 | 42.71279    | -626.15391  | -2651.37258 | 1 |
| 89  | H | 72.50097 | 83.86436 | 74.03722 | -2026.39012 | -1590.33709 | -887.82922  | 1 |
| 90  | C | 73.88093 | 80.06845 | 75.35989 | -672.89153  | 382.57394   | -156.34072  | 1 |
| 91  | O | 74.87119 | 79.45796 | 75.92465 | 410.04627   | 221.86223   | 500.35950   | 1 |
| 92  | N | 72.71148 | 79.49626 | 75.22173 | -378.11782  | -443.79414  | -441.10984  | 1 |
| 93  | H | 72.12095 | 80.21217 | 74.79399 | 2404.15973  | -568.14894  | 1149.30085  | 1 |
| 94  | C | 72.53277 | 78.42497 | 76.15792 | -544.54484  | 466.16019   | 331.29119   | 1 |
| 95  | H | 72.35167 | 78.96988 | 77.10657 | -1409.80988 | -170.17955  | 2325.32679  | 1 |
| 96  | C | 71.28596 | 77.57942 | 75.75103 | -184.48284  | 116.78282   | -758.89137  | 1 |
| 97  | H | 70.34092 | 78.08049 | 76.06741 | 1893.78641  | 1861.14652  | 611.04528   | 1 |
| 98  | H | 71.20317 | 77.47530 | 74.63663 | -2170.79665 | -974.19311  | 1327.50117  | 1 |
| 99  | C | 71.43656 | 76.18712 | 76.45764 | 389.51668   | 672.81878   | -138.49152  | 1 |
| 100 | H | 72.40556 | 75.72756 | 76.16205 | 510.64577   | 1933.03327  | 1851.02484  | 1 |
| 101 | H | 71.50282 | 76.31164 | 77.56046 | -2302.30869 | -1105.72939 | -948.89774  | 1 |
| 102 | C | 70.23579 | 75.21811 | 76.09596 | -559.93427  | -126.34590  | 542.30857   | 1 |
| 103 | O | 69.78635 | 74.46146 | 76.92076 | -670.36003  | -111.83166  | 76.36448    | 1 |
| 104 | N | 69.85707 | 75.30844 | 74.80788 | -216.06729  | -537.07037  | 446.51379   | 1 |

|     |   |          |          |          |             |             |             |   |
|-----|---|----------|----------|----------|-------------|-------------|-------------|---|
| 105 | H | 70.24686 | 75.89712 | 74.01829 | -1251.96487 | 1074.12894  | -2168.52500 | 1 |
| 106 | H | 69.11713 | 74.69532 | 74.44114 | -2451.83023 | -720.73851  | 944.84612   | 1 |
| 107 | C | 74.06826 | 77.70086 | 76.25124 | 546.24052   | -563.88337  | -85.11809   | 1 |
| 108 | O | 74.41339 | 77.26341 | 77.35261 | 71.70702    | -307.40463  | 606.69673   | 1 |
| 109 | N | 74.33836 | 77.00979 | 75.07179 | 479.90863   | -504.50129  | 222.86849   | 1 |
| 110 | C | 75.20669 | 75.91413 | 75.05771 | 75.51268    | -600.91904  | 506.73700   | 1 |
| 111 | H | 75.28560 | 75.55063 | 76.11271 | -2033.61562 | 1795.30103  | 254.89480   | 1 |
| 112 | C | 74.45620 | 74.97593 | 73.99491 | 523.79067   | 517.99274   | 284.45581   | 1 |
| 113 | H | 75.11437 | 74.17013 | 73.60054 | 1599.61665  | -1127.00911 | 1895.98173  | 1 |
| 114 | H | 73.56612 | 74.48093 | 74.44204 | -1881.83093 | 1275.82488  | -1501.55016 | 1 |
| 115 | C | 74.04881 | 76.02063 | 72.91749 | -600.05639  | -404.05026  | 316.64485   | 1 |
| 116 | H | 74.88210 | 76.21186 | 72.20501 | -2597.05260 | 496.36221   | 657.73249   | 1 |
| 117 | H | 73.17958 | 75.69635 | 72.30234 | -1666.24518 | 1294.38985  | -1723.90591 | 1 |
| 118 | C | 73.73008 | 77.31608 | 73.79872 | 493.57570   | -129.95376  | -602.56394  | 1 |
| 119 | H | 74.19203 | 78.26886 | 73.43380 | -1469.08415 | -637.84797  | 2204.22581  | 1 |
| 120 | H | 72.64126 | 77.49153 | 73.98673 | -1038.97840 | 1068.88701  | -2280.71789 | 1 |
| 121 | C | 76.67509 | 76.20128 | 74.32998 | 188.88100   | 241.05089   | -727.87821  | 1 |
| 122 | O | 77.25924 | 75.28390 | 73.81024 | 531.88613   | -49.19943   | 427.07960   | 1 |
| 123 | N | 77.14239 | 77.47740 | 74.50699 | 708.14833   | 26.93417    | -179.73509  | 1 |
| 124 | H | 76.34908 | 77.88481 | 75.03364 | -2232.69501 | -1179.09831 | 1023.94816  | 1 |
| 125 | C | 77.44889 | 78.16894 | 73.26393 | -738.32412  | 259.92548   | 104.42456   | 1 |
| 126 | H | 76.46082 | 78.35356 | 72.78874 | 2028.89123  | 1260.02983  | 1311.33324  | 1 |
| 127 | C | 78.19126 | 79.49960 | 73.67207 | -258.65678  | -345.52513  | 661.28459   | 1 |
| 128 | H | 79.03994 | 79.28368 | 74.35764 | -1826.06090 | -1801.46097 | -918.64554  | 1 |
| 129 | C | 78.69081 | 80.19952 | 72.35848 | -541.23400  | 531.92970   | -218.41428  | 1 |
| 130 | H | 79.27173 | 81.12585 | 72.57760 | 1311.73218  | -2219.18200 | 882.19023   | 1 |
| 131 | H | 79.35118 | 79.52095 | 71.76391 | -1048.71298 | 1223.58118  | -2196.97971 | 1 |
| 132 | H | 77.83694 | 80.48553 | 71.70059 | 419.06414   | 1903.92898  | 1903.44670  | 1 |
| 133 | C | 77.16299 | 80.47642 | 74.33806 | -423.86431  | 152.66566   | -648.55262  | 1 |
| 134 | H | 77.55764 | 81.51785 | 74.40653 | 105.68386   | -2342.50080 | 1387.51238  | 1 |
| 135 | H | 76.20400 | 80.50191 | 73.73118 | -1695.63603 | -1484.73621 | -1531.02793 | 1 |
| 136 | H | 76.90386 | 80.15012 | 75.37488 | -1853.57121 | -487.39031  | 1936.59343  | 1 |
| 137 | C | 78.47464 | 77.38404 | 72.29110 | 539.71428   | -510.58232  | 267.58633   | 1 |
| 138 | O | 78.41840 | 77.54536 | 71.09009 | -15.93758   | -278.34085  | -624.49402  | 1 |
| 139 | N | 79.54875 | 76.84817 | 72.98914 | -676.81886  | 12.05292    | 276.17960   | 1 |
| 140 | H | 79.08761 | 76.69234 | 73.90090 | -1694.44250 | -373.84189  | -2100.66098 | 1 |
| 141 | C | 80.13974 | 75.72193 | 72.28170 | 412.33078   | -664.70360  | 108.35451   | 1 |
| 142 | H | 79.28815 | 75.06981 | 71.99108 | 1765.77476  | 1294.44366  | 1621.76594  | 1 |
| 143 | C | 80.92510 | 76.33163 | 71.06869 | -179.66635  | -721.95667  | -264.73915  | 1 |
| 144 | H | 80.23031 | 76.86261 | 70.36599 | -607.34922  | 2587.87032  | -598.10018  | 1 |
| 145 | H | 81.63542 | 77.10792 | 71.43576 | -359.69332  | -1479.13954 | -2259.74260 | 1 |
| 146 | C | 81.69591 | 75.18286 | 70.32949 | -240.01076  | 616.02425   | 431.85322   | 1 |
| 147 | H | 82.33707 | 74.61670 | 71.04217 | -1359.17131 | 782.54425   | 2227.99181  | 1 |
| 148 | H | 80.99244 | 74.44111 | 69.88991 | -820.36667  | 85.81767    | -2596.78715 | 1 |
| 149 | C | 82.57323 | 75.87588 | 69.21234 | -513.07015  | 236.18570   | -551.87280  | 1 |
| 150 | H | 81.92842 | 76.41516 | 68.48067 | 1816.11944  | -1183.11722 | -1650.94321 | 1 |
| 151 | H | 83.23657 | 76.65182 | 69.65944 | -1800.04429 | -1361.53473 | 1526.34643  | 1 |
| 152 | C | 83.41495 | 74.78783 | 68.50582 | 726.08972   | -253.19732  | -179.64713  | 1 |
| 153 | H | 84.14214 | 74.26857 | 69.16148 | 1224.27271  | -456.51798  | -2390.90304 | 1 |
| 154 | H | 82.82485 | 74.04553 | 67.93235 | 1206.40339  | -1150.93514 | -2154.90344 | 1 |
| 155 | N | 84.29851 | 75.51139 | 67.43378 | 329.70796   | -633.68968  | -155.67358  | 1 |
| 156 | H | 84.93944 | 74.88473 | 66.86671 | 1348.31305  | 1938.76845  | 1359.00643  | 1 |
| 157 | H | 83.79102 | 76.03989 | 66.66577 | 2096.92035  | 1446.54551  | -966.48890  | 1 |
| 158 | H | 84.98239 | 76.24235 | 67.78716 | -1197.07217 | -2303.53719 | 827.28733   | 1 |
| 159 | C | 81.20738 | 75.02252 | 73.28764 | -378.01186  | -556.17301  | -413.96481  | 1 |
| 160 | O | 82.21212 | 75.57383 | 73.67798 | -409.44433  | -307.55053  | -453.30833  | 1 |
| 161 | N | 80.83128 | 73.75652 | 73.50473 | -429.02477  | 524.70884   | 274.08502   | 1 |
| 162 | H | 79.92109 | 73.44498 | 73.16369 | 1706.34263  | -1425.96036 | 1574.38926  | 1 |
| 163 | C | 81.69579 | 73.00565 | 74.36724 | -45.25864   | -626.22952  | 478.93267   | 1 |
| 164 | H | 82.71393 | 73.31253 | 74.03475 | 1988.63164  | 570.90773   | 1772.87287  | 1 |
| 165 | C | 81.43607 | 73.53567 | 75.83731 | 551.77128   | -20.49526   | -564.54996  | 1 |
| 166 | H | 81.57371 | 74.64049 | 75.87603 | 1434.61535  | -1753.10253 | 1513.99471  | 1 |

|     |   |          |          |          |             |             |             |   |
|-----|---|----------|----------|----------|-------------|-------------|-------------|---|
| 167 | H | 80.38531 | 73.34857 | 76.15398 | -714.67738  | 1819.09770  | 1898.36494  | 1 |
| 168 | C | 82.44567 | 72.80096 | 76.77925 | 446.99263   | -555.77305  | 338.97221   | 1 |
| 169 | H | 82.19265 | 71.71127 | 76.83791 | 1953.68466  | 1892.25957  | -161.67766  | 1 |
| 170 | H | 83.48299 | 72.85362 | 76.37803 | -403.03785  | 2688.07032  | -188.43591  | 1 |
| 171 | C | 82.35824 | 73.49355 | 78.19591 | 567.86262   | 335.74681   | 434.04421   | 1 |
| 172 | H | 82.75649 | 74.53375 | 78.15950 | -1080.02275 | 1568.26081  | -1948.78900 | 1 |
| 173 | H | 81.29293 | 73.59042 | 78.52203 | -919.54108  | 2111.34692  | 1456.13463  | 1 |
| 174 | C | 83.17687 | 72.61173 | 79.17547 | 195.81897   | 173.33862   | -745.11536  | 1 |
| 175 | H | 82.87100 | 71.54467 | 79.20414 | 1405.67949  | -2301.21089 | -390.08113  | 1 |
| 176 | H | 84.27453 | 72.68250 | 79.03194 | -940.37328  | -1118.32446 | 2299.72133  | 1 |
| 177 | N | 82.93055 | 73.11511 | 80.61824 | 319.26422   | 656.36007   | -42.02424   | 1 |
| 178 | H | 83.70725 | 72.85364 | 81.29168 | 1961.03633  | 619.91968   | 1787.09422  | 1 |
| 179 | H | 82.91084 | 74.16469 | 80.76414 | 854.14343   | -2156.80752 | 1429.08711  | 1 |
| 180 | H | 82.01209 | 72.72942 | 81.12946 | 1237.02905  | -1378.50857 | -1998.28500 | 1 |
| 181 | C | 81.42249 | 71.39432 | 74.30823 | 532.53319   | -268.57236  | 517.55729   | 1 |
| 182 | O | 82.26084 | 70.67594 | 74.80059 | 266.16714   | -290.73804  | -558.88002  | 1 |
| 183 | N | 80.26129 | 71.07148 | 73.76230 | -226.25352  | 640.49678   | -270.32839  | 1 |
| 184 | H | 79.68916 | 71.81936 | 73.37128 | 2007.69063  | -1035.27229 | 1523.50231  | 1 |
| 185 | C | 79.82698 | 69.70749 | 73.66974 | -540.76542  | -573.33303  | 49.50000    | 1 |
| 186 | H | 78.94795 | 69.79529 | 72.98864 | -2374.20950 | -1036.76023 | 843.75774   | 1 |
| 187 | C | 81.00601 | 68.81919 | 73.02246 | -77.09082   | 666.87422   | -415.84136  | 1 |
| 188 | H | 81.78409 | 68.67219 | 73.82281 | -985.81834  | 617.19825   | 2463.91927  | 1 |
| 189 | O | 81.66899 | 69.40642 | 71.89198 | 293.29899   | -391.65602  | -477.80926  | 1 |
| 190 | H | 82.52452 | 69.65611 | 72.30350 | 2528.72714  | -681.76262  | -751.27122  | 1 |
| 191 | C | 80.29962 | 67.45042 | 72.71094 | 252.47363   | -605.14473  | 440.05134   | 1 |
| 192 | H | 81.02576 | 66.70241 | 72.31595 | -2052.65063 | 1456.49051  | -1043.51830 | 1 |
| 193 | H | 79.82321 | 67.00071 | 73.61761 | -2152.98800 | -1661.97574 | -161.70652  | 1 |
| 194 | H | 79.50190 | 67.57110 | 71.94156 | -473.12726  | -1584.27339 | 2165.61725  | 1 |
| 195 | C | 79.41134 | 69.22622 | 75.12955 | 360.36307   | 488.46713   | 505.10056   | 1 |
| 196 | O | 79.55708 | 67.93366 | 75.48923 | -200.08817  | -528.03552  | -385.82850  | 1 |
| 197 | N | 78.82682 | 70.13499 | 75.80393 | -597.54095  | -226.44775  | 355.20479   | 1 |
| 198 | H | 78.79902 | 70.97602 | 75.20547 | 2179.23655  | -1300.70981 | -991.33835  | 1 |
| 199 | C | 78.35744 | 70.11541 | 77.14296 | -687.68921  | 297.39807   | -249.45179  | 1 |
| 200 | H | 77.42902 | 70.72546 | 77.12298 | -349.16256  | -2467.37713 | -1101.72831 | 1 |
| 201 | C | 78.13866 | 68.60927 | 77.66059 | 672.47345   | 361.54328   | -201.62880  | 1 |
| 202 | H | 79.11344 | 68.05852 | 77.66091 | 1541.41502  | 582.18425   | 2169.97026  | 1 |
| 203 | H | 77.76261 | 68.61870 | 78.71867 | -2534.67717 | 60.25153    | 997.72295   | 1 |
| 204 | C | 77.15333 | 67.97161 | 76.69912 | 574.26774   | -389.43119  | -377.02542  | 1 |
| 205 | C | 75.75241 | 68.14032 | 76.71900 | 688.82679   | -287.33580  | -257.96133  | 1 |
| 206 | H | 75.25637 | 68.69383 | 77.54084 | 331.14182   | 1470.38163  | 2269.80013  | 1 |
| 207 | C | 77.83729 | 67.20394 | 75.62218 | -383.52382  | -675.04808  | 144.24917   | 1 |
| 208 | H | 78.57843 | 66.40065 | 75.96454 | 4.09847     | 1517.59662  | 2262.86397  | 1 |
| 209 | C | 75.00743 | 67.63935 | 75.63436 | -134.76730  | 428.45285   | -649.50303  | 1 |
| 210 | H | 73.91435 | 67.77881 | 75.63564 | -903.23433  | 1600.49020  | 2011.53387  | 1 |
| 211 | C | 76.97848 | 66.79888 | 74.49568 | -335.53281  | -615.00040  | -364.39058  | 1 |
| 212 | H | 77.43617 | 66.28776 | 73.63687 | 1596.45398  | -1369.33862 | 1732.02659  | 1 |
| 213 | C | 75.59869 | 66.98565 | 74.51092 | 585.48547   | -340.24194  | -406.23938  | 1 |
| 214 | O | 74.73069 | 66.55218 | 73.42101 | -419.15649  | -173.04408  | -511.94141  | 1 |
| 215 | H | 75.39454 | 66.16060 | 72.83219 | -1071.84350 | 1559.71507  | -1960.13012 | 1 |
| 216 | C | 79.48647 | 70.76206 | 78.11715 | 291.41878   | -183.13091  | 710.72246   | 1 |
| 217 | O | 80.66885 | 70.50876 | 78.04388 | 379.87695   | 523.47396   | -222.23622  | 1 |
| 218 | N | 78.85716 | 71.48337 | 79.05131 | 564.30591   | 373.09380   | 277.24371   | 1 |
| 219 | H | 77.84248 | 71.58697 | 79.00713 | -120.59931  | -2436.07824 | -1214.35098 | 1 |
| 220 | C | 79.68094 | 72.36447 | 79.82233 | 404.07514   | -299.37480  | 608.84009   | 1 |
| 221 | H | 80.67619 | 72.35182 | 79.31101 | -1071.07882 | -841.69025  | 2359.66467  | 1 |
| 222 | C | 78.97243 | 73.78490 | 79.86297 | -683.12807  | 68.71770    | -390.13096  | 1 |
| 223 | H | 78.77558 | 74.16952 | 78.83721 | 2068.88918  | 1596.58590  | 770.89603   | 1 |
| 224 | H | 77.97506 | 73.70996 | 80.35208 | 1379.86429  | 2342.49779  | -179.85638  | 1 |
| 225 | C | 79.91584 | 74.73754 | 80.65865 | -176.39967  | 537.49466   | 550.97268   | 1 |
| 226 | H | 80.21848 | 74.26901 | 81.62478 | -396.28051  | 1942.22168  | 1869.33314  | 1 |
| 227 | H | 80.86423 | 74.92094 | 80.10692 | -94.44700   | 586.00678   | -2659.20016 | 1 |
| 228 | C | 79.11927 | 76.10005 | 80.90420 | -291.69381  | -718.18079  | -150.72929  | 1 |



|     |   |          |          |          |             |             |             |   |
|-----|---|----------|----------|----------|-------------|-------------|-------------|---|
| 229 | H | 78.88947 | 76.70608 | 79.99111 | -2303.38776 | 1089.76242  | 964.62032   | 1 |
| 230 | H | 78.17513 | 76.00209 | 81.49866 | 884.16729   | 2568.80533  | -207.74283  | 1 |
| 231 | N | 80.04242 | 76.81269 | 81.68460 | -594.49522  | -252.81478  | 342.29276   | 1 |
| 232 | H | 80.87569 | 76.32046 | 81.96787 | -1735.17426 | 2084.05705  | -263.71605  | 1 |
| 233 | C | 79.89313 | 78.01760 | 82.06243 | 595.23177   | -271.52487  | 442.22352   | 1 |
| 234 | N | 78.72836 | 78.68406 | 81.66710 | 585.53813   | -424.79750  | -105.81303  | 1 |
| 235 | H | 77.94793 | 78.34500 | 81.10586 | 959.88797   | 1327.56823  | -2177.11905 | 1 |
| 236 | H | 78.49424 | 79.64756 | 81.90797 | 1578.48647  | 16.27378    | -2220.76233 | 1 |
| 237 | N | 80.98416 | 78.43915 | 82.83549 | -452.17763  | -390.33541  | -421.51853  | 1 |
| 238 | H | 81.82853 | 77.94727 | 83.12400 | 470.26107   | 1974.25629  | -1817.92087 | 1 |
| 239 | H | 81.05604 | 79.37416 | 83.23834 | 1856.67307  | -1573.97321 | -1224.35416 | 1 |
| 240 | C | 79.80135 | 71.83812 | 81.35803 | -531.47271  | -581.45780  | -55.06206   | 1 |
| 241 | O | 80.81959 | 72.10012 | 82.01451 | -243.00837  | 192.73507   | 609.52485   | 1 |
| 242 | N | 78.70025 | 71.25464 | 81.76552 | 343.49288   | -644.25607  | 38.09164    | 1 |
| 243 | H | 77.99917 | 71.24932 | 81.02713 | -1691.16043 | -1535.97525 | -1484.73099 | 1 |
| 244 | C | 78.69076 | 70.29903 | 82.87597 | 542.66492   | 350.14337   | 454.42563   | 1 |
| 245 | H | 79.71902 | 69.86434 | 82.85351 | 1209.57979  | -2396.95920 | 463.86744   | 1 |
| 246 | C | 78.41285 | 71.04841 | 84.17172 | -737.14309  | 145.93010   | 242.71942   | 1 |
| 247 | H | 77.38241 | 71.46443 | 84.10677 | -1050.18303 | 159.36419   | -2509.06125 | 1 |
| 248 | C | 78.47465 | 70.12044 | 85.36978 | -706.77696  | -252.88343  | -245.16230  | 1 |
| 249 | H | 78.22365 | 70.65490 | 86.32718 | -1624.64039 | -1665.49085 | 1417.86935  | 1 |
| 250 | H | 77.74609 | 69.26336 | 85.25860 | 2566.10521  | 598.51109   | 693.22305   | 1 |
| 251 | H | 79.49951 | 69.67391 | 85.49628 | -1972.69758 | 107.10018   | -1876.34312 | 1 |
| 252 | C | 79.36791 | 72.21233 | 84.36200 | 412.85148   | 672.58832   | -27.69222   | 1 |
| 253 | H | 79.15956 | 72.78224 | 85.30907 | 1447.02277  | 1762.76533  | -1490.78944 | 1 |
| 254 | H | 80.43719 | 71.86343 | 84.40137 | 1320.77379  | -145.20455  | 2378.68491  | 1 |
| 255 | H | 79.30282 | 72.93824 | 83.50265 | -1512.10848 | 1470.52031  | 1724.75147  | 1 |
| 256 | C | 77.49444 | 69.21921 | 82.50921 | -607.11113  | 499.56689   | 73.73769    | 1 |
| 257 | O | 76.84029 | 68.70410 | 83.39028 | 357.97126   | 460.81534   | 356.68785   | 1 |
| 258 | N | 77.47049 | 68.96534 | 81.20075 | 536.55407   | -368.62270  | 332.76306   | 1 |
| 259 | H | 78.18853 | 69.47989 | 80.68968 | 524.38866   | 2297.69985  | 1367.20941  | 1 |
| 260 | C | 76.20126 | 68.77285 | 80.56697 | 46.50277    | -774.29190  | -147.97904  | 1 |
| 261 | H | 76.43326 | 68.62665 | 79.48503 | 1676.51875  | 1883.29066  | 1032.55549  | 1 |
| 262 | C | 75.49495 | 67.48264 | 81.21403 | -559.41456  | -34.19198   | -556.30433  | 1 |
| 263 | H | 75.50940 | 67.55127 | 82.33722 | -64.66664   | 395.18769   | 2695.05373  | 1 |
| 264 | H | 74.42379 | 67.40075 | 80.90712 | -2703.44278 | -60.40056   | 333.79418   | 1 |
| 265 | C | 76.29938 | 66.29623 | 80.74445 | -519.76435  | 377.31045   | 459.42366   | 1 |
| 266 | H | 77.37084 | 66.60044 | 80.71631 | -1746.74323 | 1667.50644  | -1261.73691 | 1 |
| 267 | C | 76.16898 | 65.13212 | 81.71744 | 570.95554   | 16.46261    | -545.27700  | 1 |
| 268 | H | 76.77680 | 64.24938 | 81.38952 | 2391.58273  | 28.05277    | -1305.07271 | 1 |
| 269 | H | 76.51930 | 65.41373 | 82.74451 | 175.75588   | 917.63458   | 2559.43867  | 1 |
| 270 | H | 75.10690 | 64.78787 | 81.81104 | -1063.97851 | -2155.34650 | 1283.00462  | 1 |
| 271 | C | 75.87574 | 65.86027 | 79.34877 | 193.76014   | 2.62946     | -765.53141  | 1 |
| 272 | H | 76.50058 | 65.00952 | 78.97294 | 507.39394   | -846.55087  | 2539.60089  | 1 |
| 273 | H | 74.80807 | 65.52075 | 79.32937 | 1337.57841  | 1818.19054  | 1526.01994  | 1 |
| 274 | H | 75.97079 | 66.69221 | 78.60559 | 1100.88635  | -1172.91350 | -2199.08909 | 1 |
| 275 | C | 75.40840 | 70.16149 | 80.75768 | -549.21115  | 475.64486   | -309.38218  | 1 |
| 276 | O | 75.52452 | 71.04544 | 79.94862 | 556.06106   | -390.37755  | -78.24250   | 1 |
| 277 | O | 74.61503 | 70.33264 | 81.91568 | -572.27940  | -310.19032  | -209.75862  | 1 |
| 278 | H | 74.96556 | 69.57284 | 82.46299 | -1380.08193 | 2212.14486  | 790.85944   | 1 |

Listing 84: C00084.xmolout

|   |   |          |          |          |             |             |             |        |          |
|---|---|----------|----------|----------|-------------|-------------|-------------|--------|----------|
| 1 |   | 276      |          |          |             |             |             |        |          |
| 2 |   | 150.0000 | 150.0000 | 150.0000 | 0.0000      | 0.0000      | 0.0000***** | 2.7750 | 11100    |
|   |   | 0.2500   | 300.00   | 0.00     | 0.00        | 0.00        | -1293.5003  | 0.0000 | 300.0000 |
| 3 | H | 74.99049 | 62.39079 | 74.38730 | -2043.14101 | -1757.64893 | 399.89339   |        | 1        |
| 4 | N | 74.91929 | 63.40443 | 74.31773 | 426.75047   | 490.45733   | -334.42467  |        | 1        |
| 5 | H | 74.61490 | 63.66701 | 75.25539 | 442.25559   | -1110.30854 | -2448.52907 |        | 1        |
| 6 | C | 76.11801 | 64.05675 | 73.95908 | 415.32972   | -666.39213  | 83.73172    |        | 1        |
| 7 | H | 76.66978 | 63.39464 | 73.25746 | 879.32219   | 2491.00447  | 667.35213   |        | 1        |
| 8 | C | 75.72620 | 65.49312 | 73.33932 | 31.35357    | 477.41777   | 628.23362   |        | 1        |

|    |   |          |          |          |             |             |             |   |
|----|---|----------|----------|----------|-------------|-------------|-------------|---|
| 9  | H | 75.22750 | 66.09959 | 74.13331 | 1168.38489  | 2240.25337  | -1019.71136 | 1 |
| 10 | H | 76.64416 | 66.05879 | 73.04904 | -360.43770  | 2534.90498  | 931.67112   | 1 |
| 11 | C | 74.80008 | 65.31484 | 72.16317 | 463.18208   | 512.70242   | -382.34388  | 1 |
| 12 | H | 74.00320 | 64.59446 | 72.45721 | 1725.29117  | 1863.52247  | -987.07854  | 1 |
| 13 | C | 74.14230 | 66.64081 | 71.80288 | 710.42801   | -144.27427  | -313.15367  | 1 |
| 14 | H | 73.43243 | 66.53107 | 70.94279 | 364.20195   | -1033.13725 | 2494.72524  | 1 |
| 15 | H | 73.55954 | 67.06072 | 72.66328 | 2567.61904  | 335.80679   | 847.48802   | 1 |
| 16 | H | 74.90170 | 67.41091 | 71.50966 | -2587.99029 | 680.92867   | -512.16411  | 1 |
| 17 | C | 75.53705 | 64.76057 | 70.95226 | 268.17616   | 741.64379   | -40.42634   | 1 |
| 18 | H | 74.85373 | 64.64263 | 70.07161 | 1283.54314  | -1945.37420 | -1411.27812 | 1 |
| 19 | H | 76.37360 | 65.43538 | 70.63458 | -1258.57796 | 1317.15249  | -2026.02085 | 1 |
| 20 | H | 75.98288 | 63.75455 | 71.16376 | -2502.84526 | 909.80597   | 575.92391   | 1 |
| 21 | C | 76.87865 | 64.34746 | 75.37110 | 619.36578   | -458.64843  | -172.09273  | 1 |
| 22 | O | 76.28551 | 64.82106 | 76.32532 | -81.40433   | 433.87611   | 522.34594   | 1 |
| 23 | N | 78.17216 | 64.09436 | 75.23967 | 175.23996   | -622.20190  | 341.55523   | 1 |
| 24 | H | 78.51533 | 63.73578 | 74.34961 | -876.57256  | -303.22879  | -2561.90213 | 1 |
| 25 | C | 78.98174 | 64.07271 | 76.41206 | -571.88214  | -534.10783  | -106.15033  | 1 |
| 26 | H | 78.25920 | 64.25095 | 77.24205 | -2713.20841 | -16.25800   | -248.80809  | 1 |
| 27 | C | 79.73713 | 62.65729 | 76.47935 | 166.60354   | 288.16399   | -716.09568  | 1 |
| 28 | H | 80.42293 | 62.58125 | 75.59209 | -2097.85574 | 1636.78449  | -586.18044  | 1 |
| 29 | O | 78.89442 | 61.49652 | 76.45113 | -317.80580  | -363.38227  | 484.43082   | 1 |
| 30 | H | 79.21334 | 61.04898 | 75.64070 | 1863.74748  | -1451.84923 | 1357.29467  | 1 |
| 31 | C | 80.59791 | 62.84822 | 77.78140 | 503.80731   | 517.99032   | 318.51606   | 1 |
| 32 | H | 81.29760 | 61.99459 | 77.93829 | 640.61020   | -2157.10410 | -1536.29104 | 1 |
| 33 | H | 81.21237 | 63.78267 | 77.73726 | 1687.88455  | 465.60692   | 2087.56452  | 1 |
| 34 | H | 79.95534 | 62.91811 | 78.68953 | -1293.07895 | -1899.88581 | -1463.57452 | 1 |
| 35 | C | 80.10283 | 65.23902 | 76.22547 | -153.07550  | -733.68902  | 248.70981   | 1 |
| 36 | O | 81.20216 | 64.95522 | 75.77679 | 186.15459   | -480.78787  | -449.34387  | 1 |
| 37 | N | 79.64130 | 66.42483 | 76.62343 | -487.53139  | 543.18517   | 42.03850    | 1 |
| 38 | C | 80.30006 | 67.64777 | 76.26815 | -699.35871  | 69.34393    | 360.10701   | 1 |
| 39 | H | 80.71850 | 67.48768 | 75.24774 | 2.81126     | -221.99807  | -2715.58072 | 1 |
| 40 | C | 79.10519 | 68.68394 | 76.38120 | -507.46439  | -592.59194  | 122.07761   | 1 |
| 41 | H | 79.44829 | 69.74021 | 76.44270 | -1975.08116 | 525.87560   | -1801.71556 | 1 |
| 42 | H | 78.42399 | 68.61989 | 75.50361 | 1588.27743  | -1913.22100 | 1113.83566  | 1 |
| 43 | C | 78.40521 | 68.17110 | 77.67984 | -613.62442  | -457.55993  | -194.14490  | 1 |
| 44 | H | 78.96774 | 68.49474 | 78.58495 | 1707.54637  | -721.27992  | 1996.92523  | 1 |
| 45 | H | 77.36453 | 68.54650 | 77.80538 | 758.23357   | 2100.81767  | 1560.55011  | 1 |
| 46 | C | 78.48355 | 66.59723 | 77.49263 | -352.41524  | 704.96076   | 49.21465    | 1 |
| 47 | H | 78.67655 | 66.01965 | 78.42771 | 1714.76886  | -2070.42778 | 443.35792   | 1 |
| 48 | H | 77.61337 | 66.12930 | 76.94219 | 1224.15040  | 1801.50881  | 1636.97633  | 1 |
| 49 | C | 81.46923 | 67.89900 | 77.38967 | 566.85117   | 537.05831   | 117.62814   | 1 |
| 50 | O | 81.45243 | 68.86288 | 78.11314 | -550.26779  | -406.08867  | 4.21666     | 1 |
| 51 | N | 82.36767 | 66.92149 | 77.31303 | 566.34832   | -425.77725  | 180.18749   | 1 |
| 52 | H | 82.22568 | 66.12321 | 76.65427 | 644.44502   | 2646.80550  | -52.73430   | 1 |
| 53 | C | 83.47361 | 67.01181 | 78.22072 | 612.34801   | -281.48662  | 411.56221   | 1 |
| 54 | H | 83.00284 | 67.42196 | 79.14359 | 1667.23498  | -1490.75142 | 1556.16753  | 1 |
| 55 | C | 84.05723 | 65.53622 | 78.39729 | -714.45746  | -175.43074  | 286.98927   | 1 |
| 56 | H | 84.46436 | 65.19000 | 77.40796 | -787.09484  | 1763.03619  | -1922.46060 | 1 |
| 57 | O | 83.09440 | 64.53380 | 78.78999 | -429.46514  | 516.51932   | -128.40526  | 1 |
| 58 | H | 83.16770 | 63.91123 | 78.03968 | 1981.82785  | 436.16847   | -1818.18182 | 1 |
| 59 | C | 85.24913 | 65.72034 | 79.40542 | 630.79189   | -468.94448  | 76.03230    | 1 |
| 60 | H | 85.72690 | 64.74328 | 79.65040 | -1775.71861 | 2062.30353  | 131.89849   | 1 |
| 61 | H | 86.04965 | 66.38325 | 78.99587 | -1855.14608 | 88.94118    | 1993.53760  | 1 |
| 62 | H | 84.90490 | 66.16951 | 80.36600 | -1504.82350 | -780.94249  | -2132.90992 | 1 |
| 63 | C | 84.57672 | 68.06165 | 77.65096 | 288.57638   | 618.62814   | -397.00270  | 1 |
| 64 | O | 85.48440 | 68.41787 | 78.40153 | 321.70495   | -185.26452  | 574.37218   | 1 |
| 65 | N | 84.36384 | 68.41374 | 76.40845 | -447.05792  | -446.53431  | 367.76425   | 1 |
| 66 | H | 83.52583 | 68.04892 | 75.95785 | 350.31316   | 1975.63644  | -1843.31522 | 1 |
| 67 | C | 85.32777 | 69.08612 | 75.59456 | -511.23061  | 374.03917   | -471.51480  | 1 |
| 68 | H | 86.30568 | 68.67255 | 75.93124 | 2234.79579  | -898.70890  | -1273.45190 | 1 |
| 69 | C | 84.89739 | 68.69817 | 74.11026 | 529.53781   | -159.34528  | 563.72604   | 1 |
| 70 | H | 85.51429 | 69.29523 | 73.39273 | 654.59388   | 2347.94251  | 1217.51488  | 1 |

|     |   |          |          |          |             |             |             |   |
|-----|---|----------|----------|----------|-------------|-------------|-------------|---|
| 71  | H | 85.19033 | 67.62993 | 73.91960 | -1526.55661 | 2103.42026  | 817.87394   | 1 |
| 72  | O | 83.45948 | 68.77476 | 73.80585 | -554.84278  | 14.12789    | 399.58769   | 1 |
| 73  | H | 83.50456 | 69.03990 | 72.87600 | 1297.06236  | 2061.84854  | 1220.68812  | 1 |
| 74  | C | 85.26148 | 70.68328 | 75.88109 | -662.15484  | -412.13544  | 123.62687   | 1 |
| 75  | O | 85.17776 | 71.48659 | 74.98549 | -540.01537  | -317.05804  | 274.91456   | 1 |
| 76  | N | 85.42250 | 70.88468 | 77.18850 | -202.76299  | -690.00100  | -131.49145  | 1 |
| 77  | H | 85.56249 | 70.04034 | 77.80019 | -702.62132  | -2617.37191 | 281.70413   | 1 |
| 78  | C | 85.28378 | 72.19202 | 77.81935 | -491.73914  | 576.34187   | 222.73509   | 1 |
| 79  | H | 85.66832 | 72.02507 | 78.85346 | 1977.17978  | -1823.58850 | -434.68928  | 1 |
| 80  | C | 86.12716 | 73.19108 | 77.04953 | -649.50797  | -328.66843  | 306.11224   | 1 |
| 81  | H | 85.79230 | 73.16832 | 75.97882 | 2075.07803  | 1452.16490  | -1004.45904 | 1 |
| 82  | C | 85.97231 | 74.60858 | 77.56583 | -615.18735  | -489.99689  | -70.96352   | 1 |
| 83  | H | 86.63331 | 75.32881 | 77.00866 | -1226.32661 | -1724.38906 | -1716.47170 | 1 |
| 84  | H | 84.91228 | 74.97622 | 77.46059 | 2381.64273  | -969.84735  | 900.46860   | 1 |
| 85  | H | 86.24129 | 74.68312 | 78.65569 | 2122.74991  | 1702.23946  | -141.36228  | 1 |
| 86  | C | 87.59437 | 72.79802 | 77.07504 | -501.86074  | -479.61276  | -376.42482  | 1 |
| 87  | H | 88.22363 | 73.48369 | 76.44432 | 993.79261   | -2246.95401 | -1177.81305 | 1 |
| 88  | H | 88.01230 | 72.82625 | 78.11863 | 42.71279    | -626.15391  | -2651.37258 | 1 |
| 89  | H | 87.74264 | 71.75283 | 76.68691 | -2026.39012 | -1590.33709 | -887.82922  | 1 |
| 90  | C | 83.66550 | 72.59762 | 77.87142 | -672.89153  | 382.57394   | -156.34072  | 1 |
| 91  | O | 83.35048 | 73.62776 | 78.41602 | 410.04627   | 221.86223   | 500.35950   | 1 |
| 92  | N | 82.89341 | 71.69811 | 77.29347 | -378.11782  | -443.79414  | -441.10984  | 1 |
| 93  | H | 83.38630 | 70.87714 | 76.94218 | 2404.15973  | -568.14894  | 1149.30085  | 1 |
| 94  | C | 81.46843 | 71.77779 | 77.28969 | -544.54484  | 466.16019   | 331.29119   | 1 |
| 95  | H | 81.19445 | 70.86807 | 76.70752 | -1409.80988 | -170.17955  | 2325.32679  | 1 |
| 96  | C | 81.00472 | 71.68728 | 78.81025 | -184.48284  | 116.78282   | -758.89137  | 1 |
| 97  | H | 81.50564 | 70.81740 | 79.29732 | 1893.78641  | 1861.14652  | 611.04528   | 1 |
| 98  | H | 81.33489 | 72.59245 | 79.37068 | -2170.79665 | -974.19311  | 1327.50117  | 1 |
| 99  | C | 79.45588 | 71.52341 | 78.85737 | 389.51668   | 672.81878   | -138.49152  | 1 |
| 100 | H | 78.96073 | 72.44317 | 78.46116 | 510.64577   | 1933.03327  | 1851.02484  | 1 |
| 101 | H | 79.13716 | 70.71983 | 78.15937 | -2302.30869 | -1105.72939 | -948.89774  | 1 |
| 102 | C | 78.88698 | 71.20390 | 80.29109 | -559.93427  | -126.34590  | 542.30857   | 1 |
| 103 | O | 77.70642 | 71.00716 | 80.42154 | -670.36003  | -111.83166  | 76.36448    | 1 |
| 104 | N | 79.81699 | 71.18188 | 81.26940 | -216.06729  | -537.07037  | 446.51379   | 1 |
| 105 | H | 80.82640 | 71.36284 | 81.21903 | -1251.96487 | 1074.12894  | -2168.52500 | 1 |
| 106 | H | 79.60308 | 71.01338 | 82.25859 | -2451.83023 | -720.73851  | 944.84612   | 1 |
| 107 | C | 80.93933 | 73.15590 | 76.62928 | 546.24052   | -563.88337  | -85.11809   | 1 |
| 108 | O | 80.06017 | 73.78048 | 77.20865 | 71.70702    | -307.40463  | 606.69673   | 1 |
| 109 | N | 81.45576 | 73.39880 | 75.42887 | 479.90863   | -504.50129  | 222.86849   | 1 |
| 110 | C | 81.31164 | 74.69301 | 74.81193 | 75.51268    | -600.91904  | 506.73700   | 1 |
| 111 | H | 81.45773 | 75.41957 | 75.64431 | -2033.61562 | 1795.30103  | 254.89480   | 1 |
| 112 | C | 82.45104 | 74.66467 | 73.70874 | 523.79067   | 517.99274   | 284.45581   | 1 |
| 113 | H | 82.25275 | 75.36730 | 72.86824 | 1599.61665  | -1127.00911 | 1895.98173  | 1 |
| 114 | H | 83.43979 | 74.94546 | 74.13616 | -1881.83093 | 1275.82488  | -1501.55016 | 1 |
| 115 | C | 82.43119 | 73.16628 | 73.27255 | -600.05639  | -404.05026  | 316.64485   | 1 |
| 116 | H | 81.56346 | 72.95795 | 72.60651 | -2597.05260 | 496.36221   | 657.73249   | 1 |
| 117 | H | 83.34532 | 72.84686 | 72.72257 | -1666.24518 | 1294.38985  | -1723.90591 | 1 |
| 118 | C | 82.27297 | 72.45179 | 74.68278 | 493.57570   | -129.95376  | -602.56394  | 1 |
| 119 | H | 81.76174 | 71.46051 | 74.66916 | -1469.08415 | -637.84797  | 2204.22581  | 1 |
| 120 | H | 83.22672 | 72.36645 | 75.26136 | -1038.97840 | 1068.88701  | -2280.71789 | 1 |
| 121 | C | 79.82084 | 74.80018 | 74.16747 | 188.88100   | 241.05089   | -727.87821  | 1 |
| 122 | O | 79.65870 | 74.69923 | 72.98448 | 531.88613   | -49.19943   | 427.07960   | 1 |
| 123 | N | 78.91667 | 75.03239 | 75.13669 | 708.14833   | 26.93417    | -179.73509  | 1 |
| 124 | H | 79.21783 | 74.91348 | 76.13368 | -2232.69501 | -1179.09831 | 1023.94816  | 1 |
| 125 | C | 77.49174 | 75.05373 | 74.78299 | -738.32412  | 259.92548   | 104.42456   | 1 |
| 126 | H | 77.51217 | 74.66118 | 73.73796 | 2028.89123  | 1260.02983  | 1311.33324  | 1 |
| 127 | C | 76.75323 | 74.16639 | 75.76120 | -258.65678  | -345.52513  | 661.28459   | 1 |
| 128 | H | 76.90027 | 74.57331 | 76.78644 | -1826.06090 | -1801.46097 | -918.64554  | 1 |
| 129 | C | 75.26479 | 74.13451 | 75.46179 | -541.23400  | 531.92970   | -218.41428  | 1 |
| 130 | H | 74.69869 | 73.53656 | 76.22722 | 1311.73218  | -2219.18200 | 882.19023   | 1 |
| 131 | H | 74.82036 | 75.16771 | 75.44664 | -1048.71298 | 1223.58118  | -2196.97971 | 1 |
| 132 | H | 75.05673 | 73.67371 | 74.45764 | 419.06414   | 1903.92898  | 1903.44670  | 1 |

|     |   |          |          |          |             |             |             |   |
|-----|---|----------|----------|----------|-------------|-------------|-------------|---|
| 133 | C | 77.30957 | 72.75264 | 75.77235 | -423.86431  | 152.66566   | -648.55262  | 1 |
| 134 | H | 76.79746 | 72.10755 | 76.53781 | 105.68386   | -2342.50080 | 1387.51238  | 1 |
| 135 | H | 77.18638 | 72.25148 | 74.77370 | -1695.63603 | -1484.73621 | -1531.02793 | 1 |
| 136 | H | 78.41028 | 72.74827 | 76.01188 | -1853.57121 | -487.39031  | 1936.59343  | 1 |
| 137 | C | 77.01371 | 76.65018 | 74.79164 | 539.71428   | -510.58232  | 267.58633   | 1 |
| 138 | O | 77.27084 | 77.30942 | 73.80909 | -15.93758   | -278.34085  | -624.49402  | 1 |
| 139 | N | 76.41205 | 77.03191 | 75.90038 | -676.81886  | 12.05292    | 276.17960   | 1 |
| 140 | H | 76.33515 | 76.33954 | 76.64080 | -1694.44250 | -373.84189  | -2100.66098 | 1 |
| 141 | C | 75.88941 | 78.34553 | 76.05460 | 412.33078   | -664.70360  | 108.35451   | 1 |
| 142 | H | 75.77799 | 78.43856 | 77.15827 | 1765.77476  | 1294.44366  | 1621.76594  | 1 |
| 143 | C | 76.89656 | 79.37120 | 75.39575 | -179.66635  | -721.95667  | -264.73915  | 1 |
| 144 | H | 77.94429 | 79.13663 | 75.69294 | -607.34922  | 2587.87032  | -598.10018  | 1 |
| 145 | H | 76.86929 | 79.27859 | 74.27692 | -359.69332  | -1479.13954 | -2259.74260 | 1 |
| 146 | C | 76.49528 | 80.82302 | 75.82560 | -240.01076  | 616.02425   | 431.85322   | 1 |
| 147 | H | 75.44590 | 81.04238 | 75.52036 | -1359.17131 | 782.54425   | 2227.99181  | 1 |
| 148 | H | 76.52881 | 80.94556 | 76.93141 | -820.36667  | 85.81767    | -2596.78715 | 1 |
| 149 | C | 77.50575 | 81.80476 | 75.10808 | -513.07015  | 236.18570   | -551.87280  | 1 |
| 150 | H | 78.54296 | 81.65143 | 75.48542 | 1816.11944  | -1183.11722 | -1650.94321 | 1 |
| 151 | H | 77.54840 | 81.59333 | 74.01464 | -1800.04429 | -1361.53473 | 1526.34643  | 1 |
| 152 | C | 77.03634 | 83.25687 | 75.35692 | 726.08972   | -253.19732  | -179.64713  | 1 |
| 153 | H | 76.06206 | 83.51179 | 74.89413 | 1224.27271  | -456.51798  | -2390.90304 | 1 |
| 154 | H | 77.04460 | 83.57125 | 76.41952 | 1206.40339  | -1150.93514 | -2154.90344 | 1 |
| 155 | N | 78.06850 | 84.20160 | 74.65242 | 329.70796   | -633.68968  | -155.67358  | 1 |
| 156 | H | 77.86340 | 85.24028 | 74.71709 | 1348.31305  | 1938.76845  | 1359.00643  | 1 |
| 157 | H | 79.07041 | 84.16531 | 75.00093 | 2096.92035  | 1446.54551  | -966.48890  | 1 |
| 158 | H | 78.19730 | 84.07899 | 73.60591 | -1197.07217 | -2303.53719 | 827.28733   | 1 |
| 159 | C | 74.45514 | 78.50705 | 75.27071 | -378.01186  | -556.17301  | -413.96481  | 1 |
| 160 | O | 74.28348 | 79.38737 | 74.45752 | -409.44433  | -307.55053  | -453.30833  | 1 |
| 161 | N | 73.58061 | 77.59971 | 75.69411 | -429.02477  | 524.70884   | 274.08502   | 1 |
| 162 | H | 73.88043 | 76.97031 | 76.43731 | 1706.34263  | -1425.96036 | 1574.38926  | 1 |
| 163 | C | 72.21445 | 77.79769 | 75.34272 | -45.25864   | -626.22952  | 478.93267   | 1 |
| 164 | H | 72.25856 | 78.40538 | 74.40882 | 1988.63164  | 570.90773   | 1772.87287  | 1 |
| 165 | C | 71.54696 | 76.37417 | 75.21162 | 551.77128   | -20.49526   | -564.54996  | 1 |
| 166 | H | 72.18212 | 75.69592 | 74.59825 | 1434.61535  | -1753.10253 | 1513.99471  | 1 |
| 167 | H | 71.46563 | 75.89178 | 76.21223 | -714.67738  | 1819.09770  | 1898.36494  | 1 |
| 168 | C | 70.13151 | 76.55651 | 74.56678 | 446.99263   | -555.77305  | 338.97221   | 1 |
| 169 | H | 69.47967 | 77.21454 | 75.19187 | 1953.68466  | 1892.25957  | -161.67766  | 1 |
| 170 | H | 70.20090 | 77.05093 | 73.57167 | -403.03785  | 2688.07032  | -188.43591  | 1 |
| 171 | C | 69.52425 | 75.10226 | 74.43938 | 567.86262   | 335.74681   | 434.04421   | 1 |
| 172 | H | 70.18435 | 74.45156 | 73.82075 | -1080.02275 | 1568.26081  | -1948.78900 | 1 |
| 173 | H | 69.46593 | 74.61101 | 75.43801 | -919.54108  | 2111.34692  | 1456.13463  | 1 |
| 174 | C | 68.11890 | 75.21535 | 73.80463 | 195.81897   | 173.33862   | -745.11536  | 1 |
| 175 | H | 67.37103 | 75.74201 | 74.43072 | 1405.67949  | -2301.21089 | -390.08113  | 1 |
| 176 | H | 68.10723 | 75.62683 | 72.77553 | -940.37328  | -1118.32446 | 2299.72133  | 1 |
| 177 | N | 67.57287 | 73.75494 | 73.65824 | 319.26422   | 656.36007   | -42.02424   | 1 |
| 178 | H | 66.60144 | 73.66268 | 73.24292 | 1961.03633  | 619.91968   | 1787.09422  | 1 |
| 179 | H | 68.12704 | 73.09322 | 73.04006 | 854.14343   | -2156.80752 | 1429.08711  | 1 |
| 180 | H | 67.47325 | 73.18727 | 74.54969 | 1237.02905  | -1378.50857 | -1998.28500 | 1 |
| 181 | C | 71.47788 | 78.57976 | 76.59854 | 532.53319   | -268.57236  | 517.55729   | 1 |
| 182 | O | 70.95130 | 77.97607 | 77.50299 | 266.16714   | -290.73804  | -558.88002  | 1 |
| 183 | N | 71.58541 | 79.88823 | 76.41501 | -226.25352  | 640.49678   | -270.32839  | 1 |
| 184 | H | 72.10613 | 80.22404 | 75.60554 | 2007.69063  | -1035.27229 | 1523.50231  | 1 |
| 185 | C | 70.98358 | 80.74783 | 77.36945 | -540.76542  | -573.33303  | 49.50000    | 1 |
| 186 | H | 70.83289 | 80.09814 | 78.26262 | -2374.20950 | -1036.76023 | 843.75774   | 1 |
| 187 | C | 71.95721 | 81.99531 | 77.57724 | -77.09082   | 666.87422   | -415.84136  | 1 |
| 188 | H | 72.06491 | 82.52925 | 76.59334 | -985.81834  | 617.19825   | 2463.91927  | 1 |
| 189 | O | 73.29541 | 81.69158 | 78.01273 | 293.29899   | -391.65602  | -477.80926  | 1 |
| 190 | H | 73.82064 | 82.00894 | 77.25115 | 2528.72714  | -681.76262  | -751.27122  | 1 |
| 191 | C | 71.09260 | 82.87218 | 78.55633 | 252.47363   | -605.14473  | 440.05134   | 1 |
| 192 | H | 71.56452 | 83.86370 | 78.74691 | -2052.65063 | 1456.49051  | -1043.51830 | 1 |
| 193 | H | 70.07591 | 83.05975 | 78.13680 | -2152.98800 | -1661.97574 | -161.70652  | 1 |
| 194 | H | 70.95825 | 82.37313 | 79.54406 | -473.12726  | -1584.27339 | 2165.61725  | 1 |

|     |   |          |          |          |             |             |             |   |
|-----|---|----------|----------|----------|-------------|-------------|-------------|---|
| 195 | C | 69.56336 | 81.28022 | 76.70608 | 360.36307   | 488.46713   | 505.10056   | 1 |
| 196 | O | 69.53820 | 82.29610 | 76.05019 | -200.08817  | -528.03552  | -385.82850  | 1 |
| 197 | N | 68.58541 | 80.47029 | 77.06831 | -597.54095  | -226.44775  | 355.20479   | 1 |
| 198 | H | 68.86189 | 79.65856 | 77.62121 | 2179.23655  | -1300.70981 | -991.33835  | 1 |
| 199 | C | 67.27427 | 80.53830 | 76.52946 | -687.68921  | 297.39807   | -249.45179  | 1 |
| 200 | H | 66.71364 | 79.93774 | 77.27926 | -349.16256  | -2467.37713 | -1101.72831 | 1 |
| 201 | C | 66.75316 | 82.04510 | 76.40490 | 672.47345   | 361.54328   | -201.62880  | 1 |
| 202 | H | 67.41099 | 82.61250 | 75.70080 | 1541.41502  | 582.18425   | 2169.97026  | 1 |
| 203 | H | 65.72260 | 82.05117 | 75.97596 | -2534.67717 | 60.25153    | 997.72295   | 1 |
| 204 | C | 66.75228 | 82.72413 | 77.78320 | 574.26774   | -389.43119  | -377.02542  | 1 |
| 205 | C | 65.76304 | 82.41160 | 78.76286 | 688.82679   | -287.33580  | -257.96133  | 1 |
| 206 | H | 64.96653 | 81.67604 | 78.54883 | 331.14182   | 1470.38163  | 2269.80013  | 1 |
| 207 | C | 67.76953 | 83.68484 | 78.06129 | -383.52382  | -675.04808  | 144.24917   | 1 |
| 208 | H | 68.52780 | 83.92769 | 77.29168 | 4.09847     | 1517.59662  | 2262.86397  | 1 |
| 209 | C | 65.82672 | 83.05718 | 79.99774 | -134.76730  | 428.45285   | -649.50303  | 1 |
| 210 | H | 65.06187 | 82.81974 | 80.75756 | -903.23433  | 1600.49020  | 2011.53387  | 1 |
| 211 | C | 67.79593 | 84.29944 | 79.31544 | -335.53281  | -615.00040  | -364.39058  | 1 |
| 212 | H | 68.59396 | 85.03382 | 79.52227 | 1596.45398  | -1369.33862 | 1732.02659  | 1 |
| 213 | C | 66.83335 | 84.01115 | 80.32633 | 585.48547   | -340.24194  | -406.23938  | 1 |
| 214 | O | 66.84976 | 84.62730 | 81.60504 | -419.15649  | -173.04408  | -511.94141  | 1 |
| 215 | H | 67.62876 | 85.22170 | 81.49310 | -1071.84350 | 1559.71507  | -1960.13012 | 1 |
| 216 | C | 67.27743 | 79.78305 | 75.08773 | 291.41878   | -183.13091  | 710.72246   | 1 |
| 217 | O | 67.82526 | 78.71397 | 74.93039 | 379.87695   | 523.47396   | -222.23622  | 1 |
| 218 | N | 66.55465 | 80.46489 | 74.19952 | 564.30591   | 373.09380   | 277.24371   | 1 |
| 219 | H | 66.12453 | 81.34934 | 74.47144 | -120.59931  | -2436.07824 | -1214.35098 | 1 |
| 220 | C | 66.18348 | 79.78004 | 73.00479 | 404.07514   | -299.37480  | 608.84009   | 1 |
| 221 | H | 66.25055 | 78.69979 | 73.27206 | -1071.07882 | -841.69025  | 2359.66467  | 1 |
| 222 | C | 64.74483 | 80.30465 | 72.60238 | -683.12807  | 68.71770    | -390.13096  | 1 |
| 223 | H | 64.02396 | 80.17032 | 73.43992 | 2068.88918  | 1596.58590  | 770.89603   | 1 |
| 224 | H | 64.77759 | 81.40103 | 72.41166 | 1379.86429  | 2342.49779  | -179.85638  | 1 |
| 225 | C | 64.26637 | 79.54527 | 71.32616 | -176.39967  | 537.49466   | 550.97268   | 1 |
| 226 | H | 65.04158 | 79.58197 | 70.52556 | -396.28051  | 1942.22168  | 1869.33314  | 1 |
| 227 | H | 64.10249 | 78.46499 | 71.53545 | -94.44700   | 586.00678   | -2659.20016 | 1 |
| 228 | C | 62.91794 | 80.26556 | 70.86059 | -291.69381  | -718.18079  | -150.72929  | 1 |
| 229 | H | 62.07552 | 80.20861 | 71.59624 | -2303.38776 | 1089.76242  | 964.62032   | 1 |
| 230 | H | 63.02081 | 81.33389 | 70.54148 | 884.16729   | 2568.80533  | -207.74283  | 1 |
| 231 | N | 62.54277 | 79.51714 | 69.73625 | -594.49522  | -252.81478  | 342.29276   | 1 |
| 232 | H | 63.05543 | 78.66545 | 69.56839 | -1735.17426 | 2084.05705  | -263.71605  | 1 |
| 233 | C | 61.60623 | 79.83438 | 68.93754 | 595.23177   | -271.52487  | 442.22352   | 1 |
| 234 | N | 60.89622 | 81.01232 | 69.19594 | 585.53813   | -424.79750  | -105.81303  | 1 |
| 235 | H | 60.99024 | 81.66642 | 69.97180 | 959.88797   | 1327.56823  | -2177.11905 | 1 |
| 236 | H | 60.10916 | 81.35301 | 68.64293 | 1578.48647  | 16.27378    | -2220.76233 | 1 |
| 237 | N | 61.47827 | 78.88865 | 67.91077 | -452.17763  | -390.33541  | -421.51853  | 1 |
| 238 | H | 61.98917 | 78.02687 | 67.72527 | 470.26107   | 1974.25629  | -1817.92087 | 1 |
| 239 | H | 60.77399 | 78.95911 | 67.17517 | 1856.67307  | -1573.97321 | -1224.35416 | 1 |
| 240 | C | 67.19100 | 80.15544 | 71.76501 | -531.47271  | -581.45780  | -55.06206   | 1 |
| 241 | O | 67.29740 | 79.38559 | 70.84297 | -243.00837  | 192.73507   | 609.52485   | 1 |
| 242 | N | 67.64126 | 81.44573 | 71.81616 | 343.49288   | -644.25607  | 38.09164    | 1 |
| 243 | H | 67.35350 | 81.73492 | 72.75791 | -1691.16043 | -1535.97525 | -1484.73099 | 1 |
| 244 | C | 69.00879 | 81.77569 | 71.34527 | 542.66492   | 350.14337   | 454.42563   | 1 |
| 245 | H | 69.05384 | 82.85480 | 71.61808 | 1209.57979  | -2396.95920 | 463.86744   | 1 |
| 246 | C | 70.02799 | 80.94549 | 72.08023 | -737.14309  | 145.93010   | 242.71942   | 1 |
| 247 | H | 69.81622 | 79.87316 | 71.86650 | -1050.18303 | 159.36419   | -2509.06125 | 1 |
| 248 | C | 71.44171 | 81.26004 | 71.61777 | -706.77696  | -252.88343  | -245.16230  | 1 |
| 249 | H | 72.20893 | 80.66429 | 72.18404 | -1624.64039 | -1665.49085 | 1417.86935  | 1 |
| 250 | H | 71.57800 | 81.02932 | 70.52358 | 2566.10521  | 598.51109   | 693.22305   | 1 |
| 251 | H | 71.69138 | 82.34671 | 71.76174 | -1972.69758 | 107.10018   | -1876.34312 | 1 |
| 252 | C | 69.95182 | 81.15080 | 73.58505 | 412.85148   | 672.58832   | -27.69222   | 1 |
| 253 | H | 70.69406 | 80.51137 | 74.13439 | 1447.02277  | 1762.76533  | -1490.78944 | 1 |
| 254 | H | 70.16228 | 82.22089 | 73.86516 | 1320.77379  | -145.20455  | 2378.68491  | 1 |
| 255 | H | 68.93622 | 80.89727 | 73.99380 | -1512.10848 | 1470.52031  | 1724.75147  | 1 |
| 256 | C | 69.06875 | 81.54056 | 69.71649 | -607.11113  | 499.56689   | 73.73769    | 1 |

|     |   |          |          |          |             |             |             |   |
|-----|---|----------|----------|----------|-------------|-------------|-------------|---|
| 257 | O | 69.78182 | 80.69616 | 69.22311 | 357.97126   | 460.81534   | 356.68785   | 1 |
| 258 | N | 68.29440 | 82.42086 | 69.09649 | 536.55407   | -368.62270  | 332.76306   | 1 |
| 259 | H | 67.76055 | 83.08291 | 69.65753 | 524.38866   | 2297.69985  | 1367.20941  | 1 |
| 260 | C | 68.21247 | 82.35382 | 67.68707 | 46.50277    | -774.29190  | -147.97904  | 1 |
| 261 | H | 68.92216 | 81.54378 | 67.39460 | 1676.51875  | 1883.29066  | 1032.55549  | 1 |
| 262 | C | 66.67892 | 82.06963 | 67.26249 | -559.41456  | -34.19198   | -556.30433  | 1 |
| 263 | H | 66.06777 | 82.98317 | 67.45561 | -64.66664   | 395.18769   | 2695.05373  | 1 |
| 264 | H | 66.61380 | 81.88993 | 66.16300 | -2703.44278 | -60.40056   | 333.79418   | 1 |
| 265 | C | 66.12564 | 80.90350 | 68.03639 | -519.76435  | 377.31045   | 459.42366   | 1 |
| 266 | H | 66.18073 | 81.14141 | 69.12392 | -1746.74323 | 1667.50644  | -1261.73691 | 1 |
| 267 | C | 64.66864 | 80.67104 | 67.65562 | 570.95554   | 16.46261    | -545.27700  | 1 |
| 268 | H | 64.23653 | 79.78626 | 68.18845 | 2391.58273  | 28.05277    | -1305.07271 | 1 |
| 269 | H | 64.02583 | 81.55282 | 67.91093 | 175.75588   | 917.63458   | 2559.43867  | 1 |
| 270 | H | 64.55243 | 80.48334 | 66.55717 | -1063.97851 | -2155.34650 | 1283.00462  | 1 |
| 271 | C | 66.93608 | 79.63665 | 67.80218 | 193.76014   | 2.62946     | -765.53141  | 1 |
| 272 | H | 66.47554 | 78.75307 | 68.31575 | 507.39394   | -846.55087  | 2539.60089  | 1 |
| 273 | H | 67.01779 | 79.38815 | 66.71228 | 1337.57841  | 1818.19054  | 1526.01994  | 1 |
| 274 | H | 67.98015 | 79.74035 | 68.20842 | 1100.88635  | -1172.91350 | -2199.08909 | 1 |
| 275 | C | 68.57759 | 83.81822 | 67.10204 | -549.21115  | 475.64486   | -309.38218  | 1 |
| 276 | O | 68.41965 | 84.84001 | 67.71625 | 556.06106   | -390.37755  | -78.24250   | 1 |
| 277 | O | 68.96281 | 83.84552 | 65.74134 | -572.27940  | -310.19032  | -209.75862  | 1 |
| 278 | H | 68.98129 | 82.86313 | 65.56712 | -1380.08193 | 2212.14486  | 790.85944   | 1 |

Listing 85: C00085.xmolout

|    |   |          |          |          |             |             |             |        |          |   |
|----|---|----------|----------|----------|-------------|-------------|-------------|--------|----------|---|
| 1  |   | 276      |          |          |             |             |             |        |          |   |
| 2  |   | 150.0000 | 150.0000 | 150.0000 | 0.0000      | 0.0000      | 0.0000***** | 2.7480 | 10992    |   |
|    |   | 0.2500   | 300.00   | 0.00     | 0.00        | 0.00        | -1293.4847  | 0.0000 | 300.0000 |   |
| 3  | H | 81.91957 | 72.42649 | 65.31007 | -2043.14101 | -1757.64893 | 399.89339   |        |          | 1 |
| 4  | N | 82.37937 | 72.97459 | 66.03181 | 426.75047   | 490.45733   | -334.42467  |        |          | 1 |
| 5  | H | 81.61328 | 73.53777 | 66.39241 | 442.25559   | -1110.30854 | -2448.52907 |        |          | 1 |
| 6  | C | 83.53188 | 73.68346 | 65.62944 | 415.32972   | -666.39213  | 83.73172    |        |          | 1 |
| 7  | H | 84.02239 | 73.01856 | 64.88549 | 879.32219   | 2491.00447  | 667.35213   |        |          | 1 |
| 8  | C | 83.08740 | 75.09406 | 64.97522 | 31.35357    | 477.41777   | 628.23362   |        |          | 1 |
| 9  | H | 82.57787 | 75.71136 | 65.75253 | 1168.38489  | 2240.25337  | -1019.71136 |        |          | 1 |
| 10 | H | 83.99548 | 75.67146 | 64.67806 | -360.43770  | 2534.90498  | 931.67112   |        |          | 1 |
| 11 | C | 82.17904 | 74.88695 | 63.79458 | 463.18208   | 512.70242   | -382.34388  |        |          | 1 |
| 12 | H | 81.35459 | 74.20094 | 64.09193 | 1725.29117  | 1863.52247  | -987.07854  |        |          | 1 |
| 13 | C | 81.56386 | 76.21380 | 63.36464 | 710.42801   | -144.27427  | -313.15367  |        |          | 1 |
| 14 | H | 80.87220 | 76.08629 | 62.49251 | 364.20195   | -1033.13725 | 2494.72524  |        |          | 1 |
| 15 | H | 80.97270 | 76.68402 | 64.19216 | 2567.61904  | 335.80679   | 847.48802   |        |          | 1 |
| 16 | H | 82.34993 | 76.95134 | 63.05899 | -2587.99029 | 680.92867   | -512.16411  |        |          | 1 |
| 17 | C | 82.92725 | 74.27128 | 62.61954 | 268.17616   | 741.64379   | -40.42634   |        |          | 1 |
| 18 | H | 82.26120 | 74.14186 | 61.72777 | 1283.54314  | -1945.37420 | -1411.27812 |        |          | 1 |
| 19 | H | 83.78852 | 74.91270 | 62.29937 | -1258.57796 | 1317.15249  | -2026.02085 |        |          | 1 |
| 20 | H | 83.34203 | 73.26199 | 62.87262 | -2502.84526 | 909.80597   | 575.92391   |        |          | 1 |
| 21 | C | 84.48504 | 74.04371 | 66.87049 | 619.36578   | -458.64843  | -172.09273  |        |          | 1 |
| 22 | O | 85.53023 | 74.65606 | 66.64857 | -81.40433   | 433.87611   | 522.34594   |        |          | 1 |
| 23 | N | 83.99502 | 73.68740 | 68.03364 | 175.23996   | -622.20190  | 341.55523   |        |          | 1 |
| 24 | H | 83.08748 | 73.19017 | 68.12510 | -876.57256  | -303.22879  | -2561.90213 |        |          | 1 |
| 25 | C | 84.85114 | 73.59035 | 69.18355 | -571.88214  | -534.10783  | -106.15033  |        |          | 1 |
| 26 | H | 85.84873 | 73.22563 | 68.84825 | -2713.20841 | -16.25800   | -248.80809  |        |          | 1 |
| 27 | C | 84.93797 | 75.07686 | 69.76775 | 166.60354   | 288.16399   | -716.09568  |        |          | 1 |
| 28 | H | 83.90224 | 75.52595 | 69.77619 | -2097.85574 | 1636.78449  | -586.18044  |        |          | 1 |
| 29 | O | 85.64677 | 76.02655 | 68.94793 | -317.80580  | -363.38227  | 484.43082   |        |          | 1 |
| 30 | H | 85.65068 | 75.52746 | 68.05334 | 1863.74748  | -1451.84923 | 1357.29467  |        |          | 1 |
| 31 | C | 85.43684 | 74.90793 | 71.24008 | 503.80731   | 517.99032   | 318.51606   |        |          | 1 |
| 32 | H | 85.43306 | 75.88220 | 71.78432 | 640.61020   | -2157.10410 | -1536.29104 |        |          | 1 |
| 33 | H | 84.79341 | 74.20244 | 71.82047 | 1687.88455  | 465.60692   | 2087.56452  |        |          | 1 |
| 34 | H | 86.48126 | 74.51321 | 71.27709 | -1293.07895 | -1899.88581 | -1463.57452 |        |          | 1 |
| 35 | C | 83.98975 | 72.54970 | 70.06870 | -153.07550  | -733.68902  | 248.70981   |        |          | 1 |
| 36 | O | 82.81996 | 72.38963 | 69.77718 | 186.15459   | -480.78787  | -449.34387  |        |          | 1 |

|    |   |          |          |          |             |             |             |   |
|----|---|----------|----------|----------|-------------|-------------|-------------|---|
| 37 | N | 84.71165 | 71.95274 | 71.01619 | -487.53139  | 543.18517   | 42.03850    | 1 |
| 38 | C | 84.07599 | 71.21031 | 72.06972 | -699.35871  | 69.34393    | 360.10701   | 1 |
| 39 | H | 83.20086 | 70.70761 | 71.59775 | 2.81126     | -221.99807  | -2715.58072 | 1 |
| 40 | C | 85.25124 | 70.26757 | 72.56706 | -507.46439  | -592.59194  | 122.07761   | 1 |
| 41 | H | 85.10299 | 69.90298 | 73.60816 | -1975.08116 | 525.87560   | -1801.71556 | 1 |
| 42 | H | 85.36081 | 69.36691 | 71.92230 | 1588.27743  | -1913.22100 | 1113.83566  | 1 |
| 43 | C | 86.47082 | 71.22888 | 72.41880 | -613.62442  | -457.55993  | -194.14490  | 1 |
| 44 | H | 86.45494 | 72.00175 | 73.22385 | 1707.54637  | -721.27992  | 1996.92523  | 1 |
| 45 | H | 87.45827 | 70.71758 | 72.47279 | 758.23357   | 2100.81767  | 1560.55011  | 1 |
| 46 | C | 86.16652 | 71.86661 | 70.99572 | -352.41524  | 704.96076   | 49.21465    | 1 |
| 47 | H | 86.59404 | 72.88316 | 70.82621 | 1714.76886  | -2070.42778 | 443.35792   | 1 |
| 48 | H | 86.42025 | 71.21343 | 70.12747 | 1224.15040  | 1801.50881  | 1636.97633  | 1 |
| 49 | C | 83.64459 | 72.27262 | 73.23358 | 566.85117   | 537.05831   | 117.62814   | 1 |
| 50 | O | 84.43955 | 72.62050 | 74.10395 | -550.26779  | -406.08867  | 4.21666     | 1 |
| 51 | N | 82.41030 | 72.67442 | 73.03440 | 566.34832   | -425.77725  | 180.18749   | 1 |
| 52 | H | 81.94790 | 72.33251 | 72.19224 | 644.44502   | 2646.80550  | -52.73430   | 1 |
| 53 | C | 81.62518 | 73.07269 | 74.17061 | 612.34801   | -281.48662  | 411.56221   | 1 |
| 54 | H | 81.99150 | 72.45768 | 75.02365 | 1667.23498  | -1490.75142 | 1556.16753  | 1 |
| 55 | C | 81.90525 | 74.62191 | 74.38725 | -714.45746  | -175.43074  | 286.98927   | 1 |
| 56 | H | 81.57647 | 75.21052 | 73.48156 | -787.09484  | 1763.03619  | -1922.46060 | 1 |
| 57 | O | 83.28390 | 75.02823 | 74.50841 | -429.46514  | 516.51932   | -128.40526  | 1 |
| 58 | H | 83.74964 | 74.13151 | 74.39228 | 1981.82785  | 436.16847   | -1818.18182 | 1 |
| 59 | C | 80.95790 | 74.95637 | 75.59091 | 630.79189   | -468.94448  | 76.03230    | 1 |
| 60 | H | 80.96434 | 76.04772 | 75.82140 | -1775.71861 | 2062.30353  | 131.89849   | 1 |
| 61 | H | 79.90023 | 74.66629 | 75.38141 | -1855.14608 | 88.94118    | 1993.53760  | 1 |
| 62 | H | 81.27045 | 74.42124 | 76.51846 | -1504.82350 | -780.94249  | -2132.90992 | 1 |
| 63 | C | 80.07465 | 72.81005 | 73.74261 | 288.57638   | 618.62814   | -397.00270  | 1 |
| 64 | O | 79.54863 | 73.46867 | 72.85050 | 321.70495   | -185.26452  | 574.37218   | 1 |
| 65 | N | 79.55310 | 71.84862 | 74.47333 | -447.05792  | -446.53431  | 367.76425   | 1 |
| 66 | H | 80.10785 | 71.42913 | 75.21626 | 350.31316   | 1975.63644  | -1843.31522 | 1 |
| 67 | C | 78.29608 | 71.30539 | 74.06822 | -511.23061  | 374.03917   | -471.51480  | 1 |
| 68 | H | 78.31482 | 71.54109 | 72.97810 | 2234.79579  | -898.70890  | -1273.45190 | 1 |
| 69 | C | 78.33856 | 69.73999 | 74.40408 | 529.53781   | -159.34528  | 563.72604   | 1 |
| 70 | H | 77.35440 | 69.31528 | 74.06688 | 654.59388   | 2347.94251  | 1217.51488  | 1 |
| 71 | H | 79.13008 | 69.29573 | 73.74215 | -1526.55661 | 2103.42026  | 817.87394   | 1 |
| 72 | O | 78.55859 | 69.35312 | 75.78224 | -554.84278  | 14.12789    | 399.58769   | 1 |
| 73 | H | 79.53443 | 69.36094 | 75.80122 | 1297.06236  | 2061.84854  | 1220.68812  | 1 |
| 74 | C | 77.10245 | 72.16645 | 74.76527 | -662.15484  | -412.13544  | 123.62687   | 1 |
| 75 | O | 76.31181 | 71.69755 | 75.57096 | -540.01537  | -317.05804  | 274.91456   | 1 |
| 76 | N | 77.15601 | 73.35309 | 74.21197 | -202.76299  | -690.00100  | -131.49145  | 1 |
| 77 | H | 77.92612 | 73.54340 | 73.52715 | -702.62132  | -2617.37191 | 281.70413   | 1 |
| 78 | C | 76.19770 | 74.37399 | 74.42339 | -491.73914  | 576.34187   | 222.73509   | 1 |
| 79 | H | 76.47988 | 75.13577 | 73.66235 | 1977.17978  | -1823.58850 | -434.68928  | 1 |
| 80 | C | 74.73056 | 73.79074 | 74.21443 | -649.50797  | -328.66843  | 306.11224   | 1 |
| 81 | H | 74.52495 | 72.97992 | 74.95044 | 2075.07803  | 1452.16490  | -1004.45904 | 1 |
| 82 | C | 73.76096 | 75.00734 | 74.39326 | -615.18735  | -489.99689  | -70.96352   | 1 |
| 83 | H | 72.69506 | 74.68242 | 74.31295 | -1226.32661 | -1724.38906 | -1716.47170 | 1 |
| 84 | H | 73.89799 | 75.49455 | 75.38796 | 2381.64273  | -969.84735  | 900.46860   | 1 |
| 85 | H | 73.93354 | 75.78989 | 73.61726 | 2122.74991  | 1702.23946  | -141.36228  | 1 |
| 86 | C | 74.51977 | 73.26933 | 72.75276 | -501.86074  | -479.61276  | -376.42482  | 1 |
| 87 | H | 73.46243 | 72.95456 | 72.58307 | 993.79261   | -2246.95401 | -1177.81305 | 1 |
| 88 | H | 74.75878 | 74.05525 | 71.99820 | 42.71279    | -626.15391  | -2651.37258 | 1 |
| 89 | H | 75.16992 | 72.38955 | 72.53593 | -2026.39012 | -1590.33709 | -887.82922  | 1 |
| 90 | C | 76.27444 | 74.98909 | 75.94122 | -672.89153  | 382.57394   | -156.34072  | 1 |
| 91 | O | 76.32234 | 76.18593 | 76.07692 | 410.04627   | 221.86223   | 500.35950   | 1 |
| 92 | N | 76.15640 | 74.05623 | 76.88625 | -378.11782  | -443.79414  | -441.10984  | 1 |
| 93 | H | 76.09723 | 73.04009 | 76.62217 | 2404.15973  | -568.14894  | 1149.30085  | 1 |
| 94 | C | 76.69936 | 74.46478 | 78.16642 | -544.54484  | 466.16019   | 331.29119   | 1 |
| 95 | H | 77.57239 | 75.08913 | 77.87298 | -1409.80988 | -170.17955  | 2325.32679  | 1 |
| 96 | C | 75.58143 | 75.38023 | 78.80084 | -184.48284  | 116.78282   | -758.89137  | 1 |
| 97 | H | 75.40617 | 76.28418 | 78.16916 | 1893.78641  | 1861.14652  | 611.04528   | 1 |
| 98 | H | 74.60201 | 74.84137 | 78.80897 | -2170.79665 | -974.19311  | 1327.50117  | 1 |

|     |   |          |          |          |             |             |             |   |
|-----|---|----------|----------|----------|-------------|-------------|-------------|---|
| 99  | C | 76.04450 | 75.76980 | 80.24863 | 389.51668   | 672.81878   | -138.49152  | 1 |
| 100 | H | 76.54283 | 74.90695 | 80.74652 | 510.64577   | 1933.03327  | 1851.02484  | 1 |
| 101 | H | 76.84935 | 76.53707 | 80.19644 | -2302.30869 | -1105.72939 | -948.89774  | 1 |
| 102 | C | 74.88607 | 76.27877 | 81.15849 | -559.93427  | -126.34590  | 542.30857   | 1 |
| 103 | O | 75.07338 | 76.49364 | 82.36002 | -670.36003  | -111.83166  | 76.36448    | 1 |
| 104 | N | 73.74188 | 76.45557 | 80.50828 | -216.06729  | -537.07037  | 446.51379   | 1 |
| 105 | H | 73.44435 | 76.21473 | 79.51645 | -1251.96487 | 1074.12894  | -2168.52500 | 1 |
| 106 | H | 72.92165 | 76.82882 | 81.00864 | -2451.83023 | -720.73851  | 944.84612   | 1 |
| 107 | C | 77.16095 | 73.12288 | 78.96663 | 546.24052   | -563.88337  | -85.11809   | 1 |
| 108 | O | 78.34671 | 72.91255 | 78.90071 | 71.70702    | -307.40463  | 606.69673   | 1 |
| 109 | N | 76.22963 | 72.38849 | 79.60912 | 479.90863   | -504.50129  | 222.86849   | 1 |
| 110 | C | 76.65842 | 71.24606 | 80.34310 | 75.51268    | -600.91904  | 506.73700   | 1 |
| 111 | H | 77.77443 | 71.22832 | 80.32203 | -2033.61562 | 1795.30103  | 254.89480   | 1 |
| 112 | C | 75.96102 | 71.51421 | 81.74995 | 523.79067   | 517.99274   | 284.45581   | 1 |
| 113 | H | 75.92531 | 70.60765 | 82.39711 | 1599.61665  | -1127.00911 | 1895.98173  | 1 |
| 114 | H | 76.48968 | 72.30695 | 82.32507 | -1881.83093 | 1275.82488  | -1501.55016 | 1 |
| 115 | C | 74.55218 | 71.99447 | 81.28224 | -600.05639  | -404.05026  | 316.64485   | 1 |
| 116 | H | 73.89319 | 71.13181 | 81.03242 | -2597.05260 | 496.36221   | 657.73249   | 1 |
| 117 | H | 74.01588 | 72.57805 | 82.06598 | -1666.24518 | 1294.38985  | -1723.90591 | 1 |
| 118 | C | 74.90236 | 72.85463 | 79.99178 | 493.57570   | -129.95376  | -602.56394  | 1 |
| 119 | H | 74.22751 | 72.68183 | 79.11985 | -1469.08415 | -637.84797  | 2204.22581  | 1 |
| 120 | H | 74.97966 | 73.94808 | 80.19376 | -1038.97840 | 1068.88701  | -2280.71789 | 1 |
| 121 | C | 75.92001 | 69.84781 | 79.85921 | 188.88100   | 241.05089   | -727.87821  | 1 |
| 122 | O | 75.51444 | 69.10826 | 80.73034 | 531.88613   | -49.19943   | 427.07960   | 1 |
| 123 | N | 75.85357 | 69.71835 | 78.54580 | 708.14833   | 26.93417    | -179.73509  | 1 |
| 124 | H | 76.27046 | 70.47479 | 78.00085 | -2232.69501 | -1179.09831 | 1023.94816  | 1 |
| 125 | C | 75.41020 | 68.52988 | 77.91211 | -738.32412  | 259.92548   | 104.42456   | 1 |
| 126 | H | 75.75161 | 68.64384 | 76.85882 | 2028.89123  | 1260.02983  | 1311.33324  | 1 |
| 127 | C | 76.07284 | 67.28280 | 78.64512 | -258.65678  | -345.52513  | 661.28459   | 1 |
| 128 | H | 75.81312 | 67.29804 | 79.73271 | -1826.06090 | -1801.46097 | -918.64554  | 1 |
| 129 | C | 75.61620 | 65.93461 | 77.99261 | -541.23400  | 531.92970   | -218.41428  | 1 |
| 130 | H | 76.10536 | 65.05703 | 78.47809 | 1311.73218  | -2219.18200 | 882.19023   | 1 |
| 131 | H | 74.51172 | 65.79069 | 78.08198 | -1048.71298 | 1223.58118  | -2196.97971 | 1 |
| 132 | H | 75.86739 | 65.89827 | 76.90672 | 419.06414   | 1903.92898  | 1903.44670  | 1 |
| 133 | C | 77.62412 | 67.38928 | 78.44883 | -423.86431  | 152.66566   | -648.55262  | 1 |
| 134 | H | 78.16225 | 66.54154 | 78.93458 | 105.68386   | -2342.50080 | 1387.51238  | 1 |
| 135 | H | 77.90091 | 67.38927 | 77.36795 | -1695.63603 | -1484.73621 | -1531.02793 | 1 |
| 136 | H | 78.02187 | 68.33455 | 78.88788 | -1853.57121 | -487.39031  | 1936.59343  | 1 |
| 137 | C | 73.78006 | 68.39961 | 78.01077 | 539.71428   | -510.58232  | 267.58633   | 1 |
| 138 | O | 73.21146 | 67.53557 | 77.38168 | -15.93758   | -278.34085  | -624.49402  | 1 |
| 139 | N | 73.24363 | 69.30708 | 78.81601 | -676.81886  | 12.05292    | 276.17960   | 1 |
| 140 | H | 73.88500 | 69.90521 | 79.33690 | -1694.44250 | -373.84189  | -2100.66098 | 1 |
| 141 | C | 71.82555 | 69.28488 | 79.03074 | 412.33078   | -664.70360  | 108.35451   | 1 |
| 142 | H | 71.43476 | 69.23986 | 77.99013 | 1765.77476  | 1294.44366  | 1621.76594  | 1 |
| 143 | C | 71.47168 | 67.96572 | 79.82220 | -179.66635  | -721.95667  | -264.73915  | 1 |
| 144 | H | 71.89156 | 67.07557 | 79.29748 | -607.34922  | 2587.87032  | -598.10018  | 1 |
| 145 | H | 71.93995 | 67.97597 | 80.83246 | -359.69332  | -1479.13954 | -2259.74260 | 1 |
| 146 | C | 69.91063 | 67.88896 | 79.92511 | -240.01076  | 616.02425   | 431.85322   | 1 |
| 147 | H | 69.51401 | 68.81969 | 80.39411 | -1359.17131 | 782.54425   | 2227.99181  | 1 |
| 148 | H | 69.45077 | 67.83443 | 78.91307 | -820.36667  | 85.81767    | -2596.78715 | 1 |
| 149 | C | 69.50096 | 66.63229 | 80.79206 | -513.07015  | 236.18570   | -551.87280  | 1 |
| 150 | H | 69.82254 | 65.68424 | 80.30275 | 1816.11944  | -1183.11722 | -1650.94321 | 1 |
| 151 | H | 70.00755 | 66.65119 | 81.78445 | -1800.04429 | -1361.53473 | 1526.34643  | 1 |
| 152 | C | 67.96389 | 66.68189 | 80.96045 | 726.08972   | -253.19732  | -179.64713  | 1 |
| 153 | H | 67.59194 | 67.55796 | 81.52860 | 1224.27271  | -456.51798  | -2390.90304 | 1 |
| 154 | H | 67.39261 | 66.57399 | 80.01695 | 1206.40339  | -1150.93514 | -2154.90344 | 1 |
| 155 | N | 67.53249 | 65.44948 | 81.82420 | 329.70796   | -633.68968  | -155.67358  | 1 |
| 156 | H | 66.49256 | 65.37197 | 82.01936 | 1348.31305  | 1938.76845  | 1359.00643  | 1 |
| 157 | H | 67.74313 | 64.48505 | 81.43412 | 2096.92035  | 1446.54551  | -966.48890  | 1 |
| 158 | H | 67.93227 | 65.38382 | 82.80531 | -1197.07217 | -2303.53719 | 827.28733   | 1 |
| 159 | C | 71.40811 | 70.63192 | 79.85455 | -378.01186  | -556.17301  | -413.96481  | 1 |
| 160 | O | 70.83918 | 70.55947 | 80.92210 | -409.44433  | -307.55053  | -453.30833  | 1 |



|     |   |          |          |          |             |             |             |   |
|-----|---|----------|----------|----------|-------------|-------------|-------------|---|
| 161 | N | 71.77236 | 71.72052 | 79.18835 | -429.02477  | 524.70884   | 274.08502   | 1 |
| 162 | H | 72.24179 | 71.59396 | 78.29245 | 1706.34263  | -1425.96036 | 1574.38926  | 1 |
| 163 | C | 71.24548 | 72.99011 | 79.62776 | -45.25864   | -626.22952  | 478.93267   | 1 |
| 164 | H | 70.15010 | 72.80182 | 79.67986 | 1988.63164  | 570.90773   | 1772.87287  | 1 |
| 165 | C | 71.86012 | 73.27854 | 81.04996 | 551.77128   | -20.49526   | -564.54996  | 1 |
| 166 | H | 71.64430 | 72.43501 | 81.75016 | 1434.61535  | -1753.10253 | 1513.99471  | 1 |
| 167 | H | 72.97046 | 73.33156 | 80.96618 | -714.67738  | 1819.09770  | 1898.36494  | 1 |
| 168 | C | 71.30897 | 74.63173 | 81.61352 | 446.99263   | -555.77305  | 338.97221   | 1 |
| 169 | H | 71.34326 | 75.42045 | 80.82545 | 1953.68466  | 1892.25957  | -161.67766  | 1 |
| 170 | H | 70.24659 | 74.54834 | 81.93642 | -403.03785  | 2688.07032  | -188.43591  | 1 |
| 171 | C | 72.27576 | 74.97467 | 82.81412 | 567.86262   | 335.74681   | 434.04421   | 1 |
| 172 | H | 72.25093 | 74.16571 | 83.57958 | -1080.02275 | 1568.26081  | -1948.78900 | 1 |
| 173 | H | 73.33241 | 75.01707 | 82.45407 | -919.54108  | 2111.34692  | 1456.13463  | 1 |
| 174 | C | 71.89746 | 76.34037 | 83.44666 | 195.81897   | 173.33862   | -745.11536  | 1 |
| 175 | H | 71.71169 | 77.15337 | 82.71487 | 1405.67949  | -2301.21089 | -390.08113  | 1 |
| 176 | H | 71.07509 | 76.30471 | 84.19064 | -940.37328  | -1118.32446 | 2299.72133  | 1 |
| 177 | N | 73.16429 | 76.79962 | 84.20533 | 319.26422   | 656.36007   | -42.02424   | 1 |
| 178 | H | 73.13433 | 77.78372 | 84.59483 | 1961.03633  | 619.91968   | 1787.09422  | 1 |
| 179 | H | 73.40220 | 76.25519 | 85.08198 | 854.14343   | -2156.80752 | 1429.08711  | 1 |
| 180 | H | 74.11171 | 76.77146 | 83.58819 | 1237.02905  | -1378.50857 | -1998.28500 | 1 |
| 181 | C | 71.67820 | 74.10607 | 78.53139 | 532.53319   | -268.57236  | 517.55729   | 1 |
| 182 | O | 72.44877 | 75.02558 | 78.81401 | 266.16714   | -290.73804  | -558.88002  | 1 |
| 183 | N | 71.08835 | 73.84824 | 77.38469 | -226.25352  | 640.49678   | -270.32839  | 1 |
| 184 | H | 70.45707 | 73.04903 | 77.36272 | 2007.69063  | -1035.27229 | 1523.50231  | 1 |
| 185 | C | 71.08170 | 74.86784 | 76.38333 | -540.76542  | -573.33303  | 49.50000    | 1 |
| 186 | H | 72.14741 | 75.15751 | 76.26643 | -2374.20950 | -1036.76023 | 843.75774   | 1 |
| 187 | C | 70.42590 | 74.21249 | 75.08889 | -77.09082   | 666.87422   | -415.84136  | 1 |
| 188 | H | 69.42977 | 73.77825 | 75.37618 | -985.81834  | 617.19825   | 2463.91927  | 1 |
| 189 | O | 71.17082 | 73.10997 | 74.51558 | 293.29899   | -391.65602  | -477.80926  | 1 |
| 190 | H | 70.53550 | 72.37942 | 74.62811 | 2528.72714  | -681.76262  | -751.27122  | 1 |
| 191 | C | 70.18590 | 75.43359 | 74.12985 | 252.47363   | -605.14473  | 440.05134   | 1 |
| 192 | H | 69.68760 | 75.10723 | 73.18875 | -2052.65063 | 1456.49051  | -1043.51830 | 1 |
| 193 | H | 69.52692 | 76.21861 | 74.59658 | -2152.98800 | -1661.97574 | -161.70652  | 1 |
| 194 | H | 71.13974 | 75.93247 | 73.84015 | -473.12726  | -1584.27339 | 2165.61725  | 1 |
| 195 | C | 70.21369 | 76.12496 | 76.97835 | 360.36307   | 488.46713   | 505.10056   | 1 |
| 196 | O | 69.27548 | 76.00483 | 77.72930 | -200.08817  | -528.03552  | -385.82850  | 1 |
| 197 | N | 70.72280 | 77.22588 | 76.43344 | -597.54095  | -226.44775  | 355.20479   | 1 |
| 198 | H | 71.51058 | 77.14046 | 75.79262 | 2179.23655  | -1300.70981 | -991.33835  | 1 |
| 199 | C | 70.02260 | 78.44987 | 76.60097 | -687.68921  | 297.39807   | -249.45179  | 1 |
| 200 | H | 69.49082 | 78.27522 | 77.56496 | -349.16256  | -2467.37713 | -1101.72831 | 1 |
| 201 | C | 71.08627 | 79.64578 | 76.60384 | 672.47345   | 361.54328   | -201.62880  | 1 |
| 202 | H | 71.70316 | 79.60807 | 75.67685 | 1541.41502  | 582.18425   | 2169.97026  | 1 |
| 203 | H | 70.54345 | 80.62099 | 76.60187 | -2534.67717 | 60.25153    | 997.72295   | 1 |
| 204 | C | 71.98975 | 79.57289 | 77.84300 | 574.26774   | -389.43119  | -377.02542  | 1 |
| 205 | C | 71.48383 | 80.07818 | 79.07882 | 688.82679   | -287.33580  | -257.96133  | 1 |
| 206 | H | 70.44333 | 80.44195 | 79.15607 | 331.14182   | 1470.38163  | 2269.80013  | 1 |
| 207 | C | 73.32289 | 79.06606 | 77.76219 | -383.52382  | -675.04808  | 144.24917   | 1 |
| 208 | H | 73.70988 | 78.64467 | 76.81669 | 4.09847     | 1517.59662  | 2262.86397  | 1 |
| 209 | C | 72.33706 | 80.12607 | 80.17996 | -134.76730  | 428.45285   | -649.50303  | 1 |
| 210 | H | 71.95050 | 80.53147 | 81.13106 | -903.23433  | 1600.49020  | 2011.53387  | 1 |
| 211 | C | 74.13867 | 79.13417 | 78.89527 | -335.53281  | -615.00040  | -364.39058  | 1 |
| 212 | H | 75.17166 | 78.75146 | 78.81875 | 1596.45398  | -1369.33862 | 1732.02659  | 1 |
| 213 | C | 73.68986 | 79.67967 | 80.13411 | 585.48547   | -340.24194  | -406.23938  | 1 |
| 214 | O | 74.51238 | 79.79072 | 81.28556 | -419.15649  | -173.04408  | -511.94141  | 1 |
| 215 | H | 75.30038 | 79.28401 | 80.97820 | -1071.84350 | 1559.71507  | -1960.13012 | 1 |
| 216 | C | 68.97491 | 78.59505 | 75.36173 | 291.41878   | -183.13091  | 710.72246   | 1 |
| 217 | O | 68.19441 | 77.71112 | 75.06885 | 379.87695   | 523.47396   | -222.23622  | 1 |
| 218 | N | 69.09201 | 79.78074 | 74.77647 | 564.30591   | 373.09380   | 277.24371   | 1 |
| 219 | H | 69.79721 | 80.44921 | 75.08638 | -120.59931  | -2436.07824 | -1214.35098 | 1 |
| 220 | C | 68.14065 | 80.08256 | 73.75184 | 404.07514   | -299.37480  | 608.84009   | 1 |
| 221 | H | 67.22802 | 79.53802 | 74.09076 | -1071.07882 | -841.69025  | 2359.66467  | 1 |
| 222 | C | 68.00146 | 81.65856 | 73.69677 | -683.12807  | 68.71770    | -390.13096  | 1 |

|     |   |          |          |          |             |             |             |   |
|-----|---|----------|----------|----------|-------------|-------------|-------------|---|
| 223 | H | 67.89205 | 82.07536 | 74.72378 | 2068.88918  | 1596.58590  | 770.89603   | 1 |
| 224 | H | 68.92640 | 82.11954 | 73.27672 | 1379.86429  | 2342.49779  | -179.85638  | 1 |
| 225 | C | 66.76898 | 82.02691 | 72.81494 | -176.39967  | 537.49466   | 550.97268   | 1 |
| 226 | H | 66.91610 | 81.67148 | 71.76774 | -396.28051  | 1942.22168  | 1869.33314  | 1 |
| 227 | H | 65.84480 | 81.52580 | 73.17996 | -94.44700   | 586.00678   | -2659.20016 | 1 |
| 228 | C | 66.62618 | 83.61888 | 72.87338 | -291.69381  | -718.18079  | -150.72929  | 1 |
| 229 | H | 66.48042 | 84.06746 | 73.88854 | -2303.38776 | 1089.76242  | 964.62032   | 1 |
| 230 | H | 67.45453 | 84.16508 | 72.35213 | 884.16729   | 2568.80533  | -207.74283  | 1 |
| 231 | N | 65.45349 | 83.80809 | 72.12977 | -594.49522  | -252.81478  | 342.29276   | 1 |
| 232 | H | 65.22171 | 83.08215 | 71.46874 | -1735.17426 | 2084.05705  | -263.71605  | 1 |
| 233 | C | 64.69338 | 84.82567 | 72.19965 | 595.23177   | -271.52487  | 442.22352   | 1 |
| 234 | N | 65.02779 | 85.84533 | 73.09632 | 585.53813   | -424.79750  | -105.81303  | 1 |
| 235 | H | 65.83984 | 85.93094 | 73.70605 | 959.88797   | 1327.56823  | -2177.11905 | 1 |
| 236 | H | 64.50537 | 86.71414 | 73.21398 | 1578.48647  | 16.27378    | -2220.76233 | 1 |
| 237 | N | 63.61807 | 84.70623 | 71.30876 | -452.17763  | -390.33541  | -421.51853  | 1 |
| 238 | H | 63.37642 | 83.96824 | 70.64911 | 470.26107   | 1974.25629  | -1817.92087 | 1 |
| 239 | H | 62.89742 | 85.42136 | 71.20334 | 1856.67307  | -1573.97321 | -1224.35416 | 1 |
| 240 | C | 68.64886 | 79.50762 | 72.30430 | -531.47271  | -581.45780  | -55.06206   | 1 |
| 241 | O | 67.95260 | 79.70219 | 71.33012 | -243.00837  | 192.73507   | 609.52485   | 1 |
| 242 | N | 69.78396 | 78.83301 | 72.39921 | 343.49288   | -644.25607  | 38.09164    | 1 |
| 243 | H | 70.15716 | 78.73324 | 73.34163 | -1691.16043 | -1535.97525 | -1484.73099 | 1 |
| 244 | C | 70.48793 | 78.37375 | 71.25392 | 542.66492   | 350.14337   | 454.42563   | 1 |
| 245 | H | 71.23486 | 77.66440 | 71.67507 | 1209.57979  | -2396.95920 | 463.86744   | 1 |
| 246 | C | 69.46340 | 77.68793 | 70.25361 | -737.14309  | 145.93010   | 242.71942   | 1 |
| 247 | H | 68.68514 | 78.42833 | 69.92955 | -1050.18303 | 159.36419   | -2509.06125 | 1 |
| 248 | C | 70.23376 | 77.10522 | 69.02009 | -706.77696  | -252.88343  | -245.16230  | 1 |
| 249 | H | 69.54247 | 76.60330 | 68.30262 | -1624.64039 | -1665.49085 | 1417.86935  | 1 |
| 250 | H | 70.77119 | 77.91694 | 68.46006 | 2566.10521  | 598.51109   | 693.22305   | 1 |
| 251 | H | 70.99625 | 76.35223 | 69.32973 | -1972.69758 | 107.10018   | -1876.34312 | 1 |
| 252 | C | 68.80328 | 76.47785 | 71.00102 | 412.85148   | 672.58832   | -27.69222   | 1 |
| 253 | H | 68.00464 | 75.99868 | 70.38814 | 1447.02277  | 1762.76533  | -1490.78944 | 1 |
| 254 | H | 69.55445 | 75.69080 | 71.24336 | 1320.77379  | -145.20455  | 2378.68491  | 1 |
| 255 | H | 68.33789 | 76.80406 | 71.96184 | -1512.10848 | 1470.52031  | 1724.75147  | 1 |
| 256 | C | 71.21523 | 79.67017 | 70.55785 | -607.11113  | 499.56689   | 73.73769    | 1 |
| 257 | O | 71.43060 | 79.68959 | 69.36353 | 357.97126   | 460.81534   | 356.68785   | 1 |
| 258 | N | 71.66053 | 80.47716 | 71.50682 | 536.55407   | -368.62270  | 332.76306   | 1 |
| 259 | H | 71.37594 | 80.22265 | 72.45099 | 524.38866   | 2297.69985  | 1367.20941  | 1 |
| 260 | C | 72.26421 | 81.73866 | 71.26164 | 46.50277    | -774.29190  | -147.97904  | 1 |
| 261 | H | 72.95820 | 81.84972 | 72.12184 | 1676.51875  | 1883.29066  | 1032.55549  | 1 |
| 262 | C | 73.00670 | 81.78196 | 69.83472 | -559.41456  | -34.19198   | -556.30433  | 1 |
| 263 | H | 72.25044 | 81.62646 | 69.02039 | -64.66664   | 395.18769   | 2695.05373  | 1 |
| 264 | H | 73.45165 | 82.79057 | 69.65307 | -2703.44278 | -60.40056   | 333.79418   | 1 |
| 265 | C | 74.06450 | 80.70887 | 69.77504 | -519.76435  | 377.31045   | 459.42366   | 1 |
| 266 | H | 73.59275 | 79.75164 | 70.09979 | -1746.74323 | 1667.50644  | -1261.73691 | 1 |
| 267 | C | 74.56683 | 80.52628 | 68.34855 | 570.95554   | 16.46261    | -545.27700  | 1 |
| 268 | H | 75.33429 | 79.71234 | 68.28080 | 2391.58273  | 28.05277    | -1305.07271 | 1 |
| 269 | H | 73.73180 | 80.25411 | 67.65191 | 175.75588   | 917.63458   | 2559.43867  | 1 |
| 270 | H | 75.04010 | 81.46155 | 67.95281 | -1063.97851 | -2155.34650 | 1283.00462  | 1 |
| 271 | C | 75.23745 | 81.02034 | 70.69353 | 193.76014   | 2.62946     | -765.53141  | 1 |
| 272 | H | 76.01919 | 80.21835 | 70.65108 | 507.39394   | -846.55087  | 2539.60089  | 1 |
| 273 | H | 75.73655 | 81.98326 | 70.41189 | 1337.57841  | 1818.19054  | 1526.01994  | 1 |
| 274 | H | 74.91609 | 81.11270 | 71.76258 | 1100.88635  | -1172.91350 | -2199.08909 | 1 |
| 275 | C | 71.12794 | 82.87575 | 71.35114 | -549.21115  | 475.64486   | -309.38218  | 1 |
| 276 | O | 69.95095 | 82.69146 | 71.18456 | 556.06106   | -390.37755  | -78.24250   | 1 |
| 277 | O | 71.61491 | 84.18244 | 71.61240 | -572.27940  | -310.19032  | -209.75862  | 1 |
| 278 | H | 72.58534 | 83.97196 | 71.68342 | -1380.08193 | 2212.14486  | 790.85944   | 1 |

Listing 86: C00086.xmolout

|   |          |          |          |        |        |             |        |          |  |
|---|----------|----------|----------|--------|--------|-------------|--------|----------|--|
| 1 | 276      |          |          |        |        |             |        |          |  |
| 2 | 150.0000 | 150.0000 | 150.0000 | 0.0000 | 0.0000 | 0.0000***** | 2.7750 | 11100    |  |
|   | 0.2500   | 300.00   | 0.00     | 0.00   | 0.00   | -1293.4830  | 0.0000 | 300.0000 |  |

|    |   |          |          |          |             |             |             |   |
|----|---|----------|----------|----------|-------------|-------------|-------------|---|
| 3  | H | 81.65603 | 70.80945 | 71.56068 | -2043.14101 | -1757.64893 | 399.89339   | 1 |
| 4  | N | 82.32176 | 70.21833 | 71.06671 | 426.75047   | 490.45733   | -334.42467  | 1 |
| 5  | H | 81.70164 | 69.62099 | 70.52464 | 442.25559   | -1110.30854 | -2448.52907 | 1 |
| 6  | C | 83.28614 | 70.90440 | 70.29191 | 415.32972   | -666.39213  | 83.73172    | 1 |
| 7  | H | 83.33682 | 71.92297 | 70.73844 | 879.32219   | 2491.00447  | 667.35213   | 1 |
| 8  | C | 84.70174 | 70.12353 | 70.40267 | 31.35357    | 477.41777   | 628.23362   | 1 |
| 9  | H | 84.67180 | 69.21815 | 69.75206 | 1168.38489  | 2240.25337  | -1019.71136 | 1 |
| 10 | H | 85.52403 | 70.75804 | 69.99488 | -360.43770  | 2534.90498  | 931.67112   | 1 |
| 11 | C | 84.97913 | 69.73018 | 71.82494 | 463.18208   | 512.70242   | -382.34388  | 1 |
| 12 | H | 84.12467 | 69.11131 | 72.18299 | 1725.29117  | 1863.52247  | -987.07854  | 1 |
| 13 | C | 86.25603 | 68.90156 | 71.90811 | 710.42801   | -144.27427  | -313.15367  | 1 |
| 14 | H | 86.45416 | 68.55044 | 72.95328 | 364.20195   | -1033.13725 | 2494.72524  | 1 |
| 15 | H | 86.20416 | 67.99220 | 71.25592 | 2567.61904  | 335.80679   | 847.48802   | 1 |
| 16 | H | 87.15098 | 69.49165 | 71.58241 | -2587.99029 | 680.92867   | -512.16411  | 1 |
| 17 | C | 85.10607 | 70.94735 | 72.73212 | 268.17616   | 741.64379   | -40.42634   | 1 |
| 18 | H | 85.32585 | 70.65214 | 73.79041 | 1283.54314  | -1945.37420 | -1411.27812 | 1 |
| 19 | H | 85.93078 | 71.62805 | 72.39797 | -1258.57796 | 1317.15249  | -2026.02085 | 1 |
| 20 | H | 84.16143 | 71.54956 | 72.74586 | -2502.84526 | 909.80597   | 575.92391   | 1 |
| 21 | C | 82.78242 | 70.88612 | 68.76557 | 619.36578   | -458.64843  | -172.09273  | 1 |
| 22 | O | 81.74466 | 70.32691 | 68.37968 | -81.40433   | 433.87611   | 522.34594   | 1 |
| 23 | N | 83.65509 | 71.59500 | 68.11979 | 175.23996   | -622.20190  | 341.55523   | 1 |
| 24 | H | 84.45647 | 72.04638 | 68.60892 | -876.57256  | -303.22879  | -2561.90213 | 1 |
| 25 | C | 83.71147 | 71.76004 | 66.69260 | -571.88214  | -534.10783  | -106.15033  | 1 |
| 26 | H | 84.03644 | 70.77675 | 66.28314 | -2713.20841 | -16.25800   | -248.80809  | 1 |
| 27 | C | 82.21090 | 72.08025 | 66.22326 | 166.60354   | 288.16399   | -716.09568  | 1 |
| 28 | H | 81.69480 | 72.43386 | 67.16681 | -2097.85574 | 1636.78449  | -586.18044  | 1 |
| 29 | O | 81.46241 | 70.91719 | 65.85521 | -317.80580  | -363.38227  | 484.43082   | 1 |
| 30 | H | 81.32358 | 70.50718 | 66.78739 | 1863.74748  | -1451.84923 | 1357.29467  | 1 |
| 31 | C | 82.29998 | 73.26180 | 65.19989 | 503.80731   | 517.99032   | 318.51606   | 1 |
| 32 | H | 81.29869 | 73.70337 | 64.99005 | 640.61020   | -2157.10410 | -1536.29104 | 1 |
| 33 | H | 82.94155 | 74.08577 | 65.59274 | 1687.88455  | 465.60692   | 2087.56452  | 1 |
| 34 | H | 82.72726 | 72.93941 | 64.22276 | -1293.07895 | -1899.88581 | -1463.57452 | 1 |
| 35 | C | 84.85236 | 72.88601 | 66.58855 | -153.07550  | -733.68902  | 248.70981   | 1 |
| 36 | O | 85.48552 | 73.14537 | 67.59931 | 186.15459   | -480.78787  | -449.34387  | 1 |
| 37 | N | 85.07425 | 73.31467 | 65.34324 | -487.53139  | 543.18517   | 42.03850    | 1 |
| 38 | C | 85.76731 | 74.55608 | 65.12546 | -699.35871  | 69.34393    | 360.10701   | 1 |
| 39 | H | 86.58595 | 74.52237 | 65.87950 | 2.81126     | -221.99807  | -2715.58072 | 1 |
| 40 | C | 86.24107 | 74.46301 | 63.62162 | -507.46439  | -592.59194  | 122.07761   | 1 |
| 41 | H | 86.17594 | 75.44255 | 63.09451 | -1975.08116 | 525.87560   | -1801.71556 | 1 |
| 42 | H | 87.31027 | 74.15753 | 63.56459 | 1588.27743  | -1913.22100 | 1113.83566  | 1 |
| 43 | C | 85.31846 | 73.37392 | 62.98284 | -613.62442  | -457.55993  | -194.14490  | 1 |
| 44 | H | 84.35619 | 73.80883 | 62.63330 | 1707.54637  | -721.27992  | 1996.92523  | 1 |
| 45 | H | 85.77326 | 72.87340 | 62.09859 | 758.23357   | 2100.81767  | 1560.55011  | 1 |
| 46 | C | 85.10904 | 72.39251 | 64.21271 | -352.41524  | 704.96076   | 49.21465    | 1 |
| 47 | H | 84.16834 | 71.79465 | 64.19696 | 1714.76886  | -2070.42778 | 443.35792   | 1 |
| 48 | H | 85.96869 | 71.70980 | 64.41121 | 1224.15040  | 1801.50881  | 1636.97633  | 1 |
| 49 | C | 84.80644 | 75.84993 | 65.41179 | 566.85117   | 537.05831   | 117.62814   | 1 |
| 50 | O | 85.11962 | 76.61895 | 66.29011 | -550.26779  | -406.08867  | 4.21666     | 1 |
| 51 | N | 83.72641 | 75.91706 | 64.61397 | 566.34832   | -425.77725  | 180.18749   | 1 |
| 52 | H | 83.72557 | 75.21674 | 63.87265 | 644.44502   | 2646.80550  | -52.73430   | 1 |
| 53 | C | 83.26492 | 77.26100 | 64.38115 | 612.34801   | -281.48662  | 411.56221   | 1 |
| 54 | H | 84.12103 | 77.90655 | 64.68601 | 1667.23498  | -1490.75142 | 1556.16753  | 1 |
| 55 | C | 82.86484 | 77.35155 | 62.84399 | -714.45746  | -175.43074  | 286.98927   | 1 |
| 56 | H | 82.03751 | 76.61711 | 62.63978 | -787.09484  | 1763.03619  | -1922.46060 | 1 |
| 57 | O | 83.91653 | 77.02401 | 61.91277 | -429.46514  | 516.51932   | -128.40526  | 1 |
| 58 | H | 83.50074 | 76.30249 | 61.40160 | 1981.82785  | 436.16847   | -1818.18182 | 1 |
| 59 | C | 82.28278 | 78.81072 | 62.74807 | 630.79189   | -468.94448  | 76.03230    | 1 |
| 60 | H | 81.87883 | 79.02414 | 61.73140 | -1775.71861 | 2062.30353  | 131.89849   | 1 |
| 61 | H | 81.45129 | 78.97608 | 63.47555 | -1855.14608 | 88.94118    | 1993.53760  | 1 |
| 62 | H | 83.06428 | 79.57626 | 62.96209 | -1504.82350 | -780.94249  | -2132.90992 | 1 |
| 63 | C | 81.93248 | 77.56092 | 65.27342 | 288.57638   | 618.62814   | -397.00270  | 1 |
| 64 | O | 81.72626 | 78.66467 | 65.72333 | 321.70495   | -185.26452  | 574.37218   | 1 |

|     |   |          |          |          |             |             |             |   |
|-----|---|----------|----------|----------|-------------|-------------|-------------|---|
| 65  | N | 81.01025 | 76.53607 | 65.17538 | -447.05792  | -446.53431  | 367.76425   | 1 |
| 66  | H | 81.63994 | 75.76606 | 64.90541 | 350.31316   | 1975.63644  | -1843.31522 | 1 |
| 67  | C | 80.20427 | 76.40299 | 66.38651 | -511.23061  | 374.03917   | -471.51480  | 1 |
| 68  | H | 80.94389 | 76.51830 | 67.20940 | 2234.79579  | -898.70890  | -1273.45190 | 1 |
| 69  | C | 79.14677 | 77.56728 | 66.36112 | 529.53781   | -159.34528  | 563.72604   | 1 |
| 70  | H | 78.56234 | 77.54238 | 67.31249 | 654.59388   | 2347.94251  | 1217.51488  | 1 |
| 71  | H | 79.68877 | 78.55026 | 66.33845 | -1526.55661 | 2103.42026  | 817.87394   | 1 |
| 72  | O | 78.13500 | 77.50472 | 65.23332 | -554.84278  | 14.12789    | 399.58769   | 1 |
| 73  | H | 78.71031 | 77.83618 | 64.53481 | 1297.06236  | 2061.84854  | 1220.68812  | 1 |
| 74  | C | 79.58022 | 74.91160 | 66.33786 | -662.15484  | -412.13544  | 123.62687   | 1 |
| 75  | O | 80.20700 | 74.06046 | 66.96330 | -540.01537  | -317.05804  | 274.91456   | 1 |
| 76  | N | 78.49925 | 74.81391 | 65.60272 | -202.76299  | -690.00100  | -131.49145  | 1 |
| 77  | H | 78.13523 | 75.68814 | 65.17262 | -702.62132  | -2617.37191 | 281.70413   | 1 |
| 78  | C | 77.93852 | 73.58573 | 65.17381 | -491.73914  | 576.34187   | 222.73509   | 1 |
| 79  | H | 77.19689 | 73.90279 | 64.40793 | 1977.17978  | -1823.58850 | -434.68928  | 1 |
| 80  | C | 79.07563 | 72.63953 | 64.59030 | -649.50797  | -328.66843  | 306.11224   | 1 |
| 81  | H | 79.88401 | 72.48566 | 65.34240 | 2075.07803  | 1452.16490  | -1004.45904 | 1 |
| 82  | C | 78.43217 | 71.26523 | 64.20180 | -615.18735  | -489.99689  | -70.96352   | 1 |
| 83  | H | 79.18954 | 70.56614 | 63.77465 | -1226.32661 | -1724.38906 | -1716.47170 | 1 |
| 84  | H | 77.98226 | 70.76216 | 65.09081 | 2381.64273  | -969.84735  | 900.46860   | 1 |
| 85  | H | 77.62217 | 71.38775 | 63.44485 | 2122.74991  | 1702.23946  | -141.36228  | 1 |
| 86  | C | 79.64056 | 73.28443 | 63.27832 | -501.86074  | -479.61276  | -376.42482  | 1 |
| 87  | H | 80.47895 | 72.68298 | 62.85464 | 993.79261   | -2246.95401 | -1177.81305 | 1 |
| 88  | H | 78.85496 | 73.36173 | 62.49082 | 42.71279    | -626.15391  | -2651.37258 | 1 |
| 89  | H | 80.02502 | 74.31542 | 63.46234 | -2026.39012 | -1590.33709 | -887.82922  | 1 |
| 90  | C | 77.21553 | 72.77706 | 66.40982 | -672.89153  | 382.57394   | -156.34072  | 1 |
| 91  | O | 76.05880 | 72.44567 | 66.31962 | 410.04627   | 221.86223   | 500.35950   | 1 |
| 92  | N | 78.08025 | 72.53091 | 67.38429 | -378.11782  | -443.79414  | -441.10984  | 1 |
| 93  | H | 79.07791 | 72.87140 | 67.32194 | 2404.15973  | -568.14894  | 1149.30085  | 1 |
| 94  | C | 77.57662 | 72.13164 | 68.65159 | -544.54484  | 466.16019   | 331.29119   | 1 |
| 95  | H | 76.51298 | 71.84579 | 68.47358 | -1409.80988 | -170.17955  | 2325.32679  | 1 |
| 96  | C | 78.56263 | 70.94983 | 69.04537 | -184.48284  | 116.78282   | -758.89137  | 1 |
| 97  | H | 78.58086 | 70.19197 | 68.22943 | 1893.78641  | 1861.14652  | 611.04528   | 1 |
| 98  | H | 79.60957 | 71.32574 | 69.12238 | -2170.79665 | -974.19311  | 1327.50117  | 1 |
| 99  | C | 78.12067 | 70.29245 | 70.38598 | 389.51668   | 672.81878   | -138.49152  | 1 |
| 100 | H | 78.24974 | 71.01369 | 71.22812 | 510.64577   | 1933.03327  | 1851.02484  | 1 |
| 101 | H | 77.03052 | 70.06978 | 70.37883 | -2302.30869 | -1105.72939 | -948.89774  | 1 |
| 102 | C | 78.93149 | 68.96196 | 70.64699 | -559.93427  | -126.34590  | 542.30857   | 1 |
| 103 | O | 78.59888 | 68.23878 | 71.55139 | -670.36003  | -111.83166  | 76.36448    | 1 |
| 104 | N | 79.95685 | 68.74801 | 69.79619 | -216.06729  | -537.07037  | 446.51379   | 1 |
| 105 | H | 80.39378 | 69.33919 | 69.04866 | -1251.96487 | 1074.12894  | -2168.52500 | 1 |
| 106 | H | 80.53431 | 67.90238 | 69.90197 | -2451.83023 | -720.73851  | 944.84612   | 1 |
| 107 | C | 77.78549 | 73.35164 | 69.72725 | 546.24052   | -563.88337  | -85.11809   | 1 |
| 108 | O | 78.59933 | 73.18268 | 70.59730 | 71.70702    | -307.40463  | 606.69673   | 1 |
| 109 | N | 76.99507 | 74.41540 | 69.50187 | 479.90863   | -504.50129  | 222.86849   | 1 |
| 110 | C | 76.95387 | 75.52846 | 70.39331 | 75.51268    | -600.91904  | 506.73700   | 1 |
| 111 | H | 77.91826 | 75.55396 | 70.95114 | -2033.61562 | 1795.30103  | 254.89480   | 1 |
| 112 | C | 76.67422 | 76.74483 | 69.40676 | 523.79067   | 517.99274   | 284.45581   | 1 |
| 113 | H | 76.26113 | 77.63721 | 69.92835 | 1599.61665  | -1127.00911 | 1895.98173  | 1 |
| 114 | H | 77.60170 | 77.07465 | 68.89178 | -1881.83093 | 1275.82488  | -1501.55016 | 1 |
| 115 | C | 75.66613 | 76.09286 | 68.41061 | -600.05639  | -404.05026  | 316.64485   | 1 |
| 116 | H | 74.64538 | 76.03418 | 68.85136 | -2597.05260 | 496.36221   | 657.73249   | 1 |
| 117 | H | 75.56684 | 76.64483 | 67.44818 | -1666.24518 | 1294.38985  | -1723.90591 | 1 |
| 118 | C | 76.30612 | 74.64969 | 68.23753 | 493.57570   | -129.95376  | -602.56394  | 1 |
| 119 | H | 75.57292 | 73.82246 | 68.07924 | -1469.08415 | -637.84797  | 2204.22581  | 1 |
| 120 | H | 77.10284 | 74.58980 | 67.45690 | -1038.97840 | 1068.88701  | -2280.71789 | 1 |
| 121 | C | 75.63483 | 75.45858 | 71.36557 | 188.88100   | 241.05089   | -727.87821  | 1 |
| 122 | O | 75.31349 | 76.42410 | 72.01949 | 531.88613   | -49.19943   | 427.07960   | 1 |
| 123 | N | 74.99508 | 74.29500 | 71.25590 | 708.14833   | 26.93417    | -179.73509  | 1 |
| 124 | H | 75.44804 | 73.56450 | 70.70858 | -2232.69501 | -1179.09831 | 1023.94816  | 1 |
| 125 | C | 73.95823 | 74.05468 | 72.20361 | -738.32412  | 259.92548   | 104.42456   | 1 |
| 126 | H | 73.52581 | 75.05792 | 72.42682 | 2028.89123  | 1260.02983  | 1311.33324  | 1 |

|     |   |          |          |          |             |             |             |   |
|-----|---|----------|----------|----------|-------------|-------------|-------------|---|
| 127 | C | 72.95521 | 72.99740 | 71.57713 | -258.65678  | -345.52513  | 661.28459   | 1 |
| 128 | H | 73.49419 | 72.06418 | 71.30462 | -1826.06090 | -1801.46097 | -918.64554  | 1 |
| 129 | C | 71.83746 | 72.71084 | 72.63808 | -541.23400  | 531.92970   | -218.41428  | 1 |
| 130 | H | 71.09476 | 71.96784 | 72.26373 | 1311.73218  | -2219.18200 | 882.19023   | 1 |
| 131 | H | 72.26629 | 72.30370 | 73.58614 | -1048.71298 | 1223.58118  | -2196.97971 | 1 |
| 132 | H | 71.27659 | 73.63749 | 72.90344 | 419.06414   | 1903.92898  | 1903.44670  | 1 |
| 133 | C | 72.28362 | 73.63232 | 70.31091 | -423.86431  | 152.66566   | -648.55262  | 1 |
| 134 | H | 71.56123 | 72.93104 | 69.83123 | 105.68386   | -2342.50080 | 1387.51238  | 1 |
| 135 | H | 71.72475 | 74.56248 | 70.56794 | -1695.63603 | -1484.73621 | -1531.02793 | 1 |
| 136 | H | 73.04475 | 73.90601 | 69.54259 | -1853.57121 | -487.39031  | 1936.59343  | 1 |
| 137 | C | 74.65701 | 73.35156 | 73.52056 | 539.71428   | -510.58232  | 267.58633   | 1 |
| 138 | O | 75.42511 | 72.42309 | 73.44767 | -15.93758   | -278.34085  | -624.49402  | 1 |
| 139 | N | 74.11823 | 73.92563 | 74.58634 | -676.81886  | 12.05292    | 276.17960   | 1 |
| 140 | H | 73.46645 | 74.69747 | 74.45468 | -1694.44250 | -373.84189  | -2100.66098 | 1 |
| 141 | C | 74.51246 | 73.50822 | 75.88763 | 412.33078   | -664.70360  | 108.35451   | 1 |
| 142 | H | 75.12832 | 72.60095 | 75.68121 | 1765.77476  | 1294.44366  | 1621.76594  | 1 |
| 143 | C | 75.34381 | 74.70865 | 76.50352 | -179.66635  | -721.95667  | -264.73915  | 1 |
| 144 | H | 76.11727 | 75.06088 | 75.78461 | -607.34922  | 2587.87032  | -598.10018  | 1 |
| 145 | H | 74.68416 | 75.58890 | 76.67356 | -359.69332  | -1479.13954 | -2259.74260 | 1 |
| 146 | C | 76.00178 | 74.22795 | 77.83824 | -240.01076  | 616.02425   | 431.85322   | 1 |
| 147 | H | 75.28061 | 73.64593 | 78.45526 | -1359.17131 | 782.54425   | 2227.99181  | 1 |
| 148 | H | 76.85754 | 73.54404 | 77.64174 | -820.36667  | 85.81767    | -2596.78715 | 1 |
| 149 | C | 76.46512 | 75.52959 | 78.60906 | -513.07015  | 236.18570   | -551.87280  | 1 |
| 150 | H | 77.21163 | 76.10281 | 78.01245 | 1816.11944  | -1183.11722 | -1650.94321 | 1 |
| 151 | H | 75.60453 | 76.22057 | 78.76866 | -1800.04429 | -1361.53473 | 1526.34643  | 1 |
| 152 | C | 77.05871 | 75.08565 | 79.96541 | 726.08972   | -253.19732  | -179.64713  | 1 |
| 153 | H | 76.32723 | 74.60979 | 80.65075 | 1224.27271  | -456.51798  | -2390.90304 | 1 |
| 154 | H | 77.96761 | 74.45600 | 79.88942 | 1206.40339  | -1150.93514 | -2154.90344 | 1 |
| 155 | N | 77.54055 | 76.37956 | 80.70467 | 329.70796   | -633.68968  | -155.67358  | 1 |
| 156 | H | 78.01654 | 76.23089 | 81.64123 | 1348.31305  | 1938.76845  | 1359.00643  | 1 |
| 157 | H | 78.27359 | 76.95290 | 80.19690 | 2096.92035  | 1446.54551  | -966.48890  | 1 |
| 158 | H | 76.81362 | 77.11696 | 80.93898 | -1197.07217 | -2303.53719 | 827.28733   | 1 |
| 159 | C | 73.11524 | 73.19651 | 76.69051 | -378.01186  | -556.17301  | -413.96481  | 1 |
| 160 | O | 72.38211 | 72.32852 | 76.28833 | -409.44433  | -307.55053  | -453.30833  | 1 |
| 161 | N | 72.96613 | 73.97158 | 77.75251 | -429.02477  | 524.70884   | 274.08502   | 1 |
| 162 | H | 73.60865 | 74.71596 | 78.08442 | 1706.34263  | -1425.96036 | 1574.38926  | 1 |
| 163 | C | 71.81945 | 73.76431 | 78.59252 | -45.25864   | -626.22952  | 478.93267   | 1 |
| 164 | H | 70.91890 | 73.66999 | 77.94495 | 1988.63164  | 570.90773   | 1772.87287  | 1 |
| 165 | C | 72.11435 | 72.43962 | 79.40777 | 551.77128   | -20.49526   | -564.54996  | 1 |
| 166 | H | 72.27278 | 71.59731 | 78.69634 | 1434.61535  | -1753.10253 | 1513.99471  | 1 |
| 167 | H | 73.06845 | 72.53446 | 79.97320 | -714.67738  | 1819.09770  | 1898.36494  | 1 |
| 168 | C | 70.92676 | 72.12089 | 80.37342 | 446.99263   | -555.77305  | 338.97221   | 1 |
| 169 | H | 70.83367 | 72.89173 | 81.19722 | 1953.68466  | 1892.25957  | -161.67766  | 1 |
| 170 | H | 69.95596 | 72.12924 | 79.82801 | -403.03785  | 2688.07032  | -188.43591  | 1 |
| 171 | C | 71.23371 | 70.68029 | 80.95099 | 567.86262   | 335.74681   | 434.04421   | 1 |
| 172 | H | 71.36518 | 69.94755 | 80.12160 | -1080.02275 | 1568.26081  | -1948.78900 | 1 |
| 173 | H | 72.19755 | 70.67763 | 81.51019 | -919.54108  | 2111.34692  | 1456.13463  | 1 |
| 174 | C | 70.06902 | 70.24560 | 81.86937 | 195.81897   | 173.33862   | -745.11536  | 1 |
| 175 | H | 69.98461 | 70.81999 | 82.81345 | 1405.67949  | -2301.21089 | -390.08113  | 1 |
| 176 | H | 69.08153 | 70.18975 | 81.36933 | -940.37328  | -1118.32446 | 2299.72133  | 1 |
| 177 | N | 70.36466 | 68.77212 | 82.31372 | 319.26422   | 656.36007   | -42.02424   | 1 |
| 178 | H | 69.64517 | 68.33085 | 82.95590 | 1961.03633  | 619.91968   | 1787.09422  | 1 |
| 179 | H | 70.43114 | 68.04253 | 81.54541 | 854.14343   | -2156.80752 | 1429.08711  | 1 |
| 180 | H | 71.26110 | 68.60038 | 82.85531 | 1237.02905  | -1378.50857 | -1998.28500 | 1 |
| 181 | C | 71.93323 | 75.11679 | 79.49309 | 532.53319   | -268.57236  | 517.55729   | 1 |
| 182 | O | 72.99488 | 75.72719 | 79.49423 | 266.16714   | -290.73804  | -558.88002  | 1 |
| 183 | N | 70.79878 | 75.37220 | 80.12040 | -226.25352  | 640.49678   | -270.32839  | 1 |
| 184 | H | 70.02620 | 74.72147 | 79.97835 | 2007.69063  | -1035.27229 | 1523.50231  | 1 |
| 185 | C | 70.75810 | 76.33172 | 81.16626 | -540.76542  | -573.33303  | 49.50000    | 1 |
| 186 | H | 71.81713 | 76.68481 | 81.17934 | -2374.20950 | -1036.76023 | 843.75774   | 1 |
| 187 | C | 69.70601 | 77.48866 | 80.79799 | -77.09082   | 666.87422   | -415.84136  | 1 |
| 188 | H | 68.73885 | 77.27035 | 81.32919 | -985.81834  | 617.19825   | 2463.91927  | 1 |

|     |   |          |          |          |             |             |             |   |
|-----|---|----------|----------|----------|-------------|-------------|-------------|---|
| 189 | O | 69.37292 | 77.66279 | 79.41299 | 293.29899   | -391.65602  | -477.80926  | 1 |
| 190 | H | 68.39843 | 77.57873 | 79.44243 | 2528.72714  | -681.76262  | -751.27122  | 1 |
| 191 | C | 70.39109 | 78.74125 | 81.46008 | 252.47363   | -605.14473  | 440.05134   | 1 |
| 192 | H | 69.69043 | 79.60650 | 81.50894 | -2052.65063 | 1456.49051  | -1043.51830 | 1 |
| 193 | H | 70.75430 | 78.54630 | 82.49654 | -2152.98800 | -1661.97574 | -161.70652  | 1 |
| 194 | H | 71.27390 | 79.06802 | 80.86375 | -473.12726  | -1584.27339 | 2165.61725  | 1 |
| 195 | C | 70.29657 | 75.49573 | 82.48585 | 360.36307   | 488.46713   | 505.10056   | 1 |
| 196 | O | 70.38981 | 74.28592 | 82.53920 | -200.08817  | -528.03552  | -385.82850  | 1 |
| 197 | N | 69.82607 | 76.32419 | 83.42082 | -597.54095  | -226.44775  | 355.20479   | 1 |
| 198 | H | 69.83627 | 77.32140 | 83.21431 | 2179.23655  | -1300.70981 | -991.33835  | 1 |
| 199 | C | 69.91779 | 75.88750 | 84.76760 | -687.68921  | 297.39807   | -249.45179  | 1 |
| 200 | H | 70.00233 | 74.77686 | 84.72100 | -349.16256  | -2467.37713 | -1101.72831 | 1 |
| 201 | C | 71.19654 | 76.59911 | 85.42531 | 672.47345   | 361.54328   | -201.62880  | 1 |
| 202 | H | 71.09826 | 77.70567 | 85.35008 | 1541.41502  | 582.18425   | 2169.97026  | 1 |
| 203 | H | 71.23363 | 76.34824 | 86.51034 | -2534.67717 | 60.25153    | 997.72295   | 1 |
| 204 | C | 72.47692 | 76.12720 | 84.72620 | 574.26774   | -389.43119  | -377.02542  | 1 |
| 205 | C | 72.99122 | 74.83399 | 85.04352 | 688.82679   | -287.33580  | -257.96133  | 1 |
| 206 | H | 72.46779 | 74.17946 | 85.76379 | 331.14182   | 1470.38163  | 2269.80013  | 1 |
| 207 | C | 73.14372 | 76.95826 | 83.77492 | -383.52382  | -675.04808  | 144.24917   | 1 |
| 208 | H | 72.73961 | 77.95291 | 83.51453 | 4.09847     | 1517.59662  | 2262.86397  | 1 |
| 209 | C | 74.17036 | 74.41725 | 84.42911 | -134.76730  | 428.45285   | -649.50303  | 1 |
| 210 | H | 74.57281 | 73.42031 | 84.67983 | -903.23433  | 1600.49020  | 2011.53387  | 1 |
| 211 | C | 74.32239 | 76.49397 | 83.18545 | -335.53281  | -615.00040  | -364.39058  | 1 |
| 212 | H | 74.83375 | 77.14543 | 82.45519 | 1596.45398  | -1369.33862 | 1732.02659  | 1 |
| 213 | C | 74.88378 | 75.22048 | 83.49353 | 585.48547   | -340.24194  | -406.23938  | 1 |
| 214 | O | 76.08944 | 74.73820 | 82.91897 | -419.15649  | -173.04408  | -511.94141  | 1 |
| 215 | H | 76.32473 | 75.50991 | 82.35332 | -1071.84350 | 1559.71507  | -1960.13012 | 1 |
| 216 | C | 68.69005 | 76.45120 | 85.68347 | 291.41878   | -183.13091  | 710.72246   | 1 |
| 217 | O | 68.51830 | 75.98339 | 86.78820 | 379.87695   | 523.47396   | -222.23622  | 1 |
| 218 | N | 68.04109 | 77.47018 | 85.12245 | 564.30591   | 373.09380   | 277.24371   | 1 |
| 219 | H | 68.33639 | 77.76318 | 84.19310 | -120.59931  | -2436.07824 | -1214.35098 | 1 |
| 220 | C | 67.03683 | 78.11819 | 85.89871 | 404.07514   | -299.37480  | 608.84009   | 1 |
| 221 | H | 66.72363 | 77.35395 | 86.64908 | -1071.07882 | -841.69025  | 2359.66467  | 1 |
| 222 | C | 67.71109 | 79.38851 | 86.58030 | -683.12807  | 68.71770    | -390.13096  | 1 |
| 223 | H | 68.63629 | 79.10212 | 87.12833 | 2068.88918  | 1596.58590  | 770.89603   | 1 |
| 224 | H | 68.03328 | 80.12296 | 85.80897 | 1379.86429  | 2342.49779  | -179.85638  | 1 |
| 225 | C | 66.65353 | 80.01232 | 87.53987 | -176.39967  | 537.49466   | 550.97268   | 1 |
| 226 | H | 65.69794 | 80.19580 | 86.99642 | -396.28051  | 1942.22168  | 1869.33314  | 1 |
| 227 | H | 66.39811 | 79.29932 | 88.35534 | -94.44700   | 586.00678   | -2659.20016 | 1 |
| 228 | C | 67.21076 | 81.38398 | 88.13998 | -291.69381  | -718.18079  | -150.72929  | 1 |
| 229 | H | 68.09715 | 81.30889 | 88.81970 | -2303.38776 | 1089.76242  | 964.62032   | 1 |
| 230 | H | 67.40677 | 82.19408 | 87.39170 | 884.16729   | 2568.80533  | -207.74283  | 1 |
| 231 | N | 66.08850 | 81.75363 | 88.90204 | -594.49522  | -252.81478  | 342.29276   | 1 |
| 232 | H | 65.25972 | 81.18900 | 88.79073 | -1735.17426 | 2084.05705  | -263.71605  | 1 |
| 233 | C | 66.03778 | 82.73992 | 89.70339 | 595.23177   | -271.52487  | 442.22352   | 1 |
| 234 | N | 67.18430 | 83.52676 | 89.84880 | 585.53813   | -424.79750  | -105.81303  | 1 |
| 235 | H | 68.08965 | 83.43862 | 89.38914 | 959.88797   | 1327.56823  | -2177.11905 | 1 |
| 236 | H | 67.26153 | 84.34332 | 90.45615 | 1578.48647  | 16.27378    | -2220.76233 | 1 |
| 237 | N | 64.77207 | 82.83019 | 90.29963 | -452.17763  | -390.33541  | -421.51853  | 1 |
| 238 | H | 63.93965 | 82.25344 | 90.18729 | 470.26107   | 1974.25629  | -1817.92087 | 1 |
| 239 | H | 64.52040 | 83.55216 | 90.97552 | 1856.67307  | -1573.97321 | -1224.35416 | 1 |
| 240 | C | 65.83281 | 78.70522 | 84.96659 | -531.47271  | -581.45780  | -55.06206   | 1 |
| 241 | O | 64.73539 | 78.87073 | 85.44487 | -243.00837  | 192.73507   | 609.52485   | 1 |
| 242 | N | 66.25103 | 79.06351 | 83.75256 | 343.49288   | -644.25607  | 38.09164    | 1 |
| 243 | H | 67.22514 | 78.86523 | 83.52578 | -1691.16043 | -1535.97525 | -1484.73099 | 1 |
| 244 | C | 65.32927 | 79.67075 | 82.79694 | 542.66492   | 350.14337   | 454.42563   | 1 |
| 245 | H | 64.45391 | 79.93603 | 83.44124 | 1209.57979  | -2396.95920 | 463.86744   | 1 |
| 246 | C | 66.01843 | 80.87868 | 82.18420 | -737.14309  | 145.93010   | 242.71942   | 1 |
| 247 | H | 66.94515 | 80.52505 | 81.67938 | -1050.18303 | 159.36419   | -2509.06125 | 1 |
| 248 | C | 65.15056 | 81.56744 | 81.14866 | -706.77696  | -252.88343  | -245.16230  | 1 |
| 249 | H | 65.68308 | 82.43187 | 80.66342 | -1624.64039 | -1665.49085 | 1417.86935  | 1 |
| 250 | H | 64.84354 | 80.84983 | 80.32629 | 2566.10521  | 598.51109   | 693.22305   | 1 |

|     |   |          |          |          |             |             |             |   |
|-----|---|----------|----------|----------|-------------|-------------|-------------|---|
| 251 | H | 64.20513 | 81.97245 | 81.60496 | -1972.69758 | 107.10018   | -1876.34312 | 1 |
| 252 | C | 66.42634 | 81.87868 | 83.25251 | 412.85148   | 672.58832   | -27.69222   | 1 |
| 253 | H | 66.99984 | 82.74446 | 82.82130 | 1447.02277  | 1762.76533  | -1490.78944 | 1 |
| 254 | H | 65.52841 | 82.30418 | 83.77971 | 1320.77379  | -145.20455  | 2378.68491  | 1 |
| 255 | H | 67.07274 | 81.40216 | 84.03948 | -1512.10848 | 1470.52031  | 1724.75147  | 1 |
| 256 | C | 64.93353 | 78.50749 | 81.68551 | -607.11113  | 499.56689   | 73.73769    | 1 |
| 257 | O | 64.58969 | 78.81446 | 80.56526 | 357.97126   | 460.81534   | 356.68785   | 1 |
| 258 | N | 65.01305 | 77.29321 | 82.20696 | 536.55407   | -368.62270  | 332.76306   | 1 |
| 259 | H | 65.29879 | 77.22321 | 83.18235 | 524.38866   | 2297.69985  | 1367.20941  | 1 |
| 260 | C | 64.34110 | 76.23484 | 81.53624 | 46.50277    | -774.29190  | -147.97904  | 1 |
| 261 | H | 63.66151 | 76.73964 | 80.81287 | 1676.51875  | 1883.29066  | 1032.55549  | 1 |
| 262 | C | 65.43763 | 75.29859 | 80.80584 | -559.41456  | -34.19198   | -556.30433  | 1 |
| 263 | H | 66.18255 | 74.94680 | 81.55909 | -64.66664   | 395.18769   | 2695.05373  | 1 |
| 264 | H | 64.95355 | 74.38031 | 80.39578 | -2703.44278 | -60.40056   | 333.79418   | 1 |
| 265 | C | 66.11851 | 76.07942 | 79.71435 | -519.76435  | 377.31045   | 459.42366   | 1 |
| 266 | H | 66.51856 | 77.01859 | 80.15950 | -1746.74323 | 1667.50644  | -1261.73691 | 1 |
| 267 | C | 67.27463 | 75.26951 | 79.14022 | 570.95554   | 16.46261    | -545.27700  | 1 |
| 268 | H | 67.80953 | 75.82407 | 78.32618 | 2391.58273  | 28.05277    | -1305.07271 | 1 |
| 269 | H | 68.03235 | 75.02435 | 79.92772 | 175.75588   | 917.63458   | 2559.43867  | 1 |
| 270 | H | 66.92233 | 74.29974 | 78.70370 | -1063.97851 | -2155.34650 | 1283.00462  | 1 |
| 271 | C | 65.14948 | 76.46055 | 78.60397 | 193.76014   | 2.62946     | -765.53141  | 1 |
| 272 | H | 65.68138 | 76.91743 | 77.72977 | 507.39394   | -846.55087  | 2539.60089  | 1 |
| 273 | H | 64.58248 | 75.57220 | 78.22272 | 1337.57841  | 1818.19054  | 1526.01994  | 1 |
| 274 | H | 64.39764 | 77.21557 | 78.95996 | 1100.88635  | -1172.91350 | -2199.08909 | 1 |
| 275 | C | 63.62008 | 75.32097 | 82.64984 | -549.21115  | 475.64486   | -309.38218  | 1 |
| 276 | O | 63.97631 | 75.27379 | 83.79778 | 556.06106   | -390.37755  | -78.24250   | 1 |
| 277 | O | 62.61875 | 74.44378 | 82.16690 | -572.27940  | -310.19032  | -209.75862  | 1 |
| 278 | H | 62.59561 | 74.74269 | 81.21660 | -1380.08193 | 2212.14486  | 790.85944   | 1 |

Listing 87: C00087.xmolout

|    |   |          |          |          |             |             |             |        |          |
|----|---|----------|----------|----------|-------------|-------------|-------------|--------|----------|
| 1  |   | 276      |          |          |             |             |             |        |          |
| 2  |   | 150.0000 | 150.0000 | 150.0000 | 0.0000      | 0.0000      | 0.0000***** | 0.7275 | 2910     |
|    |   | 0.2500   | 300.00   | 0.00     | 0.00        | 0.00        | -1293.4826  | 0.0000 | 300.0000 |
| 3  | H | 66.32904 | 74.58603 | 69.75108 | -2043.14101 | -1757.64893 | 399.89339   |        | 1        |
| 4  | N | 66.32302 | 75.50505 | 70.19171 | 426.75047   | 490.45733   | -334.42467  |        | 1        |
| 5  | H | 66.33882 | 75.26030 | 71.18535 | 442.25559   | -1110.30854 | -2448.52907 |        | 1        |
| 6  | C | 67.42834 | 76.31409 | 69.83767 | 415.32972   | -666.39213  | 83.73172    |        | 1        |
| 7  | H | 67.97197 | 75.68191 | 69.10362 | 879.32219   | 2491.00447  | 667.35213   |        | 1        |
| 8  | C | 66.91475 | 77.68441 | 69.16752 | 31.35357    | 477.41777   | 628.23362   |        | 1        |
| 9  | H | 66.32366 | 78.26181 | 69.91839 | 1168.38489  | 2240.25337  | -1019.71136 |        | 1        |
| 10 | H | 67.77836 | 78.33354 | 68.88490 | -360.43770  | 2534.90498  | 931.67112   |        | 1        |
| 11 | C | 66.07372 | 77.38263 | 67.95394 | 463.18208   | 512.70242   | -382.34388  |        | 1        |
| 12 | H | 65.27149 | 76.67116 | 68.25328 | 1725.29117  | 1863.52247  | -987.07854  |        | 1        |
| 13 | C | 65.42628 | 78.65973 | 67.43229 | 710.42801   | -144.27427  | -313.15367  |        | 1        |
| 14 | H | 64.77878 | 78.46093 | 66.53963 | 364.20195   | -1033.13725 | 2494.72524  |        | 1        |
| 15 | H | 64.78180 | 79.14573 | 68.20945 | 2567.61904  | 335.80679   | 847.48802   |        | 1        |
| 16 | H | 66.19538 | 79.41301 | 67.12112 | -2587.99029 | 680.92867   | -512.16411  |        | 1        |
| 17 | C | 66.90053 | 76.74968 | 66.84296 | 268.17616   | 741.64379   | -40.42634   |        | 1        |
| 18 | H | 66.29030 | 76.58419 | 65.91771 | 1283.54314  | -1945.37420 | -1411.27812 |        | 1        |
| 19 | H | 67.76877 | 77.39711 | 66.55526 | -1258.57796 | 1317.15249  | -2026.02085 |        | 1        |
| 20 | H | 67.31461 | 75.75426 | 67.14691 | -2502.84526 | 909.80597   | 575.92391   |        | 1        |
| 21 | C | 68.24972 | 76.50378 | 71.22844 | 619.36578   | -458.64843  | -172.09273  |        | 1        |
| 22 | O | 68.21645 | 75.64113 | 72.08425 | -81.40433   | 433.87611   | 522.34594   |        | 1        |
| 23 | N | 68.90743 | 77.65431 | 71.22062 | 175.23996   | -622.20190  | 341.55523   |        | 1        |
| 24 | H | 68.73689 | 78.26479 | 70.42461 | -876.57256  | -303.22879  | -2561.90213 |        | 1        |
| 25 | C | 69.96491 | 77.98750 | 72.11338 | -571.88214  | -534.10783  | -106.15033  |        | 1        |
| 26 | H | 70.01561 | 79.09350 | 72.00968 | -2713.20841 | -16.25800   | -248.80809  |        | 1        |
| 27 | C | 69.59582 | 77.49671 | 73.58727 | 166.60354   | 288.16399   | -716.09568  |        | 1        |
| 28 | H | 69.60604 | 76.36804 | 73.57797 | -2097.85574 | 1636.78449  | -586.18044  |        | 1        |
| 29 | O | 68.28487 | 77.88949 | 74.04909 | -317.80580  | -363.38227  | 484.43082   |        | 1        |
| 30 | H | 67.77019 | 77.09572 | 73.78322 | 1863.74748  | -1451.84923 | 1357.29467  |        | 1        |

|    |   |          |          |          |             |             |             |   |
|----|---|----------|----------|----------|-------------|-------------|-------------|---|
| 31 | C | 70.80213 | 78.02526 | 74.44602 | 503.80731   | 517.99032   | 318.51606   | 1 |
| 32 | H | 70.71818 | 77.69613 | 75.50781 | 640.61020   | -2157.10410 | -1536.29104 | 1 |
| 33 | H | 71.78382 | 77.65839 | 74.06013 | 1687.88455  | 465.60692   | 2087.56452  | 1 |
| 34 | H | 70.84289 | 79.13954 | 74.44895 | -1293.07895 | -1899.88581 | -1463.57452 | 1 |
| 35 | C | 71.31934 | 77.25786 | 71.57233 | -153.07550  | -733.68902  | 248.70981   | 1 |
| 36 | O | 71.77916 | 76.33868 | 72.20711 | 186.15459   | -480.78787  | -449.34387  | 1 |
| 37 | N | 71.79114 | 77.81660 | 70.44316 | -487.53139  | 543.18517   | 42.03850    | 1 |
| 38 | C | 72.93945 | 77.29583 | 69.78510 | -699.35871  | 69.34393    | 360.10701   | 1 |
| 39 | H | 72.90973 | 76.19238 | 69.92259 | 2.81126     | -221.99807  | -2715.58072 | 1 |
| 40 | C | 72.78021 | 77.84360 | 68.31562 | -507.46439  | -592.59194  | 122.07761   | 1 |
| 41 | H | 73.73539 | 77.83895 | 67.74193 | -1975.08116 | 525.87560   | -1801.71556 | 1 |
| 42 | H | 72.04175 | 77.25353 | 67.72709 | 1588.27743  | -1913.22100 | 1113.83566  | 1 |
| 43 | C | 72.25111 | 79.28077 | 68.62890 | -613.62442  | -457.55993  | -194.14490  | 1 |
| 44 | H | 73.08050 | 79.92427 | 69.00471 | 1707.54637  | -721.27992  | 1996.92523  | 1 |
| 45 | H | 71.80879 | 79.80036 | 67.74944 | 758.23357   | 2100.81767  | 1560.55011  | 1 |
| 46 | C | 71.19432 | 78.96578 | 69.77013 | -352.41524  | 704.96076   | 49.21465    | 1 |
| 47 | H | 71.04125 | 79.78078 | 70.51502 | 1714.76886  | -2070.42778 | 443.35792   | 1 |
| 48 | H | 70.20547 | 78.61640 | 69.39241 | 1224.15040  | 1801.50881  | 1636.97633  | 1 |
| 49 | C | 74.28679 | 77.99593 | 70.49800 | 566.85117   | 537.05831   | 117.62814   | 1 |
| 50 | O | 74.98610 | 78.84938 | 69.88396 | -550.26779  | -406.08867  | 4.21666     | 1 |
| 51 | N | 74.47388 | 77.55760 | 71.67343 | 566.34832   | -425.77725  | 180.18749   | 1 |
| 52 | H | 73.78100 | 76.89884 | 71.99916 | 644.44502   | 2646.80550  | -52.73430   | 1 |
| 53 | C | 76.16032 | 79.20624 | 73.12604 | 612.34801   | -281.48662  | 411.56221   | 2 |
| 54 | H | 77.10058 | 78.79218 | 73.54837 | 1667.23498  | -1490.75142 | 1556.16753  | 2 |
| 55 | C | 76.46425 | 80.28532 | 72.03725 | -714.45746  | -175.43074  | 286.98927   | 2 |
| 56 | H | 75.47226 | 80.65565 | 71.65186 | -787.09484  | 1763.03619  | -1922.46060 | 2 |
| 57 | O | 77.18659 | 79.82709 | 70.89454 | -429.46514  | 516.51932   | -128.40526  | 2 |
| 58 | H | 76.37934 | 79.53251 | 70.29930 | 1981.82785  | 436.16847   | -1818.18182 | 2 |
| 59 | C | 77.16389 | 81.39862 | 72.91337 | 630.79189   | -468.94448  | 76.03230    | 2 |
| 60 | H | 77.37225 | 82.31699 | 72.31870 | -1775.71861 | 2062.30353  | 131.89849   | 2 |
| 61 | H | 76.53484 | 81.70245 | 73.78239 | -1855.14608 | 88.94118    | 1993.53760  | 2 |
| 62 | H | 78.13758 | 81.04205 | 73.32127 | -1504.82350 | -780.94249  | -2132.90992 | 2 |
| 63 | C | 75.24722 | 79.87297 | 74.25807 | 288.57638   | 618.62814   | -397.00270  | 2 |
| 64 | O | 74.17341 | 80.38663 | 74.02542 | 321.70495   | -185.26452  | 574.37218   | 2 |
| 65 | N | 75.92338 | 79.84980 | 75.41659 | -447.05792  | -446.53431  | 367.76425   | 2 |
| 66 | H | 76.78997 | 79.31553 | 75.48723 | 350.31316   | 1975.63644  | -1843.31522 | 2 |
| 67 | C | 75.27844 | 80.29120 | 76.59634 | -511.23061  | 374.03917   | -471.51480  | 2 |
| 68 | H | 74.27965 | 80.67748 | 76.28126 | 2234.79579  | -898.70890  | -1273.45190 | 2 |
| 69 | C | 75.21516 | 79.00241 | 77.55057 | 529.53781   | -159.34528  | 563.72604   | 2 |
| 70 | H | 74.89560 | 79.37408 | 78.55895 | 654.59388   | 2347.94251  | 1217.51488  | 2 |
| 71 | H | 74.37632 | 78.35959 | 77.16505 | -1526.55661 | 2103.42026  | 817.87394   | 2 |
| 72 | O | 76.39216 | 78.19132 | 77.59984 | -554.84278  | 14.12789    | 399.58769   | 2 |
| 73 | H | 76.88133 | 78.64043 | 78.38984 | 1297.06236  | 2061.84854  | 1220.68812  | 2 |
| 74 | C | 76.19120 | 81.40140 | 77.37019 | -662.15484  | -412.13544  | 123.62687   | 2 |
| 75 | O | 75.71641 | 81.93656 | 78.37520 | -540.01537  | -317.05804  | 274.91456   | 2 |
| 76 | N | 77.37445 | 81.56741 | 76.83028 | -202.76299  | -690.00100  | -131.49145  | 2 |
| 77 | H | 77.49100 | 80.97081 | 76.01338 | -702.62132  | -2617.37191 | 281.70413   | 2 |
| 78 | C | 78.36820 | 82.56105 | 77.17804 | -491.73914  | 576.34187   | 222.73509   | 2 |
| 79 | H | 79.10446 | 82.49266 | 76.34177 | 1977.17978  | -1823.58850 | -434.68928  | 2 |
| 80 | C | 77.68822 | 83.92305 | 77.27866 | -649.50797  | -328.66843  | 306.11224   | 2 |
| 81 | H | 76.81273 | 83.81437 | 77.96157 | 2075.07803  | 1452.16490  | -1004.45904 | 2 |
| 82 | C | 78.62123 | 84.96620 | 77.86230 | -615.18735  | -489.99689  | -70.96352   | 2 |
| 83 | H | 78.12132 | 85.96992 | 77.95450 | -1226.32661 | -1724.38906 | -1716.47170 | 2 |
| 84 | H | 78.97713 | 84.67287 | 78.88932 | 2381.64273  | -969.84735  | 900.46860   | 2 |
| 85 | H | 79.53711 | 85.10623 | 77.22394 | 2122.74991  | 1702.23946  | -141.36228  | 2 |
| 86 | C | 77.16078 | 84.38303 | 75.93277 | -501.86074  | -479.61276  | -376.42482  | 2 |
| 87 | H | 76.62528 | 85.36939 | 76.01038 | 993.79261   | -2246.95401 | -1177.81305 | 2 |
| 88 | H | 77.99069 | 84.51254 | 75.18443 | 42.71279    | -626.15391  | -2651.37258 | 2 |
| 89 | H | 76.43509 | 83.63944 | 75.50080 | -2026.39012 | -1590.33709 | -887.82922  | 2 |
| 90 | C | 79.08083 | 82.17265 | 78.63777 | -672.89153  | 382.57394   | -156.34072  | 2 |
| 91 | O | 80.27756 | 82.19090 | 78.73339 | 410.04627   | 221.86223   | 500.35950   | 2 |
| 92 | N | 78.17031 | 82.01709 | 79.58479 | -378.11782  | -443.79414  | -441.10984  | 2 |



|     |   |          |          |          |             |             |             |   |
|-----|---|----------|----------|----------|-------------|-------------|-------------|---|
| 93  | H | 77.15562 | 82.03261 | 79.31360 | 2404.15973  | -568.14894  | 1149.30085  | 2 |
| 94  | C | 78.59582 | 81.26846 | 80.74424 | -544.54484  | 466.16019   | 331.29119   | 2 |
| 95  | H | 79.59618 | 81.68456 | 81.00340 | -1409.80988 | -170.17955  | 2325.32679  | 2 |
| 96  | C | 77.45009 | 81.54030 | 81.81168 | -184.48284  | 116.78282   | -758.89137  | 2 |
| 97  | H | 77.27617 | 82.63644 | 81.89565 | 1893.78641  | 1861.14652  | 611.04528   | 2 |
| 98  | H | 76.48538 | 81.10895 | 81.46005 | -2170.79665 | -974.19311  | 1327.50117  | 2 |
| 99  | C | 77.84149 | 80.94677 | 83.19796 | 389.51668   | 672.81878   | -138.49152  | 2 |
| 100 | H | 77.88555 | 79.81115 | 83.15769 | 510.64577   | 1933.03327  | 1851.02484  | 2 |
| 101 | H | 78.87548 | 81.25387 | 83.47024 | -2302.30869 | -1105.72939 | -948.89774  | 2 |
| 102 | C | 76.86158 | 81.41320 | 84.34124 | -559.93427  | -126.34590  | 542.30857   | 2 |
| 103 | O | 77.09405 | 81.11319 | 85.48405 | -670.36003  | -111.83166  | 76.36448    | 2 |
| 104 | N | 75.82093 | 82.15710 | 83.90720 | -216.06729  | -537.07037  | 446.51379   | 2 |
| 105 | H | 75.55113 | 82.41423 | 82.95057 | -1251.96487 | 1074.12894  | -2168.52500 | 2 |
| 106 | H | 75.08854 | 82.52994 | 84.52097 | -2451.83023 | -720.73851  | 944.84612   | 2 |
| 107 | C | 78.63047 | 79.70262 | 80.37351 | 546.24052   | -563.88337  | -85.11809   | 2 |
| 108 | O | 77.88004 | 79.24434 | 79.52264 | 71.70702    | -307.40463  | 606.69673   | 2 |
| 109 | N | 79.52317 | 79.06889 | 81.12717 | 479.90863   | -504.50129  | 222.86849   | 2 |
| 110 | C | 79.55705 | 77.63569 | 81.18633 | 75.51268    | -600.91904  | 506.73700   | 2 |
| 111 | H | 79.26516 | 77.26819 | 80.17599 | -2033.61562 | 1795.30103  | 254.89480   | 2 |
| 112 | C | 81.06424 | 77.37033 | 81.60333 | 523.79067   | 517.99274   | 284.45581   | 2 |
| 113 | H | 81.22023 | 76.36880 | 82.06261 | 1599.61665  | -1127.00911 | 1895.98173  | 2 |
| 114 | H | 81.74445 | 77.42783 | 80.72433 | -1881.83093 | 1275.82488  | -1501.55016 | 2 |
| 115 | C | 81.32670 | 78.54931 | 82.59192 | -600.05639  | -404.05026  | 316.64485   | 2 |
| 116 | H | 80.84320 | 78.36367 | 83.57720 | -2597.05260 | 496.36221   | 657.73249   | 2 |
| 117 | H | 82.40588 | 78.73529 | 82.79365 | -1666.24518 | 1294.38985  | -1723.90591 | 2 |
| 118 | C | 80.62130 | 79.74090 | 81.81757 | 493.57570   | -129.95376  | -602.56394  | 2 |
| 119 | H | 80.20413 | 80.53967 | 82.47154 | -1469.08415 | -637.84797  | 2204.22581  | 2 |
| 120 | H | 81.23852 | 80.20829 | 81.01382 | -1038.97840 | 1068.88701  | -2280.71789 | 2 |
| 121 | C | 78.53721 | 77.11374 | 82.35624 | 188.88100   | 241.05089   | -727.87821  | 2 |
| 122 | O | 77.97997 | 77.88430 | 83.11848 | 531.88613   | -49.19943   | 427.07960   | 2 |
| 123 | N | 78.51764 | 75.79397 | 82.33395 | 708.14833   | 26.93417    | -179.73509  | 2 |
| 124 | H | 79.11221 | 75.42156 | 81.59414 | -2232.69501 | -1179.09831 | 1023.94816  | 2 |
| 125 | C | 77.77281 | 74.91174 | 83.20271 | -738.32412  | 259.92548   | 104.42456   | 2 |
| 126 | H | 78.41351 | 74.00030 | 83.27065 | 2028.89123  | 1260.02983  | 1311.33324  | 2 |
| 127 | C | 77.49302 | 75.56599 | 84.54258 | -258.65678  | -345.52513  | 661.28459   | 2 |
| 128 | H | 76.99901 | 76.55400 | 84.34505 | -1826.06090 | -1801.46097 | -918.64554  | 2 |
| 129 | C | 76.55496 | 74.71544 | 85.38025 | -541.23400  | 531.92970   | -218.41428  | 2 |
| 130 | H | 76.30259 | 75.21033 | 86.35766 | 1311.73218  | -2219.18200 | 882.19023   | 2 |
| 131 | H | 75.58571 | 74.52070 | 84.84321 | -1048.71298 | 1223.58118  | -2196.97971 | 2 |
| 132 | H | 77.00669 | 73.71360 | 85.61919 | 419.06414   | 1903.92898  | 1903.44670  | 2 |
| 133 | C | 78.76486 | 75.84219 | 85.32356 | -423.86431  | 152.66566   | -648.55262  | 2 |
| 134 | H | 78.54978 | 76.38182 | 86.28693 | 105.68386   | -2342.50080 | 1387.51238  | 2 |
| 135 | H | 79.30821 | 74.89311 | 85.58592 | -1695.63603 | -1484.73621 | -1531.02793 | 2 |
| 136 | H | 79.47477 | 76.48416 | 84.73270 | -1853.57121 | -487.39031  | 1936.59343  | 2 |
| 137 | C | 76.28752 | 74.55862 | 82.48196 | 539.71428   | -510.58232  | 267.58633   | 2 |
| 138 | O | 75.55909 | 75.41001 | 82.03669 | -15.93758   | -278.34085  | -624.49402  | 2 |
| 139 | N | 76.07738 | 73.26385 | 82.64171 | -676.81886  | 12.05292    | 276.17960   | 2 |
| 140 | H | 76.84738 | 72.76536 | 83.08166 | -1694.44250 | -373.84189  | -2100.66098 | 2 |
| 141 | C | 74.93843 | 72.57037 | 82.15116 | 412.33078   | -664.70360  | 108.35451   | 2 |
| 142 | H | 75.23861 | 71.51815 | 82.35155 | 1765.77476  | 1294.44366  | 1621.76594  | 2 |
| 143 | C | 73.67688 | 72.99015 | 83.00793 | -179.66635  | -721.95667  | -264.73915  | 2 |
| 144 | H | 73.89869 | 72.94253 | 84.09741 | -607.34922  | 2587.87032  | -598.10018  | 2 |
| 145 | H | 73.38932 | 74.04813 | 82.81439 | -359.69332  | -1479.13954 | -2259.74260 | 2 |
| 146 | C | 72.53912 | 71.98646 | 82.61831 | -240.01076  | 616.02425   | 431.85322   | 2 |
| 147 | H | 72.36384 | 71.99646 | 81.51860 | -1359.17131 | 782.54425   | 2227.99181  | 2 |
| 148 | H | 72.83500 | 70.94108 | 82.85896 | -820.36667  | 85.81767    | -2596.78715 | 2 |
| 149 | C | 71.21907 | 72.38316 | 83.39101 | -513.07015  | 236.18570   | -551.87280  | 2 |
| 150 | H | 71.30077 | 72.13952 | 84.47535 | 1816.11944  | -1183.11722 | -1650.94321 | 2 |
| 151 | H | 71.03834 | 73.48133 | 83.33875 | -1800.04429 | -1361.53473 | 1526.34643  | 2 |
| 152 | C | 70.05806 | 71.60693 | 82.72470 | 726.08972   | -253.19732  | -179.64713  | 2 |
| 153 | H | 69.81840 | 71.93673 | 81.69382 | 1224.27271  | -456.51798  | -2390.90304 | 2 |
| 154 | H | 70.16004 | 70.50337 | 82.75216 | 1206.40339  | -1150.93514 | -2154.90344 | 2 |

|     |   |          |          |          |             |             |             |   |
|-----|---|----------|----------|----------|-------------|-------------|-------------|---|
| 155 | N | 68.75972 | 71.90254 | 83.54681 | 329.70796   | -633.68968  | -155.67358  | 2 |
| 156 | H | 67.86763 | 71.48050 | 83.15777 | 1348.31305  | 1938.76845  | 1359.00643  | 2 |
| 157 | H | 68.73370 | 71.55548 | 84.54975 | 2096.92035  | 1446.54551  | -966.48890  | 2 |
| 158 | H | 68.47749 | 72.91968 | 83.65847 | -1197.07217 | -2303.53719 | 827.28733   | 2 |
| 159 | C | 74.79002 | 72.85541 | 80.53794 | -378.01186  | -556.17301  | -413.96481  | 2 |
| 160 | O | 75.69011 | 72.47905 | 79.81797 | -409.44433  | -307.55053  | -453.30833  | 2 |
| 161 | N | 73.65143 | 73.44234 | 80.22215 | -429.02477  | 524.70884   | 274.08502   | 2 |
| 162 | H | 73.04748 | 73.73062 | 80.98819 | 1706.34263  | -1425.96036 | 1574.38926  | 2 |
| 163 | C | 73.26977 | 73.73259 | 78.88424 | -45.25864   | -626.22952  | 478.93267   | 2 |
| 164 | H | 72.51579 | 74.54520 | 78.98891 | 1988.63164  | 570.90773   | 1772.87287  | 2 |
| 165 | C | 74.59260 | 74.18525 | 78.14895 | 551.77128   | -20.49526   | -564.54996  | 2 |
| 166 | H | 75.12155 | 74.92769 | 78.79066 | 1434.61535  | -1753.10253 | 1513.99471  | 2 |
| 167 | H | 75.30324 | 73.31871 | 78.04418 | -714.67738  | 1819.09770  | 1898.36494  | 2 |
| 168 | C | 74.30648 | 74.79052 | 76.72706 | 446.99263   | -555.77305  | 338.97221   | 2 |
| 169 | H | 74.02141 | 73.97452 | 75.99562 | 1953.68466  | 1892.25957  | -161.67766  | 2 |
| 170 | H | 73.47751 | 75.53582 | 76.74423 | -403.03785  | 2688.07032  | -188.43591  | 2 |
| 171 | C | 75.66539 | 75.44634 | 76.32976 | 567.86262   | 335.74681   | 434.04421   | 2 |
| 172 | H | 75.97979 | 76.19255 | 77.09919 | -1080.02275 | 1568.26081  | -1948.78900 | 2 |
| 173 | H | 76.47439 | 74.68320 | 76.30863 | -919.54108  | 2111.34692  | 1456.13463  | 2 |
| 174 | C | 75.52888 | 76.16456 | 74.90414 | 195.81897   | 173.33862   | -745.11536  | 2 |
| 175 | H | 75.39335 | 75.45645 | 74.04873 | 1405.67949  | -2301.21089 | -390.08113  | 2 |
| 176 | H | 74.74527 | 76.96333 | 74.88238 | -940.37328  | -1118.32446 | 2299.72133  | 2 |
| 177 | N | 76.79033 | 76.82296 | 74.73884 | 319.26422   | 656.36007   | -42.02424   | 2 |
| 178 | H | 75.61367 | 78.33715 | 72.65056 | 1961.03633  | 619.91968   | 1787.09422  | 2 |
| 179 | H | 77.03334 | 77.40800 | 75.53653 | 854.14343   | -2156.80752 | 1429.08711  | 2 |
| 180 | H | 77.59136 | 76.20170 | 74.67854 | 1237.02905  | -1378.50857 | -1998.28500 | 2 |
| 181 | C | 72.60369 | 72.39608 | 78.19415 | 532.53319   | -268.57236  | 517.55729   | 2 |
| 182 | O | 72.54680 | 71.30697 | 78.71189 | 266.16714   | -290.73804  | -558.88002  | 2 |
| 183 | N | 72.07721 | 72.79325 | 77.03714 | -226.25352  | 640.49678   | -270.32839  | 2 |
| 184 | H | 72.22801 | 73.76794 | 76.78901 | 2007.69063  | -1035.27229 | 1523.50231  | 2 |
| 185 | C | 71.78242 | 71.82250 | 76.03470 | -540.76542  | -573.33303  | 49.50000    | 2 |
| 186 | H | 71.34044 | 70.95385 | 76.57241 | -2374.20950 | -1036.76023 | 843.75774   | 2 |
| 187 | C | 70.80586 | 72.54603 | 74.99999 | -77.09082   | 666.87422   | -415.84136  | 2 |
| 188 | H | 71.31736 | 73.46323 | 74.59720 | -985.81834  | 617.19825   | 2463.91927  | 2 |
| 189 | O | 69.56289 | 73.01219 | 75.56637 | 293.29899   | -391.65602  | -477.80926  | 2 |
| 190 | H | 69.59139 | 73.95963 | 75.33106 | 2528.72714  | -681.76262  | -751.27122  | 2 |
| 191 | C | 70.65761 | 71.50332 | 73.83319 | 252.47363   | -605.14473  | 440.05134   | 2 |
| 192 | H | 69.98417 | 71.89331 | 73.03420 | -2052.65063 | 1456.49051  | -1043.51830 | 2 |
| 193 | H | 71.64644 | 71.25814 | 73.33756 | -2152.98800 | -1661.97574 | -161.70652  | 2 |
| 194 | H | 70.21593 | 70.54586 | 74.19565 | -473.12726  | -1584.27339 | 2165.61725  | 2 |
| 195 | C | 73.18097 | 71.43916 | 75.28078 | 360.36307   | 488.46713   | 505.10056   | 2 |
| 196 | O | 74.08771 | 72.23216 | 75.12521 | -200.08817  | -528.03552  | -385.82850  | 2 |
| 197 | N | 73.05720 | 70.20890 | 74.81275 | -597.54095  | -226.44775  | 355.20479   | 2 |
| 198 | H | 72.20806 | 69.68277 | 75.00816 | 2179.23655  | -1300.70981 | -991.33835  | 2 |
| 199 | C | 74.09896 | 69.68071 | 73.99070 | -687.68921  | 297.39807   | -249.45179  | 2 |
| 200 | H | 75.04079 | 69.83093 | 74.56311 | -349.16256  | -2467.37713 | -1101.72831 | 2 |
| 201 | C | 73.74445 | 68.16329 | 73.65431 | 672.47345   | 361.54328   | -201.62880  | 2 |
| 202 | H | 72.82934 | 68.12264 | 73.02023 | 1541.41502  | 582.18425   | 2169.97026  | 2 |
| 203 | H | 74.57125 | 67.71803 | 73.05366 | -2534.67717 | 60.25153    | 997.72295   | 2 |
| 204 | C | 73.52204 | 67.36223 | 74.94664 | 574.26774   | -389.43119  | -377.02542  | 2 |
| 205 | C | 74.63196 | 67.00657 | 75.76949 | 688.82679   | -287.33580  | -257.96133  | 2 |
| 206 | H | 75.65822 | 67.31310 | 75.49705 | 331.14182   | 1470.38163  | 2269.80013  | 2 |
| 207 | C | 72.19628 | 66.97967 | 75.31229 | -383.52382  | -675.04808  | 144.24917   | 2 |
| 208 | H | 71.33397 | 67.26400 | 74.68233 | 4.09847     | 1517.59662  | 2262.86397  | 2 |
| 209 | C | 74.39193 | 66.26390 | 76.92572 | -134.76730  | 428.45285   | -649.50303  | 2 |
| 210 | H | 75.24933 | 65.98716 | 77.56364 | -903.23433  | 1600.49020  | 2011.53387  | 2 |
| 211 | C | 72.00844 | 66.23431 | 76.47881 | -335.53281  | -615.00040  | -364.39058  | 2 |
| 212 | H | 70.97975 | 65.93868 | 76.74946 | 1596.45398  | -1369.33862 | 1732.02659  | 2 |
| 213 | C | 73.08905 | 65.84570 | 77.32337 | 585.48547   | -340.24194  | -406.23938  | 2 |
| 214 | O | 72.90850 | 65.08214 | 78.50615 | -419.15649  | -173.04408  | -511.94141  | 2 |
| 215 | H | 71.92874 | 64.97173 | 78.48525 | -1071.84350 | 1559.71507  | -1960.13012 | 2 |
| 216 | C | 74.10108 | 70.48250 | 72.57079 | 291.41878   | -183.13091  | 710.72246   | 2 |

|     |   |          |          |          |             |             |             |   |
|-----|---|----------|----------|----------|-------------|-------------|-------------|---|
| 217 | O | 73.10166 | 70.89684 | 72.01788 | 379.87695   | 523.47396   | -222.23622  | 2 |
| 218 | N | 75.35218 | 70.47698 | 72.13249 | 564.30591   | 373.09380   | 277.24371   | 2 |
| 219 | H | 76.07918 | 70.03394 | 72.69226 | -120.59931  | -2436.07824 | -1214.35098 | 2 |
| 220 | C | 75.64418 | 71.07602 | 70.87951 | 404.07514   | -299.37480  | 608.84009   | 2 |
| 221 | H | 74.71284 | 71.60730 | 70.57035 | -1071.07882 | -841.69025  | 2359.66467  | 2 |
| 222 | C | 76.91342 | 71.99576 | 71.13674 | -683.12807  | 68.71770    | -390.13096  | 2 |
| 223 | H | 76.78335 | 72.56689 | 72.08320 | 2068.88918  | 1596.58590  | 770.89603   | 2 |
| 224 | H | 77.81948 | 71.36664 | 71.28883 | 1379.86429  | 2342.49779  | -179.85638  | 2 |
| 225 | C | 77.11815 | 72.96849 | 69.93699 | -176.39967  | 537.49466   | 550.97268   | 2 |
| 226 | H | 77.34793 | 72.42000 | 68.99717 | -396.28051  | 1942.22168  | 1869.33314  | 2 |
| 227 | H | 76.19781 | 73.55735 | 69.72660 | -94.44700   | 586.00678   | -2659.20016 | 2 |
| 228 | C | 78.32553 | 73.91772 | 70.38365 | -291.69381  | -718.18079  | -150.72929  | 2 |
| 229 | H | 78.07131 | 74.64145 | 71.19976 | -2303.38776 | 1089.76242  | 964.62032   | 2 |
| 230 | H | 79.27209 | 73.39732 | 70.67697 | 884.16729   | 2568.80533  | -207.74283  | 2 |
| 231 | N | 78.58484 | 74.66861 | 69.22926 | -594.49522  | -252.81478  | 342.29276   | 2 |
| 232 | H | 77.90791 | 74.60365 | 68.48516 | -1735.17426 | 2084.05705  | -263.71605  | 2 |
| 233 | C | 79.59017 | 75.43110 | 69.07663 | 595.23177   | -271.52487  | 442.22352   | 2 |
| 234 | N | 80.51145 | 75.51277 | 70.12686 | 585.53813   | -424.79750  | -105.81303  | 2 |
| 235 | H | 80.48816 | 75.07408 | 71.04646 | 959.88797   | 1327.56823  | -2177.11905 | 2 |
| 236 | H | 81.33466 | 76.11580 | 70.13039 | 1578.48647  | 16.27378    | -2220.76233 | 2 |
| 237 | N | 79.56521 | 76.05479 | 67.82093 | -452.17763  | -390.33541  | -421.51853  | 2 |
| 238 | H | 78.87363 | 76.02808 | 67.07334 | 470.26107   | 1974.25629  | -1817.92087 | 2 |
| 239 | H | 80.26140 | 76.74325 | 67.53219 | 1856.67307  | -1573.97321 | -1224.35416 | 2 |
| 240 | C | 76.11773 | 69.86621 | 69.87618 | -531.47271  | -581.45780  | -55.06206   | 2 |
| 241 | O | 77.11473 | 69.18757 | 70.08592 | -243.00837  | 192.73507   | 609.52485   | 2 |
| 242 | N | 75.28840 | 69.80584 | 68.85674 | 343.49288   | -644.25607  | 38.09164    | 2 |
| 243 | H | 74.52025 | 70.47201 | 68.88596 | -1691.16043 | -1535.97525 | -1484.73099 | 2 |
| 244 | C | 75.33596 | 68.69562 | 67.90345 | 542.66492   | 350.14337   | 454.42563   | 2 |
| 245 | H | 75.55407 | 67.82512 | 68.56711 | 1209.57979  | -2396.95920 | 463.86744   | 2 |
| 246 | C | 74.01319 | 68.61216 | 67.16228 | -737.14309  | 145.93010   | 242.71942   | 2 |
| 247 | H | 73.80806 | 69.61205 | 66.71893 | -1050.18303 | 159.36419   | -2509.06125 | 2 |
| 248 | C | 74.06717 | 67.60012 | 66.03275 | -706.77696  | -252.88343  | -245.16230  | 2 |
| 249 | H | 73.09262 | 67.54730 | 65.47323 | -1624.64039 | -1665.49085 | 1417.86935  | 2 |
| 250 | H | 74.86913 | 67.86144 | 65.28458 | 2566.10521  | 598.51109   | 693.22305   | 2 |
| 251 | H | 74.29127 | 66.56510 | 66.41254 | -1972.69758 | 107.10018   | -1876.34312 | 2 |
| 252 | C | 72.86686 | 68.27433 | 68.09841 | 412.85148   | 672.58832   | -27.69222   | 2 |
| 253 | H | 71.87513 | 68.29526 | 67.56813 | 1447.02277  | 1762.76533  | -1490.78944 | 2 |
| 254 | H | 72.98577 | 67.24672 | 68.54032 | 1320.77379  | -145.20455  | 2378.68491  | 2 |
| 255 | H | 72.80485 | 68.99756 | 68.95788 | -1512.10848 | 1470.52031  | 1724.75147  | 2 |
| 256 | C | 76.62154 | 69.01606 | 66.90003 | -607.11113  | 499.56689   | 73.73769    | 2 |
| 257 | O | 76.45957 | 69.41085 | 65.77445 | 357.97126   | 460.81534   | 356.68785   | 2 |
| 258 | N | 77.74777 | 68.77643 | 67.55208 | 536.55407   | -368.62270  | 332.76306   | 2 |
| 259 | H | 77.74400 | 68.52121 | 68.56698 | 524.38866   | 2297.69985  | 1367.20941  | 2 |
| 260 | C | 78.93947 | 68.77971 | 66.79132 | 46.50277    | -774.29190  | -147.97904  | 2 |
| 261 | H | 78.64720 | 69.16046 | 65.78442 | 1676.51875  | 1883.29066  | 1032.55549  | 2 |
| 262 | C | 80.03811 | 69.68240 | 67.56202 | -559.41456  | -34.19198   | -556.30433  | 2 |
| 263 | H | 80.31944 | 69.18734 | 68.52248 | -64.66664   | 395.18769   | 2695.05373  | 2 |
| 264 | H | 80.97786 | 69.74750 | 66.96376 | -2703.44278 | -60.40056   | 333.79418   | 2 |
| 265 | C | 79.46400 | 71.04683 | 67.82880 | -519.76435  | 377.31045   | 459.42366   | 2 |
| 266 | H | 78.52319 | 70.91314 | 68.41003 | -1746.74323 | 1667.50644  | -1261.73691 | 2 |
| 267 | C | 80.43427 | 71.88558 | 68.65154 | 570.95554   | 16.46261    | -545.27700  | 2 |
| 268 | H | 80.06682 | 72.93677 | 68.77555 | 2391.58273  | 28.05277    | -1305.07271 | 2 |
| 269 | H | 80.58354 | 71.45932 | 69.67703 | 175.75588   | 917.63458   | 2559.43867  | 2 |
| 270 | H | 81.44208 | 71.94567 | 68.16592 | -1063.97851 | -2155.34650 | 1283.00462  | 2 |
| 271 | C | 79.13279 | 71.78089 | 66.53635 | 193.76014   | 2.62946     | -765.53141  | 2 |
| 272 | H | 78.77973 | 72.82617 | 66.73390 | 507.39394   | -846.55087  | 2539.60089  | 2 |
| 273 | H | 80.02536 | 71.85389 | 65.86275 | 1337.57841  | 1818.19054  | 1526.01994  | 2 |
| 274 | H | 78.32226 | 71.25938 | 65.96299 | 1100.88635  | -1172.91350 | -2199.08909 | 2 |
| 275 | C | 79.51337 | 67.26454 | 66.77826 | -549.21115  | 475.64486   | -309.38218  | 2 |
| 276 | O | 79.26178 | 66.44608 | 67.62246 | 556.06106   | -390.37755  | -78.24250   | 2 |
| 277 | O | 80.45933 | 66.98695 | 65.76425 | -572.27940  | -310.19032  | -209.75862  | 2 |
| 278 | H | 80.41747 | 67.85549 | 65.27428 | -1380.08193 | 2212.14486  | 790.85944   | 2 |

Listing 88: C00088.xmolout

|    |          |          |          |          |             |             |             |          |
|----|----------|----------|----------|----------|-------------|-------------|-------------|----------|
| 1  | 276      |          |          |          |             |             |             |          |
| 2  | 150.0000 | 150.0000 | 150.0000 | 0.0000   | 0.0000      | 0.0000***** | 2.7750      | 11100    |
|    | 0.2500   | 300.00   | 0.00     | 0.00     | 0.00        | -1293.4725  | 0.0000      | 300.0000 |
| 3  | H        | 79.32990 | 71.39819 | 90.43648 | -2043.14101 | -1757.64893 | 399.89339   | 1        |
| 4  | N        | 79.34998 | 71.48243 | 89.42115 | 426.75047   | 490.45733   | -334.42467  | 1        |
| 5  | H        | 78.50753 | 72.03664 | 89.26914 | 442.25559   | -1110.30854 | -2448.52907 | 1        |
| 6  | C        | 80.52376 | 72.11840 | 88.94053 | 415.32972   | -666.39213  | 83.73172    | 1        |
| 7  | H        | 80.70185 | 72.95846 | 89.64551 | 879.32219   | 2491.00447  | 667.35213   | 1        |
| 8  | C        | 81.73913 | 71.06387 | 88.94335 | 31.35357    | 477.41777   | 628.23362   | 1        |
| 9  | H        | 81.57258 | 70.32446 | 88.12303 | 1168.38489  | 2240.25337  | -1019.71136 | 1        |
| 10 | H        | 82.68966 | 71.59061 | 88.68657 | -360.43770  | 2534.90498  | 931.67112   | 1        |
| 11 | C        | 81.86383 | 70.34550 | 90.26361 | 463.18208   | 512.70242   | -382.34388  | 1        |
| 12 | H        | 80.89704 | 69.83637 | 90.47623 | 1725.29117  | 1863.52247  | -987.07854  | 1        |
| 13 | C        | 82.95807 | 69.28804 | 90.18597 | 710.42801   | -144.27427  | -313.15367  | 1        |
| 14 | H        | 83.04593 | 68.71165 | 91.14300 | 364.20195   | -1033.13725 | 2494.72524  | 1        |
| 15 | H        | 82.76206 | 68.54732 | 89.36814 | 2567.61904  | 335.80679   | 847.48802   | 1        |
| 16 | H        | 83.96012 | 69.74713 | 89.98343 | -2587.99029 | 680.92867   | -512.16411  | 1        |
| 17 | C        | 82.16907 | 71.30708 | 91.40334 | 268.17616   | 741.64379   | -40.42634   | 1        |
| 18 | H        | 82.28131 | 70.76753 | 92.37938 | 1283.54314  | -1945.37420 | -1411.27812 | 1        |
| 19 | H        | 83.12177 | 71.86924 | 91.22383 | -1258.57796 | 1317.15249  | -2026.02085 | 1        |
| 20 | H        | 81.35588 | 72.06625 | 91.53638 | -2502.84526 | 909.80597   | 575.92391   | 1        |
| 21 | C        | 80.28871 | 72.62004 | 87.41562 | 619.36578   | -458.64843  | -172.09273  | 1        |
| 22 | O        | 80.98493 | 73.49178 | 86.94231 | -81.40433   | 433.87611   | 522.34594   | 1        |
| 23 | N        | 79.37715 | 71.87032 | 86.77518 | 175.23996   | -622.20190  | 341.55523   | 1        |
| 24 | H        | 78.86081 | 71.21411 | 87.36049 | -876.57256  | -303.22879  | -2561.90213 | 1        |
| 25 | C        | 78.80719 | 72.45759 | 85.59646 | -571.88214  | -534.10783  | -106.15033  | 1        |
| 26 | H        | 79.68490 | 72.87780 | 85.05952 | -2713.20841 | -16.25800   | -248.80809  | 1        |
| 27 | C        | 78.02663 | 71.30239 | 84.82261 | 166.60354   | 288.16399   | -716.09568  | 1        |
| 28 | H        | 77.16137 | 70.97262 | 85.46019 | -2097.85574 | 1636.78449  | -586.18044  | 1        |
| 29 | O        | 78.78637 | 70.11252 | 84.53085 | -317.80580  | -363.38227  | 484.43082   | 1        |
| 30 | H        | 78.29610 | 69.44284 | 85.04578 | 1863.74748  | -1451.84923 | 1357.29467  | 1        |
| 31 | C        | 77.48659 | 72.07360 | 83.56273 | 503.80731   | 517.99032   | 318.51606   | 1        |
| 32 | H        | 76.81702 | 71.42635 | 82.94945 | 640.61020   | -2157.10410 | -1536.29104 | 1        |
| 33 | H        | 76.89589 | 73.00396 | 83.83432 | 1687.88455  | 465.60692   | 2087.56452  | 1        |
| 34 | H        | 78.32252 | 72.39691 | 82.89956 | -1293.07895 | -1899.88581 | -1463.57452 | 1        |
| 35 | C        | 77.74019 | 73.58338 | 86.10677 | -153.07550  | -733.68902  | 248.70981   | 1        |
| 36 | O        | 76.92027 | 73.28640 | 86.93317 | 186.15459   | -480.78787  | -449.34387  | 1        |
| 37 | N        | 77.91652 | 74.74175 | 85.45473 | -487.53139  | 543.18517   | 42.03850    | 1        |
| 38 | C        | 76.95489 | 75.79844 | 85.53664 | -699.35871  | 69.34393    | 360.10701   | 1        |
| 39 | H        | 76.48748 | 75.69800 | 86.54418 | 2.81126     | -221.99807  | -2715.58072 | 1        |
| 40 | C        | 77.87134 | 77.08215 | 85.32852 | -507.46439  | -592.59194  | 122.07761   | 1        |
| 41 | H        | 77.30444 | 77.97812 | 84.99149 | -1975.08116 | 525.87560   | -1801.71556 | 1        |
| 42 | H        | 78.38836 | 77.36901 | 86.27135 | 1588.27743  | -1913.22100 | 1113.83566  | 1        |
| 43 | C        | 78.88738 | 76.56675 | 84.26383 | -613.62442  | -457.55993  | -194.14490  | 1        |
| 44 | H        | 78.43354 | 76.57245 | 83.24702 | 1707.54637  | -721.27992  | 1996.92523  | 1        |
| 45 | H        | 79.81340 | 77.18117 | 84.19978 | 758.23357   | 2100.81767  | 1560.55011  | 1        |
| 46 | C        | 79.15504 | 75.08420 | 84.76874 | -352.41524  | 704.96076   | 49.21465    | 1        |
| 47 | H        | 79.32401 | 74.34309 | 83.95292 | 1714.76886  | -2070.42778 | 443.35792   | 1        |
| 48 | H        | 79.96041 | 74.97812 | 85.53917 | 1224.15040  | 1801.50881  | 1636.97633  | 1        |
| 49 | C        | 75.86059 | 75.61679 | 84.33927 | 566.85117   | 537.05831   | 117.62814   | 1        |
| 50 | O        | 75.76605 | 74.59072 | 83.69536 | -550.26779  | -406.08867  | 4.21666     | 1        |
| 51 | N        | 75.11708 | 76.70858 | 84.25054 | 566.34832   | -425.77725  | 180.18749   | 1        |
| 52 | H        | 75.31217 | 77.49744 | 84.86296 | 644.44502   | 2646.80550  | -52.73430   | 1        |
| 53 | C        | 73.98815 | 76.67322 | 83.38192 | 612.34801   | -281.48662  | 411.56221   | 1        |
| 54 | H        | 73.72784 | 75.59220 | 83.29902 | 1667.23498  | -1490.75142 | 1556.16753  | 1        |
| 55 | C        | 72.87345 | 77.61772 | 84.03389 | -714.45746  | -175.43074  | 286.98927   | 1        |
| 56 | H        | 73.19640 | 78.68792 | 83.90933 | -787.09484  | 1763.03619  | -1922.46060 | 1        |
| 57 | O        | 72.63163 | 77.43790 | 85.44043 | -429.46514  | 516.51932   | -128.40526  | 1        |

|     |   |          |          |          |             |             |             |   |
|-----|---|----------|----------|----------|-------------|-------------|-------------|---|
| 58  | H | 72.85909 | 78.32419 | 85.78758 | 1981.82785  | 436.16847   | -1818.18182 | 1 |
| 59  | C | 71.64354 | 77.32932 | 83.09677 | 630.79189   | -468.94448  | 76.03230    | 1 |
| 60  | H | 70.77932 | 77.98820 | 83.34423 | -1775.71861 | 2062.30353  | 131.89849   | 1 |
| 61  | H | 71.88646 | 77.48799 | 82.01770 | -1855.14608 | 88.94118    | 1993.53760  | 1 |
| 62  | H | 71.29318 | 76.27611 | 83.20289 | -1504.82350 | -780.94249  | -2132.90992 | 1 |
| 63  | C | 74.43611 | 77.34224 | 81.95635 | 288.57638   | 618.62814   | -397.00270  | 1 |
| 64  | O | 75.10127 | 78.34313 | 81.88831 | 321.70495   | -185.26452  | 574.37218   | 1 |
| 65  | N | 73.88731 | 76.63555 | 80.96477 | -447.05792  | -446.53431  | 367.76425   | 1 |
| 66  | H | 73.20513 | 75.88055 | 81.13793 | 350.31316   | 1975.63644  | -1843.31522 | 1 |
| 67  | C | 73.75843 | 77.30673 | 79.70588 | -511.23061  | 374.03917   | -471.51480  | 1 |
| 68  | H | 73.96296 | 78.38614 | 79.90426 | 2234.79579  | -898.70890  | -1273.45190 | 1 |
| 69  | C | 74.80608 | 76.65424 | 78.67928 | 529.53781   | -159.34528  | 563.72604   | 1 |
| 70  | H | 74.70360 | 77.19272 | 77.69573 | 654.59388   | 2347.94251  | 1217.51488  | 1 |
| 71  | H | 75.83119 | 76.89619 | 79.06929 | -1526.55661 | 2103.42026  | 817.87394   | 1 |
| 72  | O | 74.62578 | 75.23895 | 78.38536 | -554.84278  | 14.12789    | 399.58769   | 1 |
| 73  | H | 74.98339 | 74.86946 | 79.21475 | 1297.06236  | 2061.84854  | 1220.68812  | 1 |
| 74  | C | 72.23630 | 76.90838 | 79.32930 | -662.15484  | -412.13544  | 123.62687   | 1 |
| 75  | O | 71.59304 | 76.24534 | 80.12218 | -540.01537  | -317.05804  | 274.91456   | 1 |
| 76  | N | 71.85880 | 77.41431 | 78.15540 | -202.76299  | -690.00100  | -131.49145  | 1 |
| 77  | H | 72.58195 | 77.92340 | 77.64416 | -702.62132  | -2617.37191 | 281.70413   | 1 |
| 78  | C | 70.61969 | 76.99674 | 77.50434 | -491.73914  | 576.34187   | 222.73509   | 1 |
| 79  | H | 69.90696 | 76.85658 | 78.35191 | 1977.17978  | -1823.58850 | -434.68928  | 1 |
| 80  | C | 70.21336 | 78.08498 | 76.52684 | -649.50797  | -328.66843  | 306.11224   | 1 |
| 81  | H | 71.03412 | 78.19596 | 75.78263 | 2075.07803  | 1452.16490  | -1004.45904 | 1 |
| 82  | C | 68.94360 | 77.73911 | 75.77114 | -615.18735  | -489.99689  | -70.96352   | 1 |
| 83  | H | 68.62668 | 78.57311 | 75.08604 | -1226.32661 | -1724.38906 | -1716.47170 | 1 |
| 84  | H | 69.07607 | 76.81817 | 75.13490 | 2381.64273  | -969.84735  | 900.46860   | 1 |
| 85  | H | 68.08692 | 77.53823 | 76.47187 | 2122.74991  | 1702.23946  | -141.36228  | 1 |
| 86  | C | 70.03995 | 79.42576 | 77.21909 | -501.86074  | -479.61276  | -376.42482  | 1 |
| 87  | H | 69.80504 | 80.24644 | 76.48708 | 993.79261   | -2246.95401 | -1177.81305 | 1 |
| 88  | H | 69.20101 | 79.39707 | 77.96731 | 42.71279    | -626.15391  | -2651.37258 | 1 |
| 89  | H | 70.96923 | 79.72657 | 77.77599 | -2026.39012 | -1590.33709 | -887.82922  | 1 |
| 90  | C | 70.87932 | 75.56031 | 76.70299 | -672.89153  | 382.57394   | -156.34072  | 1 |
| 91  | O | 69.94199 | 75.02521 | 76.16270 | 410.04627   | 221.86223   | 500.35950   | 1 |
| 92  | N | 72.13285 | 75.16238 | 76.76929 | -378.11782  | -443.79414  | -441.10984  | 1 |
| 93  | H | 72.78477 | 75.72219 | 77.31757 | 2404.15973  | -568.14894  | 1149.30085  | 1 |
| 94  | C | 72.57970 | 73.97970 | 76.09875 | -544.54484  | 466.16019   | 331.29119   | 1 |
| 95  | H | 73.60855 | 73.89411 | 76.51732 | -1409.80988 | -170.17955  | 2325.32679  | 1 |
| 96  | C | 71.61419 | 72.81943 | 76.60922 | -184.48284  | 116.78282   | -758.89137  | 1 |
| 97  | H | 70.82229 | 73.24287 | 77.26794 | 1893.78641  | 1861.14652  | 611.04528   | 1 |
| 98  | H | 71.08256 | 72.31142 | 75.77220 | -2170.79665 | -974.19311  | 1327.50117  | 1 |
| 99  | C | 72.52332 | 71.83345 | 77.40408 | 389.51668   | 672.81878   | -138.49152  | 1 |
| 100 | H | 73.25487 | 71.34037 | 76.72784 | 510.64577   | 1933.03327  | 1851.02484  | 1 |
| 101 | H | 73.15476 | 72.41194 | 78.11491 | -2302.30869 | -1105.72939 | -948.89774  | 1 |
| 102 | C | 71.72865 | 70.73547 | 78.20883 | -559.93427  | -126.34590  | 542.30857   | 1 |
| 103 | O | 72.32076 | 69.77972 | 78.63754 | -670.36003  | -111.83166  | 76.36448    | 1 |
| 104 | N | 70.41867 | 71.01276 | 78.38862 | -216.06729  | -537.07037  | 446.51379   | 1 |
| 105 | H | 69.88338 | 71.84494 | 78.11646 | -1251.96487 | 1074.12894  | -2168.52500 | 1 |
| 106 | H | 69.79452 | 70.45305 | 78.98011 | -2451.83023 | -720.73851  | 944.84612   | 1 |
| 107 | C | 72.62682 | 74.31257 | 74.51627 | 546.24052   | -563.88337  | -85.11809   | 1 |
| 108 | O | 72.99537 | 75.41461 | 74.18628 | 71.70702    | -307.40463  | 606.69673   | 1 |
| 109 | N | 72.45235 | 73.23773 | 73.72403 | 479.90863   | -504.50129  | 222.86849   | 1 |
| 110 | C | 72.44209 | 73.47531 | 72.31328 | 75.51268    | -600.91904  | 506.73700   | 1 |
| 111 | H | 72.80986 | 74.52389 | 72.19762 | -2033.61562 | 1795.30103  | 254.89480   | 1 |
| 112 | C | 73.43836 | 72.35525 | 71.79459 | 523.79067   | 517.99274   | 284.45581   | 1 |
| 113 | H | 73.28242 | 72.10416 | 70.70770 | 1599.61665  | -1127.00911 | 1895.98173  | 1 |
| 114 | H | 74.49588 | 72.69090 | 71.88434 | -1881.83093 | 1275.82488  | -1501.55016 | 1 |
| 115 | C | 73.16255 | 71.15583 | 72.75410 | -600.05639  | -404.05026  | 316.64485   | 1 |
| 116 | H | 72.26738 | 70.57617 | 72.43433 | -2597.05260 | 496.36221   | 657.73249   | 1 |
| 117 | H | 74.00222 | 70.42661 | 72.80172 | -1666.24518 | 1294.38985  | -1723.90591 | 1 |
| 118 | C | 72.92159 | 71.91436 | 74.12717 | 493.57570   | -129.95376  | -602.56394  | 1 |
| 119 | H | 72.14145 | 71.44536 | 74.77146 | -1469.08415 | -637.84797  | 2204.22581  | 1 |

|     |   |          |          |          |             |             |             |   |
|-----|---|----------|----------|----------|-------------|-------------|-------------|---|
| 120 | H | 73.84001 | 72.09144 | 74.73286 | -1038.97840 | 1068.88701  | -2280.71789 | 1 |
| 121 | C | 70.96779 | 73.28650 | 71.60878 | 188.88100   | 241.05089   | -727.87821  | 1 |
| 122 | O | 70.67009 | 74.02153 | 70.65227 | 531.88613   | -49.19943   | 427.07960   | 1 |
| 123 | N | 70.30637 | 72.26712 | 72.08753 | 708.14833   | 26.93417    | -179.73509  | 1 |
| 124 | H | 70.87508 | 71.89319 | 72.85260 | -2232.69501 | -1179.09831 | 1023.94816  | 1 |
| 125 | C | 68.90005 | 71.94632 | 71.97282 | -738.32412  | 259.92548   | 104.42456   | 1 |
| 126 | H | 68.83986 | 70.99367 | 72.55200 | 2028.89123  | 1260.02983  | 1311.33324  | 1 |
| 127 | C | 68.08844 | 73.06974 | 72.60907 | -258.65678  | -345.52513  | 661.28459   | 1 |
| 128 | H | 68.32149 | 74.01098 | 72.06398 | -1826.06090 | -1801.46097 | -918.64554  | 1 |
| 129 | C | 66.60080 | 72.80050 | 72.47914 | -541.23400  | 531.92970   | -218.41428  | 1 |
| 130 | H | 65.98298 | 73.62744 | 72.92500 | 1311.73218  | -2219.18200 | 882.19023   | 1 |
| 131 | H | 66.29276 | 72.69467 | 71.40169 | -1048.71298 | 1223.58118  | -2196.97971 | 1 |
| 132 | H | 66.30630 | 71.84699 | 72.99836 | 419.06414   | 1903.92898  | 1903.44670  | 1 |
| 133 | C | 68.46141 | 73.27886 | 74.06447 | -423.86431  | 152.66566   | -648.55262  | 1 |
| 134 | H | 67.85467 | 74.09863 | 74.53861 | 105.68386   | -2342.50080 | 1387.51238  | 1 |
| 135 | H | 68.29299 | 72.34749 | 74.67247 | -1695.63603 | -1484.73621 | -1531.02793 | 1 |
| 136 | H | 69.54509 | 73.56271 | 74.18316 | -1853.57121 | -487.39031  | 1936.59343  | 1 |
| 137 | C | 68.35774 | 71.72693 | 70.40615 | 539.71428   | -510.58232  | 267.58633   | 1 |
| 138 | O | 67.74131 | 70.72227 | 70.17010 | -15.93758   | -278.34085  | -624.49402  | 1 |
| 139 | N | 68.57015 | 72.77412 | 69.63450 | -676.81886  | 12.05292    | 276.17960   | 1 |
| 140 | H | 69.15487 | 73.57704 | 69.97169 | -1694.44250 | -373.84189  | -2100.66098 | 1 |
| 141 | C | 68.11926 | 72.69354 | 68.28726 | 412.33078   | -664.70360  | 108.35451   | 1 |
| 142 | H | 67.44317 | 71.80620 | 68.23353 | 1765.77476  | 1294.44366  | 1621.76594  | 1 |
| 143 | C | 67.42390 | 74.08392 | 67.95580 | -179.66635  | -721.95667  | -264.73915  | 1 |
| 144 | H | 66.55785 | 74.25812 | 68.63207 | -607.34922  | 2587.87032  | -598.10018  | 1 |
| 145 | H | 68.12820 | 74.92156 | 68.15675 | -359.69332  | -1479.13954 | -2259.74260 | 1 |
| 146 | C | 66.97146 | 74.09781 | 66.46033 | -240.01076  | 616.02425   | 431.85322   | 1 |
| 147 | H | 67.83816 | 73.89660 | 65.78945 | -1359.17131 | 782.54425   | 2227.99181  | 1 |
| 148 | H | 66.23584 | 73.28731 | 66.25797 | -820.36667  | 85.81767    | -2596.78715 | 1 |
| 149 | C | 66.35315 | 75.51832 | 66.13706 | -513.07015  | 236.18570   | -551.87280  | 1 |
| 150 | H | 65.41271 | 75.68496 | 66.71074 | 1816.11944  | -1183.11722 | -1650.94321 | 1 |
| 151 | H | 67.04652 | 76.33284 | 66.44878 | -1800.04429 | -1361.53473 | 1526.34643  | 1 |
| 152 | C | 66.09486 | 75.57950 | 64.61387 | 726.08972   | -253.19732  | -179.64713  | 1 |
| 153 | H | 67.00813 | 75.51600 | 63.98900 | 1224.27271  | -456.51798  | -2390.90304 | 1 |
| 154 | H | 65.33454 | 74.86292 | 64.24437 | 1206.40339  | -1150.93514 | -2154.90344 | 1 |
| 155 | N | 65.49819 | 76.99111 | 64.28973 | 329.70796   | -633.68968  | -155.67358  | 1 |
| 156 | H | 65.28620 | 77.17430 | 63.26659 | 1348.31305  | 1938.76845  | 1359.00643  | 1 |
| 157 | H | 64.56976 | 77.23795 | 64.74087 | 2096.92035  | 1446.54551  | -966.48890  | 1 |
| 158 | H | 66.09202 | 77.83650 | 64.53346 | -1197.07217 | -2303.53719 | 827.28733   | 1 |
| 159 | C | 69.40691 | 72.57910 | 67.28238 | -378.01186  | -556.17301  | -413.96481  | 1 |
| 160 | O | 69.24943 | 72.14640 | 66.16404 | -409.44433  | -307.55053  | -453.30833  | 1 |
| 161 | N | 70.50826 | 73.10377 | 67.80376 | -429.02477  | 524.70884   | 274.08502   | 1 |
| 162 | H | 70.55136 | 73.43979 | 68.77496 | 1706.34263  | -1425.96036 | 1574.38926  | 1 |
| 163 | C | 71.66410 | 73.08085 | 66.94324 | -45.25864   | -626.22952  | 478.93267   | 1 |
| 164 | H | 71.63541 | 72.03354 | 66.56755 | 1988.63164  | 570.90773   | 1772.87287  | 1 |
| 165 | C | 71.40818 | 74.09956 | 65.76504 | 551.77128   | -20.49526   | -564.54996  | 1 |
| 166 | H | 70.43848 | 73.87666 | 65.26066 | 1434.61535  | -1753.10253 | 1513.99471  | 1 |
| 167 | H | 71.30656 | 75.13822 | 66.15269 | -714.67738  | 1819.09770  | 1898.36494  | 1 |
| 168 | C | 72.60505 | 73.97215 | 64.76182 | 446.99263   | -555.77305  | 338.97221   | 1 |
| 169 | H | 73.57698 | 73.99033 | 65.30427 | 1953.68466  | 1892.25957  | -161.67766  | 1 |
| 170 | H | 72.57835 | 72.99576 | 64.22868 | -403.03785  | 2688.07032  | -188.43591  | 1 |
| 171 | C | 72.52286 | 75.17839 | 63.74613 | 567.86262   | 335.74681   | 434.04421   | 1 |
| 172 | H | 71.68533 | 75.04128 | 63.02430 | -1080.02275 | 1568.26081  | -1948.78900 | 1 |
| 173 | H | 72.31245 | 76.13483 | 64.27752 | -919.54108  | 2111.34692  | 1456.13463  | 1 |
| 174 | C | 73.89245 | 75.25064 | 63.02336 | 195.81897   | 173.33862   | -745.11536  | 1 |
| 175 | H | 74.73788 | 75.54352 | 63.67979 | 1405.67949  | -2301.21089 | -390.08113  | 1 |
| 176 | H | 74.16443 | 74.34562 | 62.44260 | -940.37328  | -1118.32446 | 2299.72133  | 1 |
| 177 | N | 73.81016 | 76.38968 | 61.97275 | 319.26422   | 656.36007   | -42.02424   | 1 |
| 178 | H | 74.79136 | 76.72439 | 61.59620 | 1961.03633  | 619.91968   | 1787.09422  | 1 |
| 179 | H | 73.24943 | 76.18148 | 61.09548 | 854.14343   | -2156.80752 | 1429.08711  | 1 |
| 180 | H | 73.34642 | 77.28755 | 62.29909 | 1237.02905  | -1378.50857 | -1998.28500 | 1 |
| 181 | C | 72.94402 | 73.40153 | 67.91190 | 532.53319   | -268.57236  | 517.55729   | 1 |

|     |   |          |          |          |             |             |             |   |
|-----|---|----------|----------|----------|-------------|-------------|-------------|---|
| 182 | O | 73.19815 | 72.58038 | 68.77010 | 266.16714   | -290.73804  | -558.88002  | 1 |
| 183 | N | 73.53923 | 74.53710 | 67.59781 | -226.25352  | 640.49678   | -270.32839  | 1 |
| 184 | H | 73.10649 | 75.07586 | 66.84863 | 2007.69063  | -1035.27229 | 1523.50231  | 1 |
| 185 | C | 74.55053 | 75.17356 | 68.35917 | -540.76542  | -573.33303  | 49.50000    | 1 |
| 186 | H | 74.59407 | 76.20941 | 67.95580 | -2374.20950 | -1036.76023 | 843.75774   | 1 |
| 187 | C | 74.01879 | 75.15336 | 69.86879 | -77.09082   | 666.87422   | -415.84136  | 1 |
| 188 | H | 73.72807 | 74.09511 | 70.12886 | -985.81834  | 617.19825   | 2463.91927  | 1 |
| 189 | O | 72.85621 | 75.96533 | 70.09685 | 293.29899   | -391.65602  | -477.80926  | 1 |
| 190 | H | 72.16053 | 75.28490 | 70.27429 | 2528.72714  | -681.76262  | -751.27122  | 1 |
| 191 | C | 75.30171 | 75.53436 | 70.68530 | 252.47363   | -605.14473  | 440.05134   | 1 |
| 192 | H | 75.09852 | 75.54715 | 71.78117 | -2052.65063 | 1456.49051  | -1043.51830 | 1 |
| 193 | H | 76.13124 | 74.80743 | 70.51487 | -2152.98800 | -1661.97574 | -161.70652  | 1 |
| 194 | H | 75.67971 | 76.54617 | 70.40919 | -473.12726  | -1584.27339 | 2165.61725  | 1 |
| 195 | C | 75.97194 | 74.39873 | 68.10977 | 360.36307   | 488.46713   | 505.10056   | 1 |
| 196 | O | 76.09808 | 73.19752 | 68.10335 | -200.08817  | -528.03552  | -385.82850  | 1 |
| 197 | N | 76.93464 | 75.31704 | 68.00456 | -597.54095  | -226.44775  | 355.20479   | 1 |
| 198 | H | 76.69671 | 76.30776 | 68.03614 | 2179.23655  | -1300.70981 | -991.33835  | 1 |
| 199 | C | 78.19332 | 74.84101 | 67.53868 | -687.68921  | 297.39807   | -249.45179  | 1 |
| 200 | H | 77.96653 | 73.89889 | 66.98743 | -349.16256  | -2467.37713 | -1101.72831 | 1 |
| 201 | C | 78.92810 | 75.97312 | 66.69170 | 672.47345   | 361.54328   | -201.62880  | 1 |
| 202 | H | 79.03900 | 76.89374 | 67.30778 | 1541.41502  | 582.18425   | 2169.97026  | 1 |
| 203 | H | 79.95814 | 75.62462 | 66.44789 | -2534.67717 | 60.25153    | 997.72295   | 1 |
| 204 | C | 78.16642 | 76.29652 | 65.38955 | 574.26774   | -389.43119  | -377.02542  | 1 |
| 205 | C | 78.25042 | 75.40155 | 64.28593 | 688.82679   | -287.33580  | -257.96133  | 1 |
| 206 | H | 78.80264 | 74.44987 | 64.37192 | 331.14182   | 1470.38163  | 2269.80013  | 1 |
| 207 | C | 77.44148 | 77.51647 | 65.28008 | -383.52382  | -675.04808  | 144.24917   | 1 |
| 208 | H | 77.36315 | 78.20448 | 66.13908 | 4.09847     | 1517.59662  | 2262.86397  | 1 |
| 209 | C | 77.63962 | 75.77734 | 63.07203 | -134.76730  | 428.45285   | -649.50303  | 1 |
| 210 | H | 77.71744 | 75.10171 | 62.20018 | -903.23433  | 1600.49020  | 2011.53387  | 1 |
| 211 | C | 76.85586 | 77.84312 | 64.03814 | -335.53281  | -615.00040  | -364.39058  | 1 |
| 212 | H | 76.31379 | 78.80242 | 63.94443 | 1596.45398  | -1369.33862 | 1732.02659  | 1 |
| 213 | C | 76.94448 | 76.99458 | 62.91542 | 585.48547   | -340.24194  | -406.23938  | 1 |
| 214 | O | 76.33128 | 77.34857 | 61.58193 | -419.15649  | -173.04408  | -511.94141  | 1 |
| 215 | H | 76.11293 | 78.26718 | 61.80309 | -1071.84350 | 1559.71507  | -1960.13012 | 1 |
| 216 | C | 79.21521 | 74.58141 | 68.79134 | 291.41878   | -183.13091  | 710.72246   | 1 |
| 217 | O | 80.26590 | 74.00702 | 68.60625 | 379.87695   | 523.47396   | -222.23622  | 1 |
| 218 | N | 78.77946 | 75.15778 | 69.90752 | 564.30591   | 373.09380   | 277.24371   | 1 |
| 219 | H | 77.87637 | 75.62343 | 69.86230 | -120.59931  | -2436.07824 | -1214.35098 | 1 |
| 220 | C | 79.55435 | 75.00257 | 71.09102 | 404.07514   | -299.37480  | 608.84009   | 1 |
| 221 | H | 80.23644 | 74.14841 | 70.87011 | -1071.07882 | -841.69025  | 2359.66467  | 1 |
| 222 | C | 80.33245 | 76.37454 | 71.26586 | -683.12807  | 68.71770    | -390.13096  | 1 |
| 223 | H | 80.78475 | 76.68817 | 70.29814 | 2068.88918  | 1596.58590  | 770.89603   | 1 |
| 224 | H | 79.63431 | 77.19343 | 71.55007 | 1379.86429  | 2342.49779  | -179.85638  | 1 |
| 225 | C | 81.42901 | 76.19351 | 72.35807 | -176.39967  | 537.49466   | 550.97268   | 1 |
| 226 | H | 80.97779 | 75.85347 | 73.31991 | -396.28051  | 1942.22168  | 1869.33314  | 1 |
| 227 | H | 82.16434 | 75.40962 | 72.06905 | -94.44700   | 586.00678   | -2659.20016 | 1 |
| 228 | C | 82.13405 | 77.62040 | 72.52685 | -291.69381  | -718.18079  | -150.72929  | 1 |
| 229 | H | 82.60397 | 78.05331 | 71.60814 | -2303.38776 | 1089.76242  | 964.62032   | 1 |
| 230 | H | 81.47079 | 78.39380 | 72.99229 | 884.16729   | 2568.80533  | -207.74283  | 1 |
| 231 | N | 83.14718 | 77.31808 | 73.44603 | -594.49522  | -252.81478  | 342.29276   | 1 |
| 232 | H | 82.98092 | 76.52339 | 74.04477 | -1735.17426 | 2084.05705  | -263.71605  | 1 |
| 233 | C | 84.22475 | 77.97686 | 73.59879 | 595.23177   | -271.52487  | 442.22352   | 1 |
| 234 | N | 84.44135 | 79.09545 | 72.78848 | 585.53813   | -424.79750  | -105.81303  | 1 |
| 235 | H | 83.84503 | 79.50530 | 72.07095 | 959.88797   | 1327.56823  | -2177.11905 | 1 |
| 236 | H | 85.26341 | 79.69850 | 72.83605 | 1578.48647  | 16.27378    | -2220.76233 | 1 |
| 237 | N | 85.01203 | 77.41346 | 74.61237 | -452.17763  | -390.33541  | -421.51853  | 1 |
| 238 | H | 84.86022 | 76.59570 | 75.20078 | 470.26107   | 1974.25629  | -1817.92087 | 1 |
| 239 | H | 85.91982 | 77.79026 | 74.88762 | 1856.67307  | -1573.97321 | -1224.35416 | 1 |
| 240 | C | 78.54716 | 74.76648 | 72.36415 | -531.47271  | -581.45780  | -55.06206   | 1 |
| 241 | O | 78.68998 | 73.79471 | 73.06815 | -243.00837  | 192.73507   | 609.52485   | 1 |
| 242 | N | 77.57952 | 75.70104 | 72.42155 | 343.49288   | -644.25607  | 38.09164    | 1 |
| 243 | H | 77.75071 | 76.38320 | 71.68017 | -1691.16043 | -1535.97525 | -1484.73099 | 1 |

|     |   |          |          |          |             |             |             |   |
|-----|---|----------|----------|----------|-------------|-------------|-------------|---|
| 244 | C | 76.98254 | 76.14981 | 73.68458 | 542.66492   | 350.14337   | 454.42563   | 1 |
| 245 | H | 76.07426 | 76.71609 | 73.37196 | 1209.57979  | -2396.95920 | 463.86744   | 1 |
| 246 | C | 76.67194 | 74.96479 | 74.57168 | -737.14309  | 145.93010   | 242.71942   | 1 |
| 247 | H | 77.64378 | 74.50896 | 74.88049 | -1050.18303 | 159.36419   | -2509.06125 | 1 |
| 248 | C | 75.91698 | 75.39219 | 75.81824 | -706.77696  | -252.88343  | -245.16230  | 1 |
| 249 | H | 75.75763 | 74.53493 | 76.53016 | -1624.64039 | -1665.49085 | 1417.86935  | 1 |
| 250 | H | 76.46855 | 76.19142 | 76.38662 | 2566.10521  | 598.51109   | 693.22305   | 1 |
| 251 | H | 74.89831 | 75.80126 | 75.56249 | -1972.69758 | 107.10018   | -1876.34312 | 1 |
| 252 | C | 75.87998 | 73.89288 | 73.84339 | 412.85148   | 672.58832   | -27.69222   | 1 |
| 253 | H | 75.72409 | 72.98200 | 74.48238 | 1447.02277  | 1762.76533  | -1490.78944 | 1 |
| 254 | H | 74.86219 | 74.26572 | 73.53710 | 1320.77379  | -145.20455  | 2378.68491  | 1 |
| 255 | H | 76.42078 | 73.56107 | 72.91193 | -1512.10848 | 1470.52031  | 1724.75147  | 1 |
| 256 | C | 78.09654 | 77.13504 | 74.42028 | -607.11113  | 499.56689   | 73.73769    | 1 |
| 257 | O | 79.28950 | 76.95805 | 74.35884 | 357.97126   | 460.81534   | 356.68785   | 1 |
| 258 | N | 77.43555 | 78.07538 | 75.08237 | 536.55407   | -368.62270  | 332.76306   | 1 |
| 259 | H | 76.41747 | 78.06142 | 75.05893 | 524.38866   | 2297.69985  | 1367.20941  | 1 |
| 260 | C | 78.16079 | 78.90944 | 75.96439 | 46.50277    | -774.29190  | -147.97904  | 1 |
| 261 | H | 79.23423 | 78.66583 | 75.79034 | 1676.51875  | 1883.29066  | 1032.55549  | 1 |
| 262 | C | 77.75653 | 80.44290 | 75.66017 | -559.41456  | -34.19198   | -556.30433  | 1 |
| 263 | H | 76.67787 | 80.59217 | 75.90499 | -64.66664   | 395.18769   | 2695.05373  | 1 |
| 264 | H | 78.32185 | 81.13864 | 76.32523 | -2703.44278 | -60.40056   | 333.79418   | 1 |
| 265 | C | 78.01460 | 80.74479 | 74.20753 | -519.76435  | 377.31045   | 459.42366   | 1 |
| 266 | H | 77.56561 | 79.92740 | 73.59873 | -1746.74323 | 1667.50644  | -1261.73691 | 1 |
| 267 | C | 77.35311 | 82.05892 | 73.81215 | 570.95554   | 16.46261    | -545.27700  | 1 |
| 268 | H | 77.51582 | 82.29556 | 72.72909 | 2391.58273  | 28.05277    | -1305.07271 | 1 |
| 269 | H | 76.24595 | 82.03292 | 73.98370 | 175.75588   | 917.63458   | 2559.43867  | 1 |
| 270 | H | 77.75973 | 82.91914 | 74.40386 | -1063.97851 | -2155.34650 | 1283.00462  | 1 |
| 271 | C | 79.50614 | 80.80428 | 73.90795 | 193.76014   | 2.62946     | -765.53141  | 1 |
| 272 | H | 79.70272 | 81.03630 | 72.82939 | 507.39394   | -846.55087  | 2539.60089  | 1 |
| 273 | H | 80.01757 | 81.59496 | 74.51534 | 1337.57841  | 1818.19054  | 1526.01994  | 1 |
| 274 | H | 80.01173 | 79.83037 | 74.13537 | 1100.88635  | -1172.91350 | -2199.08909 | 1 |
| 275 | C | 77.61594 | 78.55195 | 77.44847 | -549.21115  | 475.64486   | -309.38218  | 1 |
| 276 | O | 76.45527 | 78.65590 | 77.75275 | 556.06106   | -390.37755  | -78.24250   | 1 |
| 277 | O | 78.57773 | 78.13285 | 78.39079 | -572.27940  | -310.19032  | -209.75862  | 1 |
| 278 | H | 79.39486 | 78.17573 | 77.81827 | -1380.08193 | 2212.14486  | 790.85944   | 1 |

Listing 89: C00089.xmolout

|    |   |          |          |          |             |             |             |        |          |
|----|---|----------|----------|----------|-------------|-------------|-------------|--------|----------|
| 1  |   | 276      |          |          |             |             |             |        |          |
| 2  |   | 150.0000 | 150.0000 | 150.0000 | 0.0000      | 0.0000      | 0.0000***** | 0.7727 | 3091     |
|    |   | 0.2500   | 300.00   | 0.00     | 0.00        | 0.00        | -1293.4702  | 0.0000 | 300.0000 |
| 3  | H | 79.87832 | 74.05051 | 80.38166 | -2043.14101 | -1757.64893 | 399.89339   |        | 1        |
| 4  | N | 80.77122 | 73.82749 | 79.94591 | 426.75047   | 490.45733   | -334.42467  |        | 1        |
| 5  | H | 80.45720 | 73.28652 | 79.14176 | 442.25559   | -1110.30854 | -2448.52907 |        | 1        |
| 6  | C | 81.55764 | 74.96260 | 79.63522 | 415.32972   | -666.39213  | 83.73172    |        | 1        |
| 7  | H | 80.98019 | 75.84915 | 79.97780 | 879.32219   | 2491.00447  | 667.35213   |        | 1        |
| 8  | C | 82.97750 | 74.81574 | 80.38938 | 31.35357    | 477.41777   | 628.23362   |        | 1        |
| 9  | H | 83.47163 | 73.87085 | 80.05943 | 1168.38489  | 2240.25337  | -1019.71136 |        | 1        |
| 10 | H | 83.66525 | 75.64271 | 80.08964 | -360.43770  | 2534.90498  | 931.67112   |        | 1        |
| 11 | C | 82.76718 | 74.80521 | 81.88045 | 463.18208   | 512.70242   | -382.34388  |        | 1        |
| 12 | H | 81.92224 | 74.11700 | 82.10929 | 1725.29117  | 1863.52247  | -987.07854  |        | 1        |
| 13 | C | 84.01498 | 74.28979 | 82.58711 | 710.42801   | -144.27427  | -313.15367  |        | 1        |
| 14 | H | 83.88121 | 74.26546 | 83.69939 | 364.20195   | -1033.13725 | 2494.72524  |        | 1        |
| 15 | H | 84.27633 | 73.25007 | 82.26072 | 2567.61904  | 335.80679   | 847.48802   |        | 1        |
| 16 | H | 84.90495 | 74.93674 | 82.37462 | -2587.99029 | 680.92867   | -512.16411  |        | 1        |
| 17 | C | 82.42650 | 76.19527 | 82.40030 | 268.17616   | 741.64379   | -40.42634   |        | 1        |
| 18 | H | 82.28405 | 76.19750 | 83.51188 | 1283.54314  | -1945.37420 | -1411.27812 |        | 1        |
| 19 | H | 83.23976 | 76.93114 | 82.16971 | -1258.57796 | 1317.15249  | -2026.02085 |        | 1        |
| 20 | H | 81.48273 | 76.59072 | 81.94418 | -2502.84526 | 909.80597   | 575.92391   |        | 1        |
| 21 | C | 81.82033 | 74.93683 | 78.04007 | 619.36578   | -458.64843  | -172.09273  |        | 1        |
| 22 | O | 81.69744 | 75.96221 | 77.34804 | -81.40433   | 433.87611   | 522.34594   |        | 1        |
| 23 | N | 82.18575 | 73.73265 | 77.68260 | 175.23996   | -622.20190  | 341.55523   |        | 1        |



|    |   |          |          |          |             |             |             |   |
|----|---|----------|----------|----------|-------------|-------------|-------------|---|
| 24 | H | 82.21372 | 73.02083 | 78.41040 | -876.57256  | -303.22879  | -2561.90213 | 1 |
| 25 | C | 82.32072 | 73.41956 | 76.29567 | -571.88214  | -534.10783  | -106.15033  | 1 |
| 26 | H | 82.79208 | 74.31865 | 75.83654 | -2713.20841 | -16.25800   | -248.80809  | 1 |
| 27 | C | 83.15571 | 72.06113 | 76.16758 | 166.60354   | 288.16399   | -716.09568  | 1 |
| 28 | H | 82.55241 | 71.23176 | 76.62906 | -2097.85574 | 1636.78449  | -586.18044  | 1 |
| 29 | O | 84.43406 | 72.04067 | 76.82382 | -317.80580  | -363.38227  | 484.43082   | 1 |
| 30 | H | 84.30946 | 71.30869 | 77.46165 | 1863.74748  | -1451.84923 | 1357.29467  | 1 |
| 31 | C | 83.18166 | 71.88126 | 74.60425 | 503.80731   | 517.99032   | 318.51606   | 1 |
| 32 | H | 83.60944 | 70.89297 | 74.31665 | 640.61020   | -2157.10410 | -1536.29104 | 1 |
| 33 | H | 82.15799 | 71.94961 | 74.14344 | 1687.88455  | 465.60692   | 2087.56452  | 1 |
| 34 | H | 83.81135 | 72.66268 | 74.11913 | -1293.07895 | -1899.88581 | -1463.57452 | 1 |
| 35 | C | 80.80977 | 73.12214 | 75.75033 | -153.07550  | -733.68902  | 248.70981   | 1 |
| 36 | O | 80.17196 | 72.21909 | 76.24009 | 186.15459   | -480.78787  | -449.34387  | 1 |
| 37 | N | 80.50331 | 73.94418 | 74.74895 | -487.53139  | 543.18517   | 42.03850    | 1 |
| 38 | C | 79.31267 | 73.78723 | 73.95868 | -699.35871  | 69.34393    | 360.10701   | 1 |
| 39 | H | 78.49339 | 73.50177 | 74.65274 | 2.81126     | -221.99807  | -2715.58072 | 1 |
| 40 | C | 79.15331 | 75.22746 | 73.30498 | -507.46439  | -592.59194  | 122.07761   | 1 |
| 41 | H | 78.56252 | 75.21369 | 72.36208 | -1975.08116 | 525.87560   | -1801.71556 | 1 |
| 42 | H | 78.62609 | 75.91828 | 73.99502 | 1588.27743  | -1913.22100 | 1113.83566  | 1 |
| 43 | C | 80.63658 | 75.66235 | 73.09233 | -613.62442  | -457.55993  | -194.14490  | 1 |
| 44 | H | 81.05720 | 75.19661 | 72.17296 | 1707.54637  | -721.27992  | 1996.92523  | 1 |
| 45 | H | 80.76740 | 76.76191 | 72.97673 | 758.23357   | 2100.81767  | 1560.55011  | 1 |
| 46 | C | 81.33873 | 75.08424 | 74.39429 | -352.41524  | 704.96076   | 49.21465    | 1 |
| 47 | H | 82.38320 | 74.71893 | 74.24081 | 1714.76886  | -2070.42778 | 443.35792   | 1 |
| 48 | H | 81.31051 | 75.75074 | 75.29787 | 1224.15040  | 1801.50881  | 1636.97633  | 1 |
| 49 | C | 79.57469 | 72.67695 | 72.80464 | 566.85117   | 537.05831   | 117.62814   | 1 |
| 50 | O | 80.67791 | 72.13979 | 72.65429 | -550.26779  | -406.08867  | 4.21666     | 1 |
| 51 | N | 78.44731 | 72.45130 | 72.17895 | 566.34832   | -425.77725  | 180.18749   | 1 |
| 52 | H | 77.67186 | 73.02167 | 72.51735 | 644.44502   | 2646.80550  | -52.73430   | 1 |
| 53 | C | 78.36851 | 72.00355 | 70.81380 | 612.34801   | -281.48662  | 411.56221   | 1 |
| 54 | H | 78.48947 | 72.94415 | 70.23529 | 1667.23498  | -1490.75142 | 1556.16753  | 1 |
| 55 | C | 79.56135 | 70.99723 | 70.52136 | -714.45746  | -175.43074  | 286.98927   | 1 |
| 56 | H | 79.73146 | 70.42863 | 71.48047 | -787.09484  | 1763.03619  | -1922.46060 | 1 |
| 57 | O | 80.81037 | 71.62775 | 70.21721 | -429.46514  | 516.51932   | -128.40526  | 1 |
| 58 | H | 81.18581 | 71.71489 | 71.16936 | 1981.82785  | 436.16847   | -1818.18182 | 1 |
| 59 | C | 79.05754 | 70.02148 | 69.39774 | 630.79189   | -468.94448  | 76.03230    | 1 |
| 60 | H | 79.84511 | 69.28030 | 69.12585 | -1775.71861 | 2062.30353  | 131.89849   | 1 |
| 61 | H | 78.15388 | 69.43996 | 69.71647 | -1855.14608 | 88.94118    | 1993.53760  | 1 |
| 62 | H | 78.79246 | 70.57461 | 68.46678 | -1504.82350 | -780.94249  | -2132.90992 | 1 |
| 63 | C | 76.84162 | 71.45022 | 70.69539 | 288.57638   | 618.62814   | -397.00270  | 1 |
| 64 | O | 76.58284 | 70.24581 | 70.80282 | 321.70495   | -185.26452  | 574.37218   | 1 |
| 65 | N | 76.04705 | 72.45827 | 70.43612 | -447.05792  | -446.53431  | 367.76425   | 1 |
| 66 | H | 76.52427 | 73.35797 | 70.37500 | 350.31316   | 1975.63644  | -1843.31522 | 1 |
| 67 | C | 74.63129 | 72.43678 | 70.42164 | -511.23061  | 374.03917   | -471.51480  | 1 |
| 68 | H | 74.36406 | 73.41273 | 69.95775 | 2234.79579  | -898.70890  | -1273.45190 | 1 |
| 69 | C | 74.13792 | 71.18399 | 69.55872 | 529.53781   | -159.34528  | 563.72604   | 1 |
| 70 | H | 73.10293 | 71.39807 | 69.16743 | 654.59388   | 2347.94251  | 1217.51488  | 1 |
| 71 | H | 74.82249 | 71.14823 | 68.66935 | -1526.55661 | 2103.42026  | 817.87394   | 1 |
| 72 | O | 74.06368 | 69.91132 | 70.20855 | -554.84278  | 14.12789    | 399.58769   | 1 |
| 73 | H | 75.05318 | 69.82654 | 70.50766 | 1297.06236  | 2061.84854  | 1220.68812  | 1 |
| 74 | C | 74.06100 | 72.32523 | 71.94593 | -662.15484  | -412.13544  | 123.62687   | 1 |
| 75 | O | 74.64684 | 71.77322 | 72.85121 | -540.01537  | -317.05804  | 274.91456   | 1 |
| 76 | N | 72.88255 | 72.93910 | 71.99506 | -202.76299  | -690.00100  | -131.49145  | 1 |
| 77 | H | 72.45378 | 73.35085 | 71.16377 | -702.62132  | -2617.37191 | 281.70413   | 1 |
| 78 | C | 72.25122 | 72.97061 | 73.28090 | -491.73914  | 576.34187   | 222.73509   | 1 |
| 79 | H | 72.42397 | 71.93523 | 73.65388 | 1977.17978  | -1823.58850 | -434.68928  | 1 |
| 80 | C | 72.89437 | 74.07547 | 74.22234 | -649.50797  | -328.66843  | 306.11224   | 1 |
| 81 | H | 72.62606 | 75.09152 | 73.85627 | 2075.07803  | 1452.16490  | -1004.45904 | 1 |
| 82 | C | 72.30228 | 73.80918 | 75.64897 | -615.18735  | -489.99689  | -70.96352   | 1 |
| 83 | H | 72.80595 | 74.46865 | 76.43044 | -1226.32661 | -1724.38906 | -1716.47170 | 1 |
| 84 | H | 71.20444 | 74.01589 | 75.68218 | 2381.64273  | -969.84735  | 900.46860   | 1 |
| 85 | H | 72.45400 | 72.74927 | 75.96800 | 2122.74991  | 1702.23946  | -141.36228  | 1 |

|     |   |          |          |          |             |             |             |   |
|-----|---|----------|----------|----------|-------------|-------------|-------------|---|
| 86  | C | 74.44972 | 73.92288 | 74.35598 | -501.86074  | -479.61276  | -376.42482  | 1 |
| 87  | H | 74.89423 | 74.70710 | 75.01247 | 993.79261   | -2246.95401 | -1177.81305 | 1 |
| 88  | H | 74.71561 | 72.92583 | 74.78618 | 42.71279    | -626.15391  | -2651.37258 | 1 |
| 89  | H | 74.95408 | 73.98246 | 73.36071 | -2026.39012 | -1590.33709 | -887.82922  | 1 |
| 90  | C | 70.69264 | 73.45048 | 73.12725 | -672.89153  | 382.57394   | -156.34072  | 1 |
| 91  | O | 70.37719 | 74.52898 | 73.61525 | 410.04627   | 221.86223   | 500.35950   | 1 |
| 92  | N | 69.96730 | 72.54941 | 72.50840 | -378.11782  | -443.79414  | -441.10984  | 1 |
| 93  | H | 70.50211 | 71.74964 | 72.16864 | 2404.15973  | -568.14894  | 1149.30085  | 1 |
| 94  | C | 68.54912 | 72.56224 | 72.39548 | -544.54484  | 466.16019   | 331.29119   | 1 |
| 95  | H | 68.30184 | 71.47783 | 72.38567 | -1409.80988 | -170.17955  | 2325.32679  | 1 |
| 96  | C | 67.90096 | 73.33411 | 73.61712 | -184.48284  | 116.78282   | -758.89137  | 1 |
| 97  | H | 68.13233 | 72.82496 | 74.58063 | 1893.78641  | 1861.14652  | 611.04528   | 1 |
| 98  | H | 68.33636 | 74.36014 | 73.71991 | -2170.79665 | -974.19311  | 1327.50117  | 1 |
| 99  | C | 66.36107 | 73.41022 | 73.36894 | 389.51668   | 672.81878   | -138.49152  | 1 |
| 100 | H | 66.15297 | 73.63709 | 72.29948 | 510.64577   | 1933.03327  | 1851.02484  | 1 |
| 101 | H | 65.89191 | 72.41354 | 73.52106 | -2302.30869 | -1105.72939 | -948.89774  | 1 |
| 102 | C | 65.65085 | 74.48931 | 74.26911 | -559.93427  | -126.34590  | 542.30857   | 1 |
| 103 | O | 64.46834 | 74.68031 | 74.14514 | -670.36003  | -111.83166  | 76.36448    | 1 |
| 104 | N | 66.47637 | 75.13270 | 75.12371 | -216.06729  | -537.07037  | 446.51379   | 1 |
| 105 | H | 67.48121 | 75.01181 | 75.29580 | -1251.96487 | 1074.12894  | -2168.52500 | 1 |
| 106 | H | 66.16426 | 75.86369 | 75.77237 | -2451.83023 | -720.73851  | 944.84612   | 1 |
| 107 | C | 68.11430 | 73.14829 | 70.92607 | 546.24052   | -563.88337  | -85.11809   | 1 |
| 108 | O | 67.42948 | 72.40170 | 70.27502 | 71.70702    | -307.40463  | 606.69673   | 1 |
| 109 | N | 68.45378 | 74.41795 | 70.65457 | 479.90863   | -504.50129  | 222.86849   | 1 |
| 110 | C | 68.72397 | 74.83331 | 69.31344 | 75.51268    | -600.91904  | 506.73700   | 1 |
| 111 | H | 68.16244 | 74.11844 | 68.66772 | -2033.61562 | 1795.30103  | 254.89480   | 1 |
| 112 | C | 68.17309 | 76.32393 | 69.34020 | 523.79067   | 517.99274   | 284.45581   | 1 |
| 113 | H | 68.53526 | 76.94717 | 68.49045 | 1599.61665  | -1127.00911 | 1895.98173  | 1 |
| 114 | H | 67.06101 | 76.34924 | 69.30163 | -1881.83093 | 1275.82488  | -1501.55016 | 1 |
| 115 | C | 68.69758 | 76.79572 | 70.73163 | -600.05639  | -404.05026  | 316.64485   | 1 |
| 116 | H | 69.79116 | 77.00489 | 70.69844 | -2597.05260 | 496.36221   | 657.73249   | 1 |
| 117 | H | 68.20705 | 77.72208 | 71.10715 | -1666.24518 | 1294.38985  | -1723.90591 | 1 |
| 118 | C | 68.37243 | 75.51462 | 71.61119 | 493.57570   | -129.95376  | -602.56394  | 1 |
| 119 | H | 69.13467 | 75.28635 | 72.42212 | -1469.08415 | -637.84797  | 2204.22581  | 1 |
| 120 | H | 67.34326 | 75.48594 | 72.04159 | -1038.97840 | 1068.88701  | -2280.71789 | 1 |
| 121 | C | 70.35064 | 74.72134 | 69.11977 | 188.88100   | 241.05089   | -727.87821  | 1 |
| 122 | O | 70.97096 | 73.74716 | 69.47728 | 531.88613   | -49.19943   | 427.07960   | 1 |
| 123 | N | 70.80092 | 75.79549 | 68.48699 | 708.14833   | 26.93417    | -179.73509  | 1 |
| 124 | H | 70.16635 | 76.54615 | 68.21632 | -2232.69501 | -1179.09831 | 1023.94816  | 1 |
| 125 | C | 72.17967 | 75.84461 | 68.15010 | -738.32412  | 259.92548   | 104.42456   | 1 |
| 126 | H | 72.67597 | 75.08030 | 68.79149 | 2028.89123  | 1260.02983  | 1311.33324  | 1 |
| 127 | C | 72.25292 | 75.50895 | 66.59613 | -258.65678  | -345.52513  | 661.28459   | 1 |
| 128 | H | 71.55062 | 76.15984 | 66.03178 | -1826.06090 | -1801.46097 | -918.64554  | 1 |
| 129 | C | 73.72283 | 75.69897 | 66.09232 | -541.23400  | 531.92970   | -218.41428  | 1 |
| 130 | H | 73.82446 | 75.42638 | 65.01537 | 1311.73218  | -2219.18200 | 882.19023   | 1 |
| 131 | H | 74.05280 | 76.75974 | 66.19876 | -1048.71298 | 1223.58118  | -2196.97971 | 1 |
| 132 | H | 74.43941 | 75.06579 | 66.66634 | 419.06414   | 1903.92898  | 1903.44670  | 1 |
| 133 | C | 71.87868 | 73.99838 | 66.41073 | -423.86431  | 152.66566   | -648.55262  | 1 |
| 134 | H | 71.76733 | 73.72675 | 65.33491 | 105.68386   | -2342.50080 | 1387.51238  | 1 |
| 135 | H | 72.65477 | 73.32742 | 66.84793 | -1695.63603 | -1484.73621 | -1531.02793 | 1 |
| 136 | H | 70.91521 | 73.75538 | 66.91855 | -1853.57121 | -487.39031  | 1936.59343  | 1 |
| 137 | C | 72.64066 | 77.40231 | 68.41402 | 539.71428   | -510.58232  | 267.58633   | 1 |
| 138 | O | 72.35021 | 78.28344 | 67.64003 | -15.93758   | -278.34085  | -624.49402  | 1 |
| 139 | N | 73.27119 | 77.48297 | 69.58194 | -676.81886  | 12.05292    | 276.17960   | 1 |
| 140 | H | 73.42794 | 76.61849 | 70.09949 | -1694.44250 | -373.84189  | -2100.66098 | 1 |
| 141 | C | 74.06233 | 78.66077 | 69.81530 | 412.33078   | -664.70360  | 108.35451   | 1 |
| 142 | H | 74.64685 | 78.79081 | 68.87861 | 1765.77476  | 1294.44366  | 1621.76594  | 1 |
| 143 | C | 73.05233 | 79.85467 | 70.01883 | -179.66635  | -721.95667  | -264.73915  | 1 |
| 144 | H | 72.33136 | 79.89709 | 69.16709 | -607.34922  | 2587.87032  | -598.10018  | 1 |
| 145 | H | 72.43348 | 79.70359 | 70.93251 | -359.69332  | -1479.13954 | -2259.74260 | 1 |
| 146 | C | 73.88556 | 81.17692 | 70.11803 | -240.01076  | 616.02425   | 431.85322   | 1 |
| 147 | H | 74.49819 | 81.18635 | 71.04835 | -1359.17131 | 782.54425   | 2227.99181  | 1 |

|     |   |          |          |          |             |             |             |   |
|-----|---|----------|----------|----------|-------------|-------------|-------------|---|
| 148 | H | 74.60649 | 81.25721 | 69.27370 | -820.36667  | 85.81767    | -2596.78715 | 1 |
| 149 | C | 72.86134 | 82.38134 | 70.09308 | -513.07015  | 236.18570   | -551.87280  | 1 |
| 150 | H | 72.26862 | 82.37637 | 69.14917 | 1816.11944  | -1183.11722 | -1650.94321 | 1 |
| 151 | H | 72.11848 | 82.28531 | 70.91813 | -1800.04429 | -1361.53473 | 1526.34643  | 1 |
| 152 | C | 73.66217 | 83.69713 | 70.22888 | 726.08972   | -253.19732  | -179.64713  | 1 |
| 153 | H | 74.17442 | 83.82577 | 71.20322 | 1224.27271  | -456.51798  | -2390.90304 | 1 |
| 154 | H | 74.37015 | 83.89583 | 69.39960 | 1206.40339  | -1150.93514 | -2154.90344 | 1 |
| 155 | N | 72.63506 | 84.87781 | 70.16220 | 329.70796   | -633.68968  | -155.67358  | 1 |
| 156 | H | 73.04586 | 85.85043 | 70.26406 | 1348.31305  | 1938.76845  | 1359.00643  | 1 |
| 157 | H | 72.07376 | 84.98188 | 69.26720 | 2096.92035  | 1446.54551  | -966.48890  | 1 |
| 158 | H | 71.87424 | 84.89543 | 70.90206 | -1197.07217 | -2303.53719 | 827.28733   | 1 |
| 159 | C | 74.99323 | 78.43321 | 71.14453 | -378.01186  | -556.17301  | -413.96481  | 1 |
| 160 | O | 76.14181 | 78.81578 | 71.08338 | -409.44433  | -307.55053  | -453.30833  | 1 |
| 161 | N | 74.34433 | 77.84264 | 72.13313 | -429.02477  | 524.70884   | 274.08502   | 1 |
| 162 | H | 73.37334 | 77.60585 | 71.93338 | 1706.34263  | -1425.96036 | 1574.38926  | 1 |
| 163 | C | 74.85370 | 77.69805 | 73.45807 | -45.25864   | -626.22952  | 478.93267   | 1 |
| 164 | H | 74.52666 | 76.68565 | 73.78197 | 1988.63164  | 570.90773   | 1772.87287  | 1 |
| 165 | C | 76.41420 | 77.92625 | 73.45551 | 551.77128   | -20.49526   | -564.54996  | 1 |
| 166 | H | 76.90244 | 77.33256 | 72.64741 | 1434.61535  | -1753.10253 | 1513.99471  | 1 |
| 167 | H | 76.63403 | 78.99457 | 73.21058 | -714.67738  | 1819.09770  | 1898.36494  | 1 |
| 168 | C | 76.99928 | 77.56330 | 74.86308 | 446.99263   | -555.77305  | 338.97221   | 1 |
| 169 | H | 76.39775 | 78.01454 | 75.68317 | 1953.68466  | 1892.25957  | -161.67766  | 1 |
| 170 | H | 76.97242 | 76.46508 | 75.03394 | -403.03785  | 2688.07032  | -188.43591  | 1 |
| 171 | C | 78.47528 | 78.12569 | 74.87675 | 567.86262   | 335.74681   | 434.04421   | 1 |
| 172 | H | 79.00489 | 77.88100 | 73.92783 | -1080.02275 | 1568.26081  | -1948.78900 | 1 |
| 173 | H | 78.47676 | 79.23821 | 74.93634 | -919.54108  | 2111.34692  | 1456.13463  | 1 |
| 174 | C | 79.20865 | 77.49697 | 76.08966 | 195.81897   | 173.33862   | -745.11536  | 1 |
| 175 | H | 78.82353 | 77.80803 | 77.08278 | 1405.67949  | -2301.21089 | -390.08113  | 1 |
| 176 | H | 79.28940 | 76.39086 | 76.05040 | -940.37328  | -1118.32446 | 2299.72133  | 1 |
| 177 | N | 80.67816 | 77.98061 | 76.04617 | 319.26422   | 656.36007   | -42.02424   | 1 |
| 178 | H | 81.35035 | 77.39370 | 76.73140 | 1961.03633  | 619.91968   | 1787.09422  | 1 |
| 179 | H | 81.15567 | 77.92097 | 75.10205 | 854.14343   | -2156.80752 | 1429.08711  | 1 |
| 180 | H | 80.85674 | 78.99484 | 76.29406 | 1237.02905  | -1378.50857 | -1998.28500 | 1 |
| 181 | C | 74.23666 | 78.88000 | 74.41685 | 532.53319   | -268.57236  | 517.55729   | 1 |
| 182 | O | 74.22444 | 80.04667 | 74.10515 | 266.16714   | -290.73804  | -558.88002  | 1 |
| 183 | N | 73.97719 | 78.33187 | 75.60369 | -226.25352  | 640.49678   | -270.32839  | 1 |
| 184 | H | 74.05371 | 77.31968 | 75.69884 | 2007.69063  | -1035.27229 | 1523.50231  | 1 |
| 185 | C | 73.18609 | 79.07536 | 76.52725 | -540.76542  | -573.33303  | 49.50000    | 1 |
| 186 | H | 73.34139 | 80.12785 | 76.19183 | -2374.20950 | -1036.76023 | 843.75774   | 1 |
| 187 | C | 71.66454 | 78.59292 | 76.41145 | -77.09082   | 666.87422   | -415.84136  | 1 |
| 188 | H | 71.56645 | 77.60994 | 76.94863 | -985.81834  | 617.19825   | 2463.91927  | 1 |
| 189 | O | 71.14569 | 78.38445 | 75.08862 | 293.29899   | -391.65602  | -477.80926  | 1 |
| 190 | H | 70.94905 | 77.42511 | 75.10712 | 2528.72714  | -681.76262  | -751.27122  | 1 |
| 191 | C | 70.94882 | 79.72274 | 77.24085 | 252.47363   | -605.14473  | 440.05134   | 1 |
| 192 | H | 69.86056 | 79.51424 | 77.35888 | -2052.65063 | 1456.49051  | -1043.51830 | 1 |
| 193 | H | 71.38065 | 79.82610 | 78.26520 | -2152.98800 | -1661.97574 | -161.70652  | 1 |
| 194 | H | 71.04089 | 80.71414 | 76.73931 | -473.12726  | -1584.27339 | 2165.61725  | 1 |
| 195 | C | 73.74502 | 78.71854 | 78.02309 | 360.36307   | 488.46713   | 505.10056   | 1 |
| 196 | O | 72.97274 | 78.36666 | 78.91535 | -200.08817  | -528.03552  | -385.82850  | 1 |
| 197 | N | 75.04334 | 78.91429 | 78.06544 | -597.54095  | -226.44775  | 355.20479   | 1 |
| 198 | H | 75.42426 | 79.21064 | 77.16648 | 2179.23655  | -1300.70981 | -991.33835  | 1 |
| 199 | C | 75.86471 | 78.74043 | 79.19805 | -687.68921  | 297.39807   | -249.45179  | 1 |
| 200 | H | 76.83471 | 79.19546 | 78.90215 | -349.16256  | -2467.37713 | -1101.72831 | 1 |
| 201 | C | 75.18401 | 79.40628 | 80.48598 | 672.47345   | 361.54328   | -201.62880  | 1 |
| 202 | H | 74.14073 | 79.02278 | 80.60471 | 1541.41502  | 582.18425   | 2169.97026  | 1 |
| 203 | H | 75.75080 | 79.09726 | 81.39437 | -2534.67717 | 60.25153    | 997.72295   | 1 |
| 204 | C | 75.16217 | 80.93668 | 80.38189 | 574.26774   | -389.43119  | -377.02542  | 1 |
| 205 | C | 76.34064 | 81.68389 | 80.68253 | 688.82679   | -287.33580  | -257.96133  | 1 |
| 206 | H | 77.28357 | 81.17101 | 80.94532 | 331.14182   | 1470.38163  | 2269.80013  | 1 |
| 207 | C | 73.94726 | 81.60175 | 80.03393 | -383.52382  | -675.04808  | 144.24917   | 1 |
| 208 | H | 73.03887 | 81.02058 | 79.79118 | 4.09847     | 1517.59662  | 2262.86397  | 1 |
| 209 | C | 76.26789 | 83.07591 | 80.65467 | -134.76730  | 428.45285   | -649.50303  | 1 |

|     |   |          |          |          |             |             |             |   |
|-----|---|----------|----------|----------|-------------|-------------|-------------|---|
| 210 | H | 77.17469 | 83.65705 | 80.89693 | -903.23433  | 1600.49020  | 2011.53387  | 1 |
| 211 | C | 73.92587 | 82.99834 | 80.02420 | -335.53281  | -615.00040  | -364.39058  | 1 |
| 212 | H | 72.97880 | 83.50490 | 79.76837 | 1596.45398  | -1369.33862 | 1732.02659  | 1 |
| 213 | C | 75.07335 | 83.78505 | 80.33615 | 585.48547   | -340.24194  | -406.23938  | 1 |
| 214 | O | 75.06204 | 85.20410 | 80.33451 | -419.15649  | -173.04408  | -511.94141  | 1 |
| 215 | H | 74.11631 | 85.36304 | 80.10460 | -1071.84350 | 1559.71507  | -1960.13012 | 1 |
| 216 | C | 76.01937 | 77.15659 | 79.59210 | 291.41878   | -183.13091  | 710.72246   | 1 |
| 217 | O | 77.10176 | 76.62921 | 79.63145 | 379.87695   | 523.47396   | -222.23622  | 1 |
| 218 | N | 74.83333 | 76.66911 | 79.95802 | 564.30591   | 373.09380   | 277.24371   | 1 |
| 219 | H | 73.96437 | 77.22616 | 79.76373 | -120.59931  | -2436.07824 | -1214.35098 | 1 |
| 220 | C | 74.75519 | 75.25206 | 80.15657 | 404.07514   | -299.37480  | 608.84009   | 1 |
| 221 | H | 75.70401 | 74.93938 | 80.64980 | -1071.07882 | -841.69025  | 2359.66467  | 1 |
| 222 | C | 73.43249 | 75.04904 | 81.00614 | -683.12807  | 68.71770    | -390.13096  | 1 |
| 223 | H | 73.45071 | 75.70019 | 81.90881 | 2068.88918  | 1596.58590  | 770.89603   | 1 |
| 224 | H | 72.55338 | 75.39095 | 80.41435 | 1379.86429  | 2342.49779  | -179.85638  | 1 |
| 225 | C | 73.26003 | 73.55517 | 81.41701 | -176.39967  | 537.49466   | 550.97268   | 1 |
| 226 | H | 73.30388 | 72.88094 | 80.53182 | -396.28051  | 1942.22168  | 1869.33314  | 1 |
| 227 | H | 74.07545 | 73.22060 | 82.09616 | -94.44700   | 586.00678   | -2659.20016 | 1 |
| 228 | C | 71.83061 | 73.48966 | 82.13135 | -291.69381  | -718.18079  | -150.72929  | 1 |
| 229 | H | 71.69701 | 74.17512 | 83.00652 | -2303.38776 | 1089.76242  | 964.62032   | 1 |
| 230 | H | 70.95595 | 73.64364 | 81.44914 | 884.16729   | 2568.80533  | -207.74283  | 1 |
| 231 | N | 71.75512 | 72.17831 | 82.61784 | -594.49522  | -252.81478  | 342.29276   | 1 |
| 232 | H | 72.50421 | 71.55509 | 82.36023 | -1735.17426 | 2084.05705  | -263.71605  | 1 |
| 233 | C | 70.81191 | 71.73451 | 83.34525 | 595.23177   | -271.52487  | 442.22352   | 1 |
| 234 | N | 69.77766 | 72.61537 | 83.68304 | 585.53813   | -424.79750  | -105.81303  | 1 |
| 235 | H | 69.64482 | 73.59084 | 83.41990 | 959.88797   | 1327.56823  | -2177.11905 | 1 |
| 236 | H | 68.96726 | 72.37173 | 84.25313 | 1578.48647  | 16.27378    | -2220.76233 | 1 |
| 237 | N | 71.01481 | 70.38689 | 83.67516 | -452.17763  | -390.33541  | -421.51853  | 1 |
| 238 | H | 71.76758 | 69.74488 | 83.43186 | 470.26107   | 1974.25629  | -1817.92087 | 1 |
| 239 | H | 70.36728 | 69.85228 | 84.25551 | 1856.67307  | -1573.97321 | -1224.35416 | 1 |
| 240 | C | 74.53980 | 74.58516 | 78.68867 | -531.47271  | -581.45780  | -55.06206   | 1 |
| 241 | O | 73.86743 | 75.11978 | 77.82648 | -243.00837  | 192.73507   | 609.52485   | 1 |
| 242 | N | 75.07866 | 73.36880 | 78.66543 | 343.49288   | -644.25607  | 38.09164    | 1 |
| 243 | H | 75.60130 | 73.12015 | 79.50519 | -1691.16043 | -1535.97525 | -1484.73099 | 1 |
| 244 | C | 75.35202 | 72.71966 | 77.38360 | 542.66492   | 350.14337   | 454.42563   | 1 |
| 245 | H | 74.73737 | 73.33771 | 76.69019 | 1209.57979  | -2396.95920 | 463.86744   | 1 |
| 246 | C | 76.84419 | 72.79193 | 77.10947 | -737.14309  | 145.93010   | 242.71942   | 1 |
| 247 | H | 77.37681 | 72.34861 | 77.98117 | -1050.18303 | 159.36419   | -2509.06125 | 1 |
| 248 | C | 77.21618 | 71.99505 | 75.87541 | -706.77696  | -252.88343  | -245.16230  | 1 |
| 249 | H | 78.35861 | 71.93245 | 75.77304 | -1624.64039 | -1665.49085 | 1417.86935  | 1 |
| 250 | H | 76.83121 | 70.94096 | 75.92246 | 2566.10521  | 598.51109   | 693.22305   | 1 |
| 251 | H | 76.80456 | 72.45070 | 74.93305 | -1972.69758 | 107.10018   | -1876.34312 | 1 |
| 252 | C | 77.34619 | 74.21916 | 76.98287 | 412.85148   | 672.58832   | -27.69222   | 1 |
| 253 | H | 78.46180 | 74.25330 | 76.83516 | 1447.02277  | 1762.76533  | -1490.78944 | 1 |
| 254 | H | 76.87650 | 74.74592 | 76.10902 | 1320.77379  | -145.20455  | 2378.68491  | 1 |
| 255 | H | 77.11092 | 74.82642 | 77.90219 | -1512.10848 | 1470.52031  | 1724.75147  | 1 |
| 256 | C | 74.78791 | 71.15760 | 77.51428 | -607.11113  | 499.56689   | 73.73769    | 1 |
| 257 | O | 73.62179 | 70.93815 | 77.30042 | 357.97126   | 460.81534   | 356.68785   | 1 |
| 258 | N | 75.74369 | 70.30723 | 77.85226 | 536.55407   | -368.62270  | 332.76306   | 1 |
| 259 | H | 76.68688 | 70.64326 | 78.03602 | 524.38866   | 2297.69985  | 1367.20941  | 1 |
| 260 | C | 75.43659 | 68.93727 | 78.01272 | 46.50277    | -774.29190  | -147.97904  | 1 |
| 261 | H | 74.32446 | 68.87724 | 77.99696 | 1676.51875  | 1883.29066  | 1032.55549  | 1 |
| 262 | C | 76.14490 | 68.08829 | 76.83089 | -559.41456  | -34.19198   | -556.30433  | 1 |
| 263 | H | 77.24862 | 68.24238 | 76.88620 | -64.66664   | 395.18769   | 2695.05373  | 1 |
| 264 | H | 75.98185 | 66.99600 | 76.99049 | -2703.44278 | -60.40056   | 333.79418   | 1 |
| 265 | C | 75.62830 | 68.51228 | 75.48438 | -519.76435  | 377.31045   | 459.42366   | 1 |
| 266 | H | 75.70770 | 69.61975 | 75.40416 | -1746.74323 | 1667.50644  | -1261.73691 | 1 |
| 267 | C | 76.46434 | 67.88918 | 74.37273 | 570.95554   | 16.46261    | -545.27700  | 1 |
| 268 | H | 76.12782 | 68.23515 | 73.36057 | 2391.58273  | 28.05277    | -1305.07271 | 1 |
| 269 | H | 77.54818 | 68.15647 | 74.46931 | 175.75588   | 917.63458   | 2559.43867  | 1 |
| 270 | H | 76.39633 | 66.77071 | 74.38194 | -1063.97851 | -2155.34650 | 1283.00462  | 1 |
| 271 | C | 74.16547 | 68.13257 | 75.29655 | 193.76014   | 2.62946     | -765.53141  | 1 |

|     |   |          |          |          |             |             |             |   |
|-----|---|----------|----------|----------|-------------|-------------|-------------|---|
| 272 | H | 73.80087 | 68.40389 | 74.27163 | 507.39394   | -846.55087  | 2539.60089  | 1 |
| 273 | H | 74.00135 | 67.03194 | 75.42920 | 1337.57841  | 1818.19054  | 1526.01994  | 1 |
| 274 | H | 73.50633 | 68.66315 | 76.03187 | 1100.88635  | -1172.91350 | -2199.08909 | 1 |
| 275 | C | 76.14647 | 68.47561 | 79.38910 | -549.21115  | 475.64486   | -309.38218  | 1 |
| 276 | O | 77.06401 | 69.07113 | 79.89018 | 556.06106   | -390.37755  | -78.24250   | 1 |
| 277 | O | 75.70547 | 67.24424 | 79.92756 | -572.27940  | -310.19032  | -209.75862  | 1 |
| 278 | H | 74.98461 | 67.03814 | 79.26952 | -1380.08193 | 2212.14486  | 790.85944   | 1 |

Listing 90: C00090.xmolout

|    |         |          |          |          |             |             |             |          |  |
|----|---------|----------|----------|----------|-------------|-------------|-------------|----------|--|
| 1  | 276     |          |          |          |             |             |             |          |  |
| 2  | initial | 150.0000 | 150.0000 | 150.0000 | 0.0000      | 0.0000      | 0.0000***** | 2.7750   |  |
|    |         | 11100    | 0.2500   | 300.00   | 0.00        | 0.00        | 0.00        | 300.0000 |  |
| 3  | H       | 69.32652 | 74.40636 | 89.18194 | -2043.14101 | -1757.64893 | 399.89339   | 1        |  |
| 4  | N       | 70.12955 | 74.05564 | 88.66396 | 426.75047   | 490.45733   | -334.42467  | 1        |  |
| 5  | H       | 70.43287 | 73.27324 | 89.23954 | 442.25559   | -1110.30854 | -2448.52907 | 1        |  |
| 6  | C       | 71.13063 | 75.00978 | 88.38794 | 415.32972   | -666.39213  | 83.73172    | 1        |  |
| 7  | H       | 70.56368 | 75.92154 | 88.10589 | 879.32219   | 2491.00447  | 667.35213   | 1        |  |
| 8  | C       | 72.08706 | 75.19630 | 89.66629 | 31.35357    | 477.41777   | 628.23362   | 1        |  |
| 9  | H       | 72.57367 | 74.21849 | 89.90053 | 1168.38489  | 2240.25337  | -1019.71136 | 1        |  |
| 10 | H       | 72.92031 | 75.89400 | 89.40945 | -360.43770  | 2534.90498  | 931.67112   | 1        |  |
| 11 | C       | 71.32217 | 75.70394 | 90.86475 | 463.18208   | 512.70242   | -382.34388  | 1        |  |
| 12 | H       | 70.47032 | 75.01619 | 91.06304 | 1725.29117  | 1863.52247  | -987.07854  | 1        |  |
| 13 | C       | 72.22664 | 75.71611 | 92.09055 | 710.42801   | -144.27427  | -313.15367  | 1        |  |
| 14 | H       | 71.68364 | 76.07380 | 93.00325 | 364.20195   | -1033.13725 | 2494.72524  | 1        |  |
| 15 | H       | 72.62760 | 74.69491 | 92.32005 | 2567.61904  | 335.80679   | 847.48802   | 1        |  |
| 16 | H       | 73.10856 | 76.39202 | 91.94376 | -2587.99029 | 680.92867   | -512.16411  | 1        |  |
| 17 | C       | 70.77270 | 77.10192 | 90.61977 | 268.17616   | 741.64379   | -40.42634   | 1        |  |
| 18 | H       | 70.24621 | 77.50319 | 91.52424 | 1283.54314  | -1945.37420 | -1411.27812 | 1        |  |
| 19 | H       | 71.58917 | 77.82571 | 90.36317 | -1258.57796 | 1317.15249  | -2026.02085 | 1        |  |
| 20 | H       | 70.03728 | 77.11778 | 89.77449 | -2502.84526 | 909.80597   | 575.92391   | 1        |  |
| 21 | C       | 72.06404 | 74.39981 | 87.18668 | 619.36578   | -458.64843  | -172.09273  | 1        |  |
| 22 | O       | 73.13075 | 73.88938 | 87.44062 | -81.40433   | 433.87611   | 522.34594   | 1        |  |
| 23 | N       | 71.44834 | 74.54427 | 86.01834 | 175.23996   | -622.20190  | 341.55523   | 1        |  |
| 24 | H       | 70.56084 | 75.04659 | 86.01584 | -876.57256  | -303.22879  | -2561.90213 | 1        |  |
| 25 | C       | 72.05736 | 74.13063 | 84.80112 | -571.88214  | -534.10783  | -106.15033  | 1        |  |
| 26 | H       | 71.29355 | 74.38804 | 84.03313 | -2713.20841 | -16.25800   | -248.80809  | 1        |  |
| 27 | C       | 73.35218 | 75.07661 | 84.68093 | 166.60354   | 288.16399   | -716.09568  | 1        |  |
| 28 | H       | 74.00547 | 74.86975 | 85.57387 | -2097.85574 | 1636.78449  | -586.18044  | 1        |  |
| 29 | O       | 73.04471 | 76.48342 | 84.71360 | -317.80580  | -363.38227  | 484.43082   | 1        |  |
| 30 | H       | 73.46854 | 76.74254 | 85.55570 | 1863.74748  | -1451.84923 | 1357.29467  | 1        |  |
| 31 | C       | 74.10680 | 74.61906 | 83.38264 | 503.80731   | 517.99032   | 318.51606   | 1        |  |
| 32 | H       | 74.96397 | 75.29642 | 83.15743 | 640.61020   | -2157.10410 | -1536.29104 | 1        |  |
| 33 | H       | 74.53014 | 73.58209 | 83.48134 | 1687.88455  | 465.60692   | 2087.56452  | 1        |  |
| 34 | H       | 73.43480 | 74.63056 | 82.49269 | -1293.07895 | -1899.88581 | -1463.57452 | 1        |  |
| 35 | C       | 72.35799 | 72.53995 | 84.84780 | -153.07550  | -733.68902  | 248.70981   | 1        |  |
| 36 | O       | 73.37944 | 72.16000 | 84.31563 | 186.15459   | -480.78787  | -449.34387  | 1        |  |
| 37 | N       | 71.37421 | 71.78754 | 85.36061 | -487.53139  | 543.18517   | 42.03850    | 1        |  |
| 38 | C       | 71.57801 | 70.39753 | 85.61901 | -699.35871  | 69.34393    | 360.10701   | 1        |  |
| 39 | H       | 72.65072 | 70.27355 | 85.88910 | 2.81126     | -221.99807  | -2715.58072 | 1        |  |
| 40 | C       | 70.52844 | 70.15271 | 86.78099 | -507.46439  | -592.59194  | 122.07761   | 1        |  |
| 41 | H       | 70.28294 | 69.07696 | 86.92625 | -1975.08116 | 525.87560   | -1801.71556 | 1        |  |
| 42 | H       | 70.90785 | 70.53138 | 87.75670 | 1588.27743  | -1913.22100 | 1113.83566  | 1        |  |
| 43 | C       | 69.31639 | 71.00086 | 86.28296 | -613.62442  | -457.55993  | -194.14490  | 1        |  |
| 44 | H       | 68.77633 | 70.48205 | 85.45574 | 1707.54637  | -721.27992  | 1996.92523  | 1        |  |
| 45 | H       | 68.56381 | 71.21910 | 87.07435 | 758.23357   | 2100.81767  | 1560.55011  | 1        |  |
| 46 | C       | 70.06737 | 72.29795 | 85.75928 | -352.41524  | 704.96076   | 49.21465    | 1        |  |
| 47 | H       | 69.60574 | 72.79938 | 84.87619 | 1714.76886  | -2070.42778 | 443.35792   | 1        |  |
| 48 | H       | 70.27266 | 73.05649 | 86.55054 | 1224.15040  | 1801.50881  | 1636.97633  | 1        |  |
| 49 | C       | 71.15566 | 69.54628 | 84.26833 | 566.85117   | 537.05831   | 117.62814   | 1        |  |
| 50 | O       | 70.02809 | 69.60263 | 83.84025 | -550.26779  | -406.08867  | 4.21666     | 1        |  |
| 51 | N       | 72.18283 | 68.81464 | 83.87224 | 566.34832   | -425.77725  | 180.18749   | 1        |  |

|     |   |          |          |          |             |             |             |   |
|-----|---|----------|----------|----------|-------------|-------------|-------------|---|
| 52  | H | 73.04212 | 68.90403 | 84.41314 | 644.44502   | 2646.80550  | -52.73430   | 1 |
| 53  | C | 72.18015 | 68.05866 | 82.67055 | 612.34801   | -281.48662  | 411.56221   | 1 |
| 54  | H | 73.16200 | 67.53850 | 82.73070 | 1667.23498  | -1490.75142 | 1556.16753  | 1 |
| 55  | C | 70.94302 | 67.04945 | 82.68678 | -714.45746  | -175.43074  | 286.98927   | 1 |
| 56  | H | 69.99293 | 67.65326 | 82.68694 | -787.09484  | 1763.03619  | -1922.46060 | 1 |
| 57  | O | 70.88210 | 66.17378 | 83.82938 | -429.46514  | 516.51932   | -128.40526  | 1 |
| 58  | H | 70.05156 | 66.47311 | 84.24882 | 1981.82785  | 436.16847   | -1818.18182 | 1 |
| 59  | C | 71.10035 | 66.31523 | 81.30444 | 630.79189   | -468.94448  | 76.03230    | 1 |
| 60  | H | 70.27980 | 65.57863 | 81.14141 | -1775.71861 | 2062.30353  | 131.89849   | 1 |
| 61  | H | 71.07650 | 67.03203 | 80.44435 | -1855.14608 | 88.94118    | 1993.53760  | 1 |
| 62  | H | 72.06225 | 65.75479 | 81.24673 | -1504.82350 | -780.94249  | -2132.90992 | 1 |
| 63  | C | 72.12754 | 69.10889 | 81.41292 | 288.57638   | 618.62814   | -397.00270  | 1 |
| 64  | O | 71.23685 | 69.13221 | 80.59384 | 321.70495   | -185.26452  | 574.37218   | 1 |
| 65  | N | 73.28256 | 69.77596 | 81.38758 | -447.05792  | -446.53431  | 367.76425   | 1 |
| 66  | H | 73.88138 | 69.64993 | 82.20328 | 350.31316   | 1975.63644  | -1843.31522 | 1 |
| 67  | C | 73.28588 | 71.02487 | 80.65300 | -511.23061  | 374.03917   | -471.51480  | 1 |
| 68  | H | 72.25359 | 71.42293 | 80.79030 | 2234.79579  | -898.70890  | -1273.45190 | 1 |
| 69  | C | 74.42340 | 71.93707 | 81.33499 | 529.53781   | -159.34528  | 563.72604   | 1 |
| 70  | H | 74.26167 | 72.98461 | 80.96789 | 654.59388   | 2347.94251  | 1217.51488  | 1 |
| 71  | H | 74.18441 | 71.93043 | 82.44334 | -1526.55661 | 2103.42026  | 817.87394   | 1 |
| 72  | O | 75.78776 | 71.50550 | 81.14133 | -554.84278  | 14.12789    | 399.58769   | 1 |
| 73  | H | 76.00653 | 72.00421 | 80.32921 | 1297.06236  | 2061.84854  | 1220.68812  | 1 |
| 74  | C | 73.62827 | 70.82094 | 79.12074 | -662.15484  | -412.13544  | 123.62687   | 1 |
| 75  | O | 73.54958 | 71.88277 | 78.31639 | -540.01537  | -317.05804  | 274.91456   | 1 |
| 76  | N | 73.99563 | 69.62767 | 78.83748 | -202.76299  | -690.00100  | -131.49145  | 1 |
| 77  | H | 74.02213 | 69.12529 | 79.74313 | -702.62132  | -2617.37191 | 281.70413   | 1 |
| 78  | C | 73.80224 | 68.85737 | 77.65446 | -491.73914  | 576.34187   | 222.73509   | 1 |
| 79  | H | 73.45126 | 67.88554 | 78.06577 | 1977.17978  | -1823.58850 | -434.68928  | 1 |
| 80  | C | 72.69096 | 69.48751 | 76.70917 | -649.50797  | -328.66843  | 306.11224   | 1 |
| 81  | H | 72.71856 | 70.60248 | 76.71169 | 2075.07803  | 1452.16490  | -1004.45904 | 1 |
| 82  | C | 72.93198 | 68.92752 | 75.26416 | -615.18735  | -489.99689  | -70.96352   | 1 |
| 83  | H | 72.09975 | 69.18803 | 74.56835 | -1226.32661 | -1724.38906 | -1716.47170 | 1 |
| 84  | H | 73.87920 | 69.32859 | 74.82589 | 2381.64273  | -969.84735  | 900.46860   | 1 |
| 85  | H | 73.03969 | 67.81584 | 75.27364 | 2122.74991  | 1702.23946  | -141.36228  | 1 |
| 86  | C | 71.30648 | 68.98716 | 77.24957 | -501.86074  | -479.61276  | -376.42482  | 1 |
| 87  | H | 70.45910 | 69.41672 | 76.66531 | 993.79261   | -2246.95401 | -1177.81305 | 1 |
| 88  | H | 71.22028 | 67.87697 | 77.19204 | 42.71279    | -626.15391  | -2651.37258 | 1 |
| 89  | H | 71.15910 | 69.27780 | 78.32139 | -2026.39012 | -1590.33709 | -887.82922  | 1 |
| 90  | C | 75.22751 | 68.57820 | 76.91752 | -672.89153  | 382.57394   | -156.34072  | 1 |
| 91  | O | 75.24587 | 67.86839 | 75.93212 | 410.04627   | 221.86223   | 500.35950   | 1 |
| 92  | N | 76.25368 | 69.13152 | 77.55416 | -378.11782  | -443.79414  | -441.10984  | 1 |
| 93  | H | 76.02212 | 69.67493 | 78.38640 | 2404.15973  | -568.14894  | 1149.30085  | 1 |
| 94  | C | 77.54034 | 69.18005 | 76.96990 | -544.54484  | 466.16019   | 331.29119   | 1 |
| 95  | H | 78.18599 | 69.59919 | 77.77314 | -1409.80988 | -170.17955  | 2325.32679  | 1 |
| 96  | C | 77.89684 | 67.69897 | 76.55619 | -184.48284  | 116.78282   | -758.89137  | 1 |
| 97  | H | 77.58225 | 66.98427 | 77.35093 | 1893.78641  | 1861.14652  | 611.04528   | 1 |
| 98  | H | 77.32628 | 67.40699 | 75.63828 | -2170.79665 | -974.19311  | 1327.50117  | 1 |
| 99  | C | 79.43745 | 67.62806 | 76.30907 | 389.51668   | 672.81878   | -138.49152  | 1 |
| 100 | H | 79.72663 | 68.36493 | 75.51608 | 510.64577   | 1933.03327  | 1851.02484  | 1 |
| 101 | H | 79.99134 | 67.96594 | 77.21310 | -2302.30869 | -1105.72939 | -948.89774  | 1 |
| 102 | C | 79.91755 | 66.18228 | 75.90893 | -559.93427  | -126.34590  | 542.30857   | 1 |
| 103 | O | 81.09215 | 65.96801 | 75.75452 | -670.36003  | -111.83166  | 76.36448    | 1 |
| 104 | N | 78.91530 | 65.28637 | 75.77444 | -216.06729  | -537.07037  | 446.51379   | 1 |
| 105 | H | 77.90035 | 65.41827 | 75.85712 | -1251.96487 | 1074.12894  | -2168.52500 | 1 |
| 106 | H | 79.05430 | 64.31204 | 75.48639 | -2451.83023 | -720.73851  | 944.84612   | 1 |
| 107 | C | 77.60608 | 70.09070 | 75.57924 | 546.24052   | -563.88337  | -85.11809   | 1 |
| 108 | O | 78.58011 | 70.00097 | 74.84446 | 71.70702    | -307.40463  | 606.69673   | 1 |
| 109 | N | 76.52206 | 70.81629 | 75.49964 | 479.90863   | -504.50129  | 222.86849   | 1 |
| 110 | C | 76.57071 | 71.94815 | 74.73133 | 75.51268    | -600.91904  | 506.73700   | 1 |
| 111 | H | 77.18094 | 71.66513 | 73.83357 | -2033.61562 | 1795.30103  | 254.89480   | 1 |
| 112 | C | 75.03359 | 72.31133 | 74.44996 | 523.79067   | 517.99274   | 284.45581   | 1 |
| 113 | H | 74.94452 | 73.11960 | 73.69448 | 1599.61665  | -1127.00911 | 1895.98173  | 1 |

|     |   |          |          |          |             |             |             |   |
|-----|---|----------|----------|----------|-------------|-------------|-------------|---|
| 114 | H | 74.51868 | 71.43180 | 74.00936 | -1881.83093 | 1275.82488  | -1501.55016 | 1 |
| 115 | C | 74.32289 | 72.73433 | 75.79419 | -600.05639  | -404.05026  | 316.64485   | 1 |
| 116 | H | 74.68411 | 73.73838 | 76.12029 | -2597.05260 | 496.36221   | 657.73249   | 1 |
| 117 | H | 73.22587 | 72.83642 | 75.61741 | -1666.24518 | 1294.38985  | -1723.90591 | 1 |
| 118 | C | 74.56132 | 71.72106 | 76.91596 | 493.57570   | -129.95376  | -602.56394  | 1 |
| 119 | H | 75.59507 | 71.76629 | 77.30998 | -1469.08415 | -637.84797  | 2204.22581  | 1 |
| 120 | H | 74.40870 | 70.68099 | 76.57339 | -1038.97840 | 1068.88701  | -2280.71789 | 1 |
| 121 | C | 77.33504 | 73.14036 | 75.62762 | 188.88100   | 241.05089   | -727.87821  | 1 |
| 122 | O | 77.99070 | 72.87678 | 76.61164 | 531.88613   | -49.19943   | 427.07960   | 1 |
| 123 | N | 77.13872 | 74.30047 | 75.03551 | 708.14833   | 26.93417    | -179.73509  | 1 |
| 124 | H | 76.53716 | 74.19247 | 74.22202 | -2232.69501 | -1179.09831 | 1023.94816  | 1 |
| 125 | C | 77.65541 | 75.59057 | 75.45101 | -738.32412  | 259.92548   | 104.42456   | 1 |
| 126 | H | 76.87161 | 76.31337 | 75.11848 | 2028.89123  | 1260.02983  | 1311.33324  | 1 |
| 127 | C | 77.88745 | 75.61587 | 76.95305 | -258.65678  | -345.52513  | 661.28459   | 1 |
| 128 | H | 78.52420 | 74.72930 | 77.21975 | -1826.06090 | -1801.46097 | -918.64554  | 1 |
| 129 | C | 78.61980 | 76.87009 | 77.39035 | -541.23400  | 531.92970   | -218.41428  | 1 |
| 130 | H | 78.81856 | 76.87306 | 78.49765 | 1311.73218  | -2219.18200 | 882.19023   | 1 |
| 131 | H | 79.61460 | 76.96966 | 76.86937 | -1048.71298 | 1223.58118  | -2196.97971 | 1 |
| 132 | H | 78.03014 | 77.79788 | 77.15320 | 419.06414   | 1903.92898  | 1903.44670  | 1 |
| 133 | C | 76.58720 | 75.48218 | 77.72508 | -423.86431  | 152.66566   | -648.55262  | 1 |
| 134 | H | 76.75435 | 75.53416 | 78.83582 | 105.68386   | -2342.50080 | 1387.51238  | 1 |
| 135 | H | 75.85920 | 76.29640 | 77.45799 | -1695.63603 | -1484.73621 | -1531.02793 | 1 |
| 136 | H | 76.08505 | 74.49922 | 77.51044 | -1853.57121 | -487.39031  | 1936.59343  | 1 |
| 137 | C | 79.06971 | 75.86797 | 74.60699 | 539.71428   | -510.58232  | 267.58633   | 1 |
| 138 | O | 79.53037 | 76.98474 | 74.58511 | -15.93758   | -278.34085  | -624.49402  | 1 |
| 139 | N | 79.56378 | 74.77055 | 74.06338 | -676.81886  | 12.05292    | 276.17960   | 1 |
| 140 | H | 79.02051 | 73.91987 | 74.19048 | -1694.44250 | -373.84189  | -2100.66098 | 1 |
| 141 | C | 80.68249 | 74.87709 | 73.18673 | 412.33078   | -664.70360  | 108.35451   | 1 |
| 142 | H | 81.12193 | 75.88724 | 73.36553 | 1765.77476  | 1294.44366  | 1621.76594  | 1 |
| 143 | C | 81.61940 | 73.65177 | 73.56021 | -179.66635  | -721.95667  | -264.73915  | 1 |
| 144 | H | 81.83986 | 73.65139 | 74.65102 | -607.34922  | 2587.87032  | -598.10018  | 1 |
| 145 | H | 81.09778 | 72.68816 | 73.36363 | -359.69332  | -1479.13954 | -2259.74260 | 1 |
| 146 | C | 82.93765 | 73.75292 | 72.72689 | -240.01076  | 616.02425   | 431.85322   | 1 |
| 147 | H | 82.72023 | 73.71497 | 71.63560 | -1359.17131 | 782.54425   | 2227.99181  | 1 |
| 148 | H | 83.44909 | 74.72504 | 72.90621 | -820.36667  | 85.81767    | -2596.78715 | 1 |
| 149 | C | 83.85859 | 72.54261 | 73.16503 | -513.07015  | 236.18570   | -551.87280  | 1 |
| 150 | H | 84.06827 | 72.58271 | 74.25860 | 1816.11944  | -1183.11722 | -1650.94321 | 1 |
| 151 | H | 83.34141 | 71.57061 | 72.99355 | -1800.04429 | -1361.53473 | 1526.34643  | 1 |
| 152 | C | 85.17366 | 72.61223 | 72.35570 | 726.08972   | -253.19732  | -179.64713  | 1 |
| 153 | H | 85.05395 | 72.45785 | 71.26484 | 1224.27271  | -456.51798  | -2390.90304 | 1 |
| 154 | H | 85.78645 | 73.51600 | 72.54524 | 1206.40339  | -1150.93514 | -2154.90344 | 1 |
| 155 | N | 86.07344 | 71.41993 | 72.82917 | 329.70796   | -633.68968  | -155.67358  | 1 |
| 156 | H | 87.01458 | 71.33410 | 72.34751 | 1348.31305  | 1938.76845  | 1359.00643  | 1 |
| 157 | H | 86.36082 | 71.40916 | 73.85085 | 2096.92035  | 1446.54551  | -966.48890  | 1 |
| 158 | H | 85.68320 | 70.44108 | 72.70211 | -1197.07217 | -2303.53719 | 827.28733   | 1 |
| 159 | C | 80.16597 | 74.63044 | 71.65601 | -378.01186  | -556.17301  | -413.96481  | 1 |
| 160 | O | 79.26832 | 73.81515 | 71.40696 | -409.44433  | -307.55053  | -453.30833  | 1 |
| 161 | N | 80.86498 | 75.37507 | 70.84291 | -429.02477  | 524.70884   | 274.08502   | 1 |
| 162 | H | 81.58186 | 75.93615 | 71.30048 | 1706.34263  | -1425.96036 | 1574.38926  | 1 |
| 163 | C | 80.73581 | 75.35212 | 69.42829 | -45.25864   | -626.22952  | 478.93267   | 1 |
| 164 | H | 81.76739 | 75.58021 | 69.07942 | 1988.63164  | 570.90773   | 1772.87287  | 1 |
| 165 | C | 80.21380 | 73.93420 | 68.96739 | 551.77128   | -20.49526   | -564.54996  | 1 |
| 166 | H | 80.73911 | 73.12409 | 69.52260 | 1434.61535  | -1753.10253 | 1513.99471  | 1 |
| 167 | H | 79.13372 | 73.82168 | 69.23331 | -714.67738  | 1819.09770  | 1898.36494  | 1 |
| 168 | C | 80.40615 | 73.78323 | 67.42067 | 446.99263   | -555.77305  | 338.97221   | 1 |
| 169 | H | 79.90476 | 74.62433 | 66.88338 | 1953.68466  | 1892.25957  | -161.67766  | 1 |
| 170 | H | 81.48152 | 73.83362 | 67.13793 | -403.03785  | 2688.07032  | -188.43591  | 1 |
| 171 | C | 79.77047 | 72.39566 | 67.00722 | 567.86262   | 335.74681   | 434.04421   | 1 |
| 172 | H | 80.35247 | 71.54699 | 67.43486 | -1080.02275 | 1568.26081  | -1948.78900 | 1 |
| 173 | H | 78.74078 | 72.29488 | 67.42178 | -919.54108  | 2111.34692  | 1456.13463  | 1 |
| 174 | C | 79.73758 | 72.32736 | 65.46276 | 195.81897   | 173.33862   | -745.11536  | 1 |
| 175 | H | 79.06841 | 73.07052 | 64.98471 | 1405.67949  | -2301.21089 | -390.08113  | 1 |

|     |   |          |          |          |             |             |             |   |
|-----|---|----------|----------|----------|-------------|-------------|-------------|---|
| 176 | H | 80.73291 | 72.34578 | 64.97590 | -940.37328  | -1118.32446 | 2299.72133  | 1 |
| 177 | N | 79.12625 | 70.94000 | 65.06989 | 319.26422   | 656.36007   | -42.02424   | 1 |
| 178 | H | 79.00582 | 70.76874 | 64.03001 | 1961.03633  | 619.91968   | 1787.09422  | 1 |
| 179 | H | 79.66374 | 70.07305 | 65.36343 | 854.14343   | -2156.80752 | 1429.08711  | 1 |
| 180 | H | 78.15113 | 70.72629 | 65.43068 | 1237.02905  | -1378.50857 | -1998.28500 | 1 |
| 181 | C | 79.68455 | 76.49298 | 68.87433 | 532.53319   | -268.57236  | 517.55729   | 1 |
| 182 | O | 79.62481 | 76.64484 | 67.67081 | 266.16714   | -290.73804  | -558.88002  | 1 |
| 183 | N | 79.03072 | 77.11699 | 69.83493 | -226.25352  | 640.49678   | -270.32839  | 1 |
| 184 | H | 79.29231 | 76.80089 | 70.76790 | 2007.69063  | -1035.27229 | 1523.50231  | 1 |
| 185 | C | 78.15052 | 78.21604 | 69.66163 | -540.76542  | -573.33303  | 49.50000    | 1 |
| 186 | H | 78.25316 | 78.80094 | 70.60166 | -2374.20950 | -1036.76023 | 843.75774   | 1 |
| 187 | C | 78.53155 | 79.02995 | 68.34438 | -77.09082   | 666.87422   | -415.84136  | 1 |
| 188 | H | 78.40396 | 78.33400 | 67.46146 | -985.81834  | 617.19825   | 2463.91927  | 1 |
| 189 | O | 79.89166 | 79.51780 | 68.29614 | 293.29899   | -391.65602  | -477.80926  | 1 |
| 190 | H | 80.29731 | 78.82318 | 67.73319 | 2528.72714  | -681.76262  | -751.27122  | 1 |
| 191 | C | 77.41801 | 80.13893 | 68.27097 | 252.47363   | -605.14473  | 440.05134   | 1 |
| 192 | H | 77.50801 | 80.74438 | 67.33911 | -2052.65063 | 1456.49051  | -1043.51830 | 1 |
| 193 | H | 76.38951 | 79.70485 | 68.28037 | -2152.98800 | -1661.97574 | -161.70652  | 1 |
| 194 | H | 77.48628 | 80.84552 | 69.13014 | -473.12726  | -1584.27339 | 2165.61725  | 1 |
| 195 | C | 76.62231 | 77.65755 | 69.45319 | 360.36307   | 488.46713   | 505.10056   | 1 |
| 196 | O | 76.32912 | 76.79263 | 68.66337 | -200.08817  | -528.03552  | -385.82850  | 1 |
| 197 | N | 75.81808 | 78.42821 | 70.18220 | -597.54095  | -226.44775  | 355.20479   | 1 |
| 198 | H | 76.20309 | 79.14704 | 70.79373 | 2179.23655  | -1300.70981 | -991.33835  | 1 |
| 199 | C | 74.43540 | 78.14453 | 70.17114 | -687.68921  | 297.39807   | -249.45179  | 1 |
| 200 | H | 74.26725 | 77.42796 | 69.33386 | -349.16256  | -2467.37713 | -1101.72831 | 1 |
| 201 | C | 74.04595 | 77.56019 | 71.61707 | 672.47345   | 361.54328   | -201.62880  | 1 |
| 202 | H | 74.37343 | 78.26566 | 72.41424 | 1541.41502  | 582.18425   | 2169.97026  | 1 |
| 203 | H | 72.94195 | 77.44348 | 71.70718 | -2534.67717 | 60.25153    | 997.72295   | 1 |
| 204 | C | 74.75972 | 76.21020 | 71.74563 | 574.26774   | -389.43119  | -377.02542  | 1 |
| 205 | C | 74.13577 | 75.00006 | 71.32089 | 688.82679   | -287.33580  | -257.96133  | 1 |
| 206 | H | 73.09002 | 74.99855 | 70.96481 | 331.14182   | 1470.38163  | 2269.80013  | 1 |
| 207 | C | 76.11071 | 76.19827 | 72.20234 | -383.52382  | -675.04808  | 144.24917   | 1 |
| 208 | H | 76.60845 | 77.12938 | 72.52887 | 4.09847     | 1517.59662  | 2262.86397  | 1 |
| 209 | C | 74.88495 | 73.82537 | 71.33608 | -134.76730  | 428.45285   | -649.50303  | 1 |
| 210 | H | 74.39951 | 72.89457 | 70.99487 | -903.23433  | 1600.49020  | 2011.53387  | 1 |
| 211 | C | 76.80272 | 74.99017 | 72.18294 | -335.53281  | -615.00040  | -364.39058  | 1 |
| 212 | H | 77.85160 | 75.00846 | 72.53476 | 1596.45398  | -1369.33862 | 1732.02659  | 1 |
| 213 | C | 76.23995 | 73.76074 | 71.75104 | 585.48547   | -340.24194  | -406.23938  | 1 |
| 214 | O | 76.95706 | 72.56281 | 71.74494 | -419.15649  | -173.04408  | -511.94141  | 1 |
| 215 | H | 77.93280 | 72.92992 | 71.60271 | -1071.84350 | 1559.71507  | -1960.13012 | 1 |
| 216 | C | 73.62437 | 79.56971 | 70.08028 | 291.41878   | -183.13091  | 710.72246   | 1 |
| 217 | O | 73.77704 | 80.45310 | 70.89275 | 379.87695   | 523.47396   | -222.23622  | 1 |
| 218 | N | 72.74348 | 79.47927 | 69.09218 | 564.30591   | 373.09380   | 277.24371   | 1 |
| 219 | H | 72.75265 | 78.64517 | 68.50646 | -120.59931  | -2436.07824 | -1214.35098 | 1 |
| 220 | C | 71.99221 | 80.63107 | 68.71888 | 404.07514   | -299.37480  | 608.84009   | 1 |
| 221 | H | 71.22450 | 80.20956 | 68.03195 | -1071.07882 | -841.69025  | 2359.66467  | 1 |
| 222 | C | 71.39254 | 81.19591 | 70.07687 | -683.12807  | 68.71770    | -390.13096  | 1 |
| 223 | H | 71.23838 | 80.34643 | 70.78002 | 2068.88918  | 1596.58590  | 770.89603   | 1 |
| 224 | H | 72.12435 | 81.86609 | 70.58764 | 1379.86429  | 2342.49779  | -179.85638  | 1 |
| 225 | C | 70.04010 | 81.93608 | 69.83616 | -176.39967  | 537.49466   | 550.97268   | 1 |
| 226 | H | 70.19590 | 82.95707 | 69.42025 | -396.28051  | 1942.22168  | 1869.33314  | 1 |
| 227 | H | 69.41408 | 81.39950 | 69.08922 | -94.44700   | 586.00678   | -2659.20016 | 1 |
| 228 | C | 69.30141 | 81.99782 | 71.25209 | -291.69381  | -718.18079  | -150.72929  | 1 |
| 229 | H | 68.95619 | 81.01592 | 71.66504 | -2303.38776 | 1089.76242  | 964.62032   | 1 |
| 230 | H | 69.86352 | 82.52923 | 72.06179 | 884.16729   | 2568.80533  | -207.74283  | 1 |
| 231 | N | 68.16597 | 82.76467 | 70.95231 | -594.49522  | -252.81478  | 342.29276   | 1 |
| 232 | H | 68.11337 | 83.15124 | 70.02263 | -1735.17426 | 2084.05705  | -263.71605  | 1 |
| 233 | C | 67.21941 | 83.00854 | 71.76547 | 595.23177   | -271.52487  | 442.22352   | 1 |
| 234 | N | 67.30898 | 82.46802 | 73.05297 | 585.53813   | -424.79750  | -105.81303  | 1 |
| 235 | H | 68.03960 | 81.88676 | 73.46132 | 959.88797   | 1327.56823  | -2177.11905 | 1 |
| 236 | H | 66.61347 | 82.59407 | 73.78882 | 1578.48647  | 16.27378    | -2220.76233 | 1 |
| 237 | N | 66.23876 | 83.81217 | 71.16615 | -452.17763  | -390.33541  | -421.51853  | 1 |



|     |   |          |          |          |             |             |             |   |
|-----|---|----------|----------|----------|-------------|-------------|-------------|---|
| 238 | H | 66.17686 | 84.20327 | 70.22753 | 470.26107   | 1974.25629  | -1817.92087 | 1 |
| 239 | H | 65.39720 | 84.12175 | 71.65334 | 1856.67307  | -1573.97321 | -1224.35416 | 1 |
| 240 | C | 73.00950 | 81.63835 | 67.93515 | -531.47271  | -581.45780  | -55.06206   | 1 |
| 241 | O | 73.99283 | 81.25519 | 67.34701 | -243.00837  | 192.73507   | 609.52485   | 1 |
| 242 | N | 72.47911 | 82.86529 | 67.92376 | 343.49288   | -644.25607  | 38.09164    | 1 |
| 243 | H | 71.62853 | 82.96044 | 68.47661 | -1691.16043 | -1535.97525 | -1484.73099 | 1 |
| 244 | C | 73.22163 | 84.04539 | 67.49082 | 542.66492   | 350.14337   | 454.42563   | 1 |
| 245 | H | 72.56949 | 84.89295 | 67.81150 | 1209.57979  | -2396.95920 | 463.86744   | 1 |
| 246 | C | 74.56925 | 84.05677 | 68.19173 | -737.14309  | 145.93010   | 242.71942   | 1 |
| 247 | H | 75.14187 | 83.17095 | 67.82812 | -1050.18303 | 159.36419   | -2509.06125 | 1 |
| 248 | C | 75.35829 | 85.31102 | 67.86683 | -706.77696  | -252.88343  | -245.16230  | 1 |
| 249 | H | 76.37702 | 85.30043 | 68.34290 | -1624.64039 | -1665.49085 | 1417.86935  | 1 |
| 250 | H | 75.50353 | 85.42791 | 66.75016 | 2566.10521  | 598.51109   | 693.22305   | 1 |
| 251 | H | 74.83141 | 86.23620 | 68.22939 | -1972.69758 | 107.10018   | -1876.34312 | 1 |
| 252 | C | 74.42607 | 83.91937 | 69.69736 | 412.85148   | 672.58832   | -27.69222   | 1 |
| 253 | H | 75.42325 | 83.93791 | 70.21564 | 1447.02277  | 1762.76533  | -1490.78944 | 1 |
| 254 | H | 73.80855 | 84.75257 | 70.13193 | 1320.77379  | -145.20455  | 2378.68491  | 1 |
| 255 | H | 73.92429 | 82.95188 | 69.97570 | -1512.10848 | 1470.52031  | 1724.75147  | 1 |
| 256 | C | 73.38979 | 83.99515 | 65.83926 | -607.11113  | 499.56689   | 73.73769    | 1 |
| 257 | O | 74.19743 | 84.70864 | 65.28653 | 357.97126   | 460.81534   | 356.68785   | 1 |
| 258 | N | 72.53338 | 83.15228 | 65.28493 | 536.55407   | -368.62270  | 332.76306   | 1 |
| 259 | H | 71.93247 | 82.64206 | 65.92906 | 524.38866   | 2297.69985  | 1367.20941  | 1 |
| 260 | C | 72.30314 | 83.19334 | 63.88999 | 46.50277    | -774.29190  | -147.97904  | 1 |
| 261 | H | 72.90827 | 84.05088 | 63.51674 | 1676.51875  | 1883.29066  | 1032.55549  | 1 |
| 262 | C | 72.72769 | 81.77471 | 63.24243 | -559.41456  | -34.19198   | -556.30433  | 1 |
| 263 | H | 72.02895 | 80.98171 | 63.60053 | -64.66664   | 395.18769   | 2695.05373  | 1 |
| 264 | H | 72.61182 | 81.80481 | 62.13273 | -2703.44278 | -60.40056   | 333.79418   | 1 |
| 265 | C | 74.14175 | 81.43691 | 63.63213 | -519.76435  | 377.31045   | 459.42366   | 1 |
| 266 | H | 74.21022 | 81.44920 | 64.74517 | -1746.74323 | 1667.50644  | -1261.73691 | 1 |
| 267 | C | 74.50504 | 80.04277 | 63.13661 | 570.95554   | 16.46261    | -545.27700  | 1 |
| 268 | H | 75.55055 | 79.75999 | 63.42382 | 2391.58273  | 28.05277    | -1305.07271 | 1 |
| 269 | H | 73.82206 | 79.26259 | 63.56171 | 175.75588   | 917.63458   | 2559.43867  | 1 |
| 270 | H | 74.43632 | 79.97016 | 62.02045 | -1063.97851 | -2155.34650 | 1283.00462  | 1 |
| 271 | C | 75.12708 | 82.45762 | 63.08075 | 193.76014   | 2.62946     | -765.53141  | 1 |
| 272 | H | 76.18787 | 82.16791 | 63.29677 | 507.39394   | -846.55087  | 2539.60089  | 1 |
| 273 | H | 75.03251 | 82.56647 | 61.96910 | 1337.57841  | 1818.19054  | 1526.01994  | 1 |
| 274 | H | 74.96162 | 83.47232 | 63.53618 | 1100.88635  | -1172.91350 | -2199.08909 | 1 |
| 275 | C | 70.70629 | 83.33060 | 63.69524 | -549.21115  | 475.64486   | -309.38218  | 1 |
| 276 | O | 69.90781 | 83.01895 | 64.53937 | 556.06106   | -390.37755  | -78.24250   | 1 |
| 277 | O | 70.27810 | 83.72575 | 62.40595 | -572.27940  | -310.19032  | -209.75862  | 1 |
| 278 | H | 71.17015 | 83.88722 | 61.98996 | -1380.08193 | 2212.14486  | 790.85944   | 1 |

Listing 91: C00091.xmolout

|    |   |          |          |          |             |             |             |        |          |
|----|---|----------|----------|----------|-------------|-------------|-------------|--------|----------|
| 1  |   | 276      |          |          |             |             |             |        |          |
| 2  |   | 150.0000 | 150.0000 | 150.0000 | 0.0000      | 0.0000      | 0.0000***** | 2.7750 | 11100    |
|    |   | 0.2500   | 300.00   | 0.00     | 0.00        | 0.00        | -1293.4661  | 0.0000 | 300.0000 |
| 3  | H | 84.93286 | 63.36514 | 74.49521 | -2043.14101 | -1757.64893 | 399.89339   |        | 1        |
| 4  | N | 84.70924 | 63.90716 | 73.66273 | 426.75047   | 490.45733   | -334.42467  |        | 1        |
| 5  | H | 84.50274 | 63.18082 | 72.98041 | 442.25559   | -1110.30854 | -2448.52907 |        | 1        |
| 6  | C | 85.70254 | 64.82517 | 73.25887 | 415.32972   | -666.39213  | 83.73172    |        | 1        |
| 7  | H | 86.05124 | 65.27355 | 74.21280 | 879.32219   | 2491.00447  | 667.35213   |        | 1        |
| 8  | C | 86.85733 | 64.05853 | 72.44592 | 31.35357    | 477.41777   | 628.23362   |        | 1        |
| 9  | H | 86.43280 | 63.68127 | 71.48418 | 1168.38489  | 2240.25337  | -1019.71136 |        | 1        |
| 10 | H | 87.65858 | 64.78125 | 72.15864 | -360.43770  | 2534.90498  | 931.67112   |        | 1        |
| 11 | C | 87.43229 | 62.91606 | 73.24716 | 463.18208   | 512.70242   | -382.34388  |        | 1        |
| 12 | H | 86.59845 | 62.25180 | 73.56597 | 1725.29117  | 1863.52247  | -987.07854  |        | 1        |
| 13 | C | 88.39062 | 62.09832 | 72.39061 | 710.42801   | -144.27427  | -313.15367  |        | 1        |
| 14 | H | 88.80368 | 61.22182 | 72.95385 | 364.20195   | -1033.13725 | 2494.72524  |        | 1        |
| 15 | H | 87.88755 | 61.69681 | 71.47315 | 2567.61904  | 335.80679   | 847.48802   |        | 1        |
| 16 | H | 89.26332 | 62.71221 | 72.04805 | -2587.99029 | 680.92867   | -512.16411  |        | 1        |
| 17 | C | 88.15809 | 63.41341 | 74.48920 | 268.17616   | 741.64379   | -40.42634   |        | 1        |

|    |   |          |          |          |             |             |             |   |
|----|---|----------|----------|----------|-------------|-------------|-------------|---|
| 18 | H | 88.59476 | 62.56610 | 75.07893 | 1283.54314  | -1945.37420 | -1411.27812 | 1 |
| 19 | H | 89.00168 | 64.10241 | 74.22530 | -1258.57796 | 1317.15249  | -2026.02085 | 1 |
| 20 | H | 87.47264 | 63.97507 | 75.17477 | -2502.84526 | 909.80597   | 575.92391   | 1 |
| 21 | C | 84.95735 | 65.88841 | 72.25326 | 619.36578   | -458.64843  | -172.09273  | 1 |
| 22 | O | 84.98209 | 65.74775 | 71.05288 | -81.40433   | 433.87611   | 522.34594   | 1 |
| 23 | N | 84.33373 | 66.80474 | 72.98782 | 175.23996   | -622.20190  | 341.55523   | 1 |
| 24 | H | 84.48507 | 66.76524 | 73.99583 | -876.57256  | -303.22879  | -2561.90213 | 1 |
| 25 | C | 83.66699 | 67.91513 | 72.40175 | -571.88214  | -534.10783  | -106.15033  | 1 |
| 26 | H | 83.34995 | 68.50977 | 73.28796 | -2713.20841 | -16.25800   | -248.80809  | 1 |
| 27 | C | 84.79394 | 68.66961 | 71.54352 | 166.60354   | 288.16399   | -716.09568  | 1 |
| 28 | H | 85.05168 | 67.99858 | 70.67638 | -2097.85574 | 1636.78449  | -586.18044  | 1 |
| 29 | O | 86.02392 | 68.92334 | 72.24900 | -317.80580  | -363.38227  | 484.43082   | 1 |
| 30 | H | 86.63928 | 68.34742 | 71.75290 | 1863.74748  | -1451.84923 | 1357.29467  | 1 |
| 31 | C | 84.09009 | 69.97001 | 71.01228 | 503.80731   | 517.99032   | 318.51606   | 1 |
| 32 | H | 84.78177 | 70.57032 | 70.37570 | 640.61020   | -2157.10410 | -1536.29104 | 1 |
| 33 | H | 83.17969 | 69.74073 | 70.38846 | 1687.88455  | 465.60692   | 2087.56452  | 1 |
| 34 | H | 83.76526 | 70.62819 | 71.85178 | -1293.07895 | -1899.88581 | -1463.57452 | 1 |
| 35 | C | 82.40549 | 67.41185 | 71.51188 | -153.07550  | -733.68902  | 248.70981   | 1 |
| 36 | O | 82.15384 | 68.04759 | 70.51490 | 186.15459   | -480.78787  | -449.34387  | 1 |
| 37 | N | 81.68107 | 66.42302 | 72.05719 | -487.53139  | 543.18517   | 42.03850    | 1 |
| 38 | C | 80.72924 | 65.68535 | 71.28821 | -699.35871  | 69.34393    | 360.10701   | 1 |
| 39 | H | 81.07433 | 65.70841 | 70.22899 | 2.81126     | -221.99807  | -2715.58072 | 1 |
| 40 | C | 80.77514 | 64.26951 | 72.00729 | -507.46439  | -592.59194  | 122.07761   | 1 |
| 41 | H | 79.88684 | 63.63888 | 71.77946 | -1975.08116 | 525.87560   | -1801.71556 | 1 |
| 42 | H | 81.67377 | 63.68574 | 71.70595 | 1588.27743  | -1913.22100 | 1113.83566  | 1 |
| 43 | C | 80.86017 | 64.70658 | 73.50259 | -613.62442  | -457.55993  | -194.14490  | 1 |
| 44 | H | 79.87557 | 65.06725 | 73.87694 | 1707.54637  | -721.27992  | 1996.92523  | 1 |
| 45 | H | 81.18651 | 63.89355 | 74.18969 | 758.23357   | 2100.81767  | 1560.55011  | 1 |
| 46 | C | 81.90939 | 65.89447 | 73.39758 | -352.41524  | 704.96076   | 49.21465    | 1 |
| 47 | H | 81.77451 | 66.72291 | 74.13238 | 1714.76886  | -2070.42778 | 443.35792   | 1 |
| 48 | H | 82.97821 | 65.56848 | 73.39870 | 1224.15040  | 1801.50881  | 1636.97633  | 1 |
| 49 | C | 79.20403 | 66.26388 | 71.46706 | 566.85117   | 537.05831   | 117.62814   | 1 |
| 50 | O | 78.28182 | 65.67405 | 70.95544 | -550.26779  | -406.08867  | 4.21666     | 1 |
| 51 | N | 79.16369 | 67.38592 | 72.18909 | 566.34832   | -425.77725  | 180.18749   | 1 |
| 52 | H | 80.06148 | 67.68871 | 72.56453 | 644.44502   | 2646.80550  | -52.73430   | 1 |
| 53 | C | 77.91765 | 67.67190 | 72.84791 | 612.34801   | -281.48662  | 411.56221   | 1 |
| 54 | H | 77.49825 | 66.67894 | 73.12104 | 1667.23498  | -1490.75142 | 1556.16753  | 1 |
| 55 | C | 78.26176 | 68.60680 | 74.08425 | -714.45746  | -175.43074  | 286.98927   | 1 |
| 56 | H | 78.73873 | 69.55277 | 73.70794 | -787.09484  | 1763.03619  | -1922.46060 | 1 |
| 57 | O | 79.18942 | 68.04812 | 75.03909 | -429.46514  | 516.51932   | -128.40526  | 1 |
| 58 | H | 79.89310 | 68.72513 | 75.04108 | 1981.82785  | 436.16847   | -1818.18182 | 1 |
| 59 | C | 76.81668 | 68.93204 | 74.61804 | 630.79189   | -468.94448  | 76.03230    | 1 |
| 60 | H | 76.84987 | 69.64446 | 75.47422 | -1775.71861 | 2062.30353  | 131.89849   | 1 |
| 61 | H | 76.17604 | 69.39129 | 73.82867 | -1855.14608 | 88.94118    | 1993.53760  | 1 |
| 62 | H | 76.29709 | 68.01252 | 74.97378 | -1504.82350 | -780.94249  | -2132.90992 | 1 |
| 63 | C | 76.99241 | 68.47845 | 71.76917 | 288.57638   | 618.62814   | -397.00270  | 1 |
| 64 | O | 77.32479 | 69.53499 | 71.28228 | 321.70495   | -185.26452  | 574.37218   | 1 |
| 65 | N | 75.76741 | 67.86026 | 71.63777 | -447.05792  | -446.53431  | 367.76425   | 1 |
| 66 | H | 75.89739 | 67.03965 | 72.24382 | 350.31316   | 1975.63644  | -1843.31522 | 1 |
| 67 | C | 75.47729 | 67.51908 | 70.25367 | -511.23061  | 374.03917   | -471.51480  | 1 |
| 68 | H | 76.40512 | 67.04124 | 69.86889 | 2234.79579  | -898.70890  | -1273.45190 | 1 |
| 69 | C | 74.25100 | 66.51058 | 70.33639 | 529.53781   | -159.34528  | 563.72604   | 1 |
| 70 | H | 74.00126 | 66.19729 | 69.28635 | 654.59388   | 2347.94251  | 1217.51488  | 1 |
| 71 | H | 74.61303 | 65.59465 | 70.87334 | -1526.55661 | 2103.42026  | 817.87394   | 1 |
| 72 | O | 73.02668 | 67.01887 | 70.94503 | -554.84278  | 14.12789    | 399.58769   | 1 |
| 73 | H | 73.26898 | 66.93385 | 71.88316 | 1297.06236  | 2061.84854  | 1220.68812  | 1 |
| 74 | C | 75.07066 | 68.83162 | 69.41419 | -662.15484  | -412.13544  | 123.62687   | 1 |
| 75 | O | 75.16303 | 68.84182 | 68.20849 | -540.01537  | -317.05804  | 274.91456   | 1 |
| 76 | N | 74.51193 | 69.82807 | 70.19523 | -202.76299  | -690.00100  | -131.49145  | 1 |
| 77 | H | 74.56144 | 69.36855 | 71.12012 | -702.62132  | -2617.37191 | 281.70413   | 1 |
| 78 | C | 75.07398 | 71.19892 | 70.12256 | -491.73914  | 576.34187   | 222.73509   | 1 |
| 79 | H | 75.75510 | 71.17515 | 71.00759 | 1977.17978  | -1823.58850 | -434.68928  | 1 |

|     |   |          |          |          |             |             |             |   |
|-----|---|----------|----------|----------|-------------|-------------|-------------|---|
| 80  | C | 75.83365 | 71.45083 | 68.84923 | -649.50797  | -328.66843  | 306.11224   | 1 |
| 81  | H | 75.25704 | 71.00099 | 68.00402 | 2075.07803  | 1452.16490  | -1004.45904 | 1 |
| 82  | C | 76.03408 | 72.92846 | 68.55738 | -615.18735  | -489.99689  | -70.96352   | 1 |
| 83  | H | 76.67039 | 73.09227 | 67.64463 | -1226.32661 | -1724.38906 | -1716.47170 | 1 |
| 84  | H | 75.04766 | 73.45448 | 68.37667 | 2381.64273  | -969.84735  | 900.46860   | 1 |
| 85  | H | 76.53957 | 73.45107 | 69.41539 | 2122.74991  | 1702.23946  | -141.36228  | 1 |
| 86  | C | 77.20756 | 70.79576 | 68.88987 | -501.86074  | -479.61276  | -376.42482  | 1 |
| 87  | H | 77.79618 | 70.99500 | 67.95305 | 993.79261   | -2246.95401 | -1177.81305 | 1 |
| 88  | H | 77.81744 | 71.16871 | 69.76016 | 42.71279    | -626.15391  | -2651.37258 | 1 |
| 89  | H | 77.13414 | 69.67718 | 69.00884 | -2026.39012 | -1590.33709 | -887.82922  | 1 |
| 90  | C | 73.77201 | 72.16238 | 70.41326 | -672.89153  | 382.57394   | -156.34072  | 1 |
| 91  | O | 73.58168 | 73.18609 | 69.78954 | 410.04627   | 221.86223   | 500.35950   | 1 |
| 92  | N | 73.06905 | 71.69809 | 71.43236 | -378.11782  | -443.79414  | -441.10984  | 1 |
| 93  | H | 73.35391 | 70.79672 | 71.80535 | 2404.15973  | -568.14894  | 1149.30085  | 1 |
| 94  | C | 71.95302 | 72.45513 | 71.91824 | -544.54484  | 466.16019   | 331.29119   | 1 |
| 95  | H | 71.51106 | 72.85073 | 70.97487 | -1409.80988 | -170.17955  | 2325.32679  | 1 |
| 96  | C | 71.03677 | 71.41903 | 72.69706 | -184.48284  | 116.78282   | -758.89137  | 1 |
| 97  | H | 70.87949 | 70.50401 | 72.08188 | 1893.78641  | 1861.14652  | 611.04528   | 1 |
| 98  | H | 71.53091 | 71.07157 | 73.63108 | -2170.79665 | -974.19311  | 1327.50117  | 1 |
| 99  | C | 69.67937 | 72.11209 | 73.02727 | 389.51668   | 672.81878   | -138.49152  | 1 |
| 100 | H | 69.85740 | 73.04199 | 73.61192 | 510.64577   | 1933.03327  | 1851.02484  | 1 |
| 101 | H | 69.19536 | 72.47018 | 72.09205 | -2302.30869 | -1105.72939 | -948.89774  | 1 |
| 102 | C | 68.68093 | 71.17776 | 73.81159 | -559.93427  | -126.34590  | 542.30857   | 1 |
| 103 | O | 67.61884 | 71.61823 | 74.16815 | -670.36003  | -111.83166  | 76.36448    | 1 |
| 104 | N | 69.12962 | 69.91880 | 74.00381 | -216.06729  | -537.07037  | 446.51379   | 1 |
| 105 | H | 70.00586 | 69.47957 | 73.69815 | -1251.96487 | 1074.12894  | -2168.52500 | 1 |
| 106 | H | 68.58624 | 69.18169 | 74.46620 | -2451.83023 | -720.73851  | 944.84612   | 1 |
| 107 | C | 72.41860 | 73.69414 | 72.85821 | 546.24052   | -563.88337  | -85.11809   | 1 |
| 108 | O | 71.80875 | 74.74040 | 72.67589 | 71.70702    | -307.40463  | 606.69673   | 1 |
| 109 | N | 73.34541 | 73.44203 | 73.78105 | 479.90863   | -504.50129  | 222.86849   | 1 |
| 110 | C | 73.67956 | 74.45192 | 74.75110 | 75.51268    | -600.91904  | 506.73700   | 1 |
| 111 | H | 72.70757 | 74.93206 | 75.00662 | -2033.61562 | 1795.30103  | 254.89480   | 1 |
| 112 | C | 74.38032 | 73.60654 | 75.89982 | 523.79067   | 517.99274   | 284.45581   | 1 |
| 113 | H | 75.05056 | 74.22376 | 76.53954 | 1599.61665  | -1127.00911 | 1895.98173  | 1 |
| 114 | H | 73.63455 | 73.13494 | 76.57821 | -1881.83093 | 1275.82488  | -1501.55016 | 1 |
| 115 | C | 75.14807 | 72.53598 | 75.06375 | -600.05639  | -404.05026  | 316.64485   | 1 |
| 116 | H | 76.08318 | 72.96697 | 74.64042 | -2597.05260 | 496.36221   | 657.73249   | 1 |
| 117 | H | 75.44983 | 71.64082 | 75.65296 | -1666.24518 | 1294.38985  | -1723.90591 | 1 |
| 118 | C | 74.09979 | 72.20486 | 73.91585 | 493.57570   | -129.95376  | -602.56394  | 1 |
| 119 | H | 74.55198 | 71.97275 | 72.92454 | -1469.08415 | -637.84797  | 2204.22581  | 1 |
| 120 | H | 73.36096 | 71.41272 | 74.17769 | -1038.97840 | 1068.88701  | -2280.71789 | 1 |
| 121 | C | 74.70099 | 75.50730 | 74.04716 | 188.88100   | 241.05089   | -727.87821  | 1 |
| 122 | O | 75.86367 | 75.54712 | 74.33618 | 531.88613   | -49.19943   | 427.07960   | 1 |
| 123 | N | 74.01179 | 76.27077 | 73.18250 | 708.14833   | 26.93417    | -179.73509  | 1 |
| 124 | H | 73.01799 | 76.01379 | 72.97651 | -2232.69501 | -1179.09831 | 1023.94816  | 1 |
| 125 | C | 74.77201 | 77.19369 | 72.32464 | -738.32412  | 259.92548   | 104.42456   | 1 |
| 126 | H | 75.83660 | 76.98560 | 72.59578 | 2028.89123  | 1260.02983  | 1311.33324  | 1 |
| 127 | C | 74.42784 | 76.90241 | 70.87272 | -258.65678  | -345.52513  | 661.28459   | 1 |
| 128 | H | 73.32046 | 76.91572 | 70.76712 | -1826.06090 | -1801.46097 | -918.64554  | 1 |
| 129 | C | 75.00365 | 77.95611 | 69.94569 | -541.23400  | 531.92970   | -218.41428  | 1 |
| 130 | H | 74.74002 | 77.75670 | 68.87033 | 1311.73218  | -2219.18200 | 882.19023   | 1 |
| 131 | H | 74.61966 | 78.98346 | 70.20034 | -1048.71298 | 1223.58118  | -2196.97971 | 1 |
| 132 | H | 76.12607 | 77.99758 | 70.01292 | 419.06414   | 1903.92898  | 1903.44670  | 1 |
| 133 | C | 74.90098 | 75.52005 | 70.46354 | -423.86431  | 152.66566   | -648.55262  | 1 |
| 134 | H | 74.52568 | 75.23833 | 69.43918 | 105.68386   | -2342.50080 | 1387.51238  | 1 |
| 135 | H | 76.02430 | 75.45399 | 70.44289 | -1695.63603 | -1484.73621 | -1531.02793 | 1 |
| 136 | H | 74.53100 | 74.73199 | 71.18087 | -1853.57121 | -487.39031  | 1936.59343  | 1 |
| 137 | C | 74.33185 | 78.73549 | 72.70901 | 539.71428   | -510.58232  | 267.58633   | 1 |
| 138 | O | 75.21402 | 79.51287 | 73.08268 | -15.93758   | -278.34085  | -624.49402  | 1 |
| 139 | N | 73.06850 | 78.98711 | 72.49795 | -676.81886  | 12.05292    | 276.17960   | 1 |
| 140 | H | 72.50553 | 78.20395 | 72.16923 | -1694.44250 | -373.84189  | -2100.66098 | 1 |
| 141 | C | 72.57411 | 80.31043 | 72.67415 | 412.33078   | -664.70360  | 108.35451   | 1 |

|     |   |          |          |          |             |             |             |   |
|-----|---|----------|----------|----------|-------------|-------------|-------------|---|
| 142 | H | 73.48130 | 80.93204 | 72.84446 | 1765.77476  | 1294.44366  | 1621.76594  | 1 |
| 143 | C | 71.78871 | 80.72615 | 71.35985 | -179.66635  | -721.95667  | -264.73915  | 1 |
| 144 | H | 72.37275 | 80.47730 | 70.44585 | -607.34922  | 2587.87032  | -598.10018  | 1 |
| 145 | H | 70.83330 | 80.16267 | 71.27176 | -359.69332  | -1479.13954 | -2259.74260 | 1 |
| 146 | C | 71.53337 | 82.26490 | 71.47142 | -240.01076  | 616.02425   | 431.85322   | 1 |
| 147 | H | 71.04263 | 82.49763 | 72.45036 | -1359.17131 | 782.54425   | 2227.99181  | 1 |
| 148 | H | 72.49482 | 82.82711 | 71.47226 | -820.36667  | 85.81767    | -2596.78715 | 1 |
| 149 | C | 70.61308 | 82.72730 | 70.27126 | -513.07015  | 236.18570   | -551.87280  | 1 |
| 150 | H | 71.15166 | 82.65020 | 69.29881 | 1816.11944  | -1183.11722 | -1650.94321 | 1 |
| 151 | H | 69.71928 | 82.06871 | 70.17738 | -1800.04429 | -1361.53473 | 1526.34643  | 1 |
| 152 | C | 70.18725 | 84.18500 | 70.56418 | 726.08972   | -253.19732  | -179.64713  | 1 |
| 153 | H | 69.55975 | 84.30620 | 71.46982 | 1224.27271  | -456.51798  | -2390.90304 | 1 |
| 154 | H | 71.02036 | 84.91559 | 70.58164 | 1206.40339  | -1150.93514 | -2154.90344 | 1 |
| 155 | N | 69.26781 | 84.65967 | 69.38919 | 329.70796   | -633.68968  | -155.67358  | 1 |
| 156 | H | 68.87733 | 85.64162 | 69.48233 | 1348.31305  | 1938.76845  | 1359.00643  | 1 |
| 157 | H | 69.70078 | 84.69871 | 68.42092 | 2096.92035  | 1446.54551  | -966.48890  | 1 |
| 158 | H | 68.38306 | 84.10045 | 69.21265 | -1197.07217 | -2303.53719 | 827.28733   | 1 |
| 159 | C | 71.51698 | 80.35829 | 73.92580 | -378.01186  | -556.17301  | -413.96481  | 1 |
| 160 | O | 71.04793 | 81.42631 | 74.26102 | -409.44433  | -307.55053  | -453.30833  | 1 |
| 161 | N | 71.25760 | 79.15704 | 74.42088 | -429.02477  | 524.70884   | 274.08502   | 1 |
| 162 | H | 71.78291 | 78.37046 | 74.04418 | 1706.34263  | -1425.96036 | 1574.38926  | 1 |
| 163 | C | 70.29694 | 79.04890 | 75.46446 | -45.25864   | -626.22952  | 478.93267   | 1 |
| 164 | H | 69.72974 | 80.00767 | 75.42286 | 1988.63164  | 570.90773   | 1772.87287  | 1 |
| 165 | C | 69.43994 | 77.74888 | 75.17913 | 551.77128   | -20.49526   | -564.54996  | 1 |
| 166 | H | 68.91934 | 77.83300 | 74.19911 | 1434.61535  | -1753.10253 | 1513.99471  | 1 |
| 167 | H | 70.08399 | 76.84506 | 75.09281 | -714.67738  | 1819.09770  | 1898.36494  | 1 |
| 168 | C | 68.41408 | 77.59041 | 76.34969 | 446.99263   | -555.77305  | 338.97221   | 1 |
| 169 | H | 68.94171 | 77.35137 | 77.30072 | 1953.68466  | 1892.25957  | -161.67766  | 1 |
| 170 | H | 67.87496 | 78.54700 | 76.53044 | -403.03785  | 2688.07032  | -188.43591  | 1 |
| 171 | C | 67.39324 | 76.44351 | 75.96996 | 567.86262   | 335.74681   | 434.04421   | 1 |
| 172 | H | 66.88697 | 76.66617 | 75.00263 | -1080.02275 | 1568.26081  | -1948.78900 | 1 |
| 173 | H | 67.92053 | 75.47290 | 75.81947 | -919.54108  | 2111.34692  | 1456.13463  | 1 |
| 174 | C | 66.36024 | 76.33757 | 77.11620 | 195.81897   | 173.33862   | -745.11536  | 1 |
| 175 | H | 66.76956 | 75.95161 | 78.07116 | 1405.67949  | -2301.21089 | -390.08113  | 1 |
| 176 | H | 65.77772 | 77.26244 | 77.30035 | -940.37328  | -1118.32446 | 2299.72133  | 1 |
| 177 | N | 65.28948 | 75.27971 | 76.68716 | 319.26422   | 656.36007   | -42.02424   | 1 |
| 178 | H | 64.52268 | 75.08067 | 77.39296 | 1961.03633  | 619.91968   | 1787.09422  | 1 |
| 179 | H | 64.72312 | 75.48580 | 75.81332 | 854.14343   | -2156.80752 | 1429.08711  | 1 |
| 180 | H | 65.64921 | 74.30208 | 76.48724 | 1237.02905  | -1378.50857 | -1998.28500 | 1 |
| 181 | C | 71.07165 | 78.87055 | 76.90774 | 532.53319   | -268.57236  | 517.55729   | 1 |
| 182 | O | 70.86726 | 79.66792 | 77.79057 | 266.16714   | -290.73804  | -558.88002  | 1 |
| 183 | N | 71.85967 | 77.79812 | 76.91597 | -226.25352  | 640.49678   | -270.32839  | 1 |
| 184 | H | 71.86135 | 77.23820 | 76.06473 | 2007.69063  | -1035.27229 | 1523.50231  | 1 |
| 185 | C | 72.17650 | 77.22776 | 78.21287 | -540.76542  | -573.33303  | 49.50000    | 1 |
| 186 | H | 71.26346 | 77.34245 | 78.84045 | -2374.20950 | -1036.76023 | 843.75774   | 1 |
| 187 | C | 72.53387 | 75.69046 | 77.90005 | -77.09082   | 666.87422   | -415.84136  | 1 |
| 188 | H | 73.31717 | 75.66653 | 77.09654 | -985.81834  | 617.19825   | 2463.91927  | 1 |
| 189 | O | 71.41904 | 74.90976 | 77.44143 | 293.29899   | -391.65602  | -477.80926  | 1 |
| 190 | H | 71.75936 | 74.57056 | 76.59163 | 2528.72714  | -681.76262  | -751.27122  | 1 |
| 191 | C | 73.18706 | 75.21693 | 79.24737 | 252.47363   | -605.14473  | 440.05134   | 1 |
| 192 | H | 73.58901 | 74.18031 | 79.16637 | -2052.65063 | 1456.49051  | -1043.51830 | 1 |
| 193 | H | 74.03097 | 75.87932 | 79.54803 | -2152.98800 | -1661.97574 | -161.70652  | 1 |
| 194 | H | 72.45077 | 75.22152 | 80.08415 | -473.12726  | -1584.27339 | 2165.61725  | 1 |
| 195 | C | 73.38983 | 78.06270 | 78.78981 | 360.36307   | 488.46713   | 505.10056   | 1 |
| 196 | O | 74.35436 | 78.58705 | 78.09827 | -200.08817  | -528.03552  | -385.82850  | 1 |
| 197 | N | 73.34317 | 78.12243 | 80.08701 | -597.54095  | -226.44775  | 355.20479   | 1 |
| 198 | H | 72.56265 | 77.71793 | 80.60157 | 2179.23655  | -1300.70981 | -991.33835  | 1 |
| 199 | C | 74.49779 | 78.71740 | 80.66090 | -687.68921  | 297.39807   | -249.45179  | 1 |
| 200 | H | 74.20878 | 79.21616 | 81.60979 | -349.16256  | -2467.37713 | -1101.72831 | 1 |
| 201 | C | 75.63108 | 77.61403 | 80.80847 | 672.47345   | 361.54328   | -201.62880  | 1 |
| 202 | H | 75.80153 | 77.11004 | 79.82908 | 1541.41502  | 582.18425   | 2169.97026  | 1 |
| 203 | H | 76.58942 | 78.12690 | 81.06190 | -2534.67717 | 60.25153    | 997.72295   | 1 |

|     |   |          |          |          |             |             |             |   |
|-----|---|----------|----------|----------|-------------|-------------|-------------|---|
| 204 | C | 75.28826 | 76.57130 | 81.88838 | 574.26774   | -389.43119  | -377.02542  | 1 |
| 205 | C | 74.97288 | 76.99222 | 83.21425 | 688.82679   | -287.33580  | -257.96133  | 1 |
| 206 | H | 74.94676 | 78.06605 | 83.47424 | 331.14182   | 1470.38163  | 2269.80013  | 1 |
| 207 | C | 75.33798 | 75.18095 | 81.57031 | -383.52382  | -675.04808  | 144.24917   | 1 |
| 208 | H | 75.60293 | 74.84498 | 80.55151 | 4.09847     | 1517.59662  | 2262.86397  | 1 |
| 209 | C | 74.70403 | 76.02116 | 84.17989 | -134.76730  | 428.45285   | -649.50303  | 1 |
| 210 | H | 74.46280 | 76.34911 | 85.20600 | -903.23433  | 1600.49020  | 2011.53387  | 1 |
| 211 | C | 75.05763 | 74.24509 | 82.57007 | -335.53281  | -615.00040  | -364.39058  | 1 |
| 212 | H | 75.09758 | 73.17315 | 82.30874 | 1596.45398  | -1369.33862 | 1732.02659  | 1 |
| 213 | C | 74.73172 | 74.62343 | 83.90493 | 585.48547   | -340.24194  | -406.23938  | 1 |
| 214 | O | 74.44734 | 73.68278 | 84.92981 | -419.15649  | -173.04408  | -511.94141  | 1 |
| 215 | H | 74.57200 | 72.84436 | 84.42652 | -1071.84350 | 1559.71507  | -1960.13012 | 1 |
| 216 | C | 75.16532 | 79.65881 | 79.44464 | 291.41878   | -183.13091  | 710.72246   | 1 |
| 217 | O | 76.36628 | 79.72109 | 79.30607 | 379.87695   | 523.47396   | -222.23622  | 1 |
| 218 | N | 74.38443 | 80.90213 | 79.50870 | 564.30591   | 373.09380   | 277.24371   | 1 |
| 219 | H | 74.46713 | 81.35782 | 80.42206 | -120.59931  | -2436.07824 | -1214.35098 | 1 |
| 220 | C | 74.92911 | 81.81295 | 78.51868 | 404.07514   | -299.37480  | 608.84009   | 1 |
| 221 | H | 76.00493 | 81.91912 | 78.78976 | -1071.07882 | -841.69025  | 2359.66467  | 1 |
| 222 | C | 74.72024 | 81.22710 | 77.06612 | -683.12807  | 68.71770    | -390.13096  | 1 |
| 223 | H | 75.27888 | 80.27111 | 76.92334 | 2068.88918  | 1596.58590  | 770.89603   | 1 |
| 224 | H | 73.64714 | 80.97460 | 76.89975 | 1379.86429  | 2342.49779  | -179.85638  | 1 |
| 225 | C | 75.21872 | 82.32052 | 76.07327 | -176.39967  | 537.49466   | 550.97268   | 1 |
| 226 | H | 74.94530 | 83.33673 | 76.43729 | -396.28051  | 1942.22168  | 1869.33314  | 1 |
| 227 | H | 76.32880 | 82.32357 | 76.00391 | -94.44700   | 586.00678   | -2659.20016 | 1 |
| 228 | C | 74.55034 | 82.04807 | 74.63943 | -291.69381  | -718.18079  | -150.72929  | 1 |
| 229 | H | 74.88973 | 81.10024 | 74.10297 | -2303.38776 | 1089.76242  | 964.62032   | 1 |
| 230 | H | 73.43127 | 82.13139 | 74.66471 | 884.16729   | 2568.80533  | -207.74283  | 1 |
| 231 | N | 75.08469 | 83.18313 | 74.02316 | -594.49522  | -252.81478  | 342.29276   | 1 |
| 232 | H | 74.87943 | 84.06636 | 74.47165 | -1735.17426 | 2084.05705  | -263.71605  | 1 |
| 233 | C | 75.78640 | 83.22136 | 72.95243 | 595.23177   | -271.52487  | 442.22352   | 1 |
| 234 | N | 76.07028 | 82.03860 | 72.28142 | 585.53813   | -424.79750  | -105.81303  | 1 |
| 235 | H | 75.78738 | 81.07209 | 72.55723 | 959.88797   | 1327.56823  | -2177.11905 | 1 |
| 236 | H | 76.62842 | 81.98662 | 71.42198 | 1578.48647  | 16.27378    | -2220.76233 | 1 |
| 237 | N | 76.14782 | 84.54088 | 72.64428 | -452.17763  | -390.33541  | -421.51853  | 1 |
| 238 | H | 75.97553 | 85.40904 | 73.14802 | 470.26107   | 1974.25629  | -1817.92087 | 1 |
| 239 | H | 76.73178 | 84.79298 | 71.84664 | 1856.67307  | -1573.97321 | -1224.35416 | 1 |
| 240 | C | 74.09931 | 83.20900 | 78.62982 | -531.47271  | -581.45780  | -55.06206   | 1 |
| 241 | O | 74.66083 | 84.27165 | 78.50351 | -243.00837  | 192.73507   | 609.52485   | 1 |
| 242 | N | 72.78957 | 82.97559 | 78.75279 | 343.49288   | -644.25607  | 38.09164    | 1 |
| 243 | H | 72.52270 | 81.99094 | 78.78893 | -1691.16043 | -1535.97525 | -1484.73099 | 1 |
| 244 | C | 71.83707 | 84.08201 | 78.74851 | 542.66492   | 350.14337   | 454.42563   | 1 |
| 245 | H | 72.49060 | 84.98128 | 78.62714 | 1209.57979  | -2396.95920 | 463.86744   | 1 |
| 246 | C | 70.88911 | 83.87347 | 77.57545 | -737.14309  | 145.93010   | 242.71942   | 1 |
| 247 | H | 70.31786 | 82.93669 | 77.76266 | -1050.18303 | 159.36419   | -2509.06125 | 1 |
| 248 | C | 69.90218 | 85.01628 | 77.43508 | -706.77696  | -252.88343  | -245.16230  | 1 |
| 249 | H | 69.22206 | 84.87478 | 76.55032 | -1624.64039 | -1665.49085 | 1417.86935  | 1 |
| 250 | H | 69.24892 | 85.11626 | 78.34921 | 2566.10521  | 598.51109   | 693.22305   | 1 |
| 251 | H | 70.42761 | 86.00170 | 77.29795 | -1972.69758 | 107.10018   | -1876.34312 | 1 |
| 252 | C | 71.65100 | 83.68514 | 76.27602 | 412.85148   | 672.58832   | -27.69222   | 1 |
| 253 | H | 70.97176 | 83.38162 | 75.42963 | 1447.02277  | 1762.76533  | -1490.78944 | 1 |
| 254 | H | 72.18037 | 84.62728 | 75.96381 | 1320.77379  | -145.20455  | 2378.68491  | 1 |
| 255 | H | 72.43295 | 82.88405 | 76.37651 | -1512.10848 | 1470.52031  | 1724.75147  | 1 |
| 256 | C | 71.00556 | 84.09763 | 80.18599 | -607.11113  | 499.56689   | 73.73769    | 1 |
| 257 | O | 70.13808 | 84.92103 | 80.36307 | 357.97126   | 460.81534   | 356.68785   | 1 |
| 258 | N | 71.40033 | 83.14025 | 81.00967 | 536.55407   | -368.62270  | 332.76306   | 1 |
| 259 | H | 72.16080 | 82.53851 | 80.69968 | 524.38866   | 2297.69985  | 1367.20941  | 1 |
| 260 | C | 70.98034 | 83.18451 | 82.36232 | 46.50277    | -774.29190  | -147.97904  | 1 |
| 261 | H | 70.48975 | 84.17611 | 82.49513 | 1676.51875  | 1883.29066  | 1032.55549  | 1 |
| 262 | C | 69.98510 | 81.94002 | 82.62747 | -559.41456  | -34.19198   | -556.30433  | 1 |
| 263 | H | 70.56021 | 80.98824 | 82.53264 | -64.66664   | 395.18769   | 2695.05373  | 1 |
| 264 | H | 69.60067 | 81.96398 | 83.67506 | -2703.44278 | -60.40056   | 333.79418   | 1 |
| 265 | C | 68.85628 | 81.96696 | 81.63168 | -519.76435  | 377.31045   | 459.42366   | 1 |

|     |   |          |          |          |             |             |             |   |
|-----|---|----------|----------|----------|-------------|-------------|-------------|---|
| 266 | H | 69.29548 | 82.04438 | 80.61055 | -1746.74323 | 1667.50644  | -1261.73691 | 1 |
| 267 | C | 68.04732 | 80.67837 | 81.71125 | 570.95554   | 16.46261    | -545.27700  | 1 |
| 268 | H | 67.20548 | 80.67226 | 80.97181 | 2391.58273  | 28.05277    | -1305.07271 | 1 |
| 269 | H | 68.68194 | 79.77940 | 81.49896 | 175.75588   | 917.63458   | 2559.43867  | 1 |
| 270 | H | 67.59771 | 80.53572 | 82.72759 | -1063.97851 | -2155.34650 | 1283.00462  | 1 |
| 271 | C | 67.94510 | 83.16608 | 81.85242 | 193.76014   | 2.62946     | -765.53141  | 1 |
| 272 | H | 67.05738 | 83.14248 | 81.16879 | 507.39394   | -846.55087  | 2539.60089  | 1 |
| 273 | H | 67.55480 | 83.20312 | 82.90238 | 1337.57841  | 1818.19054  | 1526.01994  | 1 |
| 274 | H | 68.48638 | 84.13185 | 81.65728 | 1100.88635  | -1172.91350 | -2199.08909 | 1 |
| 275 | C | 72.30719 | 82.92514 | 83.24722 | -549.21115  | 475.64486   | -309.38218  | 1 |
| 276 | O | 73.16829 | 82.15102 | 82.91932 | 556.06106   | -390.37755  | -78.24250   | 1 |
| 277 | O | 72.33068 | 83.54106 | 84.51918 | -572.27940  | -310.19032  | -209.75862  | 1 |
| 278 | H | 71.50228 | 84.09139 | 84.44438 | -1380.08193 | 2212.14486  | 790.85944   | 1 |

Listing 92: C00092.xmolout

|    |   |          |          |          |             |             |             |        |          |
|----|---|----------|----------|----------|-------------|-------------|-------------|--------|----------|
| 1  |   | 276      |          |          |             |             |             |        |          |
| 2  |   | 150.0000 | 150.0000 | 150.0000 | 0.0000      | 0.0000      | 0.0000***** | 2.7750 | 11100    |
|    |   | 0.2500   | 300.00   | 0.00     | 0.00        | 0.00        | -1293.4631  | 0.0000 | 300.0000 |
| 3  | H | 77.48945 | 78.02532 | 73.36187 | -2043.14101 | -1757.64893 | 399.89339   |        | 1        |
| 4  | N | 78.16364 | 77.95390 | 74.12454 | 426.75047   | 490.45733   | -334.42467  |        | 1        |
| 5  | H | 78.41065 | 76.95081 | 74.13935 | 442.25559   | -1110.30854 | -2448.52907 |        | 1        |
| 6  | C | 79.30987 | 78.77037 | 73.95592 | 415.32972   | -666.39213  | 83.73172    |        | 1        |
| 7  | H | 79.28409 | 79.07157 | 72.88579 | 879.32219   | 2491.00447  | 667.35213   |        | 1        |
| 8  | C | 79.27274 | 80.04895 | 74.93793 | 31.35357    | 477.41777   | 628.23362   |        | 1        |
| 9  | H | 79.35621 | 79.70625 | 75.99623 | 1168.38489  | 2240.25337  | -1019.71136 |        | 1        |
| 10 | H | 80.15917 | 80.70287 | 74.75708 | -360.43770  | 2534.90498  | 931.67112   |        | 1        |
| 11 | C | 77.99737 | 80.82291 | 74.74312 | 463.18208   | 512.70242   | -382.34388  |        | 1        |
| 12 | H | 77.14156 | 80.13032 | 74.90999 | 1725.29117  | 1863.52247  | -987.07854  |        | 1        |
| 13 | C | 77.91744 | 81.95931 | 75.75624 | 710.42801   | -144.27427  | -313.15367  |        | 1        |
| 14 | H | 76.95764 | 82.52954 | 75.66442 | 364.20195   | -1033.13725 | 2494.72524  |        | 1        |
| 15 | H | 77.98189 | 81.58207 | 76.80907 | 2567.61904  | 335.80679   | 847.48802   |        | 1        |
| 16 | H | 78.75246 | 82.69325 | 75.61650 | -2587.99029 | 680.92867   | -512.16411  |        | 1        |
| 17 | C | 77.89269 | 81.39646 | 73.33620 | 268.17616   | 741.64379   | -40.42634   |        | 1        |
| 18 | H | 76.96012 | 82.00404 | 73.20723 | 1283.54314  | -1945.37420 | -1411.27812 |        | 1        |
| 19 | H | 78.75958 | 82.06495 | 73.09747 | -1258.57796 | 1317.15249  | -2026.02085 |        | 1        |
| 20 | H | 77.87044 | 80.58996 | 72.55930 | -2502.84526 | 909.80597   | 575.92391   |        | 1        |
| 21 | C | 80.48245 | 77.72285 | 74.30777 | 619.36578   | -458.64843  | -172.09273  |        | 1        |
| 22 | O | 80.23374 | 76.51614 | 74.29568 | -81.40433   | 433.87611   | 522.34594   |        | 1        |
| 23 | N | 81.62597 | 78.33371 | 74.56467 | 175.23996   | -622.20190  | 341.55523   |        | 1        |
| 24 | H | 81.65558 | 79.35204 | 74.52923 | -876.57256  | -303.22879  | -2561.90213 |        | 1        |
| 25 | C | 82.79402 | 77.58414 | 74.84569 | -571.88214  | -534.10783  | -106.15033  |        | 1        |
| 26 | H | 82.49611 | 76.53439 | 74.61957 | -2713.20841 | -16.25800   | -248.80809  |        | 1        |
| 27 | C | 83.96809 | 78.20080 | 73.94425 | 166.60354   | 288.16399   | -716.09568  |        | 1        |
| 28 | H | 84.20678 | 79.22332 | 74.34928 | -2097.85574 | 1636.78449  | -586.18044  |        | 1        |
| 29 | O | 83.65830 | 78.37494 | 72.55039 | -317.80580  | -363.38227  | 484.43082   |        | 1        |
| 30 | H | 83.75455 | 79.34483 | 72.45692 | 1863.74748  | -1451.84923 | 1357.29467  |        | 1        |
| 31 | C | 85.17797 | 77.24425 | 74.25093 | 503.80731   | 517.99032   | 318.51606   |        | 1        |
| 32 | H | 86.11468 | 77.61354 | 73.77176 | 640.61020   | -2157.10410 | -1536.29104 |        | 1        |
| 33 | H | 85.37751 | 77.16391 | 75.34672 | 1687.88455  | 465.60692   | 2087.56452  |        | 1        |
| 34 | H | 84.99310 | 76.21502 | 73.86549 | -1293.07895 | -1899.88581 | -1463.57452 |        | 1        |
| 35 | C | 83.23576 | 77.83757 | 76.40412 | -153.07550  | -733.68902  | 248.70981   |        | 1        |
| 36 | O | 84.14036 | 78.59695 | 76.62774 | 186.15459   | -480.78787  | -449.34387  |        | 1        |
| 37 | N | 82.43747 | 77.18236 | 77.26998 | -487.53139  | 543.18517   | 42.03850    |        | 1        |
| 38 | C | 82.85572 | 76.79820 | 78.57115 | -699.35871  | 69.34393    | 360.10701   |        | 1        |
| 39 | H | 83.80408 | 77.33505 | 78.80317 | 2.81126     | -221.99807  | -2715.58072 |        | 1        |
| 40 | C | 81.58721 | 77.15159 | 79.46096 | -507.46439  | -592.59194  | 122.07761   |        | 1        |
| 41 | H | 81.58772 | 76.61261 | 80.43694 | -1975.08116 | 525.87560   | -1801.71556 |        | 1        |
| 42 | H | 81.52743 | 78.24044 | 79.68448 | 1588.27743  | -1913.22100 | 1113.83566  |        | 1        |
| 43 | C | 80.43761 | 76.69551 | 78.50797 | -613.62442  | -457.55993  | -194.14490  |        | 1        |
| 44 | H | 80.31917 | 75.58571 | 78.52566 | 1707.54637  | -721.27992  | 1996.92523  |        | 1        |
| 45 | H | 79.44217 | 77.12519 | 78.76295 | 758.23357   | 2100.81767  | 1560.55011  |        | 1        |

|     |   |          |          |          |             |             |             |   |
|-----|---|----------|----------|----------|-------------|-------------|-------------|---|
| 46  | C | 80.98512 | 77.17952 | 77.10062 | -352.41524  | 704.96076   | 49.21465    | 1 |
| 47  | H | 80.76675 | 76.48581 | 76.24449 | 1714.76886  | -2070.42778 | 443.35792   | 1 |
| 48  | H | 80.71132 | 78.22208 | 76.81418 | 1224.15040  | 1801.50881  | 1636.97633  | 1 |
| 49  | C | 82.93431 | 75.14863 | 78.70640 | 566.85117   | 537.05831   | 117.62814   | 1 |
| 50  | O | 82.55153 | 74.65859 | 79.74533 | -550.26779  | -406.08867  | 4.21666     | 1 |
| 51  | N | 83.44827 | 74.57870 | 77.63008 | 566.34832   | -425.77725  | 180.18749   | 1 |
| 52  | H | 83.70843 | 75.25060 | 76.90790 | 644.44502   | 2646.80550  | -52.73430   | 1 |
| 53  | C | 83.91660 | 73.23350 | 77.60947 | 612.34801   | -281.48662  | 411.56221   | 1 |
| 54  | H | 84.71825 | 73.29213 | 76.83974 | 1667.23498  | -1490.75142 | 1556.16753  | 1 |
| 55  | C | 84.46679 | 72.83159 | 79.05161 | -714.45746  | -175.43074  | 286.98927   | 1 |
| 56  | H | 83.57866 | 72.74065 | 79.74124 | -787.09484  | 1763.03619  | -1922.46060 | 1 |
| 57  | O | 85.36553 | 73.79037 | 79.65438 | -429.46514  | 516.51932   | -128.40526  | 1 |
| 58  | H | 84.73883 | 74.25325 | 80.25124 | 1981.82785  | 436.16847   | -1818.18182 | 1 |
| 59  | C | 85.09052 | 71.40574 | 78.82783 | 630.79189   | -468.94448  | 76.03230    | 1 |
| 60  | H | 85.47227 | 70.97778 | 79.78418 | -1775.71861 | 2062.30353  | 131.89849   | 1 |
| 61  | H | 84.33898 | 70.68112 | 78.41580 | -1855.14608 | 88.94118    | 1993.53760  | 1 |
| 62  | H | 85.94945 | 71.44143 | 78.11801 | -1504.82350 | -780.94249  | -2132.90992 | 1 |
| 63  | C | 82.70519 | 72.26481 | 77.11692 | 288.57638   | 618.62814   | -397.00270  | 1 |
| 64  | O | 82.49500 | 71.18668 | 77.63171 | 321.70495   | -185.26452  | 574.37218   | 1 |
| 65  | N | 82.07422 | 72.79503 | 76.05862 | -447.05792  | -446.53431  | 367.76425   | 1 |
| 66  | H | 82.45224 | 73.70312 | 75.78725 | 350.31316   | 1975.63644  | -1843.31522 | 1 |
| 67  | C | 81.66970 | 71.84144 | 75.03353 | -511.23061  | 374.03917   | -471.51480  | 1 |
| 68  | H | 82.54913 | 71.16292 | 74.97325 | 2234.79579  | -898.70890  | -1273.45190 | 1 |
| 69  | C | 80.41231 | 71.10036 | 75.56253 | 529.53781   | -159.34528  | 563.72604   | 1 |
| 70  | H | 80.14627 | 70.22475 | 74.91762 | 654.59388   | 2347.94251  | 1217.51488  | 1 |
| 71  | H | 80.59576 | 70.73694 | 76.59997 | -1526.55661 | 2103.42026  | 817.87394   | 1 |
| 72  | O | 78.94212 | 71.76444 | 75.50211 | -554.84278  | 14.12789    | 399.58769   | 1 |
| 73  | H | 79.12359 | 72.43562 | 76.15226 | 1297.06236  | 2061.84854  | 1220.68812  | 1 |
| 74  | C | 81.46602 | 72.72846 | 73.67089 | -662.15484  | -412.13544  | 123.62687   | 1 |
| 75  | O | 82.46161 | 73.02904 | 73.05835 | -540.01537  | -317.05804  | 274.91456   | 1 |
| 76  | N | 80.20545 | 73.08233 | 73.50945 | -202.76299  | -690.00100  | -131.49145  | 1 |
| 77  | H | 79.49416 | 72.74120 | 74.20781 | -702.62132  | -2617.37191 | 281.70413   | 1 |
| 78  | C | 79.70617 | 73.65208 | 72.29924 | -491.73914  | 576.34187   | 222.73509   | 1 |
| 79  | H | 78.98881 | 74.41899 | 72.66403 | 1977.17978  | -1823.58850 | -434.68928  | 1 |
| 80  | C | 80.84802 | 74.23265 | 71.37462 | -649.50797  | -328.66843  | 306.11224   | 1 |
| 81  | H | 81.59549 | 73.43766 | 71.13658 | 2075.07803  | 1452.16490  | -1004.45904 | 1 |
| 82  | C | 80.18711 | 74.79199 | 70.06592 | -615.18735  | -489.99689  | -70.96352   | 1 |
| 83  | H | 80.94782 | 75.22702 | 69.37610 | -1226.32661 | -1724.38906 | -1716.47170 | 1 |
| 84  | H | 79.64927 | 73.99038 | 69.50633 | 2381.64273  | -969.84735  | 900.46860   | 1 |
| 85  | H | 79.44441 | 75.59281 | 70.29099 | 2122.74991  | 1702.23946  | -141.36228  | 1 |
| 86  | C | 81.52687 | 75.43850 | 72.11722 | -501.86074  | -479.61276  | -376.42482  | 1 |
| 87  | H | 82.50031 | 75.72218 | 71.65120 | 993.79261   | -2246.95401 | -1177.81305 | 1 |
| 88  | H | 80.87771 | 76.34678 | 72.11023 | 42.71279    | -626.15391  | -2651.37258 | 1 |
| 89  | H | 81.72770 | 75.18907 | 73.18898 | -2026.39012 | -1590.33709 | -887.82922  | 1 |
| 90  | C | 78.92284 | 72.41923 | 71.54748 | -672.89153  | 382.57394   | -156.34072  | 1 |
| 91  | O | 79.49985 | 71.52175 | 70.98033 | 410.04627   | 221.86223   | 500.35950   | 1 |
| 92  | N | 77.61348 | 72.58254 | 71.72273 | -378.11782  | -443.79414  | -441.10984  | 1 |
| 93  | H | 77.26362 | 73.42328 | 72.18132 | 2404.15973  | -568.14894  | 1149.30085  | 1 |
| 94  | C | 76.74704 | 71.75663 | 70.93671 | -544.54484  | 466.16019   | 331.29119   | 1 |
| 95  | H | 77.33395 | 70.82698 | 70.74654 | -1409.80988 | -170.17955  | 2325.32679  | 1 |
| 96  | C | 75.43011 | 71.56227 | 71.80881 | -184.48284  | 116.78282   | -758.89137  | 1 |
| 97  | H | 75.69648 | 71.24915 | 72.84297 | 1893.78641  | 1861.14652  | 611.04528   | 1 |
| 98  | H | 74.88445 | 72.52622 | 71.92206 | -2170.79665 | -974.19311  | 1327.50117  | 1 |
| 99  | C | 74.54425 | 70.48516 | 71.11044 | 389.51668   | 672.81878   | -138.49152  | 1 |
| 100 | H | 74.14564 | 70.87806 | 70.14825 | 510.64577   | 1933.03327  | 1851.02484  | 1 |
| 101 | H | 75.18290 | 69.60533 | 70.85249 | -2302.30869 | -1105.72939 | -948.89774  | 1 |
| 102 | C | 73.35557 | 70.00628 | 72.05114 | -559.93427  | -126.34590  | 542.30857   | 1 |
| 103 | O | 72.19894 | 70.14494 | 71.73481 | -670.36003  | -111.83166  | 76.36448    | 1 |
| 104 | N | 73.83303 | 69.44847 | 73.17764 | -216.06729  | -537.07037  | 446.51379   | 1 |
| 105 | H | 74.81702 | 69.30292 | 73.43305 | -1251.96487 | 1074.12894  | -2168.52500 | 1 |
| 106 | H | 73.26081 | 69.03022 | 73.91898 | -2451.83023 | -720.73851  | 944.84612   | 1 |
| 107 | C | 76.36928 | 72.57777 | 69.58999 | 546.24052   | -563.88337  | -85.11809   | 1 |

|     |   |          |          |          |             |             |             |   |
|-----|---|----------|----------|----------|-------------|-------------|-------------|---|
| 108 | O | 76.20893 | 73.78877 | 69.62167 | 71.70702    | -307.40463  | 606.69673   | 1 |
| 109 | N | 76.21159 | 71.74637 | 68.56445 | 479.90863   | -504.50129  | 222.86849   | 1 |
| 110 | C | 75.92428 | 72.25327 | 67.24549 | 75.51268    | -600.91904  | 506.73700   | 1 |
| 111 | H | 76.62793 | 73.10985 | 67.13677 | -2033.61562 | 1795.30103  | 254.89480   | 1 |
| 112 | C | 76.21511 | 71.00884 | 66.30625 | 523.79067   | 517.99274   | 284.45581   | 1 |
| 113 | H | 75.60664 | 71.02391 | 65.37398 | 1599.61665  | -1127.00911 | 1895.98173  | 1 |
| 114 | H | 77.28170 | 70.97696 | 65.98955 | -1881.83093 | 1275.82488  | -1501.55016 | 1 |
| 115 | C | 75.87003 | 69.80928 | 67.24235 | -600.05639  | -404.05026  | 316.64485   | 1 |
| 116 | H | 74.76795 | 69.67556 | 67.32748 | -2597.05260 | 496.36221   | 657.73249   | 1 |
| 117 | H | 76.28852 | 68.83627 | 66.89940 | -1666.24518 | 1294.38985  | -1723.90591 | 1 |
| 118 | C | 76.50358 | 70.32058 | 68.60804 | 493.57570   | -129.95376  | -602.56394  | 1 |
| 119 | H | 76.05768 | 69.87588 | 69.53132 | -1469.08415 | -637.84797  | 2204.22581  | 1 |
| 120 | H | 77.61605 | 70.24021 | 68.65916 | -1038.97840 | 1068.88701  | -2280.71789 | 1 |
| 121 | C | 74.37433 | 72.74318 | 67.17404 | 188.88100   | 241.05089   | -727.87821  | 1 |
| 122 | O | 73.54586 | 72.08905 | 66.60788 | 531.88613   | -49.19943   | 427.07960   | 1 |
| 123 | N | 74.24278 | 73.91807 | 67.81787 | 708.14833   | 26.93417    | -179.73509  | 1 |
| 124 | H | 75.07128 | 74.26171 | 68.36648 | -2232.69501 | -1179.09831 | 1023.94816  | 1 |
| 125 | C | 73.26759 | 74.91398 | 67.33893 | -738.32412  | 259.92548   | 104.42456   | 1 |
| 126 | H | 73.65028 | 75.86054 | 67.78893 | 2028.89123  | 1260.02983  | 1311.33324  | 1 |
| 127 | C | 73.26212 | 74.95713 | 65.82501 | -258.65678  | -345.52513  | 661.28459   | 1 |
| 128 | H | 73.00598 | 73.93571 | 65.45597 | -1826.06090 | -1801.46097 | -918.64554  | 1 |
| 129 | C | 72.22688 | 75.92262 | 65.27856 | -541.23400  | 531.92970   | -218.41428  | 1 |
| 130 | H | 72.21568 | 75.93097 | 64.15385 | 1311.73218  | -2219.18200 | 882.19023   | 1 |
| 131 | H | 71.18217 | 75.64664 | 65.62667 | -1048.71298 | 1223.58118  | -2196.97971 | 1 |
| 132 | H | 72.42237 | 76.97679 | 65.61769 | 419.06414   | 1903.92898  | 1903.44670  | 1 |
| 133 | C | 74.62680 | 75.32320 | 65.26582 | -423.86431  | 152.66566   | -648.55262  | 1 |
| 134 | H | 74.63525 | 75.30329 | 64.14181 | 105.68386   | -2342.50080 | 1387.51238  | 1 |
| 135 | H | 74.93792 | 76.35625 | 65.58203 | -1695.63603 | -1484.73621 | -1531.02793 | 1 |
| 136 | H | 75.42328 | 74.61379 | 65.61991 | -1853.57121 | -487.39031  | 1936.59343  | 1 |
| 137 | C | 71.81218 | 74.48900 | 67.98481 | 539.71428   | -510.58232  | 267.58633   | 1 |
| 138 | O | 70.77969 | 74.70851 | 67.38528 | -15.93758   | -278.34085  | -624.49402  | 1 |
| 139 | N | 71.94699 | 74.03765 | 69.22525 | -676.81886  | 12.05292    | 276.17960   | 1 |
| 140 | H | 72.90676 | 73.90618 | 69.53772 | -1694.44250 | -373.84189  | -2100.66098 | 1 |
| 141 | C | 70.77542 | 73.52807 | 69.85639 | 412.33078   | -664.70360  | 108.35451   | 1 |
| 142 | H | 69.93531 | 74.01639 | 69.30651 | 1765.77476  | 1294.44366  | 1621.76594  | 1 |
| 143 | C | 70.81434 | 71.95679 | 69.64949 | -179.66635  | -721.95667  | -264.73915  | 1 |
| 144 | H | 71.00379 | 71.69970 | 68.58216 | -607.34922  | 2587.87032  | -598.10018  | 1 |
| 145 | H | 71.65346 | 71.49451 | 70.23189 | -359.69332  | -1479.13954 | -2259.74260 | 1 |
| 146 | C | 69.43879 | 71.40306 | 70.14472 | -240.01076  | 616.02425   | 431.85322   | 1 |
| 147 | H | 69.24049 | 71.73169 | 71.19061 | -1359.17131 | 782.54425   | 2227.99181  | 1 |
| 148 | H | 68.59748 | 71.79616 | 69.53086 | -820.36667  | 85.81767    | -2596.78715 | 1 |
| 149 | C | 69.52937 | 69.82654 | 70.05927 | -513.07015  | 236.18570   | -551.87280  | 1 |
| 150 | H | 69.66835 | 69.49266 | 69.00501 | 1816.11944  | -1183.11722 | -1650.94321 | 1 |
| 151 | H | 70.42480 | 69.45758 | 70.61859 | -1800.04429 | -1361.53473 | 1526.34643  | 1 |
| 152 | C | 68.23006 | 69.24290 | 70.66064 | 726.08972   | -253.19732  | -179.64713  | 1 |
| 153 | H | 68.11329 | 69.40605 | 71.75077 | 1224.27271  | -456.51798  | -2390.90304 | 1 |
| 154 | H | 67.30147 | 69.53631 | 70.13166 | 1206.40339  | -1150.93514 | -2154.90344 | 1 |
| 155 | N | 68.31024 | 67.68811 | 70.49547 | 329.70796   | -633.68968  | -155.67358  | 1 |
| 156 | H | 67.49416 | 67.13918 | 70.89247 | 1348.31305  | 1938.76845  | 1359.00643  | 1 |
| 157 | H | 68.35584 | 67.30924 | 69.50491 | 2096.92035  | 1446.54551  | -966.48890  | 1 |
| 158 | H | 69.13344 | 67.20012 | 70.95463 | -1197.07217 | -2303.53719 | 827.28733   | 1 |
| 159 | C | 70.76056 | 73.78662 | 71.47838 | -378.01186  | -556.17301  | -413.96481  | 1 |
| 160 | O | 69.71336 | 74.10500 | 71.99463 | -409.44433  | -307.55053  | -453.30833  | 1 |
| 161 | N | 71.91544 | 73.50724 | 72.06969 | -429.02477  | 524.70884   | 274.08502   | 1 |
| 162 | H | 72.71157 | 73.23834 | 71.49423 | 1706.34263  | -1425.96036 | 1574.38926  | 1 |
| 163 | C | 71.94408 | 73.54055 | 73.48782 | -45.25864   | -626.22952  | 478.93267   | 1 |
| 164 | H | 70.89650 | 73.75365 | 73.81243 | 1988.63164  | 570.90773   | 1772.87287  | 1 |
| 165 | C | 72.52433 | 72.14981 | 73.98408 | 551.77128   | -20.49526   | -564.54996  | 1 |
| 166 | H | 71.86485 | 71.30443 | 73.67613 | 1434.61535  | -1753.10253 | 1513.99471  | 1 |
| 167 | H | 73.50771 | 71.94211 | 73.50845 | -714.67738  | 1819.09770  | 1898.36494  | 1 |
| 168 | C | 72.67273 | 72.23652 | 75.53767 | 446.99263   | -555.77305  | 338.97221   | 1 |
| 169 | H | 73.31410 | 73.10973 | 75.79177 | 1953.68466  | 1892.25957  | -161.67766  | 1 |



|     |   |          |          |          |             |             |             |   |
|-----|---|----------|----------|----------|-------------|-------------|-------------|---|
| 170 | H | 71.68899 | 72.41923 | 76.02643 | -403.03785  | 2688.07032  | -188.43591  | 1 |
| 171 | C | 73.34455 | 70.91779 | 76.09363 | 567.86262   | 335.74681   | 434.04421   | 1 |
| 172 | H | 72.64320 | 70.05311 | 76.04718 | -1080.02275 | 1568.26081  | -1948.78900 | 1 |
| 173 | H | 74.22813 | 70.63031 | 75.47861 | -919.54108  | 2111.34692  | 1456.13463  | 1 |
| 174 | C | 73.76802 | 71.23481 | 77.54775 | 195.81897   | 173.33862   | -745.11536  | 1 |
| 175 | H | 74.50802 | 72.05509 | 77.64000 | 1405.67949  | -2301.21089 | -390.08113  | 1 |
| 176 | H | 72.92545 | 71.40333 | 78.24810 | -940.37328  | -1118.32446 | 2299.72133  | 1 |
| 177 | N | 74.51852 | 69.98380 | 78.11112 | 319.26422   | 656.36007   | -42.02424   | 1 |
| 178 | H | 74.86910 | 70.06860 | 79.10896 | 1961.03633  | 619.91968   | 1787.09422  | 1 |
| 179 | H | 73.98290 | 69.06811 | 78.15227 | 854.14343   | -2156.80752 | 1429.08711  | 1 |
| 180 | H | 75.40551 | 69.70005 | 77.60314 | 1237.02905  | -1378.50857 | -1998.28500 | 1 |
| 181 | C | 73.04907 | 74.67062 | 73.96925 | 532.53319   | -268.57236  | 517.55729   | 1 |
| 182 | O | 74.17264 | 74.72876 | 73.53575 | 266.16714   | -290.73804  | -558.88002  | 1 |
| 183 | N | 72.50045 | 75.30344 | 75.00245 | -226.25352  | 640.49678   | -270.32839  | 1 |
| 184 | H | 71.53223 | 75.08062 | 75.23159 | 2007.69063  | -1035.27229 | 1523.50231  | 1 |
| 185 | C | 73.10272 | 76.49726 | 75.48072 | -540.76542  | -573.33303  | 49.50000    | 1 |
| 186 | H | 74.07271 | 76.53686 | 74.93211 | -2374.20950 | -1036.76023 | 843.75774   | 1 |
| 187 | C | 72.11300 | 77.67656 | 75.04085 | -77.09082   | 666.87422   | -415.84136  | 1 |
| 188 | H | 71.08867 | 77.45617 | 75.44760 | -985.81834  | 617.19825   | 2463.91927  | 1 |
| 189 | O | 71.95124 | 77.80331 | 73.61387 | 293.29899   | -391.65602  | -477.80926  | 1 |
| 190 | H | 71.02012 | 77.53004 | 73.50400 | 2528.72714  | -681.76262  | -751.27122  | 1 |
| 191 | C | 72.68135 | 78.96000 | 75.74750 | 252.47363   | -605.14473  | 440.05134   | 1 |
| 192 | H | 72.20877 | 79.88294 | 75.33624 | -2052.65063 | 1456.49051  | -1043.51830 | 1 |
| 193 | H | 72.48759 | 78.96375 | 76.85225 | -2152.98800 | -1661.97574 | -161.70652  | 1 |
| 194 | H | 73.78228 | 79.05717 | 75.59678 | -473.12726  | -1584.27339 | 2165.61725  | 1 |
| 195 | C | 73.29416 | 76.39934 | 77.10193 | 360.36307   | 488.46713   | 505.10056   | 1 |
| 196 | O | 73.53764 | 77.41534 | 77.72616 | -200.08817  | -528.03552  | -385.82850  | 1 |
| 197 | N | 73.20849 | 75.15630 | 77.54913 | -597.54095  | -226.44775  | 355.20479   | 1 |
| 198 | H | 73.03662 | 74.47309 | 76.81450 | 2179.23655  | -1300.70981 | -991.33835  | 1 |
| 199 | C | 73.53465 | 74.75271 | 78.86598 | -687.68921  | 297.39807   | -249.45179  | 1 |
| 200 | H | 73.78201 | 73.67323 | 78.76892 | -349.16256  | -2467.37713 | -1101.72831 | 1 |
| 201 | C | 74.70241 | 75.63454 | 79.51426 | 672.47345   | 361.54328   | -201.62880  | 1 |
| 202 | H | 74.44852 | 76.72571 | 79.43806 | 1541.41502  | 582.18425   | 2169.97026  | 1 |
| 203 | H | 74.78583 | 75.38852 | 80.60005 | -2534.67717 | 60.25153    | 997.72295   | 1 |
| 204 | C | 76.00643 | 75.32102 | 78.76674 | 574.26774   | -389.43119  | -377.02542  | 1 |
| 205 | C | 76.79618 | 74.19640 | 79.14965 | 688.82679   | -287.33580  | -257.96133  | 1 |
| 206 | H | 76.48827 | 73.54513 | 79.98801 | 331.14182   | 1470.38163  | 2269.80013  | 1 |
| 207 | C | 76.39234 | 76.15041 | 77.67222 | -383.52382  | -675.04808  | 144.24917   | 1 |
| 208 | H | 75.75891 | 77.00746 | 77.37056 | 4.09847     | 1517.59662  | 2262.86397  | 1 |
| 209 | C | 77.96889 | 73.94404 | 78.43741 | -134.76730  | 428.45285   | -649.50303  | 1 |
| 210 | H | 78.58894 | 73.07925 | 78.73310 | -903.23433  | 1600.49020  | 2011.53387  | 1 |
| 211 | C | 77.57567 | 75.85235 | 76.98934 | -335.53281  | -615.00040  | -364.39058  | 1 |
| 212 | H | 77.87594 | 76.50155 | 76.14818 | 1596.45398  | -1369.33862 | 1732.02659  | 1 |
| 213 | C | 78.40083 | 74.74820 | 77.34406 | 585.48547   | -340.24194  | -406.23938  | 1 |
| 214 | O | 79.62063 | 74.44404 | 76.67500 | -419.15649  | -173.04408  | -511.94141  | 1 |
| 215 | H | 79.55729 | 75.06709 | 75.91182 | -1071.84350 | 1559.71507  | -1960.13012 | 1 |
| 216 | C | 72.29226 | 75.01172 | 79.88932 | 291.41878   | -183.13091  | 710.72246   | 1 |
| 217 | O | 72.51306 | 75.11302 | 81.07799 | 379.87695   | 523.47396   | -222.23622  | 1 |
| 218 | N | 71.13785 | 75.05430 | 79.24340 | 564.30591   | 373.09380   | 277.24371   | 1 |
| 219 | H | 71.14893 | 74.91385 | 78.23258 | -120.59931  | -2436.07824 | -1214.35098 | 1 |
| 220 | C | 69.88735 | 74.98894 | 79.95725 | 404.07514   | -299.37480  | 608.84009   | 1 |
| 221 | H | 69.98197 | 74.02949 | 80.51299 | -1071.07882 | -841.69025  | 2359.66467  | 1 |
| 222 | C | 69.83469 | 76.21533 | 80.95451 | -683.12807  | 68.71770    | -390.13096  | 1 |
| 223 | H | 70.84117 | 76.33590 | 81.43106 | 2068.88918  | 1596.58590  | 770.89603   | 1 |
| 224 | H | 69.66061 | 77.15774 | 80.38689 | 1379.86429  | 2342.49779  | -179.85638  | 1 |
| 225 | C | 68.75625 | 76.04634 | 82.07120 | -176.39967  | 537.49466   | 550.97268   | 1 |
| 226 | H | 67.72985 | 75.90362 | 81.66373 | -396.28051  | 1942.22168  | 1869.33314  | 1 |
| 227 | H | 68.95393 | 75.15192 | 82.70266 | -94.44700   | 586.00678   | -2659.20016 | 1 |
| 228 | C | 68.86368 | 77.40103 | 82.91347 | -291.69381  | -718.18079  | -150.72929  | 1 |
| 229 | H | 69.76261 | 77.49382 | 83.57379 | -2303.38776 | 1089.76242  | 964.62032   | 1 |
| 230 | H | 68.79523 | 78.33117 | 82.29765 | 884.16729   | 2568.80533  | -207.74283  | 1 |
| 231 | N | 67.71706 | 77.41974 | 83.71418 | -594.49522  | -252.81478  | 342.29276   | 1 |

|     |   |          |          |          |             |             |             |   |
|-----|---|----------|----------|----------|-------------|-------------|-------------|---|
| 232 | H | 66.99546 | 76.75256 | 83.48938 | -1735.17426 | 2084.05705  | -263.71605  | 1 |
| 233 | C | 67.51883 | 78.23515 | 84.66942 | 595.23177   | -271.52487  | 442.22352   | 1 |
| 234 | N | 68.52664 | 79.16449 | 84.95094 | 585.53813   | -424.79750  | -105.81303  | 1 |
| 235 | H | 69.42871 | 79.30169 | 84.49682 | 959.88797   | 1327.56823  | -2177.11905 | 1 |
| 236 | H | 68.48241 | 79.86562 | 85.69096 | 1578.48647  | 16.27378    | -2220.76233 | 1 |
| 237 | N | 66.26763 | 78.02559 | 85.26603 | -452.17763  | -390.33541  | -421.51853  | 1 |
| 238 | H | 65.52566 | 77.36220 | 85.04783 | 470.26107   | 1974.25629  | -1817.92087 | 1 |
| 239 | H | 65.91706 | 78.59086 | 86.04040 | 1856.67307  | -1573.97321 | -1224.35416 | 1 |
| 240 | C | 68.80029 | 74.94039 | 78.76520 | -531.47271  | -581.45780  | -55.06206   | 1 |
| 241 | O | 68.96921 | 74.26881 | 77.77697 | -243.00837  | 192.73507   | 609.52485   | 1 |
| 242 | N | 67.68890 | 75.62084 | 79.11554 | 343.49288   | -644.25607  | 38.09164    | 1 |
| 243 | H | 67.76477 | 76.14646 | 79.99203 | -1691.16043 | -1535.97525 | -1484.73099 | 1 |
| 244 | C | 66.88379 | 76.28026 | 78.06997 | 542.66492   | 350.14337   | 454.42563   | 1 |
| 245 | H | 67.49252 | 76.28848 | 77.13721 | 1209.57979  | -2396.95920 | 463.86744   | 1 |
| 246 | C | 65.61410 | 75.46305 | 77.96523 | -737.14309  | 145.93010   | 242.71942   | 1 |
| 247 | H | 65.17964 | 75.39648 | 78.98852 | -1050.18303 | 159.36419   | -2509.06125 | 1 |
| 248 | C | 64.58981 | 76.10661 | 77.04974 | -706.77696  | -252.88343  | -245.16230  | 1 |
| 249 | H | 63.62824 | 75.52252 | 77.02771 | -1624.64039 | -1665.49085 | 1417.86935  | 1 |
| 250 | H | 64.33986 | 77.15383 | 77.37893 | 2566.10521  | 598.51109   | 693.22305   | 1 |
| 251 | H | 64.96372 | 76.17204 | 75.99062 | -1972.69758 | 107.10018   | -1876.34312 | 1 |
| 252 | C | 65.91898 | 74.04976 | 77.49982 | 412.85148   | 672.58832   | -27.69222   | 1 |
| 253 | H | 65.04273 | 73.35903 | 77.64091 | 1447.02277  | 1762.76533  | -1490.78944 | 1 |
| 254 | H | 66.19581 | 74.02361 | 76.41034 | 1320.77379  | -145.20455  | 2378.68491  | 1 |
| 255 | H | 66.79535 | 73.61881 | 78.06565 | -1512.10848 | 1470.52031  | 1724.75147  | 1 |
| 256 | C | 66.66361 | 77.76081 | 78.77944 | -607.11113  | 499.56689   | 73.73769    | 1 |
| 257 | O | 66.23635 | 77.84495 | 79.90709 | 357.97126   | 460.81534   | 356.68785   | 1 |
| 258 | N | 67.04880 | 78.73137 | 77.96271 | 536.55407   | -368.62270  | 332.76306   | 1 |
| 259 | H | 67.35460 | 78.50703 | 77.01657 | 524.38866   | 2297.69985  | 1367.20941  | 1 |
| 260 | C | 66.95603 | 80.05981 | 78.43805 | 46.50277    | -774.29190  | -147.97904  | 1 |
| 261 | H | 66.68845 | 79.96384 | 79.51672 | 1676.51875  | 1883.29066  | 1032.55549  | 1 |
| 262 | C | 68.34605 | 80.83373 | 78.15157 | -559.41456  | -34.19198   | -556.30433  | 1 |
| 263 | H | 68.50525 | 80.89588 | 77.04878 | -64.66664   | 395.18769   | 2695.05373  | 1 |
| 264 | H | 68.28237 | 81.88911 | 78.50923 | -2703.44278 | -60.40056   | 333.79418   | 1 |
| 265 | C | 69.49649 | 80.11493 | 78.80254 | -519.76435  | 377.31045   | 459.42366   | 1 |
| 266 | H | 69.42574 | 79.03389 | 78.54473 | -1746.74323 | 1667.50644  | -1261.73691 | 1 |
| 267 | C | 70.81953 | 80.65487 | 78.27232 | 570.95554   | 16.46261    | -545.27700  | 1 |
| 268 | H | 71.69528 | 80.10876 | 78.70901 | 2391.58273  | 28.05277    | -1305.07271 | 1 |
| 269 | H | 70.88772 | 80.56015 | 77.15824 | 175.75588   | 917.63458   | 2559.43867  | 1 |
| 270 | H | 70.94984 | 81.74010 | 78.51871 | -1063.97851 | -2155.34650 | 1283.00462  | 1 |
| 271 | C | 69.45851 | 80.25637 | 80.31816 | 193.76014   | 2.62946     | -765.53141  | 1 |
| 272 | H | 70.31008 | 79.71411 | 80.80506 | 507.39394   | -846.55087  | 2539.60089  | 1 |
| 273 | H | 69.52635 | 81.32966 | 80.63349 | 1337.57841  | 1818.19054  | 1526.01994  | 1 |
| 274 | H | 68.50996 | 79.84288 | 80.74769 | 1100.88635  | -1172.91350 | -2199.08909 | 1 |
| 275 | C | 65.83330 | 80.81162 | 77.54483 | -549.21115  | 475.64486   | -309.38218  | 1 |
| 276 | O | 65.58973 | 80.52201 | 76.40333 | 556.06106   | -390.37755  | -78.24250   | 1 |
| 277 | O | 65.25247 | 81.95536 | 78.13958 | -572.27940  | -310.19032  | -209.75862  | 1 |
| 278 | H | 65.67081 | 81.88865 | 79.04320 | -1380.08193 | 2212.14486  | 790.85944   | 1 |

Listing 93: C00093.xmolout

|    |   |          |          |          |             |             |             |        |          |
|----|---|----------|----------|----------|-------------|-------------|-------------|--------|----------|
| 1  |   | 276      |          |          |             |             |             |        |          |
| 2  |   | 150.0000 | 150.0000 | 150.0000 | 0.0000      | 0.0000      | 0.0000***** | 0.8425 | 3370     |
|    |   | 0.2500   | 300.00   | 0.00     | 0.00        | 0.00        | -1293.4467  | 0.0000 | 300.0000 |
| 3  | H | 73.11748 | 65.85716 | 75.17561 | -2043.14101 | -1757.64893 | 399.89339   |        | 1        |
| 4  | N | 73.27936 | 66.60521 | 75.84514 | 426.75047   | 490.45733   | -334.42467  |        | 1        |
| 5  | H | 72.33554 | 66.94999 | 76.00615 | 442.25559   | -1110.30854 | -2448.52907 |        | 1        |
| 6  | C | 74.21342 | 67.58584 | 75.44636 | 415.32972   | -666.39213  | 83.73172    |        | 1        |
| 7  | H | 75.06025 | 66.98973 | 75.04303 | 879.32219   | 2491.00447  | 667.35213   |        | 1        |
| 8  | C | 73.57056 | 68.54101 | 74.31717 | 31.35357    | 477.41777   | 628.23362   |        | 1        |
| 9  | H | 72.68897 | 69.08429 | 74.73484 | 1168.38489  | 2240.25337  | -1019.71136 |        | 1        |
| 10 | H | 74.31308 | 69.32878 | 74.04460 | -360.43770  | 2534.90498  | 931.67112   |        | 1        |
| 11 | C | 73.17486 | 67.74445 | 73.10185 | 463.18208   | 512.70242   | -382.34388  |        | 1        |

|    |   |          |          |          |             |             |             |   |
|----|---|----------|----------|----------|-------------|-------------|-------------|---|
| 12 | H | 72.40605 | 66.99538 | 73.39627 | 1725.29117  | 1863.52247  | -987.07854  | 1 |
| 13 | C | 72.56978 | 68.66426 | 72.04829 | 710.42801   | -144.27427  | -313.15367  | 1 |
| 14 | H | 72.23452 | 68.09377 | 71.14397 | 364.20195   | -1033.13725 | 2494.72524  | 1 |
| 15 | H | 71.67799 | 69.21664 | 72.44266 | 2567.61904  | 335.80679   | 847.48802   | 1 |
| 16 | H | 73.30843 | 69.43189 | 71.70061 | -2587.99029 | 680.92867   | -512.16411  | 1 |
| 17 | C | 74.37223 | 67.01041 | 72.51362 | 268.17616   | 741.64379   | -40.42634   | 1 |
| 18 | H | 74.12398 | 66.53564 | 71.52947 | 1283.54314  | -1945.37420 | -1411.27812 | 1 |
| 19 | H | 75.23648 | 67.70497 | 72.34322 | -1258.57796 | 1317.15249  | -2026.02085 | 1 |
| 20 | H | 74.73344 | 66.19437 | 73.19099 | -2502.84526 | 909.80597   | 575.92391   | 1 |
| 21 | C | 74.64333 | 68.53032 | 76.68286 | 619.36578   | -458.64843  | -172.09273  | 1 |
| 22 | O | 75.12437 | 69.64286 | 76.44641 | -81.40433   | 433.87611   | 522.34594   | 1 |
| 23 | N | 74.44319 | 67.94439 | 77.84088 | 175.23996   | -622.20190  | 341.55523   | 1 |
| 24 | H | 73.98425 | 67.03572 | 77.80008 | -876.57256  | -303.22879  | -2561.90213 | 1 |
| 25 | C | 74.87952 | 68.53359 | 79.06429 | -571.88214  | -534.10783  | -106.15033  | 1 |
| 26 | H | 74.58379 | 69.60232 | 78.95423 | -2713.20841 | -16.25800   | -248.80809  | 1 |
| 27 | C | 74.10572 | 67.76252 | 80.23422 | 166.60354   | 288.16399   | -716.09568  | 1 |
| 28 | H | 74.42988 | 66.68617 | 80.24686 | -2097.85574 | 1636.78449  | -586.18044  | 1 |
| 29 | O | 72.67187 | 67.72583 | 80.10583 | -317.80580  | -363.38227  | 484.43082   | 1 |
| 30 | H | 72.50998 | 66.76214 | 80.06839 | 1863.74748  | -1451.84923 | 1357.29467  | 1 |
| 31 | C | 74.65666 | 68.47172 | 81.52399 | 503.80731   | 517.99032   | 318.51606   | 1 |
| 32 | H | 74.26382 | 67.99329 | 82.45119 | 640.61020   | -2157.10410 | -1536.29104 | 1 |
| 33 | H | 75.77138 | 68.43463 | 81.57792 | 1687.88455  | 465.60692   | 2087.56452  | 1 |
| 34 | H | 74.35899 | 69.54597 | 81.55369 | -1293.07895 | -1899.88581 | -1463.57452 | 1 |
| 35 | C | 76.49910 | 68.42519 | 79.19831 | -153.07550  | -733.68902  | 248.70981   | 1 |
| 36 | O | 77.00706 | 69.29722 | 79.85911 | 186.15459   | -480.78787  | -449.34387  | 1 |
| 37 | N | 77.09682 | 67.33634 | 78.68483 | -487.53139  | 543.18517   | 42.03850    | 1 |
| 38 | C | 78.52344 | 67.27041 | 78.72130 | -699.35871  | 69.34393    | 360.10701   | 1 |
| 39 | H | 78.84655 | 67.97555 | 79.52474 | 2.81126     | -221.99807  | -2715.58072 | 1 |
| 40 | C | 78.76404 | 65.72268 | 79.00030 | -507.46439  | -592.59194  | 122.07761   | 1 |
| 41 | H | 79.78908 | 65.38883 | 78.72328 | -1975.08116 | 525.87560   | -1801.71556 | 1 |
| 42 | H | 78.62286 | 65.47160 | 80.07511 | 1588.27743  | -1913.22100 | 1113.83566  | 1 |
| 43 | C | 77.64782 | 65.08545 | 78.11689 | -613.62442  | -457.55993  | -194.14490  | 1 |
| 44 | H | 77.93813 | 65.10232 | 77.04150 | 1707.54637  | -721.27992  | 1996.92523  | 1 |
| 45 | H | 77.42622 | 64.02421 | 78.37067 | 758.23357   | 2100.81767  | 1560.55011  | 1 |
| 46 | C | 76.43373 | 66.06662 | 78.41090 | -352.41524  | 704.96076   | 49.21465    | 1 |
| 47 | H | 75.73885 | 66.21349 | 77.55266 | 1714.76886  | -2070.42778 | 443.35792   | 1 |
| 48 | H | 75.84533 | 65.81946 | 79.32365 | 1224.15040  | 1801.50881  | 1636.97633  | 1 |
| 49 | C | 79.20399 | 67.61459 | 77.26518 | 566.85117   | 537.05831   | 117.62814   | 1 |
| 50 | O | 80.40262 | 67.77688 | 77.21751 | -550.26779  | -406.08867  | 4.21666     | 1 |
| 51 | N | 78.33395 | 67.61175 | 76.26434 | 566.34832   | -425.77725  | 180.18749   | 1 |
| 52 | H | 77.35356 | 67.47430 | 76.50349 | 644.44502   | 2646.80550  | -52.73430   | 1 |
| 53 | C | 78.83075 | 67.78206 | 74.94361 | 612.34801   | -281.48662  | 411.56221   | 1 |
| 54 | H | 79.91655 | 67.97629 | 75.12855 | 1667.23498  | -1490.75142 | 1556.16753  | 1 |
| 55 | C | 78.55487 | 66.46449 | 74.07715 | -714.45746  | -175.43074  | 286.98927   | 1 |
| 56 | H | 77.45305 | 66.38807 | 73.86996 | -787.09484  | 1763.03619  | -1922.46060 | 1 |
| 57 | O | 78.94895 | 65.21999 | 74.67562 | -429.46514  | 516.51932   | -128.40526  | 1 |
| 58 | H | 78.10672 | 64.72205 | 74.65270 | 1981.82785  | 436.16847   | -1818.18182 | 1 |
| 59 | C | 79.30823 | 66.84334 | 72.74831 | 630.79189   | -468.94448  | 76.03230    | 1 |
| 60 | H | 79.18927 | 66.05256 | 71.97223 | -1775.71861 | 2062.30353  | 131.89849   | 1 |
| 61 | H | 78.92670 | 67.79703 | 72.31137 | -1855.14608 | 88.94118    | 1993.53760  | 1 |
| 62 | H | 80.40193 | 66.97088 | 72.92268 | -1504.82350 | -780.94249  | -2132.90992 | 1 |
| 63 | C | 78.01192 | 69.04427 | 74.28427 | 288.57638   | 618.62814   | -397.00270  | 1 |
| 64 | O | 77.22965 | 68.89371 | 73.38027 | 321.70495   | -185.26452  | 574.37218   | 1 |
| 65 | N | 78.35473 | 70.14148 | 74.93590 | -447.05792  | -446.53431  | 367.76425   | 1 |
| 66 | H | 79.03722 | 70.13440 | 75.71838 | 350.31316   | 1975.63644  | -1843.31522 | 1 |
| 67 | C | 78.13895 | 71.43795 | 74.34161 | -511.23061  | 374.03917   | -471.51480  | 1 |
| 68 | H | 78.58701 | 71.35897 | 73.32493 | 2234.79579  | -898.70890  | -1273.45190 | 1 |
| 69 | C | 76.56444 | 71.67360 | 74.24035 | 529.53781   | -159.34528  | 563.72604   | 1 |
| 70 | H | 76.43931 | 72.51573 | 73.50464 | 654.59388   | 2347.94251  | 1217.51488  | 1 |
| 71 | H | 76.12925 | 70.75239 | 73.76067 | -1526.55661 | 2103.42026  | 817.87394   | 1 |
| 72 | O | 75.87331 | 71.99739 | 75.45287 | -554.84278  | 14.12789    | 399.58769   | 1 |
| 73 | H | 75.65300 | 71.04566 | 75.79617 | 1297.06236  | 2061.84854  | 1220.68812  | 1 |

|     |   |          |          |          |             |             |             |   |
|-----|---|----------|----------|----------|-------------|-------------|-------------|---|
| 74  | C | 78.96939 | 72.36096 | 75.36213 | -662.15484  | -412.13544  | 123.62687   | 1 |
| 75  | O | 79.73694 | 71.80429 | 76.13467 | -540.01537  | -317.05804  | 274.91456   | 1 |
| 76  | N | 78.80582 | 73.67308 | 75.17399 | -202.76299  | -690.00100  | -131.49145  | 1 |
| 77  | H | 78.09048 | 73.91303 | 74.48288 | -702.62132  | -2617.37191 | 281.70413   | 1 |
| 78  | C | 79.20467 | 74.63742 | 76.20001 | -491.73914  | 576.34187   | 222.73509   | 1 |
| 79  | H | 78.70469 | 75.58777 | 75.89188 | 1977.17978  | -1823.58850 | -434.68928  | 1 |
| 80  | C | 78.69957 | 74.15088 | 77.54394 | -649.50797  | -328.66843  | 306.11224   | 1 |
| 81  | H | 79.17932 | 73.16211 | 77.74813 | 2075.07803  | 1452.16490  | -1004.45904 | 1 |
| 82  | C | 79.06041 | 75.10334 | 78.66910 | -615.18735  | -489.99689  | -70.96352   | 1 |
| 83  | H | 78.66456 | 74.74708 | 79.65983 | -1226.32661 | -1724.38906 | -1716.47170 | 1 |
| 84  | H | 80.17945 | 75.21703 | 78.77322 | 2381.64273  | -969.84735  | 900.46860   | 1 |
| 85  | H | 78.64137 | 76.13167 | 78.48751 | 2122.74991  | 1702.23946  | -141.36228  | 1 |
| 86  | C | 77.19609 | 73.94028 | 77.53451 | -501.86074  | -479.61276  | -376.42482  | 1 |
| 87  | H | 76.83113 | 73.45832 | 78.48430 | 993.79261   | -2246.95401 | -1177.81305 | 1 |
| 88  | H | 76.64300 | 74.91237 | 77.41709 | 42.71279    | -626.15391  | -2651.37258 | 1 |
| 89  | H | 76.86876 | 73.26982 | 76.68026 | -2026.39012 | -1590.33709 | -887.82922  | 1 |
| 90  | C | 80.85951 | 74.79442 | 76.17951 | -672.89153  | 382.57394   | -156.34072  | 1 |
| 91  | O | 81.42632 | 75.41345 | 77.05360 | 410.04627   | 221.86223   | 500.35950   | 1 |
| 92  | N | 81.41152 | 74.21046 | 75.12686 | -378.11782  | -443.79414  | -441.10984  | 1 |
| 93  | H | 80.75853 | 73.71802 | 74.52275 | 2404.15973  | -568.14894  | 1149.30085  | 1 |
| 94  | C | 82.74791 | 74.56186 | 74.75272 | -544.54484  | 466.16019   | 331.29119   | 1 |
| 95  | H | 83.26780 | 74.57196 | 75.73775 | -1409.80988 | -170.17955  | 2325.32679  | 1 |
| 96  | C | 83.22539 | 73.41530 | 73.76870 | -184.48284  | 116.78282   | -758.89137  | 1 |
| 97  | H | 82.93156 | 72.41792 | 74.16768 | 1893.78641  | 1861.14652  | 611.04528   | 1 |
| 98  | H | 82.71548 | 73.51069 | 72.78365 | -2170.79665 | -974.19311  | 1327.50117  | 1 |
| 99  | C | 84.77351 | 73.50868 | 73.59500 | 389.51668   | 672.81878   | -138.49152  | 1 |
| 100 | H | 85.05838 | 74.52198 | 73.22657 | 510.64577   | 1933.03327  | 1851.02484  | 1 |
| 101 | H | 85.27753 | 73.43257 | 74.58387 | -2302.30869 | -1105.72939 | -948.89774  | 1 |
| 102 | C | 85.35032 | 72.40824 | 72.62587 | -559.93427  | -126.34590  | 542.30857   | 1 |
| 103 | O | 86.53399 | 72.37135 | 72.40804 | -670.36003  | -111.83166  | 76.36448    | 1 |
| 104 | N | 84.41853 | 71.57469 | 72.11468 | -216.06729  | -537.07037  | 446.51379   | 1 |
| 105 | H | 83.40435 | 71.54852 | 72.27126 | -1251.96487 | 1074.12894  | -2168.52500 | 1 |
| 106 | H | 84.63175 | 70.80150 | 71.47489 | -2451.83023 | -720.73851  | 944.84612   | 1 |
| 107 | C | 82.89088 | 76.01953 | 74.03750 | 546.24052   | -563.88337  | -85.11809   | 1 |
| 108 | O | 84.02370 | 76.42590 | 73.95218 | 71.70702    | -307.40463  | 606.69673   | 1 |
| 109 | N | 81.77596 | 76.60583 | 73.56928 | 479.90863   | -504.50129  | 222.86849   | 1 |
| 110 | C | 81.80437 | 77.94129 | 73.06412 | 75.51268    | -600.91904  | 506.73700   | 1 |
| 111 | H | 82.84400 | 78.12634 | 72.70512 | -2033.61562 | 1795.30103  | 254.89480   | 1 |
| 112 | C | 80.66210 | 77.90772 | 71.95708 | 523.79067   | 517.99274   | 284.45581   | 1 |
| 113 | H | 80.30376 | 78.92455 | 71.67972 | 1599.61665  | -1127.00911 | 1895.98173  | 1 |
| 114 | H | 81.00717 | 77.41567 | 71.02053 | -1881.83093 | 1275.82488  | -1501.55016 | 1 |
| 115 | C | 79.58891 | 77.05200 | 72.69701 | -600.05639  | -404.05026  | 316.64485   | 1 |
| 116 | H | 79.05774 | 77.65546 | 73.46812 | -2597.05260 | 496.36221   | 657.73249   | 1 |
| 117 | H | 78.80086 | 76.63008 | 72.03001 | -1666.24518 | 1294.38985  | -1723.90591 | 1 |
| 118 | C | 80.49617 | 75.93673 | 73.37498 | 493.57570   | -129.95376  | -602.56394  | 1 |
| 119 | H | 80.14565 | 75.61095 | 74.38186 | -1469.08415 | -637.84797  | 2204.22581  | 1 |
| 120 | H | 80.70401 | 75.04110 | 72.74320 | -1038.97840 | 1068.88701  | -2280.71789 | 1 |
| 121 | C | 81.30911 | 79.01563 | 74.20533 | 188.88100   | 241.05089   | -727.87821  | 1 |
| 122 | O | 80.83056 | 80.06569 | 73.83653 | 531.88613   | -49.19943   | 427.07960   | 1 |
| 123 | N | 81.61085 | 78.62348 | 75.43803 | 708.14833   | 26.93417    | -179.73509  | 1 |
| 124 | H | 81.98022 | 77.67330 | 75.45891 | -2232.69501 | -1179.09831 | 1023.94816  | 1 |
| 125 | C | 81.10893 | 79.26921 | 76.65109 | -738.32412  | 259.92548   | 104.42456   | 1 |
| 126 | H | 81.75994 | 78.84480 | 77.45221 | 2028.89123  | 1260.02983  | 1311.33324  | 1 |
| 127 | C | 81.30663 | 80.76250 | 76.46395 | -258.65678  | -345.52513  | 661.28459   | 1 |
| 128 | H | 80.71202 | 81.07124 | 75.55997 | -1826.06090 | -1801.46097 | -918.64554  | 1 |
| 129 | C | 80.85221 | 81.63227 | 77.62058 | -541.23400  | 531.92970   | -218.41428  | 1 |
| 130 | H | 81.17636 | 82.70100 | 77.48234 | 1311.73218  | -2219.18200 | 882.19023   | 1 |
| 131 | H | 79.73024 | 81.64627 | 77.71983 | -1048.71298 | 1223.58118  | -2196.97971 | 1 |
| 132 | H | 81.27953 | 81.28225 | 78.60106 | 419.06414   | 1903.92898  | 1903.44670  | 1 |
| 133 | C | 82.76501 | 81.07387 | 76.16731 | -423.86431  | 152.66566   | -648.55262  | 1 |
| 134 | H | 82.91993 | 82.16046 | 75.92414 | 105.68386   | -2342.50080 | 1387.51238  | 1 |
| 135 | H | 83.42791 | 80.82784 | 77.04121 | -1695.63603 | -1484.73621 | -1531.02793 | 1 |

|     |   |          |          |          |             |             |             |   |
|-----|---|----------|----------|----------|-------------|-------------|-------------|---|
| 136 | H | 83.13771 | 80.47762 | 75.28946 | -1853.57121 | -487.39031  | 1936.59343  | 1 |
| 137 | C | 79.55979 | 78.71309 | 76.82434 | 539.71428   | -510.58232  | 267.58633   | 1 |
| 138 | O | 79.10924 | 77.81371 | 76.11910 | -15.93758   | -278.34085  | -624.49402  | 1 |
| 139 | N | 78.98754 | 79.31020 | 77.84050 | -676.81886  | 12.05292    | 276.17960   | 1 |
| 140 | H | 79.57302 | 79.99564 | 78.30806 | -1694.44250 | -373.84189  | -2100.66098 | 1 |
| 141 | C | 77.57924 | 79.28029 | 78.09080 | 412.33078   | -664.70360  | 108.35451   | 1 |
| 142 | H | 77.33122 | 78.19643 | 78.04189 | 1765.77476  | 1294.44366  | 1621.76594  | 1 |
| 143 | C | 77.39739 | 79.96543 | 79.50023 | -179.66635  | -721.95667  | -264.73915  | 1 |
| 144 | H | 78.12370 | 79.55696 | 80.23835 | -607.34922  | 2587.87032  | -598.10018  | 1 |
| 145 | H | 77.63701 | 81.04986 | 79.41679 | -359.69332  | -1479.13954 | -2259.74260 | 1 |
| 146 | C | 75.92735 | 79.78663 | 80.00759 | -240.01076  | 616.02425   | 431.85322   | 1 |
| 147 | H | 75.20266 | 80.06751 | 79.20734 | -1359.17131 | 782.54425   | 2227.99181  | 1 |
| 148 | H | 75.71398 | 78.72628 | 80.27060 | -820.36667  | 85.81767    | -2596.78715 | 1 |
| 149 | C | 75.77528 | 80.73789 | 81.26294 | -513.07015  | 236.18570   | -551.87280  | 1 |
| 150 | H | 76.53950 | 80.49633 | 82.03708 | 1816.11944  | -1183.11722 | -1650.94321 | 1 |
| 151 | H | 75.96680 | 81.79647 | 80.97206 | -1800.04429 | -1361.53473 | 1526.34643  | 1 |
| 152 | C | 74.35058 | 80.59160 | 81.84391 | 726.08972   | -253.19732  | -179.64713  | 1 |
| 153 | H | 73.53617 | 80.86090 | 81.14232 | 1224.27271  | -456.51798  | -2390.90304 | 1 |
| 154 | H | 74.13942 | 79.60963 | 82.31219 | 1206.40339  | -1150.93514 | -2154.90344 | 1 |
| 155 | N | 74.21606 | 81.62879 | 83.01168 | 329.70796   | -633.68968  | -155.67358  | 1 |
| 156 | H | 73.27785 | 81.64683 | 83.50607 | 1348.31305  | 1938.76845  | 1359.00643  | 1 |
| 157 | H | 74.88189 | 81.52667 | 83.83191 | 2096.92035  | 1446.54551  | -966.48890  | 1 |
| 158 | H | 74.33608 | 82.65268 | 82.75891 | -1197.07217 | -2303.53719 | 827.28733   | 1 |
| 159 | C | 76.76258 | 80.13083 | 76.95982 | -378.01186  | -556.17301  | -413.96481  | 1 |
| 160 | O | 75.97698 | 80.99209 | 77.26513 | -409.44433  | -307.55053  | -453.30833  | 1 |
| 161 | N | 77.13741 | 79.72060 | 75.74775 | -429.02477  | 524.70884   | 274.08502   | 1 |
| 162 | H | 77.77713 | 78.89932 | 75.68512 | 1706.34263  | -1425.96036 | 1574.38926  | 1 |
| 163 | C | 76.23554 | 79.92840 | 74.65391 | -45.25864   | -626.22952  | 478.93267   | 1 |
| 164 | H | 75.53548 | 80.69919 | 75.05348 | 1988.63164  | 570.90773   | 1772.87287  | 1 |
| 165 | C | 77.14629 | 80.43490 | 73.46471 | 551.77128   | -20.49526   | -564.54996  | 1 |
| 166 | H | 77.95079 | 81.09499 | 73.86139 | 1434.61535  | -1753.10253 | 1513.99471  | 1 |
| 167 | H | 77.68291 | 79.58241 | 72.99100 | -714.67738  | 1819.09770  | 1898.36494  | 1 |
| 168 | C | 76.28277 | 81.20836 | 72.41330 | 446.99263   | -555.77305  | 338.97221   | 1 |
| 169 | H | 75.46685 | 80.57238 | 72.00381 | 1953.68466  | 1892.25957  | -161.67766  | 1 |
| 170 | H | 75.77997 | 82.09048 | 72.86941 | -403.03785  | 2688.07032  | -188.43591  | 1 |
| 171 | C | 77.29004 | 81.64656 | 71.27507 | 567.86262   | 335.74681   | 434.04421   | 1 |
| 172 | H | 77.98031 | 82.43981 | 71.64409 | -1080.02275 | 1568.26081  | -1948.78900 | 1 |
| 173 | H | 77.94430 | 80.79396 | 70.98116 | -919.54108  | 2111.34692  | 1456.13463  | 1 |
| 174 | C | 76.47857 | 82.14174 | 70.05590 | 195.81897   | 173.33862   | -745.11536  | 1 |
| 175 | H | 75.85280 | 81.36465 | 69.57326 | 1405.67949  | -2301.21089 | -390.08113  | 1 |
| 176 | H | 75.87684 | 83.05546 | 70.23432 | -940.37328  | -1118.32446 | 2299.72133  | 1 |
| 177 | N | 77.51709 | 82.55187 | 68.95680 | 319.26422   | 656.36007   | -42.02424   | 1 |
| 178 | H | 77.10889 | 82.85841 | 68.02713 | 1961.03633  | 619.91968   | 1787.09422  | 1 |
| 179 | H | 78.15773 | 83.36774 | 69.18162 | 854.14343   | -2156.80752 | 1429.08711  | 1 |
| 180 | H | 78.21034 | 81.81048 | 68.64602 | 1237.02905  | -1378.50857 | -1998.28500 | 1 |
| 181 | C | 75.54002 | 78.46909 | 74.43817 | 532.53319   | -268.57236  | 517.55729   | 1 |
| 182 | O | 75.16907 | 77.85043 | 75.43818 | 266.16714   | -290.73804  | -558.88002  | 1 |
| 183 | N | 75.41906 | 78.15509 | 73.17201 | -226.25352  | 640.49678   | -270.32839  | 1 |
| 184 | H | 75.78739 | 78.84394 | 72.51905 | 2007.69063  | -1035.27229 | 1523.50231  | 1 |
| 185 | C | 74.95021 | 76.91989 | 72.66294 | -540.76542  | -573.33303  | 49.50000    | 1 |
| 186 | H | 75.19866 | 76.98251 | 71.58060 | -2374.20950 | -1036.76023 | 843.75774   | 1 |
| 187 | C | 75.70344 | 75.72048 | 73.40699 | -77.09082   | 666.87422   | -415.84136  | 1 |
| 188 | H | 75.54504 | 75.82405 | 74.51774 | -985.81834  | 617.19825   | 2463.91927  | 1 |
| 189 | O | 77.13133 | 75.63250 | 73.22863 | 293.29899   | -391.65602  | -477.80926  | 1 |
| 190 | H | 77.44086 | 75.79355 | 74.14297 | 2528.72714  | -681.76262  | -751.27122  | 1 |
| 191 | C | 74.86256 | 74.50759 | 72.86692 | 252.47363   | -605.14473  | 440.05134   | 1 |
| 192 | H | 75.11466 | 73.56087 | 73.40025 | -2052.65063 | 1456.49051  | -1043.51830 | 1 |
| 193 | H | 73.76500 | 74.68078 | 72.99903 | -2152.98800 | -1661.97574 | -161.70652  | 1 |
| 194 | H | 75.04165 | 74.33972 | 71.77894 | -473.12726  | -1584.27339 | 2165.61725  | 1 |
| 195 | C | 73.32741 | 76.74978 | 72.88730 | 360.36307   | 488.46713   | 505.10056   | 1 |
| 196 | O | 72.65330 | 76.38318 | 71.95636 | -200.08817  | -528.03552  | -385.82850  | 1 |
| 197 | N | 72.98025 | 76.94678 | 74.14803 | -597.54095  | -226.44775  | 355.20479   | 1 |

|     |   |          |          |          |             |             |             |   |
|-----|---|----------|----------|----------|-------------|-------------|-------------|---|
| 198 | H | 73.69426 | 77.22388 | 74.86788 | 2179.23655  | -1300.70981 | -991.33835  | 1 |
| 199 | C | 71.59030 | 76.89621 | 74.47814 | -687.68921  | 297.39807   | -249.45179  | 1 |
| 200 | H | 71.22949 | 75.90452 | 74.12845 | -349.16256  | -2467.37713 | -1101.72831 | 1 |
| 201 | C | 71.46551 | 77.15395 | 76.04413 | 672.47345   | 361.54328   | -201.62880  | 1 |
| 202 | H | 71.77890 | 78.20050 | 76.26516 | 1541.41502  | 582.18425   | 2169.97026  | 1 |
| 203 | H | 70.39369 | 77.07043 | 76.33869 | -2534.67717 | 60.25153    | 997.72295   | 1 |
| 204 | C | 72.32180 | 76.18152 | 76.87174 | 574.26774   | -389.43119  | -377.02542  | 1 |
| 205 | C | 71.90262 | 74.83155 | 77.06536 | 688.82679   | -287.33580  | -257.96133  | 1 |
| 206 | H | 70.97382 | 74.45760 | 76.59703 | 331.14182   | 1470.38163  | 2269.80013  | 1 |
| 207 | C | 73.52799 | 76.65209 | 77.47367 | -383.52382  | -675.04808  | 144.24917   | 1 |
| 208 | H | 73.87059 | 77.69183 | 77.31027 | 4.09847     | 1517.59662  | 2262.86397  | 1 |
| 209 | C | 72.68210 | 73.99842 | 77.87059 | -134.76730  | 428.45285   | -649.50303  | 1 |
| 210 | H | 72.35306 | 72.95604 | 78.02647 | -903.23433  | 1600.49020  | 2011.53387  | 1 |
| 211 | C | 74.27234 | 75.78332 | 78.27518 | -335.53281  | -615.00040  | -364.39058  | 1 |
| 212 | H | 75.19876 | 76.16496 | 78.73950 | 1596.45398  | -1369.33862 | 1732.02659  | 1 |
| 213 | C | 73.87878 | 74.43361 | 78.51091 | 585.48547   | -340.24194  | -406.23938  | 1 |
| 214 | O | 74.62824 | 73.55057 | 79.33396 | -419.15649  | -173.04408  | -511.94141  | 1 |
| 215 | H | 75.31108 | 74.17790 | 79.67053 | -1071.84350 | 1559.71507  | -1960.13012 | 1 |
| 216 | C | 70.81854 | 78.13378 | 73.74901 | 291.41878   | -183.13091  | 710.72246   | 1 |
| 217 | O | 71.24041 | 79.26710 | 73.72757 | 379.87695   | 523.47396   | -222.23622  | 1 |
| 218 | N | 69.61107 | 77.69512 | 73.38597 | 564.30591   | 373.09380   | 277.24371   | 1 |
| 219 | H | 69.39239 | 76.70495 | 73.49357 | -120.59931  | -2436.07824 | -1214.35098 | 1 |
| 220 | C | 68.87940 | 78.48734 | 72.45326 | 404.07514   | -299.37480  | 608.84009   | 1 |
| 221 | H | 69.33917 | 79.49904 | 72.55232 | -1071.07882 | -841.69025  | 2359.66467  | 1 |
| 222 | C | 69.06482 | 77.83661 | 71.02024 | -683.12807  | 68.71770    | -390.13096  | 1 |
| 223 | H | 70.14364 | 77.69876 | 70.77858 | 2068.88918  | 1596.58590  | 770.89603   | 1 |
| 224 | H | 68.61382 | 76.81881 | 70.99193 | 1379.86429  | 2342.49779  | -179.85638  | 1 |
| 225 | C | 68.36242 | 78.78795 | 70.00292 | -176.39967  | 537.49466   | 550.97268   | 1 |
| 226 | H | 67.30349 | 78.96013 | 70.30739 | -396.28051  | 1942.22168  | 1869.33314  | 1 |
| 227 | H | 68.84479 | 79.79086 | 69.99786 | -94.44700   | 586.00678   | -2659.20016 | 1 |
| 228 | C | 68.42849 | 78.10940 | 68.55885 | -291.69381  | -718.18079  | -150.72929  | 1 |
| 229 | H | 69.45619 | 77.93978 | 68.14759 | -2303.38776 | 1089.76242  | 964.62032   | 1 |
| 230 | H | 67.84974 | 77.15761 | 68.44308 | 884.16729   | 2568.80533  | -207.74283  | 1 |
| 231 | N | 67.80611 | 79.09303 | 67.77391 | -594.49522  | -252.81478  | 342.29276   | 1 |
| 232 | H | 67.49639 | 79.92627 | 68.24986 | -1735.17426 | 2084.05705  | -263.71605  | 1 |
| 233 | C | 67.61026 | 79.00645 | 66.52094 | 595.23177   | -271.52487  | 442.22352   | 1 |
| 234 | N | 68.04353 | 77.84534 | 65.87200 | 585.53813   | -424.79750  | -105.81303  | 1 |
| 235 | H | 68.50921 | 77.02456 | 66.25710 | 959.88797   | 1327.56823  | -2177.11905 | 1 |
| 236 | H | 67.94191 | 77.66186 | 64.87327 | 1578.48647  | 16.27378    | -2220.76233 | 1 |
| 237 | N | 66.96920 | 80.15418 | 66.03310 | -452.17763  | -390.33541  | -421.51853  | 1 |
| 238 | H | 66.65496 | 80.99884 | 66.50846 | 470.26107   | 1974.25629  | -1817.92087 | 1 |
| 239 | H | 66.72394 | 80.28131 | 65.05056 | 1856.67307  | -1573.97321 | -1224.35416 | 1 |
| 240 | C | 67.29009 | 78.40443 | 72.85614 | -531.47271  | -581.45780  | -55.06206   | 1 |
| 241 | O | 66.47185 | 77.84775 | 72.12189 | -243.00837  | 192.73507   | 609.52485   | 1 |
| 242 | N | 67.09348 | 79.00338 | 74.00792 | 343.49288   | -644.25607  | 38.09164    | 1 |
| 243 | H | 67.98692 | 79.30792 | 74.39404 | -1691.16043 | -1535.97525 | -1484.73099 | 1 |
| 244 | C | 65.82578 | 79.45870 | 74.53761 | 542.66492   | 350.14337   | 454.42563   | 1 |
| 245 | H | 66.11065 | 80.16375 | 75.35574 | 1209.57979  | -2396.95920 | 463.86744   | 1 |
| 246 | C | 65.02251 | 80.10919 | 73.41530 | -737.14309  | 145.93010   | 242.71942   | 1 |
| 247 | H | 65.02362 | 79.40558 | 72.54832 | -1050.18303 | 159.36419   | -2509.06125 | 1 |
| 248 | C | 63.58222 | 80.34423 | 73.82679 | -706.77696  | -252.88343  | -245.16230  | 1 |
| 249 | H | 62.97537 | 80.78872 | 72.99024 | -1624.64039 | -1665.49085 | 1417.86935  | 1 |
| 250 | H | 63.07855 | 79.38466 | 74.13302 | 2566.10521  | 598.51109   | 693.22305   | 1 |
| 251 | H | 63.51166 | 81.04708 | 74.70254 | -1972.69758 | 107.10018   | -1876.34312 | 1 |
| 252 | C | 65.65932 | 81.40576 | 72.95329 | 412.85148   | 672.58832   | -27.69222   | 1 |
| 253 | H | 65.09995 | 81.86041 | 72.08958 | 1447.02277  | 1762.76533  | -1490.78944 | 1 |
| 254 | H | 65.68021 | 82.17199 | 73.77690 | 1320.77379  | -145.20455  | 2378.68491  | 1 |
| 255 | H | 66.72215 | 81.24599 | 72.61995 | -1512.10848 | 1470.52031  | 1724.75147  | 1 |
| 256 | C | 64.94412 | 78.16742 | 75.12700 | -607.11113  | 499.56689   | 73.73769    | 1 |
| 257 | O | 64.41098 | 78.27265 | 76.20003 | 357.97126   | 460.81534   | 356.68785   | 1 |
| 258 | N | 64.84647 | 77.20130 | 74.23269 | 536.55407   | -368.62270  | 332.76306   | 1 |
| 259 | H | 65.36826 | 77.26010 | 73.32436 | 524.38866   | 2297.69985  | 1367.20941  | 1 |

|     |   |          |          |          |             |             |             |   |
|-----|---|----------|----------|----------|-------------|-------------|-------------|---|
| 260 | C | 64.18698 | 76.01985 | 74.65565 | 46.50277    | -774.29190  | -147.97904  | 1 |
| 261 | H | 63.53084 | 76.34174 | 75.49675 | 1676.51875  | 1883.29066  | 1032.55549  | 1 |
| 262 | C | 63.41743 | 75.38175 | 73.38858 | -559.41456  | -34.19198   | -556.30433  | 1 |
| 263 | H | 64.16000 | 75.14567 | 72.58885 | -64.66664   | 395.18769   | 2695.05373  | 1 |
| 264 | H | 62.94747 | 74.40887 | 73.66938 | -2703.44278 | -60.40056   | 333.79418   | 1 |
| 265 | C | 62.38451 | 76.34960 | 72.87459 | -519.76435  | 377.31045   | 459.42366   | 1 |
| 266 | H | 62.88378 | 77.32666 | 72.68413 | -1746.74323 | 1667.50644  | -1261.73691 | 1 |
| 267 | C | 61.79128 | 75.84582 | 71.56463 | 570.95554   | 16.46261    | -545.27700  | 1 |
| 268 | H | 61.02012 | 76.55131 | 71.16044 | 2391.58273  | 28.05277    | -1305.07271 | 1 |
| 269 | H | 62.57647 | 75.72359 | 70.77443 | 175.75588   | 917.63458   | 2559.43867  | 1 |
| 270 | H | 61.29325 | 74.85033 | 71.69376 | -1063.97851 | -2155.34650 | 1283.00462  | 1 |
| 271 | C | 61.26911 | 76.56438 | 73.88858 | 193.76014   | 2.62946     | -765.53141  | 1 |
| 272 | H | 60.46640 | 77.23391 | 73.48452 | 507.39394   | -846.55087  | 2539.60089  | 1 |
| 273 | H | 60.78064 | 75.59726 | 74.17496 | 1337.57841  | 1818.19054  | 1526.01994  | 1 |
| 274 | H | 61.65037 | 77.03702 | 74.83039 | 1100.88635  | -1172.91350 | -2199.08909 | 1 |
| 275 | C | 65.32006 | 74.95921 | 75.12243 | -549.21115  | 475.64486   | -309.38218  | 1 |
| 276 | O | 66.38356 | 74.83210 | 74.57611 | 556.06106   | -390.37755  | -78.24250   | 1 |
| 277 | O | 64.91344 | 74.05190 | 76.12794 | -572.27940  | -310.19032  | -209.75862  | 1 |
| 278 | H | 64.02696 | 74.45248 | 76.34955 | -1380.08193 | 2212.14486  | 790.85944   | 1 |

Listing 94: C00094.xmolout

|    |   |          |          |          |             |             |             |        |          |
|----|---|----------|----------|----------|-------------|-------------|-------------|--------|----------|
| 1  |   | 276      |          |          |             |             |             |        |          |
| 2  |   | 150.0000 | 150.0000 | 150.0000 | 0.0000      | 0.0000      | 0.0000***** | 2.7750 | 11100    |
|    |   | 0.2500   | 300.00   | 0.00     | 0.00        | 0.00        | -1293.4465  | 0.0000 | 300.0000 |
| 3  | H | 72.88353 | 83.36807 | 69.46098 | -2043.14101 | -1757.64893 | 399.89339   |        | 1        |
| 4  | N | 72.89145 | 84.34422 | 69.74821 | 426.75047   | 490.45733   | -334.42467  |        | 1        |
| 5  | H | 71.98457 | 84.66884 | 69.41908 | 442.25559   | -1110.30854 | -2448.52907 |        | 1        |
| 6  | C | 73.99588 | 85.08932 | 69.28646 | 415.32972   | -666.39213  | 83.73172    |        | 1        |
| 7  | H | 74.85081 | 84.39249 | 69.41256 | 879.32219   | 2491.00447  | 667.35213   |        | 1        |
| 8  | C | 73.77508 | 85.49183 | 67.74295 | 31.35357    | 477.41777   | 628.23362   |        | 1        |
| 9  | H | 72.81078 | 86.04272 | 67.62427 | 1168.38489  | 2240.25337  | -1019.71136 |        | 1        |
| 10 | H | 74.57460 | 86.20453 | 67.42706 | -360.43770  | 2534.90498  | 931.67112   |        | 1        |
| 11 | C | 73.79201 | 84.25888 | 66.87644 | 463.18208   | 512.70242   | -382.34388  |        | 1        |
| 12 | H | 72.98880 | 83.56965 | 67.22035 | 1725.29117  | 1863.52247  | -987.07854  |        | 1        |
| 13 | C | 73.52025 | 84.62424 | 65.42235 | 710.42801   | -144.27427  | -313.15367  |        | 1        |
| 14 | H | 73.51880 | 83.71840 | 64.76237 | 364.20195   | -1033.13725 | 2494.72524  |        | 1        |
| 15 | H | 72.52692 | 85.12763 | 65.29813 | 2567.61904  | 335.80679   | 847.48802   |        | 1        |
| 16 | H | 74.29886 | 85.32334 | 65.02134 | -2587.99029 | 680.92867   | -512.16411  |        | 1        |
| 17 | C | 75.12799 | 83.53367 | 66.96824 | 268.17616   | 741.64379   | -40.42634   |        | 1        |
| 18 | H | 75.17943 | 82.66995 | 66.25630 | 1283.54314  | -1945.37420 | -1411.27812 |        | 1        |
| 19 | H | 75.98355 | 84.21556 | 66.72534 | -1258.57796 | 1317.15249  | -2026.02085 |        | 1        |
| 20 | H | 75.31271 | 83.12342 | 67.99417 | -2502.84526 | 909.80597   | 575.92391   |        | 1        |
| 21 | C | 74.17925 | 86.44321 | 70.16097 | 619.36578   | -458.64843  | -172.09273  |        | 1        |
| 22 | O | 74.84223 | 87.36265 | 69.72884 | -81.40433   | 433.87611   | 522.34594   |        | 1        |
| 23 | N | 73.61462 | 86.34455 | 71.36571 | 175.23996   | -622.20190  | 341.55523   |        | 1        |
| 24 | H | 73.05297 | 85.51170 | 71.53366 | -876.57256  | -303.22879  | -2561.90213 |        | 1        |
| 25 | C | 73.68330 | 87.46763 | 72.24343 | -571.88214  | -534.10783  | -106.15033  |        | 1        |
| 26 | H | 73.78558 | 88.32172 | 71.53298 | -2713.20841 | -16.25800   | -248.80809  |        | 1        |
| 27 | C | 72.32681 | 87.46349 | 73.09448 | 166.60354   | 288.16399   | -716.09568  |        | 1        |
| 28 | H | 72.25902 | 86.49949 | 73.66995 | -2097.85574 | 1636.78449  | -586.18044  |        | 1        |
| 29 | O | 71.11845 | 87.53373 | 72.31510 | -317.80580  | -363.38227  | 484.43082   |        | 1        |
| 30 | H | 70.69124 | 86.68720 | 72.55315 | 1863.74748  | -1451.84923 | 1357.29467  |        | 1        |
| 31 | C | 72.55869 | 88.64123 | 74.10884 | 503.80731   | 517.99032   | 318.51606   |        | 1        |
| 32 | H | 71.71737 | 88.72491 | 74.83557 | 640.61020   | -2157.10410 | -1536.29104 |        | 1        |
| 33 | H | 73.49639 | 88.50410 | 74.69946 | 1687.88455  | 465.60692   | 2087.56452  |        | 1        |
| 34 | H | 72.64074 | 89.62010 | 73.58144 | -1293.07895 | -1899.88581 | -1463.57452 |        | 1        |
| 35 | C | 74.99702 | 87.38342 | 73.20721 | -153.07550  | -733.68902  | 248.70981   |        | 1        |
| 36 | O | 75.45737 | 88.45165 | 73.52501 | 186.15459   | -480.78787  | -449.34387  |        | 1        |
| 37 | N | 75.36297 | 86.16954 | 73.64924 | -487.53139  | 543.18517   | 42.03850    |        | 1        |
| 38 | C | 76.54222 | 86.03904 | 74.44941 | -699.35871  | 69.34393    | 360.10701   |        | 1        |
| 39 | H | 76.75729 | 87.05295 | 74.86445 | 2.81126     | -221.99807  | -2715.58072 |        | 1        |

|     |   |          |          |          |             |             |             |   |
|-----|---|----------|----------|----------|-------------|-------------|-------------|---|
| 40  | C | 76.08375 | 84.93341 | 75.50225 | -507.46439  | -592.59194  | 122.07761   | 1 |
| 41  | H | 76.94623 | 84.44171 | 76.01873 | -1975.08116 | 525.87560   | -1801.71556 | 1 |
| 42  | H | 75.43617 | 85.36824 | 76.29607 | 1588.27743  | -1913.22100 | 1113.83566  | 1 |
| 43  | C | 75.27973 | 83.96620 | 74.58128 | -613.62442  | -457.55993  | -194.14490  | 1 |
| 44  | H | 75.96499 | 83.30306 | 74.00665 | 1707.54637  | -721.27992  | 1996.92523  | 1 |
| 45  | H | 74.59026 | 83.29520 | 75.14116 | 758.23357   | 2100.81767  | 1560.55011  | 1 |
| 46  | C | 74.52056 | 84.98110 | 73.62215 | -352.41524  | 704.96076   | 49.21465    | 1 |
| 47  | H | 74.45022 | 84.64619 | 72.56143 | 1714.76886  | -2070.42778 | 443.35792   | 1 |
| 48  | H | 73.51449 | 85.30202 | 73.97777 | 1224.15040  | 1801.50881  | 1636.97633  | 1 |
| 49  | C | 77.78393 | 85.41339 | 73.59380 | 566.85117   | 537.05831   | 117.62814   | 1 |
| 50  | O | 78.76891 | 84.99468 | 74.21530 | -550.26779  | -406.08867  | 4.21666     | 1 |
| 51  | N | 77.57499 | 85.44289 | 72.30388 | 566.34832   | -425.77725  | 180.18749   | 1 |
| 52  | H | 76.67665 | 85.85408 | 72.05352 | 644.44502   | 2646.80550  | -52.73430   | 1 |
| 53  | C | 78.54433 | 85.09084 | 71.33156 | 612.34801   | -281.48662  | 411.56221   | 1 |
| 54  | H | 78.06293 | 85.35837 | 70.36566 | 1667.23498  | -1490.75142 | 1556.16753  | 1 |
| 55  | C | 79.84765 | 85.96986 | 71.63180 | -714.45746  | -175.43074  | 286.98927   | 1 |
| 56  | H | 80.12007 | 85.87124 | 72.72126 | -787.09484  | 1763.03619  | -1922.46060 | 1 |
| 57  | O | 79.67998 | 87.38370 | 71.40881 | -429.46514  | 516.51932   | -128.40526  | 1 |
| 58  | H | 79.73919 | 87.72835 | 72.32148 | 1981.82785  | 436.16847   | -1818.18182 | 1 |
| 59  | C | 80.95662 | 85.26717 | 70.76946 | 630.79189   | -468.94448  | 76.03230    | 1 |
| 60  | H | 81.94007 | 85.78095 | 70.88058 | -1775.71861 | 2062.30353  | 131.89849   | 1 |
| 61  | H | 81.11012 | 84.20258 | 71.07555 | -1855.14608 | 88.94118    | 1993.53760  | 1 |
| 62  | H | 80.69941 | 85.27488 | 69.68462 | -1504.82350 | -780.94249  | -2132.90992 | 1 |
| 63  | C | 78.83821 | 83.48124 | 71.43597 | 288.57638   | 618.62814   | -397.00270  | 1 |
| 64  | O | 78.50655 | 82.76382 | 70.52405 | 321.70495   | -185.26452  | 574.37218   | 1 |
| 65  | N | 79.44342 | 83.15983 | 72.57227 | -447.05792  | -446.53431  | 367.76425   | 1 |
| 66  | H | 79.68985 | 83.88747 | 73.28931 | 350.31316   | 1975.63644  | -1843.31522 | 1 |
| 67  | C | 79.94249 | 81.82645 | 72.68945 | -511.23061  | 374.03917   | -471.51480  | 1 |
| 68  | H | 79.17454 | 81.21393 | 72.16022 | 2234.79579  | -898.70890  | -1273.45190 | 1 |
| 69  | C | 81.33773 | 81.78739 | 71.88287 | 529.53781   | -159.34528  | 563.72604   | 1 |
| 70  | H | 81.69807 | 80.72650 | 71.91868 | 654.59388   | 2347.94251  | 1217.51488  | 1 |
| 71  | H | 81.09126 | 82.01196 | 70.80853 | -1526.55661 | 2103.42026  | 817.87394   | 1 |
| 72  | O | 82.34809 | 82.73527 | 72.29893 | -554.84278  | 14.12789    | 399.58769   | 1 |
| 73  | H | 82.78193 | 82.20964 | 73.00060 | 1297.06236  | 2061.84854  | 1220.68812  | 1 |
| 74  | C | 80.16132 | 81.44770 | 74.23786 | -662.15484  | -412.13544  | 123.62687   | 1 |
| 75  | O | 80.89797 | 80.51958 | 74.53836 | -540.01537  | -317.05804  | 274.91456   | 1 |
| 76  | N | 79.46035 | 82.21684 | 75.05827 | -202.76299  | -690.00100  | -131.49145  | 1 |
| 77  | H | 78.87691 | 82.94529 | 74.63770 | -702.62132  | -2617.37191 | 281.70413   | 1 |
| 78  | C | 79.48694 | 82.00914 | 76.50528 | -491.73914  | 576.34187   | 222.73509   | 1 |
| 79  | H | 80.56225 | 81.76816 | 76.67959 | 1977.17978  | -1823.58850 | -434.68928  | 1 |
| 80  | C | 79.00431 | 83.27801 | 77.18204 | -649.50797  | -328.66843  | 306.11224   | 1 |
| 81  | H | 77.99712 | 83.53028 | 76.76268 | 2075.07803  | 1452.16490  | -1004.45904 | 1 |
| 82  | C | 78.85880 | 83.10064 | 78.68196 | -615.18735  | -489.99689  | -70.96352   | 1 |
| 83  | H | 78.49771 | 84.04360 | 79.17846 | -1226.32661 | -1724.38906 | -1716.47170 | 1 |
| 84  | H | 78.11928 | 82.28660 | 78.92818 | 2381.64273  | -969.84735  | 900.46860   | 1 |
| 85  | H | 79.83654 | 82.82298 | 79.16428 | 2122.74991  | 1702.23946  | -141.36228  | 1 |
| 86  | C | 79.93137 | 84.44398 | 76.89302 | -501.86074  | -479.61276  | -376.42482  | 1 |
| 87  | H | 79.55985 | 85.39870 | 77.35703 | 993.79261   | -2246.95401 | -1177.81305 | 1 |
| 88  | H | 80.96858 | 84.26001 | 77.28817 | 42.71279    | -626.15391  | -2651.37258 | 1 |
| 89  | H | 80.01832 | 84.62349 | 75.77579 | -2026.39012 | -1590.33709 | -887.82922  | 1 |
| 90  | C | 78.52576 | 80.67945 | 76.81273 | -672.89153  | 382.57394   | -156.34072  | 1 |
| 91  | O | 77.44925 | 80.78913 | 77.33673 | 410.04627   | 221.86223   | 500.35950   | 1 |
| 92  | N | 79.21579 | 79.61104 | 76.47670 | -378.11782  | -443.79414  | -441.10984  | 1 |
| 93  | H | 80.12066 | 79.75501 | 75.97924 | 2404.15973  | -568.14894  | 1149.30085  | 1 |
| 94  | C | 78.62917 | 78.30372 | 76.41676 | -544.54484  | 466.16019   | 331.29119   | 1 |
| 95  | H | 79.41395 | 77.66631 | 76.88765 | -1409.80988 | -170.17955  | 2325.32679  | 1 |
| 96  | C | 77.23797 | 78.23347 | 77.15325 | -184.48284  | 116.78282   | -758.89137  | 1 |
| 97  | H | 77.30358 | 78.66915 | 78.17864 | 1893.78641  | 1861.14652  | 611.04528   | 1 |
| 98  | H | 76.47801 | 78.84943 | 76.61451 | -2170.79665 | -974.19311  | 1327.50117  | 1 |
| 99  | C | 76.86392 | 76.71298 | 77.17927 | 389.51668   | 672.81878   | -138.49152  | 1 |
| 100 | H | 76.83304 | 76.31562 | 76.13960 | 510.64577   | 1933.03327  | 1851.02484  | 1 |
| 101 | H | 77.68294 | 76.13140 | 77.65664 | -2302.30869 | -1105.72939 | -948.89774  | 1 |



|     |   |          |          |          |             |             |             |   |
|-----|---|----------|----------|----------|-------------|-------------|-------------|---|
| 102 | C | 75.51463 | 76.37352 | 77.90457 | -559.93427  | -126.34590  | 542.30857   | 1 |
| 103 | O | 75.17360 | 75.21802 | 78.01759 | -670.36003  | -111.83166  | 76.36448    | 1 |
| 104 | N | 74.85592 | 77.45823 | 78.35411 | -216.06729  | -537.07037  | 446.51379   | 1 |
| 105 | H | 75.10792 | 78.45148 | 78.27721 | -1251.96487 | 1074.12894  | -2168.52500 | 1 |
| 106 | H | 73.96089 | 77.42469 | 78.85427 | -2451.83023 | -720.73851  | 944.84612   | 1 |
| 107 | C | 78.44231 | 77.95124 | 74.82860 | 546.24052   | -563.88337  | -85.11809   | 1 |
| 108 | O | 77.49122 | 78.36686 | 74.22119 | 71.70702    | -307.40463  | 606.69673   | 1 |
| 109 | N | 79.46440 | 77.19723 | 74.39725 | 479.90863   | -504.50129  | 222.86849   | 1 |
| 110 | C | 79.40629 | 76.50857 | 73.14471 | 75.51268    | -600.91904  | 506.73700   | 1 |
| 111 | H | 78.86136 | 77.16837 | 72.43077 | -2033.61562 | 1795.30103  | 254.89480   | 1 |
| 112 | C | 80.94546 | 76.26641 | 72.82740 | 523.79067   | 517.99274   | 284.45581   | 1 |
| 113 | H | 81.11431 | 75.43411 | 72.10799 | 1599.61665  | -1127.00911 | 1895.98173  | 1 |
| 114 | H | 81.42215 | 77.17205 | 72.39039 | -1881.83093 | 1275.82488  | -1501.55016 | 1 |
| 115 | C | 81.49945 | 75.96731 | 74.25373 | -600.05639  | -404.05026  | 316.64485   | 1 |
| 116 | H | 81.22326 | 74.93895 | 74.57997 | -2597.05260 | 496.36221   | 657.73249   | 1 |
| 117 | H | 82.60747 | 76.04273 | 74.33238 | -1666.24518 | 1294.38985  | -1723.90591 | 1 |
| 118 | C | 80.73182 | 77.06932 | 75.10367 | 493.57570   | -129.95376  | -602.56394  | 1 |
| 119 | H | 80.53340 | 76.78530 | 76.16838 | -1469.08415 | -637.84797  | 2204.22581  | 1 |
| 120 | H | 81.18774 | 78.08844 | 75.07057 | -1038.97840 | 1068.88701  | -2280.71789 | 1 |
| 121 | C | 78.65834 | 75.07430 | 73.37916 | 188.88100   | 241.05089   | -727.87821  | 1 |
| 122 | O | 78.36880 | 74.64253 | 74.46668 | 531.88613   | -49.19943   | 427.07960   | 1 |
| 123 | N | 78.57347 | 74.40392 | 72.17925 | 708.14833   | 26.93417    | -179.73509  | 1 |
| 124 | H | 78.76867 | 75.16248 | 71.51600 | -2232.69501 | -1179.09831 | 1023.94816  | 1 |
| 125 | C | 77.42174 | 73.49329 | 71.98122 | -738.32412  | 259.92548   | 104.42456   | 1 |
| 126 | H | 76.52786 | 74.09136 | 72.26933 | 2028.89123  | 1260.02983  | 1311.33324  | 1 |
| 127 | C | 77.43288 | 73.06894 | 70.53618 | -258.65678  | -345.52513  | 661.28459   | 1 |
| 128 | H | 78.48965 | 72.86192 | 70.25224 | -1826.06090 | -1801.46097 | -918.64554  | 1 |
| 129 | C | 76.62858 | 71.79961 | 70.30989 | -541.23400  | 531.92970   | -218.41428  | 1 |
| 130 | H | 76.58864 | 71.51875 | 69.22183 | 1311.73218  | -2219.18200 | 882.19023   | 1 |
| 131 | H | 77.07331 | 70.92615 | 70.86136 | -1048.71298 | 1223.58118  | -2196.97971 | 1 |
| 132 | H | 75.56753 | 71.91009 | 70.66573 | 419.06414   | 1903.92898  | 1903.44670  | 1 |
| 133 | C | 76.90815 | 74.16177 | 69.61968 | -423.86431  | 152.66566   | -648.55262  | 1 |
| 134 | H | 76.95694 | 73.85594 | 68.53866 | 105.68386   | -2342.50080 | 1387.51238  | 1 |
| 135 | H | 75.83481 | 74.40929 | 69.84607 | -1695.63603 | -1484.73621 | -1531.02793 | 1 |
| 136 | H | 77.49730 | 75.11330 | 69.72493 | -1853.57121 | -487.39031  | 1936.59343  | 1 |
| 137 | C | 77.66924 | 72.19166 | 72.96829 | 539.71428   | -510.58232  | 267.58633   | 1 |
| 138 | O | 78.64198 | 71.47986 | 72.85167 | -15.93758   | -278.34085  | -624.49402  | 1 |
| 139 | N | 76.58600 | 71.99553 | 73.71595 | -676.81886  | 12.05292    | 276.17960   | 1 |
| 140 | H | 75.87792 | 72.72267 | 73.63426 | -1694.44250 | -373.84189  | -2100.66098 | 1 |
| 141 | C | 76.71960 | 71.25468 | 74.93916 | 412.33078   | -664.70360  | 108.35451   | 1 |
| 142 | H | 77.76413 | 71.47344 | 75.25428 | 1765.77476  | 1294.44366  | 1621.76594  | 1 |
| 143 | C | 75.62528 | 71.85864 | 75.89193 | -179.66635  | -721.95667  | -264.73915  | 1 |
| 144 | H | 75.64727 | 72.97144 | 75.84149 | -607.34922  | 2587.87032  | -598.10018  | 1 |
| 145 | H | 74.60591 | 71.56325 | 75.55554 | -359.69332  | -1479.13954 | -2259.74260 | 1 |
| 146 | C | 75.87590 | 71.38216 | 77.36946 | -240.01076  | 616.02425   | 431.85322   | 1 |
| 147 | H | 75.74486 | 70.27636 | 77.44779 | -1359.17131 | 782.54425   | 2227.99181  | 1 |
| 148 | H | 76.92090 | 71.60011 | 77.68797 | -820.36667  | 85.81767    | -2596.78715 | 1 |
| 149 | C | 74.84949 | 72.15330 | 78.26076 | -513.07015  | 236.18570   | -551.87280  | 1 |
| 150 | H | 74.95923 | 73.27679 | 78.14877 | 1816.11944  | -1183.11722 | -1650.94321 | 1 |
| 151 | H | 73.80306 | 71.91425 | 77.95766 | -1800.04429 | -1361.53473 | 1526.34643  | 1 |
| 152 | C | 75.10067 | 71.72001 | 79.77833 | 726.08972   | -253.19732  | -179.64713  | 1 |
| 153 | H | 74.98049 | 70.62171 | 79.94805 | 1224.27271  | -456.51798  | -2390.90304 | 1 |
| 154 | H | 76.08552 | 72.05279 | 80.19068 | 1206.40339  | -1150.93514 | -2154.90344 | 1 |
| 155 | N | 74.08889 | 72.37555 | 80.55791 | 329.70796   | -633.68968  | -155.67358  | 1 |
| 156 | H | 74.10304 | 70.19372 | 82.05419 | 1348.31305  | 1938.76845  | 1359.00643  | 1 |
| 157 | H | 74.24086 | 72.35775 | 81.56211 | 2096.92035  | 1446.54551  | -966.48890  | 1 |
| 158 | H | 73.16657 | 71.95603 | 80.48864 | -1197.07217 | -2303.53719 | 827.28733   | 1 |
| 159 | C | 76.51732 | 69.64846 | 74.67528 | -378.01186  | -556.17301  | -413.96481  | 1 |
| 160 | O | 76.24063 | 68.90714 | 75.58739 | -409.44433  | -307.55053  | -453.30833  | 1 |
| 161 | N | 76.76410 | 69.36803 | 73.40284 | -429.02477  | 524.70884   | 274.08502   | 1 |
| 162 | H | 77.05083 | 70.16915 | 72.82952 | 1706.34263  | -1425.96036 | 1574.38926  | 1 |
| 163 | C | 76.78393 | 68.06586 | 72.84602 | -45.25864   | -626.22952  | 478.93267   | 1 |

|     |   |          |          |          |             |             |             |   |
|-----|---|----------|----------|----------|-------------|-------------|-------------|---|
| 164 | H | 77.06976 | 68.26267 | 71.78868 | 1988.63164  | 570.90773   | 1772.87287  | 1 |
| 165 | C | 77.87866 | 67.23042 | 73.62319 | 551.77128   | -20.49526   | -564.54996  | 1 |
| 166 | H | 78.86983 | 67.73309 | 73.55296 | 1434.61535  | -1753.10253 | 1513.99471  | 1 |
| 167 | H | 77.65323 | 67.18212 | 74.71298 | -714.67738  | 1819.09770  | 1898.36494  | 1 |
| 168 | C | 77.91871 | 65.80959 | 72.96860 | 446.99263   | -555.77305  | 338.97221   | 1 |
| 169 | H | 76.96742 | 65.25805 | 73.16024 | 1953.68466  | 1892.25957  | -161.67766  | 1 |
| 170 | H | 78.00615 | 65.89433 | 71.86205 | -403.03785  | 2688.07032  | -188.43591  | 1 |
| 171 | C | 79.15352 | 65.01323 | 73.55269 | 567.86262   | 335.74681   | 434.04421   | 1 |
| 172 | H | 80.10641 | 65.56187 | 73.37096 | -1080.02275 | 1568.26081  | -1948.78900 | 1 |
| 173 | H | 79.07156 | 64.90312 | 74.65826 | -919.54108  | 2111.34692  | 1456.13463  | 1 |
| 174 | C | 79.17081 | 63.63193 | 72.85653 | 195.81897   | 173.33862   | -745.11536  | 1 |
| 175 | H | 78.29815 | 62.98930 | 73.08927 | 1405.67949  | -2301.21089 | -390.08113  | 1 |
| 176 | H | 79.33003 | 63.66979 | 71.76023 | -940.37328  | -1118.32446 | 2299.72133  | 1 |
| 177 | N | 80.40437 | 62.83647 | 73.40084 | 319.26422   | 656.36007   | -42.02424   | 1 |
| 178 | H | 80.52309 | 61.85771 | 73.00928 | 1961.03633  | 619.91968   | 1787.09422  | 1 |
| 179 | H | 81.36624 | 63.24925 | 73.22330 | 854.14343   | -2156.80752 | 1429.08711  | 1 |
| 180 | H | 80.43470 | 62.64671 | 74.44463 | 1237.02905  | -1378.50857 | -1998.28500 | 1 |
| 181 | C | 75.26911 | 67.41778 | 72.94018 | 532.53319   | -268.57236  | 517.55729   | 1 |
| 182 | O | 74.48005 | 67.63652 | 72.05170 | 266.16714   | -290.73804  | -558.88002  | 1 |
| 183 | N | 75.09326 | 66.71327 | 74.04783 | -226.25352  | 640.49678   | -270.32839  | 1 |
| 184 | H | 75.86344 | 66.67685 | 74.71227 | 2007.69063  | -1035.27229 | 1523.50231  | 1 |
| 185 | C | 73.95362 | 65.83615 | 74.12718 | -540.76542  | -573.33303  | 49.50000    | 1 |
| 186 | H | 73.74121 | 65.54513 | 73.07143 | -2374.20950 | -1036.76023 | 843.75774   | 1 |
| 187 | C | 74.45079 | 64.60066 | 75.03573 | -77.09082   | 666.87422   | -415.84136  | 1 |
| 188 | H | 74.75871 | 64.99772 | 76.04097 | -985.81834  | 617.19825   | 2463.91927  | 1 |
| 189 | O | 75.59656 | 63.91031 | 74.50870 | 293.29899   | -391.65602  | -477.80926  | 1 |
| 190 | H | 76.23615 | 64.03186 | 75.23976 | 2528.72714  | -681.76262  | -751.27122  | 1 |
| 191 | C | 73.15308 | 63.73650 | 75.21524 | 252.47363   | -605.14473  | 440.05134   | 1 |
| 192 | H | 73.34812 | 62.83419 | 75.84088 | -2052.65063 | 1456.49051  | -1043.51830 | 1 |
| 193 | H | 72.33295 | 64.31004 | 75.71217 | -2152.98800 | -1661.97574 | -161.70652  | 1 |
| 194 | H | 72.76073 | 63.37997 | 74.23426 | -473.12726  | -1584.27339 | 2165.61725  | 1 |
| 195 | C | 72.71938 | 66.63884 | 74.72613 | 360.36307   | 488.46713   | 505.10056   | 1 |
| 196 | O | 71.49574 | 66.08771 | 74.60198 | -200.08817  | -528.03552  | -385.82850  | 1 |
| 197 | N | 73.01986 | 67.70219 | 75.36084 | -597.54095  | -226.44775  | 355.20479   | 1 |
| 198 | H | 74.03831 | 67.84221 | 75.26848 | 2179.23655  | -1300.70981 | -991.33835  | 1 |
| 199 | C | 72.16898 | 68.75131 | 75.80939 | -687.68921  | 297.39807   | -249.45179  | 1 |
| 200 | H | 72.57840 | 69.64161 | 75.28766 | -349.16256  | -2467.37713 | -1101.72831 | 1 |
| 201 | C | 70.61024 | 68.48615 | 75.53245 | 672.47345   | 361.54328   | -201.62880  | 1 |
| 202 | H | 70.30748 | 67.49266 | 75.95587 | 1541.41502  | 582.18425   | 2169.97026  | 1 |
| 203 | H | 69.98901 | 69.27195 | 76.02797 | -2534.67717 | 60.25153    | 997.72295   | 1 |
| 204 | C | 70.41479 | 68.50480 | 74.02832 | 574.26774   | -389.43119  | -377.02542  | 1 |
| 205 | C | 70.21239 | 69.66991 | 73.26034 | 688.82679   | -287.33580  | -257.96133  | 1 |
| 206 | H | 70.11322 | 70.66060 | 73.74626 | 331.14182   | 1470.38163  | 2269.80013  | 1 |
| 207 | C | 70.50390 | 67.15054 | 73.41792 | -383.52382  | -675.04808  | 144.24917   | 1 |
| 208 | H | 69.80383 | 66.35276 | 73.85730 | 4.09847     | 1517.59662  | 2262.86397  | 1 |
| 209 | C | 70.18591 | 69.54224 | 71.85914 | -134.76730  | 428.45285   | -649.50303  | 1 |
| 210 | H | 70.03854 | 70.44712 | 71.24775 | -903.23433  | 1600.49020  | 2011.53387  | 1 |
| 211 | C | 70.56626 | 67.14567 | 71.94664 | -335.53281  | -615.00040  | -364.39058  | 1 |
| 212 | H | 70.70963 | 66.18752 | 71.42751 | 1596.45398  | -1369.33862 | 1732.02659  | 1 |
| 213 | C | 70.37374 | 68.29734 | 71.18637 | 585.48547   | -340.24194  | -406.23938  | 1 |
| 214 | O | 70.35662 | 68.29345 | 69.72794 | -419.15649  | -173.04408  | -511.94141  | 1 |
| 215 | H | 70.59153 | 67.36682 | 69.56569 | -1071.84350 | 1559.71507  | -1960.13012 | 1 |
| 216 | C | 72.29817 | 68.91992 | 77.42405 | 291.41878   | -183.13091  | 710.72246   | 1 |
| 217 | O | 72.51564 | 70.02669 | 77.90382 | 379.87695   | 523.47396   | -222.23622  | 1 |
| 218 | N | 72.02083 | 67.78782 | 78.04610 | 564.30591   | 373.09380   | 277.24371   | 1 |
| 219 | H | 71.83393 | 66.99133 | 77.43636 | -120.59931  | -2436.07824 | -1214.35098 | 1 |
| 220 | C | 72.09585 | 67.62183 | 79.45464 | 404.07514   | -299.37480  | 608.84009   | 1 |
| 221 | H | 72.19384 | 66.52213 | 79.60223 | -1071.07882 | -841.69025  | 2359.66467  | 1 |
| 222 | C | 73.32010 | 68.47571 | 79.99146 | -683.12807  | 68.71770    | -390.13096  | 1 |
| 223 | H | 74.24325 | 68.27586 | 79.40287 | 2068.88918  | 1596.58590  | 770.89603   | 1 |
| 224 | H | 73.11272 | 69.56846 | 79.86520 | 1379.86429  | 2342.49779  | -179.85638  | 1 |
| 225 | C | 73.50427 | 68.11194 | 81.50454 | -176.39967  | 537.49466   | 550.97268   | 1 |

|     |   |          |          |          |             |             |             |   |
|-----|---|----------|----------|----------|-------------|-------------|-------------|---|
| 226 | H | 72.52142 | 68.14243 | 82.03531 | -396.28051  | 1942.22168  | 1869.33314  | 1 |
| 227 | H | 73.88652 | 67.07232 | 81.62149 | -94.44700   | 586.00678   | -2659.20016 | 1 |
| 228 | C | 74.50425 | 69.15550 | 82.11677 | -291.69381  | -718.18079  | -150.72929  | 1 |
| 229 | H | 75.48563 | 69.14393 | 81.58768 | -2303.38776 | 1089.76242  | 964.62032   | 1 |
| 230 | H | 74.70884 | 68.94448 | 83.19629 | 884.16729   | 2568.80533  | -207.74283  | 1 |
| 231 | N | 75.71331 | 68.74671 | 84.77664 | -594.49522  | -252.81478  | 342.29276   | 2 |
| 232 | H | 75.72420 | 68.06537 | 85.52604 | -1735.17426 | 2084.05705  | -263.71605  | 2 |
| 233 | C | 76.54388 | 69.69533 | 84.98847 | 595.23177   | -271.52487  | 442.22352   | 2 |
| 234 | N | 76.72039 | 70.80573 | 84.05041 | 585.53813   | -424.79750  | -105.81303  | 2 |
| 235 | H | 76.44469 | 70.64373 | 83.08912 | 959.88797   | 1327.56823  | -2177.11905 | 2 |
| 236 | H | 77.68259 | 71.11681 | 83.96527 | 1578.48647  | 16.27378    | -2220.76233 | 2 |
| 237 | N | 77.36598 | 69.70619 | 86.19905 | -452.17763  | -390.33541  | -421.51853  | 2 |
| 238 | H | 76.98872 | 69.29075 | 87.04371 | 470.26107   | 1974.25629  | -1817.92087 | 2 |
| 239 | H | 77.60651 | 70.64979 | 86.48496 | 1856.67307  | -1573.97321 | -1224.35416 | 2 |
| 240 | C | 70.78027 | 68.22750 | 80.21510 | -531.47271  | -581.45780  | -55.06206   | 1 |
| 241 | O | 70.41281 | 67.73736 | 81.25113 | -243.00837  | 192.73507   | 609.52485   | 1 |
| 242 | N | 70.33913 | 69.33979 | 79.62271 | 343.49288   | -644.25607  | 38.09164    | 1 |
| 243 | H | 70.84644 | 69.65946 | 78.78214 | -1691.16043 | -1535.97525 | -1484.73099 | 1 |
| 244 | C | 69.02738 | 69.88772 | 79.99980 | 542.66492   | 350.14337   | 454.42563   | 1 |
| 245 | H | 68.74543 | 69.25711 | 80.87985 | 1209.57979  | -2396.95920 | 463.86744   | 1 |
| 246 | C | 69.19446 | 71.35886 | 80.35732 | -737.14309  | 145.93010   | 242.71942   | 1 |
| 247 | H | 69.46299 | 71.90663 | 79.42684 | -1050.18303 | 159.36419   | -2509.06125 | 1 |
| 248 | C | 67.90974 | 71.95165 | 80.90288 | -706.77696  | -252.88343  | -245.16230  | 1 |
| 249 | H | 68.01541 | 73.04945 | 81.12423 | -1624.64039 | -1665.49085 | 1417.86935  | 1 |
| 250 | H | 67.05675 | 71.83483 | 80.16841 | 2566.10521  | 598.51109   | 693.22305   | 1 |
| 251 | H | 67.59484 | 71.44863 | 81.85874 | -1972.69758 | 107.10018   | -1876.34312 | 1 |
| 252 | C | 70.32083 | 71.56287 | 81.35405 | 412.85148   | 672.58832   | -27.69222   | 1 |
| 253 | H | 70.51302 | 72.65293 | 81.55397 | 1447.02277  | 1762.76533  | -1490.78944 | 1 |
| 254 | H | 70.08907 | 71.07606 | 82.34130 | 1320.77379  | -145.20455  | 2378.68491  | 1 |
| 255 | H | 71.28095 | 71.11032 | 80.98289 | -1512.10848 | 1470.52031  | 1724.75147  | 1 |
| 256 | C | 68.00552 | 69.69326 | 78.72827 | -607.11113  | 499.56689   | 73.73769    | 1 |
| 257 | O | 67.02008 | 70.39346 | 78.63778 | 357.97126   | 460.81534   | 356.68785   | 1 |
| 258 | N | 68.39623 | 68.71626 | 77.90867 | 536.55407   | -368.62270  | 332.76306   | 1 |
| 259 | H | 69.27428 | 68.25845 | 78.18541 | 524.38866   | 2297.69985  | 1367.20941  | 1 |
| 260 | C | 67.35483 | 67.77383 | 77.55512 | 46.50277    | -774.29190  | -147.97904  | 1 |
| 261 | H | 66.61471 | 67.82423 | 78.38345 | 1676.51875  | 1883.29066  | 1032.55549  | 1 |
| 262 | C | 66.69798 | 68.16856 | 76.13855 | -559.41456  | -34.19198   | -556.30433  | 1 |
| 263 | H | 67.48738 | 68.59646 | 75.47509 | -64.66664   | 395.18769   | 2695.05373  | 1 |
| 264 | H | 66.31247 | 67.25978 | 75.61609 | -2703.44278 | -60.40056   | 333.79418   | 1 |
| 265 | C | 65.58007 | 69.15462 | 76.35077 | -519.76435  | 377.31045   | 459.42366   | 1 |
| 266 | H | 65.93860 | 69.94502 | 77.07363 | -1746.74323 | 1667.50644  | -1261.73691 | 1 |
| 267 | C | 65.20349 | 69.81886 | 75.03318 | 570.95554   | 16.46261    | -545.27700  | 1 |
| 268 | H | 64.39951 | 70.58727 | 75.17224 | 2391.58273  | 28.05277    | -1305.07271 | 1 |
| 269 | H | 66.07993 | 70.33567 | 74.56353 | 175.75588   | 917.63458   | 2559.43867  | 1 |
| 270 | H | 64.82174 | 69.07157 | 74.29023 | -1063.97851 | -2155.34650 | 1283.00462  | 1 |
| 271 | C | 64.34959 | 68.48655 | 76.94814 | 193.76014   | 2.62946     | -765.53141  | 1 |
| 272 | H | 63.51308 | 69.21908 | 77.09015 | 507.39394   | -846.55087  | 2539.60089  | 1 |
| 273 | H | 63.96263 | 67.66592 | 76.29060 | 1337.57841  | 1818.19054  | 1526.01994  | 1 |
| 274 | H | 64.56468 | 68.03548 | 77.95083 | 1100.88635  | -1172.91350 | -2199.08909 | 1 |
| 275 | C | 68.09667 | 66.37057 | 77.42577 | -549.21115  | 475.64486   | -309.38218  | 1 |
| 276 | O | 69.28802 | 66.24741 | 77.58025 | 556.06106   | -390.37755  | -78.24250   | 1 |
| 277 | O | 67.29731 | 65.25079 | 77.08762 | -572.27940  | -310.19032  | -209.75862  | 1 |
| 278 | H | 66.40256 | 65.68846 | 77.10308 | -1380.08193 | 2212.14486  | 790.85944   | 1 |

Listing 95: C00095.xmolout

|   |   |          |          |          |             |             |             |        |          |
|---|---|----------|----------|----------|-------------|-------------|-------------|--------|----------|
| 1 |   | 276      |          |          |             |             |             |        |          |
| 2 |   | 150.0000 | 150.0000 | 150.0000 | 0.0000      | 0.0000      | 0.0000***** | 1.4615 | 5846     |
|   |   | 0.2500   | 300.00   | 0.00     | 0.00        | 0.00        | -1293.4429  | 0.0000 | 300.0000 |
| 3 | H | 68.73413 | 74.71237 | 66.33684 | -2043.14101 | -1757.64893 | 399.89339   |        | 1        |
| 4 | N | 69.31873 | 75.26091 | 66.96709 | 426.75047   | 490.45733   | -334.42467  |        | 1        |
| 5 | H | 69.67105 | 74.56061 | 67.63452 | 442.25559   | -1110.30854 | -2448.52907 |        | 1        |

|    |   |          |          |          |             |             |             |   |
|----|---|----------|----------|----------|-------------|-------------|-------------|---|
| 6  | C | 70.38829 | 75.92082 | 66.32218 | 415.32972   | -666.39213  | 83.73172    | 1 |
| 7  | H | 70.14154 | 75.98903 | 65.24009 | 879.32219   | 2491.00447  | 667.35213   | 1 |
| 8  | C | 70.56939 | 77.37015 | 67.00735 | 31.35357    | 477.41777   | 628.23362   | 1 |
| 9  | H | 70.76082 | 77.24016 | 68.09920 | 1168.38489  | 2240.25337  | -1019.71136 | 1 |
| 10 | H | 71.46414 | 77.89572 | 66.59505 | -360.43770  | 2534.90498  | 931.67112   | 1 |
| 11 | C | 69.31416 | 78.17119 | 66.78271 | 463.18208   | 512.70242   | -382.34388  | 1 |
| 12 | H | 68.44356 | 77.52160 | 67.02923 | 1725.29117  | 1863.52247  | -987.07854  | 1 |
| 13 | C | 69.28146 | 79.38784 | 67.69938 | 710.42801   | -144.27427  | -313.15367  | 1 |
| 14 | H | 68.33869 | 79.97923 | 67.56767 | 364.20195   | -1033.13725 | 2494.72524  | 1 |
| 15 | H | 69.34194 | 79.09507 | 68.77936 | 2567.61904  | 335.80679   | 847.48802   | 1 |
| 16 | H | 70.13800 | 80.08069 | 67.49487 | -2587.99029 | 680.92867   | -512.16411  | 1 |
| 17 | C | 69.19041 | 78.62597 | 65.33475 | 268.17616   | 741.64379   | -40.42634   | 1 |
| 18 | H | 68.25641 | 79.22258 | 65.16841 | 1283.54314  | -1945.37420 | -1411.27812 | 1 |
| 19 | H | 70.05394 | 79.27205 | 65.03069 | -1258.57796 | 1317.15249  | -2026.02085 | 1 |
| 20 | H | 69.15880 | 77.75862 | 64.62669 | -2502.84526 | 909.80597   | 575.92391   | 1 |
| 21 | C | 71.65086 | 74.95599 | 66.65975 | 619.36578   | -458.64843  | -172.09273  | 1 |
| 22 | O | 71.58551 | 74.09070 | 67.51601 | -81.40433   | 433.87611   | 522.34594   | 1 |
| 23 | N | 72.68356 | 75.28283 | 65.89199 | 175.23996   | -622.20190  | 341.55523   | 1 |
| 24 | H | 72.60380 | 76.07385 | 65.25445 | -876.57256  | -303.22879  | -2561.90213 | 1 |
| 25 | C | 73.87378 | 74.51415 | 66.01707 | -571.88214  | -534.10783  | -106.15033  | 1 |
| 26 | H | 73.53478 | 73.54625 | 66.45220 | -2713.20841 | -16.25800   | -248.80809  | 1 |
| 27 | C | 74.52476 | 74.41620 | 64.55698 | 166.60354   | 288.16399   | -716.09568  | 1 |
| 28 | H | 74.74403 | 75.46013 | 64.20306 | -2097.85574 | 1636.78449  | -586.18044  | 1 |
| 29 | O | 73.68027 | 73.82166 | 63.55343 | -317.80580  | -363.38227  | 484.43082   | 1 |
| 30 | H | 73.57959 | 74.56540 | 62.92813 | 1863.74748  | -1451.84923 | 1357.29467  | 1 |
| 31 | C | 75.88383 | 73.66827 | 64.81064 | 503.80731   | 517.99032   | 318.51606   | 1 |
| 32 | H | 76.50408 | 73.63634 | 63.88458 | 640.61020   | -2157.10410 | -1536.29104 | 1 |
| 33 | H | 76.51289 | 74.15520 | 65.61391 | 1687.88455  | 465.60692   | 2087.56452  | 1 |
| 34 | H | 75.71282 | 72.61109 | 65.11971 | -1293.07895 | -1899.88581 | -1463.57452 | 1 |
| 35 | C | 74.88307 | 75.35568 | 66.99289 | -153.07550  | -733.68902  | 248.70981   | 1 |
| 36 | O | 75.01358 | 76.54030 | 66.84491 | 186.15459   | -480.78787  | -449.34387  | 1 |
| 37 | N | 75.52513 | 74.51965 | 67.81883 | -487.53139  | 543.18517   | 42.03850    | 1 |
| 38 | C | 76.58274 | 74.97193 | 68.67357 | -699.35871  | 69.34393    | 360.10701   | 1 |
| 39 | H | 76.25656 | 75.95435 | 69.08490 | 2.81126     | -221.99807  | -2715.58072 | 1 |
| 40 | C | 76.69564 | 73.79929 | 69.73471 | -507.46439  | -592.59194  | 122.07761   | 1 |
| 41 | H | 77.73558 | 73.70703 | 70.16679 | -1975.08116 | 525.87560   | -1801.71556 | 1 |
| 42 | H | 75.99904 | 73.95255 | 70.58998 | 1588.27743  | -1913.22100 | 1113.83566  | 1 |
| 43 | C | 76.29973 | 72.54661 | 68.89361 | -613.62442  | -457.55993  | -194.14490  | 1 |
| 44 | H | 77.14676 | 72.21621 | 68.25114 | 1707.54637  | -721.27992  | 1996.92523  | 1 |
| 45 | H | 76.00222 | 71.66803 | 69.50963 | 758.23357   | 2100.81767  | 1560.55011  | 1 |
| 46 | C | 75.10929 | 73.13860 | 68.02370 | -352.41524  | 704.96076   | 49.21465    | 1 |
| 47 | H | 74.96112 | 72.64852 | 67.03347 | 1714.76886  | -2070.42778 | 443.35792   | 1 |
| 48 | H | 74.12818 | 73.19684 | 68.55393 | 1224.15040  | 1801.50881  | 1636.97633  | 1 |
| 49 | C | 77.97674 | 75.11100 | 67.82701 | 566.85117   | 537.05831   | 117.62814   | 1 |
| 50 | O | 78.13113 | 74.62024 | 66.73044 | -550.26779  | -406.08867  | 4.21666     | 1 |
| 51 | N | 78.85557 | 75.74523 | 68.59478 | 566.34832   | -425.77725  | 180.18749   | 1 |
| 52 | H | 78.50875 | 76.07024 | 69.49578 | 644.44502   | 2646.80550  | -52.73430   | 1 |
| 53 | C | 80.03419 | 76.29589 | 68.00521 | 612.34801   | -281.48662  | 411.56221   | 1 |
| 54 | H | 79.80478 | 76.41128 | 66.92110 | 1667.23498  | -1490.75142 | 1556.16753  | 1 |
| 55 | C | 80.32968 | 77.65342 | 68.80258 | -714.45746  | -175.43074  | 286.98927   | 1 |
| 56 | H | 80.45491 | 77.39841 | 69.89151 | -787.09484  | 1763.03619  | -1922.46060 | 1 |
| 57 | O | 79.28395 | 78.63972 | 68.75188 | -429.46514  | 516.51932   | -128.40526  | 1 |
| 58 | H | 79.04293 | 78.71185 | 69.69724 | 1981.82785  | 436.16847   | -1818.18182 | 1 |
| 59 | C | 81.72180 | 78.10162 | 68.22572 | 630.79189   | -468.94448  | 76.03230    | 1 |
| 60 | H | 82.11206 | 79.00142 | 68.75547 | -1775.71861 | 2062.30353  | 131.89849   | 1 |
| 61 | H | 82.49357 | 77.30053 | 68.32538 | -1855.14608 | 88.94118    | 1993.53760  | 1 |
| 62 | H | 81.64935 | 78.35907 | 67.14355 | -1504.82350 | -780.94249  | -2132.90992 | 1 |
| 63 | C | 81.28474 | 75.29505 | 68.27060 | 288.57638   | 618.62814   | -397.00270  | 1 |
| 64 | O | 82.18116 | 75.20265 | 67.47434 | 321.70495   | -185.26452  | 574.37218   | 1 |
| 65 | N | 81.24732 | 74.84451 | 69.54618 | -447.05792  | -446.53431  | 367.76425   | 1 |
| 66 | H | 80.32056 | 74.88049 | 70.02067 | 350.31316   | 1975.63644  | -1843.31522 | 1 |
| 67 | C | 81.92530 | 73.57954 | 69.72546 | -511.23061  | 374.03917   | -471.51480  | 1 |

|     |   |          |          |          |             |             |             |   |
|-----|---|----------|----------|----------|-------------|-------------|-------------|---|
| 68  | H | 82.33587 | 73.29668 | 68.72779 | 2234.79579  | -898.70890  | -1273.45190 | 1 |
| 69  | C | 83.06510 | 73.74920 | 70.83968 | 529.53781   | -159.34528  | 563.72604   | 1 |
| 70  | H | 83.55369 | 72.74151 | 70.94376 | 654.59388   | 2347.94251  | 1217.51488  | 1 |
| 71  | H | 83.84337 | 74.43893 | 70.42072 | -1526.55661 | 2103.42026  | 817.87394   | 1 |
| 72  | O | 82.62844 | 74.16324 | 72.15852 | -554.84278  | 14.12789    | 399.58769   | 1 |
| 73  | H | 82.83653 | 75.11562 | 72.10350 | 1297.06236  | 2061.84854  | 1220.68812  | 1 |
| 74  | C | 80.69959 | 72.68064 | 70.24384 | -662.15484  | -412.13544  | 123.62687   | 1 |
| 75  | O | 79.59263 | 73.20135 | 70.38559 | -540.01537  | -317.05804  | 274.91456   | 1 |
| 76  | N | 81.06398 | 71.42868 | 70.48196 | -202.76299  | -690.00100  | -131.49145  | 1 |
| 77  | H | 82.04415 | 71.22064 | 70.28596 | -702.62132  | -2617.37191 | 281.70413   | 1 |
| 78  | C | 80.07324 | 70.35987 | 70.61707 | -491.73914  | 576.34187   | 222.73509   | 1 |
| 79  | H | 79.22784 | 70.67607 | 69.96021 | 1977.17978  | -1823.58850 | -434.68928  | 1 |
| 80  | C | 80.73708 | 69.06509 | 70.18053 | -649.50797  | -328.66843  | 306.11224   | 1 |
| 81  | H | 81.68673 | 68.96136 | 70.75145 | 2075.07803  | 1452.16490  | -1004.45904 | 1 |
| 82  | C | 79.87153 | 67.85622 | 70.48137 | -615.18735  | -489.99689  | -70.96352   | 1 |
| 83  | H | 80.38921 | 66.89419 | 70.21218 | -1226.32661 | -1724.38906 | -1716.47170 | 1 |
| 84  | H | 79.60281 | 67.80361 | 71.57572 | 2381.64273  | -969.84735  | 900.46860   | 1 |
| 85  | H | 78.90432 | 67.88781 | 69.90766 | 2122.74991  | 1702.23946  | -141.36228  | 1 |
| 86  | C | 81.08691 | 69.09433 | 68.70321 | -501.86074  | -479.61276  | -376.42482  | 1 |
| 87  | H | 81.66601 | 68.18222 | 68.39161 | 993.79261   | -2246.95401 | -1177.81305 | 1 |
| 88  | H | 80.16309 | 69.13660 | 68.06307 | 42.71279    | -626.15391  | -2651.37258 | 1 |
| 89  | H | 81.70871 | 69.99404 | 68.44081 | -2026.39012 | -1590.33709 | -887.82922  | 1 |
| 90  | C | 79.58380 | 70.30618 | 72.20249 | -672.89153  | 382.57394   | -156.34072  | 1 |
| 91  | O | 78.61359 | 69.64729 | 72.49422 | 410.04627   | 221.86223   | 500.35950   | 1 |
| 92  | N | 80.37453 | 70.98935 | 73.01276 | -378.11782  | -443.79414  | -441.10984  | 1 |
| 93  | H | 81.15599 | 71.48805 | 72.59093 | 2404.15973  | -568.14894  | 1149.30085  | 1 |
| 94  | C | 79.92700 | 71.17765 | 74.36075 | -544.54484  | 466.16019   | 331.29119   | 1 |
| 95  | H | 78.82052 | 71.08060 | 74.26503 | -1409.80988 | -170.17955  | 2325.32679  | 1 |
| 96  | C | 80.55503 | 69.99747 | 75.21554 | -184.48284  | 116.78282   | -758.89137  | 1 |
| 97  | H | 80.32270 | 69.01564 | 74.74378 | 1893.78641  | 1861.14652  | 611.04528   | 1 |
| 98  | H | 81.66579 | 70.07387 | 75.24034 | -2170.79665 | -974.19311  | 1327.50117  | 1 |
| 99  | C | 79.95437 | 70.09130 | 76.65179 | 389.51668   | 672.81878   | -138.49152  | 1 |
| 100 | H | 80.25760 | 71.05540 | 77.12289 | 510.64577   | 1933.03327  | 1851.02484  | 1 |
| 101 | H | 78.84463 | 70.14847 | 76.60208 | -2302.30869 | -1105.72939 | -948.89774  | 1 |
| 102 | C | 80.37184 | 68.89088 | 77.58296 | -559.93427  | -126.34590  | 542.30857   | 1 |
| 103 | O | 79.94747 | 68.84895 | 78.70876 | -670.36003  | -111.83166  | 76.36448    | 1 |
| 104 | N | 81.18914 | 67.98882 | 76.99891 | -216.06729  | -537.07037  | 446.51379   | 1 |
| 105 | H | 81.59090 | 67.98155 | 76.05395 | -1251.96487 | 1074.12894  | -2168.52500 | 1 |
| 106 | H | 81.55515 | 67.15649 | 77.47364 | -2451.83023 | -720.73851  | 944.84612   | 1 |
| 107 | C | 80.45864 | 72.61995 | 74.90376 | 546.24052   | -563.88337  | -85.11809   | 1 |
| 108 | O | 81.25474 | 72.63317 | 75.80503 | 71.70702    | -307.40463  | 606.69673   | 1 |
| 109 | N | 79.87990 | 73.64818 | 74.26510 | 479.90863   | -504.50129  | 222.86849   | 1 |
| 110 | C | 80.25153 | 75.00234 | 74.53141 | 75.51268    | -600.91904  | 506.73700   | 1 |
| 111 | H | 81.31964 | 75.00274 | 74.85109 | -2033.61562 | 1795.30103  | 254.89480   | 1 |
| 112 | C | 79.94769 | 75.67200 | 73.11727 | 523.79067   | 517.99274   | 284.45581   | 1 |
| 113 | H | 79.87511 | 76.78128 | 73.16634 | 1599.61665  | -1127.00911 | 1895.98173  | 1 |
| 114 | H | 80.74565 | 75.42775 | 72.37787 | -1881.83093 | 1275.82488  | -1501.55016 | 1 |
| 115 | C | 78.60590 | 74.97975 | 72.73320 | -600.05639  | -404.05026  | 316.64485   | 1 |
| 116 | H | 77.74713 | 75.43110 | 73.27780 | -2597.05260 | 496.36221   | 657.73249   | 1 |
| 117 | H | 78.36831 | 75.05139 | 71.64859 | -1666.24518 | 1294.38985  | -1723.90591 | 1 |
| 118 | C | 78.88644 | 73.48937 | 73.21173 | 493.57570   | -129.95376  | -602.56394  | 1 |
| 119 | H | 78.00643 | 72.95545 | 73.64080 | -1469.08415 | -637.84797  | 2204.22581  | 1 |
| 120 | H | 79.37425 | 72.83785 | 72.44230 | -1038.97840 | 1068.88701  | -2280.71789 | 1 |
| 121 | C | 79.23552 | 75.59994 | 75.66106 | 188.88100   | 241.05089   | -727.87821  | 1 |
| 122 | O | 78.23016 | 75.02777 | 76.00672 | 531.88613   | -49.19943   | 427.07960   | 1 |
| 123 | N | 79.64139 | 76.83831 | 75.98359 | 708.14833   | 26.93417    | -179.73509  | 1 |
| 124 | H | 80.55933 | 77.05468 | 75.59648 | -2232.69501 | -1179.09831 | 1023.94816  | 1 |
| 125 | C | 79.11468 | 77.50179 | 77.18761 | -738.32412  | 259.92548   | 104.42456   | 1 |
| 126 | H | 79.32914 | 76.80207 | 78.02711 | 2028.89123  | 1260.02983  | 1311.33324  | 1 |
| 127 | C | 79.80427 | 78.83951 | 77.30737 | -258.65678  | -345.52513  | 661.28459   | 1 |
| 128 | H | 79.80476 | 79.31487 | 76.30033 | -1826.06090 | -1801.46097 | -918.64554  | 1 |
| 129 | C | 79.06738 | 79.76653 | 78.25895 | -541.23400  | 531.92970   | -218.41428  | 1 |

|     |   |          |          |          |             |             |             |   |
|-----|---|----------|----------|----------|-------------|-------------|-------------|---|
| 130 | H | 79.55211 | 80.77989 | 78.31242 | 1311.73218  | -2219.18200 | 882.19023   | 1 |
| 131 | H | 77.99970 | 79.92149 | 77.93854 | -1048.71298 | 1223.58118  | -2196.97971 | 1 |
| 132 | H | 79.04206 | 79.35182 | 79.30372 | 419.06414   | 1903.92898  | 1903.44670  | 1 |
| 133 | C | 81.25248 | 78.70619 | 77.74604 | -423.86431  | 152.66566   | -648.55262  | 1 |
| 134 | H | 81.77616 | 79.70149 | 77.75505 | 105.68386   | -2342.50080 | 1387.51238  | 1 |
| 135 | H | 81.33181 | 78.28012 | 78.78344 | -1695.63603 | -1484.73621 | -1531.02793 | 1 |
| 136 | H | 81.83461 | 78.02809 | 77.06403 | -1853.57121 | -487.39031  | 1936.59343  | 1 |
| 137 | C | 77.48194 | 77.68114 | 76.94029 | 539.71428   | -510.58232  | 267.58633   | 1 |
| 138 | O | 76.70375 | 77.41602 | 77.85573 | -15.93758   | -278.34085  | -624.49402  | 1 |
| 139 | N | 77.23790 | 78.23088 | 75.76947 | -676.81886  | 12.05292    | 276.17960   | 1 |
| 140 | H | 78.14368 | 78.31874 | 75.30392 | -1694.44250 | -373.84189  | -2100.66098 | 1 |
| 141 | C | 76.01944 | 78.17288 | 75.04620 | 412.33078   | -664.70360  | 108.35451   | 1 |
| 142 | H | 76.31326 | 78.52819 | 74.03290 | 1765.77476  | 1294.44366  | 1621.76594  | 1 |
| 143 | C | 75.51882 | 76.66978 | 75.05805 | -179.66635  | -721.95667  | -264.73915  | 1 |
| 144 | H | 76.31389 | 75.96556 | 74.72300 | -607.34922  | 2587.87032  | -598.10018  | 1 |
| 145 | H | 75.25370 | 76.34678 | 76.08986 | -359.69332  | -1479.13954 | -2259.74260 | 1 |
| 146 | C | 74.27384 | 76.66107 | 74.11045 | -240.01076  | 616.02425   | 431.85322   | 1 |
| 147 | H | 73.54615 | 77.44196 | 74.43156 | -1359.17131 | 782.54425   | 2227.99181  | 1 |
| 148 | H | 74.56248 | 76.92506 | 73.06827 | -820.36667  | 85.81767    | -2596.78715 | 1 |
| 149 | C | 73.59597 | 75.23516 | 74.16435 | -513.07015  | 236.18570   | -551.87280  | 1 |
| 150 | H | 74.27419 | 74.44684 | 73.76377 | 1816.11944  | -1183.11722 | -1650.94321 | 1 |
| 151 | H | 73.36984 | 74.94094 | 75.21506 | -1800.04429 | -1361.53473 | 1526.34643  | 1 |
| 152 | C | 72.29900 | 75.34808 | 73.32646 | 726.08972   | -253.19732  | -179.64713  | 1 |
| 153 | H | 71.62106 | 76.17313 | 73.63376 | 1224.27271  | -456.51798  | -2390.90304 | 1 |
| 154 | H | 72.45255 | 75.38088 | 72.22881 | 1206.40339  | -1150.93514 | -2154.90344 | 1 |
| 155 | N | 71.46767 | 74.05070 | 73.58853 | 329.70796   | -633.68968  | -155.67358  | 1 |
| 156 | H | 70.50485 | 74.03965 | 73.14302 | 1348.31305  | 1938.76845  | 1359.00643  | 1 |
| 157 | H | 71.87991 | 73.15040 | 73.20824 | 2096.92035  | 1446.54551  | -966.48890  | 1 |
| 158 | H | 71.24012 | 73.77946 | 74.58975 | -1197.07217 | -2303.53719 | 827.28733   | 1 |
| 159 | C | 74.82131 | 79.08746 | 75.70232 | -378.01186  | -556.17301  | -413.96481  | 1 |
| 160 | O | 74.24279 | 79.84584 | 74.96474 | -409.44433  | -307.55053  | -453.30833  | 1 |
| 161 | N | 74.57622 | 78.78121 | 76.96521 | -429.02477  | 524.70884   | 274.08502   | 1 |
| 162 | H | 75.21033 | 78.10192 | 77.46894 | 1706.34263  | -1425.96036 | 1574.38926  | 1 |
| 163 | C | 73.75702 | 79.64955 | 77.74710 | -45.25864   | -626.22952  | 478.93267   | 1 |
| 164 | H | 74.16052 | 79.48150 | 78.77137 | 1988.63164  | 570.90773   | 1772.87287  | 1 |
| 165 | C | 73.93959 | 81.13825 | 77.23491 | 551.77128   | -20.49526   | -564.54996  | 1 |
| 166 | H | 75.00857 | 81.35588 | 77.01077 | 1434.61535  | -1753.10253 | 1513.99471  | 1 |
| 167 | H | 73.38656 | 81.29790 | 76.27466 | -714.67738  | 1819.09770  | 1898.36494  | 1 |
| 168 | C | 73.38471 | 82.07549 | 78.35922 | 446.99263   | -555.77305  | 338.97221   | 1 |
| 169 | H | 72.31210 | 81.83278 | 78.55747 | 1953.68466  | 1892.25957  | -161.67766  | 1 |
| 170 | H | 73.92295 | 81.90845 | 79.31896 | -403.03785  | 2688.07032  | -188.43591  | 1 |
| 171 | C | 73.53429 | 83.57724 | 77.88752 | 567.86262   | 335.74681   | 434.04421   | 1 |
| 172 | H | 74.60633 | 83.86706 | 77.79402 | -1080.02275 | 1568.26081  | -1948.78900 | 1 |
| 173 | H | 73.08899 | 83.72539 | 76.87675 | -919.54108  | 2111.34692  | 1456.13463  | 1 |
| 174 | C | 72.80543 | 84.44102 | 78.94344 | 195.81897   | 173.33862   | -745.11536  | 1 |
| 175 | H | 71.71562 | 84.25220 | 79.01652 | 1405.67949  | -2301.21089 | -390.08113  | 1 |
| 176 | H | 73.26025 | 84.41792 | 79.95392 | -940.37328  | -1118.32446 | 2299.72133  | 1 |
| 177 | N | 72.91230 | 85.93576 | 78.49266 | 319.26422   | 656.36007   | -42.02424   | 1 |
| 178 | H | 72.42000 | 86.63556 | 79.11972 | 1961.03633  | 619.91968   | 1787.09422  | 1 |
| 179 | H | 73.88478 | 86.35704 | 78.43346 | 854.14343   | -2156.80752 | 1429.08711  | 1 |
| 180 | H | 72.50589 | 86.18386 | 77.54390 | 1237.02905  | -1378.50857 | -1998.28500 | 1 |
| 181 | C | 72.18431 | 79.22305 | 77.64667 | 532.53319   | -268.57236  | 517.55729   | 1 |
| 182 | O | 71.32066 | 80.05942 | 77.79954 | 266.16714   | -290.73804  | -558.88002  | 1 |
| 183 | N | 72.01985 | 77.91036 | 77.46675 | -226.25352  | 640.49678   | -270.32839  | 1 |
| 184 | H | 72.87632 | 77.35738 | 77.43282 | 2007.69063  | -1035.27229 | 1523.50231  | 1 |
| 185 | C | 70.76357 | 77.37074 | 77.88415 | -540.76542  | -573.33303  | 49.50000    | 1 |
| 186 | H | 70.02686 | 78.20311 | 77.79187 | -2374.20950 | -1036.76023 | 843.75774   | 1 |
| 187 | C | 70.45219 | 76.08627 | 76.98029 | -77.09082   | 666.87422   | -415.84136  | 1 |
| 188 | H | 71.25548 | 75.31924 | 77.15530 | -985.81834  | 617.19825   | 2463.91927  | 1 |
| 189 | O | 70.40113 | 76.30441 | 75.55979 | 293.29899   | -391.65602  | -477.80926  | 1 |
| 190 | H | 71.03128 | 75.62788 | 75.23929 | 2528.72714  | -681.76262  | -751.27122  | 1 |
| 191 | C | 69.10819 | 75.58182 | 77.62254 | 252.47363   | -605.14473  | 440.05134   | 1 |

|     |   |          |          |          |             |             |             |   |
|-----|---|----------|----------|----------|-------------|-------------|-------------|---|
| 192 | H | 68.75823 | 74.63626 | 77.14816 | -2052.65063 | 1456.49051  | -1043.51830 | 1 |
| 193 | H | 69.21752 | 75.38531 | 78.71462 | -2152.98800 | -1661.97574 | -161.70652  | 1 |
| 194 | H | 68.29314 | 76.33201 | 77.50118 | -473.12726  | -1584.27339 | 2165.61725  | 1 |
| 195 | C | 70.95503 | 76.81547 | 79.40480 | 360.36307   | 488.46713   | 505.10056   | 1 |
| 196 | O | 71.93911 | 76.14907 | 79.70870 | -200.08817  | -528.03552  | -385.82850  | 1 |
| 197 | N | 69.90103 | 77.10046 | 80.14282 | -597.54095  | -226.44775  | 355.20479   | 1 |
| 198 | H | 69.12980 | 77.61770 | 79.72552 | 2179.23655  | -1300.70981 | -991.33835  | 1 |
| 199 | C | 69.81076 | 76.46231 | 81.41525 | -687.68921  | 297.39807   | -249.45179  | 1 |
| 200 | H | 70.85153 | 76.53823 | 81.80439 | -349.16256  | -2467.37713 | -1101.72831 | 1 |
| 201 | C | 68.66110 | 77.10636 | 82.31192 | 672.47345   | 361.54328   | -201.62880  | 1 |
| 202 | H | 67.67671 | 76.97056 | 81.80756 | 1541.41502  | 582.18425   | 2169.97026  | 1 |
| 203 | H | 68.60293 | 76.55288 | 83.27810 | -2534.67717 | 60.25153    | 997.72295   | 1 |
| 204 | C | 68.92433 | 78.59754 | 82.57251 | 574.26774   | -389.43119  | -377.02542  | 1 |
| 205 | C | 69.87077 | 78.99072 | 83.56546 | 688.82679   | -287.33580  | -257.96133  | 1 |
| 206 | H | 70.43796 | 78.23380 | 84.13754 | 331.14182   | 1470.38163  | 2269.80013  | 1 |
| 207 | C | 68.19951 | 79.57867 | 81.83178 | -383.52382  | -675.04808  | 144.24917   | 1 |
| 208 | H | 67.46922 | 79.27510 | 81.05998 | 4.09847     | 1517.59662  | 2262.86397  | 1 |
| 209 | C | 70.06031 | 80.35235 | 83.80142 | -134.76730  | 428.45285   | -649.50303  | 1 |
| 210 | H | 70.78868 | 80.65831 | 84.57256 | -903.23433  | 1600.49020  | 2011.53387  | 1 |
| 211 | C | 68.42417 | 80.92994 | 82.10637 | -335.53281  | -615.00040  | -364.39058  | 1 |
| 212 | H | 67.85393 | 81.68077 | 81.53205 | 1596.45398  | -1369.33862 | 1732.02659  | 1 |
| 213 | C | 69.35414 | 81.36798 | 83.09373 | 585.48547   | -340.24194  | -406.23938  | 1 |
| 214 | O | 69.58865 | 82.73877 | 83.37822 | -419.15649  | -173.04408  | -511.94141  | 1 |
| 215 | H | 68.94557 | 83.15026 | 82.75363 | -1071.84350 | 1559.71507  | -1960.13012 | 1 |
| 216 | C | 69.35171 | 74.91105 | 81.17529 | 291.41878   | -183.13091  | 710.72246   | 1 |
| 217 | O | 68.22215 | 74.53884 | 81.38447 | 379.87695   | 523.47396   | -222.23622  | 1 |
| 218 | N | 70.39262 | 74.21633 | 80.72421 | 564.30591   | 373.09380   | 277.24371   | 1 |
| 219 | H | 71.29897 | 74.68391 | 80.49696 | -120.59931  | -2436.07824 | -1214.35098 | 1 |
| 220 | C | 70.16380 | 72.81698 | 80.51065 | 404.07514   | -299.37480  | 608.84009   | 1 |
| 221 | H | 69.63407 | 72.48330 | 81.42967 | -1071.07882 | -841.69025  | 2359.66467  | 1 |
| 222 | C | 69.21574 | 72.73332 | 79.24897 | -683.12807  | 68.71770    | -390.13096  | 1 |
| 223 | H | 68.38750 | 73.47268 | 79.36855 | 2068.88918  | 1596.58590  | 770.89603   | 1 |
| 224 | H | 69.76813 | 73.03307 | 78.33009 | 1379.86429  | 2342.49779  | -179.85638  | 1 |
| 225 | C | 68.63089 | 71.29435 | 79.09851 | -176.39967  | 537.49466   | 550.97268   | 1 |
| 226 | H | 69.44002 | 70.54183 | 78.97108 | -396.28051  | 1942.22168  | 1869.33314  | 1 |
| 227 | H | 68.07562 | 70.99068 | 80.01384 | -94.44700   | 586.00678   | -2659.20016 | 1 |
| 228 | C | 67.66244 | 71.32757 | 77.82684 | -291.69381  | -718.18079  | -150.72929  | 1 |
| 229 | H | 66.77814 | 72.00888 | 77.91747 | -2303.38776 | 1089.76242  | 964.62032   | 1 |
| 230 | H | 68.15853 | 71.55000 | 76.84807 | 884.16729   | 2568.80533  | -207.74283  | 1 |
| 231 | N | 67.17128 | 70.01529 | 77.76411 | -594.49522  | -252.81478  | 342.29276   | 1 |
| 232 | H | 67.47016 | 69.38480 | 78.49144 | -1735.17426 | 2084.05705  | -263.71605  | 1 |
| 233 | C | 66.38323 | 69.57652 | 76.86950 | 595.23177   | -271.52487  | 442.22352   | 1 |
| 234 | N | 65.97086 | 70.46049 | 75.86581 | 585.53813   | -424.79750  | -105.81303  | 1 |
| 235 | H | 66.19790 | 71.44534 | 75.73513 | 959.88797   | 1327.56823  | -2177.11905 | 1 |
| 236 | H | 65.33463 | 70.22004 | 75.10483 | 1578.48647  | 16.27378    | -2220.76233 | 1 |
| 237 | N | 66.07186 | 68.22530 | 77.08093 | -452.17763  | -390.33541  | -421.51853  | 1 |
| 238 | H | 66.36435 | 67.57525 | 77.80881 | 470.26107   | 1974.25629  | -1817.92087 | 1 |
| 239 | H | 65.45138 | 67.69544 | 76.46750 | 1856.67307  | -1573.97321 | -1224.35416 | 1 |
| 240 | C | 71.64832 | 72.16421 | 80.27671 | -531.47271  | -581.45780  | -55.06206   | 1 |
| 241 | O | 72.29687 | 72.37808 | 79.27038 | -243.00837  | 192.73507   | 609.52485   | 1 |
| 242 | N | 71.97233 | 71.44135 | 81.33603 | 343.49288   | -644.25607  | 38.09164    | 1 |
| 243 | H | 71.26335 | 71.43964 | 82.06945 | -1691.16043 | -1535.97525 | -1484.73099 | 1 |
| 244 | C | 73.17143 | 70.63675 | 81.47206 | 542.66492   | 350.14337   | 454.42563   | 1 |
| 245 | H | 72.92937 | 69.95463 | 82.32169 | 1209.57979  | -2396.95920 | 463.86744   | 1 |
| 246 | C | 73.45490 | 69.91084 | 80.16302 | -737.14309  | 145.93010   | 242.71942   | 1 |
| 247 | H | 73.43511 | 70.67867 | 79.34487 | -1050.18303 | 159.36419   | -2509.06125 | 1 |
| 248 | C | 74.82666 | 69.26524 | 80.17972 | -706.77696  | -252.88343  | -245.16230  | 1 |
| 249 | H | 75.09127 | 68.81250 | 79.18449 | -1624.64039 | -1665.49085 | 1417.86935  | 1 |
| 250 | H | 75.63124 | 70.01309 | 80.43756 | 2566.10521  | 598.51109   | 693.22305   | 1 |
| 251 | H | 74.88792 | 68.44578 | 80.94820 | -1972.69758 | 107.10018   | -1876.34312 | 1 |
| 252 | C | 72.38788 | 68.87928 | 79.85122 | 412.85148   | 672.58832   | -27.69222   | 1 |
| 253 | H | 72.56385 | 68.38486 | 78.85622 | 1447.02277  | 1762.76533  | -1490.78944 | 1 |

|     |   |          |          |          |             |             |             |   |
|-----|---|----------|----------|----------|-------------|-------------|-------------|---|
| 254 | H | 72.35971 | 68.06578 | 80.62785 | 1320.77379  | -145.20455  | 2378.68491  | 1 |
| 255 | H | 71.36435 | 69.34545 | 79.81943 | -1512.10848 | 1470.52031  | 1724.75147  | 1 |
| 256 | C | 74.51985 | 71.56218 | 81.81525 | -607.11113  | 499.56689   | 73.73769    | 1 |
| 257 | O | 75.40041 | 71.04850 | 82.46356 | 357.97126   | 460.81534   | 356.68785   | 1 |
| 258 | N | 74.52426 | 72.73519 | 81.20801 | 536.55407   | -368.62270  | 332.76306   | 1 |
| 259 | H | 73.69157 | 72.99772 | 80.67115 | 524.38866   | 2297.69985  | 1367.20941  | 1 |
| 260 | C | 75.60736 | 73.60206 | 81.50574 | 46.50277    | -774.29190  | -147.97904  | 1 |
| 261 | H | 76.31516 | 72.96525 | 82.08861 | 1676.51875  | 1883.29066  | 1032.55549  | 1 |
| 262 | C | 76.23586 | 74.17686 | 80.13089 | -559.41456  | -34.19198   | -556.30433  | 1 |
| 263 | H | 75.44232 | 74.70093 | 79.54567 | -64.66664   | 395.18769   | 2695.05373  | 1 |
| 264 | H | 77.00818 | 74.95078 | 80.35526 | -2703.44278 | -60.40056   | 333.79418   | 1 |
| 265 | C | 76.83050 | 73.05592 | 79.32646 | -519.76435  | 377.31045   | 459.42366   | 1 |
| 266 | H | 76.01740 | 72.33204 | 79.09183 | -1746.74323 | 1667.50644  | -1261.73691 | 1 |
| 267 | C | 77.41751 | 73.57508 | 78.01569 | 570.95554   | 16.46261    | -545.27700  | 1 |
| 268 | H | 77.84212 | 72.74503 | 77.39314 | 2391.58273  | 28.05277    | -1305.07271 | 1 |
| 269 | H | 76.65524 | 74.10470 | 77.38378 | 175.75588   | 917.63458   | 2559.43867  | 1 |
| 270 | H | 78.24858 | 74.31191 | 78.18097 | -1063.97851 | -2155.34650 | 1283.00462  | 1 |
| 271 | C | 77.91768 | 72.31809 | 80.09654 | 193.76014   | 2.62946     | -765.53141  | 1 |
| 272 | H | 78.41841 | 71.53838 | 79.46522 | 507.39394   | -846.55087  | 2539.60089  | 1 |
| 273 | H | 78.71731 | 73.01657 | 80.45509 | 1337.57841  | 1818.19054  | 1526.01994  | 1 |
| 274 | H | 77.50532 | 71.79217 | 80.99674 | 1100.88635  | -1172.91350 | -2199.08909 | 1 |
| 275 | C | 75.05457 | 74.85174 | 82.36383 | -549.21115  | 475.64486   | -309.38218  | 1 |
| 276 | O | 73.89052 | 75.11527 | 82.50938 | 556.06106   | -390.37755  | -78.24250   | 1 |
| 277 | O | 76.05575 | 75.68924 | 82.91587 | -572.27940  | -310.19032  | -209.75862  | 1 |
| 278 | H | 76.85908 | 75.16749 | 82.64042 | -1380.08193 | 2212.14486  | 790.85944   | 1 |

Listing 96: C00096.xmolout

|    |   |          |          |          |             |             |             |        |          |
|----|---|----------|----------|----------|-------------|-------------|-------------|--------|----------|
| 1  |   | 276      |          |          |             |             |             |        |          |
| 2  |   | 150.0000 | 150.0000 | 150.0000 | 0.0000      | 0.0000      | 0.0000***** | 0.8450 | 3380     |
|    |   | 0.2500   | 300.00   | 0.00     | 0.00        | 0.00        | -1293.4425  | 0.0000 | 300.0000 |
| 3  | H | 67.04811 | 73.55345 | 87.78173 | -2043.14101 | -1757.64893 | 399.89339   |        | 1        |
| 4  | N | 68.03048 | 73.32915 | 87.63426 | 426.75047   | 490.45733   | -334.42467  |        | 1        |
| 5  | H | 67.99948 | 72.77435 | 86.78050 | 442.25559   | -1110.30854 | -2448.52907 |        | 1        |
| 6  | C | 68.88762 | 74.44488 | 87.53209 | 415.32972   | -666.39213  | 83.73172    |        | 1        |
| 7  | H | 68.50938 | 75.21053 | 88.24264 | 879.32219   | 2491.00447  | 667.35213   |        | 1        |
| 8  | C | 70.38275 | 73.93569 | 87.84799 | 31.35357    | 477.41777   | 628.23362   |        | 1        |
| 9  | H | 70.65995 | 73.15346 | 87.10073 | 1168.38489  | 2240.25337  | -1019.71136 |        | 1        |
| 10 | H | 71.12049 | 74.76430 | 87.71855 | -360.43770  | 2534.90498  | 931.67112   |        | 1        |
| 11 | C | 70.43830 | 73.37047 | 89.24573 | 463.18208   | 512.70242   | -382.34388  |        | 1        |
| 12 | H | 69.51727 | 72.76643 | 89.41025 | 1725.29117  | 1863.52247  | -987.07854  |        | 1        |
| 13 | C | 71.64476 | 72.45482 | 89.40653 | 710.42801   | -144.27427  | -313.15367  |        | 1        |
| 14 | H | 71.69541 | 72.01381 | 90.43567 | 364.20195   | -1033.13725 | 2494.72524  |        | 1        |
| 15 | H | 71.61608 | 71.60105 | 88.68088 | 2567.61904  | 335.80679   | 847.48802   |        | 1        |
| 16 | H | 72.60592 | 73.00462 | 89.23428 | -2587.99029 | 680.92867   | -512.16411  |        | 1        |
| 17 | C | 70.49310 | 74.47760 | 90.28882 | 268.17616   | 741.64379   | -40.42634   |        | 1        |
| 18 | H | 70.51879 | 74.06332 | 91.33010 | 1283.54314  | -1945.37420 | -1411.27812 |        | 1        |
| 19 | H | 71.40623 | 75.11556 | 90.16437 | -1258.57796 | 1317.15249  | -2026.02085 |        | 1        |
| 20 | H | 69.60328 | 75.15528 | 90.22220 | -2502.84526 | 909.80597   | 575.92391   |        | 1        |
| 21 | C | 68.85512 | 74.90384 | 85.96213 | 619.36578   | -458.64843  | -172.09273  |        | 1        |
| 22 | O | 69.16409 | 74.15033 | 85.06535 | -81.40433   | 433.87611   | 522.34594   |        | 1        |
| 23 | N | 68.49981 | 76.18462 | 85.88710 | 175.23996   | -622.20190  | 341.55523   |        | 1        |
| 24 | H | 68.31192 | 76.69640 | 86.74877 | -876.57256  | -303.22879  | -2561.90213 |        | 1        |
| 25 | C | 68.73289 | 76.87047 | 84.66342 | -571.88214  | -534.10783  | -106.15033  |        | 1        |
| 26 | H | 68.98416 | 76.07836 | 83.92110 | -2713.20841 | -16.25800   | -248.80809  |        | 1        |
| 27 | C | 67.38983 | 77.67594 | 84.32459 | 166.60354   | 288.16399   | -716.09568  |        | 1        |
| 28 | H | 67.06540 | 78.21719 | 85.25358 | -2097.85574 | 1636.78449  | -586.18044  |        | 1        |
| 29 | O | 66.28295 | 76.84421 | 83.92175 | -317.80580  | -363.38227  | 484.43082   |        | 1        |
| 30 | H | 65.66064 | 76.99495 | 84.65950 | 1863.74748  | -1451.84923 | 1357.29467  |        | 1        |
| 31 | C | 67.84447 | 78.73116 | 83.25369 | 503.80731   | 517.99032   | 318.51606   |        | 1        |
| 32 | H | 66.99760 | 79.39086 | 82.95234 | 640.61020   | -2157.10410 | -1536.29104 |        | 1        |
| 33 | H | 68.65944 | 79.39294 | 83.63253 | 1687.88455  | 465.60692   | 2087.56452  |        | 1        |



|    |   |          |          |          |             |             |             |   |
|----|---|----------|----------|----------|-------------|-------------|-------------|---|
| 34 | H | 68.21906 | 78.23473 | 82.32838 | -1293.07895 | -1899.88581 | -1463.57452 | 1 |
| 35 | C | 69.96378 | 77.90241 | 84.97370 | -153.07550  | -733.68902  | 248.70981   | 1 |
| 36 | O | 69.75476 | 78.91846 | 85.58146 | 186.15459   | -480.78787  | -449.34387  | 1 |
| 37 | N | 71.12959 | 77.40574 | 84.51651 | -487.53139  | 543.18517   | 42.03850    | 1 |
| 38 | C | 72.28425 | 78.22889 | 84.41287 | -699.35871  | 69.34393    | 360.10701   | 1 |
| 39 | H | 72.05102 | 79.17129 | 84.96121 | 2.81126     | -221.99807  | -2715.58072 | 1 |
| 40 | C | 73.39413 | 77.27906 | 85.03465 | -507.46439  | -592.59194  | 122.07761   | 1 |
| 41 | H | 74.42911 | 77.59467 | 84.77418 | -1975.08116 | 525.87560   | -1801.71556 | 1 |
| 42 | H | 73.33351 | 77.24600 | 86.14556 | 1588.27743  | -1913.22100 | 1113.83566  | 1 |
| 43 | C | 72.98846 | 75.91241 | 84.39746 | -613.62442  | -457.55993  | -194.14490  | 1 |
| 44 | H | 73.34269 | 75.85487 | 83.34172 | 1707.54637  | -721.27992  | 1996.92523  | 1 |
| 45 | H | 73.41534 | 75.02922 | 84.92445 | 758.23357   | 2100.81767  | 1560.55011  | 1 |
| 46 | C | 71.40471 | 75.97235 | 84.46521 | -352.41524  | 704.96076   | 49.21465    | 1 |
| 47 | H | 70.88706 | 75.55185 | 83.57159 | 1714.76886  | -2070.42778 | 443.35792   | 1 |
| 48 | H | 70.95236 | 75.53780 | 85.38877 | 1224.15040  | 1801.50881  | 1636.97633  | 1 |
| 49 | C | 72.65154 | 78.43449 | 82.80902 | 566.85117   | 537.05831   | 117.62814   | 1 |
| 50 | O | 73.63777 | 77.90009 | 82.36223 | -550.26779  | -406.08867  | 4.21666     | 1 |
| 51 | N | 71.77047 | 79.22963 | 82.22874 | 566.34832   | -425.77725  | 180.18749   | 1 |
| 52 | H | 71.02903 | 79.57375 | 82.83892 | 644.44502   | 2646.80550  | -52.73430   | 1 |
| 53 | C | 71.74288 | 79.47712 | 80.83254 | 612.34801   | -281.48662  | 411.56221   | 1 |
| 54 | H | 70.97146 | 80.27543 | 80.75310 | 1667.23498  | -1490.75142 | 1556.16753  | 1 |
| 55 | C | 73.18798 | 79.93197 | 80.33265 | -714.45746  | -175.43074  | 286.98927   | 1 |
| 56 | H | 73.88085 | 79.04971 | 80.43143 | -787.09484  | 1763.03619  | -1922.46060 | 1 |
| 57 | O | 73.79057 | 81.01944 | 81.06096 | -429.46514  | 516.51932   | -128.40526  | 1 |
| 58 | H | 74.51985 | 80.55290 | 81.51655 | 1981.82785  | 436.16847   | -1818.18182 | 1 |
| 59 | C | 72.91379 | 80.22565 | 78.81119 | 630.79189   | -468.94448  | 76.03230    | 1 |
| 60 | H | 73.85784 | 80.45139 | 78.26292 | -1775.71861 | 2062.30353  | 131.89849   | 1 |
| 61 | H | 72.43439 | 79.35859 | 78.29822 | -1855.14608 | 88.94118    | 1993.53760  | 1 |
| 62 | H | 72.23701 | 81.10177 | 78.68160 | -1504.82350 | -780.94249  | -2132.90992 | 1 |
| 63 | C | 71.27800 | 78.08590 | 80.09343 | 288.57638   | 618.62814   | -397.00270  | 1 |
| 64 | O | 71.98429 | 77.44836 | 79.34590 | 321.70495   | -185.26452  | 574.37218   | 1 |
| 65 | N | 70.03431 | 77.81391 | 80.49690 | -447.05792  | -446.53431  | 367.76425   | 1 |
| 66 | H | 69.59663 | 78.53284 | 81.07088 | 350.31316   | 1975.63644  | -1843.31522 | 1 |
| 67 | C | 69.26388 | 76.95668 | 79.64510 | -511.23061  | 374.03917   | -471.51480  | 1 |
| 68 | H | 70.04048 | 76.21791 | 79.33484 | 2234.79579  | -898.70890  | -1273.45190 | 1 |
| 69 | C | 68.07963 | 76.34062 | 80.52268 | 529.53781   | -159.34528  | 563.72604   | 1 |
| 70 | H | 67.69912 | 75.42016 | 80.00284 | 654.59388   | 2347.94251  | 1217.51488  | 1 |
| 71 | H | 68.50580 | 75.97178 | 81.49164 | -1526.55661 | 2103.42026  | 817.87394   | 1 |
| 72 | O | 66.92329 | 77.20185 | 80.76900 | -554.84278  | 14.12789    | 399.58769   | 1 |
| 73 | H | 66.74209 | 76.98759 | 81.70471 | 1297.06236  | 2061.84854  | 1220.68812  | 1 |
| 74 | C | 68.73658 | 77.82011 | 78.38008 | -662.15484  | -412.13544  | 123.62687   | 1 |
| 75 | O | 69.08092 | 78.96944 | 78.12774 | -540.01537  | -317.05804  | 274.91456   | 1 |
| 76 | N | 67.94877 | 77.03612 | 77.66894 | -202.76299  | -690.00100  | -131.49145  | 1 |
| 77 | H | 67.80535 | 76.11135 | 78.06609 | -702.62132  | -2617.37191 | 281.70413   | 1 |
| 78 | C | 67.29274 | 77.45038 | 76.41980 | -491.73914  | 576.34187   | 222.73509   | 1 |
| 79 | H | 66.58884 | 76.61261 | 76.19170 | 1977.17978  | -1823.58850 | -434.68928  | 1 |
| 80 | C | 66.58856 | 78.78462 | 76.67970 | -649.50797  | -328.66843  | 306.11224   | 1 |
| 81 | H | 67.35434 | 79.50515 | 77.06039 | 2075.07803  | 1452.16490  | -1004.45904 | 1 |
| 82 | C | 65.99452 | 79.35285 | 75.40676 | -615.18735  | -489.99689  | -70.96352   | 1 |
| 83 | H | 65.52518 | 80.36071 | 75.58009 | -1226.32661 | -1724.38906 | -1716.47170 | 1 |
| 84 | H | 66.77560 | 79.48182 | 74.60765 | 2381.64273  | -969.84735  | 900.46860   | 1 |
| 85 | H | 65.19726 | 78.68125 | 74.98420 | 2122.74991  | 1702.23946  | -141.36228  | 1 |
| 86 | C | 65.53336 | 78.64962 | 77.75947 | -501.86074  | -479.61276  | -376.42482  | 1 |
| 87 | H | 65.06464 | 79.64120 | 78.01094 | 993.79261   | -2246.95401 | -1177.81305 | 1 |
| 88 | H | 64.70358 | 77.95831 | 77.44493 | 42.71279    | -626.15391  | -2651.37258 | 1 |
| 89 | H | 65.97340 | 78.23304 | 78.71102 | -2026.39012 | -1590.33709 | -887.82922  | 1 |
| 90 | C | 68.47389 | 77.57091 | 75.31425 | -672.89153  | 382.57394   | -156.34072  | 1 |
| 91 | O | 68.58384 | 76.72157 | 74.37943 | 410.04627   | 221.86223   | 500.35950   | 1 |
| 92 | N | 69.24121 | 78.59581 | 75.48310 | -378.11782  | -443.79414  | -441.10984  | 1 |
| 93 | H | 69.15745 | 79.20431 | 76.32432 | 2404.15973  | -568.14894  | 1149.30085  | 1 |
| 94 | C | 70.37239 | 78.60637 | 74.61004 | -544.54484  | 466.16019   | 331.29119   | 1 |
| 95 | H | 70.49227 | 79.65891 | 74.28079 | -1409.80988 | -170.17955  | 2325.32679  | 1 |

|     |   |          |          |          |             |             |             |   |
|-----|---|----------|----------|----------|-------------|-------------|-------------|---|
| 96  | C | 71.55879 | 78.15619 | 75.52492 | -184.48284  | 116.78282   | -758.89137  | 1 |
| 97  | H | 71.56665 | 78.73846 | 76.47472 | 1893.78641  | 1861.14652  | 611.04528   | 1 |
| 98  | H | 71.45451 | 77.08698 | 75.82193 | -2170.79665 | -974.19311  | 1327.50117  | 1 |
| 99  | C | 72.86508 | 78.39462 | 74.69718 | 389.51668   | 672.81878   | -138.49152  | 1 |
| 100 | H | 72.86645 | 77.73500 | 73.79784 | 510.64577   | 1933.03327  | 1851.02484  | 1 |
| 101 | H | 72.87596 | 79.42390 | 74.27550 | -2302.30869 | -1105.72939 | -948.89774  | 1 |
| 102 | C | 74.16927 | 78.16626 | 75.54461 | -559.93427  | -126.34590  | 542.30857   | 1 |
| 103 | O | 75.23880 | 78.37466 | 75.03162 | -670.36003  | -111.83166  | 76.36448    | 1 |
| 104 | N | 73.96411 | 77.75562 | 76.81665 | -216.06729  | -537.07037  | 446.51379   | 1 |
| 105 | H | 73.11065 | 77.54767 | 77.35523 | -1251.96487 | 1074.12894  | -2168.52500 | 1 |
| 106 | H | 74.73655 | 77.59404 | 77.47199 | -2451.83023 | -720.73851  | 944.84612   | 1 |
| 107 | C | 70.10311 | 77.48003 | 73.36523 | 546.24052   | -563.88337  | -85.11809   | 1 |
| 108 | O | 70.97425 | 76.62208 | 73.15860 | 71.70702    | -307.40463  | 606.69673   | 1 |
| 109 | N | 69.40305 | 78.09670 | 72.34885 | 479.90863   | -504.50129  | 222.86849   | 1 |
| 110 | C | 68.75049 | 77.32190 | 71.36290 | 75.51268    | -600.91904  | 506.73700   | 1 |
| 111 | H | 68.69750 | 76.28511 | 71.77361 | -2033.61562 | 1795.30103  | 254.89480   | 1 |
| 112 | C | 67.35350 | 78.08215 | 71.19590 | 523.79067   | 517.99274   | 284.45581   | 1 |
| 113 | H | 66.84901 | 77.84885 | 70.23172 | 1599.61665  | -1127.00911 | 1895.98173  | 1 |
| 114 | H | 66.64346 | 77.81020 | 72.00852 | -1881.83093 | 1275.82488  | -1501.55016 | 1 |
| 115 | C | 67.80889 | 79.56448 | 71.31239 | -600.05639  | -404.05026  | 316.64485   | 1 |
| 116 | H | 68.25399 | 79.92349 | 70.35775 | -2597.05260 | 496.36221   | 657.73249   | 1 |
| 117 | H | 66.98196 | 80.26575 | 71.56237 | -1666.24518 | 1294.38985  | -1723.90591 | 1 |
| 118 | C | 68.90801 | 79.45126 | 72.46804 | 493.57570   | -129.95376  | -602.56394  | 1 |
| 119 | H | 69.77136 | 80.15132 | 72.36344 | -1469.08415 | -637.84797  | 2204.22581  | 1 |
| 120 | H | 68.50075 | 79.53193 | 73.50393 | -1038.97840 | 1068.88701  | -2280.71789 | 1 |
| 121 | C | 69.55405 | 77.38983 | 69.92390 | 188.88100   | 241.05089   | -727.87821  | 1 |
| 122 | O | 68.95054 | 77.42156 | 68.88146 | 531.88613   | -49.19943   | 427.07960   | 1 |
| 123 | N | 70.87512 | 77.27549 | 70.10980 | 708.14833   | 26.93417    | -179.73509  | 1 |
| 124 | H | 71.12886 | 77.28213 | 71.10012 | -2232.69501 | -1179.09831 | 1023.94816  | 1 |
| 125 | C | 71.80138 | 77.72086 | 69.06948 | -738.32412  | 259.92548   | 104.42456   | 1 |
| 126 | H | 71.14875 | 78.24078 | 68.32775 | 2028.89123  | 1260.02983  | 1311.33324  | 1 |
| 127 | C | 72.83919 | 78.61551 | 69.72056 | -258.65678  | -345.52513  | 661.28459   | 1 |
| 128 | H | 73.34558 | 78.02606 | 70.51820 | -1826.06090 | -1801.46097 | -918.64554  | 1 |
| 129 | C | 73.89885 | 79.07684 | 68.73762 | -541.23400  | 531.92970   | -218.41428  | 1 |
| 130 | H | 74.63614 | 79.77784 | 69.21731 | 1311.73218  | -2219.18200 | 882.19023   | 1 |
| 131 | H | 74.48848 | 78.21011 | 68.32171 | -1048.71298 | 1223.58118  | -2196.97971 | 1 |
| 132 | H | 73.44401 | 79.61670 | 67.86163 | 419.06414   | 1903.92898  | 1903.44670  | 1 |
| 133 | C | 72.19367 | 79.81908 | 70.38506 | -423.86431  | 152.66566   | -648.55262  | 1 |
| 134 | H | 72.94885 | 80.45310 | 70.92528 | 105.68386   | -2342.50080 | 1387.51238  | 1 |
| 135 | H | 71.67997 | 80.47838 | 69.63259 | -1695.63603 | -1484.73621 | -1531.02793 | 1 |
| 136 | H | 71.41667 | 79.50632 | 71.13521 | -1853.57121 | -487.39031  | 1936.59343  | 1 |
| 137 | C | 72.53936 | 76.38081 | 68.40760 | 539.71428   | -510.58232  | 267.58633   | 1 |
| 138 | O | 73.25372 | 76.54238 | 67.44238 | -15.93758   | -278.34085  | -624.49402  | 1 |
| 139 | N | 72.25932 | 75.26619 | 69.05227 | -676.81886  | 12.05292    | 276.17960   | 1 |
| 140 | H | 71.57616 | 75.39527 | 69.79439 | -1694.44250 | -373.84189  | -2100.66098 | 1 |
| 141 | C | 72.82770 | 74.00050 | 68.71244 | 412.33078   | -664.70360  | 108.35451   | 1 |
| 142 | H | 72.01363 | 73.28537 | 68.97066 | 1765.77476  | 1294.44366  | 1621.76594  | 1 |
| 143 | C | 73.23593 | 73.99239 | 67.18318 | -179.66635  | -721.95667  | -264.73915  | 1 |
| 144 | H | 72.46345 | 74.51012 | 66.56868 | -607.34922  | 2587.87032  | -598.10018  | 1 |
| 145 | H | 74.17025 | 74.58958 | 67.04162 | -359.69332  | -1479.13954 | -2259.74260 | 1 |
| 146 | C | 73.46416 | 72.51881 | 66.70922 | -240.01076  | 616.02425   | 431.85322   | 1 |
| 147 | H | 74.20883 | 72.01346 | 67.37163 | -1359.17131 | 782.54425   | 2227.99181  | 1 |
| 148 | H | 72.52819 | 71.92019 | 66.77683 | -820.36667  | 85.81767    | -2596.78715 | 1 |
| 149 | C | 73.99782 | 72.58176 | 65.22155 | -513.07015  | 236.18570   | -551.87280  | 1 |
| 150 | H | 73.21575 | 72.97625 | 64.53275 | 1816.11944  | -1183.11722 | -1650.94321 | 1 |
| 151 | H | 74.85691 | 73.28687 | 65.13899 | -1800.04429 | -1361.53473 | 1526.34643  | 1 |
| 152 | C | 74.42955 | 71.15281 | 64.81847 | 726.08972   | -253.19732  | -179.64713  | 1 |
| 153 | H | 75.27691 | 70.74573 | 65.40569 | 1224.27271  | -456.51798  | -2390.90304 | 1 |
| 154 | H | 73.60507 | 70.41332 | 64.78194 | 1206.40339  | -1150.93514 | -2154.90344 | 1 |
| 155 | N | 74.96905 | 71.22233 | 63.34990 | 329.70796   | -633.68968  | -155.67358  | 1 |
| 156 | H | 75.31608 | 70.30524 | 62.94530 | 1348.31305  | 1938.76845  | 1359.00643  | 1 |
| 157 | H | 74.28808 | 71.53719 | 62.59912 | 2096.92035  | 1446.54551  | -966.48890  | 1 |

|     |   |          |          |          |             |             |             |   |
|-----|---|----------|----------|----------|-------------|-------------|-------------|---|
| 158 | H | 75.80113 | 71.85685 | 63.17148 | -1197.07217 | -2303.53719 | 827.28733   | 1 |
| 159 | C | 74.16942 | 73.72093 | 69.58669 | -378.01186  | -556.17301  | -413.96481  | 1 |
| 160 | O | 75.02695 | 72.95467 | 69.13943 | -409.44433  | -307.55053  | -453.30833  | 1 |
| 161 | N | 74.12140 | 74.32275 | 70.75176 | -429.02477  | 524.70884   | 274.08502   | 1 |
| 162 | H | 73.30551 | 74.91891 | 70.88503 | 1706.34263  | -1425.96036 | 1574.38926  | 1 |
| 163 | C | 75.06281 | 74.12889 | 71.79469 | -45.25864   | -626.22952  | 478.93267   | 1 |
| 164 | H | 74.58252 | 74.61259 | 72.67447 | 1988.63164  | 570.90773   | 1772.87287  | 1 |
| 165 | C | 75.30599 | 72.57490 | 71.97940 | 551.77128   | -20.49526   | -564.54996  | 1 |
| 166 | H | 74.36622 | 72.06661 | 72.29207 | 1434.61535  | -1753.10253 | 1513.99471  | 1 |
| 167 | H | 75.58835 | 72.10413 | 71.00541 | -714.67738  | 1819.09770  | 1898.36494  | 1 |
| 168 | C | 76.43948 | 72.35934 | 73.03556 | 446.99263   | -555.77305  | 338.97221   | 1 |
| 169 | H | 77.40454 | 72.82669 | 72.67903 | 1953.68466  | 1892.25957  | -161.67766  | 1 |
| 170 | H | 76.18847 | 72.85262 | 74.00172 | -403.03785  | 2688.07032  | -188.43591  | 1 |
| 171 | C | 76.62153 | 70.79974 | 73.22376 | 567.86262   | 335.74681   | 434.04421   | 1 |
| 172 | H | 75.68252 | 70.33296 | 73.60066 | -1080.02275 | 1568.26081  | -1948.78900 | 1 |
| 173 | H | 76.83249 | 70.30761 | 72.24631 | -919.54108  | 2111.34692  | 1456.13463  | 1 |
| 174 | C | 77.78988 | 70.56330 | 74.20885 | 195.81897   | 173.33862   | -745.11536  | 1 |
| 175 | H | 78.78769 | 70.84914 | 73.81904 | 1405.67949  | -2301.21089 | -390.08113  | 1 |
| 176 | H | 77.63751 | 70.99413 | 75.21854 | -940.37328  | -1118.32446 | 2299.72133  | 1 |
| 177 | N | 77.89070 | 69.01895 | 74.45155 | 319.26422   | 656.36007   | -42.02424   | 1 |
| 178 | H | 78.63783 | 68.69408 | 75.13236 | 1961.03633  | 619.91968   | 1787.09422  | 1 |
| 179 | H | 77.02962 | 68.53033 | 74.83515 | 854.14343   | -2156.80752 | 1429.08711  | 1 |
| 180 | H | 78.11532 | 68.42820 | 73.60013 | 1237.02905  | -1378.50857 | -1998.28500 | 1 |
| 181 | C | 76.49712 | 74.85532 | 71.43030 | 532.53319   | -268.57236  | 517.55729   | 1 |
| 182 | O | 76.90320 | 75.66649 | 72.22540 | 266.16714   | -290.73804  | -558.88002  | 1 |
| 183 | N | 77.01422 | 74.40473 | 70.30496 | -226.25352  | 640.49678   | -270.32839  | 1 |
| 184 | H | 76.46908 | 73.70097 | 69.74858 | 2007.69063  | -1035.27229 | 1523.50231  | 1 |
| 185 | C | 78.31420 | 74.76845 | 69.86816 | -540.76542  | -573.33303  | 49.50000    | 1 |
| 186 | H | 78.34301 | 74.43030 | 68.80849 | -2374.20950 | -1036.76023 | 843.75774   | 1 |
| 187 | C | 78.43494 | 76.35986 | 69.99100 | -77.09082   | 666.87422   | -415.84136  | 1 |
| 188 | H | 78.29863 | 76.64235 | 71.07931 | -985.81834  | 617.19825   | 2463.91927  | 1 |
| 189 | O | 77.43446 | 77.08692 | 69.24621 | 293.29899   | -391.65602  | -477.80926  | 1 |
| 190 | H | 76.87195 | 77.41088 | 69.97801 | 2528.72714  | -681.76262  | -751.27122  | 1 |
| 191 | C | 79.91618 | 76.68956 | 69.58626 | 252.47363   | -605.14473  | 440.05134   | 1 |
| 192 | H | 80.12038 | 77.78259 | 69.66450 | -2052.65063 | 1456.49051  | -1043.51830 | 1 |
| 193 | H | 80.65275 | 76.17083 | 70.24312 | -2152.98800 | -1661.97574 | -161.70652  | 1 |
| 194 | H | 80.13024 | 76.39006 | 68.53391 | -473.12726  | -1584.27339 | 2165.61725  | 1 |
| 195 | C | 79.37767 | 73.93725 | 70.77815 | 360.36307   | 488.46713   | 505.10056   | 1 |
| 196 | O | 79.08926 | 73.42317 | 71.84231 | -200.08817  | -528.03552  | -385.82850  | 1 |
| 197 | N | 80.64338 | 73.99905 | 70.23875 | -597.54095  | -226.44775  | 355.20479   | 1 |
| 198 | H | 80.42355 | 74.34550 | 69.29575 | 2179.23655  | -1300.70981 | -991.33835  | 1 |
| 199 | C | 81.34890 | 72.73714 | 70.35574 | -687.68921  | 297.39807   | -249.45179  | 1 |
| 200 | H | 80.71495 | 71.98479 | 69.84042 | -349.16256  | -2467.37713 | -1101.72831 | 1 |
| 201 | C | 82.77730 | 72.92806 | 69.69250 | 672.47345   | 361.54328   | -201.62880  | 1 |
| 202 | H | 83.33012 | 73.72861 | 70.23600 | 1541.41502  | 582.18425   | 2169.97026  | 1 |
| 203 | H | 83.36164 | 71.98587 | 69.82156 | -2534.67717 | 60.25153    | 997.72295   | 1 |
| 204 | C | 82.69569 | 73.29177 | 68.19988 | 574.26774   | -389.43119  | -377.02542  | 1 |
| 205 | C | 82.79614 | 72.26111 | 67.21846 | 688.82679   | -287.33580  | -257.96133  | 1 |
| 206 | H | 82.88766 | 71.19680 | 67.52002 | 331.14182   | 1470.38163  | 2269.80013  | 1 |
| 207 | C | 82.57445 | 74.65786 | 67.80502 | -383.52382  | -675.04808  | 144.24917   | 1 |
| 208 | H | 82.48968 | 75.45647 | 68.56418 | 4.09847     | 1517.59662  | 2262.86397  | 1 |
| 209 | C | 82.80026 | 72.62196 | 65.87076 | -134.76730  | 428.45285   | -649.50303  | 1 |
| 210 | H | 82.89460 | 71.82510 | 65.11218 | -903.23433  | 1600.49020  | 2011.53387  | 1 |
| 211 | C | 82.58147 | 74.96856 | 66.44221 | -335.53281  | -615.00040  | -364.39058  | 1 |
| 212 | H | 82.49807 | 76.02924 | 66.14769 | 1596.45398  | -1369.33862 | 1732.02659  | 1 |
| 213 | C | 82.69937 | 73.97305 | 65.42881 | 585.48547   | -340.24194  | -406.23938  | 1 |
| 214 | O | 82.71239 | 74.27819 | 64.04207 | -419.15649  | -173.04408  | -511.94141  | 1 |
| 215 | H | 82.67735 | 75.26252 | 64.08785 | -1071.84350 | 1559.71507  | -1960.13012 | 1 |
| 216 | C | 81.59762 | 72.39696 | 71.91883 | 291.41878   | -183.13091  | 710.72246   | 1 |
| 217 | O | 81.48618 | 71.24231 | 72.32622 | 379.87695   | 523.47396   | -222.23622  | 1 |
| 218 | N | 82.16228 | 73.43855 | 72.52639 | 564.30591   | 373.09380   | 277.24371   | 1 |
| 219 | H | 82.12800 | 74.25901 | 71.91811 | -120.59931  | -2436.07824 | -1214.35098 | 1 |

|     |   |          |          |          |             |             |             |   |
|-----|---|----------|----------|----------|-------------|-------------|-------------|---|
| 220 | C | 82.16592 | 73.63407 | 73.93986 | 404.07514   | -299.37480  | 608.84009   | 1 |
| 221 | H | 82.57220 | 74.66414 | 74.05534 | -1071.07882 | -841.69025  | 2359.66467  | 1 |
| 222 | C | 80.65032 | 73.56714 | 74.41058 | -683.12807  | 68.71770    | -390.13096  | 1 |
| 223 | H | 80.01469 | 74.19638 | 73.74424 | 2068.88918  | 1596.58590  | 770.89603   | 1 |
| 224 | H | 80.24928 | 72.53400 | 74.30800 | 1379.86429  | 2342.49779  | -179.85638  | 1 |
| 225 | C | 80.57315 | 74.06811 | 75.88391 | -176.39967  | 537.49466   | 550.97268   | 1 |
| 226 | H | 81.10234 | 73.36788 | 76.57102 | -396.28051  | 1942.22168  | 1869.33314  | 1 |
| 227 | H | 81.08928 | 75.04693 | 76.00148 | -94.44700   | 586.00678   | -2659.20016 | 1 |
| 228 | C | 79.02208 | 74.20092 | 76.24971 | -291.69381  | -718.18079  | -150.72929  | 1 |
| 229 | H | 78.43037 | 74.93517 | 75.64612 | -2303.38776 | 1089.76242  | 964.62032   | 1 |
| 230 | H | 78.46857 | 73.22746 | 76.27151 | 884.16729   | 2568.80533  | -207.74283  | 1 |
| 231 | N | 79.12135 | 74.68206 | 77.56384 | -594.49522  | -252.81478  | 342.29276   | 1 |
| 232 | H | 79.99552 | 74.51549 | 78.03937 | -1735.17426 | 2084.05705  | -263.71605  | 1 |
| 233 | C | 78.19717 | 75.28219 | 78.19941 | 595.23177   | -271.52487  | 442.22352   | 1 |
| 234 | N | 76.97690 | 75.49549 | 77.55108 | 585.53813   | -424.79750  | -105.81303  | 1 |
| 235 | H | 76.69501 | 75.26874 | 76.59825 | 959.88797   | 1327.56823  | -2177.11905 | 1 |
| 236 | H | 76.17378 | 75.97165 | 77.96259 | 1578.48647  | 16.27378    | -2220.76233 | 1 |
| 237 | N | 78.62110 | 75.61313 | 79.49405 | -452.17763  | -390.33541  | -421.51853  | 1 |
| 238 | H | 79.51318 | 75.46709 | 79.96436 | 470.26107   | 1974.25629  | -1817.92087 | 1 |
| 239 | H | 78.02909 | 76.10420 | 80.16502 | 1856.67307  | -1573.97321 | -1224.35416 | 1 |
| 240 | C | 83.06221 | 72.52808 | 74.71536 | -531.47271  | -581.45780  | -55.06206   | 1 |
| 241 | O | 83.12435 | 72.52447 | 75.92069 | -243.00837  | 192.73507   | 609.52485   | 1 |
| 242 | N | 83.74169 | 71.73850 | 73.85420 | 343.49288   | -644.25607  | 38.09164    | 1 |
| 243 | H | 83.45515 | 71.95235 | 72.89117 | -1691.16043 | -1535.97525 | -1484.73099 | 1 |
| 244 | C | 83.95047 | 70.31246 | 74.18721 | 542.66492   | 350.14337   | 454.42563   | 1 |
| 245 | H | 84.62469 | 70.34288 | 75.07371 | 1209.57979  | -2396.95920 | 463.86744   | 1 |
| 246 | C | 82.63241 | 69.63201 | 74.47017 | -737.14309  | 145.93010   | 242.71942   | 1 |
| 247 | H | 81.92435 | 69.87376 | 73.62320 | -1050.18303 | 159.36419   | -2509.06125 | 1 |
| 248 | C | 82.79709 | 68.12402 | 74.53785 | -706.77696  | -252.88343  | -245.16230  | 1 |
| 249 | H | 81.81781 | 67.60660 | 74.73296 | -1624.64039 | -1665.49085 | 1417.86935  | 1 |
| 250 | H | 83.20478 | 67.71028 | 73.57480 | 2566.10521  | 598.51109   | 693.22305   | 1 |
| 251 | H | 83.50501 | 67.82104 | 75.35758 | -1972.69758 | 107.10018   | -1876.34312 | 1 |
| 252 | C | 81.96729 | 70.12956 | 75.74233 | 412.85148   | 672.58832   | -27.69222   | 1 |
| 253 | H | 81.24145 | 69.37910 | 76.16117 | 1447.02277  | 1762.76533  | -1490.78944 | 1 |
| 254 | H | 82.72566 | 70.36112 | 76.54334 | 1320.77379  | -145.20455  | 2378.68491  | 1 |
| 255 | H | 81.39083 | 71.07959 | 75.56002 | -1512.10848 | 1470.52031  | 1724.75147  | 1 |
| 256 | C | 84.67533 | 69.71956 | 72.82660 | -607.11113  | 499.56689   | 73.73769    | 1 |
| 257 | O | 85.84059 | 69.40866 | 72.87573 | 357.97126   | 460.81534   | 356.68785   | 1 |
| 258 | N | 83.85061 | 69.66312 | 71.78955 | 536.55407   | -368.62270  | 332.76306   | 1 |
| 259 | H | 82.87200 | 69.98136 | 71.86175 | 524.38866   | 2297.69985  | 1367.20941  | 1 |
| 260 | C | 84.37454 | 69.05369 | 70.61381 | 46.50277    | -774.29190  | -147.97904  | 1 |
| 261 | H | 85.45252 | 69.33188 | 70.62422 | 1676.51875  | 1883.29066  | 1032.55549  | 1 |
| 262 | C | 84.17831 | 67.44943 | 70.68626 | -559.41456  | -34.19198   | -556.30433  | 1 |
| 263 | H | 83.13777 | 67.21761 | 71.01553 | -64.66664   | 395.18769   | 2695.05373  | 1 |
| 264 | H | 84.28051 | 67.01305 | 69.66402 | -2703.44278 | -60.40056   | 333.79418   | 1 |
| 265 | C | 85.18073 | 66.82200 | 71.61393 | -519.76435  | 377.31045   | 459.42366   | 1 |
| 266 | H | 85.06421 | 67.27378 | 72.62657 | -1746.74323 | 1667.50644  | -1261.73691 | 1 |
| 267 | C | 84.93889 | 65.32027 | 71.71361 | 570.95554   | 16.46261    | -545.27700  | 1 |
| 268 | H | 85.66206 | 64.83120 | 72.41589 | 2391.58273  | 28.05277    | -1305.07271 | 1 |
| 269 | H | 83.90709 | 65.08903 | 72.08350 | 175.75588   | 917.63458   | 2559.43867  | 1 |
| 270 | H | 85.05456 | 64.81888 | 70.71829 | -1063.97851 | -2155.34650 | 1283.00462  | 1 |
| 271 | C | 86.61068 | 67.07168 | 71.15282 | 193.76014   | 2.62946     | -765.53141  | 1 |
| 272 | H | 87.34524 | 66.46016 | 71.73749 | 507.39394   | -846.55087  | 2539.60089  | 1 |
| 273 | H | 86.75077 | 66.81706 | 70.07057 | 1337.57841  | 1818.19054  | 1526.01994  | 1 |
| 274 | H | 86.90054 | 68.14771 | 71.29068 | 1100.88635  | -1172.91350 | -2199.08909 | 1 |
| 275 | C | 83.54855 | 69.55955 | 69.33028 | -549.21115  | 475.64486   | -309.38218  | 1 |
| 276 | O | 82.41140 | 69.95317 | 69.37744 | 556.06106   | -390.37755  | -78.24250   | 1 |
| 277 | O | 84.20098 | 69.41473 | 68.07926 | -572.27940  | -310.19032  | -209.75862  | 1 |
| 278 | H | 85.05678 | 69.01783 | 68.40171 | -1380.08193 | 2212.14486  | 790.85944   | 1 |

Listing 97: C00097.xmolout

|    |   |          |          |          |             |             |             |        |          |
|----|---|----------|----------|----------|-------------|-------------|-------------|--------|----------|
| 1  |   | 276      |          |          |             |             |             |        |          |
| 2  |   | 150.0000 | 150.0000 | 150.0000 | 0.0000      | 0.0000      | 0.0000***** | 2.7750 | 11100    |
|    |   | 0.2500   | 300.00   | 0.00     | 0.00        | 0.00        | -1293.4419  | 0.0000 | 300.0000 |
| 3  | H | 78.63710 | 61.70117 | 66.93972 | -2043.14101 | -1757.64893 | 399.89339   |        | 1        |
| 4  | N | 79.00914 | 62.41968 | 67.55825 | 426.75047   | 490.45733   | -334.42467  |        | 1        |
| 5  | H | 78.16977 | 62.94462 | 67.79671 | 442.25559   | -1110.30854 | -2448.52907 |        | 1        |
| 6  | C | 80.05901 | 63.18055 | 67.00922 | 415.32972   | -666.39213  | 83.73172    |        | 1        |
| 7  | H | 80.59767 | 62.46120 | 66.35713 | 879.32219   | 2491.00447  | 667.35213   |        | 1        |
| 8  | C | 79.46116 | 64.42625 | 66.18697 | 31.35357    | 477.41777   | 628.23362   |        | 1        |
| 9  | H | 78.84102 | 65.05587 | 66.86953 | 1168.38489  | 2240.25337  | -1019.71136 |        | 1        |
| 10 | H | 80.29841 | 65.08213 | 65.84560 | -360.43770  | 2534.90498  | 931.67112   |        | 1        |
| 11 | C | 78.63951 | 63.96013 | 65.01038 | 463.18208   | 512.70242   | -382.34388  |        | 1        |
| 12 | H | 77.88350 | 63.22697 | 65.36962 | 1725.29117  | 1863.52247  | -987.07854  |        | 1        |
| 13 | C | 77.90510 | 65.13899 | 64.38398 | 710.42801   | -144.27427  | -313.15367  |        | 1        |
| 14 | H | 77.27972 | 64.82075 | 63.51014 | 364.20195   | -1033.13725 | 2494.72524  |        | 1        |
| 15 | H | 77.22169 | 65.63971 | 65.11751 | 2567.61904  | 335.80679   | 847.48802   |        | 1        |
| 16 | H | 78.62013 | 65.91804 | 64.01270 | -2587.99029 | 680.92867   | -512.16411  |        | 1        |
| 17 | C | 79.50747 | 63.28759 | 63.95605 | 268.17616   | 741.64379   | -40.42634   |        | 1        |
| 18 | H | 78.90744 | 62.98478 | 63.05904 | 1283.54314  | -1945.37420 | -1411.27812 |        | 1        |
| 19 | H | 80.31969 | 63.97059 | 63.59541 | -1258.57796 | 1317.15249  | -2026.02085 |        | 1        |
| 20 | H | 80.00225 | 62.36288 | 64.35008 | -2502.84526 | 909.80597   | 575.92391   |        | 1        |
| 21 | C | 81.00504 | 63.78495 | 68.18974 | 619.36578   | -458.64843  | -172.09273  |        | 1        |
| 22 | O | 81.70812 | 64.74467 | 67.95323 | -81.40433   | 433.87611   | 522.34594   |        | 1        |
| 23 | N | 80.92048 | 63.07084 | 69.30744 | 175.23996   | -622.20190  | 341.55523   |        | 1        |
| 24 | H | 80.30977 | 62.25689 | 69.24409 | -876.57256  | -303.22879  | -2561.90213 |        | 1        |
| 25 | C | 81.66098 | 63.36111 | 70.48856 | -571.88214  | -534.10783  | -106.15033  |        | 1        |
| 26 | H | 81.40518 | 62.49535 | 71.14121 | -2713.20841 | -16.25800   | -248.80809  |        | 1        |
| 27 | C | 83.20985 | 63.37766 | 70.06815 | 166.60354   | 288.16399   | -716.09568  |        | 1        |
| 28 | H | 83.37445 | 64.30520 | 69.45099 | -2097.85574 | 1636.78449  | -586.18044  |        | 1        |
| 29 | O | 83.64943 | 62.26080 | 69.27591 | -317.80580  | -363.38227  | 484.43082   |        | 1        |
| 30 | H | 83.80295 | 62.69899 | 68.41379 | 1863.74748  | -1451.84923 | 1357.29467  |        | 1        |
| 31 | C | 83.93767 | 63.51302 | 71.45495 | 503.80731   | 517.99032   | 318.51606   |        | 1        |
| 32 | H | 85.04012 | 63.61514 | 71.32563 | 640.61020   | -2157.10410 | -1536.29104 |        | 1        |
| 33 | H | 83.58637 | 64.40434 | 72.03172 | 1687.88455  | 465.60692   | 2087.56452  |        | 1        |
| 34 | H | 83.76410 | 62.61470 | 72.09225 | -1293.07895 | -1899.88581 | -1463.57452 |        | 1        |
| 35 | C | 81.16699 | 64.77083 | 71.10374 | -153.07550  | -733.68902  | 248.70981   |        | 1        |
| 36 | O | 81.99268 | 65.65158 | 71.30777 | 186.15459   | -480.78787  | -449.34387  |        | 1        |
| 37 | N | 79.86754 | 64.77672 | 71.39213 | -487.53139  | 543.18517   | 42.03850    |        | 1        |
| 38 | C | 79.23924 | 65.92835 | 71.97188 | -699.35871  | 69.34393    | 360.10701   |        | 1        |
| 39 | H | 79.68095 | 66.83125 | 71.49344 | 2.81126     | -221.99807  | -2715.58072 |        | 1        |
| 40 | C | 77.70868 | 65.65040 | 71.66516 | -507.46439  | -592.59194  | 122.07761   |        | 1        |
| 41 | H | 77.02337 | 66.22593 | 72.32713 | -1975.08116 | 525.87560   | -1801.71556 |        | 1        |
| 42 | H | 77.44123 | 65.91402 | 70.61739 | 1588.27743  | -1913.22100 | 1113.83566  |        | 1        |
| 43 | C | 77.64205 | 64.10943 | 71.90043 | -613.62442  | -457.55993  | -194.14490  |        | 1        |
| 44 | H | 77.69313 | 63.87253 | 72.98931 | 1707.54637  | -721.27992  | 1996.92523  |        | 1        |
| 45 | H | 76.71957 | 63.62889 | 71.50292 | 758.23357   | 2100.81767  | 1560.55011  |        | 1        |
| 46 | C | 78.96579 | 63.65297 | 71.15292 | -352.41524  | 704.96076   | 49.21465    |        | 1        |
| 47 | H | 79.43898 | 62.72373 | 71.54597 | 1714.76886  | -2070.42778 | 443.35792   |        | 1        |
| 48 | H | 78.86845 | 63.57992 | 70.04406 | 1224.15040  | 1801.50881  | 1636.97633  |        | 1        |
| 49 | C | 79.46987 | 65.88115 | 73.59854 | 566.85117   | 537.05831   | 117.62814   |        | 1        |
| 50 | O | 79.36154 | 64.84532 | 74.21325 | -550.26779  | -406.08867  | 4.21666     |        | 1        |
| 51 | N | 79.57540 | 67.12732 | 74.03553 | 566.34832   | -425.77725  | 180.18749   |        | 1        |
| 52 | H | 79.56594 | 67.84810 | 73.31392 | 644.44502   | 2646.80550  | -52.73430   |        | 1        |
| 53 | C | 80.15328 | 67.46456 | 75.29490 | 612.34801   | -281.48662  | 411.56221   |        | 1        |
| 54 | H | 79.78809 | 68.50330 | 75.45277 | 1667.23498  | -1490.75142 | 1556.16753  |        | 1        |
| 55 | C | 79.70771 | 66.43222 | 76.42205 | -714.45746  | -175.43074  | 286.98927   |        | 1        |
| 56 | H | 80.11144 | 65.41433 | 76.14610 | -787.09484  | 1763.03619  | -1922.46060 |        | 1        |
| 57 | O | 78.27989 | 66.28242 | 76.58062 | -429.46514  | 516.51932   | -128.40526  |        | 1        |
| 58 | H | 78.13213 | 65.48567 | 76.02406 | 1981.82785  | 436.16847   | -1818.18182 |        | 1        |
| 59 | C | 80.49725 | 66.97782 | 77.66843 | 630.79189   | -468.94448  | 76.03230    |        | 1        |
| 60 | H | 80.35661 | 66.32140 | 78.55840 | -1775.71861 | 2062.30353  | 131.89849   |        | 1        |

|     |   |          |          |          |             |             |             |   |
|-----|---|----------|----------|----------|-------------|-------------|-------------|---|
| 61  | H | 81.59500 | 67.03277 | 77.46335 | -1855.14608 | 88.94118    | 1993.53760  | 1 |
| 62  | H | 80.15649 | 68.00020 | 77.95395 | -1504.82350 | -780.94249  | -2132.90992 | 1 |
| 63  | C | 81.78165 | 67.42408 | 75.09399 | 288.57638   | 618.62814   | -397.00270  | 1 |
| 64  | O | 82.45883 | 66.48130 | 75.42024 | 321.70495   | -185.26452  | 574.37218   | 1 |
| 65  | N | 82.14790 | 68.58057 | 74.57098 | -447.05792  | -446.53431  | 367.76425   | 1 |
| 66  | H | 81.51524 | 69.36255 | 74.32176 | 350.31316   | 1975.63644  | -1843.31522 | 1 |
| 67  | C | 83.52816 | 68.78651 | 74.22720 | -511.23061  | 374.03917   | -471.51480  | 1 |
| 68  | H | 84.10184 | 68.58163 | 75.15963 | 2234.79579  | -898.70890  | -1273.45190 | 1 |
| 69  | C | 83.91694 | 67.72911 | 73.09629 | 529.53781   | -159.34528  | 563.72604   | 1 |
| 70  | H | 85.03821 | 67.76569 | 73.02208 | 654.59388   | 2347.94251  | 1217.51488  | 1 |
| 71  | H | 83.65760 | 66.70761 | 73.48995 | -1526.55661 | 2103.42026  | 817.87394   | 1 |
| 72  | O | 83.36882 | 67.91554 | 71.78169 | -554.84278  | 14.12789    | 399.58769   | 1 |
| 73  | H | 82.81714 | 67.05958 | 71.68470 | 1297.06236  | 2061.84854  | 1220.68812  | 1 |
| 74  | C | 83.46418 | 70.34019 | 73.79263 | -662.15484  | -412.13544  | 123.62687   | 1 |
| 75  | O | 82.39143 | 70.93580 | 73.85935 | -540.01537  | -317.05804  | 274.91456   | 1 |
| 76  | N | 84.65504 | 70.81199 | 73.45402 | -202.76299  | -690.00100  | -131.49145  | 1 |
| 77  | H | 85.40085 | 70.11452 | 73.48325 | -702.62132  | -2617.37191 | 281.70413   | 1 |
| 78  | C | 84.83475 | 72.04515 | 72.69637 | -491.73914  | 576.34187   | 222.73509   | 1 |
| 79  | H | 85.91689 | 72.00264 | 72.43011 | 1977.17978  | -1823.58850 | -434.68928  | 1 |
| 80  | C | 83.92380 | 71.99855 | 71.48272 | -649.50797  | -328.66843  | 306.11224   | 1 |
| 81  | H | 82.87441 | 71.90900 | 71.85046 | 2075.07803  | 1452.16490  | -1004.45904 | 1 |
| 82  | C | 84.05218 | 73.25496 | 70.64029 | -615.18735  | -489.99689  | -70.96352   | 1 |
| 83  | H | 83.32157 | 73.25788 | 69.78581 | -1226.32661 | -1724.38906 | -1716.47170 | 1 |
| 84  | H | 83.86638 | 74.18671 | 71.24172 | 2381.64273  | -969.84735  | 900.46860   | 1 |
| 85  | H | 85.08134 | 73.35028 | 70.19792 | 2122.74991  | 1702.23946  | -141.36228  | 1 |
| 86  | C | 84.19099 | 70.78001 | 70.61763 | -501.86074  | -479.61276  | -376.42482  | 1 |
| 87  | H | 83.52259 | 70.75706 | 69.71365 | 993.79261   | -2246.95401 | -1177.81305 | 1 |
| 88  | H | 85.25260 | 70.75891 | 70.24754 | 42.71279    | -626.15391  | -2651.37258 | 1 |
| 89  | H | 84.01306 | 69.81741 | 71.18746 | -2026.39012 | -1590.33709 | -887.82922  | 1 |
| 90  | C | 84.52976 | 73.29488 | 73.76017 | -672.89153  | 382.57394   | -156.34072  | 1 |
| 91  | O | 85.35720 | 73.54780 | 74.60168 | 410.04627   | 221.86223   | 500.35950   | 1 |
| 92  | N | 83.37348 | 73.89192 | 73.54622 | -378.11782  | -443.79414  | -441.10984  | 1 |
| 93  | H | 82.76363 | 73.53770 | 72.81494 | 2404.15973  | -568.14894  | 1149.30085  | 1 |
| 94  | C | 82.99579 | 74.99538 | 74.37045 | -544.54484  | 466.16019   | 331.29119   | 1 |
| 95  | H | 83.62602 | 74.87353 | 75.28458 | -1409.80988 | -170.17955  | 2325.32679  | 1 |
| 96  | C | 83.34097 | 76.32288 | 73.56296 | -184.48284  | 116.78282   | -758.89137  | 1 |
| 97  | H | 84.43628 | 76.39767 | 73.37921 | 1893.78641  | 1861.14652  | 611.04528   | 1 |
| 98  | H | 82.85920 | 76.31554 | 72.55958 | -2170.79665 | -974.19311  | 1327.50117  | 1 |
| 99  | C | 82.81974 | 77.51223 | 74.42689 | 389.51668   | 672.81878   | -138.49152  | 1 |
| 100 | H | 81.71948 | 77.40538 | 74.56295 | 510.64577   | 1933.03327  | 1851.02484  | 1 |
| 101 | H | 83.23456 | 77.43834 | 75.45678 | -2302.30869 | -1105.72939 | -948.89774  | 1 |
| 102 | C | 83.11941 | 78.94240 | 73.85173 | -559.93427  | -126.34590  | 542.30857   | 1 |
| 103 | O | 82.64140 | 79.90725 | 74.40263 | -670.36003  | -111.83166  | 76.36448    | 1 |
| 104 | N | 83.91929 | 78.94440 | 72.77055 | -216.06729  | -537.07037  | 446.51379   | 1 |
| 105 | H | 84.35029 | 78.15217 | 72.27873 | -1251.96487 | 1074.12894  | -2168.52500 | 1 |
| 106 | H | 84.22464 | 79.79266 | 72.27885 | -2451.83023 | -720.73851  | 944.84612   | 1 |
| 107 | C | 81.39194 | 74.88992 | 74.61650 | 546.24052   | -563.88337  | -85.11809   | 1 |
| 108 | O | 80.61939 | 75.51481 | 73.90619 | 71.70702    | -307.40463  | 606.69673   | 1 |
| 109 | N | 81.12287 | 74.05251 | 75.61279 | 479.90863   | -504.50129  | 222.86849   | 1 |
| 110 | C | 79.76996 | 73.83106 | 76.06258 | 75.51268    | -600.91904  | 506.73700   | 1 |
| 111 | H | 79.20634 | 73.69991 | 75.11087 | -2033.61562 | 1795.30103  | 254.89480   | 1 |
| 112 | C | 79.89346 | 72.53312 | 76.96195 | 523.79067   | 517.99274   | 284.45581   | 1 |
| 113 | H | 79.15659 | 72.52151 | 77.79683 | 1599.61665  | -1127.00911 | 1895.98173  | 1 |
| 114 | H | 79.71222 | 71.60945 | 76.36765 | -1881.83093 | 1275.82488  | -1501.55016 | 1 |
| 115 | C | 81.37312 | 72.59889 | 77.45614 | -600.05639  | -404.05026  | 316.64485   | 1 |
| 116 | H | 81.48207 | 73.32954 | 78.28933 | -2597.05260 | 496.36221   | 657.73249   | 1 |
| 117 | H | 81.76611 | 71.62594 | 77.82790 | -1666.24518 | 1294.38985  | -1723.90591 | 1 |
| 118 | C | 82.09817 | 73.10695 | 76.13675 | 493.57570   | -129.95376  | -602.56394  | 1 |
| 119 | H | 83.07333 | 73.62908 | 76.29311 | -1469.08415 | -637.84797  | 2204.22581  | 1 |
| 120 | H | 82.21536 | 72.32832 | 75.32621 | -1038.97840 | 1068.88701  | -2280.71789 | 1 |
| 121 | C | 79.25377 | 75.13674 | 76.87993 | 188.88100   | 241.05089   | -727.87821  | 1 |
| 122 | O | 79.04003 | 75.09682 | 78.06159 | 531.88613   | -49.19943   | 427.07960   | 1 |

|     |   |          |          |          |             |             |             |   |
|-----|---|----------|----------|----------|-------------|-------------|-------------|---|
| 123 | N | 79.11609 | 76.17716 | 76.04614 | 708.14833   | 26.93417    | -179.73509  | 1 |
| 124 | H | 79.36891 | 76.07100 | 75.03568 | -2232.69501 | -1179.09831 | 1023.94816  | 1 |
| 125 | C | 78.55119 | 77.41737 | 76.57573 | -738.32412  | 259.92548   | 104.42456   | 1 |
| 126 | H | 78.69680 | 77.32495 | 77.67947 | 2028.89123  | 1260.02983  | 1311.33324  | 1 |
| 127 | C | 79.28027 | 78.57647 | 75.91915 | -258.65678  | -345.52513  | 661.28459   | 1 |
| 128 | H | 79.32731 | 78.36739 | 74.82634 | -1826.06090 | -1801.46097 | -918.64554  | 1 |
| 129 | C | 78.54996 | 79.89141 | 76.11791 | -541.23400  | 531.92970   | -218.41428  | 1 |
| 130 | H | 79.09369 | 80.74559 | 75.62655 | 1311.73218  | -2219.18200 | 882.19023   | 1 |
| 131 | H | 77.51357 | 79.85704 | 75.67894 | -1048.71298 | 1223.58118  | -2196.97971 | 1 |
| 132 | H | 78.44047 | 80.14627 | 77.20856 | 419.06414   | 1903.92898  | 1903.44670  | 1 |
| 133 | C | 80.70115 | 78.68965 | 76.43371 | -423.86431  | 152.66566   | -648.55262  | 1 |
| 134 | H | 81.36130 | 79.31080 | 75.72897 | 105.68386   | -2342.50080 | 1387.51238  | 1 |
| 135 | H | 80.73872 | 79.17385 | 77.44839 | -1695.63603 | -1484.73621 | -1531.02793 | 1 |
| 136 | H | 81.17748 | 77.67514 | 76.53588 | -1853.57121 | -487.39031  | 1936.59343  | 1 |
| 137 | C | 76.94113 | 77.44940 | 76.13801 | 539.71428   | -510.58232  | 267.58633   | 1 |
| 138 | O | 76.59177 | 77.52414 | 74.98632 | -15.93758   | -278.34085  | -624.49402  | 1 |
| 139 | N | 76.20144 | 77.47793 | 77.23406 | -676.81886  | 12.05292    | 276.17960   | 1 |
| 140 | H | 76.67014 | 77.37795 | 78.13225 | -1694.44250 | -373.84189  | -2100.66098 | 1 |
| 141 | C | 74.78548 | 77.48052 | 77.11205 | 412.33078   | -664.70360  | 108.35451   | 1 |
| 142 | H | 74.60845 | 77.85374 | 76.07595 | 1765.77476  | 1294.44366  | 1621.76594  | 1 |
| 143 | C | 74.27821 | 75.99871 | 77.35057 | -179.66635  | -721.95667  | -264.73915  | 1 |
| 144 | H | 74.83547 | 75.27923 | 76.70939 | -607.34922  | 2587.87032  | -598.10018  | 1 |
| 145 | H | 74.48125 | 75.68828 | 78.40026 | -359.69332  | -1479.13954 | -2259.74260 | 1 |
| 146 | C | 72.74424 | 75.95813 | 77.04818 | -240.01076  | 616.02425   | 431.85322   | 1 |
| 147 | H | 72.21930 | 76.76785 | 77.60789 | -1359.17131 | 782.54425   | 2227.99181  | 1 |
| 148 | H | 72.54312 | 76.14309 | 75.96897 | -820.36667  | 85.81767    | -2596.78715 | 1 |
| 149 | C | 72.20053 | 74.54166 | 77.49596 | -513.07015  | 236.18570   | -551.87280  | 1 |
| 150 | H | 72.74409 | 73.71994 | 76.97537 | 1816.11944  | -1183.11722 | -1650.94321 | 1 |
| 151 | H | 72.37245 | 74.37965 | 78.58506 | -1800.04429 | -1361.53473 | 1526.34643  | 1 |
| 152 | C | 70.69045 | 74.50147 | 77.16672 | 726.08972   | -253.19732  | -179.64713  | 1 |
| 153 | H | 70.08986 | 75.29034 | 77.66275 | 1224.27271  | -456.51798  | -2390.90304 | 1 |
| 154 | H | 70.45865 | 74.46949 | 76.08381 | 1206.40339  | -1150.93514 | -2154.90344 | 1 |
| 155 | N | 70.11044 | 73.16490 | 77.74090 | 329.70796   | -633.68968  | -155.67358  | 1 |
| 156 | H | 69.07007 | 73.01716 | 77.59590 | 1348.31305  | 1938.76845  | 1359.00643  | 1 |
| 157 | H | 70.50731 | 72.25615 | 77.36233 | 2096.92035  | 1446.54551  | -966.48890  | 1 |
| 158 | H | 70.19325 | 73.02238 | 78.78947 | -1197.07217 | -2303.53719 | 827.28733   | 1 |
| 159 | C | 74.18949 | 78.40907 | 78.33146 | -378.01186  | -556.17301  | -413.96481  | 1 |
| 160 | O | 73.43858 | 77.93286 | 79.15219 | -409.44433  | -307.55053  | -453.30833  | 1 |
| 161 | N | 74.64105 | 79.65317 | 78.24839 | -429.02477  | 524.70884   | 274.08502   | 1 |
| 162 | H | 75.25683 | 79.89049 | 77.47181 | 1706.34263  | -1425.96036 | 1574.38926  | 1 |
| 163 | C | 74.25530 | 80.57511 | 79.26541 | -45.25864   | -626.22952  | 478.93267   | 1 |
| 164 | H | 73.88657 | 79.94414 | 80.10958 | 1988.63164  | 570.90773   | 1772.87287  | 1 |
| 165 | C | 75.51740 | 81.48546 | 79.57484 | 551.77128   | -20.49526   | -564.54996  | 1 |
| 166 | H | 76.37736 | 80.87587 | 79.93143 | 1434.61535  | -1753.10253 | 1513.99471  | 1 |
| 167 | H | 75.86690 | 81.98636 | 78.64448 | -714.67738  | 1819.09770  | 1898.36494  | 1 |
| 168 | C | 75.08555 | 82.54134 | 80.64374 | 446.99263   | -555.77305  | 338.97221   | 1 |
| 169 | H | 74.15264 | 83.05655 | 80.32068 | 1953.68466  | 1892.25957  | -161.67766  | 1 |
| 170 | H | 74.84869 | 82.05633 | 81.61713 | -403.03785  | 2688.07032  | -188.43591  | 1 |
| 171 | C | 76.26354 | 83.58632 | 80.79509 | 567.86262   | 335.74681   | 434.04421   | 1 |
| 172 | H | 77.18198 | 83.09956 | 81.19637 | -1080.02275 | 1568.26081  | -1948.78900 | 1 |
| 173 | H | 76.54969 | 84.00412 | 79.80253 | -919.54108  | 2111.34692  | 1456.13463  | 1 |
| 174 | C | 75.77225 | 84.71198 | 81.73483 | 195.81897   | 173.33862   | -745.11536  | 1 |
| 175 | H | 74.89088 | 85.27099 | 81.36148 | 1405.67949  | -2301.21089 | -390.08113  | 1 |
| 176 | H | 75.60478 | 84.39860 | 82.78460 | -940.37328  | -1118.32446 | 2299.72133  | 1 |
| 177 | N | 76.90863 | 85.78530 | 81.81161 | 319.26422   | 656.36007   | -42.02424   | 1 |
| 178 | H | 76.70647 | 86.62929 | 82.42166 | 1961.03633  | 619.91968   | 1787.09422  | 1 |
| 179 | H | 77.84952 | 85.47242 | 82.19053 | 854.14343   | -2156.80752 | 1429.08711  | 1 |
| 180 | H | 77.18197 | 86.24946 | 80.89781 | 1237.02905  | -1378.50857 | -1998.28500 | 1 |
| 181 | C | 73.10956 | 81.56870 | 78.64866 | 532.53319   | -268.57236  | 517.55729   | 1 |
| 182 | O | 73.38287 | 82.42665 | 77.81703 | 266.16714   | -290.73804  | -558.88002  | 1 |
| 183 | N | 71.97110 | 81.26354 | 79.18880 | -226.25352  | 640.49678   | -270.32839  | 1 |
| 184 | H | 71.84588 | 80.45873 | 79.83589 | 2007.69063  | -1035.27229 | 1523.50231  | 1 |

|     |   |          |          |          |             |             |             |   |
|-----|---|----------|----------|----------|-------------|-------------|-------------|---|
| 185 | C | 70.78591 | 82.05407 | 79.00403 | -540.76542  | -573.33303  | 49.50000    | 1 |
| 186 | H | 70.95141 | 82.99398 | 79.57582 | -2374.20950 | -1036.76023 | 843.75774   | 1 |
| 187 | C | 70.73419 | 82.39938 | 77.44033 | -77.09082   | 666.87422   | -415.84136  | 1 |
| 188 | H | 71.42396 | 81.65534 | 76.94430 | -985.81834  | 617.19825   | 2463.91927  | 1 |
| 189 | O | 71.28605 | 83.67771 | 77.12210 | 293.29899   | -391.65602  | -477.80926  | 1 |
| 190 | H | 72.29248 | 83.44048 | 77.15882 | 2528.72714  | -681.76262  | -751.27122  | 1 |
| 191 | C | 69.26590 | 82.12581 | 76.96221 | 252.47363   | -605.14473  | 440.05134   | 1 |
| 192 | H | 69.18542 | 82.14103 | 75.84495 | -2052.65063 | 1456.49051  | -1043.51830 | 1 |
| 193 | H | 68.90772 | 81.12384 | 77.31259 | -2152.98800 | -1661.97574 | -161.70652  | 1 |
| 194 | H | 68.55802 | 82.89614 | 77.34909 | -473.12726  | -1584.27339 | 2165.61725  | 1 |
| 195 | C | 69.70738 | 81.08885 | 79.71654 | 360.36307   | 488.46713   | 505.10056   | 1 |
| 196 | O | 70.11171 | 80.06990 | 80.27156 | -200.08817  | -528.03552  | -385.82850  | 1 |
| 197 | N | 68.46433 | 81.55238 | 79.67865 | -597.54095  | -226.44775  | 355.20479   | 1 |
| 198 | H | 68.27050 | 82.44384 | 79.22509 | 2179.23655  | -1300.70981 | -991.33835  | 1 |
| 199 | C | 67.45452 | 80.76878 | 80.29306 | -687.68921  | 297.39807   | -249.45179  | 1 |
| 200 | H | 67.99514 | 80.16480 | 81.05792 | -349.16256  | -2467.37713 | -1101.72831 | 1 |
| 201 | C | 66.30779 | 81.72822 | 80.86099 | 672.47345   | 361.54328   | -201.62880  | 1 |
| 202 | H | 65.80396 | 82.25691 | 80.02002 | 1541.41502  | 582.18425   | 2169.97026  | 1 |
| 203 | H | 65.53050 | 81.11210 | 81.36913 | -2534.67717 | 60.25153    | 997.72295   | 1 |
| 204 | C | 66.91876 | 82.74257 | 81.83768 | 574.26774   | -389.43119  | -377.02542  | 1 |
| 205 | C | 67.20120 | 82.35505 | 83.18198 | 688.82679   | -287.33580  | -257.96133  | 1 |
| 206 | H | 66.98620 | 81.32863 | 83.53086 | 331.14182   | 1470.38163  | 2269.80013  | 1 |
| 207 | C | 67.20946 | 84.06662 | 81.38973 | -383.52382  | -675.04808  | 144.24917   | 1 |
| 208 | H | 67.00042 | 84.36631 | 80.34694 | 4.09847     | 1517.59662  | 2262.86397  | 1 |
| 209 | C | 67.75318 | 83.30056 | 84.04588 | -134.76730  | 428.45285   | -649.50303  | 1 |
| 210 | H | 67.96786 | 83.00346 | 85.08726 | -903.23433  | 1600.49020  | 2011.53387  | 1 |
| 211 | C | 67.76076 | 84.97749 | 82.29384 | -335.53281  | -615.00040  | -364.39058  | 1 |
| 212 | H | 67.97620 | 86.00024 | 81.93827 | 1596.45398  | -1369.33862 | 1732.02659  | 1 |
| 213 | C | 68.05119 | 84.63597 | 83.64706 | 585.48547   | -340.24194  | -406.23938  | 1 |
| 214 | O | 68.61369 | 85.55428 | 84.57153 | -419.15649  | -173.04408  | -511.94141  | 1 |
| 215 | H | 68.65780 | 86.35817 | 84.00175 | -1071.84350 | 1559.71507  | -1960.13012 | 1 |
| 216 | C | 66.70300 | 79.81794 | 79.19023 | 291.41878   | -183.13091  | 710.72246   | 1 |
| 217 | O | 66.20868 | 78.77229 | 79.54839 | 379.87695   | 523.47396   | -222.23622  | 1 |
| 218 | N | 66.61585 | 80.39723 | 77.99704 | 564.30591   | 373.09380   | 277.24371   | 1 |
| 219 | H | 67.06044 | 81.30372 | 77.87091 | -120.59931  | -2436.07824 | -1214.35098 | 1 |
| 220 | C | 66.06729 | 79.64423 | 76.92570 | 404.07514   | -299.37480  | 608.84009   | 1 |
| 221 | H | 65.72775 | 78.68029 | 77.37673 | -1071.07882 | -841.69025  | 2359.66467  | 1 |
| 222 | C | 64.90028 | 80.52034 | 76.29143 | -683.12807  | 68.71770    | -390.13096  | 1 |
| 223 | H | 64.41320 | 81.15381 | 77.06590 | 2068.88918  | 1596.58590  | 770.89603   | 1 |
| 224 | H | 65.30256 | 81.22572 | 75.52776 | 1379.86429  | 2342.49779  | -179.85638  | 1 |
| 225 | C | 63.87863 | 79.53188 | 75.65327 | -176.39967  | 537.49466   | 550.97268   | 1 |
| 226 | H | 64.38168 | 78.81484 | 74.96807 | -396.28051  | 1942.22168  | 1869.33314  | 1 |
| 227 | H | 63.38926 | 78.90795 | 76.43429 | -94.44700   | 586.00678   | -2659.20016 | 1 |
| 228 | C | 62.80781 | 80.40741 | 74.85439 | -291.69381  | -718.18079  | -150.72929  | 1 |
| 229 | H | 62.22798 | 81.14893 | 75.46073 | -2303.38776 | 1089.76242  | 964.62032   | 1 |
| 230 | H | 63.20053 | 80.93463 | 73.94796 | 884.16729   | 2568.80533  | -207.74283  | 1 |
| 231 | N | 61.92191 | 79.40142 | 74.43783 | -594.49522  | -252.81478  | 342.29276   | 1 |
| 232 | H | 62.19209 | 78.44814 | 74.62543 | -1735.17426 | 2084.05705  | -263.71605  | 1 |
| 233 | C | 60.80956 | 79.61124 | 73.85787 | 595.23177   | -271.52487  | 442.22352   | 1 |
| 234 | N | 60.45896 | 80.93941 | 73.59463 | 585.53813   | -424.79750  | -105.81303  | 1 |
| 235 | H | 60.97876 | 81.79463 | 73.78784 | 959.88797   | 1327.56823  | -2177.11905 | 1 |
| 236 | H | 59.59808 | 81.23845 | 73.13595 | 1578.48647  | 16.27378    | -2220.76233 | 1 |
| 237 | N | 60.14621 | 78.40370 | 73.59461 | -452.17763  | -390.33541  | -421.51853  | 1 |
| 238 | H | 60.38910 | 77.44309 | 73.83208 | 470.26107   | 1974.25629  | -1817.92087 | 1 |
| 239 | H | 59.21959 | 78.35783 | 73.16994 | 1856.67307  | -1573.97321 | -1224.35416 | 1 |
| 240 | C | 67.18044 | 79.50229 | 75.73074 | -531.47271  | -581.45780  | -55.06206   | 1 |
| 241 | O | 68.04234 | 80.32031 | 75.49320 | -243.00837  | 192.73507   | 609.52485   | 1 |
| 242 | N | 66.88357 | 78.40884 | 75.03911 | 343.49288   | -644.25607  | 38.09164    | 1 |
| 243 | H | 66.10556 | 77.85484 | 75.39187 | -1691.16043 | -1535.97525 | -1484.73099 | 1 |
| 244 | C | 67.69336 | 77.99786 | 73.90059 | 542.66492   | 350.14337   | 454.42563   | 1 |
| 245 | H | 68.59759 | 78.64935 | 73.99988 | 1209.57979  | -2396.95920 | 463.86744   | 1 |
| 246 | C | 67.97308 | 76.50686 | 74.03630 | -737.14309  | 145.93010   | 242.71942   | 1 |



|     |   |          |          |          |             |             |             |   |
|-----|---|----------|----------|----------|-------------|-------------|-------------|---|
| 247 | H | 67.01127 | 75.97041 | 73.87374 | -1050.18303 | 159.36419   | -2509.06125 | 1 |
| 248 | C | 68.96251 | 76.02740 | 72.99201 | -706.77696  | -252.88343  | -245.16230  | 1 |
| 249 | H | 69.10023 | 74.91154 | 73.02731 | -1624.64039 | -1665.49085 | 1417.86935  | 1 |
| 250 | H | 68.61673 | 76.29624 | 71.94874 | 2566.10521  | 598.51109   | 693.22305   | 1 |
| 251 | H | 69.97649 | 76.49255 | 73.13723 | -1972.69758 | 107.10018   | -1876.34312 | 1 |
| 252 | C | 68.46556 | 76.14870 | 75.42655 | 412.85148   | 672.58832   | -27.69222   | 1 |
| 253 | H | 68.54059 | 75.03611 | 75.56838 | 1447.02277  | 1762.76533  | -1490.78944 | 1 |
| 254 | H | 69.48200 | 76.58565 | 75.62863 | 1320.77379  | -145.20455  | 2378.68491  | 1 |
| 255 | H | 67.77698 | 76.54157 | 76.22423 | -1512.10848 | 1470.52031  | 1724.75147  | 1 |
| 256 | C | 66.84214 | 78.30656 | 72.50805 | -607.11113  | 499.56689   | 73.73769    | 1 |
| 257 | O | 67.16503 | 77.76784 | 71.46697 | 357.97126   | 460.81534   | 356.68785   | 1 |
| 258 | N | 65.85507 | 79.16388 | 72.71023 | 536.55407   | -368.62270  | 332.76306   | 1 |
| 259 | H | 65.78409 | 79.53210 | 73.65698 | 524.38866   | 2297.69985  | 1367.20941  | 1 |
| 260 | C | 65.30142 | 79.84200 | 71.59376 | 46.50277    | -774.29190  | -147.97904  | 1 |
| 261 | H | 65.95427 | 79.56383 | 70.73572 | 1676.51875  | 1883.29066  | 1032.55549  | 1 |
| 262 | C | 63.76292 | 79.39666 | 71.38228 | -559.41456  | -34.19198   | -556.30433  | 1 |
| 263 | H | 63.14426 | 79.76638 | 72.23440 | -64.66664   | 395.18769   | 2695.05373  | 1 |
| 264 | H | 63.34724 | 79.88991 | 70.47126 | -2703.44278 | -60.40056   | 333.79418   | 1 |
| 265 | C | 63.64716 | 77.89902 | 71.28139 | -519.76435  | 377.31045   | 459.42366   | 1 |
| 266 | H | 64.04501 | 77.45705 | 72.22340 | -1746.74323 | 1667.50644  | -1261.73691 | 1 |
| 267 | C | 62.18309 | 77.50306 | 71.13388 | 570.95554   | 16.46261    | -545.27700  | 1 |
| 268 | H | 62.05055 | 76.39053 | 71.12936 | 2391.58273  | 28.05277    | -1305.07271 | 1 |
| 269 | H | 61.56251 | 77.91055 | 71.97254 | 175.75588   | 917.63458   | 2559.43867  | 1 |
| 270 | H | 61.74378 | 77.89364 | 70.18012 | -1063.97851 | -2155.34650 | 1283.00462  | 1 |
| 271 | C | 64.45424 | 77.34634 | 70.11737 | 193.76014   | 2.62946     | -765.53141  | 1 |
| 272 | H | 64.25792 | 76.25428 | 69.95846 | 507.39394   | -846.55087  | 2539.60089  | 1 |
| 273 | H | 64.21296 | 77.86964 | 69.15594 | 1337.57841  | 1818.19054  | 1526.01994  | 1 |
| 274 | H | 65.56823 | 77.46246 | 70.30764 | 1100.88635  | -1172.91350 | -2199.08909 | 1 |
| 275 | C | 65.26344 | 81.41073 | 71.96968 | -549.21115  | 475.64486   | -309.38218  | 1 |
| 276 | O | 65.13384 | 81.81459 | 73.09424 | 556.06106   | -390.37755  | -78.24250   | 1 |
| 277 | O | 65.21445 | 82.30090 | 70.87139 | -572.27940  | -310.19032  | -209.75862  | 1 |
| 278 | H | 65.33972 | 81.64363 | 70.13140 | -1380.08193 | 2212.14486  | 790.85944   | 1 |

Listing 98: C00098.xmolout

|    |   |          |          |          |             |             |             |        |          |
|----|---|----------|----------|----------|-------------|-------------|-------------|--------|----------|
| 1  |   | 276      |          |          |             |             |             |        |          |
| 2  |   | 150.0000 | 150.0000 | 150.0000 | 0.0000      | 0.0000      | 0.0000***** | 2.7750 | 11100    |
|    |   | 0.2500   | 300.00   | 0.00     | 0.00        | 0.00        | -1293.4398  | 0.0000 | 300.0000 |
| 3  | H | 79.28104 | 64.21731 | 80.25313 | -2043.14101 | -1757.64893 | 399.89339   |        | 1        |
| 4  | N | 79.05101 | 64.98594 | 79.62374 | 426.75047   | 490.45733   | -334.42467  |        | 1        |
| 5  | H | 78.38976 | 65.54825 | 80.17676 | 442.25559   | -1110.30854 | -2448.52907 |        | 1        |
| 6  | C | 80.16943 | 65.75835 | 79.23345 | 415.32972   | -666.39213  | 83.73172    |        | 1        |
| 7  | H | 81.05531 | 65.24291 | 79.66299 | 879.32219   | 2491.00447  | 667.35213   |        | 1        |
| 8  | C | 80.23521 | 65.83825 | 77.62351 | 31.35357    | 477.41777   | 628.23362   |        | 1        |
| 9  | H | 79.26570 | 66.23339 | 77.23804 | 1168.38489  | 2240.25337  | -1019.71136 |        | 1        |
| 10 | H | 81.01617 | 66.56519 | 77.29599 | -360.43770  | 2534.90498  | 931.67112   |        | 1        |
| 11 | C | 80.51610 | 64.47231 | 77.05752 | 463.18208   | 512.70242   | -382.34388  |        | 1        |
| 12 | H | 79.73398 | 63.77248 | 77.42945 | 1725.29117  | 1863.52247  | -987.07854  |        | 1        |
| 13 | C | 80.45700 | 64.50995 | 75.53484 | 710.42801   | -144.27427  | -313.15367  |        | 1        |
| 14 | H | 80.70251 | 63.51267 | 75.08718 | 364.20195   | -1033.13725 | 2494.72524  |        | 1        |
| 15 | H | 79.43933 | 64.79709 | 75.16608 | 2567.61904  | 335.80679   | 847.48802   |        | 1        |
| 16 | H | 81.18449 | 65.25045 | 75.11280 | -2587.99029 | 680.92867   | -512.16411  |        | 1        |
| 17 | C | 81.87886 | 63.94867 | 77.49149 | 268.17616   | 741.64379   | -40.42634   |        | 1        |
| 18 | H | 82.11155 | 62.96138 | 77.01529 | 1283.54314  | -1945.37420 | -1411.27812 |        | 1        |
| 19 | H | 82.70184 | 64.65459 | 77.20952 | -1258.57796 | 1317.15249  | -2026.02085 |        | 1        |
| 20 | H | 81.93485 | 63.79839 | 78.59996 | -2502.84526 | 909.80597   | 575.92391   |        | 1        |
| 21 | C | 79.87378 | 67.20589 | 79.90020 | 619.36578   | -458.64843  | -172.09273  |        | 1        |
| 22 | O | 78.95404 | 67.38288 | 80.67813 | -81.40433   | 433.87611   | 522.34594   |        | 1        |
| 23 | N | 80.81699 | 68.06420 | 79.52126 | 175.23996   | -622.20190  | 341.55523   |        | 1        |
| 24 | H | 81.50189 | 67.75737 | 78.83233 | -876.57256  | -303.22879  | -2561.90213 |        | 1        |
| 25 | C | 80.63387 | 69.44803 | 79.81971 | -571.88214  | -534.10783  | -106.15033  |        | 1        |
| 26 | H | 80.20402 | 69.45960 | 80.84522 | -2713.20841 | -16.25800   | -248.80809  |        | 1        |

|    |   |          |          |          |             |             |             |   |
|----|---|----------|----------|----------|-------------|-------------|-------------|---|
| 27 | C | 82.07346 | 70.12476 | 79.66255 | 166.60354   | 288.16399   | -716.09568  | 1 |
| 28 | H | 82.39388 | 70.00246 | 78.59159 | -2097.85574 | 1636.78449  | -586.18044  | 1 |
| 29 | O | 83.12437 | 69.54162 | 80.45795 | -317.80580  | -363.38227  | 484.43082   | 1 |
| 30 | H | 83.72941 | 69.21882 | 79.76206 | 1863.74748  | -1451.84923 | 1357.29467  | 1 |
| 31 | C | 81.79598 | 71.64797 | 79.93736 | 503.80731   | 517.99032   | 318.51606   | 1 |
| 32 | H | 82.69086 | 72.27014 | 79.70297 | 640.61020   | -2157.10410 | -1536.29104 | 1 |
| 33 | H | 80.94488 | 72.04951 | 79.32388 | 1687.88455  | 465.60692   | 2087.56452  | 1 |
| 34 | H | 81.54857 | 71.82911 | 81.00887 | -1293.07895 | -1899.88581 | -1463.57452 | 1 |
| 35 | C | 79.63025 | 70.05781 | 78.68696 | -153.07550  | -733.68902  | 248.70981   | 1 |
| 36 | O | 79.75561 | 69.72316 | 77.53976 | 186.15459   | -480.78787  | -449.34387  | 1 |
| 37 | N | 78.82231 | 70.98521 | 79.22132 | -487.53139  | 543.18517   | 42.03850    | 1 |
| 38 | C | 77.99638 | 71.82036 | 78.40761 | -699.35871  | 69.34393    | 360.10701   | 1 |
| 39 | H | 77.65117 | 71.22958 | 77.52750 | 2.81126     | -221.99807  | -2715.58072 | 1 |
| 40 | C | 76.88724 | 72.29349 | 79.44340 | -507.46439  | -592.59194  | 122.07761   | 1 |
| 41 | H | 76.35673 | 73.21372 | 79.11159 | -1975.08116 | 525.87560   | -1801.71556 | 1 |
| 42 | H | 76.10821 | 71.51686 | 79.61543 | 1588.27743  | -1913.22100 | 1113.83566  | 1 |
| 43 | C | 77.77729 | 72.50758 | 80.70462 | -613.62442  | -457.55993  | -194.14490  | 1 |
| 44 | H | 78.42620 | 73.40748 | 80.58377 | 1707.54637  | -721.27992  | 1996.92523  | 1 |
| 45 | H | 77.21041 | 72.63607 | 81.65340 | 758.23357   | 2100.81767  | 1560.55011  | 1 |
| 46 | C | 78.63623 | 71.17073 | 80.65559 | -352.41524  | 704.96076   | 49.21465    | 1 |
| 47 | H | 79.62872 | 71.23237 | 81.15718 | 1714.76886  | -2070.42778 | 443.35792   | 1 |
| 48 | H | 78.09859 | 70.25860 | 81.01023 | 1224.15040  | 1801.50881  | 1636.97633  | 1 |
| 49 | C | 78.80193 | 73.20060 | 78.01003 | 566.85117   | 537.05831   | 117.62814   | 1 |
| 50 | O | 79.69734 | 73.63633 | 78.69772 | -550.26779  | -406.08867  | 4.21666     | 1 |
| 51 | N | 78.13323 | 73.75911 | 77.01460 | 566.34832   | -425.77725  | 180.18749   | 1 |
| 52 | H | 77.36639 | 73.19652 | 76.64570 | 644.44502   | 2646.80550  | -52.73430   | 1 |
| 53 | C | 78.67335 | 74.76762 | 76.16402 | 612.34801   | -281.48662  | 411.56221   | 1 |
| 54 | H | 77.77301 | 75.14426 | 75.61454 | 1667.23498  | -1490.75142 | 1556.16753  | 1 |
| 55 | C | 79.35313 | 75.91248 | 77.04170 | -714.45746  | -175.43074  | 286.98927   | 1 |
| 56 | H | 80.19060 | 75.45835 | 77.64429 | -787.09484  | 1763.03619  | -1922.46060 | 1 |
| 57 | O | 78.45999 | 76.57165 | 77.96573 | -429.46514  | 516.51932   | -128.40526  | 1 |
| 58 | H | 78.82093 | 76.25417 | 78.81719 | 1981.82785  | 436.16847   | -1818.18182 | 1 |
| 59 | C | 79.95227 | 76.83510 | 75.91878 | 630.79189   | -468.94448  | 76.03230    | 1 |
| 60 | H | 80.52314 | 77.68813 | 76.35452 | -1775.71861 | 2062.30353  | 131.89849   | 1 |
| 61 | H | 80.64617 | 76.27547 | 75.24840 | -1855.14608 | 88.94118    | 1993.53760  | 1 |
| 62 | H | 79.14692 | 77.26917 | 75.28057 | -1504.82350 | -780.94249  | -2132.90992 | 1 |
| 63 | C | 79.68988 | 73.97457 | 75.15501 | 288.57638   | 618.62814   | -397.00270  | 1 |
| 64 | O | 80.80696 | 73.60508 | 75.51005 | 321.70495   | -185.26452  | 574.37218   | 1 |
| 65 | N | 79.11261 | 73.91244 | 73.97979 | -447.05792  | -446.53431  | 367.76425   | 1 |
| 66 | H | 78.19005 | 74.34915 | 73.92574 | 350.31316   | 1975.63644  | -1843.31522 | 1 |
| 67 | C | 79.39482 | 72.89137 | 73.02506 | -511.23061  | 374.03917   | -471.51480  | 1 |
| 68 | H | 78.94809 | 73.31570 | 72.09835 | 2234.79579  | -898.70890  | -1273.45190 | 1 |
| 69 | C | 80.97257 | 72.69767 | 72.91780 | 529.53781   | -159.34528  | 563.72604   | 1 |
| 70 | H | 81.21121 | 72.31109 | 71.88911 | 654.59388   | 2347.94251  | 1217.51488  | 1 |
| 71 | H | 81.41989 | 73.72442 | 72.99761 | -1526.55661 | 2103.42026  | 817.87394   | 1 |
| 72 | O | 81.59611 | 71.80411 | 73.85857 | -554.84278  | 14.12789    | 399.58769   | 1 |
| 73 | H | 81.52812 | 72.40455 | 74.69632 | 1297.06236  | 2061.84854  | 1220.68812  | 1 |
| 74 | C | 78.60935 | 71.53171 | 73.46240 | -662.15484  | -412.13544  | 123.62687   | 1 |
| 75 | O | 77.89822 | 71.46046 | 74.43663 | -540.01537  | -317.05804  | 274.91456   | 1 |
| 76 | N | 78.78130 | 70.62311 | 72.48952 | -202.76299  | -690.00100  | -131.49145  | 1 |
| 77 | H | 79.46067 | 70.94606 | 71.79976 | -702.62132  | -2617.37191 | 281.70413   | 1 |
| 78 | C | 78.48834 | 69.20209 | 72.62781 | -491.73914  | 576.34187   | 222.73509   | 1 |
| 79 | H | 79.07350 | 68.77034 | 71.78255 | 1977.17978  | -1823.58850 | -434.68928  | 1 |
| 80 | C | 78.93477 | 68.70537 | 73.98556 | -649.50797  | -328.66843  | 306.11224   | 1 |
| 81 | H | 78.43670 | 69.33825 | 74.76070 | 2075.07803  | 1452.16490  | -1004.45904 | 1 |
| 82 | C | 78.53006 | 67.25790 | 74.20787 | -615.18735  | -489.99689  | -70.96352   | 1 |
| 83 | H | 78.85364 | 66.88993 | 75.21854 | -1226.32661 | -1724.38906 | -1716.47170 | 1 |
| 84 | H | 77.41338 | 67.12585 | 74.14818 | 2381.64273  | -969.84735  | 900.46860   | 1 |
| 85 | H | 78.98753 | 66.57518 | 73.44035 | 2122.74991  | 1702.23946  | -141.36228  | 1 |
| 86 | C | 80.43526 | 68.83519 | 74.17556 | -501.86074  | -479.61276  | -376.42482  | 1 |
| 87 | H | 80.75058 | 68.50170 | 75.20269 | 993.79261   | -2246.95401 | -1177.81305 | 1 |
| 88 | H | 81.00158 | 68.20856 | 73.43272 | 42.71279    | -626.15391  | -2651.37258 | 1 |

|     |   |          |          |          |             |             |             |   |
|-----|---|----------|----------|----------|-------------|-------------|-------------|---|
| 89  | H | 80.78537 | 69.90690 | 74.04709 | -2026.39012 | -1590.33709 | -887.82922  | 1 |
| 90  | C | 76.84267 | 68.97958 | 72.41510 | -672.89153  | 382.57394   | -156.34072  | 1 |
| 91  | O | 76.10561 | 68.80407 | 73.35520 | 410.04627   | 221.86223   | 500.35950   | 1 |
| 92  | N | 76.55761 | 68.99055 | 71.12453 | -378.11782  | -443.79414  | -441.10984  | 1 |
| 93  | H | 77.35334 | 69.12678 | 70.50380 | 2404.15973  | -568.14894  | 1149.30085  | 1 |
| 94  | C | 75.23032 | 68.84507 | 70.63630 | -544.54484  | 466.16019   | 331.29119   | 1 |
| 95  | H | 75.35943 | 68.91913 | 69.53256 | -1409.80988 | -170.17955  | 2325.32679  | 1 |
| 96  | C | 74.76708 | 67.39764 | 71.10858 | -184.48284  | 116.78282   | -758.89137  | 1 |
| 97  | H | 75.58608 | 66.66135 | 70.94694 | 1893.78641  | 1861.14652  | 611.04528   | 1 |
| 98  | H | 74.56993 | 67.39673 | 72.20628 | -2170.79665 | -974.19311  | 1327.50117  | 1 |
| 99  | C | 73.49512 | 67.00333 | 70.29953 | 389.51668   | 672.81878   | -138.49152  | 1 |
| 100 | H | 72.65786 | 67.69922 | 70.54926 | 510.64577   | 1933.03327  | 1851.02484  | 1 |
| 101 | H | 73.67079 | 67.16861 | 69.21342 | -2302.30869 | -1105.72939 | -948.89774  | 1 |
| 102 | C | 73.02864 | 65.51457 | 70.51865 | -559.93427  | -126.34590  | 542.30857   | 1 |
| 103 | O | 72.04050 | 65.12124 | 69.95465 | -670.36003  | -111.83166  | 76.36448    | 1 |
| 104 | N | 73.82625 | 64.79096 | 71.33303 | -216.06729  | -537.07037  | 446.51379   | 1 |
| 105 | H | 74.66399 | 65.07419 | 71.85447 | -1251.96487 | 1074.12894  | -2168.52500 | 1 |
| 106 | H | 73.65614 | 63.80778 | 71.57295 | -2451.83023 | -720.73851  | 944.84612   | 1 |
| 107 | C | 74.21331 | 69.96948 | 71.23133 | 546.24052   | -563.88337  | -85.11809   | 1 |
| 108 | O | 73.06486 | 69.64293 | 71.42401 | 71.70702    | -307.40463  | 606.69673   | 1 |
| 109 | N | 74.74353 | 71.19525 | 71.30438 | 479.90863   | -504.50129  | 222.86849   | 1 |
| 110 | C | 74.09954 | 72.23141 | 72.05711 | 75.51268    | -600.91904  | 506.73700   | 1 |
| 111 | H | 73.71265 | 71.76008 | 72.98859 | -2033.61562 | 1795.30103  | 254.89480   | 1 |
| 112 | C | 75.29344 | 73.25975 | 72.24453 | 523.79067   | 517.99274   | 284.45581   | 1 |
| 113 | H | 74.94669 | 74.28618 | 72.49641 | 1599.61665  | -1127.00911 | 1895.98173  | 1 |
| 114 | H | 75.97959 | 72.94293 | 73.06265 | -1881.83093 | 1275.82488  | -1501.55016 | 1 |
| 115 | C | 75.99788 | 73.16894 | 70.85579 | -600.05639  | -404.05026  | 316.64485   | 1 |
| 116 | H | 75.40581 | 73.68432 | 70.06452 | -2597.05260 | 496.36221   | 657.73249   | 1 |
| 117 | H | 77.01928 | 73.61104 | 70.83698 | -1666.24518 | 1294.38985  | -1723.90591 | 1 |
| 118 | C | 75.98561 | 71.59272 | 70.65360 | 493.57570   | -129.95376  | -602.56394  | 1 |
| 119 | H | 75.96071 | 71.23686 | 69.59652 | -1469.08415 | -637.84797  | 2204.22581  | 1 |
| 120 | H | 76.79536 | 71.06235 | 71.20745 | -1038.97840 | 1068.88701  | -2280.71789 | 1 |
| 121 | C | 72.91668 | 72.85853 | 71.11997 | 188.88100   | 241.05089   | -727.87821  | 1 |
| 122 | O | 73.15077 | 73.46162 | 70.09649 | 531.88613   | -49.19943   | 427.07960   | 1 |
| 123 | N | 71.69197 | 72.74080 | 71.72881 | 708.14833   | 26.93417    | -179.73509  | 1 |
| 124 | H | 71.88243 | 72.02952 | 72.44429 | -2232.69501 | -1179.09831 | 1023.94816  | 1 |
| 125 | C | 70.52047 | 72.60127 | 70.82686 | -738.32412  | 259.92548   | 104.42456   | 1 |
| 126 | H | 70.93563 | 72.19752 | 69.87523 | 2028.89123  | 1260.02983  | 1311.33324  | 1 |
| 127 | C | 69.52117 | 71.68375 | 71.48880 | -258.65678  | -345.52513  | 661.28459   | 1 |
| 128 | H | 69.43648 | 71.99166 | 72.55533 | -1826.06090 | -1801.46097 | -918.64554  | 1 |
| 129 | C | 68.14814 | 71.80514 | 70.85040 | -541.23400  | 531.92970   | -218.41428  | 1 |
| 130 | H | 67.36730 | 71.22634 | 71.41590 | 1311.73218  | -2219.18200 | 882.19023   | 1 |
| 131 | H | 67.80867 | 72.87954 | 70.80645 | -1048.71298 | 1223.58118  | -2196.97971 | 1 |
| 132 | H | 68.14856 | 71.42276 | 69.79280 | 419.06414   | 1903.92898  | 1903.44670  | 1 |
| 133 | C | 69.97675 | 70.23647 | 71.44876 | -423.86431  | 152.66566   | -648.55262  | 1 |
| 134 | H | 69.35555 | 69.58700 | 72.12529 | 105.68386   | -2342.50080 | 1387.51238  | 1 |
| 135 | H | 69.88938 | 69.80976 | 70.41199 | -1695.63603 | -1484.73621 | -1531.02793 | 1 |
| 136 | H | 71.06520 | 70.11868 | 71.75511 | -1853.57121 | -487.39031  | 1936.59343  | 1 |
| 137 | C | 69.88046 | 74.10531 | 70.63311 | 539.71428   | -510.58232  | 267.58633   | 1 |
| 138 | O | 69.17086 | 74.33122 | 69.68121 | -15.93758   | -278.34085  | -624.49402  | 1 |
| 139 | N | 70.12414 | 74.89776 | 71.67797 | -676.81886  | 12.05292    | 276.17960   | 1 |
| 140 | H | 70.74161 | 74.49751 | 72.38297 | -1694.44250 | -373.84189  | -2100.66098 | 1 |
| 141 | C | 70.04474 | 76.31027 | 71.45873 | 412.33078   | -664.70360  | 108.35451   | 1 |
| 142 | H | 69.41071 | 76.40338 | 70.54458 | 1765.77476  | 1294.44366  | 1621.76594  | 1 |
| 143 | C | 69.39849 | 76.95701 | 72.75111 | -179.66635  | -721.95667  | -264.73915  | 1 |
| 144 | H | 68.51890 | 76.36806 | 73.09571 | -607.34922  | 2587.87032  | -598.10018  | 1 |
| 145 | H | 70.12135 | 76.95219 | 73.60478 | -359.69332  | -1479.13954 | -2259.74260 | 1 |
| 146 | C | 68.98763 | 78.41419 | 72.35323 | -240.01076  | 616.02425   | 431.85322   | 1 |
| 147 | H | 69.89356 | 78.98206 | 72.01736 | -1359.17131 | 782.54425   | 2227.99181  | 1 |
| 148 | H | 68.28763 | 78.40987 | 71.48719 | -820.36667  | 85.81767    | -2596.78715 | 1 |
| 149 | C | 68.32395 | 79.11594 | 73.60253 | -513.07015  | 236.18570   | -551.87280  | 1 |
| 150 | H | 67.32423 | 78.67480 | 73.82485 | 1816.11944  | -1183.11722 | -1650.94321 | 1 |

|     |   |          |          |          |             |             |             |   |
|-----|---|----------|----------|----------|-------------|-------------|-------------|---|
| 151 | H | 68.95848 | 78.94220 | 74.53588 | -1800.04429 | -1361.53473 | 1526.34643  | 1 |
| 152 | C | 68.21315 | 80.62743 | 73.29469 | 726.08972   | -253.19732  | -179.64713  | 1 |
| 153 | H | 69.18363 | 81.13303 | 73.11778 | 1224.27271  | -456.51798  | -2390.90304 | 1 |
| 154 | H | 67.49661 | 80.88847 | 72.49000 | 1206.40339  | -1150.93514 | -2154.90344 | 1 |
| 155 | N | 67.64981 | 81.31307 | 74.58307 | 329.70796   | -633.68968  | -155.67358  | 1 |
| 156 | H | 67.54404 | 82.36803 | 74.54428 | 1348.31305  | 1938.76845  | 1359.00643  | 1 |
| 157 | H | 66.68400 | 81.01427 | 74.90681 | 2096.92035  | 1446.54551  | -966.48890  | 1 |
| 158 | H | 68.22378 | 81.18807 | 75.46564 | -1197.07217 | -2303.53719 | 827.28733   | 1 |
| 159 | C | 71.53549 | 76.95065 | 71.27841 | -378.01186  | -556.17301  | -413.96481  | 1 |
| 160 | O | 71.67696 | 78.15502 | 71.32530 | -409.44433  | -307.55053  | -453.30833  | 1 |
| 161 | N | 72.44815 | 76.02302 | 71.06197 | -429.02477  | 524.70884   | 274.08502   | 1 |
| 162 | H | 72.15698 | 75.04370 | 70.96965 | 1706.34263  | -1425.96036 | 1574.38926  | 1 |
| 163 | C | 73.82327 | 76.36002 | 70.87081 | -45.25864   | -626.22952  | 478.93267   | 1 |
| 164 | H | 74.22307 | 75.46642 | 70.33638 | 1988.63164  | 570.90773   | 1772.87287  | 1 |
| 165 | C | 73.90260 | 77.68974 | 69.99842 | 551.77128   | -20.49526   | -564.54996  | 1 |
| 166 | H | 73.17797 | 77.64811 | 69.15457 | 1434.61535  | -1753.10253 | 1513.99471  | 1 |
| 167 | H | 73.60606 | 78.57875 | 70.61034 | -714.67738  | 1819.09770  | 1898.36494  | 1 |
| 168 | C | 75.37073 | 77.83972 | 69.48139 | 446.99263   | -555.77305  | 338.97221   | 1 |
| 169 | H | 76.08650 | 77.81360 | 70.34039 | 1953.68466  | 1892.25957  | -161.67766  | 1 |
| 170 | H | 75.65244 | 76.99080 | 68.81877 | -403.03785  | 2688.07032  | -188.43591  | 1 |
| 171 | C | 75.47632 | 79.21925 | 68.71389 | 567.86262   | 335.74681   | 434.04421   | 1 |
| 172 | H | 74.90312 | 79.18981 | 67.75892 | -1080.02275 | 1568.26081  | -1948.78900 | 1 |
| 173 | H | 75.02688 | 80.04384 | 69.31338 | -919.54108  | 2111.34692  | 1456.13463  | 1 |
| 174 | C | 76.97762 | 79.48913 | 68.46085 | 195.81897   | 173.33862   | -745.11536  | 1 |
| 175 | H | 77.57541 | 79.65789 | 69.37893 | 1405.67949  | -2301.21089 | -390.08113  | 1 |
| 176 | H | 77.48000 | 78.74212 | 67.81444 | -940.37328  | -1118.32446 | 2299.72133  | 1 |
| 177 | N | 77.08186 | 80.83604 | 67.66989 | 319.26422   | 656.36007   | -42.02424   | 1 |
| 178 | H | 78.06609 | 81.16569 | 67.45131 | 1961.03633  | 619.91968   | 1787.09422  | 1 |
| 179 | H | 76.63413 | 80.86442 | 66.70789 | 854.14343   | -2156.80752 | 1429.08711  | 1 |
| 180 | H | 76.66921 | 81.69941 | 68.12921 | 1237.02905  | -1378.50857 | -1998.28500 | 1 |
| 181 | C | 74.56268 | 76.58744 | 72.29336 | 532.53319   | -268.57236  | 517.55729   | 1 |
| 182 | O | 75.70067 | 77.05966 | 72.27390 | 266.16714   | -290.73804  | -558.88002  | 1 |
| 183 | N | 73.84584 | 76.20282 | 73.30297 | -226.25352  | 640.49678   | -270.32839  | 1 |
| 184 | H | 72.87613 | 75.86185 | 73.15729 | 2007.69063  | -1035.27229 | 1523.50231  | 1 |
| 185 | C | 74.26237 | 76.17067 | 74.67725 | -540.76542  | -573.33303  | 49.50000    | 1 |
| 186 | H | 74.49433 | 75.09443 | 74.83318 | -2374.20950 | -1036.76023 | 843.75774   | 1 |
| 187 | C | 75.58718 | 77.00614 | 74.92725 | -77.09082   | 666.87422   | -415.84136  | 1 |
| 188 | H | 75.49141 | 77.96874 | 74.35407 | -985.81834  | 617.19825   | 2463.91927  | 1 |
| 189 | O | 76.76041 | 76.34256 | 74.39165 | 293.29899   | -391.65602  | -477.80926  | 1 |
| 190 | H | 76.76715 | 76.76812 | 73.46344 | 2528.72714  | -681.76262  | -751.27122  | 1 |
| 191 | C | 75.73137 | 77.31882 | 76.45538 | 252.47363   | -605.14473  | 440.05134   | 1 |
| 192 | H | 76.79942 | 77.52811 | 76.72183 | -2052.65063 | 1456.49051  | -1043.51830 | 1 |
| 193 | H | 75.14780 | 78.22315 | 76.76007 | -2152.98800 | -1661.97574 | -161.70652  | 1 |
| 194 | H | 75.41165 | 76.45849 | 77.09078 | -473.12726  | -1584.27339 | 2165.61725  | 1 |
| 195 | C | 72.79638 | 76.42232 | 75.33448 | 360.36307   | 488.46713   | 505.10056   | 1 |
| 196 | O | 71.84187 | 75.95239 | 74.72861 | -200.08817  | -528.03552  | -385.82850  | 1 |
| 197 | N | 72.80617 | 77.04539 | 76.49948 | -597.54095  | -226.44775  | 355.20479   | 1 |
| 198 | H | 73.67631 | 77.40198 | 76.89061 | 2179.23655  | -1300.70981 | -991.33835  | 1 |
| 199 | C | 71.61948 | 77.12159 | 77.27508 | -687.68921  | 297.39807   | -249.45179  | 1 |
| 200 | H | 71.03585 | 76.23683 | 76.93530 | -349.16256  | -2467.37713 | -1101.72831 | 1 |
| 201 | C | 72.04491 | 77.14412 | 78.81644 | 672.47345   | 361.54328   | -201.62880  | 1 |
| 202 | H | 72.78154 | 77.96322 | 78.99410 | 1541.41502  | 582.18425   | 2169.97026  | 1 |
| 203 | H | 71.14138 | 77.37329 | 79.42814 | -2534.67717 | 60.25153    | 997.72295   | 1 |
| 204 | C | 72.66284 | 75.82659 | 79.30418 | 574.26774   | -389.43119  | -377.02542  | 1 |
| 205 | C | 71.83782 | 74.68397 | 79.53226 | 688.82679   | -287.33580  | -257.96133  | 1 |
| 206 | H | 70.76260 | 74.70149 | 79.27751 | 331.14182   | 1470.38163  | 2269.80013  | 1 |
| 207 | C | 74.05408 | 75.79951 | 79.62949 | -383.52382  | -675.04808  | 144.24917   | 1 |
| 208 | H | 74.69468 | 76.68094 | 79.44411 | 4.09847     | 1517.59662  | 2262.86397  | 1 |
| 209 | C | 72.41596 | 73.55748 | 80.11708 | -134.76730  | 428.45285   | -649.50303  | 1 |
| 210 | H | 71.77851 | 72.67799 | 80.31383 | -903.23433  | 1600.49020  | 2011.53387  | 1 |
| 211 | C | 74.58101 | 74.65137 | 80.22517 | -335.53281  | -615.00040  | -364.39058  | 1 |
| 212 | H | 75.64971 | 74.65245 | 80.50313 | 1596.45398  | -1369.33862 | 1732.02659  | 1 |

|     |   |          |          |          |             |             |             |   |
|-----|---|----------|----------|----------|-------------|-------------|-------------|---|
| 213 | C | 73.78876 | 73.49674 | 80.49459 | 585.48547   | -340.24194  | -406.23938  | 1 |
| 214 | O | 74.31292 | 72.32376 | 81.09966 | -419.15649  | -173.04408  | -511.94141  | 1 |
| 215 | H | 75.21132 | 72.65023 | 81.34076 | -1071.84350 | 1559.71507  | -1960.13012 | 1 |
| 216 | C | 70.83004 | 78.51386 | 76.93952 | 291.41878   | -183.13091  | 710.72246   | 1 |
| 217 | O | 70.08113 | 78.57492 | 75.98334 | 379.87695   | 523.47396   | -222.23622  | 1 |
| 218 | N | 71.06299 | 79.43655 | 77.86008 | 564.30591   | 373.09380   | 277.24371   | 1 |
| 219 | H | 71.77646 | 79.25259 | 78.56517 | -120.59931  | -2436.07824 | -1214.35098 | 1 |
| 220 | C | 70.71678 | 80.79049 | 77.56213 | 404.07514   | -299.37480  | 608.84009   | 1 |
| 221 | H | 69.78858 | 80.73704 | 76.94752 | -1071.07882 | -841.69025  | 2359.66467  | 1 |
| 222 | C | 70.55659 | 81.49288 | 78.97538 | -683.12807  | 68.71770    | -390.13096  | 1 |
| 223 | H | 69.96563 | 80.83979 | 79.65589 | 2068.88918  | 1596.58590  | 770.89603   | 1 |
| 224 | H | 71.55214 | 81.60230 | 79.46114 | 1379.86429  | 2342.49779  | -179.85638  | 1 |
| 225 | C | 69.86776 | 82.88447 | 78.83585 | -176.39967  | 537.49466   | 550.97268   | 1 |
| 226 | H | 70.47127 | 83.57569 | 78.20592 | -396.28051  | 1942.22168  | 1869.33314  | 1 |
| 227 | H | 68.87806 | 82.79777 | 78.33462 | -94.44700   | 586.00678   | -2659.20016 | 1 |
| 228 | C | 69.72224 | 83.44810 | 80.32497 | -291.69381  | -718.18079  | -150.72929  | 1 |
| 229 | H | 69.12530 | 82.80575 | 81.02150 | -2303.38776 | 1089.76242  | 964.62032   | 1 |
| 230 | H | 70.68310 | 83.70210 | 80.84063 | 884.16729   | 2568.80533  | -207.74283  | 1 |
| 231 | N | 69.00721 | 84.64034 | 80.14534 | -594.49522  | -252.81478  | 342.29276   | 1 |
| 232 | H | 68.70359 | 84.84960 | 79.20730 | -1735.17426 | 2084.05705  | -263.71605  | 1 |
| 233 | C | 68.71725 | 85.45525 | 81.07677 | 595.23177   | -271.52487  | 442.22352   | 1 |
| 234 | N | 69.14664 | 85.14480 | 82.37223 | 585.53813   | -424.79750  | -105.81303  | 1 |
| 235 | H | 69.67525 | 84.33944 | 82.70450 | 959.88797   | 1327.56823  | -2177.11905 | 1 |
| 236 | H | 68.97360 | 85.72000 | 83.19703 | 1578.48647  | 16.27378    | -2220.76233 | 1 |
| 237 | N | 67.98893 | 86.54796 | 80.58468 | -452.17763  | -390.33541  | -421.51853  | 1 |
| 238 | H | 67.67273 | 86.77380 | 79.64298 | 470.26107   | 1974.25629  | -1817.92087 | 1 |
| 239 | H | 67.65892 | 87.30886 | 81.17956 | 1856.67307  | -1573.97321 | -1224.35416 | 1 |
| 240 | C | 71.98234 | 81.43300 | 76.75958 | -531.47271  | -581.45780  | -55.06206   | 1 |
| 241 | O | 73.10039 | 80.95890 | 76.75979 | -243.00837  | 192.73507   | 609.52485   | 1 |
| 242 | N | 71.62661 | 82.65733 | 76.26416 | 343.49288   | -644.25607  | 38.09164    | 1 |
| 243 | H | 70.60619 | 82.62828 | 76.40310 | -1691.16043 | -1535.97525 | -1484.73099 | 1 |
| 244 | C | 72.15778 | 83.06807 | 74.94393 | 542.66492   | 350.14337   | 454.42563   | 1 |
| 245 | H | 71.86422 | 82.23473 | 74.26674 | 1209.57979  | -2396.95920 | 463.86744   | 1 |
| 246 | C | 71.49683 | 84.38098 | 74.62649 | -737.14309  | 145.93010   | 242.71942   | 1 |
| 247 | H | 71.55726 | 85.01430 | 75.54160 | -1050.18303 | 159.36419   | -2509.06125 | 1 |
| 248 | C | 72.21132 | 85.11502 | 73.50422 | -706.77696  | -252.88343  | -245.16230  | 1 |
| 249 | H | 71.73180 | 86.10809 | 73.28474 | -1624.64039 | -1665.49085 | 1417.86935  | 1 |
| 250 | H | 73.28849 | 85.31379 | 73.77115 | 2566.10521  | 598.51109   | 693.22305   | 1 |
| 251 | H | 72.20646 | 84.52202 | 72.54923 | -1972.69758 | 107.10018   | -1876.34312 | 1 |
| 252 | C | 70.02759 | 84.21504 | 74.27486 | 412.85148   | 672.58832   | -27.69222   | 1 |
| 253 | H | 69.53532 | 85.20476 | 74.07096 | 1447.02277  | 1762.76533  | -1490.78944 | 1 |
| 254 | H | 69.89121 | 83.58029 | 73.35730 | 1320.77379  | -145.20455  | 2378.68491  | 1 |
| 255 | H | 69.45259 | 83.72239 | 75.10531 | -1512.10848 | 1470.52031  | 1724.75147  | 1 |
| 256 | C | 73.80331 | 83.24574 | 75.06325 | -607.11113  | 499.56689   | 73.73769    | 1 |
| 257 | O | 74.27778 | 84.25142 | 75.53773 | 357.97126   | 460.81534   | 356.68785   | 1 |
| 258 | N | 74.40812 | 82.20163 | 74.52360 | 536.55407   | -368.62270  | 332.76306   | 1 |
| 259 | H | 73.78853 | 81.46796 | 74.18304 | 524.38866   | 2297.69985  | 1367.20941  | 1 |
| 260 | C | 75.81064 | 82.10896 | 74.34406 | 46.50277    | -774.29190  | -147.97904  | 1 |
| 261 | H | 75.91033 | 81.25077 | 73.64238 | 1676.51875  | 1883.29066  | 1032.55549  | 1 |
| 262 | C | 76.42356 | 83.49142 | 73.76632 | -559.41456  | -34.19198   | -556.30433  | 1 |
| 263 | H | 76.12730 | 84.33161 | 74.44685 | -64.66664   | 395.18769   | 2695.05373  | 1 |
| 264 | H | 77.53886 | 83.44721 | 73.79872 | -2703.44278 | -60.40056   | 333.79418   | 1 |
| 265 | C | 75.94369 | 83.75315 | 72.36779 | -519.76435  | 377.31045   | 459.42366   | 1 |
| 266 | H | 74.83024 | 83.76478 | 72.37231 | -1746.74323 | 1667.50644  | -1261.73691 | 1 |
| 267 | C | 76.44568 | 85.11214 | 71.89162 | 570.95554   | 16.46261    | -545.27700  | 1 |
| 268 | H | 76.09827 | 85.34222 | 70.85185 | 2391.58273  | 28.05277    | -1305.07271 | 1 |
| 269 | H | 76.08745 | 85.94175 | 72.55395 | 175.75588   | 917.63458   | 2559.43867  | 1 |
| 270 | H | 77.56523 | 85.15645 | 71.88311 | -1063.97851 | -2155.34650 | 1283.00462  | 1 |
| 271 | C | 76.41852 | 82.67586 | 71.40081 | 193.76014   | 2.62946     | -765.53141  | 1 |
| 272 | H | 76.14608 | 82.92042 | 70.34216 | 507.39394   | -846.55087  | 2539.60089  | 1 |
| 273 | H | 77.53152 | 82.55294 | 71.43611 | 1337.57841  | 1818.19054  | 1526.01994  | 1 |
| 274 | H | 75.96746 | 81.67760 | 71.63396 | 1100.88635  | -1172.91350 | -2199.08909 | 1 |

|     |   |          |          |          |             |            |            |   |
|-----|---|----------|----------|----------|-------------|------------|------------|---|
| 275 | C | 76.54536 | 81.81816 | 75.73821 | -549.21115  | 475.64486  | -309.38218 | 1 |
| 276 | O | 77.70916 | 82.09894 | 75.86443 | 556.06106   | -390.37755 | -78.24250  | 1 |
| 277 | O | 75.86576 | 81.06054 | 76.70040 | -572.27940  | -310.19032 | -209.75862 | 1 |
| 278 | H | 74.91019 | 81.18298 | 76.38268 | -1380.08193 | 2212.14486 | 790.85944  | 1 |

Listing 99: C00099.xmolout

|    |   |          |          |          |             |             |             |        |          |
|----|---|----------|----------|----------|-------------|-------------|-------------|--------|----------|
| 1  |   | 276      |          |          |             |             |             |        |          |
| 2  |   | 150.0000 | 150.0000 | 150.0000 | 0.0000      | 0.0000      | 0.0000***** | 1.3310 | 5324     |
|    |   | 0.2500   | 300.00   | 0.00     | 0.00        | 0.00        | -1293.4318  | 0.0000 | 300.0000 |
| 3  | H | 64.41057 | 73.24798 | 72.34644 | -2043.14101 | -1757.64893 | 399.89339   |        | 1        |
| 4  | N | 65.14137 | 72.75704 | 71.83185 | 426.75047   | 490.45733   | -334.42467  |        | 1        |
| 5  | H | 64.61975 | 72.26968 | 71.09166 | 442.25559   | -1110.30854 | -2448.52907 |        | 1        |
| 6  | C | 66.14976 | 73.60045 | 71.30588 | 415.32972   | -666.39213  | 83.73172    |        | 1        |
| 7  | H | 65.97987 | 74.60398 | 71.75745 | 879.32219   | 2491.00447  | 667.35213   |        | 1        |
| 8  | C | 67.60181 | 73.00154 | 71.69033 | 31.35357    | 477.41777   | 628.23362   |        | 1        |
| 9  | H | 67.77067 | 72.05742 | 71.12002 | 1168.38489  | 2240.25337  | -1019.71136 |        | 1        |
| 10 | H | 68.41019 | 73.70031 | 71.36768 | -360.43770  | 2534.90498  | 931.67112   |        | 1        |
| 11 | C | 67.67650 | 72.73533 | 73.16770 | 463.18208   | 512.70242   | -382.34388  |        | 1        |
| 12 | H | 66.80863 | 72.09642 | 73.44978 | 1725.29117  | 1863.52247  | -987.07854  |        | 1        |
| 13 | C | 68.96410 | 71.99147 | 73.50364 | 710.42801   | -144.27427  | -313.15367  |        | 1        |
| 14 | H | 69.05869 | 71.79326 | 74.60292 | 364.20195   | -1033.13725 | 2494.72524  |        | 1        |
| 15 | H | 69.02401 | 71.00374 | 72.97746 | 2567.61904  | 335.80679   | 847.48802   |        | 1        |
| 16 | H | 69.86595 | 72.58002 | 73.19898 | -2587.99029 | 680.92867   | -512.16411  |        | 1        |
| 17 | C | 67.61284 | 74.02419 | 73.97673 | 268.17616   | 741.64379   | -40.42634   |        | 1        |
| 18 | H | 67.70135 | 73.82592 | 75.07628 | 1283.54314  | -1945.37420 | -1411.27812 |        | 1        |
| 19 | H | 68.44142 | 74.72616 | 73.70043 | -1258.57796 | 1317.15249  | -2026.02085 |        | 1        |
| 20 | H | 66.64668 | 74.56796 | 73.81506 | -2502.84526 | 909.80597   | 575.92391   |        | 1        |
| 21 | C | 65.88669 | 73.53281 | 69.72377 | 619.36578   | -458.64843  | -172.09273  |        | 1        |
| 22 | O | 64.92304 | 72.88960 | 69.27462 | -81.40433   | 433.87611   | 522.34594   |        | 1        |
| 23 | N | 66.76948 | 74.24381 | 69.04570 | 175.23996   | -622.20190  | 341.55523   |        | 1        |
| 24 | H | 67.50518 | 74.69370 | 69.59097 | -876.57256  | -303.22879  | -2561.90213 |        | 1        |
| 25 | C | 67.05499 | 73.80813 | 67.70188 | -571.88214  | -534.10783  | -106.15033  |        | 1        |
| 26 | H | 66.86433 | 72.71168 | 67.73909 | -2713.20841 | -16.25800   | -248.80809  |        | 1        |
| 27 | C | 65.98881 | 74.50551 | 66.75055 | 166.60354   | 288.16399   | -716.09568  |        | 1        |
| 28 | H | 65.91279 | 75.61389 | 66.98208 | -2097.85574 | 1636.78449  | -586.18044  |        | 1        |
| 29 | O | 64.59885 | 74.15610 | 66.94045 | -317.80580  | -363.38227  | 484.43082   |        | 1        |
| 30 | H | 64.66565 | 73.63296 | 67.81335 | 1863.74748  | -1451.84923 | 1357.29467  |        | 1        |
| 31 | C | 66.58932 | 74.28721 | 65.32125 | 503.80731   | 517.99032   | 318.51606   |        | 1        |
| 32 | H | 66.01009 | 74.84451 | 64.54780 | 640.61020   | -2157.10410 | -1536.29104 |        | 1        |
| 33 | H | 67.64982 | 74.62971 | 65.25578 | 1687.88455  | 465.60692   | 2087.56452  |        | 1        |
| 34 | H | 66.57494 | 73.20934 | 65.03525 | -1293.07895 | -1899.88581 | -1463.57452 |        | 1        |
| 35 | C | 68.61601 | 74.14568 | 67.37616 | -153.07550  | -733.68902  | 248.70981   |        | 1        |
| 36 | O | 69.26586 | 73.20204 | 67.00440 | 186.15459   | -480.78787  | -449.34387  |        | 1        |
| 37 | N | 69.00085 | 75.43093 | 67.46729 | -487.53139  | 543.18517   | 42.03850    |        | 1        |
| 38 | C | 70.38049 | 75.75201 | 67.28906 | -699.35871  | 69.34393    | 360.10701   |        | 1        |
| 39 | H | 70.87254 | 74.82762 | 66.89951 | 2.81126     | -221.99807  | -2715.58072 |        | 1        |
| 40 | C | 70.25296 | 76.97838 | 66.27861 | -507.46439  | -592.59194  | 122.07761   |        | 1        |
| 41 | H | 71.18760 | 77.57459 | 66.18795 | -1975.08116 | 525.87560   | -1801.71556 |        | 1        |
| 42 | H | 69.98551 | 76.63793 | 65.25382 | 1588.27743  | -1913.22100 | 1113.83566  |        | 1        |
| 43 | C | 69.08316 | 77.76104 | 66.94724 | -613.62442  | -457.55993  | -194.14490  |        | 1        |
| 44 | H | 69.43273 | 78.30509 | 67.85360 | 1707.54637  | -721.27992  | 1996.92523  |        | 1        |
| 45 | H | 68.61782 | 78.51973 | 66.27911 | 758.23357   | 2100.81767  | 1560.55011  |        | 1        |
| 46 | C | 68.10055 | 76.56964 | 67.32153 | -352.41524  | 704.96076   | 49.21465    |        | 1        |
| 47 | H | 67.55512 | 76.69250 | 68.28652 | 1714.76886  | -2070.42778 | 443.35792   |        | 1        |
| 48 | H | 67.38171 | 76.30433 | 66.51336 | 1224.15040  | 1801.50881  | 1636.97633  |        | 1        |
| 49 | C | 71.02562 | 76.32710 | 68.68743 | 566.85117   | 537.05831   | 117.62814   |        | 1        |
| 50 | O | 70.43593 | 76.33667 | 69.73997 | -550.26779  | -406.08867  | 4.21666     |        | 1        |
| 51 | N | 72.24680 | 76.76702 | 68.40918 | 566.34832   | -425.77725  | 180.18749   |        | 1        |
| 52 | H | 72.59451 | 76.68872 | 67.45494 | 644.44502   | 2646.80550  | -52.73430   |        | 1        |
| 53 | C | 73.04541 | 77.30389 | 69.44437 | 612.34801   | -281.48662  | 411.56221   |        | 1        |
| 54 | H | 72.44348 | 77.22408 | 70.38084 | 1667.23498  | -1490.75142 | 1556.16753  |        | 1        |

|     |   |          |          |          |             |             |             |   |
|-----|---|----------|----------|----------|-------------|-------------|-------------|---|
| 55  | C | 74.41162 | 76.46194 | 69.42606 | -714.45746  | -175.43074  | 286.98927   | 1 |
| 56  | H | 75.01711 | 76.79766 | 68.53917 | -787.09484  | 1763.03619  | -1922.46060 | 1 |
| 57  | O | 74.29735 | 75.03421 | 69.30250 | -429.46514  | 516.51932   | -128.40526  | 1 |
| 58  | H | 74.69312 | 74.88724 | 68.41952 | 1981.82785  | 436.16847   | -1818.18182 | 1 |
| 59  | C | 75.07908 | 76.97145 | 70.75428 | 630.79189   | -468.94448  | 76.03230    | 1 |
| 60  | H | 76.11312 | 76.56486 | 70.86499 | -1775.71861 | 2062.30353  | 131.89849   | 1 |
| 61  | H | 75.14985 | 78.08304 | 70.79026 | -1855.14608 | 88.94118    | 1993.53760  | 1 |
| 62  | H | 74.50235 | 76.63919 | 71.65282 | -1504.82350 | -780.94249  | -2132.90992 | 1 |
| 63  | C | 73.45533 | 78.82619 | 68.97227 | 288.57638   | 618.62814   | -397.00270  | 1 |
| 64  | O | 73.84738 | 79.04627 | 67.85231 | 321.70495   | -185.26452  | 574.37218   | 1 |
| 65  | N | 73.42002 | 79.64813 | 70.01833 | -447.05792  | -446.53431  | 367.76425   | 1 |
| 66  | H | 73.06426 | 79.30592 | 70.91114 | 350.31316   | 1975.63644  | -1843.31522 | 1 |
| 67  | C | 73.39677 | 81.04724 | 69.76547 | -511.23061  | 374.03917   | -471.51480  | 1 |
| 68  | H | 73.48341 | 81.13523 | 68.65738 | 2234.79579  | -898.70890  | -1273.45190 | 1 |
| 69  | C | 72.00845 | 81.58329 | 70.36048 | 529.53781   | -159.34528  | 563.72604   | 1 |
| 70  | H | 71.94516 | 82.67957 | 70.13548 | 654.59388   | 2347.94251  | 1217.51488  | 1 |
| 71  | H | 71.19809 | 81.08193 | 69.76272 | -1526.55661 | 2103.42026  | 817.87394   | 1 |
| 72  | O | 71.74049 | 81.29670 | 71.75814 | -554.84278  | 14.12789    | 399.58769   | 1 |
| 73  | H | 71.87406 | 82.18287 | 72.14056 | 1297.06236  | 2061.84854  | 1220.68812  | 1 |
| 74  | C | 74.63879 | 81.75218 | 70.55419 | -662.15484  | -412.13544  | 123.62687   | 1 |
| 75  | O | 74.59658 | 82.91292 | 70.88938 | -540.01537  | -317.05804  | 274.91456   | 1 |
| 76  | N | 75.67621 | 80.90932 | 70.62420 | -202.76299  | -690.00100  | -131.49145  | 1 |
| 77  | H | 75.50398 | 79.97400 | 70.25768 | -702.62132  | -2617.37191 | 281.70413   | 1 |
| 78  | C | 76.63289 | 81.11667 | 71.66342 | -491.73914  | 576.34187   | 222.73509   | 1 |
| 79  | H | 76.70315 | 82.21870 | 71.80930 | 1977.17978  | -1823.58850 | -434.68928  | 1 |
| 80  | C | 76.06793 | 80.35392 | 72.94161 | -649.50797  | -328.66843  | 306.11224   | 1 |
| 81  | H | 75.74833 | 79.32561 | 72.66742 | 2075.07803  | 1452.16490  | -1004.45904 | 1 |
| 82  | C | 77.17939 | 80.31126 | 74.04399 | -615.18735  | -489.99689  | -70.96352   | 1 |
| 83  | H | 76.80403 | 79.85337 | 74.98917 | -1226.32661 | -1724.38906 | -1716.47170 | 1 |
| 84  | H | 78.05503 | 79.70738 | 73.70959 | 2381.64273  | -969.84735  | 900.46860   | 1 |
| 85  | H | 77.55230 | 81.33278 | 74.29231 | 2122.74991  | 1702.23946  | -141.36228  | 1 |
| 86  | C | 74.85965 | 81.15945 | 73.52923 | -501.86074  | -479.61276  | -376.42482  | 1 |
| 87  | H | 74.44338 | 80.67198 | 74.44217 | 993.79261   | -2246.95401 | -1177.81305 | 1 |
| 88  | H | 75.15698 | 82.19755 | 73.80958 | 42.71279    | -626.15391  | -2651.37258 | 1 |
| 89  | H | 74.02718 | 81.24354 | 72.78951 | -2026.39012 | -1590.33709 | -887.82922  | 1 |
| 90  | C | 78.00470 | 80.36950 | 71.20246 | -672.89153  | 382.57394   | -156.34072  | 1 |
| 91  | O | 78.00792 | 79.21982 | 70.81727 | 410.04627   | 221.86223   | 500.35950   | 1 |
| 92  | N | 79.06060 | 81.14992 | 71.49673 | -378.11782  | -443.79414  | -441.10984  | 1 |
| 93  | H | 78.77698 | 82.10062 | 71.74085 | 2404.15973  | -568.14894  | 1149.30085  | 1 |
| 94  | C | 80.22302 | 80.96587 | 70.64634 | -544.54484  | 466.16019   | 331.29119   | 1 |
| 95  | H | 79.78896 | 80.92753 | 69.62317 | -1409.80988 | -170.17955  | 2325.32679  | 1 |
| 96  | C | 81.16139 | 82.21344 | 70.87115 | -184.48284  | 116.78282   | -758.89137  | 1 |
| 97  | H | 80.62867 | 83.16501 | 70.64487 | 1893.78641  | 1861.14652  | 611.04528   | 1 |
| 98  | H | 81.47615 | 82.28930 | 71.93611 | -2170.79665 | -974.19311  | 1327.50117  | 1 |
| 99  | C | 82.39928 | 82.01628 | 69.93752 | 389.51668   | 672.81878   | -138.49152  | 1 |
| 100 | H | 82.85766 | 81.01554 | 70.12083 | 510.64577   | 1933.03327  | 1851.02484  | 1 |
| 101 | H | 82.07364 | 81.96329 | 68.87527 | -2302.30869 | -1105.72939 | -948.89774  | 1 |
| 102 | C | 83.48916 | 83.14112 | 70.09868 | -559.93427  | -126.34590  | 542.30857   | 1 |
| 103 | O | 84.52358 | 83.05759 | 69.48780 | -670.36003  | -111.83166  | 76.36448    | 1 |
| 104 | N | 83.13309 | 84.14461 | 70.93010 | -216.06729  | -537.07037  | 446.51379   | 1 |
| 105 | H | 82.26489 | 84.28061 | 71.46060 | -1251.96487 | 1074.12894  | -2168.52500 | 1 |
| 106 | H | 83.72097 | 84.96309 | 71.12294 | -2451.83023 | -720.73851  | 944.84612   | 1 |
| 107 | C | 81.02763 | 79.59672 | 70.98232 | 546.24052   | -563.88337  | -85.11809   | 1 |
| 108 | O | 81.59253 | 79.11329 | 70.03475 | 71.70702    | -307.40463  | 606.69673   | 1 |
| 109 | N | 81.08339 | 79.21964 | 72.26451 | 479.90863   | -504.50129  | 222.86849   | 1 |
| 110 | C | 81.65209 | 77.95465 | 72.64410 | 75.51268    | -600.91904  | 506.73700   | 1 |
| 111 | H | 82.57813 | 77.81781 | 72.03926 | -2033.61562 | 1795.30103  | 254.89480   | 1 |
| 112 | C | 81.87493 | 78.12343 | 74.21001 | 523.79067   | 517.99274   | 284.45581   | 1 |
| 113 | H | 81.86222 | 77.15098 | 74.75154 | 1599.61665  | -1127.00911 | 1895.98173  | 1 |
| 114 | H | 82.85584 | 78.59818 | 74.43469 | -1881.83093 | 1275.82488  | -1501.55016 | 1 |
| 115 | C | 80.69165 | 79.06114 | 74.59875 | -600.05639  | -404.05026  | 316.64485   | 1 |
| 116 | H | 79.72818 | 78.50399 | 74.62427 | -2597.05260 | 496.36221   | 657.73249   | 1 |

|     |   |          |          |          |             |             |             |   |
|-----|---|----------|----------|----------|-------------|-------------|-------------|---|
| 117 | H | 80.80967 | 79.54708 | 75.59302 | -1666.24518 | 1294.38985  | -1723.90591 | 1 |
| 118 | C | 80.74819 | 80.08781 | 73.38366 | 493.57570   | -129.95376  | -602.56394  | 1 |
| 119 | H | 79.79511 | 80.61568 | 73.14513 | -1469.08415 | -637.84797  | 2204.22581  | 1 |
| 120 | H | 81.57500 | 80.83381 | 73.44998 | -1038.97840 | 1068.88701  | -2280.71789 | 1 |
| 121 | C | 80.58547 | 76.75260 | 72.40762 | 188.88100   | 241.05089   | -727.87821  | 1 |
| 122 | O | 80.94764 | 75.61098 | 72.52921 | 531.88613   | -49.19943   | 427.07960   | 1 |
| 123 | N | 79.33210 | 77.21784 | 72.26723 | 708.14833   | 26.93417    | -179.73509  | 1 |
| 124 | H | 79.25900 | 78.23368 | 72.11316 | -2232.69501 | -1179.09831 | 1023.94816  | 1 |
| 125 | C | 78.25818 | 76.37552 | 71.71611 | -738.32412  | 259.92548   | 104.42456   | 1 |
| 126 | H | 77.45018 | 77.13449 | 71.55916 | 2028.89123  | 1260.02983  | 1311.33324  | 1 |
| 127 | C | 78.75871 | 75.80602 | 70.40016 | -258.65678  | -345.52513  | 661.28459   | 1 |
| 128 | H | 79.76631 | 75.36663 | 70.58837 | -1826.06090 | -1801.46097 | -918.64554  | 1 |
| 129 | C | 77.86690 | 74.71224 | 69.84613 | -541.23400  | 531.92970   | -218.41428  | 1 |
| 130 | H | 78.26227 | 74.30562 | 68.87413 | 1311.73218  | -2219.18200 | 882.19023   | 1 |
| 131 | H | 77.78218 | 73.84638 | 70.56249 | -1048.71298 | 1223.58118  | -2196.97971 | 1 |
| 132 | H | 76.82128 | 75.07950 | 69.65245 | 419.06414   | 1903.92898  | 1903.44670  | 1 |
| 133 | C | 78.91793 | 76.91484 | 69.37472 | -423.86431  | 152.66566   | -648.55262  | 1 |
| 134 | H | 79.47166 | 76.56817 | 68.45937 | 105.68386   | -2342.50080 | 1387.51238  | 1 |
| 135 | H | 77.92019 | 77.30890 | 69.03585 | -1695.63603 | -1484.73621 | -1531.02793 | 1 |
| 136 | H | 79.48129 | 77.79442 | 69.80355 | -1853.57121 | -487.39031  | 1936.59343  | 1 |
| 137 | C | 77.79593 | 75.24806 | 72.82130 | 539.71428   | -510.58232  | 267.58633   | 1 |
| 138 | O | 76.88333 | 74.47127 | 72.56830 | -15.93758   | -278.34085  | -624.49402  | 1 |
| 139 | N | 78.43484 | 75.37981 | 73.96966 | -676.81886  | 12.05292    | 276.17960   | 1 |
| 140 | H | 79.18526 | 76.06861 | 73.91108 | -1694.44250 | -373.84189  | -2100.66098 | 1 |
| 141 | C | 78.48811 | 74.24255 | 74.84808 | 412.33078   | -664.70360  | 108.35451   | 1 |
| 142 | H | 78.36367 | 73.34496 | 74.20038 | 1765.77476  | 1294.44366  | 1621.76594  | 1 |
| 143 | C | 79.87158 | 74.34332 | 75.60364 | -179.66635  | -721.95667  | -264.73915  | 1 |
| 144 | H | 80.72446 | 74.25512 | 74.89214 | -607.34922  | 2587.87032  | -598.10018  | 1 |
| 145 | H | 79.98177 | 75.34561 | 76.07615 | -359.69332  | -1479.13954 | -2259.74260 | 1 |
| 146 | C | 79.90744 | 73.21408 | 76.68634 | -240.01076  | 616.02425   | 431.85322   | 1 |
| 147 | H | 78.97385 | 73.23265 | 77.29554 | -1359.17131 | 782.54425   | 2227.99181  | 1 |
| 148 | H | 79.94373 | 72.20603 | 76.21626 | -820.36667  | 85.81767    | -2596.78715 | 1 |
| 149 | C | 81.17772 | 73.46949 | 77.59345 | -513.07015  | 236.18570   | -551.87280  | 1 |
| 150 | H | 82.11617 | 73.36918 | 77.00081 | 1816.11944  | -1183.11722 | -1650.94321 | 1 |
| 151 | H | 81.17998 | 74.51125 | 77.98882 | -1800.04429 | -1361.53473 | 1526.34643  | 1 |
| 152 | C | 81.14067 | 72.44785 | 78.75347 | 726.08972   | -253.19732  | -179.64713  | 1 |
| 153 | H | 80.26311 | 72.54467 | 79.42200 | 1224.27271  | -456.51798  | -2390.90304 | 1 |
| 154 | H | 81.26266 | 71.39105 | 78.44338 | 1206.40339  | -1150.93514 | -2154.90344 | 1 |
| 155 | N | 82.37291 | 72.73593 | 79.67641 | 329.70796   | -633.68968  | -155.67358  | 1 |
| 156 | H | 82.45776 | 72.11201 | 80.53000 | 1348.31305  | 1938.76845  | 1359.00643  | 1 |
| 157 | H | 83.33636 | 72.62832 | 79.24362 | 2096.92035  | 1446.54551  | -966.48890  | 1 |
| 158 | H | 82.43625 | 73.69907 | 80.11802 | -1197.07217 | -2303.53719 | 827.28733   | 1 |
| 159 | C | 77.28345 | 74.37998 | 75.93353 | -378.01186  | -556.17301  | -413.96481  | 1 |
| 160 | O | 76.76296 | 73.37281 | 76.40852 | -409.44433  | -307.55053  | -453.30833  | 1 |
| 161 | N | 77.09693 | 75.63840 | 76.27939 | -429.02477  | 524.70884   | 274.08502   | 1 |
| 162 | H | 77.60074 | 76.33072 | 75.72929 | 1706.34263  | -1425.96036 | 1574.38926  | 1 |
| 163 | C | 76.11187 | 75.93917 | 77.26811 | -45.25864   | -626.22952  | 478.93267   | 1 |
| 164 | H | 76.20293 | 75.06940 | 77.95985 | 1988.63164  | 570.90773   | 1772.87287  | 1 |
| 165 | C | 76.45008 | 77.34856 | 77.89261 | 551.77128   | -20.49526   | -564.54996  | 1 |
| 166 | H | 77.48859 | 77.37488 | 78.29305 | 1434.61535  | -1753.10253 | 1513.99471  | 1 |
| 167 | H | 76.40607 | 78.14121 | 77.11197 | -714.67738  | 1819.09770  | 1898.36494  | 1 |
| 168 | C | 75.39658 | 77.61795 | 79.01974 | 446.99263   | -555.77305  | 338.97221   | 1 |
| 169 | H | 74.36513 | 77.51172 | 78.61007 | 1953.68466  | 1892.25957  | -161.67766  | 1 |
| 170 | H | 75.48032 | 76.86859 | 79.83862 | -403.03785  | 2688.07032  | -188.43591  | 1 |
| 171 | C | 75.62041 | 79.08523 | 79.56346 | 567.86262   | 335.74681   | 434.04421   | 1 |
| 172 | H | 76.56471 | 79.15828 | 80.15064 | -1080.02275 | 1568.26081  | -1948.78900 | 1 |
| 173 | H | 75.72819 | 79.80810 | 78.72235 | -919.54108  | 2111.34692  | 1456.13463  | 1 |
| 174 | C | 74.38792 | 79.44105 | 80.42784 | 195.81897   | 173.33862   | -745.11536  | 1 |
| 175 | H | 73.43237 | 79.48409 | 79.86754 | 1405.67949  | -2301.21089 | -390.08113  | 1 |
| 176 | H | 74.26471 | 78.81928 | 81.33685 | -940.37328  | -1118.32446 | 2299.72133  | 1 |
| 177 | N | 74.59028 | 80.89763 | 80.96391 | 319.26422   | 656.36007   | -42.02424   | 1 |
| 178 | H | 73.79770 | 81.28097 | 81.55562 | 1961.03633  | 619.91968   | 1787.09422  | 1 |



|     |   |          |          |          |             |             |             |   |
|-----|---|----------|----------|----------|-------------|-------------|-------------|---|
| 179 | H | 75.42505 | 81.06961 | 81.59655 | 854.14343   | -2156.80752 | 1429.08711  | 1 |
| 180 | H | 74.70019 | 81.66692 | 80.24079 | 1237.02905  | -1378.50857 | -1998.28500 | 1 |
| 181 | C | 74.64145 | 75.95513 | 76.53237 | 532.53319   | -268.57236  | 517.55729   | 1 |
| 182 | O | 73.97492 | 76.95375 | 76.42793 | 266.16714   | -290.73804  | -558.88002  | 1 |
| 183 | N | 74.36620 | 74.70190 | 76.18399 | -226.25352  | 640.49678   | -270.32839  | 1 |
| 184 | H | 75.09916 | 73.96793 | 76.31937 | 2007.69063  | -1035.27229 | 1523.50231  | 1 |
| 185 | C | 73.16310 | 74.47074 | 75.46788 | -540.76542  | -573.33303  | 49.50000    | 1 |
| 186 | H | 72.64588 | 75.45920 | 75.44393 | -2374.20950 | -1036.76023 | 843.75774   | 1 |
| 187 | C | 73.62016 | 73.99745 | 74.00377 | -77.09082   | 666.87422   | -415.84136  | 1 |
| 188 | H | 74.37895 | 73.17387 | 74.10752 | -985.81834  | 617.19825   | 2463.91927  | 1 |
| 189 | O | 74.24897 | 75.02085 | 73.22882 | 293.29899   | -391.65602  | -477.80926  | 1 |
| 190 | H | 75.15355 | 74.63001 | 73.05128 | 2528.72714  | -681.76262  | -751.27122  | 1 |
| 191 | C | 72.30396 | 73.40109 | 73.39689 | 252.47363   | -605.14473  | 440.05134   | 1 |
| 192 | H | 72.45339 | 73.07580 | 72.34032 | -2052.65063 | 1456.49051  | -1043.51830 | 1 |
| 193 | H | 71.94795 | 72.50909 | 73.96828 | -2152.98800 | -1661.97574 | -161.70652  | 1 |
| 194 | H | 71.47964 | 74.15314 | 73.39792 | -473.12726  | -1584.27339 | 2165.61725  | 1 |
| 195 | C | 72.29426 | 73.32953 | 76.25768 | 360.36307   | 488.46713   | 505.10056   | 1 |
| 196 | O | 71.12252 | 73.20801 | 75.98128 | -200.08817  | -528.03552  | -385.82850  | 1 |
| 197 | N | 73.02221 | 72.61211 | 77.10381 | -597.54095  | -226.44775  | 355.20479   | 1 |
| 198 | H | 74.00691 | 72.83310 | 77.22992 | 2179.23655  | -1300.70981 | -991.33835  | 1 |
| 199 | C | 72.38744 | 71.60883 | 77.87778 | -687.68921  | 297.39807   | -249.45179  | 1 |
| 200 | H | 71.30523 | 71.77977 | 77.66624 | -349.16256  | -2467.37713 | -1101.72831 | 1 |
| 201 | C | 72.90795 | 70.18361 | 77.36278 | 672.47345   | 361.54328   | -201.62880  | 1 |
| 202 | H | 74.01717 | 70.12337 | 77.45697 | 1541.41502  | 582.18425   | 2169.97026  | 1 |
| 203 | H | 72.47198 | 69.37323 | 77.99201 | -2534.67717 | 60.25153    | 997.72295   | 1 |
| 204 | C | 72.49320 | 69.98044 | 75.89834 | 574.26774   | -389.43119  | -377.02542  | 1 |
| 205 | C | 71.15758 | 69.58015 | 75.59257 | 688.82679   | -287.33580  | -257.96133  | 1 |
| 206 | H | 70.41079 | 69.44159 | 76.39519 | 331.14182   | 1470.38163  | 2269.80013  | 1 |
| 207 | C | 73.44781 | 70.17729 | 74.85523 | -383.52382  | -675.04808  | 144.24917   | 1 |
| 208 | H | 74.47778 | 70.50174 | 75.09039 | 4.09847     | 1517.59662  | 2262.86397  | 1 |
| 209 | C | 70.81904 | 69.35535 | 74.25914 | -134.76730  | 428.45285   | -649.50303  | 1 |
| 210 | H | 69.79109 | 69.02898 | 74.02378 | -903.23433  | 1600.49020  | 2011.53387  | 1 |
| 211 | C | 73.05924 | 69.93945 | 73.53453 | -335.53281  | -615.00040  | -364.39058  | 1 |
| 212 | H | 73.80893 | 70.08067 | 72.73648 | 1596.45398  | -1369.33862 | 1732.02659  | 1 |
| 213 | C | 71.74283 | 69.51788 | 73.18623 | 585.48547   | -340.24194  | -406.23938  | 1 |
| 214 | O | 71.33623 | 69.26966 | 71.84928 | -419.15649  | -173.04408  | -511.94141  | 1 |
| 215 | H | 72.19125 | 69.42668 | 71.38338 | -1071.84350 | 1559.71507  | -1960.13012 | 1 |
| 216 | C | 72.81519 | 71.86341 | 79.43280 | 291.41878   | -183.13091  | 710.72246   | 1 |
| 217 | O | 72.57281 | 72.90926 | 79.98920 | 379.87695   | 523.47396   | -222.23622  | 1 |
| 218 | N | 73.33688 | 70.75832 | 79.96863 | 564.30591   | 373.09380   | 277.24371   | 1 |
| 219 | H | 73.54648 | 69.96525 | 79.36252 | -120.59931  | -2436.07824 | -1214.35098 | 1 |
| 220 | C | 74.00074 | 70.88465 | 81.22201 | 404.07514   | -299.37480  | 608.84009   | 1 |
| 221 | H | 73.54698 | 71.77483 | 81.71881 | -1071.07882 | -841.69025  | 2359.66467  | 1 |
| 222 | C | 73.78205 | 69.49391 | 81.95040 | -683.12807  | 68.71770    | -390.13096  | 1 |
| 223 | H | 72.78418 | 69.07854 | 81.68518 | 2068.88918  | 1596.58590  | 770.89603   | 1 |
| 224 | H | 74.52297 | 68.74864 | 81.58261 | 1379.86429  | 2342.49779  | -179.85638  | 1 |
| 225 | C | 73.90457 | 69.66519 | 83.49537 | -176.39967  | 537.49466   | 550.97268   | 1 |
| 226 | H | 74.90946 | 70.03987 | 83.79241 | -396.28051  | 1942.22168  | 1869.33314  | 1 |
| 227 | H | 73.17214 | 70.40960 | 83.87979 | -94.44700   | 586.00678   | -2659.20016 | 1 |
| 228 | C | 73.62533 | 68.20742 | 84.08877 | -291.69381  | -718.18079  | -150.72929  | 1 |
| 229 | H | 72.63349 | 67.76400 | 83.81668 | -2303.38776 | 1089.76242  | 964.62032   | 1 |
| 230 | H | 74.40956 | 67.44015 | 83.86511 | 884.16729   | 2568.80533  | -207.74283  | 1 |
| 231 | N | 73.61420 | 68.41569 | 85.47411 | -594.49522  | -252.81478  | 342.29276   | 1 |
| 232 | H | 73.76284 | 69.36083 | 85.79124 | -1735.17426 | 2084.05705  | -263.71605  | 1 |
| 233 | C | 73.42198 | 67.49936 | 86.33392 | 595.23177   | -271.52487  | 442.22352   | 1 |
| 234 | N | 73.22015 | 66.19788 | 85.86132 | 585.53813   | -424.79750  | -105.81303  | 1 |
| 235 | H | 73.18504 | 65.85558 | 84.90187 | 959.88797   | 1327.56823  | -2177.11905 | 1 |
| 236 | H | 73.04527 | 65.38332 | 86.45049 | 1578.48647  | 16.27378    | -2220.76233 | 1 |
| 237 | N | 73.46184 | 68.01438 | 87.63728 | -452.17763  | -390.33541  | -421.51853  | 1 |
| 238 | H | 73.57844 | 68.96700 | 87.97975 | 470.26107   | 1974.25629  | -1817.92087 | 1 |
| 239 | H | 73.30798 | 67.43844 | 88.46571 | 1856.67307  | -1573.97321 | -1224.35416 | 1 |
| 240 | C | 75.61035 | 71.01609 | 80.92535 | -531.47271  | -581.45780  | -55.06206   | 1 |

|     |   |          |          |          |             |             |             |   |
|-----|---|----------|----------|----------|-------------|-------------|-------------|---|
| 241 | O | 76.12368 | 70.63455 | 79.89803 | -243.00837  | 192.73507   | 609.52485   | 1 |
| 242 | N | 76.19603 | 71.50455 | 82.01377 | 343.49288   | -644.25607  | 38.09164    | 1 |
| 243 | H | 75.60763 | 71.76653 | 82.80214 | -1691.16043 | -1535.97525 | -1484.73099 | 1 |
| 244 | C | 77.60825 | 71.64035 | 82.00179 | 542.66492   | 350.14337   | 454.42563   | 1 |
| 245 | H | 77.93784 | 71.06554 | 81.10504 | 1209.57979  | -2396.95920 | 463.86744   | 1 |
| 246 | C | 77.90860 | 73.19806 | 81.86999 | -737.14309  | 145.93010   | 242.71942   | 1 |
| 247 | H | 77.31864 | 73.77842 | 82.61125 | -1050.18303 | 159.36419   | -2509.06125 | 1 |
| 248 | C | 79.44126 | 73.43825 | 82.07585 | -706.77696  | -252.88343  | -245.16230  | 1 |
| 249 | H | 79.74212 | 74.46999 | 81.77619 | -1624.64039 | -1665.49085 | 1417.86935  | 1 |
| 250 | H | 79.72810 | 73.30675 | 83.16411 | 2566.10521  | 598.51109   | 693.22305   | 1 |
| 251 | H | 80.05682 | 72.72478 | 81.47869 | -1972.69758 | 107.10018   | -1876.34312 | 1 |
| 252 | C | 77.52868 | 73.63553 | 80.41353 | 412.85148   | 672.58832   | -27.69222   | 1 |
| 253 | H | 77.70208 | 74.72472 | 80.24751 | 1447.02277  | 1762.76533  | -1490.78944 | 1 |
| 254 | H | 78.12269 | 73.08192 | 79.64952 | 1320.77379  | -145.20455  | 2378.68491  | 1 |
| 255 | H | 76.45290 | 73.43074 | 80.19875 | -1512.10848 | 1470.52031  | 1724.75147  | 1 |
| 256 | C | 78.22626 | 71.06218 | 83.41672 | -607.11113  | 499.56689   | 73.73769    | 1 |
| 257 | O | 79.11398 | 70.24175 | 83.34957 | 357.97126   | 460.81534   | 356.68785   | 1 |
| 258 | N | 77.63698 | 71.58421 | 84.48010 | 536.55407   | -368.62270  | 332.76306   | 1 |
| 259 | H | 76.89107 | 72.25051 | 84.28566 | 524.38866   | 2297.69985  | 1367.20941  | 1 |
| 260 | C | 78.15382 | 71.43891 | 85.79228 | 46.50277    | -774.29190  | -147.97904  | 1 |
| 261 | H | 77.31259 | 71.76787 | 86.44128 | 1676.51875  | 1883.29066  | 1032.55549  | 1 |
| 262 | C | 78.61969 | 69.91697 | 86.06231 | -559.41456  | -34.19198   | -556.30433  | 1 |
| 263 | H | 79.41789 | 69.64564 | 85.31887 | -64.66664   | 395.18769   | 2695.05373  | 1 |
| 264 | H | 79.08879 | 69.81949 | 87.07100 | -2703.44278 | -60.40056   | 333.79418   | 1 |
| 265 | C | 77.44937 | 68.98195 | 85.92691 | -519.76435  | 377.31045   | 459.42366   | 1 |
| 266 | H | 76.95298 | 69.18160 | 84.94997 | -1746.74323 | 1667.50644  | -1261.73691 | 1 |
| 267 | C | 77.92810 | 67.53476 | 85.93986 | 570.95554   | 16.46261    | -545.27700  | 1 |
| 268 | H | 77.07630 | 66.81634 | 85.82131 | 2391.58273  | 28.05277    | -1305.07271 | 1 |
| 269 | H | 78.65349 | 67.33280 | 85.10971 | 175.75588   | 917.63458   | 2559.43867  | 1 |
| 270 | H | 78.44518 | 67.28048 | 86.90099 | -1063.97851 | -2155.34650 | 1283.00462  | 1 |
| 271 | C | 76.43605 | 69.18545 | 87.04527 | 193.76014   | 2.62946     | -765.53141  | 1 |
| 272 | H | 75.60785 | 68.43327 | 86.98471 | 507.39394   | -846.55087  | 2539.60089  | 1 |
| 273 | H | 76.90704 | 69.07732 | 88.05624 | 1337.57841  | 1818.19054  | 1526.01994  | 1 |
| 274 | H | 75.96539 | 70.20102 | 87.00259 | 1100.88635  | -1172.91350 | -2199.08909 | 1 |
| 275 | C | 79.44043 | 72.38180 | 85.98354 | -549.21115  | 475.64486   | -309.38218  | 1 |
| 276 | O | 79.93919 | 73.04521 | 85.10465 | 556.06106   | -390.37755  | -78.24250   | 1 |
| 277 | O | 79.98262 | 72.40898 | 87.28843 | -572.27940  | -310.19032  | -209.75862  | 1 |
| 278 | H | 79.33052 | 71.79916 | 87.73551 | -1380.08193 | 2212.14486  | 790.85944   | 1 |

Listing 100: C00100.xmolout

|    |   |          |          |          |             |             |             |        |          |
|----|---|----------|----------|----------|-------------|-------------|-------------|--------|----------|
| 1  |   | 276      |          |          |             |             |             |        |          |
| 2  |   | 150.0000 | 150.0000 | 150.0000 | 0.0000      | 0.0000      | 0.0000***** | 2.7750 | 11100    |
|    |   | 0.2500   | 300.00   | 0.00     | 0.00        | 0.00        | -1293.4309  | 0.0000 | 300.0000 |
| 3  | H | 73.12045 | 65.74689 | 66.44632 | -2043.14101 | -1757.64893 | 399.89339   |        | 1        |
| 4  | N | 73.52448 | 66.23757 | 67.24051 | 426.75047   | 490.45733   | -334.42467  |        | 1        |
| 5  | H | 72.69606 | 66.57767 | 67.72394 | 442.25559   | -1110.30854 | -2448.52907 |        | 1        |
| 6  | C | 74.47122 | 67.22856 | 66.91027 | 415.32972   | -666.39213  | 83.73172    |        | 1        |
| 7  | H | 75.07534 | 66.74717 | 66.11284 | 879.32219   | 2491.00447  | 667.35213   |        | 1        |
| 8  | C | 73.73967 | 68.56293 | 66.39403 | 31.35357    | 477.41777   | 628.23362   |        | 1        |
| 9  | H | 73.10518 | 68.98001 | 67.21277 | 1168.38489  | 2240.25337  | -1019.71136 |        | 1        |
| 10 | H | 74.51152 | 69.34214 | 66.18323 | -360.43770  | 2534.90498  | 931.67112   |        | 1        |
| 11 | C | 72.90431 | 68.30115 | 65.16521 | 463.18208   | 512.70242   | -382.34388  |        | 1        |
| 12 | H | 72.11998 | 67.55415 | 65.42032 | 1725.29117  | 1863.52247  | -987.07854  |        | 1        |
| 13 | C | 72.22064 | 69.58673 | 64.71586 | 710.42801   | -144.27427  | -313.15367  |        | 1        |
| 14 | H | 71.56845 | 69.41782 | 63.82033 | 364.20195   | -1033.13725 | 2494.72524  |        | 1        |
| 15 | H | 71.57356 | 70.01739 | 65.52300 | 2567.61904  | 335.80679   | 847.48802   |        | 1        |
| 16 | H | 72.96827 | 70.37329 | 64.43590 | -2587.99029 | 680.92867   | -512.16411  |        | 1        |
| 17 | C | 73.74142 | 67.75051 | 64.01927 | 268.17616   | 741.64379   | -40.42634   |        | 1        |
| 18 | H | 73.13374 | 67.62991 | 63.08522 | 1283.54314  | -1945.37420 | -1411.27812 |        | 1        |
| 19 | H | 74.59819 | 68.42926 | 63.77170 | -1258.57796 | 1317.15249  | -2026.02085 |        | 1        |
| 20 | H | 74.17295 | 66.74569 | 64.26292 | -2502.84526 | 909.80597   | 575.92391   |        | 1        |

|    |   |          |          |          |             |             |             |   |
|----|---|----------|----------|----------|-------------|-------------|-------------|---|
| 21 | C | 75.34635 | 67.59643 | 68.23677 | 619.36578   | -458.64843  | -172.09273  | 1 |
| 22 | O | 75.78593 | 68.72042 | 68.36565 | -81.40433   | 433.87611   | 522.34594   | 1 |
| 23 | N | 75.52568 | 66.52039 | 68.99051 | 175.23996   | -622.20190  | 341.55523   | 1 |
| 24 | H | 75.06474 | 65.68790 | 68.62216 | -876.57256  | -303.22879  | -2561.90213 | 1 |
| 25 | C | 76.37099 | 66.42440 | 70.12906 | -571.88214  | -534.10783  | -106.15033  | 1 |
| 26 | H | 76.74277 | 65.38039 | 70.06146 | -2713.20841 | -16.25800   | -248.80809  | 1 |
| 27 | C | 77.52664 | 67.52323 | 70.07411 | 166.60354   | 288.16399   | -716.09568  | 1 |
| 28 | H | 77.03534 | 68.54135 | 70.05493 | -2097.85574 | 1636.78449  | -586.18044  | 1 |
| 29 | O | 78.39346 | 67.44617 | 68.92285 | -317.80580  | -363.38227  | 484.43082   | 1 |
| 30 | H | 77.99388 | 68.14726 | 68.36304 | 1863.74748  | -1451.84923 | 1357.29467  | 1 |
| 31 | C | 78.21381 | 67.31358 | 71.47343 | 503.80731   | 517.99032   | 318.51606   | 1 |
| 32 | H | 79.00986 | 68.07264 | 71.65565 | 640.61020   | -2157.10410 | -1536.29104 | 1 |
| 33 | H | 77.47541 | 67.39684 | 72.30896 | 1687.88455  | 465.60692   | 2087.56452  | 1 |
| 34 | H | 78.69110 | 66.30900 | 71.55006 | -1293.07895 | -1899.88581 | -1463.57452 | 1 |
| 35 | C | 75.45303 | 66.66626 | 71.46278 | -153.07550  | -733.68902  | 248.70981   | 1 |
| 36 | O | 75.27210 | 67.79253 | 71.84561 | 186.15459   | -480.78787  | -449.34387  | 1 |
| 37 | N | 75.04237 | 65.50831 | 72.00301 | -487.53139  | 543.18517   | 42.03850    | 1 |
| 38 | C | 74.17800 | 65.49163 | 73.14013 | -699.35871  | 69.34393    | 360.10701   | 1 |
| 39 | H | 73.49584 | 66.36729 | 73.05024 | 2.81126     | -221.99807  | -2715.58072 | 1 |
| 40 | C | 73.50678 | 64.06003 | 73.00024 | -507.46439  | -592.59194  | 122.07761   | 1 |
| 41 | H | 73.06026 | 63.69584 | 73.95250 | -1975.08116 | 525.87560   | -1801.71556 | 1 |
| 42 | H | 72.69050 | 64.06371 | 72.24395 | 1588.27743  | -1913.22100 | 1113.83566  | 1 |
| 43 | C | 74.72047 | 63.20455 | 72.52147 | -613.62442  | -457.55993  | -194.14490  | 1 |
| 44 | H | 75.40128 | 62.97488 | 73.37450 | 1707.54637  | -721.27992  | 1996.92523  | 1 |
| 45 | H | 74.43244 | 62.22919 | 72.06802 | 758.23357   | 2100.81767  | 1560.55011  | 1 |
| 46 | C | 75.41444 | 64.19544 | 71.49226 | -352.41524  | 704.96076   | 49.21465    | 1 |
| 47 | H | 76.52803 | 64.13589 | 71.46789 | 1714.76886  | -2070.42778 | 443.35792   | 1 |
| 48 | H | 75.01590 | 64.14448 | 70.45128 | 1224.15040  | 1801.50881  | 1636.97633  | 1 |
| 49 | C | 75.10867 | 65.54843 | 74.49851 | 566.85117   | 537.05831   | 117.62814   | 1 |
| 50 | O | 75.97961 | 64.74440 | 74.70114 | -550.26779  | -406.08867  | 4.21666     | 1 |
| 51 | N | 74.63105 | 66.50974 | 75.26798 | 566.34832   | -425.77725  | 180.18749   | 1 |
| 52 | H | 73.79532 | 67.06617 | 75.02870 | 644.44502   | 2646.80550  | -52.73430   | 1 |
| 53 | C | 75.28907 | 66.91742 | 76.46043 | 612.34801   | -281.48662  | 411.56221   | 1 |
| 54 | H | 75.82180 | 66.03609 | 76.88304 | 1667.23498  | -1490.75142 | 1556.16753  | 1 |
| 55 | C | 76.29050 | 68.10631 | 76.05937 | -714.45746  | -175.43074  | 286.98927   | 1 |
| 56 | H | 75.67712 | 68.92547 | 75.59193 | -787.09484  | 1763.03619  | -1922.46060 | 1 |
| 57 | O | 77.30207 | 67.78382 | 75.08882 | -429.46514  | 516.51932   | -128.40526  | 1 |
| 58 | H | 76.97774 | 68.27996 | 74.30956 | 1981.82785  | 436.16847   | -1818.18182 | 1 |
| 59 | C | 76.85070 | 68.59399 | 77.44406 | 630.79189   | -468.94448  | 76.03230    | 1 |
| 60 | H | 77.56103 | 69.44336 | 77.31532 | -1775.71861 | 2062.30353  | 131.89849   | 1 |
| 61 | H | 76.03859 | 68.95081 | 78.12046 | -1855.14608 | 88.94118    | 1993.53760  | 1 |
| 62 | H | 77.39929 | 67.78127 | 77.97476 | -1504.82350 | -780.94249  | -2132.90992 | 1 |
| 63 | C | 73.99577 | 67.47518 | 77.28037 | 288.57638   | 618.62814   | -397.00270  | 1 |
| 64 | O | 72.96232 | 67.68031 | 76.66366 | 321.70495   | -185.26452  | 574.37218   | 1 |
| 65 | N | 74.23227 | 67.62539 | 78.57945 | -447.05792  | -446.53431  | 367.76425   | 1 |
| 66 | H | 75.16815 | 67.40636 | 78.92047 | 350.31316   | 1975.63644  | -1843.31522 | 1 |
| 67 | C | 73.41377 | 68.56720 | 79.28261 | -511.23061  | 374.03917   | -471.51480  | 1 |
| 68 | H | 72.44487 | 68.41711 | 78.75141 | 2234.79579  | -898.70890  | -1273.45190 | 1 |
| 69 | C | 73.39894 | 68.10264 | 80.81287 | 529.53781   | -159.34528  | 563.72604   | 1 |
| 70 | H | 72.53055 | 68.62143 | 81.30250 | 654.59388   | 2347.94251  | 1217.51488  | 1 |
| 71 | H | 73.16622 | 67.00588 | 80.82298 | -1526.55661 | 2103.42026  | 817.87394   | 1 |
| 72 | O | 74.59219 | 68.39398 | 81.59264 | -554.84278  | 14.12789    | 399.58769   | 1 |
| 73 | H | 75.07529 | 67.55765 | 81.46778 | 1297.06236  | 2061.84854  | 1220.68812  | 1 |
| 74 | C | 73.97857 | 70.06224 | 79.01625 | -662.15484  | -412.13544  | 123.62687   | 1 |
| 75 | O | 74.33131 | 70.41485 | 77.91767 | -540.01537  | -317.05804  | 274.91456   | 1 |
| 76 | N | 73.94722 | 70.82418 | 80.13740 | -202.76299  | -690.00100  | -131.49145  | 1 |
| 77 | H | 73.61624 | 70.28212 | 80.93915 | -702.62132  | -2617.37191 | 281.70413   | 1 |
| 78 | C | 73.55264 | 72.24497 | 80.01070 | -491.73914  | 576.34187   | 222.73509   | 1 |
| 79 | H | 72.59184 | 72.23489 | 79.44839 | 1977.17978  | -1823.58850 | -434.68928  | 1 |
| 80 | C | 73.44956 | 72.81402 | 81.40310 | -649.50797  | -328.66843  | 306.11224   | 1 |
| 81 | H | 74.26245 | 72.36309 | 82.01666 | 2075.07803  | 1452.16490  | -1004.45904 | 1 |
| 82 | C | 73.64433 | 74.32025 | 81.40895 | -615.18735  | -489.99689  | -70.96352   | 1 |

|     |   |          |          |          |             |             |             |   |
|-----|---|----------|----------|----------|-------------|-------------|-------------|---|
| 83  | H | 73.60930 | 74.74209 | 82.45091 | -1226.32661 | -1724.38906 | -1716.47170 | 1 |
| 84  | H | 74.63846 | 74.61184 | 80.96160 | 2381.64273  | -969.84735  | 900.46860   | 1 |
| 85  | H | 72.84938 | 74.84220 | 80.80827 | 2122.74991  | 1702.23946  | -141.36228  | 1 |
| 86  | C | 72.12759 | 72.46356 | 82.06378 | -501.86074  | -479.61276  | -376.42482  | 1 |
| 87  | H | 72.08284 | 72.83456 | 83.12471 | 993.79261   | -2246.95401 | -1177.81305 | 1 |
| 88  | H | 71.25794 | 72.91934 | 81.51479 | 42.71279    | -626.15391  | -2651.37258 | 1 |
| 89  | H | 71.95874 | 71.35184 | 82.09096 | -2026.39012 | -1590.33709 | -887.82922  | 1 |
| 90  | C | 74.75583 | 73.01087 | 79.16657 | -672.89153  | 382.57394   | -156.34072  | 1 |
| 91  | O | 74.45999 | 73.80896 | 78.30431 | 410.04627   | 221.86223   | 500.35950   | 1 |
| 92  | N | 75.94179 | 72.70094 | 79.66600 | -378.11782  | -443.79414  | -441.10984  | 1 |
| 93  | H | 75.88451 | 71.95903 | 80.36179 | 2404.15973  | -568.14894  | 1149.30085  | 1 |
| 94  | C | 77.16856 | 73.09799 | 79.05985 | -544.54484  | 466.16019   | 331.29119   | 1 |
| 95  | H | 77.90676 | 72.33316 | 79.38989 | -1409.80988 | -170.17955  | 2325.32679  | 1 |
| 96  | C | 76.84455 | 73.04633 | 77.50144 | -184.48284  | 116.78282   | -758.89137  | 1 |
| 97  | H | 76.25162 | 72.12652 | 77.28743 | 1893.78641  | 1861.14652  | 611.04528   | 1 |
| 98  | H | 76.18514 | 73.90379 | 77.20676 | -2170.79665 | -974.19311  | 1327.50117  | 1 |
| 99  | C | 78.15321 | 73.06501 | 76.64973 | 389.51668   | 672.81878   | -138.49152  | 1 |
| 100 | H | 78.72851 | 73.99921 | 76.84312 | 510.64577   | 1933.03327  | 1851.02484  | 1 |
| 101 | H | 78.83721 | 72.24678 | 76.96724 | -2302.30869 | -1105.72939 | -948.89774  | 1 |
| 102 | C | 77.86756 | 72.92316 | 75.12134 | -559.93427  | -126.34590  | 542.30857   | 1 |
| 103 | O | 78.81109 | 72.96356 | 74.35089 | -670.36003  | -111.83166  | 76.36448    | 1 |
| 104 | N | 76.57187 | 72.79042 | 74.80582 | -216.06729  | -537.07037  | 446.51379   | 1 |
| 105 | H | 75.75710 | 72.71238 | 75.42743 | -1251.96487 | 1074.12894  | -2168.52500 | 1 |
| 106 | H | 76.21821 | 72.62977 | 73.85480 | -2451.83023 | -720.73851  | 944.84612   | 1 |
| 107 | C | 77.54248 | 74.59012 | 79.56110 | 546.24052   | -563.88337  | -85.11809   | 1 |
| 108 | O | 76.67387 | 75.41602 | 79.81601 | 71.70702    | -307.40463  | 606.69673   | 1 |
| 109 | N | 78.86372 | 74.75571 | 79.60211 | 479.90863   | -504.50129  | 222.86849   | 1 |
| 110 | C | 79.42674 | 76.02988 | 79.96499 | 75.51268    | -600.91904  | 506.73700   | 1 |
| 111 | H | 78.83110 | 76.36398 | 80.84511 | -2033.61562 | 1795.30103  | 254.89480   | 1 |
| 112 | C | 80.94773 | 75.69669 | 80.24809 | 523.79067   | 517.99274   | 284.45581   | 1 |
| 113 | H | 81.61862 | 76.56843 | 80.07383 | 1599.61665  | -1127.00911 | 1895.98173  | 1 |
| 114 | H | 81.10922 | 75.37424 | 81.30128 | -1881.83093 | 1275.82488  | -1501.55016 | 1 |
| 115 | C | 81.19377 | 74.52299 | 79.24888 | -600.05639  | -404.05026  | 316.64485   | 1 |
| 116 | H | 81.30004 | 74.90593 | 78.20865 | -2597.05260 | 496.36221   | 657.73249   | 1 |
| 117 | H | 82.10932 | 73.93006 | 79.47004 | -1666.24518 | 1294.38985  | -1723.90591 | 1 |
| 118 | C | 79.84738 | 73.69653 | 79.43104 | 493.57570   | -129.95376  | -602.56394  | 1 |
| 119 | H | 79.56197 | 73.06072 | 78.56418 | -1469.08415 | -637.84797  | 2204.22581  | 1 |
| 120 | H | 79.80439 | 73.08644 | 80.36450 | -1038.97840 | 1068.88701  | -2280.71789 | 1 |
| 121 | C | 79.24413 | 77.04361 | 78.69329 | 188.88100   | 241.05089   | -727.87821  | 1 |
| 122 | O | 80.17554 | 77.38622 | 78.00887 | 531.88613   | -49.19943   | 427.07960   | 1 |
| 123 | N | 77.96439 | 77.39985 | 78.60420 | 708.14833   | 26.93417    | -179.73509  | 1 |
| 124 | H | 77.23730 | 76.97271 | 79.22488 | -2232.69501 | -1179.09831 | 1023.94816  | 1 |
| 125 | C | 77.64453 | 78.29130 | 77.53122 | -738.32412  | 259.92548   | 104.42456   | 1 |
| 126 | H | 78.39083 | 78.04374 | 76.73992 | 2028.89123  | 1260.02983  | 1311.33324  | 1 |
| 127 | C | 76.12484 | 78.07163 | 77.11678 | -258.65678  | -345.52513  | 661.28459   | 1 |
| 128 | H | 75.44018 | 78.36049 | 77.94695 | -1826.06090 | -1801.46097 | -918.64554  | 1 |
| 129 | C | 75.85734 | 78.96664 | 75.85729 | -541.23400  | 531.92970   | -218.41428  | 1 |
| 130 | H | 74.89230 | 78.70845 | 75.35600 | 1311.73218  | -2219.18200 | 882.19023   | 1 |
| 131 | H | 75.81164 | 80.05557 | 76.13063 | -1048.71298 | 1223.58118  | -2196.97971 | 1 |
| 132 | H | 76.66196 | 78.84743 | 75.09306 | 419.06414   | 1903.92898  | 1903.44670  | 1 |
| 133 | C | 75.90493 | 76.56077 | 76.77053 | -423.86431  | 152.66566   | -648.55262  | 1 |
| 134 | H | 74.85040 | 76.35813 | 76.46934 | 105.68386   | -2342.50080 | 1387.51238  | 1 |
| 135 | H | 76.56904 | 76.22658 | 75.93307 | -1695.63603 | -1484.73621 | -1531.02793 | 1 |
| 136 | H | 76.12244 | 75.91087 | 77.65458 | -1853.57121 | -487.39031  | 1936.59343  | 1 |
| 137 | C | 77.78867 | 79.83838 | 78.02634 | 539.71428   | -510.58232  | 267.58633   | 1 |
| 138 | O | 77.73408 | 80.72109 | 77.16954 | -15.93758   | -278.34085  | -624.49402  | 1 |
| 139 | N | 77.87669 | 79.94913 | 79.33055 | -676.81886  | 12.05292    | 276.17960   | 1 |
| 140 | H | 77.87978 | 79.05966 | 79.82783 | -1694.44250 | -373.84189  | -2100.66098 | 1 |
| 141 | C | 78.06279 | 81.17841 | 80.01704 | 412.33078   | -664.70360  | 108.35451   | 1 |
| 142 | H | 78.39613 | 80.87280 | 81.03383 | 1765.77476  | 1294.44366  | 1621.76594  | 1 |
| 143 | C | 79.14456 | 82.01150 | 79.21528 | -179.66635  | -721.95667  | -264.73915  | 1 |
| 144 | H | 80.03037 | 81.37623 | 78.98781 | -607.34922  | 2587.87032  | -598.10018  | 1 |

|     |   |          |          |          |             |             |             |   |
|-----|---|----------|----------|----------|-------------|-------------|-------------|---|
| 145 | H | 78.74366 | 82.32583 | 78.22074 | -359.69332  | -1479.13954 | -2259.74260 | 1 |
| 146 | C | 79.55031 | 83.25522 | 80.07238 | -240.01076  | 616.02425   | 431.85322   | 1 |
| 147 | H | 78.67106 | 83.91308 | 80.25543 | -1359.17131 | 782.54425   | 2227.99181  | 1 |
| 148 | H | 79.91663 | 82.94557 | 81.07666 | -820.36667  | 85.81767    | -2596.78715 | 1 |
| 149 | C | 80.68082 | 84.02200 | 79.27382 | -513.07015  | 236.18570   | -551.87280  | 1 |
| 150 | H | 81.56267 | 83.36198 | 79.10502 | 1816.11944  | -1183.11722 | -1650.94321 | 1 |
| 151 | H | 80.32245 | 84.31038 | 78.25890 | -1800.04429 | -1361.53473 | 1526.34643  | 1 |
| 152 | C | 81.08225 | 85.27269 | 80.08898 | 726.08972   | -253.19732  | -179.64713  | 1 |
| 153 | H | 80.28848 | 86.04114 | 80.17570 | 1224.27271  | -456.51798  | -2390.90304 | 1 |
| 154 | H | 81.50899 | 85.05555 | 81.08843 | 1206.40339  | -1150.93514 | -2154.90344 | 1 |
| 155 | N | 82.24275 | 85.98514 | 79.31412 | 329.70796   | -633.68968  | -155.67358  | 1 |
| 156 | H | 82.60881 | 86.87739 | 79.75576 | 1348.31305  | 1938.76845  | 1359.00643  | 1 |
| 157 | H | 83.14162 | 85.43653 | 79.18083 | 2096.92035  | 1446.54551  | -966.48890  | 1 |
| 158 | H | 82.03687 | 86.31135 | 78.32530 | -1197.07217 | -2303.53719 | 827.28733   | 1 |
| 159 | C | 76.63413 | 81.98590 | 80.07350 | -378.01186  | -556.17301  | -413.96481  | 1 |
| 160 | O | 76.27538 | 82.47965 | 81.11291 | -409.44433  | -307.55053  | -453.30833  | 1 |
| 161 | N | 76.06126 | 82.05364 | 78.87883 | -429.02477  | 524.70884   | 274.08502   | 1 |
| 162 | H | 76.53669 | 81.67915 | 78.02676 | 1706.34263  | -1425.96036 | 1574.38926  | 1 |
| 163 | C | 74.68212 | 82.44299 | 78.84741 | -45.25864   | -626.22952  | 478.93267   | 1 |
| 164 | H | 74.19231 | 81.98319 | 79.73450 | 1988.63164  | 570.90773   | 1772.87287  | 1 |
| 165 | C | 74.75696 | 84.01611 | 78.98766 | 551.77128   | -20.49526   | -564.54996  | 1 |
| 166 | H | 75.32578 | 84.27378 | 79.91196 | 1434.61535  | -1753.10253 | 1513.99471  | 1 |
| 167 | H | 75.34267 | 84.44811 | 78.14555 | -714.67738  | 1819.09770  | 1898.36494  | 1 |
| 168 | C | 73.31958 | 84.63024 | 79.03470 | 446.99263   | -555.77305  | 338.97221   | 1 |
| 169 | H | 72.74534 | 84.38236 | 78.11330 | 1953.68466  | 1892.25957  | -161.67766  | 1 |
| 170 | H | 72.73200 | 84.22103 | 79.88686 | -403.03785  | 2688.07032  | -188.43591  | 1 |
| 171 | C | 73.53074 | 86.19186 | 79.18210 | 567.86262   | 335.74681   | 434.04421   | 1 |
| 172 | H | 74.10418 | 86.42227 | 80.10936 | -1080.02275 | 1568.26081  | -1948.78900 | 1 |
| 173 | H | 74.14865 | 86.58376 | 78.34189 | -919.54108  | 2111.34692  | 1456.13463  | 1 |
| 174 | C | 72.15387 | 86.89294 | 79.21103 | 195.81897   | 173.33862   | -745.11536  | 1 |
| 175 | H | 71.57343 | 86.81274 | 78.27030 | 1405.67949  | -2301.21089 | -390.08113  | 1 |
| 176 | H | 71.51474 | 86.62392 | 80.07549 | -940.37328  | -1118.32446 | 2299.72133  | 1 |
| 177 | N | 72.42710 | 88.42686 | 79.38198 | 319.26422   | 656.36007   | -42.02424   | 1 |
| 178 | H | 71.56725 | 89.04684 | 79.41311 | 1961.03633  | 619.91968   | 1787.09422  | 1 |
| 179 | H | 72.93463 | 88.73112 | 80.26323 | 854.14343   | -2156.80752 | 1429.08711  | 1 |
| 180 | H | 72.99892 | 88.90274 | 78.62490 | 1237.02905  | -1378.50857 | -1998.28500 | 1 |
| 181 | C | 74.08464 | 81.97472 | 77.39814 | 532.53319   | -268.57236  | 517.55729   | 1 |
| 182 | O | 74.76049 | 82.06761 | 76.39603 | 266.16714   | -290.73804  | -558.88002  | 1 |
| 183 | N | 72.81029 | 81.63984 | 77.53653 | -226.25352  | 640.49678   | -270.32839  | 1 |
| 184 | H | 72.43298 | 81.66772 | 78.48252 | 2007.69063  | -1035.27229 | 1523.50231  | 1 |
| 185 | C | 72.06110 | 81.02487 | 76.49708 | -540.76542  | -573.33303  | 49.50000    | 1 |
| 186 | H | 71.03181 | 80.96932 | 76.91560 | -2374.20950 | -1036.76023 | 843.75774   | 1 |
| 187 | C | 72.12825 | 82.04019 | 75.25907 | -77.09082   | 666.87422   | -415.84136  | 1 |
| 188 | H | 73.22021 | 82.27938 | 75.07536 | -985.81834  | 617.19825   | 2463.91927  | 1 |
| 189 | O | 71.47146 | 83.29528 | 75.54120 | 293.29899   | -391.65602  | -477.80926  | 1 |
| 190 | H | 72.24250 | 83.89466 | 75.57094 | 2528.72714  | -681.76262  | -751.27122  | 1 |
| 191 | C | 71.60231 | 81.31312 | 73.97076 | 252.47363   | -605.14473  | 440.05134   | 1 |
| 192 | H | 71.58345 | 82.01514 | 73.10403 | -2052.65063 | 1456.49051  | -1043.51830 | 1 |
| 193 | H | 72.26644 | 80.44234 | 73.67075 | -2152.98800 | -1661.97574 | -161.70652  | 1 |
| 194 | H | 70.56002 | 80.93719 | 74.10242 | -473.12726  | -1584.27339 | 2165.61725  | 1 |
| 195 | C | 72.65608 | 79.52616 | 76.29831 | 360.36307   | 488.46713   | 505.10056   | 1 |
| 196 | O | 73.49787 | 79.04365 | 77.02734 | -200.08817  | -528.03552  | -385.82850  | 1 |
| 197 | N | 71.97999 | 78.90667 | 75.33161 | -597.54095  | -226.44775  | 355.20479   | 1 |
| 198 | H | 71.26282 | 79.41915 | 74.82137 | 2179.23655  | -1300.70981 | -991.33835  | 1 |
| 199 | C | 72.54893 | 77.71771 | 74.79489 | -687.68921  | 297.39807   | -249.45179  | 1 |
| 200 | H | 72.99647 | 77.17670 | 75.65871 | -349.16256  | -2467.37713 | -1101.72831 | 1 |
| 201 | C | 71.42106 | 76.93548 | 73.97850 | 672.47345   | 361.54328   | -201.62880  | 1 |
| 202 | H | 71.11635 | 77.54168 | 73.09572 | 1541.41502  | 582.18425   | 2169.97026  | 1 |
| 203 | H | 71.84008 | 75.98016 | 73.58656 | -2534.67717 | 60.25153    | 997.72295   | 1 |
| 204 | C | 70.20356 | 76.66973 | 74.87476 | 574.26774   | -389.43119  | -377.02542  | 1 |
| 205 | C | 70.25445 | 75.66407 | 75.88590 | 688.82679   | -287.33580  | -257.96133  | 1 |
| 206 | H | 71.16792 | 75.06096 | 76.03979 | 331.14182   | 1470.38163  | 2269.80013  | 1 |

|     |   |          |          |          |             |             |             |   |
|-----|---|----------|----------|----------|-------------|-------------|-------------|---|
| 207 | C | 69.02348 | 77.44930 | 74.68121 | -383.52382  | -675.04808  | 144.24917   | 1 |
| 208 | H | 68.98160 | 78.22031 | 73.88997 | 4.09847     | 1517.59662  | 2262.86397  | 1 |
| 209 | C | 69.12309 | 75.46198 | 76.67591 | -134.76730  | 428.45285   | -649.50303  | 1 |
| 210 | H | 69.15760 | 74.68205 | 77.45629 | -903.23433  | 1600.49020  | 2011.53387  | 1 |
| 211 | C | 67.91845 | 77.20968 | 75.50073 | -335.53281  | -615.00040  | -364.39058  | 1 |
| 212 | H | 67.00950 | 77.81565 | 75.34047 | 1596.45398  | -1369.33862 | 1732.02659  | 1 |
| 213 | C | 67.92287 | 76.21483 | 76.52171 | 585.48547   | -340.24194  | -406.23938  | 1 |
| 214 | O | 66.80467 | 75.96523 | 77.35918 | -419.15649  | -173.04408  | -511.94141  | 1 |
| 215 | H | 66.16386 | 76.61091 | 76.97750 | -1071.84350 | 1559.71507  | -1960.13012 | 1 |
| 216 | C | 73.63547 | 78.12481 | 73.64168 | 291.41878   | -183.13091  | 710.72246   | 1 |
| 217 | O | 73.50916 | 79.09838 | 72.92535 | 379.87695   | 523.47396   | -222.23622  | 1 |
| 218 | N | 74.52308 | 77.14504 | 73.58117 | 564.30591   | 373.09380   | 277.24371   | 1 |
| 219 | H | 74.43336 | 76.38129 | 74.24838 | -120.59931  | -2436.07824 | -1214.35098 | 1 |
| 220 | C | 75.68787 | 77.28686 | 72.76055 | 404.07514   | -299.37480  | 608.84009   | 1 |
| 221 | H | 76.01771 | 78.34163 | 72.89619 | -1071.07882 | -841.69025  | 2359.66467  | 1 |
| 222 | C | 76.73304 | 76.20166 | 73.24105 | -683.12807  | 68.71770    | -390.13096  | 1 |
| 223 | H | 76.86391 | 76.23440 | 74.35049 | 2068.88918  | 1596.58590  | 770.89603   | 1 |
| 224 | H | 76.35619 | 75.17674 | 73.01999 | 1379.86429  | 2342.49779  | -179.85638  | 1 |
| 225 | C | 78.08965 | 76.45631 | 72.51170 | -176.39967  | 537.49466   | 550.97268   | 1 |
| 226 | H | 77.95121 | 76.47833 | 71.40539 | -396.28051  | 1942.22168  | 1869.33314  | 1 |
| 227 | H | 78.51351 | 77.44846 | 72.78312 | -94.44700   | 586.00678   | -2659.20016 | 1 |
| 228 | C | 79.05942 | 75.26622 | 72.95498 | -291.69381  | -718.18079  | -150.72929  | 1 |
| 229 | H | 79.23872 | 75.18720 | 74.05756 | -2303.38776 | 1089.76242  | 964.62032   | 1 |
| 230 | H | 78.76853 | 74.24766 | 72.58173 | 884.16729   | 2568.80533  | -207.74283  | 1 |
| 231 | N | 80.30427 | 75.57526 | 72.39510 | -594.49522  | -252.81478  | 342.29276   | 1 |
| 232 | H | 80.36123 | 76.42489 | 71.85682 | -1735.17426 | 2084.05705  | -263.71605  | 1 |
| 233 | C | 81.35098 | 74.86441 | 72.53291 | 595.23177   | -271.52487  | 442.22352   | 1 |
| 234 | N | 81.25552 | 73.68922 | 73.27801 | 585.53813   | -424.79750  | -105.81303  | 1 |
| 235 | H | 80.40009 | 73.29055 | 73.73211 | 959.88797   | 1327.56823  | -2177.11905 | 1 |
| 236 | H | 82.04677 | 73.05728 | 73.43966 | 1578.48647  | 16.27378    | -2220.76233 | 1 |
| 237 | N | 82.45332 | 75.43357 | 71.87342 | -452.17763  | -390.33541  | -421.51853  | 1 |
| 238 | H | 82.53636 | 76.29132 | 71.33084 | 470.26107   | 1974.25629  | -1817.92087 | 1 |
| 239 | H | 83.38316 | 75.01352 | 71.87940 | 1856.67307  | -1573.97321 | -1224.35416 | 1 |
| 240 | C | 75.31631 | 76.99126 | 71.20058 | -531.47271  | -581.45780  | -55.06206   | 1 |
| 241 | O | 76.10200 | 77.28107 | 70.32731 | -243.00837  | 192.73507   | 609.52485   | 1 |
| 242 | N | 74.15684 | 76.34286 | 71.07064 | 343.49288   | -644.25607  | 38.09164    | 1 |
| 243 | H | 73.66470 | 76.17196 | 71.94693 | -1691.16043 | -1535.97525 | -1484.73099 | 1 |
| 244 | C | 73.59836 | 76.05812 | 69.75748 | 542.66492   | 350.14337   | 454.42563   | 1 |
| 245 | H | 74.34526 | 76.52792 | 69.07132 | 1209.57979  | -2396.95920 | 463.86744   | 1 |
| 246 | C | 73.53686 | 74.54344 | 69.60767 | -737.14309  | 145.93010   | 242.71942   | 1 |
| 247 | H | 72.83287 | 74.15430 | 70.37607 | -1050.18303 | 159.36419   | -2509.06125 | 1 |
| 248 | C | 73.02694 | 74.12122 | 68.24361 | -706.77696  | -252.88343  | -245.16230  | 1 |
| 249 | H | 72.95446 | 73.00169 | 68.15436 | -1624.64039 | -1665.49085 | 1417.86935  | 1 |
| 250 | H | 72.00009 | 74.54584 | 68.03512 | 2566.10521  | 598.51109   | 693.22305   | 1 |
| 251 | H | 73.70610 | 74.47703 | 67.42024 | -1972.69758 | 107.10018   | -1876.34312 | 1 |
| 252 | C | 74.89381 | 73.91175 | 69.86337 | 412.85148   | 672.58832   | -27.69222   | 1 |
| 253 | H | 74.85332 | 72.78915 | 69.80885 | 1447.02277  | 1762.76533  | -1490.78944 | 1 |
| 254 | H | 75.65452 | 74.25567 | 69.10945 | 1320.77379  | -145.20455  | 2378.68491  | 1 |
| 255 | H | 75.29244 | 74.18809 | 70.87814 | -1512.10848 | 1470.52031  | 1724.75147  | 1 |
| 256 | C | 72.09421 | 76.76606 | 69.66120 | -607.11113  | 499.56689   | 73.73769    | 1 |
| 257 | O | 71.36410 | 76.45143 | 68.75177 | 357.97126   | 460.81534   | 356.68785   | 1 |
| 258 | N | 71.87080 | 77.63047 | 70.64446 | 536.55407   | -368.62270  | 332.76306   | 1 |
| 259 | H | 72.66926 | 77.76732 | 71.26641 | 524.38866   | 2297.69985  | 1367.20941  | 1 |
| 260 | C | 70.93785 | 78.69352 | 70.49531 | 46.50277    | -774.29190  | -147.97904  | 1 |
| 261 | H | 71.18107 | 79.34599 | 71.36253 | 1676.51875  | 1883.29066  | 1032.55549  | 1 |
| 262 | C | 71.12123 | 79.43743 | 69.07525 | -559.41456  | -34.19198   | -556.30433  | 1 |
| 263 | H | 71.21596 | 78.67825 | 68.25865 | -64.66664   | 395.18769   | 2695.05373  | 1 |
| 264 | H | 70.19448 | 80.01904 | 68.84855 | -2703.44278 | -60.40056   | 333.79418   | 1 |
| 265 | C | 72.31932 | 80.34740 | 69.10352 | -519.76435  | 377.31045   | 459.42366   | 1 |
| 266 | H | 73.24020 | 79.72594 | 69.18063 | -1746.74323 | 1667.50644  | -1261.73691 | 1 |
| 267 | C | 72.38138 | 81.16677 | 67.81973 | 570.95554   | 16.46261    | -545.27700  | 1 |
| 268 | H | 73.26386 | 81.85722 | 67.81123 | 2391.58273  | 28.05277    | -1305.07271 | 1 |

|     |   |          |          |          |             |             |             |   |
|-----|---|----------|----------|----------|-------------|-------------|-------------|---|
| 269 | H | 72.46101 | 80.51358 | 66.91287 | 175.75588   | 917.63458   | 2559.43867  | 1 |
| 270 | H | 71.46564 | 81.80017 | 67.69174 | -1063.97851 | -2155.34650 | 1283.00462  | 1 |
| 271 | C | 72.27765 | 81.29103 | 70.29826 | 193.76014   | 2.62946     | -765.53141  | 1 |
| 272 | H | 73.05906 | 82.09014 | 70.22249 | 507.39394   | -846.55087  | 2539.60089  | 1 |
| 273 | H | 71.28440 | 81.80339 | 70.38514 | 1337.57841  | 1818.19054  | 1526.01994  | 1 |
| 274 | H | 72.46244 | 80.74746 | 71.26111 | 1100.88635  | -1172.91350 | -2199.08909 | 1 |
| 275 | C | 69.42846 | 78.15472 | 70.55160 | -549.21115  | 475.64486   | -309.38218  | 1 |
| 276 | O | 68.52112 | 78.75029 | 70.02888 | 556.06106   | -390.37755  | -78.24250   | 1 |
| 277 | O | 69.16726 | 77.07853 | 71.43709 | -572.27940  | -310.19032  | -209.75862  | 1 |
| 278 | H | 70.10405 | 76.75654 | 71.56041 | -1380.08193 | 2212.14486  | 790.85944   | 1 |

Listing 101: C00101.xmolout

|    |   |          |          |          |             |             |             |        |          |
|----|---|----------|----------|----------|-------------|-------------|-------------|--------|----------|
| 1  |   | 276      |          |          |             |             |             |        |          |
| 2  |   | 150.0000 | 150.0000 | 150.0000 | 0.0000      | 0.0000      | 0.0000***** | 2.7750 | 11100    |
|    |   | 0.2500   | 300.00   | 0.00     | 0.00        | 0.00        | -1293.4272  | 0.0000 | 300.0000 |
| 3  | H | 80.89296 | 72.09404 | 75.93576 | -2043.14101 | -1757.64893 | 399.89339   |        | 1        |
| 4  | N | 80.99881 | 72.36087 | 74.95719 | 426.75047   | 490.45733   | -334.42467  |        | 1        |
| 5  | H | 80.09531 | 72.80438 | 74.78961 | 442.25559   | -1110.30854 | -2448.52907 |        | 1        |
| 6  | C | 82.05539 | 73.28458 | 74.75225 | 415.32972   | -666.39213  | 83.73172    |        | 1        |
| 7  | H | 81.84519 | 74.11841 | 75.45545 | 879.32219   | 2491.00447  | 667.35213   |        | 1        |
| 8  | C | 83.47614 | 72.59016 | 75.04960 | 31.35357    | 477.41777   | 628.23362   |        | 1        |
| 9  | H | 83.59961 | 71.71554 | 74.36665 | 1168.38489  | 2240.25337  | -1019.71136 |        | 1        |
| 10 | H | 84.29365 | 73.30294 | 74.78266 | -360.43770  | 2534.90498  | 931.67112   |        | 1        |
| 11 | C | 83.61601 | 72.15211 | 76.48550 | 463.18208   | 512.70242   | -382.34388  |        | 1        |
| 12 | H | 82.77190 | 71.47126 | 76.73416 | 1725.29117  | 1863.52247  | -987.07854  |        | 1        |
| 13 | C | 84.92173 | 71.38760 | 76.66928 | 710.42801   | -144.27427  | -313.15367  |        | 1        |
| 14 | H | 85.04951 | 71.03230 | 77.72427 | 364.20195   | -1033.13725 | 2494.72524  |        | 1        |
| 15 | H | 84.97151 | 70.48560 | 76.00624 | 2567.61904  | 335.80679   | 847.48802   |        | 1        |
| 16 | H | 85.81016 | 72.02575 | 76.42550 | -2587.99029 | 680.92867   | -512.16411  |        | 1        |
| 17 | C | 83.58738 | 73.33625 | 77.44171 | 268.17616   | 741.64379   | -40.42634   |        | 1        |
| 18 | H | 83.72267 | 73.01364 | 78.50699 | 1283.54314  | -1945.37420 | -1411.27812 |        | 1        |
| 19 | H | 84.40333 | 74.06989 | 77.21358 | -1258.57796 | 1317.15249  | -2026.02085 |        | 1        |
| 20 | H | 82.61683 | 73.89288 | 77.38956 | -2502.84526 | 909.80597   | 575.92391   |        | 1        |
| 21 | C | 82.04423 | 73.77232 | 73.20055 | 619.36578   | -458.64843  | -172.09273  |        | 1        |
| 22 | O | 82.60170 | 74.81117 | 72.91499 | -81.40433   | 433.87611   | 522.34594   |        | 1        |
| 23 | N | 81.45744 | 72.90057 | 72.38038 | 175.23996   | -622.20190  | 341.55523   |        | 1        |
| 24 | H | 81.04308 | 72.07249 | 72.80474 | -876.57256  | -303.22879  | -2561.90213 |        | 1        |
| 25 | C | 81.46562 | 73.17905 | 70.98683 | -571.88214  | -534.10783  | -106.15033  |        | 1        |
| 26 | H | 81.95911 | 74.18047 | 70.92695 | -2713.20841 | -16.25800   | -248.80809  |        | 1        |
| 27 | C | 82.32469 | 72.02881 | 70.26595 | 166.60354   | 288.16399   | -716.09568  |        | 1        |
| 28 | H | 81.86527 | 71.02543 | 70.49368 | -2097.85574 | 1636.78449  | -586.18044  |        | 1        |
| 29 | O | 83.69365 | 71.90424 | 70.68324 | -317.80580  | -363.38227  | 484.43082   |        | 1        |
| 30 | H | 83.69497 | 70.99857 | 71.05540 | 1863.74748  | -1451.84923 | 1357.29467  |        | 1        |
| 31 | C | 82.09321 | 72.37933 | 68.75158 | 503.80731   | 517.99032   | 318.51606   |        | 1        |
| 32 | H | 82.49686 | 71.58630 | 68.08014 | 640.61020   | -2157.10410 | -1536.29104 |        | 1        |
| 33 | H | 81.00831 | 72.50254 | 68.51273 | 1687.88455  | 465.60692   | 2087.56452  |        | 1        |
| 34 | H | 82.59878 | 73.33452 | 68.47795 | -1293.07895 | -1899.88581 | -1463.57452 |        | 1        |
| 35 | C | 79.92964 | 73.18959 | 70.42779 | -153.07550  | -733.68902  | 248.70981   |        | 1        |
| 36 | O | 79.69314 | 74.02716 | 69.59531 | 186.15459   | -480.78787  | -449.34387  |        | 1        |
| 37 | N | 79.16008 | 72.15823 | 70.80738 | -487.53139  | 543.18517   | 42.03850    |        | 1        |
| 38 | C | 77.73536 | 72.29682 | 70.70806 | -699.35871  | 69.34393    | 360.10701   |        | 1        |
| 39 | H | 77.61273 | 73.21727 | 70.08969 | 2.81126     | -221.99807  | -2715.58072 |        | 1        |
| 40 | C | 77.32326 | 70.94364 | 69.98659 | -507.46439  | -592.59194  | 122.07761   |        | 1        |
| 41 | H | 76.25956 | 70.66481 | 70.15401 | -1975.08116 | 525.87560   | -1801.71556 |        | 1        |
| 42 | H | 77.44901 | 71.03244 | 68.88465 | 1588.27743  | -1913.22100 | 1113.83566  |        | 1        |
| 43 | C | 78.33142 | 69.90626 | 70.57589 | -613.62442  | -457.55993  | -194.14490  |        | 1        |
| 44 | H | 77.99891 | 69.51220 | 71.56214 | 1707.54637  | -721.27992  | 1996.92523  |        | 1        |
| 45 | H | 78.47415 | 69.01700 | 69.92168 | 758.23357   | 2100.81767  | 1560.55011  |        | 1        |
| 46 | C | 79.64471 | 70.78266 | 70.72519 | -352.41524  | 704.96076   | 49.21465    |        | 1        |
| 47 | H | 80.22702 | 70.57473 | 71.65294 | 1714.76886  | -2070.42778 | 443.35792   |        | 1        |
| 48 | H | 80.32286 | 70.74996 | 69.83952 | 1224.15040  | 1801.50881  | 1636.97633  |        | 1        |

|     |   |          |          |          |             |             |             |   |
|-----|---|----------|----------|----------|-------------|-------------|-------------|---|
| 49  | C | 77.11383 | 72.49255 | 72.20661 | 566.85117   | 537.05831   | 117.62814   | 1 |
| 50  | O | 77.16308 | 73.61360 | 72.72496 | -550.26779  | -406.08867  | 4.21666     | 1 |
| 51  | N | 76.59832 | 71.38923 | 72.67443 | 566.34832   | -425.77725  | 180.18749   | 1 |
| 52  | H | 76.65347 | 70.58213 | 72.05797 | 644.44502   | 2646.80550  | -52.73430   | 1 |
| 53  | C | 76.12895 | 71.22796 | 74.00666 | 612.34801   | -281.48662  | 411.56221   | 1 |
| 54  | H | 75.90588 | 70.13964 | 74.06701 | 1667.23498  | -1490.75142 | 1556.16753  | 1 |
| 55  | C | 77.33775 | 71.61915 | 74.98337 | -714.45746  | -175.43074  | 286.98927   | 1 |
| 56  | H | 77.77758 | 72.60294 | 74.66408 | -787.09484  | 1763.03619  | -1922.46060 | 1 |
| 57  | O | 78.40646 | 70.65379 | 74.97183 | -429.46514  | 516.51932   | -128.40526  | 1 |
| 58  | H | 79.16375 | 71.20479 | 74.70275 | 1981.82785  | 436.16847   | -1818.18182 | 1 |
| 59  | C | 76.62005 | 71.81192 | 76.36608 | 630.79189   | -468.94448  | 76.03230    | 1 |
| 60  | H | 77.35888 | 72.01438 | 77.17832 | -1775.71861 | 2062.30353  | 131.89849   | 1 |
| 61  | H | 75.90688 | 72.67333 | 76.35142 | -1855.14608 | 88.94118    | 1993.53760  | 1 |
| 62  | H | 76.05033 | 70.90069 | 76.66084 | -1504.82350 | -780.94249  | -2132.90992 | 1 |
| 63  | C | 74.74463 | 72.08364 | 74.15540 | 288.57638   | 618.62814   | -397.00270  | 1 |
| 64  | O | 73.74809 | 71.43639 | 74.37035 | 321.70495   | -185.26452  | 574.37218   | 1 |
| 65  | N | 74.87945 | 73.41225 | 74.08210 | -447.05792  | -446.53431  | 367.76425   | 1 |
| 66  | H | 75.81352 | 73.80904 | 73.81386 | 350.31316   | 1975.63644  | -1843.31522 | 1 |
| 67  | C | 73.66962 | 74.08304 | 73.70892 | -511.23061  | 374.03917   | -471.51480  | 1 |
| 68  | H | 72.84642 | 73.45200 | 74.13148 | 2234.79579  | -898.70890  | -1273.45190 | 1 |
| 69  | C | 73.72073 | 75.56696 | 74.30174 | 529.53781   | -159.34528  | 563.72604   | 1 |
| 70  | H | 72.87229 | 76.14314 | 73.84159 | 654.59388   | 2347.94251  | 1217.51488  | 1 |
| 71  | H | 73.46539 | 75.47736 | 75.39113 | -1526.55661 | 2103.42026  | 817.87394   | 1 |
| 72  | O | 74.94015 | 76.32169 | 74.08970 | -554.84278  | 14.12789    | 399.58769   | 1 |
| 73  | H | 75.54714 | 75.81805 | 74.66163 | 1297.06236  | 2061.84854  | 1220.68812  | 1 |
| 74  | C | 73.52394 | 74.18550 | 72.08704 | -662.15484  | -412.13544  | 123.62687   | 1 |
| 75  | O | 72.40750 | 74.10109 | 71.62696 | -540.01537  | -317.05804  | 274.91456   | 1 |
| 76  | N | 74.68246 | 74.34338 | 71.46740 | -202.76299  | -690.00100  | -131.49145  | 1 |
| 77  | H | 75.55136 | 74.37280 | 72.02189 | -702.62132  | -2617.37191 | 281.70413   | 1 |
| 78  | C | 74.71943 | 74.67132 | 70.08403 | -491.73914  | 576.34187   | 222.73509   | 1 |
| 79  | H | 75.76799 | 74.47455 | 69.76854 | 1977.17978  | -1823.58850 | -434.68928  | 1 |
| 80  | C | 73.64233 | 73.77310 | 69.32829 | -649.50797  | -328.66843  | 306.11224   | 1 |
| 81  | H | 72.61386 | 74.16042 | 69.53203 | 2075.07803  | 1452.16490  | -1004.45904 | 1 |
| 82  | C | 73.92771 | 73.72589 | 67.78837 | -615.18735  | -489.99689  | -70.96352   | 1 |
| 83  | H | 73.17885 | 73.09315 | 67.25660 | -1226.32661 | -1724.38906 | -1716.47170 | 1 |
| 84  | H | 73.89216 | 74.73540 | 67.31883 | 2381.64273  | -969.84735  | 900.46860   | 1 |
| 85  | H | 74.93466 | 73.29800 | 67.57360 | 2122.74991  | 1702.23946  | -141.36228  | 1 |
| 86  | C | 73.75908 | 72.28498 | 69.80542 | -501.86074  | -479.61276  | -376.42482  | 1 |
| 87  | H | 73.02045 | 71.62639 | 69.29090 | 993.79261   | -2246.95401 | -1177.81305 | 1 |
| 88  | H | 74.77405 | 71.87151 | 69.60628 | 42.71279    | -626.15391  | -2651.37258 | 1 |
| 89  | H | 73.57057 | 72.20274 | 70.90354 | -2026.39012 | -1590.33709 | -887.82922  | 1 |
| 90  | C | 74.30984 | 76.24367 | 69.94481 | -672.89153  | 382.57394   | -156.34072  | 1 |
| 91  | O | 73.67683 | 76.87844 | 70.78916 | 410.04627   | 221.86223   | 500.35950   | 1 |
| 92  | N | 74.66027 | 76.65650 | 68.74343 | -378.11782  | -443.79414  | -441.10984  | 1 |
| 93  | H | 75.21791 | 76.00662 | 68.19396 | 2404.15973  | -568.14894  | 1149.30085  | 1 |
| 94  | C | 74.58528 | 78.06459 | 68.45007 | -544.54484  | 466.16019   | 331.29119   | 1 |
| 95  | H | 75.21926 | 78.49785 | 69.25561 | -1409.80988 | -170.17955  | 2325.32679  | 1 |
| 96  | C | 75.20946 | 78.25564 | 67.01085 | -184.48284  | 116.78282   | -758.89137  | 1 |
| 97  | H | 76.16739 | 77.69589 | 66.91294 | 1893.78641  | 1861.14652  | 611.04528   | 1 |
| 98  | H | 74.53471 | 77.84675 | 66.22493 | -2170.79665 | -974.19311  | 1327.50117  | 1 |
| 99  | C | 75.42676 | 79.79064 | 66.81954 | 389.51668   | 672.81878   | -138.49152  | 1 |
| 100 | H | 74.46101 | 80.33137 | 66.95923 | 510.64577   | 1933.03327  | 1851.02484  | 1 |
| 101 | H | 76.07239 | 80.18880 | 67.63323 | -2302.30869 | -1105.72939 | -948.89774  | 1 |
| 102 | C | 76.05665 | 80.16549 | 65.42585 | -559.93427  | -126.34590  | 542.30857   | 1 |
| 103 | O | 76.24142 | 81.32353 | 65.15186 | -670.36003  | -111.83166  | 76.36448    | 1 |
| 104 | N | 76.35624 | 79.10351 | 64.64681 | -216.06729  | -537.07037  | 446.51379   | 1 |
| 105 | H | 76.23707 | 78.10041 | 64.82945 | -1251.96487 | 1074.12894  | -2168.52500 | 1 |
| 106 | H | 76.79038 | 79.17876 | 63.72037 | -2451.83023 | -720.73851  | 944.84612   | 1 |
| 107 | C | 73.08341 | 78.69448 | 68.54011 | 546.24052   | -563.88337  | -85.11809   | 1 |
| 108 | O | 73.07374 | 79.88665 | 68.72015 | 71.70702    | -307.40463  | 606.69673   | 1 |
| 109 | N | 72.04986 | 77.88421 | 68.33333 | 479.90863   | -504.50129  | 222.86849   | 1 |
| 110 | C | 70.68137 | 78.29489 | 68.58754 | 75.51268    | -600.91904  | 506.73700   | 1 |



|     |   |          |          |          |             |             |             |   |
|-----|---|----------|----------|----------|-------------|-------------|-------------|---|
| 111 | H | 70.61271 | 79.35292 | 68.23310 | -2033.61562 | 1795.30103  | 254.89480   | 1 |
| 112 | C | 69.83717 | 77.24561 | 67.71187 | 523.79067   | 517.99274   | 284.45581   | 1 |
| 113 | H | 68.79310 | 77.12690 | 68.07642 | 1599.61665  | -1127.00911 | 1895.98173  | 1 |
| 114 | H | 69.77039 | 77.56505 | 66.64872 | -1881.83093 | 1275.82488  | -1501.55016 | 1 |
| 115 | C | 70.69506 | 75.95812 | 67.86364 | -600.05639  | -404.05026  | 316.64485   | 1 |
| 116 | H | 70.51773 | 75.47478 | 68.85084 | -2597.05260 | 496.36221   | 657.73249   | 1 |
| 117 | H | 70.48352 | 75.18780 | 67.08864 | -1666.24518 | 1294.38985  | -1723.90591 | 1 |
| 118 | C | 72.17164 | 76.55302 | 67.76832 | 493.57570   | -129.95376  | -602.56394  | 1 |
| 119 | H | 72.93246 | 76.01621 | 68.38323 | -1469.08415 | -637.84797  | 2204.22581  | 1 |
| 120 | H | 72.56253 | 76.68826 | 66.73192 | -1038.97840 | 1068.88701  | -2280.71789 | 1 |
| 121 | C | 70.30961 | 78.15387 | 70.11427 | 188.88100   | 241.05089   | -727.87821  | 1 |
| 122 | O | 69.08730 | 78.14688 | 70.53734 | 531.88613   | -49.19943   | 427.07960   | 1 |
| 123 | N | 71.31951 | 78.04744 | 70.92216 | 708.14833   | 26.93417    | -179.73509  | 1 |
| 124 | H | 72.31948 | 77.94112 | 70.62435 | -2232.69501 | -1179.09831 | 1023.94816  | 1 |
| 125 | C | 70.97411 | 78.43627 | 72.25586 | -738.32412  | 259.92548   | 104.42456   | 1 |
| 126 | H | 71.71290 | 77.96736 | 72.93987 | 2028.89123  | 1260.02983  | 1311.33324  | 1 |
| 127 | C | 71.01633 | 80.01999 | 72.25116 | -258.65678  | -345.52513  | 661.28459   | 1 |
| 128 | H | 70.35230 | 80.40589 | 71.44707 | -1826.06090 | -1801.46097 | -918.64554  | 1 |
| 129 | C | 70.58718 | 80.62139 | 73.63333 | -541.23400  | 531.92970   | -218.41428  | 1 |
| 130 | H | 70.66563 | 81.73411 | 73.63728 | 1311.73218  | -2219.18200 | 882.19023   | 1 |
| 131 | H | 69.52713 | 80.36552 | 73.87848 | -1048.71298 | 1223.58118  | -2196.97971 | 1 |
| 132 | H | 71.21938 | 80.24405 | 74.46937 | 419.06414   | 1903.92898  | 1903.44670  | 1 |
| 133 | C | 72.49423 | 80.47408 | 71.98983 | -423.86431  | 152.66566   | -648.55262  | 1 |
| 134 | H | 72.59938 | 81.58326 | 72.04091 | 105.68386   | -2342.50080 | 1387.51238  | 1 |
| 135 | H | 73.19617 | 80.03708 | 72.73850 | -1695.63603 | -1484.73621 | -1531.02793 | 1 |
| 136 | H | 72.84449 | 80.15387 | 70.97706 | -1853.57121 | -487.39031  | 1936.59343  | 1 |
| 137 | C | 69.39459 | 77.91125 | 72.39474 | 539.71428   | -510.58232  | 267.58633   | 1 |
| 138 | O | 68.54292 | 78.51784 | 73.06272 | -15.93758   | -278.34085  | -624.49402  | 1 |
| 139 | N | 69.61281 | 76.50182 | 72.60900 | -676.81886  | 12.05292    | 276.17960   | 1 |
| 140 | H | 70.29299 | 76.08754 | 71.96286 | -1694.44250 | -373.84189  | -2100.66098 | 1 |
| 141 | C | 68.34872 | 75.80361 | 72.64800 | 412.33078   | -664.70360  | 108.35451   | 1 |
| 142 | H | 67.58330 | 76.57804 | 72.40826 | 1765.77476  | 1294.44366  | 1621.76594  | 1 |
| 143 | C | 68.42141 | 74.62285 | 71.60579 | -179.66635  | -721.95667  | -264.73915  | 1 |
| 144 | H | 68.62147 | 75.00092 | 70.57755 | -607.34922  | 2587.87032  | -598.10018  | 1 |
| 145 | H | 69.26420 | 73.93447 | 71.84444 | -359.69332  | -1479.13954 | -2259.74260 | 1 |
| 146 | C | 67.04418 | 73.88090 | 71.68805 | -240.01076  | 616.02425   | 431.85322   | 1 |
| 147 | H | 66.82695 | 73.59197 | 72.74289 | -1359.17131 | 782.54425   | 2227.99181  | 1 |
| 148 | H | 66.21447 | 74.55747 | 71.38407 | -820.36667  | 85.81767    | -2596.78715 | 1 |
| 149 | C | 67.08434 | 72.59493 | 70.77059 | -513.07015  | 236.18570   | -551.87280  | 1 |
| 150 | H | 67.21403 | 72.86887 | 69.69838 | 1816.11944  | -1183.11722 | -1650.94321 | 1 |
| 151 | H | 67.95318 | 71.94594 | 71.02729 | -1800.04429 | -1361.53473 | 1526.34643  | 1 |
| 152 | C | 65.74900 | 71.84819 | 71.00306 | 726.08972   | -253.19732  | -179.64713  | 1 |
| 153 | H | 65.61797 | 71.44951 | 72.02900 | 1224.27271  | -456.51798  | -2390.90304 | 1 |
| 154 | H | 64.84574 | 72.41529 | 70.70173 | 1206.40339  | -1150.93514 | -2154.90344 | 1 |
| 155 | N | 65.74072 | 70.58120 | 70.08584 | 329.70796   | -633.68968  | -155.67358  | 1 |
| 156 | H | 64.87467 | 69.97207 | 70.15457 | 1348.31305  | 1938.76845  | 1359.00643  | 1 |
| 157 | H | 65.79230 | 70.75072 | 69.04005 | 2096.92035  | 1446.54551  | -966.48890  | 1 |
| 158 | H | 66.51159 | 69.86616 | 70.23271 | -1197.07217 | -2303.53719 | 827.28733   | 1 |
| 159 | C | 68.11033 | 75.14479 | 74.12037 | -378.01186  | -556.17301  | -413.96481  | 1 |
| 160 | O | 66.97082 | 75.03632 | 74.50800 | -409.44433  | -307.55053  | -453.30833  | 1 |
| 161 | N | 69.21306 | 74.61353 | 74.64509 | -429.02477  | 524.70884   | 274.08502   | 1 |
| 162 | H | 70.11424 | 74.82799 | 74.21267 | 1706.34263  | -1425.96036 | 1574.38926  | 1 |
| 163 | C | 69.17654 | 74.26116 | 76.04845 | -45.25864   | -626.22952  | 478.93267   | 1 |
| 164 | H | 68.78511 | 75.18908 | 76.52065 | 1988.63164  | 570.90773   | 1772.87287  | 1 |
| 165 | C | 68.18908 | 73.04184 | 76.24758 | 551.77128   | -20.49526   | -564.54996  | 1 |
| 166 | H | 67.43353 | 73.00494 | 75.42927 | 1434.61535  | -1753.10253 | 1513.99471  | 1 |
| 167 | H | 68.75744 | 72.08674 | 76.17633 | -714.67738  | 1819.09770  | 1898.36494  | 1 |
| 168 | C | 67.47815 | 73.15263 | 77.63802 | 446.99263   | -555.77305  | 338.97221   | 1 |
| 169 | H | 68.18651 | 73.48379 | 78.43048 | 1953.68466  | 1892.25957  | -161.67766  | 1 |
| 170 | H | 66.67515 | 73.92330 | 77.61885 | -403.03785  | 2688.07032  | -188.43591  | 1 |
| 171 | C | 66.89929 | 71.72288 | 77.98662 | 567.86262   | 335.74681   | 434.04421   | 1 |
| 172 | H | 65.85447 | 71.61272 | 77.61527 | -1080.02275 | 1568.26081  | -1948.78900 | 1 |

|     |   |          |          |          |             |             |             |   |
|-----|---|----------|----------|----------|-------------|-------------|-------------|---|
| 173 | H | 67.48515 | 70.92192 | 77.47984 | -919.54108  | 2111.34692  | 1456.13463  | 1 |
| 174 | C | 66.97838 | 71.53496 | 79.51958 | 195.81897   | 173.33862   | -745.11536  | 1 |
| 175 | H | 68.01019 | 71.46429 | 79.91896 | 1405.67949  | -2301.21089 | -390.08113  | 1 |
| 176 | H | 66.39246 | 72.26663 | 80.11111 | -940.37328  | -1118.32446 | 2299.72133  | 1 |
| 177 | N | 66.33680 | 70.14622 | 79.85580 | 319.26422   | 656.36007   | -42.02424   | 1 |
| 178 | H | 66.38033 | 69.85499 | 80.87486 | 1961.03633  | 619.91968   | 1787.09422  | 1 |
| 179 | H | 65.30218 | 70.02908 | 79.64978 | 854.14343   | -2156.80752 | 1429.08711  | 1 |
| 180 | H | 66.75427 | 69.29459 | 79.37916 | 1237.02905  | -1378.50857 | -1998.28500 | 1 |
| 181 | C | 70.69544 | 73.88565 | 76.43996 | 532.53319   | -268.57236  | 517.55729   | 1 |
| 182 | O | 71.63385 | 74.15019 | 75.69514 | 266.16714   | -290.73804  | -558.88002  | 1 |
| 183 | N | 70.71940 | 73.34127 | 77.64326 | -226.25352  | 640.49678   | -270.32839  | 1 |
| 184 | H | 69.82136 | 73.20870 | 78.10458 | 2007.69063  | -1035.27229 | 1523.50231  | 1 |
| 185 | C | 71.82554 | 72.58375 | 78.12278 | -540.76542  | -573.33303  | 49.50000    | 1 |
| 186 | H | 71.42912 | 72.10872 | 79.04765 | -2374.20950 | -1036.76023 | 843.75774   | 1 |
| 187 | C | 72.18132 | 71.49618 | 77.00054 | -77.09082   | 666.87422   | -415.84136  | 1 |
| 188 | H | 72.37167 | 72.02150 | 76.02016 | -985.81834  | 617.19825   | 2463.91927  | 1 |
| 189 | O | 71.13994 | 70.54314 | 76.71709 | 293.29899   | -391.65602  | -477.80926  | 1 |
| 190 | H | 71.05630 | 70.64824 | 75.74718 | 2528.72714  | -681.76262  | -751.27122  | 1 |
| 191 | C | 73.53621 | 70.90614 | 77.53528 | 252.47363   | -605.14473  | 440.05134   | 1 |
| 192 | H | 73.99059 | 70.21208 | 76.78970 | -2052.65063 | 1456.49051  | -1043.51830 | 1 |
| 193 | H | 74.28363 | 71.70723 | 77.74501 | -2152.98800 | -1661.97574 | -161.70652  | 1 |
| 194 | H | 73.39016 | 70.33196 | 78.47930 | -473.12726  | -1584.27339 | 2165.61725  | 1 |
| 195 | C | 73.04175 | 73.61624 | 78.46737 | 360.36307   | 488.46713   | 505.10056   | 1 |
| 196 | O | 73.21646 | 73.87666 | 79.64898 | -200.08817  | -528.03552  | -385.82850  | 1 |
| 197 | N | 73.67409 | 74.02936 | 77.39517 | -597.54095  | -226.44775  | 355.20479   | 1 |
| 198 | H | 73.25996 | 73.79701 | 76.46795 | 2179.23655  | -1300.70981 | -991.33835  | 1 |
| 199 | C | 74.72110 | 74.97880 | 77.45159 | -687.68921  | 297.39807   | -249.45179  | 1 |
| 200 | H | 74.92092 | 75.18799 | 76.38026 | -349.16256  | -2467.37713 | -1101.72831 | 1 |
| 201 | C | 74.23084 | 76.26941 | 78.26893 | 672.47345   | 361.54328   | -201.62880  | 1 |
| 202 | H | 73.99605 | 75.99975 | 79.32921 | 1541.41502  | 582.18425   | 2169.97026  | 1 |
| 203 | H | 75.05027 | 77.02463 | 78.30209 | -2534.67717 | 60.25153    | 997.72295   | 1 |
| 204 | C | 72.99397 | 76.83218 | 77.56115 | 574.26774   | -389.43119  | -377.02542  | 1 |
| 205 | C | 73.13362 | 77.59489 | 76.37036 | 688.82679   | -287.33580  | -257.96133  | 1 |
| 206 | H | 74.13152 | 77.83102 | 75.95712 | 331.14182   | 1470.38163  | 2269.80013  | 1 |
| 207 | C | 71.70600 | 76.52590 | 78.07467 | -383.52382  | -675.04808  | 144.24917   | 1 |
| 208 | H | 71.59401 | 75.91814 | 78.99101 | 4.09847     | 1517.59662  | 2262.86397  | 1 |
| 209 | C | 71.98602 | 77.99755 | 75.71609 | -134.76730  | 428.45285   | -649.50303  | 1 |
| 210 | H | 72.10459 | 78.56699 | 74.78067 | -903.23433  | 1600.49020  | 2011.53387  | 1 |
| 211 | C | 70.59986 | 76.97314 | 77.38007 | -335.53281  | -615.00040  | -364.39058  | 1 |
| 212 | H | 69.60048 | 76.72851 | 77.77669 | 1596.45398  | -1369.33862 | 1732.02659  | 1 |
| 213 | C | 70.68575 | 77.71011 | 76.18131 | 585.48547   | -340.24194  | -406.23938  | 1 |
| 214 | O | 69.55245 | 78.11087 | 75.49976 | -419.15649  | -173.04408  | -511.94141  | 1 |
| 215 | H | 68.96842 | 78.34819 | 74.67335 | -1071.84350 | 1559.71507  | -1960.13012 | 1 |
| 216 | C | 76.06464 | 74.42691 | 78.20729 | 291.41878   | -183.13091  | 710.72246   | 1 |
| 217 | O | 77.05745 | 74.25045 | 77.54252 | 379.87695   | 523.47396   | -222.23622  | 1 |
| 218 | N | 75.83603 | 74.19518 | 79.48564 | 564.30591   | 373.09380   | 277.24371   | 1 |
| 219 | H | 74.85262 | 74.30906 | 79.84920 | -120.59931  | -2436.07824 | -1214.35098 | 1 |
| 220 | C | 76.85049 | 74.37901 | 80.49638 | 404.07514   | -299.37480  | 608.84009   | 1 |
| 221 | H | 76.98249 | 73.36597 | 80.93497 | -1071.07882 | -841.69025  | 2359.66467  | 1 |
| 222 | C | 78.19979 | 74.96447 | 79.93313 | -683.12807  | 68.71770    | -390.13096  | 1 |
| 223 | H | 78.48154 | 74.47518 | 78.96232 | 2068.88918  | 1596.58590  | 770.89603   | 1 |
| 224 | H | 78.10975 | 76.05479 | 79.71448 | 1379.86429  | 2342.49779  | -179.85638  | 1 |
| 225 | C | 79.28968 | 74.68225 | 81.01869 | -176.39967  | 537.49466   | 550.97268   | 1 |
| 226 | H | 79.13699 | 75.31289 | 81.92253 | -396.28051  | 1942.22168  | 1869.33314  | 1 |
| 227 | H | 79.22031 | 73.63018 | 81.37267 | -94.44700   | 586.00678   | -2659.20016 | 1 |
| 228 | C | 80.71472 | 74.95815 | 80.35431 | -291.69381  | -718.18079  | -150.72929  | 1 |
| 229 | H | 80.89841 | 74.43915 | 79.38020 | -2303.38776 | 1089.76242  | 964.62032   | 1 |
| 230 | H | 81.00560 | 76.03260 | 80.23430 | 884.16729   | 2568.80533  | -207.74283  | 1 |
| 231 | N | 81.56801 | 74.35199 | 81.28854 | -594.49522  | -252.81478  | 342.29276   | 1 |
| 232 | H | 81.12883 | 73.85541 | 82.04869 | -1735.17426 | 2084.05705  | -263.71605  | 1 |
| 233 | C | 82.83828 | 74.36687 | 81.23269 | 595.23177   | -271.52487  | 442.22352   | 1 |
| 234 | N | 83.43668 | 75.05401 | 80.17205 | 585.53813   | -424.79750  | -105.81303  | 1 |

|     |   |          |          |          |             |             |             |   |
|-----|---|----------|----------|----------|-------------|-------------|-------------|---|
| 235 | H | 82.99974 | 75.56992 | 79.40912 | 959.88797   | 1327.56823  | -2177.11905 | 1 |
| 236 | H | 84.44269 | 75.14276 | 80.02482 | 1578.48647  | 16.27378    | -2220.76233 | 1 |
| 237 | N | 83.38993 | 73.65376 | 82.30670 | -452.17763  | -390.33541  | -421.51853  | 1 |
| 238 | H | 82.94896 | 73.13910 | 83.06771 | 470.26107   | 1974.25629  | -1817.92087 | 1 |
| 239 | H | 84.39469 | 73.53370 | 82.43886 | 1856.67307  | -1573.97321 | -1224.35416 | 1 |
| 240 | C | 76.15800 | 75.41345 | 81.54108 | -531.47271  | -581.45780  | -55.06206   | 1 |
| 241 | O | 75.39024 | 76.28425 | 81.20286 | -243.00837  | 192.73507   | 609.52485   | 1 |
| 242 | N | 76.63615 | 75.17666 | 82.76753 | 343.49288   | -644.25607  | 38.09164    | 1 |
| 243 | H | 77.30476 | 74.41404 | 82.86406 | -1691.16043 | -1535.97525 | -1484.73099 | 1 |
| 244 | C | 76.21785 | 76.00972 | 83.89572 | 542.66492   | 350.14337   | 454.42563   | 1 |
| 245 | H | 75.33139 | 76.54419 | 83.47408 | 1209.57979  | -2396.95920 | 463.86744   | 1 |
| 246 | C | 75.89630 | 75.09743 | 85.07048 | -737.14309  | 145.93010   | 242.71942   | 1 |
| 247 | H | 76.82032 | 74.53137 | 85.32284 | -1050.18303 | 159.36419   | -2509.06125 | 1 |
| 248 | C | 75.47245 | 75.87859 | 86.29852 | -706.77696  | -252.88343  | -245.16230  | 1 |
| 249 | H | 75.30027 | 75.20497 | 87.18307 | -1624.64039 | -1665.49085 | 1417.86935  | 1 |
| 250 | H | 76.26228 | 76.63680 | 86.59483 | 2566.10521  | 598.51109   | 693.22305   | 1 |
| 251 | H | 74.51695 | 76.44513 | 86.12086 | -1972.69758 | 107.10018   | -1876.34312 | 1 |
| 252 | C | 74.82059 | 74.08951 | 84.70692 | 412.85148   | 672.58832   | -27.69222   | 1 |
| 253 | H | 74.63155 | 73.35898 | 85.54050 | 1447.02277  | 1762.76533  | -1490.78944 | 1 |
| 254 | H | 73.84271 | 74.59634 | 84.47934 | 1320.77379  | -145.20455  | 2378.68491  | 1 |
| 255 | H | 75.10239 | 73.49656 | 83.79382 | -1512.10848 | 1470.52031  | 1724.75147  | 1 |
| 256 | C | 77.47599 | 77.04241 | 84.21835 | -607.11113  | 499.56689   | 73.73769    | 1 |
| 257 | O | 77.68233 | 77.44542 | 85.34236 | 357.97126   | 460.81534   | 356.68785   | 1 |
| 258 | N | 78.12199 | 77.35393 | 83.10805 | 536.55407   | -368.62270  | 332.76306   | 1 |
| 259 | H | 77.77450 | 76.94539 | 82.24196 | 524.38866   | 2297.69985  | 1367.20941  | 1 |
| 260 | C | 79.09140 | 78.38614 | 83.14663 | 46.50277    | -774.29190  | -147.97904  | 1 |
| 261 | H | 78.88239 | 78.93660 | 84.09222 | 1676.51875  | 1883.29066  | 1032.55549  | 1 |
| 262 | C | 80.57281 | 77.73915 | 83.11402 | -559.41456  | -34.19198   | -556.30433  | 1 |
| 263 | H | 80.69788 | 77.15771 | 82.16995 | -64.66664   | 395.18769   | 2695.05373  | 1 |
| 264 | H | 81.34303 | 78.54633 | 83.08080 | -2703.44278 | -60.40056   | 333.79418   | 1 |
| 265 | C | 80.78490 | 76.84658 | 84.30644 | -519.76435  | 377.31045   | 459.42366   | 1 |
| 266 | H | 79.95802 | 76.10099 | 84.33588 | -1746.74323 | 1667.50644  | -1261.73691 | 1 |
| 267 | C | 82.11010 | 76.10565 | 84.17181 | 570.95554   | 16.46261    | -545.27700  | 1 |
| 268 | H | 82.27364 | 75.38751 | 85.01601 | 2391.58273  | 28.05277    | -1305.07271 | 1 |
| 269 | H | 82.15766 | 75.51736 | 83.21998 | 175.75588   | 917.63458   | 2559.43867  | 1 |
| 270 | H | 82.97907 | 76.81278 | 84.16393 | -1063.97851 | -2155.34650 | 1283.00462  | 1 |
| 271 | C | 80.76974 | 77.63326 | 85.60950 | 193.76014   | 2.62946     | -765.53141  | 1 |
| 272 | H | 81.03620 | 76.98691 | 86.48538 | 507.39394   | -846.55087  | 2539.60089  | 1 |
| 273 | H | 81.49969 | 78.48361 | 85.59009 | 1337.57841  | 1818.19054  | 1526.01994  | 1 |
| 274 | H | 79.75151 | 78.06352 | 85.81592 | 1100.88635  | -1172.91350 | -2199.08909 | 1 |
| 275 | C | 78.94599 | 79.23150 | 81.77994 | -549.21115  | 475.64486   | -309.38218  | 1 |
| 276 | O | 78.57106 | 78.74573 | 80.74502 | 556.06106   | -390.37755  | -78.24250   | 1 |
| 277 | O | 79.45524 | 80.55108 | 81.81754 | -572.27940  | -310.19032  | -209.75862  | 1 |
| 278 | H | 79.68511 | 80.60214 | 82.78629 | -1380.08193 | 2212.14486  | 790.85944   | 1 |

Listing 102: C00102.xmolout

|    |   |          |          |          |             |             |             |        |          |
|----|---|----------|----------|----------|-------------|-------------|-------------|--------|----------|
| 1  |   | 276      |          |          |             |             |             |        |          |
| 2  |   | 150.0000 | 150.0000 | 150.0000 | 0.0000      | 0.0000      | 0.0000***** | 2.7750 | 11100    |
|    |   | 0.2500   | 300.00   | 0.00     | 0.00        | 0.00        | -1293.4171  | 0.0000 | 300.0000 |
| 3  | H | 72.52675 | 84.15658 | 83.29686 | -2043.14101 | -1757.64893 | 399.89339   |        | 1        |
| 4  | N | 73.39020 | 83.63226 | 83.41829 | 426.75047   | 490.45733   | -334.42467  |        | 1        |
| 5  | H | 73.27892 | 83.25107 | 84.35506 | 442.25559   | -1110.30854 | -2448.52907 |        | 1        |
| 6  | C | 74.57877 | 84.35892 | 83.19987 | 415.32972   | -666.39213  | 83.73172    |        | 1        |
| 7  | H | 74.34545 | 84.96363 | 82.29762 | 879.32219   | 2491.00447  | 667.35213   |        | 1        |
| 8  | C | 74.89677 | 85.28865 | 84.47481 | 31.35357    | 477.41777   | 628.23362   |        | 1        |
| 9  | H | 75.18345 | 84.64275 | 85.33915 | 1168.38489  | 2240.25337  | -1019.71136 |        | 1        |
| 10 | H | 75.79519 | 85.91532 | 84.25841 | -360.43770  | 2534.90498  | 931.67112   |        | 1        |
| 11 | C | 73.71737 | 86.15344 | 84.84022 | 463.18208   | 512.70242   | -382.34388  |        | 1        |
| 12 | H | 72.85060 | 85.49345 | 85.06782 | 1725.29117  | 1863.52247  | -987.07854  |        | 1        |
| 13 | C | 74.03324 | 86.97579 | 86.08366 | 710.42801   | -144.27427  | -313.15367  |        | 1        |
| 14 | H | 73.15868 | 87.60132 | 86.39933 | 364.20195   | -1033.13725 | 2494.72524  |        | 1        |

|    |   |          |          |          |             |             |             |   |
|----|---|----------|----------|----------|-------------|-------------|-------------|---|
| 15 | H | 74.30811 | 86.32460 | 86.95319 | 2567.61904  | 335.80679   | 847.48802   | 1 |
| 16 | H | 74.89239 | 87.67344 | 85.90782 | -2587.99029 | 680.92867   | -512.16411  | 1 |
| 17 | C | 73.32767 | 87.08738 | 83.70288 | 268.17616   | 741.64379   | -40.42634   | 1 |
| 18 | H | 72.47401 | 87.75409 | 83.99070 | 1283.54314  | -1945.37420 | -1411.27812 | 1 |
| 19 | H | 74.18010 | 87.75049 | 83.40394 | -1258.57796 | 1317.15249  | -2026.02085 | 1 |
| 20 | H | 73.01074 | 86.52177 | 82.78918 | -2502.84526 | 909.80597   | 575.92391   | 1 |
| 21 | C | 75.82995 | 83.35278 | 82.98011 | 619.36578   | -458.64843  | -172.09273  | 1 |
| 22 | O | 76.96864 | 83.75351 | 83.16511 | -81.40433   | 433.87611   | 522.34594   | 1 |
| 23 | N | 75.44493 | 82.15534 | 82.56492 | 175.23996   | -622.20190  | 341.55523   | 1 |
| 24 | H | 74.44418 | 82.02908 | 82.42392 | -876.57256  | -303.22879  | -2561.90213 | 1 |
| 25 | C | 76.41604 | 81.15839 | 82.26004 | -571.88214  | -534.10783  | -106.15033  | 1 |
| 26 | H | 77.23476 | 81.32818 | 82.99106 | -2713.20841 | -16.25800   | -248.80809  | 1 |
| 27 | C | 75.67400 | 79.74915 | 82.38744 | 166.60354   | 288.16399   | -716.09568  | 1 |
| 28 | H | 74.79381 | 79.74529 | 81.68796 | -2097.85574 | 1636.78449  | -586.18044  | 1 |
| 29 | O | 75.14938 | 79.44518 | 83.69341 | -317.80580  | -363.38227  | 484.43082   | 1 |
| 30 | H | 74.19095 | 79.39323 | 83.50806 | 1863.74748  | -1451.84923 | 1357.29467  | 1 |
| 31 | C | 76.77074 | 78.76220 | 81.84324 | 503.80731   | 517.99032   | 318.51606   | 1 |
| 32 | H | 76.40730 | 77.70865 | 81.84297 | 640.61020   | -2157.10410 | -1536.29104 | 1 |
| 33 | H | 77.06204 | 79.00972 | 80.79694 | 1687.88455  | 465.60692   | 2087.56452  | 1 |
| 34 | H | 77.69580 | 78.79495 | 82.46443 | -1293.07895 | -1899.88581 | -1463.57452 | 1 |
| 35 | C | 76.87486 | 81.41841 | 80.71076 | -153.07550  | -733.68902  | 248.70981   | 1 |
| 36 | O | 76.06765 | 81.27404 | 79.83245 | 186.15459   | -480.78787  | -449.34387  | 1 |
| 37 | N | 78.18403 | 81.71294 | 80.62677 | -487.53139  | 543.18517   | 42.03850    | 1 |
| 38 | C | 78.80821 | 82.03016 | 79.38392 | -699.35871  | 69.34393    | 360.10701   | 1 |
| 39 | H | 77.99989 | 82.37813 | 78.69974 | 2.81126     | -221.99807  | -2715.58072 | 1 |
| 40 | C | 79.87789 | 83.11916 | 79.82150 | -507.46439  | -592.59194  | 122.07761   | 1 |
| 41 | H | 80.69643 | 83.24045 | 79.07647 | -1975.08116 | 525.87560   | -1801.71556 | 1 |
| 42 | H | 79.41367 | 84.12116 | 79.96086 | 1588.27743  | -1913.22100 | 1113.83566  | 1 |
| 43 | C | 80.36426 | 82.52467 | 81.18049 | -613.62442  | -457.55993  | -194.14490  | 1 |
| 44 | H | 81.07820 | 81.68653 | 81.01441 | 1707.54637  | -721.27992  | 1996.92523  | 1 |
| 45 | H | 80.88679 | 83.26249 | 81.83056 | 758.23357   | 2100.81767  | 1560.55011  | 1 |
| 46 | C | 78.99977 | 82.00345 | 81.79984 | -352.41524  | 704.96076   | 49.21465    | 1 |
| 47 | H | 79.08768 | 81.06786 | 82.40173 | 1714.76886  | -2070.42778 | 443.35792   | 1 |
| 48 | H | 78.39996 | 82.77980 | 82.38129 | 1224.15040  | 1801.50881  | 1636.97633  | 1 |
| 49 | C | 79.63562 | 80.73657 | 78.79816 | 566.85117   | 537.05831   | 117.62814   | 1 |
| 50 | O | 80.64590 | 80.89343 | 78.15463 | -550.26779  | -406.08867  | 4.21666     | 1 |
| 51 | N | 79.05307 | 79.58373 | 79.15384 | 566.34832   | -425.77725  | 180.18749   | 1 |
| 52 | H | 78.14525 | 79.72525 | 79.59609 | 644.44502   | 2646.80550  | -52.73430   | 1 |
| 53 | C | 79.35014 | 78.43828 | 78.34698 | 612.34801   | -281.48662  | 411.56221   | 1 |
| 54 | H | 80.42684 | 78.53434 | 78.07617 | 1667.23498  | -1490.75142 | 1556.16753  | 1 |
| 55 | C | 78.98456 | 77.14389 | 79.21234 | -714.45746  | -175.43074  | 286.98927   | 1 |
| 56 | H | 77.88560 | 77.17556 | 79.44897 | -787.09484  | 1763.03619  | -1922.46060 | 1 |
| 57 | O | 79.65506 | 77.02095 | 80.48088 | -429.46514  | 516.51932   | -128.40526  | 1 |
| 58 | H | 78.90525 | 77.12262 | 81.10029 | 1981.82785  | 436.16847   | -1818.18182 | 1 |
| 59 | C | 79.26772 | 75.97965 | 78.19346 | 630.79189   | -468.94448  | 76.03230    | 1 |
| 60 | H | 79.03551 | 74.98327 | 78.63079 | -1775.71861 | 2062.30353  | 131.89849   | 1 |
| 61 | H | 78.65628 | 76.07421 | 77.26542 | -1855.14608 | 88.94118    | 1993.53760  | 1 |
| 62 | H | 80.33891 | 75.95788 | 77.88663 | -1504.82350 | -780.94249  | -2132.90992 | 1 |
| 63 | C | 78.35248 | 78.49794 | 77.06546 | 288.57638   | 618.62814   | -397.00270  | 1 |
| 64 | O | 77.22255 | 78.97489 | 77.13551 | 321.70495   | -185.26452  | 574.37218   | 1 |
| 65 | N | 78.92892 | 77.89923 | 76.04760 | -447.05792  | -446.53431  | 367.76425   | 1 |
| 66 | H | 79.86148 | 77.50929 | 76.16622 | 350.31316   | 1975.63644  | -1843.31522 | 1 |
| 67 | C | 78.17283 | 77.68849 | 74.84983 | -511.23061  | 374.03917   | -471.51480  | 1 |
| 68 | H | 77.66658 | 78.67129 | 74.71126 | 2234.79579  | -898.70890  | -1273.45190 | 1 |
| 69 | C | 79.20398 | 77.25543 | 73.71226 | 529.53781   | -159.34528  | 563.72604   | 1 |
| 70 | H | 78.64567 | 77.31395 | 72.73923 | 654.59388   | 2347.94251  | 1217.51488  | 1 |
| 71 | H | 80.03051 | 78.00982 | 73.64093 | -1526.55661 | 2103.42026  | 817.87394   | 1 |
| 72 | O | 79.76085 | 75.93689 | 73.86447 | -554.84278  | 14.12789    | 399.58769   | 1 |
| 73 | H | 78.89847 | 75.42071 | 74.02827 | 1297.06236  | 2061.84854  | 1220.68812  | 1 |
| 74 | C | 77.11169 | 76.47951 | 75.06374 | -662.15484  | -412.13544  | 123.62687   | 1 |
| 75 | O | 77.28829 | 75.39465 | 74.53575 | -540.01537  | -317.05804  | 274.91456   | 1 |
| 76 | N | 76.14238 | 76.88200 | 75.85640 | -202.76299  | -690.00100  | -131.49145  | 1 |

|     |   |          |          |          |             |             |             |   |
|-----|---|----------|----------|----------|-------------|-------------|-------------|---|
| 77  | H | 76.20705 | 77.85173 | 76.25604 | -702.62132  | -2617.37191 | 281.70413   | 1 |
| 78  | C | 74.86805 | 76.19346 | 75.93620 | -491.73914  | 576.34187   | 222.73509   | 1 |
| 79  | H | 74.23133 | 76.93451 | 76.47467 | 1977.17978  | -1823.58850 | -434.68928  | 1 |
| 80  | C | 74.36450 | 75.90286 | 74.53270 | -649.50797  | -328.66843  | 306.11224   | 1 |
| 81  | H | 75.06369 | 75.16163 | 74.07766 | 2075.07803  | 1452.16490  | -1004.45904 | 1 |
| 82  | C | 72.97164 | 75.30240 | 74.55468 | -615.18735  | -489.99689  | -70.96352   | 1 |
| 83  | H | 72.63356 | 75.00486 | 73.52573 | -1226.32661 | -1724.38906 | -1716.47170 | 1 |
| 84  | H | 72.93891 | 74.37758 | 75.21344 | 2381.64273  | -969.84735  | 900.46860   | 1 |
| 85  | H | 72.21077 | 76.02674 | 74.95693 | 2122.74991  | 1702.23946  | -141.36228  | 1 |
| 86  | C | 74.36039 | 77.13639 | 73.64723 | -501.86074  | -479.61276  | -376.42482  | 1 |
| 87  | H | 74.01608 | 76.89895 | 72.60307 | 993.79261   | -2246.95401 | -1177.81305 | 1 |
| 88  | H | 73.67637 | 77.93259 | 74.05058 | 42.71279    | -626.15391  | -2651.37258 | 1 |
| 89  | H | 75.38566 | 77.59018 | 73.56620 | -2026.39012 | -1590.33709 | -887.82922  | 1 |
| 90  | C | 75.04811 | 74.77961 | 76.83187 | -672.89153  | 382.57394   | -156.34072  | 1 |
| 91  | O | 74.23830 | 73.88502 | 76.67396 | 410.04627   | 221.86223   | 500.35950   | 1 |
| 92  | N | 75.99991 | 74.88379 | 77.72977 | -378.11782  | -443.79414  | -441.10984  | 1 |
| 93  | H | 76.44970 | 75.78864 | 77.61068 | 2404.15973  | -568.14894  | 1149.30085  | 1 |
| 94  | C | 76.33820 | 73.92897 | 78.73190 | -544.54484  | 466.16019   | 331.29119   | 1 |
| 95  | H | 76.66023 | 74.55554 | 79.59206 | -1409.80988 | -170.17955  | 2325.32679  | 1 |
| 96  | C | 75.05207 | 73.04664 | 79.00407 | -184.48284  | 116.78282   | -758.89137  | 1 |
| 97  | H | 74.16208 | 73.71092 | 79.09317 | 1893.78641  | 1861.14652  | 611.04528   | 1 |
| 98  | H | 74.85018 | 72.39481 | 78.11748 | -2170.79665 | -974.19311  | 1327.50117  | 1 |
| 99  | C | 75.22001 | 72.17238 | 80.28616 | 389.51668   | 672.81878   | -138.49152  | 1 |
| 100 | H | 76.06515 | 71.45779 | 80.16131 | 510.64577   | 1933.03327  | 1851.02484  | 1 |
| 101 | H | 75.51510 | 72.80486 | 81.15185 | -2302.30869 | -1105.72939 | -948.89774  | 1 |
| 102 | C | 73.90299 | 71.38648 | 80.65071 | -559.93427  | -126.34590  | 542.30857   | 1 |
| 103 | O | 73.87447 | 70.68644 | 81.63027 | -670.36003  | -111.83166  | 76.36448    | 1 |
| 104 | N | 72.87560 | 71.60776 | 79.80166 | -216.06729  | -537.07037  | 446.51379   | 1 |
| 105 | H | 72.83104 | 72.19207 | 78.95878 | -1251.96487 | 1074.12894  | -2168.52500 | 1 |
| 106 | H | 71.93489 | 71.22077 | 79.93368 | -2451.83023 | -720.73851  | 944.84612   | 1 |
| 107 | C | 77.53095 | 72.95736 | 78.19403 | 546.24052   | -563.88337  | -85.11809   | 1 |
| 108 | O | 77.43632 | 72.35833 | 77.14496 | 71.70702    | -307.40463  | 606.69673   | 1 |
| 109 | N | 78.51103 | 72.87854 | 79.10084 | 479.90863   | -504.50129  | 222.86849   | 1 |
| 110 | C | 79.76628 | 72.27835 | 78.74726 | 75.51268    | -600.91904  | 506.73700   | 1 |
| 111 | H | 79.98629 | 72.62824 | 77.71221 | -2033.61562 | 1795.30103  | 254.89480   | 1 |
| 112 | C | 80.72262 | 72.81274 | 79.89621 | 523.79067   | 517.99274   | 284.45581   | 1 |
| 113 | H | 81.63796 | 72.19166 | 80.02105 | 1599.61665  | -1127.00911 | 1895.98173  | 1 |
| 114 | H | 81.05873 | 73.85761 | 79.71028 | -1881.83093 | 1275.82488  | -1501.55016 | 1 |
| 115 | C | 79.74984 | 72.72815 | 81.11142 | -600.05639  | -404.05026  | 316.64485   | 1 |
| 116 | H | 79.59343 | 71.66258 | 81.40578 | -2597.05260 | 496.36221   | 657.73249   | 1 |
| 117 | H | 80.10668 | 73.27263 | 82.01460 | -1666.24518 | 1294.38985  | -1723.90591 | 1 |
| 118 | C | 78.43448 | 73.35486 | 80.47391 | 493.57570   | -129.95376  | -602.56394  | 1 |
| 119 | H | 77.47687 | 73.00506 | 80.92118 | -1469.08415 | -637.84797  | 2204.22581  | 1 |
| 120 | H | 78.43741 | 74.47004 | 80.43522 | -1038.97840 | 1068.88701  | -2280.71789 | 1 |
| 121 | C | 79.61274 | 70.64629 | 78.83651 | 188.88100   | 241.05089   | -727.87821  | 1 |
| 122 | O | 79.99239 | 70.05716 | 79.81383 | 531.88613   | -49.19943   | 427.07960   | 1 |
| 123 | N | 79.14296 | 70.19173 | 77.67692 | 708.14833   | 26.93417    | -179.73509  | 1 |
| 124 | H | 78.76428 | 70.91685 | 77.04056 | -2232.69501 | -1179.09831 | 1023.94816  | 1 |
| 125 | C | 78.81189 | 68.79124 | 77.41269 | -738.32412  | 259.92548   | 104.42456   | 1 |
| 126 | H | 79.05515 | 68.67475 | 76.33053 | 2028.89123  | 1260.02983  | 1311.33324  | 1 |
| 127 | C | 79.54333 | 67.82257 | 78.31428 | -258.65678  | -345.52513  | 661.28459   | 1 |
| 128 | H | 79.33686 | 68.11661 | 79.37569 | -1826.06090 | -1801.46097 | -918.64554  | 1 |
| 129 | C | 79.04668 | 66.40063 | 78.11420 | -541.23400  | 531.92970   | -218.41428  | 1 |
| 130 | H | 79.55957 | 65.67949 | 78.80754 | 1311.73218  | -2219.18200 | 882.19023   | 1 |
| 131 | H | 77.94174 | 66.31894 | 78.30745 | -1048.71298 | 1223.58118  | -2196.97971 | 1 |
| 132 | H | 79.22826 | 66.03999 | 77.06511 | 419.06414   | 1903.92898  | 1903.44670  | 1 |
| 133 | C | 81.04709 | 67.86667 | 78.10855 | -423.86431  | 152.66566   | -648.55262  | 1 |
| 134 | H | 81.58248 | 67.16203 | 78.80256 | 105.68386   | -2342.50080 | 1387.51238  | 1 |
| 135 | H | 81.33351 | 67.58384 | 77.05855 | -1695.63603 | -1484.73621 | -1531.02793 | 1 |
| 136 | H | 81.44923 | 68.89933 | 78.30398 | -1853.57121 | -487.39031  | 1936.59343  | 1 |
| 137 | C | 77.17455 | 68.64921 | 77.69931 | 539.71428   | -510.58232  | 267.58633   | 1 |
| 138 | O | 76.72691 | 68.67565 | 78.82094 | -15.93758   | -278.34085  | -624.49402  | 1 |

|     |   |          |          |          |             |             |             |   |
|-----|---|----------|----------|----------|-------------|-------------|-------------|---|
| 139 | N | 76.53312 | 68.54954 | 76.54139 | -676.81886  | 12.05292    | 276.17960   | 1 |
| 140 | H | 77.14767 | 68.54661 | 75.72834 | -1694.44250 | -373.84189  | -2100.66098 | 1 |
| 141 | C | 75.30475 | 67.79105 | 76.47317 | 412.33078   | -664.70360  | 108.35451   | 1 |
| 142 | H | 75.60161 | 66.72024 | 76.43421 | 1765.77476  | 1294.44366  | 1621.76594  | 1 |
| 143 | C | 74.44990 | 68.15507 | 77.74370 | -179.66635  | -721.95667  | -264.73915  | 1 |
| 144 | H | 74.76608 | 67.55205 | 78.62760 | -607.34922  | 2587.87032  | -598.10018  | 1 |
| 145 | H | 74.65107 | 69.21522 | 78.02981 | -359.69332  | -1479.13954 | -2259.74260 | 1 |
| 146 | C | 72.92871 | 67.92716 | 77.44055 | -240.01076  | 616.02425   | 431.85322   | 1 |
| 147 | H | 72.64692 | 68.36335 | 76.45476 | -1359.17131 | 782.54425   | 2227.99181  | 1 |
| 148 | H | 72.68103 | 66.84395 | 77.37936 | -820.36667  | 85.81767    | -2596.78715 | 1 |
| 149 | C | 72.15765 | 68.64346 | 78.61901 | -513.07015  | 236.18570   | -551.87280  | 1 |
| 150 | H | 72.46510 | 68.22719 | 79.60629 | 1816.11944  | -1183.11722 | -1650.94321 | 1 |
| 151 | H | 72.42976 | 69.72261 | 78.65371 | -1800.04429 | -1361.53473 | 1526.34643  | 1 |
| 152 | C | 70.63630 | 68.47109 | 78.39969 | 726.08972   | -253.19732  | -179.64713  | 1 |
| 153 | H | 70.24080 | 68.94520 | 77.47891 | 1224.27271  | -456.51798  | -2390.90304 | 1 |
| 154 | H | 70.27743 | 67.42494 | 78.47041 | 1206.40339  | -1150.93514 | -2154.90344 | 1 |
| 155 | N | 69.92299 | 69.21747 | 79.57631 | 329.70796   | -633.68968  | -155.67358  | 1 |
| 156 | H | 68.86943 | 69.10429 | 79.62685 | 1348.31305  | 1938.76845  | 1359.00643  | 1 |
| 157 | H | 70.21192 | 68.93223 | 80.55631 | 2096.92035  | 1446.54551  | -966.48890  | 1 |
| 158 | H | 70.02192 | 70.27320 | 79.61949 | -1197.07217 | -2303.53719 | 827.28733   | 1 |
| 159 | C | 74.54500 | 68.25944 | 75.11222 | -378.01186  | -556.17301  | -413.96481  | 1 |
| 160 | O | 73.83724 | 67.49645 | 74.49514 | -409.44433  | -307.55053  | -453.30833  | 1 |
| 161 | N | 74.67786 | 69.57924 | 74.94298 | -429.02477  | 524.70884   | 274.08502   | 1 |
| 162 | H | 75.35363 | 70.05844 | 75.54098 | 1706.34263  | -1425.96036 | 1574.38926  | 1 |
| 163 | C | 74.31644 | 70.13429 | 73.67716 | -45.25864   | -626.22952  | 478.93267   | 1 |
| 164 | H | 73.85490 | 69.30215 | 73.09194 | 1988.63164  | 570.90773   | 1772.87287  | 1 |
| 165 | C | 73.29160 | 71.28463 | 74.06974 | 551.77128   | -20.49526   | -564.54996  | 1 |
| 166 | H | 72.46370 | 70.84787 | 74.67183 | 1434.61535  | -1753.10253 | 1513.99471  | 1 |
| 167 | H | 73.77691 | 72.03212 | 74.73799 | -714.67738  | 1819.09770  | 1898.36494  | 1 |
| 168 | C | 72.72413 | 71.96889 | 72.78724 | 446.99263   | -555.77305  | 338.97221   | 1 |
| 169 | H | 73.47826 | 72.65693 | 72.34252 | 1953.68466  | 1892.25957  | -161.67766  | 1 |
| 170 | H | 72.48550 | 71.22142 | 71.99738 | -403.03785  | 2688.07032  | -188.43591  | 1 |
| 171 | C | 71.41505 | 72.74536 | 73.22772 | 567.86262   | 335.74681   | 434.04421   | 1 |
| 172 | H | 70.58893 | 72.03501 | 73.46123 | -1080.02275 | 1568.26081  | -1948.78900 | 1 |
| 173 | H | 71.58121 | 73.32353 | 74.16346 | -919.54108  | 2111.34692  | 1456.13463  | 1 |
| 174 | C | 71.03402 | 73.67825 | 72.05684 | 195.81897   | 173.33862   | -745.11536  | 1 |
| 175 | H | 71.78552 | 74.45561 | 71.81468 | 1405.67949  | -2301.21089 | -390.08113  | 1 |
| 176 | H | 70.74688 | 73.13756 | 71.13508 | -940.37328  | -1118.32446 | 2299.72133  | 1 |
| 177 | N | 69.75034 | 74.48279 | 72.45449 | 319.26422   | 656.36007   | -42.02424   | 1 |
| 178 | H | 69.33518 | 75.08538 | 71.68235 | 1961.03633  | 619.91968   | 1787.09422  | 1 |
| 179 | H | 68.88829 | 73.93173 | 72.73718 | 854.14343   | -2156.80752 | 1429.08711  | 1 |
| 180 | H | 69.82030 | 75.19907 | 73.23642 | 1237.02905  | -1378.50857 | -1998.28500 | 1 |
| 181 | C | 75.69579 | 70.72433 | 73.05945 | 532.53319   | -268.57236  | 517.55729   | 1 |
| 182 | O | 76.68567 | 70.93116 | 73.76904 | 266.16714   | -290.73804  | -558.88002  | 1 |
| 183 | N | 75.57471 | 70.90679 | 71.76128 | -226.25352  | 640.49678   | -270.32839  | 1 |
| 184 | H | 74.66456 | 70.69283 | 71.35704 | 2007.69063  | -1035.27229 | 1523.50231  | 1 |
| 185 | C | 76.49237 | 71.81759 | 71.13779 | -540.76542  | -573.33303  | 49.50000    | 1 |
| 186 | H | 76.66481 | 72.61297 | 71.89904 | -2374.20950 | -1036.76023 | 843.75774   | 1 |
| 187 | C | 77.83329 | 71.02773 | 70.80783 | -77.09082   | 666.87422   | -415.84136  | 1 |
| 188 | H | 77.63649 | 70.20277 | 70.06128 | -985.81834  | 617.19825   | 2463.91927  | 1 |
| 189 | O | 78.46437 | 70.30628 | 71.87835 | 293.29899   | -391.65602  | -477.80926  | 1 |
| 190 | H | 77.86111 | 70.57830 | 72.66078 | 2528.72714  | -681.76262  | -751.27122  | 1 |
| 191 | C | 78.69837 | 72.13263 | 70.10547 | 252.47363   | -605.14473  | 440.05134   | 1 |
| 192 | H | 79.66638 | 71.71803 | 69.73800 | -2052.65063 | 1456.49051  | -1043.51830 | 1 |
| 193 | H | 78.17113 | 72.57800 | 69.22605 | -2152.98800 | -1661.97574 | -161.70652  | 1 |
| 194 | H | 78.93900 | 72.96832 | 70.80441 | -473.12726  | -1584.27339 | 2165.61725  | 1 |
| 195 | C | 75.84774 | 72.34956 | 69.73445 | 360.36307   | 488.46713   | 505.10056   | 1 |
| 196 | O | 76.07681 | 73.48057 | 69.36925 | -200.08817  | -528.03552  | -385.82850  | 1 |
| 197 | N | 75.21088 | 71.38199 | 69.08132 | -597.54095  | -226.44775  | 355.20479   | 1 |
| 198 | H | 75.11044 | 70.46702 | 69.51782 | 2179.23655  | -1300.70981 | -991.33835  | 1 |
| 199 | C | 74.76467 | 71.66293 | 67.76509 | -687.68921  | 297.39807   | -249.45179  | 1 |
| 200 | H | 75.38404 | 72.52373 | 67.42380 | -349.16256  | -2467.37713 | -1101.72831 | 1 |

|     |   |          |          |          |             |             |             |   |
|-----|---|----------|----------|----------|-------------|-------------|-------------|---|
| 201 | C | 74.89076 | 70.32033 | 66.90634 | 672.47345   | 361.54328   | -201.62880  | 1 |
| 202 | H | 74.25791 | 69.52153 | 67.35649 | 1541.41502  | 582.18425   | 2169.97026  | 1 |
| 203 | H | 74.50896 | 70.49684 | 65.87454 | -2534.67717 | 60.25153    | 997.72295   | 1 |
| 204 | C | 76.36339 | 69.88716 | 66.87465 | 574.26774   | -389.43119  | -377.02542  | 1 |
| 205 | C | 77.25587 | 70.48848 | 65.93733 | 688.82679   | -287.33580  | -257.96133  | 1 |
| 206 | H | 76.89852 | 71.26255 | 65.23421 | 331.14182   | 1470.38163  | 2269.80013  | 1 |
| 207 | C | 76.83700 | 68.90016 | 67.79116 | -383.52382  | -675.04808  | 144.24917   | 1 |
| 208 | H | 76.15215 | 68.44077 | 68.52661 | 4.09847     | 1517.59662  | 2262.86397  | 1 |
| 209 | C | 78.58778 | 70.07526 | 65.92422 | -134.76730  | 428.45285   | -649.50303  | 1 |
| 210 | H | 79.27620 | 70.53408 | 65.19325 | -903.23433  | 1600.49020  | 2011.53387  | 1 |
| 211 | C | 78.18062 | 68.52125 | 67.74012 | -335.53281  | -615.00040  | -364.39058  | 1 |
| 212 | H | 78.53377 | 67.75298 | 68.45011 | 1596.45398  | -1369.33862 | 1732.02659  | 1 |
| 213 | C | 79.10222 | 69.08405 | 66.80948 | 585.48547   | -340.24194  | -406.23938  | 1 |
| 214 | O | 80.46784 | 68.70275 | 66.74473 | -419.15649  | -173.04408  | -511.94141  | 1 |
| 215 | H | 80.48290 | 68.01599 | 67.45234 | -1071.84350 | 1559.71507  | -1960.13012 | 1 |
| 216 | C | 73.16442 | 72.02022 | 67.86655 | 291.41878   | -183.13091  | 710.72246   | 1 |
| 217 | O | 72.34081 | 71.19134 | 68.16358 | 379.87695   | 523.47396   | -222.23622  | 1 |
| 218 | N | 73.01845 | 73.29728 | 67.56964 | 564.30591   | 373.09380   | 277.24371   | 1 |
| 219 | H | 73.79802 | 73.93682 | 67.32436 | -120.59931  | -2436.07824 | -1214.35098 | 1 |
| 220 | C | 71.70347 | 73.88436 | 67.47323 | 404.07514   | -299.37480  | 608.84009   | 1 |
| 221 | H | 71.19063 | 73.30361 | 66.67351 | -1071.07882 | -841.69025  | 2359.66467  | 1 |
| 222 | C | 70.97303 | 73.69461 | 68.86629 | -683.12807  | 68.71770    | -390.13096  | 1 |
| 223 | H | 71.16990 | 72.65494 | 69.22642 | 2068.88918  | 1596.58590  | 770.89603   | 1 |
| 224 | H | 71.41945 | 74.37055 | 69.63003 | 1379.86429  | 2342.49779  | -179.85638  | 1 |
| 225 | C | 69.43740 | 73.93132 | 68.75121 | -176.39967  | 537.49466   | 550.97268   | 1 |
| 226 | H | 69.16910 | 74.97618 | 69.02736 | -396.28051  | 1942.22168  | 1869.33314  | 1 |
| 227 | H | 69.08706 | 73.79416 | 67.70424 | -94.44700   | 586.00678   | -2659.20016 | 1 |
| 228 | C | 68.72130 | 72.87357 | 69.72004 | -291.69381  | -718.18079  | -150.72929  | 1 |
| 229 | H | 68.61411 | 71.85674 | 69.26254 | -2303.38776 | 1089.76242  | 964.62032   | 1 |
| 230 | H | 69.14067 | 72.77506 | 70.75228 | 884.16729   | 2568.80533  | -207.74283  | 1 |
| 231 | N | 67.45550 | 73.46084 | 69.82978 | -594.49522  | -252.81478  | 342.29276   | 1 |
| 232 | H | 67.11704 | 73.94644 | 69.01248 | -1735.17426 | 2084.05705  | -263.71605  | 1 |
| 233 | C | 66.70910 | 73.42610 | 70.86088 | 595.23177   | -271.52487  | 442.22352   | 1 |
| 234 | N | 67.15229 | 72.73403 | 71.99048 | 585.53813   | -424.79750  | -105.81303  | 1 |
| 235 | H | 67.99929 | 72.18351 | 72.12673 | 959.88797   | 1327.56823  | -2177.11905 | 1 |
| 236 | H | 66.61871 | 72.63431 | 72.85465 | 1578.48647  | 16.27378    | -2220.76233 | 1 |
| 237 | N | 65.51489 | 74.12306 | 70.62512 | -452.17763  | -390.33541  | -421.51853  | 1 |
| 238 | H | 65.22809 | 74.68859 | 69.82816 | 470.26107   | 1974.25629  | -1817.92087 | 1 |
| 239 | H | 64.80831 | 74.27725 | 71.34464 | 1856.67307  | -1573.97321 | -1224.35416 | 1 |
| 240 | C | 72.12619 | 75.38018 | 67.05554 | -531.47271  | -581.45780  | -55.06206   | 1 |
| 241 | O | 73.27837 | 75.60218 | 66.71049 | -243.00837  | 192.73507   | 609.52485   | 1 |
| 242 | N | 71.09523 | 76.23340 | 67.03810 | 343.49288   | -644.25607  | 38.09164    | 1 |
| 243 | H | 70.22625 | 75.84776 | 67.40961 | -1691.16043 | -1535.97525 | -1484.73099 | 1 |
| 244 | C | 71.37457 | 77.67311 | 67.10541 | 542.66492   | 350.14337   | 454.42563   | 1 |
| 245 | H | 72.39235 | 77.74723 | 66.65035 | 1209.57979  | -2396.95920 | 463.86744   | 1 |
| 246 | C | 70.27920 | 78.37870 | 66.32906 | -737.14309  | 145.93010   | 242.71942   | 1 |
| 247 | H | 69.29672 | 78.02989 | 66.71724 | -1050.18303 | 159.36419   | -2509.06125 | 1 |
| 248 | C | 70.34688 | 79.88440 | 66.50325 | -706.77696  | -252.88343  | -245.16230  | 1 |
| 249 | H | 69.52058 | 80.40490 | 65.94457 | -1624.64039 | -1665.49085 | 1417.86935  | 1 |
| 250 | H | 70.25783 | 80.17909 | 67.58608 | 2566.10521  | 598.51109   | 693.22305   | 1 |
| 251 | H | 71.32057 | 80.30124 | 66.12392 | -1972.69758 | 107.10018   | -1876.34312 | 1 |
| 252 | C | 70.33130 | 78.01923 | 64.85456 | 412.85148   | 672.58832   | -27.69222   | 1 |
| 253 | H | 69.47213 | 78.46655 | 64.28296 | 1447.02277  | 1762.76533  | -1490.78944 | 1 |
| 254 | H | 71.27979 | 78.38572 | 64.37355 | 1320.77379  | -145.20455  | 2378.68491  | 1 |
| 255 | H | 70.29442 | 76.90489 | 64.70368 | -1512.10848 | 1470.52031  | 1724.75147  | 1 |
| 256 | C | 71.39766 | 78.08561 | 68.71524 | -607.11113  | 499.56689   | 73.73769    | 1 |
| 257 | O | 72.44316 | 78.39279 | 69.23415 | 357.97126   | 460.81534   | 356.68785   | 1 |
| 258 | N | 70.19235 | 78.05903 | 69.25851 | 536.55407   | -368.62270  | 332.76306   | 1 |
| 259 | H | 69.39253 | 77.75385 | 68.70657 | 524.38866   | 2297.69985  | 1367.20941  | 1 |
| 260 | C | 70.11098 | 78.15613 | 70.67834 | 46.50277    | -774.29190  | -147.97904  | 1 |
| 261 | H | 71.12300 | 77.84506 | 71.02602 | 1676.51875  | 1883.29066  | 1032.55549  | 1 |
| 262 | C | 69.77525 | 79.68253 | 71.10176 | -559.41456  | -34.19198   | -556.30433  | 1 |

|     |   |          |          |          |             |             |             |   |
|-----|---|----------|----------|----------|-------------|-------------|-------------|---|
| 263 | H | 69.05146 | 80.12061 | 70.37452 | -64.66664   | 395.18769   | 2695.05373  | 1 |
| 264 | H | 69.27127 | 79.71534 | 72.09662 | -2703.44278 | -60.40056   | 333.79418   | 1 |
| 265 | C | 71.05000 | 80.47603 | 71.13678 | -519.76435  | 377.31045   | 459.42366   | 1 |
| 266 | H | 71.60585 | 80.29385 | 70.18701 | -1746.74323 | 1667.50644  | -1261.73691 | 1 |
| 267 | C | 70.74266 | 81.96509 | 71.24747 | 570.95554   | 16.46261    | -545.27700  | 1 |
| 268 | H | 71.67844 | 82.58106 | 71.25757 | 2391.58273  | 28.05277    | -1305.07271 | 1 |
| 269 | H | 70.11689 | 82.32476 | 70.39066 | 175.75588   | 917.63458   | 2559.43867  | 1 |
| 270 | H | 70.18192 | 82.20015 | 72.18859 | -1063.97851 | -2155.34650 | 1283.00462  | 1 |
| 271 | C | 71.93303 | 80.05763 | 72.30590 | 193.76014   | 2.62946     | -765.53141  | 1 |
| 272 | H | 72.86359 | 80.67888 | 72.36134 | 507.39394   | -846.55087  | 2539.60089  | 1 |
| 273 | H | 71.40173 | 80.16842 | 73.28597 | 1337.57841  | 1818.19054  | 1526.01994  | 1 |
| 274 | H | 72.25750 | 78.98903 | 72.22210 | 1100.88635  | -1172.91350 | -2199.08909 | 1 |
| 275 | C | 68.90090 | 77.20870 | 71.13351 | -549.21115  | 475.64486   | -309.38218  | 1 |
| 276 | O | 68.22824 | 76.58078 | 70.35557 | 556.06106   | -390.37755  | -78.24250   | 1 |
| 277 | O | 68.67460 | 77.09986 | 72.53010 | -572.27940  | -310.19032  | -209.75862  | 1 |
| 278 | H | 69.36233 | 77.74917 | 72.84405 | -1380.08193 | 2212.14486  | 790.85944   | 1 |

Listing 103: C00103.xmolout

|    |   |          |          |          |             |             |             |        |          |
|----|---|----------|----------|----------|-------------|-------------|-------------|--------|----------|
| 1  |   | 276      |          |          |             |             |             |        |          |
| 2  |   | 150.0000 | 150.0000 | 150.0000 | 0.0000      | 0.0000      | 0.0000***** | 2.7750 | 11100    |
|    |   | 0.2500   | 300.00   | 0.00     | 0.00        | 0.00        | -1293.4116  | 0.0000 | 300.0000 |
| 3  | H | 64.93624 | 68.23730 | 61.77167 | -2043.14101 | -1757.64893 | 399.89339   |        | 1        |
| 4  | N | 64.51992 | 69.12593 | 61.49110 | 426.75047   | 490.45733   | -334.42467  |        | 1        |
| 5  | H | 63.96207 | 69.40573 | 62.31453 | 442.25559   | -1110.30854 | -2448.52907 |        | 1        |
| 6  | C | 65.47518 | 70.10983 | 61.14455 | 415.32972   | -666.39213  | 83.73172    |        | 1        |
| 7  | H | 66.46259 | 69.62414 | 61.30203 | 879.32219   | 2491.00447  | 667.35213   |        | 1        |
| 8  | C | 65.27296 | 70.57809 | 59.61557 | 31.35357    | 477.41777   | 628.23362   |        | 1        |
| 9  | H | 64.27486 | 71.06618 | 59.50775 | 1168.38489  | 2240.25337  | -1019.71136 |        | 1        |
| 10 | H | 66.02546 | 71.35609 | 59.34283 | -360.43770  | 2534.90498  | 931.67112   |        | 1        |
| 11 | C | 65.38033 | 69.39425 | 58.69191 | 463.18208   | 512.70242   | -382.34388  |        | 1        |
| 12 | H | 64.60761 | 68.65010 | 58.99024 | 1725.29117  | 1863.52247  | -987.07854  |        | 1        |
| 13 | C | 65.11997 | 69.82451 | 57.25307 | 710.42801   | -144.27427  | -313.15367  |        | 1        |
| 14 | H | 65.15823 | 68.95509 | 56.54738 | 364.20195   | -1033.13725 | 2494.72524  |        | 1        |
| 15 | H | 64.11318 | 70.30250 | 57.13834 | 2567.61904  | 335.80679   | 847.48802   |        | 1        |
| 16 | H | 65.88121 | 70.56811 | 56.90218 | -2587.99029 | 680.92867   | -512.16411  |        | 1        |
| 17 | C | 66.74938 | 68.73274 | 58.77704 | 268.17616   | 741.64379   | -40.42634   |        | 1        |
| 18 | H | 66.84505 | 67.88698 | 58.04826 | 1283.54314  | -1945.37420 | -1411.27812 |        | 1        |
| 19 | H | 67.57329 | 69.45828 | 58.55314 | -1258.57796 | 1317.15249  | -2026.02085 |        | 1        |
| 20 | H | 66.94512 | 68.31196 | 59.79661 | -2502.84526 | 909.80597   | 575.92391   |        | 1        |
| 21 | C | 65.14383 | 71.28036 | 62.21463 | 619.36578   | -458.64843  | -172.09273  |        | 1        |
| 22 | O | 64.39332 | 71.03628 | 63.15982 | -81.40433   | 433.87611   | 522.34594   |        | 1        |
| 23 | N | 65.79385 | 72.37856 | 61.90021 | 175.23996   | -622.20190  | 341.55523   |        | 1        |
| 24 | H | 66.38443 | 72.31225 | 61.07147 | -876.57256  | -303.22879  | -2561.90213 |        | 1        |
| 25 | C | 65.69716 | 73.63717 | 62.55135 | -571.88214  | -534.10783  | -106.15033  |        | 1        |
| 26 | H | 65.96825 | 74.33840 | 61.73136 | -2713.20841 | -16.25800   | -248.80809  |        | 1        |
| 27 | C | 64.21095 | 73.89822 | 63.07362 | 166.60354   | 288.16399   | -716.09568  |        | 1        |
| 28 | H | 63.88618 | 73.05434 | 63.74943 | -2097.85574 | 1636.78449  | -586.18044  |        | 1        |
| 29 | O | 63.19821 | 73.94395 | 62.04596 | -317.80580  | -363.38227  | 484.43082   |        | 1        |
| 30 | H | 62.70303 | 73.12437 | 62.24503 | 1863.74748  | -1451.84923 | 1357.29467  |        | 1        |
| 31 | C | 64.39405 | 75.21569 | 63.91072 | 503.80731   | 517.99032   | 318.51606   |        | 1        |
| 32 | H | 63.45171 | 75.49973 | 64.43447 | 640.61020   | -2157.10410 | -1536.29104 |        | 1        |
| 33 | H | 65.18872 | 75.10649 | 64.68853 | 1687.88455  | 465.60692   | 2087.56452  |        | 1        |
| 34 | H | 64.68097 | 76.07391 | 63.25991 | -1293.07895 | -1899.88581 | -1463.57452 |        | 1        |
| 35 | C | 66.98963 | 73.73327 | 63.55970 | -153.07550  | -733.68902  | 248.70981   |        | 1        |
| 36 | O | 67.96274 | 74.22918 | 63.05066 | 186.15459   | -480.78787  | -449.34387  |        | 1        |
| 37 | N | 66.84579 | 73.26841 | 64.80868 | -487.53139  | 543.18517   | 42.03850    |        | 1        |
| 38 | C | 67.92597 | 73.36254 | 65.74394 | -699.35871  | 69.34393    | 360.10701   |        | 1        |
| 39 | H | 68.45030 | 74.31687 | 65.51046 | 2.81126     | -221.99807  | -2715.58072 |        | 1        |
| 40 | C | 67.16143 | 73.28081 | 67.12927 | -507.46439  | -592.59194  | 122.07761   |        | 1        |
| 41 | H | 67.82460 | 72.97783 | 67.97047 | -1975.08116 | 525.87560   | -1801.71556 |        | 1        |
| 42 | H | 66.70791 | 74.25750 | 67.41069 | 1588.27743  | -1913.22100 | 1113.83566  |        | 1        |



|     |   |          |          |          |             |             |             |   |
|-----|---|----------|----------|----------|-------------|-------------|-------------|---|
| 43  | C | 66.06862 | 72.21800 | 66.79285 | -613.62442  | -457.55993  | -194.14490  | 1 |
| 44  | H | 66.51245 | 71.19462 | 66.73381 | 1707.54637  | -721.27992  | 1996.92523  | 1 |
| 45  | H | 65.23963 | 72.17208 | 67.53456 | 758.23357   | 2100.81767  | 1560.55011  | 1 |
| 46  | C | 65.60943 | 72.73755 | 65.36413 | -352.41524  | 704.96076   | 49.21465    | 1 |
| 47  | H | 65.22120 | 71.95300 | 64.64390 | 1714.76886  | -2070.42778 | 443.35792   | 1 |
| 48  | H | 64.89593 | 73.59612 | 65.40281 | 1224.15040  | 1801.50881  | 1636.97633  | 1 |
| 49  | C | 68.91262 | 72.05005 | 65.61391 | 566.85117   | 537.05831   | 117.62814   | 1 |
| 50  | O | 68.62149 | 71.00402 | 66.14402 | -550.26779  | -406.08867  | 4.21666     | 1 |
| 51  | N | 69.99726 | 72.36397 | 64.92083 | 566.34832   | -425.77725  | 180.18749   | 1 |
| 52  | H | 70.07284 | 73.29170 | 64.50361 | 644.44502   | 2646.80550  | -52.73430   | 1 |
| 53  | C | 71.07188 | 71.43943 | 64.89947 | 612.34801   | -281.48662  | 411.56221   | 1 |
| 54  | H | 70.77365 | 70.60604 | 65.57869 | 1667.23498  | -1490.75142 | 1556.16753  | 1 |
| 55  | C | 71.25910 | 70.99964 | 63.36605 | -714.45746  | -175.43074  | 286.98927   | 1 |
| 56  | H | 71.40468 | 71.93379 | 62.75710 | -787.09484  | 1763.03619  | -1922.46060 | 1 |
| 57  | O | 70.14973 | 70.30826 | 62.76920 | -429.46514  | 516.51932   | -128.40526  | 1 |
| 58  | H | 69.82066 | 70.98422 | 62.14282 | 1981.82785  | 436.16847   | -1818.18182 | 1 |
| 59  | C | 72.60864 | 70.19619 | 63.42680 | 630.79189   | -468.94448  | 76.03230    | 1 |
| 60  | H | 72.92721 | 69.85764 | 62.41369 | -1775.71861 | 2062.30353  | 131.89849   | 1 |
| 61  | H | 73.43696 | 70.81418 | 63.84520 | -1855.14608 | 88.94118    | 1993.53760  | 1 |
| 62  | H | 72.51454 | 69.28672 | 64.06455 | -1504.82350 | -780.94249  | -2132.90992 | 1 |
| 63  | C | 72.41378 | 72.27222 | 65.33948 | 288.57638   | 618.62814   | -397.00270  | 1 |
| 64  | O | 72.88962 | 73.11472 | 64.57465 | 321.70495   | -185.26452  | 574.37218   | 1 |
| 65  | N | 72.84786 | 71.86785 | 66.49889 | -447.05792  | -446.53431  | 367.76425   | 1 |
| 66  | H | 72.27943 | 71.15998 | 66.96152 | 350.31316   | 1975.63644  | -1843.31522 | 1 |
| 67  | C | 74.10190 | 72.27245 | 67.05409 | -511.23061  | 374.03917   | -471.51480  | 1 |
| 68  | H | 74.36907 | 71.31559 | 67.55705 | 2234.79579  | -898.70890  | -1273.45190 | 1 |
| 69  | C | 75.10712 | 72.64992 | 65.86905 | 529.53781   | -159.34528  | 563.72604   | 1 |
| 70  | H | 76.15100 | 72.42656 | 66.22522 | 654.59388   | 2347.94251  | 1217.51488  | 1 |
| 71  | H | 74.88457 | 71.93977 | 65.02757 | -1526.55661 | 2103.42026  | 817.87394   | 1 |
| 72  | O | 75.10183 | 74.00596 | 65.39354 | -554.84278  | 14.12789    | 399.58769   | 1 |
| 73  | H | 74.23818 | 73.95690 | 64.82419 | 1297.06236  | 2061.84854  | 1220.68812  | 1 |
| 74  | C | 73.86490 | 73.39916 | 68.18304 | -662.15484  | -412.13544  | 123.62687   | 1 |
| 75  | O | 72.91749 | 73.34184 | 68.95880 | -540.01537  | -317.05804  | 274.91456   | 1 |
| 76  | N | 74.90157 | 74.22253 | 68.23026 | -202.76299  | -690.00100  | -131.49145  | 1 |
| 77  | H | 75.56818 | 74.09025 | 67.46448 | -702.62132  | -2617.37191 | 281.70413   | 1 |
| 78  | C | 74.89532 | 75.50023 | 68.93524 | -491.73914  | 576.34187   | 222.73509   | 1 |
| 79  | H | 75.77609 | 76.03615 | 68.50758 | 1977.17978  | -1823.58850 | -434.68928  | 1 |
| 80  | C | 73.57661 | 76.21116 | 68.66654 | -649.50797  | -328.66843  | 306.11224   | 1 |
| 81  | H | 72.74690 | 75.48649 | 68.85027 | 2075.07803  | 1452.16490  | -1004.45904 | 1 |
| 82  | C | 73.38105 | 77.39327 | 69.59215 | -615.18735  | -489.99689  | -70.96352   | 1 |
| 83  | H | 72.42197 | 77.93893 | 69.37298 | -1226.32661 | -1724.38906 | -1716.47170 | 1 |
| 84  | H | 73.34549 | 77.07022 | 70.69350 | 2381.64273  | -969.84735  | 900.46860   | 1 |
| 85  | H | 74.21797 | 78.13863 | 69.49258 | 2122.74991  | 1702.23946  | -141.36228  | 1 |
| 86  | C | 73.48740 | 76.64770 | 67.21552 | -501.86074  | -479.61276  | -376.42482  | 1 |
| 87  | H | 72.48895 | 77.10618 | 66.97521 | 993.79261   | -2246.95401 | -1177.81305 | 1 |
| 88  | H | 74.27464 | 77.41070 | 66.96348 | 42.71279    | -626.15391  | -2651.37258 | 1 |
| 89  | H | 73.63652 | 75.77617 | 66.51762 | -2026.39012 | -1590.33709 | -887.82922  | 1 |
| 90  | C | 75.11012 | 75.20311 | 70.55770 | -672.89153  | 382.57394   | -156.34072  | 1 |
| 91  | O | 76.11235 | 75.61184 | 71.08325 | 410.04627   | 221.86223   | 500.35950   | 1 |
| 92  | N | 74.10354 | 74.52904 | 71.08157 | -378.11782  | -443.79414  | -441.10984  | 1 |
| 93  | H | 73.33958 | 74.16072 | 70.47088 | 2404.15973  | -568.14894  | 1149.30085  | 1 |
| 94  | C | 74.11647 | 74.30874 | 72.49446 | -544.54484  | 466.16019   | 331.29119   | 1 |
| 95  | H | 73.27406 | 73.59462 | 72.63786 | -1409.80988 | -170.17955  | 2325.32679  | 1 |
| 96  | C | 75.55158 | 73.66553 | 72.75761 | -184.48284  | 116.78282   | -758.89137  | 1 |
| 97  | H | 76.04768 | 73.43731 | 71.78613 | 1893.78641  | 1861.14652  | 611.04528   | 1 |
| 98  | H | 76.21803 | 74.40748 | 73.25610 | -2170.79665 | -974.19311  | 1327.50117  | 1 |
| 99  | C | 75.41030 | 72.36179 | 73.60211 | 389.51668   | 672.81878   | -138.49152  | 1 |
| 100 | H | 74.70861 | 72.50475 | 74.45487 | 510.64577   | 1933.03327  | 1851.02484  | 1 |
| 101 | H | 74.92808 | 71.56539 | 72.99278 | -2302.30869 | -1105.72939 | -948.89774  | 1 |
| 102 | C | 76.80769 | 71.86438 | 74.14592 | -559.93427  | -126.34590  | 542.30857   | 1 |
| 103 | O | 76.85897 | 71.04948 | 75.03084 | -670.36003  | -111.83166  | 76.36448    | 1 |
| 104 | N | 77.86118 | 72.41369 | 73.50437 | -216.06729  | -537.07037  | 446.51379   | 1 |

|     |   |          |          |          |             |             |             |   |
|-----|---|----------|----------|----------|-------------|-------------|-------------|---|
| 105 | H | 77.87069 | 73.07962 | 72.72313 | -1251.96487 | 1074.12894  | -2168.52500 | 1 |
| 106 | H | 78.83901 | 72.15635 | 73.67185 | -2451.83023 | -720.73851  | 944.84612   | 1 |
| 107 | C | 73.85718 | 75.73159 | 73.22374 | 546.24052   | -563.88337  | -85.11809   | 1 |
| 108 | O | 73.33442 | 76.62978 | 72.59654 | 71.70702    | -307.40463  | 606.69673   | 1 |
| 109 | N | 74.20235 | 75.74710 | 74.52054 | 479.90863   | -504.50129  | 222.86849   | 1 |
| 110 | C | 74.04118 | 76.93797 | 75.29886 | 75.51268    | -600.91904  | 506.73700   | 1 |
| 111 | H | 73.19265 | 77.50317 | 74.84581 | -2033.61562 | 1795.30103  | 254.89480   | 1 |
| 112 | C | 73.80594 | 76.34957 | 76.75604 | 523.79067   | 517.99274   | 284.45581   | 1 |
| 113 | H | 73.99127 | 77.09989 | 77.55993 | 1599.61665  | -1127.00911 | 1895.98173  | 1 |
| 114 | H | 72.76033 | 75.98490 | 76.88687 | -1881.83093 | 1275.82488  | -1501.55016 | 1 |
| 115 | C | 74.82786 | 75.17165 | 76.76810 | -600.05639  | -404.05026  | 316.64485   | 1 |
| 116 | H | 75.86045 | 75.54514 | 76.95004 | -2597.05260 | 496.36221   | 657.73249   | 1 |
| 117 | H | 74.62479 | 74.41144 | 77.55557 | -1666.24518 | 1294.38985  | -1723.90591 | 1 |
| 118 | C | 74.67238 | 74.60488 | 75.29084 | 493.57570   | -129.95376  | -602.56394  | 1 |
| 119 | H | 75.63202 | 74.25961 | 74.83910 | -1469.08415 | -637.84797  | 2204.22581  | 1 |
| 120 | H | 73.89631 | 73.81092 | 75.16686 | -1038.97840 | 1068.88701  | -2280.71789 | 1 |
| 121 | C | 75.44934 | 77.77526 | 75.31071 | 188.88100   | 241.05089   | -727.87821  | 1 |
| 122 | O | 75.81409 | 78.38508 | 76.31273 | 531.88613   | -49.19943   | 427.07960   | 1 |
| 123 | N | 76.03124 | 77.69382 | 74.13891 | 708.14833   | 26.93417    | -179.73509  | 1 |
| 124 | H | 75.50555 | 77.11757 | 73.47862 | -2232.69501 | -1179.09831 | 1023.94816  | 1 |
| 125 | C | 77.20062 | 78.44874 | 73.73445 | -738.32412  | 259.92548   | 104.42456   | 1 |
| 126 | H | 77.28810 | 78.24268 | 72.63963 | 2028.89123  | 1260.02983  | 1311.33324  | 1 |
| 127 | C | 76.96449 | 79.91980 | 74.07074 | -258.65678  | -345.52513  | 661.28459   | 1 |
| 128 | H | 76.65135 | 79.97653 | 75.14142 | -1826.06090 | -1801.46097 | -918.64554  | 1 |
| 129 | C | 78.22881 | 80.73993 | 73.90791 | -541.23400  | 531.92970   | -218.41428  | 1 |
| 130 | H | 78.06241 | 81.82028 | 74.17527 | 1311.73218  | -2219.18200 | 882.19023   | 1 |
| 131 | H | 79.05709 | 80.35609 | 74.56700 | -1048.71298 | 1223.58118  | -2196.97971 | 1 |
| 132 | H | 78.60753 | 80.71185 | 72.84880 | 419.06414   | 1903.92898  | 1903.44670  | 1 |
| 133 | C | 75.83894 | 80.50713 | 73.24143 | -423.86431  | 152.66566   | -648.55262  | 1 |
| 134 | H | 75.62040 | 81.57276 | 73.52960 | 105.68386   | -2342.50080 | 1387.51238  | 1 |
| 135 | H | 76.08673 | 80.50215 | 72.14408 | -1695.63603 | -1484.73621 | -1531.02793 | 1 |
| 136 | H | 74.88661 | 79.92097 | 73.37019 | -1853.57121 | -487.39031  | 1936.59343  | 1 |
| 137 | C | 78.52357 | 77.88172 | 74.57442 | 539.71428   | -510.58232  | 267.58633   | 1 |
| 138 | O | 79.42504 | 77.38331 | 73.95325 | -15.93758   | -278.34085  | -624.49402  | 1 |
| 139 | N | 78.44273 | 78.09677 | 75.87903 | -676.81886  | 12.05292    | 276.17960   | 1 |
| 140 | H | 77.57190 | 78.48392 | 76.31082 | -1694.44250 | -373.84189  | -2100.66098 | 1 |
| 141 | C | 79.70740 | 78.02344 | 76.55688 | 412.33078   | -664.70360  | 108.35451   | 1 |
| 142 | H | 80.43826 | 78.35918 | 75.78435 | 1765.77476  | 1294.44366  | 1621.76594  | 1 |
| 143 | C | 79.67070 | 78.91400 | 77.86270 | -179.66635  | -721.95667  | -264.73915  | 1 |
| 144 | H | 79.34827 | 79.95557 | 77.63922 | -607.34922  | 2587.87032  | -598.10018  | 1 |
| 145 | H | 78.91708 | 78.51608 | 78.57828 | -359.69332  | -1479.13954 | -2259.74260 | 1 |
| 146 | C | 81.10484 | 78.88694 | 78.49226 | -240.01076  | 616.02425   | 431.85322   | 1 |
| 147 | H | 81.51917 | 77.84736 | 78.46444 | -1359.17131 | 782.54425   | 2227.99181  | 1 |
| 148 | H | 81.81616 | 79.51120 | 77.90590 | -820.36667  | 85.81767    | -2596.78715 | 1 |
| 149 | C | 80.99962 | 79.38624 | 79.98744 | -513.07015  | 236.18570   | -551.87280  | 1 |
| 150 | H | 80.77529 | 80.47699 | 80.03150 | 1816.11944  | -1183.11722 | -1650.94321 | 1 |
| 151 | H | 80.14720 | 78.88305 | 80.50129 | -1800.04429 | -1361.53473 | 1526.34643  | 1 |
| 152 | C | 82.31977 | 79.05866 | 80.72499 | 726.08972   | -253.19732  | -179.64713  | 1 |
| 153 | H | 82.51841 | 77.97496 | 80.84788 | 1224.27271  | -456.51798  | -2390.90304 | 1 |
| 154 | H | 83.22183 | 79.56632 | 80.32800 | 1206.40339  | -1150.93514 | -2154.90344 | 1 |
| 155 | N | 82.15513 | 79.59990 | 82.18405 | 329.70796   | -633.68968  | -155.67358  | 1 |
| 156 | H | 82.87917 | 79.30101 | 82.90134 | 1348.31305  | 1938.76845  | 1359.00643  | 1 |
| 157 | H | 82.16521 | 80.65353 | 82.30138 | 2096.92035  | 1446.54551  | -966.48890  | 1 |
| 158 | H | 81.24570 | 79.34767 | 82.66675 | -1197.07217 | -2303.53719 | 827.28733   | 1 |
| 159 | C | 80.00058 | 76.47221 | 76.99458 | -378.01186  | -556.17301  | -413.96481  | 1 |
| 160 | O | 81.13496 | 76.15338 | 77.29966 | -409.44433  | -307.55053  | -453.30833  | 1 |
| 161 | N | 78.89448 | 75.74635 | 77.06040 | -429.02477  | 524.70884   | 274.08502   | 1 |
| 162 | H | 78.05706 | 76.22078 | 76.72417 | 1706.34263  | -1425.96036 | 1574.38926  | 1 |
| 163 | C | 78.98766 | 74.33463 | 77.21412 | -45.25864   | -626.22952  | 478.93267   | 1 |
| 164 | H | 78.01297 | 73.96873 | 76.81985 | 1988.63164  | 570.90773   | 1772.87287  | 1 |
| 165 | C | 80.25044 | 73.83621 | 76.40261 | 551.77128   | -20.49526   | -564.54996  | 1 |
| 166 | H | 80.27673 | 74.30261 | 75.39034 | 1434.61535  | -1753.10253 | 1513.99471  | 1 |

|     |   |          |          |          |             |             |             |   |
|-----|---|----------|----------|----------|-------------|-------------|-------------|---|
| 167 | H | 81.19864 | 74.15778 | 76.91454 | -714.67738  | 1819.09770  | 1898.36494  | 1 |
| 168 | C | 80.19514 | 72.27404 | 76.31112 | 446.99263   | -555.77305  | 338.97221   | 1 |
| 169 | H | 80.13140 | 71.82832 | 77.33121 | 1953.68466  | 1892.25957  | -161.67766  | 1 |
| 170 | H | 79.28693 | 71.92899 | 75.76691 | -403.03785  | 2688.07032  | -188.43591  | 1 |
| 171 | C | 81.51998 | 71.80748 | 75.58476 | 567.86262   | 335.74681   | 434.04421   | 1 |
| 172 | H | 81.54366 | 72.16069 | 74.52809 | -1080.02275 | 1568.26081  | -1948.78900 | 1 |
| 173 | H | 82.41663 | 72.25463 | 76.07321 | -919.54108  | 2111.34692  | 1456.13463  | 1 |
| 174 | C | 81.57711 | 70.26415 | 75.66136 | 195.81897   | 173.33862   | -745.11536  | 1 |
| 175 | H | 81.64832 | 69.85761 | 76.69015 | 1405.67949  | -2301.21089 | -390.08113  | 1 |
| 176 | H | 80.77308 | 69.74358 | 75.10396 | -940.37328  | -1118.32446 | 2299.72133  | 1 |
| 177 | N | 82.90675 | 69.80914 | 74.97020 | 319.26422   | 656.36007   | -42.02424   | 1 |
| 178 | H | 83.08289 | 68.76319 | 74.96048 | 1961.03633  | 619.91968   | 1787.09422  | 1 |
| 179 | H | 83.02641 | 70.04991 | 73.94344 | 854.14343   | -2156.80752 | 1429.08711  | 1 |
| 180 | H | 83.81450 | 70.16857 | 75.38716 | 1237.02905  | -1378.50857 | -1998.28500 | 1 |
| 181 | C | 79.21497 | 73.97046 | 78.79938 | 532.53319   | -268.57236  | 517.55729   | 1 |
| 182 | O | 80.11646 | 73.19230 | 79.14286 | 266.16714   | -290.73804  | -558.88002  | 1 |
| 183 | N | 78.33044 | 74.57670 | 79.53927 | -226.25352  | 640.49678   | -270.32839  | 1 |
| 184 | H | 77.69027 | 75.10819 | 78.95102 | 2007.69063  | -1035.27229 | 1523.50231  | 1 |
| 185 | C | 78.09806 | 74.35402 | 80.93724 | -540.76542  | -573.33303  | 49.50000    | 1 |
| 186 | H | 77.28182 | 73.59374 | 80.95329 | -2374.20950 | -1036.76023 | 843.75774   | 1 |
| 187 | C | 79.41336 | 73.77074 | 81.63407 | -77.09082   | 666.87422   | -415.84136  | 1 |
| 188 | H | 80.29746 | 74.27139 | 81.14298 | -985.81834  | 617.19825   | 2463.91927  | 1 |
| 189 | O | 79.62018 | 72.37038 | 81.44699 | 293.29899   | -391.65602  | -477.80926  | 1 |
| 190 | H | 80.12963 | 72.40071 | 80.54433 | 2528.72714  | -681.76262  | -751.27122  | 1 |
| 191 | C | 79.30170 | 74.23965 | 83.12866 | 252.47363   | -605.14473  | 440.05134   | 1 |
| 192 | H | 80.13461 | 73.83751 | 83.75188 | -2052.65063 | 1456.49051  | -1043.51830 | 1 |
| 193 | H | 79.32345 | 75.35313 | 83.21747 | -2152.98800 | -1661.97574 | -161.70652  | 1 |
| 194 | H | 78.33700 | 73.90084 | 83.59148 | -473.12726  | -1584.27339 | 2165.61725  | 1 |
| 195 | C | 77.55763 | 75.71457 | 81.60869 | 360.36307   | 488.46713   | 505.10056   | 1 |
| 196 | O | 77.10332 | 75.62923 | 82.76160 | -200.08817  | -528.03552  | -385.82850  | 1 |
| 197 | N | 77.70618 | 76.78261 | 80.86089 | -597.54095  | -226.44775  | 355.20479   | 1 |
| 198 | H | 78.15261 | 76.60109 | 79.96235 | 2179.23655  | -1300.70981 | -991.33835  | 1 |
| 199 | C | 77.22209 | 78.07709 | 81.15452 | -687.68921  | 297.39807   | -249.45179  | 1 |
| 200 | H | 77.22666 | 78.60028 | 80.17341 | -349.16256  | -2467.37713 | -1101.72831 | 1 |
| 201 | C | 75.78597 | 78.01231 | 81.86099 | 672.47345   | 361.54328   | -201.62880  | 1 |
| 202 | H | 75.83386 | 77.35450 | 82.76431 | 1541.41502  | 582.18425   | 2169.97026  | 1 |
| 203 | H | 75.52020 | 79.03367 | 82.21851 | -2534.67717 | 60.25153    | 997.72295   | 1 |
| 204 | C | 74.68851 | 77.49214 | 80.92339 | 574.26774   | -389.43119  | -377.02542  | 1 |
| 205 | C | 74.08609 | 78.36415 | 79.96663 | 688.82679   | -287.33580  | -257.96133  | 1 |
| 206 | H | 74.46097 | 79.39392 | 79.82437 | 331.14182   | 1470.38163  | 2269.80013  | 1 |
| 207 | C | 74.21974 | 76.15261 | 81.08596 | -383.52382  | -675.04808  | 144.24917   | 1 |
| 208 | H | 74.70240 | 75.47600 | 81.81498 | 4.09847     | 1517.59662  | 2262.86397  | 1 |
| 209 | C | 72.99158 | 77.89358 | 79.24015 | -134.76730  | 428.45285   | -649.50303  | 1 |
| 210 | H | 72.50879 | 78.57360 | 78.51613 | -903.23433  | 1600.49020  | 2011.53387  | 1 |
| 211 | C | 73.12167 | 75.72946 | 80.33274 | -335.53281  | -615.00040  | -364.39058  | 1 |
| 212 | H | 72.75203 | 74.69934 | 80.47891 | 1596.45398  | -1369.33862 | 1732.02659  | 1 |
| 213 | C | 72.45830 | 76.58036 | 79.40121 | 585.48547   | -340.24194  | -406.23938  | 1 |
| 214 | O | 71.33709 | 76.16134 | 78.63432 | -419.15649  | -173.04408  | -511.94141  | 1 |
| 215 | H | 71.18877 | 75.27174 | 79.03329 | -1071.84350 | 1559.71507  | -1960.13012 | 1 |
| 216 | C | 78.21216 | 78.79816 | 82.23832 | 291.41878   | -183.13091  | 710.72246   | 1 |
| 217 | O | 78.74767 | 79.85089 | 81.99653 | 379.87695   | 523.47396   | -222.23622  | 1 |
| 218 | N | 78.15100 | 78.09650 | 83.37368 | 564.30591   | 373.09380   | 277.24371   | 1 |
| 219 | H | 77.63088 | 77.19344 | 83.28687 | -120.59931  | -2436.07824 | -1214.35098 | 1 |
| 220 | C | 79.31494 | 78.10254 | 84.23866 | 404.07514   | -299.37480  | 608.84009   | 1 |
| 221 | H | 80.14751 | 77.77443 | 83.57755 | -1071.07882 | -841.69025  | 2359.66467  | 1 |
| 222 | C | 79.50957 | 79.59454 | 84.71443 | -683.12807  | 68.71770    | -390.13096  | 1 |
| 223 | H | 79.44653 | 80.28632 | 83.82999 | 2068.88918  | 1596.58590  | 770.89603   | 1 |
| 224 | H | 78.67599 | 79.89945 | 85.38750 | 1379.86429  | 2342.49779  | -179.85638  | 1 |
| 225 | C | 80.88323 | 79.76400 | 85.43572 | -176.39967  | 537.49466   | 550.97268   | 1 |
| 226 | H | 80.88425 | 79.25919 | 86.43037 | -396.28051  | 1942.22168  | 1869.33314  | 1 |
| 227 | H | 81.71596 | 79.30269 | 84.86079 | -94.44700   | 586.00678   | -2659.20016 | 1 |
| 228 | C | 81.05144 | 81.35078 | 85.53684 | -291.69381  | -718.18079  | -150.72929  | 1 |

|     |   |          |          |          |             |             |             |   |
|-----|---|----------|----------|----------|-------------|-------------|-------------|---|
| 229 | H | 81.07005 | 81.89399 | 84.55777 | -2303.38776 | 1089.76242  | 964.62032   | 1 |
| 230 | H | 80.29594 | 81.85717 | 86.18758 | 884.16729   | 2568.80533  | -207.74283  | 1 |
| 231 | N | 82.29275 | 81.55336 | 86.14793 | -594.49522  | -252.81478  | 342.29276   | 1 |
| 232 | H | 82.73552 | 80.74478 | 86.55537 | -1735.17426 | 2084.05705  | -263.71605  | 1 |
| 233 | C | 82.87230 | 82.68189 | 86.23379 | 595.23177   | -271.52487  | 442.22352   | 1 |
| 234 | N | 82.23143 | 83.79143 | 85.67013 | 585.53813   | -424.79750  | -105.81303  | 1 |
| 235 | H | 81.33442 | 83.84850 | 85.18966 | 959.88797   | 1327.56823  | -2177.11905 | 1 |
| 236 | H | 82.59553 | 84.74456 | 85.68418 | 1578.48647  | 16.27378    | -2220.76233 | 1 |
| 237 | N | 84.09446 | 82.57797 | 86.91240 | -452.17763  | -390.33541  | -421.51853  | 1 |
| 238 | H | 84.56088 | 81.77566 | 87.33293 | 470.26107   | 1974.25629  | -1817.92087 | 1 |
| 239 | H | 84.70087 | 83.37959 | 87.09123 | 1856.67307  | -1573.97321 | -1224.35416 | 1 |
| 240 | C | 79.09407 | 77.11956 | 85.49500 | -531.47271  | -581.45780  | -55.06206   | 1 |
| 241 | O | 79.89931 | 77.19601 | 86.39885 | -243.00837  | 192.73507   | 609.52485   | 1 |
| 242 | N | 78.06135 | 76.27958 | 85.42043 | 343.49288   | -644.25607  | 38.09164    | 1 |
| 243 | H | 77.42053 | 76.17201 | 84.62463 | -1691.16043 | -1535.97525 | -1484.73099 | 1 |
| 244 | C | 77.66540 | 75.65889 | 86.65222 | 542.66492   | 350.14337   | 454.42563   | 1 |
| 245 | H | 78.60339 | 75.26982 | 87.10733 | 1209.57979  | -2396.95920 | 463.86744   | 1 |
| 246 | C | 76.94916 | 76.74021 | 87.56531 | -737.14309  | 145.93010   | 242.71942   | 1 |
| 247 | H | 76.11975 | 77.22667 | 87.00771 | -1050.18303 | 159.36419   | -2509.06125 | 1 |
| 248 | C | 76.40844 | 75.98356 | 88.82707 | -706.77696  | -252.88343  | -245.16230  | 1 |
| 249 | H | 75.88742 | 76.67436 | 89.53070 | -1624.64039 | -1665.49085 | 1417.86935  | 1 |
| 250 | H | 75.67884 | 75.18858 | 88.54189 | 2566.10521  | 598.51109   | 693.22305   | 1 |
| 251 | H | 77.23157 | 75.48831 | 89.39369 | -1972.69758 | 107.10018   | -1876.34312 | 1 |
| 252 | C | 77.96948 | 77.81661 | 88.07710 | 412.85148   | 672.58832   | -27.69222   | 1 |
| 253 | H | 77.54315 | 78.42401 | 88.91064 | 1447.02277  | 1762.76533  | -1490.78944 | 1 |
| 254 | H | 78.90965 | 77.34325 | 88.45203 | 1320.77379  | -145.20455  | 2378.68491  | 1 |
| 255 | H | 78.25708 | 78.52813 | 87.26620 | -1512.10848 | 1470.52031  | 1724.75147  | 1 |
| 256 | C | 76.53052 | 74.54769 | 86.25642 | -607.11113  | 499.56689   | 73.73769    | 1 |
| 257 | O | 75.44780 | 74.87819 | 85.82296 | 357.97126   | 460.81534   | 356.68785   | 1 |
| 258 | N | 76.97745 | 73.32959 | 86.53113 | 536.55407   | -368.62270  | 332.76306   | 1 |
| 259 | H | 77.91201 | 73.17983 | 86.91188 | 524.38866   | 2297.69985  | 1367.20941  | 1 |
| 260 | C | 76.08439 | 72.24313 | 86.34890 | 46.50277    | -774.29190  | -147.97904  | 1 |
| 261 | H | 75.06863 | 72.70037 | 86.31951 | 1676.51875  | 1883.29066  | 1032.55549  | 1 |
| 262 | C | 76.45025 | 71.48213 | 84.96888 | -559.41456  | -34.19198   | -556.30433  | 1 |
| 263 | H | 77.50494 | 71.12171 | 85.01800 | -64.66664   | 395.18769   | 2695.05373  | 1 |
| 264 | H | 75.81994 | 70.56815 | 84.85761 | -2703.44278 | -60.40056   | 333.79418   | 1 |
| 265 | C | 76.26771 | 72.39744 | 83.79010 | -519.76435  | 377.31045   | 459.42366   | 1 |
| 266 | H | 76.88750 | 73.31689 | 83.94734 | -1746.74323 | 1667.50644  | -1261.73691 | 1 |
| 267 | C | 76.73570 | 71.69856 | 82.51975 | 570.95554   | 16.46261    | -545.27700  | 1 |
| 268 | H | 76.54546 | 72.32620 | 81.60567 | 2391.58273  | 28.05277    | -1305.07271 | 1 |
| 269 | H | 77.83738 | 71.48297 | 82.54947 | 175.75588   | 917.63458   | 2559.43867  | 1 |
| 270 | H | 76.20964 | 70.72124 | 82.36673 | -1063.97851 | -2155.34650 | 1283.00462  | 1 |
| 271 | C | 74.81914 | 72.83595 | 83.63077 | 193.76014   | 2.62946     | -765.53141  | 1 |
| 272 | H | 74.65299 | 73.36291 | 82.65593 | 507.39394   | -846.55087  | 2539.60089  | 1 |
| 273 | H | 74.11239 | 71.96681 | 83.66451 | 1337.57841  | 1818.19054  | 1526.01994  | 1 |
| 274 | H | 74.52343 | 73.55517 | 84.44807 | 1100.88635  | -1172.91350 | -2199.08909 | 1 |
| 275 | C | 76.34016 | 71.20535 | 87.55617 | -549.21115  | 475.64486   | -309.38218  | 1 |
| 276 | O | 77.31170 | 71.24027 | 88.26498 | 556.06106   | -390.37755  | -78.24250   | 1 |
| 277 | O | 75.38747 | 70.16618 | 87.68700 | -572.27940  | -310.19032  | -209.75862  | 1 |
| 278 | H | 74.75582 | 70.44525 | 86.96798 | -1380.08193 | 2212.14486  | 790.85944   | 1 |

Listing 104: C00104.xmolout

|   |   |          |          |          |             |             |             |        |          |
|---|---|----------|----------|----------|-------------|-------------|-------------|--------|----------|
| 1 |   | 276      |          |          |             |             |             |        |          |
| 2 |   | 150.0000 | 150.0000 | 150.0000 | 0.0000      | 0.0000      | 0.0000***** | 0.2750 | 1100     |
|   |   | 0.2500   | 300.00   | 0.00     | 0.00        | 0.00        | -1293.4101  | 0.0000 | 300.0000 |
| 3 | H | 82.12460 | 73.63974 | 69.98136 | -2043.14101 | -1757.64893 | 399.89339   |        | 1        |
| 4 | N | 82.03970 | 74.60119 | 69.65854 | 426.75047   | 490.45733   | -334.42467  |        | 1        |
| 5 | H | 81.51859 | 75.02698 | 70.42186 | 442.25559   | -1110.30854 | -2448.52907 |        | 1        |
| 6 | C | 83.25334 | 75.22933 | 69.30725 | 415.32972   | -666.39213  | 83.73172    |        | 1        |
| 7 | H | 83.94269 | 74.41160 | 69.00958 | 879.32219   | 2491.00447  | 667.35213   |        | 1        |
| 8 | C | 82.95368 | 76.27109 | 68.11889 | 31.35357    | 477.41777   | 628.23362   |        | 1        |

|    |   |          |          |          |             |             |             |   |
|----|---|----------|----------|----------|-------------|-------------|-------------|---|
| 9  | H | 82.14134 | 76.97658 | 68.42440 | 1168.38489  | 2240.25337  | -1019.71136 | 1 |
| 10 | H | 83.84960 | 76.90386 | 67.90712 | -360.43770  | 2534.90498  | 931.67112   | 1 |
| 11 | C | 82.55048 | 75.47495 | 66.90118 | 463.18208   | 512.70242   | -382.34388  | 1 |
| 12 | H | 81.73260 | 74.78017 | 67.19857 | 1725.29117  | 1863.52247  | -987.07854  | 1 |
| 13 | C | 82.03429 | 76.40171 | 65.80849 | 710.42801   | -144.27427  | -313.15367  | 1 |
| 14 | H | 81.72523 | 75.83091 | 64.89490 | 364.20195   | -1033.13725 | 2494.72524  | 1 |
| 15 | H | 81.14589 | 76.99307 | 66.15052 | 2567.61904  | 335.80679   | 847.48802   | 1 |
| 16 | H | 82.81880 | 77.13656 | 65.48957 | -2587.99029 | 680.92867   | -512.16411  | 1 |
| 17 | C | 83.71758 | 74.65955 | 66.36246 | 268.17616   | 741.64379   | -40.42634   | 1 |
| 18 | H | 83.44311 | 74.11632 | 65.42146 | 1283.54314  | -1945.37420 | -1411.27812 | 1 |
| 19 | H | 84.59888 | 75.31093 | 66.12464 | -1258.57796 | 1317.15249  | -2026.02085 | 1 |
| 20 | H | 84.06540 | 73.88890 | 67.09753 | -2502.84526 | 909.80597   | 575.92391   | 1 |
| 21 | C | 83.77750 | 76.06238 | 70.60964 | 619.36578   | -458.64843  | -172.09273  | 1 |
| 22 | O | 84.91988 | 75.98486 | 71.00794 | -81.40433   | 433.87611   | 522.34594   | 1 |
| 23 | N | 82.77819 | 76.80568 | 71.09083 | 175.23996   | -622.20190  | 341.55523   | 1 |
| 24 | H | 81.87654 | 76.78083 | 70.61643 | -876.57256  | -303.22879  | -2561.90213 | 1 |
| 25 | C | 82.89861 | 77.33704 | 72.40204 | -571.88214  | -534.10783  | -106.15033  | 1 |
| 26 | H | 83.98610 | 77.26087 | 72.64022 | -2713.20841 | -16.25800   | -248.80809  | 1 |
| 27 | C | 82.27714 | 78.81330 | 72.35440 | 166.60354   | 288.16399   | -716.09568  | 1 |
| 28 | H | 81.15619 | 78.71649 | 72.28836 | -2097.85574 | 1636.78449  | -586.18044  | 1 |
| 29 | O | 82.66683 | 79.63282 | 71.23833 | -317.80580  | -363.38227  | 484.43082   | 1 |
| 30 | H | 81.85113 | 79.61660 | 70.69902 | 1863.74748  | -1451.84923 | 1357.29467  | 1 |
| 31 | C | 82.68612 | 79.36176 | 73.76995 | 503.80731   | 517.99032   | 318.51606   | 1 |
| 32 | H | 82.19086 | 80.33604 | 73.98965 | 640.61020   | -2157.10410 | -1536.29104 | 1 |
| 33 | H | 82.41386 | 78.64974 | 74.59994 | 1687.88455  | 465.60692   | 2087.56452  | 1 |
| 34 | H | 83.78650 | 79.53285 | 73.82735 | -1293.07895 | -1899.88581 | -1463.57452 | 1 |
| 35 | C | 81.90641 | 76.45433 | 73.36299 | -153.07550  | -733.68902  | 248.70981   | 1 |
| 36 | O | 80.75468 | 76.78970 | 73.44585 | 186.15459   | -480.78787  | -449.34387  | 1 |
| 37 | N | 82.51319 | 75.35533 | 73.84550 | -487.53139  | 543.18517   | 42.03850    | 1 |
| 38 | C | 81.90392 | 74.61815 | 74.90315 | -699.35871  | 69.34393    | 360.10701   | 1 |
| 39 | H | 80.89969 | 75.06930 | 75.08314 | 2.81126     | -221.99807  | -2715.58072 | 1 |
| 40 | C | 81.88715 | 73.15281 | 74.28205 | -507.46439  | -592.59194  | 122.07761   | 1 |
| 41 | H | 81.74459 | 72.35846 | 75.04812 | -1975.08116 | 525.87560   | -1801.71556 | 1 |
| 42 | H | 81.06183 | 73.03366 | 73.54379 | 1588.27743  | -1913.22100 | 1113.83566  | 1 |
| 43 | C | 83.28117 | 73.09297 | 73.58231 | -613.62442  | -457.55993  | -194.14490  | 1 |
| 44 | H | 84.09721 | 72.89728 | 74.31290 | 1707.54637  | -721.27992  | 1996.92523  | 1 |
| 45 | H | 83.35865 | 72.29773 | 72.80590 | 758.23357   | 2100.81767  | 1560.55011  | 1 |
| 46 | C | 83.38436 | 74.55667 | 72.98183 | -352.41524  | 704.96076   | 49.21465    | 1 |
| 47 | H | 84.40617 | 75.00271 | 73.00819 | 1714.76886  | -2070.42778 | 443.35792   | 1 |
| 48 | H | 82.95907 | 74.67895 | 71.95636 | 1224.15040  | 1801.50881  | 1636.97633  | 1 |
| 49 | C | 82.85179 | 74.54819 | 76.24372 | 566.85117   | 537.05831   | 117.62814   | 1 |
| 50 | O | 82.43791 | 73.93068 | 77.19745 | -550.26779  | -406.08867  | 4.21666     | 1 |
| 51 | N | 84.02691 | 75.15164 | 76.10373 | 566.34832   | -425.77725  | 180.18749   | 1 |
| 52 | H | 84.17946 | 75.68068 | 75.24759 | 644.44502   | 2646.80550  | -52.73430   | 1 |
| 53 | C | 84.97221 | 75.02346 | 77.15776 | 612.34801   | -281.48662  | 411.56221   | 1 |
| 54 | H | 84.65328 | 74.10210 | 77.69622 | 1667.23498  | -1490.75142 | 1556.16753  | 1 |
| 55 | C | 86.44351 | 74.97795 | 76.53230 | -714.45746  | -175.43074  | 286.98927   | 1 |
| 56 | H | 86.57639 | 75.87923 | 75.87350 | -787.09484  | 1763.03619  | -1922.46060 | 1 |
| 57 | O | 86.72632 | 73.82274 | 75.72426 | -429.46514  | 516.51932   | -128.40526  | 1 |
| 58 | H | 86.88759 | 74.23318 | 74.85173 | 1981.82785  | 436.16847   | -1818.18182 | 1 |
| 59 | C | 87.32464 | 75.16429 | 77.82168 | 630.79189   | -468.94448  | 76.03230    | 1 |
| 60 | H | 88.40622 | 75.26470 | 77.56782 | -1775.71861 | 2062.30353  | 131.89849   | 1 |
| 61 | H | 87.02667 | 76.08337 | 78.38521 | -1855.14608 | 88.94118    | 1993.53760  | 1 |
| 62 | H | 87.22939 | 74.30027 | 78.52087 | -1504.82350 | -780.94249  | -2132.90992 | 1 |
| 63 | C | 84.87380 | 76.37912 | 78.08531 | 288.57638   | 618.62814   | -397.00270  | 1 |
| 64 | O | 85.33706 | 77.44766 | 77.68263 | 321.70495   | -185.26452  | 574.37218   | 1 |
| 65 | N | 84.34370 | 76.04626 | 79.23399 | -447.05792  | -446.53431  | 367.76425   | 1 |
| 66 | H | 84.06118 | 75.06520 | 79.25218 | 350.31316   | 1975.63644  | -1843.31522 | 1 |
| 67 | C | 83.98957 | 76.85904 | 80.33667 | -511.23061  | 374.03917   | -471.51480  | 1 |
| 68 | H | 83.53539 | 76.09623 | 81.00934 | 2234.79579  | -898.70890  | -1273.45190 | 1 |
| 69 | C | 85.30708 | 77.51122 | 80.97550 | 529.53781   | -159.34528  | 563.72604   | 1 |
| 70 | H | 85.06225 | 77.85654 | 82.01730 | 654.59388   | 2347.94251  | 1217.51488  | 1 |

|     |   |          |          |          |             |             |             |   |
|-----|---|----------|----------|----------|-------------|-------------|-------------|---|
| 71  | H | 86.04922 | 76.67906 | 81.08290 | -1526.55661 | 2103.42026  | 817.87394   | 1 |
| 72  | O | 85.89167 | 78.65180 | 80.29857 | -554.84278  | 14.12789    | 399.58769   | 1 |
| 73  | H | 86.08772 | 78.24658 | 79.42701 | 1297.06236  | 2061.84854  | 1220.68812  | 1 |
| 74  | C | 82.91242 | 78.02580 | 79.97070 | -662.15484  | -412.13544  | 123.62687   | 1 |
| 75  | O | 81.95988 | 78.19387 | 80.68635 | -540.01537  | -317.05804  | 274.91456   | 1 |
| 76  | N | 83.28655 | 78.75063 | 78.91432 | -202.76299  | -690.00100  | -131.49145  | 1 |
| 77  | H | 84.14385 | 78.46854 | 78.37308 | -702.62132  | -2617.37191 | 281.70413   | 1 |
| 78  | C | 82.36590 | 79.75936 | 78.39117 | -491.73914  | 576.34187   | 222.73509   | 1 |
| 79  | H | 81.80738 | 80.13133 | 79.28163 | 1977.17978  | -1823.58850 | -434.68928  | 1 |
| 80  | C | 83.23116 | 80.80037 | 77.70179 | -649.50797  | -328.66843  | 306.11224   | 1 |
| 81  | H | 83.92684 | 80.26556 | 77.01728 | 2075.07803  | 1452.16490  | -1004.45904 | 1 |
| 82  | C | 82.40355 | 81.76359 | 76.87337 | -615.18735  | -489.99689  | -70.96352   | 1 |
| 83  | H | 83.05164 | 82.49181 | 76.31019 | -1226.32661 | -1724.38906 | -1716.47170 | 1 |
| 84  | H | 81.77599 | 81.21713 | 76.11475 | 2381.64273  | -969.84735  | 900.46860   | 1 |
| 85  | H | 81.70043 | 82.36693 | 77.51326 | 2122.74991  | 1702.23946  | -141.36228  | 1 |
| 86  | C | 84.07043 | 81.54949 | 78.72079 | -501.86074  | -479.61276  | -376.42482  | 1 |
| 87  | H | 84.80031 | 82.25228 | 78.23302 | 993.79261   | -2246.95401 | -1177.81305 | 1 |
| 88  | H | 83.43009 | 82.16122 | 79.41590 | 42.71279    | -626.15391  | -2651.37258 | 1 |
| 89  | H | 84.66324 | 80.83702 | 79.36233 | -2026.39012 | -1590.33709 | -887.82922  | 1 |
| 90  | C | 81.37913 | 78.94526 | 77.32245 | -672.89153  | 382.57394   | -156.34072  | 1 |
| 91  | O | 81.83110 | 78.20239 | 76.47806 | 410.04627   | 221.86223   | 500.35950   | 1 |
| 92  | N | 80.13124 | 79.31700 | 77.52442 | -378.11782  | -443.79414  | -441.10984  | 1 |
| 93  | H | 79.99768 | 80.00646 | 78.26187 | 2404.15973  | -568.14894  | 1149.30085  | 1 |
| 94  | C | 79.04292 | 78.75662 | 76.80253 | -544.54484  | 466.16019   | 331.29119   | 1 |
| 95  | H | 78.15852 | 79.30784 | 77.19669 | -1409.80988 | -170.17955  | 2325.32679  | 1 |
| 96  | C | 79.33977 | 79.05981 | 75.26608 | -184.48284  | 116.78282   | -758.89137  | 1 |
| 97  | H | 79.63706 | 80.12687 | 75.15032 | 1893.78641  | 1861.14652  | 611.04528   | 1 |
| 98  | H | 80.21249 | 78.45804 | 74.91146 | -2170.79665 | -974.19311  | 1327.50117  | 1 |
| 99  | C | 78.07942 | 78.72762 | 74.41390 | 389.51668   | 672.81878   | -138.49152  | 1 |
| 100 | H | 77.90049 | 77.61993 | 74.41624 | 510.64577   | 1933.03327  | 1851.02484  | 1 |
| 101 | H | 77.17240 | 79.15365 | 74.89857 | -2302.30869 | -1105.72939 | -948.89774  | 1 |
| 102 | C | 78.16276 | 79.22233 | 72.92029 | -559.93427  | -126.34590  | 542.30857   | 1 |
| 103 | O | 77.31730 | 78.85927 | 72.14457 | -670.36003  | -111.83166  | 76.36448    | 1 |
| 104 | N | 79.18147 | 80.06852 | 72.65532 | -216.06729  | -537.07037  | 446.51379   | 1 |
| 105 | H | 79.91315 | 80.44354 | 73.27038 | -1251.96487 | 1074.12894  | -2168.52500 | 1 |
| 106 | H | 79.30820 | 80.53550 | 71.75003 | -2451.83023 | -720.73851  | 944.84612   | 1 |
| 107 | C | 78.92171 | 77.14448 | 76.98736 | 546.24052   | -563.88337  | -85.11809   | 1 |
| 108 | O | 78.42473 | 76.54392 | 76.05996 | 71.70702    | -307.40463  | 606.69673   | 1 |
| 109 | N | 79.22599 | 76.67081 | 78.19893 | 479.90863   | -504.50129  | 222.86849   | 1 |
| 110 | C | 79.56038 | 75.28940 | 78.40345 | 75.51268    | -600.91904  | 506.73700   | 1 |
| 111 | H | 80.24974 | 74.98298 | 77.58192 | -2033.61562 | 1795.30103  | 254.89480   | 1 |
| 112 | C | 80.21905 | 75.33754 | 79.84711 | 523.79067   | 517.99274   | 284.45581   | 1 |
| 113 | H | 80.25440 | 74.34079 | 80.34183 | 1599.61665  | -1127.00911 | 1895.98173  | 1 |
| 114 | H | 81.26433 | 75.72024 | 79.80745 | -1881.83093 | 1275.82488  | -1501.55016 | 1 |
| 115 | C | 79.27546 | 76.35561 | 80.55823 | -600.05639  | -404.05026  | 316.64485   | 1 |
| 116 | H | 78.28335 | 75.90450 | 80.77917 | -2597.05260 | 496.36221   | 657.73249   | 1 |
| 117 | H | 79.67618 | 76.74677 | 81.51931 | -1666.24518 | 1294.38985  | -1723.90591 | 1 |
| 118 | C | 79.18647 | 77.46416 | 79.42154 | 493.57570   | -129.95376  | -602.56394  | 1 |
| 119 | H | 78.25996 | 78.08379 | 79.41500 | -1469.08415 | -637.84797  | 2204.22581  | 1 |
| 120 | H | 80.08316 | 78.12834 | 79.38079 | -1038.97840 | 1068.88701  | -2280.71789 | 1 |
| 121 | C | 78.20944 | 74.37465 | 78.45721 | 188.88100   | 241.05089   | -727.87821  | 1 |
| 122 | O | 78.28000 | 73.22391 | 78.81322 | 531.88613   | -49.19943   | 427.07960   | 1 |
| 123 | N | 77.11457 | 75.07237 | 78.14387 | 708.14833   | 26.93417    | -179.73509  | 1 |
| 124 | H | 77.29228 | 76.02107 | 77.80169 | -2232.69501 | -1179.09831 | 1023.94816  | 1 |
| 125 | C | 75.79776 | 74.45449 | 78.17514 | -738.32412  | 259.92548   | 104.42456   | 1 |
| 126 | H | 76.01296 | 73.45628 | 78.62769 | 2028.89123  | 1260.02983  | 1311.33324  | 1 |
| 127 | C | 74.88559 | 75.33402 | 79.01440 | -258.65678  | -345.52513  | 661.28459   | 1 |
| 128 | H | 75.07247 | 76.39670 | 78.74618 | -1826.06090 | -1801.46097 | -918.64554  | 1 |
| 129 | C | 73.42242 | 75.02743 | 78.75876 | -541.23400  | 531.92970   | -218.41428  | 1 |
| 130 | H | 72.74269 | 75.62140 | 79.43138 | 1311.73218  | -2219.18200 | 882.19023   | 1 |
| 131 | H | 73.12810 | 75.26217 | 77.69322 | -1048.71298 | 1223.58118  | -2196.97971 | 1 |
| 132 | H | 73.19394 | 73.93643 | 78.93169 | 419.06414   | 1903.92898  | 1903.44670  | 1 |

|     |   |          |          |          |             |             |             |   |
|-----|---|----------|----------|----------|-------------|-------------|-------------|---|
| 133 | C | 75.17727 | 75.17851 | 80.49658 | -423.86431  | 152.66566   | -648.55262  | 1 |
| 134 | H | 74.49889 | 75.81936 | 81.12464 | 105.68386   | -2342.50080 | 1387.51238  | 1 |
| 135 | H | 75.03300 | 74.11382 | 80.83134 | -1695.63603 | -1484.73621 | -1531.02793 | 1 |
| 136 | H | 76.23601 | 75.46402 | 80.74274 | -1853.57121 | -487.39031  | 1936.59343  | 1 |
| 137 | C | 75.22583 | 74.29754 | 76.61181 | 539.71428   | -510.58232  | 267.58633   | 1 |
| 138 | O | 75.13468 | 73.16003 | 76.15306 | -15.93758   | -278.34085  | -624.49402  | 1 |
| 139 | N | 74.86203 | 75.44009 | 76.08380 | -676.81886  | 12.05292    | 276.17960   | 1 |
| 140 | H | 75.05850 | 76.21680 | 76.71296 | -1694.44250 | -373.84189  | -2100.66098 | 1 |
| 141 | C | 74.45978 | 75.65237 | 74.74187 | 412.33078   | -664.70360  | 108.35451   | 1 |
| 142 | H | 74.46716 | 76.76125 | 74.64921 | 1765.77476  | 1294.44366  | 1621.76594  | 1 |
| 143 | C | 75.54543 | 74.94525 | 73.83271 | -179.66635  | -721.95667  | -264.73915  | 1 |
| 144 | H | 76.57052 | 75.28716 | 74.10593 | -607.34922  | 2587.87032  | -598.10018  | 1 |
| 145 | H | 75.54232 | 73.84357 | 74.01183 | -359.69332  | -1479.13954 | -2259.74260 | 1 |
| 146 | C | 75.21398 | 75.28262 | 72.34133 | -240.01076  | 616.02425   | 431.85322   | 1 |
| 147 | H | 74.18528 | 74.94291 | 72.08348 | -1359.17131 | 782.54425   | 2227.99181  | 1 |
| 148 | H | 75.22744 | 76.38279 | 72.16901 | -820.36667  | 85.81767    | -2596.78715 | 1 |
| 149 | C | 76.29044 | 74.56201 | 71.43533 | -513.07015  | 236.18570   | -551.87280  | 1 |
| 150 | H | 77.30643 | 74.98081 | 71.62168 | 1816.11944  | -1183.11722 | -1650.94321 | 1 |
| 151 | H | 76.35772 | 73.47809 | 71.68470 | -1800.04429 | -1361.53473 | 1526.34643  | 1 |
| 152 | C | 75.87599 | 74.75808 | 69.95772 | 726.08972   | -253.19732  | -179.64713  | 1 |
| 153 | H | 74.92372 | 74.26517 | 69.67664 | 1224.27271  | -456.51798  | -2390.90304 | 1 |
| 154 | H | 75.87429 | 75.81213 | 69.61430 | 1206.40339  | -1150.93514 | -2154.90344 | 1 |
| 155 | N | 76.96248 | 74.05884 | 69.07485 | 329.70796   | -633.68968  | -155.67358  | 1 |
| 156 | H | 76.80076 | 74.08845 | 68.02667 | 1348.31305  | 1938.76845  | 1359.00643  | 1 |
| 157 | H | 77.94571 | 74.45086 | 69.14534 | 2096.92035  | 1446.54551  | -966.48890  | 1 |
| 158 | H | 77.12665 | 73.02204 | 69.23376 | -1197.07217 | -2303.53719 | 827.28733   | 1 |
| 159 | C | 72.97781 | 75.03430 | 74.38205 | -378.01186  | -556.17301  | -413.96481  | 1 |
| 160 | O | 72.26625 | 75.65446 | 73.63156 | -409.44433  | -307.55053  | -453.30833  | 1 |
| 161 | N | 72.79878 | 73.81511 | 74.86741 | -429.02477  | 524.70884   | 274.08502   | 1 |
| 162 | H | 73.55044 | 73.37788 | 75.44497 | 1706.34263  | -1425.96036 | 1574.38926  | 1 |
| 163 | C | 71.46480 | 73.30162 | 74.89363 | -45.25864   | -626.22952  | 478.93267   | 1 |
| 164 | H | 71.00678 | 73.75761 | 73.98509 | 1988.63164  | 570.90773   | 1772.87287  | 1 |
| 165 | C | 71.66102 | 71.73456 | 74.83196 | 551.77128   | -20.49526   | -564.54996  | 1 |
| 166 | H | 72.40928 | 71.50291 | 74.04067 | 1434.61535  | -1753.10253 | 1513.99471  | 1 |
| 167 | H | 72.12621 | 71.37526 | 75.77781 | -714.67738  | 1819.09770  | 1898.36494  | 1 |
| 168 | C | 70.34504 | 70.93513 | 74.55250 | 446.99263   | -555.77305  | 338.97221   | 1 |
| 169 | H | 69.71381 | 70.88074 | 75.46867 | 1953.68466  | 1892.25957  | -161.67766  | 1 |
| 170 | H | 69.72133 | 71.42614 | 73.76563 | -403.03785  | 2688.07032  | -188.43591  | 1 |
| 171 | C | 70.73126 | 69.46673 | 74.10769 | 567.86262   | 335.74681   | 434.04421   | 1 |
| 172 | H | 71.31020 | 69.46680 | 73.15552 | -1080.02275 | 1568.26081  | -1948.78900 | 1 |
| 173 | H | 71.38380 | 68.97278 | 74.86361 | -919.54108  | 2111.34692  | 1456.13463  | 1 |
| 174 | C | 69.38582 | 68.71949 | 73.95237 | 195.81897   | 173.33862   | -745.11536  | 1 |
| 175 | H | 68.75859 | 68.71062 | 74.86567 | 1405.67949  | -2301.21089 | -390.08113  | 1 |
| 176 | H | 68.78295 | 69.03917 | 73.07848 | -940.37328  | -1118.32446 | 2299.72133  | 1 |
| 177 | N | 69.68663 | 67.20546 | 73.70067 | 319.26422   | 656.36007   | -42.02424   | 1 |
| 178 | H | 68.83175 | 66.58174 | 73.62404 | 1961.03633  | 619.91968   | 1787.09422  | 1 |
| 179 | H | 70.20441 | 66.95887 | 72.80806 | 854.14343   | -2156.80752 | 1429.08711  | 1 |
| 180 | H | 70.25415 | 66.69288 | 74.43705 | 1237.02905  | -1378.50857 | -1998.28500 | 1 |
| 181 | C | 70.73896 | 73.83924 | 76.25965 | 532.53319   | -268.57236  | 517.55729   | 1 |
| 182 | O | 71.17383 | 74.77615 | 76.89585 | 266.16714   | -290.73804  | -558.88002  | 1 |
| 183 | N | 69.58239 | 73.20772 | 76.41486 | -226.25352  | 640.49678   | -270.32839  | 1 |
| 184 | H | 69.39090 | 72.52561 | 75.68249 | 2007.69063  | -1035.27229 | 1523.50231  | 1 |
| 185 | C | 68.95134 | 73.00600 | 77.68231 | -540.76542  | -573.33303  | 49.50000    | 1 |
| 186 | H | 68.80648 | 71.90546 | 77.74500 | -2374.20950 | -1036.76023 | 843.75774   | 1 |
| 187 | C | 69.75302 | 73.59650 | 78.92568 | -77.09082   | 666.87422   | -415.84136  | 1 |
| 188 | H | 70.13522 | 74.63000 | 78.66265 | -985.81834  | 617.19825   | 2463.91927  | 1 |
| 189 | O | 70.88846 | 72.80551 | 79.33305 | 293.29899   | -391.65602  | -477.80926  | 1 |
| 190 | H | 71.62099 | 73.36740 | 79.00943 | 2528.72714  | -681.76262  | -751.27122  | 1 |
| 191 | C | 68.59675 | 73.76014 | 79.97923 | 252.47363   | -605.14473  | 440.05134   | 1 |
| 192 | H | 68.95502 | 74.24204 | 80.91802 | -2052.65063 | 1456.49051  | -1043.51830 | 1 |
| 193 | H | 67.76401 | 74.39195 | 79.57114 | -2152.98800 | -1661.97574 | -161.70652  | 1 |
| 194 | H | 68.15222 | 72.77658 | 80.25666 | -473.12726  | -1584.27339 | 2165.61725  | 1 |

|     |   |          |          |          |             |             |             |   |
|-----|---|----------|----------|----------|-------------|-------------|-------------|---|
| 195 | C | 67.51627 | 73.78073 | 77.58174 | 360.36307   | 488.46713   | 505.10056   | 1 |
| 196 | O | 66.50147 | 73.28458 | 78.01746 | -200.08817  | -528.03552  | -385.82850  | 1 |
| 197 | N | 67.71090 | 75.02494 | 77.11616 | -597.54095  | -226.44775  | 355.20479   | 1 |
| 198 | H | 68.65000 | 75.22310 | 76.76201 | 2179.23655  | -1300.70981 | -991.33835  | 1 |
| 199 | C | 66.54887 | 75.70818 | 76.65513 | -687.68921  | 297.39807   | -249.45179  | 1 |
| 200 | H | 65.75109 | 75.32296 | 77.32856 | -349.16256  | -2467.37713 | -1101.72831 | 1 |
| 201 | C | 66.79683 | 77.28126 | 76.78036 | 672.47345   | 361.54328   | -201.62880  | 1 |
| 202 | H | 67.65167 | 77.59681 | 76.13826 | 1541.41502  | 582.18425   | 2169.97026  | 1 |
| 203 | H | 65.89532 | 77.82605 | 76.41510 | -2534.67717 | 60.25153    | 997.72295   | 1 |
| 204 | C | 67.07809 | 77.62003 | 78.25298 | 574.26774   | -389.43119  | -377.02542  | 1 |
| 205 | C | 65.99712 | 77.68792 | 79.18255 | 688.82679   | -287.33580  | -257.96133  | 1 |
| 206 | H | 64.96002 | 77.48648 | 78.85679 | 331.14182   | 1470.38163  | 2269.80013  | 1 |
| 207 | C | 68.41683 | 77.85460 | 78.68942 | -383.52382  | -675.04808  | 144.24917   | 1 |
| 208 | H | 69.26103 | 77.78108 | 77.97953 | 4.09847     | 1517.59662  | 2262.86397  | 1 |
| 209 | C | 66.27282 | 78.02176 | 80.50891 | -134.76730  | 428.45285   | -649.50303  | 1 |
| 210 | H | 65.43331 | 78.08125 | 81.22389 | -903.23433  | 1600.49020  | 2011.53387  | 1 |
| 211 | C | 68.64267 | 78.18914 | 80.02756 | -335.53281  | -615.00040  | -364.39058  | 1 |
| 212 | H | 69.68108 | 78.38117 | 80.34961 | 1596.45398  | -1369.33862 | 1732.02659  | 1 |
| 213 | C | 67.58940 | 78.29345 | 80.98258 | 585.48547   | -340.24194  | -406.23938  | 1 |
| 214 | O | 67.81085 | 78.63919 | 82.34129 | -419.15649  | -173.04408  | -511.94141  | 1 |
| 215 | H | 68.78669 | 78.77842 | 82.32028 | -1071.84350 | 1559.71507  | -1960.13012 | 1 |
| 216 | C | 66.24342 | 75.33715 | 75.09721 | 291.41878   | -183.13091  | 710.72246   | 1 |
| 217 | O | 65.37652 | 75.93343 | 74.49774 | 379.87695   | 523.47396   | -222.23622  | 1 |
| 218 | N | 66.98436 | 74.32379 | 74.66021 | 564.30591   | 373.09380   | 277.24371   | 1 |
| 219 | H | 67.69476 | 73.94974 | 75.28833 | -120.59931  | -2436.07824 | -1214.35098 | 1 |
| 220 | C | 66.82614 | 73.85661 | 73.32780 | 404.07514   | -299.37480  | 608.84009   | 1 |
| 221 | H | 65.81190 | 74.22550 | 73.04296 | -1071.07882 | -841.69025  | 2359.66467  | 1 |
| 222 | C | 67.98971 | 74.49326 | 72.46048 | -683.12807  | 68.71770    | -390.13096  | 1 |
| 223 | H | 68.11568 | 75.57577 | 72.68902 | 2068.88918  | 1596.58590  | 770.89603   | 1 |
| 224 | H | 68.96377 | 74.01349 | 72.70760 | 1379.86429  | 2342.49779  | -179.85638  | 1 |
| 225 | C | 67.62480 | 74.27040 | 70.96029 | -176.39967  | 537.49466   | 550.97268   | 1 |
| 226 | H | 67.42894 | 73.19295 | 70.74838 | -396.28051  | 1942.22168  | 1869.33314  | 1 |
| 227 | H | 66.70145 | 74.81885 | 70.66727 | -94.44700   | 586.00678   | -2659.20016 | 1 |
| 228 | C | 68.90912 | 74.80547 | 70.17527 | -291.69381  | -718.18079  | -150.72929  | 1 |
| 229 | H | 69.16509 | 75.88145 | 70.35321 | -2303.38776 | 1089.76242  | 964.62032   | 1 |
| 230 | H | 69.84153 | 74.20735 | 70.33646 | 884.16729   | 2568.80533  | -207.74283  | 1 |
| 231 | N | 68.56251 | 74.67459 | 68.82625 | -594.49522  | -252.81478  | 342.29276   | 1 |
| 232 | H | 67.66118 | 74.27385 | 68.61578 | -1735.17426 | 2084.05705  | -263.71605  | 1 |
| 233 | C | 69.32038 | 75.02602 | 67.86771 | 595.23177   | -271.52487  | 442.22352   | 1 |
| 234 | N | 70.56399 | 75.57041 | 68.20932 | 585.53813   | -424.79750  | -105.81303  | 1 |
| 235 | H | 70.97066 | 75.73083 | 69.13035 | 959.88797   | 1327.56823  | -2177.11905 | 1 |
| 236 | H | 71.26894 | 75.88710 | 67.54360 | 1578.48647  | 16.27378    | -2220.76233 | 1 |
| 237 | N | 68.71987 | 74.78533 | 66.62485 | -452.17763  | -390.33541  | -421.51853  | 1 |
| 238 | H | 67.82196 | 74.36500 | 66.38901 | 470.26107   | 1974.25629  | -1817.92087 | 1 |
| 239 | H | 69.17354 | 74.99298 | 65.73461 | 1856.67307  | -1573.97321 | -1224.35416 | 1 |
| 240 | C | 67.03331 | 72.23189 | 73.34599 | -531.47271  | -581.45780  | -55.06206   | 1 |
| 241 | O | 67.75927 | 71.66887 | 72.55861 | -243.00837  | 192.73507   | 609.52485   | 1 |
| 242 | N | 66.30318 | 71.68406 | 74.31868 | 343.49288   | -644.25607  | 38.09164    | 1 |
| 243 | H | 65.75910 | 72.35650 | 74.85611 | -1691.16043 | -1535.97525 | -1484.73099 | 1 |
| 244 | C | 66.11349 | 70.23538 | 74.39177 | 542.66492   | 350.14337   | 454.42563   | 1 |
| 245 | H | 67.05343 | 69.88179 | 73.90528 | 1209.57979  | -2396.95920 | 463.86744   | 1 |
| 246 | C | 65.96875 | 69.86173 | 75.85620 | -737.14309  | 145.93010   | 242.71942   | 1 |
| 247 | H | 65.07060 | 70.38697 | 76.25632 | -1050.18303 | 159.36419   | -2509.06125 | 1 |
| 248 | C | 65.76419 | 68.37321 | 76.05967 | -706.77696  | -252.88343  | -245.16230  | 1 |
| 249 | H | 65.69421 | 68.10841 | 77.15122 | -1624.64039 | -1665.49085 | 1417.86935  | 1 |
| 250 | H | 64.80628 | 68.02429 | 75.56705 | 2566.10521  | 598.51109   | 693.22305   | 1 |
| 251 | H | 66.60770 | 67.77105 | 75.62164 | -1972.69758 | 107.10018   | -1876.34312 | 1 |
| 252 | C | 67.16339 | 70.33777 | 76.66459 | 412.85148   | 672.58832   | -27.69222   | 1 |
| 253 | H | 67.04740 | 70.10745 | 77.75931 | 1447.02277  | 1762.76533  | -1490.78944 | 1 |
| 254 | H | 68.11825 | 69.85423 | 76.32308 | 1320.77379  | -145.20455  | 2378.68491  | 1 |
| 255 | H | 67.29445 | 71.45099 | 76.56727 | -1512.10848 | 1470.52031  | 1724.75147  | 1 |
| 256 | C | 64.78242 | 69.80123 | 73.49982 | -607.11113  | 499.56689   | 73.73769    | 1 |



|     |   |          |          |          |             |             |             |   |
|-----|---|----------|----------|----------|-------------|-------------|-------------|---|
| 257 | O | 63.95967 | 69.03135 | 73.95089 | 357.97126   | 460.81534   | 356.68785   | 1 |
| 258 | N | 64.81429 | 70.33033 | 72.29098 | 536.55407   | -368.62270  | 332.76306   | 1 |
| 259 | H | 65.60168 | 70.94160 | 72.07344 | 524.38866   | 2297.69985  | 1367.20941  | 1 |
| 260 | C | 63.81851 | 69.93927 | 71.35965 | 46.50277    | -774.29190  | -147.97904  | 1 |
| 261 | H | 63.45612 | 68.94871 | 71.72200 | 1676.51875  | 1883.29066  | 1032.55549  | 1 |
| 262 | C | 62.65049 | 71.05431 | 71.32581 | -559.41456  | -34.19198   | -556.30433  | 1 |
| 263 | H | 63.10631 | 72.03682 | 71.05354 | -64.66664   | 395.18769   | 2695.05373  | 1 |
| 264 | H | 61.91988 | 70.82123 | 70.51364 | -2703.44278 | -60.40056   | 333.79418   | 1 |
| 265 | C | 61.95135 | 71.14621 | 72.65527 | -519.76435  | 377.31045   | 459.42366   | 1 |
| 266 | H | 62.71933 | 71.34072 | 73.43872 | -1746.74323 | 1667.50644  | -1261.73691 | 1 |
| 267 | C | 60.95309 | 72.29788 | 72.65731 | 570.95554   | 16.46261    | -545.27700  | 1 |
| 268 | H | 60.43779 | 72.39336 | 73.64713 | 2391.58273  | 28.05277    | -1305.07271 | 1 |
| 269 | H | 61.45017 | 73.28008 | 72.44698 | 175.75588   | 917.63458   | 2559.43867  | 1 |
| 270 | H | 60.15608 | 72.15678 | 71.88285 | -1063.97851 | -2155.34650 | 1283.00462  | 1 |
| 271 | C | 61.22823 | 69.85355 | 73.00639 | 193.76014   | 2.62946     | -765.53141  | 1 |
| 272 | H | 60.57861 | 69.97800 | 73.91135 | 507.39394   | -846.55087  | 2539.60089  | 1 |
| 273 | H | 60.56891 | 69.50102 | 72.17158 | 1337.57841  | 1818.19054  | 1526.01994  | 1 |
| 274 | H | 61.95878 | 69.02743 | 73.23879 | 1100.88635  | -1172.91350 | -2199.08909 | 1 |
| 275 | C | 64.51094 | 69.95744 | 69.90085 | -549.21115  | 475.64486   | -309.38218  | 1 |
| 276 | O | 65.21367 | 70.86498 | 69.53959 | 556.06106   | -390.37755  | -78.24250   | 1 |
| 277 | O | 64.12997 | 68.93956 | 68.99797 | -572.27940  | -310.19032  | -209.75862  | 1 |
| 278 | H | 63.55869 | 68.39310 | 69.60449 | -1380.08193 | 2212.14486  | 790.85944   | 1 |

Listing 105: C00105.xmolout

|    |   |          |          |          |             |             |             |        |          |  |
|----|---|----------|----------|----------|-------------|-------------|-------------|--------|----------|--|
| 1  |   | 276      |          |          |             |             |             |        |          |  |
| 2  |   | 150.0000 | 150.0000 | 150.0000 | 0.0000      | 0.0000      | 0.0000***** | 2.7750 | 11100    |  |
|    |   | 0.2500   | 300.00   | 0.00     | 0.00        | 0.00        | -1293.4091  | 0.0000 | 300.0000 |  |
| 3  | H | 84.27790 | 65.94794 | 78.59807 | -2043.14101 | -1757.64893 | 399.89339   |        | 1        |  |
| 4  | N | 85.20849 | 65.60722 | 78.36149 | 426.75047   | 490.45733   | -334.42467  |        | 1        |  |
| 5  | H | 85.04235 | 64.88523 | 77.65077 | 442.25559   | -1110.30854 | -2448.52907 |        | 1        |  |
| 6  | C | 86.15143 | 66.55530 | 77.91544 | 415.32972   | -666.39213  | 83.73172    |        | 1        |  |
| 7  | H | 85.77898 | 67.56870 | 78.17727 | 879.32219   | 2491.00447  | 667.35213   |        | 1        |  |
| 8  | C | 87.57316 | 66.21808 | 78.59554 | 31.35357    | 477.41777   | 628.23362   |        | 1        |  |
| 9  | H | 87.89757 | 65.19831 | 78.27717 | 1168.38489  | 2240.25337  | -1019.71136 |        | 1        |  |
| 10 | H | 88.35905 | 66.92144 | 78.22806 | -360.43770  | 2534.90498  | 931.67112   |        | 1        |  |
| 11 | C | 87.44427 | 66.28291 | 80.09597 | 463.18208   | 512.70242   | -382.34388  |        | 1        |  |
| 12 | H | 86.57957 | 65.64776 | 80.39468 | 1725.29117  | 1863.52247  | -987.07854  |        | 1        |  |
| 13 | C | 88.70180 | 65.73511 | 80.75887 | 710.42801   | -144.27427  | -313.15367  |        | 1        |  |
| 14 | H | 88.61678 | 65.73968 | 81.87624 | 364.20195   | -1033.13725 | 2494.72524  |        | 1        |  |
| 15 | H | 88.90901 | 64.67922 | 80.44549 | 2567.61904  | 335.80679   | 847.48802   |        | 1        |  |
| 16 | H | 89.60530 | 66.34252 | 80.49310 | -2587.99029 | 680.92867   | -512.16411  |        | 1        |  |
| 17 | C | 87.19180 | 67.70521 | 80.57611 | 268.17616   | 741.64379   | -40.42634   |        | 1        |  |
| 18 | H | 87.12199 | 67.75720 | 81.69350 | 1283.54314  | -1945.37420 | -1411.27812 |        | 1        |  |
| 19 | H | 88.01445 | 68.39877 | 80.26280 | -1258.57796 | 1317.15249  | -2026.02085 |        | 1        |  |
| 20 | H | 86.23445 | 68.11836 | 80.16575 | -2502.84526 | 909.80597   | 575.92391   |        | 1        |  |
| 21 | C | 86.26910 | 66.25119 | 76.31845 | 619.36578   | -458.64843  | -172.09273  |        | 1        |  |
| 22 | O | 85.93190 | 65.17209 | 75.84736 | -81.40433   | 433.87611   | 522.34594   |        | 1        |  |
| 23 | N | 86.76550 | 67.32262 | 75.72858 | 175.23996   | -622.20190  | 341.55523   |        | 1        |  |
| 24 | H | 86.98590 | 68.10191 | 76.34911 | -876.57256  | -303.22879  | -2561.90213 |        | 1        |  |
| 25 | C | 87.06286 | 67.45076 | 74.34533 | -571.88214  | -534.10783  | -106.15033  |        | 1        |  |
| 26 | H | 87.90678 | 68.17578 | 74.35874 | -2713.20841 | -16.25800   | -248.80809  |        | 1        |  |
| 27 | C | 87.48642 | 66.05260 | 73.69302 | 166.60354   | 288.16399   | -716.09568  |        | 1        |  |
| 28 | H | 86.69599 | 65.27422 | 73.91338 | -2097.85574 | 1636.78449  | -586.18044  |        | 1        |  |
| 29 | O | 88.72380 | 65.51147 | 74.19423 | -317.80580  | -363.38227  | 484.43082   |        | 1        |  |
| 30 | H | 88.38888 | 64.74434 | 74.70289 | 1863.74748  | -1451.84923 | 1357.29467  |        | 1        |  |
| 31 | C | 87.44935 | 66.39547 | 72.15948 | 503.80731   | 517.99032   | 318.51606   |        | 1        |  |
| 32 | H | 87.66348 | 65.49747 | 71.53469 | 640.61020   | -2157.10410 | -1536.29104 |        | 1        |  |
| 33 | H | 86.45331 | 66.78907 | 71.84663 | 1687.88455  | 465.60692   | 2087.56452  |        | 1        |  |
| 34 | H | 88.20788 | 67.16966 | 71.89779 | -1293.07895 | -1899.88581 | -1463.57452 |        | 1        |  |
| 35 | C | 85.83441 | 68.24345 | 73.60260 | -153.07550  | -733.68902  | 248.70981   |        | 1        |  |
| 36 | O | 86.16287 | 69.32028 | 73.17368 | 186.15459   | -480.78787  | -449.34387  |        | 1        |  |

|    |   |          |          |          |             |             |             |   |
|----|---|----------|----------|----------|-------------|-------------|-------------|---|
| 37 | N | 84.64478 | 67.63235 | 73.51606 | -487.53139  | 543.18517   | 42.03850    | 1 |
| 38 | C | 83.54486 | 68.31394 | 72.89880 | -699.35871  | 69.34393    | 360.10701   | 1 |
| 39 | H | 83.94492 | 68.83145 | 71.99694 | 2.81126     | -221.99807  | -2715.58072 | 1 |
| 40 | C | 82.54799 | 67.11020 | 72.60764 | -507.46439  | -592.59194  | 122.07761   | 1 |
| 41 | H | 81.49824 | 67.44627 | 72.45225 | -1975.08116 | 525.87560   | -1801.71556 | 1 |
| 42 | H | 82.84428 | 66.55264 | 71.69140 | 1588.27743  | -1913.22100 | 1113.83566  | 1 |
| 43 | C | 82.72991 | 66.23223 | 73.88416 | -613.62442  | -457.55993  | -194.14490  | 1 |
| 44 | H | 82.10276 | 66.61383 | 74.72204 | 1707.54637  | -721.27992  | 1996.92523  | 1 |
| 45 | H | 82.43544 | 65.16940 | 73.73436 | 758.23357   | 2100.81767  | 1560.55011  | 1 |
| 46 | C | 84.27513 | 66.40784 | 74.21360 | -352.41524  | 704.96076   | 49.21465    | 1 |
| 47 | H | 84.48578 | 66.59006 | 75.29899 | 1714.76886  | -2070.42778 | 443.35792   | 1 |
| 48 | H | 84.93700 | 65.59439 | 73.83362 | 1224.15040  | 1801.50881  | 1636.97633  | 1 |
| 49 | C | 82.89342 | 69.37618 | 73.95731 | 566.85117   | 537.05831   | 117.62814   | 1 |
| 50 | O | 82.12652 | 70.23636 | 73.53513 | -550.26779  | -406.08867  | 4.21666     | 1 |
| 51 | N | 83.27601 | 69.13683 | 75.18907 | 566.34832   | -425.77725  | 180.18749   | 1 |
| 52 | H | 83.97403 | 68.40679 | 75.29511 | 644.44502   | 2646.80550  | -52.73430   | 1 |
| 53 | C | 82.72955 | 69.81067 | 76.31822 | 612.34801   | -281.48662  | 411.56221   | 1 |
| 54 | H | 81.65779 | 69.94372 | 76.04742 | 1667.23498  | -1490.75142 | 1556.16753  | 1 |
| 55 | C | 83.02194 | 68.91803 | 77.60568 | -714.45746  | -175.43074  | 286.98927   | 1 |
| 56 | H | 84.12725 | 68.93560 | 77.81358 | -787.09484  | 1763.03619  | -1922.46060 | 1 |
| 57 | O | 82.67102 | 67.52549 | 77.50753 | -429.46514  | 516.51932   | -128.40526  | 1 |
| 58 | H | 83.54255 | 67.09566 | 77.62399 | 1981.82785  | 436.16847   | -1818.18182 | 1 |
| 59 | C | 82.27414 | 69.75823 | 78.70556 | 630.79189   | -468.94448  | 76.03230    | 1 |
| 60 | H | 82.42413 | 69.32586 | 79.72200 | -1775.71861 | 2062.30353  | 131.89849   | 1 |
| 61 | H | 82.64004 | 70.81375 | 78.73607 | -1855.14608 | 88.94118    | 1993.53760  | 1 |
| 62 | H | 81.17552 | 69.79168 | 78.51966 | -1504.82350 | -780.94249  | -2132.90992 | 1 |
| 63 | C | 83.53366 | 71.23897 | 76.40262 | 288.57638   | 618.62814   | -397.00270  | 1 |
| 64 | O | 84.28321 | 71.51173 | 77.30827 | 321.70495   | -185.26452  | 574.37218   | 1 |
| 65 | N | 83.18843 | 71.94404 | 75.33412 | -447.05792  | -446.53431  | 367.76425   | 1 |
| 66 | H | 82.54923 | 71.54189 | 74.60553 | 350.31316   | 1975.63644  | -1843.31522 | 1 |
| 67 | C | 83.77876 | 73.22701 | 75.17139 | -511.23061  | 374.03917   | -471.51480  | 1 |
| 68 | H | 84.37170 | 73.35097 | 76.10994 | 2234.79579  | -898.70890  | -1273.45190 | 1 |
| 69 | C | 84.68669 | 73.13111 | 73.86003 | 529.53781   | -159.34528  | 563.72604   | 1 |
| 70 | H | 85.30370 | 74.06484 | 73.79477 | 654.59388   | 2347.94251  | 1217.51488  | 1 |
| 71 | H | 85.40261 | 72.27995 | 74.00465 | -1526.55661 | 2103.42026  | 817.87394   | 1 |
| 72 | O | 83.96995 | 72.95930 | 72.58157 | -554.84278  | 14.12789    | 399.58769   | 1 |
| 73 | H | 83.70067 | 72.02840 | 72.69908 | 1297.06236  | 2061.84854  | 1220.68812  | 1 |
| 74 | C | 82.50916 | 74.25016 | 75.08106 | -662.15484  | -412.13544  | 123.62687   | 1 |
| 75 | O | 81.77617 | 74.37086 | 76.02805 | -540.01537  | -317.05804  | 274.91456   | 1 |
| 76 | N | 82.43799 | 74.87010 | 73.89840 | -202.76299  | -690.00100  | -131.49145  | 1 |
| 77 | H | 83.12027 | 74.60397 | 73.17514 | -702.62132  | -2617.37191 | 281.70413   | 1 |
| 78 | C | 81.57021 | 76.04158 | 73.75392 | -491.73914  | 576.34187   | 222.73509   | 1 |
| 79 | H | 81.68193 | 76.58622 | 74.72014 | 1977.17978  | -1823.58850 | -434.68928  | 1 |
| 80 | C | 82.00761 | 76.81514 | 72.52921 | -649.50797  | -328.66843  | 306.11224   | 1 |
| 81 | H | 82.07091 | 76.10306 | 71.67563 | 2075.07803  | 1452.16490  | -1004.45904 | 1 |
| 82 | C | 80.99628 | 77.88922 | 72.16899 | -615.18735  | -489.99689  | -70.96352   | 1 |
| 83 | H | 81.28459 | 78.43796 | 71.23093 | -1226.32661 | -1724.38906 | -1716.47170 | 1 |
| 84 | H | 79.97276 | 77.45150 | 72.00270 | 2381.64273  | -969.84735  | 900.46860   | 1 |
| 85 | H | 80.89722 | 78.65287 | 72.98854 | 2122.74991  | 1702.23946  | -141.36228  | 1 |
| 86 | C | 83.38300 | 77.43321 | 72.70713 | -501.86074  | -479.61276  | -376.42482  | 1 |
| 87 | H | 83.71724 | 77.97712 | 71.78124 | 993.79261   | -2246.95401 | -1177.81305 | 1 |
| 88 | H | 83.39535 | 78.17514 | 73.55222 | 42.71279    | -626.15391  | -2651.37258 | 1 |
| 89 | H | 84.16086 | 76.65420 | 72.93781 | -2026.39012 | -1590.33709 | -887.82922  | 1 |
| 90 | C | 79.99612 | 75.51929 | 73.55068 | -672.89153  | 382.57394   | -156.34072  | 1 |
| 91 | O | 79.09894 | 76.10963 | 74.10147 | 410.04627   | 221.86223   | 500.35950   | 1 |
| 92 | N | 79.91082 | 74.59062 | 72.58577 | -378.11782  | -443.79414  | -441.10984  | 1 |
| 93 | H | 80.87079 | 74.31654 | 72.36931 | 2404.15973  | -568.14894  | 1149.30085  | 1 |
| 94 | C | 78.85797 | 73.61168 | 72.61428 | -544.54484  | 466.16019   | 331.29119   | 1 |
| 95 | H | 79.09245 | 73.01936 | 71.70247 | -1409.80988 | -170.17955  | 2325.32679  | 1 |
| 96 | C | 79.09572 | 72.76509 | 73.92823 | -184.48284  | 116.78282   | -758.89137  | 1 |
| 97 | H | 80.18252 | 72.59924 | 74.11157 | 1893.78641  | 1861.14652  | 611.04528   | 1 |
| 98 | H | 78.70545 | 73.29337 | 74.82820 | -2170.79665 | -974.19311  | 1327.50117  | 1 |

|     |   |          |          |          |             |             |             |   |
|-----|---|----------|----------|----------|-------------|-------------|-------------|---|
| 99  | C | 78.34247 | 71.41550 | 73.66601 | 389.51668   | 672.81878   | -138.49152  | 1 |
| 100 | H | 77.25205 | 71.63022 | 73.56085 | 510.64577   | 1933.03327  | 1851.02484  | 1 |
| 101 | H | 78.63165 | 70.99774 | 72.67541 | -2302.30869 | -1105.72939 | -948.89774  | 1 |
| 102 | C | 78.56590 | 70.32122 | 74.74512 | -559.93427  | -126.34590  | 542.30857   | 1 |
| 103 | O | 78.14619 | 69.17708 | 74.53615 | -670.36003  | -111.83166  | 76.36448    | 1 |
| 104 | N | 79.17957 | 70.74421 | 75.84536 | -216.06729  | -537.07037  | 446.51379   | 1 |
| 105 | H | 79.55632 | 71.67970 | 76.04991 | -1251.96487 | 1074.12894  | -2168.52500 | 1 |
| 106 | H | 79.41137 | 70.15112 | 76.65354 | -2451.83023 | -720.73851  | 944.84612   | 1 |
| 107 | C | 77.37645 | 74.27671 | 72.57782 | 546.24052   | -563.88337  | -85.11809   | 1 |
| 108 | O | 76.52763 | 73.77846 | 73.27079 | 71.70702    | -307.40463  | 606.69673   | 1 |
| 109 | N | 77.24011 | 75.21142 | 71.62818 | 479.90863   | -504.50129  | 222.86849   | 1 |
| 110 | C | 76.21619 | 76.21007 | 71.67014 | 75.51268    | -600.91904  | 506.73700   | 1 |
| 111 | H | 76.06443 | 76.50014 | 72.73472 | -2033.61562 | 1795.30103  | 254.89480   | 1 |
| 112 | C | 76.83660 | 77.32272 | 70.71980 | 523.79067   | 517.99274   | 284.45581   | 1 |
| 113 | H | 76.07640 | 78.04113 | 70.33974 | 1599.61665  | -1127.00911 | 1895.98173  | 1 |
| 114 | H | 77.61544 | 77.92308 | 71.24069 | -1881.83093 | 1275.82488  | -1501.55016 | 1 |
| 115 | C | 77.45668 | 76.43247 | 69.60004 | -600.05639  | -404.05026  | 316.64485   | 1 |
| 116 | H | 76.66074 | 76.00709 | 68.94432 | -2597.05260 | 496.36221   | 657.73249   | 1 |
| 117 | H | 78.17317 | 76.96927 | 68.93806 | -1666.24518 | 1294.38985  | -1723.90591 | 1 |
| 118 | C | 78.13728 | 75.29966 | 70.48185 | 493.57570   | -129.95376  | -602.56394  | 1 |
| 119 | H | 78.19781 | 74.29137 | 70.00890 | -1469.08415 | -637.84797  | 2204.22581  | 1 |
| 120 | H | 79.13574 | 75.57372 | 70.89658 | -1038.97840 | 1068.88701  | -2280.71789 | 1 |
| 121 | C | 74.85750 | 75.65018 | 70.94749 | 188.88100   | 241.05089   | -727.87821  | 1 |
| 122 | O | 74.90965 | 74.94740 | 69.96292 | 531.88613   | -49.19943   | 427.07960   | 1 |
| 123 | N | 73.79381 | 76.18365 | 71.53652 | 708.14833   | 26.93417    | -179.73509  | 1 |
| 124 | H | 74.00665 | 76.78553 | 72.33175 | -2232.69501 | -1179.09831 | 1023.94816  | 1 |
| 125 | C | 72.41912 | 75.88046 | 71.16701 | -738.32412  | 259.92548   | 104.42456   | 1 |
| 126 | H | 71.81937 | 76.64764 | 71.71400 | 2028.89123  | 1260.02983  | 1311.33324  | 1 |
| 127 | C | 72.28047 | 75.99669 | 69.65776 | -258.65678  | -345.52513  | 661.28459   | 1 |
| 128 | H | 73.06357 | 75.33631 | 69.19690 | -1826.06090 | -1801.46097 | -918.64554  | 1 |
| 129 | C | 70.92372 | 75.54644 | 69.15214 | -541.23400  | 531.92970   | -218.41428  | 1 |
| 130 | H | 70.80362 | 75.74288 | 68.05080 | 1311.73218  | -2219.18200 | 882.19023   | 1 |
| 131 | H | 70.76483 | 74.44097 | 69.30970 | -1048.71298 | 1223.58118  | -2196.97971 | 1 |
| 132 | H | 70.08624 | 76.07994 | 69.68131 | 419.06414   | 1903.92898  | 1903.44670  | 1 |
| 133 | C | 72.54725 | 77.41426 | 69.18301 | -423.86431  | 152.66566   | -648.55262  | 1 |
| 134 | H | 72.52460 | 77.48831 | 68.06094 | 105.68386   | -2342.50080 | 1387.51238  | 1 |
| 135 | H | 71.78059 | 78.13528 | 69.57949 | -1695.63603 | -1484.73621 | -1531.02793 | 1 |
| 136 | H | 73.55576 | 77.77733 | 69.52323 | -1853.57121 | -487.39031  | 1936.59343  | 1 |
| 137 | C | 72.04056 | 74.35081 | 71.70554 | 539.71428   | -510.58232  | 267.58633   | 1 |
| 138 | O | 70.96087 | 73.87975 | 71.43717 | -15.93758   | -278.34085  | -624.49402  | 1 |
| 139 | N | 72.99853 | 73.81364 | 72.43709 | -676.81886  | 12.05292    | 276.17960   | 1 |
| 140 | H | 73.84715 | 74.35926 | 72.56104 | -1694.44250 | -373.84189  | -2100.66098 | 1 |
| 141 | C | 72.75880 | 72.54494 | 73.05775 | 412.33078   | -664.70360  | 108.35451   | 1 |
| 142 | H | 72.20519 | 71.95312 | 72.29270 | 1765.77476  | 1294.44366  | 1621.76594  | 1 |
| 143 | C | 74.17455 | 71.96450 | 73.44932 | -179.66635  | -721.95667  | -264.73915  | 1 |
| 144 | H | 74.82752 | 71.86720 | 72.55237 | -607.34922  | 2587.87032  | -598.10018  | 1 |
| 145 | H | 74.71863 | 72.67070 | 74.12142 | -359.69332  | -1479.13954 | -2259.74260 | 1 |
| 146 | C | 73.94604 | 70.57728 | 74.14107 | -240.01076  | 616.02425   | 431.85322   | 1 |
| 147 | H | 73.19203 | 70.67108 | 74.95826 | -1359.17131 | 782.54425   | 2227.99181  | 1 |
| 148 | H | 73.51993 | 69.84415 | 73.41986 | -820.36667  | 85.81767    | -2596.78715 | 1 |
| 149 | C | 75.31092 | 70.05478 | 74.73512 | -513.07015  | 236.18570   | -551.87280  | 1 |
| 150 | H | 76.04955 | 69.84346 | 73.92560 | 1816.11944  | -1183.11722 | -1650.94321 | 1 |
| 151 | H | 75.78763 | 70.82594 | 75.38326 | -1800.04429 | -1361.53473 | 1526.34643  | 1 |
| 152 | C | 75.00227 | 68.76734 | 75.54632 | 726.08972   | -253.19732  | -179.64713  | 1 |
| 153 | H | 74.35281 | 68.91887 | 76.43317 | 1224.27271  | -456.51798  | -2390.90304 | 1 |
| 154 | H | 74.61414 | 67.92772 | 74.93415 | 1206.40339  | -1150.93514 | -2154.90344 | 1 |
| 155 | N | 76.35100 | 68.26061 | 76.10490 | 329.70796   | -633.68968  | -155.67358  | 1 |
| 156 | H | 76.34590 | 67.30430 | 76.56084 | 1348.31305  | 1938.76845  | 1359.00643  | 1 |
| 157 | H | 77.17951 | 68.21224 | 75.34005 | 2096.92035  | 1446.54551  | -966.48890  | 1 |
| 158 | H | 76.76467 | 68.84488 | 76.88593 | -1197.07217 | -2303.53719 | 827.28733   | 1 |
| 159 | C | 71.83239 | 72.75457 | 74.38771 | -378.01186  | -556.17301  | -413.96481  | 1 |
| 160 | O | 71.32592 | 71.79212 | 74.92114 | -409.44433  | -307.55053  | -453.30833  | 1 |

|     |   |          |          |          |             |             |             |   |
|-----|---|----------|----------|----------|-------------|-------------|-------------|---|
| 161 | N | 71.85736 | 74.01446 | 74.82576 | -429.02477  | 524.70884   | 274.08502   | 1 |
| 162 | H | 72.29595 | 74.68267 | 74.19375 | 1706.34263  | -1425.96036 | 1574.38926  | 1 |
| 163 | C | 70.77471 | 74.42195 | 75.68975 | -45.25864   | -626.22952  | 478.93267   | 1 |
| 164 | H | 69.89432 | 73.96049 | 75.19109 | 1988.63164  | 570.90773   | 1772.87287  | 1 |
| 165 | C | 71.04818 | 73.75539 | 77.08842 | 551.77128   | -20.49526   | -564.54996  | 1 |
| 166 | H | 71.25896 | 72.66736 | 76.95042 | 1434.61535  | -1753.10253 | 1513.99471  | 1 |
| 167 | H | 71.97518 | 74.17565 | 77.53981 | -714.67738  | 1819.09770  | 1898.36494  | 1 |
| 168 | C | 69.82285 | 73.94606 | 78.04793 | 446.99263   | -555.77305  | 338.97221   | 1 |
| 169 | H | 69.52810 | 75.01607 | 78.12917 | 1953.68466  | 1892.25957  | -161.67766  | 1 |
| 170 | H | 68.92453 | 73.41097 | 77.66715 | -403.03785  | 2688.07032  | -188.43591  | 1 |
| 171 | C | 70.28406 | 73.37361 | 79.44776 | 567.86262   | 335.74681   | 434.04421   | 1 |
| 172 | H | 70.46159 | 72.27536 | 79.38101 | -1080.02275 | 1568.26081  | -1948.78900 | 1 |
| 173 | H | 71.26107 | 73.81670 | 79.74874 | -919.54108  | 2111.34692  | 1456.13463  | 1 |
| 174 | C | 69.20695 | 73.69047 | 80.51071 | 195.81897   | 173.33862   | -745.11536  | 1 |
| 175 | H | 69.06833 | 74.76985 | 80.72252 | 1405.67949  | -2301.21089 | -390.08113  | 1 |
| 176 | H | 68.22483 | 73.20848 | 80.33431 | -940.37328  | -1118.32446 | 2299.72133  | 1 |
| 177 | N | 69.71007 | 73.08821 | 81.86705 | 319.26422   | 656.36007   | -42.02424   | 1 |
| 178 | H | 69.08891 | 73.26650 | 82.70794 | 1961.03633  | 619.91968   | 1787.09422  | 1 |
| 179 | H | 69.83481 | 72.03481 | 81.91613 | 854.14343   | -2156.80752 | 1429.08711  | 1 |
| 180 | H | 70.64378 | 73.43747 | 82.23089 | 1237.02905  | -1378.50857 | -1998.28500 | 1 |
| 181 | C | 70.76478 | 76.05380 | 75.61760 | 532.53319   | -268.57236  | 517.55729   | 1 |
| 182 | O | 70.64281 | 76.57251 | 74.52991 | 266.16714   | -290.73804  | -558.88002  | 1 |
| 183 | N | 70.94324 | 76.60553 | 76.80993 | -226.25352  | 640.49678   | -270.32839  | 1 |
| 184 | H | 71.11772 | 75.96836 | 77.58562 | 2007.69063  | -1035.27229 | 1523.50231  | 1 |
| 185 | C | 70.60391 | 77.94516 | 77.13268 | -540.76542  | -573.33303  | 49.50000    | 1 |
| 186 | H | 71.09006 | 78.12723 | 78.11615 | -2374.20950 | -1036.76023 | 843.75774   | 1 |
| 187 | C | 71.15832 | 78.89067 | 75.96993 | -77.09082   | 666.87422   | -415.84136  | 1 |
| 188 | H | 70.67426 | 78.57846 | 74.99473 | -985.81834  | 617.19825   | 2463.91927  | 1 |
| 189 | O | 72.58606 | 78.82916 | 75.76661 | 293.29899   | -391.65602  | -477.80926  | 1 |
| 190 | H | 72.62406 | 78.28477 | 74.95371 | 2528.72714  | -681.76262  | -751.27122  | 1 |
| 191 | C | 70.59211 | 80.29576 | 76.38641 | 252.47363   | -605.14473  | 440.05134   | 1 |
| 192 | H | 70.84000 | 81.07544 | 75.62826 | -2052.65063 | 1456.49051  | -1043.51830 | 1 |
| 193 | H | 69.47969 | 80.27787 | 76.48357 | -2152.98800 | -1661.97574 | -161.70652  | 1 |
| 194 | H | 71.01092 | 80.63531 | 77.36215 | -473.12726  | -1584.27339 | 2165.61725  | 1 |
| 195 | C | 68.97043 | 78.02528 | 77.24538 | 360.36307   | 488.46713   | 505.10056   | 1 |
| 196 | O | 68.24014 | 77.63482 | 76.36692 | -200.08817  | -528.03552  | -385.82850  | 1 |
| 197 | N | 68.64562 | 78.69467 | 78.35796 | -597.54095  | -226.44775  | 355.20479   | 1 |
| 198 | H | 69.39519 | 78.89138 | 79.02052 | 2179.23655  | -1300.70981 | -991.33835  | 1 |
| 199 | C | 67.29408 | 78.49618 | 78.81125 | -687.68921  | 297.39807   | -249.45179  | 1 |
| 200 | H | 67.10647 | 77.40222 | 78.75864 | -349.16256  | -2467.37713 | -1101.72831 | 1 |
| 201 | C | 67.12479 | 79.13426 | 80.25792 | 672.47345   | 361.54328   | -201.62880  | 1 |
| 202 | H | 67.47253 | 80.19266 | 80.23688 | 1541.41502  | 582.18425   | 2169.97026  | 1 |
| 203 | H | 66.03925 | 79.15383 | 80.51151 | -2534.67717 | 60.25153    | 997.72295   | 1 |
| 204 | C | 67.88724 | 78.35527 | 81.34145 | 574.26774   | -389.43119  | -377.02542  | 1 |
| 205 | C | 67.27846 | 77.20736 | 81.93174 | 688.82679   | -287.33580  | -257.96133  | 1 |
| 206 | H | 66.29569 | 76.84522 | 81.57898 | 331.14182   | 1470.38163  | 2269.80013  | 1 |
| 207 | C | 69.15706 | 78.81996 | 81.79898 | -383.52382  | -675.04808  | 144.24917   | 1 |
| 208 | H | 69.63229 | 79.70553 | 81.33944 | 4.09847     | 1517.59662  | 2262.86397  | 1 |
| 209 | C | 67.93682 | 76.57153 | 82.98444 | -134.76730  | 428.45285   | -649.50303  | 1 |
| 210 | H | 67.45746 | 75.69606 | 83.45570 | -903.23433  | 1600.49020  | 2011.53387  | 1 |
| 211 | C | 69.77430 | 78.15016 | 82.85906 | -335.53281  | -615.00040  | -364.39058  | 1 |
| 212 | H | 70.74686 | 78.52845 | 83.21939 | 1596.45398  | -1369.33862 | 1732.02659  | 1 |
| 213 | C | 69.19315 | 77.01288 | 83.49240 | 585.48547   | -340.24194  | -406.23938  | 1 |
| 214 | O | 69.81227 | 76.32729 | 84.57072 | -419.15649  | -173.04408  | -511.94141  | 1 |
| 215 | H | 70.58797 | 76.91795 | 84.71964 | -1071.84350 | 1559.71507  | -1960.13012 | 1 |
| 216 | C | 66.29018 | 79.34745 | 77.85694 | 291.41878   | -183.13091  | 710.72246   | 1 |
| 217 | O | 65.14380 | 79.00022 | 77.68177 | 379.87695   | 523.47396   | -222.23622  | 1 |
| 218 | N | 66.86343 | 80.51261 | 77.52384 | 564.30591   | 373.09380   | 277.24371   | 1 |
| 219 | H | 67.85288 | 80.60563 | 77.75235 | -120.59931  | -2436.07824 | -1214.35098 | 1 |
| 220 | C | 66.25294 | 81.26625 | 76.48357 | 404.07514   | -299.37480  | 608.84009   | 1 |
| 221 | H | 65.20977 | 80.87807 | 76.41933 | -1071.07882 | -841.69025  | 2359.66467  | 1 |
| 222 | C | 66.39391 | 82.78338 | 76.90597 | -683.12807  | 68.71770    | -390.13096  | 1 |

|     |   |          |          |          |             |             |             |   |
|-----|---|----------|----------|----------|-------------|-------------|-------------|---|
| 223 | H | 66.04812 | 82.92365 | 77.95515 | 2068.88918  | 1596.58590  | 770.89603   | 1 |
| 224 | H | 67.46442 | 83.08941 | 76.89919 | 1379.86429  | 2342.49779  | -179.85638  | 1 |
| 225 | C | 65.55880 | 83.66697 | 75.92762 | -176.39967  | 537.49466   | 550.97268   | 1 |
| 226 | H | 65.92249 | 83.57297 | 74.88008 | -396.28051  | 1942.22168  | 1869.33314  | 1 |
| 227 | H | 64.48979 | 83.35843 | 75.91022 | -94.44700   | 586.00678   | -2659.20016 | 1 |
| 228 | C | 65.73071 | 85.15645 | 76.47973 | -291.69381  | -718.18079  | -150.72929  | 1 |
| 229 | H | 65.38568 | 85.32055 | 77.53257 | -2303.38776 | 1089.76242  | 964.62032   | 1 |
| 230 | H | 66.76420 | 85.57918 | 76.39528 | 884.16729   | 2568.80533  | -207.74283  | 1 |
| 231 | N | 64.89445 | 85.91261 | 75.64826 | -594.49522  | -252.81478  | 342.29276   | 1 |
| 232 | H | 64.42799 | 85.42071 | 74.90237 | -1735.17426 | 2084.05705  | -263.71605  | 1 |
| 233 | C | 64.69355 | 87.16060 | 75.78341 | 595.23177   | -271.52487  | 442.22352   | 1 |
| 234 | N | 65.35641 | 87.81604 | 76.82748 | 585.53813   | -424.79750  | -105.81303  | 1 |
| 235 | H | 65.99918 | 87.44071 | 77.52381 | 959.88797   | 1327.56823  | -2177.11905 | 1 |
| 236 | H | 65.27449 | 88.81102 | 77.03835 | 1578.48647  | 16.27378    | -2220.76233 | 1 |
| 237 | N | 63.80648 | 87.63796 | 74.80854 | -452.17763  | -390.33541  | -421.51853  | 1 |
| 238 | H | 63.30836 | 87.15723 | 74.06089 | 470.26107   | 1974.25629  | -1817.92087 | 1 |
| 239 | H | 63.50596 | 88.61257 | 74.76304 | 1856.67307  | -1573.97321 | -1224.35416 | 1 |
| 240 | C | 67.15924 | 81.02428 | 75.12712 | -531.47271  | -581.45780  | -55.06206   | 1 |
| 241 | O | 68.26239 | 81.49687 | 74.98162 | -243.00837  | 192.73507   | 609.52485   | 1 |
| 242 | N | 66.45796 | 80.26722 | 74.29555 | 343.49288   | -644.25607  | 38.09164    | 1 |
| 243 | H | 65.52875 | 79.94689 | 74.56760 | -1691.16043 | -1535.97525 | -1484.73099 | 1 |
| 244 | C | 67.01357 | 80.01086 | 73.01086 | 542.66492   | 350.14337   | 454.42563   | 1 |
| 245 | H | 68.11212 | 80.09021 | 73.18494 | 1209.57979  | -2396.95920 | 463.86744   | 1 |
| 246 | C | 66.51116 | 78.56633 | 72.58425 | -737.14309  | 145.93010   | 242.71942   | 1 |
| 247 | H | 65.39987 | 78.53034 | 72.59331 | -1050.18303 | 159.36419   | -2509.06125 | 1 |
| 248 | C | 67.06042 | 78.18566 | 71.16770 | -706.77696  | -252.88343  | -245.16230  | 1 |
| 249 | H | 66.75799 | 77.15285 | 70.87367 | -1624.64039 | -1665.49085 | 1417.86935  | 1 |
| 250 | H | 66.67504 | 78.88134 | 70.38207 | 2566.10521  | 598.51109   | 693.22305   | 1 |
| 251 | H | 68.17435 | 78.23005 | 71.13335 | -1972.69758 | 107.10018   | -1876.34312 | 1 |
| 252 | C | 67.10403 | 77.53983 | 73.61092 | 412.85148   | 672.58832   | -27.69222   | 1 |
| 253 | H | 66.75133 | 76.50109 | 73.40933 | 1447.02277  | 1762.76533  | -1490.78944 | 1 |
| 254 | H | 68.22005 | 77.52218 | 73.58373 | 1320.77379  | -145.20455  | 2378.68491  | 1 |
| 255 | H | 66.81169 | 77.79664 | 74.66030 | -1512.10848 | 1470.52031  | 1724.75147  | 1 |
| 256 | C | 66.51290 | 81.14857 | 71.93355 | -607.11113  | 499.56689   | 73.73769    | 1 |
| 257 | O | 66.95223 | 81.10234 | 70.80516 | 357.97126   | 460.81534   | 356.68785   | 1 |
| 258 | N | 65.70245 | 82.04111 | 72.47830 | 536.55407   | -368.62270  | 332.76306   | 1 |
| 259 | H | 65.49492 | 81.88215 | 73.46251 | 524.38866   | 2297.69985  | 1367.20941  | 1 |
| 260 | C | 65.04469 | 83.06173 | 71.74949 | 46.50277    | -774.29190  | -147.97904  | 1 |
| 261 | H | 64.72133 | 83.77593 | 72.53857 | 1676.51875  | 1883.29066  | 1032.55549  | 1 |
| 262 | C | 66.04883 | 83.71223 | 70.66796 | -559.41456  | -34.19198   | -556.30433  | 1 |
| 263 | H | 66.35679 | 82.91941 | 69.93418 | -64.66664   | 395.18769   | 2695.05373  | 1 |
| 264 | H | 65.54077 | 84.50756 | 70.07160 | -2703.44278 | -60.40056   | 333.79418   | 1 |
| 265 | C | 67.25812 | 84.25941 | 71.37816 | -519.76435  | 377.31045   | 459.42366   | 1 |
| 266 | H | 67.65570 | 83.46270 | 72.04803 | -1746.74323 | 1667.50644  | -1261.73691 | 1 |
| 267 | C | 68.33924 | 84.62061 | 70.36682 | 570.95554   | 16.46261    | -545.27700  | 1 |
| 268 | H | 69.26390 | 85.00668 | 70.86810 | 2391.58273  | 28.05277    | -1305.07271 | 1 |
| 269 | H | 68.64041 | 83.73304 | 69.75200 | 175.75588   | 917.63458   | 2559.43867  | 1 |
| 270 | H | 67.99146 | 85.41349 | 69.65563 | -1063.97851 | -2155.34650 | 1283.00462  | 1 |
| 271 | C | 66.91136 | 85.47763 | 72.22271 | 193.76014   | 2.62946     | -765.53141  | 1 |
| 272 | H | 67.81903 | 85.90389 | 72.72268 | 507.39394   | -846.55087  | 2539.60089  | 1 |
| 273 | H | 66.46015 | 86.29454 | 71.60262 | 1337.57841  | 1818.19054  | 1526.01994  | 1 |
| 274 | H | 66.17682 | 85.22991 | 73.03172 | 1100.88635  | -1172.91350 | -2199.08909 | 1 |
| 275 | C | 63.77475 | 82.42495 | 70.99414 | -549.21115  | 475.64486   | -309.38218  | 1 |
| 276 | O | 63.41411 | 81.28376 | 71.11359 | 556.06106   | -390.37755  | -78.24250   | 1 |
| 277 | O | 63.02006 | 83.33420 | 70.20886 | -572.27940  | -310.19032  | -209.75862  | 1 |
| 278 | H | 63.54743 | 84.15974 | 70.38367 | -1380.08193 | 2212.14486  | 790.85944   | 1 |

Listing 106: C00106.xmolout

|   |          |          |          |        |        |             |        |          |  |
|---|----------|----------|----------|--------|--------|-------------|--------|----------|--|
| 1 | 276      |          |          |        |        |             |        |          |  |
| 2 | 150.0000 | 150.0000 | 150.0000 | 0.0000 | 0.0000 | 0.0000***** | 2.7750 | 11100    |  |
|   | 0.2500   | 300.00   | 0.00     | 0.00   | 0.00   | -1293.4080  | 0.0000 | 300.0000 |  |

|    |   |          |          |          |             |             |             |   |
|----|---|----------|----------|----------|-------------|-------------|-------------|---|
| 3  | H | 66.75474 | 82.77873 | 74.13355 | -2043.14101 | -1757.64893 | 399.89339   | 1 |
| 4  | N | 66.97021 | 83.51154 | 74.80742 | 426.75047   | 490.45733   | -334.42467  | 1 |
| 5  | H | 67.01164 | 82.98131 | 75.67613 | 442.25559   | -1110.30854 | -2448.52907 | 1 |
| 6  | C | 68.16879 | 84.19791 | 74.50639 | 415.32972   | -666.39213  | 83.73172    | 1 |
| 7  | H | 68.02805 | 84.42142 | 73.42805 | 879.32219   | 2491.00447  | 667.35213   | 1 |
| 8  | C | 68.26860 | 85.52872 | 75.40338 | 31.35357    | 477.41777   | 628.23362   | 1 |
| 9  | H | 68.30693 | 85.24745 | 76.48349 | 1168.38489  | 2240.25337  | -1019.71136 | 1 |
| 10 | H | 69.21497 | 86.08255 | 75.19039 | -360.43770  | 2534.90498  | 931.67112   | 1 |
| 11 | C | 67.07609 | 86.41212 | 75.13285 | 463.18208   | 512.70242   | -382.34388  | 1 |
| 12 | H | 66.15488 | 85.79637 | 75.24088 | 1725.29117  | 1863.52247  | -987.07854  | 1 |
| 13 | C | 67.02543 | 87.55045 | 76.14412 | 710.42801   | -144.27427  | -313.15367  | 1 |
| 14 | H | 66.13246 | 88.20813 | 75.98324 | 364.20195   | -1033.13725 | 2494.72524  | 1 |
| 15 | H | 66.97230 | 87.16860 | 77.19636 | 2567.61904  | 335.80679   | 847.48802   | 1 |
| 16 | H | 67.93373 | 88.20321 | 76.07398 | -2587.99029 | 680.92867   | -512.16411  | 1 |
| 17 | C | 67.11654 | 86.98788 | 73.72419 | 268.17616   | 741.64379   | -40.42634   | 1 |
| 18 | H | 66.25942 | 87.68596 | 73.53929 | 1283.54314  | -1945.37420 | -1411.27812 | 1 |
| 19 | H | 68.05966 | 87.56507 | 73.54117 | -1258.57796 | 1317.15249  | -2026.02085 | 1 |
| 20 | H | 67.06142 | 86.18502 | 72.94482 | -2502.84526 | 909.80597   | 575.92391   | 1 |
| 21 | C | 69.36560 | 83.11083 | 74.72152 | 619.36578   | -458.64843  | -172.09273  | 1 |
| 22 | O | 69.28094 | 82.00197 | 74.24444 | -81.40433   | 433.87611   | 522.34594   | 1 |
| 23 | N | 70.36845 | 83.64458 | 75.41104 | 175.23996   | -622.20190  | 341.55523   | 1 |
| 24 | H | 70.24004 | 84.57634 | 75.80042 | -876.57256  | -303.22879  | -2561.90213 | 1 |
| 25 | C | 71.67764 | 83.08266 | 75.41293 | -571.88214  | -534.10783  | -106.15033  | 1 |
| 26 | H | 72.24395 | 83.78466 | 76.06620 | -2713.20841 | -16.25800   | -248.80809  | 1 |
| 27 | C | 71.57607 | 81.59419 | 76.00221 | 166.60354   | 288.16399   | -716.09568  | 1 |
| 28 | H | 71.06657 | 80.96492 | 75.21765 | -2097.85574 | 1636.78449  | -586.18044  | 1 |
| 29 | O | 70.79895 | 81.44428 | 77.20301 | -317.80580  | -363.38227  | 484.43082   | 1 |
| 30 | H | 70.00129 | 81.00036 | 76.84600 | 1863.74748  | -1451.84923 | 1357.29467  | 1 |
| 31 | C | 73.08596 | 81.17904 | 76.15071 | 503.80731   | 517.99032   | 318.51606   | 1 |
| 32 | H | 73.18687 | 80.11480 | 76.46348 | 640.61020   | -2157.10410 | -1536.29104 | 1 |
| 33 | H | 73.66482 | 81.29657 | 75.19707 | 1687.88455  | 465.60692   | 2087.56452  | 1 |
| 34 | H | 73.60069 | 81.79464 | 76.92434 | -1293.07895 | -1899.88581 | -1463.57452 | 1 |
| 35 | C | 72.23211 | 83.03645 | 73.88934 | -153.07550  | -733.68902  | 248.70981   | 1 |
| 36 | O | 72.48665 | 81.94280 | 73.40947 | 186.15459   | -480.78787  | -449.34387  | 1 |
| 37 | N | 72.35014 | 84.24001 | 73.32837 | -487.53139  | 543.18517   | 42.03850    | 1 |
| 38 | C | 72.97810 | 84.39341 | 72.04598 | -699.35871  | 69.34393    | 360.10701   | 1 |
| 39 | H | 72.71482 | 83.49357 | 71.44351 | 2.81126     | -221.99807  | -2715.58072 | 1 |
| 40 | C | 72.36887 | 85.76974 | 71.53273 | -507.46439  | -592.59194  | 122.07761   | 1 |
| 41 | H | 73.00245 | 86.26005 | 70.76020 | -1975.08116 | 525.87560   | -1801.71556 | 1 |
| 42 | H | 71.36343 | 85.62753 | 71.07752 | 1588.27743  | -1913.22100 | 1113.83566  | 1 |
| 43 | C | 72.27800 | 86.57999 | 72.86273 | -613.62442  | -457.55993  | -194.14490  | 1 |
| 44 | H | 73.27997 | 86.95247 | 73.17834 | 1707.54637  | -721.27992  | 1996.92523  | 1 |
| 45 | H | 71.61048 | 87.46910 | 72.80162 | 758.23357   | 2100.81767  | 1560.55011  | 1 |
| 46 | C | 71.73772 | 85.45735 | 73.84832 | -352.41524  | 704.96076   | 49.21465    | 1 |
| 47 | H | 72.02963 | 85.58158 | 74.91695 | 1714.76886  | -2070.42778 | 443.35792   | 1 |
| 48 | H | 70.63886 | 85.27874 | 73.78438 | 1224.15040  | 1801.50881  | 1636.97633  | 1 |
| 49 | C | 74.58693 | 84.56333 | 72.22811 | 566.85117   | 537.05831   | 117.62814   | 1 |
| 50 | O | 75.31826 | 84.50104 | 71.24353 | -550.26779  | -406.08867  | 4.21666     | 1 |
| 51 | N | 74.91793 | 84.81566 | 73.47776 | 566.34832   | -425.77725  | 180.18749   | 1 |
| 52 | H | 74.15360 | 84.83581 | 74.14783 | 644.44502   | 2646.80550  | -52.73430   | 1 |
| 53 | C | 76.21329 | 85.35219 | 73.75586 | 612.34801   | -281.48662  | 411.56221   | 1 |
| 54 | H | 76.44079 | 85.91594 | 72.82230 | 1667.23498  | -1490.75142 | 1556.16753  | 1 |
| 55 | C | 76.11967 | 86.23064 | 75.08048 | -714.45746  | -175.43074  | 286.98927   | 1 |
| 56 | H | 75.95115 | 85.54852 | 75.95837 | -787.09484  | 1763.03619  | -1922.46060 | 1 |
| 57 | O | 75.05467 | 87.20002 | 75.11650 | -429.46514  | 516.51932   | -128.40526  | 1 |
| 58 | H | 74.57611 | 86.92738 | 75.92467 | 1981.82785  | 436.16847   | -1818.18182 | 1 |
| 59 | C | 77.58568 | 86.80065 | 75.14413 | 630.79189   | -468.94448  | 76.03230    | 1 |
| 60 | H | 77.76018 | 87.37737 | 76.08197 | -1775.71861 | 2062.30353  | 131.89849   | 1 |
| 61 | H | 78.34788 | 85.98314 | 75.10693 | -1855.14608 | 88.94118    | 1993.53760  | 1 |
| 62 | H | 77.79340 | 87.48812 | 74.29136 | -1504.82350 | -780.94249  | -2132.90992 | 1 |
| 63 | C | 77.22873 | 84.07693 | 73.96120 | 288.57638   | 618.62814   | -397.00270  | 1 |
| 64 | O | 77.66350 | 83.80269 | 75.04688 | 321.70495   | -185.26452  | 574.37218   | 1 |

|     |   |          |          |          |             |             |             |   |
|-----|---|----------|----------|----------|-------------|-------------|-------------|---|
| 65  | N | 77.33969 | 83.46442 | 72.78509 | -447.05792  | -446.53431  | 367.76425   | 1 |
| 66  | H | 76.75254 | 83.83727 | 71.99661 | 350.31316   | 1975.63644  | -1843.31522 | 1 |
| 67  | C | 78.52136 | 82.76124 | 72.41815 | -511.23061  | 374.03917   | -471.51480  | 1 |
| 68  | H | 78.19306 | 82.31332 | 71.45366 | 2234.79579  | -898.70890  | -1273.45190 | 1 |
| 69  | C | 79.70605 | 83.80897 | 72.14467 | 529.53781   | -159.34528  | 563.72604   | 1 |
| 70  | H | 80.51643 | 83.22511 | 71.63152 | 654.59388   | 2347.94251  | 1217.51488  | 1 |
| 71  | H | 79.33037 | 84.56932 | 71.40663 | -1526.55661 | 2103.42026  | 817.87394   | 1 |
| 72  | O | 80.23675 | 84.52967 | 73.28420 | -554.84278  | 14.12789    | 399.58769   | 1 |
| 73  | H | 80.70431 | 83.79584 | 73.73283 | 1297.06236  | 2061.84854  | 1220.68812  | 1 |
| 74  | C | 78.92906 | 81.63463 | 73.51013 | -662.15484  | -412.13544  | 123.62687   | 1 |
| 75  | O | 80.07608 | 81.26782 | 73.58959 | -540.01537  | -317.05804  | 274.91456   | 1 |
| 76  | N | 77.84693 | 81.13892 | 74.09649 | -202.76299  | -690.00100  | -131.49145  | 1 |
| 77  | H | 76.90320 | 81.54171 | 73.95797 | -702.62132  | -2617.37191 | 281.70413   | 1 |
| 78  | C | 77.93534 | 80.08536 | 75.05442 | -491.73914  | 576.34187   | 222.73509   | 1 |
| 79  | H | 78.72699 | 79.36440 | 74.75141 | 1977.17978  | -1823.58850 | -434.68928  | 1 |
| 80  | C | 78.23320 | 80.78408 | 76.45895 | -649.50797  | -328.66843  | 306.11224   | 1 |
| 81  | H | 77.81840 | 81.81712 | 76.46173 | 2075.07803  | 1452.16490  | -1004.45904 | 1 |
| 82  | C | 77.62378 | 79.91545 | 77.61044 | -615.18735  | -489.99689  | -70.96352   | 1 |
| 83  | H | 77.84854 | 80.34508 | 78.61485 | -1226.32661 | -1724.38906 | -1716.47170 | 1 |
| 84  | H | 76.51411 | 79.84007 | 77.52164 | 2381.64273  | -969.84735  | 900.46860   | 1 |
| 85  | H | 78.02650 | 78.87533 | 77.59619 | 2122.74991  | 1702.23946  | -141.36228  | 1 |
| 86  | C | 79.78251 | 80.80579 | 76.67989 | -501.86074  | -479.61276  | -376.42482  | 1 |
| 87  | H | 80.05618 | 81.31210 | 77.63564 | 993.79261   | -2246.95401 | -1177.81305 | 1 |
| 88  | H | 80.20656 | 79.77454 | 76.71584 | 42.71279    | -626.15391  | -2651.37258 | 1 |
| 89  | H | 80.29978 | 81.34990 | 75.85133 | -2026.39012 | -1590.33709 | -887.82922  | 1 |
| 90  | C | 76.39518 | 79.57402 | 74.96691 | -672.89153  | 382.57394   | -156.34072  | 1 |
| 91  | O | 75.55267 | 80.40115 | 74.65009 | 410.04627   | 221.86223   | 500.35950   | 1 |
| 92  | N | 76.27750 | 78.28987 | 75.22106 | -378.11782  | -443.79414  | -441.10984  | 1 |
| 93  | H | 77.08634 | 77.68033 | 75.45057 | 2404.15973  | -568.14894  | 1149.30085  | 1 |
| 94  | C | 74.99846 | 77.72747 | 75.60353 | -544.54484  | 466.16019   | 331.29119   | 1 |
| 95  | H | 74.70104 | 78.30458 | 76.50892 | -1409.80988 | -170.17955  | 2325.32679  | 1 |
| 96  | C | 73.96876 | 77.98634 | 74.41712 | -184.48284  | 116.78282   | -758.89137  | 1 |
| 97  | H | 74.08179 | 79.03587 | 74.04320 | 1893.78641  | 1861.14652  | 611.04528   | 1 |
| 98  | H | 74.19338 | 77.33147 | 73.54513 | -2170.79665 | -974.19311  | 1327.50117  | 1 |
| 99  | C | 72.52045 | 77.74730 | 74.93829 | 389.51668   | 672.81878   | -138.49152  | 1 |
| 100 | H | 72.37190 | 76.67062 | 75.16840 | 510.64577   | 1933.03327  | 1851.02484  | 1 |
| 101 | H | 72.38597 | 78.28375 | 75.90221 | -2302.30869 | -1105.72939 | -948.89774  | 1 |
| 102 | C | 71.39157 | 78.22319 | 73.92594 | -559.93427  | -126.34590  | 542.30857   | 1 |
| 103 | O | 70.42361 | 77.52535 | 73.75526 | -670.36003  | -111.83166  | 76.36448    | 1 |
| 104 | N | 71.59429 | 79.44851 | 73.40626 | -216.06729  | -537.07037  | 446.51379   | 1 |
| 105 | H | 72.34002 | 80.18438 | 73.50714 | -1251.96487 | 1074.12894  | -2168.52500 | 1 |
| 106 | H | 70.84093 | 79.86616 | 72.84041 | -2451.83023 | -720.73851  | 944.84612   | 1 |
| 107 | C | 75.44336 | 76.22707 | 75.91649 | 546.24052   | -563.88337  | -85.11809   | 1 |
| 108 | O | 76.64768 | 75.95764 | 75.94284 | 71.70702    | -307.40463  | 606.69673   | 1 |
| 109 | N | 74.42779 | 75.44123 | 76.25493 | 479.90863   | -504.50129  | 222.86849   | 1 |
| 110 | C | 74.58171 | 74.00652 | 76.16710 | 75.51268    | -600.91904  | 506.73700   | 1 |
| 111 | H | 75.54999 | 73.80771 | 76.68094 | -2033.61562 | 1795.30103  | 254.89480   | 1 |
| 112 | C | 73.33705 | 73.43045 | 76.95061 | 523.79067   | 517.99274   | 284.45581   | 1 |
| 113 | H | 72.85247 | 72.57712 | 76.41948 | 1599.61665  | -1127.00911 | 1895.98173  | 1 |
| 114 | H | 73.64583 | 73.03268 | 77.94385 | -1881.83093 | 1275.82488  | -1501.55016 | 1 |
| 115 | C | 72.38645 | 74.66126 | 77.10406 | -600.05639  | -404.05026  | 316.64485   | 1 |
| 116 | H | 71.75824 | 74.79487 | 76.19488 | -2597.05260 | 496.36221   | 657.73249   | 1 |
| 117 | H | 71.68698 | 74.57700 | 77.96558 | -1666.24518 | 1294.38985  | -1723.90591 | 1 |
| 118 | C | 73.44894 | 75.83127 | 77.26664 | 493.57570   | -129.95376  | -602.56394  | 1 |
| 119 | H | 73.07884 | 76.86085 | 77.06537 | -1469.08415 | -637.84797  | 2204.22581  | 1 |
| 120 | H | 74.00371 | 75.82161 | 78.23522 | -1038.97840 | 1068.88701  | -2280.71789 | 1 |
| 121 | C | 74.65061 | 73.52503 | 74.60894 | 188.88100   | 241.05089   | -727.87821  | 1 |
| 122 | O | 75.24438 | 72.49043 | 74.34310 | 531.88613   | -49.19943   | 427.07960   | 1 |
| 123 | N | 73.94961 | 74.31315 | 73.81330 | 708.14833   | 26.93417    | -179.73509  | 1 |
| 124 | H | 73.54820 | 75.12605 | 74.27878 | -2232.69501 | -1179.09831 | 1023.94816  | 1 |
| 125 | C | 73.71352 | 74.04369 | 72.44329 | -738.32412  | 259.92548   | 104.42456   | 1 |
| 126 | H | 73.42048 | 75.02884 | 72.01746 | 2028.89123  | 1260.02983  | 1311.33324  | 1 |

|     |   |          |          |          |             |             |             |   |
|-----|---|----------|----------|----------|-------------|-------------|-------------|---|
| 127 | C | 75.01762 | 73.42145 | 71.78088 | -258.65678  | -345.52513  | 661.28459   | 1 |
| 128 | H | 75.27722 | 72.45095 | 72.27551 | -1826.06090 | -1801.46097 | -918.64554  | 1 |
| 129 | C | 74.72941 | 73.21432 | 70.25464 | -541.23400  | 531.92970   | -218.41428  | 1 |
| 130 | H | 75.59365 | 72.74123 | 69.73162 | 1311.73218  | -2219.18200 | 882.19023   | 1 |
| 131 | H | 73.83972 | 72.55678 | 70.09422 | -1048.71298 | 1223.58118  | -2196.97971 | 1 |
| 132 | H | 74.51838 | 74.18200 | 69.74190 | 419.06414   | 1903.92898  | 1903.44670  | 1 |
| 133 | C | 76.21175 | 74.42787 | 71.91580 | -423.86431  | 152.66566   | -648.55262  | 1 |
| 134 | H | 77.14529 | 74.02054 | 71.46064 | 105.68386   | -2342.50080 | 1387.51238  | 1 |
| 135 | H | 75.99027 | 75.39877 | 71.41412 | -1695.63603 | -1484.73621 | -1531.02793 | 1 |
| 136 | H | 76.43198 | 74.64877 | 72.98737 | -1853.57121 | -487.39031  | 1936.59343  | 1 |
| 137 | C | 72.50186 | 72.94721 | 72.28223 | 539.71428   | -510.58232  | 267.58633   | 1 |
| 138 | O | 71.89173 | 72.90807 | 71.23821 | -15.93758   | -278.34085  | -624.49402  | 1 |
| 139 | N | 72.40484 | 72.12628 | 73.31902 | -676.81886  | 12.05292    | 276.17960   | 1 |
| 140 | H | 73.04582 | 72.27182 | 74.09900 | -1694.44250 | -373.84189  | -2100.66098 | 1 |
| 141 | C | 71.18593 | 71.37857 | 73.47978 | 412.33078   | -664.70360  | 108.35451   | 1 |
| 142 | H | 70.40293 | 72.13357 | 73.24667 | 1765.77476  | 1294.44366  | 1621.76594  | 1 |
| 143 | C | 71.21778 | 70.24188 | 72.38713 | -179.66635  | -721.95667  | -264.73915  | 1 |
| 144 | H | 71.36561 | 70.68821 | 71.37532 | -607.34922  | 2587.87032  | -598.10018  | 1 |
| 145 | H | 72.08735 | 69.56387 | 72.54059 | -359.69332  | -1479.13954 | -2259.74260 | 1 |
| 146 | C | 69.86276 | 69.45977 | 72.46264 | -240.01076  | 616.02425   | 431.85322   | 1 |
| 147 | H | 69.70821 | 69.02782 | 73.47688 | -1359.17131 | 782.54425   | 2227.99181  | 1 |
| 148 | H | 69.00118 | 70.14112 | 72.28397 | -820.36667  | 85.81767    | -2596.78715 | 1 |
| 149 | C | 69.91887 | 68.32139 | 71.36706 | -513.07015  | 236.18570   | -551.87280  | 1 |
| 150 | H | 70.07593 | 68.75588 | 70.35295 | 1816.11944  | -1183.11722 | -1650.94321 | 1 |
| 151 | H | 70.78566 | 67.64389 | 71.54456 | -1800.04429 | -1361.53473 | 1526.34643  | 1 |
| 152 | C | 68.58742 | 67.53707 | 71.42681 | 726.08972   | -253.19732  | -179.64713  | 1 |
| 153 | H | 68.42347 | 66.97657 | 72.36870 | 1224.27271  | -456.51798  | -2390.90304 | 1 |
| 154 | H | 67.68765 | 68.13555 | 71.18078 | 1206.40339  | -1150.93514 | -2154.90344 | 1 |
| 155 | N | 68.64404 | 66.43778 | 70.31268 | 329.70796   | -633.68968  | -155.67358  | 1 |
| 156 | H | 67.78806 | 65.81592 | 70.23683 | 1348.31305  | 1938.76845  | 1359.00643  | 1 |
| 157 | H | 68.74507 | 66.77369 | 69.31083 | 2096.92035  | 1446.54551  | -966.48890  | 1 |
| 158 | H | 69.42037 | 65.71721 | 70.38158 | -1197.07217 | -2303.53719 | 827.28733   | 1 |
| 159 | C | 71.15330 | 70.87012 | 75.03072 | -378.01186  | -556.17301  | -413.96481  | 1 |
| 160 | O | 70.86480 | 71.66533 | 75.89249 | -409.44433  | -307.55053  | -453.30833  | 1 |
| 161 | N | 71.47242 | 69.59170 | 75.16291 | -429.02477  | 524.70884   | 274.08502   | 1 |
| 162 | H | 71.75188 | 68.95820 | 74.39888 | 1706.34263  | -1425.96036 | 1574.38926  | 1 |
| 163 | C | 71.48292 | 69.01466 | 76.47717 | -45.25864   | -626.22952  | 478.93267   | 1 |
| 164 | H | 71.91623 | 69.76476 | 77.17765 | 1988.63164  | 570.90773   | 1772.87287  | 1 |
| 165 | C | 69.97469 | 68.66479 | 76.83108 | 551.77128   | -20.49526   | -564.54996  | 1 |
| 166 | H | 69.36737 | 69.59598 | 76.88419 | 1434.61535  | -1753.10253 | 1513.99471  | 1 |
| 167 | H | 69.51484 | 68.05339 | 76.02325 | -714.67738  | 1819.09770  | 1898.36494  | 1 |
| 168 | C | 69.94426 | 67.90223 | 78.19468 | 446.99263   | -555.77305  | 338.97221   | 1 |
| 169 | H | 70.49406 | 66.93612 | 78.11750 | 1953.68466  | 1892.25957  | -161.67766  | 1 |
| 170 | H | 70.45963 | 68.49042 | 78.98667 | -403.03785  | 2688.07032  | -188.43591  | 1 |
| 171 | C | 68.43120 | 67.65167 | 78.58372 | 567.86262   | 335.74681   | 434.04421   | 1 |
| 172 | H | 67.86779 | 68.61184 | 78.63053 | -1080.02275 | 1568.26081  | -1948.78900 | 1 |
| 173 | H | 67.91801 | 67.03502 | 77.81049 | -919.54108  | 2111.34692  | 1456.13463  | 1 |
| 174 | C | 68.41950 | 66.93934 | 79.95603 | 195.81897   | 173.33862   | -745.11536  | 1 |
| 175 | H | 68.86517 | 65.92447 | 79.95324 | 1405.67949  | -2301.21089 | -390.08113  | 1 |
| 176 | H | 68.84248 | 67.53614 | 80.78871 | -940.37328  | -1118.32446 | 2299.72133  | 1 |
| 177 | N | 66.92245 | 66.71370 | 80.35573 | 319.26422   | 656.36007   | -42.02424   | 1 |
| 178 | H | 66.76528 | 66.24402 | 81.29368 | 1961.03633  | 619.91968   | 1787.09422  | 1 |
| 179 | H | 66.31044 | 67.57605 | 80.44875 | 854.14343   | -2156.80752 | 1429.08711  | 1 |
| 180 | H | 66.34103 | 66.09825 | 79.71568 | 1237.02905  | -1378.50857 | -1998.28500 | 1 |
| 181 | C | 72.37154 | 67.68505 | 76.19782 | 532.53319   | -268.57236  | 517.55729   | 1 |
| 182 | O | 72.51558 | 67.31903 | 75.02202 | 266.16714   | -290.73804  | -558.88002  | 1 |
| 183 | N | 72.78783 | 67.15755 | 77.32038 | -226.25352  | 640.49678   | -270.32839  | 1 |
| 184 | H | 72.53492 | 67.68243 | 78.15869 | 2007.69063  | -1035.27229 | 1523.50231  | 1 |
| 185 | C | 73.50181 | 65.94407 | 77.46029 | -540.76542  | -573.33303  | 49.50000    | 1 |
| 186 | H | 73.47317 | 65.74477 | 78.55438 | -2374.20950 | -1036.76023 | 843.75774   | 1 |
| 187 | C | 72.75376 | 64.81807 | 76.60109 | -77.09082   | 666.87422   | -415.84136  | 1 |
| 188 | H | 72.66534 | 65.17220 | 75.53494 | -985.81834  | 617.19825   | 2463.91927  | 1 |



|     |   |          |          |          |             |             |             |   |
|-----|---|----------|----------|----------|-------------|-------------|-------------|---|
| 189 | O | 71.41353 | 64.51840 | 77.03294 | 293.29899   | -391.65602  | -477.80926  | 1 |
| 190 | H | 70.89809 | 64.81818 | 76.25704 | 2528.72714  | -681.76262  | -751.27122  | 1 |
| 191 | C | 73.78450 | 63.63276 | 76.65768 | 252.47363   | -605.14473  | 440.05134   | 1 |
| 192 | H | 73.44299 | 62.76464 | 76.04718 | -2052.65063 | 1456.49051  | -1043.51830 | 1 |
| 193 | H | 74.78697 | 63.93412 | 76.26964 | -2152.98800 | -1661.97574 | -161.70652  | 1 |
| 194 | H | 73.92897 | 63.26752 | 77.70123 | -473.12726  | -1584.27339 | 2165.61725  | 1 |
| 195 | C | 75.04477 | 66.15519 | 76.94315 | 360.36307   | 488.46713   | 505.10056   | 1 |
| 196 | O | 75.95960 | 65.80969 | 77.64863 | -200.08817  | -528.03552  | -385.82850  | 1 |
| 197 | N | 75.06847 | 66.59390 | 75.68870 | -597.54095  | -226.44775  | 355.20479   | 1 |
| 198 | H | 74.17150 | 66.83977 | 75.20460 | 2179.23655  | -1300.70981 | -991.33835  | 1 |
| 199 | C | 76.30126 | 67.13437 | 75.22935 | -687.68921  | 297.39807   | -249.45179  | 1 |
| 200 | H | 77.07381 | 66.61633 | 75.84344 | -349.16256  | -2467.37713 | -1101.72831 | 1 |
| 201 | C | 76.37727 | 66.82224 | 73.66040 | 672.47345   | 361.54328   | -201.62880  | 1 |
| 202 | H | 75.56095 | 67.35299 | 73.11965 | 1541.41502  | 582.18425   | 2169.97026  | 1 |
| 203 | H | 77.34154 | 67.18101 | 73.23290 | -2534.67717 | 60.25153    | 997.72295   | 1 |
| 204 | C | 76.23295 | 65.30163 | 73.51061 | 574.26774   | -389.43119  | -377.02542  | 1 |
| 205 | C | 77.36677 | 64.46048 | 73.72081 | 688.82679   | -287.33580  | -257.96133  | 1 |
| 206 | H | 78.35884 | 64.89483 | 73.94089 | 331.14182   | 1470.38163  | 2269.80013  | 1 |
| 207 | C | 74.95034 | 64.73198 | 73.24607 | -383.52382  | -675.04808  | 144.24917   | 1 |
| 208 | H | 74.06711 | 65.38034 | 73.10211 | 4.09847     | 1517.59662  | 2262.86397  | 1 |
| 209 | C | 77.19218 | 63.07827 | 73.65904 | -134.76730  | 428.45285   | -649.50303  | 1 |
| 210 | H | 78.06825 | 62.42735 | 73.82531 | -903.23433  | 1600.49020  | 2011.53387  | 1 |
| 211 | C | 74.82698 | 63.34168 | 73.19280 | -335.53281  | -615.00040  | -364.39058  | 1 |
| 212 | H | 73.83016 | 62.91287 | 72.98962 | 1596.45398  | -1369.33862 | 1732.02659  | 1 |
| 213 | C | 75.93307 | 62.46522 | 73.39507 | 585.48547   | -340.24194  | -406.23938  | 1 |
| 214 | O | 75.81806 | 61.05136 | 73.34772 | -419.15649  | -173.04408  | -511.94141  | 1 |
| 215 | H | 74.85975 | 60.96953 | 73.12959 | -1071.84350 | 1559.71507  | -1960.13012 | 1 |
| 216 | C | 76.25719 | 68.74428 | 75.49734 | 291.41878   | -183.13091  | 710.72246   | 1 |
| 217 | O | 75.36722 | 69.30351 | 76.09693 | 379.87695   | 523.47396   | -222.23622  | 1 |
| 218 | N | 77.37556 | 69.27021 | 75.01392 | 564.30591   | 373.09380   | 277.24371   | 1 |
| 219 | H | 78.05277 | 68.66930 | 74.54901 | -120.59931  | -2436.07824 | -1214.35098 | 1 |
| 220 | C | 77.54468 | 70.69390 | 75.05255 | 404.07514   | -299.37480  | 608.84009   | 1 |
| 221 | H | 76.56383 | 71.07988 | 74.64412 | -1071.07882 | -841.69025  | 2359.66467  | 1 |
| 222 | C | 77.69123 | 71.11260 | 76.56880 | -683.12807  | 68.71770    | -390.13096  | 1 |
| 223 | H | 76.88782 | 70.62167 | 77.16700 | 2068.88918  | 1596.58590  | 770.89603   | 1 |
| 224 | H | 78.64928 | 70.75172 | 77.00715 | 1379.86429  | 2342.49779  | -179.85638  | 1 |
| 225 | C | 77.56209 | 72.66721 | 76.65065 | -176.39967  | 537.49466   | 550.97268   | 1 |
| 226 | H | 78.48619 | 73.18435 | 76.30863 | -396.28051  | 1942.22168  | 1869.33314  | 1 |
| 227 | H | 76.75143 | 73.02915 | 75.96769 | -94.44700   | 586.00678   | -2659.20016 | 1 |
| 228 | C | 77.23322 | 73.00213 | 78.17610 | -291.69381  | -718.18079  | -150.72929  | 1 |
| 229 | H | 76.29250 | 72.54290 | 78.57457 | -2303.38776 | 1089.76242  | 964.62032   | 1 |
| 230 | H | 78.05172 | 72.76925 | 78.90364 | 884.16729   | 2568.80533  | -207.74283  | 1 |
| 231 | N | 77.04945 | 74.38507 | 78.17242 | -594.49522  | -252.81478  | 342.29276   | 1 |
| 232 | H | 77.18591 | 74.85787 | 77.26957 | -1735.17426 | 2084.05705  | -263.71605  | 1 |
| 233 | C | 76.72019 | 75.04164 | 79.21211 | 595.23177   | -271.52487  | 442.22352   | 1 |
| 234 | N | 76.54134 | 74.34170 | 80.40592 | 585.53813   | -424.79750  | -105.81303  | 1 |
| 235 | H | 76.64409 | 73.34425 | 80.59384 | 959.88797   | 1327.56823  | -2177.11905 | 1 |
| 236 | H | 76.28626 | 74.76267 | 81.30089 | 1578.48647  | 16.27378    | -2220.76233 | 1 |
| 237 | N | 76.60328 | 76.39894 | 78.89424 | -452.17763  | -390.33541  | -421.51853  | 1 |
| 238 | H | 76.72131 | 76.85536 | 77.98863 | 470.26107   | 1974.25629  | -1817.92087 | 1 |
| 239 | H | 76.34696 | 77.12802 | 79.56196 | 1856.67307  | -1573.97321 | -1224.35416 | 1 |
| 240 | C | 78.81869 | 71.01049 | 74.08508 | -531.47271  | -581.45780  | -55.06206   | 1 |
| 241 | O | 78.78567 | 70.67981 | 72.92110 | -243.00837  | 192.73507   | 609.52485   | 1 |
| 242 | N | 79.76503 | 71.69286 | 74.72477 | 343.49288   | -644.25607  | 38.09164    | 1 |
| 243 | H | 79.66553 | 71.88952 | 75.71836 | -1691.16043 | -1535.97525 | -1484.73099 | 1 |
| 244 | C | 81.02797 | 71.85477 | 74.09005 | 542.66492   | 350.14337   | 454.42563   | 1 |
| 245 | H | 80.93050 | 71.25994 | 73.15201 | 1209.57979  | -2396.95920 | 463.86744   | 1 |
| 246 | C | 81.20974 | 73.40961 | 73.81762 | -737.14309  | 145.93010   | 242.71942   | 1 |
| 247 | H | 81.22141 | 73.98111 | 74.77092 | -1050.18303 | 159.36419   | -2509.06125 | 1 |
| 248 | C | 82.54158 | 73.60389 | 73.01706 | -706.77696  | -252.88343  | -245.16230  | 1 |
| 249 | H | 82.77819 | 74.68379 | 72.86696 | -1624.64039 | -1665.49085 | 1417.86935  | 1 |
| 250 | H | 83.42240 | 73.13173 | 73.54796 | 2566.10521  | 598.51109   | 693.22305   | 1 |

|     |   |          |          |          |             |             |             |   |
|-----|---|----------|----------|----------|-------------|-------------|-------------|---|
| 251 | H | 82.48071 | 73.13429 | 72.00690 | -1972.69758 | 107.10018   | -1876.34312 | 1 |
| 252 | C | 80.02020 | 73.90001 | 72.92209 | 412.85148   | 672.58832   | -27.69222   | 1 |
| 253 | H | 80.10750 | 74.98335 | 72.67223 | 1447.02277  | 1762.76533  | -1490.78944 | 1 |
| 254 | H | 79.97323 | 73.33555 | 71.96133 | 1320.77379  | -145.20455  | 2378.68491  | 1 |
| 255 | H | 79.04102 | 73.75238 | 73.43662 | -1512.10848 | 1470.52031  | 1724.75147  | 1 |
| 256 | C | 82.11334 | 71.23372 | 75.15962 | -607.11113  | 499.56689   | 73.73769    | 1 |
| 257 | O | 82.18401 | 70.03115 | 75.26567 | 357.97126   | 460.81534   | 356.68785   | 1 |
| 258 | N | 82.71541 | 72.17476 | 75.87572 | 536.55407   | -368.62270  | 332.76306   | 1 |
| 259 | H | 82.49694 | 73.14641 | 75.66017 | 524.38866   | 2297.69985  | 1367.20941  | 1 |
| 260 | C | 83.94346 | 71.88786 | 76.54214 | 46.50277    | -774.29190  | -147.97904  | 1 |
| 261 | H | 84.14539 | 72.82114 | 77.11253 | 1676.51875  | 1883.29066  | 1032.55549  | 1 |
| 262 | C | 83.74659 | 70.60515 | 77.50167 | -559.41456  | -34.19198   | -556.30433  | 1 |
| 263 | H | 83.51447 | 69.70731 | 76.86907 | -64.66664   | 395.18769   | 2695.05373  | 1 |
| 264 | H | 84.68241 | 70.36381 | 78.05987 | -2703.44278 | -60.40056   | 333.79418   | 1 |
| 265 | C | 82.61480 | 70.87860 | 78.45424 | -519.76435  | 377.31045   | 459.42366   | 1 |
| 266 | H | 81.76342 | 71.29270 | 77.86736 | -1746.74323 | 1667.50644  | -1261.73691 | 1 |
| 267 | C | 82.15604 | 69.58714 | 79.12066 | 570.95554   | 16.46261    | -545.27700  | 1 |
| 268 | H | 81.29958 | 69.76361 | 79.82110 | 2391.58273  | 28.05277    | -1305.07271 | 1 |
| 269 | H | 81.81811 | 68.83132 | 78.36530 | 175.75588   | 917.63458   | 2559.43867  | 1 |
| 270 | H | 82.97958 | 69.11591 | 79.71649 | -1063.97851 | -2155.34650 | 1283.00462  | 1 |
| 271 | C | 83.01655 | 71.88891 | 79.52066 | 193.76014   | 2.62946     | -765.53141  | 1 |
| 272 | H | 82.17738 | 72.09231 | 80.23458 | 507.39394   | -846.55087  | 2539.60089  | 1 |
| 273 | H | 83.88533 | 71.52425 | 80.12691 | 1337.57841  | 1818.19054  | 1526.01994  | 1 |
| 274 | H | 83.31442 | 72.87095 | 79.07202 | 1100.88635  | -1172.91350 | -2199.08909 | 1 |
| 275 | C | 85.05648 | 71.65320 | 75.41421 | -549.21115  | 475.64486   | -309.38218  | 1 |
| 276 | O | 84.98742 | 72.16607 | 74.32059 | 556.06106   | -390.37755  | -78.24250   | 1 |
| 277 | O | 86.22309 | 70.95145 | 75.79182 | -572.27940  | -310.19032  | -209.75862  | 1 |
| 278 | H | 85.97118 | 70.72135 | 76.72669 | -1380.08193 | 2212.14486  | 790.85944   | 1 |

Listing 107: C00107.xmolout

|    |   |          |          |          |             |             |             |        |          |
|----|---|----------|----------|----------|-------------|-------------|-------------|--------|----------|
| 1  |   | 276      |          |          |             |             |             |        |          |
| 2  |   | 150.0000 | 150.0000 | 150.0000 | 0.0000      | 0.0000      | 0.0000***** | 0.7945 | 3178     |
|    |   | 0.2500   | 300.00   | 0.00     | 0.00        | 0.00        | -1293.4053  | 0.0000 | 300.0000 |
| 3  | H | 73.71269 | 86.56676 | 77.05086 | -2043.14101 | -1757.64893 | 399.89339   |        | 1        |
| 4  | N | 74.17203 | 87.13851 | 77.77890 | 426.75047   | 490.45733   | -334.42467  |        | 1        |
| 5  | H | 74.49890 | 86.46919 | 78.49537 | 442.25559   | -1110.30854 | -2448.52907 |        | 1        |
| 6  | C | 75.22354 | 87.97304 | 77.35375 | 415.32972   | -666.39213  | 83.73172    |        | 1        |
| 7  | H | 75.17555 | 88.07182 | 76.24761 | 879.32219   | 2491.00447  | 667.35213   |        | 1        |
| 8  | C | 75.12021 | 89.38181 | 78.13417 | 31.35357    | 477.41777   | 628.23362   |        | 1        |
| 9  | H | 75.10777 | 89.18567 | 79.23299 | 1168.38489  | 2240.25337  | -1019.71136 |        | 1        |
| 10 | H | 76.02953 | 90.00087 | 77.94192 | -360.43770  | 2534.90498  | 931.67112   |        | 1        |
| 11 | C | 73.87387 | 90.11931 | 77.72018 | 463.18208   | 512.70242   | -382.34388  |        | 1        |
| 12 | H | 73.00872 | 89.42463 | 77.81503 | 1725.29117  | 1863.52247  | -987.07854  |        | 1        |
| 13 | C | 73.64193 | 91.31437 | 78.63665 | 710.42801   | -144.27427  | -313.15367  |        | 1        |
| 14 | H | 72.70781 | 91.87047 | 78.36519 | 364.20195   | -1033.13725 | 2494.72524  |        | 1        |
| 15 | H | 73.54342 | 91.00229 | 79.70848 | 2567.61904  | 335.80679   | 847.48802   |        | 1        |
| 16 | H | 74.48981 | 92.04509 | 78.58212 | -2587.99029 | 680.92867   | -512.16411  |        | 1        |
| 17 | C | 73.96787 | 90.59431 | 76.27664 | 268.17616   | 741.64379   | -40.42634   |        | 1        |
| 18 | H | 73.06496 | 91.18656 | 75.97701 | 1283.54314  | -1945.37420 | -1411.27812 |        | 1        |
| 19 | H | 74.86257 | 91.25017 | 76.11741 | -1258.57796 | 1317.15249  | -2026.02085 |        | 1        |
| 20 | H | 74.05327 | 89.73560 | 75.56217 | -2502.84526 | 909.80597   | 575.92391   |        | 1        |
| 21 | C | 76.52784 | 87.19185 | 77.93080 | 619.36578   | -458.64843  | -172.09273  |        | 1        |
| 22 | O | 76.37697 | 86.32202 | 78.78829 | -81.40433   | 433.87611   | 522.34594   |        | 1        |
| 23 | N | 77.60955 | 87.71209 | 77.39844 | 175.23996   | -622.20190  | 341.55523   |        | 1        |
| 24 | H | 77.42905 | 88.43579 | 76.70187 | -876.57256  | -303.22879  | -2561.90213 |        | 1        |
| 25 | C | 78.96069 | 87.45381 | 77.76419 | -571.88214  | -534.10783  | -106.15033  |        | 1        |
| 26 | H | 79.45676 | 88.37486 | 77.38477 | -2713.20841 | -16.25800   | -248.80809  |        | 1        |
| 27 | C | 79.08637 | 87.34695 | 79.35487 | 166.60354   | 288.16399   | -716.09568  |        | 1        |
| 28 | H | 78.43886 | 86.50536 | 79.72980 | -2097.85574 | 1636.78449  | -586.18044  |        | 1        |
| 29 | O | 78.63040 | 88.50005 | 80.09185 | -317.80580  | -363.38227  | 484.43082   |        | 1        |
| 30 | H | 77.83704 | 88.13136 | 80.52881 | 1863.74748  | -1451.84923 | 1357.29467  |        | 1        |

|    |   |          |          |          |             |             |             |   |
|----|---|----------|----------|----------|-------------|-------------|-------------|---|
| 31 | C | 80.60836 | 86.99242 | 79.52513 | 503.80731   | 517.99032   | 318.51606   | 1 |
| 32 | H | 80.85134 | 86.73452 | 80.58197 | 640.61020   | -2157.10410 | -1536.29104 | 1 |
| 33 | H | 80.91380 | 86.12809 | 78.89021 | 1687.88455  | 465.60692   | 2087.56452  | 1 |
| 34 | H | 81.25690 | 87.85299 | 79.23987 | -1293.07895 | -1899.88581 | -1463.57452 | 1 |
| 35 | C | 79.52010 | 86.27153 | 76.79171 | -153.07550  | -733.68902  | 248.70981   | 1 |
| 36 | O | 79.94285 | 86.67247 | 75.71423 | 186.15459   | -480.78787  | -449.34387  | 1 |
| 37 | N | 79.48202 | 85.02042 | 77.24587 | -487.53139  | 543.18517   | 42.03850    | 1 |
| 38 | C | 80.05466 | 83.93910 | 76.48929 | -699.35871  | 69.34393    | 360.10701   | 1 |
| 39 | H | 81.04948 | 84.29512 | 76.13640 | 2.81126     | -221.99807  | -2715.58072 | 1 |
| 40 | C | 80.04267 | 82.73585 | 77.52036 | -507.46439  | -592.59194  | 122.07761   | 1 |
| 41 | H | 80.08616 | 81.74237 | 77.01862 | -1975.08116 | 525.87560   | -1801.71556 | 1 |
| 42 | H | 80.89685 | 82.78250 | 78.23276 | 1588.27743  | -1913.22100 | 1113.83566  | 1 |
| 43 | C | 78.67906 | 83.00568 | 78.23114 | -613.62442  | -457.55993  | -194.14490  | 1 |
| 44 | H | 77.83145 | 82.73179 | 77.56258 | 1707.54637  | -721.27992  | 1996.92523  | 1 |
| 45 | H | 78.54376 | 82.44162 | 79.18108 | 758.23357   | 2100.81767  | 1560.55011  | 1 |
| 46 | C | 78.77616 | 84.57746 | 78.43946 | -352.41524  | 704.96076   | 49.21465    | 1 |
| 47 | H | 77.78865 | 85.14202 | 78.47258 | 1714.76886  | -2070.42778 | 443.35792   | 1 |
| 48 | H | 79.40612 | 84.87199 | 79.31131 | 1224.15040  | 1801.50881  | 1636.97633  | 1 |
| 49 | C | 79.03744 | 83.53203 | 75.26524 | 566.85117   | 537.05831   | 117.62814   | 1 |
| 50 | O | 78.55288 | 82.42832 | 75.27465 | -550.26779  | -406.08867  | 4.21666     | 1 |
| 51 | N | 78.99845 | 84.49981 | 74.36441 | 566.34832   | -425.77725  | 180.18749   | 1 |
| 52 | H | 79.52135 | 85.38355 | 74.57075 | 644.44502   | 2646.80550  | -52.73430   | 1 |
| 53 | C | 77.96803 | 84.56035 | 73.38184 | 612.34801   | -281.48662  | 411.56221   | 1 |
| 54 | H | 78.35039 | 85.30078 | 72.64508 | 1667.23498  | -1490.75142 | 1556.16753  | 1 |
| 55 | C | 77.78744 | 83.10695 | 72.75134 | -714.45746  | -175.43074  | 286.98927   | 1 |
| 56 | H | 77.33488 | 82.44033 | 73.54197 | -787.09484  | 1763.03619  | -1922.46060 | 1 |
| 57 | O | 79.02959 | 82.48080 | 72.34194 | -429.46514  | 516.51932   | -128.40526  | 1 |
| 58 | H | 79.21814 | 81.95338 | 73.14556 | 1981.82785  | 436.16847   | -1818.18182 | 1 |
| 59 | C | 76.74752 | 83.26887 | 71.58515 | 630.79189   | -468.94448  | 76.03230    | 1 |
| 60 | H | 76.56828 | 82.29652 | 71.07037 | -1775.71861 | 2062.30353  | 131.89849   | 1 |
| 61 | H | 75.75672 | 83.63329 | 71.94319 | -1855.14608 | 88.94118    | 1993.53760  | 1 |
| 62 | H | 77.11076 | 83.98486 | 70.81174 | -1504.82350 | -780.94249  | -2132.90992 | 1 |
| 63 | C | 76.63190 | 85.11731 | 74.13474 | 288.57638   | 618.62814   | -397.00270  | 1 |
| 64 | O | 76.49913 | 85.12415 | 75.34476 | 321.70495   | -185.26452  | 574.37218   | 1 |
| 65 | N | 75.75311 | 85.48438 | 73.22128 | -447.05792  | -446.53431  | 367.76425   | 1 |
| 66 | H | 76.01610 | 85.44861 | 72.24004 | 350.31316   | 1975.63644  | -1843.31522 | 1 |
| 67 | C | 74.44908 | 85.92461 | 73.63675 | -511.23061  | 374.03917   | -471.51480  | 1 |
| 68 | H | 74.58487 | 86.96741 | 73.99727 | 2234.79579  | -898.70890  | -1273.45190 | 1 |
| 69 | C | 73.51330 | 85.79436 | 72.35411 | 529.53781   | -159.34528  | 563.72604   | 1 |
| 70 | H | 72.51495 | 86.21346 | 72.64500 | 654.59388   | 2347.94251  | 1217.51488  | 1 |
| 71 | H | 73.91733 | 86.45568 | 71.54181 | -1526.55661 | 2103.42026  | 817.87394   | 1 |
| 72 | O | 73.37739 | 84.45364 | 71.79140 | -554.84278  | 14.12789    | 399.58769   | 1 |
| 73 | H | 72.84861 | 84.02961 | 72.49458 | 1297.06236  | 2061.84854  | 1220.68812  | 1 |
| 74 | C | 73.85350 | 84.94467 | 74.78713 | -662.15484  | -412.13544  | 123.62687   | 1 |
| 75 | O | 73.18559 | 85.41198 | 75.70445 | -540.01537  | -317.05804  | 274.91456   | 1 |
| 76 | N | 74.06505 | 83.68267 | 74.45140 | -202.76299  | -690.00100  | -131.49145  | 1 |
| 77 | H | 74.63285 | 83.63171 | 73.60223 | -702.62132  | -2617.37191 | 281.70413   | 1 |
| 78 | C | 73.89275 | 82.51273 | 75.28707 | -491.73914  | 576.34187   | 222.73509   | 1 |
| 79 | H | 74.84459 | 81.94192 | 75.16487 | 1977.17978  | -1823.58850 | -434.68928  | 1 |
| 80 | C | 73.62660 | 82.91033 | 76.72709 | -649.50797  | -328.66843  | 306.11224   | 1 |
| 81 | H | 72.84359 | 83.71619 | 76.72800 | 2075.07803  | 1452.16490  | -1004.45904 | 1 |
| 82 | C | 73.11103 | 81.74379 | 77.54931 | -615.18735  | -489.99689  | -70.96352   | 1 |
| 83 | H | 72.89920 | 82.04468 | 78.61200 | -1226.32661 | -1724.38906 | -1716.47170 | 1 |
| 84 | H | 72.15655 | 81.32756 | 77.12276 | 2381.64273  | -969.84735  | 900.46860   | 1 |
| 85 | H | 73.85308 | 80.89939 | 77.58383 | 2122.74991  | 1702.23946  | -141.36228  | 1 |
| 86 | C | 74.88182 | 83.47574 | 77.36312 | -501.86074  | -479.61276  | -376.42482  | 1 |
| 87 | H | 74.66923 | 83.97370 | 78.34854 | 993.79261   | -2246.95401 | -1177.81305 | 1 |
| 88 | H | 75.64285 | 82.67046 | 77.55262 | 42.71279    | -626.15391  | -2651.37258 | 1 |
| 89 | H | 75.37998 | 84.25131 | 76.68064 | -2026.39012 | -1590.33709 | -887.82922  | 1 |
| 90 | C | 72.62285 | 81.68042 | 74.56332 | -672.89153  | 382.57394   | -156.34072  | 1 |
| 91 | O | 71.70847 | 82.21856 | 73.98240 | 410.04627   | 221.86223   | 500.35950   | 1 |
| 92 | N | 72.87497 | 80.39311 | 74.71811 | -378.11782  | -443.79414  | -441.10984  | 1 |

|     |   |          |          |          |             |             |             |   |
|-----|---|----------|----------|----------|-------------|-------------|-------------|---|
| 93  | H | 73.68625 | 80.25905 | 75.31519 | 2404.15973  | -568.14894  | 1149.30085  | 1 |
| 94  | C | 71.89527 | 79.35188 | 74.54295 | -544.54484  | 466.16019   | 331.29119   | 1 |
| 95  | H | 71.47479 | 79.20434 | 75.56162 | -1409.80988 | -170.17955  | 2325.32679  | 1 |
| 96  | C | 70.80587 | 79.83806 | 73.50715 | -184.48284  | 116.78282   | -758.89137  | 1 |
| 97  | H | 70.11425 | 80.57998 | 73.97305 | 1893.78641  | 1861.14652  | 611.04528   | 1 |
| 98  | H | 71.29003 | 80.39531 | 72.66971 | -2170.79665 | -974.19311  | 1327.50117  | 1 |
| 99  | C | 70.03783 | 78.57410 | 73.00194 | 389.51668   | 672.81878   | -138.49152  | 1 |
| 100 | H | 70.75550 | 77.75501 | 72.77376 | 510.64577   | 1933.03327  | 1851.02484  | 1 |
| 101 | H | 69.40603 | 78.15403 | 73.81488 | -2302.30869 | -1105.72939 | -948.89774  | 1 |
| 102 | C | 69.16374 | 78.85107 | 71.72227 | -559.93427  | -126.34590  | 542.30857   | 1 |
| 103 | O | 68.59990 | 77.93683 | 71.17710 | -670.36003  | -111.83166  | 76.36448    | 1 |
| 104 | N | 69.13561 | 80.14745 | 71.34295 | -216.06729  | -537.07037  | 446.51379   | 1 |
| 105 | H | 69.56180 | 80.97121 | 71.78361 | -1251.96487 | 1074.12894  | -2168.52500 | 1 |
| 106 | H | 68.59566 | 80.49755 | 70.54437 | -2451.83023 | -720.73851  | 944.84612   | 1 |
| 107 | C | 72.78310 | 78.05481 | 74.14905 | 546.24052   | -563.88337  | -85.11809   | 1 |
| 108 | O | 73.06817 | 77.31993 | 75.08589 | 71.70702    | -307.40463  | 606.69673   | 1 |
| 109 | N | 73.17215 | 77.97739 | 72.88275 | 479.90863   | -504.50129  | 222.86849   | 1 |
| 110 | C | 73.72051 | 76.76709 | 72.31947 | 75.51268    | -600.91904  | 506.73700   | 1 |
| 111 | H | 73.09191 | 75.93127 | 72.70692 | -2033.61562 | 1795.30103  | 254.89480   | 1 |
| 112 | C | 73.65417 | 77.05185 | 70.75449 | 523.79067   | 517.99274   | 284.45581   | 1 |
| 113 | H | 74.38421 | 76.43454 | 70.18225 | 1599.61665  | -1127.00911 | 1895.98173  | 1 |
| 114 | H | 72.64490 | 76.84158 | 70.33499 | -1881.83093 | 1275.82488  | -1501.55016 | 1 |
| 115 | C | 73.98371 | 78.57596 | 70.71947 | -600.05639  | -404.05026  | 316.64485   | 1 |
| 116 | H | 75.07057 | 78.75193 | 70.88487 | -2597.05260 | 496.36221   | 657.73249   | 1 |
| 117 | H | 73.72092 | 79.06985 | 69.75693 | -1666.24518 | 1294.38985  | -1723.90591 | 1 |
| 118 | C | 73.11320 | 79.09129 | 71.94655 | 493.57570   | -129.95376  | -602.56394  | 1 |
| 119 | H | 73.49232 | 80.00273 | 72.46726 | -1469.08415 | -637.84797  | 2204.22581  | 1 |
| 120 | H | 72.03441 | 79.22702 | 71.69381 | -1038.97840 | 1068.88701  | -2280.71789 | 1 |
| 121 | C | 75.28909 | 76.61497 | 72.67808 | 188.88100   | 241.05089   | -727.87821  | 1 |
| 122 | O | 76.09095 | 76.46346 | 71.77764 | 531.88613   | -49.19943   | 427.07960   | 1 |
| 123 | N | 75.50027 | 76.63462 | 73.98857 | 708.14833   | 26.93417    | -179.73509  | 1 |
| 124 | H | 74.66567 | 76.73650 | 74.61519 | -2232.69501 | -1179.09831 | 1023.94816  | 1 |
| 125 | C | 76.84207 | 77.01011 | 74.47860 | -738.32412  | 259.92548   | 104.42456   | 1 |
| 126 | H | 77.20933 | 77.65411 | 73.64569 | 2028.89123  | 1260.02983  | 1311.33324  | 1 |
| 127 | C | 76.71362 | 77.72210 | 75.80687 | -258.65678  | -345.52513  | 661.28459   | 1 |
| 128 | H | 76.22850 | 77.01951 | 76.52200 | -1826.06090 | -1801.46097 | -918.64554  | 1 |
| 129 | C | 78.06689 | 78.11495 | 76.37278 | -541.23400  | 531.92970   | -218.41428  | 1 |
| 130 | H | 77.96768 | 78.63086 | 77.36729 | 1311.73218  | -2219.18200 | 882.19023   | 1 |
| 131 | H | 78.72676 | 77.21415 | 76.52700 | -1048.71298 | 1223.58118  | -2196.97971 | 1 |
| 132 | H | 78.61463 | 78.81855 | 75.68671 | 419.06414   | 1903.92898  | 1903.44670  | 1 |
| 133 | C | 75.83848 | 78.95958 | 75.70652 | -423.86431  | 152.66566   | -648.55262  | 1 |
| 134 | H | 75.69213 | 79.45171 | 76.70718 | 105.68386   | -2342.50080 | 1387.51238  | 1 |
| 135 | H | 76.28512 | 79.72939 | 75.01843 | -1695.63603 | -1484.73621 | -1531.02793 | 1 |
| 136 | H | 74.81939 | 78.70395 | 75.30346 | -1853.57121 | -487.39031  | 1936.59343  | 1 |
| 137 | C | 77.70942 | 75.60247 | 74.58322 | 539.71428   | -510.58232  | 267.58633   | 1 |
| 138 | O | 78.16153 | 75.23326 | 75.63622 | -15.93758   | -278.34085  | -624.49402  | 1 |
| 139 | N | 77.88829 | 75.12122 | 73.36846 | -676.81886  | 12.05292    | 276.17960   | 1 |
| 140 | H | 77.43047 | 75.61611 | 72.56919 | -1694.44250 | -373.84189  | -2100.66098 | 1 |
| 141 | C | 78.30340 | 73.77116 | 73.16211 | 412.33078   | -664.70360  | 108.35451   | 1 |
| 142 | H | 78.68631 | 73.79794 | 72.11752 | 1765.77476  | 1294.44366  | 1621.76594  | 1 |
| 143 | C | 79.37682 | 73.36309 | 74.24724 | -179.66635  | -721.95667  | -264.73915  | 1 |
| 144 | H | 80.14992 | 74.15732 | 74.35543 | -607.34922  | 2587.87032  | -598.10018  | 1 |
| 145 | H | 78.90559 | 73.25549 | 75.25626 | -359.69332  | -1479.13954 | -2259.74260 | 1 |
| 146 | C | 80.00406 | 72.00710 | 73.77509 | -240.01076  | 616.02425   | 431.85322   | 1 |
| 147 | H | 79.25042 | 71.18483 | 73.82243 | -1359.17131 | 782.54425   | 2227.99181  | 1 |
| 148 | H | 80.32879 | 72.06753 | 72.71235 | -820.36667  | 85.81767    | -2596.78715 | 1 |
| 149 | C | 81.23660 | 71.69379 | 74.71384 | -513.07015  | 236.18570   | -551.87280  | 1 |
| 150 | H | 82.01903 | 72.48279 | 74.62947 | 1816.11944  | -1183.11722 | -1650.94321 | 1 |
| 151 | H | 80.92960 | 71.68004 | 75.78506 | -1800.04429 | -1361.53473 | 1526.34643  | 1 |
| 152 | C | 81.78167 | 70.31267 | 74.27954 | 726.08972   | -253.19732  | -179.64713  | 1 |
| 153 | H | 81.11347 | 69.45989 | 74.52380 | 1224.27271  | -456.51798  | -2390.90304 | 1 |
| 154 | H | 82.09824 | 70.25528 | 73.21882 | 1206.40339  | -1150.93514 | -2154.90344 | 1 |

|     |   |          |          |          |             |             |             |   |
|-----|---|----------|----------|----------|-------------|-------------|-------------|---|
| 155 | N | 83.08987 | 70.04111 | 75.09262 | 329.70796   | -633.68968  | -155.67358  | 1 |
| 156 | H | 83.58768 | 69.13175 | 74.86765 | 1348.31305  | 1938.76845  | 1359.00643  | 1 |
| 157 | H | 83.88009 | 70.74237 | 74.98832 | 2096.92035  | 1446.54551  | -966.48890  | 1 |
| 158 | H | 82.99496 | 69.97081 | 76.14742 | -1197.07217 | -2303.53719 | 827.28733   | 1 |
| 159 | C | 77.01132 | 72.77327 | 73.31333 | -378.01186  | -556.17301  | -413.96481  | 1 |
| 160 | O | 76.54930 | 72.40691 | 74.38561 | -409.44433  | -307.55053  | -453.30833  | 1 |
| 161 | N | 76.60358 | 72.45299 | 72.10220 | -429.02477  | 524.70884   | 274.08502   | 1 |
| 162 | H | 77.11806 | 72.80845 | 71.29912 | 1706.34263  | -1425.96036 | 1574.38926  | 1 |
| 163 | C | 75.66009 | 71.37764 | 72.01453 | -45.25864   | -626.22952  | 478.93267   | 1 |
| 164 | H | 74.95807 | 71.61536 | 72.84714 | 1988.63164  | 570.90773   | 1772.87287  | 1 |
| 165 | C | 75.03544 | 71.36466 | 70.56540 | 551.77128   | -20.49526   | -564.54996  | 1 |
| 166 | H | 74.57062 | 72.34571 | 70.31752 | 1434.61535  | -1753.10253 | 1513.99471  | 1 |
| 167 | H | 75.82387 | 71.19882 | 69.79690 | -714.67738  | 1819.09770  | 1898.36494  | 1 |
| 168 | C | 73.97899 | 70.20845 | 70.53933 | 446.99263   | -555.77305  | 338.97221   | 1 |
| 169 | H | 74.45157 | 69.24185 | 70.83248 | 1953.68466  | 1892.25957  | -161.67766  | 1 |
| 170 | H | 73.17234 | 70.39850 | 71.28191 | -403.03785  | 2688.07032  | -188.43591  | 1 |
| 171 | C | 73.38917 | 70.11522 | 69.07655 | 567.86262   | 335.74681   | 434.04421   | 1 |
| 172 | H | 73.17508 | 71.12796 | 68.66370 | -1080.02275 | 1568.26081  | -1948.78900 | 1 |
| 173 | H | 74.13102 | 69.64793 | 68.37717 | -919.54108  | 2111.34692  | 1456.13463  | 1 |
| 174 | C | 72.09528 | 69.26987 | 69.14343 | 195.81897   | 173.33862   | -745.11536  | 1 |
| 175 | H | 72.22372 | 68.27117 | 69.60551 | 1405.67949  | -2301.21089 | -390.08113  | 1 |
| 176 | H | 71.22237 | 69.78312 | 69.59403 | -940.37328  | -1118.32446 | 2299.72133  | 1 |
| 177 | N | 71.68580 | 68.97579 | 67.66120 | 319.26422   | 656.36007   | -42.02424   | 1 |
| 178 | H | 70.88734 | 68.29322 | 67.50676 | 1961.03633  | 619.91968   | 1787.09422  | 1 |
| 179 | H | 71.37255 | 69.80337 | 67.07600 | 854.14343   | -2156.80752 | 1429.08711  | 1 |
| 180 | H | 72.44616 | 68.56071 | 67.04808 | 1237.02905  | -1378.50857 | -1998.28500 | 1 |
| 181 | C | 76.47397 | 69.97772 | 72.29352 | 532.53319   | -268.57236  | 517.55729   | 1 |
| 182 | O | 76.82129 | 69.24953 | 71.39705 | 266.16714   | -290.73804  | -558.88002  | 1 |
| 183 | N | 76.67141 | 69.84618 | 73.60220 | -226.25352  | 640.49678   | -270.32839  | 1 |
| 184 | H | 76.37023 | 70.59679 | 74.25669 | 2007.69063  | -1035.27229 | 1523.50231  | 1 |
| 185 | C | 77.11157 | 68.55582 | 74.03013 | -540.76542  | -573.33303  | 49.50000    | 1 |
| 186 | H | 77.75217 | 68.18853 | 73.19559 | -2374.20950 | -1036.76023 | 843.75774   | 1 |
| 187 | C | 77.85190 | 68.74274 | 75.43316 | -77.09082   | 666.87422   | -415.84136  | 1 |
| 188 | H | 77.14166 | 69.25231 | 76.14037 | -985.81834  | 617.19825   | 2463.91927  | 1 |
| 189 | O | 79.04042 | 69.55951 | 75.41314 | 293.29899   | -391.65602  | -477.80926  | 1 |
| 190 | H | 78.75743 | 70.31027 | 75.97264 | 2528.72714  | -681.76262  | -751.27122  | 1 |
| 191 | C | 78.05715 | 67.25020 | 75.88371 | 252.47363   | -605.14473  | 440.05134   | 1 |
| 192 | H | 78.47065 | 67.18819 | 76.91665 | -2052.65063 | 1456.49051  | -1043.51830 | 1 |
| 193 | H | 77.09874 | 66.67984 | 75.87439 | -2152.98800 | -1661.97574 | -161.70652  | 1 |
| 194 | H | 78.76578 | 66.71593 | 75.20960 | -473.12726  | -1584.27339 | 2165.61725  | 1 |
| 195 | C | 75.78097 | 67.62721 | 74.25950 | 360.36307   | 488.46713   | 505.10056   | 1 |
| 196 | O | 74.91423 | 67.91359 | 75.07753 | -200.08817  | -528.03552  | -385.82850  | 1 |
| 197 | N | 75.92145 | 66.53461 | 73.54039 | -597.54095  | -226.44775  | 355.20479   | 1 |
| 198 | H | 76.74394 | 66.49988 | 72.94130 | 2179.23655  | -1300.70981 | -991.33835  | 1 |
| 199 | C | 74.75794 | 65.76710 | 73.20702 | -687.68921  | 297.39807   | -249.45179  | 1 |
| 200 | H | 73.95806 | 66.52920 | 73.07845 | -349.16256  | -2467.37713 | -1101.72831 | 1 |
| 201 | C | 75.08340 | 64.87462 | 71.92582 | 672.47345   | 361.54328   | -201.62880  | 1 |
| 202 | H | 76.05318 | 64.34506 | 72.06991 | 1541.41502  | 582.18425   | 2169.97026  | 1 |
| 203 | H | 74.29872 | 64.09016 | 71.81408 | -2534.67717 | 60.25153    | 997.72295   | 1 |
| 204 | C | 75.13368 | 65.77011 | 70.67706 | 574.26774   | -389.43119  | -377.02542  | 1 |
| 205 | C | 73.93636 | 65.99076 | 69.93386 | 688.82679   | -287.33580  | -257.96133  | 1 |
| 206 | H | 72.98300 | 65.52926 | 70.24862 | 331.14182   | 1470.38163  | 2269.80013  | 1 |
| 207 | C | 76.35760 | 66.37485 | 70.26279 | -383.52382  | -675.04808  | 144.24917   | 1 |
| 208 | H | 77.28844 | 66.21238 | 70.83503 | 4.09847     | 1517.59662  | 2262.86397  | 1 |
| 209 | C | 73.99709 | 66.79442 | 68.79386 | -134.76730  | 428.45285   | -649.50303  | 1 |
| 210 | H | 73.07318 | 66.94568 | 68.21046 | -903.23433  | 1600.49020  | 2011.53387  | 1 |
| 211 | C | 76.36075 | 67.18745 | 69.12427 | -335.53281  | -615.00040  | -364.39058  | 1 |
| 212 | H | 77.31263 | 67.66063 | 68.82550 | 1596.45398  | -1369.33862 | 1732.02659  | 1 |
| 213 | C | 75.19118 | 67.42996 | 68.34936 | 585.48547   | -340.24194  | -406.23938  | 1 |
| 214 | O | 75.18445 | 68.26026 | 67.18800 | -419.15649  | -173.04408  | -511.94141  | 1 |
| 215 | H | 76.13863 | 68.50364 | 67.16050 | -1071.84350 | 1559.71507  | -1960.13012 | 1 |
| 216 | C | 74.42827 | 64.71736 | 74.39651 | 291.41878   | -183.13091  | 710.72246   | 1 |

|     |   |          |          |          |             |             |             |   |
|-----|---|----------|----------|----------|-------------|-------------|-------------|---|
| 217 | O | 74.41059 | 63.53206 | 74.16719 | 379.87695   | 523.47396   | -222.23622  | 1 |
| 218 | N | 74.10037 | 65.35337 | 75.53363 | 564.30591   | 373.09380   | 277.24371   | 1 |
| 219 | H | 74.21994 | 66.39747 | 75.58544 | -120.59931  | -2436.07824 | -1214.35098 | 1 |
| 220 | C | 74.20183 | 64.52791 | 76.71014 | 404.07514   | -299.37480  | 608.84009   | 1 |
| 221 | H | 73.85489 | 63.53407 | 76.34170 | -1071.07882 | -841.69025  | 2359.66467  | 1 |
| 222 | C | 75.72428 | 64.45854 | 77.14735 | -683.12807  | 68.71770    | -390.13096  | 1 |
| 223 | H | 76.37213 | 64.18662 | 76.28359 | 2068.88918  | 1596.58590  | 770.89603   | 1 |
| 224 | H | 76.08798 | 65.44858 | 77.50285 | 1379.86429  | 2342.49779  | -179.85638  | 1 |
| 225 | C | 75.79890 | 63.38647 | 78.27838 | -176.39967  | 537.49466   | 550.97268   | 1 |
| 226 | H | 75.19143 | 63.72447 | 79.15962 | -396.28051  | 1942.22168  | 1869.33314  | 1 |
| 227 | H | 75.32927 | 62.43576 | 77.93908 | -94.44700   | 586.00678   | -2659.20016 | 1 |
| 228 | C | 77.31444 | 63.12751 | 78.70827 | -291.69381  | -718.18079  | -150.72929  | 1 |
| 229 | H | 77.95686 | 62.59863 | 77.95855 | -2303.38776 | 1089.76242  | 964.62032   | 1 |
| 230 | H | 77.87867 | 64.01056 | 79.10301 | 884.16729   | 2568.80533  | -207.74283  | 1 |
| 231 | N | 77.04687 | 62.25181 | 79.77743 | -594.49522  | -252.81478  | 342.29276   | 1 |
| 232 | H | 76.07757 | 62.02605 | 79.94676 | -1735.17426 | 2084.05705  | -263.71605  | 1 |
| 233 | C | 77.92411 | 61.73274 | 80.53896 | 595.23177   | -271.52487  | 442.22352   | 1 |
| 234 | N | 79.26530 | 62.04437 | 80.30049 | 585.53813   | -424.79750  | -105.81303  | 1 |
| 235 | H | 79.66836 | 62.64389 | 79.58138 | 959.88797   | 1327.56823  | -2177.11905 | 1 |
| 236 | H | 80.05577 | 61.69094 | 80.84088 | 1578.48647  | 16.27378    | -2220.76233 | 1 |
| 237 | N | 77.31579 | 60.91651 | 81.50243 | -452.17763  | -390.33541  | -421.51853  | 1 |
| 238 | H | 76.33285 | 60.70900 | 81.67320 | 470.26107   | 1974.25629  | -1817.92087 | 1 |
| 239 | H | 77.83440 | 60.41267 | 82.22243 | 1856.67307  | -1573.97321 | -1224.35416 | 1 |
| 240 | C | 73.27803 | 65.14586 | 77.89213 | -531.47271  | -581.45780  | -55.06206   | 1 |
| 241 | O | 73.50773 | 64.89487 | 79.05873 | -243.00837  | 192.73507   | 609.52485   | 1 |
| 242 | N | 72.27212 | 65.86264 | 77.39645 | 343.49288   | -644.25607  | 38.09164    | 1 |
| 243 | H | 72.19830 | 65.95271 | 76.38344 | -1691.16043 | -1535.97525 | -1484.73099 | 1 |
| 244 | C | 71.19372 | 66.16756 | 78.27337 | 542.66492   | 350.14337   | 454.42563   | 1 |
| 245 | H | 71.45569 | 65.70956 | 79.25697 | 1209.57979  | -2396.95920 | 463.86744   | 1 |
| 246 | C | 71.08550 | 67.75654 | 78.32145 | -737.14309  | 145.93010   | 242.71942   | 1 |
| 247 | H | 71.22319 | 68.19163 | 77.30819 | -1050.18303 | 159.36419   | -2509.06125 | 1 |
| 248 | C | 69.70292 | 68.16527 | 78.93179 | -706.77696  | -252.88343  | -245.16230  | 1 |
| 249 | H | 69.62135 | 69.26978 | 79.06489 | -1624.64039 | -1665.49085 | 1417.86935  | 1 |
| 250 | H | 68.85913 | 67.84607 | 78.27449 | 2566.10521  | 598.51109   | 693.22305   | 1 |
| 251 | H | 69.53857 | 67.69407 | 79.92988 | -1972.69758 | 107.10018   | -1876.34312 | 1 |
| 252 | C | 72.20692 | 68.24103 | 79.30178 | 412.85148   | 672.58832   | -27.69222   | 1 |
| 253 | H | 72.25259 | 69.35348 | 79.36458 | 1447.02277  | 1762.76533  | -1490.78944 | 1 |
| 254 | H | 72.04007 | 67.85426 | 80.33491 | 1320.77379  | -145.20455  | 2378.68491  | 1 |
| 255 | H | 73.21074 | 67.88022 | 78.97345 | -1512.10848 | 1470.52031  | 1724.75147  | 1 |
| 256 | C | 69.82232 | 65.58213 | 77.59041 | -607.11113  | 499.56689   | 73.73769    | 1 |
| 257 | O | 69.44040 | 65.91573 | 76.48808 | 357.97126   | 460.81534   | 356.68785   | 1 |
| 258 | N | 69.25922 | 64.76063 | 78.46275 | 536.55407   | -368.62270  | 332.76306   | 1 |
| 259 | H | 69.69600 | 64.61053 | 79.37271 | 524.38866   | 2297.69985  | 1367.20941  | 1 |
| 260 | C | 67.90316 | 64.39244 | 78.27114 | 46.50277    | -774.29190  | -147.97904  | 1 |
| 261 | H | 67.55233 | 65.04141 | 77.43552 | 1676.51875  | 1883.29066  | 1032.55549  | 1 |
| 262 | C | 67.80811 | 62.81677 | 77.91742 | -559.41456  | -34.19198   | -556.30433  | 1 |
| 263 | H | 68.15741 | 62.22034 | 78.79298 | -64.66664   | 395.18769   | 2695.05373  | 1 |
| 264 | H | 66.74418 | 62.52305 | 77.75610 | -2703.44278 | -60.40056   | 333.79418   | 1 |
| 265 | C | 68.63471 | 62.49074 | 76.70454 | -519.76435  | 377.31045   | 459.42366   | 1 |
| 266 | H | 69.70055 | 62.71937 | 76.93498 | -1746.74323 | 1667.50644  | -1261.73691 | 1 |
| 267 | C | 68.51289 | 61.00965 | 76.36468 | 570.95554   | 16.46261    | -545.27700  | 1 |
| 268 | H | 69.14166 | 60.73579 | 75.47881 | 2391.58273  | 28.05277    | -1305.07271 | 1 |
| 269 | H | 68.83886 | 60.36048 | 77.21739 | 175.75588   | 917.63458   | 2559.43867  | 1 |
| 270 | H | 67.45642 | 60.72913 | 76.11969 | -1063.97851 | -2155.34650 | 1283.00462  | 1 |
| 271 | C | 68.22161 | 63.32616 | 75.50258 | 193.76014   | 2.62946     | -765.53141  | 1 |
| 272 | H | 68.71066 | 62.96782 | 74.56014 | 507.39394   | -846.55087  | 2539.60089  | 1 |
| 273 | H | 67.11412 | 63.29844 | 75.33420 | 1337.57841  | 1818.19054  | 1526.01994  | 1 |
| 274 | H | 68.52665 | 64.41517 | 75.64696 | 1100.88635  | -1172.91350 | -2199.08909 | 1 |
| 275 | C | 67.16994 | 64.62532 | 79.68657 | -549.21115  | 475.64486   | -309.38218  | 1 |
| 276 | O | 67.73810 | 65.04626 | 80.66073 | 556.06106   | -390.37755  | -78.24250   | 1 |
| 277 | O | 65.79406 | 64.29643 | 79.74314 | -572.27940  | -310.19032  | -209.75862  | 1 |
| 278 | H | 65.66448 | 64.01489 | 78.79645 | -1380.08193 | 2212.14486  | 790.85944   | 1 |

Listing 108: C00108.xmolout

|    |          |          |          |          |             |             |             |          |  |
|----|----------|----------|----------|----------|-------------|-------------|-------------|----------|--|
| 1  | 276      |          |          |          |             |             |             |          |  |
| 2  | 150.0000 | 150.0000 | 150.0000 | 0.0000   | 0.0000      | 0.0000***** | 0.9140      | 3656     |  |
|    | 0.2500   | 300.00   | 0.00     | 0.00     | 0.00        | -1293.4041  | 0.0000      | 300.0000 |  |
| 3  | H        | 63.95723 | 67.35718 | 74.02234 | -2043.14101 | -1757.64893 | 399.89339   | 1        |  |
| 4  | N        | 64.64856 | 67.60708 | 74.72660 | 426.75047   | 490.45733   | -334.42467  | 1        |  |
| 5  | H        | 64.99886 | 66.69235 | 75.00538 | 442.25559   | -1110.30854 | -2448.52907 | 1        |  |
| 6  | C        | 65.64527 | 68.49083 | 74.25474 | 415.32972   | -666.39213  | 83.73172    | 1        |  |
| 7  | H        | 65.07140 | 69.22189 | 73.64747 | 879.32219   | 2491.00447  | 667.35213   | 1        |  |
| 8  | C        | 66.38859 | 69.15710 | 75.51658 | 31.35357    | 477.41777   | 628.23362   | 1        |  |
| 9  | H        | 66.82630 | 68.35506 | 76.15900 | 1168.38489  | 2240.25337  | -1019.71136 | 1        |  |
| 10 | H        | 67.24748 | 69.78252 | 75.17066 | -360.43770  | 2534.90498  | 931.67112   | 1        |  |
| 11 | C        | 65.41784 | 69.98225 | 76.32374 | 463.18208   | 512.70242   | -382.34388  | 1        |  |
| 12 | H        | 64.53578 | 69.34593 | 76.56208 | 1725.29117  | 1863.52247  | -987.07854  | 1        |  |
| 13 | C        | 66.06952 | 70.42310 | 77.62867 | 710.42801   | -144.27427  | -313.15367  | 1        |  |
| 14 | H        | 65.36003 | 71.00835 | 78.26882 | 364.20195   | -1033.13725 | 2494.72524  | 1        |  |
| 15 | H        | 66.41978 | 69.54772 | 78.23446 | 2567.61904  | 335.80679   | 847.48802   | 1        |  |
| 16 | H        | 66.96161 | 71.07531 | 77.44258 | -2587.99029 | 680.92867   | -512.16411  | 1        |  |
| 17 | C        | 64.94139 | 71.20679 | 75.55562 | 268.17616   | 741.64379   | -40.42634   | 1        |  |
| 18 | H        | 64.26113 | 71.84471 | 76.17753 | 1283.54314  | -1945.37420 | -1411.27812 | 1        |  |
| 19 | H        | 65.79953 | 71.85244 | 75.23483 | -1258.57796 | 1317.15249  | -2026.02085 | 1        |  |
| 20 | H        | 64.37442 | 70.92396 | 74.63154 | -2502.84526 | 909.80597   | 575.92391   | 1        |  |
| 21 | C        | 66.65017 | 67.59654 | 73.33121 | 619.36578   | -458.64843  | -172.09273  | 1        |  |
| 22 | O        | 66.36448 | 67.29553 | 72.18664 | -81.40433   | 433.87611   | 522.34594   | 1        |  |
| 23 | N        | 67.73293 | 67.24805 | 74.01045 | 175.23996   | -622.20190  | 341.55523   | 1        |  |
| 24 | H        | 67.85477 | 67.51451 | 74.98506 | -876.57256  | -303.22879  | -2561.90213 | 1        |  |
| 25 | C        | 68.77247 | 66.60461 | 73.27096 | -571.88214  | -534.10783  | -106.15033  | 1        |  |
| 26 | H        | 68.62840 | 66.97909 | 72.23257 | -2713.20841 | -16.25800   | -248.80809  | 1        |  |
| 27 | C        | 70.16529 | 66.96319 | 73.96627 | 166.60354   | 288.16399   | -716.09568  | 1        |  |
| 28 | H        | 70.22020 | 66.41402 | 74.94871 | -2097.85574 | 1636.78449  | -586.18044  | 1        |  |
| 29 | O        | 70.37781 | 68.35413 | 74.28007 | -317.80580  | -363.38227  | 484.43082   | 1        |  |
| 30 | H        | 70.64037 | 68.28442 | 75.22161 | 1863.74748  | -1451.84923 | 1357.29467  | 1        |  |
| 31 | C        | 71.18757 | 66.30589 | 72.96679 | 503.80731   | 517.99032   | 318.51606   | 1        |  |
| 32 | H        | 72.20965 | 66.26097 | 73.41589 | 640.61020   | -2157.10410 | -1536.29104 | 1        |  |
| 33 | H        | 70.89716 | 65.26348 | 72.69836 | 1687.88455  | 465.60692   | 2087.56452  | 1        |  |
| 34 | H        | 71.26071 | 66.88425 | 72.01688 | -1293.07895 | -1899.88581 | -1463.57452 | 1        |  |
| 35 | C        | 68.54495 | 64.99277 | 73.44874 | -153.07550  | -733.68902  | 248.70981   | 1        |  |
| 36 | O        | 68.70838 | 64.48987 | 74.53824 | 186.15459   | -480.78787  | -449.34387  | 1        |  |
| 37 | N        | 68.26500 | 64.41061 | 72.27796 | -487.53139  | 543.18517   | 42.03850    | 1        |  |
| 38 | C        | 67.79144 | 63.05993 | 72.18824 | -699.35871  | 69.34393    | 360.10701   | 1        |  |
| 39 | H        | 67.10837 | 62.92198 | 73.05709 | 2.81126     | -221.99807  | -2715.58072 | 1        |  |
| 40 | C        | 67.09508 | 63.00828 | 70.76706 | -507.46439  | -592.59194  | 122.07761   | 1        |  |
| 41 | H        | 67.09566 | 61.98359 | 70.32979 | -1975.08116 | 525.87560   | -1801.71556 | 1        |  |
| 42 | H        | 66.03139 | 63.33184 | 70.82095 | 1588.27743  | -1913.22100 | 1113.83566  | 1        |  |
| 43 | C        | 67.95250 | 64.02479 | 69.94777 | -613.62442  | -457.55993  | -194.14490  | 1        |  |
| 44 | H        | 68.90964 | 63.56161 | 69.61755 | 1707.54637  | -721.27992  | 1996.92523  | 1        |  |
| 45 | H        | 67.44629 | 64.39941 | 69.02953 | 758.23357   | 2100.81767  | 1560.55011  | 1        |  |
| 46 | C        | 68.20630 | 65.15901 | 71.02884 | -352.41524  | 704.96076   | 49.21465    | 1        |  |
| 47 | H        | 69.16385 | 65.71847 | 70.90585 | 1714.76886  | -2070.42778 | 443.35792   | 1        |  |
| 48 | H        | 67.35460 | 65.89198 | 71.17647 | 1224.15040  | 1801.50881  | 1636.97633  | 1        |  |
| 49 | C        | 69.03938 | 62.00184 | 72.23250 | 566.85117   | 537.05831   | 117.62814   | 1        |  |
| 50 | O        | 68.94241 | 60.92503 | 71.69577 | -550.26779  | -406.08867  | 4.21666     | 1        |  |
| 51 | N        | 70.03734 | 62.48963 | 72.96395 | 566.34832   | -425.77725  | 180.18749   | 1        |  |
| 52 | H        | 69.89443 | 63.40090 | 73.42520 | 644.44502   | 2646.80550  | -52.73430   | 1        |  |
| 53 | C        | 71.19328 | 61.69387 | 73.14619 | 612.34801   | -281.48662  | 411.56221   | 1        |  |
| 54 | H        | 70.90833 | 60.67293 | 72.79988 | 1667.23498  | -1490.75142 | 1556.16753  | 1        |  |
| 55 | C        | 72.39502 | 62.34623 | 72.30569 | -714.45746  | -175.43074  | 286.98927   | 1        |  |
| 56 | H        | 72.57877 | 63.38975 | 72.68450 | -787.09484  | 1763.03619  | -1922.46060 | 1        |  |
| 57 | O        | 72.19468 | 62.48137 | 70.89119 | -429.46514  | 516.51932   | -128.40526  | 1        |  |

|     |   |          |          |          |             |             |             |   |
|-----|---|----------|----------|----------|-------------|-------------|-------------|---|
| 58  | H | 72.24276 | 63.45373 | 70.78265 | 1981.82785  | 436.16847   | -1818.18182 | 1 |
| 59  | C | 73.57746 | 61.41397 | 72.75948 | 630.79189   | -468.94448  | 76.03230    | 1 |
| 60  | H | 74.56070 | 61.79055 | 72.39324 | -1775.71861 | 2062.30353  | 131.89849   | 1 |
| 61  | H | 73.63951 | 61.34344 | 73.87450 | -1855.14608 | 88.94118    | 1993.53760  | 1 |
| 62  | H | 73.45139 | 60.37743 | 72.36824 | -1504.82350 | -780.94249  | -2132.90992 | 1 |
| 63  | C | 71.65494 | 61.82098 | 74.72160 | 288.57638   | 618.62814   | -397.00270  | 1 |
| 64  | O | 71.96557 | 60.83463 | 75.34651 | 321.70495   | -185.26452  | 574.37218   | 1 |
| 65  | N | 71.72995 | 63.09272 | 75.07642 | -447.05792  | -446.53431  | 367.76425   | 1 |
| 66  | H | 71.49091 | 63.82367 | 74.41034 | 350.31316   | 1975.63644  | -1843.31522 | 1 |
| 67  | C | 72.22336 | 63.43943 | 76.36954 | -511.23061  | 374.03917   | -471.51480  | 1 |
| 68  | H | 71.64540 | 62.81605 | 77.08698 | 2234.79579  | -898.70890  | -1273.45190 | 1 |
| 69  | C | 73.76585 | 63.00662 | 76.39010 | 529.53781   | -159.34528  | 563.72604   | 1 |
| 70  | H | 74.13383 | 63.19638 | 77.43256 | 654.59388   | 2347.94251  | 1217.51488  | 1 |
| 71  | H | 73.78809 | 61.89045 | 76.22756 | -1526.55661 | 2103.42026  | 817.87394   | 1 |
| 72  | O | 74.64270 | 63.58246 | 75.38862 | -554.84278  | 14.12789    | 399.58769   | 1 |
| 73  | H | 74.82329 | 64.44766 | 75.80138 | 1297.06236  | 2061.84854  | 1220.68812  | 1 |
| 74  | C | 71.98445 | 65.04243 | 76.51296 | -662.15484  | -412.13544  | 123.62687   | 1 |
| 75  | O | 72.30922 | 65.83268 | 75.65952 | -540.01537  | -317.05804  | 274.91456   | 1 |
| 76  | N | 71.44312 | 65.28517 | 77.71096 | -202.76299  | -690.00100  | -131.49145  | 1 |
| 77  | H | 71.27173 | 64.47259 | 78.30354 | -702.62132  | -2617.37191 | 281.70413   | 1 |
| 78  | C | 70.94795 | 66.61328 | 78.06859 | -491.73914  | 576.34187   | 222.73509   | 1 |
| 79  | H | 70.43353 | 66.99974 | 77.15863 | 1977.17978  | -1823.58850 | -434.68928  | 1 |
| 80  | C | 70.04858 | 66.45425 | 79.27573 | -649.50797  | -328.66843  | 306.11224   | 1 |
| 81  | H | 70.61792 | 65.89180 | 80.04964 | 2075.07803  | 1452.16490  | -1004.45904 | 1 |
| 82  | C | 69.65201 | 67.79616 | 79.86545 | -615.18735  | -489.99689  | -70.96352   | 1 |
| 83  | H | 69.03262 | 67.67425 | 80.79624 | -1226.32661 | -1724.38906 | -1716.47170 | 1 |
| 84  | H | 70.55454 | 68.40871 | 80.14178 | 2381.64273  | -969.84735  | 900.46860   | 1 |
| 85  | H | 69.04634 | 68.40534 | 79.13950 | 2122.74991  | 1702.23946  | -141.36228  | 1 |
| 86  | C | 68.79913 | 65.65500 | 78.94854 | -501.86074  | -479.61276  | -376.42482  | 1 |
| 87  | H | 68.17087 | 65.47124 | 79.86308 | 993.79261   | -2246.95401 | -1177.81305 | 1 |
| 88  | H | 68.15102 | 66.19023 | 78.20129 | 42.71279    | -626.15391  | -2651.37258 | 1 |
| 89  | H | 69.05045 | 64.65214 | 78.50612 | -2026.39012 | -1590.33709 | -887.82922  | 1 |
| 90  | C | 72.28916 | 67.52924 | 78.46198 | -672.89153  | 382.57394   | -156.34072  | 1 |
| 91  | O | 73.21561 | 67.06764 | 79.08910 | 410.04627   | 221.86223   | 500.35950   | 1 |
| 92  | N | 72.05691 | 68.78162 | 78.11557 | -378.11782  | -443.79414  | -441.10984  | 1 |
| 93  | H | 71.13862 | 68.92283 | 77.70144 | 2404.15973  | -568.14894  | 1149.30085  | 1 |
| 94  | C | 73.03029 | 69.81357 | 78.20336 | -544.54484  | 466.16019   | 331.29119   | 1 |
| 95  | H | 72.42459 | 70.74722 | 78.19145 | -1409.80988 | -170.17955  | 2325.32679  | 1 |
| 96  | C | 73.90015 | 69.56893 | 79.50846 | -184.48284  | 116.78282   | -758.89137  | 1 |
| 97  | H | 73.24106 | 69.34108 | 80.37761 | 1893.78641  | 1861.14652  | 611.04528   | 1 |
| 98  | H | 74.55701 | 68.66903 | 79.36913 | -2170.79665 | -974.19311  | 1327.50117  | 1 |
| 99  | C | 74.77039 | 70.83909 | 79.77050 | 389.51668   | 672.81878   | -138.49152  | 1 |
| 100 | H | 75.48834 | 70.97681 | 78.92831 | 510.64577   | 1933.03327  | 1851.02484  | 1 |
| 101 | H | 74.14094 | 71.75544 | 79.74910 | -2302.30869 | -1105.72939 | -948.89774  | 1 |
| 102 | C | 75.55323 | 70.77156 | 81.13607 | -559.93427  | -126.34590  | 542.30857   | 1 |
| 103 | O | 76.19280 | 71.72507 | 81.49968 | -670.36003  | -111.83166  | 76.36448    | 1 |
| 104 | N | 75.42087 | 69.59823 | 81.79226 | -216.06729  | -537.07037  | 446.51379   | 1 |
| 105 | H | 74.92984 | 68.74063 | 81.51307 | -1251.96487 | 1074.12894  | -2168.52500 | 1 |
| 106 | H | 75.89538 | 69.37969 | 82.67472 | -2451.83023 | -720.73851  | 944.84612   | 1 |
| 107 | C | 74.09859 | 69.72552 | 76.96953 | 546.24052   | -563.88337  | -85.11809   | 1 |
| 108 | O | 75.23577 | 69.44637 | 77.24894 | 71.70702    | -307.40463  | 606.69673   | 1 |
| 109 | N | 73.57373 | 70.06511 | 75.78244 | 479.90863   | -504.50129  | 222.86849   | 1 |
| 110 | C | 74.26173 | 69.77791 | 74.56526 | 75.51268    | -600.91904  | 506.73700   | 1 |
| 111 | H | 74.90329 | 68.88697 | 74.75544 | -2033.61562 | 1795.30103  | 254.89480   | 1 |
| 112 | C | 73.03839 | 69.55723 | 73.57729 | 523.79067   | 517.99274   | 284.45581   | 1 |
| 113 | H | 73.32439 | 69.63949 | 72.50454 | 1599.61665  | -1127.00911 | 1895.98173  | 1 |
| 114 | H | 72.58246 | 68.54906 | 73.71433 | -1881.83093 | 1275.82488  | -1501.55016 | 1 |
| 115 | C | 72.04639 | 70.66691 | 74.04564 | -600.05639  | -404.05026  | 316.64485   | 1 |
| 116 | H | 72.33478 | 71.66731 | 73.65083 | -2597.05260 | 496.36221   | 657.73249   | 1 |
| 117 | H | 70.99733 | 70.47946 | 73.71667 | -1666.24518 | 1294.38985  | -1723.90591 | 1 |
| 118 | C | 72.21819 | 70.58049 | 75.62196 | 493.57570   | -129.95376  | -602.56394  | 1 |
| 119 | H | 72.14344 | 71.55255 | 76.16396 | -1469.08415 | -637.84797  | 2204.22581  | 1 |



|     |   |          |          |          |             |             |             |   |
|-----|---|----------|----------|----------|-------------|-------------|-------------|---|
| 120 | H | 71.55360 | 69.83812 | 76.11648 | -1038.97840 | 1068.88701  | -2280.71789 | 1 |
| 121 | C | 75.13383 | 71.06714 | 74.03857 | 188.88100   | 241.05089   | -727.87821  | 1 |
| 122 | O | 76.01107 | 70.89385 | 73.22781 | 531.88613   | -49.19943   | 427.07960   | 1 |
| 123 | N | 74.68088 | 72.21173 | 74.53188 | 708.14833   | 26.93417    | -179.73509  | 1 |
| 124 | H | 73.91388 | 72.12031 | 75.19736 | -2232.69501 | -1179.09831 | 1023.94816  | 1 |
| 125 | C | 75.12548 | 73.52866 | 74.09674 | -738.32412  | 259.92548   | 104.42456   | 1 |
| 126 | H | 76.23340 | 73.46438 | 73.98175 | 2028.89123  | 1260.02983  | 1311.33324  | 1 |
| 127 | C | 74.42107 | 73.91951 | 72.80676 | -258.65678  | -345.52513  | 661.28459   | 1 |
| 128 | H | 73.32576 | 73.82444 | 72.97819 | -1826.06090 | -1801.46097 | -918.64554  | 1 |
| 129 | C | 74.72030 | 75.36004 | 72.43232 | -541.23400  | 531.92970   | -218.41428  | 1 |
| 130 | H | 74.19053 | 75.66831 | 71.48897 | 1311.73218  | -2219.18200 | 882.19023   | 1 |
| 131 | H | 74.40247 | 76.07508 | 73.24140 | -1048.71298 | 1223.58118  | -2196.97971 | 1 |
| 132 | H | 75.81982 | 75.52759 | 72.26101 | 419.06414   | 1903.92898  | 1903.44670  | 1 |
| 133 | C | 74.78415 | 73.00731 | 71.64998 | -423.86431  | 152.66566   | -648.55262  | 1 |
| 134 | H | 74.26642 | 73.30943 | 70.69797 | 105.68386   | -2342.50080 | 1387.51238  | 1 |
| 135 | H | 75.89122 | 73.01957 | 71.44849 | -1695.63603 | -1484.73621 | -1531.02793 | 1 |
| 136 | H | 74.50264 | 71.93770 | 71.86323 | -1853.57121 | -487.39031  | 1936.59343  | 1 |
| 137 | C | 74.57933 | 74.52507 | 75.31205 | 539.71428   | -510.58232  | 267.58633   | 1 |
| 138 | O | 73.52888 | 74.31915 | 75.87237 | -15.93758   | -278.34085  | -624.49402  | 1 |
| 139 | N | 75.39703 | 75.55998 | 75.44031 | -676.81886  | 12.05292    | 276.17960   | 1 |
| 140 | H | 76.24573 | 75.54910 | 74.87682 | -1694.44250 | -373.84189  | -2100.66098 | 1 |
| 141 | C | 75.12391 | 76.47942 | 76.49560 | 412.33078   | -664.70360  | 108.35451   | 1 |
| 142 | H | 74.01748 | 76.42133 | 76.62790 | 1765.77476  | 1294.44366  | 1621.76594  | 1 |
| 143 | C | 75.90136 | 75.93570 | 77.76789 | -179.66635  | -721.95667  | -264.73915  | 1 |
| 144 | H | 75.60471 | 74.88687 | 77.99386 | -607.34922  | 2587.87032  | -598.10018  | 1 |
| 145 | H | 76.99535 | 75.90037 | 77.56818 | -359.69332  | -1479.13954 | -2259.74260 | 1 |
| 146 | C | 75.58415 | 76.88464 | 78.96843 | -240.01076  | 616.02425   | 431.85322   | 1 |
| 147 | H | 75.80048 | 77.94512 | 78.69691 | -1359.17131 | 782.54425   | 2227.99181  | 1 |
| 148 | H | 74.50312 | 76.85082 | 79.23224 | -820.36667  | 85.81767    | -2596.78715 | 1 |
| 149 | C | 76.48334 | 76.41467 | 80.18246 | -513.07015  | 236.18570   | -551.87280  | 1 |
| 150 | H | 76.23064 | 75.37150 | 80.48328 | 1816.11944  | -1183.11722 | -1650.94321 | 1 |
| 151 | H | 77.55888 | 76.39207 | 79.89219 | -1800.04429 | -1361.53473 | 1526.34643  | 1 |
| 152 | C | 76.25753 | 77.39604 | 81.35548 | 726.08972   | -253.19732  | -179.64713  | 1 |
| 153 | H | 76.61017 | 78.43009 | 81.16822 | 1224.27271  | -456.51798  | -2390.90304 | 1 |
| 154 | H | 75.22213 | 77.41453 | 81.75019 | 1206.40339  | -1150.93514 | -2154.90344 | 1 |
| 155 | N | 77.12950 | 76.88559 | 82.55210 | 329.70796   | -633.68968  | -155.67358  | 1 |
| 156 | H | 77.08132 | 77.44952 | 83.45023 | 1348.31305  | 1938.76845  | 1359.00643  | 1 |
| 157 | H | 76.91044 | 75.90977 | 82.90517 | 2096.92035  | 1446.54551  | -966.48890  | 1 |
| 158 | H | 78.17759 | 76.82777 | 82.39547 | -1197.07217 | -2303.53719 | 827.28733   | 1 |
| 159 | C | 75.70914 | 77.96976 | 76.15645 | -378.01186  | -556.17301  | -413.96481  | 1 |
| 160 | O | 75.22684 | 78.92787 | 76.71439 | -409.44433  | -307.55053  | -453.30833  | 1 |
| 161 | N | 76.79190 | 77.93232 | 75.38383 | -429.02477  | 524.70884   | 274.08502   | 1 |
| 162 | H | 77.07844 | 77.03442 | 74.99525 | 1706.34263  | -1425.96036 | 1574.38926  | 1 |
| 163 | C | 77.18626 | 79.14388 | 74.73956 | -45.25864   | -626.22952  | 478.93267   | 1 |
| 164 | H | 76.55950 | 79.96091 | 75.17030 | 1988.63164  | 570.90773   | 1772.87287  | 1 |
| 165 | C | 78.74301 | 79.28693 | 75.02041 | 551.77128   | -20.49526   | -564.54996  | 1 |
| 166 | H | 78.92173 | 79.39953 | 76.11277 | 1434.61535  | -1753.10253 | 1513.99471  | 1 |
| 167 | H | 79.27813 | 78.35661 | 74.72742 | -714.67738  | 1819.09770  | 1898.36494  | 1 |
| 168 | C | 79.31165 | 80.51574 | 74.23935 | 446.99263   | -555.77305  | 338.97221   | 1 |
| 169 | H | 79.31258 | 80.33086 | 73.14185 | 1953.68466  | 1892.25957  | -161.67766  | 1 |
| 170 | H | 78.68266 | 81.42102 | 74.39270 | -403.03785  | 2688.07032  | -188.43591  | 1 |
| 171 | C | 80.77680 | 80.72810 | 74.79531 | 567.86262   | 335.74681   | 434.04421   | 1 |
| 172 | H | 80.74943 | 80.89788 | 75.89606 | -1080.02275 | 1568.26081  | -1948.78900 | 1 |
| 173 | H | 81.38616 | 79.80718 | 74.64990 | -919.54108  | 2111.34692  | 1456.13463  | 1 |
| 174 | C | 81.44208 | 81.93269 | 74.08423 | 195.81897   | 173.33862   | -745.11536  | 1 |
| 175 | H | 81.73550 | 81.75896 | 73.02889 | 1405.67949  | -2301.21089 | -390.08113  | 1 |
| 176 | H | 80.87487 | 82.88199 | 74.16458 | -940.37328  | -1118.32446 | 2299.72133  | 1 |
| 177 | N | 82.75678 | 82.23601 | 74.85498 | 319.26422   | 656.36007   | -42.02424   | 1 |
| 178 | H | 83.08031 | 83.28721 | 74.84925 | 1961.03633  | 619.91968   | 1787.09422  | 1 |
| 179 | H | 82.73930 | 82.00188 | 75.89154 | 854.14343   | -2156.80752 | 1429.08711  | 1 |
| 180 | H | 83.61998 | 81.69779 | 74.55115 | 1237.02905  | -1378.50857 | -1998.28500 | 1 |
| 181 | C | 77.02214 | 78.90701 | 73.13393 | 532.53319   | -268.57236  | 517.55729   | 1 |

|     |   |          |          |          |             |             |             |   |
|-----|---|----------|----------|----------|-------------|-------------|-------------|---|
| 182 | O | 77.32613 | 77.84476 | 72.59083 | 266.16714   | -290.73804  | -558.88002  | 1 |
| 183 | N | 76.59225 | 80.02246 | 72.59356 | -226.25352  | 640.49678   | -270.32839  | 1 |
| 184 | H | 76.37956 | 80.79936 | 73.21742 | 2007.69063  | -1035.27229 | 1523.50231  | 1 |
| 185 | C | 76.84510 | 80.27203 | 71.20673 | -540.76542  | -573.33303  | 49.50000    | 1 |
| 186 | H | 77.85279 | 79.83683 | 71.02623 | -2374.20950 | -1036.76023 | 843.75774   | 1 |
| 187 | C | 75.71804 | 79.52659 | 70.37697 | -77.09082   | 666.87422   | -415.84136  | 1 |
| 188 | H | 74.69690 | 79.90412 | 70.67695 | -985.81834  | 617.19825   | 2463.91927  | 1 |
| 189 | O | 75.57124 | 78.10608 | 70.58107 | 293.29899   | -391.65602  | -477.80926  | 1 |
| 190 | H | 76.25623 | 77.96051 | 71.32475 | 2528.72714  | -681.76262  | -751.27122  | 1 |
| 191 | C | 76.04141 | 80.00692 | 68.91923 | 252.47363   | -605.14473  | 440.05134   | 1 |
| 192 | H | 75.28318 | 79.63795 | 68.18956 | -2052.65063 | 1456.49051  | -1043.51830 | 1 |
| 193 | H | 76.05390 | 81.12048 | 68.85496 | -2152.98800 | -1661.97574 | -161.70652  | 1 |
| 194 | H | 77.03800 | 79.64260 | 68.57620 | -473.12726  | -1584.27339 | 2165.61725  | 1 |
| 195 | C | 76.75304 | 81.90662 | 71.02493 | 360.36307   | 488.46713   | 505.10056   | 1 |
| 196 | O | 75.68467 | 82.42711 | 70.80952 | -200.08817  | -528.03552  | -385.82850  | 1 |
| 197 | N | 77.96629 | 82.43074 | 71.10785 | -597.54095  | -226.44775  | 355.20479   | 1 |
| 198 | H | 78.73763 | 81.78158 | 71.26369 | 2179.23655  | -1300.70981 | -991.33835  | 1 |
| 199 | C | 78.21199 | 83.82089 | 71.18506 | -687.68921  | 297.39807   | -249.45179  | 1 |
| 200 | H | 79.30949 | 83.87860 | 71.01467 | -349.16256  | -2467.37713 | -1101.72831 | 1 |
| 201 | C | 77.33209 | 84.62501 | 70.12394 | 672.47345   | 361.54328   | -201.62880  | 1 |
| 202 | H | 76.25200 | 84.53554 | 70.39865 | 1541.41502  | 582.18425   | 2169.97026  | 1 |
| 203 | H | 77.59055 | 85.70841 | 70.17150 | -2534.67717 | 60.25153    | 997.72295   | 1 |
| 204 | C | 77.56954 | 84.06993 | 68.71013 | 574.26774   | -389.43119  | -377.02542  | 1 |
| 205 | C | 78.80021 | 84.28212 | 68.01983 | 688.82679   | -287.33580  | -257.96133  | 1 |
| 206 | H | 79.60992 | 84.87902 | 68.47746 | 331.14182   | 1470.38163  | 2269.80013  | 1 |
| 207 | C | 76.52679 | 83.30712 | 68.10482 | -383.52382  | -675.04808  | 144.24917   | 1 |
| 208 | H | 75.57210 | 83.14686 | 68.64247 | 4.09847     | 1517.59662  | 2262.86397  | 1 |
| 209 | C | 78.96083 | 83.71223 | 66.75621 | -134.76730  | 428.45285   | -649.50303  | 1 |
| 210 | H | 79.91238 | 83.87426 | 66.22036 | -903.23433  | 1600.49020  | 2011.53387  | 1 |
| 211 | C | 76.73624 | 82.75128 | 66.84039 | -335.53281  | -615.00040  | -364.39058  | 1 |
| 212 | H | 75.92474 | 82.15319 | 66.39004 | 1596.45398  | -1369.33862 | 1732.02659  | 1 |
| 213 | C | 77.95408 | 82.92808 | 66.12145 | 585.48547   | -340.24194  | -406.23938  | 1 |
| 214 | O | 78.18123 | 82.36431 | 64.83849 | -419.15649  | -173.04408  | -511.94141  | 1 |
| 215 | H | 77.31288 | 81.91928 | 64.69576 | -1071.84350 | 1559.71507  | -1960.13012 | 1 |
| 216 | C | 77.78763 | 84.35137 | 72.68115 | 291.41878   | -183.13091  | 710.72246   | 1 |
| 217 | O | 76.75105 | 84.93045 | 72.91028 | 379.87695   | 523.47396   | -222.23622  | 1 |
| 218 | N | 78.73939 | 83.99667 | 73.54760 | 564.30591   | 373.09380   | 277.24371   | 1 |
| 219 | H | 79.57966 | 83.57653 | 73.15313 | -120.59931  | -2436.07824 | -1214.35098 | 1 |
| 220 | C | 78.72244 | 84.65599 | 74.81455 | 404.07514   | -299.37480  | 608.84009   | 1 |
| 221 | H | 77.64225 | 84.84836 | 75.01474 | -1071.07882 | -841.69025  | 2359.66467  | 1 |
| 222 | C | 79.44933 | 83.69582 | 75.84203 | -683.12807  | 68.71770    | -390.13096  | 1 |
| 223 | H | 79.08353 | 82.65378 | 75.71207 | 2068.88918  | 1596.58590  | 770.89603   | 1 |
| 224 | H | 80.54420 | 83.66033 | 75.63265 | 1379.86429  | 2342.49779  | -179.85638  | 1 |
| 225 | C | 79.20747 | 84.15893 | 77.31128 | -176.39967  | 537.49466   | 550.97268   | 1 |
| 226 | H | 79.63038 | 85.17058 | 77.50343 | -396.28051  | 1942.22168  | 1869.33314  | 1 |
| 227 | H | 78.12201 | 84.22457 | 77.54776 | -94.44700   | 586.00678   | -2659.20016 | 1 |
| 228 | C | 79.93809 | 83.03929 | 78.18718 | -291.69381  | -718.18079  | -150.72929  | 1 |
| 229 | H | 79.57364 | 81.99256 | 78.02605 | -2303.38776 | 1089.76242  | 964.62032   | 1 |
| 230 | H | 81.05464 | 83.02190 | 78.10720 | 884.16729   | 2568.80533  | -207.74283  | 1 |
| 231 | N | 79.60018 | 83.39654 | 79.49864 | -594.49522  | -252.81478  | 342.29276   | 1 |
| 232 | H | 79.03223 | 84.22152 | 79.61408 | -1735.17426 | 2084.05705  | -263.71605  | 1 |
| 233 | C | 79.95393 | 82.74529 | 80.53203 | 595.23177   | -271.52487  | 442.22352   | 1 |
| 234 | N | 80.74625 | 81.60828 | 80.33941 | 585.53813   | -424.79750  | -105.81303  | 1 |
| 235 | H | 81.09291 | 81.20165 | 79.47135 | 959.88797   | 1327.56823  | -2177.11905 | 1 |
| 236 | H | 81.09327 | 81.00428 | 81.08501 | 1578.48647  | 16.27378    | -2220.76233 | 1 |
| 237 | N | 79.45631 | 83.34394 | 81.69788 | -452.17763  | -390.33541  | -421.51853  | 1 |
| 238 | H | 78.86470 | 84.16285 | 81.83076 | 470.26107   | 1974.25629  | -1817.92087 | 1 |
| 239 | H | 79.61724 | 82.96396 | 82.63142 | 1856.67307  | -1573.97321 | -1224.35416 | 1 |
| 240 | C | 79.61331 | 86.02682 | 74.70033 | -531.47271  | -581.45780  | -55.06206   | 1 |
| 241 | O | 80.51000 | 86.19175 | 73.90860 | -243.00837  | 192.73507   | 609.52485   | 1 |
| 242 | N | 79.23486 | 86.83005 | 75.69755 | 343.49288   | -644.25607  | 38.09164    | 1 |
| 243 | H | 78.46918 | 86.47736 | 76.27014 | -1691.16043 | -1535.97525 | -1484.73099 | 1 |

|     |   |          |          |          |             |             |             |   |
|-----|---|----------|----------|----------|-------------|-------------|-------------|---|
| 244 | C | 79.80891 | 88.16189 | 75.88493 | 542.66492   | 350.14337   | 454.42563   | 1 |
| 245 | H | 80.09867 | 88.46997 | 74.85146 | 1209.57979  | -2396.95920 | 463.86744   | 1 |
| 246 | C | 78.75138 | 89.04228 | 76.52840 | -737.14309  | 145.93010   | 242.71942   | 1 |
| 247 | H | 78.52056 | 88.61274 | 77.52922 | -1050.18303 | 159.36419   | -2509.06125 | 1 |
| 248 | C | 79.23952 | 90.46445 | 76.72862 | -706.77696  | -252.88343  | -245.16230  | 1 |
| 249 | H | 78.49056 | 91.08822 | 77.29000 | -1624.64039 | -1665.49085 | 1417.86935  | 1 |
| 250 | H | 80.21005 | 90.48656 | 77.31487 | 2566.10521  | 598.51109   | 693.22305   | 1 |
| 251 | H | 79.43148 | 90.97912 | 75.74728 | -1972.69758 | 107.10018   | -1876.34312 | 1 |
| 252 | C | 77.46210 | 89.05682 | 75.72567 | 412.85148   | 672.58832   | -27.69222   | 1 |
| 253 | H | 76.65049 | 89.63195 | 76.24945 | 1447.02277  | 1762.76533  | -1490.78944 | 1 |
| 254 | H | 77.61066 | 89.53294 | 74.71820 | 1320.77379  | -145.20455  | 2378.68491  | 1 |
| 255 | H | 77.07371 | 88.01785 | 75.54251 | -1512.10848 | 1470.52031  | 1724.75147  | 1 |
| 256 | C | 81.13846 | 87.99164 | 76.86046 | -607.11113  | 499.56689   | 73.73769    | 1 |
| 257 | O | 81.51762 | 88.92062 | 77.54241 | 357.97126   | 460.81534   | 356.68785   | 1 |
| 258 | N | 81.67719 | 86.79175 | 76.74607 | 536.55407   | -368.62270  | 332.76306   | 1 |
| 259 | H | 81.24296 | 86.15532 | 76.07527 | 524.38866   | 2297.69985  | 1367.20941  | 1 |
| 260 | C | 82.95605 | 86.57322 | 77.33267 | 46.50277    | -774.29190  | -147.97904  | 1 |
| 261 | H | 83.37702 | 87.59236 | 77.49411 | 1676.51875  | 1883.29066  | 1032.55549  | 1 |
| 262 | C | 82.78266 | 85.74845 | 78.71634 | -559.41456  | -34.19198   | -556.30433  | 1 |
| 263 | H | 82.28674 | 84.77370 | 78.49748 | -64.66664   | 395.18769   | 2695.05373  | 1 |
| 264 | H | 83.78730 | 85.49426 | 79.13060 | -2703.44278 | -60.40056   | 333.79418   | 1 |
| 265 | C | 81.97898 | 86.52265 | 79.72298 | -519.76435  | 377.31045   | 459.42366   | 1 |
| 266 | H | 80.99780 | 86.78128 | 79.26372 | -1746.74323 | 1667.50644  | -1261.73691 | 1 |
| 267 | C | 81.73395 | 85.66500 | 80.95960 | 570.95554   | 16.46261    | -545.27700  | 1 |
| 268 | H | 81.09763 | 86.19432 | 81.71440 | 2391.58273  | 28.05277    | -1305.07271 | 1 |
| 269 | H | 81.21384 | 84.70757 | 80.70003 | 175.75588   | 917.63458   | 2559.43867  | 1 |
| 270 | H | 82.69375 | 85.39083 | 81.46836 | -1063.97851 | -2155.34650 | 1283.00462  | 1 |
| 271 | C | 82.67507 | 87.81342 | 80.13098 | 193.76014   | 2.62946     | -765.53141  | 1 |
| 272 | H | 82.14698 | 88.31643 | 80.98186 | 507.39394   | -846.55087  | 2539.60089  | 1 |
| 273 | H | 83.73188 | 87.63190 | 80.45730 | 1337.57841  | 1818.19054  | 1526.01994  | 1 |
| 274 | H | 82.70106 | 88.54937 | 79.27809 | 1100.88635  | -1172.91350 | -2199.08909 | 1 |
| 275 | C | 83.80305 | 85.61419 | 76.37134 | -549.21115  | 475.64486   | -309.38218  | 1 |
| 276 | O | 83.29934 | 84.67695 | 75.76765 | 556.06106   | -390.37755  | -78.24250   | 1 |
| 277 | O | 85.19159 | 85.75831 | 76.40781 | -572.27940  | -310.19032  | -209.75862  | 1 |
| 278 | H | 85.24377 | 86.58056 | 76.99091 | -1380.08193 | 2212.14486  | 790.85944   | 1 |

Listing 109: C00109.xmolout

|    |   |          |          |          |             |             |             |        |          |
|----|---|----------|----------|----------|-------------|-------------|-------------|--------|----------|
| 1  |   | 276      |          |          |             |             |             |        |          |
| 2  |   | 150.0000 | 150.0000 | 150.0000 | 0.0000      | 0.0000      | 0.0000***** | 2.7750 | 11100    |
|    |   | 0.2500   | 300.00   | 0.00     | 0.00        | 0.00        | -1293.4020  | 0.0000 | 300.0000 |
| 3  | H | 68.85742 | 84.37051 | 78.01415 | -2043.14101 | -1757.64893 | 399.89339   |        | 1        |
| 4  | N | 69.86759 | 84.25051 | 77.94731 | 426.75047   | 490.45733   | -334.42467  |        | 1        |
| 5  | H | 69.91794 | 83.41010 | 77.37085 | 442.25559   | -1110.30854 | -2448.52907 |        | 1        |
| 6  | C | 70.52627 | 85.37002 | 77.38477 | 415.32972   | -666.39213  | 83.73172    |        | 1        |
| 7  | H | 69.74958 | 85.97820 | 76.87411 | 879.32219   | 2491.00447  | 667.35213   |        | 1        |
| 8  | C | 71.27161 | 86.17107 | 78.56652 | 31.35357    | 477.41777   | 628.23362   |        | 1        |
| 9  | H | 71.90174 | 85.44894 | 79.13879 | 1168.38489  | 2240.25337  | -1019.71136 |        | 1        |
| 10 | H | 71.97098 | 86.92435 | 78.12977 | -360.43770  | 2534.90498  | 931.67112   |        | 1        |
| 11 | C | 70.30962 | 86.85626 | 79.50520 | 463.18208   | 512.70242   | -382.34388  |        | 1        |
| 12 | H | 69.48638 | 86.15058 | 79.75450 | 1725.29117  | 1863.52247  | -987.07854  |        | 1        |
| 13 | C | 71.03823 | 87.23044 | 80.79028 | 710.42801   | -144.27427  | -313.15367  |        | 1        |
| 14 | H | 70.36347 | 87.75619 | 81.51380 | 364.20195   | -1033.13725 | 2494.72524  |        | 1        |
| 15 | H | 71.44720 | 86.32681 | 81.31233 | 2567.61904  | 335.80679   | 847.48802   |        | 1        |
| 16 | H | 71.90382 | 87.91318 | 80.58745 | -2587.99029 | 680.92867   | -512.16411  |        | 1        |
| 17 | C | 69.72222 | 88.10490 | 78.86331 | 268.17616   | 741.64379   | -40.42634   |        | 1        |
| 18 | H | 69.03506 | 88.64692 | 79.56354 | 1283.54314  | -1945.37420 | -1411.27812 |        | 1        |
| 19 | H | 70.52526 | 88.82719 | 78.56229 | -1258.57796 | 1317.15249  | -2026.02085 |        | 1        |
| 20 | H | 69.13486 | 87.86101 | 77.94057 | -2502.84526 | 909.80597   | 575.92391   |        | 1        |
| 21 | C | 71.68729 | 84.81295 | 76.37627 | 619.36578   | -458.64843  | -172.09273  |        | 1        |
| 22 | O | 71.98756 | 85.41435 | 75.36548 | -81.40433   | 433.87611   | 522.34594   |        | 1        |
| 23 | N | 72.30378 | 83.77865 | 76.94994 | 175.23996   | -622.20190  | 341.55523   |        | 1        |

|    |   |          |          |          |             |             |             |   |
|----|---|----------|----------|----------|-------------|-------------|-------------|---|
| 24 | H | 71.86837 | 83.43850 | 77.80491 | -876.57256  | -303.22879  | -2561.90213 | 1 |
| 25 | C | 73.33693 | 83.02320 | 76.29734 | -571.88214  | -534.10783  | -106.15033  | 1 |
| 26 | H | 73.46818 | 82.15117 | 76.97810 | -2713.20841 | -16.25800   | -248.80809  | 1 |
| 27 | C | 72.72630 | 82.56733 | 74.92880 | 166.60354   | 288.16399   | -716.09568  | 1 |
| 28 | H | 72.25223 | 83.41459 | 74.38322 | -2097.85574 | 1636.78449  | -586.18044  | 1 |
| 29 | O | 71.46605 | 81.59542 | 75.17373 | -317.80580  | -363.38227  | 484.43082   | 1 |
| 30 | H | 70.81619 | 82.14324 | 74.74780 | 1863.74748  | -1451.84923 | 1357.29467  | 1 |
| 31 | C | 73.82696 | 81.88808 | 74.08580 | 503.80731   | 517.99032   | 318.51606   | 1 |
| 32 | H | 73.40122 | 81.21189 | 73.29947 | 640.61020   | -2157.10410 | -1536.29104 | 1 |
| 33 | H | 74.47841 | 82.63135 | 73.54795 | 1687.88455  | 465.60692   | 2087.56452  | 1 |
| 34 | H | 74.50110 | 81.26914 | 74.73987 | -1293.07895 | -1899.88581 | -1463.57452 | 1 |
| 35 | C | 74.75498 | 83.83511 | 76.14511 | -153.07550  | -733.68902  | 248.70981   | 1 |
| 36 | O | 75.48601 | 83.42022 | 75.27698 | 186.15459   | -480.78787  | -449.34387  | 1 |
| 37 | N | 75.03727 | 84.78064 | 77.05344 | -487.53139  | 543.18517   | 42.03850    | 1 |
| 38 | C | 76.23581 | 85.55286 | 76.92170 | -699.35871  | 69.34393    | 360.10701   | 1 |
| 39 | H | 76.45945 | 85.61571 | 75.83188 | 2.81126     | -221.99807  | -2715.58072 | 1 |
| 40 | C | 75.83496 | 86.91561 | 77.63247 | -507.46439  | -592.59194  | 122.07761   | 1 |
| 41 | H | 76.71885 | 87.50340 | 77.96718 | -1975.08116 | 525.87560   | -1801.71556 | 1 |
| 42 | H | 75.25308 | 87.57276 | 76.94839 | 1588.27743  | -1913.22100 | 1113.83566  | 1 |
| 43 | C | 74.94905 | 86.41167 | 78.81321 | -613.62442  | -457.55993  | -194.14490  | 1 |
| 44 | H | 75.57507 | 86.00150 | 79.64744 | 1707.54637  | -721.27992  | 1996.92523  | 1 |
| 45 | H | 74.30198 | 87.20099 | 79.25889 | 758.23357   | 2100.81767  | 1560.55011  | 1 |
| 46 | C | 74.12203 | 85.27203 | 78.07449 | -352.41524  | 704.96076   | 49.21465    | 1 |
| 47 | H | 73.79106 | 84.41560 | 78.70849 | 1714.76886  | -2070.42778 | 443.35792   | 1 |
| 48 | H | 73.26487 | 85.64989 | 77.47164 | 1224.15040  | 1801.50881  | 1636.97633  | 1 |
| 49 | C | 77.46068 | 84.85748 | 77.76021 | 566.85117   | 537.05831   | 117.62814   | 1 |
| 50 | O | 78.60420 | 85.09625 | 77.44328 | -550.26779  | -406.08867  | 4.21666     | 1 |
| 51 | N | 77.03070 | 84.09027 | 78.75886 | 566.34832   | -425.77725  | 180.18749   | 1 |
| 52 | H | 76.02038 | 84.02213 | 78.86371 | 644.44502   | 2646.80550  | -52.73430   | 1 |
| 53 | C | 77.95291 | 83.77921 | 79.81203 | 612.34801   | -281.48662  | 411.56221   | 1 |
| 54 | H | 78.76115 | 84.53119 | 79.65325 | 1667.23498  | -1490.75142 | 1556.16753  | 1 |
| 55 | C | 77.18461 | 83.95300 | 81.19515 | -714.45746  | -175.43074  | 286.98927   | 1 |
| 56 | H | 76.40433 | 83.15165 | 81.28922 | -787.09484  | 1763.03619  | -1922.46060 | 1 |
| 57 | O | 76.46254 | 85.20515 | 81.35201 | -429.46514  | 516.51932   | -128.40526  | 1 |
| 58 | H | 75.57722 | 84.87070 | 81.58624 | 1981.82785  | 436.16847   | -1818.18182 | 1 |
| 59 | C | 78.31083 | 83.70777 | 82.26022 | 630.79189   | -468.94448  | 76.03230    | 1 |
| 60 | H | 77.90972 | 83.77433 | 83.29883 | -1775.71861 | 2062.30353  | 131.89849   | 1 |
| 61 | H | 78.77952 | 82.69159 | 82.14768 | -1855.14608 | 88.94118    | 1993.53760  | 1 |
| 62 | H | 79.12658 | 84.46342 | 82.17342 | -1504.82350 | -780.94249  | -2132.90992 | 1 |
| 63 | C | 78.49141 | 82.26821 | 79.54762 | 288.57638   | 618.62814   | -397.00270  | 1 |
| 64 | O | 78.73959 | 81.51146 | 80.49713 | 321.70495   | -185.26452  | 574.37218   | 1 |
| 65 | N | 78.65733 | 82.06074 | 78.26610 | -447.05792  | -446.53431  | 367.76425   | 1 |
| 66 | H | 78.43572 | 82.88600 | 77.70666 | 350.31316   | 1975.63644  | -1843.31522 | 1 |
| 67 | C | 78.95015 | 80.81385 | 77.65284 | -511.23061  | 374.03917   | -471.51480  | 1 |
| 68 | H | 78.99015 | 81.08861 | 76.57415 | 2234.79579  | -898.70890  | -1273.45190 | 1 |
| 69 | C | 80.37174 | 80.31849 | 78.19893 | 529.53781   | -159.34528  | 563.72604   | 1 |
| 70 | H | 80.80497 | 79.56651 | 77.48322 | 654.59388   | 2347.94251  | 1217.51488  | 1 |
| 71 | H | 81.04456 | 81.21679 | 78.14664 | -1526.55661 | 2103.42026  | 817.87394   | 1 |
| 72 | O | 80.42883 | 79.73686 | 79.50688 | -554.84278  | 14.12789    | 399.58769   | 1 |
| 73 | H | 79.78699 | 80.37596 | 80.00093 | 1297.06236  | 2061.84854  | 1220.68812  | 1 |
| 74 | C | 77.78678 | 79.72401 | 77.95190 | -662.15484  | -412.13544  | 123.62687   | 1 |
| 75 | O | 77.96800 | 78.55236 | 77.67789 | -540.01537  | -317.05804  | 274.91456   | 1 |
| 76 | N | 76.64672 | 80.28488 | 78.35176 | -202.76299  | -690.00100  | -131.49145  | 1 |
| 77 | H | 76.72501 | 81.28823 | 78.51355 | -702.62132  | -2617.37191 | 281.70413   | 1 |
| 78 | C | 75.54865 | 79.46702 | 78.88056 | -491.73914  | 576.34187   | 222.73509   | 1 |
| 79 | H | 76.06818 | 78.61256 | 79.37786 | 1977.17978  | -1823.58850 | -434.68928  | 1 |
| 80 | C | 74.74575 | 80.32218 | 79.84093 | -649.50797  | -328.66843  | 306.11224   | 1 |
| 81 | H | 74.49095 | 81.27371 | 79.32292 | 2075.07803  | 1452.16490  | -1004.45904 | 1 |
| 82 | C | 73.45173 | 79.65164 | 80.26501 | -615.18735  | -489.99689  | -70.96352   | 1 |
| 83 | H | 72.88369 | 80.27047 | 81.01294 | -1226.32661 | -1724.38906 | -1716.47170 | 1 |
| 84 | H | 72.76599 | 79.47526 | 79.38882 | 2381.64273  | -969.84735  | 900.46860   | 1 |
| 85 | H | 73.64339 | 78.64877 | 80.73804 | 2122.74991  | 1702.23946  | -141.36228  | 1 |

|     |   |          |          |          |             |             |             |   |
|-----|---|----------|----------|----------|-------------|-------------|-------------|---|
| 86  | C | 75.55965 | 80.66750 | 81.07623 | -501.86074  | -479.61276  | -376.42482  | 1 |
| 87  | H | 75.04145 | 81.43049 | 81.71969 | 993.79261   | -2246.95401 | -1177.81305 | 1 |
| 88  | H | 75.73681 | 79.76024 | 81.71688 | 42.71279    | -626.15391  | -2651.37258 | 1 |
| 89  | H | 76.57530 | 81.07661 | 80.80495 | -2026.39012 | -1590.33709 | -887.82922  | 1 |
| 90  | C | 74.64303 | 78.92189 | 77.61029 | -672.89153  | 382.57394   | -156.34072  | 1 |
| 91  | O | 73.73931 | 78.14233 | 77.80697 | 410.04627   | 221.86223   | 500.35950   | 1 |
| 92  | N | 74.97786 | 79.47992 | 76.43856 | -378.11782  | -443.79414  | -441.10984  | 1 |
| 93  | H | 75.82964 | 80.03267 | 76.51227 | 2404.15973  | -568.14894  | 1149.30085  | 1 |
| 94  | C | 74.69307 | 78.62603 | 75.29837 | -544.54484  | 466.16019   | 331.29119   | 1 |
| 95  | H | 74.87879 | 77.59793 | 75.68280 | -1409.80988 | -170.17955  | 2325.32679  | 1 |
| 96  | C | 73.15902 | 78.86705 | 75.01688 | -184.48284  | 116.78282   | -758.89137  | 1 |
| 97  | H | 72.54966 | 78.37531 | 75.81310 | 1893.78641  | 1861.14652  | 611.04528   | 1 |
| 98  | H | 72.90363 | 79.95233 | 75.08457 | -2170.79665 | -974.19311  | 1327.50117  | 1 |
| 99  | C | 72.82522 | 78.28890 | 73.60580 | 389.51668   | 672.81878   | -138.49152  | 1 |
| 100 | H | 73.41355 | 78.83677 | 72.83263 | 510.64577   | 1933.03327  | 1851.02484  | 1 |
| 101 | H | 73.17198 | 77.23575 | 73.52343 | -2302.30869 | -1105.72939 | -948.89774  | 1 |
| 102 | C | 71.27812 | 78.36150 | 73.27791 | -559.93427  | -126.34590  | 542.30857   | 1 |
| 103 | O | 70.80257 | 77.61751 | 72.45716 | -670.36003  | -111.83166  | 76.36448    | 1 |
| 104 | N | 70.62626 | 79.32185 | 73.95729 | -216.06729  | -537.07037  | 446.51379   | 1 |
| 105 | H | 71.01891 | 80.07465 | 74.60024 | -1251.96487 | 1074.12894  | -2168.52500 | 1 |
| 106 | H | 69.62454 | 79.49734 | 73.80031 | -2451.83023 | -720.73851  | 944.84612   | 1 |
| 107 | C | 75.69511 | 79.05189 | 74.09542 | 546.24052   | -563.88337  | -85.11809   | 1 |
| 108 | O | 75.36979 | 79.91476 | 73.31846 | 71.70702    | -307.40463  | 606.69673   | 1 |
| 109 | N | 76.82561 | 78.33790 | 74.14211 | 479.90863   | -504.50129  | 222.86849   | 1 |
| 110 | C | 77.88063 | 78.53799 | 73.18927 | 75.51268    | -600.91904  | 506.73700   | 1 |
| 111 | H | 78.00475 | 79.63431 | 73.03027 | -2033.61562 | 1795.30103  | 254.89480   | 1 |
| 112 | C | 79.09816 | 77.79278 | 73.89828 | 523.79067   | 517.99274   | 284.45581   | 1 |
| 113 | H | 79.90908 | 77.51672 | 73.18798 | 1599.61665  | -1127.00911 | 1895.98173  | 1 |
| 114 | H | 79.56308 | 78.42272 | 74.68908 | -1881.83093 | 1275.82488  | -1501.55016 | 1 |
| 115 | C | 78.36973 | 76.55939 | 74.51097 | -600.05639  | -404.05026  | 316.64485   | 1 |
| 116 | H | 78.12180 | 75.80880 | 73.72661 | -2597.05260 | 496.36221   | 657.73249   | 1 |
| 117 | H | 78.96454 | 76.03085 | 75.28939 | -1666.24518 | 1294.38985  | -1723.90591 | 1 |
| 118 | C | 77.06133 | 77.25688 | 75.08650 | 493.57570   | -129.95376  | -602.56394  | 1 |
| 119 | H | 76.14973 | 76.61316 | 75.13352 | -1469.08415 | -637.84797  | 2204.22581  | 1 |
| 120 | H | 77.22108 | 77.76636 | 76.08574 | -1038.97840 | 1068.88701  | -2280.71789 | 1 |
| 121 | C | 77.49670 | 77.73066 | 71.83210 | 188.88100   | 241.05089   | -727.87821  | 1 |
| 122 | O | 76.63711 | 76.85551 | 71.79827 | 531.88613   | -49.19943   | 427.07960   | 1 |
| 123 | N | 78.30413 | 78.12812 | 70.87113 | 708.14833   | 26.93417    | -179.73509  | 1 |
| 124 | H | 78.98992 | 78.82659 | 71.14938 | -2232.69501 | -1179.09831 | 1023.94816  | 1 |
| 125 | C | 78.24443 | 77.56547 | 69.52478 | -738.32412  | 259.92548   | 104.42456   | 1 |
| 126 | H | 77.14360 | 77.50715 | 69.34864 | 2028.89123  | 1260.02983  | 1311.33324  | 1 |
| 127 | C | 79.00266 | 78.46979 | 68.56692 | -258.65678  | -345.52513  | 661.28459   | 1 |
| 128 | H | 80.06396 | 78.50293 | 68.90151 | -1826.06090 | -1801.46097 | -918.64554  | 1 |
| 129 | C | 78.97507 | 77.91539 | 67.15429 | -541.23400  | 531.92970   | -218.41428  | 1 |
| 130 | H | 79.56532 | 78.55549 | 66.44241 | 1311.73218  | -2219.18200 | 882.19023   | 1 |
| 131 | H | 79.41301 | 76.87667 | 67.11653 | -1048.71298 | 1223.58118  | -2196.97971 | 1 |
| 132 | H | 77.92573 | 77.85083 | 66.75446 | 419.06414   | 1903.92898  | 1903.44670  | 1 |
| 133 | C | 78.47292 | 79.89184 | 68.57691 | -423.86431  | 152.66566   | -648.55262  | 1 |
| 134 | H | 79.06523 | 80.56234 | 67.89529 | 105.68386   | -2342.50080 | 1387.51238  | 1 |
| 135 | H | 77.40136 | 79.93502 | 68.23860 | -1695.63603 | -1484.73621 | -1531.02793 | 1 |
| 136 | H | 78.51086 | 80.34260 | 69.60643 | -1853.57121 | -487.39031  | 1936.59343  | 1 |
| 137 | C | 78.92755 | 76.05082 | 69.61038 | 539.71428   | -510.58232  | 267.58633   | 1 |
| 138 | O | 79.96821 | 75.80664 | 69.05725 | -15.93758   | -278.34085  | -624.49402  | 1 |
| 139 | N | 78.15014 | 75.24651 | 70.31046 | -676.81886  | 12.05292    | 276.17960   | 1 |
| 140 | H | 77.28326 | 75.59857 | 70.78138 | -1694.44250 | -373.84189  | -2100.66098 | 1 |
| 141 | C | 78.59399 | 73.89146 | 70.44819 | 412.33078   | -664.70360  | 108.35451   | 1 |
| 142 | H | 79.07573 | 73.73808 | 69.45444 | 1765.77476  | 1294.44366  | 1621.76594  | 1 |
| 143 | C | 79.67834 | 73.82888 | 71.59856 | -179.66635  | -721.95667  | -264.73915  | 1 |
| 144 | H | 80.45982 | 74.60895 | 71.45644 | -607.34922  | 2587.87032  | -598.10018  | 1 |
| 145 | H | 79.23403 | 74.03374 | 72.59799 | -359.69332  | -1479.13954 | -2259.74260 | 1 |
| 146 | C | 80.28449 | 72.38684 | 71.50643 | -240.01076  | 616.02425   | 431.85322   | 1 |
| 147 | H | 79.47414 | 71.63045 | 71.39991 | -1359.17131 | 782.54425   | 2227.99181  | 1 |

|     |   |          |          |          |             |             |             |   |
|-----|---|----------|----------|----------|-------------|-------------|-------------|---|
| 148 | H | 80.91614 | 72.28498 | 70.59558 | -820.36667  | 85.81767    | -2596.78715 | 1 |
| 149 | C | 81.12093 | 72.09787 | 72.80998 | -513.07015  | 236.18570   | -551.87280  | 1 |
| 150 | H | 81.93546 | 72.84585 | 72.94261 | 1816.11944  | -1183.11722 | -1650.94321 | 1 |
| 151 | H | 80.48103 | 72.17450 | 73.71861 | -1800.04429 | -1361.53473 | 1526.34643  | 1 |
| 152 | C | 81.69344 | 70.65736 | 72.65583 | 726.08972   | -253.19732  | -179.64713  | 1 |
| 153 | H | 80.93715 | 69.89419 | 72.37184 | 1224.27271  | -456.51798  | -2390.90304 | 1 |
| 154 | H | 82.58179 | 70.57724 | 71.99447 | 1206.40339  | -1150.93514 | -2154.90344 | 1 |
| 155 | N | 82.14099 | 70.21134 | 74.04748 | 329.70796   | -633.68968  | -155.67358  | 1 |
| 156 | H | 82.60403 | 69.26636 | 74.08320 | 1348.31305  | 1938.76845  | 1359.00643  | 1 |
| 157 | H | 82.85355 | 70.79894 | 74.55248 | 2096.92035  | 1446.54551  | -966.48890  | 1 |
| 158 | H | 81.22861 | 70.10323 | 74.79379 | -1197.07217 | -2303.53719 | 827.28733   | 1 |
| 159 | C | 77.25206 | 72.98006 | 70.69363 | -378.01186  | -556.17301  | -413.96481  | 1 |
| 160 | O | 76.51462 | 72.82390 | 69.74822 | -409.44433  | -307.55053  | -453.30833  | 1 |
| 161 | N | 77.20653 | 72.39570 | 71.90067 | -429.02477  | 524.70884   | 274.08502   | 1 |
| 162 | H | 77.93700 | 72.77440 | 72.50593 | 1706.34263  | -1425.96036 | 1574.38926  | 1 |
| 163 | C | 75.93079 | 72.13480 | 72.53262 | -45.25864   | -626.22952  | 478.93267   | 1 |
| 164 | H | 75.79883 | 73.01565 | 73.19780 | 1988.63164  | 570.90773   | 1772.87287  | 1 |
| 165 | C | 74.77885 | 72.04417 | 71.46398 | 551.77128   | -20.49526   | -564.54996  | 1 |
| 166 | H | 74.61837 | 73.04779 | 71.00268 | 1434.61535  | -1753.10253 | 1513.99471  | 1 |
| 167 | H | 75.08426 | 71.37639 | 70.62242 | -714.67738  | 1819.09770  | 1898.36494  | 1 |
| 168 | C | 73.44354 | 71.52154 | 72.09462 | 446.99263   | -555.77305  | 338.97221   | 1 |
| 169 | H | 73.52125 | 70.42790 | 72.30868 | 1953.68466  | 1892.25957  | -161.67766  | 1 |
| 170 | H | 73.22677 | 72.01433 | 73.06910 | -403.03785  | 2688.07032  | -188.43591  | 1 |
| 171 | C | 72.30141 | 71.81132 | 71.03797 | 567.86262   | 335.74681   | 434.04421   | 1 |
| 172 | H | 72.05903 | 72.89814 | 70.98652 | -1080.02275 | 1568.26081  | -1948.78900 | 1 |
| 173 | H | 72.62410 | 71.51857 | 70.01208 | -919.54108  | 2111.34692  | 1456.13463  | 1 |
| 174 | C | 71.07954 | 70.97412 | 71.47745 | 195.81897   | 173.33862   | -745.11536  | 1 |
| 175 | H | 71.24413 | 69.87610 | 71.39968 | 1405.67949  | -2301.21089 | -390.08113  | 1 |
| 176 | H | 70.68368 | 71.23907 | 72.47820 | -940.37328  | -1118.32446 | 2299.72133  | 1 |
| 177 | N | 69.88104 | 71.24100 | 70.50582 | 319.26422   | 656.36007   | -42.02424   | 1 |
| 178 | H | 68.98828 | 70.70854 | 70.72465 | 1961.03633  | 619.91968   | 1787.09422  | 1 |
| 179 | H | 69.52008 | 72.23669 | 70.44208 | 854.14343   | -2156.80752 | 1429.08711  | 1 |
| 180 | H | 70.02627 | 70.99202 | 69.48483 | 1237.02905  | -1378.50857 | -1998.28500 | 1 |
| 181 | C | 76.03657 | 70.79160 | 73.42668 | 532.53319   | -268.57236  | 517.55729   | 1 |
| 182 | O | 75.05016 | 70.39567 | 74.00642 | 266.16714   | -290.73804  | -558.88002  | 1 |
| 183 | N | 77.30402 | 70.31541 | 73.56989 | -226.25352  | 640.49678   | -270.32839  | 1 |
| 184 | H | 77.89317 | 70.92072 | 72.98997 | 2007.69063  | -1035.27229 | 1523.50231  | 1 |
| 185 | C | 77.57144 | 68.89405 | 73.35809 | -540.76542  | -573.33303  | 49.50000    | 1 |
| 186 | H | 78.04775 | 68.91399 | 72.35308 | -2374.20950 | -1036.76023 | 843.75774   | 1 |
| 187 | C | 78.57209 | 68.48414 | 74.44855 | -77.09082   | 666.87422   | -415.84136  | 1 |
| 188 | H | 78.13473 | 68.55686 | 75.46777 | -985.81834  | 617.19825   | 2463.91927  | 1 |
| 189 | O | 79.90541 | 69.46806 | 74.83150 | 293.29899   | -391.65602  | -477.80926  | 1 |
| 190 | H | 79.59977 | 69.74605 | 75.69445 | 2528.72714  | -681.76262  | -751.27122  | 1 |
| 191 | C | 79.06921 | 67.06870 | 74.09418 | 252.47363   | -605.14473  | 440.05134   | 1 |
| 192 | H | 79.65064 | 66.61953 | 74.93745 | -2052.65063 | 1456.49051  | -1043.51830 | 1 |
| 193 | H | 78.22081 | 66.38178 | 73.85755 | -2152.98800 | -1661.97574 | -161.70652  | 1 |
| 194 | H | 79.73805 | 67.08918 | 73.19836 | -473.12726  | -1584.27339 | 2165.61725  | 1 |
| 195 | C | 76.23929 | 67.92248 | 73.39026 | 360.36307   | 488.46713   | 505.10056   | 1 |
| 196 | O | 75.85238 | 67.40167 | 74.41599 | -200.08817  | -528.03552  | -385.82850  | 1 |
| 197 | N | 75.81742 | 67.75698 | 72.15108 | -597.54095  | -226.44775  | 355.20479   | 1 |
| 198 | H | 76.30381 | 68.28313 | 71.42650 | 2179.23655  | -1300.70981 | -991.33835  | 1 |
| 199 | C | 74.67680 | 66.98363 | 71.82604 | -687.68921  | 297.39807   | -249.45179  | 1 |
| 200 | H | 74.81955 | 66.80098 | 70.73896 | -349.16256  | -2467.37713 | -1101.72831 | 1 |
| 201 | C | 74.59904 | 65.64875 | 72.69913 | 672.47345   | 361.54328   | -201.62880  | 1 |
| 202 | H | 74.50639 | 65.89301 | 73.78831 | 1541.41502  | 582.18425   | 2169.97026  | 1 |
| 203 | H | 73.68127 | 65.08261 | 72.41664 | -2534.67717 | 60.25153    | 997.72295   | 1 |
| 204 | C | 75.84817 | 64.77910 | 72.48491 | 574.26774   | -389.43119  | -377.02542  | 1 |
| 205 | C | 76.09945 | 64.08746 | 71.26262 | 688.82679   | -287.33580  | -257.96133  | 1 |
| 206 | H | 75.40134 | 64.16981 | 70.40986 | 331.14182   | 1470.38163  | 2269.80013  | 1 |
| 207 | C | 76.75276 | 64.66927 | 73.58235 | -383.52382  | -675.04808  | 144.24917   | 1 |
| 208 | H | 76.55128 | 65.22301 | 74.52048 | 4.09847     | 1517.59662  | 2262.86397  | 1 |
| 209 | C | 77.24682 | 63.29872 | 71.17483 | -134.76730  | 428.45285   | -649.50303  | 1 |

|     |   |          |          |          |             |             |             |   |
|-----|---|----------|----------|----------|-------------|-------------|-------------|---|
| 210 | H | 77.44398 | 62.75659 | 70.23354 | -903.23433  | 1600.49020  | 2011.53387  | 1 |
| 211 | C | 77.88860 | 63.86711 | 73.44522 | -335.53281  | -615.00040  | -364.39058  | 1 |
| 212 | H | 78.58221 | 63.78845 | 74.30062 | 1596.45398  | -1369.33862 | 1732.02659  | 1 |
| 213 | C | 78.17646 | 63.15345 | 72.24540 | 585.48547   | -340.24194  | -406.23938  | 1 |
| 214 | O | 79.32626 | 62.33510 | 72.09046 | -419.15649  | -173.04408  | -511.94141  | 1 |
| 215 | H | 79.71702 | 62.42446 | 72.99124 | -1071.84350 | 1559.71507  | -1960.13012 | 1 |
| 216 | C | 73.33949 | 67.90036 | 72.08153 | 291.41878   | -183.13091  | 710.72246   | 1 |
| 217 | O | 72.91094 | 68.55308 | 71.15379 | 379.87695   | 523.47396   | -222.23622  | 1 |
| 218 | N | 72.84339 | 67.78092 | 73.30305 | 564.30591   | 373.09380   | 277.24371   | 1 |
| 219 | H | 73.37731 | 67.27139 | 74.00423 | -120.59931  | -2436.07824 | -1214.35098 | 1 |
| 220 | C | 71.65464 | 68.52791 | 73.61658 | 404.07514   | -299.37480  | 608.84009   | 1 |
| 221 | H | 71.89378 | 69.57489 | 73.33075 | -1071.07882 | -841.69025  | 2359.66467  | 1 |
| 222 | C | 70.49933 | 67.90195 | 72.73244 | -683.12807  | 68.71770    | -390.13096  | 1 |
| 223 | H | 70.79802 | 67.88091 | 71.65899 | 2068.88918  | 1596.58590  | 770.89603   | 1 |
| 224 | H | 70.32333 | 66.83795 | 73.00774 | 1379.86429  | 2342.49779  | -179.85638  | 1 |
| 225 | C | 69.20227 | 68.74511 | 72.93228 | -176.39967  | 537.49466   | 550.97268   | 1 |
| 226 | H | 68.78216 | 68.60617 | 73.95348 | -396.28051  | 1942.22168  | 1869.33314  | 1 |
| 227 | H | 69.40702 | 69.83310 | 72.84335 | -94.44700   | 586.00678   | -2659.20016 | 1 |
| 228 | C | 68.18570 | 68.26055 | 71.79917 | -291.69381  | -718.18079  | -150.72929  | 1 |
| 229 | H | 68.57397 | 68.32539 | 70.75050 | -2303.38776 | 1089.76242  | 964.62032   | 1 |
| 230 | H | 67.74933 | 67.23903 | 71.93886 | 884.16729   | 2568.80533  | -207.74283  | 1 |
| 231 | N | 67.15331 | 69.20204 | 71.91942 | -594.49522  | -252.81478  | 342.29276   | 1 |
| 232 | H | 67.29306 | 69.95001 | 72.58097 | -1735.17426 | 2084.05705  | -263.71605  | 1 |
| 233 | C | 66.06934 | 69.17117 | 71.25569 | 595.23177   | -271.52487  | 442.22352   | 1 |
| 234 | N | 65.89570 | 68.12668 | 70.34100 | 585.53813   | -424.79750  | -105.81303  | 1 |
| 235 | H | 66.52108 | 67.35404 | 70.11573 | 959.88797   | 1327.56823  | -2177.11905 | 1 |
| 236 | H | 65.06980 | 67.99106 | 69.75724 | 1578.48647  | 16.27378    | -2220.76233 | 1 |
| 237 | N | 65.23990 | 70.24844 | 71.59786 | -452.17763  | -390.33541  | -421.51853  | 1 |
| 238 | H | 65.36383 | 70.99939 | 72.27527 | 470.26107   | 1974.25629  | -1817.92087 | 1 |
| 239 | H | 64.31716 | 70.39391 | 71.18641 | 1856.67307  | -1573.97321 | -1224.35416 | 1 |
| 240 | C | 71.26332 | 68.35267 | 75.18408 | -531.47271  | -581.45780  | -55.06206   | 1 |
| 241 | O | 70.90883 | 69.30410 | 75.83762 | -243.00837  | 192.73507   | 609.52485   | 1 |
| 242 | N | 71.21567 | 67.05572 | 75.53330 | 343.49288   | -644.25607  | 38.09164    | 1 |
| 243 | H | 71.59968 | 66.41290 | 74.84010 | -1691.16043 | -1535.97525 | -1484.73099 | 1 |
| 244 | C | 71.10484 | 66.71009 | 76.94678 | 542.66492   | 350.14337   | 454.42563   | 1 |
| 245 | H | 70.82452 | 67.67374 | 77.43939 | 1209.57979  | -2396.95920 | 463.86744   | 1 |
| 246 | C | 70.06779 | 65.60657 | 77.07380 | -737.14309  | 145.93010   | 242.71942   | 1 |
| 247 | H | 70.38401 | 64.76443 | 76.41890 | -1050.18303 | 159.36419   | -2509.06125 | 1 |
| 248 | C | 69.97546 | 65.09230 | 78.49794 | -706.77696  | -252.88343  | -245.16230  | 1 |
| 249 | H | 69.21672 | 64.26696 | 78.59479 | -1624.64039 | -1665.49085 | 1417.86935  | 1 |
| 250 | H | 70.96260 | 64.68491 | 78.85464 | 2566.10521  | 598.51109   | 693.22305   | 1 |
| 251 | H | 69.67581 | 65.90701 | 79.21413 | -1972.69758 | 107.10018   | -1876.34312 | 1 |
| 252 | C | 68.70584 | 66.07637 | 76.59584 | 412.85148   | 672.58832   | -27.69222   | 1 |
| 253 | H | 67.94304 | 65.25009 | 76.62010 | 1447.02277  | 1762.76533  | -1490.78944 | 1 |
| 254 | H | 68.31162 | 66.91389 | 77.23538 | 1320.77379  | -145.20455  | 2378.68491  | 1 |
| 255 | H | 68.75312 | 66.46338 | 75.54016 | -1512.10848 | 1470.52031  | 1724.75147  | 1 |
| 256 | C | 72.61853 | 66.14584 | 77.36626 | -607.11113  | 499.56689   | 73.73769    | 1 |
| 257 | O | 73.11114 | 65.18079 | 76.83782 | 357.97126   | 460.81534   | 356.68785   | 1 |
| 258 | N | 73.09988 | 66.90660 | 78.33385 | 536.55407   | -368.62270  | 332.76306   | 1 |
| 259 | H | 72.54058 | 67.68804 | 78.67255 | 524.38866   | 2297.69985  | 1367.20941  | 1 |
| 260 | C | 74.34628 | 66.57213 | 78.92435 | 46.50277    | -774.29190  | -147.97904  | 1 |
| 261 | H | 74.64609 | 65.59153 | 78.48191 | 1676.51875  | 1883.29066  | 1032.55549  | 1 |
| 262 | C | 75.35188 | 67.77303 | 78.61733 | -559.41456  | -34.19198   | -556.30433  | 1 |
| 263 | H | 74.86932 | 68.74089 | 78.87621 | -64.66664   | 395.18769   | 2695.05373  | 1 |
| 264 | H | 76.26575 | 67.70678 | 79.24793 | -2703.44278 | -60.40056   | 333.79418   | 1 |
| 265 | C | 75.72621 | 67.73718 | 77.09978 | -519.76435  | 377.31045   | 459.42366   | 1 |
| 266 | H | 74.85512 | 67.43592 | 76.47137 | -1746.74323 | 1667.50644  | -1261.73691 | 1 |
| 267 | C | 76.17457 | 69.19333 | 76.71053 | 570.95554   | 16.46261    | -545.27700  | 1 |
| 268 | H | 76.27489 | 69.30860 | 75.60083 | 2391.58273  | 28.05277    | -1305.07271 | 1 |
| 269 | H | 75.42665 | 69.95219 | 77.03855 | 175.75588   | 917.63458   | 2559.43867  | 1 |
| 270 | H | 77.15092 | 69.46539 | 77.17520 | -1063.97851 | -2155.34650 | 1283.00462  | 1 |
| 271 | C | 76.90128 | 66.70154 | 76.95326 | 193.76014   | 2.62946     | -765.53141  | 1 |

|     |   |          |          |          |             |             |             |   |
|-----|---|----------|----------|----------|-------------|-------------|-------------|---|
| 272 | H | 77.30166 | 66.68018 | 75.91194 | 507.39394   | -846.55087  | 2539.60089  | 1 |
| 273 | H | 77.75296 | 66.94089 | 77.63105 | 1337.57841  | 1818.19054  | 1526.01994  | 1 |
| 274 | H | 76.56337 | 65.66651 | 77.19335 | 1100.88635  | -1172.91350 | -2199.08909 | 1 |
| 275 | C | 74.14041 | 66.58534 | 80.53807 | -549.21115  | 475.64486   | -309.38218  | 1 |
| 276 | O | 73.23854 | 67.16318 | 81.08400 | 556.06106   | -390.37755  | -78.24250   | 1 |
| 277 | O | 75.17340 | 65.98292 | 81.28900 | -572.27940  | -310.19032  | -209.75862  | 1 |
| 278 | H | 75.72451 | 65.63039 | 80.53281 | -1380.08193 | 2212.14486  | 790.85944   | 1 |

Listing 110: C00110.xmolout

|    |   |          |          |          |             |             |             |        |          |
|----|---|----------|----------|----------|-------------|-------------|-------------|--------|----------|
| 1  |   | 276      |          |          |             |             |             |        |          |
| 2  |   | 150.0000 | 150.0000 | 150.0000 | 0.0000      | 0.0000      | 0.0000***** | 2.7750 | 11100    |
|    |   | 0.2500   | 300.00   | 0.00     | 0.00        | 0.00        | -1293.4019  | 0.0000 | 300.0000 |
| 3  | H | 78.54615 | 64.31219 | 79.81565 | -2043.14101 | -1757.64893 | 399.89339   |        | 1        |
| 4  | N | 78.26460 | 65.29048 | 79.78473 | 426.75047   | 490.45733   | -334.42467  |        | 1        |
| 5  | H | 77.43313 | 65.25726 | 79.19856 | 442.25559   | -1110.30854 | -2448.52907 |        | 1        |
| 6  | C | 79.25782 | 66.19042 | 79.34363 | 415.32972   | -666.39213  | 83.73172    |        | 1        |
| 7  | H | 80.17129 | 65.85260 | 79.87675 | 879.32219   | 2491.00447  | 667.35213   |        | 1        |
| 8  | C | 79.38506 | 66.13986 | 77.74338 | 31.35357    | 477.41777   | 628.23362   |        | 1        |
| 9  | H | 78.44619 | 66.55075 | 77.29904 | 1168.38489  | 2240.25337  | -1019.71136 |        | 1        |
| 10 | H | 80.19969 | 66.82947 | 77.41499 | -360.43770  | 2534.90498  | 931.67112   |        | 1        |
| 11 | C | 79.63668 | 64.74150 | 77.23256 | 463.18208   | 512.70242   | -382.34388  |        | 1        |
| 12 | H | 78.82086 | 64.07725 | 77.59484 | 1725.29117  | 1863.52247  | -987.07854  |        | 1        |
| 13 | C | 79.62092 | 64.73389 | 75.70915 | 710.42801   | -144.27427  | -313.15367  |        | 1        |
| 14 | H | 79.78205 | 63.70399 | 75.29782 | 364.20195   | -1033.13725 | 2494.72524  |        | 1        |
| 15 | H | 78.64491 | 65.10574 | 75.30274 | 2567.61904  | 335.80679   | 847.48802   |        | 1        |
| 16 | H | 80.42635 | 65.38859 | 75.28642 | -2587.99029 | 680.92867   | -512.16411  |        | 1        |
| 17 | C | 80.96571 | 64.19341 | 77.73180 | 268.17616   | 741.64379   | -40.42634   |        | 1        |
| 18 | H | 81.17201 | 63.17178 | 77.31910 | 1283.54314  | -1945.37420 | -1411.27812 |        | 1        |
| 19 | H | 81.82173 | 64.85116 | 77.43051 | -1258.57796 | 1317.15249  | -2026.02085 |        | 1        |
| 20 | H | 80.98784 | 64.10992 | 78.84902 | -2502.84526 | 909.80597   | 575.92391   |        | 1        |
| 21 | C | 78.74930 | 67.69937 | 79.75656 | 619.36578   | -458.64843  | -172.09273  |        | 1        |
| 22 | O | 78.27008 | 68.44550 | 78.93419 | -81.40433   | 433.87611   | 522.34594   |        | 1        |
| 23 | N | 78.99659 | 67.89547 | 81.04574 | 175.23996   | -622.20190  | 341.55523   |        | 1        |
| 24 | H | 79.45734 | 67.12325 | 81.52750 | -876.57256  | -303.22879  | -2561.90213 |        | 1        |
| 25 | C | 78.43888 | 68.96519 | 81.79367 | -571.88214  | -534.10783  | -106.15033  |        | 1        |
| 26 | H | 78.88939 | 68.81243 | 82.79953 | -2713.20841 | -16.25800   | -248.80809  |        | 1        |
| 27 | C | 78.87659 | 70.34178 | 81.11085 | 166.60354   | 288.16399   | -716.09568  |        | 1        |
| 28 | H | 78.36553 | 70.40014 | 80.10877 | -2097.85574 | 1636.78449  | -586.18044  |        | 1        |
| 29 | O | 80.28862 | 70.49208 | 80.87253 | -317.80580  | -363.38227  | 484.43082   |        | 1        |
| 30 | H | 80.31425 | 70.46583 | 79.89511 | 1863.74748  | -1451.84923 | 1357.29467  |        | 1        |
| 31 | C | 78.26235 | 71.40198 | 82.09846 | 503.80731   | 517.99032   | 318.51606   |        | 1        |
| 32 | H | 78.41769 | 72.44015 | 81.72498 | 640.61020   | -2157.10410 | -1536.29104 |        | 1        |
| 33 | H | 77.16407 | 71.26285 | 82.24820 | 1687.88455  | 465.60692   | 2087.56452  |        | 1        |
| 34 | H | 78.73913 | 71.34190 | 83.10451 | -1293.07895 | -1899.88581 | -1463.57452 |        | 1        |
| 35 | C | 76.80835 | 68.81375 | 81.81515 | -153.07550  | -733.68902  | 248.70981   |        | 1        |
| 36 | O | 76.12534 | 69.57632 | 81.18194 | 186.15459   | -480.78787  | -449.34387  |        | 1        |
| 37 | N | 76.43140 | 67.79167 | 82.59589 | -487.53139  | 543.18517   | 42.03850    |        | 1        |
| 38 | C | 75.11686 | 67.74001 | 83.16669 | -699.35871  | 69.34393    | 360.10701   |        | 1        |
| 39 | H | 74.43788 | 68.11211 | 82.35769 | 2.81126     | -221.99807  | -2715.58072 |        | 1        |
| 40 | C | 74.96038 | 66.19460 | 83.51244 | -507.46439  | -592.59194  | 122.07761   |        | 1        |
| 41 | H | 74.19812 | 65.99002 | 84.29611 | -1975.08116 | 525.87560   | -1801.71556 |        | 1        |
| 42 | H | 74.65707 | 65.60933 | 82.61608 | 1588.27743  | -1913.22100 | 1113.83566  |        | 1        |
| 43 | C | 76.40805 | 65.82845 | 83.95923 | -613.62442  | -457.55993  | -194.14490  |        | 1        |
| 44 | H | 76.60136 | 66.17710 | 84.99859 | 1707.54637  | -721.27992  | 1996.92523  |        | 1        |
| 45 | H | 76.61607 | 64.73470 | 83.94830 | 758.23357   | 2100.81767  | 1560.55011  |        | 1        |
| 46 | C | 77.26967 | 66.64141 | 82.89743 | -352.41524  | 704.96076   | 49.21465    |        | 1        |
| 47 | H | 78.25523 | 67.00071 | 83.27306 | 1714.76886  | -2070.42778 | 443.35792   |        | 1        |
| 48 | H | 77.41815 | 66.12526 | 81.91825 | 1224.15040  | 1801.50881  | 1636.97633  |        | 1        |
| 49 | C | 75.11506 | 68.72371 | 84.46495 | 566.85117   | 537.05831   | 117.62814   |        | 1        |
| 50 | O | 75.95390 | 69.61489 | 84.58424 | -550.26779  | -406.08867  | 4.21666     |        | 1        |
| 51 | N | 74.07607 | 68.45199 | 85.22256 | 566.34832   | -425.77725  | 180.18749   |        | 1        |



|     |   |          |          |          |             |             |             |   |
|-----|---|----------|----------|----------|-------------|-------------|-------------|---|
| 52  | H | 73.49734 | 67.68425 | 84.88739 | 644.44502   | 2646.80550  | -52.73430   | 1 |
| 53  | C | 73.94336 | 68.90817 | 86.55993 | 612.34801   | -281.48662  | 411.56221   | 1 |
| 54  | H | 73.14138 | 68.26164 | 86.97912 | 1667.23498  | -1490.75142 | 1556.16753  | 1 |
| 55  | C | 75.34563 | 68.73536 | 87.31088 | -714.45746  | -175.43074  | 286.98927   | 1 |
| 56  | H | 76.12605 | 69.36258 | 86.79283 | -787.09484  | 1763.03619  | -1922.46060 | 1 |
| 57  | O | 75.88564 | 67.40159 | 87.33935 | -429.46514  | 516.51932   | -128.40526  | 1 |
| 58  | H | 76.72615 | 67.53260 | 86.85385 | 1981.82785  | 436.16847   | -1818.18182 | 1 |
| 59  | C | 75.02064 | 69.38140 | 88.70736 | 630.79189   | -468.94448  | 76.03230    | 1 |
| 60  | H | 75.93151 | 69.44724 | 89.34665 | -1775.71861 | 2062.30353  | 131.89849   | 1 |
| 61  | H | 74.61423 | 70.41500 | 88.60196 | -1855.14608 | 88.94118    | 1993.53760  | 1 |
| 62  | H | 74.26556 | 68.78250 | 89.26731 | -1504.82350 | -780.94249  | -2132.90992 | 1 |
| 63  | C | 73.50562 | 70.48884 | 86.53400 | 288.57638   | 618.62814   | -397.00270  | 1 |
| 64  | O | 72.44116 | 70.80820 | 87.00295 | 321.70495   | -185.26452  | 574.37218   | 1 |
| 65  | N | 74.46629 | 71.25486 | 86.03292 | -447.05792  | -446.53431  | 367.76425   | 1 |
| 66  | H | 75.33684 | 70.84287 | 85.60618 | 350.31316   | 1975.63644  | -1843.31522 | 1 |
| 67  | C | 74.15156 | 72.61878 | 85.79850 | -511.23061  | 374.03917   | -471.51480  | 1 |
| 68  | H | 73.11094 | 72.73533 | 86.18831 | 2234.79579  | -898.70890  | -1273.45190 | 1 |
| 69  | C | 75.25006 | 73.49491 | 86.55680 | 529.53781   | -159.34528  | 563.72604   | 1 |
| 70  | H | 74.89275 | 74.55769 | 86.50350 | 654.59388   | 2347.94251  | 1217.51488  | 1 |
| 71  | H | 75.25220 | 73.22581 | 87.64530 | -1526.55661 | 2103.42026  | 817.87394   | 1 |
| 72  | O | 76.59496 | 73.40859 | 86.03642 | -554.84278  | 14.12789    | 399.58769   | 1 |
| 73  | H | 76.40454 | 73.57016 | 85.07093 | 1297.06236  | 2061.84854  | 1220.68812  | 1 |
| 74  | C | 74.31831 | 72.83625 | 84.18243 | -662.15484  | -412.13544  | 123.62687   | 1 |
| 75  | O | 75.21877 | 73.47897 | 83.68002 | -540.01537  | -317.05804  | 274.91456   | 1 |
| 76  | N | 73.25701 | 72.26136 | 83.55571 | -202.76299  | -690.00100  | -131.49145  | 1 |
| 77  | H | 72.81269 | 71.73776 | 84.32176 | -702.62132  | -2617.37191 | 281.70413   | 1 |
| 78  | C | 73.47835 | 71.59070 | 82.24875 | -491.73914  | 576.34187   | 222.73509   | 1 |
| 79  | H | 74.39795 | 70.97280 | 82.37304 | 1977.17978  | -1823.58850 | -434.68928  | 1 |
| 80  | C | 72.22019 | 70.80395 | 81.97656 | -649.50797  | -328.66843  | 306.11224   | 1 |
| 81  | H | 71.36308 | 71.39069 | 82.37895 | 2075.07803  | 1452.16490  | -1004.45904 | 1 |
| 82  | C | 71.99348 | 70.61105 | 80.48722 | -615.18735  | -489.99689  | -70.96352   | 1 |
| 83  | H | 71.05008 | 70.03637 | 80.27682 | -1226.32661 | -1724.38906 | -1716.47170 | 1 |
| 84  | H | 71.90743 | 71.60709 | 79.96367 | 2381.64273  | -969.84735  | 900.46860   | 1 |
| 85  | H | 72.84301 | 70.05044 | 80.00763 | 2122.74991  | 1702.23946  | -141.36228  | 1 |
| 86  | C | 72.23185 | 69.45487 | 82.67179 | -501.86074  | -479.61276  | -376.42482  | 1 |
| 87  | H | 71.24887 | 68.91884 | 82.56241 | 993.79261   | -2246.95401 | -1177.81305 | 1 |
| 88  | H | 73.03132 | 68.78477 | 82.23546 | 42.71279    | -626.15391  | -2651.37258 | 1 |
| 89  | H | 72.44201 | 69.55512 | 83.77332 | -2026.39012 | -1590.33709 | -887.82922  | 1 |
| 90  | C | 73.62692 | 72.77413 | 81.11623 | -672.89153  | 382.57394   | -156.34072  | 1 |
| 91  | O | 72.71447 | 73.53523 | 80.89150 | 410.04627   | 221.86223   | 500.35950   | 1 |
| 92  | N | 74.75533 | 72.62825 | 80.42162 | -378.11782  | -443.79414  | -441.10984  | 1 |
| 93  | H | 75.40973 | 71.91295 | 80.74167 | 2404.15973  | -568.14894  | 1149.30085  | 1 |
| 94  | C | 75.20151 | 73.80260 | 79.72567 | -544.54484  | 466.16019   | 331.29119   | 1 |
| 95  | H | 74.25504 | 74.37760 | 79.58217 | -1409.80988 | -170.17955  | 2325.32679  | 1 |
| 96  | C | 76.19507 | 74.51227 | 80.73784 | -184.48284  | 116.78282   | -758.89137  | 1 |
| 97  | H | 75.73319 | 74.56804 | 81.75401 | 1893.78641  | 1861.14652  | 611.04528   | 1 |
| 98  | H | 77.12623 | 73.91529 | 80.86081 | -2170.79665 | -974.19311  | 1327.50117  | 1 |
| 99  | C | 76.52019 | 75.92976 | 80.17525 | 389.51668   | 672.81878   | -138.49152  | 1 |
| 100 | H | 76.97126 | 75.83759 | 79.15955 | 510.64577   | 1933.03327  | 1851.02484  | 1 |
| 101 | H | 75.58012 | 76.50070 | 80.00731 | -2302.30869 | -1105.72939 | -948.89774  | 1 |
| 102 | C | 77.48326 | 76.76143 | 81.10525 | -559.93427  | -126.34590  | 542.30857   | 1 |
| 103 | O | 77.91539 | 77.81463 | 80.71379 | -670.36003  | -111.83166  | 76.36448    | 1 |
| 104 | N | 77.71966 | 76.19592 | 82.30848 | -216.06729  | -537.07037  | 446.51379   | 1 |
| 105 | H | 77.35098 | 75.32659 | 82.71219 | -1251.96487 | 1074.12894  | -2168.52500 | 1 |
| 106 | H | 78.29227 | 76.62909 | 83.04123 | -2451.83023 | -720.73851  | 944.84612   | 1 |
| 107 | C | 75.92868 | 73.38642 | 78.32949 | 546.24052   | -563.88337  | -85.11809   | 1 |
| 108 | O | 77.02677 | 73.81773 | 78.09363 | 71.70702    | -307.40463  | 606.69673   | 1 |
| 109 | N | 75.12908 | 72.64661 | 77.53972 | 479.90863   | -504.50129  | 222.86849   | 1 |
| 110 | C | 75.61623 | 72.03199 | 76.35004 | 75.51268    | -600.91904  | 506.73700   | 1 |
| 111 | H | 76.71807 | 71.92971 | 76.47704 | -2033.61562 | 1795.30103  | 254.89480   | 1 |
| 112 | C | 74.76924 | 70.68937 | 76.34508 | 523.79067   | 517.99274   | 284.45581   | 1 |
| 113 | H | 74.74377 | 70.19770 | 75.34724 | 1599.61665  | -1127.00911 | 1895.98173  | 1 |

|     |   |          |          |          |             |             |             |   |
|-----|---|----------|----------|----------|-------------|-------------|-------------|---|
| 114 | H | 75.18588 | 69.94605 | 77.06125 | -1881.83093 | 1275.82488  | -1501.55016 | 1 |
| 115 | C | 73.37038 | 71.19950 | 76.81349 | -600.05639  | -404.05026  | 316.64485   | 1 |
| 116 | H | 72.83105 | 71.71346 | 75.98284 | -2597.05260 | 496.36221   | 657.73249   | 1 |
| 117 | H | 72.69674 | 70.39291 | 77.18197 | -1666.24518 | 1294.38985  | -1723.90591 | 1 |
| 118 | C | 73.79321 | 72.22673 | 77.94756 | 493.57570   | -129.95376  | -602.56394  | 1 |
| 119 | H | 73.15091 | 73.13508 | 78.03518 | -1469.08415 | -637.84797  | 2204.22581  | 1 |
| 120 | H | 73.93235 | 71.77658 | 78.96041 | -1038.97840 | 1068.88701  | -2280.71789 | 1 |
| 121 | C | 75.18648 | 72.93527 | 75.04518 | 188.88100   | 241.05089   | -727.87821  | 1 |
| 122 | O | 74.07874 | 72.88146 | 74.57025 | 531.88613   | -49.19943   | 427.07960   | 1 |
| 123 | N | 76.27224 | 73.60303 | 74.52565 | 708.14833   | 26.93417    | -179.73509  | 1 |
| 124 | H | 76.94573 | 73.51351 | 75.29870 | -2232.69501 | -1179.09831 | 1023.94816  | 1 |
| 125 | C | 76.01911 | 74.95388 | 73.96010 | -738.32412  | 259.92548   | 104.42456   | 1 |
| 126 | H | 75.48091 | 75.49389 | 74.77170 | 2028.89123  | 1260.02983  | 1311.33324  | 1 |
| 127 | C | 77.36389 | 75.54679 | 73.63021 | -258.65678  | -345.52513  | 661.28459   | 1 |
| 128 | H | 77.97097 | 74.75374 | 73.13716 | -1826.06090 | -1801.46097 | -918.64554  | 1 |
| 129 | C | 77.25183 | 76.71576 | 72.66593 | -541.23400  | 531.92970   | -218.41428  | 1 |
| 130 | H | 78.26231 | 77.11830 | 72.38055 | 1311.73218  | -2219.18200 | 882.19023   | 1 |
| 131 | H | 76.73092 | 76.41778 | 71.71314 | -1048.71298 | 1223.58118  | -2196.97971 | 1 |
| 132 | H | 76.66663 | 77.56675 | 73.10981 | 419.06414   | 1903.92898  | 1903.44670  | 1 |
| 133 | C | 78.11727 | 75.99105 | 74.87308 | -423.86431  | 152.66566   | -648.55262  | 1 |
| 134 | H | 79.15082 | 76.35721 | 74.62341 | 105.68386   | -2342.50080 | 1387.51238  | 1 |
| 135 | H | 77.58655 | 76.83005 | 75.40066 | -1695.63603 | -1484.73621 | -1531.02793 | 1 |
| 136 | H | 78.23032 | 75.15406 | 75.61554 | -1853.57121 | -487.39031  | 1936.59343  | 1 |
| 137 | C | 75.09278 | 74.80989 | 72.60873 | 539.71428   | -510.58232  | 267.58633   | 1 |
| 138 | O | 74.15812 | 75.61568 | 72.43372 | -15.93758   | -278.34085  | -624.49402  | 1 |
| 139 | N | 75.55236 | 73.91187 | 71.77069 | -676.81886  | 12.05292    | 276.17960   | 1 |
| 140 | H | 76.35902 | 73.48446 | 72.23420 | -1694.44250 | -373.84189  | -2100.66098 | 1 |
| 141 | C | 74.72955 | 73.19062 | 70.85955 | 412.33078   | -664.70360  | 108.35451   | 1 |
| 142 | H | 75.45168 | 72.45880 | 70.43613 | 1765.77476  | 1294.44366  | 1621.76594  | 1 |
| 143 | C | 73.62018 | 72.48019 | 71.73072 | -179.66635  | -721.95667  | -264.73915  | 1 |
| 144 | H | 74.08952 | 71.85540 | 72.52616 | -607.34922  | 2587.87032  | -598.10018  | 1 |
| 145 | H | 72.99595 | 73.21598 | 72.28697 | -359.69332  | -1479.13954 | -2259.74260 | 1 |
| 146 | C | 72.76867 | 71.61342 | 70.74321 | -240.01076  | 616.02425   | 431.85322   | 1 |
| 147 | H | 72.11111 | 72.26075 | 70.12083 | -1359.17131 | 782.54425   | 2227.99181  | 1 |
| 148 | H | 73.43031 | 71.07808 | 70.02634 | -820.36667  | 85.81767    | -2596.78715 | 1 |
| 149 | C | 71.91481 | 70.57286 | 71.57180 | -513.07015  | 236.18570   | -551.87280  | 1 |
| 150 | H | 72.57341 | 69.90549 | 72.17408 | 1816.11944  | -1183.11722 | -1650.94321 | 1 |
| 151 | H | 71.25138 | 71.08746 | 72.30437 | -1800.04429 | -1361.53473 | 1526.34643  | 1 |
| 152 | C | 71.09236 | 69.75973 | 70.54419 | 726.08972   | -253.19732  | -179.64713  | 1 |
| 153 | H | 70.30594 | 70.33982 | 70.02150 | 1224.27271  | -456.51798  | -2390.90304 | 1 |
| 154 | H | 71.70164 | 69.20090 | 69.80600 | 1206.40339  | -1150.93514 | -2154.90344 | 1 |
| 155 | N | 70.31565 | 68.64625 | 71.32337 | 329.70796   | -633.68968  | -155.67358  | 1 |
| 156 | H | 69.69853 | 68.02037 | 70.72927 | 1348.31305  | 1938.76845  | 1359.00643  | 1 |
| 157 | H | 70.89748 | 67.92739 | 71.84451 | 2096.92035  | 1446.54551  | -966.48890  | 1 |
| 158 | H | 69.63314 | 68.96224 | 72.07227 | -1197.07217 | -2303.53719 | 827.28733   | 1 |
| 159 | C | 74.11572 | 74.17219 | 69.68917 | -378.01186  | -556.17301  | -413.96481  | 1 |
| 160 | O | 74.78161 | 74.35617 | 68.69780 | -409.44433  | -307.55053  | -453.30833  | 1 |
| 161 | N | 72.89294 | 74.60674 | 69.95639 | -429.02477  | 524.70884   | 274.08502   | 1 |
| 162 | H | 72.49761 | 74.39688 | 70.87107 | 1706.34263  | -1425.96036 | 1574.38926  | 1 |
| 163 | C | 72.20869 | 75.42416 | 69.01717 | -45.25864   | -626.22952  | 478.93267   | 1 |
| 164 | H | 72.88057 | 75.46051 | 68.12553 | 1988.63164  | 570.90773   | 1772.87287  | 1 |
| 165 | C | 70.81204 | 74.71045 | 68.75191 | 551.77128   | -20.49526   | -564.54996  | 1 |
| 166 | H | 70.95473 | 73.63543 | 68.50436 | 1434.61535  | -1753.10253 | 1513.99471  | 1 |
| 167 | H | 70.21157 | 74.71945 | 69.68827 | -714.67738  | 1819.09770  | 1898.36494  | 1 |
| 168 | C | 70.04486 | 75.44557 | 67.60714 | 446.99263   | -555.77305  | 338.97221   | 1 |
| 169 | H | 70.18151 | 76.55817 | 67.70255 | 1953.68466  | 1892.25957  | -161.67766  | 1 |
| 170 | H | 70.44007 | 75.17056 | 66.60289 | -403.03785  | 2688.07032  | -188.43591  | 1 |
| 171 | C | 68.50975 | 75.08724 | 67.74700 | 567.86262   | 335.74681   | 434.04421   | 1 |
| 172 | H | 68.29577 | 74.06052 | 67.37120 | -1080.02275 | 1568.26081  | -1948.78900 | 1 |
| 173 | H | 68.19854 | 75.09101 | 68.81675 | -919.54108  | 2111.34692  | 1456.13463  | 1 |
| 174 | C | 67.71932 | 76.16045 | 66.96298 | 195.81897   | 173.33862   | -745.11536  | 1 |
| 175 | H | 67.86386 | 77.19682 | 67.33315 | 1405.67949  | -2301.21089 | -390.08113  | 1 |

|     |   |          |          |          |             |             |             |   |
|-----|---|----------|----------|----------|-------------|-------------|-------------|---|
| 176 | H | 67.85506 | 76.13280 | 65.86306 | -940.37328  | -1118.32446 | 2299.72133  | 1 |
| 177 | N | 66.19437 | 75.88937 | 67.18545 | 319.26422   | 656.36007   | -42.02424   | 1 |
| 178 | H | 65.54983 | 76.58061 | 66.70432 | 1961.03633  | 619.91968   | 1787.09422  | 1 |
| 179 | H | 65.80601 | 74.96460 | 66.83850 | 854.14343   | -2156.80752 | 1429.08711  | 1 |
| 180 | H | 65.83147 | 75.92440 | 68.18252 | 1237.02905  | -1378.50857 | -1998.28500 | 1 |
| 181 | C | 71.88695 | 76.88663 | 69.66334 | 532.53319   | -268.57236  | 517.55729   | 1 |
| 182 | O | 71.10255 | 77.63093 | 69.11429 | 266.16714   | -290.73804  | -558.88002  | 1 |
| 183 | N | 72.55252 | 77.10546 | 70.78673 | -226.25352  | 640.49678   | -270.32839  | 1 |
| 184 | H | 73.23484 | 76.41277 | 71.17814 | 2007.69063  | -1035.27229 | 1523.50231  | 1 |
| 185 | C | 72.40072 | 78.42551 | 71.34123 | -540.76542  | -573.33303  | 49.50000    | 1 |
| 186 | H | 71.30687 | 78.62440 | 71.38280 | -2374.20950 | -1036.76023 | 843.75774   | 1 |
| 187 | C | 73.15224 | 78.37976 | 72.74613 | -77.09082   | 666.87422   | -415.84136  | 1 |
| 188 | H | 74.20473 | 78.02193 | 72.54327 | -985.81834  | 617.19825   | 2463.91927  | 1 |
| 189 | O | 72.65521 | 77.42144 | 73.68682 | 293.29899   | -391.65602  | -477.80926  | 1 |
| 190 | H | 73.22403 | 76.61929 | 73.43367 | 2528.72714  | -681.76262  | -751.27122  | 1 |
| 191 | C | 73.16724 | 79.88715 | 73.18614 | 252.47363   | -605.14473  | 440.05134   | 1 |
| 192 | H | 73.75573 | 80.03401 | 74.12132 | -2052.65063 | 1456.49051  | -1043.51830 | 1 |
| 193 | H | 73.61558 | 80.54455 | 72.40360 | -2152.98800 | -1661.97574 | -161.70652  | 1 |
| 194 | H | 72.13595 | 80.26302 | 73.38147 | -473.12726  | -1584.27339 | 2165.61725  | 1 |
| 195 | C | 73.19402 | 79.46183 | 70.36527 | 360.36307   | 488.46713   | 505.10056   | 1 |
| 196 | O | 74.37888 | 79.27781 | 70.10183 | -200.08817  | -528.03552  | -385.82850  | 1 |
| 197 | N | 72.42887 | 80.49808 | 70.10500 | -597.54095  | -226.44775  | 355.20479   | 1 |
| 198 | H | 71.46615 | 80.46067 | 70.43516 | 2179.23655  | -1300.70981 | -991.33835  | 1 |
| 199 | C | 72.79347 | 81.37966 | 69.03689 | -687.68921  | 297.39807   | -249.45179  | 1 |
| 200 | H | 73.16349 | 80.69489 | 68.24222 | -349.16256  | -2467.37713 | -1101.72831 | 1 |
| 201 | C | 71.54084 | 82.28587 | 68.65531 | 672.47345   | 361.54328   | -201.62880  | 1 |
| 202 | H | 71.18137 | 82.83442 | 69.55645 | 1541.41502  | 582.18425   | 2169.97026  | 1 |
| 203 | H | 71.85875 | 83.05802 | 67.91653 | -2534.67717 | 60.25153    | 997.72295   | 1 |
| 204 | C | 70.41374 | 81.41954 | 68.06927 | 574.26774   | -389.43119  | -377.02542  | 1 |
| 205 | C | 70.54484 | 80.90942 | 66.74348 | 688.82679   | -287.33580  | -257.96133  | 1 |
| 206 | H | 71.45588 | 81.10737 | 66.14980 | 331.14182   | 1470.38163  | 2269.80013  | 1 |
| 207 | C | 69.24290 | 81.14939 | 68.83914 | -383.52382  | -675.04808  | 144.24917   | 1 |
| 208 | H | 69.14483 | 81.53394 | 69.87058 | 4.09847     | 1517.59662  | 2262.86397  | 1 |
| 209 | C | 69.49223 | 80.16384 | 66.21085 | -134.76730  | 428.45285   | -649.50303  | 1 |
| 210 | H | 69.58829 | 79.77518 | 65.18235 | -903.23433  | 1600.49020  | 2011.53387  | 1 |
| 211 | C | 68.21518 | 80.40039 | 68.25897 | -335.53281  | -615.00040  | -364.39058  | 1 |
| 212 | H | 67.30876 | 80.20478 | 68.85824 | 1596.45398  | -1369.33862 | 1732.02659  | 1 |
| 213 | C | 68.29436 | 79.88845 | 66.93140 | 585.48547   | -340.24194  | -406.23938  | 1 |
| 214 | O | 67.24934 | 79.13340 | 66.33183 | -419.15649  | -173.04408  | -511.94141  | 1 |
| 215 | H | 66.57997 | 79.17734 | 67.05509 | -1071.84350 | 1559.71507  | -1960.13012 | 1 |
| 216 | C | 73.94414 | 82.39866 | 69.56643 | 291.41878   | -183.13091  | 710.72246   | 1 |
| 217 | O | 73.71075 | 83.57255 | 69.72517 | 379.87695   | 523.47396   | -222.23622  | 1 |
| 218 | N | 75.10226 | 81.74690 | 69.71065 | 564.30591   | 373.09380   | 277.24371   | 1 |
| 219 | H | 75.16009 | 80.70101 | 69.57307 | -120.59931  | -2436.07824 | -1214.35098 | 1 |
| 220 | C | 76.09065 | 82.42391 | 70.50056 | 404.07514   | -299.37480  | 608.84009   | 1 |
| 221 | H | 75.55161 | 83.26170 | 71.00409 | -1071.07882 | -841.69025  | 2359.66467  | 1 |
| 222 | C | 76.70607 | 81.35216 | 71.49454 | -683.12807  | 68.71770    | -390.13096  | 1 |
| 223 | H | 75.90627 | 80.83089 | 72.06750 | 2068.88918  | 1596.58590  | 770.89603   | 1 |
| 224 | H | 77.23650 | 80.55268 | 70.92942 | 1379.86429  | 2342.49779  | -179.85638  | 1 |
| 225 | C | 77.68071 | 82.11462 | 72.44282 | -176.39967  | 537.49466   | 550.97268   | 1 |
| 226 | H | 78.42765 | 82.69491 | 71.84972 | -396.28051  | 1942.22168  | 1869.33314  | 1 |
| 227 | H | 77.13894 | 82.86763 | 73.05781 | -94.44700   | 586.00678   | -2659.20016 | 1 |
| 228 | C | 78.38152 | 81.01263 | 73.36443 | -291.69381  | -718.18079  | -150.72929  | 1 |
| 229 | H | 77.70177 | 80.42235 | 74.03013 | -2303.38776 | 1089.76242  | 964.62032   | 1 |
| 230 | H | 79.03881 | 80.29198 | 72.81410 | 884.16729   | 2568.80533  | -207.74283  | 1 |
| 231 | N | 79.20365 | 81.80926 | 74.17491 | -594.49522  | -252.81478  | 342.29276   | 1 |
| 232 | H | 79.33858 | 82.76432 | 73.88021 | -1735.17426 | 2084.05705  | -263.71605  | 1 |
| 233 | C | 79.79443 | 81.41075 | 75.22786 | 595.23177   | -271.52487  | 442.22352   | 1 |
| 234 | N | 79.61127 | 80.07945 | 75.61609 | 585.53813   | -424.79750  | -105.81303  | 1 |
| 235 | H | 79.05986 | 79.34211 | 75.17881 | 959.88797   | 1327.56823  | -2177.11905 | 1 |
| 236 | H | 80.02407 | 79.65492 | 76.44746 | 1578.48647  | 16.27378    | -2220.76233 | 1 |
| 237 | N | 80.54543 | 82.44703 | 75.80015 | -452.17763  | -390.33541  | -421.51853  | 1 |

|     |   |          |          |          |             |             |             |   |
|-----|---|----------|----------|----------|-------------|-------------|-------------|---|
| 238 | H | 80.67293 | 83.41730 | 75.51616 | 470.26107   | 1974.25629  | -1817.92087 | 1 |
| 239 | H | 81.08951 | 82.33344 | 76.65626 | 1856.67307  | -1573.97321 | -1224.35416 | 1 |
| 240 | C | 77.26664 | 82.96739 | 69.51436 | -531.47271  | -581.45780  | -55.06206   | 1 |
| 241 | O | 77.99450 | 83.84524 | 69.92179 | -243.00837  | 192.73507   | 609.52485   | 1 |
| 242 | N | 77.33917 | 82.28967 | 68.37448 | 343.49288   | -644.25607  | 38.09164    | 1 |
| 243 | H | 76.73095 | 81.46685 | 68.20182 | -1691.16043 | -1535.97525 | -1484.73099 | 1 |
| 244 | C | 77.88018 | 82.99560 | 67.24506 | 542.66492   | 350.14337   | 454.42563   | 1 |
| 245 | H | 77.63880 | 84.05607 | 67.47915 | 1209.57979  | -2396.95920 | 463.86744   | 1 |
| 246 | C | 79.45508 | 82.76981 | 67.28896 | -737.14309  | 145.93010   | 242.71942   | 1 |
| 247 | H | 79.69847 | 81.91366 | 67.95426 | -1050.18303 | 159.36419   | -2509.06125 | 1 |
| 248 | C | 80.08212 | 82.56737 | 65.86749 | -706.77696  | -252.88343  | -245.16230  | 1 |
| 249 | H | 81.19715 | 82.59685 | 65.89788 | -1624.64039 | -1665.49085 | 1417.86935  | 1 |
| 250 | H | 79.78531 | 81.58293 | 65.42889 | 2566.10521  | 598.51109   | 693.22305   | 1 |
| 251 | H | 79.74311 | 83.35943 | 65.15579 | -1972.69758 | 107.10018   | -1876.34312 | 1 |
| 252 | C | 80.05997 | 84.10381 | 67.84492 | 412.85148   | 672.58832   | -27.69222   | 1 |
| 253 | H | 81.16159 | 84.02851 | 68.00260 | 1447.02277  | 1762.76533  | -1490.78944 | 1 |
| 254 | H | 79.88209 | 84.95720 | 67.14825 | 1320.77379  | -145.20455  | 2378.68491  | 1 |
| 255 | H | 79.58710 | 84.37270 | 68.83554 | -1512.10848 | 1470.52031  | 1724.75147  | 1 |
| 256 | C | 77.12553 | 82.44221 | 65.92142 | -607.11113  | 499.56689   | 73.73769    | 1 |
| 257 | O | 77.71027 | 82.35514 | 64.86384 | 357.97126   | 460.81534   | 356.68785   | 1 |
| 258 | N | 75.80576 | 82.30750 | 66.14506 | 536.55407   | -368.62270  | 332.76306   | 1 |
| 259 | H | 75.54956 | 82.48497 | 67.11918 | 524.38866   | 2297.69985  | 1367.20941  | 1 |
| 260 | C | 75.13251 | 81.19995 | 65.51114 | 46.50277    | -774.29190  | -147.97904  | 1 |
| 261 | H | 74.05914 | 81.42774 | 65.68756 | 1676.51875  | 1883.29066  | 1032.55549  | 1 |
| 262 | C | 75.49847 | 81.10196 | 63.94598 | -559.41456  | -34.19198   | -556.30433  | 1 |
| 263 | H | 76.55770 | 80.75695 | 63.83806 | -64.66664   | 395.18769   | 2695.05373  | 1 |
| 264 | H | 74.87490 | 80.33244 | 63.43023 | -2703.44278 | -60.40056   | 333.79418   | 1 |
| 265 | C | 75.32473 | 82.45566 | 63.30728 | -519.76435  | 377.31045   | 459.42366   | 1 |
| 266 | H | 75.76765 | 83.21023 | 63.99400 | -1746.74323 | 1667.50644  | -1261.73691 | 1 |
| 267 | C | 76.06839 | 82.52350 | 61.97962 | 570.95554   | 16.46261    | -545.27700  | 1 |
| 268 | H | 75.96799 | 83.53119 | 61.50003 | 2391.58273  | 28.05277    | -1305.07271 | 1 |
| 269 | H | 77.16403 | 82.32868 | 62.11577 | 175.75588   | 917.63458   | 2559.43867  | 1 |
| 270 | H | 75.68318 | 81.76719 | 61.24845 | -1063.97851 | -2155.34650 | 1283.00462  | 1 |
| 271 | C | 73.85351 | 82.78587 | 63.09934 | 193.76014   | 2.62946     | -765.53141  | 1 |
| 272 | H | 73.71847 | 83.80458 | 62.65272 | 507.39394   | -846.55087  | 2539.60089  | 1 |
| 273 | H | 73.36074 | 82.05381 | 62.40893 | 1337.57841  | 1818.19054  | 1526.01994  | 1 |
| 274 | H | 73.28497 | 82.76776 | 64.06451 | 1100.88635  | -1172.91350 | -2199.08909 | 1 |
| 275 | C | 75.57382 | 79.88765 | 66.28854 | -549.21115  | 475.64486   | -309.38218  | 1 |
| 276 | O | 76.16095 | 79.92377 | 67.35229 | 556.06106   | -390.37755  | -78.24250   | 1 |
| 277 | O | 75.17855 | 78.65213 | 65.73368 | -572.27940  | -310.19032  | -209.75862  | 1 |
| 278 | H | 74.69719 | 78.98904 | 64.92735 | -1380.08193 | 2212.14486  | 790.85944   | 1 |

Listing 111: C00111.xmolout

|    |   |          |          |          |             |             |             |        |          |
|----|---|----------|----------|----------|-------------|-------------|-------------|--------|----------|
| 1  |   | 276      |          |          |             |             |             |        |          |
| 2  |   | 150.0000 | 150.0000 | 150.0000 | 0.0000      | 0.0000      | 0.0000***** | 2.7750 | 11100    |
|    |   | 0.2500   | 300.00   | 0.00     | 0.00        | 0.00        | -1293.3991  | 0.0000 | 300.0000 |
| 3  | H | 71.45839 | 78.32557 | 88.18066 | -2043.14101 | -1757.64893 | 399.89339   |        | 1        |
| 4  | N | 72.08738 | 78.01669 | 87.44287 | 426.75047   | 490.45733   | -334.42467  |        | 1        |
| 5  | H | 72.32469 | 77.07469 | 87.74562 | 442.25559   | -1110.30854 | -2448.52907 |        | 1        |
| 6  | C | 73.18235 | 78.86575 | 87.18421 | 415.32972   | -666.39213  | 83.73172    |        | 1        |
| 7  | H | 72.73789 | 79.88364 | 87.20217 | 879.32219   | 2491.00447  | 667.35213   |        | 1        |
| 8  | C | 74.33493 | 78.68110 | 88.29404 | 31.35357    | 477.41777   | 628.23362   |        | 1        |
| 9  | H | 74.67417 | 77.61756 | 88.30418 | 1168.38489  | 2240.25337  | -1019.71136 |        | 1        |
| 10 | H | 75.22667 | 79.27990 | 87.98779 | -360.43770  | 2534.90498  | 931.67112   |        | 1        |
| 11 | C | 73.86522 | 79.09575 | 89.66445 | 463.18208   | 512.70242   | -382.34388  |        | 1        |
| 12 | H | 72.99400 | 78.46491 | 89.94981 | 1725.29117  | 1863.52247  | -987.07854  |        | 1        |
| 13 | C | 74.97962 | 78.87587 | 90.68086 | 710.42801   | -144.27427  | -313.15367  |        | 1        |
| 14 | H | 74.65613 | 79.15176 | 91.71750 | 364.20195   | -1033.13725 | 2494.72524  |        | 1        |
| 15 | H | 75.31129 | 77.80592 | 90.70834 | 2567.61904  | 335.80679   | 847.48802   |        | 1        |
| 16 | H | 75.88204 | 79.49542 | 90.44033 | -2587.99029 | 680.92867   | -512.16411  |        | 1        |
| 17 | C | 73.43785 | 80.55666 | 89.69600 | 268.17616   | 741.64379   | -40.42634   |        | 1        |

|    |   |          |          |          |             |             |             |   |
|----|---|----------|----------|----------|-------------|-------------|-------------|---|
| 18 | H | 73.16379 | 80.88423 | 90.73213 | 1283.54314  | -1945.37420 | -1411.27812 | 1 |
| 19 | H | 74.25784 | 81.23296 | 89.34062 | -1258.57796 | 1317.15249  | -2026.02085 | 1 |
| 20 | H | 72.54608 | 80.74495 | 89.04456 | -2502.84526 | 909.80597   | 575.92391   | 1 |
| 21 | C | 73.84953 | 78.48050 | 85.75948 | 619.36578   | -458.64843  | -172.09273  | 1 |
| 22 | O | 75.03711 | 78.70506 | 85.57713 | -81.40433   | 433.87611   | 522.34594   | 1 |
| 23 | N | 72.96507 | 77.96377 | 84.92022 | 175.23996   | -622.20190  | 341.55523   | 1 |
| 24 | H | 72.00722 | 77.90398 | 85.26355 | -876.57256  | -303.22879  | -2561.90213 | 1 |
| 25 | C | 73.32052 | 77.71264 | 83.56290 | -571.88214  | -534.10783  | -106.15033  | 1 |
| 26 | H | 74.37906 | 77.37411 | 83.58714 | -2713.20841 | -16.25800   | -248.80809  | 1 |
| 27 | C | 72.27382 | 76.64040 | 83.00797 | 166.60354   | 288.16399   | -716.09568  | 1 |
| 28 | H | 71.23808 | 77.06297 | 83.12537 | -2097.85574 | 1636.78449  | -586.18044  | 1 |
| 29 | O | 72.26272 | 75.37040 | 83.68561 | -317.80580  | -363.38227  | 484.43082   | 1 |
| 30 | H | 71.36082 | 75.36283 | 84.06369 | 1863.74748  | -1451.84923 | 1357.29467  | 1 |
| 31 | C | 72.64851 | 76.60360 | 81.48070 | 503.80731   | 517.99032   | 318.51606   | 1 |
| 32 | H | 71.95498 | 75.94495 | 80.90807 | 640.61020   | -2157.10410 | -1536.29104 | 1 |
| 33 | H | 72.60143 | 77.61741 | 81.01646 | 1687.88455  | 465.60692   | 2087.56452  | 1 |
| 34 | H | 73.68054 | 76.21358 | 81.32260 | -1293.07895 | -1899.88581 | -1463.57452 | 1 |
| 35 | C | 73.10887 | 79.11913 | 82.75782 | -153.07550  | -733.68902  | 248.70981   | 1 |
| 36 | O | 71.99660 | 79.56797 | 82.66902 | 186.15459   | -480.78787  | -449.34387  | 1 |
| 37 | N | 74.26118 | 79.59490 | 82.24882 | -487.53139  | 543.18517   | 42.03850    | 1 |
| 38 | C | 74.24904 | 80.81550 | 81.51084 | -699.35871  | 69.34393    | 360.10701   | 1 |
| 39 | H | 73.33127 | 81.34438 | 81.85791 | 2.81126     | -221.99807  | -2715.58072 | 1 |
| 40 | C | 75.62803 | 81.46817 | 81.94553 | -507.46439  | -592.59194  | 122.07761   | 1 |
| 41 | H | 76.02513 | 82.17519 | 81.18314 | -1975.08116 | 525.87560   | -1801.71556 | 1 |
| 42 | H | 75.50325 | 82.05812 | 82.88086 | 1588.27743  | -1913.22100 | 1113.83566  | 1 |
| 43 | C | 76.57668 | 80.25139 | 82.19285 | -613.62442  | -457.55993  | -194.14490  | 1 |
| 44 | H | 77.12404 | 79.96477 | 81.26628 | 1707.54637  | -721.27992  | 1996.92523  | 1 |
| 45 | H | 77.36351 | 80.46391 | 82.95131 | 758.23357   | 2100.81767  | 1560.55011  | 1 |
| 46 | C | 75.57350 | 79.11613 | 82.66056 | -352.41524  | 704.96076   | 49.21465    | 1 |
| 47 | H | 75.73550 | 78.12349 | 82.17686 | 1714.76886  | -2070.42778 | 443.35792   | 1 |
| 48 | H | 75.49594 | 78.97987 | 83.79132 | 1224.15040  | 1801.50881  | 1636.97633  | 1 |
| 49 | C | 74.17471 | 80.51762 | 79.89543 | 566.85117   | 537.05831   | 117.62814   | 1 |
| 50 | O | 73.24967 | 80.98716 | 79.27063 | -550.26779  | -406.08867  | 4.21666     | 1 |
| 51 | N | 75.16931 | 79.75518 | 79.45104 | 566.34832   | -425.77725  | 180.18749   | 1 |
| 52 | H | 75.85090 | 79.47785 | 80.15440 | 644.44502   | 2646.80550  | -52.73430   | 1 |
| 53 | C | 75.54034 | 79.92007 | 78.07187 | 612.34801   | -281.48662  | 411.56221   | 1 |
| 54 | H | 75.40303 | 81.00178 | 77.85322 | 1667.23498  | -1490.75142 | 1556.16753  | 1 |
| 55 | C | 77.03308 | 79.39696 | 77.90096 | -714.45746  | -175.43074  | 286.98927   | 1 |
| 56 | H | 77.12330 | 78.37754 | 78.36647 | -787.09484  | 1763.03619  | -1922.46060 | 1 |
| 57 | O | 78.05227 | 80.20929 | 78.51416 | -429.46514  | 516.51932   | -128.40526  | 1 |
| 58 | H | 78.50498 | 79.55746 | 79.08402 | 1981.82785  | 436.16847   | -1818.18182 | 1 |
| 59 | C | 77.07607 | 79.25142 | 76.33407 | 630.79189   | -468.94448  | 76.03230    | 1 |
| 60 | H | 78.02044 | 78.77105 | 75.98784 | -1775.71861 | 2062.30353  | 131.89849   | 1 |
| 61 | H | 76.22169 | 78.62563 | 75.96844 | -1855.14608 | 88.94118    | 1993.53760  | 1 |
| 62 | H | 77.00124 | 80.24200 | 75.82780 | -1504.82350 | -780.94249  | -2132.90992 | 1 |
| 63 | C | 74.53339 | 78.97642 | 77.18811 | 288.57638   | 618.62814   | -397.00270  | 1 |
| 64 | O | 74.53130 | 77.76993 | 77.24760 | 321.70495   | -185.26452  | 574.37218   | 1 |
| 65 | N | 73.87903 | 79.77960 | 76.35080 | -447.05792  | -446.53431  | 367.76425   | 1 |
| 66 | H | 73.98386 | 80.78842 | 76.45922 | 350.31316   | 1975.63644  | -1843.31522 | 1 |
| 67 | C | 72.67767 | 79.29064 | 75.73248 | -511.23061  | 374.03917   | -471.51480  | 1 |
| 68 | H | 73.06102 | 78.42335 | 75.14854 | 2234.79579  | -898.70890  | -1273.45190 | 1 |
| 69 | C | 71.69459 | 78.81393 | 76.90072 | 529.53781   | -159.34528  | 563.72604   | 1 |
| 70 | H | 70.94786 | 78.10696 | 76.44758 | 654.59388   | 2347.94251  | 1217.51488  | 1 |
| 71 | H | 72.32013 | 78.21031 | 77.61296 | -1526.55661 | 2103.42026  | 817.87394   | 1 |
| 72 | O | 70.96866 | 79.86276 | 77.58328 | -554.84278  | 14.12789    | 399.58769   | 1 |
| 73 | H | 71.67990 | 80.20077 | 78.17569 | 1297.06236  | 2061.84854  | 1220.68812  | 1 |
| 74 | C | 72.14677 | 80.51907 | 74.83326 | -662.15484  | -412.13544  | 123.62687   | 1 |
| 75 | O | 72.91981 | 81.25101 | 74.25570 | -540.01537  | -317.05804  | 274.91456   | 1 |
| 76 | N | 70.80576 | 80.49220 | 74.73427 | -202.76299  | -690.00100  | -131.49145  | 1 |
| 77 | H | 70.34138 | 79.86355 | 75.39275 | -702.62132  | -2617.37191 | 281.70413   | 1 |
| 78 | C | 70.05504 | 81.49597 | 73.99122 | -491.73914  | 576.34187   | 222.73509   | 1 |
| 79 | H | 68.99549 | 81.31112 | 74.28656 | 1977.17978  | -1823.58850 | -434.68928  | 1 |

|     |   |          |          |          |             |             |             |   |
|-----|---|----------|----------|----------|-------------|-------------|-------------|---|
| 80  | C | 70.54167 | 82.85730 | 74.45022 | -649.50797  | -328.66843  | 306.11224   | 1 |
| 81  | H | 71.65289 | 82.88800 | 74.30270 | 2075.07803  | 1452.16490  | -1004.45904 | 1 |
| 82  | C | 69.92780 | 83.99357 | 73.65548 | -615.18735  | -489.99689  | -70.96352   | 1 |
| 83  | H | 70.27057 | 84.99769 | 74.03062 | -1226.32661 | -1724.38906 | -1716.47170 | 1 |
| 84  | H | 70.20294 | 83.92808 | 72.56422 | 2381.64273  | -969.84735  | 900.46860   | 1 |
| 85  | H | 68.80454 | 83.98040 | 73.71333 | 2122.74991  | 1702.23946  | -141.36228  | 1 |
| 86  | C | 70.26984 | 83.05535 | 75.93153 | -501.86074  | -479.61276  | -376.42482  | 1 |
| 87  | H | 70.70061 | 84.02077 | 76.31392 | 993.79261   | -2246.95401 | -1177.81305 | 1 |
| 88  | H | 69.16703 | 83.07268 | 76.15041 | 42.71279    | -626.15391  | -2651.37258 | 1 |
| 89  | H | 70.71385 | 82.22116 | 76.54422 | -2026.39012 | -1590.33709 | -887.82922  | 1 |
| 90  | C | 70.25868 | 81.23274 | 72.35406 | -672.89153  | 382.57394   | -156.34072  | 1 |
| 91  | O | 69.67282 | 81.93930 | 71.56886 | 410.04627   | 221.86223   | 500.35950   | 1 |
| 92  | N | 71.06309 | 80.22302 | 72.10331 | -378.11782  | -443.79414  | -441.10984  | 1 |
| 93  | H | 71.51429 | 79.81749 | 72.92121 | 2404.15973  | -568.14894  | 1149.30085  | 1 |
| 94  | C | 71.25756 | 79.67812 | 70.79080 | -544.54484  | 466.16019   | 331.29119   | 1 |
| 95  | H | 70.25282 | 79.42132 | 70.38931 | -1409.80988 | -170.17955  | 2325.32679  | 1 |
| 96  | C | 71.93168 | 80.85175 | 69.96712 | -184.48284  | 116.78282   | -758.89137  | 1 |
| 97  | H | 71.22782 | 81.71631 | 69.90810 | 1893.78641  | 1861.14652  | 611.04528   | 1 |
| 98  | H | 72.83164 | 81.22855 | 70.50442 | -2170.79665 | -974.19311  | 1327.50117  | 1 |
| 99  | C | 72.31113 | 80.33163 | 68.54556 | 389.51668   | 672.81878   | -138.49152  | 1 |
| 100 | H | 72.99277 | 79.45373 | 68.61945 | 510.64577   | 1933.03327  | 1851.02484  | 1 |
| 101 | H | 71.41340 | 79.93029 | 68.02609 | -2302.30869 | -1105.72939 | -948.89774  | 1 |
| 102 | C | 72.97673 | 81.45102 | 67.65761 | -559.93427  | -126.34590  | 542.30857   | 1 |
| 103 | O | 73.40616 | 81.17312 | 66.56759 | -670.36003  | -111.83166  | 76.36448    | 1 |
| 104 | N | 72.98356 | 82.67579 | 68.22775 | -216.06729  | -537.07037  | 446.51379   | 1 |
| 105 | H | 72.60917 | 82.98240 | 69.13308 | -1251.96487 | 1074.12894  | -2168.52500 | 1 |
| 106 | H | 73.33280 | 83.52085 | 67.76324 | -2451.83023 | -720.73851  | 944.84612   | 1 |
| 107 | C | 72.27094 | 78.43004 | 70.99689 | 546.24052   | -563.88337  | -85.11809   | 1 |
| 108 | O | 73.23983 | 78.56506 | 71.70457 | 71.70702    | -307.40463  | 606.69673   | 1 |
| 109 | N | 71.91771 | 77.36601 | 70.25822 | 479.90863   | -504.50129  | 222.86849   | 1 |
| 110 | C | 72.83117 | 76.27704 | 70.10837 | 75.51268    | -600.91904  | 506.73700   | 1 |
| 111 | H | 73.35459 | 76.15475 | 71.08539 | -2033.61562 | 1795.30103  | 254.89480   | 1 |
| 112 | C | 71.87844 | 75.09158 | 69.67293 | 523.79067   | 517.99274   | 284.45581   | 1 |
| 113 | H | 72.42800 | 74.27075 | 69.15959 | 1599.61665  | -1127.00911 | 1895.98173  | 1 |
| 114 | H | 71.36507 | 74.63482 | 70.54914 | -1881.83093 | 1275.82488  | -1501.55016 | 1 |
| 115 | C | 70.87764 | 75.85252 | 68.74628 | -600.05639  | -404.05026  | 316.64485   | 1 |
| 116 | H | 71.34210 | 76.03901 | 67.74877 | -2597.05260 | 496.36221   | 657.73249   | 1 |
| 117 | H | 69.93140 | 75.29668 | 68.55960 | -1666.24518 | 1294.38985  | -1723.90591 | 1 |
| 118 | C | 70.66174 | 77.21300 | 69.53812 | 493.57570   | -129.95376  | -602.56394  | 1 |
| 119 | H | 70.51373 | 78.11113 | 68.89481 | -1469.08415 | -637.84797  | 2204.22581  | 1 |
| 120 | H | 69.86361 | 77.18099 | 70.31681 | -1038.97840 | 1068.88701  | -2280.71789 | 1 |
| 121 | C | 73.84413 | 76.73968 | 68.88133 | 188.88100   | 241.05089   | -727.87821  | 1 |
| 122 | O | 73.49391 | 76.76932 | 67.72809 | 531.88613   | -49.19943   | 427.07960   | 1 |
| 123 | N | 74.97675 | 77.12522 | 69.44695 | 708.14833   | 26.93417    | -179.73509  | 1 |
| 124 | H | 74.98664 | 77.15875 | 70.46510 | -2232.69501 | -1179.09831 | 1023.94816  | 1 |
| 125 | C | 76.18128 | 77.23216 | 68.68736 | -738.32412  | 259.92548   | 104.42456   | 1 |
| 126 | H | 75.79122 | 77.67392 | 67.74251 | 2028.89123  | 1260.02983  | 1311.33324  | 1 |
| 127 | C | 77.12215 | 78.19090 | 69.52645 | -258.65678  | -345.52513  | 661.28459   | 1 |
| 128 | H | 77.38223 | 77.71408 | 70.52708 | -1826.06090 | -1801.46097 | -918.64554  | 1 |
| 129 | C | 78.40191 | 78.56795 | 68.70508 | -541.23400  | 531.92970   | -218.41428  | 1 |
| 130 | H | 79.01658 | 79.33286 | 69.23532 | 1311.73218  | -2219.18200 | 882.19023   | 1 |
| 131 | H | 79.05831 | 77.68243 | 68.52409 | -1048.71298 | 1223.58118  | -2196.97971 | 1 |
| 132 | H | 78.13534 | 78.99125 | 67.70823 | 419.06414   | 1903.92898  | 1903.44670  | 1 |
| 133 | C | 76.32940 | 79.52612 | 69.75007 | -423.86431  | 152.66566   | -648.55262  | 1 |
| 134 | H | 76.92281 | 80.26671 | 70.33525 | 105.68386   | -2342.50080 | 1387.51238  | 1 |
| 135 | H | 76.05703 | 80.00687 | 68.78103 | -1695.63603 | -1484.73621 | -1531.02793 | 1 |
| 136 | H | 75.37765 | 79.34742 | 70.30575 | -1853.57121 | -487.39031  | 1936.59343  | 1 |
| 137 | C | 76.73809 | 75.72549 | 68.39038 | 539.71428   | -510.58232  | 267.58633   | 1 |
| 138 | O | 76.00578 | 74.93841 | 67.82628 | -15.93758   | -278.34085  | -624.49402  | 1 |
| 139 | N | 77.99812 | 75.51413 | 68.75276 | -676.81886  | 12.05292    | 276.17960   | 1 |
| 140 | H | 78.51947 | 76.24060 | 69.24160 | -1694.44250 | -373.84189  | -2100.66098 | 1 |
| 141 | C | 78.62188 | 74.36804 | 68.15978 | 412.33078   | -664.70360  | 108.35451   | 1 |

|     |   |          |          |          |             |             |             |   |
|-----|---|----------|----------|----------|-------------|-------------|-------------|---|
| 142 | H | 78.04761 | 74.18449 | 67.22199 | 1765.77476  | 1294.44366  | 1621.76594  | 1 |
| 143 | C | 80.15187 | 74.69292 | 67.94506 | -179.66635  | -721.95667  | -264.73915  | 1 |
| 144 | H | 80.28210 | 75.56637 | 67.26735 | -607.34922  | 2587.87032  | -598.10018  | 1 |
| 145 | H | 80.63677 | 74.98502 | 68.90309 | -359.69332  | -1479.13954 | -2259.74260 | 1 |
| 146 | C | 80.82766 | 73.41183 | 67.34871 | -240.01076  | 616.02425   | 431.85322   | 1 |
| 147 | H | 80.68855 | 72.54718 | 68.03619 | -1359.17131 | 782.54425   | 2227.99181  | 1 |
| 148 | H | 80.34588 | 73.11777 | 66.38963 | -820.36667  | 85.81767    | -2596.78715 | 1 |
| 149 | C | 82.36567 | 73.70988 | 67.13437 | -513.07015  | 236.18570   | -551.87280  | 1 |
| 150 | H | 82.51173 | 74.52671 | 66.39074 | 1816.11944  | -1183.11722 | -1650.94321 | 1 |
| 151 | H | 82.83325 | 74.07293 | 68.07820 | -1800.04429 | -1361.53473 | 1526.34643  | 1 |
| 152 | C | 83.04479 | 72.40454 | 66.65817 | 726.08972   | -253.19732  | -179.64713  | 1 |
| 153 | H | 83.03156 | 71.58095 | 67.39969 | 1224.27271  | -456.51798  | -2390.90304 | 1 |
| 154 | H | 82.69405 | 72.03261 | 65.67490 | 1206.40339  | -1150.93514 | -2154.90344 | 1 |
| 155 | N | 84.56538 | 72.71227 | 66.44147 | 329.70796   | -633.68968  | -155.67358  | 1 |
| 156 | H | 85.15901 | 71.89092 | 66.12775 | 1348.31305  | 1938.76845  | 1359.00643  | 1 |
| 157 | H | 84.81107 | 73.43765 | 65.70657 | 2096.92035  | 1446.54551  | -966.48890  | 1 |
| 158 | H | 85.11522 | 73.05679 | 67.28150 | -1197.07217 | -2303.53719 | 827.28733   | 1 |
| 159 | C | 78.47263 | 73.08157 | 69.17534 | -378.01186  | -556.17301  | -413.96481  | 1 |
| 160 | O | 77.98874 | 72.05088 | 68.76655 | -409.44433  | -307.55053  | -453.30833  | 1 |
| 161 | N | 79.01528 | 73.33137 | 70.36023 | -429.02477  | 524.70884   | 274.08502   | 1 |
| 162 | H | 79.34713 | 74.28053 | 70.52747 | 1706.34263  | -1425.96036 | 1574.38926  | 1 |
| 163 | C | 78.86118 | 72.36827 | 71.39650 | -45.25864   | -626.22952  | 478.93267   | 1 |
| 164 | H | 78.48319 | 71.46377 | 70.86322 | 1988.63164  | 570.90773   | 1772.87287  | 1 |
| 165 | C | 80.29044 | 72.16577 | 72.04998 | 551.77128   | -20.49526   | -564.54996  | 1 |
| 166 | H | 81.05695 | 71.98374 | 71.26357 | 1434.61535  | -1753.10253 | 1513.99471  | 1 |
| 167 | H | 80.61935 | 73.08621 | 72.58192 | -714.67738  | 1819.09770  | 1898.36494  | 1 |
| 168 | C | 80.19058 | 70.95207 | 73.03101 | 446.99263   | -555.77305  | 338.97221   | 1 |
| 169 | H | 79.44452 | 71.16986 | 73.83610 | 1953.68466  | 1892.25957  | -161.67766  | 1 |
| 170 | H | 79.81760 | 70.04501 | 72.50421 | -403.03785  | 2688.07032  | -188.43591  | 1 |
| 171 | C | 81.62394 | 70.68902 | 73.64525 | 567.86262   | 335.74681   | 434.04421   | 1 |
| 172 | H | 82.33507 | 70.33596 | 72.86321 | -1080.02275 | 1568.26081  | -1948.78900 | 1 |
| 173 | H | 82.06299 | 71.62837 | 74.05304 | -919.54108  | 2111.34692  | 1456.13463  | 1 |
| 174 | C | 81.45074 | 69.63373 | 74.76247 | 195.81897   | 173.33862   | -745.11536  | 1 |
| 175 | H | 80.88238 | 69.98789 | 75.64582 | 1405.67949  | -2301.21089 | -390.08113  | 1 |
| 176 | H | 81.04800 | 68.65964 | 74.42030 | -940.37328  | -1118.32446 | 2299.72133  | 1 |
| 177 | N | 82.87605 | 69.29694 | 75.31532 | 319.26422   | 656.36007   | -42.02424   | 1 |
| 178 | H | 82.89900 | 68.60278 | 76.11696 | 1961.03633  | 619.91968   | 1787.09422  | 1 |
| 179 | H | 83.56655 | 68.85743 | 74.63927 | 854.14343   | -2156.80752 | 1429.08711  | 1 |
| 180 | H | 83.44191 | 70.09948 | 75.71824 | 1237.02905  | -1378.50857 | -1998.28500 | 1 |
| 181 | C | 77.80655 | 72.92361 | 72.52280 | 532.53319   | -268.57236  | 517.55729   | 1 |
| 182 | O | 77.76174 | 72.42820 | 73.63010 | 266.16714   | -290.73804  | -558.88002  | 1 |
| 183 | N | 77.00418 | 73.83840 | 72.00840 | -226.25352  | 640.49678   | -270.32839  | 1 |
| 184 | H | 77.17968 | 74.11164 | 71.04246 | 2007.69063  | -1035.27229 | 1523.50231  | 1 |
| 185 | C | 76.05876 | 74.52079 | 72.83968 | -540.76542  | -573.33303  | 49.50000    | 1 |
| 186 | H | 76.40316 | 74.32570 | 73.88424 | -2374.20950 | -1036.76023 | 843.75774   | 1 |
| 187 | C | 76.10809 | 76.01273 | 72.39299 | -77.09082   | 666.87422   | -415.84136  | 1 |
| 188 | H | 75.97168 | 76.07366 | 71.27409 | -985.81834  | 617.19825   | 2463.91927  | 1 |
| 189 | O | 77.52258 | 76.78913 | 72.17597 | 293.29899   | -391.65602  | -477.80926  | 1 |
| 190 | H | 77.51943 | 77.25661 | 72.99464 | 2528.72714  | -681.76262  | -751.27122  | 1 |
| 191 | C | 75.09944 | 76.83946 | 73.22211 | 252.47363   | -605.14473  | 440.05134   | 1 |
| 192 | H | 74.90832 | 77.85094 | 72.76271 | -2052.65063 | 1456.49051  | -1043.51830 | 1 |
| 193 | H | 74.09795 | 76.31892 | 73.29898 | -2152.98800 | -1661.97574 | -161.70652  | 1 |
| 194 | H | 75.46351 | 77.00727 | 74.26712 | -473.12726  | -1584.27339 | 2165.61725  | 1 |
| 195 | C | 74.57921 | 73.84809 | 72.53481 | 360.36307   | 488.46713   | 505.10056   | 1 |
| 196 | O | 73.56520 | 74.50521 | 72.65363 | -200.08817  | -528.03552  | -385.82850  | 1 |
| 197 | N | 74.69093 | 72.56516 | 72.22548 | -597.54095  | -226.44775  | 355.20479   | 1 |
| 198 | H | 75.64279 | 72.20372 | 72.19286 | 2179.23655  | -1300.70981 | -991.33835  | 1 |
| 199 | C | 73.52024 | 71.82289 | 71.96390 | -687.68921  | 297.39807   | -249.45179  | 1 |
| 200 | H | 72.70095 | 72.57350 | 71.87439 | -349.16256  | -2467.37713 | -1101.72831 | 1 |
| 201 | C | 73.74995 | 70.89906 | 70.67407 | 672.47345   | 361.54328   | -201.62880  | 1 |
| 202 | H | 74.76441 | 70.44137 | 70.70683 | 1541.41502  | 582.18425   | 2169.97026  | 1 |
| 203 | H | 73.00999 | 70.06594 | 70.69499 | -2534.67717 | 60.25153    | 997.72295   | 1 |

|     |   |          |          |          |             |             |             |   |
|-----|---|----------|----------|----------|-------------|-------------|-------------|---|
| 204 | C | 73.56144 | 71.70751 | 69.38493 | 574.26774   | -389.43119  | -377.02542  | 1 |
| 205 | C | 72.23542 | 71.91188 | 68.89352 | 688.82679   | -287.33580  | -257.96133  | 1 |
| 206 | H | 71.36047 | 71.55289 | 69.46444 | 331.14182   | 1470.38163  | 2269.80013  | 1 |
| 207 | C | 74.68872 | 72.19745 | 68.65769 | -383.52382  | -675.04808  | 144.24917   | 1 |
| 208 | H | 75.71949 | 72.05986 | 69.04113 | 4.09847     | 1517.59662  | 2262.86397  | 1 |
| 209 | C | 72.06755 | 72.56109 | 67.67090 | -134.76730  | 428.45285   | -649.50303  | 1 |
| 210 | H | 71.04343 | 72.71518 | 67.28895 | -903.23433  | 1600.49020  | 2011.53387  | 1 |
| 211 | C | 74.46633 | 72.83695 | 67.43411 | -335.53281  | -615.00040  | -364.39058  | 1 |
| 212 | H | 75.34873 | 73.18736 | 66.85782 | 1596.45398  | -1369.33862 | 1732.02659  | 1 |
| 213 | C | 73.16185 | 73.04180 | 66.89305 | 585.48547   | -340.24194  | -406.23938  | 1 |
| 214 | O | 72.92987 | 73.67451 | 65.64362 | -419.15649  | -173.04408  | -511.94141  | 1 |
| 215 | H | 73.83543 | 74.02287 | 65.46216 | -1071.84350 | 1559.71507  | -1960.13012 | 1 |
| 216 | C | 73.22368 | 70.68453 | 73.10404 | 291.41878   | -183.13091  | 710.72246   | 1 |
| 217 | O | 72.09309 | 70.25532 | 73.20376 | 379.87695   | 523.47396   | -222.23622  | 1 |
| 218 | N | 74.31132 | 70.26157 | 73.73899 | 564.30591   | 373.09380   | 277.24371   | 1 |
| 219 | H | 75.20387 | 70.70239 | 73.52444 | -120.59931  | -2436.07824 | -1214.35098 | 1 |
| 220 | C | 74.14752 | 69.14574 | 74.61470 | 404.07514   | -299.37480  | 608.84009   | 1 |
| 221 | H | 73.03921 | 69.09533 | 74.75277 | -1071.07882 | -841.69025  | 2359.66467  | 1 |
| 222 | C | 74.71763 | 67.86839 | 73.86544 | -683.12807  | 68.71770    | -390.13096  | 1 |
| 223 | H | 74.17387 | 67.70295 | 72.90835 | 2068.88918  | 1596.58590  | 770.89603   | 1 |
| 224 | H | 75.78156 | 68.00902 | 73.57198 | 1379.86429  | 2342.49779  | -179.85638  | 1 |
| 225 | C | 74.55151 | 66.64625 | 74.82071 | -176.39967  | 537.49466   | 550.97268   | 1 |
| 226 | H | 75.03695 | 66.83332 | 75.80782 | -396.28051  | 1942.22168  | 1869.33314  | 1 |
| 227 | H | 73.47900 | 66.46438 | 75.05641 | -94.44700   | 586.00678   | -2659.20016 | 1 |
| 228 | C | 75.20162 | 65.38445 | 74.08754 | -291.69381  | -718.18079  | -150.72929  | 1 |
| 229 | H | 74.70291 | 65.05924 | 73.13904 | -2303.38776 | 1089.76242  | 964.62032   | 1 |
| 230 | H | 76.30078 | 65.46076 | 73.88670 | 884.16729   | 2568.80533  | -207.74283  | 1 |
| 231 | N | 75.01367 | 64.37417 | 75.04238 | -594.49522  | -252.81478  | 342.29276   | 1 |
| 232 | H | 74.63143 | 64.65722 | 75.93238 | -1735.17426 | 2084.05705  | -263.71605  | 1 |
| 233 | C | 75.29737 | 63.14826 | 74.86290 | 595.23177   | -271.52487  | 442.22352   | 1 |
| 234 | N | 75.83371 | 62.77324 | 73.62615 | 585.53813   | -424.79750  | -105.81303  | 1 |
| 235 | H | 76.04911 | 63.34819 | 72.81266 | 959.88797   | 1327.56823  | -2177.11905 | 1 |
| 236 | H | 76.10452 | 61.82347 | 73.36897 | 1578.48647  | 16.27378    | -2220.76233 | 1 |
| 237 | N | 74.99745 | 62.39090 | 76.00354 | -452.17763  | -390.33541  | -421.51853  | 1 |
| 238 | H | 74.61118 | 62.67323 | 76.90348 | 470.26107   | 1974.25629  | -1817.92087 | 1 |
| 239 | H | 75.15347 | 61.38422 | 76.06774 | 1856.67307  | -1573.97321 | -1224.35416 | 1 |
| 240 | C | 74.95364 | 69.44946 | 76.00832 | -531.47271  | -581.45780  | -55.06206   | 1 |
| 241 | O | 74.31022 | 69.88939 | 76.95942 | -243.00837  | 192.73507   | 609.52485   | 1 |
| 242 | N | 76.23073 | 69.16418 | 75.93731 | 343.49288   | -644.25607  | 38.09164    | 1 |
| 243 | H | 76.51654 | 68.80849 | 75.02660 | -1691.16043 | -1535.97525 | -1484.73099 | 1 |
| 244 | C | 77.22739 | 69.50375 | 76.93534 | 542.66492   | 350.14337   | 454.42563   | 1 |
| 245 | H | 78.19893 | 69.33865 | 76.40947 | 1209.57979  | -2396.95920 | 463.86744   | 1 |
| 246 | C | 77.00488 | 70.95188 | 77.35931 | -737.14309  | 145.93010   | 242.71942   | 1 |
| 247 | H | 75.94135 | 71.04830 | 77.69073 | -1050.18303 | 159.36419   | -2509.06125 | 1 |
| 248 | C | 77.89788 | 71.33649 | 78.52182 | -706.77696  | -252.88343  | -245.16230  | 1 |
| 249 | H | 77.71741 | 72.39670 | 78.85304 | -1624.64039 | -1665.49085 | 1417.86935  | 1 |
| 250 | H | 77.72358 | 70.67138 | 79.41364 | 2566.10521  | 598.51109   | 693.22305   | 1 |
| 251 | H | 78.98721 | 71.24929 | 78.25353 | -1972.69758 | 107.10018   | -1876.34312 | 1 |
| 252 | C | 77.20306 | 71.90216 | 76.19254 | 412.85148   | 672.58832   | -27.69222   | 1 |
| 253 | H | 77.00232 | 72.97096 | 76.48048 | 1447.02277  | 1762.76533  | -1490.78944 | 1 |
| 254 | H | 78.25427 | 71.85768 | 75.78852 | 1320.77379  | -145.20455  | 2378.68491  | 1 |
| 255 | H | 76.51371 | 71.65118 | 75.33541 | -1512.10848 | 1470.52031  | 1724.75147  | 1 |
| 256 | C | 77.08991 | 68.49482 | 78.25830 | -607.11113  | 499.56689   | 73.73769    | 1 |
| 257 | O | 78.09503 | 68.02184 | 78.72170 | 357.97126   | 460.81534   | 356.68785   | 1 |
| 258 | N | 75.85039 | 68.42498 | 78.70752 | 536.55407   | -368.62270  | 332.76306   | 1 |
| 259 | H | 75.07957 | 68.93259 | 78.21717 | 524.38866   | 2297.69985  | 1367.20941  | 1 |
| 260 | C | 75.59147 | 67.42692 | 79.68212 | 46.50277    | -774.29190  | -147.97904  | 1 |
| 261 | H | 76.59913 | 67.03511 | 79.95740 | 1676.51875  | 1883.29066  | 1032.55549  | 1 |
| 262 | C | 74.81072 | 68.11169 | 80.92150 | -559.41456  | -34.19198   | -556.30433  | 1 |
| 263 | H | 73.82713 | 68.50888 | 80.57436 | -64.66664   | 395.18769   | 2695.05373  | 1 |
| 264 | H | 74.57493 | 67.35075 | 81.70277 | -2703.44278 | -60.40056   | 333.79418   | 1 |
| 265 | C | 75.65155 | 69.22115 | 81.48980 | -519.76435  | 377.31045   | 459.42366   | 1 |



|     |   |          |          |          |             |             |             |   |
|-----|---|----------|----------|----------|-------------|-------------|-------------|---|
| 266 | H | 75.86457 | 69.94621 | 80.67168 | -1746.74323 | 1667.50644  | -1261.73691 | 1 |
| 267 | C | 74.90852 | 69.95080 | 82.60245 | 570.95554   | 16.46261    | -545.27700  | 1 |
| 268 | H | 75.51637 | 70.79374 | 83.02194 | 2391.58273  | 28.05277    | -1305.07271 | 1 |
| 269 | H | 73.94247 | 70.38769 | 82.24025 | 175.75588   | 917.63458   | 2559.43867  | 1 |
| 270 | H | 74.66387 | 69.26556 | 83.45442 | -1063.97851 | -2155.34650 | 1283.00462  | 1 |
| 271 | C | 76.97790 | 68.70249 | 82.03025 | 193.76014   | 2.62946     | -765.53141  | 1 |
| 272 | H | 77.57624 | 69.51876 | 82.51105 | 507.39394   | -846.55087  | 2539.60089  | 1 |
| 273 | H | 76.82617 | 67.90445 | 82.80204 | 1337.57841  | 1818.19054  | 1526.01994  | 1 |
| 274 | H | 77.61339 | 68.26549 | 81.21663 | 1100.88635  | -1172.91350 | -2199.08909 | 1 |
| 275 | C | 74.64279 | 66.30365 | 79.01317 | -549.21115  | 475.64486   | -309.38218  | 1 |
| 276 | O | 74.10621 | 66.41428 | 77.94218 | 556.06106   | -390.37755  | -78.24250   | 1 |
| 277 | O | 74.44390 | 65.14016 | 79.79606 | -572.27940  | -310.19032  | -209.75862  | 1 |
| 278 | H | 75.04143 | 65.37029 | 80.56118 | -1380.08193 | 2212.14486  | 790.85944   | 1 |

Listing 112: C00112.xmolout

|    |   |          |          |          |             |             |             |        |          |
|----|---|----------|----------|----------|-------------|-------------|-------------|--------|----------|
| 1  |   | 276      |          |          |             |             |             |        |          |
| 2  |   | 150.0000 | 150.0000 | 150.0000 | 0.0000      | 0.0000      | 0.0000***** | 2.7750 | 11100    |
|    |   | 0.2500   | 300.00   | 0.00     | 0.00        | 0.00        | -1293.3914  | 0.0000 | 300.0000 |
| 3  | H | 64.63594 | 72.37309 | 66.81011 | -2043.14101 | -1757.64893 | 399.89339   |        | 1        |
| 4  | N | 64.84861 | 72.80134 | 65.90970 | 426.75047   | 490.45733   | -334.42467  |        | 1        |
| 5  | H | 64.01408 | 73.36882 | 65.71179 | 442.25559   | -1110.30854 | -2448.52907 |        | 1        |
| 6  | C | 66.00704 | 73.60648 | 65.91379 | 415.32972   | -666.39213  | 83.73172    |        | 1        |
| 7  | H | 66.68574 | 73.24469 | 66.71575 | 879.32219   | 2491.00447  | 667.35213   |        | 1        |
| 8  | C | 66.65893 | 73.53436 | 64.44160 | 31.35357    | 477.41777   | 628.23362   |        | 1        |
| 9  | H | 65.90814 | 73.88280 | 63.69230 | 1168.38489  | 2240.25337  | -1019.71136 |        | 1        |
| 10 | H | 67.52884 | 74.22961 | 64.35666 | -360.43770  | 2534.90498  | 931.67112   |        | 1        |
| 11 | C | 67.06514 | 72.11056 | 64.15782 | 463.18208   | 512.70242   | -382.34388  |        | 1        |
| 12 | H | 66.23591 | 71.44426 | 64.48793 | 1725.29117  | 1863.52247  | -987.07854  |        | 1        |
| 13 | C | 67.28183 | 71.90228 | 62.66454 | 710.42801   | -144.27427  | -313.15367  |        | 1        |
| 14 | H | 67.56532 | 70.84335 | 62.43154 | 364.20195   | -1033.13725 | 2494.72524  |        | 1        |
| 15 | H | 66.35747 | 72.13590 | 62.07541 | 2567.61904  | 335.80679   | 847.48802   |        | 1        |
| 16 | H | 68.10050 | 72.55875 | 62.27143 | -2587.99029 | 680.92867   | -512.16411  |        | 1        |
| 17 | C | 68.32979 | 71.73270 | 64.91635 | 268.17616   | 741.64379   | -40.42634   |        | 1        |
| 18 | H | 68.62826 | 70.67083 | 64.71764 | 1283.54314  | -1945.37420 | -1411.27812 |        | 1        |
| 19 | H | 69.19545 | 72.38053 | 64.62163 | -1258.57796 | 1317.15249  | -2026.02085 |        | 1        |
| 20 | H | 68.19737 | 71.83838 | 66.02377 | -2502.84526 | 909.80597   | 575.92391   |        | 1        |
| 21 | C | 65.40060 | 75.10542 | 66.14881 | 619.36578   | -458.64843  | -172.09273  |        | 1        |
| 22 | O | 64.25307 | 75.35249 | 65.82911 | -81.40433   | 433.87611   | 522.34594   |        | 1        |
| 23 | N | 66.34864 | 75.88733 | 66.63784 | 175.23996   | -622.20190  | 341.55523   |        | 1        |
| 24 | H | 67.26005 | 75.44743 | 66.76771 | -876.57256  | -303.22879  | -2561.90213 |        | 1        |
| 25 | C | 66.20984 | 77.27893 | 66.86827 | -571.88214  | -534.10783  | -106.15033  |        | 1        |
| 26 | H | 67.26273 | 77.60517 | 67.01102 | -2713.20841 | -16.25800   | -248.80809  |        | 1        |
| 27 | C | 65.50723 | 77.94116 | 65.59020 | 166.60354   | 288.16399   | -716.09568  |        | 1        |
| 28 | H | 64.47340 | 77.49890 | 65.49697 | -2097.85574 | 1636.78449  | -586.18044  |        | 1        |
| 29 | O | 66.17458 | 77.72628 | 64.33450 | -317.80580  | -363.38227  | 484.43082   |        | 1        |
| 30 | H | 65.52166 | 77.15883 | 63.87504 | 1863.74748  | -1451.84923 | 1357.29467  |        | 1        |
| 31 | C | 65.39076 | 79.44159 | 66.04548 | 503.80731   | 517.99032   | 318.51606   |        | 1        |
| 32 | H | 64.84700 | 80.05538 | 65.28992 | 640.61020   | -2157.10410 | -1536.29104 |        | 1        |
| 33 | H | 64.83315 | 79.53840 | 67.01318 | 1687.88455  | 465.60692   | 2087.56452  |        | 1        |
| 34 | H | 66.39391 | 79.90638 | 66.18846 | -1293.07895 | -1899.88581 | -1463.57452 |        | 1        |
| 35 | C | 65.28699 | 77.50960 | 68.20017 | -153.07550  | -733.68902  | 248.70981   |        | 1        |
| 36 | O | 64.09679 | 77.64980 | 68.06566 | 186.15459   | -480.78787  | -449.34387  |        | 1        |
| 37 | N | 66.01665 | 77.57003 | 69.32269 | -487.53139  | 543.18517   | 42.03850    |        | 1        |
| 38 | C | 65.37952 | 77.48408 | 70.60265 | -699.35871  | 69.34393    | 360.10701   |        | 1        |
| 39 | H | 64.57952 | 76.71668 | 70.49494 | 2.81126     | -221.99807  | -2715.58072 |        | 1        |
| 40 | C | 66.57501 | 77.07327 | 71.55788 | -507.46439  | -592.59194  | 122.07761   |        | 1        |
| 41 | H | 66.40764 | 77.40170 | 72.62930 | -1975.08116 | 525.87560   | -1801.71556 |        | 1        |
| 42 | H | 66.71231 | 75.96842 | 71.58040 | 1588.27743  | -1913.22100 | 1113.83566  |        | 1        |
| 43 | C | 67.80087 | 77.77520 | 70.89420 | -613.62442  | -457.55993  | -194.14490  |        | 1        |
| 44 | H | 67.84529 | 78.85063 | 71.17851 | 1707.54637  | -721.27992  | 1996.92523  |        | 1        |
| 45 | H | 68.77802 | 77.33231 | 71.19039 | 758.23357   | 2100.81767  | 1560.55011  |        | 1        |

|     |   |          |          |          |             |             |             |   |
|-----|---|----------|----------|----------|-------------|-------------|-------------|---|
| 46  | C | 67.47250 | 77.58876 | 69.35060 | -352.41524  | 704.96076   | 49.21465    | 1 |
| 47  | H | 67.82855 | 78.41321 | 68.68923 | 1714.76886  | -2070.42778 | 443.35792   | 1 |
| 48  | H | 67.79387 | 76.60978 | 68.92307 | 1224.15040  | 1801.50881  | 1636.97633  | 1 |
| 49  | C | 64.72321 | 78.92093 | 71.04102 | 566.85117   | 537.05831   | 117.62814   | 1 |
| 50  | O | 63.79274 | 78.89607 | 71.85340 | -550.26779  | -406.08867  | 4.21666     | 1 |
| 51  | N | 65.36753 | 79.95572 | 70.54102 | 566.34832   | -425.77725  | 180.18749   | 1 |
| 52  | H | 66.11340 | 79.58978 | 69.94792 | 644.44502   | 2646.80550  | -52.73430   | 1 |
| 53  | C | 64.83015 | 81.24909 | 70.31919 | 612.34801   | -281.48662  | 411.56221   | 1 |
| 54  | H | 65.54939 | 81.72202 | 69.61541 | 1667.23498  | -1490.75142 | 1556.16753  | 1 |
| 55  | C | 63.39131 | 81.02651 | 69.66117 | -714.45746  | -175.43074  | 286.98927   | 1 |
| 56  | H | 62.85451 | 80.25076 | 70.27567 | -787.09484  | 1763.03619  | -1922.46060 | 1 |
| 57  | O | 63.41292 | 80.53061 | 68.30618 | -429.46514  | 516.51932   | -128.40526  | 1 |
| 58  | H | 63.25792 | 79.57128 | 68.44668 | 1981.82785  | 436.16847   | -1818.18182 | 1 |
| 59  | C | 62.71845 | 82.42994 | 69.85838 | 630.79189   | -468.94448  | 76.03230    | 1 |
| 60  | H | 61.64220 | 82.41582 | 69.56725 | -1775.71861 | 2062.30353  | 131.89849   | 1 |
| 61  | H | 62.78071 | 82.76910 | 70.92334 | -1855.14608 | 88.94118    | 1993.53760  | 1 |
| 62  | H | 63.21981 | 83.20900 | 69.23722 | -1504.82350 | -780.94249  | -2132.90992 | 1 |
| 63  | C | 64.66981 | 82.13690 | 71.68660 | 288.57638   | 618.62814   | -397.00270  | 1 |
| 64  | O | 64.87902 | 83.32650 | 71.63682 | 321.70495   | -185.26452  | 574.37218   | 1 |
| 65  | N | 64.16817 | 81.42677 | 72.68456 | -447.05792  | -446.53431  | 367.76425   | 1 |
| 66  | H | 63.96446 | 80.39846 | 72.56730 | 350.31316   | 1975.63644  | -1843.31522 | 1 |
| 67  | C | 63.99256 | 82.08195 | 73.93434 | -511.23061  | 374.03917   | -471.51480  | 1 |
| 68  | H | 63.81177 | 83.14902 | 73.66608 | 2234.79579  | -898.70890  | -1273.45190 | 1 |
| 69  | C | 62.75632 | 81.28874 | 74.57631 | 529.53781   | -159.34528  | 563.72604   | 1 |
| 70  | H | 62.47244 | 81.80274 | 75.53291 | 654.59388   | 2347.94251  | 1217.51488  | 1 |
| 71  | H | 61.89366 | 81.42108 | 73.87084 | -1526.55661 | 2103.42026  | 817.87394   | 1 |
| 72  | O | 62.97295 | 79.88162 | 74.85292 | -554.84278  | 14.12789    | 399.58769   | 1 |
| 73  | H | 62.99417 | 79.53464 | 73.93677 | 1297.06236  | 2061.84854  | 1220.68812  | 1 |
| 74  | C | 65.35416 | 81.92566 | 74.82019 | -662.15484  | -412.13544  | 123.62687   | 1 |
| 75  | O | 65.81473 | 82.91649 | 75.32899 | -540.01537  | -317.05804  | 274.91456   | 1 |
| 76  | N | 65.75680 | 80.66454 | 74.95933 | -202.76299  | -690.00100  | -131.49145  | 1 |
| 77  | H | 65.22054 | 79.92156 | 74.49459 | -702.62132  | -2617.37191 | 281.70413   | 1 |
| 78  | C | 67.10017 | 80.34634 | 75.46286 | -491.73914  | 576.34187   | 222.73509   | 1 |
| 79  | H | 67.76262 | 81.15603 | 75.07544 | 1977.17978  | -1823.58850 | -434.68928  | 1 |
| 80  | C | 67.05587 | 80.31696 | 76.98076 | -649.50797  | -328.66843  | 306.11224   | 1 |
| 81  | H | 66.39099 | 79.47752 | 77.28496 | 2075.07803  | 1452.16490  | -1004.45904 | 1 |
| 82  | C | 68.42743 | 80.08377 | 77.58194 | -615.18735  | -489.99689  | -70.96352   | 1 |
| 83  | H | 68.40242 | 80.14168 | 78.70491 | -1226.32661 | -1724.38906 | -1716.47170 | 1 |
| 84  | H | 68.84036 | 79.04870 | 77.30952 | 2381.64273  | -969.84735  | 900.46860   | 1 |
| 85  | H | 69.17180 | 80.84909 | 77.22775 | 2122.74991  | 1702.23946  | -141.36228  | 1 |
| 86  | C | 66.46825 | 81.59224 | 77.56284 | -501.86074  | -479.61276  | -376.42482  | 1 |
| 87  | H | 66.48604 | 81.59083 | 78.68739 | 993.79261   | -2246.95401 | -1177.81305 | 1 |
| 88  | H | 67.03636 | 82.50157 | 77.21613 | 42.71279    | -626.15391  | -2651.37258 | 1 |
| 89  | H | 65.39821 | 81.73469 | 77.24121 | -2026.39012 | -1590.33709 | -887.82922  | 1 |
| 90  | C | 67.36856 | 78.85852 | 74.80330 | -672.89153  | 382.57394   | -156.34072  | 1 |
| 91  | O | 66.44441 | 78.17127 | 74.40184 | 410.04627   | 221.86223   | 500.35950   | 1 |
| 92  | N | 68.65965 | 78.58077 | 74.76386 | -378.11782  | -443.79414  | -441.10984  | 1 |
| 93  | H | 69.26379 | 79.27393 | 75.20032 | 2404.15973  | -568.14894  | 1149.30085  | 1 |
| 94  | C | 69.04225 | 77.20763 | 74.62882 | -544.54484  | 466.16019   | 331.29119   | 1 |
| 95  | H | 68.21115 | 76.74322 | 74.04919 | -1409.80988 | -170.17955  | 2325.32679  | 1 |
| 96  | C | 70.45212 | 77.23250 | 73.89489 | -184.48284  | 116.78282   | -758.89137  | 1 |
| 97  | H | 70.33655 | 77.70781 | 72.89553 | 1893.78641  | 1861.14652  | 611.04528   | 1 |
| 98  | H | 71.16182 | 77.88243 | 74.45378 | -2170.79665 | -974.19311  | 1327.50117  | 1 |
| 99  | C | 71.04460 | 75.79800 | 73.74785 | 389.51668   | 672.81878   | -138.49152  | 1 |
| 100 | H | 71.25295 | 75.34955 | 74.76527 | 510.64577   | 1933.03327  | 1851.02484  | 1 |
| 101 | H | 70.28919 | 75.11665 | 73.29445 | -2302.30869 | -1105.72939 | -948.89774  | 1 |
| 102 | C | 72.35500 | 75.75245 | 72.87069 | -559.93427  | -126.34590  | 542.30857   | 1 |
| 103 | O | 72.91747 | 74.70394 | 72.68285 | -670.36003  | -111.83166  | 76.36448    | 1 |
| 104 | N | 72.71900 | 76.95273 | 72.37053 | -216.06729  | -537.07037  | 446.51379   | 1 |
| 105 | H | 72.29623 | 77.87729 | 72.51270 | -1251.96487 | 1074.12894  | -2168.52500 | 1 |
| 106 | H | 73.54575 | 77.10398 | 71.78307 | -2451.83023 | -720.73851  | 944.84612   | 1 |
| 107 | C | 69.22946 | 76.57909 | 76.11470 | 546.24052   | -563.88337  | -85.11809   | 1 |

|     |   |          |          |          |             |             |             |   |
|-----|---|----------|----------|----------|-------------|-------------|-------------|---|
| 108 | O | 69.54126 | 77.28345 | 77.04884 | 71.70702    | -307.40463  | 606.69673   | 1 |
| 109 | N | 69.02853 | 75.26055 | 76.09090 | 479.90863   | -504.50129  | 222.86849   | 1 |
| 110 | C | 69.31578 | 74.45093 | 77.24636 | 75.51268    | -600.91904  | 506.73700   | 1 |
| 111 | H | 68.90067 | 75.00491 | 78.12024 | -2033.61562 | 1795.30103  | 254.89480   | 1 |
| 112 | C | 68.57628 | 73.08424 | 76.91121 | 523.79067   | 517.99274   | 284.45581   | 1 |
| 113 | H | 69.05001 | 72.20606 | 77.40464 | 1599.61665  | -1127.00911 | 1895.98173  | 1 |
| 114 | H | 67.51672 | 73.10275 | 77.25038 | -1881.83093 | 1275.82488  | -1501.55016 | 1 |
| 115 | C | 68.66925 | 73.03684 | 75.35570 | -600.05639  | -404.05026  | 316.64485   | 1 |
| 116 | H | 69.68919 | 72.73787 | 75.02421 | -2597.05260 | 496.36221   | 657.73249   | 1 |
| 117 | H | 67.95504 | 72.32412 | 74.88526 | -1666.24518 | 1294.38985  | -1723.90591 | 1 |
| 118 | C | 68.36555 | 74.55799 | 75.00259 | 493.57570   | -129.95376  | -602.56394  | 1 |
| 119 | H | 68.77426 | 74.90741 | 74.02584 | -1469.08415 | -637.84797  | 2204.22581  | 1 |
| 120 | H | 67.28863 | 74.84374 | 75.07213 | -1038.97840 | 1068.88701  | -2280.71789 | 1 |
| 121 | C | 70.91529 | 74.22687 | 77.38409 | 188.88100   | 241.05089   | -727.87821  | 1 |
| 122 | O | 71.72754 | 74.53620 | 76.51702 | 531.88613   | -49.19943   | 427.07960   | 1 |
| 123 | N | 71.16090 | 73.55811 | 78.52337 | 708.14833   | 26.93417    | -179.73509  | 1 |
| 124 | H | 70.25773 | 73.52678 | 78.99847 | -2232.69501 | -1179.09831 | 1023.94816  | 1 |
| 125 | C | 72.44010 | 73.74778 | 79.23926 | -738.32412  | 259.92548   | 104.42456   | 1 |
| 126 | H | 72.69356 | 74.80935 | 79.01067 | 2028.89123  | 1260.02983  | 1311.33324  | 1 |
| 127 | C | 72.21684 | 73.46536 | 80.70405 | -258.65678  | -345.52513  | 661.28459   | 1 |
| 128 | H | 71.77312 | 72.44769 | 80.79063 | -1826.06090 | -1801.46097 | -918.64554  | 1 |
| 129 | C | 73.51802 | 73.48121 | 81.48863 | -541.23400  | 531.92970   | -218.41428  | 1 |
| 130 | H | 73.34882 | 73.26441 | 82.57893 | 1311.73218  | -2219.18200 | 882.19023   | 1 |
| 131 | H | 74.24250 | 72.70939 | 81.10289 | -1048.71298 | 1223.58118  | -2196.97971 | 1 |
| 132 | H | 74.02992 | 74.48013 | 81.42226 | 419.06414   | 1903.92898  | 1903.44670  | 1 |
| 133 | C | 71.24751 | 74.45141 | 81.33548 | -423.86431  | 152.66566   | -648.55262  | 1 |
| 134 | H | 71.05939 | 74.21423 | 82.41801 | 105.68386   | -2342.50080 | 1387.51238  | 1 |
| 135 | H | 71.64297 | 75.50274 | 81.28963 | -1695.63603 | -1484.73621 | -1531.02793 | 1 |
| 136 | H | 70.25099 | 74.45211 | 80.81666 | -1853.57121 | -487.39031  | 1936.59343  | 1 |
| 137 | C | 73.50476 | 72.69621 | 78.53633 | 539.71428   | -510.58232  | 267.58633   | 1 |
| 138 | O | 73.88670 | 71.70193 | 79.09832 | -15.93758   | -278.34085  | -624.49402  | 1 |
| 139 | N | 73.82596 | 73.14349 | 77.33380 | -676.81886  | 12.05292    | 276.17960   | 1 |
| 140 | H | 73.34801 | 73.97740 | 76.92242 | -1694.44250 | -373.84189  | -2100.66098 | 1 |
| 141 | C | 74.77000 | 72.37747 | 76.58037 | 412.33078   | -664.70360  | 108.35451   | 1 |
| 142 | H | 74.59482 | 71.31961 | 76.88867 | 1765.77476  | 1294.44366  | 1621.76594  | 1 |
| 143 | C | 74.42222 | 72.71315 | 75.07153 | -179.66635  | -721.95667  | -264.73915  | 1 |
| 144 | H | 73.33080 | 72.58475 | 74.89158 | -607.34922  | 2587.87032  | -598.10018  | 1 |
| 145 | H | 74.62326 | 73.78707 | 74.85660 | -359.69332  | -1479.13954 | -2259.74260 | 1 |
| 146 | C | 75.24830 | 71.79849 | 74.10973 | -240.01076  | 616.02425   | 431.85322   | 1 |
| 147 | H | 76.34073 | 71.96516 | 74.24404 | -1359.17131 | 782.54425   | 2227.99181  | 1 |
| 148 | H | 75.06762 | 70.72131 | 74.32493 | -820.36667  | 85.81767    | -2596.78715 | 1 |
| 149 | C | 74.81361 | 72.16192 | 72.63293 | -513.07015  | 236.18570   | -551.87280  | 1 |
| 150 | H | 73.73038 | 71.95654 | 72.47097 | 1816.11944  | -1183.11722 | -1650.94321 | 1 |
| 151 | H | 74.93788 | 73.25269 | 72.43619 | -1800.04429 | -1361.53473 | 1526.34643  | 1 |
| 152 | C | 75.69346 | 71.31529 | 71.68354 | 726.08972   | -253.19732  | -179.64713  | 1 |
| 153 | H | 76.78258 | 71.50130 | 71.77272 | 1224.27271  | -456.51798  | -2390.90304 | 1 |
| 154 | H | 75.49303 | 70.22566 | 71.71644 | 1206.40339  | -1150.93514 | -2154.90344 | 1 |
| 155 | N | 75.33999 | 71.74513 | 70.22097 | 329.70796   | -633.68968  | -155.67358  | 1 |
| 156 | H | 75.86871 | 71.24070 | 69.45187 | 1348.31305  | 1938.76845  | 1359.00643  | 1 |
| 157 | H | 74.33427 | 71.61137 | 69.90960 | 2096.92035  | 1446.54551  | -966.48890  | 1 |
| 158 | H | 75.51276 | 72.76049 | 69.96460 | -1197.07217 | -2303.53719 | 827.28733   | 1 |
| 159 | C | 76.27601 | 72.87876 | 76.95611 | -378.01186  | -556.17301  | -413.96481  | 1 |
| 160 | O | 76.52109 | 73.96050 | 77.48603 | -409.44433  | -307.55053  | -453.30833  | 1 |
| 161 | N | 77.16373 | 72.02732 | 76.40567 | -429.02477  | 524.70884   | 274.08502   | 1 |
| 162 | H | 76.55553 | 71.26963 | 76.06795 | 1706.34263  | -1425.96036 | 1574.38926  | 1 |
| 163 | C | 78.31299 | 71.61472 | 77.18671 | -45.25864   | -626.22952  | 478.93267   | 1 |
| 164 | H | 77.90162 | 71.05168 | 78.05213 | 1988.63164  | 570.90773   | 1772.87287  | 1 |
| 165 | C | 79.12742 | 70.72277 | 76.18293 | 551.77128   | -20.49526   | -564.54996  | 1 |
| 166 | H | 78.52516 | 69.85620 | 75.82829 | 1434.61535  | -1753.10253 | 1513.99471  | 1 |
| 167 | H | 79.35007 | 71.31798 | 75.26847 | -714.67738  | 1819.09770  | 1898.36494  | 1 |
| 168 | C | 80.46323 | 70.24357 | 76.84966 | 446.99263   | -555.77305  | 338.97221   | 1 |
| 169 | H | 80.88605 | 71.03079 | 77.51493 | 1953.68466  | 1892.25957  | -161.67766  | 1 |

|     |   |          |          |          |             |             |             |   |
|-----|---|----------|----------|----------|-------------|-------------|-------------|---|
| 170 | H | 80.29963 | 69.35505 | 77.49942 | -403.03785  | 2688.07032  | -188.43591  | 1 |
| 171 | C | 81.46221 | 69.92840 | 75.66750 | 567.86262   | 335.74681   | 434.04421   | 1 |
| 172 | H | 81.11135 | 69.05695 | 75.06863 | -1080.02275 | 1568.26081  | -1948.78900 | 1 |
| 173 | H | 81.52005 | 70.78320 | 74.95375 | -919.54108  | 2111.34692  | 1456.13463  | 1 |
| 174 | C | 82.85290 | 69.65610 | 76.29439 | 195.81897   | 173.33862   | -745.11536  | 1 |
| 175 | H | 83.35529 | 70.55664 | 76.71849 | 1405.67949  | -2301.21089 | -390.08113  | 1 |
| 176 | H | 82.87977 | 68.82783 | 77.03234 | -940.37328  | -1118.32446 | 2299.72133  | 1 |
| 177 | N | 83.79383 | 69.18192 | 75.15449 | 319.26422   | 656.36007   | -42.02424   | 1 |
| 178 | H | 84.84421 | 69.07929 | 75.48146 | 1961.03633  | 619.91968   | 1787.09422  | 1 |
| 179 | H | 83.56509 | 68.23110 | 74.74237 | 854.14343   | -2156.80752 | 1429.08711  | 1 |
| 180 | H | 83.84373 | 69.77227 | 74.27452 | 1237.02905  | -1378.50857 | -1998.28500 | 1 |
| 181 | C | 79.26797 | 72.85089 | 77.64081 | 532.53319   | -268.57236  | 517.55729   | 1 |
| 182 | O | 79.88923 | 72.72941 | 78.67552 | 266.16714   | -290.73804  | -558.88002  | 1 |
| 183 | N | 79.40637 | 73.77239 | 76.68135 | -226.25352  | 640.49678   | -270.32839  | 1 |
| 184 | H | 78.73570 | 73.64924 | 75.92193 | 2007.69063  | -1035.27229 | 1523.50231  | 1 |
| 185 | C | 80.02227 | 75.02902 | 76.92391 | -540.76542  | -573.33303  | 49.50000    | 1 |
| 186 | H | 79.75373 | 75.64273 | 76.03635 | -2374.20950 | -1036.76023 | 843.75774   | 1 |
| 187 | C | 79.32614 | 75.61882 | 78.23847 | -77.09082   | 666.87422   | -415.84136  | 1 |
| 188 | H | 79.13813 | 74.77300 | 78.96597 | -985.81834  | 617.19825   | 2463.91927  | 1 |
| 189 | O | 78.01069 | 76.13129 | 77.99925 | 293.29899   | -391.65602  | -477.80926  | 1 |
| 190 | H | 77.48598 | 75.25522 | 77.88134 | 2528.72714  | -681.76262  | -751.27122  | 1 |
| 191 | C | 80.40627 | 76.58910 | 78.82824 | 252.47363   | -605.14473  | 440.05134   | 1 |
| 192 | H | 80.00204 | 77.18073 | 79.68372 | -2052.65063 | 1456.49051  | -1043.51830 | 1 |
| 193 | H | 81.29860 | 76.03042 | 79.20463 | -2152.98800 | -1661.97574 | -161.70652  | 1 |
| 194 | H | 80.77316 | 77.31024 | 78.05673 | -473.12726  | -1584.27339 | 2165.61725  | 1 |
| 195 | C | 81.64382 | 74.86477 | 77.03615 | 360.36307   | 488.46713   | 505.10056   | 1 |
| 196 | O | 82.30533 | 75.87172 | 77.15896 | -200.08817  | -528.03552  | -385.82850  | 1 |
| 197 | N | 82.04078 | 73.60048 | 76.96005 | -597.54095  | -226.44775  | 355.20479   | 1 |
| 198 | H | 81.28787 | 72.91488 | 76.88775 | 2179.23655  | -1300.70981 | -991.33835  | 1 |
| 199 | C | 83.38261 | 73.23805 | 76.68463 | -687.68921  | 297.39807   | -249.45179  | 1 |
| 200 | H | 83.30382 | 72.13419 | 76.53213 | -349.16256  | -2467.37713 | -1101.72831 | 1 |
| 201 | C | 83.84188 | 74.01305 | 75.36312 | 672.47345   | 361.54328   | -201.62880  | 1 |
| 202 | H | 83.62265 | 75.10387 | 75.45516 | 1541.41502  | 582.18425   | 2169.97026  | 1 |
| 203 | H | 84.93894 | 73.89456 | 75.20574 | -2534.67717 | 60.25153    | 997.72295   | 1 |
| 204 | C | 83.06942 | 73.39561 | 74.18820 | 574.26774   | -389.43119  | -377.02542  | 1 |
| 205 | C | 83.54535 | 72.17088 | 73.63296 | 688.82679   | -287.33580  | -257.96133  | 1 |
| 206 | H | 84.45727 | 71.69076 | 74.03199 | 331.14182   | 1470.38163  | 2269.80013  | 1 |
| 207 | C | 81.89108 | 74.01750 | 73.67701 | -383.52382  | -675.04808  | 144.24917   | 1 |
| 208 | H | 81.51871 | 74.96185 | 74.11397 | 4.09847     | 1517.59662  | 2262.86397  | 1 |
| 209 | C | 82.83524 | 71.59746 | 72.57862 | -134.76730  | 428.45285   | -649.50303  | 1 |
| 210 | H | 83.20209 | 70.65046 | 72.14611 | -903.23433  | 1600.49020  | 2011.53387  | 1 |
| 211 | C | 81.22081 | 73.40892 | 72.61294 | -335.53281  | -615.00040  | -364.39058  | 1 |
| 212 | H | 80.31706 | 73.90210 | 72.21455 | 1596.45398  | -1369.33862 | 1732.02659  | 1 |
| 213 | C | 81.66001 | 72.18555 | 72.02766 | 585.48547   | -340.24194  | -406.23938  | 1 |
| 214 | O | 80.97825 | 71.55576 | 70.95325 | -419.15649  | -173.04408  | -511.94141  | 1 |
| 215 | H | 80.28598 | 72.23521 | 70.77504 | -1071.84350 | 1559.71507  | -1960.13012 | 1 |
| 216 | C | 84.29484 | 73.60025 | 77.99286 | 291.41878   | -183.13091  | 710.72246   | 1 |
| 217 | O | 84.14682 | 72.96825 | 79.01483 | 379.87695   | 523.47396   | -222.23622  | 1 |
| 218 | N | 85.22153 | 74.51434 | 77.71033 | 564.30591   | 373.09380   | 277.24371   | 1 |
| 219 | H | 85.14772 | 74.94913 | 76.79122 | -120.59931  | -2436.07824 | -1214.35098 | 1 |
| 220 | C | 85.87045 | 75.25558 | 78.73834 | 404.07514   | -299.37480  | 608.84009   | 1 |
| 221 | H | 86.11939 | 76.22307 | 78.24863 | -1071.07882 | -841.69025  | 2359.66467  | 1 |
| 222 | C | 84.86793 | 75.41143 | 79.95336 | -683.12807  | 68.71770    | -390.13096  | 1 |
| 223 | H | 83.85372 | 75.70422 | 79.59590 | 2068.88918  | 1596.58590  | 770.89603   | 1 |
| 224 | H | 84.73393 | 74.43344 | 80.47931 | 1379.86429  | 2342.49779  | -179.85638  | 1 |
| 225 | C | 85.47503 | 76.48480 | 80.91066 | -176.39967  | 537.49466   | 550.97268   | 1 |
| 226 | H | 86.52916 | 76.22739 | 81.16645 | -396.28051  | 1942.22168  | 1869.33314  | 1 |
| 227 | H | 85.52282 | 77.47962 | 80.41411 | -94.44700   | 586.00678   | -2659.20016 | 1 |
| 228 | C | 84.57646 | 76.54247 | 82.22884 | -291.69381  | -718.18079  | -150.72929  | 1 |
| 229 | H | 83.53270 | 76.92697 | 82.10007 | -2303.38776 | 1089.76242  | 964.62032   | 1 |
| 230 | H | 84.52813 | 75.59257 | 82.82043 | 884.16729   | 2568.80533  | -207.74283  | 1 |
| 231 | N | 85.31018 | 77.47875 | 82.97589 | -594.49522  | -252.81478  | 342.29276   | 1 |

|     |   |          |          |          |             |             |             |   |
|-----|---|----------|----------|----------|-------------|-------------|-------------|---|
| 232 | H | 86.18543 | 77.78812 | 82.58125 | -1735.17426 | 2084.05705  | -263.71605  | 1 |
| 233 | C | 84.95892 | 77.94748 | 84.10464 | 595.23177   | -271.52487  | 442.22352   | 1 |
| 234 | N | 83.74703 | 77.50507 | 84.64447 | 585.53813   | -424.79750  | -105.81303  | 1 |
| 235 | H | 83.07980 | 76.83278 | 84.26799 | 959.88797   | 1327.56823  | -2177.11905 | 1 |
| 236 | H | 83.36384 | 77.80179 | 85.54257 | 1578.48647  | 16.27378    | -2220.76233 | 1 |
| 237 | N | 85.91498 | 78.85245 | 84.58651 | -452.17763  | -390.33541  | -421.51853  | 1 |
| 238 | H | 86.79985 | 79.16287 | 84.18783 | 470.26107   | 1974.25629  | -1817.92087 | 1 |
| 239 | H | 85.82739 | 79.33766 | 85.48006 | 1856.67307  | -1573.97321 | -1224.35416 | 1 |
| 240 | C | 87.21462 | 74.49644 | 79.28927 | -531.47271  | -581.45780  | -55.06206   | 1 |
| 241 | O | 88.04885 | 75.11879 | 79.90829 | -243.00837  | 192.73507   | 609.52485   | 1 |
| 242 | N | 87.18225 | 73.13941 | 79.10931 | 343.49288   | -644.25607  | 38.09164    | 1 |
| 243 | H | 86.36615 | 73.03344 | 78.49416 | -1691.16043 | -1535.97525 | -1484.73099 | 1 |
| 244 | C | 88.45280 | 72.57001 | 78.69091 | 542.66492   | 350.14337   | 454.42563   | 1 |
| 245 | H | 88.80809 | 73.24561 | 77.88330 | 1209.57979  | -2396.95920 | 463.86744   | 1 |
| 246 | C | 89.41069 | 72.63529 | 79.95090 | -737.14309  | 145.93010   | 242.71942   | 1 |
| 247 | H | 88.84743 | 73.00757 | 80.83480 | -1050.18303 | 159.36419   | -2509.06125 | 1 |
| 248 | C | 90.06208 | 71.23806 | 80.23751 | -706.77696  | -252.88343  | -245.16230  | 1 |
| 249 | H | 90.80603 | 71.28862 | 81.06667 | -1624.64039 | -1665.49085 | 1417.86935  | 1 |
| 250 | H | 89.29490 | 70.48118 | 80.52272 | 2566.10521  | 598.51109   | 693.22305   | 1 |
| 251 | H | 90.59172 | 70.84634 | 79.33452 | -1972.69758 | 107.10018   | -1876.34312 | 1 |
| 252 | C | 90.60057 | 73.59902 | 79.61222 | 412.85148   | 672.58832   | -27.69222   | 1 |
| 253 | H | 91.34114 | 73.64595 | 80.44493 | 1447.02277  | 1762.76533  | -1490.78944 | 1 |
| 254 | H | 91.14854 | 73.27360 | 78.69690 | 1320.77379  | -145.20455  | 2378.68491  | 1 |
| 255 | H | 90.23401 | 74.63993 | 79.43561 | -1512.10848 | 1470.52031  | 1724.75147  | 1 |
| 256 | C | 88.22973 | 71.06713 | 78.17089 | -607.11113  | 499.56689   | 73.73769    | 1 |
| 257 | O | 89.13681 | 70.49770 | 77.60634 | 357.97126   | 460.81534   | 356.68785   | 1 |
| 258 | N | 86.99425 | 70.56482 | 78.43338 | 536.55407   | -368.62270  | 332.76306   | 1 |
| 259 | H | 86.41618 | 71.19193 | 78.99748 | 524.38866   | 2297.69985  | 1367.20941  | 1 |
| 260 | C | 87.03344 | 69.16656 | 78.80907 | 46.50277    | -774.29190  | -147.97904  | 1 |
| 261 | H | 88.07079 | 68.99788 | 79.17225 | 1676.51875  | 1883.29066  | 1032.55549  | 1 |
| 262 | C | 85.88926 | 68.91871 | 79.91377 | -559.41456  | -34.19198   | -556.30433  | 1 |
| 263 | H | 84.93458 | 69.38119 | 79.56337 | -64.66664   | 395.18769   | 2695.05373  | 1 |
| 264 | H | 85.68279 | 67.82588 | 80.01945 | -2703.44278 | -60.40056   | 333.79418   | 1 |
| 265 | C | 86.30903 | 69.50508 | 81.23886 | -519.76435  | 377.31045   | 459.42366   | 1 |
| 266 | H | 86.69562 | 70.53518 | 81.06971 | -1746.74323 | 1667.50644  | -1261.73691 | 1 |
| 267 | C | 85.11050 | 69.58758 | 82.17566 | 570.95554   | 16.46261    | -545.27700  | 1 |
| 268 | H | 85.39159 | 70.01444 | 83.17295 | 2391.58273  | 28.05277    | -1305.07271 | 1 |
| 269 | H | 84.29898 | 70.23540 | 81.75298 | 175.75588   | 917.63458   | 2559.43867  | 1 |
| 270 | H | 84.66378 | 68.57660 | 82.36231 | -1063.97851 | -2155.34650 | 1283.00462  | 1 |
| 271 | C | 87.40461 | 68.66713 | 81.88323 | 193.76014   | 2.62946     | -765.53141  | 1 |
| 272 | H | 87.72265 | 69.09135 | 82.87057 | 507.39394   | -846.55087  | 2539.60089  | 1 |
| 273 | H | 87.06125 | 67.61654 | 82.06964 | 1337.57841  | 1818.19054  | 1526.01994  | 1 |
| 274 | H | 88.31838 | 68.60527 | 81.23833 | 1100.88635  | -1172.91350 | -2199.08909 | 1 |
| 275 | C | 86.68522 | 68.26905 | 77.54407 | -549.21115  | 475.64486   | -309.38218  | 1 |
| 276 | O | 85.90233 | 68.61523 | 76.66716 | 556.06106   | -390.37755  | -78.24250   | 1 |
| 277 | O | 87.14294 | 66.94816 | 77.59051 | -572.27940  | -310.19032  | -209.75862  | 1 |
| 278 | H | 87.72036 | 67.01615 | 78.41275 | -1380.08193 | 2212.14486  | 790.85944   | 1 |

Listing 113: C00113.xmolout

|    |   |          |          |          |             |             |             |        |          |
|----|---|----------|----------|----------|-------------|-------------|-------------|--------|----------|
| 1  |   | 276      |          |          |             |             |             |        |          |
| 2  |   | 150.0000 | 150.0000 | 150.0000 | 0.0000      | 0.0000      | 0.0000***** | 2.7750 | 11100    |
|    |   | 0.2500   | 300.00   | 0.00     | 0.00        | 0.00        | -1293.3894  | 0.0000 | 300.0000 |
| 3  | H | 75.23134 | 71.44033 | 83.84587 | -2043.14101 | -1757.64893 | 399.89339   |        | 1        |
| 4  | N | 75.53238 | 71.95895 | 84.66977 | 426.75047   | 490.45733   | -334.42467  |        | 1        |
| 5  | H | 75.60646 | 71.22542 | 85.38266 | 442.25559   | -1110.30854 | -2448.52907 |        | 1        |
| 6  | C | 76.75403 | 72.65265 | 84.50708 | 415.32972   | -666.39213  | 83.73172    |        | 1        |
| 7  | H | 76.95180 | 72.71135 | 83.41366 | 879.32219   | 2491.00447  | 667.35213   |        | 1        |
| 8  | C | 76.61363 | 74.11166 | 85.18911 | 31.35357    | 477.41777   | 628.23362   |        | 1        |
| 9  | H | 76.30411 | 73.98799 | 86.25409 | 1168.38489  | 2240.25337  | -1019.71136 |        | 1        |
| 10 | H | 77.60188 | 74.63013 | 85.21178 | -360.43770  | 2534.90498  | 931.67112   |        | 1        |
| 11 | C | 75.60013 | 74.93058 | 84.43676 | 463.18208   | 512.70242   | -382.34388  |        | 1        |

|    |   |          |          |          |             |             |             |   |
|----|---|----------|----------|----------|-------------|-------------|-------------|---|
| 12 | H | 74.67084 | 74.32585 | 84.33300 | 1725.29117  | 1863.52247  | -987.07854  | 1 |
| 13 | C | 75.27476 | 76.19504 | 85.22356 | 710.42801   | -144.27427  | -313.15367  | 1 |
| 14 | H | 74.50893 | 76.82608 | 84.70562 | 364.20195   | -1033.13725 | 2494.72524  | 1 |
| 15 | H | 74.87302 | 75.95572 | 86.24191 | 2567.61904  | 335.80679   | 847.48802   | 1 |
| 16 | H | 76.18467 | 76.83243 | 85.36848 | -2587.99029 | 680.92867   | -512.16411  | 1 |
| 17 | C | 76.10575 | 75.30004 | 83.04912 | 268.17616   | 741.64379   | -40.42634   | 1 |
| 18 | H | 75.35585 | 75.90912 | 82.47938 | 1283.54314  | -1945.37420 | -1411.27812 | 1 |
| 19 | H | 77.05114 | 75.90078 | 83.09849 | -1258.57796 | 1317.15249  | -2026.02085 | 1 |
| 20 | H | 76.32744 | 74.39418 | 82.42800 | -2502.84526 | 909.80597   | 575.92391   | 1 |
| 21 | C | 77.83599 | 71.78037 | 85.33006 | 619.36578   | -458.64843  | -172.09273  | 1 |
| 22 | O | 77.50941 | 70.75699 | 85.94822 | -81.40433   | 433.87611   | 522.34594   | 1 |
| 23 | N | 79.02537 | 72.30047 | 85.14981 | 175.23996   | -622.20190  | 341.55523   | 1 |
| 24 | H | 79.03961 | 73.14807 | 84.58117 | -876.57256  | -303.22879  | -2561.90213 | 1 |
| 25 | C | 80.11400 | 72.10159 | 86.06607 | -571.88214  | -534.10783  | -106.15033  | 1 |
| 26 | H | 79.75056 | 72.49924 | 87.03951 | -2713.20841 | -16.25800   | -248.80809  | 1 |
| 27 | C | 80.41637 | 70.53913 | 86.19620 | 166.60354   | 288.16399   | -716.09568  | 1 |
| 28 | H | 80.11339 | 70.06084 | 85.22177 | -2097.85574 | 1636.78449  | -586.18044  | 1 |
| 29 | O | 79.62619 | 69.84686 | 87.17104 | -317.80580  | -363.38227  | 484.43082   | 1 |
| 30 | H | 78.68246 | 70.01778 | 86.78528 | 1863.74748  | -1451.84923 | 1357.29467  | 1 |
| 31 | C | 81.97027 | 70.46363 | 86.39238 | 503.80731   | 517.99032   | 318.51606   | 1 |
| 32 | H | 82.32714 | 69.40777 | 86.42629 | 640.61020   | -2157.10410 | -1536.29104 | 1 |
| 33 | H | 82.52390 | 70.97741 | 85.57168 | 1687.88455  | 465.60692   | 2087.56452  | 1 |
| 34 | H | 82.27890 | 70.94963 | 87.34791 | -1293.07895 | -1899.88581 | -1463.57452 | 1 |
| 35 | C | 81.34289 | 72.98299 | 85.47896 | -153.07550  | -733.68902  | 248.70981   | 1 |
| 36 | O | 82.05051 | 73.48843 | 86.31198 | 186.15459   | -480.78787  | -449.34387  | 1 |
| 37 | N | 81.51806 | 72.93972 | 84.14969 | -487.53139  | 543.18517   | 42.03850    | 1 |
| 38 | C | 82.36497 | 73.89574 | 83.50257 | -699.35871  | 69.34393    | 360.10701   | 1 |
| 39 | H | 83.13239 | 74.21442 | 84.24677 | 2.81126     | -221.99807  | -2715.58072 | 1 |
| 40 | C | 82.90019 | 73.05247 | 82.26088 | -507.46439  | -592.59194  | 122.07761   | 1 |
| 41 | H | 83.28194 | 73.69383 | 81.43575 | -1975.08116 | 525.87560   | -1801.71556 | 1 |
| 42 | H | 83.73526 | 72.37860 | 82.55481 | 1588.27743  | -1913.22100 | 1113.83566  | 1 |
| 43 | C | 81.62752 | 72.24142 | 81.87179 | -613.62442  | -457.55993  | -194.14490  | 1 |
| 44 | H | 80.89426 | 72.88330 | 81.33340 | 1707.54637  | -721.27992  | 1996.92523  | 1 |
| 45 | H | 81.83535 | 71.36848 | 81.21254 | 758.23357   | 2100.81767  | 1560.55011  | 1 |
| 46 | C | 81.08995 | 71.82859 | 83.30940 | -352.41524  | 704.96076   | 49.21465    | 1 |
| 47 | H | 79.98242 | 71.73425 | 83.38513 | 1714.76886  | -2070.42778 | 443.35792   | 1 |
| 48 | H | 81.56115 | 70.91382 | 83.73810 | 1224.15040  | 1801.50881  | 1636.97633  | 1 |
| 49 | C | 81.47016 | 75.13419 | 82.92962 | 566.85117   | 537.05831   | 117.62814   | 1 |
| 50 | O | 80.25046 | 75.07230 | 82.79910 | -550.26779  | -406.08867  | 4.21666     | 1 |
| 51 | N | 82.29649 | 76.09575 | 82.59427 | 566.34832   | -425.77725  | 180.18749   | 1 |
| 52 | H | 83.28524 | 75.93501 | 82.76818 | 644.44502   | 2646.80550  | -52.73430   | 1 |
| 53 | C | 81.79937 | 77.35365 | 82.13433 | 612.34801   | -281.48662  | 411.56221   | 1 |
| 54 | H | 80.92762 | 77.52374 | 82.80516 | 1667.23498  | -1490.75142 | 1556.16753  | 1 |
| 55 | C | 82.96235 | 78.43340 | 82.25063 | -714.45746  | -175.43074  | 286.98927   | 1 |
| 56 | H | 83.78444 | 78.16030 | 81.53418 | -787.09484  | 1763.03619  | -1922.46060 | 1 |
| 57 | O | 83.57685 | 78.55137 | 83.54851 | -429.46514  | 516.51932   | -128.40526  | 1 |
| 58 | H | 84.50818 | 78.34052 | 83.34162 | 1981.82785  | 436.16847   | -1818.18182 | 1 |
| 59 | C | 82.22465 | 79.72199 | 81.72788 | 630.79189   | -468.94448  | 76.03230    | 1 |
| 60 | H | 82.91676 | 80.59418 | 81.67678 | -1775.71861 | 2062.30353  | 131.89849   | 1 |
| 61 | H | 81.80252 | 79.57281 | 80.70468 | -1855.14608 | 88.94118    | 1993.53760  | 1 |
| 62 | H | 81.38096 | 80.00855 | 82.39776 | -1504.82350 | -780.94249  | -2132.90992 | 1 |
| 63 | C | 81.32134 | 77.15066 | 80.57818 | 288.57638   | 618.62814   | -397.00270  | 1 |
| 64 | O | 81.94654 | 77.56022 | 79.63200 | 321.70495   | -185.26452  | 574.37218   | 1 |
| 65 | N | 80.19254 | 76.45216 | 80.60472 | -447.05792  | -446.53431  | 367.76425   | 1 |
| 66 | H | 79.78023 | 76.12337 | 81.51484 | 350.31316   | 1975.63644  | -1843.31522 | 1 |
| 67 | C | 79.38843 | 76.47352 | 79.43260 | -511.23061  | 374.03917   | -471.51480  | 1 |
| 68 | H | 80.07038 | 76.76200 | 78.59627 | 2234.79579  | -898.70890  | -1273.45190 | 1 |
| 69 | C | 78.80868 | 74.97509 | 79.35350 | 529.53781   | -159.34528  | 563.72604   | 1 |
| 70 | H | 78.18436 | 74.88492 | 78.42554 | 654.59388   | 2347.94251  | 1217.51488  | 1 |
| 71 | H | 79.70164 | 74.31203 | 79.20051 | -1526.55661 | 2103.42026  | 817.87394   | 1 |
| 72 | O | 78.03814 | 74.51565 | 80.49084 | -554.84278  | 14.12789    | 399.58769   | 1 |
| 73 | H | 78.74278 | 74.54171 | 81.17457 | 1297.06236  | 2061.84854  | 1220.68812  | 1 |

|     |   |          |          |          |             |             |             |   |
|-----|---|----------|----------|----------|-------------|-------------|-------------|---|
| 74  | C | 78.20531 | 77.54748 | 79.69519 | -662.15484  | -412.13544  | 123.62687   | 1 |
| 75  | O | 77.98832 | 78.06276 | 80.78024 | -540.01537  | -317.05804  | 274.91456   | 1 |
| 76  | N | 77.45130 | 77.71125 | 78.56488 | -202.76299  | -690.00100  | -131.49145  | 1 |
| 77  | H | 77.94918 | 77.08181 | 77.91763 | -702.62132  | -2617.37191 | 281.70413   | 1 |
| 78  | C | 77.13846 | 79.08742 | 78.08992 | -491.73914  | 576.34187   | 222.73509   | 1 |
| 79  | H | 78.01997 | 79.68254 | 78.42346 | 1977.17978  | -1823.58850 | -434.68928  | 1 |
| 80  | C | 77.03472 | 78.99340 | 76.59157 | -649.50797  | -328.66843  | 306.11224   | 1 |
| 81  | H | 76.49238 | 78.05213 | 76.34521 | 2075.07803  | 1452.16490  | -1004.45904 | 1 |
| 82  | C | 76.26296 | 80.14451 | 75.96471 | -615.18735  | -489.99689  | -70.96352   | 1 |
| 83  | H | 76.41768 | 80.19483 | 74.85086 | -1226.32661 | -1724.38906 | -1716.47170 | 1 |
| 84  | H | 75.15277 | 80.04503 | 76.13886 | 2381.64273  | -969.84735  | 900.46860   | 1 |
| 85  | H | 76.57738 | 81.13570 | 76.39587 | 2122.74991  | 1702.23946  | -141.36228  | 1 |
| 86  | C | 78.40795 | 78.91185 | 75.94353 | -501.86074  | -479.61276  | -376.42482  | 1 |
| 87  | H | 78.33602 | 78.75053 | 74.83288 | 993.79261   | -2246.95401 | -1177.81305 | 1 |
| 88  | H | 78.99556 | 79.85743 | 76.10300 | 42.71279    | -626.15391  | -2651.37258 | 1 |
| 89  | H | 79.02092 | 78.06843 | 76.36403 | -2026.39012 | -1590.33709 | -887.82922  | 1 |
| 90  | C | 75.76402 | 79.62644 | 78.80597 | -672.89153  | 382.57394   | -156.34072  | 1 |
| 91  | O | 75.16353 | 80.55010 | 78.31442 | 410.04627   | 221.86223   | 500.35950   | 1 |
| 92  | N | 75.57240 | 79.03799 | 79.97249 | -378.11782  | -443.79414  | -441.10984  | 1 |
| 93  | H | 76.29607 | 78.36231 | 80.29298 | 2404.15973  | -568.14894  | 1149.30085  | 1 |
| 94  | C | 74.29880 | 79.00674 | 80.62480 | -544.54484  | 466.16019   | 331.29119   | 1 |
| 95  | H | 74.57606 | 78.85531 | 81.69043 | -1409.80988 | -170.17955  | 2325.32679  | 1 |
| 96  | C | 73.52525 | 80.35905 | 80.33601 | -184.48284  | 116.78282   | -758.89137  | 1 |
| 97  | H | 74.21439 | 81.23073 | 80.42143 | 1893.78641  | 1861.14652  | 611.04528   | 1 |
| 98  | H | 73.14426 | 80.37497 | 79.28612 | -2170.79665 | -974.19311  | 1327.50117  | 1 |
| 99  | C | 72.35094 | 80.43927 | 81.36056 | 389.51668   | 672.81878   | -138.49152  | 1 |
| 100 | H | 71.69217 | 79.54850 | 81.25639 | 510.64577   | 1933.03327  | 1851.02484  | 1 |
| 101 | H | 72.74389 | 80.37031 | 82.39860 | -2302.30869 | -1105.72939 | -948.89774  | 1 |
| 102 | C | 71.48693 | 81.74865 | 81.22103 | -559.93427  | -126.34590  | 542.30857   | 1 |
| 103 | O | 70.51791 | 81.89452 | 81.92309 | -670.36003  | -111.83166  | 76.36448    | 1 |
| 104 | N | 71.94804 | 82.62229 | 80.30014 | -216.06729  | -537.07037  | 446.51379   | 1 |
| 105 | H | 72.76270 | 82.55235 | 79.67922 | -1251.96487 | 1074.12894  | -2168.52500 | 1 |
| 106 | H | 71.51066 | 83.52843 | 80.10240 | -2451.83023 | -720.73851  | 944.84612   | 1 |
| 107 | C | 73.42076 | 77.78090 | 80.01979 | 546.24052   | -563.88337  | -85.11809   | 1 |
| 108 | O | 73.14102 | 77.73750 | 78.83037 | 71.70702    | -307.40463  | 606.69673   | 1 |
| 109 | N | 73.02554 | 76.96231 | 80.99289 | 479.90863   | -504.50129  | 222.86849   | 1 |
| 110 | C | 72.48765 | 75.66570 | 80.68435 | 75.51268    | -600.91904  | 506.73700   | 1 |
| 111 | H | 73.13157 | 75.28958 | 79.85663 | -2033.61562 | 1795.30103  | 254.89480   | 1 |
| 112 | C | 72.61732 | 74.89753 | 82.06351 | 523.79067   | 517.99274   | 284.45581   | 1 |
| 113 | H | 71.88933 | 74.06052 | 82.15913 | 1599.61665  | -1127.00911 | 1895.98173  | 1 |
| 114 | H | 73.63072 | 74.45612 | 82.19398 | -1881.83093 | 1275.82488  | -1501.55016 | 1 |
| 115 | C | 72.36246 | 76.04880 | 83.08699 | -600.05639  | -404.05026  | 316.64485   | 1 |
| 116 | H | 71.27754 | 76.28922 | 83.15061 | -2597.05260 | 496.36221   | 657.73249   | 1 |
| 117 | H | 72.69856 | 75.81029 | 84.12105 | -1666.24518 | 1294.38985  | -1723.90591 | 1 |
| 118 | C | 73.17843 | 77.23491 | 82.41653 | 493.57570   | -129.95376  | -602.56394  | 1 |
| 119 | H | 72.79001 | 78.25688 | 82.63057 | -1469.08415 | -637.84797  | 2204.22581  | 1 |
| 120 | H | 74.27617 | 77.20811 | 82.61870 | -1038.97840 | 1068.88701  | -2280.71789 | 1 |
| 121 | C | 70.92717 | 75.80343 | 80.21087 | 188.88100   | 241.05089   | -727.87821  | 1 |
| 122 | O | 70.04504 | 75.35890 | 80.90214 | 531.88613   | -49.19943   | 427.07960   | 1 |
| 123 | N | 70.84089 | 76.38822 | 79.02065 | 708.14833   | 26.93417    | -179.73509  | 1 |
| 124 | H | 71.67634 | 76.81572 | 78.55149 | -2232.69501 | -1179.09831 | 1023.94816  | 1 |
| 125 | C | 69.54455 | 76.43684 | 78.43001 | -738.32412  | 259.92548   | 104.42456   | 1 |
| 126 | H | 68.95559 | 75.62280 | 78.91400 | 2028.89123  | 1260.02983  | 1311.33324  | 1 |
| 127 | C | 68.95760 | 77.87495 | 78.80569 | -258.65678  | -345.52513  | 661.28459   | 1 |
| 128 | H | 69.78321 | 78.60848 | 78.92769 | -1826.06090 | -1801.46097 | -918.64554  | 1 |
| 129 | C | 67.92253 | 78.36750 | 77.74079 | -541.23400  | 531.92970   | -218.41428  | 1 |
| 130 | H | 67.43312 | 79.32078 | 78.05112 | 1311.73218  | -2219.18200 | 882.19023   | 1 |
| 131 | H | 68.41331 | 78.55075 | 76.75650 | -1048.71298 | 1223.58118  | -2196.97971 | 1 |
| 132 | H | 67.11427 | 77.61696 | 77.57401 | 419.06414   | 1903.92898  | 1903.44670  | 1 |
| 133 | C | 68.14900 | 77.70963 | 80.13612 | -423.86431  | 152.66566   | -648.55262  | 1 |
| 134 | H | 67.76407 | 78.68753 | 80.51119 | 105.68386   | -2342.50080 | 1387.51238  | 1 |
| 135 | H | 67.26888 | 77.03742 | 79.99970 | -1695.63603 | -1484.73621 | -1531.02793 | 1 |

|     |   |          |          |          |             |             |             |   |
|-----|---|----------|----------|----------|-------------|-------------|-------------|---|
| 136 | H | 68.78219 | 77.26364 | 80.94263 | -1853.57121 | -487.39031  | 1936.59343  | 1 |
| 137 | C | 69.70767 | 76.28936 | 76.81356 | 539.71428   | -510.58232  | 267.58633   | 1 |
| 138 | O | 70.69037 | 76.69948 | 76.20451 | -15.93758   | -278.34085  | -624.49402  | 1 |
| 139 | N | 68.60485 | 75.74077 | 76.35124 | -676.81886  | 12.05292    | 276.17960   | 1 |
| 140 | H | 67.92285 | 75.48444 | 77.06360 | -1694.44250 | -373.84189  | -2100.66098 | 1 |
| 141 | C | 68.25230 | 75.70057 | 74.97845 | 412.33078   | -664.70360  | 108.35451   | 1 |
| 142 | H | 67.18897 | 75.37332 | 74.99050 | 1765.77476  | 1294.44366  | 1621.76594  | 1 |
| 143 | C | 68.46041 | 77.15308 | 74.37931 | -179.66635  | -721.95667  | -264.73915  | 1 |
| 144 | H | 67.77014 | 77.88484 | 74.85504 | -607.34922  | 2587.87032  | -598.10018  | 1 |
| 145 | H | 69.48872 | 77.52729 | 74.60052 | -359.69332  | -1479.13954 | -2259.74260 | 1 |
| 146 | C | 68.22310 | 77.07824 | 72.83617 | -240.01076  | 616.02425   | 431.85322   | 1 |
| 147 | H | 68.86013 | 76.26883 | 72.37056 | -1359.17131 | 782.54425   | 2227.99181  | 1 |
| 148 | H | 67.16626 | 76.81464 | 72.60533 | -820.36667  | 85.81767    | -2596.78715 | 1 |
| 149 | C | 68.61356 | 78.47877 | 72.21424 | -513.07015  | 236.18570   | -551.87280  | 1 |
| 150 | H | 67.92371 | 79.28400 | 72.55683 | 1816.11944  | -1183.11722 | -1650.94321 | 1 |
| 151 | H | 69.63362 | 78.79002 | 72.53838 | -1800.04429 | -1361.53473 | 1526.34643  | 1 |
| 152 | C | 68.56130 | 78.29576 | 70.67928 | 726.08972   | -253.19732  | -179.64713  | 1 |
| 153 | H | 69.31330 | 77.58575 | 70.27789 | 1224.27271  | -456.51798  | -2390.90304 | 1 |
| 154 | H | 67.55745 | 78.05007 | 70.27894 | 1206.40339  | -1150.93514 | -2154.90344 | 1 |
| 155 | N | 68.92392 | 79.66918 | 70.02390 | 329.70796   | -633.68968  | -155.67358  | 1 |
| 156 | H | 68.89916 | 79.69019 | 68.96373 | 1348.31305  | 1938.76845  | 1359.00643  | 1 |
| 157 | H | 68.31248 | 80.50308 | 70.26468 | 2096.92035  | 1446.54551  | -966.48890  | 1 |
| 158 | H | 69.89809 | 80.04561 | 70.21335 | -1197.07217 | -2303.53719 | 827.28733   | 1 |
| 159 | C | 69.19747 | 74.64017 | 74.14449 | -378.01186  | -556.17301  | -413.96481  | 1 |
| 160 | O | 68.67510 | 73.65432 | 73.68506 | -409.44433  | -307.55053  | -453.30833  | 1 |
| 161 | N | 70.44943 | 75.05436 | 74.08250 | -429.02477  | 524.70884   | 274.08502   | 1 |
| 162 | H | 70.74727 | 75.87866 | 74.65890 | 1706.34263  | -1425.96036 | 1574.38926  | 1 |
| 163 | C | 71.38080 | 74.43459 | 73.20902 | -45.25864   | -626.22952  | 478.93267   | 1 |
| 164 | H | 72.37164 | 74.78300 | 73.57821 | 1988.63164  | 570.90773   | 1772.87287  | 1 |
| 165 | C | 71.15922 | 72.87122 | 73.34302 | 551.77128   | -20.49526   | -564.54996  | 1 |
| 166 | H | 71.01046 | 72.60748 | 74.41475 | 1434.61535  | -1753.10253 | 1513.99471  | 1 |
| 167 | H | 70.21491 | 72.55897 | 72.82825 | -714.67738  | 1819.09770  | 1898.36494  | 1 |
| 168 | C | 72.37746 | 72.09162 | 72.74505 | 446.99263   | -555.77305  | 338.97221   | 1 |
| 169 | H | 72.39697 | 72.16278 | 71.63077 | 1953.68466  | 1892.25957  | -161.67766  | 1 |
| 170 | H | 73.34732 | 72.50553 | 73.10121 | -403.03785  | 2688.07032  | -188.43591  | 1 |
| 171 | C | 72.18769 | 70.59760 | 73.22695 | 567.86262   | 335.74681   | 434.04421   | 1 |
| 172 | H | 72.29093 | 70.52439 | 74.33447 | -1080.02275 | 1568.26081  | -1948.78900 | 1 |
| 173 | H | 71.14709 | 70.24502 | 72.99899 | -919.54108  | 2111.34692  | 1456.13463  | 1 |
| 174 | C | 73.23234 | 69.70499 | 72.51896 | 195.81897   | 173.33862   | -745.11536  | 1 |
| 175 | H | 73.12183 | 69.64779 | 71.41741 | 1405.67949  | -2301.21089 | -390.08113  | 1 |
| 176 | H | 74.28628 | 69.92343 | 72.78359 | -940.37328  | -1118.32446 | 2299.72133  | 1 |
| 177 | N | 72.97800 | 68.24751 | 73.03198 | 319.26422   | 656.36007   | -42.02424   | 1 |
| 178 | H | 73.61317 | 67.49729 | 72.63393 | 1961.03633  | 619.91968   | 1787.09422  | 1 |
| 179 | H | 73.08701 | 68.08129 | 74.07472 | 854.14343   | -2156.80752 | 1429.08711  | 1 |
| 180 | H | 72.01798 | 67.83323 | 72.84874 | 1237.02905  | -1378.50857 | -1998.28500 | 1 |
| 181 | C | 71.11716 | 74.86843 | 71.64559 | 532.53319   | -268.57236  | 517.55729   | 1 |
| 182 | O | 70.06371 | 75.25323 | 71.18191 | 266.16714   | -290.73804  | -558.88002  | 1 |
| 183 | N | 72.26980 | 74.68109 | 71.02422 | -226.25352  | 640.49678   | -270.32839  | 1 |
| 184 | H | 73.05597 | 74.32129 | 71.56162 | 2007.69063  | -1035.27229 | 1523.50231  | 1 |
| 185 | C | 72.34431 | 74.84311 | 69.61995 | -540.76542  | -573.33303  | 49.50000    | 1 |
| 186 | H | 71.35040 | 75.22833 | 69.29236 | -2374.20950 | -1036.76023 | 843.75774   | 1 |
| 187 | C | 73.56028 | 75.86146 | 69.37045 | -77.09082   | 666.87422   | -415.84136  | 1 |
| 188 | H | 74.47527 | 75.44322 | 69.87263 | -985.81834  | 617.19825   | 2463.91927  | 1 |
| 189 | O | 73.37486 | 77.17900 | 69.91927 | 293.29899   | -391.65602  | -477.80926  | 1 |
| 190 | H | 74.09962 | 77.21112 | 70.57528 | 2528.72714  | -681.76262  | -751.27122  | 1 |
| 191 | C | 73.76692 | 75.80650 | 67.81395 | 252.47363   | -605.14473  | 440.05134   | 1 |
| 192 | H | 74.61445 | 76.45491 | 67.49178 | -2052.65063 | 1456.49051  | -1043.51830 | 1 |
| 193 | H | 73.99477 | 74.77256 | 67.46901 | -2152.98800 | -1661.97574 | -161.70652  | 1 |
| 194 | H | 72.85969 | 76.15099 | 67.26558 | -473.12726  | -1584.27339 | 2165.61725  | 1 |
| 195 | C | 72.73692 | 73.37014 | 69.02031 | 360.36307   | 488.46713   | 505.10056   | 1 |
| 196 | O | 73.42812 | 72.59174 | 69.63592 | -200.08817  | -528.03552  | -385.82850  | 1 |
| 197 | N | 72.28154 | 73.27017 | 67.77114 | -597.54095  | -226.44775  | 355.20479   | 1 |



|     |   |          |          |          |             |             |             |   |
|-----|---|----------|----------|----------|-------------|-------------|-------------|---|
| 198 | H | 71.70670 | 74.02823 | 67.40291 | 2179.23655  | -1300.70981 | -991.33835  | 1 |
| 199 | C | 72.31319 | 71.99837 | 67.15767 | -687.68921  | 297.39807   | -249.45179  | 1 |
| 200 | H | 73.03192 | 71.40306 | 67.76862 | -349.16256  | -2467.37713 | -1101.72831 | 1 |
| 201 | C | 70.83135 | 71.38733 | 67.11144 | 672.47345   | 361.54328   | -201.62880  | 1 |
| 202 | H | 70.13538 | 72.10002 | 66.61290 | 1541.41502  | 582.18425   | 2169.97026  | 1 |
| 203 | H | 70.83610 | 70.45439 | 66.49791 | -2534.67717 | 60.25153    | 997.72295   | 1 |
| 204 | C | 70.37914 | 71.10478 | 68.55210 | 574.26774   | -389.43119  | -377.02542  | 1 |
| 205 | C | 70.78978 | 69.90098 | 69.19926 | 688.82679   | -287.33580  | -257.96133  | 1 |
| 206 | H | 71.43162 | 69.16987 | 68.67498 | 331.14182   | 1470.38163  | 2269.80013  | 1 |
| 207 | C | 69.58317 | 72.06102 | 69.25145 | -383.52382  | -675.04808  | 144.24917   | 1 |
| 208 | H | 69.28896 | 73.00916 | 68.76690 | 4.09847     | 1517.59662  | 2262.86397  | 1 |
| 209 | C | 70.36119 | 69.66574 | 70.50752 | -134.76730  | 428.45285   | -649.50303  | 1 |
| 210 | H | 70.67617 | 68.73073 | 71.00288 | -903.23433  | 1600.49020  | 2011.53387  | 1 |
| 211 | C | 69.18312 | 71.78158 | 70.56218 | -335.53281  | -615.00040  | -364.39058  | 1 |
| 212 | H | 68.56769 | 72.53105 | 71.09218 | 1596.45398  | -1369.33862 | 1732.02659  | 1 |
| 213 | C | 69.53916 | 70.57639 | 71.23217 | 585.48547   | -340.24194  | -406.23938  | 1 |
| 214 | O | 69.12051 | 70.27740 | 72.56462 | -419.15649  | -173.04408  | -511.94141  | 1 |
| 215 | H | 68.63695 | 71.11281 | 72.77199 | -1071.84350 | 1559.71507  | -1960.13012 | 1 |
| 216 | C | 72.64938 | 72.10156 | 65.55644 | 291.41878   | -183.13091  | 710.72246   | 1 |
| 217 | O | 72.05820 | 71.36748 | 64.79487 | 379.87695   | 523.47396   | -222.23622  | 1 |
| 218 | N | 73.62375 | 72.96372 | 65.29501 | 564.30591   | 373.09380   | 277.24371   | 1 |
| 219 | H | 73.97773 | 73.49958 | 66.08537 | -120.59931  | -2436.07824 | -1214.35098 | 1 |
| 220 | C | 73.95692 | 73.27313 | 63.93997 | 404.07514   | -299.37480  | 608.84009   | 1 |
| 221 | H | 73.83378 | 72.29756 | 63.41672 | -1071.07882 | -841.69025  | 2359.66467  | 1 |
| 222 | C | 72.90014 | 74.33524 | 63.41375 | -683.12807  | 68.71770    | -390.13096  | 1 |
| 223 | H | 71.86283 | 73.99509 | 63.63117 | 2068.88918  | 1596.58590  | 770.89603   | 1 |
| 224 | H | 73.01873 | 75.30524 | 63.94633 | 1379.86429  | 2342.49779  | -179.85638  | 1 |
| 225 | C | 73.12379 | 74.50905 | 61.88020 | -176.39967  | 537.49466   | 550.97268   | 1 |
| 226 | H | 74.17765 | 74.82724 | 61.67501 | -396.28051  | 1942.22168  | 1869.33314  | 1 |
| 227 | H | 72.98997 | 73.54124 | 61.34679 | -94.44700   | 586.00678   | -2659.20016 | 1 |
| 228 | C | 72.08596 | 75.59982 | 61.34643 | -291.69381  | -718.18079  | -150.72929  | 1 |
| 229 | H | 71.00201 | 75.33818 | 61.44680 | -2303.38776 | 1089.76242  | 964.62032   | 1 |
| 230 | H | 72.23173 | 76.63280 | 61.75392 | 884.16729   | 2568.80533  | -207.74283  | 1 |
| 231 | N | 72.39954 | 75.63295 | 59.97875 | -594.49522  | -252.81478  | 342.29276   | 1 |
| 232 | H | 73.22429 | 75.12990 | 59.68952 | -1735.17426 | 2084.05705  | -263.71605  | 1 |
| 233 | C | 71.73145 | 76.25560 | 59.09544 | 595.23177   | -271.52487  | 442.22352   | 1 |
| 234 | N | 70.59603 | 76.95960 | 59.50990 | 585.53813   | -424.79750  | -105.81303  | 1 |
| 235 | H | 70.20769 | 77.06849 | 60.44614 | 959.88797   | 1327.56823  | -2177.11905 | 1 |
| 236 | H | 69.98720 | 77.50131 | 58.89524 | 1578.48647  | 16.27378    | -2220.76233 | 1 |
| 237 | N | 72.30380 | 76.09865 | 57.82549 | -452.17763  | -390.33541  | -421.51853  | 1 |
| 238 | H | 73.13351 | 75.58920 | 57.52419 | 470.26107   | 1974.25629  | -1817.92087 | 1 |
| 239 | H | 71.91738 | 76.52426 | 56.98179 | 1856.67307  | -1573.97321 | -1224.35416 | 1 |
| 240 | C | 75.45557 | 73.90340 | 63.90680 | -531.47271  | -581.45780  | -55.06206   | 1 |
| 241 | O | 75.76832 | 74.69875 | 63.04899 | -243.00837  | 192.73507   | 609.52485   | 1 |
| 242 | N | 76.20519 | 73.38763 | 64.86362 | 343.49288   | -644.25607  | 38.09164    | 1 |
| 243 | H | 75.88513 | 72.62713 | 65.48680 | -1691.16043 | -1535.97525 | -1484.73099 | 1 |
| 244 | C | 77.44986 | 73.99347 | 65.23223 | 542.66492   | 350.14337   | 454.42563   | 1 |
| 245 | H | 78.00689 | 74.13927 | 64.28011 | 1209.57979  | -2396.95920 | 463.86744   | 1 |
| 246 | C | 77.18435 | 75.38481 | 65.95184 | -737.14309  | 145.93010   | 242.71942   | 1 |
| 247 | H | 76.60922 | 75.22895 | 66.88986 | -1050.18303 | 159.36419   | -2509.06125 | 1 |
| 248 | C | 78.53602 | 76.11952 | 66.24856 | -706.77696  | -252.88343  | -245.16230  | 1 |
| 249 | H | 78.36909 | 77.18547 | 66.53039 | -1624.64039 | -1665.49085 | 1417.86935  | 1 |
| 250 | H | 79.08596 | 75.64418 | 67.09703 | 2566.10521  | 598.51109   | 693.22305   | 1 |
| 251 | H | 79.21119 | 76.11484 | 65.36033 | -1972.69758 | 107.10018   | -1876.34312 | 1 |
| 252 | C | 76.40872 | 76.35381 | 64.99133 | 412.85148   | 672.58832   | -27.69222   | 1 |
| 253 | H | 76.38760 | 77.39651 | 65.38769 | 1447.02277  | 1762.76533  | -1490.78944 | 1 |
| 254 | H | 76.88254 | 76.39231 | 63.97886 | 1320.77379  | -145.20455  | 2378.68491  | 1 |
| 255 | H | 75.34738 | 76.03491 | 64.85473 | -1512.10848 | 1470.52031  | 1724.75147  | 1 |
| 256 | C | 78.01346 | 72.83238 | 66.21819 | -607.11113  | 499.56689   | 73.73769    | 1 |
| 257 | O | 77.37580 | 71.79928 | 66.35323 | 357.97126   | 460.81534   | 356.68785   | 1 |
| 258 | N | 79.18411 | 73.16714 | 66.75102 | 536.55407   | -368.62270  | 332.76306   | 1 |
| 259 | H | 79.54274 | 74.10137 | 66.55701 | 524.38866   | 2297.69985  | 1367.20941  | 1 |

|     |   |          |          |          |             |             |             |   |
|-----|---|----------|----------|----------|-------------|-------------|-------------|---|
| 260 | C | 79.63615 | 72.43703 | 67.89022 | 46.50277    | -774.29190  | -147.97904  | 1 |
| 261 | H | 79.62232 | 71.37947 | 67.54905 | 1676.51875  | 1883.29066  | 1032.55549  | 1 |
| 262 | C | 81.07028 | 72.99060 | 68.35513 | -559.41456  | -34.19198   | -556.30433  | 1 |
| 263 | H | 80.90884 | 73.96673 | 68.87408 | -64.66664   | 395.18769   | 2695.05373  | 1 |
| 264 | H | 81.50690 | 72.31236 | 69.12750 | -2703.44278 | -60.40056   | 333.79418   | 1 |
| 265 | C | 82.03296 | 73.18630 | 67.20725 | -519.76435  | 377.31045   | 459.42366   | 1 |
| 266 | H | 81.50730 | 73.72233 | 66.38651 | -1746.74323 | 1667.50644  | -1261.73691 | 1 |
| 267 | C | 83.20706 | 74.04513 | 67.66088 | 570.95554   | 16.46261    | -545.27700  | 1 |
| 268 | H | 83.92839 | 74.23757 | 66.82547 | 2391.58273  | 28.05277    | -1305.07271 | 1 |
| 269 | H | 82.86668 | 75.04244 | 68.04271 | 175.75588   | 917.63458   | 2559.43867  | 1 |
| 270 | H | 83.78099 | 73.55353 | 68.48819 | -1063.97851 | -2155.34650 | 1283.00462  | 1 |
| 271 | C | 82.53651 | 71.85597 | 66.66711 | 193.76014   | 2.62946     | -765.53141  | 1 |
| 272 | H | 83.25581 | 72.00130 | 65.81956 | 507.39394   | -846.55087  | 2539.60089  | 1 |
| 273 | H | 83.06930 | 71.26493 | 67.45640 | 1337.57841  | 1818.19054  | 1526.01994  | 1 |
| 274 | H | 81.69476 | 71.22191 | 66.28528 | 1100.88635  | -1172.91350 | -2199.08909 | 1 |
| 275 | C | 78.61576 | 72.69822 | 69.11094 | -549.21115  | 475.64486   | -309.38218  | 1 |
| 276 | O | 78.05298 | 73.74483 | 69.30008 | 556.06106   | -390.37755  | -78.24250   | 1 |
| 277 | O | 78.57713 | 71.67357 | 70.08802 | -572.27940  | -310.19032  | -209.75862  | 1 |
| 278 | H | 79.12653 | 70.98866 | 69.61755 | -1380.08193 | 2212.14486  | 790.85944   | 1 |

Listing 114: C00114.xmolout

|    |   |          |          |          |             |             |             |        |          |
|----|---|----------|----------|----------|-------------|-------------|-------------|--------|----------|
| 1  |   | 276      |          |          |             |             |             |        |          |
| 2  |   | 150.0000 | 150.0000 | 150.0000 | 0.0000      | 0.0000      | 0.0000***** | 0.9840 | 3936     |
|    |   | 0.2500   | 300.00   | 0.00     | 0.00        | 0.00        | -1293.3814  | 0.0000 | 300.0000 |
| 3  | H | 68.56733 | 81.73815 | 68.34202 | -2043.14101 | -1757.64893 | 399.89339   |        | 1        |
| 4  | N | 68.95824 | 82.58432 | 68.75224 | 426.75047   | 490.45733   | -334.42467  |        | 1        |
| 5  | H | 69.22829 | 82.25454 | 69.67721 | 442.25559   | -1110.30854 | -2448.52907 |        | 1        |
| 6  | C | 69.99112 | 83.18254 | 67.99895 | 415.32972   | -666.39213  | 83.73172    |        | 1        |
| 7  | H | 69.80747 | 82.87326 | 66.94876 | 879.32219   | 2491.00447  | 667.35213   |        | 1        |
| 8  | C | 69.91944 | 84.77595 | 68.21433 | 31.35357    | 477.41777   | 628.23362   |        | 1        |
| 9  | H | 70.08907 | 85.01590 | 69.29119 | 1168.38489  | 2240.25337  | -1019.71136 |        | 1        |
| 10 | H | 70.74208 | 85.28449 | 67.65539 | -360.43770  | 2534.90498  | 931.67112   |        | 1        |
| 11 | C | 68.56691 | 85.27924 | 67.77371 | 463.18208   | 512.70242   | -382.34388  |        | 1        |
| 12 | H | 67.79312 | 84.57742 | 68.15966 | 1725.29117  | 1863.52247  | -987.07854  |        | 1        |
| 13 | C | 68.29839 | 86.65906 | 68.35979 | 710.42801   | -144.27427  | -313.15367  |        | 1        |
| 14 | H | 67.29644 | 87.05362 | 68.04907 | 364.20195   | -1033.13725 | 2494.72524  |        | 1        |
| 15 | H | 68.31625 | 86.64332 | 69.48049 | 2567.61904  | 335.80679   | 847.48802   |        | 1        |
| 16 | H | 69.06618 | 87.40438 | 68.02667 | -2587.99029 | 680.92867   | -512.16411  |        | 1        |
| 17 | C | 68.46819 | 85.33402 | 66.25587 | 268.17616   | 741.64379   | -40.42634   |        | 1        |
| 18 | H | 67.46717 | 85.70959 | 65.91922 | 1283.54314  | -1945.37420 | -1411.27812 |        | 1        |
| 19 | H | 69.24222 | 86.01619 | 65.81781 | -1258.57796 | 1317.15249  | -2026.02085 |        | 1        |
| 20 | H | 68.61690 | 84.32422 | 65.79329 | -2502.84526 | 909.80597   | 575.92391   |        | 1        |
| 21 | C | 71.41490 | 82.63782 | 68.59722 | 619.36578   | -458.64843  | -172.09273  |        | 1        |
| 22 | O | 72.23680 | 82.08496 | 67.90227 | -81.40433   | 433.87611   | 522.34594   |        | 1        |
| 23 | N | 71.47766 | 82.92571 | 69.89403 | 175.23996   | -622.20190  | 341.55523   |        | 1        |
| 24 | H | 70.68000 | 83.37407 | 70.34262 | -876.57256  | -303.22879  | -2561.90213 |        | 1        |
| 25 | C | 72.62052 | 82.54588 | 70.63603 | -571.88214  | -534.10783  | -106.15033  |        | 1        |
| 26 | H | 73.32827 | 82.08342 | 69.90945 | -2713.20841 | -16.25800   | -248.80809  |        | 1        |
| 27 | C | 73.15273 | 83.88373 | 71.35362 | 166.60354   | 288.16399   | -716.09568  |        | 1        |
| 28 | H | 72.33102 | 84.25904 | 72.02316 | -2097.85574 | 1636.78449  | -586.18044  |        | 1        |
| 29 | O | 73.47474 | 84.97420 | 70.47483 | -317.80580  | -363.38227  | 484.43082   |        | 1        |
| 30 | H | 72.79090 | 85.62708 | 70.72703 | 1863.74748  | -1451.84923 | 1357.29467  |        | 1        |
| 31 | C | 74.34166 | 83.36180 | 72.23796 | 503.80731   | 517.99032   | 318.51606   |        | 1        |
| 32 | H | 74.73485 | 84.16681 | 72.90138 | 640.61020   | -2157.10410 | -1536.29104 |        | 1        |
| 33 | H | 74.04322 | 82.50106 | 72.90111 | 1687.88455  | 465.60692   | 2087.56452  |        | 1        |
| 34 | H | 75.19329 | 83.01698 | 71.60679 | -1293.07895 | -1899.88581 | -1463.57452 |        | 1        |
| 35 | C | 72.05394 | 81.57062 | 71.82289 | -153.07550  | -733.68902  | 248.70981   |        | 1        |
| 36 | O | 71.06558 | 81.90500 | 72.42042 | 186.15459   | -480.78787  | -449.34387  |        | 1        |
| 37 | N | 72.86121 | 80.52648 | 72.03418 | -487.53139  | 543.18517   | 42.03850    |        | 1        |
| 38 | C | 72.62496 | 79.63556 | 73.13808 | -699.35871  | 69.34393    | 360.10701   |        | 1        |
| 39 | H | 71.53306 | 79.41185 | 73.15511 | 2.81126     | -221.99807  | -2715.58072 |        | 1        |

|     |   |          |          |          |             |             |             |   |
|-----|---|----------|----------|----------|-------------|-------------|-------------|---|
| 40  | C | 73.56436 | 78.40004 | 72.78793 | -507.46439  | -592.59194  | 122.07761   | 1 |
| 41  | H | 73.86946 | 77.82321 | 73.68986 | -1975.08116 | 525.87560   | -1801.71556 | 1 |
| 42  | H | 73.05467 | 77.67979 | 72.11004 | 1588.27743  | -1913.22100 | 1113.83566  | 1 |
| 43  | C | 74.76013 | 79.09951 | 72.07358 | -613.62442  | -457.55993  | -194.14490  | 1 |
| 44  | H | 75.43493 | 79.58694 | 72.81267 | 1707.54637  | -721.27992  | 1996.92523  | 1 |
| 45  | H | 75.39018 | 78.40615 | 71.47223 | 758.23357   | 2100.81767  | 1560.55011  | 1 |
| 46  | C | 73.99412 | 80.17948 | 71.19133 | -352.41524  | 704.96076   | 49.21465    | 1 |
| 47  | H | 74.58012 | 81.09875 | 70.96191 | 1714.76886  | -2070.42778 | 443.35792   | 1 |
| 48  | H | 73.55343 | 79.77915 | 70.24712 | 1224.15040  | 1801.50881  | 1636.97633  | 1 |
| 49  | C | 73.12282 | 80.37399 | 74.49660 | 566.85117   | 537.05831   | 117.62814   | 1 |
| 50  | O | 73.98728 | 81.22954 | 74.50023 | -550.26779  | -406.08867  | 4.21666     | 1 |
| 51  | N | 72.54212 | 79.76021 | 75.52904 | 566.34832   | -425.77725  | 180.18749   | 1 |
| 52  | H | 71.81179 | 79.08861 | 75.27813 | 644.44502   | 2646.80550  | -52.73430   | 1 |
| 53  | C | 72.22440 | 80.59668 | 76.67014 | 612.34801   | -281.48662  | 411.56221   | 1 |
| 54  | H | 71.63595 | 81.44590 | 76.25924 | 1667.23498  | -1490.75142 | 1556.16753  | 1 |
| 55  | C | 71.39712 | 79.65385 | 77.63944 | -714.45746  | -175.43074  | 286.98927   | 1 |
| 56  | H | 72.09622 | 78.90329 | 78.10107 | -787.09484  | 1763.03619  | -1922.46060 | 1 |
| 57  | O | 70.34670 | 78.87248 | 77.02535 | -429.46514  | 516.51932   | -128.40526  | 1 |
| 58  | H | 70.62841 | 77.96512 | 77.25074 | 1981.82785  | 436.16847   | -1818.18182 | 1 |
| 59  | C | 70.94408 | 80.70252 | 78.72273 | 630.79189   | -468.94448  | 76.03230    | 1 |
| 60  | H | 70.49766 | 80.20417 | 79.61417 | -1775.71861 | 2062.30353  | 131.89849   | 1 |
| 61  | H | 71.79468 | 81.32863 | 79.07856 | -1855.14608 | 88.94118    | 1993.53760  | 1 |
| 62  | H | 70.17410 | 81.39686 | 78.31381 | -1504.82350 | -780.94249  | -2132.90992 | 1 |
| 63  | C | 73.63207 | 81.03409 | 77.35327 | 288.57638   | 618.62814   | -397.00270  | 1 |
| 64  | O | 74.50123 | 80.23547 | 77.62502 | 321.70495   | -185.26452  | 574.37218   | 1 |
| 65  | N | 73.65809 | 82.39515 | 77.62820 | -447.05792  | -446.53431  | 367.76425   | 1 |
| 66  | H | 72.69671 | 82.63893 | 77.34112 | 350.31316   | 1975.63644  | -1843.31522 | 1 |
| 67  | C | 74.67989 | 83.04126 | 76.80598 | -511.23061  | 374.03917   | -471.51480  | 1 |
| 68  | H | 74.60518 | 82.45908 | 75.83803 | 2234.79579  | -898.70890  | -1273.45190 | 1 |
| 69  | C | 74.19397 | 84.54027 | 76.68054 | 529.53781   | -159.34528  | 563.72604   | 1 |
| 70  | H | 74.94016 | 85.13848 | 76.09657 | 654.59388   | 2347.94251  | 1217.51488  | 1 |
| 71  | H | 73.25945 | 84.53810 | 76.05647 | -1526.55661 | 2103.42026  | 817.87394   | 1 |
| 72  | O | 73.86851 | 85.25065 | 77.92792 | -554.84278  | 14.12789    | 399.58769   | 1 |
| 73  | H | 73.47558 | 84.51482 | 78.42290 | 1297.06236  | 2061.84854  | 1220.68812  | 1 |
| 74  | C | 76.12019 | 82.86218 | 77.51669 | -662.15484  | -412.13544  | 123.62687   | 1 |
| 75  | O | 76.51997 | 83.67516 | 78.35132 | -540.01537  | -317.05804  | 274.91456   | 1 |
| 76  | N | 76.71468 | 81.79258 | 77.03322 | -202.76299  | -690.00100  | -131.49145  | 1 |
| 77  | H | 76.14994 | 81.22101 | 76.40208 | -702.62132  | -2617.37191 | 281.70413   | 1 |
| 78  | C | 78.04202 | 81.39404 | 77.31562 | -491.73914  | 576.34187   | 222.73509   | 1 |
| 79  | H | 78.23757 | 80.60685 | 76.55565 | 1977.17978  | -1823.58850 | -434.68928  | 1 |
| 80  | C | 78.98458 | 82.66774 | 77.17345 | -649.50797  | -328.66843  | 306.11224   | 1 |
| 81  | H | 78.57847 | 83.51843 | 77.77052 | 2075.07803  | 1452.16490  | -1004.45904 | 1 |
| 82  | C | 80.43324 | 82.30531 | 77.64634 | -615.18735  | -489.99689  | -70.96352   | 1 |
| 83  | H | 81.14111 | 83.15286 | 77.48919 | -1226.32661 | -1724.38906 | -1716.47170 | 1 |
| 84  | H | 80.45514 | 82.05168 | 78.73251 | 2381.64273  | -969.84735  | 900.46860   | 1 |
| 85  | H | 80.83980 | 81.42586 | 77.09683 | 2122.74991  | 1702.23946  | -141.36228  | 1 |
| 86  | C | 79.05003 | 83.05762 | 75.65716 | -501.86074  | -479.61276  | -376.42482  | 1 |
| 87  | H | 79.69721 | 83.94982 | 75.48806 | 993.79261   | -2246.95401 | -1177.81305 | 1 |
| 88  | H | 79.46045 | 82.22814 | 75.03739 | 42.71279    | -626.15391  | -2651.37258 | 1 |
| 89  | H | 78.03668 | 83.30046 | 75.25932 | -2026.39012 | -1590.33709 | -887.82922  | 1 |
| 90  | C | 78.19002 | 80.79660 | 78.84321 | -672.89153  | 382.57394   | -156.34072  | 1 |
| 91  | O | 78.70363 | 79.71654 | 79.02494 | 410.04627   | 221.86223   | 500.35950   | 1 |
| 92  | N | 77.70999 | 81.66027 | 79.70693 | -378.11782  | -443.79414  | -441.10984  | 1 |
| 93  | H | 77.34379 | 82.58101 | 79.35206 | 2404.15973  | -568.14894  | 1149.30085  | 1 |
| 94  | C | 77.87469 | 81.46460 | 81.11876 | -544.54484  | 466.16019   | 331.29119   | 1 |
| 95  | H | 78.97629 | 81.40629 | 81.25782 | -1409.80988 | -170.17955  | 2325.32679  | 1 |
| 96  | C | 77.21872 | 82.78641 | 81.70311 | -184.48284  | 116.78282   | -758.89137  | 1 |
| 97  | H | 77.99479 | 83.55347 | 81.92373 | 1893.78641  | 1861.14652  | 611.04528   | 1 |
| 98  | H | 76.57456 | 83.24071 | 80.91623 | -2170.79665 | -974.19311  | 1327.50117  | 1 |
| 99  | C | 76.36880 | 82.49433 | 82.97693 | 389.51668   | 672.81878   | -138.49152  | 1 |
| 100 | H | 76.03570 | 81.43219 | 82.98281 | 510.64577   | 1933.03327  | 1851.02484  | 1 |
| 101 | H | 76.99681 | 82.57775 | 83.89105 | -2302.30869 | -1105.72939 | -948.89774  | 1 |

|     |   |          |          |          |             |             |             |   |
|-----|---|----------|----------|----------|-------------|-------------|-------------|---|
| 102 | C | 75.10267 | 83.42320 | 83.09965 | -559.93427  | -126.34590  | 542.30857   | 1 |
| 103 | O | 74.37998 | 83.29989 | 84.05458 | -670.36003  | -111.83166  | 76.36448    | 1 |
| 104 | N | 74.91719 | 84.28427 | 82.07459 | -216.06729  | -537.07037  | 446.51379   | 1 |
| 105 | H | 75.47515 | 84.48427 | 81.23461 | -1251.96487 | 1074.12894  | -2168.52500 | 1 |
| 106 | H | 74.13279 | 84.94618 | 82.04012 | -2451.83023 | -720.73851  | 944.84612   | 1 |
| 107 | C | 77.20254 | 80.08733 | 81.65525 | 546.24052   | -563.88337  | -85.11809   | 1 |
| 108 | O | 77.79507 | 79.55820 | 82.56223 | 71.70702    | -307.40463  | 606.69673   | 1 |
| 109 | N | 75.99424 | 79.76548 | 81.16463 | 479.90863   | -504.50129  | 222.86849   | 1 |
| 110 | C | 75.33197 | 78.60194 | 81.66930 | 75.51268    | -600.91904  | 506.73700   | 1 |
| 111 | H | 75.83055 | 78.38845 | 82.64488 | -2033.61562 | 1795.30103  | 254.89480   | 1 |
| 112 | C | 73.83266 | 79.12132 | 81.72571 | 523.79067   | 517.99274   | 284.45581   | 1 |
| 113 | H | 73.08886 | 78.29565 | 81.77204 | 1599.61665  | -1127.00911 | 1895.98173  | 1 |
| 114 | H | 73.65484 | 79.76602 | 82.61496 | -1881.83093 | 1275.82488  | -1501.55016 | 1 |
| 115 | C | 73.75611 | 79.94601 | 80.40365 | -600.05639  | -404.05026  | 316.64485   | 1 |
| 116 | H | 73.65621 | 79.27268 | 79.51780 | -2597.05260 | 496.36221   | 657.73249   | 1 |
| 117 | H | 72.89703 | 80.65084 | 80.37331 | -1666.24518 | 1294.38985  | -1723.90591 | 1 |
| 118 | C | 75.16390 | 80.67938 | 80.39244 | 493.57570   | -129.95376  | -602.56394  | 1 |
| 119 | H | 75.63455 | 80.78766 | 79.38071 | -1469.08415 | -637.84797  | 2204.22581  | 1 |
| 120 | H | 75.18525 | 81.66354 | 80.91541 | -1038.97840 | 1068.88701  | -2280.71789 | 1 |
| 121 | C | 75.42739 | 77.35656 | 80.60087 | 188.88100   | 241.05089   | -727.87821  | 1 |
| 122 | O | 74.68931 | 77.29417 | 79.62323 | 531.88613   | -49.19943   | 427.07960   | 1 |
| 123 | N | 76.31249 | 76.49453 | 81.03618 | 708.14833   | 26.93417    | -179.73509  | 1 |
| 124 | H | 76.82202 | 76.77813 | 81.87263 | -2232.69501 | -1179.09831 | 1023.94816  | 1 |
| 125 | C | 76.68869 | 75.32037 | 80.33120 | -738.32412  | 259.92548   | 104.42456   | 1 |
| 126 | H | 77.33859 | 74.77821 | 81.05341 | 2028.89123  | 1260.02983  | 1311.33324  | 1 |
| 127 | C | 75.39794 | 74.49859 | 79.88190 | -258.65678  | -345.52513  | 661.28459   | 1 |
| 128 | H | 74.70318 | 75.15572 | 79.30945 | -1826.06090 | -1801.46097 | -918.64554  | 1 |
| 129 | C | 75.86100 | 73.28154 | 79.01115 | -541.23400  | 531.92970   | -218.41428  | 1 |
| 130 | H | 74.99437 | 72.70198 | 78.60613 | 1311.73218  | -2219.18200 | 882.19023   | 1 |
| 131 | H | 76.47406 | 73.59993 | 78.13052 | -1048.71298 | 1223.58118  | -2196.97971 | 1 |
| 132 | H | 76.49062 | 72.57063 | 79.59639 | 419.06414   | 1903.92898  | 1903.44670  | 1 |
| 133 | C | 74.66541 | 73.92683 | 81.14184 | -423.86431  | 152.66566   | -648.55262  | 1 |
| 134 | H | 73.75610 | 73.34582 | 80.85797 | 105.68386   | -2342.50080 | 1387.51238  | 1 |
| 135 | H | 75.32479 | 73.24590 | 81.72933 | -1695.63603 | -1484.73621 | -1531.02793 | 1 |
| 136 | H | 74.33760 | 74.74507 | 81.82545 | -1853.57121 | -487.39031  | 1936.59343  | 1 |
| 137 | C | 77.50208 | 75.72742 | 78.97253 | 539.71428   | -510.58232  | 267.58633   | 1 |
| 138 | O | 78.68567 | 75.42534 | 78.90417 | -15.93758   | -278.34085  | -624.49402  | 1 |
| 139 | N | 76.71008 | 76.30809 | 78.10893 | -676.81886  | 12.05292    | 276.17960   | 1 |
| 140 | H | 75.74025 | 76.56393 | 78.41021 | -1694.44250 | -373.84189  | -2100.66098 | 1 |
| 141 | C | 77.11276 | 76.66136 | 76.79848 | 412.33078   | -664.70360  | 108.35451   | 1 |
| 142 | H | 76.24622 | 77.25440 | 76.42815 | 1765.77476  | 1294.44366  | 1621.76594  | 1 |
| 143 | C | 78.45586 | 77.49229 | 76.91532 | -179.66635  | -721.95667  | -264.73915  | 1 |
| 144 | H | 78.38148 | 78.28688 | 77.71426 | -607.34922  | 2587.87032  | -598.10018  | 1 |
| 145 | H | 79.30256 | 76.83753 | 77.23002 | -359.69332  | -1479.13954 | -2259.74260 | 1 |
| 146 | C | 78.72029 | 78.12720 | 75.51153 | -240.01076  | 616.02425   | 431.85322   | 1 |
| 147 | H | 78.79436 | 77.34339 | 74.72447 | -1359.17131 | 782.54425   | 2227.99181  | 1 |
| 148 | H | 77.87181 | 78.78305 | 75.21217 | -820.36667  | 85.81767    | -2596.78715 | 1 |
| 149 | C | 80.06456 | 78.95427 | 75.61794 | -513.07015  | 236.18570   | -551.87280  | 1 |
| 150 | H | 80.04947 | 79.62711 | 76.50535 | 1816.11944  | -1183.11722 | -1650.94321 | 1 |
| 151 | H | 80.93958 | 78.28084 | 75.76798 | -1800.04429 | -1361.53473 | 1526.34643  | 1 |
| 152 | C | 80.18879 | 79.75917 | 74.30354 | 726.08972   | -253.19732  | -179.64713  | 1 |
| 153 | H | 80.37052 | 79.14098 | 73.40198 | 1224.27271  | -456.51798  | -2390.90304 | 1 |
| 154 | H | 79.34961 | 80.45694 | 74.11417 | 1206.40339  | -1150.93514 | -2154.90344 | 1 |
| 155 | N | 81.45255 | 80.67827 | 74.40971 | 329.70796   | -633.68968  | -155.67358  | 1 |
| 156 | H | 81.63741 | 81.29004 | 73.56300 | 1348.31305  | 1938.76845  | 1359.00643  | 1 |
| 157 | H | 81.48175 | 81.39602 | 75.19060 | 2096.92035  | 1446.54551  | -966.48890  | 1 |
| 158 | H | 82.39030 | 80.19431 | 74.52359 | -1197.07217 | -2303.53719 | 827.28733   | 1 |
| 159 | C | 77.41690 | 75.34754 | 75.84419 | -378.01186  | -556.17301  | -413.96481  | 1 |
| 160 | O | 76.84533 | 75.23826 | 74.79017 | -409.44433  | -307.55053  | -453.30833  | 1 |
| 161 | N | 78.37849 | 74.60129 | 76.35889 | -429.02477  | 524.70884   | 274.08502   | 1 |
| 162 | H | 78.78195 | 74.82176 | 77.30205 | 1706.34263  | -1425.96036 | 1574.38926  | 1 |
| 163 | C | 78.72451 | 73.39079 | 75.69894 | -45.25864   | -626.22952  | 478.93267   | 1 |

|     |   |          |          |          |             |             |             |   |
|-----|---|----------|----------|----------|-------------|-------------|-------------|---|
| 164 | H | 78.50470 | 73.54929 | 74.61889 | 1988.63164  | 570.90773   | 1772.87287  | 1 |
| 165 | C | 80.23762 | 73.16249 | 76.09812 | 551.77128   | -20.49526   | -564.54996  | 1 |
| 166 | H | 80.86280 | 74.00991 | 75.73800 | 1434.61535  | -1753.10253 | 1513.99471  | 1 |
| 167 | H | 80.32943 | 73.18102 | 77.20772 | -714.67738  | 1819.09770  | 1898.36494  | 1 |
| 168 | C | 80.79078 | 71.80723 | 75.54758 | 446.99263   | -555.77305  | 338.97221   | 1 |
| 169 | H | 80.13178 | 70.95868 | 75.84015 | 1953.68466  | 1892.25957  | -161.67766  | 1 |
| 170 | H | 80.83059 | 71.80547 | 74.43719 | -403.03785  | 2688.07032  | -188.43591  | 1 |
| 171 | C | 82.24165 | 71.63149 | 76.15425 | 567.86262   | 335.74681   | 434.04421   | 1 |
| 172 | H | 82.87355 | 72.52178 | 75.93130 | -1080.02275 | 1568.26081  | -1948.78900 | 1 |
| 173 | H | 82.19948 | 71.56152 | 77.26556 | -919.54108  | 2111.34692  | 1456.13463  | 1 |
| 174 | C | 82.86724 | 70.35535 | 75.54610 | 195.81897   | 173.33862   | -745.11536  | 1 |
| 175 | H | 82.34208 | 69.41432 | 75.80487 | 1405.67949  | -2301.21089 | -390.08113  | 1 |
| 176 | H | 83.04272 | 70.40275 | 74.45281 | -940.37328  | -1118.32446 | 2299.72133  | 1 |
| 177 | N | 84.29575 | 70.19808 | 76.16996 | 319.26422   | 656.36007   | -42.02424   | 1 |
| 178 | H | 84.85349 | 69.35965 | 75.83673 | 1961.03633  | 619.91968   | 1787.09422  | 1 |
| 179 | H | 84.98630 | 70.98671 | 76.00293 | 854.14343   | -2156.80752 | 1429.08711  | 1 |
| 180 | H | 84.34979 | 70.07905 | 77.22327 | 1237.02905  | -1378.50857 | -1998.28500 | 1 |
| 181 | C | 77.83013 | 72.17806 | 76.36954 | 532.53319   | -268.57236  | 517.55729   | 1 |
| 182 | O | 77.89609 | 71.90780 | 77.54519 | 266.16714   | -290.73804  | -558.88002  | 1 |
| 183 | N | 77.16940 | 71.56203 | 75.39753 | -226.25352  | 640.49678   | -270.32839  | 1 |
| 184 | H | 77.21124 | 71.95745 | 74.45946 | 2007.69063  | -1035.27229 | 1523.50231  | 1 |
| 185 | C | 76.26848 | 70.52221 | 75.73970 | -540.76542  | -573.33303  | 49.50000    | 1 |
| 186 | H | 76.51737 | 70.27023 | 76.79629 | -2374.20950 | -1036.76023 | 843.75774   | 1 |
| 187 | C | 74.80146 | 71.13718 | 75.57166 | -77.09082   | 666.87422   | -415.84136  | 1 |
| 188 | H | 74.69660 | 71.53767 | 74.52612 | -985.81834  | 617.19825   | 2463.91927  | 1 |
| 189 | O | 74.48248 | 72.25176 | 76.43108 | 293.29899   | -391.65602  | -477.80926  | 1 |
| 190 | H | 74.44664 | 72.98210 | 75.78262 | 2528.72714  | -681.76262  | -751.27122  | 1 |
| 191 | C | 73.89921 | 69.86163 | 75.73793 | 252.47363   | -605.14473  | 440.05134   | 1 |
| 192 | H | 72.82371 | 70.09771 | 75.56512 | -2052.65063 | 1456.49051  | -1043.51830 | 1 |
| 193 | H | 74.18173 | 69.05839 | 75.01952 | -2152.98800 | -1661.97574 | -161.70652  | 1 |
| 194 | H | 73.98544 | 69.43425 | 76.76368 | -473.12726  | -1584.27339 | 2165.61725  | 1 |
| 195 | C | 76.50479 | 69.28290 | 74.67885 | 360.36307   | 488.46713   | 505.10056   | 1 |
| 196 | O | 76.80864 | 68.19960 | 75.11610 | -200.08817  | -528.03552  | -385.82850  | 1 |
| 197 | N | 76.22983 | 69.63060 | 73.42302 | -597.54095  | -226.44775  | 355.20479   | 1 |
| 198 | H | 76.00896 | 70.61754 | 73.29280 | 2179.23655  | -1300.70981 | -991.33835  | 1 |
| 199 | C | 76.73264 | 68.89011 | 72.32347 | -687.68921  | 297.39807   | -249.45179  | 1 |
| 200 | H | 76.52714 | 69.54914 | 71.45107 | -349.16256  | -2467.37713 | -1101.72831 | 1 |
| 201 | C | 78.29958 | 68.62216 | 72.53199 | 672.47345   | 361.54328   | -201.62880  | 1 |
| 202 | H | 78.51415 | 68.42057 | 73.60960 | 1541.41502  | 582.18425   | 2169.97026  | 1 |
| 203 | H | 78.61047 | 67.72361 | 71.94758 | -2534.67717 | 60.25153    | 997.72295   | 1 |
| 204 | C | 79.01490 | 69.88207 | 72.02807 | 574.26774   | -389.43119  | -377.02542  | 1 |
| 205 | C | 79.43251 | 69.96146 | 70.66500 | 688.82679   | -287.33580  | -257.96133  | 1 |
| 206 | H | 79.28854 | 69.10671 | 69.97944 | 331.14182   | 1470.38163  | 2269.80013  | 1 |
| 207 | C | 79.18947 | 70.99628 | 72.90178 | -383.52382  | -675.04808  | 144.24917   | 1 |
| 208 | H | 78.85683 | 70.93413 | 73.95312 | 4.09847     | 1517.59662  | 2262.86397  | 1 |
| 209 | C | 80.01676 | 71.14445 | 70.21455 | -134.76730  | 428.45285   | -649.50303  | 1 |
| 210 | H | 80.33938 | 71.20586 | 69.16049 | -903.23433  | 1600.49020  | 2011.53387  | 1 |
| 211 | C | 79.77266 | 72.16331 | 72.40145 | -335.53281  | -615.00040  | -364.39058  | 1 |
| 212 | H | 79.89615 | 73.02432 | 73.08117 | 1596.45398  | -1369.33862 | 1732.02659  | 1 |
| 213 | C | 80.21232 | 72.28194 | 71.05128 | 585.48547   | -340.24194  | -406.23938  | 1 |
| 214 | O | 80.81433 | 73.45976 | 70.53678 | -419.15649  | -173.04408  | -511.94141  | 1 |
| 215 | H | 80.78630 | 74.02699 | 71.34305 | -1071.84350 | 1559.71507  | -1960.13012 | 1 |
| 216 | C | 76.09173 | 67.40548 | 72.15362 | 291.41878   | -183.13091  | 710.72246   | 1 |
| 217 | O | 76.61652 | 66.60709 | 71.39611 | 379.87695   | 523.47396   | -222.23622  | 1 |
| 218 | N | 74.86358 | 67.27253 | 72.73817 | 564.30591   | 373.09380   | 277.24371   | 1 |
| 219 | H | 74.83993 | 68.10385 | 73.34259 | -120.59931  | -2436.07824 | -1214.35098 | 1 |
| 220 | C | 74.61376 | 65.96193 | 73.32069 | 404.07514   | -299.37480  | 608.84009   | 1 |
| 221 | H | 75.57266 | 65.66601 | 73.80060 | -1071.07882 | -841.69025  | 2359.66467  | 1 |
| 222 | C | 73.44905 | 66.18463 | 74.35517 | -683.12807  | 68.71770    | -390.13096  | 1 |
| 223 | H | 73.75452 | 66.92168 | 75.13199 | 2068.88918  | 1596.58590  | 770.89603   | 1 |
| 224 | H | 72.56760 | 66.63592 | 73.84582 | 1379.86429  | 2342.49779  | -179.85638  | 1 |
| 225 | C | 73.05297 | 64.82823 | 75.02183 | -176.39967  | 537.49466   | 550.97268   | 1 |

|     |   |          |          |          |             |             |             |   |
|-----|---|----------|----------|----------|-------------|-------------|-------------|---|
| 226 | H | 72.74707 | 64.07704 | 74.25846 | -396.28051  | 1942.22168  | 1869.33314  | 1 |
| 227 | H | 73.91644 | 64.37420 | 75.55617 | -94.44700   | 586.00678   | -2659.20016 | 1 |
| 228 | C | 71.85071 | 65.15212 | 76.02530 | -291.69381  | -718.18079  | -150.72929  | 1 |
| 229 | H | 72.16914 | 65.72669 | 76.93291 | -2303.38776 | 1089.76242  | 964.62032   | 1 |
| 230 | H | 70.95103 | 65.64562 | 75.57945 | 884.16729   | 2568.80533  | -207.74283  | 1 |
| 231 | N | 71.50017 | 63.85742 | 76.43158 | -594.49522  | -252.81478  | 342.29276   | 1 |
| 232 | H | 72.23791 | 63.16917 | 76.41212 | -1735.17426 | 2084.05705  | -263.71605  | 1 |
| 233 | C | 70.35176 | 63.49982 | 76.84660 | 595.23177   | -271.52487  | 442.22352   | 1 |
| 234 | N | 69.33134 | 64.45408 | 76.89628 | 585.53813   | -424.79750  | -105.81303  | 1 |
| 235 | H | 69.36229 | 65.45221 | 76.69290 | 959.88797   | 1327.56823  | -2177.11905 | 1 |
| 236 | H | 68.38558 | 64.27410 | 77.23458 | 1578.48647  | 16.27378    | -2220.76233 | 1 |
| 237 | N | 70.34652 | 62.13866 | 77.18058 | -452.17763  | -390.33541  | -421.51853  | 1 |
| 238 | H | 71.09015 | 61.44223 | 77.16844 | 470.26107   | 1974.25629  | -1817.92087 | 1 |
| 239 | H | 69.52504 | 61.66200 | 77.55403 | 1856.67307  | -1573.97321 | -1224.35416 | 1 |
| 240 | C | 74.14820 | 64.91323 | 72.18776 | -531.47271  | -581.45780  | -55.06206   | 1 |
| 241 | O | 74.09948 | 63.71200 | 72.45444 | -243.00837  | 192.73507   | 609.52485   | 1 |
| 242 | N | 73.75837 | 65.50891 | 71.07320 | 343.49288   | -644.25607  | 38.09164    | 1 |
| 243 | H | 73.90645 | 66.51647 | 71.10911 | -1691.16043 | -1535.97525 | -1484.73099 | 1 |
| 244 | C | 73.47033 | 64.81841 | 69.82976 | 542.66492   | 350.14337   | 454.42563   | 1 |
| 245 | H | 73.42606 | 65.63001 | 69.06488 | 1209.57979  | -2396.95920 | 463.86744   | 1 |
| 246 | C | 74.57122 | 63.79723 | 69.57069 | -737.14309  | 145.93010   | 242.71942   | 1 |
| 247 | H | 74.66799 | 63.15774 | 70.48273 | -1050.18303 | 159.36419   | -2509.06125 | 1 |
| 248 | C | 74.23837 | 62.90226 | 68.39437 | -706.77696  | -252.88343  | -245.16230  | 1 |
| 249 | H | 75.03119 | 62.12218 | 68.22723 | -1624.64039 | -1665.49085 | 1417.86935  | 1 |
| 250 | H | 73.24788 | 62.35038 | 68.54557 | 2566.10521  | 598.51109   | 693.22305   | 1 |
| 251 | H | 74.14546 | 63.49080 | 67.44036 | -1972.69758 | 107.10018   | -1876.34312 | 1 |
| 252 | C | 75.91251 | 64.46674 | 69.35222 | 412.85148   | 672.58832   | -27.69222   | 1 |
| 253 | H | 76.74679 | 63.71562 | 69.28316 | 1447.02277  | 1762.76533  | -1490.78944 | 1 |
| 254 | H | 75.92505 | 65.06587 | 68.40060 | 1320.77379  | -145.20455  | 2378.68491  | 1 |
| 255 | H | 76.16650 | 65.19122 | 70.21205 | -1512.10848 | 1470.52031  | 1724.75147  | 1 |
| 256 | C | 71.98110 | 64.08903 | 70.03999 | -607.11113  | 499.56689   | 73.73769    | 1 |
| 257 | O | 71.03025 | 64.56912 | 69.48579 | 357.97126   | 460.81534   | 356.68785   | 1 |
| 258 | N | 72.07126 | 63.05054 | 70.84967 | 536.55407   | -368.62270  | 332.76306   | 1 |
| 259 | H | 72.95903 | 62.88461 | 71.37550 | 524.38866   | 2297.69985  | 1367.20941  | 1 |
| 260 | C | 71.00370 | 62.12006 | 70.94596 | 46.50277    | -774.29190  | -147.97904  | 1 |
| 261 | H | 71.40601 | 61.35660 | 71.64787 | 1676.51875  | 1883.29066  | 1032.55549  | 1 |
| 262 | C | 69.71240 | 62.88580 | 71.55277 | -559.41456  | -34.19198   | -556.30433  | 1 |
| 263 | H | 69.51668 | 63.81685 | 70.96382 | -64.66664   | 395.18769   | 2695.05373  | 1 |
| 264 | H | 68.79042 | 62.26266 | 71.46909 | -2703.44278 | -60.40056   | 333.79418   | 1 |
| 265 | C | 70.00929 | 63.20563 | 72.98963 | -519.76435  | 377.31045   | 459.42366   | 1 |
| 266 | H | 70.99618 | 63.72006 | 73.03569 | -1746.74323 | 1667.50644  | -1261.73691 | 1 |
| 267 | C | 68.94821 | 64.13503 | 73.56785 | 570.95554   | 16.46261    | -545.27700  | 1 |
| 268 | H | 69.15158 | 64.36633 | 74.64489 | 2391.58273  | 28.05277    | -1305.07271 | 1 |
| 269 | H | 68.90454 | 65.11009 | 73.01780 | 175.75588   | 917.63458   | 2559.43867  | 1 |
| 270 | H | 67.92696 | 63.67675 | 73.51621 | -1063.97851 | -2155.34650 | 1283.00462  | 1 |
| 271 | C | 70.07186 | 61.94213 | 73.83923 | 193.76014   | 2.62946     | -765.53141  | 1 |
| 272 | H | 70.24009 | 62.18443 | 74.91936 | 507.39394   | -846.55087  | 2539.60089  | 1 |
| 273 | H | 69.11997 | 61.35429 | 73.77717 | 1337.57841  | 1818.19054  | 1526.01994  | 1 |
| 274 | H | 70.90369 | 61.26222 | 73.52415 | 1100.88635  | -1172.91350 | -2199.08909 | 1 |
| 275 | C | 70.69370 | 61.48667 | 69.50500 | -549.21115  | 475.64486   | -309.38218  | 1 |
| 276 | O | 71.52089 | 61.41618 | 68.62501 | 556.06106   | -390.37755  | -78.24250   | 1 |
| 277 | O | 69.44795 | 60.83909 | 69.35847 | -572.27940  | -310.19032  | -209.75862  | 1 |
| 278 | H | 69.06423 | 61.04056 | 70.25654 | -1380.08193 | 2212.14486  | 790.85944   | 1 |

Listing 115: C00115.xmolout

|   |   |          |          |          |             |             |             |        |          |
|---|---|----------|----------|----------|-------------|-------------|-------------|--------|----------|
| 1 |   | 276      |          |          |             |             |             |        |          |
| 2 |   | 150.0000 | 150.0000 | 150.0000 | 0.0000      | 0.0000      | 0.0000***** | 2.7750 | 11100    |
|   |   | 0.2500   | 300.00   | 0.00     | 0.00        | 0.00        | -1293.3772  | 0.0000 | 300.0000 |
| 3 | H | 83.89417 | 78.01318 | 75.65562 | -2043.14101 | -1757.64893 | 399.89339   |        | 1        |
| 4 | N | 83.69350 | 78.76603 | 74.99664 | 426.75047   | 490.45733   | -334.42467  |        | 1        |
| 5 | H | 83.03913 | 79.37508 | 75.51038 | 442.25559   | -1110.30854 | -2448.52907 |        | 1        |

|    |   |          |          |          |             |             |             |   |
|----|---|----------|----------|----------|-------------|-------------|-------------|---|
| 6  | C | 84.87720 | 79.41395 | 74.55229 | 415.32972   | -666.39213  | 83.73172    | 1 |
| 7  | H | 85.42737 | 78.55110 | 74.11399 | 879.32219   | 2491.00447  | 667.35213   | 1 |
| 8  | C | 84.50074 | 80.53956 | 73.44621 | 31.35357    | 477.41777   | 628.23362   | 1 |
| 9  | H | 83.77755 | 81.26673 | 73.88481 | 1168.38489  | 2240.25337  | -1019.71136 | 1 |
| 10 | H | 85.40060 | 81.12996 | 73.15486 | -360.43770  | 2534.90498  | 931.67112   | 1 |
| 11 | C | 83.91399 | 79.85761 | 72.24656 | 463.18208   | 512.70242   | -382.34388  | 1 |
| 12 | H | 83.15532 | 79.12159 | 72.59784 | 1725.29117  | 1863.52247  | -987.07854  | 1 |
| 13 | C | 83.22708 | 80.87280 | 71.33918 | 710.42801   | -144.27427  | -313.15367  | 1 |
| 14 | H | 82.77498 | 80.38349 | 70.43866 | 364.20195   | -1033.13725 | 2494.72524  | 1 |
| 15 | H | 82.40422 | 81.41462 | 71.87214 | 2567.61904  | 335.80679   | 847.48802   | 1 |
| 16 | H | 83.94770 | 81.64619 | 70.96845 | -2587.99029 | 680.92867   | -512.16411  | 1 |
| 17 | C | 84.98521 | 79.12346 | 71.44838 | 268.17616   | 741.64379   | -40.42634   | 1 |
| 18 | H | 84.55736 | 78.63049 | 70.53812 | 1283.54314  | -1945.37420 | -1411.27812 | 1 |
| 19 | H | 85.78843 | 79.82176 | 71.09896 | -1258.57796 | 1317.15249  | -2026.02085 | 1 |
| 20 | H | 85.48319 | 78.32394 | 72.05362 | -2502.84526 | 909.80597   | 575.92391   | 1 |
| 21 | C | 85.62301 | 79.93238 | 75.85202 | 619.36578   | -458.64843  | -172.09273  | 1 |
| 22 | O | 85.69321 | 79.26301 | 76.94623 | -81.40433   | 433.87611   | 522.34594   | 1 |
| 23 | N | 86.21532 | 81.08849 | 75.69752 | 175.23996   | -622.20190  | 341.55523   | 1 |
| 24 | H | 86.19814 | 81.54208 | 74.78703 | -876.57256  | -303.22879  | -2561.90213 | 1 |
| 25 | C | 87.32941 | 81.22440 | 76.59435 | -571.88214  | -534.10783  | -106.15033  | 1 |
| 26 | H | 88.08462 | 80.58577 | 76.09184 | -2713.20841 | -16.25800   | -248.80809  | 1 |
| 27 | C | 87.80576 | 82.71998 | 76.56558 | 166.60354   | 288.16399   | -716.09568  | 1 |
| 28 | H | 86.95624 | 83.41019 | 76.83639 | -2097.85574 | 1636.78449  | -586.18044  | 1 |
| 29 | O | 88.23763 | 83.21568 | 75.26590 | -317.80580  | -363.38227  | 484.43082   | 1 |
| 30 | H | 87.63190 | 83.96453 | 75.13592 | 1863.74748  | -1451.84923 | 1357.29467  | 1 |
| 31 | C | 88.89270 | 82.71110 | 77.70475 | 503.80731   | 517.99032   | 318.51606   | 1 |
| 32 | H | 89.27188 | 83.73764 | 77.91663 | 640.61020   | -2157.10410 | -1536.29104 | 1 |
| 33 | H | 88.49198 | 82.29635 | 78.65982 | 1687.88455  | 465.60692   | 2087.56452  | 1 |
| 34 | H | 89.77094 | 82.08631 | 77.42011 | -1293.07895 | -1899.88581 | -1463.57452 | 1 |
| 35 | C | 86.86469 | 80.42163 | 78.02234 | -153.07550  | -733.68902  | 248.70981   | 1 |
| 36 | O | 87.76418 | 79.75905 | 78.56168 | 186.15459   | -480.78787  | -449.34387  | 1 |
| 37 | N | 85.95901 | 81.14678 | 78.77400 | -487.53139  | 543.18517   | 42.03850    | 1 |
| 38 | C | 85.53156 | 80.63276 | 80.01550 | -699.35871  | 69.34393    | 360.10701   | 1 |
| 39 | H | 86.37165 | 79.98215 | 80.36270 | 2.81126     | -221.99807  | -2715.58072 | 1 |
| 40 | C | 85.25356 | 81.97302 | 80.84119 | -507.46439  | -592.59194  | 122.07761   | 1 |
| 41 | H | 84.57413 | 81.81132 | 81.70792 | -1975.08116 | 525.87560   | -1801.71556 | 1 |
| 42 | H | 86.19432 | 82.40881 | 81.24448 | 1588.27743  | -1913.22100 | 1113.83566  | 1 |
| 43 | C | 84.63494 | 82.87941 | 79.73806 | -613.62442  | -457.55993  | -194.14490  | 1 |
| 44 | H | 83.57133 | 82.60955 | 79.55181 | 1707.54637  | -721.27992  | 1996.92523  | 1 |
| 45 | H | 84.65062 | 83.96325 | 79.98883 | 758.23357   | 2100.81767  | 1560.55011  | 1 |
| 46 | C | 85.55964 | 82.50668 | 78.49008 | -352.41524  | 704.96076   | 49.21465    | 1 |
| 47 | H | 85.05597 | 82.51821 | 77.49285 | 1714.76886  | -2070.42778 | 443.35792   | 1 |
| 48 | H | 86.50364 | 83.09995 | 78.43574 | 1224.15040  | 1801.50881  | 1636.97633  | 1 |
| 49 | C | 84.08874 | 79.82065 | 79.95500 | 566.85117   | 537.05831   | 117.62814   | 1 |
| 50 | O | 83.83757 | 79.01720 | 80.82090 | -550.26779  | -406.08867  | 4.21666     | 1 |
| 51 | N | 83.31896 | 80.21332 | 78.94960 | 566.34832   | -425.77725  | 180.18749   | 1 |
| 52 | H | 83.73695 | 80.87964 | 78.30298 | 644.44502   | 2646.80550  | -52.73430   | 1 |
| 53 | C | 81.91300 | 80.00188 | 79.05662 | 612.34801   | -281.48662  | 411.56221   | 1 |
| 54 | H | 81.80489 | 79.16292 | 79.78414 | 1667.23498  | -1490.75142 | 1556.16753  | 1 |
| 55 | C | 81.23306 | 81.36096 | 79.57718 | -714.45746  | -175.43074  | 286.98927   | 1 |
| 56 | H | 81.33699 | 82.14812 | 78.78191 | -787.09484  | 1763.03619  | -1922.46060 | 1 |
| 57 | O | 81.77073 | 81.93019 | 80.78214 | -429.46514  | 516.51932   | -128.40526  | 1 |
| 58 | H | 81.90677 | 82.85991 | 80.50832 | 1981.82785  | 436.16847   | -1818.18182 | 1 |
| 59 | C | 79.72760 | 80.91969 | 79.67149 | 630.79189   | -468.94448  | 76.03230    | 1 |
| 60 | H | 79.07462 | 81.76627 | 79.98631 | -1775.71861 | 2062.30353  | 131.89849   | 1 |
| 61 | H | 79.33937 | 80.54766 | 78.69519 | -1855.14608 | 88.94118    | 1993.53760  | 1 |
| 62 | H | 79.58884 | 80.10391 | 80.41874 | -1504.82350 | -780.94249  | -2132.90992 | 1 |
| 63 | C | 81.40104 | 79.70917 | 77.54330 | 288.57638   | 618.62814   | -397.00270  | 1 |
| 64 | O | 81.83117 | 80.31808 | 76.57660 | 321.70495   | -185.26452  | 574.37218   | 1 |
| 65 | N | 80.38366 | 78.84019 | 77.56845 | -447.05792  | -446.53431  | 367.76425   | 1 |
| 66 | H | 80.17718 | 78.43922 | 78.48627 | 350.31316   | 1975.63644  | -1843.31522 | 1 |
| 67 | C | 80.36519 | 77.93057 | 76.45931 | -511.23061  | 374.03917   | -471.51480  | 1 |

|     |   |          |          |          |             |             |             |   |
|-----|---|----------|----------|----------|-------------|-------------|-------------|---|
| 68  | H | 80.77388 | 78.53338 | 75.61563 | 2234.79579  | -898.70890  | -1273.45190 | 1 |
| 69  | C | 81.34759 | 76.73671 | 76.87381 | 529.53781   | -159.34528  | 563.72604   | 1 |
| 70  | H | 81.29971 | 75.99227 | 76.03388 | 654.59388   | 2347.94251  | 1217.51488  | 1 |
| 71  | H | 82.39086 | 77.15114 | 76.88475 | -1526.55661 | 2103.42026  | 817.87394   | 1 |
| 72  | O | 81.06589 | 76.06267 | 78.12482 | -554.84278  | 14.12789    | 399.58769   | 1 |
| 73  | H | 81.68260 | 76.53924 | 78.71261 | 1297.06236  | 2061.84854  | 1220.68812  | 1 |
| 74  | C | 78.85042 | 77.39895 | 76.19589 | -662.15484  | -412.13544  | 123.62687   | 1 |
| 75  | O | 78.68033 | 76.40744 | 75.51662 | -540.01537  | -317.05804  | 274.91456   | 1 |
| 76  | N | 77.94714 | 78.22178 | 76.71073 | -202.76299  | -690.00100  | -131.49145  | 1 |
| 77  | H | 78.33200 | 79.01228 | 77.22531 | -702.62132  | -2617.37191 | 281.70413   | 1 |
| 78  | C | 76.56418 | 78.21513 | 76.35759 | -491.73914  | 576.34187   | 222.73509   | 1 |
| 79  | H | 76.38757 | 79.30140 | 76.19969 | 1977.17978  | -1823.58850 | -434.68928  | 1 |
| 80  | C | 76.27197 | 77.35650 | 75.06059 | -649.50797  | -328.66843  | 306.11224   | 1 |
| 81  | H | 76.61269 | 76.30033 | 75.19821 | 2075.07803  | 1452.16490  | -1004.45904 | 1 |
| 82  | C | 74.74795 | 77.42150 | 74.68780 | -615.18735  | -489.99689  | -70.96352   | 1 |
| 83  | H | 74.52454 | 76.82052 | 73.77535 | -1226.32661 | -1724.38906 | -1716.47170 | 1 |
| 84  | H | 74.09831 | 77.03205 | 75.50553 | 2381.64273  | -969.84735  | 900.46860   | 1 |
| 85  | H | 74.42355 | 78.46830 | 74.48420 | 2122.74991  | 1702.23946  | -141.36228  | 1 |
| 86  | C | 77.00610 | 78.02334 | 73.84343 | -501.86074  | -479.61276  | -376.42482  | 1 |
| 87  | H | 76.78479 | 77.49484 | 72.88734 | 993.79261   | -2246.95401 | -1177.81305 | 1 |
| 88  | H | 76.70324 | 79.08844 | 73.71356 | 42.71279    | -626.15391  | -2651.37258 | 1 |
| 89  | H | 78.11360 | 78.00563 | 73.98381 | -2026.39012 | -1590.33709 | -887.82922  | 1 |
| 90  | C | 75.75876 | 77.79237 | 77.71714 | -672.89153  | 382.57394   | -156.34072  | 1 |
| 91  | O | 75.76906 | 78.54137 | 78.66701 | 410.04627   | 221.86223   | 500.35950   | 1 |
| 92  | N | 75.07559 | 76.65757 | 77.57382 | -378.11782  | -443.79414  | -441.10984  | 1 |
| 93  | H | 75.24879 | 76.07990 | 76.75295 | 2404.15973  | -568.14894  | 1149.30085  | 1 |
| 94  | C | 74.42667 | 76.11356 | 78.71738 | -544.54484  | 466.16019   | 331.29119   | 1 |
| 95  | H | 74.40621 | 76.92493 | 79.48139 | -1409.80988 | -170.17955  | 2325.32679  | 1 |
| 96  | C | 72.99455 | 75.64090 | 78.20872 | -184.48284  | 116.78282   | -758.89137  | 1 |
| 97  | H | 72.42486 | 76.49617 | 77.78162 | 1893.78641  | 1861.14652  | 611.04528   | 1 |
| 98  | H | 73.10111 | 74.91246 | 77.37592 | -2170.79665 | -974.19311  | 1327.50117  | 1 |
| 99  | C | 72.22684 | 74.99907 | 79.40400 | 389.51668   | 672.81878   | -138.49152  | 1 |
| 100 | H | 72.90895 | 74.35495 | 79.99743 | 510.64577   | 1933.03327  | 1851.02484  | 1 |
| 101 | H | 71.89885 | 75.78924 | 80.11458 | -2302.30869 | -1105.72939 | -948.89774  | 1 |
| 102 | C | 70.99368 | 74.12455 | 78.95430 | -559.93427  | -126.34590  | 542.30857   | 1 |
| 103 | O | 70.58243 | 73.26034 | 79.69002 | -670.36003  | -111.83166  | 76.36448    | 1 |
| 104 | N | 70.50527 | 74.45488 | 77.74396 | -216.06729  | -537.07037  | 446.51379   | 1 |
| 105 | H | 70.80270 | 75.21089 | 77.11560 | -1251.96487 | 1074.12894  | -2168.52500 | 1 |
| 106 | H | 69.68277 | 74.01890 | 77.31162 | -2451.83023 | -720.73851  | 944.84612   | 1 |
| 107 | C | 75.29834 | 74.79557 | 79.13818 | 546.24052   | -563.88337  | -85.11809   | 1 |
| 108 | O | 75.65297 | 74.02891 | 78.28076 | 71.70702    | -307.40463  | 606.69673   | 1 |
| 109 | N | 75.40775 | 74.68305 | 80.46738 | 479.90863   | -504.50129  | 222.86849   | 1 |
| 110 | C | 76.27298 | 73.70612 | 81.05944 | 75.51268    | -600.91904  | 506.73700   | 1 |
| 111 | H | 77.15195 | 73.61315 | 80.38026 | -2033.61562 | 1795.30103  | 254.89480   | 1 |
| 112 | C | 76.57325 | 74.33635 | 82.48530 | 523.79067   | 517.99274   | 284.45581   | 1 |
| 113 | H | 76.88567 | 73.57447 | 83.23471 | 1599.61665  | -1127.00911 | 1895.98173  | 1 |
| 114 | H | 77.38790 | 75.09328 | 82.43768 | -1881.83093 | 1275.82488  | -1501.55016 | 1 |
| 115 | C | 75.20078 | 75.00135 | 82.81273 | -600.05639  | -404.05026  | 316.64485   | 1 |
| 116 | H | 74.44122 | 74.23854 | 83.09724 | -2597.05260 | 496.36221   | 657.73249   | 1 |
| 117 | H | 75.24468 | 75.73897 | 83.64533 | -1666.24518 | 1294.38985  | -1723.90591 | 1 |
| 118 | C | 74.86886 | 75.66069 | 81.40509 | 493.57570   | -129.95376  | -602.56394  | 1 |
| 119 | H | 73.78505 | 75.81205 | 81.19541 | -1469.08415 | -637.84797  | 2204.22581  | 1 |
| 120 | H | 75.41903 | 76.61020 | 81.20152 | -1038.97840 | 1068.88701  | -2280.71789 | 1 |
| 121 | C | 75.55093 | 72.26524 | 81.31667 | 188.88100   | 241.05089   | -727.87821  | 1 |
| 122 | O | 76.12024 | 71.39422 | 81.92963 | 531.88613   | -49.19943   | 427.07960   | 1 |
| 123 | N | 74.23600 | 72.21357 | 80.90349 | 708.14833   | 26.93417    | -179.73509  | 1 |
| 124 | H | 74.19546 | 73.05036 | 80.30861 | -2232.69501 | -1179.09831 | 1023.94816  | 1 |
| 125 | C | 73.78905 | 70.90404 | 80.37256 | -738.32412  | 259.92548   | 104.42456   | 1 |
| 126 | H | 74.54769 | 70.19430 | 80.78178 | 2028.89123  | 1260.02983  | 1311.33324  | 1 |
| 127 | C | 72.38200 | 70.66974 | 80.87252 | -258.65678  | -345.52513  | 661.28459   | 1 |
| 128 | H | 71.78074 | 71.59285 | 80.69188 | -1826.06090 | -1801.46097 | -918.64554  | 1 |
| 129 | C | 71.71285 | 69.52069 | 80.14038 | -541.23400  | 531.92970   | -218.41428  | 1 |



|     |   |          |          |          |             |             |             |   |
|-----|---|----------|----------|----------|-------------|-------------|-------------|---|
| 130 | H | 70.66273 | 69.35046 | 80.50610 | 1311.73218  | -2219.18200 | 882.19023   | 1 |
| 131 | H | 71.65179 | 69.71670 | 79.03284 | -1048.71298 | 1223.58118  | -2196.97971 | 1 |
| 132 | H | 72.27662 | 68.55682 | 80.27704 | 419.06414   | 1903.92898  | 1903.44670  | 1 |
| 133 | C | 72.36671 | 70.41478 | 82.36976 | -423.86431  | 152.66566   | -648.55262  | 1 |
| 134 | H | 71.31871 | 70.31327 | 82.76624 | 105.68386   | -2342.50080 | 1387.51238  | 1 |
| 135 | H | 72.91909 | 69.47110 | 82.63468 | -1695.63603 | -1484.73621 | -1531.02793 | 1 |
| 136 | H | 72.86152 | 71.25608 | 82.93024 | -1853.57121 | -487.39031  | 1936.59343  | 1 |
| 137 | C | 73.84553 | 71.02543 | 78.72957 | 539.71428   | -510.58232  | 267.58633   | 1 |
| 138 | O | 74.72313 | 70.44261 | 78.10975 | -15.93758   | -278.34085  | -624.49402  | 1 |
| 139 | N | 72.88659 | 71.80046 | 78.28802 | -676.81886  | 12.05292    | 276.17960   | 1 |
| 140 | H | 72.25411 | 72.19840 | 78.98469 | -1694.44250 | -373.84189  | -2100.66098 | 1 |
| 141 | C | 72.61012 | 71.99688 | 76.90637 | 412.33078   | -664.70360  | 108.35451   | 1 |
| 142 | H | 71.76366 | 72.72079 | 76.91376 | 1765.77476  | 1294.44366  | 1621.76594  | 1 |
| 143 | C | 73.92815 | 72.57225 | 76.23148 | -179.66635  | -721.95667  | -264.73915  | 1 |
| 144 | H | 74.24632 | 73.51819 | 76.73032 | -607.34922  | 2587.87032  | -598.10018  | 1 |
| 145 | H | 74.79066 | 71.87936 | 76.36887 | -359.69332  | -1479.13954 | -2259.74260 | 1 |
| 146 | C | 73.61532 | 72.80233 | 74.71797 | -240.01076  | 616.02425   | 431.85322   | 1 |
| 147 | H | 73.42340 | 71.83127 | 74.20243 | -1359.17131 | 782.54425   | 2227.99181  | 1 |
| 148 | H | 72.68570 | 73.40386 | 74.58584 | -820.36667  | 85.81767    | -2596.78715 | 1 |
| 149 | C | 74.86077 | 73.54507 | 74.08631 | -513.07015  | 236.18570   | -551.87280  | 1 |
| 150 | H | 75.07847 | 74.49271 | 74.63096 | 1816.11944  | -1183.11722 | -1650.94321 | 1 |
| 151 | H | 75.78250 | 72.92595 | 74.18140 | -1800.04429 | -1361.53473 | 1526.34643  | 1 |
| 152 | C | 74.53348 | 73.82659 | 72.60079 | 726.08972   | -253.19732  | -179.64713  | 1 |
| 153 | H | 74.34312 | 72.92302 | 71.98581 | 1224.27271  | -456.51798  | -2390.90304 | 1 |
| 154 | H | 73.72739 | 74.56983 | 72.43949 | 1206.40339  | -1150.93514 | -2154.90344 | 1 |
| 155 | N | 75.81243 | 74.47197 | 71.97378 | 329.70796   | -633.68968  | -155.67358  | 1 |
| 156 | H | 75.74178 | 74.75302 | 70.95375 | 1348.31305  | 1938.76845  | 1359.00643  | 1 |
| 157 | H | 76.18355 | 75.36084 | 72.42015 | 2096.92035  | 1446.54551  | -966.48890  | 1 |
| 158 | H | 76.67849 | 73.86002 | 71.95755 | -1197.07217 | -2303.53719 | 827.28733   | 1 |
| 159 | C | 72.17323 | 70.56998 | 76.23811 | -378.01186  | -556.17301  | -413.96481  | 1 |
| 160 | O | 70.98531 | 70.39816 | 75.99838 | -409.44433  | -307.55053  | -453.30833  | 1 |
| 161 | N | 73.20180 | 69.77775 | 76.07296 | -429.02477  | 524.70884   | 274.08502   | 1 |
| 162 | H | 74.12403 | 70.04410 | 76.48595 | 1706.34263  | -1425.96036 | 1574.38926  | 1 |
| 163 | C | 73.10462 | 68.55311 | 75.36504 | -45.25864   | -626.22952  | 478.93267   | 1 |
| 164 | H | 74.08877 | 68.06992 | 75.55653 | 1988.63164  | 570.90773   | 1772.87287  | 1 |
| 165 | C | 71.88096 | 67.76713 | 75.99259 | 551.77128   | -20.49526   | -564.54996  | 1 |
| 166 | H | 71.92121 | 67.83325 | 77.10330 | 1434.61535  | -1753.10253 | 1513.99471  | 1 |
| 167 | H | 70.91047 | 68.23750 | 75.70398 | -714.67738  | 1819.09770  | 1898.36494  | 1 |
| 168 | C | 71.93376 | 66.27720 | 75.52144 | 446.99263   | -555.77305  | 338.97221   | 1 |
| 169 | H | 71.72877 | 66.19432 | 74.42988 | 1953.68466  | 1892.25957  | -161.67766  | 1 |
| 170 | H | 72.94615 | 65.84281 | 75.68048 | -403.03785  | 2688.07032  | -188.43591  | 1 |
| 171 | C | 70.85007 | 65.50251 | 76.37591 | 567.86262   | 335.74681   | 434.04421   | 1 |
| 172 | H | 71.04751 | 65.62658 | 77.46554 | -1080.02275 | 1568.26081  | -1948.78900 | 1 |
| 173 | H | 69.83440 | 65.92713 | 76.20366 | -919.54108  | 2111.34692  | 1456.13463  | 1 |
| 174 | C | 70.89201 | 64.00714 | 75.98704 | 195.81897   | 173.33862   | -745.11536  | 1 |
| 175 | H | 70.53892 | 63.78649 | 74.95999 | 1405.67949  | -2301.21089 | -390.08113  | 1 |
| 176 | H | 71.86557 | 63.50945 | 76.16813 | -940.37328  | -1118.32446 | 2299.72133  | 1 |
| 177 | N | 69.88892 | 63.25510 | 76.92707 | 319.26422   | 656.36007   | -42.02424   | 1 |
| 178 | H | 69.80381 | 62.21027 | 76.76591 | 1961.03633  | 619.91968   | 1787.09422  | 1 |
| 179 | H | 70.08669 | 63.28793 | 77.96952 | 854.14343   | -2156.80752 | 1429.08711  | 1 |
| 180 | H | 68.87167 | 63.55523 | 76.88773 | 1237.02905  | -1378.50857 | -1998.28500 | 1 |
| 181 | C | 72.87688 | 68.83263 | 73.75588 | 532.53319   | -268.57236  | 517.55729   | 1 |
| 182 | O | 73.65811 | 68.37640 | 72.96003 | 266.16714   | -290.73804  | -558.88002  | 1 |
| 183 | N | 71.78621 | 69.55040 | 73.54831 | -226.25352  | 640.49678   | -270.32839  | 1 |
| 184 | H | 71.20367 | 69.87904 | 74.35238 | 2007.69063  | -1035.27229 | 1523.50231  | 1 |
| 185 | C | 71.40837 | 69.85306 | 72.21785 | -540.76542  | -573.33303  | 49.50000    | 1 |
| 186 | H | 72.10341 | 69.28826 | 71.55315 | -2374.20950 | -1036.76023 | 843.75774   | 1 |
| 187 | C | 69.88429 | 69.35213 | 72.15836 | -77.09082   | 666.87422   | -415.84136  | 1 |
| 188 | H | 69.30894 | 69.86357 | 72.97839 | -985.81834  | 617.19825   | 2463.91927  | 1 |
| 189 | O | 69.70761 | 67.93934 | 72.38865 | 293.29899   | -391.65602  | -477.80926  | 1 |
| 190 | H | 69.13026 | 67.94977 | 73.17649 | 2528.72714  | -681.76262  | -751.27122  | 1 |
| 191 | C | 69.34912 | 69.87018 | 70.77785 | 252.47363   | -605.14473  | 440.05134   | 1 |

|     |   |          |          |          |             |             |             |   |
|-----|---|----------|----------|----------|-------------|-------------|-------------|---|
| 192 | H | 68.27311 | 69.59209 | 70.64586 | -2052.65063 | 1456.49051  | -1043.51830 | 1 |
| 193 | H | 69.40917 | 70.99686 | 70.69728 | -2152.98800 | -1661.97574 | -161.70652  | 1 |
| 194 | H | 69.91869 | 69.43224 | 69.92431 | -473.12726  | -1584.27339 | 2165.61725  | 1 |
| 195 | C | 71.52337 | 71.47919 | 72.07020 | 360.36307   | 488.46713   | 505.10056   | 1 |
| 196 | O | 71.50458 | 72.22390 | 73.02460 | -200.08817  | -528.03552  | -385.82850  | 1 |
| 197 | N | 71.61396 | 71.80556 | 70.78459 | -597.54095  | -226.44775  | 355.20479   | 1 |
| 198 | H | 71.57514 | 71.06994 | 70.08186 | 2179.23655  | -1300.70981 | -991.33835  | 1 |
| 199 | C | 71.45953 | 73.19866 | 70.46756 | -687.68921  | 297.39807   | -249.45179  | 1 |
| 200 | H | 72.21419 | 73.73281 | 71.08532 | -349.16256  | -2467.37713 | -1101.72831 | 1 |
| 201 | C | 71.63757 | 73.38309 | 68.89070 | 672.47345   | 361.54328   | -201.62880  | 1 |
| 202 | H | 70.92020 | 72.73356 | 68.34101 | 1541.41502  | 582.18425   | 2169.97026  | 1 |
| 203 | H | 71.39454 | 74.43580 | 68.61703 | -2534.67717 | 60.25153    | 997.72295   | 1 |
| 204 | C | 73.08345 | 73.05196 | 68.49439 | 574.26774   | -389.43119  | -377.02542  | 1 |
| 205 | C | 74.12927 | 73.95695 | 68.84693 | 688.82679   | -287.33580  | -257.96133  | 1 |
| 206 | H | 73.91053 | 74.88003 | 69.41390 | 331.14182   | 1470.38163  | 2269.80013  | 1 |
| 207 | C | 73.36920 | 71.85538 | 67.77042 | -383.52382  | -675.04808  | 144.24917   | 1 |
| 208 | H | 72.56058 | 71.15095 | 67.50333 | 4.09847     | 1517.59662  | 2262.86397  | 1 |
| 209 | C | 75.43174 | 73.65214 | 68.45331 | -134.76730  | 428.45285   | -649.50303  | 1 |
| 210 | H | 76.24235 | 74.35376 | 68.71599 | -903.23433  | 1600.49020  | 2011.53387  | 1 |
| 211 | C | 74.69103 | 71.59650 | 67.39925 | -335.53281  | -615.00040  | -364.39058  | 1 |
| 212 | H | 74.90263 | 70.67225 | 66.83367 | 1596.45398  | -1369.33862 | 1732.02659  | 1 |
| 213 | C | 75.76555 | 72.47640 | 67.72050 | 585.48547   | -340.24194  | -406.23938  | 1 |
| 214 | O | 77.11119 | 72.22374 | 67.34664 | -419.15649  | -173.04408  | -511.94141  | 1 |
| 215 | H | 76.99214 | 71.37478 | 66.85922 | -1071.84350 | 1559.71507  | -1960.13012 | 1 |
| 216 | C | 69.94989 | 73.65458 | 70.82046 | 291.41878   | -183.13091  | 710.72246   | 1 |
| 217 | O | 68.96774 | 72.91773 | 70.61088 | 379.87695   | 523.47396   | -222.23622  | 1 |
| 218 | N | 69.97218 | 74.90838 | 71.19727 | 564.30591   | 373.09380   | 277.24371   | 1 |
| 219 | H | 70.90395 | 75.31980 | 71.22553 | -120.59931  | -2436.07824 | -1214.35098 | 1 |
| 220 | C | 68.94018 | 75.44279 | 72.03704 | 404.07514   | -299.37480  | 608.84009   | 1 |
| 221 | H | 68.63783 | 74.56355 | 72.64885 | -1071.07882 | -841.69025  | 2359.66467  | 1 |
| 222 | C | 69.58447 | 76.63299 | 72.84599 | -683.12807  | 68.71770    | -390.13096  | 1 |
| 223 | H | 70.49114 | 76.29509 | 73.39795 | 2068.88918  | 1596.58590  | 770.89603   | 1 |
| 224 | H | 69.93555 | 77.42382 | 72.14486 | 1379.86429  | 2342.49779  | -179.85638  | 1 |
| 225 | C | 68.51715 | 77.21320 | 73.82848 | -176.39967  | 537.49466   | 550.97268   | 1 |
| 226 | H | 67.58291 | 77.48029 | 73.28273 | -396.28051  | 1942.22168  | 1869.33314  | 1 |
| 227 | H | 68.21888 | 76.46175 | 74.59308 | -94.44700   | 586.00678   | -2659.20016 | 1 |
| 228 | C | 69.16595 | 78.50873 | 74.50003 | -291.69381  | -718.18079  | -150.72929  | 1 |
| 229 | H | 70.01421 | 78.30454 | 75.20242 | -2303.38776 | 1089.76242  | 964.62032   | 1 |
| 230 | H | 69.48706 | 79.31667 | 73.79435 | 884.16729   | 2568.80533  | -207.74283  | 1 |
| 231 | N | 68.08803 | 79.00461 | 75.24835 | -594.49522  | -252.81478  | 342.29276   | 1 |
| 232 | H | 67.28467 | 78.40249 | 75.34226 | -1735.17426 | 2084.05705  | -263.71605  | 1 |
| 233 | C | 68.05855 | 80.14422 | 75.81101 | 595.23177   | -271.52487  | 442.22352   | 1 |
| 234 | N | 69.18267 | 80.96734 | 75.68444 | 585.53813   | -424.79750  | -105.81303  | 1 |
| 235 | H | 70.06014 | 80.79508 | 75.19557 | 959.88797   | 1327.56823  | -2177.11905 | 1 |
| 236 | H | 69.27372 | 81.89852 | 76.09190 | 1578.48647  | 16.27378    | -2220.76233 | 1 |
| 237 | N | 66.84213 | 80.34406 | 76.47931 | -452.17763  | -390.33541  | -421.51853  | 1 |
| 238 | H | 66.01713 | 79.75122 | 76.55645 | 470.26107   | 1974.25629  | -1817.92087 | 1 |
| 239 | H | 66.61533 | 81.20336 | 76.98116 | 1856.67307  | -1573.97321 | -1224.35416 | 1 |
| 240 | C | 67.70528 | 75.97991 | 71.10185 | -531.47271  | -581.45780  | -55.06206   | 1 |
| 241 | O | 67.39275 | 77.14503 | 71.02979 | -243.00837  | 192.73507   | 609.52485   | 1 |
| 242 | N | 67.13066 | 74.90347 | 70.58876 | 343.49288   | -644.25607  | 38.09164    | 1 |
| 243 | H | 67.58944 | 73.99016 | 70.78279 | -1691.16043 | -1535.97525 | -1484.73099 | 1 |
| 244 | C | 66.25116 | 75.02013 | 69.46545 | 542.66492   | 350.14337   | 454.42563   | 1 |
| 245 | H | 65.44632 | 75.70332 | 69.81480 | 1209.57979  | -2396.95920 | 463.86744   | 1 |
| 246 | C | 67.03506 | 75.66750 | 68.23955 | -737.14309  | 145.93010   | 242.71942   | 1 |
| 247 | H | 68.12727 | 75.48514 | 68.33444 | -1050.18303 | 159.36419   | -2509.06125 | 1 |
| 248 | C | 66.45559 | 75.06899 | 66.91101 | -706.77696  | -252.88343  | -245.16230  | 1 |
| 249 | H | 66.94206 | 75.50805 | 66.00847 | -1624.64039 | -1665.49085 | 1417.86935  | 1 |
| 250 | H | 66.59340 | 73.96138 | 66.86566 | 2566.10521  | 598.51109   | 693.22305   | 1 |
| 251 | H | 65.35670 | 75.25672 | 66.82867 | -1972.69758 | 107.10018   | -1876.34312 | 1 |
| 252 | C | 66.71326 | 77.19885 | 68.17347 | 412.85148   | 672.58832   | -27.69222   | 1 |
| 253 | H | 67.29881 | 77.71155 | 67.37404 | 1447.02277  | 1762.76533  | -1490.78944 | 1 |

|     |   |          |          |          |             |             |             |   |
|-----|---|----------|----------|----------|-------------|-------------|-------------|---|
| 254 | H | 65.63298 | 77.38173 | 67.96166 | 1320.77379  | -145.20455  | 2378.68491  | 1 |
| 255 | H | 66.95103 | 77.70735 | 69.15147 | -1512.10848 | 1470.52031  | 1724.75147  | 1 |
| 256 | C | 65.72739 | 73.56567 | 68.97590 | -607.11113  | 499.56689   | 73.73769    | 1 |
| 257 | O | 64.75886 | 73.56516 | 68.24561 | 357.97126   | 460.81534   | 356.68785   | 1 |
| 258 | N | 66.48968 | 72.52413 | 69.29855 | 536.55407   | -368.62270  | 332.76306   | 1 |
| 259 | H | 67.35227 | 72.55135 | 69.87322 | 524.38866   | 2297.69985  | 1367.20941  | 1 |
| 260 | C | 66.04044 | 71.26416 | 68.83204 | 46.50277    | -774.29190  | -147.97904  | 1 |
| 261 | H | 65.22163 | 71.47773 | 68.10242 | 1676.51875  | 1883.29066  | 1032.55549  | 1 |
| 262 | C | 67.30718 | 70.45230 | 68.24042 | -559.41456  | -34.19198   | -556.30433  | 1 |
| 263 | H | 67.97792 | 70.18027 | 69.08960 | -64.66664   | 395.18769   | 2695.05373  | 1 |
| 264 | H | 66.97995 | 69.48438 | 67.79104 | -2703.44278 | -60.40056   | 333.79418   | 1 |
| 265 | C | 68.06545 | 71.29102 | 67.24557 | -519.76435  | 377.31045   | 459.42366   | 1 |
| 266 | H | 68.08995 | 72.34084 | 67.61631 | -1746.74323 | 1667.50644  | -1261.73691 | 1 |
| 267 | C | 69.50235 | 70.79766 | 67.13024 | 570.95554   | 16.46261    | -545.27700  | 1 |
| 268 | H | 70.09455 | 71.41018 | 66.40261 | 2391.58273  | 28.05277    | -1305.07271 | 1 |
| 269 | H | 70.03396 | 70.84393 | 68.11543 | 175.75588   | 917.63458   | 2559.43867  | 1 |
| 270 | H | 69.54586 | 69.73378 | 66.78186 | -1063.97851 | -2155.34650 | 1283.00462  | 1 |
| 271 | C | 67.38524 | 71.26199 | 65.88410 | 193.76014   | 2.62946     | -765.53141  | 1 |
| 272 | H | 67.92736 | 71.89577 | 65.13571 | 507.39394   | -846.55087  | 2539.60089  | 1 |
| 273 | H | 67.34307 | 70.22190 | 65.46829 | 1337.57841  | 1818.19054  | 1526.01994  | 1 |
| 274 | H | 66.33130 | 71.63924 | 65.94103 | 1100.88635  | -1172.91350 | -2199.08909 | 1 |
| 275 | C | 65.57758 | 70.40141 | 70.12508 | -549.21115  | 475.64486   | -309.38218  | 1 |
| 276 | O | 66.09532 | 70.49582 | 71.20666 | 556.06106   | -390.37755  | -78.24250   | 1 |
| 277 | O | 64.64885 | 69.36960 | 69.86058 | -572.27940  | -310.19032  | -209.75862  | 1 |
| 278 | H | 64.45622 | 69.57785 | 68.90346 | -1380.08193 | 2212.14486  | 790.85944   | 1 |

Listing 116: C00116.xmolout

|    |   |          |          |          |             |             |             |        |          |
|----|---|----------|----------|----------|-------------|-------------|-------------|--------|----------|
| 1  |   | 276      |          |          |             |             |             |        |          |
| 2  |   | 150.0000 | 150.0000 | 150.0000 | 0.0000      | 0.0000      | 0.0000***** | 2.7750 | 11100    |
|    |   | 0.2500   | 300.00   | 0.00     | 0.00        | 0.00        | -1293.3770  | 0.0000 | 300.0000 |
| 3  | H | 73.38581 | 70.28863 | 75.72308 | -2043.14101 | -1757.64893 | 399.89339   |        | 1        |
| 4  | N | 73.54253 | 70.28434 | 74.71356 | 426.75047   | 490.45733   | -334.42467  |        | 1        |
| 5  | H | 72.59068 | 70.33455 | 74.26268 | 442.25559   | -1110.30854 | -2448.52907 |        | 1        |
| 6  | C | 74.54329 | 71.15160 | 74.25170 | 415.32972   | -666.39213  | 83.73172    |        | 1        |
| 7  | H | 75.23381 | 71.29739 | 75.10909 | 879.32219   | 2491.00447  | 667.35213   |        | 1        |
| 8  | C | 75.22384 | 70.52134 | 72.93645 | 31.35357    | 477.41777   | 628.23362   |        | 1        |
| 9  | H | 74.46927 | 70.52461 | 72.11112 | 1168.38489  | 2240.25337  | -1019.71136 |        | 1        |
| 10 | H | 76.06013 | 71.17548 | 72.58789 | -360.43770  | 2534.90498  | 931.67112   |        | 1        |
| 11 | C | 75.70718 | 69.11731 | 73.20778 | 463.18208   | 512.70242   | -382.34388  |        | 1        |
| 12 | H | 74.83324 | 68.50072 | 73.51735 | 1725.29117  | 1863.52247  | -987.07854  |        | 1        |
| 13 | C | 76.31007 | 68.51539 | 71.94573 | 710.42801   | -144.27427  | -313.15367  |        | 1        |
| 14 | H | 76.65035 | 67.46036 | 72.11094 | 364.20195   | -1033.13725 | 2494.72524  |        | 1        |
| 15 | H | 75.57200 | 68.49894 | 71.10206 | 2567.61904  | 335.80679   | 847.48802   |        | 1        |
| 16 | H | 77.20020 | 69.09992 | 71.59557 | -2587.99029 | 680.92867   | -512.16411  |        | 1        |
| 17 | C | 76.73338 | 69.09927 | 74.33162 | 268.17616   | 741.64379   | -40.42634   |        | 1        |
| 18 | H | 77.18044 | 68.08095 | 74.47206 | 1283.54314  | -1945.37420 | -1411.27812 |        | 1        |
| 19 | H | 77.57364 | 69.80954 | 74.12493 | -1258.57796 | 1317.15249  | -2026.02085 |        | 1        |
| 20 | H | 76.27899 | 69.40015 | 75.31132 | -2502.84526 | 909.80597   | 575.92391   |        | 1        |
| 21 | C | 73.80114 | 72.51553 | 73.71997 | 619.36578   | -458.64843  | -172.09273  |        | 1        |
| 22 | O | 73.25422 | 72.53714 | 72.63295 | -81.40433   | 433.87611   | 522.34594   |        | 1        |
| 23 | N | 73.89066 | 73.44420 | 74.65389 | 175.23996   | -622.20190  | 341.55523   |        | 1        |
| 24 | H | 74.39309 | 73.17446 | 75.49999 | -876.57256  | -303.22879  | -2561.90213 |        | 1        |
| 25 | C | 73.74213 | 74.84153 | 74.36561 | -571.88214  | -534.10783  | -106.15033  |        | 1        |
| 26 | H | 74.22568 | 75.31707 | 75.24589 | -2713.20841 | -16.25800   | -248.80809  |        | 1        |
| 27 | C | 74.56601 | 75.14523 | 73.04198 | 166.60354   | 288.16399   | -716.09568  |        | 1        |
| 28 | H | 74.09663 | 74.58063 | 72.18059 | -2097.85574 | 1636.78449  | -586.18044  |        | 1        |
| 29 | O | 75.91186 | 74.58223 | 72.95928 | -317.80580  | -363.38227  | 484.43082   |        | 1        |
| 30 | H | 76.46887 | 75.38262 | 72.98904 | 1863.74748  | -1451.84923 | 1357.29467  |        | 1        |
| 31 | C | 74.42890 | 76.69117 | 72.85662 | 503.80731   | 517.99032   | 318.51606   |        | 1        |
| 32 | H | 74.68061 | 77.00320 | 71.81228 | 640.61020   | -2157.10410 | -1536.29104 |        | 1        |
| 33 | H | 73.39953 | 77.06545 | 73.08799 | 1687.88455  | 465.60692   | 2087.56452  |        | 1        |

|    |   |          |          |          |             |             |             |   |
|----|---|----------|----------|----------|-------------|-------------|-------------|---|
| 34 | H | 75.12967 | 77.23915 | 73.53124 | -1293.07895 | -1899.88581 | -1463.57452 | 1 |
| 35 | C | 72.15530 | 75.16245 | 74.54172 | -153.07550  | -733.68902  | 248.70981   | 1 |
| 36 | O | 71.87636 | 75.61847 | 75.64408 | 186.15459   | -480.78787  | -449.34387  | 1 |
| 37 | N | 71.32378 | 74.89922 | 73.53080 | -487.53139  | 543.18517   | 42.03850    | 1 |
| 38 | C | 69.93237 | 74.65531 | 73.75291 | -699.35871  | 69.34393    | 360.10701   | 1 |
| 39 | H | 69.67827 | 75.02661 | 74.77106 | 2.81126     | -221.99807  | -2715.58072 | 1 |
| 40 | C | 69.31648 | 75.46529 | 72.53413 | -507.46439  | -592.59194  | 122.07761   | 1 |
| 41 | H | 68.25784 | 75.19278 | 72.32494 | -1975.08116 | 525.87560   | -1801.71556 | 1 |
| 42 | H | 69.33306 | 76.56063 | 72.72895 | 1588.27743  | -1913.22100 | 1113.83566  | 1 |
| 43 | C | 70.28917 | 75.08292 | 71.37390 | -613.62442  | -457.55993  | -194.14490  | 1 |
| 44 | H | 69.99928 | 74.11041 | 70.90876 | 1707.54637  | -721.27992  | 1996.92523  | 1 |
| 45 | H | 70.30049 | 75.83102 | 70.54926 | 758.23357   | 2100.81767  | 1560.55011  | 1 |
| 46 | C | 71.68393 | 74.95988 | 72.11777 | -352.41524  | 704.96076   | 49.21465    | 1 |
| 47 | H | 72.22968 | 73.98027 | 71.93163 | 1714.76886  | -2070.42778 | 443.35792   | 1 |
| 48 | H | 72.37307 | 75.82306 | 71.97748 | 1224.15040  | 1801.50881  | 1636.97633  | 1 |
| 49 | C | 69.59060 | 73.06923 | 73.50068 | 566.85117   | 537.05831   | 117.62814   | 1 |
| 50 | O | 69.83520 | 72.53150 | 72.43798 | -550.26779  | -406.08867  | 4.21666     | 1 |
| 51 | N | 69.00544 | 72.53849 | 74.55779 | 566.34832   | -425.77725  | 180.18749   | 1 |
| 52 | H | 68.81388 | 73.14128 | 75.35413 | 644.44502   | 2646.80550  | -52.73430   | 1 |
| 53 | C | 68.41320 | 71.22963 | 74.40459 | 612.34801   | -281.48662  | 411.56221   | 1 |
| 54 | H | 68.14941 | 71.24203 | 73.32014 | 1667.23498  | -1490.75142 | 1556.16753  | 1 |
| 55 | C | 69.48101 | 70.14057 | 74.69888 | -714.45746  | -175.43074  | 286.98927   | 1 |
| 56 | H | 69.95927 | 70.23532 | 75.70836 | -787.09484  | 1763.03619  | -1922.46060 | 1 |
| 57 | O | 70.92702 | 70.24381 | 73.96033 | -429.46514  | 516.51932   | -128.40526  | 1 |
| 58 | H | 70.70703 | 70.97186 | 73.37561 | 1981.82785  | 436.16847   | -1818.18182 | 1 |
| 59 | C | 68.82174 | 68.76300 | 74.46456 | 630.79189   | -468.94448  | 76.03230    | 1 |
| 60 | H | 69.51485 | 67.93002 | 74.73977 | -1775.71861 | 2062.30353  | 131.89849   | 1 |
| 61 | H | 67.88580 | 68.63840 | 75.06517 | -1855.14608 | 88.94118    | 1993.53760  | 1 |
| 62 | H | 68.54575 | 68.62655 | 73.38951 | -1504.82350 | -780.94249  | -2132.90992 | 1 |
| 63 | C | 67.10178 | 71.17260 | 75.40943 | 288.57638   | 618.62814   | -397.00270  | 1 |
| 64 | O | 66.09250 | 71.72742 | 75.04866 | 321.70495   | -185.26452  | 574.37218   | 1 |
| 65 | N | 67.33367 | 70.50117 | 76.52438 | -447.05792  | -446.53431  | 367.76425   | 1 |
| 66 | H | 68.24435 | 70.08003 | 76.69437 | 350.31316   | 1975.63644  | -1843.31522 | 1 |
| 67 | C | 66.28136 | 70.34526 | 77.47015 | -511.23061  | 374.03917   | -471.51480  | 1 |
| 68 | H | 65.39850 | 70.72910 | 76.90567 | 2234.79579  | -898.70890  | -1273.45190 | 1 |
| 69 | C | 66.21918 | 68.78291 | 77.79455 | 529.53781   | -159.34528  | 563.72604   | 1 |
| 70 | H | 65.32534 | 68.62030 | 78.45219 | 654.59388   | 2347.94251  | 1217.51488  | 1 |
| 71 | H | 66.02013 | 68.23978 | 76.83540 | -1526.55661 | 2103.42026  | 817.87394   | 1 |
| 72 | O | 67.39148 | 68.20444 | 78.47546 | -554.84278  | 14.12789    | 399.58769   | 1 |
| 73 | H | 67.88305 | 67.90468 | 77.69319 | 1297.06236  | 2061.84854  | 1220.68812  | 1 |
| 74 | C | 66.60258 | 71.29035 | 78.76350 | -662.15484  | -412.13544  | 123.62687   | 1 |
| 75 | O | 66.56156 | 72.49001 | 78.64765 | -540.01537  | -317.05804  | 274.91456   | 1 |
| 76 | N | 66.83716 | 70.59057 | 79.87378 | -202.76299  | -690.00100  | -131.49145  | 1 |
| 77 | H | 66.91587 | 69.56803 | 79.80426 | -702.62132  | -2617.37191 | 281.70413   | 1 |
| 78 | C | 67.06066 | 71.27949 | 81.13386 | -491.73914  | 576.34187   | 222.73509   | 1 |
| 79 | H | 66.89545 | 72.36075 | 80.90627 | 1977.17978  | -1823.58850 | -434.68928  | 1 |
| 80 | C | 66.13239 | 70.69158 | 82.18513 | -649.50797  | -328.66843  | 306.11224   | 1 |
| 81 | H | 66.32532 | 69.59611 | 82.23110 | 2075.07803  | 1452.16490  | -1004.45904 | 1 |
| 82 | C | 66.41378 | 71.27890 | 83.55560 | -615.18735  | -489.99689  | -70.96352   | 1 |
| 83 | H | 65.75166 | 70.82963 | 84.34650 | -1226.32661 | -1724.38906 | -1716.47170 | 1 |
| 84 | H | 67.47986 | 71.09839 | 83.86912 | 2381.64273  | -969.84735  | 900.46860   | 1 |
| 85 | H | 66.24658 | 72.39140 | 83.57195 | 2122.74991  | 1702.23946  | -141.36228  | 1 |
| 86 | C | 64.67183 | 70.88578 | 81.82346 | -501.86074  | -479.61276  | -376.42482  | 1 |
| 87 | H | 63.98711 | 70.41205 | 82.58041 | 993.79261   | -2246.95401 | -1177.81305 | 1 |
| 88 | H | 64.40288 | 71.97684 | 81.76626 | 42.71279    | -626.15391  | -2651.37258 | 1 |
| 89 | H | 64.43300 | 70.43314 | 80.82135 | -2026.39012 | -1590.33709 | -887.82922  | 1 |
| 90 | C | 68.62912 | 70.89551 | 81.59201 | -672.89153  | 382.57394   | -156.34072  | 1 |
| 91 | O | 68.92989 | 69.74855 | 81.82498 | 410.04627   | 221.86223   | 500.35950   | 1 |
| 92 | N | 69.34530 | 71.99521 | 81.68176 | -378.11782  | -443.79414  | -441.10984  | 1 |
| 93 | H | 68.86481 | 72.86843 | 81.47436 | 2404.15973  | -568.14894  | 1149.30085  | 1 |
| 94 | C | 70.77905 | 71.99689 | 81.78254 | -544.54484  | 466.16019   | 331.29119   | 1 |
| 95 | H | 70.96388 | 72.36611 | 82.81529 | -1409.80988 | -170.17955  | 2325.32679  | 1 |

|     |   |          |          |          |             |             |             |   |
|-----|---|----------|----------|----------|-------------|-------------|-------------|---|
| 96  | C | 71.35291 | 70.54441 | 81.54572 | -184.48284  | 116.78282   | -758.89137  | 1 |
| 97  | H | 71.08912 | 69.86942 | 82.39527 | 1893.78641  | 1861.14652  | 611.04528   | 1 |
| 98  | H | 70.86485 | 70.08842 | 80.65306 | -2170.79665 | -974.19311  | 1327.50117  | 1 |
| 99  | C | 72.90198 | 70.62147 | 81.35601 | 389.51668   | 672.81878   | -138.49152  | 1 |
| 100 | H | 73.16565 | 71.45154 | 80.66031 | 510.64577   | 1933.03327  | 1851.02484  | 1 |
| 101 | H | 73.39525 | 70.90989 | 82.31054 | -2302.30869 | -1105.72939 | -948.89774  | 1 |
| 102 | C | 73.51279 | 69.27599 | 80.81039 | -559.93427  | -126.34590  | 542.30857   | 1 |
| 103 | O | 74.67772 | 69.22888 | 80.50925 | -670.36003  | -111.83166  | 76.36448    | 1 |
| 104 | N | 72.62438 | 68.26163 | 80.72538 | -216.06729  | -537.07037  | 446.51379   | 1 |
| 105 | H | 71.63477 | 68.22754 | 80.99799 | -1251.96487 | 1074.12894  | -2168.52500 | 1 |
| 106 | H | 72.86711 | 67.31303 | 80.42010 | -2451.83023 | -720.73851  | 944.84612   | 1 |
| 107 | C | 71.38862 | 73.05372 | 80.70385 | 546.24052   | -563.88337  | -85.11809   | 1 |
| 108 | O | 72.42248 | 73.57930 | 81.03098 | 71.70702    | -307.40463  | 606.69673   | 1 |
| 109 | N | 70.78370 | 73.08171 | 79.51411 | 479.90863   | -504.50129  | 222.86849   | 1 |
| 110 | C | 71.06788 | 74.11917 | 78.55817 | 75.51268    | -600.91904  | 506.73700   | 1 |
| 111 | H | 72.15118 | 74.35513 | 78.68185 | -2033.61562 | 1795.30103  | 254.89480   | 1 |
| 112 | C | 70.67454 | 73.40406 | 77.18865 | 523.79067   | 517.99274   | 284.45581   | 1 |
| 113 | H | 70.43731 | 74.12092 | 76.37277 | 1599.61665  | -1127.00911 | 1895.98173  | 1 |
| 114 | H | 71.49633 | 72.75649 | 76.80874 | -1881.83093 | 1275.82488  | -1501.55016 | 1 |
| 115 | C | 69.44033 | 72.56353 | 77.62831 | -600.05639  | -404.05026  | 316.64485   | 1 |
| 116 | H | 68.53994 | 73.20393 | 77.78178 | -2597.05260 | 496.36221   | 657.73249   | 1 |
| 117 | H | 69.15266 | 71.77826 | 76.89792 | -1666.24518 | 1294.38985  | -1723.90591 | 1 |
| 118 | C | 69.98215 | 71.97764 | 79.00321 | 493.57570   | -129.95376  | -602.56394  | 1 |
| 119 | H | 69.19054 | 71.72942 | 79.74870 | -1469.08415 | -637.84797  | 2204.22581  | 1 |
| 120 | H | 70.67483 | 71.10921 | 78.90029 | -1038.97840 | 1068.88701  | -2280.71789 | 1 |
| 121 | C | 70.12760 | 75.40947 | 78.83827 | 188.88100   | 241.05089   | -727.87821  | 1 |
| 122 | O | 69.47540 | 75.49980 | 79.84144 | 531.88613   | -49.19943   | 427.07960   | 1 |
| 123 | N | 70.24948 | 76.25515 | 77.81219 | 708.14833   | 26.93417    | -179.73509  | 1 |
| 124 | H | 70.90255 | 76.02187 | 77.01935 | -2232.69501 | -1179.09831 | 1023.94816  | 1 |
| 125 | C | 69.51422 | 77.52543 | 77.70933 | -738.32412  | 259.92548   | 104.42456   | 1 |
| 126 | H | 69.18052 | 77.47188 | 76.64703 | 2028.89123  | 1260.02983  | 1311.33324  | 1 |
| 127 | C | 68.37244 | 77.65067 | 78.68754 | -258.65678  | -345.52513  | 661.28459   | 1 |
| 128 | H | 68.77523 | 77.46396 | 79.71644 | -1826.06090 | -1801.46097 | -918.64554  | 1 |
| 129 | C | 67.76107 | 79.04221 | 78.66902 | -541.23400  | 531.92970   | -218.41428  | 1 |
| 130 | H | 66.90691 | 79.12989 | 79.39426 | 1311.73218  | -2219.18200 | 882.19023   | 1 |
| 131 | H | 68.51503 | 79.83064 | 78.95000 | -1048.71298 | 1223.58118  | -2196.97971 | 1 |
| 132 | H | 67.36362 | 79.30839 | 77.65205 | 419.06414   | 1903.92898  | 1903.44670  | 1 |
| 133 | C | 67.27303 | 76.63630 | 78.41835 | -423.86431  | 152.66566   | -648.55262  | 1 |
| 134 | H | 66.44952 | 76.70687 | 79.18014 | 105.68386   | -2342.50080 | 1387.51238  | 1 |
| 135 | H | 66.80597 | 76.78779 | 77.40745 | -1695.63603 | -1484.73621 | -1531.02793 | 1 |
| 136 | H | 67.66362 | 75.58100 | 78.44985 | -1853.57121 | -487.39031  | 1936.59343  | 1 |
| 137 | C | 70.65072 | 78.72032 | 77.89746 | 539.71428   | -510.58232  | 267.58633   | 1 |
| 138 | O | 70.69341 | 79.38943 | 78.90609 | -15.93758   | -278.34085  | -624.49402  | 1 |
| 139 | N | 71.46361 | 78.76368 | 76.84867 | -676.81886  | 12.05292    | 276.17960   | 1 |
| 140 | H | 71.24215 | 78.05618 | 76.14710 | -1694.44250 | -373.84189  | -2100.66098 | 1 |
| 141 | C | 71.95668 | 80.03303 | 76.35725 | 412.33078   | -664.70360  | 108.35451   | 1 |
| 142 | H | 71.11336 | 80.37725 | 75.71909 | 1765.77476  | 1294.44366  | 1621.76594  | 1 |
| 143 | C | 72.22568 | 81.03201 | 77.54290 | -179.66635  | -721.95667  | -264.73915  | 1 |
| 144 | H | 71.29132 | 81.22205 | 78.12985 | -607.34922  | 2587.87032  | -598.10018  | 1 |
| 145 | H | 72.94078 | 80.57753 | 78.26601 | -359.69332  | -1479.13954 | -2259.74260 | 1 |
| 146 | C | 72.75554 | 82.40840 | 76.99998 | -240.01076  | 616.02425   | 431.85322   | 1 |
| 147 | H | 73.64750 | 82.27717 | 76.34617 | -1359.17131 | 782.54425   | 2227.99181  | 1 |
| 148 | H | 71.99308 | 82.91398 | 76.36699 | -820.36667  | 85.81767    | -2596.78715 | 1 |
| 149 | C | 73.11295 | 83.27921 | 78.26907 | -513.07015  | 236.18570   | -551.87280  | 1 |
| 150 | H | 72.18853 | 83.58865 | 78.80892 | 1816.11944  | -1183.11722 | -1650.94321 | 1 |
| 151 | H | 73.70226 | 82.68217 | 79.00231 | -1800.04429 | -1361.53473 | 1526.34643  | 1 |
| 152 | C | 73.92650 | 84.51260 | 77.81113 | 726.08972   | -253.19732  | -179.64713  | 1 |
| 153 | H | 74.92362 | 84.27515 | 77.38953 | 1224.27271  | -456.51798  | -2390.90304 | 1 |
| 154 | H | 73.38494 | 85.20379 | 77.13476 | 1206.40339  | -1150.93514 | -2154.90344 | 1 |
| 155 | N | 74.23247 | 85.36510 | 79.08927 | 329.70796   | -633.68968  | -155.67358  | 1 |
| 156 | H | 74.83044 | 86.22778 | 78.93600 | 1348.31305  | 1938.76845  | 1359.00643  | 1 |
| 157 | H | 73.40030 | 85.77834 | 79.60245 | 2096.92035  | 1446.54551  | -966.48890  | 1 |

|     |   |          |          |          |             |             |             |   |
|-----|---|----------|----------|----------|-------------|-------------|-------------|---|
| 158 | H | 74.75740 | 84.88533 | 79.87738 | -1197.07217 | -2303.53719 | 827.28733   | 1 |
| 159 | C | 73.20156 | 79.57272 | 75.42821 | -378.01186  | -556.17301  | -413.96481  | 1 |
| 160 | O | 72.96075 | 78.82477 | 74.47990 | -409.44433  | -307.55053  | -453.30833  | 1 |
| 161 | N | 74.33929 | 80.12559 | 75.79390 | -429.02477  | 524.70884   | 274.08502   | 1 |
| 162 | H | 74.27847 | 80.72621 | 76.61892 | 1706.34263  | -1425.96036 | 1574.38926  | 1 |
| 163 | C | 75.62226 | 79.57392 | 75.50743 | -45.25864   | -626.22952  | 478.93267   | 1 |
| 164 | H | 76.28570 | 80.09857 | 76.23155 | 1988.63164  | 570.90773   | 1772.87287  | 1 |
| 165 | C | 75.51483 | 78.01789 | 75.79536 | 551.77128   | -20.49526   | -564.54996  | 1 |
| 166 | H | 75.17213 | 77.83423 | 76.83848 | 1434.61535  | -1753.10253 | 1513.99471  | 1 |
| 167 | H | 74.73440 | 77.55164 | 75.14739 | -714.67738  | 1819.09770  | 1898.36494  | 1 |
| 168 | C | 76.92657 | 77.39528 | 75.54507 | 446.99263   | -555.77305  | 338.97221   | 1 |
| 169 | H | 77.23662 | 77.53600 | 74.48240 | 1953.68466  | 1892.25957  | -161.67766  | 1 |
| 170 | H | 77.69563 | 77.92003 | 76.15495 | -403.03785  | 2688.07032  | -188.43591  | 1 |
| 171 | C | 76.88595 | 75.85743 | 75.91435 | 567.86262   | 335.74681   | 434.04421   | 1 |
| 172 | H | 76.56219 | 75.70474 | 76.96973 | -1080.02275 | 1568.26081  | -1948.78900 | 1 |
| 173 | H | 76.14902 | 75.31152 | 75.28189 | -919.54108  | 2111.34692  | 1456.13463  | 1 |
| 174 | C | 78.30682 | 75.29590 | 75.67640 | 195.81897   | 173.33862   | -745.11536  | 1 |
| 175 | H | 78.62813 | 75.32509 | 74.60456 | 1405.67949  | -2301.21089 | -390.08113  | 1 |
| 176 | H | 79.09369 | 75.73831 | 76.32008 | -940.37328  | -1118.32446 | 2299.72133  | 1 |
| 177 | N | 78.28164 | 73.78148 | 76.06990 | 319.26422   | 656.36007   | -42.02424   | 1 |
| 178 | H | 79.19900 | 73.25587 | 75.97576 | 1961.03633  | 619.91968   | 1787.09422  | 1 |
| 179 | H | 78.01539 | 73.54552 | 77.07004 | 854.14343   | -2156.80752 | 1429.08711  | 1 |
| 180 | H | 77.62785 | 73.15605 | 75.51504 | 1237.02905  | -1378.50857 | -1998.28500 | 1 |
| 181 | C | 76.12661 | 79.82479 | 73.97223 | 532.53319   | -268.57236  | 517.55729   | 1 |
| 182 | O | 77.28469 | 80.18203 | 73.80905 | 266.16714   | -290.73804  | -558.88002  | 1 |
| 183 | N | 75.19950 | 79.52252 | 73.10724 | -226.25352  | 640.49678   | -270.32839  | 1 |
| 184 | H | 74.26650 | 79.19535 | 73.47414 | 2007.69063  | -1035.27229 | 1523.50231  | 1 |
| 185 | C | 75.31127 | 79.74242 | 71.71210 | -540.76542  | -573.33303  | 49.50000    | 1 |
| 186 | H | 74.27044 | 79.57520 | 71.35564 | -2374.20950 | -1036.76023 | 843.75774   | 1 |
| 187 | C | 75.81800 | 81.23918 | 71.45683 | -77.09082   | 666.87422   | -415.84136  | 1 |
| 188 | H | 76.84294 | 81.35625 | 71.90724 | -985.81834  | 617.19825   | 2463.91927  | 1 |
| 189 | O | 75.00414 | 82.28005 | 72.02604 | 293.29899   | -391.65602  | -477.80926  | 1 |
| 190 | H | 75.60955 | 82.63883 | 72.70577 | 2528.72714  | -681.76262  | -751.27122  | 1 |
| 191 | C | 75.92584 | 81.24185 | 69.88818 | 252.47363   | -605.14473  | 440.05134   | 1 |
| 192 | H | 76.34996 | 82.20056 | 69.51042 | -2052.65063 | 1456.49051  | -1043.51830 | 1 |
| 193 | H | 76.58000 | 80.41908 | 69.51290 | -2152.98800 | -1661.97574 | -161.70652  | 1 |
| 194 | H | 74.92691 | 81.11327 | 69.41049 | -473.12726  | -1584.27339 | 2165.61725  | 1 |
| 195 | C | 76.34849 | 78.65699 | 71.04238 | 360.36307   | 488.46713   | 505.10056   | 1 |
| 196 | O | 75.93271 | 77.95469 | 70.15288 | -200.08817  | -528.03552  | -385.82850  | 1 |
| 197 | N | 77.56412 | 78.73736 | 71.55671 | -597.54095  | -226.44775  | 355.20479   | 1 |
| 198 | H | 77.77413 | 79.39039 | 72.35027 | 2179.23655  | -1300.70981 | -991.33835  | 1 |
| 199 | C | 78.57678 | 77.92480 | 70.98022 | -687.68921  | 297.39807   | -249.45179  | 1 |
| 200 | H | 78.02139 | 77.36843 | 70.18684 | -349.16256  | -2467.37713 | -1101.72831 | 1 |
| 201 | C | 79.71046 | 78.90216 | 70.39568 | 672.47345   | 361.54328   | -201.62880  | 1 |
| 202 | H | 80.08654 | 79.58489 | 71.19121 | 1541.41502  | 582.18425   | 2169.97026  | 1 |
| 203 | H | 80.57971 | 78.30620 | 70.03596 | -2534.67717 | 60.25153    | 997.72295   | 1 |
| 204 | C | 79.14456 | 79.70067 | 69.21540 | 574.26774   | -389.43119  | -377.02542  | 1 |
| 205 | C | 78.84359 | 78.99783 | 68.00922 | 688.82679   | -287.33580  | -257.96133  | 1 |
| 206 | H | 78.99173 | 77.90485 | 67.94192 | 331.14182   | 1470.38163  | 2269.80013  | 1 |
| 207 | C | 78.94938 | 81.11302 | 69.29708 | -383.52382  | -675.04808  | 144.24917   | 1 |
| 208 | H | 79.17364 | 81.66005 | 70.23041 | 4.09847     | 1517.59662  | 2262.86397  | 1 |
| 209 | C | 78.36342 | 79.71810 | 66.91746 | -134.76730  | 428.45285   | -649.50303  | 1 |
| 210 | H | 78.13290 | 79.17323 | 65.98522 | -903.23433  | 1600.49020  | 2011.53387  | 1 |
| 211 | C | 78.47183 | 81.79047 | 68.17238 | -335.53281  | -615.00040  | -364.39058  | 1 |
| 212 | H | 78.32982 | 82.88299 | 68.24248 | 1596.45398  | -1369.33862 | 1732.02659  | 1 |
| 213 | C | 78.16118 | 81.12854 | 66.94866 | 585.48547   | -340.24194  | -406.23938  | 1 |
| 214 | O | 77.67266 | 81.80651 | 65.80183 | -419.15649  | -173.04408  | -511.94141  | 1 |
| 215 | H | 77.66675 | 82.73107 | 66.14473 | -1071.84350 | 1559.71507  | -1960.13012 | 1 |
| 216 | C | 79.13705 | 76.95852 | 72.15894 | 291.41878   | -183.13091  | 710.72246   | 1 |
| 217 | O | 78.37399 | 76.36657 | 72.89548 | 379.87695   | 523.47396   | -222.23622  | 1 |
| 218 | N | 80.44916 | 76.83496 | 72.08133 | 564.30591   | 373.09380   | 277.24371   | 1 |
| 219 | H | 81.08123 | 77.33762 | 71.42775 | -120.59931  | -2436.07824 | -1214.35098 | 1 |

|     |   |          |          |          |             |             |             |   |
|-----|---|----------|----------|----------|-------------|-------------|-------------|---|
| 220 | C | 81.14469 | 76.15177 | 73.14074 | 404.07514   | -299.37480  | 608.84009   | 1 |
| 221 | H | 80.75681 | 76.57135 | 74.09585 | -1071.07882 | -841.69025  | 2359.66467  | 1 |
| 222 | C | 80.79243 | 74.61453 | 73.00479 | -683.12807  | 68.71770    | -390.13096  | 1 |
| 223 | H | 79.68911 | 74.49641 | 72.88354 | 2068.88918  | 1596.58590  | 770.89603   | 1 |
| 224 | H | 81.24582 | 74.18196 | 72.08426 | 1379.86429  | 2342.49779  | -179.85638  | 1 |
| 225 | C | 81.29465 | 73.86983 | 74.28019 | -176.39967  | 537.49466   | 550.97268   | 1 |
| 226 | H | 82.40636 | 73.84100 | 74.31339 | -396.28051  | 1942.22168  | 1869.33314  | 1 |
| 227 | H | 80.97344 | 74.40676 | 75.20038 | -94.44700   | 586.00678   | -2659.20016 | 1 |
| 228 | C | 80.70199 | 72.38678 | 74.24535 | -291.69381  | -718.18079  | -150.72929  | 1 |
| 229 | H | 79.59523 | 72.29466 | 74.10044 | -2303.38776 | 1089.76242  | 964.62032   | 1 |
| 230 | H | 81.21022 | 71.68862 | 73.53240 | 884.16729   | 2568.80533  | -207.74283  | 1 |
| 231 | N | 81.01126 | 71.98952 | 75.55667 | -594.49522  | -252.81478  | 342.29276   | 1 |
| 232 | H | 81.64252 | 72.58202 | 76.07405 | -1735.17426 | 2084.05705  | -263.71605  | 1 |
| 233 | C | 80.56894 | 70.93952 | 76.12264 | 595.23177   | -271.52487  | 442.22352   | 1 |
| 234 | N | 79.71030 | 70.11943 | 75.38226 | 585.53813   | -424.79750  | -105.81303  | 1 |
| 235 | H | 79.43651 | 70.20806 | 74.40514 | 959.88797   | 1327.56823  | -2177.11905 | 1 |
| 236 | H | 79.31485 | 69.23670 | 75.70698 | 1578.48647  | 16.27378    | -2220.76233 | 1 |
| 237 | N | 81.05876 | 70.82992 | 77.43093 | -452.17763  | -390.33541  | -421.51853  | 1 |
| 238 | H | 81.69545 | 71.42496 | 77.95886 | 470.26107   | 1974.25629  | -1817.92087 | 1 |
| 239 | H | 80.82790 | 70.05254 | 78.05086 | 1856.67307  | -1573.97321 | -1224.35416 | 1 |
| 240 | C | 82.66761 | 76.56974 | 72.76306 | -531.47271  | -581.45780  | -55.06206   | 1 |
| 241 | O | 82.86203 | 77.28280 | 71.78570 | -243.00837  | 192.73507   | 609.52485   | 1 |
| 242 | N | 83.53567 | 76.11539 | 73.65311 | 343.49288   | -644.25607  | 38.09164    | 1 |
| 243 | H | 83.16720 | 75.51823 | 74.39219 | -1691.16043 | -1535.97525 | -1484.73099 | 1 |
| 244 | C | 84.92044 | 76.05981 | 73.31176 | 542.66492   | 350.14337   | 454.42563   | 1 |
| 245 | H | 85.13764 | 77.01666 | 72.78585 | 1209.57979  | -2396.95920 | 463.86744   | 1 |
| 246 | C | 85.70539 | 75.85749 | 74.67532 | -737.14309  | 145.93010   | 242.71942   | 1 |
| 247 | H | 85.37381 | 74.92113 | 75.17404 | -1050.18303 | 159.36419   | -2509.06125 | 1 |
| 248 | C | 87.25301 | 75.83682 | 74.43511 | -706.77696  | -252.88343  | -245.16230  | 1 |
| 249 | H | 87.81442 | 75.78738 | 75.39801 | -1624.64039 | -1665.49085 | 1417.86935  | 1 |
| 250 | H | 87.57112 | 74.94034 | 73.81927 | 2566.10521  | 598.51109   | 693.22305   | 1 |
| 251 | H | 87.59768 | 76.75246 | 73.89907 | -1972.69758 | 107.10018   | -1876.34312 | 1 |
| 252 | C | 85.42136 | 77.10010 | 75.58922 | 412.85148   | 672.58832   | -27.69222   | 1 |
| 253 | H | 85.93137 | 77.01164 | 76.57688 | 1447.02277  | 1762.76533  | -1490.78944 | 1 |
| 254 | H | 85.77625 | 78.04459 | 75.11455 | 1320.77379  | -145.20455  | 2378.68491  | 1 |
| 255 | H | 84.33014 | 77.22016 | 75.78482 | -1512.10848 | 1470.52031  | 1724.75147  | 1 |
| 256 | C | 85.13365 | 74.76881 | 72.32569 | -607.11113  | 499.56689   | 73.73769    | 1 |
| 257 | O | 84.37509 | 73.83079 | 72.25661 | 357.97126   | 460.81534   | 356.68785   | 1 |
| 258 | N | 86.27609 | 74.96330 | 71.67063 | 536.55407   | -368.62270  | 332.76306   | 1 |
| 259 | H | 86.83355 | 75.78716 | 71.89034 | 524.38866   | 2297.69985  | 1367.20941  | 1 |
| 260 | C | 86.77287 | 73.90380 | 70.86825 | 46.50277    | -774.29190  | -147.97904  | 1 |
| 261 | H | 85.85843 | 73.33107 | 70.58906 | 1676.51875  | 1883.29066  | 1032.55549  | 1 |
| 262 | C | 87.61699 | 74.51157 | 69.63264 | -559.41456  | -34.19198   | -556.30433  | 1 |
| 263 | H | 88.58263 | 74.91621 | 70.01964 | -64.66664   | 395.18769   | 2695.05373  | 1 |
| 264 | H | 87.89764 | 73.70178 | 68.91768 | -2703.44278 | -60.40056   | 333.79418   | 1 |
| 265 | C | 86.84629 | 75.60069 | 68.93581 | -519.76435  | 377.31045   | 459.42366   | 1 |
| 266 | H | 86.51585 | 76.34144 | 69.69873 | -1746.74323 | 1667.50644  | -1261.73691 | 1 |
| 267 | C | 87.73742 | 76.31210 | 67.92495 | 570.95554   | 16.46261    | -545.27700  | 1 |
| 268 | H | 87.19739 | 77.15058 | 67.41442 | 2391.58273  | 28.05277    | -1305.07271 | 1 |
| 269 | H | 88.64752 | 76.74996 | 68.41045 | 175.75588   | 917.63458   | 2559.43867  | 1 |
| 270 | H | 88.09390 | 75.61249 | 67.12571 | -1063.97851 | -2155.34650 | 1283.00462  | 1 |
| 271 | C | 85.61047 | 75.04947 | 68.23802 | 193.76014   | 2.62946     | -765.53141  | 1 |
| 272 | H | 85.04456 | 75.85610 | 67.70399 | 507.39394   | -846.55087  | 2539.60089  | 1 |
| 273 | H | 85.87728 | 74.27076 | 67.47763 | 1337.57841  | 1818.19054  | 1526.01994  | 1 |
| 274 | H | 84.90368 | 74.57662 | 68.96833 | 1100.88635  | -1172.91350 | -2199.08909 | 1 |
| 275 | C | 87.80729 | 73.03364 | 71.74344 | -549.21115  | 475.64486   | -309.38218  | 1 |
| 276 | O | 88.21358 | 73.36186 | 72.83370 | 556.06106   | -390.37755  | -78.24250   | 1 |
| 277 | O | 88.30306 | 71.86962 | 71.11831 | -572.27940  | -310.19032  | -209.75862  | 1 |
| 278 | H | 87.76088 | 71.90662 | 70.27876 | -1380.08193 | 2212.14486  | 790.85944   | 1 |

Listing 117: C00117.xmolout

|    |   |          |          |          |             |             |             |        |          |
|----|---|----------|----------|----------|-------------|-------------|-------------|--------|----------|
| 1  |   | 276      |          |          |             |             |             |        |          |
| 2  |   | 150.0000 | 150.0000 | 150.0000 | 0.0000      | 0.0000      | 0.0000***** | 2.7750 | 11100    |
|    |   | 0.2500   | 300.00   | 0.00     | 0.00        | 0.00        | -1293.3754  | 0.0000 | 300.0000 |
| 3  | H | 70.97346 | 64.98471 | 80.28844 | -2043.14101 | -1757.64893 | 399.89339   |        | 1        |
| 4  | N | 71.43028 | 64.84826 | 79.38579 | 426.75047   | 490.45733   | -334.42467  |        | 1        |
| 5  | H | 70.66029 | 64.90472 | 78.69637 | 442.25559   | -1110.30854 | -2448.52907 |        | 1        |
| 6  | C | 72.44509 | 65.79200 | 79.11690 | 415.32972   | -666.39213  | 83.73172    |        | 1        |
| 7  | H | 72.72764 | 66.28626 | 80.07178 | 879.32219   | 2491.00447  | 667.35213   |        | 1        |
| 8  | C | 73.68091 | 65.02983 | 78.41073 | 31.35357    | 477.41777   | 628.23362   |        | 1        |
| 9  | H | 73.31620 | 64.51232 | 77.49174 | 1168.38489  | 2240.25337  | -1019.71136 |        | 1        |
| 10 | H | 74.45138 | 65.76408 | 78.07309 | -360.43770  | 2534.90498  | 931.67112   |        | 1        |
| 11 | C | 74.27783 | 64.02006 | 79.35410 | 463.18208   | 512.70242   | -382.34388  |        | 1        |
| 12 | H | 73.45282 | 63.38452 | 79.74876 | 1725.29117  | 1863.52247  | -987.07854  |        | 1        |
| 13 | C | 75.26395 | 63.13066 | 78.60578 | 710.42801   | -144.27427  | -313.15367  |        | 1        |
| 14 | H | 75.70272 | 62.34513 | 79.27325 | 364.20195   | -1033.13725 | 2494.72524  |        | 1        |
| 15 | H | 74.77591 | 62.60252 | 77.74641 | 2567.61904  | 335.80679   | 847.48802   |        | 1        |
| 16 | H | 76.11726 | 63.72430 | 78.18756 | -2587.99029 | 680.92867   | -512.16411  |        | 1        |
| 17 | C | 74.98260 | 64.69028 | 80.52532 | 268.17616   | 741.64379   | -40.42634   |        | 1        |
| 18 | H | 75.45312 | 63.93696 | 81.20874 | 1283.54314  | -1945.37420 | -1411.27812 |        | 1        |
| 19 | H | 75.79707 | 65.37698 | 80.17777 | -1258.57796 | 1317.15249  | -2026.02085 |        | 1        |
| 20 | H | 74.27391 | 65.29988 | 81.14267 | -2502.84526 | 909.80597   | 575.92391   |        | 1        |
| 21 | C | 71.69512 | 66.74884 | 78.04655 | 619.36578   | -458.64843  | -172.09273  |        | 1        |
| 22 | O | 70.62844 | 66.38575 | 77.56512 | -81.40433   | 433.87611   | 522.34594   |        | 1        |
| 23 | N | 72.40580 | 67.83500 | 77.77211 | 175.23996   | -622.20190  | 341.55523   |        | 1        |
| 24 | H | 73.29530 | 67.96824 | 78.25384 | -876.57256  | -303.22879  | -2561.90213 |        | 1        |
| 25 | C | 72.03715 | 68.63191 | 76.65819 | -571.88214  | -534.10783  | -106.15033  |        | 1        |
| 26 | H | 71.02983 | 68.25495 | 76.36164 | -2713.20841 | -16.25800   | -248.80809  |        | 1        |
| 27 | C | 72.11438 | 70.17957 | 77.07710 | 166.60354   | 288.16399   | -716.09568  |        | 1        |
| 28 | H | 73.19429 | 70.42725 | 77.27845 | -2097.85574 | 1636.78449  | -586.18044  |        | 1        |
| 29 | O | 71.37851 | 70.54332 | 78.25608 | -317.80580  | -363.38227  | 484.43082   |        | 1        |
| 30 | H | 72.09865 | 70.84297 | 78.84744 | 1863.74748  | -1451.84923 | 1357.29467  |        | 1        |
| 31 | C | 71.66190 | 70.90448 | 75.75613 | 503.80731   | 517.99032   | 318.51606   |        | 1        |
| 32 | H | 71.74481 | 72.01227 | 75.85126 | 640.61020   | -2157.10410 | -1536.29104 |        | 1        |
| 33 | H | 72.28559 | 70.60328 | 74.87972 | 1687.88455  | 465.60692   | 2087.56452  |        | 1        |
| 34 | H | 70.60007 | 70.67346 | 75.50674 | -1293.07895 | -1899.88581 | -1463.57452 |        | 1        |
| 35 | C | 73.20904 | 68.46288 | 75.52698 | -153.07550  | -733.68902  | 248.70981   |        | 1        |
| 36 | O | 74.06611 | 69.30718 | 75.49087 | 186.15459   | -480.78787  | -449.34387  |        | 1        |
| 37 | N | 73.09720 | 67.33526 | 74.80624 | -487.53139  | 543.18517   | 42.03850    |        | 1        |
| 38 | C | 73.92254 | 67.15335 | 73.65366 | -699.35871  | 69.34393    | 360.10701   |        | 1        |
| 39 | H | 74.73162 | 67.91877 | 73.72048 | 2.81126     | -221.99807  | -2715.58072 |        | 1        |
| 40 | C | 74.38290 | 65.64029 | 73.83379 | -507.46439  | -592.59194  | 122.07761   |        | 1        |
| 41 | H | 74.73642 | 65.18176 | 72.88345 | -1975.08116 | 525.87560   | -1801.71556 |        | 1        |
| 42 | H | 75.22051 | 65.55704 | 74.56139 | 1588.27743  | -1913.22100 | 1113.83566  |        | 1        |
| 43 | C | 73.08703 | 64.97419 | 74.39055 | -613.62442  | -457.55993  | -194.14490  |        | 1        |
| 44 | H | 72.36285 | 64.76617 | 73.56978 | 1707.54637  | -721.27992  | 1996.92523  |        | 1        |
| 45 | H | 73.27144 | 64.00256 | 74.90147 | 758.23357   | 2100.81767  | 1560.55011  |        | 1        |
| 46 | C | 72.55842 | 66.10289 | 75.37432 | -352.41524  | 704.96076   | 49.21465    |        | 1        |
| 47 | H | 71.44729 | 66.19390 | 75.43985 | 1714.76886  | -2070.42778 | 443.35792   |        | 1        |
| 48 | H | 72.97856 | 66.06661 | 76.40380 | 1224.15040  | 1801.50881  | 1636.97633  |        | 1        |
| 49 | C | 73.04091 | 67.27346 | 72.27946 | 566.85117   | 537.05831   | 117.62814   |        | 1        |
| 50 | O | 73.62897 | 67.57202 | 71.24134 | -550.26779  | -406.08867  | 4.21666     |        | 1        |
| 51 | N | 71.77614 | 66.98574 | 72.46105 | 566.34832   | -425.77725  | 180.18749   |        | 1        |
| 52 | H | 71.53984 | 66.80106 | 73.43281 | 644.44502   | 2646.80550  | -52.73430   |        | 1        |
| 53 | C | 70.80877 | 66.92573 | 71.42194 | 612.34801   | -281.48662  | 411.56221   |        | 1        |
| 54 | H | 69.87242 | 66.66777 | 71.96362 | 1667.23498  | -1490.75142 | 1556.16753  |        | 1        |
| 55 | C | 70.75442 | 68.42246 | 70.87308 | -714.45746  | -175.43074  | 286.98927   |        | 1        |
| 56 | H | 71.77731 | 68.65999 | 70.47490 | -787.09484  | 1763.03619  | -1922.46060 |        | 1        |
| 57 | O | 70.52517 | 69.40982 | 71.91449 | -429.46514  | 516.51932   | -128.40526  |        | 1        |
| 58 | H | 71.44140 | 69.67662 | 72.10982 | 1981.82785  | 436.16847   | -1818.18182 |        | 1        |
| 59 | C | 69.70248 | 68.50304 | 69.71079 | 630.79189   | -468.94448  | 76.03230    |        | 1        |
| 60 | H | 69.37374 | 69.55575 | 69.55318 | -1775.71861 | 2062.30353  | 131.89849   |        | 1        |



|     |   |          |          |          |             |             |             |   |
|-----|---|----------|----------|----------|-------------|-------------|-------------|---|
| 61  | H | 70.11278 | 68.15762 | 68.73081 | -1855.14608 | 88.94118    | 1993.53760  | 1 |
| 62  | H | 68.78411 | 67.91170 | 69.93735 | -1504.82350 | -780.94249  | -2132.90992 | 1 |
| 63  | C | 71.27032 | 65.70585 | 70.44525 | 288.57638   | 618.62814   | -397.00270  | 1 |
| 64  | O | 71.99351 | 64.81383 | 70.83042 | 321.70495   | -185.26452  | 574.37218   | 1 |
| 65  | N | 70.61694 | 65.76590 | 69.28715 | -447.05792  | -446.53431  | 367.76425   | 1 |
| 66  | H | 69.95750 | 66.51846 | 69.10130 | 350.31316   | 1975.63644  | -1843.31522 | 1 |
| 67  | C | 71.04396 | 64.89537 | 68.24823 | -511.23061  | 374.03917   | -471.51480  | 1 |
| 68  | H | 71.46373 | 64.00777 | 68.77663 | 2234.79579  | -898.70890  | -1273.45190 | 1 |
| 69  | C | 69.74258 | 64.60215 | 67.35645 | 529.53781   | -159.34528  | 563.72604   | 1 |
| 70  | H | 70.05547 | 63.86130 | 66.57049 | 654.59388   | 2347.94251  | 1217.51488  | 1 |
| 71  | H | 68.99818 | 64.08541 | 68.01739 | -1526.55661 | 2103.42026  | 817.87394   | 1 |
| 72  | O | 69.15162 | 65.73916 | 66.67986 | -554.84278  | 14.12789    | 399.58769   | 1 |
| 73  | H | 68.51179 | 66.01977 | 67.36044 | 1297.06236  | 2061.84854  | 1220.68812  | 1 |
| 74  | C | 72.15896 | 65.58903 | 67.28410 | -662.15484  | -412.13544  | 123.62687   | 1 |
| 75  | O | 72.75320 | 64.89754 | 66.48984 | -540.01537  | -317.05804  | 274.91456   | 1 |
| 76  | N | 72.20570 | 66.95459 | 67.35869 | -202.76299  | -690.00100  | -131.49145  | 1 |
| 77  | H | 71.72835 | 67.14536 | 68.24153 | -702.62132  | -2617.37191 | 281.70413   | 1 |
| 78  | C | 73.51482 | 67.62016 | 67.01952 | -491.73914  | 576.34187   | 222.73509   | 1 |
| 79  | H | 74.24329 | 66.85659 | 67.38412 | 1977.17978  | -1823.58850 | -434.68928  | 1 |
| 80  | C | 73.61106 | 67.90716 | 65.53486 | -649.50797  | -328.66843  | 306.11224   | 1 |
| 81  | H | 72.88846 | 68.72502 | 65.30969 | 2075.07803  | 1452.16490  | -1004.45904 | 1 |
| 82  | C | 75.00063 | 68.40172 | 65.17164 | -615.18735  | -489.99689  | -70.96352   | 1 |
| 83  | H | 75.08173 | 68.65490 | 64.07963 | -1226.32661 | -1724.38906 | -1716.47170 | 1 |
| 84  | H | 75.26583 | 69.33100 | 65.75161 | 2381.64273  | -969.84735  | 900.46860   | 1 |
| 85  | H | 75.78783 | 67.63085 | 65.39473 | 2122.74991  | 1702.23946  | -141.36228  | 1 |
| 86  | C | 73.23712 | 66.72070 | 64.66263 | -501.86074  | -479.61276  | -376.42482  | 1 |
| 87  | H | 73.32044 | 66.96232 | 63.56697 | 993.79261   | -2246.95401 | -1177.81305 | 1 |
| 88  | H | 73.90336 | 65.83265 | 64.86400 | 42.71279    | -626.15391  | -2651.37258 | 1 |
| 89  | H | 72.17694 | 66.38963 | 64.85578 | -2026.39012 | -1590.33709 | -887.82922  | 1 |
| 90  | C | 73.57553 | 69.01223 | 67.80175 | -672.89153  | 382.57394   | -156.34072  | 1 |
| 91  | O | 73.67800 | 70.12609 | 67.18908 | 410.04627   | 221.86223   | 500.35950   | 1 |
| 92  | N | 73.50870 | 68.89203 | 69.08783 | -378.11782  | -443.79414  | -441.10984  | 1 |
| 93  | H | 73.42423 | 67.97699 | 69.60650 | 2404.15973  | -568.14894  | 1149.30085  | 1 |
| 94  | C | 73.83146 | 70.09288 | 69.78915 | -544.54484  | 466.16019   | 331.29119   | 1 |
| 95  | H | 73.12777 | 70.14884 | 70.64645 | -1409.80988 | -170.17955  | 2325.32679  | 1 |
| 96  | C | 75.30708 | 69.89648 | 70.27206 | -184.48284  | 116.78282   | -758.89137  | 1 |
| 97  | H | 75.42013 | 68.91857 | 70.79951 | 1893.78641  | 1861.14652  | 611.04528   | 1 |
| 98  | H | 76.00466 | 69.86560 | 69.40331 | -2170.79665 | -974.19311  | 1327.50117  | 1 |
| 99  | C | 75.63589 | 71.09831 | 71.22230 | 389.51668   | 672.81878   | -138.49152  | 1 |
| 100 | H | 75.49148 | 72.06127 | 70.67787 | 510.64577   | 1933.03327  | 1851.02484  | 1 |
| 101 | H | 74.90050 | 71.14848 | 72.05655 | -2302.30869 | -1105.72939 | -948.89774  | 1 |
| 102 | C | 77.08780 | 71.03584 | 71.80744 | -559.93427  | -126.34590  | 542.30857   | 1 |
| 103 | O | 77.44719 | 71.89315 | 72.58422 | -670.36003  | -111.83166  | 76.36448    | 1 |
| 104 | N | 77.82165 | 69.99709 | 71.36653 | -216.06729  | -537.07037  | 446.51379   | 1 |
| 105 | H | 77.56980 | 69.25073 | 70.70742 | -1251.96487 | 1074.12894  | -2168.52500 | 1 |
| 106 | H | 78.79204 | 69.81605 | 71.64735 | -2451.83023 | -720.73851  | 944.84612   | 1 |
| 107 | C | 73.75409 | 71.39420 | 68.69594 | 546.24052   | -563.88337  | -85.11809   | 1 |
| 108 | O | 74.75506 | 72.10002 | 68.52584 | 71.70702    | -307.40463  | 606.69673   | 1 |
| 109 | N | 72.47788 | 71.91531 | 68.82192 | 479.90863   | -504.50129  | 222.86849   | 1 |
| 110 | C | 72.10699 | 73.08786 | 68.13016 | 75.51268    | -600.91904  | 506.73700   | 1 |
| 111 | H | 72.75169 | 73.15891 | 67.22201 | -2033.61562 | 1795.30103  | 254.89480   | 1 |
| 112 | C | 70.54275 | 72.87842 | 67.86903 | 523.79067   | 517.99274   | 284.45581   | 1 |
| 113 | H | 69.99737 | 73.83636 | 67.71787 | 1599.61665  | -1127.00911 | 1895.98173  | 1 |
| 114 | H | 70.36049 | 72.26066 | 66.96178 | -1881.83093 | 1275.82488  | -1501.55016 | 1 |
| 115 | C | 70.12033 | 72.12198 | 69.15953 | -600.05639  | -404.05026  | 316.64485   | 1 |
| 116 | H | 70.02237 | 72.81490 | 70.02485 | -2597.05260 | 496.36221   | 657.73249   | 1 |
| 117 | H | 69.14911 | 71.58801 | 69.06775 | -1666.24518 | 1294.38985  | -1723.90591 | 1 |
| 118 | C | 71.37248 | 71.14046 | 69.33739 | 493.57570   | -129.95376  | -602.56394  | 1 |
| 119 | H | 71.59529 | 70.84608 | 70.39340 | -1469.08415 | -637.84797  | 2204.22581  | 1 |
| 120 | H | 71.34592 | 70.22127 | 68.70182 | -1038.97840 | 1068.88701  | -2280.71789 | 1 |
| 121 | C | 72.30036 | 74.39651 | 69.11866 | 188.88100   | 241.05089   | -727.87821  | 1 |
| 122 | O | 72.16930 | 75.50503 | 68.65636 | 531.88613   | -49.19943   | 427.07960   | 1 |

|     |   |          |          |          |             |             |             |   |
|-----|---|----------|----------|----------|-------------|-------------|-------------|---|
| 123 | N | 72.51550 | 74.04784 | 70.37823 | 708.14833   | 26.93417    | -179.73509  | 1 |
| 124 | H | 72.55499 | 73.05357 | 70.59708 | -2232.69501 | -1179.09831 | 1023.94816  | 1 |
| 125 | C | 72.53003 | 75.06926 | 71.36733 | -738.32412  | 259.92548   | 104.42456   | 1 |
| 126 | H | 72.90542 | 75.98561 | 70.85759 | 2028.89123  | 1260.02983  | 1311.33324  | 1 |
| 127 | C | 71.03144 | 75.23314 | 71.88222 | -258.65678  | -345.52513  | 661.28459   | 1 |
| 128 | H | 70.62362 | 74.24846 | 72.19620 | -1826.06090 | -1801.46097 | -918.64554  | 1 |
| 129 | C | 71.02850 | 76.25475 | 73.06951 | -541.23400  | 531.92970   | -218.41428  | 1 |
| 130 | H | 69.99803 | 76.42967 | 73.45869 | 1311.73218  | -2219.18200 | 882.19023   | 1 |
| 131 | H | 71.65008 | 75.89161 | 73.92198 | -1048.71298 | 1223.58118  | -2196.97971 | 1 |
| 132 | H | 71.43986 | 77.24380 | 72.75908 | 419.06414   | 1903.92898  | 1903.44670  | 1 |
| 133 | C | 70.15881 | 75.85528 | 70.73994 | -423.86431  | 152.66566   | -648.55262  | 1 |
| 134 | H | 69.08554 | 75.93511 | 71.03335 | 105.68386   | -2342.50080 | 1387.51238  | 1 |
| 135 | H | 70.51030 | 76.87888 | 70.47023 | -1695.63603 | -1484.73621 | -1531.02793 | 1 |
| 136 | H | 70.21096 | 75.24103 | 69.80821 | -1853.57121 | -487.39031  | 1936.59343  | 1 |
| 137 | C | 73.40690 | 74.53027 | 72.64462 | 539.71428   | -510.58232  | 267.58633   | 1 |
| 138 | O | 73.20282 | 73.45561 | 73.15694 | -15.93758   | -278.34085  | -624.49402  | 1 |
| 139 | N | 74.22252 | 75.50158 | 73.03796 | -676.81886  | 12.05292    | 276.17960   | 1 |
| 140 | H | 74.30827 | 76.35207 | 72.48355 | -1694.44250 | -373.84189  | -2100.66098 | 1 |
| 141 | C | 74.99744 | 75.29239 | 74.22292 | 412.33078   | -664.70360  | 108.35451   | 1 |
| 142 | H | 74.34972 | 74.67304 | 74.88655 | 1765.77476  | 1294.44366  | 1621.76594  | 1 |
| 143 | C | 76.31412 | 74.55079 | 73.78223 | -179.66635  | -721.95667  | -264.73915  | 1 |
| 144 | H | 76.08451 | 73.59941 | 73.24767 | -607.34922  | 2587.87032  | -598.10018  | 1 |
| 145 | H | 76.87455 | 75.17350 | 73.05046 | -359.69332  | -1479.13954 | -2259.74260 | 1 |
| 146 | C | 77.19264 | 74.27692 | 75.08136 | -240.01076  | 616.02425   | 431.85322   | 1 |
| 147 | H | 77.29088 | 75.20817 | 75.69313 | -1359.17131 | 782.54425   | 2227.99181  | 1 |
| 148 | H | 76.69474 | 73.52025 | 75.73735 | -820.36667  | 85.81767    | -2596.78715 | 1 |
| 149 | C | 78.54445 | 73.79492 | 74.60517 | -513.07015  | 236.18570   | -551.87280  | 1 |
| 150 | H | 78.39166 | 72.94470 | 73.86526 | 1816.11944  | -1183.11722 | -1650.94321 | 1 |
| 151 | H | 79.03474 | 74.60218 | 74.01310 | -1800.04429 | -1361.53473 | 1526.34643  | 1 |
| 152 | C | 79.43686 | 73.37372 | 75.68274 | 726.08972   | -253.19732  | -179.64713  | 1 |
| 153 | H | 79.73851 | 74.18419 | 76.37688 | 1224.27271  | -456.51798  | -2390.90304 | 1 |
| 154 | H | 79.08206 | 72.49553 | 76.25943 | 1206.40339  | -1150.93514 | -2154.90344 | 1 |
| 155 | N | 80.77419 | 72.89278 | 75.03007 | 329.70796   | -633.68968  | -155.67358  | 1 |
| 156 | H | 81.53110 | 72.55712 | 75.69605 | 1348.31305  | 1938.76845  | 1359.00643  | 1 |
| 157 | H | 80.70373 | 72.06838 | 74.36346 | 2096.92035  | 1446.54551  | -966.48890  | 1 |
| 158 | H | 81.30906 | 73.59997 | 74.44415 | -1197.07217 | -2303.53719 | 827.28733   | 1 |
| 159 | C | 75.44314 | 76.76173 | 74.80025 | -378.01186  | -556.17301  | -413.96481  | 1 |
| 160 | O | 76.38998 | 77.36591 | 74.30802 | -409.44433  | -307.55053  | -453.30833  | 1 |
| 161 | N | 74.75084 | 77.06100 | 75.88142 | -429.02477  | 524.70884   | 274.08502   | 1 |
| 162 | H | 74.00142 | 76.39737 | 76.07780 | 1706.34263  | -1425.96036 | 1574.38926  | 1 |
| 163 | C | 74.57595 | 78.45709 | 76.22209 | -45.25864   | -626.22952  | 478.93267   | 1 |
| 164 | H | 74.12148 | 78.92666 | 75.32204 | 1988.63164  | 570.90773   | 1772.87287  | 1 |
| 165 | C | 73.62948 | 78.47488 | 77.46733 | 551.77128   | -20.49526   | -564.54996  | 1 |
| 166 | H | 72.66506 | 77.97134 | 77.23600 | 1434.61535  | -1753.10253 | 1513.99471  | 1 |
| 167 | H | 74.07880 | 77.87629 | 78.29031 | -714.67738  | 1819.09770  | 1898.36494  | 1 |
| 168 | C | 73.37513 | 79.97193 | 77.95169 | 446.99263   | -555.77305  | 338.97221   | 1 |
| 169 | H | 74.34851 | 80.49926 | 78.11972 | 1953.68466  | 1892.25957  | -161.67766  | 1 |
| 170 | H | 72.84151 | 80.55737 | 77.16327 | -403.03785  | 2688.07032  | -188.43591  | 1 |
| 171 | C | 72.57546 | 79.90892 | 79.23264 | 567.86262   | 335.74681   | 434.04421   | 1 |
| 172 | H | 71.59693 | 79.41358 | 79.03839 | -1080.02275 | 1568.26081  | -1948.78900 | 1 |
| 173 | H | 73.09361 | 79.24369 | 79.96098 | -919.54108  | 2111.34692  | 1456.13463  | 1 |
| 174 | C | 72.35233 | 81.21842 | 79.84608 | 195.81897   | 173.33862   | -745.11536  | 1 |
| 175 | H | 73.27924 | 81.73940 | 80.16596 | 1405.67949  | -2301.21089 | -390.08113  | 1 |
| 176 | H | 71.72172 | 81.90634 | 79.24707 | -940.37328  | -1118.32446 | 2299.72133  | 1 |
| 177 | N | 71.55209 | 81.01781 | 81.17425 | 319.26422   | 656.36007   | -42.02424   | 1 |
| 178 | H | 71.34405 | 81.89794 | 81.73243 | 1961.03633  | 619.91968   | 1787.09422  | 1 |
| 179 | H | 70.58144 | 80.59351 | 81.08997 | 854.14343   | -2156.80752 | 1429.08711  | 1 |
| 180 | H | 71.99549 | 80.40033 | 81.91706 | 1237.02905  | -1378.50857 | -1998.28500 | 1 |
| 181 | C | 76.00598 | 79.14861 | 76.60386 | 532.53319   | -268.57236  | 517.55729   | 1 |
| 182 | O | 76.06520 | 80.35449 | 76.73175 | 266.16714   | -290.73804  | -558.88002  | 1 |
| 183 | N | 76.92762 | 78.23427 | 76.89782 | -226.25352  | 640.49678   | -270.32839  | 1 |
| 184 | H | 76.62870 | 77.27987 | 76.70408 | 2007.69063  | -1035.27229 | 1523.50231  | 1 |

|     |   |          |          |          |             |             |             |   |
|-----|---|----------|----------|----------|-------------|-------------|-------------|---|
| 185 | C | 78.30332 | 78.53349 | 77.09739 | -540.76542  | -573.33303  | 49.50000    | 1 |
| 186 | H | 78.80002 | 77.54017 | 77.02997 | -2374.20950 | -1036.76023 | 843.75774   | 1 |
| 187 | C | 78.75961 | 79.48105 | 75.91015 | -77.09082   | 666.87422   | -415.84136  | 1 |
| 188 | H | 78.18794 | 80.45493 | 75.96896 | -985.81834  | 617.19825   | 2463.91927  | 1 |
| 189 | O | 78.44386 | 79.06238 | 74.55604 | 293.29899   | -391.65602  | -477.80926  | 1 |
| 190 | H | 77.63420 | 78.48207 | 74.71002 | 2528.72714  | -681.76262  | -751.27122  | 1 |
| 191 | C | 80.28104 | 79.72966 | 76.17519 | 252.47363   | -605.14473  | 440.05134   | 1 |
| 192 | H | 80.70221 | 80.46573 | 75.45025 | -2052.65063 | 1456.49051  | -1043.51830 | 1 |
| 193 | H | 80.47550 | 80.12509 | 77.20229 | -2152.98800 | -1661.97574 | -161.70652  | 1 |
| 194 | H | 80.86862 | 78.78759 | 76.06855 | -473.12726  | -1584.27339 | 2165.61725  | 1 |
| 195 | C | 78.50871 | 79.18518 | 78.59042 | 360.36307   | 488.46713   | 505.10056   | 1 |
| 196 | O | 79.63825 | 79.30126 | 79.01186 | -200.08817  | -528.03552  | -385.82850  | 1 |
| 197 | N | 77.36961 | 79.53579 | 79.16520 | -597.54095  | -226.44775  | 355.20479   | 1 |
| 198 | H | 76.52328 | 79.34978 | 78.62342 | 2179.23655  | -1300.70981 | -991.33835  | 1 |
| 199 | C | 77.26283 | 79.97651 | 80.50481 | -687.68921  | 297.39807   | -249.45179  | 1 |
| 200 | H | 76.16516 | 80.00914 | 80.68699 | -349.16256  | -2467.37713 | -1101.72831 | 1 |
| 201 | C | 78.03803 | 78.97061 | 81.48646 | 672.47345   | 361.54328   | -201.62880  | 1 |
| 202 | H | 79.05350 | 78.73225 | 81.08786 | 1541.41502  | 582.18425   | 2169.97026  | 1 |
| 203 | H | 78.17896 | 79.46344 | 82.47735 | -2534.67717 | 60.25153    | 997.72295   | 1 |
| 204 | C | 77.17739 | 77.70771 | 81.61935 | 574.26774   | -389.43119  | -377.02542  | 1 |
| 205 | C | 75.94525 | 77.78537 | 82.33625 | 688.82679   | -287.33580  | -257.96133  | 1 |
| 206 | H | 75.61990 | 78.73528 | 82.79789 | 331.14182   | 1470.38163  | 2269.80013  | 1 |
| 207 | C | 77.58983 | 76.48093 | 81.01741 | -383.52382  | -675.04808  | 144.24917   | 1 |
| 208 | H | 78.53905 | 76.42188 | 80.45465 | 4.09847     | 1517.59662  | 2262.86397  | 1 |
| 209 | C | 75.16113 | 76.63761 | 82.44046 | -134.76730  | 428.45285   | -649.50303  | 1 |
| 210 | H | 74.20910 | 76.69643 | 82.99628 | -903.23433  | 1600.49020  | 2011.53387  | 1 |
| 211 | C | 76.77261 | 75.35638 | 81.15696 | -335.53281  | -615.00040  | -364.39058  | 1 |
| 212 | H | 77.10451 | 74.40896 | 80.69759 | 1596.45398  | -1369.33862 | 1732.02659  | 1 |
| 213 | C | 75.53663 | 75.38821 | 81.86642 | 585.48547   | -340.24194  | -406.23938  | 1 |
| 214 | O | 74.69521 | 74.25353 | 82.00465 | -419.15649  | -173.04408  | -511.94141  | 1 |
| 215 | H | 75.25982 | 73.57357 | 81.56707 | -1071.84350 | 1559.71507  | -1960.13012 | 1 |
| 216 | C | 77.97778 | 81.42178 | 80.70936 | 291.41878   | -183.13091  | 710.72246   | 1 |
| 217 | O | 78.36473 | 81.76058 | 81.80471 | 379.87695   | 523.47396   | -222.23622  | 1 |
| 218 | N | 77.89458 | 82.18012 | 79.59584 | 564.30591   | 373.09380   | 277.24371   | 1 |
| 219 | H | 77.56274 | 81.65002 | 78.78663 | -120.59931  | -2436.07824 | -1214.35098 | 1 |
| 220 | C | 78.97704 | 83.11735 | 79.43278 | 404.07514   | -299.37480  | 608.84009   | 1 |
| 221 | H | 79.29020 | 83.33213 | 80.48141 | -1071.07882 | -841.69025  | 2359.66467  | 1 |
| 222 | C | 80.09759 | 82.39691 | 78.58445 | -683.12807  | 68.71770    | -390.13096  | 1 |
| 223 | H | 80.33440 | 81.39440 | 79.01724 | 2068.88918  | 1596.58590  | 770.89603   | 1 |
| 224 | H | 79.74261 | 82.20509 | 77.54622 | 1379.86429  | 2342.49779  | -179.85638  | 1 |
| 225 | C | 81.35000 | 83.32891 | 78.58458 | -176.39967  | 537.49466   | 550.97268   | 1 |
| 226 | H | 81.08598 | 84.33399 | 78.17636 | -396.28051  | 1942.22168  | 1869.33314  | 1 |
| 227 | H | 81.71126 | 83.50941 | 79.62193 | -94.44700   | 586.00678   | -2659.20016 | 1 |
| 228 | C | 82.47983 | 82.63524 | 77.69543 | -291.69381  | -718.18079  | -150.72929  | 1 |
| 229 | H | 82.91808 | 81.69159 | 78.11002 | -2303.38776 | 1089.76242  | 964.62032   | 1 |
| 230 | H | 82.21863 | 82.45713 | 76.62098 | 884.16729   | 2568.80533  | -207.74283  | 1 |
| 231 | N | 83.45734 | 83.64299 | 77.74755 | -594.49522  | -252.81478  | 342.29276   | 1 |
| 232 | H | 83.24079 | 84.45776 | 78.30158 | -1735.17426 | 2084.05705  | -263.71605  | 1 |
| 233 | C | 84.58020 | 83.60138 | 77.15038 | 595.23177   | -271.52487  | 442.22352   | 1 |
| 234 | N | 84.86940 | 82.46605 | 76.38652 | 585.53813   | -424.79750  | -105.81303  | 1 |
| 235 | H | 84.30283 | 81.63398 | 76.22816 | 959.88797   | 1327.56823  | -2177.11905 | 1 |
| 236 | H | 85.73326 | 82.31595 | 75.86482 | 1578.48647  | 16.27378    | -2220.76233 | 1 |
| 237 | N | 85.31957 | 84.76547 | 77.40433 | -452.17763  | -390.33541  | -421.51853  | 1 |
| 238 | H | 85.09055 | 85.59273 | 77.95294 | 470.26107   | 1974.25629  | -1817.92087 | 1 |
| 239 | H | 86.24512 | 84.93903 | 77.01162 | 1856.67307  | -1573.97321 | -1224.35416 | 1 |
| 240 | C | 78.39538 | 84.41197 | 78.63850 | -531.47271  | -581.45780  | -55.06206   | 1 |
| 241 | O | 79.02091 | 85.00932 | 77.79562 | -243.00837  | 192.73507   | 609.52485   | 1 |
| 242 | N | 77.18448 | 84.79715 | 79.17389 | 343.49288   | -644.25607  | 38.09164    | 1 |
| 243 | H | 76.98002 | 83.99564 | 79.78359 | -1691.16043 | -1535.97525 | -1484.73099 | 1 |
| 244 | C | 76.15766 | 85.26741 | 78.20992 | 542.66492   | 350.14337   | 454.42563   | 1 |
| 245 | H | 76.40275 | 84.76669 | 77.24487 | 1209.57979  | -2396.95920 | 463.86744   | 1 |
| 246 | C | 74.80886 | 84.88821 | 78.77336 | -737.14309  | 145.93010   | 242.71942   | 1 |

|     |   |          |          |          |             |             |             |   |
|-----|---|----------|----------|----------|-------------|-------------|-------------|---|
| 247 | H | 74.79331 | 85.19290 | 79.84455 | -1050.18303 | 159.36419   | -2509.06125 | 1 |
| 248 | C | 73.68406 | 85.61767 | 78.06006 | -706.77696  | -252.88343  | -245.16230  | 1 |
| 249 | H | 72.68968 | 85.44178 | 78.55581 | -1624.64039 | -1665.49085 | 1417.86935  | 1 |
| 250 | H | 73.86603 | 86.73021 | 78.03957 | 2566.10521  | 598.51109   | 693.22305   | 1 |
| 251 | H | 73.58953 | 85.28495 | 76.99018 | -1972.69758 | 107.10018   | -1876.34312 | 1 |
| 252 | C | 74.57161 | 83.38926 | 78.71436 | 412.85148   | 672.58832   | -27.69222   | 1 |
| 253 | H | 73.59863 | 83.10652 | 79.20348 | 1447.02277  | 1762.76533  | -1490.78944 | 1 |
| 254 | H | 74.53267 | 83.01781 | 77.65327 | 1320.77379  | -145.20455  | 2378.68491  | 1 |
| 255 | H | 75.38749 | 82.81382 | 79.23248 | -1512.10848 | 1470.52031  | 1724.75147  | 1 |
| 256 | C | 76.29041 | 86.90227 | 78.11790 | -607.11113  | 499.56689   | 73.73769    | 1 |
| 257 | O | 75.85924 | 87.47866 | 77.14118 | 357.97126   | 460.81534   | 356.68785   | 1 |
| 258 | N | 76.74691 | 87.43226 | 79.24423 | 536.55407   | -368.62270  | 332.76306   | 1 |
| 259 | H | 77.08214 | 86.79001 | 79.96251 | 524.38866   | 2297.69985  | 1367.20941  | 1 |
| 260 | C | 77.10960 | 88.80573 | 79.22455 | 46.50277    | -774.29190  | -147.97904  | 1 |
| 261 | H | 77.17466 | 89.05893 | 78.14128 | 1676.51875  | 1883.29066  | 1032.55549  | 1 |
| 262 | C | 75.99003 | 89.68280 | 79.99268 | -559.41456  | -34.19198   | -556.30433  | 1 |
| 263 | H | 75.93738 | 89.35187 | 81.05698 | -64.66664   | 395.18769   | 2695.05373  | 1 |
| 264 | H | 76.30020 | 90.75447 | 80.02295 | -2703.44278 | -60.40056   | 333.79418   | 1 |
| 265 | C | 74.64255 | 89.54151 | 79.33970 | -519.76435  | 377.31045   | 459.42366   | 1 |
| 266 | H | 74.38035 | 88.45952 | 79.31534 | -1746.74323 | 1667.50644  | -1261.73691 | 1 |
| 267 | C | 73.57987 | 90.28054 | 80.14509 | 570.95554   | 16.46261    | -545.27700  | 1 |
| 268 | H | 72.56155 | 90.15996 | 79.69358 | 2391.58273  | 28.05277    | -1305.07271 | 1 |
| 269 | H | 73.52249 | 89.90592 | 81.19921 | 175.75588   | 917.63458   | 2559.43867  | 1 |
| 270 | H | 73.79110 | 91.37956 | 80.19454 | -1063.97851 | -2155.34650 | 1283.00462  | 1 |
| 271 | C | 74.64622 | 90.06798 | 77.91210 | 193.76014   | 2.62946     | -765.53141  | 1 |
| 272 | H | 73.60838 | 90.13960 | 77.49541 | 507.39394   | -846.55087  | 2539.60089  | 1 |
| 273 | H | 75.10296 | 91.08889 | 77.84339 | 1337.57841  | 1818.19054  | 1526.01994  | 1 |
| 274 | H | 75.23012 | 89.37929 | 77.22667 | 1100.88635  | -1172.91350 | -2199.08909 | 1 |
| 275 | C | 78.47414 | 88.94471 | 80.06842 | -549.21115  | 475.64486   | -309.38218  | 1 |
| 276 | O | 78.84045 | 88.12399 | 80.86877 | 556.06106   | -390.37755  | -78.24250   | 1 |
| 277 | O | 79.16826 | 90.17003 | 79.92275 | -572.27940  | -310.19032  | -209.75862  | 1 |
| 278 | H | 78.60249 | 90.58530 | 79.21538 | -1380.08193 | 2212.14486  | 790.85944   | 1 |

Listing 118: C00118.xmolout

|    |   |          |          |          |             |             |             |        |          |
|----|---|----------|----------|----------|-------------|-------------|-------------|--------|----------|
| 1  |   | 276      |          |          |             |             |             |        |          |
| 2  |   | 150.0000 | 150.0000 | 150.0000 | 0.0000      | 0.0000      | 0.0000***** | 2.7750 | 11100    |
|    |   | 0.2500   | 300.00   | 0.00     | 0.00        | 0.00        | -1293.3750  | 0.0000 | 300.0000 |
| 3  | H | 68.44644 | 68.55395 | 83.54742 | -2043.14101 | -1757.64893 | 399.89339   |        | 1        |
| 4  | N | 69.33845 | 68.21722 | 83.90263 | 426.75047   | 490.45733   | -334.42467  |        | 1        |
| 5  | H | 69.06137 | 67.77533 | 84.77655 | 442.25559   | -1110.30854 | -2448.52907 |        | 1        |
| 6  | C | 70.34468 | 69.20053 | 84.01987 | 415.32972   | -666.39213  | 83.73172    |        | 1        |
| 7  | H | 70.28054 | 69.76083 | 83.06274 | 879.32219   | 2491.00447  | 667.35213   |        | 1        |
| 8  | C | 70.04505 | 70.14590 | 85.29302 | 31.35357    | 477.41777   | 628.23362   |        | 1        |
| 9  | H | 69.85734 | 69.51706 | 86.19624 | 1168.38489  | 2240.25337  | -1019.71136 |        | 1        |
| 10 | H | 70.96251 | 70.74009 | 85.53058 | -360.43770  | 2534.90498  | 931.67112   |        | 1        |
| 11 | C | 68.87906 | 71.06283 | 85.04086 | 463.18208   | 512.70242   | -382.34388  |        | 1        |
| 12 | H | 67.95259 | 70.44804 | 84.98733 | 1725.29117  | 1863.52247  | -987.07854  |        | 1        |
| 13 | C | 68.74897 | 72.04975 | 86.19632 | 710.42801   | -144.27427  | -313.15367  |        | 1        |
| 14 | H | 67.87318 | 72.73510 | 86.06031 | 364.20195   | -1033.13725 | 2494.72524  |        | 1        |
| 15 | H | 68.61309 | 71.52491 | 87.17679 | 2567.61904  | 335.80679   | 847.48802   |        | 1        |
| 16 | H | 69.66172 | 72.69322 | 86.29082 | -2587.99029 | 680.92867   | -512.16411  |        | 1        |
| 17 | C | 69.00480 | 71.84200 | 83.73870 | 268.17616   | 741.64379   | -40.42634   |        | 1        |
| 18 | H | 68.16422 | 72.57260 | 83.61614 | 1283.54314  | -1945.37420 | -1411.27812 |        | 1        |
| 19 | H | 69.95755 | 72.42836 | 83.69154 | -1258.57796 | 1317.15249  | -2026.02085 |        | 1        |
| 20 | H | 68.98344 | 71.16867 | 82.84391 | -2502.84526 | 909.80597   | 575.92391   |        | 1        |
| 21 | C | 71.79122 | 68.52555 | 84.24168 | 619.36578   | -458.64843  | -172.09273  |        | 1        |
| 22 | O | 72.70227 | 69.19841 | 84.73537 | -81.40433   | 433.87611   | 522.34594   |        | 1        |
| 23 | N | 71.83804 | 67.28157 | 83.81193 | 175.23996   | -622.20190  | 341.55523   |        | 1        |
| 24 | H | 70.96070 | 66.89053 | 83.47426 | -876.57256  | -303.22879  | -2561.90213 |        | 1        |
| 25 | C | 73.07349 | 66.57144 | 83.87037 | -571.88214  | -534.10783  | -106.15033  |        | 1        |
| 26 | H | 73.54708 | 66.99117 | 84.78815 | -2713.20841 | -16.25800   | -248.80809  |        | 1        |

|    |   |          |          |          |             |             |             |   |
|----|---|----------|----------|----------|-------------|-------------|-------------|---|
| 27 | C | 72.72537 | 65.01125 | 83.96282 | 166.60354   | 288.16399   | -716.09568  | 1 |
| 28 | H | 72.13634 | 64.70910 | 83.05176 | -2097.85574 | 1636.78449  | -586.18044  | 1 |
| 29 | O | 71.92086 | 64.62188 | 85.08989 | -317.80580  | -363.38227  | 484.43082   | 1 |
| 30 | H | 71.13415 | 64.25178 | 84.64217 | 1863.74748  | -1451.84923 | 1357.29467  | 1 |
| 31 | C | 74.15938 | 64.37237 | 83.88244 | 503.80731   | 517.99032   | 318.51606   | 1 |
| 32 | H | 74.10940 | 63.26175 | 83.79985 | 640.61020   | -2157.10410 | -1536.29104 | 1 |
| 33 | H | 74.73366 | 64.75139 | 83.00162 | 1687.88455  | 465.60692   | 2087.56452  | 1 |
| 34 | H | 74.75870 | 64.61036 | 84.79185 | -1293.07895 | -1899.88581 | -1463.57452 | 1 |
| 35 | C | 73.99862 | 66.92580 | 82.56868 | -153.07550  | -733.68902  | 248.70981   | 1 |
| 36 | O | 75.17984 | 66.98394 | 82.79810 | 186.15459   | -480.78787  | -449.34387  | 1 |
| 37 | N | 73.38243 | 66.99247 | 81.38027 | -487.53139  | 543.18517   | 42.03850    | 1 |
| 38 | C | 74.08703 | 67.45326 | 80.22139 | -699.35871  | 69.34393    | 360.10701   | 1 |
| 39 | H | 75.17250 | 67.32963 | 80.45115 | 2.81126     | -221.99807  | -2715.58072 | 1 |
| 40 | C | 73.48784 | 66.51535 | 79.08253 | -507.46439  | -592.59194  | 122.07761   | 1 |
| 41 | H | 73.64808 | 66.92739 | 78.06083 | -1975.08116 | 525.87560   | -1801.71556 | 1 |
| 42 | H | 73.94291 | 65.50011 | 79.10055 | 1588.27743  | -1913.22100 | 1113.83566  | 1 |
| 43 | C | 71.98672 | 66.48009 | 79.50346 | -613.62442  | -457.55993  | -194.14490  | 1 |
| 44 | H | 71.47110 | 67.41872 | 79.19916 | 1707.54637  | -721.27992  | 1996.92523  | 1 |
| 45 | H | 71.41452 | 65.64198 | 79.04531 | 758.23357   | 2100.81767  | 1560.55011  | 1 |
| 46 | C | 72.09760 | 66.37087 | 81.08482 | -352.41524  | 704.96076   | 49.21465    | 1 |
| 47 | H | 71.31440 | 66.93424 | 81.64181 | 1714.76886  | -2070.42778 | 443.35792   | 1 |
| 48 | H | 72.15931 | 65.32877 | 81.47768 | 1224.15040  | 1801.50881  | 1636.97633  | 1 |
| 49 | C | 73.66005 | 68.98726 | 79.86994 | 566.85117   | 537.05831   | 117.62814   | 1 |
| 50 | O | 73.44108 | 69.31911 | 78.70468 | -550.26779  | -406.08867  | 4.21666     | 1 |
| 51 | N | 73.60321 | 69.74551 | 80.95364 | 566.34832   | -425.77725  | 180.18749   | 1 |
| 52 | H | 73.84582 | 69.23669 | 81.80496 | 644.44502   | 2646.80550  | -52.73430   | 1 |
| 53 | C | 73.98708 | 71.12232 | 80.75892 | 612.34801   | -281.48662  | 411.56221   | 1 |
| 54 | H | 74.66538 | 71.10168 | 79.87668 | 1667.23498  | -1490.75142 | 1556.16753  | 1 |
| 55 | C | 72.65813 | 71.92113 | 80.43365 | -714.45746  | -175.43074  | 286.98927   | 1 |
| 56 | H | 71.93193 | 71.85234 | 81.29330 | -787.09484  | 1763.03619  | -1922.46060 | 1 |
| 57 | O | 71.86045 | 71.41499 | 79.33390 | -429.46514  | 516.51932   | -128.40526  | 1 |
| 58 | H | 72.44039 | 70.63226 | 79.04922 | 1981.82785  | 436.16847   | -1818.18182 | 1 |
| 59 | C | 73.14290 | 73.40468 | 80.29981 | 630.79189   | -468.94448  | 76.03230    | 1 |
| 60 | H | 72.28158 | 74.10837 | 80.22803 | -1775.71861 | 2062.30353  | 131.89849   | 1 |
| 61 | H | 73.76218 | 73.72648 | 81.17022 | -1855.14608 | 88.94118    | 1993.53760  | 1 |
| 62 | H | 73.75859 | 73.54625 | 79.38144 | -1504.82350 | -780.94249  | -2132.90992 | 1 |
| 63 | C | 74.72706 | 71.60937 | 82.12733 | 288.57638   | 618.62814   | -397.00270  | 1 |
| 64 | O | 75.87864 | 71.98600 | 82.08677 | 321.70495   | -185.26452  | 574.37218   | 1 |
| 65 | N | 73.92482 | 71.52677 | 83.23949 | -447.05792  | -446.53431  | 367.76425   | 1 |
| 66 | H | 73.13272 | 70.98807 | 82.85539 | 350.31316   | 1975.63644  | -1843.31522 | 1 |
| 67 | C | 73.52819 | 72.81505 | 83.80437 | -511.23061  | 374.03917   | -471.51480  | 1 |
| 68 | H | 72.99574 | 73.33049 | 82.97673 | 2234.79579  | -898.70890  | -1273.45190 | 1 |
| 69 | C | 72.55835 | 72.38139 | 84.97041 | 529.53781   | -159.34528  | 563.72604   | 1 |
| 70 | H | 72.18301 | 73.31630 | 85.46275 | 654.59388   | 2347.94251  | 1217.51488  | 1 |
| 71 | H | 71.67142 | 71.88502 | 84.49579 | -1526.55661 | 2103.42026  | 817.87394   | 1 |
| 72 | O | 73.09794 | 71.50914 | 86.01071 | -554.84278  | 14.12789    | 399.58769   | 1 |
| 73 | H | 73.02789 | 70.61399 | 85.51843 | 1297.06236  | 2061.84854  | 1220.68812  | 1 |
| 74 | C | 74.81266 | 73.65708 | 84.29281 | -662.15484  | -412.13544  | 123.62687   | 1 |
| 75 | O | 75.14846 | 74.60845 | 83.64108 | -540.01537  | -317.05804  | 274.91456   | 1 |
| 76 | N | 75.31973 | 73.21084 | 85.47006 | -202.76299  | -690.00100  | -131.49145  | 1 |
| 77 | H | 74.76122 | 72.44060 | 85.88316 | -702.62132  | -2617.37191 | 281.70413   | 1 |
| 78 | C | 76.79387 | 73.05510 | 85.61290 | -491.73914  | 576.34187   | 222.73509   | 1 |
| 79 | H | 76.84541 | 72.79187 | 86.69397 | 1977.17978  | -1823.58850 | -434.68928  | 1 |
| 80 | C | 77.23738 | 71.91270 | 84.73786 | -649.50797  | -328.66843  | 306.11224   | 1 |
| 81 | H | 77.02915 | 72.18008 | 83.66040 | 2075.07803  | 1452.16490  | -1004.45904 | 1 |
| 82 | C | 78.72111 | 71.62964 | 84.90430 | -615.18735  | -489.99689  | -70.96352   | 1 |
| 83 | H | 79.07476 | 70.83644 | 84.19085 | -1226.32661 | -1724.38906 | -1716.47170 | 1 |
| 84 | H | 79.34886 | 72.54462 | 84.72366 | 2381.64273  | -969.84735  | 900.46860   | 1 |
| 85 | H | 78.95717 | 71.27145 | 85.94322 | 2122.74991  | 1702.23946  | -141.36228  | 1 |
| 86 | C | 76.45708 | 70.63645 | 85.00902 | -501.86074  | -479.61276  | -376.42482  | 1 |
| 87 | H | 76.82828 | 69.78187 | 84.37965 | 993.79261   | -2246.95401 | -1177.81305 | 1 |
| 88 | H | 76.53392 | 70.31956 | 86.08463 | 42.71279    | -626.15391  | -2651.37258 | 1 |

|     |   |          |          |          |             |             |             |   |
|-----|---|----------|----------|----------|-------------|-------------|-------------|---|
| 89  | H | 75.36379 | 70.76317 | 84.77342 | -2026.39012 | -1590.33709 | -887.82922  | 1 |
| 90  | C | 77.49785 | 74.51386 | 85.33825 | -672.89153  | 382.57394   | -156.34072  | 1 |
| 91  | O | 77.39123 | 75.37111 | 86.18321 | 410.04627   | 221.86223   | 500.35950   | 1 |
| 92  | N | 78.23443 | 74.55716 | 84.22159 | -378.11782  | -443.79414  | -441.10984  | 1 |
| 93  | H | 78.14979 | 73.72717 | 83.63768 | 2404.15973  | -568.14894  | 1149.30085  | 1 |
| 94  | C | 78.26765 | 75.85172 | 83.56118 | -544.54484  | 466.16019   | 331.29119   | 1 |
| 95  | H | 77.20026 | 76.16300 | 83.52566 | -1409.80988 | -170.17955  | 2325.32679  | 1 |
| 96  | C | 79.15568 | 76.77513 | 84.47690 | -184.48284  | 116.78282   | -758.89137  | 1 |
| 97  | H | 78.65816 | 76.93785 | 85.46696 | 1893.78641  | 1861.14652  | 611.04528   | 1 |
| 98  | H | 80.12308 | 76.26869 | 84.69992 | -2170.79665 | -974.19311  | 1327.50117  | 1 |
| 99  | C | 79.40461 | 78.13068 | 83.74034 | 389.51668   | 672.81878   | -138.49152  | 1 |
| 100 | H | 79.90446 | 77.93630 | 82.76114 | 510.64577   | 1933.03327  | 1851.02484  | 1 |
| 101 | H | 78.43908 | 78.60937 | 83.46401 | -2302.30869 | -1105.72939 | -948.89774  | 1 |
| 102 | C | 80.26851 | 79.13248 | 84.59562 | -559.93427  | -126.34590  | 542.30857   | 1 |
| 103 | O | 80.51646 | 80.22748 | 84.15981 | -670.36003  | -111.83166  | 76.36448    | 1 |
| 104 | N | 80.66397 | 78.64303 | 85.79122 | -216.06729  | -537.07037  | 446.51379   | 1 |
| 105 | H | 80.48788 | 77.72835 | 86.22268 | -1251.96487 | 1074.12894  | -2168.52500 | 1 |
| 106 | H | 81.23276 | 79.16857 | 86.46404 | -2451.83023 | -720.73851  | 944.84612   | 1 |
| 107 | C | 78.94295 | 75.63464 | 82.10197 | 546.24052   | -563.88337  | -85.11809   | 1 |
| 108 | O | 80.13128 | 75.79663 | 81.98920 | 71.70702    | -307.40463  | 606.69673   | 1 |
| 109 | N | 78.05563 | 75.24482 | 81.17150 | 479.90863   | -504.50129  | 222.86849   | 1 |
| 110 | C | 78.43912 | 75.07295 | 79.80605 | 75.51268    | -600.91904  | 506.73700   | 1 |
| 111 | H | 79.54859 | 74.95507 | 79.80670 | -2033.61562 | 1795.30103  | 254.89480   | 1 |
| 112 | C | 77.58491 | 73.77563 | 79.43838 | 523.79067   | 517.99274   | 284.45581   | 1 |
| 113 | H | 77.50640 | 73.57985 | 78.34700 | 1599.61665  | -1127.00911 | 1895.98173  | 1 |
| 114 | H | 78.01234 | 72.85820 | 79.90072 | -1881.83093 | 1275.82488  | -1501.55016 | 1 |
| 115 | C | 76.22606 | 74.15528 | 80.09556 | -600.05639  | -404.05026  | 316.64485   | 1 |
| 116 | H | 75.67077 | 74.89806 | 79.47815 | -2597.05260 | 496.36221   | 657.73249   | 1 |
| 117 | H | 75.55413 | 73.27895 | 80.23020 | -1666.24518 | 1294.38985  | -1723.90591 | 1 |
| 118 | C | 76.71026 | 74.77817 | 81.47791 | 493.57570   | -129.95376  | -602.56394  | 1 |
| 119 | H | 76.10681 | 75.64446 | 81.84257 | -1469.08415 | -637.84797  | 2204.22581  | 1 |
| 120 | H | 76.83485 | 74.03597 | 82.30309 | -1038.97840 | 1068.88701  | -2280.71789 | 1 |
| 121 | C | 77.91810 | 76.36052 | 78.94602 | 188.88100   | 241.05089   | -727.87821  | 1 |
| 122 | O | 77.67390 | 77.42293 | 79.46062 | 531.88613   | -49.19943   | 427.07960   | 1 |
| 123 | N | 77.94801 | 76.07731 | 77.62786 | 708.14833   | 26.93417    | -179.73509  | 1 |
| 124 | H | 78.17680 | 75.09818 | 77.46069 | -2232.69501 | -1179.09831 | 1023.94816  | 1 |
| 125 | C | 77.05737 | 76.81755 | 76.72409 | -738.32412  | 259.92548   | 104.42456   | 1 |
| 126 | H | 77.10439 | 77.85923 | 77.12072 | 2028.89123  | 1260.02983  | 1311.33324  | 1 |
| 127 | C | 77.60401 | 76.64829 | 75.32253 | -258.65678  | -345.52513  | 661.28459   | 1 |
| 128 | H | 77.67816 | 75.55914 | 75.10356 | -1826.06090 | -1801.46097 | -918.64554  | 1 |
| 129 | C | 76.69053 | 77.26293 | 74.27826 | -541.23400  | 531.92970   | -218.41428  | 1 |
| 130 | H | 77.13342 | 77.19352 | 73.24656 | 1311.73218  | -2219.18200 | 882.19023   | 1 |
| 131 | H | 75.69117 | 76.73860 | 74.24236 | -1048.71298 | 1223.58118  | -2196.97971 | 1 |
| 132 | H | 76.49209 | 78.35036 | 74.48684 | 419.06414   | 1903.92898  | 1903.44670  | 1 |
| 133 | C | 79.00340 | 77.22809 | 75.20770 | -423.86431  | 152.66566   | -648.55262  | 1 |
| 134 | H | 79.45129 | 77.04633 | 74.19266 | 105.68386   | -2342.50080 | 1387.51238  | 1 |
| 135 | H | 79.00564 | 78.33888 | 75.38212 | -1695.63603 | -1484.73621 | -1531.02793 | 1 |
| 136 | H | 79.69641 | 76.77456 | 75.96897 | -1853.57121 | -487.39031  | 1936.59343  | 1 |
| 137 | C | 75.51778 | 76.20315 | 76.84917 | 539.71428   | -510.58232  | 267.58633   | 1 |
| 138 | O | 74.61353 | 76.95518 | 77.13165 | -15.93758   | -278.34085  | -624.49402  | 1 |
| 139 | N | 75.46244 | 74.89262 | 76.63385 | -676.81886  | 12.05292    | 276.17960   | 1 |
| 140 | H | 76.36312 | 74.48157 | 76.39584 | -1694.44250 | -373.84189  | -2100.66098 | 1 |
| 141 | C | 74.25063 | 74.33215 | 76.10866 | 412.33078   | -664.70360  | 108.35451   | 1 |
| 142 | H | 74.44003 | 73.24607 | 76.25565 | 1765.77476  | 1294.44366  | 1621.76594  | 1 |
| 143 | C | 73.06897 | 74.89897 | 76.98688 | -179.66635  | -721.95667  | -264.73915  | 1 |
| 144 | H | 73.45115 | 75.18578 | 77.99447 | -607.34922  | 2587.87032  | -598.10018  | 1 |
| 145 | H | 72.69298 | 75.85708 | 76.55697 | -359.69332  | -1479.13954 | -2259.74260 | 1 |
| 146 | C | 71.92824 | 73.83104 | 77.09942 | -240.01076  | 616.02425   | 431.85322   | 1 |
| 147 | H | 71.63018 | 73.44604 | 76.09852 | -1359.17131 | 782.54425   | 2227.99181  | 1 |
| 148 | H | 72.26651 | 72.94168 | 77.68391 | -820.36667  | 85.81767    | -2596.78715 | 1 |
| 149 | C | 70.71149 | 74.53704 | 77.82034 | -513.07015  | 236.18570   | -551.87280  | 1 |
| 150 | H | 71.04714 | 75.06168 | 78.74383 | 1816.11944  | -1183.11722 | -1650.94321 | 1 |

|     |   |          |          |          |             |             |             |   |
|-----|---|----------|----------|----------|-------------|-------------|-------------|---|
| 151 | H | 70.26355 | 75.32518 | 77.17224 | -1800.04429 | -1361.53473 | 1526.34643  | 1 |
| 152 | C | 69.67878 | 73.43793 | 78.16439 | 726.08972   | -253.19732  | -179.64713  | 1 |
| 153 | H | 69.19872 | 72.96330 | 77.28535 | 1224.27271  | -456.51798  | -2390.90304 | 1 |
| 154 | H | 70.05301 | 72.65648 | 78.85885 | 1206.40339  | -1150.93514 | -2154.90344 | 1 |
| 155 | N | 68.50648 | 74.12061 | 78.94392 | 329.70796   | -633.68968  | -155.67358  | 1 |
| 156 | H | 67.71151 | 73.47824 | 79.22806 | 1348.31305  | 1938.76845  | 1359.00643  | 1 |
| 157 | H | 68.74464 | 74.57930 | 79.87120 | 2096.92035  | 1446.54551  | -966.48890  | 1 |
| 158 | H | 67.97976 | 74.89557 | 78.44516 | -1197.07217 | -2303.53719 | 827.28733   | 1 |
| 159 | C | 74.19721 | 74.70137 | 74.51715 | -378.01186  | -556.17301  | -413.96481  | 1 |
| 160 | O | 75.19005 | 74.54351 | 73.84558 | -409.44433  | -307.55053  | -453.30833  | 1 |
| 161 | N | 73.00241 | 75.14461 | 74.12570 | -429.02477  | 524.70884   | 274.08502   | 1 |
| 162 | H | 72.26904 | 75.16861 | 74.83176 | 1706.34263  | -1425.96036 | 1574.38926  | 1 |
| 163 | C | 72.64433 | 74.99526 | 72.73735 | -45.25864   | -626.22952  | 478.93267   | 1 |
| 164 | H | 72.95929 | 73.96709 | 72.45410 | 1988.63164  | 570.90773   | 1772.87287  | 1 |
| 165 | C | 71.09492 | 75.25213 | 72.67282 | 551.77128   | -20.49526   | -564.54996  | 1 |
| 166 | H | 70.54540 | 74.53262 | 73.32121 | 1434.61535  | -1753.10253 | 1513.99471  | 1 |
| 167 | H | 70.86586 | 76.25974 | 73.08794 | -714.67738  | 1819.09770  | 1898.36494  | 1 |
| 168 | C | 70.59264 | 75.15255 | 71.19032 | 446.99263   | -555.77305  | 338.97221   | 1 |
| 169 | H | 71.21284 | 75.78338 | 70.50948 | 1953.68466  | 1892.25957  | -161.67766  | 1 |
| 170 | H | 70.67307 | 74.11357 | 70.79986 | -403.03785  | 2688.07032  | -188.43591  | 1 |
| 171 | C | 69.09325 | 75.65114 | 71.20480 | 567.86262   | 335.74681   | 434.04421   | 1 |
| 172 | H | 68.46280 | 74.99399 | 71.84754 | -1080.02275 | 1568.26081  | -1948.78900 | 1 |
| 173 | H | 69.02861 | 76.67565 | 71.65725 | -919.54108  | 2111.34692  | 1456.13463  | 1 |
| 174 | C | 68.54898 | 75.68882 | 69.75789 | 195.81897   | 173.33862   | -745.11536  | 1 |
| 175 | H | 69.09318 | 76.37805 | 69.08104 | 1405.67949  | -2301.21089 | -390.08113  | 1 |
| 176 | H | 68.42557 | 74.69940 | 69.27369 | -940.37328  | -1118.32446 | 2299.72133  | 1 |
| 177 | N | 67.10382 | 76.28458 | 69.85691 | 319.26422   | 656.36007   | -42.02424   | 1 |
| 178 | H | 66.61422 | 76.51508 | 68.94362 | 1961.03633  | 619.91968   | 1787.09422  | 1 |
| 179 | H | 66.36993 | 75.69584 | 70.34769 | 854.14343   | -2156.80752 | 1429.08711  | 1 |
| 180 | H | 67.02203 | 77.20332 | 70.38054 | 1237.02905  | -1378.50857 | -1998.28500 | 1 |
| 181 | C | 73.37295 | 76.14174 | 71.82253 | 532.53319   | -268.57236  | 517.55729   | 1 |
| 182 | O | 73.37656 | 77.31851 | 72.09221 | 266.16714   | -290.73804  | -558.88002  | 1 |
| 183 | N | 73.79030 | 75.53554 | 70.71693 | -226.25352  | 640.49678   | -270.32839  | 1 |
| 184 | H | 73.72918 | 74.52210 | 70.62274 | 2007.69063  | -1035.27229 | 1523.50231  | 1 |
| 185 | C | 74.26007 | 76.28094 | 69.61283 | -540.76542  | -573.33303  | 49.50000    | 1 |
| 186 | H | 74.54497 | 77.28315 | 70.00766 | -2374.20950 | -1036.76023 | 843.75774   | 1 |
| 187 | C | 75.42537 | 75.42766 | 68.90011 | -77.09082   | 666.87422   | -415.84136  | 1 |
| 188 | H | 75.14438 | 75.27176 | 67.82098 | -985.81834  | 617.19825   | 2463.91927  | 1 |
| 189 | O | 75.67191 | 74.11780 | 69.43072 | 293.29899   | -391.65602  | -477.80926  | 1 |
| 190 | H | 75.49207 | 73.55613 | 68.64806 | 2528.72714  | -681.76262  | -751.27122  | 1 |
| 191 | C | 76.61199 | 76.45765 | 68.92475 | 252.47363   | -605.14473  | 440.05134   | 1 |
| 192 | H | 77.52514 | 76.03165 | 68.44808 | -2052.65063 | 1456.49051  | -1043.51830 | 1 |
| 193 | H | 76.36575 | 77.39677 | 68.37024 | -2152.98800 | -1661.97574 | -161.70652  | 1 |
| 194 | H | 76.88511 | 76.73956 | 69.96853 | -473.12726  | -1584.27339 | 2165.61725  | 1 |
| 195 | C | 73.06777 | 76.32755 | 68.48590 | 360.36307   | 488.46713   | 505.10056   | 1 |
| 196 | O | 72.14032 | 75.55436 | 68.43232 | -200.08817  | -528.03552  | -385.82850  | 1 |
| 197 | N | 73.42104 | 77.27297 | 67.61322 | -597.54095  | -226.44775  | 355.20479   | 1 |
| 198 | H | 74.23241 | 77.83975 | 67.85450 | 2179.23655  | -1300.70981 | -991.33835  | 1 |
| 199 | C | 72.50312 | 77.62652 | 66.59659 | -687.68921  | 297.39807   | -249.45179  | 1 |
| 200 | H | 71.70899 | 76.84346 | 66.61644 | -349.16256  | -2467.37713 | -1101.72831 | 1 |
| 201 | C | 71.96122 | 79.10499 | 66.91810 | 672.47345   | 361.54328   | -201.62880  | 1 |
| 202 | H | 72.81936 | 79.81207 | 66.98120 | 1541.41502  | 582.18425   | 2169.97026  | 1 |
| 203 | H | 71.30154 | 79.46118 | 66.09423 | -2534.67717 | 60.25153    | 997.72295   | 1 |
| 204 | C | 71.20051 | 79.05634 | 68.24852 | 574.26774   | -389.43119  | -377.02542  | 1 |
| 205 | C | 69.77636 | 78.96386 | 68.25158 | 688.82679   | -287.33580  | -257.96133  | 1 |
| 206 | H | 69.20825 | 78.95764 | 67.30382 | 331.14182   | 1470.38163  | 2269.80013  | 1 |
| 207 | C | 71.92355 | 79.05261 | 69.47988 | -383.52382  | -675.04808  | 144.24917   | 1 |
| 208 | H | 73.02660 | 79.11019 | 69.48186 | 4.09847     | 1517.59662  | 2262.86397  | 1 |
| 209 | C | 69.11809 | 78.87891 | 69.47961 | -134.76730  | 428.45285   | -649.50303  | 1 |
| 210 | H | 68.01638 | 78.81917 | 69.47792 | -903.23433  | 1600.49020  | 2011.53387  | 1 |
| 211 | C | 71.21960 | 78.94102 | 70.68167 | -335.53281  | -615.00040  | -364.39058  | 1 |
| 212 | H | 71.80068 | 78.90640 | 71.62321 | 1596.45398  | -1369.33862 | 1732.02659  | 1 |

|     |   |          |          |          |             |             |             |   |
|-----|---|----------|----------|----------|-------------|-------------|-------------|---|
| 213 | C | 69.79843 | 78.85756 | 70.73080 | 585.48547   | -340.24194  | -406.23938  | 1 |
| 214 | O | 69.07178 | 78.74660 | 71.95483 | -419.15649  | -173.04408  | -511.94141  | 1 |
| 215 | H | 69.82007 | 78.83114 | 72.59122 | -1071.84350 | 1559.71507  | -1960.13012 | 1 |
| 216 | C | 73.27733 | 77.78779 | 65.16974 | 291.41878   | -183.13091  | 710.72246   | 1 |
| 217 | O | 72.65149 | 77.77242 | 64.13960 | 379.87695   | 523.47396   | -222.23622  | 1 |
| 218 | N | 74.56248 | 78.06140 | 65.35240 | 564.30591   | 373.09380   | 277.24371   | 1 |
| 219 | H | 75.03801 | 78.09174 | 66.27593 | -120.59931  | -2436.07824 | -1214.35098 | 1 |
| 220 | C | 75.46474 | 77.98394 | 64.23229 | 404.07514   | -299.37480  | 608.84009   | 1 |
| 221 | H | 75.19355 | 77.08020 | 63.64141 | -1071.07882 | -841.69025  | 2359.66467  | 1 |
| 222 | C | 75.27200 | 79.31855 | 63.39980 | -683.12807  | 68.71770    | -390.13096  | 1 |
| 223 | H | 74.18641 | 79.47983 | 63.20707 | 2068.88918  | 1596.58590  | 770.89603   | 1 |
| 224 | H | 75.60311 | 80.19734 | 63.99731 | 1379.86429  | 2342.49779  | -179.85638  | 1 |
| 225 | C | 76.05531 | 79.23873 | 62.05329 | -176.39967  | 537.49466   | 550.97268   | 1 |
| 226 | H | 77.14559 | 79.05512 | 62.21836 | -396.28051  | 1942.22168  | 1869.33314  | 1 |
| 227 | H | 75.69449 | 78.38507 | 61.43684 | -94.44700   | 586.00678   | -2659.20016 | 1 |
| 228 | C | 75.83803 | 80.62792 | 61.29441 | -291.69381  | -718.18079  | -150.72929  | 1 |
| 229 | H | 74.77465 | 80.92245 | 61.10483 | -2303.38776 | 1089.76242  | 964.62032   | 1 |
| 230 | H | 76.36527 | 81.50761 | 61.74473 | 884.16729   | 2568.80533  | -207.74283  | 1 |
| 231 | N | 76.43107 | 80.35493 | 60.05247 | -594.49522  | -252.81478  | 342.29276   | 1 |
| 232 | H | 76.91560 | 79.47477 | 59.96622 | -1735.17426 | 2084.05705  | -263.71605  | 1 |
| 233 | C | 76.40085 | 81.13412 | 59.04815 | 595.23177   | -271.52487  | 442.22352   | 1 |
| 234 | N | 75.74486 | 82.36108 | 59.19333 | 585.53813   | -424.79750  | -105.81303  | 1 |
| 235 | H | 75.26464 | 82.74501 | 60.00610 | 959.88797   | 1327.56823  | -2177.11905 | 1 |
| 236 | H | 75.65968 | 83.06874 | 58.46308 | 1578.48647  | 16.27378    | -2220.76233 | 1 |
| 237 | N | 77.08524 | 80.57512 | 57.95949 | -452.17763  | -390.33541  | -421.51853  | 1 |
| 238 | H | 77.54990 | 79.67449 | 57.85510 | 470.26107   | 1974.25629  | -1817.92087 | 1 |
| 239 | H | 77.16283 | 81.03573 | 57.05208 | 1856.67307  | -1573.97321 | -1224.35416 | 1 |
| 240 | C | 76.86127 | 77.91708 | 65.04470 | -531.47271  | -581.45780  | -55.06206   | 1 |
| 241 | O | 76.86531 | 78.10522 | 66.25519 | -243.00837  | 192.73507   | 609.52485   | 1 |
| 242 | N | 77.87681 | 77.60844 | 64.24323 | 343.49288   | -644.25607  | 38.09164    | 1 |
| 243 | H | 77.67988 | 77.44966 | 63.25000 | -1691.16043 | -1535.97525 | -1484.73099 | 1 |
| 244 | C | 79.14003 | 78.22174 | 64.52191 | 542.66492   | 350.14337   | 454.42563   | 1 |
| 245 | H | 78.99958 | 78.89174 | 65.40004 | 1209.57979  | -2396.95920 | 463.86744   | 1 |
| 246 | C | 80.14278 | 77.01934 | 64.81562 | -737.14309  | 145.93010   | 242.71942   | 1 |
| 247 | H | 79.92726 | 76.16352 | 64.14069 | -1050.18303 | 159.36419   | -2509.06125 | 1 |
| 248 | C | 81.62817 | 77.48979 | 64.66453 | -706.77696  | -252.88343  | -245.16230  | 1 |
| 249 | H | 82.34717 | 76.68714 | 64.95323 | -1624.64039 | -1665.49085 | 1417.86935  | 1 |
| 250 | H | 81.86008 | 77.77991 | 63.61191 | 2566.10521  | 598.51109   | 693.22305   | 1 |
| 251 | H | 81.85093 | 78.38221 | 65.29983 | -1972.69758 | 107.10018   | -1876.34312 | 1 |
| 252 | C | 79.91898 | 76.62023 | 66.31395 | 412.85148   | 672.58832   | -27.69222   | 1 |
| 253 | H | 80.51931 | 75.72503 | 66.60018 | 1447.02277  | 1762.76533  | -1490.78944 | 1 |
| 254 | H | 80.20417 | 77.44804 | 67.00500 | 1320.77379  | -145.20455  | 2378.68491  | 1 |
| 255 | H | 78.84569 | 76.38418 | 66.50869 | -1512.10848 | 1470.52031  | 1724.75147  | 1 |
| 256 | C | 79.54695 | 78.97316 | 63.13198 | -607.11113  | 499.56689   | 73.73769    | 1 |
| 257 | O | 79.21647 | 78.54778 | 62.04667 | 357.97126   | 460.81534   | 356.68785   | 1 |
| 258 | N | 80.25202 | 80.06699 | 63.42532 | 536.55407   | -368.62270  | 332.76306   | 1 |
| 259 | H | 80.47338 | 80.24817 | 64.40586 | 524.38866   | 2297.69985  | 1367.20941  | 1 |
| 260 | C | 81.14413 | 80.55588 | 62.43256 | 46.50277    | -774.29190  | -147.97904  | 1 |
| 261 | H | 80.96123 | 79.92210 | 61.53494 | 1676.51875  | 1883.29066  | 1032.55549  | 1 |
| 262 | C | 80.83868 | 82.12427 | 62.18406 | -559.41456  | -34.19198   | -556.30433  | 1 |
| 263 | H | 80.94274 | 82.68286 | 63.14460 | -64.66664   | 395.18769   | 2695.05373  | 1 |
| 264 | H | 81.58926 | 82.56781 | 61.48739 | -2703.44278 | -60.40056   | 333.79418   | 1 |
| 265 | C | 79.44574 | 82.26714 | 61.63552 | -519.76435  | 377.31045   | 459.42366   | 1 |
| 266 | H | 78.74785 | 81.70714 | 62.29891 | -1746.74323 | 1667.50644  | -1261.73691 | 1 |
| 267 | C | 79.02426 | 83.73126 | 61.61097 | 570.95554   | 16.46261    | -545.27700  | 1 |
| 268 | H | 77.98017 | 83.85387 | 61.22242 | 2391.58273  | 28.05277    | -1305.07271 | 1 |
| 269 | H | 79.05631 | 84.18973 | 62.63287 | 175.75588   | 917.63458   | 2559.43867  | 1 |
| 270 | H | 79.69577 | 84.34122 | 60.95331 | -1063.97851 | -2155.34650 | 1283.00462  | 1 |
| 271 | C | 79.34588 | 81.68977 | 60.22946 | 193.76014   | 2.62946     | -765.53141  | 1 |
| 272 | H | 78.36087 | 81.93459 | 59.75633 | 507.39394   | -846.55087  | 2539.60089  | 1 |
| 273 | H | 80.14510 | 82.09312 | 59.55564 | 1337.57841  | 1818.19054  | 1526.01994  | 1 |
| 274 | H | 79.43874 | 80.57256 | 60.23287 | 1100.88635  | -1172.91350 | -2199.08909 | 1 |



|     |   |          |          |          |             |            |            |   |
|-----|---|----------|----------|----------|-------------|------------|------------|---|
| 275 | C | 82.62635 | 80.43810 | 63.05139 | -549.21115  | 475.64486  | -309.38218 | 1 |
| 276 | O | 82.84057 | 80.12128 | 64.19347 | 556.06106   | -390.37755 | -78.24250  | 1 |
| 277 | O | 83.69335 | 80.77283 | 62.18448 | -572.27940  | -310.19032 | -209.75862 | 1 |
| 278 | H | 83.16593 | 80.97247 | 61.36202 | -1380.08193 | 2212.14486 | 790.85944  | 1 |

Listing 119: C00119.xmolout

|    |   |          |          |          |             |             |             |                 |
|----|---|----------|----------|----------|-------------|-------------|-------------|-----------------|
| 1  |   | 276      |          |          |             |             |             |                 |
| 2  |   | 150.0000 | 150.0000 | 150.0000 | 0.0000      | 0.0000      | 0.0000***** | 2.7750 11100    |
|    |   | 0.2500   | 300.00   | 0.00     | 0.00        | 0.00        | -1293.3688  | 0.0000 300.0000 |
| 3  | H | 66.57129 | 70.67049 | 68.15094 | -2043.14101 | -1757.64893 | 399.89339   | 1               |
| 4  | N | 67.08590 | 71.28089 | 68.78324 | 426.75047   | 490.45733   | -334.42467  | 1               |
| 5  | H | 67.37864 | 70.63666 | 69.51673 | 442.25559   | -1110.30854 | -2448.52907 | 1               |
| 6  | C | 68.17676 | 71.95771 | 68.19783 | 415.32972   | -666.39213  | 83.73172    | 1               |
| 7  | H | 67.90104 | 72.18254 | 67.14488 | 879.32219   | 2491.00447  | 667.35213   | 1               |
| 8  | C | 68.47323 | 73.26700 | 69.09020 | 31.35357    | 477.41777   | 628.23362   | 1               |
| 9  | H | 68.79932 | 72.93765 | 70.10612 | 1168.38489  | 2240.25337  | -1019.71136 | 1               |
| 10 | H | 69.32777 | 73.84617 | 68.66439 | -360.43770  | 2534.90498  | 931.67112   | 1               |
| 11 | C | 67.23433 | 74.12043 | 69.19419 | 463.18208   | 512.70242   | -382.34388  | 1               |
| 12 | H | 66.37378 | 73.45292 | 69.42714 | 1725.29117  | 1863.52247  | -987.07854  | 1               |
| 13 | C | 67.38181 | 75.12882 | 70.32651 | 710.42801   | -144.27427  | -313.15367  | 1               |
| 14 | H | 66.46472 | 75.76294 | 70.43904 | 364.20195   | -1033.13725 | 2494.72524  | 1               |
| 15 | H | 67.55855 | 74.62256 | 71.31075 | 2567.61904  | 335.80679   | 847.48802   | 1               |
| 16 | H | 68.24465 | 75.82196 | 70.15102 | -2587.99029 | 680.92867   | -512.16411  | 1               |
| 17 | C | 66.94560 | 74.85112 | 67.89072 | 268.17616   | 741.64379   | -40.42634   | 1               |
| 18 | H | 66.03070 | 75.49380 | 67.97190 | 1283.54314  | -1945.37420 | -1411.27812 | 1               |
| 19 | H | 67.79493 | 75.52039 | 67.59605 | -1258.57796 | 1317.15249  | -2026.02085 | 1               |
| 20 | H | 66.77555 | 74.13694 | 67.04419 | -2502.84526 | 909.80597   | 575.92391   | 1               |
| 21 | C | 69.45807 | 70.96347 | 68.37050 | 619.36578   | -458.64843  | -172.09273  | 1               |
| 22 | O | 69.74004 | 70.44804 | 69.43972 | -81.40433   | 433.87611   | 522.34594   | 1               |
| 23 | N | 70.12046 | 70.90806 | 67.22667 | 175.23996   | -622.20190  | 341.55523   | 1               |
| 24 | H | 69.78273 | 71.44324 | 66.42822 | -876.57256  | -303.22879  | -2561.90213 | 1               |
| 25 | C | 71.19722 | 69.98728 | 67.11041 | -571.88214  | -534.10783  | -106.15033  | 1               |
| 26 | H | 71.10373 | 69.31712 | 67.99470 | -2713.20841 | -16.25800   | -248.80809  | 1               |
| 27 | C | 71.05143 | 69.25706 | 65.69141 | 166.60354   | 288.16399   | -716.09568  | 1               |
| 28 | H | 71.11596 | 70.03343 | 64.88070 | -2097.85574 | 1636.78449  | -586.18044  | 1               |
| 29 | O | 69.81977 | 68.54996 | 65.47464 | -317.80580  | -363.38227  | 484.43082   | 1               |
| 30 | H | 69.46646 | 69.01664 | 64.69001 | 1863.74748  | -1451.84923 | 1357.29467  | 1               |
| 31 | C | 72.35995 | 68.38500 | 65.67951 | 503.80731   | 517.99032   | 318.51606   | 1               |
| 32 | H | 72.47895 | 67.83873 | 64.71522 | 640.61020   | -2157.10410 | -1536.29104 | 1               |
| 33 | H | 73.27003 | 69.01353 | 65.82157 | 1687.88455  | 465.60692   | 2087.56452  | 1               |
| 34 | H | 72.35094 | 67.62164 | 66.49242 | -1293.07895 | -1899.88581 | -1463.57452 | 1               |
| 35 | C | 72.56517 | 70.89264 | 67.08375 | -153.07550  | -733.68902  | 248.70981   | 1               |
| 36 | O | 72.79755 | 71.55163 | 66.10538 | 186.15459   | -480.78787  | -449.34387  | 1               |
| 37 | N | 73.27848 | 70.77094 | 68.21851 | -487.53139  | 543.18517   | 42.03850    | 1               |
| 38 | C | 74.46921 | 71.53747 | 68.39241 | -699.35871  | 69.34393    | 360.10701   | 1               |
| 39 | H | 74.34105 | 72.39270 | 67.68991 | 2.81126     | -221.99807  | -2715.58072 | 1               |
| 40 | C | 74.38490 | 71.89890 | 69.93272 | -507.46439  | -592.59194  | 122.07761   | 1               |
| 41 | H | 75.38715 | 72.08422 | 70.38158 | -1975.08116 | 525.87560   | -1801.71556 | 1               |
| 42 | H | 73.80713 | 72.83786 | 70.07401 | 1588.27743  | -1913.22100 | 1113.83566  | 1               |
| 43 | C | 73.62555 | 70.70543 | 70.59909 | -613.62442  | -457.55993  | -194.14490  | 1               |
| 44 | H | 74.32367 | 69.94953 | 71.02272 | 1707.54637  | -721.27992  | 1996.92523  | 1               |
| 45 | H | 72.99082 | 71.02895 | 71.45451 | 758.23357   | 2100.81767  | 1560.55011  | 1               |
| 46 | C | 72.76834 | 70.10442 | 69.40848 | -352.41524  | 704.96076   | 49.21465    | 1               |
| 47 | H | 72.91380 | 69.00975 | 69.24394 | 1714.76886  | -2070.42778 | 443.35792   | 1               |
| 48 | H | 71.65525 | 70.33011 | 69.45579 | 1224.15040  | 1801.50881  | 1636.97633  | 1               |
| 49 | C | 75.80954 | 70.66841 | 67.99900 | 566.85117   | 537.05831   | 117.62814   | 1               |
| 50 | O | 76.45745 | 71.02338 | 67.01728 | -550.26779  | -406.08867  | 4.21666     | 1               |
| 51 | N | 76.04402 | 69.68814 | 68.83817 | 566.34832   | -425.77725  | 180.18749   | 1               |
| 52 | H | 75.32833 | 69.61474 | 69.55688 | 644.44502   | 2646.80550  | -52.73430   | 1               |
| 53 | C | 76.98551 | 68.64941 | 68.63215 | 612.34801   | -281.48662  | 411.56221   | 1               |
| 54 | H | 76.78025 | 67.94239 | 69.46567 | 1667.23498  | -1490.75142 | 1556.16753  | 1               |

|     |   |          |          |          |             |             |             |   |
|-----|---|----------|----------|----------|-------------|-------------|-------------|---|
| 55  | C | 76.67824 | 68.01983 | 67.19399 | -714.45746  | -175.43074  | 286.98927   | 1 |
| 56  | H | 76.71937 | 68.83833 | 66.42060 | -787.09484  | 1763.03619  | -1922.46060 | 1 |
| 57  | O | 75.37684 | 67.41942 | 67.04710 | -429.46514  | 516.51932   | -128.40526  | 1 |
| 58  | H | 74.99165 | 67.98379 | 66.34795 | 1981.82785  | 436.16847   | -1818.18182 | 1 |
| 59  | C | 77.90850 | 67.05924 | 67.00471 | 630.79189   | -468.94448  | 76.03230    | 1 |
| 60  | H | 77.89812 | 66.57721 | 65.99978 | -1775.71861 | 2062.30353  | 131.89849   | 1 |
| 61  | H | 78.87719 | 67.60371 | 67.09946 | -1855.14608 | 88.94118    | 1993.53760  | 1 |
| 62  | H | 77.91061 | 66.24400 | 67.76501 | -1504.82350 | -780.94249  | -2132.90992 | 1 |
| 63  | C | 78.52191 | 69.22385 | 68.68741 | 288.57638   | 618.62814   | -397.00270  | 1 |
| 64  | O | 79.25318 | 68.82062 | 69.55720 | 321.70495   | -185.26452  | 574.37218   | 1 |
| 65  | N | 78.79208 | 70.03631 | 67.67447 | -447.05792  | -446.53431  | 367.76425   | 1 |
| 66  | H | 78.04788 | 70.34673 | 67.00038 | 350.31316   | 1975.63644  | -1843.31522 | 1 |
| 67  | C | 80.10185 | 70.55974 | 67.58139 | -511.23061  | 374.03917   | -471.51480  | 1 |
| 68  | H | 80.59904 | 70.26235 | 68.53502 | 2234.79579  | -898.70890  | -1273.45190 | 1 |
| 69  | C | 80.77981 | 69.88615 | 66.28803 | 529.53781   | -159.34528  | 563.72604   | 1 |
| 70  | H | 81.86414 | 70.17243 | 66.31694 | 654.59388   | 2347.94251  | 1217.51488  | 1 |
| 71  | H | 80.73044 | 68.77232 | 66.42769 | -1526.55661 | 2103.42026  | 817.87394   | 1 |
| 72  | O | 80.18297 | 70.19665 | 65.00557 | -554.84278  | 14.12789    | 399.58769   | 1 |
| 73  | H | 80.58066 | 71.07916 | 64.85710 | 1297.06236  | 2061.84854  | 1220.68812  | 1 |
| 74  | C | 80.05581 | 72.17101 | 67.29861 | -662.15484  | -412.13544  | 123.62687   | 1 |
| 75  | O | 81.01236 | 72.74547 | 66.83591 | -540.01537  | -317.05804  | 274.91456   | 1 |
| 76  | N | 78.89707 | 72.68808 | 67.68899 | -202.76299  | -690.00100  | -131.49145  | 1 |
| 77  | H | 78.22702 | 72.01668 | 68.07031 | -702.62132  | -2617.37191 | 281.70413   | 1 |
| 78  | C | 78.54709 | 74.08939 | 67.60656 | -491.73914  | 576.34187   | 222.73509   | 1 |
| 79  | H | 79.43216 | 74.63938 | 67.20254 | 1977.17978  | -1823.58850 | -434.68928  | 1 |
| 80  | C | 77.29397 | 74.14556 | 66.73865 | -649.50797  | -328.66843  | 306.11224   | 1 |
| 81  | H | 76.52603 | 73.49951 | 67.22317 | 2075.07803  | 1452.16490  | -1004.45904 | 1 |
| 82  | C | 76.74189 | 75.55353 | 66.63758 | -615.18735  | -489.99689  | -70.96352   | 1 |
| 83  | H | 75.78316 | 75.58206 | 66.04876 | -1226.32661 | -1724.38906 | -1716.47170 | 1 |
| 84  | H | 76.52475 | 75.98587 | 67.65432 | 2381.64273  | -969.84735  | 900.46860   | 1 |
| 85  | H | 77.46650 | 76.24745 | 66.12824 | 2122.74991  | 1702.23946  | -141.36228  | 1 |
| 86  | C | 77.54332 | 73.56342 | 65.35988 | -501.86074  | -479.61276  | -376.42482  | 1 |
| 87  | H | 76.61023 | 73.56064 | 64.73121 | 993.79261   | -2246.95401 | -1177.81305 | 1 |
| 88  | H | 78.32758 | 74.14222 | 64.79810 | 42.71279    | -626.15391  | -2651.37258 | 1 |
| 89  | H | 77.90118 | 72.49740 | 65.43047 | -2026.39012 | -1590.33709 | -887.82922  | 1 |
| 90  | C | 78.13430 | 74.44207 | 69.18468 | -672.89153  | 382.57394   | -156.34072  | 1 |
| 91  | O | 77.53540 | 73.61086 | 69.84355 | 410.04627   | 221.86223   | 500.35950   | 1 |
| 92  | N | 78.46850 | 75.66883 | 69.51193 | -378.11782  | -443.79414  | -441.10984  | 1 |
| 93  | H | 78.92342 | 76.21951 | 68.78772 | 2404.15973  | -568.14894  | 1149.30085  | 1 |
| 94  | C | 78.45232 | 76.04094 | 70.89360 | -544.54484  | 466.16019   | 331.29119   | 1 |
| 95  | H | 78.45391 | 75.05698 | 71.41453 | -1409.80988 | -170.17955  | 2325.32679  | 1 |
| 96  | C | 79.71511 | 76.96144 | 71.16410 | -184.48284  | 116.78282   | -758.89137  | 1 |
| 97  | H | 80.66295 | 76.42178 | 70.93982 | 1893.78641  | 1861.14652  | 611.04528   | 1 |
| 98  | H | 79.70239 | 77.85276 | 70.49637 | -2170.79665 | -974.19311  | 1327.50117  | 1 |
| 99  | C | 79.63738 | 77.39134 | 72.66208 | 389.51668   | 672.81878   | -138.49152  | 1 |
| 100 | H | 78.65877 | 77.89149 | 72.85060 | 510.64577   | 1933.03327  | 1851.02484  | 1 |
| 101 | H | 79.61895 | 76.49232 | 73.31665 | -2302.30869 | -1105.72939 | -948.89774  | 1 |
| 102 | C | 80.80297 | 78.34811 | 73.11887 | -559.93427  | -126.34590  | 542.30857   | 1 |
| 103 | O | 80.79731 | 78.79543 | 74.23689 | -670.36003  | -111.83166  | 76.36448    | 1 |
| 104 | N | 81.74106 | 78.56923 | 72.17346 | -216.06729  | -537.07037  | 446.51379   | 1 |
| 105 | H | 81.79524 | 78.21888 | 71.20988 | -1251.96487 | 1074.12894  | -2168.52500 | 1 |
| 106 | H | 82.56491 | 79.16452 | 72.31150 | -2451.83023 | -720.73851  | 944.84612   | 1 |
| 107 | C | 77.12683 | 76.93378 | 71.21384 | 546.24052   | -563.88337  | -85.11809   | 1 |
| 108 | O | 77.15831 | 78.14753 | 71.08850 | 71.70702    | -307.40463  | 606.69673   | 1 |
| 109 | N | 76.12909 | 76.17345 | 71.66064 | 479.90863   | -504.50129  | 222.86849   | 1 |
| 110 | C | 74.75809 | 76.59068 | 71.54370 | 75.51268    | -600.91904  | 506.73700   | 1 |
| 111 | H | 74.67964 | 77.12106 | 70.56597 | -2033.61562 | 1795.30103  | 254.89480   | 1 |
| 112 | C | 73.96631 | 75.21945 | 71.67866 | 523.79067   | 517.99274   | 284.45581   | 1 |
| 113 | H | 72.91432 | 75.36810 | 72.01292 | 1599.61665  | -1127.00911 | 1895.98173  | 1 |
| 114 | H | 73.92835 | 74.67565 | 70.70971 | -1881.83093 | 1275.82488  | -1501.55016 | 1 |
| 115 | C | 74.84189 | 74.46701 | 72.72997 | -600.05639  | -404.05026  | 316.64485   | 1 |
| 116 | H | 74.65091 | 74.85374 | 73.75685 | -2597.05260 | 496.36221   | 657.73249   | 1 |

|     |   |          |          |          |             |             |             |   |
|-----|---|----------|----------|----------|-------------|-------------|-------------|---|
| 117 | H | 74.66262 | 73.36850 | 72.76054 | -1666.24518 | 1294.38985  | -1723.90591 | 1 |
| 118 | C | 76.30245 | 74.84886 | 72.24141 | 493.57570   | -129.95376  | -602.56394  | 1 |
| 119 | H | 77.07462 | 74.90765 | 73.04252 | -1469.08415 | -637.84797  | 2204.22581  | 1 |
| 120 | H | 76.69443 | 74.20723 | 71.38566 | -1038.97840 | 1068.88701  | -2280.71789 | 1 |
| 121 | C | 74.33262 | 77.52162 | 72.81232 | 188.88100   | 241.05089   | -727.87821  | 1 |
| 122 | O | 73.37383 | 77.18541 | 73.45707 | 531.88613   | -49.19943   | 427.07960   | 1 |
| 123 | N | 75.07985 | 78.61931 | 72.88056 | 708.14833   | 26.93417    | -179.73509  | 1 |
| 124 | H | 75.87502 | 78.71010 | 72.20327 | -2232.69501 | -1179.09831 | 1023.94816  | 1 |
| 125 | C | 74.83220 | 79.67653 | 73.86908 | -738.32412  | 259.92548   | 104.42456   | 1 |
| 126 | H | 75.21430 | 80.59643 | 73.36619 | 2028.89123  | 1260.02983  | 1311.33324  | 1 |
| 127 | C | 73.34534 | 79.74949 | 74.15704 | -258.65678  | -345.52513  | 661.28459   | 1 |
| 128 | H | 73.03806 | 78.79122 | 74.65689 | -1826.06090 | -1801.46097 | -918.64554  | 1 |
| 129 | C | 72.96849 | 80.88546 | 75.08713 | -541.23400  | 531.92970   | -218.41428  | 1 |
| 130 | H | 71.86212 | 81.08683 | 75.06005 | 1311.73218  | -2219.18200 | 882.19023   | 1 |
| 131 | H | 73.22328 | 80.63819 | 76.17447 | -1048.71298 | 1223.58118  | -2196.97971 | 1 |
| 132 | H | 73.48766 | 81.84496 | 74.81507 | 419.06414   | 1903.92898  | 1903.44670  | 1 |
| 133 | C | 72.53170 | 79.87146 | 72.87898 | -423.86431  | 152.66566   | -648.55262  | 1 |
| 134 | H | 71.42962 | 79.93333 | 73.09059 | 105.68386   | -2342.50080 | 1387.51238  | 1 |
| 135 | H | 72.81357 | 80.78614 | 72.29021 | -1695.63603 | -1484.73621 | -1531.02793 | 1 |
| 136 | H | 72.69192 | 78.97781 | 72.21317 | -1853.57121 | -487.39031  | 1936.59343  | 1 |
| 137 | C | 75.74068 | 79.31751 | 75.19837 | 539.71428   | -510.58232  | 267.58633   | 1 |
| 138 | O | 76.10962 | 78.17345 | 75.44640 | -15.93758   | -278.34085  | -624.49402  | 1 |
| 139 | N | 75.95276 | 80.40220 | 75.91241 | -676.81886  | 12.05292    | 276.17960   | 1 |
| 140 | H | 75.54945 | 81.25257 | 75.52855 | -1694.44250 | -373.84189  | -2100.66098 | 1 |
| 141 | C | 76.99249 | 80.38865 | 76.89022 | 412.33078   | -664.70360  | 108.35451   | 1 |
| 142 | H | 77.36462 | 79.33524 | 76.89682 | 1765.77476  | 1294.44366  | 1621.76594  | 1 |
| 143 | C | 78.09057 | 81.43703 | 76.41910 | -179.66635  | -721.95667  | -264.73915  | 1 |
| 144 | H | 78.32352 | 81.31601 | 75.33761 | -607.34922  | 2587.87032  | -598.10018  | 1 |
| 145 | H | 77.70411 | 82.47463 | 76.52967 | -359.69332  | -1479.13954 | -2259.74260 | 1 |
| 146 | C | 79.36739 | 81.22357 | 77.29374 | -240.01076  | 616.02425   | 431.85322   | 1 |
| 147 | H | 79.07907 | 81.11016 | 78.37228 | -1359.17131 | 782.54425   | 2227.99181  | 1 |
| 148 | H | 79.89095 | 80.28188 | 77.01022 | -820.36667  | 85.81767    | -2596.78715 | 1 |
| 149 | C | 80.31864 | 82.47560 | 77.11727 | -513.07015  | 236.18570   | -551.87280  | 1 |
| 150 | H | 80.68880 | 82.55228 | 76.06907 | 1816.11944  | -1183.11722 | -1650.94321 | 1 |
| 151 | H | 79.76817 | 83.42356 | 77.31749 | -1800.04429 | -1361.53473 | 1526.34643  | 1 |
| 152 | C | 81.48952 | 82.30690 | 78.11300 | 726.08972   | -253.19732  | -179.64713  | 1 |
| 153 | H | 81.18654 | 82.27817 | 79.17897 | 1224.27271  | -456.51798  | -2390.90304 | 1 |
| 154 | H | 82.16711 | 81.45890 | 77.88919 | 1206.40339  | -1150.93514 | -2154.90344 | 1 |
| 155 | N | 82.39407 | 83.58043 | 78.00337 | 329.70796   | -633.68968  | -155.67358  | 1 |
| 156 | H | 83.24061 | 83.59751 | 78.64239 | 1348.31305  | 1938.76845  | 1359.00643  | 1 |
| 157 | H | 82.84028 | 83.77611 | 77.06051 | 2096.92035  | 1446.54551  | -966.48890  | 1 |
| 158 | H | 81.94279 | 84.51360 | 78.23217 | -1197.07217 | -2303.53719 | 827.28733   | 1 |
| 159 | C | 76.45509 | 80.89247 | 78.34014 | -378.01186  | -556.17301  | -413.96481  | 1 |
| 160 | O | 77.22555 | 81.03465 | 79.26234 | -409.44433  | -307.55053  | -453.30833  | 1 |
| 161 | N | 75.15245 | 81.16321 | 78.32552 | -429.02477  | 524.70884   | 274.08502   | 1 |
| 162 | H | 74.55726 | 80.90171 | 77.51798 | 1706.34263  | -1425.96036 | 1574.38926  | 1 |
| 163 | C | 74.49251 | 81.17854 | 79.59990 | -45.25864   | -626.22952  | 478.93267   | 1 |
| 164 | H | 75.19941 | 80.74662 | 80.34539 | 1988.63164  | 570.90773   | 1772.87287  | 1 |
| 165 | C | 74.12219 | 82.69343 | 79.88048 | 551.77128   | -20.49526   | -564.54996  | 1 |
| 166 | H | 74.98967 | 83.35078 | 79.64772 | 1434.61535  | -1753.10253 | 1513.99471  | 1 |
| 167 | H | 73.30720 | 83.02412 | 79.19845 | -714.67738  | 1819.09770  | 1898.36494  | 1 |
| 168 | C | 73.69582 | 82.85674 | 81.37555 | 446.99263   | -555.77305  | 338.97221   | 1 |
| 169 | H | 72.85933 | 82.16743 | 81.62623 | 1953.68466  | 1892.25957  | -161.67766  | 1 |
| 170 | H | 74.53437 | 82.58998 | 82.05726 | -403.03785  | 2688.07032  | -188.43591  | 1 |
| 171 | C | 73.25208 | 84.36089 | 81.58841 | 567.86262   | 335.74681   | 434.04421   | 1 |
| 172 | H | 74.08296 | 85.06134 | 81.34197 | -1080.02275 | 1568.26081  | -1948.78900 | 1 |
| 173 | H | 72.41696 | 84.62733 | 80.90058 | -919.54108  | 2111.34692  | 1456.13463  | 1 |
| 174 | C | 72.81681 | 84.51883 | 83.06344 | 195.81897   | 173.33862   | -745.11536  | 1 |
| 175 | H | 71.97306 | 83.86732 | 83.36641 | 1405.67949  | -2301.21089 | -390.08113  | 1 |
| 176 | H | 73.64099 | 84.43808 | 83.79999 | -940.37328  | -1118.32446 | 2299.72133  | 1 |
| 177 | N | 72.26352 | 85.97357 | 83.24164 | 319.26422   | 656.36007   | -42.02424   | 1 |
| 178 | H | 71.91135 | 86.21288 | 84.21317 | 1961.03633  | 619.91968   | 1787.09422  | 1 |

|     |   |          |          |          |             |             |             |   |
|-----|---|----------|----------|----------|-------------|-------------|-------------|---|
| 179 | H | 72.93526 | 86.77498 | 83.05995 | 854.14343   | -2156.80752 | 1429.08711  | 1 |
| 180 | H | 71.42838 | 86.24637 | 82.64598 | 1237.02905  | -1378.50857 | -1998.28500 | 1 |
| 181 | C | 73.16768 | 80.29732 | 79.22304 | 532.53319   | -268.57236  | 517.55729   | 1 |
| 182 | O | 72.88973 | 80.20487 | 78.02725 | 266.16714   | -290.73804  | -558.88002  | 1 |
| 183 | N | 72.53423 | 79.88634 | 80.29350 | -226.25352  | 640.49678   | -270.32839  | 1 |
| 184 | H | 72.97629 | 80.14821 | 81.17493 | 2007.69063  | -1035.27229 | 1523.50231  | 1 |
| 185 | C | 71.42191 | 79.00523 | 80.31751 | -540.76542  | -573.33303  | 49.50000    | 1 |
| 186 | H | 70.90408 | 79.24942 | 81.27147 | -2374.20950 | -1036.76023 | 843.75774   | 1 |
| 187 | C | 70.51904 | 79.26112 | 79.02719 | -77.09082   | 666.87422   | -415.84136  | 1 |
| 188 | H | 71.14060 | 79.01515 | 78.11654 | -985.81834  | 617.19825   | 2463.91927  | 1 |
| 189 | O | 70.07154 | 80.62725 | 78.86634 | 293.29899   | -391.65602  | -477.80926  | 1 |
| 190 | H | 70.74589 | 80.94742 | 78.22860 | 2528.72714  | -681.76262  | -751.27122  | 1 |
| 191 | C | 69.37351 | 78.19222 | 79.15455 | 252.47363   | -605.14473  | 440.05134   | 1 |
| 192 | H | 68.69181 | 78.22343 | 78.27334 | -2052.65063 | 1456.49051  | -1043.51830 | 1 |
| 193 | H | 69.77764 | 77.15471 | 79.22086 | -2152.98800 | -1661.97574 | -161.70652  | 1 |
| 194 | H | 68.74791 | 78.36846 | 80.06033 | -473.12726  | -1584.27339 | 2165.61725  | 1 |
| 195 | C | 71.99635 | 77.47265 | 80.32802 | 360.36307   | 488.46713   | 505.10056   | 1 |
| 196 | O | 72.96952 | 77.11736 | 79.70583 | -200.08817  | -528.03552  | -385.82850  | 1 |
| 197 | N | 71.11219 | 76.65391 | 80.99657 | -597.54095  | -226.44775  | 355.20479   | 1 |
| 198 | H | 70.37840 | 77.33897 | 81.23547 | 2179.23655  | -1300.70981 | -991.33835  | 1 |
| 199 | C | 71.63946 | 75.99741 | 82.18077 | -687.68921  | 297.39807   | -249.45179  | 1 |
| 200 | H | 71.76880 | 76.82079 | 82.91400 | -349.16256  | -2467.37713 | -1101.72831 | 1 |
| 201 | C | 70.48614 | 74.98679 | 82.58980 | 672.47345   | 361.54328   | -201.62880  | 1 |
| 202 | H | 70.07266 | 74.49432 | 81.67955 | 1541.41502  | 582.18425   | 2169.97026  | 1 |
| 203 | H | 70.89714 | 74.18517 | 83.24616 | -2534.67717 | 60.25153    | 997.72295   | 1 |
| 204 | C | 69.37006 | 75.75171 | 83.32313 | 574.26774   | -389.43119  | -377.02542  | 1 |
| 205 | C | 69.39446 | 75.80655 | 84.74793 | 688.82679   | -287.33580  | -257.96133  | 1 |
| 206 | H | 70.20355 | 75.31443 | 85.31768 | 331.14182   | 1470.38163  | 2269.80013  | 1 |
| 207 | C | 68.32345 | 76.38923 | 82.59210 | -383.52382  | -675.04808  | 144.24917   | 1 |
| 208 | H | 68.30305 | 76.34842 | 81.48781 | 4.09847     | 1517.59662  | 2262.86397  | 1 |
| 209 | C | 68.36982 | 76.48624 | 85.40731 | -134.76730  | 428.45285   | -649.50303  | 1 |
| 210 | H | 68.38367 | 76.52153 | 86.51054 | -903.23433  | 1600.49020  | 2011.53387  | 1 |
| 211 | C | 67.32137 | 77.06145 | 83.29795 | -335.53281  | -615.00040  | -364.39058  | 1 |
| 212 | H | 66.51483 | 77.54976 | 82.72355 | 1596.45398  | -1369.33862 | 1732.02659  | 1 |
| 213 | C | 67.30270 | 77.13466 | 84.72134 | 585.48547   | -340.24194  | -406.23938  | 1 |
| 214 | O | 66.28994 | 77.81290 | 85.44968 | -419.15649  | -173.04408  | -511.94141  | 1 |
| 215 | H | 65.72326 | 78.11781 | 84.70300 | -1071.84350 | 1559.71507  | -1960.13012 | 1 |
| 216 | C | 73.03169 | 75.22379 | 81.90111 | 291.41878   | -183.13091  | 710.72246   | 1 |
| 217 | O | 74.07178 | 75.67970 | 82.37647 | 379.87695   | 523.47396   | -222.23622  | 1 |
| 218 | N | 72.83718 | 74.09803 | 81.24005 | 564.30591   | 373.09380   | 277.24371   | 1 |
| 219 | H | 71.86621 | 73.95686 | 80.96097 | -120.59931  | -2436.07824 | -1214.35098 | 1 |
| 220 | C | 73.85695 | 73.44410 | 80.48281 | 404.07514   | -299.37480  | 608.84009   | 1 |
| 221 | H | 73.27258 | 72.71486 | 79.87682 | -1071.07882 | -841.69025  | 2359.66467  | 1 |
| 222 | C | 74.54837 | 74.56625 | 79.59112 | -683.12807  | 68.71770    | -390.13096  | 1 |
| 223 | H | 73.77429 | 75.22977 | 79.12950 | 2068.88918  | 1596.58590  | 770.89603   | 1 |
| 224 | H | 75.17801 | 75.24520 | 80.21084 | 1379.86429  | 2342.49779  | -179.85638  | 1 |
| 225 | C | 75.39353 | 73.82438 | 78.51304 | -176.39967  | 537.49466   | 550.97268   | 1 |
| 226 | H | 76.26771 | 73.31776 | 78.98128 | -396.28051  | 1942.22168  | 1869.33314  | 1 |
| 227 | H | 74.80010 | 73.01025 | 78.04035 | -94.44700   | 586.00678   | -2659.20016 | 1 |
| 228 | C | 75.85745 | 74.88505 | 77.41127 | -291.69381  | -718.18079  | -150.72929  | 1 |
| 229 | H | 75.04044 | 75.33188 | 76.78828 | -2303.38776 | 1089.76242  | 964.62032   | 1 |
| 230 | H | 76.50683 | 75.72117 | 77.77638 | 884.16729   | 2568.80533  | -207.74283  | 1 |
| 231 | N | 76.63462 | 74.05297 | 76.58955 | -594.49522  | -252.81478  | 342.29276   | 1 |
| 232 | H | 76.68839 | 73.08003 | 76.85011 | -1735.17426 | 2084.05705  | -263.71605  | 1 |
| 233 | C | 77.27800 | 74.43542 | 75.55950 | 595.23177   | -271.52487  | 442.22352   | 1 |
| 234 | N | 77.19693 | 75.77974 | 75.20522 | 585.53813   | -424.79750  | -105.81303  | 1 |
| 235 | H | 76.62453 | 76.53624 | 75.65211 | 959.88797   | 1327.56823  | -2177.11905 | 1 |
| 236 | H | 77.67391 | 76.19092 | 74.39522 | 1578.48647  | 16.27378    | -2220.76233 | 1 |
| 237 | N | 77.97035 | 73.36891 | 74.96073 | -452.17763  | -390.33541  | -421.51853  | 1 |
| 238 | H | 78.04840 | 72.39429 | 75.24561 | 470.26107   | 1974.25629  | -1817.92087 | 1 |
| 239 | H | 78.57377 | 73.46705 | 74.14442 | 1856.67307  | -1573.97321 | -1224.35416 | 1 |
| 240 | C | 74.95101 | 72.69682 | 81.42116 | -531.47271  | -581.45780  | -55.06206   | 1 |

|     |   |          |          |          |             |             |             |   |
|-----|---|----------|----------|----------|-------------|-------------|-------------|---|
| 241 | O | 75.08644 | 71.49869 | 81.27473 | -243.00837  | 192.73507   | 609.52485   | 1 |
| 242 | N | 75.62284 | 73.52792 | 82.19728 | 343.49288   | -644.25607  | 38.09164    | 1 |
| 243 | H | 75.31967 | 74.54281 | 82.21345 | -1691.16043 | -1535.97525 | -1484.73099 | 1 |
| 244 | C | 76.35580 | 73.05152 | 83.37700 | 542.66492   | 350.14337   | 454.42563   | 1 |
| 245 | H | 76.55189 | 74.00056 | 83.92848 | 1209.57979  | -2396.95920 | 463.86744   | 1 |
| 246 | C | 75.46031 | 72.10113 | 84.15088 | -737.14309  | 145.93010   | 242.71942   | 1 |
| 247 | H | 75.16995 | 71.26551 | 83.47150 | -1050.18303 | 159.36419   | -2509.06125 | 1 |
| 248 | C | 76.17483 | 71.50341 | 85.34855 | -706.77696  | -252.88343  | -245.16230  | 1 |
| 249 | H | 75.49760 | 70.83217 | 85.94544 | -1624.64039 | -1665.49085 | 1417.86935  | 1 |
| 250 | H | 77.06107 | 70.88715 | 85.03461 | 2566.10521  | 598.51109   | 693.22305   | 1 |
| 251 | H | 76.55419 | 72.30086 | 86.04565 | -1972.69758 | 107.10018   | -1876.34312 | 1 |
| 252 | C | 74.18235 | 72.79015 | 84.59504 | 412.85148   | 672.58832   | -27.69222   | 1 |
| 253 | H | 73.47560 | 72.07701 | 85.10155 | 1447.02277  | 1762.76533  | -1490.78944 | 1 |
| 254 | H | 74.39341 | 73.62382 | 85.31993 | 1320.77379  | -145.20455  | 2378.68491  | 1 |
| 255 | H | 73.63702 | 73.24341 | 83.72052 | -1512.10848 | 1470.52031  | 1724.75147  | 1 |
| 256 | C | 77.78141 | 72.35378 | 82.89351 | -607.11113  | 499.56689   | 73.73769    | 1 |
| 257 | O | 78.80629 | 72.83129 | 83.31005 | 357.97126   | 460.81534   | 356.68785   | 1 |
| 258 | N | 77.61590 | 71.29131 | 82.12650 | 536.55407   | -368.62270  | 332.76306   | 1 |
| 259 | H | 76.66732 | 70.97772 | 81.81294 | 524.38866   | 2297.69985  | 1367.20941  | 1 |
| 260 | C | 78.80249 | 70.68736 | 81.63126 | 46.50277    | -774.29190  | -147.97904  | 1 |
| 261 | H | 79.57888 | 71.48509 | 81.65884 | 1676.51875  | 1883.29066  | 1032.55549  | 1 |
| 262 | C | 79.18653 | 69.43154 | 82.57207 | -559.41456  | -34.19198   | -556.30433  | 1 |
| 263 | H | 78.29120 | 68.77535 | 82.68818 | -64.66664   | 395.18769   | 2695.05373  | 1 |
| 264 | H | 79.96348 | 68.80628 | 82.07050 | -2703.44278 | -60.40056   | 333.79418   | 1 |
| 265 | C | 79.67990 | 69.89794 | 83.91486 | -519.76435  | 377.31045   | 459.42366   | 1 |
| 266 | H | 78.90195 | 70.55220 | 84.36773 | -1746.74323 | 1667.50644  | -1261.73691 | 1 |
| 267 | C | 79.91780 | 68.70481 | 84.83280 | 570.95554   | 16.46261    | -545.27700  | 1 |
| 268 | H | 80.25460 | 69.02708 | 85.85172 | 2391.58273  | 28.05277    | -1305.07271 | 1 |
| 269 | H | 78.98932 | 68.09241 | 84.96719 | 175.75588   | 917.63458   | 2559.43867  | 1 |
| 270 | H | 80.70779 | 68.02330 | 84.42413 | -1063.97851 | -2155.34650 | 1283.00462  | 1 |
| 271 | C | 80.96241 | 70.71058 | 83.79914 | 193.76014   | 2.62946     | -765.53141  | 1 |
| 272 | H | 81.39952 | 70.93654 | 84.80605 | 507.39394   | -846.55087  | 2539.60089  | 1 |
| 273 | H | 81.74675 | 70.17010 | 83.20885 | 1337.57841  | 1818.19054  | 1526.01994  | 1 |
| 274 | H | 80.77690 | 71.69697 | 83.29532 | 1100.88635  | -1172.91350 | -2199.08909 | 1 |
| 275 | C | 78.46151 | 70.09602 | 80.16553 | -549.21115  | 475.64486   | -309.38218  | 1 |
| 276 | O | 77.67606 | 69.20150 | 79.99453 | 556.06106   | -390.37755  | -78.24250   | 1 |
| 277 | O | 79.17660 | 70.65416 | 79.08148 | -572.27940  | -310.19032  | -209.75862  | 1 |
| 278 | H | 79.72887 | 71.32061 | 79.57514 | -1380.08193 | 2212.14486  | 790.85944   | 1 |

Listing 120: C00120.xmolout

|    |   |          |          |          |             |             |             |        |          |
|----|---|----------|----------|----------|-------------|-------------|-------------|--------|----------|
| 1  |   | 276      |          |          |             |             |             |        |          |
| 2  |   | 150.0000 | 150.0000 | 150.0000 | 0.0000      | 0.0000      | 0.0000***** | 0.2750 | 1100     |
|    |   | 0.2500   | 300.00   | 0.00     | 0.00        | 0.00        | -1293.3685  | 0.0000 | 300.0000 |
| 3  | H | 78.67782 | 65.63576 | 71.09836 | -2043.14101 | -1757.64893 | 399.89339   |        | 1        |
| 4  | N | 78.85828 | 65.67139 | 70.09413 | 426.75047   | 490.45733   | -334.42467  |        | 1        |
| 5  | H | 77.93537 | 65.86848 | 69.67036 | 442.25559   | -1110.30854 | -2448.52907 |        | 1        |
| 6  | C | 79.83755 | 66.61871 | 69.72496 | 415.32972   | -666.39213  | 83.73172    |        | 1        |
| 7  | H | 80.32269 | 66.97757 | 70.65886 | 879.32219   | 2491.00447  | 667.35213   |        | 1        |
| 8  | C | 80.88171 | 65.94854 | 68.69491 | 31.35357    | 477.41777   | 628.23362   |        | 1        |
| 9  | H | 80.36575 | 65.73874 | 67.72793 | 1168.38489  | 2240.25337  | -1019.71136 |        | 1        |
| 10 | H | 81.70826 | 66.65807 | 68.45238 | -360.43770  | 2534.90498  | 931.67112   |        | 1        |
| 11 | C | 81.41579 | 64.67302 | 69.29437 | 463.18208   | 512.70242   | -382.34388  |        | 1        |
| 12 | H | 80.54823 | 64.03850 | 69.58612 | 1725.29117  | 1863.52247  | -987.07854  |        | 1        |
| 13 | C | 82.24846 | 63.91624 | 68.26760 | 710.42801   | -144.27427  | -313.15367  |        | 1        |
| 14 | H | 82.63863 | 62.95136 | 68.68245 | 364.20195   | -1033.13725 | 2494.72524  |        | 1        |
| 15 | H | 81.65076 | 63.66804 | 67.35261 | 2567.61904  | 335.80679   | 847.48802   |        | 1        |
| 16 | H | 83.13365 | 64.51580 | 67.93216 | -2587.99029 | 680.92867   | -512.16411  |        | 1        |
| 17 | C | 82.25134 | 64.95466 | 70.53554 | 268.17616   | 741.64379   | -40.42634   |        | 1        |
| 18 | H | 82.69255 | 64.01545 | 70.95801 | 1283.54314  | -1945.37420 | -1411.27812 |        | 1        |
| 19 | H | 83.10047 | 65.65079 | 70.31231 | -1258.57796 | 1317.15249  | -2026.02085 |        | 1        |
| 20 | H | 81.63856 | 65.42640 | 71.34640 | -2502.84526 | 909.80597   | 575.92391   |        | 1        |

|    |   |          |          |          |             |             |             |   |
|----|---|----------|----------|----------|-------------|-------------|-------------|---|
| 21 | C | 78.92843 | 67.72038 | 68.95719 | 619.36578   | -458.64843  | -172.09273  | 1 |
| 22 | O | 77.72778 | 67.48986 | 68.82787 | -81.40433   | 433.87611   | 522.34594   | 1 |
| 23 | N | 79.66412 | 68.73650 | 68.55954 | 175.23996   | -622.20190  | 341.55523   | 1 |
| 24 | H | 80.65991 | 68.67088 | 68.77504 | -876.57256  | -303.22879  | -2561.90213 | 1 |
| 25 | C | 79.20717 | 69.81664 | 67.76408 | -571.88214  | -534.10783  | -106.15033  | 1 |
| 26 | H | 80.14698 | 70.25510 | 67.36500 | -2713.20841 | -16.25800   | -248.80809  | 1 |
| 27 | C | 78.24517 | 69.24431 | 66.61520 | 166.60354   | 288.16399   | -716.09568  | 1 |
| 28 | H | 77.42495 | 68.65124 | 67.11427 | -2097.85574 | 1636.78449  | -586.18044  | 1 |
| 29 | O | 78.88611 | 68.36379 | 65.67638 | -317.80580  | -363.38227  | 484.43082   | 1 |
| 30 | H | 78.44545 | 67.51519 | 65.89159 | 1863.74748  | -1451.84923 | 1357.29467  | 1 |
| 31 | C | 77.61497 | 70.55849 | 66.02718 | 503.80731   | 517.99032   | 318.51606   | 1 |
| 32 | H | 76.89955 | 70.33408 | 65.20190 | 640.61020   | -2157.10410 | -1536.29104 | 1 |
| 33 | H | 77.05192 | 71.12178 | 66.80888 | 1687.88455  | 465.60692   | 2087.56452  | 1 |
| 34 | H | 78.39436 | 71.23929 | 65.61249 | -1293.07895 | -1899.88581 | -1463.57452 | 1 |
| 35 | C | 78.39650 | 70.84109 | 68.74656 | -153.07550  | -733.68902  | 248.70981   | 1 |
| 36 | O | 77.31113 | 70.52686 | 69.17398 | 186.15459   | -480.78787  | -449.34387  | 1 |
| 37 | N | 79.05797 | 71.99416 | 68.87888 | -487.53139  | 543.18517   | 42.03850    | 1 |
| 38 | C | 78.70278 | 72.93591 | 69.90522 | -699.35871  | 69.34393    | 360.10701   | 1 |
| 39 | H | 78.57454 | 72.34992 | 70.84301 | 2.81126     | -221.99807  | -2715.58072 | 1 |
| 40 | C | 79.94234 | 73.92866 | 69.90859 | -507.46439  | -592.59194  | 122.07761   | 1 |
| 41 | H | 79.67914 | 74.94350 | 70.28189 | -1975.08116 | 525.87560   | -1801.71556 | 1 |
| 42 | H | 80.76139 | 73.55399 | 70.56203 | 1588.27743  | -1913.22100 | 1113.83566  | 1 |
| 43 | C | 80.37197 | 73.91694 | 68.40874 | -613.62442  | -457.55993  | -194.14490  | 1 |
| 44 | H | 79.68873 | 74.54393 | 67.79237 | 1707.54637  | -721.27992  | 1996.92523  | 1 |
| 45 | H | 81.40327 | 74.29899 | 68.23388 | 758.23357   | 2100.81767  | 1560.55011  | 1 |
| 46 | C | 80.20932 | 72.37201 | 68.07091 | -352.41524  | 704.96076   | 49.21465    | 1 |
| 47 | H | 79.99476 | 72.14019 | 67.00140 | 1714.76886  | -2070.42778 | 443.35792   | 1 |
| 48 | H | 81.05527 | 71.73628 | 68.42650 | 1224.15040  | 1801.50881  | 1636.97633  | 1 |
| 49 | C | 77.32500 | 73.71062 | 69.51622 | 566.85117   | 537.05831   | 117.62814   | 1 |
| 50 | O | 76.74971 | 74.37882 | 70.37272 | -550.26779  | -406.08867  | 4.21666     | 1 |
| 51 | N | 77.00118 | 73.53283 | 68.25535 | 566.34832   | -425.77725  | 180.18749   | 1 |
| 52 | H | 77.61631 | 72.93010 | 67.71434 | 644.44502   | 2646.80550  | -52.73430   | 1 |
| 53 | C | 75.78974 | 74.09339 | 67.75447 | 612.34801   | -281.48662  | 411.56221   | 1 |
| 54 | H | 75.65362 | 74.96183 | 68.44168 | 1667.23498  | -1490.75142 | 1556.16753  | 1 |
| 55 | C | 76.09476 | 74.47567 | 66.23249 | -714.45746  | -175.43074  | 286.98927   | 1 |
| 56 | H | 76.31645 | 73.53918 | 65.64869 | -787.09484  | 1763.03619  | -1922.46060 | 1 |
| 57 | O | 77.24793 | 75.31578 | 66.02111 | -429.46514  | 516.51932   | -128.40526  | 1 |
| 58 | H | 77.81596 | 74.72495 | 65.48988 | 1981.82785  | 436.16847   | -1818.18182 | 1 |
| 59 | C | 74.71661 | 75.07587 | 65.77444 | 630.79189   | -468.94448  | 76.03230    | 1 |
| 60 | H | 74.72165 | 75.32012 | 64.68670 | -1775.71861 | 2062.30353  | 131.89849   | 1 |
| 61 | H | 73.87281 | 74.36880 | 65.95124 | -1855.14608 | 88.94118    | 1993.53760  | 1 |
| 62 | H | 74.48434 | 76.01719 | 66.32468 | -1504.82350 | -780.94249  | -2132.90992 | 1 |
| 63 | C | 74.60958 | 72.98797 | 67.98651 | 288.57638   | 618.62814   | -397.00270  | 1 |
| 64 | O | 74.11146 | 72.88673 | 69.10168 | 321.70495   | -185.26452  | 574.37218   | 1 |
| 65 | N | 74.34218 | 72.29406 | 66.90433 | -447.05792  | -446.53431  | 367.76425   | 1 |
| 66 | H | 74.88302 | 72.44102 | 66.05420 | 350.31316   | 1975.63644  | -1843.31522 | 1 |
| 67 | C | 73.06291 | 71.67289 | 66.76614 | -511.23061  | 374.03917   | -471.51480  | 1 |
| 68 | H | 72.41574 | 72.28943 | 67.42962 | 2234.79579  | -898.70890  | -1273.45190 | 1 |
| 69 | C | 72.68890 | 71.73936 | 65.21780 | 529.53781   | -159.34528  | 563.72604   | 1 |
| 70 | H | 71.85690 | 71.01133 | 65.04035 | 654.59388   | 2347.94251  | 1217.51488  | 1 |
| 71 | H | 72.25293 | 72.75955 | 65.03134 | -1526.55661 | 2103.42026  | 817.87394   | 1 |
| 72 | O | 73.78004 | 71.58708 | 64.26055 | -554.84278  | 14.12789    | 399.58769   | 1 |
| 73 | H | 73.54276 | 70.72827 | 63.87271 | 1297.06236  | 2061.84854  | 1220.68812  | 1 |
| 74 | C | 73.15942 | 70.14803 | 67.34652 | -662.15484  | -412.13544  | 123.62687   | 1 |
| 75 | O | 72.85444 | 69.17372 | 66.70221 | -540.01537  | -317.05804  | 274.91456   | 1 |
| 76 | N | 73.52870 | 70.23631 | 68.62017 | -202.76299  | -690.00100  | -131.49145  | 1 |
| 77 | H | 73.71196 | 71.18618 | 69.01479 | -702.62132  | -2617.37191 | 281.70413   | 1 |
| 78 | C | 73.73220 | 69.02897 | 69.35207 | -491.73914  | 576.34187   | 222.73509   | 1 |
| 79 | H | 72.88114 | 68.38415 | 69.03919 | 1977.17978  | -1823.58850 | -434.68928  | 1 |
| 80 | C | 75.10968 | 68.37297 | 68.90313 | -649.50797  | -328.66843  | 306.11224   | 1 |
| 81 | H | 75.97578 | 69.08364 | 69.06513 | 2075.07803  | 1452.16490  | -1004.45904 | 1 |
| 82 | C | 75.23864 | 67.07550 | 69.77358 | -615.18735  | -489.99689  | -70.96352   | 1 |

|     |   |          |          |          |             |             |             |   |
|-----|---|----------|----------|----------|-------------|-------------|-------------|---|
| 83  | H | 76.04674 | 66.39362 | 69.40585 | -1226.32661 | -1724.38906 | -1716.47170 | 1 |
| 84  | H | 75.46835 | 67.32346 | 70.83950 | 2381.64273  | -969.84735  | 900.46860   | 1 |
| 85  | H | 74.28889 | 66.49077 | 69.77083 | 2122.74991  | 1702.23946  | -141.36228  | 1 |
| 86  | C | 75.06315 | 67.92278 | 67.40453 | -501.86074  | -479.61276  | -376.42482  | 1 |
| 87  | H | 75.92511 | 67.25812 | 67.15357 | 993.79261   | -2246.95401 | -1177.81305 | 1 |
| 88  | H | 74.12762 | 67.35772 | 67.16983 | 42.71279    | -626.15391  | -2651.37258 | 1 |
| 89  | H | 75.10851 | 68.79830 | 66.71078 | -2026.39012 | -1590.33709 | -887.82922  | 1 |
| 90  | C | 73.84228 | 69.29422 | 70.96052 | -672.89153  | 382.57394   | -156.34072  | 1 |
| 91  | O | 73.62901 | 68.36772 | 71.70888 | 410.04627   | 221.86223   | 500.35950   | 1 |
| 92  | N | 74.28353 | 70.50277 | 71.27709 | -378.11782  | -443.79414  | -441.10984  | 1 |
| 93  | H | 74.44925 | 71.21857 | 70.57078 | 2404.15973  | -568.14894  | 1149.30085  | 1 |
| 94  | C | 74.53291 | 70.77997 | 72.66147 | -544.54484  | 466.16019   | 331.29119   | 1 |
| 95  | H | 75.02755 | 69.85906 | 73.03844 | -1409.80988 | -170.17955  | 2325.32679  | 1 |
| 96  | C | 75.44844 | 72.06914 | 72.62494 | -184.48284  | 116.78282   | -758.89137  | 1 |
| 97  | H | 76.37398 | 71.86934 | 72.03654 | 1893.78641  | 1861.14652  | 611.04528   | 1 |
| 98  | H | 74.93279 | 72.90212 | 72.09273 | -2170.79665 | -974.19311  | 1327.50117  | 1 |
| 99  | C | 75.79398 | 72.46238 | 74.09421 | 389.51668   | 672.81878   | -138.49152  | 1 |
| 100 | H | 74.86090 | 72.73074 | 74.63966 | 510.64577   | 1933.03327  | 1851.02484  | 1 |
| 101 | H | 76.18652 | 71.57877 | 74.64250 | -2302.30869 | -1105.72939 | -948.89774  | 1 |
| 102 | C | 76.83579 | 73.64170 | 74.21964 | -559.93427  | -126.34590  | 542.30857   | 1 |
| 103 | O | 77.32337 | 73.87334 | 75.29845 | -670.36003  | -111.83166  | 76.36448    | 1 |
| 104 | N | 77.09116 | 74.31221 | 73.07998 | -216.06729  | -537.07037  | 446.51379   | 1 |
| 105 | H | 76.71188 | 74.23350 | 72.09765 | -1251.96487 | 1074.12894  | -2168.52500 | 1 |
| 106 | H | 77.72185 | 75.12692 | 73.09875 | -2451.83023 | -720.73851  | 944.84612   | 1 |
| 107 | C | 73.09569 | 71.04933 | 73.39545 | 546.24052   | -563.88337  | -85.11809   | 1 |
| 108 | O | 72.40475 | 71.95405 | 73.00784 | 71.70702    | -307.40463  | 606.69673   | 1 |
| 109 | N | 72.90357 | 70.22846 | 74.44035 | 479.90863   | -504.50129  | 222.86849   | 1 |
| 110 | C | 71.59734 | 70.01586 | 74.98367 | 75.51268    | -600.91904  | 506.73700   | 1 |
| 111 | H | 70.88250 | 70.07537 | 74.13169 | -2033.61562 | 1795.30103  | 254.89480   | 1 |
| 112 | C | 71.73628 | 68.59474 | 75.67758 | 523.79067   | 517.99274   | 284.45581   | 1 |
| 113 | H | 70.99204 | 68.43959 | 76.49110 | 1599.61665  | -1127.00911 | 1895.98173  | 1 |
| 114 | H | 71.59127 | 67.76548 | 74.94962 | -1881.83093 | 1275.82488  | -1501.55016 | 1 |
| 115 | C | 73.20845 | 68.64211 | 76.18996 | -600.05639  | -404.05026  | 316.64485   | 1 |
| 116 | H | 73.30452 | 69.29295 | 77.08825 | -2597.05260 | 496.36221   | 657.73249   | 1 |
| 117 | H | 73.62205 | 67.64755 | 76.47039 | -1666.24518 | 1294.38985  | -1723.90591 | 1 |
| 118 | C | 73.90723 | 69.28380 | 74.91280 | 493.57570   | -129.95376  | -602.56394  | 1 |
| 119 | H | 74.85728 | 69.83332 | 75.11204 | -1469.08415 | -637.84797  | 2204.22581  | 1 |
| 120 | H | 74.05401 | 68.56869 | 74.06593 | -1038.97840 | 1068.88701  | -2280.71789 | 1 |
| 121 | C | 71.21325 | 71.07622 | 76.17504 | 188.88100   | 241.05089   | -727.87821  | 1 |
| 122 | O | 70.05362 | 71.23054 | 76.48061 | 531.88613   | -49.19943   | 427.07960   | 1 |
| 123 | N | 72.29689 | 71.53313 | 76.80247 | 708.14833   | 26.93417    | -179.73509  | 1 |
| 124 | H | 73.18958 | 71.32249 | 76.35798 | -2232.69501 | -1179.09831 | 1023.94816  | 1 |
| 125 | C | 72.11366 | 72.60381 | 77.71870 | -738.32412  | 259.92548   | 104.42456   | 1 |
| 126 | H | 71.03098 | 72.60254 | 77.98337 | 2028.89123  | 1260.02983  | 1311.33324  | 1 |
| 127 | C | 73.10324 | 72.35707 | 78.93367 | -258.65678  | -345.52513  | 661.28459   | 1 |
| 128 | H | 74.11901 | 72.11421 | 78.54963 | -1826.06090 | -1801.46097 | -918.64554  | 1 |
| 129 | C | 73.13831 | 73.63345 | 79.84513 | -541.23400  | 531.92970   | -218.41428  | 1 |
| 130 | H | 73.80150 | 73.48302 | 80.72959 | 1311.73218  | -2219.18200 | 882.19023   | 1 |
| 131 | H | 73.53876 | 74.51817 | 79.29301 | -1048.71298 | 1223.58118  | -2196.97971 | 1 |
| 132 | H | 72.12538 | 73.90535 | 80.22246 | 419.06414   | 1903.92898  | 1903.44670  | 1 |
| 133 | C | 72.57378 | 71.17398 | 79.81509 | -423.86431  | 152.66566   | -648.55262  | 1 |
| 134 | H | 73.26429 | 70.95803 | 80.66433 | 105.68386   | -2342.50080 | 1387.51238  | 1 |
| 135 | H | 71.57196 | 71.39845 | 80.25017 | -1695.63603 | -1484.73621 | -1531.02793 | 1 |
| 136 | H | 72.47395 | 70.23621 | 79.21930 | -1853.57121 | -487.39031  | 1936.59343  | 1 |
| 137 | C | 72.60296 | 73.95319 | 76.90206 | 539.71428   | -510.58232  | 267.58633   | 1 |
| 138 | O | 73.75384 | 74.12905 | 76.57755 | -15.93758   | -278.34085  | -624.49402  | 1 |
| 139 | N | 71.54975 | 74.74332 | 76.76733 | -676.81886  | 12.05292    | 276.17960   | 1 |
| 140 | H | 70.64944 | 74.41805 | 77.11728 | -1694.44250 | -373.84189  | -2100.66098 | 1 |
| 141 | C | 71.68032 | 75.97108 | 76.05321 | 412.33078   | -664.70360  | 108.35451   | 1 |
| 142 | H | 72.43822 | 75.75178 | 75.26732 | 1765.77476  | 1294.44366  | 1621.76594  | 1 |
| 143 | C | 70.24053 | 76.32300 | 75.50358 | -179.66635  | -721.95667  | -264.73915  | 1 |
| 144 | H | 69.83332 | 75.46333 | 74.92547 | -607.34922  | 2587.87032  | -598.10018  | 1 |

|     |   |          |          |          |             |             |             |   |
|-----|---|----------|----------|----------|-------------|-------------|-------------|---|
| 145 | H | 69.52769 | 76.47735 | 76.34439 | -359.69332  | -1479.13954 | -2259.74260 | 1 |
| 146 | C | 70.31402 | 77.60501 | 74.60922 | -240.01076  | 616.02425   | 431.85322   | 1 |
| 147 | H | 70.59590 | 78.49593 | 75.22108 | -1359.17131 | 782.54425   | 2227.99181  | 1 |
| 148 | H | 71.10375 | 77.50478 | 73.83169 | -820.36667  | 85.81767    | -2596.78715 | 1 |
| 149 | C | 68.89112 | 77.78616 | 73.94099 | -513.07015  | 236.18570   | -551.87280  | 1 |
| 150 | H | 68.64278 | 76.90919 | 73.29986 | 1816.11944  | -1183.11722 | -1650.94321 | 1 |
| 151 | H | 68.09273 | 77.82747 | 74.71664 | -1800.04429 | -1361.53473 | 1526.34643  | 1 |
| 152 | C | 68.89686 | 79.08668 | 73.10522 | 726.08972   | -253.19732  | -179.64713  | 1 |
| 153 | H | 68.98473 | 80.01720 | 73.70153 | 1224.27271  | -456.51798  | -2390.90304 | 1 |
| 154 | H | 69.62783 | 79.09936 | 72.27229 | 1206.40339  | -1150.93514 | -2154.90344 | 1 |
| 155 | N | 67.50033 | 79.19479 | 72.40229 | 329.70796   | -633.68968  | -155.67358  | 1 |
| 156 | H | 67.35612 | 80.05481 | 71.79822 | 1348.31305  | 1938.76845  | 1359.00643  | 1 |
| 157 | H | 67.23410 | 78.41943 | 71.72759 | 2096.92035  | 1446.54551  | -966.48890  | 1 |
| 158 | H | 66.64721 | 79.24025 | 73.03203 | -1197.07217 | -2303.53719 | 827.28733   | 1 |
| 159 | C | 72.21477 | 77.15745 | 77.05038 | -378.01186  | -556.17301  | -413.96481  | 1 |
| 160 | O | 72.40581 | 78.26326 | 76.59699 | -409.44433  | -307.55053  | -453.30833  | 1 |
| 161 | N | 72.40225 | 76.73348 | 78.29520 | -429.02477  | 524.70884   | 274.08502   | 1 |
| 162 | H | 72.18058 | 75.75487 | 78.46842 | 1706.34263  | -1425.96036 | 1574.38926  | 1 |
| 163 | C | 72.66466 | 77.65793 | 79.34102 | -45.25864   | -626.22952  | 478.93267   | 1 |
| 164 | H | 72.78753 | 78.63626 | 78.81965 | 1988.63164  | 570.90773   | 1772.87287  | 1 |
| 165 | C | 71.41004 | 77.60783 | 80.31338 | 551.77128   | -20.49526   | -564.54996  | 1 |
| 166 | H | 70.50967 | 77.99887 | 79.79010 | 1434.61535  | -1753.10253 | 1513.99471  | 1 |
| 167 | H | 71.15841 | 76.56268 | 80.59754 | -714.67738  | 1819.09770  | 1898.36494  | 1 |
| 168 | C | 71.74231 | 78.46809 | 81.57595 | 446.99263   | -555.77305  | 338.97221   | 1 |
| 169 | H | 72.34233 | 77.88590 | 82.31952 | 1953.68466  | 1892.25957  | -161.67766  | 1 |
| 170 | H | 72.37954 | 79.33207 | 81.28243 | -403.03785  | 2688.07032  | -188.43591  | 1 |
| 171 | C | 70.39543 | 78.97599 | 82.23416 | 567.86262   | 335.74681   | 434.04421   | 1 |
| 172 | H | 69.69456 | 79.36538 | 81.46381 | -1080.02275 | 1568.26081  | -1948.78900 | 1 |
| 173 | H | 69.85491 | 78.14775 | 82.74747 | -919.54108  | 2111.34692  | 1456.13463  | 1 |
| 174 | C | 70.79419 | 80.09630 | 83.22168 | 195.81897   | 173.33862   | -745.11536  | 1 |
| 175 | H | 71.49169 | 79.77879 | 84.02216 | 1405.67949  | -2301.21089 | -390.08113  | 1 |
| 176 | H | 71.17029 | 81.01597 | 82.73346 | -940.37328  | -1118.32446 | 2299.72133  | 1 |
| 177 | N | 69.51285 | 80.57566 | 83.98369 | 319.26422   | 656.36007   | -42.02424   | 1 |
| 178 | H | 69.66219 | 81.36560 | 84.67584 | 1961.03633  | 619.91968   | 1787.09422  | 1 |
| 179 | H | 68.71848 | 80.96335 | 83.39823 | 854.14343   | -2156.80752 | 1429.08711  | 1 |
| 180 | H | 69.01314 | 79.85998 | 84.58768 | 1237.02905  | -1378.50857 | -1998.28500 | 1 |
| 181 | C | 73.99567 | 77.16584 | 80.15411 | 532.53319   | -268.57236  | 517.55729   | 1 |
| 182 | O | 74.16086 | 77.46910 | 81.31756 | 266.16714   | -290.73804  | -558.88002  | 1 |
| 183 | N | 74.81272 | 76.47114 | 79.37127 | -226.25352  | 640.49678   | -270.32839  | 1 |
| 184 | H | 74.56101 | 76.35719 | 78.39024 | 2007.69063  | -1035.27229 | 1523.50231  | 1 |
| 185 | C | 76.05500 | 76.06227 | 79.93647 | -540.76542  | -573.33303  | 49.50000    | 1 |
| 186 | H | 75.84179 | 75.91460 | 81.01977 | -2374.20950 | -1036.76023 | 843.75774   | 1 |
| 187 | C | 76.56471 | 74.78163 | 79.13633 | -77.09082   | 666.87422   | -415.84136  | 1 |
| 188 | H | 76.77087 | 75.08492 | 78.07183 | -985.81834  | 617.19825   | 2463.91927  | 1 |
| 189 | O | 75.63917 | 73.67839 | 79.03172 | 293.29899   | -391.65602  | -477.80926  | 1 |
| 190 | H | 75.33036 | 73.78330 | 78.10286 | 2528.72714  | -681.76262  | -751.27122  | 1 |
| 191 | C | 77.90735 | 74.47000 | 79.88974 | 252.47363   | -605.14473  | 440.05134   | 1 |
| 192 | H | 78.46657 | 73.63983 | 79.40030 | -2052.65063 | 1456.49051  | -1043.51830 | 1 |
| 193 | H | 78.58640 | 75.35675 | 79.91850 | -2152.98800 | -1661.97574 | -161.70652  | 1 |
| 194 | H | 77.72218 | 74.16577 | 80.94529 | -473.12726  | -1584.27339 | 2165.61725  | 1 |
| 195 | C | 77.14895 | 77.26355 | 79.64989 | 360.36307   | 488.46713   | 505.10056   | 1 |
| 196 | O | 77.29827 | 77.74754 | 78.55427 | -200.08817  | -528.03552  | -385.82850  | 1 |
| 197 | N | 77.82151 | 77.47096 | 80.77444 | -597.54095  | -226.44775  | 355.20479   | 1 |
| 198 | H | 77.54051 | 76.92890 | 81.59151 | 2179.23655  | -1300.70981 | -991.33835  | 1 |
| 199 | C | 78.97313 | 78.28371 | 80.82599 | -687.68921  | 297.39807   | -249.45179  | 1 |
| 200 | H | 79.37212 | 78.14109 | 81.85521 | -349.16256  | -2467.37713 | -1101.72831 | 1 |
| 201 | C | 80.02067 | 77.88833 | 79.67468 | 672.47345   | 361.54328   | -201.62880  | 1 |
| 202 | H | 79.50410 | 77.80575 | 78.68789 | 1541.41502  | 582.18425   | 2169.97026  | 1 |
| 203 | H | 80.76872 | 78.71164 | 79.58046 | -2534.67717 | 60.25153    | 997.72295   | 1 |
| 204 | C | 80.71416 | 76.56887 | 80.03836 | 574.26774   | -389.43119  | -377.02542  | 1 |
| 205 | C | 81.50262 | 76.49214 | 81.22638 | 688.82679   | -287.33580  | -257.96133  | 1 |
| 206 | H | 81.63476 | 77.37902 | 81.87184 | 331.14182   | 1470.38163  | 2269.80013  | 1 |



|     |   |          |          |          |             |             |             |   |
|-----|---|----------|----------|----------|-------------|-------------|-------------|---|
| 207 | C | 80.57542 | 75.42191 | 79.19797 | -383.52382  | -675.04808  | 144.24917   | 1 |
| 208 | H | 79.98515 | 75.47634 | 78.26336 | 4.09847     | 1517.59662  | 2262.86397  | 1 |
| 209 | C | 82.10085 | 75.27720 | 81.55973 | -134.76730  | 428.45285   | -649.50303  | 1 |
| 210 | H | 82.70489 | 75.22144 | 82.48237 | -903.23433  | 1600.49020  | 2011.53387  | 1 |
| 211 | C | 81.19199 | 74.22534 | 79.57536 | -335.53281  | -615.00040  | -364.39058  | 1 |
| 212 | H | 81.06797 | 73.34552 | 78.92086 | 1596.45398  | -1369.33862 | 1732.02659  | 1 |
| 213 | C | 81.96853 | 74.10213 | 80.76430 | 585.48547   | -340.24194  | -406.23938  | 1 |
| 214 | O | 82.59489 | 72.89137 | 81.16075 | -419.15649  | -173.04408  | -511.94141  | 1 |
| 215 | H | 82.31993 | 72.30863 | 80.41451 | -1071.84350 | 1559.71507  | -1960.13012 | 1 |
| 216 | C | 78.60617 | 79.83622 | 80.48458 | 291.41878   | -183.13091  | 710.72246   | 1 |
| 217 | O | 79.49357 | 80.57249 | 80.11245 | 379.87695   | 523.47396   | -222.23622  | 1 |
| 218 | N | 77.34053 | 80.14606 | 80.77427 | 564.30591   | 373.09380   | 277.24371   | 1 |
| 219 | H | 76.72416 | 79.37350 | 81.02690 | -120.59931  | -2436.07824 | -1214.35098 | 1 |
| 220 | C | 76.86546 | 81.41133 | 80.31466 | 404.07514   | -299.37480  | 608.84009   | 1 |
| 221 | H | 77.78534 | 82.04004 | 80.32523 | -1071.07882 | -841.69025  | 2359.66467  | 1 |
| 222 | C | 76.32184 | 81.19209 | 78.84652 | -683.12807  | 68.71770    | -390.13096  | 1 |
| 223 | H | 77.11860 | 80.76658 | 78.19449 | 2068.88918  | 1596.58590  | 770.89603   | 1 |
| 224 | H | 75.49537 | 80.44748 | 78.81739 | 1379.86429  | 2342.49779  | -179.85638  | 1 |
| 225 | C | 75.85168 | 82.59165 | 78.33805 | -176.39967  | 537.49466   | 550.97268   | 1 |
| 226 | H | 75.05770 | 83.00697 | 78.99905 | -396.28051  | 1942.22168  | 1869.33314  | 1 |
| 227 | H | 76.68730 | 83.32583 | 78.37396 | -94.44700   | 586.00678   | -2659.20016 | 1 |
| 228 | C | 75.30740 | 82.40940 | 76.84868 | -291.69381  | -718.18079  | -150.72929  | 1 |
| 229 | H | 76.02051 | 81.95201 | 76.11616 | -2303.38776 | 1089.76242  | 964.62032   | 1 |
| 230 | H | 74.32193 | 81.87987 | 76.76327 | 884.16729   | 2568.80533  | -207.74283  | 1 |
| 231 | N | 75.10034 | 83.74635 | 76.47549 | -594.49522  | -252.81478  | 342.29276   | 1 |
| 232 | H | 75.15742 | 84.43849 | 77.20624 | -1735.17426 | 2084.05705  | -263.71605  | 1 |
| 233 | C | 74.82280 | 84.13248 | 75.29596 | 595.23177   | -271.52487  | 442.22352   | 1 |
| 234 | N | 74.73495 | 83.15545 | 74.29690 | 585.53813   | -424.79750  | -105.81303  | 1 |
| 235 | H | 74.79048 | 82.14197 | 74.38697 | 959.88797   | 1327.56823  | -2177.11905 | 1 |
| 236 | H | 74.46797 | 83.33131 | 73.32846 | 1578.48647  | 16.27378    | -2220.76233 | 1 |
| 237 | N | 74.66503 | 85.52446 | 75.24748 | -452.17763  | -390.33541  | -421.51853  | 1 |
| 238 | H | 74.70675 | 86.22504 | 75.98613 | 470.26107   | 1974.25629  | -1817.92087 | 1 |
| 239 | H | 74.41059 | 86.02900 | 74.39767 | 1856.67307  | -1573.97321 | -1224.35416 | 1 |
| 240 | C | 75.69608 | 81.94805 | 81.34764 | -531.47271  | -581.45780  | -55.06206   | 1 |
| 241 | O | 76.04324 | 82.75189 | 82.18631 | -243.00837  | 192.73507   | 609.52485   | 1 |
| 242 | N | 74.51083 | 81.42471 | 81.11484 | 343.49288   | -644.25607  | 38.09164    | 1 |
| 243 | H | 74.48468 | 80.72685 | 80.37499 | -1691.16043 | -1535.97525 | -1484.73099 | 1 |
| 244 | C | 73.34140 | 81.65557 | 81.90374 | 542.66492   | 350.14337   | 454.42563   | 1 |
| 245 | H | 73.06657 | 80.60167 | 82.13184 | 1209.57979  | -2396.95920 | 463.86744   | 1 |
| 246 | C | 73.63244 | 82.51098 | 83.20179 | -737.14309  | 145.93010   | 242.71942   | 1 |
| 247 | H | 74.24392 | 83.41384 | 82.94540 | -1050.18303 | 159.36419   | -2509.06125 | 1 |
| 248 | C | 72.33103 | 82.94902 | 83.96038 | -706.77696  | -252.88343  | -245.16230  | 1 |
| 249 | H | 72.56878 | 83.61347 | 84.82427 | -1624.64039 | -1665.49085 | 1417.86935  | 1 |
| 250 | H | 71.63657 | 83.51769 | 83.28893 | 2566.10521  | 598.51109   | 693.22305   | 1 |
| 251 | H | 71.77004 | 82.07469 | 84.36424 | -1972.69758 | 107.10018   | -1876.34312 | 1 |
| 252 | C | 74.39740 | 81.56291 | 84.19144 | 412.85148   | 672.58832   | -27.69222   | 1 |
| 253 | H | 74.63533 | 82.07461 | 85.15293 | 1447.02277  | 1762.76533  | -1490.78944 | 1 |
| 254 | H | 73.79935 | 80.65311 | 84.43631 | 1320.77379  | -145.20455  | 2378.68491  | 1 |
| 255 | H | 75.36377 | 81.22365 | 83.74495 | -1512.10848 | 1470.52031  | 1724.75147  | 1 |
| 256 | C | 72.19776 | 82.30913 | 80.93177 | -607.11113  | 499.56689   | 73.73769    | 1 |
| 257 | O | 71.71910 | 83.39772 | 81.16889 | 357.97126   | 460.81534   | 356.68785   | 1 |
| 258 | N | 71.93190 | 81.48710 | 79.92032 | 536.55407   | -368.62270  | 332.76306   | 1 |
| 259 | H | 72.48467 | 80.63130 | 79.92938 | 524.38866   | 2297.69985  | 1367.20941  | 1 |
| 260 | C | 70.63942 | 81.40891 | 79.30762 | 46.50277    | -774.29190  | -147.97904  | 1 |
| 261 | H | 70.23705 | 80.44035 | 79.67158 | 1676.51875  | 1883.29066  | 1032.55549  | 1 |
| 262 | C | 69.67151 | 82.65000 | 79.62603 | -559.41456  | -34.19198   | -556.30433  | 1 |
| 263 | H | 70.26944 | 83.59781 | 79.58612 | -64.66664   | 395.18769   | 2695.05373  | 1 |
| 264 | H | 68.89408 | 82.74018 | 78.82781 | -2703.44278 | -60.40056   | 333.79418   | 1 |
| 265 | C | 68.99861 | 82.49675 | 80.96831 | -519.76435  | 377.31045   | 459.42366   | 1 |
| 266 | H | 69.77258 | 82.19884 | 81.71171 | -1746.74323 | 1667.50644  | -1261.73691 | 1 |
| 267 | C | 68.39936 | 83.82723 | 81.40734 | 570.95554   | 16.46261    | -545.27700  | 1 |
| 268 | H | 67.92748 | 83.75550 | 82.42128 | 2391.58273  | 28.05277    | -1305.07271 | 1 |

|     |   |          |          |          |             |             |             |   |
|-----|---|----------|----------|----------|-------------|-------------|-------------|---|
| 269 | H | 69.17878 | 84.63120 | 81.45748 | 175.75588   | 917.63458   | 2559.43867  | 1 |
| 270 | H | 67.60570 | 84.17601 | 80.69637 | -1063.97851 | -2155.34650 | 1283.00462  | 1 |
| 271 | C | 67.89651 | 81.44792 | 80.92790 | 193.76014   | 2.62946     | -765.53141  | 1 |
| 272 | H | 67.37219 | 81.35929 | 81.91421 | 507.39394   | -846.55087  | 2539.60089  | 1 |
| 273 | H | 67.11479 | 81.70205 | 80.16609 | 1337.57841  | 1818.19054  | 1526.01994  | 1 |
| 274 | H | 68.28928 | 80.43294 | 80.66774 | 1100.88635  | -1172.91350 | -2199.08909 | 1 |
| 275 | C | 70.88638 | 81.35659 | 77.72620 | -549.21115  | 475.64486   | -309.38218  | 1 |
| 276 | O | 71.89889 | 81.71844 | 77.18455 | 556.06106   | -390.37755  | -78.24250   | 1 |
| 277 | O | 69.76577 | 80.94689 | 76.95415 | -572.27940  | -310.19032  | -209.75862  | 1 |
| 278 | H | 69.13500 | 80.74561 | 77.69669 | -1380.08193 | 2212.14486  | 790.85944   | 1 |

Listing 121: C00121.xmolout

|    |   |          |          |          |             |             |             |        |          |
|----|---|----------|----------|----------|-------------|-------------|-------------|--------|----------|
| 1  |   | 276      |          |          |             |             |             |        |          |
| 2  |   | 150.0000 | 150.0000 | 150.0000 | 0.0000      | 0.0000      | 0.0000***** | 2.7750 | 11100    |
|    |   | 0.2500   | 300.00   | 0.00     | 0.00        | 0.00        | -1293.3649  | 0.0000 | 300.0000 |
| 3  | H | 56.46556 | 75.37115 | 71.76407 | -2043.14101 | -1757.64893 | 399.89339   |        | 1        |
| 4  | N | 57.28378 | 75.20829 | 72.35232 | 426.75047   | 490.45733   | -334.42467  |        | 1        |
| 5  | H | 57.51930 | 74.21291 | 72.19371 | 442.25559   | -1110.30854 | -2448.52907 |        | 1        |
| 6  | C | 58.37126 | 76.05840 | 72.05387 | 415.32972   | -666.39213  | 83.73172    |        | 1        |
| 7  | H | 57.99882 | 76.86376 | 71.38380 | 879.32219   | 2491.00447  | 667.35213   |        | 1        |
| 8  | C | 58.99808 | 76.62929 | 73.42709 | 31.35357    | 477.41777   | 628.23362   |        | 1        |
| 9  | H | 59.34904 | 75.77774 | 74.05691 | 1168.38489  | 2240.25337  | -1019.71136 |        | 1        |
| 10 | H | 59.90170 | 77.24876 | 73.21247 | -360.43770  | 2534.90498  | 931.67112   |        | 1        |
| 11 | C | 57.96612 | 77.42505 | 74.18002 | 463.18208   | 512.70242   | -382.34388  |        | 1        |
| 12 | H | 57.07372 | 76.77669 | 74.33391 | 1725.29117  | 1863.52247  | -987.07854  |        | 1        |
| 13 | C | 58.51791 | 77.83176 | 75.54152 | 710.42801   | -144.27427  | -313.15367  |        | 1        |
| 14 | H | 57.75795 | 78.38893 | 76.14739 | 364.20195   | -1033.13725 | 2494.72524  |        | 1        |
| 15 | H | 58.83543 | 76.94120 | 76.14286 | 2567.61904  | 335.80679   | 847.48802   |        | 1        |
| 16 | H | 59.41290 | 78.49814 | 75.43946 | -2587.99029 | 680.92867   | -512.16411  |        | 1        |
| 17 | C | 57.53612 | 78.66799 | 73.41324 | 268.17616   | 741.64379   | -40.42634   |        | 1        |
| 18 | H | 56.80523 | 79.28198 | 74.00038 | 1283.54314  | -1945.37420 | -1411.27812 |        | 1        |
| 19 | H | 58.40924 | 79.32877 | 73.17544 | -1258.57796 | 1317.15249  | -2026.02085 |        | 1        |
| 20 | H | 57.04205 | 78.40602 | 72.44250 | -2502.84526 | 909.80597   | 575.92391   |        | 1        |
| 21 | C | 59.40007 | 75.01699 | 71.36064 | 619.36578   | -458.64843  | -172.09273  |        | 1        |
| 22 | O | 59.12738 | 73.82173 | 71.33198 | -81.40433   | 433.87611   | 522.34594   |        | 1        |
| 23 | N | 60.50831 | 75.62513 | 70.95287 | 175.23996   | -622.20190  | 341.55523   |        | 1        |
| 24 | H | 60.59199 | 76.63359 | 71.08097 | -876.57256  | -303.22879  | -2561.90213 |        | 1        |
| 25 | C | 61.59746 | 74.83885 | 70.50008 | -571.88214  | -534.10783  | -106.15033  |        | 1        |
| 26 | H | 61.16955 | 73.81739 | 70.36533 | -2713.20841 | -16.25800   | -248.80809  |        | 1        |
| 27 | C | 62.20162 | 75.53783 | 69.18737 | 166.60354   | 288.16399   | -716.09568  |        | 1        |
| 28 | H | 62.66528 | 76.51565 | 69.49993 | -2097.85574 | 1636.78449  | -586.18044  |        | 1        |
| 29 | O | 61.25549 | 75.84511 | 68.15053 | -317.80580  | -363.38227  | 484.43082   |        | 1        |
| 30 | H | 61.31440 | 76.82198 | 68.12098 | 1863.74748  | -1451.84923 | 1357.29467  |        | 1        |
| 31 | C | 63.34473 | 74.53575 | 68.78407 | 503.80731   | 517.99032   | 318.51606   |        | 1        |
| 32 | H | 63.93599 | 74.92058 | 67.92071 | 640.61020   | -2157.10410 | -1536.29104 |        | 1        |
| 33 | H | 64.05923 | 74.36422 | 69.62621 | 1687.88455  | 465.60692   | 2087.56452  |        | 1        |
| 34 | H | 62.93154 | 73.54426 | 68.48532 | -1293.07895 | -1899.88581 | -1463.57452 |        | 1        |
| 35 | C | 62.79685 | 74.94535 | 71.61194 | -153.07550  | -733.68902  | 248.70981   |        | 1        |
| 36 | O | 63.66763 | 75.74943 | 71.40194 | 186.15459   | -480.78787  | -449.34387  |        | 1        |
| 37 | N | 62.60893 | 74.15453 | 72.68125 | -487.53139  | 543.18517   | 42.03850    |        | 1        |
| 38 | C | 63.64723 | 73.98395 | 73.64644 | -699.35871  | 69.34393    | 360.10701   |        | 1        |
| 39 | H | 64.42905 | 74.72312 | 73.34943 | 2.81126     | -221.99807  | -2715.58072 |        | 1        |
| 40 | C | 62.83942 | 74.31628 | 74.97665 | -507.46439  | -592.59194  | 122.07761   |        | 1        |
| 41 | H | 63.36907 | 74.01947 | 75.90977 | -1975.08116 | 525.87560   | -1801.71556 |        | 1        |
| 42 | H | 62.63240 | 75.40608 | 75.06139 | 1588.27743  | -1913.22100 | 1113.83566  |        | 1        |
| 43 | C | 61.52990 | 73.50979 | 74.71955 | -613.62442  | -457.55993  | -194.14490  |        | 1        |
| 44 | H | 61.68774 | 72.41963 | 74.88542 | 1707.54637  | -721.27992  | 1996.92523  |        | 1        |
| 45 | H | 60.68505 | 73.81257 | 75.37812 | 758.23357   | 2100.81767  | 1560.55011  |        | 1        |
| 46 | C | 61.27509 | 73.84154 | 73.18748 | -352.41524  | 704.96076   | 49.21465    |        | 1        |
| 47 | H | 60.85543 | 73.00186 | 72.58158 | 1714.76886  | -2070.42778 | 443.35792   |        | 1        |
| 48 | H | 60.67323 | 74.76126 | 73.00283 | 1224.15040  | 1801.50881  | 1636.97633  |        | 1        |

|     |   |          |          |          |             |             |             |   |
|-----|---|----------|----------|----------|-------------|-------------|-------------|---|
| 49  | C | 64.17254 | 72.42585 | 73.59041 | 566.85117   | 537.05831   | 117.62814   | 1 |
| 50  | O | 64.33068 | 71.88075 | 72.52281 | -550.26779  | -406.08867  | 4.21666     | 1 |
| 51  | N | 64.50789 | 72.00960 | 74.80273 | 566.34832   | -425.77725  | 180.18749   | 1 |
| 52  | H | 64.32145 | 72.65176 | 75.57139 | 644.44502   | 2646.80550  | -52.73430   | 1 |
| 53  | C | 64.88947 | 70.67730 | 75.11627 | 612.34801   | -281.48662  | 411.56221   | 1 |
| 54  | H | 64.76705 | 70.62645 | 76.22097 | 1667.23498  | -1490.75142 | 1556.16753  | 1 |
| 55  | C | 63.89368 | 69.66584 | 74.37778 | -714.45746  | -175.43074  | 286.98927   | 1 |
| 56  | H | 64.00831 | 69.79587 | 73.26515 | -787.09484  | 1763.03619  | -1922.46060 | 1 |
| 57  | O | 62.49761 | 69.87313 | 74.67082 | -429.46514  | 516.51932   | -128.40526  | 1 |
| 58  | H | 62.16184 | 70.12551 | 73.78777 | 1981.82785  | 436.16847   | -1818.18182 | 1 |
| 59  | C | 64.45284 | 68.25621 | 74.79101 | 630.79189   | -468.94448  | 76.03230    | 1 |
| 60  | H | 63.84724 | 67.43229 | 74.34665 | -1775.71861 | 2062.30353  | 131.89849   | 1 |
| 61  | H | 65.50751 | 68.10648 | 74.45600 | -1855.14608 | 88.94118    | 1993.53760  | 1 |
| 62  | H | 64.43376 | 68.11845 | 75.89740 | -1504.82350 | -780.94249  | -2132.90992 | 1 |
| 63  | C | 66.45684 | 70.47248 | 74.71472 | 288.57638   | 618.62814   | -397.00270  | 1 |
| 64  | O | 67.07002 | 69.54215 | 75.18568 | 321.70495   | -185.26452  | 574.37218   | 1 |
| 65  | N | 66.89335 | 71.37206 | 73.83057 | -447.05792  | -446.53431  | 367.76425   | 1 |
| 66  | H | 66.24318 | 72.09514 | 73.50955 | 350.31316   | 1975.63644  | -1843.31522 | 1 |
| 67  | C | 68.28899 | 71.66750 | 73.86443 | -511.23061  | 374.03917   | -471.51480  | 1 |
| 68  | H | 68.72735 | 71.02845 | 74.66557 | 2234.79579  | -898.70890  | -1273.45190 | 1 |
| 69  | C | 68.76643 | 71.21405 | 72.40237 | 529.53781   | -159.34528  | 563.72604   | 1 |
| 70  | H | 69.87912 | 71.33619 | 72.32588 | 654.59388   | 2347.94251  | 1217.51488  | 1 |
| 71  | H | 68.56648 | 70.10855 | 72.35932 | -1526.55661 | 2103.42026  | 817.87394   | 1 |
| 72  | O | 68.13113 | 71.85884 | 71.26822 | -554.84278  | 14.12789    | 399.58769   | 1 |
| 73  | H | 67.19846 | 71.64476 | 71.47025 | 1297.06236  | 2061.84854  | 1220.68812  | 1 |
| 74  | C | 68.39616 | 73.26335 | 74.15707 | -662.15484  | -412.13544  | 123.62687   | 1 |
| 75  | O | 67.66041 | 74.08537 | 73.67386 | -540.01537  | -317.05804  | 274.91456   | 1 |
| 76  | N | 69.36112 | 73.45452 | 75.08389 | -202.76299  | -690.00100  | -131.49145  | 1 |
| 77  | H | 69.90918 | 72.61337 | 75.27331 | -702.62132  | -2617.37191 | 281.70413   | 1 |
| 78  | C | 70.02269 | 74.77369 | 75.17930 | -491.73914  | 576.34187   | 222.73509   | 1 |
| 79  | H | 69.77912 | 75.20263 | 74.17888 | 1977.17978  | -1823.58850 | -434.68928  | 1 |
| 80  | C | 69.42235 | 75.56996 | 76.31653 | -649.50797  | -328.66843  | 306.11224   | 1 |
| 81  | H | 69.76917 | 75.11411 | 77.27136 | 2075.07803  | 1452.16490  | -1004.45904 | 1 |
| 82  | C | 69.86461 | 77.02314 | 76.28766 | -615.18735  | -489.99689  | -70.96352   | 1 |
| 83  | H | 69.50909 | 77.58222 | 77.19567 | -1226.32661 | -1724.38906 | -1716.47170 | 1 |
| 84  | H | 70.98526 | 77.12440 | 76.25067 | 2381.64273  | -969.84735  | 900.46860   | 1 |
| 85  | H | 69.45646 | 77.55953 | 75.38848 | 2122.74991  | 1702.23946  | -141.36228  | 1 |
| 86  | C | 67.90361 | 75.51307 | 76.31451 | -501.86074  | -479.61276  | -376.42482  | 1 |
| 87  | H | 67.45976 | 76.07086 | 77.18359 | 993.79261   | -2246.95401 | -1177.81305 | 1 |
| 88  | H | 67.47975 | 75.95886 | 75.37306 | 42.71279    | -626.15391  | -2651.37258 | 1 |
| 89  | H | 67.53393 | 74.45270 | 76.36523 | -2026.39012 | -1590.33709 | -887.82922  | 1 |
| 90  | C | 71.60733 | 74.36446 | 75.36152 | -672.89153  | 382.57394   | -156.34072  | 1 |
| 91  | O | 72.09678 | 73.54206 | 74.62178 | 410.04627   | 221.86223   | 500.35950   | 1 |
| 92  | N | 72.21413 | 75.02478 | 76.33629 | -378.11782  | -443.79414  | -441.10984  | 1 |
| 93  | H | 71.72533 | 75.73586 | 76.87647 | 2404.15973  | -568.14894  | 1149.30085  | 1 |
| 94  | C | 73.63155 | 74.80287 | 76.45565 | -544.54484  | 466.16019   | 331.29119   | 1 |
| 95  | H | 73.69167 | 73.69179 | 76.46403 | -1409.80988 | -170.17955  | 2325.32679  | 1 |
| 96  | C | 74.31679 | 75.40434 | 75.13660 | -184.48284  | 116.78282   | -758.89137  | 1 |
| 97  | H | 73.88103 | 74.91656 | 74.22941 | 1893.78641  | 1861.14652  | 611.04528   | 1 |
| 98  | H | 74.10621 | 76.49584 | 75.03793 | -2170.79665 | -974.19311  | 1327.50117  | 1 |
| 99  | C | 75.78919 | 75.13564 | 75.27687 | 389.51668   | 672.81878   | -138.49152  | 1 |
| 100 | H | 76.17439 | 75.62723 | 76.19966 | 510.64577   | 1933.03327  | 1851.02484  | 1 |
| 101 | H | 75.95446 | 74.05290 | 75.47393 | -2302.30869 | -1105.72939 | -948.89774  | 1 |
| 102 | C | 76.65396 | 75.55754 | 74.10712 | -559.93427  | -126.34590  | 542.30857   | 1 |
| 103 | O | 77.84615 | 75.45724 | 74.31656 | -670.36003  | -111.83166  | 76.36448    | 1 |
| 104 | N | 76.06634 | 75.97937 | 72.92416 | -216.06729  | -537.07037  | 446.51379   | 1 |
| 105 | H | 75.07696 | 75.83597 | 72.69937 | -1251.96487 | 1074.12894  | -2168.52500 | 1 |
| 106 | H | 76.54943 | 75.89020 | 72.02391 | -2451.83023 | -720.73851  | 944.84612   | 1 |
| 107 | C | 74.17012 | 75.52022 | 77.79190 | 546.24052   | -563.88337  | -85.11809   | 1 |
| 108 | O | 74.74793 | 76.59306 | 77.69872 | 71.70702    | -307.40463  | 606.69673   | 1 |
| 109 | N | 73.92506 | 74.80603 | 78.88956 | 479.90863   | -504.50129  | 222.86849   | 1 |
| 110 | C | 74.14610 | 75.36722 | 80.18917 | 75.51268    | -600.91904  | 506.73700   | 1 |

|     |   |          |          |          |             |             |             |   |
|-----|---|----------|----------|----------|-------------|-------------|-------------|---|
| 111 | H | 74.12174 | 76.47202 | 80.04612 | -2033.61562 | 1795.30103  | 254.89480   | 1 |
| 112 | C | 72.93128 | 74.75535 | 81.00551 | 523.79067   | 517.99274   | 284.45581   | 1 |
| 113 | H | 73.10167 | 74.77313 | 82.10561 | 1599.61665  | -1127.00911 | 1895.98173  | 1 |
| 114 | H | 71.98928 | 75.31711 | 80.81581 | -1881.83093 | 1275.82488  | -1501.55016 | 1 |
| 115 | C | 72.85422 | 73.31129 | 80.41585 | -600.05639  | -404.05026  | 316.64485   | 1 |
| 116 | H | 73.64132 | 72.65863 | 80.85464 | -2597.05260 | 496.36221   | 657.73249   | 1 |
| 117 | H | 71.88140 | 72.80419 | 80.60734 | -1666.24518 | 1294.38985  | -1723.90591 | 1 |
| 118 | C | 73.11616 | 73.58840 | 78.87659 | 493.57570   | -129.95376  | -602.56394  | 1 |
| 119 | H | 73.68880 | 72.79332 | 78.34530 | -1469.08415 | -637.84797  | 2204.22581  | 1 |
| 120 | H | 72.20427 | 73.83819 | 78.28506 | -1038.97840 | 1068.88701  | -2280.71789 | 1 |
| 121 | C | 75.53906 | 74.86611 | 80.88541 | 188.88100   | 241.05089   | -727.87821  | 1 |
| 122 | O | 75.62210 | 74.87039 | 82.09202 | 531.88613   | -49.19943   | 427.07960   | 1 |
| 123 | N | 76.54459 | 74.60785 | 80.01242 | 708.14833   | 26.93417    | -179.73509  | 1 |
| 124 | H | 76.12309 | 74.61110 | 79.08315 | -2232.69501 | -1179.09831 | 1023.94816  | 1 |
| 125 | C | 77.62307 | 73.71248 | 80.44832 | -738.32412  | 259.92548   | 104.42456   | 1 |
| 126 | H | 77.36930 | 73.51299 | 81.51728 | 2028.89123  | 1260.02983  | 1311.33324  | 1 |
| 127 | C | 77.62923 | 72.48023 | 79.57361 | -258.65678  | -345.52513  | 661.28459   | 1 |
| 128 | H | 77.68592 | 72.81012 | 78.51188 | -1826.06090 | -1801.46097 | -918.64554  | 1 |
| 129 | C | 78.83429 | 71.59925 | 79.85598 | -541.23400  | 531.92970   | -218.41428  | 1 |
| 130 | H | 78.84191 | 70.68061 | 79.20788 | 1311.73218  | -2219.18200 | 882.19023   | 1 |
| 131 | H | 79.79878 | 72.14460 | 79.66921 | -1048.71298 | 1223.58118  | -2196.97971 | 1 |
| 132 | H | 78.85417 | 71.25580 | 80.92651 | 419.06414   | 1903.92898  | 1903.44670  | 1 |
| 133 | C | 76.35621 | 71.66698 | 79.73400 | -423.86431  | 152.66566   | -648.55262  | 1 |
| 134 | H | 76.33193 | 70.78775 | 79.03326 | 105.68386   | -2342.50080 | 1387.51238  | 1 |
| 135 | H | 76.25499 | 71.26323 | 80.77885 | -1695.63603 | -1484.73621 | -1531.02793 | 1 |
| 136 | H | 75.44263 | 72.28864 | 79.52915 | -1853.57121 | -487.39031  | 1936.59343  | 1 |
| 137 | C | 79.09460 | 74.48482 | 80.30210 | 539.71428   | -510.58232  | 267.58633   | 1 |
| 138 | O | 79.90596 | 74.34249 | 81.18784 | -15.93758   | -278.34085  | -624.49402  | 1 |
| 139 | N | 79.26509 | 75.05064 | 79.11226 | -676.81886  | 12.05292    | 276.17960   | 1 |
| 140 | H | 78.40381 | 75.02164 | 78.56834 | -1694.44250 | -373.84189  | -2100.66098 | 1 |
| 141 | C | 80.27486 | 76.01913 | 78.86113 | 412.33078   | -664.70360  | 108.35451   | 1 |
| 142 | H | 79.95765 | 76.47104 | 77.89720 | 1765.77476  | 1294.44366  | 1621.76594  | 1 |
| 143 | C | 80.22564 | 77.05264 | 80.05911 | -179.66635  | -721.95667  | -264.73915  | 1 |
| 144 | H | 79.18520 | 77.42312 | 80.20531 | -607.34922  | 2587.87032  | -598.10018  | 1 |
| 145 | H | 80.49693 | 76.54398 | 81.01395 | -359.69332  | -1479.13954 | -2259.74260 | 1 |
| 146 | C | 81.19811 | 78.24280 | 79.76738 | -240.01076  | 616.02425   | 431.85322   | 1 |
| 147 | H | 82.24134 | 77.87390 | 79.61143 | -1359.17131 | 782.54425   | 2227.99181  | 1 |
| 148 | H | 80.91412 | 78.76324 | 78.82109 | -820.36667  | 85.81767    | -2596.78715 | 1 |
| 149 | C | 81.15006 | 79.23821 | 80.99545 | -513.07015  | 236.18570   | -551.87280  | 1 |
| 150 | H | 80.12906 | 79.66451 | 81.12511 | 1816.11944  | -1183.11722 | -1650.94321 | 1 |
| 151 | H | 81.38084 | 78.70816 | 81.94807 | -1800.04429 | -1361.53473 | 1526.34643  | 1 |
| 152 | C | 82.18990 | 80.34883 | 80.71807 | 726.08972   | -253.19732  | -179.64713  | 1 |
| 153 | H | 83.23846 | 79.99355 | 80.66451 | 1224.27271  | -456.51798  | -2390.90304 | 1 |
| 154 | H | 81.96240 | 80.98594 | 79.84032 | 1206.40339  | -1150.93514 | -2154.90344 | 1 |
| 155 | N | 82.17507 | 81.33070 | 81.93775 | 329.70796   | -633.68968  | -155.67358  | 1 |
| 156 | H | 82.86325 | 82.13618 | 81.88308 | 1348.31305  | 1938.76845  | 1359.00643  | 1 |
| 157 | H | 81.26808 | 81.84471 | 82.13708 | 2096.92035  | 1446.54551  | -966.48890  | 1 |
| 158 | H | 82.41051 | 80.92188 | 82.88866 | -1197.07217 | -2303.53719 | 827.28733   | 1 |
| 159 | C | 81.78264 | 75.38662 | 78.76940 | -378.01186  | -556.17301  | -413.96481  | 1 |
| 160 | O | 82.70366 | 76.12622 | 78.49260 | -409.44433  | -307.55053  | -453.30833  | 1 |
| 161 | N | 81.83683 | 74.07846 | 78.99515 | -429.02477  | 524.70884   | 274.08502   | 1 |
| 162 | H | 80.95176 | 73.65790 | 79.27217 | 1706.34263  | -1425.96036 | 1574.38926  | 1 |
| 163 | C | 83.12716 | 73.50259 | 79.26962 | -45.25864   | -626.22952  | 478.93267   | 1 |
| 164 | H | 83.64500 | 74.24587 | 79.91558 | 1988.63164  | 570.90773   | 1772.87287  | 1 |
| 165 | C | 82.87370 | 72.09907 | 79.93482 | 551.77128   | -20.49526   | -564.54996  | 1 |
| 166 | H | 82.30644 | 72.19647 | 80.88853 | 1434.61535  | -1753.10253 | 1513.99471  | 1 |
| 167 | H | 82.24206 | 71.46802 | 79.26917 | -714.67738  | 1819.09770  | 1898.36494  | 1 |
| 168 | C | 84.27434 | 71.43378 | 80.16721 | 446.99263   | -555.77305  | 338.97221   | 1 |
| 169 | H | 84.88196 | 71.48069 | 79.23566 | 1953.68466  | 1892.25957  | -161.67766  | 1 |
| 170 | H | 84.85915 | 71.98103 | 80.93964 | -403.03785  | 2688.07032  | -188.43591  | 1 |
| 171 | C | 84.03258 | 69.93050 | 80.59062 | 567.86262   | 335.74681   | 434.04421   | 1 |
| 172 | H | 83.52388 | 69.87242 | 81.58034 | -1080.02275 | 1568.26081  | -1948.78900 | 1 |

|     |   |          |          |          |             |             |             |   |
|-----|---|----------|----------|----------|-------------|-------------|-------------|---|
| 173 | H | 83.35077 | 69.42385 | 79.86947 | -919.54108  | 2111.34692  | 1456.13463  | 1 |
| 174 | C | 85.40380 | 69.21558 | 80.62763 | 195.81897   | 173.33862   | -745.11536  | 1 |
| 175 | H | 85.93110 | 69.17869 | 79.65337 | 1405.67949  | -2301.21089 | -390.08113  | 1 |
| 176 | H | 86.09373 | 69.57563 | 81.41658 | -940.37328  | -1118.32446 | 2299.72133  | 1 |
| 177 | N | 85.13793 | 67.71381 | 80.98316 | 319.26422   | 656.36007   | -42.02424   | 1 |
| 178 | H | 85.99863 | 67.09526 | 81.02438 | 1961.03633  | 619.91968   | 1787.09422  | 1 |
| 179 | H | 84.68989 | 67.50988 | 81.92358 | 854.14343   | -2156.80752 | 1429.08711  | 1 |
| 180 | H | 84.51855 | 67.16251 | 80.32030 | 1237.02905  | -1378.50857 | -1998.28500 | 1 |
| 181 | C | 83.90079 | 73.26330 | 77.84595 | 532.53319   | -268.57236  | 517.55729   | 1 |
| 182 | O | 83.51041 | 72.43035 | 77.03247 | 266.16714   | -290.73804  | -558.88002  | 1 |
| 183 | N | 84.97948 | 74.01009 | 77.83846 | -226.25352  | 640.49678   | -270.32839  | 1 |
| 184 | H | 85.07999 | 74.64083 | 78.63377 | 2007.69063  | -1035.27229 | 1523.50231  | 1 |
| 185 | C | 85.95837 | 74.03550 | 76.81767 | -540.76542  | -573.33303  | 49.50000    | 1 |
| 186 | H | 86.76857 | 74.66261 | 77.25215 | -2374.20950 | -1036.76023 | 843.75774   | 1 |
| 187 | C | 86.42353 | 72.53946 | 76.47689 | -77.09082   | 666.87422   | -415.84136  | 1 |
| 188 | H | 85.52131 | 71.93549 | 76.17447 | -985.81834  | 617.19825   | 2463.91927  | 1 |
| 189 | O | 87.04821 | 71.80684 | 77.54270 | 293.29899   | -391.65602  | -477.80926  | 1 |
| 190 | H | 86.43560 | 71.04739 | 77.63188 | 2528.72714  | -681.76262  | -751.27122  | 1 |
| 191 | C | 87.30096 | 72.82890 | 75.20415 | 252.47363   | -605.14473  | 440.05134   | 1 |
| 192 | H | 87.60026 | 71.88897 | 74.68495 | -2052.65063 | 1456.49051  | -1043.51830 | 1 |
| 193 | H | 86.74773 | 73.46389 | 74.46406 | -2152.98800 | -1661.97574 | -161.70652  | 1 |
| 194 | H | 88.23673 | 73.37355 | 75.47035 | -473.12726  | -1584.27339 | 2165.61725  | 1 |
| 195 | C | 85.36129 | 74.69470 | 75.43566 | 360.36307   | 488.46713   | 505.10056   | 1 |
| 196 | O | 85.98894 | 75.57589 | 74.89859 | -200.08817  | -528.03552  | -385.82850  | 1 |
| 197 | N | 84.27849 | 74.05970 | 75.00032 | -597.54095  | -226.44775  | 355.20479   | 1 |
| 198 | H | 83.83157 | 73.29639 | 75.56800 | 2179.23655  | -1300.70981 | -991.33835  | 1 |
| 199 | C | 83.61621 | 74.62533 | 73.88761 | -687.68921  | 297.39807   | -249.45179  | 1 |
| 200 | H | 84.20726 | 75.51152 | 73.55445 | -349.16256  | -2467.37713 | -1101.72831 | 1 |
| 201 | C | 83.45551 | 73.47623 | 72.77404 | 672.47345   | 361.54328   | -201.62880  | 1 |
| 202 | H | 83.03019 | 72.55308 | 73.22920 | 1541.41502  | 582.18425   | 2169.97026  | 1 |
| 203 | H | 82.73911 | 73.81883 | 71.99176 | -2534.67717 | 60.25153    | 997.72295   | 1 |
| 204 | C | 84.82785 | 73.19646 | 72.15306 | 574.26774   | -389.43119  | -377.02542  | 1 |
| 205 | C | 85.36930 | 74.11971 | 71.20730 | 688.82679   | -287.33580  | -257.96133  | 1 |
| 206 | H | 84.81621 | 75.03623 | 70.92995 | 331.14182   | 1470.38163  | 2269.80013  | 1 |
| 207 | C | 85.55639 | 72.02411 | 72.52032 | -383.52382  | -675.04808  | 144.24917   | 1 |
| 208 | H | 85.14766 | 71.31831 | 73.26566 | 4.09847     | 1517.59662  | 2262.86397  | 1 |
| 209 | C | 86.60841 | 73.83643 | 70.63560 | -134.76730  | 428.45285   | -649.50303  | 1 |
| 210 | H | 87.02461 | 74.54716 | 69.89989 | -903.23433  | 1600.49020  | 2011.53387  | 1 |
| 211 | C | 86.79165 | 71.78333 | 71.91491 | -335.53281  | -615.00040  | -364.39058  | 1 |
| 212 | H | 87.34162 | 70.86831 | 72.19623 | 1596.45398  | -1369.33862 | 1732.02659  | 1 |
| 213 | C | 87.36123 | 72.66813 | 70.95285 | 585.48547   | -340.24194  | -406.23938  | 1 |
| 214 | O | 88.61306 | 72.42999 | 70.32870 | -419.15649  | -173.04408  | -511.94141  | 1 |
| 215 | H | 88.84050 | 71.56155 | 70.73757 | -1071.84350 | 1559.71507  | -1960.13012 | 1 |
| 216 | C | 82.07118 | 74.92754 | 74.33446 | 291.41878   | -183.13091  | 710.72246   | 1 |
| 217 | O | 81.48180 | 74.24895 | 75.14421 | 379.87695   | 523.47396   | -222.23622  | 1 |
| 218 | N | 81.59448 | 75.90789 | 73.57329 | 564.30591   | 373.09380   | 277.24371   | 1 |
| 219 | H | 82.19442 | 76.38543 | 72.90207 | -120.59931  | -2436.07824 | -1214.35098 | 1 |
| 220 | C | 80.25739 | 76.34328 | 73.84392 | 404.07514   | -299.37480  | 608.84009   | 1 |
| 221 | H | 79.79581 | 75.37126 | 74.18891 | -1071.07882 | -841.69025  | 2359.66467  | 1 |
| 222 | C | 80.35280 | 77.37492 | 75.04534 | -683.12807  | 68.71770    | -390.13096  | 1 |
| 223 | H | 81.14712 | 77.06097 | 75.76039 | 2068.88918  | 1596.58590  | 770.89603   | 1 |
| 224 | H | 80.65761 | 78.38518 | 74.69137 | 1379.86429  | 2342.49779  | -179.85638  | 1 |
| 225 | C | 78.96060 | 77.40514 | 75.75069 | -176.39967  | 537.49466   | 550.97268   | 1 |
| 226 | H | 78.13787 | 77.60427 | 75.02662 | -396.28051  | 1942.22168  | 1869.33314  | 1 |
| 227 | H | 78.72454 | 76.41168 | 76.19747 | -94.44700   | 586.00678   | -2659.20016 | 1 |
| 228 | C | 79.02144 | 78.54930 | 76.86526 | -291.69381  | -718.18079  | -150.72929  | 1 |
| 229 | H | 79.86855 | 78.48675 | 77.59924 | -2303.38776 | 1089.76242  | 964.62032   | 1 |
| 230 | H | 78.98608 | 79.59798 | 76.47417 | 884.16729   | 2568.80533  | -207.74283  | 1 |
| 231 | N | 77.83458 | 78.30109 | 77.56808 | -594.49522  | -252.81478  | 342.29276   | 1 |
| 232 | H | 77.20247 | 77.62298 | 77.17049 | -1735.17426 | 2084.05705  | -263.71605  | 1 |
| 233 | C | 77.50121 | 78.87252 | 78.65728 | 595.23177   | -271.52487  | 442.22352   | 1 |
| 234 | N | 78.37377 | 79.82511 | 79.20271 | 585.53813   | -424.79750  | -105.81303  | 1 |

|     |   |          |          |          |             |             |             |   |
|-----|---|----------|----------|----------|-------------|-------------|-------------|---|
| 235 | H | 79.26103 | 80.16810 | 78.83881 | 959.88797   | 1327.56823  | -2177.11905 | 1 |
| 236 | H | 78.19963 | 80.36121 | 80.05250 | 1578.48647  | 16.27378    | -2220.76233 | 1 |
| 237 | N | 76.26486 | 78.40482 | 79.10455 | -452.17763  | -390.33541  | -421.51853  | 1 |
| 238 | H | 75.64223 | 77.69162 | 78.64530 | 470.26107   | 1974.25629  | -1817.92087 | 1 |
| 239 | H | 75.82850 | 78.74651 | 79.96721 | 1856.67307  | -1573.97321 | -1224.35416 | 1 |
| 240 | C | 79.64946 | 76.88867 | 72.43129 | -531.47271  | -581.45780  | -55.06206   | 1 |
| 241 | O | 79.65177 | 76.19475 | 71.44369 | -243.00837  | 192.73507   | 609.52485   | 1 |
| 242 | N | 79.22687 | 78.19584 | 72.50229 | 343.49288   | -644.25607  | 38.09164    | 1 |
| 243 | H | 79.19505 | 78.37363 | 73.50773 | -1691.16043 | -1535.97525 | -1484.73099 | 1 |
| 244 | C | 78.06317 | 78.57310 | 71.65606 | 542.66492   | 350.14337   | 454.42563   | 1 |
| 245 | H | 77.32099 | 77.75906 | 71.81704 | 1209.57979  | -2396.95920 | 463.86744   | 1 |
| 246 | C | 77.56989 | 79.92325 | 72.11569 | -737.14309  | 145.93010   | 242.71942   | 1 |
| 247 | H | 78.45171 | 80.59760 | 72.20105 | -1050.18303 | 159.36419   | -2509.06125 | 1 |
| 248 | C | 76.60789 | 80.53274 | 71.11019 | -706.77696  | -252.88343  | -245.16230  | 1 |
| 249 | H | 76.31359 | 81.58062 | 71.39292 | -1624.64039 | -1665.49085 | 1417.86935  | 1 |
| 250 | H | 77.06234 | 80.57379 | 70.07905 | 2566.10521  | 598.51109   | 693.22305   | 1 |
| 251 | H | 75.66250 | 79.92994 | 71.02607 | -1972.69758 | 107.10018   | -1876.34312 | 1 |
| 252 | C | 76.90333 | 79.85539 | 73.47913 | 412.85148   | 672.58832   | -27.69222   | 1 |
| 253 | H | 76.49737 | 80.85570 | 73.79360 | 1447.02277  | 1762.76533  | -1490.78944 | 1 |
| 254 | H | 76.04277 | 79.13091 | 73.48082 | 1320.77379  | -145.20455  | 2378.68491  | 1 |
| 255 | H | 77.61738 | 79.52138 | 74.27983 | -1512.10848 | 1470.52031  | 1724.75147  | 1 |
| 256 | C | 78.58297 | 78.63963 | 70.10121 | -607.11113  | 499.56689   | 73.73769    | 1 |
| 257 | O | 77.77270 | 78.58667 | 69.20086 | 357.97126   | 460.81534   | 356.68785   | 1 |
| 258 | N | 79.88632 | 78.90277 | 70.01409 | 536.55407   | -368.62270  | 332.76306   | 1 |
| 259 | H | 80.39901 | 78.87962 | 70.89663 | 524.38866   | 2297.69985  | 1367.20941  | 1 |
| 260 | C | 80.52635 | 78.53703 | 68.79578 | 46.50277    | -774.29190  | -147.97904  | 1 |
| 261 | H | 79.74915 | 77.97857 | 68.22630 | 1676.51875  | 1883.29066  | 1032.55549  | 1 |
| 262 | C | 81.01112 | 79.88043 | 68.04472 | -559.41456  | -34.19198   | -556.30433  | 1 |
| 263 | H | 81.82907 | 80.35266 | 68.63936 | -64.66664   | 395.18769   | 2695.05373  | 1 |
| 264 | H | 81.46021 | 79.62978 | 67.05411 | -2703.44278 | -60.40056   | 333.79418   | 1 |
| 265 | C | 79.86090 | 80.84080 | 67.89183 | -519.76435  | 377.31045   | 459.42366   | 1 |
| 266 | H | 79.39514 | 80.98610 | 68.89341 | -1746.74323 | 1667.50644  | -1261.73691 | 1 |
| 267 | C | 80.35941 | 82.19117 | 67.39186 | 570.95554   | 16.46261    | -545.27700  | 1 |
| 268 | H | 79.52272 | 82.92981 | 67.29266 | 2391.58273  | 28.05277    | -1305.07271 | 1 |
| 269 | H | 81.11487 | 82.63664 | 68.08926 | 175.75588   | 917.63458   | 2559.43867  | 1 |
| 270 | H | 80.84625 | 82.10444 | 66.38666 | -1063.97851 | -2155.34650 | 1283.00462  | 1 |
| 271 | C | 78.79791 | 80.30005 | 66.94759 | 193.76014   | 2.62946     | -765.53141  | 1 |
| 272 | H | 78.02249 | 81.07403 | 66.71123 | 507.39394   | -846.55087  | 2539.60089  | 1 |
| 273 | H | 79.23671 | 79.96117 | 65.97362 | 1337.57841  | 1818.19054  | 1526.01994  | 1 |
| 274 | H | 78.25672 | 79.41947 | 67.41004 | 1100.88635  | -1172.91350 | -2199.08909 | 1 |
| 275 | C | 81.84955 | 77.70133 | 69.18582 | -549.21115  | 475.64486   | -309.38218  | 1 |
| 276 | O | 82.47732 | 77.89247 | 70.19468 | 556.06106   | -390.37755  | -78.24250   | 1 |
| 277 | O | 82.34668 | 76.83877 | 68.18037 | -572.27940  | -310.19032  | -209.75862  | 1 |
| 278 | H | 81.60410 | 76.92425 | 67.52080 | -1380.08193 | 2212.14486  | 790.85944   | 1 |

Listing 122: C00122.xmolout

|    |   |          |          |          |             |             |             |        |          |  |
|----|---|----------|----------|----------|-------------|-------------|-------------|--------|----------|--|
| 1  |   | 276      |          |          |             |             |             |        |          |  |
| 2  |   | 150.0000 | 150.0000 | 150.0000 | 0.0000      | 0.0000      | 0.0000***** | 0.6442 | 2577     |  |
|    |   | 0.2500   | 300.00   | 0.00     | 0.00        | 0.00        | -1293.3647  | 0.0000 | 300.0000 |  |
| 3  | H | 61.30083 | 77.04047 | 67.81352 | -2043.14101 | -1757.64893 | 399.89339   |        | 1        |  |
| 4  | N | 61.22278 | 77.75775 | 67.09405 | 426.75047   | 490.45733   | -334.42467  |        | 1        |  |
| 5  | H | 60.44387 | 78.33244 | 67.42896 | 442.25559   | -1110.30854 | -2448.52907 |        | 1        |  |
| 6  | C | 62.39217 | 78.52976 | 66.91454 | 415.32972   | -666.39213  | 83.73172    |        | 1        |  |
| 7  | H | 63.25829 | 77.90794 | 67.23176 | 879.32219   | 2491.00447  | 667.35213   |        | 1        |  |
| 8  | C | 62.46676 | 78.96842 | 65.36111 | 31.35357    | 477.41777   | 628.23362   |        | 1        |  |
| 9  | H | 61.57051 | 79.58627 | 65.11522 | 1168.38489  | 2240.25337  | -1019.71136 |        | 1        |  |
| 10 | H | 63.35239 | 79.62334 | 65.18041 | -360.43770  | 2534.90498  | 931.67112   |        | 1        |  |
| 11 | C | 62.51278 | 77.74219 | 64.49006 | 463.18208   | 512.70242   | -382.34388  |        | 1        |  |
| 12 | H | 61.71364 | 77.04595 | 64.83251 | 1725.29117  | 1863.52247  | -987.07854  |        | 1        |  |
| 13 | C | 62.24358 | 78.10984 | 63.03585 | 710.42801   | -144.27427  | -313.15367  |        | 1        |  |
| 14 | H | 62.24947 | 77.20649 | 62.37292 | 364.20195   | -1033.13725 | 2494.72524  |        | 1        |  |

|    |   |          |          |          |             |             |             |   |
|----|---|----------|----------|----------|-------------|-------------|-------------|---|
| 15 | H | 61.24695 | 78.60671 | 62.91146 | 2567.61904  | 335.80679   | 847.48802   | 1 |
| 16 | H | 63.01778 | 78.81609 | 62.63937 | -2587.99029 | 680.92867   | -512.16411  | 1 |
| 17 | C | 63.85693 | 77.03376 | 64.59199 | 268.17616   | 741.64379   | -40.42634   | 1 |
| 18 | H | 63.89486 | 76.12537 | 63.93680 | 1283.54314  | -1945.37420 | -1411.27812 | 1 |
| 19 | H | 64.69997 | 77.70244 | 64.27943 | -1258.57796 | 1317.15249  | -2026.02085 | 1 |
| 20 | H | 64.07040 | 76.69631 | 65.63859 | -2502.84526 | 909.80597   | 575.92391   | 1 |
| 21 | C | 62.14612 | 79.85292 | 67.81884 | 619.36578   | -458.64843  | -172.09273  | 1 |
| 22 | O | 61.00040 | 80.19918 | 68.14803 | -81.40433   | 433.87611   | 522.34594   | 1 |
| 23 | N | 63.28817 | 80.47416 | 67.97225 | 175.23996   | -622.20190  | 341.55523   | 1 |
| 24 | H | 64.06588 | 79.99633 | 67.51730 | -876.57256  | -303.22879  | -2561.90213 | 1 |
| 25 | C | 63.58777 | 81.38621 | 69.03506 | -571.88214  | -534.10783  | -106.15033  | 1 |
| 26 | H | 64.18169 | 82.18758 | 68.54752 | -2713.20841 | -16.25800   | -248.80809  | 1 |
| 27 | C | 62.26768 | 81.90824 | 69.75169 | 166.60354   | 288.16399   | -716.09568  | 1 |
| 28 | H | 61.73078 | 80.99777 | 70.14789 | -2097.85574 | 1636.78449  | -586.18044  | 1 |
| 29 | O | 61.32881 | 82.58048 | 68.91514 | -317.80580  | -363.38227  | 484.43082   | 1 |
| 30 | H | 60.81288 | 81.75521 | 68.56227 | 1863.74748  | -1451.84923 | 1357.29467  | 1 |
| 31 | C | 62.85632 | 82.73902 | 70.95099 | 503.80731   | 517.99032   | 318.51606   | 1 |
| 32 | H | 62.05008 | 83.09843 | 71.63185 | 640.61020   | -2157.10410 | -1536.29104 | 1 |
| 33 | H | 63.57059 | 82.13965 | 71.56876 | 1687.88455  | 465.60692   | 2087.56452  | 1 |
| 34 | H | 63.40899 | 83.63842 | 70.59217 | -1293.07895 | -1899.88581 | -1463.57452 | 1 |
| 35 | C | 64.46045 | 80.53476 | 70.12289 | -153.07550  | -733.68902  | 248.70981   | 1 |
| 36 | O | 63.94780 | 79.62636 | 70.72165 | 186.15459   | -480.78787  | -449.34387  | 1 |
| 37 | N | 65.71377 | 81.01201 | 70.21115 | -487.53139  | 543.18517   | 42.03850    | 1 |
| 38 | C | 66.56027 | 80.68393 | 71.31265 | -699.35871  | 69.34393    | 360.10701   | 1 |
| 39 | H | 66.07903 | 79.80257 | 71.79900 | 2.81126     | -221.99807  | -2715.58072 | 1 |
| 40 | C | 67.91101 | 80.39504 | 70.51720 | -507.46439  | -592.59194  | 122.07761   | 1 |
| 41 | H | 68.81235 | 80.32789 | 71.16641 | -1975.08116 | 525.87560   | -1801.71556 | 1 |
| 42 | H | 67.85331 | 79.43507 | 69.95840 | 1588.27743  | -1913.22100 | 1113.83566  | 1 |
| 43 | C | 67.92144 | 81.61302 | 69.54481 | -613.62442  | -457.55993  | -194.14490  | 1 |
| 44 | H | 68.23664 | 82.54212 | 70.07081 | 1707.54637  | -721.27992  | 1996.92523  | 1 |
| 45 | H | 68.61455 | 81.48804 | 68.68341 | 758.23357   | 2100.81767  | 1560.55011  | 1 |
| 46 | C | 66.39333 | 81.68680 | 69.11270 | -352.41524  | 704.96076   | 49.21465    | 1 |
| 47 | H | 65.98586 | 82.72292 | 69.04524 | 1714.76886  | -2070.42778 | 443.35792   | 1 |
| 48 | H | 66.13176 | 81.12130 | 68.18775 | 1224.15040  | 1801.50881  | 1636.97633  | 1 |
| 49 | C | 66.61818 | 82.00093 | 72.28895 | 566.85117   | 537.05831   | 117.62814   | 1 |
| 50 | O | 65.57083 | 82.60342 | 72.53275 | -550.26779  | -406.08867  | 4.21666     | 1 |
| 51 | N | 67.82712 | 82.21444 | 72.71456 | 566.34832   | -425.77725  | 180.18749   | 1 |
| 52 | H | 68.52623 | 81.57279 | 72.34693 | 644.44502   | 2646.80550  | -52.73430   | 1 |
| 53 | C | 68.25068 | 83.15549 | 73.70363 | 612.34801   | -281.48662  | 411.56221   | 1 |
| 54 | H | 68.98916 | 83.81075 | 73.19274 | 1667.23498  | -1490.75142 | 1556.16753  | 1 |
| 55 | C | 67.01768 | 83.96222 | 74.29136 | -714.45746  | -175.43074  | 286.98927   | 1 |
| 56 | H | 66.24750 | 83.20863 | 74.62420 | -787.09484  | 1763.03619  | -1922.46060 | 1 |
| 57 | O | 66.35108 | 84.83013 | 73.37188 | -429.46514  | 516.51932   | -128.40526  | 1 |
| 58 | H | 65.67176 | 84.15796 | 72.98532 | 1981.82785  | 436.16847   | -1818.18182 | 1 |
| 59 | C | 67.65219 | 84.67057 | 75.54339 | 630.79189   | -468.94448  | 76.03230    | 1 |
| 60 | H | 66.90115 | 85.29818 | 76.07759 | -1775.71861 | 2062.30353  | 131.89849   | 1 |
| 61 | H | 68.05778 | 83.93266 | 76.29037 | -1855.14608 | 88.94118    | 1993.53760  | 1 |
| 62 | H | 68.49065 | 85.34413 | 75.24908 | -1504.82350 | -780.94249  | -2132.90992 | 1 |
| 63 | C | 68.98966 | 82.21090 | 74.82815 | 288.57638   | 618.62814   | -397.00270  | 1 |
| 64 | O | 68.46666 | 81.20433 | 75.24118 | 321.70495   | -185.26452  | 574.37218   | 1 |
| 65 | N | 70.18394 | 82.73141 | 75.10424 | -447.05792  | -446.53431  | 367.76425   | 1 |
| 66 | H | 70.41894 | 83.58381 | 74.59405 | 350.31316   | 1975.63644  | -1843.31522 | 1 |
| 67 | C | 70.85214 | 82.50665 | 76.34340 | -511.23061  | 374.03917   | -471.51480  | 1 |
| 68 | H | 71.85932 | 82.91095 | 76.09741 | 2234.79579  | -898.70890  | -1273.45190 | 1 |
| 69 | C | 70.16976 | 83.38423 | 77.49064 | 529.53781   | -159.34528  | 563.72604   | 1 |
| 70 | H | 70.86220 | 83.34267 | 78.37284 | 654.59388   | 2347.94251  | 1217.51488  | 1 |
| 71 | H | 70.13370 | 84.45467 | 77.15969 | -1526.55661 | 2103.42026  | 817.87394   | 1 |
| 72 | O | 68.82639 | 82.98349 | 77.92466 | -554.84278  | 14.12789    | 399.58769   | 1 |
| 73 | H | 69.03206 | 82.07424 | 78.21874 | 1297.06236  | 2061.84854  | 1220.68812  | 1 |
| 74 | C | 70.89187 | 80.93852 | 76.76800 | -662.15484  | -412.13544  | 123.62687   | 1 |
| 75 | O | 70.74613 | 80.59949 | 77.91788 | -540.01537  | -317.05804  | 274.91456   | 1 |
| 76 | N | 71.30901 | 80.17454 | 75.73151 | -202.76299  | -690.00100  | -131.49145  | 1 |

|     |   |          |          |          |             |             |             |   |
|-----|---|----------|----------|----------|-------------|-------------|-------------|---|
| 77  | H | 71.26721 | 80.72718 | 74.87431 | -702.62132  | -2617.37191 | 281.70413   | 1 |
| 78  | C | 71.07840 | 78.71952 | 75.76288 | -491.73914  | 576.34187   | 222.73509   | 1 |
| 79  | H | 70.14745 | 78.58288 | 76.36044 | 1977.17978  | -1823.58850 | -434.68928  | 1 |
| 80  | C | 70.98410 | 78.24551 | 74.33085 | -649.50797  | -328.66843  | 306.11224   | 1 |
| 81  | H | 71.86377 | 78.65287 | 73.78324 | 2075.07803  | 1452.16490  | -1004.45904 | 1 |
| 82  | C | 71.03126 | 76.73017 | 74.24134 | -615.18735  | -489.99689  | -70.96352   | 1 |
| 83  | H | 71.02396 | 76.37461 | 73.17460 | -1226.32661 | -1724.38906 | -1716.47170 | 1 |
| 84  | H | 71.95925 | 76.31712 | 74.72627 | 2381.64273  | -969.84735  | 900.46860   | 1 |
| 85  | H | 70.15114 | 76.25691 | 74.75711 | 2122.74991  | 1702.23946  | -141.36228  | 1 |
| 86  | C | 69.72860 | 78.76227 | 73.65003 | -501.86074  | -479.61276  | -376.42482  | 1 |
| 87  | H | 69.72869 | 78.54191 | 72.54735 | 993.79261   | -2246.95401 | -1177.81305 | 1 |
| 88  | H | 68.80278 | 78.29394 | 74.08328 | 42.71279    | -626.15391  | -2651.37258 | 1 |
| 89  | H | 69.61431 | 79.87612 | 73.77585 | -2026.39012 | -1590.33709 | -887.82922  | 1 |
| 90  | C | 72.41652 | 78.07664 | 76.49574 | -672.89153  | 382.57394   | -156.34072  | 1 |
| 91  | O | 73.53857 | 78.27844 | 76.07571 | 410.04627   | 221.86223   | 500.35950   | 1 |
| 92  | N | 72.04897 | 77.28234 | 77.48195 | -378.11782  | -443.79414  | -441.10984  | 1 |
| 93  | H | 71.05510 | 77.19308 | 77.67993 | 2404.15973  | -568.14894  | 1149.30085  | 1 |
| 94  | C | 73.06740 | 76.85409 | 78.39405 | -544.54484  | 466.16019   | 331.29119   | 1 |
| 95  | H | 73.88989 | 77.58597 | 78.22597 | -1409.80988 | -170.17955  | 2325.32679  | 1 |
| 96  | C | 72.42291 | 76.87558 | 79.84356 | -184.48284  | 116.78282   | -758.89137  | 1 |
| 97  | H | 71.98981 | 77.87648 | 80.06887 | 1893.78641  | 1861.14652  | 611.04528   | 1 |
| 98  | H | 71.57656 | 76.15439 | 79.90627 | -2170.79665 | -974.19311  | 1327.50117  | 1 |
| 99  | C | 73.54965 | 76.49929 | 80.85469 | 389.51668   | 672.81878   | -138.49152  | 1 |
| 100 | H | 74.06215 | 75.56743 | 80.53024 | 510.64577   | 1933.03327  | 1851.02484  | 1 |
| 101 | H | 74.35133 | 77.27035 | 80.83757 | -2302.30869 | -1105.72939 | -948.89774  | 1 |
| 102 | C | 73.01015 | 76.31462 | 82.32638 | -559.93427  | -126.34590  | 542.30857   | 1 |
| 103 | O | 73.68698 | 75.73990 | 83.13919 | -670.36003  | -111.83166  | 76.36448    | 1 |
| 104 | N | 71.80222 | 76.87799 | 82.54193 | -216.06729  | -537.07037  | 446.51379   | 1 |
| 105 | H | 71.21116 | 77.41940 | 81.90030 | -1251.96487 | 1074.12894  | -2168.52500 | 1 |
| 106 | H | 71.33751 | 76.90706 | 83.45597 | -2451.83023 | -720.73851  | 944.84612   | 1 |
| 107 | C | 73.46429 | 75.32059 | 78.01631 | 546.24052   | -563.88337  | -85.11809   | 1 |
| 108 | O | 72.71365 | 74.40165 | 78.31943 | 71.70702    | -307.40463  | 606.69673   | 1 |
| 109 | N | 74.65168 | 75.26633 | 77.42298 | 479.90863   | -504.50129  | 222.86849   | 1 |
| 110 | C | 75.07162 | 74.11587 | 76.66485 | 75.51268    | -600.91904  | 506.73700   | 1 |
| 111 | H | 74.14681 | 73.75357 | 76.15894 | -2033.61562 | 1795.30103  | 254.89480   | 1 |
| 112 | C | 76.19253 | 74.71460 | 75.71450 | 523.79067   | 517.99274   | 284.45581   | 1 |
| 113 | H | 76.91454 | 73.94378 | 75.36240 | 1599.61665  | -1127.00911 | 1895.98173  | 1 |
| 114 | H | 75.75223 | 75.18198 | 74.80557 | -1881.83093 | 1275.82488  | -1501.55016 | 1 |
| 115 | C | 76.84226 | 75.78580 | 76.64569 | -600.05639  | -404.05026  | 316.64485   | 1 |
| 116 | H | 77.52005 | 75.30816 | 77.39195 | -2597.05260 | 496.36221   | 657.73249   | 1 |
| 117 | H | 77.45203 | 76.54373 | 76.10368 | -1666.24518 | 1294.38985  | -1723.90591 | 1 |
| 118 | C | 75.56008 | 76.40325 | 77.34851 | 493.57570   | -129.95376  | -602.56394  | 1 |
| 119 | H | 75.72854 | 76.78870 | 78.38273 | -1469.08415 | -637.84797  | 2204.22581  | 1 |
| 120 | H | 75.00323 | 77.18140 | 76.73552 | -1038.97840 | 1068.88701  | -2280.71789 | 1 |
| 121 | C | 75.69598 | 72.99952 | 77.67048 | 188.88100   | 241.05089   | -727.87821  | 1 |
| 122 | O | 76.83622 | 72.64857 | 77.56781 | 531.88613   | -49.19943   | 427.07960   | 1 |
| 123 | N | 74.72339 | 72.51915 | 78.46819 | 708.14833   | 26.93417    | -179.73509  | 1 |
| 124 | H | 73.79825 | 73.01421 | 78.43812 | -2232.69501 | -1179.09831 | 1023.94816  | 1 |
| 125 | C | 75.12115 | 71.77671 | 79.68472 | -738.32412  | 259.92548   | 104.42456   | 1 |
| 126 | H | 75.94488 | 72.38367 | 80.12727 | 2028.89123  | 1260.02983  | 1311.33324  | 1 |
| 127 | C | 73.91961 | 71.62829 | 80.59017 | -258.65678  | -345.52513  | 661.28459   | 1 |
| 128 | H | 73.10488 | 71.15462 | 79.99628 | -1826.06090 | -1801.46097 | -918.64554  | 1 |
| 129 | C | 74.22629 | 70.72516 | 81.77281 | -541.23400  | 531.92970   | -218.41428  | 1 |
| 130 | H | 73.32354 | 70.56664 | 82.42417 | 1311.73218  | -2219.18200 | 882.19023   | 1 |
| 131 | H | 74.58207 | 69.71051 | 81.43594 | -1048.71298 | 1223.58118  | -2196.97971 | 1 |
| 132 | H | 75.03569 | 71.15751 | 82.42269 | 419.06414   | 1903.92898  | 1903.44670  | 1 |
| 133 | C | 73.39702 | 72.96076 | 81.09587 | -423.86431  | 152.66566   | -648.55262  | 1 |
| 134 | H | 72.50566 | 72.83082 | 81.76940 | 105.68386   | -2342.50080 | 1387.51238  | 1 |
| 135 | H | 74.17611 | 73.51754 | 81.68694 | -1695.63603 | -1484.73621 | -1531.02793 | 1 |
| 136 | H | 73.07768 | 73.63029 | 80.24265 | -1853.57121 | -487.39031  | 1936.59343  | 1 |
| 137 | C | 75.65175 | 70.29102 | 79.20897 | 539.71428   | -510.58232  | 267.58633   | 1 |
| 138 | O | 76.32446 | 69.62270 | 79.95784 | -15.93758   | -278.34085  | -624.49402  | 1 |



|     |   |          |          |          |             |             |             |   |
|-----|---|----------|----------|----------|-------------|-------------|-------------|---|
| 139 | N | 75.13973 | 69.92257 | 78.03253 | -676.81886  | 12.05292    | 276.17960   | 1 |
| 140 | H | 74.60434 | 70.63967 | 77.54374 | -1694.44250 | -373.84189  | -2100.66098 | 1 |
| 141 | C | 75.91095 | 68.95088 | 77.31040 | 412.33078   | -664.70360  | 108.35451   | 1 |
| 142 | H | 76.89430 | 68.89858 | 77.83754 | 1765.77476  | 1294.44366  | 1621.76594  | 1 |
| 143 | C | 75.10230 | 67.59886 | 77.42902 | -179.66635  | -721.95667  | -264.73915  | 1 |
| 144 | H | 74.82471 | 67.41487 | 78.49150 | -607.34922  | 2587.87032  | -598.10018  | 1 |
| 145 | H | 74.14043 | 67.65764 | 76.87174 | -359.69332  | -1479.13954 | -2259.74260 | 1 |
| 146 | C | 76.00793 | 66.44544 | 76.88253 | -240.01076  | 616.02425   | 431.85322   | 1 |
| 147 | H | 76.15322 | 66.53939 | 75.78257 | -1359.17131 | 782.54425   | 2227.99181  | 1 |
| 148 | H | 77.02548 | 66.49285 | 77.33126 | -820.36667  | 85.81767    | -2596.78715 | 1 |
| 149 | C | 75.29768 | 65.08276 | 77.25777 | -513.07015  | 236.18570   | -551.87280  | 1 |
| 150 | H | 75.16562 | 64.99996 | 78.36121 | 1816.11944  | -1183.11722 | -1650.94321 | 1 |
| 151 | H | 74.27103 | 65.03987 | 76.82702 | -1800.04429 | -1361.53473 | 1526.34643  | 1 |
| 152 | C | 76.16295 | 63.91671 | 76.72682 | 726.08972   | -253.19732  | -179.64713  | 1 |
| 153 | H | 76.21510 | 63.84536 | 75.62210 | 1224.27271  | -456.51798  | -2390.90304 | 1 |
| 154 | H | 77.18256 | 63.86334 | 77.15794 | 1206.40339  | -1150.93514 | -2154.90344 | 1 |
| 155 | N | 75.47409 | 62.58556 | 77.18275 | 329.70796   | -633.68968  | -155.67358  | 1 |
| 156 | H | 75.95516 | 61.69100 | 76.87728 | 1348.31305  | 1938.76845  | 1359.00643  | 1 |
| 157 | H | 75.38111 | 62.42449 | 78.22787 | 2096.92035  | 1446.54551  | -966.48890  | 1 |
| 158 | H | 74.48223 | 62.41426 | 76.84598 | -1197.07217 | -2303.53719 | 827.28733   | 1 |
| 159 | C | 75.96952 | 69.45063 | 75.75135 | -378.01186  | -556.17301  | -413.96481  | 1 |
| 160 | O | 75.00280 | 69.87326 | 75.16259 | -409.44433  | -307.55053  | -453.30833  | 1 |
| 161 | N | 77.19430 | 69.23216 | 75.29174 | -429.02477  | 524.70884   | 274.08502   | 1 |
| 162 | H | 77.91016 | 68.83450 | 75.89705 | 1706.34263  | -1425.96036 | 1574.38926  | 1 |
| 163 | C | 77.50689 | 69.65160 | 73.95591 | -45.25864   | -626.22952  | 478.93267   | 1 |
| 164 | H | 76.63332 | 69.24216 | 73.40030 | 1988.63164  | 570.90773   | 1772.87287  | 1 |
| 165 | C | 77.50011 | 71.23370 | 73.91707 | 551.77128   | -20.49526   | -564.54996  | 1 |
| 166 | H | 76.70436 | 71.63963 | 74.58231 | 1434.61535  | -1753.10253 | 1513.99471  | 1 |
| 167 | H | 78.45863 | 71.63814 | 74.31345 | -714.67738  | 1819.09770  | 1898.36494  | 1 |
| 168 | C | 77.26776 | 71.67692 | 72.43394 | 446.99263   | -555.77305  | 338.97221   | 1 |
| 169 | H | 77.88564 | 71.06512 | 71.73612 | 1953.68466  | 1892.25957  | -161.67766  | 1 |
| 170 | H | 76.21140 | 71.50501 | 72.12849 | -403.03785  | 2688.07032  | -188.43591  | 1 |
| 171 | C | 77.65534 | 73.20514 | 72.31096 | 567.86262   | 335.74681   | 434.04421   | 1 |
| 172 | H | 76.94840 | 73.84478 | 72.88758 | -1080.02275 | 1568.26081  | -1948.78900 | 1 |
| 173 | H | 78.66298 | 73.39518 | 72.74733 | -919.54108  | 2111.34692  | 1456.13463  | 1 |
| 174 | C | 77.64115 | 73.57003 | 70.80819 | 195.81897   | 173.33862   | -745.11536  | 1 |
| 175 | H | 78.41217 | 73.05309 | 70.20237 | 1405.67949  | -2301.21089 | -390.08113  | 1 |
| 176 | H | 76.65139 | 73.47753 | 70.31844 | -940.37328  | -1118.32446 | 2299.72133  | 1 |
| 177 | N | 78.00232 | 75.08931 | 70.68732 | 319.26422   | 656.36007   | -42.02424   | 1 |
| 178 | H | 78.04999 | 75.47291 | 69.69937 | 1961.03633  | 619.91968   | 1787.09422  | 1 |
| 179 | H | 77.34285 | 75.78222 | 71.14747 | 854.14343   | -2156.80752 | 1429.08711  | 1 |
| 180 | H | 78.94377 | 75.39247 | 71.07256 | 1237.02905  | -1378.50857 | -1998.28500 | 1 |
| 181 | C | 78.93351 | 68.95643 | 73.59517 | 532.53319   | -268.57236  | 517.55729   | 1 |
| 182 | O | 79.21597 | 67.85518 | 74.00990 | 266.16714   | -290.73804  | -558.88002  | 1 |
| 183 | N | 79.65769 | 69.74739 | 72.80612 | -226.25352  | 640.49678   | -270.32839  | 1 |
| 184 | H | 79.32410 | 70.67596 | 72.54994 | 2007.69063  | -1035.27229 | 1523.50231  | 1 |
| 185 | C | 80.86753 | 69.25266 | 72.26932 | -540.76542  | -573.33303  | 49.50000    | 1 |
| 186 | H | 81.00191 | 68.22261 | 72.67619 | -2374.20950 | -1036.76023 | 843.75774   | 1 |
| 187 | C | 80.74584 | 69.33512 | 70.67095 | -77.09082   | 666.87422   | -415.84136  | 1 |
| 188 | H | 80.68536 | 70.41966 | 70.37921 | -985.81834  | 617.19825   | 2463.91927  | 1 |
| 189 | O | 79.59653 | 68.70292 | 70.08498 | 293.29899   | -391.65602  | -477.80926  | 1 |
| 190 | H | 79.14146 | 69.47114 | 69.68359 | 2528.72714  | -681.76262  | -751.27122  | 1 |
| 191 | C | 82.13594 | 68.74685 | 70.23038 | 252.47363   | -605.14473  | 440.05134   | 1 |
| 192 | H | 82.28622 | 68.83153 | 69.12936 | -2052.65063 | 1456.49051  | -1043.51830 | 1 |
| 193 | H | 82.98767 | 69.27327 | 70.72095 | -2152.98800 | -1661.97574 | -161.70652  | 1 |
| 194 | H | 82.21994 | 67.66684 | 70.49256 | -473.12726  | -1584.27339 | 2165.61725  | 1 |
| 195 | C | 82.02591 | 70.35203 | 72.68275 | 360.36307   | 488.46713   | 505.10056   | 1 |
| 196 | O | 81.84146 | 71.54159 | 72.56184 | -200.08817  | -528.03552  | -385.82850  | 1 |
| 197 | N | 83.12498 | 69.68216 | 72.98573 | -597.54095  | -226.44775  | 355.20479   | 1 |
| 198 | H | 83.06749 | 68.66431 | 72.98977 | 2179.23655  | -1300.70981 | -991.33835  | 1 |
| 199 | C | 84.27232 | 70.31970 | 73.51822 | -687.68921  | 297.39807   | -249.45179  | 1 |
| 200 | H | 85.04489 | 69.52315 | 73.45137 | -349.16256  | -2467.37713 | -1101.72831 | 1 |

|     |   |          |          |          |             |             |             |   |
|-----|---|----------|----------|----------|-------------|-------------|-------------|---|
| 201 | C | 84.62775 | 71.62569 | 72.66802 | 672.47345   | 361.54328   | -201.62880  | 1 |
| 202 | H | 83.77002 | 72.34701 | 72.67677 | 1541.41502  | 582.18425   | 2169.97026  | 1 |
| 203 | H | 85.50522 | 72.14350 | 73.12016 | -2534.67717 | 60.25153    | 997.72295   | 1 |
| 204 | C | 84.92600 | 71.20265 | 71.22200 | 574.26774   | -389.43119  | -377.02542  | 1 |
| 205 | C | 86.18606 | 70.64133 | 70.85839 | 688.82679   | -287.33580  | -257.96133  | 1 |
| 206 | H | 86.98734 | 70.51241 | 71.60859 | 331.14182   | 1470.38163  | 2269.80013  | 1 |
| 207 | C | 83.89079 | 71.36454 | 70.25327 | -383.52382  | -675.04808  | 144.24917   | 1 |
| 208 | H | 82.90841 | 71.78045 | 70.55388 | 4.09847     | 1517.59662  | 2262.86397  | 1 |
| 209 | C | 86.37834 | 70.25756 | 69.53150 | -134.76730  | 428.45285   | -649.50303  | 1 |
| 210 | H | 87.35194 | 69.82418 | 69.24342 | -903.23433  | 1600.49020  | 2011.53387  | 1 |
| 211 | C | 84.13358 | 70.96472 | 68.93699 | -335.53281  | -615.00040  | -364.39058  | 1 |
| 212 | H | 83.32641 | 71.08967 | 68.19431 | 1596.45398  | -1369.33862 | 1732.02659  | 1 |
| 213 | C | 85.37685 | 70.39990 | 68.52780 | 585.48547   | -340.24194  | -406.23938  | 1 |
| 214 | O | 85.63451 | 69.98398 | 67.19530 | -419.15649  | -173.04408  | -511.94141  | 1 |
| 215 | H | 84.77877 | 70.23509 | 66.77447 | -1071.84350 | 1559.71507  | -1960.13012 | 1 |
| 216 | C | 83.93501 | 70.66714 | 75.08417 | 291.41878   | -183.13091  | 710.72246   | 1 |
| 217 | O | 84.03140 | 69.78269 | 75.90257 | 379.87695   | 523.47396   | -222.23622  | 1 |
| 218 | N | 83.50652 | 71.91876 | 75.26783 | 564.30591   | 373.09380   | 277.24371   | 1 |
| 219 | H | 83.45515 | 72.51279 | 74.44163 | -120.59931  | -2436.07824 | -1214.35098 | 1 |
| 220 | C | 83.79267 | 72.49987 | 76.55450 | 404.07514   | -299.37480  | 608.84009   | 1 |
| 221 | H | 84.76557 | 72.06673 | 76.87718 | -1071.07882 | -841.69025  | 2359.66467  | 1 |
| 222 | C | 83.78757 | 74.06624 | 76.36574 | -683.12807  | 68.71770    | -390.13096  | 1 |
| 223 | H | 84.60892 | 74.39969 | 75.69175 | 2068.88918  | 1596.58590  | 770.89603   | 1 |
| 224 | H | 82.84376 | 74.38746 | 75.86982 | 1379.86429  | 2342.49779  | -179.85638  | 1 |
| 225 | C | 83.91229 | 74.71784 | 77.78006 | -176.39967  | 537.49466   | 550.97268   | 1 |
| 226 | H | 83.25824 | 74.19619 | 78.51697 | -396.28051  | 1942.22168  | 1869.33314  | 1 |
| 227 | H | 84.94612 | 74.62877 | 78.18143 | -94.44700   | 586.00678   | -2659.20016 | 1 |
| 228 | C | 83.46977 | 76.24239 | 77.61017 | -291.69381  | -718.18079  | -150.72929  | 1 |
| 229 | H | 84.11564 | 76.87116 | 76.94590 | -2303.38776 | 1089.76242  | 964.62032   | 1 |
| 230 | H | 82.40322 | 76.39456 | 77.30164 | 884.16729   | 2568.80533  | -207.74283  | 1 |
| 231 | N | 83.59183 | 76.71953 | 78.92314 | -594.49522  | -252.81478  | 342.29276   | 1 |
| 232 | H | 83.79207 | 76.03588 | 79.63566 | -1735.17426 | 2084.05705  | -263.71605  | 1 |
| 233 | C | 83.44955 | 77.93526 | 79.26715 | 595.23177   | -271.52487  | 442.22352   | 1 |
| 234 | N | 83.17491 | 78.86726 | 78.26101 | 585.53813   | -424.79750  | -105.81303  | 1 |
| 235 | H | 83.03926 | 78.71731 | 77.26192 | 959.88797   | 1327.56823  | -2177.11905 | 1 |
| 236 | H | 83.02164 | 79.86497 | 78.41080 | 1578.48647  | 16.27378    | -2220.76233 | 1 |
| 237 | N | 83.61241 | 78.07753 | 80.65187 | -452.17763  | -390.33541  | -421.51853  | 1 |
| 238 | H | 83.79484 | 77.38770 | 81.37947 | 470.26107   | 1974.25629  | -1817.92087 | 1 |
| 239 | H | 83.51976 | 78.97301 | 81.13310 | 1856.67307  | -1573.97321 | -1224.35416 | 1 |
| 240 | C | 82.59445 | 72.11280 | 77.59589 | -531.47271  | -581.45780  | -55.06206   | 1 |
| 241 | O | 82.88759 | 71.95463 | 78.76634 | -243.00837  | 192.73507   | 609.52485   | 1 |
| 242 | N | 81.39282 | 72.20891 | 77.03849 | 343.49288   | -644.25607  | 38.09164    | 1 |
| 243 | H | 81.43013 | 72.36566 | 76.03043 | -1691.16043 | -1535.97525 | -1484.73099 | 1 |
| 244 | C | 80.25651 | 71.59301 | 77.64143 | 542.66492   | 350.14337   | 454.42563   | 1 |
| 245 | H | 79.43074 | 71.81056 | 76.92647 | 1209.57979  | -2396.95920 | 463.86744   | 1 |
| 246 | C | 80.55348 | 70.03479 | 77.74323 | -737.14309  | 145.93010   | 242.71942   | 1 |
| 247 | H | 81.43844 | 69.84572 | 78.39020 | -1050.18303 | 159.36419   | -2509.06125 | 1 |
| 248 | C | 79.27168 | 69.34330 | 78.31861 | -706.77696  | -252.88343  | -245.16230  | 1 |
| 249 | H | 79.37049 | 68.23177 | 78.33595 | -1624.64039 | -1665.49085 | 1417.86935  | 1 |
| 250 | H | 79.06297 | 69.68127 | 79.37002 | 2566.10521  | 598.51109   | 693.22305   | 1 |
| 251 | H | 78.36605 | 69.59450 | 77.71177 | -1972.69758 | 107.10018   | -1876.34312 | 1 |
| 252 | C | 80.81114 | 69.49455 | 76.29441 | 412.85148   | 672.58832   | -27.69222   | 1 |
| 253 | H | 80.91608 | 68.38421 | 76.27562 | 1447.02277  | 1762.76533  | -1490.78944 | 1 |
| 254 | H | 79.97808 | 69.75908 | 75.60119 | 1320.77379  | -145.20455  | 2378.68491  | 1 |
| 255 | H | 81.74977 | 69.92253 | 75.86253 | -1512.10848 | 1470.52031  | 1724.75147  | 1 |
| 256 | C | 80.01502 | 72.25652 | 79.11154 | -607.11113  | 499.56689   | 73.73769    | 1 |
| 257 | O | 79.59405 | 71.60721 | 80.04818 | 357.97126   | 460.81534   | 356.68785   | 1 |
| 258 | N | 80.26699 | 73.55817 | 79.05884 | 536.55407   | -368.62270  | 332.76306   | 1 |
| 259 | H | 80.61880 | 73.94334 | 78.18285 | 524.38866   | 2297.69985  | 1367.20941  | 1 |
| 260 | C | 79.96514 | 74.36291 | 80.18198 | 46.50277    | -774.29190  | -147.97904  | 1 |
| 261 | H | 79.35504 | 73.71259 | 80.85029 | 1676.51875  | 1883.29066  | 1032.55549  | 1 |
| 262 | C | 81.34669 | 74.84731 | 80.86821 | -559.41456  | -34.19198   | -556.30433  | 1 |

|     |   |          |          |          |             |             |             |   |
|-----|---|----------|----------|----------|-------------|-------------|-------------|---|
| 263 | H | 81.88641 | 75.52254 | 80.16322 | -64.66664   | 395.18769   | 2695.05373  | 1 |
| 264 | H | 81.13393 | 75.46230 | 81.77461 | -2703.44278 | -60.40056   | 333.79418   | 1 |
| 265 | C | 82.19278 | 73.65379 | 81.21312 | -519.76435  | 377.31045   | 459.42366   | 1 |
| 266 | H | 82.35963 | 73.04022 | 80.27463 | -1746.74323 | 1667.50644  | -1261.73691 | 1 |
| 267 | C | 83.54947 | 74.08830 | 81.75252 | 570.95554   | 16.46261    | -545.27700  | 1 |
| 268 | H | 84.18134 | 73.20581 | 82.03121 | 2391.58273  | 28.05277    | -1305.07271 | 1 |
| 269 | H | 84.12899 | 74.67911 | 80.99866 | 175.75588   | 917.63458   | 2559.43867  | 1 |
| 270 | H | 83.44681 | 74.72629 | 82.66762 | -1063.97851 | -2155.34650 | 1283.00462  | 1 |
| 271 | C | 81.50345 | 72.75445 | 82.22879 | 193.76014   | 2.62946     | -765.53141  | 1 |
| 272 | H | 82.18220 | 71.93369 | 82.57828 | 507.39394   | -846.55087  | 2539.60089  | 1 |
| 273 | H | 81.17328 | 73.32333 | 83.13609 | 1337.57841  | 1818.19054  | 1526.01994  | 1 |
| 274 | H | 80.59339 | 72.25947 | 81.77834 | 1100.88635  | -1172.91350 | -2199.08909 | 1 |
| 275 | C | 79.20946 | 75.67327 | 79.61626 | -549.21115  | 475.64486   | -309.38218  | 1 |
| 276 | O | 79.36153 | 76.09252 | 78.49806 | 556.06106   | -390.37755  | -78.24250   | 1 |
| 277 | O | 78.41945 | 76.38227 | 80.55063 | -572.27940  | -310.19032  | -209.75862  | 1 |
| 278 | H | 78.54944 | 75.78959 | 81.34325 | -1380.08193 | 2212.14486  | 790.85944   | 1 |

Listing 123: C00123.xmolout

|    |   |          |          |          |             |             |             |        |          |
|----|---|----------|----------|----------|-------------|-------------|-------------|--------|----------|
| 1  |   | 276      |          |          |             |             |             |        |          |
| 2  |   | 150.0000 | 150.0000 | 150.0000 | 0.0000      | 0.0000      | 0.0000***** | 0.2750 | 1100     |
|    |   | 0.2500   | 300.00   | 0.00     | 0.00        | 0.00        | -1293.3643  | 0.0000 | 300.0000 |
| 3  | H | 60.13081 | 71.47686 | 78.20793 | -2043.14101 | -1757.64893 | 399.89339   |        | 1        |
| 4  | N | 60.17649 | 72.38795 | 78.66443 | 426.75047   | 490.45733   | -334.42467  |        | 1        |
| 5  | H | 60.25831 | 72.15748 | 79.66654 | 442.25559   | -1110.30854 | -2448.52907 |        | 1        |
| 6  | C | 61.25370 | 73.19089 | 78.23322 | 415.32972   | -666.39213  | 83.73172    |        | 1        |
| 7  | H | 61.62843 | 72.78465 | 77.26839 | 879.32219   | 2491.00447  | 667.35213   |        | 1        |
| 8  | C | 60.77171 | 74.72692 | 78.13166 | 31.35357    | 477.41777   | 628.23362   |        | 1        |
| 9  | H | 60.44642 | 75.07205 | 79.14210 | 1168.38489  | 2240.25337  | -1019.71136 |        | 1        |
| 10 | H | 61.62914 | 75.38152 | 77.84380 | -360.43770  | 2534.90498  | 931.67112   |        | 1        |
| 11 | C | 59.63826 | 74.86111 | 77.14905 | 463.18208   | 512.70242   | -382.34388  |        | 1        |
| 12 | H | 58.83971 | 74.14119 | 77.43938 | 1725.29117  | 1863.52247  | -987.07854  |        | 1        |
| 13 | C | 59.06827 | 76.27344 | 77.20480 | 710.42801   | -144.27427  | -313.15367  |        | 1        |
| 14 | H | 58.20624 | 76.40132 | 76.50070 | 364.20195   | -1033.13725 | 2494.72524  |        | 1        |
| 15 | H | 58.70045 | 76.53102 | 78.23147 | 2567.61904  | 335.80679   | 847.48802   |        | 1        |
| 16 | H | 59.83846 | 77.03872 | 76.92763 | -2587.99029 | 680.92867   | -512.16411  |        | 1        |
| 17 | C | 60.08313 | 74.54529 | 75.72787 | 268.17616   | 741.64379   | -40.42634   |        | 1        |
| 18 | H | 59.24928 | 74.68951 | 74.99299 | 1283.54314  | -1945.37420 | -1411.27812 |        | 1        |
| 19 | H | 60.92869 | 75.20528 | 75.40358 | -1258.57796 | 1317.15249  | -2026.02085 |        | 1        |
| 20 | H | 60.43115 | 73.48496 | 75.62871 | -2502.84526 | 909.80597   | 575.92391   |        | 1        |
| 21 | C | 62.28385 | 73.07340 | 79.48372 | 619.36578   | -458.64843  | -172.09273  |        | 1        |
| 22 | O | 61.91075 | 72.62404 | 80.55497 | -81.40433   | 433.87611   | 522.34594   |        | 1        |
| 23 | N | 63.45047 | 73.61325 | 79.15768 | 175.23996   | -622.20190  | 341.55523   |        | 1        |
| 24 | H | 63.57449 | 73.97359 | 78.21183 | -876.57256  | -303.22879  | -2561.90213 |        | 1        |
| 25 | C | 64.50263 | 73.63774 | 80.10659 | -571.88214  | -534.10783  | -106.15033  |        | 1        |
| 26 | H | 64.04306 | 73.23029 | 81.03654 | -2713.20841 | -16.25800   | -248.80809  |        | 1        |
| 27 | C | 65.68478 | 72.72967 | 79.51228 | 166.60354   | 288.16399   | -716.09568  |        | 1        |
| 28 | H | 65.98158 | 73.15852 | 78.51673 | -2097.85574 | 1636.78449  | -586.18044  |        | 1        |
| 29 | O | 65.34363 | 71.35389 | 79.27423 | -317.80580  | -363.38227  | 484.43082   |        | 1        |
| 30 | H | 65.39618 | 71.31010 | 78.29870 | 1863.74748  | -1451.84923 | 1357.29467  |        | 1        |
| 31 | C | 66.84444 | 72.97034 | 80.54550 | 503.80731   | 517.99032   | 318.51606   |        | 1        |
| 32 | H | 67.77431 | 72.43709 | 80.23957 | 640.61020   | -2157.10410 | -1536.29104 |        | 1        |
| 33 | H | 67.10059 | 74.05315 | 80.63865 | 1687.88455  | 465.60692   | 2087.56452  |        | 1        |
| 34 | H | 66.57031 | 72.60160 | 81.56098 | -1293.07895 | -1899.88581 | -1463.57452 |        | 1        |
| 35 | C | 64.99480 | 75.19797 | 80.18822 | -153.07550  | -733.68902  | 248.70981   |        | 1        |
| 36 | O | 65.87056 | 75.56995 | 79.45127 | 186.15459   | -480.78787  | -449.34387  |        | 1        |
| 37 | N | 64.30001 | 75.90354 | 81.09457 | -487.53139  | 543.18517   | 42.03850    |        | 1        |
| 38 | C | 64.53041 | 77.30509 | 81.25333 | -699.35871  | 69.34393    | 360.10701   |        | 1        |
| 39 | H | 64.88995 | 77.65751 | 80.25901 | 2.81126     | -221.99807  | -2715.58072 |        | 1        |
| 40 | C | 63.12825 | 77.85429 | 81.74180 | -507.46439  | -592.59194  | 122.07761   |        | 1        |
| 41 | H | 63.23358 | 78.78502 | 82.34747 | -1975.08116 | 525.87560   | -1801.71556 |        | 1        |
| 42 | H | 62.46184 | 78.09801 | 80.88407 | 1588.27743  | -1913.22100 | 1113.83566  |        | 1        |

|     |   |          |          |          |             |             |             |   |
|-----|---|----------|----------|----------|-------------|-------------|-------------|---|
| 43  | C | 62.57690 | 76.64965 | 82.57122 | -613.62442  | -457.55993  | -194.14490  | 1 |
| 44  | H | 62.99808 | 76.65661 | 83.60160 | 1707.54637  | -721.27992  | 1996.92523  | 1 |
| 45  | H | 61.46922 | 76.66130 | 82.68458 | 758.23357   | 2100.81767  | 1560.55011  | 1 |
| 46  | C | 63.10175 | 75.39636 | 81.75161 | -352.41524  | 704.96076   | 49.21465    | 1 |
| 47  | H | 63.38822 | 74.51794 | 82.37577 | 1714.76886  | -2070.42778 | 443.35792   | 1 |
| 48  | H | 62.42899 | 75.05362 | 80.92925 | 1224.15040  | 1801.50881  | 1636.97633  | 1 |
| 49  | C | 65.60923 | 77.61922 | 82.45752 | 566.85117   | 537.05831   | 117.62814   | 1 |
| 50  | O | 65.33108 | 78.45124 | 83.28941 | -550.26779  | -406.08867  | 4.21666     | 1 |
| 51  | N | 66.75273 | 76.97698 | 82.26069 | 566.34832   | -425.77725  | 180.18749   | 1 |
| 52  | H | 66.77763 | 76.34288 | 81.45974 | 644.44502   | 2646.80550  | -52.73430   | 1 |
| 53  | C | 67.75793 | 77.01361 | 83.26664 | 612.34801   | -281.48662  | 411.56221   | 1 |
| 54  | H | 67.32377 | 77.70124 | 84.03075 | 1667.23498  | -1490.75142 | 1556.16753  | 1 |
| 55  | C | 67.94836 | 75.52428 | 83.81505 | -714.45746  | -175.43074  | 286.98927   | 1 |
| 56  | H | 68.34288 | 74.88439 | 82.98011 | -787.09484  | 1763.03619  | -1922.46060 | 1 |
| 57  | O | 66.73738 | 74.89051 | 84.27275 | -429.46514  | 516.51932   | -128.40526  | 1 |
| 58  | H | 66.63300 | 74.18239 | 83.60876 | 1981.82785  | 436.16847   | -1818.18182 | 1 |
| 59  | C | 69.05572 | 75.68984 | 84.91864 | 630.79189   | -468.94448  | 76.03230    | 1 |
| 60  | H | 69.26772 | 74.72267 | 85.43113 | -1775.71861 | 2062.30353  | 131.89849   | 1 |
| 61  | H | 70.02874 | 76.05712 | 84.48815 | -1855.14608 | 88.94118    | 1993.53760  | 1 |
| 62  | H | 68.74416 | 76.41695 | 85.70471 | -1504.82350 | -780.94249  | -2132.90992 | 1 |
| 63  | C | 69.10104 | 77.61093 | 82.55352 | 288.57638   | 618.62814   | -397.00270  | 1 |
| 64  | O | 70.23054 | 77.18426 | 82.83437 | 321.70495   | -185.26452  | 574.37218   | 1 |
| 65  | N | 68.77007 | 78.63241 | 81.80503 | -447.05792  | -446.53431  | 367.76425   | 1 |
| 66  | H | 67.75903 | 78.76183 | 81.80883 | 350.31316   | 1975.63644  | -1843.31522 | 1 |
| 67  | C | 69.60469 | 79.32757 | 80.89654 | -511.23061  | 374.03917   | -471.51480  | 1 |
| 68  | H | 69.05313 | 80.27917 | 80.73202 | 2234.79579  | -898.70890  | -1273.45190 | 1 |
| 69  | C | 71.02509 | 79.55070 | 81.58922 | 529.53781   | -159.34528  | 563.72604   | 1 |
| 70  | H | 71.50022 | 80.47062 | 81.14484 | 654.59388   | 2347.94251  | 1217.51488  | 1 |
| 71  | H | 70.79496 | 79.78077 | 82.66541 | -1526.55661 | 2103.42026  | 817.87394   | 1 |
| 72  | O | 72.00023 | 78.50616 | 81.50276 | -554.84278  | 14.12789    | 399.58769   | 1 |
| 73  | H | 71.51974 | 77.79743 | 82.08675 | 1297.06236  | 2061.84854  | 1220.68812  | 1 |
| 74  | C | 69.67876 | 78.45952 | 79.51037 | -662.15484  | -412.13544  | 123.62687   | 1 |
| 75  | O | 69.74033 | 77.25392 | 79.44193 | -540.01537  | -317.05804  | 274.91456   | 1 |
| 76  | N | 69.67439 | 79.34307 | 78.51539 | -202.76299  | -690.00100  | -131.49145  | 1 |
| 77  | H | 69.64849 | 80.34210 | 78.71330 | -702.62132  | -2617.37191 | 281.70413   | 1 |
| 78  | C | 69.68498 | 78.85308 | 77.18748 | -491.73914  | 576.34187   | 222.73509   | 1 |
| 79  | H | 69.68521 | 77.73995 | 77.26148 | 1977.17978  | -1823.58850 | -434.68928  | 1 |
| 80  | C | 68.41205 | 79.47219 | 76.45426 | -649.50797  | -328.66843  | 306.11224   | 1 |
| 81  | H | 68.38295 | 80.57443 | 76.59246 | 2075.07803  | 1452.16490  | -1004.45904 | 1 |
| 82  | C | 68.47854 | 79.10536 | 74.93376 | -615.18735  | -489.99689  | -70.96352   | 1 |
| 83  | H | 67.58676 | 79.48301 | 74.37994 | -1226.32661 | -1724.38906 | -1716.47170 | 1 |
| 84  | H | 69.38175 | 79.54694 | 74.44905 | 2381.64273  | -969.84735  | 900.46860   | 1 |
| 85  | H | 68.52481 | 78.00191 | 74.77896 | 2122.74991  | 1702.23946  | -141.36228  | 1 |
| 86  | C | 67.12051 | 78.81103 | 77.04443 | -501.86074  | -479.61276  | -376.42482  | 1 |
| 87  | H | 66.19773 | 79.18575 | 76.54170 | 993.79261   | -2246.95401 | -1177.81305 | 1 |
| 88  | H | 67.13711 | 77.70195 | 76.92609 | 42.71279    | -626.15391  | -2651.37258 | 1 |
| 89  | H | 67.01728 | 79.02231 | 78.13495 | -2026.39012 | -1590.33709 | -887.82922  | 1 |
| 90  | C | 71.00920 | 79.49826 | 76.44921 | -672.89153  | 382.57394   | -156.34072  | 1 |
| 91  | O | 71.19353 | 80.68993 | 76.38839 | 410.04627   | 221.86223   | 500.35950   | 1 |
| 92  | N | 71.69904 | 78.51664 | 75.87746 | -378.11782  | -443.79414  | -441.10984  | 1 |
| 93  | H | 71.41199 | 77.55154 | 76.03581 | 2404.15973  | -568.14894  | 1149.30085  | 1 |
| 94  | C | 72.98891 | 78.82458 | 75.35929 | -544.54484  | 466.16019   | 331.29119   | 1 |
| 95  | H | 72.95943 | 79.92014 | 75.16180 | -1409.80988 | -170.17955  | 2325.32679  | 1 |
| 96  | C | 74.02828 | 78.42351 | 76.49165 | -184.48284  | 116.78282   | -758.89137  | 1 |
| 97  | H | 73.80661 | 78.97151 | 77.43561 | 1893.78641  | 1861.14652  | 611.04528   | 1 |
| 98  | H | 73.93856 | 77.34182 | 76.73905 | -2170.79665 | -974.19311  | 1327.50117  | 1 |
| 99  | C | 75.45712 | 78.76083 | 75.96312 | 389.51668   | 672.81878   | -138.49152  | 1 |
| 100 | H | 75.65030 | 78.21285 | 75.01394 | 510.64577   | 1933.03327  | 1851.02484  | 1 |
| 101 | H | 75.51405 | 79.83330 | 75.67245 | -2302.30869 | -1105.72939 | -948.89774  | 1 |
| 102 | C | 76.59710 | 78.43499 | 76.99505 | -559.93427  | -126.34590  | 542.30857   | 1 |
| 103 | O | 77.74894 | 78.62057 | 76.68553 | -670.36003  | -111.83166  | 76.36448    | 1 |
| 104 | N | 76.15779 | 77.94888 | 78.17367 | -216.06729  | -537.07037  | 446.51379   | 1 |

|     |   |          |          |          |             |             |             |   |
|-----|---|----------|----------|----------|-------------|-------------|-------------|---|
| 105 | H | 75.19699 | 77.80810 | 78.50717 | -1251.96487 | 1074.12894  | -2168.52500 | 1 |
| 106 | H | 76.76778 | 77.74563 | 78.97334 | -2451.83023 | -720.73851  | 944.84612   | 1 |
| 107 | C | 73.26897 | 77.85217 | 74.06858 | 546.24052   | -563.88337  | -85.11809   | 1 |
| 108 | O | 73.29246 | 76.65997 | 74.22135 | 71.70702    | -307.40463  | 606.69673   | 1 |
| 109 | N | 73.52915 | 78.57922 | 72.97227 | 479.90863   | -504.50129  | 222.86849   | 1 |
| 110 | C | 73.46067 | 78.01256 | 71.66115 | 75.51268    | -600.91904  | 506.73700   | 1 |
| 111 | H | 72.64428 | 77.25590 | 71.69032 | -2033.61562 | 1795.30103  | 254.89480   | 1 |
| 112 | C | 73.18876 | 79.27812 | 70.74561 | 523.79067   | 517.99274   | 284.45581   | 1 |
| 113 | H | 73.52666 | 79.12770 | 69.69557 | 1599.61665  | -1127.00911 | 1895.98173  | 1 |
| 114 | H | 72.10452 | 79.52367 | 70.69891 | -1881.83093 | 1275.82488  | -1501.55016 | 1 |
| 115 | C | 73.98573 | 80.39171 | 71.49491 | -600.05639  | -404.05026  | 316.64485   | 1 |
| 116 | H | 75.07754 | 80.30479 | 71.30832 | -2597.05260 | 496.36221   | 657.73249   | 1 |
| 117 | H | 73.69303 | 81.42619 | 71.20590 | -1666.24518 | 1294.38985  | -1723.90591 | 1 |
| 118 | C | 73.62594 | 80.03444 | 73.00012 | 493.57570   | -129.95376  | -602.56394  | 1 |
| 119 | H | 74.39204 | 80.32765 | 73.75593 | -1469.08415 | -637.84797  | 2204.22581  | 1 |
| 120 | H | 72.62313 | 80.40082 | 73.32627 | -1038.97840 | 1068.88701  | -2280.71789 | 1 |
| 121 | C | 74.87081 | 77.35073 | 71.14444 | 188.88100   | 241.05089   | -727.87821  | 1 |
| 122 | O | 74.87791 | 76.72699 | 70.10649 | 531.88613   | -49.19943   | 427.07960   | 1 |
| 123 | N | 75.90163 | 77.65994 | 71.92160 | 708.14833   | 26.93417    | -179.73509  | 1 |
| 124 | H | 75.68997 | 78.19852 | 72.75981 | -2232.69501 | -1179.09831 | 1023.94816  | 1 |
| 125 | C | 77.18090 | 77.12744 | 71.60473 | -738.32412  | 259.92548   | 104.42456   | 1 |
| 126 | H | 77.05134 | 76.72878 | 70.57248 | 2028.89123  | 1260.02983  | 1311.33324  | 1 |
| 127 | C | 78.22047 | 78.32416 | 71.69421 | -258.65678  | -345.52513  | 661.28459   | 1 |
| 128 | H | 78.20059 | 78.76583 | 72.71495 | -1826.06090 | -1801.46097 | -918.64554  | 1 |
| 129 | C | 79.65976 | 77.83847 | 71.30414 | -541.23400  | 531.92970   | -218.41428  | 1 |
| 130 | H | 80.42178 | 78.64723 | 71.44489 | 1311.73218  | -2219.18200 | 882.19023   | 1 |
| 131 | H | 79.98031 | 76.95741 | 71.92923 | -1048.71298 | 1223.58118  | -2196.97971 | 1 |
| 132 | H | 79.71447 | 77.52584 | 70.23493 | 419.06414   | 1903.92898  | 1903.44670  | 1 |
| 133 | C | 77.85496 | 79.40538 | 70.62039 | -423.86431  | 152.66566   | -648.55262  | 1 |
| 134 | H | 78.56050 | 80.26877 | 70.64907 | 105.68386   | -2342.50080 | 1387.51238  | 1 |
| 135 | H | 77.88490 | 78.98073 | 69.58897 | -1695.63603 | -1484.73621 | -1531.02793 | 1 |
| 136 | H | 76.82903 | 79.80618 | 70.78223 | -1853.57121 | -487.39031  | 1936.59343  | 1 |
| 137 | C | 77.55395 | 75.94613 | 72.68068 | 539.71428   | -510.58232  | 267.58633   | 1 |
| 138 | O | 78.71018 | 75.65853 | 72.90966 | -15.93758   | -278.34085  | -624.49402  | 1 |
| 139 | N | 76.45788 | 75.38600 | 73.16315 | -676.81886  | 12.05292    | 276.17960   | 1 |
| 140 | H | 75.57296 | 75.73172 | 72.79696 | -1694.44250 | -373.84189  | -2100.66098 | 1 |
| 141 | C | 76.54014 | 74.25405 | 74.02964 | 412.33078   | -664.70360  | 108.35451   | 1 |
| 142 | H | 77.36790 | 74.47237 | 74.73700 | 1765.77476  | 1294.44366  | 1621.76594  | 1 |
| 143 | C | 75.10237 | 74.12542 | 74.66397 | -179.66635  | -721.95667  | -264.73915  | 1 |
| 144 | H | 74.77544 | 75.08744 | 75.12670 | -607.34922  | 2587.87032  | -598.10018  | 1 |
| 145 | H | 74.34640 | 73.91075 | 73.87403 | -359.69332  | -1479.13954 | -2259.74260 | 1 |
| 146 | C | 75.16413 | 72.96271 | 75.71098 | -240.01076  | 616.02425   | 431.85322   | 1 |
| 147 | H | 75.47329 | 72.01327 | 75.21827 | -1359.17131 | 782.54425   | 2227.99181  | 1 |
| 148 | H | 75.93039 | 73.16723 | 76.49163 | -820.36667  | 85.81767    | -2596.78715 | 1 |
| 149 | C | 73.72762 | 72.81570 | 76.35462 | -513.07015  | 236.18570   | -551.87280  | 1 |
| 150 | H | 73.43304 | 73.74821 | 76.88908 | 1816.11944  | -1183.11722 | -1650.94321 | 1 |
| 151 | H | 72.95428 | 72.66106 | 75.56716 | -1800.04429 | -1361.53473 | 1526.34643  | 1 |
| 152 | C | 73.77260 | 71.61064 | 77.32327 | 726.08972   | -253.19732  | -179.64713  | 1 |
| 153 | H | 73.91830 | 70.62851 | 76.83070 | 1224.27271  | -456.51798  | -2390.90304 | 1 |
| 154 | H | 74.48534 | 71.72095 | 78.16463 | 1206.40339  | -1150.93514 | -2154.90344 | 1 |
| 155 | N | 72.36927 | 71.50476 | 78.00987 | 329.70796   | -633.68968  | -155.67358  | 1 |
| 156 | H | 72.25765 | 70.70977 | 78.70331 | 1348.31305  | 1938.76845  | 1359.00643  | 1 |
| 157 | H | 72.05302 | 72.33493 | 78.59105 | 2096.92035  | 1446.54551  | -966.48890  | 1 |
| 158 | H | 71.53189 | 71.34822 | 77.37679 | -1197.07217 | -2303.53719 | 827.28733   | 1 |
| 159 | C | 76.85103 | 72.91811 | 73.11744 | -378.01186  | -556.17301  | -413.96481  | 1 |
| 160 | O | 76.03599 | 72.49435 | 72.33010 | -409.44433  | -307.55053  | -453.30833  | 1 |
| 161 | N | 78.04708 | 72.43274 | 73.41862 | -429.02477  | 524.70884   | 274.08502   | 1 |
| 162 | H | 78.59993 | 72.91445 | 74.12449 | 1706.34263  | -1425.96036 | 1574.38926  | 1 |
| 163 | C | 78.42498 | 71.17480 | 72.83665 | -45.25864   | -626.22952  | 478.93267   | 1 |
| 164 | H | 77.59120 | 70.49061 | 73.10786 | 1988.63164  | 570.90773   | 1772.87287  | 1 |
| 165 | C | 78.50061 | 71.37928 | 71.27235 | 551.77128   | -20.49526   | -564.54996  | 1 |
| 166 | H | 77.53361 | 71.77555 | 70.87927 | 1434.61535  | -1753.10253 | 1513.99471  | 1 |

|     |   |          |          |          |             |             |             |   |
|-----|---|----------|----------|----------|-------------|-------------|-------------|---|
| 167 | H | 79.26973 | 72.14130 | 71.01366 | -714.67738  | 1819.09770  | 1898.36494  | 1 |
| 168 | C | 78.84559 | 69.99132 | 70.63425 | 446.99263   | -555.77305  | 338.97221   | 1 |
| 169 | H | 79.80059 | 69.60021 | 71.04841 | 1953.68466  | 1892.25957  | -161.67766  | 1 |
| 170 | H | 78.06906 | 69.23493 | 70.88746 | -403.03785  | 2688.07032  | -188.43591  | 1 |
| 171 | C | 78.96692 | 70.17431 | 69.07013 | 567.86262   | 335.74681   | 434.04421   | 1 |
| 172 | H | 78.01199 | 70.55429 | 68.63985 | -1080.02275 | 1568.26081  | -1948.78900 | 1 |
| 173 | H | 79.74166 | 70.93482 | 68.81822 | -919.54108  | 2111.34692  | 1456.13463  | 1 |
| 174 | C | 79.33184 | 68.79366 | 68.47258 | 195.81897   | 173.33862   | -745.11536  | 1 |
| 175 | H | 80.32937 | 68.40419 | 68.77195 | 1405.67949  | -2301.21089 | -390.08113  | 1 |
| 176 | H | 78.56246 | 68.00768 | 68.61306 | -940.37328  | -1118.32446 | 2299.72133  | 1 |
| 177 | N | 79.43360 | 68.98650 | 66.92476 | 319.26422   | 656.36007   | -42.02424   | 1 |
| 178 | H | 79.72282 | 68.13138 | 66.36761 | 1961.03633  | 619.91968   | 1787.09422  | 1 |
| 179 | H | 78.55028 | 69.28161 | 66.41463 | 854.14343   | -2156.80752 | 1429.08711  | 1 |
| 180 | H | 80.13678 | 69.70473 | 66.58575 | 1237.02905  | -1378.50857 | -1998.28500 | 1 |
| 181 | C | 79.89071 | 70.66069 | 73.34156 | 532.53319   | -268.57236  | 517.55729   | 1 |
| 182 | O | 80.09984 | 69.45741 | 73.30677 | 266.16714   | -290.73804  | -558.88002  | 1 |
| 183 | N | 80.73506 | 71.64447 | 73.59681 | -226.25352  | 640.49678   | -270.32839  | 1 |
| 184 | H | 80.33265 | 72.57677 | 73.51550 | 2007.69063  | -1035.27229 | 1523.50231  | 1 |
| 185 | C | 82.05411 | 71.46455 | 74.08341 | -540.76542  | -573.33303  | 49.50000    | 1 |
| 186 | H | 82.32258 | 72.45995 | 74.50058 | -2374.20950 | -1036.76023 | 843.75774   | 1 |
| 187 | C | 82.06484 | 70.31379 | 75.19586 | -77.09082   | 666.87422   | -415.84136  | 1 |
| 188 | H | 81.63052 | 69.37309 | 74.74256 | -985.81834  | 617.19825   | 2463.91927  | 1 |
| 189 | O | 81.28825 | 70.60867 | 76.37176 | 293.29899   | -391.65602  | -477.80926  | 1 |
| 190 | H | 80.60553 | 69.90928 | 76.31984 | 2528.72714  | -681.76262  | -751.27122  | 1 |
| 191 | C | 83.60028 | 70.08203 | 75.44009 | 252.47363   | -605.14473  | 440.05134   | 1 |
| 192 | H | 83.77652 | 69.28732 | 76.20222 | -2052.65063 | 1456.49051  | -1043.51830 | 1 |
| 193 | H | 84.12683 | 69.76660 | 74.50684 | -2152.98800 | -1661.97574 | -161.70652  | 1 |
| 194 | H | 84.10076 | 71.00862 | 75.80558 | -473.12726  | -1584.27339 | 2165.61725  | 1 |
| 195 | C | 83.04814 | 71.07257 | 72.84556 | 360.36307   | 488.46713   | 505.10056   | 1 |
| 196 | O | 84.21337 | 71.39203 | 72.90452 | -200.08817  | -528.03552  | -385.82850  | 1 |
| 197 | N | 82.43668 | 70.36932 | 71.89556 | -597.54095  | -226.44775  | 355.20479   | 1 |
| 198 | H | 81.44522 | 70.12727 | 72.02043 | 2179.23655  | -1300.70981 | -991.33835  | 1 |
| 199 | C | 83.20345 | 70.08803 | 70.72833 | -687.68921  | 297.39807   | -249.45179  | 1 |
| 200 | H | 84.22483 | 69.89169 | 71.12687 | -349.16256  | -2467.37713 | -1101.72831 | 1 |
| 201 | C | 82.56087 | 68.90366 | 69.86979 | 672.47345   | 361.54328   | -201.62880  | 1 |
| 202 | H | 81.53768 | 69.20006 | 69.53219 | 1541.41502  | 582.18425   | 2169.97026  | 1 |
| 203 | H | 83.17469 | 68.76530 | 68.94900 | -2534.67717 | 60.25153    | 997.72295   | 1 |
| 204 | C | 82.49933 | 67.58596 | 70.65467 | 574.26774   | -389.43119  | -377.02542  | 1 |
| 205 | C | 83.67413 | 66.78695 | 70.79286 | 688.82679   | -287.33580  | -257.96133  | 1 |
| 206 | H | 84.63736 | 67.12101 | 70.36624 | 331.14182   | 1470.38163  | 2269.80013  | 1 |
| 207 | C | 81.26019 | 67.14527 | 71.20982 | -383.52382  | -675.04808  | 144.24917   | 1 |
| 208 | H | 80.34738 | 67.75804 | 71.11245 | 4.09847     | 1517.59662  | 2262.86397  | 1 |
| 209 | C | 83.57921 | 65.57052 | 71.46866 | -134.76730  | 428.45285   | -649.50303  | 1 |
| 210 | H | 84.48656 | 64.94993 | 71.57058 | -903.23433  | 1600.49020  | 2011.53387  | 1 |
| 211 | C | 81.21547 | 65.91974 | 71.87731 | -335.53281  | -615.00040  | -364.39058  | 1 |
| 212 | H | 80.24904 | 65.59176 | 72.29840 | 1596.45398  | -1369.33862 | 1732.02659  | 1 |
| 213 | C | 82.36233 | 65.08774 | 72.03199 | 585.48547   | -340.24194  | -406.23938  | 1 |
| 214 | O | 82.32423 | 63.83992 | 72.70644 | -419.15649  | -173.04408  | -511.94141  | 1 |
| 215 | H | 81.36964 | 63.81319 | 72.95388 | -1071.84350 | 1559.71507  | -1960.13012 | 1 |
| 216 | C | 83.19071 | 71.35696 | 69.70718 | 291.41878   | -183.13091  | 710.72246   | 1 |
| 217 | O | 83.74439 | 71.25919 | 68.63197 | 379.87695   | 523.47396   | -222.23622  | 1 |
| 218 | N | 82.49802 | 72.39406 | 70.17607 | 564.30591   | 373.09380   | 277.24371   | 1 |
| 219 | H | 82.08516 | 72.30945 | 71.10424 | -120.59931  | -2436.07824 | -1214.35098 | 1 |
| 220 | C | 82.45766 | 73.56493 | 69.37412 | 404.07514   | -299.37480  | 608.84009   | 1 |
| 221 | H | 82.80661 | 73.22092 | 68.37063 | -1071.07882 | -841.69025  | 2359.66467  | 1 |
| 222 | C | 80.96157 | 74.07832 | 69.42954 | -683.12807  | 68.71770    | -390.13096  | 1 |
| 223 | H | 80.25663 | 73.24661 | 69.20520 | 2068.88918  | 1596.58590  | 770.89603   | 1 |
| 224 | H | 80.69904 | 74.42649 | 70.45440 | 1379.86429  | 2342.49779  | -179.85638  | 1 |
| 225 | C | 80.80490 | 75.23625 | 68.39606 | -176.39967  | 537.49466   | 550.97268   | 1 |
| 226 | H | 81.44168 | 76.10910 | 68.66656 | -396.28051  | 1942.22168  | 1869.33314  | 1 |
| 227 | H | 81.13797 | 74.92371 | 67.38098 | -94.44700   | 586.00678   | -2659.20016 | 1 |
| 228 | C | 79.25000 | 75.60313 | 68.41385 | -291.69381  | -718.18079  | -150.72929  | 1 |

|     |   |          |          |          |             |             |             |   |
|-----|---|----------|----------|----------|-------------|-------------|-------------|---|
| 229 | H | 78.56367 | 74.78681 | 68.07242 | -2303.38776 | 1089.76242  | 964.62032   | 1 |
| 230 | H | 78.85286 | 75.98797 | 69.38628 | 884.16729   | 2568.80533  | -207.74283  | 1 |
| 231 | N | 79.17714 | 76.63727 | 67.47036 | -594.49522  | -252.81478  | 342.29276   | 1 |
| 232 | H | 80.03264 | 76.88305 | 66.99632 | -1735.17426 | 2084.05705  | -263.71605  | 1 |
| 233 | C | 78.11304 | 77.26497 | 67.17070 | 595.23177   | -271.52487  | 442.22352   | 1 |
| 234 | N | 76.93924 | 76.90639 | 67.84196 | 585.53813   | -424.79750  | -105.81303  | 1 |
| 235 | H | 76.77715 | 76.19833 | 68.55689 | 959.88797   | 1327.56823  | -2177.11905 | 1 |
| 236 | H | 76.02345 | 77.33282 | 67.69955 | 1578.48647  | 16.27378    | -2220.76233 | 1 |
| 237 | N | 78.35795 | 78.22719 | 66.18063 | -452.17763  | -390.33541  | -421.51853  | 1 |
| 238 | H | 79.21096 | 78.46645 | 65.67712 | 470.26107   | 1974.25629  | -1817.92087 | 1 |
| 239 | H | 77.62515 | 78.81316 | 65.77881 | 1856.67307  | -1573.97321 | -1224.35416 | 1 |
| 240 | C | 83.41191 | 74.77678 | 69.97345 | -531.47271  | -581.45780  | -55.06206   | 1 |
| 241 | O | 83.96870 | 75.49050 | 69.16572 | -243.00837  | 192.73507   | 609.52485   | 1 |
| 242 | N | 83.37090 | 74.86264 | 71.28611 | 343.49288   | -644.25607  | 38.09164    | 1 |
| 243 | H | 82.84426 | 74.11170 | 71.72792 | -1691.16043 | -1535.97525 | -1484.73099 | 1 |
| 244 | C | 84.08159 | 75.81697 | 72.06896 | 542.66492   | 350.14337   | 454.42563   | 1 |
| 245 | H | 84.49988 | 75.22210 | 72.90984 | 1209.57979  | -2396.95920 | 463.86744   | 1 |
| 246 | C | 85.17176 | 76.59838 | 71.22245 | -737.14309  | 145.93010   | 242.71942   | 1 |
| 247 | H | 84.72491 | 77.02656 | 70.28847 | -1050.18303 | 159.36419   | -2509.06125 | 1 |
| 248 | C | 85.78496 | 77.74528 | 72.09984 | -706.77696  | -252.88343  | -245.16230  | 1 |
| 249 | H | 86.59508 | 78.28921 | 71.55965 | -1624.64039 | -1665.49085 | 1417.86935  | 1 |
| 250 | H | 85.01226 | 78.50034 | 72.38082 | 2566.10521  | 598.51109   | 693.22305   | 1 |
| 251 | H | 86.22004 | 77.35578 | 73.04977 | -1972.69758 | 107.10018   | -1876.34312 | 1 |
| 252 | C | 86.30581 | 75.57320 | 70.87238 | 412.85148   | 672.58832   | -27.69222   | 1 |
| 253 | H | 87.15256 | 76.05897 | 70.33357 | 1447.02277  | 1762.76533  | -1490.78944 | 1 |
| 254 | H | 86.72240 | 75.08928 | 71.78693 | 1320.77379  | -145.20455  | 2378.68491  | 1 |
| 255 | H | 85.90689 | 74.76493 | 70.21121 | -1512.10848 | 1470.52031  | 1724.75147  | 1 |
| 256 | C | 83.01016 | 76.93475 | 72.60900 | -607.11113  | 499.56689   | 73.73769    | 1 |
| 257 | O | 82.19720 | 77.49591 | 71.90887 | 357.97126   | 460.81534   | 356.68785   | 1 |
| 258 | N | 83.28971 | 77.13896 | 73.88939 | 536.55407   | -368.62270  | 332.76306   | 1 |
| 259 | H | 84.03893 | 76.61394 | 74.33883 | 524.38866   | 2297.69985  | 1367.20941  | 1 |
| 260 | C | 82.65873 | 78.21233 | 74.57302 | 46.50277    | -774.29190  | -147.97904  | 1 |
| 261 | H | 82.10702 | 78.78783 | 73.79226 | 1676.51875  | 1883.29066  | 1032.55549  | 1 |
| 262 | C | 81.71855 | 77.56896 | 75.69265 | -559.41456  | -34.19198   | -556.30433  | 1 |
| 263 | H | 82.27656 | 76.80391 | 76.27587 | -64.66664   | 395.18769   | 2695.05373  | 1 |
| 264 | H | 81.37617 | 78.33210 | 76.42625 | -2703.44278 | -60.40056   | 333.79418   | 1 |
| 265 | C | 80.50014 | 76.92573 | 74.95483 | -519.76435  | 377.31045   | 459.42366   | 1 |
| 266 | H | 80.84167 | 76.27789 | 74.11608 | -1746.74323 | 1667.50644  | -1261.73691 | 1 |
| 267 | C | 79.60755 | 76.11337 | 75.96247 | 570.95554   | 16.46261    | -545.27700  | 1 |
| 268 | H | 78.78617 | 75.58626 | 75.42509 | 2391.58273  | 28.05277    | -1305.07271 | 1 |
| 269 | H | 80.19585 | 75.34134 | 76.51174 | 175.75588   | 917.63458   | 2559.43867  | 1 |
| 270 | H | 79.13021 | 76.78681 | 76.71777 | -1063.97851 | -2155.34650 | 1283.00462  | 1 |
| 271 | C | 79.58560 | 78.09538 | 74.43859 | 193.76014   | 2.62946     | -765.53141  | 1 |
| 272 | H | 78.66428 | 77.69306 | 73.94830 | 507.39394   | -846.55087  | 2539.60089  | 1 |
| 273 | H | 79.25358 | 78.75612 | 75.28367 | 1337.57841  | 1818.19054  | 1526.01994  | 1 |
| 274 | H | 80.11104 | 78.73766 | 73.69475 | 1100.88635  | -1172.91350 | -2199.08909 | 1 |
| 275 | C | 83.81363 | 79.04452 | 75.35789 | -549.21115  | 475.64486   | -309.38218  | 1 |
| 276 | O | 84.86315 | 78.55929 | 75.68740 | 556.06106   | -390.37755  | -78.24250   | 1 |
| 277 | O | 83.46758 | 80.35787 | 75.74495 | -572.27940  | -310.19032  | -209.75862  | 1 |
| 278 | H | 82.55348 | 80.40025 | 75.34253 | -1380.08193 | 2212.14486  | 790.85944   | 1 |

Listing 124: C00124.xmolout

|   |   |          |          |          |             |             |             |        |          |
|---|---|----------|----------|----------|-------------|-------------|-------------|--------|----------|
| 1 |   | 276      |          |          |             |             |             |        |          |
| 2 |   | 150.0000 | 150.0000 | 150.0000 | 0.0000      | 0.0000      | 0.0000***** | 2.7750 | 11100    |
|   |   | 0.2500   | 300.00   | 0.00     | 0.00        | 0.00        | -1293.3642  | 0.0000 | 300.0000 |
| 3 | H | 79.90597 | 81.15335 | 84.89988 | -2043.14101 | -1757.64893 | 399.89339   |        | 1        |
| 4 | N | 79.88147 | 81.72474 | 84.05627 | 426.75047   | 490.45733   | -334.42467  |        | 1        |
| 5 | H | 78.96825 | 82.16546 | 84.16326 | 442.25559   | -1110.30854 | -2448.52907 |        | 1        |
| 6 | C | 80.94199 | 82.66582 | 83.99873 | 415.32972   | -666.39213  | 83.73172    |        | 1        |
| 7 | H | 81.14012 | 82.97356 | 85.04818 | 879.32219   | 2491.00447  | 667.35213   |        | 1        |
| 8 | C | 82.21776 | 81.95665 | 83.31623 | 31.35357    | 477.41777   | 628.23362   |        | 1        |

|    |   |          |          |          |             |             |             |   |
|----|---|----------|----------|----------|-------------|-------------|-------------|---|
| 9  | H | 81.90901 | 81.50903 | 82.34100 | 1168.38489  | 2240.25337  | -1019.71136 | 1 |
| 10 | H | 82.99785 | 82.71948 | 83.07676 | -360.43770  | 2534.90498  | 931.67112   | 1 |
| 11 | C | 82.78018 | 80.89287 | 84.22414 | 463.18208   | 512.70242   | -382.34388  | 1 |
| 12 | H | 81.94929 | 80.22383 | 84.54130 | 1725.29117  | 1863.52247  | -987.07854  | 1 |
| 13 | C | 83.81046 | 80.05700 | 83.47461 | 710.42801   | -144.27427  | -313.15367  | 1 |
| 14 | H | 84.23331 | 79.24421 | 84.11991 | 364.20195   | -1033.13725 | 2494.72524  | 1 |
| 15 | H | 83.36627 | 79.56629 | 82.56988 | 2567.61904  | 335.80679   | 847.48802   | 1 |
| 16 | H | 84.67147 | 80.68262 | 83.12345 | -2587.99029 | 680.92867   | -512.16411  | 1 |
| 17 | C | 83.42432 | 81.50106 | 85.46217 | 268.17616   | 741.64379   | -40.42634   | 1 |
| 18 | H | 83.87789 | 80.71561 | 86.12053 | 1283.54314  | -1945.37420 | -1411.27812 | 1 |
| 19 | H | 84.24249 | 82.21732 | 85.19029 | -1258.57796 | 1317.15249  | -2026.02085 | 1 |
| 20 | H | 82.68409 | 82.06656 | 86.08448 | -2502.84526 | 909.80597   | 575.92391   | 1 |
| 21 | C | 80.48927 | 83.91397 | 83.06468 | 619.36578   | -458.64843  | -172.09273  | 1 |
| 22 | O | 80.94676 | 85.04265 | 83.28466 | -81.40433   | 433.87611   | 522.34594   | 1 |
| 23 | N | 79.76335 | 83.49483 | 82.06156 | 175.23996   | -622.20190  | 341.55523   | 1 |
| 24 | H | 79.54754 | 82.49999 | 82.10726 | -876.57256  | -303.22879  | -2561.90213 | 1 |
| 25 | C | 79.04817 | 84.33334 | 81.14415 | -571.88214  | -534.10783  | -106.15033  | 1 |
| 26 | H | 78.04881 | 84.45995 | 81.61298 | -2713.20841 | -16.25800   | -248.80809  | 1 |
| 27 | C | 79.79044 | 85.73756 | 80.99174 | 166.60354   | 288.16399   | -716.09568  | 1 |
| 28 | H | 80.90139 | 85.54902 | 81.06235 | -2097.85574 | 1636.78449  | -586.18044  | 1 |
| 29 | O | 79.52459 | 86.67943 | 82.03184 | -317.80580  | -363.38227  | 484.43082   | 1 |
| 30 | H | 80.24351 | 86.37832 | 82.71518 | 1863.74748  | -1451.84923 | 1357.29467  | 1 |
| 31 | C | 79.41045 | 86.19396 | 79.53705 | 503.80731   | 517.99032   | 318.51606   | 1 |
| 32 | H | 79.91757 | 87.14898 | 79.26522 | 640.61020   | -2157.10410 | -1536.29104 | 1 |
| 33 | H | 79.69622 | 85.43503 | 78.77155 | 1687.88455  | 465.60692   | 2087.56452  | 1 |
| 34 | H | 78.31267 | 86.36427 | 79.44112 | -1293.07895 | -1899.88581 | -1463.57452 | 1 |
| 35 | C | 78.88689 | 83.43732 | 79.79515 | -153.07550  | -733.68902  | 248.70981   | 1 |
| 36 | O | 77.74979 | 83.31382 | 79.42026 | 186.15459   | -480.78787  | -449.34387  | 1 |
| 37 | N | 80.01654 | 82.98683 | 79.22766 | -487.53139  | 543.18517   | 42.03850    | 1 |
| 38 | C | 79.97419 | 82.24547 | 78.00677 | -699.35871  | 69.34393    | 360.10701   | 1 |
| 39 | H | 79.14200 | 82.67927 | 77.40793 | 2.81126     | -221.99807  | -2715.58072 | 1 |
| 40 | C | 81.44125 | 82.45954 | 77.44837 | -507.46439  | -592.59194  | 122.07761   | 1 |
| 41 | H | 81.73942 | 81.68490 | 76.70669 | -1975.08116 | 525.87560   | -1801.71556 | 1 |
| 42 | H | 81.55111 | 83.44605 | 76.94513 | 1588.27743  | -1913.22100 | 1113.83566  | 1 |
| 43 | C | 82.27199 | 82.39942 | 78.76836 | -613.62442  | -457.55993  | -194.14490  | 1 |
| 44 | H | 82.34982 | 81.34923 | 79.14063 | 1707.54637  | -721.27992  | 1996.92523  | 1 |
| 45 | H | 83.31095 | 82.78685 | 78.66780 | 758.23357   | 2100.81767  | 1560.55011  | 1 |
| 46 | C | 81.35630 | 83.28603 | 79.71680 | -352.41524  | 704.96076   | 49.21465    | 1 |
| 47 | H | 81.40025 | 83.03086 | 80.80062 | 1714.76886  | -2070.42778 | 443.35792   | 1 |
| 48 | H | 81.49701 | 84.38492 | 79.59320 | 1224.15040  | 1801.50881  | 1636.97633  | 1 |
| 49 | C | 79.74479 | 80.64536 | 78.34588 | 566.85117   | 537.05831   | 117.62814   | 1 |
| 50 | O | 80.66054 | 79.98472 | 78.77432 | -550.26779  | -406.08867  | 4.21666     | 1 |
| 51 | N | 78.50582 | 80.29165 | 78.05233 | 566.34832   | -425.77725  | 180.18749   | 1 |
| 52 | H | 77.88736 | 81.02202 | 77.70135 | 644.44502   | 2646.80550  | -52.73430   | 1 |
| 53 | C | 78.06255 | 78.94301 | 78.13487 | 612.34801   | -281.48662  | 411.56221   | 1 |
| 54 | H | 77.01281 | 79.01719 | 77.77421 | 1667.23498  | -1490.75142 | 1556.16753  | 1 |
| 55 | C | 78.98428 | 78.06457 | 77.18050 | -714.45746  | -175.43074  | 286.98927   | 1 |
| 56 | H | 80.04394 | 78.16511 | 77.54106 | -787.09484  | 1763.03619  | -1922.46060 | 1 |
| 57 | O | 79.00070 | 78.48170 | 75.77630 | -429.46514  | 516.51932   | -128.40526  | 1 |
| 58 | H | 79.91593 | 78.80260 | 75.70699 | 1981.82785  | 436.16847   | -1818.18182 | 1 |
| 59 | C | 78.48015 | 76.59853 | 77.40000 | 630.79189   | -468.94448  | 76.03230    | 1 |
| 60 | H | 79.01394 | 75.88302 | 76.73067 | -1775.71861 | 2062.30353  | 131.89849   | 1 |
| 61 | H | 78.64481 | 76.24844 | 78.45787 | -1855.14608 | 88.94118    | 1993.53760  | 1 |
| 62 | H | 77.38684 | 76.50449 | 77.18130 | -1504.82350 | -780.94249  | -2132.90992 | 1 |
| 63 | C | 78.14806 | 78.47607 | 79.70263 | 288.57638   | 618.62814   | -397.00270  | 1 |
| 64 | O | 78.73384 | 77.46799 | 80.04579 | 321.70495   | -185.26452  | 574.37218   | 1 |
| 65 | N | 77.41777 | 79.28002 | 80.46435 | -447.05792  | -446.53431  | 367.76425   | 1 |
| 66 | H | 76.98141 | 80.09688 | 80.03928 | 350.31316   | 1975.63644  | -1843.31522 | 1 |
| 67 | C | 77.41532 | 78.96669 | 81.85502 | -511.23061  | 374.03917   | -471.51480  | 1 |
| 68 | H | 78.43976 | 78.56357 | 82.03136 | 2234.79579  | -898.70890  | -1273.45190 | 1 |
| 69 | C | 77.07034 | 80.32138 | 82.62942 | 529.53781   | -159.34528  | 563.72604   | 1 |
| 70 | H | 77.23667 | 80.11668 | 83.72221 | 654.59388   | 2347.94251  | 1217.51488  | 1 |



|     |   |          |          |          |             |             |             |   |
|-----|---|----------|----------|----------|-------------|-------------|-------------|---|
| 71  | H | 77.83071 | 81.08517 | 82.31867 | -1526.55661 | 2103.42026  | 817.87394   | 1 |
| 72  | O | 75.72038 | 80.83077 | 82.47495 | -554.84278  | 14.12789    | 399.58769   | 1 |
| 73  | H | 75.85198 | 81.42108 | 81.71076 | 1297.06236  | 2061.84854  | 1220.68812  | 1 |
| 74  | C | 76.30126 | 77.79487 | 82.12704 | -662.15484  | -412.13544  | 123.62687   | 1 |
| 75  | O | 76.47193 | 77.02194 | 83.04393 | -540.01537  | -317.05804  | 274.91456   | 1 |
| 76  | N | 75.25838 | 77.90758 | 81.31763 | -202.76299  | -690.00100  | -131.49145  | 1 |
| 77  | H | 75.29680 | 78.66870 | 80.64172 | -702.62132  | -2617.37191 | 281.70413   | 1 |
| 78  | C | 74.31917 | 76.83579 | 81.19746 | -491.73914  | 576.34187   | 222.73509   | 1 |
| 79  | H | 74.95429 | 75.92745 | 81.29534 | 1977.17978  | -1823.58850 | -434.68928  | 1 |
| 80  | C | 73.25596 | 76.94414 | 82.36730 | -649.50797  | -328.66843  | 306.11224   | 1 |
| 81  | H | 72.73299 | 77.92431 | 82.32535 | 2075.07803  | 1452.16490  | -1004.45904 | 1 |
| 82  | C | 72.24288 | 75.76320 | 82.17860 | -615.18735  | -489.99689  | -70.96352   | 1 |
| 83  | H | 71.46149 | 75.75922 | 82.97467 | -1226.32661 | -1724.38906 | -1716.47170 | 1 |
| 84  | H | 71.71817 | 75.84236 | 81.19430 | 2381.64273  | -969.84735  | 900.46860   | 1 |
| 85  | H | 72.75366 | 74.77201 | 82.20781 | 2122.74991  | 1702.23946  | -141.36228  | 1 |
| 86  | C | 73.95310 | 76.75832 | 83.76115 | -501.86074  | -479.61276  | -376.42482  | 1 |
| 87  | H | 73.21009 | 76.58997 | 84.57632 | 993.79261   | -2246.95401 | -1177.81305 | 1 |
| 88  | H | 74.65165 | 75.88517 | 83.75819 | 42.71279    | -626.15391  | -2651.37258 | 1 |
| 89  | H | 74.55010 | 77.66128 | 84.03990 | -2026.39012 | -1590.33709 | -887.82922  | 1 |
| 90  | C | 73.59643 | 77.02728 | 79.74533 | -672.89153  | 382.57394   | -156.34072  | 1 |
| 91  | O | 72.43697 | 77.36207 | 79.64428 | 410.04627   | 221.86223   | 500.35950   | 1 |
| 92  | N | 74.47842 | 76.82560 | 78.76427 | -378.11782  | -443.79414  | -441.10984  | 1 |
| 93  | H | 75.40681 | 76.48506 | 79.01451 | 2404.15973  | -568.14894  | 1149.30085  | 1 |
| 94  | C | 73.93491 | 76.72556 | 77.44440 | -544.54484  | 466.16019   | 331.29119   | 1 |
| 95  | H | 73.07862 | 77.43749 | 77.45086 | -1409.80988 | -170.17955  | 2325.32679  | 1 |
| 96  | C | 75.13191 | 77.08171 | 76.47231 | -184.48284  | 116.78282   | -758.89137  | 1 |
| 97  | H | 75.61499 | 78.02882 | 76.79958 | 1893.78641  | 1861.14652  | 611.04528   | 1 |
| 98  | H | 75.92109 | 76.29425 | 76.55331 | -2170.79665 | -974.19311  | 1327.50117  | 1 |
| 99  | C | 74.64520 | 77.22262 | 74.99586 | 389.51668   | 672.81878   | -138.49152  | 1 |
| 100 | H | 74.36258 | 76.22450 | 74.58898 | 510.64577   | 1933.03327  | 1851.02484  | 1 |
| 101 | H | 73.73162 | 77.85249 | 74.93376 | -2302.30869 | -1105.72939 | -948.89774  | 1 |
| 102 | C | 75.80551 | 77.89714 | 74.13918 | -559.93427  | -126.34590  | 542.30857   | 1 |
| 103 | O | 75.65031 | 78.92342 | 73.52568 | -670.36003  | -111.83166  | 76.36448    | 1 |
| 104 | N | 77.00101 | 77.20623 | 74.25598 | -216.06729  | -537.07037  | 446.51379   | 1 |
| 105 | H | 77.02069 | 76.48778 | 74.98399 | -1251.96487 | 1074.12894  | -2168.52500 | 1 |
| 106 | H | 77.86953 | 77.75791 | 74.37387 | -2451.83023 | -720.73851  | 944.84612   | 1 |
| 107 | C | 73.49484 | 75.16596 | 77.20735 | 546.24052   | -563.88337  | -85.11809   | 1 |
| 108 | O | 74.29547 | 74.29283 | 77.41186 | 71.70702    | -307.40463  | 606.69673   | 1 |
| 109 | N | 72.26123 | 75.08544 | 76.69563 | 479.90863   | -504.50129  | 222.86849   | 1 |
| 110 | C | 71.60041 | 73.81524 | 76.55999 | 75.51268    | -600.91904  | 506.73700   | 1 |
| 111 | H | 71.73599 | 73.28519 | 77.52998 | -2033.61562 | 1795.30103  | 254.89480   | 1 |
| 112 | C | 70.10177 | 74.22363 | 76.23138 | 523.79067   | 517.99274   | 284.45581   | 1 |
| 113 | H | 69.57993 | 73.46944 | 75.60054 | 1599.61665  | -1127.00911 | 1895.98173  | 1 |
| 114 | H | 69.49923 | 74.32128 | 77.16183 | -1881.83093 | 1275.82488  | -1501.55016 | 1 |
| 115 | C | 70.25664 | 75.60562 | 75.52375 | -600.05639  | -404.05026  | 316.64485   | 1 |
| 116 | H | 70.53580 | 75.48360 | 74.45271 | -2597.05260 | 496.36221   | 657.73249   | 1 |
| 117 | H | 69.32953 | 76.22221 | 75.53871 | -1666.24518 | 1294.38985  | -1723.90591 | 1 |
| 118 | C | 71.44273 | 76.24303 | 76.37047 | 493.57570   | -129.95376  | -602.56394  | 1 |
| 119 | H | 72.06624 | 76.98816 | 75.82418 | -1469.08415 | -637.84797  | 2204.22581  | 1 |
| 120 | H | 71.12809 | 76.67104 | 77.35311 | -1038.97840 | 1068.88701  | -2280.71789 | 1 |
| 121 | C | 72.28362 | 72.98179 | 75.34531 | 188.88100   | 241.05089   | -727.87821  | 1 |
| 122 | O | 72.26400 | 71.74749 | 75.33233 | 531.88613   | -49.19943   | 427.07960   | 1 |
| 123 | N | 72.74138 | 73.79302 | 74.42246 | 708.14833   | 26.93417    | -179.73509  | 1 |
| 124 | H | 72.63280 | 74.78981 | 74.60110 | -2232.69501 | -1179.09831 | 1023.94816  | 1 |
| 125 | C | 73.25555 | 73.26532 | 73.20651 | -738.32412  | 259.92548   | 104.42456   | 1 |
| 126 | H | 73.53665 | 72.20934 | 73.42210 | 2028.89123  | 1260.02983  | 1311.33324  | 1 |
| 127 | C | 72.10659 | 73.39223 | 72.10685 | -258.65678  | -345.52513  | 661.28459   | 1 |
| 128 | H | 71.78845 | 74.44640 | 71.94717 | -1826.06090 | -1801.46097 | -918.64554  | 1 |
| 129 | C | 72.69421 | 72.78889 | 70.78826 | -541.23400  | 531.92970   | -218.41428  | 1 |
| 130 | H | 71.89903 | 72.67103 | 70.01852 | 1311.73218  | -2219.18200 | 882.19023   | 1 |
| 131 | H | 73.48673 | 73.44605 | 70.35481 | -1048.71298 | 1223.58118  | -2196.97971 | 1 |
| 132 | H | 73.14974 | 71.77629 | 70.95775 | 419.06414   | 1903.92898  | 1903.44670  | 1 |

|     |   |          |          |          |             |             |             |   |
|-----|---|----------|----------|----------|-------------|-------------|-------------|---|
| 133 | C | 70.90095 | 72.52797 | 72.60719 | -423.86431  | 152.66566   | -648.55262  | 1 |
| 134 | H | 68.56080 | 72.19164 | 70.72275 | 105.68386   | -2342.50080 | 1387.51238  | 1 |
| 135 | H | 70.35570 | 72.05338 | 71.75300 | -1695.63603 | -1484.73621 | -1531.02793 | 1 |
| 136 | H | 70.16128 | 73.14912 | 73.16816 | -1853.57121 | -487.39031  | 1936.59343  | 1 |
| 137 | C | 74.45972 | 74.25113 | 72.70326 | 539.71428   | -510.58232  | 267.58633   | 1 |
| 138 | O | 74.28600 | 75.44357 | 72.48575 | -15.93758   | -278.34085  | -624.49402  | 1 |
| 139 | N | 75.54025 | 73.52335 | 72.52554 | -676.81886  | 12.05292    | 276.17960   | 1 |
| 140 | H | 75.46980 | 72.51539 | 72.66041 | -1694.44250 | -373.84189  | -2100.66098 | 1 |
| 141 | C | 76.77013 | 74.17571 | 72.21313 | 412.33078   | -664.70360  | 108.35451   | 1 |
| 142 | H | 76.65585 | 75.18826 | 72.66742 | 1765.77476  | 1294.44366  | 1621.76594  | 1 |
| 143 | C | 77.90404 | 73.26653 | 72.83311 | -179.66635  | -721.95667  | -264.73915  | 1 |
| 144 | H | 77.75982 | 73.16269 | 73.93205 | -607.34922  | 2587.87032  | -598.10018  | 1 |
| 145 | H | 77.83277 | 72.23397 | 72.42257 | -359.69332  | -1479.13954 | -2259.74260 | 1 |
| 146 | C | 79.31314 | 73.87336 | 72.53017 | -240.01076  | 616.02425   | 431.85322   | 1 |
| 147 | H | 79.47064 | 73.97726 | 71.43038 | -1359.17131 | 782.54425   | 2227.99181  | 1 |
| 148 | H | 79.42049 | 74.89305 | 72.96410 | -820.36667  | 85.81767    | -2596.78715 | 1 |
| 149 | C | 80.33998 | 72.85486 | 73.17310 | -513.07015  | 236.18570   | -551.87280  | 1 |
| 150 | H | 80.13583 | 72.72664 | 74.26107 | 1816.11944  | -1183.11722 | -1650.94321 | 1 |
| 151 | H | 80.21705 | 71.84252 | 72.72380 | -1800.04429 | -1361.53473 | 1526.34643  | 1 |
| 152 | C | 81.77885 | 73.37224 | 72.95042 | 726.08972   | -253.19732  | -179.64713  | 1 |
| 153 | H | 82.09093 | 73.42818 | 71.88850 | 1224.27271  | -456.51798  | -2390.90304 | 1 |
| 154 | H | 82.01407 | 74.32437 | 73.46644 | 1206.40339  | -1150.93514 | -2154.90344 | 1 |
| 155 | N | 82.74589 | 72.31920 | 73.59265 | 329.70796   | -633.68968  | -155.67358  | 1 |
| 156 | H | 83.78045 | 72.53872 | 73.51520 | 1348.31305  | 1938.76845  | 1359.00643  | 1 |
| 157 | H | 82.64838 | 72.14080 | 74.63450 | 2096.92035  | 1446.54551  | -966.48890  | 1 |
| 158 | H | 82.71365 | 71.33451 | 73.19772 | -1197.07217 | -2303.53719 | 827.28733   | 1 |
| 159 | C | 76.82725 | 74.25186 | 70.57311 | -378.01186  | -556.17301  | -413.96481  | 1 |
| 160 | O | 77.74384 | 73.78351 | 69.94469 | -409.44433  | -307.55053  | -453.30833  | 1 |
| 161 | N | 75.73968 | 74.88470 | 70.16323 | -429.02477  | 524.70884   | 274.08502   | 1 |
| 162 | H | 75.09395 | 75.29965 | 70.86736 | 1706.34263  | -1425.96036 | 1574.38926  | 1 |
| 163 | C | 75.52469 | 75.09132 | 68.75636 | -45.25864   | -626.22952  | 478.93267   | 1 |
| 164 | H | 76.39765 | 75.73240 | 68.50404 | 1988.63164  | 570.90773   | 1772.87287  | 1 |
| 165 | C | 75.61009 | 73.70883 | 68.00489 | 551.77128   | -20.49526   | -564.54996  | 1 |
| 166 | H | 76.53341 | 73.15366 | 68.30642 | 1434.61535  | -1753.10253 | 1513.99471  | 1 |
| 167 | H | 74.76163 | 73.04106 | 68.27703 | -714.67738  | 1819.09770  | 1898.36494  | 1 |
| 168 | C | 75.63189 | 74.02294 | 66.46936 | 446.99263   | -555.77305  | 338.97221   | 1 |
| 169 | H | 74.72182 | 74.58624 | 66.16609 | 1953.68466  | 1892.25957  | -161.67766  | 1 |
| 170 | H | 76.49267 | 74.68228 | 66.21864 | -403.03785  | 2688.07032  | -188.43591  | 1 |
| 171 | C | 75.73828 | 72.65361 | 65.68737 | 567.86262   | 335.74681   | 434.04421   | 1 |
| 172 | H | 76.63929 | 72.08273 | 66.01061 | -1080.02275 | 1568.26081  | -1948.78900 | 1 |
| 173 | H | 74.86694 | 71.99615 | 65.91142 | -919.54108  | 2111.34692  | 1456.13463  | 1 |
| 174 | C | 75.81296 | 72.98075 | 64.17716 | 195.81897   | 173.33862   | -745.11536  | 1 |
| 175 | H | 74.89728 | 73.44416 | 63.75891 | 1405.67949  | -2301.21089 | -390.08113  | 1 |
| 176 | H | 76.70387 | 73.56772 | 63.87655 | -940.37328  | -1118.32446 | 2299.72133  | 1 |
| 177 | N | 75.96354 | 71.62678 | 63.40642 | 319.26422   | 656.36007   | -42.02424   | 1 |
| 178 | H | 76.02482 | 71.70285 | 62.34994 | 1961.03633  | 619.91968   | 1787.09422  | 1 |
| 179 | H | 76.83041 | 71.05492 | 63.62261 | 854.14343   | -2156.80752 | 1429.08711  | 1 |
| 180 | H | 75.19096 | 70.90788 | 63.52177 | 1237.02905  | -1378.50857 | -1998.28500 | 1 |
| 181 | C | 74.10336 | 75.88387 | 68.64033 | 532.53319   | -268.57236  | 517.55729   | 1 |
| 182 | O | 74.03865 | 77.00900 | 69.08293 | 266.16714   | -290.73804  | -558.88002  | 1 |
| 183 | N | 73.12392 | 75.15988 | 68.09358 | -226.25352  | 640.49678   | -270.32839  | 1 |
| 184 | H | 73.34543 | 74.22907 | 67.74366 | 2007.69063  | -1035.27229 | 1523.50231  | 1 |
| 185 | C | 71.95931 | 75.86454 | 67.68558 | -540.76542  | -573.33303  | 49.50000    | 1 |
| 186 | H | 72.11443 | 76.90786 | 68.05312 | -2374.20950 | -1036.76023 | 843.75774   | 1 |
| 187 | C | 71.89438 | 75.75473 | 66.08813 | -77.09082   | 666.87422   | -415.84136  | 1 |
| 188 | H | 71.89336 | 74.66854 | 65.79670 | -985.81834  | 617.19825   | 2463.91927  | 1 |
| 189 | O | 73.00928 | 76.34527 | 65.39451 | 293.29899   | -391.65602  | -477.80926  | 1 |
| 190 | H | 73.32841 | 75.58534 | 64.86873 | 2528.72714  | -681.76262  | -751.27122  | 1 |
| 191 | C | 70.49039 | 76.37119 | 65.74491 | 252.47363   | -605.14473  | 440.05134   | 1 |
| 192 | H | 70.34913 | 76.47212 | 64.64386 | -2052.65063 | 1456.49051  | -1043.51830 | 1 |
| 193 | H | 69.65169 | 75.73837 | 66.12311 | -2152.98800 | -1661.97574 | -161.70652  | 1 |
| 194 | H | 70.36825 | 77.38625 | 66.19082 | -473.12726  | -1584.27339 | 2165.61725  | 1 |

|     |   |          |          |          |             |             |             |   |
|-----|---|----------|----------|----------|-------------|-------------|-------------|---|
| 195 | C | 70.61830 | 75.15701 | 68.30849 | 360.36307   | 488.46713   | 505.10056   | 1 |
| 196 | O | 69.59681 | 75.80146 | 68.39018 | -200.08817  | -528.03552  | -385.82850  | 1 |
| 197 | N | 70.79902 | 73.87254 | 68.58064 | -597.54095  | -226.44775  | 355.20479   | 1 |
| 198 | H | 71.72364 | 73.49053 | 68.39523 | 2179.23655  | -1300.70981 | -991.33835  | 1 |
| 199 | C | 69.62477 | 73.06356 | 68.86346 | -687.68921  | 297.39807   | -249.45179  | 1 |
| 200 | H | 68.86418 | 73.54673 | 68.20570 | -349.16256  | -2467.37713 | -1101.72831 | 1 |
| 201 | C | 69.96953 | 71.52620 | 68.49670 | 672.47345   | 361.54328   | -201.62880  | 1 |
| 202 | H | 71.01141 | 71.26581 | 68.78738 | 1541.41502  | 582.18425   | 2169.97026  | 1 |
| 203 | H | 69.29506 | 70.83719 | 69.05392 | -2534.67717 | 60.25153    | 997.72295   | 1 |
| 204 | C | 69.75941 | 71.36958 | 66.98927 | 574.26774   | -389.43119  | -377.02542  | 1 |
| 205 | C | 68.41718 | 71.30402 | 66.50469 | 688.82679   | -287.33580  | -257.96133  | 1 |
| 206 | H | 67.56209 | 71.35891 | 67.20250 | 331.14182   | 1470.38163  | 2269.80013  | 1 |
| 207 | C | 70.86383 | 71.30567 | 66.08503 | -383.52382  | -675.04808  | 144.24917   | 1 |
| 208 | H | 71.90283 | 71.35943 | 66.45744 | 4.09847     | 1517.59662  | 2262.86397  | 1 |
| 209 | C | 68.21026 | 71.16874 | 65.13426 | -134.76730  | 428.45285   | -649.50303  | 1 |
| 210 | H | 67.17306 | 71.11560 | 64.75930 | -903.23433  | 1600.49020  | 2011.53387  | 1 |
| 211 | C | 70.60177 | 71.16476 | 64.72067 | -335.53281  | -615.00040  | -364.39058  | 1 |
| 212 | H | 71.45959 | 71.10559 | 64.02814 | 1596.45398  | -1369.33862 | 1732.02659  | 1 |
| 213 | C | 69.27865 | 71.09170 | 64.19383 | 585.48547   | -340.24194  | -406.23938  | 1 |
| 214 | O | 69.00071 | 70.95511 | 62.80961 | -419.15649  | -173.04408  | -511.94141  | 1 |
| 215 | H | 69.92084 | 70.89612 | 62.45968 | -1071.84350 | 1559.71507  | -1960.13012 | 1 |
| 216 | C | 69.15722 | 73.08585 | 70.34395 | 291.41878   | -183.13091  | 710.72246   | 1 |
| 217 | O | 69.17528 | 73.93150 | 71.19996 | 379.87695   | 523.47396   | -222.23622  | 1 |
| 218 | N | 71.18714 | 69.71035 | 71.01175 | 564.30591   | 373.09380   | 277.24371   | 2 |
| 219 | H | 71.96074 | 69.86517 | 70.36211 | -120.59931  | -2436.07824 | -1214.35098 | 2 |
| 220 | C | 71.58321 | 69.68738 | 72.17662 | 404.07514   | -299.37480  | 608.84009   | 2 |
| 221 | H | 71.23979 | 71.71174 | 73.29090 | -1071.07882 | -841.69025  | 2359.66467  | 1 |
| 222 | C | 70.40834 | 69.36040 | 73.23410 | -683.12807  | 68.71770    | -390.13096  | 2 |
| 223 | H | 69.62749 | 70.15351 | 73.13730 | 2068.88918  | 1596.58590  | 770.89603   | 2 |
| 224 | H | 69.91030 | 68.43637 | 72.85120 | 1379.86429  | 2342.49779  | -179.85638  | 2 |
| 225 | C | 70.75905 | 69.16757 | 74.67715 | -176.39967  | 537.49466   | 550.97268   | 2 |
| 226 | H | 71.56485 | 68.40848 | 74.76041 | -396.28051  | 1942.22168  | 1869.33314  | 2 |
| 227 | H | 71.19811 | 70.11322 | 75.09457 | -94.44700   | 586.00678   | -2659.20016 | 2 |
| 228 | C | 69.59022 | 68.75040 | 75.52956 | -291.69381  | -718.18079  | -150.72929  | 2 |
| 229 | H | 68.69824 | 69.41752 | 75.43716 | -2303.38776 | 1089.76242  | 964.62032   | 2 |
| 230 | H | 69.26207 | 67.69249 | 75.38393 | 884.16729   | 2568.80533  | -207.74283  | 2 |
| 231 | N | 69.98047 | 68.86254 | 76.98027 | -594.49522  | -252.81478  | 342.29276   | 2 |
| 232 | H | 70.80048 | 69.32816 | 77.36009 | -1735.17426 | 2084.05705  | -263.71605  | 2 |
| 233 | C | 69.08544 | 68.51220 | 77.96559 | 595.23177   | -271.52487  | 442.22352   | 2 |
| 234 | N | 67.86829 | 67.94394 | 77.63853 | 585.53813   | -424.79750  | -105.81303  | 2 |
| 235 | H | 67.50120 | 67.72376 | 76.71016 | 959.88797   | 1327.56823  | -2177.11905 | 2 |
| 236 | H | 67.18126 | 67.66416 | 78.33894 | 1578.48647  | 16.27378    | -2220.76233 | 2 |
| 237 | N | 69.44811 | 68.74776 | 79.27865 | -452.17763  | -390.33541  | -421.51853  | 2 |
| 238 | H | 70.30841 | 69.13905 | 79.67386 | 470.26107   | 1974.25629  | -1817.92087 | 2 |
| 239 | H | 68.81212 | 68.48217 | 80.03077 | 1856.67307  | -1573.97321 | -1224.35416 | 2 |
| 240 | C | 73.09464 | 69.88807 | 72.36649 | -531.47271  | -581.45780  | -55.06206   | 2 |
| 241 | O | 73.87237 | 69.88898 | 71.42258 | -243.00837  | 192.73507   | 609.52485   | 2 |
| 242 | N | 73.52148 | 70.08027 | 73.67154 | 343.49288   | -644.25607  | 38.09164    | 2 |
| 243 | H | 72.89359 | 70.39977 | 74.45294 | -1691.16043 | -1535.97525 | -1484.73099 | 2 |
| 244 | C | 74.85942 | 69.52867 | 73.95592 | 542.66492   | 350.14337   | 454.42563   | 2 |
| 245 | H | 75.41731 | 69.69114 | 73.00224 | 1209.57979  | -2396.95920 | 463.86744   | 2 |
| 246 | C | 75.50796 | 70.13208 | 75.17759 | -737.14309  | 145.93010   | 242.71942   | 2 |
| 247 | H | 74.87448 | 69.90389 | 76.06487 | -1050.18303 | 159.36419   | -2509.06125 | 2 |
| 248 | C | 76.87353 | 69.50291 | 75.40523 | -706.77696  | -252.88343  | -245.16230  | 2 |
| 249 | H | 77.39472 | 69.94046 | 76.29941 | -1624.64039 | -1665.49085 | 1417.86935  | 2 |
| 250 | H | 76.78692 | 68.39339 | 75.57944 | 2566.10521  | 598.51109   | 693.22305   | 2 |
| 251 | H | 77.54963 | 69.64704 | 74.51812 | -1972.69758 | 107.10018   | -1876.34312 | 2 |
| 252 | C | 75.64146 | 71.64214 | 75.10073 | 412.85148   | 672.58832   | -27.69222   | 2 |
| 253 | H | 76.22639 | 72.05540 | 75.96806 | 1447.02277  | 1762.76533  | -1490.78944 | 2 |
| 254 | H | 76.17201 | 71.95700 | 74.16171 | 1320.77379  | -145.20455  | 2378.68491  | 2 |
| 255 | H | 74.63546 | 72.14816 | 75.10919 | -1512.10848 | 1470.52031  | 1724.75147  | 2 |
| 256 | C | 74.63899 | 67.90973 | 74.28028 | -607.11113  | 499.56689   | 73.73769    | 2 |

|     |   |          |          |          |             |             |             |   |
|-----|---|----------|----------|----------|-------------|-------------|-------------|---|
| 257 | O | 75.37751 | 67.09057 | 73.78660 | 357.97126   | 460.81534   | 356.68785   | 2 |
| 258 | N | 73.61999 | 67.74523 | 75.10613 | 536.55407   | -368.62270  | 332.76306   | 2 |
| 259 | H | 73.18162 | 68.61874 | 75.39404 | 524.38866   | 2297.69985  | 1367.20941  | 2 |
| 260 | C | 73.31814 | 66.51900 | 75.74908 | 46.50277    | -774.29190  | -147.97904  | 2 |
| 261 | H | 72.23802 | 66.61281 | 75.99699 | 1676.51875  | 1883.29066  | 1032.55549  | 2 |
| 262 | C | 73.66441 | 65.26200 | 74.80400 | -559.41456  | -34.19198   | -556.30433  | 2 |
| 263 | H | 74.77717 | 65.19235 | 74.69122 | -64.66664   | 395.18769   | 2695.05373  | 2 |
| 264 | H | 73.34513 | 64.30708 | 75.28716 | -2703.44278 | -60.40056   | 333.79418   | 2 |
| 265 | C | 73.02490 | 65.42547 | 73.44874 | -519.76435  | 377.31045   | 459.42366   | 2 |
| 266 | H | 73.31751 | 66.42716 | 73.05246 | -1746.74323 | 1667.50644  | -1261.73691 | 2 |
| 267 | C | 73.54914 | 64.36525 | 72.48851 | 570.95554   | 16.46261    | -545.27700  | 2 |
| 268 | H | 73.10208 | 64.47406 | 71.46670 | 2391.58273  | 28.05277    | -1305.07271 | 2 |
| 269 | H | 74.66217 | 64.43351 | 72.37167 | 175.75588   | 917.63458   | 2559.43867  | 2 |
| 270 | H | 73.31495 | 63.32929 | 72.84569 | -1063.97851 | -2155.34650 | 1283.00462  | 2 |
| 271 | C | 71.50713 | 65.35179 | 73.52818 | 193.76014   | 2.62946     | -765.53141  | 2 |
| 272 | H | 71.03596 | 65.46471 | 72.51751 | 507.39394   | -846.55087  | 2539.60089  | 2 |
| 273 | H | 71.16345 | 64.37082 | 73.94721 | 1337.57841  | 1818.19054  | 1526.01994  | 2 |
| 274 | H | 71.08663 | 66.15928 | 74.18131 | 1100.88635  | -1172.91350 | -2199.08909 | 2 |
| 275 | C | 74.21213 | 66.43101 | 77.08590 | -549.21115  | 475.64486   | -309.38218  | 2 |
| 276 | O | 75.14761 | 67.14627 | 77.33175 | 556.06106   | -390.37755  | -78.24250   | 2 |
| 277 | O | 73.85037 | 65.39050 | 77.97840 | -572.27940  | -310.19032  | -209.75862  | 2 |
| 278 | H | 73.05550 | 65.04047 | 77.49125 | -1380.08193 | 2212.14486  | 790.85944   | 2 |

Listing 125: C00125.xmolout

|    |         |          |          |          |             |             |             |                 |  |
|----|---------|----------|----------|----------|-------------|-------------|-------------|-----------------|--|
| 1  | 276     |          |          |          |             |             |             |                 |  |
| 2  | initial | 150.0000 | 150.0000 | 150.0000 | 0.0000      | 0.0000      | 0.0000***** | 2.7750          |  |
|    |         | 11100    | 0.2500   | 300.00   | 0.00        | 0.00        | -1293.3602  | 0.0000 300.0000 |  |
| 3  | H       | 83.59154 | 68.91789 | 73.47310 | -2043.14101 | -1757.64893 | 399.89339   | 1               |  |
| 4  | N       | 83.44817 | 69.65839 | 72.78952 | 426.75047   | 490.45733   | -334.42467  | 1               |  |
| 5  | H       | 82.75274 | 70.23744 | 73.25665 | 442.25559   | -1110.30854 | -2448.52907 | 1               |  |
| 6  | C       | 84.63373 | 70.34215 | 72.43735 | 415.32972   | -666.39213  | 83.73172    | 1               |  |
| 7  | H       | 85.39422 | 69.53448 | 72.40980 | 879.32219   | 2491.00447  | 667.35213   | 1               |  |
| 8  | C       | 84.41065 | 71.03743 | 71.00430 | 31.35357    | 477.41777   | 628.23362   | 1               |  |
| 9  | H       | 83.49291 | 71.67341 | 71.02379 | 1168.38489  | 2240.25337  | -1019.71136 | 1               |  |
| 10 | H       | 85.26201 | 71.72108 | 70.76726 | -360.43770  | 2534.90498  | 931.67112   | 1               |  |
| 11 | C       | 84.27085 | 69.96948 | 69.94782 | 463.18208   | 512.70242   | -382.34388  | 1               |  |
| 12 | H       | 83.49171 | 69.24899 | 70.28480 | 1725.29117  | 1863.52247  | -987.07854  | 1               |  |
| 13 | C       | 83.82327 | 70.58853 | 68.62957 | 710.42801   | -144.27427  | -313.15367  | 1               |  |
| 14 | H       | 83.68523 | 69.81210 | 67.83325 | 364.20195   | -1033.13725 | 2494.72524  | 1               |  |
| 15 | H       | 82.84958 | 71.13297 | 68.73566 | 2567.61904  | 335.80679   | 847.48802   | 1               |  |
| 16 | H       | 84.57519 | 71.32552 | 68.24548 | -2587.99029 | 680.92867   | -512.16411  | 1               |  |
| 17 | C       | 85.57348 | 69.21248 | 69.73132 | 268.17616   | 741.64379   | -40.42634   | 1               |  |
| 18 | H       | 85.48056 | 68.46026 | 68.90548 | 1283.54314  | -1945.37420 | -1411.27812 | 1               |  |
| 19 | H       | 86.41138 | 69.90429 | 69.45653 | -1258.57796 | 1317.15249  | -2026.02085 | 1               |  |
| 20 | H       | 85.89066 | 68.65500 | 70.64984 | -2502.84526 | 909.80597   | 575.92391   | 1               |  |
| 21 | C       | 84.93250 | 71.39475 | 73.65117 | 619.36578   | -458.64843  | -172.09273  | 1               |  |
| 22 | O       | 85.49990 | 71.01372 | 74.66113 | -81.40433   | 433.87611   | 522.34594   | 1               |  |
| 23 | N       | 84.46737 | 72.60007 | 73.38024 | 175.23996   | -622.20190  | 341.55523   | 1               |  |
| 24 | H       | 83.95346 | 72.74931 | 72.51571 | -876.57256  | -303.22879  | -2561.90213 | 1               |  |
| 25 | C       | 84.64705 | 73.64585 | 74.33606 | -571.88214  | -534.10783  | -106.15033  | 1               |  |
| 26 | H       | 85.63240 | 73.45215 | 74.81399 | -2713.20841 | -16.25800   | -248.80809  | 1               |  |
| 27 | C       | 84.51607 | 75.03300 | 73.54285 | 166.60354   | 288.16399   | -716.09568  | 1               |  |
| 28 | H       | 83.55773 | 75.01643 | 72.95349 | -2097.85574 | 1636.78449  | -586.18044  | 1               |  |
| 29 | O       | 85.55745 | 75.31973 | 72.59774 | -317.80580  | -363.38227  | 484.43082   | 1               |  |
| 30 | H       | 85.04983 | 75.37641 | 71.76181 | 1863.74748  | -1451.84923 | 1357.29467  | 1               |  |
| 31 | C       | 84.35002 | 76.01959 | 74.75634 | 503.80731   | 517.99032   | 318.51606   | 1               |  |
| 32 | H       | 84.09912 | 77.05225 | 74.41874 | 640.61020   | -2157.10410 | -1536.29104 | 1               |  |
| 33 | H       | 83.52973 | 75.67579 | 75.43990 | 1687.88455  | 465.60692   | 2087.56452  | 1               |  |
| 34 | H       | 85.28357 | 76.08647 | 75.36194 | -1293.07895 | -1899.88581 | -1463.57452 | 1               |  |
| 35 | C       | 83.39486 | 73.58270 | 75.37692 | -153.07550  | -733.68902  | 248.70981   | 1               |  |
| 36 | O       | 82.28006 | 73.82097 | 74.96716 | 186.15459   | -480.78787  | -449.34387  | 1               |  |

|    |   |          |          |          |             |             |             |   |
|----|---|----------|----------|----------|-------------|-------------|-------------|---|
| 37 | N | 83.78639 | 73.32126 | 76.63141 | -487.53139  | 543.18517   | 42.03850    | 1 |
| 38 | C | 82.78138 | 73.09933 | 77.62935 | -699.35871  | 69.34393    | 360.10701   | 1 |
| 39 | H | 81.91005 | 72.70944 | 77.05666 | 2.81126     | -221.99807  | -2715.58072 | 1 |
| 40 | C | 83.48156 | 72.04940 | 78.59356 | -507.46439  | -592.59194  | 122.07761   | 1 |
| 41 | H | 83.07773 | 72.08808 | 79.63081 | -1975.08116 | 525.87560   | -1801.71556 | 1 |
| 42 | H | 83.32113 | 71.00894 | 78.23277 | 1588.27743  | -1913.22100 | 1113.83566  | 1 |
| 43 | C | 84.99014 | 72.44143 | 78.50439 | -613.62442  | -457.55993  | -194.14490  | 1 |
| 44 | H | 85.22782 | 73.27815 | 79.19907 | 1707.54637  | -721.27992  | 1996.92523  | 1 |
| 45 | H | 85.67721 | 71.60913 | 78.77666 | 758.23357   | 2100.81767  | 1560.55011  | 1 |
| 46 | C | 85.12882 | 72.88321 | 76.98634 | -352.41524  | 704.96076   | 49.21465    | 1 |
| 47 | H | 85.82912 | 73.73333 | 76.80810 | 1714.76886  | -2070.42778 | 443.35792   | 1 |
| 48 | H | 85.36045 | 72.04330 | 76.25202 | 1224.15040  | 1801.50881  | 1636.97633  | 1 |
| 49 | C | 82.39933 | 74.46820 | 78.43715 | 566.85117   | 537.05831   | 117.62814   | 1 |
| 50 | O | 81.21136 | 74.62459 | 78.73897 | -550.26779  | -406.08867  | 4.21666     | 1 |
| 51 | N | 83.42332 | 75.22674 | 78.72610 | 566.34832   | -425.77725  | 180.18749   | 1 |
| 52 | H | 84.30268 | 74.88375 | 78.34220 | 644.44502   | 2646.80550  | -52.73430   | 1 |
| 53 | C | 83.34082 | 76.36525 | 79.56877 | 612.34801   | -281.48662  | 411.56221   | 1 |
| 54 | H | 84.36383 | 76.79848 | 79.52066 | 1667.23498  | -1490.75142 | 1556.16753  | 1 |
| 55 | C | 82.22374 | 77.34248 | 78.96953 | -714.45746  | -175.43074  | 286.98927   | 1 |
| 56 | H | 81.25000 | 76.77896 | 78.88139 | -787.09484  | 1763.03619  | -1922.46060 | 1 |
| 57 | O | 82.50417 | 77.85836 | 77.65531 | -429.46514  | 516.51932   | -128.40526  | 1 |
| 58 | H | 81.76007 | 77.48131 | 77.14400 | 1981.82785  | 436.16847   | -1818.18182 | 1 |
| 59 | C | 82.08888 | 78.40986 | 80.11582 | 630.79189   | -468.94448  | 76.03230    | 1 |
| 60 | H | 81.28396 | 79.14800 | 79.89220 | -1775.71861 | 2062.30353  | 131.89849   | 1 |
| 61 | H | 81.84243 | 77.93780 | 81.09614 | -1855.14608 | 88.94118    | 1993.53760  | 1 |
| 62 | H | 83.03517 | 78.98285 | 80.25259 | -1504.82350 | -780.94249  | -2132.90992 | 1 |
| 63 | C | 82.96362 | 75.89877 | 81.09498 | 288.57638   | 618.62814   | -397.00270  | 1 |
| 64 | O | 83.76696 | 76.14558 | 81.96025 | 321.70495   | -185.26452  | 574.37218   | 1 |
| 65 | N | 81.75050 | 75.37000 | 81.21378 | -447.05792  | -446.53431  | 367.76425   | 1 |
| 66 | H | 81.15699 | 75.16430 | 80.37192 | 350.31316   | 1975.63644  | -1843.31522 | 1 |
| 67 | C | 81.45687 | 74.74949 | 82.46091 | -511.23061  | 374.03917   | -471.51480  | 1 |
| 68 | H | 82.35527 | 74.90768 | 83.10576 | 2234.79579  | -898.70890  | -1273.45190 | 1 |
| 69 | C | 80.14478 | 75.49974 | 83.02407 | 529.53781   | -159.34528  | 563.72604   | 1 |
| 70 | H | 79.97309 | 75.10850 | 84.06430 | 654.59388   | 2347.94251  | 1217.51488  | 1 |
| 71 | H | 80.42219 | 76.58220 | 83.12508 | -1526.55661 | 2103.42026  | 817.87394   | 1 |
| 72 | O | 78.91796 | 75.33038 | 82.28014 | -554.84278  | 14.12789    | 399.58769   | 1 |
| 73 | H | 79.05645 | 76.01317 | 81.59298 | 1297.06236  | 2061.84854  | 1220.68812  | 1 |
| 74 | C | 81.09889 | 73.19405 | 82.18550 | -662.15484  | -412.13544  | 123.62687   | 1 |
| 75 | O | 80.64800 | 72.76615 | 81.12689 | -540.01537  | -317.05804  | 274.91456   | 1 |
| 76 | N | 81.33786 | 72.51162 | 83.29110 | -202.76299  | -690.00100  | -131.49145  | 1 |
| 77 | H | 81.69196 | 73.06197 | 84.06979 | -702.62132  | -2617.37191 | 281.70413   | 1 |
| 78 | C | 81.34429 | 71.04675 | 83.28307 | -491.73914  | 576.34187   | 222.73509   | 1 |
| 79 | H | 81.72360 | 70.83129 | 82.25606 | 1977.17978  | -1823.58850 | -434.68928  | 1 |
| 80 | C | 82.25143 | 70.56739 | 84.40187 | -649.50797  | -328.66843  | 306.11224   | 1 |
| 81 | H | 81.89224 | 71.02142 | 85.35221 | 2075.07803  | 1452.16490  | -1004.45904 | 1 |
| 82 | C | 82.21355 | 69.05884 | 84.55948 | -615.18735  | -489.99689  | -70.96352   | 1 |
| 83 | H | 82.90332 | 68.70848 | 85.37654 | -1226.32661 | -1724.38906 | -1716.47170 | 1 |
| 84 | H | 81.17703 | 68.69749 | 84.81836 | 2381.64273  | -969.84735  | 900.46860   | 1 |
| 85 | H | 82.52329 | 68.53443 | 83.61359 | 2122.74991  | 1702.23946  | -141.36228  | 1 |
| 86 | C | 83.68443 | 71.02061 | 84.18382 | -501.86074  | -479.61276  | -376.42482  | 1 |
| 87 | H | 84.35041 | 70.73106 | 85.04241 | 993.79261   | -2246.95401 | -1177.81305 | 1 |
| 88 | H | 84.12301 | 70.56399 | 83.25422 | 42.71279    | -626.15391  | -2651.37258 | 1 |
| 89 | H | 83.75422 | 72.13688 | 84.06569 | -2026.39012 | -1590.33709 | -887.82922  | 1 |
| 90 | C | 79.75696 | 70.57247 | 83.42876 | -672.89153  | 382.57394   | -156.34072  | 1 |
| 91 | O | 79.37934 | 69.97323 | 84.40090 | 410.04627   | 221.86223   | 500.35950   | 1 |
| 92 | N | 79.09402 | 70.92824 | 82.34891 | -378.11782  | -443.79414  | -441.10984  | 1 |
| 93 | H | 79.56982 | 71.47295 | 81.59144 | 2404.15973  | -568.14894  | 1149.30085  | 1 |
| 94 | C | 77.69093 | 70.63174 | 82.24729 | -544.54484  | 466.16019   | 331.29119   | 1 |
| 95 | H | 77.69844 | 69.53306 | 82.42454 | -1409.80988 | -170.17955  | 2325.32679  | 1 |
| 96 | C | 76.97706 | 71.33755 | 83.47127 | -184.48284  | 116.78282   | -758.89137  | 1 |
| 97 | H | 77.48709 | 71.08164 | 84.43162 | 1893.78641  | 1861.14652  | 611.04528   | 1 |
| 98 | H | 77.06941 | 72.44494 | 83.38407 | -2170.79665 | -974.19311  | 1327.50117  | 1 |

|     |   |          |          |          |             |             |             |   |
|-----|---|----------|----------|----------|-------------|-------------|-------------|---|
| 99  | C | 75.48797 | 70.86344 | 83.50504 | 389.51668   | 672.81878   | -138.49152  | 1 |
| 100 | H | 75.07833 | 70.78581 | 82.47307 | 510.64577   | 1933.03327  | 1851.02484  | 1 |
| 101 | H | 75.42412 | 69.82282 | 83.89233 | -2302.30869 | -1105.72939 | -948.89774  | 1 |
| 102 | C | 74.56836 | 71.81645 | 84.35857 | -559.93427  | -126.34590  | 542.30857   | 1 |
| 103 | O | 73.37571 | 71.65855 | 84.34289 | -670.36003  | -111.83166  | 76.36448    | 1 |
| 104 | N | 75.24275 | 72.76060 | 85.05017 | -216.06729  | -537.07037  | 446.51379   | 1 |
| 105 | H | 76.25461 | 72.90727 | 85.14513 | -1251.96487 | 1074.12894  | -2168.52500 | 1 |
| 106 | H | 74.79618 | 73.43204 | 85.68402 | -2451.83023 | -720.73851  | 944.84612   | 1 |
| 107 | C | 77.28266 | 71.01086 | 80.72188 | 546.24052   | -563.88337  | -85.11809   | 1 |
| 108 | O | 77.91323 | 70.42556 | 79.87076 | 71.70702    | -307.40463  | 606.69673   | 1 |
| 109 | N | 76.28733 | 71.89381 | 80.53213 | 479.90863   | -504.50129  | 222.86849   | 1 |
| 110 | C | 75.46610 | 71.79844 | 79.36792 | 75.51268    | -600.91904  | 506.73700   | 1 |
| 111 | H | 75.35433 | 70.71217 | 79.15218 | -2033.61562 | 1795.30103  | 254.89480   | 1 |
| 112 | C | 74.15778 | 72.54769 | 79.85301 | 523.79067   | 517.99274   | 284.45581   | 1 |
| 113 | H | 73.51463 | 72.88434 | 79.00910 | 1599.61665  | -1127.00911 | 1895.98173  | 1 |
| 114 | H | 73.52863 | 71.88921 | 80.49289 | -1881.83093 | 1275.82488  | -1501.55016 | 1 |
| 115 | C | 74.75044 | 73.72934 | 80.68464 | -600.05639  | -404.05026  | 316.64485   | 1 |
| 116 | H | 75.07871 | 74.56544 | 80.02716 | -2597.05260 | 496.36221   | 657.73249   | 1 |
| 117 | H | 74.02393 | 74.16866 | 81.40431 | -1666.24518 | 1294.38985  | -1723.90591 | 1 |
| 118 | C | 75.97562 | 73.01940 | 81.40391 | 493.57570   | -129.95376  | -602.56394  | 1 |
| 119 | H | 76.90078 | 73.63555 | 81.51225 | -1469.08415 | -637.84797  | 2204.22581  | 1 |
| 120 | H | 75.70254 | 72.59974 | 82.39903 | -1038.97840 | 1068.88701  | -2280.71789 | 1 |
| 121 | C | 76.07888 | 72.59561 | 78.05880 | 188.88100   | 241.05089   | -727.87821  | 1 |
| 122 | O | 75.79054 | 72.20547 | 76.92627 | 531.88613   | -49.19943   | 427.07960   | 1 |
| 123 | N | 76.71310 | 73.69004 | 78.41831 | 708.14833   | 26.93417    | -179.73509  | 1 |
| 124 | H | 76.73602 | 73.69000 | 79.43874 | -2232.69501 | -1179.09831 | 1023.94816  | 1 |
| 125 | C | 77.63108 | 74.46746 | 77.67283 | -738.32412  | 259.92548   | 104.42456   | 1 |
| 126 | H | 77.98950 | 75.19729 | 78.43346 | 2028.89123  | 1260.02983  | 1311.33324  | 1 |
| 127 | C | 78.79219 | 73.51269 | 77.14479 | -258.65678  | -345.52513  | 661.28459   | 1 |
| 128 | H | 78.41738 | 72.76739 | 76.41018 | -1826.06090 | -1801.46097 | -918.64554  | 1 |
| 129 | C | 79.75187 | 74.53537 | 76.44722 | -541.23400  | 531.92970   | -218.41428  | 1 |
| 130 | H | 80.73022 | 74.07337 | 76.10712 | 1311.73218  | -2219.18200 | 882.19023   | 1 |
| 131 | H | 79.26949 | 74.98155 | 75.54280 | -1048.71298 | 1223.58118  | -2196.97971 | 1 |
| 132 | H | 79.99769 | 75.39409 | 77.12084 | 419.06414   | 1903.92898  | 1903.44670  | 1 |
| 133 | C | 79.38671 | 72.76856 | 78.38858 | -423.86431  | 152.66566   | -648.55262  | 1 |
| 134 | H | 80.38543 | 72.32292 | 78.17340 | 105.68386   | -2342.50080 | 1387.51238  | 1 |
| 135 | H | 79.51449 | 73.45498 | 79.26945 | -1695.63603 | -1484.73621 | -1531.02793 | 1 |
| 136 | H | 78.71584 | 71.92992 | 78.72973 | -1853.57121 | -487.39031  | 1936.59343  | 1 |
| 137 | C | 77.06488 | 75.20545 | 76.31985 | 539.71428   | -510.58232  | 267.58633   | 1 |
| 138 | O | 77.41417 | 76.34674 | 76.13019 | -15.93758   | -278.34085  | -624.49402  | 1 |
| 139 | N | 76.40262 | 74.39660 | 75.50680 | -676.81886  | 12.05292    | 276.17960   | 1 |
| 140 | H | 76.14844 | 73.41282 | 75.79222 | -1694.44250 | -373.84189  | -2100.66098 | 1 |
| 141 | C | 76.09142 | 74.93198 | 74.22422 | 412.33078   | -664.70360  | 108.35451   | 1 |
| 142 | H | 76.61727 | 75.91813 | 74.18134 | 1765.77476  | 1294.44366  | 1621.76594  | 1 |
| 143 | C | 76.56669 | 73.88446 | 73.12965 | -179.66635  | -721.95667  | -264.73915  | 1 |
| 144 | H | 77.67609 | 73.79953 | 73.11694 | -607.34922  | 2587.87032  | -598.10018  | 1 |
| 145 | H | 76.19684 | 72.86161 | 73.36269 | -359.69332  | -1479.13954 | -2259.74260 | 1 |
| 146 | C | 76.02105 | 74.37290 | 71.74864 | -240.01076  | 616.02425   | 431.85322   | 1 |
| 147 | H | 74.91030 | 74.45911 | 71.78220 | -1359.17131 | 782.54425   | 2227.99181  | 1 |
| 148 | H | 76.39833 | 75.39328 | 71.51412 | -820.36667  | 85.81767    | -2596.78715 | 1 |
| 149 | C | 76.45182 | 73.34585 | 70.62504 | -513.07015  | 236.18570   | -551.87280  | 1 |
| 150 | H | 77.55995 | 73.30285 | 70.51659 | 1816.11944  | -1183.11722 | -1650.94321 | 1 |
| 151 | H | 76.12896 | 72.31104 | 70.88285 | -1800.04429 | -1361.53473 | 1526.34643  | 1 |
| 152 | C | 75.77419 | 73.82502 | 69.31987 | 726.08972   | -253.19732  | -179.64713  | 1 |
| 153 | H | 74.65313 | 73.84895 | 69.36984 | 1224.27271  | -456.51798  | -2390.90304 | 1 |
| 154 | H | 76.15609 | 74.79005 | 68.92969 | 1206.40339  | -1150.93514 | -2154.90344 | 1 |
| 155 | N | 76.10329 | 72.79100 | 68.19419 | 329.70796   | -633.68968  | -155.67358  | 1 |
| 156 | H | 75.69780 | 73.01533 | 67.23988 | 1348.31305  | 1938.76845  | 1359.00643  | 1 |
| 157 | H | 77.12662 | 72.64057 | 67.95424 | 2096.92035  | 1446.54551  | -966.48890  | 1 |
| 158 | H | 75.75985 | 71.79647 | 68.33500 | -1197.07217 | -2303.53719 | 827.28733   | 1 |
| 159 | C | 74.45883 | 75.09531 | 74.10324 | -378.01186  | -556.17301  | -413.96481  | 1 |
| 160 | O | 74.00537 | 76.21129 | 73.85677 | -409.44433  | -307.55053  | -453.30833  | 1 |

|     |   |          |          |          |             |             |             |   |
|-----|---|----------|----------|----------|-------------|-------------|-------------|---|
| 161 | N | 73.85126 | 73.94026 | 74.21868 | -429.02477  | 524.70884   | 274.08502   | 1 |
| 162 | H | 74.48755 | 73.16957 | 74.41938 | 1706.34263  | -1425.96036 | 1574.38926  | 1 |
| 163 | C | 72.44886 | 73.77649 | 74.35498 | -45.25864   | -626.22952  | 478.93267   | 1 |
| 164 | H | 72.34814 | 72.71468 | 74.67258 | 1988.63164  | 570.90773   | 1772.87287  | 1 |
| 165 | C | 71.98396 | 74.80778 | 75.46105 | 551.77128   | -20.49526   | -564.54996  | 1 |
| 166 | H | 72.60971 | 74.69903 | 76.37575 | 1434.61535  | -1753.10253 | 1513.99471  | 1 |
| 167 | H | 72.13666 | 75.86013 | 75.12307 | -714.67738  | 1819.09770  | 1898.36494  | 1 |
| 168 | C | 70.47663 | 74.52060 | 75.76619 | 446.99263   | -555.77305  | 338.97221   | 1 |
| 169 | H | 69.82962 | 74.85966 | 74.92552 | 1953.68466  | 1892.25957  | -161.67766  | 1 |
| 170 | H | 70.28864 | 73.42942 | 75.88077 | -403.03785  | 2688.07032  | -188.43591  | 1 |
| 171 | C | 70.14331 | 75.29031 | 77.10604 | 567.86262   | 335.74681   | 434.04421   | 1 |
| 172 | H | 70.74284 | 74.88592 | 77.95459 | -1080.02275 | 1568.26081  | -1948.78900 | 1 |
| 173 | H | 70.43572 | 76.36856 | 77.01726 | -919.54108  | 2111.34692  | 1456.13463  | 1 |
| 174 | C | 68.62972 | 75.16331 | 77.39531 | 195.81897   | 173.33862   | -745.11536  | 1 |
| 175 | H | 67.98098 | 75.73672 | 76.70337 | 1405.67949  | -2301.21089 | -390.08113  | 1 |
| 176 | H | 68.25724 | 74.12361 | 77.49059 | -940.37328  | -1118.32446 | 2299.72133  | 1 |
| 177 | N | 68.39037 | 75.80107 | 78.80525 | 319.26422   | 656.36007   | -42.02424   | 1 |
| 178 | H | 67.37883 | 75.90923 | 79.10626 | 1961.03633  | 619.91968   | 1787.09422  | 1 |
| 179 | H | 68.80022 | 75.27654 | 79.63079 | 854.14343   | -2156.80752 | 1429.08711  | 1 |
| 180 | H | 68.76935 | 76.77847 | 78.97065 | 1237.02905  | -1378.50857 | -1998.28500 | 1 |
| 181 | C | 71.65191 | 74.05479 | 72.93640 | 532.53319   | -268.57236  | 517.55729   | 1 |
| 182 | O | 70.90892 | 73.18610 | 72.55659 | 266.16714   | -290.73804  | -558.88002  | 1 |
| 183 | N | 71.91535 | 75.24649 | 72.44415 | -226.25352  | 640.49678   | -270.32839  | 1 |
| 184 | H | 72.59939 | 75.86331 | 72.95428 | 2007.69063  | -1035.27229 | 1523.50231  | 1 |
| 185 | C | 71.45439 | 75.68228 | 71.17298 | -540.76542  | -573.33303  | 49.50000    | 1 |
| 186 | H | 72.19270 | 76.47883 | 70.93106 | -2374.20950 | -1036.76023 | 843.75774   | 1 |
| 187 | C | 71.45636 | 74.48522 | 70.12696 | -77.09082   | 666.87422   | -415.84136  | 1 |
| 188 | H | 70.75639 | 73.68250 | 70.49874 | -985.81834  | 617.19825   | 2463.91927  | 1 |
| 189 | O | 72.75102 | 73.84819 | 69.91519 | 293.29899   | -391.65602  | -477.80926  | 1 |
| 190 | H | 72.59320 | 73.00093 | 70.37469 | 2528.72714  | -681.76262  | -751.27122  | 1 |
| 191 | C | 70.83339 | 75.16042 | 68.85511 | 252.47363   | -605.14473  | 440.05134   | 1 |
| 192 | H | 70.72210 | 74.43059 | 68.01979 | -2052.65063 | 1456.49051  | -1043.51830 | 1 |
| 193 | H | 69.82008 | 75.57731 | 69.06688 | -2152.98800 | -1661.97574 | -161.70652  | 1 |
| 194 | H | 71.46953 | 75.99660 | 68.48220 | -473.12726  | -1584.27339 | 2165.61725  | 1 |
| 195 | C | 69.94744 | 76.31552 | 71.37328 | 360.36307   | 488.46713   | 505.10056   | 1 |
| 196 | O | 68.93035 | 75.68073 | 71.17010 | -200.08817  | -528.03552  | -385.82850  | 1 |
| 197 | N | 70.07660 | 77.58922 | 71.70627 | -597.54095  | -226.44775  | 355.20479   | 1 |
| 198 | H | 71.01560 | 77.96824 | 71.81386 | 2179.23655  | -1300.70981 | -991.33835  | 1 |
| 199 | C | 68.92179 | 78.36271 | 72.00616 | -687.68921  | 297.39807   | -249.45179  | 1 |
| 200 | H | 68.21784 | 77.62420 | 72.45045 | -349.16256  | -2467.37713 | -1101.72831 | 1 |
| 201 | C | 69.32792 | 79.59010 | 72.93989 | 672.47345   | 361.54328   | -201.62880  | 1 |
| 202 | H | 70.04239 | 80.25231 | 72.39948 | 1541.41502  | 582.18425   | 2169.97026  | 1 |
| 203 | H | 68.42077 | 80.20211 | 73.15150 | -2534.67717 | 60.25153    | 997.72295   | 1 |
| 204 | C | 69.95830 | 79.09322 | 74.25041 | 574.26774   | -389.43119  | -377.02542  | 1 |
| 205 | C | 69.11597 | 78.63737 | 75.30845 | 688.82679   | -287.33580  | -257.96133  | 1 |
| 206 | H | 68.01962 | 78.59081 | 75.17728 | 331.14182   | 1470.38163  | 2269.80013  | 1 |
| 207 | C | 71.37583 | 79.11981 | 74.41807 | -383.52382  | -675.04808  | 144.24917   | 1 |
| 208 | H | 72.03390 | 79.45175 | 73.59496 | 4.09847     | 1517.59662  | 2262.86397  | 1 |
| 209 | C | 69.70542 | 78.27512 | 76.52195 | -134.76730  | 428.45285   | -649.50303  | 1 |
| 210 | H | 69.04451 | 77.95027 | 77.34362 | -903.23433  | 1600.49020  | 2011.53387  | 1 |
| 211 | C | 71.91931 | 78.73769 | 75.64846 | -335.53281  | -615.00040  | -364.39058  | 1 |
| 212 | H | 73.01701 | 78.77069 | 75.76548 | 1596.45398  | -1369.33862 | 1732.02659  | 1 |
| 213 | C | 71.11448 | 78.31952 | 76.74920 | 585.48547   | -340.24194  | -406.23938  | 1 |
| 214 | O | 71.66095 | 77.94597 | 78.01021 | -419.15649  | -173.04408  | -511.94141  | 1 |
| 215 | H | 72.61485 | 78.11789 | 77.83189 | -1071.84350 | 1559.71507  | -1960.13012 | 1 |
| 216 | C | 68.33747 | 79.01799 | 70.62793 | 291.41878   | -183.13091  | 710.72246   | 1 |
| 217 | O | 67.87201 | 80.13112 | 70.59583 | 379.87695   | 523.47396   | -222.23622  | 1 |
| 218 | N | 68.40519 | 78.11123 | 69.65637 | 564.30591   | 373.09380   | 277.24371   | 1 |
| 219 | H | 68.75709 | 77.17189 | 69.89067 | -120.59931  | -2436.07824 | -1214.35098 | 1 |
| 220 | C | 68.01594 | 78.49068 | 68.33791 | 404.07514   | -299.37480  | 608.84009   | 1 |
| 221 | H | 68.27230 | 79.57176 | 68.25940 | -1071.07882 | -841.69025  | 2359.66467  | 1 |
| 222 | C | 68.80753 | 77.53554 | 67.35544 | -683.12807  | 68.71770    | -390.13096  | 1 |

|     |   |          |          |          |             |             |             |   |
|-----|---|----------|----------|----------|-------------|-------------|-------------|---|
| 223 | H | 69.89242 | 77.52917 | 67.60436 | 2068.88918  | 1596.58590  | 770.89603   | 1 |
| 224 | H | 68.46525 | 76.48451 | 67.48855 | 1379.86429  | 2342.49779  | -179.85638  | 1 |
| 225 | C | 68.58216 | 77.99749 | 65.88225 | -176.39967  | 537.49466   | 550.97268   | 1 |
| 226 | H | 67.49514 | 78.09364 | 65.65292 | -396.28051  | 1942.22168  | 1869.33314  | 1 |
| 227 | H | 69.01903 | 79.00491 | 65.70187 | -94.44700   | 586.00678   | -2659.20016 | 1 |
| 228 | C | 69.26833 | 76.88569 | 64.96277 | -291.69381  | -718.18079  | -150.72929  | 1 |
| 229 | H | 70.37587 | 76.77419 | 65.08459 | -2303.38776 | 1089.76242  | 964.62032   | 1 |
| 230 | H | 68.81582 | 75.86323 | 65.02612 | 884.16729   | 2568.80533  | -207.74283  | 1 |
| 231 | N | 69.02670 | 77.37653 | 63.67162 | -594.49522  | -252.81478  | 342.29276   | 1 |
| 232 | H | 68.51590 | 78.24303 | 63.60266 | -1735.17426 | 2084.05705  | -263.71605  | 1 |
| 233 | C | 69.40377 | 76.80584 | 62.60023 | 595.23177   | -271.52487  | 442.22352   | 1 |
| 234 | N | 70.10950 | 75.60311 | 62.71677 | 585.53813   | -424.79750  | -105.81303  | 1 |
| 235 | H | 70.37619 | 75.08835 | 63.55500 | 959.88797   | 1327.56823  | -2177.11905 | 1 |
| 236 | H | 70.45995 | 75.05290 | 61.93209 | 1578.48647  | 16.27378    | -2220.76233 | 1 |
| 237 | N | 69.01333 | 77.54085 | 61.47193 | -452.17763  | -390.33541  | -421.51853  | 1 |
| 238 | H | 68.49577 | 78.41470 | 61.39036 | 470.26107   | 1974.25629  | -1817.92087 | 1 |
| 239 | H | 69.21973 | 77.24853 | 60.51601 | 1856.67307  | -1573.97321 | -1224.35416 | 1 |
| 240 | C | 66.41039 | 78.24791 | 68.11925 | -531.47271  | -581.45780  | -55.06206   | 1 |
| 241 | O | 65.87322 | 78.66720 | 67.12106 | -243.00837  | 192.73507   | 609.52485   | 1 |
| 242 | N | 65.87115 | 77.53013 | 69.10147 | 343.49288   | -644.25607  | 38.09164    | 1 |
| 243 | H | 66.52775 | 77.28564 | 69.84040 | -1691.16043 | -1535.97525 | -1484.73099 | 1 |
| 244 | C | 64.45471 | 77.17469 | 69.13241 | 542.66492   | 350.14337   | 454.42563   | 1 |
| 245 | H | 64.24611 | 76.72228 | 68.13398 | 1209.57979  | -2396.95920 | 463.86744   | 1 |
| 246 | C | 64.25234 | 76.24122 | 70.31004 | -737.14309  | 145.93010   | 242.71942   | 1 |
| 247 | H | 64.75894 | 76.69277 | 71.19370 | -1050.18303 | 159.36419   | -2509.06125 | 1 |
| 248 | C | 62.78381 | 76.08750 | 70.65818 | -706.77696  | -252.88343  | -245.16230  | 1 |
| 249 | H | 62.62839 | 75.37103 | 71.51128 | -1624.64039 | -1665.49085 | 1417.86935  | 1 |
| 250 | H | 62.33138 | 77.07686 | 70.96510 | 2566.10521  | 598.51109   | 693.22305   | 1 |
| 251 | H | 62.18742 | 75.70512 | 69.78422 | -1972.69758 | 107.10018   | -1876.34312 | 1 |
| 252 | C | 64.89081 | 74.88625 | 70.06492 | 412.85148   | 672.58832   | -27.69222   | 1 |
| 253 | H | 64.79571 | 74.21121 | 70.95940 | 1447.02277  | 1762.76533  | -1490.78944 | 1 |
| 254 | H | 64.41590 | 74.35618 | 69.19405 | 1320.77379  | -145.20455  | 2378.68491  | 1 |
| 255 | H | 65.98845 | 74.98410 | 69.83587 | -1512.10848 | 1470.52031  | 1724.75147  | 1 |
| 256 | C | 63.55885 | 78.56311 | 69.34922 | -607.11113  | 499.56689   | 73.73769    | 1 |
| 257 | O | 62.43199 | 78.60226 | 68.91545 | 357.97126   | 460.81534   | 356.68785   | 1 |
| 258 | N | 64.22168 | 79.45727 | 70.06275 | 536.55407   | -368.62270  | 332.76306   | 1 |
| 259 | H | 65.18156 | 79.20066 | 70.28835 | 524.38866   | 2297.69985  | 1367.20941  | 1 |
| 260 | C | 63.58211 | 80.58288 | 70.63779 | 46.50277    | -774.29190  | -147.97904  | 1 |
| 261 | H | 64.42461 | 81.19241 | 71.03228 | 1676.51875  | 1883.29066  | 1032.55549  | 1 |
| 262 | C | 62.72388 | 81.33596 | 69.49654 | -559.41456  | -34.19198   | -556.30433  | 1 |
| 263 | H | 61.90410 | 80.65335 | 69.14837 | -64.66664   | 395.18769   | 2695.05373  | 1 |
| 264 | H | 62.22176 | 82.24777 | 69.89909 | -2703.44278 | -60.40056   | 333.79418   | 1 |
| 265 | C | 63.63550 | 81.67923 | 68.34965 | -519.76435  | 377.31045   | 459.42366   | 1 |
| 266 | H | 64.18527 | 80.75505 | 68.05408 | -1746.74323 | 1667.50644  | -1261.73691 | 1 |
| 267 | C | 62.82558 | 82.15942 | 67.15170 | 570.95554   | 16.46261    | -545.27700  | 1 |
| 268 | H | 63.48457 | 82.40484 | 66.27924 | 2391.58273  | 28.05277    | -1305.07271 | 1 |
| 269 | H | 62.09724 | 81.37970 | 66.80821 | 175.75588   | 917.63458   | 2559.43867  | 1 |
| 270 | H | 62.23669 | 83.08158 | 67.39323 | -1063.97851 | -2155.34650 | 1283.00462  | 1 |
| 271 | C | 64.65041 | 82.74316 | 68.74523 | 193.76014   | 2.62946     | -765.53141  | 1 |
| 272 | H | 65.29712 | 83.03855 | 67.87921 | 507.39394   | -846.55087  | 2539.60089  | 1 |
| 273 | H | 64.14986 | 83.67333 | 69.11937 | 1337.57841  | 1818.19054  | 1526.01994  | 1 |
| 274 | H | 65.33343 | 82.38164 | 69.55680 | 1100.88635  | -1172.91350 | -2199.08909 | 1 |
| 275 | C | 62.61240 | 80.06927 | 71.81495 | -549.21115  | 475.64486   | -309.38218  | 1 |
| 276 | O | 62.61718 | 78.94706 | 72.25182 | 556.06106   | -390.37755  | -78.24250   | 1 |
| 277 | O | 61.78754 | 81.05940 | 72.40447 | -572.27940  | -310.19032  | -209.75862  | 1 |
| 278 | H | 62.08474 | 81.84388 | 71.86862 | -1380.08193 | 2212.14486  | 790.85944   | 1 |

Listing 126: C00126.xmolout

|   |          |          |          |        |        |            |        |          |       |
|---|----------|----------|----------|--------|--------|------------|--------|----------|-------|
| 1 | 276      |          |          |        |        |            |        |          |       |
| 2 | 150.0000 | 150.0000 | 150.0000 | 0.0000 | 0.0000 | 0.0000     | *****  | 2.7750   | 11100 |
|   | 0.2500   | 300.00   | 0.00     | 0.00   | 0.00   | -1293.3533 | 0.0000 | 300.0000 |       |



|    |   |          |          |          |             |             |             |   |
|----|---|----------|----------|----------|-------------|-------------|-------------|---|
| 3  | H | 67.54065 | 81.67793 | 77.02445 | -2043.14101 | -1757.64893 | 399.89339   | 1 |
| 4  | N | 67.38016 | 82.65722 | 77.25269 | 426.75047   | 490.45733   | -334.42467  | 1 |
| 5  | H | 66.96686 | 82.57773 | 78.18035 | 442.25559   | -1110.30854 | -2448.52907 | 1 |
| 6  | C | 68.55632 | 83.44540 | 77.23464 | 415.32972   | -666.39213  | 83.73172    | 1 |
| 7  | H | 69.09067 | 83.07757 | 76.33081 | 879.32219   | 2491.00447  | 667.35213   | 1 |
| 8  | C | 68.15199 | 85.00302 | 77.12028 | 31.35357    | 477.41777   | 628.23362   | 1 |
| 9  | H | 67.76463 | 85.35796 | 78.10495 | 1168.38489  | 2240.25337  | -1019.71136 | 1 |
| 10 | H | 69.05130 | 85.62858 | 76.90247 | -360.43770  | 2534.90498  | 931.67112   | 1 |
| 11 | C | 67.10607 | 85.18286 | 76.05237 | 463.18208   | 512.70242   | -382.34388  | 1 |
| 12 | H | 66.25190 | 84.50422 | 76.27903 | 1725.29117  | 1863.52247  | -987.07854  | 1 |
| 13 | C | 66.59071 | 86.61711 | 76.05496 | 710.42801   | -144.27427  | -313.15367  | 1 |
| 14 | H | 65.79901 | 86.77411 | 75.27794 | 364.20195   | -1033.13725 | 2494.72524  | 1 |
| 15 | H | 66.14297 | 86.89358 | 77.04422 | 2567.61904  | 335.80679   | 847.48802   | 1 |
| 16 | H | 67.41161 | 87.35020 | 75.84597 | -2587.99029 | 680.92867   | -512.16411  | 1 |
| 17 | C | 67.64962 | 84.82241 | 74.67929 | 268.17616   | 741.64379   | -40.42634   | 1 |
| 18 | H | 66.95791 | 85.14971 | 73.86082 | 1283.54314  | -1945.37420 | -1411.27812 | 1 |
| 19 | H | 68.66969 | 85.30067 | 74.48098 | -1258.57796 | 1317.15249  | -2026.02085 | 1 |
| 20 | H | 67.78668 | 83.71508 | 74.57400 | -2502.84526 | 909.80597   | 575.92391   | 1 |
| 21 | C | 69.32444 | 83.09067 | 78.60812 | 619.36578   | -458.64843  | -172.09273  | 1 |
| 22 | O | 69.13264 | 82.01547 | 79.19148 | -81.40433   | 433.87611   | 522.34594   | 1 |
| 23 | N | 70.22262 | 84.00516 | 78.86816 | 175.23996   | -622.20190  | 341.55523   | 1 |
| 24 | H | 70.26615 | 84.80126 | 78.23252 | -876.57256  | -303.22879  | -2561.90213 | 1 |
| 25 | C | 70.82327 | 84.18593 | 80.16304 | -571.88214  | -534.10783  | -106.15033  | 1 |
| 26 | H | 70.16113 | 84.90089 | 80.69999 | -2713.20841 | -16.25800   | -248.80809  | 1 |
| 27 | C | 70.93041 | 82.79802 | 80.94390 | 166.60354   | 288.16399   | -716.09568  | 1 |
| 28 | H | 71.18732 | 82.00723 | 80.18024 | -2097.85574 | 1636.78449  | -586.18044  | 1 |
| 29 | O | 69.73706 | 82.32933 | 81.57102 | -317.80580  | -363.38227  | 484.43082   | 1 |
| 30 | H | 69.32818 | 81.80495 | 80.77710 | 1863.74748  | -1451.84923 | 1357.29467  | 1 |
| 31 | C | 72.14504 | 83.04364 | 81.91153 | 503.80731   | 517.99032   | 318.51606   | 1 |
| 32 | H | 72.44271 | 82.10967 | 82.44212 | 640.61020   | -2157.10410 | -1536.29104 | 1 |
| 33 | H | 73.04412 | 83.42595 | 81.37031 | 1687.88455  | 465.60692   | 2087.56452  | 1 |
| 34 | H | 71.88966 | 83.79939 | 82.69067 | -1293.07895 | -1899.88581 | -1463.57452 | 1 |
| 35 | C | 72.25087 | 84.88083 | 79.83713 | -153.07550  | -733.68902  | 248.70981   | 1 |
| 36 | O | 72.71432 | 85.58576 | 80.69567 | 186.15459   | -480.78787  | -449.34387  | 1 |
| 37 | N | 72.83772 | 84.42045 | 78.71944 | -487.53139  | 543.18517   | 42.03850    | 1 |
| 38 | C | 73.72993 | 85.22994 | 77.95271 | -699.35871  | 69.34393    | 360.10701   | 1 |
| 39 | H | 74.09216 | 86.00920 | 78.66282 | 2.81126     | -221.99807  | -2715.58072 | 1 |
| 40 | C | 74.80751 | 84.15559 | 77.50225 | -507.46439  | -592.59194  | 122.07761   | 1 |
| 41 | H | 75.43645 | 84.48991 | 76.64692 | -1975.08116 | 525.87560   | -1801.71556 | 1 |
| 42 | H | 75.50802 | 83.91286 | 78.33182 | 1588.27743  | -1913.22100 | 1113.83566  | 1 |
| 43 | C | 73.88623 | 82.93861 | 77.17439 | -613.62442  | -457.55993  | -194.14490  | 1 |
| 44 | H | 73.37499 | 83.07270 | 76.19403 | 1707.54637  | -721.27992  | 1996.92523  | 1 |
| 45 | H | 74.43219 | 81.96996 | 77.12316 | 758.23357   | 2100.81767  | 1560.55011  | 1 |
| 46 | C | 72.84735 | 83.00231 | 78.37161 | -352.41524  | 704.96076   | 49.21465    | 1 |
| 47 | H | 71.80484 | 82.71119 | 78.10264 | 1714.76886  | -2070.42778 | 443.35792   | 1 |
| 48 | H | 73.15710 | 82.45756 | 79.29381 | 1224.15040  | 1801.50881  | 1636.97633  | 1 |
| 49 | C | 72.85125 | 85.88015 | 76.72141 | 566.85117   | 537.05831   | 117.62814   | 1 |
| 50 | O | 71.92902 | 86.60627 | 77.00296 | -550.26779  | -406.08867  | 4.21666     | 1 |
| 51 | N | 73.27788 | 85.50356 | 75.52271 | 566.34832   | -425.77725  | 180.18749   | 1 |
| 52 | H | 74.08390 | 84.88562 | 75.45890 | 644.44502   | 2646.80550  | -52.73430   | 1 |
| 53 | C | 72.83473 | 86.24174 | 74.38586 | 612.34801   | -281.48662  | 411.56221   | 1 |
| 54 | H | 72.40384 | 87.16548 | 74.83760 | 1667.23498  | -1490.75142 | 1556.16753  | 1 |
| 55 | C | 74.12495 | 86.47719 | 73.47580 | -714.45746  | -175.43074  | 286.98927   | 1 |
| 56 | H | 74.53965 | 85.48301 | 73.14667 | -787.09484  | 1763.03619  | -1922.46060 | 1 |
| 57 | O | 75.23914 | 87.13077 | 74.11699 | -429.46514  | 516.51932   | -128.40526  | 1 |
| 58 | H | 75.93546 | 86.45093 | 74.02752 | 1981.82785  | 436.16847   | -1818.18182 | 1 |
| 59 | C | 73.50635 | 87.22910 | 72.24123 | 630.79189   | -468.94448  | 76.03230    | 1 |
| 60 | H | 74.26108 | 87.37401 | 71.43380 | -1775.71861 | 2062.30353  | 131.89849   | 1 |
| 61 | H | 72.64856 | 86.67069 | 71.79879 | -1855.14608 | 88.94118    | 1993.53760  | 1 |
| 62 | H | 73.13281 | 88.23919 | 72.52864 | -1504.82350 | -780.94249  | -2132.90992 | 1 |
| 63 | C | 71.67470 | 85.33891 | 73.65853 | 288.57638   | 618.62814   | -397.00270  | 1 |
| 64 | O | 70.52191 | 85.47310 | 74.01644 | 321.70495   | -185.26452  | 574.37218   | 1 |

|     |   |          |          |          |             |             |             |   |
|-----|---|----------|----------|----------|-------------|-------------|-------------|---|
| 65  | N | 72.17265 | 84.52444 | 72.74460 | -447.05792  | -446.53431  | 367.76425   | 1 |
| 66  | H | 73.17355 | 84.51744 | 72.55507 | 350.31316   | 1975.63644  | -1843.31522 | 1 |
| 67  | C | 71.30193 | 83.69624 | 72.00037 | -511.23061  | 374.03917   | -471.51480  | 1 |
| 68  | H | 70.27742 | 83.96093 | 72.35158 | 2234.79579  | -898.70890  | -1273.45190 | 1 |
| 69  | C | 71.57570 | 84.03996 | 70.45470 | 529.53781   | -159.34528  | 563.72604   | 1 |
| 70  | H | 70.86752 | 83.39975 | 69.86167 | 654.59388   | 2347.94251  | 1217.51488  | 1 |
| 71  | H | 71.26405 | 85.10557 | 70.29470 | -1526.55661 | 2103.42026  | 817.87394   | 1 |
| 72  | O | 72.91961 | 83.80326 | 69.97026 | -554.84278  | 14.12789    | 399.58769   | 1 |
| 73  | H | 73.30592 | 84.68578 | 70.12657 | 1297.06236  | 2061.84854  | 1220.68812  | 1 |
| 74  | C | 71.67229 | 82.11613 | 72.21535 | -662.15484  | -412.13544  | 123.62687   | 1 |
| 75  | O | 71.13018 | 81.27720 | 71.52866 | -540.01537  | -317.05804  | 274.91456   | 1 |
| 76  | N | 72.45646 | 81.94167 | 73.28242 | -202.76299  | -690.00100  | -131.49145  | 1 |
| 77  | H | 72.75797 | 82.83962 | 73.66134 | -702.62132  | -2617.37191 | 281.70413   | 1 |
| 78  | C | 73.36455 | 80.81977 | 73.34218 | -491.73914  | 576.34187   | 222.73509   | 1 |
| 79  | H | 73.94080 | 80.82722 | 72.39193 | 1977.17978  | -1823.58850 | -434.68928  | 1 |
| 80  | C | 74.20850 | 81.13216 | 74.63928 | -649.50797  | -328.66843  | 306.11224   | 1 |
| 81  | H | 73.50125 | 81.50806 | 75.40844 | 2075.07803  | 1452.16490  | -1004.45904 | 1 |
| 82  | C | 74.95586 | 79.86365 | 75.17781 | -615.18735  | -489.99689  | -70.96352   | 1 |
| 83  | H | 75.45646 | 80.06145 | 76.15468 | -1226.32661 | -1724.38906 | -1716.47170 | 1 |
| 84  | H | 74.24674 | 79.01313 | 75.33487 | 2381.64273  | -969.84735  | 900.46860   | 1 |
| 85  | H | 75.74437 | 79.52756 | 74.46853 | 2122.74991  | 1702.23946  | -141.36228  | 1 |
| 86  | C | 75.32959 | 82.18812 | 74.33503 | -501.86074  | -479.61276  | -376.42482  | 1 |
| 87  | H | 75.90172 | 82.45286 | 75.25483 | 993.79261   | -2246.95401 | -1177.81305 | 1 |
| 88  | H | 76.06385 | 81.80094 | 73.59068 | 42.71279    | -626.15391  | -2651.37258 | 1 |
| 89  | H | 74.90749 | 83.13390 | 73.92348 | -2026.39012 | -1590.33709 | -887.82922  | 1 |
| 90  | C | 72.49800 | 79.46361 | 73.55470 | -672.89153  | 382.57394   | -156.34072  | 1 |
| 91  | O | 72.07329 | 79.15934 | 74.64657 | 410.04627   | 221.86223   | 500.35950   | 1 |
| 92  | N | 72.45632 | 78.72577 | 72.41330 | -378.11782  | -443.79414  | -441.10984  | 1 |
| 93  | H | 72.74734 | 79.28894 | 71.61076 | 2404.15973  | -568.14894  | 1149.30085  | 1 |
| 94  | C | 71.25648 | 77.92118 | 72.30644 | -544.54484  | 466.16019   | 331.29119   | 1 |
| 95  | H | 70.68621 | 78.16653 | 73.23313 | -1409.80988 | -170.17955  | 2325.32679  | 1 |
| 96  | C | 70.51051 | 78.37804 | 70.99154 | -184.48284  | 116.78282   | -758.89137  | 1 |
| 97  | H | 70.25281 | 79.46992 | 71.04858 | 1893.78641  | 1861.14652  | 611.04528   | 1 |
| 98  | H | 71.16699 | 78.28510 | 70.09658 | -2170.79665 | -974.19311  | 1327.50117  | 1 |
| 99  | C | 69.23733 | 77.48455 | 70.84735 | 389.51668   | 672.81878   | -138.49152  | 1 |
| 100 | H | 69.51509 | 76.40982 | 70.93098 | 510.64577   | 1933.03327  | 1851.02484  | 1 |
| 101 | H | 68.55372 | 77.64770 | 71.70951 | -2302.30869 | -1105.72939 | -948.89774  | 1 |
| 102 | C | 68.45465 | 77.70984 | 69.50003 | -559.93427  | -126.34590  | 542.30857   | 1 |
| 103 | O | 67.49326 | 77.02844 | 69.25130 | -670.36003  | -111.83166  | 76.36448    | 1 |
| 104 | N | 68.95944 | 78.69051 | 68.71983 | -216.06729  | -537.07037  | 446.51379   | 1 |
| 105 | H | 69.74397 | 79.32945 | 68.89315 | -1251.96487 | 1074.12894  | -2168.52500 | 1 |
| 106 | H | 68.54627 | 78.97822 | 67.82572 | -2451.83023 | -720.73851  | 944.84612   | 1 |
| 107 | C | 71.65791 | 76.34243 | 72.30714 | 546.24052   | -563.88337  | -85.11809   | 1 |
| 108 | O | 71.05812 | 75.68953 | 73.12071 | 71.70702    | -307.40463  | 606.69673   | 1 |
| 109 | N | 72.53216 | 75.92411 | 71.38125 | 479.90863   | -504.50129  | 222.86849   | 1 |
| 110 | C | 73.03649 | 74.58340 | 71.40354 | 75.51268    | -600.91904  | 506.73700   | 1 |
| 111 | H | 72.28067 | 73.96633 | 71.95167 | -2033.61562 | 1795.30103  | 254.89480   | 1 |
| 112 | C | 73.21234 | 74.27420 | 69.85261 | 523.79067   | 517.99274   | 284.45581   | 1 |
| 113 | H | 73.90565 | 73.42561 | 69.65871 | 1599.61665  | -1127.00911 | 1895.98173  | 1 |
| 114 | H | 72.24252 | 74.01891 | 69.37047 | -1881.83093 | 1275.82488  | -1501.55016 | 1 |
| 115 | C | 73.75390 | 75.64748 | 69.35000 | -600.05639  | -404.05026  | 316.64485   | 1 |
| 116 | H | 74.81754 | 75.79355 | 69.64447 | -2597.05260 | 496.36221   | 657.73249   | 1 |
| 117 | H | 73.70672 | 75.77153 | 68.24470 | -1666.24518 | 1294.38985  | -1723.90591 | 1 |
| 118 | C | 72.78701 | 76.63569 | 70.13394 | 493.57570   | -129.95376  | -602.56394  | 1 |
| 119 | H | 73.22091 | 77.63223 | 70.37975 | -1469.08415 | -637.84797  | 2204.22581  | 1 |
| 120 | H | 71.78655 | 76.77101 | 69.65690 | -1038.97840 | 1068.88701  | -2280.71789 | 1 |
| 121 | C | 74.53244 | 74.51935 | 72.05313 | 188.88100   | 241.05089   | -727.87821  | 1 |
| 122 | O | 75.27085 | 73.56731 | 71.81345 | 531.88613   | -49.19943   | 427.07960   | 1 |
| 123 | N | 74.76578 | 75.55786 | 72.82790 | 708.14833   | 26.93417    | -179.73509  | 1 |
| 124 | H | 74.00328 | 76.23105 | 72.89068 | -2232.69501 | -1179.09831 | 1023.94816  | 1 |
| 125 | C | 76.13853 | 75.92002 | 73.06440 | -738.32412  | 259.92548   | 104.42456   | 1 |
| 126 | H | 76.64105 | 75.64961 | 72.10885 | 2028.89123  | 1260.02983  | 1311.33324  | 1 |

|     |   |          |          |          |             |             |             |   |
|-----|---|----------|----------|----------|-------------|-------------|-------------|---|
| 127 | C | 76.16531 | 77.46185 | 73.42303 | -258.65678  | -345.52513  | 661.28459   | 1 |
| 128 | H | 75.40861 | 77.66800 | 74.20931 | -1826.06090 | -1801.46097 | -918.64554  | 1 |
| 129 | C | 77.60422 | 77.86402 | 73.90044 | -541.23400  | 531.92970   | -218.41428  | 1 |
| 130 | H | 77.70658 | 78.96640 | 74.03288 | 1311.73218  | -2219.18200 | 882.19023   | 1 |
| 131 | H | 77.85367 | 77.39019 | 74.88156 | -1048.71298 | 1223.58118  | -2196.97971 | 1 |
| 132 | H | 78.38348 | 77.54417 | 73.17007 | 419.06414   | 1903.92898  | 1903.44670  | 1 |
| 133 | C | 75.86236 | 78.28771 | 72.12445 | -423.86431  | 152.66566   | -648.55262  | 1 |
| 134 | H | 75.89999 | 79.38589 | 72.31376 | 105.68386   | -2342.50080 | 1387.51238  | 1 |
| 135 | H | 76.59998 | 78.06542 | 71.31833 | -1695.63603 | -1484.73621 | -1531.02793 | 1 |
| 136 | H | 74.84901 | 78.05439 | 71.72316 | -1853.57121 | -487.39031  | 1936.59343  | 1 |
| 137 | C | 76.69043 | 75.01584 | 74.29783 | 539.71428   | -510.58232  | 267.58633   | 1 |
| 138 | O | 76.84863 | 75.44696 | 75.41108 | -15.93758   | -278.34085  | -624.49402  | 1 |
| 139 | N | 77.03455 | 73.81009 | 73.80535 | -676.81886  | 12.05292    | 276.17960   | 1 |
| 140 | H | 76.65133 | 73.52681 | 72.86540 | -1694.44250 | -373.84189  | -2100.66098 | 1 |
| 141 | C | 77.20407 | 72.80558 | 74.82677 | 412.33078   | -664.70360  | 108.35451   | 1 |
| 142 | H | 77.55582 | 73.37861 | 75.71838 | 1765.77476  | 1294.44366  | 1621.76594  | 1 |
| 143 | C | 75.76508 | 72.18325 | 75.07272 | -179.66635  | -721.95667  | -264.73915  | 1 |
| 144 | H | 74.98550 | 72.97428 | 75.15039 | -607.34922  | 2587.87032  | -598.10018  | 1 |
| 145 | H | 75.45485 | 71.53914 | 74.21906 | -359.69332  | -1479.13954 | -2259.74260 | 1 |
| 146 | C | 75.90258 | 71.37189 | 76.40118 | -240.01076  | 616.02425   | 431.85322   | 1 |
| 147 | H | 76.83435 | 70.74800 | 76.33719 | -1359.17131 | 782.54425   | 2227.99181  | 1 |
| 148 | H | 76.05060 | 72.05808 | 77.26540 | -820.36667  | 85.81767    | -2596.78715 | 1 |
| 149 | C | 74.65772 | 70.43097 | 76.64523 | -513.07015  | 236.18570   | -551.87280  | 1 |
| 150 | H | 73.84655 | 70.94804 | 77.20696 | 1816.11944  | -1183.11722 | -1650.94321 | 1 |
| 151 | H | 74.20471 | 70.09346 | 75.68794 | -1800.04429 | -1361.53473 | 1526.34643  | 1 |
| 152 | C | 75.25891 | 69.23787 | 77.43328 | 726.08972   | -253.19732  | -179.64713  | 1 |
| 153 | H | 75.96414 | 68.60662 | 76.85305 | 1224.27271  | -456.51798  | -2390.90304 | 1 |
| 154 | H | 75.73163 | 69.52474 | 78.39878 | 1206.40339  | -1150.93514 | -2154.90344 | 1 |
| 155 | N | 74.15336 | 68.24749 | 77.86567 | 329.70796   | -633.68968  | -155.67358  | 1 |
| 156 | H | 74.60055 | 67.40503 | 78.46017 | 1348.31305  | 1938.76845  | 1359.00643  | 1 |
| 157 | H | 73.37906 | 68.62003 | 78.48658 | 2096.92035  | 1446.54551  | -966.48890  | 1 |
| 158 | H | 73.60088 | 67.76564 | 77.10040 | -1197.07217 | -2303.53719 | 827.28733   | 1 |
| 159 | C | 78.25111 | 71.67324 | 74.32973 | -378.01186  | -556.17301  | -413.96481  | 1 |
| 160 | O | 78.26326 | 70.57831 | 74.89783 | -409.44433  | -307.55053  | -453.30833  | 1 |
| 161 | N | 79.00750 | 72.09382 | 73.34186 | -429.02477  | 524.70884   | 274.08502   | 1 |
| 162 | H | 78.83278 | 73.05551 | 73.05161 | 1706.34263  | -1425.96036 | 1574.38926  | 1 |
| 163 | C | 80.03773 | 71.30387 | 72.76912 | -45.25864   | -626.22952  | 478.93267   | 1 |
| 164 | H | 80.52604 | 71.99743 | 72.04804 | 1988.63164  | 570.90773   | 1772.87287  | 1 |
| 165 | C | 81.00487 | 70.80833 | 73.92098 | 551.77128   | -20.49526   | -564.54996  | 1 |
| 166 | H | 81.31643 | 71.65515 | 74.57255 | 1434.61535  | -1753.10253 | 1513.99471  | 1 |
| 167 | H | 80.47364 | 70.09147 | 74.59020 | -714.67738  | 1819.09770  | 1898.36494  | 1 |
| 168 | C | 82.23817 | 70.14464 | 73.22337 | 446.99263   | -555.77305  | 338.97221   | 1 |
| 169 | H | 81.90186 | 69.28199 | 72.59437 | 1953.68466  | 1892.25957  | -161.67766  | 1 |
| 170 | H | 82.72378 | 70.86337 | 72.52534 | -403.03785  | 2688.07032  | -188.43591  | 1 |
| 171 | C | 83.27472 | 69.65528 | 74.31194 | 567.86262   | 335.74681   | 434.04421   | 1 |
| 172 | H | 83.62761 | 70.50238 | 74.94389 | -1080.02275 | 1568.26081  | -1948.78900 | 1 |
| 173 | H | 82.80688 | 68.92682 | 75.01242 | -919.54108  | 2111.34692  | 1456.13463  | 1 |
| 174 | C | 84.44827 | 69.01489 | 73.53294 | 195.81897   | 173.33862   | -745.11536  | 1 |
| 175 | H | 84.17121 | 68.12327 | 72.93622 | 1405.67949  | -2301.21089 | -390.08113  | 1 |
| 176 | H | 85.02064 | 69.72370 | 72.90170 | -940.37328  | -1118.32446 | 2299.72133  | 1 |
| 177 | N | 85.49510 | 68.49618 | 74.57359 | 319.26422   | 656.36007   | -42.02424   | 1 |
| 178 | H | 86.36182 | 68.04093 | 74.16415 | 1961.03633  | 619.91968   | 1787.09422  | 1 |
| 179 | H | 85.92727 | 69.22575 | 75.21033 | 854.14343   | -2156.80752 | 1429.08711  | 1 |
| 180 | H | 85.18149 | 67.75682 | 75.26817 | 1237.02905  | -1378.50857 | -1998.28500 | 1 |
| 181 | C | 79.35984 | 69.99260 | 72.03956 | 532.53319   | -268.57236  | 517.55729   | 1 |
| 182 | O | 79.89538 | 68.90688 | 72.07494 | 266.16714   | -290.73804  | -558.88002  | 1 |
| 183 | N | 78.28523 | 70.38459 | 71.37460 | -226.25352  | 640.49678   | -270.32839  | 1 |
| 184 | H | 78.05437 | 71.37346 | 71.46493 | 2007.69063  | -1035.27229 | 1523.50231  | 1 |
| 185 | C | 77.41104 | 69.47886 | 70.72027 | -540.76542  | -573.33303  | 49.50000    | 1 |
| 186 | H | 76.70135 | 70.16142 | 70.20172 | -2374.20950 | -1036.76023 | 843.75774   | 1 |
| 187 | C | 78.28705 | 68.63343 | 69.68582 | -77.09082   | 666.87422   | -415.84136  | 1 |
| 188 | H | 78.96362 | 67.95813 | 70.28158 | -985.81834  | 617.19825   | 2463.91927  | 1 |

|     |   |          |          |          |             |             |             |   |
|-----|---|----------|----------|----------|-------------|-------------|-------------|---|
| 189 | O | 79.14436 | 69.41374 | 68.82482 | 293.29899   | -391.65602  | -477.80926  | 1 |
| 190 | H | 80.02130 | 69.18390 | 69.18891 | 2528.72714  | -681.76262  | -751.27122  | 1 |
| 191 | C | 77.23028 | 67.76328 | 68.91372 | 252.47363   | -605.14473  | 440.05134   | 1 |
| 192 | H | 77.72552 | 67.04910 | 68.21478 | -2052.65063 | 1456.49051  | -1043.51830 | 1 |
| 193 | H | 76.58662 | 67.15857 | 69.61587 | -2152.98800 | -1661.97574 | -161.70652  | 1 |
| 194 | H | 76.54964 | 68.40075 | 68.30246 | -473.12726  | -1584.27339 | 2165.61725  | 1 |
| 195 | C | 76.64056 | 68.56812 | 71.84047 | 360.36307   | 488.46713   | 505.10056   | 1 |
| 196 | O | 76.11036 | 67.52778 | 71.50138 | -200.08817  | -528.03552  | -385.82850  | 1 |
| 197 | N | 76.57661 | 69.18700 | 73.00514 | -597.54095  | -226.44775  | 355.20479   | 1 |
| 198 | H | 77.09768 | 70.06453 | 73.05982 | 2179.23655  | -1300.70981 | -991.33835  | 1 |
| 199 | C | 75.89142 | 68.71861 | 74.14681 | -687.68921  | 297.39807   | -249.45179  | 1 |
| 200 | H | 75.86431 | 69.62775 | 74.78209 | -349.16256  | -2467.37713 | -1101.72831 | 1 |
| 201 | C | 74.46645 | 68.08943 | 73.77177 | 672.47345   | 361.54328   | -201.62880  | 1 |
| 202 | H | 74.62076 | 67.27708 | 73.01547 | 1541.41502  | 582.18425   | 2169.97026  | 1 |
| 203 | H | 74.01285 | 67.61717 | 74.67359 | -2534.67717 | 60.25153    | 997.72295   | 1 |
| 204 | C | 73.55187 | 69.18776 | 73.20920 | 574.26774   | -389.43119  | -377.02542  | 1 |
| 205 | C | 72.61187 | 69.86490 | 74.04267 | 688.82679   | -287.33580  | -257.96133  | 1 |
| 206 | H | 72.50906 | 69.60332 | 75.11140 | 331.14182   | 1470.38163  | 2269.80013  | 1 |
| 207 | C | 73.66030 | 69.52393 | 71.82670 | -383.52382  | -675.04808  | 144.24917   | 1 |
| 208 | H | 74.39114 | 68.99882 | 71.18190 | 4.09847     | 1517.59662  | 2262.86397  | 1 |
| 209 | C | 71.81084 | 70.85690 | 73.47540 | -134.76730  | 428.45285   | -649.50303  | 1 |
| 210 | H | 71.08587 | 71.38436 | 74.12006 | -903.23433  | 1600.49020  | 2011.53387  | 1 |
| 211 | C | 72.82962 | 70.51674 | 71.30108 | -335.53281  | -615.00040  | -364.39058  | 1 |
| 212 | H | 72.92036 | 70.76463 | 70.22898 | 1596.45398  | -1369.33862 | 1732.02659  | 1 |
| 213 | C | 71.87528 | 71.21244 | 72.09730 | 585.48547   | -340.24194  | -406.23938  | 1 |
| 214 | O | 71.01837 | 72.21659 | 71.56668 | -419.15649  | -173.04408  | -511.94141  | 1 |
| 215 | H | 71.26359 | 72.15527 | 70.61397 | -1071.84350 | 1559.71507  | -1960.13012 | 1 |
| 216 | C | 76.69388 | 67.49099 | 74.86128 | 291.41878   | -183.13091  | 710.72246   | 1 |
| 217 | O | 76.18493 | 66.39496 | 74.91365 | 379.87695   | 523.47396   | -222.23622  | 1 |
| 218 | N | 77.82852 | 67.91736 | 75.41423 | 564.30591   | 373.09380   | 277.24371   | 1 |
| 219 | H | 78.16413 | 68.90933 | 75.31776 | -120.59931  | -2436.07824 | -1214.35098 | 1 |
| 220 | C | 78.66672 | 66.89238 | 75.93394 | 404.07514   | -299.37480  | 608.84009   | 1 |
| 221 | H | 78.19814 | 65.94485 | 75.57410 | -1071.07882 | -841.69025  | 2359.66467  | 1 |
| 222 | C | 80.11406 | 67.18111 | 75.35866 | -683.12807  | 68.71770    | -390.13096  | 1 |
| 223 | H | 80.06208 | 67.47721 | 74.28482 | 2068.88918  | 1596.58590  | 770.89603   | 1 |
| 224 | H | 80.58834 | 68.03850 | 75.88746 | 1379.86429  | 2342.49779  | -179.85638  | 1 |
| 225 | C | 80.93985 | 65.87105 | 75.54556 | -176.39967  | 537.49466   | 550.97268   | 1 |
| 226 | H | 80.95759 | 65.57084 | 76.61549 | -396.28051  | 1942.22168  | 1869.33314  | 1 |
| 227 | H | 80.46035 | 65.02335 | 75.00728 | -94.44700   | 586.00678   | -2659.20016 | 1 |
| 228 | C | 82.42101 | 66.11917 | 75.00180 | -291.69381  | -718.18079  | -150.72929  | 1 |
| 229 | H | 82.51939 | 66.31255 | 73.90323 | -2303.38776 | 1089.76242  | 964.62032   | 1 |
| 230 | H | 83.00989 | 66.89946 | 75.54709 | 884.16729   | 2568.80533  | -207.74283  | 1 |
| 231 | N | 82.99341 | 64.86895 | 75.28980 | -594.49522  | -252.81478  | 342.29276   | 1 |
| 232 | H | 82.42661 | 64.22165 | 75.81615 | -1735.17426 | 2084.05705  | -263.71605  | 1 |
| 233 | C | 84.16221 | 64.50339 | 74.94762 | 595.23177   | -271.52487  | 442.22352   | 1 |
| 234 | N | 84.94505 | 65.40884 | 74.22458 | 585.53813   | -424.79750  | -105.81303  | 1 |
| 235 | H | 84.72330 | 66.35554 | 73.92063 | 959.88797   | 1327.56823  | -2177.11905 | 1 |
| 236 | H | 85.89406 | 65.23012 | 73.89514 | 1578.48647  | 16.27378    | -2220.76233 | 1 |
| 237 | N | 84.43223 | 63.20250 | 75.39599 | -452.17763  | -390.33541  | -421.51853  | 1 |
| 238 | H | 83.86009 | 62.54272 | 75.92075 | 470.26107   | 1974.25629  | -1817.92087 | 1 |
| 239 | H | 85.31680 | 62.72419 | 75.22173 | 1856.67307  | -1573.97321 | -1224.35416 | 1 |
| 240 | C | 78.71107 | 67.01185 | 77.58347 | -531.47271  | -581.45780  | -55.06206   | 1 |
| 241 | O | 79.16444 | 67.96157 | 78.17154 | -243.00837  | 192.73507   | 609.52485   | 1 |
| 242 | N | 78.28568 | 65.84386 | 78.06951 | 343.49288   | -644.25607  | 38.09164    | 1 |
| 243 | H | 77.90856 | 65.22034 | 77.35629 | -1691.16043 | -1535.97525 | -1484.73099 | 1 |
| 244 | C | 78.01061 | 65.59202 | 79.48803 | 542.66492   | 350.14337   | 454.42563   | 1 |
| 245 | H | 77.54696 | 64.58099 | 79.40369 | 1209.57979  | -2396.95920 | 463.86744   | 1 |
| 246 | C | 79.30860 | 65.56073 | 80.27611 | -737.14309  | 145.93010   | 242.71942   | 1 |
| 247 | H | 79.60520 | 66.61328 | 80.48437 | -1050.18303 | 159.36419   | -2509.06125 | 1 |
| 248 | C | 79.14137 | 64.82302 | 81.59365 | -706.77696  | -252.88343  | -245.16230  | 1 |
| 249 | H | 80.05492 | 64.91987 | 82.24076 | -1624.64039 | -1665.49085 | 1417.86935  | 1 |
| 250 | H | 78.26723 | 65.19870 | 82.19190 | 2566.10521  | 598.51109   | 693.22305   | 1 |

|     |   |          |          |          |             |             |             |   |
|-----|---|----------|----------|----------|-------------|-------------|-------------|---|
| 251 | H | 78.96944 | 63.72506 | 81.42858 | -1972.69758 | 107.10018   | -1876.34312 | 1 |
| 252 | C | 80.45156 | 64.92664 | 79.50196 | 412.85148   | 672.58832   | -27.69222   | 1 |
| 253 | H | 81.40056 | 64.90262 | 80.10402 | 1447.02277  | 1762.76533  | -1490.78944 | 1 |
| 254 | H | 80.21465 | 63.86807 | 79.20741 | 1320.77379  | -145.20455  | 2378.68491  | 1 |
| 255 | H | 80.66730 | 65.49640 | 78.55874 | -1512.10848 | 1470.52031  | 1724.75147  | 1 |
| 256 | C | 76.89106 | 66.71079 | 79.96268 | -607.11113  | 499.56689   | 73.73769    | 1 |
| 257 | O | 75.92526 | 66.92987 | 79.22178 | 357.97126   | 460.81534   | 356.68785   | 1 |
| 258 | N | 77.14291 | 67.18002 | 81.15431 | 536.55407   | -368.62270  | 332.76306   | 1 |
| 259 | H | 78.01564 | 66.83189 | 81.54299 | 524.38866   | 2297.69985  | 1367.20941  | 1 |
| 260 | C | 76.45142 | 68.21566 | 81.82077 | 46.50277    | -774.29190  | -147.97904  | 1 |
| 261 | H | 77.12871 | 68.45315 | 82.66926 | 1676.51875  | 1883.29066  | 1032.55549  | 1 |
| 262 | C | 76.24687 | 69.45367 | 80.80964 | -559.41456  | -34.19198   | -556.30433  | 1 |
| 263 | H | 75.68111 | 69.08909 | 79.90996 | -64.66664   | 395.18769   | 2695.05373  | 1 |
| 264 | H | 75.61361 | 70.24411 | 81.28085 | -2703.44278 | -60.40056   | 333.79418   | 1 |
| 265 | C | 77.59351 | 70.00315 | 80.42071 | -519.76435  | 377.31045   | 459.42366   | 1 |
| 266 | H | 78.21196 | 69.16996 | 80.00978 | -1746.74323 | 1667.50644  | -1261.73691 | 1 |
| 267 | C | 77.46956 | 71.07367 | 79.34361 | 570.95554   | 16.46261    | -545.27700  | 1 |
| 268 | H | 78.44333 | 71.60071 | 79.17063 | 2391.58273  | 28.05277    | -1305.07271 | 1 |
| 269 | H | 77.16318 | 70.63428 | 78.36187 | 175.75588   | 917.63458   | 2559.43867  | 1 |
| 270 | H | 76.71322 | 71.85450 | 79.61735 | -1063.97851 | -2155.34650 | 1283.00462  | 1 |
| 271 | C | 78.30781 | 70.60462 | 81.62464 | 193.76014   | 2.62946     | -765.53141  | 1 |
| 272 | H | 79.28166 | 71.07583 | 81.33274 | 507.39394   | -846.55087  | 2539.60089  | 1 |
| 273 | H | 77.68905 | 71.40015 | 82.11485 | 1337.57841  | 1818.19054  | 1526.01994  | 1 |
| 274 | H | 78.53678 | 69.83370 | 82.40389 | 1100.88635  | -1172.91350 | -2199.08909 | 1 |
| 275 | C | 74.99981 | 67.73127 | 82.34442 | -549.21115  | 475.64486   | -309.38218  | 1 |
| 276 | O | 74.25763 | 67.00122 | 81.74400 | 556.06106   | -390.37755  | -78.24250   | 1 |
| 277 | O | 74.57337 | 68.35663 | 83.54231 | -572.27940  | -310.19032  | -209.75862  | 1 |
| 278 | H | 75.39740 | 68.87730 | 83.74659 | -1380.08193 | 2212.14486  | 790.85944   | 1 |

Listing 127: C00127.xmolout

|    |   |          |          |          |             |             |             |        |          |
|----|---|----------|----------|----------|-------------|-------------|-------------|--------|----------|
| 1  |   | 276      |          |          |             |             |             |        |          |
| 2  |   | 150.0000 | 150.0000 | 150.0000 | 0.0000      | 0.0000      | 0.0000***** | 2.7750 | 11100    |
|    |   | 0.2500   | 300.00   | 0.00     | 0.00        | 0.00        | -1293.3463  | 0.0000 | 300.0000 |
| 3  | H | 75.73027 | 63.25027 | 70.97825 | -2043.14101 | -1757.64893 | 399.89339   |        | 1        |
| 4  | N | 75.62271 | 64.24232 | 70.77120 | 426.75047   | 490.45733   | -334.42467  |        | 1        |
| 5  | H | 74.97905 | 64.51543 | 71.51272 | 442.25559   | -1110.30854 | -2448.52907 |        | 1        |
| 6  | C | 76.84908 | 64.95225 | 70.79158 | 415.32972   | -666.39213  | 83.73172    |        | 1        |
| 7  | H | 77.53357 | 64.37321 | 71.44830 | 879.32219   | 2491.00447  | 667.35213   |        | 1        |
| 8  | C | 77.39714 | 65.05031 | 69.28065 | 31.35357    | 477.41777   | 628.23362   |        | 1        |
| 9  | H | 76.61193 | 65.51642 | 68.63815 | 1168.38489  | 2240.25337  | -1019.71136 |        | 1        |
| 10 | H | 78.28266 | 65.72950 | 69.23054 | -360.43770  | 2534.90498  | 931.67112   |        | 1        |
| 11 | C | 77.74793 | 63.67334 | 68.77555 | 463.18208   | 512.70242   | -382.34388  |        | 1        |
| 12 | H | 76.91614 | 62.98114 | 69.03592 | 1725.29117  | 1863.52247  | -987.07854  |        | 1        |
| 13 | C | 77.90269 | 63.68330 | 67.26011 | 710.42801   | -144.27427  | -313.15367  |        | 1        |
| 14 | H | 78.15501 | 62.66584 | 66.86359 | 364.20195   | -1033.13725 | 2494.72524  |        | 1        |
| 15 | H | 76.96174 | 64.01487 | 66.74958 | 2567.61904  | 335.80679   | 847.48802   |        | 1        |
| 16 | H | 78.71959 | 64.37769 | 66.93407 | -2587.99029 | 680.92867   | -512.16411  |        | 1        |
| 17 | C | 79.03246 | 63.16320 | 69.41407 | 268.17616   | 741.64379   | -40.42634   |        | 1        |
| 18 | H | 79.30376 | 62.14256 | 69.03896 | 1283.54314  | -1945.37420 | -1411.27812 |        | 1        |
| 19 | H | 79.89849 | 63.83866 | 69.19058 | -1258.57796 | 1317.15249  | -2026.02085 |        | 1        |
| 20 | H | 78.94633 | 63.09467 | 70.52891 | -2502.84526 | 909.80597   | 575.92391   |        | 1        |
| 21 | C | 76.55957 | 66.44887 | 71.35524 | 619.36578   | -458.64843  | -172.09273  |        | 1        |
| 22 | O | 77.40983 | 67.03873 | 71.99584 | -81.40433   | 433.87611   | 522.34594   |        | 1        |
| 23 | N | 75.37703 | 66.89585 | 70.94491 | 175.23996   | -622.20190  | 341.55523   |        | 1        |
| 24 | H | 74.79215 | 66.25048 | 70.41613 | -876.57256  | -303.22879  | -2561.90213 |        | 1        |
| 25 | C | 74.91872 | 68.15831 | 71.40566 | -571.88214  | -534.10783  | -106.15033  |        | 1        |
| 26 | H | 75.83208 | 68.67379 | 71.77858 | -2713.20841 | -16.25800   | -248.80809  |        | 1        |
| 27 | C | 74.17182 | 68.88372 | 70.18625 | 166.60354   | 288.16399   | -716.09568  |        | 1        |
| 28 | H | 73.36382 | 68.19797 | 69.81008 | -2097.85574 | 1636.78449  | -586.18044  |        | 1        |
| 29 | O | 74.99115 | 69.19550 | 69.04823 | -317.80580  | -363.38227  | 484.43082   |        | 1        |
| 30 | H | 74.57661 | 68.63950 | 68.35703 | 1863.74748  | -1451.84923 | 1357.29467  |        | 1        |

|    |   |          |          |          |             |             |             |   |
|----|---|----------|----------|----------|-------------|-------------|-------------|---|
| 31 | C | 73.50891 | 70.10424 | 70.92386 | 503.80731   | 517.99032   | 318.51606   | 1 |
| 32 | H | 72.88496 | 70.71241 | 70.22863 | 640.61020   | -2157.10410 | -1536.29104 | 1 |
| 33 | H | 72.84413 | 69.76289 | 71.75436 | 1687.88455  | 465.60692   | 2087.56452  | 1 |
| 34 | H | 74.27476 | 70.78415 | 71.36384 | -1293.07895 | -1899.88581 | -1463.57452 | 1 |
| 35 | C | 73.79025 | 67.85145 | 72.55477 | -153.07550  | -733.68902  | 248.70981   | 1 |
| 36 | O | 72.68510 | 67.52729 | 72.20813 | 186.15459   | -480.78787  | -449.34387  | 1 |
| 37 | N | 74.27075 | 68.04887 | 73.79356 | -487.53139  | 543.18517   | 42.03850    | 1 |
| 38 | C | 73.47661 | 67.76183 | 74.94453 | -699.35871  | 69.34393    | 360.10701   | 1 |
| 39 | H | 72.76410 | 66.95329 | 74.66190 | 2.81126     | -221.99807  | -2715.58072 | 1 |
| 40 | C | 74.58260 | 67.36705 | 76.01432 | -507.46439  | -592.59194  | 122.07761   | 1 |
| 41 | H | 74.21851 | 67.45248 | 77.06283 | -1975.08116 | 525.87560   | -1801.71556 | 1 |
| 42 | H | 74.92534 | 66.31727 | 75.87802 | 1588.27743  | -1913.22100 | 1113.83566  | 1 |
| 43 | C | 75.71514 | 68.38375 | 75.66663 | -613.62442  | -457.55993  | -194.14490  | 1 |
| 44 | H | 75.49705 | 69.38458 | 76.10287 | 1707.54637  | -721.27992  | 1996.92523  | 1 |
| 45 | H | 76.71561 | 68.08349 | 76.05227 | 758.23357   | 2100.81767  | 1560.55011  | 1 |
| 46 | C | 75.64815 | 68.42971 | 74.08162 | -352.41524  | 704.96076   | 49.21465    | 1 |
| 47 | H | 75.82853 | 69.43721 | 73.63784 | 1714.76886  | -2070.42778 | 443.35792   | 1 |
| 48 | H | 76.29129 | 67.67432 | 73.54854 | 1224.15040  | 1801.50881  | 1636.97633  | 1 |
| 49 | C | 72.70585 | 69.11905 | 75.45716 | 566.85117   | 537.05831   | 117.62814   | 1 |
| 50 | O | 71.99127 | 69.05391 | 76.42888 | -550.26779  | -406.08867  | 4.21666     | 1 |
| 51 | N | 72.98234 | 70.17466 | 74.70125 | 566.34832   | -425.77725  | 180.18749   | 1 |
| 52 | H | 73.64459 | 70.03904 | 73.94047 | 644.44502   | 2646.80550  | -52.73430   | 1 |
| 53 | C | 72.48660 | 71.45655 | 75.11177 | 612.34801   | -281.48662  | 411.56221   | 1 |
| 54 | H | 72.63677 | 71.48825 | 76.21471 | 1667.23498  | -1490.75142 | 1556.16753  | 1 |
| 55 | C | 73.30491 | 72.56502 | 74.30489 | -714.45746  | -175.43074  | 286.98927   | 1 |
| 56 | H | 73.14572 | 72.40008 | 73.20374 | -787.09484  | 1763.03619  | -1922.46060 | 1 |
| 57 | O | 74.73114 | 72.54849 | 74.50425 | -429.46514  | 516.51932   | -128.40526  | 1 |
| 58 | H | 75.04671 | 72.37291 | 73.59517 | 1981.82785  | 436.16847   | -1818.18182 | 1 |
| 59 | C | 72.55389 | 73.87591 | 74.74327 | 630.79189   | -468.94448  | 76.03230    | 1 |
| 60 | H | 72.94622 | 74.77137 | 74.20787 | -1775.71861 | 2062.30353  | 131.89849   | 1 |
| 61 | H | 71.45868 | 73.81184 | 74.53138 | -1855.14608 | 88.94118    | 1993.53760  | 1 |
| 62 | H | 72.67014 | 74.06593 | 75.83555 | -1504.82350 | -780.94249  | -2132.90992 | 1 |
| 63 | C | 70.90191 | 71.49590 | 74.74876 | 288.57638   | 618.62814   | -397.00270  | 1 |
| 64 | O | 70.16144 | 72.17852 | 75.46255 | 321.70495   | -185.26452  | 574.37218   | 1 |
| 65 | N | 70.63425 | 70.83750 | 73.64988 | -447.05792  | -446.53431  | 367.76425   | 1 |
| 66 | H | 71.42668 | 70.33827 | 73.24662 | 350.31316   | 1975.63644  | -1843.31522 | 1 |
| 67 | C | 69.31258 | 70.65517 | 73.14790 | -511.23061  | 374.03917   | -471.51480  | 1 |
| 68 | H | 69.51896 | 69.95589 | 72.30457 | 2234.79579  | -898.70890  | -1273.45190 | 1 |
| 69 | C | 68.46754 | 69.98106 | 74.31173 | 529.53781   | -159.34528  | 563.72604   | 1 |
| 70 | H | 67.64930 | 69.35711 | 73.86852 | 654.59388   | 2347.94251  | 1217.51488  | 1 |
| 71 | H | 69.14990 | 69.27027 | 74.84748 | -1526.55661 | 2103.42026  | 817.87394   | 1 |
| 72 | O | 67.86355 | 70.87522 | 75.29732 | -554.84278  | 14.12789    | 399.58769   | 1 |
| 73 | H | 68.68360 | 71.46939 | 75.45968 | 1297.06236  | 2061.84854  | 1220.68812  | 1 |
| 74 | C | 68.73952 | 72.08737 | 72.62491 | -662.15484  | -412.13544  | 123.62687   | 1 |
| 75 | O | 69.37349 | 72.78497 | 71.87506 | -540.01537  | -317.05804  | 274.91456   | 1 |
| 76 | N | 67.47844 | 72.25912 | 73.03278 | -202.76299  | -690.00100  | -131.49145  | 1 |
| 77 | H | 67.10238 | 71.61135 | 73.74395 | -702.62132  | -2617.37191 | 281.70413   | 1 |
| 78 | C | 66.74443 | 73.46653 | 72.66613 | -491.73914  | 576.34187   | 222.73509   | 1 |
| 79 | H | 67.16281 | 73.69648 | 71.65818 | 1977.17978  | -1823.58850 | -434.68928  | 1 |
| 80 | C | 65.26579 | 73.14260 | 72.69890 | -649.50797  | -328.66843  | 306.11224   | 1 |
| 81 | H | 65.03726 | 72.71011 | 73.69942 | 2075.07803  | 1452.16490  | -1004.45904 | 1 |
| 82 | C | 64.40221 | 74.37761 | 72.51662 | -615.18735  | -489.99689  | -70.96352   | 1 |
| 83 | H | 63.30630 | 74.12548 | 72.54324 | -1226.32661 | -1724.38906 | -1716.47170 | 1 |
| 84 | H | 64.58860 | 75.13568 | 73.33048 | 2381.64273  | -969.84735  | 900.46860   | 1 |
| 85 | H | 64.60506 | 74.88543 | 71.53397 | 2122.74991  | 1702.23946  | -141.36228  | 1 |
| 86 | C | 64.89123 | 72.10613 | 71.65355 | -501.86074  | -479.61276  | -376.42482  | 1 |
| 87 | H | 63.80869 | 71.81036 | 71.72846 | 993.79261   | -2246.95401 | -1177.81305 | 1 |
| 88 | H | 65.05805 | 72.49372 | 70.61107 | 42.71279    | -626.15391  | -2651.37258 | 1 |
| 89 | H | 65.50473 | 71.16983 | 71.76086 | -2026.39012 | -1590.33709 | -887.82922  | 1 |
| 90 | C | 67.13387 | 74.65582 | 73.78278 | -672.89153  | 382.57394   | -156.34072  | 1 |
| 91 | O | 66.35554 | 74.94023 | 74.65928 | 410.04627   | 221.86223   | 500.35950   | 1 |
| 92 | N | 68.32735 | 75.14562 | 73.51812 | -378.11782  | -443.79414  | -441.10984  | 1 |

|     |   |          |          |          |             |             |             |   |
|-----|---|----------|----------|----------|-------------|-------------|-------------|---|
| 93  | H | 68.81537 | 74.66203 | 72.75912 | 2404.15973  | -568.14894  | 1149.30085  | 1 |
| 94  | C | 68.94409 | 76.22898 | 74.21465 | -544.54484  | 466.16019   | 331.29119   | 1 |
| 95  | H | 69.99195 | 75.86268 | 74.28740 | -1409.80988 | -170.17955  | 2325.32679  | 1 |
| 96  | C | 68.84980 | 77.52216 | 73.30081 | -184.48284  | 116.78282   | -758.89137  | 1 |
| 97  | H | 69.03524 | 77.26805 | 72.23238 | 1893.78641  | 1861.14652  | 611.04528   | 1 |
| 98  | H | 67.82715 | 77.96198 | 73.34369 | -2170.79665 | -974.19311  | 1327.50117  | 1 |
| 99  | C | 69.91887 | 78.52971 | 73.83328 | 389.51668   | 672.81878   | -138.49152  | 1 |
| 100 | H | 69.65456 | 78.83761 | 74.86998 | 510.64577   | 1933.03327  | 1851.02484  | 1 |
| 101 | H | 70.90335 | 78.02478 | 73.94239 | -2302.30869 | -1105.72939 | -948.89774  | 1 |
| 102 | C | 70.10023 | 79.81323 | 72.94296 | -559.93427  | -126.34590  | 542.30857   | 1 |
| 103 | O | 71.03341 | 80.54936 | 73.15473 | -670.36003  | -111.83166  | 76.36448    | 1 |
| 104 | N | 69.13629 | 79.99074 | 72.01786 | -216.06729  | -537.07037  | 446.51379   | 1 |
| 105 | H | 68.32634 | 79.39775 | 71.80112 | -1251.96487 | 1074.12894  | -2168.52500 | 1 |
| 106 | H | 69.11208 | 80.77221 | 71.35328 | -2451.83023 | -720.73851  | 944.84612   | 1 |
| 107 | C | 68.25796 | 76.59971 | 75.64302 | 546.24052   | -563.88337  | -85.11809   | 1 |
| 108 | O | 67.87840 | 77.73322 | 75.78587 | 71.70702    | -307.40463  | 606.69673   | 1 |
| 109 | N | 68.34543 | 75.61672 | 76.55097 | 479.90863   | -504.50129  | 222.86849   | 1 |
| 110 | C | 67.36218 | 75.48388 | 77.58186 | 75.51268    | -600.91904  | 506.73700   | 1 |
| 111 | H | 66.41987 | 75.91010 | 77.16703 | -2033.61562 | 1795.30103  | 254.89480   | 1 |
| 112 | C | 67.34960 | 73.91747 | 77.82862 | 523.79067   | 517.99274   | 284.45581   | 1 |
| 113 | H | 66.97074 | 73.64119 | 78.83858 | 1599.61665  | -1127.00911 | 1895.98173  | 1 |
| 114 | H | 66.69510 | 73.40266 | 77.08892 | -1881.83093 | 1275.82488  | -1501.55016 | 1 |
| 115 | C | 68.84575 | 73.53713 | 77.59941 | -600.05639  | -404.05026  | 316.64485   | 1 |
| 116 | H | 69.48283 | 73.81150 | 78.46763 | -2597.05260 | 496.36221   | 657.73249   | 1 |
| 117 | H | 69.00947 | 72.44984 | 77.41521 | -1666.24518 | 1294.38985  | -1723.90591 | 1 |
| 118 | C | 69.17573 | 74.43626 | 76.33035 | 493.57570   | -129.95376  | -602.56394  | 1 |
| 119 | H | 70.23945 | 74.75688 | 76.23121 | -1469.08415 | -637.84797  | 2204.22581  | 1 |
| 120 | H | 68.82614 | 74.00850 | 75.35841 | -1038.97840 | 1068.88701  | -2280.71789 | 1 |
| 121 | C | 67.81985 | 76.24828 | 78.95856 | 188.88100   | 241.05089   | -727.87821  | 1 |
| 122 | O | 66.98639 | 76.51350 | 79.79557 | 531.88613   | -49.19943   | 427.07960   | 1 |
| 123 | N | 69.13937 | 76.40645 | 79.02583 | 708.14833   | 26.93417    | -179.73509  | 1 |
| 124 | H | 69.66475 | 76.05230 | 78.22743 | -2232.69501 | -1179.09831 | 1023.94816  | 1 |
| 125 | C | 69.68350 | 77.00225 | 80.18937 | -738.32412  | 259.92548   | 104.42456   | 1 |
| 126 | H | 68.79364 | 77.29583 | 80.79520 | 2028.89123  | 1260.02983  | 1311.33324  | 1 |
| 127 | C | 70.59511 | 75.91661 | 80.91422 | -258.65678  | -345.52513  | 661.28459   | 1 |
| 128 | H | 71.47264 | 75.66484 | 80.27987 | -1826.06090 | -1801.46097 | -918.64554  | 1 |
| 129 | C | 71.04612 | 76.48775 | 82.30092 | -541.23400  | 531.92970   | -218.41428  | 1 |
| 130 | H | 71.74265 | 75.79023 | 82.82343 | 1311.73218  | -2219.18200 | 882.19023   | 1 |
| 131 | H | 71.57908 | 77.46582 | 82.18913 | -1048.71298 | 1223.58118  | -2196.97971 | 1 |
| 132 | H | 70.17584 | 76.66119 | 82.97674 | 419.06414   | 1903.92898  | 1903.44670  | 1 |
| 133 | C | 69.75478 | 74.63288 | 81.23149 | -423.86431  | 152.66566   | -648.55262  | 1 |
| 134 | H | 70.37751 | 73.83885 | 81.70692 | 105.68386   | -2342.50080 | 1387.51238  | 1 |
| 135 | H | 68.91278 | 74.85959 | 81.92665 | -1695.63603 | -1484.73621 | -1531.02793 | 1 |
| 136 | H | 69.30559 | 74.19860 | 80.30959 | -1853.57121 | -487.39031  | 1936.59343  | 1 |
| 137 | C | 70.65990 | 78.26655 | 79.78756 | 539.71428   | -510.58232  | 267.58633   | 1 |
| 138 | O | 70.94152 | 79.04605 | 80.66604 | -15.93758   | -278.34085  | -624.49402  | 1 |
| 139 | N | 71.17959 | 78.15753 | 78.56802 | -676.81886  | 12.05292    | 276.17960   | 1 |
| 140 | H | 70.81437 | 77.34776 | 78.06453 | -1694.44250 | -373.84189  | -2100.66098 | 1 |
| 141 | C | 71.56168 | 79.27387 | 77.75647 | 412.33078   | -664.70360  | 108.35451   | 1 |
| 142 | H | 72.03290 | 78.76125 | 76.88872 | 1765.77476  | 1294.44366  | 1621.76594  | 1 |
| 143 | C | 70.26286 | 80.07089 | 77.34039 | -179.66635  | -721.95667  | -264.73915  | 1 |
| 144 | H | 69.46809 | 79.40028 | 76.93885 | -607.34922  | 2587.87032  | -598.10018  | 1 |
| 145 | H | 69.81388 | 80.59404 | 78.21538 | -359.69332  | -1479.13954 | -2259.74260 | 1 |
| 146 | C | 70.79341 | 81.08161 | 76.26777 | -240.01076  | 616.02425   | 431.85322   | 1 |
| 147 | H | 71.58803 | 81.71611 | 76.72256 | -1359.17131 | 782.54425   | 2227.99181  | 1 |
| 148 | H | 71.28408 | 80.53774 | 75.42616 | -820.36667  | 85.81767    | -2596.78715 | 1 |
| 149 | C | 69.63700 | 81.99556 | 75.70141 | -513.07015  | 236.18570   | -551.87280  | 1 |
| 150 | H | 68.87813 | 81.39477 | 75.14822 | 1816.11944  | -1183.11722 | -1650.94321 | 1 |
| 151 | H | 69.08826 | 82.51760 | 76.51885 | -1800.04429 | -1361.53473 | 1526.34643  | 1 |
| 152 | C | 70.35742 | 82.99842 | 74.76605 | 726.08972   | -253.19732  | -179.64713  | 1 |
| 153 | H | 71.00074 | 83.73651 | 75.28740 | 1224.27271  | -456.51798  | -2390.90304 | 1 |
| 154 | H | 70.92383 | 82.51933 | 73.93482 | 1206.40339  | -1150.93514 | -2154.90344 | 1 |

|     |   |          |          |          |             |             |             |   |
|-----|---|----------|----------|----------|-------------|-------------|-------------|---|
| 155 | N | 69.27925 | 83.85415 | 74.03019 | 329.70796   | -633.68968  | -155.67358  | 1 |
| 156 | H | 69.65815 | 84.59048 | 73.36650 | 1348.31305  | 1938.76845  | 1359.00643  | 1 |
| 157 | H | 68.62164 | 83.32000 | 73.39206 | 2096.92035  | 1446.54551  | -966.48890  | 1 |
| 158 | H | 68.60798 | 84.42530 | 74.62204 | -1197.07217 | -2303.53719 | 827.28733   | 1 |
| 159 | C | 72.55389 | 80.34730 | 78.49375 | -378.01186  | -556.17301  | -413.96481  | 1 |
| 160 | O | 72.13247 | 81.28476 | 79.12469 | -409.44433  | -307.55053  | -453.30833  | 1 |
| 161 | N | 73.81151 | 80.08006 | 78.16897 | -429.02477  | 524.70884   | 274.08502   | 1 |
| 162 | H | 74.12915 | 79.30821 | 77.56294 | 1706.34263  | -1425.96036 | 1574.38926  | 1 |
| 163 | C | 74.83617 | 80.69904 | 78.97971 | -45.25864   | -626.22952  | 478.93267   | 1 |
| 164 | H | 74.67518 | 81.79553 | 78.87052 | 1988.63164  | 570.90773   | 1772.87287  | 1 |
| 165 | C | 74.58129 | 80.24548 | 80.47563 | 551.77128   | -20.49526   | -564.54996  | 1 |
| 166 | H | 73.50300 | 80.39935 | 80.72671 | 1434.61535  | -1753.10253 | 1513.99471  | 1 |
| 167 | H | 74.76134 | 79.15239 | 80.59300 | -714.67738  | 1819.09770  | 1898.36494  | 1 |
| 168 | C | 75.49387 | 81.06155 | 81.44828 | 446.99263   | -555.77305  | 338.97221   | 1 |
| 169 | H | 76.56801 | 80.82413 | 81.27817 | 1953.68466  | 1892.25957  | -161.67766  | 1 |
| 170 | H | 75.38395 | 82.15467 | 81.26914 | -403.03785  | 2688.07032  | -188.43591  | 1 |
| 171 | C | 75.08442 | 80.69718 | 82.93246 | 567.86262   | 335.74681   | 434.04421   | 1 |
| 172 | H | 74.01946 | 80.96013 | 83.12974 | -1080.02275 | 1568.26081  | -1948.78900 | 1 |
| 173 | H | 75.16315 | 79.59961 | 83.10938 | -919.54108  | 2111.34692  | 1456.13463  | 1 |
| 174 | C | 76.03415 | 81.48027 | 83.86849 | 195.81897   | 173.33862   | -745.11536  | 1 |
| 175 | H | 77.10366 | 81.20538 | 83.77409 | 1405.67949  | -2301.21089 | -390.08113  | 1 |
| 176 | H | 75.92227 | 82.58189 | 83.82141 | -940.37328  | -1118.32446 | 2299.72133  | 1 |
| 177 | N | 75.66494 | 81.11118 | 85.34516 | 319.26422   | 656.36007   | -42.02424   | 1 |
| 178 | H | 76.24761 | 81.58403 | 86.09521 | 1961.03633  | 619.91968   | 1787.09422  | 1 |
| 179 | H | 74.68132 | 81.34388 | 85.66897 | 854.14343   | -2156.80752 | 1429.08711  | 1 |
| 180 | H | 75.75287 | 80.09135 | 85.62592 | 1237.02905  | -1378.50857 | -1998.28500 | 1 |
| 181 | C | 76.14535 | 80.12239 | 78.23171 | 532.53319   | -268.57236  | 517.55729   | 1 |
| 182 | O | 75.99836 | 79.44110 | 77.20703 | 266.16714   | -290.73804  | -558.88002  | 1 |
| 183 | N | 77.25307 | 80.46001 | 78.84943 | -226.25352  | 640.49678   | -270.32839  | 1 |
| 184 | H | 77.17627 | 81.07206 | 79.66068 | 2007.69063  | -1035.27229 | 1523.50231  | 1 |
| 185 | C | 78.51775 | 80.32263 | 78.18920 | -540.76542  | -573.33303  | 49.50000    | 1 |
| 186 | H | 78.30467 | 80.71820 | 77.17123 | -2374.20950 | -1036.76023 | 843.75774   | 1 |
| 187 | C | 79.55370 | 81.17792 | 79.04072 | -77.09082   | 666.87422   | -415.84136  | 1 |
| 188 | H | 79.69215 | 80.68666 | 80.04300 | -985.81834  | 617.19825   | 2463.91927  | 1 |
| 189 | O | 79.15473 | 82.53574 | 79.32170 | 293.29899   | -391.65602  | -477.80926  | 1 |
| 190 | H | 79.18356 | 82.54626 | 80.29834 | 2528.72714  | -681.76262  | -751.27122  | 1 |
| 191 | C | 80.86934 | 81.00231 | 78.19561 | 252.47363   | -605.14473  | 440.05134   | 1 |
| 192 | H | 81.74205 | 81.48002 | 78.69866 | -2052.65063 | 1456.49051  | -1043.51830 | 1 |
| 193 | H | 81.12224 | 79.92467 | 78.04247 | -2152.98800 | -1661.97574 | -161.70652  | 1 |
| 194 | H | 80.77259 | 81.46850 | 77.18763 | -473.12726  | -1584.27339 | 2165.61725  | 1 |
| 195 | C | 78.91799 | 78.73832 | 78.14656 | 360.36307   | 488.46713   | 505.10056   | 1 |
| 196 | O | 79.76118 | 78.29417 | 78.88770 | -200.08817  | -528.03552  | -385.82850  | 1 |
| 197 | N | 78.21281 | 78.10753 | 77.21097 | -597.54095  | -226.44775  | 355.20479   | 1 |
| 198 | H | 77.42206 | 78.57356 | 76.70315 | 2179.23655  | -1300.70981 | -991.33835  | 1 |
| 199 | C | 78.56281 | 76.76223 | 76.96083 | -687.68921  | 297.39807   | -249.45179  | 1 |
| 200 | H | 79.21145 | 76.43951 | 77.80895 | -349.16256  | -2467.37713 | -1101.72831 | 1 |
| 201 | C | 77.22367 | 75.91492 | 76.73389 | 672.47345   | 361.54328   | -201.62880  | 1 |
| 202 | H | 76.76555 | 76.17764 | 75.75287 | 1541.41502  | 582.18425   | 2169.97026  | 1 |
| 203 | H | 77.47142 | 74.82989 | 76.68072 | -2534.67717 | 60.25153    | 997.72295   | 1 |
| 204 | C | 76.22467 | 76.19818 | 77.86459 | 574.26774   | -389.43119  | -377.02542  | 1 |
| 205 | C | 76.60658 | 76.05875 | 79.23319 | 688.82679   | -287.33580  | -257.96133  | 1 |
| 206 | H | 77.61673 | 75.70129 | 79.50326 | 331.14182   | 1470.38163  | 2269.80013  | 1 |
| 207 | C | 74.91542 | 76.64589 | 77.51587 | -383.52382  | -675.04808  | 144.24917   | 1 |
| 208 | H | 74.61373 | 76.74809 | 76.45755 | 4.09847     | 1517.59662  | 2262.86397  | 1 |
| 209 | C | 75.68987 | 76.42010 | 80.22017 | -134.76730  | 428.45285   | -649.50303  | 1 |
| 210 | H | 75.99266 | 76.33260 | 81.27799 | -903.23433  | 1600.49020  | 2011.53387  | 1 |
| 211 | C | 74.03639 | 76.98868 | 78.54442 | -335.53281  | -615.00040  | -364.39058  | 1 |
| 212 | H | 73.03382 | 77.35230 | 78.26983 | 1596.45398  | -1369.33862 | 1732.02659  | 1 |
| 213 | C | 74.38517 | 76.91094 | 79.92242 | 585.48547   | -340.24194  | -406.23938  | 1 |
| 214 | O | 73.49548 | 77.28776 | 80.96048 | -419.15649  | -173.04408  | -511.94141  | 1 |
| 215 | H | 72.77570 | 77.71319 | 80.42192 | -1071.84350 | 1559.71507  | -1960.13012 | 1 |
| 216 | C | 79.27369 | 76.66313 | 75.47653 | 291.41878   | -183.13091  | 710.72246   | 1 |



|     |   |          |          |          |             |             |             |   |
|-----|---|----------|----------|----------|-------------|-------------|-------------|---|
| 217 | O | 78.82780 | 77.22461 | 74.50246 | 379.87695   | 523.47396   | -222.23622  | 1 |
| 218 | N | 80.22137 | 75.74250 | 75.56284 | 564.30591   | 373.09380   | 277.24371   | 1 |
| 219 | H | 80.40349 | 75.35160 | 76.48604 | -120.59931  | -2436.07824 | -1214.35098 | 1 |
| 220 | C | 81.12153 | 75.48736 | 74.48971 | 404.07514   | -299.37480  | 608.84009   | 1 |
| 221 | H | 81.57135 | 74.49892 | 74.73563 | -1071.07882 | -841.69025  | 2359.66467  | 1 |
| 222 | C | 80.25886 | 75.47980 | 73.15633 | -683.12807  | 68.71770    | -390.13096  | 1 |
| 223 | H | 79.27306 | 75.00073 | 73.35466 | 2068.88918  | 1596.58590  | 770.89603   | 1 |
| 224 | H | 80.01964 | 76.52422 | 72.83678 | 1379.86429  | 2342.49779  | -179.85638  | 1 |
| 225 | C | 81.02217 | 74.71765 | 72.03042 | -176.39967  | 537.49466   | 550.97268   | 1 |
| 226 | H | 81.91607 | 75.28758 | 71.68692 | -396.28051  | 1942.22168  | 1869.33314  | 1 |
| 227 | H | 81.41032 | 73.74169 | 72.39786 | -94.44700   | 586.00678   | -2659.20016 | 1 |
| 228 | C | 79.98281 | 74.49874 | 70.83585 | -291.69381  | -718.18079  | -150.72929  | 1 |
| 229 | H | 79.08519 | 73.87097 | 71.06828 | -2303.38776 | 1089.76242  | 964.62032   | 1 |
| 230 | H | 79.63425 | 75.44190 | 70.34254 | 884.16729   | 2568.80533  | -207.74283  | 1 |
| 231 | N | 80.78048 | 73.80508 | 69.91422 | -594.49522  | -252.81478  | 342.29276   | 1 |
| 232 | H | 81.77708 | 73.83793 | 70.06801 | -1735.17426 | 2084.05705  | -263.71605  | 1 |
| 233 | C | 80.34425 | 73.17191 | 68.90132 | 595.23177   | -271.52487  | 442.22352   | 1 |
| 234 | N | 78.96332 | 73.15018 | 68.68298 | 585.53813   | -424.79750  | -105.81303  | 1 |
| 235 | H | 78.21453 | 73.58899 | 69.21727 | 959.88797   | 1327.56823  | -2177.11905 | 1 |
| 236 | H | 78.50192 | 72.67983 | 67.90349 | 1578.48647  | 16.27378    | -2220.76233 | 1 |
| 237 | N | 81.40313 | 72.60200 | 68.18064 | -452.17763  | -390.33541  | -421.51853  | 1 |
| 238 | H | 82.41014 | 72.65751 | 68.32608 | 470.26107   | 1974.25629  | -1817.92087 | 1 |
| 239 | H | 81.27440 | 72.07787 | 67.31459 | 1856.67307  | -1573.97321 | -1224.35416 | 1 |
| 240 | C | 82.24645 | 76.66823 | 74.46066 | -531.47271  | -581.45780  | -55.06206   | 1 |
| 241 | O | 82.19012 | 77.70561 | 75.07622 | -243.00837  | 192.73507   | 609.52485   | 1 |
| 242 | N | 83.22646 | 76.23771 | 73.67683 | 343.49288   | -644.25607  | 38.09164    | 1 |
| 243 | H | 83.24990 | 75.34672 | 73.14721 | -1691.16043 | -1535.97525 | -1484.73099 | 1 |
| 244 | C | 84.26831 | 77.16127 | 73.34396 | 542.66492   | 350.14337   | 454.42563   | 1 |
| 245 | H | 83.81837 | 78.17854 | 73.30083 | 1209.57979  | -2396.95920 | 463.86744   | 1 |
| 246 | C | 85.37849 | 77.04684 | 74.47781 | -737.14309  | 145.93010   | 242.71942   | 1 |
| 247 | H | 85.76609 | 76.00722 | 74.53676 | -1050.18303 | 159.36419   | -2509.06125 | 1 |
| 248 | C | 86.53732 | 78.05761 | 74.18318 | -706.77696  | -252.88343  | -245.16230  | 1 |
| 249 | H | 87.30565 | 78.04512 | 74.99152 | -1624.64039 | -1665.49085 | 1417.86935  | 1 |
| 250 | H | 87.06062 | 77.81724 | 73.22822 | 2566.10521  | 598.51109   | 693.22305   | 1 |
| 251 | H | 86.15781 | 79.10318 | 74.10252 | -1972.69758 | 107.10018   | -1876.34312 | 1 |
| 252 | C | 84.73056 | 77.46365 | 75.84392 | 412.85148   | 672.58832   | -27.69222   | 1 |
| 253 | H | 85.48705 | 77.52136 | 76.66184 | 1447.02277  | 1762.76533  | -1490.78944 | 1 |
| 254 | H | 84.23194 | 78.46097 | 75.77318 | 1320.77379  | -145.20455  | 2378.68491  | 1 |
| 255 | H | 83.94887 | 76.73207 | 76.16333 | -1512.10848 | 1470.52031  | 1724.75147  | 1 |
| 256 | C | 84.73986 | 76.50368 | 71.92650 | -607.11113  | 499.56689   | 73.73769    | 1 |
| 257 | O | 84.37236 | 75.36676 | 71.66585 | 357.97126   | 460.81534   | 356.68785   | 1 |
| 258 | N | 85.49617 | 77.34307 | 71.24318 | 536.55407   | -368.62270  | 332.76306   | 1 |
| 259 | H | 85.68131 | 78.24545 | 71.68324 | 524.38866   | 2297.69985  | 1367.20941  | 1 |
| 260 | C | 86.18157 | 76.96687 | 70.06343 | 46.50277    | -774.29190  | -147.97904  | 1 |
| 261 | H | 86.86953 | 77.82262 | 69.88428 | 1676.51875  | 1883.29066  | 1032.55549  | 1 |
| 262 | C | 86.95237 | 75.56168 | 70.25812 | -559.41456  | -34.19198   | -556.30433  | 1 |
| 263 | H | 86.20230 | 74.76270 | 70.48217 | -64.66664   | 395.18769   | 2695.05373  | 1 |
| 264 | H | 87.43877 | 75.26796 | 69.29730 | -2703.44278 | -60.40056   | 333.79418   | 1 |
| 265 | C | 87.96650 | 75.65392 | 71.36483 | -519.76435  | 377.31045   | 459.42366   | 1 |
| 266 | H | 87.42638 | 75.84580 | 72.31933 | -1746.74323 | 1667.50644  | -1261.73691 | 1 |
| 267 | C | 88.72826 | 74.33909 | 71.48765 | 570.95554   | 16.46261    | -545.27700  | 1 |
| 268 | H | 89.47726 | 74.37047 | 72.32028 | 2391.58273  | 28.05277    | -1305.07271 | 1 |
| 269 | H | 88.04012 | 73.47848 | 71.69003 | 175.75588   | 917.63458   | 2559.43867  | 1 |
| 270 | H | 89.28955 | 74.10044 | 70.54762 | -1063.97851 | -2155.34650 | 1283.00462  | 1 |
| 271 | C | 88.95812 | 76.78650 | 71.13311 | 193.76014   | 2.62946     | -765.53141  | 1 |
| 272 | H | 89.76600 | 76.79351 | 71.90937 | 507.39394   | -846.55087  | 2539.60089  | 1 |
| 273 | H | 89.45831 | 76.69801 | 70.13437 | 1337.57841  | 1818.19054  | 1526.01994  | 1 |
| 274 | H | 88.45982 | 77.78907 | 71.16821 | 1100.88635  | -1172.91350 | -2199.08909 | 1 |
| 275 | C | 85.09896 | 76.80009 | 68.88309 | -549.21115  | 475.64486   | -309.38218  | 1 |
| 276 | O | 85.18885 | 75.95577 | 68.03125 | 556.06106   | -390.37755  | -78.24250   | 1 |
| 277 | O | 84.11483 | 77.81622 | 68.79577 | -572.27940  | -310.19032  | -209.75862  | 1 |
| 278 | H | 84.29523 | 78.27468 | 69.66457 | -1380.08193 | 2212.14486  | 790.85944   | 1 |

Listing 128: C00128.xmolout

|    |          |          |          |          |             |             |             |          |  |
|----|----------|----------|----------|----------|-------------|-------------|-------------|----------|--|
| 1  | 276      |          |          |          |             |             |             |          |  |
| 2  | 150.0000 | 150.0000 | 150.0000 | 0.0000   | 0.0000      | 0.0000***** | 2.7750      | 11100    |  |
|    | 0.2500   | 300.00   | 0.00     | 0.00     | 0.00        | -1293.3450  | 0.0000      | 300.0000 |  |
| 3  | H        | 64.38604 | 79.26139 | 81.78076 | -2043.14101 | -1757.64893 | 399.89339   | 1        |  |
| 4  | N        | 64.65841 | 80.04452 | 82.36809 | 426.75047   | 490.45733   | -334.42467  | 1        |  |
| 5  | H        | 64.67693 | 79.62902 | 83.29498 | 442.25559   | -1110.30854 | -2448.52907 | 1        |  |
| 6  | C        | 65.81945 | 80.74866 | 81.96694 | 415.32972   | -666.39213  | 83.73172    | 1        |  |
| 7  | H        | 65.70648 | 80.85711 | 80.85596 | 879.32219   | 2491.00447  | 667.35213   | 1        |  |
| 8  | C        | 65.85710 | 82.17573 | 82.74243 | 31.35357    | 477.41777   | 628.23362   | 1        |  |
| 9  | H        | 66.07936 | 81.99742 | 83.82101 | 1168.38489  | 2240.25337  | -1019.71136 | 1        |  |
| 10 | H        | 66.70004 | 82.79829 | 82.36070 | -360.43770  | 2534.90498  | 931.67112   | 1        |  |
| 11 | C        | 64.54320 | 82.88404 | 82.59565 | 463.18208   | 512.70242   | -382.34388  | 1        |  |
| 12 | H        | 63.73037 | 82.16583 | 82.85082 | 1725.29117  | 1863.52247  | -987.07854  | 1        |  |
| 13 | C        | 64.46118 | 84.06702 | 83.55397 | 710.42801   | -144.27427  | -313.15367  | 1        |  |
| 14 | H        | 63.47770 | 84.59722 | 83.47385 | 364.20195   | -1033.13725 | 2494.72524  | 1        |  |
| 15 | H        | 64.57868 | 83.74561 | 84.62070 | 2567.61904  | 335.80679   | 847.48802   | 1        |  |
| 16 | H        | 65.26206 | 84.82195 | 83.34608 | -2587.99029 | 680.92867   | -512.16411  | 1        |  |
| 17 | C        | 64.33244 | 83.37027 | 81.16713 | 268.17616   | 741.64379   | -40.42634   | 1        |  |
| 18 | H        | 63.35502 | 83.90592 | 81.05324 | 1283.54314  | -1945.37420 | -1411.27812 | 1        |  |
| 19 | H        | 65.13945 | 84.07953 | 80.84994 | -1258.57796 | 1317.15249  | -2026.02085 | 1        |  |
| 20 | H        | 64.33235 | 82.51941 | 80.43808 | -2502.84526 | 909.80597   | 575.92391   | 1        |  |
| 21 | C        | 67.13395 | 79.96382 | 82.36195 | 619.36578   | -458.64843  | -172.09273  | 1        |  |
| 22 | O        | 68.30738 | 80.47391 | 82.23277 | -81.40433   | 433.87611   | 522.34594   | 1        |  |
| 23 | N        | 66.95051 | 78.74408 | 82.80402 | 175.23996   | -622.20190  | 341.55523   | 1        |  |
| 24 | H        | 66.00191 | 78.40045 | 82.93629 | -876.57256  | -303.22879  | -2561.90213 | 1        |  |
| 25 | C        | 68.05103 | 78.33826 | 83.63375 | -571.88214  | -534.10783  | -106.15033  | 1        |  |
| 26 | H        | 67.88759 | 78.95413 | 84.54199 | -2713.20841 | -16.25800   | -248.80809  | 1        |  |
| 27 | C        | 67.87192 | 76.81960 | 83.98839 | 166.60354   | 288.16399   | -716.09568  | 1        |  |
| 28 | H        | 67.73513 | 76.20633 | 83.05148 | -2097.85574 | 1636.78449  | -586.18044  | 1        |  |
| 29 | O        | 66.68073 | 76.49472 | 84.76250 | -317.80580  | -363.38227  | 484.43082   | 1        |  |
| 30 | H        | 66.24052 | 75.85702 | 84.17626 | 1863.74748  | -1451.84923 | 1357.29467  | 1        |  |
| 31 | C        | 69.25625 | 76.49844 | 84.66567 | 503.80731   | 517.99032   | 318.51606   | 1        |  |
| 32 | H        | 69.36407 | 75.41023 | 84.88160 | 640.61020   | -2157.10410 | -1536.29104 | 1        |  |
| 33 | H        | 70.11552 | 76.80045 | 84.02114 | 1687.88455  | 465.60692   | 2087.56452  | 1        |  |
| 34 | H        | 69.36817 | 77.04076 | 85.63321 | -1293.07895 | -1899.88581 | -1463.57452 | 1        |  |
| 35 | C        | 69.43000 | 78.98028 | 82.86274 | -153.07550  | -733.68902  | 248.70981   | 1        |  |
| 36 | O        | 70.31403 | 79.38573 | 83.62727 | 186.15459   | -480.78787  | -449.34387  | 1        |  |
| 37 | N        | 69.73117 | 78.30771 | 81.69344 | -487.53139  | 543.18517   | 42.03850    | 1        |  |
| 38 | C        | 70.84958 | 78.67264 | 80.92097 | -699.35871  | 69.34393    | 360.10701   | 1        |  |
| 39 | H        | 71.54334 | 79.22613 | 81.59968 | 2.81126     | -221.99807  | -2715.58072 | 1        |  |
| 40 | C        | 71.33705 | 77.24216 | 80.39252 | -507.46439  | -592.59194  | 122.07761   | 1        |  |
| 41 | H        | 72.03712 | 77.31563 | 79.53124 | -1975.08116 | 525.87560   | -1801.71556 | 1        |  |
| 42 | H        | 71.85844 | 76.66673 | 81.18901 | 1588.27743  | -1913.22100 | 1113.83566  | 1        |  |
| 43 | C        | 69.96638 | 76.60454 | 80.02821 | -613.62442  | -457.55993  | -194.14490  | 1        |  |
| 44 | H        | 69.56873 | 77.01245 | 79.07170 | 1707.54637  | -721.27992  | 1996.92523  | 1        |  |
| 45 | H        | 70.00498 | 75.49863 | 79.91281 | 758.23357   | 2100.81767  | 1560.55011  | 1        |  |
| 46 | C        | 69.09082 | 77.07712 | 81.27865 | -352.41524  | 704.96076   | 49.21465    | 1        |  |
| 47 | H        | 68.01938 | 77.30324 | 81.05773 | 1714.76886  | -2070.42778 | 443.35792   | 1        |  |
| 48 | H        | 69.15583 | 76.39088 | 82.15556 | 1224.15040  | 1801.50881  | 1636.97633  | 1        |  |
| 49 | C        | 70.49240 | 79.49802 | 79.52625 | 566.85117   | 537.05831   | 117.62814   | 1        |  |
| 50 | O        | 71.41339 | 79.69567 | 78.72909 | -550.26779  | -406.08867  | 4.21666     | 1        |  |
| 51 | N        | 69.22349 | 79.75563 | 79.41061 | 566.34832   | -425.77725  | 180.18749   | 1        |  |
| 52 | H        | 68.74620 | 79.48315 | 80.27135 | 644.44502   | 2646.80550  | -52.73430   | 1        |  |
| 53 | C        | 68.59189 | 80.65232 | 78.48820 | 612.34801   | -281.48662  | 411.56221   | 1        |  |
| 54 | H        | 68.47419 | 81.58962 | 79.07426 | 1667.23498  | -1490.75142 | 1556.16753  | 1        |  |
| 55 | C        | 69.44376 | 80.86586 | 77.16847 | -714.45746  | -175.43074  | 286.98927   | 1        |  |
| 56 | H        | 69.80510 | 79.85602 | 76.82173 | -787.09484  | 1763.03619  | -1922.46060 | 1        |  |
| 57 | O        | 70.64539 | 81.64063 | 77.28636 | -429.46514  | 516.51932   | -128.40526  | 1        |  |

|     |   |          |          |          |             |             |             |   |
|-----|---|----------|----------|----------|-------------|-------------|-------------|---|
| 58  | H | 71.26437 | 80.91966 | 77.68758 | 1981.82785  | 436.16847   | -1818.18182 | 1 |
| 59  | C | 68.37878 | 81.46627 | 76.18134 | 630.79189   | -468.94448  | 76.03230    | 1 |
| 60  | H | 68.83461 | 81.73013 | 75.20006 | -1775.71861 | 2062.30353  | 131.89849   | 1 |
| 61  | H | 67.53638 | 80.75658 | 75.97189 | -1855.14608 | 88.94118    | 1993.53760  | 1 |
| 62  | H | 67.93108 | 82.40231 | 76.58883 | -1504.82350 | -780.94249  | -2132.90992 | 1 |
| 63  | C | 67.13213 | 79.95798 | 78.24704 | 288.57638   | 618.62814   | -397.00270  | 1 |
| 64  | O | 66.17717 | 80.36707 | 78.87042 | 321.70495   | -185.26452  | 574.37218   | 1 |
| 65  | N | 67.19631 | 78.93008 | 77.40199 | -447.05792  | -446.53431  | 367.76425   | 1 |
| 66  | H | 68.09827 | 78.73744 | 76.96754 | 350.31316   | 1975.63644  | -1843.31522 | 1 |
| 67  | C | 65.96255 | 78.54619 | 76.72941 | -511.23061  | 374.03917   | -471.51480  | 1 |
| 68  | H | 65.36825 | 78.22019 | 77.61350 | 2234.79579  | -898.70890  | -1273.45190 | 1 |
| 69  | C | 65.32401 | 79.80119 | 76.05913 | 529.53781   | -159.34528  | 563.72604   | 1 |
| 70  | H | 64.26696 | 79.59734 | 75.77542 | 654.59388   | 2347.94251  | 1217.51488  | 1 |
| 71  | H | 65.30333 | 80.64963 | 76.77828 | -1526.55661 | 2103.42026  | 817.87394   | 1 |
| 72  | O | 65.94253 | 80.33230 | 74.66295 | -554.84278  | 14.12789    | 399.58769   | 1 |
| 73  | H | 65.13563 | 80.70312 | 74.33264 | 1297.06236  | 2061.84854  | 1220.68812  | 1 |
| 74  | C | 66.32763 | 77.33360 | 75.71793 | -662.15484  | -412.13544  | 123.62687   | 1 |
| 75  | O | 66.70530 | 76.27769 | 76.13868 | -540.01537  | -317.05804  | 274.91456   | 1 |
| 76  | N | 66.05157 | 77.68022 | 74.44284 | -202.76299  | -690.00100  | -131.49145  | 1 |
| 77  | H | 65.81933 | 78.68499 | 74.21745 | -702.62132  | -2617.37191 | 281.70413   | 1 |
| 78  | C | 66.48733 | 76.75091 | 73.35928 | -491.73914  | 576.34187   | 222.73509   | 1 |
| 79  | H | 66.63294 | 75.78567 | 73.90694 | 1977.17978  | -1823.58850 | -434.68928  | 1 |
| 80  | C | 65.35848 | 76.69588 | 72.33976 | -649.50797  | -328.66843  | 306.11224   | 1 |
| 81  | H | 65.22300 | 77.71958 | 71.92548 | 2075.07803  | 1452.16490  | -1004.45904 | 1 |
| 82  | C | 65.66753 | 75.75865 | 71.18794 | -615.18735  | -489.99689  | -70.96352   | 1 |
| 83  | H | 64.81338 | 75.70112 | 70.45794 | -1226.32661 | -1724.38906 | -1716.47170 | 1 |
| 84  | H | 66.57770 | 76.08997 | 70.61274 | 2381.64273  | -969.84735  | 900.46860   | 1 |
| 85  | H | 65.86800 | 74.71263 | 71.54993 | 2122.74991  | 1702.23946  | -141.36228  | 1 |
| 86  | C | 64.05003 | 76.28994 | 72.99491 | -501.86074  | -479.61276  | -376.42482  | 1 |
| 87  | H | 63.19212 | 76.30996 | 72.26833 | 993.79261   | -2246.95401 | -1177.81305 | 1 |
| 88  | H | 64.10735 | 75.24870 | 73.41597 | 42.71279    | -626.15391  | -2651.37258 | 1 |
| 89  | H | 63.78786 | 76.97535 | 73.84717 | -2026.39012 | -1590.33709 | -887.82922  | 1 |
| 90  | C | 67.85523 | 77.29327 | 72.71656 | -672.89153  | 382.57394   | -156.34072  | 1 |
| 91  | O | 68.44683 | 76.66743 | 71.76917 | 410.04627   | 221.86223   | 500.35950   | 1 |
| 92  | N | 68.32202 | 78.38508 | 73.24483 | -378.11782  | -443.79414  | -441.10984  | 1 |
| 93  | H | 67.74115 | 78.82686 | 73.95370 | 2404.15973  | -568.14894  | 1149.30085  | 1 |
| 94  | C | 69.31681 | 79.01478 | 72.41837 | -544.54484  | 466.16019   | 331.29119   | 1 |
| 95  | H | 68.72305 | 79.69430 | 71.77708 | -1409.80988 | -170.17955  | 2325.32679  | 1 |
| 96  | C | 70.27433 | 79.77923 | 73.37973 | -184.48284  | 116.78282   | -758.89137  | 1 |
| 97  | H | 69.71374 | 80.51724 | 73.99572 | 1893.78641  | 1861.14652  | 611.04528   | 1 |
| 98  | H | 70.74209 | 79.07004 | 74.10217 | -2170.79665 | -974.19311  | 1327.50117  | 1 |
| 99  | C | 71.36885 | 80.48214 | 72.50385 | 389.51668   | 672.81878   | -138.49152  | 1 |
| 100 | H | 71.85317 | 79.74275 | 71.82843 | 510.64577   | 1933.03327  | 1851.02484  | 1 |
| 101 | H | 70.89733 | 81.21196 | 71.81048 | -2302.30869 | -1105.72939 | -948.89774  | 1 |
| 102 | C | 72.46541 | 81.20178 | 73.37201 | -559.93427  | -126.34590  | 542.30857   | 1 |
| 103 | O | 73.47730 | 81.58671 | 72.84352 | -670.36003  | -111.83166  | 76.36448    | 1 |
| 104 | N | 72.13977 | 81.35845 | 74.67530 | -216.06729  | -537.07037  | 446.51379   | 1 |
| 105 | H | 71.28922 | 81.12372 | 75.20286 | -1251.96487 | 1074.12894  | -2168.52500 | 1 |
| 106 | H | 72.72777 | 81.86980 | 75.34287 | -2451.83023 | -720.73851  | 944.84612   | 1 |
| 107 | C | 70.09003 | 77.75982 | 71.57790 | 546.24052   | -563.88337  | -85.11809   | 1 |
| 108 | O | 70.96983 | 77.10705 | 72.15377 | 71.70702    | -307.40463  | 606.69673   | 1 |
| 109 | N | 70.17884 | 78.12312 | 70.24781 | 479.90863   | -504.50129  | 222.86849   | 1 |
| 110 | C | 70.78497 | 77.26072 | 69.30762 | 75.51268    | -600.91904  | 506.73700   | 1 |
| 111 | H | 70.72668 | 76.22101 | 69.70871 | -2033.61562 | 1795.30103  | 254.89480   | 1 |
| 112 | C | 69.94870 | 77.56683 | 67.97523 | 523.79067   | 517.99274   | 284.45581   | 1 |
| 113 | H | 70.48735 | 77.26988 | 67.04817 | 1599.61665  | -1127.00911 | 1895.98173  | 1 |
| 114 | H | 68.97515 | 77.02891 | 67.96822 | -1881.83093 | 1275.82488  | -1501.55016 | 1 |
| 115 | C | 69.75331 | 79.10169 | 68.11176 | -600.05639  | -404.05026  | 316.64485   | 1 |
| 116 | H | 70.69512 | 79.64616 | 67.86522 | -2597.05260 | 496.36221   | 657.73249   | 1 |
| 117 | H | 68.95507 | 79.51543 | 67.45632 | -1666.24518 | 1294.38985  | -1723.90591 | 1 |
| 118 | C | 69.41658 | 79.20743 | 69.67334 | 493.57570   | -129.95376  | -602.56394  | 1 |
| 119 | H | 69.73827 | 80.16074 | 70.15778 | -1469.08415 | -637.84797  | 2204.22581  | 1 |

|     |   |          |          |          |             |             |             |   |
|-----|---|----------|----------|----------|-------------|-------------|-------------|---|
| 120 | H | 68.34886 | 79.00235 | 69.93234 | -1038.97840 | 1068.88701  | -2280.71789 | 1 |
| 121 | C | 72.33507 | 77.75430 | 69.02881 | 188.88100   | 241.05089   | -727.87821  | 1 |
| 122 | O | 72.61393 | 78.91523 | 68.86919 | 531.88613   | -49.19943   | 427.07960   | 1 |
| 123 | N | 73.09978 | 76.68686 | 68.92225 | 708.14833   | 26.93417    | -179.73509  | 1 |
| 124 | H | 72.79269 | 75.70156 | 69.02457 | -2232.69501 | -1179.09831 | 1023.94816  | 1 |
| 125 | C | 74.50954 | 76.85451 | 68.73471 | -738.32412  | 259.92548   | 104.42456   | 1 |
| 126 | H | 74.66157 | 77.65405 | 67.97564 | 2028.89123  | 1260.02983  | 1311.33324  | 1 |
| 127 | C | 75.14330 | 77.25031 | 70.13929 | -258.65678  | -345.52513  | 661.28459   | 1 |
| 128 | H | 74.83779 | 76.51911 | 70.92075 | -1826.06090 | -1801.46097 | -918.64554  | 1 |
| 129 | C | 76.70243 | 77.27893 | 69.99599 | -541.23400  | 531.92970   | -218.41428  | 1 |
| 130 | H | 77.19350 | 77.62960 | 70.93397 | 1311.73218  | -2219.18200 | 882.19023   | 1 |
| 131 | H | 77.10674 | 76.25978 | 69.78103 | -1048.71298 | 1223.58118  | -2196.97971 | 1 |
| 132 | H | 77.03152 | 77.95595 | 69.17278 | 419.06414   | 1903.92898  | 1903.44670  | 1 |
| 133 | C | 74.66068 | 78.68643 | 70.54412 | -423.86431  | 152.66566   | -648.55262  | 1 |
| 134 | H | 75.28559 | 79.11998 | 71.36086 | 105.68386   | -2342.50080 | 1387.51238  | 1 |
| 135 | H | 74.69648 | 79.39456 | 69.68014 | -1695.63603 | -1484.73621 | -1531.02793 | 1 |
| 136 | H | 73.60636 | 78.67049 | 70.91349 | -1853.57121 | -487.39031  | 1936.59343  | 1 |
| 137 | C | 74.88058 | 75.33816 | 68.27053 | 539.71428   | -510.58232  | 267.58633   | 1 |
| 138 | O | 74.05276 | 74.45473 | 68.45161 | -15.93758   | -278.34085  | -624.49402  | 1 |
| 139 | N | 76.08446 | 75.26453 | 67.73227 | -676.81886  | 12.05292    | 276.17960   | 1 |
| 140 | H | 76.64406 | 76.11462 | 67.67448 | -1694.44250 | -373.84189  | -2100.66098 | 1 |
| 141 | C | 76.57574 | 74.00611 | 67.28256 | 412.33078   | -664.70360  | 108.35451   | 1 |
| 142 | H | 75.64795 | 73.40679 | 67.13010 | 1765.77476  | 1294.44366  | 1621.76594  | 1 |
| 143 | C | 77.40604 | 74.32449 | 65.97107 | -179.66635  | -721.95667  | -264.73915  | 1 |
| 144 | H | 76.75449 | 74.82264 | 65.21899 | -607.34922  | 2587.87032  | -598.10018  | 1 |
| 145 | H | 78.21222 | 75.06052 | 66.18375 | -359.69332  | -1479.13954 | -2259.74260 | 1 |
| 146 | C | 78.01523 | 73.01157 | 65.37975 | -240.01076  | 616.02425   | 431.85322   | 1 |
| 147 | H | 78.66299 | 72.50119 | 66.12753 | -1359.17131 | 782.54425   | 2227.99181  | 1 |
| 148 | H | 77.21634 | 72.28423 | 65.11287 | -820.36667  | 85.81767    | -2596.78715 | 1 |
| 149 | C | 78.84813 | 73.43651 | 64.10214 | -513.07015  | 236.18570   | -551.87280  | 1 |
| 150 | H | 78.20164 | 73.98081 | 63.37611 | 1816.11944  | -1183.11722 | -1650.94321 | 1 |
| 151 | H | 79.65519 | 74.15254 | 64.38020 | -1800.04429 | -1361.53473 | 1526.34643  | 1 |
| 152 | C | 79.44808 | 72.17295 | 63.44519 | 726.08972   | -253.19732  | -179.64713  | 1 |
| 153 | H | 80.19447 | 71.63836 | 64.06576 | 1224.27271  | -456.51798  | -2390.90304 | 1 |
| 154 | H | 78.69953 | 71.45668 | 63.05186 | 1206.40339  | -1150.93514 | -2154.90344 | 1 |
| 155 | N | 80.24719 | 72.63779 | 62.17893 | 329.70796   | -633.68968  | -155.67358  | 1 |
| 156 | H | 80.71764 | 71.86601 | 61.62386 | 1348.31305  | 1938.76845  | 1359.00643  | 1 |
| 157 | H | 79.69916 | 73.13519 | 61.41814 | 2096.92035  | 1446.54551  | -966.48890  | 1 |
| 158 | H | 81.05792 | 73.30468 | 62.33526 | -1197.07217 | -2303.53719 | 827.28733   | 1 |
| 159 | C | 77.50460 | 73.36067 | 68.46844 | -378.01186  | -556.17301  | -413.96481  | 1 |
| 160 | O | 77.08482 | 72.41064 | 69.12055 | -409.44433  | -307.55053  | -453.30833  | 1 |
| 161 | N | 78.66589 | 73.96714 | 68.57802 | -429.02477  | 524.70884   | 274.08502   | 1 |
| 162 | H | 78.85098 | 74.77536 | 67.99011 | 1706.34263  | -1425.96036 | 1574.38926  | 1 |
| 163 | C | 79.65365 | 73.32536 | 69.39291 | -45.25864   | -626.22952  | 478.93267   | 1 |
| 164 | H | 79.39143 | 72.24930 | 69.26212 | 1988.63164  | 570.90773   | 1772.87287  | 1 |
| 165 | C | 81.09378 | 73.74409 | 68.89905 | 551.77128   | -20.49526   | -564.54996  | 1 |
| 166 | H | 81.24164 | 73.50875 | 67.82092 | 1434.61535  | -1753.10253 | 1513.99471  | 1 |
| 167 | H | 81.24048 | 74.84344 | 68.99571 | -714.67738  | 1819.09770  | 1898.36494  | 1 |
| 168 | C | 82.10144 | 72.96041 | 69.80654 | 446.99263   | -555.77305  | 338.97221   | 1 |
| 169 | H | 81.87845 | 73.16315 | 70.88043 | 1953.68466  | 1892.25957  | -161.67766  | 1 |
| 170 | H | 81.98984 | 71.86109 | 69.67199 | -403.03785  | 2688.07032  | -188.43591  | 1 |
| 171 | C | 83.57088 | 73.42578 | 69.45818 | 567.86262   | 335.74681   | 434.04421   | 1 |
| 172 | H | 83.85413 | 73.12747 | 68.42250 | -1080.02275 | 1568.26081  | -1948.78900 | 1 |
| 173 | H | 83.65480 | 74.53650 | 69.49038 | -919.54108  | 2111.34692  | 1456.13463  | 1 |
| 174 | C | 84.50281 | 72.77520 | 70.50804 | 195.81897   | 173.33862   | -745.11536  | 1 |
| 175 | H | 84.31552 | 73.09945 | 71.55139 | 1405.67949  | -2301.21089 | -390.08113  | 1 |
| 176 | H | 84.55244 | 71.66905 | 70.46027 | -940.37328  | -1118.32446 | 2299.72133  | 1 |
| 177 | N | 85.96101 | 73.25600 | 70.20688 | 319.26422   | 656.36007   | -42.02424   | 1 |
| 178 | H | 86.70515 | 72.90496 | 70.87641 | 1961.03633  | 619.91968   | 1787.09422  | 1 |
| 179 | H | 86.37791 | 72.98433 | 69.26921 | 854.14343   | -2156.80752 | 1429.08711  | 1 |
| 180 | H | 86.13692 | 74.30255 | 70.23181 | 1237.02905  | -1378.50857 | -1998.28500 | 1 |
| 181 | C | 79.42808 | 73.80115 | 70.94996 | 532.53319   | -268.57236  | 517.55729   | 1 |

|     |   |          |          |          |             |             |             |   |
|-----|---|----------|----------|----------|-------------|-------------|-------------|---|
| 182 | O | 80.17960 | 74.55348 | 71.51804 | 266.16714   | -290.73804  | -558.88002  | 1 |
| 183 | N | 78.36726 | 73.14971 | 71.41526 | -226.25352  | 640.49678   | -270.32839  | 1 |
| 184 | H | 77.78022 | 72.58667 | 70.75950 | 2007.69063  | -1035.27229 | 1523.50231  | 1 |
| 185 | C | 77.93226 | 73.49266 | 72.72869 | -540.76542  | -573.33303  | 49.50000    | 1 |
| 186 | H | 78.55251 | 74.38360 | 72.98974 | -2374.20950 | -1036.76023 | 843.75774   | 1 |
| 187 | C | 76.37204 | 73.82224 | 72.60016 | -77.09082   | 666.87422   | -415.84136  | 1 |
| 188 | H | 75.82626 | 72.85694 | 72.41974 | -985.81834  | 617.19825   | 2463.91927  | 1 |
| 189 | O | 76.02399 | 74.70430 | 71.51441 | 293.29899   | -391.65602  | -477.80926  | 1 |
| 190 | H | 75.62649 | 74.07493 | 70.87908 | 2528.72714  | -681.76262  | -751.27122  | 1 |
| 191 | C | 76.01265 | 74.37847 | 74.02472 | 252.47363   | -605.14473  | 440.05134   | 1 |
| 192 | H | 74.92038 | 74.58206 | 74.12041 | -2052.65063 | 1456.49051  | -1043.51830 | 1 |
| 193 | H | 76.29745 | 73.65805 | 74.84347 | -2152.98800 | -1661.97574 | -161.70652  | 1 |
| 194 | H | 76.54461 | 75.33729 | 74.22968 | -473.12726  | -1584.27339 | 2165.61725  | 1 |
| 195 | C | 78.20251 | 72.24417 | 73.74554 | 360.36307   | 488.46713   | 505.10056   | 1 |
| 196 | O | 77.73225 | 72.26769 | 74.86673 | -200.08817  | -528.03552  | -385.82850  | 1 |
| 197 | N | 78.98883 | 71.31327 | 73.22202 | -597.54095  | -226.44775  | 355.20479   | 1 |
| 198 | H | 79.31467 | 71.44622 | 72.26642 | 2179.23655  | -1300.70981 | -991.33835  | 1 |
| 199 | C | 79.21891 | 70.13768 | 73.97400 | -687.68921  | 297.39807   | -249.45179  | 1 |
| 200 | H | 78.76775 | 70.34027 | 74.97393 | -349.16256  | -2467.37713 | -1101.72831 | 1 |
| 201 | C | 78.54473 | 68.91659 | 73.18534 | 672.47345   | 361.54328   | -201.62880  | 1 |
| 202 | H | 79.01036 | 68.80396 | 72.17987 | 1541.41502  | 582.18425   | 2169.97026  | 1 |
| 203 | H | 78.71882 | 67.96445 | 73.73726 | -2534.67717 | 60.25153    | 997.72295   | 1 |
| 204 | C | 77.04506 | 69.21680 | 73.06290 | 574.26774   | -389.43119  | -377.02542  | 1 |
| 205 | C | 76.17105 | 68.92022 | 74.15188 | 688.82679   | -287.33580  | -257.96133  | 1 |
| 206 | H | 76.55592 | 68.44397 | 75.07195 | 331.14182   | 1470.38163  | 2269.80013  | 1 |
| 207 | C | 76.54222 | 69.85253 | 71.88707 | -383.52382  | -675.04808  | 144.24917   | 1 |
| 208 | H | 77.21795 | 70.10076 | 71.04861 | 4.09847     | 1517.59662  | 2262.86397  | 1 |
| 209 | C | 74.82294 | 69.25720 | 74.03615 | -134.76730  | 428.45285   | -649.50303  | 1 |
| 210 | H | 74.14786 | 69.03008 | 74.87979 | -903.23433  | 1600.49020  | 2011.53387  | 1 |
| 211 | C | 75.18422 | 70.17098 | 71.81918 | -335.53281  | -615.00040  | -364.39058  | 1 |
| 212 | H | 74.81039 | 70.66335 | 70.90405 | 1596.45398  | -1369.33862 | 1732.02659  | 1 |
| 213 | C | 74.27572 | 69.88681 | 72.88056 | 585.48547   | -340.24194  | -406.23938  | 1 |
| 214 | O | 72.89368 | 70.20346 | 72.82241 | -419.15649  | -173.04408  | -511.94141  | 1 |
| 215 | H | 72.85495 | 70.61791 | 71.92820 | -1071.84350 | 1559.71507  | -1960.13012 | 1 |
| 216 | C | 80.84069 | 69.87078 | 73.97401 | 291.41878   | -183.13091  | 710.72246   | 1 |
| 217 | O | 81.44786 | 69.53907 | 72.98398 | 379.87695   | 523.47396   | -222.23622  | 1 |
| 218 | N | 81.29490 | 70.07922 | 75.20363 | 564.30591   | 373.09380   | 277.24371   | 1 |
| 219 | H | 80.66104 | 70.35846 | 75.95258 | -120.59931  | -2436.07824 | -1214.35098 | 1 |
| 220 | C | 82.64462 | 69.75028 | 75.49570 | 404.07514   | -299.37480  | 608.84009   | 1 |
| 221 | H | 83.03088 | 69.20641 | 74.60044 | -1071.07882 | -841.69025  | 2359.66467  | 1 |
| 222 | C | 83.39154 | 71.12773 | 75.77403 | -683.12807  | 68.71770    | -390.13096  | 1 |
| 223 | H | 83.03569 | 71.90846 | 75.06531 | 2068.88918  | 1596.58590  | 770.89603   | 1 |
| 224 | H | 83.14365 | 71.50863 | 76.79005 | 1379.86429  | 2342.49779  | -179.85638  | 1 |
| 225 | C | 84.92595 | 70.90285 | 75.62467 | -176.39967  | 537.49466   | 550.97268   | 1 |
| 226 | H | 85.29455 | 70.14561 | 76.35248 | -396.28051  | 1942.22168  | 1869.33314  | 1 |
| 227 | H | 85.17418 | 70.50297 | 74.61593 | -94.44700   | 586.00678   | -2659.20016 | 1 |
| 228 | C | 85.62891 | 72.31677 | 75.87171 | -291.69381  | -718.18079  | -150.72929  | 1 |
| 229 | H | 85.35703 | 73.12560 | 75.14651 | -2303.38776 | 1089.76242  | 964.62032   | 1 |
| 230 | H | 85.51656 | 72.73384 | 76.90476 | 884.16729   | 2568.80533  | -207.74283  | 1 |
| 231 | N | 86.98533 | 72.01290 | 75.68271 | -594.49522  | -252.81478  | 342.29276   | 1 |
| 232 | H | 87.21065 | 71.05389 | 75.46877 | -1735.17426 | 2084.05705  | -263.71605  | 1 |
| 233 | C | 87.93350 | 72.85442 | 75.77061 | 595.23177   | -271.52487  | 442.22352   | 1 |
| 234 | N | 87.60083 | 74.18005 | 76.07130 | 585.53813   | -424.79750  | -105.81303  | 1 |
| 235 | H | 86.68656 | 74.59306 | 76.25084 | 959.88797   | 1327.56823  | -2177.11905 | 1 |
| 236 | H | 88.27339 | 74.93987 | 76.17921 | 1578.48647  | 16.27378    | -2220.76233 | 1 |
| 237 | N | 89.17464 | 72.24691 | 75.53174 | -452.17763  | -390.33541  | -421.51853  | 1 |
| 238 | H | 89.41845 | 71.27784 | 75.33291 | 470.26107   | 1974.25629  | -1817.92087 | 1 |
| 239 | H | 90.06001 | 72.75292 | 75.57606 | 1856.67307  | -1573.97321 | -1224.35416 | 1 |
| 240 | C | 82.61623 | 68.91518 | 76.90566 | -531.47271  | -581.45780  | -55.06206   | 1 |
| 241 | O | 81.73083 | 69.03591 | 77.71688 | -243.00837  | 192.73507   | 609.52485   | 1 |
| 242 | N | 83.72401 | 68.17873 | 76.99514 | 343.49288   | -644.25607  | 38.09164    | 1 |
| 243 | H | 84.37847 | 68.25893 | 76.21901 | -1691.16043 | -1535.97525 | -1484.73099 | 1 |

|     |   |          |          |          |             |             |             |   |
|-----|---|----------|----------|----------|-------------|-------------|-------------|---|
| 244 | C | 83.97736 | 67.35025 | 78.17273 | 542.66492   | 350.14337   | 454.42563   | 1 |
| 245 | H | 82.98192 | 66.91861 | 78.43147 | 1209.57979  | -2396.95920 | 463.86744   | 1 |
| 246 | C | 85.05468 | 66.33854 | 77.83266 | -737.14309  | 145.93010   | 242.71942   | 1 |
| 247 | H | 85.96800 | 66.90429 | 77.54028 | -1050.18303 | 159.36419   | -2509.06125 | 1 |
| 248 | C | 85.39482 | 65.48030 | 79.03818 | -706.77696  | -252.88343  | -245.16230  | 1 |
| 249 | H | 86.22557 | 64.75631 | 78.81435 | -1624.64039 | -1665.49085 | 1417.86935  | 1 |
| 250 | H | 85.72286 | 66.10848 | 79.91239 | 2566.10521  | 598.51109   | 693.22305   | 1 |
| 251 | H | 84.50894 | 64.87737 | 79.37987 | -1972.69758 | 107.10018   | -1876.34312 | 1 |
| 252 | C | 84.66436 | 65.45707 | 76.66027 | 412.85148   | 672.58832   | -27.69222   | 1 |
| 253 | H | 85.49457 | 64.75559 | 76.37158 | 1447.02277  | 1762.76533  | -1490.78944 | 1 |
| 254 | H | 83.76368 | 64.82797 | 76.90003 | 1320.77379  | -145.20455  | 2378.68491  | 1 |
| 255 | H | 84.40802 | 66.06672 | 75.75074 | -1512.10848 | 1470.52031  | 1724.75147  | 1 |
| 256 | C | 84.55911 | 68.36221 | 79.36400 | -607.11113  | 499.56689   | 73.73769    | 1 |
| 257 | O | 85.60724 | 68.95010 | 79.24510 | 357.97126   | 460.81534   | 356.68785   | 1 |
| 258 | N | 83.73343 | 68.33324 | 80.39559 | 536.55407   | -368.62270  | 332.76306   | 1 |
| 259 | H | 82.87672 | 67.78445 | 80.34008 | 524.38866   | 2297.69985  | 1367.20941  | 1 |
| 260 | C | 84.14255 | 68.93244 | 81.61288 | 46.50277    | -774.29190  | -147.97904  | 1 |
| 261 | H | 85.23980 | 69.08869 | 81.49767 | 1676.51875  | 1883.29066  | 1032.55549  | 1 |
| 262 | C | 83.33748 | 70.32126 | 81.81747 | -559.41456  | -34.19198   | -556.30433  | 1 |
| 263 | H | 82.24249 | 70.11081 | 81.86556 | -64.66664   | 395.18769   | 2695.05373  | 1 |
| 264 | H | 83.60347 | 70.78413 | 82.79730 | -2703.44278 | -60.40056   | 333.79418   | 1 |
| 265 | C | 83.63974 | 71.25887 | 80.68179 | -519.76435  | 377.31045   | 459.42366   | 1 |
| 266 | H | 83.39588 | 70.73952 | 79.72611 | -1746.74323 | 1667.50644  | -1261.73691 | 1 |
| 267 | C | 82.78021 | 72.51293 | 80.78891 | 570.95554   | 16.46261    | -545.27700  | 1 |
| 268 | H | 82.98112 | 73.22533 | 79.94794 | 2391.58273  | 28.05277    | -1305.07271 | 1 |
| 269 | H | 81.68721 | 72.26755 | 80.76265 | 175.75588   | 917.63458   | 2559.43867  | 1 |
| 270 | H | 82.97350 | 73.06486 | 81.74462 | -1063.97851 | -2155.34650 | 1283.00462  | 1 |
| 271 | C | 85.11123 | 71.64815 | 80.65476 | 193.76014   | 2.62946     | -765.53141  | 1 |
| 272 | H | 85.31196 | 72.45829 | 79.90719 | 507.39394   | -846.55087  | 2539.60089  | 1 |
| 273 | H | 85.46120 | 72.02181 | 81.65186 | 1337.57841  | 1818.19054  | 1526.01994  | 1 |
| 274 | H | 85.75929 | 70.77153 | 80.37050 | 1100.88635  | -1172.91350 | -2199.08909 | 1 |
| 275 | C | 83.70005 | 67.93694 | 82.80077 | -549.21115  | 475.64486   | -309.38218  | 1 |
| 276 | O | 82.98613 | 66.98260 | 82.63523 | 556.06106   | -390.37755  | -78.24250   | 1 |
| 277 | O | 84.15028 | 68.28359 | 84.09774 | -572.27940  | -310.19032  | -209.75862  | 1 |
| 278 | H | 84.69402 | 69.08491 | 83.86210 | -1380.08193 | 2212.14486  | 790.85944   | 1 |

Listing 129: N1

|    |   |          |          |          |        |         |             |         |      |
|----|---|----------|----------|----------|--------|---------|-------------|---------|------|
| 1  |   | 273      |          |          |        |         |             |         |      |
| 2  |   | 150.0000 | 150.0000 | 150.0000 | 0.0000 | 0.0000  | 0.0000***** | 0.5000  | 2000 |
|    |   | 0.2500   | 300.00   | 0.00     | 0.00   | 0.00    | -1290.8409  | 0.0000  |      |
| 3  | N | 68.26713 | 77.54244 | 77.65881 |        | 0.00000 | 0.00000     | 0.00000 | 1    |
| 4  | C | 68.92185 | 77.51207 | 76.46485 |        | 0.00000 | 0.00000     | 0.00000 | 1    |
| 5  | C | 68.28644 | 76.18164 | 75.60507 |        | 0.00000 | 0.00000     | 0.00000 | 1    |
| 6  | O | 67.98507 | 75.13900 | 76.13196 |        | 0.00000 | 0.00000     | 0.00000 | 1    |
| 7  | C | 70.51480 | 77.12763 | 76.74818 |        | 0.00000 | 0.00000     | 0.00000 | 1    |
| 8  | C | 71.07403 | 78.06769 | 77.74538 |        | 0.00000 | 0.00000     | 0.00000 | 1    |
| 9  | C | 72.36892 | 77.50703 | 78.33085 |        | 0.00000 | 0.00000     | 0.00000 | 1    |
| 10 | C | 71.33944 | 79.44485 | 77.14382 |        | 0.00000 | 0.00000     | 0.00000 | 1    |
| 11 | H | 68.21844 | 76.65144 | 78.11918 |        | 0.00000 | 0.00000     | 0.00000 | 1    |
| 12 | H | 68.77365 | 78.52073 | 75.99851 |        | 0.00000 | 0.00000     | 0.00000 | 1    |
| 13 | H | 70.60054 | 76.06968 | 77.12272 |        | 0.00000 | 0.00000     | 0.00000 | 1    |
| 14 | H | 71.08374 | 77.15754 | 75.79363 |        | 0.00000 | 0.00000     | 0.00000 | 1    |
| 15 | H | 70.33797 | 78.17188 | 78.57763 |        | 0.00000 | 0.00000     | 0.00000 | 1    |
| 16 | H | 73.20049 | 77.50875 | 77.58137 |        | 0.00000 | 0.00000     | 0.00000 | 1    |
| 17 | H | 72.24288 | 76.44573 | 78.67837 |        | 0.00000 | 0.00000     | 0.00000 | 1    |
| 18 | H | 72.71282 | 78.10074 | 79.21594 |        | 0.00000 | 0.00000     | 0.00000 | 1    |
| 19 | H | 72.35538 | 79.82917 | 77.41672 |        | 0.00000 | 0.00000     | 0.00000 | 1    |
| 20 | H | 70.59468 | 80.20330 | 77.49718 |        | 0.00000 | 0.00000     | 0.00000 | 1    |
| 21 | H | 71.27997 | 79.42615 | 76.02622 |        | 0.00000 | 0.00000     | 0.00000 | 1    |
| 22 | N | 68.30577 | 76.49795 | 74.32284 |        | 0.00000 | 0.00000     | 0.00000 | 1    |
| 23 | C | 67.77587 | 75.60949 | 73.30994 |        | 0.00000 | 0.00000     | 0.00000 | 1    |

|    |   |          |          |          |         |         |         |   |
|----|---|----------|----------|----------|---------|---------|---------|---|
| 24 | C | 68.84185 | 75.42293 | 72.03741 | 0.00000 | 0.00000 | 0.00000 | 1 |
| 25 | O | 68.58717 | 74.61334 | 71.17749 | 0.00000 | 0.00000 | 0.00000 | 1 |
| 26 | C | 66.52885 | 76.18798 | 72.64731 | 0.00000 | 0.00000 | 0.00000 | 1 |
| 27 | C | 65.31252 | 76.08162 | 73.54561 | 0.00000 | 0.00000 | 0.00000 | 1 |
| 28 | C | 66.72377 | 77.61717 | 72.18353 | 0.00000 | 0.00000 | 0.00000 | 1 |
| 29 | H | 68.58947 | 77.46154 | 74.16930 | 0.00000 | 0.00000 | 0.00000 | 1 |
| 30 | H | 67.58335 | 74.66709 | 73.88022 | 0.00000 | 0.00000 | 0.00000 | 1 |
| 31 | H | 66.33174 | 75.56461 | 71.74456 | 0.00000 | 0.00000 | 0.00000 | 1 |
| 32 | H | 65.07030 | 75.00979 | 73.79192 | 0.00000 | 0.00000 | 0.00000 | 1 |
| 33 | H | 65.47646 | 76.61624 | 74.52330 | 0.00000 | 0.00000 | 0.00000 | 1 |
| 34 | H | 64.39710 | 76.53027 | 73.06631 | 0.00000 | 0.00000 | 0.00000 | 1 |
| 35 | H | 65.88836 | 77.95530 | 71.50805 | 0.00000 | 0.00000 | 0.00000 | 1 |
| 36 | H | 66.75902 | 78.33200 | 73.05272 | 0.00000 | 0.00000 | 0.00000 | 1 |
| 37 | H | 67.68741 | 77.73812 | 71.61240 | 0.00000 | 0.00000 | 0.00000 | 1 |
| 38 | N | 69.83814 | 76.29207 | 72.07467 | 0.00000 | 0.00000 | 0.00000 | 1 |
| 39 | C | 70.83510 | 76.23104 | 71.06385 | 0.00000 | 0.00000 | 0.00000 | 1 |
| 40 | C | 72.30217 | 75.84724 | 71.68734 | 0.00000 | 0.00000 | 0.00000 | 1 |
| 41 | O | 73.24296 | 75.72344 | 70.93682 | 0.00000 | 0.00000 | 0.00000 | 1 |
| 42 | C | 71.05002 | 77.70248 | 70.49699 | 0.00000 | 0.00000 | 0.00000 | 1 |
| 43 | C | 71.61180 | 77.54410 | 69.05420 | 0.00000 | 0.00000 | 0.00000 | 1 |
| 44 | C | 70.42401 | 76.91723 | 68.18475 | 0.00000 | 0.00000 | 0.00000 | 1 |
| 45 | N | 70.76958 | 77.21708 | 66.86227 | 0.00000 | 0.00000 | 0.00000 | 1 |
| 46 | C | 70.02379 | 76.98298 | 65.85924 | 0.00000 | 0.00000 | 0.00000 | 1 |
| 47 | N | 68.78558 | 76.37268 | 66.09232 | 0.00000 | 0.00000 | 0.00000 | 1 |
| 48 | N | 70.62655 | 77.41105 | 64.66710 | 0.00000 | 0.00000 | 0.00000 | 1 |
| 49 | H | 69.86338 | 76.91248 | 72.87855 | 0.00000 | 0.00000 | 0.00000 | 1 |
| 50 | H | 70.44502 | 75.49387 | 70.32234 | 0.00000 | 0.00000 | 0.00000 | 1 |
| 51 | H | 70.10182 | 78.28705 | 70.50276 | 0.00000 | 0.00000 | 0.00000 | 1 |
| 52 | H | 71.75957 | 78.27026 | 71.14237 | 0.00000 | 0.00000 | 0.00000 | 1 |
| 53 | H | 71.94429 | 78.52232 | 68.64152 | 0.00000 | 0.00000 | 0.00000 | 1 |
| 54 | H | 72.51201 | 76.88485 | 69.05428 | 0.00000 | 0.00000 | 0.00000 | 1 |
| 55 | H | 70.30634 | 75.80548 | 68.26207 | 0.00000 | 0.00000 | 0.00000 | 1 |
| 56 | H | 69.41804 | 77.37951 | 68.34547 | 0.00000 | 0.00000 | 0.00000 | 1 |
| 57 | H | 71.66478 | 77.64876 | 66.69697 | 0.00000 | 0.00000 | 0.00000 | 1 |
| 58 | H | 68.36859 | 76.06417 | 66.96965 | 0.00000 | 0.00000 | 0.00000 | 1 |
| 59 | H | 68.10406 | 76.14180 | 65.36740 | 0.00000 | 0.00000 | 0.00000 | 1 |
| 60 | H | 71.53701 | 77.83405 | 64.49172 | 0.00000 | 0.00000 | 0.00000 | 1 |
| 61 | H | 70.19000 | 77.29609 | 63.75176 | 0.00000 | 0.00000 | 0.00000 | 1 |
| 62 | N | 72.28541 | 75.82990 | 73.01611 | 0.00000 | 0.00000 | 0.00000 | 1 |
| 63 | C | 73.44506 | 75.39042 | 73.70789 | 0.00000 | 0.00000 | 0.00000 | 1 |
| 64 | C | 73.03438 | 74.03099 | 74.50287 | 0.00000 | 0.00000 | 0.00000 | 1 |
| 65 | O | 72.25998 | 73.23184 | 74.02415 | 0.00000 | 0.00000 | 0.00000 | 1 |
| 66 | C | 73.92083 | 76.55300 | 74.69945 | 0.00000 | 0.00000 | 0.00000 | 1 |
| 67 | C | 74.09696 | 77.87336 | 73.93145 | 0.00000 | 0.00000 | 0.00000 | 1 |
| 68 | C | 74.64108 | 77.87713 | 72.61069 | 0.00000 | 0.00000 | 0.00000 | 1 |
| 69 | C | 73.72403 | 79.10528 | 74.55020 | 0.00000 | 0.00000 | 0.00000 | 1 |
| 70 | C | 74.77664 | 79.08924 | 71.93202 | 0.00000 | 0.00000 | 0.00000 | 1 |
| 71 | C | 73.87537 | 80.29332 | 73.83431 | 0.00000 | 0.00000 | 0.00000 | 1 |
| 72 | C | 74.40439 | 80.33741 | 72.51090 | 0.00000 | 0.00000 | 0.00000 | 1 |
| 73 | O | 74.53578 | 81.56883 | 71.81877 | 0.00000 | 0.00000 | 0.00000 | 1 |
| 74 | H | 71.38599 | 75.94162 | 73.48017 | 0.00000 | 0.00000 | 0.00000 | 1 |
| 75 | H | 74.16410 | 75.20312 | 72.87463 | 0.00000 | 0.00000 | 0.00000 | 1 |
| 76 | H | 73.18832 | 76.69024 | 75.52891 | 0.00000 | 0.00000 | 0.00000 | 1 |
| 77 | H | 74.88266 | 76.26817 | 75.18440 | 0.00000 | 0.00000 | 0.00000 | 1 |
| 78 | H | 74.92581 | 76.93061 | 72.11360 | 0.00000 | 0.00000 | 0.00000 | 1 |
| 79 | H | 73.32503 | 79.11703 | 75.58043 | 0.00000 | 0.00000 | 0.00000 | 1 |
| 80 | H | 75.18655 | 79.07063 | 70.90683 | 0.00000 | 0.00000 | 0.00000 | 1 |
| 81 | H | 73.57802 | 81.24218 | 74.31508 | 0.00000 | 0.00000 | 0.00000 | 1 |
| 82 | H | 74.98500 | 81.25366 | 70.99886 | 0.00000 | 0.00000 | 0.00000 | 1 |
| 83 | N | 73.81551 | 73.86193 | 75.57387 | 0.00000 | 0.00000 | 0.00000 | 1 |
| 84 | C | 73.43932 | 72.82372 | 76.50108 | 0.00000 | 0.00000 | 0.00000 | 1 |
| 85 | C | 72.32253 | 73.38398 | 77.55340 | 0.00000 | 0.00000 | 0.00000 | 1 |

|     |   |          |          |          |         |         |         |   |
|-----|---|----------|----------|----------|---------|---------|---------|---|
| 86  | O | 71.68095 | 74.39559 | 77.38562 | 0.00000 | 0.00000 | 0.00000 | 1 |
| 87  | C | 74.74580 | 72.28630 | 77.19233 | 0.00000 | 0.00000 | 0.00000 | 1 |
| 88  | O | 74.47956 | 71.05938 | 78.11366 | 0.00000 | 0.00000 | 0.00000 | 1 |
| 89  | C | 75.43354 | 73.47784 | 77.91201 | 0.00000 | 0.00000 | 0.00000 | 1 |
| 90  | H | 74.39305 | 74.64811 | 75.85438 | 0.00000 | 0.00000 | 0.00000 | 1 |
| 91  | H | 72.96738 | 72.07655 | 75.81792 | 0.00000 | 0.00000 | 0.00000 | 1 |
| 92  | H | 75.45186 | 71.87501 | 76.43027 | 0.00000 | 0.00000 | 0.00000 | 1 |
| 93  | H | 74.97000 | 70.40891 | 77.62208 | 0.00000 | 0.00000 | 0.00000 | 1 |
| 94  | H | 76.38625 | 73.14916 | 78.39870 | 0.00000 | 0.00000 | 0.00000 | 1 |
| 95  | H | 74.77805 | 73.91102 | 78.71490 | 0.00000 | 0.00000 | 0.00000 | 1 |
| 96  | H | 75.68322 | 74.31337 | 77.22020 | 0.00000 | 0.00000 | 0.00000 | 1 |
| 97  | N | 72.19870 | 72.47136 | 78.50778 | 0.00000 | 0.00000 | 0.00000 | 1 |
| 98  | C | 71.27674 | 72.71798 | 79.55793 | 0.00000 | 0.00000 | 0.00000 | 1 |
| 99  | C | 72.02994 | 73.42975 | 80.82815 | 0.00000 | 0.00000 | 0.00000 | 1 |
| 100 | O | 71.37420 | 73.91502 | 81.72121 | 0.00000 | 0.00000 | 0.00000 | 1 |
| 101 | C | 70.82844 | 71.32535 | 80.18206 | 0.00000 | 0.00000 | 0.00000 | 1 |
| 102 | C | 69.89063 | 70.52173 | 79.22805 | 0.00000 | 0.00000 | 0.00000 | 1 |
| 103 | C | 68.39473 | 70.99573 | 79.42370 | 0.00000 | 0.00000 | 0.00000 | 1 |
| 104 | C | 68.12556 | 72.28549 | 78.61302 | 0.00000 | 0.00000 | 0.00000 | 1 |
| 105 | N | 66.57373 | 72.48817 | 78.57950 | 0.00000 | 0.00000 | 0.00000 | 1 |
| 106 | H | 72.83478 | 71.65081 | 78.54026 | 0.00000 | 0.00000 | 0.00000 | 1 |
| 107 | H | 70.47567 | 73.35235 | 79.11622 | 0.00000 | 0.00000 | 0.00000 | 1 |
| 108 | H | 71.74016 | 70.72383 | 80.39554 | 0.00000 | 0.00000 | 0.00000 | 1 |
| 109 | H | 70.32895 | 71.48502 | 81.16382 | 0.00000 | 0.00000 | 0.00000 | 1 |
| 110 | H | 70.21147 | 70.62673 | 78.16740 | 0.00000 | 0.00000 | 0.00000 | 1 |
| 111 | H | 69.96642 | 69.43521 | 79.46014 | 0.00000 | 0.00000 | 0.00000 | 1 |
| 112 | H | 67.69825 | 70.19346 | 79.08617 | 0.00000 | 0.00000 | 0.00000 | 1 |
| 113 | H | 68.17069 | 71.14861 | 80.50541 | 0.00000 | 0.00000 | 0.00000 | 1 |
| 114 | H | 68.52175 | 73.21935 | 79.05901 | 0.00000 | 0.00000 | 0.00000 | 1 |
| 115 | H | 68.41335 | 72.22129 | 77.54465 | 0.00000 | 0.00000 | 0.00000 | 1 |
| 116 | H | 65.96010 | 71.62399 | 78.60452 | 0.00000 | 0.00000 | 0.00000 | 1 |
| 117 | H | 66.21202 | 72.98077 | 77.71474 | 0.00000 | 0.00000 | 0.00000 | 1 |
| 118 | H | 66.14850 | 73.08267 | 79.34667 | 0.00000 | 0.00000 | 0.00000 | 1 |
| 119 | N | 73.34509 | 73.20306 | 80.79718 | 0.00000 | 0.00000 | 0.00000 | 1 |
| 120 | C | 74.16425 | 74.00303 | 81.66336 | 0.00000 | 0.00000 | 0.00000 | 1 |
| 121 | C | 74.58732 | 75.35824 | 80.87291 | 0.00000 | 0.00000 | 0.00000 | 1 |
| 122 | O | 74.05278 | 75.73722 | 79.85925 | 0.00000 | 0.00000 | 0.00000 | 1 |
| 123 | C | 75.43732 | 73.13606 | 82.03169 | 0.00000 | 0.00000 | 0.00000 | 1 |
| 124 | C | 75.64170 | 73.16643 | 83.58144 | 0.00000 | 0.00000 | 0.00000 | 1 |
| 125 | C | 74.92398 | 71.90884 | 84.21663 | 0.00000 | 0.00000 | 0.00000 | 1 |
| 126 | C | 73.38592 | 72.03413 | 84.12175 | 0.00000 | 0.00000 | 0.00000 | 1 |
| 127 | N | 72.79616 | 70.74746 | 84.79713 | 0.00000 | 0.00000 | 0.00000 | 1 |
| 128 | H | 73.71006 | 72.78625 | 79.94533 | 0.00000 | 0.00000 | 0.00000 | 1 |
| 129 | H | 73.46968 | 74.20459 | 82.51284 | 0.00000 | 0.00000 | 0.00000 | 1 |
| 130 | H | 75.32908 | 72.08939 | 81.66788 | 0.00000 | 0.00000 | 0.00000 | 1 |
| 131 | H | 76.33655 | 73.54276 | 81.51660 | 0.00000 | 0.00000 | 0.00000 | 1 |
| 132 | H | 76.72624 | 73.14005 | 83.82387 | 0.00000 | 0.00000 | 0.00000 | 1 |
| 133 | H | 75.25578 | 74.11253 | 84.02258 | 0.00000 | 0.00000 | 0.00000 | 1 |
| 134 | H | 75.26773 | 70.97632 | 83.71277 | 0.00000 | 0.00000 | 0.00000 | 1 |
| 135 | H | 75.22412 | 71.79811 | 85.28384 | 0.00000 | 0.00000 | 0.00000 | 1 |
| 136 | H | 72.95551 | 72.87517 | 84.70305 | 0.00000 | 0.00000 | 0.00000 | 1 |
| 137 | H | 72.97362 | 72.02972 | 83.09118 | 0.00000 | 0.00000 | 0.00000 | 1 |
| 138 | H | 73.18817 | 70.47893 | 85.74675 | 0.00000 | 0.00000 | 0.00000 | 1 |
| 139 | H | 72.88626 | 69.83648 | 84.25934 | 0.00000 | 0.00000 | 0.00000 | 1 |
| 140 | H | 71.75534 | 70.76840 | 85.00009 | 0.00000 | 0.00000 | 0.00000 | 1 |
| 141 | N | 75.54026 | 75.98092 | 81.57231 | 0.00000 | 0.00000 | 0.00000 | 1 |
| 142 | C | 76.10002 | 77.26554 | 81.10951 | 0.00000 | 0.00000 | 0.00000 | 1 |
| 143 | C | 76.87086 | 76.98856 | 79.68705 | 0.00000 | 0.00000 | 0.00000 | 1 |
| 144 | O | 77.65180 | 76.06137 | 79.56897 | 0.00000 | 0.00000 | 0.00000 | 1 |
| 145 | C | 77.07447 | 77.75180 | 82.16414 | 0.00000 | 0.00000 | 0.00000 | 1 |
| 146 | C | 77.78031 | 79.02347 | 81.72913 | 0.00000 | 0.00000 | 0.00000 | 1 |
| 147 | C | 76.39264 | 77.97325 | 83.50265 | 0.00000 | 0.00000 | 0.00000 | 1 |



|     |   |          |          |          |         |         |         |   |
|-----|---|----------|----------|----------|---------|---------|---------|---|
| 148 | H | 75.87187 | 75.49802 | 82.40730 | 0.00000 | 0.00000 | 0.00000 | 1 |
| 149 | H | 75.20113 | 77.91179 | 80.99171 | 0.00000 | 0.00000 | 0.00000 | 1 |
| 150 | H | 77.85161 | 76.96501 | 82.29931 | 0.00000 | 0.00000 | 0.00000 | 1 |
| 151 | H | 78.58317 | 79.32545 | 82.45829 | 0.00000 | 0.00000 | 0.00000 | 1 |
| 152 | H | 78.28857 | 78.89523 | 80.72976 | 0.00000 | 0.00000 | 0.00000 | 1 |
| 153 | H | 77.06636 | 79.89047 | 81.64117 | 0.00000 | 0.00000 | 0.00000 | 1 |
| 154 | H | 75.93120 | 77.02629 | 83.89738 | 0.00000 | 0.00000 | 0.00000 | 1 |
| 155 | H | 77.11133 | 78.34522 | 84.28249 | 0.00000 | 0.00000 | 0.00000 | 1 |
| 156 | H | 75.56544 | 78.73247 | 83.42155 | 0.00000 | 0.00000 | 0.00000 | 1 |
| 157 | N | 76.57342 | 77.93652 | 78.79782 | 0.00000 | 0.00000 | 0.00000 | 1 |
| 158 | C | 77.13709 | 77.89574 | 77.47568 | 0.00000 | 0.00000 | 0.00000 | 1 |
| 159 | C | 78.69859 | 78.38625 | 77.59745 | 0.00000 | 0.00000 | 0.00000 | 1 |
| 160 | O | 79.03222 | 79.50979 | 77.31611 | 0.00000 | 0.00000 | 0.00000 | 1 |
| 161 | C | 76.21086 | 78.88377 | 76.65685 | 0.00000 | 0.00000 | 0.00000 | 1 |
| 162 | C | 75.82404 | 79.93640 | 77.74464 | 0.00000 | 0.00000 | 0.00000 | 1 |
| 163 | C | 75.60910 | 79.00669 | 79.01377 | 0.00000 | 0.00000 | 0.00000 | 1 |
| 164 | H | 77.06773 | 76.82221 | 77.19931 | 0.00000 | 0.00000 | 0.00000 | 1 |
| 165 | H | 76.72828 | 79.32815 | 75.77373 | 0.00000 | 0.00000 | 0.00000 | 1 |
| 166 | H | 75.31121 | 78.35787 | 76.26557 | 0.00000 | 0.00000 | 0.00000 | 1 |
| 167 | H | 76.65728 | 80.65894 | 77.90715 | 0.00000 | 0.00000 | 0.00000 | 1 |
| 168 | H | 74.92383 | 80.53972 | 77.48449 | 0.00000 | 0.00000 | 0.00000 | 1 |
| 169 | H | 75.81758 | 79.48825 | 79.99738 | 0.00000 | 0.00000 | 0.00000 | 1 |
| 170 | H | 74.61494 | 78.50097 | 79.05520 | 0.00000 | 0.00000 | 0.00000 | 1 |
| 171 | N | 79.41761 | 77.36837 | 78.06035 | 0.00000 | 0.00000 | 0.00000 | 1 |
| 172 | C | 80.83524 | 77.52302 | 78.08743 | 0.00000 | 0.00000 | 0.00000 | 1 |
| 173 | C | 81.42377 | 77.00423 | 76.65698 | 0.00000 | 0.00000 | 0.00000 | 1 |
| 174 | O | 80.75838 | 76.99272 | 75.64910 | 0.00000 | 0.00000 | 0.00000 | 1 |
| 175 | C | 81.35844 | 76.66113 | 79.31281 | 0.00000 | 0.00000 | 0.00000 | 1 |
| 176 | C | 82.45963 | 77.45754 | 80.07745 | 0.00000 | 0.00000 | 0.00000 | 1 |
| 177 | C | 81.70839 | 78.35456 | 81.13851 | 0.00000 | 0.00000 | 0.00000 | 1 |
| 178 | O | 80.52464 | 78.26715 | 81.34898 | 0.00000 | 0.00000 | 0.00000 | 1 |
| 179 | N | 82.58628 | 79.16322 | 81.76657 | 0.00000 | 0.00000 | 0.00000 | 1 |
| 180 | H | 78.94924 | 76.49256 | 78.37521 | 0.00000 | 0.00000 | 0.00000 | 1 |
| 181 | H | 80.94169 | 78.62716 | 78.20366 | 0.00000 | 0.00000 | 0.00000 | 1 |
| 182 | H | 80.51630 | 76.41444 | 80.00375 | 0.00000 | 0.00000 | 0.00000 | 1 |
| 183 | H | 81.75383 | 75.68381 | 78.95532 | 0.00000 | 0.00000 | 0.00000 | 1 |
| 184 | H | 83.17070 | 76.76754 | 80.58384 | 0.00000 | 0.00000 | 0.00000 | 1 |
| 185 | H | 83.09249 | 78.06686 | 79.39401 | 0.00000 | 0.00000 | 0.00000 | 1 |
| 186 | H | 83.60111 | 79.23186 | 81.62456 | 0.00000 | 0.00000 | 0.00000 | 1 |
| 187 | H | 82.34842 | 79.80406 | 82.53088 | 0.00000 | 0.00000 | 0.00000 | 1 |
| 188 | N | 82.71190 | 76.67558 | 76.77952 | 0.00000 | 0.00000 | 0.00000 | 1 |
| 189 | C | 83.51876 | 76.28862 | 75.61888 | 0.00000 | 0.00000 | 0.00000 | 1 |
| 190 | C | 83.19745 | 74.72978 | 75.14166 | 0.00000 | 0.00000 | 0.00000 | 1 |
| 191 | O | 83.72934 | 74.30524 | 74.14312 | 0.00000 | 0.00000 | 0.00000 | 1 |
| 192 | C | 84.99609 | 76.27283 | 75.95662 | 0.00000 | 0.00000 | 0.00000 | 1 |
| 193 | C | 85.59068 | 77.66772 | 76.00329 | 0.00000 | 0.00000 | 0.00000 | 1 |
| 194 | C | 85.28671 | 75.52556 | 77.24427 | 0.00000 | 0.00000 | 0.00000 | 1 |
| 195 | H | 83.11042 | 76.78740 | 77.70876 | 0.00000 | 0.00000 | 0.00000 | 1 |
| 196 | H | 83.23033 | 77.02306 | 74.82896 | 0.00000 | 0.00000 | 0.00000 | 1 |
| 197 | H | 85.50205 | 75.72320 | 75.12720 | 0.00000 | 0.00000 | 0.00000 | 1 |
| 198 | H | 85.08375 | 78.30527 | 76.77954 | 0.00000 | 0.00000 | 0.00000 | 1 |
| 199 | H | 86.68835 | 77.64544 | 76.25049 | 0.00000 | 0.00000 | 0.00000 | 1 |
| 200 | H | 85.48072 | 78.19770 | 75.01636 | 0.00000 | 0.00000 | 0.00000 | 1 |
| 201 | H | 84.49899 | 74.74883 | 77.45393 | 0.00000 | 0.00000 | 0.00000 | 1 |
| 202 | H | 86.27678 | 74.99233 | 77.20328 | 0.00000 | 0.00000 | 0.00000 | 1 |
| 203 | H | 85.31646 | 76.21698 | 78.13100 | 0.00000 | 0.00000 | 0.00000 | 1 |
| 204 | N | 82.47056 | 74.06205 | 76.03047 | 0.00000 | 0.00000 | 0.00000 | 1 |
| 205 | C | 81.92664 | 72.81697 | 75.62180 | 0.00000 | 0.00000 | 0.00000 | 1 |
| 206 | C | 80.29826 | 72.98146 | 75.65540 | 0.00000 | 0.00000 | 0.00000 | 1 |
| 207 | O | 79.69622 | 73.25746 | 76.66638 | 0.00000 | 0.00000 | 0.00000 | 1 |
| 208 | C | 82.40172 | 71.78782 | 76.75487 | 0.00000 | 0.00000 | 0.00000 | 1 |
| 209 | O | 81.98946 | 70.41206 | 76.57326 | 0.00000 | 0.00000 | 0.00000 | 1 |

|     |   |          |          |          |         |         |         |   |
|-----|---|----------|----------|----------|---------|---------|---------|---|
| 210 | H | 82.09984 | 74.61649 | 76.79917 | 0.00000 | 0.00000 | 0.00000 | 1 |
| 211 | H | 82.35688 | 72.61028 | 74.61290 | 0.00000 | 0.00000 | 0.00000 | 1 |
| 212 | H | 83.51220 | 71.90319 | 76.86750 | 0.00000 | 0.00000 | 0.00000 | 1 |
| 213 | H | 81.94802 | 72.16444 | 77.71279 | 0.00000 | 0.00000 | 0.00000 | 1 |
| 214 | H | 82.79127 | 70.05472 | 76.14799 | 0.00000 | 0.00000 | 0.00000 | 1 |
| 215 | N | 79.82900 | 72.77177 | 74.43965 | 0.00000 | 0.00000 | 0.00000 | 1 |
| 216 | C | 78.41000 | 72.83290 | 74.24721 | 0.00000 | 0.00000 | 0.00000 | 1 |
| 217 | C | 78.28059 | 72.03541 | 72.85629 | 0.00000 | 0.00000 | 0.00000 | 1 |
| 218 | O | 79.29695 | 71.79749 | 72.23221 | 0.00000 | 0.00000 | 0.00000 | 1 |
| 219 | C | 77.91755 | 74.36887 | 74.09438 | 0.00000 | 0.00000 | 0.00000 | 1 |
| 220 | O | 78.62667 | 75.18378 | 73.15749 | 0.00000 | 0.00000 | 0.00000 | 1 |
| 221 | C | 77.88247 | 74.87374 | 75.58117 | 0.00000 | 0.00000 | 0.00000 | 1 |
| 222 | H | 80.37556 | 72.53756 | 73.59145 | 0.00000 | 0.00000 | 0.00000 | 1 |
| 223 | H | 77.94438 | 72.34593 | 75.13412 | 0.00000 | 0.00000 | 0.00000 | 1 |
| 224 | H | 76.85797 | 74.32430 | 73.71720 | 0.00000 | 0.00000 | 0.00000 | 1 |
| 225 | H | 77.93024 | 75.35700 | 72.48998 | 0.00000 | 0.00000 | 0.00000 | 1 |
| 226 | H | 78.88778 | 75.24468 | 75.90467 | 0.00000 | 0.00000 | 0.00000 | 1 |
| 227 | H | 77.59486 | 74.06571 | 76.29442 | 0.00000 | 0.00000 | 0.00000 | 1 |
| 228 | H | 77.14835 | 75.70679 | 75.70052 | 0.00000 | 0.00000 | 0.00000 | 1 |
| 229 | N | 77.01173 | 71.70978 | 72.59819 | 0.00000 | 0.00000 | 0.00000 | 1 |
| 230 | C | 76.62706 | 71.10915 | 71.35397 | 0.00000 | 0.00000 | 0.00000 | 1 |
| 231 | C | 76.53376 | 72.26306 | 70.19307 | 0.00000 | 0.00000 | 0.00000 | 1 |
| 232 | O | 75.98036 | 73.32051 | 70.36416 | 0.00000 | 0.00000 | 0.00000 | 1 |
| 233 | C | 75.18267 | 70.54871 | 71.68300 | 0.00000 | 0.00000 | 0.00000 | 1 |
| 234 | C | 74.65245 | 71.58910 | 72.72148 | 0.00000 | 0.00000 | 0.00000 | 1 |
| 235 | C | 75.95620 | 71.80183 | 73.60105 | 0.00000 | 0.00000 | 0.00000 | 1 |
| 236 | H | 77.39641 | 70.34245 | 71.11574 | 0.00000 | 0.00000 | 0.00000 | 1 |
| 237 | H | 74.53840 | 70.46563 | 70.77670 | 0.00000 | 0.00000 | 0.00000 | 1 |
| 238 | H | 75.23766 | 69.52713 | 72.12465 | 0.00000 | 0.00000 | 0.00000 | 1 |
| 239 | H | 74.34141 | 72.53748 | 72.22332 | 0.00000 | 0.00000 | 0.00000 | 1 |
| 240 | H | 73.77439 | 71.23749 | 73.31224 | 0.00000 | 0.00000 | 0.00000 | 1 |
| 241 | H | 76.01705 | 72.78650 | 74.12101 | 0.00000 | 0.00000 | 0.00000 | 1 |
| 242 | H | 76.15475 | 70.98727 | 74.34026 | 0.00000 | 0.00000 | 0.00000 | 1 |
| 243 | N | 77.06509 | 71.76252 | 69.08373 | 0.00000 | 0.00000 | 0.00000 | 1 |
| 244 | C | 76.96996 | 72.49325 | 67.87658 | 0.00000 | 0.00000 | 0.00000 | 1 |
| 245 | C | 75.83691 | 71.75127 | 66.94561 | 0.00000 | 0.00000 | 0.00000 | 1 |
| 246 | O | 76.11966 | 71.05213 | 66.00526 | 0.00000 | 0.00000 | 0.00000 | 1 |
| 247 | C | 78.42741 | 72.40612 | 67.19193 | 0.00000 | 0.00000 | 0.00000 | 1 |
| 248 | O | 79.02580 | 71.10100 | 67.15093 | 0.00000 | 0.00000 | 0.00000 | 1 |
| 249 | C | 79.19524 | 73.49440 | 68.02284 | 0.00000 | 0.00000 | 0.00000 | 1 |
| 250 | H | 77.52277 | 70.85061 | 69.07824 | 0.00000 | 0.00000 | 0.00000 | 1 |
| 251 | H | 76.64636 | 73.50904 | 68.19957 | 0.00000 | 0.00000 | 0.00000 | 1 |
| 252 | H | 78.33002 | 72.75650 | 66.12990 | 0.00000 | 0.00000 | 0.00000 | 1 |
| 253 | H | 78.94619 | 70.88433 | 66.19771 | 0.00000 | 0.00000 | 0.00000 | 1 |
| 254 | H | 78.69336 | 74.48886 | 67.98068 | 0.00000 | 0.00000 | 0.00000 | 1 |
| 255 | H | 80.23774 | 73.63212 | 67.65000 | 0.00000 | 0.00000 | 0.00000 | 1 |
| 256 | H | 79.26293 | 73.19806 | 69.09782 | 0.00000 | 0.00000 | 0.00000 | 1 |
| 257 | N | 74.63096 | 71.99635 | 67.45103 | 0.00000 | 0.00000 | 0.00000 | 1 |
| 258 | C | 73.51103 | 72.05175 | 66.33032 | 0.00000 | 0.00000 | 0.00000 | 1 |
| 259 | C | 73.67935 | 73.11496 | 65.35835 | 0.00000 | 0.00000 | 0.00000 | 1 |
| 260 | O | 73.81538 | 73.98198 | 64.56507 | 0.00000 | 0.00000 | 0.00000 | 1 |
| 261 | C | 72.12306 | 72.26166 | 67.19056 | 0.00000 | 0.00000 | 0.00000 | 1 |
| 262 | C | 70.97963 | 71.90753 | 66.30515 | 0.00000 | 0.00000 | 0.00000 | 1 |
| 263 | C | 70.71413 | 70.40517 | 66.31212 | 0.00000 | 0.00000 | 0.00000 | 1 |
| 264 | C | 69.72437 | 72.65871 | 66.74136 | 0.00000 | 0.00000 | 0.00000 | 1 |
| 265 | H | 74.62283 | 72.66158 | 68.21925 | 0.00000 | 0.00000 | 0.00000 | 1 |
| 266 | H | 73.63012 | 71.02904 | 65.89435 | 0.00000 | 0.00000 | 0.00000 | 1 |
| 267 | H | 72.14064 | 71.64680 | 68.11560 | 0.00000 | 0.00000 | 0.00000 | 1 |
| 268 | H | 72.06261 | 73.31913 | 67.53443 | 0.00000 | 0.00000 | 0.00000 | 1 |
| 269 | H | 71.22628 | 72.21988 | 65.26307 | 0.00000 | 0.00000 | 0.00000 | 1 |
| 270 | H | 70.28661 | 70.06780 | 67.29052 | 0.00000 | 0.00000 | 0.00000 | 1 |
| 271 | H | 71.65359 | 69.81912 | 66.14295 | 0.00000 | 0.00000 | 0.00000 | 1 |

|     |   |          |          |          |         |                 |             |             |
|-----|---|----------|----------|----------|---------|-----------------|-------------|-------------|
| 272 | H | 69.98990 | 70.10553 | 65.51448 | 0.00000 | 0.00000         | 0.00000     | 1           |
| 273 | H | 68.82775 | 72.35045 | 66.14519 | 0.00000 | 0.00000         | 0.00000     | 1           |
| 274 | H | 69.84236 | 73.76549 | 66.62011 | 0.00000 | 0.00000         | 0.00000     | 1           |
| 275 | H | 69.48894 | 72.46627 | 67.81918 | 0.00000 | 0.00000         | 0.00000     | 1           |
| 276 |   | 273      |          |          |         |                 |             |             |
| 277 |   | 150.0000 | 150.0000 | 150.0000 | 0.0000  | 0.0000          | 0.0000***** | 1.0000 4000 |
|     |   | 0.2500   | 300.00   | 0.00     | 0.00    | 0.00 -1291.2195 | 0.0000      | 0.0000      |
| 278 | N | 68.27731 | 77.50660 | 77.65939 | 0.00000 | 0.00000         | 0.00000     | 1           |
| 279 | C | 68.90988 | 77.48424 | 76.45340 | 0.00000 | 0.00000         | 0.00000     | 1           |
| 280 | C | 68.27803 | 76.15502 | 75.58847 | 0.00000 | 0.00000         | 0.00000     | 1           |
| 281 | O | 67.97016 | 75.10793 | 76.10378 | 0.00000 | 0.00000         | 0.00000     | 1           |
| 282 | C | 70.50894 | 77.10608 | 76.70272 | 0.00000 | 0.00000         | 0.00000     | 1           |
| 283 | C | 71.07440 | 78.03374 | 77.70971 | 0.00000 | 0.00000         | 0.00000     | 1           |
| 284 | C | 72.37699 | 77.46417 | 78.26978 | 0.00000 | 0.00000         | 0.00000     | 1           |
| 285 | C | 71.32672 | 79.42610 | 77.13880 | 0.00000 | 0.00000         | 0.00000     | 1           |
| 286 | H | 68.28477 | 76.63085 | 78.14957 | 0.00000 | 0.00000         | 0.00000     | 1           |
| 287 | H | 68.74768 | 78.49212 | 75.99129 | 0.00000 | 0.00000         | 0.00000     | 1           |
| 288 | H | 70.60308 | 76.04143 | 77.05660 | 0.00000 | 0.00000         | 0.00000     | 1           |
| 289 | H | 71.06735 | 77.15489 | 75.74251 | 0.00000 | 0.00000         | 0.00000     | 1           |
| 290 | H | 70.34980 | 78.11862 | 78.55395 | 0.00000 | 0.00000         | 0.00000     | 1           |
| 291 | H | 73.20505 | 77.49083 | 77.51773 | 0.00000 | 0.00000         | 0.00000     | 1           |
| 292 | H | 72.25655 | 76.39329 | 78.58912 | 0.00000 | 0.00000         | 0.00000     | 1           |
| 293 | H | 72.72187 | 78.03721 | 79.16714 | 0.00000 | 0.00000         | 0.00000     | 1           |
| 294 | H | 72.29197 | 79.85799 | 77.50698 | 0.00000 | 0.00000         | 0.00000     | 1           |
| 295 | H | 70.51561 | 80.14227 | 77.42580 | 0.00000 | 0.00000         | 0.00000     | 1           |
| 296 | H | 71.37043 | 79.41549 | 76.02079 | 0.00000 | 0.00000         | 0.00000     | 1           |
| 297 | N | 68.31801 | 76.47854 | 74.30824 | 0.00000 | 0.00000         | 0.00000     | 1           |
| 298 | C | 67.77921 | 75.60898 | 73.27992 | 0.00000 | 0.00000         | 0.00000     | 1           |
| 299 | C | 68.84944 | 75.44003 | 72.01252 | 0.00000 | 0.00000         | 0.00000     | 1           |
| 300 | O | 68.59744 | 74.65760 | 71.12697 | 0.00000 | 0.00000         | 0.00000     | 1           |
| 301 | C | 66.52221 | 76.20080 | 72.64862 | 0.00000 | 0.00000         | 0.00000     | 1           |
| 302 | C | 65.33145 | 76.10005 | 73.58179 | 0.00000 | 0.00000         | 0.00000     | 1           |
| 303 | C | 66.71327 | 77.63288 | 72.19152 | 0.00000 | 0.00000         | 0.00000     | 1           |
| 304 | H | 68.60108 | 77.44504 | 74.16730 | 0.00000 | 0.00000         | 0.00000     | 1           |
| 305 | H | 67.59228 | 74.65793 | 73.83726 | 0.00000 | 0.00000         | 0.00000     | 1           |
| 306 | H | 66.29343 | 75.58753 | 71.74711 | 0.00000 | 0.00000         | 0.00000     | 1           |
| 307 | H | 65.11816 | 75.03210 | 73.86811 | 0.00000 | 0.00000         | 0.00000     | 1           |
| 308 | H | 65.51112 | 76.66991 | 74.53624 | 0.00000 | 0.00000         | 0.00000     | 1           |
| 309 | H | 64.39654 | 76.51548 | 73.11149 | 0.00000 | 0.00000         | 0.00000     | 1           |
| 310 | H | 65.83154 | 78.00028 | 71.59517 | 0.00000 | 0.00000         | 0.00000     | 1           |
| 311 | H | 66.83756 | 78.33129 | 73.06553 | 0.00000 | 0.00000         | 0.00000     | 1           |
| 312 | H | 67.62762 | 77.74280 | 71.54298 | 0.00000 | 0.00000         | 0.00000     | 1           |
| 313 | N | 69.86975 | 76.27807 | 72.10057 | 0.00000 | 0.00000         | 0.00000     | 1           |
| 314 | C | 70.86090 | 76.24332 | 71.08516 | 0.00000 | 0.00000         | 0.00000     | 1           |
| 315 | C | 72.33863 | 75.89222 | 71.70396 | 0.00000 | 0.00000         | 0.00000     | 1           |
| 316 | O | 73.28453 | 75.85867 | 70.94925 | 0.00000 | 0.00000         | 0.00000     | 1           |
| 317 | C | 71.01354 | 77.71559 | 70.49947 | 0.00000 | 0.00000         | 0.00000     | 1           |
| 318 | C | 71.59412 | 77.56397 | 69.06408 | 0.00000 | 0.00000         | 0.00000     | 1           |
| 319 | C | 70.41972 | 76.90667 | 68.19671 | 0.00000 | 0.00000         | 0.00000     | 1           |
| 320 | N | 70.77240 | 77.18683 | 66.87159 | 0.00000 | 0.00000         | 0.00000     | 1           |
| 321 | C | 70.03614 | 76.94672 | 65.86335 | 0.00000 | 0.00000         | 0.00000     | 1           |
| 322 | N | 68.79118 | 76.35000 | 66.09124 | 0.00000 | 0.00000         | 0.00000     | 1           |
| 323 | N | 70.65992 | 77.35771 | 64.67698 | 0.00000 | 0.00000         | 0.00000     | 1           |
| 324 | H | 69.89448 | 76.88405 | 72.91660 | 0.00000 | 0.00000         | 0.00000     | 1           |
| 325 | H | 70.48534 | 75.49203 | 70.34986 | 0.00000 | 0.00000         | 0.00000     | 1           |
| 326 | H | 70.03814 | 78.25164 | 70.48700 | 0.00000 | 0.00000         | 0.00000     | 1           |
| 327 | H | 71.68850 | 78.32526 | 71.14240 | 0.00000 | 0.00000         | 0.00000     | 1           |
| 328 | H | 71.90484 | 78.54786 | 68.64716 | 0.00000 | 0.00000         | 0.00000     | 1           |
| 329 | H | 72.51040 | 76.92552 | 69.07660 | 0.00000 | 0.00000         | 0.00000     | 1           |
| 330 | H | 70.31237 | 75.79678 | 68.29689 | 0.00000 | 0.00000         | 0.00000     | 1           |
| 331 | H | 69.40633 | 77.35582 | 68.34221 | 0.00000 | 0.00000         | 0.00000     | 1           |
| 332 | H | 71.67507 | 77.60994 | 66.72295 | 0.00000 | 0.00000         | 0.00000     | 1           |

|     |   |          |          |          |         |         |         |   |
|-----|---|----------|----------|----------|---------|---------|---------|---|
| 333 | H | 68.36219 | 76.05563 | 66.96783 | 0.00000 | 0.00000 | 0.00000 | 1 |
| 334 | H | 68.11590 | 76.11544 | 65.36294 | 0.00000 | 0.00000 | 0.00000 | 1 |
| 335 | H | 71.57639 | 77.77179 | 64.51347 | 0.00000 | 0.00000 | 0.00000 | 1 |
| 336 | H | 70.24036 | 77.24047 | 63.75398 | 0.00000 | 0.00000 | 0.00000 | 1 |
| 337 | N | 72.30826 | 75.75029 | 73.02263 | 0.00000 | 0.00000 | 0.00000 | 1 |
| 338 | C | 73.48089 | 75.34612 | 73.71401 | 0.00000 | 0.00000 | 0.00000 | 1 |
| 339 | C | 73.12592 | 73.95796 | 74.48384 | 0.00000 | 0.00000 | 0.00000 | 1 |
| 340 | O | 72.47277 | 73.09600 | 73.93764 | 0.00000 | 0.00000 | 0.00000 | 1 |
| 341 | C | 73.92902 | 76.52660 | 74.69808 | 0.00000 | 0.00000 | 0.00000 | 1 |
| 342 | C | 74.08704 | 77.85145 | 73.93169 | 0.00000 | 0.00000 | 0.00000 | 1 |
| 343 | C | 74.63391 | 77.87508 | 72.61307 | 0.00000 | 0.00000 | 0.00000 | 1 |
| 344 | C | 73.71322 | 79.07799 | 74.55837 | 0.00000 | 0.00000 | 0.00000 | 1 |
| 345 | C | 74.76605 | 79.09312 | 71.94281 | 0.00000 | 0.00000 | 0.00000 | 1 |
| 346 | C | 73.86944 | 80.27382 | 73.85558 | 0.00000 | 0.00000 | 0.00000 | 1 |
| 347 | C | 74.39267 | 80.33615 | 72.53137 | 0.00000 | 0.00000 | 0.00000 | 1 |
| 348 | O | 74.52411 | 81.57825 | 71.85696 | 0.00000 | 0.00000 | 0.00000 | 1 |
| 349 | H | 71.39906 | 75.79198 | 73.47982 | 0.00000 | 0.00000 | 0.00000 | 1 |
| 350 | H | 74.19926 | 75.19892 | 72.87452 | 0.00000 | 0.00000 | 0.00000 | 1 |
| 351 | H | 73.19477 | 76.65212 | 75.52555 | 0.00000 | 0.00000 | 0.00000 | 1 |
| 352 | H | 74.89511 | 76.26420 | 75.18717 | 0.00000 | 0.00000 | 0.00000 | 1 |
| 353 | H | 74.93171 | 76.93545 | 72.11144 | 0.00000 | 0.00000 | 0.00000 | 1 |
| 354 | H | 73.31570 | 79.08269 | 75.58827 | 0.00000 | 0.00000 | 0.00000 | 1 |
| 355 | H | 75.17572 | 79.08161 | 70.91744 | 0.00000 | 0.00000 | 0.00000 | 1 |
| 356 | H | 73.57866 | 81.21797 | 74.34791 | 0.00000 | 0.00000 | 0.00000 | 1 |
| 357 | H | 74.94804 | 81.27033 | 71.02104 | 0.00000 | 0.00000 | 0.00000 | 1 |
| 358 | N | 73.81371 | 73.85215 | 75.62553 | 0.00000 | 0.00000 | 0.00000 | 1 |
| 359 | C | 73.43064 | 72.80690 | 76.52738 | 0.00000 | 0.00000 | 0.00000 | 1 |
| 360 | C | 72.30829 | 73.36156 | 77.56651 | 0.00000 | 0.00000 | 0.00000 | 1 |
| 361 | O | 71.66267 | 74.36962 | 77.38576 | 0.00000 | 0.00000 | 0.00000 | 1 |
| 362 | C | 74.74679 | 72.26141 | 77.24021 | 0.00000 | 0.00000 | 0.00000 | 1 |
| 363 | O | 74.53148 | 71.09976 | 78.13283 | 0.00000 | 0.00000 | 0.00000 | 1 |
| 364 | C | 75.40877 | 73.50218 | 77.92208 | 0.00000 | 0.00000 | 0.00000 | 1 |
| 365 | H | 74.28037 | 74.69019 | 75.96248 | 0.00000 | 0.00000 | 0.00000 | 1 |
| 366 | H | 72.97726 | 72.06345 | 75.82834 | 0.00000 | 0.00000 | 0.00000 | 1 |
| 367 | H | 75.45806 | 71.88477 | 76.45967 | 0.00000 | 0.00000 | 0.00000 | 1 |
| 368 | H | 75.18119 | 70.48747 | 77.75743 | 0.00000 | 0.00000 | 0.00000 | 1 |
| 369 | H | 76.34844 | 73.21772 | 78.45330 | 0.00000 | 0.00000 | 0.00000 | 1 |
| 370 | H | 74.72928 | 73.97278 | 78.67422 | 0.00000 | 0.00000 | 0.00000 | 1 |
| 371 | H | 75.67660 | 74.29256 | 77.18326 | 0.00000 | 0.00000 | 0.00000 | 1 |
| 372 | N | 72.17113 | 72.45402 | 78.52642 | 0.00000 | 0.00000 | 0.00000 | 1 |
| 373 | C | 71.26906 | 72.72554 | 79.58790 | 0.00000 | 0.00000 | 0.00000 | 1 |
| 374 | C | 72.04331 | 73.41209 | 80.85920 | 0.00000 | 0.00000 | 0.00000 | 1 |
| 375 | O | 71.40079 | 73.88945 | 81.76686 | 0.00000 | 0.00000 | 0.00000 | 1 |
| 376 | C | 70.79225 | 71.33788 | 80.20247 | 0.00000 | 0.00000 | 0.00000 | 1 |
| 377 | C | 69.89795 | 70.53905 | 79.20356 | 0.00000 | 0.00000 | 0.00000 | 1 |
| 378 | C | 68.39385 | 70.99711 | 79.37321 | 0.00000 | 0.00000 | 0.00000 | 1 |
| 379 | C | 68.13902 | 72.29238 | 78.56753 | 0.00000 | 0.00000 | 0.00000 | 1 |
| 380 | N | 66.59288 | 72.53633 | 78.56624 | 0.00000 | 0.00000 | 0.00000 | 1 |
| 381 | H | 72.79686 | 71.63464 | 78.56128 | 0.00000 | 0.00000 | 0.00000 | 1 |
| 382 | H | 70.48125 | 73.38491 | 79.15874 | 0.00000 | 0.00000 | 0.00000 | 1 |
| 383 | H | 71.68930 | 70.73268 | 80.46440 | 0.00000 | 0.00000 | 0.00000 | 1 |
| 384 | H | 70.24908 | 71.50317 | 81.15947 | 0.00000 | 0.00000 | 0.00000 | 1 |
| 385 | H | 70.24902 | 70.67524 | 78.15569 | 0.00000 | 0.00000 | 0.00000 | 1 |
| 386 | H | 69.98160 | 69.44889 | 79.41477 | 0.00000 | 0.00000 | 0.00000 | 1 |
| 387 | H | 67.70834 | 70.19457 | 79.01675 | 0.00000 | 0.00000 | 0.00000 | 1 |
| 388 | H | 68.14555 | 71.14305 | 80.44977 | 0.00000 | 0.00000 | 0.00000 | 1 |
| 389 | H | 68.56439 | 73.21760 | 79.00422 | 0.00000 | 0.00000 | 0.00000 | 1 |
| 390 | H | 68.40462 | 72.22391 | 77.49341 | 0.00000 | 0.00000 | 0.00000 | 1 |
| 391 | H | 65.95918 | 71.69459 | 78.43554 | 0.00000 | 0.00000 | 0.00000 | 1 |
| 392 | H | 66.25208 | 73.18112 | 77.79646 | 0.00000 | 0.00000 | 0.00000 | 1 |
| 393 | H | 66.17381 | 72.99850 | 79.42486 | 0.00000 | 0.00000 | 0.00000 | 1 |
| 394 | N | 73.35775 | 73.18658 | 80.81095 | 0.00000 | 0.00000 | 0.00000 | 1 |

|     |   |          |          |          |         |         |         |   |
|-----|---|----------|----------|----------|---------|---------|---------|---|
| 395 | C | 74.18184 | 73.98915 | 81.66541 | 0.00000 | 0.00000 | 0.00000 | 1 |
| 396 | C | 74.57752 | 75.35670 | 80.87847 | 0.00000 | 0.00000 | 0.00000 | 1 |
| 397 | O | 74.00700 | 75.75401 | 79.89144 | 0.00000 | 0.00000 | 0.00000 | 1 |
| 398 | C | 75.47028 | 73.13381 | 82.01709 | 0.00000 | 0.00000 | 0.00000 | 1 |
| 399 | C | 75.68115 | 73.15737 | 83.56556 | 0.00000 | 0.00000 | 0.00000 | 1 |
| 400 | C | 74.94495 | 71.91235 | 84.20480 | 0.00000 | 0.00000 | 0.00000 | 1 |
| 401 | C | 73.40978 | 72.06154 | 84.09675 | 0.00000 | 0.00000 | 0.00000 | 1 |
| 402 | N | 72.78491 | 70.78454 | 84.75445 | 0.00000 | 0.00000 | 0.00000 | 1 |
| 403 | H | 73.70973 | 72.76984 | 79.94980 | 0.00000 | 0.00000 | 0.00000 | 1 |
| 404 | H | 73.50583 | 74.18678 | 82.53033 | 0.00000 | 0.00000 | 0.00000 | 1 |
| 405 | H | 75.37000 | 72.08910 | 81.64743 | 0.00000 | 0.00000 | 0.00000 | 1 |
| 406 | H | 76.36132 | 73.55350 | 81.49755 | 0.00000 | 0.00000 | 0.00000 | 1 |
| 407 | H | 76.76749 | 73.11159 | 83.80331 | 0.00000 | 0.00000 | 0.00000 | 1 |
| 408 | H | 75.31380 | 74.10981 | 84.00970 | 0.00000 | 0.00000 | 0.00000 | 1 |
| 409 | H | 75.27665 | 70.97149 | 83.70890 | 0.00000 | 0.00000 | 0.00000 | 1 |
| 410 | H | 75.23641 | 71.80247 | 85.27468 | 0.00000 | 0.00000 | 0.00000 | 1 |
| 411 | H | 72.98603 | 72.90833 | 84.67280 | 0.00000 | 0.00000 | 0.00000 | 1 |
| 412 | H | 73.01004 | 72.06963 | 83.06205 | 0.00000 | 0.00000 | 0.00000 | 1 |
| 413 | H | 73.08272 | 70.55661 | 85.74766 | 0.00000 | 0.00000 | 0.00000 | 1 |
| 414 | H | 72.94605 | 69.85873 | 84.26085 | 0.00000 | 0.00000 | 0.00000 | 1 |
| 415 | H | 71.72879 | 70.78877 | 84.85042 | 0.00000 | 0.00000 | 0.00000 | 1 |
| 416 | N | 75.54447 | 75.97279 | 81.56467 | 0.00000 | 0.00000 | 0.00000 | 1 |
| 417 | C | 76.10463 | 77.25542 | 81.09890 | 0.00000 | 0.00000 | 0.00000 | 1 |
| 418 | C | 76.86481 | 76.97114 | 79.67070 | 0.00000 | 0.00000 | 0.00000 | 1 |
| 419 | O | 77.64220 | 76.04047 | 79.55384 | 0.00000 | 0.00000 | 0.00000 | 1 |
| 420 | C | 77.09232 | 77.72512 | 82.15123 | 0.00000 | 0.00000 | 0.00000 | 1 |
| 421 | C | 77.83987 | 78.97041 | 81.71107 | 0.00000 | 0.00000 | 0.00000 | 1 |
| 422 | C | 76.41736 | 77.97213 | 83.48837 | 0.00000 | 0.00000 | 0.00000 | 1 |
| 423 | H | 75.90800 | 75.46863 | 82.37078 | 0.00000 | 0.00000 | 0.00000 | 1 |
| 424 | H | 75.20933 | 77.90929 | 80.98684 | 0.00000 | 0.00000 | 0.00000 | 1 |
| 425 | H | 77.84475 | 76.91665 | 82.29322 | 0.00000 | 0.00000 | 0.00000 | 1 |
| 426 | H | 78.63588 | 79.25963 | 82.45323 | 0.00000 | 0.00000 | 0.00000 | 1 |
| 427 | H | 78.36546 | 78.81293 | 80.72514 | 0.00000 | 0.00000 | 0.00000 | 1 |
| 428 | H | 77.15263 | 79.85329 | 81.59343 | 0.00000 | 0.00000 | 0.00000 | 1 |
| 429 | H | 75.92569 | 77.04145 | 83.88418 | 0.00000 | 0.00000 | 0.00000 | 1 |
| 430 | H | 77.14997 | 78.32070 | 84.26703 | 0.00000 | 0.00000 | 0.00000 | 1 |
| 431 | H | 75.61701 | 78.75808 | 83.40833 | 0.00000 | 0.00000 | 0.00000 | 1 |
| 432 | N | 76.56314 | 77.91530 | 78.77689 | 0.00000 | 0.00000 | 0.00000 | 1 |
| 433 | C | 77.13070 | 77.87631 | 77.45907 | 0.00000 | 0.00000 | 0.00000 | 1 |
| 434 | C | 78.68827 | 78.38224 | 77.59251 | 0.00000 | 0.00000 | 0.00000 | 1 |
| 435 | O | 79.01682 | 79.50943 | 77.32484 | 0.00000 | 0.00000 | 0.00000 | 1 |
| 436 | C | 76.20984 | 78.86522 | 76.63647 | 0.00000 | 0.00000 | 0.00000 | 1 |
| 437 | C | 75.82716 | 79.92099 | 77.72229 | 0.00000 | 0.00000 | 0.00000 | 1 |
| 438 | C | 75.62201 | 79.00371 | 79.00283 | 0.00000 | 0.00000 | 0.00000 | 1 |
| 439 | H | 77.06999 | 76.80341 | 77.17223 | 0.00000 | 0.00000 | 0.00000 | 1 |
| 440 | H | 76.73006 | 79.31022 | 75.75768 | 0.00000 | 0.00000 | 0.00000 | 1 |
| 441 | H | 75.30868 | 78.34564 | 76.24236 | 0.00000 | 0.00000 | 0.00000 | 1 |
| 442 | H | 76.65899 | 80.64481 | 77.87566 | 0.00000 | 0.00000 | 0.00000 | 1 |
| 443 | H | 74.92563 | 80.52056 | 77.46242 | 0.00000 | 0.00000 | 0.00000 | 1 |
| 444 | H | 75.86153 | 79.49101 | 79.97619 | 0.00000 | 0.00000 | 0.00000 | 1 |
| 445 | H | 74.62051 | 78.51996 | 79.06950 | 0.00000 | 0.00000 | 0.00000 | 1 |
| 446 | N | 79.40930 | 77.36869 | 78.05805 | 0.00000 | 0.00000 | 0.00000 | 1 |
| 447 | C | 80.82701 | 77.52269 | 78.09013 | 0.00000 | 0.00000 | 0.00000 | 1 |
| 448 | C | 81.41631 | 76.98878 | 76.66416 | 0.00000 | 0.00000 | 0.00000 | 1 |
| 449 | O | 80.74590 | 76.94195 | 75.66130 | 0.00000 | 0.00000 | 0.00000 | 1 |
| 450 | C | 81.33226 | 76.66280 | 79.32441 | 0.00000 | 0.00000 | 0.00000 | 1 |
| 451 | C | 82.44019 | 77.44522 | 80.09245 | 0.00000 | 0.00000 | 0.00000 | 1 |
| 452 | C | 81.69543 | 78.37669 | 81.12764 | 0.00000 | 0.00000 | 0.00000 | 1 |
| 453 | O | 80.51017 | 78.30919 | 81.33832 | 0.00000 | 0.00000 | 0.00000 | 1 |
| 454 | N | 82.58249 | 79.18903 | 81.73800 | 0.00000 | 0.00000 | 0.00000 | 1 |
| 455 | H | 78.94446 | 76.48789 | 78.35908 | 0.00000 | 0.00000 | 0.00000 | 1 |
| 456 | H | 80.93382 | 78.62730 | 78.20355 | 0.00000 | 0.00000 | 0.00000 | 1 |

|     |   |          |          |          |         |         |         |   |
|-----|---|----------|----------|----------|---------|---------|---------|---|
| 457 | H | 80.48397 | 76.44381 | 80.01665 | 0.00000 | 0.00000 | 0.00000 | 1 |
| 458 | H | 81.71227 | 75.67523 | 78.97674 | 0.00000 | 0.00000 | 0.00000 | 1 |
| 459 | H | 83.12501 | 76.74754 | 80.62302 | 0.00000 | 0.00000 | 0.00000 | 1 |
| 460 | H | 83.09804 | 78.02976 | 79.41219 | 0.00000 | 0.00000 | 0.00000 | 1 |
| 461 | H | 83.59830 | 79.23711 | 81.59388 | 0.00000 | 0.00000 | 0.00000 | 1 |
| 462 | H | 82.35576 | 79.85084 | 82.48772 | 0.00000 | 0.00000 | 0.00000 | 1 |
| 463 | N | 82.71008 | 76.67916 | 76.78893 | 0.00000 | 0.00000 | 0.00000 | 1 |
| 464 | C | 83.52222 | 76.28956 | 75.63451 | 0.00000 | 0.00000 | 0.00000 | 1 |
| 465 | C | 83.20354 | 74.72897 | 75.16467 | 0.00000 | 0.00000 | 0.00000 | 1 |
| 466 | O | 83.73638 | 74.29716 | 74.16934 | 0.00000 | 0.00000 | 0.00000 | 1 |
| 467 | C | 84.99951 | 76.29687 | 75.97271 | 0.00000 | 0.00000 | 0.00000 | 1 |
| 468 | C | 85.57497 | 77.69958 | 76.03268 | 0.00000 | 0.00000 | 0.00000 | 1 |
| 469 | C | 85.30600 | 75.55208 | 77.25882 | 0.00000 | 0.00000 | 0.00000 | 1 |
| 470 | H | 83.10541 | 76.81331 | 77.71670 | 0.00000 | 0.00000 | 0.00000 | 1 |
| 471 | H | 83.22552 | 77.01393 | 74.83889 | 0.00000 | 0.00000 | 0.00000 | 1 |
| 472 | H | 85.51660 | 75.76078 | 75.14188 | 0.00000 | 0.00000 | 0.00000 | 1 |
| 473 | H | 85.07287 | 78.31712 | 76.82783 | 0.00000 | 0.00000 | 0.00000 | 1 |
| 474 | H | 86.67637 | 77.68582 | 76.26394 | 0.00000 | 0.00000 | 0.00000 | 1 |
| 475 | H | 85.44491 | 78.24393 | 75.05637 | 0.00000 | 0.00000 | 0.00000 | 1 |
| 476 | H | 84.63925 | 74.65373 | 77.38201 | 0.00000 | 0.00000 | 0.00000 | 1 |
| 477 | H | 86.36969 | 75.18631 | 77.28498 | 0.00000 | 0.00000 | 0.00000 | 1 |
| 478 | H | 85.15696 | 76.20414 | 78.16317 | 0.00000 | 0.00000 | 0.00000 | 1 |
| 479 | N | 82.46426 | 74.06823 | 76.04838 | 0.00000 | 0.00000 | 0.00000 | 1 |
| 480 | C | 81.90407 | 72.83298 | 75.62938 | 0.00000 | 0.00000 | 0.00000 | 1 |
| 481 | C | 80.27772 | 73.00784 | 75.67814 | 0.00000 | 0.00000 | 0.00000 | 1 |
| 482 | O | 79.70207 | 73.28919 | 76.70124 | 0.00000 | 0.00000 | 0.00000 | 1 |
| 483 | C | 82.36017 | 71.78790 | 76.75583 | 0.00000 | 0.00000 | 0.00000 | 1 |
| 484 | O | 81.95463 | 70.41471 | 76.54696 | 0.00000 | 0.00000 | 0.00000 | 1 |
| 485 | H | 82.09000 | 74.62773 | 76.81243 | 0.00000 | 0.00000 | 0.00000 | 1 |
| 486 | H | 82.32346 | 72.62405 | 74.61687 | 0.00000 | 0.00000 | 0.00000 | 1 |
| 487 | H | 83.46740 | 71.90660 | 76.88485 | 0.00000 | 0.00000 | 0.00000 | 1 |
| 488 | H | 81.89315 | 72.14868 | 77.71293 | 0.00000 | 0.00000 | 0.00000 | 1 |
| 489 | H | 82.75971 | 70.06781 | 76.12032 | 0.00000 | 0.00000 | 0.00000 | 1 |
| 490 | N | 79.78292 | 72.79320 | 74.47130 | 0.00000 | 0.00000 | 0.00000 | 1 |
| 491 | C | 78.36597 | 72.83173 | 74.27798 | 0.00000 | 0.00000 | 0.00000 | 1 |
| 492 | C | 78.23641 | 72.00672 | 72.90243 | 0.00000 | 0.00000 | 0.00000 | 1 |
| 493 | O | 79.25571 | 71.74376 | 72.29490 | 0.00000 | 0.00000 | 0.00000 | 1 |
| 494 | C | 77.87091 | 74.36284 | 74.08751 | 0.00000 | 0.00000 | 0.00000 | 1 |
| 495 | O | 78.49977 | 75.12165 | 73.05079 | 0.00000 | 0.00000 | 0.00000 | 1 |
| 496 | C | 77.96870 | 74.93991 | 75.54523 | 0.00000 | 0.00000 | 0.00000 | 1 |
| 497 | H | 80.32453 | 72.54155 | 73.62470 | 0.00000 | 0.00000 | 0.00000 | 1 |
| 498 | H | 77.90806 | 72.36308 | 75.17884 | 0.00000 | 0.00000 | 0.00000 | 1 |
| 499 | H | 76.78233 | 74.32841 | 73.79837 | 0.00000 | 0.00000 | 0.00000 | 1 |
| 500 | H | 77.74442 | 75.28905 | 72.44848 | 0.00000 | 0.00000 | 0.00000 | 1 |
| 501 | H | 79.01619 | 75.25671 | 75.78344 | 0.00000 | 0.00000 | 0.00000 | 1 |
| 502 | H | 77.65774 | 74.19261 | 76.31596 | 0.00000 | 0.00000 | 0.00000 | 1 |
| 503 | H | 77.31874 | 75.83722 | 75.66635 | 0.00000 | 0.00000 | 0.00000 | 1 |
| 504 | N | 76.96894 | 71.69322 | 72.62065 | 0.00000 | 0.00000 | 0.00000 | 1 |
| 505 | C | 76.61134 | 71.09050 | 71.37015 | 0.00000 | 0.00000 | 0.00000 | 1 |
| 506 | C | 76.52308 | 72.25073 | 70.21419 | 0.00000 | 0.00000 | 0.00000 | 1 |
| 507 | O | 75.95199 | 73.29873 | 70.38969 | 0.00000 | 0.00000 | 0.00000 | 1 |
| 508 | C | 75.15417 | 70.53761 | 71.65854 | 0.00000 | 0.00000 | 0.00000 | 1 |
| 509 | C | 74.60853 | 71.59670 | 72.66693 | 0.00000 | 0.00000 | 0.00000 | 1 |
| 510 | C | 75.88531 | 71.79573 | 73.59053 | 0.00000 | 0.00000 | 0.00000 | 1 |
| 511 | H | 77.38659 | 70.32453 | 71.14137 | 0.00000 | 0.00000 | 0.00000 | 1 |
| 512 | H | 74.53752 | 70.45387 | 70.73509 | 0.00000 | 0.00000 | 0.00000 | 1 |
| 513 | H | 75.18588 | 69.52135 | 72.11104 | 0.00000 | 0.00000 | 0.00000 | 1 |
| 514 | H | 74.33591 | 72.54224 | 72.14455 | 0.00000 | 0.00000 | 0.00000 | 1 |
| 515 | H | 73.70106 | 71.27556 | 73.23120 | 0.00000 | 0.00000 | 0.00000 | 1 |
| 516 | H | 75.93984 | 72.77502 | 74.11916 | 0.00000 | 0.00000 | 0.00000 | 1 |
| 517 | H | 76.05983 | 70.97443 | 74.32576 | 0.00000 | 0.00000 | 0.00000 | 1 |
| 518 | N | 77.08202 | 71.77191 | 69.11043 | 0.00000 | 0.00000 | 0.00000 | 1 |

|     |   |          |          |          |         |         |             |         |      |
|-----|---|----------|----------|----------|---------|---------|-------------|---------|------|
| 519 | C | 76.96527 | 72.49123 | 67.89777 | 0.00000 | 0.00000 | 0.00000     | 1       |      |
| 520 | C | 75.82020 | 71.72908 | 66.99976 | 0.00000 | 0.00000 | 0.00000     | 1       |      |
| 521 | O | 76.09114 | 70.99673 | 66.07869 | 0.00000 | 0.00000 | 0.00000     | 1       |      |
| 522 | C | 78.40593 | 72.40527 | 67.18296 | 0.00000 | 0.00000 | 0.00000     | 1       |      |
| 523 | O | 79.00067 | 71.10095 | 67.10827 | 0.00000 | 0.00000 | 0.00000     | 1       |      |
| 524 | C | 79.19173 | 73.47361 | 68.02568 | 0.00000 | 0.00000 | 0.00000     | 1       |      |
| 525 | H | 77.52302 | 70.85321 | 69.09368 | 0.00000 | 0.00000 | 0.00000     | 1       |      |
| 526 | H | 76.64571 | 73.50889 | 68.22131 | 0.00000 | 0.00000 | 0.00000     | 1       |      |
| 527 | H | 78.29141 | 72.77561 | 66.12820 | 0.00000 | 0.00000 | 0.00000     | 1       |      |
| 528 | H | 78.90684 | 70.90224 | 66.15378 | 0.00000 | 0.00000 | 0.00000     | 1       |      |
| 529 | H | 78.71337 | 74.47965 | 67.97664 | 0.00000 | 0.00000 | 0.00000     | 1       |      |
| 530 | H | 80.24183 | 73.58432 | 67.66833 | 0.00000 | 0.00000 | 0.00000     | 1       |      |
| 531 | H | 79.23746 | 73.17854 | 69.10128 | 0.00000 | 0.00000 | 0.00000     | 1       |      |
| 532 | N | 74.61540 | 71.98717 | 67.50776 | 0.00000 | 0.00000 | 0.00000     | 1       |      |
| 533 | C | 73.52317 | 72.08857 | 66.35665 | 0.00000 | 0.00000 | 0.00000     | 1       |      |
| 534 | C | 73.72596 | 73.17795 | 65.42268 | 0.00000 | 0.00000 | 0.00000     | 1       |      |
| 535 | O | 73.89449 | 74.06162 | 64.65475 | 0.00000 | 0.00000 | 0.00000     | 1       |      |
| 536 | C | 72.12399 | 72.28436 | 67.19673 | 0.00000 | 0.00000 | 0.00000     | 1       |      |
| 537 | C | 70.98369 | 71.93663 | 66.30376 | 0.00000 | 0.00000 | 0.00000     | 1       |      |
| 538 | C | 70.72956 | 70.43207 | 66.31597 | 0.00000 | 0.00000 | 0.00000     | 1       |      |
| 539 | C | 69.72550 | 72.68233 | 66.74140 | 0.00000 | 0.00000 | 0.00000     | 1       |      |
| 540 | H | 74.63484 | 72.67839 | 68.25351 | 0.00000 | 0.00000 | 0.00000     | 1       |      |
| 541 | H | 73.66148 | 71.07842 | 65.89877 | 0.00000 | 0.00000 | 0.00000     | 1       |      |
| 542 | H | 72.13093 | 71.65507 | 68.11552 | 0.00000 | 0.00000 | 0.00000     | 1       |      |
| 543 | H | 72.05195 | 73.33747 | 67.55226 | 0.00000 | 0.00000 | 0.00000     | 1       |      |
| 544 | H | 71.22905 | 72.25212 | 65.26308 | 0.00000 | 0.00000 | 0.00000     | 1       |      |
| 545 | H | 70.40404 | 70.07805 | 67.32732 | 0.00000 | 0.00000 | 0.00000     | 1       |      |
| 546 | H | 71.65084 | 69.85537 | 66.04602 | 0.00000 | 0.00000 | 0.00000     | 1       |      |
| 547 | H | 69.92945 | 70.13917 | 65.58957 | 0.00000 | 0.00000 | 0.00000     | 1       |      |
| 548 | H | 68.84212 | 72.41404 | 66.10820 | 0.00000 | 0.00000 | 0.00000     | 1       |      |
| 549 | H | 69.86014 | 73.79262 | 66.67015 | 0.00000 | 0.00000 | 0.00000     | 1       |      |
| 550 | H | 69.45735 | 72.44896 | 67.80347 | 0.00000 | 0.00000 | 0.00000     | 1       |      |
| 551 |   | 273      |          |          |         |         |             |         |      |
| 552 |   | 150.0000 | 150.0000 | 150.0000 | 0.0000  | 0.0000  | 0.0000***** | 1.5000  | 6000 |
|     |   | 0.2500   | 300.00   | 0.00     | 0.00    | 0.00    | -1291.2768  | 0.0000  |      |
| 553 | N | 68.27887 | 77.50069 | 77.66078 | 0.00000 | 0.00000 | 0.00000     | 0.00000 | 1    |
| 554 | C | 68.90955 | 77.47922 | 76.45375 | 0.00000 | 0.00000 | 0.00000     | 0.00000 | 1    |
| 555 | C | 68.27733 | 76.15123 | 75.58855 | 0.00000 | 0.00000 | 0.00000     | 0.00000 | 1    |
| 556 | O | 67.97027 | 75.10308 | 76.10197 | 0.00000 | 0.00000 | 0.00000     | 0.00000 | 1    |
| 557 | C | 70.50988 | 77.10209 | 76.69603 | 0.00000 | 0.00000 | 0.00000     | 0.00000 | 1    |
| 558 | C | 71.07664 | 78.02678 | 77.70503 | 0.00000 | 0.00000 | 0.00000     | 0.00000 | 1    |
| 559 | C | 72.38087 | 77.45612 | 78.25992 | 0.00000 | 0.00000 | 0.00000     | 0.00000 | 1    |
| 560 | C | 71.32344 | 79.42103 | 77.13634 | 0.00000 | 0.00000 | 0.00000     | 0.00000 | 1    |
| 561 | H | 68.27894 | 76.62310 | 78.14761 | 0.00000 | 0.00000 | 0.00000     | 0.00000 | 1    |
| 562 | H | 68.74634 | 78.48771 | 75.99347 | 0.00000 | 0.00000 | 0.00000     | 0.00000 | 1    |
| 563 | H | 70.60809 | 76.03600 | 77.04519 | 0.00000 | 0.00000 | 0.00000     | 0.00000 | 1    |
| 564 | H | 71.06485 | 77.15654 | 75.73404 | 0.00000 | 0.00000 | 0.00000     | 0.00000 | 1    |
| 565 | H | 70.35435 | 78.10775 | 78.55163 | 0.00000 | 0.00000 | 0.00000     | 0.00000 | 1    |
| 566 | H | 73.20867 | 77.49061 | 77.50795 | 0.00000 | 0.00000 | 0.00000     | 0.00000 | 1    |
| 567 | H | 72.26293 | 76.38228 | 78.57103 | 0.00000 | 0.00000 | 0.00000     | 0.00000 | 1    |
| 568 | H | 72.72471 | 78.02287 | 79.16168 | 0.00000 | 0.00000 | 0.00000     | 0.00000 | 1    |
| 569 | H | 72.27777 | 79.86393 | 77.51952 | 0.00000 | 0.00000 | 0.00000     | 0.00000 | 1    |
| 570 | H | 70.49972 | 80.12850 | 77.40852 | 0.00000 | 0.00000 | 0.00000     | 0.00000 | 1    |
| 571 | H | 71.38535 | 79.40927 | 76.01922 | 0.00000 | 0.00000 | 0.00000     | 0.00000 | 1    |
| 572 | N | 68.31647 | 76.47740 | 74.30875 | 0.00000 | 0.00000 | 0.00000     | 0.00000 | 1    |
| 573 | C | 67.77767 | 75.60889 | 73.28021 | 0.00000 | 0.00000 | 0.00000     | 0.00000 | 1    |
| 574 | C | 68.84846 | 75.44543 | 72.01365 | 0.00000 | 0.00000 | 0.00000     | 0.00000 | 1    |
| 575 | O | 68.59450 | 74.67020 | 71.12207 | 0.00000 | 0.00000 | 0.00000     | 0.00000 | 1    |
| 576 | C | 66.51938 | 76.20049 | 72.65229 | 0.00000 | 0.00000 | 0.00000     | 0.00000 | 1    |
| 577 | C | 65.33039 | 76.10272 | 73.58805 | 0.00000 | 0.00000 | 0.00000     | 0.00000 | 1    |
| 578 | C | 66.71422 | 77.63179 | 72.19384 | 0.00000 | 0.00000 | 0.00000     | 0.00000 | 1    |
| 579 | H | 68.59916 | 77.44418 | 74.16641 | 0.00000 | 0.00000 | 0.00000     | 0.00000 | 1    |

|     |   |          |          |          |         |         |         |   |
|-----|---|----------|----------|----------|---------|---------|---------|---|
| 580 | H | 67.59275 | 74.65631 | 73.83634 | 0.00000 | 0.00000 | 0.00000 | 1 |
| 581 | H | 66.28658 | 75.58715 | 71.75177 | 0.00000 | 0.00000 | 0.00000 | 1 |
| 582 | H | 65.11582 | 75.03534 | 73.87577 | 0.00000 | 0.00000 | 0.00000 | 1 |
| 583 | H | 65.51294 | 76.67302 | 74.54171 | 0.00000 | 0.00000 | 0.00000 | 1 |
| 584 | H | 64.39490 | 76.51918 | 73.11962 | 0.00000 | 0.00000 | 0.00000 | 1 |
| 585 | H | 65.83202 | 78.00361 | 71.60100 | 0.00000 | 0.00000 | 0.00000 | 1 |
| 586 | H | 66.84594 | 78.32956 | 73.06730 | 0.00000 | 0.00000 | 0.00000 | 1 |
| 587 | H | 67.62667 | 77.73680 | 71.54174 | 0.00000 | 0.00000 | 0.00000 | 1 |
| 588 | N | 69.87373 | 76.27687 | 72.10870 | 0.00000 | 0.00000 | 0.00000 | 1 |
| 589 | C | 70.86229 | 76.24312 | 71.09028 | 0.00000 | 0.00000 | 0.00000 | 1 |
| 590 | C | 72.34069 | 75.89017 | 71.70556 | 0.00000 | 0.00000 | 0.00000 | 1 |
| 591 | O | 73.28680 | 75.86361 | 70.95112 | 0.00000 | 0.00000 | 0.00000 | 1 |
| 592 | C | 71.01150 | 77.71483 | 70.50231 | 0.00000 | 0.00000 | 0.00000 | 1 |
| 593 | C | 71.59100 | 77.56546 | 69.06618 | 0.00000 | 0.00000 | 0.00000 | 1 |
| 594 | C | 70.42073 | 76.90405 | 68.19651 | 0.00000 | 0.00000 | 0.00000 | 1 |
| 595 | N | 70.77621 | 77.18214 | 66.87165 | 0.00000 | 0.00000 | 0.00000 | 1 |
| 596 | C | 70.04067 | 76.94157 | 65.86303 | 0.00000 | 0.00000 | 0.00000 | 1 |
| 597 | N | 68.79479 | 76.34715 | 66.09244 | 0.00000 | 0.00000 | 0.00000 | 1 |
| 598 | N | 70.66522 | 77.34909 | 64.67589 | 0.00000 | 0.00000 | 0.00000 | 1 |
| 599 | H | 69.90332 | 76.87834 | 72.92801 | 0.00000 | 0.00000 | 0.00000 | 1 |
| 600 | H | 70.48288 | 75.49196 | 70.35651 | 0.00000 | 0.00000 | 0.00000 | 1 |
| 601 | H | 70.03484 | 78.24860 | 70.49068 | 0.00000 | 0.00000 | 0.00000 | 1 |
| 602 | H | 71.68559 | 78.32661 | 71.14415 | 0.00000 | 0.00000 | 0.00000 | 1 |
| 603 | H | 71.89766 | 78.55077 | 68.64961 | 0.00000 | 0.00000 | 0.00000 | 1 |
| 604 | H | 72.50995 | 76.93094 | 69.07804 | 0.00000 | 0.00000 | 0.00000 | 1 |
| 605 | H | 70.31600 | 75.79405 | 68.29836 | 0.00000 | 0.00000 | 0.00000 | 1 |
| 606 | H | 69.40577 | 77.35085 | 68.33813 | 0.00000 | 0.00000 | 0.00000 | 1 |
| 607 | H | 71.67981 | 77.60334 | 66.72343 | 0.00000 | 0.00000 | 0.00000 | 1 |
| 608 | H | 68.36594 | 76.05560 | 66.97004 | 0.00000 | 0.00000 | 0.00000 | 1 |
| 609 | H | 68.11885 | 76.11152 | 65.36516 | 0.00000 | 0.00000 | 0.00000 | 1 |
| 610 | H | 71.58231 | 77.76145 | 64.51144 | 0.00000 | 0.00000 | 0.00000 | 1 |
| 611 | H | 70.24558 | 77.23080 | 63.75302 | 0.00000 | 0.00000 | 0.00000 | 1 |
| 612 | N | 72.31026 | 75.73453 | 73.02258 | 0.00000 | 0.00000 | 0.00000 | 1 |
| 613 | C | 73.48846 | 75.34017 | 73.71032 | 0.00000 | 0.00000 | 0.00000 | 1 |
| 614 | C | 73.14083 | 73.95169 | 74.48257 | 0.00000 | 0.00000 | 0.00000 | 1 |
| 615 | O | 72.49437 | 73.08588 | 73.93448 | 0.00000 | 0.00000 | 0.00000 | 1 |
| 616 | C | 73.93097 | 76.52115 | 74.69642 | 0.00000 | 0.00000 | 0.00000 | 1 |
| 617 | C | 74.08812 | 77.84747 | 73.93260 | 0.00000 | 0.00000 | 0.00000 | 1 |
| 618 | C | 74.63771 | 77.87389 | 72.61520 | 0.00000 | 0.00000 | 0.00000 | 1 |
| 619 | C | 73.71220 | 79.07231 | 74.56133 | 0.00000 | 0.00000 | 0.00000 | 1 |
| 620 | C | 74.76831 | 79.09339 | 71.94734 | 0.00000 | 0.00000 | 0.00000 | 1 |
| 621 | C | 73.86795 | 80.26963 | 73.86114 | 0.00000 | 0.00000 | 0.00000 | 1 |
| 622 | C | 74.39127 | 80.33473 | 72.53710 | 0.00000 | 0.00000 | 0.00000 | 1 |
| 623 | O | 74.51979 | 81.57815 | 71.86461 | 0.00000 | 0.00000 | 0.00000 | 1 |
| 624 | H | 71.40158 | 75.76793 | 73.48180 | 0.00000 | 0.00000 | 0.00000 | 1 |
| 625 | H | 74.20608 | 75.19797 | 72.86919 | 0.00000 | 0.00000 | 0.00000 | 1 |
| 626 | H | 73.19398 | 76.64352 | 75.52192 | 0.00000 | 0.00000 | 0.00000 | 1 |
| 627 | H | 74.89654 | 76.26034 | 75.18734 | 0.00000 | 0.00000 | 0.00000 | 1 |
| 628 | H | 74.93807 | 76.93548 | 72.11269 | 0.00000 | 0.00000 | 0.00000 | 1 |
| 629 | H | 73.31334 | 79.07454 | 75.59069 | 0.00000 | 0.00000 | 0.00000 | 1 |
| 630 | H | 75.17968 | 79.08431 | 70.92267 | 0.00000 | 0.00000 | 0.00000 | 1 |
| 631 | H | 73.57636 | 81.21261 | 74.35525 | 0.00000 | 0.00000 | 0.00000 | 1 |
| 632 | H | 74.93832 | 81.27166 | 71.02548 | 0.00000 | 0.00000 | 0.00000 | 1 |
| 633 | N | 73.81838 | 73.85475 | 75.63114 | 0.00000 | 0.00000 | 0.00000 | 1 |
| 634 | C | 73.43443 | 72.80934 | 76.53191 | 0.00000 | 0.00000 | 0.00000 | 1 |
| 635 | C | 72.31121 | 73.36286 | 77.57036 | 0.00000 | 0.00000 | 0.00000 | 1 |
| 636 | O | 71.66414 | 74.37003 | 77.38851 | 0.00000 | 0.00000 | 0.00000 | 1 |
| 637 | C | 74.75402 | 72.26804 | 77.24366 | 0.00000 | 0.00000 | 0.00000 | 1 |
| 638 | O | 74.54260 | 71.10828 | 78.13362 | 0.00000 | 0.00000 | 0.00000 | 1 |
| 639 | C | 75.40886 | 73.51359 | 77.92478 | 0.00000 | 0.00000 | 0.00000 | 1 |
| 640 | H | 74.27432 | 74.69741 | 75.97157 | 0.00000 | 0.00000 | 0.00000 | 1 |
| 641 | H | 72.98331 | 72.06440 | 75.83291 | 0.00000 | 0.00000 | 0.00000 | 1 |



|     |   |          |          |          |         |         |         |   |
|-----|---|----------|----------|----------|---------|---------|---------|---|
| 642 | H | 75.46657 | 71.89991 | 76.46020 | 0.00000 | 0.00000 | 0.00000 | 1 |
| 643 | H | 75.17804 | 70.48890 | 77.74326 | 0.00000 | 0.00000 | 0.00000 | 1 |
| 644 | H | 76.34822 | 73.23522 | 78.45959 | 0.00000 | 0.00000 | 0.00000 | 1 |
| 645 | H | 74.72484 | 73.98271 | 78.67351 | 0.00000 | 0.00000 | 0.00000 | 1 |
| 646 | H | 75.67525 | 74.30346 | 77.18486 | 0.00000 | 0.00000 | 0.00000 | 1 |
| 647 | N | 72.17409 | 72.45575 | 78.53073 | 0.00000 | 0.00000 | 0.00000 | 1 |
| 648 | C | 71.27012 | 72.72802 | 79.59039 | 0.00000 | 0.00000 | 0.00000 | 1 |
| 649 | C | 72.04448 | 73.41000 | 80.86408 | 0.00000 | 0.00000 | 0.00000 | 1 |
| 650 | O | 71.40308 | 73.88284 | 81.77485 | 0.00000 | 0.00000 | 0.00000 | 1 |
| 651 | C | 70.78795 | 71.34144 | 80.20334 | 0.00000 | 0.00000 | 0.00000 | 1 |
| 652 | C | 69.89618 | 70.54152 | 79.20306 | 0.00000 | 0.00000 | 0.00000 | 1 |
| 653 | C | 68.39051 | 70.99740 | 79.36458 | 0.00000 | 0.00000 | 0.00000 | 1 |
| 654 | C | 68.13907 | 72.29451 | 78.56085 | 0.00000 | 0.00000 | 0.00000 | 1 |
| 655 | N | 66.59382 | 72.54391 | 78.56241 | 0.00000 | 0.00000 | 0.00000 | 1 |
| 656 | H | 72.80077 | 71.63755 | 78.56653 | 0.00000 | 0.00000 | 0.00000 | 1 |
| 657 | H | 70.48519 | 73.39045 | 79.16039 | 0.00000 | 0.00000 | 0.00000 | 1 |
| 658 | H | 71.68350 | 70.73544 | 80.46848 | 0.00000 | 0.00000 | 0.00000 | 1 |
| 659 | H | 70.24217 | 71.50827 | 81.15858 | 0.00000 | 0.00000 | 0.00000 | 1 |
| 660 | H | 70.25117 | 70.67573 | 78.15630 | 0.00000 | 0.00000 | 0.00000 | 1 |
| 661 | H | 69.97959 | 69.45185 | 79.41682 | 0.00000 | 0.00000 | 0.00000 | 1 |
| 662 | H | 67.70814 | 70.19514 | 79.00144 | 0.00000 | 0.00000 | 0.00000 | 1 |
| 663 | H | 68.13502 | 71.13995 | 80.43992 | 0.00000 | 0.00000 | 0.00000 | 1 |
| 664 | H | 68.56832 | 73.21750 | 78.99839 | 0.00000 | 0.00000 | 0.00000 | 1 |
| 665 | H | 68.40287 | 72.22673 | 77.48623 | 0.00000 | 0.00000 | 0.00000 | 1 |
| 666 | H | 65.95792 | 71.70760 | 78.40950 | 0.00000 | 0.00000 | 0.00000 | 1 |
| 667 | H | 66.25706 | 73.20821 | 77.80757 | 0.00000 | 0.00000 | 0.00000 | 1 |
| 668 | H | 66.17408 | 72.98617 | 79.43114 | 0.00000 | 0.00000 | 0.00000 | 1 |
| 669 | N | 73.35911 | 73.18630 | 80.81226 | 0.00000 | 0.00000 | 0.00000 | 1 |
| 670 | C | 74.18444 | 73.98908 | 81.66538 | 0.00000 | 0.00000 | 0.00000 | 1 |
| 671 | C | 74.57628 | 75.35830 | 80.87948 | 0.00000 | 0.00000 | 0.00000 | 1 |
| 672 | O | 74.00143 | 75.75859 | 79.89617 | 0.00000 | 0.00000 | 0.00000 | 1 |
| 673 | C | 75.47404 | 73.13358 | 82.01257 | 0.00000 | 0.00000 | 0.00000 | 1 |
| 674 | C | 75.68624 | 73.15538 | 83.56085 | 0.00000 | 0.00000 | 0.00000 | 1 |
| 675 | C | 74.94670 | 71.91323 | 84.20192 | 0.00000 | 0.00000 | 0.00000 | 1 |
| 676 | C | 73.41189 | 72.06410 | 84.09120 | 0.00000 | 0.00000 | 0.00000 | 1 |
| 677 | N | 72.78337 | 70.78898 | 84.74907 | 0.00000 | 0.00000 | 0.00000 | 1 |
| 678 | H | 73.71023 | 72.77255 | 79.94934 | 0.00000 | 0.00000 | 0.00000 | 1 |
| 679 | H | 73.51063 | 74.18526 | 82.53231 | 0.00000 | 0.00000 | 0.00000 | 1 |
| 680 | H | 75.37365 | 72.08946 | 81.64125 | 0.00000 | 0.00000 | 0.00000 | 1 |
| 681 | H | 76.36408 | 73.55464 | 81.49236 | 0.00000 | 0.00000 | 0.00000 | 1 |
| 682 | H | 76.77266 | 73.10606 | 83.79740 | 0.00000 | 0.00000 | 0.00000 | 1 |
| 683 | H | 75.32252 | 74.10909 | 84.00520 | 0.00000 | 0.00000 | 0.00000 | 1 |
| 684 | H | 75.27776 | 70.97057 | 83.70904 | 0.00000 | 0.00000 | 0.00000 | 1 |
| 685 | H | 75.23633 | 71.80578 | 85.27254 | 0.00000 | 0.00000 | 0.00000 | 1 |
| 686 | H | 72.98809 | 72.91220 | 84.66529 | 0.00000 | 0.00000 | 0.00000 | 1 |
| 687 | H | 73.01398 | 72.07116 | 83.05580 | 0.00000 | 0.00000 | 0.00000 | 1 |
| 688 | H | 73.07356 | 70.56518 | 85.74546 | 0.00000 | 0.00000 | 0.00000 | 1 |
| 689 | H | 72.94884 | 69.86136 | 84.26031 | 0.00000 | 0.00000 | 0.00000 | 1 |
| 690 | H | 71.72653 | 70.79292 | 84.83681 | 0.00000 | 0.00000 | 0.00000 | 1 |
| 691 | N | 75.54487 | 75.97340 | 81.56435 | 0.00000 | 0.00000 | 0.00000 | 1 |
| 692 | C | 76.10649 | 77.25440 | 81.09700 | 0.00000 | 0.00000 | 0.00000 | 1 |
| 693 | C | 76.86406 | 76.96822 | 79.66795 | 0.00000 | 0.00000 | 0.00000 | 1 |
| 694 | O | 77.63871 | 76.03514 | 79.55019 | 0.00000 | 0.00000 | 0.00000 | 1 |
| 695 | C | 77.09616 | 77.72162 | 82.14846 | 0.00000 | 0.00000 | 0.00000 | 1 |
| 696 | C | 77.84954 | 78.96199 | 81.70421 | 0.00000 | 0.00000 | 0.00000 | 1 |
| 697 | C | 76.42238 | 77.97295 | 83.48533 | 0.00000 | 0.00000 | 0.00000 | 1 |
| 698 | H | 75.91281 | 75.46682 | 82.36707 | 0.00000 | 0.00000 | 0.00000 | 1 |
| 699 | H | 75.21235 | 77.91023 | 80.98575 | 0.00000 | 0.00000 | 0.00000 | 1 |
| 700 | H | 77.84492 | 76.90995 | 82.29192 | 0.00000 | 0.00000 | 0.00000 | 1 |
| 701 | H | 78.65557 | 79.24350 | 82.43909 | 0.00000 | 0.00000 | 0.00000 | 1 |
| 702 | H | 78.36512 | 78.80182 | 80.71335 | 0.00000 | 0.00000 | 0.00000 | 1 |
| 703 | H | 77.16799 | 79.85029 | 81.59358 | 0.00000 | 0.00000 | 0.00000 | 1 |

|     |   |          |          |          |         |         |         |   |
|-----|---|----------|----------|----------|---------|---------|---------|---|
| 704 | H | 75.92567 | 77.04489 | 83.88123 | 0.00000 | 0.00000 | 0.00000 | 1 |
| 705 | H | 77.15647 | 78.31775 | 84.26428 | 0.00000 | 0.00000 | 0.00000 | 1 |
| 706 | H | 75.62597 | 78.76292 | 83.40507 | 0.00000 | 0.00000 | 0.00000 | 1 |
| 707 | N | 76.56384 | 77.91310 | 78.77451 | 0.00000 | 0.00000 | 0.00000 | 1 |
| 708 | C | 77.13034 | 77.87486 | 77.45616 | 0.00000 | 0.00000 | 0.00000 | 1 |
| 709 | C | 78.68776 | 78.38149 | 77.58863 | 0.00000 | 0.00000 | 0.00000 | 1 |
| 710 | O | 79.01892 | 79.50695 | 77.31673 | 0.00000 | 0.00000 | 0.00000 | 1 |
| 711 | C | 76.20716 | 78.86257 | 76.63480 | 0.00000 | 0.00000 | 0.00000 | 1 |
| 712 | C | 75.82681 | 79.91891 | 77.72085 | 0.00000 | 0.00000 | 0.00000 | 1 |
| 713 | C | 75.62265 | 79.00135 | 79.00134 | 0.00000 | 0.00000 | 0.00000 | 1 |
| 714 | H | 77.07028 | 76.80191 | 77.16922 | 0.00000 | 0.00000 | 0.00000 | 1 |
| 715 | H | 76.72472 | 79.30699 | 75.75416 | 0.00000 | 0.00000 | 0.00000 | 1 |
| 716 | H | 75.30515 | 78.34216 | 76.24374 | 0.00000 | 0.00000 | 0.00000 | 1 |
| 717 | H | 76.65944 | 80.64204 | 77.87313 | 0.00000 | 0.00000 | 0.00000 | 1 |
| 718 | H | 74.92533 | 80.51911 | 77.46227 | 0.00000 | 0.00000 | 0.00000 | 1 |
| 719 | H | 75.86251 | 79.48851 | 79.97473 | 0.00000 | 0.00000 | 0.00000 | 1 |
| 720 | H | 74.62151 | 78.51686 | 79.06835 | 0.00000 | 0.00000 | 0.00000 | 1 |
| 721 | N | 79.40649 | 77.36915 | 78.06010 | 0.00000 | 0.00000 | 0.00000 | 1 |
| 722 | C | 80.82448 | 77.52040 | 78.09146 | 0.00000 | 0.00000 | 0.00000 | 1 |
| 723 | C | 81.41141 | 76.97815 | 76.66776 | 0.00000 | 0.00000 | 0.00000 | 1 |
| 724 | O | 80.73809 | 76.91862 | 75.66746 | 0.00000 | 0.00000 | 0.00000 | 1 |
| 725 | C | 81.32872 | 76.66206 | 79.32744 | 0.00000 | 0.00000 | 0.00000 | 1 |
| 726 | C | 82.43756 | 77.44417 | 80.09425 | 0.00000 | 0.00000 | 0.00000 | 1 |
| 727 | C | 81.69353 | 78.37840 | 81.12750 | 0.00000 | 0.00000 | 0.00000 | 1 |
| 728 | O | 80.50820 | 78.31127 | 81.34031 | 0.00000 | 0.00000 | 0.00000 | 1 |
| 729 | N | 82.58123 | 79.19320 | 81.73334 | 0.00000 | 0.00000 | 0.00000 | 1 |
| 730 | H | 78.94069 | 76.48879 | 78.36140 | 0.00000 | 0.00000 | 0.00000 | 1 |
| 731 | H | 80.93381 | 78.62528 | 78.20068 | 0.00000 | 0.00000 | 0.00000 | 1 |
| 732 | H | 80.48030 | 76.44522 | 80.02021 | 0.00000 | 0.00000 | 0.00000 | 1 |
| 733 | H | 81.70769 | 75.67353 | 78.98109 | 0.00000 | 0.00000 | 0.00000 | 1 |
| 734 | H | 83.12132 | 76.74634 | 80.62608 | 0.00000 | 0.00000 | 0.00000 | 1 |
| 735 | H | 83.09646 | 78.02652 | 79.41308 | 0.00000 | 0.00000 | 0.00000 | 1 |
| 736 | H | 83.59711 | 79.23994 | 81.58886 | 0.00000 | 0.00000 | 0.00000 | 1 |
| 737 | H | 82.35505 | 79.85829 | 82.48033 | 0.00000 | 0.00000 | 0.00000 | 1 |
| 738 | N | 82.70622 | 76.67352 | 76.79297 | 0.00000 | 0.00000 | 0.00000 | 1 |
| 739 | C | 83.52057 | 76.28933 | 75.63754 | 0.00000 | 0.00000 | 0.00000 | 1 |
| 740 | C | 83.20414 | 74.72855 | 75.16756 | 0.00000 | 0.00000 | 0.00000 | 1 |
| 741 | O | 83.73934 | 74.29628 | 74.17386 | 0.00000 | 0.00000 | 0.00000 | 1 |
| 742 | C | 84.99830 | 76.29981 | 75.97565 | 0.00000 | 0.00000 | 0.00000 | 1 |
| 743 | C | 85.57034 | 77.70377 | 76.03626 | 0.00000 | 0.00000 | 0.00000 | 1 |
| 744 | C | 85.30638 | 75.55423 | 77.26079 | 0.00000 | 0.00000 | 0.00000 | 1 |
| 745 | H | 83.10248 | 76.81642 | 77.71889 | 0.00000 | 0.00000 | 0.00000 | 1 |
| 746 | H | 83.22219 | 77.01448 | 74.84356 | 0.00000 | 0.00000 | 0.00000 | 1 |
| 747 | H | 85.51642 | 75.76575 | 75.14422 | 0.00000 | 0.00000 | 0.00000 | 1 |
| 748 | H | 85.06702 | 78.31991 | 76.83168 | 0.00000 | 0.00000 | 0.00000 | 1 |
| 749 | H | 86.67181 | 77.69241 | 76.26728 | 0.00000 | 0.00000 | 0.00000 | 1 |
| 750 | H | 85.43900 | 78.24819 | 75.06014 | 0.00000 | 0.00000 | 0.00000 | 1 |
| 751 | H | 84.65645 | 74.64209 | 77.37212 | 0.00000 | 0.00000 | 0.00000 | 1 |
| 752 | H | 86.37687 | 75.20973 | 77.29599 | 0.00000 | 0.00000 | 0.00000 | 1 |
| 753 | H | 85.13494 | 76.19803 | 78.16705 | 0.00000 | 0.00000 | 0.00000 | 1 |
| 754 | N | 82.46252 | 74.06867 | 76.05011 | 0.00000 | 0.00000 | 0.00000 | 1 |
| 755 | C | 81.90000 | 72.83512 | 75.62954 | 0.00000 | 0.00000 | 0.00000 | 1 |
| 756 | C | 80.27365 | 73.01112 | 75.68197 | 0.00000 | 0.00000 | 0.00000 | 1 |
| 757 | O | 79.70191 | 73.29406 | 76.70667 | 0.00000 | 0.00000 | 0.00000 | 1 |
| 758 | C | 82.35594 | 71.78816 | 76.75429 | 0.00000 | 0.00000 | 0.00000 | 1 |
| 759 | O | 81.94880 | 70.41566 | 76.54401 | 0.00000 | 0.00000 | 0.00000 | 1 |
| 760 | H | 82.08682 | 74.62828 | 76.81343 | 0.00000 | 0.00000 | 0.00000 | 1 |
| 761 | H | 82.31794 | 72.62725 | 74.61625 | 0.00000 | 0.00000 | 0.00000 | 1 |
| 762 | H | 83.46332 | 71.90565 | 76.88302 | 0.00000 | 0.00000 | 0.00000 | 1 |
| 763 | H | 81.88967 | 72.14864 | 77.71188 | 0.00000 | 0.00000 | 0.00000 | 1 |
| 764 | H | 82.75368 | 70.06814 | 76.11753 | 0.00000 | 0.00000 | 0.00000 | 1 |
| 765 | N | 79.77596 | 72.79595 | 74.47659 | 0.00000 | 0.00000 | 0.00000 | 1 |

|     |     |          |          |          |         |         |                    |      |
|-----|-----|----------|----------|----------|---------|---------|--------------------|------|
| 766 | C   | 78.35936 | 72.83463 | 74.28191 | 0.00000 | 0.00000 | 0.00000            | 1    |
| 767 | C   | 78.23145 | 72.00615 | 72.90836 | 0.00000 | 0.00000 | 0.00000            | 1    |
| 768 | O   | 79.25145 | 71.73747 | 72.30416 | 0.00000 | 0.00000 | 0.00000            | 1    |
| 769 | C   | 77.86355 | 74.36480 | 74.08616 | 0.00000 | 0.00000 | 0.00000            | 1    |
| 770 | O   | 78.48334 | 75.11563 | 73.03809 | 0.00000 | 0.00000 | 0.00000            | 1    |
| 771 | C   | 77.97668 | 74.95218 | 75.53850 | 0.00000 | 0.00000 | 0.00000            | 1    |
| 772 | H   | 80.31737 | 72.54119 | 73.63065 | 0.00000 | 0.00000 | 0.00000            | 1    |
| 773 | H   | 77.89899 | 72.36848 | 75.18273 | 0.00000 | 0.00000 | 0.00000            | 1    |
| 774 | H   | 76.77221 | 74.32884 | 73.80771 | 0.00000 | 0.00000 | 0.00000            | 1    |
| 775 | H   | 77.72447 | 75.27118 | 72.43692 | 0.00000 | 0.00000 | 0.00000            | 1    |
| 776 | H   | 79.02930 | 75.25983 | 75.76799 | 0.00000 | 0.00000 | 0.00000            | 1    |
| 777 | H   | 77.66231 | 74.21401 | 76.31662 | 0.00000 | 0.00000 | 0.00000            | 1    |
| 778 | H   | 77.33735 | 75.85749 | 75.65688 | 0.00000 | 0.00000 | 0.00000            | 1    |
| 779 | N   | 76.96408 | 71.69513 | 72.62384 | 0.00000 | 0.00000 | 0.00000            | 1    |
| 780 | C   | 76.60952 | 71.09007 | 71.37329 | 0.00000 | 0.00000 | 0.00000            | 1    |
| 781 | C   | 76.52333 | 72.24771 | 70.21477 | 0.00000 | 0.00000 | 0.00000            | 1    |
| 782 | O   | 75.94909 | 73.29429 | 70.38864 | 0.00000 | 0.00000 | 0.00000            | 1    |
| 783 | C   | 75.15163 | 70.53826 | 71.65988 | 0.00000 | 0.00000 | 0.00000            | 1    |
| 784 | C   | 74.60574 | 71.60175 | 72.66277 | 0.00000 | 0.00000 | 0.00000            | 1    |
| 785 | C   | 75.87899 | 71.79850 | 73.59186 | 0.00000 | 0.00000 | 0.00000            | 1    |
| 786 | H   | 77.38456 | 70.32294 | 71.14849 | 0.00000 | 0.00000 | 0.00000            | 1    |
| 787 | H   | 74.53567 | 70.45083 | 70.73638 | 0.00000 | 0.00000 | 0.00000            | 1    |
| 788 | H   | 75.18100 | 69.52487 | 72.11891 | 0.00000 | 0.00000 | 0.00000            | 1    |
| 789 | H   | 74.33740 | 72.54785 | 72.13829 | 0.00000 | 0.00000 | 0.00000            | 1    |
| 790 | H   | 73.69754 | 71.27714 | 73.22239 | 0.00000 | 0.00000 | 0.00000            | 1    |
| 791 | H   | 75.93323 | 72.77681 | 74.12260 | 0.00000 | 0.00000 | 0.00000            | 1    |
| 792 | H   | 76.04935 | 70.97550 | 74.32609 | 0.00000 | 0.00000 | 0.00000            | 1    |
| 793 | N   | 77.08706 | 71.77088 | 69.11259 | 0.00000 | 0.00000 | 0.00000            | 1    |
| 794 | C   | 76.96799 | 72.48937 | 67.89937 | 0.00000 | 0.00000 | 0.00000            | 1    |
| 795 | C   | 75.82057 | 71.72716 | 67.00431 | 0.00000 | 0.00000 | 0.00000            | 1    |
| 796 | O   | 76.08838 | 70.99278 | 66.08389 | 0.00000 | 0.00000 | 0.00000            | 1    |
| 797 | C   | 78.40763 | 72.40470 | 67.18261 | 0.00000 | 0.00000 | 0.00000            | 1    |
| 798 | O   | 79.00272 | 71.10061 | 67.10643 | 0.00000 | 0.00000 | 0.00000            | 1    |
| 799 | C   | 79.19234 | 73.47305 | 68.02641 | 0.00000 | 0.00000 | 0.00000            | 1    |
| 800 | H   | 77.53028 | 70.85317 | 69.09591 | 0.00000 | 0.00000 | 0.00000            | 1    |
| 801 | H   | 76.64838 | 73.50718 | 68.22221 | 0.00000 | 0.00000 | 0.00000            | 1    |
| 802 | H   | 78.29161 | 72.77614 | 66.12842 | 0.00000 | 0.00000 | 0.00000            | 1    |
| 803 | H   | 78.89932 | 70.89851 | 66.15367 | 0.00000 | 0.00000 | 0.00000            | 1    |
| 804 | H   | 78.70922 | 74.47712 | 67.98368 | 0.00000 | 0.00000 | 0.00000            | 1    |
| 805 | H   | 80.24053 | 73.59014 | 67.66561 | 0.00000 | 0.00000 | 0.00000            | 1    |
| 806 | H   | 79.24335 | 73.17360 | 69.10056 | 0.00000 | 0.00000 | 0.00000            | 1    |
| 807 | N   | 74.61718 | 71.98859 | 67.51410 | 0.00000 | 0.00000 | 0.00000            | 1    |
| 808 | C   | 73.52458 | 72.09576 | 66.36428 | 0.00000 | 0.00000 | 0.00000            | 1    |
| 809 | C   | 73.72962 | 73.18526 | 65.43070 | 0.00000 | 0.00000 | 0.00000            | 1    |
| 810 | O   | 73.89787 | 74.07365 | 64.66886 | 0.00000 | 0.00000 | 0.00000            | 1    |
| 811 | C   | 72.12340 | 72.29037 | 67.20064 | 0.00000 | 0.00000 | 0.00000            | 1    |
| 812 | C   | 70.98378 | 71.94250 | 66.30453 | 0.00000 | 0.00000 | 0.00000            | 1    |
| 813 | C   | 70.72882 | 70.43857 | 66.31457 | 0.00000 | 0.00000 | 0.00000            | 1    |
| 814 | C   | 69.72347 | 72.68415 | 66.74127 | 0.00000 | 0.00000 | 0.00000            | 1    |
| 815 | H   | 74.64127 | 72.68076 | 68.25880 | 0.00000 | 0.00000 | 0.00000            | 1    |
| 816 | H   | 73.66419 | 71.08566 | 65.90395 | 0.00000 | 0.00000 | 0.00000            | 1    |
| 817 | H   | 72.12800 | 71.66107 | 68.11889 | 0.00000 | 0.00000 | 0.00000            | 1    |
| 818 | H   | 72.05033 | 73.34340 | 67.55505 | 0.00000 | 0.00000 | 0.00000            | 1    |
| 819 | H   | 71.23136 | 72.26025 | 65.26519 | 0.00000 | 0.00000 | 0.00000            | 1    |
| 820 | H   | 70.40687 | 70.08269 | 67.32645 | 0.00000 | 0.00000 | 0.00000            | 1    |
| 821 | H   | 71.64783 | 69.86080 | 66.03921 | 0.00000 | 0.00000 | 0.00000            | 1    |
| 822 | H   | 69.92487 | 70.14873 | 65.59111 | 0.00000 | 0.00000 | 0.00000            | 1    |
| 823 | H   | 68.84211 | 72.41346 | 66.10619 | 0.00000 | 0.00000 | 0.00000            | 1    |
| 824 | H   | 69.85404 | 73.79504 | 66.67172 | 0.00000 | 0.00000 | 0.00000            | 1    |
| 825 | H   | 69.45393 | 72.44830 | 67.80247 | 0.00000 | 0.00000 | 0.00000            | 1    |
| 826 | 273 |          |          |          |         |         |                    |      |
| 827 |     | 150.0000 | 150.0000 | 150.0000 | 0.0000  | 0.0000  | 0.0000***** 2.0000 | 8000 |

|     |   | 0.2500   | 300.00   | 0.00     | 0.00 | 0.00    | -1291.3155 | 0.0000  | 0.0000 |   |
|-----|---|----------|----------|----------|------|---------|------------|---------|--------|---|
| 828 | N | 68.28035 | 77.49520 | 77.66227 |      | 0.00000 | 0.00000    | 0.00000 |        | 1 |
| 829 | C | 68.90885 | 77.47547 | 76.45409 |      | 0.00000 | 0.00000    | 0.00000 |        | 1 |
| 830 | C | 68.27639 | 76.14795 | 75.58906 |      | 0.00000 | 0.00000    | 0.00000 |        | 1 |
| 831 | O | 67.96987 | 75.09921 | 76.10141 |      | 0.00000 | 0.00000    | 0.00000 |        | 1 |
| 832 | C | 70.51011 | 77.09870 | 76.69057 |      | 0.00000 | 0.00000    | 0.00000 |        | 1 |
| 833 | C | 71.07851 | 78.02076 | 77.70108 |      | 0.00000 | 0.00000    | 0.00000 |        | 1 |
| 834 | C | 72.38439 | 77.44898 | 78.25075 |      | 0.00000 | 0.00000    | 0.00000 |        | 1 |
| 835 | C | 71.32072 | 79.41675 | 77.13469 |      | 0.00000 | 0.00000    | 0.00000 |        | 1 |
| 836 | H | 68.27681 | 76.61583 | 78.14582 |      | 0.00000 | 0.00000    | 0.00000 |        | 1 |
| 837 | H | 68.74448 | 78.48448 | 75.99538 |      | 0.00000 | 0.00000    | 0.00000 |        | 1 |
| 838 | H | 70.61080 | 76.03157 | 77.03624 |      | 0.00000 | 0.00000    | 0.00000 |        | 1 |
| 839 | H | 71.06233 | 77.15701 | 75.72718 |      | 0.00000 | 0.00000    | 0.00000 |        | 1 |
| 840 | H | 70.35857 | 78.09836 | 78.55000 |      | 0.00000 | 0.00000    | 0.00000 |        | 1 |
| 841 | H | 73.21166 | 77.49082 | 77.49863 |      | 0.00000 | 0.00000    | 0.00000 |        | 1 |
| 842 | H | 72.26885 | 76.37242 | 78.55416 |      | 0.00000 | 0.00000    | 0.00000 |        | 1 |
| 843 | H | 72.72760 | 78.00983 | 79.15645 |      | 0.00000 | 0.00000    | 0.00000 |        | 1 |
| 844 | H | 72.26505 | 79.86902 | 77.53139 |      | 0.00000 | 0.00000    | 0.00000 |        | 1 |
| 845 | H | 70.48620 | 80.11648 | 77.39362 |      | 0.00000 | 0.00000    | 0.00000 |        | 1 |
| 846 | H | 71.39903 | 79.40443 | 76.01863 |      | 0.00000 | 0.00000    | 0.00000 |        | 1 |
| 847 | N | 68.31595 | 76.47634 | 74.31028 |      | 0.00000 | 0.00000    | 0.00000 |        | 1 |
| 848 | C | 67.77660 | 75.60731 | 73.28037 |      | 0.00000 | 0.00000    | 0.00000 |        | 1 |
| 849 | C | 68.84766 | 75.44894 | 72.01324 |      | 0.00000 | 0.00000    | 0.00000 |        | 1 |
| 850 | O | 68.59089 | 74.67991 | 71.11736 |      | 0.00000 | 0.00000    | 0.00000 |        | 1 |
| 851 | C | 66.51634 | 76.20106 | 72.65460 |      | 0.00000 | 0.00000    | 0.00000 |        | 1 |
| 852 | C | 65.33002 | 76.10534 | 73.59332 |      | 0.00000 | 0.00000    | 0.00000 |        | 1 |
| 853 | C | 66.71441 | 77.63133 | 72.19549 |      | 0.00000 | 0.00000    | 0.00000 |        | 1 |
| 854 | H | 68.59777 | 77.44269 | 74.16701 |      | 0.00000 | 0.00000    | 0.00000 |        | 1 |
| 855 | H | 67.59266 | 74.65435 | 73.83487 |      | 0.00000 | 0.00000    | 0.00000 |        | 1 |
| 856 | H | 66.28128 | 75.58722 | 71.75535 |      | 0.00000 | 0.00000    | 0.00000 |        | 1 |
| 857 | H | 65.11450 | 75.03847 | 73.88231 |      | 0.00000 | 0.00000    | 0.00000 |        | 1 |
| 858 | H | 65.51535 | 76.67604 | 74.54622 |      | 0.00000 | 0.00000    | 0.00000 |        | 1 |
| 859 | H | 64.39412 | 76.52274 | 73.12659 |      | 0.00000 | 0.00000    | 0.00000 |        | 1 |
| 860 | H | 65.83129 | 78.00593 | 71.60589 |      | 0.00000 | 0.00000    | 0.00000 |        | 1 |
| 861 | H | 66.85185 | 78.32874 | 73.06836 |      | 0.00000 | 0.00000    | 0.00000 |        | 1 |
| 862 | H | 67.62487 | 77.73311 | 71.54007 |      | 0.00000 | 0.00000    | 0.00000 |        | 1 |
| 863 | N | 69.87685 | 76.27458 | 72.11439 |      | 0.00000 | 0.00000    | 0.00000 |        | 1 |
| 864 | C | 70.86313 | 76.24256 | 71.09351 |      | 0.00000 | 0.00000    | 0.00000 |        | 1 |
| 865 | C | 72.34286 | 75.89036 | 71.70562 |      | 0.00000 | 0.00000    | 0.00000 |        | 1 |
| 866 | O | 73.28874 | 75.87014 | 70.95071 |      | 0.00000 | 0.00000    | 0.00000 |        | 1 |
| 867 | C | 71.00942 | 77.71424 | 70.50465 |      | 0.00000 | 0.00000    | 0.00000 |        | 1 |
| 868 | C | 71.58879 | 77.56675 | 69.06823 |      | 0.00000 | 0.00000    | 0.00000 |        | 1 |
| 869 | C | 70.42181 | 76.90177 | 68.19693 |      | 0.00000 | 0.00000    | 0.00000 |        | 1 |
| 870 | N | 70.77933 | 77.17785 | 66.87218 |      | 0.00000 | 0.00000    | 0.00000 |        | 1 |
| 871 | C | 70.04440 | 76.93683 | 65.86325 |      | 0.00000 | 0.00000    | 0.00000 |        | 1 |
| 872 | N | 68.79761 | 76.34444 | 66.09324 |      | 0.00000 | 0.00000    | 0.00000 |        | 1 |
| 873 | N | 70.66985 | 77.34138 | 64.67557 |      | 0.00000 | 0.00000    | 0.00000 |        | 1 |
| 874 | H | 69.91007 | 76.87182 | 72.93675 |      | 0.00000 | 0.00000    | 0.00000 |        | 1 |
| 875 | H | 70.48199 | 75.49155 | 70.36037 |      | 0.00000 | 0.00000    | 0.00000 |        | 1 |
| 876 | H | 70.03172 | 78.24607 | 70.49351 |      | 0.00000 | 0.00000    | 0.00000 |        | 1 |
| 877 | H | 71.68257 | 78.32747 | 71.14610 |      | 0.00000 | 0.00000    | 0.00000 |        | 1 |
| 878 | H | 71.89217 | 78.55320 | 68.65194 |      | 0.00000 | 0.00000    | 0.00000 |        | 1 |
| 879 | H | 72.50996 | 76.93542 | 69.08010 |      | 0.00000 | 0.00000    | 0.00000 |        | 1 |
| 880 | H | 70.31930 | 75.79171 | 68.30044 |      | 0.00000 | 0.00000    | 0.00000 |        | 1 |
| 881 | H | 69.40558 | 77.34659 | 68.33558 |      | 0.00000 | 0.00000    | 0.00000 |        | 1 |
| 882 | H | 71.68372 | 77.59742 | 66.72421 |      | 0.00000 | 0.00000    | 0.00000 |        | 1 |
| 883 | H | 68.36831 | 76.05497 | 66.97130 |      | 0.00000 | 0.00000    | 0.00000 |        | 1 |
| 884 | H | 68.12153 | 76.10830 | 65.36629 |      | 0.00000 | 0.00000    | 0.00000 |        | 1 |
| 885 | H | 71.58760 | 77.75208 | 64.51054 |      | 0.00000 | 0.00000    | 0.00000 |        | 1 |
| 886 | H | 70.25031 | 77.22206 | 63.75277 |      | 0.00000 | 0.00000    | 0.00000 |        | 1 |
| 887 | N | 72.31300 | 75.72602 | 73.02158 |      | 0.00000 | 0.00000    | 0.00000 |        | 1 |
| 888 | C | 73.49336 | 75.33651 | 73.70823 |      | 0.00000 | 0.00000    | 0.00000 |        | 1 |

|     |   |          |          |          |         |         |         |   |
|-----|---|----------|----------|----------|---------|---------|---------|---|
| 889 | C | 73.14569 | 73.95039 | 74.48458 | 0.00000 | 0.00000 | 0.00000 | 1 |
| 890 | O | 72.49927 | 73.08337 | 73.93861 | 0.00000 | 0.00000 | 0.00000 | 1 |
| 891 | C | 73.93341 | 76.51704 | 74.69606 | 0.00000 | 0.00000 | 0.00000 | 1 |
| 892 | C | 74.08971 | 77.84426 | 73.93360 | 0.00000 | 0.00000 | 0.00000 | 1 |
| 893 | C | 74.64076 | 77.87327 | 72.61685 | 0.00000 | 0.00000 | 0.00000 | 1 |
| 894 | C | 73.71182 | 79.06763 | 74.56401 | 0.00000 | 0.00000 | 0.00000 | 1 |
| 895 | C | 74.76977 | 79.09395 | 71.95079 | 0.00000 | 0.00000 | 0.00000 | 1 |
| 896 | C | 73.86623 | 80.26620 | 73.86571 | 0.00000 | 0.00000 | 0.00000 | 1 |
| 897 | C | 74.38971 | 80.33374 | 72.54188 | 0.00000 | 0.00000 | 0.00000 | 1 |
| 898 | O | 74.51604 | 81.57823 | 71.87100 | 0.00000 | 0.00000 | 0.00000 | 1 |
| 899 | H | 71.40437 | 75.75112 | 73.48152 | 0.00000 | 0.00000 | 0.00000 | 1 |
| 900 | H | 74.21154 | 75.19533 | 72.86732 | 0.00000 | 0.00000 | 0.00000 | 1 |
| 901 | H | 73.19450 | 76.63776 | 75.52008 | 0.00000 | 0.00000 | 0.00000 | 1 |
| 902 | H | 74.89864 | 76.25733 | 75.18821 | 0.00000 | 0.00000 | 0.00000 | 1 |
| 903 | H | 74.94341 | 76.93608 | 72.11349 | 0.00000 | 0.00000 | 0.00000 | 1 |
| 904 | H | 73.31263 | 79.06769 | 75.59323 | 0.00000 | 0.00000 | 0.00000 | 1 |
| 905 | H | 75.18241 | 79.08707 | 70.92661 | 0.00000 | 0.00000 | 0.00000 | 1 |
| 906 | H | 73.57332 | 81.20808 | 74.36115 | 0.00000 | 0.00000 | 0.00000 | 1 |
| 907 | H | 74.93159 | 81.27300 | 71.02992 | 0.00000 | 0.00000 | 0.00000 | 1 |
| 908 | N | 73.82051 | 73.85816 | 75.63530 | 0.00000 | 0.00000 | 0.00000 | 1 |
| 909 | C | 73.43787 | 72.81208 | 76.53566 | 0.00000 | 0.00000 | 0.00000 | 1 |
| 910 | C | 72.31367 | 73.36378 | 77.57363 | 0.00000 | 0.00000 | 0.00000 | 1 |
| 911 | O | 71.66534 | 74.37028 | 77.39121 | 0.00000 | 0.00000 | 0.00000 | 1 |
| 912 | C | 74.75992 | 72.27417 | 77.24658 | 0.00000 | 0.00000 | 0.00000 | 1 |
| 913 | O | 74.55068 | 71.11490 | 78.13429 | 0.00000 | 0.00000 | 0.00000 | 1 |
| 914 | C | 75.40931 | 73.52294 | 77.92768 | 0.00000 | 0.00000 | 0.00000 | 1 |
| 915 | H | 74.27247 | 74.70345 | 75.97525 | 0.00000 | 0.00000 | 0.00000 | 1 |
| 916 | H | 72.98857 | 72.06563 | 75.83699 | 0.00000 | 0.00000 | 0.00000 | 1 |
| 917 | H | 75.47382 | 71.91161 | 76.46169 | 0.00000 | 0.00000 | 0.00000 | 1 |
| 918 | H | 75.17759 | 70.49167 | 77.73504 | 0.00000 | 0.00000 | 0.00000 | 1 |
| 919 | H | 76.34841 | 73.24895 | 78.46511 | 0.00000 | 0.00000 | 0.00000 | 1 |
| 920 | H | 74.72186 | 73.99091 | 78.67394 | 0.00000 | 0.00000 | 0.00000 | 1 |
| 921 | H | 75.67474 | 74.31258 | 77.18713 | 0.00000 | 0.00000 | 0.00000 | 1 |
| 922 | N | 72.17635 | 72.45686 | 78.53419 | 0.00000 | 0.00000 | 0.00000 | 1 |
| 923 | C | 71.27084 | 72.72970 | 79.59240 | 0.00000 | 0.00000 | 0.00000 | 1 |
| 924 | C | 72.04555 | 73.40806 | 80.86778 | 0.00000 | 0.00000 | 0.00000 | 1 |
| 925 | O | 71.40504 | 73.87710 | 81.78108 | 0.00000 | 0.00000 | 0.00000 | 1 |
| 926 | C | 70.78401 | 71.34415 | 80.20410 | 0.00000 | 0.00000 | 0.00000 | 1 |
| 927 | C | 69.89491 | 70.54345 | 79.20209 | 0.00000 | 0.00000 | 0.00000 | 1 |
| 928 | C | 68.38809 | 70.99792 | 79.35700 | 0.00000 | 0.00000 | 0.00000 | 1 |
| 929 | C | 68.13937 | 72.29669 | 78.55516 | 0.00000 | 0.00000 | 0.00000 | 1 |
| 930 | N | 66.59485 | 72.55058 | 78.55893 | 0.00000 | 0.00000 | 0.00000 | 1 |
| 931 | H | 72.80388 | 71.63964 | 78.57067 | 0.00000 | 0.00000 | 0.00000 | 1 |
| 932 | H | 70.48832 | 73.39462 | 79.16164 | 0.00000 | 0.00000 | 0.00000 | 1 |
| 933 | H | 71.67798 | 70.73740 | 80.47282 | 0.00000 | 0.00000 | 0.00000 | 1 |
| 934 | H | 70.23532 | 71.51257 | 81.15740 | 0.00000 | 0.00000 | 0.00000 | 1 |
| 935 | H | 70.25345 | 70.67634 | 78.15640 | 0.00000 | 0.00000 | 0.00000 | 1 |
| 936 | H | 69.97795 | 69.45410 | 79.41763 | 0.00000 | 0.00000 | 0.00000 | 1 |
| 937 | H | 67.70815 | 70.19601 | 78.98848 | 0.00000 | 0.00000 | 0.00000 | 1 |
| 938 | H | 68.12696 | 71.13767 | 80.43134 | 0.00000 | 0.00000 | 0.00000 | 1 |
| 939 | H | 68.57152 | 73.21779 | 78.99378 | 0.00000 | 0.00000 | 0.00000 | 1 |
| 940 | H | 68.40193 | 72.22989 | 77.48017 | 0.00000 | 0.00000 | 0.00000 | 1 |
| 941 | H | 65.95706 | 71.71937 | 78.38728 | 0.00000 | 0.00000 | 0.00000 | 1 |
| 942 | H | 66.26169 | 73.23111 | 77.81706 | 0.00000 | 0.00000 | 0.00000 | 1 |
| 943 | H | 66.17440 | 72.97590 | 79.43575 | 0.00000 | 0.00000 | 0.00000 | 1 |
| 944 | N | 73.36038 | 73.18607 | 80.81300 | 0.00000 | 0.00000 | 0.00000 | 1 |
| 945 | C | 74.18645 | 73.98881 | 81.66551 | 0.00000 | 0.00000 | 0.00000 | 1 |
| 946 | C | 74.57459 | 75.35975 | 80.88084 | 0.00000 | 0.00000 | 0.00000 | 1 |
| 947 | O | 73.99563 | 75.76261 | 79.90101 | 0.00000 | 0.00000 | 0.00000 | 1 |
| 948 | C | 75.47720 | 73.13349 | 82.00904 | 0.00000 | 0.00000 | 0.00000 | 1 |
| 949 | C | 75.69086 | 73.15373 | 83.55711 | 0.00000 | 0.00000 | 0.00000 | 1 |
| 950 | C | 74.94828 | 71.91397 | 84.19933 | 0.00000 | 0.00000 | 0.00000 | 1 |

|      |   |          |          |          |         |         |         |   |
|------|---|----------|----------|----------|---------|---------|---------|---|
| 951  | C | 73.41380 | 72.06640 | 84.08620 | 0.00000 | 0.00000 | 0.00000 | 1 |
| 952  | N | 72.78215 | 70.79296 | 84.74434 | 0.00000 | 0.00000 | 0.00000 | 1 |
| 953  | H | 73.71098 | 72.77524 | 79.94848 | 0.00000 | 0.00000 | 0.00000 | 1 |
| 954  | H | 73.51426 | 74.18324 | 82.53405 | 0.00000 | 0.00000 | 0.00000 | 1 |
| 955  | H | 75.37683 | 72.08979 | 81.63645 | 0.00000 | 0.00000 | 0.00000 | 1 |
| 956  | H | 76.36628 | 73.55573 | 81.48812 | 0.00000 | 0.00000 | 0.00000 | 1 |
| 957  | H | 76.77737 | 73.10109 | 83.79252 | 0.00000 | 0.00000 | 0.00000 | 1 |
| 958  | H | 75.33051 | 74.10850 | 84.00189 | 0.00000 | 0.00000 | 0.00000 | 1 |
| 959  | H | 75.27870 | 70.96991 | 83.70872 | 0.00000 | 0.00000 | 0.00000 | 1 |
| 960  | H | 75.23624 | 71.80815 | 85.27057 | 0.00000 | 0.00000 | 0.00000 | 1 |
| 961  | H | 72.98998 | 72.91576 | 84.65842 | 0.00000 | 0.00000 | 0.00000 | 1 |
| 962  | H | 73.01752 | 72.07240 | 83.05017 | 0.00000 | 0.00000 | 0.00000 | 1 |
| 963  | H | 73.06597 | 70.57269 | 85.74334 | 0.00000 | 0.00000 | 0.00000 | 1 |
| 964  | H | 72.95124 | 69.86383 | 84.25972 | 0.00000 | 0.00000 | 0.00000 | 1 |
| 965  | H | 71.72477 | 70.79664 | 84.82520 | 0.00000 | 0.00000 | 0.00000 | 1 |
| 966  | N | 75.54480 | 75.97390 | 81.56437 | 0.00000 | 0.00000 | 0.00000 | 1 |
| 967  | C | 76.10803 | 77.25344 | 81.09545 | 0.00000 | 0.00000 | 0.00000 | 1 |
| 968  | C | 76.86300 | 76.96554 | 79.66554 | 0.00000 | 0.00000 | 0.00000 | 1 |
| 969  | O | 77.63547 | 76.03055 | 79.54699 | 0.00000 | 0.00000 | 0.00000 | 1 |
| 970  | C | 77.10022 | 77.71840 | 82.14556 | 0.00000 | 0.00000 | 0.00000 | 1 |
| 971  | C | 77.85920 | 78.95405 | 81.69754 | 0.00000 | 0.00000 | 0.00000 | 1 |
| 972  | C | 76.42764 | 77.97410 | 83.48214 | 0.00000 | 0.00000 | 0.00000 | 1 |
| 973  | H | 75.91679 | 75.46469 | 82.36363 | 0.00000 | 0.00000 | 0.00000 | 1 |
| 974  | H | 75.21500 | 77.91108 | 80.98531 | 0.00000 | 0.00000 | 0.00000 | 1 |
| 975  | H | 77.84549 | 76.90370 | 82.29010 | 0.00000 | 0.00000 | 0.00000 | 1 |
| 976  | H | 78.67566 | 79.22714 | 82.42483 | 0.00000 | 0.00000 | 0.00000 | 1 |
| 977  | H | 78.36401 | 78.79234 | 80.70149 | 0.00000 | 0.00000 | 0.00000 | 1 |
| 978  | H | 77.18329 | 79.84778 | 81.59512 | 0.00000 | 0.00000 | 0.00000 | 1 |
| 979  | H | 75.92633 | 77.04860 | 83.87844 | 0.00000 | 0.00000 | 0.00000 | 1 |
| 980  | H | 77.16311 | 78.31579 | 84.26116 | 0.00000 | 0.00000 | 0.00000 | 1 |
| 981  | H | 75.63485 | 78.76767 | 83.40133 | 0.00000 | 0.00000 | 0.00000 | 1 |
| 982  | N | 76.56373 | 77.91094 | 78.77243 | 0.00000 | 0.00000 | 0.00000 | 1 |
| 983  | C | 77.12964 | 77.87323 | 77.45378 | 0.00000 | 0.00000 | 0.00000 | 1 |
| 984  | C | 78.68697 | 78.38020 | 77.58582 | 0.00000 | 0.00000 | 0.00000 | 1 |
| 985  | O | 79.01976 | 79.50432 | 77.31047 | 0.00000 | 0.00000 | 0.00000 | 1 |
| 986  | C | 76.20500 | 78.86031 | 76.63334 | 0.00000 | 0.00000 | 0.00000 | 1 |
| 987  | C | 75.82646 | 79.91714 | 77.71954 | 0.00000 | 0.00000 | 0.00000 | 1 |
| 988  | C | 75.62305 | 78.99952 | 79.00010 | 0.00000 | 0.00000 | 0.00000 | 1 |
| 989  | H | 77.06993 | 76.80027 | 77.16673 | 0.00000 | 0.00000 | 0.00000 | 1 |
| 990  | H | 76.72070 | 79.30422 | 75.75136 | 0.00000 | 0.00000 | 0.00000 | 1 |
| 991  | H | 75.30234 | 78.33940 | 76.24450 | 0.00000 | 0.00000 | 0.00000 | 1 |
| 992  | H | 76.65970 | 80.63976 | 77.87091 | 0.00000 | 0.00000 | 0.00000 | 1 |
| 993  | H | 74.92504 | 80.51782 | 77.46187 | 0.00000 | 0.00000 | 0.00000 | 1 |
| 994  | H | 75.86376 | 79.48652 | 79.97339 | 0.00000 | 0.00000 | 0.00000 | 1 |
| 995  | H | 74.62193 | 78.51505 | 79.06774 | 0.00000 | 0.00000 | 0.00000 | 1 |
| 996  | N | 79.40388 | 77.36880 | 78.06202 | 0.00000 | 0.00000 | 0.00000 | 1 |
| 997  | C | 80.82203 | 77.51802 | 78.09249 | 0.00000 | 0.00000 | 0.00000 | 1 |
| 998  | C | 81.40672 | 76.96815 | 76.67078 | 0.00000 | 0.00000 | 0.00000 | 1 |
| 999  | O | 80.73011 | 76.89571 | 75.67343 | 0.00000 | 0.00000 | 0.00000 | 1 |
| 1000 | C | 81.32516 | 76.66181 | 79.33049 | 0.00000 | 0.00000 | 0.00000 | 1 |
| 1001 | C | 82.43467 | 77.44388 | 80.09653 | 0.00000 | 0.00000 | 0.00000 | 1 |
| 1002 | C | 81.69079 | 78.38036 | 81.12796 | 0.00000 | 0.00000 | 0.00000 | 1 |
| 1003 | O | 80.50581 | 78.31403 | 81.34314 | 0.00000 | 0.00000 | 0.00000 | 1 |
| 1004 | N | 82.57953 | 79.19675 | 81.72967 | 0.00000 | 0.00000 | 0.00000 | 1 |
| 1005 | H | 78.93749 | 76.48858 | 78.36352 | 0.00000 | 0.00000 | 0.00000 | 1 |
| 1006 | H | 80.93387 | 78.62300 | 78.19798 | 0.00000 | 0.00000 | 0.00000 | 1 |
| 1007 | H | 80.47654 | 76.44745 | 80.02371 | 0.00000 | 0.00000 | 0.00000 | 1 |
| 1008 | H | 81.70319 | 75.67229 | 78.98597 | 0.00000 | 0.00000 | 0.00000 | 1 |
| 1009 | H | 83.11732 | 76.74584 | 80.62954 | 0.00000 | 0.00000 | 0.00000 | 1 |
| 1010 | H | 83.09460 | 78.02434 | 79.41475 | 0.00000 | 0.00000 | 0.00000 | 1 |
| 1011 | H | 83.59527 | 79.24290 | 81.58360 | 0.00000 | 0.00000 | 0.00000 | 1 |
| 1012 | H | 82.35445 | 79.86463 | 82.47449 | 0.00000 | 0.00000 | 0.00000 | 1 |

|      |   |          |          |          |         |         |         |   |
|------|---|----------|----------|----------|---------|---------|---------|---|
| 1013 | N | 82.70288 | 76.66919 | 76.79551 | 0.00000 | 0.00000 | 0.00000 | 1 |
| 1014 | C | 83.51906 | 76.28867 | 75.64010 | 0.00000 | 0.00000 | 0.00000 | 1 |
| 1015 | C | 83.20446 | 74.72789 | 75.16991 | 0.00000 | 0.00000 | 0.00000 | 1 |
| 1016 | O | 83.74150 | 74.29519 | 74.17744 | 0.00000 | 0.00000 | 0.00000 | 1 |
| 1017 | C | 84.99664 | 76.30232 | 75.97811 | 0.00000 | 0.00000 | 0.00000 | 1 |
| 1018 | C | 85.56588 | 77.70742 | 76.03964 | 0.00000 | 0.00000 | 0.00000 | 1 |
| 1019 | C | 85.30664 | 75.55621 | 77.26252 | 0.00000 | 0.00000 | 0.00000 | 1 |
| 1020 | H | 83.09984 | 76.82194 | 77.71960 | 0.00000 | 0.00000 | 0.00000 | 1 |
| 1021 | H | 83.21937 | 77.01414 | 74.84685 | 0.00000 | 0.00000 | 0.00000 | 1 |
| 1022 | H | 85.51622 | 75.77020 | 75.14631 | 0.00000 | 0.00000 | 0.00000 | 1 |
| 1023 | H | 85.06149 | 78.32213 | 76.83547 | 0.00000 | 0.00000 | 0.00000 | 1 |
| 1024 | H | 86.66740 | 77.69813 | 76.27050 | 0.00000 | 0.00000 | 0.00000 | 1 |
| 1025 | H | 85.43345 | 78.25213 | 75.06384 | 0.00000 | 0.00000 | 0.00000 | 1 |
| 1026 | H | 84.67135 | 74.63270 | 77.36418 | 0.00000 | 0.00000 | 0.00000 | 1 |
| 1027 | H | 86.38252 | 75.22984 | 77.30531 | 0.00000 | 0.00000 | 0.00000 | 1 |
| 1028 | H | 85.11659 | 76.19276 | 78.17018 | 0.00000 | 0.00000 | 0.00000 | 1 |
| 1029 | N | 82.46109 | 74.06847 | 76.05154 | 0.00000 | 0.00000 | 0.00000 | 1 |
| 1030 | C | 81.89608 | 72.83644 | 75.62994 | 0.00000 | 0.00000 | 0.00000 | 1 |
| 1031 | C | 80.26984 | 73.01401 | 75.68547 | 0.00000 | 0.00000 | 0.00000 | 1 |
| 1032 | O | 79.70021 | 73.29804 | 76.71090 | 0.00000 | 0.00000 | 0.00000 | 1 |
| 1033 | C | 82.35220 | 71.78795 | 76.75314 | 0.00000 | 0.00000 | 0.00000 | 1 |
| 1034 | O | 81.94386 | 70.41599 | 76.54175 | 0.00000 | 0.00000 | 0.00000 | 1 |
| 1035 | H | 82.08433 | 74.62843 | 76.81408 | 0.00000 | 0.00000 | 0.00000 | 1 |
| 1036 | H | 82.31246 | 72.62919 | 74.61594 | 0.00000 | 0.00000 | 0.00000 | 1 |
| 1037 | H | 83.45975 | 71.90462 | 76.88119 | 0.00000 | 0.00000 | 0.00000 | 1 |
| 1038 | H | 81.88682 | 72.14806 | 77.71128 | 0.00000 | 0.00000 | 0.00000 | 1 |
| 1039 | H | 82.74831 | 70.06814 | 76.11474 | 0.00000 | 0.00000 | 0.00000 | 1 |
| 1040 | N | 79.77063 | 72.79903 | 74.48078 | 0.00000 | 0.00000 | 0.00000 | 1 |
| 1041 | C | 78.35429 | 72.83711 | 74.28520 | 0.00000 | 0.00000 | 0.00000 | 1 |
| 1042 | C | 78.22787 | 72.00530 | 72.91354 | 0.00000 | 0.00000 | 0.00000 | 1 |
| 1043 | O | 79.24854 | 71.73312 | 72.31180 | 0.00000 | 0.00000 | 0.00000 | 1 |
| 1044 | C | 77.85784 | 74.36641 | 74.08498 | 0.00000 | 0.00000 | 0.00000 | 1 |
| 1045 | O | 78.46939 | 75.10969 | 73.02669 | 0.00000 | 0.00000 | 0.00000 | 1 |
| 1046 | C | 77.98459 | 74.96369 | 75.53208 | 0.00000 | 0.00000 | 0.00000 | 1 |
| 1047 | H | 80.31207 | 72.54192 | 73.63547 | 0.00000 | 0.00000 | 0.00000 | 1 |
| 1048 | H | 77.89337 | 72.37329 | 75.18702 | 0.00000 | 0.00000 | 0.00000 | 1 |
| 1049 | H | 76.76413 | 74.32944 | 73.81608 | 0.00000 | 0.00000 | 0.00000 | 1 |
| 1050 | H | 77.70688 | 75.25625 | 72.42773 | 0.00000 | 0.00000 | 0.00000 | 1 |
| 1051 | H | 79.04131 | 75.26523 | 75.75322 | 0.00000 | 0.00000 | 0.00000 | 1 |
| 1052 | H | 77.66878 | 74.23366 | 76.31736 | 0.00000 | 0.00000 | 0.00000 | 1 |
| 1053 | H | 77.35313 | 75.87489 | 75.64751 | 0.00000 | 0.00000 | 0.00000 | 1 |
| 1054 | N | 76.96082 | 71.69540 | 72.62652 | 0.00000 | 0.00000 | 0.00000 | 1 |
| 1055 | C | 76.60958 | 71.08927 | 71.37541 | 0.00000 | 0.00000 | 0.00000 | 1 |
| 1056 | C | 76.52364 | 72.24582 | 70.21584 | 0.00000 | 0.00000 | 0.00000 | 1 |
| 1057 | O | 75.94636 | 73.29100 | 70.38825 | 0.00000 | 0.00000 | 0.00000 | 1 |
| 1058 | C | 75.15152 | 70.53666 | 71.65916 | 0.00000 | 0.00000 | 0.00000 | 1 |
| 1059 | C | 74.60297 | 71.60055 | 72.66006 | 0.00000 | 0.00000 | 0.00000 | 1 |
| 1060 | C | 75.87375 | 71.79896 | 73.59221 | 0.00000 | 0.00000 | 0.00000 | 1 |
| 1061 | H | 77.38570 | 70.32260 | 71.15285 | 0.00000 | 0.00000 | 0.00000 | 1 |
| 1062 | H | 74.53737 | 70.44784 | 70.73458 | 0.00000 | 0.00000 | 0.00000 | 1 |
| 1063 | H | 75.18026 | 69.52406 | 72.11992 | 0.00000 | 0.00000 | 0.00000 | 1 |
| 1064 | H | 74.33469 | 72.54646 | 72.13500 | 0.00000 | 0.00000 | 0.00000 | 1 |
| 1065 | H | 73.69431 | 71.27358 | 73.21731 | 0.00000 | 0.00000 | 0.00000 | 1 |
| 1066 | H | 75.92638 | 72.77767 | 74.12247 | 0.00000 | 0.00000 | 0.00000 | 1 |
| 1067 | H | 76.04265 | 70.97654 | 74.32739 | 0.00000 | 0.00000 | 0.00000 | 1 |
| 1068 | N | 77.09103 | 71.77053 | 69.11487 | 0.00000 | 0.00000 | 0.00000 | 1 |
| 1069 | C | 76.96985 | 72.48811 | 67.90113 | 0.00000 | 0.00000 | 0.00000 | 1 |
| 1070 | C | 75.82027 | 71.72583 | 67.00884 | 0.00000 | 0.00000 | 0.00000 | 1 |
| 1071 | O | 76.08580 | 70.98966 | 66.08917 | 0.00000 | 0.00000 | 0.00000 | 1 |
| 1072 | C | 78.40856 | 72.40407 | 67.18262 | 0.00000 | 0.00000 | 0.00000 | 1 |
| 1073 | O | 79.00391 | 71.10017 | 67.10475 | 0.00000 | 0.00000 | 0.00000 | 1 |
| 1074 | C | 79.19305 | 73.47228 | 68.02684 | 0.00000 | 0.00000 | 0.00000 | 1 |

|      |   |          |          |          |         |            |             |         |       |
|------|---|----------|----------|----------|---------|------------|-------------|---------|-------|
| 1075 | H | 77.53623 | 70.85377 | 69.09877 | 0.00000 | 0.00000    | 0.00000     | 1       |       |
| 1076 | H | 76.65039 | 73.50598 | 68.22378 | 0.00000 | 0.00000    | 0.00000     | 1       |       |
| 1077 | H | 78.29120 | 72.77623 | 66.12883 | 0.00000 | 0.00000    | 0.00000     | 1       |       |
| 1078 | H | 78.89392 | 70.89620 | 66.15313 | 0.00000 | 0.00000    | 0.00000     | 1       |       |
| 1079 | H | 78.70651 | 74.47491 | 67.98904 | 0.00000 | 0.00000    | 0.00000     | 1       |       |
| 1080 | H | 80.23962 | 73.59402 | 67.66289 | 0.00000 | 0.00000    | 0.00000     | 1       |       |
| 1081 | H | 79.24862 | 73.16968 | 69.09987 | 0.00000 | 0.00000    | 0.00000     | 1       |       |
| 1082 | N | 74.61775 | 71.98981 | 67.51961 | 0.00000 | 0.00000    | 0.00000     | 1       |       |
| 1083 | C | 73.52563 | 72.10129 | 66.36998 | 0.00000 | 0.00000    | 0.00000     | 1       |       |
| 1084 | C | 73.73184 | 73.19305 | 65.43914 | 0.00000 | 0.00000    | 0.00000     | 1       |       |
| 1085 | O | 73.90202 | 74.08334 | 64.68002 | 0.00000 | 0.00000    | 0.00000     | 1       |       |
| 1086 | C | 72.12253 | 72.29515 | 67.20347 | 0.00000 | 0.00000    | 0.00000     | 1       |       |
| 1087 | C | 70.98440 | 71.94772 | 66.30579 | 0.00000 | 0.00000    | 0.00000     | 1       |       |
| 1088 | C | 70.72887 | 70.44381 | 66.31334 | 0.00000 | 0.00000    | 0.00000     | 1       |       |
| 1089 | C | 69.72195 | 72.68649 | 66.74147 | 0.00000 | 0.00000    | 0.00000     | 1       |       |
| 1090 | H | 74.64516 | 72.68279 | 68.26344 | 0.00000 | 0.00000    | 0.00000     | 1       |       |
| 1091 | H | 73.66532 | 71.09211 | 65.90754 | 0.00000 | 0.00000    | 0.00000     | 1       |       |
| 1092 | H | 72.12560 | 71.66578 | 68.12172 | 0.00000 | 0.00000    | 0.00000     | 1       |       |
| 1093 | H | 72.04882 | 73.34814 | 67.55803 | 0.00000 | 0.00000    | 0.00000     | 1       |       |
| 1094 | H | 71.23306 | 72.26717 | 65.26720 | 0.00000 | 0.00000    | 0.00000     | 1       |       |
| 1095 | H | 70.41000 | 70.08598 | 67.32551 | 0.00000 | 0.00000    | 0.00000     | 1       |       |
| 1096 | H | 71.64649 | 69.86603 | 66.03356 | 0.00000 | 0.00000    | 0.00000     | 1       |       |
| 1097 | H | 69.92216 | 70.15612 | 65.59206 | 0.00000 | 0.00000    | 0.00000     | 1       |       |
| 1098 | H | 68.84212 | 72.41441 | 66.10479 | 0.00000 | 0.00000    | 0.00000     | 1       |       |
| 1099 | H | 69.85004 | 73.79772 | 66.67323 | 0.00000 | 0.00000    | 0.00000     | 1       |       |
| 1100 | H | 69.45124 | 72.44879 | 67.80194 | 0.00000 | 0.00000    | 0.00000     | 1       |       |
| 1101 |   | 273      |          |          |         |            |             |         |       |
| 1102 |   | 150.0000 | 150.0000 | 150.0000 | 0.0000  | 0.0000     | 0.0000***** | 2.5000  | 10000 |
|      |   | 0.2500   | 300.00   | 0.00     | 0.00    | -1291.3565 | 0.0000      | 0.0000  |       |
| 1103 | N | 68.28180 | 77.48947 | 77.66397 | 0.00000 | 0.00000    | 0.00000     | 0.00000 | 1     |
| 1104 | C | 68.90782 | 77.47184 | 76.45449 | 0.00000 | 0.00000    | 0.00000     | 0.00000 | 1     |
| 1105 | C | 68.27514 | 76.14462 | 75.58940 | 0.00000 | 0.00000    | 0.00000     | 0.00000 | 1     |
| 1106 | O | 67.96891 | 75.09550 | 76.10103 | 0.00000 | 0.00000    | 0.00000     | 0.00000 | 1     |
| 1107 | C | 70.50994 | 77.09534 | 76.68538 | 0.00000 | 0.00000    | 0.00000     | 0.00000 | 1     |
| 1108 | C | 71.08041 | 78.01470 | 77.69724 | 0.00000 | 0.00000    | 0.00000     | 0.00000 | 1     |
| 1109 | C | 72.38807 | 77.44161 | 78.24112 | 0.00000 | 0.00000    | 0.00000     | 0.00000 | 1     |
| 1110 | C | 71.31810 | 79.41250 | 77.13345 | 0.00000 | 0.00000    | 0.00000     | 0.00000 | 1     |
| 1111 | H | 68.27638 | 76.60848 | 78.14454 | 0.00000 | 0.00000    | 0.00000     | 0.00000 | 1     |
| 1112 | H | 68.74209 | 78.48138 | 75.99742 | 0.00000 | 0.00000    | 0.00000     | 0.00000 | 1     |
| 1113 | H | 70.61262 | 76.02729 | 77.02787 | 0.00000 | 0.00000    | 0.00000     | 0.00000 | 1     |
| 1114 | H | 71.05952 | 77.15702 | 75.72063 | 0.00000 | 0.00000    | 0.00000     | 0.00000 | 1     |
| 1115 | H | 70.36309 | 78.08893 | 78.54869 | 0.00000 | 0.00000    | 0.00000     | 0.00000 | 1     |
| 1116 | H | 73.21461 | 77.49128 | 77.48872 | 0.00000 | 0.00000    | 0.00000     | 0.00000 | 1     |
| 1117 | H | 72.27521 | 76.36217 | 78.53636 | 0.00000 | 0.00000    | 0.00000     | 0.00000 | 1     |
| 1118 | H | 72.73081 | 77.99612 | 79.15089 | 0.00000 | 0.00000    | 0.00000     | 0.00000 | 1     |
| 1119 | H | 72.25197 | 79.87401 | 77.54396 | 0.00000 | 0.00000    | 0.00000     | 0.00000 | 1     |
| 1120 | H | 70.47295 | 80.10432 | 77.37883 | 0.00000 | 0.00000    | 0.00000     | 0.00000 | 1     |
| 1121 | H | 71.41322 | 79.40005 | 76.01872 | 0.00000 | 0.00000    | 0.00000     | 0.00000 | 1     |
| 1122 | N | 68.31516 | 76.47394 | 74.31065 | 0.00000 | 0.00000    | 0.00000     | 0.00000 | 1     |
| 1123 | C | 67.77542 | 75.60695 | 73.28010 | 0.00000 | 0.00000    | 0.00000     | 0.00000 | 1     |
| 1124 | C | 68.84607 | 75.45185 | 72.01281 | 0.00000 | 0.00000    | 0.00000     | 0.00000 | 1     |
| 1125 | O | 68.58670 | 74.68879 | 71.11239 | 0.00000 | 0.00000    | 0.00000     | 0.00000 | 1     |
| 1126 | C | 66.51471 | 76.20123 | 72.65728 | 0.00000 | 0.00000    | 0.00000     | 0.00000 | 1     |
| 1127 | C | 65.33002 | 76.10808 | 73.59851 | 0.00000 | 0.00000    | 0.00000     | 0.00000 | 1     |
| 1128 | C | 66.71426 | 77.63109 | 72.19695 | 0.00000 | 0.00000    | 0.00000     | 0.00000 | 1     |
| 1129 | H | 68.59682 | 77.44077 | 74.16804 | 0.00000 | 0.00000    | 0.00000     | 0.00000 | 1     |
| 1130 | H | 67.59233 | 74.65246 | 73.83294 | 0.00000 | 0.00000    | 0.00000     | 0.00000 | 1     |
| 1131 | H | 66.27628 | 75.58752 | 71.75871 | 0.00000 | 0.00000    | 0.00000     | 0.00000 | 1     |
| 1132 | H | 65.11356 | 75.04174 | 73.88879 | 0.00000 | 0.00000    | 0.00000     | 0.00000 | 1     |
| 1133 | H | 65.51821 | 76.67921 | 74.55061 | 0.00000 | 0.00000    | 0.00000     | 0.00000 | 1     |
| 1134 | H | 64.39363 | 76.52647 | 73.13357 | 0.00000 | 0.00000    | 0.00000     | 0.00000 | 1     |
| 1135 | H | 65.82996 | 78.00800 | 71.61060 | 0.00000 | 0.00000    | 0.00000     | 0.00000 | 1     |



|      |   |          |          |          |         |         |         |   |
|------|---|----------|----------|----------|---------|---------|---------|---|
| 1136 | H | 66.85698 | 78.32828 | 73.06916 | 0.00000 | 0.00000 | 0.00000 | 1 |
| 1137 | H | 67.62257 | 77.73023 | 71.53812 | 0.00000 | 0.00000 | 0.00000 | 1 |
| 1138 | N | 69.87960 | 76.27160 | 72.11907 | 0.00000 | 0.00000 | 0.00000 | 1 |
| 1139 | C | 70.86401 | 76.24182 | 71.09616 | 0.00000 | 0.00000 | 0.00000 | 1 |
| 1140 | C | 72.34528 | 75.89142 | 71.70543 | 0.00000 | 0.00000 | 0.00000 | 1 |
| 1141 | O | 73.29121 | 75.87756 | 70.95055 | 0.00000 | 0.00000 | 0.00000 | 1 |
| 1142 | C | 71.00711 | 77.71368 | 70.50696 | 0.00000 | 0.00000 | 0.00000 | 1 |
| 1143 | C | 71.58679 | 77.56802 | 69.07045 | 0.00000 | 0.00000 | 0.00000 | 1 |
| 1144 | C | 70.42297 | 76.89943 | 68.19775 | 0.00000 | 0.00000 | 0.00000 | 1 |
| 1145 | N | 70.78235 | 77.17340 | 66.87304 | 0.00000 | 0.00000 | 0.00000 | 1 |
| 1146 | C | 70.04807 | 76.93191 | 65.86383 | 0.00000 | 0.00000 | 0.00000 | 1 |
| 1147 | N | 68.80030 | 76.34157 | 66.09394 | 0.00000 | 0.00000 | 0.00000 | 1 |
| 1148 | N | 70.67456 | 77.33351 | 64.67570 | 0.00000 | 0.00000 | 0.00000 | 1 |
| 1149 | H | 69.91596 | 76.86454 | 72.94446 | 0.00000 | 0.00000 | 0.00000 | 1 |
| 1150 | H | 70.48189 | 75.49095 | 70.36327 | 0.00000 | 0.00000 | 0.00000 | 1 |
| 1151 | H | 70.02827 | 78.24341 | 70.49601 | 0.00000 | 0.00000 | 0.00000 | 1 |
| 1152 | H | 71.67900 | 78.32833 | 71.14836 | 0.00000 | 0.00000 | 0.00000 | 1 |
| 1153 | H | 71.88721 | 78.55546 | 68.65439 | 0.00000 | 0.00000 | 0.00000 | 1 |
| 1154 | H | 72.51010 | 76.93974 | 69.08245 | 0.00000 | 0.00000 | 0.00000 | 1 |
| 1155 | H | 70.32264 | 75.78933 | 68.30302 | 0.00000 | 0.00000 | 0.00000 | 1 |
| 1156 | H | 69.40556 | 77.34234 | 68.33362 | 0.00000 | 0.00000 | 0.00000 | 1 |
| 1157 | H | 71.68753 | 77.59133 | 66.72531 | 0.00000 | 0.00000 | 0.00000 | 1 |
| 1158 | H | 68.37014 | 76.05404 | 66.97224 | 0.00000 | 0.00000 | 0.00000 | 1 |
| 1159 | H | 68.12430 | 76.10511 | 65.36702 | 0.00000 | 0.00000 | 0.00000 | 1 |
| 1160 | H | 71.59303 | 77.74246 | 64.51023 | 0.00000 | 0.00000 | 0.00000 | 1 |
| 1161 | H | 70.25525 | 77.21311 | 63.75290 | 0.00000 | 0.00000 | 0.00000 | 1 |
| 1162 | N | 72.31575 | 75.71959 | 73.02037 | 0.00000 | 0.00000 | 0.00000 | 1 |
| 1163 | C | 73.49722 | 75.33308 | 73.70664 | 0.00000 | 0.00000 | 0.00000 | 1 |
| 1164 | C | 73.14869 | 73.94901 | 74.48626 | 0.00000 | 0.00000 | 0.00000 | 1 |
| 1165 | O | 72.50227 | 73.08008 | 73.94284 | 0.00000 | 0.00000 | 0.00000 | 1 |
| 1166 | C | 73.93589 | 76.51321 | 74.69580 | 0.00000 | 0.00000 | 0.00000 | 1 |
| 1167 | C | 74.09171 | 77.84124 | 73.93478 | 0.00000 | 0.00000 | 0.00000 | 1 |
| 1168 | C | 74.64392 | 77.87273 | 72.61863 | 0.00000 | 0.00000 | 0.00000 | 1 |
| 1169 | C | 73.71181 | 79.06307 | 74.56688 | 0.00000 | 0.00000 | 0.00000 | 1 |
| 1170 | C | 74.77103 | 79.09448 | 71.95427 | 0.00000 | 0.00000 | 0.00000 | 1 |
| 1171 | C | 73.86442 | 80.26277 | 73.87024 | 0.00000 | 0.00000 | 0.00000 | 1 |
| 1172 | C | 74.38802 | 80.33277 | 72.54658 | 0.00000 | 0.00000 | 0.00000 | 1 |
| 1173 | O | 74.51201 | 81.57829 | 71.87723 | 0.00000 | 0.00000 | 0.00000 | 1 |
| 1174 | H | 71.40703 | 75.73774 | 73.48044 | 0.00000 | 0.00000 | 0.00000 | 1 |
| 1175 | H | 74.21620 | 75.19207 | 72.86646 | 0.00000 | 0.00000 | 0.00000 | 1 |
| 1176 | H | 73.19592 | 76.63247 | 75.51909 | 0.00000 | 0.00000 | 0.00000 | 1 |
| 1177 | H | 74.90086 | 76.25373 | 75.18872 | 0.00000 | 0.00000 | 0.00000 | 1 |
| 1178 | H | 74.94850 | 76.93643 | 72.11423 | 0.00000 | 0.00000 | 0.00000 | 1 |
| 1179 | H | 73.31259 | 79.06099 | 75.59607 | 0.00000 | 0.00000 | 0.00000 | 1 |
| 1180 | H | 75.18455 | 79.08969 | 70.93044 | 0.00000 | 0.00000 | 0.00000 | 1 |
| 1181 | H | 73.56985 | 81.20346 | 74.36691 | 0.00000 | 0.00000 | 0.00000 | 1 |
| 1182 | H | 74.92589 | 81.27453 | 71.03479 | 0.00000 | 0.00000 | 0.00000 | 1 |
| 1183 | N | 73.82184 | 73.86170 | 75.63846 | 0.00000 | 0.00000 | 0.00000 | 1 |
| 1184 | C | 73.44120 | 72.81553 | 76.53944 | 0.00000 | 0.00000 | 0.00000 | 1 |
| 1185 | C | 72.31599 | 73.36512 | 77.57705 | 0.00000 | 0.00000 | 0.00000 | 1 |
| 1186 | O | 71.66636 | 74.37099 | 77.39458 | 0.00000 | 0.00000 | 0.00000 | 1 |
| 1187 | C | 74.76535 | 72.28076 | 77.24976 | 0.00000 | 0.00000 | 0.00000 | 1 |
| 1188 | O | 74.55817 | 71.12152 | 78.13565 | 0.00000 | 0.00000 | 0.00000 | 1 |
| 1189 | C | 75.40992 | 73.53220 | 77.93093 | 0.00000 | 0.00000 | 0.00000 | 1 |
| 1190 | H | 74.27111 | 74.70930 | 75.97648 | 0.00000 | 0.00000 | 0.00000 | 1 |
| 1191 | H | 72.99365 | 72.06768 | 75.84112 | 0.00000 | 0.00000 | 0.00000 | 1 |
| 1192 | H | 75.48037 | 71.92240 | 76.46390 | 0.00000 | 0.00000 | 0.00000 | 1 |
| 1193 | H | 75.17890 | 70.49580 | 77.72972 | 0.00000 | 0.00000 | 0.00000 | 1 |
| 1194 | H | 76.34874 | 73.26180 | 78.47064 | 0.00000 | 0.00000 | 0.00000 | 1 |
| 1195 | H | 74.71951 | 73.99914 | 78.67516 | 0.00000 | 0.00000 | 0.00000 | 1 |
| 1196 | H | 75.67455 | 74.32170 | 77.18992 | 0.00000 | 0.00000 | 0.00000 | 1 |
| 1197 | N | 72.17848 | 72.45780 | 78.53727 | 0.00000 | 0.00000 | 0.00000 | 1 |

|      |   |          |          |          |         |         |         |   |
|------|---|----------|----------|----------|---------|---------|---------|---|
| 1198 | C | 71.27157 | 72.73103 | 79.59423 | 0.00000 | 0.00000 | 0.00000 | 1 |
| 1199 | C | 72.04665 | 73.40594 | 80.87116 | 0.00000 | 0.00000 | 0.00000 | 1 |
| 1200 | O | 71.40696 | 73.87128 | 81.78689 | 0.00000 | 0.00000 | 0.00000 | 1 |
| 1201 | C | 70.77998 | 71.34660 | 80.20478 | 0.00000 | 0.00000 | 0.00000 | 1 |
| 1202 | C | 69.89380 | 70.54528 | 79.20070 | 0.00000 | 0.00000 | 0.00000 | 1 |
| 1203 | C | 68.38599 | 70.99862 | 79.34935 | 0.00000 | 0.00000 | 0.00000 | 1 |
| 1204 | C | 68.13992 | 72.29916 | 78.54962 | 0.00000 | 0.00000 | 0.00000 | 1 |
| 1205 | N | 66.59610 | 72.55733 | 78.55535 | 0.00000 | 0.00000 | 0.00000 | 1 |
| 1206 | H | 72.80700 | 71.64158 | 78.57424 | 0.00000 | 0.00000 | 0.00000 | 1 |
| 1207 | H | 70.49140 | 73.39838 | 79.16276 | 0.00000 | 0.00000 | 0.00000 | 1 |
| 1208 | H | 71.67220 | 70.73906 | 80.47750 | 0.00000 | 0.00000 | 0.00000 | 1 |
| 1209 | H | 70.22802 | 71.51672 | 81.15589 | 0.00000 | 0.00000 | 0.00000 | 1 |
| 1210 | H | 70.25592 | 70.67720 | 78.15614 | 0.00000 | 0.00000 | 0.00000 | 1 |
| 1211 | H | 69.97641 | 69.45619 | 79.41765 | 0.00000 | 0.00000 | 0.00000 | 1 |
| 1212 | H | 67.70825 | 70.19721 | 78.97569 | 0.00000 | 0.00000 | 0.00000 | 1 |
| 1213 | H | 68.11958 | 71.13561 | 80.42276 | 0.00000 | 0.00000 | 0.00000 | 1 |
| 1214 | H | 68.57468 | 73.21836 | 78.98959 | 0.00000 | 0.00000 | 0.00000 | 1 |
| 1215 | H | 68.40148 | 72.23363 | 77.47429 | 0.00000 | 0.00000 | 0.00000 | 1 |
| 1216 | H | 65.95655 | 71.73145 | 78.36557 | 0.00000 | 0.00000 | 0.00000 | 1 |
| 1217 | H | 66.26660 | 73.25330 | 77.82628 | 0.00000 | 0.00000 | 0.00000 | 1 |
| 1218 | H | 66.17476 | 72.96615 | 79.43957 | 0.00000 | 0.00000 | 0.00000 | 1 |
| 1219 | N | 73.36171 | 73.18579 | 80.81353 | 0.00000 | 0.00000 | 0.00000 | 1 |
| 1220 | C | 74.18832 | 73.98842 | 81.66569 | 0.00000 | 0.00000 | 0.00000 | 1 |
| 1221 | C | 74.57261 | 75.36116 | 80.88236 | 0.00000 | 0.00000 | 0.00000 | 1 |
| 1222 | O | 73.98949 | 75.76655 | 79.90607 | 0.00000 | 0.00000 | 0.00000 | 1 |
| 1223 | C | 75.48027 | 73.13346 | 82.00573 | 0.00000 | 0.00000 | 0.00000 | 1 |
| 1224 | C | 75.69557 | 73.15211 | 83.55358 | 0.00000 | 0.00000 | 0.00000 | 1 |
| 1225 | C | 74.94990 | 71.91464 | 84.19669 | 0.00000 | 0.00000 | 0.00000 | 1 |
| 1226 | C | 73.41577 | 72.06872 | 84.08109 | 0.00000 | 0.00000 | 0.00000 | 1 |
| 1227 | N | 72.78103 | 70.79702 | 84.73958 | 0.00000 | 0.00000 | 0.00000 | 1 |
| 1228 | H | 73.71184 | 72.77791 | 79.94744 | 0.00000 | 0.00000 | 0.00000 | 1 |
| 1229 | H | 73.51752 | 74.18088 | 82.53572 | 0.00000 | 0.00000 | 0.00000 | 1 |
| 1230 | H | 75.38001 | 72.09017 | 81.63195 | 0.00000 | 0.00000 | 0.00000 | 1 |
| 1231 | H | 76.36833 | 73.55692 | 81.48406 | 0.00000 | 0.00000 | 0.00000 | 1 |
| 1232 | H | 76.78217 | 73.09604 | 83.78777 | 0.00000 | 0.00000 | 0.00000 | 1 |
| 1233 | H | 75.33868 | 74.10790 | 83.99895 | 0.00000 | 0.00000 | 0.00000 | 1 |
| 1234 | H | 75.27966 | 70.96929 | 83.70812 | 0.00000 | 0.00000 | 0.00000 | 1 |
| 1235 | H | 75.23617 | 71.81019 | 85.26851 | 0.00000 | 0.00000 | 0.00000 | 1 |
| 1236 | H | 72.99198 | 72.91941 | 84.65136 | 0.00000 | 0.00000 | 0.00000 | 1 |
| 1237 | H | 73.02113 | 72.07358 | 83.04443 | 0.00000 | 0.00000 | 0.00000 | 1 |
| 1238 | H | 73.05869 | 70.58023 | 85.74106 | 0.00000 | 0.00000 | 0.00000 | 1 |
| 1239 | H | 72.95354 | 69.86639 | 84.25906 | 0.00000 | 0.00000 | 0.00000 | 1 |
| 1240 | H | 71.72315 | 70.80046 | 84.81380 | 0.00000 | 0.00000 | 0.00000 | 1 |
| 1241 | N | 75.54439 | 75.97433 | 81.56464 | 0.00000 | 0.00000 | 0.00000 | 1 |
| 1242 | C | 76.10943 | 77.25244 | 81.09387 | 0.00000 | 0.00000 | 0.00000 | 1 |
| 1243 | C | 76.86157 | 76.96263 | 79.66298 | 0.00000 | 0.00000 | 0.00000 | 1 |
| 1244 | O | 77.63183 | 76.02574 | 79.54364 | 0.00000 | 0.00000 | 0.00000 | 1 |
| 1245 | C | 77.10469 | 77.71482 | 82.14229 | 0.00000 | 0.00000 | 0.00000 | 1 |
| 1246 | C | 77.86920 | 78.94578 | 81.69058 | 0.00000 | 0.00000 | 0.00000 | 1 |
| 1247 | C | 76.43374 | 77.97559 | 83.47863 | 0.00000 | 0.00000 | 0.00000 | 1 |
| 1248 | H | 75.92060 | 75.46245 | 82.36023 | 0.00000 | 0.00000 | 0.00000 | 1 |
| 1249 | H | 75.21775 | 77.91216 | 80.98520 | 0.00000 | 0.00000 | 0.00000 | 1 |
| 1250 | H | 77.84621 | 76.89685 | 82.28781 | 0.00000 | 0.00000 | 0.00000 | 1 |
| 1251 | H | 78.69268 | 79.21163 | 82.41286 | 0.00000 | 0.00000 | 0.00000 | 1 |
| 1252 | H | 78.36385 | 78.78252 | 80.68936 | 0.00000 | 0.00000 | 0.00000 | 1 |
| 1253 | H | 77.19989 | 79.84523 | 81.59670 | 0.00000 | 0.00000 | 0.00000 | 1 |
| 1254 | H | 75.92771 | 77.05296 | 83.87569 | 0.00000 | 0.00000 | 0.00000 | 1 |
| 1255 | H | 77.17085 | 78.31433 | 84.25741 | 0.00000 | 0.00000 | 0.00000 | 1 |
| 1256 | H | 75.64482 | 78.77297 | 83.39701 | 0.00000 | 0.00000 | 0.00000 | 1 |
| 1257 | N | 76.56312 | 77.90857 | 78.77031 | 0.00000 | 0.00000 | 0.00000 | 1 |
| 1258 | C | 77.12856 | 77.87130 | 77.45143 | 0.00000 | 0.00000 | 0.00000 | 1 |
| 1259 | C | 78.68582 | 78.37844 | 77.58329 | 0.00000 | 0.00000 | 0.00000 | 1 |

|      |   |          |          |          |         |         |         |   |
|------|---|----------|----------|----------|---------|---------|---------|---|
| 1260 | O | 79.02075 | 79.50126 | 77.30493 | 0.00000 | 0.00000 | 0.00000 | 1 |
| 1261 | C | 76.20290 | 78.85807 | 76.63182 | 0.00000 | 0.00000 | 0.00000 | 1 |
| 1262 | C | 75.82609 | 79.91534 | 77.71818 | 0.00000 | 0.00000 | 0.00000 | 1 |
| 1263 | C | 75.62340 | 78.99783 | 78.99892 | 0.00000 | 0.00000 | 0.00000 | 1 |
| 1264 | H | 77.06906 | 76.79835 | 77.16428 | 0.00000 | 0.00000 | 0.00000 | 1 |
| 1265 | H | 76.71713 | 79.30147 | 75.74874 | 0.00000 | 0.00000 | 0.00000 | 1 |
| 1266 | H | 75.29963 | 78.33687 | 76.24486 | 0.00000 | 0.00000 | 0.00000 | 1 |
| 1267 | H | 76.65989 | 80.63750 | 77.86865 | 0.00000 | 0.00000 | 0.00000 | 1 |
| 1268 | H | 74.92474 | 80.51648 | 77.46135 | 0.00000 | 0.00000 | 0.00000 | 1 |
| 1269 | H | 75.86541 | 79.48465 | 79.97202 | 0.00000 | 0.00000 | 0.00000 | 1 |
| 1270 | H | 74.62208 | 78.51387 | 79.06751 | 0.00000 | 0.00000 | 0.00000 | 1 |
| 1271 | N | 79.40103 | 77.36811 | 78.06413 | 0.00000 | 0.00000 | 0.00000 | 1 |
| 1272 | C | 80.81937 | 77.51531 | 78.09343 | 0.00000 | 0.00000 | 0.00000 | 1 |
| 1273 | C | 81.40137 | 76.95683 | 76.67390 | 0.00000 | 0.00000 | 0.00000 | 1 |
| 1274 | O | 80.72063 | 76.86913 | 75.68039 | 0.00000 | 0.00000 | 0.00000 | 1 |
| 1275 | C | 81.32135 | 76.66161 | 79.33374 | 0.00000 | 0.00000 | 0.00000 | 1 |
| 1276 | C | 82.43139 | 77.44355 | 80.09874 | 0.00000 | 0.00000 | 0.00000 | 1 |
| 1277 | C | 81.68898 | 78.38271 | 81.12818 | 0.00000 | 0.00000 | 0.00000 | 1 |
| 1278 | O | 80.50403 | 78.31579 | 81.34433 | 0.00000 | 0.00000 | 0.00000 | 1 |
| 1279 | N | 82.57786 | 79.20123 | 81.72672 | 0.00000 | 0.00000 | 0.00000 | 1 |
| 1280 | H | 78.93421 | 76.48790 | 78.36555 | 0.00000 | 0.00000 | 0.00000 | 1 |
| 1281 | H | 80.93344 | 78.62069 | 78.19439 | 0.00000 | 0.00000 | 0.00000 | 1 |
| 1282 | H | 80.47194 | 76.44880 | 80.02656 | 0.00000 | 0.00000 | 0.00000 | 1 |
| 1283 | H | 81.69854 | 75.67104 | 78.99151 | 0.00000 | 0.00000 | 0.00000 | 1 |
| 1284 | H | 83.11280 | 76.74573 | 80.63362 | 0.00000 | 0.00000 | 0.00000 | 1 |
| 1285 | H | 83.09234 | 78.02255 | 79.41674 | 0.00000 | 0.00000 | 0.00000 | 1 |
| 1286 | H | 83.59320 | 79.24627 | 81.57823 | 0.00000 | 0.00000 | 0.00000 | 1 |
| 1287 | H | 82.35381 | 79.87164 | 82.46952 | 0.00000 | 0.00000 | 0.00000 | 1 |
| 1288 | N | 82.69914 | 76.66512 | 76.79764 | 0.00000 | 0.00000 | 0.00000 | 1 |
| 1289 | C | 83.51723 | 76.28780 | 75.64237 | 0.00000 | 0.00000 | 0.00000 | 1 |
| 1290 | C | 83.20455 | 74.72688 | 75.17218 | 0.00000 | 0.00000 | 0.00000 | 1 |
| 1291 | O | 83.74329 | 74.29382 | 74.18085 | 0.00000 | 0.00000 | 0.00000 | 1 |
| 1292 | C | 84.99468 | 76.30480 | 75.98054 | 0.00000 | 0.00000 | 0.00000 | 1 |
| 1293 | C | 85.56093 | 77.71108 | 76.04321 | 0.00000 | 0.00000 | 0.00000 | 1 |
| 1294 | C | 85.30668 | 75.55825 | 77.26422 | 0.00000 | 0.00000 | 0.00000 | 1 |
| 1295 | H | 83.09701 | 76.82988 | 77.71929 | 0.00000 | 0.00000 | 0.00000 | 1 |
| 1296 | H | 83.21645 | 77.01331 | 74.84962 | 0.00000 | 0.00000 | 0.00000 | 1 |
| 1297 | H | 85.51585 | 75.77474 | 75.14840 | 0.00000 | 0.00000 | 0.00000 | 1 |
| 1298 | H | 85.05545 | 78.32418 | 76.83954 | 0.00000 | 0.00000 | 0.00000 | 1 |
| 1299 | H | 86.66251 | 77.70390 | 76.27393 | 0.00000 | 0.00000 | 0.00000 | 1 |
| 1300 | H | 85.42741 | 78.25624 | 75.06782 | 0.00000 | 0.00000 | 0.00000 | 1 |
| 1301 | H | 84.68592 | 74.62398 | 77.35675 | 0.00000 | 0.00000 | 0.00000 | 1 |
| 1302 | H | 86.38745 | 75.24955 | 77.31433 | 0.00000 | 0.00000 | 0.00000 | 1 |
| 1303 | H | 85.09886 | 76.18748 | 78.17306 | 0.00000 | 0.00000 | 0.00000 | 1 |
| 1304 | N | 82.45993 | 74.06775 | 76.05320 | 0.00000 | 0.00000 | 0.00000 | 1 |
| 1305 | C | 81.89190 | 72.83753 | 75.63050 | 0.00000 | 0.00000 | 0.00000 | 1 |
| 1306 | C | 80.26603 | 73.01851 | 75.68877 | 0.00000 | 0.00000 | 0.00000 | 1 |
| 1307 | O | 79.69999 | 73.30661 | 76.71498 | 0.00000 | 0.00000 | 0.00000 | 1 |
| 1308 | C | 82.34828 | 71.78747 | 76.75211 | 0.00000 | 0.00000 | 0.00000 | 1 |
| 1309 | O | 81.93878 | 70.41602 | 76.53966 | 0.00000 | 0.00000 | 0.00000 | 1 |
| 1310 | H | 82.08201 | 74.62831 | 76.81476 | 0.00000 | 0.00000 | 0.00000 | 1 |
| 1311 | H | 82.30660 | 72.63062 | 74.61580 | 0.00000 | 0.00000 | 0.00000 | 1 |
| 1312 | H | 83.45603 | 71.90330 | 76.87924 | 0.00000 | 0.00000 | 0.00000 | 1 |
| 1313 | H | 81.88405 | 72.14711 | 77.71099 | 0.00000 | 0.00000 | 0.00000 | 1 |
| 1314 | H | 82.74270 | 70.06798 | 76.11176 | 0.00000 | 0.00000 | 0.00000 | 1 |
| 1315 | N | 79.76508 | 72.80273 | 74.48507 | 0.00000 | 0.00000 | 0.00000 | 1 |
| 1316 | C | 78.34905 | 72.83962 | 74.28758 | 0.00000 | 0.00000 | 0.00000 | 1 |
| 1317 | C | 78.22444 | 72.00425 | 72.91809 | 0.00000 | 0.00000 | 0.00000 | 1 |
| 1318 | O | 79.24606 | 71.72886 | 72.31924 | 0.00000 | 0.00000 | 0.00000 | 1 |
| 1319 | C | 77.85236 | 74.36832 | 74.08387 | 0.00000 | 0.00000 | 0.00000 | 1 |
| 1320 | O | 78.45576 | 75.10327 | 73.01501 | 0.00000 | 0.00000 | 0.00000 | 1 |
| 1321 | C | 77.99388 | 74.97518 | 75.52559 | 0.00000 | 0.00000 | 0.00000 | 1 |

|      |   |          |          |          |         |         |             |         |        |
|------|---|----------|----------|----------|---------|---------|-------------|---------|--------|
| 1322 | H | 80.30683 | 72.54274 | 73.64070 | 0.00000 | 0.00000 | 0.00000     | 1       |        |
| 1323 | H | 77.88802 | 72.37808 | 75.19046 | 0.00000 | 0.00000 | 0.00000     | 1       |        |
| 1324 | H | 76.75621 | 74.33076 | 73.82521 | 0.00000 | 0.00000 | 0.00000     | 1       |        |
| 1325 | H | 77.68938 | 75.24177 | 72.41902 | 0.00000 | 0.00000 | 0.00000     | 1       |        |
| 1326 | H | 79.05524 | 75.26961 | 75.73858 | 0.00000 | 0.00000 | 0.00000     | 1       |        |
| 1327 | H | 77.67654 | 74.25365 | 76.31816 | 0.00000 | 0.00000 | 0.00000     | 1       |        |
| 1328 | H | 77.37050 | 75.89241 | 75.63799 | 0.00000 | 0.00000 | 0.00000     | 1       |        |
| 1329 | N | 76.95771 | 71.69500 | 72.62891 | 0.00000 | 0.00000 | 0.00000     | 1       |        |
| 1330 | C | 76.60965 | 71.08816 | 71.37723 | 0.00000 | 0.00000 | 0.00000     | 1       |        |
| 1331 | C | 76.52369 | 72.24428 | 70.21719 | 0.00000 | 0.00000 | 0.00000     | 1       |        |
| 1332 | O | 75.94350 | 73.28804 | 70.38853 | 0.00000 | 0.00000 | 0.00000     | 1       |        |
| 1333 | C | 75.15157 | 70.53427 | 71.65824 | 0.00000 | 0.00000 | 0.00000     | 1       |        |
| 1334 | C | 74.60007 | 71.59798 | 72.65763 | 0.00000 | 0.00000 | 0.00000     | 1       |        |
| 1335 | C | 75.86861 | 71.79886 | 73.59224 | 0.00000 | 0.00000 | 0.00000     | 1       |        |
| 1336 | H | 77.38719 | 70.32240 | 71.15648 | 0.00000 | 0.00000 | 0.00000     | 1       |        |
| 1337 | H | 74.53938 | 70.44455 | 70.73243 | 0.00000 | 0.00000 | 0.00000     | 1       |        |
| 1338 | H | 75.18027 | 69.52197 | 72.11963 | 0.00000 | 0.00000 | 0.00000     | 1       |        |
| 1339 | H | 74.33131 | 72.54341 | 72.13183 | 0.00000 | 0.00000 | 0.00000     | 1       |        |
| 1340 | H | 73.69104 | 71.26923 | 73.21308 | 0.00000 | 0.00000 | 0.00000     | 1       |        |
| 1341 | H | 75.91927 | 72.77834 | 74.12134 | 0.00000 | 0.00000 | 0.00000     | 1       |        |
| 1342 | H | 76.03659 | 70.97763 | 74.32893 | 0.00000 | 0.00000 | 0.00000     | 1       |        |
| 1343 | N | 77.09469 | 71.77060 | 69.11739 | 0.00000 | 0.00000 | 0.00000     | 1       |        |
| 1344 | C | 76.97135 | 72.48709 | 67.90312 | 0.00000 | 0.00000 | 0.00000     | 1       |        |
| 1345 | C | 75.81960 | 71.72473 | 67.01366 | 0.00000 | 0.00000 | 0.00000     | 1       |        |
| 1346 | O | 76.08305 | 70.98677 | 66.09475 | 0.00000 | 0.00000 | 0.00000     | 1       |        |
| 1347 | C | 78.40904 | 72.40344 | 67.18275 | 0.00000 | 0.00000 | 0.00000     | 1       |        |
| 1348 | O | 79.00451 | 71.09968 | 67.10316 | 0.00000 | 0.00000 | 0.00000     | 1       |        |
| 1349 | C | 79.19387 | 73.47138 | 68.02707 | 0.00000 | 0.00000 | 0.00000     | 1       |        |
| 1350 | H | 77.54184 | 70.85475 | 69.10191 | 0.00000 | 0.00000 | 0.00000     | 1       |        |
| 1351 | H | 76.65212 | 73.50509 | 68.22550 | 0.00000 | 0.00000 | 0.00000     | 1       |        |
| 1352 | H | 78.29026 | 72.77623 | 66.12933 | 0.00000 | 0.00000 | 0.00000     | 1       |        |
| 1353 | H | 78.88928 | 70.89451 | 66.15242 | 0.00000 | 0.00000 | 0.00000     | 1       |        |
| 1354 | H | 78.70452 | 74.47281 | 67.99381 | 0.00000 | 0.00000 | 0.00000     | 1       |        |
| 1355 | H | 80.23885 | 73.59697 | 67.65992 | 0.00000 | 0.00000 | 0.00000     | 1       |        |
| 1356 | H | 79.25384 | 73.16599 | 69.09907 | 0.00000 | 0.00000 | 0.00000     | 1       |        |
| 1357 | N | 74.61786 | 71.99113 | 67.52520 | 0.00000 | 0.00000 | 0.00000     | 1       |        |
| 1358 | C | 73.52577 | 72.10670 | 66.37516 | 0.00000 | 0.00000 | 0.00000     | 1       |        |
| 1359 | C | 73.73538 | 73.20086 | 65.44806 | 0.00000 | 0.00000 | 0.00000     | 1       |        |
| 1360 | O | 73.90598 | 74.09303 | 64.69093 | 0.00000 | 0.00000 | 0.00000     | 1       |        |
| 1361 | C | 72.12157 | 72.29988 | 67.20644 | 0.00000 | 0.00000 | 0.00000     | 1       |        |
| 1362 | C | 70.98474 | 71.95282 | 66.30714 | 0.00000 | 0.00000 | 0.00000     | 1       |        |
| 1363 | C | 70.72940 | 70.44911 | 66.31210 | 0.00000 | 0.00000 | 0.00000     | 1       |        |
| 1364 | C | 69.72083 | 72.68918 | 66.74180 | 0.00000 | 0.00000 | 0.00000     | 1       |        |
| 1365 | H | 74.64815 | 72.68489 | 68.26815 | 0.00000 | 0.00000 | 0.00000     | 1       |        |
| 1366 | H | 73.66609 | 71.09850 | 65.91081 | 0.00000 | 0.00000 | 0.00000     | 1       |        |
| 1367 | H | 72.12334 | 71.67014 | 68.12446 | 0.00000 | 0.00000 | 0.00000     | 1       |        |
| 1368 | H | 72.04725 | 73.35274 | 67.56136 | 0.00000 | 0.00000 | 0.00000     | 1       |        |
| 1369 | H | 71.23460 | 72.27406 | 65.26925 | 0.00000 | 0.00000 | 0.00000     | 1       |        |
| 1370 | H | 70.41347 | 70.08898 | 67.32445 | 0.00000 | 0.00000 | 0.00000     | 1       |        |
| 1371 | H | 71.64598 | 69.87159 | 66.02822 | 0.00000 | 0.00000 | 0.00000     | 1       |        |
| 1372 | H | 69.92034 | 70.16301 | 65.59273 | 0.00000 | 0.00000 | 0.00000     | 1       |        |
| 1373 | H | 68.84223 | 72.41628 | 66.10368 | 0.00000 | 0.00000 | 0.00000     | 1       |        |
| 1374 | H | 69.84686 | 73.80076 | 66.67493 | 0.00000 | 0.00000 | 0.00000     | 1       |        |
| 1375 | H | 69.44883 | 72.44988 | 67.80164 | 0.00000 | 0.00000 | 0.00000     | 1       |        |
| 1376 |   | 273      |          |          |         |         |             |         |        |
| 1377 |   | 150.0000 | 150.0000 | 150.0000 | 0.0000  | 0.0000  | 0.0000***** | 3.0000  | 12000  |
|      |   | 0.2500   | 300.00   | 0.00     | 0.00    | 0.00    | -1291.3801  | 0.0000  | 0.0000 |
| 1378 | N | 68.28269 | 77.48574 | 77.66511 | 0.00000 | 0.00000 | 0.00000     | 0.00000 | 1      |
| 1379 | C | 68.90706 | 77.46954 | 76.45478 | 0.00000 | 0.00000 | 0.00000     | 0.00000 | 1      |
| 1380 | C | 68.27424 | 76.14251 | 75.58955 | 0.00000 | 0.00000 | 0.00000     | 0.00000 | 1      |
| 1381 | O | 67.96802 | 75.09319 | 76.10074 | 0.00000 | 0.00000 | 0.00000     | 0.00000 | 1      |
| 1382 | C | 70.50970 | 77.09322 | 76.68221 | 0.00000 | 0.00000 | 0.00000     | 0.00000 | 1      |

|      |   |          |          |          |         |         |         |   |
|------|---|----------|----------|----------|---------|---------|---------|---|
| 1383 | C | 71.08169 | 78.01074 | 77.69490 | 0.00000 | 0.00000 | 0.00000 | 1 |
| 1384 | C | 72.39056 | 77.43680 | 78.23485 | 0.00000 | 0.00000 | 0.00000 | 1 |
| 1385 | C | 71.31649 | 79.40974 | 77.13289 | 0.00000 | 0.00000 | 0.00000 | 1 |
| 1386 | H | 68.27674 | 76.60384 | 78.14401 | 0.00000 | 0.00000 | 0.00000 | 1 |
| 1387 | H | 68.74036 | 78.47941 | 75.99878 | 0.00000 | 0.00000 | 0.00000 | 1 |
| 1388 | H | 70.61348 | 76.02459 | 77.02273 | 0.00000 | 0.00000 | 0.00000 | 1 |
| 1389 | H | 71.05760 | 77.15689 | 75.71661 | 0.00000 | 0.00000 | 0.00000 | 1 |
| 1390 | H | 70.36616 | 78.08283 | 78.54804 | 0.00000 | 0.00000 | 0.00000 | 1 |
| 1391 | H | 73.21651 | 77.49167 | 77.48222 | 0.00000 | 0.00000 | 0.00000 | 1 |
| 1392 | H | 72.27964 | 76.35547 | 78.52479 | 0.00000 | 0.00000 | 0.00000 | 1 |
| 1393 | H | 72.73308 | 77.98717 | 79.14722 | 0.00000 | 0.00000 | 0.00000 | 1 |
| 1394 | H | 72.24351 | 79.87706 | 77.55225 | 0.00000 | 0.00000 | 0.00000 | 1 |
| 1395 | H | 70.46471 | 80.09643 | 77.36958 | 0.00000 | 0.00000 | 0.00000 | 1 |
| 1396 | H | 71.42240 | 79.39744 | 76.01915 | 0.00000 | 0.00000 | 0.00000 | 1 |
| 1397 | N | 68.31489 | 76.47244 | 74.31097 | 0.00000 | 0.00000 | 0.00000 | 1 |
| 1398 | C | 67.77478 | 75.60649 | 73.27978 | 0.00000 | 0.00000 | 0.00000 | 1 |
| 1399 | C | 68.84519 | 75.45352 | 72.01212 | 0.00000 | 0.00000 | 0.00000 | 1 |
| 1400 | O | 68.58396 | 74.69414 | 71.10910 | 0.00000 | 0.00000 | 0.00000 | 1 |
| 1401 | C | 66.51354 | 76.20150 | 72.65877 | 0.00000 | 0.00000 | 0.00000 | 1 |
| 1402 | C | 65.33014 | 76.10986 | 73.60177 | 0.00000 | 0.00000 | 0.00000 | 1 |
| 1403 | C | 66.71403 | 77.63104 | 72.19779 | 0.00000 | 0.00000 | 0.00000 | 1 |
| 1404 | H | 68.59644 | 77.43940 | 74.16880 | 0.00000 | 0.00000 | 0.00000 | 1 |
| 1405 | H | 67.59210 | 74.65127 | 73.83153 | 0.00000 | 0.00000 | 0.00000 | 1 |
| 1406 | H | 66.27315 | 75.58779 | 71.76073 | 0.00000 | 0.00000 | 0.00000 | 1 |
| 1407 | H | 65.11312 | 75.04384 | 73.89288 | 0.00000 | 0.00000 | 0.00000 | 1 |
| 1408 | H | 65.52021 | 76.68125 | 74.55335 | 0.00000 | 0.00000 | 0.00000 | 1 |
| 1409 | H | 64.39343 | 76.52887 | 73.13802 | 0.00000 | 0.00000 | 0.00000 | 1 |
| 1410 | H | 65.82892 | 78.00923 | 71.61350 | 0.00000 | 0.00000 | 0.00000 | 1 |
| 1411 | H | 66.85995 | 78.32810 | 73.06958 | 0.00000 | 0.00000 | 0.00000 | 1 |
| 1412 | H | 67.62095 | 77.72868 | 71.53681 | 0.00000 | 0.00000 | 0.00000 | 1 |
| 1413 | N | 69.88135 | 76.26955 | 72.12151 | 0.00000 | 0.00000 | 0.00000 | 1 |
| 1414 | C | 70.86487 | 76.24120 | 71.09763 | 0.00000 | 0.00000 | 0.00000 | 1 |
| 1415 | C | 72.34684 | 75.89194 | 71.70566 | 0.00000 | 0.00000 | 0.00000 | 1 |
| 1416 | O | 73.29273 | 75.88108 | 70.95072 | 0.00000 | 0.00000 | 0.00000 | 1 |
| 1417 | C | 71.00577 | 77.71318 | 70.50826 | 0.00000 | 0.00000 | 0.00000 | 1 |
| 1418 | C | 71.58545 | 77.56909 | 69.07155 | 0.00000 | 0.00000 | 0.00000 | 1 |
| 1419 | C | 70.42348 | 76.89803 | 68.19835 | 0.00000 | 0.00000 | 0.00000 | 1 |
| 1420 | N | 70.78419 | 77.17055 | 66.87370 | 0.00000 | 0.00000 | 0.00000 | 1 |
| 1421 | C | 70.05032 | 76.92870 | 65.86423 | 0.00000 | 0.00000 | 0.00000 | 1 |
| 1422 | N | 68.80188 | 76.33967 | 66.09435 | 0.00000 | 0.00000 | 0.00000 | 1 |
| 1423 | N | 70.67764 | 77.32842 | 64.67588 | 0.00000 | 0.00000 | 0.00000 | 1 |
| 1424 | H | 69.91933 | 76.85973 | 72.94882 | 0.00000 | 0.00000 | 0.00000 | 1 |
| 1425 | H | 70.48233 | 75.49046 | 70.36486 | 0.00000 | 0.00000 | 0.00000 | 1 |
| 1426 | H | 70.02612 | 78.24141 | 70.49757 | 0.00000 | 0.00000 | 0.00000 | 1 |
| 1427 | H | 71.67670 | 78.32882 | 71.14971 | 0.00000 | 0.00000 | 0.00000 | 1 |
| 1428 | H | 71.88358 | 78.55734 | 68.65577 | 0.00000 | 0.00000 | 0.00000 | 1 |
| 1429 | H | 72.51020 | 76.94301 | 69.08291 | 0.00000 | 0.00000 | 0.00000 | 1 |
| 1430 | H | 70.32471 | 75.78790 | 68.30487 | 0.00000 | 0.00000 | 0.00000 | 1 |
| 1431 | H | 69.40528 | 77.33964 | 68.33255 | 0.00000 | 0.00000 | 0.00000 | 1 |
| 1432 | H | 71.68987 | 77.58741 | 66.72614 | 0.00000 | 0.00000 | 0.00000 | 1 |
| 1433 | H | 68.37113 | 76.05336 | 66.97272 | 0.00000 | 0.00000 | 0.00000 | 1 |
| 1434 | H | 68.12607 | 76.10306 | 65.36734 | 0.00000 | 0.00000 | 0.00000 | 1 |
| 1435 | H | 71.59656 | 77.73626 | 64.51026 | 0.00000 | 0.00000 | 0.00000 | 1 |
| 1436 | H | 70.25852 | 77.20735 | 63.75310 | 0.00000 | 0.00000 | 0.00000 | 1 |
| 1437 | N | 72.31715 | 75.71602 | 73.02011 | 0.00000 | 0.00000 | 0.00000 | 1 |
| 1438 | C | 73.49927 | 75.33098 | 73.70593 | 0.00000 | 0.00000 | 0.00000 | 1 |
| 1439 | C | 73.15043 | 73.94802 | 74.48731 | 0.00000 | 0.00000 | 0.00000 | 1 |
| 1440 | O | 72.50446 | 73.07780 | 73.94515 | 0.00000 | 0.00000 | 0.00000 | 1 |
| 1441 | C | 73.93742 | 76.51093 | 74.69557 | 0.00000 | 0.00000 | 0.00000 | 1 |
| 1442 | C | 74.09305 | 77.83947 | 73.93548 | 0.00000 | 0.00000 | 0.00000 | 1 |
| 1443 | C | 74.64598 | 77.87240 | 72.61968 | 0.00000 | 0.00000 | 0.00000 | 1 |
| 1444 | C | 73.71189 | 79.06034 | 74.56870 | 0.00000 | 0.00000 | 0.00000 | 1 |

|      |   |          |          |          |         |         |         |   |
|------|---|----------|----------|----------|---------|---------|---------|---|
| 1445 | C | 74.77184 | 79.09489 | 71.95643 | 0.00000 | 0.00000 | 0.00000 | 1 |
| 1446 | C | 73.86325 | 80.26074 | 73.87306 | 0.00000 | 0.00000 | 0.00000 | 1 |
| 1447 | C | 74.38692 | 80.33221 | 72.54951 | 0.00000 | 0.00000 | 0.00000 | 1 |
| 1448 | O | 74.50933 | 81.57837 | 71.88108 | 0.00000 | 0.00000 | 0.00000 | 1 |
| 1449 | H | 71.40825 | 75.73054 | 73.47997 | 0.00000 | 0.00000 | 0.00000 | 1 |
| 1450 | H | 74.21862 | 75.18995 | 72.86604 | 0.00000 | 0.00000 | 0.00000 | 1 |
| 1451 | H | 73.19697 | 76.62947 | 75.51855 | 0.00000 | 0.00000 | 0.00000 | 1 |
| 1452 | H | 74.90231 | 76.25150 | 75.18873 | 0.00000 | 0.00000 | 0.00000 | 1 |
| 1453 | H | 74.95229 | 76.93715 | 72.11513 | 0.00000 | 0.00000 | 0.00000 | 1 |
| 1454 | H | 73.31276 | 79.05692 | 75.59791 | 0.00000 | 0.00000 | 0.00000 | 1 |
| 1455 | H | 75.18580 | 79.09145 | 70.93279 | 0.00000 | 0.00000 | 0.00000 | 1 |
| 1456 | H | 73.56758 | 81.20071 | 74.37047 | 0.00000 | 0.00000 | 0.00000 | 1 |
| 1457 | H | 74.92265 | 81.27561 | 71.03800 | 0.00000 | 0.00000 | 0.00000 | 1 |
| 1458 | N | 73.82249 | 73.86356 | 75.64035 | 0.00000 | 0.00000 | 0.00000 | 1 |
| 1459 | C | 73.44310 | 72.81749 | 76.54184 | 0.00000 | 0.00000 | 0.00000 | 1 |
| 1460 | C | 72.31737 | 73.36602 | 77.57925 | 0.00000 | 0.00000 | 0.00000 | 1 |
| 1461 | O | 71.66706 | 74.37162 | 77.39697 | 0.00000 | 0.00000 | 0.00000 | 1 |
| 1462 | C | 74.76859 | 72.28499 | 77.25194 | 0.00000 | 0.00000 | 0.00000 | 1 |
| 1463 | O | 74.56275 | 71.12581 | 78.13692 | 0.00000 | 0.00000 | 0.00000 | 1 |
| 1464 | C | 75.41035 | 73.53801 | 77.93313 | 0.00000 | 0.00000 | 0.00000 | 1 |
| 1465 | H | 74.27095 | 74.71201 | 75.97750 | 0.00000 | 0.00000 | 0.00000 | 1 |
| 1466 | H | 72.99658 | 72.06869 | 75.84384 | 0.00000 | 0.00000 | 0.00000 | 1 |
| 1467 | H | 75.48430 | 71.92900 | 76.46561 | 0.00000 | 0.00000 | 0.00000 | 1 |
| 1468 | H | 75.18042 | 70.49893 | 77.72760 | 0.00000 | 0.00000 | 0.00000 | 1 |
| 1469 | H | 76.34899 | 73.26966 | 78.47413 | 0.00000 | 0.00000 | 0.00000 | 1 |
| 1470 | H | 74.71828 | 74.00434 | 78.67615 | 0.00000 | 0.00000 | 0.00000 | 1 |
| 1471 | H | 75.67458 | 74.32742 | 77.19186 | 0.00000 | 0.00000 | 0.00000 | 1 |
| 1472 | N | 72.17973 | 72.45836 | 78.53915 | 0.00000 | 0.00000 | 0.00000 | 1 |
| 1473 | C | 71.27196 | 72.73178 | 79.59535 | 0.00000 | 0.00000 | 0.00000 | 1 |
| 1474 | C | 72.04731 | 73.40452 | 80.87321 | 0.00000 | 0.00000 | 0.00000 | 1 |
| 1475 | O | 71.40815 | 73.86755 | 81.79046 | 0.00000 | 0.00000 | 0.00000 | 1 |
| 1476 | C | 70.77740 | 71.34803 | 80.20515 | 0.00000 | 0.00000 | 0.00000 | 1 |
| 1477 | C | 69.89315 | 70.54642 | 79.19962 | 0.00000 | 0.00000 | 0.00000 | 1 |
| 1478 | C | 68.38477 | 70.99915 | 79.34447 | 0.00000 | 0.00000 | 0.00000 | 1 |
| 1479 | C | 68.14039 | 72.30087 | 78.54618 | 0.00000 | 0.00000 | 0.00000 | 1 |
| 1480 | N | 66.59701 | 72.56164 | 78.55302 | 0.00000 | 0.00000 | 0.00000 | 1 |
| 1481 | H | 72.80882 | 71.64270 | 78.57628 | 0.00000 | 0.00000 | 0.00000 | 1 |
| 1482 | H | 70.49328 | 73.40066 | 79.16344 | 0.00000 | 0.00000 | 0.00000 | 1 |
| 1483 | H | 71.66846 | 70.73999 | 80.48050 | 0.00000 | 0.00000 | 0.00000 | 1 |
| 1484 | H | 70.22326 | 71.51924 | 81.15481 | 0.00000 | 0.00000 | 0.00000 | 1 |
| 1485 | H | 70.25754 | 70.67787 | 78.15580 | 0.00000 | 0.00000 | 0.00000 | 1 |
| 1486 | H | 69.97546 | 69.45745 | 79.41731 | 0.00000 | 0.00000 | 0.00000 | 1 |
| 1487 | H | 67.70835 | 70.19811 | 78.96761 | 0.00000 | 0.00000 | 0.00000 | 1 |
| 1488 | H | 68.11518 | 71.13436 | 80.41730 | 0.00000 | 0.00000 | 0.00000 | 1 |
| 1489 | H | 68.57670 | 73.21885 | 78.98715 | 0.00000 | 0.00000 | 0.00000 | 1 |
| 1490 | H | 68.40144 | 72.23628 | 77.47066 | 0.00000 | 0.00000 | 0.00000 | 1 |
| 1491 | H | 65.95640 | 71.73924 | 78.35209 | 0.00000 | 0.00000 | 0.00000 | 1 |
| 1492 | H | 66.26983 | 73.26697 | 77.83193 | 0.00000 | 0.00000 | 0.00000 | 1 |
| 1493 | H | 66.17501 | 72.96027 | 79.44158 | 0.00000 | 0.00000 | 0.00000 | 1 |
| 1494 | N | 73.36250 | 73.18545 | 80.81380 | 0.00000 | 0.00000 | 0.00000 | 1 |
| 1495 | C | 74.18937 | 73.98808 | 81.66579 | 0.00000 | 0.00000 | 0.00000 | 1 |
| 1496 | C | 74.57099 | 75.36195 | 80.88326 | 0.00000 | 0.00000 | 0.00000 | 1 |
| 1497 | O | 73.98510 | 75.76903 | 79.90927 | 0.00000 | 0.00000 | 0.00000 | 1 |
| 1498 | C | 75.48216 | 73.13347 | 82.00371 | 0.00000 | 0.00000 | 0.00000 | 1 |
| 1499 | C | 75.69857 | 73.15109 | 83.55140 | 0.00000 | 0.00000 | 0.00000 | 1 |
| 1500 | C | 74.95095 | 71.91502 | 84.19498 | 0.00000 | 0.00000 | 0.00000 | 1 |
| 1501 | C | 73.41705 | 72.07019 | 84.07781 | 0.00000 | 0.00000 | 0.00000 | 1 |
| 1502 | N | 72.78036 | 70.79961 | 84.73656 | 0.00000 | 0.00000 | 0.00000 | 1 |
| 1503 | H | 73.71239 | 72.77951 | 79.94672 | 0.00000 | 0.00000 | 0.00000 | 1 |
| 1504 | H | 73.51943 | 74.17925 | 82.53675 | 0.00000 | 0.00000 | 0.00000 | 1 |
| 1505 | H | 75.38204 | 72.09043 | 81.62920 | 0.00000 | 0.00000 | 0.00000 | 1 |
| 1506 | H | 76.36956 | 73.55775 | 81.48156 | 0.00000 | 0.00000 | 0.00000 | 1 |

|      |   |          |          |          |         |         |         |   |
|------|---|----------|----------|----------|---------|---------|---------|---|
| 1507 | H | 76.78522 | 73.09283 | 83.78480 | 0.00000 | 0.00000 | 0.00000 | 1 |
| 1508 | H | 75.34389 | 74.10750 | 83.99721 | 0.00000 | 0.00000 | 0.00000 | 1 |
| 1509 | H | 75.28028 | 70.96891 | 83.70762 | 0.00000 | 0.00000 | 0.00000 | 1 |
| 1510 | H | 75.23614 | 71.81135 | 85.26716 | 0.00000 | 0.00000 | 0.00000 | 1 |
| 1511 | H | 72.99329 | 72.92175 | 84.64680 | 0.00000 | 0.00000 | 0.00000 | 1 |
| 1512 | H | 73.02346 | 72.07429 | 83.04075 | 0.00000 | 0.00000 | 0.00000 | 1 |
| 1513 | H | 73.05422 | 70.58500 | 85.73955 | 0.00000 | 0.00000 | 0.00000 | 1 |
| 1514 | H | 72.95494 | 69.86804 | 84.25861 | 0.00000 | 0.00000 | 0.00000 | 1 |
| 1515 | H | 71.72220 | 70.80294 | 84.80670 | 0.00000 | 0.00000 | 0.00000 | 1 |
| 1516 | N | 75.54378 | 75.97448 | 81.56472 | 0.00000 | 0.00000 | 0.00000 | 1 |
| 1517 | C | 76.10985 | 77.25176 | 81.09275 | 0.00000 | 0.00000 | 0.00000 | 1 |
| 1518 | C | 76.86044 | 76.96070 | 79.66131 | 0.00000 | 0.00000 | 0.00000 | 1 |
| 1519 | O | 77.62921 | 76.02257 | 79.54146 | 0.00000 | 0.00000 | 0.00000 | 1 |
| 1520 | C | 77.10654 | 77.71276 | 82.14032 | 0.00000 | 0.00000 | 0.00000 | 1 |
| 1521 | C | 77.87233 | 78.94283 | 81.68813 | 0.00000 | 0.00000 | 0.00000 | 1 |
| 1522 | C | 76.43711 | 77.97629 | 83.47691 | 0.00000 | 0.00000 | 0.00000 | 1 |
| 1523 | H | 75.92275 | 75.46097 | 82.35798 | 0.00000 | 0.00000 | 0.00000 | 1 |
| 1524 | H | 75.21903 | 77.91273 | 80.98485 | 0.00000 | 0.00000 | 0.00000 | 1 |
| 1525 | H | 77.84654 | 76.89341 | 82.28588 | 0.00000 | 0.00000 | 0.00000 | 1 |
| 1526 | H | 78.69462 | 79.20831 | 82.41179 | 0.00000 | 0.00000 | 0.00000 | 1 |
| 1527 | H | 78.36582 | 78.77873 | 80.68655 | 0.00000 | 0.00000 | 0.00000 | 1 |
| 1528 | H | 77.20448 | 79.84318 | 81.59392 | 0.00000 | 0.00000 | 0.00000 | 1 |
| 1529 | H | 75.92827 | 77.05552 | 83.87467 | 0.00000 | 0.00000 | 0.00000 | 1 |
| 1530 | H | 77.17581 | 78.31323 | 84.25502 | 0.00000 | 0.00000 | 0.00000 | 1 |
| 1531 | H | 75.65093 | 78.77634 | 83.39488 | 0.00000 | 0.00000 | 0.00000 | 1 |
| 1532 | N | 76.56255 | 77.90697 | 78.76888 | 0.00000 | 0.00000 | 0.00000 | 1 |
| 1533 | C | 77.12785 | 77.87002 | 77.44992 | 0.00000 | 0.00000 | 0.00000 | 1 |
| 1534 | C | 78.68509 | 78.37716 | 77.58185 | 0.00000 | 0.00000 | 0.00000 | 1 |
| 1535 | O | 79.02107 | 79.49915 | 77.30152 | 0.00000 | 0.00000 | 0.00000 | 1 |
| 1536 | C | 76.20163 | 78.85666 | 76.63081 | 0.00000 | 0.00000 | 0.00000 | 1 |
| 1537 | C | 75.82585 | 79.91420 | 77.71727 | 0.00000 | 0.00000 | 0.00000 | 1 |
| 1538 | C | 75.62359 | 78.99680 | 78.99813 | 0.00000 | 0.00000 | 0.00000 | 1 |
| 1539 | H | 77.06832 | 76.79709 | 77.16270 | 0.00000 | 0.00000 | 0.00000 | 1 |
| 1540 | H | 76.71502 | 79.29976 | 75.74711 | 0.00000 | 0.00000 | 0.00000 | 1 |
| 1541 | H | 75.29796 | 78.33537 | 76.24490 | 0.00000 | 0.00000 | 0.00000 | 1 |
| 1542 | H | 76.65999 | 80.63609 | 77.86719 | 0.00000 | 0.00000 | 0.00000 | 1 |
| 1543 | H | 74.92453 | 80.51561 | 77.46095 | 0.00000 | 0.00000 | 0.00000 | 1 |
| 1544 | H | 75.86660 | 79.48351 | 79.97105 | 0.00000 | 0.00000 | 0.00000 | 1 |
| 1545 | H | 74.62207 | 78.51337 | 79.06749 | 0.00000 | 0.00000 | 0.00000 | 1 |
| 1546 | N | 79.39916 | 77.36743 | 78.06559 | 0.00000 | 0.00000 | 0.00000 | 1 |
| 1547 | C | 80.81759 | 77.51320 | 78.09399 | 0.00000 | 0.00000 | 0.00000 | 1 |
| 1548 | C | 81.39790 | 76.94898 | 76.67612 | 0.00000 | 0.00000 | 0.00000 | 1 |
| 1549 | O | 80.71500 | 76.85172 | 75.68459 | 0.00000 | 0.00000 | 0.00000 | 1 |
| 1550 | C | 81.31993 | 76.66043 | 79.33493 | 0.00000 | 0.00000 | 0.00000 | 1 |
| 1551 | C | 82.43098 | 77.44218 | 80.09878 | 0.00000 | 0.00000 | 0.00000 | 1 |
| 1552 | C | 81.69131 | 78.38367 | 81.12734 | 0.00000 | 0.00000 | 0.00000 | 1 |
| 1553 | O | 80.50637 | 78.31512 | 81.34441 | 0.00000 | 0.00000 | 0.00000 | 1 |
| 1554 | N | 82.57867 | 79.20486 | 81.72480 | 0.00000 | 0.00000 | 0.00000 | 1 |
| 1555 | H | 78.93200 | 76.48720 | 78.36678 | 0.00000 | 0.00000 | 0.00000 | 1 |
| 1556 | H | 80.93359 | 78.61860 | 78.19221 | 0.00000 | 0.00000 | 0.00000 | 1 |
| 1557 | H | 80.47019 | 76.44667 | 80.02675 | 0.00000 | 0.00000 | 0.00000 | 1 |
| 1558 | H | 81.69703 | 75.66974 | 78.99312 | 0.00000 | 0.00000 | 0.00000 | 1 |
| 1559 | H | 83.11133 | 76.74430 | 80.63465 | 0.00000 | 0.00000 | 0.00000 | 1 |
| 1560 | H | 83.09244 | 78.01969 | 79.41625 | 0.00000 | 0.00000 | 0.00000 | 1 |
| 1561 | H | 83.59372 | 79.25011 | 81.57587 | 0.00000 | 0.00000 | 0.00000 | 1 |
| 1562 | H | 82.35446 | 79.87636 | 82.46657 | 0.00000 | 0.00000 | 0.00000 | 1 |
| 1563 | N | 82.69675 | 76.66254 | 76.79881 | 0.00000 | 0.00000 | 0.00000 | 1 |
| 1564 | C | 83.51595 | 76.28717 | 75.64357 | 0.00000 | 0.00000 | 0.00000 | 1 |
| 1565 | C | 83.20463 | 74.72612 | 75.17349 | 0.00000 | 0.00000 | 0.00000 | 1 |
| 1566 | O | 83.74437 | 74.29289 | 74.18283 | 0.00000 | 0.00000 | 0.00000 | 1 |
| 1567 | C | 84.99327 | 76.30639 | 75.98205 | 0.00000 | 0.00000 | 0.00000 | 1 |
| 1568 | C | 85.55754 | 77.71344 | 76.04554 | 0.00000 | 0.00000 | 0.00000 | 1 |

|      |   |          |          |          |         |         |         |   |
|------|---|----------|----------|----------|---------|---------|---------|---|
| 1569 | C | 85.30654 | 75.55957 | 77.26528 | 0.00000 | 0.00000 | 0.00000 | 1 |
| 1570 | H | 83.09516 | 76.83611 | 77.71848 | 0.00000 | 0.00000 | 0.00000 | 1 |
| 1571 | H | 83.21450 | 77.01267 | 74.85108 | 0.00000 | 0.00000 | 0.00000 | 1 |
| 1572 | H | 85.51550 | 75.77768 | 75.14972 | 0.00000 | 0.00000 | 0.00000 | 1 |
| 1573 | H | 85.05134 | 78.32543 | 76.84224 | 0.00000 | 0.00000 | 0.00000 | 1 |
| 1574 | H | 86.65914 | 77.70761 | 76.27619 | 0.00000 | 0.00000 | 0.00000 | 1 |
| 1575 | H | 85.42330 | 78.25895 | 75.07045 | 0.00000 | 0.00000 | 0.00000 | 1 |
| 1576 | H | 84.69488 | 74.61880 | 77.35224 | 0.00000 | 0.00000 | 0.00000 | 1 |
| 1577 | H | 86.39015 | 75.26180 | 77.31988 | 0.00000 | 0.00000 | 0.00000 | 1 |
| 1578 | H | 85.08787 | 76.18414 | 78.17476 | 0.00000 | 0.00000 | 0.00000 | 1 |
| 1579 | N | 82.45958 | 74.06707 | 76.05438 | 0.00000 | 0.00000 | 0.00000 | 1 |
| 1580 | C | 81.88931 | 72.83816 | 75.63087 | 0.00000 | 0.00000 | 0.00000 | 1 |
| 1581 | C | 80.26377 | 73.02179 | 75.69068 | 0.00000 | 0.00000 | 0.00000 | 1 |
| 1582 | O | 79.69914 | 73.31225 | 76.71702 | 0.00000 | 0.00000 | 0.00000 | 1 |
| 1583 | C | 82.34572 | 71.78705 | 76.75146 | 0.00000 | 0.00000 | 0.00000 | 1 |
| 1584 | O | 81.93539 | 70.41595 | 76.53830 | 0.00000 | 0.00000 | 0.00000 | 1 |
| 1585 | H | 82.08079 | 74.62805 | 76.81520 | 0.00000 | 0.00000 | 0.00000 | 1 |
| 1586 | H | 82.30293 | 72.63134 | 74.61575 | 0.00000 | 0.00000 | 0.00000 | 1 |
| 1587 | H | 83.45361 | 71.90225 | 76.87800 | 0.00000 | 0.00000 | 0.00000 | 1 |
| 1588 | H | 81.88230 | 72.14641 | 77.71083 | 0.00000 | 0.00000 | 0.00000 | 1 |
| 1589 | H | 82.73892 | 70.06777 | 76.10980 | 0.00000 | 0.00000 | 0.00000 | 1 |
| 1590 | N | 79.76180 | 72.80503 | 74.48768 | 0.00000 | 0.00000 | 0.00000 | 1 |
| 1591 | C | 78.34593 | 72.84127 | 74.28951 | 0.00000 | 0.00000 | 0.00000 | 1 |
| 1592 | C | 78.22227 | 72.00372 | 72.92129 | 0.00000 | 0.00000 | 0.00000 | 1 |
| 1593 | O | 79.24446 | 71.72631 | 72.32422 | 0.00000 | 0.00000 | 0.00000 | 1 |
| 1594 | C | 77.84929 | 74.36957 | 74.08311 | 0.00000 | 0.00000 | 0.00000 | 1 |
| 1595 | O | 78.44709 | 75.09956 | 73.00765 | 0.00000 | 0.00000 | 0.00000 | 1 |
| 1596 | C | 78.00004 | 74.98246 | 75.52130 | 0.00000 | 0.00000 | 0.00000 | 1 |
| 1597 | H | 80.30366 | 72.54287 | 73.64400 | 0.00000 | 0.00000 | 0.00000 | 1 |
| 1598 | H | 77.88438 | 72.38125 | 75.19291 | 0.00000 | 0.00000 | 0.00000 | 1 |
| 1599 | H | 76.75161 | 74.33200 | 73.83116 | 0.00000 | 0.00000 | 0.00000 | 1 |
| 1600 | H | 77.67811 | 75.23282 | 72.41376 | 0.00000 | 0.00000 | 0.00000 | 1 |
| 1601 | H | 79.06356 | 75.27210 | 75.72860 | 0.00000 | 0.00000 | 0.00000 | 1 |
| 1602 | H | 77.68245 | 74.26641 | 76.31865 | 0.00000 | 0.00000 | 0.00000 | 1 |
| 1603 | H | 77.38226 | 75.90357 | 75.63186 | 0.00000 | 0.00000 | 0.00000 | 1 |
| 1604 | N | 76.95587 | 71.69470 | 72.63047 | 0.00000 | 0.00000 | 0.00000 | 1 |
| 1605 | C | 76.60969 | 71.08747 | 71.37842 | 0.00000 | 0.00000 | 0.00000 | 1 |
| 1606 | C | 76.52365 | 72.24334 | 70.21818 | 0.00000 | 0.00000 | 0.00000 | 1 |
| 1607 | O | 75.94169 | 73.28624 | 70.38878 | 0.00000 | 0.00000 | 0.00000 | 1 |
| 1608 | C | 75.15165 | 70.53256 | 71.65761 | 0.00000 | 0.00000 | 0.00000 | 1 |
| 1609 | C | 74.59822 | 71.59610 | 72.65611 | 0.00000 | 0.00000 | 0.00000 | 1 |
| 1610 | C | 75.86539 | 71.79869 | 73.59221 | 0.00000 | 0.00000 | 0.00000 | 1 |
| 1611 | H | 77.38806 | 70.32229 | 71.15852 | 0.00000 | 0.00000 | 0.00000 | 1 |
| 1612 | H | 74.54068 | 70.44228 | 70.73105 | 0.00000 | 0.00000 | 0.00000 | 1 |
| 1613 | H | 75.18043 | 69.52038 | 72.11924 | 0.00000 | 0.00000 | 0.00000 | 1 |
| 1614 | H | 74.32906 | 72.54112 | 72.12978 | 0.00000 | 0.00000 | 0.00000 | 1 |
| 1615 | H | 73.68879 | 71.26663 | 73.21069 | 0.00000 | 0.00000 | 0.00000 | 1 |
| 1616 | H | 75.91480 | 72.77874 | 74.12034 | 0.00000 | 0.00000 | 0.00000 | 1 |
| 1617 | H | 76.03292 | 70.97829 | 74.32992 | 0.00000 | 0.00000 | 0.00000 | 1 |
| 1618 | N | 77.09691 | 71.77068 | 69.11911 | 0.00000 | 0.00000 | 0.00000 | 1 |
| 1619 | C | 76.97209 | 72.48656 | 67.90449 | 0.00000 | 0.00000 | 0.00000 | 1 |
| 1620 | C | 75.81915 | 71.72410 | 67.01680 | 0.00000 | 0.00000 | 0.00000 | 1 |
| 1621 | O | 76.08120 | 70.98504 | 66.09841 | 0.00000 | 0.00000 | 0.00000 | 1 |
| 1622 | C | 78.40915 | 72.40309 | 67.18287 | 0.00000 | 0.00000 | 0.00000 | 1 |
| 1623 | O | 79.00462 | 71.09938 | 67.10220 | 0.00000 | 0.00000 | 0.00000 | 1 |
| 1624 | C | 79.19441 | 73.47077 | 68.02711 | 0.00000 | 0.00000 | 0.00000 | 1 |
| 1625 | H | 77.54525 | 70.85541 | 69.10392 | 0.00000 | 0.00000 | 0.00000 | 1 |
| 1626 | H | 76.65305 | 73.50459 | 68.22689 | 0.00000 | 0.00000 | 0.00000 | 1 |
| 1627 | H | 78.28943 | 72.77625 | 66.12968 | 0.00000 | 0.00000 | 0.00000 | 1 |
| 1628 | H | 78.88663 | 70.89371 | 66.15192 | 0.00000 | 0.00000 | 0.00000 | 1 |
| 1629 | H | 78.70357 | 74.47156 | 67.99657 | 0.00000 | 0.00000 | 0.00000 | 1 |
| 1630 | H | 80.23843 | 73.59846 | 67.65796 | 0.00000 | 0.00000 | 0.00000 | 1 |



|      |   |          |          |          |         |         |                   |              |
|------|---|----------|----------|----------|---------|---------|-------------------|--------------|
| 1631 | H | 79.25707 | 73.16377 | 69.09851 | 0.00000 | 0.00000 | 0.00000           | 1            |
| 1632 | N | 74.61761 | 71.99202 | 67.52877 | 0.00000 | 0.00000 | 0.00000           | 1            |
| 1633 | C | 73.52601 | 72.11043 | 66.37887 | 0.00000 | 0.00000 | 0.00000           | 1            |
| 1634 | C | 73.73678 | 73.20549 | 65.45284 | 0.00000 | 0.00000 | 0.00000           | 1            |
| 1635 | O | 73.90888 | 74.09939 | 64.69841 | 0.00000 | 0.00000 | 0.00000           | 1            |
| 1636 | C | 72.12134 | 72.30286 | 67.20832 | 0.00000 | 0.00000 | 0.00000           | 1            |
| 1637 | C | 70.98521 | 71.95622 | 66.30781 | 0.00000 | 0.00000 | 0.00000           | 1            |
| 1638 | C | 70.72988 | 70.45214 | 66.31133 | 0.00000 | 0.00000 | 0.00000           | 1            |
| 1639 | C | 69.71998 | 72.69121 | 66.74219 | 0.00000 | 0.00000 | 0.00000           | 1            |
| 1640 | H | 74.64971 | 72.68624 | 68.27125 | 0.00000 | 0.00000 | 0.00000           | 1            |
| 1641 | H | 73.66651 | 71.10233 | 65.91278 | 0.00000 | 0.00000 | 0.00000           | 1            |
| 1642 | H | 72.12198 | 71.67286 | 68.12608 | 0.00000 | 0.00000 | 0.00000           | 1            |
| 1643 | H | 72.04630 | 73.35556 | 67.56352 | 0.00000 | 0.00000 | 0.00000           | 1            |
| 1644 | H | 71.23556 | 72.27846 | 65.27054 | 0.00000 | 0.00000 | 0.00000           | 1            |
| 1645 | H | 70.41576 | 70.09085 | 67.32373 | 0.00000 | 0.00000 | 0.00000           | 1            |
| 1646 | H | 71.64599 | 69.87526 | 66.02500 | 0.00000 | 0.00000 | 0.00000           | 1            |
| 1647 | H | 69.91955 | 70.16723 | 65.59302 | 0.00000 | 0.00000 | 0.00000           | 1            |
| 1648 | H | 68.84235 | 72.41779 | 66.10307 | 0.00000 | 0.00000 | 0.00000           | 1            |
| 1649 | H | 69.84516 | 73.80285 | 66.67610 | 0.00000 | 0.00000 | 0.00000           | 1            |
| 1650 | H | 69.44745 | 72.45078 | 67.80154 | 0.00000 | 0.00000 | 0.00000           | 1            |
| 1651 |   | 273      |          |          |         |         |                   |              |
| 1652 |   | 150.0000 | 150.0000 | 150.0000 | 0.0000  | 0.0000  | 0.0000*****       | 3.5000 14000 |
|      |   | 0.2500   | 300.00   | 0.00     | 0.00    | 0.00    | -1291.3972 0.0000 | 0.0000       |
| 1653 | N | 68.28347 | 77.48227 | 77.66618 | 0.00000 | 0.00000 | 0.00000           | 1            |
| 1654 | C | 68.90629 | 77.46742 | 76.45506 | 0.00000 | 0.00000 | 0.00000           | 1            |
| 1655 | C | 68.27337 | 76.14059 | 75.58966 | 0.00000 | 0.00000 | 0.00000           | 1            |
| 1656 | O | 67.96705 | 75.09112 | 76.10041 | 0.00000 | 0.00000 | 0.00000           | 1            |
| 1657 | C | 70.50940 | 77.09126 | 76.67938 | 0.00000 | 0.00000 | 0.00000           | 1            |
| 1658 | C | 71.08290 | 78.00705 | 77.69283 | 0.00000 | 0.00000 | 0.00000           | 1            |
| 1659 | C | 72.39292 | 77.43231 | 78.22903 | 0.00000 | 0.00000 | 0.00000           | 1            |
| 1660 | C | 71.31506 | 79.40717 | 77.13255 | 0.00000 | 0.00000 | 0.00000           | 1            |
| 1661 | H | 68.27741 | 76.59963 | 78.14370 | 0.00000 | 0.00000 | 0.00000           | 1            |
| 1662 | H | 68.73868 | 78.47760 | 76.00007 | 0.00000 | 0.00000 | 0.00000           | 1            |
| 1663 | H | 70.61411 | 76.02213 | 77.01810 | 0.00000 | 0.00000 | 0.00000           | 1            |
| 1664 | H | 71.05578 | 77.15671 | 75.71301 | 0.00000 | 0.00000 | 0.00000           | 1            |
| 1665 | H | 70.36908 | 78.07712 | 78.54757 | 0.00000 | 0.00000 | 0.00000           | 1            |
| 1666 | H | 73.21828 | 77.49208 | 77.47615 | 0.00000 | 0.00000 | 0.00000           | 1            |
| 1667 | H | 72.28390 | 76.34921 | 78.51404 | 0.00000 | 0.00000 | 0.00000           | 1            |
| 1668 | H | 72.73530 | 77.97880 | 79.14379 | 0.00000 | 0.00000 | 0.00000           | 1            |
| 1669 | H | 72.23568 | 79.87973 | 77.56000 | 0.00000 | 0.00000 | 0.00000           | 1            |
| 1670 | H | 70.45731 | 80.08912 | 77.36124 | 0.00000 | 0.00000 | 0.00000           | 1            |
| 1671 | H | 71.43087 | 79.39515 | 76.01980 | 0.00000 | 0.00000 | 0.00000           | 1            |
| 1672 | N | 68.31477 | 76.47108 | 74.31126 | 0.00000 | 0.00000 | 0.00000           | 1            |
| 1673 | C | 67.77422 | 75.60597 | 73.27941 | 0.00000 | 0.00000 | 0.00000           | 1            |
| 1674 | C | 68.84429 | 75.45487 | 72.01131 | 0.00000 | 0.00000 | 0.00000           | 1            |
| 1675 | O | 68.58142 | 74.69882 | 71.10599 | 0.00000 | 0.00000 | 0.00000           | 1            |
| 1676 | C | 66.51241 | 76.20183 | 72.66004 | 0.00000 | 0.00000 | 0.00000           | 1            |
| 1677 | C | 65.33032 | 76.11149 | 73.60473 | 0.00000 | 0.00000 | 0.00000           | 1            |
| 1678 | C | 66.71376 | 77.63105 | 72.19850 | 0.00000 | 0.00000 | 0.00000           | 1            |
| 1679 | H | 68.59625 | 77.43809 | 74.16951 | 0.00000 | 0.00000 | 0.00000           | 1            |
| 1680 | H | 67.59187 | 74.65018 | 73.83016 | 0.00000 | 0.00000 | 0.00000           | 1            |
| 1681 | H | 66.27031 | 75.58810 | 71.76251 | 0.00000 | 0.00000 | 0.00000           | 1            |
| 1682 | H | 65.11283 | 75.04578 | 73.89660 | 0.00000 | 0.00000 | 0.00000           | 1            |
| 1683 | H | 65.52214 | 76.68312 | 74.55582 | 0.00000 | 0.00000 | 0.00000           | 1            |
| 1684 | H | 64.39330 | 76.53108 | 73.14211 | 0.00000 | 0.00000 | 0.00000           | 1            |
| 1685 | H | 65.82789 | 78.01034 | 71.61610 | 0.00000 | 0.00000 | 0.00000           | 1            |
| 1686 | H | 66.86251 | 78.32799 | 73.06990 | 0.00000 | 0.00000 | 0.00000           | 1            |
| 1687 | H | 67.61939 | 77.72741 | 71.53557 | 0.00000 | 0.00000 | 0.00000           | 1            |
| 1688 | N | 69.88274 | 76.26762 | 72.12356 | 0.00000 | 0.00000 | 0.00000           | 1            |
| 1689 | C | 70.86543 | 76.24062 | 71.09880 | 0.00000 | 0.00000 | 0.00000           | 1            |
| 1690 | C | 72.34806 | 75.89245 | 71.70571 | 0.00000 | 0.00000 | 0.00000           | 1            |
| 1691 | O | 73.29432 | 75.88441 | 70.95112 | 0.00000 | 0.00000 | 0.00000           | 1            |

|      |   |          |          |          |         |         |         |   |
|------|---|----------|----------|----------|---------|---------|---------|---|
| 1692 | C | 71.00442 | 77.71278 | 70.50945 | 0.00000 | 0.00000 | 0.00000 | 1 |
| 1693 | C | 71.58426 | 77.57001 | 69.07264 | 0.00000 | 0.00000 | 0.00000 | 1 |
| 1694 | C | 70.42400 | 76.89668 | 68.19898 | 0.00000 | 0.00000 | 0.00000 | 1 |
| 1695 | N | 70.78581 | 77.16790 | 66.87436 | 0.00000 | 0.00000 | 0.00000 | 1 |
| 1696 | C | 70.05235 | 76.92574 | 65.86466 | 0.00000 | 0.00000 | 0.00000 | 1 |
| 1697 | N | 68.80331 | 76.33792 | 66.09470 | 0.00000 | 0.00000 | 0.00000 | 1 |
| 1698 | N | 70.68047 | 77.32373 | 64.67616 | 0.00000 | 0.00000 | 0.00000 | 1 |
| 1699 | H | 69.92220 | 76.85535 | 72.95257 | 0.00000 | 0.00000 | 0.00000 | 1 |
| 1700 | H | 70.48280 | 75.48991 | 70.36604 | 0.00000 | 0.00000 | 0.00000 | 1 |
| 1701 | H | 70.02404 | 78.23966 | 70.49891 | 0.00000 | 0.00000 | 0.00000 | 1 |
| 1702 | H | 71.67451 | 78.32925 | 71.15097 | 0.00000 | 0.00000 | 0.00000 | 1 |
| 1703 | H | 71.88043 | 78.55889 | 68.65704 | 0.00000 | 0.00000 | 0.00000 | 1 |
| 1704 | H | 72.51021 | 76.94606 | 69.08352 | 0.00000 | 0.00000 | 0.00000 | 1 |
| 1705 | H | 70.32656 | 75.78655 | 68.30665 | 0.00000 | 0.00000 | 0.00000 | 1 |
| 1706 | H | 69.40513 | 77.33717 | 68.33168 | 0.00000 | 0.00000 | 0.00000 | 1 |
| 1707 | H | 71.69196 | 77.58379 | 66.72697 | 0.00000 | 0.00000 | 0.00000 | 1 |
| 1708 | H | 68.37193 | 76.05270 | 66.97311 | 0.00000 | 0.00000 | 0.00000 | 1 |
| 1709 | H | 68.12769 | 76.10116 | 65.36757 | 0.00000 | 0.00000 | 0.00000 | 1 |
| 1710 | H | 71.59983 | 77.73053 | 64.51045 | 0.00000 | 0.00000 | 0.00000 | 1 |
| 1711 | H | 70.26160 | 77.20204 | 63.75334 | 0.00000 | 0.00000 | 0.00000 | 1 |
| 1712 | N | 72.31854 | 75.71307 | 73.01971 | 0.00000 | 0.00000 | 0.00000 | 1 |
| 1713 | C | 73.50105 | 75.32913 | 73.70529 | 0.00000 | 0.00000 | 0.00000 | 1 |
| 1714 | C | 73.15202 | 73.94710 | 74.48821 | 0.00000 | 0.00000 | 0.00000 | 1 |
| 1715 | O | 72.50615 | 73.07629 | 73.94735 | 0.00000 | 0.00000 | 0.00000 | 1 |
| 1716 | C | 73.93883 | 76.50888 | 74.69536 | 0.00000 | 0.00000 | 0.00000 | 1 |
| 1717 | C | 74.09424 | 77.83793 | 73.93616 | 0.00000 | 0.00000 | 0.00000 | 1 |
| 1718 | C | 74.64793 | 77.87230 | 72.62072 | 0.00000 | 0.00000 | 0.00000 | 1 |
| 1719 | C | 73.71200 | 79.05794 | 74.57035 | 0.00000 | 0.00000 | 0.00000 | 1 |
| 1720 | C | 74.77252 | 79.09537 | 71.95833 | 0.00000 | 0.00000 | 0.00000 | 1 |
| 1721 | C | 73.86220 | 80.25896 | 73.87559 | 0.00000 | 0.00000 | 0.00000 | 1 |
| 1722 | C | 74.38586 | 80.33180 | 72.55213 | 0.00000 | 0.00000 | 0.00000 | 1 |
| 1723 | O | 74.50686 | 81.57852 | 71.88452 | 0.00000 | 0.00000 | 0.00000 | 1 |
| 1724 | H | 71.40957 | 75.72453 | 73.47949 | 0.00000 | 0.00000 | 0.00000 | 1 |
| 1725 | H | 74.22066 | 75.18807 | 72.86563 | 0.00000 | 0.00000 | 0.00000 | 1 |
| 1726 | H | 73.19805 | 76.62686 | 75.51814 | 0.00000 | 0.00000 | 0.00000 | 1 |
| 1727 | H | 74.90369 | 76.24948 | 75.18866 | 0.00000 | 0.00000 | 0.00000 | 1 |
| 1728 | H | 74.95566 | 76.93758 | 72.11574 | 0.00000 | 0.00000 | 0.00000 | 1 |
| 1729 | H | 73.31304 | 79.05331 | 75.59960 | 0.00000 | 0.00000 | 0.00000 | 1 |
| 1730 | H | 75.18692 | 79.09310 | 70.93486 | 0.00000 | 0.00000 | 0.00000 | 1 |
| 1731 | H | 73.56552 | 81.19825 | 74.37366 | 0.00000 | 0.00000 | 0.00000 | 1 |
| 1732 | H | 74.91989 | 81.27665 | 71.04098 | 0.00000 | 0.00000 | 0.00000 | 1 |
| 1733 | N | 73.82305 | 73.86510 | 75.64202 | 0.00000 | 0.00000 | 0.00000 | 1 |
| 1734 | C | 73.44477 | 72.81921 | 76.54403 | 0.00000 | 0.00000 | 0.00000 | 1 |
| 1735 | C | 72.31863 | 73.36685 | 77.58127 | 0.00000 | 0.00000 | 0.00000 | 1 |
| 1736 | O | 71.66781 | 74.37232 | 77.39928 | 0.00000 | 0.00000 | 0.00000 | 1 |
| 1737 | C | 74.77142 | 72.28885 | 77.25407 | 0.00000 | 0.00000 | 0.00000 | 1 |
| 1738 | O | 74.56683 | 71.12975 | 78.13839 | 0.00000 | 0.00000 | 0.00000 | 1 |
| 1739 | C | 75.41074 | 73.54325 | 77.93520 | 0.00000 | 0.00000 | 0.00000 | 1 |
| 1740 | H | 74.27103 | 74.71415 | 75.97838 | 0.00000 | 0.00000 | 0.00000 | 1 |
| 1741 | H | 72.99914 | 72.06946 | 75.84644 | 0.00000 | 0.00000 | 0.00000 | 1 |
| 1742 | H | 75.48776 | 71.93487 | 76.46738 | 0.00000 | 0.00000 | 0.00000 | 1 |
| 1743 | H | 75.18225 | 70.50207 | 77.72647 | 0.00000 | 0.00000 | 0.00000 | 1 |
| 1744 | H | 76.34924 | 73.27669 | 78.47734 | 0.00000 | 0.00000 | 0.00000 | 1 |
| 1745 | H | 74.71725 | 74.00913 | 78.67723 | 0.00000 | 0.00000 | 0.00000 | 1 |
| 1746 | H | 75.67462 | 74.33258 | 77.19371 | 0.00000 | 0.00000 | 0.00000 | 1 |
| 1747 | N | 72.18078 | 72.45882 | 78.54080 | 0.00000 | 0.00000 | 0.00000 | 1 |
| 1748 | C | 71.27227 | 72.73240 | 79.59636 | 0.00000 | 0.00000 | 0.00000 | 1 |
| 1749 | C | 72.04789 | 73.40316 | 80.87505 | 0.00000 | 0.00000 | 0.00000 | 1 |
| 1750 | O | 71.40921 | 73.86410 | 81.79366 | 0.00000 | 0.00000 | 0.00000 | 1 |
| 1751 | C | 70.77502 | 71.34927 | 80.20545 | 0.00000 | 0.00000 | 0.00000 | 1 |
| 1752 | C | 69.89259 | 70.54744 | 79.19851 | 0.00000 | 0.00000 | 0.00000 | 1 |
| 1753 | C | 68.38373 | 70.99968 | 79.33999 | 0.00000 | 0.00000 | 0.00000 | 1 |

|      |   |          |          |          |         |         |         |   |
|------|---|----------|----------|----------|---------|---------|---------|---|
| 1754 | C | 68.14090 | 72.30253 | 78.54309 | 0.00000 | 0.00000 | 0.00000 | 1 |
| 1755 | N | 66.59791 | 72.56561 | 78.55085 | 0.00000 | 0.00000 | 0.00000 | 1 |
| 1756 | H | 72.81034 | 71.64363 | 78.57804 | 0.00000 | 0.00000 | 0.00000 | 1 |
| 1757 | H | 70.49493 | 73.40267 | 79.16407 | 0.00000 | 0.00000 | 0.00000 | 1 |
| 1758 | H | 71.66500 | 70.74077 | 80.48322 | 0.00000 | 0.00000 | 0.00000 | 1 |
| 1759 | H | 70.21885 | 71.52143 | 81.15375 | 0.00000 | 0.00000 | 0.00000 | 1 |
| 1760 | H | 70.25904 | 70.67858 | 78.15538 | 0.00000 | 0.00000 | 0.00000 | 1 |
| 1761 | H | 69.97461 | 69.45856 | 79.41676 | 0.00000 | 0.00000 | 0.00000 | 1 |
| 1762 | H | 67.70845 | 70.19903 | 78.96022 | 0.00000 | 0.00000 | 0.00000 | 1 |
| 1763 | H | 68.11131 | 71.13325 | 80.41231 | 0.00000 | 0.00000 | 0.00000 | 1 |
| 1764 | H | 68.57854 | 73.21937 | 78.98509 | 0.00000 | 0.00000 | 0.00000 | 1 |
| 1765 | H | 68.40157 | 72.23889 | 77.46741 | 0.00000 | 0.00000 | 0.00000 | 1 |
| 1766 | H | 65.95640 | 71.74641 | 78.34001 | 0.00000 | 0.00000 | 0.00000 | 1 |
| 1767 | H | 66.27286 | 73.27917 | 77.83694 | 0.00000 | 0.00000 | 0.00000 | 1 |
| 1768 | H | 66.17525 | 72.95513 | 79.44314 | 0.00000 | 0.00000 | 0.00000 | 1 |
| 1769 | N | 73.36320 | 73.18508 | 80.81406 | 0.00000 | 0.00000 | 0.00000 | 1 |
| 1770 | C | 74.19029 | 73.98774 | 81.66585 | 0.00000 | 0.00000 | 0.00000 | 1 |
| 1771 | C | 74.56937 | 75.36270 | 80.88402 | 0.00000 | 0.00000 | 0.00000 | 1 |
| 1772 | O | 73.98094 | 75.77116 | 79.91221 | 0.00000 | 0.00000 | 0.00000 | 1 |
| 1773 | C | 75.48383 | 73.13351 | 82.00188 | 0.00000 | 0.00000 | 0.00000 | 1 |
| 1774 | C | 75.70129 | 73.15017 | 83.54944 | 0.00000 | 0.00000 | 0.00000 | 1 |
| 1775 | C | 74.95192 | 71.91535 | 84.19341 | 0.00000 | 0.00000 | 0.00000 | 1 |
| 1776 | C | 73.41824 | 72.07151 | 84.07480 | 0.00000 | 0.00000 | 0.00000 | 1 |
| 1777 | N | 72.77976 | 70.80198 | 84.73381 | 0.00000 | 0.00000 | 0.00000 | 1 |
| 1778 | H | 73.71286 | 72.78089 | 79.94605 | 0.00000 | 0.00000 | 0.00000 | 1 |
| 1779 | H | 73.52107 | 74.17768 | 82.53764 | 0.00000 | 0.00000 | 0.00000 | 1 |
| 1780 | H | 75.38390 | 72.09068 | 81.62671 | 0.00000 | 0.00000 | 0.00000 | 1 |
| 1781 | H | 76.37061 | 73.55856 | 81.47930 | 0.00000 | 0.00000 | 0.00000 | 1 |
| 1782 | H | 76.78800 | 73.08990 | 83.78209 | 0.00000 | 0.00000 | 0.00000 | 1 |
| 1783 | H | 75.34864 | 74.10712 | 83.99567 | 0.00000 | 0.00000 | 0.00000 | 1 |
| 1784 | H | 75.28085 | 70.96855 | 83.70711 | 0.00000 | 0.00000 | 0.00000 | 1 |
| 1785 | H | 75.23613 | 71.81233 | 85.26591 | 0.00000 | 0.00000 | 0.00000 | 1 |
| 1786 | H | 72.99452 | 72.92389 | 84.64261 | 0.00000 | 0.00000 | 0.00000 | 1 |
| 1787 | H | 73.02559 | 72.07491 | 83.03738 | 0.00000 | 0.00000 | 0.00000 | 1 |
| 1788 | H | 73.05023 | 70.58935 | 85.73813 | 0.00000 | 0.00000 | 0.00000 | 1 |
| 1789 | H | 72.95616 | 69.86956 | 84.25819 | 0.00000 | 0.00000 | 0.00000 | 1 |
| 1790 | H | 71.72137 | 70.80523 | 84.80031 | 0.00000 | 0.00000 | 0.00000 | 1 |
| 1791 | N | 75.54307 | 75.97470 | 81.56474 | 0.00000 | 0.00000 | 0.00000 | 1 |
| 1792 | C | 76.11003 | 77.25125 | 81.09182 | 0.00000 | 0.00000 | 0.00000 | 1 |
| 1793 | C | 76.85926 | 76.95899 | 79.65991 | 0.00000 | 0.00000 | 0.00000 | 1 |
| 1794 | O | 77.62663 | 76.01968 | 79.53963 | 0.00000 | 0.00000 | 0.00000 | 1 |
| 1795 | C | 77.10786 | 77.71131 | 82.13866 | 0.00000 | 0.00000 | 0.00000 | 1 |
| 1796 | C | 77.87439 | 78.94079 | 81.68607 | 0.00000 | 0.00000 | 0.00000 | 1 |
| 1797 | C | 76.43984 | 77.97678 | 83.47559 | 0.00000 | 0.00000 | 0.00000 | 1 |
| 1798 | H | 75.92454 | 75.45964 | 82.35581 | 0.00000 | 0.00000 | 0.00000 | 1 |
| 1799 | H | 75.21986 | 77.91316 | 80.98442 | 0.00000 | 0.00000 | 0.00000 | 1 |
| 1800 | H | 77.84690 | 76.89105 | 82.28408 | 0.00000 | 0.00000 | 0.00000 | 1 |
| 1801 | H | 78.69534 | 79.20684 | 82.41099 | 0.00000 | 0.00000 | 0.00000 | 1 |
| 1802 | H | 78.36886 | 78.77577 | 80.68499 | 0.00000 | 0.00000 | 0.00000 | 1 |
| 1803 | H | 77.20702 | 79.84134 | 81.59074 | 0.00000 | 0.00000 | 0.00000 | 1 |
| 1804 | H | 75.92861 | 77.05756 | 83.87382 | 0.00000 | 0.00000 | 0.00000 | 1 |
| 1805 | H | 77.17997 | 78.31191 | 84.25315 | 0.00000 | 0.00000 | 0.00000 | 1 |
| 1806 | H | 75.65599 | 78.77914 | 83.39364 | 0.00000 | 0.00000 | 0.00000 | 1 |
| 1807 | N | 76.56195 | 77.90553 | 78.76763 | 0.00000 | 0.00000 | 0.00000 | 1 |
| 1808 | C | 77.12719 | 77.86880 | 77.44863 | 0.00000 | 0.00000 | 0.00000 | 1 |
| 1809 | C | 78.68451 | 78.37564 | 77.58058 | 0.00000 | 0.00000 | 0.00000 | 1 |
| 1810 | O | 79.02117 | 79.49704 | 77.29869 | 0.00000 | 0.00000 | 0.00000 | 1 |
| 1811 | C | 76.20056 | 78.85537 | 76.62990 | 0.00000 | 0.00000 | 0.00000 | 1 |
| 1812 | C | 75.82564 | 79.91318 | 77.71640 | 0.00000 | 0.00000 | 0.00000 | 1 |
| 1813 | C | 75.62373 | 78.99591 | 78.99739 | 0.00000 | 0.00000 | 0.00000 | 1 |
| 1814 | H | 77.06756 | 76.79589 | 77.16131 | 0.00000 | 0.00000 | 0.00000 | 1 |
| 1815 | H | 76.71327 | 79.29820 | 75.74566 | 0.00000 | 0.00000 | 0.00000 | 1 |

|      |   |          |          |          |         |         |         |   |
|------|---|----------|----------|----------|---------|---------|---------|---|
| 1816 | H | 75.29656 | 78.33404 | 76.24487 | 0.00000 | 0.00000 | 0.00000 | 1 |
| 1817 | H | 76.66006 | 80.63483 | 77.86583 | 0.00000 | 0.00000 | 0.00000 | 1 |
| 1818 | H | 74.92435 | 80.51482 | 77.46049 | 0.00000 | 0.00000 | 0.00000 | 1 |
| 1819 | H | 75.86768 | 79.48251 | 79.97012 | 0.00000 | 0.00000 | 0.00000 | 1 |
| 1820 | H | 74.62198 | 78.51303 | 79.06746 | 0.00000 | 0.00000 | 0.00000 | 1 |
| 1821 | N | 79.39785 | 77.36630 | 78.06624 | 0.00000 | 0.00000 | 0.00000 | 1 |
| 1822 | C | 80.81639 | 77.51132 | 78.09438 | 0.00000 | 0.00000 | 0.00000 | 1 |
| 1823 | C | 81.39764 | 76.94630 | 76.67737 | 0.00000 | 0.00000 | 0.00000 | 1 |
| 1824 | O | 80.71738 | 76.84991 | 75.68415 | 0.00000 | 0.00000 | 0.00000 | 1 |
| 1825 | C | 81.31913 | 76.65937 | 79.33579 | 0.00000 | 0.00000 | 0.00000 | 1 |
| 1826 | C | 82.43108 | 77.44089 | 80.09882 | 0.00000 | 0.00000 | 0.00000 | 1 |
| 1827 | C | 81.69312 | 78.38413 | 81.12678 | 0.00000 | 0.00000 | 0.00000 | 1 |
| 1828 | O | 80.50883 | 78.31398 | 81.34437 | 0.00000 | 0.00000 | 0.00000 | 1 |
| 1829 | N | 82.57971 | 79.20754 | 81.72232 | 0.00000 | 0.00000 | 0.00000 | 1 |
| 1830 | H | 78.93015 | 76.48641 | 78.36790 | 0.00000 | 0.00000 | 0.00000 | 1 |
| 1831 | H | 80.93324 | 78.61669 | 78.19121 | 0.00000 | 0.00000 | 0.00000 | 1 |
| 1832 | H | 80.46950 | 76.44572 | 80.02794 | 0.00000 | 0.00000 | 0.00000 | 1 |
| 1833 | H | 81.69593 | 75.66849 | 78.99425 | 0.00000 | 0.00000 | 0.00000 | 1 |
| 1834 | H | 83.11066 | 76.74258 | 80.63517 | 0.00000 | 0.00000 | 0.00000 | 1 |
| 1835 | H | 83.09313 | 78.01694 | 79.41558 | 0.00000 | 0.00000 | 0.00000 | 1 |
| 1836 | H | 83.59483 | 79.25389 | 81.57336 | 0.00000 | 0.00000 | 0.00000 | 1 |
| 1837 | H | 82.35509 | 79.87998 | 82.46331 | 0.00000 | 0.00000 | 0.00000 | 1 |
| 1838 | N | 82.69674 | 76.66057 | 76.80105 | 0.00000 | 0.00000 | 0.00000 | 1 |
| 1839 | C | 83.51547 | 76.28644 | 75.64474 | 0.00000 | 0.00000 | 0.00000 | 1 |
| 1840 | C | 83.20484 | 74.72531 | 75.17474 | 0.00000 | 0.00000 | 0.00000 | 1 |
| 1841 | O | 83.74519 | 74.29188 | 74.18454 | 0.00000 | 0.00000 | 0.00000 | 1 |
| 1842 | C | 84.99266 | 76.30772 | 75.98327 | 0.00000 | 0.00000 | 0.00000 | 1 |
| 1843 | C | 85.55457 | 77.71567 | 76.04769 | 0.00000 | 0.00000 | 0.00000 | 1 |
| 1844 | C | 85.30661 | 75.56071 | 77.26623 | 0.00000 | 0.00000 | 0.00000 | 1 |
| 1845 | H | 83.09485 | 76.84024 | 77.71960 | 0.00000 | 0.00000 | 0.00000 | 1 |
| 1846 | H | 83.21282 | 77.01192 | 74.85267 | 0.00000 | 0.00000 | 0.00000 | 1 |
| 1847 | H | 85.51577 | 75.78029 | 75.15073 | 0.00000 | 0.00000 | 0.00000 | 1 |
| 1848 | H | 85.04744 | 78.32643 | 76.84476 | 0.00000 | 0.00000 | 0.00000 | 1 |
| 1849 | H | 86.65615 | 77.71130 | 76.27832 | 0.00000 | 0.00000 | 0.00000 | 1 |
| 1850 | H | 85.41947 | 78.26154 | 75.07291 | 0.00000 | 0.00000 | 0.00000 | 1 |
| 1851 | H | 84.70293 | 74.61434 | 77.34820 | 0.00000 | 0.00000 | 0.00000 | 1 |
| 1852 | H | 86.39258 | 75.27260 | 77.32506 | 0.00000 | 0.00000 | 0.00000 | 1 |
| 1853 | H | 85.07813 | 76.18111 | 78.17617 | 0.00000 | 0.00000 | 0.00000 | 1 |
| 1854 | N | 82.45912 | 74.06650 | 76.05532 | 0.00000 | 0.00000 | 0.00000 | 1 |
| 1855 | C | 81.88720 | 72.83859 | 75.63121 | 0.00000 | 0.00000 | 0.00000 | 1 |
| 1856 | C | 80.26177 | 73.02335 | 75.69269 | 0.00000 | 0.00000 | 0.00000 | 1 |
| 1857 | O | 79.69878 | 73.31355 | 76.71988 | 0.00000 | 0.00000 | 0.00000 | 1 |
| 1858 | C | 82.34345 | 71.78652 | 76.75091 | 0.00000 | 0.00000 | 0.00000 | 1 |
| 1859 | O | 81.93223 | 70.41580 | 76.53709 | 0.00000 | 0.00000 | 0.00000 | 1 |
| 1860 | H | 82.07999 | 74.62778 | 76.81576 | 0.00000 | 0.00000 | 0.00000 | 1 |
| 1861 | H | 82.29977 | 72.63196 | 74.61565 | 0.00000 | 0.00000 | 0.00000 | 1 |
| 1862 | H | 83.45145 | 71.90111 | 76.87694 | 0.00000 | 0.00000 | 0.00000 | 1 |
| 1863 | H | 81.88067 | 72.14565 | 77.71069 | 0.00000 | 0.00000 | 0.00000 | 1 |
| 1864 | H | 82.73535 | 70.06743 | 76.10796 | 0.00000 | 0.00000 | 0.00000 | 1 |
| 1865 | N | 79.75877 | 72.80720 | 74.49002 | 0.00000 | 0.00000 | 0.00000 | 1 |
| 1866 | C | 78.34302 | 72.84251 | 74.29132 | 0.00000 | 0.00000 | 0.00000 | 1 |
| 1867 | C | 78.22032 | 72.00304 | 72.92423 | 0.00000 | 0.00000 | 0.00000 | 1 |
| 1868 | O | 79.24298 | 71.72397 | 72.32863 | 0.00000 | 0.00000 | 0.00000 | 1 |
| 1869 | C | 77.84475 | 74.36990 | 74.08172 | 0.00000 | 0.00000 | 0.00000 | 1 |
| 1870 | O | 78.43878 | 75.09594 | 73.00140 | 0.00000 | 0.00000 | 0.00000 | 1 |
| 1871 | C | 78.00170 | 74.98710 | 75.51728 | 0.00000 | 0.00000 | 0.00000 | 1 |
| 1872 | H | 80.30076 | 72.54350 | 73.64683 | 0.00000 | 0.00000 | 0.00000 | 1 |
| 1873 | H | 77.88137 | 72.38391 | 75.19536 | 0.00000 | 0.00000 | 0.00000 | 1 |
| 1874 | H | 76.74601 | 74.33227 | 73.83514 | 0.00000 | 0.00000 | 0.00000 | 1 |
| 1875 | H | 77.66810 | 75.22507 | 72.40875 | 0.00000 | 0.00000 | 0.00000 | 1 |
| 1876 | H | 79.06703 | 75.26916 | 75.72017 | 0.00000 | 0.00000 | 0.00000 | 1 |
| 1877 | H | 77.68311 | 74.27632 | 76.31879 | 0.00000 | 0.00000 | 0.00000 | 1 |

|      |   |          |          |          |         |            |             |         |       |
|------|---|----------|----------|----------|---------|------------|-------------|---------|-------|
| 1878 | H | 77.39122 | 75.91335 | 75.62615 | 0.00000 | 0.00000    | 0.00000     | 1       |       |
| 1879 | N | 76.95417 | 71.69435 | 72.63196 | 0.00000 | 0.00000    | 0.00000     | 1       |       |
| 1880 | C | 76.60975 | 71.08680 | 71.37956 | 0.00000 | 0.00000    | 0.00000     | 1       |       |
| 1881 | C | 76.52356 | 72.24254 | 70.21920 | 0.00000 | 0.00000    | 0.00000     | 1       |       |
| 1882 | O | 75.93997 | 73.28463 | 70.38926 | 0.00000 | 0.00000    | 0.00000     | 1       |       |
| 1883 | C | 75.15177 | 70.53093 | 71.65710 | 0.00000 | 0.00000    | 0.00000     | 1       |       |
| 1884 | C | 74.59651 | 71.59429 | 72.65481 | 0.00000 | 0.00000    | 0.00000     | 1       |       |
| 1885 | C | 75.86243 | 71.79850 | 73.59223 | 0.00000 | 0.00000    | 0.00000     | 1       |       |
| 1886 | H | 77.38893 | 70.32223 | 71.16042 | 0.00000 | 0.00000    | 0.00000     | 1       |       |
| 1887 | H | 74.54194 | 70.44016 | 70.72982 | 0.00000 | 0.00000    | 0.00000     | 1       |       |
| 1888 | H | 75.18065 | 69.51884 | 72.11891 | 0.00000 | 0.00000    | 0.00000     | 1       |       |
| 1889 | H | 74.32703 | 72.53893 | 72.12792 | 0.00000 | 0.00000    | 0.00000     | 1       |       |
| 1890 | H | 73.68713 | 71.26365 | 73.20831 | 0.00000 | 0.00000    | 0.00000     | 1       |       |
| 1891 | H | 75.91067 | 72.77911 | 74.11948 | 0.00000 | 0.00000    | 0.00000     | 1       |       |
| 1892 | H | 76.02958 | 70.97892 | 74.33093 | 0.00000 | 0.00000    | 0.00000     | 1       |       |
| 1893 | N | 77.09880 | 71.77088 | 69.12071 | 0.00000 | 0.00000    | 0.00000     | 1       |       |
| 1894 | C | 76.97271 | 72.48613 | 67.90580 | 0.00000 | 0.00000    | 0.00000     | 1       |       |
| 1895 | C | 75.81853 | 71.72357 | 67.01977 | 0.00000 | 0.00000    | 0.00000     | 1       |       |
| 1896 | O | 76.07950 | 70.98352 | 66.10180 | 0.00000 | 0.00000    | 0.00000     | 1       |       |
| 1897 | C | 78.40913 | 72.40276 | 67.18300 | 0.00000 | 0.00000    | 0.00000     | 1       |       |
| 1898 | O | 79.00456 | 71.09908 | 67.10137 | 0.00000 | 0.00000    | 0.00000     | 1       |       |
| 1899 | C | 79.19491 | 73.47019 | 68.02710 | 0.00000 | 0.00000    | 0.00000     | 1       |       |
| 1900 | H | 77.54823 | 70.85613 | 69.10579 | 0.00000 | 0.00000    | 0.00000     | 1       |       |
| 1901 | H | 76.65382 | 73.50424 | 68.22809 | 0.00000 | 0.00000    | 0.00000     | 1       |       |
| 1902 | H | 78.28853 | 72.77626 | 66.13003 | 0.00000 | 0.00000    | 0.00000     | 1       |       |
| 1903 | H | 78.88436 | 70.89310 | 66.15143 | 0.00000 | 0.00000    | 0.00000     | 1       |       |
| 1904 | H | 78.70288 | 74.47046 | 67.99891 | 0.00000 | 0.00000    | 0.00000     | 1       |       |
| 1905 | H | 80.23807 | 73.59960 | 67.65612 | 0.00000 | 0.00000    | 0.00000     | 1       |       |
| 1906 | H | 79.25996 | 73.16183 | 69.09796 | 0.00000 | 0.00000    | 0.00000     | 1       |       |
| 1907 | N | 74.61739 | 71.99274 | 67.53210 | 0.00000 | 0.00000    | 0.00000     | 1       |       |
| 1908 | C | 73.52652 | 72.11383 | 66.38243 | 0.00000 | 0.00000    | 0.00000     | 1       |       |
| 1909 | C | 73.73885 | 73.20940 | 65.45700 | 0.00000 | 0.00000    | 0.00000     | 1       |       |
| 1910 | O | 73.91117 | 74.10540 | 64.70503 | 0.00000 | 0.00000    | 0.00000     | 1       |       |
| 1911 | C | 72.12075 | 72.30559 | 67.21029 | 0.00000 | 0.00000    | 0.00000     | 1       |       |
| 1912 | C | 70.98539 | 71.95920 | 66.30850 | 0.00000 | 0.00000    | 0.00000     | 1       |       |
| 1913 | C | 70.73042 | 70.45509 | 66.31058 | 0.00000 | 0.00000    | 0.00000     | 1       |       |
| 1914 | C | 69.71943 | 72.69306 | 66.74250 | 0.00000 | 0.00000    | 0.00000     | 1       |       |
| 1915 | H | 74.65099 | 72.68744 | 68.27407 | 0.00000 | 0.00000    | 0.00000     | 1       |       |
| 1916 | H | 73.66685 | 71.10625 | 65.91441 | 0.00000 | 0.00000    | 0.00000     | 1       |       |
| 1917 | H | 72.12074 | 71.67520 | 68.12773 | 0.00000 | 0.00000    | 0.00000     | 1       |       |
| 1918 | H | 72.04546 | 73.35820 | 67.56560 | 0.00000 | 0.00000    | 0.00000     | 1       |       |
| 1919 | H | 71.23640 | 72.28247 | 65.27171 | 0.00000 | 0.00000    | 0.00000     | 1       |       |
| 1920 | H | 70.41787 | 70.09253 | 67.32304 | 0.00000 | 0.00000    | 0.00000     | 1       |       |
| 1921 | H | 71.64617 | 69.87868 | 66.02216 | 0.00000 | 0.00000    | 0.00000     | 1       |       |
| 1922 | H | 69.91901 | 70.17096 | 65.59319 | 0.00000 | 0.00000    | 0.00000     | 1       |       |
| 1923 | H | 68.84245 | 72.41939 | 66.10258 | 0.00000 | 0.00000    | 0.00000     | 1       |       |
| 1924 | H | 69.84380 | 73.80484 | 66.67722 | 0.00000 | 0.00000    | 0.00000     | 1       |       |
| 1925 | H | 69.44629 | 72.45170 | 67.80151 | 0.00000 | 0.00000    | 0.00000     | 1       |       |
| 1926 |   | 273      |          |          |         |            |             |         |       |
| 1927 |   | 150.0000 | 150.0000 | 150.0000 | 0.0000  | 0.0000     | 0.0000***** | 4.0000  | 16000 |
|      |   | 0.2500   | 300.00   | 0.00     | 0.00    | -1291.4020 | 0.0000      | 0.0000  |       |
| 1928 | N | 68.28411 | 77.47941 | 77.66707 | 0.00000 | 0.00000    | 0.00000     | 0.00000 | 1     |
| 1929 | C | 68.90564 | 77.46568 | 76.45529 | 0.00000 | 0.00000    | 0.00000     | 0.00000 | 1     |
| 1930 | C | 68.27263 | 76.13903 | 75.58970 | 0.00000 | 0.00000    | 0.00000     | 0.00000 | 1     |
| 1931 | O | 67.96616 | 75.08945 | 76.10011 | 0.00000 | 0.00000    | 0.00000     | 0.00000 | 1     |
| 1932 | C | 70.50913 | 77.08965 | 76.67711 | 0.00000 | 0.00000    | 0.00000     | 0.00000 | 1     |
| 1933 | C | 71.08391 | 78.00397 | 77.69118 | 0.00000 | 0.00000    | 0.00000     | 0.00000 | 1     |
| 1934 | C | 72.39490 | 77.42858 | 78.22423 | 0.00000 | 0.00000    | 0.00000     | 0.00000 | 1     |
| 1935 | C | 71.31392 | 79.40503 | 77.13237 | 0.00000 | 0.00000    | 0.00000     | 0.00000 | 1     |
| 1936 | H | 68.27814 | 76.59620 | 78.14355 | 0.00000 | 0.00000    | 0.00000     | 0.00000 | 1     |
| 1937 | H | 68.73725 | 78.47611 | 76.00115 | 0.00000 | 0.00000    | 0.00000     | 0.00000 | 1     |
| 1938 | H | 70.61455 | 76.02011 | 77.01436 | 0.00000 | 0.00000    | 0.00000     | 0.00000 | 1     |

|      |   |          |          |          |         |         |         |   |
|------|---|----------|----------|----------|---------|---------|---------|---|
| 1939 | H | 71.05427 | 77.15654 | 75.71012 | 0.00000 | 0.00000 | 0.00000 | 1 |
| 1940 | H | 70.37153 | 78.07237 | 78.54726 | 0.00000 | 0.00000 | 0.00000 | 1 |
| 1941 | H | 73.21973 | 77.49242 | 77.47114 | 0.00000 | 0.00000 | 0.00000 | 1 |
| 1942 | H | 72.28749 | 76.34401 | 78.50516 | 0.00000 | 0.00000 | 0.00000 | 1 |
| 1943 | H | 72.73719 | 77.97184 | 79.14093 | 0.00000 | 0.00000 | 0.00000 | 1 |
| 1944 | H | 72.22924 | 79.88183 | 77.56644 | 0.00000 | 0.00000 | 0.00000 | 1 |
| 1945 | H | 70.45137 | 80.08308 | 77.35455 | 0.00000 | 0.00000 | 0.00000 | 1 |
| 1946 | H | 71.43781 | 79.39335 | 76.02052 | 0.00000 | 0.00000 | 0.00000 | 1 |
| 1947 | N | 68.31474 | 76.46993 | 74.31145 | 0.00000 | 0.00000 | 0.00000 | 1 |
| 1948 | C | 67.77377 | 75.60556 | 73.27904 | 0.00000 | 0.00000 | 0.00000 | 1 |
| 1949 | C | 68.84358 | 75.45593 | 72.01056 | 0.00000 | 0.00000 | 0.00000 | 1 |
| 1950 | O | 68.57935 | 74.70253 | 71.10343 | 0.00000 | 0.00000 | 0.00000 | 1 |
| 1951 | C | 66.51152 | 76.20212 | 72.66103 | 0.00000 | 0.00000 | 0.00000 | 1 |
| 1952 | C | 65.33050 | 76.11283 | 73.60713 | 0.00000 | 0.00000 | 0.00000 | 1 |
| 1953 | C | 66.71350 | 77.63109 | 72.19905 | 0.00000 | 0.00000 | 0.00000 | 1 |
| 1954 | H | 68.59619 | 77.43698 | 74.17010 | 0.00000 | 0.00000 | 0.00000 | 1 |
| 1955 | H | 67.59167 | 74.64931 | 73.82899 | 0.00000 | 0.00000 | 0.00000 | 1 |
| 1956 | H | 66.26801 | 75.58838 | 71.76392 | 0.00000 | 0.00000 | 0.00000 | 1 |
| 1957 | H | 65.11264 | 75.04736 | 73.89961 | 0.00000 | 0.00000 | 0.00000 | 1 |
| 1958 | H | 65.52377 | 76.68465 | 74.55782 | 0.00000 | 0.00000 | 0.00000 | 1 |
| 1959 | H | 64.39323 | 76.53288 | 73.14545 | 0.00000 | 0.00000 | 0.00000 | 1 |
| 1960 | H | 65.82700 | 78.01123 | 71.61818 | 0.00000 | 0.00000 | 0.00000 | 1 |
| 1961 | H | 66.86451 | 78.32794 | 73.07014 | 0.00000 | 0.00000 | 0.00000 | 1 |
| 1962 | H | 67.61808 | 77.72647 | 71.53454 | 0.00000 | 0.00000 | 0.00000 | 1 |
| 1963 | N | 69.88386 | 76.26600 | 72.12506 | 0.00000 | 0.00000 | 0.00000 | 1 |
| 1964 | C | 70.86608 | 76.24009 | 71.09975 | 0.00000 | 0.00000 | 0.00000 | 1 |
| 1965 | C | 72.34925 | 75.89289 | 71.70583 | 0.00000 | 0.00000 | 0.00000 | 1 |
| 1966 | O | 73.29512 | 75.88707 | 70.95128 | 0.00000 | 0.00000 | 0.00000 | 1 |
| 1967 | C | 71.00335 | 77.71241 | 70.51040 | 0.00000 | 0.00000 | 0.00000 | 1 |
| 1968 | C | 71.58324 | 77.57083 | 69.07347 | 0.00000 | 0.00000 | 0.00000 | 1 |
| 1969 | C | 70.42434 | 76.89559 | 68.19949 | 0.00000 | 0.00000 | 0.00000 | 1 |
| 1970 | N | 70.78705 | 77.16570 | 66.87486 | 0.00000 | 0.00000 | 0.00000 | 1 |
| 1971 | C | 70.05401 | 76.92330 | 65.86506 | 0.00000 | 0.00000 | 0.00000 | 1 |
| 1972 | N | 68.80454 | 76.33650 | 66.09494 | 0.00000 | 0.00000 | 0.00000 | 1 |
| 1973 | N | 70.68275 | 77.31985 | 64.67651 | 0.00000 | 0.00000 | 0.00000 | 1 |
| 1974 | H | 69.92442 | 76.85177 | 72.95542 | 0.00000 | 0.00000 | 0.00000 | 1 |
| 1975 | H | 70.48332 | 75.48943 | 70.36694 | 0.00000 | 0.00000 | 0.00000 | 1 |
| 1976 | H | 70.02235 | 78.23814 | 70.50000 | 0.00000 | 0.00000 | 0.00000 | 1 |
| 1977 | H | 71.67271 | 78.32959 | 71.15199 | 0.00000 | 0.00000 | 0.00000 | 1 |
| 1978 | H | 71.87775 | 78.56025 | 68.65803 | 0.00000 | 0.00000 | 0.00000 | 1 |
| 1979 | H | 72.51041 | 76.94840 | 69.08417 | 0.00000 | 0.00000 | 0.00000 | 1 |
| 1980 | H | 70.32805 | 75.78545 | 68.30816 | 0.00000 | 0.00000 | 0.00000 | 1 |
| 1981 | H | 69.40494 | 77.33515 | 68.33101 | 0.00000 | 0.00000 | 0.00000 | 1 |
| 1982 | H | 71.69361 | 77.58081 | 66.72767 | 0.00000 | 0.00000 | 0.00000 | 1 |
| 1983 | H | 68.37252 | 76.05215 | 66.97339 | 0.00000 | 0.00000 | 0.00000 | 1 |
| 1984 | H | 68.12900 | 76.09959 | 65.36772 | 0.00000 | 0.00000 | 0.00000 | 1 |
| 1985 | H | 71.60253 | 77.72582 | 64.51068 | 0.00000 | 0.00000 | 0.00000 | 1 |
| 1986 | H | 70.26417 | 77.19768 | 63.75356 | 0.00000 | 0.00000 | 0.00000 | 1 |
| 1987 | N | 72.31956 | 75.71082 | 73.01944 | 0.00000 | 0.00000 | 0.00000 | 1 |
| 1988 | C | 73.50242 | 75.32758 | 73.70487 | 0.00000 | 0.00000 | 0.00000 | 1 |
| 1989 | C | 73.15332 | 73.94615 | 74.48888 | 0.00000 | 0.00000 | 0.00000 | 1 |
| 1990 | O | 72.50842 | 73.07417 | 73.94871 | 0.00000 | 0.00000 | 0.00000 | 1 |
| 1991 | C | 73.93999 | 76.50726 | 74.69520 | 0.00000 | 0.00000 | 0.00000 | 1 |
| 1992 | C | 74.09523 | 77.83670 | 73.93669 | 0.00000 | 0.00000 | 0.00000 | 1 |
| 1993 | C | 74.64944 | 77.87218 | 72.62150 | 0.00000 | 0.00000 | 0.00000 | 1 |
| 1994 | C | 73.71213 | 79.05602 | 74.57167 | 0.00000 | 0.00000 | 0.00000 | 1 |
| 1995 | C | 74.77307 | 79.09577 | 71.95986 | 0.00000 | 0.00000 | 0.00000 | 1 |
| 1996 | C | 73.86135 | 80.25754 | 73.87763 | 0.00000 | 0.00000 | 0.00000 | 1 |
| 1997 | C | 74.38502 | 80.33148 | 72.55423 | 0.00000 | 0.00000 | 0.00000 | 1 |
| 1998 | O | 74.50484 | 81.57865 | 71.88728 | 0.00000 | 0.00000 | 0.00000 | 1 |
| 1999 | H | 71.41054 | 75.71997 | 73.47915 | 0.00000 | 0.00000 | 0.00000 | 1 |
| 2000 | H | 74.22217 | 75.18656 | 72.86534 | 0.00000 | 0.00000 | 0.00000 | 1 |

|      |   |          |          |          |         |         |         |   |
|------|---|----------|----------|----------|---------|---------|---------|---|
| 2001 | H | 73.19899 | 76.62481 | 75.51784 | 0.00000 | 0.00000 | 0.00000 | 1 |
| 2002 | H | 74.90484 | 76.24785 | 75.18854 | 0.00000 | 0.00000 | 0.00000 | 1 |
| 2003 | H | 74.95842 | 76.93812 | 72.11633 | 0.00000 | 0.00000 | 0.00000 | 1 |
| 2004 | H | 73.31333 | 79.05042 | 75.60097 | 0.00000 | 0.00000 | 0.00000 | 1 |
| 2005 | H | 75.18780 | 79.09446 | 70.93653 | 0.00000 | 0.00000 | 0.00000 | 1 |
| 2006 | H | 73.56384 | 81.19630 | 74.37622 | 0.00000 | 0.00000 | 0.00000 | 1 |
| 2007 | H | 74.91776 | 81.27755 | 71.04341 | 0.00000 | 0.00000 | 0.00000 | 1 |
| 2008 | N | 73.82345 | 73.86630 | 75.64327 | 0.00000 | 0.00000 | 0.00000 | 1 |
| 2009 | C | 73.44610 | 72.82059 | 76.54579 | 0.00000 | 0.00000 | 0.00000 | 1 |
| 2010 | C | 72.31967 | 73.36755 | 77.58294 | 0.00000 | 0.00000 | 0.00000 | 1 |
| 2011 | O | 71.66852 | 74.37298 | 77.40124 | 0.00000 | 0.00000 | 0.00000 | 1 |
| 2012 | C | 74.77365 | 72.29199 | 77.25588 | 0.00000 | 0.00000 | 0.00000 | 1 |
| 2013 | O | 74.57008 | 71.13296 | 78.13976 | 0.00000 | 0.00000 | 0.00000 | 1 |
| 2014 | C | 75.41103 | 73.54749 | 77.93695 | 0.00000 | 0.00000 | 0.00000 | 1 |
| 2015 | H | 74.27117 | 74.71573 | 75.97900 | 0.00000 | 0.00000 | 0.00000 | 1 |
| 2016 | H | 73.00119 | 72.07002 | 75.84862 | 0.00000 | 0.00000 | 0.00000 | 1 |
| 2017 | H | 75.49052 | 71.93953 | 76.46897 | 0.00000 | 0.00000 | 0.00000 | 1 |
| 2018 | H | 75.18401 | 70.50480 | 77.72605 | 0.00000 | 0.00000 | 0.00000 | 1 |
| 2019 | H | 76.34943 | 73.28234 | 78.47994 | 0.00000 | 0.00000 | 0.00000 | 1 |
| 2020 | H | 74.71645 | 74.01302 | 78.67823 | 0.00000 | 0.00000 | 0.00000 | 1 |
| 2021 | H | 75.67460 | 74.33675 | 77.19528 | 0.00000 | 0.00000 | 0.00000 | 1 |
| 2022 | N | 72.18158 | 72.45917 | 78.54210 | 0.00000 | 0.00000 | 0.00000 | 1 |
| 2023 | C | 71.27250 | 72.73287 | 79.59717 | 0.00000 | 0.00000 | 0.00000 | 1 |
| 2024 | C | 72.04836 | 73.40202 | 80.87653 | 0.00000 | 0.00000 | 0.00000 | 1 |
| 2025 | O | 71.41006 | 73.86126 | 81.79624 | 0.00000 | 0.00000 | 0.00000 | 1 |
| 2026 | C | 70.77307 | 71.35023 | 80.20566 | 0.00000 | 0.00000 | 0.00000 | 1 |
| 2027 | C | 69.89215 | 70.54827 | 79.19752 | 0.00000 | 0.00000 | 0.00000 | 1 |
| 2028 | C | 68.38292 | 71.00013 | 79.33633 | 0.00000 | 0.00000 | 0.00000 | 1 |
| 2029 | C | 68.14137 | 72.30394 | 78.54061 | 0.00000 | 0.00000 | 0.00000 | 1 |
| 2030 | N | 66.59870 | 72.56885 | 78.54906 | 0.00000 | 0.00000 | 0.00000 | 1 |
| 2031 | H | 72.81147 | 71.64432 | 78.57940 | 0.00000 | 0.00000 | 0.00000 | 1 |
| 2032 | H | 70.49624 | 73.40428 | 79.16461 | 0.00000 | 0.00000 | 0.00000 | 1 |
| 2033 | H | 71.66217 | 70.74136 | 80.48542 | 0.00000 | 0.00000 | 0.00000 | 1 |
| 2034 | H | 70.21523 | 71.52315 | 81.15284 | 0.00000 | 0.00000 | 0.00000 | 1 |
| 2035 | H | 70.26028 | 70.67921 | 78.15497 | 0.00000 | 0.00000 | 0.00000 | 1 |
| 2036 | H | 69.97393 | 69.45945 | 79.41616 | 0.00000 | 0.00000 | 0.00000 | 1 |
| 2037 | H | 67.70854 | 70.19985 | 78.95420 | 0.00000 | 0.00000 | 0.00000 | 1 |
| 2038 | H | 68.10824 | 71.13235 | 80.40824 | 0.00000 | 0.00000 | 0.00000 | 1 |
| 2039 | H | 68.58004 | 73.21984 | 78.98351 | 0.00000 | 0.00000 | 0.00000 | 1 |
| 2040 | H | 68.40179 | 72.24114 | 77.46482 | 0.00000 | 0.00000 | 0.00000 | 1 |
| 2041 | H | 65.95647 | 71.75229 | 78.33032 | 0.00000 | 0.00000 | 0.00000 | 1 |
| 2042 | H | 66.27538 | 73.28891 | 77.84091 | 0.00000 | 0.00000 | 0.00000 | 1 |
| 2043 | H | 66.17546 | 72.95111 | 79.44422 | 0.00000 | 0.00000 | 0.00000 | 1 |
| 2044 | N | 73.36377 | 73.18476 | 80.81426 | 0.00000 | 0.00000 | 0.00000 | 1 |
| 2045 | C | 74.19101 | 73.98746 | 81.66588 | 0.00000 | 0.00000 | 0.00000 | 1 |
| 2046 | C | 74.56801 | 75.36333 | 80.88467 | 0.00000 | 0.00000 | 0.00000 | 1 |
| 2047 | O | 73.97746 | 75.77290 | 79.91458 | 0.00000 | 0.00000 | 0.00000 | 1 |
| 2048 | C | 75.48517 | 73.13358 | 82.00040 | 0.00000 | 0.00000 | 0.00000 | 1 |
| 2049 | C | 75.70350 | 73.14943 | 83.54784 | 0.00000 | 0.00000 | 0.00000 | 1 |
| 2050 | C | 74.95273 | 71.91561 | 84.19210 | 0.00000 | 0.00000 | 0.00000 | 1 |
| 2051 | C | 73.41921 | 72.07258 | 84.07233 | 0.00000 | 0.00000 | 0.00000 | 1 |
| 2052 | N | 72.77930 | 70.80391 | 84.73157 | 0.00000 | 0.00000 | 0.00000 | 1 |
| 2053 | H | 73.71323 | 72.78197 | 79.94551 | 0.00000 | 0.00000 | 0.00000 | 1 |
| 2054 | H | 73.52237 | 74.17638 | 82.53834 | 0.00000 | 0.00000 | 0.00000 | 1 |
| 2055 | H | 75.38541 | 72.09092 | 81.62470 | 0.00000 | 0.00000 | 0.00000 | 1 |
| 2056 | H | 76.37145 | 73.55927 | 81.47748 | 0.00000 | 0.00000 | 0.00000 | 1 |
| 2057 | H | 76.79024 | 73.08753 | 83.77988 | 0.00000 | 0.00000 | 0.00000 | 1 |
| 2058 | H | 75.35249 | 74.10681 | 83.99445 | 0.00000 | 0.00000 | 0.00000 | 1 |
| 2059 | H | 75.28133 | 70.96827 | 83.70665 | 0.00000 | 0.00000 | 0.00000 | 1 |
| 2060 | H | 75.23614 | 71.81309 | 85.26486 | 0.00000 | 0.00000 | 0.00000 | 1 |
| 2061 | H | 72.99554 | 72.92562 | 84.63918 | 0.00000 | 0.00000 | 0.00000 | 1 |
| 2062 | H | 73.02733 | 72.07540 | 83.03462 | 0.00000 | 0.00000 | 0.00000 | 1 |

|      |   |          |          |          |         |         |         |   |
|------|---|----------|----------|----------|---------|---------|---------|---|
| 2063 | H | 73.04705 | 70.59287 | 85.73696 | 0.00000 | 0.00000 | 0.00000 | 1 |
| 2064 | H | 72.95711 | 69.87080 | 84.25783 | 0.00000 | 0.00000 | 0.00000 | 1 |
| 2065 | H | 71.72073 | 70.80712 | 84.79516 | 0.00000 | 0.00000 | 0.00000 | 1 |
| 2066 | N | 75.54242 | 75.97496 | 81.56476 | 0.00000 | 0.00000 | 0.00000 | 1 |
| 2067 | C | 76.11012 | 77.25089 | 81.09113 | 0.00000 | 0.00000 | 0.00000 | 1 |
| 2068 | C | 76.85830 | 76.95766 | 79.65881 | 0.00000 | 0.00000 | 0.00000 | 1 |
| 2069 | O | 77.62459 | 76.01746 | 79.53825 | 0.00000 | 0.00000 | 0.00000 | 1 |
| 2070 | C | 77.10883 | 77.71036 | 82.13735 | 0.00000 | 0.00000 | 0.00000 | 1 |
| 2071 | C | 77.87591 | 78.93935 | 81.68435 | 0.00000 | 0.00000 | 0.00000 | 1 |
| 2072 | C | 76.44191 | 77.97712 | 83.47458 | 0.00000 | 0.00000 | 0.00000 | 1 |
| 2073 | H | 75.92591 | 75.45859 | 82.35402 | 0.00000 | 0.00000 | 0.00000 | 1 |
| 2074 | H | 75.22040 | 77.91348 | 80.98404 | 0.00000 | 0.00000 | 0.00000 | 1 |
| 2075 | H | 77.84721 | 76.88947 | 82.28261 | 0.00000 | 0.00000 | 0.00000 | 1 |
| 2076 | H | 78.69634 | 79.20574 | 82.40977 | 0.00000 | 0.00000 | 0.00000 | 1 |
| 2077 | H | 78.37157 | 78.77344 | 80.68380 | 0.00000 | 0.00000 | 0.00000 | 1 |
| 2078 | H | 77.20879 | 79.83994 | 81.58802 | 0.00000 | 0.00000 | 0.00000 | 1 |
| 2079 | H | 75.92885 | 77.05902 | 83.87304 | 0.00000 | 0.00000 | 0.00000 | 1 |
| 2080 | H | 77.18316 | 78.31070 | 84.25177 | 0.00000 | 0.00000 | 0.00000 | 1 |
| 2081 | H | 75.65985 | 78.78126 | 83.39291 | 0.00000 | 0.00000 | 0.00000 | 1 |
| 2082 | N | 76.56147 | 77.90438 | 78.76660 | 0.00000 | 0.00000 | 0.00000 | 1 |
| 2083 | C | 77.12665 | 77.86775 | 77.44770 | 0.00000 | 0.00000 | 0.00000 | 1 |
| 2084 | C | 78.68407 | 78.37424 | 77.57951 | 0.00000 | 0.00000 | 0.00000 | 1 |
| 2085 | O | 79.02090 | 79.49532 | 77.29648 | 0.00000 | 0.00000 | 0.00000 | 1 |
| 2086 | C | 76.19980 | 78.85426 | 76.62920 | 0.00000 | 0.00000 | 0.00000 | 1 |
| 2087 | C | 75.82550 | 79.91234 | 77.71565 | 0.00000 | 0.00000 | 0.00000 | 1 |
| 2088 | C | 75.62385 | 78.99518 | 78.99677 | 0.00000 | 0.00000 | 0.00000 | 1 |
| 2089 | H | 77.06686 | 76.79483 | 77.16030 | 0.00000 | 0.00000 | 0.00000 | 1 |
| 2090 | H | 76.71199 | 79.29688 | 75.74455 | 0.00000 | 0.00000 | 0.00000 | 1 |
| 2091 | H | 75.29550 | 78.33295 | 76.24481 | 0.00000 | 0.00000 | 0.00000 | 1 |
| 2092 | H | 76.66013 | 80.63382 | 77.86471 | 0.00000 | 0.00000 | 0.00000 | 1 |
| 2093 | H | 74.92424 | 80.51415 | 77.46003 | 0.00000 | 0.00000 | 0.00000 | 1 |
| 2094 | H | 75.86854 | 79.48175 | 79.96934 | 0.00000 | 0.00000 | 0.00000 | 1 |
| 2095 | H | 74.62189 | 78.51282 | 79.06742 | 0.00000 | 0.00000 | 0.00000 | 1 |
| 2096 | N | 79.39709 | 77.36524 | 78.06635 | 0.00000 | 0.00000 | 0.00000 | 1 |
| 2097 | C | 80.81574 | 77.51021 | 78.09468 | 0.00000 | 0.00000 | 0.00000 | 1 |
| 2098 | C | 81.39763 | 76.94561 | 76.67794 | 0.00000 | 0.00000 | 0.00000 | 1 |
| 2099 | O | 80.71820 | 76.84936 | 75.68393 | 0.00000 | 0.00000 | 0.00000 | 1 |
| 2100 | C | 81.31868 | 76.65858 | 79.33630 | 0.00000 | 0.00000 | 0.00000 | 1 |
| 2101 | C | 82.43131 | 77.43980 | 80.09877 | 0.00000 | 0.00000 | 0.00000 | 1 |
| 2102 | C | 81.69465 | 78.38433 | 81.12631 | 0.00000 | 0.00000 | 0.00000 | 1 |
| 2103 | O | 80.50976 | 78.31349 | 81.34499 | 0.00000 | 0.00000 | 0.00000 | 1 |
| 2104 | N | 82.58082 | 79.20952 | 81.72006 | 0.00000 | 0.00000 | 0.00000 | 1 |
| 2105 | H | 78.92912 | 76.48567 | 78.36854 | 0.00000 | 0.00000 | 0.00000 | 1 |
| 2106 | H | 80.93266 | 78.61546 | 78.19134 | 0.00000 | 0.00000 | 0.00000 | 1 |
| 2107 | H | 80.46922 | 76.44515 | 80.02871 | 0.00000 | 0.00000 | 0.00000 | 1 |
| 2108 | H | 81.69509 | 75.66750 | 78.99498 | 0.00000 | 0.00000 | 0.00000 | 1 |
| 2109 | H | 83.11024 | 76.74115 | 80.63547 | 0.00000 | 0.00000 | 0.00000 | 1 |
| 2110 | H | 83.09381 | 78.01480 | 79.41515 | 0.00000 | 0.00000 | 0.00000 | 1 |
| 2111 | H | 83.59583 | 79.25689 | 81.57093 | 0.00000 | 0.00000 | 0.00000 | 1 |
| 2112 | H | 82.35565 | 79.88256 | 82.46037 | 0.00000 | 0.00000 | 0.00000 | 1 |
| 2113 | N | 82.69669 | 76.65981 | 76.80240 | 0.00000 | 0.00000 | 0.00000 | 1 |
| 2114 | C | 83.51531 | 76.28585 | 75.64583 | 0.00000 | 0.00000 | 0.00000 | 1 |
| 2115 | C | 83.20502 | 74.72468 | 75.17592 | 0.00000 | 0.00000 | 0.00000 | 1 |
| 2116 | O | 83.74577 | 74.29108 | 74.18602 | 0.00000 | 0.00000 | 0.00000 | 1 |
| 2117 | C | 84.99241 | 76.30874 | 75.98428 | 0.00000 | 0.00000 | 0.00000 | 1 |
| 2118 | C | 85.55231 | 77.71747 | 76.04946 | 0.00000 | 0.00000 | 0.00000 | 1 |
| 2119 | C | 85.30693 | 75.56158 | 77.26702 | 0.00000 | 0.00000 | 0.00000 | 1 |
| 2120 | H | 83.09468 | 76.84179 | 77.72057 | 0.00000 | 0.00000 | 0.00000 | 1 |
| 2121 | H | 83.21177 | 77.01125 | 74.85401 | 0.00000 | 0.00000 | 0.00000 | 1 |
| 2122 | H | 85.51637 | 75.78242 | 75.15160 | 0.00000 | 0.00000 | 0.00000 | 1 |
| 2123 | H | 85.04429 | 78.32710 | 76.84683 | 0.00000 | 0.00000 | 0.00000 | 1 |
| 2124 | H | 86.65390 | 77.71454 | 76.28010 | 0.00000 | 0.00000 | 0.00000 | 1 |



|      |   |          |          |          |         |         |         |   |
|------|---|----------|----------|----------|---------|---------|---------|---|
| 2125 | H | 85.41641 | 78.26366 | 75.07497 | 0.00000 | 0.00000 | 0.00000 | 1 |
| 2126 | H | 84.70958 | 74.61084 | 77.34498 | 0.00000 | 0.00000 | 0.00000 | 1 |
| 2127 | H | 86.39467 | 75.28108 | 77.32938 | 0.00000 | 0.00000 | 0.00000 | 1 |
| 2128 | H | 85.07060 | 76.17862 | 78.17724 | 0.00000 | 0.00000 | 0.00000 | 1 |
| 2129 | N | 82.45849 | 74.06608 | 76.05602 | 0.00000 | 0.00000 | 0.00000 | 1 |
| 2130 | C | 81.88544 | 72.83888 | 75.63152 | 0.00000 | 0.00000 | 0.00000 | 1 |
| 2131 | C | 80.26007 | 73.02427 | 75.69429 | 0.00000 | 0.00000 | 0.00000 | 1 |
| 2132 | O | 79.69806 | 73.31466 | 76.72193 | 0.00000 | 0.00000 | 0.00000 | 1 |
| 2133 | C | 82.34164 | 71.78605 | 76.75045 | 0.00000 | 0.00000 | 0.00000 | 1 |
| 2134 | O | 81.92969 | 70.41561 | 76.53615 | 0.00000 | 0.00000 | 0.00000 | 1 |
| 2135 | H | 82.07942 | 74.62758 | 76.81633 | 0.00000 | 0.00000 | 0.00000 | 1 |
| 2136 | H | 82.29730 | 72.63246 | 74.61563 | 0.00000 | 0.00000 | 0.00000 | 1 |
| 2137 | H | 83.44974 | 71.90009 | 76.87612 | 0.00000 | 0.00000 | 0.00000 | 1 |
| 2138 | H | 81.87938 | 72.14495 | 77.71057 | 0.00000 | 0.00000 | 0.00000 | 1 |
| 2139 | H | 82.73241 | 70.06707 | 76.10642 | 0.00000 | 0.00000 | 0.00000 | 1 |
| 2140 | N | 79.75624 | 72.80904 | 74.49181 | 0.00000 | 0.00000 | 0.00000 | 1 |
| 2141 | C | 78.34059 | 72.84339 | 74.29283 | 0.00000 | 0.00000 | 0.00000 | 1 |
| 2142 | C | 78.21872 | 72.00240 | 72.92664 | 0.00000 | 0.00000 | 0.00000 | 1 |
| 2143 | O | 79.24175 | 71.72206 | 72.33218 | 0.00000 | 0.00000 | 0.00000 | 1 |
| 2144 | C | 77.84091 | 74.36998 | 74.08067 | 0.00000 | 0.00000 | 0.00000 | 1 |
| 2145 | O | 78.43183 | 75.09301 | 72.99659 | 0.00000 | 0.00000 | 0.00000 | 1 |
| 2146 | C | 78.00327 | 74.99068 | 75.51404 | 0.00000 | 0.00000 | 0.00000 | 1 |
| 2147 | H | 80.29835 | 72.54448 | 73.64894 | 0.00000 | 0.00000 | 0.00000 | 1 |
| 2148 | H | 77.87901 | 72.38578 | 75.19743 | 0.00000 | 0.00000 | 0.00000 | 1 |
| 2149 | H | 76.74132 | 74.33189 | 73.83788 | 0.00000 | 0.00000 | 0.00000 | 1 |
| 2150 | H | 77.65990 | 75.21877 | 72.40482 | 0.00000 | 0.00000 | 0.00000 | 1 |
| 2151 | H | 79.07046 | 75.26725 | 75.71432 | 0.00000 | 0.00000 | 0.00000 | 1 |
| 2152 | H | 77.68224 | 74.28400 | 76.31820 | 0.00000 | 0.00000 | 0.00000 | 1 |
| 2153 | H | 77.39806 | 75.92067 | 75.62115 | 0.00000 | 0.00000 | 0.00000 | 1 |
| 2154 | N | 76.95277 | 71.69399 | 72.63319 | 0.00000 | 0.00000 | 0.00000 | 1 |
| 2155 | C | 76.60974 | 71.08624 | 71.38049 | 0.00000 | 0.00000 | 0.00000 | 1 |
| 2156 | C | 76.52347 | 72.24190 | 70.22005 | 0.00000 | 0.00000 | 0.00000 | 1 |
| 2157 | O | 75.93861 | 73.28336 | 70.38964 | 0.00000 | 0.00000 | 0.00000 | 1 |
| 2158 | C | 75.15181 | 70.52961 | 71.65679 | 0.00000 | 0.00000 | 0.00000 | 1 |
| 2159 | C | 74.59501 | 71.59281 | 72.65384 | 0.00000 | 0.00000 | 0.00000 | 1 |
| 2160 | C | 75.85997 | 71.79831 | 73.59225 | 0.00000 | 0.00000 | 0.00000 | 1 |
| 2161 | H | 77.38964 | 70.32221 | 71.16195 | 0.00000 | 0.00000 | 0.00000 | 1 |
| 2162 | H | 74.54298 | 70.43837 | 70.72886 | 0.00000 | 0.00000 | 0.00000 | 1 |
| 2163 | H | 75.18088 | 69.51753 | 72.11865 | 0.00000 | 0.00000 | 0.00000 | 1 |
| 2164 | H | 74.32541 | 72.53708 | 72.12639 | 0.00000 | 0.00000 | 0.00000 | 1 |
| 2165 | H | 73.68518 | 71.26232 | 73.20678 | 0.00000 | 0.00000 | 0.00000 | 1 |
| 2166 | H | 75.90730 | 72.77939 | 74.11875 | 0.00000 | 0.00000 | 0.00000 | 1 |
| 2167 | H | 76.02685 | 70.97944 | 74.33180 | 0.00000 | 0.00000 | 0.00000 | 1 |
| 2168 | N | 77.10031 | 71.77103 | 69.12206 | 0.00000 | 0.00000 | 0.00000 | 1 |
| 2169 | C | 76.97314 | 72.48578 | 67.90695 | 0.00000 | 0.00000 | 0.00000 | 1 |
| 2170 | C | 75.81794 | 71.72320 | 67.02226 | 0.00000 | 0.00000 | 0.00000 | 1 |
| 2171 | O | 76.07807 | 70.98234 | 66.10459 | 0.00000 | 0.00000 | 0.00000 | 1 |
| 2172 | C | 78.40902 | 72.40252 | 67.18315 | 0.00000 | 0.00000 | 0.00000 | 1 |
| 2173 | O | 79.00442 | 71.09886 | 67.10072 | 0.00000 | 0.00000 | 0.00000 | 1 |
| 2174 | C | 79.19532 | 73.46972 | 68.02707 | 0.00000 | 0.00000 | 0.00000 | 1 |
| 2175 | H | 77.55061 | 70.85668 | 69.10734 | 0.00000 | 0.00000 | 0.00000 | 1 |
| 2176 | H | 76.65437 | 73.50393 | 68.22925 | 0.00000 | 0.00000 | 0.00000 | 1 |
| 2177 | H | 78.28770 | 72.77628 | 66.13034 | 0.00000 | 0.00000 | 0.00000 | 1 |
| 2178 | H | 78.88259 | 70.89269 | 66.15103 | 0.00000 | 0.00000 | 0.00000 | 1 |
| 2179 | H | 78.70242 | 74.46962 | 68.00070 | 0.00000 | 0.00000 | 0.00000 | 1 |
| 2180 | H | 80.23779 | 73.60038 | 67.65461 | 0.00000 | 0.00000 | 0.00000 | 1 |
| 2181 | H | 79.26227 | 73.16031 | 69.09750 | 0.00000 | 0.00000 | 0.00000 | 1 |
| 2182 | N | 74.61733 | 71.99340 | 67.53486 | 0.00000 | 0.00000 | 0.00000 | 1 |
| 2183 | C | 73.52642 | 72.11785 | 66.38601 | 0.00000 | 0.00000 | 0.00000 | 1 |
| 2184 | C | 73.74092 | 73.21021 | 65.45772 | 0.00000 | 0.00000 | 0.00000 | 1 |
| 2185 | O | 73.91281 | 74.11137 | 64.71216 | 0.00000 | 0.00000 | 0.00000 | 1 |
| 2186 | C | 72.12023 | 72.30781 | 67.21174 | 0.00000 | 0.00000 | 0.00000 | 1 |

|      |   |          |          |          |         |         |             |         |        |
|------|---|----------|----------|----------|---------|---------|-------------|---------|--------|
| 2187 | C | 70.98581 | 71.96174 | 66.30915 | 0.00000 | 0.00000 | 0.00000     | 1       |        |
| 2188 | C | 70.73093 | 70.45742 | 66.30999 | 0.00000 | 0.00000 | 0.00000     | 1       |        |
| 2189 | C | 69.71897 | 72.69467 | 66.74283 | 0.00000 | 0.00000 | 0.00000     | 1       |        |
| 2190 | H | 74.65196 | 72.68841 | 68.27643 | 0.00000 | 0.00000 | 0.00000     | 1       |        |
| 2191 | H | 73.66712 | 71.10949 | 65.91588 | 0.00000 | 0.00000 | 0.00000     | 1       |        |
| 2192 | H | 72.11975 | 71.67711 | 68.12899 | 0.00000 | 0.00000 | 0.00000     | 1       |        |
| 2193 | H | 72.04475 | 73.36027 | 67.56737 | 0.00000 | 0.00000 | 0.00000     | 1       |        |
| 2194 | H | 71.23711 | 72.28575 | 65.27270 | 0.00000 | 0.00000 | 0.00000     | 1       |        |
| 2195 | H | 70.41960 | 70.09389 | 67.32245 | 0.00000 | 0.00000 | 0.00000     | 1       |        |
| 2196 | H | 71.64642 | 69.88150 | 66.01992 | 0.00000 | 0.00000 | 0.00000     | 1       |        |
| 2197 | H | 69.91871 | 70.17399 | 65.59327 | 0.00000 | 0.00000 | 0.00000     | 1       |        |
| 2198 | H | 68.84259 | 72.42078 | 66.10221 | 0.00000 | 0.00000 | 0.00000     | 1       |        |
| 2199 | H | 69.84280 | 73.80651 | 66.67818 | 0.00000 | 0.00000 | 0.00000     | 1       |        |
| 2200 | H | 69.44539 | 72.45252 | 67.80151 | 0.00000 | 0.00000 | 0.00000     | 1       |        |
| 2201 |   | 273      |          |          |         |         |             |         |        |
| 2202 |   | 150.0000 | 150.0000 | 150.0000 | 0.0000  | 0.0000  | 0.0000***** | 4.5000  | 18000  |
|      |   | 0.2500   | 300.00   | 0.00     | 0.00    | 0.00    | -1291.4365  | 0.0000  | 0.0000 |
| 2203 | N | 68.28519 | 77.47436 | 77.66864 | 0.00000 | 0.00000 | 0.00000     | 0.00000 | 1      |
| 2204 | C | 68.90446 | 77.46261 | 76.45571 | 0.00000 | 0.00000 | 0.00000     | 0.00000 | 1      |
| 2205 | C | 68.27129 | 76.13633 | 75.58969 | 0.00000 | 0.00000 | 0.00000     | 0.00000 | 1      |
| 2206 | O | 67.96442 | 75.08658 | 76.09948 | 0.00000 | 0.00000 | 0.00000     | 0.00000 | 1      |
| 2207 | C | 70.50859 | 77.08682 | 76.67322 | 0.00000 | 0.00000 | 0.00000     | 0.00000 | 1      |
| 2208 | C | 71.08577 | 77.99842 | 77.68842 | 0.00000 | 0.00000 | 0.00000     | 0.00000 | 1      |
| 2209 | C | 72.39848 | 77.42188 | 78.21577 | 0.00000 | 0.00000 | 0.00000     | 0.00000 | 1      |
| 2210 | C | 71.31196 | 79.40119 | 77.13233 | 0.00000 | 0.00000 | 0.00000     | 0.00000 | 1      |
| 2211 | H | 68.27976 | 76.59025 | 78.14346 | 0.00000 | 0.00000 | 0.00000     | 0.00000 | 1      |
| 2212 | H | 68.73467 | 78.47348 | 76.00307 | 0.00000 | 0.00000 | 0.00000     | 0.00000 | 1      |
| 2213 | H | 70.61514 | 76.01656 | 77.00785 | 0.00000 | 0.00000 | 0.00000     | 0.00000 | 1      |
| 2214 | H | 71.05158 | 77.15620 | 75.70517 | 0.00000 | 0.00000 | 0.00000     | 0.00000 | 1      |
| 2215 | H | 70.37597 | 78.06385 | 78.54688 | 0.00000 | 0.00000 | 0.00000     | 0.00000 | 1      |
| 2216 | H | 73.22231 | 77.49299 | 77.46227 | 0.00000 | 0.00000 | 0.00000     | 0.00000 | 1      |
| 2217 | H | 72.29392 | 76.33477 | 78.48940 | 0.00000 | 0.00000 | 0.00000     | 0.00000 | 1      |
| 2218 | H | 72.74070 | 77.95943 | 79.13586 | 0.00000 | 0.00000 | 0.00000     | 0.00000 | 1      |
| 2219 | H | 72.21789 | 79.88525 | 77.57787 | 0.00000 | 0.00000 | 0.00000     | 0.00000 | 1      |
| 2220 | H | 70.44122 | 80.07237 | 77.34315 | 0.00000 | 0.00000 | 0.00000     | 0.00000 | 1      |
| 2221 | H | 71.44991 | 79.39035 | 76.02215 | 0.00000 | 0.00000 | 0.00000     | 0.00000 | 1      |
| 2222 | N | 68.31474 | 76.46787 | 74.31167 | 0.00000 | 0.00000 | 0.00000     | 0.00000 | 1      |
| 2223 | C | 67.77303 | 75.60487 | 73.27829 | 0.00000 | 0.00000 | 0.00000     | 0.00000 | 1      |
| 2224 | C | 68.84229 | 75.45768 | 72.00912 | 0.00000 | 0.00000 | 0.00000     | 0.00000 | 1      |
| 2225 | O | 68.57575 | 74.70881 | 71.09893 | 0.00000 | 0.00000 | 0.00000     | 0.00000 | 1      |
| 2226 | C | 66.51001 | 76.20266 | 72.66271 | 0.00000 | 0.00000 | 0.00000     | 0.00000 | 1      |
| 2227 | C | 65.33090 | 76.11517 | 73.61130 | 0.00000 | 0.00000 | 0.00000     | 0.00000 | 1      |
| 2228 | C | 66.71300 | 77.63122 | 72.19997 | 0.00000 | 0.00000 | 0.00000     | 0.00000 | 1      |
| 2229 | H | 68.59627 | 77.43498 | 74.17112 | 0.00000 | 0.00000 | 0.00000     | 0.00000 | 1      |
| 2230 | H | 67.59131 | 74.64782 | 73.82684 | 0.00000 | 0.00000 | 0.00000     | 0.00000 | 1      |
| 2231 | H | 66.26401 | 75.58893 | 71.76630 | 0.00000 | 0.00000 | 0.00000     | 0.00000 | 1      |
| 2232 | H | 65.11243 | 75.05012 | 73.90484 | 0.00000 | 0.00000 | 0.00000     | 0.00000 | 1      |
| 2233 | H | 65.52673 | 76.68730 | 74.56127 | 0.00000 | 0.00000 | 0.00000     | 0.00000 | 1      |
| 2234 | H | 64.39316 | 76.53602 | 73.15130 | 0.00000 | 0.00000 | 0.00000     | 0.00000 | 1      |
| 2235 | H | 65.82539 | 78.01277 | 71.62175 | 0.00000 | 0.00000 | 0.00000     | 0.00000 | 1      |
| 2236 | H | 66.86786 | 78.32792 | 73.07049 | 0.00000 | 0.00000 | 0.00000     | 0.00000 | 1      |
| 2237 | H | 67.61573 | 77.72496 | 71.53271 | 0.00000 | 0.00000 | 0.00000     | 0.00000 | 1      |
| 2238 | N | 69.88570 | 76.26318 | 72.12745 | 0.00000 | 0.00000 | 0.00000     | 0.00000 | 1      |
| 2239 | C | 70.86704 | 76.23913 | 71.10124 | 0.00000 | 0.00000 | 0.00000     | 0.00000 | 1      |
| 2240 | C | 72.35100 | 75.89364 | 71.70611 | 0.00000 | 0.00000 | 0.00000     | 0.00000 | 1      |
| 2241 | O | 73.29735 | 75.89203 | 70.95175 | 0.00000 | 0.00000 | 0.00000     | 0.00000 | 1      |
| 2242 | C | 71.00145 | 77.71175 | 70.51199 | 0.00000 | 0.00000 | 0.00000     | 0.00000 | 1      |
| 2243 | C | 71.58159 | 77.57213 | 69.07496 | 0.00000 | 0.00000 | 0.00000     | 0.00000 | 1      |
| 2244 | C | 70.42495 | 76.89367 | 68.20052 | 0.00000 | 0.00000 | 0.00000     | 0.00000 | 1      |
| 2245 | N | 70.78927 | 77.16186 | 66.87596 | 0.00000 | 0.00000 | 0.00000     | 0.00000 | 1      |
| 2246 | C | 70.05680 | 76.91896 | 65.86572 | 0.00000 | 0.00000 | 0.00000     | 0.00000 | 1      |
| 2247 | N | 68.80637 | 76.33386 | 66.09539 | 0.00000 | 0.00000 | 0.00000     | 0.00000 | 1      |

|      |   |          |          |          |         |         |         |   |
|------|---|----------|----------|----------|---------|---------|---------|---|
| 2248 | N | 70.68691 | 77.31310 | 64.67697 | 0.00000 | 0.00000 | 0.00000 | 1 |
| 2249 | H | 69.92804 | 76.84558 | 72.96011 | 0.00000 | 0.00000 | 0.00000 | 1 |
| 2250 | H | 70.48437 | 75.48853 | 70.36836 | 0.00000 | 0.00000 | 0.00000 | 1 |
| 2251 | H | 70.01937 | 78.23545 | 70.50186 | 0.00000 | 0.00000 | 0.00000 | 1 |
| 2252 | H | 71.66954 | 78.33015 | 71.15374 | 0.00000 | 0.00000 | 0.00000 | 1 |
| 2253 | H | 71.87301 | 78.56260 | 68.65971 | 0.00000 | 0.00000 | 0.00000 | 1 |
| 2254 | H | 72.51064 | 76.95257 | 69.08549 | 0.00000 | 0.00000 | 0.00000 | 1 |
| 2255 | H | 70.33058 | 75.78354 | 68.31089 | 0.00000 | 0.00000 | 0.00000 | 1 |
| 2256 | H | 69.40457 | 77.33161 | 68.32993 | 0.00000 | 0.00000 | 0.00000 | 1 |
| 2257 | H | 71.69649 | 77.57559 | 66.72900 | 0.00000 | 0.00000 | 0.00000 | 1 |
| 2258 | H | 68.37344 | 76.05114 | 66.97383 | 0.00000 | 0.00000 | 0.00000 | 1 |
| 2259 | H | 68.13127 | 76.09680 | 65.36791 | 0.00000 | 0.00000 | 0.00000 | 1 |
| 2260 | H | 71.60730 | 77.71754 | 64.51125 | 0.00000 | 0.00000 | 0.00000 | 1 |
| 2261 | H | 70.26877 | 77.19002 | 63.75400 | 0.00000 | 0.00000 | 0.00000 | 1 |
| 2262 | N | 72.32137 | 75.70713 | 73.01914 | 0.00000 | 0.00000 | 0.00000 | 1 |
| 2263 | C | 73.50478 | 75.32518 | 73.70411 | 0.00000 | 0.00000 | 0.00000 | 1 |
| 2264 | C | 73.15561 | 73.94493 | 74.49017 | 0.00000 | 0.00000 | 0.00000 | 1 |
| 2265 | O | 72.51066 | 73.07207 | 73.95152 | 0.00000 | 0.00000 | 0.00000 | 1 |
| 2266 | C | 73.94207 | 76.50453 | 74.69495 | 0.00000 | 0.00000 | 0.00000 | 1 |
| 2267 | C | 74.09701 | 77.83463 | 73.93759 | 0.00000 | 0.00000 | 0.00000 | 1 |
| 2268 | C | 74.65208 | 77.87201 | 72.62283 | 0.00000 | 0.00000 | 0.00000 | 1 |
| 2269 | C | 73.71243 | 79.05277 | 74.57394 | 0.00000 | 0.00000 | 0.00000 | 1 |
| 2270 | C | 74.77401 | 79.09649 | 71.96250 | 0.00000 | 0.00000 | 0.00000 | 1 |
| 2271 | C | 73.85990 | 80.25517 | 73.88112 | 0.00000 | 0.00000 | 0.00000 | 1 |
| 2272 | C | 74.38356 | 80.33099 | 72.55783 | 0.00000 | 0.00000 | 0.00000 | 1 |
| 2273 | O | 74.50133 | 81.57895 | 71.89201 | 0.00000 | 0.00000 | 0.00000 | 1 |
| 2274 | H | 71.41223 | 75.71254 | 73.47870 | 0.00000 | 0.00000 | 0.00000 | 1 |
| 2275 | H | 74.22469 | 75.18405 | 72.86475 | 0.00000 | 0.00000 | 0.00000 | 1 |
| 2276 | H | 73.20076 | 76.62132 | 75.51743 | 0.00000 | 0.00000 | 0.00000 | 1 |
| 2277 | H | 74.90693 | 76.24502 | 75.18830 | 0.00000 | 0.00000 | 0.00000 | 1 |
| 2278 | H | 74.96252 | 76.93872 | 72.11688 | 0.00000 | 0.00000 | 0.00000 | 1 |
| 2279 | H | 73.31394 | 79.04552 | 75.60333 | 0.00000 | 0.00000 | 0.00000 | 1 |
| 2280 | H | 75.18927 | 79.09687 | 70.93939 | 0.00000 | 0.00000 | 0.00000 | 1 |
| 2281 | H | 73.56096 | 81.19298 | 74.38062 | 0.00000 | 0.00000 | 0.00000 | 1 |
| 2282 | H | 74.91425 | 81.27920 | 71.04766 | 0.00000 | 0.00000 | 0.00000 | 1 |
| 2283 | N | 73.82435 | 73.86815 | 75.64556 | 0.00000 | 0.00000 | 0.00000 | 1 |
| 2284 | C | 73.44840 | 72.82287 | 76.54895 | 0.00000 | 0.00000 | 0.00000 | 1 |
| 2285 | C | 72.32152 | 73.36883 | 77.58590 | 0.00000 | 0.00000 | 0.00000 | 1 |
| 2286 | O | 71.67007 | 74.37438 | 77.40489 | 0.00000 | 0.00000 | 0.00000 | 1 |
| 2287 | C | 74.77743 | 72.29742 | 77.25923 | 0.00000 | 0.00000 | 0.00000 | 1 |
| 2288 | O | 74.57558 | 71.13860 | 78.14251 | 0.00000 | 0.00000 | 0.00000 | 1 |
| 2289 | C | 75.41148 | 73.55483 | 77.94013 | 0.00000 | 0.00000 | 0.00000 | 1 |
| 2290 | H | 74.27162 | 74.71838 | 75.98009 | 0.00000 | 0.00000 | 0.00000 | 1 |
| 2291 | H | 73.00470 | 72.07087 | 75.85253 | 0.00000 | 0.00000 | 0.00000 | 1 |
| 2292 | H | 75.49522 | 71.94742 | 76.47202 | 0.00000 | 0.00000 | 0.00000 | 1 |
| 2293 | H | 75.18756 | 70.50983 | 77.72632 | 0.00000 | 0.00000 | 0.00000 | 1 |
| 2294 | H | 76.34976 | 73.29210 | 78.48449 | 0.00000 | 0.00000 | 0.00000 | 1 |
| 2295 | H | 74.71510 | 74.01971 | 78.68012 | 0.00000 | 0.00000 | 0.00000 | 1 |
| 2296 | H | 75.67446 | 74.34398 | 77.19812 | 0.00000 | 0.00000 | 0.00000 | 1 |
| 2297 | N | 72.18288 | 72.45973 | 78.54430 | 0.00000 | 0.00000 | 0.00000 | 1 |
| 2298 | C | 71.27287 | 72.73363 | 79.59858 | 0.00000 | 0.00000 | 0.00000 | 1 |
| 2299 | C | 72.04916 | 73.39998 | 80.87905 | 0.00000 | 0.00000 | 0.00000 | 1 |
| 2300 | O | 71.41153 | 73.85629 | 81.80066 | 0.00000 | 0.00000 | 0.00000 | 1 |
| 2301 | C | 70.76967 | 71.35182 | 80.20595 | 0.00000 | 0.00000 | 0.00000 | 1 |
| 2302 | C | 69.89140 | 70.54970 | 79.19564 | 0.00000 | 0.00000 | 0.00000 | 1 |
| 2303 | C | 68.38157 | 71.00099 | 79.32991 | 0.00000 | 0.00000 | 0.00000 | 1 |
| 2304 | C | 68.14228 | 72.30652 | 78.53639 | 0.00000 | 0.00000 | 0.00000 | 1 |
| 2305 | N | 66.60015 | 72.57455 | 78.54588 | 0.00000 | 0.00000 | 0.00000 | 1 |
| 2306 | H | 72.81323 | 71.64537 | 78.58162 | 0.00000 | 0.00000 | 0.00000 | 1 |
| 2307 | H | 70.49847 | 73.40701 | 79.16558 | 0.00000 | 0.00000 | 0.00000 | 1 |
| 2308 | H | 71.65721 | 70.74227 | 80.48916 | 0.00000 | 0.00000 | 0.00000 | 1 |
| 2309 | H | 70.20889 | 71.52600 | 81.15116 | 0.00000 | 0.00000 | 0.00000 | 1 |

|      |   |          |          |          |         |         |         |   |
|------|---|----------|----------|----------|---------|---------|---------|---|
| 2310 | H | 70.26243 | 70.68042 | 78.15410 | 0.00000 | 0.00000 | 0.00000 | 1 |
| 2311 | H | 69.97276 | 69.46096 | 79.41482 | 0.00000 | 0.00000 | 0.00000 | 1 |
| 2312 | H | 67.70872 | 70.20138 | 78.94368 | 0.00000 | 0.00000 | 0.00000 | 1 |
| 2313 | H | 68.10305 | 71.13078 | 80.40113 | 0.00000 | 0.00000 | 0.00000 | 1 |
| 2314 | H | 68.58266 | 73.22076 | 78.98100 | 0.00000 | 0.00000 | 0.00000 | 1 |
| 2315 | H | 68.40240 | 72.24533 | 77.46042 | 0.00000 | 0.00000 | 0.00000 | 1 |
| 2316 | H | 65.95677 | 71.76261 | 78.31378 | 0.00000 | 0.00000 | 0.00000 | 1 |
| 2317 | H | 66.27984 | 73.30547 | 77.84755 | 0.00000 | 0.00000 | 0.00000 | 1 |
| 2318 | H | 66.17583 | 72.94447 | 79.44570 | 0.00000 | 0.00000 | 0.00000 | 1 |
| 2319 | N | 73.36475 | 73.18418 | 80.81457 | 0.00000 | 0.00000 | 0.00000 | 1 |
| 2320 | C | 74.19223 | 73.98704 | 81.66591 | 0.00000 | 0.00000 | 0.00000 | 1 |
| 2321 | C | 74.56556 | 75.36454 | 80.88579 | 0.00000 | 0.00000 | 0.00000 | 1 |
| 2322 | O | 73.97133 | 75.77601 | 79.91880 | 0.00000 | 0.00000 | 0.00000 | 1 |
| 2323 | C | 75.48748 | 73.13376 | 81.99782 | 0.00000 | 0.00000 | 0.00000 | 1 |
| 2324 | C | 75.70732 | 73.14816 | 83.54505 | 0.00000 | 0.00000 | 0.00000 | 1 |
| 2325 | C | 74.95414 | 71.91603 | 84.18979 | 0.00000 | 0.00000 | 0.00000 | 1 |
| 2326 | C | 73.42093 | 72.07442 | 84.06802 | 0.00000 | 0.00000 | 0.00000 | 1 |
| 2327 | N | 72.77851 | 70.80726 | 84.72770 | 0.00000 | 0.00000 | 0.00000 | 1 |
| 2328 | H | 73.71385 | 72.78376 | 79.94459 | 0.00000 | 0.00000 | 0.00000 | 1 |
| 2329 | H | 73.52455 | 74.17412 | 82.53946 | 0.00000 | 0.00000 | 0.00000 | 1 |
| 2330 | H | 75.38801 | 72.09141 | 81.62117 | 0.00000 | 0.00000 | 0.00000 | 1 |
| 2331 | H | 76.37287 | 73.56058 | 81.47432 | 0.00000 | 0.00000 | 0.00000 | 1 |
| 2332 | H | 76.79413 | 73.08343 | 83.77602 | 0.00000 | 0.00000 | 0.00000 | 1 |
| 2333 | H | 75.35916 | 74.10625 | 83.99237 | 0.00000 | 0.00000 | 0.00000 | 1 |
| 2334 | H | 75.28217 | 70.96778 | 83.70575 | 0.00000 | 0.00000 | 0.00000 | 1 |
| 2335 | H | 75.23619 | 71.81435 | 85.26299 | 0.00000 | 0.00000 | 0.00000 | 1 |
| 2336 | H | 72.99735 | 72.92863 | 84.63319 | 0.00000 | 0.00000 | 0.00000 | 1 |
| 2337 | H | 73.03035 | 72.07620 | 83.02982 | 0.00000 | 0.00000 | 0.00000 | 1 |
| 2338 | H | 73.04164 | 70.59896 | 85.73487 | 0.00000 | 0.00000 | 0.00000 | 1 |
| 2339 | H | 72.95870 | 69.87296 | 84.25721 | 0.00000 | 0.00000 | 0.00000 | 1 |
| 2340 | H | 71.71966 | 70.81044 | 84.78635 | 0.00000 | 0.00000 | 0.00000 | 1 |
| 2341 | N | 75.54117 | 75.97556 | 81.56479 | 0.00000 | 0.00000 | 0.00000 | 1 |
| 2342 | C | 76.11018 | 77.25039 | 81.08997 | 0.00000 | 0.00000 | 0.00000 | 1 |
| 2343 | C | 76.85671 | 76.95537 | 79.65713 | 0.00000 | 0.00000 | 0.00000 | 1 |
| 2344 | O | 77.62129 | 76.01388 | 79.53606 | 0.00000 | 0.00000 | 0.00000 | 1 |
| 2345 | C | 77.11048 | 77.70894 | 82.13508 | 0.00000 | 0.00000 | 0.00000 | 1 |
| 2346 | C | 77.87868 | 78.93690 | 81.68109 | 0.00000 | 0.00000 | 0.00000 | 1 |
| 2347 | C | 76.44538 | 77.97763 | 83.47285 | 0.00000 | 0.00000 | 0.00000 | 1 |
| 2348 | H | 75.92816 | 75.45683 | 82.35080 | 0.00000 | 0.00000 | 0.00000 | 1 |
| 2349 | H | 75.22124 | 77.91409 | 80.98337 | 0.00000 | 0.00000 | 0.00000 | 1 |
| 2350 | H | 77.84779 | 76.88705 | 82.28008 | 0.00000 | 0.00000 | 0.00000 | 1 |
| 2351 | H | 78.69861 | 79.20374 | 82.40697 | 0.00000 | 0.00000 | 0.00000 | 1 |
| 2352 | H | 78.37429 | 78.76971 | 80.68092 | 0.00000 | 0.00000 | 0.00000 | 1 |
| 2353 | H | 77.21208 | 79.83771 | 81.58321 | 0.00000 | 0.00000 | 0.00000 | 1 |
| 2354 | H | 75.92931 | 77.06128 | 83.87146 | 0.00000 | 0.00000 | 0.00000 | 1 |
| 2355 | H | 77.18842 | 78.30840 | 84.24955 | 0.00000 | 0.00000 | 0.00000 | 1 |
| 2356 | H | 75.66624 | 78.78466 | 83.39187 | 0.00000 | 0.00000 | 0.00000 | 1 |
| 2357 | N | 76.56058 | 77.90243 | 78.76504 | 0.00000 | 0.00000 | 0.00000 | 1 |
| 2358 | C | 77.12569 | 77.86568 | 77.44601 | 0.00000 | 0.00000 | 0.00000 | 1 |
| 2359 | C | 78.68326 | 78.37167 | 77.57773 | 0.00000 | 0.00000 | 0.00000 | 1 |
| 2360 | O | 79.02065 | 79.49221 | 77.29323 | 0.00000 | 0.00000 | 0.00000 | 1 |
| 2361 | C | 76.19853 | 78.85233 | 76.62794 | 0.00000 | 0.00000 | 0.00000 | 1 |
| 2362 | C | 75.82530 | 79.91087 | 77.71429 | 0.00000 | 0.00000 | 0.00000 | 1 |
| 2363 | C | 75.62398 | 78.99407 | 78.99569 | 0.00000 | 0.00000 | 0.00000 | 1 |
| 2364 | H | 77.06554 | 76.79280 | 77.15881 | 0.00000 | 0.00000 | 0.00000 | 1 |
| 2365 | H | 76.71005 | 79.29449 | 75.74269 | 0.00000 | 0.00000 | 0.00000 | 1 |
| 2366 | H | 75.29383 | 78.33105 | 76.24457 | 0.00000 | 0.00000 | 0.00000 | 1 |
| 2367 | H | 76.66029 | 80.63208 | 77.86272 | 0.00000 | 0.00000 | 0.00000 | 1 |
| 2368 | H | 74.92410 | 80.51295 | 77.45908 | 0.00000 | 0.00000 | 0.00000 | 1 |
| 2369 | H | 75.86996 | 79.48055 | 79.96796 | 0.00000 | 0.00000 | 0.00000 | 1 |
| 2370 | H | 74.62169 | 78.51255 | 79.06732 | 0.00000 | 0.00000 | 0.00000 | 1 |
| 2371 | N | 79.39603 | 77.36333 | 78.06639 | 0.00000 | 0.00000 | 0.00000 | 1 |

|      |   |          |          |          |         |         |         |   |
|------|---|----------|----------|----------|---------|---------|---------|---|
| 2372 | C | 80.81465 | 77.50863 | 78.09538 | 0.00000 | 0.00000 | 0.00000 | 1 |
| 2373 | C | 81.39765 | 76.94531 | 76.67868 | 0.00000 | 0.00000 | 0.00000 | 1 |
| 2374 | O | 80.72002 | 76.85069 | 75.68346 | 0.00000 | 0.00000 | 0.00000 | 1 |
| 2375 | C | 81.31797 | 76.65742 | 79.33708 | 0.00000 | 0.00000 | 0.00000 | 1 |
| 2376 | C | 82.43169 | 77.43806 | 80.09880 | 0.00000 | 0.00000 | 0.00000 | 1 |
| 2377 | C | 81.69663 | 78.38459 | 81.12560 | 0.00000 | 0.00000 | 0.00000 | 1 |
| 2378 | O | 80.51312 | 78.31257 | 81.34693 | 0.00000 | 0.00000 | 0.00000 | 1 |
| 2379 | N | 82.58261 | 79.21250 | 81.71581 | 0.00000 | 0.00000 | 0.00000 | 1 |
| 2380 | H | 78.92774 | 76.48413 | 78.36924 | 0.00000 | 0.00000 | 0.00000 | 1 |
| 2381 | H | 80.93081 | 78.61404 | 78.19206 | 0.00000 | 0.00000 | 0.00000 | 1 |
| 2382 | H | 80.46886 | 76.44454 | 80.03004 | 0.00000 | 0.00000 | 0.00000 | 1 |
| 2383 | H | 81.69364 | 75.66599 | 78.99594 | 0.00000 | 0.00000 | 0.00000 | 1 |
| 2384 | H | 83.10953 | 76.73878 | 80.63603 | 0.00000 | 0.00000 | 0.00000 | 1 |
| 2385 | H | 83.09504 | 78.01139 | 79.41464 | 0.00000 | 0.00000 | 0.00000 | 1 |
| 2386 | H | 83.59749 | 79.26174 | 81.56592 | 0.00000 | 0.00000 | 0.00000 | 1 |
| 2387 | H | 82.35677 | 79.88671 | 82.45489 | 0.00000 | 0.00000 | 0.00000 | 1 |
| 2388 | N | 82.69672 | 76.65914 | 76.80415 | 0.00000 | 0.00000 | 0.00000 | 1 |
| 2389 | C | 83.51519 | 76.28490 | 75.64769 | 0.00000 | 0.00000 | 0.00000 | 1 |
| 2390 | C | 83.20518 | 74.72358 | 75.17814 | 0.00000 | 0.00000 | 0.00000 | 1 |
| 2391 | O | 83.74665 | 74.28963 | 74.18879 | 0.00000 | 0.00000 | 0.00000 | 1 |
| 2392 | C | 84.99208 | 76.31051 | 75.98610 | 0.00000 | 0.00000 | 0.00000 | 1 |
| 2393 | C | 85.54852 | 77.72059 | 76.05267 | 0.00000 | 0.00000 | 0.00000 | 1 |
| 2394 | C | 85.30772 | 75.56302 | 77.26842 | 0.00000 | 0.00000 | 0.00000 | 1 |
| 2395 | H | 83.09417 | 76.84250 | 77.72232 | 0.00000 | 0.00000 | 0.00000 | 1 |
| 2396 | H | 83.21044 | 77.00991 | 74.85587 | 0.00000 | 0.00000 | 0.00000 | 1 |
| 2397 | H | 85.51768 | 75.78615 | 75.15324 | 0.00000 | 0.00000 | 0.00000 | 1 |
| 2398 | H | 85.03888 | 78.32819 | 76.85057 | 0.00000 | 0.00000 | 0.00000 | 1 |
| 2399 | H | 86.65010 | 77.72030 | 76.28331 | 0.00000 | 0.00000 | 0.00000 | 1 |
| 2400 | H | 85.41120 | 78.26734 | 75.07867 | 0.00000 | 0.00000 | 0.00000 | 1 |
| 2401 | H | 84.72125 | 74.60500 | 77.33961 | 0.00000 | 0.00000 | 0.00000 | 1 |
| 2402 | H | 86.39834 | 75.29542 | 77.33674 | 0.00000 | 0.00000 | 0.00000 | 1 |
| 2403 | H | 85.05827 | 76.17421 | 78.17909 | 0.00000 | 0.00000 | 0.00000 | 1 |
| 2404 | N | 82.45709 | 74.06551 | 76.05730 | 0.00000 | 0.00000 | 0.00000 | 1 |
| 2405 | C | 81.88207 | 72.83946 | 75.63223 | 0.00000 | 0.00000 | 0.00000 | 1 |
| 2406 | C | 80.25678 | 73.02592 | 75.69705 | 0.00000 | 0.00000 | 0.00000 | 1 |
| 2407 | O | 79.69566 | 73.31649 | 76.72504 | 0.00000 | 0.00000 | 0.00000 | 1 |
| 2408 | C | 82.33846 | 71.78521 | 76.74968 | 0.00000 | 0.00000 | 0.00000 | 1 |
| 2409 | O | 81.92522 | 70.41524 | 76.53450 | 0.00000 | 0.00000 | 0.00000 | 1 |
| 2410 | H | 82.07831 | 74.62737 | 76.81746 | 0.00000 | 0.00000 | 0.00000 | 1 |
| 2411 | H | 82.29284 | 72.63346 | 74.61583 | 0.00000 | 0.00000 | 0.00000 | 1 |
| 2412 | H | 83.44675 | 71.89824 | 76.87461 | 0.00000 | 0.00000 | 0.00000 | 1 |
| 2413 | H | 81.87718 | 72.14360 | 77.71045 | 0.00000 | 0.00000 | 0.00000 | 1 |
| 2414 | H | 82.72723 | 70.06645 | 76.10369 | 0.00000 | 0.00000 | 0.00000 | 1 |
| 2415 | N | 79.75208 | 72.81232 | 74.49469 | 0.00000 | 0.00000 | 0.00000 | 1 |
| 2416 | C | 78.33645 | 72.84467 | 74.29544 | 0.00000 | 0.00000 | 0.00000 | 1 |
| 2417 | C | 78.21595 | 72.00111 | 72.93075 | 0.00000 | 0.00000 | 0.00000 | 1 |
| 2418 | O | 79.23958 | 71.71873 | 72.33817 | 0.00000 | 0.00000 | 0.00000 | 1 |
| 2419 | C | 77.83434 | 74.36989 | 74.07876 | 0.00000 | 0.00000 | 0.00000 | 1 |
| 2420 | O | 78.41975 | 75.08791 | 72.98833 | 0.00000 | 0.00000 | 0.00000 | 1 |
| 2421 | C | 78.00531 | 74.99653 | 75.50840 | 0.00000 | 0.00000 | 0.00000 | 1 |
| 2422 | H | 80.29433 | 72.54662 | 73.65224 | 0.00000 | 0.00000 | 0.00000 | 1 |
| 2423 | H | 77.87516 | 72.38873 | 75.20101 | 0.00000 | 0.00000 | 0.00000 | 1 |
| 2424 | H | 76.73342 | 74.33067 | 73.84238 | 0.00000 | 0.00000 | 0.00000 | 1 |
| 2425 | H | 77.64558 | 75.20779 | 72.39820 | 0.00000 | 0.00000 | 0.00000 | 1 |
| 2426 | H | 79.07538 | 75.26410 | 75.70452 | 0.00000 | 0.00000 | 0.00000 | 1 |
| 2427 | H | 77.68126 | 74.29661 | 76.31714 | 0.00000 | 0.00000 | 0.00000 | 1 |
| 2428 | H | 77.40921 | 75.93270 | 75.61214 | 0.00000 | 0.00000 | 0.00000 | 1 |
| 2429 | N | 76.95031 | 71.69318 | 72.63539 | 0.00000 | 0.00000 | 0.00000 | 1 |
| 2430 | C | 76.60974 | 71.08521 | 71.38210 | 0.00000 | 0.00000 | 0.00000 | 1 |
| 2431 | C | 76.52324 | 72.24084 | 70.22164 | 0.00000 | 0.00000 | 0.00000 | 1 |
| 2432 | O | 75.93621 | 73.28120 | 70.39053 | 0.00000 | 0.00000 | 0.00000 | 1 |
| 2433 | C | 75.15197 | 70.52708 | 71.65612 | 0.00000 | 0.00000 | 0.00000 | 1 |

|      |     |          |          |          |         |         |             |         |        |
|------|-----|----------|----------|----------|---------|---------|-------------|---------|--------|
| 2434 | C   | 74.59272 | 71.59010 | 72.65196 | 0.00000 | 0.00000 | 0.00000     | 1       |        |
| 2435 | C   | 75.85580 | 71.79795 | 73.59238 | 0.00000 | 0.00000 | 0.00000     | 1       |        |
| 2436 | H   | 77.39080 | 70.32208 | 71.16456 | 0.00000 | 0.00000 | 0.00000     | 1       |        |
| 2437 | H   | 74.54469 | 70.43513 | 70.72728 | 0.00000 | 0.00000 | 0.00000     | 1       |        |
| 2438 | H   | 75.18123 | 69.51520 | 72.11834 | 0.00000 | 0.00000 | 0.00000     | 1       |        |
| 2439 | H   | 74.32252 | 72.53384 | 72.12378 | 0.00000 | 0.00000 | 0.00000     | 1       |        |
| 2440 | H   | 73.68279 | 71.25782 | 73.20350 | 0.00000 | 0.00000 | 0.00000     | 1       |        |
| 2441 | H   | 75.90149 | 72.77989 | 74.11746 | 0.00000 | 0.00000 | 0.00000     | 1       |        |
| 2442 | H   | 76.02203 | 70.98032 | 74.33341 | 0.00000 | 0.00000 | 0.00000     | 1       |        |
| 2443 | N   | 77.10283 | 71.77135 | 69.12450 | 0.00000 | 0.00000 | 0.00000     | 1       |        |
| 2444 | C   | 76.97381 | 72.48534 | 67.90898 | 0.00000 | 0.00000 | 0.00000     | 1       |        |
| 2445 | C   | 75.81704 | 71.72258 | 67.02653 | 0.00000 | 0.00000 | 0.00000     | 1       |        |
| 2446 | O   | 76.07550 | 70.98036 | 66.10950 | 0.00000 | 0.00000 | 0.00000     | 1       |        |
| 2447 | C   | 78.40874 | 72.40211 | 67.18340 | 0.00000 | 0.00000 | 0.00000     | 1       |        |
| 2448 | O   | 79.00402 | 71.09847 | 67.09961 | 0.00000 | 0.00000 | 0.00000     | 1       |        |
| 2449 | C   | 79.19604 | 73.46890 | 68.02694 | 0.00000 | 0.00000 | 0.00000     | 1       |        |
| 2450 | H   | 77.55458 | 70.85773 | 69.11008 | 0.00000 | 0.00000 | 0.00000     | 1       |        |
| 2451 | H   | 76.65528 | 73.50351 | 68.23128 | 0.00000 | 0.00000 | 0.00000     | 1       |        |
| 2452 | H   | 78.28611 | 72.77631 | 66.13091 | 0.00000 | 0.00000 | 0.00000     | 1       |        |
| 2453 | H   | 78.87965 | 70.89211 | 66.15030 | 0.00000 | 0.00000 | 0.00000     | 1       |        |
| 2454 | H   | 78.70182 | 74.46821 | 68.00361 | 0.00000 | 0.00000 | 0.00000     | 1       |        |
| 2455 | H   | 80.23736 | 73.60151 | 67.65196 | 0.00000 | 0.00000 | 0.00000     | 1       |        |
| 2456 | H   | 79.26618 | 73.15780 | 69.09668 | 0.00000 | 0.00000 | 0.00000     | 1       |        |
| 2457 | N   | 74.61695 | 71.99460 | 67.53971 | 0.00000 | 0.00000 | 0.00000     | 1       |        |
| 2458 | C   | 73.52720 | 72.12062 | 66.38822 | 0.00000 | 0.00000 | 0.00000     | 1       |        |
| 2459 | C   | 73.74259 | 73.22026 | 65.46886 | 0.00000 | 0.00000 | 0.00000     | 1       |        |
| 2460 | O   | 73.91686 | 74.11743 | 64.71883 | 0.00000 | 0.00000 | 0.00000     | 1       |        |
| 2461 | C   | 72.11978 | 72.31179 | 67.21461 | 0.00000 | 0.00000 | 0.00000     | 1       |        |
| 2462 | C   | 70.98586 | 71.96593 | 66.31007 | 0.00000 | 0.00000 | 0.00000     | 1       |        |
| 2463 | C   | 70.73193 | 70.46175 | 66.30898 | 0.00000 | 0.00000 | 0.00000     | 1       |        |
| 2464 | C   | 69.71842 | 72.69744 | 66.74339 | 0.00000 | 0.00000 | 0.00000     | 1       |        |
| 2465 | H   | 74.65349 | 72.69020 | 68.28066 | 0.00000 | 0.00000 | 0.00000     | 1       |        |
| 2466 | H   | 73.66760 | 71.11507 | 65.91834 | 0.00000 | 0.00000 | 0.00000     | 1       |        |
| 2467 | H   | 72.11809 | 71.68037 | 68.13118 | 0.00000 | 0.00000 | 0.00000     | 1       |        |
| 2468 | H   | 72.04349 | 73.36395 | 67.57055 | 0.00000 | 0.00000 | 0.00000     | 1       |        |
| 2469 | H   | 71.23836 | 72.29151 | 65.27444 | 0.00000 | 0.00000 | 0.00000     | 1       |        |
| 2470 | H   | 70.42259 | 70.09627 | 67.32136 | 0.00000 | 0.00000 | 0.00000     | 1       |        |
| 2471 | H   | 71.64702 | 69.88652 | 66.01617 | 0.00000 | 0.00000 | 0.00000     | 1       |        |
| 2472 | H   | 69.91844 | 70.17921 | 65.59331 | 0.00000 | 0.00000 | 0.00000     | 1       |        |
| 2473 | H   | 68.84287 | 72.42343 | 66.10166 | 0.00000 | 0.00000 | 0.00000     | 1       |        |
| 2474 | H   | 69.84121 | 73.80950 | 66.67993 | 0.00000 | 0.00000 | 0.00000     | 1       |        |
| 2475 | H   | 69.44391 | 72.45406 | 67.80155 | 0.00000 | 0.00000 | 0.00000     | 1       |        |
| 2476 | 273 |          |          |          |         |         |             |         |        |
| 2477 |     | 150.0000 | 150.0000 | 150.0000 | 0.0000  | 0.0000  | 0.0000***** | 5.0000  | 20000  |
|      |     | 0.2500   | 300.00   | 0.00     | 0.00    | 0.00    | -1291.4519  | 0.0000  | 0.0000 |
| 2478 | N   | 68.28601 | 77.47051 | 77.66983 | 0.00000 | 0.00000 | 0.00000     | 0.00000 | 1      |
| 2479 | C   | 68.90355 | 77.46028 | 76.45603 | 0.00000 | 0.00000 | 0.00000     | 0.00000 | 1      |
| 2480 | C   | 68.27023 | 76.13429 | 75.58959 | 0.00000 | 0.00000 | 0.00000     | 0.00000 | 1      |
| 2481 | O   | 67.96299 | 75.08445 | 76.09894 | 0.00000 | 0.00000 | 0.00000     | 0.00000 | 1      |
| 2482 | C   | 70.50813 | 77.08467 | 76.67031 | 0.00000 | 0.00000 | 0.00000     | 0.00000 | 1      |
| 2483 | C   | 71.08717 | 77.99415 | 77.68640 | 0.00000 | 0.00000 | 0.00000     | 0.00000 | 1      |
| 2484 | C   | 72.40121 | 77.41668 | 78.20927 | 0.00000 | 0.00000 | 0.00000     | 0.00000 | 1      |
| 2485 | C   | 71.31052 | 79.39824 | 77.13250 | 0.00000 | 0.00000 | 0.00000     | 0.00000 | 1      |
| 2486 | H   | 68.28121 | 76.58578 | 78.14351 | 0.00000 | 0.00000 | 0.00000     | 0.00000 | 1      |
| 2487 | H   | 68.73269 | 78.47150 | 76.00455 | 0.00000 | 0.00000 | 0.00000     | 0.00000 | 1      |
| 2488 | H   | 70.61547 | 76.01386 | 77.00292 | 0.00000 | 0.00000 | 0.00000     | 0.00000 | 1      |
| 2489 | H   | 71.04953 | 77.15593 | 75.70148 | 0.00000 | 0.00000 | 0.00000     | 0.00000 | 1      |
| 2490 | H   | 70.37941 | 78.05722 | 78.54671 | 0.00000 | 0.00000 | 0.00000     | 0.00000 | 1      |
| 2491 | H   | 73.22426 | 77.49335 | 77.45550 | 0.00000 | 0.00000 | 0.00000     | 0.00000 | 1      |
| 2492 | H   | 72.29856 | 76.32763 | 78.47707 | 0.00000 | 0.00000 | 0.00000     | 0.00000 | 1      |
| 2493 | H   | 72.74348 | 77.94972 | 79.13198 | 0.00000 | 0.00000 | 0.00000     | 0.00000 | 1      |
| 2494 | H   | 72.20928 | 79.88760 | 77.58664 | 0.00000 | 0.00000 | 0.00000     | 0.00000 | 1      |

|      |   |          |          |          |         |         |         |   |
|------|---|----------|----------|----------|---------|---------|---------|---|
| 2495 | H | 70.43377 | 80.06418 | 77.33484 | 0.00000 | 0.00000 | 0.00000 | 1 |
| 2496 | H | 71.45899 | 79.38822 | 76.02370 | 0.00000 | 0.00000 | 0.00000 | 1 |
| 2497 | N | 68.31462 | 76.46599 | 74.31141 | 0.00000 | 0.00000 | 0.00000 | 1 |
| 2498 | C | 67.77242 | 75.60481 | 73.27763 | 0.00000 | 0.00000 | 0.00000 | 1 |
| 2499 | C | 68.84112 | 75.45893 | 72.00815 | 0.00000 | 0.00000 | 0.00000 | 1 |
| 2500 | O | 68.57304 | 74.71340 | 71.09555 | 0.00000 | 0.00000 | 0.00000 | 1 |
| 2501 | C | 66.50928 | 76.20290 | 72.66411 | 0.00000 | 0.00000 | 0.00000 | 1 |
| 2502 | C | 65.33127 | 76.11693 | 73.61441 | 0.00000 | 0.00000 | 0.00000 | 1 |
| 2503 | C | 66.71259 | 77.63134 | 72.20063 | 0.00000 | 0.00000 | 0.00000 | 1 |
| 2504 | H | 68.59646 | 77.43343 | 74.17186 | 0.00000 | 0.00000 | 0.00000 | 1 |
| 2505 | H | 67.59103 | 74.64676 | 73.82514 | 0.00000 | 0.00000 | 0.00000 | 1 |
| 2506 | H | 66.26103 | 75.58939 | 71.76806 | 0.00000 | 0.00000 | 0.00000 | 1 |
| 2507 | H | 65.11235 | 75.05218 | 73.90875 | 0.00000 | 0.00000 | 0.00000 | 1 |
| 2508 | H | 65.52904 | 76.68928 | 74.56386 | 0.00000 | 0.00000 | 0.00000 | 1 |
| 2509 | H | 64.39313 | 76.53838 | 73.15572 | 0.00000 | 0.00000 | 0.00000 | 1 |
| 2510 | H | 65.82413 | 78.01393 | 71.62438 | 0.00000 | 0.00000 | 0.00000 | 1 |
| 2511 | H | 66.87027 | 78.32794 | 73.07073 | 0.00000 | 0.00000 | 0.00000 | 1 |
| 2512 | H | 67.61392 | 77.72393 | 71.53132 | 0.00000 | 0.00000 | 0.00000 | 1 |
| 2513 | N | 69.88700 | 76.26103 | 72.12908 | 0.00000 | 0.00000 | 0.00000 | 1 |
| 2514 | C | 70.86789 | 76.23836 | 71.10233 | 0.00000 | 0.00000 | 0.00000 | 1 |
| 2515 | C | 72.35237 | 75.89426 | 71.70650 | 0.00000 | 0.00000 | 0.00000 | 1 |
| 2516 | O | 73.29975 | 75.89557 | 70.95328 | 0.00000 | 0.00000 | 0.00000 | 1 |
| 2517 | C | 71.00001 | 77.71122 | 70.51321 | 0.00000 | 0.00000 | 0.00000 | 1 |
| 2518 | C | 71.58020 | 77.57321 | 69.07599 | 0.00000 | 0.00000 | 0.00000 | 1 |
| 2519 | C | 70.42533 | 76.89219 | 68.20117 | 0.00000 | 0.00000 | 0.00000 | 1 |
| 2520 | N | 70.79053 | 77.15881 | 66.87635 | 0.00000 | 0.00000 | 0.00000 | 1 |
| 2521 | C | 70.05906 | 76.91572 | 65.86643 | 0.00000 | 0.00000 | 0.00000 | 1 |
| 2522 | N | 68.80841 | 76.33216 | 66.09558 | 0.00000 | 0.00000 | 0.00000 | 1 |
| 2523 | N | 70.68973 | 77.30776 | 64.67802 | 0.00000 | 0.00000 | 0.00000 | 1 |
| 2524 | H | 69.93060 | 76.84097 | 72.96340 | 0.00000 | 0.00000 | 0.00000 | 1 |
| 2525 | H | 70.48527 | 75.48782 | 70.36934 | 0.00000 | 0.00000 | 0.00000 | 1 |
| 2526 | H | 70.01709 | 78.23340 | 70.50324 | 0.00000 | 0.00000 | 0.00000 | 1 |
| 2527 | H | 71.66712 | 78.33056 | 71.15507 | 0.00000 | 0.00000 | 0.00000 | 1 |
| 2528 | H | 71.86942 | 78.56436 | 68.66095 | 0.00000 | 0.00000 | 0.00000 | 1 |
| 2529 | H | 72.51064 | 76.95602 | 69.08572 | 0.00000 | 0.00000 | 0.00000 | 1 |
| 2530 | H | 70.33245 | 75.78206 | 68.31302 | 0.00000 | 0.00000 | 0.00000 | 1 |
| 2531 | H | 69.40427 | 77.32892 | 68.32917 | 0.00000 | 0.00000 | 0.00000 | 1 |
| 2532 | H | 71.69847 | 77.57156 | 66.72997 | 0.00000 | 0.00000 | 0.00000 | 1 |
| 2533 | H | 68.37406 | 76.05035 | 66.97412 | 0.00000 | 0.00000 | 0.00000 | 1 |
| 2534 | H | 68.13299 | 76.09468 | 65.36800 | 0.00000 | 0.00000 | 0.00000 | 1 |
| 2535 | H | 71.61095 | 77.71126 | 64.51181 | 0.00000 | 0.00000 | 0.00000 | 1 |
| 2536 | H | 70.27233 | 77.18420 | 63.75440 | 0.00000 | 0.00000 | 0.00000 | 1 |
| 2537 | N | 72.32257 | 75.70474 | 73.01909 | 0.00000 | 0.00000 | 0.00000 | 1 |
| 2538 | C | 73.50642 | 75.32353 | 73.70390 | 0.00000 | 0.00000 | 0.00000 | 1 |
| 2539 | C | 73.15711 | 73.94400 | 74.49126 | 0.00000 | 0.00000 | 0.00000 | 1 |
| 2540 | O | 72.51259 | 73.07024 | 73.95356 | 0.00000 | 0.00000 | 0.00000 | 1 |
| 2541 | C | 73.94398 | 76.50256 | 74.69467 | 0.00000 | 0.00000 | 0.00000 | 1 |
| 2542 | C | 74.09849 | 77.83332 | 73.93822 | 0.00000 | 0.00000 | 0.00000 | 1 |
| 2543 | C | 74.65402 | 77.87187 | 72.62367 | 0.00000 | 0.00000 | 0.00000 | 1 |
| 2544 | C | 73.71271 | 79.05049 | 74.57565 | 0.00000 | 0.00000 | 0.00000 | 1 |
| 2545 | C | 74.77469 | 79.09710 | 71.96439 | 0.00000 | 0.00000 | 0.00000 | 1 |
| 2546 | C | 73.85885 | 80.25352 | 73.88368 | 0.00000 | 0.00000 | 0.00000 | 1 |
| 2547 | C | 74.38249 | 80.33070 | 72.56049 | 0.00000 | 0.00000 | 0.00000 | 1 |
| 2548 | O | 74.49873 | 81.57924 | 71.89550 | 0.00000 | 0.00000 | 0.00000 | 1 |
| 2549 | H | 71.41340 | 75.70736 | 73.47838 | 0.00000 | 0.00000 | 0.00000 | 1 |
| 2550 | H | 74.22634 | 75.18226 | 72.86453 | 0.00000 | 0.00000 | 0.00000 | 1 |
| 2551 | H | 73.20195 | 76.61792 | 75.51638 | 0.00000 | 0.00000 | 0.00000 | 1 |
| 2552 | H | 74.90878 | 76.24303 | 75.18823 | 0.00000 | 0.00000 | 0.00000 | 1 |
| 2553 | H | 74.96491 | 76.93897 | 72.11691 | 0.00000 | 0.00000 | 0.00000 | 1 |
| 2554 | H | 73.31450 | 79.04195 | 75.60512 | 0.00000 | 0.00000 | 0.00000 | 1 |
| 2555 | H | 75.19032 | 79.09873 | 70.94141 | 0.00000 | 0.00000 | 0.00000 | 1 |
| 2556 | H | 73.55885 | 81.19062 | 74.38384 | 0.00000 | 0.00000 | 0.00000 | 1 |

|      |   |          |          |          |         |         |         |   |
|------|---|----------|----------|----------|---------|---------|---------|---|
| 2557 | H | 74.91177 | 81.28049 | 71.05085 | 0.00000 | 0.00000 | 0.00000 | 1 |
| 2558 | N | 73.82499 | 73.86946 | 75.64722 | 0.00000 | 0.00000 | 0.00000 | 1 |
| 2559 | C | 73.45014 | 72.82456 | 76.55136 | 0.00000 | 0.00000 | 0.00000 | 1 |
| 2560 | C | 72.32301 | 73.36987 | 77.58819 | 0.00000 | 0.00000 | 0.00000 | 1 |
| 2561 | O | 71.67158 | 74.37570 | 77.40789 | 0.00000 | 0.00000 | 0.00000 | 1 |
| 2562 | C | 74.78022 | 72.30145 | 77.26188 | 0.00000 | 0.00000 | 0.00000 | 1 |
| 2563 | O | 74.57961 | 71.14287 | 78.14488 | 0.00000 | 0.00000 | 0.00000 | 1 |
| 2564 | C | 75.41184 | 73.56029 | 77.94257 | 0.00000 | 0.00000 | 0.00000 | 1 |
| 2565 | H | 74.27209 | 74.72018 | 75.98081 | 0.00000 | 0.00000 | 0.00000 | 1 |
| 2566 | H | 73.00731 | 72.07144 | 75.85557 | 0.00000 | 0.00000 | 0.00000 | 1 |
| 2567 | H | 75.49870 | 71.95317 | 76.47454 | 0.00000 | 0.00000 | 0.00000 | 1 |
| 2568 | H | 75.19058 | 70.51380 | 77.72731 | 0.00000 | 0.00000 | 0.00000 | 1 |
| 2569 | H | 76.35004 | 73.29938 | 78.48795 | 0.00000 | 0.00000 | 0.00000 | 1 |
| 2570 | H | 74.71409 | 74.02463 | 78.68159 | 0.00000 | 0.00000 | 0.00000 | 1 |
| 2571 | H | 75.67432 | 74.34936 | 77.20030 | 0.00000 | 0.00000 | 0.00000 | 1 |
| 2572 | N | 72.18378 | 72.46014 | 78.54589 | 0.00000 | 0.00000 | 0.00000 | 1 |
| 2573 | C | 71.27312 | 72.73415 | 79.59964 | 0.00000 | 0.00000 | 0.00000 | 1 |
| 2574 | C | 72.04976 | 73.39843 | 80.88092 | 0.00000 | 0.00000 | 0.00000 | 1 |
| 2575 | O | 71.41262 | 73.85254 | 81.80393 | 0.00000 | 0.00000 | 0.00000 | 1 |
| 2576 | C | 70.76712 | 71.35294 | 80.20611 | 0.00000 | 0.00000 | 0.00000 | 1 |
| 2577 | C | 69.89086 | 70.55078 | 79.19410 | 0.00000 | 0.00000 | 0.00000 | 1 |
| 2578 | C | 68.38061 | 71.00167 | 79.32506 | 0.00000 | 0.00000 | 0.00000 | 1 |
| 2579 | C | 68.14305 | 72.30857 | 78.53329 | 0.00000 | 0.00000 | 0.00000 | 1 |
| 2580 | N | 66.60132 | 72.57886 | 78.54343 | 0.00000 | 0.00000 | 0.00000 | 1 |
| 2581 | H | 72.81434 | 71.64603 | 78.58315 | 0.00000 | 0.00000 | 0.00000 | 1 |
| 2582 | H | 70.50010 | 73.40901 | 79.16636 | 0.00000 | 0.00000 | 0.00000 | 1 |
| 2583 | H | 71.65348 | 70.74288 | 80.49189 | 0.00000 | 0.00000 | 0.00000 | 1 |
| 2584 | H | 70.20412 | 71.52803 | 81.14984 | 0.00000 | 0.00000 | 0.00000 | 1 |
| 2585 | H | 70.26404 | 70.68144 | 78.15333 | 0.00000 | 0.00000 | 0.00000 | 1 |
| 2586 | H | 69.97189 | 69.46207 | 79.41357 | 0.00000 | 0.00000 | 0.00000 | 1 |
| 2587 | H | 67.70887 | 70.20263 | 78.93573 | 0.00000 | 0.00000 | 0.00000 | 1 |
| 2588 | H | 68.09927 | 71.12959 | 80.39576 | 0.00000 | 0.00000 | 0.00000 | 1 |
| 2589 | H | 68.58462 | 73.22153 | 78.97931 | 0.00000 | 0.00000 | 0.00000 | 1 |
| 2590 | H | 68.40305 | 72.24868 | 77.45721 | 0.00000 | 0.00000 | 0.00000 | 1 |
| 2591 | H | 65.95713 | 71.77041 | 78.30164 | 0.00000 | 0.00000 | 0.00000 | 1 |
| 2592 | H | 66.28326 | 73.31757 | 77.85230 | 0.00000 | 0.00000 | 0.00000 | 1 |
| 2593 | H | 66.17612 | 72.93981 | 79.44649 | 0.00000 | 0.00000 | 0.00000 | 1 |
| 2594 | N | 73.36548 | 73.18377 | 80.81476 | 0.00000 | 0.00000 | 0.00000 | 1 |
| 2595 | C | 74.19311 | 73.98674 | 81.66590 | 0.00000 | 0.00000 | 0.00000 | 1 |
| 2596 | C | 74.56374 | 75.36550 | 80.88674 | 0.00000 | 0.00000 | 0.00000 | 1 |
| 2597 | O | 73.96678 | 75.77851 | 79.92210 | 0.00000 | 0.00000 | 0.00000 | 1 |
| 2598 | C | 75.48918 | 73.13395 | 81.99588 | 0.00000 | 0.00000 | 0.00000 | 1 |
| 2599 | C | 75.71016 | 73.14723 | 83.54296 | 0.00000 | 0.00000 | 0.00000 | 1 |
| 2600 | C | 74.95521 | 71.91634 | 84.18801 | 0.00000 | 0.00000 | 0.00000 | 1 |
| 2601 | C | 73.42222 | 72.07578 | 84.06477 | 0.00000 | 0.00000 | 0.00000 | 1 |
| 2602 | N | 72.77795 | 70.80977 | 84.72480 | 0.00000 | 0.00000 | 0.00000 | 1 |
| 2603 | H | 73.71431 | 72.78506 | 79.94388 | 0.00000 | 0.00000 | 0.00000 | 1 |
| 2604 | H | 73.52612 | 74.17244 | 82.54027 | 0.00000 | 0.00000 | 0.00000 | 1 |
| 2605 | H | 75.38996 | 72.09184 | 81.61849 | 0.00000 | 0.00000 | 0.00000 | 1 |
| 2606 | H | 76.37390 | 73.56166 | 81.47196 | 0.00000 | 0.00000 | 0.00000 | 1 |
| 2607 | H | 76.79701 | 73.08040 | 83.77310 | 0.00000 | 0.00000 | 0.00000 | 1 |
| 2608 | H | 75.36412 | 74.10582 | 83.99082 | 0.00000 | 0.00000 | 0.00000 | 1 |
| 2609 | H | 75.28282 | 70.96742 | 83.70499 | 0.00000 | 0.00000 | 0.00000 | 1 |
| 2610 | H | 75.23625 | 71.81525 | 85.26153 | 0.00000 | 0.00000 | 0.00000 | 1 |
| 2611 | H | 72.99873 | 72.93088 | 84.62866 | 0.00000 | 0.00000 | 0.00000 | 1 |
| 2612 | H | 73.03262 | 72.07676 | 83.02621 | 0.00000 | 0.00000 | 0.00000 | 1 |
| 2613 | H | 73.03768 | 70.60350 | 85.73327 | 0.00000 | 0.00000 | 0.00000 | 1 |
| 2614 | H | 72.95982 | 69.87459 | 84.25672 | 0.00000 | 0.00000 | 0.00000 | 1 |
| 2615 | H | 71.71890 | 70.81295 | 84.77985 | 0.00000 | 0.00000 | 0.00000 | 1 |
| 2616 | N | 75.54024 | 75.97609 | 81.56492 | 0.00000 | 0.00000 | 0.00000 | 1 |
| 2617 | C | 76.11019 | 77.25010 | 81.08914 | 0.00000 | 0.00000 | 0.00000 | 1 |
| 2618 | C | 76.85557 | 76.95376 | 79.65592 | 0.00000 | 0.00000 | 0.00000 | 1 |



|      |   |          |          |          |         |         |         |   |
|------|---|----------|----------|----------|---------|---------|---------|---|
| 2619 | O | 77.61903 | 76.01141 | 79.53459 | 0.00000 | 0.00000 | 0.00000 | 1 |
| 2620 | C | 77.11171 | 77.70800 | 82.13338 | 0.00000 | 0.00000 | 0.00000 | 1 |
| 2621 | C | 77.88080 | 78.93509 | 81.67852 | 0.00000 | 0.00000 | 0.00000 | 1 |
| 2622 | C | 76.44792 | 77.97796 | 83.47155 | 0.00000 | 0.00000 | 0.00000 | 1 |
| 2623 | H | 75.92981 | 75.45554 | 82.34844 | 0.00000 | 0.00000 | 0.00000 | 1 |
| 2624 | H | 75.22183 | 77.91462 | 80.98285 | 0.00000 | 0.00000 | 0.00000 | 1 |
| 2625 | H | 77.84823 | 76.88537 | 82.27818 | 0.00000 | 0.00000 | 0.00000 | 1 |
| 2626 | H | 78.70054 | 79.20218 | 82.40458 | 0.00000 | 0.00000 | 0.00000 | 1 |
| 2627 | H | 78.37673 | 78.76674 | 80.67873 | 0.00000 | 0.00000 | 0.00000 | 1 |
| 2628 | H | 77.21468 | 79.83617 | 81.57956 | 0.00000 | 0.00000 | 0.00000 | 1 |
| 2629 | H | 75.92968 | 77.06282 | 83.87014 | 0.00000 | 0.00000 | 0.00000 | 1 |
| 2630 | H | 77.19221 | 78.30662 | 84.24795 | 0.00000 | 0.00000 | 0.00000 | 1 |
| 2631 | H | 75.67084 | 78.78705 | 83.39117 | 0.00000 | 0.00000 | 0.00000 | 1 |
| 2632 | N | 76.55988 | 77.90098 | 78.76386 | 0.00000 | 0.00000 | 0.00000 | 1 |
| 2633 | C | 77.12496 | 77.86409 | 77.44486 | 0.00000 | 0.00000 | 0.00000 | 1 |
| 2634 | C | 78.68262 | 78.36978 | 77.57650 | 0.00000 | 0.00000 | 0.00000 | 1 |
| 2635 | O | 79.02015 | 79.49000 | 77.29102 | 0.00000 | 0.00000 | 0.00000 | 1 |
| 2636 | C | 76.19768 | 78.85079 | 76.62699 | 0.00000 | 0.00000 | 0.00000 | 1 |
| 2637 | C | 75.82518 | 79.90973 | 77.71321 | 0.00000 | 0.00000 | 0.00000 | 1 |
| 2638 | C | 75.62407 | 78.99325 | 78.99485 | 0.00000 | 0.00000 | 0.00000 | 1 |
| 2639 | H | 77.06447 | 76.79119 | 77.15785 | 0.00000 | 0.00000 | 0.00000 | 1 |
| 2640 | H | 76.70879 | 79.29259 | 75.74133 | 0.00000 | 0.00000 | 0.00000 | 1 |
| 2641 | H | 75.29265 | 78.32959 | 76.24429 | 0.00000 | 0.00000 | 0.00000 | 1 |
| 2642 | H | 76.66043 | 80.63073 | 77.86115 | 0.00000 | 0.00000 | 0.00000 | 1 |
| 2643 | H | 74.92405 | 80.51201 | 77.45823 | 0.00000 | 0.00000 | 0.00000 | 1 |
| 2644 | H | 75.87099 | 79.47974 | 79.96688 | 0.00000 | 0.00000 | 0.00000 | 1 |
| 2645 | H | 74.62149 | 78.51242 | 79.06721 | 0.00000 | 0.00000 | 0.00000 | 1 |
| 2646 | N | 79.39526 | 77.36193 | 78.06639 | 0.00000 | 0.00000 | 0.00000 | 1 |
| 2647 | C | 80.81389 | 77.50770 | 78.09594 | 0.00000 | 0.00000 | 0.00000 | 1 |
| 2648 | C | 81.39763 | 76.94548 | 76.67914 | 0.00000 | 0.00000 | 0.00000 | 1 |
| 2649 | O | 80.72093 | 76.85211 | 75.68315 | 0.00000 | 0.00000 | 0.00000 | 1 |
| 2650 | C | 81.31757 | 76.65677 | 79.33762 | 0.00000 | 0.00000 | 0.00000 | 1 |
| 2651 | C | 82.43183 | 77.43673 | 80.09876 | 0.00000 | 0.00000 | 0.00000 | 1 |
| 2652 | C | 81.69793 | 78.38469 | 81.12500 | 0.00000 | 0.00000 | 0.00000 | 1 |
| 2653 | O | 80.51485 | 78.31188 | 81.34820 | 0.00000 | 0.00000 | 0.00000 | 1 |
| 2654 | N | 82.58391 | 79.21463 | 81.71251 | 0.00000 | 0.00000 | 0.00000 | 1 |
| 2655 | H | 78.92693 | 76.48288 | 78.36958 | 0.00000 | 0.00000 | 0.00000 | 1 |
| 2656 | H | 80.92934 | 78.61316 | 78.19286 | 0.00000 | 0.00000 | 0.00000 | 1 |
| 2657 | H | 80.46858 | 76.44431 | 80.03104 | 0.00000 | 0.00000 | 0.00000 | 1 |
| 2658 | H | 81.69247 | 75.66495 | 78.99654 | 0.00000 | 0.00000 | 0.00000 | 1 |
| 2659 | H | 83.10900 | 76.73703 | 80.63648 | 0.00000 | 0.00000 | 0.00000 | 1 |
| 2660 | H | 83.09599 | 78.00896 | 79.41432 | 0.00000 | 0.00000 | 0.00000 | 1 |
| 2661 | H | 83.59858 | 79.26507 | 81.56167 | 0.00000 | 0.00000 | 0.00000 | 1 |
| 2662 | H | 82.35776 | 79.88973 | 82.45065 | 0.00000 | 0.00000 | 0.00000 | 1 |
| 2663 | N | 82.69650 | 76.65895 | 76.80531 | 0.00000 | 0.00000 | 0.00000 | 1 |
| 2664 | C | 83.51507 | 76.28423 | 75.64889 | 0.00000 | 0.00000 | 0.00000 | 1 |
| 2665 | C | 83.20510 | 74.72261 | 75.17997 | 0.00000 | 0.00000 | 0.00000 | 1 |
| 2666 | O | 83.74711 | 74.28832 | 74.19112 | 0.00000 | 0.00000 | 0.00000 | 1 |
| 2667 | C | 84.99204 | 76.31182 | 75.98756 | 0.00000 | 0.00000 | 0.00000 | 1 |
| 2668 | C | 85.54572 | 77.72291 | 76.05516 | 0.00000 | 0.00000 | 0.00000 | 1 |
| 2669 | C | 85.30844 | 75.56406 | 77.26948 | 0.00000 | 0.00000 | 0.00000 | 1 |
| 2670 | H | 83.09358 | 76.84198 | 77.72362 | 0.00000 | 0.00000 | 0.00000 | 1 |
| 2671 | H | 83.20965 | 77.00873 | 74.85697 | 0.00000 | 0.00000 | 0.00000 | 1 |
| 2672 | H | 85.51874 | 75.78897 | 75.15453 | 0.00000 | 0.00000 | 0.00000 | 1 |
| 2673 | H | 85.03486 | 78.32896 | 76.85347 | 0.00000 | 0.00000 | 0.00000 | 1 |
| 2674 | H | 86.64729 | 77.72459 | 76.28582 | 0.00000 | 0.00000 | 0.00000 | 1 |
| 2675 | H | 85.40735 | 78.27010 | 75.08156 | 0.00000 | 0.00000 | 0.00000 | 1 |
| 2676 | H | 84.72999 | 74.60082 | 77.33580 | 0.00000 | 0.00000 | 0.00000 | 1 |
| 2677 | H | 86.40104 | 75.30585 | 77.34205 | 0.00000 | 0.00000 | 0.00000 | 1 |
| 2678 | H | 85.04959 | 76.17086 | 78.18046 | 0.00000 | 0.00000 | 0.00000 | 1 |
| 2679 | N | 82.45567 | 74.06524 | 76.05845 | 0.00000 | 0.00000 | 0.00000 | 1 |
| 2680 | C | 81.87908 | 72.84005 | 75.63303 | 0.00000 | 0.00000 | 0.00000 | 1 |

|      |   |          |          |          |         |         |         |   |
|------|---|----------|----------|----------|---------|---------|---------|---|
| 2681 | C | 80.25391 | 73.02750 | 75.69899 | 0.00000 | 0.00000 | 0.00000 | 1 |
| 2682 | O | 79.69294 | 73.31827 | 76.72698 | 0.00000 | 0.00000 | 0.00000 | 1 |
| 2683 | C | 82.33582 | 71.78464 | 76.74917 | 0.00000 | 0.00000 | 0.00000 | 1 |
| 2684 | O | 81.92175 | 70.41502 | 76.53325 | 0.00000 | 0.00000 | 0.00000 | 1 |
| 2685 | H | 82.07722 | 74.62747 | 76.81846 | 0.00000 | 0.00000 | 0.00000 | 1 |
| 2686 | H | 82.28904 | 72.63440 | 74.61624 | 0.00000 | 0.00000 | 0.00000 | 1 |
| 2687 | H | 83.44429 | 71.89691 | 76.87332 | 0.00000 | 0.00000 | 0.00000 | 1 |
| 2688 | H | 81.87552 | 72.14253 | 77.71059 | 0.00000 | 0.00000 | 0.00000 | 1 |
| 2689 | H | 82.72327 | 70.06611 | 76.10164 | 0.00000 | 0.00000 | 0.00000 | 1 |
| 2690 | N | 79.74908 | 72.81481 | 74.49653 | 0.00000 | 0.00000 | 0.00000 | 1 |
| 2691 | C | 78.33344 | 72.84545 | 74.29719 | 0.00000 | 0.00000 | 0.00000 | 1 |
| 2692 | C | 78.21392 | 71.99996 | 72.93363 | 0.00000 | 0.00000 | 0.00000 | 1 |
| 2693 | O | 79.23798 | 71.71614 | 72.34240 | 0.00000 | 0.00000 | 0.00000 | 1 |
| 2694 | C | 77.82967 | 74.36969 | 74.07739 | 0.00000 | 0.00000 | 0.00000 | 1 |
| 2695 | O | 78.41070 | 75.08410 | 72.98224 | 0.00000 | 0.00000 | 0.00000 | 1 |
| 2696 | C | 78.00744 | 75.00070 | 75.50421 | 0.00000 | 0.00000 | 0.00000 | 1 |
| 2697 | H | 80.29154 | 72.54827 | 73.65448 | 0.00000 | 0.00000 | 0.00000 | 1 |
| 2698 | H | 77.87250 | 72.39068 | 75.20355 | 0.00000 | 0.00000 | 0.00000 | 1 |
| 2699 | H | 76.72775 | 74.32952 | 73.84583 | 0.00000 | 0.00000 | 0.00000 | 1 |
| 2700 | H | 77.63477 | 75.19947 | 72.39345 | 0.00000 | 0.00000 | 0.00000 | 1 |
| 2701 | H | 79.07930 | 75.26353 | 75.69644 | 0.00000 | 0.00000 | 0.00000 | 1 |
| 2702 | H | 77.68235 | 74.30528 | 76.31647 | 0.00000 | 0.00000 | 0.00000 | 1 |
| 2703 | H | 77.41668 | 75.94047 | 75.60589 | 0.00000 | 0.00000 | 0.00000 | 1 |
| 2704 | N | 76.94848 | 71.69238 | 72.63697 | 0.00000 | 0.00000 | 0.00000 | 1 |
| 2705 | C | 76.60969 | 71.08430 | 71.38325 | 0.00000 | 0.00000 | 0.00000 | 1 |
| 2706 | C | 76.52305 | 72.24003 | 70.22288 | 0.00000 | 0.00000 | 0.00000 | 1 |
| 2707 | O | 75.93453 | 73.27969 | 70.39099 | 0.00000 | 0.00000 | 0.00000 | 1 |
| 2708 | C | 75.15205 | 70.52510 | 71.65567 | 0.00000 | 0.00000 | 0.00000 | 1 |
| 2709 | C | 74.59090 | 71.58793 | 72.65067 | 0.00000 | 0.00000 | 0.00000 | 1 |
| 2710 | C | 75.85268 | 71.79758 | 73.59242 | 0.00000 | 0.00000 | 0.00000 | 1 |
| 2711 | H | 77.39166 | 70.32192 | 71.16640 | 0.00000 | 0.00000 | 0.00000 | 1 |
| 2712 | H | 74.54596 | 70.43255 | 70.72611 | 0.00000 | 0.00000 | 0.00000 | 1 |
| 2713 | H | 75.18156 | 69.51332 | 72.11810 | 0.00000 | 0.00000 | 0.00000 | 1 |
| 2714 | H | 74.32031 | 72.53122 | 72.12188 | 0.00000 | 0.00000 | 0.00000 | 1 |
| 2715 | H | 73.68070 | 71.25495 | 73.20134 | 0.00000 | 0.00000 | 0.00000 | 1 |
| 2716 | H | 75.89718 | 72.78022 | 74.11636 | 0.00000 | 0.00000 | 0.00000 | 1 |
| 2717 | H | 76.01844 | 70.98097 | 74.33467 | 0.00000 | 0.00000 | 0.00000 | 1 |
| 2718 | N | 77.10467 | 71.77164 | 69.12631 | 0.00000 | 0.00000 | 0.00000 | 1 |
| 2719 | C | 76.97429 | 72.48501 | 67.91062 | 0.00000 | 0.00000 | 0.00000 | 1 |
| 2720 | C | 75.81610 | 71.72219 | 67.02981 | 0.00000 | 0.00000 | 0.00000 | 1 |
| 2721 | O | 76.07351 | 70.97900 | 66.11325 | 0.00000 | 0.00000 | 0.00000 | 1 |
| 2722 | C | 78.40841 | 72.40184 | 67.18364 | 0.00000 | 0.00000 | 0.00000 | 1 |
| 2723 | O | 79.00360 | 71.09818 | 67.09882 | 0.00000 | 0.00000 | 0.00000 | 1 |
| 2724 | C | 79.19658 | 73.46829 | 68.02680 | 0.00000 | 0.00000 | 0.00000 | 1 |
| 2725 | H | 77.55745 | 70.85851 | 69.11216 | 0.00000 | 0.00000 | 0.00000 | 1 |
| 2726 | H | 76.65580 | 73.50321 | 68.23323 | 0.00000 | 0.00000 | 0.00000 | 1 |
| 2727 | H | 78.28479 | 72.77636 | 66.13135 | 0.00000 | 0.00000 | 0.00000 | 1 |
| 2728 | H | 78.87751 | 70.89178 | 66.14975 | 0.00000 | 0.00000 | 0.00000 | 1 |
| 2729 | H | 78.70151 | 74.46723 | 68.00561 | 0.00000 | 0.00000 | 0.00000 | 1 |
| 2730 | H | 80.23706 | 73.60219 | 67.64996 | 0.00000 | 0.00000 | 0.00000 | 1 |
| 2731 | H | 79.26903 | 73.15602 | 69.09604 | 0.00000 | 0.00000 | 0.00000 | 1 |
| 2732 | N | 74.61661 | 71.99554 | 67.54308 | 0.00000 | 0.00000 | 0.00000 | 1 |
| 2733 | C | 73.52815 | 72.12386 | 66.39144 | 0.00000 | 0.00000 | 0.00000 | 1 |
| 2734 | C | 73.74366 | 73.22594 | 65.47471 | 0.00000 | 0.00000 | 0.00000 | 1 |
| 2735 | O | 73.92001 | 74.12315 | 64.72513 | 0.00000 | 0.00000 | 0.00000 | 1 |
| 2736 | C | 72.11898 | 72.31460 | 67.21649 | 0.00000 | 0.00000 | 0.00000 | 1 |
| 2737 | C | 70.98633 | 71.96925 | 66.31097 | 0.00000 | 0.00000 | 0.00000 | 1 |
| 2738 | C | 70.73274 | 70.46490 | 66.30817 | 0.00000 | 0.00000 | 0.00000 | 1 |
| 2739 | C | 69.71797 | 72.69968 | 66.74385 | 0.00000 | 0.00000 | 0.00000 | 1 |
| 2740 | H | 74.65455 | 72.69147 | 68.28379 | 0.00000 | 0.00000 | 0.00000 | 1 |
| 2741 | H | 73.66795 | 71.11905 | 65.92021 | 0.00000 | 0.00000 | 0.00000 | 1 |
| 2742 | H | 72.11689 | 71.68276 | 68.13294 | 0.00000 | 0.00000 | 0.00000 | 1 |

|      |   |          |          |          |         |         |                   |              |
|------|---|----------|----------|----------|---------|---------|-------------------|--------------|
| 2743 | H | 72.04264 | 73.36674 | 67.57301 | 0.00000 | 0.00000 | 0.00000           | 1            |
| 2744 | H | 71.23931 | 72.29589 | 65.27571 | 0.00000 | 0.00000 | 0.00000           | 1            |
| 2745 | H | 70.42480 | 70.09809 | 67.32054 | 0.00000 | 0.00000 | 0.00000           | 1            |
| 2746 | H | 71.64764 | 69.89035 | 66.01348 | 0.00000 | 0.00000 | 0.00000           | 1            |
| 2747 | H | 69.91839 | 70.18309 | 65.59322 | 0.00000 | 0.00000 | 0.00000           | 1            |
| 2748 | H | 68.84310 | 72.42555 | 66.10128 | 0.00000 | 0.00000 | 0.00000           | 1            |
| 2749 | H | 69.84015 | 73.81184 | 66.68131 | 0.00000 | 0.00000 | 0.00000           | 1            |
| 2750 | H | 69.44287 | 72.45527 | 67.80166 | 0.00000 | 0.00000 | 0.00000           | 1            |
| 2751 |   | 273      |          |          |         |         |                   |              |
| 2752 |   | 150.0000 | 150.0000 | 150.0000 | 0.0000  | 0.0000  | 0.0000*****       | 5.5000 22000 |
|      |   | 0.2500   | 300.00   | 0.00     | 0.00    | 0.00    | -1291.4690 0.0000 | 0.0000       |
| 2753 | N | 68.28662 | 77.46732 | 77.67074 | 0.00000 | 0.00000 | 0.00000           | 1            |
| 2754 | C | 68.90275 | 77.45836 | 76.45624 | 0.00000 | 0.00000 | 0.00000           | 1            |
| 2755 | C | 68.26935 | 76.13264 | 75.58951 | 0.00000 | 0.00000 | 0.00000           | 1            |
| 2756 | O | 67.96172 | 75.08267 | 76.09833 | 0.00000 | 0.00000 | 0.00000           | 1            |
| 2757 | C | 70.50771 | 77.08292 | 76.66790 | 0.00000 | 0.00000 | 0.00000           | 1            |
| 2758 | C | 71.08826 | 77.99067 | 77.68473 | 0.00000 | 0.00000 | 0.00000           | 1            |
| 2759 | C | 72.40335 | 77.41229 | 78.20383 | 0.00000 | 0.00000 | 0.00000           | 1            |
| 2760 | C | 71.30933 | 79.39585 | 77.13272 | 0.00000 | 0.00000 | 0.00000           | 1            |
| 2761 | H | 68.28251 | 76.58213 | 78.14355 | 0.00000 | 0.00000 | 0.00000           | 1            |
| 2762 | H | 68.73100 | 78.46984 | 76.00569 | 0.00000 | 0.00000 | 0.00000           | 1            |
| 2763 | H | 70.61564 | 76.01167 | 76.99885 | 0.00000 | 0.00000 | 0.00000           | 1            |
| 2764 | H | 71.04783 | 77.15570 | 75.69847 | 0.00000 | 0.00000 | 0.00000           | 1            |
| 2765 | H | 70.38218 | 78.05176 | 78.54657 | 0.00000 | 0.00000 | 0.00000           | 1            |
| 2766 | H | 73.22578 | 77.49358 | 77.44990 | 0.00000 | 0.00000 | 0.00000           | 1            |
| 2767 | H | 72.30201 | 76.32160 | 78.46654 | 0.00000 | 0.00000 | 0.00000           | 1            |
| 2768 | H | 72.74571 | 77.94141 | 79.12878 | 0.00000 | 0.00000 | 0.00000           | 1            |
| 2769 | H | 72.20223 | 79.88940 | 77.59383 | 0.00000 | 0.00000 | 0.00000           | 1            |
| 2770 | H | 70.42783 | 80.05755 | 77.32822 | 0.00000 | 0.00000 | 0.00000           | 1            |
| 2771 | H | 71.46632 | 79.38664 | 76.02511 | 0.00000 | 0.00000 | 0.00000           | 1            |
| 2772 | N | 68.31485 | 76.46489 | 74.31160 | 0.00000 | 0.00000 | 0.00000           | 1            |
| 2773 | C | 67.77197 | 75.60424 | 73.27714 | 0.00000 | 0.00000 | 0.00000           | 1            |
| 2774 | C | 68.84035 | 75.45993 | 72.00717 | 0.00000 | 0.00000 | 0.00000           | 1            |
| 2775 | O | 68.57081 | 74.71708 | 71.09290 | 0.00000 | 0.00000 | 0.00000           | 1            |
| 2776 | C | 66.50824 | 76.20334 | 72.66501 | 0.00000 | 0.00000 | 0.00000           | 1            |
| 2777 | C | 65.33158 | 76.11835 | 73.61694 | 0.00000 | 0.00000 | 0.00000           | 1            |
| 2778 | C | 66.71222 | 77.63147 | 72.20114 | 0.00000 | 0.00000 | 0.00000           | 1            |
| 2779 | H | 68.59670 | 77.43224 | 74.17246 | 0.00000 | 0.00000 | 0.00000           | 1            |
| 2780 | H | 67.59074 | 74.64592 | 73.82387 | 0.00000 | 0.00000 | 0.00000           | 1            |
| 2781 | H | 66.25863 | 75.58977 | 71.76946 | 0.00000 | 0.00000 | 0.00000           | 1            |
| 2782 | H | 65.11235 | 75.05385 | 73.91194 | 0.00000 | 0.00000 | 0.00000           | 1            |
| 2783 | H | 65.53097 | 76.69086 | 74.56595 | 0.00000 | 0.00000 | 0.00000           | 1            |
| 2784 | H | 64.39315 | 76.54029 | 73.15933 | 0.00000 | 0.00000 | 0.00000           | 1            |
| 2785 | H | 65.82307 | 78.01484 | 71.62650 | 0.00000 | 0.00000 | 0.00000           | 1            |
| 2786 | H | 66.87218 | 78.32798 | 73.07090 | 0.00000 | 0.00000 | 0.00000           | 1            |
| 2787 | H | 67.61241 | 77.72317 | 71.53018 | 0.00000 | 0.00000 | 0.00000           | 1            |
| 2788 | N | 69.88797 | 76.25933 | 72.13039 | 0.00000 | 0.00000 | 0.00000           | 1            |
| 2789 | C | 70.86839 | 76.23776 | 71.10321 | 0.00000 | 0.00000 | 0.00000           | 1            |
| 2790 | C | 72.35340 | 75.89469 | 71.70667 | 0.00000 | 0.00000 | 0.00000           | 1            |
| 2791 | O | 73.30010 | 75.89840 | 70.95289 | 0.00000 | 0.00000 | 0.00000           | 1            |
| 2792 | C | 70.99878 | 77.71081 | 70.51418 | 0.00000 | 0.00000 | 0.00000           | 1            |
| 2793 | C | 71.57927 | 77.57386 | 69.07701 | 0.00000 | 0.00000 | 0.00000           | 1            |
| 2794 | C | 70.42572 | 76.89095 | 68.20205 | 0.00000 | 0.00000 | 0.00000           | 1            |
| 2795 | N | 70.79229 | 77.15654 | 66.87763 | 0.00000 | 0.00000 | 0.00000           | 1            |
| 2796 | C | 70.06056 | 76.91294 | 65.86671 | 0.00000 | 0.00000 | 0.00000           | 1            |
| 2797 | N | 68.80874 | 76.33015 | 66.09596 | 0.00000 | 0.00000 | 0.00000           | 1            |
| 2798 | N | 70.69269 | 77.30382 | 64.67768 | 0.00000 | 0.00000 | 0.00000           | 1            |
| 2799 | H | 69.93272 | 76.83740 | 72.96597 | 0.00000 | 0.00000 | 0.00000           | 1            |
| 2800 | H | 70.48585 | 75.48722 | 70.37016 | 0.00000 | 0.00000 | 0.00000           | 1            |
| 2801 | H | 70.01521 | 78.23174 | 70.50432 | 0.00000 | 0.00000 | 0.00000           | 1            |
| 2802 | H | 71.66507 | 78.33086 | 71.15620 | 0.00000 | 0.00000 | 0.00000           | 1            |
| 2803 | H | 71.86662 | 78.56564 | 68.66202 | 0.00000 | 0.00000 | 0.00000           | 1            |

|      |   |          |          |          |         |         |         |   |
|------|---|----------|----------|----------|---------|---------|---------|---|
| 2804 | H | 72.51091 | 76.95816 | 69.08724 | 0.00000 | 0.00000 | 0.00000 | 1 |
| 2805 | H | 70.33396 | 75.78084 | 68.31477 | 0.00000 | 0.00000 | 0.00000 | 1 |
| 2806 | H | 69.40406 | 77.32671 | 68.32861 | 0.00000 | 0.00000 | 0.00000 | 1 |
| 2807 | H | 71.70036 | 77.56837 | 66.73096 | 0.00000 | 0.00000 | 0.00000 | 1 |
| 2808 | H | 68.37452 | 76.04969 | 66.97432 | 0.00000 | 0.00000 | 0.00000 | 1 |
| 2809 | H | 68.13438 | 76.09294 | 65.36802 | 0.00000 | 0.00000 | 0.00000 | 1 |
| 2810 | H | 71.61393 | 77.70609 | 64.51230 | 0.00000 | 0.00000 | 0.00000 | 1 |
| 2811 | H | 70.27523 | 77.17942 | 63.75471 | 0.00000 | 0.00000 | 0.00000 | 1 |
| 2812 | N | 72.32377 | 75.70265 | 73.01888 | 0.00000 | 0.00000 | 0.00000 | 1 |
| 2813 | C | 73.50779 | 75.32195 | 73.70342 | 0.00000 | 0.00000 | 0.00000 | 1 |
| 2814 | C | 73.15860 | 73.94312 | 74.49215 | 0.00000 | 0.00000 | 0.00000 | 1 |
| 2815 | O | 72.51445 | 73.06830 | 73.95577 | 0.00000 | 0.00000 | 0.00000 | 1 |
| 2816 | C | 73.94531 | 76.50087 | 74.69439 | 0.00000 | 0.00000 | 0.00000 | 1 |
| 2817 | C | 74.09963 | 77.83212 | 73.93881 | 0.00000 | 0.00000 | 0.00000 | 1 |
| 2818 | C | 74.65565 | 77.87203 | 72.62457 | 0.00000 | 0.00000 | 0.00000 | 1 |
| 2819 | C | 73.71301 | 79.04862 | 74.57699 | 0.00000 | 0.00000 | 0.00000 | 1 |
| 2820 | C | 74.77529 | 79.09766 | 71.96596 | 0.00000 | 0.00000 | 0.00000 | 1 |
| 2821 | C | 73.85803 | 80.25217 | 73.88575 | 0.00000 | 0.00000 | 0.00000 | 1 |
| 2822 | C | 74.38165 | 80.33049 | 72.56261 | 0.00000 | 0.00000 | 0.00000 | 1 |
| 2823 | O | 74.49659 | 81.57950 | 71.89827 | 0.00000 | 0.00000 | 0.00000 | 1 |
| 2824 | H | 71.41444 | 75.70339 | 73.47821 | 0.00000 | 0.00000 | 0.00000 | 1 |
| 2825 | H | 74.22773 | 75.18062 | 72.86409 | 0.00000 | 0.00000 | 0.00000 | 1 |
| 2826 | H | 73.20302 | 76.61563 | 75.51594 | 0.00000 | 0.00000 | 0.00000 | 1 |
| 2827 | H | 74.91010 | 76.24136 | 75.18799 | 0.00000 | 0.00000 | 0.00000 | 1 |
| 2828 | H | 74.96798 | 76.93965 | 72.11755 | 0.00000 | 0.00000 | 0.00000 | 1 |
| 2829 | H | 73.31499 | 79.03912 | 75.60652 | 0.00000 | 0.00000 | 0.00000 | 1 |
| 2830 | H | 75.19118 | 79.10028 | 70.94312 | 0.00000 | 0.00000 | 0.00000 | 1 |
| 2831 | H | 73.55713 | 81.18873 | 74.38643 | 0.00000 | 0.00000 | 0.00000 | 1 |
| 2832 | H | 74.90981 | 81.28160 | 71.05342 | 0.00000 | 0.00000 | 0.00000 | 1 |
| 2833 | N | 73.82569 | 73.87072 | 75.64864 | 0.00000 | 0.00000 | 0.00000 | 1 |
| 2834 | C | 73.45156 | 72.82605 | 76.55326 | 0.00000 | 0.00000 | 0.00000 | 1 |
| 2835 | C | 72.32431 | 73.37079 | 77.59010 | 0.00000 | 0.00000 | 0.00000 | 1 |
| 2836 | O | 71.67307 | 74.37702 | 77.41054 | 0.00000 | 0.00000 | 0.00000 | 1 |
| 2837 | C | 74.78242 | 72.30468 | 77.26401 | 0.00000 | 0.00000 | 0.00000 | 1 |
| 2838 | O | 74.58270 | 71.14634 | 78.14682 | 0.00000 | 0.00000 | 0.00000 | 1 |
| 2839 | C | 75.41211 | 73.56465 | 77.94454 | 0.00000 | 0.00000 | 0.00000 | 1 |
| 2840 | H | 74.27259 | 74.72186 | 75.98143 | 0.00000 | 0.00000 | 0.00000 | 1 |
| 2841 | H | 73.00926 | 72.07245 | 75.85755 | 0.00000 | 0.00000 | 0.00000 | 1 |
| 2842 | H | 75.50151 | 71.95772 | 76.47664 | 0.00000 | 0.00000 | 0.00000 | 1 |
| 2843 | H | 75.19319 | 70.51713 | 77.72847 | 0.00000 | 0.00000 | 0.00000 | 1 |
| 2844 | H | 76.35025 | 73.30523 | 78.49074 | 0.00000 | 0.00000 | 0.00000 | 1 |
| 2845 | H | 74.71330 | 74.02856 | 78.68282 | 0.00000 | 0.00000 | 0.00000 | 1 |
| 2846 | H | 75.67419 | 74.35368 | 77.20208 | 0.00000 | 0.00000 | 0.00000 | 1 |
| 2847 | N | 72.18446 | 72.46043 | 78.54708 | 0.00000 | 0.00000 | 0.00000 | 1 |
| 2848 | C | 71.27333 | 72.73454 | 79.60046 | 0.00000 | 0.00000 | 0.00000 | 1 |
| 2849 | C | 72.05025 | 73.39715 | 80.88239 | 0.00000 | 0.00000 | 0.00000 | 1 |
| 2850 | O | 71.41350 | 73.84947 | 81.80654 | 0.00000 | 0.00000 | 0.00000 | 1 |
| 2851 | C | 70.76507 | 71.35382 | 80.20619 | 0.00000 | 0.00000 | 0.00000 | 1 |
| 2852 | C | 69.89044 | 70.55166 | 79.19278 | 0.00000 | 0.00000 | 0.00000 | 1 |
| 2853 | C | 68.37986 | 71.00225 | 79.32110 | 0.00000 | 0.00000 | 0.00000 | 1 |
| 2854 | C | 68.14372 | 72.31029 | 78.53081 | 0.00000 | 0.00000 | 0.00000 | 1 |
| 2855 | N | 66.60231 | 72.58238 | 78.54142 | 0.00000 | 0.00000 | 0.00000 | 1 |
| 2856 | H | 72.81511 | 71.64647 | 78.58427 | 0.00000 | 0.00000 | 0.00000 | 1 |
| 2857 | H | 70.50142 | 73.41061 | 79.16700 | 0.00000 | 0.00000 | 0.00000 | 1 |
| 2858 | H | 71.65045 | 70.74333 | 80.49405 | 0.00000 | 0.00000 | 0.00000 | 1 |
| 2859 | H | 70.20026 | 71.52962 | 81.14871 | 0.00000 | 0.00000 | 0.00000 | 1 |
| 2860 | H | 70.26536 | 70.68232 | 78.15264 | 0.00000 | 0.00000 | 0.00000 | 1 |
| 2861 | H | 69.97119 | 69.46297 | 79.41244 | 0.00000 | 0.00000 | 0.00000 | 1 |
| 2862 | H | 67.70900 | 70.20370 | 78.92923 | 0.00000 | 0.00000 | 0.00000 | 1 |
| 2863 | H | 68.09626 | 71.12861 | 80.39139 | 0.00000 | 0.00000 | 0.00000 | 1 |
| 2864 | H | 68.58622 | 73.22220 | 78.97805 | 0.00000 | 0.00000 | 0.00000 | 1 |
| 2865 | H | 68.40368 | 72.25153 | 77.45466 | 0.00000 | 0.00000 | 0.00000 | 1 |

|      |   |          |          |          |         |         |         |   |
|------|---|----------|----------|----------|---------|---------|---------|---|
| 2866 | H | 65.95750 | 71.77677 | 78.29195 | 0.00000 | 0.00000 | 0.00000 | 1 |
| 2867 | H | 66.28607 | 73.32719 | 77.85602 | 0.00000 | 0.00000 | 0.00000 | 1 |
| 2868 | H | 66.17636 | 72.93621 | 79.44694 | 0.00000 | 0.00000 | 0.00000 | 1 |
| 2869 | N | 73.36608 | 73.18348 | 80.81489 | 0.00000 | 0.00000 | 0.00000 | 1 |
| 2870 | C | 74.19380 | 73.98650 | 81.66593 | 0.00000 | 0.00000 | 0.00000 | 1 |
| 2871 | C | 74.56233 | 75.36632 | 80.88765 | 0.00000 | 0.00000 | 0.00000 | 1 |
| 2872 | O | 73.96321 | 75.78059 | 79.92492 | 0.00000 | 0.00000 | 0.00000 | 1 |
| 2873 | C | 75.49055 | 73.13412 | 81.99430 | 0.00000 | 0.00000 | 0.00000 | 1 |
| 2874 | C | 75.71245 | 73.14648 | 83.54125 | 0.00000 | 0.00000 | 0.00000 | 1 |
| 2875 | C | 74.95608 | 71.91657 | 84.18655 | 0.00000 | 0.00000 | 0.00000 | 1 |
| 2876 | C | 73.42328 | 72.07687 | 84.06213 | 0.00000 | 0.00000 | 0.00000 | 1 |
| 2877 | N | 72.77751 | 70.81180 | 84.72246 | 0.00000 | 0.00000 | 0.00000 | 1 |
| 2878 | H | 73.71470 | 72.78610 | 79.94331 | 0.00000 | 0.00000 | 0.00000 | 1 |
| 2879 | H | 73.52735 | 74.17103 | 82.54094 | 0.00000 | 0.00000 | 0.00000 | 1 |
| 2880 | H | 75.39155 | 72.09220 | 81.61630 | 0.00000 | 0.00000 | 0.00000 | 1 |
| 2881 | H | 76.37471 | 73.56256 | 81.47005 | 0.00000 | 0.00000 | 0.00000 | 1 |
| 2882 | H | 76.79934 | 73.07796 | 83.77073 | 0.00000 | 0.00000 | 0.00000 | 1 |
| 2883 | H | 75.36812 | 74.10547 | 83.98958 | 0.00000 | 0.00000 | 0.00000 | 1 |
| 2884 | H | 75.28335 | 70.96713 | 83.70433 | 0.00000 | 0.00000 | 0.00000 | 1 |
| 2885 | H | 75.23633 | 71.81595 | 85.26032 | 0.00000 | 0.00000 | 0.00000 | 1 |
| 2886 | H | 72.99987 | 72.93269 | 84.62499 | 0.00000 | 0.00000 | 0.00000 | 1 |
| 2887 | H | 73.03445 | 72.07720 | 83.02328 | 0.00000 | 0.00000 | 0.00000 | 1 |
| 2888 | H | 73.03453 | 70.60717 | 85.73195 | 0.00000 | 0.00000 | 0.00000 | 1 |
| 2889 | H | 72.96069 | 69.87591 | 84.25633 | 0.00000 | 0.00000 | 0.00000 | 1 |
| 2890 | H | 71.71831 | 70.81501 | 84.77464 | 0.00000 | 0.00000 | 0.00000 | 1 |
| 2891 | N | 75.53957 | 75.97654 | 81.56518 | 0.00000 | 0.00000 | 0.00000 | 1 |
| 2892 | C | 76.11022 | 77.24991 | 81.08850 | 0.00000 | 0.00000 | 0.00000 | 1 |
| 2893 | C | 76.85469 | 76.95246 | 79.65505 | 0.00000 | 0.00000 | 0.00000 | 1 |
| 2894 | O | 77.61729 | 76.00951 | 79.53347 | 0.00000 | 0.00000 | 0.00000 | 1 |
| 2895 | C | 77.11274 | 77.70729 | 82.13204 | 0.00000 | 0.00000 | 0.00000 | 1 |
| 2896 | C | 77.88251 | 78.93365 | 81.67642 | 0.00000 | 0.00000 | 0.00000 | 1 |
| 2897 | C | 76.44997 | 77.97822 | 83.47051 | 0.00000 | 0.00000 | 0.00000 | 1 |
| 2898 | H | 75.93126 | 75.45453 | 82.34666 | 0.00000 | 0.00000 | 0.00000 | 1 |
| 2899 | H | 75.22232 | 77.91506 | 80.98246 | 0.00000 | 0.00000 | 0.00000 | 1 |
| 2900 | H | 77.84862 | 76.88406 | 82.27665 | 0.00000 | 0.00000 | 0.00000 | 1 |
| 2901 | H | 78.70223 | 79.20089 | 82.40250 | 0.00000 | 0.00000 | 0.00000 | 1 |
| 2902 | H | 78.37872 | 78.76428 | 80.67687 | 0.00000 | 0.00000 | 0.00000 | 1 |
| 2903 | H | 77.21686 | 79.83498 | 81.57662 | 0.00000 | 0.00000 | 0.00000 | 1 |
| 2904 | H | 75.93002 | 77.06402 | 83.86904 | 0.00000 | 0.00000 | 0.00000 | 1 |
| 2905 | H | 77.19524 | 78.30517 | 84.24671 | 0.00000 | 0.00000 | 0.00000 | 1 |
| 2906 | H | 75.67453 | 78.78893 | 83.39062 | 0.00000 | 0.00000 | 0.00000 | 1 |
| 2907 | N | 76.55921 | 77.89982 | 78.76308 | 0.00000 | 0.00000 | 0.00000 | 1 |
| 2908 | C | 77.12438 | 77.86262 | 77.44381 | 0.00000 | 0.00000 | 0.00000 | 1 |
| 2909 | C | 78.68209 | 78.36829 | 77.57556 | 0.00000 | 0.00000 | 0.00000 | 1 |
| 2910 | O | 79.01967 | 79.48825 | 77.28943 | 0.00000 | 0.00000 | 0.00000 | 1 |
| 2911 | C | 76.19693 | 78.84959 | 76.62612 | 0.00000 | 0.00000 | 0.00000 | 1 |
| 2912 | C | 75.82509 | 79.90881 | 77.71230 | 0.00000 | 0.00000 | 0.00000 | 1 |
| 2913 | C | 75.62410 | 78.99265 | 78.99417 | 0.00000 | 0.00000 | 0.00000 | 1 |
| 2914 | H | 77.06362 | 76.78980 | 77.15712 | 0.00000 | 0.00000 | 0.00000 | 1 |
| 2915 | H | 76.70785 | 79.29102 | 75.74023 | 0.00000 | 0.00000 | 0.00000 | 1 |
| 2916 | H | 75.29175 | 78.32840 | 76.24399 | 0.00000 | 0.00000 | 0.00000 | 1 |
| 2917 | H | 76.66056 | 80.62963 | 77.85985 | 0.00000 | 0.00000 | 0.00000 | 1 |
| 2918 | H | 74.92403 | 80.51124 | 77.45747 | 0.00000 | 0.00000 | 0.00000 | 1 |
| 2919 | H | 75.87179 | 79.47913 | 79.96598 | 0.00000 | 0.00000 | 0.00000 | 1 |
| 2920 | H | 74.62131 | 78.51236 | 79.06711 | 0.00000 | 0.00000 | 0.00000 | 1 |
| 2921 | N | 79.39461 | 77.36081 | 78.06637 | 0.00000 | 0.00000 | 0.00000 | 1 |
| 2922 | C | 80.81330 | 77.50703 | 78.09633 | 0.00000 | 0.00000 | 0.00000 | 1 |
| 2923 | C | 81.39750 | 76.94557 | 76.67942 | 0.00000 | 0.00000 | 0.00000 | 1 |
| 2924 | O | 80.72143 | 76.85312 | 75.68294 | 0.00000 | 0.00000 | 0.00000 | 1 |
| 2925 | C | 81.31707 | 76.65606 | 79.33805 | 0.00000 | 0.00000 | 0.00000 | 1 |
| 2926 | C | 82.43215 | 77.43577 | 80.09878 | 0.00000 | 0.00000 | 0.00000 | 1 |
| 2927 | C | 81.69896 | 78.38479 | 81.12453 | 0.00000 | 0.00000 | 0.00000 | 1 |

|      |   |          |          |          |         |         |         |   |
|------|---|----------|----------|----------|---------|---------|---------|---|
| 2928 | O | 80.51608 | 78.31141 | 81.34930 | 0.00000 | 0.00000 | 0.00000 | 1 |
| 2929 | N | 82.58489 | 79.21630 | 81.70975 | 0.00000 | 0.00000 | 0.00000 | 1 |
| 2930 | H | 78.92632 | 76.48186 | 78.36976 | 0.00000 | 0.00000 | 0.00000 | 1 |
| 2931 | H | 80.92817 | 78.61252 | 78.19352 | 0.00000 | 0.00000 | 0.00000 | 1 |
| 2932 | H | 80.46834 | 76.44409 | 80.03172 | 0.00000 | 0.00000 | 0.00000 | 1 |
| 2933 | H | 81.69149 | 75.66414 | 78.99700 | 0.00000 | 0.00000 | 0.00000 | 1 |
| 2934 | H | 83.10854 | 76.73566 | 80.63680 | 0.00000 | 0.00000 | 0.00000 | 1 |
| 2935 | H | 83.09674 | 78.00703 | 79.41407 | 0.00000 | 0.00000 | 0.00000 | 1 |
| 2936 | H | 83.59943 | 79.26767 | 81.55805 | 0.00000 | 0.00000 | 0.00000 | 1 |
| 2937 | H | 82.35863 | 79.89218 | 82.44718 | 0.00000 | 0.00000 | 0.00000 | 1 |
| 2938 | N | 82.69631 | 76.65881 | 76.80600 | 0.00000 | 0.00000 | 0.00000 | 1 |
| 2939 | C | 83.51500 | 76.28367 | 75.65000 | 0.00000 | 0.00000 | 0.00000 | 1 |
| 2940 | C | 83.20501 | 74.72193 | 75.18156 | 0.00000 | 0.00000 | 0.00000 | 1 |
| 2941 | O | 83.74743 | 74.28718 | 74.19312 | 0.00000 | 0.00000 | 0.00000 | 1 |
| 2942 | C | 84.99180 | 76.31288 | 75.98872 | 0.00000 | 0.00000 | 0.00000 | 1 |
| 2943 | C | 85.54345 | 77.72477 | 76.05723 | 0.00000 | 0.00000 | 0.00000 | 1 |
| 2944 | C | 85.30905 | 75.56488 | 77.27033 | 0.00000 | 0.00000 | 0.00000 | 1 |
| 2945 | H | 83.09294 | 76.84126 | 77.72466 | 0.00000 | 0.00000 | 0.00000 | 1 |
| 2946 | H | 83.20907 | 77.00772 | 74.85777 | 0.00000 | 0.00000 | 0.00000 | 1 |
| 2947 | H | 85.51957 | 75.79126 | 75.15559 | 0.00000 | 0.00000 | 0.00000 | 1 |
| 2948 | H | 85.03161 | 78.32955 | 76.85588 | 0.00000 | 0.00000 | 0.00000 | 1 |
| 2949 | H | 86.64500 | 77.72804 | 76.28791 | 0.00000 | 0.00000 | 0.00000 | 1 |
| 2950 | H | 85.40423 | 78.27234 | 75.08395 | 0.00000 | 0.00000 | 0.00000 | 1 |
| 2951 | H | 84.73704 | 74.59754 | 77.33282 | 0.00000 | 0.00000 | 0.00000 | 1 |
| 2952 | H | 86.40317 | 75.31414 | 77.34622 | 0.00000 | 0.00000 | 0.00000 | 1 |
| 2953 | H | 85.04285 | 76.16811 | 78.18155 | 0.00000 | 0.00000 | 0.00000 | 1 |
| 2954 | N | 82.45451 | 74.06507 | 76.05951 | 0.00000 | 0.00000 | 0.00000 | 1 |
| 2955 | C | 81.87671 | 72.84059 | 75.63369 | 0.00000 | 0.00000 | 0.00000 | 1 |
| 2956 | C | 80.25170 | 73.02909 | 75.70035 | 0.00000 | 0.00000 | 0.00000 | 1 |
| 2957 | O | 79.69109 | 73.32055 | 76.72829 | 0.00000 | 0.00000 | 0.00000 | 1 |
| 2958 | C | 82.33361 | 71.78422 | 76.74881 | 0.00000 | 0.00000 | 0.00000 | 1 |
| 2959 | O | 81.91883 | 70.41492 | 76.53221 | 0.00000 | 0.00000 | 0.00000 | 1 |
| 2960 | H | 82.07615 | 74.62763 | 76.81932 | 0.00000 | 0.00000 | 0.00000 | 1 |
| 2961 | H | 82.28604 | 72.63521 | 74.61659 | 0.00000 | 0.00000 | 0.00000 | 1 |
| 2962 | H | 83.44222 | 71.89586 | 76.87228 | 0.00000 | 0.00000 | 0.00000 | 1 |
| 2963 | H | 81.87415 | 72.14168 | 77.71078 | 0.00000 | 0.00000 | 0.00000 | 1 |
| 2964 | H | 82.71997 | 70.06590 | 76.09998 | 0.00000 | 0.00000 | 0.00000 | 1 |
| 2965 | N | 79.74666 | 72.81683 | 74.49790 | 0.00000 | 0.00000 | 0.00000 | 1 |
| 2966 | C | 78.33104 | 72.84603 | 74.29850 | 0.00000 | 0.00000 | 0.00000 | 1 |
| 2967 | C | 78.21228 | 71.99898 | 72.93588 | 0.00000 | 0.00000 | 0.00000 | 1 |
| 2968 | O | 79.23666 | 71.71398 | 72.34574 | 0.00000 | 0.00000 | 0.00000 | 1 |
| 2969 | C | 77.82597 | 74.36950 | 74.07634 | 0.00000 | 0.00000 | 0.00000 | 1 |
| 2970 | O | 78.40336 | 75.08102 | 72.97737 | 0.00000 | 0.00000 | 0.00000 | 1 |
| 2971 | C | 78.00921 | 75.00401 | 75.50089 | 0.00000 | 0.00000 | 0.00000 | 1 |
| 2972 | H | 80.28928 | 72.54942 | 73.65619 | 0.00000 | 0.00000 | 0.00000 | 1 |
| 2973 | H | 77.87042 | 72.39215 | 75.20550 | 0.00000 | 0.00000 | 0.00000 | 1 |
| 2974 | H | 76.72324 | 74.32857 | 73.84875 | 0.00000 | 0.00000 | 0.00000 | 1 |
| 2975 | H | 77.62599 | 75.19269 | 72.38972 | 0.00000 | 0.00000 | 0.00000 | 1 |
| 2976 | H | 79.08258 | 75.26273 | 75.69026 | 0.00000 | 0.00000 | 0.00000 | 1 |
| 2977 | H | 77.68269 | 74.31240 | 76.31584 | 0.00000 | 0.00000 | 0.00000 | 1 |
| 2978 | H | 77.42284 | 75.94667 | 75.60081 | 0.00000 | 0.00000 | 0.00000 | 1 |
| 2979 | N | 76.94700 | 71.69166 | 72.63822 | 0.00000 | 0.00000 | 0.00000 | 1 |
| 2980 | C | 76.60958 | 71.08354 | 71.38414 | 0.00000 | 0.00000 | 0.00000 | 1 |
| 2981 | C | 76.52285 | 72.23939 | 70.22388 | 0.00000 | 0.00000 | 0.00000 | 1 |
| 2982 | O | 75.93312 | 73.27837 | 70.39170 | 0.00000 | 0.00000 | 0.00000 | 1 |
| 2983 | C | 75.15205 | 70.52346 | 71.65534 | 0.00000 | 0.00000 | 0.00000 | 1 |
| 2984 | C | 74.58946 | 71.58622 | 72.64960 | 0.00000 | 0.00000 | 0.00000 | 1 |
| 2985 | C | 75.85018 | 71.79729 | 73.59244 | 0.00000 | 0.00000 | 0.00000 | 1 |
| 2986 | H | 77.39224 | 70.32169 | 71.16783 | 0.00000 | 0.00000 | 0.00000 | 1 |
| 2987 | H | 74.54684 | 70.43040 | 70.72525 | 0.00000 | 0.00000 | 0.00000 | 1 |
| 2988 | H | 75.18173 | 69.51180 | 72.11803 | 0.00000 | 0.00000 | 0.00000 | 1 |
| 2989 | H | 74.31860 | 72.52916 | 72.12030 | 0.00000 | 0.00000 | 0.00000 | 1 |

|      |   |          |          |          |         |         |             |               |
|------|---|----------|----------|----------|---------|---------|-------------|---------------|
| 2990 | H | 73.67905 | 71.25264 | 73.19956 | 0.00000 | 0.00000 | 0.00000     | 1             |
| 2991 | H | 75.89378 | 72.78049 | 74.11545 | 0.00000 | 0.00000 | 0.00000     | 1             |
| 2992 | H | 76.01550 | 70.98149 | 74.33568 | 0.00000 | 0.00000 | 0.00000     | 1             |
| 2993 | N | 77.10613 | 71.77180 | 69.12788 | 0.00000 | 0.00000 | 0.00000     | 1             |
| 2994 | C | 76.97453 | 72.48477 | 67.91192 | 0.00000 | 0.00000 | 0.00000     | 1             |
| 2995 | C | 75.81564 | 71.72190 | 67.03251 | 0.00000 | 0.00000 | 0.00000     | 1             |
| 2996 | O | 76.07199 | 70.97786 | 66.11617 | 0.00000 | 0.00000 | 0.00000     | 1             |
| 2997 | C | 78.40813 | 72.40163 | 67.18383 | 0.00000 | 0.00000 | 0.00000     | 1             |
| 2998 | O | 79.00319 | 71.09798 | 67.09820 | 0.00000 | 0.00000 | 0.00000     | 1             |
| 2999 | C | 79.19702 | 73.46780 | 68.02667 | 0.00000 | 0.00000 | 0.00000     | 1             |
| 3000 | H | 77.55973 | 70.85909 | 69.11384 | 0.00000 | 0.00000 | 0.00000     | 1             |
| 3001 | H | 76.65627 | 73.50294 | 68.23457 | 0.00000 | 0.00000 | 0.00000     | 1             |
| 3002 | H | 78.28365 | 72.77640 | 66.13175 | 0.00000 | 0.00000 | 0.00000     | 1             |
| 3003 | H | 78.87580 | 70.89158 | 66.14931 | 0.00000 | 0.00000 | 0.00000     | 1             |
| 3004 | H | 78.70133 | 74.46647 | 68.00715 | 0.00000 | 0.00000 | 0.00000     | 1             |
| 3005 | H | 80.23683 | 73.60264 | 67.64833 | 0.00000 | 0.00000 | 0.00000     | 1             |
| 3006 | H | 79.27129 | 73.15465 | 69.09552 | 0.00000 | 0.00000 | 0.00000     | 1             |
| 3007 | N | 74.61615 | 71.99640 | 67.54608 | 0.00000 | 0.00000 | 0.00000     | 1             |
| 3008 | C | 73.52815 | 72.12660 | 66.39365 | 0.00000 | 0.00000 | 0.00000     | 1             |
| 3009 | C | 73.74474 | 73.22929 | 65.47880 | 0.00000 | 0.00000 | 0.00000     | 1             |
| 3010 | O | 73.92188 | 74.12854 | 64.73131 | 0.00000 | 0.00000 | 0.00000     | 1             |
| 3011 | C | 72.11894 | 72.31699 | 67.21780 | 0.00000 | 0.00000 | 0.00000     | 1             |
| 3012 | C | 70.98666 | 71.97195 | 66.31186 | 0.00000 | 0.00000 | 0.00000     | 1             |
| 3013 | C | 70.73352 | 70.46783 | 66.30758 | 0.00000 | 0.00000 | 0.00000     | 1             |
| 3014 | C | 69.71797 | 72.70137 | 66.74419 | 0.00000 | 0.00000 | 0.00000     | 1             |
| 3015 | H | 74.65529 | 72.69274 | 68.28642 | 0.00000 | 0.00000 | 0.00000     | 1             |
| 3016 | H | 73.66827 | 71.12196 | 65.92203 | 0.00000 | 0.00000 | 0.00000     | 1             |
| 3017 | H | 72.11589 | 71.68499 | 68.13418 | 0.00000 | 0.00000 | 0.00000     | 1             |
| 3018 | H | 72.04206 | 73.36899 | 67.57478 | 0.00000 | 0.00000 | 0.00000     | 1             |
| 3019 | H | 71.24010 | 72.29948 | 65.27682 | 0.00000 | 0.00000 | 0.00000     | 1             |
| 3020 | H | 70.42661 | 70.09964 | 67.31980 | 0.00000 | 0.00000 | 0.00000     | 1             |
| 3021 | H | 71.64818 | 69.89354 | 66.01137 | 0.00000 | 0.00000 | 0.00000     | 1             |
| 3022 | H | 69.91851 | 70.18630 | 65.59313 | 0.00000 | 0.00000 | 0.00000     | 1             |
| 3023 | H | 68.84337 | 72.42735 | 66.10101 | 0.00000 | 0.00000 | 0.00000     | 1             |
| 3024 | H | 69.83933 | 73.81375 | 66.68246 | 0.00000 | 0.00000 | 0.00000     | 1             |
| 3025 | H | 69.44208 | 72.45631 | 67.80170 | 0.00000 | 0.00000 | 0.00000     | 1             |
| 3026 |   | 273      |          |          |         |         |             |               |
| 3027 |   | 150.0000 | 150.0000 | 150.0000 | 0.0000  | 0.0000  | 0.0000***** | 5.5500 22200  |
|      |   | 0.2500   | 300.00   | 0.00     | 0.00    | 0.00    | -1291.4707  | 0.0000 0.0000 |
| 3028 | N | 68.28674 | 77.46674 | 77.67093 | 0.00000 | 0.00000 | 0.00000     | 1             |
| 3029 | C | 68.90259 | 77.45802 | 76.45629 | 0.00000 | 0.00000 | 0.00000     | 1             |
| 3030 | C | 68.26919 | 76.13234 | 75.58950 | 0.00000 | 0.00000 | 0.00000     | 1             |
| 3031 | O | 67.96150 | 75.08236 | 76.09826 | 0.00000 | 0.00000 | 0.00000     | 1             |
| 3032 | C | 70.50762 | 77.08260 | 76.66746 | 0.00000 | 0.00000 | 0.00000     | 1             |
| 3033 | C | 71.08846 | 77.99003 | 77.68443 | 0.00000 | 0.00000 | 0.00000     | 1             |
| 3034 | C | 72.40373 | 77.41146 | 78.20282 | 0.00000 | 0.00000 | 0.00000     | 1             |
| 3035 | C | 71.30911 | 79.39542 | 77.13277 | 0.00000 | 0.00000 | 0.00000     | 1             |
| 3036 | H | 68.28276 | 76.58146 | 78.14358 | 0.00000 | 0.00000 | 0.00000     | 1             |
| 3037 | H | 68.73069 | 78.46955 | 76.00592 | 0.00000 | 0.00000 | 0.00000     | 1             |
| 3038 | H | 70.61567 | 76.01127 | 76.99810 | 0.00000 | 0.00000 | 0.00000     | 1             |
| 3039 | H | 71.04751 | 77.15567 | 75.69792 | 0.00000 | 0.00000 | 0.00000     | 1             |
| 3040 | H | 70.38269 | 78.05075 | 78.54654 | 0.00000 | 0.00000 | 0.00000     | 1             |
| 3041 | H | 73.22605 | 77.49362 | 77.44886 | 0.00000 | 0.00000 | 0.00000     | 1             |
| 3042 | H | 72.30263 | 76.32045 | 78.46455 | 0.00000 | 0.00000 | 0.00000     | 1             |
| 3043 | H | 72.74612 | 77.93981 | 79.12820 | 0.00000 | 0.00000 | 0.00000     | 1             |
| 3044 | H | 72.20093 | 79.88973 | 77.59516 | 0.00000 | 0.00000 | 0.00000     | 1             |
| 3045 | H | 70.42675 | 80.05633 | 77.32702 | 0.00000 | 0.00000 | 0.00000     | 1             |
| 3046 | H | 71.46767 | 79.38637 | 76.02538 | 0.00000 | 0.00000 | 0.00000     | 1             |
| 3047 | N | 68.31485 | 76.46464 | 74.31161 | 0.00000 | 0.00000 | 0.00000     | 1             |
| 3048 | C | 67.77189 | 75.60418 | 73.27703 | 0.00000 | 0.00000 | 0.00000     | 1             |
| 3049 | C | 68.84020 | 75.46010 | 72.00698 | 0.00000 | 0.00000 | 0.00000     | 1             |
| 3050 | O | 68.57043 | 74.71774 | 71.09238 | 0.00000 | 0.00000 | 0.00000     | 1             |

|      |   |          |          |          |         |         |         |   |
|------|---|----------|----------|----------|---------|---------|---------|---|
| 3051 | C | 66.50808 | 76.20341 | 72.66519 | 0.00000 | 0.00000 | 0.00000 | 1 |
| 3052 | C | 65.33164 | 76.11861 | 73.61741 | 0.00000 | 0.00000 | 0.00000 | 1 |
| 3053 | C | 66.71215 | 77.63150 | 72.20123 | 0.00000 | 0.00000 | 0.00000 | 1 |
| 3054 | H | 68.59675 | 77.43199 | 74.17256 | 0.00000 | 0.00000 | 0.00000 | 1 |
| 3055 | H | 67.59070 | 74.64576 | 73.82361 | 0.00000 | 0.00000 | 0.00000 | 1 |
| 3056 | H | 66.25817 | 75.58985 | 71.76971 | 0.00000 | 0.00000 | 0.00000 | 1 |
| 3057 | H | 65.11234 | 75.05416 | 73.91252 | 0.00000 | 0.00000 | 0.00000 | 1 |
| 3058 | H | 65.53132 | 76.69116 | 74.56634 | 0.00000 | 0.00000 | 0.00000 | 1 |
| 3059 | H | 64.39314 | 76.54064 | 73.16000 | 0.00000 | 0.00000 | 0.00000 | 1 |
| 3060 | H | 65.82287 | 78.01502 | 71.62688 | 0.00000 | 0.00000 | 0.00000 | 1 |
| 3061 | H | 66.87252 | 78.32799 | 73.07093 | 0.00000 | 0.00000 | 0.00000 | 1 |
| 3062 | H | 67.61214 | 77.72302 | 71.52998 | 0.00000 | 0.00000 | 0.00000 | 1 |
| 3063 | N | 69.88813 | 76.25901 | 72.13064 | 0.00000 | 0.00000 | 0.00000 | 1 |
| 3064 | C | 70.86845 | 76.23764 | 71.10333 | 0.00000 | 0.00000 | 0.00000 | 1 |
| 3065 | C | 72.35353 | 75.89478 | 71.70673 | 0.00000 | 0.00000 | 0.00000 | 1 |
| 3066 | O | 73.30026 | 75.89869 | 70.95288 | 0.00000 | 0.00000 | 0.00000 | 1 |
| 3067 | C | 70.99856 | 77.71075 | 70.51435 | 0.00000 | 0.00000 | 0.00000 | 1 |
| 3068 | C | 71.57908 | 77.57400 | 69.07718 | 0.00000 | 0.00000 | 0.00000 | 1 |
| 3069 | C | 70.42578 | 76.89072 | 68.20210 | 0.00000 | 0.00000 | 0.00000 | 1 |
| 3070 | N | 70.79233 | 77.15603 | 66.87751 | 0.00000 | 0.00000 | 0.00000 | 1 |
| 3071 | C | 70.06095 | 76.91248 | 65.86688 | 0.00000 | 0.00000 | 0.00000 | 1 |
| 3072 | N | 68.80931 | 76.33001 | 66.09594 | 0.00000 | 0.00000 | 0.00000 | 1 |
| 3073 | N | 70.69299 | 77.30293 | 64.67810 | 0.00000 | 0.00000 | 0.00000 | 1 |
| 3074 | H | 69.93305 | 76.83671 | 72.96645 | 0.00000 | 0.00000 | 0.00000 | 1 |
| 3075 | H | 70.48602 | 75.48710 | 70.37028 | 0.00000 | 0.00000 | 0.00000 | 1 |
| 3076 | H | 70.01487 | 78.23143 | 70.50452 | 0.00000 | 0.00000 | 0.00000 | 1 |
| 3077 | H | 71.66471 | 78.33093 | 71.15639 | 0.00000 | 0.00000 | 0.00000 | 1 |
| 3078 | H | 71.86609 | 78.56587 | 68.66220 | 0.00000 | 0.00000 | 0.00000 | 1 |
| 3079 | H | 72.51085 | 76.95872 | 69.08723 | 0.00000 | 0.00000 | 0.00000 | 1 |
| 3080 | H | 70.33423 | 75.78062 | 68.31510 | 0.00000 | 0.00000 | 0.00000 | 1 |
| 3081 | H | 69.40402 | 77.32630 | 68.32850 | 0.00000 | 0.00000 | 0.00000 | 1 |
| 3082 | H | 71.70059 | 77.56773 | 66.73109 | 0.00000 | 0.00000 | 0.00000 | 1 |
| 3083 | H | 68.37461 | 76.04957 | 66.97435 | 0.00000 | 0.00000 | 0.00000 | 1 |
| 3084 | H | 68.13465 | 76.09262 | 65.36804 | 0.00000 | 0.00000 | 0.00000 | 1 |
| 3085 | H | 71.61448 | 77.70514 | 64.51240 | 0.00000 | 0.00000 | 0.00000 | 1 |
| 3086 | H | 70.27578 | 77.17854 | 63.75479 | 0.00000 | 0.00000 | 0.00000 | 1 |
| 3087 | N | 72.32394 | 75.70228 | 73.01891 | 0.00000 | 0.00000 | 0.00000 | 1 |
| 3088 | C | 73.50807 | 75.32167 | 73.70335 | 0.00000 | 0.00000 | 0.00000 | 1 |
| 3089 | C | 73.15884 | 73.94300 | 74.49235 | 0.00000 | 0.00000 | 0.00000 | 1 |
| 3090 | O | 72.51467 | 73.06802 | 73.95615 | 0.00000 | 0.00000 | 0.00000 | 1 |
| 3091 | C | 73.94556 | 76.50059 | 74.69436 | 0.00000 | 0.00000 | 0.00000 | 1 |
| 3092 | C | 74.09983 | 77.83191 | 73.93890 | 0.00000 | 0.00000 | 0.00000 | 1 |
| 3093 | C | 74.65592 | 77.87202 | 72.62470 | 0.00000 | 0.00000 | 0.00000 | 1 |
| 3094 | C | 73.71306 | 79.04827 | 74.57724 | 0.00000 | 0.00000 | 0.00000 | 1 |
| 3095 | C | 74.77538 | 79.09776 | 71.96624 | 0.00000 | 0.00000 | 0.00000 | 1 |
| 3096 | C | 73.85788 | 80.25193 | 73.88612 | 0.00000 | 0.00000 | 0.00000 | 1 |
| 3097 | C | 74.38149 | 80.33046 | 72.56299 | 0.00000 | 0.00000 | 0.00000 | 1 |
| 3098 | O | 74.49621 | 81.57955 | 71.89879 | 0.00000 | 0.00000 | 0.00000 | 1 |
| 3099 | H | 71.41464 | 75.70265 | 73.47820 | 0.00000 | 0.00000 | 0.00000 | 1 |
| 3100 | H | 74.22798 | 75.18032 | 72.86402 | 0.00000 | 0.00000 | 0.00000 | 1 |
| 3101 | H | 73.20324 | 76.61525 | 75.51589 | 0.00000 | 0.00000 | 0.00000 | 1 |
| 3102 | H | 74.91035 | 76.24105 | 75.18795 | 0.00000 | 0.00000 | 0.00000 | 1 |
| 3103 | H | 74.96864 | 76.93989 | 72.11776 | 0.00000 | 0.00000 | 0.00000 | 1 |
| 3104 | H | 73.31510 | 79.03860 | 75.60678 | 0.00000 | 0.00000 | 0.00000 | 1 |
| 3105 | H | 75.19133 | 79.10056 | 70.94342 | 0.00000 | 0.00000 | 0.00000 | 1 |
| 3106 | H | 73.55682 | 81.18838 | 74.38690 | 0.00000 | 0.00000 | 0.00000 | 1 |
| 3107 | H | 74.90946 | 81.28181 | 71.05389 | 0.00000 | 0.00000 | 0.00000 | 1 |
| 3108 | N | 73.82583 | 73.87095 | 75.64891 | 0.00000 | 0.00000 | 0.00000 | 1 |
| 3109 | C | 73.45183 | 72.82633 | 76.55363 | 0.00000 | 0.00000 | 0.00000 | 1 |
| 3110 | C | 72.32456 | 73.37097 | 77.59047 | 0.00000 | 0.00000 | 0.00000 | 1 |
| 3111 | O | 71.67339 | 74.37730 | 77.41107 | 0.00000 | 0.00000 | 0.00000 | 1 |
| 3112 | C | 74.78282 | 72.30527 | 77.26441 | 0.00000 | 0.00000 | 0.00000 | 1 |



|      |   |          |          |          |         |         |         |   |
|------|---|----------|----------|----------|---------|---------|---------|---|
| 3113 | O | 74.58327 | 71.14698 | 78.14719 | 0.00000 | 0.00000 | 0.00000 | 1 |
| 3114 | C | 75.41216 | 73.56545 | 77.94491 | 0.00000 | 0.00000 | 0.00000 | 1 |
| 3115 | H | 74.27271 | 74.72217 | 75.98155 | 0.00000 | 0.00000 | 0.00000 | 1 |
| 3116 | H | 73.00964 | 72.07261 | 75.85797 | 0.00000 | 0.00000 | 0.00000 | 1 |
| 3117 | H | 75.50202 | 71.95854 | 76.47704 | 0.00000 | 0.00000 | 0.00000 | 1 |
| 3118 | H | 75.19370 | 70.51775 | 77.72872 | 0.00000 | 0.00000 | 0.00000 | 1 |
| 3119 | H | 76.35029 | 73.30630 | 78.49125 | 0.00000 | 0.00000 | 0.00000 | 1 |
| 3120 | H | 74.71316 | 74.02927 | 78.68305 | 0.00000 | 0.00000 | 0.00000 | 1 |
| 3121 | H | 75.67417 | 74.35446 | 77.20241 | 0.00000 | 0.00000 | 0.00000 | 1 |
| 3122 | N | 72.18457 | 72.46049 | 78.54730 | 0.00000 | 0.00000 | 0.00000 | 1 |
| 3123 | C | 71.27336 | 72.73461 | 79.60061 | 0.00000 | 0.00000 | 0.00000 | 1 |
| 3124 | C | 72.05034 | 73.39691 | 80.88265 | 0.00000 | 0.00000 | 0.00000 | 1 |
| 3125 | O | 71.41366 | 73.84891 | 81.80701 | 0.00000 | 0.00000 | 0.00000 | 1 |
| 3126 | C | 70.76469 | 71.35398 | 80.20620 | 0.00000 | 0.00000 | 0.00000 | 1 |
| 3127 | C | 69.89036 | 70.55182 | 79.19253 | 0.00000 | 0.00000 | 0.00000 | 1 |
| 3128 | C | 68.37973 | 71.00236 | 79.32037 | 0.00000 | 0.00000 | 0.00000 | 1 |
| 3129 | C | 68.14384 | 72.31062 | 78.53036 | 0.00000 | 0.00000 | 0.00000 | 1 |
| 3130 | N | 66.60249 | 72.58303 | 78.54104 | 0.00000 | 0.00000 | 0.00000 | 1 |
| 3131 | H | 72.81523 | 71.64654 | 78.58446 | 0.00000 | 0.00000 | 0.00000 | 1 |
| 3132 | H | 70.50166 | 73.41091 | 79.16712 | 0.00000 | 0.00000 | 0.00000 | 1 |
| 3133 | H | 71.64990 | 70.74341 | 80.49444 | 0.00000 | 0.00000 | 0.00000 | 1 |
| 3134 | H | 70.19955 | 71.52990 | 81.14850 | 0.00000 | 0.00000 | 0.00000 | 1 |
| 3135 | H | 70.26560 | 70.68249 | 78.15250 | 0.00000 | 0.00000 | 0.00000 | 1 |
| 3136 | H | 69.97107 | 69.46313 | 79.41221 | 0.00000 | 0.00000 | 0.00000 | 1 |
| 3137 | H | 67.70903 | 70.20391 | 78.92804 | 0.00000 | 0.00000 | 0.00000 | 1 |
| 3138 | H | 68.09571 | 71.12843 | 80.39058 | 0.00000 | 0.00000 | 0.00000 | 1 |
| 3139 | H | 68.58651 | 73.22232 | 78.97783 | 0.00000 | 0.00000 | 0.00000 | 1 |
| 3140 | H | 68.40381 | 72.25207 | 77.45419 | 0.00000 | 0.00000 | 0.00000 | 1 |
| 3141 | H | 65.95757 | 71.77794 | 78.29019 | 0.00000 | 0.00000 | 0.00000 | 1 |
| 3142 | H | 66.28659 | 73.32894 | 77.85669 | 0.00000 | 0.00000 | 0.00000 | 1 |
| 3143 | H | 66.17640 | 72.93558 | 79.44700 | 0.00000 | 0.00000 | 0.00000 | 1 |
| 3144 | N | 73.36619 | 73.18343 | 80.81491 | 0.00000 | 0.00000 | 0.00000 | 1 |
| 3145 | C | 74.19393 | 73.98645 | 81.66594 | 0.00000 | 0.00000 | 0.00000 | 1 |
| 3146 | C | 74.56208 | 75.36647 | 80.88783 | 0.00000 | 0.00000 | 0.00000 | 1 |
| 3147 | O | 73.96257 | 75.78098 | 79.92544 | 0.00000 | 0.00000 | 0.00000 | 1 |
| 3148 | C | 75.49080 | 73.13415 | 81.99402 | 0.00000 | 0.00000 | 0.00000 | 1 |
| 3149 | C | 75.71287 | 73.14635 | 83.54094 | 0.00000 | 0.00000 | 0.00000 | 1 |
| 3150 | C | 74.95625 | 71.91662 | 84.18628 | 0.00000 | 0.00000 | 0.00000 | 1 |
| 3151 | C | 73.42348 | 72.07707 | 84.06164 | 0.00000 | 0.00000 | 0.00000 | 1 |
| 3152 | N | 72.77743 | 70.81217 | 84.72203 | 0.00000 | 0.00000 | 0.00000 | 1 |
| 3153 | H | 73.71477 | 72.78630 | 79.94320 | 0.00000 | 0.00000 | 0.00000 | 1 |
| 3154 | H | 73.52757 | 74.17077 | 82.54106 | 0.00000 | 0.00000 | 0.00000 | 1 |
| 3155 | H | 75.39184 | 72.09227 | 81.61590 | 0.00000 | 0.00000 | 0.00000 | 1 |
| 3156 | H | 76.37486 | 73.56273 | 81.46970 | 0.00000 | 0.00000 | 0.00000 | 1 |
| 3157 | H | 76.79977 | 73.07752 | 83.77030 | 0.00000 | 0.00000 | 0.00000 | 1 |
| 3158 | H | 75.36885 | 74.10540 | 83.98935 | 0.00000 | 0.00000 | 0.00000 | 1 |
| 3159 | H | 75.28345 | 70.96708 | 83.70421 | 0.00000 | 0.00000 | 0.00000 | 1 |
| 3160 | H | 75.23634 | 71.81607 | 85.26009 | 0.00000 | 0.00000 | 0.00000 | 1 |
| 3161 | H | 73.00008 | 72.93302 | 84.62431 | 0.00000 | 0.00000 | 0.00000 | 1 |
| 3162 | H | 73.03478 | 72.07728 | 83.02274 | 0.00000 | 0.00000 | 0.00000 | 1 |
| 3163 | H | 73.03396 | 70.60784 | 85.73171 | 0.00000 | 0.00000 | 0.00000 | 1 |
| 3164 | H | 72.96085 | 69.87615 | 84.25625 | 0.00000 | 0.00000 | 0.00000 | 1 |
| 3165 | H | 71.71820 | 70.81539 | 84.77369 | 0.00000 | 0.00000 | 0.00000 | 1 |
| 3166 | N | 75.53946 | 75.97664 | 81.56524 | 0.00000 | 0.00000 | 0.00000 | 1 |
| 3167 | C | 76.11023 | 77.24986 | 81.08840 | 0.00000 | 0.00000 | 0.00000 | 1 |
| 3168 | C | 76.85451 | 76.95227 | 79.65485 | 0.00000 | 0.00000 | 0.00000 | 1 |
| 3169 | O | 77.61698 | 76.00916 | 79.53327 | 0.00000 | 0.00000 | 0.00000 | 1 |
| 3170 | C | 77.11291 | 77.70716 | 82.13179 | 0.00000 | 0.00000 | 0.00000 | 1 |
| 3171 | C | 77.88284 | 78.93339 | 81.67602 | 0.00000 | 0.00000 | 0.00000 | 1 |
| 3172 | C | 76.45034 | 77.97827 | 83.47032 | 0.00000 | 0.00000 | 0.00000 | 1 |
| 3173 | H | 75.93153 | 75.45435 | 82.34635 | 0.00000 | 0.00000 | 0.00000 | 1 |
| 3174 | H | 75.22240 | 77.91514 | 80.98239 | 0.00000 | 0.00000 | 0.00000 | 1 |

|      |   |          |          |          |         |         |         |   |
|------|---|----------|----------|----------|---------|---------|---------|---|
| 3175 | H | 77.84870 | 76.88383 | 82.27638 | 0.00000 | 0.00000 | 0.00000 | 1 |
| 3176 | H | 78.70256 | 79.20066 | 82.40211 | 0.00000 | 0.00000 | 0.00000 | 1 |
| 3177 | H | 78.37912 | 78.76382 | 80.67653 | 0.00000 | 0.00000 | 0.00000 | 1 |
| 3178 | H | 77.21727 | 79.83476 | 81.57608 | 0.00000 | 0.00000 | 0.00000 | 1 |
| 3179 | H | 75.93009 | 77.06424 | 83.86883 | 0.00000 | 0.00000 | 0.00000 | 1 |
| 3180 | H | 77.19579 | 78.30491 | 84.24648 | 0.00000 | 0.00000 | 0.00000 | 1 |
| 3181 | H | 75.67520 | 78.78926 | 83.39052 | 0.00000 | 0.00000 | 0.00000 | 1 |
| 3182 | N | 76.55916 | 77.89960 | 78.76277 | 0.00000 | 0.00000 | 0.00000 | 1 |
| 3183 | C | 77.12420 | 77.86249 | 77.44379 | 0.00000 | 0.00000 | 0.00000 | 1 |
| 3184 | C | 78.68192 | 78.36796 | 77.57540 | 0.00000 | 0.00000 | 0.00000 | 1 |
| 3185 | O | 79.01945 | 79.48799 | 77.28909 | 0.00000 | 0.00000 | 0.00000 | 1 |
| 3186 | C | 76.19689 | 78.84927 | 76.62604 | 0.00000 | 0.00000 | 0.00000 | 1 |
| 3187 | C | 75.82509 | 79.90862 | 77.71212 | 0.00000 | 0.00000 | 0.00000 | 1 |
| 3188 | C | 75.62414 | 78.99249 | 78.99403 | 0.00000 | 0.00000 | 0.00000 | 1 |
| 3189 | H | 77.06345 | 76.78956 | 77.15699 | 0.00000 | 0.00000 | 0.00000 | 1 |
| 3190 | H | 76.70769 | 79.29072 | 75.74003 | 0.00000 | 0.00000 | 0.00000 | 1 |
| 3191 | H | 75.29159 | 78.32818 | 76.24393 | 0.00000 | 0.00000 | 0.00000 | 1 |
| 3192 | H | 76.66059 | 80.62942 | 77.85961 | 0.00000 | 0.00000 | 0.00000 | 1 |
| 3193 | H | 74.92402 | 80.51109 | 77.45732 | 0.00000 | 0.00000 | 0.00000 | 1 |
| 3194 | H | 75.87194 | 79.47902 | 79.96581 | 0.00000 | 0.00000 | 0.00000 | 1 |
| 3195 | H | 74.62127 | 78.51235 | 79.06709 | 0.00000 | 0.00000 | 0.00000 | 1 |
| 3196 | N | 79.39455 | 77.36063 | 78.06637 | 0.00000 | 0.00000 | 0.00000 | 1 |
| 3197 | C | 80.81314 | 77.50687 | 78.09642 | 0.00000 | 0.00000 | 0.00000 | 1 |
| 3198 | C | 81.39747 | 76.94561 | 76.67952 | 0.00000 | 0.00000 | 0.00000 | 1 |
| 3199 | O | 80.72148 | 76.85329 | 75.68291 | 0.00000 | 0.00000 | 0.00000 | 1 |
| 3200 | C | 81.31699 | 76.65600 | 79.33808 | 0.00000 | 0.00000 | 0.00000 | 1 |
| 3201 | C | 82.43214 | 77.43557 | 80.09877 | 0.00000 | 0.00000 | 0.00000 | 1 |
| 3202 | C | 81.69914 | 78.38480 | 81.12444 | 0.00000 | 0.00000 | 0.00000 | 1 |
| 3203 | O | 80.51626 | 78.31134 | 81.34950 | 0.00000 | 0.00000 | 0.00000 | 1 |
| 3204 | N | 82.58508 | 79.21661 | 81.70923 | 0.00000 | 0.00000 | 0.00000 | 1 |
| 3205 | H | 78.92621 | 76.48168 | 78.36979 | 0.00000 | 0.00000 | 0.00000 | 1 |
| 3206 | H | 80.92806 | 78.61233 | 78.19369 | 0.00000 | 0.00000 | 0.00000 | 1 |
| 3207 | H | 80.46830 | 76.44401 | 80.03183 | 0.00000 | 0.00000 | 0.00000 | 1 |
| 3208 | H | 81.69133 | 75.66399 | 78.99706 | 0.00000 | 0.00000 | 0.00000 | 1 |
| 3209 | H | 83.10844 | 76.73541 | 80.63687 | 0.00000 | 0.00000 | 0.00000 | 1 |
| 3210 | H | 83.09686 | 78.00668 | 79.41404 | 0.00000 | 0.00000 | 0.00000 | 1 |
| 3211 | H | 83.59958 | 79.26814 | 81.55736 | 0.00000 | 0.00000 | 0.00000 | 1 |
| 3212 | H | 82.35881 | 79.89263 | 82.44653 | 0.00000 | 0.00000 | 0.00000 | 1 |
| 3213 | N | 82.69630 | 76.65877 | 76.80607 | 0.00000 | 0.00000 | 0.00000 | 1 |
| 3214 | C | 83.51501 | 76.28355 | 75.65024 | 0.00000 | 0.00000 | 0.00000 | 1 |
| 3215 | C | 83.20501 | 74.72184 | 75.18186 | 0.00000 | 0.00000 | 0.00000 | 1 |
| 3216 | O | 83.74749 | 74.28696 | 74.19350 | 0.00000 | 0.00000 | 0.00000 | 1 |
| 3217 | C | 84.99170 | 76.31308 | 75.98893 | 0.00000 | 0.00000 | 0.00000 | 1 |
| 3218 | C | 85.54302 | 77.72510 | 76.05762 | 0.00000 | 0.00000 | 0.00000 | 1 |
| 3219 | C | 85.30916 | 75.56503 | 77.27047 | 0.00000 | 0.00000 | 0.00000 | 1 |
| 3220 | H | 83.09282 | 76.84111 | 77.72484 | 0.00000 | 0.00000 | 0.00000 | 1 |
| 3221 | H | 83.20896 | 77.00752 | 74.85791 | 0.00000 | 0.00000 | 0.00000 | 1 |
| 3222 | H | 85.51972 | 75.79169 | 75.15579 | 0.00000 | 0.00000 | 0.00000 | 1 |
| 3223 | H | 85.03101 | 78.32966 | 76.85633 | 0.00000 | 0.00000 | 0.00000 | 1 |
| 3224 | H | 86.64458 | 77.72867 | 76.28830 | 0.00000 | 0.00000 | 0.00000 | 1 |
| 3225 | H | 85.40366 | 78.27275 | 75.08440 | 0.00000 | 0.00000 | 0.00000 | 1 |
| 3226 | H | 84.73833 | 74.59695 | 77.33228 | 0.00000 | 0.00000 | 0.00000 | 1 |
| 3227 | H | 86.40355 | 75.31564 | 77.34697 | 0.00000 | 0.00000 | 0.00000 | 1 |
| 3228 | H | 85.04164 | 76.16761 | 78.18175 | 0.00000 | 0.00000 | 0.00000 | 1 |
| 3229 | N | 82.45430 | 74.06506 | 76.05973 | 0.00000 | 0.00000 | 0.00000 | 1 |
| 3230 | C | 81.87631 | 72.84069 | 75.63379 | 0.00000 | 0.00000 | 0.00000 | 1 |
| 3231 | C | 80.25130 | 73.02928 | 75.70063 | 0.00000 | 0.00000 | 0.00000 | 1 |
| 3232 | O | 79.69075 | 73.32066 | 76.72866 | 0.00000 | 0.00000 | 0.00000 | 1 |
| 3233 | C | 82.33321 | 71.78414 | 76.74875 | 0.00000 | 0.00000 | 0.00000 | 1 |
| 3234 | O | 81.91828 | 70.41489 | 76.53202 | 0.00000 | 0.00000 | 0.00000 | 1 |
| 3235 | H | 82.07595 | 74.62768 | 76.81948 | 0.00000 | 0.00000 | 0.00000 | 1 |
| 3236 | H | 82.28550 | 72.63536 | 74.61666 | 0.00000 | 0.00000 | 0.00000 | 1 |

|      |   |          |          |          |         |         |         |   |
|------|---|----------|----------|----------|---------|---------|---------|---|
| 3237 | H | 83.44184 | 71.89566 | 76.87209 | 0.00000 | 0.00000 | 0.00000 | 1 |
| 3238 | H | 81.87389 | 72.14153 | 77.71081 | 0.00000 | 0.00000 | 0.00000 | 1 |
| 3239 | H | 82.71935 | 70.06587 | 76.09967 | 0.00000 | 0.00000 | 0.00000 | 1 |
| 3240 | N | 79.74623 | 72.81720 | 74.49816 | 0.00000 | 0.00000 | 0.00000 | 1 |
| 3241 | C | 78.33059 | 72.84613 | 74.29875 | 0.00000 | 0.00000 | 0.00000 | 1 |
| 3242 | C | 78.21198 | 71.99879 | 72.93629 | 0.00000 | 0.00000 | 0.00000 | 1 |
| 3243 | O | 79.23643 | 71.71359 | 72.34636 | 0.00000 | 0.00000 | 0.00000 | 1 |
| 3244 | C | 77.82529 | 74.36948 | 74.07615 | 0.00000 | 0.00000 | 0.00000 | 1 |
| 3245 | O | 78.40202 | 75.08045 | 72.97647 | 0.00000 | 0.00000 | 0.00000 | 1 |
| 3246 | C | 78.00952 | 75.00470 | 75.50023 | 0.00000 | 0.00000 | 0.00000 | 1 |
| 3247 | H | 80.28886 | 72.54966 | 73.65651 | 0.00000 | 0.00000 | 0.00000 | 1 |
| 3248 | H | 77.87004 | 72.39242 | 75.20586 | 0.00000 | 0.00000 | 0.00000 | 1 |
| 3249 | H | 76.72242 | 74.32838 | 73.84929 | 0.00000 | 0.00000 | 0.00000 | 1 |
| 3250 | H | 77.62438 | 75.19145 | 72.38905 | 0.00000 | 0.00000 | 0.00000 | 1 |
| 3251 | H | 79.08311 | 75.26294 | 75.68896 | 0.00000 | 0.00000 | 0.00000 | 1 |
| 3252 | H | 77.68297 | 74.31372 | 76.31572 | 0.00000 | 0.00000 | 0.00000 | 1 |
| 3253 | H | 77.42381 | 75.94780 | 75.59987 | 0.00000 | 0.00000 | 0.00000 | 1 |
| 3254 | N | 76.94674 | 71.69152 | 72.63846 | 0.00000 | 0.00000 | 0.00000 | 1 |
| 3255 | C | 76.60958 | 71.08337 | 71.38431 | 0.00000 | 0.00000 | 0.00000 | 1 |
| 3256 | C | 76.52281 | 72.23927 | 70.22409 | 0.00000 | 0.00000 | 0.00000 | 1 |
| 3257 | O | 75.93283 | 73.27812 | 70.39194 | 0.00000 | 0.00000 | 0.00000 | 1 |
| 3258 | C | 75.15205 | 70.52314 | 71.65527 | 0.00000 | 0.00000 | 0.00000 | 1 |
| 3259 | C | 74.58920 | 71.58587 | 72.64941 | 0.00000 | 0.00000 | 0.00000 | 1 |
| 3260 | C | 75.84973 | 71.79722 | 73.59243 | 0.00000 | 0.00000 | 0.00000 | 1 |
| 3261 | H | 77.39236 | 70.32164 | 71.16808 | 0.00000 | 0.00000 | 0.00000 | 1 |
| 3262 | H | 74.54701 | 70.42999 | 70.72508 | 0.00000 | 0.00000 | 0.00000 | 1 |
| 3263 | H | 75.18177 | 69.51150 | 72.11800 | 0.00000 | 0.00000 | 0.00000 | 1 |
| 3264 | H | 74.31827 | 72.52874 | 72.12002 | 0.00000 | 0.00000 | 0.00000 | 1 |
| 3265 | H | 73.67877 | 71.25216 | 73.19923 | 0.00000 | 0.00000 | 0.00000 | 1 |
| 3266 | H | 75.89316 | 72.78053 | 74.11527 | 0.00000 | 0.00000 | 0.00000 | 1 |
| 3267 | H | 76.01497 | 70.98159 | 74.33587 | 0.00000 | 0.00000 | 0.00000 | 1 |
| 3268 | N | 77.10638 | 71.77186 | 69.12816 | 0.00000 | 0.00000 | 0.00000 | 1 |
| 3269 | C | 76.97461 | 72.48473 | 67.91216 | 0.00000 | 0.00000 | 0.00000 | 1 |
| 3270 | C | 75.81552 | 71.72182 | 67.03294 | 0.00000 | 0.00000 | 0.00000 | 1 |
| 3271 | O | 76.07166 | 70.97769 | 66.11677 | 0.00000 | 0.00000 | 0.00000 | 1 |
| 3272 | C | 78.40807 | 72.40159 | 67.18386 | 0.00000 | 0.00000 | 0.00000 | 1 |
| 3273 | O | 79.00312 | 71.09793 | 67.09809 | 0.00000 | 0.00000 | 0.00000 | 1 |
| 3274 | C | 79.19710 | 73.46772 | 68.02665 | 0.00000 | 0.00000 | 0.00000 | 1 |
| 3275 | H | 77.56013 | 70.85921 | 69.11415 | 0.00000 | 0.00000 | 0.00000 | 1 |
| 3276 | H | 76.65639 | 73.50295 | 68.23472 | 0.00000 | 0.00000 | 0.00000 | 1 |
| 3277 | H | 78.28343 | 72.77641 | 66.13182 | 0.00000 | 0.00000 | 0.00000 | 1 |
| 3278 | H | 78.87549 | 70.89154 | 66.14923 | 0.00000 | 0.00000 | 0.00000 | 1 |
| 3279 | H | 78.70131 | 74.46634 | 68.00742 | 0.00000 | 0.00000 | 0.00000 | 1 |
| 3280 | H | 80.23679 | 73.60272 | 67.64803 | 0.00000 | 0.00000 | 0.00000 | 1 |
| 3281 | H | 79.27170 | 73.15441 | 69.09543 | 0.00000 | 0.00000 | 0.00000 | 1 |
| 3282 | N | 74.61617 | 71.99651 | 67.54676 | 0.00000 | 0.00000 | 0.00000 | 1 |
| 3283 | C | 73.52800 | 72.12722 | 66.39439 | 0.00000 | 0.00000 | 0.00000 | 1 |
| 3284 | C | 73.74513 | 73.23033 | 65.47964 | 0.00000 | 0.00000 | 0.00000 | 1 |
| 3285 | O | 73.92221 | 74.12913 | 64.73222 | 0.00000 | 0.00000 | 0.00000 | 1 |
| 3286 | C | 72.11894 | 72.31746 | 67.21818 | 0.00000 | 0.00000 | 0.00000 | 1 |
| 3287 | C | 70.98680 | 71.97250 | 66.31183 | 0.00000 | 0.00000 | 0.00000 | 1 |
| 3288 | C | 70.73362 | 70.46811 | 66.30747 | 0.00000 | 0.00000 | 0.00000 | 1 |
| 3289 | C | 69.71774 | 72.70182 | 66.74434 | 0.00000 | 0.00000 | 0.00000 | 1 |
| 3290 | H | 74.65541 | 72.69291 | 68.28684 | 0.00000 | 0.00000 | 0.00000 | 1 |
| 3291 | H | 73.66838 | 71.12261 | 65.92207 | 0.00000 | 0.00000 | 0.00000 | 1 |
| 3292 | H | 72.11574 | 71.68535 | 68.13440 | 0.00000 | 0.00000 | 0.00000 | 1 |
| 3293 | H | 72.04196 | 73.36936 | 67.57512 | 0.00000 | 0.00000 | 0.00000 | 1 |
| 3294 | H | 71.24026 | 72.30015 | 65.27701 | 0.00000 | 0.00000 | 0.00000 | 1 |
| 3295 | H | 70.42693 | 70.09992 | 67.31968 | 0.00000 | 0.00000 | 0.00000 | 1 |
| 3296 | H | 71.64829 | 69.89412 | 66.01099 | 0.00000 | 0.00000 | 0.00000 | 1 |
| 3297 | H | 69.91853 | 70.18689 | 65.59310 | 0.00000 | 0.00000 | 0.00000 | 1 |
| 3298 | H | 68.84342 | 72.42769 | 66.10096 | 0.00000 | 0.00000 | 0.00000 | 1 |

|      |   |          |          |          |         |         |         |   |
|------|---|----------|----------|----------|---------|---------|---------|---|
| 3299 | H | 69.83920 | 73.81411 | 66.68268 | 0.00000 | 0.00000 | 0.00000 | 1 |
| 3300 | H | 69.44194 | 72.45651 | 67.80173 | 0.00000 | 0.00000 | 0.00000 | 1 |

## 2 control - SCM's ReaxFF Input

Input file for the energy minimization within SCM's ReaxFF.

Listing 130: control emin

```

1 # General parameters
2     0 itrans      1: Translate atoms back into unit cell
3     1 icobo
4     1 icentr      0: off, 1: put center of mass at center of cube, 2: put com at
      origin
5     1 imetho      0: Normal MD-run 1: Energy minimisation 2:MD-energy minimisation
6     1 igeofo      0:xyz-input geometry 1: Biograf input geometry 2: xmol-input geometry
7 150.0 axis1      a cell axis
8 150.0 axis2      b cell axis
9 150.0 axis3      c cell axis
10 90.000 angle1    cell angle alpha
11 90.000 angle2    cell angle beta
12 90.000 angle3    cell angle gamma
13 0.0050 cutof2    B0-cutoff for valency angles and torsion angles
14 25 irecon        Frequency of reading control-file
15 1 ixmolo         0: only x,y,z-coordinates in xmolout  1: x,y,z + velocities + molnr.
      in xmolout
16 00001 ichupd     Charge update frequency
17 4 icharg         Charges. 1:EEM 2:- 3: Shielded EEM (default for crystals) 4: Full
      system EEM 5: Fixed (unit 26) 6: Fragment EEM
18 1 iappen        1: Append fort.7 and fort.8
19 # MD-parameters
20 0300.00 mdtemp    1st MD-temperature
21 000.25 tdamp1     1st Berendsen/Anderson temperature damping constant (fs)
22 0 nrstep
23 1 imdmet         MD-method. 1:Velocity Verlet+Berendsen 2:Hoover-Nose;3:NVE 4: NPT
24 0.250 tstep      MD-time step (fs)
25 0000.00 mdpres    MD-pressure (MPa)
26 00100.0 pdamp1    Berendsen pressure damping constant (fs)
27 0 inpt          0: Change all cell parameters in NPT-run  1: fixed x 2: fixed y 3:
      fixed z
28 0004000 nmdit     Number of MD-iterations
29 000000 nmdeqi     Number of MD-equilibrium iterations
30 100 iout1         Output to unit 71 and unit 73
31 1000 iout2        Save coordinates (xmolout)
32 1 iout3          0: create moldyn.xxxx-files 1: do not create moldyn.xxxx-files
33 0 ivels          1:Set vels and accels from moldyn.vel to zero
34 001000 iout6      Save velocity file (restart-files)
35 50 iout7         Frequency of reaxout.kf writing
36 500000 irten      Frequency of removal of rotational and translational energy
37 0 npreit         Nr. of iterations in previous runs
38 0.00 range        Range for back-translation of atoms
39 # MM-parameters
40 03.0000 endmm      End point criterium for MM energy minimisation
41 500 imaxmo        Maximum movement (1/1D6 A) during minimisation 0: Conjugate gradient
42 11101 imaxit      Maximum number of iterations
43 1 iout4           Frequency of structure output during minimisation
44 0 iout5           1:Remove fort.57 and fort.58 files
45 0 icelop          0: No cell parameter optimisation 1:Cell parameter optimisation
46 1.00050 celopt     Cell parameter change
47 0 icelo2          Change all cell parameters (0) or only x/y/z axis (1/2/3)

```

### 3 MD - CXCR4 + EPI-X4

Shortend Trajectory of CXCR4 and EPI-X4 (every 2000th image)

Listing 131: control emin

| 1  | 5463     |          |           |          |                  |             |             |   |
|----|----------|----------|-----------|----------|------------------|-------------|-------------|---|
| 2  | 150.0000 | 150.0000 | 150.0000  | 0.0000   | 0.0000           | 0.0000***** | 0.0000      | 0 |
|    | 0.2500   | 400.00   | 0.00      | 0.00     | 0.00 -25768.3435 | 0.3525      | 400.0000    |   |
| 3  | N        | 65.31100 | 109.69780 | 59.77190 | -637.81715       | -537.95505  | 128.31970   | 1 |
| 4  | H        | 65.94100 | 108.87480 | 59.68890 | 1815.64688       | 2133.64569  | -1431.50574 | 1 |
| 5  | H        | 64.42200 | 109.47580 | 60.26290 | 298.67448        | -1303.95025 | -2847.58380 | 1 |
| 6  | H        | 65.74600 | 110.46680 | 60.31990 | 1607.41886       | -2678.28120 | 375.81997   | 1 |
| 7  | C        | 65.07300 | 110.23980 | 58.36890 | 250.52454        | 841.36837   | 246.55166   | 1 |
| 8  | H        | 65.99500 | 110.60580 | 57.94090 | 81.33623         | 1897.04725  | 2508.54986  | 1 |
| 9  | C        | 64.57200 | 109.07580 | 57.46690 | 378.68866        | 758.52905   | -335.67780  | 1 |
| 10 | H        | 63.72300 | 108.60380 | 58.00590 | -498.82673       | 2902.04710  | 1107.93536  | 1 |
| 11 | H        | 65.36700 | 108.31580 | 57.30390 | 1825.83454       | 2064.81780  | -1516.93174 | 1 |
| 12 | C        | 64.06900 | 109.37880 | 56.07290 | 569.42849        | 633.03860   | -326.28872  | 1 |
| 13 | H        | 64.86000 | 109.98680 | 55.58490 | 2832.62222       | -576.14906  | -1241.98625 | 1 |
| 14 | H        | 63.10100 | 109.92380 | 56.09390 | 240.20186        | -1139.12498 | 2922.82801  | 1 |
| 15 | S        | 63.78400 | 107.89480 | 55.05890 | 505.57229        | 85.68365    | 219.69429   | 1 |
| 16 | C        | 63.35500 | 108.83480 | 53.50190 | -869.87204       | 226.92678   | -152.57087  | 1 |
| 17 | H        | 64.24900 | 109.35680 | 53.09790 | 946.70162        | 2998.88790  | -93.02501   | 1 |
| 18 | H        | 63.14400 | 108.16180 | 52.64390 | 1455.09290       | -2266.57970 | -1625.89893 | 1 |
| 19 | H        | 62.46700 | 109.49880 | 53.57490 | -1499.80430      | 1526.46630  | -2306.23371 | 1 |
| 20 | C        | 64.20700 | 111.41880 | 58.36390 | -837.25650       | 297.34736   | 205.02954   | 1 |
| 21 | O        | 63.25100 | 111.43480 | 59.17690 | 610.52612        | -475.02150  | -158.86996  | 1 |
| 22 | N        | 64.43500 | 112.38880 | 57.48690 | -110.29444       | 533.17298   | 645.16199   | 1 |
| 23 | H        | 65.13300 | 112.24580 | 56.78990 | 654.61939        | -2669.33879 | 1531.12053  | 1 |
| 24 | C        | 63.48300 | 113.49880 | 57.31190 | -317.53438       | -97.62167   | -849.17191  | 1 |
| 25 | H        | 63.22500 | 113.92180 | 58.27090 | -2319.28714      | -2091.15589 | -382.36165  | 1 |
| 26 | C        | 64.12400 | 114.66180 | 56.54490 | -909.20212       | -1.05087    | -69.29212   | 1 |
| 27 | H        | 64.28200 | 114.38580 | 55.47990 | 593.09351        | 1181.77544  | -2854.79826 | 1 |
| 28 | H        | 63.34000 | 115.43580 | 56.68990 | -2443.96997      | 1875.26019  | -639.24661  | 1 |
| 29 | C        | 65.44500 | 115.15480 | 57.20390 | -431.18422       | -477.77421  | 645.95896   | 1 |
| 30 | H        | 66.25700 | 114.45680 | 56.90490 | 2131.92792       | -1679.03260 | 1591.84142  | 1 |
| 31 | H        | 65.31200 | 115.17380 | 58.30590 | 1763.64081       | 2163.75555  | 1451.19236  | 1 |
| 32 | C        | 65.89500 | 116.52780 | 56.78890 | 193.56188        | -730.46210  | -510.30375  | 1 |
| 33 | O        | 66.39800 | 116.65480 | 55.61890 | 474.69686        | 138.46776   | 615.72461   | 1 |
| 34 | O        | 65.78200 | 117.48080 | 57.60290 | -395.05638       | -545.62127  | -412.13483  | 1 |
| 35 | C        | 62.20400 | 113.11580 | 56.57590 | -200.00050       | -838.02099  | 298.61618   | 1 |
| 36 | O        | 62.22500 | 112.31380 | 55.66790 | 203.33457        | -560.10405  | -188.23329  | 1 |
| 37 | N        | 61.04700 | 113.70880 | 56.97790 | -568.19059       | 621.99226   | 54.38174    | 1 |
| 38 | H        | 61.04300 | 114.23080 | 57.82690 | -2785.32528      | 281.84288   | 1435.53263  | 1 |
| 39 | C        | 59.73700 | 113.42980 | 56.36590 | -18.47557        | -71.45658   | -908.84741  | 1 |
| 40 | H        | 59.91800 | 113.26680 | 55.31290 | -2082.03596      | -2298.40051 | 529.81848   | 1 |
| 41 | H        | 58.98400 | 114.16080 | 56.62090 | -2323.67413      | 613.98655   | -2030.21804 | 1 |
| 42 | C        | 59.19200 | 112.14780 | 56.93090 | 505.91605        | -645.40307  | 398.69139   | 1 |
| 43 | O        | 59.31000 | 111.77580 | 58.08890 | -620.78190       | -451.33913  | -185.87642  | 1 |
| 44 | N        | 58.56200 | 111.40380 | 55.94890 | 508.80851        | -220.57079  | 636.50194   | 1 |
| 45 | H        | 58.47400 | 111.82980 | 55.05190 | 707.31680        | 2430.51482  | 1868.29518  | 1 |
| 46 | C        | 57.87500 | 110.13780 | 56.01090 | -431.12889       | 800.07626   | 73.87060    | 1 |
| 47 | H        | 57.76700 | 109.95980 | 54.95090 | 1935.73757       | -2415.68363 | 561.79966   | 1 |
| 48 | C        | 58.62000 | 108.94680 | 56.58990 | 399.27872        | 604.82924   | 553.36163   | 1 |
| 49 | H        | 58.96700 | 109.18380 | 57.61890 | 2196.73043       | 2189.76815  | 526.79890   | 1 |
| 50 | C        | 57.74600 | 107.62980 | 56.62790 | -739.43343       | -533.41251  | 12.66079    | 1 |
| 51 | H        | 56.88400 | 107.77680 | 57.31390 | 2379.97955       | -1864.14277 | 871.14596   | 1 |
| 52 | H        | 58.49600 | 106.91780 | 57.03390 | 610.90176        | 3086.24411  | 11.07053    | 1 |
| 53 | H        | 57.25700 | 107.46180 | 55.64490 | 2407.74805       | -1121.89555 | 1685.91991  | 1 |
| 54 | C        | 59.89200 | 108.69180 | 55.73090 | 552.37139        | -499.13420  | 526.49967   | 1 |
| 55 | H        | 60.46000 | 107.93180 | 56.30790 | -2853.36259      | -621.31981  | 1170.68777  | 1 |
| 56 | H        | 60.53800 | 109.58580 | 55.60090 | -948.64980       | 2042.34479  | -2197.07022 | 1 |

|     |   |          |           |          |             |             |             |   |
|-----|---|----------|-----------|----------|-------------|-------------|-------------|---|
| 57  | C | 59.57500 | 108.00080 | 54.36190 | -589.39940  | 679.02636   | -151.59995  | 1 |
| 58  | H | 60.54100 | 107.88380 | 53.82490 | 2279.89638  | 516.73247   | -2105.53706 | 1 |
| 59  | H | 58.78200 | 108.53880 | 53.79990 | 2485.54959  | -1895.59912 | 356.33331   | 1 |
| 60  | H | 59.27100 | 106.95080 | 54.55890 | -2071.75806 | 2361.21377  | 175.25495   | 1 |
| 61  | C | 56.48300 | 110.35280 | 56.48890 | -626.74106  | 33.22444    | 661.47017   | 1 |
| 62  | O | 56.23200 | 110.72880 | 57.61390 | -494.78213  | -211.96420  | -577.83133  | 1 |
| 63  | N | 55.51000 | 110.10980 | 55.59990 | 298.36158   | 668.28082   | -420.77714  | 1 |
| 64  | H | 55.68700 | 109.79380 | 54.67090 | 1423.02840  | -842.07996  | 2676.58696  | 1 |
| 65  | C | 54.13200 | 110.46880 | 55.93890 | -562.06457  | -551.34409  | 459.95012   | 1 |
| 66  | H | 54.18500 | 111.42780 | 56.43490 | 367.93292   | 2298.15833  | -2116.91282 | 1 |
| 67  | C | 53.21700 | 110.89980 | 54.75590 | -598.43326  | 431.78225   | -535.62368  | 1 |
| 68  | H | 52.16900 | 111.09380 | 55.06890 | 2577.16638  | -1046.48916 | -1470.13609 | 1 |
| 69  | H | 53.67400 | 111.80280 | 54.29990 | 2055.88982  | -626.19471  | 2297.69960  | 1 |
| 70  | O | 53.16900 | 109.82880 | 53.75190 | 175.88709   | 681.05106   | 358.97133   | 1 |
| 71  | H | 52.74300 | 109.09380 | 54.19890 | -1791.22073 | 2401.81507  | 959.70771   | 1 |
| 72  | C | 53.33100 | 109.55880 | 56.84290 | -741.01262  | 21.30884    | 530.93995   | 1 |
| 73  | O | 52.32800 | 109.92080 | 57.43390 | 361.55453   | 601.33889   | 362.34941   | 1 |
| 74  | N | 53.81900 | 108.32080 | 57.03090 | -717.28209  | -420.93005  | 144.90197   | 1 |
| 75  | H | 54.63200 | 108.03380 | 56.52990 | -2511.73549 | -1395.42995 | 1281.47817  | 1 |
| 76  | C | 53.27600 | 107.22980 | 57.84390 | -315.38428  | -845.70486  | -129.48762  | 1 |
| 77  | H | 53.71100 | 106.35180 | 57.38890 | -947.43436  | -2973.43547 | 399.09381   | 1 |
| 78  | C | 53.68500 | 107.21180 | 59.33890 | -582.37724  | 648.99036   | 266.64444   | 1 |
| 79  | H | 53.02300 | 106.46180 | 59.82190 | 2256.70610  | -2141.09507 | -470.33575  | 1 |
| 80  | C | 55.10400 | 106.60980 | 59.52090 | -755.53303  | -364.16236  | 357.78013   | 1 |
| 81  | H | 55.25900 | 106.34180 | 60.58690 | 2376.76960  | 1712.36305  | -1147.60850 | 1 |
| 82  | H | 55.24300 | 105.66880 | 58.94590 | -2497.24019 | -1899.87062 | -229.14903  | 1 |
| 83  | H | 55.91800 | 107.29780 | 59.20490 | -1519.26996 | -1970.50533 | -1925.39704 | 1 |
| 84  | C | 53.49000 | 108.57480 | 60.04890 | 792.13528   | -325.73872  | 312.83700   | 1 |
| 85  | H | 52.61700 | 109.17680 | 59.71690 | 2424.57460  | 2000.36678  | -134.89620  | 1 |
| 86  | H | 54.39300 | 109.19080 | 59.84990 | -2030.60966 | -1897.44686 | -1474.63422 | 1 |
| 87  | C | 53.42500 | 108.40480 | 61.55690 | 322.74875   | -757.74522  | -391.28818  | 1 |
| 88  | H | 54.39100 | 108.06980 | 61.99090 | -967.26387  | -626.45216  | -2927.48775 | 1 |
| 89  | H | 53.08300 | 109.37180 | 61.98490 | -2366.39255 | -1817.64686 | -997.28253  | 1 |
| 90  | H | 52.80700 | 107.56480 | 61.93990 | -2735.93884 | 1477.94169  | -478.07244  | 1 |
| 91  | C | 51.74800 | 107.04180 | 57.69290 | 534.29515   | 298.97215   | 675.71840   | 1 |
| 92  | O | 51.26900 | 106.49380 | 56.68990 | -421.98068  | -475.88817  | -468.07050  | 1 |
| 93  | N | 50.96400 | 107.43080 | 58.69590 | 738.64120   | -175.29094  | 369.26218   | 1 |
| 94  | H | 51.44500 | 107.82480 | 59.47590 | -2187.84852 | 1830.83186  | 1326.49907  | 1 |
| 95  | C | 49.51000 | 107.15480 | 58.80290 | -480.09988  | -52.79815   | 773.41287   | 1 |
| 96  | H | 49.24000 | 106.29580 | 58.20690 | -797.98833  | 478.74135   | -3005.36979 | 1 |
| 97  | C | 49.13800 | 106.74880 | 60.22390 | 626.63504   | 627.89309   | 211.02084   | 1 |
| 98  | H | 48.04800 | 106.59680 | 60.36990 | -2541.19385 | -1032.01872 | 1541.26487  | 1 |
| 99  | H | 49.52600 | 107.52080 | 60.92290 | 1500.63915  | 2715.49669  | -521.90620  | 1 |
| 100 | C | 49.80200 | 105.42880 | 60.66190 | 156.34109   | 646.39906   | 623.84030   | 1 |
| 101 | C | 49.51100 | 104.24580 | 59.97190 | -782.69746  | -359.48071  | -299.34814  | 1 |
| 102 | H | 48.82300 | 104.26580 | 59.13890 | -2292.15100 | -415.77080  | 2114.56962  | 1 |
| 103 | C | 49.99500 | 102.99780 | 60.39790 | -893.96840  | -137.06794  | 116.12013   | 1 |
| 104 | H | 49.67200 | 102.07880 | 59.93090 | -1364.88315 | -1990.13725 | 2018.58217  | 1 |
| 105 | C | 50.83600 | 102.89980 | 61.52590 | -431.14538  | 361.32335   | -717.64204  | 1 |
| 106 | O | 51.34200 | 101.66280 | 61.93590 | -711.72147  | -201.17784  | 276.78016   | 1 |
| 107 | H | 52.07400 | 101.77080 | 62.54690 | 2162.07263  | -2262.59015 | -323.03864  | 1 |
| 108 | C | 50.70100 | 105.34680 | 61.77690 | 74.96514    | -403.36374  | 814.32728   | 1 |
| 109 | H | 50.99900 | 106.23980 | 62.30790 | 1737.80775  | -2267.04501 | 1318.61949  | 1 |
| 110 | C | 51.19500 | 104.07880 | 62.11790 | 10.73246    | -670.48962  | 617.88307   | 1 |
| 111 | H | 51.89600 | 104.05880 | 62.93890 | -2374.85852 | 2036.45887  | 333.32946   | 1 |
| 112 | C | 48.66600 | 108.33480 | 58.25590 | 594.88125   | 603.38902   | 336.88127   | 1 |
| 113 | O | 47.44300 | 108.33480 | 58.50390 | 446.05914   | -325.05626  | 564.79811   | 1 |
| 114 | N | 49.33000 | 109.34580 | 57.52190 | -594.75174  | 394.55488   | -450.85375  | 1 |
| 115 | H | 50.32600 | 109.32880 | 57.49590 | -2406.65710 | -1578.70913 | 1270.39573  | 1 |
| 116 | C | 48.70200 | 110.35780 | 56.73590 | -865.48018  | 165.35998   | 234.62978   | 1 |
| 117 | H | 49.51800 | 111.06180 | 56.67490 | -1970.01195 | 1495.38084  | -1944.50901 | 1 |
| 118 | C | 48.32200 | 110.06680 | 55.26590 | 562.88804   | -149.74036  | -701.55960  | 1 |

|     |   |          |           |          |             |             |             |   |
|-----|---|----------|-----------|----------|-------------|-------------|-------------|---|
| 119 | H | 48.01000 | 111.02580 | 54.79990 | -1723.78248 | -713.98499  | 2533.18488  | 1 |
| 120 | O | 47.28400 | 109.07980 | 55.22090 | -363.06735  | 320.35793   | -623.84303  | 1 |
| 121 | H | 46.60800 | 109.42880 | 55.80590 | 681.71193   | 993.43412   | -2906.30069 | 1 |
| 122 | C | 49.48500 | 109.62180 | 54.37090 | 692.33013   | -61.54088   | 590.20565   | 1 |
| 123 | H | 49.16200 | 109.70980 | 53.31190 | 3051.93252  | 134.09191   | -752.29878  | 1 |
| 124 | H | 50.28600 | 110.34180 | 54.64090 | -2609.05251 | -1278.02176 | 1207.36555  | 1 |
| 125 | H | 49.70100 | 108.55280 | 54.58190 | -2941.40876 | 1020.30552  | 453.11958   | 1 |
| 126 | C | 47.57700 | 111.10780 | 57.38490 | 650.16682   | 436.16239   | 467.43607   | 1 |
| 127 | O | 46.39300 | 110.89080 | 57.12090 | -301.20932  | -317.28978  | 657.44001   | 1 |
| 128 | N | 47.88200 | 112.03280 | 58.27090 | -572.15517  | -554.48258  | -279.03372  | 1 |
| 129 | H | 48.83600 | 112.25780 | 58.45390 | -2186.62039 | 2104.46012  | -829.55718  | 1 |
| 130 | C | 46.81200 | 112.72280 | 58.99690 | 406.02563   | -749.60925  | 323.54314   | 1 |
| 131 | H | 46.01700 | 112.92780 | 58.29590 | -1448.90481 | 1449.80297  | -2386.83314 | 1 |
| 132 | C | 46.15500 | 111.80380 | 60.08690 | 128.82578   | 636.50492   | 640.09094   | 1 |
| 133 | H | 45.48300 | 111.07380 | 59.58590 | -1735.30460 | 616.43085   | -2550.87380 | 1 |
| 134 | H | 47.00000 | 111.26880 | 60.57090 | -283.59024  | -2574.19557 | 1786.42660  | 1 |
| 135 | O | 45.43200 | 112.47680 | 61.08990 | -500.20041  | -427.14734  | -437.00334  | 1 |
| 136 | H | 44.56000 | 112.09380 | 61.21190 | -2158.82516 | -539.63033  | 2224.07267  | 1 |
| 137 | C | 47.30300 | 114.07380 | 59.45890 | 616.14077   | -592.13650  | 318.11305   | 1 |
| 138 | O | 48.42400 | 114.32380 | 59.86690 | -126.46106  | -321.69902  | -710.03139  | 1 |
| 139 | N | 46.33200 | 114.98980 | 59.38090 | -779.80526  | 20.00679    | 322.76272   | 1 |
| 140 | H | 45.47600 | 114.82980 | 58.89590 | -2001.26457 | -420.68031  | -2390.85642 | 1 |
| 141 | C | 46.40900 | 116.36480 | 59.86390 | 465.58388   | -772.37405  | 134.61417   | 1 |
| 142 | H | 47.26700 | 116.76780 | 59.34590 | 2014.79584  | 1503.24460  | 1891.84556  | 1 |
| 143 | C | 45.16300 | 117.20380 | 59.51090 | -223.72262  | -832.29354  | -297.80306  | 1 |
| 144 | H | 45.19100 | 118.23680 | 59.92090 | -770.12187  | 2981.20109  | -646.20320  | 1 |
| 145 | H | 44.26900 | 116.67380 | 59.90090 | -471.38089  | -1709.58465 | -2598.72018 | 1 |
| 146 | C | 44.82600 | 117.37080 | 58.03290 | -297.40929  | 700.79008   | 501.88841   | 1 |
| 147 | O | 45.71600 | 117.07080 | 57.16090 | -405.38803  | 224.61790   | 639.40173   | 1 |
| 148 | O | 43.78100 | 117.95980 | 57.71290 | -263.78280  | 29.70124    | -743.74976  | 1 |
| 149 | C | 46.82400 | 116.53780 | 61.30190 | -606.07194  | 274.25726   | -623.62710  | 1 |
| 150 | O | 47.50400 | 117.48180 | 61.75190 | 522.30663   | -346.84740  | -480.12487  | 1 |
| 151 | N | 46.49000 | 115.47180 | 62.10190 | -562.05691  | -415.49385  | 473.42282   | 1 |
| 152 | H | 45.90500 | 114.76980 | 61.70290 | 2894.62860  | -1120.26444 | -514.15862  | 1 |
| 153 | C | 46.81200 | 115.30180 | 63.49290 | 395.52060   | -152.00027  | -807.40967  | 1 |
| 154 | H | 46.41100 | 116.13880 | 64.04490 | 1365.81931  | -1338.74614 | -2498.10380 | 1 |
| 155 | C | 46.28400 | 113.95680 | 64.09990 | 397.16889   | -799.40098  | -186.18796  | 1 |
| 156 | H | 46.69400 | 113.83180 | 65.12490 | 1346.92975  | 2286.75763  | 1689.59937  | 1 |
| 157 | H | 46.70100 | 113.18980 | 63.41290 | 2408.00873  | 1695.41184  | -1106.93219 | 1 |
| 158 | C | 44.81000 | 113.88480 | 64.02690 | -417.50990  | -758.78581  | 285.27283   | 1 |
| 159 | O | 44.22800 | 114.89880 | 63.63190 | -388.52591  | -553.56476  | -407.72651  | 1 |
| 160 | N | 44.13400 | 112.78080 | 64.44390 | -517.37619  | -376.10424  | -550.94443  | 1 |
| 161 | H | 43.13400 | 112.74780 | 64.46190 | -1865.44274 | 2237.93649  | 1187.42995  | 1 |
| 162 | H | 44.63200 | 112.12380 | 65.00990 | 1946.08158  | -1647.35193 | 1843.15608  | 1 |
| 163 | C | 48.27100 | 115.34780 | 63.66390 | -71.33377   | -715.66557  | 560.52234   | 1 |
| 164 | O | 48.75500 | 115.84680 | 64.69590 | 549.50417   | 174.39701   | 539.68331   | 1 |
| 165 | N | 49.09400 | 114.78180 | 62.71890 | 582.33452   | -16.87225   | -610.96164  | 1 |
| 166 | H | 48.76200 | 114.38980 | 61.86490 | 1566.89667  | -2026.72431 | 1826.32133  | 1 |
| 167 | C | 50.53500 | 114.78580 | 62.77090 | -249.36110  | 604.67021   | 635.32982   | 1 |
| 168 | H | 50.99700 | 114.55180 | 63.71790 | 1755.56054  | -2218.92294 | 1375.72323  | 1 |
| 169 | C | 51.15000 | 113.64380 | 61.82790 | 643.60234   | 644.35876   | -45.04254   | 1 |
| 170 | H | 50.78900 | 113.78680 | 60.78690 | -554.62476  | 3092.45672  | -165.31494  | 1 |
| 171 | H | 52.25900 | 113.70180 | 61.85990 | 2230.28325  | 1351.73538  | 1759.79383  | 1 |
| 172 | C | 50.82300 | 112.26880 | 62.31090 | -371.01252  | 526.00669   | -645.84648  | 1 |
| 173 | C | 51.69800 | 111.63680 | 63.23690 | -320.89938  | 699.21388   | 489.46352   | 1 |
| 174 | H | 52.60400 | 112.12780 | 63.56090 | 709.66459   | 719.95863   | -2979.30562 | 1 |
| 175 | C | 51.44700 | 110.35180 | 63.72190 | 451.18329   | -783.68514  | -117.14196  | 1 |
| 176 | H | 52.13100 | 109.96180 | 64.46090 | -1122.87261 | -1267.21102 | 2651.70880  | 1 |
| 177 | C | 50.40700 | 109.57580 | 63.20790 | 378.75399   | 828.44739   | -40.88212   | 1 |
| 178 | O | 50.05200 | 108.37980 | 63.75790 | 555.01495   | 184.17046   | 530.72297   | 1 |
| 179 | H | 50.65900 | 108.15080 | 64.46590 | 891.02809   | -2484.26089 | 1712.52533  | 1 |
| 180 | C | 49.82500 | 111.46180 | 61.76290 | 394.55542   | -470.90609  | -673.81339  | 1 |

|     |   |          |           |          |             |             |             |   |
|-----|---|----------|-----------|----------|-------------|-------------|-------------|---|
| 181 | H | 49.07500 | 111.91980 | 61.13690 | 2016.91856  | -1060.71859 | 2169.13388  | 1 |
| 182 | C | 49.60600 | 110.15880 | 62.27290 | 344.37401   | -390.78512  | -748.42804  | 1 |
| 183 | H | 48.69600 | 109.66080 | 61.97190 | -1062.72377 | 2749.37317  | -1099.90525 | 1 |
| 184 | C | 51.20200 | 116.03480 | 62.27090 | 627.94011   | -345.68922  | 563.59664   | 1 |
| 185 | O | 52.28700 | 116.46380 | 62.68990 | -546.04755  | -567.93889  | 53.89537    | 1 |
| 186 | N | 50.51400 | 116.67680 | 61.33390 | -738.20959  | -311.93525  | 265.35880   | 1 |
| 187 | H | 49.65700 | 116.22980 | 61.08790 | -368.92311  | 2669.21390  | -1624.01328 | 1 |
| 188 | C | 50.91600 | 117.85280 | 60.57690 | -342.65727  | 206.31415   | 819.43363   | 1 |
| 189 | H | 51.92000 | 117.69080 | 60.21190 | 1327.71152  | -1813.42467 | -2201.56747 | 1 |
| 190 | C | 50.01500 | 118.20880 | 59.38790 | 847.18615   | -230.12949  | -246.50974  | 1 |
| 191 | H | 49.02300 | 118.57080 | 59.73390 | 933.03089   | -2405.24345 | 1800.68974  | 1 |
| 192 | O | 49.75800 | 117.08080 | 58.61790 | -614.36626  | 415.48690   | -271.20465  | 1 |
| 193 | H | 49.30700 | 117.45980 | 57.85990 | -2509.95781 | -1890.29593 | -158.49082  | 1 |
| 194 | C | 50.71300 | 119.22280 | 58.45690 | -170.66794  | -523.72999  | 726.65697   | 1 |
| 195 | H | 50.36900 | 119.10080 | 57.40790 | 1374.00483  | 1957.08783  | 2044.54009  | 1 |
| 196 | H | 51.80600 | 119.02380 | 58.44690 | -973.61161  | -2425.18650 | -1751.79254 | 1 |
| 197 | H | 50.63100 | 120.26780 | 58.82490 | -2646.48056 | -714.85490  | 1543.81001  | 1 |
| 198 | C | 50.96000 | 119.06580 | 61.54390 | 725.95815   | -443.54152  | -328.18697  | 1 |
| 199 | O | 51.87600 | 119.93180 | 61.48590 | -694.73977  | 295.08999   | -232.13310  | 1 |
| 200 | N | 50.00500 | 119.13780 | 62.47790 | -162.22679  | -765.05259  | -317.88250  | 1 |
| 201 | H | 49.35900 | 118.38080 | 62.53090 | 2666.42016  | 1472.94964  | -786.66962  | 1 |
| 202 | C | 49.99000 | 119.99780 | 63.65990 | 500.53767   | 198.19477   | 735.95644   | 1 |
| 203 | H | 50.16900 | 121.00080 | 63.30190 | -2922.49830 | 83.05115    | 1162.03805  | 1 |
| 204 | C | 48.61300 | 120.03080 | 64.30690 | 660.59545   | -453.60954  | -435.08970  | 1 |
| 205 | H | 48.18100 | 119.03180 | 64.53290 | 2742.37084  | -1160.78399 | -1014.99208 | 1 |
| 206 | H | 48.66100 | 120.58280 | 65.26990 | 306.20586   | 1694.38815  | 2633.15647  | 1 |
| 207 | C | 47.57200 | 120.77580 | 63.45990 | -470.86725  | -759.15118  | 182.82373   | 1 |
| 208 | H | 47.54400 | 120.23480 | 62.48890 | -119.77742  | 1736.51799  | 2620.76036  | 1 |
| 209 | H | 46.55800 | 120.69780 | 63.90690 | -586.14818  | 1720.20645  | -2568.17957 | 1 |
| 210 | C | 47.92400 | 122.23580 | 63.23490 | -311.61999  | 531.66622   | 672.06772   | 1 |
| 211 | O | 48.09300 | 122.64780 | 62.07790 | -353.65294  | -610.86611  | -354.11781  | 1 |
| 212 | O | 48.15800 | 122.93180 | 64.26690 | 441.55324   | -396.12869  | 521.28689   | 1 |
| 213 | C | 51.05000 | 119.71080 | 64.68690 | 673.96832   | -396.07191  | -469.40893  | 1 |
| 214 | O | 51.30200 | 118.56080 | 64.97790 | -497.09315  | -196.37468  | -581.34552  | 1 |
| 215 | N | 51.58900 | 120.75180 | 65.34890 | -341.36189  | 484.42081   | -601.23276  | 1 |
| 216 | H | 51.26000 | 121.67180 | 65.15190 | 1080.25693  | -713.16287  | 2867.51982  | 1 |
| 217 | C | 52.56100 | 120.67980 | 66.43190 | 495.67658   | 707.96741   | -290.75398  | 1 |
| 218 | H | 53.39500 | 120.09880 | 66.06790 | 470.41975   | 2054.41744  | 2335.87253  | 1 |
| 219 | C | 52.95500 | 122.14780 | 66.82590 | -71.04859   | -818.84628  | -394.83397  | 1 |
| 220 | H | 51.97800 | 122.56380 | 67.15390 | 1548.16084  | -1183.96184 | 2469.74869  | 1 |
| 221 | H | 53.25100 | 122.70680 | 65.91290 | -1302.68703 | -929.34644  | 2708.79086  | 1 |
| 222 | C | 54.10700 | 122.27280 | 67.87790 | -796.76535  | 81.70128    | -435.82207  | 1 |
| 223 | H | 53.80100 | 122.02580 | 68.91790 | 2354.64088  | 1869.45184  | 926.84540   | 1 |
| 224 | H | 54.82700 | 121.47980 | 67.58490 | 1549.01585  | 2732.48118  | -179.78523  | 1 |
| 225 | C | 54.75900 | 123.65480 | 67.87090 | -213.95449  | 616.86018   | 636.52023   | 1 |
| 226 | O | 55.63000 | 123.91080 | 67.02390 | -126.35229  | 559.39788   | 542.89625   | 1 |
| 227 | O | 54.43000 | 124.46180 | 68.79590 | -46.70079   | 175.24499   | -768.59317  | 1 |
| 228 | C | 52.04700 | 119.94880 | 67.69290 | -355.15677  | -823.77917  | -163.40913  | 1 |
| 229 | O | 51.02000 | 120.34680 | 68.24990 | -668.48005  | 312.12958   | 281.66784   | 1 |
| 230 | N | 52.81100 | 118.90280 | 68.20390 | 246.93134   | 805.76383   | -49.41510   | 1 |
| 231 | H | 53.56100 | 118.54280 | 67.65390 | -2566.95031 | -1063.01005 | 1476.14429  | 1 |
| 232 | C | 52.46000 | 118.03280 | 69.30690 | -590.07812  | 690.83456   | -77.50114   | 1 |
| 233 | H | 51.59900 | 117.45380 | 69.00690 | 2347.61703  | -1081.23772 | 1793.83542  | 1 |
| 234 | C | 53.52300 | 116.85980 | 69.48290 | 725.56606   | -538.36511  | -123.15805  | 1 |
| 235 | H | 53.07200 | 116.10880 | 70.16590 | 1045.02487  | 1576.21006  | -2514.30131 | 1 |
| 236 | H | 53.66200 | 116.37380 | 68.49390 | 1802.35862  | 28.44178    | -2578.55012 | 1 |
| 237 | C | 54.91600 | 117.26480 | 70.10790 | -576.90308  | -482.24756  | -515.82083  | 1 |
| 238 | H | 54.77000 | 117.43580 | 71.19590 | 484.51933   | 2308.86716  | -2081.48978 | 1 |
| 239 | H | 55.36700 | 118.17980 | 69.66690 | 1920.70502  | -2092.24524 | -1353.37663 | 1 |
| 240 | S | 56.23900 | 115.97180 | 69.95690 | -389.45599  | -398.53009  | -26.61590   | 1 |
| 241 | C | 55.37600 | 114.58580 | 70.80290 | -338.31655  | 255.68040   | 807.23011   | 1 |
| 242 | H | 56.12900 | 113.76980 | 70.83190 | 1429.41716  | -2795.35621 | 202.42652   | 1 |



|     |   |          |           |          |             |             |             |   |
|-----|---|----------|-----------|----------|-------------|-------------|-------------|---|
| 243 | H | 54.53900 | 114.22880 | 70.16590 | -1978.97674 | -1763.88412 | -1694.28159 | 1 |
| 244 | H | 55.02300 | 114.75580 | 71.84190 | 1916.28562  | 1481.53445  | 2007.76775  | 1 |
| 245 | C | 52.20000 | 118.71080 | 70.64890 | 388.42660   | -807.59821  | 168.40699   | 1 |
| 246 | O | 52.91500 | 119.64880 | 70.97790 | -735.37882  | 145.34206   | 248.43692   | 1 |
| 247 | N | 51.21600 | 118.21080 | 71.41490 | -343.82757  | 52.86089    | -769.19478  | 1 |
| 248 | H | 50.67800 | 117.48480 | 70.99390 | -2893.61153 | -922.24024  | -821.40825  | 1 |
| 249 | C | 50.81400 | 118.79680 | 72.69490 | -563.05869  | -533.54968  | 479.31270   | 1 |
| 250 | H | 51.33000 | 119.69580 | 72.99790 | 2941.25425  | 717.96157   | 855.44188   | 1 |
| 251 | H | 49.79700 | 119.14380 | 72.58690 | -2315.51239 | 132.70742   | -2125.79805 | 1 |
| 252 | C | 50.93000 | 117.84780 | 73.85490 | 454.70767   | 790.17509   | -17.75587   | 1 |
| 253 | O | 51.01900 | 118.16680 | 75.05290 | 412.95350   | 517.46571   | -430.49492  | 1 |
| 254 | N | 50.99800 | 116.54480 | 73.59190 | 393.11431   | -41.91803   | 745.90637   | 1 |
| 255 | H | 51.07400 | 116.21780 | 72.65290 | -1765.31676 | 1682.88637  | 1987.40445  | 1 |
| 256 | C | 51.24700 | 115.58080 | 74.58990 | -706.47776  | 568.76657   | 94.04665    | 1 |
| 257 | H | 50.61700 | 115.77180 | 75.44690 | 1296.16369  | 2197.79699  | 1840.61792  | 1 |
| 258 | C | 50.83800 | 114.13280 | 74.24690 | 660.48385   | -461.28193  | 427.11950   | 1 |
| 259 | H | 51.10000 | 113.42080 | 75.05790 | 551.73321   | 2652.20567  | 1599.88181  | 1 |
| 260 | H | 49.73600 | 114.04180 | 74.13690 | 67.47395    | -3100.03367 | -532.41409  | 1 |
| 261 | O | 51.41100 | 113.59580 | 73.06890 | 473.88069   | 551.27384   | 308.48252   | 1 |
| 262 | H | 52.36200 | 113.53980 | 73.18990 | -2259.60099 | -127.99613  | -2185.41680 | 1 |
| 263 | C | 52.74000 | 115.47980 | 75.09390 | -59.75506   | 136.22552   | 899.62378   | 1 |
| 264 | O | 53.67700 | 115.65280 | 74.29690 | -781.17088  | -7.65142    | 115.50214   | 1 |
| 265 | N | 52.96000 | 115.23580 | 76.43190 | -567.73238  | 390.44269   | 487.75685   | 1 |
| 266 | H | 52.13300 | 115.20480 | 76.98790 | -2069.41889 | 1915.25038  | -1395.54566 | 1 |
| 267 | C | 54.25700 | 114.86280 | 77.04290 | 656.85015   | 21.44070    | -632.09111  | 1 |
| 268 | H | 55.10700 | 115.30180 | 76.54190 | 2759.74565  | 83.51715    | -1508.32857 | 1 |
| 269 | H | 54.22100 | 115.03380 | 78.10890 | 42.15724    | 1061.40532  | 2961.39625  | 1 |
| 270 | C | 54.41600 | 113.39880 | 76.98090 | -370.53267  | -710.73057  | 434.76270   | 1 |
| 271 | O | 53.59300 | 112.69380 | 76.37590 | 154.37836   | 11.90406    | -774.37255  | 1 |
| 272 | N | 55.57900 | 112.83980 | 77.40290 | 138.65499   | -257.46323  | 791.93419   | 1 |
| 273 | H | 56.36100 | 113.40180 | 77.66290 | 1510.69631  | 2107.38219  | 1781.84264  | 1 |
| 274 | C | 55.75500 | 111.46880 | 77.54390 | 359.55564   | -395.40116  | -738.80218  | 1 |
| 275 | H | 55.39900 | 111.03980 | 76.61890 | -2235.52476 | 1880.24405  | -1168.47661 | 1 |
| 276 | C | 57.26800 | 111.09280 | 77.55690 | 727.87086   | -543.79823  | -77.06159   | 1 |
| 277 | H | 57.66800 | 111.68780 | 76.70790 | -2661.00559 | -1401.00435 | -924.37129  | 1 |
| 278 | H | 57.36000 | 109.99780 | 77.39790 | -1641.30559 | 2515.02322  | 937.55022   | 1 |
| 279 | C | 58.03100 | 111.60080 | 78.77190 | -306.07235  | 848.25066   | 135.06126   | 1 |
| 280 | O | 59.25200 | 111.30280 | 78.87290 | 188.40035   | -593.20694  | 486.04327   | 1 |
| 281 | O | 57.51600 | 112.46380 | 79.53090 | 676.45332   | -224.35251  | 340.15302   | 1 |
| 282 | C | 54.85100 | 110.75880 | 78.66790 | -463.98191  | -296.47116  | 726.82642   | 1 |
| 283 | O | 54.46200 | 111.36580 | 79.65890 | 70.35126    | 538.02814   | -573.76271  | 1 |
| 284 | N | 54.49300 | 109.47880 | 78.36290 | -435.46505  | 130.40193   | -711.36335  | 1 |
| 285 | H | 54.67700 | 109.08680 | 77.46490 | 841.87018   | -2082.59627 | 2202.78769  | 1 |
| 286 | C | 53.76800 | 108.54880 | 79.17990 | 430.14130   | 617.90026   | 514.42077   | 1 |
| 287 | H | 52.81700 | 109.00280 | 79.41590 | -235.35062  | 3037.49624  | 785.14516   | 1 |
| 288 | C | 53.38200 | 107.31980 | 78.25890 | 413.69700   | -168.95326  | 794.83369   | 1 |
| 289 | H | 54.34200 | 107.04580 | 77.77190 | -379.89386  | 2391.19881  | 2008.99853  | 1 |
| 290 | H | 52.70000 | 107.65380 | 77.44790 | 1198.39067  | 2164.37903  | -1943.59189 | 1 |
| 291 | C | 52.81800 | 106.16380 | 79.07090 | 421.18946   | -694.55628  | 414.29701   | 1 |
| 292 | C | 53.41400 | 104.92580 | 79.23390 | -240.58022  | 869.62901   | 131.59613   | 1 |
| 293 | H | 54.42500 | 104.85180 | 78.86090 | -2190.44871 | 1793.59299  | 1372.29183  | 1 |
| 294 | C | 52.72300 | 103.84880 | 79.87090 | -551.89627  | 449.85556   | 569.64154   | 1 |
| 295 | H | 53.13500 | 102.84980 | 79.87490 | -2692.99508 | 1559.27435  | 463.32193   | 1 |
| 296 | C | 51.39200 | 104.10480 | 80.26790 | 206.54373   | 376.10785   | -804.57043  | 1 |
| 297 | O | 50.59800 | 103.10580 | 80.83390 | 433.58136   | -410.12556  | 517.13776   | 1 |
| 298 | H | 49.86400 | 103.55080 | 81.26490 | 1588.46795  | -1898.21374 | 1942.10720  | 1 |
| 299 | C | 51.47800 | 106.36080 | 79.45290 | -711.47028  | 525.73618   | -221.04867  | 1 |
| 300 | H | 50.93600 | 107.28580 | 79.31990 | -2879.60782 | 1239.71328  | -263.05137  | 1 |
| 301 | C | 50.76400 | 105.33380 | 80.04890 | -648.21613  | 586.79076   | 258.73433   | 1 |
| 302 | H | 49.79000 | 105.62980 | 80.40890 | -924.48069  | 2514.60475  | -1649.34067 | 1 |
| 303 | C | 54.31600 | 108.18180 | 80.56890 | -561.52673  | -372.13036  | -614.53863  | 1 |
| 304 | O | 53.62700 | 108.14980 | 81.56290 | 497.91119   | 467.53260   | 396.38989   | 1 |

|     |   |          |           |          |             |             |             |   |
|-----|---|----------|-----------|----------|-------------|-------------|-------------|---|
| 305 | N | 55.68800 | 107.92880 | 80.57790 | -433.23298  | 20.15064    | -724.27579  | 1 |
| 306 | H | 56.10600 | 107.80480 | 79.68190 | 2502.00501  | 32.77674    | 1907.12424  | 1 |
| 307 | C | 56.44100 | 107.71180 | 81.79290 | -739.65208  | -463.49025  | 263.70929   | 1 |
| 308 | H | 55.98600 | 108.43680 | 82.45190 | 1095.79596  | -2129.61372 | -2040.14776 | 1 |
| 309 | C | 56.29100 | 106.15780 | 82.24090 | -419.31983  | 549.92603   | -594.30905  | 1 |
| 310 | H | 55.20700 | 105.98880 | 82.41890 | 2722.18904  | -774.90780  | 1373.83805  | 1 |
| 311 | H | 56.67400 | 105.44380 | 81.47990 | -2157.12055 | -1448.33524 | 1774.08630  | 1 |
| 312 | C | 56.99500 | 105.84580 | 83.54390 | -102.20739  | 590.69776   | 687.08137   | 1 |
| 313 | O | 57.19800 | 104.63480 | 83.81990 | 629.73890   | 356.53000   | 316.13685   | 1 |
| 314 | O | 57.36300 | 106.74580 | 84.32990 | -300.27440  | 426.76794   | -592.73235  | 1 |
| 315 | C | 57.82100 | 108.16680 | 81.61990 | -226.44491  | -449.70442  | -760.22341  | 1 |
| 316 | O | 58.33300 | 109.17280 | 82.17690 | 567.06529   | -17.23705   | -549.33330  | 1 |
| 317 | N | 58.56500 | 107.53480 | 80.70590 | -809.43081  | -148.67963  | 188.11810   | 1 |
| 318 | H | 58.26400 | 106.72480 | 80.20790 | -2156.34980 | -1029.24040 | 2046.71590  | 1 |
| 319 | C | 59.85300 | 108.03280 | 80.26890 | -468.54051  | -606.73866  | -493.74992  | 1 |
| 320 | H | 59.71000 | 109.10180 | 80.20890 | -1515.33597 | 1004.83514  | -2567.54542 | 1 |
| 321 | C | 61.08800 | 107.57880 | 81.06890 | 428.62307   | -692.38599  | 410.28638   | 1 |
| 322 | H | 61.97600 | 107.81280 | 80.44490 | 2751.26827  | 423.56343   | -1466.06383 | 1 |
| 323 | H | 60.96100 | 106.48180 | 81.19490 | -1815.08318 | -2532.30611 | 437.17849   | 1 |
| 324 | O | 61.18400 | 108.26280 | 82.33390 | 672.19713   | -382.33209  | 160.00130   | 1 |
| 325 | H | 60.66900 | 107.78380 | 82.98790 | 601.70700   | 1837.84543  | 2481.63234  | 1 |
| 326 | C | 60.05000 | 107.53880 | 78.82690 | -74.26237   | 794.17176   | -441.84535  | 1 |
| 327 | O | 59.94300 | 106.33880 | 78.50090 | -668.67814  | 385.70393   | 166.52103   | 1 |
| 328 | N | 60.38400 | 108.47080 | 78.00190 | 393.85757   | 675.08060   | -319.08413  | 1 |
| 329 | H | 60.19400 | 109.41180 | 78.26890 | -1816.30563 | 1555.16773  | -2044.67929 | 1 |
| 330 | C | 60.67400 | 108.12380 | 76.60790 | 904.18788   | -46.95501   | 108.12265   | 1 |
| 331 | H | 60.04800 | 107.29280 | 76.32090 | 1819.62955  | 1861.18503  | -1767.24781 | 1 |
| 332 | C | 60.20800 | 109.28180 | 75.58590 | -43.10306   | 886.67973   | 208.30792   | 1 |
| 333 | H | 60.43500 | 108.91680 | 74.56190 | 2372.41933  | 1942.46578  | 704.75488   | 1 |
| 334 | H | 59.11400 | 109.34780 | 75.77190 | -89.95310   | -2268.14834 | -2178.44848 | 1 |
| 335 | C | 60.77400 | 110.64280 | 75.95290 | 429.65920   | -624.06885  | 507.32834   | 1 |
| 336 | H | 60.26100 | 111.39580 | 75.31790 | -1432.79834 | -1665.51231 | 2251.97333  | 1 |
| 337 | H | 60.57500 | 110.97880 | 76.99390 | 1122.33026  | 1486.73055  | -2535.39608 | 1 |
| 338 | S | 62.55100 | 110.85680 | 75.67090 | 438.60939   | 134.25516   | -317.50270  | 1 |
| 339 | C | 62.43900 | 111.03380 | 73.84490 | 369.89737   | 388.36231   | -737.42908  | 1 |
| 340 | H | 63.38500 | 111.51080 | 73.50790 | 1116.47799  | 1665.51419  | -2424.41036 | 1 |
| 341 | H | 62.50200 | 110.05080 | 73.32990 | -2985.47745 | -966.87288  | 224.29326   | 1 |
| 342 | H | 61.55400 | 111.65080 | 73.58090 | -1988.06635 | -1042.73197 | 2204.20699  | 1 |
| 343 | C | 62.06900 | 107.56380 | 76.30990 | 269.07769   | -4.42747    | -871.22247  | 1 |
| 344 | O | 63.03500 | 107.93580 | 76.95290 | 475.07566   | 109.62868   | -621.21807  | 1 |
| 345 | N | 62.16100 | 106.58480 | 75.43990 | 517.09379   | -171.34958  | 644.92296   | 1 |
| 346 | H | 61.40400 | 106.33880 | 74.84090 | -2349.22886 | 1504.74288  | 1454.33795  | 1 |
| 347 | C | 63.41000 | 105.90980 | 75.13290 | -624.18257  | -478.01165  | -461.90041  | 1 |
| 348 | H | 64.14600 | 106.06280 | 75.90790 | -2342.21064 | -159.10473  | 2094.50740  | 1 |
| 349 | C | 63.16600 | 104.40980 | 74.87990 | 602.97994   | -604.65315  | 319.78236   | 1 |
| 350 | H | 62.45500 | 104.32780 | 74.02990 | -2585.93458 | 1654.64169  | 687.98944   | 1 |
| 351 | H | 64.13300 | 103.91480 | 74.64490 | 2435.74999  | 1954.99822  | -378.58972  | 1 |
| 352 | C | 62.53200 | 103.69180 | 76.04290 | -330.93251  | -799.17625  | 288.53424   | 1 |
| 353 | H | 61.66000 | 104.23780 | 76.46090 | -1519.66182 | 1835.76983  | -2053.97257 | 1 |
| 354 | H | 63.23400 | 103.66580 | 76.90290 | 20.29495    | -2237.00862 | -2212.14980 | 1 |
| 355 | C | 62.25800 | 102.19480 | 75.76290 | -452.73765  | -785.92160  | 93.84494    | 1 |
| 356 | H | 61.54400 | 102.17580 | 74.91190 | -1697.49561 | -1934.24538 | -1809.81482 | 1 |
| 357 | H | 61.77700 | 101.70080 | 76.63490 | -2067.60589 | 1805.09650  | -1537.80972 | 1 |
| 358 | C | 63.46800 | 101.44780 | 75.28890 | -583.69775  | -683.59205  | -153.13343  | 1 |
| 359 | H | 64.24800 | 101.46280 | 76.07990 | 1887.23045  | 2290.58395  | -1043.94091 | 1 |
| 360 | H | 63.89700 | 101.89080 | 74.36490 | 1516.45135  | -2146.38012 | -1729.63982 | 1 |
| 361 | N | 63.12400 | 100.07280 | 74.98990 | 739.34801   | -388.98777  | 121.34792   | 1 |
| 362 | H | 62.54300 | 99.89180  | 74.14690 | -1919.35125 | 1386.69995  | 2071.56469  | 1 |
| 363 | H | 63.89900 | 99.38180  | 74.93190 | 2628.20852  | -1698.71606 | -324.20660  | 1 |
| 364 | H | 62.54400 | 99.71080  | 75.77390 | -86.97828   | -2787.29733 | -1456.58319 | 1 |
| 365 | C | 64.06300 | 106.52780 | 73.93390 | -611.58936  | 460.20818   | -495.59852  | 1 |
| 366 | O | 63.56800 | 106.44980 | 72.81290 | 497.95718   | 580.16888   | -197.66119  | 1 |

|     |   |          |           |          |             |             |             |   |
|-----|---|----------|-----------|----------|-------------|-------------|-------------|---|
| 367 | N | 65.20700 | 107.25280 | 74.15290 | 630.71635   | -210.79508  | 520.03328   | 1 |
| 368 | H | 65.59800 | 107.30980 | 75.06890 | -2464.37488 | 1447.43124  | -1315.30434 | 1 |
| 369 | C | 65.85000 | 107.87280 | 72.97490 | 69.82670    | 663.52994   | -621.53299  | 1 |
| 370 | H | 65.63600 | 107.23580 | 72.12990 | -1593.95325 | 1287.62804  | -2387.37372 | 1 |
| 371 | C | 65.38700 | 109.28680 | 72.58690 | 173.50623   | -722.80134  | 528.11439   | 1 |
| 372 | H | 64.30700 | 109.23580 | 72.32990 | 1774.50095  | 2329.86017  | 1149.40167  | 1 |
| 373 | H | 65.40200 | 109.96080 | 73.47090 | -913.49335  | 1201.49647  | 2760.46416  | 1 |
| 374 | C | 66.04100 | 110.06580 | 71.42790 | 872.02946   | 115.05480   | -240.37057  | 1 |
| 375 | H | 65.55700 | 109.78380 | 70.46790 | -2232.87896 | 106.22793   | 2213.86391  | 1 |
| 376 | H | 67.05200 | 109.61780 | 71.32090 | -789.06758  | 613.78790   | -2983.09621 | 1 |
| 377 | C | 65.97100 | 111.59280 | 71.60190 | -607.49360  | -341.83178  | -587.83805  | 1 |
| 378 | O | 65.06100 | 112.23780 | 70.97590 | 724.00339   | 1.76245     | -315.34619  | 1 |
| 379 | O | 66.75900 | 112.17680 | 72.38990 | 548.19796   | 348.25432   | -449.24954  | 1 |
| 380 | C | 67.35200 | 107.73080 | 73.03590 | 218.52958   | -425.89927  | -776.08352  | 1 |
| 381 | O | 67.83700 | 106.97580 | 72.19790 | 536.53107   | -393.48506  | -425.36002  | 1 |
| 382 | N | 68.22200 | 108.25380 | 73.96990 | -450.68827  | 240.63929   | 672.04546   | 1 |
| 383 | C | 67.88700 | 109.31680 | 74.86890 | -498.93459  | -179.94217  | -741.71160  | 1 |
| 384 | H | 66.91900 | 109.13480 | 75.38190 | 1404.55301  | -1948.91199 | 2031.55092  | 1 |
| 385 | H | 67.69700 | 110.19280 | 74.21090 | -1578.69783 | -2556.31178 | 933.38602   | 1 |
| 386 | C | 69.65900 | 108.01880 | 74.03690 | -459.64308  | 699.39143   | -361.98187  | 1 |
| 387 | H | 70.07900 | 108.16480 | 73.05290 | -1241.71990 | 1151.77913  | -2651.36998 | 1 |
| 388 | C | 70.14800 | 109.25780 | 74.86290 | -668.03733  | 307.02304   | -539.36443  | 1 |
| 389 | H | 70.28000 | 110.09880 | 74.14990 | 2888.19205  | -1003.91282 | -740.76446  | 1 |
| 390 | H | 71.15000 | 109.03480 | 75.28890 | 2006.58822  | 1460.18518  | 1933.82759  | 1 |
| 391 | C | 69.04400 | 109.50680 | 75.87390 | -737.48456  | 505.55391   | 178.83729   | 1 |
| 392 | H | 69.09000 | 110.54880 | 76.25790 | 2232.27236  | 1666.11546  | 1462.61602  | 1 |
| 393 | H | 69.12200 | 108.76480 | 76.69690 | 3076.67406  | -597.46055  | 274.48831   | 1 |
| 394 | C | 70.08700 | 106.61680 | 74.57190 | -667.00086  | -614.09358  | 97.21074    | 1 |
| 395 | O | 71.25500 | 106.47080 | 74.96990 | 486.63680   | -427.53607  | -451.69100  | 1 |
| 396 | N | 69.19600 | 105.56580 | 74.56890 | 605.89723   | 583.20402   | -73.71506   | 1 |
| 397 | H | 68.36100 | 105.61180 | 74.02590 | -2426.72247 | -431.88383  | -1955.17790 | 1 |
| 398 | C | 69.48600 | 104.28380 | 75.21390 | -800.59421  | -385.74731  | 204.20317   | 1 |
| 399 | H | 69.77300 | 104.39880 | 76.24890 | 2046.73852  | 90.54925    | -2387.65335 | 1 |
| 400 | C | 68.21500 | 103.35380 | 75.28190 | 30.03648    | -0.37494    | -911.34443  | 1 |
| 401 | H | 67.84500 | 103.20280 | 74.24490 | -1825.93331 | -209.09434  | 2553.52175  | 1 |
| 402 | H | 68.48900 | 102.35480 | 75.68390 | -1890.28550 | 27.38608    | -2514.81549 | 1 |
| 403 | S | 66.88000 | 104.12080 | 76.21390 | 195.65999   | 327.39544   | -407.11178  | 1 |
| 404 | C | 70.55400 | 103.47180 | 74.55290 | -41.53492   | -598.87998  | 686.34439   | 1 |
| 405 | O | 70.50800 | 103.20580 | 73.35790 | -272.53787  | -556.54031  | 489.50303   | 1 |
| 406 | N | 71.52600 | 102.95180 | 75.35490 | -478.74045  | -482.18673  | 500.97487   | 1 |
| 407 | H | 71.48700 | 103.20280 | 76.31890 | -228.40112  | 1667.45140  | 2658.13186  | 1 |
| 408 | C | 72.33200 | 101.85280 | 75.04890 | -204.90218  | 881.08175   | 114.72162   | 1 |
| 409 | H | 72.03800 | 101.35280 | 74.13890 | 886.33756   | 150.73731   | 3014.94780  | 1 |
| 410 | C | 73.81400 | 102.26780 | 74.93190 | 77.25381    | 644.14506   | 640.74956   | 1 |
| 411 | H | 74.39600 | 101.32180 | 74.90890 | -1150.89139 | -2849.28212 | 674.73450   | 1 |
| 412 | H | 74.14900 | 102.95580 | 75.73790 | -2581.63378 | 1080.72853  | -1437.15659 | 1 |
| 413 | C | 73.94900 | 103.02380 | 73.66090 | 598.72907   | 687.12798   | 28.80354    | 1 |
| 414 | C | 74.30600 | 102.35780 | 72.44890 | -224.18917  | 817.90129   | -335.00403  | 1 |
| 415 | H | 74.29800 | 101.27780 | 72.45890 | -2316.16460 | 123.57426   | 2125.63807  | 1 |
| 416 | C | 74.70200 | 103.04680 | 71.29590 | 401.78273   | -557.21131  | 599.61420   | 1 |
| 417 | H | 74.89000 | 102.53680 | 70.36190 | 119.45646   | 2952.82235  | -1079.25740 | 1 |
| 418 | C | 74.81400 | 104.45080 | 71.38890 | 360.96702   | -28.26743   | -836.87201  | 1 |
| 419 | H | 75.24600 | 104.96280 | 70.54190 | -1743.04270 | 666.48540   | -2532.94800 | 1 |
| 420 | C | 73.98600 | 104.42880 | 73.64890 | 458.23108   | 637.35358   | -463.95657  | 1 |
| 421 | H | 73.78100 | 104.96380 | 74.56490 | -3069.02688 | -685.04438  | 100.07198   | 1 |
| 422 | C | 74.45500 | 105.11980 | 72.52590 | 38.98743    | 631.38976   | 656.71756   | 1 |
| 423 | H | 74.60000 | 106.18980 | 72.51690 | -1784.05118 | -1635.43488 | 2010.15929  | 1 |
| 424 | C | 72.21300 | 100.84580 | 76.15190 | -763.57979  | 150.34859   | -475.17598  | 1 |
| 425 | O | 71.68300 | 101.16780 | 77.20590 | -690.90603  | 163.90978   | -345.55705  | 1 |
| 426 | N | 72.53700 | 99.58580  | 75.86190 | 467.85121   | -101.71349  | 695.29986   | 1 |
| 427 | H | 72.87100 | 99.41180  | 74.93890 | 2104.70849  | 1048.27536  | 2090.34618  | 1 |
| 428 | C | 72.58100 | 98.56180  | 76.81190 | 900.02218   | -134.67921  | -57.20650   | 1 |

|     |   |          |           |          |             |             |             |   |
|-----|---|----------|-----------|----------|-------------|-------------|-------------|---|
| 429 | H | 71.71300 | 98.59980  | 77.45290 | 2864.58880  | 291.91619   | 1267.73111  | 1 |
| 430 | C | 72.54400 | 97.15380  | 76.13090 | -294.84409  | -709.86159  | 490.52470   | 1 |
| 431 | H | 72.71300 | 96.34080  | 76.86890 | -2364.97392 | 1292.53496  | -1623.10750 | 1 |
| 432 | H | 73.25700 | 97.11580  | 75.27990 | -1460.95230 | -1595.98307 | 2284.00583  | 1 |
| 433 | C | 71.15900 | 97.00780  | 75.56090 | -85.27762   | -638.77948  | -645.08876  | 1 |
| 434 | H | 70.31600 | 97.24980  | 76.24290 | 2369.92782  | 853.57037   | -1884.96312 | 1 |
| 435 | H | 71.13100 | 97.73280  | 74.71890 | -2548.07914 | -233.03401  | 1830.63216  | 1 |
| 436 | C | 70.94100 | 95.54280  | 75.00690 | -668.66546  | 248.40500   | 568.00745   | 1 |
| 437 | H | 71.06100 | 94.85480  | 75.87090 | 2509.11451  | 1648.34279  | 941.02957   | 1 |
| 438 | H | 71.71300 | 95.43180  | 74.21590 | -1860.00457 | 2536.65173  | 63.30279    | 1 |
| 439 | N | 69.55900 | 95.45880  | 74.44790 | 390.41094   | 337.20349   | -668.24052  | 1 |
| 440 | H | 68.95100 | 96.25180  | 74.49390 | -2564.56482 | -1434.85597 | -1123.57549 | 1 |
| 441 | C | 68.96900 | 94.33980  | 74.12190 | 234.50530   | 375.01418   | 797.38487   | 1 |
| 442 | N | 69.66000 | 93.24180  | 73.94590 | 577.41225   | -600.07732  | -138.47233  | 1 |
| 443 | H | 70.65800 | 93.29780  | 73.98490 | 1034.06525  | -185.93057  | -2965.52948 | 1 |
| 444 | H | 69.18800 | 92.38480  | 73.73990 | 1609.12958  | -1418.95934 | -2301.19156 | 1 |
| 445 | N | 67.64900 | 94.26480  | 73.96590 | -113.33767  | -726.22360  | -415.24226  | 1 |
| 446 | H | 67.06000 | 95.03580  | 74.20890 | -1565.39657 | -2236.71637 | 1563.60471  | 1 |
| 447 | H | 67.26300 | 93.35580  | 73.80890 | 1525.50127  | -1948.68861 | 1942.59744  | 1 |
| 448 | C | 73.74800 | 98.68280  | 77.74690 | 755.96089   | 475.62491   | -183.72556  | 1 |
| 449 | O | 73.63900 | 98.24680  | 78.83690 | 463.22655   | 615.70376   | 173.08168   | 1 |
| 450 | N | 74.84600 | 99.31480  | 77.33590 | -790.76865  | -206.10640  | 211.84281   | 1 |
| 451 | H | 74.88600 | 99.55780  | 76.36990 | -2516.14661 | -1888.33412 | -37.77206   | 1 |
| 452 | C | 76.06300 | 99.48080  | 78.09590 | -676.30911  | -517.34974  | 326.19970   | 1 |
| 453 | H | 76.77600 | 99.87080  | 77.38390 | 3093.13872  | 370.72935   | -439.63492  | 1 |
| 454 | C | 75.87900 | 100.65680 | 79.10690 | -2.47182    | -361.65621  | -837.04820  | 1 |
| 455 | H | 74.92800 | 100.55580 | 79.67290 | 2293.57654  | -2009.15854 | -775.25148  | 1 |
| 456 | H | 76.66200 | 100.74080 | 79.88990 | -1042.32021 | 1903.85729  | 2277.52547  | 1 |
| 457 | C | 75.60300 | 102.01980 | 78.43190 | 463.06484   | 644.11096   | -449.60319  | 1 |
| 458 | H | 74.71700 | 101.89880 | 77.77190 | 1711.81835  | -593.77103  | -2572.03035 | 1 |
| 459 | H | 76.44600 | 102.35880 | 77.79190 | 1553.07480  | 2650.84665  | 677.64071   | 1 |
| 460 | C | 75.26700 | 103.23980 | 79.28090 | -392.01105  | 573.27873   | 590.87210   | 1 |
| 461 | O | 74.10200 | 103.50380 | 79.64390 | -687.88794  | 387.46435   | 17.57214    | 1 |
| 462 | O | 76.23400 | 103.93280 | 79.71990 | 722.93122   | -317.28029  | 18.19079    | 1 |
| 463 | C | 76.72800 | 98.22480  | 78.72090 | -494.92821  | -120.37527  | -756.31135  | 1 |
| 464 | O | 76.23600 | 97.10980  | 78.65890 | -436.21647  | 586.06331   | -299.78695  | 1 |
| 465 | N | 77.86900 | 98.38280  | 79.40690 | 240.36755   | -539.61408  | 603.08571   | 1 |
| 466 | H | 78.16300 | 99.31580  | 79.59790 | -1646.26057 | 1759.18637  | -2023.19442 | 1 |
| 467 | C | 78.75500 | 97.37880  | 79.91690 | 93.74012    | -237.27461  | -875.42250  | 1 |
| 468 | H | 78.24500 | 96.43280  | 79.81790 | -1164.93251 | 1606.90261  | 2441.11091  | 1 |
| 469 | C | 80.00100 | 97.35880  | 78.99090 | 368.91637   | -593.35085  | 585.90655   | 1 |
| 470 | H | 80.84600 | 97.00080  | 79.61690 | -1678.32018 | 2496.80112  | -920.57144  | 1 |
| 471 | H | 80.19900 | 98.40480  | 78.67290 | -2063.05746 | -2245.50344 | -774.42523  | 1 |
| 472 | C | 79.83000 | 96.53980  | 77.68790 | -537.31659  | 225.99264   | 701.19128   | 1 |
| 473 | H | 80.86500 | 96.35380  | 77.32790 | 581.12542   | -1687.83623 | 2590.70035  | 1 |
| 474 | H | 79.16200 | 97.11380  | 77.01190 | -2651.36805 | -1539.47471 | 706.03917   | 1 |
| 475 | C | 79.13700 | 95.18980  | 77.86590 | 734.41092   | 149.37853   | -519.40125  | 1 |
| 476 | O | 79.56700 | 94.36780  | 78.71590 | -684.63631  | -165.06219  | 357.28816   | 1 |
| 477 | O | 78.32600 | 94.90780  | 76.96890 | -293.37082  | -594.43953  | 429.18811   | 1 |
| 478 | C | 79.11700 | 97.51380  | 81.41390 | 13.86330    | -661.35695  | 627.58728   | 1 |
| 479 | O | 79.60500 | 98.53980  | 81.90390 | -203.26659  | 753.77743   | -118.86762  | 1 |
| 480 | N | 78.81900 | 96.47680  | 82.28590 | -128.43913  | 562.37264   | -616.37058  | 1 |
| 481 | H | 78.31700 | 95.69580  | 81.92190 | -2750.95225 | 255.50441   | 1505.05994  | 1 |
| 482 | C | 79.20300 | 96.47480  | 83.67590 | 274.93315   | 650.36456   | 576.96508   | 1 |
| 483 | H | 79.11900 | 97.48380  | 84.05190 | -1512.59960 | 456.75187   | 2720.59670  | 1 |
| 484 | C | 78.30400 | 95.58880  | 84.57390 | -279.92943  | -685.49286  | -532.15605  | 1 |
| 485 | H | 78.37100 | 94.58480  | 84.10390 | -2810.92677 | 851.15893   | 1128.02720  | 1 |
| 486 | H | 77.26300 | 95.94780  | 84.42690 | -1630.68225 | 2061.54193  | -1728.91483 | 1 |
| 487 | C | 78.83000 | 95.41580  | 85.95590 | 328.23710   | -639.86951  | -560.60541  | 1 |
| 488 | O | 79.81200 | 94.70780  | 86.27390 | 578.37715   | -175.01029  | -508.40781  | 1 |
| 489 | N | 78.20900 | 96.11780  | 86.93990 | -9.69508    | 212.88791   | -816.85802  | 1 |
| 490 | H | 77.67900 | 96.92680  | 86.68390 | -264.20800  | 645.91936   | 3067.76931  | 1 |

|     |   |          |          |          |             |             |             |   |
|-----|---|----------|----------|----------|-------------|-------------|-------------|---|
| 491 | H | 78.67300 | 96.06480 | 87.82390 | 1469.95309  | 2140.74062  | -1776.14575 | 1 |
| 492 | C | 80.69000 | 96.04180 | 83.75490 | 378.24319   | -22.34042   | -829.38773  | 1 |
| 493 | O | 81.10400 | 95.04180 | 83.13390 | 161.73252   | 483.74341   | -602.87820  | 1 |
| 494 | N | 81.45100 | 96.92680 | 84.40990 | 497.23555   | 395.97537   | -555.54711  | 1 |
| 495 | H | 81.08100 | 97.69580 | 84.92590 | 1670.81636  | 1976.32021  | -1789.06605 | 1 |
| 496 | C | 82.84600 | 96.66980 | 84.72090 | 205.86799   | -780.04324  | 424.97284   | 1 |
| 497 | H | 83.24900 | 95.99880 | 83.97690 | 1594.82121  | 1338.03133  | 2358.90731  | 1 |
| 498 | C | 83.58400 | 98.04180 | 84.88990 | 40.63712    | -406.66264  | 815.12277   | 1 |
| 499 | H | 84.67900 | 97.92480 | 85.02990 | -1012.27326 | 2706.09389  | 1245.22485  | 1 |
| 500 | H | 83.40100 | 98.55980 | 83.92390 | 1781.41214  | -878.82307  | 2439.76782  | 1 |
| 501 | H | 83.07200 | 98.64180 | 85.67190 | 2364.33775  | 2074.56491  | 65.67828    | 1 |
| 502 | C | 83.00800 | 95.84680 | 86.00290 | 500.78592   | 11.64795    | 761.92440   | 1 |
| 503 | O | 83.77400 | 94.88980 | 86.04690 | 552.42643   | -507.04756  | 247.69951   | 1 |
| 504 | N | 82.40400 | 96.36780 | 87.13390 | -46.17366   | -659.23202  | 525.31270   | 1 |
| 505 | H | 81.78200 | 97.14680 | 87.11390 | -1807.89452 | 2510.97374  | 569.87236   | 1 |
| 506 | C | 82.83500 | 96.10880 | 88.51090 | 236.86674   | 864.31394   | -168.24557  | 1 |
| 507 | H | 83.91500 | 96.11680 | 88.48190 | -1207.86809 | 110.73305   | 2902.93285  | 1 |
| 508 | C | 82.44500 | 97.30480 | 89.36290 | 188.71149   | -121.75925  | 883.74977   | 1 |
| 509 | H | 82.84500 | 98.22480 | 88.88690 | -1307.07613 | -1974.16178 | -2071.82612 | 1 |
| 510 | H | 82.87500 | 97.21880 | 90.38390 | -242.68203  | 2433.26362  | -1979.53526 | 1 |
| 511 | C | 80.92300 | 97.56480 | 89.56490 | 450.39606   | 542.97537   | -577.73016  | 1 |
| 512 | O | 80.11000 | 96.84580 | 88.98890 | -604.38440  | 232.86764   | -451.79574  | 1 |
| 513 | N | 80.55400 | 98.59480 | 90.38390 | 297.64192   | -781.70590  | 114.09411   | 1 |
| 514 | H | 81.14700 | 98.87580 | 91.13890 | 1748.42026  | -2146.87973 | -1494.04159 | 1 |
| 515 | H | 79.59800 | 98.88580 | 90.35990 | 716.09906   | -2173.24149 | 2159.27066  | 1 |
| 516 | C | 82.40200 | 94.79380 | 89.05990 | -411.57009  | -620.27723  | -526.60917  | 1 |
| 517 | O | 82.89700 | 94.33280 | 90.08190 | -403.43707  | 349.49488   | -581.99578  | 1 |
| 518 | N | 81.51000 | 94.10480 | 88.38990 | -662.67971  | -516.80321  | 80.26415    | 1 |
| 519 | H | 81.16800 | 94.55480 | 87.56790 | -366.96978  | 2473.50813  | 1909.27130  | 1 |
| 520 | C | 81.12400 | 92.75780 | 88.70090 | 584.80035   | 558.93828   | -420.77019  | 1 |
| 521 | H | 81.62000 | 92.33280 | 89.56190 | -1513.99996 | 1695.63418  | -2175.05289 | 1 |
| 522 | C | 79.64100 | 92.55580 | 89.08290 | -510.77412  | 670.29164   | -348.23831  | 1 |
| 523 | H | 78.94900 | 92.91080 | 88.29090 | 1613.17726  | -690.35458  | 2611.37816  | 1 |
| 524 | H | 79.48000 | 93.19280 | 89.97990 | -1092.29596 | -2124.44132 | 2047.40441  | 1 |
| 525 | C | 79.23800 | 91.16380 | 89.48190 | -625.69741  | 646.88214   | -146.61940  | 1 |
| 526 | C | 79.93400 | 90.37880 | 90.42390 | 97.96293    | 43.84402    | 905.50095   | 1 |
| 527 | H | 80.74300 | 90.81880 | 90.98890 | -3054.85671 | -701.24759  | 272.63258   | 1 |
| 528 | C | 79.52800 | 89.06080 | 90.67690 | 420.97657   | 806.39842   | 62.85955    | 1 |
| 529 | H | 80.04400 | 88.47980 | 91.42690 | 1632.60506  | -1493.96721 | 2236.26674  | 1 |
| 530 | C | 78.39300 | 88.54880 | 90.02890 | 748.84000   | -445.00395  | -269.55731  | 1 |
| 531 | H | 78.14700 | 87.53080 | 90.29090 | -2056.48829 | -2287.47847 | 660.69993   | 1 |
| 532 | C | 78.16600 | 90.60380 | 88.79290 | -370.80497  | 121.68960   | -824.10334  | 1 |
| 533 | H | 77.64300 | 91.20280 | 88.06190 | -2144.51173 | -1945.56929 | 1230.46976  | 1 |
| 534 | C | 77.70400 | 89.30980 | 89.05490 | -231.67402  | 515.88356   | -715.29176  | 1 |
| 535 | H | 76.95400 | 88.81680 | 88.45390 | 332.09743   | 1906.94858  | -2480.21866 | 1 |
| 536 | C | 81.44200 | 91.76880 | 87.58190 | -225.36693  | 731.28835   | 495.86097   | 1 |
| 537 | O | 82.25000 | 90.81680 | 87.70090 | -643.66273  | -407.57298  | -207.86963  | 1 |
| 538 | N | 80.77800 | 91.92480 | 86.40090 | 763.66915   | 155.92721   | -324.29680  | 1 |
| 539 | H | 80.15600 | 92.68380 | 86.22890 | 1025.71397  | 2467.62668  | 1660.40828  | 1 |
| 540 | C | 80.86900 | 90.98080 | 85.33390 | -840.15650  | 310.08258   | -171.57174  | 1 |
| 541 | H | 80.38800 | 90.05880 | 85.62390 | -2963.51925 | 788.38558   | -703.01358  | 1 |
| 542 | C | 80.14800 | 91.45480 | 83.98090 | -837.29747  | 9.18433     | -360.97036  | 1 |
| 543 | H | 80.41000 | 90.71080 | 83.19890 | 1720.06170  | -2073.01539 | 1625.49106  | 1 |
| 544 | H | 80.51500 | 92.46580 | 83.70290 | -1118.67406 | 2323.36364  | -1802.43612 | 1 |
| 545 | C | 78.63300 | 91.53180 | 84.15290 | -251.15276  | 674.99988   | -559.23918  | 1 |
| 546 | O | 78.15100 | 91.93080 | 85.23790 | 333.03720   | 460.58310   | -548.24872  | 1 |
| 547 | N | 77.82300 | 90.99780 | 83.19090 | 245.91157   | 396.30012   | 703.66612   | 1 |
| 548 | H | 78.28200 | 90.77880 | 82.32990 | 1387.92430  | 1734.74334  | 2227.67994  | 1 |
| 549 | H | 76.85700 | 90.84880 | 83.40290 | 2142.26967  | -264.31098  | 2288.89637  | 1 |
| 550 | C | 82.29900 | 90.64080 | 84.91590 | -864.04073  | -82.37831   | -279.46098  | 1 |
| 551 | O | 82.69200 | 89.49280 | 85.00890 | 596.34707   | 433.12300   | -283.55224  | 1 |
| 552 | N | 83.18700 | 91.60280 | 84.66990 | -841.12656  | -28.23182   | -66.19183   | 1 |

|     |   |          |          |          |             |             |             |   |
|-----|---|----------|----------|----------|-------------|-------------|-------------|---|
| 553 | H | 83.00200 | 92.58180 | 84.64290 | 2092.06009  | -2260.51354 | -641.55230  | 1 |
| 554 | C | 84.54300 | 91.32680 | 84.26490 | 577.97959   | -410.42098  | -573.53746  | 1 |
| 555 | H | 84.50800 | 90.45280 | 83.63190 | -1178.71085 | 2855.54929  | -595.57131  | 1 |
| 556 | C | 85.05300 | 92.48880 | 83.38590 | 496.57895   | -746.06880  | 168.05265   | 1 |
| 557 | H | 86.14700 | 92.44080 | 83.19790 | 1429.62827  | 2477.58113  | -1309.95456 | 1 |
| 558 | H | 84.83900 | 93.51380 | 83.75890 | 2515.32733  | -1503.79632 | -1144.53103 | 1 |
| 559 | C | 84.53300 | 92.34280 | 81.91890 | 652.00081   | -614.35052  | 170.05698   | 1 |
| 560 | H | 83.45200 | 92.09780 | 81.83390 | 631.47272   | -2234.96461 | 2122.35757  | 1 |
| 561 | H | 85.11200 | 91.48080 | 81.52490 | -2859.93487 | 1309.98493  | 54.20537    | 1 |
| 562 | C | 84.94100 | 93.63080 | 81.17690 | 119.35182   | -602.48810  | 673.95418   | 1 |
| 563 | H | 85.97200 | 93.97180 | 81.40990 | -723.70638  | -2972.33312 | -734.65033  | 1 |
| 564 | H | 84.26000 | 94.40880 | 81.58290 | -1877.78583 | -1693.98437 | 1871.51371  | 1 |
| 565 | C | 84.90400 | 93.63080 | 79.66090 | 718.00822   | 551.18195   | 110.06205   | 1 |
| 566 | H | 84.83100 | 94.69680 | 79.35490 | 2123.84623  | -539.05247  | -2257.63723 | 1 |
| 567 | H | 85.84700 | 93.24380 | 79.21990 | -1783.51678 | 968.23568   | -2404.12433 | 1 |
| 568 | N | 83.68900 | 93.01780 | 79.12490 | 726.34632   | 74.75630    | -423.68008  | 1 |
| 569 | H | 82.82700 | 93.53580 | 79.39090 | -1652.40631 | 2575.37043  | -731.60562  | 1 |
| 570 | H | 83.77400 | 93.03380 | 78.08890 | -1184.51832 | 2465.45591  | 1554.56416  | 1 |
| 571 | H | 83.55000 | 92.05080 | 79.48290 | -2364.80403 | -1584.09949 | -1340.35702 | 1 |
| 572 | C | 85.52300 | 91.00780 | 85.37090 | 678.67410   | -589.11183  | -154.27156  | 1 |
| 573 | O | 86.73000 | 90.88980 | 85.12690 | -65.23234   | 659.02925   | -430.17719  | 1 |
| 574 | N | 84.97100 | 90.73280 | 86.52890 | -55.59608   | 461.02311   | -705.00997  | 1 |
| 575 | H | 83.98200 | 90.80380 | 86.63890 | -1999.45745 | -1560.20085 | -1861.76514 | 1 |
| 576 | C | 85.69000 | 90.07680 | 87.63190 | 621.76741   | 580.63698   | -328.20268  | 1 |
| 577 | H | 86.74100 | 89.99580 | 87.40090 | -3081.23309 | 491.69876   | 403.06477   | 1 |
| 578 | C | 85.64700 | 90.95180 | 88.97890 | 447.05882   | 339.67515   | 718.47770   | 1 |
| 579 | H | 84.65000 | 91.44080 | 88.94490 | -928.95370  | -1505.89169 | -2601.45372 | 1 |
| 580 | C | 85.84700 | 90.02680 | 90.24690 | -496.35257  | 420.61418   | 638.88093   | 1 |
| 581 | H | 86.83700 | 89.57380 | 90.02490 | 2295.62206  | -1244.98294 | -1754.52645 | 1 |
| 582 | H | 85.06000 | 89.24180 | 90.25090 | -1464.35575 | -2582.34347 | -1041.82085 | 1 |
| 583 | H | 85.79200 | 90.62080 | 91.18390 | -2871.62139 | 1035.06178  | 762.01308   | 1 |
| 584 | C | 86.75100 | 91.99180 | 88.80390 | -716.39392  | 535.48603   | 177.44145   | 1 |
| 585 | H | 87.73100 | 91.55880 | 89.09590 | -2011.16270 | 2048.01054  | -1288.06197 | 1 |
| 586 | H | 86.82900 | 92.25180 | 87.72690 | 2457.98221  | -237.79132  | 1949.36015  | 1 |
| 587 | C | 86.61200 | 93.21980 | 89.72990 | -119.13341  | -521.82628  | 738.21106   | 1 |
| 588 | H | 85.58000 | 93.61480 | 89.85090 | 1408.95346  | 2034.93532  | 1942.19325  | 1 |
| 589 | H | 86.93100 | 92.85080 | 90.72790 | 1278.85214  | 2395.67008  | 1588.56171  | 1 |
| 590 | H | 87.37500 | 93.98980 | 89.48690 | -898.17563  | 2184.36499  | -2078.47452 | 1 |
| 591 | C | 85.13000 | 88.64980 | 87.81490 | 91.30633    | -177.55752  | 889.71202   | 1 |
| 592 | O | 85.88500 | 87.65180 | 87.82690 | -406.60415  | 484.58626   | 472.73296   | 1 |
| 593 | N | 83.82600 | 88.54680 | 87.90990 | -583.72278  | 491.60631   | 360.91998   | 1 |
| 594 | H | 83.15600 | 89.27680 | 88.01690 | 1523.98348  | 2666.37650  | 682.74223   | 1 |
| 595 | C | 83.13400 | 87.29780 | 87.98890 | -321.45261  | 16.93891    | 853.13088   | 1 |
| 596 | H | 83.56400 | 86.79980 | 88.84590 | 2383.81824  | 1623.71770  | -1256.65336 | 1 |
| 597 | C | 81.61900 | 87.60380 | 88.25290 | -782.70833  | -466.30006  | -37.18784   | 1 |
| 598 | H | 81.05200 | 88.01580 | 87.39090 | 2448.72210  | 848.45015   | 1783.84938  | 1 |
| 599 | H | 81.37000 | 88.24980 | 89.12090 | -1517.31044 | -1926.54470 | 1970.89340  | 1 |
| 600 | C | 80.84400 | 86.27080 | 88.50390 | -280.52934  | -801.38958  | -332.45907  | 1 |
| 601 | C | 80.09000 | 85.49180 | 87.61190 | -216.95295  | 693.80286   | 550.47253   | 1 |
| 602 | H | 80.05300 | 85.86080 | 86.59690 | 2512.33038  | 1476.61981  | -1185.75554 | 1 |
| 603 | C | 79.40000 | 84.34180 | 88.00890 | 148.59986   | -886.08935  | -155.61086  | 1 |
| 604 | H | 78.84100 | 83.76780 | 87.28590 | -323.95670  | -2958.00140 | 1021.52142  | 1 |
| 605 | C | 79.47800 | 83.93480 | 89.35490 | -638.99266  | 453.47035   | -466.37326  | 1 |
| 606 | H | 78.96900 | 83.02580 | 89.64090 | -632.11128  | -440.06841  | 3050.41003  | 1 |
| 607 | C | 80.99400 | 85.82380 | 89.86490 | 147.11343   | 574.65893   | -692.51409  | 1 |
| 608 | H | 81.73600 | 86.29080 | 90.49590 | 375.29028   | 2769.09652  | -1445.50611 | 1 |
| 609 | C | 80.30600 | 84.65280 | 90.26790 | 24.69251    | -623.90608  | -664.51674  | 1 |
| 610 | H | 80.48200 | 84.28180 | 91.26690 | -2373.94869 | -1191.52542 | -1686.07859 | 1 |
| 611 | C | 83.37800 | 86.39580 | 86.79090 | 269.15974   | 594.81189   | -636.55546  | 1 |
| 612 | O | 83.72200 | 85.26080 | 86.90890 | -588.88055  | 232.47149   | -472.02112  | 1 |
| 613 | N | 83.32200 | 86.93180 | 85.55290 | 467.42489   | -452.35475  | 538.10914   | 1 |
| 614 | H | 83.05500 | 87.89180 | 85.50190 | -1158.83148 | -275.13268  | -2911.98177 | 1 |

|     |   |          |          |          |             |             |             |   |
|-----|---|----------|----------|----------|-------------|-------------|-------------|---|
| 615 | C | 83.49600 | 86.13280 | 84.35290 | -854.23097  | 277.96686   | -156.44445  | 1 |
| 616 | H | 82.75300 | 85.35980 | 84.48090 | -1017.99525 | 2707.72351  | -1236.99041 | 1 |
| 617 | C | 83.02400 | 86.92280 | 83.11790 | -720.42085  | -222.03127  | 512.97847   | 1 |
| 618 | H | 83.30700 | 86.48280 | 82.13790 | 1304.37913  | 1937.54573  | -2107.78032 | 1 |
| 619 | H | 83.52300 | 87.91480 | 83.07890 | 370.04228   | -2122.64552 | 2292.52501  | 1 |
| 620 | C | 81.48800 | 87.26180 | 83.25690 | -13.27654   | -406.21188  | 816.25158   | 1 |
| 621 | H | 81.22000 | 87.74480 | 84.22190 | -1339.38095 | -1926.95232 | 2095.50463  | 1 |
| 622 | C | 81.14900 | 88.28680 | 82.18890 | 466.39389   | -539.38801  | -568.32062  | 1 |
| 623 | H | 80.07300 | 88.55480 | 82.11890 | 2044.95439  | 1783.84312  | -1591.94582 | 1 |
| 624 | H | 81.51800 | 88.03180 | 81.17190 | -2324.15467 | -1537.60860 | 1460.23665  | 1 |
| 625 | H | 81.73000 | 89.23080 | 82.27090 | -866.54331  | -1806.49143 | 2425.67880  | 1 |
| 626 | C | 80.56500 | 86.01080 | 83.06190 | -512.64853  | 721.31371   | -219.88410  | 1 |
| 627 | H | 79.57800 | 86.23780 | 82.60590 | -2614.91104 | -1706.75049 | 384.01720   | 1 |
| 628 | H | 80.43400 | 85.42780 | 83.99890 | 2290.23109  | 2149.66023  | 178.96556   | 1 |
| 629 | H | 81.08700 | 85.32580 | 82.36090 | -2005.39683 | 40.57786    | 2423.83234  | 1 |
| 630 | C | 84.85900 | 85.42580 | 84.17190 | 271.76028   | -679.43556  | 544.02636   | 1 |
| 631 | O | 84.87300 | 84.21580 | 83.92590 | 489.99464   | -232.86132  | 573.85372   | 1 |
| 632 | N | 86.02000 | 85.99180 | 84.34990 | 772.49265   | -247.84400  | -233.45395  | 1 |
| 633 | C | 86.16700 | 87.45380 | 84.22290 | -38.02327   | 44.67794    | 909.95006   | 1 |
| 634 | H | 85.56100 | 88.17180 | 84.81690 | 1477.02567  | -2701.09055 | -648.63797  | 1 |
| 635 | H | 86.09600 | 87.77680 | 83.16190 | 1173.35413  | -582.73564  | -2860.39953 | 1 |
| 636 | C | 87.30000 | 85.35580 | 84.29190 | -371.85486  | 768.91243   | -319.29397  | 1 |
| 637 | H | 87.36000 | 84.75980 | 83.39390 | -1951.11782 | -1726.41590 | -1763.76122 | 1 |
| 638 | C | 88.32200 | 86.47380 | 84.15590 | 578.83747   | 135.71660   | -691.36039  | 1 |
| 639 | H | 88.60700 | 86.61280 | 83.09090 | -733.56839  | 2603.64339  | 1606.59414  | 1 |
| 640 | H | 89.29100 | 86.34080 | 84.68290 | 2568.40441  | -489.15501  | 1749.92926  | 1 |
| 641 | C | 87.63700 | 87.74680 | 84.70290 | -594.20144  | 671.88998   | 164.13258   | 1 |
| 642 | H | 87.58900 | 87.64080 | 85.80790 | 2328.10660  | 1640.07163  | 1337.27743  | 1 |
| 643 | H | 88.00100 | 88.74580 | 84.37890 | -1949.71798 | -1214.24786 | -2149.98329 | 1 |
| 644 | C | 87.49300 | 84.44880 | 85.47990 | 485.99674   | -771.15644  | -23.99827   | 1 |
| 645 | O | 88.17500 | 83.43780 | 85.31690 | 667.02038   | 338.23839   | -253.58595  | 1 |
| 646 | N | 86.94800 | 84.79480 | 86.61690 | -351.21097  | 360.46375   | -677.78243  | 1 |
| 647 | H | 86.51700 | 85.69380 | 86.61590 | 2658.87252  | -910.42782  | -1414.12317 | 1 |
| 648 | C | 86.99100 | 84.05980 | 87.81290 | 752.58343   | 418.51104   | -299.86278  | 1 |
| 649 | H | 88.04200 | 83.90580 | 88.00490 | -1282.28310 | 1354.76212  | -2533.49480 | 1 |
| 650 | C | 86.54200 | 84.90880 | 89.03390 | 422.30738   | 559.35235   | -583.29447  | 1 |
| 651 | H | 85.51300 | 85.29680 | 88.87390 | -2247.22178 | 599.70292   | -2118.62619 | 1 |
| 652 | O | 87.43800 | 86.02880 | 89.13590 | 470.83428   | 633.93561   | 8.24303     | 1 |
| 653 | H | 87.11700 | 86.76680 | 88.61390 | 265.48626   | 1743.24994  | -2605.53698 | 1 |
| 654 | C | 86.58800 | 84.13880 | 90.31390 | -280.22500  | 861.65118   | 102.38256   | 1 |
| 655 | H | 86.42200 | 84.88380 | 91.12190 | -1792.57882 | 1437.36362  | 2149.15640  | 1 |
| 656 | H | 87.58000 | 83.65880 | 90.45790 | -432.47922  | 1218.71390  | 2868.08723  | 1 |
| 657 | H | 85.87300 | 83.28880 | 90.33790 | 850.54544   | -2923.52327 | 792.34485   | 1 |
| 658 | C | 86.28000 | 82.71080 | 87.71290 | 352.70556   | -609.86529  | -578.89043  | 1 |
| 659 | O | 86.82200 | 81.66680 | 88.07090 | 491.28648   | -367.68551  | -497.06357  | 1 |
| 660 | N | 85.01900 | 82.70380 | 87.12790 | 152.03866   | 116.75225   | -822.14685  | 1 |
| 661 | H | 84.59100 | 83.60380 | 87.13890 | -2670.47446 | 1533.40975  | -644.55172  | 1 |
| 662 | C | 84.34600 | 81.49680 | 86.73990 | -169.54950  | 895.80157   | -15.60477   | 1 |
| 663 | H | 84.30700 | 80.75780 | 87.52590 | 2630.13013  | 725.45100   | -1566.64054 | 1 |
| 664 | C | 82.88500 | 81.78680 | 86.44690 | 476.61807   | 489.67358   | 603.74332   | 1 |
| 665 | H | 82.91900 | 82.67580 | 85.78090 | -1563.19923 | -1396.76035 | 2345.99551  | 1 |
| 666 | C | 82.17700 | 80.62380 | 85.67890 | -681.83180  | -555.91392  | -239.82518  | 1 |
| 667 | H | 81.07800 | 80.71880 | 85.54690 | 602.73017   | -2089.52721 | -2273.50360 | 1 |
| 668 | H | 82.70400 | 80.35880 | 84.73790 | 465.57596   | 2498.61775  | -1854.28546 | 1 |
| 669 | H | 82.32100 | 79.72080 | 86.31090 | 1408.56024  | -2171.16793 | 1788.91422  | 1 |
| 670 | C | 82.07000 | 82.12980 | 87.72690 | 833.83245   | -259.28105  | 262.57912   | 1 |
| 671 | H | 81.10200 | 82.37580 | 87.23990 | 2009.33983  | -1845.03907 | -1567.35782 | 1 |
| 672 | H | 82.53400 | 83.06080 | 88.11890 | 2001.44440  | -772.01096  | 2301.40079  | 1 |
| 673 | C | 81.94500 | 81.05480 | 88.81990 | -711.29367  | 296.77117   | -487.27733  | 1 |
| 674 | H | 82.88100 | 80.59980 | 89.20790 | -587.70429  | 3052.00527  | -487.94852  | 1 |
| 675 | H | 81.31400 | 80.20680 | 88.47790 | 2819.11105  | -507.83191  | 1301.13253  | 1 |
| 676 | H | 81.40000 | 81.55980 | 89.64590 | -694.54622  | -1642.16649 | 2592.12673  | 1 |

|     |   |          |          |          |             |             |             |   |
|-----|---|----------|----------|----------|-------------|-------------|-------------|---|
| 677 | C | 85.05200 | 80.71580 | 85.59890 | -4.22895    | 117.73405   | -904.19678  | 1 |
| 678 | O | 85.24900 | 79.52680 | 85.71490 | 33.01373    | 785.75877   | 71.55753    | 1 |
| 679 | N | 85.49400 | 81.43280 | 84.53190 | -389.96503  | -638.06614  | -391.75397  | 1 |
| 680 | H | 85.40200 | 82.42480 | 84.48490 | -912.91230  | -3006.00745 | -169.51857  | 1 |
| 681 | C | 86.03100 | 80.79380 | 83.32290 | -680.12736  | -510.63371  | 328.83277   | 1 |
| 682 | H | 85.31500 | 80.12480 | 82.86790 | 2092.89870  | -1750.34149 | 1566.62246  | 1 |
| 683 | C | 86.55300 | 81.83280 | 82.24690 | -280.07891  | 679.12645   | -540.17967  | 1 |
| 684 | H | 87.16500 | 81.34780 | 81.45690 | -401.43550  | 1247.37788  | 2860.26646  | 1 |
| 685 | H | 87.19100 | 82.46680 | 82.89890 | -1414.90619 | -2747.45996 | 589.68677   | 1 |
| 686 | C | 85.50700 | 82.73980 | 81.58390 | -381.73017  | -518.08598  | -646.00309  | 1 |
| 687 | C | 84.15500 | 82.39380 | 81.53690 | 13.98738    | 736.61994   | 537.25824   | 1 |
| 688 | H | 83.79200 | 81.55280 | 82.10890 | -1971.37046 | -504.49935  | -2399.45934 | 1 |
| 689 | C | 83.21100 | 83.32080 | 80.93390 | -807.86256  | 349.76018   | -237.64869  | 1 |
| 690 | H | 82.15600 | 83.09880 | 80.98090 | 2041.51106  | 1767.43141  | -1614.51077 | 1 |
| 691 | C | 83.64600 | 84.52480 | 80.37890 | 778.54054   | -29.86410   | 473.74442   | 1 |
| 692 | O | 82.63200 | 85.34680 | 79.76390 | -233.59847  | -567.07109  | 497.48303   | 1 |
| 693 | H | 81.83700 | 84.81180 | 79.82390 | -1073.70180 | -2324.00967 | 1828.76181  | 1 |
| 694 | C | 85.92600 | 83.94280 | 80.96390 | 12.02304    | -905.25558  | -108.71426  | 1 |
| 695 | H | 86.96400 | 84.21780 | 81.07890 | 2835.24504  | -600.94536  | -1224.12273 | 1 |
| 696 | C | 84.98800 | 84.82180 | 80.36790 | -671.76561  | 494.51852   | -368.28440  | 1 |
| 697 | H | 85.38700 | 85.78680 | 80.09090 | 2233.26708  | -634.59033  | 2123.21443  | 1 |
| 698 | C | 87.28100 | 79.90080 | 83.70090 | -597.77310  | 657.57265   | -204.24626  | 1 |
| 699 | O | 87.52500 | 78.85780 | 83.08590 | -544.70164  | 560.35624   | 113.70242   | 1 |
| 700 | N | 88.11400 | 80.46780 | 84.61090 | 647.50288   | 512.31416   | -175.91620  | 1 |
| 701 | H | 87.81200 | 81.38580 | 84.85490 | 559.06666   | 2850.33201  | 1208.83337  | 1 |
| 702 | C | 89.22100 | 79.75680 | 85.24590 | -797.62956  | 436.77539   | 66.82327    | 1 |
| 703 | H | 89.95300 | 79.50280 | 84.49390 | -1460.06880 | -2547.55562 | 1129.77241  | 1 |
| 704 | C | 89.96200 | 80.65580 | 86.28690 | -454.18283  | -344.00928  | 711.91753   | 1 |
| 705 | H | 90.83200 | 80.05380 | 86.62590 | 2287.01729  | -336.87369  | -2134.07926 | 1 |
| 706 | H | 89.32800 | 80.96580 | 87.14490 | 935.25630   | 2256.94615  | -1982.35111 | 1 |
| 707 | O | 90.43900 | 81.84080 | 85.66990 | 614.75734   | 91.34602    | 487.19252   | 1 |
| 708 | H | 89.67500 | 82.42080 | 85.62090 | 2373.53990  | -1179.91475 | 1694.79668  | 1 |
| 709 | C | 88.73400 | 78.47380 | 85.93690 | -905.12227  | 101.27148   | 44.14489    | 1 |
| 710 | O | 89.25800 | 77.41880 | 85.68690 | 455.97762   | 479.88502   | 430.60655   | 1 |
| 711 | N | 87.62200 | 78.53080 | 86.72490 | -698.23013  | 282.60942   | -381.15468  | 1 |
| 712 | H | 87.11900 | 79.38180 | 86.85290 | 1749.77418  | 2397.46164  | -1043.40512 | 1 |
| 713 | C | 87.01300 | 77.34680 | 87.36090 | -109.87209  | 694.32003   | 580.77433   | 1 |
| 714 | H | 87.78600 | 76.78980 | 87.87090 | 2154.73553  | 2267.17444  | 339.50120   | 1 |
| 715 | C | 85.83700 | 77.64780 | 88.31690 | -570.15198  | -362.84637  | -612.14396  | 1 |
| 716 | H | 85.15200 | 78.26580 | 87.69790 | 2173.88273  | 954.33054   | 2064.39176  | 1 |
| 717 | C | 85.23200 | 76.35180 | 88.91690 | -581.57871  | 629.52021   | -311.32219  | 1 |
| 718 | H | 84.85900 | 75.70780 | 88.09290 | 1916.25287  | 867.57994   | -2339.55257 | 1 |
| 719 | H | 85.99500 | 75.79680 | 89.50290 | -1845.52259 | -1492.04024 | 2065.45117  | 1 |
| 720 | H | 84.35600 | 76.61180 | 89.54990 | -672.14676  | 3070.81391  | 128.63473   | 1 |
| 721 | C | 86.39100 | 78.49780 | 89.48490 | 356.99775   | 773.14505   | -325.96063  | 1 |
| 722 | H | 87.06500 | 79.27980 | 89.07290 | 1431.02713  | -2197.52367 | -1738.18218 | 1 |
| 723 | H | 87.08200 | 77.89680 | 90.11390 | -988.36040  | -1147.52745 | 2757.63498  | 1 |
| 724 | C | 85.32100 | 79.24980 | 90.26490 | 550.97854   | -644.36010  | -335.66904  | 1 |
| 725 | H | 85.66100 | 79.80480 | 91.16590 | -1836.89018 | -1093.54418 | 2308.29413  | 1 |
| 726 | H | 84.50800 | 78.55480 | 90.56390 | 2591.63684  | 369.16478   | -1745.09658 | 1 |
| 727 | H | 84.81600 | 79.99880 | 89.61990 | 946.08171   | -1654.16507 | -2503.37643 | 1 |
| 728 | C | 86.59100 | 76.33380 | 86.29590 | 40.75260    | 705.04492   | -576.80317  | 1 |
| 729 | O | 86.87600 | 75.13580 | 86.32990 | 266.79178   | -247.24634  | -700.94124  | 1 |
| 730 | N | 85.94400 | 76.86980 | 85.20790 | -711.83126  | -4.55967    | 453.81467   | 1 |
| 731 | H | 85.63800 | 77.81680 | 85.14890 | 842.37471   | 1784.07581  | -2450.65391 | 1 |
| 732 | C | 85.54400 | 75.97380 | 84.09090 | -585.75515  | 55.87593    | -696.57719  | 1 |
| 733 | H | 84.97100 | 75.16780 | 84.52390 | -586.97010  | -2292.83159 | -2072.82793 | 1 |
| 734 | C | 84.70500 | 76.68680 | 83.02590 | 816.47427   | -154.59043  | -375.39655  | 1 |
| 735 | H | 85.34800 | 77.43880 | 82.51990 | -2027.81144 | -1170.43123 | -2101.49893 | 1 |
| 736 | C | 84.27500 | 75.71480 | 81.91990 | 390.62822   | -9.12547    | 823.87943   | 1 |
| 737 | H | 85.09700 | 75.06980 | 81.54390 | -1043.18891 | 1845.65843  | -2324.54901 | 1 |
| 738 | H | 83.47900 | 75.04880 | 82.31590 | -1130.74826 | 2166.20224  | 1981.71705  | 1 |



|     |   |          |          |          |             |             |             |   |
|-----|---|----------|----------|----------|-------------|-------------|-------------|---|
| 739 | H | 83.83700 | 76.40380 | 81.16690 | -1216.70776 | -1778.85079 | -2292.05984 | 1 |
| 740 | C | 83.45000 | 77.48980 | 83.55590 | 419.46463   | 384.39946   | 712.55700   | 1 |
| 741 | H | 82.97200 | 77.88180 | 82.63290 | 2756.57425  | 499.32282   | 1431.85241  | 1 |
| 742 | H | 83.89400 | 78.25780 | 84.22490 | -2550.79173 | -1013.73960 | -1537.53692 | 1 |
| 743 | C | 82.33100 | 76.72480 | 84.30590 | -569.19555  | -645.58374  | -301.14624  | 1 |
| 744 | H | 81.47300 | 77.36780 | 84.59690 | 625.84537   | 408.42952   | 3056.09704  | 1 |
| 745 | H | 82.01000 | 75.87880 | 83.66190 | -2554.73294 | -333.43172  | 1805.65477  | 1 |
| 746 | H | 82.78500 | 76.35380 | 85.24990 | 1986.33564  | 2424.54117  | -272.57487  | 1 |
| 747 | C | 86.82000 | 75.33080 | 83.39190 | 637.84342   | 6.19652     | 651.58912   | 1 |
| 748 | O | 86.93000 | 74.10180 | 83.14490 | -599.14387  | 513.65301   | 28.53841    | 1 |
| 749 | N | 87.87300 | 76.12580 | 83.05390 | -663.86913  | 290.65683   | -432.97653  | 1 |
| 750 | H | 87.78700 | 77.10580 | 83.21590 | 969.26659   | 2388.87271  | 1803.34014  | 1 |
| 751 | C | 89.14600 | 75.69580 | 82.51290 | 630.94474   | 149.00597   | -641.21522  | 1 |
| 752 | H | 88.77200 | 75.17380 | 81.64490 | 1623.04462  | -2062.26052 | -1735.23311 | 1 |
| 753 | C | 89.90200 | 76.92480 | 82.03590 | 429.36837   | 562.65273   | -574.90495  | 1 |
| 754 | H | 89.27500 | 77.50780 | 81.32890 | -1806.21469 | 1033.38445  | 2359.64643  | 1 |
| 755 | H | 90.24800 | 77.70980 | 82.74190 | 968.87177   | -2107.61869 | 2125.43106  | 1 |
| 756 | C | 91.23100 | 76.59480 | 81.38190 | 335.66772   | -777.81997  | 337.30443   | 1 |
| 757 | C | 91.21500 | 76.27080 | 80.01490 | -23.36967   | 907.47043   | 86.03647    | 1 |
| 758 | H | 90.34000 | 76.17680 | 79.38890 | -467.53920  | -1960.65393 | -2415.67164 | 1 |
| 759 | C | 92.38300 | 75.83580 | 79.33690 | 124.29451   | 103.54849   | 897.37372   | 1 |
| 760 | H | 92.23500 | 75.47680 | 78.32890 | 1781.61946  | -2563.46973 | -390.74451  | 1 |
| 761 | C | 93.59700 | 75.74780 | 79.99190 | 629.41964   | -214.97680  | -623.75227  | 1 |
| 762 | H | 94.46100 | 75.44580 | 79.41890 | -281.46604  | 2946.36560  | 1066.73935  | 1 |
| 763 | C | 92.48600 | 76.63880 | 82.03490 | 851.84921   | 315.37290   | -79.64839   | 1 |
| 764 | H | 92.45700 | 76.91580 | 83.07890 | 1218.97345  | -2335.50035 | 1719.81629  | 1 |
| 765 | C | 93.65300 | 76.24480 | 81.37190 | 120.85959   | 619.33722   | 658.22896   | 1 |
| 766 | H | 94.58100 | 76.33180 | 81.91690 | 2968.31632  | -683.86815  | 787.17776   | 1 |
| 767 | C | 89.91100 | 74.63880 | 83.25790 | -899.20530  | -97.73742   | 115.44797   | 1 |
| 768 | O | 90.31700 | 73.58680 | 82.77890 | 113.37404   | 592.87936   | -509.18329  | 1 |
| 769 | N | 90.07200 | 74.84380 | 84.60690 | -64.86282   | 763.94033   | -353.35574  | 1 |
| 770 | H | 89.75100 | 75.72580 | 84.94490 | -1902.98710 | 2503.37145  | 99.98835    | 1 |
| 771 | C | 90.99200 | 74.14780 | 85.47890 | 176.20601   | 833.55186   | 324.95190   | 1 |
| 772 | H | 91.87600 | 73.95580 | 84.88990 | -1938.84985 | 1230.85296  | 2150.36938  | 1 |
| 773 | C | 91.44100 | 74.96580 | 86.68890 | 173.02299   | 894.91988   | -25.14875   | 1 |
| 774 | H | 90.54900 | 75.39680 | 87.18990 | 1719.42224  | -1244.72462 | -2322.17011 | 1 |
| 775 | H | 91.98500 | 74.47680 | 87.52490 | -140.95733  | 3113.86396  | -426.85887  | 1 |
| 776 | C | 92.29500 | 76.20180 | 86.29890 | -749.23088  | -254.34103  | 453.22702   | 1 |
| 777 | H | 91.81200 | 76.81980 | 85.51190 | 2493.22330  | 789.70012   | -1748.83891 | 1 |
| 778 | C | 92.49600 | 77.08680 | 87.49090 | 615.93485   | -41.19508   | 671.10225   | 1 |
| 779 | H | 93.34000 | 76.67480 | 88.08490 | -644.39557  | 2184.95975  | -2170.00725 | 1 |
| 780 | H | 92.75900 | 78.11980 | 87.17690 | -2280.25586 | -592.01586  | -2085.22821 | 1 |
| 781 | H | 91.62000 | 77.10680 | 88.17290 | -2013.59702 | 1687.69269  | 1730.70698  | 1 |
| 782 | C | 93.63900 | 75.80880 | 85.71290 | -662.53911  | -597.98125  | 186.84578   | 1 |
| 783 | H | 94.39500 | 76.62280 | 85.73390 | 2425.53471  | -1273.93938 | -1546.63701 | 1 |
| 784 | H | 94.08800 | 74.94380 | 86.24590 | 218.14437   | -1964.51532 | 2447.71706  | 1 |
| 785 | H | 93.51200 | 75.52980 | 84.64590 | 2280.59240  | 1358.96732  | -1688.29274 | 1 |
| 786 | C | 90.49500 | 72.83780 | 85.92890 | -810.95123  | -84.95218   | 408.15712   | 1 |
| 787 | O | 91.27500 | 71.96380 | 86.38890 | -129.50298  | -269.20414  | 731.01665   | 1 |
| 788 | N | 89.19100 | 72.60280 | 85.69690 | -251.93515  | 121.47951   | 796.51974   | 1 |
| 789 | H | 88.59100 | 73.30280 | 85.31790 | 43.31501    | -3145.28314 | -59.53133   | 1 |
| 790 | C | 88.45900 | 71.35680 | 85.94490 | 726.48390   | -372.36520  | 406.22199   | 1 |
| 791 | H | 89.12800 | 70.64180 | 86.40090 | 2333.32560  | -2080.92148 | 351.54472   | 1 |
| 792 | C | 87.22600 | 71.64880 | 86.78490 | 631.74897   | 106.00902   | 648.92706   | 1 |
| 793 | H | 86.71000 | 70.67580 | 86.92890 | -1829.54859 | 1647.60973  | 1958.66290  | 1 |
| 794 | O | 86.29500 | 72.52080 | 86.19690 | 722.07675   | -294.97409  | 123.38023   | 1 |
| 795 | H | 86.60700 | 73.42780 | 86.23990 | 272.75475   | 493.84464   | -3095.14920 | 1 |
| 796 | C | 87.61600 | 72.22880 | 88.17090 | -735.97154  | -495.50351  | -210.41188  | 1 |
| 797 | H | 86.73200 | 72.42180 | 88.81590 | -1085.15946 | 2935.96839  | 317.40318   | 1 |
| 798 | H | 88.12700 | 73.21380 | 88.10690 | -35.06783   | -1908.79420 | 2500.70014  | 1 |
| 799 | H | 88.25200 | 71.51380 | 88.73390 | 1027.51984  | 2137.29586  | -2067.46115 | 1 |
| 800 | C | 88.17800 | 70.69480 | 84.65590 | -47.19641   | 571.30404   | -709.10874  | 1 |

|     |   |          |          |          |             |             |             |   |
|-----|---|----------|----------|----------|-------------|-------------|-------------|---|
| 801 | O | 88.41700 | 69.53780 | 84.41390 | 235.50712   | -361.22663  | -661.57309  | 1 |
| 802 | N | 87.69700 | 71.45480 | 83.66790 | -641.78769  | 345.94488   | -425.56196  | 1 |
| 803 | H | 87.49600 | 72.42580 | 83.77290 | 2623.53799  | 492.24444   | 1665.22373  | 1 |
| 804 | C | 87.33000 | 70.99180 | 82.32790 | -514.93006  | -529.73946  | -534.48494  | 1 |
| 805 | H | 86.87200 | 71.79880 | 81.77690 | -1048.08217 | -1588.60383 | 2505.21214  | 1 |
| 806 | H | 86.53900 | 70.25880 | 82.39390 | 3137.72187  | -193.95131  | 123.73591   | 1 |
| 807 | C | 88.38800 | 70.38780 | 81.46990 | -130.35224  | -889.90919  | -150.06972  | 1 |
| 808 | O | 88.07800 | 69.34780 | 80.89690 | -369.07184  | -568.54953  | 405.17236   | 1 |
| 809 | N | 89.50700 | 71.10180 | 81.21690 | -378.33265  | -574.17396  | 489.75602   | 1 |
| 810 | H | 89.71200 | 71.85980 | 81.82990 | -620.69684  | -1577.17562 | 2650.56197  | 1 |
| 811 | C | 90.54000 | 70.62380 | 80.30890 | -321.64006  | 682.06396   | 512.62797   | 1 |
| 812 | H | 90.04700 | 70.37080 | 79.38190 | 2550.62627  | -1531.66824 | 1022.99769  | 1 |
| 813 | C | 91.49700 | 71.77680 | 80.00190 | -684.88866  | -170.05872  | 577.45871   | 1 |
| 814 | H | 90.87200 | 72.69580 | 80.01990 | -275.26504  | 2904.80995  | -1176.66246 | 1 |
| 815 | C | 92.63800 | 71.97780 | 81.09890 | 362.06379   | 824.28792   | 144.60375   | 1 |
| 816 | H | 93.11400 | 72.96780 | 80.93290 | -1446.05167 | -651.16070  | 2717.19534  | 1 |
| 817 | H | 93.41500 | 71.18380 | 81.09390 | -1775.22326 | -144.94800  | -2593.41448 | 1 |
| 818 | H | 92.18000 | 72.00080 | 82.11090 | 2936.47914  | -377.82875  | 1064.21893  | 1 |
| 819 | C | 92.06200 | 71.74980 | 78.55590 | 282.82799   | -290.71302  | 816.66717   | 1 |
| 820 | H | 91.23500 | 71.68480 | 77.81690 | -1767.79188 | 2090.98319  | 1549.49263  | 1 |
| 821 | H | 92.43600 | 72.79180 | 78.45790 | -1695.32947 | 2126.98507  | 1581.14475  | 1 |
| 822 | C | 93.19900 | 70.75380 | 78.20890 | 626.50407   | -561.61670  | -351.46882  | 1 |
| 823 | H | 94.09500 | 70.93880 | 78.83990 | -2524.82516 | 385.19354   | -1837.14727 | 1 |
| 824 | H | 93.64100 | 70.73480 | 77.18990 | 902.56296   | -2279.38943 | 1971.79871  | 1 |
| 825 | H | 92.87200 | 69.72480 | 78.47090 | -2537.52079 | 633.89517   | 1748.53978  | 1 |
| 826 | C | 91.19200 | 69.33780 | 80.85890 | -845.85400  | 40.75214    | 338.11430   | 1 |
| 827 | O | 91.46200 | 68.34780 | 80.13890 | -212.93731  | 675.59238   | -349.08432  | 1 |
| 828 | N | 91.48600 | 69.32480 | 82.18790 | -413.14054  | 594.69609   | -433.96284  | 1 |
| 829 | H | 91.23100 | 70.17480 | 82.64090 | 2768.65843  | -1191.23536 | 902.06154   | 1 |
| 830 | C | 91.91500 | 68.12480 | 82.90290 | 674.76662   | -4.89852    | -613.28380  | 1 |
| 831 | H | 92.79300 | 67.74880 | 82.39990 | 1137.05328  | 2474.96393  | 1574.76652  | 1 |
| 832 | C | 92.25100 | 68.54980 | 84.34890 | -623.70194  | -217.42377  | 628.62850   | 1 |
| 833 | H | 91.36300 | 68.83680 | 84.95190 | 2031.03728  | -2134.16384 | -1103.83808 | 1 |
| 834 | C | 92.93000 | 67.35280 | 85.13090 | -38.21424   | 545.58213   | 729.61004   | 1 |
| 835 | H | 93.39500 | 67.66780 | 86.08990 | 2816.88312  | 785.42742   | -1160.38765 | 1 |
| 836 | H | 93.59900 | 66.86780 | 84.38790 | 683.50592   | 2165.82641  | 2177.20965  | 1 |
| 837 | H | 92.08600 | 66.72380 | 85.48590 | -1297.42712 | -2085.69786 | -1965.90273 | 1 |
| 838 | C | 93.12200 | 69.81780 | 84.36490 | -82.64499   | -713.48418  | -561.74829  | 1 |
| 839 | H | 92.59100 | 70.79080 | 84.28690 | 418.05189   | -1824.98671 | -2528.41499 | 1 |
| 840 | H | 93.47800 | 69.79780 | 85.41690 | -1799.71518 | 611.07834   | -2507.15671 | 1 |
| 841 | H | 93.92400 | 69.74080 | 83.59990 | -2110.06411 | -1558.22569 | -1737.17828 | 1 |
| 842 | C | 90.88500 | 67.01480 | 82.85490 | -556.90750  | 641.70428   | -330.93904  | 1 |
| 843 | O | 91.19100 | 65.97680 | 82.31990 | 578.50465   | 275.09237   | -461.82658  | 1 |
| 844 | N | 89.59800 | 67.27880 | 83.21290 | 527.47058   | 507.40287   | 420.70109   | 1 |
| 845 | H | 89.33800 | 68.17280 | 83.56890 | -3101.06471 | -449.88638  | 281.47141   | 1 |
| 846 | C | 88.50800 | 66.28280 | 83.31090 | -543.31176  | 554.50542   | 478.31693   | 1 |
| 847 | H | 87.63400 | 66.81180 | 83.66190 | -1058.56279 | -2935.79372 | 398.47993   | 1 |
| 848 | H | 88.77800 | 65.52880 | 84.03490 | 13.31072    | 2345.67527  | 2096.62981  | 1 |
| 849 | C | 88.13700 | 65.55880 | 82.06790 | 314.14467   | -561.63813  | -646.00831  | 1 |
| 850 | O | 88.04400 | 64.34280 | 82.03790 | 301.13903   | -577.45636  | 446.63929   | 1 |
| 851 | N | 87.94300 | 66.29480 | 80.94490 | -133.31966  | 640.18901   | -533.90653  | 1 |
| 852 | H | 88.08700 | 67.28080 | 80.99990 | -2812.65001 | 978.91141   | -1014.37598 | 1 |
| 853 | C | 87.72000 | 65.63780 | 79.67190 | 413.69976   | -526.35060  | -619.07879  | 1 |
| 854 | H | 87.02600 | 64.82080 | 79.79990 | 1059.06714  | 206.50054   | 2955.32748  | 1 |
| 855 | C | 86.96700 | 66.60780 | 78.71390 | -92.17659   | 171.75748   | -890.76026  | 1 |
| 856 | H | 87.46400 | 67.58080 | 78.50890 | 3104.91925  | 80.66297    | 501.19475   | 1 |
| 857 | H | 86.78100 | 66.01880 | 77.79090 | 2249.29314  | 359.21715   | -2170.22340 | 1 |
| 858 | C | 85.61000 | 66.79680 | 79.39290 | 257.20112   | 777.19145   | -401.58690  | 1 |
| 859 | O | 84.83300 | 65.81480 | 79.48890 | 41.48806    | 742.67780   | 265.20870   | 1 |
| 860 | N | 85.34400 | 67.99780 | 79.87490 | 293.16062   | 776.53241   | 154.03428   | 1 |
| 861 | H | 86.08300 | 68.66580 | 79.96190 | -2086.18902 | -1479.44611 | 1832.28840  | 1 |
| 862 | H | 84.39500 | 68.15680 | 80.14790 | -3074.19845 | 130.00965   | 656.22221   | 1 |

|     |   |          |          |          |             |             |             |   |
|-----|---|----------|----------|----------|-------------|-------------|-------------|---|
| 863 | C | 88.89800 | 64.98780 | 79.03490 | 729.59863   | 376.10731   | -397.08957  | 1 |
| 864 | O | 88.72200 | 64.04280 | 78.34190 | -693.58536  | 354.52459   | -129.91881  | 1 |
| 865 | N | 90.14400 | 65.40080 | 79.46790 | 210.13862   | -791.79120  | -203.91357  | 1 |
| 866 | H | 90.25700 | 66.25580 | 79.96790 | -1062.04363 | 2020.92879  | -2164.74858 | 1 |
| 867 | C | 91.31700 | 64.73480 | 79.05890 | 97.70485    | 515.88956   | 745.49495   | 1 |
| 868 | H | 91.30700 | 64.62180 | 77.98490 | -2927.03199 | 1151.10278  | -75.31504   | 1 |
| 869 | H | 92.21500 | 65.29480 | 79.27790 | 1062.09970  | -1925.40192 | 2250.11064  | 1 |
| 870 | C | 91.40100 | 63.43180 | 79.75790 | 310.82975   | -796.83060  | -316.06465  | 1 |
| 871 | O | 91.82500 | 62.42080 | 79.26990 | -577.07887  | 332.13922   | 424.60658   | 1 |
| 872 | N | 91.02800 | 63.38680 | 81.05790 | 661.05041   | 154.45958   | -501.82356  | 1 |
| 873 | H | 90.80500 | 64.21680 | 81.56290 | -2517.52490 | 1601.70543  | -997.41382  | 1 |
| 874 | C | 90.91800 | 62.15580 | 81.79590 | 275.37986   | -734.86526  | -464.31669  | 1 |
| 875 | H | 91.86200 | 61.64080 | 81.70190 | -1066.15996 | 2389.99152  | 1746.27308  | 1 |
| 876 | C | 90.82800 | 62.40680 | 83.27890 | 331.56885   | -794.75202  | 299.80382   | 1 |
| 877 | H | 90.54300 | 61.55180 | 83.92790 | 1677.69666  | 2644.70176  | 298.51762   | 1 |
| 878 | H | 89.92600 | 63.04680 | 83.38890 | -2285.97755 | -1673.79653 | 1367.82238  | 1 |
| 879 | C | 92.01900 | 63.17780 | 83.96190 | -507.29365  | -341.32403  | -676.46291  | 1 |
| 880 | H | 92.39400 | 64.07880 | 83.43090 | 2371.87763  | 457.82649   | 2015.64324  | 1 |
| 881 | C | 91.67700 | 63.61180 | 85.38990 | -427.74577  | 655.48410   | 467.78751   | 1 |
| 882 | H | 91.21000 | 62.80180 | 85.98990 | -2952.71904 | -361.96864  | -1024.03866 | 1 |
| 883 | H | 92.58900 | 63.86880 | 85.96890 | 1883.89389  | -747.97171  | -2406.18128 | 1 |
| 884 | H | 90.99500 | 64.48680 | 85.45990 | -1863.27798 | 1324.56257  | -2161.47065 | 1 |
| 885 | C | 93.24800 | 62.26580 | 83.90690 | 395.64209   | 142.65578   | 809.05356   | 1 |
| 886 | H | 93.04800 | 61.32980 | 84.47190 | 2319.96381  | -1501.10801 | 1504.21703  | 1 |
| 887 | H | 94.12500 | 62.84280 | 84.26990 | -1438.91126 | 1875.01864  | -2076.55140 | 1 |
| 888 | H | 93.55700 | 61.98580 | 82.87690 | 1529.33518  | 1892.55504  | 1994.39103  | 1 |
| 889 | C | 89.83700 | 61.22880 | 81.39190 | -670.64914  | 389.97123   | -479.16926  | 1 |
| 890 | O | 90.05200 | 60.01880 | 81.38790 | 781.35197   | -104.16432  | 47.60376    | 1 |
| 891 | N | 88.67800 | 61.73480 | 81.04490 | 330.59139   | -215.15975  | 746.38322   | 1 |
| 892 | H | 88.46700 | 62.70780 | 81.09490 | -1221.30094 | -2124.56655 | 1973.03503  | 1 |
| 893 | C | 87.67100 | 60.85880 | 80.39390 | 540.49009   | 460.58516   | 571.99894   | 1 |
| 894 | H | 87.32000 | 60.08580 | 81.06090 | -2109.82119 | 420.31282   | -2295.69552 | 1 |
| 895 | C | 86.36900 | 61.62080 | 80.15290 | 437.16704   | 378.29483   | 705.14467   | 1 |
| 896 | H | 86.66700 | 62.53680 | 79.59990 | -931.64399  | -1905.93439 | 2323.29073  | 1 |
| 897 | C | 85.41000 | 60.79180 | 79.24990 | -40.18690   | 139.68571   | -900.17994  | 1 |
| 898 | H | 85.78800 | 60.71980 | 78.20790 | -337.71721  | 2233.51169  | 2189.88558  | 1 |
| 899 | H | 84.42100 | 61.27980 | 79.11590 | -2232.42026 | 1456.66377  | 1671.12438  | 1 |
| 900 | H | 85.21300 | 59.82180 | 79.75490 | -1555.71342 | -964.44593  | -2558.87202 | 1 |
| 901 | C | 85.66900 | 62.05280 | 81.46790 | 59.94967    | 164.68914   | 894.83771   | 1 |
| 902 | H | 84.86800 | 62.78280 | 81.22090 | 2288.98316  | -975.36532  | -1925.47262 | 1 |
| 903 | H | 85.26400 | 61.20280 | 82.05790 | 1418.49257  | -211.68327  | -2800.23128 | 1 |
| 904 | H | 86.41700 | 62.61580 | 82.06690 | 1686.79616  | 1795.69322  | -1956.63763 | 1 |
| 905 | C | 88.14800 | 60.21080 | 79.10090 | -460.61643  | 407.85428   | 673.00698   | 1 |
| 906 | O | 87.98300 | 59.02080 | 78.84890 | -678.66037  | 361.86766   | -179.16229  | 1 |
| 907 | N | 88.93200 | 60.97080 | 78.26790 | 603.21865   | -484.47884  | -337.75701  | 1 |
| 908 | H | 88.88200 | 61.95180 | 78.43890 | 950.00296   | -2010.56634 | -2225.61084 | 1 |
| 909 | C | 89.63900 | 60.42180 | 77.09990 | 725.26411   | 366.18609   | 413.94532   | 1 |
| 910 | H | 88.99200 | 59.82980 | 76.46890 | -2637.04200 | -778.25505  | -1529.23341 | 1 |
| 911 | C | 90.13200 | 61.55680 | 76.21090 | -245.39354  | 328.56694   | -814.41806  | 1 |
| 912 | H | 90.77500 | 62.20780 | 76.84090 | 2388.04920  | 1975.44820  | -541.34249  | 1 |
| 913 | C | 91.04800 | 61.07380 | 75.04890 | -454.31315  | -405.65078  | -678.60004  | 1 |
| 914 | H | 91.94600 | 60.50580 | 75.37390 | -1639.17125 | -2672.23587 | 265.51703   | 1 |
| 915 | H | 91.50200 | 61.91580 | 74.48490 | 2378.32481  | 2035.61491  | 313.16012   | 1 |
| 916 | H | 90.55600 | 60.35680 | 74.35590 | -884.49316  | -328.70926  | -3001.30776 | 1 |
| 917 | C | 89.00800 | 62.48180 | 75.66090 | 7.02713     | 567.02539   | 714.06151   | 1 |
| 918 | H | 88.47400 | 61.93980 | 74.85190 | 2612.78447  | -1684.72838 | -482.98432  | 1 |
| 919 | H | 88.14100 | 62.60780 | 76.34490 | -2631.13738 | -1490.45271 | -868.27012  | 1 |
| 920 | C | 89.53000 | 63.78780 | 75.11390 | -553.20240  | -415.10246  | 594.22895   | 1 |
| 921 | H | 90.19400 | 63.52080 | 74.26490 | 942.90686   | -3000.78915 | 66.46305    | 1 |
| 922 | H | 88.68400 | 64.35180 | 74.66590 | -2106.33165 | 2266.34950  | -570.30969  | 1 |
| 923 | H | 89.97900 | 64.42080 | 75.90890 | -2572.36207 | 1655.35637  | -735.50996  | 1 |
| 924 | C | 90.77300 | 59.45680 | 77.46190 | 332.79423   | -609.46388  | -590.97613  | 1 |

|     |   |          |          |          |             |             |             |   |
|-----|---|----------|----------|----------|-------------|-------------|-------------|---|
| 925 | O | 90.96700 | 58.38780 | 76.89490 | -33.13991   | 738.45028   | 277.88517   | 1 |
| 926 | N | 91.47500 | 59.73380 | 78.58890 | -205.99053  | -461.63039  | 676.11949   | 1 |
| 927 | H | 91.42900 | 60.64380 | 78.99590 | 1676.62045  | 1711.55738  | 2039.05405  | 1 |
| 928 | C | 92.46700 | 58.82380 | 79.17890 | -724.88543  | -475.55518  | -282.55864  | 1 |
| 929 | H | 93.13400 | 58.59180 | 78.36190 | -2154.49200 | 2198.57070  | -650.13636  | 1 |
| 930 | C | 93.39400 | 59.54580 | 80.25190 | -727.45292  | -66.62977   | 545.73229   | 1 |
| 931 | H | 93.67500 | 58.93680 | 81.13790 | -477.43093  | 1900.27554  | 2461.55211  | 1 |
| 932 | H | 92.68800 | 60.32980 | 80.60090 | -1885.56164 | 2439.64756  | -625.30258  | 1 |
| 933 | C | 94.60100 | 60.20980 | 79.64990 | 0.07779     | 136.16699   | -901.61497  | 1 |
| 934 | H | 94.23900 | 60.46180 | 78.62990 | -1494.27344 | 2209.19348  | -1668.78317 | 1 |
| 935 | C | 95.06300 | 61.43480 | 80.47190 | 181.28753   | 817.11273   | -361.81848  | 1 |
| 936 | H | 95.28300 | 61.04180 | 81.48790 | -1711.81780 | -2403.28153 | 1091.85344  | 1 |
| 937 | H | 94.26400 | 62.20680 | 80.47790 | -1638.91079 | -1988.92275 | -1804.54535 | 1 |
| 938 | H | 96.00300 | 61.82780 | 80.02690 | 789.63194   | -1754.67722 | 2489.13951  | 1 |
| 939 | C | 95.76500 | 59.20580 | 79.52190 | -723.88704  | 514.99269   | 205.47768   | 1 |
| 940 | H | 96.08900 | 58.91780 | 80.54590 | -2579.66576 | 1679.81506  | 649.43986   | 1 |
| 941 | H | 95.53700 | 58.21280 | 79.07790 | 1397.94009  | -2453.65391 | 1386.92906  | 1 |
| 942 | H | 96.53300 | 59.68580 | 78.87890 | 591.89494   | -2907.09292 | 1047.23319  | 1 |
| 943 | C | 91.86500 | 57.57880 | 79.69390 | -582.56779  | -303.19306  | -632.56600  | 1 |
| 944 | O | 92.42900 | 56.49880 | 79.48290 | 535.77260   | -24.90168   | -579.61613  | 1 |
| 945 | N | 90.65400 | 57.56080 | 80.28190 | -381.42184  | -696.43704  | 286.64460   | 1 |
| 946 | H | 90.21300 | 58.42780 | 80.50190 | -2074.13190 | 2027.32988  | -1219.07205 | 1 |
| 947 | C | 89.92200 | 56.39580 | 80.60690 | -269.30077  | -32.73197   | -870.54966  | 1 |
| 948 | H | 90.56100 | 55.73180 | 81.16890 | 2609.90647  | -683.93234  | -1618.28644 | 1 |
| 949 | C | 88.72200 | 56.64380 | 81.52490 | -255.95642  | 818.20196   | -310.61692  | 1 |
| 950 | H | 88.11700 | 57.51680 | 81.19890 | -2200.53987 | -872.08249  | 2072.51602  | 1 |
| 951 | C | 87.81900 | 55.37180 | 81.65790 | -270.06871  | 308.71118   | -814.37786  | 1 |
| 952 | H | 87.24900 | 55.30580 | 80.70590 | -1679.32935 | 2605.55697  | 537.72862   | 1 |
| 953 | H | 88.39100 | 54.44580 | 81.87890 | 2325.06348  | 1309.71624  | -1666.41814 | 1 |
| 954 | H | 87.10100 | 55.43280 | 82.50390 | 1541.58712  | -1896.34312 | -1981.31727 | 1 |
| 955 | C | 89.30500 | 57.08480 | 82.90890 | -335.17659  | 787.08053   | -315.61352  | 1 |
| 956 | H | 89.91800 | 58.00280 | 82.78290 | 2332.24242  | 609.63530   | -2021.68651 | 1 |
| 957 | H | 89.92900 | 56.23680 | 83.26390 | -1968.73005 | 1708.57905  | 1761.55779  | 1 |
| 958 | H | 88.39800 | 57.27180 | 83.52290 | -1980.23295 | -1726.76671 | -1730.65895 | 1 |
| 959 | C | 89.44700 | 55.63980 | 79.32990 | -359.27848  | 576.33568   | 608.44652   | 1 |
| 960 | O | 89.89800 | 54.49180 | 79.18290 | -449.67866  | 648.30608   | 33.39991    | 1 |
| 961 | N | 88.71500 | 56.24380 | 78.37590 | -687.55598  | 361.92186   | -330.07821  | 1 |
| 962 | H | 88.39800 | 57.18380 | 78.48190 | -1682.32476 | -210.17816  | -2650.25183 | 1 |
| 963 | C | 88.13600 | 55.43780 | 77.35890 | 481.60797   | -515.20904  | -577.98305  | 1 |
| 964 | H | 87.98700 | 54.42380 | 77.69790 | 2167.44450  | 1544.81508  | -1677.48530 | 1 |
| 965 | C | 86.80000 | 55.99480 | 76.89190 | 518.43415   | -69.51995   | 746.88955   | 1 |
| 966 | H | 86.79700 | 57.04880 | 76.53890 | -1143.95498 | 2795.22945  | -881.07069  | 1 |
| 967 | H | 86.30400 | 55.48680 | 76.03690 | 1254.94298  | 2533.45344  | -1380.20217 | 1 |
| 968 | C | 85.67600 | 55.90280 | 77.97190 | -484.48634  | -150.54762  | 757.66708   | 1 |
| 969 | H | 86.01400 | 56.61080 | 78.75890 | 1871.95387  | 1227.76250  | 2210.56875  | 1 |
| 970 | H | 85.62800 | 54.90080 | 78.44890 | -2218.83620 | 1002.44526  | 1992.50988  | 1 |
| 971 | S | 83.95900 | 56.24880 | 77.57990 | -404.97605  | -144.73323  | 355.32703   | 1 |
| 972 | C | 84.12800 | 58.00880 | 77.20090 | -197.22130  | -509.73989  | -729.87671  | 1 |
| 973 | H | 83.24300 | 58.67880 | 77.24590 | -414.07682  | -2980.23816 | 919.21005   | 1 |
| 974 | H | 84.54900 | 58.20380 | 76.19090 | 411.47298   | 2082.84638  | -2321.78103 | 1 |
| 975 | H | 84.85200 | 58.45580 | 77.91490 | 2087.45348  | 1033.17280  | -2115.02202 | 1 |
| 976 | C | 89.02800 | 55.25480 | 76.12090 | 452.00509   | -403.62784  | -681.34204  | 1 |
| 977 | O | 88.67300 | 54.33880 | 75.34490 | -482.40885  | 216.79530   | -586.43732  | 1 |
| 978 | N | 90.17100 | 55.99680 | 75.92590 | -667.46038  | -222.59038  | 466.50022   | 1 |
| 979 | H | 90.45000 | 56.78180 | 76.47390 | 1347.87838  | 2726.98930  | -803.10612  | 1 |
| 980 | C | 91.03600 | 55.84080 | 74.74190 | -889.83329  | 191.54029   | -54.40627   | 1 |
| 981 | H | 91.33000 | 56.77180 | 74.28090 | -1586.87762 | 296.94965   | -2700.34564 | 1 |
| 982 | H | 90.59400 | 55.18780 | 74.00390 | -572.29216  | 2941.77648  | 957.42313   | 1 |
| 983 | C | 92.32500 | 55.26980 | 75.05690 | 636.94938   | -640.72478  | 123.36225   | 1 |
| 984 | O | 92.92800 | 54.78180 | 74.07790 | -199.28590  | -698.80068  | 309.17628   | 1 |
| 985 | N | 92.85900 | 55.28180 | 76.31390 | -420.26493  | -726.64527  | 89.64558    | 1 |
| 986 | H | 92.39700 | 55.80080 | 77.02990 | -2179.54868 | -321.32446  | 2246.00632  | 1 |

|      |   |          |          |          |             |             |             |   |
|------|---|----------|----------|----------|-------------|-------------|-------------|---|
| 987  | C | 94.18600 | 54.76780 | 76.54990 | -516.28029  | 736.80378   | -148.41107  | 1 |
| 988  | H | 94.42000 | 54.19980 | 75.66190 | 2046.46465  | 2181.63635  | -975.02384  | 1 |
| 989  | C | 95.24000 | 55.87480 | 76.84190 | -403.38982  | 768.94288   | -278.30649  | 1 |
| 990  | H | 96.23400 | 55.39980 | 76.97990 | 1643.87484  | 994.04106   | -2491.54252 | 1 |
| 991  | H | 94.96800 | 56.43880 | 77.75990 | 1807.35693  | -538.28990  | -2518.31911 | 1 |
| 992  | C | 95.32500 | 56.83880 | 75.67490 | 658.83343   | 599.46334   | -195.02109  | 1 |
| 993  | C | 94.57400 | 58.04680 | 75.56990 | 735.77653   | -405.26549  | 354.74468   | 1 |
| 994  | H | 93.81100 | 58.35680 | 76.26890 | 1625.72964  | -2631.85930 | 573.18932   | 1 |
| 995  | C | 94.76300 | 58.89280 | 74.47790 | -420.74497  | -268.55247  | -763.08862  | 1 |
| 996  | H | 94.19800 | 59.78980 | 74.27190 | -2210.21796 | 872.57426   | 2061.98374  | 1 |
| 997  | C | 95.64700 | 58.60780 | 73.44990 | 417.26536   | 581.36110   | 565.11937   | 1 |
| 998  | O | 95.87200 | 59.44180 | 72.41690 | -555.02119  | -364.40461  | 427.53712   | 1 |
| 999  | H | 96.32200 | 59.00280 | 71.69190 | 1960.54608  | -1695.32460 | 1783.35632  | 1 |
| 1000 | C | 96.26800 | 56.58880 | 74.66090 | -707.17336  | -527.74710  | -229.86917  | 1 |
| 1001 | H | 96.92000 | 55.72780 | 74.64290 | -1392.07536 | 228.65270   | -2812.12915 | 1 |
| 1002 | C | 96.40200 | 57.42980 | 73.55890 | 243.88306   | -863.32614  | -163.21773  | 1 |
| 1003 | H | 97.07000 | 57.15380 | 72.75690 | 1815.36562  | 1085.64151  | -2328.96037 | 1 |
| 1004 | C | 94.25100 | 53.70880 | 77.63690 | 517.31090   | 682.10256   | -313.96900  | 1 |
| 1005 | O | 94.75800 | 52.60880 | 77.40090 | -416.13956  | -623.25887  | -249.00497  | 1 |
| 1006 | N | 93.66100 | 53.96080 | 78.80590 | 256.79754   | -672.06997  | 441.64383   | 1 |
| 1007 | H | 93.27600 | 54.86780 | 78.95390 | -1234.01676 | -2604.29812 | 1262.16487  | 1 |
| 1008 | C | 93.44100 | 53.00680 | 79.89090 | -599.56266  | 600.82935   | -333.13618  | 1 |
| 1009 | H | 94.35700 | 52.47780 | 80.10790 | 1827.87857  | 1575.23439  | 2018.84194  | 1 |
| 1010 | C | 92.94400 | 53.62880 | 81.25290 | 445.77242   | -396.55549  | -689.55181  | 1 |
| 1011 | H | 92.05600 | 54.20480 | 80.91490 | 1528.57417  | 1902.28294  | 1985.70059  | 1 |
| 1012 | H | 92.64800 | 52.84180 | 81.97990 | 1217.80572  | 896.89466   | 2758.75976  | 1 |
| 1013 | C | 93.94700 | 54.46080 | 82.04690 | -393.38206  | 815.68796   | 106.55845   | 1 |
| 1014 | H | 94.47900 | 55.07880 | 81.29190 | -1516.57166 | -2750.17328 | 186.50351   | 1 |
| 1015 | H | 94.64500 | 53.84780 | 82.65590 | 2442.85213  | -1927.82729 | 462.79762   | 1 |
| 1016 | C | 93.27700 | 55.39580 | 83.02990 | -567.21803  | 42.86215    | 712.65528   | 1 |
| 1017 | O | 92.47900 | 54.97380 | 83.85390 | 278.53089   | -654.64459  | 342.76557   | 1 |
| 1018 | N | 93.52300 | 56.72180 | 82.88790 | -587.28231  | -86.24744   | 600.27756   | 1 |
| 1019 | H | 94.41900 | 57.02380 | 82.56290 | -2097.16996 | 45.48301    | -2344.78905 | 1 |
| 1020 | H | 92.86000 | 57.35880 | 83.28190 | 1729.79074  | 364.51200   | -2602.53362 | 1 |
| 1021 | C | 92.57700 | 51.86780 | 79.50590 | 309.23997   | 595.98626   | 616.94572   | 1 |
| 1022 | O | 92.78500 | 50.65780 | 79.79990 | -586.64018  | 395.11844   | -351.22919  | 1 |
| 1023 | N | 91.47300 | 52.18080 | 78.75590 | 361.09023   | 362.27129   | 671.59932   | 1 |
| 1024 | H | 91.20800 | 53.14080 | 78.70990 | 2028.97080  | 263.32461   | 2390.01337  | 1 |
| 1025 | C | 90.61600 | 51.17280 | 78.07990 | 625.30084   | -488.83724  | 448.87417   | 1 |
| 1026 | H | 90.80800 | 50.23680 | 78.58390 | -2144.40996 | -1361.23221 | -1856.55030 | 1 |
| 1027 | C | 89.08300 | 51.53180 | 78.20090 | 477.40451   | -650.07167  | 425.37367   | 1 |
| 1028 | H | 88.90900 | 52.51580 | 77.71390 | -2984.13350 | -814.07351  | 574.85456   | 1 |
| 1029 | H | 88.49600 | 50.75480 | 77.66490 | 387.63192   | 2809.97985  | 1360.87507  | 1 |
| 1030 | C | 88.66600 | 51.54680 | 79.65090 | -16.46731   | 727.72636   | 549.17591   | 1 |
| 1031 | H | 89.15400 | 52.39480 | 80.17690 | 1412.95289  | 2456.78161  | -1366.02141 | 1 |
| 1032 | H | 89.07300 | 50.61780 | 80.10390 | 2470.71274  | -1055.01199 | -1637.30098 | 1 |
| 1033 | C | 87.13900 | 51.48180 | 79.68990 | -432.57797  | -796.00644  | -103.44587  | 1 |
| 1034 | H | 86.76700 | 52.34880 | 79.10290 | 822.00885   | -1659.18601 | 2543.54663  | 1 |
| 1035 | H | 86.88900 | 50.48680 | 79.26190 | -2959.95700 | 805.02226   | 699.15660   | 1 |
| 1036 | C | 86.57500 | 51.74980 | 81.08890 | 626.28866   | 582.54457   | -315.99896  | 1 |
| 1037 | H | 86.92000 | 52.73180 | 81.47690 | -1470.60068 | 2538.39473  | -1136.71109 | 1 |
| 1038 | H | 86.98500 | 50.92780 | 81.71390 | 428.27849   | -2564.59065 | -1771.34937 | 1 |
| 1039 | N | 85.12500 | 51.68880 | 81.07790 | -325.89062  | 634.10551   | -452.08162  | 1 |
| 1040 | H | 84.77400 | 50.75480 | 80.78390 | 2061.34753  | 2252.62626  | -758.12104  | 1 |
| 1041 | H | 84.69900 | 52.02580 | 81.96490 | -2254.09242 | -2171.37274 | -320.05317  | 1 |
| 1042 | H | 84.83800 | 52.34680 | 80.32490 | 2702.72499  | 846.95956   | -1369.73113 | 1 |
| 1043 | C | 90.95300 | 50.94980 | 76.60790 | -791.95575  | 415.04482   | 178.87113   | 1 |
| 1044 | O | 90.98900 | 51.89480 | 75.82090 | -477.04654  | -343.75641  | -527.14833  | 1 |
| 1045 | N | 91.05100 | 49.72080 | 76.17790 | -649.59839  | 398.10287   | 363.60462   | 1 |
| 1046 | H | 90.96200 | 48.97080 | 76.82890 | 1458.14370  | 2348.37727  | -1502.38722 | 1 |
| 1047 | C | 91.29900 | 49.34780 | 74.85290 | -196.54250  | 852.49423   | 257.05181   | 1 |
| 1048 | H | 91.82800 | 50.10280 | 74.28990 | 810.25378   | -484.59869  | -3001.14631 | 1 |

|      |   |          |          |          |             |             |             |   |
|------|---|----------|----------|----------|-------------|-------------|-------------|---|
| 1049 | C | 92.38200 | 48.18380 | 74.82990 | -232.57955  | 668.07899   | -575.35052  | 1 |
| 1050 | H | 92.07000 | 47.34480 | 75.48790 | 1997.64510  | 893.54082   | 2260.35950  | 1 |
| 1051 | H | 92.30400 | 47.74580 | 73.81190 | -1462.04695 | -2629.60319 | 919.69126   | 1 |
| 1052 | C | 93.85500 | 48.62380 | 74.83190 | -424.38912  | 617.07221   | 520.16032   | 1 |
| 1053 | H | 94.07900 | 49.05780 | 73.83490 | -1533.42661 | -1555.59845 | -2264.27527 | 1 |
| 1054 | H | 94.46100 | 47.69280 | 74.87390 | -1012.94100 | -909.17038  | -2836.47422 | 1 |
| 1055 | C | 94.33100 | 49.57380 | 75.99790 | -123.48169  | 749.27765   | 504.76358   | 1 |
| 1056 | H | 93.81300 | 50.55380 | 75.93290 | 2516.78984  | 1864.77128  | 294.31821   | 1 |
| 1057 | H | 94.18600 | 49.06480 | 76.97490 | -1086.76355 | 2939.52485  | -276.34191  | 1 |
| 1058 | C | 95.82100 | 49.84980 | 75.84490 | 662.05657   | 334.81084   | 530.12621   | 1 |
| 1059 | H | 96.00100 | 50.55280 | 75.00390 | 1609.52510  | -840.60521  | 2569.24854  | 1 |
| 1060 | H | 96.33200 | 48.90480 | 75.56290 | -1866.05211 | 2255.16258  | 1153.39391  | 1 |
| 1061 | N | 96.36400 | 50.35680 | 77.12790 | 83.85254    | -840.00723  | -5.37561    | 1 |
| 1062 | H | 95.93900 | 49.92380 | 77.97290 | 366.75803   | -1847.68540 | -2519.87568 | 1 |
| 1063 | H | 96.24700 | 51.38080 | 77.26290 | -212.69305  | -2418.09462 | -2001.45105 | 1 |
| 1064 | H | 97.39300 | 50.20580 | 77.11590 | 2220.86465  | 1037.98853  | 1971.94479  | 1 |
| 1065 | C | 90.00100 | 49.00580 | 74.10290 | -646.14395  | -433.52289  | 475.40183   | 1 |
| 1066 | O | 90.08300 | 48.49180 | 72.98190 | -109.13754  | 630.33862   | 463.02208   | 1 |
| 1067 | N | 88.81000 | 49.29580 | 74.67490 | 645.30425   | -291.62975  | 459.57241   | 1 |
| 1068 | H | 88.70200 | 49.78880 | 75.53390 | -1336.66204 | -690.57977  | 2763.08892  | 1 |
| 1069 | C | 87.55400 | 48.97680 | 74.08890 | 810.69662   | 332.42387   | 252.42102   | 1 |
| 1070 | H | 87.68600 | 49.00780 | 73.01690 | 1261.16373  | -2809.95431 | 641.75465   | 1 |
| 1071 | C | 87.15200 | 47.53380 | 74.50490 | 195.68149   | -372.14895  | -809.11366  | 1 |
| 1072 | H | 87.00100 | 47.55280 | 75.60590 | 627.64980   | -2730.86972 | 1430.60566  | 1 |
| 1073 | H | 88.03400 | 46.90580 | 74.25790 | -294.96673  | 1838.16130  | 2536.21448  | 1 |
| 1074 | C | 85.88800 | 46.98380 | 73.78190 | -514.60994  | -676.19537  | -330.73772  | 1 |
| 1075 | H | 85.04600 | 47.70380 | 73.87690 | 2159.55539  | 2127.79094  | 840.86413   | 1 |
| 1076 | C | 86.19700 | 46.73680 | 72.27590 | 513.37198   | -390.36037  | 644.60763   | 1 |
| 1077 | H | 86.97300 | 45.94380 | 72.21590 | 757.55728   | 1552.81916  | -2629.27478 | 1 |
| 1078 | H | 86.79000 | 47.58380 | 71.86990 | -2370.02827 | 2.51577     | 2069.10268  | 1 |
| 1079 | H | 85.32100 | 46.35980 | 71.70490 | 1419.99629  | 2200.09975  | -1743.96039 | 1 |
| 1080 | C | 85.44900 | 45.69380 | 74.43390 | -572.82536  | -688.13157  | 172.61823   | 1 |
| 1081 | H | 86.17400 | 44.86080 | 74.31090 | -2596.52346 | 1295.27064  | 1215.96304  | 1 |
| 1082 | H | 84.50200 | 45.40480 | 73.93090 | -2898.30672 | -262.72757  | -1195.41566 | 1 |
| 1083 | H | 85.30700 | 45.81980 | 75.52790 | -2858.06058 | -603.19043  | 1168.70751  | 1 |
| 1084 | C | 86.58300 | 49.95080 | 74.48290 | 470.41433   | 35.85679    | 780.30485   | 1 |
| 1085 | O | 86.54200 | 50.31480 | 75.64190 | -588.56167  | 469.27101   | -238.76160  | 1 |
| 1086 | N | 85.76300 | 50.38280 | 73.53390 | 74.47277    | -813.32802  | 213.59687   | 1 |
| 1087 | H | 85.97600 | 50.05580 | 72.61690 | 1805.71083  | 1545.11727  | 2061.61278  | 1 |
| 1088 | C | 84.62100 | 51.21080 | 73.67290 | -165.33727  | -443.14724  | -779.57367  | 1 |
| 1089 | H | 84.52300 | 51.36680 | 74.73690 | -1667.06575 | 2602.13103  | -589.94247  | 1 |
| 1090 | C | 84.88700 | 52.61880 | 73.07790 | 871.12257   | 223.68728   | -150.20145  | 1 |
| 1091 | H | 83.94100 | 53.16780 | 72.88390 | 1370.99310  | 582.96801   | 2771.05620  | 1 |
| 1092 | H | 85.25400 | 52.43280 | 72.04590 | -1938.95471 | -86.65666   | -2476.12025 | 1 |
| 1093 | C | 85.88700 | 53.42880 | 73.88690 | 645.13091   | -641.00778  | 66.07680    | 1 |
| 1094 | H | 86.80800 | 52.87480 | 74.16590 | -292.94778  | 2772.15421  | -1458.61881 | 1 |
| 1095 | H | 85.38700 | 53.70380 | 74.83990 | -220.80937  | 2915.27530  | -1162.17013 | 1 |
| 1096 | C | 86.28500 | 54.67180 | 73.14490 | -46.40004   | -652.09192  | -635.66828  | 1 |
| 1097 | H | 85.41500 | 55.31380 | 72.88890 | 972.19535   | 2320.72695  | -1888.72678 | 1 |
| 1098 | H | 86.96800 | 55.30180 | 73.75390 | 1566.75036  | 2000.37395  | 1855.26914  | 1 |
| 1099 | N | 87.02500 | 54.16280 | 71.89790 | -608.96999  | 352.30617   | 466.59212   | 1 |
| 1100 | H | 86.52100 | 54.27380 | 71.04090 | 2255.82456  | 2188.50576  | -141.15364  | 1 |
| 1101 | C | 88.26400 | 53.66480 | 71.80990 | -569.81877  | 363.39144   | -612.13090  | 1 |
| 1102 | N | 89.10000 | 53.50980 | 72.82190 | 577.68006   | 610.17971   | -81.47856   | 1 |
| 1103 | H | 88.79100 | 53.70980 | 73.75190 | -327.84551  | 2636.03825  | 1685.83686  | 1 |
| 1104 | H | 90.04200 | 53.23980 | 72.62390 | 2824.26856  | 630.69254   | 1234.48785  | 1 |
| 1105 | N | 88.74400 | 53.35480 | 70.59690 | 243.88392   | -464.76129  | 661.20335   | 1 |
| 1106 | H | 88.15000 | 53.32880 | 69.79290 | 593.76744   | -1077.70321 | -2895.55215 | 1 |
| 1107 | H | 89.71700 | 53.20780 | 70.42090 | 1555.41710  | 2697.84599  | 447.80674   | 1 |
| 1108 | C | 83.32200 | 50.61480 | 73.20590 | -627.51682  | -478.99942  | -456.32576  | 1 |
| 1109 | O | 83.24600 | 50.07780 | 72.10590 | 158.13124   | 76.39803    | 769.92537   | 1 |
| 1110 | N | 82.30300 | 50.67980 | 74.02090 | 288.65807   | -357.90700  | -707.99109  | 1 |

|      |   |          |          |          |             |             |             |   |
|------|---|----------|----------|----------|-------------|-------------|-------------|---|
| 1111 | H | 82.47000 | 51.01780 | 74.94390 | -1317.19795 | 2080.32748  | 1958.43135  | 1 |
| 1112 | C | 80.90500 | 50.41080 | 73.69990 | 213.65388   | 861.83773   | 207.45781   | 1 |
| 1113 | H | 80.90700 | 49.61780 | 72.96590 | 2621.91957  | 1226.50582  | 1232.65870  | 1 |
| 1114 | C | 80.09800 | 49.91280 | 74.88890 | 891.07230   | 99.44429    | 165.98792   | 1 |
| 1115 | H | 80.65700 | 49.07480 | 75.35590 | -610.32980  | 2738.34949  | -1423.78574 | 1 |
| 1116 | H | 79.13500 | 49.50380 | 74.51390 | -1334.15046 | -2455.18096 | -1445.80609 | 1 |
| 1117 | O | 79.93000 | 50.94380 | 75.84990 | 404.99634   | 677.47108   | 25.26136    | 1 |
| 1118 | H | 80.78600 | 51.10580 | 76.25190 | 2045.17830  | -1934.17400 | 1405.14871  | 1 |
| 1119 | C | 80.20200 | 51.63780 | 73.09290 | -290.77136  | 460.76193   | 731.16446   | 1 |
| 1120 | O | 80.82500 | 52.67380 | 72.89290 | 6.22925     | -670.23758  | 417.57636   | 1 |
| 1121 | N | 78.90600 | 51.49280 | 72.63190 | 804.15742   | -245.13745  | 76.88145    | 1 |
| 1122 | H | 78.46200 | 50.61780 | 72.45690 | 1966.48604  | 2031.87133  | 1379.36862  | 1 |
| 1123 | C | 78.10900 | 52.61380 | 72.12490 | -38.80295   | -523.18019  | -745.80683  | 1 |
| 1124 | H | 78.62900 | 53.02480 | 71.27190 | 571.29205   | 3037.68164  | 586.80650   | 1 |
| 1125 | C | 76.74700 | 52.13880 | 71.62190 | -1.64929    | 686.49319   | 600.14613   | 1 |
| 1126 | H | 76.16900 | 52.99880 | 71.21990 | 960.73814   | -1454.63825 | 2619.01432  | 1 |
| 1127 | H | 76.18700 | 51.79780 | 72.51890 | -1762.84482 | -2491.16498 | -764.65771  | 1 |
| 1128 | C | 76.84800 | 51.01580 | 70.56590 | -675.82134  | 331.44193   | 514.64820   | 1 |
| 1129 | H | 75.93000 | 51.16180 | 69.95690 | 965.02650   | 1592.22819  | 2536.09138  | 1 |
| 1130 | H | 77.66100 | 51.23680 | 69.84290 | 2357.70359  | 464.66706   | 2030.65126  | 1 |
| 1131 | S | 76.94200 | 49.31380 | 71.19890 | 341.30531   | 408.22216   | 167.55883   | 1 |
| 1132 | C | 75.79700 | 48.59480 | 69.95690 | 827.16267   | 245.02624   | 295.32196   | 1 |
| 1133 | H | 75.35400 | 47.67380 | 70.39290 | 2064.85392  | -2370.72865 | -119.37418  | 1 |
| 1134 | H | 76.40800 | 48.33680 | 69.06590 | -360.06608  | -2325.14734 | 2088.60443  | 1 |
| 1135 | H | 75.08300 | 49.32480 | 69.51890 | 1737.04504  | 1346.82353  | -2250.99248 | 1 |
| 1136 | C | 77.92300 | 53.80080 | 73.01490 | -216.78428  | 637.19466   | 615.17358   | 1 |
| 1137 | O | 78.11000 | 54.94380 | 72.61990 | 511.66076   | -576.12974  | -172.93066  | 1 |
| 1138 | N | 77.71000 | 53.58280 | 74.34390 | 116.26666   | -800.05617  | 243.03183   | 1 |
| 1139 | H | 77.59800 | 52.67680 | 74.74290 | -1357.08445 | -1232.82351 | 2556.69596  | 1 |
| 1140 | C | 77.68700 | 54.67680 | 75.33990 | -678.35284  | -109.41542  | -599.43031  | 1 |
| 1141 | H | 76.94800 | 55.38980 | 75.00390 | -1206.66008 | 2905.34747  | 33.96701    | 1 |
| 1142 | C | 77.20500 | 54.32980 | 76.79390 | 472.54445   | 10.69847    | -779.76810  | 1 |
| 1143 | H | 77.72800 | 53.41580 | 77.14590 | 2373.67726  | -1298.61513 | -1605.45359 | 1 |
| 1144 | O | 75.76300 | 54.21780 | 76.78490 | 249.98320   | -474.61047  | -579.55201  | 1 |
| 1145 | H | 75.63300 | 53.42280 | 76.26290 | 3029.87441  | -803.06926  | -270.49405  | 1 |
| 1146 | C | 77.39900 | 55.42680 | 77.81890 | -565.84948  | 425.25063   | 574.82803   | 1 |
| 1147 | H | 76.81700 | 55.15480 | 78.72490 | 2380.54261  | 2038.40372  | 275.95904   | 1 |
| 1148 | H | 78.42900 | 55.46880 | 78.23490 | 223.84325   | 3107.75120  | -435.89326  | 1 |
| 1149 | H | 77.11100 | 56.36280 | 77.29590 | -8.05197    | -3029.05317 | 850.29306   | 1 |
| 1150 | C | 78.99300 | 55.41280 | 75.48290 | 701.70330   | -576.93621  | -78.79146   | 1 |
| 1151 | O | 79.01200 | 56.64380 | 75.52890 | -59.21911   | -775.59247  | -136.29617  | 1 |
| 1152 | N | 80.04200 | 54.60680 | 75.54790 | -398.63876  | 510.83580   | -541.11571  | 1 |
| 1153 | H | 79.91100 | 53.62580 | 75.42390 | -2349.11562 | 2066.51292  | 330.76636   | 1 |
| 1154 | C | 81.45000 | 55.05880 | 75.60490 | 206.95057   | 637.15206   | -618.59495  | 1 |
| 1155 | H | 81.54600 | 55.60980 | 76.52890 | 632.20188   | -642.48221  | -3014.26004 | 1 |
| 1156 | C | 82.49400 | 53.85080 | 75.62690 | 598.64805   | 397.00326   | -561.65820  | 1 |
| 1157 | H | 83.54200 | 54.17680 | 75.80090 | -2232.34802 | -1661.32334 | -1467.94186 | 1 |
| 1158 | H | 82.40300 | 53.30880 | 74.66190 | 676.89204   | 2401.68197  | -1916.23775 | 1 |
| 1159 | C | 82.13700 | 52.85880 | 76.75290 | -370.00610  | 37.83435    | -832.53531  | 1 |
| 1160 | O | 82.51800 | 51.66580 | 76.56390 | -351.41515  | 21.40122    | 706.87807   | 1 |
| 1161 | O | 81.53100 | 53.20380 | 77.76190 | 286.97340   | 74.62546    | 731.91840   | 1 |
| 1162 | C | 81.81100 | 55.96680 | 74.36290 | 205.71236   | 700.87909   | -545.80393  | 1 |
| 1163 | O | 82.31600 | 57.09180 | 74.51690 | 411.41298   | 417.00731   | 529.59560   | 1 |
| 1164 | N | 81.46000 | 55.58180 | 73.12090 | 230.67136   | -741.50725  | -331.10424  | 1 |
| 1165 | H | 80.97900 | 54.71980 | 72.97790 | 2577.54806  | 1047.01609  | 1469.09140  | 1 |
| 1166 | C | 81.68400 | 56.29980 | 71.95890 | 389.38357   | -169.83255  | -806.83848  | 1 |
| 1167 | H | 82.73300 | 56.54780 | 72.03390 | -1969.42367 | 1749.85328  | -1719.77037 | 1 |
| 1168 | C | 81.30300 | 55.39580 | 70.72990 | -581.59895  | 323.43404   | -623.36513  | 1 |
| 1169 | H | 81.29600 | 56.08680 | 69.85890 | -2342.50797 | -2032.69013 | 528.25512   | 1 |
| 1170 | H | 80.24900 | 55.09180 | 70.90490 | -2701.29281 | 1283.89242  | 976.14733   | 1 |
| 1171 | C | 82.34400 | 54.32980 | 70.40590 | 45.24449    | -679.72194  | 606.12047   | 1 |
| 1172 | H | 82.91800 | 54.03380 | 71.31090 | -1064.36985 | 1985.27929  | 2196.36272  | 1 |

|      |   |          |          |          |             |             |             |   |
|------|---|----------|----------|----------|-------------|-------------|-------------|---|
| 1173 | H | 83.11200 | 54.74680 | 69.71990 | -611.85400  | -2639.79983 | 1598.53612  | 1 |
| 1174 | C | 81.85800 | 53.05580 | 69.67590 | 660.61407   | -567.71870  | 269.69526   | 1 |
| 1175 | H | 81.45300 | 53.35580 | 68.68590 | -2517.02422 | -608.94234  | 1786.61818  | 1 |
| 1176 | H | 81.02700 | 52.73880 | 70.34090 | -286.32125  | -1820.26254 | -2550.07660 | 1 |
| 1177 | C | 82.96900 | 51.98280 | 69.53090 | -514.95006  | -516.07252  | 547.67380   | 1 |
| 1178 | H | 83.51800 | 51.86480 | 70.48990 | 1856.94857  | 1393.62275  | 2123.15423  | 1 |
| 1179 | H | 83.71600 | 52.20480 | 68.73890 | 1301.85931  | -1533.97425 | 2418.74173  | 1 |
| 1180 | N | 82.51400 | 50.65680 | 69.16890 | 535.25158   | 528.00295   | 383.91525   | 1 |
| 1181 | H | 82.10400 | 50.74380 | 68.21690 | -169.33332  | 2201.55980  | -2241.13518 | 1 |
| 1182 | H | 83.32800 | 50.00980 | 69.15490 | -692.77952  | 2016.47948  | 2313.45916  | 1 |
| 1183 | H | 81.81100 | 50.26080 | 69.82490 | -1891.10716 | -2335.74071 | 930.72835   | 1 |
| 1184 | C | 80.96500 | 57.63780 | 71.82890 | 831.35342   | -336.52414  | 164.48099   | 1 |
| 1185 | O | 81.52700 | 58.63680 | 71.43890 | 528.41780   | 45.66680    | -585.07812  | 1 |
| 1186 | N | 79.66900 | 57.69580 | 72.21290 | 67.36990    | 405.06377   | -737.60215  | 1 |
| 1187 | H | 79.23700 | 56.80280 | 72.31390 | 1052.74506  | -1323.30612 | 2653.07651  | 1 |
| 1188 | C | 78.91900 | 58.95380 | 72.34290 | 673.98104   | 4.29476     | 614.15154   | 1 |
| 1189 | H | 79.04000 | 59.54580 | 71.44790 | -1796.10232 | 2269.58137  | 1233.38685  | 1 |
| 1190 | C | 77.45800 | 58.71880 | 72.77690 | 817.18460   | -349.45788  | -203.81249  | 1 |
| 1191 | H | 76.82600 | 59.62580 | 72.87990 | -1459.46663 | -662.24447  | 2707.32629  | 1 |
| 1192 | H | 77.44500 | 58.21880 | 73.76890 | -2750.54998 | 1059.53428  | 1100.04007  | 1 |
| 1193 | C | 76.64300 | 57.82380 | 71.87090 | 570.71445   | -85.92804   | 705.94079   | 1 |
| 1194 | C | 76.58300 | 58.10480 | 70.48090 | 196.61060   | -845.10815  | -280.33459  | 1 |
| 1195 | H | 77.12200 | 58.96280 | 70.10690 | -2022.26458 | 1442.80133  | -1930.54307 | 1 |
| 1196 | C | 75.81100 | 57.35880 | 69.59390 | -620.67473  | -144.62225  | 652.14898   | 1 |
| 1197 | H | 75.76500 | 57.60680 | 68.54390 | -1774.85020 | -1785.31973 | -1886.99933 | 1 |
| 1198 | C | 75.22600 | 56.17080 | 70.00690 | 507.99053   | -715.82818  | 246.95473   | 1 |
| 1199 | O | 74.53900 | 55.28780 | 69.16190 | 636.89690   | 24.24144    | 466.26378   | 1 |
| 1200 | H | 74.41500 | 54.44180 | 69.59890 | -1229.13574 | -2728.82755 | -970.02668  | 1 |
| 1201 | C | 75.90500 | 56.70580 | 72.30390 | -438.06824  | -219.52237  | 768.99750   | 1 |
| 1202 | H | 75.83900 | 56.41280 | 73.34090 | -1389.16845 | 2304.19206  | 1630.68580  | 1 |
| 1203 | C | 75.30900 | 55.81680 | 71.36490 | -138.47807  | 486.79549   | -758.48862  | 1 |
| 1204 | H | 74.94300 | 54.87280 | 71.74090 | 1875.29069  | 1905.15049  | -1658.88899 | 1 |
| 1205 | C | 79.49600 | 59.91880 | 73.36590 | 314.93220   | -626.23050  | 583.18443   | 1 |
| 1206 | O | 79.75100 | 61.08780 | 73.13790 | 166.40047   | 34.09026    | -771.21720  | 1 |
| 1207 | N | 79.82100 | 59.45580 | 74.55290 | -641.07289  | -340.81376  | -430.74798  | 1 |
| 1208 | H | 79.68400 | 58.49580 | 74.78390 | 2770.00984  | -1453.88336 | -333.90849  | 1 |
| 1209 | C | 80.44200 | 60.30880 | 75.56290 | -729.93127  | 358.94081   | -412.08353  | 1 |
| 1210 | H | 79.90500 | 61.24580 | 75.55490 | -2787.83190 | -900.98633  | -1146.49167 | 1 |
| 1211 | C | 80.24100 | 59.73180 | 76.98690 | 332.98027   | 551.74550   | -645.09848  | 1 |
| 1212 | H | 80.77400 | 60.48080 | 77.61190 | 2466.17135  | 124.53770   | 1949.54237  | 1 |
| 1213 | H | 80.74600 | 58.75980 | 77.17490 | -1127.69053 | 2483.20785  | -1568.50855 | 1 |
| 1214 | C | 78.72500 | 59.53680 | 77.40490 | -655.38688  | 470.08820   | -425.36587  | 1 |
| 1215 | H | 78.16700 | 60.42180 | 77.03090 | 2662.62756  | 1561.17670  | -609.39974  | 1 |
| 1216 | H | 78.24300 | 58.62080 | 77.00190 | -2099.73270 | -1947.48585 | 1302.55430  | 1 |
| 1217 | C | 78.50600 | 59.36680 | 78.91590 | 31.97752    | 198.73558   | 889.34392   | 1 |
| 1218 | H | 78.94700 | 58.43680 | 79.33590 | -74.44478   | 2293.05552  | 2152.80760  | 1 |
| 1219 | H | 77.42800 | 59.16480 | 79.09190 | -1970.42781 | -1072.69218 | 2205.66815  | 1 |
| 1220 | N | 79.05000 | 60.55680 | 79.71390 | -229.64616  | 496.03660   | 643.33710   | 1 |
| 1221 | H | 79.41200 | 61.35180 | 79.22890 | 833.13704   | -2924.64675 | -806.56697  | 1 |
| 1222 | C | 79.10800 | 60.62180 | 81.05290 | 124.60381   | -647.79417  | -629.51379  | 1 |
| 1223 | N | 78.65600 | 59.79180 | 81.93890 | -677.75721  | -278.89576  | 418.96851   | 1 |
| 1224 | H | 78.00100 | 59.08680 | 81.66790 | -1755.95806 | -2224.39321 | 1366.35001  | 1 |
| 1225 | H | 78.68000 | 60.11080 | 82.88590 | -1983.36234 | -1569.63800 | -1871.02555 | 1 |
| 1226 | N | 79.61200 | 61.72080 | 81.54490 | -334.65245  | -585.25440  | -508.09184  | 1 |
| 1227 | H | 79.92100 | 62.44280 | 80.92490 | -1562.22485 | 1491.63732  | 2287.50909  | 1 |
| 1228 | H | 79.73600 | 61.78780 | 82.53490 | -1795.71036 | 1793.17424  | -1859.61734 | 1 |
| 1229 | C | 81.91100 | 60.65180 | 75.26890 | 616.82672   | 440.14893   | -507.19298  | 1 |
| 1230 | O | 82.34700 | 61.74380 | 75.64890 | 408.96491   | 673.97556   | -46.17215   | 1 |
| 1231 | N | 82.63500 | 59.80580 | 74.56990 | -190.24542  | 70.08760    | -819.49173  | 1 |
| 1232 | H | 82.35300 | 58.85480 | 74.46790 | -2529.63481 | 1462.88648  | 1165.82036  | 1 |
| 1233 | C | 83.96700 | 60.27580 | 74.06590 | 580.48783   | -682.68440  | 168.60276   | 1 |
| 1234 | H | 84.51900 | 60.58080 | 74.94290 | -2015.52347 | -270.18547  | 2400.60225  | 1 |



|      |   |          |          |          |             |             |             |   |
|------|---|----------|----------|----------|-------------|-------------|-------------|---|
| 1235 | C | 84.76500 | 59.15580 | 73.29790 | 807.44994   | -162.97781  | -391.04198  | 1 |
| 1236 | H | 84.27400 | 58.99080 | 72.31490 | -1304.61225 | 1425.38317  | -2482.84029 | 1 |
| 1237 | H | 84.62400 | 58.26080 | 73.94190 | -1610.06251 | 2701.87052  | 76.29298    | 1 |
| 1238 | C | 86.25700 | 59.33680 | 73.14890 | -736.82847  | 197.47386   | 499.53867   | 1 |
| 1239 | H | 86.42000 | 60.38280 | 72.81090 | 2282.69942  | -2080.27261 | -599.97954  | 1 |
| 1240 | C | 86.99400 | 59.10380 | 74.43890 | -132.79600  | 758.65012   | -488.12522  | 1 |
| 1241 | H | 88.03400 | 59.42780 | 74.21690 | 2316.28189  | 2059.60012  | 539.54772   | 1 |
| 1242 | H | 86.66200 | 59.73080 | 75.29390 | 1764.69691  | -1722.13532 | 1954.05245  | 1 |
| 1243 | H | 86.94000 | 58.03480 | 74.73590 | 1618.11774  | 1947.21808  | 1867.68921  | 1 |
| 1244 | C | 86.78800 | 58.36680 | 72.08090 | -33.05601   | 290.32281   | 863.75400   | 1 |
| 1245 | H | 86.63600 | 57.36080 | 72.52590 | -1363.19630 | 2394.79000  | -1518.19067 | 1 |
| 1246 | H | 87.88400 | 58.53880 | 72.02790 | -262.56333  | 2650.23136  | 1674.98074  | 1 |
| 1247 | H | 86.34700 | 58.51580 | 71.07190 | -2542.66483 | 1742.60188  | 629.61931   | 1 |
| 1248 | C | 83.83400 | 61.42680 | 73.15390 | -349.49611  | -412.57976  | -734.22164  | 1 |
| 1249 | O | 84.63000 | 62.37580 | 73.26490 | 653.38230   | 407.13363   | -175.95740  | 1 |
| 1250 | N | 82.85300 | 61.48880 | 72.22890 | -696.62291  | -443.72975  | -174.62165  | 1 |
| 1251 | H | 82.23800 | 60.70680 | 72.16490 | 2557.02351  | 1717.87314  | -639.35033  | 1 |
| 1252 | C | 82.51100 | 62.67080 | 71.40490 | -174.66495  | 893.03350   | -58.60317   | 1 |
| 1253 | H | 83.43700 | 63.02080 | 70.97290 | 2742.09203  | 936.70899   | 1225.45248  | 1 |
| 1254 | C | 81.45100 | 62.39580 | 70.30990 | 654.62704   | 631.74434   | 61.75378    | 1 |
| 1255 | H | 80.52300 | 61.97280 | 70.74890 | -1124.67376 | 1215.25919  | 2675.15986  | 1 |
| 1256 | H | 81.11100 | 63.34480 | 69.84290 | -1237.27166 | -1033.78453 | 2701.60593  | 1 |
| 1257 | N | 83.07400 | 62.04880 | 68.49190 | -65.61244   | -824.28130  | 170.08128   | 1 |
| 1258 | C | 81.94000 | 61.60380 | 69.18490 | 553.72523   | -722.80060  | 48.97612    | 1 |
| 1259 | C | 83.07900 | 61.30880 | 67.38090 | -156.05578  | 800.76146   | -407.28207  | 1 |
| 1260 | H | 83.93400 | 61.31080 | 66.70590 | 2707.28651  | 1600.97032  | 75.63083    | 1 |
| 1261 | N | 82.06700 | 60.43080 | 67.32990 | 27.73325    | 691.53841   | -483.40230  | 1 |
| 1262 | H | 81.96900 | 59.68080 | 66.67590 | 2123.25559  | 2320.04986  | -85.91020   | 1 |
| 1263 | C | 81.28500 | 60.67180 | 68.46190 | 751.95162   | 343.93963   | -384.35049  | 1 |
| 1264 | H | 80.30900 | 60.21780 | 68.57990 | 2039.24247  | 190.54477   | 2388.18112  | 1 |
| 1265 | C | 81.99700 | 63.82580 | 72.29390 | -160.21988  | -892.31250  | -97.77014   | 1 |
| 1266 | O | 82.45800 | 64.95180 | 72.13090 | -742.17490  | 52.02864    | -264.75775  | 1 |
| 1267 | N | 81.10700 | 63.58780 | 73.24290 | -506.89933  | -356.14508  | 573.48587   | 1 |
| 1268 | H | 80.64000 | 62.70880 | 73.29990 | 2261.43733  | 582.87510   | -2108.17079 | 1 |
| 1269 | C | 80.62600 | 64.63480 | 74.15290 | 540.92378   | 420.08690   | 601.97962   | 1 |
| 1270 | H | 80.25900 | 65.41980 | 73.50690 | 1104.64224  | 2675.80596  | -1232.09343 | 1 |
| 1271 | C | 79.51400 | 64.01580 | 75.02690 | 487.40404   | 679.16621   | 364.17243   | 1 |
| 1272 | H | 78.93200 | 63.32680 | 74.37890 | 1781.37923  | -1451.21758 | 2149.15839  | 1 |
| 1273 | H | 80.05900 | 63.34980 | 75.72990 | 2047.54260  | 2138.23628  | -1064.77281 | 1 |
| 1274 | C | 78.65200 | 64.92580 | 75.86790 | 150.99140   | 893.23266   | -103.86534  | 1 |
| 1275 | H | 79.32500 | 65.43280 | 76.59190 | 1577.40469  | -164.99908  | -2717.13010 | 1 |
| 1276 | C | 77.84300 | 65.91680 | 75.11090 | 402.88510   | 394.90242   | -716.37049  | 1 |
| 1277 | H | 78.40300 | 66.58380 | 74.41990 | -2081.17384 | -2130.37170 | -1014.12924 | 1 |
| 1278 | H | 77.04300 | 65.37980 | 74.55790 | 1427.12257  | -2280.78150 | 1630.82284  | 1 |
| 1279 | H | 77.34800 | 66.57180 | 75.85890 | 474.44067   | 676.84145   | -3035.62480 | 1 |
| 1280 | C | 77.73700 | 63.96780 | 76.62590 | 178.26637   | -636.12688  | -628.50194  | 1 |
| 1281 | H | 78.25600 | 63.31880 | 77.36390 | -2268.84858 | -1446.41660 | 1630.46968  | 1 |
| 1282 | H | 77.23500 | 63.24180 | 75.95090 | -2030.35526 | -471.07066  | -2356.68754 | 1 |
| 1283 | H | 77.01400 | 64.60180 | 77.18190 | 1036.87980  | 2968.51869  | -104.89656  | 1 |
| 1284 | C | 81.76100 | 65.29180 | 74.99290 | 343.66896   | 299.69006   | 789.63822   | 1 |
| 1285 | O | 81.80900 | 66.50180 | 75.10190 | 447.19691   | 528.48600   | 379.92722   | 1 |
| 1286 | N | 82.73700 | 64.49880 | 75.49490 | -433.79278  | 387.28297   | -611.97060  | 1 |
| 1287 | H | 82.74800 | 63.51180 | 75.35190 | 2667.48998  | -1434.27704 | -851.80562  | 1 |
| 1288 | C | 84.02000 | 64.94880 | 76.06590 | 574.89745   | -680.42524  | 194.84716   | 1 |
| 1289 | H | 83.77900 | 65.63080 | 76.86790 | -1563.71622 | 1465.41777  | 2303.38199  | 1 |
| 1290 | C | 84.77200 | 63.73480 | 76.76590 | 595.79640   | -682.68278  | -102.08756  | 1 |
| 1291 | H | 85.81700 | 64.05580 | 76.96690 | -1289.96943 | 2325.87140  | 1680.63301  | 1 |
| 1292 | H | 84.71000 | 62.84780 | 76.09990 | 2126.61121  | 2034.22205  | -1112.51591 | 1 |
| 1293 | O | 84.15300 | 63.55380 | 78.01490 | 486.11575   | -42.96009   | -620.86483  | 1 |
| 1294 | H | 84.37800 | 64.25280 | 78.63390 | -1787.26086 | 2063.96930  | 1563.31558  | 1 |
| 1295 | C | 84.93100 | 65.67980 | 75.13190 | -663.49168  | -288.52248  | 554.96358   | 1 |
| 1296 | O | 85.56500 | 66.64980 | 75.53790 | -588.04176  | -513.33378  | -119.67683  | 1 |

|      |   |          |          |          |             |             |             |   |
|------|---|----------|----------|----------|-------------|-------------|-------------|---|
| 1297 | N | 85.05100 | 65.29680 | 73.86190 | -259.51888  | 742.08221   | 307.63002   | 1 |
| 1298 | H | 84.70800 | 64.42780 | 73.51290 | -2106.68035 | -139.62095  | 2332.51583  | 1 |
| 1299 | C | 85.69500 | 66.04380 | 72.82190 | 573.02431   | 366.65430   | -607.17277  | 1 |
| 1300 | H | 86.70800 | 66.33380 | 73.05990 | 2764.78709  | -1501.37226 | -7.74138    | 1 |
| 1301 | C | 85.74100 | 65.15480 | 71.54090 | -133.05896  | -869.20207  | -241.31740  | 1 |
| 1302 | H | 84.87900 | 64.46080 | 71.44990 | 148.62272   | 2088.94663  | -2347.85849 | 1 |
| 1303 | C | 85.79600 | 65.94080 | 70.19390 | 454.61833   | -363.57527  | 701.84486   | 1 |
| 1304 | H | 84.86900 | 66.50480 | 69.95490 | 2551.92878  | -1366.56206 | 1232.23125  | 1 |
| 1305 | H | 85.96200 | 65.21880 | 69.36590 | -1476.37308 | -34.90144   | -2778.00840 | 1 |
| 1306 | H | 86.63500 | 66.66980 | 70.17690 | -1292.00135 | 2545.19150  | 1323.23807  | 1 |
| 1307 | C | 87.01400 | 64.26180 | 71.59490 | -392.54470  | 622.82292   | 538.00676   | 1 |
| 1308 | H | 86.82200 | 63.39980 | 72.26990 | -891.72079  | -2485.89783 | 1709.78719  | 1 |
| 1309 | H | 87.92700 | 64.84480 | 71.84190 | 315.63313   | -2973.12995 | 979.33663   | 1 |
| 1310 | H | 87.23900 | 63.84180 | 70.59090 | -3023.59537 | -818.79082  | 292.70952   | 1 |
| 1311 | C | 84.98600 | 67.39680 | 72.55390 | -382.12363  | -807.35395  | -183.33613  | 1 |
| 1312 | O | 85.69000 | 68.41580 | 72.40690 | 210.25598   | -515.88228  | 559.71879   | 1 |
| 1313 | N | 83.64700 | 67.48780 | 72.47490 | 216.00212   | -314.44842  | -753.08536  | 1 |
| 1314 | H | 83.09500 | 66.66380 | 72.57690 | 1593.33848  | 328.35976   | 2692.89409  | 1 |
| 1315 | C | 82.92000 | 68.76280 | 72.32790 | -515.80784  | 257.10074   | -706.60632  | 1 |
| 1316 | H | 83.22900 | 69.31680 | 71.45390 | 2024.47698  | 1690.93538  | -1714.77600 | 1 |
| 1317 | C | 81.43200 | 68.40580 | 72.15790 | 648.50536   | -302.09253  | 565.35997   | 1 |
| 1318 | H | 80.91900 | 69.33580 | 71.83390 | -1725.51672 | 1315.79795  | -2278.04610 | 1 |
| 1319 | H | 80.92200 | 68.18880 | 73.12090 | -1757.06882 | -1744.11894 | 1941.38727  | 1 |
| 1320 | H | 81.28100 | 67.60480 | 71.40290 | -737.82683  | 1519.08542  | 2654.47119  | 1 |
| 1321 | C | 83.14400 | 69.72080 | 73.44490 | -395.42291  | 812.29268   | 123.58130   | 1 |
| 1322 | O | 83.43900 | 70.90080 | 73.25090 | 539.79206   | 559.36134   | -139.16412  | 1 |
| 1323 | N | 83.00700 | 69.24380 | 74.69190 | -34.22935   | 573.50717   | -618.53873  | 1 |
| 1324 | H | 82.62000 | 68.33680 | 74.84090 | 2966.83186  | 973.23497   | 385.93867   | 1 |
| 1325 | C | 83.27700 | 70.00580 | 75.90190 | 873.70478   | 24.39264    | 259.79983   | 1 |
| 1326 | H | 82.61000 | 70.85480 | 75.90990 | -2612.51722 | -285.31065  | 1729.61782  | 1 |
| 1327 | C | 83.12800 | 69.09680 | 77.13590 | -189.12856  | -631.34043  | 630.15130   | 1 |
| 1328 | H | 83.48300 | 69.52780 | 78.09690 | -429.88148  | 1737.22478  | 2587.56221  | 1 |
| 1329 | H | 83.61800 | 68.12180 | 76.92790 | 552.37381   | -3048.72003 | -546.27430  | 1 |
| 1330 | C | 81.58900 | 68.79880 | 77.42290 | 506.34032   | 746.12677   | -135.51871  | 1 |
| 1331 | O | 80.75700 | 69.59680 | 76.91990 | 634.58558   | 468.81093   | 33.83312    | 1 |
| 1332 | O | 81.33500 | 67.81580 | 78.15690 | -681.02272  | -129.27330  | -378.31692  | 1 |
| 1333 | C | 84.71100 | 70.58080 | 75.95190 | 717.95488   | 52.30739    | 559.69253   | 1 |
| 1334 | O | 84.86800 | 71.75680 | 76.30490 | -392.94383  | -427.35786  | 535.33880   | 1 |
| 1335 | N | 85.74100 | 69.79480 | 75.67590 | -415.04889  | 265.39372   | -685.54568  | 1 |
| 1336 | H | 85.60700 | 68.83480 | 75.43990 | 2137.04559  | -2200.43123 | 699.54610   | 1 |
| 1337 | C | 87.13300 | 70.09780 | 75.63590 | -188.65217  | -889.33474  | -70.32133   | 1 |
| 1338 | H | 87.32400 | 70.52680 | 76.60790 | 1091.87028  | -2116.68285 | 2055.65056  | 1 |
| 1339 | C | 87.91400 | 68.77880 | 75.41390 | 489.60820   | -592.84580  | 490.17207   | 1 |
| 1340 | H | 87.59900 | 68.21680 | 74.50790 | 700.09827   | 2650.52625  | 1543.63184  | 1 |
| 1341 | H | 87.63200 | 68.11480 | 76.25890 | -2482.03662 | 1382.94635  | 1350.99216  | 1 |
| 1342 | C | 89.44000 | 68.82480 | 75.48290 | 692.80416   | 570.40126   | -161.60383  | 1 |
| 1343 | H | 89.72900 | 69.58180 | 74.72290 | 298.18466   | -1746.60285 | 2599.74818  | 1 |
| 1344 | C | 89.94100 | 69.29480 | 76.88690 | 181.95516   | 681.49958   | 577.84223   | 1 |
| 1345 | H | 89.75800 | 68.53080 | 77.67190 | 2543.27422  | 1849.91670  | -88.26466   | 1 |
| 1346 | H | 91.05200 | 69.32680 | 76.88190 | 1546.58761  | 710.38340   | 2646.06281  | 1 |
| 1347 | H | 89.44900 | 70.26980 | 77.09490 | 2913.61036  | 807.48848   | 870.09380   | 1 |
| 1348 | C | 89.95100 | 67.43480 | 75.03090 | -434.95320  | -440.02011  | 669.81267   | 1 |
| 1349 | H | 89.65900 | 67.25180 | 73.97490 | -2229.65148 | -1205.77526 | 1863.59505  | 1 |
| 1350 | H | 91.05800 | 67.51580 | 75.08490 | -2346.62516 | 2037.49304  | -490.10068  | 1 |
| 1351 | H | 89.58900 | 66.62280 | 75.69590 | 2317.98498  | 2115.13878  | 226.62696   | 1 |
| 1352 | C | 87.46200 | 71.14180 | 74.60090 | 243.29597   | -515.30183  | 711.84416   | 1 |
| 1353 | O | 88.19800 | 72.07180 | 74.83790 | 242.16191   | -373.73155  | 652.15762   | 1 |
| 1354 | N | 86.84400 | 71.04980 | 73.39090 | -206.19084  | -790.70397  | 212.00203   | 1 |
| 1355 | H | 86.17000 | 70.32580 | 73.26190 | -2329.37301 | -1645.87292 | 1327.91187  | 1 |
| 1356 | C | 87.01800 | 71.85880 | 72.20590 | -797.26164  | -385.05976  | -218.06846  | 1 |
| 1357 | H | 88.03400 | 71.65880 | 71.90090 | -1368.50983 | -1180.41086 | -2575.27421 | 1 |
| 1358 | C | 86.05600 | 71.26180 | 71.07990 | -544.54715  | -641.45881  | 351.35453   | 1 |

|      |   |          |          |          |             |             |             |   |
|------|---|----------|----------|----------|-------------|-------------|-------------|---|
| 1359 | H | 85.03600 | 71.30180 | 71.51890 | 1898.93754  | -2218.42496 | 1170.83439  | 1 |
| 1360 | H | 86.42000 | 70.23180 | 70.88090 | -1156.17871 | -2079.34627 | 2058.59080  | 1 |
| 1361 | C | 86.06000 | 71.96180 | 69.68690 | -557.49996  | 616.60391   | -374.75914  | 1 |
| 1362 | H | 85.52600 | 72.93580 | 69.71790 | 1897.10684  | -331.51851  | 2487.83186  | 1 |
| 1363 | C | 87.48200 | 72.28980 | 69.17990 | 222.43514   | -630.28591  | -620.25259  | 1 |
| 1364 | H | 88.21400 | 71.45680 | 69.22790 | 757.91180   | 3044.92607  | 228.51948   | 1 |
| 1365 | H | 87.92000 | 73.10780 | 69.79090 | -673.91154  | 2373.74099  | -1951.77436 | 1 |
| 1366 | H | 87.44600 | 72.71180 | 68.15290 | 1938.39703  | 1427.72827  | 2025.44691  | 1 |
| 1367 | C | 85.20100 | 71.16880 | 68.59090 | 73.40772    | -590.80600  | 690.65952   | 1 |
| 1368 | H | 85.60800 | 70.14180 | 68.47390 | 358.89761   | -2861.34974 | 1257.81414  | 1 |
| 1369 | H | 84.15200 | 71.20580 | 68.95590 | -2358.21230 | 2029.33669  | -467.81789  | 1 |
| 1370 | H | 85.20300 | 71.73380 | 67.63390 | 1743.93046  | -27.50855   | -2618.43007 | 1 |
| 1371 | C | 86.64900 | 73.30080 | 72.42790 | 172.18240   | -757.68989  | 477.18996   | 1 |
| 1372 | O | 87.45100 | 74.21280 | 72.17190 | 122.55922   | -369.80880  | -686.91187  | 1 |
| 1373 | N | 85.50800 | 73.52580 | 73.11090 | 162.34887   | -288.33841  | -776.64412  | 1 |
| 1374 | H | 84.97100 | 72.71180 | 73.31890 | 2621.72506  | -1513.35586 | -857.05191  | 1 |
| 1375 | C | 85.11500 | 74.80280 | 73.59690 | 627.09744   | -477.05513  | 458.93159   | 1 |
| 1376 | H | 85.32400 | 75.60080 | 72.90090 | 1530.70822  | 1534.00608  | -2280.78581 | 1 |
| 1377 | C | 83.55300 | 74.85180 | 73.84290 | 675.88439   | 204.91434   | 576.75073   | 1 |
| 1378 | H | 83.38800 | 74.05380 | 74.59790 | -1785.28981 | -1117.81202 | 2336.97728  | 1 |
| 1379 | H | 83.04800 | 74.70080 | 72.86490 | -1449.53844 | -2337.75312 | 1527.08051  | 1 |
| 1380 | C | 83.06600 | 76.20680 | 74.31390 | -316.55822  | 790.68701   | 325.66234   | 1 |
| 1381 | C | 83.49400 | 77.39480 | 73.61290 | -683.51343  | 354.64960   | 488.34830   | 1 |
| 1382 | H | 84.09300 | 77.25680 | 72.72490 | -727.13514  | 2292.88436  | -2027.85158 | 1 |
| 1383 | C | 83.02700 | 78.64780 | 74.04590 | 593.16071   | -653.76433  | -228.48102  | 1 |
| 1384 | H | 83.34500 | 79.53480 | 73.51790 | 2491.16766  | 408.28340   | 1877.66200  | 1 |
| 1385 | C | 82.11700 | 78.73280 | 75.12690 | -66.97421   | 795.26514   | -441.04288  | 1 |
| 1386 | H | 81.80600 | 79.73380 | 75.39090 | -2023.60898 | 283.96525   | 2392.19495  | 1 |
| 1387 | C | 82.25700 | 76.31380 | 75.36790 | 516.22629   | 691.61670   | -294.32595  | 1 |
| 1388 | H | 81.88900 | 75.42480 | 75.85690 | -283.41445  | 3128.62409  | -172.08652  | 1 |
| 1389 | C | 81.80600 | 77.52180 | 75.83390 | 161.00809   | -648.26628  | -620.70785  | 1 |
| 1390 | H | 81.02300 | 77.59480 | 76.57490 | 1616.68512  | 1950.46833  | 1865.53712  | 1 |
| 1391 | C | 85.85600 | 75.28680 | 74.89890 | 558.42224   | -319.32804  | 646.25476   | 1 |
| 1392 | O | 86.21200 | 76.46780 | 74.94090 | -617.03132  | -329.65839  | 366.36720   | 1 |
| 1393 | N | 86.17100 | 74.39980 | 75.83690 | 365.84895   | 181.75465   | 738.77743   | 1 |
| 1394 | H | 86.02200 | 73.41680 | 75.76590 | -963.78762  | 622.65670   | 2929.44334  | 1 |
| 1395 | C | 86.82000 | 74.75980 | 77.14490 | 92.88478    | -707.91608  | 567.16686   | 1 |
| 1396 | H | 86.15300 | 75.48880 | 77.57990 | -2690.93431 | 370.99464   | 1587.28125  | 1 |
| 1397 | C | 86.94000 | 73.58780 | 78.11590 | 410.88764   | 701.60620   | -412.76033  | 1 |
| 1398 | H | 87.14500 | 72.68280 | 77.50590 | 2428.38666  | 1806.31783  | 859.29061   | 1 |
| 1399 | C | 88.11000 | 73.73880 | 79.17790 | 432.87521   | -784.56392  | -168.90679  | 1 |
| 1400 | H | 89.11200 | 73.50380 | 78.75790 | -2802.28668 | 8.86839     | -1430.15277 | 1 |
| 1401 | H | 87.89000 | 73.00680 | 79.98390 | 1689.26299  | -2020.98145 | 1720.53793  | 1 |
| 1402 | H | 88.01200 | 74.79180 | 79.51590 | -2365.18424 | 1456.71194  | -1477.20008 | 1 |
| 1403 | C | 85.60400 | 73.41880 | 78.88190 | 489.21410   | 391.20761   | 662.62898   | 1 |
| 1404 | H | 85.67200 | 72.50580 | 79.51190 | 2305.33576  | 1919.54368  | -948.15892  | 1 |
| 1405 | H | 85.36200 | 74.27280 | 79.54890 | 1150.20989  | -2924.23098 | -155.29525  | 1 |
| 1406 | H | 84.74200 | 73.40480 | 78.18090 | 848.83691   | -2268.82709 | 2007.51732  | 1 |
| 1407 | C | 88.17300 | 75.40380 | 76.92690 | 269.85313   | -698.95484  | -519.70416  | 1 |
| 1408 | O | 88.54300 | 76.32780 | 77.61390 | 222.86699   | -474.16548  | -590.86769  | 1 |
| 1409 | N | 88.89700 | 74.85580 | 75.91890 | -237.45874  | -514.82712  | -625.49074  | 1 |
| 1410 | H | 88.53000 | 74.08180 | 75.40890 | -401.06002  | 2256.45471  | 2155.40930  | 1 |
| 1411 | C | 90.29200 | 75.32580 | 75.66290 | -228.46060  | -244.74551  | 848.14880   | 1 |
| 1412 | H | 90.89600 | 75.29980 | 76.55790 | 2246.14420  | 1860.68591  | -1179.36865 | 1 |
| 1413 | C | 90.95300 | 74.41080 | 74.56690 | 341.32691   | 764.75637   | 360.68634   | 1 |
| 1414 | H | 90.23300 | 74.14880 | 73.76190 | 2554.11733  | 1652.47885  | 802.51140   | 1 |
| 1415 | C | 92.24400 | 75.00980 | 73.95790 | -637.87628  | 639.76897   | 123.53346   | 1 |
| 1416 | H | 92.97600 | 75.11480 | 74.78690 | -1452.19126 | 1638.97488  | 2259.01043  | 1 |
| 1417 | H | 92.67300 | 74.27880 | 73.23890 | 1802.54928  | -2168.26235 | 1395.59331  | 1 |
| 1418 | H | 91.99400 | 75.90680 | 73.35290 | 2254.70122  | -2192.03053 | -97.72796   | 1 |
| 1419 | C | 91.30800 | 73.01580 | 75.20290 | 580.51474   | -213.05230  | -670.12115  | 1 |
| 1420 | H | 90.39500 | 72.66380 | 75.72790 | -1253.55495 | 2442.55631  | 1536.47157  | 1 |

|      |   |          |          |          |             |             |             |   |
|------|---|----------|----------|----------|-------------|-------------|-------------|---|
| 1421 | H | 92.16300 | 73.06880 | 75.90890 | -2566.35490 | -1170.15823 | -1393.83589 | 1 |
| 1422 | C | 91.58000 | 71.93880 | 74.11790 | -544.80879  | 723.46474   | 105.98658   | 1 |
| 1423 | H | 92.58900 | 72.13780 | 73.69690 | -1849.55825 | 1926.39631  | 1663.23713  | 1 |
| 1424 | H | 90.83500 | 71.82580 | 73.30090 | 3081.44701  | 557.50540   | 303.47698   | 1 |
| 1425 | H | 91.68900 | 70.94580 | 74.60390 | 1172.41242  | 2849.92965  | -633.70050  | 1 |
| 1426 | C | 90.27000 | 76.76580 | 75.16090 | 43.99705    | 529.99175   | -740.69157  | 1 |
| 1427 | O | 91.26100 | 77.50980 | 75.35290 | -669.29467  | -418.02486  | -30.44806   | 1 |
| 1428 | N | 89.15800 | 77.21180 | 74.50990 | -185.76579  | -545.19233  | -617.19420  | 1 |
| 1429 | H | 88.43600 | 76.60280 | 74.19090 | 1200.96570  | 1543.34285  | 2464.54873  | 1 |
| 1430 | C | 89.12800 | 78.59280 | 74.10490 | 384.61821   | 503.00683   | 656.12801   | 1 |
| 1431 | H | 90.03400 | 78.84180 | 73.57190 | 1476.59375  | -1263.13412 | -2474.34624 | 1 |
| 1432 | C | 87.93400 | 78.86780 | 73.12990 | -21.66292   | -737.14628  | 536.28078   | 1 |
| 1433 | H | 88.03500 | 79.86580 | 72.65290 | 882.49886   | -2368.00120 | -1874.03103 | 1 |
| 1434 | O | 86.60800 | 78.75480 | 73.78290 | 501.75101   | -525.68570  | 309.07555   | 1 |
| 1435 | H | 86.49900 | 77.90180 | 74.21090 | 3140.14368  | 27.99916    | 192.19760   | 1 |
| 1436 | C | 87.97000 | 77.75680 | 72.01390 | -713.52948  | -542.73673  | -166.62390  | 1 |
| 1437 | H | 87.68400 | 76.74380 | 72.36890 | 1938.00761  | 2469.06701  | -214.61793  | 1 |
| 1438 | H | 87.16200 | 78.06680 | 71.31790 | 1565.64258  | -1314.16470 | -2391.64393 | 1 |
| 1439 | H | 88.96600 | 77.83780 | 71.52890 | 202.51630   | -1564.01020 | 2722.33089  | 1 |
| 1440 | C | 88.96700 | 79.58880 | 75.24390 | -546.08792  | -598.26994  | -418.70284  | 1 |
| 1441 | O | 89.33600 | 80.75080 | 75.13190 | -473.21638  | -515.99724  | -365.29486  | 1 |
| 1442 | N | 88.46200 | 79.15180 | 76.40990 | -43.52075   | -816.92906  | -208.33901  | 1 |
| 1443 | H | 88.27300 | 78.17780 | 76.50590 | -1752.13224 | -1467.47552 | -2162.12267 | 1 |
| 1444 | C | 88.07500 | 80.00680 | 77.54090 | -22.34412   | 188.91236   | 891.77568   | 1 |
| 1445 | H | 87.30100 | 80.66680 | 77.17790 | 2302.06814  | 330.51885   | -2118.83595 | 1 |
| 1446 | C | 87.30500 | 79.28680 | 78.65090 | -594.77166  | 183.24338   | -666.42294  | 1 |
| 1447 | H | 87.05400 | 79.85480 | 79.57290 | -1998.90857 | 1716.74723  | -1719.11887 | 1 |
| 1448 | H | 87.98500 | 78.45680 | 78.93890 | 48.26060    | -2588.39189 | 1787.77084  | 1 |
| 1449 | C | 85.94700 | 78.73980 | 78.20890 | -391.05240  | 313.85106   | 761.59473   | 1 |
| 1450 | H | 86.02600 | 78.13580 | 77.27990 | -2803.23397 | 1413.33989  | -206.33925  | 1 |
| 1451 | C | 85.44800 | 77.83980 | 79.37790 | -895.95207  | -10.76464   | -169.13015  | 1 |
| 1452 | H | 86.11200 | 76.94880 | 79.37190 | 227.33190   | -2794.30265 | -1427.73216 | 1 |
| 1453 | H | 85.48900 | 78.35180 | 80.36290 | -2610.76036 | 1750.12024  | -138.69293  | 1 |
| 1454 | H | 84.39600 | 77.56880 | 79.14390 | -3046.09747 | -127.33998  | 776.72450   | 1 |
| 1455 | C | 84.96300 | 79.87180 | 77.92290 | -896.33437  | 84.57238    | 144.51028   | 1 |
| 1456 | H | 85.05400 | 80.27480 | 76.89190 | 2459.16703  | 1961.86027  | 42.75521    | 1 |
| 1457 | H | 85.04300 | 80.76780 | 78.57490 | -1997.82917 | -1897.36799 | -1518.84809 | 1 |
| 1458 | H | 83.95600 | 79.43980 | 78.10290 | 832.03319   | -1456.25588 | -2661.81626 | 1 |
| 1459 | C | 89.17800 | 80.94580 | 78.08890 | -711.38404  | 491.58397   | 289.35955   | 1 |
| 1460 | O | 88.80600 | 82.04980 | 78.42590 | 650.20613   | 447.96805   | 13.55916    | 1 |
| 1461 | N | 90.47200 | 80.68380 | 78.13390 | -569.16004  | -19.26878   | 623.18364   | 1 |
| 1462 | C | 90.96500 | 79.30680 | 78.36890 | -409.24103  | -448.61170  | -680.23550  | 1 |
| 1463 | H | 91.18800 | 78.92780 | 77.34790 | -1619.60431 | 1655.05126  | 2129.76839  | 1 |
| 1464 | H | 90.26700 | 78.62680 | 78.90290 | -1439.77459 | -1857.19598 | -2091.91263 | 1 |
| 1465 | C | 91.54100 | 81.64680 | 78.45690 | -29.16890   | -449.96339  | -792.54850  | 1 |
| 1466 | H | 91.23900 | 81.98780 | 79.43590 | 1756.31519  | -1808.82317 | -1881.95163 | 1 |
| 1467 | C | 92.73700 | 80.82480 | 78.49790 | -842.40104  | 144.23372   | -317.81774  | 1 |
| 1468 | H | 93.63600 | 81.30280 | 78.94390 | 415.84241   | -1809.51773 | 2539.87143  | 1 |
| 1469 | H | 93.12400 | 80.48380 | 77.51490 | 16.29837    | -2368.52761 | -2070.75773 | 1 |
| 1470 | C | 92.24000 | 79.53580 | 79.14890 | -347.10386  | -211.95636  | 816.11544   | 1 |
| 1471 | H | 92.99800 | 78.74380 | 78.96890 | -2027.24786 | 2403.32760  | -111.84286  | 1 |
| 1472 | H | 92.10900 | 79.69280 | 80.24090 | 1908.09932  | 919.17948   | -2326.47637 | 1 |
| 1473 | C | 91.62700 | 82.88080 | 77.58990 | 248.42227   | 689.14329   | -542.97228  | 1 |
| 1474 | O | 92.02600 | 83.95080 | 78.05690 | 149.28934   | -171.04220  | 756.36267   | 1 |
| 1475 | N | 91.29900 | 82.78080 | 76.30590 | -331.25744  | 596.28516   | -497.37794  | 1 |
| 1476 | H | 91.10600 | 81.91780 | 75.84690 | 1445.82965  | 2792.18114  | -107.36550  | 1 |
| 1477 | C | 91.14300 | 83.99380 | 75.47590 | 612.29400   | -318.80955  | -595.74116  | 1 |
| 1478 | H | 92.02900 | 84.60980 | 75.52090 | 341.74386   | 2835.43554  | 1319.75097  | 1 |
| 1479 | C | 90.89300 | 83.53080 | 73.98690 | 517.51697   | -499.03601  | -560.88346  | 1 |
| 1480 | H | 89.88900 | 83.05780 | 73.93690 | 2128.87328  | 1637.00740  | 1639.00321  | 1 |
| 1481 | H | 90.85600 | 84.47980 | 73.41090 | -1256.47112 | 2228.18795  | -1831.57992 | 1 |
| 1482 | C | 92.01000 | 82.69580 | 73.39690 | -547.41416  | 493.30768   | 537.06264   | 1 |

|      |   |          |          |          |             |             |             |   |
|------|---|----------|----------|----------|-------------|-------------|-------------|---|
| 1483 | C | 93.29400 | 83.19280 | 73.34590 | 786.37913   | -200.80348  | 415.61620   | 1 |
| 1484 | H | 93.55400 | 84.19180 | 73.66590 | 2082.03614  | 1130.29365  | -2070.21448 | 1 |
| 1485 | C | 94.39900 | 82.58680 | 72.68290 | -618.47257  | -290.02323  | 604.01093   | 1 |
| 1486 | H | 95.32400 | 83.13780 | 72.59590 | 655.95752   | 2022.12489  | 2319.25783  | 1 |
| 1487 | C | 94.10100 | 81.35380 | 72.07090 | 600.09640   | 408.89255   | 551.49089   | 1 |
| 1488 | H | 94.80900 | 80.81280 | 71.46190 | 2045.02833  | -1258.14154 | -2033.01875 | 1 |
| 1489 | C | 91.83500 | 81.41480 | 72.88390 | -370.64793  | -315.48317  | -771.06516  | 1 |
| 1490 | H | 90.85900 | 80.95880 | 72.95990 | 2820.84396  | 1337.61107  | -389.69505  | 1 |
| 1491 | C | 92.82900 | 80.73080 | 72.21990 | 278.11087   | 868.36814   | -6.49039    | 1 |
| 1492 | H | 92.53500 | 79.82280 | 71.71490 | 666.69203   | -2802.82065 | 1264.09824  | 1 |
| 1493 | C | 90.05300 | 84.85580 | 75.95490 | 652.77190   | 565.18946   | -293.08825  | 1 |
| 1494 | O | 90.11200 | 86.05780 | 76.01790 | 493.61018   | 200.67176   | 582.84394   | 1 |
| 1495 | N | 88.89800 | 84.23980 | 76.38290 | -68.55996   | -686.47804  | 486.53851   | 1 |
| 1496 | H | 88.83200 | 83.24980 | 76.48090 | 1531.30311  | 541.27594   | -2694.50503 | 1 |
| 1497 | C | 87.77100 | 84.95680 | 77.05290 | -791.18086  | 69.28925    | 447.97639   | 1 |
| 1498 | H | 87.44200 | 85.79080 | 76.45090 | -3066.76104 | 158.53757   | 684.15553   | 1 |
| 1499 | C | 86.55800 | 84.09580 | 77.20590 | 170.10671   | 496.42605   | 745.70496   | 1 |
| 1500 | H | 85.74200 | 84.75480 | 77.57290 | -13.09365   | 1988.53377  | 2437.98856  | 1 |
| 1501 | H | 86.63600 | 83.28580 | 77.96190 | -1439.65630 | -2248.20643 | 1664.68730  | 1 |
| 1502 | C | 85.94200 | 83.48480 | 75.94290 | -435.11005  | -533.77840  | -597.67121  | 1 |
| 1503 | C | 86.43200 | 82.68380 | 74.93490 | -338.30142  | 779.26114   | 331.29328   | 1 |
| 1504 | H | 87.49000 | 82.51880 | 74.79890 | 2684.63309  | -1076.73425 | 1237.58425  | 1 |
| 1505 | N | 85.42800 | 82.11980 | 74.20990 | -285.59101  | 719.79103   | 336.17099   | 1 |
| 1506 | H | 85.59200 | 81.26780 | 73.76190 | -655.80785  | 1782.74557  | -2507.97937 | 1 |
| 1507 | C | 84.25200 | 82.63580 | 74.59690 | 748.67870   | -449.43296  | -262.56661  | 1 |
| 1508 | C | 84.51500 | 83.48880 | 75.69290 | 567.91079   | 473.39531   | 533.69019   | 1 |
| 1509 | C | 83.41000 | 84.02980 | 76.41090 | -681.13713  | 147.45827   | 588.01299   | 1 |
| 1510 | H | 83.66700 | 84.57280 | 77.30890 | -3135.43706 | -243.59415  | -89.00881   | 1 |
| 1511 | C | 82.13800 | 83.76480 | 75.96090 | -655.08090  | -465.58235  | 430.75873   | 1 |
| 1512 | H | 81.32000 | 84.18880 | 76.52390 | 2399.43516  | -859.68149  | 1844.41993  | 1 |
| 1513 | C | 82.96000 | 82.40980 | 74.11690 | -616.67597  | -657.02197  | 139.58467   | 1 |
| 1514 | H | 82.82800 | 81.82880 | 73.21690 | 3104.40561  | -417.61983  | 294.08451   | 1 |
| 1515 | C | 81.86200 | 82.98280 | 74.83290 | -43.05539   | 653.94095   | 634.00195   | 1 |
| 1516 | H | 80.85600 | 82.74780 | 74.51690 | 1531.88442  | -1265.78041 | 2439.13024  | 1 |
| 1517 | C | 88.12000 | 85.62380 | 78.36990 | 603.66975   | -274.54961  | 625.82454   | 1 |
| 1518 | O | 87.76800 | 86.75980 | 78.66290 | -446.35243  | 452.83276   | -468.33667  | 1 |
| 1519 | N | 88.88700 | 84.89880 | 79.22090 | -38.26233   | 140.60432   | -831.52794  | 1 |
| 1520 | H | 89.17100 | 83.95280 | 79.08290 | -2208.21740 | -2231.00887 | -211.19081  | 1 |
| 1521 | C | 89.39800 | 85.43280 | 80.43590 | -184.12626  | -726.89566  | -518.81713  | 1 |
| 1522 | H | 88.57400 | 85.71980 | 81.07390 | -1063.25225 | 2892.21071  | -634.69530  | 1 |
| 1523 | C | 90.14400 | 84.27080 | 81.25390 | 380.34768   | -503.85067  | 657.96744   | 1 |
| 1524 | H | 90.98300 | 83.74980 | 80.74590 | 2224.12780  | 1539.57874  | -1606.60483 | 1 |
| 1525 | H | 89.46800 | 83.42280 | 81.49390 | -1277.95220 | 882.25521   | -2736.18167 | 1 |
| 1526 | H | 90.53800 | 84.71780 | 82.19190 | -2540.64013 | -1854.78556 | -56.07572   | 1 |
| 1527 | C | 90.32000 | 86.64080 | 80.29190 | -256.45285  | 659.79444   | 574.76450   | 1 |
| 1528 | O | 90.28400 | 87.59680 | 81.05490 | -277.60373  | 739.16779   | -13.94214   | 1 |
| 1529 | N | 91.18600 | 86.59780 | 79.21590 | -513.28625  | -467.09751  | 480.65520   | 1 |
| 1530 | H | 91.21500 | 85.75680 | 78.68190 | -1275.27019 | -972.57294  | -2706.66105 | 1 |
| 1531 | C | 92.03900 | 87.71780 | 78.84690 | 447.74693   | -335.55497  | -719.98372  | 1 |
| 1532 | H | 92.47800 | 88.11080 | 79.75190 | -2280.63503 | 1611.23119  | 1449.43581  | 1 |
| 1533 | C | 93.09200 | 87.28280 | 77.81590 | 774.51532   | 413.88680   | 245.50914   | 1 |
| 1534 | H | 92.62700 | 86.69580 | 76.99490 | 283.29337   | 3129.35837  | 158.38964   | 1 |
| 1535 | C | 93.79800 | 88.48080 | 77.20790 | 312.95632   | 443.58971   | 732.62372   | 1 |
| 1536 | H | 93.17800 | 89.12580 | 76.54890 | -2713.01015 | -503.80515  | -1511.28505 | 1 |
| 1537 | H | 94.33500 | 89.07080 | 77.98190 | 2433.23099  | 1773.46808  | 912.37281   | 1 |
| 1538 | H | 94.65300 | 88.14580 | 76.58190 | -758.90342  | -580.18726  | 2997.61148  | 1 |
| 1539 | C | 94.13000 | 86.37180 | 78.49990 | -40.57310   | -208.98661  | 886.63940   | 1 |
| 1540 | H | 93.76300 | 85.48380 | 79.05690 | 2041.48776  | -2018.16465 | -1287.46472 | 1 |
| 1541 | H | 94.75700 | 86.90380 | 79.24790 | -1069.84244 | -2094.53980 | 2089.63308  | 1 |
| 1542 | H | 94.82300 | 85.90380 | 77.76890 | 1503.58468  | 17.68956    | -2763.53875 | 1 |
| 1543 | C | 91.19400 | 88.88280 | 78.29690 | -641.96273  | -120.53241  | -636.24429  | 1 |
| 1544 | O | 91.40600 | 90.01480 | 78.74490 | -690.55796  | -156.12769  | 349.83007   | 1 |

|      |   |          |          |          |             |             |             |   |
|------|---|----------|----------|----------|-------------|-------------|-------------|---|
| 1545 | N | 90.23800 | 88.61480 | 77.37490 | 522.97310   | 634.92853   | -189.83464  | 1 |
| 1546 | H | 90.14000 | 87.69080 | 77.01490 | -2101.23102 | -1078.31343 | 2078.53183  | 1 |
| 1547 | C | 89.28100 | 89.55280 | 76.77890 | -618.82353  | 633.63615   | -216.82635  | 1 |
| 1548 | H | 89.65800 | 90.38580 | 76.20390 | -2109.39842 | -1040.72630 | -2089.39065 | 1 |
| 1549 | C | 88.31300 | 88.83980 | 75.79790 | 811.21825   | 374.52539   | -181.95242  | 1 |
| 1550 | H | 88.85500 | 88.57180 | 74.86590 | -1532.75225 | -600.88605  | 2681.01338  | 1 |
| 1551 | H | 87.95900 | 87.89680 | 76.26790 | -1177.72058 | -2642.69199 | 1235.87196  | 1 |
| 1552 | C | 87.02600 | 89.57680 | 75.41090 | 51.91506    | 669.11502   | -617.28512  | 1 |
| 1553 | O | 85.94100 | 89.06480 | 75.80290 | 565.61447   | -288.51242  | -469.54030  | 1 |
| 1554 | O | 87.12200 | 90.61380 | 74.76290 | -697.40220  | 276.53110   | 246.55213   | 1 |
| 1555 | C | 88.51600 | 90.34080 | 77.86990 | 602.79954   | 292.72911   | 618.37965   | 1 |
| 1556 | O | 88.38700 | 91.51780 | 77.79990 | -475.72218  | 61.08101    | 627.36333   | 1 |
| 1557 | N | 87.97500 | 89.63880 | 78.90190 | -32.45126   | -697.86445  | -473.92448  | 1 |
| 1558 | H | 87.91400 | 88.64380 | 78.89390 | 2385.90573  | -529.90168  | 1981.13207  | 1 |
| 1559 | C | 87.32900 | 90.35580 | 79.95990 | -46.22999   | 874.98991   | -252.40136  | 1 |
| 1560 | H | 86.53500 | 90.98280 | 79.58190 | -2342.25663 | 639.64327   | 2000.72902  | 1 |
| 1561 | C | 86.68900 | 89.27980 | 80.87890 | 554.24159   | 674.93424   | 262.16605   | 1 |
| 1562 | H | 86.32000 | 89.69880 | 81.83990 | -2030.06461 | 2209.71873  | 945.62520   | 1 |
| 1563 | H | 85.92900 | 88.71280 | 80.29990 | -1649.45627 | -1923.09796 | 1865.26525  | 1 |
| 1564 | H | 87.46500 | 88.49980 | 81.02890 | -1986.22614 | 2365.64006  | -597.39352  | 1 |
| 1565 | C | 88.19100 | 91.24280 | 80.82790 | -439.92803  | 350.92025   | 717.47426   | 1 |
| 1566 | O | 87.79600 | 92.35880 | 81.18590 | 189.18815   | 539.38710   | 544.88222   | 1 |
| 1567 | N | 89.41800 | 90.87680 | 81.17190 | -295.67887  | 730.81473   | -301.92074  | 1 |
| 1568 | H | 89.69500 | 90.00980 | 80.76690 | 996.02180   | 1658.27780  | 2481.18551  | 1 |
| 1569 | C | 90.31000 | 91.79280 | 81.85490 | 259.60763   | -731.97787  | 477.76906   | 1 |
| 1570 | H | 89.66800 | 92.28280 | 82.57190 | 2754.59908  | -393.08571  | 1468.29621  | 1 |
| 1571 | C | 91.35400 | 91.17480 | 82.74790 | -600.40064  | -319.27841  | -607.47953  | 1 |
| 1572 | H | 91.83200 | 91.97280 | 83.35490 | -1436.03615 | 86.86322    | -2797.94231 | 1 |
| 1573 | C | 90.69300 | 90.17980 | 83.69590 | 27.03317    | -470.45225  | -780.63749  | 1 |
| 1574 | H | 90.30300 | 89.29180 | 83.15490 | -1366.98457 | -2425.55716 | 1465.00918  | 1 |
| 1575 | H | 91.32400 | 89.80580 | 84.53090 | 2351.52614  | -565.90061  | 2012.04064  | 1 |
| 1576 | H | 89.88500 | 90.68580 | 84.26490 | 1740.42123  | 1842.53102  | 1863.93123  | 1 |
| 1577 | C | 92.42900 | 90.52180 | 81.87390 | 391.02510   | 817.64146   | 100.06411   | 1 |
| 1578 | H | 92.04900 | 89.60080 | 81.38190 | -1387.23036 | -2392.38410 | -1500.10549 | 1 |
| 1579 | H | 93.26300 | 90.10480 | 82.47690 | 373.15114   | -1974.48924 | -2420.82149 | 1 |
| 1580 | H | 92.82000 | 91.17680 | 81.06590 | -801.75862  | 2126.27475  | -2175.85961 | 1 |
| 1581 | C | 90.91900 | 92.99080 | 81.01890 | -814.87564  | -183.85307  | -365.54993  | 1 |
| 1582 | O | 90.99500 | 94.04580 | 81.54690 | -457.48252  | -34.65367   | -642.75664  | 1 |
| 1583 | N | 91.15100 | 92.74780 | 79.74390 | -701.94588  | 308.97002   | -352.81978  | 1 |
| 1584 | H | 91.02700 | 91.88880 | 79.25190 | 1822.20195  | -2394.51070 | -918.76263  | 1 |
| 1585 | C | 91.85900 | 93.82380 | 79.05390 | -788.84457  | 228.03694   | -396.45226  | 1 |
| 1586 | H | 91.80400 | 94.77680 | 79.55790 | 498.03487   | 3034.33451  | -665.58361  | 1 |
| 1587 | C | 93.39600 | 93.42580 | 78.94790 | 822.56167   | -140.91458  | 367.40494   | 1 |
| 1588 | H | 93.90700 | 93.27780 | 79.92290 | -2731.13987 | 904.23351   | -1273.36680 | 1 |
| 1589 | H | 93.34400 | 92.43980 | 78.43890 | -1566.36053 | 2045.77663  | -1805.41931 | 1 |
| 1590 | H | 94.03400 | 94.09880 | 78.33590 | 8.97752     | -2757.85898 | -1514.05399 | 1 |
| 1591 | C | 91.27100 | 94.10080 | 77.74790 | 729.12815   | -494.44307  | 235.26410   | 1 |
| 1592 | O | 90.48200 | 95.01880 | 77.56790 | 500.74512   | 448.47967   | 414.42434   | 1 |
| 1593 | N | 91.60900 | 93.31480 | 76.69490 | -357.14581  | 594.39578   | -481.46943  | 1 |
| 1594 | H | 92.04900 | 92.43080 | 76.82990 | 271.86231   | 2381.12983  | 2038.26835  | 1 |
| 1595 | C | 91.30100 | 93.63780 | 75.29790 | -415.20874  | -595.33978  | -551.92685  | 1 |
| 1596 | H | 90.34000 | 94.12380 | 75.37790 | 2831.60346  | -1034.15834 | -900.42468  | 1 |
| 1597 | C | 92.45000 | 94.53980 | 74.73790 | -210.78168  | -373.03538  | -804.90166  | 1 |
| 1598 | H | 92.87900 | 95.13680 | 75.57090 | 2113.80486  | -2233.69190 | -663.83410  | 1 |
| 1599 | H | 93.29900 | 93.91580 | 74.38490 | 2628.45076  | 1098.92793  | -1334.85214 | 1 |
| 1600 | C | 91.91400 | 95.54480 | 73.69590 | 432.91686   | -419.46955  | 684.16320   | 1 |
| 1601 | O | 90.72900 | 95.59580 | 73.31890 | 92.18250    | 773.23643   | 131.28229   | 1 |
| 1602 | N | 92.86300 | 96.38480 | 73.12990 | 487.48499   | 295.29831   | 622.75965   | 1 |
| 1603 | H | 93.75000 | 96.60380 | 73.53690 | -1869.21174 | 2527.99467  | -116.26123  | 1 |
| 1604 | H | 92.51900 | 97.13680 | 72.56690 | 793.73848   | -971.56295  | -2885.18126 | 1 |
| 1605 | C | 91.08500 | 92.36180 | 74.55590 | -340.00757  | 263.35053   | -804.04748  | 1 |
| 1606 | O | 91.49600 | 91.28780 | 75.01690 | 412.36475   | -660.96414  | 129.26312   | 1 |

|      |   |          |          |          |             |             |             |   |
|------|---|----------|----------|----------|-------------|-------------|-------------|---|
| 1607 | N | 90.47900 | 92.38580 | 73.30490 | -289.74671  | -755.36442  | 241.13011   | 1 |
| 1608 | H | 89.97500 | 93.16380 | 72.93890 | -1539.89936 | 2671.13697  | 626.06986   | 1 |
| 1609 | C | 90.64100 | 91.40580 | 72.30890 | 613.82568   | 501.44085   | -450.80606  | 1 |
| 1610 | H | 90.74400 | 90.46680 | 72.83190 | -2676.43745 | -1423.76136 | 841.31587   | 1 |
| 1611 | C | 89.32300 | 91.23280 | 71.44490 | 713.43628   | -149.66606  | 547.77710   | 1 |
| 1612 | H | 89.07000 | 92.22380 | 71.01090 | 513.40423   | 3006.12734  | 773.20161   | 1 |
| 1613 | H | 88.52900 | 90.98680 | 72.18190 | -872.40087  | 2274.92978  | 1990.43650  | 1 |
| 1614 | C | 89.38100 | 90.19680 | 70.40690 | -469.14235  | 365.14896   | 691.39185   | 1 |
| 1615 | C | 89.74800 | 90.26480 | 69.06090 | -385.34685  | 347.09750   | -749.98809  | 1 |
| 1616 | H | 90.08100 | 91.14980 | 68.53990 | 370.11855   | -2959.06702 | 1002.57710  | 1 |
| 1617 | N | 89.81500 | 88.98480 | 68.55090 | -780.96216  | 101.13283   | -304.20805  | 1 |
| 1618 | H | 90.11800 | 88.73780 | 67.65690 | 662.58035   | -1620.87833 | -2613.80316 | 1 |
| 1619 | C | 89.35300 | 88.07380 | 69.50790 | 516.30052   | 509.33277   | 552.68879   | 1 |
| 1620 | C | 89.11000 | 88.79080 | 70.71990 | -141.81440  | -289.33260  | 853.01015   | 1 |
| 1621 | C | 88.66200 | 88.15080 | 71.86190 | -626.90096  | -289.66317  | 595.43382   | 1 |
| 1622 | H | 88.49800 | 88.59680 | 72.83190 | -1493.98515 | 1681.96637  | 2199.36894  | 1 |
| 1623 | C | 88.41400 | 86.76380 | 71.73090 | -468.72694  | -173.98367  | 762.54557   | 1 |
| 1624 | H | 87.96700 | 86.19980 | 72.53590 | -258.37376  | -2273.45448 | 2159.36888  | 1 |
| 1625 | C | 89.23900 | 86.75180 | 69.40690 | -125.63511  | 607.35422   | 668.42178   | 1 |
| 1626 | H | 89.56200 | 86.18980 | 68.54290 | -961.10438  | -2665.98358 | 1366.39532  | 1 |
| 1627 | C | 88.77200 | 86.08480 | 70.56790 | 678.50777   | 185.08496   | -580.36348  | 1 |
| 1628 | H | 88.56400 | 85.02480 | 70.57790 | 1.58678     | 2992.48738  | -971.20696  | 1 |
| 1629 | C | 91.94300 | 91.50380 | 71.52590 | -868.67486  | 228.03305   | 157.65761   | 1 |
| 1630 | O | 92.06000 | 92.10180 | 70.44590 | -168.27713  | 519.15118   | -570.78200  | 1 |
| 1631 | N | 93.05400 | 90.91580 | 71.97490 | 588.35131   | 392.32893   | 461.07812   | 1 |
| 1632 | H | 92.96300 | 90.50880 | 72.87990 | -2404.20306 | 1210.10912  | -1629.00884 | 1 |
| 1633 | C | 94.35000 | 91.01880 | 71.30690 | 545.12654   | -590.91712  | -430.23833  | 1 |
| 1634 | H | 94.47500 | 91.98280 | 70.83690 | -2723.83713 | -449.96922  | -1508.79595 | 1 |
| 1635 | C | 95.50600 | 90.81680 | 72.28090 | 617.17126   | -577.27152  | 342.50289   | 1 |
| 1636 | H | 95.55500 | 89.80280 | 72.73090 | 221.04467   | 1342.63407  | 2836.67045  | 1 |
| 1637 | H | 96.44800 | 90.93180 | 71.70190 | -1599.70713 | -1372.43338 | -2335.72043 | 1 |
| 1638 | C | 95.46300 | 91.76080 | 73.45790 | 525.73175   | -149.83966  | -729.79806  | 1 |
| 1639 | C | 96.08900 | 93.01480 | 73.41290 | 384.49096   | 784.11995   | -262.24724  | 1 |
| 1640 | H | 96.54300 | 93.29080 | 72.47290 | 1991.75046  | -238.97278  | 2423.64361  | 1 |
| 1641 | C | 96.24700 | 93.82380 | 74.54290 | -444.31468  | -467.96422  | -644.23983  | 1 |
| 1642 | H | 96.74600 | 94.77980 | 74.47690 | 2397.29218  | -1792.67610 | -968.26073  | 1 |
| 1643 | C | 95.75200 | 93.37480 | 75.75090 | -150.25994  | 544.14336   | 716.08726   | 1 |
| 1644 | O | 96.06400 | 94.08980 | 76.87990 | -441.91258  | -416.02229  | -505.23851  | 1 |
| 1645 | H | 96.57500 | 94.84180 | 76.57290 | 105.42141   | 1991.33354  | -2433.45501 | 1 |
| 1646 | C | 94.92900 | 91.30880 | 74.66790 | -445.63643  | -750.22929  | 264.60383   | 1 |
| 1647 | H | 94.57600 | 90.30380 | 74.84490 | -482.99075  | 2457.88244  | 1903.61763  | 1 |
| 1648 | C | 95.07900 | 92.13080 | 75.81590 | -248.75756  | -46.06779   | 876.04134   | 1 |
| 1649 | H | 94.85900 | 91.71280 | 76.78790 | 1377.59260  | 1996.08186  | -2004.02646 | 1 |
| 1650 | C | 94.51700 | 89.93980 | 70.24890 | -500.29606  | -628.06374  | 432.07730   | 1 |
| 1651 | O | 95.62700 | 89.71980 | 69.69590 | 730.99425   | -259.77389  | -147.62166  | 1 |
| 1652 | N | 93.42300 | 89.21580 | 69.88690 | 390.18621   | 194.34238   | -722.95093  | 1 |
| 1653 | H | 92.54200 | 89.40880 | 70.31290 | 155.94001   | -2428.14804 | 1994.49393  | 1 |
| 1654 | C | 93.58900 | 87.89880 | 69.19190 | -558.27918  | -395.74158  | 602.63087   | 1 |
| 1655 | H | 94.64700 | 87.68580 | 69.22990 | 2318.13742  | -137.23707  | 2122.64720  | 1 |
| 1656 | C | 92.80600 | 86.81180 | 69.94090 | 350.19943   | -783.35971  | -308.47842  | 1 |
| 1657 | H | 93.03100 | 85.85080 | 69.42990 | 2790.97018  | -979.42046  | -1072.12278 | 1 |
| 1658 | H | 91.69800 | 86.86980 | 69.99190 | -2388.59614 | -491.06147  | -1987.88665 | 1 |
| 1659 | C | 93.35000 | 86.83680 | 71.38690 | -267.21160  | -210.66064  | -845.97344  | 1 |
| 1660 | C | 94.61200 | 86.34080 | 71.69290 | 655.75804   | -564.39688  | 287.90375   | 1 |
| 1661 | H | 95.21600 | 85.79680 | 70.98190 | 334.43709   | 2494.07345  | 1888.37911  | 1 |
| 1662 | C | 95.06100 | 86.33180 | 73.02790 | -375.00209  | -754.50196  | 348.64199   | 1 |
| 1663 | H | 96.04700 | 85.93680 | 73.22090 | -1727.33280 | 2352.20041  | 1175.45771  | 1 |
| 1664 | C | 94.24500 | 86.86180 | 74.05990 | 168.57779   | -896.03843  | -12.15211   | 1 |
| 1665 | H | 94.57100 | 86.73680 | 75.08290 | -2216.01216 | -981.64263  | -2005.96463 | 1 |
| 1666 | C | 92.50300 | 87.41580 | 72.35390 | 397.42365   | -533.22258  | -623.84223  | 1 |
| 1667 | H | 91.51600 | 87.77480 | 72.10090 | 2533.82735  | -1251.84279 | -1382.32949 | 1 |
| 1668 | C | 93.01600 | 87.49180 | 73.71890 | -799.10395  | 438.28107   | 28.17074    | 1 |

|      |   |          |          |          |             |             |             |   |
|------|---|----------|----------|----------|-------------|-------------|-------------|---|
| 1669 | H | 92.45100 | 87.95780 | 74.51290 | 634.38809   | 1427.74225  | -2730.81124 | 1 |
| 1670 | C | 93.18900 | 87.98680 | 67.65690 | 593.73866   | 152.84604   | -674.95444  | 1 |
| 1671 | O | 93.08700 | 86.93280 | 67.02390 | -215.50784  | 247.26186   | -718.36284  | 1 |
| 1672 | N | 92.91300 | 89.17280 | 67.02790 | 521.85640   | -461.99547  | -476.33850  | 1 |
| 1673 | H | 93.05700 | 89.98680 | 67.58590 | 1535.59398  | -2699.90410 | 500.69471   | 1 |
| 1674 | C | 92.57700 | 89.31980 | 65.60190 | -667.94178  | -579.26211  | -223.06993  | 1 |
| 1675 | H | 93.47200 | 89.05380 | 65.05890 | 1384.10713  | 1933.02197  | -2060.55812 | 1 |
| 1676 | H | 92.39200 | 90.37080 | 65.43790 | -2265.35263 | 1005.89386  | -1937.67418 | 1 |
| 1677 | C | 91.36200 | 88.56880 | 65.10290 | -338.21148  | 576.74889   | -620.01993  | 1 |
| 1678 | O | 90.58400 | 87.97180 | 65.85990 | -527.56455  | 24.33275    | -587.12077  | 1 |
| 1679 | N | 91.06900 | 88.61280 | 63.80390 | 258.72197   | -802.41539  | 43.18302    | 1 |
| 1680 | H | 91.77400 | 88.96380 | 63.19190 | 2299.62585  | -2030.67816 | 697.34740   | 1 |
| 1681 | C | 89.85900 | 88.04180 | 63.16090 | 400.90491   | -656.62855  | -489.45398  | 1 |
| 1682 | H | 89.00500 | 88.27780 | 63.77890 | -2324.58395 | -46.91799   | 2119.51277  | 1 |
| 1683 | C | 89.62900 | 88.63080 | 61.72090 | 884.72750   | 220.52244   | 8.83770     | 1 |
| 1684 | H | 88.99200 | 88.06880 | 61.00490 | 529.44609   | -3092.97243 | -226.79196  | 1 |
| 1685 | H | 90.64100 | 88.63280 | 61.26090 | -1376.09791 | -1176.59094 | 2572.97775  | 1 |
| 1686 | C | 89.06000 | 90.03980 | 61.75990 | 413.35551   | 777.20766   | 237.77403   | 1 |
| 1687 | O | 87.82900 | 90.27780 | 61.76490 | 635.71870   | 316.31167   | 345.59497   | 1 |
| 1688 | N | 89.92900 | 91.06780 | 61.75290 | -685.32709  | -34.16076   | -491.76428  | 1 |
| 1689 | H | 90.90900 | 90.90380 | 61.63490 | 2225.71538  | -34.57058   | 2223.33581  | 1 |
| 1690 | H | 89.47900 | 91.95780 | 61.81790 | 1952.47180  | -2290.18832 | -917.12462  | 1 |
| 1691 | C | 90.02800 | 86.49080 | 62.98590 | -341.16812  | -616.42940  | 578.85241   | 1 |
| 1692 | O | 89.09900 | 85.71380 | 63.09990 | -327.55418  | -475.33699  | -538.87868  | 1 |
| 1693 | N | 91.27900 | 85.92980 | 62.74790 | 610.27266   | -283.93615  | 509.52903   | 1 |
| 1694 | H | 92.02100 | 86.55680 | 62.52290 | -2084.90234 | -114.35491  | -2353.36598 | 1 |
| 1695 | C | 91.51800 | 84.51480 | 62.52590 | -303.85369  | 327.99406   | -794.69732  | 1 |
| 1696 | H | 90.87200 | 84.13680 | 61.74790 | 653.10532   | 1475.78820  | -2700.69044 | 1 |
| 1697 | C | 92.98800 | 84.28580 | 62.01190 | -238.70131  | 369.43906   | 798.74118   | 1 |
| 1698 | H | 93.08100 | 84.82880 | 61.04690 | 1085.24458  | -2922.78161 | -421.68479  | 1 |
| 1699 | H | 93.75600 | 84.78580 | 62.63890 | 1128.55225  | -2204.32737 | 1940.49914  | 1 |
| 1700 | C | 93.37900 | 82.83780 | 61.76390 | 608.72225   | -553.81916  | -392.67362  | 1 |
| 1701 | C | 93.09300 | 82.24380 | 60.53090 | -468.98586  | -656.18359  | -425.35439  | 1 |
| 1702 | H | 92.55800 | 82.73080 | 59.72890 | -1607.52473 | -1776.61513 | -2039.05104 | 1 |
| 1703 | C | 93.42400 | 80.89180 | 60.32490 | -625.83448  | -653.59781  | 112.21452   | 1 |
| 1704 | H | 93.07600 | 80.44380 | 59.40590 | -1045.66976 | 1143.19553  | 2738.23026  | 1 |
| 1705 | C | 94.15700 | 80.14080 | 61.27890 | 579.68301   | 666.09819   | -227.44627  | 1 |
| 1706 | H | 94.35300 | 79.09980 | 61.07090 | 1124.86553  | -373.46759  | 2914.34825  | 1 |
| 1707 | C | 94.09900 | 82.07280 | 62.66490 | 462.54836   | -777.13699  | -116.43932  | 1 |
| 1708 | H | 94.24300 | 82.65980 | 63.55990 | -85.87457   | -3127.46285 | 331.40295   | 1 |
| 1709 | C | 94.50800 | 80.76380 | 62.47290 | 675.66046   | 106.19139   | -603.04007  | 1 |
| 1710 | H | 94.97700 | 80.15980 | 63.23490 | 1560.44302  | -1618.92325 | -2200.52978 | 1 |
| 1711 | C | 91.15900 | 83.68080 | 63.73290 | -511.73531  | 21.65640    | 754.39312   | 1 |
| 1712 | O | 90.49700 | 82.62580 | 63.60990 | 165.21243   | 358.61325   | -683.90688  | 1 |
| 1713 | N | 91.54500 | 84.08880 | 64.97890 | 410.80864   | -705.33174  | 215.44300   | 1 |
| 1714 | H | 92.25500 | 84.78180 | 65.07190 | 2449.11558  | -1691.15549 | 1019.82949  | 1 |
| 1715 | C | 91.05900 | 83.46380 | 66.12890 | -632.30974  | 219.01402   | -619.40960  | 1 |
| 1716 | H | 90.97300 | 82.39880 | 65.96990 | -1278.42454 | -1123.25045 | -2646.16049 | 1 |
| 1717 | C | 91.97900 | 83.68480 | 67.32190 | 679.12662   | 291.88879   | 533.89041   | 1 |
| 1718 | H | 92.00800 | 84.76880 | 67.56390 | 105.77246   | 2278.40069  | 2167.00916  | 1 |
| 1719 | H | 91.54900 | 83.17080 | 68.20790 | 2791.06047  | 1226.09723  | -777.74883  | 1 |
| 1720 | C | 93.41300 | 83.09980 | 67.07090 | 463.97143   | 782.73025   | 59.28629    | 1 |
| 1721 | H | 93.86800 | 83.56380 | 66.16990 | 36.40771    | 2133.23610  | 2312.18607  | 1 |
| 1722 | C | 94.41000 | 83.62580 | 68.14990 | -600.67703  | -670.61488  | -144.61603  | 1 |
| 1723 | H | 94.13600 | 83.23380 | 69.15290 | 1342.01646  | -1105.45353 | -2622.05846 | 1 |
| 1724 | H | 94.50000 | 84.72780 | 68.25790 | -2084.70444 | 2346.69202  | -212.76793  | 1 |
| 1725 | H | 95.41400 | 83.22980 | 67.88390 | -2814.07102 | -49.33852   | -1405.98586 | 1 |
| 1726 | C | 93.41700 | 81.60480 | 66.91190 | -587.30337  | -417.38709  | 558.85040   | 1 |
| 1727 | H | 92.78300 | 81.17580 | 66.10690 | 69.58549    | -2208.91414 | 2239.21469  | 1 |
| 1728 | H | 93.12900 | 81.18280 | 67.89790 | -687.56433  | 1506.23164  | -2675.20985 | 1 |
| 1729 | H | 94.45700 | 81.21880 | 66.84390 | -1156.29635 | -2827.12469 | 754.03643   | 1 |
| 1730 | C | 89.61400 | 83.83780 | 66.42890 | -551.54040  | -574.51235  | -444.06052  | 1 |



|      |   |          |          |          |             |             |             |   |
|------|---|----------|----------|----------|-------------|-------------|-------------|---|
| 1731 | O | 88.85000 | 83.03980 | 67.01290 | 275.76398   | -630.50100  | 387.36281   | 1 |
| 1732 | N | 89.10300 | 85.05680 | 66.07090 | 488.92904   | -684.66165  | 69.70732    | 1 |
| 1733 | H | 89.71700 | 85.58580 | 65.48890 | -1386.15151 | -2051.54263 | -1941.12933 | 1 |
| 1734 | C | 87.69700 | 85.43480 | 66.28090 | -506.32382  | 758.05385   | -21.01315   | 1 |
| 1735 | H | 87.57200 | 85.41580 | 67.35390 | 1421.22074  | -1757.90799 | -2188.17671 | 1 |
| 1736 | C | 87.43000 | 86.86580 | 65.78490 | -218.19577  | -838.49218  | 284.20497   | 1 |
| 1737 | H | 87.71700 | 86.90780 | 64.71290 | -2996.20863 | -394.11366  | -875.00544  | 1 |
| 1738 | H | 88.11300 | 87.55180 | 66.32990 | 753.61372   | -239.34513  | 3045.16116  | 1 |
| 1739 | S | 85.78600 | 87.54880 | 66.04890 | -103.88828  | 300.77893   | 458.20287   | 1 |
| 1740 | C | 86.67300 | 84.54580 | 65.53490 | 468.55176   | -778.06349  | -80.79270   | 1 |
| 1741 | O | 85.70400 | 84.06480 | 66.09490 | -54.92999   | -671.22255  | 412.39570   | 1 |
| 1742 | N | 86.85900 | 84.23180 | 64.25690 | 66.16328    | -769.66710  | 340.45157   | 1 |
| 1743 | H | 87.68800 | 84.53680 | 63.79390 | -135.63952  | 1068.33728  | -2956.09263 | 1 |
| 1744 | C | 86.09400 | 83.32380 | 63.49490 | 130.49446   | -830.37783  | -353.40467  | 1 |
| 1745 | H | 85.03600 | 83.53880 | 63.49790 | 2368.38846  | -1149.97036 | -1722.36190 | 1 |
| 1746 | C | 86.54900 | 83.31080 | 62.03090 | 112.81255   | 636.57212   | -643.03987  | 1 |
| 1747 | H | 86.13700 | 82.48080 | 61.41790 | -304.47146  | -3122.02448 | -241.83976  | 1 |
| 1748 | H | 87.65600 | 83.22380 | 61.99490 | 2937.06650  | -918.11379  | 654.93028   | 1 |
| 1749 | C | 86.19500 | 84.62180 | 61.36690 | -497.36283  | -287.74757  | -708.01311  | 1 |
| 1750 | H | 86.37200 | 85.54180 | 61.96390 | -1057.79252 | -2332.86291 | -1826.75994 | 1 |
| 1751 | H | 85.09100 | 84.55380 | 61.26190 | -2298.96645 | -1784.27605 | 1195.54945  | 1 |
| 1752 | C | 86.79500 | 84.65480 | 59.96290 | 660.26666   | 303.50348   | -550.80358  | 1 |
| 1753 | H | 86.34400 | 83.82380 | 59.38090 | 2426.74497  | -1992.59634 | -196.71027  | 1 |
| 1754 | H | 87.86800 | 84.41480 | 60.12190 | -1387.40064 | -1541.07747 | -2366.09931 | 1 |
| 1755 | C | 86.67400 | 85.97180 | 59.23590 | -875.10080  | -255.52354  | 18.90260    | 1 |
| 1756 | H | 87.01900 | 85.79080 | 58.19590 | -1860.42353 | -756.59909  | -2421.69534 | 1 |
| 1757 | H | 87.30400 | 86.70080 | 59.78990 | -1257.14476 | 201.69799   | 2877.00038  | 1 |
| 1758 | N | 85.24300 | 86.40480 | 59.13390 | 550.15190   | -433.54662  | 471.21385   | 1 |
| 1759 | H | 85.25300 | 87.34180 | 58.68190 | -1392.02402 | -1412.62335 | -2442.33303 | 1 |
| 1760 | H | 84.90600 | 86.51780 | 60.11190 | 1359.56767  | 2827.91179  | 229.60156   | 1 |
| 1761 | H | 84.65300 | 85.74180 | 58.59290 | -2156.55298 | -656.20582  | -2194.74358 | 1 |
| 1762 | C | 86.02200 | 81.92880 | 64.05690 | -25.20875   | -730.95805  | 544.53269   | 1 |
| 1763 | O | 84.99900 | 81.30480 | 64.09590 | -669.60571  | -145.24746  | 392.63036   | 1 |
| 1764 | N | 87.20100 | 81.39480 | 64.42590 | 664.46358   | 323.69454   | -407.89985  | 1 |
| 1765 | H | 88.05400 | 81.83980 | 64.16690 | 1874.68390  | 1570.92865  | -1978.88092 | 1 |
| 1766 | C | 87.36500 | 80.09380 | 65.00890 | -806.66962  | 406.06459   | -125.88355  | 1 |
| 1767 | H | 86.88200 | 79.29380 | 64.46790 | -840.29316  | 742.92660   | -2939.42064 | 1 |
| 1768 | C | 88.86800 | 79.76980 | 65.00690 | 384.14217   | 412.45196   | 716.77694   | 1 |
| 1769 | H | 89.28500 | 79.59280 | 63.99190 | 242.40516   | 2840.98077  | -1329.77225 | 1 |
| 1770 | H | 88.98400 | 78.87080 | 65.64790 | -2622.91723 | 1509.52797  | 860.14927   | 1 |
| 1771 | H | 89.43500 | 80.62280 | 65.43790 | -671.05250  | 313.67905   | -3057.69852 | 1 |
| 1772 | C | 86.72700 | 79.92780 | 66.35090 | 447.81818   | -666.23100  | 432.48831   | 1 |
| 1773 | O | 85.95200 | 79.01880 | 66.54290 | 18.07445    | -533.90771  | 581.58671   | 1 |
| 1774 | N | 86.90000 | 80.80780 | 67.33590 | 52.24553    | -1.42966    | -842.57976  | 1 |
| 1775 | H | 87.40500 | 81.66380 | 67.25290 | -635.55545  | 3074.58441  | -203.04230  | 1 |
| 1776 | C | 86.19000 | 80.52680 | 68.62890 | -45.17959   | -746.01266  | 522.37431   | 1 |
| 1777 | H | 86.32400 | 79.48480 | 68.87990 | 2489.32848  | -1413.08181 | -1305.63002 | 1 |
| 1778 | C | 86.84000 | 81.26180 | 69.83390 | 897.64650   | -110.01010  | -116.53127  | 1 |
| 1779 | H | 86.44200 | 80.90480 | 70.80790 | 1408.17935  | 2475.00587  | 1337.76048  | 1 |
| 1780 | C | 88.33400 | 81.07680 | 69.72290 | -582.43885  | 632.82097   | -302.90858  | 1 |
| 1781 | H | 88.48300 | 79.98080 | 69.82890 | -1210.19525 | 2649.47509  | 1189.09016  | 1 |
| 1782 | H | 88.82500 | 81.27280 | 68.74590 | -2159.66932 | -2208.90610 | 595.64124   | 1 |
| 1783 | H | 88.77100 | 81.69980 | 70.53290 | -2075.46351 | -2104.57188 | 1077.70805  | 1 |
| 1784 | C | 86.58200 | 82.78080 | 69.82590 | -583.50057  | -481.36666  | 509.17996   | 1 |
| 1785 | H | 86.96400 | 83.25980 | 70.75290 | 2213.50099  | -179.52086  | -2228.54478 | 1 |
| 1786 | H | 85.55100 | 83.08380 | 69.54390 | 624.68477   | 2755.71629  | 1383.48217  | 1 |
| 1787 | H | 87.13100 | 83.11580 | 68.91990 | -244.60913  | 3125.03068  | -269.39903  | 1 |
| 1788 | C | 84.70900 | 80.73080 | 68.63990 | -624.07646  | -121.06114  | 653.70006   | 1 |
| 1789 | O | 84.02200 | 80.17280 | 69.49290 | -238.44104  | 571.68688   | 489.84406   | 1 |
| 1790 | N | 84.24600 | 81.55880 | 67.65790 | -151.63758  | -810.04598  | 183.04056   | 1 |
| 1791 | H | 84.91200 | 81.97480 | 67.04290 | 1977.50723  | 1873.26611  | 1574.34604  | 1 |
| 1792 | C | 82.80800 | 81.69580 | 67.40890 | 499.75622   | -247.95496  | 721.25797   | 1 |

|      |   |          |          |          |             |             |             |   |
|------|---|----------|----------|----------|-------------|-------------|-------------|---|
| 1793 | H | 82.37200 | 81.78180 | 68.39290 | -348.33637  | -218.96637  | -3119.12515 | 1 |
| 1794 | C | 82.41500 | 82.92780 | 66.52990 | 742.69846   | -31.02271   | 528.09810   | 1 |
| 1795 | H | 81.41600 | 82.87480 | 66.04590 | 896.14559   | -2284.10859 | -1969.26312 | 1 |
| 1796 | H | 83.13300 | 83.04280 | 65.69090 | -1146.78510 | 1807.43618  | 2305.70697  | 1 |
| 1797 | N | 83.20600 | 85.28880 | 67.26290 | 505.69156   | -647.14511  | -195.32419  | 1 |
| 1798 | H | 83.95700 | 85.33180 | 66.60390 | 2316.47881  | -476.55800  | 2074.86015  | 1 |
| 1799 | C | 82.39900 | 84.15480 | 67.43290 | 902.00239   | -124.80661  | -47.60248   | 1 |
| 1800 | C | 82.85600 | 86.07780 | 68.29290 | -638.91953  | -645.04109  | 84.58620    | 1 |
| 1801 | H | 83.50900 | 86.90180 | 68.58290 | -2641.87769 | 495.78009   | 1634.90386  | 1 |
| 1802 | N | 81.91100 | 85.62880 | 69.10190 | -349.74007  | 525.41036   | 560.62298   | 1 |
| 1803 | C | 81.65600 | 84.41580 | 68.51590 | 145.69151   | -483.20267  | -759.43411  | 1 |
| 1804 | H | 80.87200 | 83.84280 | 68.99590 | -3021.51565 | 347.01583   | -805.13936  | 1 |
| 1805 | C | 82.16700 | 80.46780 | 66.77990 | 725.62175   | 110.67695   | -540.99418  | 1 |
| 1806 | O | 81.09700 | 80.01880 | 67.19390 | 479.04239   | -454.87964  | 432.70097   | 1 |
| 1807 | N | 82.89000 | 79.89280 | 65.78590 | 188.12333   | 734.94736   | -370.31646  | 1 |
| 1808 | H | 83.69400 | 80.36680 | 65.43590 | 1914.81718  | -549.16846  | 2435.18283  | 1 |
| 1809 | C | 82.59700 | 78.59880 | 65.20790 | 54.12027    | 769.66613   | -485.93832  | 1 |
| 1810 | H | 81.57800 | 78.58580 | 64.84890 | -1049.03304 | 2426.50211  | 1705.82632  | 1 |
| 1811 | C | 83.57500 | 78.33080 | 64.01290 | 596.97102   | -687.01777  | 55.52647    | 1 |
| 1812 | H | 84.59400 | 78.72480 | 64.21390 | -496.89337  | 2038.51344  | -2344.30931 | 1 |
| 1813 | C | 83.59900 | 76.78780 | 63.77490 | 232.22169   | -880.38005  | -49.54850   | 1 |
| 1814 | H | 84.31500 | 76.28780 | 64.46290 | 246.70180   | 201.97220   | -3129.94755 | 1 |
| 1815 | H | 83.98300 | 76.51480 | 62.76890 | -2337.88053 | 281.78683   | 2086.41728  | 1 |
| 1816 | H | 82.64600 | 76.27180 | 64.01990 | -2667.66253 | 262.47740   | -1647.09090 | 1 |
| 1817 | C | 83.00400 | 79.04680 | 62.75690 | -678.67608  | 258.77949   | 551.25580   | 1 |
| 1818 | H | 81.91100 | 78.88580 | 62.63890 | 3119.82534  | -308.84410  | -263.68804  | 1 |
| 1819 | H | 83.47200 | 78.73680 | 61.79890 | -191.64151  | 3022.17448  | -853.20641  | 1 |
| 1820 | H | 83.14800 | 80.14080 | 62.88390 | 1772.08540  | -2410.22431 | -974.04228  | 1 |
| 1821 | C | 82.54300 | 77.54080 | 66.30590 | -631.12913  | 145.22344   | 641.90122   | 1 |
| 1822 | O | 81.51500 | 76.91780 | 66.54690 | -130.07486  | 580.52320   | 519.32704   | 1 |
| 1823 | N | 83.59100 | 77.46180 | 67.16990 | 126.88737   | -117.38196  | 826.31311   | 1 |
| 1824 | H | 84.39600 | 78.01380 | 66.96890 | 1956.94730  | -1116.92560 | -2195.69140 | 1 |
| 1825 | C | 83.61000 | 76.47880 | 68.21290 | 172.84335   | -885.22278  | -134.00303  | 1 |
| 1826 | H | 83.48300 | 75.48980 | 67.79590 | 2001.37120  | -2191.18902 | -1044.71538 | 1 |
| 1827 | C | 85.03500 | 76.38780 | 68.80890 | -548.43571  | -706.59961  | -177.16170  | 1 |
| 1828 | H | 85.44800 | 77.41780 | 68.87090 | -1703.84352 | 1680.71119  | 2042.14431  | 1 |
| 1829 | C | 85.07400 | 75.72080 | 70.18590 | -539.66435  | -539.81379  | 498.81306   | 1 |
| 1830 | H | 86.10000 | 75.62280 | 70.60190 | -2611.82489 | 1740.15603  | -220.12259  | 1 |
| 1831 | H | 84.55100 | 76.30080 | 70.97590 | -496.85295  | -1171.17159 | 2877.45034  | 1 |
| 1832 | H | 84.66100 | 74.69080 | 70.12890 | 2368.40023  | -2056.67944 | 242.85024   | 1 |
| 1833 | C | 85.97700 | 75.72480 | 67.76590 | -89.73891   | -245.42260  | 873.59354   | 1 |
| 1834 | H | 85.69100 | 74.65480 | 67.67490 | -1508.14052 | 2268.84120  | -1573.56220 | 1 |
| 1835 | H | 85.74100 | 76.16480 | 66.77290 | 1471.34731  | 1867.64784  | 2060.40163  | 1 |
| 1836 | C | 87.47200 | 75.97180 | 67.95890 | 398.49030   | 399.48319   | 716.28881   | 1 |
| 1837 | H | 88.05300 | 75.45780 | 67.16290 | 1584.70168  | -2599.63602 | -792.99393  | 1 |
| 1838 | H | 87.73000 | 75.66880 | 68.99590 | 1408.83570  | -3.37167    | 2813.07605  | 1 |
| 1839 | H | 87.69600 | 77.04780 | 67.79490 | 1761.32265  | -1730.37664 | -1949.81164 | 1 |
| 1840 | C | 82.51700 | 76.61280 | 69.28290 | -612.13101  | 80.81315    | -670.98127  | 1 |
| 1841 | O | 81.96700 | 75.61980 | 69.76790 | -700.48536  | 235.55583   | 278.31806   | 1 |
| 1842 | N | 82.13600 | 77.82380 | 69.67790 | -397.17551  | -497.81979  | 554.16546   | 1 |
| 1843 | H | 82.59400 | 78.62980 | 69.31090 | 651.88955   | 2517.34254  | 1770.94686  | 1 |
| 1844 | C | 81.05000 | 78.07380 | 70.56590 | 654.19916   | -590.42628  | -234.24616  | 1 |
| 1845 | H | 81.27600 | 77.50580 | 71.45590 | -377.49390  | -3116.51217 | -207.54877  | 1 |
| 1846 | C | 81.05200 | 79.58980 | 71.00790 | -114.37893  | 862.88896   | 271.64518   | 1 |
| 1847 | H | 80.98000 | 80.15680 | 70.05590 | 943.25906   | -572.63602  | -2946.28182 | 1 |
| 1848 | H | 82.02300 | 79.80180 | 71.50490 | -1748.26127 | 656.72251   | -2531.90132 | 1 |
| 1849 | C | 79.92200 | 80.03280 | 71.97990 | 452.51212   | 528.19214   | 589.65825   | 1 |
| 1850 | C | 79.38500 | 79.12780 | 72.88490 | 754.59482   | 199.91169   | -471.24620  | 1 |
| 1851 | H | 79.82100 | 78.13980 | 72.84190 | 2344.68839  | -2090.15074 | 178.69654   | 1 |
| 1852 | C | 78.46300 | 79.55580 | 73.85390 | -193.29632  | 798.69741   | -395.18348  | 1 |
| 1853 | H | 78.13700 | 78.88380 | 74.63390 | 509.82928   | 2843.38580  | 1246.37776  | 1 |
| 1854 | C | 77.98700 | 80.85580 | 73.88990 | 709.78619   | 190.32186   | -539.84457  | 1 |

|      |   |          |          |          |             |             |             |   |
|------|---|----------|----------|----------|-------------|-------------|-------------|---|
| 1855 | O | 76.96700 | 81.12580 | 74.81990 | 334.16104   | -638.41461  | -323.09504  | 1 |
| 1856 | H | 77.08100 | 82.02380 | 75.14090 | 1606.67949  | -1710.99670 | 2095.06505  | 1 |
| 1857 | C | 79.47200 | 81.38480 | 72.01490 | -504.04825  | 738.87999   | 177.32097   | 1 |
| 1858 | H | 79.94600 | 82.09480 | 71.35290 | 2005.67626  | -799.99938  | 2288.11931  | 1 |
| 1859 | C | 78.48900 | 81.79280 | 72.93090 | 691.47901   | 405.71107   | -434.40339  | 1 |
| 1860 | H | 78.06400 | 82.77980 | 73.03490 | 51.16103    | 757.40718   | -3053.18574 | 1 |
| 1861 | C | 79.67300 | 77.54080 | 70.07190 | -591.54483  | -271.63962  | -638.54337  | 1 |
| 1862 | O | 78.96500 | 76.79380 | 70.76590 | 480.63820   | -472.80926  | -411.17582  | 1 |
| 1863 | N | 79.39400 | 77.68380 | 68.75890 | -742.13666  | -402.33044  | 5.97397     | 1 |
| 1864 | H | 79.95300 | 78.19680 | 68.11190 | -1152.78188 | -985.56835  | 2756.44249  | 1 |
| 1865 | C | 78.20500 | 77.02080 | 68.19390 | 61.86485    | 795.84696   | 440.73955   | 1 |
| 1866 | H | 77.43900 | 76.92980 | 68.94890 | 2957.23336  | 311.72141   | 1027.53435  | 1 |
| 1867 | C | 77.48800 | 77.80880 | 67.07390 | 365.22154   | -641.60525  | -535.17000  | 1 |
| 1868 | H | 76.97700 | 77.12180 | 66.36490 | 1489.23193  | -2376.00632 | 1426.53721  | 1 |
| 1869 | O | 78.48200 | 78.54080 | 66.33890 | -429.72842  | -403.07271  | -525.82612  | 1 |
| 1870 | H | 77.96600 | 79.06380 | 65.71990 | -574.08783  | 2164.89805  | 2209.49448  | 1 |
| 1871 | C | 76.51200 | 78.84980 | 67.67590 | 697.50266   | 558.61072   | 181.37007   | 1 |
| 1872 | H | 76.14500 | 79.53180 | 66.87990 | 2249.53106  | -1717.20658 | -1374.42272 | 1 |
| 1873 | H | 77.06600 | 79.47580 | 68.40790 | 2634.55936  | -1601.01892 | 627.74326   | 1 |
| 1874 | H | 75.64300 | 78.39980 | 68.20290 | -713.51949  | 1849.88532  | 2442.75264  | 1 |
| 1875 | C | 78.36700 | 75.56380 | 67.75190 | -7.02825    | -797.23219  | 442.51829   | 1 |
| 1876 | O | 77.49200 | 74.70580 | 67.73790 | 240.06474   | 726.04181   | -197.12798  | 1 |
| 1877 | N | 79.64800 | 75.13880 | 67.41590 | -408.58583  | 723.26836   | 150.37549   | 1 |
| 1878 | H | 80.37000 | 75.81880 | 67.31490 | 490.41974   | -2731.32403 | -1482.42496 | 1 |
| 1879 | C | 79.99100 | 73.68980 | 67.21490 | 96.94854    | 903.87318   | -71.17058   | 1 |
| 1880 | H | 79.38000 | 73.32380 | 66.40290 | 1636.03180  | 79.93332    | 2686.11929  | 1 |
| 1881 | C | 81.38900 | 73.44280 | 66.61790 | 753.31258   | -143.30555  | 493.39100   | 1 |
| 1882 | H | 82.10200 | 74.18380 | 67.03690 | 1.26167     | -3129.15480 | 326.51929   | 1 |
| 1883 | C | 81.96200 | 72.04380 | 66.97190 | 590.03942   | 163.45730   | 675.71162   | 1 |
| 1884 | H | 82.88300 | 71.83080 | 66.38890 | 1734.49980  | -1908.04658 | -1802.52460 | 1 |
| 1885 | H | 81.18600 | 71.31880 | 66.64490 | 2503.40734  | -883.74296  | -1688.24652 | 1 |
| 1886 | H | 82.34400 | 71.99180 | 68.01390 | 424.99352   | -1858.61728 | -2502.62833 | 1 |
| 1887 | C | 81.32400 | 73.80080 | 65.10990 | 471.76441   | 434.85651   | 647.91139   | 1 |
| 1888 | H | 80.97800 | 74.84980 | 64.98990 | 2747.00389  | -1517.00860 | -225.56764  | 1 |
| 1889 | H | 82.37400 | 73.66580 | 64.77390 | -1751.98534 | 1436.13269  | -2183.18495 | 1 |
| 1890 | H | 80.63300 | 73.08980 | 64.60990 | 682.85022   | -2983.27233 | 729.40251   | 1 |
| 1891 | C | 79.75400 | 72.79980 | 68.47990 | -611.60228  | 619.69360   | -270.87543  | 1 |
| 1892 | O | 79.20000 | 71.70380 | 68.33390 | 539.82664   | 389.62199   | 424.74596   | 1 |
| 1893 | N | 80.08100 | 73.22380 | 69.70090 | 180.51449   | -501.80127  | 654.43280   | 1 |
| 1894 | H | 80.50800 | 74.12280 | 69.76890 | -623.22305  | -2689.20612 | -1509.30106 | 1 |
| 1895 | C | 79.61600 | 72.58280 | 70.91190 | -758.21121  | 77.84343    | -500.50691  | 1 |
| 1896 | H | 79.83700 | 71.53080 | 70.80090 | -2388.70021 | -667.93170  | 1935.51150  | 1 |
| 1897 | C | 80.32000 | 73.15880 | 72.15090 | 173.62257   | 886.27264   | 125.80548   | 1 |
| 1898 | H | 80.52000 | 74.24680 | 72.04990 | -487.35254  | 2917.52556  | -1071.80145 | 1 |
| 1899 | H | 81.33400 | 72.70680 | 72.18690 | -1942.63109 | -1104.31059 | -2214.70287 | 1 |
| 1900 | C | 79.57500 | 73.06880 | 73.50490 | 0.53602     | -710.39638  | 571.65348   | 1 |
| 1901 | O | 78.59100 | 73.73680 | 73.79790 | 503.15830   | -70.38296   | -604.57025  | 1 |
| 1902 | N | 80.05400 | 72.13480 | 74.36090 | 397.13462   | -702.76268  | 247.14571   | 1 |
| 1903 | H | 80.91400 | 71.64380 | 74.22290 | 2443.43042  | 1919.69813  | -492.57803  | 1 |
| 1904 | H | 79.62900 | 72.06180 | 75.26290 | -1603.97196 | -1825.56446 | 1998.20284  | 1 |
| 1905 | C | 78.06400 | 72.62880 | 71.06090 | -123.19949  | 902.26504   | -46.80486   | 1 |
| 1906 | O | 77.44500 | 71.63380 | 71.38190 | -387.17212  | 282.86592   | 627.46462   | 1 |
| 1907 | N | 77.42000 | 73.74480 | 70.75490 | -507.13097  | -667.59190  | -99.05314   | 1 |
| 1908 | H | 77.98600 | 74.52280 | 70.49790 | -2034.56775 | -2307.93209 | 657.42663   | 1 |
| 1909 | C | 76.00300 | 73.97580 | 70.88590 | -846.11252  | 99.95548    | -324.88999  | 1 |
| 1910 | H | 75.75900 | 73.92180 | 71.93690 | 1782.92205  | -2460.45939 | 815.81541   | 1 |
| 1911 | C | 75.56400 | 75.38480 | 70.54190 | -253.18701  | -871.19825  | 91.43828    | 1 |
| 1912 | H | 75.41200 | 75.53680 | 69.45190 | 2147.36810  | 1424.51941  | 1804.93239  | 1 |
| 1913 | H | 76.35700 | 76.10880 | 70.82590 | 2127.62731  | -2289.29574 | -361.32158  | 1 |
| 1914 | C | 74.25900 | 75.91580 | 71.28290 | -525.10873  | 544.33656   | 509.32263   | 1 |
| 1915 | H | 73.50300 | 75.10180 | 71.26190 | -1666.29387 | -2300.37864 | 1352.75610  | 1 |
| 1916 | C | 74.54200 | 76.24980 | 72.74990 | -617.90918  | -485.30478  | 462.72943   | 1 |

|      |   |          |          |          |             |             |             |   |
|------|---|----------|----------|----------|-------------|-------------|-------------|---|
| 1917 | H | 74.82100 | 75.38380 | 73.38690 | -351.36839  | 2865.56617  | -1250.31876 | 1 |
| 1918 | H | 73.69400 | 76.78080 | 73.23390 | -1920.77585 | 2242.40229  | 1086.49821  | 1 |
| 1919 | H | 75.40100 | 76.95280 | 72.71390 | -589.63127  | -2948.43239 | 925.90908   | 1 |
| 1920 | C | 73.71700 | 77.15380 | 70.58690 | -87.72335   | 480.98790   | 769.67932   | 1 |
| 1921 | H | 72.74800 | 77.35680 | 71.09090 | -1276.29460 | 2225.82568  | 1820.71370  | 1 |
| 1922 | H | 73.66100 | 76.90080 | 69.50690 | -2203.76964 | 934.25333   | 2041.76304  | 1 |
| 1923 | H | 74.31300 | 78.05480 | 70.84590 | -1234.75030 | -2563.91468 | 1341.62567  | 1 |
| 1924 | C | 75.09600 | 73.04480 | 70.08690 | -823.19531  | 386.69312   | -65.33692   | 1 |
| 1925 | O | 74.19500 | 72.43780 | 70.57690 | 526.45364   | 454.78628   | -373.68869  | 1 |
| 1926 | N | 75.58000 | 72.79280 | 68.84390 | 443.93448   | -712.83705  | -86.35858   | 1 |
| 1927 | H | 76.37800 | 73.29880 | 68.52390 | 601.87010   | 1445.94777  | -2728.59188 | 1 |
| 1928 | C | 75.03800 | 71.79380 | 67.92590 | 40.82754    | -550.16236  | -726.02031  | 1 |
| 1929 | H | 73.97500 | 71.68380 | 68.08490 | -943.64116  | 2265.16292  | 1968.96027  | 1 |
| 1930 | C | 75.21300 | 72.27780 | 66.44590 | 0.42648     | -911.21787  | -33.65742   | 1 |
| 1931 | H | 74.68000 | 71.57580 | 65.76990 | -390.88671  | 2219.09751  | 2195.68669  | 1 |
| 1932 | H | 76.30400 | 72.25780 | 66.23490 | 1252.60414  | 1664.08903  | -2357.96879 | 1 |
| 1933 | C | 74.58800 | 73.64280 | 66.30190 | 26.48589    | 860.96915   | 299.13478   | 1 |
| 1934 | C | 73.40500 | 74.05580 | 66.90090 | -621.48891  | 167.06086   | -645.98236  | 1 |
| 1935 | H | 72.87400 | 73.31580 | 67.48090 | 2145.74123  | 2086.75121  | -969.27303  | 1 |
| 1936 | C | 72.89700 | 75.36980 | 66.79290 | -857.74780  | 244.13350   | -190.04880  | 1 |
| 1937 | H | 72.03100 | 75.61380 | 67.39190 | 1603.14685  | 2173.95579  | 1613.09101  | 1 |
| 1938 | C | 73.59500 | 76.30480 | 66.07290 | -539.21799  | 452.23959   | -579.80541  | 1 |
| 1939 | O | 73.11000 | 77.58880 | 66.04690 | 460.31102   | -255.30135  | 588.69535   | 1 |
| 1940 | H | 73.77800 | 78.08480 | 65.56790 | 2107.07791  | -2267.33556 | 563.59415   | 1 |
| 1941 | C | 75.25300 | 74.59480 | 65.48390 | -684.91077  | 80.98427    | -596.48118  | 1 |
| 1942 | H | 76.17700 | 74.26580 | 65.03190 | 52.89202    | -2929.72220 | 1145.49398  | 1 |
| 1943 | C | 74.76400 | 75.91180 | 65.39090 | 335.61882   | 465.96907   | 708.29643   | 1 |
| 1944 | H | 75.26000 | 76.67480 | 64.80990 | 2047.39318  | -735.56354  | -2272.74144 | 1 |
| 1945 | C | 75.55000 | 70.36280 | 68.08790 | -730.70072  | 225.96520   | -496.45462  | 1 |
| 1946 | O | 74.98700 | 69.48580 | 67.47890 | 492.52319   | -467.35595  | -403.26983  | 1 |
| 1947 | N | 76.64500 | 70.10980 | 68.85690 | 332.02813   | -574.83824  | -521.52719  | 1 |
| 1948 | H | 77.20900 | 70.81580 | 69.27890 | -332.30311  | -1613.18258 | 2680.56763  | 1 |
| 1949 | C | 77.21400 | 68.74780 | 68.93090 | -683.50515  | -67.23577   | -599.79252  | 1 |
| 1950 | H | 76.76200 | 68.11280 | 68.18290 | -2599.98571 | 1610.27686  | 738.45040   | 1 |
| 1951 | C | 78.76800 | 68.59680 | 68.72990 | 603.28981   | 448.25783   | 516.29190   | 1 |
| 1952 | H | 78.91700 | 68.76980 | 67.64290 | 2145.86021  | -2299.79467 | 66.74314    | 1 |
| 1953 | H | 79.12100 | 67.55780 | 68.90390 | -2639.78228 | -698.79261  | 1562.51867  | 1 |
| 1954 | O | 79.43400 | 69.45380 | 69.61290 | 760.86385   | 211.04121   | 13.23026    | 1 |
| 1955 | H | 79.36600 | 70.29480 | 69.15390 | -3047.61140 | -664.88082  | 410.15176   | 1 |
| 1956 | C | 76.83600 | 68.12980 | 70.21990 | 505.51926   | 593.75309   | -472.60824  | 1 |
| 1957 | O | 76.31600 | 67.01880 | 70.22490 | -305.41886  | 529.60808   | -499.86181  | 1 |
| 1958 | N | 76.90800 | 68.88580 | 71.39690 | 82.91860    | 470.09816   | -696.27905  | 1 |
| 1959 | H | 77.09200 | 69.86380 | 71.34290 | -1866.32202 | 2134.50234  | 1363.43982  | 1 |
| 1960 | C | 76.65900 | 68.29280 | 72.72790 | 499.97309   | 463.04944   | -605.85735  | 1 |
| 1961 | H | 77.37300 | 67.49480 | 72.86990 | -351.75708  | -47.79780   | -3126.05319 | 1 |
| 1962 | C | 76.99100 | 69.27280 | 73.89690 | 725.69444   | 72.90043    | -547.26969  | 1 |
| 1963 | H | 78.08900 | 69.43780 | 73.90890 | 367.04990   | 3123.02768  | -100.98865  | 1 |
| 1964 | H | 76.72300 | 68.86880 | 74.89590 | 2930.09636  | 78.26983    | 1143.08153  | 1 |
| 1965 | O | 76.37400 | 70.60180 | 73.75590 | 279.79270   | 520.02189   | -524.32862  | 1 |
| 1966 | H | 76.99100 | 71.20580 | 73.33690 | 534.48385   | 2596.34613  | -1694.56189 | 1 |
| 1967 | C | 75.22200 | 67.71180 | 72.98090 | 202.29665   | -549.82311  | 698.72857   | 1 |
| 1968 | O | 75.04700 | 66.54180 | 73.22690 | 544.77936   | -309.00250  | -480.99910  | 1 |
| 1969 | N | 74.23400 | 68.54880 | 72.77190 | -752.15878  | -381.67568  | -35.39965   | 1 |
| 1970 | H | 74.49300 | 69.49780 | 72.60890 | 1268.04132  | 2607.15182  | 1221.90704  | 1 |
| 1971 | C | 72.81700 | 68.20780 | 72.84690 | 710.04538   | -428.18661  | -379.39792  | 1 |
| 1972 | H | 72.69700 | 67.79180 | 73.83690 | -686.59231  | -1500.55204 | -2678.64907 | 1 |
| 1973 | C | 71.92400 | 69.42580 | 72.75590 | 209.06955   | -36.19039   | 886.80955   | 1 |
| 1974 | H | 72.28100 | 70.22380 | 73.44090 | -2085.32984 | 2284.08993  | 576.67919   | 1 |
| 1975 | C | 71.88500 | 70.06880 | 71.32090 | 499.76581   | -492.78721  | -582.10471  | 1 |
| 1976 | H | 72.95400 | 70.30580 | 71.12690 | 2779.33005  | 739.84867   | 1275.21553  | 1 |
| 1977 | H | 71.46800 | 69.35080 | 70.58190 | 1524.64378  | -1888.52651 | -2001.78800 | 1 |
| 1978 | H | 71.31100 | 71.01980 | 71.33190 | 2637.64247  | -1630.49978 | -531.54386  | 1 |

|      |   |          |          |          |             |             |             |   |
|------|---|----------|----------|----------|-------------|-------------|-------------|---|
| 1979 | C | 70.59100 | 69.04780 | 73.37790 | -372.81460  | -735.77503  | 388.70989   | 1 |
| 1980 | H | 69.91400 | 69.92780 | 73.42990 | 1625.06971  | 2261.93045  | 1463.23112  | 1 |
| 1981 | H | 70.01500 | 68.20180 | 72.94690 | -864.21140  | -2007.22371 | 2263.27592  | 1 |
| 1982 | H | 70.85600 | 68.68180 | 74.39290 | -469.47901  | 2020.33590  | 2365.59898  | 1 |
| 1983 | C | 72.36900 | 67.11980 | 71.85690 | 629.43342   | 358.41755   | -553.89659  | 1 |
| 1984 | O | 71.52900 | 66.26080 | 72.13090 | -589.69875  | 363.08965   | -379.53724  | 1 |
| 1985 | N | 72.91100 | 67.09180 | 70.61690 | -449.40910  | 168.04409   | -694.59696  | 1 |
| 1986 | H | 73.50900 | 67.85780 | 70.39290 | 1964.75811  | -654.85447  | -2368.35754 | 1 |
| 1987 | C | 72.45400 | 66.06380 | 69.71790 | 468.66728   | -462.33048  | 630.91402   | 1 |
| 1988 | H | 71.39000 | 65.90280 | 69.80790 | 2191.61940  | 1245.69789  | -1882.35688 | 1 |
| 1989 | C | 72.66000 | 66.54280 | 68.23090 | -170.29364  | -613.54213  | 652.69988   | 1 |
| 1990 | H | 72.52100 | 65.61380 | 67.63890 | -2061.86786 | -957.50340  | 2174.88261  | 1 |
| 1991 | H | 73.68700 | 66.96680 | 68.24990 | 2005.53283  | 408.55536   | -2389.38210 | 1 |
| 1992 | C | 71.72500 | 67.59780 | 67.72090 | 128.59630   | -727.81848  | 534.03582   | 1 |
| 1993 | C | 71.74100 | 68.95780 | 67.92090 | 894.52228   | -29.63960   | 174.36279   | 1 |
| 1994 | H | 72.58600 | 69.44280 | 68.38690 | 2030.21511  | 2058.12856  | 1241.19285  | 1 |
| 1995 | N | 70.70500 | 69.55680 | 67.31790 | 727.30233   | 420.89478   | -80.93944   | 1 |
| 1996 | H | 70.35400 | 70.42880 | 67.57890 | -1973.75192 | -1651.95424 | 1809.30284  | 1 |
| 1997 | C | 69.94900 | 68.58180 | 66.73890 | 243.32934   | -63.35365   | -876.48625  | 1 |
| 1998 | C | 70.55000 | 67.30580 | 66.99790 | -190.94289  | 172.77976   | 874.72223   | 1 |
| 1999 | C | 69.90800 | 66.17080 | 66.61990 | -93.85484   | -660.48461  | 621.61271   | 1 |
| 2000 | H | 70.39900 | 65.26380 | 66.93990 | 2048.96375  | -2016.74493 | 1277.77684  | 1 |
| 2001 | C | 68.76100 | 66.27480 | 65.85090 | -377.12460  | -617.76491  | 554.61208   | 1 |
| 2002 | H | 68.26800 | 65.37480 | 65.51390 | 1730.73166  | -2328.72526 | 1216.48379  | 1 |
| 2003 | C | 68.83000 | 68.69180 | 65.97190 | 730.54797   | -304.43379  | -452.84736  | 1 |
| 2004 | H | 68.33200 | 69.62280 | 65.74690 | -2320.43694 | 1339.02085  | 1649.49137  | 1 |
| 2005 | C | 68.20200 | 67.49880 | 65.54590 | -244.50619  | -641.80439  | 599.79567   | 1 |
| 2006 | H | 67.29300 | 67.52580 | 64.96390 | -1265.65520 | 2117.35612  | -1952.72789 | 1 |
| 2007 | C | 73.19300 | 64.74780 | 69.88990 | -482.85355  | -411.10843  | -655.20478  | 1 |
| 2008 | O | 72.67800 | 63.69780 | 69.58190 | -227.20677  | 516.73750   | -552.25598  | 1 |
| 2009 | N | 74.40600 | 64.73880 | 70.51790 | 306.62036   | 443.17883   | -649.80671  | 1 |
| 2010 | H | 74.96100 | 65.55880 | 70.63090 | 541.35490   | -2263.20012 | -2117.33000 | 1 |
| 2011 | C | 74.94700 | 63.53980 | 71.09390 | 211.47599   | 668.35783   | 583.11810   | 1 |
| 2012 | H | 75.05800 | 62.74180 | 70.37490 | 1193.44186  | -1526.63374 | 2478.57059  | 1 |
| 2013 | C | 76.44200 | 63.74480 | 71.56290 | -164.41428  | -877.45988  | -185.69629  | 1 |
| 2014 | H | 76.37000 | 64.76080 | 72.00790 | -1630.38460 | 2144.49160  | 1625.18554  | 1 |
| 2015 | C | 76.85300 | 62.73380 | 72.62490 | -608.62513  | -648.12263  | 202.39444   | 1 |
| 2016 | H | 77.96400 | 62.74180 | 72.63890 | 2696.28003  | -1620.77259 | -37.36905   | 1 |
| 2017 | H | 76.59800 | 61.68380 | 72.36590 | 1179.64944  | 2730.85172  | 1024.25695  | 1 |
| 2018 | H | 76.41300 | 62.97180 | 73.61690 | -1478.26273 | 1604.74732  | -2266.66089 | 1 |
| 2019 | C | 77.39100 | 63.63880 | 70.36590 | 8.20750     | 265.60563   | 872.25987   | 1 |
| 2020 | H | 76.79400 | 64.06380 | 69.53090 | 462.68468   | -2934.50414 | -1035.77727 | 1 |
| 2021 | H | 77.58600 | 62.57880 | 70.09590 | -1516.21961 | 1468.85257  | 2332.76155  | 1 |
| 2022 | C | 78.55700 | 64.57680 | 70.48490 | 839.58786   | -355.09175  | -21.28559   | 1 |
| 2023 | H | 79.21500 | 64.35480 | 71.35190 | -436.62506  | -2985.91408 | -889.88870  | 1 |
| 2024 | H | 78.21700 | 65.63480 | 70.49190 | 2176.02064  | -1949.66633 | 1167.03110  | 1 |
| 2025 | H | 79.23400 | 64.48180 | 69.60890 | -331.58476  | 2196.46751  | 2227.96055  | 1 |
| 2026 | C | 74.09700 | 62.96180 | 72.24090 | 649.57505   | 638.24844   | 46.28366    | 1 |
| 2027 | O | 73.82900 | 61.77480 | 72.30290 | -138.42758  | 177.31496   | -756.98378  | 1 |
| 2028 | N | 73.51000 | 63.84680 | 73.06590 | 356.39596   | -536.86647  | 545.37015   | 1 |
| 2029 | H | 73.79600 | 64.80180 | 73.04790 | 604.44629   | 2816.39918  | 1265.21403  | 1 |
| 2030 | C | 72.53000 | 63.56280 | 74.09690 | -367.57465  | 819.53089   | 157.19097   | 1 |
| 2031 | H | 72.92800 | 62.80480 | 74.75590 | -2230.80755 | -2203.91626 | -253.92325  | 1 |
| 2032 | C | 72.31300 | 64.68880 | 75.09590 | -713.56169  | 533.97940   | -192.73483  | 1 |
| 2033 | H | 71.43000 | 64.41080 | 75.70990 | 737.94673   | -1447.00282 | 2694.40971  | 1 |
| 2034 | H | 71.98400 | 65.56780 | 74.50090 | 988.30864   | -2623.77034 | 1427.34070  | 1 |
| 2035 | C | 73.46500 | 64.97780 | 76.06990 | 315.59796   | 810.29507   | -274.35532  | 1 |
| 2036 | H | 74.37300 | 65.14780 | 75.45290 | -1407.76648 | -148.86095  | 2809.67261  | 1 |
| 2037 | C | 73.19900 | 66.08480 | 77.11390 | -686.19111  | -497.15689  | -336.79043  | 1 |
| 2038 | H | 74.07700 | 66.31080 | 77.75590 | 175.12160   | -2544.02273 | -1842.69015 | 1 |
| 2039 | H | 72.87400 | 67.00380 | 76.57990 | -2609.81228 | -1501.90045 | 911.81200   | 1 |
| 2040 | H | 72.38300 | 65.70780 | 77.76590 | 1615.89084  | -2455.22836 | -1122.04132 | 1 |

|      |   |          |          |          |             |             |             |   |
|------|---|----------|----------|----------|-------------|-------------|-------------|---|
| 2041 | C | 73.79100 | 63.67480 | 76.88490 | 651.44052   | 173.93095   | -613.86015  | 1 |
| 2042 | H | 74.66400 | 63.90280 | 77.53190 | 1930.19295  | -2010.98147 | 1458.94995  | 1 |
| 2043 | H | 72.87900 | 63.35080 | 77.43090 | -537.77902  | 2884.37451  | 1135.51911  | 1 |
| 2044 | H | 74.16100 | 62.87780 | 76.20390 | 843.70987   | -2804.94804 | -1148.32328 | 1 |
| 2045 | C | 71.22700 | 62.91880 | 73.51690 | 187.75238   | -389.88903  | -802.61235  | 1 |
| 2046 | O | 70.71800 | 61.98380 | 74.14690 | 577.28224   | -43.37584   | 537.11357   | 1 |
| 2047 | N | 70.70300 | 63.40180 | 72.34790 | 128.20291   | 632.22047   | 544.54896   | 1 |
| 2048 | H | 71.10300 | 64.26580 | 72.05290 | 186.89101   | 98.28880    | -3139.05038 | 1 |
| 2049 | C | 69.73400 | 62.58180 | 71.58590 | 654.06218   | -578.57456  | -262.49789  | 1 |
| 2050 | H | 68.87900 | 62.38480 | 72.21590 | 1298.20440  | -2813.05665 | -547.36078  | 1 |
| 2051 | C | 69.26800 | 63.38280 | 70.33890 | -409.82423  | 454.41187   | 676.02141   | 1 |
| 2052 | H | 68.28800 | 62.96680 | 70.02090 | 2106.20782  | -2278.35270 | 520.79157   | 1 |
| 2053 | H | 69.96100 | 63.29480 | 69.47590 | -2163.36909 | 25.16517    | -2284.16881 | 1 |
| 2054 | H | 69.03900 | 64.45180 | 70.53990 | 1007.43167  | 948.51124   | -2825.53253 | 1 |
| 2055 | C | 70.21000 | 61.21680 | 71.12590 | 491.19168   | 598.24155   | -481.96346  | 1 |
| 2056 | O | 69.50700 | 60.27980 | 71.39790 | -532.73410  | -403.46037  | -420.76280  | 1 |
| 2057 | N | 71.39700 | 61.10080 | 70.48690 | -225.28400  | -777.07639  | 240.98069   | 1 |
| 2058 | H | 71.96500 | 61.91780 | 70.43290 | 2166.94562  | 691.93797   | -2173.42926 | 1 |
| 2059 | C | 71.91600 | 59.80780 | 70.10590 | -126.00536  | 575.75589   | 695.75772   | 1 |
| 2060 | H | 71.21400 | 59.26580 | 69.48990 | -690.27769  | -1789.79050 | -2493.67057 | 1 |
| 2061 | C | 73.26300 | 60.01580 | 69.27590 | 224.21008   | 184.41705   | -864.39065  | 1 |
| 2062 | H | 73.86400 | 59.08180 | 69.30890 | -1619.40231 | -2123.66932 | -1663.06675 | 1 |
| 2063 | H | 73.85400 | 60.81780 | 69.76790 | 1913.52656  | -1741.36255 | -1790.05552 | 1 |
| 2064 | C | 73.07700 | 60.37180 | 67.86290 | -622.17021  | -263.70164  | 612.22274   | 1 |
| 2065 | C | 71.99300 | 61.12680 | 67.38390 | -153.95335  | -692.81968  | -572.49477  | 1 |
| 2066 | H | 71.19200 | 61.52980 | 67.98490 | -1051.61428 | -1867.79130 | 2302.97401  | 1 |
| 2067 | C | 71.80300 | 61.37380 | 66.02090 | -108.51949  | -460.74910  | -779.34895  | 1 |
| 2068 | H | 70.93800 | 61.91180 | 65.66190 | -2696.83752 | 568.12273   | -1517.40904 | 1 |
| 2069 | C | 72.70500 | 60.88880 | 65.10690 | 558.68542   | -586.75041  | 418.38447   | 1 |
| 2070 | H | 72.48900 | 61.01780 | 64.05590 | -1393.58512 | 1798.98202  | -2172.51247 | 1 |
| 2071 | C | 73.97600 | 59.87980 | 66.90290 | -668.38031  | -292.36310  | -547.03070  | 1 |
| 2072 | H | 74.74700 | 59.17780 | 67.18090 | -519.74511  | -1949.36202 | -2414.14145 | 1 |
| 2073 | C | 73.75000 | 60.08480 | 65.52790 | 345.24016   | -765.15780  | 356.08113   | 1 |
| 2074 | H | 74.35200 | 59.44180 | 64.90390 | 1616.51876  | -2429.04107 | 1176.79770  | 1 |
| 2075 | C | 72.12500 | 58.72180 | 71.18490 | -303.75585  | 855.95742   | -80.74823   | 1 |
| 2076 | O | 71.74000 | 57.56280 | 70.96290 | -445.51117  | 517.35292   | -396.85386  | 1 |
| 2077 | N | 72.61100 | 59.07480 | 72.37390 | 624.43315   | -41.74067   | 566.58030   | 1 |
| 2078 | H | 72.89000 | 60.02280 | 72.50490 | -2034.23856 | -302.64010  | -2380.86301 | 1 |
| 2079 | C | 72.68100 | 58.14080 | 73.49390 | 713.61045   | -433.99477  | 365.86837   | 1 |
| 2080 | H | 73.09600 | 57.19180 | 73.18990 | -1633.72734 | 654.31360   | -2607.87939 | 1 |
| 2081 | C | 73.64600 | 58.74880 | 74.51190 | 260.21211   | -18.29780   | 873.73100   | 1 |
| 2082 | H | 74.62300 | 58.87080 | 73.99490 | -2067.64718 | -1943.85280 | -1358.12284 | 1 |
| 2083 | C | 73.16700 | 60.07580 | 75.15390 | 440.04924   | -542.59235  | -586.00444  | 1 |
| 2084 | H | 72.36900 | 59.90880 | 75.90790 | -1735.24072 | -1838.97854 | -1872.25100 | 1 |
| 2085 | H | 72.74200 | 60.71680 | 74.35090 | 2076.29169  | 1145.42748  | -2067.66413 | 1 |
| 2086 | H | 73.98700 | 60.55380 | 75.73090 | 61.29541    | -2003.23385 | -2425.18520 | 1 |
| 2087 | C | 74.00800 | 57.66680 | 75.58290 | -407.78799  | 564.90514   | -588.25347  | 1 |
| 2088 | H | 74.22300 | 56.72280 | 75.03790 | -1794.03469 | 1567.45159  | -2054.93583 | 1 |
| 2089 | H | 73.10600 | 57.48480 | 76.20490 | -1525.73716 | 1839.86572  | -2045.78750 | 1 |
| 2090 | C | 75.17000 | 58.18180 | 76.40990 | 765.16157   | 229.69992   | -439.56423  | 1 |
| 2091 | H | 76.07100 | 58.47080 | 75.82890 | 2386.89484  | -203.53102  | 2039.49366  | 1 |
| 2092 | H | 74.83000 | 59.07680 | 76.97390 | -1837.93490 | 2218.18707  | -1264.85874 | 1 |
| 2093 | H | 75.49500 | 57.43180 | 77.16290 | 2558.80596  | 729.98521   | 1678.64822  | 1 |
| 2094 | C | 71.27200 | 57.86480 | 74.12990 | -473.64884  | 546.29694   | -555.57847  | 1 |
| 2095 | O | 71.00500 | 56.75880 | 74.66690 | -269.51525  | 338.64344   | 660.53719   | 1 |
| 2096 | N | 70.33700 | 58.79980 | 73.99790 | 646.29447   | 534.45494   | 96.61090    | 1 |
| 2097 | H | 70.55600 | 59.61580 | 73.46790 | 781.07339   | -2098.00231 | -2210.55127 | 1 |
| 2098 | C | 68.93700 | 58.59380 | 74.35490 | 593.35796   | 568.41995   | -395.31771  | 1 |
| 2099 | H | 68.88800 | 58.26980 | 75.38390 | 207.37911   | 2077.34144  | -2353.69341 | 1 |
| 2100 | C | 68.03700 | 59.88580 | 74.21290 | -217.45794  | -817.13132  | 341.26157   | 1 |
| 2101 | H | 66.94500 | 59.71580 | 74.32590 | -659.08708  | -2535.99944 | 1741.41819  | 1 |
| 2102 | H | 68.26200 | 60.32580 | 73.21790 | -1033.35935 | -2156.23168 | -2044.76396 | 1 |

|      |   |          |          |          |             |             |             |   |
|------|---|----------|----------|----------|-------------|-------------|-------------|---|
| 2103 | O | 68.38100 | 60.83480 | 75.21390 | -253.99409  | 745.99177   | 51.09315    | 1 |
| 2104 | H | 69.14200 | 61.29780 | 74.85590 | 803.33209   | 3021.09575  | -354.77355  | 1 |
| 2105 | C | 68.26600 | 57.55280 | 73.49690 | -30.08678   | -625.98435  | -662.33630  | 1 |
| 2106 | O | 67.62400 | 56.66180 | 74.00890 | -147.26451  | 764.27598   | -133.50141  | 1 |
| 2107 | N | 68.41900 | 57.71580 | 72.14690 | -287.87827  | -29.02419   | -793.06745  | 1 |
| 2108 | H | 68.91000 | 58.48880 | 71.75390 | 1145.58148  | -2423.08517 | 1647.58234  | 1 |
| 2109 | C | 68.00800 | 56.73880 | 71.10290 | 159.68382   | -403.84943  | -801.78409  | 1 |
| 2110 | H | 66.93000 | 56.69380 | 71.05990 | -2629.37076 | 1715.92865  | -200.56050  | 1 |
| 2111 | C | 68.42200 | 57.32980 | 69.74790 | -560.24413  | -688.18695  | -209.70514  | 1 |
| 2112 | H | 68.40100 | 56.60980 | 68.90190 | 705.45967   | 2170.66254  | -2165.35841 | 1 |
| 2113 | H | 69.46400 | 57.71380 | 69.75790 | -2176.69301 | 979.14654   | 2049.75751  | 1 |
| 2114 | C | 67.53700 | 58.48480 | 69.21390 | -503.21823  | 77.51028    | 756.44866   | 1 |
| 2115 | H | 67.35400 | 59.16180 | 70.07590 | 1502.90016  | -2763.10212 | 69.16678    | 1 |
| 2116 | C | 68.30300 | 59.44180 | 68.21290 | -889.39703  | 87.46079    | -181.03738  | 1 |
| 2117 | H | 67.50000 | 60.12880 | 67.86990 | -467.28716  | 2715.87637  | -1517.85523 | 1 |
| 2118 | H | 68.58400 | 58.83980 | 67.32290 | 3139.17701  | -199.59344  | -62.89984   | 1 |
| 2119 | H | 69.13000 | 60.00380 | 68.69590 | -2149.99199 | 625.97437   | -2209.95854 | 1 |
| 2120 | C | 66.27600 | 58.00980 | 68.50990 | -855.61590  | 268.32927   | -165.44437  | 1 |
| 2121 | H | 66.46300 | 57.26280 | 67.70990 | -2981.96851 | -570.26593  | 825.15865   | 1 |
| 2122 | H | 65.65900 | 58.82780 | 68.07890 | 802.82144   | -1280.83377 | -2759.19713 | 1 |
| 2123 | H | 65.59800 | 57.65380 | 69.31590 | 1210.31431  | 2486.21506  | -1500.69990 | 1 |
| 2124 | C | 68.65300 | 55.42080 | 71.41890 | 391.22034   | -381.16090  | -730.14657  | 1 |
| 2125 | O | 67.96100 | 54.39280 | 71.36790 | 455.71177   | 545.16498   | -344.59999  | 1 |
| 2126 | N | 69.99700 | 55.34680 | 71.65690 | 351.48327   | 563.15960   | 521.51995   | 1 |
| 2127 | H | 70.50300 | 56.19780 | 71.54090 | -1979.51661 | -2341.54775 | 704.90735   | 1 |
| 2128 | C | 70.66600 | 54.11680 | 71.95390 | 435.66842   | 173.61348   | -781.98618  | 1 |
| 2129 | H | 70.37400 | 53.43580 | 71.16790 | 863.62376   | 2358.74427  | -1894.38795 | 1 |
| 2130 | C | 72.21100 | 54.42880 | 71.99990 | 391.20592   | 677.24236   | -468.77683  | 1 |
| 2131 | H | 72.41300 | 55.16980 | 72.80390 | 351.82945   | -486.90668  | -3088.26232 | 1 |
| 2132 | H | 72.52700 | 54.79380 | 70.99990 | -2874.21529 | -490.39723  | -1181.78815 | 1 |
| 2133 | C | 72.99600 | 53.16680 | 72.28990 | -158.05239  | 897.39430   | 33.96919    | 1 |
| 2134 | O | 73.09800 | 52.74080 | 73.45190 | -319.86522  | -36.92665   | 721.07551   | 1 |
| 2135 | O | 73.42800 | 52.48280 | 71.30890 | 21.67933    | -572.38710  | 543.62693   | 1 |
| 2136 | C | 70.16900 | 53.41580 | 73.19190 | 746.88087   | 11.67975    | 522.95655   | 1 |
| 2137 | O | 70.09800 | 52.19680 | 73.28190 | -322.11435  | -301.26398  | 655.06457   | 1 |
| 2138 | N | 69.80300 | 54.19280 | 74.24790 | -534.60853  | -443.75660  | 479.52694   | 1 |
| 2139 | H | 69.85400 | 55.18780 | 74.23790 | -98.47031   | 2179.77530  | 2266.51924  | 1 |
| 2140 | C | 69.17300 | 53.66180 | 75.45390 | 489.20023   | 634.45007   | 435.43913   | 1 |
| 2141 | H | 69.73600 | 52.83980 | 75.86990 | -2529.30393 | -1780.19729 | -575.97347  | 1 |
| 2142 | C | 69.09800 | 54.71380 | 76.61790 | -508.57795  | 603.74851   | -456.38494  | 1 |
| 2143 | H | 69.19700 | 55.75280 | 76.23590 | -2706.36543 | 520.13211   | -1517.65444 | 1 |
| 2144 | H | 68.12200 | 54.60580 | 77.13890 | 1669.27123  | 1344.82401  | -2302.86955 | 1 |
| 2145 | C | 70.26100 | 54.47080 | 77.66490 | 628.80261   | -236.01511  | 616.72940   | 1 |
| 2146 | H | 70.11000 | 55.20080 | 78.48890 | -1946.14455 | 1913.91686  | 1564.50308  | 1 |
| 2147 | H | 70.18700 | 53.40880 | 77.98390 | -1769.25170 | -2205.48983 | 1379.77870  | 1 |
| 2148 | C | 71.68300 | 54.73580 | 77.10590 | 323.18171   | 728.31266   | 443.35680   | 1 |
| 2149 | H | 72.30700 | 54.92680 | 78.00490 | 1725.79829  | 1879.44631  | 1840.52385  | 1 |
| 2150 | H | 71.52300 | 55.67780 | 76.53890 | 1230.80889  | -706.21838  | 2807.95144  | 1 |
| 2151 | N | 72.29500 | 53.58780 | 76.26790 | -646.18371  | -481.90583  | 250.77015   | 1 |
| 2152 | H | 72.33300 | 53.71780 | 75.27790 | -2297.33232 | 1210.76458  | -1776.10235 | 1 |
| 2153 | C | 72.51900 | 52.36480 | 76.67390 | 661.82706   | 237.93006   | 580.36647   | 1 |
| 2154 | N | 72.45100 | 51.90980 | 77.92390 | 523.04594   | 587.03562   | 307.38317   | 1 |
| 2155 | H | 72.43900 | 52.51280 | 78.72190 | -1787.39077 | 2469.37472  | 778.23451   | 1 |
| 2156 | H | 72.53400 | 50.92280 | 78.06190 | 619.34052   | 36.08832    | 3084.37047  | 1 |
| 2157 | N | 72.86300 | 51.48580 | 75.77490 | -499.76751  | 365.50436   | 573.85650   | 1 |
| 2158 | H | 72.93300 | 51.87680 | 74.85690 | 428.56464   | -2759.31526 | -1449.39224 | 1 |
| 2159 | H | 73.24600 | 50.61580 | 76.08390 | 2888.30830  | 25.41442    | -1247.09883 | 1 |
| 2160 | C | 67.78400 | 53.02580 | 75.23090 | 419.40290   | -701.88434  | 403.62183   | 1 |
| 2161 | O | 67.57600 | 51.90080 | 75.66890 | 739.58384   | -7.74335    | -276.73636  | 1 |
| 2162 | N | 66.94800 | 53.66880 | 74.42790 | 272.18759   | -526.80115  | -600.88830  | 1 |
| 2163 | H | 67.26800 | 54.51680 | 74.01190 | -114.68577  | 570.29813   | 3091.89803  | 1 |
| 2164 | C | 65.70600 | 53.17180 | 73.94890 | 802.44318   | -342.17193  | -265.43233  | 1 |

|      |   |          |          |          |             |             |             |   |
|------|---|----------|----------|----------|-------------|-------------|-------------|---|
| 2165 | H | 65.24000 | 52.91680 | 74.88890 | -773.61628  | 2935.24407  | 827.09510   | 1 |
| 2166 | C | 65.01600 | 54.39180 | 73.21590 | -514.19369  | -573.38898  | -488.14028  | 1 |
| 2167 | H | 65.75700 | 55.08780 | 72.76690 | 586.04189   | -1171.70827 | -2860.39872 | 1 |
| 2168 | H | 64.48300 | 54.96280 | 74.00590 | -1918.41273 | -1950.05892 | -1554.08784 | 1 |
| 2169 | C | 63.96000 | 54.00580 | 72.20890 | 589.46538   | -651.03714  | -245.21870  | 1 |
| 2170 | C | 62.81500 | 53.27380 | 72.56890 | 82.15858    | -902.01760  | 105.19132   | 1 |
| 2171 | H | 62.64500 | 52.99980 | 73.59990 | -1367.78945 | -1996.15587 | 2010.65660  | 1 |
| 2172 | C | 61.86200 | 53.00680 | 71.55590 | -399.62295  | 295.36783   | 764.53276   | 1 |
| 2173 | H | 60.98800 | 52.51080 | 71.95090 | -292.73603  | -3089.36869 | -518.00862  | 1 |
| 2174 | C | 62.07000 | 53.38380 | 70.23690 | -273.52043  | 79.29525    | 866.22736   | 1 |
| 2175 | O | 61.17200 | 53.02380 | 69.23190 | 495.62397   | -74.81991   | -610.23446  | 1 |
| 2176 | H | 61.57000 | 53.06280 | 68.35890 | 851.61547   | -2247.43352 | 2030.27581  | 1 |
| 2177 | C | 64.22300 | 54.25280 | 70.86090 | 650.27815   | -305.94784  | -561.23547  | 1 |
| 2178 | H | 65.19200 | 54.70680 | 70.71490 | 1349.63683  | 2773.39621  | -620.46766  | 1 |
| 2179 | C | 63.28000 | 53.95980 | 69.85490 | -277.81554  | 535.08939   | 684.06789   | 1 |
| 2180 | H | 63.50300 | 54.29180 | 68.85190 | 1275.25847  | -1228.78225 | -2600.39156 | 1 |
| 2181 | C | 65.83400 | 51.91380 | 73.11590 | 574.02176   | 142.30897   | -694.04480  | 1 |
| 2182 | O | 65.14200 | 50.94680 | 73.39390 | 552.31917   | 520.35186   | -218.64288  | 1 |
| 2183 | N | 66.72600 | 51.85580 | 72.13990 | 422.02364   | 574.53356   | -452.19411  | 1 |
| 2184 | H | 67.18100 | 52.70080 | 71.86790 | 1203.14880  | -1030.59614 | 2718.18520  | 1 |
| 2185 | C | 67.06100 | 50.73780 | 71.34590 | 790.22595   | 424.03887   | -164.87872  | 1 |
| 2186 | H | 66.18800 | 50.37980 | 70.82090 | -2262.06129 | -451.42444  | -2139.51418 | 1 |
| 2187 | C | 68.18900 | 50.95680 | 70.27890 | 613.00707   | 645.78500   | 196.55807   | 1 |
| 2188 | H | 68.49600 | 49.97580 | 69.85790 | 1447.96023  | 1574.31117  | 2307.20215  | 1 |
| 2189 | H | 69.07300 | 51.42780 | 70.75990 | -522.29934  | 3100.87838  | 99.91442    | 1 |
| 2190 | C | 67.74500 | 51.90280 | 69.18490 | -391.16536  | -815.71745  | 114.21783   | 1 |
| 2191 | H | 67.22000 | 52.78380 | 69.61290 | -1776.43918 | 1361.34034  | 2211.16316  | 1 |
| 2192 | C | 68.90400 | 52.46280 | 68.26490 | 510.25515   | 640.32723   | -401.33741  | 1 |
| 2193 | H | 69.21300 | 51.65180 | 67.57190 | -814.81842  | 2419.76861  | 1838.21028  | 1 |
| 2194 | H | 69.81900 | 52.69180 | 68.85290 | 2307.23219  | -1576.31507 | -1445.73049 | 1 |
| 2195 | H | 68.67000 | 53.44480 | 67.79890 | -512.84722  | 2259.63912  | 2128.20229  | 1 |
| 2196 | C | 66.79800 | 51.18780 | 68.16290 | 113.62520   | 245.58611   | -870.76276  | 1 |
| 2197 | H | 67.28100 | 50.33580 | 67.63890 | -1961.02823 | -2100.52277 | -1280.78047 | 1 |
| 2198 | H | 66.50300 | 51.92080 | 67.38290 | -1866.41494 | 477.41028   | -2487.32807 | 1 |
| 2199 | H | 65.90400 | 50.68680 | 68.59190 | -1249.88407 | 1244.38661  | -2605.28655 | 1 |
| 2200 | C | 67.57100 | 49.59980 | 72.22890 | -510.18512  | -755.64773  | 12.59556    | 1 |
| 2201 | O | 67.16500 | 48.45580 | 72.05690 | 170.02894   | -395.46220  | -662.06271  | 1 |
| 2202 | N | 68.39700 | 49.92080 | 73.24090 | 644.36919   | 409.26202   | -360.50692  | 1 |
| 2203 | H | 68.72700 | 50.85680 | 73.34190 | 1479.30347  | -47.64056   | 2776.25969  | 1 |
| 2204 | C | 69.08400 | 48.91580 | 74.02090 | -270.91730  | -767.29334  | 411.47996   | 1 |
| 2205 | H | 69.46000 | 48.13080 | 73.38090 | 1797.65204  | 435.01954   | 2545.07983  | 1 |
| 2206 | C | 70.26000 | 49.50580 | 74.88190 | 468.22097   | -770.57178  | 135.79122   | 1 |
| 2207 | H | 69.96200 | 50.21280 | 75.68490 | 2054.26700  | 1367.04935  | 1951.76572  | 1 |
| 2208 | H | 70.89000 | 50.10780 | 74.19090 | -2146.73375 | 1282.63419  | -1909.08616 | 1 |
| 2209 | H | 70.83600 | 48.64580 | 75.28590 | 1459.47504  | 2739.95025  | -510.71662  | 1 |
| 2210 | C | 68.12500 | 48.26380 | 75.04290 | 756.15586   | 506.05180   | -59.92406   | 1 |
| 2211 | O | 68.45400 | 47.23480 | 75.64590 | 296.21782   | -703.34129  | 202.96123   | 1 |
| 2212 | N | 66.89700 | 48.82080 | 75.37790 | 97.57007    | 399.55034   | 737.23259   | 1 |
| 2213 | H | 66.81100 | 49.74780 | 75.01990 | -1511.28522 | 28.39929    | -2759.24568 | 1 |
| 2214 | C | 65.93700 | 48.35880 | 76.39690 | -624.55313  | 501.03365   | -436.29082  | 1 |
| 2215 | H | 66.38800 | 47.45080 | 76.76890 | -1511.13383 | -1840.62939 | 2055.91445  | 1 |
| 2216 | C | 65.75500 | 49.42180 | 77.42890 | -341.69308  | -696.41013  | 479.28047   | 1 |
| 2217 | H | 65.76800 | 50.45180 | 77.01090 | -1462.77981 | 1153.28881  | 2535.43416  | 1 |
| 2218 | C | 64.37800 | 49.29580 | 78.19190 | -248.81438  | 762.72529   | -433.35037  | 1 |
| 2219 | H | 64.35700 | 50.15180 | 78.89890 | 1472.39796  | 2763.45699  | 305.90179   | 1 |
| 2220 | H | 63.54600 | 49.42280 | 77.46690 | 1387.58266  | -2563.18625 | -1184.44790 | 1 |
| 2221 | H | 64.34900 | 48.32980 | 78.73890 | 2105.62272  | -2040.34506 | 1140.86423  | 1 |
| 2222 | C | 66.94300 | 49.36980 | 78.37390 | 601.89979   | -537.61864  | 424.42177   | 1 |
| 2223 | H | 67.87300 | 49.13980 | 77.81290 | 1558.10070  | 2341.21922  | -1410.40454 | 1 |
| 2224 | H | 66.93800 | 48.50780 | 79.07490 | 1414.57683  | 694.44056   | -2723.04075 | 1 |
| 2225 | C | 67.20200 | 50.71380 | 79.14890 | -595.51929  | 367.18638   | 584.79222   | 1 |
| 2226 | H | 68.24400 | 50.65780 | 79.52990 | -1747.67030 | 852.83322   | -2473.16604 | 1 |



|      |   |          |          |          |             |             |             |   |
|------|---|----------|----------|----------|-------------|-------------|-------------|---|
| 2227 | H | 66.39500 | 50.70680 | 79.91290 | 1661.18725  | -1989.41852 | 1783.50697  | 1 |
| 2228 | H | 67.23000 | 51.56080 | 78.43090 | 2692.93388  | -1447.99748 | 741.37483   | 1 |
| 2229 | C | 64.68400 | 47.94480 | 75.66090 | 12.54828    | -908.34415  | 78.76834    | 1 |
| 2230 | O | 64.12400 | 46.89680 | 75.93190 | -369.21429  | -539.63082  | -442.83926  | 1 |
| 2231 | N | 64.12500 | 48.67480 | 74.69190 | 88.43404    | 127.31748   | 829.84454   | 1 |
| 2232 | H | 64.58500 | 49.51780 | 74.42290 | 1222.07498  | 2313.77896  | -1746.76440 | 1 |
| 2233 | C | 62.87300 | 48.23880 | 73.93890 | 700.69683   | 574.78948   | -100.45899  | 1 |
| 2234 | H | 62.32800 | 47.76380 | 74.74190 | 1626.40524  | -736.02938  | 2590.61633  | 1 |
| 2235 | C | 62.19700 | 49.49980 | 73.38790 | -825.74470  | 64.46257    | 381.36763   | 1 |
| 2236 | H | 62.95800 | 50.04680 | 72.79190 | 30.59940    | 2226.53833  | 2222.56990  | 1 |
| 2237 | C | 61.03600 | 49.08980 | 72.50190 | -498.83728  | -243.21960  | -723.50301  | 1 |
| 2238 | H | 61.35600 | 48.76480 | 71.48890 | -2526.11441 | 1854.13627  | -281.33770  | 1 |
| 2239 | H | 60.40500 | 48.31080 | 72.98290 | -2242.58347 | -1795.54235 | 1282.60410  | 1 |
| 2240 | H | 60.31000 | 49.90180 | 72.28490 | 2313.48785  | -1447.36120 | -1565.61354 | 1 |
| 2241 | C | 61.82500 | 50.37880 | 74.60090 | -591.38656  | -661.95142  | 208.64624   | 1 |
| 2242 | H | 61.06500 | 51.09380 | 74.21890 | 1955.52936  | -432.03524  | 2426.41231  | 1 |
| 2243 | H | 62.72800 | 50.86480 | 75.02890 | 1190.10654  | -2493.82458 | 1504.23124  | 1 |
| 2244 | H | 61.21500 | 49.71080 | 75.24590 | -2259.28048 | 2110.24103  | -583.74717  | 1 |
| 2245 | C | 63.20100 | 47.23580 | 72.87290 | 417.80222   | 307.40444   | 749.92988   | 1 |
| 2246 | O | 62.38700 | 46.38080 | 72.49590 | -492.71843  | 595.46477   | -162.10330  | 1 |
| 2247 | N | 64.47400 | 47.13380 | 72.43890 | -193.69306  | 672.65699   | -471.89815  | 1 |
| 2248 | H | 65.23300 | 47.65180 | 72.82590 | 470.99995   | -1159.54275 | -2886.49370 | 1 |
| 2249 | C | 64.77200 | 46.31680 | 71.22390 | -609.91446  | 214.90419   | -642.86199  | 1 |
| 2250 | H | 64.08400 | 45.51580 | 70.99690 | -2480.15667 | 1231.58407  | -1493.40210 | 1 |
| 2251 | C | 64.96500 | 47.11680 | 69.95990 | -646.88090  | 640.06767   | 57.52811    | 1 |
| 2252 | H | 65.19000 | 46.42980 | 69.11690 | 790.08686   | -2387.03599 | -1891.04420 | 1 |
| 2253 | H | 65.80000 | 47.84180 | 70.06290 | -1996.62865 | -1793.95742 | -1641.16332 | 1 |
| 2254 | N | 62.80000 | 47.30780 | 68.67190 | 248.17708   | -160.52799  | -790.76620  | 1 |
| 2255 | H | 62.85700 | 46.39880 | 68.25890 | -1772.11809 | 2275.94912  | 1256.13665  | 1 |
| 2256 | C | 63.74700 | 47.92880 | 69.43990 | -677.71136  | 604.87165   | 79.30073    | 1 |
| 2257 | C | 61.90700 | 48.23880 | 68.29190 | 398.74466   | -522.32628  | 632.16213   | 1 |
| 2258 | H | 61.02100 | 47.93880 | 67.73390 | -685.14795  | 487.19339   | -3031.73896 | 1 |
| 2259 | N | 62.23400 | 49.43580 | 68.75890 | 414.44244   | -668.32608  | -307.00163  | 1 |
| 2260 | C | 63.35500 | 49.21480 | 69.53490 | -529.59590  | 698.22968   | -251.90175  | 1 |
| 2261 | H | 63.91700 | 50.02480 | 69.98390 | -1320.23936 | 1001.53031  | 2674.34689  | 1 |
| 2262 | C | 66.09300 | 45.60480 | 71.41390 | 748.32666   | -202.42896  | -480.08408  | 1 |
| 2263 | O | 67.00800 | 45.60980 | 70.60490 | 549.98168   | -566.01703  | 27.78668    | 1 |
| 2264 | N | 66.26200 | 44.96680 | 72.58690 | -401.93304  | -341.53202  | 659.14945   | 1 |
| 2265 | H | 65.54000 | 44.88280 | 73.26990 | -1650.61831 | 1008.01634  | 2481.44887  | 1 |
| 2266 | C | 67.55100 | 44.53680 | 72.97490 | -444.39073  | 536.63254   | -588.21204  | 1 |
| 2267 | H | 68.36100 | 45.24380 | 72.87890 | 2748.24951  | -1450.17862 | 492.27311   | 1 |
| 2268 | C | 67.54100 | 44.11380 | 74.52790 | 684.43262   | 130.49388   | -588.19583  | 1 |
| 2269 | H | 67.20500 | 45.01580 | 75.08290 | 1852.05488  | -1067.55999 | -2308.34023 | 1 |
| 2270 | H | 66.79700 | 43.31280 | 74.72290 | 2410.20495  | 595.60692   | -1932.45718 | 1 |
| 2271 | H | 68.52800 | 43.74880 | 74.88590 | -1383.08883 | -911.40774  | -2674.81353 | 1 |
| 2272 | C | 68.08100 | 43.25480 | 72.25790 | -398.17893  | 100.57878   | 814.11821   | 1 |
| 2273 | O | 69.24900 | 42.90780 | 72.37290 | 636.46954   | -463.33057  | -62.11712   | 1 |
| 2274 | N | 67.23100 | 42.50780 | 71.53190 | 4.30664     | 598.47252   | 595.38591   | 1 |
| 2275 | H | 66.32800 | 42.91980 | 71.44090 | 2912.59593  | -475.07240  | 1090.55829  | 1 |
| 2276 | C | 67.54800 | 41.26580 | 70.93090 | -335.31234  | 258.58779   | 807.55742   | 1 |
| 2277 | H | 68.32300 | 40.86780 | 71.56890 | -2010.33196 | 1752.49858  | -1668.99382 | 1 |
| 2278 | C | 66.43900 | 40.21380 | 70.95290 | 658.31779   | 513.60753   | -366.43690  | 1 |
| 2279 | H | 66.01200 | 40.24680 | 71.97790 | -1852.94001 | 1355.80876  | -2150.95843 | 1 |
| 2280 | O | 66.96200 | 38.92080 | 70.87490 | 550.85539   | 82.34729    | 559.82541   | 1 |
| 2281 | H | 67.72100 | 38.72880 | 71.43090 | -1576.56453 | -1211.14979 | 2438.39839  | 1 |
| 2282 | C | 65.34400 | 40.37980 | 69.88590 | 749.87638   | -35.58720   | -517.56156  | 1 |
| 2283 | H | 64.40400 | 39.92280 | 70.26290 | 1715.98814  | 2070.02727  | -1633.58441 | 1 |
| 2284 | H | 65.72800 | 39.97280 | 68.92590 | -218.60340  | -3067.59484 | 663.55156   | 1 |
| 2285 | H | 65.10900 | 41.45680 | 69.74290 | 1934.06509  | 1985.81936  | -1487.99863 | 1 |
| 2286 | C | 68.04700 | 41.39180 | 69.50990 | -678.69371  | -598.30908  | 113.36708   | 1 |
| 2287 | O | 68.49600 | 40.41480 | 68.88190 | 293.00025   | -344.02636  | -647.62948  | 1 |
| 2288 | N | 67.97800 | 42.58880 | 68.90590 | -98.72521   | -227.23125  | 807.02638   | 1 |

|      |   |          |          |          |             |             |             |   |
|------|---|----------|----------|----------|-------------|-------------|-------------|---|
| 2289 | H | 67.40400 | 43.31080 | 69.28390 | 1231.01158  | 1517.88517  | 2465.53469  | 1 |
| 2290 | C | 68.25700 | 42.84080 | 67.50690 | -681.96376  | 472.33319   | 378.52053   | 1 |
| 2291 | H | 69.24300 | 42.47480 | 67.26390 | 1563.84161  | -1931.99102 | -1928.73957 | 1 |
| 2292 | C | 67.21300 | 42.10680 | 66.52190 | 757.31941   | 496.00431   | 109.07811   | 1 |
| 2293 | H | 67.50300 | 42.52180 | 65.53290 | -2122.92264 | 366.82424   | 2292.78557  | 1 |
| 2294 | H | 67.39400 | 41.01280 | 66.44490 | 1704.69488  | -133.87949  | -2640.89339 | 1 |
| 2295 | C | 65.73100 | 42.38580 | 66.82990 | -606.63431  | -671.11848  | -114.21820  | 1 |
| 2296 | O | 65.28300 | 43.17080 | 67.69590 | 700.57820   | 200.82518   | 304.11620   | 1 |
| 2297 | N | 64.85100 | 41.84280 | 65.95390 | -470.70949  | 144.07806   | 685.81803   | 1 |
| 2298 | H | 65.23300 | 41.18080 | 65.30890 | 1897.93127  | -1554.74088 | -1969.48317 | 1 |
| 2299 | H | 63.87600 | 42.02380 | 66.07990 | -976.37974  | -1779.46187 | -2403.83533 | 1 |
| 2300 | C | 68.28700 | 44.37280 | 67.28890 | 603.54252   | 251.75734   | 635.45705   | 1 |
| 2301 | O | 67.32600 | 45.05080 | 66.84790 | -283.11668  | 71.34098    | -733.74562  | 1 |
| 2302 | N | 69.42800 | 45.01480 | 67.51390 | -509.83989  | 439.26624   | 509.68691   | 1 |
| 2303 | H | 70.29900 | 44.54280 | 67.62790 | 3073.41697  | 96.42858    | 665.60942   | 1 |
| 2304 | C | 69.59800 | 46.39680 | 67.30590 | -250.56010  | -750.92999  | -452.52049  | 1 |
| 2305 | H | 69.34300 | 46.64780 | 66.28690 | 2380.22491  | 527.76585   | 1988.52176  | 1 |
| 2306 | C | 68.81800 | 47.28080 | 68.35890 | -751.25610  | 368.83109   | -361.97915  | 1 |
| 2307 | H | 67.74200 | 47.08880 | 68.15690 | -1135.32986 | 1162.85284  | 2693.88671  | 1 |
| 2308 | H | 68.95200 | 48.36380 | 68.15390 | 2621.79742  | 1598.95014  | 683.93200   | 1 |
| 2309 | O | 69.09100 | 46.87480 | 69.72790 | 82.97477    | 577.35857   | -532.35279  | 1 |
| 2310 | H | 68.34100 | 46.30280 | 69.90690 | -994.29190  | -1709.16046 | 2447.11674  | 1 |
| 2311 | C | 71.05900 | 46.81080 | 67.33990 | -598.58095  | -246.29948  | -642.25262  | 1 |
| 2312 | O | 71.31200 | 47.99080 | 67.04890 | -119.88413  | -416.63787  | 660.05144   | 1 |
| 2313 | N | 72.08300 | 46.00080 | 67.59690 | -235.47629  | 186.73699   | -788.89321  | 1 |
| 2314 | H | 71.88000 | 45.04780 | 67.80590 | -1941.52766 | 367.00668   | 2448.26523  | 1 |
| 2315 | C | 73.48600 | 46.44780 | 67.59790 | -117.31300  | 808.07841   | 405.82995   | 1 |
| 2316 | H | 73.52400 | 47.26880 | 68.29890 | -94.15309   | 555.56409   | -3095.27219 | 1 |
| 2317 | C | 74.37500 | 45.29980 | 68.15590 | 349.24143   | -694.52830  | 476.56255   | 1 |
| 2318 | H | 74.02300 | 44.33880 | 67.72490 | 2187.56157  | 1734.49200  | -1450.63369 | 1 |
| 2319 | H | 74.17000 | 45.24680 | 69.24690 | -462.21592  | -675.52413  | 3037.80345  | 1 |
| 2320 | C | 75.92100 | 45.26480 | 67.94090 | -688.34064  | -188.53166  | -567.53325  | 1 |
| 2321 | H | 76.30900 | 44.56380 | 68.70990 | 900.64859   | 2483.23659  | 1708.97465  | 1 |
| 2322 | H | 76.31100 | 46.28280 | 68.15790 | 2722.79775  | 917.21387   | 1281.91941  | 1 |
| 2323 | C | 76.47700 | 44.90180 | 66.52690 | -694.39980  | 62.00798    | 587.72011   | 1 |
| 2324 | O | 77.48800 | 45.40880 | 66.06490 | -583.38469  | -402.96791  | -347.71597  | 1 |
| 2325 | N | 75.84000 | 43.91380 | 65.89590 | 677.82138   | -414.44226  | -285.42615  | 1 |
| 2326 | H | 75.05300 | 43.46880 | 66.32490 | 1601.33989  | 2239.89573  | 1522.10510  | 1 |
| 2327 | H | 76.20200 | 43.57880 | 65.02690 | 1908.02434  | -180.88731  | -2494.98479 | 1 |
| 2328 | C | 74.06300 | 47.03080 | 66.32090 | 522.08630   | -575.61216  | -477.01944  | 1 |
| 2329 | O | 74.69700 | 48.06380 | 66.27790 | 244.51640   | -347.06706  | 665.87042   | 1 |
| 2330 | N | 73.75600 | 46.55480 | 65.10790 | -757.58830  | 144.48831   | -343.30071  | 1 |
| 2331 | H | 73.25200 | 45.70380 | 64.98290 | -484.25524  | 488.11033   | 3070.09306  | 1 |
| 2332 | C | 74.08400 | 47.23980 | 63.86290 | -161.53046  | -750.43013  | 492.15193   | 1 |
| 2333 | H | 75.12800 | 47.51180 | 63.92690 | -1065.13115 | -2932.33163 | 406.39032   | 1 |
| 2334 | C | 74.06800 | 46.20880 | 62.72890 | -731.28525  | -469.71222  | 275.75953   | 1 |
| 2335 | H | 73.13500 | 45.60880 | 62.79690 | -2009.06986 | -1599.06496 | 1817.92623  | 1 |
| 2336 | H | 74.85700 | 45.42680 | 62.72790 | -416.58161  | -528.78603  | 3073.28347  | 1 |
| 2337 | C | 74.06200 | 46.76480 | 61.27790 | -776.95958  | -436.42055  | 193.18882   | 1 |
| 2338 | H | 73.11700 | 47.30680 | 61.06290 | 1417.32230  | 2737.90974  | -627.11560  | 1 |
| 2339 | H | 74.90400 | 47.46680 | 61.10090 | -1647.08289 | 868.00982   | -2536.11970 | 1 |
| 2340 | C | 74.25100 | 45.71380 | 60.15490 | 787.69201   | -432.25438  | -155.39769  | 1 |
| 2341 | H | 75.13100 | 45.04580 | 60.27290 | -2340.97760 | 1034.54472  | 1829.69051  | 1 |
| 2342 | H | 73.41700 | 44.99080 | 60.02890 | -276.37492  | 2903.44781  | 1179.76013  | 1 |
| 2343 | N | 74.37500 | 46.45680 | 58.85890 | -541.96141  | -484.39141  | 429.31933   | 1 |
| 2344 | H | 73.83000 | 47.27780 | 58.68890 | 439.68406   | 2676.96414  | 1593.35092  | 1 |
| 2345 | C | 74.66200 | 45.80580 | 57.73890 | 412.49453   | 602.72693   | -545.91163  | 1 |
| 2346 | N | 75.21300 | 44.60980 | 57.67290 | 343.28745   | -484.01684  | 600.46125   | 1 |
| 2347 | H | 75.14000 | 43.94180 | 58.41390 | 1066.64886  | 1702.06179  | -2421.46073 | 1 |
| 2348 | H | 75.29600 | 44.15880 | 56.78390 | -2741.62249 | 591.53017   | -1425.42078 | 1 |
| 2349 | N | 74.43800 | 46.41980 | 56.59390 | -652.77470  | 441.51959   | -302.68453  | 1 |
| 2350 | H | 74.35200 | 47.41580 | 56.55990 | -366.14760  | -834.01819  | -3011.40761 | 1 |

|      |   |          |          |          |             |             |             |   |
|------|---|----------|----------|----------|-------------|-------------|-------------|---|
| 2351 | H | 74.81700 | 46.00380 | 55.76690 | -2089.51111 | -2352.02812 | -11.54432   | 1 |
| 2352 | C | 73.45900 | 48.66280 | 63.65890 | 367.37472   | -648.97084  | 524.71294   | 1 |
| 2353 | O | 74.22500 | 49.62080 | 63.25590 | 591.72685   | -305.57477  | -424.39443  | 1 |
| 2354 | N | 72.19600 | 48.93680 | 63.88290 | -569.87937  | 557.90511   | -276.86041  | 1 |
| 2355 | C | 71.15200 | 47.91380 | 63.64390 | 554.89815   | 314.54020   | 651.61607   | 1 |
| 2356 | H | 71.01200 | 47.26380 | 64.53490 | -408.21656  | -2507.78575 | 1855.42343  | 1 |
| 2357 | H | 71.30300 | 47.24080 | 62.77290 | 2314.20547  | -2085.90791 | 437.79846   | 1 |
| 2358 | C | 71.58800 | 50.28980 | 63.86990 | 223.43296   | -572.17464  | 673.90274   | 1 |
| 2359 | H | 71.84300 | 50.86080 | 62.98890 | 2443.94981  | -1878.97436 | 628.32388   | 1 |
| 2360 | C | 70.07700 | 50.06480 | 63.96190 | -439.81422  | -571.98101  | 557.54119   | 1 |
| 2361 | H | 69.46100 | 50.84980 | 63.47390 | -2705.05160 | 792.16700   | 1397.63854  | 1 |
| 2362 | H | 69.73700 | 49.93580 | 65.01190 | -1616.19085 | -411.24491  | -2667.77641 | 1 |
| 2363 | C | 69.87000 | 48.68880 | 63.34890 | -607.08387  | -680.02370  | 21.63219    | 1 |
| 2364 | H | 69.82900 | 48.81780 | 62.24590 | 2001.62042  | 2191.28034  | -1044.04615 | 1 |
| 2365 | H | 68.94600 | 48.19980 | 63.72390 | -1180.94778 | -2507.16573 | 1489.19729  | 1 |
| 2366 | C | 72.06400 | 51.10980 | 65.08690 | 418.51034   | -615.39546  | -526.86671  | 1 |
| 2367 | O | 72.36800 | 52.25980 | 64.91690 | -310.85032  | -687.91968  | 231.87457   | 1 |
| 2368 | N | 72.14200 | 50.58980 | 66.34490 | -289.32400  | -596.50411  | 522.63444   | 1 |
| 2369 | H | 71.85400 | 49.64680 | 66.48990 | 1363.66697  | 2593.04601  | -1146.62592 | 1 |
| 2370 | C | 72.81900 | 51.31980 | 67.35990 | 357.30677   | 628.45541   | 555.72176   | 1 |
| 2371 | H | 72.31400 | 52.25080 | 67.56990 | 2502.65950  | 1397.91440  | 1296.44011  | 1 |
| 2372 | C | 72.89600 | 50.49980 | 68.67390 | -257.51074  | -482.49481  | -729.61495  | 1 |
| 2373 | H | 73.60400 | 51.00680 | 69.36290 | -2483.46327 | 1672.50487  | 966.10759   | 1 |
| 2374 | H | 73.30500 | 49.50780 | 68.38590 | -1677.63239 | 2346.91290  | 1255.29902  | 1 |
| 2375 | C | 71.62900 | 50.31280 | 69.43890 | -163.66395  | -590.59331  | -675.17750  | 1 |
| 2376 | H | 70.76200 | 49.92680 | 68.86190 | -554.84535  | 2989.57813  | -807.95758  | 1 |
| 2377 | H | 71.29200 | 51.26680 | 69.89990 | 481.09859   | -1476.23941 | -2736.32739 | 1 |
| 2378 | C | 71.72500 | 49.24180 | 70.58390 | 446.76018   | -774.28284  | -179.84001  | 1 |
| 2379 | H | 70.75000 | 48.93880 | 71.02290 | 1486.63614  | -1571.06313 | 2284.71002  | 1 |
| 2380 | H | 72.23500 | 48.32680 | 70.21490 | -1807.91618 | 1953.25876  | 1677.63092  | 1 |
| 2381 | N | 72.53600 | 49.96180 | 71.58390 | -293.05361  | 786.60279   | -89.71019   | 1 |
| 2382 | H | 72.73100 | 50.93480 | 71.46790 | -1194.06061 | 2648.21785  | -1208.05119 | 1 |
| 2383 | C | 73.24800 | 49.36280 | 72.44790 | 810.67973   | -416.96001  | 19.84276    | 1 |
| 2384 | N | 73.02000 | 48.12780 | 72.87290 | -787.41695  | -159.99390  | 258.93781   | 1 |
| 2385 | H | 72.19900 | 47.67380 | 72.52690 | -2513.64235 | -426.69839  | 1843.30052  | 1 |
| 2386 | H | 73.73800 | 47.68480 | 73.40890 | 1844.99598  | 1762.05733  | 1841.02417  | 1 |
| 2387 | N | 74.05500 | 50.13280 | 73.16390 | -11.35797   | 841.95718   | 60.42671    | 1 |
| 2388 | H | 74.03900 | 51.12880 | 73.07790 | -990.59967  | -2636.73108 | 1401.63752  | 1 |
| 2389 | H | 74.58500 | 49.72780 | 73.90890 | -1576.76848 | 1001.33361  | 2531.67106  | 1 |
| 2390 | C | 74.26400 | 51.75680 | 67.03390 | 490.81175   | -88.58160   | -763.35321  | 1 |
| 2391 | O | 74.70400 | 52.87880 | 67.34290 | -97.63868   | -781.84572  | 53.02065    | 1 |
| 2392 | N | 74.99000 | 50.84080 | 66.43790 | 391.45388   | -416.25300  | -621.42545  | 1 |
| 2393 | H | 74.53700 | 50.00780 | 66.12990 | -2434.88356 | 1263.10961  | -1540.81873 | 1 |
| 2394 | C | 76.32900 | 51.05180 | 65.91890 | 755.75258   | 424.99039   | 282.26265   | 1 |
| 2395 | H | 76.92000 | 51.30980 | 66.78590 | 2383.14925  | 975.35757   | 1807.62371  | 1 |
| 2396 | C | 76.94900 | 49.70280 | 65.47390 | -127.10057  | 449.84396   | -782.90284  | 1 |
| 2397 | H | 76.30500 | 49.24080 | 64.69590 | -1462.01769 | -776.97564  | 2675.26435  | 1 |
| 2398 | H | 76.96900 | 49.10280 | 66.40990 | 2351.35848  | 2038.64845  | -461.79218  | 1 |
| 2399 | C | 78.38400 | 49.85180 | 64.90690 | 507.13821   | 429.47325   | 624.35131   | 1 |
| 2400 | H | 78.99800 | 50.42380 | 65.63490 | 1539.25316  | 2178.00992  | -1668.89147 | 1 |
| 2401 | H | 78.48000 | 50.46080 | 63.98190 | 497.81871   | 1585.92457  | -2671.18813 | 1 |
| 2402 | C | 79.08600 | 48.50880 | 64.76090 | -465.49210  | -579.50324  | -528.15158  | 1 |
| 2403 | H | 80.13800 | 48.65880 | 64.43590 | -1798.56283 | 2098.41842  | -1503.34231 | 1 |
| 2404 | H | 79.13800 | 48.00180 | 65.74790 | -1712.44281 | 2016.17196  | 1703.17835  | 1 |
| 2405 | C | 78.42400 | 47.54480 | 63.73590 | -276.83746  | -461.54264  | 736.06414   | 1 |
| 2406 | H | 77.43900 | 47.19580 | 64.11290 | 2062.78229  | -900.72626  | 2198.14641  | 1 |
| 2407 | H | 78.43800 | 48.07180 | 62.75690 | -581.77017  | -1296.54614 | 2806.90894  | 1 |
| 2408 | N | 79.19100 | 46.31480 | 63.58490 | 668.80042   | -48.88060   | 512.82451   | 1 |
| 2409 | H | 79.15700 | 45.54480 | 64.28290 | -1455.35871 | 2733.96206  | -552.81890  | 1 |
| 2410 | H | 78.84600 | 45.88880 | 62.70090 | 2802.27857  | 696.03767   | -1249.39690 | 1 |
| 2411 | H | 80.20700 | 46.41180 | 63.38790 | -1395.14776 | 167.54165   | -2814.91008 | 1 |
| 2412 | C | 76.45600 | 52.09780 | 64.76190 | -340.64362  | 379.01610   | -756.14795  | 1 |

|      |   |          |          |          |             |             |             |   |
|------|---|----------|----------|----------|-------------|-------------|-------------|---|
| 2413 | O | 77.33400 | 53.00380 | 64.73790 | 480.83886   | 274.14261   | -563.26464  | 1 |
| 2414 | N | 75.49900 | 52.07180 | 63.80890 | 474.66355   | 163.46394   | -678.70932  | 1 |
| 2415 | H | 74.82500 | 51.33980 | 63.87890 | -1343.72188 | -1828.90196 | -2178.93446 | 1 |
| 2416 | C | 75.37200 | 53.05880 | 62.72290 | 505.86493   | -644.58825  | -400.07208  | 1 |
| 2417 | H | 76.24900 | 53.07880 | 62.09390 | 1996.30797  | -1795.19527 | 1640.19958  | 1 |
| 2418 | C | 74.08200 | 52.69580 | 61.93290 | 467.02505   | -635.74028  | -457.35423  | 1 |
| 2419 | H | 73.19500 | 52.54980 | 62.58490 | 2992.05203  | -698.08008  | 677.15216   | 1 |
| 2420 | H | 74.18000 | 51.73280 | 61.38690 | -2643.66720 | -1378.09349 | 1005.04144  | 1 |
| 2421 | C | 73.59900 | 53.60380 | 60.75090 | 746.41321   | -148.09729  | 502.37985   | 1 |
| 2422 | H | 73.51200 | 54.61580 | 61.20090 | -2259.59392 | 2000.75123  | 888.51342   | 1 |
| 2423 | C | 74.75200 | 53.70080 | 59.70190 | 392.86651   | 818.16838   | -87.79179   | 1 |
| 2424 | H | 75.73100 | 53.99880 | 60.13390 | 973.97142   | -2231.00409 | -1993.04456 | 1 |
| 2425 | H | 74.40100 | 54.35980 | 58.87990 | -2807.57231 | -610.77700  | -1281.68460 | 1 |
| 2426 | H | 74.77600 | 52.72380 | 59.17190 | 461.01885   | -2966.66190 | 940.53442   | 1 |
| 2427 | C | 72.26900 | 52.99980 | 60.24790 | 145.82257   | -611.60754  | -660.39609  | 1 |
| 2428 | H | 72.31900 | 51.91280 | 60.01990 | -2677.86183 | 717.21180   | -1487.57839 | 1 |
| 2429 | H | 71.53100 | 53.17380 | 61.05890 | 2811.05797  | 716.38731   | -1217.77196 | 1 |
| 2430 | H | 71.90400 | 53.53280 | 59.34390 | -582.05890  | 1814.68262  | -2503.26999 | 1 |
| 2431 | C | 75.26700 | 54.48680 | 63.29190 | 864.36087   | -210.32899  | -200.23236  | 1 |
| 2432 | O | 75.99400 | 55.39780 | 62.81990 | -722.97101  | -65.10869   | -310.96785  | 1 |
| 2433 | N | 74.42500 | 54.77980 | 64.32690 | 56.26413    | 662.10682   | -520.69299  | 1 |
| 2434 | H | 73.71000 | 54.13580 | 64.58490 | 1481.70092  | 2723.79880  | -532.64312  | 1 |
| 2435 | C | 74.40000 | 55.99780 | 65.09690 | 135.32019   | 888.85078   | 151.93334   | 1 |
| 2436 | H | 74.15100 | 56.75380 | 64.36690 | 1816.38195  | -1659.32307 | 1961.02774  | 1 |
| 2437 | C | 73.31000 | 55.86980 | 66.17990 | 147.39433   | 803.00974   | -406.08038  | 1 |
| 2438 | H | 73.30000 | 56.73880 | 66.87090 | -1879.52770 | 558.27214   | 2460.47436  | 1 |
| 2439 | H | 73.61800 | 54.94780 | 66.71790 | -124.36038  | 1122.47502  | 2936.46225  | 1 |
| 2440 | C | 71.87600 | 55.65080 | 65.62390 | -292.57289  | -459.05976  | -731.51640  | 1 |
| 2441 | H | 71.83700 | 54.60480 | 65.25090 | 853.61981   | -51.96252   | -3027.68217 | 1 |
| 2442 | C | 70.97400 | 55.48080 | 66.86590 | -262.24589  | 276.38742   | -828.42506  | 1 |
| 2443 | H | 71.23100 | 54.55980 | 67.43290 | -35.86831   | 1339.43061  | -2846.55324 | 1 |
| 2444 | H | 71.08600 | 56.36480 | 67.52890 | 690.15356   | -2302.03786 | 2030.40291  | 1 |
| 2445 | H | 69.94100 | 55.32880 | 66.48690 | 789.05455   | -2499.06386 | 1740.77540  | 1 |
| 2446 | C | 71.25800 | 56.61480 | 64.56090 | 507.07240   | 560.70252   | -509.84435  | 1 |
| 2447 | H | 70.17700 | 56.37880 | 64.46190 | -1746.50458 | -1860.64461 | 1840.09500  | 1 |
| 2448 | H | 71.83700 | 56.72880 | 63.61990 | 1435.80627  | 2799.35657  | 17.01108    | 1 |
| 2449 | H | 71.32500 | 57.64680 | 64.96790 | -602.34540  | -2187.68669 | -2179.31943 | 1 |
| 2450 | C | 75.73500 | 56.27280 | 65.77590 | 449.23342   | 690.57438   | -390.82908  | 1 |
| 2451 | O | 76.34600 | 57.33580 | 65.63190 | 98.01944    | -737.45968  | -264.90119  | 1 |
| 2452 | N | 76.31200 | 55.24680 | 66.49890 | 474.00165   | 695.72037   | 62.99122    | 1 |
| 2453 | H | 75.88100 | 54.35180 | 66.58390 | -2128.34693 | 2169.62168  | 813.08508   | 1 |
| 2454 | C | 77.48200 | 55.40080 | 67.33590 | -188.92237  | 684.46151   | -572.07673  | 1 |
| 2455 | H | 77.32600 | 56.29280 | 67.92390 | -2248.40509 | 1524.77759  | -1586.80624 | 1 |
| 2456 | C | 77.62100 | 54.17580 | 68.29490 | 656.69761   | -251.44449  | 580.49541   | 1 |
| 2457 | H | 78.49700 | 54.34580 | 68.95590 | -1355.25345 | 2557.13823  | 1233.91994  | 1 |
| 2458 | H | 76.75900 | 54.12480 | 68.99390 | -186.38175  | -699.89618  | -3061.63901 | 1 |
| 2459 | H | 77.70900 | 53.20180 | 67.76690 | 763.93062   | -1527.50127 | 2642.22938  | 1 |
| 2460 | C | 78.78300 | 55.65680 | 66.64290 | -504.56942  | 517.63806   | 555.79811   | 1 |
| 2461 | O | 79.62000 | 56.37780 | 67.15490 | -520.37260  | -556.13294  | 208.70012   | 1 |
| 2462 | N | 78.96700 | 55.15180 | 65.41590 | -170.22067  | 783.12437   | -265.35529  | 1 |
| 2463 | H | 78.26300 | 54.58880 | 64.98890 | -2830.38522 | 295.52187   | -1341.57092 | 1 |
| 2464 | C | 80.24300 | 55.01480 | 64.81890 | -742.71501  | -319.79120  | -421.37752  | 1 |
| 2465 | H | 80.93500 | 55.54480 | 65.45490 | -1284.08264 | 1406.65318  | 2504.13355  | 1 |
| 2466 | C | 80.74100 | 53.60680 | 64.68090 | 369.62887   | -790.28411  | -265.09721  | 1 |
| 2467 | H | 81.54200 | 53.50280 | 63.91790 | 1367.07050  | 2829.87709  | -145.39652  | 1 |
| 2468 | H | 79.93900 | 52.99380 | 64.21490 | -1230.72456 | -447.92394  | -2860.57817 | 1 |
| 2469 | C | 81.19200 | 53.07180 | 66.00590 | -439.81834  | 431.09233   | 672.43604   | 1 |
| 2470 | H | 80.21400 | 52.97080 | 66.52290 | 822.31980   | -2077.29909 | 2215.13992  | 1 |
| 2471 | H | 81.98500 | 53.67880 | 66.49090 | 2425.71536  | 1965.56947  | -388.15957  | 1 |
| 2472 | C | 81.80000 | 51.67080 | 65.81990 | -194.87544  | 641.85926   | -617.64978  | 1 |
| 2473 | O | 82.54700 | 51.38680 | 64.86090 | 490.51294   | 511.21769   | 348.82770   | 1 |
| 2474 | O | 81.46400 | 50.77080 | 66.62690 | 586.86452   | 97.56209    | 519.32543   | 1 |

|      |   |          |          |          |             |             |             |   |
|------|---|----------|----------|----------|-------------|-------------|-------------|---|
| 2475 | C | 80.24800 | 55.64180 | 63.46990 | -393.60719  | -299.78151  | 765.93435   | 1 |
| 2476 | O | 81.28400 | 56.18180 | 63.05390 | 185.46925   | -763.79646  | -76.44188   | 1 |
| 2477 | N | 79.10300 | 55.73680 | 62.73990 | 1.18328     | 620.27752   | -572.64884  | 1 |
| 2478 | H | 78.21300 | 55.39680 | 63.03490 | -2991.28572 | -323.39887  | 919.70058   | 1 |
| 2479 | C | 79.08500 | 56.37380 | 61.44790 | 456.82388   | -551.93061  | 564.03506   | 1 |
| 2480 | H | 80.07800 | 56.57180 | 61.07090 | 2080.94848  | -158.14349  | 2354.33011  | 1 |
| 2481 | C | 78.41800 | 55.43180 | 60.43790 | 595.38611   | -262.83251  | -638.65911  | 1 |
| 2482 | H | 77.80000 | 55.86380 | 59.62190 | -1201.22448 | 1916.78934  | -2186.59658 | 1 |
| 2483 | H | 77.61800 | 54.90880 | 61.00490 | -2339.72894 | 2080.30056  | -310.23263  | 1 |
| 2484 | C | 79.39200 | 54.30580 | 59.96390 | 523.91545   | 550.26969   | -504.14965  | 1 |
| 2485 | H | 80.20100 | 54.78780 | 59.37390 | 1632.38826  | 612.06032   | 2618.95341  | 1 |
| 2486 | H | 79.81400 | 53.79280 | 60.85490 | 3082.36072  | -630.18896  | -11.85261   | 1 |
| 2487 | C | 78.69400 | 53.25980 | 59.05890 | 535.32051   | -553.97053  | -487.85204  | 1 |
| 2488 | H | 78.18300 | 53.69880 | 58.17490 | -2896.45892 | -1228.09288 | -23.23467   | 1 |
| 2489 | H | 77.89200 | 52.86580 | 59.71890 | 574.79550   | -3068.48749 | -390.15494  | 1 |
| 2490 | C | 79.52300 | 52.08780 | 58.64990 | 119.91645   | -217.39813  | -877.38766  | 1 |
| 2491 | H | 78.88900 | 51.18480 | 58.52290 | 1550.97321  | -136.94496  | 2733.85340  | 1 |
| 2492 | H | 80.17100 | 51.87080 | 59.52690 | -1835.80481 | 76.09568    | -2553.87086 | 1 |
| 2493 | N | 80.41500 | 52.29680 | 57.45590 | -340.75312  | -238.62309  | 734.58738   | 1 |
| 2494 | H | 81.01600 | 53.14280 | 57.39090 | 2077.51361  | 1710.64734  | 1629.67761  | 1 |
| 2495 | H | 80.99800 | 51.45480 | 57.27390 | 2036.95678  | -1679.36001 | -1711.36882 | 1 |
| 2496 | H | 79.79000 | 52.30380 | 56.62490 | -136.84474  | -2232.74320 | 2212.31949  | 1 |
| 2497 | C | 78.36900 | 57.66680 | 61.44790 | -436.04995  | 495.04796   | -629.47515  | 1 |
| 2498 | O | 78.89200 | 58.71780 | 61.08490 | -87.52700   | -612.14327  | 491.16888   | 1 |
| 2499 | N | 77.09500 | 57.58980 | 61.86190 | 607.50853   | 527.28763   | -256.07310  | 1 |
| 2500 | H | 76.77100 | 56.72180 | 62.22990 | 1458.51518  | -1997.19696 | -1944.77865 | 1 |
| 2501 | C | 76.09900 | 58.66480 | 61.66090 | 133.28248   | -784.46330  | 445.31350   | 1 |
| 2502 | H | 76.35500 | 59.15680 | 60.73390 | -2975.33665 | -993.06191  | 243.77466   | 1 |
| 2503 | C | 74.63500 | 58.10880 | 61.42090 | -235.67123  | 686.81576   | -551.53802  | 1 |
| 2504 | H | 74.40700 | 57.32080 | 62.17090 | -2592.77985 | 286.31803   | -1758.90331 | 1 |
| 2505 | C | 73.63900 | 59.25180 | 61.53490 | 412.54753   | 67.66444    | 810.35613   | 1 |
| 2506 | H | 73.66300 | 59.64980 | 62.57190 | 1124.66712  | 1030.89139  | -2751.47470 | 1 |
| 2507 | H | 72.61900 | 58.85480 | 61.34290 | -2442.61912 | -1685.69764 | 1044.15588  | 1 |
| 2508 | H | 73.85800 | 60.07080 | 60.81690 | 1055.85425  | -1531.17459 | 2537.49924  | 1 |
| 2509 | C | 74.54200 | 57.54180 | 59.97590 | -322.67470  | 385.89947   | 760.53510   | 1 |
| 2510 | H | 75.40900 | 56.88280 | 59.75790 | 1220.58053  | -2103.52528 | 1995.89348  | 1 |
| 2511 | H | 73.71200 | 56.81880 | 59.81990 | 2015.11253  | 1366.60431  | 1992.47093  | 1 |
| 2512 | H | 74.61300 | 58.32480 | 59.19190 | 301.43086   | -2515.68369 | 1865.12768  | 1 |
| 2513 | C | 76.21100 | 59.84480 | 62.65990 | -12.43828   | 6.78298     | -911.72928  | 1 |
| 2514 | O | 75.93300 | 60.98580 | 62.30390 | 576.43795   | 213.03201   | -495.94745  | 1 |
| 2515 | N | 76.85000 | 59.71980 | 63.88290 | -395.10264  | 459.78809   | -587.50414  | 1 |
| 2516 | H | 76.85700 | 58.81880 | 64.30890 | -1745.59768 | -2615.25319 | -107.54412  | 1 |
| 2517 | C | 77.20900 | 60.88380 | 64.76190 | 682.57926   | -366.07454  | 481.17147   | 1 |
| 2518 | H | 76.28000 | 61.42980 | 64.83790 | -1968.94770 | 1636.93714  | 1828.08861  | 1 |
| 2519 | C | 77.73400 | 60.39280 | 66.08790 | -528.03511  | -107.94521  | -735.51190  | 1 |
| 2520 | H | 77.00500 | 59.71580 | 66.58190 | 2074.08785  | 1543.57762  | 1792.69461  | 1 |
| 2521 | C | 79.03700 | 59.53180 | 65.95890 | -159.07311  | -559.93267  | -701.87047  | 1 |
| 2522 | H | 79.91700 | 60.21080 | 65.96790 | 3081.88190  | -14.18254   | 632.47849   | 1 |
| 2523 | H | 79.30200 | 58.94780 | 65.05190 | -1119.62649 | -2552.41944 | -1459.38951 | 1 |
| 2524 | H | 79.18400 | 58.75480 | 66.73890 | -2398.91850 | 585.98352   | -1949.36902 | 1 |
| 2525 | C | 77.96200 | 61.63780 | 66.98490 | 237.71013   | -728.35172  | 494.41751   | 1 |
| 2526 | H | 78.82900 | 62.29580 | 66.75890 | 2530.62891  | 1755.47006  | -642.23704  | 1 |
| 2527 | H | 78.00300 | 61.31880 | 68.04790 | -1566.25258 | 1835.16075  | 2019.22364  | 1 |
| 2528 | H | 77.05900 | 62.28480 | 66.98290 | -1195.10023 | 2422.04621  | -1613.58416 | 1 |
| 2529 | C | 78.17500 | 61.78680 | 63.99590 | 591.43949   | 297.00416   | -627.24705  | 1 |
| 2530 | O | 78.09900 | 62.98780 | 64.12390 | -680.00288  | 401.52001   | -2.23548    | 1 |
| 2531 | N | 79.04000 | 61.27880 | 63.15690 | 461.53381   | 222.71467   | -670.86288  | 1 |
| 2532 | H | 79.21600 | 60.30180 | 63.07090 | -351.47570  | 1952.59601  | 2441.73297  | 1 |
| 2533 | C | 79.83300 | 62.16880 | 62.23990 | -743.29342  | -451.56983  | 273.95362   | 1 |
| 2534 | H | 80.38500 | 62.91080 | 62.79690 | -567.46054  | 2257.40796  | 2116.67760  | 1 |
| 2535 | C | 80.87800 | 61.35180 | 61.53590 | 247.62975   | 876.88086   | -34.79164   | 1 |
| 2536 | H | 81.46900 | 62.00780 | 60.86190 | 1668.15668  | -2662.34459 | 165.53182   | 1 |

|      |   |          |          |          |             |             |             |   |
|------|---|----------|----------|----------|-------------|-------------|-------------|---|
| 2537 | H | 80.48200 | 60.49880 | 60.94490 | 3032.26998  | 320.36756   | 775.19650   | 1 |
| 2538 | C | 81.78800 | 60.76180 | 62.55890 | -542.31176  | 452.41814   | -576.77273  | 1 |
| 2539 | C | 81.47900 | 59.48980 | 63.13990 | 610.43304   | 80.23188    | -672.59598  | 1 |
| 2540 | H | 80.54500 | 58.99280 | 62.92390 | 2094.09441  | -2307.64190 | -433.34013  | 1 |
| 2541 | C | 82.33100 | 58.99680 | 64.14690 | -627.84855  | -285.72860  | 596.33579   | 1 |
| 2542 | H | 82.11600 | 58.00880 | 64.52490 | 1288.86116  | -2499.37535 | -1410.73952 | 1 |
| 2543 | C | 83.50600 | 59.67180 | 64.52090 | 597.32487   | 558.50971   | -403.38680  | 1 |
| 2544 | O | 84.34300 | 59.10380 | 65.48790 | 784.82525   | -16.16578   | -86.11168   | 1 |
| 2545 | H | 85.16400 | 59.59980 | 65.50190 | 1989.31837  | 2340.00078  | -682.08136  | 1 |
| 2546 | C | 82.96400 | 61.42180 | 62.94590 | -743.72146  | -227.65914  | -475.92091  | 1 |
| 2547 | H | 83.22800 | 62.37680 | 62.51590 | -1601.44261 | -1953.72382 | -1875.25225 | 1 |
| 2548 | C | 83.79600 | 60.81880 | 63.85490 | -646.60004  | 642.81176   | -12.34635   | 1 |
| 2549 | H | 84.68400 | 61.36680 | 64.13590 | -1077.47896 | 1761.32941  | 2373.81213  | 1 |
| 2550 | C | 79.07200 | 63.01480 | 61.18490 | 755.97992   | -504.10201  | 76.33172    | 1 |
| 2551 | O | 79.35300 | 64.19780 | 61.05590 | 305.27495   | 532.93805   | 496.39850   | 1 |
| 2552 | N | 78.11400 | 62.42880 | 60.51990 | -330.48286  | 752.95759   | -191.07130  | 1 |
| 2553 | H | 77.89300 | 61.46280 | 60.63090 | -1800.74236 | -2418.28065 | -898.59439  | 1 |
| 2554 | C | 77.45200 | 63.00280 | 59.37490 | -171.02718  | 887.28241   | 122.19095   | 1 |
| 2555 | H | 77.88600 | 63.93180 | 59.03590 | 1745.28610  | -293.13041  | -2601.20688 | 1 |
| 2556 | C | 77.51400 | 62.02580 | 58.15990 | 496.29923   | 423.73091   | -636.85963  | 1 |
| 2557 | H | 78.58700 | 61.74980 | 58.07590 | -1987.58359 | 1594.16214  | 1845.63940  | 1 |
| 2558 | C | 76.64800 | 60.74380 | 58.20490 | -838.08345  | 59.05954    | 354.37142   | 1 |
| 2559 | H | 76.89000 | 60.04880 | 57.37290 | 1950.03968  | -933.72632  | -2285.54733 | 1 |
| 2560 | H | 75.57900 | 61.03780 | 58.26890 | -1395.33314 | 2687.81368  | 852.60148   | 1 |
| 2561 | H | 76.88300 | 60.24480 | 59.16990 | -855.71685  | 683.96007   | 2949.26661  | 1 |
| 2562 | C | 77.07000 | 62.83080 | 56.90790 | -570.77126  | -609.60883  | 366.12599   | 1 |
| 2563 | H | 77.53500 | 63.83980 | 56.88090 | 476.65632   | -683.53386  | 3033.77759  | 1 |
| 2564 | H | 77.24600 | 62.12980 | 56.06390 | -2189.15145 | -1811.11047 | 1351.19245  | 1 |
| 2565 | H | 75.98500 | 63.07180 | 56.90790 | -1330.65511 | -1417.88160 | 2473.29638  | 1 |
| 2566 | C | 75.96700 | 63.43180 | 59.71690 | -272.22670  | -592.10152  | -637.77693  | 1 |
| 2567 | O | 75.23100 | 63.95280 | 58.88690 | -83.50511   | 410.59184   | -669.37917  | 1 |
| 2568 | N | 75.55600 | 63.14580 | 60.96990 | -150.57332  | 825.49864   | 92.47680    | 1 |
| 2569 | H | 76.07500 | 62.48980 | 61.51290 | 504.16011   | 2415.79102  | 1951.41040  | 1 |
| 2570 | C | 74.24300 | 63.52480 | 61.53090 | -523.91201  | 361.70244   | -652.79288  | 1 |
| 2571 | H | 73.64800 | 62.66780 | 61.80990 | -1282.59050 | 2670.70883  | 1058.53775  | 1 |
| 2572 | H | 73.74100 | 64.17580 | 60.82990 | -2164.17609 | -669.96139  | -2183.05287 | 1 |
| 2573 | C | 74.39400 | 64.47380 | 62.76890 | 667.40836   | -593.81190  | -182.76899  | 1 |
| 2574 | O | 73.38900 | 65.08080 | 63.16490 | 213.44088   | 492.89450   | 578.90002   | 1 |
| 2575 | N | 75.62000 | 64.65580 | 63.34290 | 407.76159   | -528.08353  | 517.23356   | 1 |
| 2576 | H | 76.40600 | 64.05980 | 63.19790 | -1565.45391 | -724.90537  | 2630.98698  | 1 |
| 2577 | C | 75.80700 | 65.65780 | 64.37690 | 248.54503   | 560.24445   | 675.13149   | 1 |
| 2578 | H | 74.96800 | 66.32780 | 64.49790 | -134.98160  | 2855.56669  | -1313.67617 | 1 |
| 2579 | C | 76.01200 | 64.93380 | 65.67590 | 278.61279   | -370.56758  | 785.17870   | 1 |
| 2580 | H | 76.89500 | 64.26080 | 65.65490 | 2093.60022  | -2303.69237 | -456.14232  | 1 |
| 2581 | C | 76.30800 | 65.94080 | 66.83790 | 659.81054   | -153.30146  | -610.40947  | 1 |
| 2582 | H | 77.32300 | 66.35880 | 66.66890 | 2604.30123  | 1417.98064  | -1051.27172 | 1 |
| 2583 | H | 76.23100 | 65.35680 | 67.77990 | 1842.88595  | 1275.58512  | 2207.91308  | 1 |
| 2584 | H | 75.48500 | 66.68680 | 66.80890 | 2557.02413  | -1828.61020 | -126.64340  | 1 |
| 2585 | C | 74.73100 | 64.15080 | 66.04990 | -260.84914  | 590.19267   | -644.26807  | 1 |
| 2586 | H | 73.85200 | 64.82480 | 66.13390 | -1559.89301 | -2590.09786 | -869.68563  | 1 |
| 2587 | H | 74.86500 | 63.63880 | 67.02690 | -1583.21081 | 890.33354   | -2568.84720 | 1 |
| 2588 | H | 74.49800 | 63.28680 | 65.39090 | -1477.86579 | -1563.69327 | -2295.43074 | 1 |
| 2589 | C | 76.98200 | 66.54980 | 64.00090 | -311.36156  | -663.92101  | 541.95376   | 1 |
| 2590 | O | 76.81300 | 67.75280 | 63.82890 | 493.09283   | -568.06205  | 240.40009   | 1 |
| 2591 | N | 78.17500 | 65.95380 | 63.88490 | 669.45657   | 322.63646   | -400.50705  | 1 |
| 2592 | H | 78.34800 | 64.98480 | 64.04090 | -1952.26483 | -1901.95370 | 1571.45169  | 1 |
| 2593 | C | 79.38000 | 66.79380 | 63.80390 | 275.33721   | 269.64065   | -826.39842  | 1 |
| 2594 | H | 79.33300 | 67.52180 | 64.60090 | 435.59070   | -1565.41234 | -2694.06221 | 1 |
| 2595 | C | 80.72500 | 65.95580 | 63.88190 | 783.96094   | -408.45164  | -223.65934  | 1 |
| 2596 | H | 81.57500 | 66.47980 | 63.39390 | 952.56650   | 2545.70453  | 1584.37108  | 1 |
| 2597 | H | 80.62700 | 65.05980 | 63.23190 | -935.60924  | -1361.43225 | -2677.56677 | 1 |
| 2598 | C | 81.07600 | 65.46380 | 65.23690 | 756.59391   | -502.07413  | -83.29604   | 1 |

|      |   |          |          |          |             |             |             |   |
|------|---|----------|----------|----------|-------------|-------------|-------------|---|
| 2599 | C | 81.17800 | 64.13780 | 65.68490 | -792.75719  | -351.50764  | -281.83227  | 1 |
| 2600 | H | 81.15400 | 63.23580 | 65.09090 | 409.44274   | 1620.97532  | -2665.14950 | 1 |
| 2601 | N | 81.54500 | 64.11680 | 67.03990 | -628.07833  | 249.30732   | -505.99977  | 1 |
| 2602 | H | 81.89000 | 63.41080 | 67.61890 | -799.53679  | 1852.52640  | -2413.94140 | 1 |
| 2603 | C | 81.67300 | 65.44380 | 67.41590 | 799.83290   | -399.14944  | -179.99461  | 1 |
| 2604 | C | 81.36600 | 66.28480 | 66.35090 | -261.53011  | -603.09923  | 631.92114   | 1 |
| 2605 | C | 81.43800 | 67.69780 | 66.49390 | 449.92375   | -625.12954  | -488.09085  | 1 |
| 2606 | H | 81.35400 | 68.36680 | 65.64990 | 2137.35506  | 1826.49301  | 1412.04209  | 1 |
| 2607 | C | 81.95200 | 68.19480 | 67.67890 | 795.64160   | -402.47773  | 190.83272   | 1 |
| 2608 | H | 82.20600 | 69.23880 | 67.78590 | -1100.00132 | 2894.86718  | 554.94806   | 1 |
| 2609 | C | 81.95100 | 65.96580 | 68.65390 | -476.80441  | 764.53960   | 139.95628   | 1 |
| 2610 | H | 82.12500 | 65.34080 | 69.51690 | 2152.14988  | 774.02491   | 2160.40796  | 1 |
| 2611 | C | 82.16800 | 67.36880 | 68.71590 | 112.25910   | -691.74216  | -583.38811  | 1 |
| 2612 | H | 82.68500 | 67.67280 | 69.61390 | -1251.40173 | -1419.70961 | 2513.29357  | 1 |
| 2613 | C | 79.54100 | 67.60780 | 62.56990 | -662.04951  | -398.77358  | -483.86060  | 1 |
| 2614 | O | 79.68900 | 68.83180 | 62.62190 | -72.69763   | 683.15442   | 389.41279   | 1 |
| 2615 | N | 79.43900 | 66.98780 | 61.39490 | 234.11088   | -475.89358  | -656.80263  | 1 |
| 2616 | H | 79.52900 | 65.99580 | 61.36090 | -1658.50736 | -143.70214  | 2669.63092  | 1 |
| 2617 | C | 79.40100 | 67.72880 | 60.09790 | 664.72391   | -587.29714  | 211.36507   | 1 |
| 2618 | H | 80.27400 | 68.36380 | 60.06790 | 816.95783   | 600.97156   | -2978.19397 | 1 |
| 2619 | C | 79.57800 | 66.71580 | 58.97690 | -89.51908   | 129.76712   | 898.10792   | 1 |
| 2620 | H | 79.06400 | 65.76680 | 59.23990 | 1520.52353  | 1979.92785  | 1914.71150  | 1 |
| 2621 | C | 79.02300 | 67.18080 | 57.59490 | -566.26586  | 586.52737   | 408.38661   | 1 |
| 2622 | H | 79.08700 | 66.33780 | 56.87390 | -745.45430  | -1568.61513 | 2623.35104  | 1 |
| 2623 | H | 77.97200 | 67.53780 | 57.64990 | 2928.32411  | 1084.36958  | -383.77957  | 1 |
| 2624 | H | 79.57700 | 68.09680 | 57.29790 | 2043.77050  | -2084.93708 | -1172.29081 | 1 |
| 2625 | C | 81.08100 | 66.50980 | 58.92390 | 388.43729   | 695.20120   | 444.14273   | 1 |
| 2626 | H | 81.56100 | 66.51280 | 59.92590 | 2721.90919  | -1233.68186 | 983.59831   | 1 |
| 2627 | H | 81.53800 | 67.31980 | 58.31590 | 1799.36522  | 2401.52655  | 945.08269   | 1 |
| 2628 | C | 81.48100 | 65.22680 | 58.17990 | 554.61258   | -314.94345  | -651.66442  | 1 |
| 2629 | H | 82.58100 | 65.23080 | 58.01990 | -548.99997  | -2333.92582 | -2037.06051 | 1 |
| 2630 | H | 81.14600 | 64.38880 | 58.82690 | -1062.72655 | 1845.77819  | 2315.58662  | 1 |
| 2631 | H | 81.07500 | 65.34680 | 57.15190 | -2526.76737 | -1845.25930 | -329.68320  | 1 |
| 2632 | C | 78.20300 | 68.68480 | 59.97390 | -169.06395  | 509.15556   | 737.31201   | 1 |
| 2633 | O | 78.39300 | 69.81780 | 59.50690 | -730.96421  | -163.19824  | 250.36949   | 1 |
| 2634 | N | 76.94300 | 68.38580 | 60.25590 | 382.34420   | -450.46081  | 602.96788   | 1 |
| 2635 | C | 76.40600 | 67.04980 | 60.23790 | 101.55111   | 39.63848    | -905.29949  | 1 |
| 2636 | H | 76.84500 | 66.50280 | 61.09990 | -35.26389   | -2364.76667 | -2074.81596 | 1 |
| 2637 | H | 76.61900 | 66.55080 | 59.26890 | -2215.49163 | 1831.81047  | -1278.39488 | 1 |
| 2638 | C | 75.89100 | 69.36780 | 60.47890 | -503.71622  | -382.96712  | -656.54944  | 1 |
| 2639 | H | 75.63800 | 69.83980 | 59.54090 | 2410.32531  | 1718.91546  | -1064.84167 | 1 |
| 2640 | C | 74.79500 | 68.58480 | 61.07990 | 322.65296   | -422.80851  | 740.66121   | 1 |
| 2641 | H | 74.84900 | 68.53780 | 62.18890 | -1040.70574 | -1901.65108 | -2280.10547 | 1 |
| 2642 | H | 73.81200 | 69.09380 | 60.98690 | 2242.03676  | -2148.05451 | -507.30583  | 1 |
| 2643 | C | 74.91000 | 67.23780 | 60.38990 | -325.40783  | -656.23778  | -543.05867  | 1 |
| 2644 | H | 74.48000 | 66.36180 | 60.92190 | 2405.11862  | 197.92356   | 2018.52840  | 1 |
| 2645 | H | 74.36300 | 67.34880 | 59.42990 | -56.49788   | 846.00936   | 3029.73636  | 1 |
| 2646 | C | 76.27700 | 70.60180 | 61.32290 | 703.01954   | -46.61631   | -578.82766  | 1 |
| 2647 | O | 75.93900 | 71.65980 | 60.85690 | -723.71387  | -201.97021  | -243.05039  | 1 |
| 2648 | N | 76.98300 | 70.49280 | 62.53090 | 441.73769   | 351.29978   | 627.79660   | 1 |
| 2649 | H | 77.22900 | 69.59880 | 62.89790 | -998.57522  | -2127.28062 | 2091.82956  | 1 |
| 2650 | C | 77.34300 | 71.60280 | 63.34590 | 51.77988    | 707.65465   | -572.70825  | 1 |
| 2651 | H | 76.43300 | 72.10680 | 63.63490 | 2898.13603  | -1172.21801 | -353.46674  | 1 |
| 2652 | C | 78.07100 | 71.11780 | 64.56590 | -253.11347  | 659.10138   | -577.03548  | 1 |
| 2653 | H | 77.40400 | 70.42680 | 65.12390 | -1411.15697 | -2314.43961 | -1596.94444 | 1 |
| 2654 | H | 78.32800 | 71.98480 | 65.21090 | -2709.75096 | 367.84358   | 1555.68861  | 1 |
| 2655 | H | 79.06500 | 70.67980 | 64.33290 | -3067.13397 | 137.45548   | -687.03816  | 1 |
| 2656 | C | 78.26200 | 72.58380 | 62.57290 | 682.49780   | 447.18425   | 407.03071   | 1 |
| 2657 | O | 77.99600 | 73.79480 | 62.52490 | -478.25785  | 550.39124   | 303.25920   | 1 |
| 2658 | N | 79.28600 | 72.04380 | 61.88190 | -190.06427  | -631.23312  | -527.34487  | 1 |
| 2659 | H | 79.45000 | 71.06180 | 61.82190 | 1714.14310  | 1948.78440  | -1778.25167 | 1 |
| 2660 | C | 80.16600 | 72.83480 | 60.97290 | -481.45767  | -367.76633  | 681.46712   | 1 |

|      |   |          |          |          |             |             |             |   |
|------|---|----------|----------|----------|-------------|-------------|-------------|---|
| 2661 | H | 80.56600 | 73.62780 | 61.58790 | 1.92333     | 3141.55384  | -169.88815  | 1 |
| 2662 | C | 81.26100 | 71.99780 | 60.26490 | -642.24492  | -600.79952  | 240.85763   | 1 |
| 2663 | H | 80.87300 | 71.21680 | 59.57690 | 1253.90065  | -2877.67719 | -211.97497  | 1 |
| 2664 | H | 81.86300 | 72.79880 | 59.78490 | 1351.93614  | -2410.42112 | -1503.45100 | 1 |
| 2665 | C | 82.21600 | 71.17680 | 61.14290 | 37.20441    | 698.82925   | 584.55497   | 1 |
| 2666 | H | 81.67600 | 70.33280 | 61.62390 | -1335.69003 | -1079.49409 | -2636.06731 | 1 |
| 2667 | C | 83.30900 | 70.67280 | 60.22790 | -647.67314  | -293.02833  | 571.05596   | 1 |
| 2668 | H | 82.82200 | 70.02180 | 59.46990 | -334.40520  | 1911.46601  | 2476.42829  | 1 |
| 2669 | H | 83.81700 | 71.51980 | 59.71990 | -1094.50796 | 2151.03179  | 2018.25192  | 1 |
| 2670 | H | 84.03400 | 70.09680 | 60.84190 | 2169.42575  | -2232.25064 | -457.02871  | 1 |
| 2671 | C | 82.83200 | 72.00880 | 62.34890 | -734.31262  | -29.66428   | -539.77404  | 1 |
| 2672 | H | 81.97800 | 72.18080 | 63.03890 | 1618.46271  | 2641.76034  | 547.63768   | 1 |
| 2673 | H | 83.61500 | 71.40980 | 62.85990 | 1034.92887  | 1218.91969  | -2709.49871 | 1 |
| 2674 | H | 83.28400 | 72.93580 | 61.93590 | 904.06768   | 2719.56616  | 1298.01685  | 1 |
| 2675 | C | 79.39800 | 73.56380 | 59.85490 | -412.89558  | 811.61597   | -47.41066   | 1 |
| 2676 | O | 79.60700 | 74.74080 | 59.58190 | -265.26780  | 686.81507   | 285.56135   | 1 |
| 2677 | N | 78.44400 | 72.86480 | 59.19490 | 630.45625   | 456.03448   | -327.45955  | 1 |
| 2678 | H | 78.25100 | 71.91980 | 59.44990 | -2228.30596 | 1238.06642  | 1843.92796  | 1 |
| 2679 | C | 77.51900 | 73.42580 | 58.26290 | 466.52900   | -601.72352  | 501.72752   | 1 |
| 2680 | H | 78.15500 | 73.93980 | 57.55690 | 1337.24937  | -2722.63665 | -835.00899  | 1 |
| 2681 | C | 76.60000 | 72.37380 | 57.56490 | 309.95694   | 430.93829   | -741.39725  | 1 |
| 2682 | H | 75.90000 | 72.97980 | 56.94990 | 342.40933   | -2245.93785 | 2176.40650  | 1 |
| 2683 | H | 76.05600 | 71.96080 | 58.44090 | 1084.66154  | 928.89903   | -2803.36979 | 1 |
| 2684 | C | 77.41200 | 71.39580 | 56.68990 | 866.46906   | 252.80207   | 129.51252   | 1 |
| 2685 | H | 78.23700 | 70.92380 | 57.26490 | -1870.34412 | -1592.98019 | 1965.31250  | 1 |
| 2686 | C | 76.51500 | 70.32580 | 56.03890 | -579.50716  | -525.10325  | 468.92328   | 1 |
| 2687 | H | 75.79800 | 70.79480 | 55.33190 | 1948.98959  | -2450.34638 | 308.97967   | 1 |
| 2688 | H | 77.06300 | 69.52180 | 55.50390 | 935.83366   | -2836.40874 | 988.54796   | 1 |
| 2689 | H | 76.02800 | 69.82180 | 56.90090 | -2204.04567 | 997.94039   | -2011.10017 | 1 |
| 2690 | C | 78.08700 | 72.20080 | 55.55590 | -548.67517  | -215.89980  | 695.55290   | 1 |
| 2691 | H | 78.93000 | 72.84180 | 55.89090 | 2446.53965  | -890.45067  | -1766.28638 | 1 |
| 2692 | H | 77.35600 | 72.90380 | 55.10290 | -19.42709   | -3080.31590 | -639.92405  | 1 |
| 2693 | H | 78.47800 | 71.55980 | 54.73690 | -1972.30071 | -1450.31055 | 1976.07071  | 1 |
| 2694 | C | 76.65800 | 74.51080 | 58.81890 | 231.98561   | 562.33357   | -679.27508  | 1 |
| 2695 | O | 76.44500 | 75.53780 | 58.13990 | 714.06837   | -40.17815   | -334.84222  | 1 |
| 2696 | N | 76.13800 | 74.39180 | 60.04090 | 617.36970   | 286.62132   | -499.37476  | 1 |
| 2697 | H | 76.10800 | 73.55980 | 60.58990 | 2165.59712  | -1853.48418 | -1331.54487 | 1 |
| 2698 | C | 75.18900 | 75.41980 | 60.53390 | 701.13198   | -525.05250  | 253.34724   | 1 |
| 2699 | H | 74.52600 | 75.63580 | 59.70990 | 942.78482   | -2944.10920 | 584.46903   | 1 |
| 2700 | C | 74.32700 | 74.98880 | 61.72290 | -449.78881  | -343.47278  | -714.95978  | 1 |
| 2701 | H | 73.68700 | 75.85480 | 61.99690 | 2635.01368  | 188.31622   | 1708.64454  | 1 |
| 2702 | H | 75.08200 | 74.73680 | 62.49790 | -2836.22068 | 1121.91519  | 771.61179   | 1 |
| 2703 | C | 73.43400 | 73.79580 | 61.37990 | -400.29774  | 366.91327   | 732.52125   | 1 |
| 2704 | H | 73.87200 | 73.05280 | 60.67990 | -2481.98041 | -1112.62012 | 1581.16285  | 1 |
| 2705 | C | 73.20600 | 72.96180 | 62.64590 | 524.56692   | 373.61649   | -645.51628  | 1 |
| 2706 | H | 72.47500 | 72.15780 | 62.41390 | -135.19921  | 1449.58460  | -2789.02347 | 1 |
| 2707 | H | 72.89900 | 73.58880 | 63.51090 | -219.67440  | -1200.96979 | 2899.59324  | 1 |
| 2708 | H | 74.09900 | 72.35780 | 62.91390 | 1564.87649  | 1580.78756  | -2224.97157 | 1 |
| 2709 | C | 72.04600 | 74.18280 | 60.80190 | -273.69235  | 416.04256   | 763.84036   | 1 |
| 2710 | H | 71.38500 | 73.30880 | 60.62390 | 749.99034   | -2806.24561 | 1208.60509  | 1 |
| 2711 | H | 71.56400 | 75.00680 | 61.36990 | 1626.87072  | -1973.16836 | -1832.51863 | 1 |
| 2712 | H | 72.15400 | 74.59180 | 59.77490 | -2157.38483 | -596.93883  | -2210.78741 | 1 |
| 2713 | C | 75.85100 | 76.71480 | 60.91390 | 422.05272   | -388.77636  | -708.64338  | 1 |
| 2714 | O | 75.24100 | 77.76980 | 61.06290 | -536.29828  | 147.64734   | 560.54585   | 1 |
| 2715 | N | 77.17700 | 76.61080 | 61.06990 | 435.26067   | 426.40441   | -584.29420  | 1 |
| 2716 | H | 77.61500 | 75.74080 | 60.85690 | 3076.65370  | -173.31295  | 634.34286   | 1 |
| 2717 | C | 78.06900 | 77.62580 | 61.56690 | -385.31104  | 623.44216   | -542.50003  | 1 |
| 2718 | H | 77.44900 | 78.34180 | 62.08490 | 1219.20639  | 2253.68843  | 1825.55484  | 1 |
| 2719 | C | 79.05700 | 77.17280 | 62.62790 | -209.66098  | -676.59296  | 574.20837   | 1 |
| 2720 | H | 79.78300 | 77.96780 | 62.90290 | -2046.86423 | 791.12563   | 2254.48293  | 1 |
| 2721 | O | 79.81600 | 75.99880 | 62.30490 | -537.29814  | 487.37630   | -312.09339  | 1 |
| 2722 | H | 79.18000 | 75.28680 | 62.20490 | 1726.20155  | -1706.24308 | 2001.79644  | 1 |



|      |   |          |          |          |             |             |             |   |
|------|---|----------|----------|----------|-------------|-------------|-------------|---|
| 2723 | C | 78.13500 | 76.76780 | 63.83490 | 244.30263   | -860.47520  | 177.05836   | 1 |
| 2724 | H | 77.36500 | 77.55080 | 64.00490 | -1786.84574 | -1433.28235 | -2156.64328 | 1 |
| 2725 | H | 78.74600 | 76.71880 | 64.76190 | -1218.63170 | 2026.93918  | 2074.77241  | 1 |
| 2726 | H | 77.51500 | 75.84680 | 63.79690 | -466.71224  | -692.76123  | 3033.23059  | 1 |
| 2727 | C | 78.80100 | 78.28280 | 60.43990 | -665.85034  | 456.81807   | -423.57004  | 1 |
| 2728 | O | 79.82000 | 78.91780 | 60.65690 | -552.27533  | 557.56958   | 87.95085    | 1 |
| 2729 | N | 78.35900 | 78.17880 | 59.20190 | -162.28026  | -574.47720  | 596.91989   | 1 |
| 2730 | H | 77.57900 | 77.59780 | 58.98190 | -367.52315  | -1901.80390 | -2479.17222 | 1 |
| 2731 | C | 78.86300 | 79.05080 | 58.16390 | -14.04506   | -447.73381  | -794.22174  | 1 |
| 2732 | H | 79.93700 | 78.96980 | 58.24790 | -1992.67779 | -1609.82420 | 1826.45216  | 1 |
| 2733 | C | 78.55500 | 78.55580 | 56.73090 | 655.95336   | -529.40855  | -347.71078  | 1 |
| 2734 | H | 77.45400 | 78.54380 | 56.58590 | -2215.42451 | 2227.87174  | -163.42572  | 1 |
| 2735 | C | 79.23400 | 79.47680 | 55.69190 | -159.48417  | 502.42681   | 744.03166   | 1 |
| 2736 | H | 79.23300 | 79.06580 | 54.66090 | 2879.15674  | -1266.80384 | 62.37558    | 1 |
| 2737 | H | 78.67300 | 80.41380 | 55.48890 | 3132.71444  | -55.29409   | -285.07721  | 1 |
| 2738 | H | 80.26600 | 79.78080 | 55.97290 | -366.21256  | -1156.54205 | -2902.84775 | 1 |
| 2739 | C | 79.06900 | 77.10780 | 56.54390 | -394.22383  | 621.10379   | -538.76587  | 1 |
| 2740 | H | 79.00500 | 76.45980 | 57.44390 | -2499.35262 | -1550.88304 | 1116.34425  | 1 |
| 2741 | H | 80.15200 | 77.14780 | 56.29690 | 700.62728   | 2262.72359  | -2070.61093 | 1 |
| 2742 | C | 78.26600 | 76.33080 | 55.51690 | -565.96897  | -633.65471  | -331.07678  | 1 |
| 2743 | H | 78.23500 | 76.94280 | 54.59090 | -1800.90823 | -2245.03912 | -1270.73015 | 1 |
| 2744 | H | 77.16900 | 76.27180 | 55.68190 | 2418.72941  | -1963.84501 | 437.36376   | 1 |
| 2745 | H | 78.74700 | 75.33680 | 55.39290 | 667.24415   | -2148.85118 | 2198.96568  | 1 |
| 2746 | C | 78.55300 | 80.52180 | 58.35990 | 641.49862   | -13.07469   | -647.88856  | 1 |
| 2747 | O | 79.45400 | 81.34280 | 58.28290 | 429.95962   | -391.11820  | -534.59191  | 1 |
| 2748 | N | 77.30800 | 80.94280 | 58.79090 | -701.89462  | 110.25088   | 455.91773   | 1 |
| 2749 | C | 76.06600 | 80.31780 | 58.47990 | -458.25423  | 444.20150   | -651.25962  | 1 |
| 2750 | H | 75.80500 | 79.49080 | 59.17390 | 1834.49021  | 2545.03429  | 235.94993   | 1 |
| 2751 | H | 76.09400 | 79.92480 | 57.44090 | -2289.01874 | 1680.45934  | 1354.50206  | 1 |
| 2752 | C | 77.11200 | 82.34380 | 59.28390 | 685.39954   | 588.08551   | 125.83284   | 1 |
| 2753 | H | 77.25900 | 83.06080 | 58.48990 | -2803.66106 | -1131.60613 | -870.16002  | 1 |
| 2754 | C | 75.62100 | 82.35380 | 59.68890 | 265.07419   | 809.50247   | -325.41118  | 1 |
| 2755 | H | 75.54600 | 82.00980 | 60.74290 | -1970.85200 | 2004.33411  | -1413.01571 | 1 |
| 2756 | H | 75.08500 | 83.32580 | 59.65190 | -1975.54576 | 246.85397   | 2436.08462  | 1 |
| 2757 | C | 75.00600 | 81.34580 | 58.64290 | -729.52436  | 511.26967   | -194.54699  | 1 |
| 2758 | H | 74.62200 | 81.75380 | 57.68290 | 27.38355    | 2677.86276  | 1651.21997  | 1 |
| 2759 | H | 74.09500 | 80.94680 | 59.13790 | -1442.41782 | -2487.04692 | -1277.59722 | 1 |
| 2760 | C | 78.03700 | 82.78180 | 60.40490 | -288.39612  | -864.61200  | -26.92155   | 1 |
| 2761 | O | 78.48700 | 83.90380 | 60.44290 | 71.24541    | -687.37751  | -382.18253  | 1 |
| 2762 | N | 78.30300 | 81.91980 | 61.40090 | 198.69635   | 742.53901   | 349.03850   | 1 |
| 2763 | H | 77.87300 | 81.02280 | 61.32790 | -2899.48114 | 1090.08704  | 550.40495   | 1 |
| 2764 | C | 79.25100 | 82.16380 | 62.47790 | -722.98745  | 417.40509   | -366.76032  | 1 |
| 2765 | H | 78.89200 | 83.09180 | 62.89790 | 1628.09794  | -2323.51493 | -1359.70648 | 1 |
| 2766 | C | 79.28600 | 81.04580 | 63.50590 | 819.55453   | 342.94851   | 205.34772   | 1 |
| 2767 | H | 80.16800 | 81.03780 | 64.18090 | -2671.41909 | 1114.04009  | -1233.15082 | 1 |
| 2768 | H | 79.41000 | 80.13580 | 62.87990 | -1620.82808 | -1182.19392 | 2423.54288  | 1 |
| 2769 | C | 78.00000 | 80.97680 | 64.30490 | 482.25145   | 637.00377   | -439.44368  | 1 |
| 2770 | O | 77.75200 | 81.96580 | 65.02190 | -547.32903  | 563.75195   | 79.00572    | 1 |
| 2771 | O | 77.25500 | 79.98480 | 64.24790 | 471.88587   | -373.17630  | 511.55685   | 1 |
| 2772 | C | 80.65900 | 82.48880 | 61.91190 | -606.37378  | -460.62791  | 501.58127   | 1 |
| 2773 | O | 81.35100 | 83.42380 | 62.34390 | 426.03667   | -539.98626  | 387.98817   | 1 |
| 2774 | N | 81.09300 | 81.65880 | 60.95190 | 222.40387   | 228.73368   | 781.59434   | 1 |
| 2775 | H | 80.60900 | 80.81980 | 60.71590 | 878.16134   | -204.40596  | -3014.17934 | 1 |
| 2776 | C | 82.35100 | 81.84880 | 60.18090 | -65.79329   | -908.34534  | 45.06656    | 1 |
| 2777 | H | 83.14500 | 81.81080 | 60.91190 | 960.33334   | -2233.31578 | -1997.06954 | 1 |
| 2778 | C | 82.61200 | 80.57680 | 59.36790 | 656.24266   | -411.00044  | -481.53422  | 1 |
| 2779 | H | 81.68500 | 80.38480 | 58.78690 | 2137.83445  | 256.08662   | -2293.97248 | 1 |
| 2780 | H | 82.65500 | 79.66680 | 60.00390 | 1811.37974  | 2258.80147  | 1230.83126  | 1 |
| 2781 | C | 83.86900 | 80.51280 | 58.43890 | 592.11703   | -547.29352  | -425.81478  | 1 |
| 2782 | C | 85.11900 | 81.10280 | 58.74990 | 458.80924   | -635.21661  | -466.30992  | 1 |
| 2783 | H | 85.29600 | 81.67880 | 59.64590 | -1969.18704 | -1703.49115 | 1765.96900  | 1 |
| 2784 | C | 86.16200 | 81.10780 | 57.83790 | -577.35659  | -705.72029  | -8.32061    | 1 |

|      |   |          |          |          |             |             |             |   |
|------|---|----------|----------|----------|-------------|-------------|-------------|---|
| 2785 | H | 87.06200 | 81.63480 | 58.11890 | 917.19045   | 2209.95698  | -2042.81131 | 1 |
| 2786 | C | 85.98200 | 80.43580 | 56.65890 | -883.29316  | 208.07235   | 89.16331    | 1 |
| 2787 | H | 86.69700 | 80.46980 | 55.84990 | -1065.22346 | -984.63313  | -2791.77772 | 1 |
| 2788 | C | 83.79600 | 79.72480 | 57.31990 | 462.88303   | 622.13985   | -479.72107  | 1 |
| 2789 | H | 82.86100 | 79.25980 | 57.04390 | -888.21074  | 1701.64388  | -2492.73264 | 1 |
| 2790 | C | 84.80600 | 79.76980 | 56.36290 | 531.78267   | -487.63267  | -557.55948  | 1 |
| 2791 | H | 84.81800 | 79.17080 | 55.46490 | -2241.90357 | -1139.90078 | -1890.16423 | 1 |
| 2792 | C | 82.49700 | 83.11280 | 59.39990 | -4.58079    | -673.93494  | -614.20006  | 1 |
| 2793 | O | 83.51000 | 83.80280 | 59.50090 | 289.26115   | -607.22467  | 413.80360   | 1 |
| 2794 | N | 81.49500 | 83.40680 | 58.56490 | -483.96202  | -633.02836  | -278.79768  | 1 |
| 2795 | H | 80.75700 | 82.74780 | 58.43890 | -2093.70205 | -2006.71631 | 1219.72440  | 1 |
| 2796 | C | 81.46900 | 84.64280 | 57.71890 | 451.47373   | -784.39792  | 111.09623   | 1 |
| 2797 | H | 82.41100 | 84.77380 | 57.20590 | -1818.09101 | -1530.39103 | -2061.71642 | 1 |
| 2798 | C | 80.38000 | 84.70980 | 56.67890 | 591.42356   | -262.21945  | -642.58084  | 1 |
| 2799 | H | 79.41800 | 84.79380 | 57.22890 | -1933.84250 | -1014.42248 | -2264.82372 | 1 |
| 2800 | C | 80.53000 | 85.93080 | 55.79390 | 618.45462   | 137.25568   | -655.83974  | 1 |
| 2801 | H | 80.49300 | 86.84980 | 56.41690 | 554.59581   | -2818.18485 | -1283.93297 | 1 |
| 2802 | H | 79.71100 | 86.14580 | 55.07490 | -3032.68240 | -702.46243  | -455.64262  | 1 |
| 2803 | H | 81.47200 | 85.93480 | 55.20490 | -1309.39751 | -2768.80406 | 719.32501   | 1 |
| 2804 | C | 80.27800 | 83.41680 | 55.77490 | 71.22585    | -730.26392  | 541.38017   | 1 |
| 2805 | H | 80.08400 | 82.53880 | 56.42690 | 1881.30631  | 2002.94117  | -1532.03769 | 1 |
| 2806 | H | 81.26700 | 83.29280 | 55.28390 | 586.69067   | 2093.17112  | 2274.34715  | 1 |
| 2807 | C | 79.15000 | 83.46480 | 54.79990 | 521.37426   | -376.54092  | -646.40298  | 1 |
| 2808 | H | 79.31000 | 82.70080 | 54.00990 | -857.53232  | 1957.92398  | 2308.54895  | 1 |
| 2809 | H | 79.14200 | 84.43280 | 54.25390 | 1805.22892  | -574.56076  | -2511.82299 | 1 |
| 2810 | H | 78.13300 | 83.27280 | 55.20590 | 1499.02114  | -2753.28145 | -265.71247  | 1 |
| 2811 | C | 81.41100 | 85.83880 | 58.66890 | -22.11314   | 881.79637   | -231.07828  | 1 |
| 2812 | O | 82.18600 | 86.82180 | 58.58390 | -40.13828   | -545.56839  | -569.53602  | 1 |
| 2813 | N | 80.53200 | 85.84680 | 59.71390 | -108.28283  | 598.29957   | 585.64899   | 1 |
| 2814 | H | 79.88600 | 85.10280 | 59.86190 | -490.18561  | 1813.24831  | -2523.90073 | 1 |
| 2815 | C | 80.16500 | 87.06180 | 60.37190 | 201.98906   | 803.36332   | 381.12833   | 1 |
| 2816 | H | 80.34800 | 87.87080 | 59.68090 | 307.28550   | 2987.22972  | -938.22195  | 1 |
| 2817 | C | 78.64300 | 87.01580 | 60.60090 | -337.77149  | 845.86108   | 43.36420    | 1 |
| 2818 | H | 78.38000 | 86.19280 | 61.29990 | 2195.63541  | 1670.97116  | -1511.70988 | 1 |
| 2819 | H | 78.29200 | 87.97580 | 61.03690 | -423.32751  | -2976.39496 | 927.41202   | 1 |
| 2820 | C | 77.77100 | 86.93180 | 59.39390 | 626.34891   | -212.63972  | 627.63237   | 1 |
| 2821 | C | 78.12500 | 87.67480 | 58.24290 | -544.91853  | 274.25159   | 677.71739   | 1 |
| 2822 | H | 78.96000 | 88.35880 | 58.27390 | -3021.94084 | -375.05072  | -790.84558  | 1 |
| 2823 | C | 77.42200 | 87.53780 | 57.00990 | -521.86666  | 667.34667   | -337.27528  | 1 |
| 2824 | H | 77.64100 | 88.11680 | 56.12490 | 2115.33760  | 671.91291   | -2229.82199 | 1 |
| 2825 | C | 76.41600 | 86.58680 | 56.93190 | 234.37523   | -722.18983  | 504.93673   | 1 |
| 2826 | H | 75.85400 | 86.46680 | 56.01690 | 2738.44443  | 1472.30966  | -481.09519  | 1 |
| 2827 | C | 76.59700 | 86.08180 | 59.31690 | -32.58226   | 661.55531   | 626.68490   | 1 |
| 2828 | H | 76.31800 | 85.54980 | 60.21490 | -389.71503  | -2937.94041 | 1055.86673  | 1 |
| 2829 | C | 75.96400 | 85.91380 | 58.06690 | 209.35086   | -736.74909  | 494.79693   | 1 |
| 2830 | H | 75.05900 | 85.32780 | 58.01090 | -416.41562  | -2165.10162 | -2244.36165 | 1 |
| 2831 | C | 80.91200 | 87.39680 | 61.64790 | 321.30218   | -451.06033  | -724.40354  | 1 |
| 2832 | O | 80.78100 | 88.53880 | 62.11090 | -532.81926  | -379.84184  | 442.09845   | 1 |
| 2833 | N | 81.80500 | 86.48280 | 62.13090 | -351.57856  | -473.71698  | -603.86839  | 1 |
| 2834 | H | 81.96900 | 85.57680 | 61.74990 | 2790.44983  | -742.03048  | 1249.40256  | 1 |
| 2835 | C | 82.69800 | 86.74580 | 63.25490 | -438.29741  | -714.93486  | 358.07058   | 1 |
| 2836 | H | 82.09300 | 87.21380 | 64.01690 | -489.07405  | 2396.76294  | -1978.52476 | 1 |
| 2837 | C | 83.23800 | 85.45980 | 63.76690 | 658.80438   | -585.54875  | 233.58178   | 1 |
| 2838 | H | 84.03900 | 85.66880 | 64.50790 | -368.25003  | -1136.87784 | 2910.34825  | 1 |
| 2839 | H | 83.68000 | 84.87680 | 62.92990 | -2797.18605 | -1173.47946 | 834.81879   | 1 |
| 2840 | H | 82.44800 | 84.78880 | 64.16490 | 741.18275   | 1458.74523  | -2687.18007 | 1 |
| 2841 | C | 83.73700 | 87.78180 | 62.83590 | -413.31390  | -740.42472  | -335.25193  | 1 |
| 2842 | O | 84.45600 | 87.59580 | 61.85590 | 485.65687   | 41.53547    | -621.32072  | 1 |
| 2843 | N | 83.86400 | 88.88680 | 63.57090 | -322.39834  | -608.69326  | 488.08208   | 1 |
| 2844 | H | 83.31900 | 89.01480 | 64.39590 | -1680.88733 | -993.57362  | -2466.91214 | 1 |
| 2845 | C | 84.77900 | 89.94580 | 63.16290 | 287.78812   | 352.02637   | -790.38373  | 1 |
| 2846 | H | 85.66600 | 89.46580 | 62.77490 | -3000.03754 | 946.14999   | 52.92597    | 1 |

|      |   |          |           |          |             |             |             |   |
|------|---|----------|-----------|----------|-------------|-------------|-------------|---|
| 2847 | C | 84.18100 | 90.98080  | 62.22090 | -805.08025  | -314.70983  | 290.26630   | 1 |
| 2848 | H | 84.74200 | 91.93980  | 62.22490 | -1113.91325 | -1978.42255 | 2177.90443  | 1 |
| 2849 | H | 83.09900 | 91.16380  | 62.39090 | 1617.85215  | -2288.73627 | 1429.14902  | 1 |
| 2850 | C | 84.17800 | 90.52180  | 60.75190 | 665.95017   | 620.17102   | 57.87291    | 1 |
| 2851 | O | 83.09200 | 90.41180  | 60.08290 | 27.71212    | 285.16049   | 735.89589   | 1 |
| 2852 | N | 85.34800 | 90.18380  | 60.19090 | 186.48306   | 627.81018   | -532.68258  | 1 |
| 2853 | H | 86.20200 | 90.51280  | 60.59290 | -772.01393  | -2247.59439 | -2061.68382 | 1 |
| 2854 | H | 85.25800 | 89.91080  | 59.23290 | -582.73514  | 2028.88638  | -2332.86648 | 1 |
| 2855 | C | 85.23100 | 90.69380  | 64.33790 | 274.98917   | 676.15741   | -546.48249  | 1 |
| 2856 | O | 84.59300 | 90.65980  | 65.39590 | 242.85121   | -457.05748  | 596.44696   | 1 |
| 2857 | N | 86.37700 | 91.43280  | 64.20790 | 419.96340   | 616.18023   | 395.75870   | 1 |
| 2858 | H | 86.95000 | 91.30080  | 63.40190 | 1654.40191  | 1819.70936  | -1962.10050 | 1 |
| 2859 | C | 86.86800 | 92.36080  | 65.20990 | 676.64468   | -611.03018  | -15.65585   | 1 |
| 2860 | H | 86.53200 | 92.16380  | 66.21690 | 472.55277   | 2359.57149  | -2026.65796 | 1 |
| 2861 | C | 88.36600 | 92.28680  | 65.35290 | -565.49679  | 136.26667   | 702.20779   | 1 |
| 2862 | H | 88.87500 | 92.77380  | 64.49390 | 54.51447    | 320.02359   | 3129.35126  | 1 |
| 2863 | C | 88.65400 | 93.12380  | 66.62890 | 258.53672   | 583.47180   | -651.28367  | 1 |
| 2864 | H | 88.41000 | 94.20280  | 66.52190 | -2349.57603 | 1674.06237  | -1255.08322 | 1 |
| 2865 | H | 89.76500 | 93.15280  | 66.60990 | 12.65731    | -2222.23579 | -2227.04605 | 1 |
| 2866 | H | 88.19800 | 92.61880  | 67.50690 | 2313.17537  | 1323.45364  | 1672.09941  | 1 |
| 2867 | C | 88.86200 | 90.87680  | 65.56690 | -755.61416  | -122.63340  | 495.43849   | 1 |
| 2868 | H | 89.95600 | 90.80780  | 65.75290 | 2123.15399  | 379.73135   | 2290.46883  | 1 |
| 2869 | H | 88.17000 | 90.38680  | 66.28490 | -2558.03829 | 1082.27731  | 1477.61366  | 1 |
| 2870 | H | 88.73700 | 90.25580  | 64.65490 | -869.78412  | 2992.64638  | -431.00978  | 1 |
| 2871 | C | 86.36400 | 93.75580  | 64.95590 | -582.56426  | 140.23023   | 687.31752   | 1 |
| 2872 | O | 86.57000 | 94.35280  | 63.90990 | 188.47169   | 766.53711   | 22.94595    | 1 |
| 2873 | N | 85.74100 | 94.43580  | 65.96190 | -639.96451  | 521.39674   | 176.81391   | 1 |
| 2874 | H | 85.49000 | 93.95280  | 66.79690 | -1287.19626 | -1500.50621 | -2447.41356 | 1 |
| 2875 | C | 85.18400 | 95.74580  | 65.88090 | 402.71475   | -563.88605  | 592.70934   | 1 |
| 2876 | H | 85.61500 | 96.34380  | 65.09190 | -537.95990  | 3008.54571  | 746.64453   | 1 |
| 2877 | C | 83.61000 | 95.62180  | 65.77890 | -398.93092  | -553.57395  | -604.86445  | 1 |
| 2878 | H | 83.19100 | 95.28480  | 66.75090 | -215.95775  | -2283.30903 | -2153.62215 | 1 |
| 2879 | H | 83.39900 | 94.88280  | 64.97690 | -514.99583  | -430.76300  | -3073.67024 | 1 |
| 2880 | O | 82.98500 | 96.86580  | 65.50290 | -594.75588  | 312.47630   | -415.03161  | 1 |
| 2881 | H | 82.95600 | 97.01580  | 64.55490 | 299.13801   | 500.40859   | -3091.65553 | 1 |
| 2882 | C | 85.57700 | 96.55380  | 67.08990 | 787.27227   | -185.69108  | 420.91829   | 1 |
| 2883 | O | 86.26100 | 96.06980  | 68.02790 | 580.03053   | -315.39623  | 433.26323   | 1 |
| 2884 | N | 85.25600 | 97.85280  | 67.18390 | -465.07522  | -244.03374  | 660.92727   | 1 |
| 2885 | H | 84.70800 | 98.30380  | 66.48390 | -845.79053  | 605.30711   | -2969.25376 | 1 |
| 2886 | C | 85.67300 | 98.70880  | 68.28390 | 606.31617   | 467.36301   | -495.38220  | 1 |
| 2887 | H | 86.19400 | 98.12780  | 69.03090 | 2535.27816  | -1850.49918 | -215.04340  | 1 |
| 2888 | C | 86.49600 | 99.91680  | 67.84390 | -643.70931  | 436.72904   | 475.76998   | 1 |
| 2889 | H | 86.63700 | 100.54580 | 68.74990 | 498.60485   | -2323.32339 | 2061.98639  | 1 |
| 2890 | H | 85.85000 | 100.50980 | 67.16090 | -1361.16545 | 1079.56152  | -2622.97575 | 1 |
| 2891 | C | 87.91100 | 99.58580  | 67.26190 | 649.19315   | -593.25615  | -240.92820  | 1 |
| 2892 | H | 88.66000 | 99.34080  | 68.04490 | -1734.90115 | -1328.09038 | -2263.74031 | 1 |
| 2893 | H | 87.89700 | 98.70980  | 66.57990 | -1040.07678 | 256.89350   | 2958.11971  | 1 |
| 2894 | C | 88.42000 | 100.76080 | 66.40690 | 193.81339   | -408.74259  | -791.71767  | 1 |
| 2895 | O | 87.88100 | 101.03180 | 65.33990 | 540.03381   | -337.40863  | 467.06116   | 1 |
| 2896 | O | 89.41200 | 101.32880 | 66.84290 | 51.06230    | 638.52047   | -461.85656  | 1 |
| 2897 | C | 84.50400 | 99.21580  | 69.08090 | -385.43449  | -574.79018  | -593.72343  | 1 |
| 2898 | O | 83.45000 | 99.56580  | 68.55090 | -563.48700  | -137.47884  | 535.91903   | 1 |
| 2899 | N | 84.62100 | 99.23780  | 70.38090 | -91.28000   | -359.27453  | 758.46032   | 1 |
| 2900 | H | 85.45200 | 98.89080  | 70.80990 | -2074.68543 | -20.13668   | 2365.05838  | 1 |
| 2901 | C | 83.55600 | 99.70680  | 71.26890 | -684.62141  | -75.53675   | -597.52718  | 1 |
| 2902 | H | 83.07200 | 100.60080 | 70.90690 | 1055.54582  | -2885.61182 | 676.23493   | 1 |
| 2903 | C | 82.37200 | 98.76980  | 71.48190 | -499.36074  | 526.64628   | -552.02676  | 1 |
| 2904 | H | 82.25700 | 98.28080  | 70.49090 | -1612.27525 | -1784.55763 | 2028.33647  | 1 |
| 2905 | H | 81.49700 | 99.32980  | 71.87490 | -591.40789  | -2227.72044 | 2141.43049  | 1 |
| 2906 | H | 82.67000 | 97.97380  | 72.19690 | -1765.55613 | -2074.94864 | -1573.41218 | 1 |
| 2907 | C | 84.15600 | 100.14680 | 72.56590 | -419.70123  | 750.06400   | 304.47639   | 1 |
| 2908 | O | 84.92400 | 99.46980  | 73.28390 | 515.89267   | -288.61956  | -523.62270  | 1 |

|      |   |          |           |          |             |             |             |   |
|------|---|----------|-----------|----------|-------------|-------------|-------------|---|
| 2909 | N | 83.77400 | 101.37680 | 72.94790 | 512.01979   | -165.46656  | -650.48355  | 1 |
| 2910 | H | 83.08300 | 101.96680 | 72.53790 | -2211.47680 | -2183.79836 | 488.48880   | 1 |
| 2911 | C | 84.36000 | 102.05880 | 74.14390 | -904.30226  | -73.71556   | 90.85400    | 1 |
| 2912 | H | 83.99800 | 103.07680 | 74.13290 | 1993.44733  | -489.12971  | -2384.35444 | 1 |
| 2913 | C | 83.80800 | 101.41580 | 75.44890 | -543.77686  | 717.91892   | -142.65398  | 1 |
| 2914 | H | 84.24200 | 100.39580 | 75.52690 | -2010.18612 | 1852.74334  | 1557.15127  | 1 |
| 2915 | H | 84.17900 | 101.90080 | 76.37690 | 2007.58957  | -1406.19641 | 1972.41527  | 1 |
| 2916 | C | 82.27300 | 101.26180 | 75.49290 | 674.75715   | -452.31401  | -414.20506  | 1 |
| 2917 | O | 81.45800 | 102.17180 | 75.16490 | -100.26355  | -550.12991  | 557.61235   | 1 |
| 2918 | O | 81.86900 | 100.23580 | 76.07190 | 306.27276   | -210.75589  | -696.71097  | 1 |
| 2919 | C | 85.89000 | 102.21780 | 74.21590 | 822.75771   | -314.55955  | -235.73935  | 1 |
| 2920 | O | 86.53100 | 102.11480 | 75.24190 | -424.74015  | 523.73245   | 411.00772   | 1 |
| 2921 | N | 86.55900 | 102.52980 | 73.07790 | 168.04760   | 738.06344   | -373.75748  | 1 |
| 2922 | H | 86.04700 | 102.83480 | 72.27890 | -1721.58178 | -253.01000  | 2621.13875  | 1 |
| 2923 | C | 87.99700 | 102.51980 | 72.95490 | 667.57129   | -166.25899  | 598.46263   | 1 |
| 2924 | H | 88.23500 | 102.51880 | 71.90190 | -2321.40485 | 1728.29933  | -1233.81002 | 1 |
| 2925 | C | 88.75900 | 103.72080 | 73.51690 | -571.07052  | -686.61683  | 184.08365   | 1 |
| 2926 | H | 89.85200 | 103.60380 | 73.35790 | -1613.82085 | -1584.21234 | -2187.25393 | 1 |
| 2927 | H | 88.47600 | 103.68380 | 74.59090 | 536.44052   | -2543.41300 | 1772.43000  | 1 |
| 2928 | C | 88.35600 | 104.98980 | 72.86890 | 340.91790   | -426.13415  | 730.50371   | 1 |
| 2929 | O | 87.69500 | 105.03980 | 71.80390 | 524.06502   | -433.45520  | 401.37223   | 1 |
| 2930 | O | 88.94100 | 106.05480 | 73.24590 | 401.74842   | 408.16747   | -543.71385  | 1 |
| 2931 | C | 88.72400 | 101.19780 | 73.36790 | -37.75605   | 754.50114   | -510.64030  | 1 |
| 2932 | O | 89.78300 | 101.20980 | 74.02190 | -505.00163  | -271.91426  | 542.82891   | 1 |
| 2933 | N | 88.10000 | 100.07680 | 72.97690 | -308.59958  | -643.08763  | -451.52727  | 1 |
| 2934 | H | 87.17700 | 100.09780 | 72.59990 | -1851.98901 | -152.09036  | -2538.74604 | 1 |
| 2935 | C | 88.68300 | 98.74680  | 73.11590 | -724.72827  | -521.44715  | -185.23719  | 1 |
| 2936 | H | 89.74600 | 98.78880  | 72.93390 | -1839.87262 | 567.74288   | -2488.12439 | 1 |
| 2937 | C | 88.58400 | 98.08680  | 74.49490 | -211.78605  | -693.14120  | 553.31089   | 1 |
| 2938 | H | 89.18800 | 97.15680  | 74.56590 | 787.28146   | -2212.53146 | -2093.58990 | 1 |
| 2939 | H | 89.02300 | 98.76780  | 75.25490 | -2141.04566 | -2199.14361 | 691.31547   | 1 |
| 2940 | C | 87.17400 | 97.86380  | 75.03590 | -755.69893  | -505.60369  | 68.81167    | 1 |
| 2941 | H | 86.50200 | 97.57780  | 74.19790 | -1469.64694 | -1820.90266 | 2103.01632  | 1 |
| 2942 | H | 86.92800 | 98.81880  | 75.54790 | 661.85404   | -2364.70311 | 1966.81332  | 1 |
| 2943 | C | 87.13200 | 96.63380  | 76.01790 | -14.17894   | 461.03678   | -786.57171  | 1 |
| 2944 | H | 86.14800 | 96.57680  | 76.52990 | -1375.53556 | 145.95227   | 2825.74346  | 1 |
| 2945 | H | 87.98200 | 96.59980  | 76.73290 | 1249.11616  | 2326.76640  | -1709.99801 | 1 |
| 2946 | N | 87.19400 | 95.40980  | 75.15390 | -802.89733  | 41.45839    | -257.50606  | 1 |
| 2947 | H | 87.22200 | 95.49380  | 74.15790 | -2334.47975 | 1287.11482  | 1670.85786  | 1 |
| 2948 | C | 87.26500 | 94.17580  | 75.58590 | -358.05376  | -632.80350  | 550.28014   | 1 |
| 2949 | N | 87.33600 | 93.24680  | 74.65890 | 207.26513   | -806.81170  | -136.99759  | 1 |
| 2950 | H | 87.25200 | 93.50180  | 73.69590 | 2994.81805  | 714.48113   | 647.15362   | 1 |
| 2951 | H | 87.32800 | 92.28980  | 74.94890 | -70.00799   | -735.93913  | -3058.05800 | 1 |
| 2952 | N | 87.44200 | 93.84480  | 76.85890 | 498.46296   | -40.67939   | -680.11187  | 1 |
| 2953 | H | 87.53200 | 94.52480  | 77.58690 | -242.05718  | 3056.71768  | -704.35190  | 1 |
| 2954 | H | 87.63500 | 92.91280  | 77.16790 | 516.43613   | 2944.83375  | 979.52751   | 1 |
| 2955 | C | 88.19000 | 97.86780  | 71.99190 | -402.51475  | -663.21030  | 479.15026   | 1 |
| 2956 | O | 87.21900 | 98.21680  | 71.34290 | -237.77104  | -70.63068   | 749.73560   | 1 |
| 2957 | N | 88.79500 | 96.66280  | 71.75890 | 225.62622   | -474.49160  | -660.77441  | 1 |
| 2958 | H | 89.46100 | 96.24680  | 72.37390 | -2659.53420 | 34.48109    | 1680.45087  | 1 |
| 2959 | C | 88.29300 | 95.80580  | 70.62290 | 75.28646    | 899.45375   | 129.48324   | 1 |
| 2960 | H | 87.87200 | 96.42680  | 69.84690 | -2118.79370 | -2263.30218 | 535.16608   | 1 |
| 2961 | C | 89.45600 | 94.97780  | 70.03190 | -737.26414  | 418.15517   | 336.21250   | 1 |
| 2962 | H | 89.25500 | 94.22680  | 69.23890 | -1996.46048 | -1898.49971 | -1519.23356 | 1 |
| 2963 | H | 89.85800 | 94.43980  | 70.91690 | -1042.91693 | -2900.30144 | 631.50776   | 1 |
| 2964 | C | 90.57800 | 95.84980  | 69.51290 | -280.13327  | 78.89038    | 864.14852   | 1 |
| 2965 | C | 90.38600 | 96.79480  | 68.46590 | 324.74263   | 282.81798   | 803.74574   | 1 |
| 2966 | H | 89.38500 | 97.05980  | 68.15890 | -2307.06260 | 910.31012   | -1935.72308 | 1 |
| 2967 | C | 91.44100 | 97.45780  | 67.86390 | 679.04405   | -422.73602  | -437.77213  | 1 |
| 2968 | H | 91.25100 | 98.22080  | 67.12390 | 542.45878   | 476.41770   | 3062.18727  | 1 |
| 2969 | C | 92.74000 | 97.16980  | 68.35590 | -700.97525  | 284.77725   | 508.90727   | 1 |
| 2970 | O | 93.82400 | 97.96880  | 67.87890 | -549.98019  | -390.79587  | 410.39933   | 1 |

|      |   |          |          |          |             |             |             |   |
|------|---|----------|----------|----------|-------------|-------------|-------------|---|
| 2971 | H | 93.60400 | 98.44180 | 67.07290 | -2995.76702 | -533.91066  | 799.09048   | 1 |
| 2972 | C | 91.87400 | 95.55280 | 69.85090 | 828.20006   | -85.67220   | 371.74715   | 1 |
| 2973 | H | 92.09500 | 94.84980 | 70.63990 | 1659.86126  | -2569.27003 | 736.16461   | 1 |
| 2974 | C | 92.95600 | 96.20280 | 69.27690 | -489.12188  | 769.01537   | 28.74297    | 1 |
| 2975 | H | 93.97900 | 96.16280 | 69.62190 | 1634.06497  | -146.71735  | 2684.49845  | 1 |
| 2976 | C | 87.25600 | 94.87680 | 71.10790 | -630.90389  | -651.86562  | -92.10049   | 1 |
| 2977 | O | 87.33700 | 94.36680 | 72.23490 | 58.46103    | 701.21973   | 358.46957   | 1 |
| 2978 | N | 86.23100 | 94.55480 | 70.29690 | -238.40270  | 701.31434   | 404.96251   | 1 |
| 2979 | H | 86.20700 | 95.03580 | 69.42390 | 685.69856   | -1488.63374 | 2685.51919  | 1 |
| 2980 | C | 85.17700 | 93.65180 | 70.62590 | -19.64658   | 324.13178   | 852.05845   | 1 |
| 2981 | H | 85.45300 | 93.05980 | 71.48690 | 2410.11278  | -348.99175  | 1991.93057  | 1 |
| 2982 | C | 83.87600 | 94.46680 | 70.97290 | 577.21179   | 325.46301   | -626.37958  | 1 |
| 2983 | H | 83.63900 | 95.29380 | 70.26990 | 1297.81579  | -2422.15899 | 1532.00725  | 1 |
| 2984 | C | 82.66000 | 93.46080 | 70.91490 | 538.48962   | -648.94068  | 346.92352   | 1 |
| 2985 | H | 82.57500 | 93.03880 | 69.89090 | -1223.12363 | -1210.94878 | 2633.59030  | 1 |
| 2986 | H | 82.81000 | 92.62380 | 71.62990 | -2827.35189 | -912.03981  | -1035.61135 | 1 |
| 2987 | H | 81.75500 | 94.01380 | 71.24590 | 2637.92094  | -1297.85890 | 1120.33995  | 1 |
| 2988 | C | 84.01700 | 95.17280 | 72.32390 | 423.54265   | -647.41087  | -482.61971  | 1 |
| 2989 | H | 83.05500 | 95.71680 | 72.43390 | 249.81908   | -2659.00299 | 1662.98520  | 1 |
| 2990 | H | 84.80100 | 95.95980 | 72.31590 | 364.09177   | 1714.93999  | 2612.40201  | 1 |
| 2991 | C | 84.21000 | 94.24780 | 73.51690 | -503.12905  | -297.58898  | -699.82352  | 1 |
| 2992 | H | 85.09500 | 93.57580 | 73.50090 | 1258.92648  | -2858.69740 | -375.73865  | 1 |
| 2993 | H | 84.29100 | 94.82880 | 74.45990 | -2403.29007 | -2026.52476 | -124.98197  | 1 |
| 2994 | H | 83.30600 | 93.61280 | 73.63590 | -1171.00539 | -1446.94598 | -2536.39901 | 1 |
| 2995 | C | 85.02700 | 92.67980 | 69.49890 | -640.02508  | 640.22694   | -109.21701  | 1 |
| 2996 | O | 84.79900 | 93.11880 | 68.34090 | -271.55674  | -612.85530  | 417.48358   | 1 |
| 2997 | N | 85.23800 | 91.33080 | 69.79390 | -590.48661  | 531.53347   | 285.42953   | 1 |
| 2998 | H | 85.37600 | 91.05280 | 70.74090 | 1058.28672  | 1631.50870  | 2473.14270  | 1 |
| 2999 | C | 85.03900 | 90.23180 | 68.94490 | -786.43527  | 15.20389    | 461.23682   | 1 |
| 3000 | H | 85.08300 | 90.57180 | 67.92090 | -1033.59701 | -2971.27095 | -38.11061   | 1 |
| 3001 | C | 86.11700 | 89.17080 | 69.15890 | 153.23179   | 624.95943   | 646.06248   | 1 |
| 3002 | H | 87.06700 | 89.67880 | 68.88690 | 2013.69023  | -1339.17496 | 2012.43344  | 1 |
| 3003 | H | 86.09100 | 88.84980 | 70.22190 | 671.20904   | 1089.35111  | 2874.19881  | 1 |
| 3004 | S | 85.97400 | 87.72980 | 68.04990 | -287.75078  | 420.21714   | -227.65688  | 1 |
| 3005 | C | 83.66300 | 89.69880 | 69.14990 | -867.57642  | 238.19461   | -148.40988  | 1 |
| 3006 | O | 83.34700 | 89.18880 | 70.25090 | -587.38510  | 36.08698    | -526.59634  | 1 |
| 3007 | N | 82.85200 | 89.65080 | 68.06590 | -817.77750  | -174.68192  | 115.75180   | 1 |
| 3008 | H | 83.17700 | 89.93180 | 67.16590 | 883.39297   | -1538.95198 | 2597.97419  | 1 |
| 3009 | C | 81.48000 | 89.35180 | 68.14790 | 426.43426   | 727.32769   | -347.27404  | 1 |
| 3010 | H | 81.37500 | 88.44780 | 68.72890 | 2575.44033  | -1804.47448 | -95.94358   | 1 |
| 3011 | C | 80.71100 | 90.50080 | 68.79390 | -641.09561  | -645.14971  | 65.03282    | 1 |
| 3012 | H | 80.95300 | 91.42480 | 68.22690 | 1864.87952  | -2012.08074 | 1540.12393  | 1 |
| 3013 | H | 81.10100 | 90.68080 | 69.81890 | -1965.90742 | -2403.32418 | -507.41218  | 1 |
| 3014 | C | 79.20500 | 90.34780 | 68.95290 | -303.47521  | -614.07391  | -601.88624  | 1 |
| 3015 | O | 78.78900 | 89.17980 | 68.89090 | -544.74802  | -346.26729  | 454.94592   | 1 |
| 3016 | O | 78.48400 | 91.32780 | 69.18990 | -570.45743  | -503.96647  | -210.29348  | 1 |
| 3017 | C | 81.13700 | 89.03280 | 66.71390 | -733.20510  | 484.86676   | -242.41597  | 1 |
| 3018 | O | 81.97700 | 89.21780 | 65.81990 | -649.14730  | 434.18821   | 117.11369   | 1 |
| 3019 | N | 79.91200 | 88.54380 | 66.42590 | 251.66558   | -325.46389  | 737.16347   | 1 |
| 3020 | H | 79.31000 | 88.57880 | 67.21990 | -2088.10081 | 1506.41273  | -1807.97730 | 1 |
| 3021 | C | 79.46700 | 88.44680 | 64.98590 | 684.85885   | -600.85886  | 37.25568    | 1 |
| 3022 | H | 80.37200 | 88.40880 | 64.39790 | -466.84998  | -1733.14485 | 2583.88975  | 1 |
| 3023 | C | 78.58200 | 87.27080 | 64.70790 | 499.87848   | 540.39876   | 538.09079   | 1 |
| 3024 | H | 78.48200 | 87.25680 | 63.60190 | 2059.78309  | 1590.50628  | -1767.99594 | 1 |
| 3025 | H | 77.52400 | 87.41480 | 65.01390 | -1928.27331 | -2441.07512 | -470.25580  | 1 |
| 3026 | C | 79.07300 | 85.87680 | 65.16590 | -461.09083  | 782.17797   | -83.92781   | 1 |
| 3027 | H | 80.16900 | 85.86280 | 64.98390 | 1766.21931  | -935.75464  | 2429.62113  | 1 |
| 3028 | H | 78.66300 | 85.16780 | 64.41490 | -1840.27305 | -1964.84831 | 1628.18685  | 1 |
| 3029 | C | 78.69100 | 85.47280 | 66.60290 | -485.29762  | 158.94962   | -755.42852  | 1 |
| 3030 | H | 79.40300 | 85.87580 | 67.35490 | -1053.96920 | 1992.70376  | -2194.65415 | 1 |
| 3031 | H | 77.62400 | 85.77780 | 66.65190 | 185.27286   | -1324.56077 | 2847.70767  | 1 |
| 3032 | N | 78.71300 | 83.93980 | 66.64390 | 139.49274   | 632.25749   | 541.72366   | 1 |

|      |   |          |          |          |             |             |             |   |
|------|---|----------|----------|----------|-------------|-------------|-------------|---|
| 3033 | H | 78.51800 | 83.39480 | 65.82790 | 1546.00063  | 1711.60222  | -2139.74908 | 1 |
| 3034 | C | 78.40500 | 83.36480 | 67.75690 | -660.28185  | 376.69649   | -503.56592  | 1 |
| 3035 | N | 78.10900 | 83.97080 | 68.86490 | 784.59473   | 306.33082   | -56.96336   | 1 |
| 3036 | H | 78.26600 | 84.95480 | 68.95690 | -1717.42843 | 1638.68264  | -2064.79661 | 1 |
| 3037 | H | 77.74400 | 83.35480 | 69.56290 | -1352.92526 | 1935.42880  | -2078.92637 | 1 |
| 3038 | N | 78.05200 | 82.10080 | 67.70790 | -565.40399  | 528.41277   | -337.29892  | 1 |
| 3039 | H | 78.04200 | 81.66580 | 66.80690 | -1268.65259 | 2583.95523  | 1269.61498  | 1 |
| 3040 | H | 77.44800 | 81.87880 | 68.47390 | -1851.91353 | 1823.05462  | -1773.44702 | 1 |
| 3041 | C | 78.69900 | 89.69080 | 64.55990 | -843.15971  | -29.12928   | 345.95404   | 1 |
| 3042 | O | 77.90400 | 90.28080 | 65.27790 | 272.09443   | 701.03984   | -241.11200  | 1 |
| 3043 | N | 79.15700 | 90.22880 | 63.43090 | -352.55633  | 765.58652   | 47.47222    | 1 |
| 3044 | H | 79.90400 | 89.80280 | 62.92690 | -803.47171  | 2043.56282  | 2253.11128  | 1 |
| 3045 | C | 78.50500 | 91.35780 | 62.83390 | 242.82816   | 618.09522   | 624.85501   | 1 |
| 3046 | H | 77.71600 | 91.78880 | 63.43190 | 1925.86543  | -2164.72582 | 1226.06308  | 1 |
| 3047 | C | 79.48900 | 92.56080 | 62.61290 | -27.65838   | 550.81425   | -726.14715  | 1 |
| 3048 | H | 80.46300 | 92.22080 | 62.20290 | -519.71816  | 3085.59790  | 327.42154   | 1 |
| 3049 | H | 79.14400 | 93.30680 | 61.86590 | -145.28703  | 16.17621    | -3142.74661 | 1 |
| 3050 | C | 79.69500 | 93.20580 | 63.92390 | -61.10557   | -654.99018  | 631.43089   | 1 |
| 3051 | C | 79.02700 | 94.38280 | 64.28490 | 60.70304    | -699.15010  | -582.19866  | 1 |
| 3052 | H | 78.26800 | 94.75180 | 63.61090 | 236.25091   | 76.61065    | -3136.32628 | 1 |
| 3053 | C | 79.26900 | 95.01380 | 65.52590 | 545.31856   | 695.59345   | 224.11698   | 1 |
| 3054 | H | 78.77400 | 95.92680 | 65.82390 | 1811.96676  | 1610.83841  | 2005.04421  | 1 |
| 3055 | C | 80.26000 | 94.46780 | 66.39590 | -572.49298  | 629.83999   | 327.11524   | 1 |
| 3056 | H | 80.57300 | 94.87980 | 67.34490 | 357.75004   | 2840.82360  | -1303.82607 | 1 |
| 3057 | C | 80.61200 | 92.65780 | 64.82490 | 236.95107   | 224.70877   | 851.35842   | 1 |
| 3058 | H | 81.32300 | 91.87380 | 64.61090 | 1531.38001  | 1866.01400  | 2017.69503  | 1 |
| 3059 | C | 80.96000 | 93.37080 | 66.02290 | 537.20387   | 734.29828   | 60.57262    | 1 |
| 3060 | H | 81.73700 | 93.04080 | 66.69590 | -2735.49444 | 1211.55025  | -973.36652  | 1 |
| 3061 | C | 77.86200 | 90.88080 | 61.58490 | 385.07464   | -678.68233  | -471.76139  | 1 |
| 3062 | O | 78.49200 | 90.47880 | 60.60890 | -270.97988  | 535.95406   | -512.78687  | 1 |
| 3063 | N | 76.48600 | 90.78680 | 61.61790 | -340.32058  | 55.87217    | -770.54039  | 1 |
| 3064 | H | 75.93000 | 91.19480 | 62.33790 | 32.82856    | 2827.76922  | 1378.72032  | 1 |
| 3065 | C | 75.62900 | 90.22480 | 60.62490 | 151.55644   | 798.81900   | 412.75883   | 1 |
| 3066 | H | 76.17700 | 89.45380 | 60.10590 | 2439.90646  | 1977.10070  | -190.14604  | 1 |
| 3067 | C | 74.34500 | 89.60080 | 61.32790 | -169.32098  | -874.02750  | -197.12265  | 1 |
| 3068 | H | 73.62400 | 89.19780 | 60.58390 | 2732.14124  | -231.21634  | -1542.77979 | 1 |
| 3069 | H | 73.82200 | 90.42980 | 61.85090 | 2892.64287  | -19.61786   | 1237.11705  | 1 |
| 3070 | C | 74.60400 | 88.61080 | 62.44390 | 674.55711   | 190.70004   | -583.14424  | 1 |
| 3071 | C | 74.96300 | 87.27480 | 62.09390 | -321.99734  | -460.63195  | -718.04381  | 1 |
| 3072 | H | 75.01100 | 86.94880 | 61.06590 | -589.99434  | 1487.80925  | -2708.60786 | 1 |
| 3073 | C | 75.20000 | 86.28380 | 63.09090 | 517.57782   | -742.41817  | -111.26308  | 1 |
| 3074 | H | 75.40900 | 85.26680 | 62.79190 | -2782.89935 | 60.04875    | 1466.31906  | 1 |
| 3075 | C | 75.09600 | 86.55380 | 64.44390 | -728.47527  | -492.85847  | -240.55210  | 1 |
| 3076 | O | 75.30600 | 85.58880 | 65.44290 | -302.49231  | 508.65647   | -522.87114  | 1 |
| 3077 | H | 75.54600 | 84.77580 | 64.99090 | 11.90255    | -1173.96099 | 2918.88680  | 1 |
| 3078 | C | 74.61200 | 88.86580 | 63.80990 | 492.63088   | -654.96857  | 399.72739   | 1 |
| 3079 | H | 74.48400 | 89.90780 | 64.06090 | -1553.70120 | -2014.95306 | 1850.46021  | 1 |
| 3080 | C | 74.82300 | 87.89080 | 64.77390 | 528.57158   | 683.15329   | -292.17234  | 1 |
| 3081 | H | 74.71700 | 88.14880 | 65.81690 | 13.37643    | -2248.27139 | -2200.75511 | 1 |
| 3082 | C | 75.18000 | 91.27180 | 59.59490 | 142.12608   | -693.07206  | 575.24108   | 1 |
| 3083 | O | 75.59300 | 92.42180 | 59.74490 | -780.83749  | -109.54778  | -43.81017   | 1 |
| 3084 | N | 74.47800 | 90.91580 | 58.49590 | 422.18555   | -496.42284  | 536.65260   | 1 |
| 3085 | C | 74.35000 | 89.53680 | 57.97590 | -391.53141  | 796.59838   | 208.77066   | 1 |
| 3086 | H | 75.16500 | 88.86780 | 58.32590 | -2845.78889 | -1270.62410 | 430.37919   | 1 |
| 3087 | H | 73.39000 | 89.20380 | 58.42590 | 2134.92521  | 2205.91301  | -688.67145  | 1 |
| 3088 | C | 74.17400 | 91.83280 | 57.47490 | 702.20476   | -328.09598  | 480.32542   | 1 |
| 3089 | H | 75.07100 | 92.39780 | 57.26790 | 1401.23152  | 2279.62547  | -1654.71573 | 1 |
| 3090 | C | 73.73600 | 90.99480 | 56.30490 | -588.90108  | 577.39613   | -388.92187  | 1 |
| 3091 | H | 72.63900 | 90.81680 | 56.29490 | -2954.74876 | -369.91321  | -1015.30793 | 1 |
| 3092 | H | 74.13400 | 91.54580 | 55.42590 | 2155.31963  | -1990.43715 | -1136.21453 | 1 |
| 3093 | C | 74.37800 | 89.60580 | 56.44290 | -484.51738  | 763.39278   | -118.00586  | 1 |
| 3094 | H | 73.80700 | 88.78080 | 55.96690 | -1114.65608 | 2230.86698  | -1918.07210 | 1 |

|      |   |          |          |          |             |             |             |   |
|------|---|----------|----------|----------|-------------|-------------|-------------|---|
| 3095 | H | 75.43300 | 89.67580 | 56.10090 | 2474.99905  | -1941.77476 | -46.00758   | 1 |
| 3096 | C | 73.10400 | 92.77380 | 57.95290 | -342.59538  | 343.44875   | -772.08961  | 1 |
| 3097 | O | 73.32900 | 93.95380 | 57.75190 | 457.59786   | -628.16726  | -140.13325  | 1 |
| 3098 | N | 72.00100 | 92.25380 | 58.61190 | 758.57737   | -319.69526  | 187.15663   | 1 |
| 3099 | H | 71.79600 | 91.28380 | 58.71890 | -67.62625   | -3145.16236 | -40.08276   | 1 |
| 3100 | C | 71.08000 | 93.20680 | 59.32690 | -596.95364  | 681.56216   | 102.81231   | 1 |
| 3101 | H | 71.65900 | 93.93880 | 59.86890 | -1500.04098 | 1782.52513  | -2114.40475 | 1 |
| 3102 | C | 69.98600 | 93.89380 | 58.42590 | 466.83114   | -593.93995  | 510.64178   | 1 |
| 3103 | H | 69.28100 | 94.58780 | 58.93290 | 2377.85569  | -431.14751  | -2014.48266 | 1 |
| 3104 | H | 70.54600 | 94.43880 | 57.63590 | -2016.47580 | 2188.33390  | -1021.39429 | 1 |
| 3105 | C | 69.03900 | 92.90780 | 57.71190 | -740.15811  | 523.90286   | -95.61783   | 1 |
| 3106 | O | 69.10200 | 91.68780 | 57.76390 | 416.80758   | 41.24232    | 669.47572   | 1 |
| 3107 | N | 68.20300 | 93.43180 | 56.81490 | -532.82128  | 615.45082   | -223.59352  | 1 |
| 3108 | H | 68.42100 | 94.35780 | 56.50490 | 2729.80507  | -1364.44025 | 764.65241   | 1 |
| 3109 | H | 67.58900 | 92.77680 | 56.37490 | 2686.40596  | -1088.54750 | -1223.32072 | 1 |
| 3110 | C | 70.37700 | 92.46280 | 60.43890 | -15.89909   | 911.27431   | 27.88117    | 1 |
| 3111 | O | 70.58000 | 91.23680 | 60.64390 | -546.78021  | -293.95568  | 488.10725   | 1 |
| 3112 | N | 69.60900 | 93.15080 | 61.24690 | -99.80355   | 228.90303   | 806.42107   | 1 |
| 3113 | H | 69.68100 | 94.14380 | 61.21090 | -450.54094  | 1745.32864  | -2578.57849 | 1 |
| 3114 | C | 68.71500 | 92.61680 | 62.28090 | 831.03153   | 325.04932   | 187.56475   | 1 |
| 3115 | H | 69.37400 | 92.11780 | 62.97590 | 2733.89177  | 203.89619   | 1543.53114  | 1 |
| 3116 | C | 68.23300 | 93.82380 | 63.12490 | 674.30975   | -591.68538  | -163.29658  | 1 |
| 3117 | H | 68.04700 | 93.59780 | 64.19690 | -1143.77336 | 2592.94403  | 1366.25400  | 1 |
| 3118 | H | 69.14400 | 94.45780 | 63.10790 | -1680.35772 | -2365.33888 | 1216.46870  | 1 |
| 3119 | C | 67.13600 | 94.70480 | 62.55690 | 681.10816   | -359.30277  | 488.30748   | 1 |
| 3120 | O | 66.92500 | 94.68280 | 61.35890 | 215.54790   | -660.26749  | 375.78341   | 1 |
| 3121 | O | 66.52900 | 95.47680 | 63.28490 | 393.67950   | -569.55472  | -379.80403  | 1 |
| 3122 | C | 67.62800 | 91.65580 | 61.83490 | 439.53685   | -557.33589  | -572.39415  | 1 |
| 3123 | O | 67.25000 | 90.68680 | 62.53590 | -464.33978  | -151.70442  | -620.48495  | 1 |
| 3124 | N | 67.06100 | 91.77080 | 60.59990 | 499.63464   | -679.79613  | 30.24459    | 1 |
| 3125 | H | 67.25800 | 92.59280 | 60.07190 | -2252.46405 | -2193.40372 | -116.67078  | 1 |
| 3126 | C | 66.23300 | 90.73980 | 59.97490 | 674.79755   | 381.80870   | 479.91810   | 1 |
| 3127 | H | 65.41000 | 90.57180 | 60.65390 | -2095.65086 | 1083.62019  | 2081.40361  | 1 |
| 3128 | C | 65.64800 | 91.13880 | 58.55590 | 367.89151   | -807.74834  | 208.92454   | 1 |
| 3129 | H | 66.43100 | 90.99380 | 57.78090 | 2038.36274  | 2072.99438  | 1202.49651  | 1 |
| 3130 | H | 64.81300 | 90.42780 | 58.37690 | -198.93491  | -2966.98350 | -1027.45317 | 1 |
| 3131 | C | 65.27600 | 92.63680 | 58.47390 | -444.75254  | -625.08469  | -492.86440  | 1 |
| 3132 | H | 66.08700 | 93.32080 | 58.80390 | 2172.31399  | 2118.27683  | 831.97442   | 1 |
| 3133 | C | 64.90500 | 92.96480 | 57.01690 | -12.10528   | 759.87713   | -503.87619  | 1 |
| 3134 | H | 65.48000 | 92.49980 | 56.18890 | -2938.68197 | -1110.52064 | -170.64122  | 1 |
| 3135 | H | 64.82900 | 94.05680 | 56.82690 | -2518.58425 | -677.62155  | 1759.48533  | 1 |
| 3136 | H | 63.87000 | 92.56180 | 56.98390 | 864.32135   | -1684.85644 | -2512.45570 | 1 |
| 3137 | C | 64.03300 | 92.95580 | 59.30590 | -266.95772  | 869.94368   | -58.15984   | 1 |
| 3138 | H | 63.21900 | 92.23980 | 59.06190 | 2210.49420  | -1431.20975 | -1721.50523 | 1 |
| 3139 | H | 64.31300 | 92.90380 | 60.37890 | 980.33656   | -1939.53307 | 2274.94570  | 1 |
| 3140 | H | 63.70600 | 94.00980 | 59.17390 | -1964.62785 | -1986.36270 | -1446.66060 | 1 |
| 3141 | C | 66.92300 | 89.38480 | 59.90390 | 45.97922    | -634.99412  | -652.77820  | 1 |
| 3142 | O | 66.35100 | 88.33280 | 60.30490 | 185.70058   | -767.14650  | 25.07538    | 1 |
| 3143 | N | 68.24400 | 89.36280 | 59.47290 | -643.66149  | 500.55803   | -218.66373  | 1 |
| 3144 | H | 68.59100 | 90.13980 | 58.95390 | 2197.94600  | -2196.75884 | 491.43688   | 1 |
| 3145 | C | 69.09100 | 88.19280 | 59.60490 | -284.47269  | 600.31975   | 624.61388   | 1 |
| 3146 | H | 68.51300 | 87.34680 | 59.26390 | -617.94389  | 1932.16636  | -2404.80867 | 1 |
| 3147 | C | 70.34600 | 88.34380 | 58.71390 | 459.59627   | -541.46360  | 571.87362   | 1 |
| 3148 | H | 71.15400 | 87.68080 | 59.08990 | 2287.30485  | -2153.05635 | -175.53086  | 1 |
| 3149 | H | 70.86400 | 89.30480 | 58.92090 | -185.87604  | -3127.14635 | 290.91582   | 1 |
| 3150 | C | 70.08300 | 88.11080 | 57.26090 | -211.79256  | 319.15345   | -827.48776  | 1 |
| 3151 | C | 70.04800 | 88.92680 | 56.19490 | -840.67621  | 278.73129   | 216.84874   | 1 |
| 3152 | H | 70.08900 | 90.00580 | 56.17090 | -694.43641  | -2231.57637 | -2106.19353 | 1 |
| 3153 | N | 69.83900 | 88.20280 | 55.04390 | 483.58999   | 64.00705    | -688.99645  | 1 |
| 3154 | H | 69.47800 | 88.60480 | 54.23190 | 1359.74878  | 589.22914   | -2775.26909 | 1 |
| 3155 | C | 69.80000 | 86.85980 | 55.35490 | 455.51993   | 608.32094   | 503.88316   | 1 |
| 3156 | C | 69.89600 | 86.77080 | 56.77790 | 647.53820   | 1.27654     | -641.98415  | 1 |

|      |   |          |          |          |             |             |             |   |
|------|---|----------|----------|----------|-------------|-------------|-------------|---|
| 3157 | C | 69.81100 | 85.53980 | 57.37690 | -383.52825  | 544.66747   | 622.65113   | 1 |
| 3158 | H | 69.96700 | 85.35180 | 58.42890 | -1761.85414 | 2128.42680  | 1504.62474  | 1 |
| 3159 | C | 69.68000 | 84.43180 | 56.55090 | -249.17678  | 520.15760   | 706.25633   | 1 |
| 3160 | H | 69.73600 | 83.43380 | 56.95890 | 1509.78763  | 463.94103   | 2720.94217  | 1 |
| 3161 | C | 69.49400 | 85.77880 | 54.51890 | 699.48008   | -584.42341  | 25.05801    | 1 |
| 3162 | H | 69.31500 | 85.82980 | 53.45490 | -982.33038  | -1310.33874 | -2686.31079 | 1 |
| 3163 | C | 69.46400 | 84.55980 | 55.13790 | -726.02323  | -516.91701  | 192.71243   | 1 |
| 3164 | H | 69.43900 | 83.61780 | 54.60990 | -1237.27372 | 2881.62697  | 252.20224   | 1 |
| 3165 | C | 69.43800 | 87.78780 | 61.03290 | 264.15943   | -418.08809  | -766.07647  | 1 |
| 3166 | O | 69.58400 | 86.57980 | 61.24590 | -586.34986  | -528.56853  | 20.88976    | 1 |
| 3167 | N | 69.56600 | 88.70080 | 61.99990 | 647.79913   | -455.69419  | -292.18381  | 1 |
| 3168 | H | 69.43100 | 89.65580 | 61.74390 | 2359.40135  | 1874.51857  | 904.22987   | 1 |
| 3169 | C | 69.80300 | 88.41280 | 63.38790 | 531.70700   | -701.15702  | -238.99268  | 1 |
| 3170 | H | 70.72600 | 87.85380 | 63.40290 | -3120.36519 | 230.41472   | 329.32712   | 1 |
| 3171 | C | 70.02500 | 89.65980 | 64.23890 | -517.48663  | -537.14556  | 524.53144   | 1 |
| 3172 | H | 69.27200 | 90.43580 | 63.98390 | -2524.39813 | 1796.58899  | 545.80978   | 1 |
| 3173 | C | 69.83500 | 89.46180 | 65.76090 | -274.68066  | 650.80809   | 576.58509   | 1 |
| 3174 | H | 70.27100 | 88.52780 | 66.17490 | 1724.38717  | 1112.69244  | 2384.66573  | 1 |
| 3175 | H | 68.74300 | 89.43480 | 65.96790 | -1368.67998 | 2465.99810  | -1394.20039 | 1 |
| 3176 | H | 70.29900 | 90.30680 | 66.31390 | 1644.28268  | 1753.96113  | -2029.33020 | 1 |
| 3177 | C | 71.39000 | 90.30480 | 64.03190 | 477.06655   | 1.51879     | 777.08185   | 1 |
| 3178 | H | 71.65900 | 90.31980 | 62.95390 | -1838.26078 | -1539.31166 | -2037.04274 | 1 |
| 3179 | H | 71.40800 | 91.30480 | 64.51490 | 1623.31929  | 2157.68221  | 1614.76568  | 1 |
| 3180 | H | 72.13300 | 89.68480 | 64.57790 | -388.30119  | -3116.32795 | -189.60096  | 1 |
| 3181 | C | 68.77200 | 87.43280 | 63.95090 | -63.17081   | -851.30184  | 320.53960   | 1 |
| 3182 | O | 69.14200 | 86.39680 | 64.55590 | 548.21991   | 568.39175   | -3.60310    | 1 |
| 3183 | N | 67.48900 | 87.66980 | 63.69390 | -498.68242  | 354.19484   | -581.83688  | 1 |
| 3184 | H | 67.35500 | 88.51080 | 63.17490 | -2340.02903 | 1294.84850  | 1657.06299  | 1 |
| 3185 | C | 66.36200 | 86.87580 | 64.02290 | -171.78222  | 294.51301   | -845.69732  | 1 |
| 3186 | H | 66.40700 | 86.86080 | 65.10190 | 169.62441   | 779.44429   | 3043.34033  | 1 |
| 3187 | C | 65.05000 | 87.59180 | 63.59990 | -361.25187  | -215.17681  | -809.10261  | 1 |
| 3188 | H | 65.12200 | 87.90880 | 62.53790 | -1072.30199 | 876.75754   | -2824.83466 | 1 |
| 3189 | C | 63.81100 | 86.63280 | 63.66590 | 711.09214   | -312.98229  | 477.32699   | 1 |
| 3190 | H | 63.96700 | 85.78780 | 62.96190 | -2791.47791 | -1443.97540 | -144.26484  | 1 |
| 3191 | H | 63.73400 | 86.23480 | 64.70090 | -511.74995  | 2088.90395  | 2296.26186  | 1 |
| 3192 | H | 62.98200 | 87.29380 | 63.33390 | -2054.12404 | -2381.02365 | 97.60650    | 1 |
| 3193 | C | 64.73800 | 88.86180 | 64.45590 | 579.91598   | -408.42475  | 573.00757   | 1 |
| 3194 | H | 63.78500 | 89.26980 | 64.05690 | 1004.01090  | 1783.95418  | -2389.07845 | 1 |
| 3195 | H | 64.76800 | 88.63780 | 65.54390 | 3108.25516  | -87.85104   | 478.80925   | 1 |
| 3196 | H | 65.56400 | 89.56980 | 64.22990 | 1406.56642  | 2655.08738  | 932.90306   | 1 |
| 3197 | C | 66.48900 | 85.43980 | 63.50890 | -668.52375  | 505.67599   | -358.91335  | 1 |
| 3198 | O | 66.19800 | 84.42780 | 64.14390 | -482.57715  | 592.64948   | 198.77909   | 1 |
| 3199 | N | 67.06000 | 85.29280 | 62.28690 | 297.37484   | 577.42394   | -539.27922  | 1 |
| 3200 | H | 67.19500 | 86.04380 | 61.64590 | 1693.22093  | -1907.84288 | 1841.56582  | 1 |
| 3201 | C | 67.17300 | 83.92780 | 61.67790 | 685.68798   | 321.67274   | 507.74959   | 1 |
| 3202 | H | 66.24200 | 83.39480 | 61.79890 | 1649.61620  | 2256.69318  | 1443.72038  | 1 |
| 3203 | C | 67.57000 | 83.97580 | 60.15290 | 605.11168   | -412.29603  | 543.41774   | 1 |
| 3204 | H | 68.48300 | 84.59580 | 60.02690 | 2104.62655  | 2018.10975  | -1181.52712 | 1 |
| 3205 | C | 67.61400 | 82.57980 | 59.52390 | -543.91757  | 453.41528   | 574.47303   | 1 |
| 3206 | H | 66.79600 | 81.88480 | 59.80990 | 1862.33532  | -1444.02710 | -2084.39898 | 1 |
| 3207 | H | 68.52000 | 82.02080 | 59.84090 | 2864.49075  | 1300.75818  | -30.77500   | 1 |
| 3208 | H | 67.66500 | 82.68580 | 58.41990 | -2611.94440 | -1738.28447 | -233.10893  | 1 |
| 3209 | C | 66.50700 | 84.79580 | 59.46790 | 834.42392   | 349.32340   | -114.72088  | 1 |
| 3210 | H | 66.63300 | 84.77480 | 58.36390 | -2506.74778 | -471.96867  | -1841.65343 | 1 |
| 3211 | H | 66.49400 | 85.86380 | 59.77090 | 1852.12964  | 2492.27997  | 506.34235   | 1 |
| 3212 | H | 65.54000 | 84.29880 | 59.69790 | -1698.05578 | -2195.07427 | -1482.05322 | 1 |
| 3213 | C | 68.20200 | 83.10680 | 62.39890 | 550.50155   | 589.32564   | -425.55181  | 1 |
| 3214 | O | 68.02100 | 81.91380 | 62.76490 | 265.05037   | -645.49038  | -369.75357  | 1 |
| 3215 | N | 69.35700 | 83.66280 | 62.70190 | 611.51693   | -452.93843  | -365.46698  | 1 |
| 3216 | H | 69.64500 | 84.55180 | 62.35490 | -1783.86180 | -1016.25432 | -2383.96528 | 1 |
| 3217 | C | 70.38900 | 83.01780 | 63.55090 | -417.00848  | 393.99101   | 708.74961   | 1 |
| 3218 | H | 70.48900 | 81.98180 | 63.26390 | -1071.58594 | 2667.34841  | -1278.74246 | 1 |



|      |   |          |          |          |             |             |             |   |
|------|---|----------|----------|----------|-------------|-------------|-------------|---|
| 3219 | C | 71.76000 | 83.63580 | 63.31290 | -484.47360  | 707.47680   | 310.18206   | 1 |
| 3220 | H | 72.58800 | 82.97480 | 63.64590 | -2638.63833 | 1671.58017  | 376.34261   | 1 |
| 3221 | H | 71.82400 | 84.63980 | 63.78390 | -798.91887  | 3040.56766  | 122.07846   | 1 |
| 3222 | C | 72.03300 | 83.72280 | 61.79390 | -215.29745  | -521.99840  | 715.97184   | 1 |
| 3223 | C | 71.81600 | 82.59080 | 60.95990 | 279.85305   | -717.87178  | -487.64063  | 1 |
| 3224 | H | 71.47000 | 81.69580 | 61.45590 | -2316.48263 | 1909.86806  | 940.49903   | 1 |
| 3225 | C | 72.08100 | 82.67680 | 59.54890 | 606.64568   | 99.14528    | 673.49999   | 1 |
| 3226 | H | 71.79200 | 81.91980 | 58.83390 | -2128.87791 | 1667.81113  | -1607.64148 | 1 |
| 3227 | C | 72.48800 | 83.89180 | 59.02390 | 195.93976   | 854.07363   | -252.22381  | 1 |
| 3228 | H | 72.66000 | 83.92580 | 57.95890 | -2538.06704 | 1495.79316  | 1104.10359  | 1 |
| 3229 | C | 72.42300 | 84.92880 | 61.19290 | -50.29512   | 126.63266   | -901.60167  | 1 |
| 3230 | H | 72.56400 | 85.79180 | 61.82690 | -1253.69949 | 2365.48905  | 1652.55117  | 1 |
| 3231 | C | 72.64400 | 85.05180 | 59.81190 | -690.54677  | 458.64801   | -379.78700  | 1 |
| 3232 | H | 72.94700 | 85.99380 | 59.37990 | 3014.41700  | 675.46679   | 596.03774   | 1 |
| 3233 | C | 70.05300 | 82.90880 | 64.99590 | -703.64877  | 567.76549   | 118.20222   | 1 |
| 3234 | O | 70.29400 | 81.84380 | 65.59190 | 582.21902   | -257.82227  | -467.09306  | 1 |
| 3235 | N | 69.42700 | 83.89580 | 65.60790 | -669.99197  | -228.23948  | -460.09759  | 1 |
| 3236 | H | 69.17200 | 84.72080 | 65.10890 | -2598.22064 | 1215.83658  | 1291.98188  | 1 |
| 3237 | C | 68.97800 | 83.85380 | 67.00790 | -783.83523  | -179.54670  | 429.90268   | 1 |
| 3238 | H | 69.89000 | 83.70380 | 67.56490 | 346.22594   | -2277.71589 | -2142.51351 | 1 |
| 3239 | C | 68.16600 | 85.14180 | 67.39690 | 499.54056   | -746.63885  | 156.33509   | 1 |
| 3240 | H | 67.20300 | 85.21680 | 66.84790 | 1519.90309  | -1363.03899 | -2393.79313 | 1 |
| 3241 | H | 68.78600 | 85.92680 | 66.91090 | -387.04246  | 2488.43321  | -1885.76895 | 1 |
| 3242 | C | 67.99600 | 85.28580 | 68.92090 | 708.24611   | -228.72943  | 526.80291   | 1 |
| 3243 | H | 67.37700 | 84.47980 | 69.36990 | -251.79211  | 455.35365   | -3102.81808 | 1 |
| 3244 | H | 67.44000 | 86.22080 | 69.14890 | 1246.12225  | 1387.32933  | -2533.91454 | 1 |
| 3245 | C | 69.31100 | 85.50480 | 69.70890 | -365.77845  | -822.03664  | -148.03005  | 1 |
| 3246 | O | 69.83300 | 86.60280 | 69.87390 | -771.92348  | -136.28462  | 95.85342    | 1 |
| 3247 | N | 70.01700 | 84.39780 | 70.10590 | 430.88271   | -474.21138  | -549.66895  | 1 |
| 3248 | H | 69.81800 | 83.47480 | 69.77790 | 1631.46249  | 1462.02418  | -2258.10577 | 1 |
| 3249 | H | 70.95200 | 84.61280 | 70.38790 | -1617.99244 | -2635.09471 | 580.17461   | 1 |
| 3250 | C | 68.01400 | 82.64180 | 67.17590 | -681.98160  | -75.25730   | -600.57343  | 1 |
| 3251 | O | 68.15500 | 81.79780 | 68.04290 | 503.60685   | 290.79634   | 534.27039   | 1 |
| 3252 | N | 67.09000 | 82.50080 | 66.23490 | -542.00045  | 99.79091    | -639.49165  | 1 |
| 3253 | H | 67.03700 | 83.21580 | 65.54290 | -1827.24928 | 1527.47529  | 2055.77371  | 1 |
| 3254 | C | 66.19800 | 81.42780 | 66.04390 | -649.22657  | 631.11082   | 107.95832   | 1 |
| 3255 | H | 65.61500 | 81.36480 | 66.95090 | -749.82018  | 2991.41556  | 622.43786   | 1 |
| 3256 | C | 65.20800 | 81.57280 | 64.87290 | 376.31415   | -425.96708  | -713.01523  | 1 |
| 3257 | H | 64.70000 | 82.55680 | 64.95890 | 712.68056   | -2278.81910 | -2048.73038 | 1 |
| 3258 | H | 65.78400 | 81.60080 | 63.92390 | -2781.34911 | 1454.07416  | -219.07002  | 1 |
| 3259 | C | 64.14300 | 80.54880 | 64.85190 | 197.69820   | -878.72599  | 142.15153   | 1 |
| 3260 | C | 64.10100 | 79.51580 | 63.85590 | -289.94759  | -542.79390  | 672.87159   | 1 |
| 3261 | H | 64.80100 | 79.56380 | 63.03490 | 2747.58171  | 331.57114   | 1496.35610  | 1 |
| 3262 | C | 63.15900 | 78.47080 | 63.93090 | 616.79588   | 321.75980   | 589.47814   | 1 |
| 3263 | H | 63.17600 | 77.65880 | 63.21990 | 2085.84444  | 1593.50673  | -1734.42080 | 1 |
| 3264 | C | 62.29400 | 78.35380 | 65.04990 | 334.18835   | -806.48764  | 263.33788   | 1 |
| 3265 | H | 61.65200 | 77.48780 | 65.10490 | -1195.28903 | -2707.66152 | 1066.80806  | 1 |
| 3266 | C | 63.23200 | 80.41480 | 65.92290 | 655.30633   | -207.67647  | 599.07854   | 1 |
| 3267 | H | 63.26300 | 81.05080 | 66.79490 | -1807.55544 | 938.41900   | 2397.98652  | 1 |
| 3268 | C | 62.34100 | 79.34080 | 66.02690 | -637.91715  | 628.11748   | -173.15066  | 1 |
| 3269 | H | 61.57100 | 79.40480 | 66.78190 | -2428.13455 | 820.79013   | 1824.47044  | 1 |
| 3270 | C | 66.93500 | 80.04880 | 65.78090 | 195.05360   | -792.53318  | -406.56642  | 1 |
| 3271 | O | 66.63200 | 79.06580 | 66.49690 | 52.23850    | 680.28599   | -397.62964  | 1 |
| 3272 | N | 67.94200 | 79.96780 | 64.95690 | -147.37618  | -825.15603  | 100.34977   | 1 |
| 3273 | H | 68.28900 | 80.79880 | 64.52890 | 641.78635   | -2949.29133 | 887.70332   | 1 |
| 3274 | C | 68.76200 | 78.73780 | 64.76490 | -283.59104  | 413.20314   | 761.76787   | 1 |
| 3275 | H | 68.18600 | 77.88280 | 64.44390 | 893.12959   | -331.38519  | -2998.45454 | 1 |
| 3276 | C | 69.92700 | 79.06480 | 63.73590 | -20.02066   | 736.77696   | -536.85183  | 1 |
| 3277 | H | 70.79800 | 79.64880 | 64.10390 | 720.16800   | -286.26712  | -3049.20242 | 1 |
| 3278 | H | 69.47600 | 79.59580 | 62.87090 | -1766.34439 | 2477.45026  | 800.30865   | 1 |
| 3279 | C | 70.63800 | 77.74080 | 63.25190 | -567.84164  | -695.72988  | -158.00889  | 1 |
| 3280 | H | 69.81100 | 77.09780 | 62.88090 | 1469.65111  | 2639.96115  | -876.90192  | 1 |

|      |   |          |          |          |             |             |             |   |
|------|---|----------|----------|----------|-------------|-------------|-------------|---|
| 3281 | H | 71.15600 | 77.18480 | 64.06190 | 1330.39681  | 2323.18840  | 1652.59379  | 1 |
| 3282 | C | 71.61500 | 77.98280 | 62.06390 | -173.31241  | 676.02989   | -586.85382  | 1 |
| 3283 | O | 71.30400 | 77.62580 | 60.88590 | 253.19284   | 748.00484   | -3.06174    | 1 |
| 3284 | N | 72.76000 | 78.65180 | 62.30290 | -756.73621  | 248.18430   | 280.04847   | 1 |
| 3285 | H | 73.02500 | 78.74080 | 63.26290 | -76.03550   | 1762.26803  | 2605.15954  | 1 |
| 3286 | H | 73.53400 | 78.74680 | 61.67590 | -1129.91214 | 2023.67923  | -2127.49787 | 1 |
| 3287 | C | 69.42700 | 78.31480 | 66.03490 | -551.28833  | -311.69731  | 656.03123   | 1 |
| 3288 | O | 69.49300 | 77.10380 | 66.30090 | 607.35783   | 152.72270   | 481.06078   | 1 |
| 3289 | N | 69.91900 | 79.24580 | 66.90290 | 444.31337   | -385.07350  | -605.78570  | 1 |
| 3290 | H | 69.86900 | 80.20080 | 66.61990 | 2595.52861  | 35.76156    | -1777.68910 | 1 |
| 3291 | C | 70.55000 | 78.86580 | 68.12590 | -784.14317  | -52.59372   | 462.38987   | 1 |
| 3292 | H | 71.32000 | 78.13480 | 67.92590 | -462.13645  | -2699.23387 | 1548.80362  | 1 |
| 3293 | C | 71.25000 | 80.09480 | 68.80590 | 197.12909   | 890.15955   | 14.39087    | 1 |
| 3294 | H | 71.58700 | 79.73080 | 69.79990 | 2746.32061  | 303.57606   | -1504.58994 | 1 |
| 3295 | H | 70.61000 | 80.97980 | 69.01290 | -3097.61543 | -546.90067  | -62.48631   | 1 |
| 3296 | N | 73.40700 | 81.20880 | 68.59690 | -209.07347  | 622.14253   | 530.94185   | 1 |
| 3297 | H | 73.43300 | 81.28880 | 69.59390 | -2040.68413 | 1011.31339  | 2170.50219  | 1 |
| 3298 | C | 72.35200 | 80.62980 | 68.01290 | -248.12391  | 564.18458   | -671.99799  | 1 |
| 3299 | C | 74.26900 | 81.55580 | 67.58590 | -155.31937  | -898.50238  | -4.51232    | 1 |
| 3300 | H | 75.19500 | 82.08080 | 67.81790 | 973.62003   | -220.44013  | 2983.57108  | 1 |
| 3301 | N | 73.76200 | 81.31280 | 66.40590 | 163.43278   | -152.13122  | 814.13642   | 1 |
| 3302 | C | 72.56300 | 80.67780 | 66.66290 | 684.80954   | 300.46282   | -521.73651  | 1 |
| 3303 | H | 72.02400 | 80.25780 | 65.82290 | 1199.36856  | -2026.37391 | -2086.51625 | 1 |
| 3304 | C | 69.64000 | 78.25780 | 69.17190 | -747.16856  | 355.58843   | 383.07573   | 1 |
| 3305 | O | 70.02400 | 77.39280 | 69.98090 | -534.25265  | -579.67242  | 46.70353    | 1 |
| 3306 | N | 68.39300 | 78.68480 | 69.17490 | 45.48387    | -842.94896  | 6.36779     | 1 |
| 3307 | H | 68.03400 | 79.38880 | 68.56790 | -2083.58571 | 1357.88664  | -1926.92519 | 1 |
| 3308 | C | 67.34400 | 78.10680 | 69.99190 | -486.39842  | 359.06583   | 682.59747   | 1 |
| 3309 | H | 67.88300 | 77.80780 | 70.87890 | 1823.64178  | -2248.54392 | -1231.50603 | 1 |
| 3310 | C | 66.26800 | 79.14380 | 70.38190 | 354.39673   | -755.01887  | -368.51114  | 1 |
| 3311 | H | 65.65100 | 79.44880 | 69.50990 | -1685.12818 | 2208.34413  | 1477.08682  | 1 |
| 3312 | C | 65.27500 | 78.49980 | 71.45990 | 818.16250   | 369.91638   | 158.81751   | 1 |
| 3313 | H | 65.85400 | 78.09680 | 72.31790 | -704.60158  | 2358.52233  | 1959.37114  | 1 |
| 3314 | H | 64.71300 | 77.63880 | 71.03790 | -1922.40656 | 1060.30325  | -2253.51642 | 1 |
| 3315 | H | 64.49100 | 79.19980 | 71.82090 | 966.05373   | 2011.63690  | 2217.72032  | 1 |
| 3316 | C | 66.88300 | 80.46080 | 70.88990 | 578.45802   | -638.70251  | 298.15505   | 1 |
| 3317 | H | 67.63100 | 80.93980 | 70.22190 | 1961.27994  | -586.94183  | -2388.95511 | 1 |
| 3318 | H | 67.49200 | 80.42380 | 71.81890 | -2311.42056 | 1813.39268  | 1125.68567  | 1 |
| 3319 | C | 65.83800 | 81.51180 | 71.27090 | -829.22184  | -344.94732  | -157.64989  | 1 |
| 3320 | H | 65.02200 | 81.53180 | 70.51890 | 1146.57994  | 789.58334   | -2821.37180 | 1 |
| 3321 | H | 65.46700 | 81.24480 | 72.28390 | 429.82659   | -2165.50649 | -2241.44083 | 1 |
| 3322 | H | 66.38100 | 82.47880 | 71.20490 | -2331.25248 | -1872.54511 | -978.29592  | 1 |
| 3323 | C | 66.76900 | 76.84280 | 69.45490 | -340.18826  | 610.30084   | -585.88040  | 1 |
| 3324 | O | 66.63400 | 75.81380 | 70.12590 | 101.89568   | -622.84987  | 474.66044   | 1 |
| 3325 | N | 66.31500 | 76.98580 | 68.18590 | 158.99257   | 828.45462   | 32.50530    | 1 |
| 3326 | H | 66.41500 | 77.87280 | 67.74190 | -2616.55087 | -325.30913  | -1716.40955 | 1 |
| 3327 | C | 65.74200 | 75.94280 | 67.37790 | 151.60799   | -222.65958  | -871.14220  | 1 |
| 3328 | H | 64.79300 | 75.72480 | 67.84490 | 332.72533   | 2444.91621  | 1951.89775  | 1 |
| 3329 | C | 65.55500 | 76.47180 | 65.99690 | 516.47904   | 744.65398   | 100.94974   | 1 |
| 3330 | H | 65.01800 | 77.43680 | 65.87590 | -2309.33922 | -1649.80974 | 1357.68420  | 1 |
| 3331 | H | 66.57200 | 76.68280 | 65.60290 | -2378.86400 | 1325.20877  | 1575.77093  | 1 |
| 3332 | C | 64.89500 | 75.49180 | 64.95890 | 699.04891   | -87.30804   | 578.92913   | 1 |
| 3333 | H | 65.50600 | 74.59380 | 64.72490 | 1876.96401  | -2499.29325 | 358.83921   | 1 |
| 3334 | H | 64.58300 | 76.09980 | 64.08290 | -1213.58057 | 2898.57565  | 153.97275   | 1 |
| 3335 | S | 63.30800 | 74.83580 | 65.62490 | 416.23263   | -317.43383  | 192.86463   | 1 |
| 3336 | C | 62.41500 | 74.52080 | 64.05090 | -723.11660  | 534.39399   | 151.57985   | 1 |
| 3337 | H | 61.57500 | 73.84080 | 64.30990 | 1894.43547  | -1399.81738 | -2085.62983 | 1 |
| 3338 | H | 63.09600 | 74.03980 | 63.31690 | 1019.44980  | 2208.15760  | 1995.74255  | 1 |
| 3339 | H | 62.01300 | 75.46580 | 63.62590 | -1982.24411 | 1150.22911  | 2155.43673  | 1 |
| 3340 | C | 66.62700 | 74.71180 | 67.33690 | 574.44850   | -552.29807  | -443.20059  | 1 |
| 3341 | O | 66.22400 | 73.62780 | 67.63590 | 488.90100   | -608.17075  | 121.37288   | 1 |
| 3342 | N | 67.94400 | 74.80680 | 67.04190 | 412.83426   | 217.61314   | 703.48041   | 1 |

|      |   |          |          |          |             |             |             |   |
|------|---|----------|----------|----------|-------------|-------------|-------------|---|
| 3343 | H | 68.38100 | 75.69680 | 66.93390 | -1566.75032 | 1034.45141  | 2524.56529  | 1 |
| 3344 | C | 68.78100 | 73.65580 | 66.86890 | -596.84400  | 82.97288    | 684.35644   | 1 |
| 3345 | H | 68.16600 | 72.78480 | 66.69290 | 1497.15614  | 726.10748   | 2670.11566  | 1 |
| 3346 | C | 69.72500 | 73.87980 | 65.70990 | -175.62620  | -821.42401  | -354.78026  | 1 |
| 3347 | H | 70.51200 | 74.64080 | 65.89490 | 2171.35181  | 2255.82464  | -307.75434  | 1 |
| 3348 | C | 70.49500 | 72.60180 | 65.37190 | 378.51733   | 52.02063    | -827.93085  | 1 |
| 3349 | H | 71.16400 | 72.77680 | 64.50290 | -1830.41880 | -1926.89381 | 1683.70826  | 1 |
| 3350 | H | 71.16100 | 72.19280 | 66.16290 | -1694.63056 | -1036.21179 | -2439.81938 | 1 |
| 3351 | H | 69.76400 | 71.82480 | 65.06090 | 1340.02925  | 2669.43549  | -988.26212  | 1 |
| 3352 | C | 69.01400 | 74.34080 | 64.41390 | -814.01391  | -209.93561  | -353.21297  | 1 |
| 3353 | H | 68.75000 | 75.40280 | 64.60590 | -2507.13629 | 1875.32597  | 309.26749   | 1 |
| 3354 | H | 69.68600 | 74.31480 | 63.52990 | -1945.45291 | -2290.22985 | -931.81889  | 1 |
| 3355 | H | 68.06000 | 73.80680 | 64.21390 | 2327.78054  | 2116.14265  | 40.05353    | 1 |
| 3356 | C | 69.60800 | 73.28180 | 68.10590 | 732.54018   | -357.93091  | 408.31525   | 1 |
| 3357 | O | 69.97600 | 72.13480 | 68.30190 | 1.35383     | -550.82225  | -565.88006  | 1 |
| 3358 | N | 69.88600 | 74.25980 | 68.99390 | 363.03646   | -731.62391  | 213.54921   | 1 |
| 3359 | H | 69.62600 | 75.21180 | 68.84890 | 1755.34152  | -2608.48845 | -113.09448  | 1 |
| 3360 | C | 70.53000 | 73.95480 | 70.25190 | 897.70081   | -103.05256  | -122.32915  | 1 |
| 3361 | H | 70.92300 | 74.92080 | 70.53490 | -36.69836   | -2570.59466 | -1813.53869 | 1 |
| 3362 | H | 71.34000 | 73.25280 | 70.12490 | 2707.14142  | 1502.01009  | 559.97968   | 1 |
| 3363 | C | 69.62700 | 73.38380 | 71.24690 | -455.10011  | 563.46771   | 553.93053   | 1 |
| 3364 | O | 70.00600 | 72.62580 | 72.09890 | -186.37563  | -688.24524  | 339.42575   | 1 |
| 3365 | N | 68.35400 | 73.82580 | 71.22490 | 311.11183   | 604.43295   | 500.54223   | 1 |
| 3366 | H | 67.99000 | 74.44980 | 70.53890 | 1526.07374  | 630.11928   | -2678.11031 | 1 |
| 3367 | C | 67.42000 | 73.44580 | 72.28490 | 488.89665   | -662.84659  | -391.23583  | 1 |
| 3368 | H | 67.91200 | 72.76780 | 72.96590 | -202.70806  | -176.52103  | -3134.64129 | 1 |
| 3369 | C | 66.91300 | 74.68680 | 73.11490 | 284.28868   | 637.56471   | 586.63634   | 1 |
| 3370 | H | 66.12200 | 75.16780 | 72.50090 | 636.15078   | 1541.45354  | -2667.85671 | 1 |
| 3371 | H | 67.73000 | 75.39380 | 73.37290 | -1152.87383 | -1009.69575 | -2747.65767 | 1 |
| 3372 | C | 66.30000 | 74.35180 | 74.45690 | 529.35420   | 598.48763   | -439.37193  | 1 |
| 3373 | H | 65.60900 | 73.48980 | 74.34190 | -1404.50143 | 1893.60025  | 2083.23788  | 1 |
| 3374 | C | 67.30900 | 73.99080 | 75.58390 | -356.46527  | 191.87426   | -817.04821  | 1 |
| 3375 | H | 67.94500 | 74.88180 | 75.77790 | -2886.42813 | -572.73393  | 1112.98460  | 1 |
| 3376 | H | 67.87700 | 73.11080 | 75.21290 | 1554.72610  | 1907.30855  | 1960.41503  | 1 |
| 3377 | H | 66.84500 | 73.70680 | 76.55190 | 1700.32173  | -1757.92658 | 1979.09737  | 1 |
| 3378 | C | 65.46100 | 75.57580 | 74.92890 | -556.85359  | -709.22100  | 135.53838   | 1 |
| 3379 | H | 66.10500 | 76.45080 | 75.16190 | 2764.59040  | 962.11966   | 1153.07932  | 1 |
| 3380 | H | 64.93300 | 75.42080 | 75.89390 | -647.66229  | -1903.03744 | -2420.16700 | 1 |
| 3381 | H | 64.70300 | 75.83080 | 74.15790 | -726.31647  | 962.86753   | -2905.78333 | 1 |
| 3382 | C | 66.18200 | 72.68480 | 71.76890 | -551.55292  | 145.25812   | -711.43549  | 1 |
| 3383 | O | 65.92800 | 71.57280 | 72.17990 | 660.67273   | -87.87243   | 423.57669   | 1 |
| 3384 | N | 65.43300 | 73.25880 | 70.81490 | 350.86310   | -95.77548   | -761.83622  | 1 |
| 3385 | H | 65.71600 | 74.14280 | 70.44990 | -1155.90570 | 2419.27216  | 1645.97402  | 1 |
| 3386 | C | 64.18200 | 72.72380 | 70.30190 | -367.08880  | -590.07583  | 590.34509   | 1 |
| 3387 | H | 63.58800 | 72.69080 | 71.20390 | -2345.06017 | 1344.25605  | -1609.93625 | 1 |
| 3388 | C | 63.33000 | 73.64380 | 69.47090 | -881.45777  | -148.18660  | -180.34394  | 1 |
| 3389 | H | 63.72500 | 73.82480 | 68.44790 | -1263.21552 | -2863.19262 | -323.48226  | 1 |
| 3390 | C | 61.92300 | 73.14780 | 69.18390 | -162.98024  | 889.47281   | -117.16040  | 1 |
| 3391 | H | 61.36800 | 72.94880 | 70.12590 | 1868.77692  | 2273.08058  | 1113.10544  | 1 |
| 3392 | H | 61.30500 | 73.85280 | 68.58890 | -2062.91018 | 1098.60995  | -2106.10635 | 1 |
| 3393 | H | 61.96700 | 72.21880 | 68.57590 | 2163.49839  | -1231.78059 | -1923.59494 | 1 |
| 3394 | C | 63.22400 | 75.10980 | 70.05690 | -710.87993  | -201.85737  | 534.18567   | 1 |
| 3395 | H | 62.72800 | 74.93580 | 71.03590 | -1722.85908 | -2220.69218 | -1413.68633 | 1 |
| 3396 | H | 64.20300 | 75.58080 | 70.29190 | 74.49284    | -2991.69774 | -970.78406  | 1 |
| 3397 | C | 62.38800 | 76.05980 | 69.16990 | -901.93412  | -89.79683   | -99.51065   | 1 |
| 3398 | H | 62.69600 | 75.86280 | 68.12090 | -2194.98692 | -1319.68458 | -1827.20860 | 1 |
| 3399 | H | 62.61200 | 77.12580 | 69.38790 | -2958.87587 | 943.55482   | 502.97527   | 1 |
| 3400 | H | 61.29600 | 75.86780 | 69.23290 | 615.59011   | 228.60696   | -3076.85130 | 1 |
| 3401 | C | 64.17900 | 71.32780 | 69.69790 | 615.77418   | -500.64708  | 449.02746   | 1 |
| 3402 | O | 63.61300 | 70.39280 | 70.22690 | 672.86755   | 410.51495   | -48.51765   | 1 |
| 3403 | N | 64.84000 | 71.21580 | 68.46890 | 30.93819    | -690.30030  | -484.97486  | 1 |
| 3404 | H | 65.25800 | 71.95580 | 67.94690 | 2834.41771  | -1125.42655 | 773.12196   | 1 |

|      |   |          |          |          |             |             |             |   |
|------|---|----------|----------|----------|-------------|-------------|-------------|---|
| 3405 | C | 64.86800 | 69.95580 | 67.69390 | 598.91025   | -664.56113  | 176.39734   | 1 |
| 3406 | H | 63.81200 | 69.72680 | 67.68790 | -2265.49285 | -1205.97625 | 1819.72241  | 1 |
| 3407 | C | 65.36600 | 70.19380 | 66.22890 | -475.69890  | 749.97196   | 206.64852   | 1 |
| 3408 | H | 66.39600 | 70.60980 | 66.18990 | 1947.96506  | -2077.23152 | 1337.44816  | 1 |
| 3409 | H | 65.22500 | 69.21180 | 65.72890 | -1103.00333 | -1704.59296 | 2403.32535  | 1 |
| 3410 | C | 64.53200 | 71.18780 | 65.44590 | 645.79796   | -525.54372  | -371.75234  | 1 |
| 3411 | H | 64.74800 | 72.23680 | 65.73890 | 1034.52187  | -432.58778  | -2939.53373 | 1 |
| 3412 | C | 64.82900 | 71.16480 | 63.94490 | -193.44510  | 495.40262   | 740.67958   | 1 |
| 3413 | H | 64.37600 | 72.06480 | 63.47790 | 1030.41163  | -2830.14617 | -909.25835  | 1 |
| 3414 | H | 64.51100 | 70.21780 | 63.45690 | -1788.09069 | 1872.10513  | -1787.78642 | 1 |
| 3415 | H | 65.92000 | 71.13280 | 63.73590 | -2319.69691 | 430.01972   | 2081.42152  | 1 |
| 3416 | C | 63.01800 | 70.99680 | 65.50990 | 337.28319   | 463.18300   | -709.33247  | 1 |
| 3417 | H | 62.67500 | 69.94880 | 65.36790 | -2169.81831 | -2099.82564 | 883.65550   | 1 |
| 3418 | H | 62.52000 | 71.27080 | 66.46390 | 1287.11327  | -1973.07056 | 2085.31969  | 1 |
| 3419 | H | 62.58300 | 71.55980 | 64.65590 | 933.05301   | 2308.53467  | -1923.09802 | 1 |
| 3420 | C | 65.59900 | 68.81180 | 68.33190 | -487.30356  | 405.89265   | -655.16212  | 1 |
| 3421 | O | 65.01500 | 67.77580 | 68.08990 | 51.76259    | 752.96699   | -232.35441  | 1 |
| 3422 | N | 66.67700 | 68.82680 | 69.08290 | 716.34479   | -416.55290  | 161.26411   | 1 |
| 3423 | C | 67.51000 | 69.99280 | 69.37990 | -313.75432  | -698.84754  | 494.59211   | 1 |
| 3424 | H | 67.00000 | 70.92280 | 69.70990 | -1118.00607 | 2940.43275  | 46.30239    | 1 |
| 3425 | H | 68.07300 | 70.27080 | 68.46290 | 344.03567   | 2906.48788  | -1154.20703 | 1 |
| 3426 | C | 67.20100 | 67.63480 | 69.73590 | -534.45817  | 709.77158   | 205.01164   | 1 |
| 3427 | H | 67.07000 | 66.78880 | 69.07690 | -857.55567  | 3023.80252  | 139.43755   | 1 |
| 3428 | C | 68.66500 | 68.04580 | 70.17490 | 481.33696   | 391.24665   | 668.35005   | 1 |
| 3429 | H | 69.12400 | 67.49880 | 71.02590 | -2140.94963 | -2003.45149 | 1140.50123  | 1 |
| 3430 | H | 69.38400 | 67.82280 | 69.35690 | 672.80993   | 2140.77173  | 2205.14159  | 1 |
| 3431 | C | 68.55100 | 69.51580 | 70.42490 | -696.14943  | -406.90384  | -425.74198  | 1 |
| 3432 | H | 69.49600 | 70.06980 | 70.24090 | -962.55716  | 2608.97393  | 1471.38199  | 1 |
| 3433 | H | 68.18300 | 69.79180 | 71.43690 | -2261.40855 | -1927.18248 | -1034.51694 | 1 |
| 3434 | C | 66.39300 | 67.26680 | 71.00390 | -453.74341  | 739.56402   | 280.38006   | 1 |
| 3435 | O | 66.32900 | 66.10480 | 71.31490 | -137.54694  | 639.53244   | 442.38708   | 1 |
| 3436 | N | 65.84600 | 68.26680 | 71.68190 | 525.19233   | 644.56059   | -146.24280  | 1 |
| 3437 | H | 65.99600 | 69.19580 | 71.35290 | 2330.43331  | 683.90243   | -1999.89607 | 1 |
| 3438 | C | 64.95700 | 68.17180 | 72.79490 | 399.79504   | -677.76227  | 460.70949   | 1 |
| 3439 | H | 64.63100 | 69.17880 | 73.00590 | 2056.58315  | 1120.06637  | 2100.98627  | 1 |
| 3440 | H | 65.55800 | 67.86280 | 73.63690 | 1733.48591  | 94.92812    | -2623.78381 | 1 |
| 3441 | C | 63.76000 | 67.32980 | 72.57190 | -10.08677   | -839.03243  | -356.89472  | 1 |
| 3442 | O | 63.42600 | 66.47880 | 73.44190 | -437.01769  | -217.15932  | -620.87406  | 1 |
| 3443 | N | 63.06200 | 67.53680 | 71.42990 | 766.41190   | 160.47857   | 315.48648   | 1 |
| 3444 | H | 63.28600 | 68.31780 | 70.85290 | -1861.68302 | 1369.43190  | 2134.71751  | 1 |
| 3445 | C | 61.89500 | 66.79280 | 71.11990 | 134.00087   | -583.58071  | 687.69784   | 1 |
| 3446 | H | 61.24900 | 66.80980 | 71.98490 | -1363.52244 | -2722.36357 | -792.31898  | 1 |
| 3447 | C | 61.08100 | 67.31480 | 69.93990 | 593.24576   | -688.29568  | -75.89158   | 1 |
| 3448 | H | 60.31700 | 66.55780 | 69.66190 | 1194.47358  | 2577.93466  | -1351.18910 | 1 |
| 3449 | C | 60.20100 | 68.50380 | 70.43690 | -62.19399   | -708.20101  | 570.99408   | 1 |
| 3450 | H | 59.64400 | 68.05180 | 71.28490 | 1664.45034  | 1183.95113  | 2392.92520  | 1 |
| 3451 | H | 59.37700 | 68.71880 | 69.72290 | -665.70437  | 3054.70418  | -351.91805  | 1 |
| 3452 | H | 60.89200 | 69.32080 | 70.73390 | 1496.61065  | -1903.13702 | -2009.09239 | 1 |
| 3453 | C | 61.97000 | 67.64580 | 68.73790 | -4.01097    | 820.47718   | -397.80915  | 1 |
| 3454 | H | 62.59600 | 68.53580 | 68.96190 | -5.14008    | -236.63247  | 3137.22885  | 1 |
| 3455 | H | 62.67200 | 66.81080 | 68.52690 | 1511.82584  | -448.24004  | 2722.44187  | 1 |
| 3456 | C | 61.18200 | 67.81180 | 67.43490 | -828.62534  | -319.95147  | -206.06334  | 1 |
| 3457 | H | 61.83300 | 68.03080 | 66.56190 | 2986.70743  | -737.51338  | -658.69488  | 1 |
| 3458 | H | 60.42100 | 68.61980 | 67.48290 | 1471.44982  | 615.18607   | 2711.93800  | 1 |
| 3459 | H | 60.54100 | 66.91780 | 67.27590 | 1969.38797  | -2313.68546 | 816.45382   | 1 |
| 3460 | C | 62.10100 | 65.27780 | 70.85890 | 542.50498   | -411.58330  | 606.41449   | 1 |
| 3461 | O | 61.32600 | 64.41780 | 71.31790 | -90.26999   | -196.22098  | -759.58929  | 1 |
| 3462 | N | 63.17400 | 64.90480 | 70.18990 | -117.44128  | 375.04606   | 747.14141   | 1 |
| 3463 | H | 63.73500 | 65.66780 | 69.88090 | 734.43151   | -2823.65248 | -1177.20995 | 1 |
| 3464 | C | 63.66700 | 63.56780 | 70.06490 | -589.92492  | 639.39638   | -273.15172  | 1 |
| 3465 | H | 62.88200 | 62.91180 | 69.71890 | 1868.20173  | 2187.26408  | -1274.33290 | 1 |
| 3466 | C | 64.85000 | 63.46980 | 69.11790 | 73.22357    | -747.66018  | 516.81095   | 1 |

|      |   |          |          |          |             |             |             |   |
|------|---|----------|----------|----------|-------------|-------------|-------------|---|
| 3467 | H | 65.76400 | 63.92480 | 69.55590 | -60.91869   | -1130.28062 | -2935.46945 | 1 |
| 3468 | C | 65.11100 | 61.98380 | 68.79790 | 588.28790   | -568.72396  | -402.39460  | 1 |
| 3469 | H | 65.53400 | 61.39180 | 69.63790 | 2129.49122  | 1687.30096  | 1586.35080  | 1 |
| 3470 | H | 65.93800 | 61.98080 | 68.05590 | 869.28117   | -2724.29525 | 1311.78956  | 1 |
| 3471 | H | 64.16200 | 61.56580 | 68.39990 | -1383.60622 | -1787.62488 | -2188.20871 | 1 |
| 3472 | C | 64.66600 | 64.18280 | 67.82090 | -511.99294  | 745.72906   | 114.90170   | 1 |
| 3473 | H | 64.71900 | 65.29080 | 67.87690 | 1588.00486  | -188.69905  | -2709.40205 | 1 |
| 3474 | H | 65.40800 | 63.84580 | 67.06590 | 1800.67259  | -1935.62399 | 1705.62723  | 1 |
| 3475 | H | 63.66800 | 64.06080 | 67.34590 | 1347.81269  | 2032.19053  | -1987.92073 | 1 |
| 3476 | C | 64.06000 | 63.02280 | 71.47490 | -1.70514    | 752.11570   | -515.52892  | 1 |
| 3477 | O | 63.68600 | 61.86980 | 71.71690 | 714.84410   | -93.59885   | -322.27999  | 1 |
| 3478 | N | 64.69800 | 63.81880 | 72.35490 | 551.30940   | -398.39206  | 500.01400   | 1 |
| 3479 | H | 64.92200 | 64.75380 | 72.09190 | 1065.39191  | 2431.51348  | -1688.46336 | 1 |
| 3480 | C | 64.99500 | 63.39580 | 73.70990 | 84.22080    | 855.54583   | -303.97236  | 1 |
| 3481 | H | 65.58600 | 62.49180 | 73.72390 | -1378.58275 | -2174.01324 | -1808.70182 | 1 |
| 3482 | C | 65.90700 | 64.41680 | 74.47290 | -548.75752  | -723.60389  | 81.93657    | 1 |
| 3483 | H | 65.40800 | 65.40280 | 74.35890 | -798.90751  | -3003.86307 | 486.60013   | 1 |
| 3484 | C | 65.96600 | 64.10380 | 75.97690 | 121.52595   | 468.18448   | 772.97202   | 1 |
| 3485 | H | 64.99500 | 64.04380 | 76.51390 | 1064.66948  | 1358.25911  | -2630.55837 | 1 |
| 3486 | H | 66.52400 | 63.15380 | 76.11390 | 728.27879   | -2508.23114 | 1754.02759  | 1 |
| 3487 | H | 66.62700 | 64.80880 | 76.52590 | -2157.82906 | 216.12575   | 2279.31780  | 1 |
| 3488 | C | 67.28900 | 64.30380 | 73.77390 | 749.51981   | -457.40855  | -245.86273  | 1 |
| 3489 | H | 67.15200 | 64.24880 | 72.67190 | -420.13663  | -1908.78261 | -2465.41282 | 1 |
| 3490 | H | 67.80800 | 63.36280 | 74.05590 | 1292.12572  | -2513.34894 | -1382.64763 | 1 |
| 3491 | C | 68.16400 | 65.49680 | 74.02690 | -394.49375  | 463.21539   | -679.15918  | 1 |
| 3492 | H | 67.70100 | 66.33980 | 73.47090 | 2086.51082  | 1736.69889  | -1590.14961 | 1 |
| 3493 | H | 68.23500 | 65.67980 | 75.11990 | 2822.74157  | -548.77616  | 1276.40157  | 1 |
| 3494 | H | 69.22100 | 65.29580 | 73.74790 | 1926.09764  | -1485.74778 | 1995.22621  | 1 |
| 3495 | C | 63.73700 | 63.05580 | 74.48490 | 493.45836   | -499.32038  | -581.91839  | 1 |
| 3496 | O | 63.59500 | 61.94380 | 75.01890 | -732.30512  | 90.81087    | 281.26470   | 1 |
| 3497 | N | 62.71100 | 63.97680 | 74.42690 | -388.37517  | -500.86328  | -557.64953  | 1 |
| 3498 | H | 62.97700 | 64.85880 | 74.04390 | 1950.96197  | -1152.01113 | -2182.85226 | 1 |
| 3499 | C | 61.40000 | 63.89880 | 75.00690 | -65.73122   | 687.61042   | 595.24979   | 1 |
| 3500 | H | 61.51400 | 63.67880 | 76.05790 | -1951.21468 | 1538.10409  | -1930.08375 | 1 |
| 3501 | C | 60.66100 | 65.21180 | 74.74190 | 522.64942   | 726.40915   | -174.98094  | 1 |
| 3502 | H | 60.92700 | 65.60280 | 73.73690 | -1874.72242 | 1772.08866  | -1800.92861 | 1 |
| 3503 | H | 59.56300 | 65.07380 | 74.83190 | -3107.24857 | 303.11924   | -389.03888  | 1 |
| 3504 | C | 61.13800 | 66.33980 | 75.75290 | -526.39631  | -297.91956  | 682.35025   | 1 |
| 3505 | H | 62.24600 | 66.39680 | 75.69090 | -1296.29539 | 1075.82747  | -2657.14880 | 1 |
| 3506 | C | 60.60400 | 67.72780 | 75.32790 | 559.65290   | 571.52751   | -437.71674  | 1 |
| 3507 | H | 60.92600 | 68.06380 | 74.31990 | 2176.88016  | 889.15141   | 2090.17434  | 1 |
| 3508 | H | 59.49500 | 67.79180 | 75.33190 | -1717.87920 | -2187.24171 | -1470.74505 | 1 |
| 3509 | H | 60.93400 | 68.51280 | 76.04190 | 939.06574   | 2087.33093  | -2158.57160 | 1 |
| 3510 | C | 60.79400 | 66.15080 | 77.20290 | 793.52293   | -219.55549  | -391.87721  | 1 |
| 3511 | H | 61.31900 | 65.24480 | 77.57390 | -581.17914  | 1168.77396  | -2862.59051 | 1 |
| 3512 | H | 60.95400 | 67.10180 | 77.75390 | -2954.60589 | 506.49745   | 954.98199   | 1 |
| 3513 | H | 59.72800 | 65.90580 | 77.39990 | 1752.84334  | 232.71534   | 2602.23174  | 1 |
| 3514 | C | 60.68300 | 62.63780 | 74.55090 | -422.82354  | 680.47202   | 435.46422   | 1 |
| 3515 | O | 60.15800 | 61.87580 | 75.38690 | 507.75188   | 597.42849   | -94.31041   | 1 |
| 3516 | N | 60.66600 | 62.35580 | 73.27790 | -572.47222  | 389.58514   | 482.87811   | 1 |
| 3517 | H | 61.20100 | 62.96480 | 72.69590 | 1749.94152  | -2014.18665 | -1667.02820 | 1 |
| 3518 | C | 60.10100 | 61.11180 | 72.65490 | 146.14881   | 299.24040   | -848.85023  | 1 |
| 3519 | H | 59.04500 | 61.08180 | 72.87990 | 778.60536   | -2130.16337 | 2180.45957  | 1 |
| 3520 | C | 60.12500 | 61.11180 | 71.07890 | -81.54435   | 640.83186   | 643.53403   | 1 |
| 3521 | H | 59.92400 | 60.10280 | 70.65790 | 2240.83455  | -2098.16604 | 688.90203   | 1 |
| 3522 | H | 61.15700 | 61.42380 | 70.81190 | 1734.81488  | -2487.23910 | -838.02460  | 1 |
| 3523 | O | 59.30200 | 62.05380 | 70.45490 | -354.37435  | -48.53850   | 704.05260   | 1 |
| 3524 | H | 58.40200 | 61.85880 | 70.72590 | -972.02832  | 2985.12033  | -206.01886  | 1 |
| 3525 | C | 60.70300 | 59.78680 | 73.11590 | 596.28258   | -631.56435  | 277.53299   | 1 |
| 3526 | O | 59.91400 | 58.83680 | 73.29290 | -337.54624  | -10.70752   | 713.84530   | 1 |
| 3527 | N | 62.04400 | 59.67780 | 73.24190 | 215.16837   | -355.06463  | -735.05372  | 1 |
| 3528 | H | 62.55400 | 60.48180 | 72.94690 | -1113.47260 | -2283.51931 | -1855.78678 | 1 |

|      |   |          |          |          |             |             |             |   |
|------|---|----------|----------|----------|-------------|-------------|-------------|---|
| 3529 | C | 62.74300 | 58.45280 | 73.65390 | -412.71609  | -249.10353  | 773.99216   | 1 |
| 3530 | H | 62.41300 | 57.69680 | 72.95690 | -618.05730  | 2898.96796  | -1054.61660 | 1 |
| 3531 | C | 64.26900 | 58.73380 | 73.87290 | -728.96113  | 259.56186   | 482.38398   | 1 |
| 3532 | H | 64.76100 | 57.78280 | 74.17290 | 901.55280   | 931.36218   | -2866.70425 | 1 |
| 3533 | H | 64.35500 | 59.49580 | 74.67690 | -1452.49062 | -2621.83855 | 956.27393   | 1 |
| 3534 | S | 64.98900 | 59.21680 | 72.26490 | -194.13488  | -76.32355   | 517.39441   | 1 |
| 3535 | H | 64.69800 | 60.50780 | 72.31790 | -681.37477  | -1452.89683 | 2706.11261  | 1 |
| 3536 | C | 62.19100 | 57.92080 | 74.99590 | 116.85271   | 739.49730   | -520.51915  | 1 |
| 3537 | O | 61.86400 | 56.75380 | 75.16990 | 182.68119   | 593.14954   | 488.29135   | 1 |
| 3538 | N | 62.14600 | 58.80680 | 76.01990 | 45.70287    | 804.95113   | -250.27427  | 1 |
| 3539 | H | 62.48500 | 59.73680 | 75.89890 | -674.89009  | -2327.51731 | -2006.34313 | 1 |
| 3540 | C | 61.69700 | 58.38880 | 77.38590 | -740.98950  | -479.25022  | -229.57526  | 1 |
| 3541 | H | 62.07100 | 57.41880 | 77.67990 | -2645.96527 | 1517.62944  | 770.64577   | 1 |
| 3542 | C | 62.30100 | 59.29480 | 78.44190 | 757.50892   | 468.49620   | -195.30118  | 1 |
| 3543 | H | 61.96400 | 58.85080 | 79.40290 | 2406.12827  | 1321.26137  | -1537.21872 | 1 |
| 3544 | H | 61.85500 | 60.29480 | 78.25690 | 2782.91557  | 1102.01246  | 969.11076   | 1 |
| 3545 | C | 63.83700 | 59.35180 | 78.28390 | -803.14102  | 140.99230   | 408.08906   | 1 |
| 3546 | C | 64.38900 | 60.56680 | 77.83490 | 569.90361   | 535.86548   | -468.51795  | 1 |
| 3547 | H | 63.80300 | 61.43580 | 77.57490 | 901.26748   | 2307.51083  | 1939.41664  | 1 |
| 3548 | C | 65.78200 | 60.60780 | 77.65190 | -37.77197   | -597.50180  | -687.76150  | 1 |
| 3549 | H | 66.16600 | 61.51380 | 77.20790 | -904.88168  | 1353.36004  | 2692.17978  | 1 |
| 3550 | C | 66.60500 | 59.53580 | 77.92290 | -817.15962  | -16.96333   | -404.24424  | 1 |
| 3551 | O | 67.97300 | 59.58680 | 77.66090 | -653.44068  | -391.55089  | 208.15958   | 1 |
| 3552 | H | 68.15200 | 60.22280 | 76.96390 | 1760.09192  | -2576.95817 | -399.48619  | 1 |
| 3553 | C | 64.61200 | 58.27280 | 78.57190 | -385.75690  | 437.13966   | 701.10737   | 1 |
| 3554 | H | 64.11800 | 57.43480 | 79.04090 | 2260.45440  | -996.47659  | 1948.23164  | 1 |
| 3555 | C | 66.01500 | 58.33080 | 78.34490 | -476.74657  | -368.24947  | 684.51153   | 1 |
| 3556 | H | 66.62900 | 57.44280 | 78.37690 | 958.68698   | -2912.64048 | -704.03901  | 1 |
| 3557 | C | 60.22600 | 58.36380 | 77.44290 | 40.66128    | 834.47524   | -365.30637  | 1 |
| 3558 | O | 59.63100 | 57.65280 | 78.25890 | -322.55860  | 526.28303   | -492.55391  | 1 |
| 3559 | N | 59.50100 | 59.13780 | 76.59090 | 188.73066   | -563.22900  | -599.85508  | 1 |
| 3560 | H | 59.91300 | 59.78880 | 75.95890 | -2203.55087 | 1691.57533  | 1476.87599  | 1 |
| 3561 | C | 58.09000 | 58.99580 | 76.38390 | -901.54697  | -95.99147   | 97.20962    | 1 |
| 3562 | H | 57.66200 | 59.15280 | 77.36290 | 1913.20878  | -2197.06582 | 1187.75425  | 1 |
| 3563 | C | 57.49900 | 60.00280 | 75.39790 | -3.91098    | -816.22786  | 406.45762   | 1 |
| 3564 | H | 57.89000 | 60.99280 | 75.71490 | -1932.81911 | -1896.28298 | -1602.04474 | 1 |
| 3565 | H | 57.90100 | 59.81880 | 74.37790 | 730.76234   | -3020.63486 | 489.87516   | 1 |
| 3566 | S | 55.72300 | 60.08580 | 75.22290 | -8.62032    | -298.44196  | 471.24165   | 1 |
| 3567 | H | 55.62900 | 59.09380 | 74.34990 | -2337.76039 | 1913.19876  | 879.07513   | 1 |
| 3568 | C | 57.68600 | 57.57480 | 75.97290 | -725.82512  | 212.06652   | -509.56519  | 1 |
| 3569 | O | 56.79800 | 56.98380 | 76.56690 | -675.41180  | -371.42640  | -171.72231  | 1 |
| 3570 | N | 58.36000 | 56.95880 | 75.04090 | 12.16073    | -815.10765  | -219.37167  | 1 |
| 3571 | H | 58.91300 | 57.53180 | 74.44090 | -727.88212  | 2445.23033  | 1840.99497  | 1 |
| 3572 | C | 58.10400 | 55.59180 | 74.61790 | -590.94656  | 130.60970   | 682.03685   | 1 |
| 3573 | H | 57.05600 | 55.50580 | 74.37190 | 1979.92371  | -2441.04385 | -139.40326  | 1 |
| 3574 | C | 58.88400 | 55.19280 | 73.32890 | 626.26332   | -583.85032  | -313.63045  | 1 |
| 3575 | H | 59.96700 | 55.39580 | 73.47690 | -2093.11751 | 1786.25521  | -1525.24674 | 1 |
| 3576 | C | 58.75700 | 53.70380 | 73.07890 | -704.92997  | 108.48903   | 568.11519   | 1 |
| 3577 | H | 59.12800 | 53.48880 | 72.05390 | 2482.17114  | 1404.67173  | -1328.13778 | 1 |
| 3578 | H | 59.29400 | 53.04680 | 73.79590 | 2783.72384  | -1395.70830 | -448.44861  | 1 |
| 3579 | H | 57.68400 | 53.41180 | 73.07590 | 2819.67443  | 1395.41107  | 22.14147    | 1 |
| 3580 | C | 58.35700 | 55.95380 | 72.10590 | 625.30349   | -64.59327   | -660.51060  | 1 |
| 3581 | H | 57.42400 | 55.51380 | 71.69390 | 1383.39231  | 2825.00579  | -61.59749   | 1 |
| 3582 | H | 58.03500 | 56.99480 | 72.32590 | 2392.04041  | 2043.19427  | 41.54653    | 1 |
| 3583 | C | 59.39500 | 56.11680 | 70.97890 | 697.09019   | -527.59108  | -259.16004  | 1 |
| 3584 | H | 59.93700 | 55.16780 | 70.78090 | 1909.84300  | -1424.44627 | 2054.67242  | 1 |
| 3585 | H | 59.03200 | 56.60880 | 70.05190 | 1920.85389  | 178.12630   | 2485.32042  | 1 |
| 3586 | H | 60.04100 | 56.97780 | 71.25290 | 2526.20734  | 1579.75436  | 1010.38550  | 1 |
| 3587 | C | 58.48800 | 54.59080 | 75.69290 | -672.90234  | 35.56105    | -614.31983  | 1 |
| 3588 | O | 57.74000 | 53.60180 | 75.90990 | -478.48117  | -400.52770  | -484.00470  | 1 |
| 3589 | N | 59.64700 | 54.78980 | 76.37390 | -594.65392  | -518.80353  | -299.83646  | 1 |
| 3590 | H | 59.99800 | 55.71780 | 76.27190 | -2801.41960 | -1160.56416 | 838.66875   | 1 |

|      |   |          |          |          |             |             |             |   |
|------|---|----------|----------|----------|-------------|-------------|-------------|---|
| 3591 | C | 60.34200 | 53.84080 | 77.29690 | -465.92880  | -632.01678  | -463.59049  | 1 |
| 3592 | H | 60.57700 | 52.90980 | 76.80290 | 2104.64880  | -1398.78162 | -1874.05700 | 1 |
| 3593 | C | 61.81500 | 54.30380 | 77.78890 | 563.73452   | -478.79226  | 533.30326   | 1 |
| 3594 | H | 61.72400 | 55.38780 | 78.01790 | -180.62567  | 2661.80876  | -1667.44557 | 1 |
| 3595 | C | 62.20200 | 53.43880 | 79.01190 | -735.72828  | 495.54516   | 211.16321   | 1 |
| 3596 | H | 62.13300 | 52.35980 | 78.75490 | 1744.68210  | 1919.39457  | 1780.51539  | 1 |
| 3597 | H | 63.25500 | 53.63080 | 79.30990 | -2455.01550 | -1863.10778 | -632.41956  | 1 |
| 3598 | H | 61.54700 | 53.49980 | 79.90690 | -3074.15489 | 510.41792   | -432.74879  | 1 |
| 3599 | C | 62.82100 | 54.15980 | 76.66190 | -535.57079  | 392.91337   | -624.68714  | 1 |
| 3600 | H | 62.32800 | 54.42880 | 75.70290 | 2535.16225  | -1816.52634 | -414.01766  | 1 |
| 3601 | H | 63.23200 | 53.13380 | 76.55490 | 637.95677   | -2996.20685 | -716.92531  | 1 |
| 3602 | C | 64.08400 | 54.91880 | 76.90390 | -180.83755  | 852.62476   | 267.91753   | 1 |
| 3603 | H | 63.83200 | 55.97580 | 77.13390 | -2162.95064 | -237.77774  | -2272.29675 | 1 |
| 3604 | H | 64.72100 | 54.56480 | 77.74290 | -681.95603  | -2936.95997 | -898.57017  | 1 |
| 3605 | H | 64.80100 | 54.81880 | 76.06190 | -102.88974  | -380.35460  | -3121.37314 | 1 |
| 3606 | C | 59.39500 | 53.38480 | 78.45890 | 365.42209   | -771.75666  | 319.85834   | 1 |
| 3607 | O | 59.23700 | 52.19880 | 78.85690 | -130.96376  | -582.10112  | -517.33356  | 1 |
| 3608 | N | 58.74100 | 54.39080 | 79.02790 | -580.04826  | -497.83537  | 358.29632   | 1 |
| 3609 | H | 58.82900 | 55.33080 | 78.70690 | -2465.17050 | 1949.98831  | 136.77065   | 1 |
| 3610 | C | 57.95400 | 54.24980 | 80.20890 | 552.93237   | -538.66922  | 485.33727   | 1 |
| 3611 | H | 58.55600 | 53.66780 | 80.89190 | -1936.24275 | 1681.77355  | 1822.31390  | 1 |
| 3612 | C | 57.67700 | 55.58980 | 80.88790 | -544.96510  | 524.50920   | -509.26825  | 1 |
| 3613 | H | 57.07200 | 55.33580 | 81.78590 | 2316.46170  | -1887.20468 | -985.23598  | 1 |
| 3614 | C | 58.98100 | 56.16480 | 81.44990 | 634.75023   | 581.47036   | 300.72474   | 1 |
| 3615 | H | 58.79600 | 57.04280 | 82.10490 | 2074.77167  | -1603.44444 | 1738.53809  | 1 |
| 3616 | H | 59.55900 | 55.40180 | 82.01390 | -3027.53279 | 730.20764   | -446.17064  | 1 |
| 3617 | H | 59.56000 | 56.60080 | 80.60790 | 492.25962   | -3013.89594 | 756.53021   | 1 |
| 3618 | C | 56.89100 | 56.57580 | 80.03690 | -735.50513  | -67.82815   | -534.67985  | 1 |
| 3619 | H | 57.59600 | 57.08480 | 79.34490 | -2011.17990 | 2111.92388  | 1180.32164  | 1 |
| 3620 | H | 56.23000 | 55.99780 | 79.35490 | -1755.26170 | 1810.64938  | 1881.17820  | 1 |
| 3621 | C | 56.10400 | 57.58680 | 80.84990 | 614.68626   | 74.55363    | 669.36803   | 1 |
| 3622 | H | 55.43400 | 57.04080 | 81.54790 | 2510.66828  | 1886.50010  | 189.44233   | 1 |
| 3623 | H | 55.39900 | 58.12580 | 80.18290 | -12.55402   | 61.42276    | -3145.51997 | 1 |
| 3624 | H | 56.80600 | 58.30380 | 81.32690 | 2078.87938  | -1735.19968 | 1601.73931  | 1 |
| 3625 | C | 56.78400 | 53.35880 | 80.02290 | -743.53414  | 511.49723   | -130.30185  | 1 |
| 3626 | O | 56.23600 | 52.76380 | 80.96890 | 588.39911   | 524.92125   | 43.25962    | 1 |
| 3627 | N | 56.27700 | 53.27880 | 78.79190 | 13.28607    | 588.62638   | 604.99153   | 1 |
| 3628 | H | 56.73500 | 53.86180 | 78.12490 | 946.06818   | -1978.89572 | 2255.47178  | 1 |
| 3629 | C | 55.13000 | 52.49880 | 78.47790 | -295.89285  | 791.67877   | -342.26182  | 1 |
| 3630 | H | 54.47900 | 52.42980 | 79.33690 | 843.43458   | 1701.42202  | 2508.38742  | 1 |
| 3631 | C | 54.26500 | 53.22480 | 77.40490 | 754.02901   | 511.08116   | -41.07688   | 1 |
| 3632 | H | 53.70300 | 54.02080 | 77.93790 | -1909.60232 | -2485.84722 | 268.71691   | 1 |
| 3633 | H | 53.51500 | 52.55080 | 76.93890 | -2511.76953 | -1578.68953 | 1047.36786  | 1 |
| 3634 | O | 55.06400 | 53.77880 | 76.36790 | -400.51945  | 635.55216   | -243.48482  | 1 |
| 3635 | H | 55.77900 | 53.17280 | 76.16290 | 126.75732   | 3123.91475  | 351.16297   | 1 |
| 3636 | C | 55.34500 | 51.08080 | 78.13790 | 729.63697   | -446.46594  | 315.83076   | 1 |
| 3637 | O | 54.38400 | 50.33480 | 77.74290 | 442.93773   | -651.90520  | -49.52781   | 1 |
| 3638 | N | 56.56600 | 50.60580 | 78.30390 | -107.75884  | -765.91461  | 338.28262   | 1 |
| 3639 | H | 57.18900 | 51.23380 | 78.76590 | -203.77245  | 1794.70073  | -2575.99540 | 1 |
| 3640 | C | 56.93000 | 49.22180 | 78.07690 | 649.67172   | -639.82059  | 2.69468     | 1 |
| 3641 | H | 56.17700 | 48.60980 | 78.54990 | -1683.53299 | -2008.38757 | 1740.78209  | 1 |
| 3642 | C | 56.90500 | 48.80080 | 76.58590 | 550.37529   | 503.16102   | 524.75426   | 1 |
| 3643 | H | 55.84500 | 48.89880 | 76.26890 | -1913.41416 | 2467.82422  | 383.29633   | 1 |
| 3644 | H | 57.16400 | 47.73180 | 76.43290 | 1246.14911  | 2688.02245  | 1058.24095  | 1 |
| 3645 | C | 57.61500 | 49.74880 | 75.55590 | -524.85807  | 656.88756   | 352.80837   | 1 |
| 3646 | H | 58.66700 | 49.92380 | 75.86590 | 53.68440    | -3097.36282 | -549.26111  | 1 |
| 3647 | H | 57.07500 | 50.71580 | 75.64090 | 813.94205   | 1730.01573  | -2498.55361 | 1 |
| 3648 | C | 57.50000 | 49.15880 | 74.14190 | -220.05618  | 494.47871   | 733.83724   | 1 |
| 3649 | H | 58.09000 | 49.79580 | 73.44890 | -2571.25717 | -1811.98947 | 59.64017    | 1 |
| 3650 | H | 58.01800 | 48.17680 | 74.12790 | 2258.20433  | 443.46897   | -2145.24468 | 1 |
| 3651 | C | 56.08000 | 49.16180 | 73.63190 | 570.19697   | -673.94438  | 228.30983   | 1 |
| 3652 | H | 55.39300 | 48.50380 | 74.20690 | 1472.61415  | -1731.58635 | -2175.14195 | 1 |

|      |   |          |          |          |             |             |             |   |
|------|---|----------|----------|----------|-------------|-------------|-------------|---|
| 3653 | H | 55.70700 | 50.20880 | 73.64390 | 2314.10831  | 134.62230   | -2127.20610 | 1 |
| 3654 | N | 56.00100 | 48.71280 | 72.26790 | -364.77716  | -342.77374  | -679.79120  | 1 |
| 3655 | H | 56.26500 | 49.45680 | 71.59090 | 165.10505   | -2618.56232 | 1736.11575  | 1 |
| 3656 | H | 55.01000 | 48.47780 | 72.05990 | 1485.64317  | 2105.19406  | 1805.33891  | 1 |
| 3657 | H | 56.61600 | 47.89280 | 72.09290 | 2555.77940  | -661.07959  | -1711.48814 | 1 |
| 3658 | C | 58.25800 | 48.62980 | 78.70690 | 530.68986   | 545.42282   | 502.32780   | 1 |
| 3659 | O | 58.67000 | 47.50480 | 78.41790 | -483.71484  | -550.91079  | 293.50382   | 1 |
| 3660 | N | 58.87400 | 49.39780 | 79.67090 | -9.30974    | -840.03168  | 83.26103    | 1 |
| 3661 | H | 58.55300 | 50.33080 | 79.81490 | 2297.01815  | 2051.55425  | -642.69667  | 1 |
| 3662 | C | 60.05300 | 49.01480 | 80.43090 | -738.17546  | 52.50969    | 532.72011   | 1 |
| 3663 | H | 60.85900 | 48.83280 | 79.73490 | -210.22144  | 1446.03697  | 2786.21791  | 1 |
| 3664 | C | 60.48400 | 50.11080 | 81.40890 | -591.45373  | 419.26880   | -553.03451  | 1 |
| 3665 | H | 60.55300 | 51.07380 | 80.85790 | -1981.72135 | -900.86016  | 2271.44396  | 1 |
| 3666 | H | 59.62900 | 50.22680 | 82.10890 | -1607.70201 | -1667.68815 | -2128.92854 | 1 |
| 3667 | C | 61.81200 | 49.86180 | 82.09690 | -16.13933   | 55.14233    | 910.02739   | 1 |
| 3668 | H | 61.77700 | 48.88480 | 82.62590 | 487.95653   | 2621.51135  | 1669.67149  | 1 |
| 3669 | C | 62.94700 | 50.01980 | 81.06690 | 705.18292   | -576.44655  | -43.32926   | 1 |
| 3670 | H | 62.97300 | 51.01480 | 80.57190 | -2305.40820 | 1828.95797  | 1112.75874  | 1 |
| 3671 | H | 62.94200 | 49.14980 | 80.37590 | -378.26055  | -366.92465  | -3101.69494 | 1 |
| 3672 | H | 63.86500 | 49.83680 | 81.66490 | 2805.76968  | 1332.24762  | -500.99800  | 1 |
| 3673 | C | 61.98100 | 50.95380 | 83.20990 | -529.26154  | -527.10529  | -522.96582  | 1 |
| 3674 | H | 61.11500 | 50.89480 | 83.90290 | -2600.06500 | -10.89578   | 1771.37503  | 1 |
| 3675 | H | 62.95000 | 50.78680 | 83.72690 | -2857.22398 | -1163.83868 | -616.42263  | 1 |
| 3676 | H | 62.00600 | 51.98380 | 82.79390 | -1978.21852 | -1094.01348 | 2188.15270  | 1 |
| 3677 | C | 59.83400 | 47.69080 | 81.19690 | 29.37427    | 590.26214   | -694.39093  | 1 |
| 3678 | O | 60.73700 | 46.80980 | 81.21890 | -395.33304  | -155.10882  | 665.79296   | 1 |
| 3679 | N | 58.64700 | 47.46780 | 81.86090 | 190.50952   | -793.34384  | -216.75786  | 1 |
| 3680 | H | 57.93700 | 48.16280 | 81.93990 | -2342.89876 | -2093.71748 | 159.36980   | 1 |
| 3681 | C | 58.32400 | 46.20480 | 82.43990 | -697.54255  | 580.86657   | -86.48359   | 1 |
| 3682 | H | 59.16000 | 45.72380 | 82.92390 | -135.59744  | -1219.89506 | 2896.84235  | 1 |
| 3683 | C | 57.25300 | 46.40580 | 83.55490 | 439.01971   | -366.94824  | 709.97302   | 1 |
| 3684 | H | 56.46500 | 47.09480 | 83.18390 | -2983.55025 | -793.80366  | -605.41709  | 1 |
| 3685 | H | 56.84700 | 45.42880 | 83.89290 | -1528.44556 | 2391.22976  | -1357.97666 | 1 |
| 3686 | O | 57.79400 | 47.05480 | 84.72390 | -58.33021   | -271.59339  | -739.23058  | 1 |
| 3687 | H | 58.33600 | 46.39680 | 85.16390 | -3067.75475 | -104.94495  | 689.99534   | 1 |
| 3688 | C | 57.74300 | 45.15880 | 81.47690 | -760.62354  | 368.20265   | -342.53415  | 1 |
| 3689 | O | 57.44700 | 44.02980 | 81.86390 | 658.98494   | -55.19269   | -431.64782  | 1 |
| 3690 | N | 57.64000 | 45.44880 | 80.18090 | -27.63665   | -200.09890  | -819.67612  | 1 |
| 3691 | H | 57.87600 | 46.33480 | 79.79090 | -2405.58554 | 1968.51410  | 486.14470   | 1 |
| 3692 | C | 57.07300 | 44.51080 | 79.22090 | 223.58277   | 529.74666   | -707.69359  | 1 |
| 3693 | H | 56.64100 | 43.64980 | 79.70890 | -2194.21227 | 2069.53962  | 894.79860   | 1 |
| 3694 | C | 55.93600 | 45.12680 | 78.34290 | -518.88023  | -145.33223  | 735.59014   | 1 |
| 3695 | H | 56.29600 | 45.99180 | 77.74590 | 2184.72905  | 100.66614   | 2261.64797  | 1 |
| 3696 | H | 55.54800 | 44.49680 | 77.51490 | 1248.43424  | -602.57619  | -2824.27692 | 1 |
| 3697 | N | 53.71900 | 46.31980 | 78.70290 | -450.62011  | 535.76950   | -471.76779  | 1 |
| 3698 | H | 53.67500 | 46.71180 | 77.78490 | 2145.22324  | 692.26068   | -2194.77074 | 1 |
| 3699 | C | 54.76900 | 45.59380 | 79.19390 | 747.60014   | 320.33242   | 412.22830   | 1 |
| 3700 | C | 52.84700 | 46.50780 | 79.73890 | -653.78111  | 361.98540   | 522.48238   | 1 |
| 3701 | H | 51.89400 | 47.02380 | 79.61890 | 821.71042   | -3004.28058 | -444.20312  | 1 |
| 3702 | N | 53.29900 | 45.96080 | 80.86590 | -521.14493  | -363.93868  | 555.54378   | 1 |
| 3703 | C | 54.52600 | 45.35480 | 80.48390 | 151.03952   | 173.87420   | 882.27310   | 1 |
| 3704 | H | 55.14700 | 44.83680 | 81.20490 | -1933.72550 | 1915.08321  | 1578.41320  | 1 |
| 3705 | C | 58.04800 | 44.00880 | 78.19490 | 737.17950   | 260.16697   | 469.39380   | 1 |
| 3706 | O | 57.88200 | 42.94680 | 77.55890 | 260.74621   | -502.24469  | 550.80751   | 1 |
| 3707 | N | 59.14200 | 44.76280 | 78.02990 | -229.19614  | -767.26064  | -267.30605  | 1 |
| 3708 | H | 59.21600 | 45.65280 | 78.47390 | 2722.75767  | -1531.41429 | -373.61368  | 1 |
| 3709 | C | 60.37000 | 44.45780 | 77.32690 | 475.53858   | -634.38824  | 450.40607   | 1 |
| 3710 | H | 60.06600 | 43.86780 | 76.47490 | 1926.73388  | -1447.61399 | -2022.45804 | 1 |
| 3711 | C | 61.19700 | 45.73880 | 76.87590 | -753.09062  | -29.10756   | 513.28186   | 1 |
| 3712 | H | 62.10800 | 45.47580 | 76.29590 | -203.08343  | -2886.69370 | 1234.49700  | 1 |
| 3713 | H | 61.43300 | 46.19080 | 77.86290 | -2217.83936 | 860.91246   | -2058.69972 | 1 |
| 3714 | O | 60.39300 | 46.65880 | 76.10090 | 299.48177   | 657.88616   | 317.99952   | 1 |



|      |   |          |          |          |             |             |             |   |
|------|---|----------|----------|----------|-------------|-------------|-------------|---|
| 3715 | H | 59.93500 | 47.30180 | 76.64590 | -931.22968  | 1921.92466  | 2310.24742  | 1 |
| 3716 | C | 61.25600 | 43.57680 | 78.15690 | -178.70763  | -160.85079  | 879.56899   | 1 |
| 3717 | O | 61.74400 | 44.02380 | 79.23190 | 668.96290   | 409.43745   | 92.06977    | 1 |
| 3718 | O | 61.55900 | 42.43480 | 77.70390 | 607.49542   | -496.86289  | -87.77135   | 1 |
| 3719 | N | 68.09800 | 39.69880 | 83.86190 | 571.61285   | 349.91433   | 513.31374   | 1 |
| 3720 | H | 68.31400 | 38.85080 | 84.42290 | 910.08563   | 2169.10908  | 2089.24296  | 1 |
| 3721 | H | 68.24600 | 39.59180 | 82.83790 | 1776.01328  | -2241.62595 | 1311.15071  | 1 |
| 3722 | H | 67.12500 | 40.02180 | 84.03590 | 1021.37160  | 1012.12330  | -2798.32677 | 1 |
| 3723 | C | 68.95200 | 40.75780 | 84.30590 | 777.55891   | 146.67247   | 453.14493   | 1 |
| 3724 | H | 68.94300 | 40.82480 | 85.38390 | 1946.09249  | 226.04804   | 2461.67677  | 1 |
| 3725 | C | 70.47100 | 40.56280 | 83.91090 | -111.61165  | 613.31428   | 665.46182   | 1 |
| 3726 | H | 70.98000 | 41.53880 | 84.06090 | 2031.28577  | 2399.19909  | -126.28571  | 1 |
| 3727 | H | 70.47900 | 40.45980 | 82.80490 | 230.72473   | -2499.99811 | -1896.04900 | 1 |
| 3728 | C | 71.15500 | 39.33080 | 84.51890 | -126.72152  | -755.37306  | 494.77692   | 1 |
| 3729 | H | 72.17500 | 39.10180 | 84.14190 | 2817.21167  | -1316.06727 | 479.07368   | 1 |
| 3730 | H | 70.62200 | 38.43880 | 84.12690 | 2586.76849  | 178.09807   | -1781.89115 | 1 |
| 3731 | C | 71.32300 | 39.38980 | 86.03290 | 463.17499   | 681.60177   | -390.30625  | 1 |
| 3732 | H | 70.30800 | 39.45380 | 86.48090 | 140.17274   | -556.15974  | -3093.42273 | 1 |
| 3733 | H | 71.82700 | 40.34380 | 86.29990 | -1194.98471 | 1307.19899  | 2600.28240  | 1 |
| 3734 | C | 71.99000 | 38.13380 | 86.56490 | 192.57395   | -856.97157  | 244.87956   | 1 |
| 3735 | H | 71.54000 | 37.18180 | 86.20890 | 2223.30287  | -2111.73266 | 704.08501   | 1 |
| 3736 | H | 73.02200 | 38.05280 | 86.16090 | -2223.17803 | -1828.22959 | 1270.15048  | 1 |
| 3737 | N | 72.01700 | 38.08680 | 88.06190 | -231.46637  | 312.51116   | 749.28792   | 1 |
| 3738 | H | 72.40100 | 38.94980 | 88.49690 | -1219.09390 | 2187.79300  | -1904.10033 | 1 |
| 3739 | H | 71.06600 | 37.95380 | 88.46190 | -1435.97863 | -1999.74162 | -1958.88362 | 1 |
| 3740 | H | 72.60700 | 37.30680 | 88.41590 | 2885.33725  | 1136.02598  | -531.50744  | 1 |
| 3741 | C | 68.42100 | 42.10180 | 83.76190 | -828.88752  | -98.95561   | 366.88455   | 1 |
| 3742 | O | 67.82500 | 42.17680 | 82.71690 | -522.37256  | -577.22668  | -132.52735  | 1 |
| 3743 | N | 68.61900 | 43.27580 | 84.43490 | -646.96390  | 541.01008   | -37.65773   | 1 |
| 3744 | H | 69.20800 | 43.27780 | 85.23890 | 2269.17026  | 2048.11863  | 744.51504   | 1 |
| 3745 | C | 67.99400 | 44.54780 | 83.99690 | 242.27881   | 241.13978   | -845.34229  | 1 |
| 3746 | H | 68.34000 | 44.71780 | 82.98890 | 859.63306   | -1423.90944 | -2670.53162 | 1 |
| 3747 | H | 66.91700 | 44.46680 | 83.96490 | -771.66451  | -605.82432  | -2989.27031 | 1 |
| 3748 | C | 68.37200 | 45.68480 | 84.92590 | 184.66813   | -321.36860  | 833.10918   | 1 |
| 3749 | O | 68.20000 | 46.83880 | 84.64490 | -682.82653  | -368.19143  | 147.68288   | 1 |
| 3750 | N | 68.83800 | 45.43480 | 86.17690 | -151.80695  | 593.35009   | -581.00139  | 1 |
| 3751 | H | 69.14100 | 44.52880 | 86.46290 | 2037.25410  | 2010.44992  | 1306.10606  | 1 |
| 3752 | C | 69.04600 | 46.53980 | 87.06590 | -543.62316  | -345.00075  | -645.67743  | 1 |
| 3753 | H | 68.12300 | 47.09580 | 87.14390 | 66.33524    | -2802.41070 | 1428.39775  | 1 |
| 3754 | C | 69.42500 | 45.95680 | 88.48290 | -272.01223  | -709.62501  | -503.87766  | 1 |
| 3755 | H | 69.61000 | 46.79780 | 89.18490 | -409.90894  | 2764.32361  | -1445.23903 | 1 |
| 3756 | H | 70.26400 | 45.23680 | 88.37490 | 2379.73334  | 927.90655   | 1836.86822  | 1 |
| 3757 | N | 68.12900 | 45.25980 | 90.58990 | 460.74564   | 311.05029   | -635.32154  | 1 |
| 3758 | H | 68.44200 | 46.05880 | 91.10290 | -330.13030  | 2963.30336  | 1004.02859  | 1 |
| 3759 | C | 68.28000 | 45.18480 | 89.23290 | 519.54692   | 329.33351   | -673.09839  | 1 |
| 3760 | C | 67.11100 | 44.45380 | 90.92790 | 644.40650   | -337.95750  | 549.52342   | 1 |
| 3761 | H | 66.88800 | 44.18780 | 91.96090 | 1809.78404  | 2565.69366  | -200.30982  | 1 |
| 3762 | N | 66.50500 | 43.97780 | 89.88790 | -540.84101  | 466.07973   | -450.48082  | 1 |
| 3763 | C | 67.24500 | 44.40280 | 88.80090 | 233.82681   | 632.05969   | 614.22844   | 1 |
| 3764 | H | 67.06100 | 44.12980 | 87.76890 | 2200.32966  | 771.33471   | -2112.30168 | 1 |
| 3765 | C | 70.13100 | 47.50080 | 86.71590 | 173.45819   | 439.65766   | -779.78484  | 1 |
| 3766 | O | 69.95600 | 48.68880 | 86.84090 | 222.39656   | -627.13672  | 425.28406   | 1 |
| 3767 | N | 71.22300 | 46.97380 | 86.14590 | 204.60913   | 810.01953   | 121.14355   | 1 |
| 3768 | H | 71.30800 | 45.98380 | 86.05590 | 1395.58742  | -1035.56346 | 2622.62660  | 1 |
| 3769 | C | 72.34500 | 47.79380 | 85.73390 | 660.80815   | 628.31392   | 2.28335     | 1 |
| 3770 | H | 72.45100 | 48.61880 | 86.42290 | -1545.53051 | 576.21836   | -2679.09202 | 1 |
| 3771 | C | 73.65200 | 47.05680 | 85.70090 | -425.79057  | 48.13732    | 804.88272   | 1 |
| 3772 | H | 73.55600 | 46.00080 | 85.36790 | 3039.25537  | 630.53926   | -513.39387  | 1 |
| 3773 | H | 74.35000 | 47.50180 | 84.95990 | -1972.72698 | 1038.17948  | -2220.08060 | 1 |
| 3774 | C | 74.30700 | 47.04680 | 87.09390 | 480.53013   | 151.83766   | 759.92574   | 1 |
| 3775 | H | 74.48500 | 48.04780 | 87.54190 | 2370.68197  | 2029.45804  | -399.24092  | 1 |
| 3776 | H | 75.34400 | 46.64680 | 87.06490 | 1467.22559  | -1259.41518 | 2481.80352  | 1 |

|      |   |          |          |          |             |             |             |   |
|------|---|----------|----------|----------|-------------|-------------|-------------|---|
| 3777 | C | 73.53900 | 46.29480 | 88.22990 | 58.71735    | 865.85843   | 279.80790   | 1 |
| 3778 | O | 73.14300 | 46.94180 | 89.21590 | 700.56881   | -336.87543  | -139.08814  | 1 |
| 3779 | N | 73.26100 | 44.98580 | 88.05190 | -505.79474  | 159.24044   | -656.87629  | 1 |
| 3780 | H | 73.59700 | 44.45680 | 87.27190 | 3144.97068  | 8.48997     | -85.51932   | 1 |
| 3781 | H | 72.71800 | 44.56680 | 88.77890 | 2893.42752  | 214.46368   | -1216.67940 | 1 |
| 3782 | C | 72.00600 | 48.49580 | 84.37690 | -652.05618  | 177.10620   | -612.29661  | 1 |
| 3783 | O | 72.38900 | 49.64980 | 84.14890 | 350.99120   | 170.81571   | -686.47971  | 1 |
| 3784 | N | 71.16500 | 47.88080 | 83.49290 | -302.53106  | -766.33903  | -184.04277  | 1 |
| 3785 | H | 70.90700 | 46.92780 | 83.63290 | 364.44118   | -1764.43515 | 2579.18155  | 1 |
| 3786 | C | 70.59400 | 48.62080 | 82.36290 | -862.50171  | -289.28886  | -62.07866   | 1 |
| 3787 | H | 71.41900 | 49.01280 | 81.78590 | 1036.01167  | 2208.48577  | -1986.83081 | 1 |
| 3788 | C | 69.70100 | 47.63480 | 81.51590 | -164.55527  | -344.16843  | -828.20327  | 1 |
| 3789 | H | 69.09700 | 47.05380 | 82.24590 | 658.45871   | -2145.97582 | 2204.41515  | 1 |
| 3790 | H | 69.01800 | 48.11480 | 80.78390 | 2985.10277  | -664.84523  | 738.49069   | 1 |
| 3791 | C | 70.56200 | 46.67680 | 80.62690 | 283.54917   | 211.53191   | 840.41961   | 1 |
| 3792 | H | 71.33500 | 46.24680 | 81.29890 | -1916.84059 | 822.55660   | -2355.28109 | 1 |
| 3793 | H | 71.11300 | 47.16180 | 79.79190 | -944.70943  | -446.17113  | 2967.60537  | 1 |
| 3794 | C | 69.74500 | 45.52780 | 80.02090 | 524.29088   | -391.76342  | 634.89487   | 1 |
| 3795 | H | 69.31500 | 44.92580 | 80.84990 | -1229.57383 | 1844.48205  | 2232.54572  | 1 |
| 3796 | H | 70.38800 | 44.89380 | 79.37490 | 1015.63131  | -780.23833  | -2873.66446 | 1 |
| 3797 | C | 68.59400 | 45.99380 | 79.11190 | -663.46686  | -12.73768   | -625.38027  | 1 |
| 3798 | H | 67.85700 | 46.48980 | 79.77890 | 2253.08905  | -497.15486  | -2138.84385 | 1 |
| 3799 | H | 68.97400 | 46.63180 | 78.28490 | 916.62625   | -2520.24030 | 1645.11743  | 1 |
| 3800 | N | 68.02900 | 44.78280 | 78.47990 | -646.67135  | 411.61989   | 353.63473   | 1 |
| 3801 | H | 67.98800 | 44.08980 | 79.25490 | 456.55696   | -1691.11499 | 2613.41005  | 1 |
| 3802 | H | 67.10500 | 44.86980 | 78.00990 | 1932.75723  | 1360.21106  | 2076.65635  | 1 |
| 3803 | H | 68.67200 | 44.54580 | 77.69790 | 417.66651   | 2948.47236  | 1015.03285  | 1 |
| 3804 | C | 69.71700 | 49.79980 | 82.79390 | -617.67290  | -324.69073  | 586.94729   | 1 |
| 3805 | O | 69.79800 | 50.86580 | 82.22390 | 540.16093   | 474.80293   | -326.21401  | 1 |
| 3806 | N | 68.85600 | 49.66080 | 83.84290 | 594.48378   | 432.66991   | -414.79883  | 1 |
| 3807 | H | 68.79800 | 48.77280 | 84.29290 | -978.53363  | 2663.26302  | -1359.31167 | 1 |
| 3808 | C | 68.00000 | 50.77580 | 84.28590 | 715.14807   | -556.17579  | 103.35727   | 1 |
| 3809 | H | 67.57400 | 51.25780 | 83.41790 | 2428.98298  | 1120.09530  | 1656.39803  | 1 |
| 3810 | C | 66.81200 | 50.11480 | 85.12790 | -332.12868  | -304.81920  | 792.60759   | 1 |
| 3811 | H | 67.22400 | 49.50880 | 85.96190 | -139.30877  | 1651.25559  | -2674.35493 | 1 |
| 3812 | H | 66.27300 | 50.96480 | 85.59790 | -1694.81756 | 919.65983   | 2485.96972  | 1 |
| 3813 | C | 65.87200 | 49.30880 | 84.17590 | 395.52658   | 651.74012   | -500.24449  | 1 |
| 3814 | H | 66.45800 | 48.61780 | 83.53290 | -1809.92321 | 376.01599   | 2545.78400  | 1 |
| 3815 | H | 65.40700 | 50.13980 | 83.60490 | -2338.21175 | -441.51441  | -2058.16838 | 1 |
| 3816 | C | 64.58100 | 48.69080 | 84.76490 | 226.48407   | 674.72310   | 570.00413   | 1 |
| 3817 | H | 63.91200 | 48.26980 | 83.98490 | -2066.60647 | -2145.83371 | -1011.31678 | 1 |
| 3818 | H | 64.00700 | 49.44380 | 85.34690 | 2912.66198  | 1184.58333  | 106.71804   | 1 |
| 3819 | N | 64.98200 | 47.51680 | 85.61290 | -664.91099  | 244.64166   | -459.03826  | 1 |
| 3820 | H | 64.97100 | 46.61780 | 85.17490 | -2236.99295 | 368.58991   | 2181.33680  | 1 |
| 3821 | C | 64.91300 | 47.44980 | 86.91190 | 515.92537   | 620.47959   | -424.59050  | 1 |
| 3822 | N | 65.22000 | 46.31280 | 87.50190 | 290.27672   | -635.12157  | -474.37570  | 1 |
| 3823 | H | 65.23700 | 45.48880 | 86.93590 | -2931.03971 | -12.51396   | 1143.27417  | 1 |
| 3824 | H | 64.79200 | 46.14780 | 88.39090 | -219.68945  | 1131.84790  | 2927.26546  | 1 |
| 3825 | N | 64.55700 | 48.39180 | 87.74590 | 366.70747   | 732.70913   | 203.31074   | 1 |
| 3826 | H | 64.32200 | 49.30080 | 87.40390 | 1717.53574  | -1465.36163 | 2191.12129  | 1 |
| 3827 | H | 64.48300 | 48.15980 | 88.71590 | 896.89385   | 606.79751   | 2953.91341  | 1 |
| 3828 | C | 68.76300 | 51.77380 | 85.17190 | -285.50188  | 631.16787   | -592.93069  | 1 |
| 3829 | O | 68.31700 | 52.89480 | 85.38790 | 455.07951   | -469.12633  | -443.22720  | 1 |
| 3830 | N | 69.99200 | 51.44480 | 85.66490 | 3.21938     | -338.54617  | 773.33590   | 1 |
| 3831 | H | 70.22400 | 50.48180 | 85.78290 | -2461.25588 | 946.01213   | -1716.24788 | 1 |
| 3832 | C | 71.03900 | 52.33780 | 86.14090 | -581.44329  | 507.81909   | 485.27773   | 1 |
| 3833 | H | 70.60600 | 52.99280 | 86.88290 | -1990.57360 | -1242.27221 | -2095.85370 | 1 |
| 3834 | C | 72.06500 | 51.49980 | 86.96290 | 573.91930   | -554.52735  | 441.09757   | 1 |
| 3835 | H | 72.56500 | 50.79680 | 86.26290 | -1932.81945 | 2229.60763  | -1091.46003 | 1 |
| 3836 | H | 71.46100 | 50.99980 | 87.75090 | 560.37078   | 3084.03253  | -270.10028  | 1 |
| 3837 | C | 73.17300 | 52.34480 | 87.63990 | 60.06995    | 701.82141   | -579.04172  | 1 |
| 3838 | H | 73.64300 | 52.97080 | 86.85090 | 1255.68737  | -183.46375  | 2878.85681  | 1 |

|      |   |          |          |          |             |             |             |   |
|------|---|----------|----------|----------|-------------|-------------|-------------|---|
| 3839 | H | 74.04000 | 51.75980 | 88.01390 | 319.95097   | 2014.62973  | 2395.22956  | 1 |
| 3840 | C | 72.66500 | 53.24480 | 88.79790 | -478.15527  | 563.67583   | 533.93642   | 1 |
| 3841 | H | 72.29600 | 54.16380 | 88.29490 | -1899.60117 | -2176.04413 | 1246.82540  | 1 |
| 3842 | H | 71.81600 | 52.78380 | 89.34490 | -611.93222  | 2480.08668  | -1836.55526 | 1 |
| 3843 | C | 73.72900 | 53.65480 | 89.76990 | 779.41680   | -154.22984  | 447.40765   | 1 |
| 3844 | H | 74.54200 | 54.24280 | 89.29390 | -2182.45431 | -1070.66177 | 1997.19874  | 1 |
| 3845 | H | 74.15700 | 52.71680 | 90.18490 | -258.53165  | 184.47061   | 3130.07319  | 1 |
| 3846 | N | 73.08500 | 54.51480 | 90.80690 | -312.61414  | -447.45925  | 643.99139   | 1 |
| 3847 | H | 72.42900 | 53.95380 | 91.38690 | 1690.89145  | -1863.86110 | -1888.15628 | 1 |
| 3848 | H | 72.53100 | 55.23180 | 90.29690 | 245.16499   | 3099.80847  | 478.86093   | 1 |
| 3849 | H | 73.73600 | 55.06480 | 91.40390 | 2155.19886  | -2109.17509 | 897.06441   | 1 |
| 3850 | C | 71.68500 | 53.15880 | 85.00390 | 623.75668   | -425.37872  | -511.30378  | 1 |
| 3851 | O | 71.94000 | 54.39380 | 85.13790 | 210.32796   | -64.02608   | 758.47877   | 1 |
| 3852 | N | 72.06400 | 52.55680 | 83.85790 | -512.68802  | -561.07426  | 367.44925   | 1 |
| 3853 | H | 72.02800 | 51.56080 | 83.83890 | -1340.09802 | -2231.07034 | -1767.67889 | 1 |
| 3854 | C | 72.45900 | 53.18580 | 82.59290 | 272.44450   | 717.63508   | 492.16348   | 1 |
| 3855 | H | 73.31700 | 53.82280 | 82.75190 | -2566.36552 | 740.82608   | -1662.27885 | 1 |
| 3856 | C | 72.73700 | 52.17980 | 81.49090 | -525.34461  | -458.00046  | 587.96226   | 1 |
| 3857 | H | 73.16400 | 52.69180 | 80.60190 | -869.76759  | -2305.19100 | -1956.48282 | 1 |
| 3858 | H | 73.43100 | 51.39180 | 81.85490 | 1353.06864  | 498.04678   | -2796.31559 | 1 |
| 3859 | H | 71.81100 | 51.66480 | 81.15690 | -241.38724  | 2448.10649  | -1961.30901 | 1 |
| 3860 | C | 71.42300 | 54.10280 | 82.09390 | -689.97708  | -585.91715  | 109.92600   | 1 |
| 3861 | O | 71.72400 | 55.20980 | 81.62890 | -552.83839  | -246.67264  | 507.09915   | 1 |
| 3862 | N | 70.15100 | 53.68580 | 82.18190 | -342.29331  | 458.75259   | -620.52691  | 1 |
| 3863 | H | 69.93300 | 52.74080 | 82.41190 | -2053.05600 | -911.11173  | 2202.96680  | 1 |
| 3864 | C | 69.05200 | 54.61880 | 81.81290 | -661.84217  | 377.23300   | 501.10998   | 1 |
| 3865 | H | 69.27300 | 54.93580 | 80.80490 | 2243.27517  | 930.64832   | -1999.95911 | 1 |
| 3866 | C | 67.72000 | 53.76380 | 81.88590 | 639.20273   | -551.70776  | 344.22291   | 1 |
| 3867 | H | 67.86000 | 52.87180 | 81.23890 | -2063.73426 | -2288.81104 | 632.90689   | 1 |
| 3868 | H | 67.52600 | 53.54180 | 82.95690 | -1559.68592 | -2705.88566 | 379.19502   | 1 |
| 3869 | C | 66.42000 | 54.44080 | 81.37090 | 430.20625   | -46.35091   | -802.63639  | 1 |
| 3870 | H | 66.26400 | 55.30580 | 82.05090 | -681.97645  | -583.37952  | 3015.42744  | 1 |
| 3871 | C | 66.51600 | 54.88780 | 79.91790 | -173.14037  | -434.96732  | 782.48121   | 1 |
| 3872 | H | 67.34800 | 55.61980 | 79.84090 | -803.72996  | -2374.21637 | -1901.40501 | 1 |
| 3873 | H | 66.83700 | 54.05780 | 79.25390 | 1898.90846  | 2069.68757  | -1417.30952 | 1 |
| 3874 | H | 65.61300 | 55.35880 | 79.47290 | -1667.41036 | -79.12497   | 2666.77861  | 1 |
| 3875 | C | 65.08700 | 53.64980 | 81.60090 | -731.35607  | 301.24535   | -453.67448  | 1 |
| 3876 | H | 64.19400 | 54.26480 | 81.35690 | -2511.54906 | 1572.20663  | 1057.59817  | 1 |
| 3877 | H | 65.13500 | 52.68680 | 81.04990 | -595.74175  | -3073.77495 | -308.58642  | 1 |
| 3878 | H | 65.04700 | 53.31080 | 82.65790 | -2822.71283 | -1352.70024 | 317.36508   | 1 |
| 3879 | C | 68.94000 | 55.86580 | 82.65390 | -70.47272   | -828.70885  | 373.79973   | 1 |
| 3880 | O | 68.94800 | 56.97480 | 82.06590 | -446.80757  | 137.32904   | 636.49899   | 1 |
| 3881 | N | 68.95500 | 55.70480 | 84.03490 | 279.57794   | -554.94538  | 571.44036   | 1 |
| 3882 | H | 68.90000 | 54.78480 | 84.41390 | 1046.08587  | -532.20686  | 2919.02149  | 1 |
| 3883 | C | 69.01700 | 56.76980 | 84.97390 | -534.55167  | -434.10288  | 597.71247   | 1 |
| 3884 | H | 68.18000 | 57.41880 | 84.76190 | -1645.94003 | -1799.36271 | -1987.81324 | 1 |
| 3885 | C | 68.98700 | 56.10080 | 86.37390 | 385.92827   | 769.98546   | -299.38731  | 1 |
| 3886 | H | 67.97000 | 55.65380 | 86.34790 | 1889.06635  | 1409.96097  | 2083.66615  | 1 |
| 3887 | H | 69.84200 | 55.41280 | 86.55090 | -1619.21534 | 815.70040   | 2571.18664  | 1 |
| 3888 | C | 69.01600 | 57.12980 | 87.55390 | -623.59984  | 585.04799   | 316.69085   | 1 |
| 3889 | H | 68.64300 | 58.10980 | 87.18590 | 2090.21703  | -1164.78809 | -2042.66681 | 1 |
| 3890 | H | 70.04000 | 57.51080 | 87.75690 | 2155.28233  | 1395.29939  | -1818.27499 | 1 |
| 3891 | C | 68.28500 | 56.64680 | 88.80690 | -56.65648   | -649.82734  | -637.15420  | 1 |
| 3892 | H | 67.27800 | 56.32580 | 88.46590 | -516.46076  | -2477.12087 | -1869.58998 | 1 |
| 3893 | H | 68.78000 | 55.77180 | 89.27990 | -2708.29037 | -130.47564  | 1595.73357  | 1 |
| 3894 | C | 68.18300 | 57.76180 | 89.88990 | -301.37460  | -720.47852  | 470.67511   | 1 |
| 3895 | H | 67.70500 | 58.60680 | 89.34890 | -1411.07974 | -1846.54891 | 2120.69265  | 1 |
| 3896 | H | 69.18300 | 58.07080 | 90.26390 | 2505.33603  | -21.34407   | 1902.90884  | 1 |
| 3897 | N | 67.28600 | 57.24180 | 90.94090 | -427.52308  | -725.09425  | -64.30115   | 1 |
| 3898 | H | 67.23400 | 57.85680 | 91.77790 | -2217.36352 | 404.32433   | -2195.00503 | 1 |
| 3899 | H | 66.34800 | 56.94180 | 90.60490 | 2024.90662  | 1892.46171  | -1488.81432 | 1 |
| 3900 | H | 67.76700 | 56.37380 | 91.25190 | 2451.35277  | -664.42586  | 1856.78058  | 1 |

|      |   |          |          |          |             |             |             |   |
|------|---|----------|----------|----------|-------------|-------------|-------------|---|
| 3901 | C | 70.26400 | 57.65280 | 84.87290 | 243.27956   | -474.74816  | -739.51352  | 1 |
| 3902 | O | 70.14300 | 58.87780 | 84.98790 | -350.36558  | 642.74227   | -296.23228  | 1 |
| 3903 | N | 71.49100 | 57.15780 | 84.71690 | 525.38516   | -576.92895  | 322.17342   | 1 |
| 3904 | H | 71.63100 | 56.17080 | 84.69590 | 192.96560   | -1746.91109 | -2609.46204 | 1 |
| 3905 | C | 72.71900 | 57.94580 | 84.52690 | -330.22362  | 621.77168   | 579.48541   | 1 |
| 3906 | H | 72.79500 | 58.56780 | 85.40690 | -1952.93453 | 2422.54589  | -464.26757  | 1 |
| 3907 | C | 74.01800 | 57.10780 | 84.51390 | -88.98608   | 856.89754   | 298.76258   | 1 |
| 3908 | H | 74.13900 | 56.57280 | 83.54790 | 1097.55944  | -2284.88143 | -1863.57355 | 1 |
| 3909 | O | 74.08600 | 56.29880 | 85.65490 | -367.30544  | -694.24777  | 82.06081    | 1 |
| 3910 | H | 73.52300 | 55.52680 | 85.55590 | 2455.66144  | -868.21927  | -1764.69500 | 1 |
| 3911 | C | 75.19200 | 58.07780 | 84.76890 | 20.29836    | -909.46653  | -62.52683   | 1 |
| 3912 | H | 75.21200 | 58.81580 | 83.93790 | 3118.96169  | 66.95838    | -407.21098  | 1 |
| 3913 | H | 76.17100 | 57.55180 | 84.75690 | 2081.85373  | -2327.17554 | -385.18214  | 1 |
| 3914 | H | 75.14700 | 58.74180 | 85.65790 | 1243.13381  | 322.57344   | -2872.07085 | 1 |
| 3915 | C | 72.59200 | 58.81480 | 83.22690 | -330.46249  | 261.44679   | -808.63534  | 1 |
| 3916 | O | 73.01500 | 59.98280 | 83.18890 | -340.56796  | -20.52919   | -712.19326  | 1 |
| 3917 | N | 72.00200 | 58.27580 | 82.17390 | 268.31858   | -474.22387  | -644.81715  | 1 |
| 3918 | H | 71.78800 | 57.30480 | 82.23390 | 1714.59334  | 745.53730   | -2530.33002 | 1 |
| 3919 | C | 71.67800 | 58.96180 | 80.92490 | 197.77714   | -849.81669  | -264.85240  | 1 |
| 3920 | H | 72.62500 | 59.27280 | 80.50790 | 164.43913   | 870.78194   | 3018.76213  | 1 |
| 3921 | C | 71.09500 | 58.12480 | 79.80190 | -407.85511  | -507.48595  | -638.40678  | 1 |
| 3922 | H | 70.05700 | 57.80880 | 80.03990 | -2605.82938 | 1041.61792  | 1422.29096  | 1 |
| 3923 | O | 71.89200 | 56.91180 | 79.71290 | 480.89195   | 457.24105   | 428.13641   | 1 |
| 3924 | H | 71.56000 | 56.30780 | 80.38190 | -2278.15747 | 2128.42482  | -421.93905  | 1 |
| 3925 | C | 71.17200 | 58.81080 | 78.46790 | 509.30657   | 20.67635    | 756.06237   | 1 |
| 3926 | H | 72.19700 | 59.09080 | 78.14290 | 1932.07419  | 920.80895   | 2305.95456  | 1 |
| 3927 | H | 70.51100 | 59.70180 | 78.53390 | -407.85607  | 3061.21716  | 600.69058   | 1 |
| 3928 | H | 70.87600 | 58.20880 | 77.58290 | 637.30372   | -1572.87634 | -2649.17538 | 1 |
| 3929 | C | 70.83300 | 60.20580 | 81.08790 | -909.86007  | -35.78903   | -48.21613   | 1 |
| 3930 | O | 71.24500 | 61.35880 | 80.80990 | 298.18598   | -476.17007  | 554.95443   | 1 |
| 3931 | N | 69.70300 | 59.95480 | 81.76090 | -226.13355  | -415.64329  | 699.12557   | 1 |
| 3932 | H | 69.43500 | 59.01180 | 81.94290 | -1315.49295 | 1570.02918  | 2388.03537  | 1 |
| 3933 | C | 68.79200 | 60.93480 | 82.26090 | -456.02518  | 37.45616    | -788.72624  | 1 |
| 3934 | H | 68.27700 | 61.41580 | 81.44290 | -286.12146  | 1164.47398  | 2908.66999  | 1 |
| 3935 | C | 67.64800 | 60.18880 | 82.90290 | 570.37181   | -682.81244  | -199.73525  | 1 |
| 3936 | H | 68.05500 | 59.43180 | 83.60690 | -1276.19407 | 2174.53921  | 1881.73700  | 1 |
| 3937 | C | 66.77000 | 61.10180 | 83.78390 | 326.57539   | 660.06675   | -537.69081  | 1 |
| 3938 | H | 65.86900 | 60.56480 | 84.14890 | 2409.09134  | 642.70293   | 1918.70740  | 1 |
| 3939 | H | 66.36600 | 61.97780 | 83.23390 | -1844.74327 | 2366.54682  | -945.83543  | 1 |
| 3940 | H | 67.30500 | 61.44380 | 84.69590 | -2707.66627 | 1602.04970  | -14.36530   | 1 |
| 3941 | C | 66.87700 | 59.43380 | 81.79990 | -552.19502  | -579.97955  | -436.06809  | 1 |
| 3942 | H | 65.98800 | 58.91880 | 82.22390 | 1821.96405  | -2564.38861 | 50.83576    | 1 |
| 3943 | H | 67.56900 | 58.76680 | 81.24290 | 2706.18772  | -1097.80482 | -1170.29860 | 1 |
| 3944 | H | 66.48400 | 60.21480 | 81.11490 | 1610.79832  | -15.96195   | -2702.46188 | 1 |
| 3945 | C | 69.33700 | 61.96280 | 83.14390 | 171.94929   | 749.49115   | -490.04842  | 1 |
| 3946 | O | 69.12900 | 63.14880 | 82.91090 | -217.41480  | -646.23898  | 398.41338   | 1 |
| 3947 | N | 70.16800 | 61.60980 | 84.15190 | 639.72837   | -179.72673  | 520.69012   | 1 |
| 3948 | H | 70.42600 | 60.68180 | 84.41090 | 574.47676   | -1720.67927 | 2570.49908  | 1 |
| 3949 | C | 70.81100 | 62.52780 | 85.05990 | 765.64765   | -88.77459   | 487.18964   | 1 |
| 3950 | H | 70.02500 | 63.10980 | 85.51790 | -1690.19238 | -1785.53545 | -1962.99238 | 1 |
| 3951 | C | 71.57800 | 61.78180 | 86.15290 | -646.68575  | 67.45467    | 639.29524   | 1 |
| 3952 | H | 72.12500 | 60.95180 | 85.65690 | -2582.64648 | 1101.73039  | -1419.27923 | 1 |
| 3953 | C | 72.63700 | 62.69880 | 86.91090 | 509.85807   | 454.90297   | -603.78725  | 1 |
| 3954 | H | 73.14200 | 62.11380 | 87.70790 | -1397.43705 | -1333.21994 | 2483.52985  | 1 |
| 3955 | H | 72.14800 | 63.58180 | 87.37590 | -35.65275   | 3117.99305  | -418.41898  | 1 |
| 3956 | H | 73.44600 | 62.89480 | 86.17490 | -1420.38108 | -1983.24603 | -1986.82636 | 1 |
| 3957 | C | 70.63500 | 61.17080 | 87.20590 | 553.34893   | 534.02336   | 489.97451   | 1 |
| 3958 | H | 69.64800 | 60.89180 | 86.77890 | -1578.04832 | 140.24373   | 2718.14669  | 1 |
| 3959 | H | 70.45800 | 61.96580 | 87.96190 | 2868.32007  | 896.40040   | 931.36058   | 1 |
| 3960 | C | 71.26700 | 59.95680 | 87.91890 | 85.39618    | -811.05417  | -407.85981  | 1 |
| 3961 | H | 70.48700 | 59.54080 | 88.59190 | -1870.51271 | -1676.22946 | -1894.64066 | 1 |
| 3962 | H | 71.59500 | 59.21580 | 87.15890 | -1924.64270 | -1979.66680 | 1508.27586  | 1 |

|      |   |          |          |          |             |             |             |   |
|------|---|----------|----------|----------|-------------|-------------|-------------|---|
| 3963 | H | 72.13800 | 60.22880 | 88.55390 | -2473.46250 | -76.71059   | 1942.76220  | 1 |
| 3964 | C | 71.66200 | 63.52580 | 84.35490 | 438.07441   | 633.69871   | -487.81940  | 1 |
| 3965 | O | 71.52800 | 64.71780 | 84.59990 | -443.34025  | -349.46283  | 552.22494   | 1 |
| 3966 | N | 72.44000 | 63.06280 | 83.35390 | -624.40211  | 557.05801   | -111.71691  | 1 |
| 3967 | H | 72.41000 | 62.08380 | 83.16990 | 386.38993   | -135.32627  | 3119.39351  | 1 |
| 3968 | C | 73.23300 | 63.90780 | 82.52590 | 365.35043   | -426.39720  | 718.43962   | 1 |
| 3969 | H | 73.88400 | 64.42880 | 83.21190 | 550.96647   | 1392.34146  | 2766.95635  | 1 |
| 3970 | C | 74.22100 | 63.07780 | 81.65290 | -146.04760  | 808.90844   | -394.70019  | 1 |
| 3971 | H | 73.76600 | 62.28180 | 81.02690 | -2505.44589 | -11.68796   | 1902.84800  | 1 |
| 3972 | H | 74.79000 | 62.50380 | 82.41590 | 2273.04631  | -1218.22742 | 1802.05678  | 1 |
| 3973 | C | 75.19500 | 63.90380 | 80.72890 | -542.81902  | 264.10424   | 683.40871   | 1 |
| 3974 | H | 74.55500 | 64.48980 | 80.03390 | -767.21379  | 2580.81773  | 1627.57152  | 1 |
| 3975 | C | 76.09000 | 64.93880 | 81.32490 | 14.20169    | -878.17541  | -245.06582  | 1 |
| 3976 | H | 76.90300 | 64.44380 | 81.89790 | 1439.76558  | -2322.83709 | 1558.75886  | 1 |
| 3977 | H | 75.62900 | 65.65480 | 82.03890 | -739.09741  | 2217.17861  | 2106.20043  | 1 |
| 3978 | H | 76.67100 | 65.48180 | 80.54890 | -1948.68896 | -2390.62720 | 621.07902   | 1 |
| 3979 | C | 76.03300 | 62.90280 | 79.89590 | -458.99115  | -255.15187  | 745.43655   | 1 |
| 3980 | H | 76.48300 | 62.22980 | 80.65690 | 2600.30754  | 1525.48479  | -899.73501  | 1 |
| 3981 | H | 76.84200 | 63.38880 | 79.30890 | 1497.07460  | -1397.33276 | 2388.40010  | 1 |
| 3982 | H | 75.43400 | 62.30680 | 79.17490 | 2301.56355  | -2144.06834 | -63.26486   | 1 |
| 3983 | C | 72.43700 | 64.90980 | 81.66490 | -222.19629  | 779.00499   | 418.60606   | 1 |
| 3984 | O | 72.81300 | 66.08780 | 81.57690 | -433.56174  | -600.34748  | -274.28881  | 1 |
| 3985 | N | 71.36300 | 64.44380 | 80.99590 | -324.41239  | 573.49571   | 527.76089   | 1 |
| 3986 | H | 71.19000 | 63.46780 | 81.10790 | 1198.28039  | 1442.96826  | 2525.90438  | 1 |
| 3987 | C | 70.42600 | 65.14580 | 80.24290 | -623.76666  | 556.66821   | 363.98716   | 1 |
| 3988 | H | 71.03900 | 65.71780 | 79.56190 | -2613.07726 | -1465.26358 | -960.75809  | 1 |
| 3989 | C | 69.50000 | 64.18580 | 79.47790 | 248.39544   | -8.29385    | 877.31518   | 1 |
| 3990 | H | 69.27400 | 63.33580 | 80.15590 | 17.57965    | 1064.64299  | -2960.48180 | 1 |
| 3991 | C | 68.14600 | 64.84580 | 79.02290 | 719.99373   | -206.78992  | -519.90188  | 1 |
| 3992 | H | 67.51200 | 65.16380 | 79.87790 | 860.76847   | -3026.02063 | 22.42768    | 1 |
| 3993 | H | 67.58600 | 64.15180 | 78.35890 | -522.75864  | 2584.60160  | -1716.03735 | 1 |
| 3994 | H | 68.45800 | 65.75480 | 78.46590 | -660.30959  | -2856.39409 | 1141.59112  | 1 |
| 3995 | C | 70.28000 | 63.43880 | 78.39190 | -471.10765  | -680.19178  | 383.20717   | 1 |
| 3996 | H | 70.44600 | 64.25280 | 77.65390 | -148.63059  | 2023.65396  | -2404.36266 | 1 |
| 3997 | H | 71.27200 | 63.03780 | 78.69290 | -1939.54892 | 2067.38678  | -1364.65679 | 1 |
| 3998 | C | 69.41000 | 62.39680 | 77.58790 | 27.87344    | 617.60138   | 670.25563   | 1 |
| 3999 | H | 68.96100 | 61.73580 | 78.35990 | -2867.19630 | 554.91047   | -1170.25039 | 1 |
| 4000 | H | 68.57700 | 62.83380 | 76.99690 | 977.52840   | -2604.20158 | 1469.96550  | 1 |
| 4001 | H | 70.16900 | 61.86880 | 76.97190 | -1503.18671 | -2078.04153 | -1822.19629 | 1 |
| 4002 | C | 69.70600 | 66.19980 | 80.98090 | 615.56666   | -32.45129   | -671.91935  | 1 |
| 4003 | O | 69.55800 | 67.36380 | 80.51690 | 444.73037   | 316.86583   | 570.47189   | 1 |
| 4004 | N | 69.14000 | 65.92480 | 82.22190 | -560.34921  | 575.99168   | 258.67863   | 1 |
| 4005 | H | 69.22700 | 64.99080 | 82.55990 | -2543.67384 | -1684.65722 | -768.03624  | 1 |
| 4006 | C | 68.75000 | 66.92180 | 83.19690 | -549.25090  | -557.48047  | 467.96364   | 1 |
| 4007 | H | 67.89500 | 67.41080 | 82.75390 | -1202.66214 | 2108.85369  | 2001.14120  | 1 |
| 4008 | C | 68.34200 | 66.10180 | 84.47590 | 406.38210   | -489.19738  | 653.44511   | 1 |
| 4009 | H | 68.06800 | 66.67780 | 85.38590 | 743.46099   | -750.85036  | -2963.39598 | 1 |
| 4010 | H | 69.24300 | 65.50480 | 84.73090 | -2010.00971 | -2073.72596 | -1248.09769 | 1 |
| 4011 | C | 67.11800 | 65.15880 | 84.29590 | -81.02934   | -73.17877   | -905.27903  | 1 |
| 4012 | H | 67.27600 | 64.54180 | 83.38490 | -1070.74360 | -2563.83302 | -1475.97244 | 1 |
| 4013 | C | 67.17400 | 64.17980 | 85.52090 | 463.14448   | -513.33840  | -594.50137  | 1 |
| 4014 | H | 66.20600 | 63.64480 | 85.41390 | 2399.23451  | 1929.74753  | -646.50944  | 1 |
| 4015 | H | 67.27400 | 64.75380 | 86.46590 | -2867.84577 | 1245.42519  | -350.14706  | 1 |
| 4016 | H | 68.06800 | 63.52580 | 85.43190 | 1296.50617  | -786.12915  | -2756.68260 | 1 |
| 4017 | C | 65.84000 | 65.91780 | 84.21390 | 870.64524   | 268.71178   | -34.95503   | 1 |
| 4018 | H | 65.86700 | 66.56680 | 83.31290 | 2138.08734  | -2069.27399 | -1022.21029 | 1 |
| 4019 | H | 64.97100 | 65.22780 | 84.18490 | 2231.15667  | -824.78726  | -2059.09983 | 1 |
| 4020 | H | 65.68500 | 66.60280 | 85.07490 | -1727.56287 | -1803.47867 | -1913.43080 | 1 |
| 4021 | C | 69.78900 | 67.93480 | 83.58990 | -666.59651  | 591.10016   | -194.16668  | 1 |
| 4022 | O | 69.52000 | 69.15080 | 83.59590 | -327.14884  | -500.18694  | 516.15297   | 1 |
| 4023 | N | 71.02500 | 67.45980 | 83.92190 | -668.40418  | 452.16205   | -247.90648  | 1 |
| 4024 | H | 71.29900 | 66.50280 | 83.86090 | 1266.76997  | 2405.96981  | 1582.66527  | 1 |

|      |   |          |          |          |             |             |             |   |
|------|---|----------|----------|----------|-------------|-------------|-------------|---|
| 4025 | C | 72.04000 | 68.25880 | 84.44690 | 15.43303    | 422.10510   | 808.10897   | 1 |
| 4026 | H | 71.72900 | 68.65180 | 85.40390 | -1702.36420 | 688.91380   | 2554.52151  | 1 |
| 4027 | C | 73.35000 | 67.44380 | 84.73490 | -744.59771  | -367.26277  | 377.01897   | 1 |
| 4028 | H | 74.10400 | 68.14980 | 85.14490 | 2988.90615  | -697.01464  | -691.98039  | 1 |
| 4029 | H | 73.20500 | 66.70780 | 85.55390 | -703.87624  | -2780.78880 | 1292.28406  | 1 |
| 4030 | H | 73.77200 | 66.98480 | 83.81490 | 2028.40491  | -2216.74908 | 932.64316   | 1 |
| 4031 | C | 72.37500 | 69.33780 | 83.44090 | -762.43527  | -335.32620  | -371.07923  | 1 |
| 4032 | O | 72.35400 | 70.52480 | 83.71590 | 535.09965   | 467.64694   | 344.38631   | 1 |
| 4033 | N | 72.52600 | 68.93380 | 82.15690 | 567.82762   | -253.64860  | 570.88218   | 1 |
| 4034 | H | 72.48400 | 67.96680 | 81.91890 | -311.17023  | 2478.09920  | -1913.22338 | 1 |
| 4035 | C | 72.88600 | 69.73780 | 81.06290 | 281.76155   | 528.84857   | -687.29951  | 1 |
| 4036 | H | 73.82700 | 70.20980 | 81.30690 | -2876.31137 | 100.50283   | -1270.81010 | 1 |
| 4037 | C | 73.15900 | 68.74380 | 79.88290 | 38.65303    | 903.87174   | -113.89831  | 1 |
| 4038 | H | 72.24600 | 68.13780 | 79.70290 | 2003.80494  | -786.29881  | -2294.49911 | 1 |
| 4039 | H | 74.00200 | 68.08380 | 80.18090 | -1457.38086 | 2589.07619  | -1034.86797 | 1 |
| 4040 | C | 73.42400 | 69.35880 | 78.57890 | 807.67268   | -421.78101  | -34.88021   | 1 |
| 4041 | C | 74.73300 | 69.62180 | 78.20490 | -887.19590  | -172.55521  | 120.66125   | 1 |
| 4042 | H | 75.61300 | 69.41980 | 78.79790 | 514.38192   | -2657.95822 | 1602.77746  | 1 |
| 4043 | C | 74.94800 | 70.16980 | 76.88990 | 506.85242   | -148.00777  | 743.40119   | 1 |
| 4044 | H | 75.94500 | 70.40780 | 76.54990 | -2057.27705 | -762.85986  | -2254.74659 | 1 |
| 4045 | C | 73.86900 | 70.43680 | 76.05490 | -115.11739  | -903.73521  | -38.23159   | 1 |
| 4046 | H | 74.11800 | 70.79380 | 75.06590 | -810.10216  | 2960.38401  | -691.43851  | 1 |
| 4047 | C | 72.34100 | 69.62080 | 77.69590 | -637.40370  | -2.52272    | -652.04384  | 1 |
| 4048 | H | 71.31700 | 69.47980 | 78.01090 | -913.71889  | 1686.08332  | 2494.08641  | 1 |
| 4049 | C | 72.56000 | 70.16080 | 76.43590 | -547.91257  | -660.70685  | -307.74874  | 1 |
| 4050 | H | 71.70500 | 70.39580 | 75.81990 | -2798.21263 | 423.81403   | 1374.26851  | 1 |
| 4051 | C | 71.85900 | 70.76280 | 80.73490 | 361.91530   | -606.37613  | -576.86767  | 1 |
| 4052 | O | 72.02600 | 71.98080 | 80.52490 | 251.12941   | 291.83528   | 689.48779   | 1 |
| 4053 | N | 70.56600 | 70.38080 | 80.67190 | -574.94779  | 539.68619   | -301.40694  | 1 |
| 4054 | H | 70.32800 | 69.41380 | 80.71090 | 1729.56689  | 2048.77939  | -1646.00352 | 1 |
| 4055 | C | 69.44000 | 71.27380 | 80.50690 | -831.09200  | 347.37310   | -141.66520  | 1 |
| 4056 | H | 69.51600 | 71.89380 | 79.62590 | -663.10323  | -2419.00002 | -1899.19963 | 1 |
| 4057 | C | 68.15900 | 70.43480 | 80.33790 | 507.21461   | -180.16149  | 736.02051   | 1 |
| 4058 | H | 67.91400 | 69.83780 | 81.24290 | -1462.49686 | 1425.98534  | 2392.88424  | 1 |
| 4059 | H | 68.37400 | 69.74180 | 79.49790 | 1822.66047  | 2229.26481  | -1267.48312 | 1 |
| 4060 | C | 66.92100 | 71.17580 | 80.05790 | -383.58289  | -227.95308  | -795.20599  | 1 |
| 4061 | C | 66.57200 | 71.44880 | 78.74590 | -795.50275  | 442.43117   | -53.67529   | 1 |
| 4062 | H | 67.31800 | 71.24980 | 77.98990 | 982.27208   | 1484.92119  | 2593.91150  | 1 |
| 4063 | C | 65.36200 | 72.05980 | 78.40290 | -424.62679  | 560.01409   | -580.97100  | 1 |
| 4064 | H | 65.06300 | 72.19480 | 77.37390 | 2881.47047  | 177.74285   | 1250.50455  | 1 |
| 4065 | C | 64.52500 | 72.43380 | 79.47390 | 287.06335   | -522.43045  | 690.00874   | 1 |
| 4066 | H | 63.62600 | 73.01480 | 79.32790 | -1612.45005 | 2071.34543  | 1734.28924  | 1 |
| 4067 | C | 66.02700 | 71.52980 | 81.08290 | -416.92943  | -447.70391  | 676.15239   | 1 |
| 4068 | H | 66.30100 | 71.35380 | 82.11290 | -3035.20177 | -817.83505  | -130.08575  | 1 |
| 4069 | C | 64.89600 | 72.27080 | 80.79890 | 306.78485   | 561.44746   | -649.70055  | 1 |
| 4070 | H | 64.14400 | 72.56780 | 81.51590 | 2267.31498  | -343.02556  | -2154.02936 | 1 |
| 4071 | C | 69.33500 | 72.26180 | 81.71990 | 787.55063   | -102.23205  | -448.06654  | 1 |
| 4072 | O | 69.08000 | 73.41680 | 81.52690 | -372.56696  | 694.58838   | 48.66286    | 1 |
| 4073 | N | 69.63000 | 71.85980 | 82.96790 | 433.03109   | -325.42850  | 647.49722   | 1 |
| 4074 | H | 69.70200 | 70.91080 | 83.26390 | -1650.72846 | -2672.16063 | -181.32662  | 1 |
| 4075 | C | 69.74000 | 72.75980 | 84.02890 | -875.54912  | -117.10418  | -226.16667  | 1 |
| 4076 | H | 68.80600 | 73.27580 | 84.19490 | 2218.07323  | -1064.37813 | 1960.98867  | 1 |
| 4077 | C | 69.97200 | 71.99480 | 85.34890 | -255.79290  | 521.70126   | 702.74376   | 1 |
| 4078 | H | 69.16700 | 71.24180 | 85.48590 | 1967.09899  | 1790.97782  | -1679.62681 | 1 |
| 4079 | H | 70.95100 | 71.47480 | 85.41890 | -258.16526  | -3132.40923 | -139.96202  | 1 |
| 4080 | H | 69.93600 | 72.73580 | 86.17590 | -1650.24808 | 1788.44499  | 1994.08426  | 1 |
| 4081 | C | 70.81600 | 73.85580 | 83.78590 | 299.93807   | 614.64045   | 603.07982   | 1 |
| 4082 | O | 70.62400 | 75.02280 | 84.15090 | -635.12172  | -331.96871  | -331.72942  | 1 |
| 4083 | N | 71.92800 | 73.46580 | 83.15890 | 219.79269   | 688.33212   | -436.53449  | 1 |
| 4084 | H | 71.88900 | 72.59580 | 82.67490 | -2318.58861 | -1320.12745 | -1667.22423 | 1 |
| 4085 | C | 73.00100 | 74.43080 | 82.80690 | -56.28492   | 505.89737   | -756.53874  | 1 |
| 4086 | H | 73.28100 | 74.87180 | 83.75190 | 560.35807   | -260.08162  | 3084.89588  | 1 |

|      |   |          |          |          |             |             |             |   |
|------|---|----------|----------|----------|-------------|-------------|-------------|---|
| 4087 | C | 74.19600 | 73.61780 | 82.23390 | -178.32623  | -426.60590  | -785.91231  | 1 |
| 4088 | H | 74.96200 | 74.36980 | 81.94790 | -90.42995   | 2301.01560  | -2143.68278 | 1 |
| 4089 | H | 73.88900 | 73.19180 | 81.25490 | -2496.61376 | 281.72810   | -1893.61433 | 1 |
| 4090 | S | 74.87400 | 72.35080 | 83.38990 | -391.10506  | 304.14548   | -256.40390  | 1 |
| 4091 | H | 73.67600 | 71.91480 | 83.75190 | 2085.04461  | -1803.58698 | 1515.87902  | 1 |
| 4092 | C | 72.62400 | 75.52980 | 81.86190 | -616.08198  | 158.70291   | 653.22843   | 1 |
| 4093 | O | 72.81800 | 76.70480 | 82.13490 | 782.67298   | -104.30276  | 13.08299    | 1 |
| 4094 | N | 71.91800 | 75.07780 | 80.72890 | -223.12259  | -529.41462  | -618.55376  | 1 |
| 4095 | H | 71.92300 | 74.09580 | 80.55290 | -2078.71397 | -2344.42619 | -284.32429  | 1 |
| 4096 | C | 71.54200 | 75.91280 | 79.63390 | 160.71277   | 284.92917   | -851.13911  | 1 |
| 4097 | H | 72.31800 | 76.64380 | 79.46390 | 687.85511   | 2637.49308  | 1571.21349  | 1 |
| 4098 | C | 71.62200 | 74.98880 | 78.37290 | -14.87462   | -544.45953  | -731.29581  | 1 |
| 4099 | H | 71.04500 | 75.42080 | 77.52690 | 546.99020   | 792.51684   | 2995.15359  | 1 |
| 4100 | H | 71.17500 | 73.99780 | 78.60090 | 1747.68890  | -1667.58371 | -2015.68209 | 1 |
| 4101 | C | 73.02200 | 74.78780 | 77.81290 | 67.32814    | 600.59950   | 682.78706   | 1 |
| 4102 | C | 73.70700 | 73.56580 | 77.87990 | 108.14474   | 662.31673   | -617.32671  | 1 |
| 4103 | H | 73.23900 | 72.61380 | 78.08190 | 2252.51218  | 599.02628   | 2113.19251  | 1 |
| 4104 | N | 74.94100 | 73.72080 | 77.23790 | 664.40130   | -435.37845  | -285.81253  | 1 |
| 4105 | H | 75.57100 | 73.04880 | 76.91690 | -2958.82831 | -154.63791  | -1058.13439 | 1 |
| 4106 | C | 75.03800 | 74.99780 | 76.86390 | 318.30645   | -448.54322  | 727.28329   | 1 |
| 4107 | C | 73.88500 | 75.72880 | 77.20590 | 101.30690   | -666.07712  | -614.43403  | 1 |
| 4108 | C | 73.84600 | 77.15180 | 77.05090 | 602.07279   | -458.97011  | 508.23793   | 1 |
| 4109 | H | 72.96800 | 77.73480 | 77.28890 | -102.26161  | 3138.63819  | 191.62225   | 1 |
| 4110 | C | 74.99200 | 77.74080 | 76.45190 | -384.88471  | -657.20590  | -501.39323  | 1 |
| 4111 | H | 74.97600 | 78.77380 | 76.13690 | 2077.72398  | 2362.45752  | -9.15197    | 1 |
| 4112 | C | 76.13500 | 75.64780 | 76.26290 | 273.95214   | 365.00384   | -789.41334  | 1 |
| 4113 | H | 77.00800 | 75.08280 | 75.96990 | -1844.42720 | -2080.93541 | -1471.74127 | 1 |
| 4114 | C | 76.07400 | 77.02980 | 76.04390 | 265.68115   | 714.65104   | 500.13841   | 1 |
| 4115 | H | 76.95300 | 77.55880 | 75.70590 | -2227.71763 | 1240.99214  | -1842.67167 | 1 |
| 4116 | C | 70.21200 | 76.64580 | 79.76090 | -791.09693  | 346.49207   | 292.50624   | 1 |
| 4117 | O | 70.11700 | 77.79280 | 79.22390 | -397.74122  | -250.32718  | 634.63805   | 1 |
| 4118 | N | 69.22300 | 76.15280 | 80.47990 | -738.81374  | 392.55939   | 112.79924   | 1 |
| 4119 | H | 69.32500 | 75.27080 | 80.93290 | -2383.06337 | 1963.14052  | 604.41252   | 1 |
| 4120 | C | 67.91700 | 76.79680 | 80.50690 | -228.98232  | -612.60296  | 635.40201   | 1 |
| 4121 | H | 67.50100 | 76.72480 | 79.51290 | -2652.48398 | 586.45764   | 1587.01682  | 1 |
| 4122 | C | 67.04200 | 75.89380 | 81.32190 | 253.12686   | -868.38801  | -115.23913  | 1 |
| 4123 | H | 67.50300 | 75.63980 | 82.29990 | 1794.50829  | -2443.81903 | -840.06832  | 1 |
| 4124 | H | 67.00500 | 74.91080 | 80.80590 | 2392.61939  | 1490.38827  | 1397.26214  | 1 |
| 4125 | C | 65.64000 | 76.49380 | 81.61290 | -712.02831  | -496.01506  | 280.06384   | 1 |
| 4126 | H | 65.63400 | 77.50380 | 82.07590 | -2855.05416 | -392.98280  | 1261.92571  | 1 |
| 4127 | C | 64.73900 | 76.55180 | 80.32490 | -185.66717  | -392.15166  | 801.99488   | 1 |
| 4128 | H | 64.91700 | 75.65380 | 79.69490 | 2031.57726  | -631.98670  | 2317.65245  | 1 |
| 4129 | H | 63.67100 | 76.57880 | 80.62790 | -3050.89579 | -760.90833  | -106.20553  | 1 |
| 4130 | H | 64.89500 | 77.50380 | 79.77390 | 1268.44632  | 2145.45816  | 1919.96860  | 1 |
| 4131 | C | 64.90600 | 75.60280 | 82.61490 | 217.91727   | 481.57359   | -743.00063  | 1 |
| 4132 | H | 65.60700 | 75.23780 | 83.39590 | -1776.92534 | 1897.96495  | 1771.57885  | 1 |
| 4133 | H | 64.05500 | 76.15680 | 83.06690 | 1742.36489  | -1253.92117 | -2300.01577 | 1 |
| 4134 | H | 64.60100 | 74.61180 | 82.21590 | 1329.07292  | -1922.97514 | 2105.69656  | 1 |
| 4135 | C | 67.88300 | 78.25880 | 80.97990 | -721.79164  | -420.42846  | -365.66070  | 1 |
| 4136 | O | 67.19700 | 79.02380 | 80.29190 | 491.88635   | 473.02935   | 397.38934   | 1 |
| 4137 | N | 68.52100 | 78.78280 | 82.02490 | -50.66107   | 833.81815   | -121.87301  | 1 |
| 4138 | C | 69.31500 | 77.97980 | 82.97190 | -774.94738  | 288.15534   | 384.54396   | 1 |
| 4139 | H | 68.96900 | 76.92580 | 83.03290 | -430.51626  | 2323.24255  | -2077.36036 | 1 |
| 4140 | H | 70.36000 | 78.03480 | 82.59890 | -123.70575  | -1711.17270 | 2637.19759  | 1 |
| 4141 | C | 68.47200 | 80.19080 | 82.39590 | 123.65519   | -846.88794  | -314.54923  | 1 |
| 4142 | H | 67.44000 | 80.42380 | 82.61490 | -718.05829  | -2317.42853 | -2003.03358 | 1 |
| 4143 | C | 69.25900 | 80.17180 | 83.75390 | -400.17499  | 590.16441   | -568.34580  | 1 |
| 4144 | H | 68.88300 | 80.87580 | 84.52690 | 2876.13069  | 1213.09254  | 393.07118   | 1 |
| 4145 | H | 70.32300 | 80.40280 | 83.53390 | 1018.20321  | 2831.75888  | -917.94886  | 1 |
| 4146 | C | 69.11600 | 78.74880 | 84.28590 | 826.15565   | 200.65177   | 329.63118   | 1 |
| 4147 | H | 69.94800 | 78.54280 | 84.99390 | 2720.23055  | 1575.50067  | -127.94379  | 1 |
| 4148 | H | 68.10900 | 78.61380 | 84.73490 | 1975.53506  | -1680.30383 | 1781.02962  | 1 |

|      |   |          |          |          |             |             |             |   |
|------|---|----------|----------|----------|-------------|-------------|-------------|---|
| 4149 | C | 69.05500 | 81.12380 | 81.23090 | 627.27813   | 121.76532   | 650.49701   | 1 |
| 4150 | O | 68.57200 | 82.24780 | 81.04590 | 358.18926   | 669.48263   | 217.07301   | 1 |
| 4151 | N | 70.09900 | 80.67380 | 80.54090 | -757.99160  | -237.76688  | 285.63601   | 1 |
| 4152 | H | 70.39500 | 79.77580 | 80.85690 | 1831.42459  | -1978.30896 | -1621.85199 | 1 |
| 4153 | C | 70.60700 | 81.42980 | 79.40390 | -215.14607  | 876.68391   | 128.79633   | 1 |
| 4154 | H | 70.77000 | 82.44380 | 79.73990 | -1946.65767 | -2362.23219 | 727.05515   | 1 |
| 4155 | C | 71.94100 | 80.76680 | 78.92290 | 439.12220   | -738.99675  | -304.14882  | 1 |
| 4156 | H | 71.86800 | 79.65880 | 78.87490 | 1433.13192  | 865.53009   | -2663.68481 | 1 |
| 4157 | H | 72.71000 | 80.96280 | 79.70090 | 2497.91656  | -1128.30750 | 1544.52622  | 1 |
| 4158 | C | 72.44600 | 81.21980 | 77.54890 | 551.45682   | 363.65370   | -628.57169  | 1 |
| 4159 | C | 73.03200 | 82.49780 | 77.40790 | 126.03326   | 887.00283   | -169.68381  | 1 |
| 4160 | H | 73.19700 | 83.12680 | 78.26990 | 2997.77976  | -929.91023  | -216.35544  | 1 |
| 4161 | C | 73.38000 | 82.91680 | 76.12890 | -268.62169  | 687.00284   | 536.02284   | 1 |
| 4162 | H | 73.80300 | 83.90780 | 76.04790 | 286.85084   | 3044.91548  | 737.85674   | 1 |
| 4163 | C | 73.21100 | 82.08580 | 74.99290 | -484.43244  | -749.27995  | 188.03130   | 1 |
| 4164 | O | 73.66500 | 82.54480 | 73.75290 | 658.54087   | -314.36535  | -301.87013  | 1 |
| 4165 | H | 74.19700 | 83.33680 | 73.85990 | -741.21548  | 2282.44509  | 2034.51966  | 1 |
| 4166 | C | 72.14500 | 80.45680 | 76.39290 | -380.39147  | -828.65090  | -9.54060    | 1 |
| 4167 | H | 71.53000 | 79.57280 | 76.46990 | -237.42891  | -3112.42521 | -393.27223  | 1 |
| 4168 | C | 72.59800 | 80.86680 | 75.14790 | 360.82114   | -783.09724  | -296.67797  | 1 |
| 4169 | H | 72.46700 | 80.20280 | 74.30690 | 2569.56100  | -1632.10586 | -794.86662  | 1 |
| 4170 | C | 69.60500 | 81.53480 | 78.26890 | -278.55029  | -734.90649  | 462.35613   | 1 |
| 4171 | O | 69.34000 | 82.63880 | 77.79490 | 698.00129   | -336.44272  | 152.40644   | 1 |
| 4172 | N | 68.89900 | 80.39980 | 77.87590 | 717.85149   | 441.77882   | 46.82945    | 1 |
| 4173 | H | 69.15900 | 79.51980 | 78.26490 | -1642.63553 | -2014.54850 | -1772.44720 | 1 |
| 4174 | C | 67.79400 | 80.35980 | 76.99690 | 794.35812   | -98.70473   | -436.69619  | 1 |
| 4175 | H | 68.02800 | 80.90180 | 76.09190 | -809.75792  | -1680.34789 | -2533.56455 | 1 |
| 4176 | C | 67.37900 | 78.88380 | 76.66290 | 784.30748   | 152.04994   | -439.53793  | 1 |
| 4177 | H | 67.35800 | 78.20080 | 77.53890 | 2473.25549  | 1467.80879  | 1275.44927  | 1 |
| 4178 | H | 66.31400 | 78.74980 | 76.37590 | 1805.91656  | -974.83447  | -2384.65707 | 1 |
| 4179 | C | 68.31100 | 78.32080 | 75.65290 | -698.59298  | 500.17537   | -305.35791  | 1 |
| 4180 | C | 68.11000 | 78.68280 | 74.28590 | 540.67500   | 540.67818   | -496.77827  | 1 |
| 4181 | H | 67.23800 | 79.29980 | 74.12290 | 1016.32147  | 2082.23211  | 2128.29188  | 1 |
| 4182 | C | 68.99100 | 78.15880 | 73.25190 | 212.00214   | -690.14627  | 556.95980   | 1 |
| 4183 | H | 68.92600 | 78.57780 | 72.25790 | -1771.57840 | -172.91884  | 2594.19260  | 1 |
| 4184 | C | 69.92600 | 77.15880 | 73.58790 | -488.10877  | 111.40820   | 762.09517   | 1 |
| 4185 | O | 70.77300 | 76.70680 | 72.57590 | 624.88106   | 256.11046   | -409.33888  | 1 |
| 4186 | H | 70.57700 | 77.24380 | 71.80390 | -2369.74769 | -1734.43725 | 1128.82661  | 1 |
| 4187 | C | 69.24800 | 77.30080 | 75.92290 | 399.94764   | -446.97378  | 686.80953   | 1 |
| 4188 | H | 69.32500 | 76.81380 | 76.88390 | 2438.68726  | 1984.75587  | -108.51194  | 1 |
| 4189 | C | 70.03300 | 76.73280 | 74.90990 | 274.87732   | 481.77146   | -723.73318  | 1 |
| 4190 | H | 70.81500 | 76.02580 | 75.14390 | 1698.21567  | 2136.86009  | 1564.64652  | 1 |
| 4191 | C | 66.60900 | 81.16880 | 77.39390 | -503.59349  | 535.04360   | 539.97494   | 1 |
| 4192 | O | 66.03000 | 81.91280 | 76.59390 | -555.71653  | -31.06093   | -560.21566  | 1 |
| 4193 | N | 66.26200 | 81.14380 | 78.69490 | -423.91051  | 460.76442   | -566.27583  | 1 |
| 4194 | H | 66.72900 | 80.59280 | 79.38290 | 231.56496   | -420.20322  | -3109.34610 | 1 |
| 4195 | C | 65.22400 | 82.07880 | 79.20490 | 673.00490   | -614.10019  | -37.36801   | 1 |
| 4196 | H | 64.38800 | 81.88480 | 78.54990 | -2063.42445 | -1517.23627 | -1827.15623 | 1 |
| 4197 | C | 64.68300 | 81.72780 | 80.60790 | -832.15514  | -43.89968   | -370.19135  | 1 |
| 4198 | H | 65.60700 | 81.77480 | 81.22190 | -1925.12662 | 1278.53341  | 2134.82225  | 1 |
| 4199 | C | 63.60600 | 82.80080 | 81.01090 | 505.36527   | -397.43725  | 646.60697   | 1 |
| 4200 | H | 62.70300 | 82.86080 | 80.36690 | -2007.05635 | 1127.90983  | 2144.24123  | 1 |
| 4201 | H | 63.25600 | 82.57980 | 82.04190 | -2206.49127 | -827.25388  | 2084.53196  | 1 |
| 4202 | H | 64.00900 | 83.83280 | 81.09290 | -2810.47507 | -735.62911  | -1207.60337 | 1 |
| 4203 | C | 64.11400 | 80.29080 | 80.63890 | 612.56915   | -593.56585  | 322.31913   | 1 |
| 4204 | H | 63.25500 | 80.13980 | 79.95190 | 2849.58568  | 596.58090   | -1192.55142 | 1 |
| 4205 | H | 64.84000 | 79.61680 | 80.13490 | -1849.77837 | -2543.24136 | -92.03029   | 1 |
| 4206 | C | 63.65900 | 79.83980 | 81.99690 | 532.32684   | 449.11009   | -588.53994  | 1 |
| 4207 | H | 64.50200 | 79.89380 | 82.71890 | 2476.88810  | -656.72205  | -1825.36783 | 1 |
| 4208 | H | 63.43900 | 78.75180 | 81.95090 | 2383.43696  | -183.50493  | 2045.42916  | 1 |
| 4209 | H | 62.80200 | 80.44580 | 82.35890 | -734.01996  | 2926.88786  | 890.37542   | 1 |
| 4210 | C | 65.58000 | 83.61280 | 79.03390 | -662.43462  | -189.91493  | 597.12955   | 1 |



|      |   |          |          |          |             |             |             |   |
|------|---|----------|----------|----------|-------------|-------------|-------------|---|
| 4211 | O | 64.77400 | 84.26080 | 78.37690 | -448.56273  | -99.99674   | 642.19884   | 1 |
| 4212 | N | 66.82900 | 84.06580 | 79.36490 | -665.14497  | 222.68035   | -469.75304  | 1 |
| 4213 | H | 67.45400 | 83.43180 | 79.81190 | -2950.53399 | -175.34435  | 1077.88206  | 1 |
| 4214 | C | 67.36000 | 85.36180 | 78.94990 | -588.82118  | 446.31850   | 534.35982   | 1 |
| 4215 | H | 66.87600 | 86.21180 | 79.40790 | -1520.49547 | 35.19402    | -2754.10260 | 1 |
| 4216 | H | 68.40000 | 85.20580 | 79.19290 | -2997.98735 | -883.96427  | 359.03380   | 1 |
| 4217 | C | 67.26100 | 85.73780 | 77.49590 | -579.75952  | -504.97981  | -490.22984  | 1 |
| 4218 | O | 66.68600 | 86.70480 | 77.07990 | 253.85435   | 13.10768    | -747.67198  | 1 |
| 4219 | N | 67.89100 | 84.89680 | 76.61290 | 356.73523   | -663.28731  | 381.39508   | 1 |
| 4220 | H | 68.32900 | 84.14080 | 77.09390 | 888.15468   | 2662.37180  | 1421.68347  | 1 |
| 4221 | C | 67.85900 | 85.09480 | 75.22390 | 579.06050   | 400.74256   | 579.26276   | 1 |
| 4222 | H | 68.31200 | 86.06280 | 75.06790 | -497.62359  | -3061.05885 | -529.63734  | 1 |
| 4223 | C | 68.53600 | 83.92580 | 74.53290 | -676.89647  | -545.29416  | -275.52940  | 1 |
| 4224 | H | 68.10500 | 82.98380 | 74.93690 | -1566.49989 | 1817.76903  | -2034.70393 | 1 |
| 4225 | C | 68.34900 | 83.93880 | 73.05490 | -859.83284  | 287.47088   | 97.46273    | 1 |
| 4226 | H | 67.38300 | 83.53880 | 72.67890 | 559.45597   | -3034.42126 | 614.42889   | 1 |
| 4227 | H | 68.68700 | 84.91880 | 72.65490 | -2379.23533 | 1914.79470  | 755.66312   | 1 |
| 4228 | H | 69.02400 | 83.17980 | 72.60690 | 2573.12642  | -623.55059  | -1699.53856 | 1 |
| 4229 | C | 70.05800 | 83.94780 | 74.75490 | -859.47197  | 15.31935    | 304.17799   | 1 |
| 4230 | H | 70.56200 | 83.01280 | 74.42890 | -557.06634  | 2791.46622  | 1340.00734  | 1 |
| 4231 | H | 70.17300 | 83.76380 | 75.84390 | 1858.38971  | 1313.36782  | -2172.48219 | 1 |
| 4232 | C | 70.81700 | 85.19880 | 74.41190 | 468.39538   | 567.69126   | 538.31533   | 1 |
| 4233 | H | 71.72500 | 85.38780 | 75.02290 | 2423.32327  | 1061.82646  | -1702.42625 | 1 |
| 4234 | H | 71.17000 | 85.05380 | 73.36790 | -1391.98393 | -1495.87398 | 2392.27256  | 1 |
| 4235 | H | 70.21200 | 86.12680 | 74.49190 | -1825.42016 | -2272.48838 | -1184.00339 | 1 |
| 4236 | C | 66.41400 | 85.17680 | 74.58490 | 547.85271   | 327.48064   | 651.20261   | 1 |
| 4237 | O | 66.09500 | 85.96780 | 73.73790 | -613.35023  | -199.85188  | 455.50846   | 1 |
| 4238 | N | 65.47600 | 84.30180 | 75.09290 | -415.11655  | 435.25446   | -592.37158  | 1 |
| 4239 | H | 65.70400 | 83.60980 | 75.77290 | -77.01283   | -2431.77744 | 1994.68136  | 1 |
| 4240 | C | 64.05600 | 84.33580 | 74.67990 | -310.60242  | 222.51014   | -827.92897  | 1 |
| 4241 | H | 64.10600 | 84.16680 | 73.61490 | -2580.20351 | -1213.99403 | -1329.28347 | 1 |
| 4242 | C | 63.18100 | 83.19080 | 75.19690 | 304.73127   | -482.89879  | 710.91393   | 1 |
| 4243 | H | 62.22600 | 83.07180 | 74.64190 | 2747.40308  | 654.17390   | 1386.38344  | 1 |
| 4244 | H | 63.77500 | 82.27180 | 75.00590 | 524.28411   | -1982.39564 | -2386.09722 | 1 |
| 4245 | O | 62.80900 | 83.14980 | 76.55590 | 289.23783   | 159.36988   | 717.33531   | 1 |
| 4246 | H | 63.47300 | 83.61580 | 77.06990 | 2995.73456  | 32.18442    | -960.60649  | 1 |
| 4247 | C | 63.34300 | 85.61080 | 74.89990 | -656.06267  | -431.13188  | 463.85135   | 1 |
| 4248 | O | 62.67600 | 86.19280 | 74.08490 | 502.92737   | -462.55454  | -395.89719  | 1 |
| 4249 | N | 63.54200 | 86.18680 | 76.12590 | -408.17442  | -673.09304  | 304.97819   | 1 |
| 4250 | H | 63.94200 | 85.72380 | 76.91290 | -3039.24047 | 276.65651   | -764.65990  | 1 |
| 4251 | C | 63.04400 | 87.46780 | 76.40390 | 44.70488    | 455.93402   | -788.40132  | 1 |
| 4252 | H | 61.96800 | 87.39480 | 76.34390 | -1667.93073 | 2647.00364  | 331.06652   | 1 |
| 4253 | C | 63.35300 | 87.79980 | 77.87690 | -598.46551  | 647.21875   | -233.23361  | 1 |
| 4254 | H | 64.45200 | 87.72880 | 78.01890 | -278.17736  | -309.07368  | 3118.54406  | 1 |
| 4255 | C | 62.94900 | 89.29880 | 78.18190 | 606.71934   | -594.83637  | -330.92649  | 1 |
| 4256 | H | 63.57100 | 90.00980 | 77.59890 | -1132.92528 | 2028.61754  | -2121.18302 | 1 |
| 4257 | H | 63.03800 | 89.62780 | 79.23990 | 586.02889   | -902.88286  | 2956.28126  | 1 |
| 4258 | H | 61.86000 | 89.47680 | 78.05590 | 2126.22108  | -767.41858  | -2188.25933 | 1 |
| 4259 | C | 62.60100 | 86.80080 | 78.81690 | 367.53153   | -446.54527  | 704.96021   | 1 |
| 4260 | H | 62.53600 | 85.76480 | 78.42190 | -1942.42350 | -2208.91700 | -1116.20020 | 1 |
| 4261 | H | 61.56000 | 87.13080 | 79.01890 | 837.13409   | -1604.10293 | -2573.76893 | 1 |
| 4262 | C | 63.36500 | 86.71780 | 80.15690 | -425.39329  | -530.02168  | 607.92152   | 1 |
| 4263 | H | 62.93200 | 86.02680 | 80.91090 | -3126.52227 | -254.11949  | -241.88426  | 1 |
| 4264 | H | 64.35900 | 86.24380 | 80.00790 | 2339.91868  | 648.99618   | 2000.45264  | 1 |
| 4265 | H | 63.35000 | 87.69880 | 80.67790 | -2132.14493 | 2044.44772  | 1082.78241  | 1 |
| 4266 | C | 63.62200 | 88.55180 | 75.49490 | -777.04139  | 389.13413   | -276.10200  | 1 |
| 4267 | O | 62.90700 | 89.44980 | 75.09090 | -623.18562  | 357.24860   | 328.08590   | 1 |
| 4268 | N | 64.93800 | 88.51180 | 75.25590 | 535.72064   | -628.81794  | 173.96459   | 1 |
| 4269 | H | 65.58600 | 87.90280 | 75.70590 | -2387.27561 | 2046.77673  | -99.22908   | 1 |
| 4270 | C | 65.57500 | 89.44880 | 74.36590 | 144.86321   | 443.59837   | -783.38122  | 1 |
| 4271 | H | 65.34500 | 90.45980 | 74.66690 | -2769.77704 | -411.56968  | -1434.28441 | 1 |
| 4272 | C | 67.14800 | 89.20280 | 74.37090 | -688.59560  | 247.79742   | -543.95178  | 1 |

|      |   |          |          |          |             |             |             |   |
|------|---|----------|----------|----------|-------------|-------------|-------------|---|
| 4273 | H | 67.44500 | 88.23180 | 73.91890 | -2274.23592 | -1380.20099 | 1679.61972  | 1 |
| 4274 | H | 67.47200 | 89.10980 | 75.42890 | 2155.13779  | 1737.92999  | -1494.39176 | 1 |
| 4275 | C | 67.91700 | 90.44380 | 73.95490 | -334.06105  | 814.45484   | 237.73417   | 1 |
| 4276 | O | 69.15300 | 90.38580 | 73.78690 | -667.95610  | 393.77320   | 149.68150   | 1 |
| 4277 | O | 67.30500 | 91.53180 | 73.82090 | -561.65531  | 473.79940   | 289.28303   | 1 |
| 4278 | C | 65.14400 | 89.32380 | 72.90190 | 372.50462   | -49.14678   | -830.82845  | 1 |
| 4279 | O | 64.90300 | 90.28580 | 72.17490 | 583.88468   | -74.22430   | -526.49469  | 1 |
| 4280 | N | 64.79100 | 88.07980 | 72.53990 | -241.74926  | -305.80538  | -748.80749  | 1 |
| 4281 | H | 65.07900 | 87.29980 | 73.08990 | 1028.72721  | 2880.29732  | 737.45095   | 1 |
| 4282 | C | 64.05000 | 87.77080 | 71.30790 | -381.90911  | -806.75133  | 186.41008   | 1 |
| 4283 | H | 64.54100 | 88.24280 | 70.46990 | -2646.60051 | -1684.85058 | 234.54313   | 1 |
| 4284 | C | 64.03200 | 86.26380 | 70.91690 | -480.12005  | 509.59444   | 584.16543   | 1 |
| 4285 | H | 63.45300 | 85.74580 | 71.71090 | 368.86763   | 2307.58677  | 2106.46770  | 1 |
| 4286 | H | 63.59700 | 86.24480 | 69.89490 | -190.21284  | 44.93046    | 3140.06792  | 1 |
| 4287 | O | 65.28700 | 85.69280 | 70.81490 | 475.91158   | 428.92284   | -461.69318  | 1 |
| 4288 | H | 65.74900 | 85.77980 | 71.65090 | -577.08106  | -2276.39413 | 2093.61731  | 1 |
| 4289 | C | 62.61000 | 88.31980 | 71.28190 | 496.40988   | 544.83045   | -536.83146  | 1 |
| 4290 | O | 62.05800 | 88.75280 | 70.22290 | 777.96265   | -10.66516   | -135.23163  | 1 |
| 4291 | N | 61.82700 | 88.28880 | 72.38990 | 718.02271   | 425.55357   | 126.56950   | 1 |
| 4292 | H | 62.31400 | 87.88780 | 73.16190 | -2039.59803 | 925.04983   | 2209.64905  | 1 |
| 4293 | C | 60.49700 | 88.86780 | 72.56790 | 356.19728   | -566.43827  | 619.45314   | 1 |
| 4294 | H | 59.95400 | 88.60980 | 71.67090 | -2487.96707 | 453.02335   | 1871.63456  | 1 |
| 4295 | C | 59.71400 | 88.52580 | 73.88190 | 898.54614   | -154.90224  | 8.43378     | 1 |
| 4296 | H | 58.66500 | 88.88680 | 73.93990 | -1300.38834 | -1001.29396 | 2684.14359  | 1 |
| 4297 | H | 60.24300 | 88.94580 | 74.76490 | 1247.02449  | 2887.54142  | -72.53085   | 1 |
| 4298 | C | 59.61000 | 87.05380 | 74.08590 | -511.65030  | -560.09113  | 505.92776   | 1 |
| 4299 | C | 59.50900 | 86.23880 | 72.95590 | 452.02409   | -550.02019  | -569.73942  | 1 |
| 4300 | H | 59.52300 | 86.56480 | 71.92690 | -2176.88894 | -1346.75866 | 1829.10412  | 1 |
| 4301 | C | 59.30100 | 84.85880 | 73.12290 | 25.30453    | -618.46486  | 669.56098   | 1 |
| 4302 | H | 59.12100 | 84.20580 | 72.28090 | 1154.23989  | 2424.67675  | 1639.17636  | 1 |
| 4303 | C | 59.18800 | 84.30980 | 74.35190 | 550.80277   | -533.65806  | 493.23056   | 1 |
| 4304 | H | 59.20900 | 83.23180 | 74.40590 | -120.72906  | -1414.18726 | -2807.79720 | 1 |
| 4305 | C | 59.53100 | 86.46980 | 75.36190 | 598.14968   | 440.98937   | -528.39032  | 1 |
| 4306 | H | 59.61000 | 87.05880 | 76.26390 | -2928.88016 | 253.02367   | 1120.65440  | 1 |
| 4307 | C | 59.32900 | 85.10380 | 75.47890 | 414.74357   | -762.39785  | 279.62170   | 1 |
| 4308 | H | 59.40800 | 84.60080 | 76.43090 | 499.78648   | 3074.09538  | 445.39565   | 1 |
| 4309 | C | 60.57300 | 90.36780 | 72.47590 | 436.61691   | 785.06542   | 156.48951   | 1 |
| 4310 | O | 59.69300 | 91.01980 | 71.88190 | 430.69699   | -370.22122  | 548.69261   | 1 |
| 4311 | N | 61.61200 | 91.00880 | 73.03090 | 470.13990   | -413.92238  | 565.95851   | 1 |
| 4312 | H | 62.26600 | 90.52480 | 73.60690 | -2740.88441 | -1269.73649 | 879.51583   | 1 |
| 4313 | C | 61.98300 | 92.38380 | 72.83590 | 367.50565   | 654.02190   | -518.31067  | 1 |
| 4314 | H | 61.06200 | 92.92380 | 73.00090 | 1959.92137  | 1776.09116  | -1703.65332 | 1 |
| 4315 | C | 62.99500 | 92.85080 | 73.91290 | -198.05729  | 880.31189   | 131.43552   | 1 |
| 4316 | H | 63.71500 | 92.00380 | 73.92790 | -3114.93931 | 411.84340   | 160.51277   | 1 |
| 4317 | C | 63.69900 | 94.14680 | 73.48490 | 157.77493   | 552.46376   | 708.05498   | 1 |
| 4318 | H | 64.24300 | 94.07580 | 72.51890 | 1195.18092  | 2790.02674  | 827.96111   | 1 |
| 4319 | H | 63.00600 | 94.98380 | 73.25290 | -2573.91313 | 1146.18715  | 1399.80443  | 1 |
| 4320 | H | 64.33500 | 94.69180 | 74.21490 | -1940.69466 | -2305.82958 | 902.81803   | 1 |
| 4321 | C | 62.33300 | 92.81780 | 75.33690 | -179.94500  | 562.41271   | 694.81130   | 1 |
| 4322 | H | 61.96200 | 91.77980 | 75.47190 | -509.21854  | 1673.33294  | 2615.12515  | 1 |
| 4323 | H | 61.49500 | 93.54180 | 75.42490 | 96.74515    | 2211.27671  | 2235.87162  | 1 |
| 4324 | C | 63.29200 | 93.07080 | 76.48090 | -199.74951  | -261.89426  | -850.27204  | 1 |
| 4325 | H | 62.74900 | 92.97680 | 77.44590 | -1413.72772 | -1792.56813 | 2164.78628  | 1 |
| 4326 | H | 63.67800 | 94.11280 | 76.48690 | -2387.85302 | 2048.47276  | -11.98002   | 1 |
| 4327 | H | 64.14200 | 92.35980 | 76.40090 | -2485.99538 | -274.11740  | 1908.64162  | 1 |
| 4328 | C | 62.32600 | 92.76680 | 71.39490 | -49.24127   | -765.60269  | 492.82737   | 1 |
| 4329 | O | 61.76600 | 93.71080 | 70.85690 | 476.70310   | 269.15676   | -569.15378  | 1 |
| 4330 | N | 63.11700 | 91.91480 | 70.68990 | 686.68948   | -345.49041  | 348.95018   | 1 |
| 4331 | H | 63.47100 | 91.13780 | 71.20390 | -2023.53646 | -943.86499  | -2216.44880 | 1 |
| 4332 | C | 63.42100 | 91.92980 | 69.22690 | -284.34473  | -810.44076  | -306.24312  | 1 |
| 4333 | H | 63.88600 | 92.87780 | 69.00090 | 1766.57290  | -1355.40181 | 2222.68584  | 1 |
| 4334 | C | 64.48700 | 90.89480 | 68.84690 | -308.06672  | 96.57155    | -852.77185  | 1 |

|      |   |          |          |          |             |             |             |   |
|------|---|----------|----------|----------|-------------|-------------|-------------|---|
| 4335 | H | 64.02300 | 90.03680 | 68.31490 | -1699.33147 | 2162.14703  | -1528.27321 | 1 |
| 4336 | H | 65.03700 | 90.51580 | 69.73490 | -2666.31805 | -769.34019  | -1482.25839 | 1 |
| 4337 | C | 65.55300 | 91.46880 | 67.92090 | 904.72499   | 58.38217    | 97.54597    | 1 |
| 4338 | H | 65.88900 | 92.36180 | 68.49090 | -1413.37723 | 2175.77700  | -1779.49023 | 1 |
| 4339 | C | 66.74300 | 90.55080 | 67.77190 | 659.96935   | -437.60804  | 452.09585   | 1 |
| 4340 | H | 66.70500 | 89.77780 | 66.97590 | 1794.26758  | -2584.25429 | 21.44302    | 1 |
| 4341 | H | 67.04300 | 90.04280 | 68.71390 | -1761.65116 | -1460.27037 | 2159.26420  | 1 |
| 4342 | H | 67.68000 | 91.13080 | 67.63490 | 1724.67085  | -2619.58559 | 248.00812   | 1 |
| 4343 | C | 64.99000 | 92.02780 | 66.62490 | 812.45115   | 300.03345   | 285.22632   | 1 |
| 4344 | H | 64.39000 | 92.93380 | 66.85590 | 2225.25523  | 324.28708   | 2200.29617  | 1 |
| 4345 | H | 65.78300 | 92.40380 | 65.94390 | 2952.33407  | 1076.43689  | -152.42505  | 1 |
| 4346 | H | 64.40900 | 91.25080 | 66.08390 | 2054.98316  | -1999.50370 | 1295.08895  | 1 |
| 4347 | C | 62.22200 | 91.80780 | 68.30290 | -511.02145  | 598.77157   | -460.19636  | 1 |
| 4348 | O | 62.08600 | 92.56080 | 67.36590 | -732.03870  | 30.85435    | -294.60919  | 1 |
| 4349 | N | 61.34400 | 90.81980 | 68.58590 | -137.52035  | -125.26974  | 823.44881   | 1 |
| 4350 | H | 61.49700 | 90.14980 | 69.30790 | 2625.39759  | 170.09980   | 1725.27672  | 1 |
| 4351 | C | 60.25300 | 90.53480 | 67.66990 | -908.48253  | -56.74423   | -53.76416   | 1 |
| 4352 | H | 60.49700 | 90.84480 | 66.66490 | 958.44099   | 2762.76686  | -1160.48972 | 1 |
| 4353 | C | 59.80500 | 89.01380 | 67.63290 | -77.98446   | 837.93255   | 351.05338   | 1 |
| 4354 | H | 58.96000 | 88.88580 | 66.92290 | -1628.59390 | 1608.24391  | 2158.57816  | 1 |
| 4355 | H | 59.39100 | 88.62780 | 68.58790 | 2203.20574  | 614.73801   | 2160.14070  | 1 |
| 4356 | C | 60.97000 | 88.07680 | 67.26890 | 253.91082   | 742.44824   | -464.48995  | 1 |
| 4357 | H | 61.92200 | 88.30480 | 67.79390 | 1475.13688  | -2598.50945 | 984.85840   | 1 |
| 4358 | C | 60.64600 | 86.53780 | 67.53890 | -751.68450  | -513.33146  | 53.96512    | 1 |
| 4359 | H | 61.58000 | 85.93980 | 67.48090 | 2936.79641  | -326.08156  | -1080.33510 | 1 |
| 4360 | H | 59.86300 | 86.24980 | 66.80490 | -957.49656  | 644.10162   | -2926.86858 | 1 |
| 4361 | H | 60.31500 | 86.54780 | 68.59990 | 2959.72686  | 241.99668   | 1039.07689  | 1 |
| 4362 | C | 61.22200 | 88.19580 | 65.74490 | 354.96439   | -422.35485  | 725.99426   | 1 |
| 4363 | H | 62.08300 | 87.54380 | 65.48490 | 810.74681   | -2204.10055 | -2093.52731 | 1 |
| 4364 | H | 60.28400 | 87.83380 | 65.27190 | 1991.78702  | 1591.56674  | -1843.34642 | 1 |
| 4365 | H | 61.54500 | 89.20880 | 65.42090 | 883.86084   | 1973.04114  | 2285.63446  | 1 |
| 4366 | C | 59.02200 | 91.36880 | 68.05590 | 361.20375   | 791.18508   | -273.87776  | 1 |
| 4367 | O | 58.06000 | 91.49180 | 67.27790 | -162.46777  | -380.12080  | -672.85929  | 1 |
| 4368 | N | 59.09400 | 92.15380 | 69.13390 | -769.07544  | 199.47098   | 285.31839   | 1 |
| 4369 | H | 59.94300 | 92.03980 | 69.64290 | 2245.11343  | 1250.57882  | 1814.86763  | 1 |
| 4370 | C | 58.27900 | 93.28280 | 69.53090 | -521.15520  | 738.01222   | -123.23241  | 1 |
| 4371 | H | 58.91100 | 93.87680 | 70.17490 | -2281.03347 | -35.68296   | 2166.52700  | 1 |
| 4372 | C | 58.07200 | 94.37680 | 68.44190 | 141.58468   | -386.29826  | -813.74347  | 1 |
| 4373 | H | 57.58200 | 94.03080 | 67.50590 | 435.60624   | 2471.35445  | -1897.59864 | 1 |
| 4374 | H | 57.34300 | 95.11580 | 68.83890 | -687.92666  | 2247.46218  | -2091.38635 | 1 |
| 4375 | C | 59.37100 | 95.22880 | 68.23990 | -58.45589   | -777.88053  | -472.16077  | 1 |
| 4376 | H | 60.11800 | 94.59680 | 67.71390 | -2448.74411 | -1583.94155 | 1180.25745  | 1 |
| 4377 | H | 59.87800 | 95.63380 | 69.14190 | 2832.33529  | 868.90613   | -1058.82254 | 1 |
| 4378 | C | 59.00200 | 96.42980 | 67.42990 | 215.41922   | 151.87551   | 872.91431   | 1 |
| 4379 | O | 58.24300 | 97.34480 | 67.84890 | -454.54374  | 466.44157   | 446.59767   | 1 |
| 4380 | O | 59.36800 | 96.47080 | 66.23290 | 546.80057   | 349.08473   | 450.30681   | 1 |
| 4381 | C | 57.02900 | 92.96280 | 70.36990 | -718.01438  | 561.60954   | -22.38493   | 1 |
| 4382 | O | 56.13800 | 93.83780 | 70.46390 | -571.70451  | 540.68598   | -66.63222   | 1 |
| 4383 | N | 56.98000 | 91.76780 | 70.91190 | 9.26674     | 692.79998   | 482.30136   | 1 |
| 4384 | H | 57.72300 | 91.10880 | 70.83290 | 90.31959    | -2201.23711 | 2246.02400  | 1 |
| 4385 | C | 55.88300 | 91.32880 | 71.76290 | -100.60129  | -608.55914  | -671.55503  | 1 |
| 4386 | H | 55.00300 | 91.49780 | 71.15990 | -1776.98377 | 1184.77817  | 2310.16354  | 1 |
| 4387 | C | 56.15900 | 89.81180 | 72.05990 | -92.96948   | -263.79740  | -867.88168  | 1 |
| 4388 | H | 57.14500 | 89.73180 | 72.56590 | 2737.29581  | -183.30220  | -1540.07733 | 1 |
| 4389 | C | 55.05100 | 89.32380 | 72.95190 | 363.49373   | -833.06919  | 72.93171    | 1 |
| 4390 | H | 55.05500 | 88.22180 | 73.09590 | 1524.23176  | 2746.28700  | 181.24982   | 1 |
| 4391 | H | 55.19400 | 89.75780 | 73.96490 | 985.47413   | 1980.04105  | 2237.52193  | 1 |
| 4392 | H | 54.04400 | 89.58180 | 72.55990 | -2619.55744 | 1712.79383  | -320.12862  | 1 |
| 4393 | C | 56.34800 | 89.02380 | 70.73890 | -286.60934  | 651.20748   | -570.29371  | 1 |
| 4394 | H | 57.24700 | 89.32080 | 70.15890 | 1136.48729  | 1642.34113  | 2430.91310  | 1 |
| 4395 | H | 55.58800 | 89.36780 | 70.00490 | -2292.05810 | -2134.41636 | 298.26612   | 1 |
| 4396 | C | 56.50200 | 87.49080 | 70.85790 | 744.48531   | -235.20460  | -471.03230  | 1 |

|      |   |          |          |          |             |             |             |   |
|------|---|----------|----------|----------|-------------|-------------|-------------|---|
| 4397 | H | 56.73200 | 86.94080 | 69.92090 | -402.36676  | 2622.43372  | -1690.90763 | 1 |
| 4398 | H | 57.31500 | 87.25580 | 71.57690 | -1236.15168 | -2871.10828 | -356.21972  | 1 |
| 4399 | H | 55.50300 | 87.14480 | 71.20190 | 2153.89519  | -1474.75064 | -1756.15270 | 1 |
| 4400 | C | 55.76600 | 92.25280 | 72.96690 | 134.31473   | -568.52658  | 700.13433   | 1 |
| 4401 | O | 54.65300 | 92.72280 | 73.33990 | 113.09774   | -162.58944  | 764.46112   | 1 |
| 4402 | N | 56.88400 | 92.58880 | 73.50690 | 380.05954   | -682.57389  | -319.87486  | 1 |
| 4403 | H | 57.73700 | 92.27980 | 73.09290 | 1693.25364  | -436.33977  | -2615.47815 | 1 |
| 4404 | C | 57.01300 | 93.31680 | 74.76590 | 406.01346   | 440.19272   | 687.62959   | 1 |
| 4405 | H | 56.03600 | 93.61680 | 75.11690 | 2479.87840  | 1934.54434  | -77.25001   | 1 |
| 4406 | C | 57.46400 | 92.44880 | 75.95490 | -726.97172  | -137.95170  | 532.85312   | 1 |
| 4407 | H | 57.55200 | 93.08580 | 76.86090 | -2067.71498 | 2356.65572  | 262.59246   | 1 |
| 4408 | C | 56.41600 | 91.42680 | 76.31290 | -31.39083   | -887.09872  | -208.61803  | 1 |
| 4409 | H | 55.37100 | 91.71680 | 76.07290 | -2476.26877 | -1846.46220 | -597.40820  | 1 |
| 4410 | H | 56.58000 | 90.43780 | 75.83390 | 2203.12138  | 1077.81493  | 1970.48151  | 1 |
| 4411 | H | 56.50200 | 91.14880 | 77.38490 | -666.97644  | -2930.26221 | -931.09186  | 1 |
| 4412 | C | 58.87700 | 91.85880 | 75.79190 | 793.70700   | 435.86914   | -107.23005  | 1 |
| 4413 | H | 59.62000 | 92.66980 | 75.63290 | 520.20988   | 2252.86080  | -2133.59465 | 1 |
| 4414 | H | 58.76600 | 91.36580 | 74.80190 | -1609.62309 | 941.31790   | -2534.02059 | 1 |
| 4415 | C | 59.44300 | 90.91480 | 76.88690 | -505.18802  | 632.31375   | 420.01832   | 1 |
| 4416 | H | 60.48200 | 90.69380 | 76.56190 | -683.53794  | 2896.37661  | -1020.78628 | 1 |
| 4417 | H | 58.85100 | 89.98080 | 76.99690 | 473.10784   | -2241.19085 | 2156.72408  | 1 |
| 4418 | H | 59.57900 | 91.43880 | 77.85790 | -666.46335  | -3074.42538 | -44.28782   | 1 |
| 4419 | C | 57.83900 | 94.51480 | 74.62190 | -494.92836  | 714.30571   | 276.15987   | 1 |
| 4420 | O | 58.88000 | 94.49180 | 73.99490 | 334.39491   | -511.97831  | 499.68538   | 1 |
| 4421 | N | 57.43500 | 95.63580 | 75.27990 | -92.15096   | 754.15181   | 368.01568   | 1 |
| 4422 | H | 56.52300 | 95.78680 | 75.65390 | -905.72856  | 2520.55901  | -1650.65571 | 1 |
| 4423 | C | 58.25800 | 96.83880 | 75.22690 | 844.78454   | -231.50281  | -253.37033  | 1 |
| 4424 | H | 59.20600 | 96.64080 | 74.74990 | -843.31977  | 2783.22906  | 1200.28079  | 1 |
| 4425 | C | 57.58400 | 97.93780 | 74.39090 | 219.47670   | -178.65264  | 866.81268   | 1 |
| 4426 | H | 58.24300 | 98.83180 | 74.37090 | 2799.11058  | 1207.34245  | -778.15835  | 1 |
| 4427 | H | 56.59600 | 98.21880 | 74.81490 | 1912.41463  | -1540.89628 | -1966.35072 | 1 |
| 4428 | C | 57.42100 | 97.46980 | 72.89890 | 581.89159   | -306.29449  | 631.69365   | 1 |
| 4429 | H | 58.44600 | 97.33480 | 72.48990 | 2743.78894  | 363.10605   | -1495.99548 | 1 |
| 4430 | H | 56.78500 | 96.56080 | 72.84690 | 2185.89880  | 411.46194   | 2225.03297  | 1 |
| 4431 | C | 56.77400 | 98.51580 | 72.03390 | -392.49675  | 779.90036   | 262.96907   | 1 |
| 4432 | H | 57.23300 | 99.49080 | 72.30390 | 2113.82102  | -1802.78182 | -1476.47032 | 1 |
| 4433 | H | 55.68700 | 98.57780 | 72.25190 | 1936.97873  | -318.32427  | -2458.66006 | 1 |
| 4434 | C | 56.95100 | 98.32980 | 70.53290 | -256.14584  | -870.89224  | 85.94778    | 1 |
| 4435 | H | 56.19100 | 98.90980 | 69.96590 | -2792.73516 | 836.04161   | -1183.16988 | 1 |
| 4436 | H | 56.80600 | 97.25080 | 70.31390 | 2380.20070  | 462.98942   | -2004.62257 | 1 |
| 4437 | N | 58.24300 | 98.82280 | 70.07890 | 269.42694   | 702.65764   | -382.56195  | 1 |
| 4438 | H | 58.40600 | 98.41180 | 69.13790 | -1088.41930 | 2343.68214  | 1794.63747  | 1 |
| 4439 | H | 58.32600 | 99.85380 | 69.96590 | 2466.54525  | -1470.99767 | 1284.73600  | 1 |
| 4440 | H | 59.00800 | 98.48680 | 70.69790 | -2898.84773 | 1204.56099  | -209.62082  | 1 |
| 4441 | C | 58.57400 | 97.24380 | 76.66790 | -621.34123  | -127.45546  | 655.08868   | 1 |
| 4442 | O | 57.69300 | 97.31680 | 77.49190 | 506.82086   | -71.37615   | 601.38614   | 1 |
| 4443 | N | 59.87100 | 97.37780 | 76.93290 | -362.31753  | -195.55717  | 736.99097   | 1 |
| 4444 | H | 60.59300 | 97.31280 | 76.24790 | -2778.00772 | -1318.17235 | 665.82354   | 1 |
| 4445 | C | 60.44500 | 97.48380 | 78.27490 | 393.16436   | -561.94487  | 600.90828   | 1 |
| 4446 | H | 59.65900 | 97.62580 | 79.00190 | -2131.49500 | -1717.19315 | -1551.19405 | 1 |
| 4447 | C | 61.26600 | 96.19680 | 78.67890 | -609.35985  | -508.40593  | -449.06011  | 1 |
| 4448 | H | 61.68100 | 96.35180 | 79.69790 | -1080.04612 | 2703.63969  | -1192.50116 | 1 |
| 4449 | H | 62.16300 | 96.06980 | 78.03490 | 2147.16784  | 1855.36260  | -1358.50143 | 1 |
| 4450 | C | 60.44600 | 94.85480 | 78.66090 | -91.62198   | -633.26907  | 649.63582   | 1 |
| 4451 | H | 59.94200 | 94.74080 | 77.67690 | 2004.87724  | -917.90028  | 2244.13738  | 1 |
| 4452 | H | 61.09700 | 93.95880 | 78.74790 | -1846.75850 | -1569.59195 | 2006.01355  | 1 |
| 4453 | C | 59.44500 | 94.78580 | 79.82490 | -429.34184  | 699.98786   | -396.40078  | 1 |
| 4454 | O | 58.22300 | 94.90280 | 79.62490 | 685.67099   | -232.79582  | -315.10098  | 1 |
| 4455 | N | 59.93100 | 94.46580 | 81.06390 | 498.11152   | 672.86346   | 108.68287   | 1 |
| 4456 | H | 60.91600 | 94.51480 | 81.23090 | -2542.61648 | 69.24054    | -1851.62993 | 1 |
| 4457 | H | 59.20800 | 94.33680 | 81.74290 | -1065.19003 | 2525.37634  | -1544.69115 | 1 |
| 4458 | C | 61.34100 | 98.72380 | 78.30790 | 303.76043   | -694.25907  | -507.13405  | 1 |

|      |   |          |           |          |             |             |             |   |
|------|---|----------|-----------|----------|-------------|-------------|-------------|---|
| 4459 | O | 61.82800 | 99.19480  | 77.29590 | 413.80603   | -499.77224  | 450.13276   | 1 |
| 4460 | N | 61.58800 | 99.25980  | 79.51490 | 386.03956   | -521.49301  | 540.08405   | 1 |
| 4461 | H | 61.24200 | 98.89480  | 80.37590 | -1364.92434 | 1888.69026  | 2113.77786  | 1 |
| 4462 | C | 62.61800 | 100.32780 | 79.69390 | -803.35923  | 284.74248   | 324.01647   | 1 |
| 4463 | H | 62.67200 | 100.57080 | 80.74490 | 238.34568   | -327.90415  | -3119.91930 | 1 |
| 4464 | H | 62.35800 | 101.15980 | 79.05690 | 2675.80429  | 15.16577    | 1654.71074  | 1 |
| 4465 | C | 63.99200 | 99.94280  | 79.36590 | 629.10956   | -658.07772  | -51.04782   | 1 |
| 4466 | O | 64.38600 | 98.79380  | 79.32990 | -672.53849  | -407.94647  | 69.99204    | 1 |
| 4467 | N | 64.77500 | 101.00880 | 79.16790 | 492.08962   | -594.47331  | -342.23029  | 1 |
| 4468 | H | 64.32700 | 101.89080 | 79.03990 | -360.83645  | 2185.87360  | 2233.82629  | 1 |
| 4469 | C | 66.24800 | 101.05880 | 78.91790 | -537.72735  | 492.34922   | 547.62446   | 1 |
| 4470 | H | 66.37700 | 100.57780 | 77.95990 | -1208.33463 | 866.62565   | -2772.56445 | 1 |
| 4471 | C | 66.79800 | 102.45580 | 78.81090 | 591.95417   | -488.75801  | -492.09438  | 1 |
| 4472 | H | 67.79900 | 102.35780 | 78.33790 | 2031.23839  | -2349.62109 | 501.57510   | 1 |
| 4473 | H | 66.90700 | 103.00680 | 79.76990 | -2047.39412 | 1288.41154  | 2011.56637  | 1 |
| 4474 | S | 65.81700 | 103.59380 | 77.81590 | -515.34854  | -26.50207   | 211.95313   | 1 |
| 4475 | C | 66.99300 | 100.29880 | 79.98790 | -306.99949  | 115.12686   | -850.85141  | 1 |
| 4476 | O | 67.88000 | 99.47380  | 79.77390 | -567.17695  | 173.32166   | -521.43757  | 1 |
| 4477 | N | 66.54400 | 100.51380 | 81.27890 | -401.10325  | -435.01105  | 602.12445   | 1 |
| 4478 | H | 65.83100 | 101.17780 | 81.48990 | 455.12354   | -2523.91253 | 1822.34858  | 1 |
| 4479 | C | 67.02000 | 99.88180  | 82.51790 | -576.96346  | 558.08937   | 432.55107   | 1 |
| 4480 | H | 68.09700 | 99.96080  | 82.54290 | 2074.18141  | 1975.37048  | 1301.50266  | 1 |
| 4481 | C | 66.41100 | 100.64180 | 83.75890 | 407.94169   | 730.32140   | -362.85704  | 1 |
| 4482 | H | 65.35100 | 100.81480 | 83.47490 | -2239.46140 | -1264.23948 | -1812.38445 | 1 |
| 4483 | H | 66.89900 | 101.63880 | 83.80190 | 851.36305   | -1080.65734 | 2829.41459  | 1 |
| 4484 | C | 66.54800 | 99.88680  | 85.09890 | -504.07707  | 749.61930   | -124.21035  | 1 |
| 4485 | H | 65.85400 | 99.02280  | 85.18090 | -892.64623  | -2909.71836 | -796.83625  | 1 |
| 4486 | H | 67.51100 | 99.33480  | 85.13890 | -213.12526  | 2504.55416  | -1892.09204 | 1 |
| 4487 | C | 66.28900 | 100.87080 | 86.19690 | 683.05188   | 165.99099   | 580.80816   | 1 |
| 4488 | O | 67.32800 | 101.19980 | 86.84990 | -136.38829  | -280.21718  | -725.60581  | 1 |
| 4489 | O | 65.16300 | 101.30180 | 86.50690 | 488.89598   | -379.67191  | 490.36435   | 1 |
| 4490 | C | 66.79500 | 98.34580  | 82.63090 | 886.72408   | 84.15160    | -195.16639  | 1 |
| 4491 | O | 67.69400 | 97.57980  | 83.10990 | -541.19789  | 573.40571   | -44.02227   | 1 |
| 4492 | N | 65.61600 | 97.84880  | 82.17690 | 721.91217   | -387.58309  | 203.21036   | 1 |
| 4493 | H | 64.80900 | 98.39780  | 81.97690 | -1858.76061 | 2369.05327  | -911.49426  | 1 |
| 4494 | C | 65.33400 | 96.43080  | 81.99190 | -829.63214  | 226.75513   | -302.89212  | 1 |
| 4495 | H | 65.52200 | 95.82880  | 82.86790 | 2343.03941  | 2070.51780  | -348.35126  | 1 |
| 4496 | C | 63.77200 | 96.26080  | 81.74690 | -117.59870  | 773.92979   | -467.60478  | 1 |
| 4497 | H | 63.24200 | 96.70480  | 82.61690 | -2548.47429 | -1654.52005 | 816.13017   | 1 |
| 4498 | H | 63.44900 | 96.78180  | 80.81990 | -164.26450  | -1334.80667 | 2844.21071  | 1 |
| 4499 | C | 63.35700 | 94.81080  | 81.66990 | 772.90078   | 10.18220    | 483.70623   | 1 |
| 4500 | C | 62.80900 | 94.10180  | 82.79790 | 523.00936   | -420.34241  | 617.43378   | 1 |
| 4501 | H | 62.63100 | 94.62380  | 83.72690 | -2716.64045 | -1419.01509 | -710.27255  | 1 |
| 4502 | C | 62.39200 | 92.77480  | 82.62990 | 311.39012   | -821.47456  | -244.26776  | 1 |
| 4503 | H | 62.00500 | 92.28580  | 83.51190 | -1549.67754 | -1858.50510 | 2010.64282  | 1 |
| 4504 | C | 62.62400 | 92.09880  | 81.42490 | -116.25282  | -579.89728  | -694.01400  | 1 |
| 4505 | H | 62.26000 | 91.08280  | 81.39790 | 1248.81659  | 2315.15295  | -1725.90561 | 1 |
| 4506 | C | 63.54400 | 94.11580  | 80.48690 | -180.62298  | 672.16442   | -589.08516  | 1 |
| 4507 | H | 63.94400 | 94.68880  | 79.66390 | 2349.07241  | 1916.45918  | -840.99300  | 1 |
| 4508 | C | 63.21900 | 92.80580  | 80.33990 | 512.23643   | 556.47921   | -509.30907  | 1 |
| 4509 | H | 63.36400 | 92.28080  | 79.40790 | 2405.06051  | 1090.59627  | -1710.11987 | 1 |
| 4510 | C | 66.22000 | 95.81380  | 80.94590 | 587.13112   | -424.77149  | -553.44127  | 1 |
| 4511 | O | 66.65800 | 94.68880  | 81.18290 | -433.30365  | -349.67624  | 560.00152   | 1 |
| 4512 | N | 66.39900 | 96.46680  | 79.80590 | -378.96959  | -303.45803  | -690.62838  | 1 |
| 4513 | H | 65.93900 | 97.33380  | 79.63390 | -2740.48121 | -1317.03747 | -808.33239  | 1 |
| 4514 | C | 67.29500 | 95.96780  | 78.75290 | -523.32395  | 654.59471   | -359.28932  | 1 |
| 4515 | H | 66.93300 | 94.96880  | 78.55890 | -826.69346  | 72.22315    | -3034.73029 | 1 |
| 4516 | C | 67.06200 | 96.78780  | 77.47690 | 779.89052   | -312.14183  | 354.66782   | 1 |
| 4517 | H | 67.18400 | 97.87680  | 77.66490 | 1775.24687  | -2170.05852 | 1427.43505  | 1 |
| 4518 | H | 67.78700 | 96.49380  | 76.68690 | -1848.52398 | -2536.00268 | 223.32879   | 1 |
| 4519 | C | 65.64500 | 96.51380  | 76.88790 | 892.27510   | 130.37498   | -135.27197  | 1 |
| 4520 | H | 64.89400 | 97.05180  | 77.50390 | -2492.32341 | -1917.99827 | 88.50355    | 1 |

|      |   |          |          |          |             |             |             |   |
|------|---|----------|----------|----------|-------------|-------------|-------------|---|
| 4521 | H | 65.48400 | 95.41480 | 76.91390 | 525.92815   | 2034.88297  | 2341.12732  | 1 |
| 4522 | C | 65.47300 | 96.99180 | 75.50790 | 854.37408   | -197.50180  | -249.97796  | 1 |
| 4523 | O | 66.20800 | 96.42980 | 74.63790 | 601.86227   | -133.33160  | 493.57038   | 1 |
| 4524 | O | 64.61400 | 97.86580 | 75.15490 | -700.63094  | 361.70562   | -43.73277   | 1 |
| 4525 | C | 68.72300 | 95.85580 | 79.13490 | 630.02516   | 590.06238   | -293.84637  | 1 |
| 4526 | O | 69.44300 | 94.87880 | 78.86890 | -604.34468  | -228.20875  | -454.21966  | 1 |
| 4527 | N | 69.24100 | 96.86280 | 79.91290 | 31.23487    | 306.04149   | -786.15220  | 1 |
| 4528 | H | 68.82800 | 97.76980 | 79.93290 | -741.83341  | -3017.75172 | 491.00302   | 1 |
| 4529 | C | 70.56400 | 96.79380 | 80.57090 | 54.96050    | 712.40195   | 566.49254   | 1 |
| 4530 | H | 71.32700 | 96.63980 | 79.82290 | 946.57754   | -1959.41970 | 2272.19974  | 1 |
| 4531 | C | 70.83400 | 98.12880 | 81.32590 | -797.20287  | -440.87872  | -39.30068   | 1 |
| 4532 | H | 70.03100 | 98.34680 | 82.06290 | -1168.23346 | 2583.42648  | -1363.58514 | 1 |
| 4533 | H | 70.80400 | 98.94380 | 80.57190 | -2104.96005 | 2262.06444  | 591.97457   | 1 |
| 4534 | C | 72.15200 | 98.17780 | 82.12990 | -542.24403  | -576.70649  | -452.58374  | 1 |
| 4535 | O | 71.96400 | 97.99580 | 83.33490 | -736.90470  | 202.24862   | 199.23401   | 1 |
| 4536 | N | 73.31500 | 98.45480 | 81.58790 | -776.19999  | 83.93123    | 321.15636   | 1 |
| 4537 | H | 73.43300 | 98.38680 | 80.59690 | -1383.01634 | 2757.98116  | 615.65571   | 1 |
| 4538 | H | 74.09200 | 98.74380 | 82.14690 | 2921.37174  | -315.68092  | -1124.34823 | 1 |
| 4539 | C | 70.66400 | 95.62680 | 81.57990 | 638.67776   | -508.31582  | 406.39483   | 1 |
| 4540 | O | 71.63400 | 94.88780 | 81.55090 | 369.84116   | -455.37454  | 528.65752   | 1 |
| 4541 | N | 69.57000 | 95.38880 | 82.35190 | 803.66949   | -239.38050  | 97.38902    | 1 |
| 4542 | H | 68.96800 | 96.18380 | 82.34090 | -2589.51248 | -1310.92543 | -1214.13583 | 1 |
| 4543 | C | 69.53900 | 94.32680 | 83.36790 | 227.23494   | 552.83012   | -688.61756  | 1 |
| 4544 | H | 70.45500 | 94.44680 | 83.92590 | 2560.88098  | -475.18417  | 1764.74215  | 1 |
| 4545 | C | 68.35200 | 94.52480 | 84.31790 | 87.53090    | 727.64337   | -542.51680  | 1 |
| 4546 | H | 67.36300 | 94.44580 | 83.81990 | -659.21951  | -1877.00824 | -2437.31326 | 1 |
| 4547 | O | 68.41100 | 95.81580 | 84.87890 | -664.26496  | 135.27103   | 405.06918   | 1 |
| 4548 | H | 68.22700 | 96.47080 | 84.20190 | -1867.79321 | 1268.57734  | 2190.95556  | 1 |
| 4549 | C | 68.40700 | 93.51880 | 85.52090 | 334.58799   | 259.61003   | 807.52988   | 1 |
| 4550 | H | 69.39000 | 93.63880 | 86.02390 | -1287.43396 | -2565.55837 | 1287.88598  | 1 |
| 4551 | H | 68.34500 | 92.45380 | 85.21090 | -2476.00148 | -792.48542  | -1771.89440 | 1 |
| 4552 | H | 67.62300 | 93.68880 | 86.28990 | -1667.92656 | 2667.01738  | 57.14440    | 1 |
| 4553 | C | 69.47200 | 92.96480 | 82.78390 | -358.07958  | -543.20095  | -638.87616  | 1 |
| 4554 | O | 70.18300 | 92.01380 | 83.16790 | -348.99905  | 488.97297   | -512.57422  | 1 |
| 4555 | N | 68.69300 | 92.74580 | 81.70290 | -109.01704  | -621.71391  | -560.58843  | 1 |
| 4556 | H | 68.07500 | 93.45380 | 81.37090 | -730.30748  | 2639.49080  | -1548.53658 | 1 |
| 4557 | C | 68.70100 | 91.53980 | 80.88390 | -662.93073  | 114.45947   | -615.52651  | 1 |
| 4558 | H | 68.48700 | 90.74380 | 81.58090 | -2914.49762 | -382.24865  | -1121.52389 | 1 |
| 4559 | C | 67.46700 | 91.52180 | 79.94790 | 620.59277   | 629.21794   | -224.50032  | 1 |
| 4560 | H | 67.43600 | 92.48480 | 79.39390 | -2501.80883 | -860.28054  | -1702.67325 | 1 |
| 4561 | C | 67.58700 | 90.35180 | 78.97190 | 535.72959   | -464.83957  | -573.03489  | 1 |
| 4562 | H | 68.31500 | 90.60880 | 78.17290 | 2142.21755  | -1801.19393 | 1436.95185  | 1 |
| 4563 | H | 67.83000 | 89.44380 | 79.56390 | 365.45387   | -3097.29171 | 414.06972   | 1 |
| 4564 | H | 66.63000 | 90.11080 | 78.46090 | 19.85469    | 2330.68766  | 2113.22670  | 1 |
| 4565 | C | 66.22300 | 91.42980 | 80.81690 | -707.73477  | 15.43062    | 574.73854   | 1 |
| 4566 | H | 66.46200 | 90.58180 | 81.49390 | 311.26424   | 2840.24579  | -1316.94521 | 1 |
| 4567 | H | 65.95000 | 92.31380 | 81.43190 | -2978.16376 | 394.76408   | 934.30623   | 1 |
| 4568 | H | 65.35400 | 91.25480 | 80.14690 | -497.98330  | 798.72272   | -3002.04612 | 1 |
| 4569 | C | 69.96800 | 91.16980 | 80.22890 | -188.01956  | -683.09886  | -573.99965  | 1 |
| 4570 | O | 70.47700 | 90.03780 | 80.42490 | -516.56066  | 134.50138   | 581.98084   | 1 |
| 4571 | N | 70.63000 | 92.18480 | 79.60790 | -8.12667    | 4.64669     | -844.14729  | 1 |
| 4572 | H | 70.22000 | 93.09380 | 79.61990 | 1523.40750  | 1233.98071  | -2460.63964 | 1 |
| 4573 | C | 71.92800 | 91.98880 | 78.97590 | 724.33748   | 22.69976    | -553.41751  | 1 |
| 4574 | H | 71.80600 | 91.16980 | 78.28290 | -1470.38710 | -1832.10135 | -2092.74763 | 1 |
| 4575 | C | 72.28500 | 93.29280 | 78.21890 | 681.65803   | 232.56653   | 559.20134   | 1 |
| 4576 | H | 72.23900 | 94.14980 | 78.92390 | 652.18002   | 358.61990   | 3056.84138  | 1 |
| 4577 | H | 71.45200 | 93.48680 | 77.50990 | 2058.21365  | 2371.17056  | 198.82898   | 1 |
| 4578 | N | 73.90700 | 92.75580 | 76.30690 | 64.67433    | 628.99855   | -559.33027  | 1 |
| 4579 | C | 73.69000 | 93.34780 | 77.52990 | -638.33125  | -339.06739  | 555.89344   | 1 |
| 4580 | C | 75.18200 | 92.83380 | 76.13690 | 826.59966   | -137.74320  | 359.45906   | 1 |
| 4581 | H | 75.67100 | 92.43480 | 75.24890 | 423.03514   | -1181.67822 | 2884.94438  | 1 |
| 4582 | N | 75.77500 | 93.60580 | 77.05090 | 344.91991   | 200.20735   | 744.05615   | 1 |

|      |   |          |          |          |             |             |             |   |
|------|---|----------|----------|----------|-------------|-------------|-------------|---|
| 4583 | H | 76.65800 | 94.06280 | 76.94590 | -1917.73075 | 2493.55337  | -52.21686   | 1 |
| 4584 | C | 74.81900 | 93.91180 | 77.94990 | 678.46801   | -128.43498  | 595.51375   | 1 |
| 4585 | H | 75.04900 | 94.45280 | 78.85990 | 774.59397   | 2493.51352  | 1755.16972  | 1 |
| 4586 | C | 73.04300 | 91.56380 | 79.87290 | 571.84372   | 618.60609   | -348.95883  | 1 |
| 4587 | O | 73.74200 | 90.57580 | 79.61790 | -197.21200  | 523.09428   | -557.76969  | 1 |
| 4588 | N | 73.21000 | 92.24180 | 81.05590 | 291.77962   | -277.67722  | -741.91125  | 1 |
| 4589 | H | 72.64300 | 93.05680 | 81.13690 | 2270.83949  | -1480.64662 | -1596.62138 | 1 |
| 4590 | C | 74.29500 | 91.86580 | 81.98990 | 879.52314   | 114.28282   | -211.72974  | 1 |
| 4591 | H | 75.18400 | 91.84580 | 81.37690 | 3132.16728  | 291.18965   | -54.43283   | 1 |
| 4592 | C | 74.49600 | 92.83180 | 83.17390 | 78.17615    | 588.24346   | 692.32154   | 1 |
| 4593 | H | 74.67900 | 93.79680 | 82.65490 | -1426.37341 | -1249.81477 | -2510.30838 | 1 |
| 4594 | H | 75.41600 | 92.54880 | 83.72790 | 2186.68951  | -1572.98743 | -1625.52323 | 1 |
| 4595 | C | 73.24000 | 93.09080 | 84.05290 | 662.55941   | -622.36375  | 71.61974    | 1 |
| 4596 | H | 72.39000 | 93.37280 | 83.39590 | 1014.02519  | -748.94488  | -2882.54414 | 1 |
| 4597 | H | 72.91000 | 92.17080 | 84.58190 | -2715.90045 | -1346.48108 | -842.08058  | 1 |
| 4598 | C | 73.48100 | 94.11680 | 85.15190 | 683.93941   | 403.93374   | 447.78948   | 1 |
| 4599 | H | 74.37300 | 93.91880 | 85.78490 | -1782.77323 | -757.13202  | 2479.25331  | 1 |
| 4600 | H | 72.53000 | 94.04580 | 85.72190 | -1822.53489 | -1756.39145 | -1868.60426 | 1 |
| 4601 | C | 73.73200 | 95.54680 | 84.66290 | 545.29584   | 421.51497   | 597.01640   | 1 |
| 4602 | H | 74.72900 | 95.68580 | 84.19190 | -1318.14961 | -1395.73166 | 2492.51699  | 1 |
| 4603 | H | 73.03400 | 95.83680 | 83.84890 | -2464.75156 | -1620.10531 | 1094.75328  | 1 |
| 4604 | N | 73.60600 | 96.46680 | 85.77390 | 561.38981   | 247.02334   | -580.08037  | 1 |
| 4605 | H | 74.04900 | 97.33580 | 85.41290 | 1370.40643  | 2602.82682  | -1116.02195 | 1 |
| 4606 | H | 72.64200 | 96.65680 | 86.11590 | 2090.48050  | 1654.70179  | 1670.35310  | 1 |
| 4607 | H | 74.11500 | 96.04880 | 86.57890 | -1191.70596 | 1390.46465  | -2558.25550 | 1 |
| 4608 | C | 74.20000 | 90.47680 | 82.54090 | -487.72473  | -733.52937  | 235.60615   | 1 |
| 4609 | O | 75.22000 | 89.85080 | 82.71690 | -64.51248   | 165.60396   | 769.44181   | 1 |
| 4610 | N | 72.94000 | 89.98980 | 82.82990 | -148.33868  | 752.92200   | -351.81869  | 1 |
| 4611 | H | 72.15000 | 90.54180 | 82.57590 | 2035.76327  | -1173.54162 | -2092.05502 | 1 |
| 4612 | C | 72.77300 | 88.66980 | 83.39290 | -879.23319  | -48.37224   | -236.77022  | 1 |
| 4613 | H | 73.52500 | 88.46980 | 84.14290 | -1609.14643 | 2702.54311  | -71.65699   | 1 |
| 4614 | C | 71.49900 | 88.70180 | 84.21990 | 37.83587    | 910.21525   | -39.08526   | 1 |
| 4615 | H | 71.14700 | 87.66280 | 84.38990 | 1.38984     | 2099.06627  | 2343.53261  | 1 |
| 4616 | H | 70.72900 | 89.15680 | 83.55990 | -1754.78517 | -2513.90825 | -706.55541  | 1 |
| 4617 | C | 71.47600 | 89.29880 | 85.56990 | 476.93117   | -776.51260  | -31.87236   | 1 |
| 4618 | C | 70.77800 | 90.40080 | 85.96290 | -110.62230  | 274.39981   | -862.50707  | 1 |
| 4619 | H | 70.21900 | 90.99680 | 85.25690 | -1962.41917 | -1198.03341 | 2147.52257  | 1 |
| 4620 | N | 70.97100 | 90.65280 | 87.28890 | 402.81749   | -571.48394  | -473.09245  | 1 |
| 4621 | H | 70.71100 | 91.40380 | 87.85690 | -719.28466  | 346.24748   | 3043.18394  | 1 |
| 4622 | C | 71.85300 | 89.77980 | 87.78790 | 292.22307   | 507.77742   | 698.72654   | 1 |
| 4623 | C | 72.27800 | 88.91180 | 86.70390 | -431.23208  | 292.37630   | -748.33548  | 1 |
| 4624 | C | 73.18300 | 87.88980 | 86.97590 | 110.92114   | -779.99310  | 459.08416   | 1 |
| 4625 | H | 73.42800 | 87.26580 | 86.12990 | 2287.71933  | -289.27582  | 2140.30045  | 1 |
| 4626 | C | 73.70000 | 87.73080 | 88.28690 | 750.75952   | 468.30409   | -220.23266  | 1 |
| 4627 | H | 74.41700 | 86.99880 | 88.62790 | 3082.43382  | 241.78196   | -581.69534  | 1 |
| 4628 | C | 72.45600 | 89.67880 | 89.07590 | -701.25082  | -569.31201  | 124.82837   | 1 |
| 4629 | H | 72.15800 | 90.33180 | 89.88290 | 1529.77907  | -1868.58338 | -2016.53128 | 1 |
| 4630 | C | 73.40800 | 88.65980 | 89.24590 | -650.35960  | -636.88868  | 53.44349    | 1 |
| 4631 | H | 73.93400 | 88.44380 | 90.16390 | 1857.00231  | -163.59676  | -2534.36476 | 1 |
| 4632 | C | 72.69700 | 87.57380 | 82.32990 | 658.27244   | -45.77019   | 629.31192   | 1 |
| 4633 | O | 72.97000 | 86.37880 | 82.59190 | -694.70592  | 143.09943   | 347.17930   | 1 |
| 4634 | N | 72.52100 | 87.89680 | 81.03990 | 453.39732   | -467.60282  | -537.07612  | 1 |
| 4635 | H | 72.43400 | 88.83280 | 80.70790 | -393.16373  | -1866.50407 | 2501.96145  | 1 |
| 4636 | C | 72.62800 | 86.81380 | 80.01690 | -458.79092  | 447.13632   | -648.86902  | 1 |
| 4637 | H | 71.96700 | 86.00480 | 80.28890 | 1427.84479  | -2257.51374 | 1662.26267  | 1 |
| 4638 | C | 72.23300 | 87.26580 | 78.62290 | -794.34215  | 395.95106   | -209.03184  | 1 |
| 4639 | H | 72.65300 | 88.28780 | 78.50190 | -632.15630  | 1171.48271  | -2850.65482 | 1 |
| 4640 | C | 72.84300 | 86.40880 | 77.46290 | -492.29276  | 743.76479   | -189.50668  | 1 |
| 4641 | H | 73.95100 | 86.34980 | 77.52190 | 1111.17608  | 1705.86769  | -2398.65157 | 1 |
| 4642 | H | 72.65800 | 86.89280 | 76.48090 | -508.42400  | -2045.45502 | 2335.77504  | 1 |
| 4643 | H | 72.31200 | 85.43280 | 77.48490 | -2905.79766 | -561.37702  | -1067.43712 | 1 |
| 4644 | C | 70.68700 | 87.36480 | 78.40590 | 474.61880   | -778.50760  | -10.67300   | 1 |

|      |   |          |          |          |             |             |             |   |
|------|---|----------|----------|----------|-------------|-------------|-------------|---|
| 4645 | H | 70.17800 | 87.61580 | 79.36090 | 2505.63229  | -493.60750  | 1837.49413  | 1 |
| 4646 | H | 70.28600 | 86.36180 | 78.14590 | -2088.49886 | 2257.64032  | 662.91699   | 1 |
| 4647 | C | 70.16400 | 88.41780 | 77.37290 | -137.92445  | -819.75694  | -374.73511  | 1 |
| 4648 | H | 70.16200 | 89.45380 | 77.77490 | 1957.10291  | -2458.53115 | 153.61966   | 1 |
| 4649 | H | 70.78400 | 88.37580 | 76.45190 | 1932.01789  | 2179.48750  | -1189.69212 | 1 |
| 4650 | H | 69.12400 | 88.13080 | 77.10890 | -2594.16435 | 416.06165   | 1730.73113  | 1 |
| 4651 | C | 74.09800 | 86.35680 | 79.99190 | -45.64211   | 821.74823   | -392.55273  | 1 |
| 4652 | O | 74.44300 | 85.17380 | 79.88790 | -352.34390  | 397.93196   | -584.06434  | 1 |
| 4653 | N | 75.07900 | 87.26580 | 80.13590 | 737.87333   | -276.43125  | -302.98680  | 1 |
| 4654 | H | 74.93300 | 88.23280 | 80.33190 | -2233.39283 | -1780.45828 | 1319.14783  | 1 |
| 4655 | C | 76.53100 | 86.84580 | 80.13590 | 653.50581   | 439.88827   | 459.21615   | 1 |
| 4656 | H | 76.71700 | 86.27180 | 79.24090 | -1159.23066 | -1613.09012 | -2439.74400 | 1 |
| 4657 | C | 77.40900 | 88.11280 | 80.22090 | -576.65164  | 700.18875   | -93.05699   | 1 |
| 4658 | H | 77.21600 | 88.75580 | 81.10590 | 2183.85902  | -1768.74676 | 1414.39771  | 1 |
| 4659 | H | 78.45900 | 87.76480 | 80.12190 | 2384.49466  | 930.86428   | -1829.18101 | 1 |
| 4660 | O | 77.20500 | 88.90880 | 79.06090 | -144.64983  | 220.02156   | 744.50935   | 1 |
| 4661 | H | 77.49200 | 88.41880 | 78.28790 | -857.99633  | 639.18082   | -2958.63421 | 1 |
| 4662 | C | 76.88800 | 85.98480 | 81.37890 | 423.49418   | 466.81827   | -658.92669  | 1 |
| 4663 | O | 77.68100 | 85.04580 | 81.27590 | -303.67832  | -657.44464  | -314.91785  | 1 |
| 4664 | N | 76.30800 | 86.30980 | 82.50890 | -341.63208  | 771.76511   | -18.39636   | 1 |
| 4665 | H | 75.81500 | 87.17280 | 82.58490 | 2671.56451  | 957.79820   | -1357.78934 | 1 |
| 4666 | C | 76.52700 | 85.56580 | 83.70690 | 473.79959   | -775.19806  | -77.67188   | 1 |
| 4667 | H | 77.58500 | 85.35280 | 83.73190 | 1757.41538  | 1548.54438  | 2100.41132  | 1 |
| 4668 | C | 76.04800 | 86.41380 | 84.93190 | -224.86717  | 416.92979   | -779.13754  | 1 |
| 4669 | H | 74.99000 | 86.70980 | 84.76990 | 2129.80883  | 463.56755   | -2268.75422 | 1 |
| 4670 | C | 76.15300 | 85.60480 | 86.26390 | 693.97884   | 573.33548   | -145.36439  | 1 |
| 4671 | H | 75.89400 | 86.33780 | 87.05790 | 1022.76268  | -2880.91752 | -743.30139  | 1 |
| 4672 | H | 75.51400 | 84.69780 | 86.20590 | -1205.53578 | -2376.94491 | 1671.83810  | 1 |
| 4673 | H | 77.18100 | 85.20780 | 86.40790 | 2510.26980  | -613.46551  | -1794.55616 | 1 |
| 4674 | C | 76.77600 | 87.79080 | 84.99490 | -652.83463  | 175.22999   | -612.00686  | 1 |
| 4675 | H | 76.92500 | 88.38780 | 84.06990 | -3061.43237 | 402.46148   | 603.22699   | 1 |
| 4676 | H | 76.25800 | 88.42580 | 85.74490 | -1191.17830 | -1617.91519 | 2421.08879  | 1 |
| 4677 | C | 78.21500 | 87.72780 | 85.60790 | -755.02085  | 449.50697   | -243.59392  | 1 |
| 4678 | H | 78.16500 | 87.32980 | 86.64390 | -1608.59590 | -2035.69557 | -1779.49122 | 1 |
| 4679 | H | 78.53000 | 88.77680 | 85.79690 | 1713.38234  | -2446.06988 | -989.59048  | 1 |
| 4680 | H | 78.85800 | 87.16780 | 84.89690 | -1758.95051 | -2594.07582 | 274.02545   | 1 |
| 4681 | C | 75.78700 | 84.21280 | 83.67290 | 785.59210   | -41.69588   | -461.03959  | 1 |
| 4682 | O | 76.22800 | 83.19180 | 84.17690 | -760.26374  | -47.55351   | 208.24251   | 1 |
| 4683 | N | 74.61500 | 84.11980 | 83.04490 | 568.63411   | -188.08241  | -594.93911  | 1 |
| 4684 | H | 74.13500 | 84.95480 | 82.78790 | -339.13717  | 2869.24803  | -1245.24213 | 1 |
| 4685 | C | 73.91400 | 82.81280 | 82.88690 | -714.12081  | 390.46939   | 411.11572   | 1 |
| 4686 | H | 74.00400 | 82.22380 | 83.78790 | 627.52040   | 2153.46706  | -2206.13327 | 1 |
| 4687 | C | 72.40500 | 82.98880 | 82.63790 | 728.78165   | -305.49799  | -454.97175  | 1 |
| 4688 | H | 71.80800 | 82.06780 | 82.46190 | -1939.59620 | -1719.67361 | 1782.95134  | 1 |
| 4689 | O | 72.05500 | 83.93480 | 81.60190 | -711.95499  | -76.44498   | 333.02175   | 1 |
| 4690 | H | 72.41500 | 84.72780 | 82.00590 | 2028.88158  | -1577.80108 | -1814.49979 | 1 |
| 4691 | C | 71.88900 | 83.50080 | 83.95390 | 610.30246   | -359.87625  | 573.99564   | 1 |
| 4692 | H | 72.21200 | 84.53380 | 84.20790 | 2197.15808  | -1938.77183 | -1145.37609 | 1 |
| 4693 | H | 72.03100 | 82.81280 | 84.81390 | 1808.91683  | 84.80891    | -2572.71327 | 1 |
| 4694 | H | 70.78500 | 83.62080 | 83.92590 | -1622.85904 | -2138.11175 | -1641.04629 | 1 |
| 4695 | C | 74.57400 | 81.90580 | 81.81590 | 620.58496   | -666.18084  | 50.28313    | 1 |
| 4696 | O | 74.51000 | 80.70880 | 81.83790 | -641.08760  | 129.02499   | 442.70360   | 1 |
| 4697 | N | 75.20800 | 82.54480 | 80.80190 | 479.05021   | 677.55215   | 155.26194   | 1 |
| 4698 | H | 75.17800 | 83.52780 | 80.63590 | -837.16039  | -1004.73959 | 2861.44842  | 1 |
| 4699 | C | 76.14000 | 81.91880 | 79.89590 | 163.53308   | 867.18234   | 229.57076   | 1 |
| 4700 | H | 75.54400 | 81.19980 | 79.35290 | 2581.68508  | 1356.24594  | -1180.56144 | 1 |
| 4701 | C | 76.52300 | 82.92480 | 78.72290 | 281.23824   | 729.14528   | -469.79061  | 1 |
| 4702 | H | 75.62500 | 83.11680 | 78.09690 | 2071.08828  | -1560.73574 | -1781.27019 | 1 |
| 4703 | H | 76.66500 | 83.94280 | 79.14390 | 2175.09361  | -2265.87376 | -181.68689  | 1 |
| 4704 | C | 77.84600 | 82.66780 | 77.99590 | -611.28743  | 136.94309   | 662.58982   | 1 |
| 4705 | H | 77.88700 | 81.63180 | 77.59590 | -1864.58453 | 2010.47920  | -1542.57063 | 1 |
| 4706 | H | 78.72200 | 82.60580 | 78.67690 | 3008.43310  | -858.42995  | 332.64770   | 1 |



|      |   |          |          |          |             |             |             |   |
|------|---|----------|----------|----------|-------------|-------------|-------------|---|
| 4707 | C | 78.18500 | 83.71880 | 76.95690 | -100.08441  | -888.55719  | 178.60636   | 1 |
| 4708 | O | 77.71100 | 83.55580 | 75.80090 | 695.97028   | 2.01554     | 373.16019   | 1 |
| 4709 | O | 78.82900 | 84.76080 | 77.27790 | 526.81165   | 293.53919   | 509.83473   | 1 |
| 4710 | C | 77.35300 | 81.31380 | 80.52590 | 123.66998   | 725.30763   | 538.59594   | 1 |
| 4711 | O | 77.70100 | 80.15980 | 80.26390 | -47.60118   | 737.08425   | -279.40682  | 1 |
| 4712 | N | 77.95800 | 82.09480 | 81.38790 | 501.09383   | 643.90192   | -216.72006  | 1 |
| 4713 | H | 77.75900 | 83.05180 | 81.58290 | -1879.33957 | -2215.99323 | -1206.51688 | 1 |
| 4714 | C | 79.11300 | 81.64780 | 82.15290 | -452.63025  | 499.63369   | -613.95687  | 1 |
| 4715 | H | 79.84000 | 81.34180 | 81.41590 | 786.17076   | -2556.41567 | -1656.77418 | 1 |
| 4716 | C | 79.73600 | 82.80780 | 82.92590 | 554.46504   | -703.14981  | 172.04613   | 1 |
| 4717 | H | 79.00500 | 83.27380 | 83.62090 | 2004.73176  | -30.22616   | 2424.53360  | 1 |
| 4718 | H | 80.07200 | 83.58180 | 82.20390 | 1772.73343  | -1970.85715 | 1694.51011  | 1 |
| 4719 | H | 80.64900 | 82.46280 | 83.45690 | 2.80618     | 2331.74634  | -2112.14993 | 1 |
| 4720 | C | 78.82700 | 80.48580 | 83.13890 | -364.78748  | -599.64303  | -582.07331  | 1 |
| 4721 | O | 79.55900 | 79.51980 | 83.22390 | 155.80951   | 287.15421   | 718.95277   | 1 |
| 4722 | N | 77.64800 | 80.51980 | 83.78290 | 449.33258   | 348.72806   | 623.82791   | 1 |
| 4723 | H | 77.05800 | 81.29980 | 83.58990 | 1784.10871  | 2072.15124  | -1556.07570 | 1 |
| 4724 | C | 77.12500 | 79.38880 | 84.44290 | -295.09981  | -726.39276  | 465.53266   | 1 |
| 4725 | H | 77.86300 | 79.04080 | 85.15090 | -2727.53363 | -1206.29691 | -1001.81550 | 1 |
| 4726 | C | 75.91800 | 79.80180 | 85.39390 | -757.97348  | -220.69563  | -456.31201  | 1 |
| 4727 | H | 75.08100 | 80.21480 | 84.79090 | 1548.95543  | -1156.06598 | 2482.43323  | 1 |
| 4728 | H | 75.49200 | 78.90680 | 85.89490 | 1945.07207  | 1925.55312  | -1551.50444 | 1 |
| 4729 | C | 76.28200 | 80.82580 | 86.48490 | -429.60876  | 81.85717    | 800.11669   | 1 |
| 4730 | H | 76.98000 | 81.55880 | 86.02790 | 3043.05091  | 527.76234   | -599.61179  | 1 |
| 4731 | C | 74.98200 | 81.56780 | 86.85190 | -739.86855  | -312.57104  | -431.67682  | 1 |
| 4732 | H | 75.18900 | 82.57080 | 87.28190 | -2660.18509 | -1222.97732 | -1151.50683 | 1 |
| 4733 | H | 74.37200 | 80.96780 | 87.56090 | 447.33926   | -2204.42072 | 2199.69159  | 1 |
| 4734 | H | 74.21300 | 81.76580 | 86.07590 | -2694.53847 | -1171.12975 | -1125.23053 | 1 |
| 4735 | C | 77.11200 | 80.14080 | 87.64290 | 469.81814   | -361.58067  | -692.80686  | 1 |
| 4736 | H | 78.19900 | 80.15580 | 87.41590 | -732.39479  | -2433.87245 | -1854.20845 | 1 |
| 4737 | H | 76.72400 | 79.10680 | 87.76490 | 765.36022   | -721.81661  | -2965.03469 | 1 |
| 4738 | H | 77.02300 | 80.76480 | 88.55790 | -1923.97086 | -2479.18462 | 224.06694   | 1 |
| 4739 | C | 76.81200 | 78.16480 | 83.60190 | -22.31535   | 583.42087   | 700.40925   | 1 |
| 4740 | O | 76.88800 | 77.02780 | 84.09590 | 685.45654   | -368.42810  | -134.30301  | 1 |
| 4741 | N | 76.40900 | 78.34580 | 82.33290 | 119.54106   | -327.95053  | -768.65511  | 1 |
| 4742 | H | 76.25200 | 79.28280 | 82.02990 | -478.66696  | 1307.72408  | -2821.16322 | 1 |
| 4743 | C | 76.00000 | 77.24280 | 81.44990 | 226.40760   | -710.74026  | 524.44150   | 1 |
| 4744 | H | 75.30300 | 76.60780 | 81.97590 | -1972.63729 | 1232.05443  | 2118.71901  | 1 |
| 4745 | C | 75.34000 | 77.71080 | 80.16190 | -746.49746  | 356.20258   | -383.81280  | 1 |
| 4746 | H | 74.36600 | 78.17280 | 80.43090 | -560.59934  | 2524.15006  | -1792.37861 | 1 |
| 4747 | H | 76.02600 | 78.35680 | 79.57290 | 2904.65159  | -1130.66475 | 427.57756   | 1 |
| 4748 | H | 75.07000 | 76.89780 | 79.45490 | -1751.90925 | -2497.87211 | 767.90308   | 1 |
| 4749 | C | 77.21500 | 76.45580 | 81.18090 | 254.29364   | 646.04355   | 591.11207   | 1 |
| 4750 | O | 77.05800 | 75.22780 | 81.01690 | 85.78053    | 472.65664   | 626.78914   | 1 |
| 4751 | N | 78.42600 | 76.99280 | 81.18490 | 358.51261   | -73.79128   | 760.72061   | 1 |
| 4752 | H | 78.51000 | 77.98480 | 81.24190 | 2131.35755  | -951.09259  | 2109.73081  | 1 |
| 4753 | C | 79.72500 | 76.37280 | 80.94990 | 790.95648   | -213.49684  | 400.32231   | 1 |
| 4754 | H | 79.67100 | 75.84580 | 80.00890 | -2579.11328 | -1694.61832 | -612.10266  | 1 |
| 4755 | C | 80.84500 | 77.40480 | 80.87490 | -626.90113  | 612.71879   | -251.04114  | 1 |
| 4756 | H | 81.81300 | 76.89780 | 80.67290 | 1830.89959  | -2197.76584 | -1309.90773 | 1 |
| 4757 | H | 80.83100 | 77.90280 | 81.86790 | -790.79718  | 1507.55025  | 2645.78122  | 1 |
| 4758 | C | 80.72800 | 78.48680 | 79.85590 | 479.70328   | 135.08583   | -763.60172  | 1 |
| 4759 | C | 79.79900 | 78.45180 | 78.78390 | -183.74456  | -156.55681  | -879.30592  | 1 |
| 4760 | H | 79.19800 | 77.57480 | 78.59390 | 1926.01378  | 2015.95197  | 1457.61271  | 1 |
| 4761 | C | 79.71500 | 79.51180 | 77.92990 | -489.63198  | -675.39204  | 368.18083   | 1 |
| 4762 | H | 78.93100 | 79.51880 | 77.18690 | -2290.19744 | 314.94731   | 2134.01736  | 1 |
| 4763 | C | 80.60300 | 80.61280 | 78.00890 | -880.95828  | 130.84427   | 195.55891   | 1 |
| 4764 | H | 80.63700 | 81.41480 | 77.28690 | -1401.23023 | -534.01084  | -2765.79328 | 1 |
| 4765 | C | 81.56500 | 79.61080 | 80.03390 | -30.08665   | 719.81308   | 558.94089   | 1 |
| 4766 | H | 82.29100 | 79.66680 | 80.83190 | -3115.34577 | 373.38735   | 231.14680   | 1 |
| 4767 | C | 81.49000 | 80.62980 | 79.09190 | -431.76577  | -325.69810  | -734.13219  | 1 |
| 4768 | H | 82.21500 | 81.42980 | 79.14390 | 989.86037   | 1265.28560  | -2705.07949 | 1 |

|      |   |          |          |          |             |             |             |   |
|------|---|----------|----------|----------|-------------|-------------|-------------|---|
| 4769 | C | 80.06500 | 75.30780 | 81.89290 | 31.90069    | -619.47539  | -668.34391  | 1 |
| 4770 | O | 80.91900 | 74.45080 | 81.59690 | 674.12057   | 393.73415   | 119.00462   | 1 |
| 4771 | N | 79.44000 | 75.24380 | 83.07190 | 604.30545   | -486.62010  | -332.69820  | 1 |
| 4772 | H | 78.65900 | 75.82680 | 83.28190 | 105.38128   | 2691.56887  | 1625.60081  | 1 |
| 4773 | C | 79.63100 | 74.13880 | 83.98890 | -66.99465   | 63.58043    | 907.14952   | 1 |
| 4774 | H | 80.68900 | 74.07380 | 84.19190 | 2817.10129  | -1089.75806 | 880.11018   | 1 |
| 4775 | C | 78.87000 | 74.41180 | 85.37190 | -411.44980  | -610.69340  | -537.78586  | 1 |
| 4776 | H | 78.83600 | 73.47280 | 85.96590 | -1799.52483 | -1148.24537 | -2311.16187 | 1 |
| 4777 | H | 77.82200 | 74.75780 | 85.24390 | 738.91547   | 2930.71442  | 873.58066   | 1 |
| 4778 | C | 79.70500 | 75.33080 | 86.30090 | 16.30274    | 410.88287   | 813.85533   | 1 |
| 4779 | C | 79.44800 | 76.73280 | 86.29990 | 328.68061   | -573.89021  | -627.75002  | 1 |
| 4780 | H | 78.60500 | 77.12880 | 85.75290 | 2073.69103  | 1839.07786  | 1488.56453  | 1 |
| 4781 | C | 80.18400 | 77.60480 | 87.17890 | -239.16738  | 833.38714   | -282.33993  | 1 |
| 4782 | H | 79.91800 | 78.64980 | 87.23690 | -69.32709   | 882.12279   | -3019.15209 | 1 |
| 4783 | C | 81.22300 | 77.03480 | 87.99790 | -586.87850  | 17.73531    | -697.64610  | 1 |
| 4784 | H | 81.76900 | 77.73080 | 88.61790 | 22.20190    | -2098.03390 | 2344.35216  | 1 |
| 4785 | C | 80.73400 | 74.83380 | 87.05290 | -299.66440  | 445.90339   | -736.76483  | 1 |
| 4786 | H | 80.89600 | 73.77180 | 87.15890 | -2127.09584 | -1154.87293 | -2009.96469 | 1 |
| 4787 | C | 81.50200 | 75.61880 | 87.92690 | -213.40335  | 885.98350   | 30.71242    | 1 |
| 4788 | H | 82.33500 | 75.21480 | 88.48390 | -441.49341  | 2000.91161  | -2387.39660 | 1 |
| 4789 | C | 79.16300 | 72.79280 | 83.47990 | -512.18341  | 551.44290   | -514.81054  | 1 |
| 4790 | O | 79.55200 | 71.72080 | 84.04290 | 546.98955   | -434.99900  | -367.70305  | 1 |
| 4791 | N | 78.30700 | 72.68380 | 82.44790 | -838.63012  | 80.80121    | 53.31956    | 1 |
| 4792 | H | 77.94400 | 73.50180 | 82.00890 | 1039.05760  | -615.25822  | 2905.17518  | 1 |
| 4793 | C | 78.01100 | 71.39980 | 81.79690 | -309.55387  | 391.59378   | -763.07386  | 1 |
| 4794 | H | 77.51000 | 70.87580 | 82.59890 | 1354.97506  | 1384.02390  | -2479.26333 | 1 |
| 4795 | C | 77.14300 | 71.47680 | 80.57290 | -596.12525  | -477.18205  | 498.38036   | 1 |
| 4796 | H | 76.78100 | 70.46380 | 80.29490 | -985.45094  | -236.74442  | -2978.43327 | 1 |
| 4797 | H | 76.21100 | 71.97380 | 80.91690 | -387.48183  | -1088.87301 | 2926.16466  | 1 |
| 4798 | N | 77.72300 | 73.44280 | 79.04490 | 341.93191   | -771.55333  | -21.45493   | 1 |
| 4799 | H | 77.43600 | 74.19280 | 79.63990 | -1938.80414 | -1989.10208 | -1477.40910 | 1 |
| 4800 | C | 77.73900 | 72.10080 | 79.28290 | 344.02764   | 657.14981   | 530.33019   | 1 |
| 4801 | C | 78.21500 | 73.63280 | 77.79190 | -501.13935  | -650.85986  | -395.84316  | 1 |
| 4802 | H | 78.09200 | 74.62580 | 77.35890 | 2928.43007  | -608.88172  | 975.59552   | 1 |
| 4803 | N | 78.44100 | 72.46680 | 77.21390 | 490.42239   | -384.41680  | -569.54534  | 1 |
| 4804 | C | 78.16100 | 71.51680 | 78.14890 | -688.54299  | -588.20201  | 106.66745   | 1 |
| 4805 | H | 78.36500 | 70.47680 | 77.92590 | 1216.27355  | 1923.67520  | -2172.18291 | 1 |
| 4806 | C | 79.20000 | 70.61280 | 81.39290 | 735.05954   | 475.77954   | 254.50403   | 1 |
| 4807 | O | 79.29400 | 69.44680 | 81.75690 | -83.43832   | 41.34332    | -784.19131  | 1 |
| 4808 | N | 80.23700 | 71.24080 | 80.70990 | 572.91786   | 430.53569   | -446.17982  | 1 |
| 4809 | H | 80.12400 | 72.15080 | 80.31990 | -1145.03920 | -2406.47985 | -1672.11428 | 1 |
| 4810 | C | 81.53600 | 70.68980 | 80.37790 | 262.62537   | -782.51813  | -387.48458  | 1 |
| 4811 | H | 81.30400 | 69.88380 | 79.69790 | 319.28447   | -2656.90068 | -1654.43720 | 1 |
| 4812 | C | 82.43700 | 71.71380 | 79.66390 | 595.61793   | 253.45936   | -642.22165  | 1 |
| 4813 | H | 82.58700 | 72.59480 | 80.32390 | 637.66042   | 936.40154   | 2935.09243  | 1 |
| 4814 | H | 83.49300 | 71.39880 | 79.52090 | 1359.47320  | -2172.67367 | -1824.70490 | 1 |
| 4815 | S | 81.70000 | 72.38080 | 78.16590 | 99.41861    | -448.52625  | 316.46604   | 1 |
| 4816 | H | 80.97600 | 71.33580 | 77.79290 | 1224.90468  | -1566.27297 | 2438.15991  | 1 |
| 4817 | C | 82.28600 | 70.13480 | 81.59390 | -536.82951  | 549.70559   | 491.00799   | 1 |
| 4818 | O | 82.97200 | 69.12480 | 81.49390 | -432.37493  | 390.92855   | 532.77952   | 1 |
| 4819 | N | 82.03700 | 70.65580 | 82.81090 | 10.04037    | -152.43001  | 830.26295   | 1 |
| 4820 | H | 81.50900 | 71.49380 | 82.92690 | -1332.28925 | 1918.42969  | 2107.80908  | 1 |
| 4821 | C | 82.76200 | 70.16280 | 84.01490 | -508.81131  | 510.36718   | -558.64783  | 1 |
| 4822 | H | 83.68700 | 69.72280 | 83.67190 | 2442.91795  | 1691.13637  | -1034.61871 | 1 |
| 4823 | C | 82.99500 | 71.37380 | 84.95390 | 747.48769   | -516.64910  | 76.07140    | 1 |
| 4824 | H | 83.61300 | 70.98680 | 85.79290 | -2661.14238 | 1489.24911  | 773.74709   | 1 |
| 4825 | H | 82.07200 | 71.89880 | 85.27890 | -560.36490  | -2073.15394 | -2299.18467 | 1 |
| 4826 | S | 83.97900 | 72.63280 | 84.11290 | -393.35366  | 170.28612   | 357.05201   | 1 |
| 4827 | H | 85.18200 | 72.12980 | 84.34390 | -934.84142  | 706.51112   | -2919.78420 | 1 |
| 4828 | C | 81.93800 | 69.10780 | 84.71990 | -663.17384  | 500.13723   | 376.18375   | 1 |
| 4829 | O | 82.51800 | 68.29280 | 85.42290 | -489.82023  | -377.73486  | -490.93762  | 1 |
| 4830 | N | 80.65300 | 69.10580 | 84.45990 | 620.55471   | -132.67695  | 556.75935   | 1 |

|      |   |          |          |          |             |             |             |   |
|------|---|----------|----------|----------|-------------|-------------|-------------|---|
| 4831 | H | 80.19800 | 69.73580 | 83.83490 | -2555.32480 | -1828.15402 | -162.46305  | 1 |
| 4832 | C | 79.68700 | 68.14480 | 85.04490 | -411.87352  | 253.31633   | -773.07312  | 1 |
| 4833 | H | 80.05800 | 67.92580 | 86.03490 | -1436.50210 | -2775.98866 | -358.57345  | 1 |
| 4834 | C | 78.28300 | 68.75380 | 85.06290 | -345.68825  | 763.58357   | 359.01361   | 1 |
| 4835 | H | 77.45500 | 68.03180 | 85.23190 | 2182.10346  | 2181.03833  | 616.21628   | 1 |
| 4836 | H | 78.09100 | 69.16680 | 84.04990 | 1968.74098  | -958.03083  | -2259.30567 | 1 |
| 4837 | C | 78.00400 | 69.82480 | 86.20890 | 21.66441    | 198.75540   | 889.65046   | 1 |
| 4838 | H | 78.90500 | 70.47180 | 86.14290 | -1124.67544 | 653.13390   | -2864.74213 | 1 |
| 4839 | C | 76.81100 | 70.73680 | 85.85990 | -442.51807  | 603.47208   | 521.00884   | 1 |
| 4840 | H | 76.67900 | 71.41480 | 86.72990 | -1424.58125 | 2302.51876  | -1602.24900 | 1 |
| 4841 | H | 77.14500 | 71.31780 | 84.97290 | -1675.25388 | 735.45172   | -2559.46507 | 1 |
| 4842 | H | 75.93600 | 70.06580 | 85.72890 | 2457.59394  | 1188.55643  | 1563.90277  | 1 |
| 4843 | C | 77.83700 | 69.07980 | 87.51390 | 259.07306   | 560.55749   | 670.90048   | 1 |
| 4844 | H | 76.86500 | 68.54180 | 87.53190 | 2630.65550  | 885.60610   | 1481.07384  | 1 |
| 4845 | H | 77.89600 | 69.81380 | 88.34590 | 1042.12469  | -1661.88916 | -2459.74120 | 1 |
| 4846 | H | 78.56200 | 68.26680 | 87.73190 | 100.03453   | 2293.77046  | 2151.00823  | 1 |
| 4847 | C | 79.65200 | 66.80780 | 84.29190 | -497.04322  | -497.78045  | 580.18417   | 1 |
| 4848 | O | 79.37600 | 65.74280 | 84.89590 | 483.03343   | -539.98788  | -314.19584  | 1 |
| 4849 | N | 79.98800 | 66.80280 | 82.99990 | 630.53445   | -66.55911   | 557.37642   | 1 |
| 4850 | H | 80.13000 | 67.65680 | 82.50490 | 1403.00927  | -2147.30901 | -1821.77255 | 1 |
| 4851 | C | 80.27200 | 65.57980 | 82.21990 | 348.30010   | -448.08950  | -713.69030  | 1 |
| 4852 | H | 79.38000 | 64.97580 | 82.30090 | 1653.53871  | 1518.54351  | -2204.10108 | 1 |
| 4853 | C | 80.25600 | 65.98080 | 80.69390 | -330.36906  | 570.92528   | 629.56462   | 1 |
| 4854 | H | 80.91000 | 66.86380 | 80.53090 | 2649.74001  | -536.50494  | 1609.11980  | 1 |
| 4855 | H | 79.24200 | 66.28180 | 80.35290 | 28.02504    | -800.85526  | -3042.37928 | 1 |
| 4856 | C | 80.67100 | 64.84780 | 79.76590 | 95.16582    | 863.10047   | 278.30207   | 1 |
| 4857 | O | 80.29900 | 63.70080 | 79.96890 | 494.90230   | 508.91229   | 345.98732   | 1 |
| 4858 | N | 81.33000 | 65.20580 | 78.66090 | 438.82548   | -590.04873  | -414.66491  | 1 |
| 4859 | H | 81.30100 | 66.17680 | 78.42390 | -88.44591   | 2770.89819  | -1487.45648 | 1 |
| 4860 | H | 81.92300 | 64.53680 | 78.21290 | -1620.76387 | -664.79494  | 2613.31177  | 1 |
| 4861 | C | 81.38000 | 64.62380 | 82.85090 | 827.58549   | -12.68046   | 382.61268   | 1 |
| 4862 | O | 81.10700 | 63.45380 | 83.05790 | -128.54851  | 778.97455   | -17.35391   | 1 |
| 4863 | N | 82.53700 | 65.11480 | 83.31390 | -336.41963  | -722.01654  | 279.61803   | 1 |
| 4864 | C | 83.22100 | 66.26080 | 82.69590 | 545.21241   | -111.42309  | 722.34294   | 1 |
| 4865 | H | 82.94100 | 67.16080 | 83.28390 | 1549.02701  | -2008.63643 | 1861.21499  | 1 |
| 4866 | H | 82.92800 | 66.49280 | 81.64990 | 909.45614   | -1204.18131 | -2760.62730 | 1 |
| 4867 | C | 83.43800 | 64.25680 | 84.07790 | -238.07708  | -339.70476  | -812.01661  | 1 |
| 4868 | H | 83.55400 | 63.29780 | 83.59490 | 2126.73239  | -1230.34476 | 1965.06675  | 1 |
| 4869 | C | 84.69700 | 65.12580 | 84.13990 | -794.25120  | -125.86467  | 429.85360   | 1 |
| 4870 | H | 85.61200 | 64.50480 | 84.24490 | 2282.02598  | 693.88454   | 2051.61105  | 1 |
| 4871 | H | 84.61000 | 65.77680 | 85.03590 | -1598.53836 | -1253.88925 | 2402.22045  | 1 |
| 4872 | C | 84.69800 | 65.91280 | 82.85790 | -745.90164  | -524.29326  | -14.08283   | 1 |
| 4873 | H | 85.34200 | 66.81680 | 82.82290 | 1915.70789  | -1911.19203 | -1604.87836 | 1 |
| 4874 | H | 85.02000 | 65.31480 | 81.97890 | 2196.43781  | -1270.72493 | 1859.87777  | 1 |
| 4875 | C | 82.95000 | 63.89680 | 85.48290 | 699.85510   | -16.64032   | -584.27471  | 1 |
| 4876 | O | 83.29800 | 62.85680 | 86.07890 | 430.43769   | -589.05475  | -302.26665  | 1 |
| 4877 | N | 82.18500 | 64.85480 | 86.18890 | 647.91516   | -462.28353  | 281.37551   | 1 |
| 4878 | H | 82.04200 | 65.79680 | 85.89690 | -1847.35312 | -2155.36681 | -1356.43157 | 1 |
| 4879 | C | 81.67900 | 64.58180 | 87.53990 | 887.62622   | 204.82628   | 40.21058    | 1 |
| 4880 | H | 82.46700 | 64.31080 | 88.22590 | 1310.86746  | 1453.57780  | -2463.12085 | 1 |
| 4881 | C | 80.99100 | 65.83580 | 88.13590 | -474.95018  | 757.05842   | -180.93058  | 1 |
| 4882 | H | 80.39700 | 66.35780 | 87.35590 | 2521.47463  | 1877.07192  | 130.35679   | 1 |
| 4883 | C | 80.07500 | 65.51980 | 89.33090 | -484.17800  | 742.03202   | 215.43246   | 1 |
| 4884 | H | 79.23600 | 64.80180 | 89.20790 | -1420.43333 | -679.00593  | 2723.88442  | 1 |
| 4885 | H | 79.60200 | 66.50280 | 89.53890 | -348.43063  | 1610.18341  | -2680.32306 | 1 |
| 4886 | H | 80.59200 | 65.06380 | 90.20190 | -2652.82464 | 1246.87961  | 1142.82060  | 1 |
| 4887 | C | 82.10400 | 66.82480 | 88.54790 | 342.79674   | 752.15329   | 384.97640   | 1 |
| 4888 | H | 82.94700 | 66.77280 | 87.82690 | 1060.16392  | 253.18339   | 2951.30088  | 1 |
| 4889 | H | 82.54800 | 66.39380 | 89.46990 | 211.16541   | -1465.18218 | 2776.12618  | 1 |
| 4890 | C | 81.75600 | 68.27980 | 88.67090 | 768.55745   | 474.63903   | -124.45175  | 1 |
| 4891 | H | 81.18400 | 68.37880 | 89.61690 | -1083.06842 | -2623.20134 | 1357.94100  | 1 |
| 4892 | H | 82.69900 | 68.86180 | 88.75190 | -1627.98157 | -1946.31068 | 1860.04758  | 1 |

|      |   |          |          |          |             |             |             |   |
|------|---|----------|----------|----------|-------------|-------------|-------------|---|
| 4893 | H | 81.16100 | 68.59880 | 87.78890 | -1718.41937 | -506.04212  | 2586.34539  | 1 |
| 4894 | C | 80.71800 | 63.40580 | 87.53890 | 685.09411   | 526.56062   | 291.25758   | 1 |
| 4895 | O | 80.75900 | 62.52280 | 88.33690 | -297.37391  | 285.74901   | -673.45637  | 1 |
| 4896 | N | 79.82600 | 63.35580 | 86.53090 | -564.81906  | 398.55425   | -484.56808  | 1 |
| 4897 | H | 79.63700 | 64.12880 | 85.92890 | 1420.45157  | -2166.26829 | -1785.44820 | 1 |
| 4898 | C | 78.94800 | 62.20480 | 86.22690 | 3.46571     | 435.45703   | -801.13430  | 1 |
| 4899 | H | 78.49300 | 61.75780 | 87.09790 | 1788.16026  | -1479.33231 | 2124.21398  | 1 |
| 4900 | C | 77.77100 | 62.67180 | 85.34990 | -247.32046  | -653.19514  | -586.19084  | 1 |
| 4901 | H | 78.14500 | 63.09380 | 84.39290 | -1169.14294 | 2061.70156  | 2068.98953  | 1 |
| 4902 | H | 77.13300 | 61.79380 | 85.11490 | 2696.87489  | 115.39037   | 1616.09935  | 1 |
| 4903 | C | 76.80000 | 63.71180 | 86.07290 | -89.35583   | -902.76136  | 92.13284    | 1 |
| 4904 | H | 77.33300 | 64.63980 | 86.37290 | 241.23475   | 258.76471   | -3126.19143 | 1 |
| 4905 | C | 75.74100 | 64.25280 | 85.11390 | 508.89365   | -686.87176  | -317.30970  | 1 |
| 4906 | H | 76.09600 | 64.59780 | 84.11990 | 1290.22365  | -2286.51655 | -1733.60642 | 1 |
| 4907 | H | 74.99800 | 63.47780 | 84.82990 | -1470.30461 | 176.98919   | -2775.80717 | 1 |
| 4908 | H | 75.09800 | 65.00780 | 85.61490 | 2434.08427  | -1731.40928 | 987.76611   | 1 |
| 4909 | C | 76.08600 | 63.16980 | 87.28090 | -698.92658  | -473.00164  | -345.28551  | 1 |
| 4910 | H | 75.75700 | 62.14180 | 87.01690 | -444.39435  | -2545.30035 | 1795.04485  | 1 |
| 4911 | H | 76.70900 | 63.27280 | 88.19590 | 1112.26189  | 2060.49673  | 2101.29792  | 1 |
| 4912 | H | 75.17000 | 63.75080 | 87.51990 | -1081.19711 | -1744.84542 | 2384.27211  | 1 |
| 4913 | C | 79.71000 | 61.03980 | 85.48290 | 407.63862   | 567.41295   | -585.93883  | 1 |
| 4914 | O | 79.10700 | 60.24680 | 84.78490 | -160.11677  | 548.56613   | 545.03674   | 1 |
| 4915 | N | 81.05000 | 60.89580 | 85.67690 | 535.16889   | -564.79892  | -327.51905  | 1 |
| 4916 | H | 81.56300 | 61.63580 | 86.10390 | 1084.70637  | -1558.34142 | 2508.62718  | 1 |
| 4917 | C | 81.67900 | 59.58380 | 85.48290 | 568.02070   | -235.90330  | 673.16649   | 1 |
| 4918 | H | 80.94000 | 58.86180 | 85.16790 | -1777.96583 | 935.53677   | 2421.12261  | 1 |
| 4919 | C | 82.84300 | 59.77880 | 84.44790 | 539.89634   | -555.84947  | 480.61868   | 1 |
| 4920 | H | 83.72900 | 59.14880 | 84.67490 | 1893.32725  | 1319.30710  | 2138.44966  | 1 |
| 4921 | H | 83.19000 | 60.83380 | 84.42090 | 1060.88305  | 2829.74290  | 874.81911   | 1 |
| 4922 | C | 82.46800 | 59.21580 | 83.06090 | 638.82962   | -68.15783   | -647.07204  | 1 |
| 4923 | C | 82.09700 | 57.87180 | 82.98090 | -614.41689  | 664.29035   | -112.52206  | 1 |
| 4924 | H | 82.06500 | 57.29180 | 83.89090 | -1039.31101 | 257.72386   | -2958.31663 | 1 |
| 4925 | C | 81.76000 | 57.32380 | 81.74990 | -200.07316  | -400.13889  | 794.55057   | 1 |
| 4926 | H | 81.57400 | 56.26280 | 81.67190 | 1132.54480  | 2819.76813  | -815.15411  | 1 |
| 4927 | C | 81.73300 | 58.12080 | 80.62590 | 794.88340   | -446.15328  | -23.63556   | 1 |
| 4928 | O | 81.35100 | 57.56780 | 79.39290 | 474.27188   | 613.47937   | -149.45392  | 1 |
| 4929 | H | 80.98200 | 56.68280 | 79.44890 | -2193.12138 | -319.55392  | -2233.00921 | 1 |
| 4930 | C | 82.57200 | 59.98580 | 81.93490 | 662.44523   | -600.59580  | -178.61133  | 1 |
| 4931 | H | 82.88300 | 61.01080 | 82.07090 | 2145.09316  | -1742.62567 | -1503.34871 | 1 |
| 4932 | C | 82.18800 | 59.43480 | 80.71690 | -585.85399  | -486.28005  | -501.75474  | 1 |
| 4933 | H | 82.27300 | 60.00980 | 79.80690 | -2931.97802 | -993.46169  | 561.03920   | 1 |
| 4934 | C | 82.20300 | 59.06980 | 86.83590 | 541.32979   | 112.43807   | 725.10050   | 1 |
| 4935 | O | 82.67700 | 57.91880 | 86.94890 | 332.09874   | 31.53896    | 715.78136   | 1 |
| 4936 | N | 82.03300 | 59.88880 | 87.89690 | -705.35059  | -270.74143  | -376.63232  | 1 |
| 4937 | H | 81.63800 | 60.79980 | 87.80690 | -2286.10306 | 230.95421   | 2149.09730  | 1 |
| 4938 | C | 82.49000 | 59.51680 | 89.18790 | -428.60429  | -658.60830  | -462.58456  | 1 |
| 4939 | H | 83.47100 | 59.07480 | 89.09290 | -656.54819  | -2944.77325 | 891.89752   | 1 |
| 4940 | C | 82.64400 | 60.75380 | 90.06890 | 594.76028   | 562.03824   | -402.27382  | 1 |
| 4941 | H | 83.36700 | 60.50080 | 90.87390 | 1955.73995  | -1226.39319 | 2137.58443  | 1 |
| 4942 | H | 81.69200 | 61.08180 | 90.53790 | 2705.22946  | -863.29827  | 1354.50209  | 1 |
| 4943 | H | 83.13700 | 61.58380 | 89.51890 | -2831.04941 | -1372.20502 | -20.94952   | 1 |
| 4944 | C | 81.62000 | 58.45680 | 89.91790 | 690.61544   | 503.73551   | 317.41432   | 1 |
| 4945 | O | 80.36400 | 58.52880 | 89.88090 | 473.31981   | 534.42028   | -337.62487  | 1 |
| 4946 | N | 82.22900 | 57.62180 | 90.79390 | -74.95390   | -710.43364  | 449.82023   | 1 |
| 4947 | H | 83.21700 | 57.48780 | 90.80390 | -2531.29487 | 1335.52380  | 1306.57900  | 1 |
| 4948 | C | 81.49200 | 56.95580 | 91.86190 | -485.07052  | 583.70129   | 505.42101   | 1 |
| 4949 | H | 82.21900 | 56.51580 | 92.52890 | 415.96401   | -2019.59418 | -2376.22379 | 1 |
| 4950 | C | 80.59000 | 57.87080 | 92.75390 | -491.30625  | -658.90044  | 394.86630   | 1 |
| 4951 | H | 79.86600 | 58.38380 | 92.08590 | 1816.04908  | 1152.37066  | 2296.13454  | 1 |
| 4952 | H | 80.09300 | 57.24080 | 93.52290 | 2201.76944  | -1700.96961 | -1468.72051 | 1 |
| 4953 | C | 81.46100 | 58.86380 | 93.52190 | -583.73211  | 606.76237   | -350.06750  | 1 |
| 4954 | C | 82.52500 | 58.47380 | 94.32090 | -97.74378   | -758.65384  | 496.32802   | 1 |

|      |   |          |          |           |             |             |             |   |
|------|---|----------|----------|-----------|-------------|-------------|-------------|---|
| 4955 | H | 82.86400 | 57.44780 | 94.30990  | 2840.28852  | -959.12381  | 954.49927   | 1 |
| 4956 | C | 83.30600 | 59.40880 | 95.01490  | 402.20585   | 465.13548   | 673.29818   | 1 |
| 4957 | H | 84.13400 | 59.10480 | 95.63690  | 2263.76029  | -1687.84156 | -1387.37393 | 1 |
| 4958 | C | 82.96400 | 60.78380 | 94.84590  | 562.69367   | 510.87950   | 503.81442   | 1 |
| 4959 | H | 83.47000 | 61.57380 | 95.38290  | 2290.66345  | 1104.58151  | 1852.29232  | 1 |
| 4960 | C | 81.16500 | 60.24680 | 93.35090  | 630.27321   | 595.89160   | 281.28258   | 1 |
| 4961 | H | 80.29800 | 60.48480 | 92.75290  | -1224.04756 | 2160.53694  | -1931.84211 | 1 |
| 4962 | C | 81.88600 | 61.18680 | 94.02290  | -516.25570  | 734.96358   | 157.35180   | 1 |
| 4963 | H | 81.69100 | 62.24580 | 93.93990  | -141.20022  | -1686.02368 | 2652.47297  | 1 |
| 4964 | C | 80.76400 | 55.70980 | 91.43490  | -500.67091  | 191.22002   | -737.70899  | 1 |
| 4965 | O | 79.70800 | 55.31080 | 91.95290  | -20.76668   | 609.16259   | 502.11245   | 1 |
| 4966 | N | 81.30300 | 54.90280 | 90.49790  | -613.53821  | 139.25076   | -562.89642  | 1 |
| 4967 | H | 82.18100 | 55.22180 | 90.14890  | -1239.73952 | 2117.27393  | 1969.37129  | 1 |
| 4968 | C | 80.71900 | 53.68480 | 89.94390  | 612.00407   | 597.23992   | -316.55411  | 1 |
| 4969 | H | 79.65100 | 53.83680 | 89.97990  | 2833.75944  | -1174.44528 | -699.07934  | 1 |
| 4970 | C | 81.27100 | 53.31280 | 88.53290  | -560.37603  | 454.47798   | -557.56567  | 1 |
| 4971 | H | 80.83700 | 52.33080 | 88.24890  | 1578.57404  | -2692.15327 | 398.29759   | 1 |
| 4972 | H | 82.36400 | 53.11580 | 88.57390  | 1257.69372  | -2241.60671 | -1814.28556 | 1 |
| 4973 | C | 80.98500 | 54.38180 | 87.51690  | -841.99760  | 349.42617   | 19.80891    | 1 |
| 4974 | H | 81.51500 | 55.32680 | 87.76390  | 2395.44139  | -729.31323  | -1904.78056 | 1 |
| 4975 | C | 81.53700 | 54.10480 | 86.08490  | 671.95339   | -472.07004  | 396.33259   | 1 |
| 4976 | H | 81.59600 | 55.10380 | 85.60390  | -965.80976  | 2726.10573  | 1238.46084  | 1 |
| 4977 | H | 82.55700 | 53.69280 | 86.23790  | -2210.97216 | -2224.80784 | -245.06818  | 1 |
| 4978 | H | 81.03200 | 53.33780 | 85.45890  | -1644.81482 | -2509.38904 | 946.45502   | 1 |
| 4979 | C | 79.54200 | 54.65580 | 87.23390  | -438.41855  | 552.71613   | -577.70672  | 1 |
| 4980 | H | 79.04100 | 54.79480 | 88.21590  | -1489.29346 | -1960.43075 | -1958.81150 | 1 |
| 4981 | H | 79.34300 | 55.38180 | 86.41690  | -2620.30005 | 1269.85404  | 1191.52198  | 1 |
| 4982 | H | 79.14800 | 53.69780 | 86.83090  | -875.74175  | -2192.85269 | 2079.11032  | 1 |
| 4983 | C | 80.97300 | 52.63780 | 90.95190  | -295.42717  | 226.19485   | 832.47203   | 1 |
| 4984 | O | 82.06500 | 52.10580 | 91.11790  | -627.35600  | 133.17096   | 460.77888   | 1 |
| 4985 | N | 79.89800 | 52.16980 | 91.66690  | 699.98022   | -390.63673  | 264.76956   | 1 |
| 4986 | H | 78.97800 | 52.45280 | 91.40590  | -682.54242  | 2389.00221  | -1930.03381 | 1 |
| 4987 | C | 80.08900 | 51.23780 | 92.72590  | -238.89617  | 603.03427   | 640.88165   | 1 |
| 4988 | H | 79.15000 | 50.75680 | 92.95390  | 2214.23644  | -2229.66527 | -154.84179  | 1 |
| 4989 | H | 80.83200 | 50.52280 | 92.40490  | -1666.71564 | 2604.77001  | -579.18770  | 1 |
| 4990 | C | 80.71500 | 51.67880 | 93.95290  | 774.96208   | -244.92028  | -413.39912  | 1 |
| 4991 | O | 81.35700 | 50.96780 | 94.71090  | 241.13544   | -647.48386  | 382.42068   | 1 |
| 4992 | N | 80.54900 | 52.96080 | 94.25390  | 210.37923   | -723.05530  | 381.58078   | 1 |
| 4993 | H | 80.17900 | 53.60180 | 93.58590  | 2801.91022  | 231.30967   | 1412.09814  | 1 |
| 4994 | C | 81.11800 | 53.58680 | 95.39990  | -687.52660  | 598.73800   | 16.46173    | 1 |
| 4995 | H | 82.06300 | 53.10980 | 95.61590  | -2114.34932 | -2272.06003 | 515.26344   | 1 |
| 4996 | C | 81.44900 | 55.05980 | 95.20090  | 14.46586    | -473.49130  | 779.13268   | 1 |
| 4997 | H | 82.12800 | 55.25980 | 94.34390  | -3143.66611 | 68.32620    | 104.50435   | 1 |
| 4998 | H | 80.47800 | 55.52680 | 94.93090  | 1235.10165  | -2883.76761 | 237.98003   | 1 |
| 4999 | H | 81.73900 | 55.58780 | 96.13490  | -2909.47399 | -1185.33090 | -167.86302  | 1 |
| 5000 | C | 80.21700 | 53.42580 | 96.59890  | 723.55233   | -554.90228  | -2.54632    | 1 |
| 5001 | O | 79.01700 | 53.23880 | 96.46890  | 631.29480   | -307.86580  | 360.98858   | 1 |
| 5002 | N | 80.81200 | 53.47280 | 97.79790  | -256.05364  | 543.33727   | 593.20607   | 1 |
| 5003 | H | 81.79700 | 53.59180 | 97.89590  | -556.24216  | 1897.09413  | 2447.41798  | 1 |
| 5004 | C | 80.10400 | 53.53380 | 99.00590  | -86.72511   | 664.13658   | 618.75064   | 1 |
| 5005 | H | 79.05200 | 53.39680 | 98.80390  | -475.19793  | 2330.06184  | -2059.90897 | 1 |
| 5006 | C | 80.72100 | 52.50880 | 100.05290 | 230.36682   | -429.05876  | -770.90253  | 1 |
| 5007 | H | 81.81400 | 52.47280 | 99.85790  | 1869.39229  | -1429.11700 | -2088.35420 | 1 |
| 5008 | H | 80.40300 | 52.62580 | 101.11090 | 2229.68911  | -1199.15006 | 1867.82008  | 1 |
| 5009 | C | 80.28200 | 51.06780 | 99.72490  | 737.32720   | 385.05736   | 373.53773   | 1 |
| 5010 | H | 80.89900 | 50.69980 | 98.87790  | -910.52263  | -2102.76751 | -2155.81621 | 1 |
| 5011 | H | 80.52600 | 50.40280 | 100.58090 | 1206.09344  | -2445.06171 | 1570.10765  | 1 |
| 5012 | C | 78.78400 | 50.94080 | 99.35690  | -220.94944  | -409.60827  | -784.12589  | 1 |
| 5013 | H | 78.65100 | 51.25080 | 98.29890  | 592.24843   | 643.37699   | -3022.17373 | 1 |
| 5014 | H | 78.23800 | 51.66280 | 100.00090 | -865.79467  | 1998.83832  | 2270.08175  | 1 |
| 5015 | C | 78.18400 | 49.58980 | 99.52590  | 655.94020   | 477.55902   | -416.08993  | 1 |
| 5016 | H | 78.30600 | 49.19080 | 100.55490 | 2211.02539  | 2206.23220  | -377.00458  | 1 |

|      |   |          |          |           |             |             |             |   |
|------|---|----------|----------|-----------|-------------|-------------|-------------|---|
| 5017 | H | 78.65300 | 48.87980 | 98.81090  | 2548.99670  | -723.66099  | 1696.21839  | 1 |
| 5018 | N | 76.74200 | 49.65680 | 99.25790  | 416.26646   | 494.79098   | 542.74894   | 1 |
| 5019 | H | 76.66100 | 49.91580 | 98.25390  | -1361.29987 | 743.28023   | 2737.26568  | 1 |
| 5020 | H | 76.41300 | 50.36980 | 99.93990  | 2244.37531  | -1615.88694 | 1499.97171  | 1 |
| 5021 | H | 76.27200 | 48.73580 | 99.36890  | -544.92497  | 471.79777   | 3062.46467  | 1 |
| 5022 | C | 80.22600 | 54.95980 | 99.62690  | -378.19203  | -96.29545   | -824.10495  | 1 |
| 5023 | O | 81.26600 | 55.62880 | 99.55690  | -515.08317  | -299.62246  | -518.21129  | 1 |
| 5024 | N | 79.06500 | 55.53180 | 100.15290 | 70.80141    | -566.95695  | -621.46542  | 1 |
| 5025 | H | 78.24600 | 54.96680 | 100.20890 | 2164.26931  | 2075.14709  | 952.85317   | 1 |
| 5026 | C | 78.96600 | 56.92180 | 100.51590 | -589.40826  | -553.58529  | -421.41694  | 1 |
| 5027 | H | 79.79100 | 57.47180 | 100.08790 | -1675.87924 | -833.15247  | -2528.93495 | 1 |
| 5028 | C | 77.72400 | 57.53680 | 99.83390  | 623.27081   | 199.74475   | -634.89096  | 1 |
| 5029 | H | 76.80700 | 57.08980 | 100.27490 | 1411.86485  | -2624.29912 | -1008.91922 | 1 |
| 5030 | H | 77.67100 | 58.59880 | 100.15690 | -2148.84816 | 713.62940   | -2184.35595 | 1 |
| 5031 | C | 77.84300 | 57.42380 | 98.31090  | -242.60111  | -876.89297  | 60.45187    | 1 |
| 5032 | C | 78.61700 | 58.35580 | 97.58790  | 105.34580   | -787.70608  | 447.07090   | 1 |
| 5033 | H | 79.29400 | 59.02580 | 98.09690  | -525.39720  | 2291.80635  | -2090.40849 | 1 |
| 5034 | C | 78.64100 | 58.25080 | 96.16690  | 851.10042   | -138.40312  | -296.51924  | 1 |
| 5035 | H | 79.20400 | 58.96380 | 95.58290  | -2920.42460 | 1090.93755  | 423.32218   | 1 |
| 5036 | C | 77.93600 | 57.23580 | 95.50590  | -630.03242  | -493.47572  | 437.02616   | 1 |
| 5037 | H | 78.04600 | 57.12480 | 94.43790  | 1998.86955  | 251.13034   | -2416.54305 | 1 |
| 5038 | C | 77.15700 | 56.45480 | 97.64590  | 577.85381   | -618.90545  | 338.36670   | 1 |
| 5039 | H | 76.68800 | 55.65580 | 98.20190  | -267.36934  | -1292.25015 | 2856.01635  | 1 |
| 5040 | C | 77.20800 | 56.31680 | 96.28190  | 561.30100   | 446.83096   | -562.79151  | 1 |
| 5041 | H | 76.74300 | 55.47580 | 95.78890  | -2001.23461 | 2387.81635  | 437.74347   | 1 |
| 5042 | C | 78.97800 | 57.25380 | 102.00090 | -768.63764  | 349.27438   | 344.46275   | 1 |
| 5043 | O | 79.06900 | 58.41480 | 102.47090 | 125.32698   | 449.02694   | 637.41289   | 1 |
| 5044 | N | 78.95100 | 56.16180 | 102.83090 | 540.14932   | -557.66368  | -331.54521  | 1 |
| 5045 | H | 78.58300 | 55.30280 | 102.48390 | -2360.81145 | 1736.90962  | -1143.65227 | 1 |
| 5046 | C | 78.88800 | 56.33080 | 104.26790 | 675.31176   | -597.84226  | -134.12552  | 1 |
| 5047 | H | 78.72600 | 57.37580 | 104.48790 | 2697.96271  | 376.01024   | 1574.11554  | 1 |
| 5048 | C | 77.73800 | 55.52780 | 104.91990 | 583.94266   | -608.02770  | -347.51156  | 1 |
| 5049 | H | 77.73700 | 55.67180 | 106.02190 | -2152.12641 | 2287.11714  | 188.87393   | 1 |
| 5050 | H | 78.02200 | 54.47280 | 104.71790 | 854.06480   | -2371.74791 | -1882.44824 | 1 |
| 5051 | C | 76.39500 | 56.07880 | 104.37490 | -387.71609  | -456.11444  | -687.81310  | 1 |
| 5052 | H | 76.33400 | 56.03080 | 103.26590 | 2421.74602  | -1977.78675 | -348.90118  | 1 |
| 5053 | H | 76.43600 | 57.17880 | 104.52490 | 2443.08952  | 841.08750   | 1795.02413  | 1 |
| 5054 | C | 75.12500 | 55.41780 | 105.00790 | 97.14733    | -453.00127  | -785.36823  | 1 |
| 5055 | H | 74.21200 | 55.89580 | 104.59090 | -829.78562  | -2235.84412 | -2051.99492 | 1 |
| 5056 | H | 75.24900 | 55.59280 | 106.09790 | -2546.31834 | -786.16770  | -1672.25282 | 1 |
| 5057 | C | 75.05000 | 53.89580 | 104.84890 | -167.98973  | -550.29803  | -707.39136  | 1 |
| 5058 | H | 75.91600 | 53.36880 | 105.30390 | 2465.04029  | -386.94185  | -1916.26684 | 1 |
| 5059 | H | 74.88900 | 53.64780 | 103.77790 | -1773.59602 | 2596.47137  | 104.49781   | 1 |
| 5060 | N | 73.87300 | 53.41980 | 105.56690 | -551.26435  | 350.18367   | -534.93112  | 1 |
| 5061 | H | 74.07600 | 53.58480 | 106.57290 | 2814.68176  | -460.90583  | -1327.91516 | 1 |
| 5062 | H | 73.01100 | 53.99980 | 105.60990 | -241.20627  | 2579.86855  | -1784.46744 | 1 |
| 5063 | H | 73.73800 | 52.42180 | 105.30890 | 1431.47478  | 1835.82938  | 2116.32622  | 1 |
| 5064 | C | 80.16700 | 55.94380 | 104.98190 | -566.28741  | -635.08442  | 327.77637   | 1 |
| 5065 | O | 80.39300 | 56.21780 | 106.18890 | -474.92593  | -350.84747  | -524.38406  | 1 |
| 5066 | N | 81.09000 | 55.32780 | 104.18990 | -623.65888  | 50.73588    | 566.69900   | 1 |
| 5067 | H | 80.83000 | 54.95680 | 103.30190 | -1478.77195 | 1668.88869  | 2219.52028  | 1 |
| 5068 | C | 82.53200 | 55.16980 | 104.40690 | 222.09073   | 827.13953   | 312.99667   | 1 |
| 5069 | H | 82.59600 | 54.28380 | 105.02190 | -3144.52774 | -72.28619   | 70.32920    | 1 |
| 5070 | C | 83.29300 | 54.91580 | 103.09090 | 63.11093    | 744.29227   | -522.96944  | 1 |
| 5071 | H | 82.81500 | 54.08480 | 102.53090 | -1224.14638 | -2204.00011 | 1882.04021  | 1 |
| 5072 | O | 84.67700 | 54.54080 | 103.24590 | -725.06844  | -109.93823  | -292.94466  | 1 |
| 5073 | H | 84.78500 | 53.96080 | 104.00290 | -304.29553  | -2261.69628 | -2165.72399 | 1 |
| 5074 | C | 83.23200 | 56.06680 | 102.10790 | -556.50453  | -374.31243  | 617.77335   | 1 |
| 5075 | H | 83.45200 | 55.63380 | 101.10790 | -1792.42401 | -2551.05235 | 421.39563   | 1 |
| 5076 | H | 83.82700 | 56.93980 | 102.45090 | -1821.08005 | -628.06650  | 2487.45375  | 1 |
| 5077 | H | 82.23100 | 56.54280 | 102.03790 | 1180.34726  | 2425.35769  | -1619.45875 | 1 |
| 5078 | C | 83.20700 | 56.25880 | 105.24790 | -485.58654  | 578.43675   | -510.94779  | 1 |

|      |   |          |          |           |             |             |             |   |
|------|---|----------|----------|-----------|-------------|-------------|-------------|---|
| 5079 | O | 83.00500 | 57.44880 | 105.00190 | 547.13124   | -567.29965  | -49.45441   | 1 |
| 5080 | N | 83.99000 | 55.88980 | 106.24490 | 529.58547   | 240.29309   | -611.94015  | 1 |
| 5081 | H | 84.16600 | 54.94980 | 106.52790 | 88.04386    | -84.20542   | 3143.78497  | 1 |
| 5082 | C | 84.73700 | 56.88680 | 106.99290 | 821.10572   | -384.26135  | -97.87550   | 1 |
| 5083 | H | 84.96900 | 57.66880 | 106.28490 | -2004.76628 | 1616.49215  | -1807.23311 | 1 |
| 5084 | C | 83.91500 | 57.42980 | 108.20490 | 901.59265   | 121.77557   | -61.25690   | 1 |
| 5085 | H | 84.21500 | 58.48080 | 108.40390 | 58.48733    | -2968.54791 | 1040.44643  | 1 |
| 5086 | H | 82.85200 | 57.49980 | 107.89190 | 1198.21386  | 1397.51495  | 2551.36468  | 1 |
| 5087 | O | 83.89700 | 56.69080 | 109.40790 | -31.33697   | 777.03860   | 137.31799   | 1 |
| 5088 | H | 83.44200 | 57.18580 | 110.09290 | 1292.49466  | 1810.80216  | 2224.56272  | 1 |
| 5089 | C | 86.04500 | 56.31880 | 107.48390 | 910.25559   | -53.67074   | 2.28316     | 1 |
| 5090 | O | 86.23700 | 55.11080 | 107.49890 | 224.73168   | 386.38818   | -651.02003  | 1 |
| 5091 | N | 86.96200 | 57.19680 | 107.92490 | 592.41732   | -115.38395  | -590.25465  | 1 |
| 5092 | H | 86.55800 | 58.10780 | 107.88190 | -196.95547  | -3017.49164 | 868.43480   | 1 |
| 5093 | C | 88.24100 | 56.92680 | 108.44490 | -44.60705   | 39.58217    | -909.88706  | 1 |
| 5094 | H | 88.79900 | 56.31480 | 107.75190 | -2313.53670 | -391.48440  | 2095.83257  | 1 |
| 5095 | C | 88.99900 | 58.27680 | 108.62790 | 528.28372   | 275.33553   | -690.33156  | 1 |
| 5096 | H | 88.48300 | 58.99280 | 109.30190 | 1616.71985  | 2514.68091  | 980.21583   | 1 |
| 5097 | H | 90.03800 | 57.98680 | 108.89590 | 2278.22391  | -1515.91739 | -1552.39059 | 1 |
| 5098 | H | 89.10200 | 58.71980 | 107.61390 | -2193.15855 | -1988.53404 | 1064.90103  | 1 |
| 5099 | C | 88.23700 | 56.08880 | 109.70490 | 636.87901   | 275.86417   | 591.38404   | 1 |
| 5100 | O | 89.01500 | 55.11480 | 109.84290 | 668.78163   | -409.00382  | 95.25881    | 1 |
| 5101 | N | 87.28400 | 56.41280 | 110.61790 | 542.61366   | 463.04814   | -451.47439  | 1 |
| 5102 | H | 86.91200 | 57.33580 | 110.56290 | 2022.12249  | -1412.01961 | 1953.31705  | 1 |
| 5103 | C | 86.97200 | 55.47480 | 111.74990 | -589.19915  | -411.36289  | -561.31626  | 1 |
| 5104 | H | 87.90700 | 55.26180 | 112.24790 | 2295.20594  | 491.90314   | -2094.82391 | 1 |
| 5105 | C | 85.97400 | 56.15380 | 112.70390 | -440.56961  | 335.32811   | 724.50292   | 1 |
| 5106 | H | 85.55200 | 55.42080 | 113.42490 | -2658.59194 | -436.23655  | 1624.75006  | 1 |
| 5107 | H | 85.16200 | 56.58080 | 112.07790 | 1386.42037  | -1331.91514 | 2490.39492  | 1 |
| 5108 | C | 86.51500 | 57.41880 | 113.51390 | -524.96174  | 589.96805   | 455.85510   | 1 |
| 5109 | H | 85.63700 | 57.75580 | 114.10590 | -403.58530  | -2866.71174 | -1231.79094 | 1 |
| 5110 | H | 86.86800 | 58.20880 | 112.81690 | 3080.02555  | 295.04673   | 569.75107   | 1 |
| 5111 | C | 87.65700 | 56.97980 | 114.46190 | -379.69386  | 543.51629   | -625.99810  | 1 |
| 5112 | O | 87.51800 | 56.06080 | 115.23690 | -568.76345  | -231.43650  | -496.56068  | 1 |
| 5113 | N | 88.78900 | 57.67580 | 114.32290 | 105.92758   | 837.51450   | -4.59422    | 1 |
| 5114 | H | 88.76800 | 58.52780 | 113.79990 | -1547.03354 | -1699.33908 | 2148.75782  | 1 |
| 5115 | H | 89.56800 | 57.40480 | 114.88790 | 25.26782    | -2350.18093 | -2091.46775 | 1 |
| 5116 | C | 86.38100 | 54.13380 | 111.32290 | 180.00555   | 27.32998    | -893.47752  | 1 |
| 5117 | O | 86.84900 | 53.05580 | 111.69790 | -204.81051  | -507.76855  | 569.07907   | 1 |
| 5118 | N | 85.41700 | 54.13580 | 110.31590 | -576.83895  | -497.44063  | -363.98067  | 1 |
| 5119 | H | 85.05700 | 54.93680 | 109.84490 | 1266.94635  | -2491.28727 | 1444.49330  | 1 |
| 5120 | C | 84.85500 | 52.81180 | 109.85490 | 416.52979   | 487.10829   | -648.59807  | 1 |
| 5121 | H | 84.53200 | 52.34680 | 110.77490 | 299.29514   | -727.32019  | -3046.25245 | 1 |
| 5122 | C | 83.70500 | 53.01180 | 108.93090 | -15.29436   | -675.26288  | -612.56601  | 1 |
| 5123 | H | 84.01300 | 53.65080 | 108.07590 | 1428.91896  | -2800.76377 | -110.17758  | 1 |
| 5124 | H | 83.34100 | 52.09480 | 108.41990 | 2239.82015  | -1322.46097 | -1769.89517 | 1 |
| 5125 | N | 82.20500 | 53.38680 | 110.95190 | -135.16195  | -113.48893  | -825.54455  | 1 |
| 5126 | H | 82.76300 | 52.85980 | 111.59290 | 2109.15876  | 335.39947   | -2310.23435 | 1 |
| 5127 | C | 82.52300 | 53.64980 | 109.61990 | -546.29797  | -362.55731  | 633.68899   | 1 |
| 5128 | C | 81.11100 | 54.09780 | 111.23090 | -452.77879  | 119.68693   | 782.37932   | 1 |
| 5129 | H | 80.61100 | 53.96480 | 112.18990 | 515.65026   | -1085.65638 | -2907.52150 | 1 |
| 5130 | N | 80.67200 | 54.79180 | 110.20390 | -672.10464  | -496.37782  | 120.65113   | 1 |
| 5131 | C | 81.57800 | 54.50080 | 109.14890 | -415.10380  | 170.73927   | 793.71780   | 1 |
| 5132 | H | 81.39700 | 54.85780 | 108.14190 | -2409.73621 | -1633.57327 | 1192.82690  | 1 |
| 5133 | C | 85.90800 | 51.89980 | 109.19590 | -57.11934   | 500.76370   | 759.88427   | 1 |
| 5134 | O | 85.88900 | 50.70180 | 109.38790 | 747.08667   | -254.89254  | -22.77120   | 1 |
| 5135 | N | 86.82900 | 52.50780 | 108.42890 | 434.81749   | -696.92036  | 194.69990   | 1 |
| 5136 | H | 86.68300 | 53.45680 | 108.15990 | 2062.99251  | -2373.89735 | -83.06334   | 1 |
| 5137 | C | 88.02200 | 51.87180 | 107.84890 | 682.44651   | 538.86219   | -274.49097  | 1 |
| 5138 | H | 87.57200 | 51.13580 | 107.19990 | -1843.79418 | -2538.43053 | 234.56273   | 1 |
| 5139 | C | 88.70700 | 52.92580 | 106.97790 | -743.15574  | -519.11314  | 98.44841    | 1 |
| 5140 | H | 89.07900 | 53.71380 | 107.66690 | 1482.52963  | -2243.39052 | -1633.25781 | 1 |

|      |   |          |           |           |             |             |             |   |
|------|---|----------|-----------|-----------|-------------|-------------|-------------|---|
| 5141 | H | 88.02500 | 53.45380  | 106.27890 | 1598.24750  | -2654.66864 | 544.57836   | 1 |
| 5142 | H | 89.64100 | 52.60980  | 106.46590 | -670.78534  | 1167.49753  | 2843.45262  | 1 |
| 5143 | C | 88.99100 | 51.29980  | 108.85590 | 656.08552   | -500.36518  | -388.12045  | 1 |
| 5144 | O | 89.45100 | 50.19180  | 108.67390 | -267.34786  | -76.77617   | -739.09253  | 1 |
| 5145 | N | 89.27600 | 51.98380  | 109.97890 | -430.61950  | -549.47687  | 474.67284   | 1 |
| 5146 | H | 88.76800 | 52.80380  | 110.22890 | -911.04899  | -2824.16187 | 1045.14387  | 1 |
| 5147 | C | 90.10100 | 51.42580  | 111.06990 | -685.54544  | 552.14713   | 237.93275   | 1 |
| 5148 | H | 91.01100 | 51.07180  | 110.60790 | -937.79610  | 2652.29756  | -1408.57459 | 1 |
| 5149 | C | 90.26000 | 52.46080  | 112.19890 | -150.36184  | -552.95767  | -709.28142  | 1 |
| 5150 | H | 90.54900 | 51.99480  | 113.16490 | -2813.47406 | 1355.73689  | 380.22020   | 1 |
| 5151 | H | 89.29800 | 53.00080  | 112.32690 | -1967.51298 | 1885.96383  | 1571.70587  | 1 |
| 5152 | C | 91.46800 | 53.42280  | 111.91590 | 547.78928   | -534.48686  | 495.68306   | 1 |
| 5153 | H | 91.24700 | 53.92980  | 110.95190 | 945.15212   | -928.87648  | 2853.43690  | 1 |
| 5154 | C | 91.52600 | 54.66780  | 112.80790 | -324.36065  | -543.92493  | 656.03875   | 1 |
| 5155 | H | 91.94300 | 54.47580  | 113.81990 | -1370.29770 | -1637.02729 | -2310.98510 | 1 |
| 5156 | H | 92.19500 | 55.45480  | 112.39790 | -1482.15837 | 2656.29835  | -803.43753  | 1 |
| 5157 | H | 90.49100 | 55.02780  | 112.99190 | -1680.46250 | 1661.10919  | -2077.25499 | 1 |
| 5158 | C | 92.83900 | 52.70780  | 111.87190 | -401.11306  | 622.08389   | -532.51380  | 1 |
| 5159 | H | 92.94400 | 52.02380  | 111.00290 | -152.06164  | -2008.65723 | 2416.69188  | 1 |
| 5160 | H | 93.60500 | 53.51180  | 111.82990 | 2247.42890  | 2158.53128  | 433.62692   | 1 |
| 5161 | H | 93.04000 | 52.07480  | 112.76290 | 1888.77528  | 1844.73379  | -1711.05564 | 1 |
| 5162 | C | 89.46100 | 50.19980  | 111.71690 | -554.61851  | 177.36824   | 701.70494   | 1 |
| 5163 | O | 90.15700 | 49.23380  | 112.03990 | -668.38767  | 417.15757   | -53.52294   | 1 |
| 5164 | N | 88.19500 | 50.21680  | 112.07190 | 504.38531   | -570.37054  | 364.61650   | 1 |
| 5165 | H | 87.72300 | 51.07580  | 111.88590 | -1725.82391 | 1957.80252  | -1756.91984 | 1 |
| 5166 | C | 87.47100 | 49.11180  | 112.69890 | 394.57747   | 402.03212   | 717.02845   | 1 |
| 5167 | H | 88.04300 | 48.79080  | 113.55590 | -2404.20558 | -1920.06895 | 656.77771   | 1 |
| 5168 | C | 86.10000 | 49.48680  | 113.13590 | 601.96840   | -204.01925  | -653.80516  | 1 |
| 5169 | H | 85.43700 | 48.61080  | 113.30090 | -2440.18554 | -196.75757  | -1976.10911 | 1 |
| 5170 | O | 85.50100 | 50.38680  | 112.30590 | 203.56133   | 657.91341   | 386.44529   | 1 |
| 5171 | H | 85.67800 | 50.08280  | 111.41290 | -2043.42410 | 390.47843   | -2360.12092 | 1 |
| 5172 | C | 86.15600 | 50.20880  | 114.52090 | -427.06329  | 239.43245   | -769.24642  | 1 |
| 5173 | H | 85.14000 | 50.56980  | 114.78890 | -2914.04759 | 63.16303    | -1184.29867 | 1 |
| 5174 | H | 86.84200 | 51.06980  | 114.37390 | -874.83740  | -2997.72464 | 382.79595   | 1 |
| 5175 | H | 86.58700 | 49.54880  | 115.30390 | -2521.49096 | -1567.58855 | -1040.66119 | 1 |
| 5176 | C | 87.33200 | 47.86380  | 111.81290 | 737.98452   | -530.38323  | 74.32013    | 1 |
| 5177 | O | 87.28100 | 47.98280  | 110.59890 | 396.32778   | -502.71341  | 462.41837   | 1 |
| 5178 | N | 87.22900 | 46.69980  | 112.39890 | -249.40738  | 613.04579   | -524.06403  | 1 |
| 5179 | H | 87.31500 | 46.64780  | 113.38990 | 1722.25761  | -1493.91079 | -2168.01418 | 1 |
| 5180 | C | 87.00800 | 45.43480  | 111.73590 | 786.20236   | -460.38551  | 37.17575    | 1 |
| 5181 | H | 87.60700 | 45.49580  | 110.83890 | 767.49152   | 2902.13019  | -941.71299  | 1 |
| 5182 | C | 87.63800 | 44.22280  | 112.49690 | -387.94917  | -654.79188  | 502.18925   | 1 |
| 5183 | H | 87.57500 | 43.32580  | 111.84390 | -1412.57714 | -1579.46339 | -2325.54240 | 1 |
| 5184 | H | 88.73700 | 44.38180  | 112.50190 | -2510.80954 | -1313.94657 | 1366.60385  | 1 |
| 5185 | O | 87.05400 | 43.98480  | 113.80390 | 453.46026   | 474.88097   | 438.73578   | 1 |
| 5186 | H | 87.22400 | 44.78680  | 114.30390 | -843.74822  | -2911.98385 | -840.63382  | 1 |
| 5187 | C | 85.56100 | 45.12680  | 111.38790 | -851.26790  | -304.48452  | -118.67241  | 1 |
| 5188 | O | 84.61300 | 45.60580  | 112.09190 | 45.16908    | 705.48613   | -351.96066  | 1 |
| 5189 | O | 85.32200 | 44.42480  | 110.35290 | -400.57190  | 247.81106   | 633.84467   | 1 |
| 5190 | H | 74.86860 | 109.09180 | 75.30230  | 1742.59588  | -669.56566  | 2532.44302  | 2 |
| 5191 | N | 75.62660 | 108.42720 | 75.16160  | -151.00642  | -201.73376  | -805.71263  | 2 |
| 5192 | H | 75.63660 | 108.35790 | 74.14620  | -920.70512  | -776.31231  | -2906.52155 | 2 |
| 5193 | C | 76.86460 | 108.82700 | 75.72980  | -799.31660  | 435.31761   | 55.15933    | 2 |
| 5194 | H | 76.52560 | 109.16850 | 76.73370  | -1957.38869 | -2461.41733 | 90.99702    | 2 |
| 5195 | C | 77.86460 | 107.55470 | 75.82210  | -677.55133  | 465.66394   | -394.37582  | 2 |
| 5196 | H | 78.24660 | 107.30710 | 74.80370  | 197.90251   | 3090.55316  | 554.56471   | 2 |
| 5197 | H | 78.76260 | 107.81150 | 76.43180  | 520.58710   | 3006.29156  | -767.74107  | 2 |
| 5198 | C | 77.14260 | 106.37630 | 76.40660  | 652.02843   | 578.54495   | 267.57366   | 2 |
| 5199 | H | 76.23660 | 106.18410 | 75.78860  | 1582.05696  | 1150.60627  | -2464.02663 | 2 |
| 5200 | C | 78.03160 | 105.13690 | 76.37440  | 82.41981    | 504.53742   | 755.04965   | 2 |
| 5201 | H | 77.49760 | 104.23490 | 76.77000  | 116.48044   | 2141.24475  | -2302.11412 | 2 |
| 5202 | H | 78.36860 | 104.89460 | 75.33460  | 2538.03474  | -1343.96595 | 1284.66394  | 2 |



|      |   |          |           |          |             |             |             |   |
|------|---|----------|-----------|----------|-------------|-------------|-------------|---|
| 5203 | H | 78.95160 | 105.27520 | 76.99780 | 2250.41064  | -312.10107  | 2176.34352  | 2 |
| 5204 | C | 76.70060 | 106.63650 | 77.84230 | 548.11310   | 543.33650   | -485.60115  | 2 |
| 5205 | H | 76.19360 | 105.74090 | 78.28550 | 1658.10582  | 811.60552   | -2547.58862 | 2 |
| 5206 | H | 77.56960 | 106.88700 | 78.50280 | -2218.26434 | -137.62060  | 2226.78920  | 2 |
| 5207 | H | 75.97760 | 107.48890 | 77.90220 | -2383.20577 | -1944.91607 | 660.19539   | 2 |
| 5208 | C | 77.38660 | 110.03410 | 74.84170 | 354.49325   | 764.56738   | -348.16986  | 2 |
| 5209 | O | 76.60960 | 110.92290 | 74.33670 | 620.93658   | 106.56319   | -476.13997  | 2 |
| 5210 | N | 78.68160 | 110.06240 | 74.70270 | -312.80742  | 450.53668   | 641.74801   | 2 |
| 5211 | H | 79.26760 | 109.37800 | 75.17470 | 2332.35712  | 1511.61220  | 1474.23370  | 2 |
| 5212 | C | 79.16560 | 111.34420 | 74.27250 | 361.58572   | 662.94307   | -511.09026  | 2 |
| 5213 | H | 79.35660 | 111.87870 | 75.22520 | 99.61944    | 1005.80121  | 2979.37344  | 2 |
| 5214 | C | 80.48560 | 111.11930 | 73.45210 | 549.55947   | -634.30105  | -356.50746  | 2 |
| 5215 | H | 80.24560 | 110.50930 | 72.53820 | 1613.19275  | 2667.77888  | 422.83711   | 2 |
| 5216 | O | 81.54560 | 110.40320 | 74.13590 | -153.23227  | 172.96956   | 755.13484   | 2 |
| 5217 | H | 81.66860 | 109.63480 | 73.55040 | 1709.74513  | 826.42634   | -2508.38939 | 2 |
| 5218 | C | 80.81960 | 112.60110 | 73.02740 | 227.00171   | 146.66059   | -870.86847  | 2 |
| 5219 | H | 81.68360 | 112.63970 | 72.32500 | -1948.68275 | -1888.40305 | 1592.10417  | 2 |
| 5220 | H | 79.95660 | 113.09410 | 72.51800 | 1525.80130  | -542.05030  | -2697.46883 | 2 |
| 5221 | H | 81.08460 | 113.22960 | 73.90860 | -1991.39283 | -1912.44732 | -1508.35211 | 2 |
| 5222 | C | 77.91360 | 112.02210 | 73.34880 | 721.15823   | 20.30358    | -557.64646  | 2 |
| 5223 | O | 77.80060 | 111.71130 | 72.15660 | -399.76237  | -233.50936  | -639.75828  | 2 |
| 5224 | N | 77.76860 | 113.32190 | 73.81010 | -142.68091  | 499.04832   | 665.78166   | 2 |
| 5225 | C | 76.91560 | 114.22870 | 73.15370 | 771.65402   | 164.11767   | -457.23787  | 2 |
| 5226 | H | 76.16560 | 113.63750 | 72.57660 | -1134.90288 | -2769.56195 | -969.40614  | 2 |
| 5227 | C | 76.36360 | 115.12590 | 74.36020 | 542.06811   | 572.61779   | 457.95418   | 2 |
| 5228 | H | 75.98260 | 116.11570 | 74.02520 | -2294.95831 | 1989.42376  | 820.72266   | 2 |
| 5229 | H | 75.52760 | 114.62320 | 74.89560 | 82.22388    | -3103.51788 | -509.55102  | 2 |
| 5230 | C | 77.63560 | 115.21840 | 75.24760 | 734.20498   | 537.98103   | -54.50195   | 2 |
| 5231 | H | 78.37460 | 115.93160 | 74.81220 | -2156.52742 | 1852.81848  | -1347.10036 | 2 |
| 5232 | H | 77.43660 | 115.55040 | 76.28980 | 1549.29061  | 246.53241   | 2727.11323  | 2 |
| 5233 | C | 78.15860 | 113.70780 | 75.14640 | -730.54783  | 368.91385   | 402.06150   | 2 |
| 5234 | H | 79.26560 | 113.57840 | 75.24740 | 1506.28857  | -1645.63157 | 2218.38177  | 2 |
| 5235 | H | 77.64160 | 112.98840 | 75.82870 | -2149.98554 | 1131.36852  | -1998.94814 | 2 |
| 5236 | C | 77.81960 | 115.24140 | 72.19930 | 735.66930   | -537.27078  | -39.77186   | 2 |
| 5237 | O | 78.84160 | 115.75540 | 72.58080 | 459.16318   | -497.08963  | -407.06056  | 2 |
| 5238 | N | 77.14460 | 115.43900 | 71.08000 | 432.28801   | -392.32972  | 609.81699   | 2 |
| 5239 | H | 76.26460 | 114.94570 | 70.93140 | -2048.94953 | 1114.38755  | -2111.43848 | 2 |
| 5240 | C | 77.65360 | 116.34720 | 70.12070 | -66.19096   | 779.29053   | -468.80276  | 2 |
| 5241 | H | 78.58460 | 116.78320 | 70.55460 | -2003.26241 | -858.91823  | -2268.79382 | 2 |
| 5242 | C | 77.89060 | 115.47230 | 68.79250 | 239.90206   | -62.31579   | 877.50484   | 2 |
| 5243 | H | 76.94060 | 114.91150 | 68.57760 | -1806.19495 | 2562.36747  | 264.87537   | 2 |
| 5244 | O | 78.92560 | 114.47910 | 68.88430 | 25.33343    | -568.33858  | 547.70130   | 2 |
| 5245 | H | 78.39960 | 113.65440 | 68.85410 | 1839.34285  | -1946.38300 | 1651.25326  | 2 |
| 5246 | C | 78.10260 | 116.56900 | 67.68720 | 399.73098   | -179.83494  | 799.57835   | 2 |
| 5247 | H | 78.20760 | 116.11330 | 66.67500 | -1588.10144 | 1412.10040  | -2319.94235 | 2 |
| 5248 | H | 77.24660 | 117.27900 | 67.64220 | 95.01673    | -1629.14356 | -2689.81214 | 2 |
| 5249 | H | 79.02360 | 117.16810 | 67.87710 | -2169.67168 | 1688.54881  | 1529.56006  | 2 |
| 5250 | C | 76.44360 | 117.40720 | 69.81500 | 475.42419   | -734.33607  | 257.24187   | 2 |
| 5251 | O | 75.26860 | 117.01860 | 69.71290 | 661.09426   | -50.97493   | 428.93258   | 2 |
| 5252 | N | 76.94160 | 118.60150 | 69.64300 | 502.67520   | -560.97869  | 381.17299   | 2 |
| 5253 | H | 77.95460 | 118.59100 | 69.76160 | 1897.00604  | 629.71559   | -2429.61984 | 2 |
| 5254 | C | 76.27460 | 119.76060 | 69.17360 | 838.53066   | -1.52937    | -358.21084  | 2 |
| 5255 | H | 77.13260 | 120.39750 | 68.85820 | -129.66827  | -3029.55963 | 838.55876   | 2 |
| 5256 | C | 75.30960 | 119.38920 | 67.94850 | -810.78658  | 237.64049   | -342.93311  | 2 |
| 5257 | H | 75.09560 | 120.32380 | 67.35720 | 2602.40595  | 427.72661   | 1715.44731  | 2 |
| 5258 | H | 75.90860 | 118.72020 | 67.27540 | -181.86621  | 942.80005   | -2996.04389 | 2 |
| 5259 | O | 74.03660 | 118.82210 | 68.26780 | 558.20959   | -436.39202  | -348.69943  | 2 |
| 5260 | H | 74.35660 | 118.02150 | 68.84150 | 62.39940    | 3017.43750  | -888.48381  | 2 |
| 5261 | C | 75.37460 | 120.51430 | 70.28660 | -715.05129  | -363.89084  | -433.28525  | 2 |
| 5262 | O | 74.94060 | 121.62970 | 70.02390 | 541.72122   | 390.24166   | -421.75443  | 2 |
| 5263 | N | 75.26460 | 119.86870 | 71.47380 | -412.30973  | -48.66340   | -735.05432  | 2 |
| 5264 | H | 75.66060 | 118.94700 | 71.26260 | 49.19352    | -2580.28481 | -1799.42672 | 2 |

|      |   |          |           |          |             |             |             |   |
|------|---|----------|-----------|----------|-------------|-------------|-------------|---|
| 5265 | C | 74.01060 | 120.05060 | 72.25810 | 585.54745   | -663.97319  | 218.46003   | 2 |
| 5266 | H | 73.25960 | 120.21410 | 71.45150 | -2284.83326 | 489.18851   | -2106.76477 | 2 |
| 5267 | C | 73.77460 | 118.80050 | 73.06340 | -438.37233  | -653.99013  | -459.97566  | 2 |
| 5268 | H | 74.71460 | 118.56730 | 73.61220 | 1045.95188  | 2908.31325  | 588.15386   | 2 |
| 5269 | C | 72.66060 | 118.97230 | 74.08410 | -730.66560  | -510.69212  | 191.76117   | 2 |
| 5270 | H | 72.46960 | 118.02330 | 74.65660 | -2424.63274 | -864.21332  | 1809.01012  | 2 |
| 5271 | H | 72.90960 | 119.77190 | 74.84070 | 2281.49829  | 2161.05042  | 151.17173   | 2 |
| 5272 | H | 71.69160 | 119.26580 | 73.59470 | 2243.22530  | 638.28286   | 2111.57796  | 2 |
| 5273 | C | 73.43260 | 117.60480 | 72.19080 | -415.53920  | -443.14887  | -679.99798  | 2 |
| 5274 | H | 73.36960 | 116.65790 | 72.79230 | -2172.72336 | 2048.86570  | -989.77207  | 2 |
| 5275 | H | 72.43760 | 117.74000 | 71.68460 | 1769.95561  | 1910.25789  | -1765.33231 | 2 |
| 5276 | H | 74.19860 | 117.43250 | 71.36920 | -1252.68589 | 2389.69443  | 1618.13621  | 2 |
| 5277 | C | 74.22060 | 121.39310 | 73.17390 | 480.90611   | 651.73947   | -418.82692  | 2 |
| 5278 | O | 74.29660 | 121.33300 | 74.37660 | -587.38670  | -347.83899  | -397.00393  | 2 |
| 5279 | N | 74.19660 | 122.49100 | 72.42080 | -425.55365  | 421.56962   | 594.85749   | 2 |
| 5280 | H | 74.22760 | 122.41860 | 71.37140 | 1549.04007  | -1689.13521 | 2155.34761  | 2 |
| 5281 | C | 74.69360 | 123.67760 | 73.06350 | 556.86673   | 688.15405   | 218.61941   | 2 |
| 5282 | H | 74.24760 | 123.61880 | 74.08320 | 2429.98857  | -1875.08555 | 690.96741   | 2 |
| 5283 | C | 76.27260 | 123.54020 | 73.08470 | 681.56567   | -489.50379  | -356.79865  | 2 |
| 5284 | H | 76.57160 | 122.61590 | 73.63050 | -2224.74059 | 2027.84782  | 914.65226   | 2 |
| 5285 | H | 76.66360 | 123.42250 | 72.04840 | -610.23472  | 1934.61197  | -2404.81109 | 2 |
| 5286 | C | 76.86560 | 124.81330 | 73.76290 | 793.81854   | 189.70557   | 406.58937   | 2 |
| 5287 | H | 76.57060 | 125.72230 | 73.18830 | -1934.14804 | -1865.50657 | -1636.20990 | 2 |
| 5288 | H | 76.40660 | 124.96560 | 74.76470 | 3047.95798  | -244.31595  | -740.59983  | 2 |
| 5289 | C | 78.43460 | 124.76860 | 73.90690 | -653.52408  | 91.82360    | 629.22628   | 2 |
| 5290 | O | 79.01260 | 125.70800 | 74.39110 | 94.00375    | 412.92580   | 666.54543   | 2 |
| 5291 | N | 79.00060 | 123.62610 | 73.46250 | -642.90477  | 537.81345   | 100.51090   | 2 |
| 5292 | H | 78.56660 | 122.79470 | 73.04350 | -259.77013  | -2132.17754 | 2298.81810  | 2 |
| 5293 | H | 80.00860 | 123.43850 | 73.49250 | 1277.59881  | -1548.50601 | 2422.41546  | 2 |
| 5294 | C | 74.22960 | 124.94830 | 72.15610 | 168.68935   | 852.68998   | -275.52622  | 2 |
| 5295 | O | 75.05660 | 125.51310 | 71.48890 | 543.79617   | -1.54767    | 572.63475   | 2 |
| 5296 | N | 72.91760 | 125.21790 | 72.27400 | 531.04695   | 197.91591   | -625.69219  | 2 |
| 5297 | C | 72.25660 | 126.05240 | 71.32270 | 586.14614   | -405.64852  | 568.62376   | 2 |
| 5298 | H | 72.87460 | 126.02790 | 70.39480 | -1536.70364 | 378.67561   | -2719.07575 | 2 |
| 5299 | C | 70.83360 | 125.34730 | 71.22260 | -210.38887  | -238.66926  | 854.53175   | 2 |
| 5300 | H | 70.04860 | 126.01860 | 70.80870 | -1514.35135 | -2516.53520 | 1127.83722  | 2 |
| 5301 | H | 70.86860 | 124.45040 | 70.56430 | -2000.57644 | 1842.75410  | 1581.19494  | 2 |
| 5302 | C | 70.58660 | 124.94740 | 72.70960 | -377.06732  | -707.81804  | -433.89500  | 2 |
| 5303 | H | 70.26760 | 125.82480 | 73.31450 | -1833.18359 | 1640.53436  | 1961.20146  | 2 |
| 5304 | H | 69.79860 | 124.17160 | 72.83630 | 1084.44534  | 2725.37649  | 1137.77306  | 2 |
| 5305 | C | 72.03160 | 124.44510 | 73.13740 | 2.88091     | -436.99831  | -800.29693  | 2 |
| 5306 | H | 72.31060 | 124.65330 | 74.19730 | -2824.73571 | -974.03327  | -985.06526  | 2 |
| 5307 | H | 72.24060 | 123.37380 | 72.90690 | -1269.96415 | 1182.42511  | -2624.36433 | 2 |
| 5308 | C | 72.00660 | 127.57660 | 71.86420 | -558.31608  | -553.59803  | -461.80449  | 2 |
| 5309 | O | 71.34860 | 128.33790 | 71.19490 | -533.35334  | 504.46255   | -290.99653  | 2 |
| 5310 | N | 72.53460 | 127.81180 | 73.06560 | 799.64648   | -251.92381  | 98.85442    | 2 |
| 5311 | H | 73.08960 | 127.04460 | 73.44260 | -2537.92425 | -969.91895  | 1586.32403  | 2 |
| 5312 | C | 72.55260 | 129.16420 | 73.61210 | 586.84184   | 348.35174   | -604.74683  | 2 |
| 5313 | H | 72.18260 | 129.81160 | 72.78000 | 1119.50725  | 687.70862   | 2858.66868  | 2 |
| 5314 | C | 71.66660 | 129.18750 | 74.84990 | 404.27139   | -764.60365  | 288.78523   | 2 |
| 5315 | H | 72.02060 | 128.38390 | 75.53280 | -648.10356  | 2447.63655  | -1867.42158 | 2 |
| 5316 | C | 71.76460 | 130.51030 | 75.58530 | 528.23456   | 584.54411   | -459.05057  | 2 |
| 5317 | H | 71.14160 | 130.51620 | 76.52260 | -431.25259  | -1426.81315 | 2770.64102  | 2 |
| 5318 | H | 72.82460 | 130.73820 | 75.88730 | 2932.01629  | 1135.39336  | -111.30419  | 2 |
| 5319 | H | 71.41260 | 131.36630 | 74.94600 | -2597.65530 | -995.61545  | -1469.40909 | 2 |
| 5320 | C | 70.22060 | 128.89130 | 74.50000 | -737.30563  | -529.19495  | -88.22767   | 2 |
| 5321 | H | 69.56660 | 128.84940 | 75.41420 | -1520.44829 | -2457.09192 | -1244.65356 | 2 |
| 5322 | H | 69.79260 | 129.67760 | 73.81710 | -404.11480  | 2788.27601  | 1400.15511  | 2 |
| 5323 | H | 70.12160 | 127.90650 | 73.96590 | -1126.24669 | -1286.68001 | 2640.88038  | 2 |
| 5324 | C | 74.11260 | 129.46560 | 74.10020 | -747.16071  | -183.11628  | 489.56134   | 2 |
| 5325 | O | 74.78360 | 128.60910 | 74.62180 | 631.38231   | -243.02764  | 407.33423   | 2 |
| 5326 | N | 74.39260 | 130.75070 | 73.93650 | -465.38375  | -510.23859  | -485.53768  | 2 |

|      |   |          |           |          |             |             |             |   |
|------|---|----------|-----------|----------|-------------|-------------|-------------|---|
| 5327 | H | 73.68760 | 131.34990 | 73.51100 | 1645.14278  | 2060.84196  | -1716.00170 | 2 |
| 5328 | C | 75.71360 | 131.18570 | 74.21520 | 413.25965   | -507.30693  | -635.06467  | 2 |
| 5329 | H | 76.25660 | 130.26660 | 74.54280 | 1557.24493  | -2350.94366 | 1395.09081  | 2 |
| 5330 | C | 76.28060 | 131.85950 | 72.89420 | 583.53793   | -74.86724   | -696.65586  | 2 |
| 5331 | H | 76.10260 | 131.21240 | 72.00600 | -222.87105  | 1172.87369  | 2910.82841  | 2 |
| 5332 | H | 75.75160 | 132.81530 | 72.68300 | 898.98467   | 2148.19688  | 2115.49119  | 2 |
| 5333 | C | 77.80860 | 132.09970 | 73.12190 | -171.09162  | 860.67629   | 247.82047   | 2 |
| 5334 | H | 77.98660 | 132.64020 | 74.07960 | 1887.72926  | -415.22665  | 2482.39628  | 2 |
| 5335 | H | 78.35360 | 131.13230 | 73.21020 | -1651.59957 | 1685.31687  | 2080.90176  | 2 |
| 5336 | C | 78.35260 | 132.94790 | 71.90310 | -452.70043  | 91.74043    | 786.19146   | 2 |
| 5337 | H | 78.18660 | 132.41640 | 70.93870 | 332.06243   | 2299.87388  | 2120.97640  | 2 |
| 5338 | H | 77.80460 | 133.91430 | 71.81500 | -2259.23349 | 1342.20730  | 1729.90458  | 2 |
| 5339 | C | 79.86060 | 133.17890 | 72.15890 | -465.08369  | -692.38048  | -368.45276  | 2 |
| 5340 | H | 80.10760 | 133.61020 | 73.15410 | -878.67670  | 1891.69954  | -2355.33996 | 2 |
| 5341 | H | 80.50160 | 132.29460 | 71.96960 | 127.46997   | 1027.00573  | -2971.06662 | 2 |
| 5342 | N | 80.34360 | 134.26080 | 71.13650 | -350.26981  | 497.98381   | -584.80379  | 2 |
| 5343 | H | 81.37460 | 134.50170 | 71.20160 | 390.77252   | -2657.82305 | -1637.52854 | 2 |
| 5344 | H | 80.25260 | 134.02500 | 70.10470 | 2401.37657  | -2031.45583 | -69.31101   | 2 |
| 5345 | H | 79.90760 | 135.22820 | 71.18120 | -724.67596  | 1778.49378  | -2491.99335 | 2 |
| 5346 | C | 75.70360 | 132.41590 | 75.31230 | 295.55129   | -669.13009  | -544.39449  | 2 |
| 5347 | O | 75.02960 | 133.44420 | 75.21830 | -500.52639  | -526.65888  | -309.40425  | 2 |
| 5348 | N | 76.67360 | 132.14370 | 76.14720 | 508.36918   | 498.77976   | 453.26793   | 2 |
| 5349 | H | 77.14960 | 131.26060 | 75.97600 | 930.34245   | 2310.01954  | -1922.62812 | 2 |
| 5350 | C | 76.86660 | 132.84630 | 77.37890 | -107.68176  | 736.26898   | 527.03286   | 2 |
| 5351 | H | 75.83660 | 133.03930 | 77.75410 | 1960.21260  | 1451.58084  | -1987.13509 | 2 |
| 5352 | C | 77.72660 | 131.87570 | 78.28420 | 412.87398   | -678.69640  | -447.61287  | 2 |
| 5353 | H | 77.27560 | 130.85850 | 78.31430 | 1775.77808  | -58.28991   | 2596.42846  | 2 |
| 5354 | H | 78.73460 | 131.73720 | 77.83240 | 1017.21119  | -1328.44442 | -2664.34665 | 2 |
| 5355 | C | 77.85860 | 132.46440 | 79.72790 | 726.03867   | -11.65096   | -551.52797  | 2 |
| 5356 | H | 78.18560 | 133.53540 | 79.68020 | 2474.11025  | -1912.55496 | -345.16401  | 2 |
| 5357 | H | 76.88060 | 132.45950 | 80.25890 | -1693.09895 | 2317.38923  | 1288.93340  | 2 |
| 5358 | C | 78.93260 | 131.58850 | 80.49060 | 731.68366   | -19.37851   | -543.79638  | 2 |
| 5359 | H | 78.58260 | 130.53600 | 80.60310 | 98.63496    | 2211.84285  | 2235.22898  | 2 |
| 5360 | H | 79.87960 | 131.53020 | 79.90690 | 2240.01947  | 1404.61532  | -1705.16709 | 2 |
| 5361 | C | 79.19160 | 132.23690 | 81.87000 | 735.82829   | -538.52242  | 1.15350     | 2 |
| 5362 | H | 79.62260 | 133.25660 | 81.82520 | -1312.20376 | -1963.00299 | 2079.17455  | 2 |
| 5363 | H | 78.32360 | 132.22230 | 82.55900 | -110.64244  | 1442.03704  | 2794.01390  | 2 |
| 5364 | N | 80.28860 | 131.38330 | 82.59220 | -79.89147   | 688.60769   | 481.77702   | 2 |
| 5365 | H | 80.58160 | 131.73020 | 83.55150 | -289.83434  | -2120.17102 | 2306.31679  | 2 |
| 5366 | H | 80.05660 | 130.36870 | 82.79850 | 2325.16833  | 381.83078   | -2084.71190 | 2 |
| 5367 | H | 81.22860 | 131.29890 | 82.10750 | 43.27301    | -3040.06257 | 808.93339   | 2 |
| 5368 | C | 77.66160 | 134.23860 | 77.11520 | -358.50456  | 838.39857   | -3.65031    | 2 |
| 5369 | O | 78.27860 | 134.77030 | 78.01140 | -509.59437  | 340.31223   | 498.12488   | 2 |
| 5370 | N | 77.52760 | 134.65780 | 75.85320 | 582.43016   | 441.52645   | 422.49473   | 2 |
| 5371 | H | 76.90260 | 134.12380 | 75.23760 | -2445.18770 | 300.10025   | 1956.84010  | 2 |
| 5372 | C | 77.76560 | 136.05590 | 75.63920 | -853.28349  | 142.84686   | -288.01575  | 2 |
| 5373 | H | 78.57560 | 136.31800 | 76.35960 | 1476.23408  | -2092.42639 | -1827.76119 | 2 |
| 5374 | C | 78.20260 | 136.23260 | 74.10720 | 467.96664   | -402.45250  | -671.18568  | 2 |
| 5375 | H | 77.47360 | 135.68460 | 73.45240 | -2190.13949 | -946.25309  | 2050.88281  | 2 |
| 5376 | O | 79.50860 | 135.71170 | 73.80200 | 18.51639    | -789.37942  | -12.82603   | 2 |
| 5377 | H | 79.30260 | 135.07890 | 73.08700 | 2978.98666  | -382.29707  | -936.86374  | 2 |
| 5378 | C | 78.03460 | 137.77610 | 73.87160 | -580.89247  | 701.63774   | 41.46600    | 2 |
| 5379 | H | 78.36060 | 138.07070 | 72.84690 | 2030.98393  | -1362.32562 | -1979.24213 | 2 |
| 5380 | H | 76.97060 | 138.10050 | 73.97790 | -882.10862  | 2545.80242  | -1624.50012 | 2 |
| 5381 | H | 78.63760 | 138.36820 | 74.59780 | 2875.12388  | -443.04449  | -1198.16547 | 2 |
| 5382 | C | 76.40260 | 136.87270 | 75.97540 | -609.64388  | 655.18387   | -174.69815  | 2 |
| 5383 | O | 76.52460 | 138.05570 | 76.21160 | 215.43762   | 53.08835    | 757.88884   | 2 |
| 5384 | N | 75.28060 | 136.16130 | 75.89680 | -243.97042  | 213.69135   | -779.41435  | 2 |
| 5385 | H | 75.24660 | 135.13550 | 75.68270 | -356.06659  | -2443.05621 | -1950.10748 | 2 |
| 5386 | C | 74.08860 | 136.95140 | 75.91490 | 310.92696   | 75.03547    | -853.89994  | 2 |
| 5387 | H | 74.48460 | 137.97630 | 76.14130 | -1134.58106 | -2432.66746 | -1641.06096 | 2 |
| 5388 | C | 73.40760 | 136.86310 | 74.46410 | 423.00707   | 276.42367   | -759.01645  | 2 |

|      |   |          |           |          |             |             |             |   |
|------|---|----------|-----------|----------|-------------|-------------|-------------|---|
| 5389 | H | 73.22660 | 135.80150 | 74.17920 | 1935.88283  | 1329.06185  | 2093.84299  | 2 |
| 5390 | H | 72.42160 | 137.38410 | 74.47590 | -224.74671  | -3136.74864 | -92.32069   | 2 |
| 5391 | C | 74.33660 | 137.54680 | 73.45210 | -436.84911  | 38.07751    | -799.47730  | 2 |
| 5392 | C | 74.38660 | 138.97390 | 73.41980 | 884.88412   | 19.94487    | 219.16501   | 2 |
| 5393 | H | 73.76460 | 139.57710 | 74.10540 | 2031.41062  | 1443.06442  | -1920.71919 | 2 |
| 5394 | C | 75.14860 | 136.77110 | 72.57140 | -372.57036  | -778.83894  | -293.34662  | 2 |
| 5395 | H | 75.11860 | 135.66710 | 72.60460 | -1784.08392 | 2567.40981  | -351.67833  | 2 |
| 5396 | C | 75.24260 | 139.58890 | 72.50810 | 699.20162   | 312.46857   | 494.90553   | 2 |
| 5397 | H | 75.28460 | 140.69250 | 72.48410 | 2295.68572  | 136.57999   | 2146.95115  | 2 |
| 5398 | C | 75.98460 | 137.43570 | 71.67030 | 234.66799   | -157.10225  | 867.00682   | 2 |
| 5399 | H | 76.60860 | 136.82880 | 70.99240 | 2197.57369  | -228.08814  | 2239.83747  | 2 |
| 5400 | C | 76.06560 | 138.85770 | 71.60330 | -634.94668  | -80.13830   | -649.51642  | 2 |
| 5401 | O | 76.92460 | 139.54190 | 70.70390 | 341.80309   | -482.26454  | 523.65904   | 2 |
| 5402 | H | 77.29760 | 138.77200 | 70.21310 | -2639.78092 | -1068.99156 | 1336.80213  | 2 |
| 5403 | C | 73.12560 | 136.39880 | 77.09980 | -873.74337  | -8.22918    | 260.68334   | 2 |
| 5404 | O | 73.54060 | 136.36310 | 78.25660 | -653.65831  | -59.34966   | -439.13057  | 2 |
| 5405 | N | 71.92560 | 136.12810 | 76.64190 | 180.22179   | 592.26801   | 573.94338   | 2 |
| 5406 | H | 71.77560 | 136.24600 | 75.64020 | -313.02754  | 2914.20788  | 1143.51757  | 2 |
| 5407 | C | 70.97260 | 135.36630 | 77.38340 | -761.77781  | 474.30402   | 161.80624   | 2 |
| 5408 | H | 70.24860 | 135.03040 | 76.60690 | -2452.67380 | -651.20783  | -1859.71659 | 2 |
| 5409 | C | 71.77560 | 134.16870 | 78.05460 | 899.87403   | -85.58999   | 119.80020   | 2 |
| 5410 | H | 72.44760 | 133.68950 | 77.30640 | 1945.29243  | -2053.54524 | -1377.32187 | 2 |
| 5411 | H | 72.45160 | 134.54880 | 78.85680 | 1486.26182  | -1318.32270 | 2439.52399  | 2 |
| 5412 | C | 70.75860 | 133.14160 | 78.63370 | -560.46807  | -394.51030  | 601.40516   | 2 |
| 5413 | H | 70.10960 | 133.61190 | 79.40580 | -2119.39474 | -942.74720  | -2125.46933 | 2 |
| 5414 | H | 70.06960 | 132.76520 | 77.84610 | 1842.43010  | -195.59170  | 2542.71930  | 2 |
| 5415 | C | 71.64160 | 131.95860 | 79.24950 | 560.40431   | 391.88200   | -603.18033  | 2 |
| 5416 | H | 72.25860 | 131.38120 | 78.51460 | 1577.73754  | 1931.59019  | 1917.79295  | 2 |
| 5417 | H | 72.30860 | 132.24890 | 80.10100 | -933.15033  | -2059.56773 | 2187.60999  | 2 |
| 5418 | N | 70.65160 | 131.10300 | 79.75270 | 158.60937   | 772.85389   | -300.35349  | 2 |
| 5419 | H | 69.69560 | 131.40480 | 79.64470 | 334.84213   | -2988.70533 | -923.98455  | 2 |
| 5420 | C | 70.87860 | 129.99370 | 80.33210 | 544.75846   | 662.58563   | -309.30488  | 2 |
| 5421 | N | 72.21160 | 129.59430 | 80.47370 | 302.46105   | -747.07235  | 251.14242   | 2 |
| 5422 | H | 73.06360 | 130.06510 | 80.17230 | -2032.62033 | 2314.15084  | -641.39433  | 2 |
| 5423 | H | 72.51760 | 128.72720 | 80.91800 | 2216.72692  | -1842.47658 | 1260.80452  | 2 |
| 5424 | N | 69.67860 | 129.38220 | 80.72230 | 593.21766   | 157.66047   | 579.57594   | 2 |
| 5425 | H | 68.71060 | 129.68690 | 80.62490 | 2532.12213  | -1734.94003 | -690.33822  | 2 |
| 5426 | H | 69.64060 | 128.48900 | 81.21380 | -1423.18318 | -441.02402  | -2770.96981 | 2 |
| 5427 | C | 70.25260 | 136.30880 | 78.49570 | -38.09106   | -11.97720   | 910.96467   | 2 |
| 5428 | O | 69.04360 | 136.41840 | 78.47830 | -735.11374  | 288.35227   | 9.37988     | 2 |
| 5429 | N | 71.10960 | 136.82050 | 79.36500 | 493.85710   | 565.34291   | -386.21866  | 2 |
| 5430 | H | 72.14060 | 136.66750 | 79.22850 | -1051.92943 | -2944.04701 | -352.50235  | 2 |
| 5431 | C | 70.59760 | 137.69220 | 80.43290 | -63.48870   | -728.28016  | 545.00293   | 2 |
| 5432 | H | 69.66460 | 137.15500 | 80.72660 | -37.65542   | -2957.73065 | -1071.74516 | 2 |
| 5433 | C | 71.63760 | 137.81950 | 81.52940 | -337.75935  | 434.43445   | -727.07382  | 2 |
| 5434 | H | 72.56160 | 138.24270 | 81.07300 | -1621.67197 | 1770.14962  | -2033.46418 | 2 |
| 5435 | C | 71.17760 | 138.76840 | 82.62020 | -670.46698  | 455.11399   | 418.08646   | 2 |
| 5436 | H | 71.95460 | 138.88810 | 83.42570 | -906.37480  | -1539.84701 | 2589.51388  | 2 |
| 5437 | H | 70.96360 | 139.79530 | 82.20760 | 372.38762   | -837.28730  | -3009.73482 | 2 |
| 5438 | H | 70.23560 | 138.40610 | 83.11670 | -2295.00627 | -1359.54838 | 1668.17285  | 2 |
| 5439 | C | 71.99660 | 136.47410 | 82.13420 | -775.46996  | 429.03228   | 214.54287   | 2 |
| 5440 | H | 72.79560 | 136.57090 | 82.91930 | -2281.30448 | 2102.00299  | 524.84238   | 2 |
| 5441 | H | 71.10560 | 135.99160 | 82.62240 | -27.72195   | -2975.56894 | 1021.49262  | 2 |
| 5442 | H | 72.37560 | 135.75770 | 81.35380 | -221.52985  | -2442.11852 | -1971.09307 | 2 |
| 5443 | C | 70.25460 | 139.16130 | 79.74630 | -696.95975  | -176.83973  | -560.73686  | 2 |
| 5444 | O | 70.95760 | 140.12030 | 79.94480 | -475.49938  | -38.25694   | 629.33614   | 2 |
| 5445 | N | 69.14860 | 139.07910 | 79.02670 | -63.30393   | 195.19886   | 818.87869   | 2 |
| 5446 | H | 68.67460 | 138.16470 | 78.87410 | -1874.75856 | 1800.53060  | 1772.45483  | 2 |
| 5447 | C | 68.69060 | 140.28260 | 78.42350 | -155.21733  | 893.34934   | -96.36147   | 2 |
| 5448 | H | 69.07560 | 141.09200 | 79.08600 | 1950.78607  | 1868.32601  | 1613.07714  | 2 |
| 5449 | C | 69.31960 | 140.39390 | 76.93560 | 517.95490   | 445.31590   | 604.04261   | 2 |
| 5450 | H | 69.12260 | 139.44540 | 76.38190 | -2463.29718 | -1651.20360 | -1050.67592 | 2 |

|      |      |          |           |          |             |             |             |          |        |
|------|------|----------|-----------|----------|-------------|-------------|-------------|----------|--------|
| 5451 | H    | 68.81160 | 141.20150 | 76.35550 | 313.88956   | 2742.99591  | -1508.53340 | 2        |        |
| 5452 | C    | 70.79560 | 140.65870 | 77.02600 | 528.83897   | 532.44922   | -517.95576  | 2        |        |
| 5453 | H    | 71.25360 | 139.88630 | 77.69020 | -2112.43083 | -770.50209  | -2200.49739 | 2        |        |
| 5454 | C    | 71.43860 | 140.56890 | 75.64760 | -690.20847  | -395.67516  | -445.53838  | 2        |        |
| 5455 | H    | 72.54160 | 140.75800 | 75.69450 | 2034.40660  | 2333.14030  | -562.02523  | 2        |        |
| 5456 | H    | 71.29260 | 139.55860 | 75.18710 | 2248.94519  | 1961.22634  | 997.02710   | 2        |        |
| 5457 | H    | 71.00260 | 141.32170 | 74.94120 | -1653.09412 | -128.81697  | -2673.74498 | 2        |        |
| 5458 | C    | 71.08160 | 142.02660 | 77.63160 | 570.24062   | -573.92057  | -420.58508  | 2        |        |
| 5459 | H    | 72.16560 | 142.29710 | 77.54740 | 1757.74695  | -1540.64070 | 2105.93877  | 2        |        |
| 5460 | H    | 70.49560 | 142.83850 | 77.12800 | 751.83258   | -183.54370  | 3049.47302  | 2        |        |
| 5461 | H    | 70.82460 | 142.04870 | 78.72440 | 1622.11417  | -2533.02760 | -922.35730  | 2        |        |
| 5462 | C    | 67.08960 | 140.21570 | 78.30330 | -144.31220  | 732.67894   | -523.26529  | 2        |        |
| 5463 | O    | 66.43260 | 139.26310 | 78.63070 | -509.60359  | 492.38969   | 348.54525   | 2        |        |
| 5464 | O    | 66.46360 | 141.36840 | 77.76290 | 574.46196   | 539.67837   | 48.66154    | 2        |        |
| 5465 | H    | 67.27060 | 141.93960 | 77.64490 | 2831.71317  | -407.24322  | -1309.11410 | 2        |        |
| 5466 | 5463 |          |           |          |             |             |             |          |        |
| 5467 |      | 150.0000 | 150.0000  | 150.0000 | 0.0000      | 0.0000      | 0.0000***** | 50.0000  | 200000 |
|      |      | 0.2500   | 400.00    | 0.00     | 0.00        | -25963.4904 | 0.2194      | 400.0000 |        |
| 5468 | N    | 59.32925 | 94.60114  | 60.17705 | 271.35006   | -592.96075  | 106.19491   | 1        |        |
| 5469 | H    | 59.45444 | 94.48318  | 61.21740 | 1945.44748  | 55.50556    | 653.44217   | 1        |        |
| 5470 | H    | 59.96964 | 95.36992  | 60.02052 | -827.26400  | 1277.59156  | 2850.84393  | 1        |        |
| 5471 | H    | 56.18374 | 97.62321  | 56.25805 | -377.28197  | -74.00573   | -1322.78841 | 1        |        |
| 5472 | C    | 59.54298 | 93.40518  | 59.47197 | -21.08611   | 281.75011   | 29.15743    | 1        |        |
| 5473 | H    | 60.23468 | 92.80201  | 60.15496 | 2306.08717  | 590.25168   | -1466.72256 | 1        |        |
| 5474 | C    | 58.12407 | 92.68044  | 59.32990 | -638.42110  | -112.10884  | -474.30528  | 1        |        |
| 5475 | H    | 58.32782 | 91.64076  | 58.91158 | 1027.37746  | -535.75796  | -156.17767  | 1        |        |
| 5476 | H    | 57.46840 | 93.14445  | 58.60516 | 391.30278   | -2195.60374 | 1695.57201  | 1        |        |
| 5477 | C    | 57.57380 | 92.83528  | 60.79101 | -319.46084  | -594.93744  | -193.23657  | 1        |        |
| 5478 | H    | 57.62634 | 93.95293  | 60.99037 | 491.53102   | -1422.18652 | 1093.39794  | 1        |        |
| 5479 | H    | 58.24268 | 92.48654  | 61.62316 | -534.59506  | -565.44274  | -714.33892  | 1        |        |
| 5480 | S    | 55.95330 | 91.93372  | 60.73313 | -276.72994  | -278.48295  | 59.42670    | 1        |        |
| 5481 | C    | 54.98879 | 92.84946  | 61.98185 | -561.72265  | -587.70720  | 508.63893   | 1        |        |
| 5482 | H    | 54.55786 | 93.84318  | 61.70403 | -914.87520  | 1647.62000  | -1211.07718 | 1        |        |
| 5483 | H    | 54.12394 | 92.32817  | 62.39693 | -202.45800  | 43.39419    | -2680.50820 | 1        |        |
| 5484 | H    | 55.52626 | 93.33882  | 62.87380 | -556.34510  | 992.93955   | 965.80848   | 1        |        |
| 5485 | C    | 60.27188 | 93.43057  | 58.03160 | 294.01850   | -543.10689  | -7.80390    | 1        |        |
| 5486 | O    | 60.13723 | 92.53253  | 57.23616 | -494.52661  | -317.58210  | -130.42765  | 1        |        |
| 5487 | N    | 60.94828 | 94.60005  | 57.84207 | -221.94050  | -660.16152  | 110.41625   | 1        |        |
| 5488 | H    | 60.98009 | 95.27902  | 58.66875 | -3089.77970 | 408.72416   | 686.07439   | 1        |        |
| 5489 | C    | 60.88810 | 95.20855  | 56.53657 | 256.54620   | 486.44270   | 259.28406   | 1        |        |
| 5490 | H    | 61.10027 | 94.27884  | 55.97006 | -176.46707  | -69.72563   | -170.30418  | 1        |        |
| 5491 | C    | 59.53346 | 96.04642  | 56.43582 | -556.43475  | 1054.86722  | 180.35087   | 1        |        |
| 5492 | H    | 59.68578 | 96.95544  | 57.09911 | 1789.31693  | 456.76486   | -1832.78754 | 1        |        |
| 5493 | H    | 59.34252 | 96.46785  | 55.41925 | 224.57071   | 2155.94628  | -1218.02608 | 1        |        |
| 5494 | C    | 58.33817 | 95.16581  | 56.84036 | 548.67175   | -63.95644   | -487.19200  | 1        |        |
| 5495 | H    | 58.57741 | 94.61605  | 57.74068 | 2537.13495  | 523.27357   | -2980.79175 | 1        |        |
| 5496 | H    | 58.09546 | 94.45355  | 55.98038 | -342.38674  | 1763.57803  | -1889.47812 | 1        |        |
| 5497 | C    | 57.21427 | 96.24706  | 57.11820 | 167.09655   | -254.03887  | -185.71994  | 1        |        |
| 5498 | O    | 57.13629 | 96.81661  | 58.17480 | 612.70846   | 254.66907   | -469.39090  | 1        |        |
| 5499 | O    | 56.59923 | 96.73392  | 55.93335 | 408.27598   | 52.21467    | 31.89802    | 1        |        |
| 5500 | C    | 62.19801 | 96.18343  | 56.68810 | -457.95056  | 1318.63898  | 406.32007   | 1        |        |
| 5501 | O    | 62.15052 | 97.11055  | 57.49042 | 274.07598   | -913.07829  | -28.74658   | 1        |        |
| 5502 | N    | 63.14815 | 96.03557  | 55.69734 | -43.61819   | -551.90268  | -616.35502  | 1        |        |
| 5503 | H    | 62.97931 | 95.08775  | 55.32352 | 2713.01166  | -1228.95309 | -90.80713   | 1        |        |
| 5504 | C    | 64.37880 | 96.60809  | 56.23154 | 90.44152    | 104.11505   | -267.71328  | 1        |        |
| 5505 | H    | 64.01676 | 97.58216  | 56.64142 | 645.64017   | 1029.59248  | 1769.53233  | 1        |        |
| 5506 | H    | 65.06867 | 96.74607  | 55.33358 | -1732.13063 | 94.24752    | 3247.72997  | 1        |        |
| 5507 | C    | 65.05796 | 95.64263  | 57.33839 | 389.40382   | 187.12259   | 1392.67155  | 1        |        |
| 5508 | O    | 65.46297 | 94.54585  | 57.11387 | 59.16685    | 278.77221   | -330.24761  | 1        |        |
| 5509 | N    | 65.48482 | 96.48477  | 58.31734 | -358.39856  | -223.48690  | 290.00179   | 1        |        |
| 5510 | H    | 65.01283 | 97.38877  | 58.26927 | 1103.43442  | -1254.65042 | 4093.24517  | 1        |        |
| 5511 | C    | 66.15499 | 96.03457  | 59.54693 | 110.03861   | -792.45961  | -600.28691  | 1        |        |

|      |   |          |          |          |             |             |             |   |
|------|---|----------|----------|----------|-------------|-------------|-------------|---|
| 5512 | H | 66.76536 | 95.23235 | 59.03991 | 3881.73884  | -3246.48529 | -1713.23894 | 1 |
| 5513 | C | 66.86292 | 97.24311 | 60.13028 | 52.08378    | -63.61845   | -148.20308  | 1 |
| 5514 | H | 67.33189 | 97.87399 | 59.34886 | -884.03102  | 646.23456   | -3087.81658 | 1 |
| 5515 | C | 65.88710 | 98.15465 | 60.82359 | 718.48539   | -2022.10708 | 805.87632   | 1 |
| 5516 | H | 65.20514 | 98.63532 | 60.05887 | 895.31732   | 1686.03186  | -444.65291  | 1 |
| 5517 | H | 66.42826 | 99.04779 | 61.28863 | 690.24942   | 2073.65902  | 49.83573    | 1 |
| 5518 | H | 65.29110 | 97.63567 | 61.56247 | 712.84460   | -410.47752  | 1975.22241  | 1 |
| 5519 | C | 67.91992 | 96.74089 | 61.12998 | -516.99123  | 165.41361   | 0.52115     | 1 |
| 5520 | H | 67.67292 | 95.85373 | 61.75908 | -4240.08894 | 2619.55492  | -79.90132   | 1 |
| 5521 | H | 68.24434 | 97.56800 | 61.81029 | -1663.34688 | -1221.87864 | -909.86082  | 1 |
| 5522 | C | 69.19349 | 96.38098 | 60.29166 | -483.27781  | -701.69206  | -447.21025  | 1 |
| 5523 | H | 70.05618 | 96.15120 | 60.99200 | 2139.68355  | -210.18795  | -2581.86122 | 1 |
| 5524 | H | 69.52009 | 97.16482 | 59.57236 | -3039.11316 | 923.36106   | 1150.44268  | 1 |
| 5525 | H | 69.14960 | 95.51538 | 59.62565 | 1946.66276  | 132.09554   | 1460.33304  | 1 |
| 5526 | C | 65.13741 | 95.27173 | 60.60791 | 891.83152   | -671.48702  | 552.87713   | 1 |
| 5527 | O | 65.59917 | 94.54091 | 61.45986 | -209.21340  | -631.06791  | 70.71439    | 1 |
| 5528 | N | 63.79863 | 95.53916 | 60.41326 | -315.45965  | -334.43737  | 89.93755    | 1 |
| 5529 | H | 63.68019 | 96.07082 | 59.53924 | 520.56012   | 594.69913   | -925.42302  | 1 |
| 5530 | C | 63.17443 | 96.11190 | 61.62459 | 364.55265   | -302.73529  | -1271.76631 | 1 |
| 5531 | H | 64.06677 | 96.39402 | 62.20518 | -1278.82200 | 1071.06573  | -2767.04637 | 1 |
| 5532 | C | 62.22480 | 97.24161 | 61.15371 | -1032.23587 | 775.96994   | -740.22741  | 1 |
| 5533 | H | 61.70797 | 97.74917 | 61.96845 | 1869.34245  | -839.10498  | 1084.29825  | 1 |
| 5534 | H | 62.77055 | 97.98559 | 60.55459 | 1512.85121  | -2229.80572 | 2436.59716  | 1 |
| 5535 | O | 61.00467 | 96.74528 | 60.18003 | -196.82662  | 297.68478   | 77.01953    | 1 |
| 5536 | H | 61.51877 | 96.80085 | 59.34875 | 104.26440   | -1297.24387 | -3150.99267 | 1 |
| 5537 | C | 62.37532 | 94.92994 | 62.39599 | -91.09533   | 258.41843   | -212.37998  | 1 |
| 5538 | O | 61.93308 | 95.28370 | 63.49328 | -537.22125  | -420.46274  | -814.90440  | 1 |
| 5539 | N | 62.18252 | 93.81704 | 61.75142 | -758.45566  | 166.38333   | -992.43112  | 1 |
| 5540 | H | 62.64574 | 93.77649 | 60.82954 | 780.29074   | 1327.64348  | -57.06099   | 1 |
| 5541 | C | 62.04416 | 92.48391 | 62.30149 | 28.81129    | 873.17671   | 435.81495   | 1 |
| 5542 | H | 62.22571 | 91.79343 | 61.49499 | 763.58041   | 1314.05362  | 1439.89031  | 1 |
| 5543 | C | 63.05085 | 92.38014 | 63.43330 | 139.27596   | -1318.36300 | 764.20323   | 1 |
| 5544 | H | 62.88467 | 93.23041 | 64.19772 | -679.62479  | 579.17937   | -2534.08637 | 1 |
| 5545 | C | 62.70585 | 91.16084 | 64.30894 | -1250.11297 | 771.64091   | -23.04158   | 1 |
| 5546 | H | 63.40612 | 91.13804 | 65.16861 | 494.15987   | -113.40211  | -311.36992  | 1 |
| 5547 | H | 61.64021 | 91.36551 | 64.74677 | -561.27292  | -1666.38761 | -1021.35239 | 1 |
| 5548 | H | 62.74257 | 90.23191 | 63.66121 | 3316.31731  | -385.28006  | 895.45141   | 1 |
| 5549 | C | 64.44671 | 92.38095 | 62.93691 | 132.72633   | 523.39349   | -157.29239  | 1 |
| 5550 | H | 64.50015 | 93.30740 | 62.24877 | -2133.18391 | -982.57768  | -1380.68346 | 1 |
| 5551 | H | 64.64877 | 91.43161 | 62.32678 | 894.15604   | 2191.70205  | 962.66558   | 1 |
| 5552 | C | 65.47055 | 92.56865 | 64.14147 | 215.10070   | 317.60265   | -237.91986  | 1 |
| 5553 | H | 66.43385 | 92.02413 | 63.96196 | -562.50423  | 449.29084   | 676.16245   | 1 |
| 5554 | H | 65.77546 | 93.65866 | 64.29749 | 3783.28305  | 1.13035     | -722.13108  | 1 |
| 5555 | H | 65.10935 | 92.09428 | 65.09958 | 1535.61186  | -831.32642  | 202.37370   | 1 |
| 5556 | C | 60.46384 | 92.21919 | 62.85855 | 1278.28757  | -362.13292  | -676.06600  | 1 |
| 5557 | O | 59.89687 | 91.16033 | 62.60312 | -1111.57679 | 93.36246    | 249.66018   | 1 |
| 5558 | N | 60.10633 | 93.17396 | 63.70146 | 263.57567   | -327.00968  | -305.89760  | 1 |
| 5559 | H | 60.77530 | 93.99198 | 63.78300 | -2528.73668 | 243.86984   | -553.23964  | 1 |
| 5560 | C | 58.76008 | 93.35746 | 64.08138 | -11.93960   | -199.57436  | -263.99158  | 1 |
| 5561 | H | 58.14161 | 92.40197 | 63.82198 | -476.53435  | -1653.21494 | 2313.34811  | 1 |
| 5562 | C | 58.87048 | 93.49787 | 65.63106 | -76.47412   | -943.76637  | 6.68314     | 1 |
| 5563 | H | 59.28193 | 94.47708 | 65.90794 | 1306.92943  | -817.53450  | -3734.63506 | 1 |
| 5564 | H | 59.62290 | 92.74627 | 66.02501 | -481.60695  | -207.35339  | -576.79214  | 1 |
| 5565 | C | 57.53775 | 93.15891 | 66.28590 | 388.42732   | -78.00393   | 250.65470   | 1 |
| 5566 | C | 57.31655 | 91.74944 | 66.47768 | -459.88665  | -450.58771  | 147.63204   | 1 |
| 5567 | H | 58.09531 | 91.12175 | 66.10450 | -704.73805  | -129.60006  | 1623.38794  | 1 |
| 5568 | C | 56.16933 | 91.33385 | 67.18878 | 359.19146   | 286.04745   | -1388.17363 | 1 |
| 5569 | H | 56.29566 | 90.25852 | 67.47581 | -411.27872  | 758.09926   | -1526.45592 | 1 |
| 5570 | C | 55.13672 | 92.27473 | 67.50985 | 244.42923   | 252.52822   | 137.22366   | 1 |
| 5571 | O | 53.90785 | 91.85681 | 68.05315 | -208.05076  | -114.34113  | 70.86236    | 1 |
| 5572 | H | 53.98120 | 90.83138 | 67.84134 | -2385.74346 | -65.12607   | -2376.04346 | 1 |
| 5573 | C | 56.55835 | 94.16116 | 66.65667 | -766.66768  | -1410.11230 | -623.15769  | 1 |

|      |   |          |           |          |             |             |             |   |
|------|---|----------|-----------|----------|-------------|-------------|-------------|---|
| 5574 | H | 56.70894 | 95.20640  | 66.39477 | 2874.10504  | -521.05779  | 2288.94830  | 1 |
| 5575 | C | 55.38491 | 93.63767  | 67.20120 | 166.12471   | -238.90747  | 724.01036   | 1 |
| 5576 | H | 54.48665 | 94.25875  | 67.34514 | -2838.42778 | 636.50105   | -1360.40139 | 1 |
| 5577 | C | 58.02844 | 94.78608  | 63.58571 | 18.88269    | -1002.23445 | -115.83540  | 1 |
| 5578 | O | 56.83820 | 94.94922  | 63.79305 | -20.78638   | -557.77763  | 43.55451    | 1 |
| 5579 | N | 58.92097 | 95.54075  | 63.03451 | -235.66913  | -80.93540   | 169.89330   | 1 |
| 5580 | H | 59.80466 | 95.12294  | 62.80379 | -2269.24845 | 890.06337   | -913.23298  | 1 |
| 5581 | C | 58.64985 | 96.96680  | 62.95067 | -212.25111  | -672.29738  | -414.64313  | 1 |
| 5582 | H | 59.56273 | 97.10705  | 62.28319 | -1251.40072 | 1233.27351  | 3062.55179  | 1 |
| 5583 | C | 57.28449 | 97.21757  | 62.17124 | 267.67838   | 167.25811   | 9.16839     | 1 |
| 5584 | H | 57.17788 | 98.32498  | 61.77882 | -1095.31795 | -3757.01095 | 971.30828   | 1 |
| 5585 | O | 56.03880 | 97.20731  | 62.82015 | -373.59760  | -682.26895  | 476.69085   | 1 |
| 5586 | H | 56.11086 | 96.25407  | 63.35985 | -351.94935  | 2586.56492  | 2328.56655  | 1 |
| 5587 | C | 57.17710 | 96.53210  | 60.71677 | 184.46610   | 543.07556   | 32.37531    | 1 |
| 5588 | H | 58.13288 | 96.71022  | 60.15341 | 149.45783   | 1040.30843  | 60.78155    | 1 |
| 5589 | H | 57.07818 | 95.44201  | 60.81772 | 981.82110   | 236.45923   | -237.55639  | 1 |
| 5590 | H | 56.24589 | 96.84961  | 60.17927 | 2052.90811  | -1823.04692 | -1442.93830 | 1 |
| 5591 | C | 58.90415 | 97.62533  | 64.38763 | 178.71805   | 10.66583    | 720.33979   | 1 |
| 5592 | O | 58.81257 | 97.17321  | 65.54256 | 180.41407   | -70.28064   | -775.35859  | 1 |
| 5593 | N | 59.09288 | 98.90896  | 64.03881 | -452.87481  | 259.65035   | 201.64218   | 1 |
| 5594 | H | 59.27371 | 99.09640  | 63.04811 | -4253.94708 | -1292.17833 | -1065.16666 | 1 |
| 5595 | C | 58.85315 | 99.90142  | 65.05673 | 10.22087    | -429.64363  | 248.57024   | 1 |
| 5596 | H | 57.81174 | 99.69592  | 65.31101 | -1458.39872 | -182.07176  | -314.84649  | 1 |
| 5597 | C | 59.80504 | 99.76346  | 66.36974 | 138.09117   | -391.38804  | -746.88640  | 1 |
| 5598 | H | 59.45514 | 100.50846 | 67.16315 | 1238.49289  | 988.07306   | -461.19209  | 1 |
| 5599 | H | 59.43658 | 98.78150  | 66.78808 | 641.33275   | -757.87063  | 475.48523   | 1 |
| 5600 | O | 61.19793 | 99.87738  | 66.13620 | 215.33689   | -533.86049  | 178.45068   | 1 |
| 5601 | H | 61.37505 | 100.79136 | 66.30702 | 904.13280   | 1216.13298  | -1307.19825 | 1 |
| 5602 | C | 59.10876 | 101.37255 | 64.48920 | 417.42146   | -240.25463  | -128.50613  | 1 |
| 5603 | O | 59.56906 | 101.73828 | 63.39067 | 129.77349   | 66.53313    | 997.45764   | 1 |
| 5604 | N | 58.79354 | 102.21799 | 65.50531 | 328.51064   | -576.51570  | -238.87236  | 1 |
| 5605 | H | 58.37521 | 101.91819 | 66.40867 | -1518.00667 | -158.24277  | 1424.92745  | 1 |
| 5606 | C | 58.31621 | 103.54027 | 65.08366 | 513.39895   | -280.71622  | 640.90798   | 1 |
| 5607 | H | 57.63052 | 103.32384 | 64.18880 | -20.63138   | -734.58123  | 933.73767   | 1 |
| 5608 | C | 57.64593 | 104.25977 | 66.28290 | 47.16549    | 984.87471   | -322.23667  | 1 |
| 5609 | H | 56.69734 | 104.80280 | 65.97552 | 2392.19196  | -448.06798  | 1335.33691  | 1 |
| 5610 | H | 58.29792 | 105.09920 | 66.76208 | 1906.43067  | 580.96617   | 1844.27438  | 1 |
| 5611 | C | 56.97969 | 103.29596 | 67.54322 | -323.11192  | -327.42646  | -732.81034  | 1 |
| 5612 | O | 57.36161 | 102.15820 | 67.76695 | 416.02310   | 407.67660   | 340.06965   | 1 |
| 5613 | O | 56.26901 | 103.97478 | 68.25975 | 591.72482   | -487.49016  | 324.73034   | 1 |
| 5614 | C | 59.57722 | 104.42531 | 64.64818 | -421.99918  | -311.65626  | 1166.58460  | 1 |
| 5615 | O | 59.46408 | 105.45947 | 64.05180 | -178.90778  | 181.01323   | 775.77010   | 1 |
| 5616 | N | 60.77347 | 103.87589 | 64.99555 | 419.57978   | -107.79759  | -550.12963  | 1 |
| 5617 | H | 60.86296 | 103.04173 | 65.58217 | 217.44791   | -1276.05322 | -1543.28155 | 1 |
| 5618 | C | 61.92682 | 104.70323 | 64.84971 | 785.64442   | 434.13444   | -200.71106  | 1 |
| 5619 | H | 61.58673 | 105.72985 | 64.46319 | 3524.82552  | 1015.71317  | 98.29262    | 1 |
| 5620 | C | 62.63310 | 104.68518 | 66.30449 | 231.55685   | 530.48471   | 269.63988   | 1 |
| 5621 | H | 62.05952 | 105.42380 | 66.94158 | 1256.98169  | -1193.71174 | -800.46771  | 1 |
| 5622 | H | 63.62414 | 105.10301 | 66.12345 | 256.38718   | 734.71587   | 2450.81465  | 1 |
| 5623 | C | 62.70069 | 103.37065 | 67.09992 | 222.24728   | 540.98992   | -706.30479  | 1 |
| 5624 | O | 61.93275 | 102.39730 | 66.91270 | -525.06589  | 816.86258   | -144.65027  | 1 |
| 5625 | N | 63.74067 | 103.44970 | 67.93422 | -385.04663  | 41.44348    | -21.15067   | 1 |
| 5626 | H | 64.12829 | 102.64543 | 68.46751 | -610.53517  | -1074.44827 | 2359.85132  | 1 |
| 5627 | H | 64.37485 | 104.30985 | 67.87040 | 648.97581   | -1099.57142 | -526.42847  | 1 |
| 5628 | C | 62.80557 | 103.97703 | 63.74140 | 897.17759   | 399.36739   | -500.30324  | 1 |
| 5629 | O | 63.82173 | 104.58356 | 63.36172 | -561.19186  | 430.14220   | -289.22591  | 1 |
| 5630 | N | 62.34746 | 102.90186 | 63.10757 | -561.56343  | -238.72721  | -548.98397  | 1 |
| 5631 | H | 61.33938 | 102.61120 | 63.35224 | -698.31290  | -2438.17187 | -512.48076  | 1 |
| 5632 | C | 63.20926 | 101.80631 | 62.74732 | 282.87244   | 783.60812   | -491.46277  | 1 |
| 5633 | H | 64.13713 | 102.31174 | 62.54446 | 321.42304   | 1781.00806  | -656.36736  | 1 |
| 5634 | C | 63.44920 | 101.03820 | 64.12979 | -338.52665  | 622.12284   | 1064.91222  | 1 |
| 5635 | H | 64.00317 | 101.72956 | 64.81250 | -1107.83008 | 368.34581   | -1048.46905 | 1 |

|      |   |          |           |          |             |             |             |   |
|------|---|----------|-----------|----------|-------------|-------------|-------------|---|
| 5636 | H | 62.51833 | 100.87777 | 64.74812 | -3253.32490 | -2101.97912 | -285.30762  | 1 |
| 5637 | C | 64.22788 | 99.72653  | 64.03719 | 916.61086   | 721.76460   | -131.92515  | 1 |
| 5638 | C | 65.61901 | 99.63041  | 63.91383 | 148.02830   | -152.51061  | 254.39478   | 1 |
| 5639 | H | 66.22031 | 100.53751 | 63.85898 | 1204.52054  | -2562.29742 | -704.85918  | 1 |
| 5640 | C | 66.33390 | 98.40398  | 64.02334 | 645.49228   | 582.32706   | 270.43895   | 1 |
| 5641 | H | 67.44236 | 98.45840  | 63.94745 | -1945.01911 | 2805.85088  | -2270.40583 | 1 |
| 5642 | C | 65.60669 | 97.16980  | 64.13188 | 251.64540   | -176.61959  | -170.60553  | 1 |
| 5643 | O | 66.20019 | 95.87444  | 64.12230 | 162.19395   | 631.12489   | 403.23842   | 1 |
| 5644 | H | 65.74370 | 95.53417  | 63.31849 | -498.05509  | -2119.91763 | 1832.68412  | 1 |
| 5645 | C | 63.47933 | 98.52235  | 64.24275 | 212.89899   | -744.76234  | -537.05323  | 1 |
| 5646 | H | 62.31498 | 98.51037  | 64.44292 | -276.57417  | 1451.41024  | 990.07450   | 1 |
| 5647 | C | 64.17410 | 97.34146  | 64.25327 | 318.00939   | -627.62900  | -3.61953    | 1 |
| 5648 | H | 63.41339 | 96.48126  | 64.34834 | -1287.06219 | 482.38733   | -2042.54975 | 1 |
| 5649 | C | 62.71630 | 100.82849 | 61.52038 | 683.81416   | -110.75992  | -801.90748  | 1 |
| 5650 | O | 63.57012 | 100.40744 | 60.79521 | 263.35995   | 790.59860   | 694.17459   | 1 |
| 5651 | N | 61.37884 | 100.68261 | 61.52773 | -393.51794  | -195.82231  | 293.92597   | 1 |
| 5652 | H | 60.85068 | 101.03348 | 62.40620 | -878.21579  | -1712.30502 | 1977.46918  | 1 |
| 5653 | C | 60.90032 | 100.56057 | 60.15506 | -81.87596   | -84.25322   | 506.35658   | 1 |
| 5654 | H | 61.77189 | 100.13741 | 59.64128 | 259.73210   | 3831.76100  | 2519.44935  | 1 |
| 5655 | C | 59.49264 | 99.77687  | 60.00298 | -334.44644  | 232.13541   | 1099.21620  | 1 |
| 5656 | H | 58.69078 | 100.57836 | 60.27051 | -1023.74857 | 52.34937    | -951.28216  | 1 |
| 5657 | O | 59.18577 | 98.68645  | 60.85404 | 61.13960    | -233.33669  | -1158.27761 | 1 |
| 5658 | H | 59.59802 | 97.93752  | 60.23291 | -1620.18296 | -2346.39410 | -319.42597  | 1 |
| 5659 | C | 59.54944 | 99.36128  | 58.47773 | -909.65997  | 238.34370   | 89.00647    | 1 |
| 5660 | H | 58.79591 | 98.57949  | 58.23656 | -1182.32980 | 808.26481   | 610.19040   | 1 |
| 5661 | H | 60.51220 | 98.88734  | 58.24533 | 4107.91675  | 796.26093   | -899.46669  | 1 |
| 5662 | H | 59.39489 | 100.19576 | 57.81979 | 1035.85745  | -512.22001  | 2120.15758  | 1 |
| 5663 | C | 60.67905 | 102.03137 | 59.55278 | -1029.31749 | -895.67673  | 435.00554   | 1 |
| 5664 | O | 59.86923 | 102.20159 | 58.64380 | -154.01858  | -491.79537  | -181.45257  | 1 |
| 5665 | N | 61.44910 | 102.95473 | 60.15758 | -618.87611  | -118.94189  | -227.16164  | 1 |
| 5666 | H | 61.89296 | 102.53194 | 60.90870 | 219.98502   | -3357.60193 | 329.73072   | 1 |
| 5667 | C | 61.07240 | 104.33395 | 60.03998 | 399.53718   | -422.42073  | -568.86482  | 1 |
| 5668 | H | 60.48454 | 104.28283 | 59.08097 | 1083.22859  | -2401.46340 | -164.47079  | 1 |
| 5669 | C | 60.41697 | 104.72480 | 61.44120 | 362.14719   | 411.07401   | 220.30699   | 1 |
| 5670 | H | 60.57366 | 103.97692 | 62.23245 | 4935.53072  | 3405.57608  | 1216.17565  | 1 |
| 5671 | H | 60.83691 | 105.61094 | 61.97303 | -1281.84473 | 285.86280   | -45.74877   | 1 |
| 5672 | C | 58.88153 | 104.88769 | 61.15315 | -152.38714  | 227.02785   | 520.36199   | 1 |
| 5673 | H | 58.49790 | 103.95824 | 60.71856 | -1588.40319 | 863.05557   | 784.92045   | 1 |
| 5674 | H | 58.33786 | 105.02104 | 62.10376 | 875.95562   | 1924.26752  | 2365.40401  | 1 |
| 5675 | C | 58.72266 | 106.12575 | 60.05347 | -262.85418  | 549.90937   | -408.91926  | 1 |
| 5676 | O | 57.65628 | 106.13524 | 59.45144 | -354.06783  | 108.94323   | 483.74634   | 1 |
| 5677 | O | 59.59895 | 106.99878 | 59.92113 | -538.81824  | -411.20164  | 169.59860   | 1 |
| 5678 | C | 62.46718 | 105.15389 | 59.85562 | 535.08620   | 126.13437   | -408.58553  | 1 |
| 5679 | O | 63.47583 | 104.63194 | 59.44655 | -323.08839  | 162.16037   | 480.85768   | 1 |
| 5680 | N | 62.21087 | 106.44215 | 60.16547 | 455.61472   | -466.61767  | -479.24893  | 1 |
| 5681 | H | 61.28041 | 106.84671 | 60.45498 | 410.15238   | -1734.89461 | 1149.44398  | 1 |
| 5682 | C | 63.39419 | 107.25653 | 60.26036 | -117.63826  | 91.37175    | -338.74557  | 1 |
| 5683 | H | 64.19373 | 106.68074 | 59.67645 | -1182.61014 | -1348.42261 | 872.45746   | 1 |
| 5684 | C | 63.00247 | 108.64612 | 59.61959 | -287.63891  | -456.97052  | -323.52491  | 1 |
| 5685 | H | 63.83520 | 109.37534 | 59.70671 | 1112.95205  | 543.33647   | 1171.80086  | 1 |
| 5686 | H | 62.07222 | 109.19682 | 60.00704 | 3152.74912  | -1281.24404 | -1270.02242 | 1 |
| 5687 | C | 62.82217 | 108.18017 | 58.15061 | 622.71615   | -326.99246  | -176.06769  | 1 |
| 5688 | H | 62.13004 | 107.34835 | 58.03502 | 500.66215   | 2438.88661  | -661.79518  | 1 |
| 5689 | H | 62.26654 | 108.89826 | 57.56812 | 2986.95695  | -511.56316  | -902.05824  | 1 |
| 5690 | C | 64.29349 | 107.90104 | 57.43192 | -982.73719  | 1254.41729  | -486.40214  | 1 |
| 5691 | O | 64.22427 | 107.85843 | 56.20197 | 121.16131   | -338.54097  | -335.58652  | 1 |
| 5692 | O | 65.29548 | 107.81830 | 58.16380 | 5.22858     | -111.02898  | 67.70412    | 1 |
| 5693 | C | 63.76144 | 107.53452 | 61.83749 | 512.08054   | 326.23910   | 90.92611    | 1 |
| 5694 | O | 62.96940 | 107.52358 | 62.75735 | -41.40323   | -326.28600  | 333.69335   | 1 |
| 5695 | N | 65.07007 | 107.85344 | 61.88305 | 68.39287    | 232.85459   | 386.53416   | 1 |
| 5696 | H | 65.34966 | 107.85034 | 60.87987 | 1933.80526  | -141.95290  | 1291.79395  | 1 |
| 5697 | C | 65.96830 | 107.01919 | 62.67963 | -735.16522  | -199.07711  | -216.25938  | 1 |



|      |   |          |           |          |             |             |             |   |
|------|---|----------|-----------|----------|-------------|-------------|-------------|---|
| 5698 | H | 65.45203 | 107.07823 | 63.72703 | 654.64083   | -691.47543  | 1754.50174  | 1 |
| 5699 | C | 65.92851 | 105.58181 | 62.02034 | 84.89714    | 30.66284    | -105.52066  | 1 |
| 5700 | H | 66.27552 | 104.72547 | 62.60698 | -1462.55851 | 1376.85975  | -2031.11071 | 1 |
| 5701 | H | 64.86868 | 105.22897 | 61.70675 | -644.33858  | 1718.22079  | 1218.73074  | 1 |
| 5702 | C | 66.81462 | 105.58810 | 60.77744 | 686.67673   | 122.61879   | -13.27330   | 1 |
| 5703 | H | 67.88954 | 105.86132 | 61.03879 | 2094.97390  | 1004.81356  | -263.73462  | 1 |
| 5704 | H | 66.33730 | 106.26982 | 60.01012 | -510.33931  | -195.80673  | 1054.34381  | 1 |
| 5705 | S | 66.83581 | 103.73084 | 60.17211 | 25.83463    | 570.39914   | 386.47383   | 1 |
| 5706 | C | 66.15706 | 103.87953 | 58.42414 | 25.05472    | -12.72296   | 626.86136   | 1 |
| 5707 | H | 66.59621 | 104.62769 | 57.75640 | -1339.03361 | -2386.91770 | -839.67647  | 1 |
| 5708 | H | 65.14872 | 104.39583 | 58.45798 | 475.75006   | -638.99744  | 1936.31223  | 1 |
| 5709 | H | 65.99556 | 102.93518 | 57.82257 | 795.91667   | -1349.11094 | -1230.47953 | 1 |
| 5710 | C | 67.51212 | 107.45476 | 62.69908 | 263.92856   | -412.06866  | 318.44053   | 1 |
| 5711 | O | 68.16954 | 107.92620 | 61.78299 | 619.64612   | -192.28713  | 189.24632   | 1 |
| 5712 | N | 67.97935 | 106.80634 | 63.78315 | 836.72358   | 379.58567   | -103.15496  | 1 |
| 5713 | H | 67.36405 | 106.28586 | 64.45006 | -1912.37806 | -2400.68694 | 319.42816   | 1 |
| 5714 | C | 69.32111 | 107.20826 | 64.09420 | -635.18175  | 316.28688   | 647.41069   | 1 |
| 5715 | H | 69.52840 | 108.24480 | 63.64785 | 1655.54340  | 1815.01743  | 2144.74577  | 1 |
| 5716 | H | 69.39710 | 107.17683 | 65.25456 | 422.18176   | -1432.79473 | 1853.91825  | 1 |
| 5717 | C | 70.29769 | 106.14871 | 63.43906 | -66.82379   | 775.27844   | 515.01269   | 1 |
| 5718 | O | 70.85271 | 105.33921 | 64.17278 | -393.52836  | -508.09512  | -1290.72721 | 1 |
| 5719 | N | 70.32124 | 106.31266 | 62.09648 | 329.57484   | 342.24172   | 401.58901   | 1 |
| 5720 | H | 69.59525 | 106.90726 | 61.64047 | 1378.51241  | 1142.75280  | -1266.55282 | 1 |
| 5721 | C | 70.77096 | 105.10812 | 61.39344 | -245.71672  | -547.47360  | 11.89277    | 1 |
| 5722 | H | 70.45960 | 104.26271 | 62.02383 | 53.60239    | -2245.48160 | -89.58537   | 1 |
| 5723 | C | 70.18021 | 105.16082 | 59.94716 | 310.60388   | 183.54096   | -293.71701  | 1 |
| 5724 | H | 69.49837 | 106.02399 | 59.92059 | 603.09415   | 1647.76992  | -1083.25428 | 1 |
| 5725 | H | 71.11663 | 105.36310 | 59.32627 | -143.65081  | 870.10565   | -1511.90856 | 1 |
| 5726 | O | 69.82155 | 103.88355 | 59.35315 | -87.83103   | -294.93183  | 222.37899   | 1 |
| 5727 | H | 68.76068 | 103.89547 | 59.56669 | 210.42322   | 720.61030   | 1947.49693  | 1 |
| 5728 | C | 72.40295 | 105.20667 | 61.33804 | 758.87815   | 48.77599    | -137.64008  | 1 |
| 5729 | O | 72.97628 | 105.65480 | 60.37481 | -185.81857  | 523.09581   | -375.50609  | 1 |
| 5730 | N | 72.88691 | 104.69759 | 62.46036 | -105.39106  | 297.22773   | -159.32419  | 1 |
| 5731 | H | 72.13841 | 104.54692 | 63.18661 | 195.19942   | -53.91046   | -181.56448  | 1 |
| 5732 | C | 73.67084 | 103.44609 | 62.17848 | 119.63870   | -261.56061  | 106.73309   | 1 |
| 5733 | H | 73.10141 | 102.67336 | 61.54315 | 884.70516   | 647.91511   | -2404.17292 | 1 |
| 5734 | H | 74.53334 | 103.87390 | 61.62672 | -952.84663  | -7.55389    | -2684.62205 | 1 |
| 5735 | C | 74.04694 | 102.83092 | 63.55741 | -166.65126  | -1098.17052 | 52.85335    | 1 |
| 5736 | O | 74.12232 | 101.62738 | 63.73091 | 16.91798    | -22.74627   | 640.17447   | 1 |
| 5737 | N | 74.28400 | 103.86213 | 64.53040 | 102.35910   | 23.16833    | -348.20464  | 1 |
| 5738 | H | 74.48146 | 104.83845 | 64.19513 | -1602.72630 | -2165.89004 | -586.69221  | 1 |
| 5739 | C | 74.87233 | 103.42637 | 65.74634 | 59.45663    | -1088.44427 | 57.42303    | 1 |
| 5740 | H | 74.65058 | 102.33639 | 65.88121 | -947.23759  | 1898.09265  | -1816.17653 | 1 |
| 5741 | C | 76.41574 | 103.59764 | 65.76762 | 4.77489     | 294.75976   | 122.58672   | 1 |
| 5742 | H | 76.69546 | 104.65833 | 66.22293 | -3997.84102 | -68.52324   | 2537.60590  | 1 |
| 5743 | H | 76.88208 | 103.70505 | 64.79008 | -431.90552  | 415.98774   | 2035.35406  | 1 |
| 5744 | C | 77.19301 | 102.36961 | 66.64822 | 608.10050   | -138.99138  | 316.64360   | 1 |
| 5745 | O | 78.39027 | 102.63374 | 66.93555 | 395.95784   | -18.54771   | -40.15370   | 1 |
| 5746 | O | 76.63126 | 101.28633 | 66.71023 | -844.99768  | -384.19340  | 392.01039   | 1 |
| 5747 | C | 74.13933 | 104.23055 | 67.01691 | 1624.63902  | 80.16128    | 1142.94337  | 1 |
| 5748 | O | 74.48415 | 103.99777 | 68.15947 | 135.50600   | -265.09012  | 657.24685   | 1 |
| 5749 | N | 73.09690 | 104.95988 | 66.67280 | -13.51113   | 460.72806   | 203.74646   | 1 |
| 5750 | H | 72.76880 | 105.02792 | 65.72546 | -2727.98440 | 637.55657   | 2703.53600  | 1 |
| 5751 | C | 72.66568 | 106.13297 | 67.35736 | -26.51060   | -666.67152  | 366.93695   | 1 |
| 5752 | H | 73.20552 | 105.91445 | 68.32568 | 226.28846   | -449.44046  | 159.28564   | 1 |
| 5753 | C | 73.06221 | 107.44295 | 66.54983 | 607.70265   | 349.74508   | -827.13554  | 1 |
| 5754 | H | 72.31320 | 108.24008 | 66.80676 | 2792.39588  | 809.17654   | -97.27744   | 1 |
| 5755 | H | 72.90645 | 107.27054 | 65.48592 | -1763.67263 | 1069.84555  | -2357.18600 | 1 |
| 5756 | C | 74.45670 | 108.07969 | 66.73553 | -124.57004  | 1484.99036  | 207.71208   | 1 |
| 5757 | C | 75.51782 | 107.15326 | 66.83717 | -778.79517  | -749.33582  | -254.60816  | 1 |
| 5758 | H | 75.30250 | 106.12510 | 66.47596 | 540.46623   | 1117.67336  | -59.39611   | 1 |
| 5759 | C | 76.79382 | 107.54001 | 67.23769 | -396.46245  | 377.64462   | 495.53614   | 1 |

|      |   |          |           |          |             |             |             |   |
|------|---|----------|-----------|----------|-------------|-------------|-------------|---|
| 5760 | H | 77.64069 | 106.77709 | 67.22798 | 1844.72415  | -1146.44328 | -774.52500  | 1 |
| 5761 | C | 77.09419 | 108.93042 | 67.56768 | 57.29144    | 1037.77290  | -1022.22283 | 1 |
| 5762 | O | 78.38319 | 109.41610 | 67.97072 | -218.90375  | 136.72260   | -729.56528  | 1 |
| 5763 | H | 78.41670 | 109.20019 | 68.88873 | 579.55969   | 1477.89535  | -2665.80394 | 1 |
| 5764 | C | 74.66525 | 109.45545 | 67.09794 | 463.91968   | 26.68614    | -491.15193  | 1 |
| 5765 | H | 73.82875 | 110.13114 | 67.22269 | -902.02360  | -1092.28540 | -1502.87093 | 1 |
| 5766 | C | 75.95793 | 109.77298 | 67.50301 | 707.53164   | -134.15265  | 356.02770   | 1 |
| 5767 | H | 76.22712 | 110.80293 | 67.89965 | 2070.65500  | -3569.57077 | 1349.55047  | 1 |
| 5768 | C | 71.02110 | 106.20845 | 67.47184 | 331.33914   | 227.12618   | 17.00695    | 1 |
| 5769 | O | 70.29273 | 107.16887 | 67.39349 | -314.86178  | 299.95864   | -709.38602  | 1 |
| 5770 | N | 70.66769 | 104.94793 | 67.94985 | -778.59963  | -95.72665   | 529.08036   | 1 |
| 5771 | H | 71.32018 | 104.25346 | 67.61656 | 520.40985   | 4395.38229  | 1636.24987  | 1 |
| 5772 | C | 69.17735 | 104.82347 | 68.07005 | -113.89387  | -541.05417  | 650.25433   | 1 |
| 5773 | H | 68.86095 | 105.74046 | 68.66844 | -2027.79807 | -811.59929  | -2040.76765 | 1 |
| 5774 | C | 68.53656 | 104.91918 | 66.68667 | -248.97560  | 53.14426    | 230.07401   | 1 |
| 5775 | H | 68.95210 | 105.80474 | 66.13829 | 1703.07967  | -472.73987  | -469.10022  | 1 |
| 5776 | H | 68.82605 | 104.10199 | 66.05737 | -769.75638  | -1088.34137 | -201.73763  | 1 |
| 5777 | C | 66.96643 | 105.19096 | 66.65475 | -337.57828  | 1181.17341  | -758.13953  | 1 |
| 5778 | O | 66.36810 | 105.76405 | 65.74197 | -596.57655  | 280.70298   | 455.31619   | 1 |
| 5779 | O | 66.41392 | 104.75194 | 67.70527 | 8.79251     | -237.02661  | -127.92842  | 1 |
| 5780 | C | 68.90992 | 103.41856 | 68.78844 | 269.59986   | -539.69133  | -881.65961  | 1 |
| 5781 | O | 69.67060 | 102.46115 | 68.84695 | 322.17109   | -184.66964  | 651.64863   | 1 |
| 5782 | N | 67.69289 | 103.43959 | 69.35082 | -395.75443  | -1262.50075 | 79.35250    | 1 |
| 5783 | H | 67.04949 | 104.24955 | 69.19573 | 1916.04273  | -775.61810  | -3567.22030 | 1 |
| 5784 | C | 67.38554 | 102.32912 | 70.23750 | 548.11555   | -24.02341   | -560.42429  | 1 |
| 5785 | H | 68.35434 | 101.91173 | 70.56429 | -3236.92396 | -2366.68997 | -3654.37142 | 1 |
| 5786 | C | 66.43320 | 102.98848 | 71.28865 | 252.72848   | -177.49701  | 46.29289    | 1 |
| 5787 | H | 65.70550 | 102.19296 | 71.68980 | -76.62924   | 2357.73548  | -3815.95293 | 1 |
| 5788 | H | 65.81857 | 103.85823 | 70.84649 | -2073.98472 | 1256.27632  | -425.10834  | 1 |
| 5789 | O | 67.22699 | 103.86570 | 72.19655 | -28.35827   | -631.04393  | 382.38833   | 1 |
| 5790 | H | 67.28888 | 103.19225 | 72.94710 | -124.62220  | -2261.39465 | 1134.98166  | 1 |
| 5791 | C | 66.68349 | 101.24770 | 69.23389 | -79.38564   | 144.29958   | -75.27612   | 1 |
| 5792 | O | 65.48828 | 101.15884 | 69.11163 | 232.37471   | 728.92186   | -490.94988  | 1 |
| 5793 | N | 67.72598 | 100.65951 | 68.58241 | -784.80969  | 200.85660   | 313.24847   | 1 |
| 5794 | H | 68.72375 | 101.00805 | 68.45247 | -1377.96813 | 416.81646   | 514.38278   | 1 |
| 5795 | C | 67.21858 | 100.00842 | 67.35428 | 23.64880    | -352.79232  | -480.09362  | 1 |
| 5796 | H | 66.40453 | 99.36952  | 67.74217 | -1294.58978 | 573.57742   | 1577.38728  | 1 |
| 5797 | C | 66.72327 | 101.07805 | 66.29247 | -474.18533  | 753.27951   | 204.76787   | 1 |
| 5798 | H | 66.01408 | 100.41955 | 65.74066 | 2678.27183  | 2188.10460  | -5149.74334 | 1 |
| 5799 | H | 66.13367 | 101.88887 | 66.82799 | 2529.90202  | 1061.06314  | 508.00667   | 1 |
| 5800 | C | 67.90945 | 101.62483 | 65.39958 | 152.19329   | -600.80825  | -434.86320  | 1 |
| 5801 | H | 68.90500 | 101.85444 | 65.97524 | -1928.16587 | 1886.93325  | -2909.31792 | 1 |
| 5802 | H | 68.35522 | 100.79907 | 64.66365 | 2519.57866  | -864.05388  | -22.67159   | 1 |
| 5803 | S | 67.05802 | 102.91430 | 64.49102 | -393.30781  | -120.22204  | -290.84598  | 1 |
| 5804 | C | 68.34604 | 103.44011 | 63.31155 | 334.82130   | -182.77250  | -324.11720  | 1 |
| 5805 | H | 68.20757 | 104.44445 | 62.74908 | -729.88924  | -780.97621  | -573.46446  | 1 |
| 5806 | H | 69.36209 | 103.42649 | 63.68428 | -549.56034  | 1514.68650  | -2376.88287 | 1 |
| 5807 | H | 68.62077 | 102.59126 | 62.69164 | -518.50998  | 2756.88625  | 950.37589   | 1 |
| 5808 | C | 68.40709 | 99.12621  | 66.78055 | 63.65582    | 89.32021    | -305.56498  | 1 |
| 5809 | O | 69.55776 | 99.56114  | 66.82952 | -804.35664  | 143.32171   | -749.21497  | 1 |
| 5810 | N | 68.05053 | 97.90921  | 66.33697 | 576.01068   | 517.28769   | 195.98129   | 1 |
| 5811 | H | 67.08049 | 97.58268  | 66.28169 | 2263.08206  | -1775.38944 | 1195.06253  | 1 |
| 5812 | C | 69.12118 | 96.98689  | 66.18345 | 218.31634   | 500.64921   | -169.19653  | 1 |
| 5813 | H | 69.80180 | 97.19396  | 67.10773 | 2866.32723  | -6.86992    | -1154.51632 | 1 |
| 5814 | C | 68.64381 | 95.47197  | 66.16257 | -135.26143  | -385.47725  | -718.45969  | 1 |
| 5815 | H | 68.02999 | 95.23698  | 65.23811 | 1186.10522  | -1670.12440 | -3661.24541 | 1 |
| 5816 | H | 69.52547 | 94.76477  | 66.18538 | -1465.42999 | -1634.15221 | 3676.09937  | 1 |
| 5817 | C | 67.84554 | 95.21592  | 67.49134 | -333.04777  | -303.70143  | -522.04989  | 1 |
| 5818 | H | 66.84958 | 95.72271  | 67.52706 | -2009.86783 | -2154.54215 | -939.11352  | 1 |
| 5819 | H | 68.51889 | 95.69651  | 68.21194 | -3001.91081 | -148.41211  | 2795.73437  | 1 |
| 5820 | C | 67.70769 | 93.69896  | 67.82515 | 674.78888   | -522.42570  | -980.80073  | 1 |
| 5821 | H | 68.63294 | 93.17484  | 67.57073 | 1599.01468  | 2394.21117  | -784.93366  | 1 |

|      |   |          |           |          |             |             |             |   |
|------|---|----------|-----------|----------|-------------|-------------|-------------|---|
| 5822 | H | 66.87088 | 93.27891  | 67.13066 | 545.45154   | -789.90977  | -1134.56609 | 1 |
| 5823 | C | 67.47381 | 93.51983  | 69.34696 | -516.57556  | -262.13995  | -560.28201  | 1 |
| 5824 | H | 67.70193 | 92.54497  | 69.74269 | 564.33834   | 637.97314   | 579.09182   | 1 |
| 5825 | H | 66.52711 | 93.88891  | 69.73624 | 3815.42437  | 424.27227   | 872.89564   | 1 |
| 5826 | N | 68.51234 | 94.45145  | 70.06337 | 473.69948   | 864.27780   | -231.11256  | 1 |
| 5827 | H | 68.62716 | 94.20851  | 71.11426 | 603.53439   | -1174.73157 | 1059.17044  | 1 |
| 5828 | H | 69.58584 | 94.48516  | 69.61545 | -1249.91901 | -242.12226  | 198.39343   | 1 |
| 5829 | H | 68.31898 | 95.56318  | 70.08024 | -361.81758  | -1413.00125 | 2279.50983  | 1 |
| 5830 | C | 69.96250 | 97.22449  | 64.80571 | -259.21920  | -333.98989  | 589.01190   | 1 |
| 5831 | O | 69.89890 | 96.49327  | 63.84300 | 185.84654   | 206.43251   | 614.01045   | 1 |
| 5832 | N | 70.75935 | 98.28313  | 64.99702 | -478.26769  | -453.04486  | 153.54548   | 1 |
| 5833 | H | 70.65487 | 98.75731  | 65.90333 | -1884.26061 | -1701.89537 | 1070.51088  | 1 |
| 5834 | C | 72.06488 | 98.13875  | 64.35923 | -377.06335  | -265.63095  | 526.91144   | 1 |
| 5835 | H | 71.97302 | 97.08950  | 63.99152 | 1304.98748  | -1111.63069 | 5357.12276  | 1 |
| 5836 | C | 72.29962 | 99.17192  | 63.18804 | -705.43259  | -493.66404  | -169.59928  | 1 |
| 5837 | H | 72.54435 | 100.14853 | 63.69311 | 2683.15426  | 1128.18106  | 3543.35469  | 1 |
| 5838 | H | 73.18348 | 98.88516  | 62.55805 | -588.94202  | 1453.35019  | -256.32346  | 1 |
| 5839 | C | 70.95207 | 99.29422  | 62.38796 | -919.78019  | -132.77436  | 394.63787   | 1 |
| 5840 | H | 70.37365 | 98.33713  | 62.40838 | 1828.84721  | -524.79994  | 24.62374    | 1 |
| 5841 | H | 71.18592 | 99.46241  | 61.34356 | -1573.59723 | -1517.82706 | 636.37616   | 1 |
| 5842 | C | 69.99443 | 100.41837 | 63.05131 | 267.22849   | -599.37610  | -1144.31832 | 1 |
| 5843 | O | 68.77863 | 100.05570 | 63.10358 | 436.89200   | 230.35808   | 998.94321   | 1 |
| 5844 | O | 70.36740 | 101.48515 | 63.48645 | -51.42190   | 983.75326   | -327.92978  | 1 |
| 5845 | C | 73.21020 | 98.30600  | 65.46589 | 125.96594   | 466.77883   | 118.43234   | 1 |
| 5846 | O | 74.26628 | 97.63247  | 65.39826 | -329.90494  | -811.35976  | 52.09558    | 1 |
| 5847 | N | 72.93537 | 99.39080  | 66.22055 | 947.85110   | -59.30312   | 3.26807     | 1 |
| 5848 | C | 72.11428 | 100.52321 | 65.79321 | -494.10971  | 640.98289   | 685.15215   | 1 |
| 5849 | H | 71.12606 | 100.31918 | 65.22450 | -466.31350  | 1053.42888  | 3249.48394  | 1 |
| 5850 | H | 72.66483 | 101.27171 | 65.20985 | -91.05200   | 1447.47192  | 1674.51387  | 1 |
| 5851 | C | 73.65677 | 99.65506  | 67.40139 | 889.15705   | 483.92845   | -1034.96239 | 1 |
| 5852 | H | 74.67112 | 99.72740  | 66.94726 | -1804.02745 | 1218.64174  | -1125.88821 | 1 |
| 5853 | C | 73.10223 | 101.03314 | 67.97812 | 1031.86505  | -330.28378  | 761.33645   | 1 |
| 5854 | H | 73.85822 | 101.84724 | 67.79653 | -2716.51113 | -2429.22873 | -21.15631   | 1 |
| 5855 | H | 72.80162 | 101.03773 | 69.02199 | -884.83627  | -3738.85657 | -1604.68701 | 1 |
| 5856 | C | 71.78973 | 101.29554 | 67.16096 | -696.52078  | 273.97301   | 235.91309   | 1 |
| 5857 | H | 71.46568 | 102.32628 | 66.93769 | -601.25499  | -1433.31243 | -1085.97711 | 1 |
| 5858 | H | 70.95396 | 100.87283 | 67.76170 | 397.65221   | 705.84149   | 2989.15343  | 1 |
| 5859 | C | 73.57241 | 98.42722  | 68.49470 | 1292.65115  | -454.60886  | 312.13612   | 1 |
| 5860 | O | 72.96154 | 98.65221  | 69.53533 | 659.93816   | -95.33243   | 936.58969   | 1 |
| 5861 | N | 74.33358 | 97.42121  | 68.07465 | 798.04592   | 158.88052   | 689.68394   | 1 |
| 5862 | H | 74.81503 | 97.54850  | 67.18708 | 2935.80575  | 1431.91494  | 1351.57039  | 1 |
| 5863 | C | 74.08407 | 96.05811  | 68.47431 | -250.45814  | -542.79729  | 624.12135   | 1 |
| 5864 | H | 73.32914 | 96.12821  | 69.28992 | 1609.41603  | -1234.74519 | 1194.97490  | 1 |
| 5865 | C | 73.55377 | 95.36420  | 67.18064 | -682.70623  | 604.33204   | 101.89780   | 1 |
| 5866 | H | 73.95841 | 95.89786  | 66.30898 | 465.35140   | 1209.76695  | -30.95690   | 1 |
| 5867 | H | 74.05234 | 94.38041  | 67.08426 | -1645.20764 | 146.94405   | 1475.84807  | 1 |
| 5868 | S | 71.73668 | 95.36599  | 67.36723 | -105.13143  | -222.63977  | -142.85913  | 1 |
| 5869 | C | 75.52394 | 95.27564  | 68.86451 | 424.35973   | -280.96251  | -208.06361  | 1 |
| 5870 | O | 75.57688 | 94.04373  | 68.93346 | -347.30789  | -289.58206  | 819.15627   | 1 |
| 5871 | N | 76.60623 | 96.06978  | 68.85047 | 399.86689   | 92.24995    | -127.25726  | 1 |
| 5872 | H | 76.22638 | 97.01320  | 68.81804 | 2211.55122  | 1040.26023  | 680.90680   | 1 |
| 5873 | C | 77.82485 | 95.52927  | 69.40064 | 569.98495   | -596.74084  | -1102.81532 | 1 |
| 5874 | H | 77.86679 | 94.60935  | 68.80950 | 1197.66245  | 1918.19719  | 1505.02562  | 1 |
| 5875 | C | 79.06575 | 96.49201  | 69.20717 | -141.85137  | 547.94396   | 242.68460   | 1 |
| 5876 | H | 79.88113 | 96.14541  | 69.84449 | -1418.14399 | 1746.59955  | -1860.59569 | 1 |
| 5877 | H | 78.63743 | 97.44285  | 69.67058 | 4675.54747  | -470.92879  | -661.28973  | 1 |
| 5878 | C | 79.35348 | 96.79823  | 67.72603 | -1028.87636 | -285.26869  | -541.15691  | 1 |
| 5879 | C | 80.31923 | 95.88608  | 67.20556 | -655.95971  | -478.44912  | 831.48569   | 1 |
| 5880 | H | 80.81615 | 95.06326  | 67.79697 | 2411.96211  | 217.21909   | 2660.36816  | 1 |
| 5881 | C | 80.58078 | 95.97967  | 65.84504 | 1211.24663  | -127.44722  | -243.46366  | 1 |
| 5882 | H | 81.38859 | 95.35471  | 65.45618 | -126.47631  | 1001.17130  | 1538.30689  | 1 |
| 5883 | C | 79.92022 | 96.90235  | 65.00371 | 882.22123   | 28.30219    | -797.77945  | 1 |

|      |   |          |          |          |             |             |             |   |
|------|---|----------|----------|----------|-------------|-------------|-------------|---|
| 5884 | H | 80.08228 | 96.98416 | 63.92336 | 1652.84822  | 797.44099   | 165.87788   | 1 |
| 5885 | C | 78.73597 | 97.78477 | 66.96472 | 1095.54944  | -134.24031  | 229.94298   | 1 |
| 5886 | H | 78.00337 | 98.44681 | 67.42570 | 2639.88234  | -1998.79844 | 3388.87602  | 1 |
| 5887 | C | 79.02009 | 97.81999 | 65.57268 | -293.19916  | -990.33281  | 96.47109    | 1 |
| 5888 | H | 78.61415 | 98.68568 | 65.01327 | 458.90938   | -2359.37944 | 1961.53787  | 1 |
| 5889 | C | 77.68091 | 95.37626 | 71.00727 | -564.94689  | -48.09105   | 130.53855   | 1 |
| 5890 | O | 77.95793 | 96.27392 | 71.75526 | -230.40194  | -573.97396  | 96.16315    | 1 |
| 5891 | N | 77.56607 | 94.03459 | 71.34027 | -393.93417  | 41.04051    | -766.81876  | 1 |
| 5892 | H | 77.17035 | 93.61591 | 70.48740 | 2109.64424  | 355.79782   | 1272.12849  | 1 |
| 5893 | C | 76.71436 | 93.73527 | 72.53683 | -146.21219  | 576.80902   | -717.06452  | 1 |
| 5894 | H | 75.94492 | 94.53044 | 72.45628 | -528.49827  | -975.19542  | 716.88378   | 1 |
| 5895 | C | 76.21677 | 92.27482 | 72.22865 | 225.05408   | 356.49097   | 352.56466   | 1 |
| 5896 | H | 76.42829 | 91.62647 | 73.09968 | -2665.98755 | 2509.10792  | 587.33001   | 1 |
| 5897 | H | 76.75148 | 91.85292 | 71.36958 | 34.68398    | 477.26256   | 82.26591    | 1 |
| 5898 | C | 74.64989 | 92.23427 | 72.09563 | -314.00710  | 629.13452   | -299.62580  | 1 |
| 5899 | H | 74.22646 | 93.14756 | 71.62094 | 1195.59510  | 4125.86177  | 1674.46631  | 1 |
| 5900 | H | 74.33157 | 91.41141 | 71.38888 | 1476.93194  | 883.69646   | 534.07621   | 1 |
| 5901 | C | 73.93703 | 92.25803 | 73.52282 | 338.04031   | 481.51272   | -98.13528   | 1 |
| 5902 | H | 74.28553 | 93.16344 | 74.13948 | 1421.57559  | 391.70407   | -2387.73933 | 1 |
| 5903 | H | 74.07767 | 91.33663 | 74.06707 | 623.99891   | -1884.01765 | -1300.06026 | 1 |
| 5904 | N | 72.65858 | 92.62426 | 73.20314 | -181.20165  | 549.01519   | 76.73510    | 1 |
| 5905 | H | 72.44283 | 93.62441 | 73.05510 | 2172.68209  | -117.64222  | -668.68774  | 1 |
| 5906 | C | 71.62066 | 91.83148 | 73.30299 | 82.67211    | -1142.65430 | 37.38534    | 1 |
| 5907 | N | 71.94637 | 90.50793 | 73.55154 | -915.25704  | -442.64419  | -1421.05716 | 1 |
| 5908 | H | 72.88253 | 89.98894 | 73.71279 | -267.37036  | -421.60857  | 1580.33636  | 1 |
| 5909 | H | 71.18809 | 89.79247 | 73.59258 | 2780.64002  | -2336.70064 | -2248.26524 | 1 |
| 5910 | N | 70.37635 | 92.43538 | 73.15326 | 234.69999   | 226.26186   | -514.14808  | 1 |
| 5911 | H | 70.13914 | 93.44073 | 72.86192 | -649.90463  | 1972.24960  | 286.10204   | 1 |
| 5912 | H | 69.48784 | 91.89623 | 73.02005 | -2419.05396 | -1350.53273 | 1572.56076  | 1 |
| 5913 | C | 77.44910 | 93.93595 | 73.93837 | -386.66480  | -664.03931  | -62.90695   | 1 |
| 5914 | O | 76.71551 | 94.15946 | 74.88454 | -281.81477  | -1254.48423 | 407.15511   | 1 |
| 5915 | N | 78.76404 | 94.01743 | 73.71069 | -197.04348  | 30.61047    | -328.52838  | 1 |
| 5916 | H | 79.07766 | 93.79975 | 72.76533 | 2637.28561  | 420.95810   | -1166.57848 | 1 |
| 5917 | C | 79.58856 | 94.58825 | 74.71696 | -105.27177  | 498.14880   | 204.11360   | 1 |
| 5918 | H | 80.45557 | 94.88541 | 74.02211 | 119.77631   | 556.71388   | -394.07944  | 1 |
| 5919 | C | 78.96026 | 95.84296 | 75.48374 | 497.09344   | 60.71221    | 395.37154   | 1 |
| 5920 | H | 77.88610 | 95.79991 | 75.90033 | -1157.06690 | -72.82216   | -1292.19679 | 1 |
| 5921 | H | 79.66362 | 96.14484 | 76.30866 | -507.84837  | -1694.08716 | -101.04488  | 1 |
| 5922 | C | 79.08797 | 97.03737 | 74.47943 | 173.91130   | -111.16371  | 365.99740   | 1 |
| 5923 | H | 78.53870 | 97.93727 | 74.80321 | -398.56310  | -1766.11597 | -616.57612  | 1 |
| 5924 | H | 78.58549 | 96.74851 | 73.55982 | -3447.80274 | -496.44666  | 4415.52102  | 1 |
| 5925 | C | 80.68196 | 97.44784 | 74.25008 | 390.21692   | 885.45633   | -296.55860  | 1 |
| 5926 | O | 81.13321 | 98.56390 | 74.52652 | 341.51178   | -574.71504  | 530.95380   | 1 |
| 5927 | O | 81.34893 | 96.50129 | 73.83241 | -29.13091   | -736.09269  | 1147.62719  | 1 |
| 5928 | C | 79.88525 | 93.49178 | 75.87218 | -337.43213  | 480.34834   | -206.17163  | 1 |
| 5929 | O | 79.15054 | 92.59109 | 76.21656 | -119.71986  | 729.20937   | 124.45381   | 1 |
| 5930 | N | 81.11704 | 93.78519 | 76.34284 | -1167.84892 | -670.31657  | -357.81685  | 1 |
| 5931 | H | 81.62274 | 94.59557 | 76.07746 | -109.27097  | 2699.38799  | -3994.59109 | 1 |
| 5932 | C | 81.68321 | 93.48289 | 77.67723 | 978.63478   | 916.03327   | 344.56130   | 1 |
| 5933 | H | 81.30285 | 92.48910 | 78.01729 | 3184.41350  | -2203.76608 | -592.45596  | 1 |
| 5934 | C | 83.25183 | 93.50781 | 77.45867 | -493.98243  | -40.65460   | 1110.16988  | 1 |
| 5935 | H | 83.71604 | 94.19991 | 78.22020 | -1331.40427 | -1717.62917 | 1794.56360  | 1 |
| 5936 | H | 83.61721 | 94.05308 | 76.47541 | -517.63282  | -403.65356  | 4841.03506  | 1 |
| 5937 | C | 83.74836 | 92.04068 | 77.55677 | -53.21184   | -281.64923  | -146.35726  | 1 |
| 5938 | H | 84.86094 | 91.93084 | 77.35903 | -2704.54614 | 5913.93390  | -2028.56221 | 1 |
| 5939 | H | 83.21722 | 91.40564 | 76.80954 | -890.41431  | 1902.13963  | 2217.53632  | 1 |
| 5940 | C | 83.37906 | 91.71490 | 79.06963 | -246.00958  | -175.92686  | 353.86029   | 1 |
| 5941 | O | 84.01676 | 92.14019 | 80.05134 | -1106.51722 | -309.15336  | 87.55300    | 1 |
| 5942 | O | 82.31665 | 91.07112 | 79.23134 | -253.23075  | -1382.40508 | 213.37710   | 1 |
| 5943 | C | 81.19160 | 94.64247 | 78.66421 | 648.35828   | 317.29876   | 210.76422   | 1 |
| 5944 | O | 80.43206 | 95.49674 | 78.33628 | -1081.99470 | -421.77337  | 500.60741   | 1 |
| 5945 | N | 81.94842 | 94.51466 | 79.80952 | 29.20648    | -534.22111  | -385.87615  | 1 |

|      |   |          |          |          |             |             |             |   |
|------|---|----------|----------|----------|-------------|-------------|-------------|---|
| 5946 | H | 82.61395 | 93.69509 | 79.95882 | -364.88906  | 401.52370   | -717.32243  | 1 |
| 5947 | C | 81.30454 | 95.07840 | 81.00582 | -77.03539   | 1663.74196  | 392.96848   | 1 |
| 5948 | H | 81.11574 | 96.14028 | 80.76068 | -2249.67891 | 562.83651   | -1438.44534 | 1 |
| 5949 | C | 79.89232 | 94.32701 | 81.06098 | 356.39356   | -542.80460  | 114.18590   | 1 |
| 5950 | H | 80.23785 | 93.31521 | 80.88290 | 1299.54085  | -2356.36650 | -776.89073  | 1 |
| 5951 | H | 79.23436 | 94.65751 | 80.32975 | 1420.52369  | -1994.44430 | -1584.88091 | 1 |
| 5952 | C | 79.16365 | 94.56529 | 82.40651 | -155.78247  | 662.54231   | 361.14958   | 1 |
| 5953 | O | 79.78325 | 94.53839 | 83.48021 | -561.94934  | -690.75060  | -61.78901   | 1 |
| 5954 | N | 77.83240 | 94.63893 | 82.27839 | -327.84866  | 510.55842   | -109.89109  | 1 |
| 5955 | H | 77.38348 | 94.59613 | 81.33342 | 3003.31989  | 1696.68621  | -4146.68887 | 1 |
| 5956 | H | 77.13747 | 94.74763 | 83.06580 | -1113.92296 | -94.72718   | 1501.93143  | 1 |
| 5957 | C | 82.32088 | 94.89911 | 82.19320 | -500.88814  | 51.86795    | 294.03856   | 1 |
| 5958 | O | 82.66481 | 93.74048 | 82.38747 | -203.85888  | -352.25966  | -109.32439  | 1 |
| 5959 | N | 82.79186 | 95.95946 | 82.85632 | -301.49112  | 571.76537   | 985.24423   | 1 |
| 5960 | H | 82.40746 | 96.93395 | 82.77819 | 2110.98072  | -1197.84309 | 821.39250   | 1 |
| 5961 | C | 83.55586 | 95.69358 | 84.02355 | -67.42740   | 426.37345   | 386.73298   | 1 |
| 5962 | H | 83.86042 | 94.61600 | 83.97160 | -2724.80835 | 3185.27184  | -791.71955  | 1 |
| 5963 | C | 84.87232 | 96.64255 | 84.10817 | 169.86861   | 601.13483   | 109.41896   | 1 |
| 5964 | H | 85.63729 | 96.27000 | 84.79037 | 1573.01302  | 1239.72160  | 1562.88838  | 1 |
| 5965 | H | 85.31928 | 96.81404 | 83.05119 | 1981.68885  | 644.12815   | -495.63830  | 1 |
| 5966 | H | 84.63111 | 97.58967 | 84.61177 | 584.38206   | -3620.99960 | -1193.88259 | 1 |
| 5967 | C | 82.65981 | 95.80685 | 85.37093 | -110.65648  | -170.29690  | -244.18410  | 1 |
| 5968 | O | 83.20701 | 95.66341 | 86.44019 | 103.69839   | -803.14485  | -139.51476  | 1 |
| 5969 | N | 81.33235 | 96.11442 | 85.22829 | -87.37035   | 201.10098   | 761.58044   | 1 |
| 5970 | H | 80.94996 | 96.00784 | 84.31102 | 3069.59022  | -968.22078  | -1781.86382 | 1 |
| 5971 | C | 80.61321 | 95.99851 | 86.41131 | -944.55037  | 26.46837    | -406.73644  | 1 |
| 5972 | H | 81.41156 | 96.19969 | 87.23295 | -633.74889  | 456.25891   | -495.75305  | 1 |
| 5973 | C | 79.41043 | 96.98773 | 86.46092 | -577.71038  | 724.19143   | 539.97545   | 1 |
| 5974 | H | 79.73620 | 97.98138 | 86.08748 | 1618.02457  | -418.20756  | 245.47571   | 1 |
| 5975 | H | 79.14771 | 97.23228 | 87.59041 | 1667.22438  | -70.80923   | 1715.65362  | 1 |
| 5976 | C | 78.06036 | 96.51679 | 85.71306 | -260.68523  | -21.89333   | -374.72080  | 1 |
| 5977 | O | 77.82961 | 96.70074 | 84.52887 | 703.13254   | -383.11140  | -536.49548  | 1 |
| 5978 | N | 77.26234 | 96.06935 | 86.65053 | 473.16798   | -796.36334  | -244.24758  | 1 |
| 5979 | H | 77.67774 | 95.89292 | 87.57802 | 704.75892   | 2938.15464  | 3344.87535  | 1 |
| 5980 | H | 76.35044 | 95.57358 | 86.48988 | -324.42801  | 546.81768   | -1612.98295 | 1 |
| 5981 | C | 80.19543 | 94.45792 | 87.05534 | -97.09281   | 305.05699   | -628.10548  | 1 |
| 5982 | O | 80.12761 | 94.25799 | 88.22115 | 170.23047   | 188.29577   | 712.61475   | 1 |
| 5983 | N | 79.85683 | 93.65920 | 86.06854 | 206.64827   | -5.51085    | -787.88883  | 1 |
| 5984 | H | 79.70394 | 94.04964 | 85.07835 | 1875.58209  | -979.31731  | -2797.81850 | 1 |
| 5985 | C | 79.21943 | 92.39433 | 86.25558 | -93.09614   | 408.75825   | 368.37474   | 1 |
| 5986 | H | 78.83353 | 92.28401 | 87.29589 | 2457.26628  | 1375.36293  | 1668.13490  | 1 |
| 5987 | C | 78.12031 | 92.57460 | 85.10356 | 722.66590   | -379.67307  | 322.76012   | 1 |
| 5988 | H | 78.42545 | 92.30782 | 84.12242 | 1155.70126  | 2021.94341  | -1555.34029 | 1 |
| 5989 | H | 77.85592 | 93.63918 | 85.10495 | 1642.11238  | 1209.05768  | -643.82433  | 1 |
| 5990 | C | 76.88195 | 91.77109 | 85.51676 | -206.04052  | -401.43531  | 153.59485   | 1 |
| 5991 | C | 76.44260 | 90.73409 | 84.64309 | 172.10357   | -529.87747  | -407.25106  | 1 |
| 5992 | H | 77.12565 | 90.40917 | 83.86653 | -577.26427  | 388.56021   | 1097.11479  | 1 |
| 5993 | C | 75.13156 | 90.17362 | 84.88262 | 880.69363   | 494.14229   | -260.36559  | 1 |
| 5994 | H | 74.77280 | 89.42522 | 84.15183 | -2280.52760 | -1353.54538 | 2199.34519  | 1 |
| 5995 | C | 74.35811 | 90.50139 | 85.95261 | -98.32525   | -80.23271   | 253.82595   | 1 |
| 5996 | H | 73.30306 | 90.07334 | 86.13889 | -4642.16767 | 965.79701   | -1279.06888 | 1 |
| 5997 | C | 76.11736 | 92.05587 | 86.67544 | 275.58188   | -206.22292  | -306.43985  | 1 |
| 5998 | H | 76.36014 | 92.86418 | 87.31572 | -2616.65884 | -879.14558  | 2440.31161  | 1 |
| 5999 | C | 74.88474 | 91.45313 | 86.90868 | 251.10121   | 374.45460   | -695.41971  | 1 |
| 6000 | H | 74.26133 | 91.75223 | 87.75867 | 1026.79527  | 3611.24665  | 1380.79672  | 1 |
| 6001 | C | 80.13038 | 91.14020 | 85.82485 | 180.59794   | 78.46451    | -416.82933  | 1 |
| 6002 | O | 79.81832 | 90.02207 | 86.13483 | 83.42419    | 115.21175   | 76.64581    | 1 |
| 6003 | N | 81.30116 | 91.49166 | 85.13159 | 668.42870   | 732.76666   | 216.06736   | 1 |
| 6004 | H | 81.16796 | 92.48817 | 84.95384 | 356.52486   | 435.90525   | 1870.49997  | 1 |
| 6005 | C | 81.56031 | 90.70268 | 84.00404 | 15.65891    | 514.13574   | -683.84199  | 1 |
| 6006 | H | 80.97281 | 89.73120 | 84.13730 | 2377.00354  | 3449.40651  | 1.95238     | 1 |
| 6007 | C | 81.19406 | 91.48413 | 82.70199 | 355.63573   | -345.72267  | 310.86674   | 1 |

|      |   |          |          |          |             |             |             |   |
|------|---|----------|----------|----------|-------------|-------------|-------------|---|
| 6008 | H | 82.00646 | 91.67398 | 81.94547 | -1730.37177 | -1483.13337 | -51.08260   | 1 |
| 6009 | H | 80.81896 | 92.53302 | 82.98745 | 401.88645   | -563.36263  | 256.24078   | 1 |
| 6010 | C | 79.93866 | 90.74599 | 81.98960 | 1313.69628  | -199.51679  | -198.15791  | 1 |
| 6011 | O | 78.88957 | 90.78159 | 82.56909 | -74.45044   | 339.78767   | 334.01540   | 1 |
| 6012 | N | 80.31075 | 90.10378 | 80.87067 | 663.99376   | -126.80829  | 21.00542    | 1 |
| 6013 | H | 81.18697 | 90.30521 | 80.32464 | 324.20137   | 249.14764   | 2602.45172  | 1 |
| 6014 | H | 79.67495 | 89.42015 | 80.42020 | 615.24176   | -348.55431  | -2485.02102 | 1 |
| 6015 | C | 83.15674 | 90.44560 | 83.98979 | 128.03674   | -762.19614  | 36.87888    | 1 |
| 6016 | O | 83.58961 | 89.41425 | 84.42236 | 681.35487   | 911.15759   | 643.90234   | 1 |
| 6017 | N | 83.74782 | 91.66823 | 83.91692 | 113.53139   | 307.10552   | -132.72075  | 1 |
| 6018 | H | 83.23172 | 92.42738 | 83.33727 | -307.71971  | 2373.91495  | 356.71090   | 1 |
| 6019 | C | 85.22569 | 91.69227 | 84.06148 | -722.22465  | 143.67955   | 260.73506   | 1 |
| 6020 | H | 85.46475 | 90.86618 | 83.38915 | 282.63086   | -1032.04389 | 203.05581   | 1 |
| 6021 | C | 85.99136 | 92.94775 | 83.56661 | -1.20362    | -266.40099  | 783.24480   | 1 |
| 6022 | H | 86.96294 | 93.15561 | 83.98715 | 652.91269   | 722.14849   | 1143.93072  | 1 |
| 6023 | H | 85.43729 | 93.71301 | 84.06278 | -1817.66045 | -1397.23831 | -1378.17357 | 1 |
| 6024 | C | 85.76434 | 93.22015 | 82.00802 | 3.72312     | 364.42900   | 175.66243   | 1 |
| 6025 | H | 84.72935 | 93.62863 | 81.90481 | -1918.99719 | 426.36303   | 1778.26648  | 1 |
| 6026 | H | 85.79599 | 92.26870 | 81.51225 | -804.12721  | -2196.59276 | 144.58777   | 1 |
| 6027 | C | 86.81168 | 94.24320 | 81.46865 | -679.78944  | 256.88530   | 193.78475   | 1 |
| 6028 | H | 87.52037 | 94.27249 | 82.35374 | 839.83106   | -3277.18156 | -1665.35444 | 1 |
| 6029 | H | 86.43368 | 95.31539 | 81.45741 | 1679.91413  | -1011.41695 | -1041.31195 | 1 |
| 6030 | C | 87.41662 | 93.99268 | 80.01579 | -149.59301  | -670.81511  | 908.29559   | 1 |
| 6031 | H | 87.87227 | 94.88370 | 79.51386 | 1997.77354  | -403.49353  | -2982.64676 | 1 |
| 6032 | H | 88.14280 | 93.17663 | 80.01169 | -1378.12431 | -1019.12704 | -669.64396  | 1 |
| 6033 | N | 86.41167 | 93.59230 | 79.03292 | -486.36376  | -147.83683  | 605.25144   | 1 |
| 6034 | H | 86.69268 | 92.79890 | 78.34041 | -939.58921  | -835.71039  | -1205.48016 | 1 |
| 6035 | H | 85.50084 | 93.27164 | 79.41554 | 1849.04475  | -1170.97660 | -4297.51083 | 1 |
| 6036 | H | 85.95430 | 94.64743 | 78.42758 | 1327.23110  | 2392.20591  | -5109.60291 | 1 |
| 6037 | C | 85.78477 | 91.34634 | 85.58739 | -154.66708  | 850.27292   | 388.66302   | 1 |
| 6038 | O | 86.89949 | 91.76795 | 85.79254 | -15.98820   | 411.43312   | -23.31171   | 1 |
| 6039 | N | 84.97017 | 90.69687 | 86.38243 | 159.67061   | 565.65743   | 6.41454     | 1 |
| 6040 | H | 84.06659 | 90.38909 | 85.97303 | 1745.49619  | 1669.78271  | -232.90092  | 1 |
| 6041 | C | 85.25854 | 90.54798 | 87.80570 | 871.02788   | 847.71735   | 226.78319   | 1 |
| 6042 | H | 86.41331 | 90.68678 | 87.74736 | -964.47372  | 1978.30550  | -1712.90453 | 1 |
| 6043 | C | 84.54039 | 91.72022 | 88.54888 | -219.68524  | -888.08085  | 424.30531   | 1 |
| 6044 | H | 84.52855 | 91.56892 | 89.64808 | -1001.42408 | 1141.94271  | 1034.77161  | 1 |
| 6045 | C | 85.33627 | 93.05329 | 88.25849 | 324.13451   | -370.03471  | -783.61239  | 1 |
| 6046 | H | 85.13030 | 93.83851 | 89.00838 | 912.29624   | 262.01917   | 131.88523   | 1 |
| 6047 | H | 85.07430 | 93.49814 | 87.20268 | -2645.13370 | -1468.91348 | 283.95704   | 1 |
| 6048 | H | 86.43361 | 92.92322 | 88.30231 | -3535.98263 | 389.03232   | 586.63796   | 1 |
| 6049 | C | 83.06327 | 92.07985 | 87.91856 | 185.65929   | -349.44446  | 209.50432   | 1 |
| 6050 | H | 83.09701 | 93.14234 | 87.59101 | 314.87939   | -921.42440  | -1339.27498 | 1 |
| 6051 | H | 83.00199 | 91.61580 | 86.90741 | -3288.48551 | -35.77931   | -337.92286  | 1 |
| 6052 | C | 81.91221 | 91.66931 | 88.87786 | 1121.33849  | -195.08636  | -85.58919   | 1 |
| 6053 | H | 82.18733 | 90.60910 | 89.11046 | -934.24037  | 1778.66325  | 2573.97256  | 1 |
| 6054 | H | 81.77544 | 92.27802 | 89.81073 | 127.98549   | -2970.81856 | 2982.51588  | 1 |
| 6055 | H | 80.87550 | 91.51582 | 88.46250 | 1068.05780  | -51.00578   | 2541.40483  | 1 |
| 6056 | C | 84.90005 | 89.02375 | 88.28921 | 10.14182    | -322.86752  | 989.86339   | 1 |
| 6057 | O | 85.57822 | 88.48706 | 89.13151 | -331.35427  | 799.99705   | 250.75470   | 1 |
| 6058 | N | 83.74720 | 88.64633 | 87.69794 | -201.73296  | -340.51873  | 1017.78118  | 1 |
| 6059 | H | 83.23527 | 89.37299 | 87.22973 | -537.88252  | -1791.06782 | 1691.36410  | 1 |
| 6060 | C | 83.13739 | 87.42861 | 88.07554 | -630.17044  | -312.55225  | 243.17244   | 1 |
| 6061 | H | 83.50603 | 87.09686 | 89.07857 | 2502.90647  | -3292.17144 | -1364.00461 | 1 |
| 6062 | C | 81.58671 | 87.70700 | 88.19816 | 488.63521   | 818.30371   | 464.10621   | 1 |
| 6063 | H | 81.14347 | 88.12814 | 87.26317 | 412.26417   | 248.74084   | 682.34648   | 1 |
| 6064 | H | 81.36958 | 88.45767 | 88.97161 | 2811.71682  | -3325.37620 | -101.53152  | 1 |
| 6065 | C | 80.89754 | 86.33227 | 88.56805 | 1002.10345  | 229.57903   | -575.14241  | 1 |
| 6066 | C | 80.11743 | 85.53122 | 87.69363 | -223.22178  | -385.79029  | 432.22098   | 1 |
| 6067 | H | 80.13123 | 85.95574 | 86.67279 | 1390.27616  | 229.13966   | -2146.60278 | 1 |
| 6068 | C | 79.40000 | 84.34180 | 88.00890 | 148.59986   | -886.08935  | -155.61086  | 1 |
| 6069 | H | 78.84100 | 83.76780 | 87.28590 | -323.95670  | -2958.00140 | 1021.52142  | 1 |

|      |   |          |          |          |             |             |             |   |
|------|---|----------|----------|----------|-------------|-------------|-------------|---|
| 6070 | C | 79.47800 | 83.93480 | 89.35490 | -638.99266  | 453.47035   | -466.37326  | 1 |
| 6071 | H | 78.96900 | 83.02580 | 89.64090 | -632.11128  | -440.06841  | 3050.41003  | 1 |
| 6072 | C | 80.95579 | 85.86274 | 89.92279 | -556.98980  | 226.95203   | 120.44259   | 1 |
| 6073 | H | 81.52731 | 86.47861 | 90.63842 | -2030.25273 | 519.71676   | -2661.25873 | 1 |
| 6074 | C | 80.30600 | 84.65280 | 90.26790 | 24.69251    | -623.90608  | -664.51674  | 1 |
| 6075 | H | 80.48200 | 84.28180 | 91.26690 | -2373.94869 | -1191.52542 | -1686.07859 | 1 |
| 6076 | C | 83.53550 | 86.31397 | 86.89626 | 170.44797   | -583.94564  | 421.91148   | 1 |
| 6077 | O | 83.61434 | 85.11657 | 87.18615 | -265.64630  | -380.93254  | 554.72669   | 1 |
| 6078 | N | 83.44595 | 86.87726 | 85.71747 | -222.00228  | 923.52404   | -877.34227  | 1 |
| 6079 | H | 83.27233 | 87.85890 | 85.57075 | 3070.78027  | 2073.24620  | 7.02372     | 1 |
| 6080 | C | 83.47659 | 86.02814 | 84.56843 | 771.46604   | -178.22123  | 579.47013   | 1 |
| 6081 | H | 82.77290 | 85.27092 | 84.85372 | -2185.73405 | -1499.74307 | -2030.60992 | 1 |
| 6082 | C | 82.91934 | 86.76034 | 83.23476 | -51.84808   | 993.78003   | -380.94003  | 1 |
| 6083 | H | 83.20458 | 86.00850 | 82.40903 | 4583.47503  | 213.80021   | 391.19547   | 1 |
| 6084 | H | 83.40566 | 87.74135 | 83.00003 | -1551.73947 | -2431.97050 | -1665.22144 | 1 |
| 6085 | C | 81.43786 | 86.90832 | 83.46713 | 855.30987   | -30.45636   | -520.43797  | 1 |
| 6086 | H | 81.24799 | 87.43179 | 84.41488 | 3473.89613  | 2942.63986  | 1394.68163  | 1 |
| 6087 | C | 80.64053 | 87.41091 | 82.28641 | 473.70309   | -322.50998  | 651.47338   | 1 |
| 6088 | H | 79.54127 | 87.62078 | 82.52041 | 2922.66457  | 2479.62272  | 2334.00683  | 1 |
| 6089 | H | 80.75860 | 86.76049 | 81.34627 | 499.23618   | 2670.24261  | -517.49449  | 1 |
| 6090 | H | 81.00142 | 88.45999 | 82.00768 | 2436.69360  | 930.45168   | -1335.36152 | 1 |
| 6091 | C | 80.87944 | 85.50104 | 83.79171 | 204.33035   | -22.05488   | 687.56012   | 1 |
| 6092 | H | 79.80000 | 85.44042 | 83.70078 | -1474.17147 | 2648.96370  | -783.40077  | 1 |
| 6093 | H | 81.24225 | 85.04656 | 84.76351 | -169.86480  | 3151.81665  | -29.15865   | 1 |
| 6094 | H | 81.25712 | 84.74850 | 83.03717 | 1237.85729  | -320.29542  | 519.23379   | 1 |
| 6095 | C | 84.93968 | 85.38295 | 84.28894 | 271.42409   | 189.78324   | -471.46435  | 1 |
| 6096 | O | 84.87300 | 84.21580 | 83.92590 | 489.99464   | -232.86132  | 573.85372   | 1 |
| 6097 | N | 86.02649 | 86.12889 | 84.43236 | 512.44442   | -31.39339   | 1445.28796  | 1 |
| 6098 | C | 86.03185 | 87.56577 | 84.57719 | -112.84683  | -566.50545  | -199.12504  | 1 |
| 6099 | H | 85.44523 | 87.74352 | 85.54455 | 2396.31468  | -592.59393  | 1242.80837  | 1 |
| 6100 | H | 85.50553 | 88.08498 | 83.71775 | 3140.70656  | -124.78226  | -2973.85249 | 1 |
| 6101 | C | 87.32047 | 85.53230 | 84.21725 | -349.27475  | -1146.87057 | 190.59339   | 1 |
| 6102 | H | 87.36000 | 84.75980 | 83.39390 | -1951.11782 | -1726.41590 | -1763.76122 | 1 |
| 6103 | C | 88.36487 | 86.70913 | 84.18311 | -135.26797  | -117.57355  | 326.29888   | 1 |
| 6104 | H | 88.64425 | 87.07707 | 83.14022 | -2170.74555 | 759.39917   | -2257.35839 | 1 |
| 6105 | H | 89.36311 | 86.43897 | 84.63469 | 1640.72733  | -935.82324  | -1905.02887 | 1 |
| 6106 | C | 87.57783 | 87.93676 | 84.79748 | 502.21110   | -175.33828  | -327.25893  | 1 |
| 6107 | H | 87.83550 | 88.14316 | 85.88591 | 735.45434   | -2106.16865 | 829.53051   | 1 |
| 6108 | H | 87.88174 | 88.89326 | 84.39667 | 214.03785   | -1157.08849 | 3619.55944  | 1 |
| 6109 | C | 87.49300 | 84.44880 | 85.47990 | 485.99674   | -771.15644  | -23.99827   | 1 |
| 6110 | O | 88.17500 | 83.43780 | 85.31690 | 667.02038   | 338.23839   | -253.58595  | 1 |
| 6111 | N | 86.94800 | 84.79480 | 86.61690 | -351.21097  | 360.46375   | -677.78243  | 1 |
| 6112 | H | 86.46484 | 85.70031 | 86.58833 | -1357.09294 | -2310.47533 | -3579.10238 | 1 |
| 6113 | C | 86.99100 | 84.05980 | 87.81290 | 752.58343   | 418.51104   | -299.86278  | 1 |
| 6114 | H | 88.04200 | 83.90580 | 88.00490 | -1282.28310 | 1354.76212  | -2533.49480 | 1 |
| 6115 | C | 86.54200 | 84.90880 | 89.03390 | 422.30738   | 559.35235   | -583.29447  | 1 |
| 6116 | H | 85.57586 | 85.44111 | 88.83249 | -752.78403  | -2332.78598 | -3668.41649 | 1 |
| 6117 | O | 87.41220 | 86.27432 | 89.25132 | 207.62375   | 424.65633   | 318.47157   | 1 |
| 6118 | H | 86.72891 | 86.98116 | 89.09417 | 2252.03960  | 907.28915   | -1062.52164 | 1 |
| 6119 | C | 86.58800 | 84.13880 | 90.31390 | -280.22500  | 861.65118   | 102.38256   | 1 |
| 6120 | H | 86.42200 | 84.88380 | 91.12190 | -1792.57882 | 1437.36362  | 2149.15640  | 1 |
| 6121 | H | 87.58000 | 83.65880 | 90.45790 | -432.47922  | 1218.71390  | 2868.08723  | 1 |
| 6122 | H | 85.87300 | 83.28880 | 90.33790 | 850.54544   | -2923.52327 | 792.34485   | 1 |
| 6123 | C | 86.28000 | 82.71080 | 87.71290 | 352.70556   | -609.86529  | -578.89043  | 1 |
| 6124 | O | 86.82200 | 81.66680 | 88.07090 | 491.28648   | -367.68551  | -497.06357  | 1 |
| 6125 | N | 85.01900 | 82.70380 | 87.12790 | 152.03866   | 116.75225   | -822.14685  | 1 |
| 6126 | H | 84.59100 | 83.60380 | 87.13890 | -2670.47446 | 1533.40975  | -644.55172  | 1 |
| 6127 | C | 84.34600 | 81.49680 | 86.73990 | -169.54950  | 895.80157   | -15.60477   | 1 |
| 6128 | H | 84.30700 | 80.75780 | 87.52590 | 2630.13013  | 725.45100   | -1566.64054 | 1 |
| 6129 | C | 82.88500 | 81.78680 | 86.44690 | 476.61807   | 489.67358   | 603.74332   | 1 |
| 6130 | H | 82.91900 | 82.67580 | 85.78090 | -1563.19923 | -1396.76035 | 2345.99551  | 1 |
| 6131 | C | 82.17700 | 80.62380 | 85.67890 | -681.83180  | -555.91392  | -239.82518  | 1 |

|      |   |          |          |          |             |             |             |   |
|------|---|----------|----------|----------|-------------|-------------|-------------|---|
| 6132 | H | 81.07800 | 80.71880 | 85.54690 | 602.73017   | -2089.52721 | -2273.50360 | 1 |
| 6133 | H | 82.70400 | 80.35880 | 84.73790 | 465.57596   | 2498.61775  | -1854.28546 | 1 |
| 6134 | H | 82.32100 | 79.72080 | 86.31090 | 1408.56024  | -2171.16793 | 1788.91422  | 1 |
| 6135 | C | 82.07000 | 82.12980 | 87.72690 | 833.83245   | -259.28105  | 262.57912   | 1 |
| 6136 | H | 81.10200 | 82.37580 | 87.23990 | 2009.33983  | -1845.03907 | -1567.35782 | 1 |
| 6137 | H | 82.53400 | 83.06080 | 88.11890 | 2001.44440  | -772.01096  | 2301.40079  | 1 |
| 6138 | C | 81.94500 | 81.05480 | 88.81990 | -711.29367  | 296.77117   | -487.27733  | 1 |
| 6139 | H | 82.88100 | 80.59980 | 89.20790 | -587.70429  | 3052.00527  | -487.94852  | 1 |
| 6140 | H | 81.31400 | 80.20680 | 88.47790 | 2819.11105  | -507.83191  | 1301.13253  | 1 |
| 6141 | H | 81.40000 | 81.55980 | 89.64590 | -694.54622  | -1642.16649 | 2592.12673  | 1 |
| 6142 | C | 85.05200 | 80.71580 | 85.59890 | -4.22895    | 117.73405   | -904.19678  | 1 |
| 6143 | O | 85.24900 | 79.52680 | 85.71490 | 33.01373    | 785.75877   | 71.55753    | 1 |
| 6144 | N | 85.49400 | 81.43280 | 84.53190 | -389.96503  | -638.06614  | -391.75397  | 1 |
| 6145 | H | 85.40200 | 82.42480 | 84.48490 | -912.91230  | -3006.00745 | -169.51857  | 1 |
| 6146 | C | 86.03100 | 80.79380 | 83.32290 | -680.12736  | -510.63371  | 328.83277   | 1 |
| 6147 | H | 85.31500 | 80.12480 | 82.86790 | 2092.89870  | -1750.34149 | 1566.62246  | 1 |
| 6148 | C | 86.55300 | 81.83280 | 82.24690 | -280.07891  | 679.12645   | -540.17967  | 1 |
| 6149 | H | 87.16500 | 81.34780 | 81.45690 | -401.43550  | 1247.37788  | 2860.26646  | 1 |
| 6150 | H | 87.19100 | 82.46680 | 82.89890 | -1414.90619 | -2747.45996 | 589.68677   | 1 |
| 6151 | C | 85.50700 | 82.73980 | 81.58390 | -381.73017  | -518.08598  | -646.00309  | 1 |
| 6152 | C | 84.15500 | 82.39380 | 81.53690 | 13.98738    | 736.61994   | 537.25824   | 1 |
| 6153 | H | 83.79200 | 81.55280 | 82.10890 | -1971.37046 | -504.49935  | -2399.45934 | 1 |
| 6154 | C | 83.21100 | 83.32080 | 80.93390 | -807.86256  | 349.76018   | -237.64869  | 1 |
| 6155 | H | 82.15600 | 83.09880 | 80.98090 | 2041.51106  | 1767.43141  | -1614.51077 | 1 |
| 6156 | C | 83.64600 | 84.52480 | 80.37890 | 778.54054   | -29.86410   | 473.74442   | 1 |
| 6157 | O | 82.64628 | 85.35683 | 79.58630 | -1251.13342 | -225.13891  | 660.57574   | 1 |
| 6158 | H | 81.83700 | 84.81180 | 79.82390 | -1073.70180 | -2324.00967 | 1828.76181  | 1 |
| 6159 | C | 85.92600 | 83.94280 | 80.96390 | 12.02304    | -905.25558  | -108.71426  | 1 |
| 6160 | H | 86.96400 | 84.21780 | 81.07890 | 2835.24504  | -600.94536  | -1224.12273 | 1 |
| 6161 | C | 84.98800 | 84.82180 | 80.36790 | -671.76561  | 494.51852   | -368.28440  | 1 |
| 6162 | H | 85.28319 | 85.79739 | 80.01434 | 196.41368   | 1965.47873  | -272.27716  | 1 |
| 6163 | C | 87.28100 | 79.90080 | 83.70090 | -597.77310  | 657.57265   | -204.24626  | 1 |
| 6164 | O | 87.52500 | 78.85780 | 83.08590 | -544.70164  | 560.35624   | 113.70242   | 1 |
| 6165 | N | 88.11400 | 80.46780 | 84.61090 | 647.50288   | 512.31416   | -175.91620  | 1 |
| 6166 | H | 87.81200 | 81.38580 | 84.85490 | 559.06666   | 2850.33201  | 1208.83337  | 1 |
| 6167 | C | 89.22100 | 79.75680 | 85.24590 | -797.62956  | 436.77539   | 66.82327    | 1 |
| 6168 | H | 89.95300 | 79.50280 | 84.49390 | -1460.06880 | -2547.55562 | 1129.77241  | 1 |
| 6169 | C | 89.96200 | 80.65580 | 86.28690 | -454.18283  | -344.00928  | 711.91753   | 1 |
| 6170 | H | 90.83200 | 80.05380 | 86.62590 | 2287.01729  | -336.87369  | -2134.07926 | 1 |
| 6171 | H | 89.32800 | 80.96580 | 87.14490 | 935.25630   | 2256.94615  | -1982.35111 | 1 |
| 6172 | O | 90.43900 | 81.84080 | 85.66990 | 614.75734   | 91.34602    | 487.19252   | 1 |
| 6173 | H | 89.67500 | 82.42080 | 85.62090 | 2373.53990  | -1179.91475 | 1694.79668  | 1 |
| 6174 | C | 88.73400 | 78.47380 | 85.93690 | -905.12227  | 101.27148   | 44.14489    | 1 |
| 6175 | O | 89.25800 | 77.41880 | 85.68690 | 455.97762   | 479.88502   | 430.60655   | 1 |
| 6176 | N | 87.62200 | 78.53080 | 86.72490 | -698.23013  | 282.60942   | -381.15468  | 1 |
| 6177 | H | 87.11900 | 79.38180 | 86.85290 | 1749.77418  | 2397.46164  | -1043.40512 | 1 |
| 6178 | C | 87.01300 | 77.34680 | 87.36090 | -109.87209  | 694.32003   | 580.77433   | 1 |
| 6179 | H | 87.78600 | 76.78980 | 87.87090 | 2154.73553  | 2267.17444  | 339.50120   | 1 |
| 6180 | C | 85.83700 | 77.64780 | 88.31690 | -570.15198  | -362.84637  | -612.14396  | 1 |
| 6181 | H | 85.15200 | 78.26580 | 87.69790 | 2173.88273  | 954.33054   | 2064.39176  | 1 |
| 6182 | C | 85.23200 | 76.35180 | 88.91690 | -581.57871  | 629.52021   | -311.32219  | 1 |
| 6183 | H | 84.85900 | 75.70780 | 88.09290 | 1916.25287  | 867.57994   | -2339.55257 | 1 |
| 6184 | H | 85.99500 | 75.79680 | 89.50290 | -1845.52259 | -1492.04024 | 2065.45117  | 1 |
| 6185 | H | 84.35600 | 76.61180 | 89.54990 | -672.14676  | 3070.81391  | 128.63473   | 1 |
| 6186 | C | 86.39100 | 78.49780 | 89.48490 | 356.99775   | 773.14505   | -325.96063  | 1 |
| 6187 | H | 87.06500 | 79.27980 | 89.07290 | 1431.02713  | -2197.52367 | -1738.18218 | 1 |
| 6188 | H | 87.08200 | 77.89680 | 90.11390 | -988.36040  | -1147.52745 | 2757.63498  | 1 |
| 6189 | C | 85.32100 | 79.24980 | 90.26490 | 550.97854   | -644.36010  | -335.66904  | 1 |
| 6190 | H | 85.66100 | 79.80480 | 91.16590 | -1836.89018 | -1093.54418 | 2308.29413  | 1 |
| 6191 | H | 84.50800 | 78.55480 | 90.56390 | 2591.63684  | 369.16478   | -1745.09658 | 1 |
| 6192 | H | 84.81600 | 79.99880 | 89.61990 | 946.08171   | -1654.16507 | -2503.37643 | 1 |
| 6193 | C | 86.59100 | 76.33380 | 86.29590 | 40.75260    | 705.04492   | -576.80317  | 1 |



|      |   |          |          |          |             |             |             |   |
|------|---|----------|----------|----------|-------------|-------------|-------------|---|
| 6194 | O | 86.87600 | 75.13580 | 86.32990 | 266.79178   | -247.24634  | -700.94124  | 1 |
| 6195 | N | 85.94400 | 76.86980 | 85.20790 | -711.83126  | -4.55967    | 453.81467   | 1 |
| 6196 | H | 85.63800 | 77.81680 | 85.14890 | 842.37471   | 1784.07581  | -2450.65391 | 1 |
| 6197 | C | 85.54400 | 75.97380 | 84.09090 | -585.75515  | 55.87593    | -696.57719  | 1 |
| 6198 | H | 84.97100 | 75.16780 | 84.52390 | -586.97010  | -2292.83159 | -2072.82793 | 1 |
| 6199 | C | 84.70500 | 76.68680 | 83.02590 | 816.47427   | -154.59043  | -375.39655  | 1 |
| 6200 | H | 85.34800 | 77.43880 | 82.51990 | -2027.81144 | -1170.43123 | -2101.49893 | 1 |
| 6201 | C | 84.27500 | 75.71480 | 81.91990 | 390.62822   | -9.12547    | 823.87943   | 1 |
| 6202 | H | 85.09700 | 75.06980 | 81.54390 | -1043.18891 | 1845.65843  | -2324.54901 | 1 |
| 6203 | H | 83.47900 | 75.04880 | 82.31590 | -1130.74826 | 2166.20224  | 1981.71705  | 1 |
| 6204 | H | 83.83700 | 76.40380 | 81.16690 | -1216.70776 | -1778.85079 | -2292.05984 | 1 |
| 6205 | C | 83.45000 | 77.48980 | 83.55590 | 419.46463   | 384.39946   | 712.55700   | 1 |
| 6206 | H | 82.97200 | 77.88180 | 82.63290 | 2756.57425  | 499.32282   | 1431.85241  | 1 |
| 6207 | H | 83.89400 | 78.25780 | 84.22490 | -2550.79173 | -1013.73960 | -1537.53692 | 1 |
| 6208 | C | 82.33100 | 76.72480 | 84.30590 | -569.19555  | -645.58374  | -301.14624  | 1 |
| 6209 | H | 81.47300 | 77.36780 | 84.59690 | 625.84537   | 408.42952   | 3056.09704  | 1 |
| 6210 | H | 82.01000 | 75.87880 | 83.66190 | -2554.73294 | -333.43172  | 1805.65477  | 1 |
| 6211 | H | 82.78500 | 76.35380 | 85.24990 | 1986.33564  | 2424.54117  | -272.57487  | 1 |
| 6212 | C | 86.82000 | 75.33080 | 83.39190 | 637.84342   | 6.19652     | 651.58912   | 1 |
| 6213 | O | 86.93000 | 74.10180 | 83.14490 | -599.14387  | 513.65301   | 28.53841    | 1 |
| 6214 | N | 87.87300 | 76.12580 | 83.05390 | -663.86913  | 290.65683   | -432.97653  | 1 |
| 6215 | H | 87.78700 | 77.10580 | 83.21590 | 969.26659   | 2388.87271  | 1803.34014  | 1 |
| 6216 | C | 89.14600 | 75.69580 | 82.51290 | 630.94474   | 149.00597   | -641.21522  | 1 |
| 6217 | H | 88.77200 | 75.17380 | 81.64490 | 1623.04462  | -2062.26052 | -1735.23311 | 1 |
| 6218 | C | 89.90200 | 76.92480 | 82.03590 | 429.36837   | 562.65273   | -574.90495  | 1 |
| 6219 | H | 89.27500 | 77.50780 | 81.32890 | -1806.21469 | 1033.38445  | 2359.64643  | 1 |
| 6220 | H | 90.24800 | 77.70980 | 82.74190 | 968.87177   | -2107.61869 | 2125.43106  | 1 |
| 6221 | C | 91.23100 | 76.59480 | 81.38190 | 335.66772   | -777.81997  | 337.30443   | 1 |
| 6222 | C | 91.21500 | 76.27080 | 80.01490 | -23.36967   | 907.47043   | 86.03647    | 1 |
| 6223 | H | 90.34000 | 76.17680 | 79.38890 | -467.53920  | -1960.65393 | -2415.67164 | 1 |
| 6224 | C | 92.38300 | 75.83580 | 79.33690 | 124.29451   | 103.54849   | 897.37372   | 1 |
| 6225 | H | 92.23500 | 75.47680 | 78.32890 | 1781.61946  | -2563.46973 | -390.74451  | 1 |
| 6226 | C | 93.59700 | 75.74780 | 79.99190 | 629.41964   | -214.97680  | -623.75227  | 1 |
| 6227 | H | 94.46100 | 75.44580 | 79.41890 | -281.46604  | 2946.36560  | 1066.73935  | 1 |
| 6228 | C | 92.48600 | 76.63880 | 82.03490 | 851.84921   | 315.37290   | -79.64839   | 1 |
| 6229 | H | 92.45700 | 76.91580 | 83.07890 | 1218.97345  | -2335.50035 | 1719.81629  | 1 |
| 6230 | C | 93.65300 | 76.24480 | 81.37190 | 120.85959   | 619.33722   | 658.22896   | 1 |
| 6231 | H | 94.58100 | 76.33180 | 81.91690 | 2968.31632  | -683.86815  | 787.17776   | 1 |
| 6232 | C | 89.91100 | 74.63880 | 83.25790 | -899.20530  | -97.73742   | 115.44797   | 1 |
| 6233 | O | 90.31700 | 73.58680 | 82.77890 | 113.37404   | 592.87936   | -509.18329  | 1 |
| 6234 | N | 90.07200 | 74.84380 | 84.60690 | -64.86282   | 763.94033   | -353.35574  | 1 |
| 6235 | H | 89.75100 | 75.72580 | 84.94490 | -1902.98710 | 2503.37145  | 99.98835    | 1 |
| 6236 | C | 90.99200 | 74.14780 | 85.47890 | 176.20601   | 833.55186   | 324.95190   | 1 |
| 6237 | H | 91.87600 | 73.95580 | 84.88990 | -1938.84985 | 1230.85296  | 2150.36938  | 1 |
| 6238 | C | 91.44100 | 74.96580 | 86.68890 | 173.02299   | 894.91988   | -25.14875   | 1 |
| 6239 | H | 90.54900 | 75.39680 | 87.18990 | 1719.42224  | -1244.72462 | -2322.17011 | 1 |
| 6240 | H | 91.98500 | 74.47680 | 87.52490 | -140.95733  | 3113.86396  | -426.85887  | 1 |
| 6241 | C | 92.29500 | 76.20180 | 86.29890 | -749.23088  | -254.34103  | 453.22702   | 1 |
| 6242 | H | 91.81200 | 76.81980 | 85.51190 | 2493.22330  | 789.70012   | -1748.83891 | 1 |
| 6243 | C | 92.49600 | 77.08680 | 87.49090 | 615.93485   | -41.19508   | 671.10225   | 1 |
| 6244 | H | 93.34000 | 76.67480 | 88.08490 | -644.39557  | 2184.95975  | -2170.00725 | 1 |
| 6245 | H | 92.75900 | 78.11980 | 87.17690 | -2280.25586 | -592.01586  | -2085.22821 | 1 |
| 6246 | H | 91.62000 | 77.10680 | 88.17290 | -2013.59702 | 1687.69269  | 1730.70698  | 1 |
| 6247 | C | 93.63900 | 75.80880 | 85.71290 | -662.53911  | -597.98125  | 186.84578   | 1 |
| 6248 | H | 94.39500 | 76.62280 | 85.73390 | 2425.53471  | -1273.93938 | -1546.63701 | 1 |
| 6249 | H | 94.08800 | 74.94380 | 86.24590 | 218.14437   | -1964.51532 | 2447.71706  | 1 |
| 6250 | H | 93.51200 | 75.52980 | 84.64590 | 2280.59240  | 1358.96732  | -1688.29274 | 1 |
| 6251 | C | 90.49500 | 72.83780 | 85.92890 | -810.95123  | -84.95218   | 408.15712   | 1 |
| 6252 | O | 91.27500 | 71.96380 | 86.38890 | -129.50298  | -269.20414  | 731.01665   | 1 |
| 6253 | N | 89.19100 | 72.60280 | 85.69690 | -251.93515  | 121.47951   | 796.51974   | 1 |
| 6254 | H | 88.59100 | 73.30280 | 85.31790 | 43.31501    | -3145.28314 | -59.53133   | 1 |
| 6255 | C | 88.45900 | 71.35680 | 85.94490 | 726.48390   | -372.36520  | 406.22199   | 1 |

|      |   |          |          |          |             |             |             |   |
|------|---|----------|----------|----------|-------------|-------------|-------------|---|
| 6256 | H | 89.12800 | 70.64180 | 86.40090 | 2333.32560  | -2080.92148 | 351.54472   | 1 |
| 6257 | C | 87.22600 | 71.64880 | 86.78490 | 631.74897   | 106.00902   | 648.92706   | 1 |
| 6258 | H | 86.71000 | 70.67580 | 86.92890 | -1829.54859 | 1647.60973  | 1958.66290  | 1 |
| 6259 | O | 86.29500 | 72.52080 | 86.19690 | 722.07675   | -294.97409  | 123.38023   | 1 |
| 6260 | H | 86.60700 | 73.42780 | 86.23990 | 272.75475   | 493.84464   | -3095.14920 | 1 |
| 6261 | C | 87.61600 | 72.22880 | 88.17090 | -735.97154  | -495.50351  | -210.41188  | 1 |
| 6262 | H | 86.73200 | 72.42180 | 88.81590 | -1085.15946 | 2935.96839  | 317.40318   | 1 |
| 6263 | H | 88.12700 | 73.21380 | 88.10690 | -35.06783   | -1908.79420 | 2500.70014  | 1 |
| 6264 | H | 88.25200 | 71.51380 | 88.73390 | 1027.51984  | 2137.29586  | -2067.46115 | 1 |
| 6265 | C | 88.17800 | 70.69480 | 84.65590 | -47.19641   | 571.30404   | -709.10874  | 1 |
| 6266 | O | 88.41700 | 69.53780 | 84.41390 | 235.50712   | -361.22663  | -661.57309  | 1 |
| 6267 | N | 87.69700 | 71.45480 | 83.66790 | -641.78769  | 345.94488   | -425.56196  | 1 |
| 6268 | H | 87.49600 | 72.42580 | 83.77290 | 2623.53799  | 492.24444   | 1665.22373  | 1 |
| 6269 | C | 87.33000 | 70.99180 | 82.32790 | -514.93006  | -529.73946  | -534.48494  | 1 |
| 6270 | H | 86.87200 | 71.79880 | 81.77690 | -1048.08217 | -1588.60383 | 2505.21214  | 1 |
| 6271 | H | 86.53900 | 70.25880 | 82.39390 | 3137.72187  | -193.95131  | 123.73591   | 1 |
| 6272 | C | 88.38800 | 70.38780 | 81.46990 | -130.35224  | -889.90919  | -150.06972  | 1 |
| 6273 | O | 88.07800 | 69.34780 | 80.89690 | -369.07184  | -568.54953  | 405.17236   | 1 |
| 6274 | N | 89.50700 | 71.10180 | 81.21690 | -378.33265  | -574.17396  | 489.75602   | 1 |
| 6275 | H | 89.71200 | 71.85980 | 81.82990 | -620.69684  | -1577.17562 | 2650.56197  | 1 |
| 6276 | C | 90.54000 | 70.62380 | 80.30890 | -321.64006  | 682.06396   | 512.62797   | 1 |
| 6277 | H | 90.04700 | 70.37080 | 79.38190 | 2550.62627  | -1531.66824 | 1022.99769  | 1 |
| 6278 | C | 91.49700 | 71.77680 | 80.00190 | -684.88866  | -170.05872  | 577.45871   | 1 |
| 6279 | H | 90.87200 | 72.69580 | 80.01990 | -275.26504  | 2904.80995  | -1176.66246 | 1 |
| 6280 | C | 92.63800 | 71.97780 | 81.09890 | 362.06379   | 824.28792   | 144.60375   | 1 |
| 6281 | H | 93.11400 | 72.96780 | 80.93290 | -1446.05167 | -651.16070  | 2717.19534  | 1 |
| 6282 | H | 93.41500 | 71.18380 | 81.09390 | -1775.22326 | -144.94800  | -2593.41448 | 1 |
| 6283 | H | 92.18000 | 72.00080 | 82.11090 | 2936.47914  | -377.82875  | 1064.21893  | 1 |
| 6284 | C | 92.06200 | 71.74980 | 78.55590 | 282.82799   | -290.71302  | 816.66717   | 1 |
| 6285 | H | 91.23500 | 71.68480 | 77.81690 | -1767.79188 | 2090.98319  | 1549.49263  | 1 |
| 6286 | H | 92.43600 | 72.79180 | 78.45790 | -1695.32947 | 2126.98507  | 1581.14475  | 1 |
| 6287 | C | 93.19900 | 70.75380 | 78.20890 | 626.50407   | -561.61670  | -351.46882  | 1 |
| 6288 | H | 94.09500 | 70.93880 | 78.83990 | -2524.82516 | 385.19354   | -1837.14727 | 1 |
| 6289 | H | 93.64100 | 70.73480 | 77.18990 | 902.56296   | -2279.38943 | 1971.79871  | 1 |
| 6290 | H | 92.87200 | 69.72480 | 78.47090 | -2537.52079 | 633.89517   | 1748.53978  | 1 |
| 6291 | C | 91.19200 | 69.33780 | 80.85890 | -845.85400  | 40.75214    | 338.11430   | 1 |
| 6292 | O | 91.46200 | 68.34780 | 80.13890 | -212.93731  | 675.59238   | -349.08432  | 1 |
| 6293 | N | 91.48600 | 69.32480 | 82.18790 | -413.14054  | 594.69609   | -433.96284  | 1 |
| 6294 | H | 91.23100 | 70.17480 | 82.64090 | 2768.65843  | -1191.23536 | 902.06154   | 1 |
| 6295 | C | 91.91500 | 68.12480 | 82.90290 | 674.76662   | -4.89852    | -613.28380  | 1 |
| 6296 | H | 92.79300 | 67.74880 | 82.39990 | 1137.05328  | 2474.96393  | 1574.76652  | 1 |
| 6297 | C | 92.25100 | 68.54980 | 84.34890 | -623.70194  | -217.42377  | 628.62850   | 1 |
| 6298 | H | 91.36300 | 68.83680 | 84.95190 | 2031.03728  | -2134.16384 | -1103.83808 | 1 |
| 6299 | C | 92.93000 | 67.35280 | 85.13090 | -38.21424   | 545.58213   | 729.61004   | 1 |
| 6300 | H | 93.39500 | 67.66780 | 86.08990 | 2816.88312  | 785.42742   | -1160.38765 | 1 |
| 6301 | H | 93.59900 | 66.86780 | 84.38790 | 683.50592   | 2165.82641  | 2177.20965  | 1 |
| 6302 | H | 92.08600 | 66.72380 | 85.48590 | -1297.42712 | -2085.69786 | -1965.90273 | 1 |
| 6303 | C | 93.12200 | 69.81780 | 84.36490 | -82.64499   | -713.48418  | -561.74829  | 1 |
| 6304 | H | 92.59100 | 70.79080 | 84.28690 | 418.05189   | -1824.98671 | -2528.41499 | 1 |
| 6305 | H | 93.47800 | 69.79780 | 85.41690 | -1799.71518 | 611.07834   | -2507.15671 | 1 |
| 6306 | H | 93.92400 | 69.74080 | 83.59990 | -2110.06411 | -1558.22569 | -1737.17828 | 1 |
| 6307 | C | 90.88500 | 67.01480 | 82.85490 | -556.90750  | 641.70428   | -330.93904  | 1 |
| 6308 | O | 91.19100 | 65.97680 | 82.31990 | 578.50465   | 275.09237   | -461.82658  | 1 |
| 6309 | N | 89.59800 | 67.27880 | 83.21290 | 527.47058   | 507.40287   | 420.70109   | 1 |
| 6310 | H | 89.33800 | 68.17280 | 83.56890 | -3101.06471 | -449.88638  | 281.47141   | 1 |
| 6311 | C | 88.50800 | 66.28280 | 83.31090 | -543.31176  | 554.50542   | 478.31693   | 1 |
| 6312 | H | 87.63400 | 66.81180 | 83.66190 | -1058.56279 | -2935.79372 | 398.47993   | 1 |
| 6313 | H | 88.77800 | 65.52880 | 84.03490 | 13.31072    | 2345.67527  | 2096.62981  | 1 |
| 6314 | C | 88.13700 | 65.55880 | 82.06790 | 314.14467   | -561.63813  | -646.00831  | 1 |
| 6315 | O | 88.04400 | 64.34280 | 82.03790 | 301.13903   | -577.45636  | 446.63929   | 1 |
| 6316 | N | 87.94300 | 66.29480 | 80.94490 | -133.31966  | 640.18901   | -533.90653  | 1 |
| 6317 | H | 88.08700 | 67.28080 | 80.99990 | -2812.65001 | 978.91141   | -1014.37598 | 1 |

|      |   |          |          |          |             |             |             |   |
|------|---|----------|----------|----------|-------------|-------------|-------------|---|
| 6318 | C | 87.72000 | 65.63780 | 79.67190 | 413.69976   | -526.35060  | -619.07879  | 1 |
| 6319 | H | 87.02600 | 64.82080 | 79.79990 | 1059.06714  | 206.50054   | 2955.32748  | 1 |
| 6320 | C | 86.96700 | 66.60780 | 78.71390 | -92.17659   | 171.75748   | -890.76026  | 1 |
| 6321 | H | 87.46400 | 67.58080 | 78.50890 | 3104.91925  | 80.66297    | 501.19475   | 1 |
| 6322 | H | 86.78100 | 66.01880 | 77.79090 | 2249.29314  | 359.21715   | -2170.22340 | 1 |
| 6323 | C | 85.61000 | 66.79680 | 79.39290 | 257.20112   | 777.19145   | -401.58690  | 1 |
| 6324 | O | 84.83300 | 65.81480 | 79.48890 | 41.48806    | 742.67780   | 265.20870   | 1 |
| 6325 | N | 85.34400 | 67.99780 | 79.87490 | 293.16062   | 776.53241   | 154.03428   | 1 |
| 6326 | H | 86.08300 | 68.66580 | 79.96190 | -2086.18902 | -1479.44611 | 1832.28840  | 1 |
| 6327 | H | 84.39500 | 68.15680 | 80.14790 | -3074.19845 | 130.00965   | 656.22221   | 1 |
| 6328 | C | 88.89800 | 64.98780 | 79.03490 | 729.59863   | 376.10731   | -397.08957  | 1 |
| 6329 | O | 88.72200 | 64.04280 | 78.34190 | -693.58536  | 354.52459   | -129.91881  | 1 |
| 6330 | N | 90.14400 | 65.40080 | 79.46790 | 210.13862   | -791.79120  | -203.91357  | 1 |
| 6331 | H | 90.25700 | 66.25580 | 79.96790 | -1062.04363 | 2020.92879  | -2164.74858 | 1 |
| 6332 | C | 91.31700 | 64.73480 | 79.05890 | 97.70485    | 515.88956   | 745.49495   | 1 |
| 6333 | H | 91.30700 | 64.62180 | 77.98490 | -2927.03199 | 1151.10278  | -75.31504   | 1 |
| 6334 | H | 92.21500 | 65.29480 | 79.27790 | 1062.09970  | -1925.40192 | 2250.11064  | 1 |
| 6335 | C | 91.40100 | 63.43180 | 79.75790 | 310.82975   | -796.83060  | -316.06465  | 1 |
| 6336 | O | 91.82500 | 62.42080 | 79.26990 | -577.07887  | 332.13922   | 424.60658   | 1 |
| 6337 | N | 91.02800 | 63.38680 | 81.05790 | 661.05041   | 154.45958   | -501.82356  | 1 |
| 6338 | H | 90.80500 | 64.21680 | 81.56290 | -2517.52490 | 1601.70543  | -997.41382  | 1 |
| 6339 | C | 90.91800 | 62.15580 | 81.79590 | 275.37986   | -734.86526  | -464.31669  | 1 |
| 6340 | H | 91.86200 | 61.64080 | 81.70190 | -1066.15996 | 2389.99152  | 1746.27308  | 1 |
| 6341 | C | 90.82800 | 62.40680 | 83.27890 | 331.56885   | -794.75202  | 299.80382   | 1 |
| 6342 | H | 90.54300 | 61.55180 | 83.92790 | 1677.69666  | 2644.70176  | 298.51762   | 1 |
| 6343 | H | 89.92600 | 63.04680 | 83.38890 | -2285.97755 | -1673.79653 | 1367.82238  | 1 |
| 6344 | C | 92.01900 | 63.17780 | 83.96190 | -507.29365  | -341.32403  | -676.46291  | 1 |
| 6345 | H | 92.39400 | 64.07880 | 83.43090 | 2371.87763  | 457.82649   | 2015.64324  | 1 |
| 6346 | C | 91.67700 | 63.61180 | 85.38990 | -427.74577  | 655.48410   | 467.78751   | 1 |
| 6347 | H | 91.21000 | 62.80180 | 85.98990 | -2952.71904 | -361.96864  | -1024.03866 | 1 |
| 6348 | H | 92.58900 | 63.86880 | 85.96890 | 1883.89389  | -747.97171  | -2406.18128 | 1 |
| 6349 | H | 90.99500 | 64.48680 | 85.45990 | -1863.27798 | 1324.56257  | -2161.47065 | 1 |
| 6350 | C | 93.24800 | 62.26580 | 83.90690 | 395.64209   | 142.65578   | 809.05356   | 1 |
| 6351 | H | 93.04800 | 61.32980 | 84.47190 | 2319.96381  | -1501.10801 | 1504.21703  | 1 |
| 6352 | H | 94.12500 | 62.84280 | 84.26990 | -1438.91126 | 1875.01864  | -2076.55140 | 1 |
| 6353 | H | 93.55700 | 61.98580 | 82.87690 | 1529.33518  | 1892.55504  | 1994.39103  | 1 |
| 6354 | C | 89.83700 | 61.22880 | 81.39190 | -670.64914  | 389.97123   | -479.16926  | 1 |
| 6355 | O | 90.05200 | 60.01880 | 81.38790 | 781.35197   | -104.16432  | 47.60376    | 1 |
| 6356 | N | 88.67800 | 61.73480 | 81.04490 | 330.59139   | -215.15975  | 746.38322   | 1 |
| 6357 | H | 88.46700 | 62.70780 | 81.09490 | -1221.30094 | -2124.56655 | 1973.03503  | 1 |
| 6358 | C | 87.67100 | 60.85880 | 80.39390 | 540.49009   | 460.58516   | 571.99894   | 1 |
| 6359 | H | 87.32000 | 60.08580 | 81.06090 | -2109.82119 | 420.31282   | -2295.69552 | 1 |
| 6360 | C | 86.36900 | 61.62080 | 80.15290 | 437.16704   | 378.29483   | 705.14467   | 1 |
| 6361 | H | 86.66700 | 62.53680 | 79.59990 | -931.64399  | -1905.93439 | 2323.29073  | 1 |
| 6362 | C | 85.41000 | 60.79180 | 79.24990 | -40.18690   | 139.68571   | -900.17994  | 1 |
| 6363 | H | 85.78800 | 60.71980 | 78.20790 | -337.71721  | 2233.51169  | 2189.88558  | 1 |
| 6364 | H | 84.42100 | 61.27980 | 79.11590 | -2232.42026 | 1456.66377  | 1671.12438  | 1 |
| 6365 | H | 85.21300 | 59.82180 | 79.75490 | -1555.71342 | -964.44593  | -2558.87202 | 1 |
| 6366 | C | 85.66900 | 62.05280 | 81.46790 | 59.94967    | 164.68914   | 894.83771   | 1 |
| 6367 | H | 84.86800 | 62.78280 | 81.22090 | 2288.98316  | -975.36532  | -1925.47262 | 1 |
| 6368 | H | 85.26400 | 61.20280 | 82.05790 | 1418.49257  | -211.68327  | -2800.23128 | 1 |
| 6369 | H | 86.41700 | 62.61580 | 82.06690 | 1686.79616  | 1795.69322  | -1956.63763 | 1 |
| 6370 | C | 88.14800 | 60.21080 | 79.10090 | -460.61643  | 407.85428   | 673.00698   | 1 |
| 6371 | O | 87.98300 | 59.02080 | 78.84890 | -678.66037  | 361.86766   | -179.16229  | 1 |
| 6372 | N | 88.93200 | 60.97080 | 78.26790 | 603.21865   | -484.47884  | -337.75701  | 1 |
| 6373 | H | 88.88200 | 61.95180 | 78.43890 | 950.00296   | -2010.56634 | -2225.61084 | 1 |
| 6374 | C | 89.63900 | 60.42180 | 77.09990 | 725.26411   | 366.18609   | 413.94532   | 1 |
| 6375 | H | 88.99200 | 59.82980 | 76.46890 | -2637.04200 | -778.25505  | -1529.23341 | 1 |
| 6376 | C | 90.13200 | 61.55680 | 76.21090 | -245.39354  | 328.56694   | -814.41806  | 1 |
| 6377 | H | 90.77500 | 62.20780 | 76.84090 | 2388.04920  | 1975.44820  | -541.34249  | 1 |
| 6378 | C | 91.04800 | 61.07380 | 75.04890 | -454.31315  | -405.65078  | -678.60004  | 1 |
| 6379 | H | 91.94600 | 60.50580 | 75.37390 | -1639.17125 | -2672.23587 | 265.51703   | 1 |

|      |   |          |          |          |             |             |             |   |
|------|---|----------|----------|----------|-------------|-------------|-------------|---|
| 6380 | H | 91.50200 | 61.91580 | 74.48490 | 2378.32481  | 2035.61491  | 313.16012   | 1 |
| 6381 | H | 90.55600 | 60.35680 | 74.35590 | -884.49316  | -328.70926  | -3001.30776 | 1 |
| 6382 | C | 89.00800 | 62.48180 | 75.66090 | 7.02713     | 567.02539   | 714.06151   | 1 |
| 6383 | H | 88.47400 | 61.93980 | 74.85190 | 2612.78447  | -1684.72838 | -482.98432  | 1 |
| 6384 | H | 88.14100 | 62.60780 | 76.34490 | -2631.13738 | -1490.45271 | -868.27012  | 1 |
| 6385 | C | 89.53000 | 63.78780 | 75.11390 | -553.20240  | -415.10246  | 594.22895   | 1 |
| 6386 | H | 90.19400 | 63.52080 | 74.26490 | 942.90686   | -3000.78915 | 66.46305    | 1 |
| 6387 | H | 88.68400 | 64.35180 | 74.66590 | -2106.33165 | 2266.34950  | -570.30969  | 1 |
| 6388 | H | 89.97900 | 64.42080 | 75.90890 | -2572.36207 | 1655.35637  | -735.50996  | 1 |
| 6389 | C | 90.77300 | 59.45680 | 77.46190 | 332.79423   | -609.46388  | -590.97613  | 1 |
| 6390 | O | 90.96700 | 58.38780 | 76.89490 | -33.13991   | 738.45028   | 277.88517   | 1 |
| 6391 | N | 91.47500 | 59.73380 | 78.58890 | -205.99053  | -461.63039  | 676.11949   | 1 |
| 6392 | H | 91.42900 | 60.64380 | 78.99590 | 1676.62045  | 1711.55738  | 2039.05405  | 1 |
| 6393 | C | 92.46700 | 58.82380 | 79.17890 | -724.88543  | -475.55518  | -282.55864  | 1 |
| 6394 | H | 93.13400 | 58.59180 | 78.36190 | -2154.49200 | 2198.57070  | -650.13636  | 1 |
| 6395 | C | 93.39400 | 59.54580 | 80.25190 | -727.45292  | -66.62977   | 545.73229   | 1 |
| 6396 | H | 93.67500 | 58.93680 | 81.13790 | -477.43093  | 1900.27554  | 2461.55211  | 1 |
| 6397 | H | 92.68800 | 60.32980 | 80.60090 | -1885.56164 | 2439.64756  | -625.30258  | 1 |
| 6398 | C | 94.60100 | 60.20980 | 79.64990 | 0.07779     | 136.16699   | -901.61497  | 1 |
| 6399 | H | 94.23900 | 60.46180 | 78.62990 | -1494.27344 | 2209.19348  | -1668.78317 | 1 |
| 6400 | C | 95.06300 | 61.43480 | 80.47190 | 181.28753   | 817.11273   | -361.81848  | 1 |
| 6401 | H | 95.28300 | 61.04180 | 81.48790 | -1711.81780 | -2403.28153 | 1091.85344  | 1 |
| 6402 | H | 94.26400 | 62.20680 | 80.47790 | -1638.91079 | -1988.92275 | -1804.54535 | 1 |
| 6403 | H | 96.00300 | 61.82780 | 80.02690 | 789.63194   | -1754.67722 | 2489.13951  | 1 |
| 6404 | C | 95.76500 | 59.20580 | 79.52190 | -723.88704  | 514.99269   | 205.47768   | 1 |
| 6405 | H | 96.08900 | 58.91780 | 80.54590 | -2579.66576 | 1679.81506  | 649.43986   | 1 |
| 6406 | H | 95.53700 | 58.21280 | 79.07790 | 1397.94009  | -2453.65391 | 1386.92906  | 1 |
| 6407 | H | 96.53300 | 59.68580 | 78.87890 | 591.89494   | -2907.09292 | 1047.23319  | 1 |
| 6408 | C | 91.86500 | 57.57880 | 79.69390 | -582.56779  | -303.19306  | -632.56600  | 1 |
| 6409 | O | 92.42900 | 56.49880 | 79.48290 | 535.77260   | -24.90168   | -579.61613  | 1 |
| 6410 | N | 90.65400 | 57.56080 | 80.28190 | -381.42184  | -696.43704  | 286.64460   | 1 |
| 6411 | H | 90.21300 | 58.42780 | 80.50190 | -2074.13190 | 2027.32988  | -1219.07205 | 1 |
| 6412 | C | 89.92200 | 56.39580 | 80.60690 | -269.30077  | -32.73197   | -870.54966  | 1 |
| 6413 | H | 90.56100 | 55.73180 | 81.16890 | 2609.90647  | -683.93234  | -1618.28644 | 1 |
| 6414 | C | 88.72200 | 56.64380 | 81.52490 | -255.95642  | 818.20196   | -310.61692  | 1 |
| 6415 | H | 88.11700 | 57.51680 | 81.19890 | -2200.53987 | -872.08249  | 2072.51602  | 1 |
| 6416 | C | 87.81900 | 55.37180 | 81.65790 | -270.06871  | 308.71118   | -814.37786  | 1 |
| 6417 | H | 87.24900 | 55.30580 | 80.70590 | -1679.32935 | 2605.55697  | 537.72862   | 1 |
| 6418 | H | 88.39100 | 54.44580 | 81.87890 | 2325.06348  | 1309.71624  | -1666.41814 | 1 |
| 6419 | H | 87.10100 | 55.43280 | 82.50390 | 1541.58712  | -1896.34312 | -1981.31727 | 1 |
| 6420 | C | 89.30500 | 57.08480 | 82.90890 | -335.17659  | 787.08053   | -315.61352  | 1 |
| 6421 | H | 89.91800 | 58.00280 | 82.78290 | 2332.24242  | 609.63530   | -2021.68651 | 1 |
| 6422 | H | 89.92900 | 56.23680 | 83.26390 | -1968.73005 | 1708.57905  | 1761.55779  | 1 |
| 6423 | H | 88.39800 | 57.27180 | 83.52290 | -1980.23295 | -1726.76671 | -1730.65895 | 1 |
| 6424 | C | 89.44700 | 55.63980 | 79.32990 | -359.27848  | 576.33568   | 608.44652   | 1 |
| 6425 | O | 89.89800 | 54.49180 | 79.18290 | -449.67866  | 648.30608   | 33.39991    | 1 |
| 6426 | N | 88.71500 | 56.24380 | 78.37590 | -687.55598  | 361.92186   | -330.07821  | 1 |
| 6427 | H | 88.39800 | 57.18380 | 78.48190 | -1682.32476 | -210.17816  | -2650.25183 | 1 |
| 6428 | C | 88.13600 | 55.43780 | 77.35890 | 481.60797   | -515.20904  | -577.98305  | 1 |
| 6429 | H | 87.98700 | 54.42380 | 77.69790 | 2167.44450  | 1544.81508  | -1677.48530 | 1 |
| 6430 | C | 86.80000 | 55.99480 | 76.89190 | 518.43415   | -69.51995   | 746.88955   | 1 |
| 6431 | H | 86.79700 | 57.04880 | 76.53890 | -1143.95498 | 2795.22945  | -881.07069  | 1 |
| 6432 | H | 86.30400 | 55.48680 | 76.03690 | 1254.94298  | 2533.45344  | -1380.20217 | 1 |
| 6433 | C | 85.67600 | 55.90280 | 77.97190 | -484.48634  | -150.54762  | 757.66708   | 1 |
| 6434 | H | 86.01400 | 56.61080 | 78.75890 | 1871.95387  | 1227.76250  | 2210.56875  | 1 |
| 6435 | H | 85.62800 | 54.90080 | 78.44890 | -2218.83620 | 1002.44526  | 1992.50988  | 1 |
| 6436 | S | 83.95900 | 56.24880 | 77.57990 | -404.97605  | -144.73323  | 355.32703   | 1 |
| 6437 | C | 84.12800 | 58.00880 | 77.20090 | -197.22130  | -509.73989  | -729.87671  | 1 |
| 6438 | H | 83.24300 | 58.67880 | 77.24590 | -414.07682  | -2980.23816 | 919.21005   | 1 |
| 6439 | H | 84.54900 | 58.20380 | 76.19090 | 411.47298   | 2082.84638  | -2321.78103 | 1 |
| 6440 | H | 84.85200 | 58.45580 | 77.91490 | 2087.45348  | 1033.17280  | -2115.02202 | 1 |
| 6441 | C | 89.02800 | 55.25480 | 76.12090 | 452.00509   | -403.62784  | -681.34204  | 1 |

|      |   |          |          |          |             |             |             |   |
|------|---|----------|----------|----------|-------------|-------------|-------------|---|
| 6442 | O | 88.67300 | 54.33880 | 75.34490 | -482.40885  | 216.79530   | -586.43732  | 1 |
| 6443 | N | 90.17100 | 55.99680 | 75.92590 | -667.46038  | -222.59038  | 466.50022   | 1 |
| 6444 | H | 90.45000 | 56.78180 | 76.47390 | 1347.87838  | 2726.98930  | -803.10612  | 1 |
| 6445 | C | 91.03600 | 55.84080 | 74.74190 | -889.83329  | 191.54029   | -54.40627   | 1 |
| 6446 | H | 91.33000 | 56.77180 | 74.28090 | -1586.87762 | 296.94965   | -2700.34564 | 1 |
| 6447 | H | 90.59400 | 55.18780 | 74.00390 | -572.29216  | 2941.77648  | 957.42313   | 1 |
| 6448 | C | 92.32500 | 55.26980 | 75.05690 | 636.94938   | -640.72478  | 123.36225   | 1 |
| 6449 | O | 92.92800 | 54.78180 | 74.07790 | -199.28590  | -698.80068  | 309.17628   | 1 |
| 6450 | N | 92.85900 | 55.28180 | 76.31390 | -420.26493  | -726.64527  | 89.64558    | 1 |
| 6451 | H | 92.39700 | 55.80080 | 77.02990 | -2179.54868 | -321.32446  | 2246.00632  | 1 |
| 6452 | C | 94.18600 | 54.76780 | 76.54990 | -516.28029  | 736.80378   | -148.41107  | 1 |
| 6453 | H | 94.42000 | 54.19980 | 75.66190 | 2046.46465  | 2181.63635  | -975.02384  | 1 |
| 6454 | C | 95.24000 | 55.87480 | 76.84190 | -403.38982  | 768.94288   | -278.30649  | 1 |
| 6455 | H | 96.23400 | 55.39980 | 76.97990 | 1643.87484  | 994.04106   | -2491.54252 | 1 |
| 6456 | H | 94.96800 | 56.43880 | 77.75990 | 1807.35693  | -538.28990  | -2518.31911 | 1 |
| 6457 | C | 95.32500 | 56.83880 | 75.67490 | 658.83343   | 599.46334   | -195.02109  | 1 |
| 6458 | C | 94.57400 | 58.04680 | 75.56990 | 735.77653   | -405.26549  | 354.74468   | 1 |
| 6459 | H | 93.81100 | 58.35680 | 76.26890 | 1625.72964  | -2631.85930 | 573.18932   | 1 |
| 6460 | C | 94.76300 | 58.89280 | 74.47790 | -420.74497  | -268.55247  | -763.08862  | 1 |
| 6461 | H | 94.19800 | 59.78980 | 74.27190 | -2210.21796 | 872.57426   | 2061.98374  | 1 |
| 6462 | C | 95.64700 | 58.60780 | 73.44990 | 417.26536   | 581.36110   | 565.11937   | 1 |
| 6463 | O | 95.87200 | 59.44180 | 72.41690 | -555.02119  | -364.40461  | 427.53712   | 1 |
| 6464 | H | 96.32200 | 59.00280 | 71.69190 | 1960.54608  | -1695.32460 | 1783.35632  | 1 |
| 6465 | C | 96.26800 | 56.58880 | 74.66090 | -707.17336  | -527.74710  | -229.86917  | 1 |
| 6466 | H | 96.92000 | 55.72780 | 74.64290 | -1392.07536 | 228.65270   | -2812.12915 | 1 |
| 6467 | C | 96.40200 | 57.42980 | 73.55890 | 243.88306   | -863.32614  | -163.21773  | 1 |
| 6468 | H | 97.07000 | 57.15380 | 72.75690 | 1815.36562  | 1085.64151  | -2328.96037 | 1 |
| 6469 | C | 94.25100 | 53.70880 | 77.63690 | 517.31090   | 682.10256   | -313.96900  | 1 |
| 6470 | O | 94.75800 | 52.60880 | 77.40090 | -416.13956  | -623.25887  | -249.00497  | 1 |
| 6471 | N | 93.66100 | 53.96080 | 78.80590 | 256.79754   | -672.06997  | 441.64383   | 1 |
| 6472 | H | 93.27600 | 54.86780 | 78.95390 | -1234.01676 | -2604.29812 | 1262.16487  | 1 |
| 6473 | C | 93.44100 | 53.00680 | 79.89090 | -599.56266  | 600.82935   | -333.13618  | 1 |
| 6474 | H | 94.35700 | 52.47780 | 80.10790 | 1827.87857  | 1575.23439  | 2018.84194  | 1 |
| 6475 | C | 92.94400 | 53.62880 | 81.25290 | 445.77242   | -396.55549  | -689.55181  | 1 |
| 6476 | H | 92.05600 | 54.20480 | 80.91490 | 1528.57417  | 1902.28294  | 1985.70059  | 1 |
| 6477 | H | 92.64800 | 52.84180 | 81.97990 | 1217.80572  | 896.89466   | 2758.75976  | 1 |
| 6478 | C | 93.94700 | 54.46080 | 82.04690 | -393.38206  | 815.68796   | 106.55845   | 1 |
| 6479 | H | 94.47900 | 55.07880 | 81.29190 | -1516.57166 | -2750.17328 | 186.50351   | 1 |
| 6480 | H | 94.64500 | 53.84780 | 82.65590 | 2442.85213  | -1927.82729 | 462.79762   | 1 |
| 6481 | C | 93.27700 | 55.39580 | 83.02990 | -567.21803  | 42.86215    | 712.65528   | 1 |
| 6482 | O | 92.47900 | 54.97380 | 83.85390 | 278.53089   | -654.64459  | 342.76557   | 1 |
| 6483 | N | 93.52300 | 56.72180 | 82.88790 | -587.28231  | -86.24744   | 600.27756   | 1 |
| 6484 | H | 94.41900 | 57.02380 | 82.56290 | -2097.16996 | 45.48301    | -2344.78905 | 1 |
| 6485 | H | 92.86000 | 57.35880 | 83.28190 | 1729.79074  | 364.51200   | -2602.53362 | 1 |
| 6486 | C | 92.57700 | 51.86780 | 79.50590 | 309.23997   | 595.98626   | 616.94572   | 1 |
| 6487 | O | 92.78500 | 50.65780 | 79.79990 | -586.64018  | 395.11844   | -351.22919  | 1 |
| 6488 | N | 91.47300 | 52.18080 | 78.75590 | 361.09023   | 362.27129   | 671.59932   | 1 |
| 6489 | H | 91.20800 | 53.14080 | 78.70990 | 2028.97080  | 263.32461   | 2390.01337  | 1 |
| 6490 | C | 90.61600 | 51.17280 | 78.07990 | 625.30084   | -488.83724  | 448.87417   | 1 |
| 6491 | H | 90.80800 | 50.23680 | 78.58390 | -2144.40996 | -1361.23221 | -1856.55030 | 1 |
| 6492 | C | 89.08300 | 51.53180 | 78.20090 | 477.40451   | -650.07167  | 425.37367   | 1 |
| 6493 | H | 88.90900 | 52.51580 | 77.71390 | -2984.13350 | -814.07351  | 574.85456   | 1 |
| 6494 | H | 88.49600 | 50.75480 | 77.66490 | 387.63192   | 2809.97985  | 1360.87507  | 1 |
| 6495 | C | 88.66600 | 51.54680 | 79.65090 | -16.46731   | 727.72636   | 549.17591   | 1 |
| 6496 | H | 89.15400 | 52.39480 | 80.17690 | 1412.95289  | 2456.78161  | -1366.02141 | 1 |
| 6497 | H | 89.07300 | 50.61780 | 80.10390 | 2470.71274  | -1055.01199 | -1637.30098 | 1 |
| 6498 | C | 87.13900 | 51.48180 | 79.68990 | -432.57797  | -796.00644  | -103.44587  | 1 |
| 6499 | H | 86.76700 | 52.34880 | 79.10290 | 822.00885   | -1659.18601 | 2543.54663  | 1 |
| 6500 | H | 86.88900 | 50.48680 | 79.26190 | -2959.95700 | 805.02226   | 699.15660   | 1 |
| 6501 | C | 86.57500 | 51.74980 | 81.08890 | 626.28866   | 582.54457   | -315.99896  | 1 |
| 6502 | H | 86.92000 | 52.73180 | 81.47690 | -1470.60068 | 2538.39473  | -1136.71109 | 1 |
| 6503 | H | 86.98500 | 50.92780 | 81.71390 | 428.27849   | -2564.59065 | -1771.34937 | 1 |

|      |   |          |          |          |             |             |             |   |
|------|---|----------|----------|----------|-------------|-------------|-------------|---|
| 6504 | N | 85.12500 | 51.68880 | 81.07790 | -325.89062  | 634.10551   | -452.08162  | 1 |
| 6505 | H | 84.77400 | 50.75480 | 80.78390 | 2061.34753  | 2252.62626  | -758.12104  | 1 |
| 6506 | H | 84.69900 | 52.02580 | 81.96490 | -2254.09242 | -2171.37274 | -320.05317  | 1 |
| 6507 | H | 84.83800 | 52.34680 | 80.32490 | 2702.72499  | 846.95956   | -1369.73113 | 1 |
| 6508 | C | 90.95300 | 50.94980 | 76.60790 | -791.95575  | 415.04482   | 178.87113   | 1 |
| 6509 | O | 90.98900 | 51.89480 | 75.82090 | -477.04654  | -343.75641  | -527.14833  | 1 |
| 6510 | N | 91.05100 | 49.72080 | 76.17790 | -649.59839  | 398.10287   | 363.60462   | 1 |
| 6511 | H | 90.96200 | 48.97080 | 76.82890 | 1458.14370  | 2348.37727  | -1502.38722 | 1 |
| 6512 | C | 91.29900 | 49.34780 | 74.85290 | -196.54250  | 852.49423   | 257.05181   | 1 |
| 6513 | H | 91.82800 | 50.10280 | 74.28990 | 810.25378   | -484.59869  | -3001.14631 | 1 |
| 6514 | C | 92.38200 | 48.18380 | 74.82990 | -232.57955  | 668.07899   | -575.35052  | 1 |
| 6515 | H | 92.07000 | 47.34480 | 75.48790 | 1997.64510  | 893.54082   | 2260.35950  | 1 |
| 6516 | H | 92.30400 | 47.74580 | 73.81190 | -1462.04695 | -2629.60319 | 919.69126   | 1 |
| 6517 | C | 93.85500 | 48.62380 | 74.83190 | -424.38912  | 617.07221   | 520.16032   | 1 |
| 6518 | H | 94.07900 | 49.05780 | 73.83490 | -1533.42661 | -1555.59845 | -2264.27527 | 1 |
| 6519 | H | 94.46100 | 47.69280 | 74.87390 | -1012.94100 | -909.17038  | -2836.47422 | 1 |
| 6520 | C | 94.33100 | 49.57380 | 75.99790 | -123.48169  | 749.27765   | 504.76358   | 1 |
| 6521 | H | 93.81300 | 50.55380 | 75.93290 | 2516.78984  | 1864.77128  | 294.31821   | 1 |
| 6522 | H | 94.18600 | 49.06480 | 76.97490 | -1086.76355 | 2939.52485  | -276.34191  | 1 |
| 6523 | C | 95.82100 | 49.84980 | 75.84490 | 662.05657   | 334.81084   | 530.12621   | 1 |
| 6524 | H | 96.00100 | 50.55280 | 75.00390 | 1609.52510  | -840.60521  | 2569.24854  | 1 |
| 6525 | H | 96.33200 | 48.90480 | 75.56290 | -1866.05211 | 2255.16258  | 1153.39391  | 1 |
| 6526 | N | 96.36400 | 50.35680 | 77.12790 | 83.85254    | -840.00723  | -5.37561    | 1 |
| 6527 | H | 95.93900 | 49.92380 | 77.97290 | 366.75803   | -1847.68540 | -2519.87568 | 1 |
| 6528 | H | 96.24700 | 51.38080 | 77.26290 | -212.69305  | -2418.09462 | -2001.45105 | 1 |
| 6529 | H | 97.39300 | 50.20580 | 77.11590 | 2220.86465  | 1037.98853  | 1971.94479  | 1 |
| 6530 | C | 90.00100 | 49.00580 | 74.10290 | -646.14395  | -433.52289  | 475.40183   | 1 |
| 6531 | O | 90.08300 | 48.49180 | 72.98190 | -109.13754  | 630.33862   | 463.02208   | 1 |
| 6532 | N | 88.81000 | 49.29580 | 74.67490 | 645.30425   | -291.62975  | 459.57241   | 1 |
| 6533 | H | 88.70200 | 49.78880 | 75.53390 | -1336.66204 | -690.57977  | 2763.08892  | 1 |
| 6534 | C | 87.55400 | 48.97680 | 74.08890 | 810.69662   | 332.42387   | 252.42102   | 1 |
| 6535 | H | 87.68600 | 49.00780 | 73.01690 | 1261.16373  | -2809.95431 | 641.75465   | 1 |
| 6536 | C | 87.15200 | 47.53380 | 74.50490 | 195.68149   | -372.14895  | -809.11366  | 1 |
| 6537 | H | 87.00100 | 47.55280 | 75.60590 | 627.64980   | -2730.86972 | 1430.60566  | 1 |
| 6538 | H | 88.03400 | 46.90580 | 74.25790 | -294.96673  | 1838.16130  | 2536.21448  | 1 |
| 6539 | C | 85.88800 | 46.98380 | 73.78190 | -514.60994  | -676.19537  | -330.73772  | 1 |
| 6540 | H | 85.04600 | 47.70380 | 73.87690 | 2159.55539  | 2127.79094  | 840.86413   | 1 |
| 6541 | C | 86.19700 | 46.73680 | 72.27590 | 513.37198   | -390.36037  | 644.60763   | 1 |
| 6542 | H | 86.97300 | 45.94380 | 72.21590 | 757.55728   | 1552.81916  | -2629.27478 | 1 |
| 6543 | H | 86.79000 | 47.58380 | 71.86990 | -2370.02827 | 2.51577     | 2069.10268  | 1 |
| 6544 | H | 85.32100 | 46.35980 | 71.70490 | 1419.99629  | 2200.09975  | -1743.96039 | 1 |
| 6545 | C | 85.44900 | 45.69380 | 74.43390 | -572.82536  | -688.13157  | 172.61823   | 1 |
| 6546 | H | 86.17400 | 44.86080 | 74.31090 | -2596.52346 | 1295.27064  | 1215.96304  | 1 |
| 6547 | H | 84.50200 | 45.40480 | 73.93090 | -2898.30672 | -262.72757  | -1195.41566 | 1 |
| 6548 | H | 85.30700 | 45.81980 | 75.52790 | -2858.06058 | -603.19043  | 1168.70751  | 1 |
| 6549 | C | 86.58300 | 49.95080 | 74.48290 | 470.41433   | 35.85679    | 780.30485   | 1 |
| 6550 | O | 86.54200 | 50.31480 | 75.64190 | -588.56167  | 469.27101   | -238.76160  | 1 |
| 6551 | N | 85.76300 | 50.38280 | 73.53390 | 74.47277    | -813.32802  | 213.59687   | 1 |
| 6552 | H | 85.97600 | 50.05580 | 72.61690 | 1805.71083  | 1545.11727  | 2061.61278  | 1 |
| 6553 | C | 84.62100 | 51.21080 | 73.67290 | -165.33727  | -443.14724  | -779.57367  | 1 |
| 6554 | H | 84.52300 | 51.36680 | 74.73690 | -1667.06575 | 2602.13103  | -589.94247  | 1 |
| 6555 | C | 84.88700 | 52.61880 | 73.07790 | 871.12257   | 223.68728   | -150.20145  | 1 |
| 6556 | H | 83.94100 | 53.16780 | 72.88390 | 1370.99310  | 582.96801   | 2771.05620  | 1 |
| 6557 | H | 85.25400 | 52.43280 | 72.04590 | -1938.95471 | -86.65666   | -2476.12025 | 1 |
| 6558 | C | 85.88700 | 53.42880 | 73.88690 | 645.13091   | -641.00778  | 66.07680    | 1 |
| 6559 | H | 86.80800 | 52.87480 | 74.16590 | -292.94778  | 2772.15421  | -1458.61881 | 1 |
| 6560 | H | 85.38700 | 53.70380 | 74.83990 | -220.80937  | 2915.27530  | -1162.17013 | 1 |
| 6561 | C | 86.28500 | 54.67180 | 73.14490 | -46.40004   | -652.09192  | -635.66828  | 1 |
| 6562 | H | 85.41500 | 55.31380 | 72.88890 | 972.19535   | 2320.72695  | -1888.72678 | 1 |
| 6563 | H | 86.96800 | 55.30180 | 73.75390 | 1566.75036  | 2000.37395  | 1855.26914  | 1 |
| 6564 | N | 87.02500 | 54.16280 | 71.89790 | -608.96999  | 352.30617   | 466.59212   | 1 |
| 6565 | H | 86.52100 | 54.27380 | 71.04090 | 2255.82456  | 2188.50576  | -141.15364  | 1 |

|      |   |          |          |          |             |             |             |   |
|------|---|----------|----------|----------|-------------|-------------|-------------|---|
| 6566 | C | 88.26400 | 53.66480 | 71.80990 | -569.81877  | 363.39144   | -612.13090  | 1 |
| 6567 | N | 89.10000 | 53.50980 | 72.82190 | 577.68006   | 610.17971   | -81.47856   | 1 |
| 6568 | H | 88.79100 | 53.70980 | 73.75190 | -327.84551  | 2636.03825  | 1685.83686  | 1 |
| 6569 | H | 90.04200 | 53.23980 | 72.62390 | 2824.26856  | 630.69254   | 1234.48785  | 1 |
| 6570 | N | 88.74400 | 53.35480 | 70.59690 | 243.88392   | -464.76129  | 661.20335   | 1 |
| 6571 | H | 88.15000 | 53.32880 | 69.79290 | 593.76744   | -1077.70321 | -2895.55215 | 1 |
| 6572 | H | 89.71700 | 53.20780 | 70.42090 | 1555.41710  | 2697.84599  | 447.80674   | 1 |
| 6573 | C | 83.32200 | 50.61480 | 73.20590 | -627.51682  | -478.99942  | -456.32576  | 1 |
| 6574 | O | 83.24600 | 50.07780 | 72.10590 | 158.13124   | 76.39803    | 769.92537   | 1 |
| 6575 | N | 82.30300 | 50.67980 | 74.02090 | 288.65807   | -357.90700  | -707.99109  | 1 |
| 6576 | H | 82.47000 | 51.01780 | 74.94390 | -1317.19795 | 2080.32748  | 1958.43135  | 1 |
| 6577 | C | 80.90500 | 50.41080 | 73.69990 | 213.65388   | 861.83773   | 207.45781   | 1 |
| 6578 | H | 80.90700 | 49.61780 | 72.96590 | 2621.91957  | 1226.50582  | 1232.65870  | 1 |
| 6579 | C | 80.09800 | 49.91280 | 74.88890 | 891.07230   | 99.44429    | 165.98792   | 1 |
| 6580 | H | 80.65700 | 49.07480 | 75.35590 | -610.32980  | 2738.34949  | -1423.78574 | 1 |
| 6581 | H | 79.13500 | 49.50380 | 74.51390 | -1334.15046 | -2455.18096 | -1445.80609 | 1 |
| 6582 | O | 79.93000 | 50.94380 | 75.84990 | 404.99634   | 677.47108   | 25.26136    | 1 |
| 6583 | H | 80.78600 | 51.10580 | 76.25190 | 2045.17830  | -1934.17400 | 1405.14871  | 1 |
| 6584 | C | 80.20200 | 51.63780 | 73.09290 | -290.77136  | 460.76193   | 731.16446   | 1 |
| 6585 | O | 80.82500 | 52.67380 | 72.89290 | 6.22925     | -670.23758  | 417.57636   | 1 |
| 6586 | N | 78.90600 | 51.49280 | 72.63190 | 804.15742   | -245.13745  | 76.88145    | 1 |
| 6587 | H | 78.46200 | 50.61780 | 72.45690 | 1966.48604  | 2031.87133  | 1379.36862  | 1 |
| 6588 | C | 78.10900 | 52.61380 | 72.12490 | -38.80295   | -523.18019  | -745.80683  | 1 |
| 6589 | H | 78.62900 | 53.02480 | 71.27190 | 571.29205   | 3037.68164  | 586.80650   | 1 |
| 6590 | C | 76.74700 | 52.13880 | 71.62190 | -1.64929    | 686.49319   | 600.14613   | 1 |
| 6591 | H | 76.16900 | 52.99880 | 71.21990 | 960.73814   | -1454.63825 | 2619.01432  | 1 |
| 6592 | H | 76.18700 | 51.79780 | 72.51890 | -1762.84482 | -2491.16498 | -764.65771  | 1 |
| 6593 | C | 76.84800 | 51.01580 | 70.56590 | -675.82134  | 331.44193   | 514.64820   | 1 |
| 6594 | H | 75.93000 | 51.16180 | 69.95690 | 965.02650   | 1592.22819  | 2536.09138  | 1 |
| 6595 | H | 77.66100 | 51.23680 | 69.84290 | 2357.70359  | 464.66706   | 2030.65126  | 1 |
| 6596 | S | 76.94200 | 49.31380 | 71.19890 | 341.30531   | 408.22216   | 167.55883   | 1 |
| 6597 | C | 75.79700 | 48.59480 | 69.95690 | 827.16267   | 245.02624   | 295.32196   | 1 |
| 6598 | H | 75.35400 | 47.67380 | 70.39290 | 2064.85392  | -2370.72865 | -119.37418  | 1 |
| 6599 | H | 76.40800 | 48.33680 | 69.06590 | -360.06608  | -2325.14734 | 2088.60443  | 1 |
| 6600 | H | 75.08300 | 49.32480 | 69.51890 | 1737.04504  | 1346.82353  | -2250.99248 | 1 |
| 6601 | C | 77.92300 | 53.80080 | 73.01490 | -216.78428  | 637.19466   | 615.17358   | 1 |
| 6602 | O | 78.11000 | 54.94380 | 72.61990 | 511.66076   | -576.12974  | -172.93066  | 1 |
| 6603 | N | 77.71000 | 53.58280 | 74.34390 | 116.26666   | -800.05617  | 243.03183   | 1 |
| 6604 | H | 77.59800 | 52.67680 | 74.74290 | -1357.08445 | -1232.82351 | 2556.69596  | 1 |
| 6605 | C | 77.68700 | 54.67680 | 75.33990 | -678.35284  | -109.41542  | -599.43031  | 1 |
| 6606 | H | 76.94800 | 55.38980 | 75.00390 | -1206.66008 | 2905.34747  | 33.96701    | 1 |
| 6607 | C | 77.20500 | 54.32980 | 76.79390 | 472.54445   | 10.69847    | -779.76810  | 1 |
| 6608 | H | 77.72800 | 53.41580 | 77.14590 | 2373.67726  | -1298.61513 | -1605.45359 | 1 |
| 6609 | O | 75.76300 | 54.21780 | 76.78490 | 249.98320   | -474.61047  | -579.55201  | 1 |
| 6610 | H | 75.63300 | 53.42280 | 76.26290 | 3029.87441  | -803.06926  | -270.49405  | 1 |
| 6611 | C | 77.39900 | 55.42680 | 77.81890 | -565.84948  | 425.25063   | 574.82803   | 1 |
| 6612 | H | 76.81700 | 55.15480 | 78.72490 | 2380.54261  | 2038.40372  | 275.95904   | 1 |
| 6613 | H | 78.42900 | 55.46880 | 78.23490 | 223.84325   | 3107.75120  | -435.89326  | 1 |
| 6614 | H | 77.11100 | 56.36280 | 77.29590 | -8.05197    | -3029.05317 | 850.29306   | 1 |
| 6615 | C | 78.99300 | 55.41280 | 75.48290 | 701.70330   | -576.93621  | -78.79146   | 1 |
| 6616 | O | 79.01200 | 56.64380 | 75.52890 | -59.21911   | -775.59247  | -136.29617  | 1 |
| 6617 | N | 80.04200 | 54.60680 | 75.54790 | -398.63876  | 510.83580   | -541.11571  | 1 |
| 6618 | H | 79.91100 | 53.62580 | 75.42390 | -2349.11562 | 2066.51292  | 330.76636   | 1 |
| 6619 | C | 81.45000 | 55.05880 | 75.60490 | 206.95057   | 637.15206   | -618.59495  | 1 |
| 6620 | H | 81.54600 | 55.60980 | 76.52890 | 632.20188   | -642.48221  | -3014.26004 | 1 |
| 6621 | C | 82.49400 | 53.85080 | 75.62690 | 598.64805   | 397.00326   | -561.65820  | 1 |
| 6622 | H | 83.54200 | 54.17680 | 75.80090 | -2232.34802 | -1661.32334 | -1467.94186 | 1 |
| 6623 | H | 82.40300 | 53.30880 | 74.66190 | 676.89204   | 2401.68197  | -1916.23775 | 1 |
| 6624 | C | 82.13700 | 52.85880 | 76.75290 | -370.00610  | 37.83435    | -832.53531  | 1 |
| 6625 | O | 82.51800 | 51.66580 | 76.56390 | -351.41515  | 21.40122    | 706.87807   | 1 |
| 6626 | O | 81.53100 | 53.20380 | 77.76190 | 286.97340   | 74.62546    | 731.91840   | 1 |
| 6627 | C | 81.81100 | 55.96680 | 74.36290 | 205.71236   | 700.87909   | -545.80393  | 1 |

|      |   |          |          |          |             |             |             |   |
|------|---|----------|----------|----------|-------------|-------------|-------------|---|
| 6628 | O | 82.31600 | 57.09180 | 74.51690 | 411.41298   | 417.00731   | 529.59560   | 1 |
| 6629 | N | 81.46000 | 55.58180 | 73.12090 | 230.67136   | -741.50725  | -331.10424  | 1 |
| 6630 | H | 80.97900 | 54.71980 | 72.97790 | 2577.54806  | 1047.01609  | 1469.09140  | 1 |
| 6631 | C | 81.68400 | 56.29980 | 71.95890 | 389.38357   | -169.83255  | -806.83848  | 1 |
| 6632 | H | 82.73300 | 56.54780 | 72.03390 | -1969.42367 | 1749.85328  | -1719.77037 | 1 |
| 6633 | C | 81.30300 | 55.39580 | 70.72990 | -581.59895  | 323.43404   | -623.36513  | 1 |
| 6634 | H | 81.29600 | 56.08680 | 69.85890 | -2342.50797 | -2032.69013 | 528.25512   | 1 |
| 6635 | H | 80.24900 | 55.09180 | 70.90490 | -2701.29281 | 1283.89242  | 976.14733   | 1 |
| 6636 | C | 82.34400 | 54.32980 | 70.40590 | 45.24449    | -679.72194  | 606.12047   | 1 |
| 6637 | H | 82.91800 | 54.03380 | 71.31090 | -1064.36985 | 1985.27929  | 2196.36272  | 1 |
| 6638 | H | 83.11200 | 54.74680 | 69.71990 | -611.85400  | -2639.79983 | 1598.53612  | 1 |
| 6639 | C | 81.85800 | 53.05580 | 69.67590 | 660.61407   | -567.71870  | 269.69526   | 1 |
| 6640 | H | 81.45300 | 53.35580 | 68.68590 | -2517.02422 | -608.94234  | 1786.61818  | 1 |
| 6641 | H | 81.02700 | 52.73880 | 70.34090 | -286.32125  | -1820.26254 | -2550.07660 | 1 |
| 6642 | C | 82.96900 | 51.98280 | 69.53090 | -514.95006  | -516.07252  | 547.67380   | 1 |
| 6643 | H | 83.51800 | 51.86480 | 70.48990 | 1856.94857  | 1393.62275  | 2123.15423  | 1 |
| 6644 | H | 83.71600 | 52.20480 | 68.73890 | 1301.85931  | -1533.97425 | 2418.74173  | 1 |
| 6645 | N | 82.51400 | 50.65680 | 69.16890 | 535.25158   | 528.00295   | 383.91525   | 1 |
| 6646 | H | 82.10400 | 50.74380 | 68.21690 | -169.33332  | 2201.55980  | -2241.13518 | 1 |
| 6647 | H | 83.32800 | 50.00980 | 69.15490 | -692.77952  | 2016.47948  | 2313.45916  | 1 |
| 6648 | H | 81.81100 | 50.26080 | 69.82490 | -1891.10716 | -2335.74071 | 930.72835   | 1 |
| 6649 | C | 80.96500 | 57.63780 | 71.82890 | 831.35342   | -336.52414  | 164.48099   | 1 |
| 6650 | O | 81.52700 | 58.63680 | 71.43890 | 528.41780   | 45.66680    | -585.07812  | 1 |
| 6651 | N | 79.66900 | 57.69580 | 72.21290 | 67.36990    | 405.06377   | -737.60215  | 1 |
| 6652 | H | 79.23700 | 56.80280 | 72.31390 | 1052.74506  | -1323.30612 | 2653.07651  | 1 |
| 6653 | C | 78.91900 | 58.95380 | 72.34290 | 673.98104   | 4.29476     | 614.15154   | 1 |
| 6654 | H | 79.04000 | 59.54580 | 71.44790 | -1796.10232 | 2269.58137  | 1233.38685  | 1 |
| 6655 | C | 77.45800 | 58.71880 | 72.77690 | 817.18460   | -349.45788  | -203.81249  | 1 |
| 6656 | H | 76.82600 | 59.62580 | 72.87990 | -1459.46663 | -662.24447  | 2707.32629  | 1 |
| 6657 | H | 77.44500 | 58.21880 | 73.76890 | -2750.54998 | 1059.53428  | 1100.04007  | 1 |
| 6658 | C | 76.64300 | 57.82380 | 71.87090 | 570.71445   | -85.92804   | 705.94079   | 1 |
| 6659 | C | 76.58300 | 58.10480 | 70.48090 | 196.61060   | -845.10815  | -280.33459  | 1 |
| 6660 | H | 77.12200 | 58.96280 | 70.10690 | -2022.26458 | 1442.80133  | -1930.54307 | 1 |
| 6661 | C | 75.81100 | 57.35880 | 69.59390 | -620.67473  | -144.62225  | 652.14898   | 1 |
| 6662 | H | 75.76500 | 57.60680 | 68.54390 | -1774.85020 | -1785.31973 | -1886.99933 | 1 |
| 6663 | C | 75.22600 | 56.17080 | 70.00690 | 507.99053   | -715.82818  | 246.95473   | 1 |
| 6664 | O | 74.53900 | 55.28780 | 69.16190 | 636.89690   | 24.24144    | 466.26378   | 1 |
| 6665 | H | 74.41500 | 54.44180 | 69.59890 | -1229.13574 | -2728.82755 | -970.02668  | 1 |
| 6666 | C | 75.90500 | 56.70580 | 72.30390 | -438.06824  | -219.52237  | 768.99750   | 1 |
| 6667 | H | 75.83900 | 56.41280 | 73.34090 | -1389.16845 | 2304.19206  | 1630.68580  | 1 |
| 6668 | C | 75.30900 | 55.81680 | 71.36490 | -138.47807  | 486.79549   | -758.48862  | 1 |
| 6669 | H | 74.94300 | 54.87280 | 71.74090 | 1875.29069  | 1905.15049  | -1658.88899 | 1 |
| 6670 | C | 79.49600 | 59.91880 | 73.36590 | 314.93220   | -626.23050  | 583.18443   | 1 |
| 6671 | O | 79.75100 | 61.08780 | 73.13790 | 166.40047   | 34.09026    | -771.21720  | 1 |
| 6672 | N | 79.82100 | 59.45580 | 74.55290 | -641.07289  | -340.81376  | -430.74798  | 1 |
| 6673 | H | 79.68400 | 58.49580 | 74.78390 | 2770.00984  | -1453.88336 | -333.90849  | 1 |
| 6674 | C | 80.44200 | 60.30880 | 75.56290 | -729.93127  | 358.94081   | -412.08353  | 1 |
| 6675 | H | 79.90500 | 61.24580 | 75.55490 | -2787.83190 | -900.98633  | -1146.49167 | 1 |
| 6676 | C | 80.24100 | 59.73180 | 76.98690 | 332.98027   | 551.74550   | -645.09848  | 1 |
| 6677 | H | 80.77400 | 60.48080 | 77.61190 | 2466.17135  | 124.53770   | 1949.54237  | 1 |
| 6678 | H | 80.74600 | 58.75980 | 77.17490 | -1127.69053 | 2483.20785  | -1568.50855 | 1 |
| 6679 | C | 78.72500 | 59.53680 | 77.40490 | -655.38688  | 470.08820   | -425.36587  | 1 |
| 6680 | H | 78.16700 | 60.42180 | 77.03090 | 2662.62756  | 1561.17670  | -609.39974  | 1 |
| 6681 | H | 78.24300 | 58.62080 | 77.00190 | -2099.73270 | -1947.48585 | 1302.55430  | 1 |
| 6682 | C | 78.50600 | 59.36680 | 78.91590 | 31.97752    | 198.73558   | 889.34392   | 1 |
| 6683 | H | 78.94700 | 58.43680 | 79.33590 | -74.44478   | 2293.05552  | 2152.80760  | 1 |
| 6684 | H | 77.42800 | 59.16480 | 79.09190 | -1970.42781 | -1072.69218 | 2205.66815  | 1 |
| 6685 | N | 79.05000 | 60.55680 | 79.71390 | -229.64616  | 496.03660   | 643.33710   | 1 |
| 6686 | H | 79.41200 | 61.35180 | 79.22890 | 833.13704   | -2924.64675 | -806.56697  | 1 |
| 6687 | C | 79.10800 | 60.62180 | 81.05290 | 124.60381   | -647.79417  | -629.51379  | 1 |
| 6688 | N | 78.65600 | 59.79180 | 81.93890 | -677.75721  | -278.89576  | 418.96851   | 1 |
| 6689 | H | 78.00100 | 59.08680 | 81.66790 | -1755.95806 | -2224.39321 | 1366.35001  | 1 |



|      |   |          |          |          |             |             |             |   |
|------|---|----------|----------|----------|-------------|-------------|-------------|---|
| 6690 | H | 78.68000 | 60.11080 | 82.88590 | -1983.36234 | -1569.63800 | -1871.02555 | 1 |
| 6691 | N | 79.61200 | 61.72080 | 81.54490 | -334.65245  | -585.25440  | -508.09184  | 1 |
| 6692 | H | 79.92100 | 62.44280 | 80.92490 | -1562.22485 | 1491.63732  | 2287.50909  | 1 |
| 6693 | H | 79.73600 | 61.78780 | 82.53490 | -1795.71036 | 1793.17424  | -1859.61734 | 1 |
| 6694 | C | 81.91100 | 60.65180 | 75.26890 | 616.82672   | 440.14893   | -507.19298  | 1 |
| 6695 | O | 82.34700 | 61.74380 | 75.64890 | 408.96491   | 673.97556   | -46.17215   | 1 |
| 6696 | N | 82.63500 | 59.80580 | 74.56990 | -190.24542  | 70.08760    | -819.49173  | 1 |
| 6697 | H | 82.35300 | 58.85480 | 74.46790 | -2529.63481 | 1462.88648  | 1165.82036  | 1 |
| 6698 | C | 83.96700 | 60.27580 | 74.06590 | 580.48783   | -682.68440  | 168.60276   | 1 |
| 6699 | H | 84.51900 | 60.58080 | 74.94290 | -2015.52347 | -270.18547  | 2400.60225  | 1 |
| 6700 | C | 84.76500 | 59.15580 | 73.29790 | 807.44994   | -162.97781  | -391.04198  | 1 |
| 6701 | H | 84.27400 | 58.99080 | 72.31490 | -1304.61225 | 1425.38317  | -2482.84029 | 1 |
| 6702 | H | 84.62400 | 58.26080 | 73.94190 | -1610.06251 | 2701.87052  | 76.29298    | 1 |
| 6703 | C | 86.25700 | 59.33680 | 73.14890 | -736.82847  | 197.47386   | 499.53867   | 1 |
| 6704 | H | 86.42000 | 60.38280 | 72.81090 | 2282.69942  | -2080.27261 | -599.97954  | 1 |
| 6705 | C | 86.99400 | 59.10380 | 74.43890 | -132.79600  | 758.65012   | -488.12522  | 1 |
| 6706 | H | 88.03400 | 59.42780 | 74.21690 | 2316.28189  | 2059.60012  | 539.54772   | 1 |
| 6707 | H | 86.66200 | 59.73080 | 75.29390 | 1764.69691  | -1722.13532 | 1954.05245  | 1 |
| 6708 | H | 86.94000 | 58.03480 | 74.73590 | 1618.11774  | 1947.21808  | 1867.68921  | 1 |
| 6709 | C | 86.78800 | 58.36680 | 72.08090 | -33.05601   | 290.32281   | 863.75400   | 1 |
| 6710 | H | 86.63600 | 57.36080 | 72.52590 | -1363.19630 | 2394.79000  | -1518.19067 | 1 |
| 6711 | H | 87.88400 | 58.53880 | 72.02790 | -262.56333  | 2650.23136  | 1674.98074  | 1 |
| 6712 | H | 86.34700 | 58.51580 | 71.07190 | -2542.66483 | 1742.60188  | 629.61931   | 1 |
| 6713 | C | 83.83400 | 61.42680 | 73.15390 | -349.49611  | -412.57976  | -734.22164  | 1 |
| 6714 | O | 84.63000 | 62.37580 | 73.26490 | 653.38230   | 407.13363   | -175.95740  | 1 |
| 6715 | N | 82.85300 | 61.48880 | 72.22890 | -696.62291  | -443.72975  | -174.62165  | 1 |
| 6716 | H | 82.23800 | 60.70680 | 72.16490 | 2557.02351  | 1717.87314  | -639.35033  | 1 |
| 6717 | C | 82.51100 | 62.67080 | 71.40490 | -174.66495  | 893.03350   | -58.60317   | 1 |
| 6718 | H | 83.43700 | 63.02080 | 70.97290 | 2742.09203  | 936.70899   | 1225.45248  | 1 |
| 6719 | C | 81.45100 | 62.39580 | 70.30990 | 654.62704   | 631.74434   | 61.75378    | 1 |
| 6720 | H | 80.52300 | 61.97280 | 70.74890 | -1124.67376 | 1215.25919  | 2675.15986  | 1 |
| 6721 | H | 81.11100 | 63.34480 | 69.84290 | -1237.27166 | -1033.78453 | 2701.60593  | 1 |
| 6722 | N | 83.07400 | 62.04880 | 68.49190 | -65.61244   | -824.28130  | 170.08128   | 1 |
| 6723 | C | 81.94000 | 61.60380 | 69.18490 | 553.72523   | -722.80060  | 48.97612    | 1 |
| 6724 | C | 83.07900 | 61.30880 | 67.38090 | -156.05578  | 800.76146   | -407.28207  | 1 |
| 6725 | H | 83.93400 | 61.31080 | 66.70590 | 2707.28651  | 1600.97032  | 75.63083    | 1 |
| 6726 | N | 82.06700 | 60.43080 | 67.32990 | 27.73325    | 691.53841   | -483.40230  | 1 |
| 6727 | H | 81.96900 | 59.68080 | 66.67590 | 2123.25559  | 2320.04986  | -85.91020   | 1 |
| 6728 | C | 81.28500 | 60.67180 | 68.46190 | 751.95162   | 343.93963   | -384.35049  | 1 |
| 6729 | H | 80.30900 | 60.21780 | 68.57990 | 2039.24247  | 190.54477   | 2388.18112  | 1 |
| 6730 | C | 81.99700 | 63.82580 | 72.29390 | -160.21988  | -892.31250  | -97.77014   | 1 |
| 6731 | O | 82.45800 | 64.95180 | 72.13090 | -742.17490  | 52.02864    | -264.75775  | 1 |
| 6732 | N | 81.10700 | 63.58780 | 73.24290 | -506.89933  | -356.14508  | 573.48587   | 1 |
| 6733 | H | 80.64000 | 62.70880 | 73.29990 | 2261.43733  | 582.87510   | -2108.17079 | 1 |
| 6734 | C | 80.62600 | 64.63480 | 74.15290 | 540.92378   | 420.08690   | 601.97962   | 1 |
| 6735 | H | 80.25900 | 65.41980 | 73.50690 | 1104.64224  | 2675.80596  | -1232.09343 | 1 |
| 6736 | C | 79.51400 | 64.01580 | 75.02690 | 487.40404   | 679.16621   | 364.17243   | 1 |
| 6737 | H | 78.93200 | 63.32680 | 74.37890 | 1781.37923  | -1451.21758 | 2149.15839  | 1 |
| 6738 | H | 80.05900 | 63.34980 | 75.72990 | 2047.54260  | 2138.23628  | -1064.77281 | 1 |
| 6739 | C | 78.65200 | 64.92580 | 75.86790 | 150.99140   | 893.23266   | -103.86534  | 1 |
| 6740 | H | 79.32500 | 65.43280 | 76.59190 | 1577.40469  | -164.99908  | -2717.13010 | 1 |
| 6741 | C | 77.84300 | 65.91680 | 75.11090 | 402.88510   | 394.90242   | -716.37049  | 1 |
| 6742 | H | 78.40300 | 66.58380 | 74.41990 | -2081.17384 | -2130.37170 | -1014.12924 | 1 |
| 6743 | H | 77.04300 | 65.37980 | 74.55790 | 1427.12257  | -2280.78150 | 1630.82284  | 1 |
| 6744 | H | 77.34800 | 66.57180 | 75.85890 | 474.44067   | 676.84145   | -3035.62480 | 1 |
| 6745 | C | 77.73700 | 63.96780 | 76.62590 | 178.26637   | -636.12688  | -628.50194  | 1 |
| 6746 | H | 78.25600 | 63.31880 | 77.36390 | -2268.84858 | -1446.41660 | 1630.46968  | 1 |
| 6747 | H | 77.23500 | 63.24180 | 75.95090 | -2030.35526 | -471.07066  | -2356.68754 | 1 |
| 6748 | H | 77.01400 | 64.60180 | 77.18190 | 1036.87980  | 2968.51869  | -104.89656  | 1 |
| 6749 | C | 81.76100 | 65.29180 | 74.99290 | 343.66896   | 299.69006   | 789.63822   | 1 |
| 6750 | O | 81.80900 | 66.50180 | 75.10190 | 447.19691   | 528.48600   | 379.92722   | 1 |
| 6751 | N | 82.73700 | 64.49880 | 75.49490 | -433.79278  | 387.28297   | -611.97060  | 1 |

|      |   |          |          |          |             |             |             |   |
|------|---|----------|----------|----------|-------------|-------------|-------------|---|
| 6752 | H | 82.74800 | 63.51180 | 75.35190 | 2667.48998  | -1434.27704 | -851.80562  | 1 |
| 6753 | C | 84.02000 | 64.94880 | 76.06590 | 574.89745   | -680.42524  | 194.84716   | 1 |
| 6754 | H | 83.77900 | 65.63080 | 76.86790 | -1563.71622 | 1465.41777  | 2303.38199  | 1 |
| 6755 | C | 84.77200 | 63.73480 | 76.76590 | 595.79640   | -682.68278  | -102.08756  | 1 |
| 6756 | H | 85.81700 | 64.05580 | 76.96690 | -1289.96943 | 2325.87140  | 1680.63301  | 1 |
| 6757 | H | 84.71000 | 62.84780 | 76.09990 | 2126.61121  | 2034.22205  | -1112.51591 | 1 |
| 6758 | O | 84.15300 | 63.55380 | 78.01490 | 486.11575   | -42.96009   | -620.86483  | 1 |
| 6759 | H | 84.37800 | 64.25280 | 78.63390 | -1787.26086 | 2063.96930  | 1563.31558  | 1 |
| 6760 | C | 84.93100 | 65.67980 | 75.13190 | -663.49168  | -288.52248  | 554.96358   | 1 |
| 6761 | O | 85.56500 | 66.64980 | 75.53790 | -588.04176  | -513.33378  | -119.67683  | 1 |
| 6762 | N | 85.05100 | 65.29680 | 73.86190 | -259.51888  | 742.08221   | 307.63002   | 1 |
| 6763 | H | 84.70800 | 64.42780 | 73.51290 | -2106.68035 | -139.62095  | 2332.51583  | 1 |
| 6764 | C | 85.69500 | 66.04380 | 72.82190 | 573.02431   | 366.65430   | -607.17277  | 1 |
| 6765 | H | 86.70800 | 66.33380 | 73.05990 | 2764.78709  | -1501.37226 | -7.74138    | 1 |
| 6766 | C | 85.74100 | 65.15480 | 71.54090 | -133.05896  | -869.20207  | -241.31740  | 1 |
| 6767 | H | 84.87900 | 64.46080 | 71.44990 | 148.62272   | 2088.94663  | -2347.85849 | 1 |
| 6768 | C | 85.79600 | 65.94080 | 70.19390 | 454.61833   | -363.57527  | 701.84486   | 1 |
| 6769 | H | 84.86900 | 66.50480 | 69.95490 | 2551.92878  | -1366.56206 | 1232.23125  | 1 |
| 6770 | H | 85.96200 | 65.21880 | 69.36590 | -1476.37308 | -34.90144   | -2778.00840 | 1 |
| 6771 | H | 86.63500 | 66.66980 | 70.17690 | -1292.00135 | 2545.19150  | 1323.23807  | 1 |
| 6772 | C | 87.01400 | 64.26180 | 71.59490 | -392.54470  | 622.82292   | 538.00676   | 1 |
| 6773 | H | 86.82200 | 63.39980 | 72.26990 | -891.72079  | -2485.89783 | 1709.78719  | 1 |
| 6774 | H | 87.92700 | 64.84480 | 71.84190 | 315.63313   | -2973.12995 | 979.33663   | 1 |
| 6775 | H | 87.23900 | 63.84180 | 70.59090 | -3023.59537 | -818.79082  | 292.70952   | 1 |
| 6776 | C | 84.98600 | 67.39680 | 72.55390 | -382.12363  | -807.35395  | -183.33613  | 1 |
| 6777 | O | 85.69000 | 68.41580 | 72.40690 | 210.25598   | -515.88228  | 559.71879   | 1 |
| 6778 | N | 83.64700 | 67.48780 | 72.47490 | 216.00212   | -314.44842  | -753.08536  | 1 |
| 6779 | H | 83.09500 | 66.66380 | 72.57690 | 1593.33848  | 328.35976   | 2692.89409  | 1 |
| 6780 | C | 82.92000 | 68.76280 | 72.32790 | -515.80784  | 257.10074   | -706.60632  | 1 |
| 6781 | H | 83.22900 | 69.31680 | 71.45390 | 2024.47698  | 1690.93538  | -1714.77600 | 1 |
| 6782 | C | 81.43200 | 68.40580 | 72.15790 | 648.50536   | -302.09253  | 565.35997   | 1 |
| 6783 | H | 80.91900 | 69.33580 | 71.83390 | -1725.51672 | 1315.79795  | -2278.04610 | 1 |
| 6784 | H | 80.92200 | 68.18880 | 73.12090 | -1757.06882 | -1744.11894 | 1941.38727  | 1 |
| 6785 | H | 81.28100 | 67.60480 | 71.40290 | -737.82683  | 1519.08542  | 2654.47119  | 1 |
| 6786 | C | 83.14400 | 69.72080 | 73.44490 | -395.42291  | 812.29268   | 123.58130   | 1 |
| 6787 | O | 83.43900 | 70.90080 | 73.25090 | 539.79206   | 559.36134   | -139.16412  | 1 |
| 6788 | N | 83.00700 | 69.24380 | 74.69190 | -34.22935   | 573.50717   | -618.53873  | 1 |
| 6789 | H | 82.62000 | 68.33680 | 74.84090 | 2966.83186  | 973.23497   | 385.93867   | 1 |
| 6790 | C | 83.27700 | 70.00580 | 75.90190 | 873.70478   | 24.39264    | 259.79983   | 1 |
| 6791 | H | 82.61000 | 70.85480 | 75.90990 | -2612.51722 | -285.31065  | 1729.61782  | 1 |
| 6792 | C | 83.12800 | 69.09680 | 77.13590 | -189.12856  | -631.34043  | 630.15130   | 1 |
| 6793 | H | 83.48300 | 69.52780 | 78.09690 | -429.88148  | 1737.22478  | 2587.56221  | 1 |
| 6794 | H | 83.61800 | 68.12180 | 76.92790 | 552.37381   | -3048.72003 | -546.27430  | 1 |
| 6795 | C | 81.58900 | 68.79880 | 77.42290 | 506.34032   | 746.12677   | -135.51871  | 1 |
| 6796 | O | 80.75700 | 69.59680 | 76.91990 | 634.58558   | 468.81093   | 33.83312    | 1 |
| 6797 | O | 81.33500 | 67.81580 | 78.15690 | -681.02272  | -129.27330  | -378.31692  | 1 |
| 6798 | C | 84.71100 | 70.58080 | 75.95190 | 717.95488   | 52.30739    | 559.69253   | 1 |
| 6799 | O | 84.86800 | 71.75680 | 76.30490 | -392.94383  | -427.35786  | 535.33880   | 1 |
| 6800 | N | 85.74100 | 69.79480 | 75.67590 | -415.04889  | 265.39372   | -685.54568  | 1 |
| 6801 | H | 85.60700 | 68.83480 | 75.43990 | 2137.04559  | -2200.43123 | 699.54610   | 1 |
| 6802 | C | 87.13300 | 70.09780 | 75.63590 | -188.65217  | -889.33474  | -70.32133   | 1 |
| 6803 | H | 87.32400 | 70.52680 | 76.60790 | 1091.87028  | -2116.68285 | 2055.65056  | 1 |
| 6804 | C | 87.91400 | 68.77880 | 75.41390 | 489.60820   | -592.84580  | 490.17207   | 1 |
| 6805 | H | 87.59900 | 68.21680 | 74.50790 | 700.09827   | 2650.52625  | 1543.63184  | 1 |
| 6806 | H | 87.63200 | 68.11480 | 76.25890 | -2482.03662 | 1382.94635  | 1350.99216  | 1 |
| 6807 | C | 89.44000 | 68.82480 | 75.48290 | 692.80416   | 570.40126   | -161.60383  | 1 |
| 6808 | H | 89.72900 | 69.58180 | 74.72290 | 298.18466   | -1746.60285 | 2599.74818  | 1 |
| 6809 | C | 89.94100 | 69.29480 | 76.88690 | 181.95516   | 681.49958   | 577.84223   | 1 |
| 6810 | H | 89.75800 | 68.53080 | 77.67190 | 2543.27422  | 1849.91670  | -88.26466   | 1 |
| 6811 | H | 91.05200 | 69.32680 | 76.88190 | 1546.58761  | 710.38340   | 2646.06281  | 1 |
| 6812 | H | 89.44900 | 70.26980 | 77.09490 | 2913.61036  | 807.48848   | 870.09380   | 1 |
| 6813 | C | 89.95100 | 67.43480 | 75.03090 | -434.95320  | -440.02011  | 669.81267   | 1 |

|      |   |          |          |          |             |             |             |   |
|------|---|----------|----------|----------|-------------|-------------|-------------|---|
| 6814 | H | 89.65900 | 67.25180 | 73.97490 | -2229.65148 | -1205.77526 | 1863.59505  | 1 |
| 6815 | H | 91.05800 | 67.51580 | 75.08490 | -2346.62516 | 2037.49304  | -490.10068  | 1 |
| 6816 | H | 89.58900 | 66.62280 | 75.69590 | 2317.98498  | 2115.13878  | 226.62696   | 1 |
| 6817 | C | 87.46200 | 71.14180 | 74.60090 | 243.29597   | -515.30183  | 711.84416   | 1 |
| 6818 | O | 88.19800 | 72.07180 | 74.83790 | 242.16191   | -373.73155  | 652.15762   | 1 |
| 6819 | N | 86.84400 | 71.04980 | 73.39090 | -206.19084  | -790.70397  | 212.00203   | 1 |
| 6820 | H | 86.17000 | 70.32580 | 73.26190 | -2329.37301 | -1645.87292 | 1327.91187  | 1 |
| 6821 | C | 87.01800 | 71.85880 | 72.20590 | -797.26164  | -385.05976  | -218.06846  | 1 |
| 6822 | H | 88.03400 | 71.65880 | 71.90090 | -1368.50983 | -1180.41086 | -2575.27421 | 1 |
| 6823 | C | 86.05600 | 71.26180 | 71.07990 | -544.54715  | -641.45881  | 351.35453   | 1 |
| 6824 | H | 85.03600 | 71.30180 | 71.51890 | 1898.93754  | -2218.42496 | 1170.83439  | 1 |
| 6825 | H | 86.42000 | 70.23180 | 70.88090 | -1156.17871 | -2079.34627 | 2058.59080  | 1 |
| 6826 | C | 86.06000 | 71.96180 | 69.68690 | -557.49996  | 616.60391   | -374.75914  | 1 |
| 6827 | H | 85.52600 | 72.93580 | 69.71790 | 1897.10684  | -331.51851  | 2487.83186  | 1 |
| 6828 | C | 87.48200 | 72.28980 | 69.17990 | 222.43514   | -630.28591  | -620.25259  | 1 |
| 6829 | H | 88.21400 | 71.45680 | 69.22790 | 757.91180   | 3044.92607  | 228.51948   | 1 |
| 6830 | H | 87.92000 | 73.10780 | 69.79090 | -673.91154  | 2373.74099  | -1951.77436 | 1 |
| 6831 | H | 87.44600 | 72.71180 | 68.15290 | 1938.39703  | 1427.72827  | 2025.44691  | 1 |
| 6832 | C | 85.20100 | 71.16880 | 68.59090 | 73.40772    | -590.80600  | 690.65952   | 1 |
| 6833 | H | 85.60800 | 70.14180 | 68.47390 | 358.89761   | -2861.34974 | 1257.81414  | 1 |
| 6834 | H | 84.15200 | 71.20580 | 68.95590 | -2358.21230 | 2029.33669  | -467.81789  | 1 |
| 6835 | H | 85.20300 | 71.73380 | 67.63390 | 1743.93046  | -27.50855   | -2618.43007 | 1 |
| 6836 | C | 86.64900 | 73.30080 | 72.42790 | 172.18240   | -757.68989  | 477.18996   | 1 |
| 6837 | O | 87.45100 | 74.21280 | 72.17190 | 122.55922   | -369.80880  | -686.91187  | 1 |
| 6838 | N | 85.50800 | 73.52580 | 73.11090 | 162.34887   | -288.33841  | -776.64412  | 1 |
| 6839 | H | 84.97100 | 72.71180 | 73.31890 | 2621.72506  | -1513.35586 | -857.05191  | 1 |
| 6840 | C | 85.11500 | 74.80280 | 73.59690 | 627.09744   | -477.05513  | 458.93159   | 1 |
| 6841 | H | 85.32400 | 75.60080 | 72.90090 | 1530.70822  | 1534.00608  | -2280.78581 | 1 |
| 6842 | C | 83.55300 | 74.85180 | 73.84290 | 675.88439   | 204.91434   | 576.75073   | 1 |
| 6843 | H | 83.38800 | 74.05380 | 74.59790 | -1785.28981 | -1117.81202 | 2336.97728  | 1 |
| 6844 | H | 83.04800 | 74.70080 | 72.86490 | -1449.53844 | -2337.75312 | 1527.08051  | 1 |
| 6845 | C | 83.06600 | 76.20680 | 74.31390 | -316.55822  | 790.68701   | 325.66234   | 1 |
| 6846 | C | 83.49400 | 77.39480 | 73.61290 | -683.51343  | 354.64960   | 488.34830   | 1 |
| 6847 | H | 84.09300 | 77.25680 | 72.72490 | -727.13514  | 2292.88436  | -2027.85158 | 1 |
| 6848 | C | 83.02700 | 78.64780 | 74.04590 | 593.16071   | -653.76433  | -228.48102  | 1 |
| 6849 | H | 83.34500 | 79.53480 | 73.51790 | 2491.16766  | 408.28340   | 1877.66200  | 1 |
| 6850 | C | 82.11700 | 78.73280 | 75.12690 | -66.97421   | 795.26514   | -441.04288  | 1 |
| 6851 | H | 81.80600 | 79.73380 | 75.39090 | -2023.60898 | 283.96525   | 2392.19495  | 1 |
| 6852 | C | 82.25700 | 76.31380 | 75.36790 | 516.22629   | 691.61670   | -294.32595  | 1 |
| 6853 | H | 81.88900 | 75.42480 | 75.85690 | -283.41445  | 3128.62409  | -172.08652  | 1 |
| 6854 | C | 81.80600 | 77.52180 | 75.83390 | 161.00809   | -648.26628  | -620.70785  | 1 |
| 6855 | H | 81.02300 | 77.59480 | 76.57490 | 1616.68512  | 1950.46833  | 1865.53712  | 1 |
| 6856 | C | 85.85600 | 75.28680 | 74.89890 | 558.42224   | -319.32804  | 646.25476   | 1 |
| 6857 | O | 86.21200 | 76.46780 | 74.94090 | -617.03132  | -329.65839  | 366.36720   | 1 |
| 6858 | N | 86.17100 | 74.39980 | 75.83690 | 365.84895   | 181.75465   | 738.77743   | 1 |
| 6859 | H | 86.02200 | 73.41680 | 75.76590 | -963.78762  | 622.65670   | 2929.44334  | 1 |
| 6860 | C | 86.82000 | 74.75980 | 77.14490 | 92.88478    | -707.91608  | 567.16686   | 1 |
| 6861 | H | 86.15300 | 75.48880 | 77.57990 | -2690.93431 | 370.99464   | 1587.28125  | 1 |
| 6862 | C | 86.94000 | 73.58780 | 78.11590 | 410.88764   | 701.60620   | -412.76033  | 1 |
| 6863 | H | 87.14500 | 72.68280 | 77.50590 | 2428.38666  | 1806.31783  | 859.29061   | 1 |
| 6864 | C | 88.11000 | 73.73880 | 79.17790 | 432.87521   | -784.56392  | -168.90679  | 1 |
| 6865 | H | 89.11200 | 73.50380 | 78.75790 | -2802.28668 | 8.86839     | -1430.15277 | 1 |
| 6866 | H | 87.89000 | 73.00680 | 79.98390 | 1689.26299  | -2020.98145 | 1720.53793  | 1 |
| 6867 | H | 88.01200 | 74.79180 | 79.51590 | -2365.18424 | 1456.71194  | -1477.20008 | 1 |
| 6868 | C | 85.60400 | 73.41880 | 78.88190 | 489.21410   | 391.20761   | 662.62898   | 1 |
| 6869 | H | 85.67200 | 72.50580 | 79.51190 | 2305.33576  | 1919.54368  | -948.15892  | 1 |
| 6870 | H | 85.36200 | 74.27280 | 79.54890 | 1150.20989  | -2924.23098 | -155.29525  | 1 |
| 6871 | H | 84.74200 | 73.40480 | 78.18090 | 848.83691   | -2268.82709 | 2007.51732  | 1 |
| 6872 | C | 88.17300 | 75.40380 | 76.92690 | 269.85313   | -698.95484  | -519.70416  | 1 |
| 6873 | O | 88.54300 | 76.32780 | 77.61390 | 222.86699   | -474.16548  | -590.86769  | 1 |
| 6874 | N | 88.89700 | 74.85580 | 75.91890 | -237.45874  | -514.82712  | -625.49074  | 1 |
| 6875 | H | 88.53000 | 74.08180 | 75.40890 | -401.06002  | 2256.45471  | 2155.40930  | 1 |

|      |   |          |          |          |             |             |             |   |
|------|---|----------|----------|----------|-------------|-------------|-------------|---|
| 6876 | C | 90.29200 | 75.32580 | 75.66290 | -228.46060  | -244.74551  | 848.14880   | 1 |
| 6877 | H | 90.89600 | 75.29980 | 76.55790 | 2246.14420  | 1860.68591  | -1179.36865 | 1 |
| 6878 | C | 90.95300 | 74.41080 | 74.56690 | 341.32691   | 764.75637   | 360.68634   | 1 |
| 6879 | H | 90.23300 | 74.14880 | 73.76190 | 2554.11733  | 1652.47885  | 802.51140   | 1 |
| 6880 | C | 92.24400 | 75.00980 | 73.95790 | -637.87628  | 639.76897   | 123.53346   | 1 |
| 6881 | H | 92.97600 | 75.11480 | 74.78690 | -1452.19126 | 1638.97488  | 2259.01043  | 1 |
| 6882 | H | 92.67300 | 74.27880 | 73.23890 | 1802.54928  | -2168.26235 | 1395.59331  | 1 |
| 6883 | H | 91.99400 | 75.90680 | 73.35290 | 2254.70122  | -2192.03053 | -97.72796   | 1 |
| 6884 | C | 91.30800 | 73.01580 | 75.20290 | 580.51474   | -213.05230  | -670.12115  | 1 |
| 6885 | H | 90.39500 | 72.66380 | 75.72790 | -1253.55495 | 2442.55631  | 1536.47157  | 1 |
| 6886 | H | 92.16300 | 73.06880 | 75.90890 | -2566.35490 | -1170.15823 | -1393.83589 | 1 |
| 6887 | C | 91.58000 | 71.93880 | 74.11790 | -544.80879  | 723.46474   | 105.98658   | 1 |
| 6888 | H | 92.58900 | 72.13780 | 73.69690 | -1849.55825 | 1926.39631  | 1663.23713  | 1 |
| 6889 | H | 90.83500 | 71.82580 | 73.30090 | 3081.44701  | 557.50540   | 303.47698   | 1 |
| 6890 | H | 91.68900 | 70.94580 | 74.60390 | 1172.41242  | 2849.92965  | -633.70050  | 1 |
| 6891 | C | 90.27000 | 76.76580 | 75.16090 | 43.99705    | 529.99175   | -740.69157  | 1 |
| 6892 | O | 91.26100 | 77.50980 | 75.35290 | -669.29467  | -418.02486  | -30.44806   | 1 |
| 6893 | N | 89.15800 | 77.21180 | 74.50990 | -185.76579  | -545.19233  | -617.19420  | 1 |
| 6894 | H | 88.43600 | 76.60280 | 74.19090 | 1200.96570  | 1543.34285  | 2464.54873  | 1 |
| 6895 | C | 89.12800 | 78.59280 | 74.10490 | 384.61821   | 503.00683   | 656.12801   | 1 |
| 6896 | H | 90.03400 | 78.84180 | 73.57190 | 1476.59375  | -1263.13412 | -2474.34624 | 1 |
| 6897 | C | 87.93400 | 78.86780 | 73.12990 | -21.66292   | -737.14628  | 536.28078   | 1 |
| 6898 | H | 88.03500 | 79.86580 | 72.65290 | 882.49886   | -2368.00120 | -1874.03103 | 1 |
| 6899 | O | 86.60800 | 78.75480 | 73.78290 | 501.75101   | -525.68570  | 309.07555   | 1 |
| 6900 | H | 86.49900 | 77.90180 | 74.21090 | 3140.14368  | 27.99916    | 192.19760   | 1 |
| 6901 | C | 87.97000 | 77.75680 | 72.01390 | -713.52948  | -542.73673  | -166.62390  | 1 |
| 6902 | H | 87.68400 | 76.74380 | 72.36890 | 1938.00761  | 2469.06701  | -214.61793  | 1 |
| 6903 | H | 87.16200 | 78.06680 | 71.31790 | 1565.64258  | -1314.16470 | -2391.64393 | 1 |
| 6904 | H | 88.96600 | 77.83780 | 71.52890 | 202.51630   | -1564.01020 | 2722.33089  | 1 |
| 6905 | C | 88.96700 | 79.58880 | 75.24390 | -546.08792  | -598.26994  | -418.70284  | 1 |
| 6906 | O | 89.33600 | 80.75080 | 75.13190 | -473.21638  | -515.99724  | -365.29486  | 1 |
| 6907 | N | 88.46200 | 79.15180 | 76.40990 | -43.52075   | -816.92906  | -208.33901  | 1 |
| 6908 | H | 88.27300 | 78.17780 | 76.50590 | -1752.13224 | -1467.47552 | -2162.12267 | 1 |
| 6909 | C | 88.07500 | 80.00680 | 77.54090 | -22.34412   | 188.91236   | 891.77568   | 1 |
| 6910 | H | 87.30100 | 80.66680 | 77.17790 | 2302.06814  | 330.51885   | -2118.83595 | 1 |
| 6911 | C | 87.30500 | 79.28680 | 78.65090 | -594.77166  | 183.24338   | -666.42294  | 1 |
| 6912 | H | 87.05400 | 79.85480 | 79.57290 | -1998.90857 | 1716.74723  | -1719.11887 | 1 |
| 6913 | H | 87.98500 | 78.45680 | 78.93890 | 48.26060    | -2588.39189 | 1787.77084  | 1 |
| 6914 | C | 85.94700 | 78.73980 | 78.20890 | -391.05240  | 313.85106   | 761.59473   | 1 |
| 6915 | H | 86.02600 | 78.13580 | 77.27990 | -2803.23397 | 1413.33989  | -206.33925  | 1 |
| 6916 | C | 85.44800 | 77.83980 | 79.37790 | -895.95207  | -10.76464   | -169.13015  | 1 |
| 6917 | H | 86.11200 | 76.94880 | 79.37190 | 227.33190   | -2794.30265 | -1427.73216 | 1 |
| 6918 | H | 85.48900 | 78.35180 | 80.36290 | -2610.76036 | 1750.12024  | -138.69293  | 1 |
| 6919 | H | 84.39600 | 77.56880 | 79.14390 | -3046.09747 | -127.33998  | 776.72450   | 1 |
| 6920 | C | 84.96300 | 79.87180 | 77.92290 | -896.33437  | 84.57238    | 144.51028   | 1 |
| 6921 | H | 85.05400 | 80.27480 | 76.89190 | 2459.16703  | 1961.86027  | 42.75521    | 1 |
| 6922 | H | 85.04300 | 80.76780 | 78.57490 | -1997.82917 | -1897.36799 | -1518.84809 | 1 |
| 6923 | H | 83.95600 | 79.43980 | 78.10290 | 832.03319   | -1456.25588 | -2661.81626 | 1 |
| 6924 | C | 89.17800 | 80.94580 | 78.08890 | -711.38404  | 491.58397   | 289.35955   | 1 |
| 6925 | O | 88.80600 | 82.04980 | 78.42590 | 650.20613   | 447.96805   | 13.55916    | 1 |
| 6926 | N | 90.47200 | 80.68380 | 78.13390 | -569.16004  | -19.26878   | 623.18364   | 1 |
| 6927 | C | 90.96500 | 79.30680 | 78.36890 | -409.24103  | -448.61170  | -680.23550  | 1 |
| 6928 | H | 91.18800 | 78.92780 | 77.34790 | -1619.60431 | 1655.05126  | 2129.76839  | 1 |
| 6929 | H | 90.26700 | 78.62680 | 78.90290 | -1439.77459 | -1857.19598 | -2091.91263 | 1 |
| 6930 | C | 91.54100 | 81.64680 | 78.45690 | -29.16890   | -449.96339  | -792.54850  | 1 |
| 6931 | H | 91.23900 | 81.98780 | 79.43590 | 1756.31519  | -1808.82317 | -1881.95163 | 1 |
| 6932 | C | 92.73700 | 80.82480 | 78.49790 | -842.40104  | 144.23372   | -317.81774  | 1 |
| 6933 | H | 93.63600 | 81.30280 | 78.94390 | 415.84241   | -1809.51773 | 2539.87143  | 1 |
| 6934 | H | 93.12400 | 80.48380 | 77.51490 | 16.29837    | -2368.52761 | -2070.75773 | 1 |
| 6935 | C | 92.24000 | 79.53580 | 79.14890 | -347.10386  | -211.95636  | 816.11544   | 1 |
| 6936 | H | 92.99800 | 78.74380 | 78.96890 | -2027.24786 | 2403.32760  | -111.84286  | 1 |
| 6937 | H | 92.10900 | 79.69280 | 80.24090 | 1908.09932  | 919.17948   | -2326.47637 | 1 |

|      |   |          |          |          |             |             |             |   |
|------|---|----------|----------|----------|-------------|-------------|-------------|---|
| 6938 | C | 91.62700 | 82.88080 | 77.58990 | 248.42227   | 689.14329   | -542.97228  | 1 |
| 6939 | O | 92.02600 | 83.95080 | 78.05690 | 149.28934   | -171.04220  | 756.36267   | 1 |
| 6940 | N | 91.29900 | 82.78080 | 76.30590 | -331.25744  | 596.28516   | -497.37794  | 1 |
| 6941 | H | 91.10600 | 81.91780 | 75.84690 | 1445.82965  | 2792.18114  | -107.36550  | 1 |
| 6942 | C | 91.14300 | 83.99380 | 75.47590 | 612.29400   | -318.80955  | -595.74116  | 1 |
| 6943 | H | 92.02900 | 84.60980 | 75.52090 | 341.74386   | 2835.43554  | 1319.75097  | 1 |
| 6944 | C | 90.89300 | 83.53080 | 73.98690 | 517.51697   | -499.03601  | -560.88346  | 1 |
| 6945 | H | 89.88900 | 83.05780 | 73.93690 | 2128.87328  | 1637.00740  | 1639.00321  | 1 |
| 6946 | H | 90.85600 | 84.47980 | 73.41090 | -1256.47112 | 2228.18795  | -1831.57992 | 1 |
| 6947 | C | 92.01000 | 82.69580 | 73.39690 | -547.41416  | 493.30768   | 537.06264   | 1 |
| 6948 | C | 93.29400 | 83.19280 | 73.34590 | 786.37913   | -200.80348  | 415.61620   | 1 |
| 6949 | H | 93.55400 | 84.19180 | 73.66590 | 2082.03614  | 1130.29365  | -2070.21448 | 1 |
| 6950 | C | 94.39900 | 82.58680 | 72.68290 | -618.47257  | -290.02323  | 604.01093   | 1 |
| 6951 | H | 95.32400 | 83.13780 | 72.59590 | 655.95752   | 2022.12489  | 2319.25783  | 1 |
| 6952 | C | 94.10100 | 81.35380 | 72.07090 | 600.09640   | 408.89255   | 551.49089   | 1 |
| 6953 | H | 94.80900 | 80.81280 | 71.46190 | 2045.02833  | -1258.14154 | -2033.01875 | 1 |
| 6954 | C | 91.83500 | 81.41480 | 72.88390 | -370.64793  | -315.48317  | -771.06516  | 1 |
| 6955 | H | 90.85900 | 80.95880 | 72.95990 | 2820.84396  | 1337.61107  | -389.69505  | 1 |
| 6956 | C | 92.82900 | 80.73080 | 72.21990 | 278.11087   | 868.36814   | -6.49039    | 1 |
| 6957 | H | 92.53500 | 79.82280 | 71.71490 | 666.69203   | -2802.82065 | 1264.09824  | 1 |
| 6958 | C | 90.05300 | 84.85580 | 75.95490 | 652.77190   | 565.18946   | -293.08825  | 1 |
| 6959 | O | 90.15667 | 86.03541 | 75.72062 | 380.31096   | -233.26686  | -126.19142  | 1 |
| 6960 | N | 88.89800 | 84.23980 | 76.38290 | -68.55996   | -686.47804  | 486.53851   | 1 |
| 6961 | H | 88.83200 | 83.24980 | 76.48090 | 1531.30311  | 541.27594   | -2694.50503 | 1 |
| 6962 | C | 87.77100 | 84.95680 | 77.05290 | -791.18086  | 69.28925    | 447.97639   | 1 |
| 6963 | H | 87.56591 | 85.73597 | 76.26534 | -3168.52356 | -2493.67218 | -735.78353  | 1 |
| 6964 | C | 86.55800 | 84.09580 | 77.20590 | 170.10671   | 496.42605   | 745.70496   | 1 |
| 6965 | H | 85.74200 | 84.75480 | 77.57290 | -13.09365   | 1988.53377  | 2437.98856  | 1 |
| 6966 | H | 86.63600 | 83.28580 | 77.96190 | -1439.65630 | -2248.20643 | 1664.68730  | 1 |
| 6967 | C | 85.94200 | 83.48480 | 75.94290 | -435.11005  | -533.77840  | -597.67121  | 1 |
| 6968 | C | 86.43200 | 82.68380 | 74.93490 | -338.30142  | 779.26114   | 331.29328   | 1 |
| 6969 | H | 87.49000 | 82.51880 | 74.79890 | 2684.63309  | -1076.73425 | 1237.58425  | 1 |
| 6970 | N | 85.42800 | 82.11980 | 74.20990 | -285.59101  | 719.79103   | 336.17099   | 1 |
| 6971 | H | 85.59200 | 81.26780 | 73.76190 | -655.80785  | 1782.74557  | -2507.97937 | 1 |
| 6972 | C | 84.25200 | 82.63580 | 74.59690 | 748.67870   | -449.43296  | -262.56661  | 1 |
| 6973 | C | 84.51500 | 83.48880 | 75.69290 | 567.91079   | 473.39531   | 533.69019   | 1 |
| 6974 | C | 83.41000 | 84.02980 | 76.41090 | -681.13713  | 147.45827   | 588.01299   | 1 |
| 6975 | H | 83.66700 | 84.57280 | 77.30890 | -3135.43706 | -243.59415  | -89.00881   | 1 |
| 6976 | C | 82.13800 | 83.76480 | 75.96090 | -655.08090  | -465.58235  | 430.75873   | 1 |
| 6977 | H | 81.32000 | 84.18880 | 76.52390 | 2399.43516  | -859.68149  | 1844.51993  | 1 |
| 6978 | C | 82.96000 | 82.40980 | 74.11690 | -616.67597  | -657.02197  | 139.58467   | 1 |
| 6979 | H | 82.82800 | 81.82880 | 73.21690 | 3104.40561  | -417.61983  | 294.08451   | 1 |
| 6980 | C | 81.86200 | 82.98280 | 74.83290 | -43.05539   | 653.94095   | 634.00195   | 1 |
| 6981 | H | 80.85600 | 82.74780 | 74.51690 | 1531.88442  | -1265.78041 | 2439.13024  | 1 |
| 6982 | C | 88.03123 | 85.60355 | 78.53719 | 954.07649   | -352.42094  | -405.71230  | 1 |
| 6983 | O | 87.39763 | 86.64195 | 78.85063 | -198.28949  | -466.08465  | -354.28237  | 1 |
| 6984 | N | 88.88700 | 84.89880 | 79.22090 | -38.26233   | 140.60432   | -831.52794  | 1 |
| 6985 | H | 89.17100 | 83.95280 | 79.08290 | -2208.21740 | -2231.00887 | -211.19081  | 1 |
| 6986 | C | 89.44174 | 85.43823 | 80.44629 | 704.16894   | -1753.39508 | 119.06103   | 1 |
| 6987 | H | 88.46815 | 85.73064 | 80.85129 | -3350.48547 | -3335.77854 | -1374.58969 | 1 |
| 6988 | C | 90.14400 | 84.27080 | 81.25390 | 380.34768   | -503.85067  | 657.96744   | 1 |
| 6989 | H | 90.98300 | 83.74980 | 80.74590 | 2224.12780  | 1539.57874  | -1606.60483 | 1 |
| 6990 | H | 89.46800 | 83.42280 | 81.49390 | -1277.95220 | 882.25521   | -2736.18167 | 1 |
| 6991 | H | 90.53800 | 84.71780 | 82.19190 | -2540.64013 | -1854.78556 | -56.07572   | 1 |
| 6992 | C | 90.45716 | 86.66080 | 80.09901 | -974.45098  | -275.31493  | 705.64910   | 1 |
| 6993 | O | 90.46544 | 87.56046 | 80.90246 | -288.35472  | -128.83139  | 286.28041   | 1 |
| 6994 | N | 91.18512 | 86.54072 | 78.96793 | 726.17878   | -193.30812  | 1118.02558  | 1 |
| 6995 | H | 91.26586 | 85.62818 | 78.53088 | 2369.72227  | 1755.95245  | -50.39321   | 1 |
| 6996 | C | 91.93322 | 87.73976 | 78.70019 | -355.00702  | -579.38056  | -67.05916   | 1 |
| 6997 | H | 92.54401 | 87.96405 | 79.61294 | -770.19043  | -845.21914  | -1573.74015 | 1 |
| 6998 | C | 92.90305 | 87.55792 | 77.48869 | 631.91982   | 437.27099   | 280.86849   | 1 |
| 6999 | H | 92.42395 | 87.23112 | 76.55419 | 993.77069   | 558.23366   | 295.69066   | 1 |

|      |   |          |          |          |             |             |             |   |
|------|---|----------|----------|----------|-------------|-------------|-------------|---|
| 7000 | C | 93.69180 | 88.91328 | 77.43520 | 7.86219     | -345.94779  | 1089.03858  | 1 |
| 7001 | H | 94.58281 | 88.83085 | 76.70269 | -1389.01566 | 1035.22495  | -480.28540  | 1 |
| 7002 | H | 92.99944 | 89.69523 | 76.91508 | 1084.39961  | 912.14522   | -4150.68521 | 1 |
| 7003 | H | 94.07746 | 89.23722 | 78.38465 | 4787.34973  | -502.42298  | -2007.45619 | 1 |
| 7004 | C | 93.95351 | 86.38215 | 77.94881 | 670.87528   | -1364.53411 | -872.69131  | 1 |
| 7005 | H | 94.65986 | 86.19312 | 77.16915 | -2136.11969 | 513.10716   | 1677.02835  | 1 |
| 7006 | H | 93.34628 | 85.45166 | 78.00786 | -1077.14090 | -1282.19408 | 652.23034   | 1 |
| 7007 | H | 94.53339 | 86.54592 | 78.92070 | 3402.48907  | -2625.53839 | 1719.87640  | 1 |
| 7008 | C | 90.82825 | 88.98381 | 78.46753 | -282.32372  | -1325.56533 | -687.66863  | 1 |
| 7009 | O | 90.94231 | 90.09939 | 78.96908 | 261.34669   | -456.25710  | -16.66491   | 1 |
| 7010 | N | 89.97724 | 88.59401 | 77.56306 | -578.20778  | -268.37493  | 68.16522    | 1 |
| 7011 | H | 90.04060 | 87.64830 | 77.27201 | 2584.45271  | 1034.30767  | 488.82674   | 1 |
| 7012 | C | 89.01784 | 89.50622 | 76.92048 | 276.17262   | -224.26755  | 448.61941   | 1 |
| 7013 | H | 89.76203 | 90.29228 | 76.57731 | -1120.23282 | -1912.47483 | 2365.56709  | 1 |
| 7014 | C | 88.19893 | 88.87851 | 75.76680 | 94.58798    | -319.49767  | 277.33165   | 1 |
| 7015 | H | 88.83589 | 88.27610 | 75.14022 | 951.00822   | 5337.45112  | 943.96329   | 1 |
| 7016 | H | 87.43283 | 88.12724 | 76.11419 | 2929.79409  | 1022.46575  | 3648.31925  | 1 |
| 7017 | C | 87.18181 | 89.75204 | 74.86791 | -139.54104  | 556.43428   | -145.13964  | 1 |
| 7018 | O | 86.35886 | 89.13089 | 74.14209 | -276.95099  | 697.85692   | 178.13098   | 1 |
| 7019 | O | 87.41452 | 90.95244 | 74.75651 | -254.99440  | -399.22756  | -110.64066  | 1 |
| 7020 | C | 88.07478 | 90.24220 | 78.01335 | 450.26095   | 325.90925   | -606.51056  | 1 |
| 7021 | O | 87.61177 | 91.37393 | 77.81883 | -519.62830  | 361.79627   | -10.84374   | 1 |
| 7022 | N | 87.72879 | 89.45092 | 78.97528 | 745.91099   | 1197.36273  | -320.49765  | 1 |
| 7023 | H | 87.89749 | 88.44956 | 79.09332 | -2508.94819 | 1697.59413  | 102.49146   | 1 |
| 7024 | C | 86.73397 | 90.04188 | 79.84305 | -13.06120   | -751.45210  | -187.80049  | 1 |
| 7025 | H | 86.37848 | 90.95581 | 79.23604 | -1593.18728 | -1179.54139 | 11.80994    | 1 |
| 7026 | C | 85.67539 | 88.87149 | 79.86831 | -41.00614   | 178.67701   | 5.57704     | 1 |
| 7027 | H | 85.79966 | 88.19377 | 80.79665 | 367.27803   | 1480.99045  | -1290.75310 | 1 |
| 7028 | H | 84.66887 | 89.22840 | 79.80762 | 958.61612   | 1505.50967  | 585.91880   | 1 |
| 7029 | H | 85.72893 | 88.20758 | 79.00456 | 780.84123   | 1543.23852  | -1653.23587 | 1 |
| 7030 | C | 87.15558 | 90.29599 | 81.40365 | -782.66126  | 1353.19841  | 586.17902   | 1 |
| 7031 | O | 86.70750 | 89.84336 | 82.45710 | -807.31535  | 482.54820   | -235.83995  | 1 |
| 7032 | N | 88.19568 | 91.11951 | 81.20058 | 875.38267   | -164.85704  | 852.27280   | 1 |
| 7033 | H | 88.46478 | 91.32374 | 80.28329 | 797.57884   | -636.15600  | -1173.63201 | 1 |
| 7034 | C | 88.98097 | 91.61315 | 82.31940 | -488.65770  | 168.52201   | -123.19385  | 1 |
| 7035 | H | 88.19615 | 92.12561 | 83.00876 | 1200.07286  | 741.80615   | -2691.99824 | 1 |
| 7036 | C | 89.94785 | 90.59329 | 83.06333 | -955.91073  | -676.14739  | 156.97695   | 1 |
| 7037 | H | 89.41905 | 89.70839 | 83.48429 | -1475.09310 | -695.81014  | 53.33137    | 1 |
| 7038 | C | 91.21803 | 90.24960 | 82.20391 | 33.87078    | 274.84894   | 352.15886   | 1 |
| 7039 | H | 90.85422 | 89.46214 | 81.45525 | -223.88277  | -991.52962  | -1080.66190 | 1 |
| 7040 | H | 91.75591 | 91.01073 | 81.63286 | -4978.33390 | -658.63158  | -556.94486  | 1 |
| 7041 | H | 92.05528 | 89.73612 | 82.84324 | -805.32674  | 226.84703   | -2127.52677 | 1 |
| 7042 | C | 90.47175 | 91.44757 | 84.24232 | 627.48658   | -736.60896  | 904.13333   | 1 |
| 7043 | H | 89.71474 | 91.98946 | 84.79263 | -1828.82557 | -151.64621  | 2235.70490  | 1 |
| 7044 | H | 91.30658 | 92.16388 | 83.93564 | 224.81218   | -844.09088  | -1037.21856 | 1 |
| 7045 | H | 90.93956 | 90.71806 | 84.95203 | -1092.23533 | 1145.96683  | -1012.96400 | 1 |
| 7046 | C | 89.79832 | 92.80772 | 81.55242 | -400.88170  | 87.90720    | -251.75240  | 1 |
| 7047 | O | 89.83218 | 93.83862 | 82.18598 | -594.58375  | 764.21476   | -778.78882  | 1 |
| 7048 | N | 90.37811 | 92.51826 | 80.36587 | 350.50317   | 725.61920   | -61.98133   | 1 |
| 7049 | H | 90.31440 | 91.53386 | 79.98922 | -5117.72520 | 547.53876   | 154.39344   | 1 |
| 7050 | C | 91.10843 | 93.55725 | 79.70993 | -759.68117  | 482.55306   | 867.76291   | 1 |
| 7051 | H | 90.90920 | 94.48201 | 80.34148 | -616.31012  | 1294.16679  | 304.30631   | 1 |
| 7052 | C | 92.62179 | 93.11454 | 79.73164 | 476.26914   | -849.08727  | 29.07737    | 1 |
| 7053 | H | 92.93434 | 92.42145 | 78.90285 | -822.33106  | 1858.38300  | 2785.53236  | 1 |
| 7054 | H | 93.23075 | 93.98387 | 79.41331 | 547.36328   | 1163.96018  | -584.35613  | 1 |
| 7055 | H | 92.99587 | 92.78236 | 80.77520 | -2790.24250 | -1830.52245 | -806.05950  | 1 |
| 7056 | C | 90.40511 | 93.75919 | 78.25594 | 900.06684   | 577.89223   | 739.90875   | 1 |
| 7057 | O | 89.87026 | 94.83786 | 77.96059 | -235.20281  | 482.51857   | 568.61053   | 1 |
| 7058 | N | 90.69167 | 92.66454 | 77.56320 | -17.99058   | -386.67293  | -54.10191   | 1 |
| 7059 | H | 91.22608 | 91.77272 | 77.93641 | -2357.12780 | -419.24652  | -1687.49191 | 1 |
| 7060 | C | 90.83751 | 93.00024 | 76.19024 | 135.01845   | 700.84774   | 159.26595   | 1 |
| 7061 | H | 89.93460 | 93.55163 | 75.79835 | -1739.46359 | -768.94188  | -546.88196  | 1 |

|      |   |          |          |          |             |             |             |   |
|------|---|----------|----------|----------|-------------|-------------|-------------|---|
| 7062 | C | 92.05240 | 93.98938 | 76.20159 | -50.83490   | 162.55353   | 481.76258   | 1 |
| 7063 | H | 92.19527 | 94.45748 | 77.14670 | 3464.30898  | 2773.62535  | -309.72070  | 1 |
| 7064 | H | 92.91673 | 93.23799 | 76.16203 | 2876.40784  | 678.18411   | 241.89273   | 1 |
| 7065 | C | 92.13761 | 95.06878 | 75.06154 | 152.35350   | 475.05424   | 687.15870   | 1 |
| 7066 | O | 92.62416 | 96.17401 | 75.20182 | 320.47882   | -213.19088  | 342.64754   | 1 |
| 7067 | N | 91.64063 | 94.64519 | 73.84608 | 687.54219   | -470.92986  | 638.61838   | 1 |
| 7068 | H | 91.41947 | 93.55606 | 73.63202 | -980.92066  | -2716.06040 | -1597.55991 | 1 |
| 7069 | H | 92.32170 | 94.82647 | 73.10474 | 210.40255   | -2099.41751 | -295.07217  | 1 |
| 7070 | C | 91.19512 | 91.59282 | 75.41885 | -1249.71286 | -85.65245   | -844.90149  | 1 |
| 7071 | O | 92.02166 | 90.79055 | 75.79266 | -176.22707  | 134.98767   | -207.10670  | 1 |
| 7072 | N | 90.30609 | 91.38379 | 74.40649 | 32.67651    | -108.44679  | -164.21383  | 1 |
| 7073 | H | 89.59608 | 92.12591 | 74.32278 | -1682.14477 | -551.83073  | -2226.70481 | 1 |
| 7074 | C | 90.72641 | 90.66536 | 73.27364 | -344.33061  | 731.85074   | 621.80285   | 1 |
| 7075 | H | 91.12910 | 89.70608 | 73.55154 | 2441.97650  | -1672.08049 | -4520.32698 | 1 |
| 7076 | C | 89.44598 | 90.57833 | 72.26851 | -260.18203  | -238.89347  | 588.48653   | 1 |
| 7077 | H | 89.29023 | 91.63213 | 72.02506 | 813.43243   | 152.87458   | -739.69101  | 1 |
| 7078 | H | 88.55396 | 90.32948 | 72.83012 | 1458.09536  | 838.36867   | 2024.84345  | 1 |
| 7079 | C | 89.50659 | 89.72312 | 71.01213 | 242.27659   | -128.67682  | -652.20833  | 1 |
| 7080 | C | 89.93054 | 90.01349 | 69.70930 | -1015.88793 | -492.32286  | -45.17147   | 1 |
| 7081 | H | 90.12185 | 91.09873 | 69.35927 | 508.53396   | -208.80160  | 2626.28292  | 1 |
| 7082 | N | 90.11058 | 88.87317 | 69.03186 | 596.36469   | 456.35351   | 190.07013   | 1 |
| 7083 | H | 90.60067 | 88.84017 | 68.07203 | 260.56930   | 220.97247   | -806.97652  | 1 |
| 7084 | C | 89.69569 | 87.79798 | 69.68989 | 137.49391   | -804.67939  | -642.34934  | 1 |
| 7085 | C | 89.24112 | 88.26446 | 71.02774 | 497.09816   | 163.99405   | -392.72886  | 1 |
| 7086 | C | 88.60425 | 87.41137 | 71.95712 | 325.87923   | -349.55088  | -1339.45653 | 1 |
| 7087 | H | 88.30737 | 87.74345 | 72.90221 | 2323.24699  | -1120.26923 | -1535.38582 | 1 |
| 7088 | C | 88.55754 | 86.03858 | 71.59049 | 640.52581   | -257.25948  | -925.95502  | 1 |
| 7089 | H | 88.13293 | 85.33987 | 72.23287 | -1112.36067 | -265.98478  | -2492.51271 | 1 |
| 7090 | C | 89.58564 | 86.39333 | 69.32783 | -315.47363  | 859.17666   | 138.46405   | 1 |
| 7091 | H | 89.85615 | 86.01190 | 68.34053 | 859.88007   | 1926.41069  | -114.27788  | 1 |
| 7092 | C | 88.98740 | 85.61190 | 70.25405 | 390.11850   | -141.04079  | 239.40516   | 1 |
| 7093 | H | 88.91171 | 84.52831 | 70.03959 | -120.20056  | 138.61771   | 3415.06217  | 1 |
| 7094 | C | 91.81736 | 91.41358 | 72.31106 | 103.12506   | 438.74499   | 199.48961   | 1 |
| 7095 | O | 91.86207 | 92.64140 | 72.28489 | 302.84477   | 208.96815   | 27.85096    | 1 |
| 7096 | N | 92.51369 | 90.53726 | 71.64324 | 619.45866   | 124.77877   | -629.34081  | 1 |
| 7097 | H | 92.11191 | 89.62282 | 71.81170 | -1892.87437 | 419.73913   | 1575.59632  | 1 |
| 7098 | C | 93.85079 | 90.65543 | 71.22493 | -522.49226  | -1308.79749 | 449.81414   | 1 |
| 7099 | H | 94.06768 | 91.75682 | 71.04818 | -1306.71997 | 3362.91619  | 275.10043   | 1 |
| 7100 | C | 94.84147 | 89.92481 | 72.24851 | 39.43928    | -322.61044  | -241.94158  | 1 |
| 7101 | H | 94.47372 | 88.94966 | 72.49483 | 541.10639   | -1546.81659 | -1073.90252 | 1 |
| 7102 | H | 95.85388 | 89.84846 | 71.76977 | 920.68148   | 1180.80586  | -1996.56220 | 1 |
| 7103 | C | 94.99027 | 90.72233 | 73.55495 | 398.00475   | -219.13214  | 581.26246   | 1 |
| 7104 | C | 95.44861 | 90.13231 | 74.75174 | -180.16517  | 57.64429    | 127.34446   | 1 |
| 7105 | H | 95.84234 | 89.02780 | 74.81647 | -1072.69454 | 1418.09460  | -1343.59347 | 1 |
| 7106 | C | 95.36712 | 90.98568 | 75.89111 | 173.27812   | 53.41695    | 507.34328   | 1 |
| 7107 | H | 95.71569 | 90.42986 | 76.77225 | 218.24928   | -480.88605  | 2537.27922  | 1 |
| 7108 | C | 94.98550 | 92.36689 | 76.00846 | -743.12172  | 323.26750   | 167.96630   | 1 |
| 7109 | O | 95.06039 | 93.21337 | 77.10456 | 798.89706   | -614.58254  | 206.09155   | 1 |
| 7110 | H | 94.78904 | 94.10359 | 76.69290 | 405.62185   | -186.03431  | 402.65796   | 1 |
| 7111 | C | 94.54572 | 92.08417 | 73.52714 | 92.55886    | -37.51456   | -510.45716  | 1 |
| 7112 | H | 94.18652 | 92.56427 | 72.56264 | -739.41364  | 2189.51800  | -1619.38819 | 1 |
| 7113 | C | 94.52360 | 92.80366 | 74.73023 | 1130.89412  | 78.04030    | 669.50463   | 1 |
| 7114 | H | 94.16178 | 93.87491 | 74.62944 | -1610.70002 | -2666.35567 | 2115.04722  | 1 |
| 7115 | C | 94.21385 | 89.74268 | 69.91787 | -182.28808  | 294.70952   | 27.57054    | 1 |
| 7116 | O | 95.32707 | 89.81373 | 69.41888 | 86.89385    | 295.56373   | -322.63191  | 1 |
| 7117 | N | 93.24297 | 88.86804 | 69.48664 | 256.15042   | 384.14534   | 773.21961   | 1 |
| 7118 | H | 92.51849 | 89.08494 | 70.20787 | -386.58563  | 2766.12628  | -1702.45917 | 1 |
| 7119 | C | 93.64238 | 87.67447 | 68.90952 | -258.75842  | 490.65468   | -453.32392  | 1 |
| 7120 | H | 94.77743 | 87.64692 | 68.99854 | -4992.86221 | 1202.75627  | -1356.42151 | 1 |
| 7121 | C | 93.04868 | 86.48477 | 69.83551 | 322.14261   | 290.35284   | -133.75347  | 1 |
| 7122 | H | 93.71475 | 85.63211 | 69.62643 | -2296.41760 | -1345.60217 | 2235.21860  | 1 |
| 7123 | H | 91.93449 | 86.31690 | 69.67076 | -1185.05176 | 1247.93462  | -5057.84125 | 1 |

|      |   |          |          |          |             |             |             |   |
|------|---|----------|----------|----------|-------------|-------------|-------------|---|
| 7124 | C | 93.26506 | 86.75997 | 71.33885 | -326.28923  | -164.16469  | -304.99796  | 1 |
| 7125 | C | 94.52898 | 86.61862 | 71.97120 | -49.87148   | -326.34183  | 158.82286   | 1 |
| 7126 | H | 95.39864 | 86.40414 | 71.32918 | 2674.02262  | 1103.67932  | -2687.10472 | 1 |
| 7127 | C | 94.61780 | 86.82838 | 73.34250 | 116.59770   | -177.56392  | 233.86175   | 1 |
| 7128 | H | 95.55560 | 86.90042 | 73.90939 | 272.34734   | 2986.29612  | 711.95105   | 1 |
| 7129 | C | 93.43222 | 87.05171 | 74.13610 | 404.41422   | -498.20982  | 187.88205   | 1 |
| 7130 | H | 93.47405 | 87.20968 | 75.23887 | -991.19322  | 1308.71575  | 1003.84738  | 1 |
| 7131 | C | 92.13783 | 86.94242 | 72.13963 | -49.77198   | 68.01547    | 892.34058   | 1 |
| 7132 | H | 91.09468 | 87.03603 | 71.74048 | -2613.14027 | 1789.07621  | 1576.94875  | 1 |
| 7133 | C | 92.17465 | 87.15074 | 73.54900 | -137.14740  | -368.04094  | 135.37472   | 1 |
| 7134 | H | 91.25558 | 87.38938 | 74.09268 | -1930.77592 | 43.67455    | -965.19005  | 1 |
| 7135 | C | 93.22030 | 87.53686 | 67.36226 | -119.56760  | -369.15644  | 739.36940   | 1 |
| 7136 | O | 93.43880 | 86.53820 | 66.74236 | -302.81490  | -154.47395  | -344.05981  | 1 |
| 7137 | N | 92.47744 | 88.60706 | 66.92819 | -542.67294  | -504.60211  | -483.94770  | 1 |
| 7138 | H | 92.65556 | 89.48748 | 67.44259 | 3270.29582  | -751.65484  | -1519.85715 | 1 |
| 7139 | C | 92.42033 | 88.61795 | 65.42893 | -72.69676   | -166.46070  | 510.43035   | 1 |
| 7140 | H | 93.19900 | 87.85634 | 65.10829 | 1505.25344  | -1104.09539 | 2934.19296  | 1 |
| 7141 | H | 92.74793 | 89.63047 | 65.10771 | 300.92000   | 546.37033   | 2374.45310  | 1 |
| 7142 | C | 90.91773 | 88.32649 | 65.09784 | 475.12307   | 637.25428   | -94.64185   | 1 |
| 7143 | O | 89.97444 | 88.10123 | 65.84637 | 471.54403   | -69.39737   | 604.60811   | 1 |
| 7144 | N | 90.82018 | 88.49374 | 63.69221 | -275.84776  | -81.47426   | -365.92513  | 1 |
| 7145 | H | 91.72683 | 88.38873 | 63.31808 | 1663.08160  | 356.81262   | 470.33156   | 1 |
| 7146 | C | 89.69542 | 87.89942 | 63.04437 | 135.29324   | -486.00947  | 452.74065   | 1 |
| 7147 | H | 89.08394 | 88.13273 | 63.96319 | -1090.49678 | 2301.43610  | -1865.75898 | 1 |
| 7148 | C | 89.27297 | 88.82224 | 61.76317 | 100.09343   | 527.40829   | 795.25211   | 1 |
| 7149 | H | 89.81006 | 88.45511 | 60.81036 | -2630.86710 | 746.37737   | -1080.81310 | 1 |
| 7150 | H | 89.62316 | 89.89904 | 61.73585 | -1625.31863 | -1678.83497 | 724.31273   | 1 |
| 7151 | C | 87.76444 | 88.64984 | 61.41367 | -142.88915  | 312.74836   | -1160.50495 | 1 |
| 7152 | O | 87.25744 | 89.41400 | 60.64303 | 651.61575   | 230.05688   | -69.11906   | 1 |
| 7153 | N | 87.10318 | 87.59078 | 61.97881 | 68.71661    | -159.84505  | -51.50833   | 1 |
| 7154 | H | 87.48476 | 86.79290 | 62.43014 | -4387.45360 | -4299.80407 | 1281.57143  | 1 |
| 7155 | H | 86.03289 | 87.43157 | 61.98152 | -5.85796    | -1497.59454 | 1290.43140  | 1 |
| 7156 | C | 89.89314 | 86.32332 | 62.76301 | -291.12393  | -632.24397  | 973.85450   | 1 |
| 7157 | O | 88.92498 | 85.61951 | 62.61893 | 60.71869    | -446.34225  | -37.26749   | 1 |
| 7158 | N | 91.19626 | 86.05500 | 62.73912 | -402.67347  | -799.97036  | -441.55472  | 1 |
| 7159 | H | 91.88549 | 86.76149 | 62.73717 | -2465.42760 | -263.72247  | 945.80237   | 1 |
| 7160 | C | 91.51800 | 84.51480 | 62.52590 | -303.85369  | 327.99406   | -794.69732  | 1 |
| 7161 | H | 90.87200 | 84.13680 | 61.74790 | 653.10532   | 1475.78820  | -2700.69044 | 1 |
| 7162 | C | 92.98800 | 84.28580 | 62.01190 | -238.70131  | 369.43906   | 798.74118   | 1 |
| 7163 | H | 93.08100 | 84.82880 | 61.04690 | 1085.24458  | -2922.78161 | -421.68479  | 1 |
| 7164 | H | 93.75600 | 84.78580 | 62.63890 | 1128.55225  | -2204.32737 | 1940.49914  | 1 |
| 7165 | C | 93.37900 | 82.83780 | 61.76390 | 608.72225   | -553.81916  | -392.67362  | 1 |
| 7166 | C | 93.09300 | 82.24380 | 60.53090 | -468.98586  | -656.18359  | -425.35439  | 1 |
| 7167 | H | 92.55800 | 82.73080 | 59.72890 | -1607.52473 | -1776.61513 | -2039.05104 | 1 |
| 7168 | C | 93.42400 | 80.89180 | 60.32490 | -625.83448  | -653.59781  | 112.21452   | 1 |
| 7169 | H | 93.07600 | 80.44380 | 59.40590 | -1045.66976 | 1143.19553  | 2738.23026  | 1 |
| 7170 | C | 94.15700 | 80.14080 | 61.27890 | 579.68301   | 666.09819   | -227.44627  | 1 |
| 7171 | H | 94.35300 | 79.09980 | 61.07090 | 1124.86553  | -373.46759  | 2914.34825  | 1 |
| 7172 | C | 94.09900 | 82.07280 | 62.66490 | 462.54836   | -777.13699  | -116.43932  | 1 |
| 7173 | H | 94.24300 | 82.65980 | 63.55990 | -85.87457   | -3127.46285 | 331.40295   | 1 |
| 7174 | C | 94.50800 | 80.76380 | 62.47290 | 675.66046   | 106.19139   | -603.04007  | 1 |
| 7175 | H | 94.97700 | 80.15980 | 63.23490 | 1560.44302  | -1618.92325 | -2200.52978 | 1 |
| 7176 | C | 91.15900 | 83.68080 | 63.73290 | -511.73531  | 21.65640    | 754.39312   | 1 |
| 7177 | O | 90.49700 | 82.62580 | 63.60990 | 165.21243   | 358.61325   | -683.90688  | 1 |
| 7178 | N | 91.54500 | 84.08880 | 64.97890 | 410.80864   | -705.33174  | 215.44300   | 1 |
| 7179 | H | 92.25500 | 84.78180 | 65.07190 | 2449.11558  | -1691.15549 | 1019.82949  | 1 |
| 7180 | C | 91.05900 | 83.46380 | 66.12890 | -632.30974  | 219.01402   | -619.40960  | 1 |
| 7181 | H | 90.97300 | 82.39880 | 65.96990 | -1278.42454 | -1123.25045 | -2646.16049 | 1 |
| 7182 | C | 91.97900 | 83.68480 | 67.32190 | 679.12662   | 291.88879   | 533.89041   | 1 |
| 7183 | H | 92.00800 | 84.76880 | 67.56390 | 105.77246   | 2278.40069  | 2167.00916  | 1 |
| 7184 | H | 91.54900 | 83.17080 | 68.20790 | 2791.06047  | 1226.09723  | -777.74883  | 1 |
| 7185 | C | 93.41300 | 83.09980 | 67.07090 | 463.97143   | 782.73025   | 59.28629    | 1 |



|      |   |          |          |          |             |             |             |   |
|------|---|----------|----------|----------|-------------|-------------|-------------|---|
| 7186 | H | 93.86800 | 83.56380 | 66.16990 | 36.40771    | 2133.23610  | 2312.18607  | 1 |
| 7187 | C | 94.41000 | 83.62580 | 68.14990 | -600.67703  | -670.61488  | -144.61603  | 1 |
| 7188 | H | 94.13600 | 83.23380 | 69.15290 | 1342.01646  | -1105.45353 | -2622.05846 | 1 |
| 7189 | H | 94.50000 | 84.72780 | 68.25790 | -2084.70444 | 2346.69202  | -212.76793  | 1 |
| 7190 | H | 95.41400 | 83.22980 | 67.88390 | -2814.07102 | -49.33852   | -1405.98586 | 1 |
| 7191 | C | 93.41700 | 81.60480 | 66.91190 | -587.30337  | -417.38709  | 558.85040   | 1 |
| 7192 | H | 92.78300 | 81.17580 | 66.10690 | 69.58549    | -2208.91414 | 2239.21469  | 1 |
| 7193 | H | 93.12900 | 81.18280 | 67.89790 | -687.56433  | 1506.23164  | -2675.20985 | 1 |
| 7194 | H | 94.45700 | 81.21880 | 66.84390 | -1156.29635 | -2827.12469 | 754.03643   | 1 |
| 7195 | C | 89.61400 | 83.83780 | 66.42890 | -551.54040  | -574.51235  | -444.06052  | 1 |
| 7196 | O | 88.85000 | 83.03980 | 67.01290 | 275.76398   | -630.50100  | 387.36281   | 1 |
| 7197 | N | 89.26699 | 85.06767 | 65.89515 | 182.15401   | -353.84353  | 71.71544    | 1 |
| 7198 | H | 90.03133 | 85.51605 | 65.28241 | 1041.09300  | 1339.37489  | -2235.48960 | 1 |
| 7199 | C | 87.85405 | 85.47624 | 66.17081 | -146.33241  | 246.08806   | 587.50903   | 1 |
| 7200 | H | 87.90735 | 85.59658 | 67.27633 | 2523.72919  | 824.30489   | 2837.07741  | 1 |
| 7201 | C | 87.51160 | 86.95031 | 65.77138 | 670.79714   | -483.76843  | -87.63080   | 1 |
| 7202 | H | 87.88312 | 87.16743 | 64.75435 | -3429.05353 | -3589.33914 | 40.37964    | 1 |
| 7203 | H | 88.12587 | 87.62734 | 66.45499 | -2446.30051 | 1868.43414  | -622.66488  | 1 |
| 7204 | S | 85.71903 | 87.04428 | 66.05966 | 173.04040   | 0.87845     | 215.15603   | 1 |
| 7205 | C | 86.67300 | 84.54580 | 65.53490 | 468.55176   | -778.06349  | -80.79270   | 1 |
| 7206 | O | 85.70400 | 84.06480 | 66.09490 | -54.92999   | -671.22255  | 412.39570   | 1 |
| 7207 | N | 86.85900 | 84.23180 | 64.25690 | 66.16328    | -769.66710  | 340.45157   | 1 |
| 7208 | H | 87.68800 | 84.53680 | 63.79390 | -135.63952  | 1068.33728  | -2956.09263 | 1 |
| 7209 | C | 86.09400 | 83.32380 | 63.49490 | 130.49446   | -830.37783  | -353.40467  | 1 |
| 7210 | H | 85.03600 | 83.53880 | 63.49790 | 2368.38846  | -1149.97036 | -1722.36190 | 1 |
| 7211 | C | 86.54900 | 83.31080 | 62.03090 | 112.81255   | 636.57212   | -643.03987  | 1 |
| 7212 | H | 86.13700 | 82.48080 | 61.41790 | -304.47146  | -3122.02448 | -241.83976  | 1 |
| 7213 | H | 87.65600 | 83.22380 | 61.99490 | 2937.06650  | -918.11379  | 654.93028   | 1 |
| 7214 | C | 86.19500 | 84.62180 | 61.36690 | -497.36283  | -287.74757  | -708.01311  | 1 |
| 7215 | H | 86.41142 | 85.52573 | 62.00224 | 1964.32044  | -591.97918  | 1567.50183  | 1 |
| 7216 | H | 85.09100 | 84.55380 | 61.26190 | -2298.96645 | -1784.27605 | 1195.54945  | 1 |
| 7217 | C | 86.79500 | 84.65480 | 59.96290 | 660.26666   | 303.50348   | -550.80358  | 1 |
| 7218 | H | 86.34400 | 83.82380 | 59.38090 | 2426.74497  | -1992.59634 | -196.71027  | 1 |
| 7219 | H | 87.86800 | 84.41480 | 60.12190 | -1387.40064 | -1541.07747 | -2366.09931 | 1 |
| 7220 | C | 86.49573 | 86.03755 | 59.26389 | -865.28944  | -168.25863  | 719.34471   | 1 |
| 7221 | H | 86.74049 | 86.04727 | 58.19427 | 3744.31990  | 1691.21782  | -1462.22169 | 1 |
| 7222 | H | 87.00491 | 86.89124 | 59.76247 | 980.66461   | -2472.76020 | -566.20482  | 1 |
| 7223 | N | 84.97503 | 86.16868 | 59.37344 | -399.54779  | -319.40839  | 221.82335   | 1 |
| 7224 | H | 84.55862 | 86.89386 | 58.60105 | 1666.17049  | 293.58599   | 349.90022   | 1 |
| 7225 | H | 84.59159 | 86.65016 | 60.27522 | -809.83821  | -123.80305  | -196.37482  | 1 |
| 7226 | H | 84.40530 | 85.21527 | 59.23449 | -2785.86651 | -503.77552  | 2214.22902  | 1 |
| 7227 | C | 86.02200 | 81.92880 | 64.05690 | -25.20875   | -730.95805  | 544.53269   | 1 |
| 7228 | O | 84.99900 | 81.30480 | 64.09590 | -669.60571  | -145.24746  | 392.63036   | 1 |
| 7229 | N | 87.20100 | 81.39480 | 64.42590 | 664.46358   | 323.69454   | -407.89985  | 1 |
| 7230 | H | 88.05400 | 81.83980 | 64.16690 | 1874.68390  | 1570.92865  | -1978.88092 | 1 |
| 7231 | C | 87.36500 | 80.09380 | 65.00890 | -806.66962  | 406.06459   | -125.88355  | 1 |
| 7232 | H | 86.88200 | 79.29380 | 64.46790 | -840.29316  | 742.92660   | -2939.42064 | 1 |
| 7233 | C | 88.86800 | 79.76980 | 65.00690 | 384.14217   | 412.45196   | 716.77694   | 1 |
| 7234 | H | 89.28500 | 79.59280 | 63.99190 | 242.40516   | 2840.98077  | -1329.77225 | 1 |
| 7235 | H | 88.98400 | 78.87080 | 65.64790 | -2622.91723 | 1509.52797  | 860.14927   | 1 |
| 7236 | H | 89.43500 | 80.62280 | 65.43790 | -671.05250  | 313.67905   | -3057.69852 | 1 |
| 7237 | C | 86.72700 | 79.92780 | 66.35090 | 447.81818   | -666.23100  | 432.48831   | 1 |
| 7238 | O | 85.95200 | 79.01880 | 66.54290 | 18.07445    | -533.90771  | 581.58671   | 1 |
| 7239 | N | 86.90000 | 80.80780 | 67.33590 | 52.24553    | -1.42966    | -842.57976  | 1 |
| 7240 | H | 87.40500 | 81.66380 | 67.25290 | -635.55545  | 3074.58441  | -203.04230  | 1 |
| 7241 | C | 86.19000 | 80.52680 | 68.62890 | -45.17959   | -746.01266  | 522.37431   | 1 |
| 7242 | H | 86.32400 | 79.48480 | 68.87990 | 2489.32848  | -1413.08181 | -1305.63002 | 1 |
| 7243 | C | 86.84000 | 81.26180 | 69.83390 | 897.64650   | -110.01010  | -116.53127  | 1 |
| 7244 | H | 86.44200 | 80.90480 | 70.80790 | 1408.17935  | 2475.00587  | 1337.76048  | 1 |
| 7245 | C | 88.33400 | 81.07680 | 69.72290 | -582.43885  | 632.82097   | -302.90858  | 1 |
| 7246 | H | 88.48300 | 79.98080 | 69.82890 | -1210.19525 | 2649.47509  | 1189.09016  | 1 |
| 7247 | H | 88.82500 | 81.27280 | 68.74590 | -2159.66932 | -2208.90610 | 595.64124   | 1 |

|      |   |          |          |          |             |             |             |   |
|------|---|----------|----------|----------|-------------|-------------|-------------|---|
| 7248 | H | 88.77100 | 81.69980 | 70.53290 | -2075.46351 | -2104.57188 | 1077.70805  | 1 |
| 7249 | C | 86.58200 | 82.78080 | 69.82590 | -583.50057  | -481.36666  | 509.17996   | 1 |
| 7250 | H | 86.96400 | 83.25980 | 70.75290 | 2213.50099  | -179.52086  | -2228.54478 | 1 |
| 7251 | H | 85.55100 | 83.08380 | 69.54390 | 624.68477   | 2755.71629  | 1383.48217  | 1 |
| 7252 | H | 87.13100 | 83.11580 | 68.91990 | -244.60913  | 3125.03068  | -269.39903  | 1 |
| 7253 | C | 84.70900 | 80.73080 | 68.63990 | -624.07646  | -121.06114  | 653.70006   | 1 |
| 7254 | O | 84.02200 | 80.17280 | 69.49290 | -238.44104  | 571.68688   | 489.84406   | 1 |
| 7255 | N | 84.24600 | 81.55880 | 67.65790 | -151.63758  | -810.04598  | 183.04056   | 1 |
| 7256 | H | 84.91200 | 81.97480 | 67.04290 | 1977.50723  | 1873.26611  | 1574.34604  | 1 |
| 7257 | C | 82.80800 | 81.69580 | 67.40890 | 499.75622   | -247.95496  | 721.25797   | 1 |
| 7258 | H | 82.37200 | 81.78180 | 68.39290 | -348.33637  | -218.96637  | -3119.12515 | 1 |
| 7259 | C | 82.41500 | 82.92780 | 66.52990 | 742.69846   | -31.02271   | 528.09810   | 1 |
| 7260 | H | 81.41600 | 82.87480 | 66.04590 | 896.14559   | -2284.10859 | -1969.26312 | 1 |
| 7261 | H | 83.13300 | 83.04280 | 65.69090 | -1146.78510 | 1807.43618  | 2305.70697  | 1 |
| 7262 | N | 82.95338 | 85.43630 | 67.27554 | 548.05513   | -96.33975   | 1417.83324  | 1 |
| 7263 | H | 83.54174 | 85.72333 | 66.47539 | -217.88683  | 1816.66167  | 79.55679    | 1 |
| 7264 | C | 82.39900 | 84.15480 | 67.43290 | 902.00239   | -124.80661  | -47.60248   | 1 |
| 7265 | C | 82.60496 | 86.32339 | 68.20354 | -727.83993  | -105.20763  | 685.23799   | 1 |
| 7266 | H | 82.97967 | 87.30753 | 68.44535 | -1816.83778 | 3702.77545  | -1462.13906 | 1 |
| 7267 | N | 81.72527 | 85.69308 | 69.00202 | -110.12599  | -414.41266  | 109.15644   | 1 |
| 7268 | C | 81.65600 | 84.41580 | 68.51590 | 145.69151   | -483.20267  | -759.43411  | 1 |
| 7269 | H | 80.87200 | 83.84280 | 68.99590 | -3021.51565 | 347.01583   | -805.13936  | 1 |
| 7270 | C | 82.16700 | 80.46780 | 66.77990 | 725.62175   | 110.67695   | -540.99418  | 1 |
| 7271 | O | 81.09700 | 80.01880 | 67.19390 | 479.04239   | -454.87964  | 432.70097   | 1 |
| 7272 | N | 82.89000 | 79.89280 | 65.78590 | 188.12333   | 734.94736   | -370.31646  | 1 |
| 7273 | H | 83.69400 | 80.36680 | 65.43590 | 1914.81718  | -549.16846  | 2435.18283  | 1 |
| 7274 | C | 82.59700 | 78.59880 | 65.20790 | 54.12027    | 769.66613   | -485.93832  | 1 |
| 7275 | H | 81.57800 | 78.58580 | 64.84890 | -1049.03304 | 2426.50211  | 1705.82632  | 1 |
| 7276 | C | 83.57500 | 78.33080 | 64.01290 | 596.97102   | -687.01777  | 55.52647    | 1 |
| 7277 | H | 84.59400 | 78.72480 | 64.21390 | -496.89337  | 2038.51344  | -2344.30931 | 1 |
| 7278 | C | 83.59900 | 76.78780 | 63.77490 | 232.22169   | -880.38005  | -49.54850   | 1 |
| 7279 | H | 84.31500 | 76.28780 | 64.46290 | 246.70180   | 201.97220   | -3129.94755 | 1 |
| 7280 | H | 83.98300 | 76.51480 | 62.76890 | -2337.88053 | 281.78683   | 2086.41728  | 1 |
| 7281 | H | 82.64600 | 76.27180 | 64.01990 | -2667.66253 | 262.47740   | -1647.09090 | 1 |
| 7282 | C | 83.00400 | 79.04680 | 62.75690 | -678.67608  | 258.77949   | 551.25580   | 1 |
| 7283 | H | 81.91100 | 78.88580 | 62.63890 | 3119.82534  | -308.84410  | -263.68804  | 1 |
| 7284 | H | 83.47200 | 78.73680 | 61.79890 | -191.64151  | 3022.17448  | -853.20641  | 1 |
| 7285 | H | 83.14800 | 80.14080 | 62.88390 | 1772.08540  | -2410.22431 | -974.04228  | 1 |
| 7286 | C | 82.54300 | 77.54080 | 66.30590 | -631.12913  | 145.22344   | 641.90122   | 1 |
| 7287 | O | 81.51500 | 76.91780 | 66.54690 | -130.07486  | 580.52320   | 519.32704   | 1 |
| 7288 | N | 83.59100 | 77.46180 | 67.16990 | 126.88737   | -117.38196  | 826.31311   | 1 |
| 7289 | H | 84.39600 | 78.01380 | 66.96890 | 1956.94730  | -1116.92560 | -2195.69140 | 1 |
| 7290 | C | 83.61000 | 76.47880 | 68.21290 | 172.84335   | -885.22278  | -134.00303  | 1 |
| 7291 | H | 83.48300 | 75.48980 | 67.79590 | 2001.37120  | -2191.18902 | -1044.71538 | 1 |
| 7292 | C | 85.03500 | 76.38780 | 68.80890 | -548.43571  | -706.59961  | -177.16170  | 1 |
| 7293 | H | 85.44800 | 77.41780 | 68.87090 | -1703.84352 | 1680.71119  | 2042.14431  | 1 |
| 7294 | C | 85.07400 | 75.72080 | 70.18590 | -539.66435  | -539.81379  | 498.81306   | 1 |
| 7295 | H | 86.10000 | 75.62280 | 70.60190 | -2611.82489 | 1740.15603  | -220.12259  | 1 |
| 7296 | H | 84.55100 | 76.30080 | 70.97590 | -496.85295  | -1171.17159 | 2877.45034  | 1 |
| 7297 | H | 84.66100 | 74.69080 | 70.12890 | 2368.40023  | -2056.67944 | 242.85024   | 1 |
| 7298 | C | 85.97700 | 75.72480 | 67.76590 | -89.73891   | -245.42260  | 873.59354   | 1 |
| 7299 | H | 85.69100 | 74.65480 | 67.67490 | -1508.14052 | 2268.84120  | -1573.56220 | 1 |
| 7300 | H | 85.74100 | 76.16480 | 66.77290 | 1471.34731  | 1867.64784  | 2060.40163  | 1 |
| 7301 | C | 87.47200 | 75.97180 | 67.95890 | 398.49030   | 399.48319   | 716.28881   | 1 |
| 7302 | H | 88.05300 | 75.45780 | 67.16290 | 1584.70168  | -2599.63602 | -792.99393  | 1 |
| 7303 | H | 87.73000 | 75.66880 | 68.99590 | 1408.83570  | -3.37167    | 2813.07605  | 1 |
| 7304 | H | 87.69600 | 77.04780 | 67.79490 | 1761.32265  | -1730.37664 | -1949.81164 | 1 |
| 7305 | C | 82.51700 | 76.61280 | 69.28290 | -612.13101  | 80.81315    | -670.98127  | 1 |
| 7306 | O | 81.96700 | 75.61980 | 69.76790 | -700.48536  | 235.55583   | 278.31806   | 1 |
| 7307 | N | 82.13600 | 77.82380 | 69.67790 | -397.17551  | -497.81979  | 554.16546   | 1 |
| 7308 | H | 82.59400 | 78.62980 | 69.31090 | 651.88955   | 2517.34254  | 1770.94686  | 1 |
| 7309 | C | 81.05000 | 78.07380 | 70.56590 | 654.19916   | -590.42628  | -234.24616  | 1 |

|      |   |          |          |          |             |             |             |   |
|------|---|----------|----------|----------|-------------|-------------|-------------|---|
| 7310 | H | 81.27600 | 77.50580 | 71.45590 | -377.49390  | -3116.51217 | -207.54877  | 1 |
| 7311 | C | 81.05200 | 79.58980 | 71.00790 | -114.37893  | 862.88896   | 271.64518   | 1 |
| 7312 | H | 80.98000 | 80.15680 | 70.05590 | 943.25906   | -572.63602  | -2946.28182 | 1 |
| 7313 | H | 82.02300 | 79.80180 | 71.50490 | -1748.26127 | 656.72251   | -2531.90132 | 1 |
| 7314 | C | 79.92200 | 80.03280 | 71.97990 | 452.51212   | 528.19214   | 589.65825   | 1 |
| 7315 | C | 79.38500 | 79.12780 | 72.88490 | 754.59482   | 199.91169   | -471.24620  | 1 |
| 7316 | H | 79.82100 | 78.13980 | 72.84190 | 2344.68839  | -2090.15074 | 178.69654   | 1 |
| 7317 | C | 78.46300 | 79.55580 | 73.85390 | -193.29632  | 798.69741   | -395.18348  | 1 |
| 7318 | H | 78.13700 | 78.88380 | 74.63390 | 509.82928   | 2843.38580  | 1246.37776  | 1 |
| 7319 | C | 77.98700 | 80.85580 | 73.88990 | 709.78619   | 190.32186   | -539.84457  | 1 |
| 7320 | O | 76.96700 | 81.12580 | 74.81990 | 334.16104   | -638.41461  | -323.09504  | 1 |
| 7321 | H | 77.08100 | 82.02380 | 75.14090 | 1606.67949  | -1710.99670 | 2095.06505  | 1 |
| 7322 | C | 79.47200 | 81.38480 | 72.01490 | -504.04825  | 738.87999   | 177.32097   | 1 |
| 7323 | H | 79.94600 | 82.09480 | 71.35290 | 2005.67626  | -799.99938  | 2288.11931  | 1 |
| 7324 | C | 78.48900 | 81.79280 | 72.93090 | 691.47901   | 405.71107   | -434.40339  | 1 |
| 7325 | H | 78.06400 | 82.77980 | 73.03490 | 51.16103    | 757.40718   | -3053.18574 | 1 |
| 7326 | C | 79.67300 | 77.54080 | 70.07190 | -591.54483  | -271.63962  | -638.54337  | 1 |
| 7327 | O | 78.96500 | 76.79380 | 70.76590 | 480.63820   | -472.80926  | -411.17582  | 1 |
| 7328 | N | 79.39400 | 77.68380 | 68.75890 | -742.13666  | -402.33044  | 5.97397     | 1 |
| 7329 | H | 79.95300 | 78.19680 | 68.11190 | -1152.78188 | -985.56835  | 2756.44249  | 1 |
| 7330 | C | 78.20500 | 77.02080 | 68.19390 | 61.86485    | 795.84696   | 440.73955   | 1 |
| 7331 | H | 77.43900 | 76.92980 | 68.94890 | 2957.23336  | 311.72141   | 1027.53435  | 1 |
| 7332 | C | 77.48800 | 77.80880 | 67.07390 | 365.22154   | -641.60525  | -535.17000  | 1 |
| 7333 | H | 76.97700 | 77.12180 | 66.36490 | 1489.23193  | -2376.00632 | 1426.53721  | 1 |
| 7334 | O | 78.48200 | 78.54080 | 66.33890 | -429.72842  | -403.07271  | -525.82612  | 1 |
| 7335 | H | 77.96600 | 79.06380 | 65.71990 | -574.08783  | 2164.89805  | 2209.49448  | 1 |
| 7336 | C | 76.51200 | 78.84980 | 67.67590 | 697.50266   | 558.61072   | 181.37007   | 1 |
| 7337 | H | 76.14500 | 79.53180 | 66.87990 | 2249.53106  | -1717.20658 | -1374.42272 | 1 |
| 7338 | H | 77.06600 | 79.47580 | 68.40790 | 2634.55936  | -1601.01892 | 627.74326   | 1 |
| 7339 | H | 75.64300 | 78.39980 | 68.20290 | -713.51949  | 1849.88532  | 2442.75264  | 1 |
| 7340 | C | 78.36700 | 75.56380 | 67.75190 | -7.02825    | -797.23219  | 442.51829   | 1 |
| 7341 | O | 77.49200 | 74.70580 | 67.73790 | 240.06474   | 726.04181   | -197.12798  | 1 |
| 7342 | N | 79.64800 | 75.13880 | 67.41590 | -408.58583  | 723.26836   | 150.37549   | 1 |
| 7343 | H | 80.37000 | 75.81880 | 67.31490 | 490.41974   | -2731.32403 | -1482.42496 | 1 |
| 7344 | C | 79.99100 | 73.68980 | 67.21490 | 96.94854    | 903.87318   | -71.17058   | 1 |
| 7345 | H | 79.38000 | 73.32380 | 66.40290 | 1636.03180  | 79.93332    | 2686.11929  | 1 |
| 7346 | C | 81.38900 | 73.44280 | 66.61790 | 753.31258   | -143.30555  | 493.39100   | 1 |
| 7347 | H | 82.10200 | 74.18380 | 67.03690 | 1.26167     | -3129.15480 | 326.51929   | 1 |
| 7348 | C | 81.96200 | 72.04380 | 66.97190 | 590.03942   | 163.45730   | 675.71162   | 1 |
| 7349 | H | 82.88300 | 71.83080 | 66.38890 | 1734.49980  | -1908.04658 | -1802.52460 | 1 |
| 7350 | H | 81.18600 | 71.31880 | 66.64490 | 2503.40734  | -883.74296  | -1688.24652 | 1 |
| 7351 | H | 82.34400 | 71.99180 | 68.01390 | 424.99352   | -1858.61728 | -2502.62833 | 1 |
| 7352 | C | 81.32400 | 73.80080 | 65.10990 | 471.76441   | 434.85651   | 647.91139   | 1 |
| 7353 | H | 80.97800 | 74.84980 | 64.98990 | 2747.00389  | -1517.00860 | -225.56764  | 1 |
| 7354 | H | 82.37400 | 73.66580 | 64.77390 | -1751.98534 | 1436.13269  | -2183.18495 | 1 |
| 7355 | H | 80.63300 | 73.08980 | 64.60990 | 682.85022   | -2983.27233 | 729.40251   | 1 |
| 7356 | C | 79.75400 | 72.79980 | 68.47990 | -611.60228  | 619.69360   | -270.87543  | 1 |
| 7357 | O | 79.20000 | 71.70380 | 68.33390 | 539.82664   | 389.62199   | 424.74596   | 1 |
| 7358 | N | 80.08100 | 73.22380 | 69.70090 | 180.51449   | -501.80127  | 654.43280   | 1 |
| 7359 | H | 80.50800 | 74.12280 | 69.76890 | -623.22305  | -2689.20612 | -1509.30106 | 1 |
| 7360 | C | 79.61600 | 72.58280 | 70.91190 | -758.21121  | 77.84343    | -500.50691  | 1 |
| 7361 | H | 79.83700 | 71.53080 | 70.80090 | -2388.70021 | -667.93170  | 1935.51150  | 1 |
| 7362 | C | 80.32000 | 73.15880 | 72.15090 | 173.62257   | 886.27264   | 125.80548   | 1 |
| 7363 | H | 80.52000 | 74.24680 | 72.04990 | -487.35254  | 2917.52556  | -1071.80145 | 1 |
| 7364 | H | 81.33400 | 72.70680 | 72.18690 | -1942.63109 | -1104.31059 | -2214.70287 | 1 |
| 7365 | C | 79.57500 | 73.06880 | 73.50490 | 0.53602     | -710.39638  | 571.65348   | 1 |
| 7366 | O | 78.59100 | 73.73680 | 73.79790 | 503.15830   | -70.38296   | -604.57025  | 1 |
| 7367 | N | 80.05400 | 72.13480 | 74.36090 | 397.13462   | -702.76268  | 247.14571   | 1 |
| 7368 | H | 80.91400 | 71.64380 | 74.22290 | 2443.43042  | 1919.69813  | -492.57803  | 1 |
| 7369 | H | 79.62900 | 72.06180 | 75.26290 | -1603.97196 | -1825.56446 | 1998.20284  | 1 |
| 7370 | C | 78.06400 | 72.62880 | 71.06090 | -123.19949  | 902.26504   | -46.80486   | 1 |
| 7371 | O | 77.44500 | 71.63380 | 71.38190 | -387.17212  | 282.86592   | 627.46462   | 1 |

|      |   |          |          |          |             |             |             |   |
|------|---|----------|----------|----------|-------------|-------------|-------------|---|
| 7372 | N | 77.42000 | 73.74480 | 70.75490 | -507.13097  | -667.59190  | -99.05314   | 1 |
| 7373 | H | 77.98600 | 74.52280 | 70.49790 | -2034.56775 | -2307.93209 | 657.42663   | 1 |
| 7374 | C | 76.00300 | 73.97580 | 70.88590 | -846.11252  | 99.95548    | -324.88999  | 1 |
| 7375 | H | 75.75900 | 73.92180 | 71.93690 | 1782.92205  | -2460.45939 | 815.81541   | 1 |
| 7376 | C | 75.56400 | 75.38480 | 70.54190 | -253.18701  | -871.19825  | 91.43828    | 1 |
| 7377 | H | 75.41200 | 75.53680 | 69.45190 | 2147.36810  | 1424.51941  | 1804.93239  | 1 |
| 7378 | H | 76.35700 | 76.10880 | 70.82590 | 2127.62731  | -2289.29574 | -361.32158  | 1 |
| 7379 | C | 74.25900 | 75.91580 | 71.28290 | -525.10873  | 544.33656   | 509.32263   | 1 |
| 7380 | H | 73.50300 | 75.10180 | 71.26190 | -1666.29387 | -2300.37864 | 1352.75610  | 1 |
| 7381 | C | 74.54200 | 76.24980 | 72.74990 | -617.90918  | -485.30478  | 462.72943   | 1 |
| 7382 | H | 74.82100 | 75.38380 | 73.38690 | -351.36839  | 2865.56617  | -1250.31876 | 1 |
| 7383 | H | 73.69400 | 76.78080 | 73.23390 | -1920.77585 | 2242.40229  | 1086.49821  | 1 |
| 7384 | H | 75.40100 | 76.95280 | 72.71390 | -589.63127  | -2948.43239 | 925.90908   | 1 |
| 7385 | C | 73.71700 | 77.15380 | 70.58690 | -87.72335   | 480.98790   | 769.67932   | 1 |
| 7386 | H | 72.74800 | 77.35680 | 71.09090 | -1276.29460 | 2225.82568  | 1820.71370  | 1 |
| 7387 | H | 73.66100 | 76.90080 | 69.50690 | -2203.76964 | 934.25333   | 2041.76304  | 1 |
| 7388 | H | 74.31300 | 78.05480 | 70.84590 | -1234.75030 | -2563.91468 | 1341.62567  | 1 |
| 7389 | C | 75.09600 | 73.04480 | 70.08690 | -823.19531  | 386.69312   | -65.33692   | 1 |
| 7390 | O | 74.19500 | 72.43780 | 70.57690 | 526.45364   | 454.78628   | -373.68869  | 1 |
| 7391 | N | 75.58000 | 72.79280 | 68.84390 | 443.93448   | -712.83705  | -86.35858   | 1 |
| 7392 | H | 76.37800 | 73.29880 | 68.52390 | 601.87010   | 1445.94777  | -2728.59188 | 1 |
| 7393 | C | 75.03800 | 71.79380 | 67.92590 | 40.82754    | -550.16236  | -726.02031  | 1 |
| 7394 | H | 73.97500 | 71.68380 | 68.08490 | -943.64116  | 2265.16292  | 1968.96027  | 1 |
| 7395 | C | 75.21300 | 72.27780 | 66.44590 | 0.42648     | -911.21787  | -33.65742   | 1 |
| 7396 | H | 74.68000 | 71.57580 | 65.76990 | -390.88671  | 2219.09751  | 2195.68669  | 1 |
| 7397 | H | 76.30400 | 72.25780 | 66.23490 | 1252.60414  | 1664.08903  | -2357.96879 | 1 |
| 7398 | C | 74.58800 | 73.64280 | 66.30190 | 26.48589    | 860.96915   | 299.13478   | 1 |
| 7399 | C | 73.40500 | 74.05580 | 66.90090 | -621.48891  | 167.06086   | -645.98236  | 1 |
| 7400 | H | 72.87400 | 73.31580 | 67.48090 | 2145.74123  | 2086.75121  | -969.27303  | 1 |
| 7401 | C | 72.89700 | 75.36980 | 66.79290 | -857.74780  | 244.13350   | -190.04880  | 1 |
| 7402 | H | 72.03100 | 75.61380 | 67.39190 | 1603.14685  | 2173.95579  | 1613.09101  | 1 |
| 7403 | C | 73.59500 | 76.30480 | 66.07290 | -539.21799  | 452.23959   | -579.80541  | 1 |
| 7404 | O | 73.11000 | 77.58880 | 66.04690 | 460.31102   | -255.30135  | 588.69535   | 1 |
| 7405 | H | 73.77800 | 78.08480 | 65.56790 | 2107.07791  | -2267.33556 | 563.59415   | 1 |
| 7406 | C | 75.25300 | 74.59480 | 65.48390 | -684.91077  | 80.98427    | -596.48118  | 1 |
| 7407 | H | 76.17700 | 74.26580 | 65.03190 | 52.89202    | -2929.72220 | 1145.49398  | 1 |
| 7408 | C | 74.76400 | 75.91180 | 65.39090 | 335.61882   | 465.96907   | 708.29643   | 1 |
| 7409 | H | 75.26000 | 76.67480 | 64.80990 | 2047.39318  | -735.56354  | -2272.74144 | 1 |
| 7410 | C | 75.55000 | 70.36280 | 68.08790 | -730.70072  | 225.96520   | -496.45462  | 1 |
| 7411 | O | 74.98700 | 69.48580 | 67.47890 | 492.52319   | -467.35595  | -403.26983  | 1 |
| 7412 | N | 76.64500 | 70.10980 | 68.85690 | 332.02813   | -574.83824  | -521.52719  | 1 |
| 7413 | H | 77.20900 | 70.81580 | 69.27890 | -332.30311  | -1613.18258 | 2680.56763  | 1 |
| 7414 | C | 77.21400 | 68.74780 | 68.93090 | -683.50515  | -67.23577   | -599.79252  | 1 |
| 7415 | H | 76.76200 | 68.11280 | 68.18290 | -2599.98571 | 1610.27686  | 738.45040   | 1 |
| 7416 | C | 78.76800 | 68.59680 | 68.72990 | 603.28981   | 448.25783   | 516.29190   | 1 |
| 7417 | H | 78.91700 | 68.76980 | 67.64290 | 2145.86021  | -2299.79467 | 66.74314    | 1 |
| 7418 | H | 79.12100 | 67.55780 | 68.90390 | -2639.78228 | -698.79261  | 1562.51867  | 1 |
| 7419 | O | 79.43400 | 69.45380 | 69.61290 | 760.86385   | 211.04121   | 13.23026    | 1 |
| 7420 | H | 79.36600 | 70.29480 | 69.15390 | -3047.61140 | -664.88082  | 410.15176   | 1 |
| 7421 | C | 76.83600 | 68.12980 | 70.21990 | 505.51926   | 593.75309   | -472.60824  | 1 |
| 7422 | O | 76.31600 | 67.01880 | 70.22490 | -305.41886  | 529.60808   | -499.86181  | 1 |
| 7423 | N | 76.90800 | 68.88580 | 71.39690 | 82.91860    | 470.09816   | -696.27905  | 1 |
| 7424 | H | 77.09200 | 69.86380 | 71.34290 | -1866.32202 | 2134.50234  | 1363.43982  | 1 |
| 7425 | C | 76.65900 | 68.29280 | 72.72790 | 499.97309   | 463.04944   | -605.85735  | 1 |
| 7426 | H | 77.37300 | 67.49480 | 72.86990 | -351.75708  | -47.79780   | -3126.05319 | 1 |
| 7427 | C | 76.99100 | 69.27280 | 73.89690 | 725.69444   | 72.90043    | -547.26969  | 1 |
| 7428 | H | 78.08900 | 69.43780 | 73.90890 | 367.04990   | 3123.02768  | -100.98865  | 1 |
| 7429 | H | 76.72300 | 68.86880 | 74.89590 | 2930.09636  | 78.26983    | 1143.08153  | 1 |
| 7430 | O | 76.37400 | 70.60180 | 73.75590 | 279.79270   | 520.02189   | -524.32862  | 1 |
| 7431 | H | 76.99100 | 71.20580 | 73.33690 | 534.48385   | 2596.34613  | -1694.56189 | 1 |
| 7432 | C | 75.22200 | 67.71180 | 72.98090 | 202.29665   | -549.82311  | 698.72857   | 1 |
| 7433 | O | 75.04700 | 66.54180 | 73.22690 | 544.77936   | -309.00250  | -480.99910  | 1 |

|      |   |          |          |          |             |             |             |   |
|------|---|----------|----------|----------|-------------|-------------|-------------|---|
| 7434 | N | 74.23400 | 68.54880 | 72.77190 | -752.15878  | -381.67568  | -35.39965   | 1 |
| 7435 | H | 74.49300 | 69.49780 | 72.60890 | 1268.04132  | 2607.15182  | 1221.90704  | 1 |
| 7436 | C | 72.81700 | 68.20780 | 72.84690 | 710.04538   | -428.18661  | -379.39792  | 1 |
| 7437 | H | 72.69700 | 67.79180 | 73.83690 | -686.59231  | -1500.55204 | -2678.64907 | 1 |
| 7438 | C | 71.92400 | 69.42580 | 72.75590 | 209.06955   | -36.19039   | 886.80955   | 1 |
| 7439 | H | 72.28100 | 70.22380 | 73.44090 | -2085.32984 | 2284.08993  | 576.67919   | 1 |
| 7440 | C | 71.88500 | 70.06880 | 71.32090 | 499.76581   | -492.78721  | -582.10471  | 1 |
| 7441 | H | 72.95400 | 70.30580 | 71.12690 | 2779.33005  | 739.84867   | 1275.21553  | 1 |
| 7442 | H | 71.46800 | 69.35080 | 70.58190 | 1524.64378  | -1888.52651 | -2001.78800 | 1 |
| 7443 | H | 71.31100 | 71.01980 | 71.33190 | 2637.64247  | -1630.49978 | -531.54386  | 1 |
| 7444 | C | 70.59100 | 69.04780 | 73.37790 | -372.81460  | -735.77503  | 388.70989   | 1 |
| 7445 | H | 69.91400 | 69.92780 | 73.42990 | 1625.06971  | 2261.93045  | 1463.23112  | 1 |
| 7446 | H | 70.01500 | 68.20180 | 72.94690 | -864.21140  | -2007.22371 | 2263.27592  | 1 |
| 7447 | H | 70.85600 | 68.68180 | 74.39290 | -469.47901  | 2020.33590  | 2365.59898  | 1 |
| 7448 | C | 72.36900 | 67.11980 | 71.85690 | 629.43342   | 358.41755   | -553.89659  | 1 |
| 7449 | O | 71.52900 | 66.26080 | 72.13090 | -589.69875  | 363.08965   | -379.53724  | 1 |
| 7450 | N | 72.91100 | 67.09180 | 70.61690 | -449.40910  | 168.04409   | -694.59696  | 1 |
| 7451 | H | 73.50900 | 67.85780 | 70.39290 | 1964.75811  | -654.85447  | -2368.35754 | 1 |
| 7452 | C | 72.45400 | 66.06380 | 69.71790 | 468.66728   | -462.33048  | 630.91402   | 1 |
| 7453 | H | 71.39000 | 65.90280 | 69.80790 | 2191.61940  | 1245.69789  | -1882.35688 | 1 |
| 7454 | C | 72.66000 | 66.54280 | 68.23090 | -170.29364  | -613.54213  | 652.69988   | 1 |
| 7455 | H | 72.52100 | 65.61380 | 67.63890 | -2061.86786 | -957.50340  | 2174.88261  | 1 |
| 7456 | H | 73.68700 | 66.96680 | 68.24990 | 2005.53283  | 408.55536   | -2389.38210 | 1 |
| 7457 | C | 71.72500 | 67.59780 | 67.72090 | 128.59630   | -727.81848  | 534.03582   | 1 |
| 7458 | C | 71.74100 | 68.95780 | 67.92090 | 894.52228   | -29.63960   | 174.36279   | 1 |
| 7459 | H | 72.58600 | 69.44280 | 68.38690 | 2030.21511  | 2058.12856  | 1241.19285  | 1 |
| 7460 | N | 70.70500 | 69.55680 | 67.31790 | 727.30233   | 420.89478   | -80.93944   | 1 |
| 7461 | H | 70.35400 | 70.42880 | 67.57890 | -1973.75192 | -1651.95424 | 1809.30284  | 1 |
| 7462 | C | 69.94900 | 68.58180 | 66.73890 | 243.32934   | -63.35365   | -876.48625  | 1 |
| 7463 | C | 70.55000 | 67.30580 | 66.99790 | -190.94289  | 172.77976   | 874.72223   | 1 |
| 7464 | C | 69.90800 | 66.17080 | 66.61990 | -93.85484   | -660.48461  | 621.61271   | 1 |
| 7465 | H | 70.39900 | 65.26380 | 66.93990 | 2048.96375  | -2016.74493 | 1277.77684  | 1 |
| 7466 | C | 68.76100 | 66.27480 | 65.85090 | -377.12460  | -617.76491  | 554.61208   | 1 |
| 7467 | H | 68.26800 | 65.37480 | 65.51390 | 1730.73166  | -2328.72526 | 1216.48379  | 1 |
| 7468 | C | 68.83000 | 68.69180 | 65.97190 | 730.54797   | -304.43379  | -452.84736  | 1 |
| 7469 | H | 68.33200 | 69.62280 | 65.74690 | -2320.43694 | 1339.02085  | 1649.49137  | 1 |
| 7470 | C | 68.20200 | 67.49880 | 65.54590 | -244.50619  | -641.80439  | 599.79567   | 1 |
| 7471 | H | 67.29300 | 67.52580 | 64.96390 | -1265.65520 | 2117.35612  | -1952.72789 | 1 |
| 7472 | C | 73.19300 | 64.74780 | 69.88990 | -482.85355  | -411.10843  | -655.20478  | 1 |
| 7473 | O | 72.67800 | 63.69780 | 69.58190 | -227.20677  | 516.73750   | -552.25598  | 1 |
| 7474 | N | 74.40600 | 64.73880 | 70.51790 | 306.62036   | 443.17883   | -649.80671  | 1 |
| 7475 | H | 74.96100 | 65.55880 | 70.63090 | 541.35490   | -2263.20012 | -2117.33000 | 1 |
| 7476 | C | 74.94700 | 63.53980 | 71.09390 | 211.47599   | 668.35783   | 583.11810   | 1 |
| 7477 | H | 75.05800 | 62.74180 | 70.37490 | 1193.44186  | -1526.63374 | 2478.57059  | 1 |
| 7478 | C | 76.44200 | 63.74480 | 71.56290 | -164.41428  | -877.45988  | -185.69629  | 1 |
| 7479 | H | 76.37000 | 64.76080 | 72.00790 | -1630.38460 | 2144.49160  | 1625.18554  | 1 |
| 7480 | C | 76.85300 | 62.73380 | 72.62490 | -608.62513  | -648.12263  | 202.39444   | 1 |
| 7481 | H | 77.96400 | 62.74180 | 72.63890 | 2696.28003  | -1620.77259 | -37.36905   | 1 |
| 7482 | H | 76.59800 | 61.68380 | 72.36590 | 1179.64944  | 2730.85172  | 1024.25695  | 1 |
| 7483 | H | 76.41300 | 62.97180 | 73.61690 | -1478.26273 | 1604.74732  | -2266.66089 | 1 |
| 7484 | C | 77.39100 | 63.63880 | 70.36590 | 8.20750     | 265.60563   | 872.25987   | 1 |
| 7485 | H | 76.79400 | 64.06380 | 69.53090 | 462.68468   | -2934.50414 | -1035.77727 | 1 |
| 7486 | H | 77.58600 | 62.57880 | 70.09590 | -1516.21961 | 1468.85257  | 2332.76155  | 1 |
| 7487 | C | 78.55700 | 64.57680 | 70.48490 | 839.58786   | -355.09175  | -21.28559   | 1 |
| 7488 | H | 79.21500 | 64.35480 | 71.35190 | -436.62506  | -2985.91408 | -889.88870  | 1 |
| 7489 | H | 78.21700 | 65.63480 | 70.49190 | 2176.02064  | -1949.66633 | 1167.03110  | 1 |
| 7490 | H | 79.23400 | 64.48180 | 69.60890 | -331.58476  | 2196.46751  | 2227.96055  | 1 |
| 7491 | C | 74.09700 | 62.96180 | 72.24090 | 649.57505   | 638.24844   | 46.28366    | 1 |
| 7492 | O | 73.82900 | 61.77480 | 72.30290 | -138.42758  | 177.31496   | -756.98378  | 1 |
| 7493 | N | 73.51000 | 63.84680 | 73.06590 | 356.39596   | -536.86647  | 545.37015   | 1 |
| 7494 | H | 73.79600 | 64.80180 | 73.04790 | 604.44629   | 2816.39918  | 1265.21403  | 1 |
| 7495 | C | 72.53000 | 63.56280 | 74.09690 | -367.57465  | 819.53089   | 157.19097   | 1 |

|      |   |          |          |          |             |             |             |   |
|------|---|----------|----------|----------|-------------|-------------|-------------|---|
| 7496 | H | 72.92800 | 62.80480 | 74.75590 | -2230.80755 | -2203.91626 | -253.92325  | 1 |
| 7497 | C | 72.31300 | 64.68880 | 75.09590 | -713.56169  | 533.97940   | -192.73483  | 1 |
| 7498 | H | 71.43000 | 64.41080 | 75.70990 | 737.94673   | -1447.00282 | 2694.40971  | 1 |
| 7499 | H | 71.98400 | 65.56780 | 74.50090 | 988.30864   | -2623.77034 | 1427.34070  | 1 |
| 7500 | C | 73.46500 | 64.97780 | 76.06990 | 315.59796   | 810.29507   | -274.35532  | 1 |
| 7501 | H | 74.37300 | 65.14780 | 75.45290 | -1407.76648 | -148.86095  | 2809.67261  | 1 |
| 7502 | C | 73.19900 | 66.08480 | 77.11390 | -686.19111  | -497.15689  | -336.79043  | 1 |
| 7503 | H | 74.07700 | 66.31080 | 77.75590 | 175.12160   | -2544.02273 | -1842.69015 | 1 |
| 7504 | H | 72.87400 | 67.00380 | 76.57990 | -2609.81228 | -1501.90045 | 911.81200   | 1 |
| 7505 | H | 72.38300 | 65.70780 | 77.76590 | 1615.89084  | -2455.22836 | -1122.04132 | 1 |
| 7506 | C | 73.79100 | 63.67480 | 76.88490 | 651.44052   | 173.93095   | -613.86015  | 1 |
| 7507 | H | 74.66400 | 63.90280 | 77.53190 | 1930.19295  | -2010.98147 | 1458.94995  | 1 |
| 7508 | H | 72.87900 | 63.35080 | 77.43090 | -537.77902  | 2884.37451  | 1135.51911  | 1 |
| 7509 | H | 74.16100 | 62.87780 | 76.20390 | 843.70987   | -2804.94804 | -1148.32328 | 1 |
| 7510 | C | 71.22700 | 62.91880 | 73.51690 | 187.75238   | -389.88903  | -802.61235  | 1 |
| 7511 | O | 70.71800 | 61.98380 | 74.14690 | 577.28224   | -43.37584   | 537.11357   | 1 |
| 7512 | N | 70.70300 | 63.40180 | 72.34790 | 128.20291   | 632.22047   | 544.54896   | 1 |
| 7513 | H | 71.10300 | 64.26580 | 72.05290 | 186.89101   | 98.28880    | -3139.05038 | 1 |
| 7514 | C | 69.73400 | 62.58180 | 71.58590 | 654.06218   | -578.57456  | -262.49789  | 1 |
| 7515 | H | 68.87900 | 62.38480 | 72.21590 | 1298.20440  | -2813.05665 | -547.36078  | 1 |
| 7516 | C | 69.26800 | 63.38280 | 70.33890 | -409.82423  | 454.41187   | 676.02141   | 1 |
| 7517 | H | 68.28800 | 62.96680 | 70.02090 | 2106.20782  | -2278.35270 | 520.79157   | 1 |
| 7518 | H | 69.96100 | 63.29480 | 69.47590 | -2163.36909 | 25.16517    | -2284.16881 | 1 |
| 7519 | H | 69.03900 | 64.45180 | 70.53990 | 1007.43167  | 948.51124   | -2825.53253 | 1 |
| 7520 | C | 70.21000 | 61.21680 | 71.12590 | 491.19168   | 598.24155   | -481.96346  | 1 |
| 7521 | O | 69.50700 | 60.27980 | 71.39790 | -532.73410  | -403.46037  | -420.76280  | 1 |
| 7522 | N | 71.39700 | 61.10080 | 70.48690 | -225.28400  | -777.07639  | 240.98069   | 1 |
| 7523 | H | 71.96500 | 61.91780 | 70.43290 | 2166.94562  | 691.93797   | -2173.42926 | 1 |
| 7524 | C | 71.91600 | 59.80780 | 70.10590 | -126.00536  | 575.75589   | 695.75772   | 1 |
| 7525 | H | 71.21400 | 59.26580 | 69.48990 | -690.27769  | -1789.79050 | -2493.67057 | 1 |
| 7526 | C | 73.26300 | 60.01580 | 69.27590 | 224.21008   | 184.41705   | -864.39065  | 1 |
| 7527 | H | 73.86400 | 59.08180 | 69.30890 | -1619.40231 | -2123.66932 | -1663.06675 | 1 |
| 7528 | H | 73.85400 | 60.81780 | 69.76790 | 1913.52656  | -1741.36255 | -1790.05552 | 1 |
| 7529 | C | 73.07700 | 60.37180 | 67.86290 | -622.17021  | -263.70164  | 612.22274   | 1 |
| 7530 | C | 71.99300 | 61.12680 | 67.38390 | -153.95335  | -692.81968  | -572.49477  | 1 |
| 7531 | H | 71.19200 | 61.52980 | 67.98490 | -1051.61428 | -1867.79130 | 2302.97401  | 1 |
| 7532 | C | 71.80300 | 61.37380 | 66.02090 | -108.51949  | -460.74910  | -779.34895  | 1 |
| 7533 | H | 70.93800 | 61.91180 | 65.66190 | -2696.83752 | 568.12273   | -1517.40904 | 1 |
| 7534 | C | 72.70500 | 60.88880 | 65.10690 | 558.68542   | -586.75041  | 418.38447   | 1 |
| 7535 | H | 72.48900 | 61.01780 | 64.05590 | -1393.58512 | 1798.98202  | -2172.51247 | 1 |
| 7536 | C | 73.97600 | 59.87980 | 66.90290 | -668.38031  | -292.36310  | -547.03070  | 1 |
| 7537 | H | 74.74700 | 59.17780 | 67.18090 | -519.74511  | -1949.36202 | -2414.14145 | 1 |
| 7538 | C | 73.75000 | 60.08480 | 65.52790 | 345.24016   | -765.15780  | 356.08113   | 1 |
| 7539 | H | 74.35200 | 59.44180 | 64.90390 | 1616.51876  | -2429.04107 | 1176.79770  | 1 |
| 7540 | C | 72.12500 | 58.72180 | 71.18490 | -303.75585  | 855.95742   | -80.74823   | 1 |
| 7541 | O | 71.74000 | 57.56280 | 70.96290 | -445.51117  | 517.35292   | -396.85386  | 1 |
| 7542 | N | 72.61100 | 59.07480 | 72.37390 | 624.43315   | -41.74067   | 566.58030   | 1 |
| 7543 | H | 72.89000 | 60.02280 | 72.50490 | -2034.23856 | -302.64010  | -2380.86301 | 1 |
| 7544 | C | 72.68100 | 58.14080 | 73.49390 | 713.61045   | -433.99477  | 365.86837   | 1 |
| 7545 | H | 73.09600 | 57.19180 | 73.18990 | -1633.72734 | 654.31360   | -2607.87939 | 1 |
| 7546 | C | 73.64600 | 58.74880 | 74.51190 | 260.21211   | -18.29780   | 873.73100   | 1 |
| 7547 | H | 74.62300 | 58.87080 | 73.99490 | -2067.64718 | -1943.85280 | -1358.12284 | 1 |
| 7548 | C | 73.16700 | 60.07580 | 75.15390 | 440.04924   | -542.59235  | -586.00444  | 1 |
| 7549 | H | 72.36900 | 59.90880 | 75.90790 | -1735.24072 | -1838.97854 | -1872.25100 | 1 |
| 7550 | H | 72.74200 | 60.71680 | 74.35090 | 2076.29169  | 1145.42748  | -2067.66413 | 1 |
| 7551 | H | 73.98700 | 60.55380 | 75.73090 | 61.29541    | -2003.23385 | -2425.18520 | 1 |
| 7552 | C | 74.00800 | 57.66680 | 75.58290 | -407.78799  | 564.90514   | -588.25347  | 1 |
| 7553 | H | 74.22300 | 56.72280 | 75.03790 | -1794.03469 | 1567.45159  | -2054.93583 | 1 |
| 7554 | H | 73.10600 | 57.48480 | 76.20490 | -1525.73716 | 1839.86572  | -2045.78750 | 1 |
| 7555 | C | 75.17000 | 58.18180 | 76.40990 | 765.16157   | 229.69992   | -439.56423  | 1 |
| 7556 | H | 76.07100 | 58.47080 | 75.82890 | 2386.89484  | -203.53102  | 2039.49366  | 1 |
| 7557 | H | 74.83000 | 59.07680 | 76.97390 | -1837.93490 | 2218.18707  | -1264.85874 | 1 |

|      |   |          |          |          |             |             |             |   |
|------|---|----------|----------|----------|-------------|-------------|-------------|---|
| 7558 | H | 75.49500 | 57.43180 | 77.16290 | 2558.80596  | 729.98521   | 1678.64822  | 1 |
| 7559 | C | 71.27200 | 57.86480 | 74.12990 | -473.64884  | 546.29694   | -555.57847  | 1 |
| 7560 | O | 71.00500 | 56.75880 | 74.66690 | -269.51525  | 338.64344   | 660.53719   | 1 |
| 7561 | N | 70.33700 | 58.79980 | 73.99790 | 646.29447   | 534.45494   | 96.61090    | 1 |
| 7562 | H | 70.55600 | 59.61580 | 73.46790 | 781.07339   | -2098.00231 | -2210.55127 | 1 |
| 7563 | C | 68.93700 | 58.59380 | 74.35490 | 593.35796   | 568.41995   | -395.31771  | 1 |
| 7564 | H | 68.88800 | 58.26980 | 75.38390 | 207.37911   | 2077.34144  | -2353.69341 | 1 |
| 7565 | C | 68.03700 | 59.88580 | 74.21290 | -217.45794  | -817.13132  | 341.26157   | 1 |
| 7566 | H | 66.94500 | 59.71580 | 74.32590 | -659.08708  | -2535.99944 | 1741.41819  | 1 |
| 7567 | H | 68.26200 | 60.32580 | 73.21790 | -1033.35935 | -2156.23168 | -2044.76396 | 1 |
| 7568 | O | 68.38100 | 60.83480 | 75.21390 | -253.99409  | 745.99177   | 51.09315    | 1 |
| 7569 | H | 69.14200 | 61.29780 | 74.85590 | 803.33209   | 3021.09575  | -354.77355  | 1 |
| 7570 | C | 68.26600 | 57.55280 | 73.49690 | -30.08678   | -625.98435  | -662.33630  | 1 |
| 7571 | O | 67.62400 | 56.66180 | 74.00890 | -147.26451  | 764.27598   | -133.50141  | 1 |
| 7572 | N | 68.41900 | 57.71580 | 72.14690 | -287.87827  | -29.02419   | -793.06745  | 1 |
| 7573 | H | 68.91000 | 58.48880 | 71.75390 | 1145.58148  | -2423.08517 | 1647.58234  | 1 |
| 7574 | C | 68.00800 | 56.73880 | 71.10290 | 159.68382   | -403.84943  | -801.78409  | 1 |
| 7575 | H | 66.93000 | 56.69380 | 71.05990 | -2629.37076 | 1715.92865  | -200.56050  | 1 |
| 7576 | C | 68.42200 | 57.32980 | 69.74790 | -560.24413  | -688.18695  | -209.70514  | 1 |
| 7577 | H | 68.40100 | 56.60980 | 68.90190 | 705.45967   | 2170.66254  | -2165.35841 | 1 |
| 7578 | H | 69.46400 | 57.71380 | 69.75790 | -2176.69301 | 979.14654   | 2049.75751  | 1 |
| 7579 | C | 67.53700 | 58.48480 | 69.21390 | -503.21823  | 77.51028    | 756.44866   | 1 |
| 7580 | H | 67.35400 | 59.16180 | 70.07590 | 1502.90016  | -2763.10212 | 69.16678    | 1 |
| 7581 | C | 68.30300 | 59.44180 | 68.21290 | -889.39703  | 87.46079    | -181.03738  | 1 |
| 7582 | H | 67.50000 | 60.12880 | 67.86990 | -467.28716  | 2715.87637  | -1517.85523 | 1 |
| 7583 | H | 68.58400 | 58.83980 | 67.32290 | 3139.17701  | -199.59344  | -62.89984   | 1 |
| 7584 | H | 69.13000 | 60.00380 | 68.69590 | -2149.99199 | 625.97437   | -2209.95854 | 1 |
| 7585 | C | 66.27600 | 58.00980 | 68.50990 | -855.61590  | 268.32927   | -165.44437  | 1 |
| 7586 | H | 66.46300 | 57.26280 | 67.70990 | -2981.96851 | -570.26593  | 825.15865   | 1 |
| 7587 | H | 65.65900 | 58.82780 | 68.07890 | 802.82144   | -1280.83377 | -2759.19713 | 1 |
| 7588 | H | 65.59800 | 57.65380 | 69.31590 | 1210.31431  | 2486.21506  | -1500.69990 | 1 |
| 7589 | C | 68.65300 | 55.42080 | 71.41890 | 391.22034   | -381.16090  | -730.14657  | 1 |
| 7590 | O | 67.96100 | 54.39280 | 71.36790 | 455.71177   | 545.16498   | -344.59999  | 1 |
| 7591 | N | 69.99700 | 55.34680 | 71.65690 | 351.48327   | 563.15960   | 521.51995   | 1 |
| 7592 | H | 70.50300 | 56.19780 | 71.54090 | -1979.51661 | -2341.54775 | 704.90735   | 1 |
| 7593 | C | 70.66600 | 54.11680 | 71.95390 | 435.66842   | 173.61348   | -781.98618  | 1 |
| 7594 | H | 70.37400 | 53.43580 | 71.16790 | 863.62376   | 2358.74427  | -1894.38795 | 1 |
| 7595 | C | 72.21100 | 54.42880 | 71.99990 | 391.20592   | 677.24236   | -468.77683  | 1 |
| 7596 | H | 72.41300 | 55.16980 | 72.80390 | 351.82945   | -486.90668  | -3088.26232 | 1 |
| 7597 | H | 72.52700 | 54.79380 | 70.99990 | -2874.21529 | -490.39723  | -1181.78815 | 1 |
| 7598 | C | 72.99600 | 53.16680 | 72.28990 | -158.05239  | 897.39430   | 33.96919    | 1 |
| 7599 | O | 73.09800 | 52.74080 | 73.45190 | -319.86522  | -36.92665   | 721.07551   | 1 |
| 7600 | O | 73.42800 | 52.48280 | 71.30890 | 21.67933    | -572.38710  | 543.62693   | 1 |
| 7601 | C | 70.16900 | 53.41580 | 73.19190 | 746.88087   | 11.67975    | 522.95655   | 1 |
| 7602 | O | 70.09800 | 52.19680 | 73.28190 | -322.11435  | -301.26398  | 655.06457   | 1 |
| 7603 | N | 69.80300 | 54.19280 | 74.24790 | -534.60853  | -443.75660  | 479.52694   | 1 |
| 7604 | H | 69.85400 | 55.18780 | 74.23790 | -98.47031   | 2179.77530  | 2266.51924  | 1 |
| 7605 | C | 69.17300 | 53.66180 | 75.45390 | 489.20023   | 634.45007   | 435.43913   | 1 |
| 7606 | H | 69.73600 | 52.83980 | 75.86990 | -2529.30393 | -1780.19729 | -575.97347  | 1 |
| 7607 | C | 69.09800 | 54.71380 | 76.61790 | -508.57795  | 603.74851   | -456.38494  | 1 |
| 7608 | H | 69.19700 | 55.75280 | 76.23590 | -2706.36543 | 520.13211   | -1517.65444 | 1 |
| 7609 | H | 68.12200 | 54.60580 | 77.13890 | 1669.27123  | 1344.82401  | -2302.86955 | 1 |
| 7610 | C | 70.26100 | 54.47080 | 77.66490 | 628.80261   | -236.01511  | 616.72940   | 1 |
| 7611 | H | 70.11000 | 55.20080 | 78.48890 | -1946.14455 | 1913.91686  | 1564.50308  | 1 |
| 7612 | H | 70.18700 | 53.40880 | 77.98390 | -1769.25170 | -2205.48983 | 1379.77870  | 1 |
| 7613 | C | 71.68300 | 54.73580 | 77.10590 | 323.18171   | 728.31266   | 443.35680   | 1 |
| 7614 | H | 72.30700 | 54.92680 | 78.00490 | 1725.79829  | 1879.44631  | 1840.52385  | 1 |
| 7615 | H | 71.52300 | 55.67780 | 76.53890 | 1230.80889  | -706.21838  | 2807.95144  | 1 |
| 7616 | N | 72.29500 | 53.58780 | 76.26790 | -646.18371  | -481.90583  | 250.77015   | 1 |
| 7617 | H | 72.33300 | 53.71780 | 75.27790 | -2297.33232 | 1210.76458  | -1776.10235 | 1 |
| 7618 | C | 72.51900 | 52.36480 | 76.67390 | 661.82706   | 237.93006   | 580.36647   | 1 |
| 7619 | N | 72.45100 | 51.90980 | 77.92390 | 523.04594   | 587.03562   | 307.38317   | 1 |

|      |   |          |          |          |             |             |             |   |
|------|---|----------|----------|----------|-------------|-------------|-------------|---|
| 7620 | H | 72.43900 | 52.51280 | 78.72190 | -1787.39077 | 2469.37472  | 778.23451   | 1 |
| 7621 | H | 72.53400 | 50.92280 | 78.06190 | 619.34052   | 36.08832    | 3084.37047  | 1 |
| 7622 | N | 72.86300 | 51.48580 | 75.77490 | -499.76751  | 365.50436   | 573.85650   | 1 |
| 7623 | H | 72.93300 | 51.87680 | 74.85690 | 428.56464   | -2759.31526 | -1449.39224 | 1 |
| 7624 | H | 73.24600 | 50.61580 | 76.08390 | 2888.30830  | 25.41442    | -1247.09883 | 1 |
| 7625 | C | 67.78400 | 53.02580 | 75.23090 | 419.40290   | -701.88434  | 403.62183   | 1 |
| 7626 | O | 67.57600 | 51.90080 | 75.66890 | 739.58384   | -7.74335    | -276.73636  | 1 |
| 7627 | N | 66.94800 | 53.66880 | 74.42790 | 272.18759   | -526.80115  | -600.88830  | 1 |
| 7628 | H | 67.26800 | 54.51680 | 74.01190 | -114.68577  | 570.29813   | 3091.89803  | 1 |
| 7629 | C | 65.70600 | 53.17180 | 73.94890 | 802.44318   | -342.17193  | -265.43233  | 1 |
| 7630 | H | 65.24000 | 52.91680 | 74.88890 | -773.61628  | 2935.24407  | 827.09510   | 1 |
| 7631 | C | 65.01600 | 54.39180 | 73.21590 | -514.19369  | -573.38898  | -488.14028  | 1 |
| 7632 | H | 65.75700 | 55.08780 | 72.76690 | 586.04189   | -1171.70827 | -2860.39872 | 1 |
| 7633 | H | 64.48300 | 54.96280 | 74.00590 | -1918.41273 | -1950.05892 | -1554.08784 | 1 |
| 7634 | C | 63.96000 | 54.00580 | 72.20890 | 589.46538   | -651.03714  | -245.21870  | 1 |
| 7635 | C | 62.81500 | 53.27380 | 72.56890 | 82.15858    | -902.01760  | 105.19132   | 1 |
| 7636 | H | 62.64500 | 52.99980 | 73.59990 | -1367.78945 | -1996.15587 | 2010.65660  | 1 |
| 7637 | C | 61.86200 | 53.00680 | 71.55590 | -399.62295  | 295.36783   | 764.53276   | 1 |
| 7638 | H | 60.98800 | 52.51080 | 71.95090 | -292.73603  | -3089.36869 | -518.00862  | 1 |
| 7639 | C | 62.07000 | 53.38380 | 70.23690 | -273.52043  | 79.29525    | 866.22736   | 1 |
| 7640 | O | 61.17200 | 53.02380 | 69.23190 | 495.62397   | -74.81991   | -610.23446  | 1 |
| 7641 | H | 61.57000 | 53.06280 | 68.35890 | 851.61547   | -2247.43352 | 2030.27581  | 1 |
| 7642 | C | 64.22300 | 54.25280 | 70.86090 | 650.27815   | -305.94784  | -561.23547  | 1 |
| 7643 | H | 65.19200 | 54.70680 | 70.71490 | 1349.63683  | 2773.39621  | -620.46766  | 1 |
| 7644 | C | 63.28000 | 53.95980 | 69.85490 | -277.81554  | 535.08939   | 684.06789   | 1 |
| 7645 | H | 63.50300 | 54.29180 | 68.85190 | 1275.25847  | -1228.78225 | -2600.39156 | 1 |
| 7646 | C | 65.83400 | 51.91380 | 73.11590 | 574.02176   | 142.30897   | -694.04480  | 1 |
| 7647 | O | 65.14200 | 50.94680 | 73.39390 | 552.31917   | 520.35186   | -218.64288  | 1 |
| 7648 | N | 66.72600 | 51.85580 | 72.13990 | 422.02364   | 574.53356   | -452.19411  | 1 |
| 7649 | H | 67.18100 | 52.70080 | 71.86790 | 1203.14880  | -1030.59614 | 2718.18520  | 1 |
| 7650 | C | 67.06100 | 50.73780 | 71.34590 | 790.22595   | 424.03887   | -164.87872  | 1 |
| 7651 | H | 66.18800 | 50.37980 | 70.82090 | -2262.06129 | -451.42444  | -2139.51418 | 1 |
| 7652 | C | 68.18900 | 50.95680 | 70.27890 | 613.00707   | 645.78500   | 196.55807   | 1 |
| 7653 | H | 68.49600 | 49.97580 | 69.85790 | 1447.96023  | 1574.31117  | 2307.20215  | 1 |
| 7654 | H | 69.07300 | 51.42780 | 70.75990 | -522.29934  | 3100.87838  | 99.91442    | 1 |
| 7655 | C | 67.74500 | 51.90280 | 69.18490 | -391.16536  | -815.71745  | 114.21783   | 1 |
| 7656 | H | 67.22000 | 52.78380 | 69.61290 | -1776.43918 | 1361.34034  | 2211.16316  | 1 |
| 7657 | C | 68.90400 | 52.46280 | 68.26490 | 510.25515   | 640.32723   | -401.33741  | 1 |
| 7658 | H | 69.21300 | 51.65180 | 67.57190 | -814.81842  | 2419.76861  | 1838.21028  | 1 |
| 7659 | H | 69.81900 | 52.69180 | 68.85290 | 2307.23219  | -1576.31507 | -1445.73049 | 1 |
| 7660 | H | 68.67000 | 53.44480 | 67.79890 | -512.84722  | 2259.63912  | 2128.20229  | 1 |
| 7661 | C | 66.79800 | 51.18780 | 68.16290 | 113.62520   | 245.58611   | -870.76276  | 1 |
| 7662 | H | 67.28100 | 50.33580 | 67.63890 | -1961.02823 | -2100.52277 | -1280.78047 | 1 |
| 7663 | H | 66.50300 | 51.92080 | 67.38290 | -1866.41494 | 477.41028   | -2487.32807 | 1 |
| 7664 | H | 65.90400 | 50.68680 | 68.59190 | -1249.88407 | 1244.38661  | -2605.28655 | 1 |
| 7665 | C | 67.57100 | 49.59980 | 72.22890 | -510.18512  | -755.64773  | 12.59556    | 1 |
| 7666 | O | 67.16500 | 48.45580 | 72.05690 | 170.02894   | -395.46220  | -662.06271  | 1 |
| 7667 | N | 68.39700 | 49.92080 | 73.24090 | 644.36919   | 409.26202   | -360.50692  | 1 |
| 7668 | H | 68.72700 | 50.85680 | 73.34190 | 1479.30347  | -47.64056   | 2776.25969  | 1 |
| 7669 | C | 69.08400 | 48.91580 | 74.02090 | -270.91730  | -767.29334  | 411.47996   | 1 |
| 7670 | H | 69.46000 | 48.13080 | 73.38090 | 1797.65204  | 435.01954   | 2545.07983  | 1 |
| 7671 | C | 70.26000 | 49.50580 | 74.88190 | 468.22097   | -770.57178  | 135.79122   | 1 |
| 7672 | H | 69.96200 | 50.21280 | 75.68490 | 2054.26700  | 1367.04935  | 1951.76572  | 1 |
| 7673 | H | 70.89000 | 50.10780 | 74.19090 | -2146.73375 | 1282.63419  | -1909.08616 | 1 |
| 7674 | H | 70.83600 | 48.64580 | 75.28590 | 1459.47504  | 2739.95025  | -510.71662  | 1 |
| 7675 | C | 68.12500 | 48.26380 | 75.04290 | 756.15586   | 506.05180   | -59.92406   | 1 |
| 7676 | O | 68.45400 | 47.23480 | 75.64590 | 296.21782   | -703.34129  | 202.96123   | 1 |
| 7677 | N | 66.89700 | 48.82080 | 75.37790 | 97.57007    | 399.55034   | 737.23259   | 1 |
| 7678 | H | 66.81100 | 49.74780 | 75.01990 | -1511.28522 | 28.39929    | -2759.24568 | 1 |
| 7679 | C | 65.93700 | 48.35880 | 76.39690 | -624.55313  | 501.03365   | -436.29082  | 1 |
| 7680 | H | 66.38800 | 47.45080 | 76.76890 | -1511.13383 | -1840.62939 | 2055.91445  | 1 |
| 7681 | C | 65.75500 | 49.42180 | 77.42890 | -341.69308  | -696.41013  | 479.28047   | 1 |



|      |   |          |          |          |             |             |             |   |
|------|---|----------|----------|----------|-------------|-------------|-------------|---|
| 7682 | H | 65.76800 | 50.45180 | 77.01090 | -1462.77981 | 1153.28881  | 2535.43416  | 1 |
| 7683 | C | 64.37800 | 49.29580 | 78.19190 | -248.81438  | 762.72529   | -433.35037  | 1 |
| 7684 | H | 64.35700 | 50.15180 | 78.89890 | 1472.39796  | 2763.45699  | 305.90179   | 1 |
| 7685 | H | 63.54600 | 49.42280 | 77.46690 | 1387.58266  | -2563.18625 | -1184.44790 | 1 |
| 7686 | H | 64.34900 | 48.32980 | 78.73890 | 2105.62272  | -2040.34506 | 1140.86423  | 1 |
| 7687 | C | 66.94300 | 49.36980 | 78.37390 | 601.89979   | -537.61864  | 424.42177   | 1 |
| 7688 | H | 67.87300 | 49.13980 | 77.81290 | 1558.10070  | 2341.21922  | -1410.40454 | 1 |
| 7689 | H | 66.93800 | 48.50780 | 79.07490 | 1414.57683  | 694.44056   | -2723.04075 | 1 |
| 7690 | C | 67.20200 | 50.71380 | 79.14890 | -595.51929  | 367.18638   | 584.79222   | 1 |
| 7691 | H | 68.24400 | 50.65780 | 79.52990 | -1747.67030 | 852.83322   | -2473.16604 | 1 |
| 7692 | H | 66.39500 | 50.70680 | 79.91290 | 1661.18725  | -1989.41852 | 1783.50697  | 1 |
| 7693 | H | 67.23000 | 51.56080 | 78.43090 | 2692.93388  | -1447.99748 | 741.37483   | 1 |
| 7694 | C | 64.68400 | 47.94480 | 75.66090 | 12.54828    | -908.34415  | 78.76834    | 1 |
| 7695 | O | 64.12400 | 46.89680 | 75.93190 | -369.21429  | -539.63082  | -442.83926  | 1 |
| 7696 | N | 64.12500 | 48.67480 | 74.69190 | 88.43404    | 127.31748   | 829.84454   | 1 |
| 7697 | H | 64.58500 | 49.51780 | 74.42290 | 1222.07498  | 2313.77896  | -1746.76440 | 1 |
| 7698 | C | 62.87300 | 48.23880 | 73.93890 | 700.69683   | 574.78948   | -100.45899  | 1 |
| 7699 | H | 62.32800 | 47.76380 | 74.74190 | 1626.40524  | -736.02938  | 2590.61633  | 1 |
| 7700 | C | 62.19700 | 49.49980 | 73.38790 | -825.74470  | 64.46257    | 381.36763   | 1 |
| 7701 | H | 62.95800 | 50.04680 | 72.79190 | 30.59940    | 2226.53833  | 2222.56990  | 1 |
| 7702 | C | 61.03600 | 49.08980 | 72.50190 | -498.83728  | -243.21960  | -723.50301  | 1 |
| 7703 | H | 61.35600 | 48.76480 | 71.48890 | -2526.11441 | 1854.13627  | -281.33770  | 1 |
| 7704 | H | 60.40500 | 48.31080 | 72.98290 | -2242.58347 | -1795.54235 | 1282.60410  | 1 |
| 7705 | H | 60.31000 | 49.90180 | 72.28490 | 2313.48785  | -1447.36120 | -1565.61354 | 1 |
| 7706 | C | 61.82500 | 50.37880 | 74.60090 | -591.38656  | -661.95142  | 208.64624   | 1 |
| 7707 | H | 61.06500 | 51.09380 | 74.21890 | 1955.52936  | -432.03524  | 2426.41231  | 1 |
| 7708 | H | 62.72800 | 50.86480 | 75.02890 | 1190.10654  | -2493.82458 | 1504.23124  | 1 |
| 7709 | H | 61.21500 | 49.71080 | 75.24590 | -2259.28048 | 2110.24103  | -583.74717  | 1 |
| 7710 | C | 63.20100 | 47.23580 | 72.87290 | 417.80222   | 307.40444   | 749.92988   | 1 |
| 7711 | O | 62.38700 | 46.38080 | 72.49590 | -492.71843  | 595.46477   | -162.10330  | 1 |
| 7712 | N | 64.47400 | 47.13380 | 72.43890 | -193.69306  | 672.65699   | -471.89815  | 1 |
| 7713 | H | 65.23300 | 47.65180 | 72.82590 | 470.99995   | -1159.54275 | -2886.49370 | 1 |
| 7714 | C | 64.77200 | 46.31680 | 71.22390 | -609.91446  | 214.90419   | -642.86199  | 1 |
| 7715 | H | 64.08400 | 45.51580 | 70.99690 | -2480.15667 | 1231.58407  | -1493.40210 | 1 |
| 7716 | C | 64.96500 | 47.11680 | 69.95990 | -646.88090  | 640.06767   | 57.52811    | 1 |
| 7717 | H | 65.19000 | 46.42980 | 69.11690 | 790.08686   | -2387.03599 | -1891.04420 | 1 |
| 7718 | H | 65.80000 | 47.84180 | 70.06290 | -1996.62865 | -1793.95742 | -1641.16332 | 1 |
| 7719 | N | 62.80000 | 47.30780 | 68.67190 | 248.17708   | -160.52799  | -790.76620  | 1 |
| 7720 | H | 62.85700 | 46.39880 | 68.25890 | -1772.11809 | 2275.94912  | 1256.13665  | 1 |
| 7721 | C | 63.74700 | 47.92880 | 69.43990 | -677.71136  | 604.87165   | 79.30073    | 1 |
| 7722 | C | 61.90700 | 48.23880 | 68.29190 | 398.74466   | -522.32628  | 632.16213   | 1 |
| 7723 | H | 61.02100 | 47.93880 | 67.73390 | -685.14795  | 487.19339   | -3031.73896 | 1 |
| 7724 | N | 62.23400 | 49.43580 | 68.75890 | 414.44244   | -668.32608  | -307.00163  | 1 |
| 7725 | C | 63.35500 | 49.21480 | 69.53490 | -529.59590  | 698.22968   | -251.90175  | 1 |
| 7726 | H | 63.91700 | 50.02480 | 69.98390 | -1320.23936 | 1001.53031  | 2674.34689  | 1 |
| 7727 | C | 66.09300 | 45.60480 | 71.41390 | 748.32666   | -202.42896  | -480.08408  | 1 |
| 7728 | O | 67.00800 | 45.60980 | 70.60490 | 549.98168   | -566.01703  | 27.78668    | 1 |
| 7729 | N | 66.26200 | 44.96680 | 72.58690 | -401.93304  | -341.53202  | 659.14945   | 1 |
| 7730 | H | 65.54000 | 44.88280 | 73.26990 | -1650.61831 | 1008.01634  | 2481.44887  | 1 |
| 7731 | C | 67.55100 | 44.53680 | 72.97490 | -444.39073  | 536.63254   | -588.21204  | 1 |
| 7732 | H | 68.36100 | 45.24380 | 72.87890 | 2748.24951  | -1450.17862 | 492.27311   | 1 |
| 7733 | C | 67.54100 | 44.11380 | 74.52790 | 684.43262   | 130.49388   | -588.19583  | 1 |
| 7734 | H | 67.20500 | 45.01580 | 75.08290 | 1852.05488  | -1067.55999 | -2308.34023 | 1 |
| 7735 | H | 66.79700 | 43.31280 | 74.72290 | 2410.20495  | 595.60692   | -1932.45718 | 1 |
| 7736 | H | 68.52800 | 43.74880 | 74.88590 | -1383.08883 | -911.40774  | -2674.81353 | 1 |
| 7737 | C | 68.08100 | 43.25480 | 72.25790 | -398.17893  | 100.57878   | 814.11821   | 1 |
| 7738 | O | 69.24900 | 42.90780 | 72.37290 | 636.46954   | -463.33057  | -62.11712   | 1 |
| 7739 | N | 67.23100 | 42.50780 | 71.53190 | 4.30664     | 598.47252   | 595.38591   | 1 |
| 7740 | H | 66.32800 | 42.91980 | 71.44090 | 2912.59593  | -475.07240  | 1090.55829  | 1 |
| 7741 | C | 67.54800 | 41.26580 | 70.93090 | -335.31234  | 258.58779   | 807.55742   | 1 |
| 7742 | H | 68.32300 | 40.86780 | 71.56890 | -2010.33196 | 1752.49858  | -1668.99382 | 1 |
| 7743 | C | 66.43900 | 40.21380 | 70.95290 | 658.31779   | 513.60753   | -366.43690  | 1 |

|      |   |          |          |          |             |             |             |   |
|------|---|----------|----------|----------|-------------|-------------|-------------|---|
| 7744 | H | 66.01200 | 40.24680 | 71.97790 | -1852.94001 | 1355.80876  | -2150.95843 | 1 |
| 7745 | O | 66.96200 | 38.92080 | 70.87490 | 550.85539   | 82.34729    | 559.82541   | 1 |
| 7746 | H | 67.72100 | 38.72880 | 71.43090 | -1576.56453 | -1211.14979 | 2438.39839  | 1 |
| 7747 | C | 65.34400 | 40.37980 | 69.88590 | 749.87638   | -35.58720   | -517.56156  | 1 |
| 7748 | H | 64.40400 | 39.92280 | 70.26290 | 1715.98814  | 2070.02727  | -1633.58441 | 1 |
| 7749 | H | 65.72800 | 39.97280 | 68.92590 | -218.60340  | -3067.59484 | 663.55156   | 1 |
| 7750 | H | 65.10900 | 41.45680 | 69.74290 | 1934.06509  | 1985.81936  | -1487.99863 | 1 |
| 7751 | C | 68.04700 | 41.39180 | 69.50990 | -678.69371  | -598.30908  | 113.36708   | 1 |
| 7752 | O | 68.49600 | 40.41480 | 68.88190 | 293.00025   | -344.02636  | -647.62948  | 1 |
| 7753 | N | 67.97800 | 42.58880 | 68.90590 | -98.72521   | -227.23125  | 807.02638   | 1 |
| 7754 | H | 67.40400 | 43.31080 | 69.28390 | 1231.01158  | 1517.88517  | 2465.53469  | 1 |
| 7755 | C | 68.25700 | 42.84080 | 67.50690 | -681.96376  | 472.33319   | 378.52053   | 1 |
| 7756 | H | 69.24300 | 42.47480 | 67.26390 | 1563.84161  | -1931.99102 | -1928.73957 | 1 |
| 7757 | C | 67.21300 | 42.10680 | 66.52190 | 757.31941   | 496.00431   | 109.07811   | 1 |
| 7758 | H | 67.50300 | 42.52180 | 65.53290 | -2122.92264 | 366.82424   | 2292.78557  | 1 |
| 7759 | H | 67.39400 | 41.01280 | 66.44490 | 1704.69488  | -133.87949  | -2640.89339 | 1 |
| 7760 | C | 65.73100 | 42.38580 | 66.82990 | -606.63431  | -671.11848  | -114.21820  | 1 |
| 7761 | O | 65.28300 | 43.17080 | 67.69590 | 700.57820   | 200.82518   | 304.11620   | 1 |
| 7762 | N | 64.85100 | 41.84280 | 65.95390 | -470.70949  | 144.07806   | 685.81803   | 1 |
| 7763 | H | 65.23300 | 41.18080 | 65.30890 | 1897.93127  | -1554.74088 | -1969.48317 | 1 |
| 7764 | H | 63.87600 | 42.02380 | 66.07990 | -976.37974  | -1779.46187 | -2403.83533 | 1 |
| 7765 | C | 68.28700 | 44.37280 | 67.28890 | 603.54252   | 251.75734   | 635.45705   | 1 |
| 7766 | O | 67.32600 | 45.05080 | 66.84790 | -283.11668  | 71.34098    | -733.74562  | 1 |
| 7767 | N | 69.42800 | 45.01480 | 67.51390 | -509.83989  | 439.26624   | 509.68691   | 1 |
| 7768 | H | 70.29900 | 44.54280 | 67.62790 | 3073.41697  | 96.42858    | 665.60942   | 1 |
| 7769 | C | 69.59800 | 46.39680 | 67.30590 | -250.56010  | -750.92999  | -452.52049  | 1 |
| 7770 | H | 69.34300 | 46.64780 | 66.28690 | 2380.22491  | 527.76585   | 1988.52176  | 1 |
| 7771 | C | 68.81800 | 47.28080 | 68.35890 | -751.25610  | 368.83109   | -361.97915  | 1 |
| 7772 | H | 67.74200 | 47.08880 | 68.15690 | -1135.32986 | 1162.85284  | 2693.88671  | 1 |
| 7773 | H | 68.95200 | 48.36380 | 68.15390 | 2621.79742  | 1598.95014  | 683.93200   | 1 |
| 7774 | O | 69.09100 | 46.87480 | 69.72790 | 82.97477    | 577.35857   | -532.35279  | 1 |
| 7775 | H | 68.34100 | 46.30280 | 69.90690 | -994.29190  | -1709.16046 | 2447.11674  | 1 |
| 7776 | C | 71.05900 | 46.81080 | 67.33990 | -598.58095  | -246.29948  | -642.25262  | 1 |
| 7777 | O | 71.31200 | 47.99080 | 67.04890 | -119.88413  | -416.63787  | 660.05144   | 1 |
| 7778 | N | 72.08300 | 46.00080 | 67.59690 | -235.47629  | 186.73699   | -788.89321  | 1 |
| 7779 | H | 71.88000 | 45.04780 | 67.80590 | -1941.52766 | 367.00668   | 2448.26523  | 1 |
| 7780 | C | 73.48600 | 46.44780 | 67.59790 | -117.31300  | 808.07841   | 405.82995   | 1 |
| 7781 | H | 73.52400 | 47.26880 | 68.29890 | -94.15309   | 555.56409   | -3095.27219 | 1 |
| 7782 | C | 74.37500 | 45.29980 | 68.15590 | 349.24143   | -694.52830  | 476.56255   | 1 |
| 7783 | H | 74.02300 | 44.33880 | 67.72490 | 2187.56157  | 1734.49200  | -1450.63369 | 1 |
| 7784 | H | 74.17000 | 45.24680 | 69.24690 | -462.21592  | -675.52413  | 3037.80345  | 1 |
| 7785 | C | 75.92100 | 45.26480 | 67.94090 | -688.34064  | -188.53166  | -567.53325  | 1 |
| 7786 | H | 76.30900 | 44.56380 | 68.70990 | 900.64859   | 2483.23659  | 1708.97465  | 1 |
| 7787 | H | 76.31100 | 46.28280 | 68.15790 | 2722.79775  | 917.21387   | 1281.91941  | 1 |
| 7788 | C | 76.47700 | 44.90180 | 66.52690 | -694.39980  | 62.00798    | 587.72011   | 1 |
| 7789 | O | 77.48800 | 45.40880 | 66.06490 | -583.38469  | -402.96791  | -347.71597  | 1 |
| 7790 | N | 75.84000 | 43.91380 | 65.89590 | 677.82138   | -414.44226  | -285.42615  | 1 |
| 7791 | H | 75.05300 | 43.46880 | 66.32490 | 1601.33989  | 2239.89573  | 1522.10510  | 1 |
| 7792 | H | 76.20200 | 43.57880 | 65.02690 | 1908.02434  | -180.88731  | -2494.98479 | 1 |
| 7793 | C | 74.06300 | 47.03080 | 66.32090 | 522.08630   | -575.61216  | -477.01944  | 1 |
| 7794 | O | 74.69700 | 48.06380 | 66.27790 | 244.51640   | -347.06706  | 665.87042   | 1 |
| 7795 | N | 73.75600 | 46.55480 | 65.10790 | -757.58830  | 144.48831   | -343.30071  | 1 |
| 7796 | H | 73.25200 | 45.70380 | 64.98290 | -484.25524  | 488.11033   | 3070.09306  | 1 |
| 7797 | C | 74.08400 | 47.23980 | 63.86290 | -161.53046  | -750.43013  | 492.15193   | 1 |
| 7798 | H | 75.12800 | 47.51180 | 63.92690 | -1065.13115 | -2932.33163 | 406.39032   | 1 |
| 7799 | C | 74.06800 | 46.20880 | 62.72890 | -731.28525  | -469.71222  | 275.75953   | 1 |
| 7800 | H | 73.13500 | 45.60880 | 62.79690 | -2009.06986 | -1599.06496 | 1817.92623  | 1 |
| 7801 | H | 74.85700 | 45.42680 | 62.72790 | -416.58161  | -528.78603  | 3073.28347  | 1 |
| 7802 | C | 74.06200 | 46.76480 | 61.27790 | -776.95958  | -436.42055  | 193.18882   | 1 |
| 7803 | H | 73.11700 | 47.30680 | 61.06290 | 1417.32230  | 2737.90974  | -627.11560  | 1 |
| 7804 | H | 74.90400 | 47.46680 | 61.10090 | -1647.08289 | 868.00982   | -2536.11970 | 1 |
| 7805 | C | 74.25100 | 45.71380 | 60.15490 | 787.69201   | -432.25438  | -155.39769  | 1 |

|      |   |          |          |          |             |             |             |   |
|------|---|----------|----------|----------|-------------|-------------|-------------|---|
| 7806 | H | 75.13100 | 45.04580 | 60.27290 | -2340.97760 | 1034.54472  | 1829.69051  | 1 |
| 7807 | H | 73.41700 | 44.99080 | 60.02890 | -276.37492  | 2903.44781  | 1179.76013  | 1 |
| 7808 | N | 74.37500 | 46.45680 | 58.85890 | -541.96141  | -484.39141  | 429.31933   | 1 |
| 7809 | H | 73.83000 | 47.27780 | 58.68890 | 439.68406   | 2676.96414  | 1593.35092  | 1 |
| 7810 | C | 74.66200 | 45.80580 | 57.73890 | 412.49453   | 602.72693   | -545.91163  | 1 |
| 7811 | N | 75.21300 | 44.60980 | 57.67290 | 343.28745   | -484.01684  | 600.46125   | 1 |
| 7812 | H | 75.14000 | 43.94180 | 58.41390 | 1066.64886  | 1702.06179  | -2421.46073 | 1 |
| 7813 | H | 75.29600 | 44.15880 | 56.78390 | -2741.62249 | 591.53017   | -1425.42078 | 1 |
| 7814 | N | 74.43800 | 46.41980 | 56.59390 | -652.77470  | 441.51959   | -302.68453  | 1 |
| 7815 | H | 74.35200 | 47.41580 | 56.55990 | -366.14760  | -834.01819  | -3011.40761 | 1 |
| 7816 | H | 74.81700 | 46.00380 | 55.76690 | -2089.51111 | -2352.02812 | -11.54432   | 1 |
| 7817 | C | 73.45900 | 48.66280 | 63.65890 | 367.37472   | -648.97084  | 524.71294   | 1 |
| 7818 | O | 74.22500 | 49.62080 | 63.25590 | 591.72685   | -305.57477  | -424.39443  | 1 |
| 7819 | N | 72.19600 | 48.93680 | 63.88290 | -569.87937  | 557.90511   | -276.86041  | 1 |
| 7820 | C | 71.15200 | 47.91380 | 63.64390 | 554.89815   | 314.54020   | 651.61607   | 1 |
| 7821 | H | 71.01200 | 47.26380 | 64.53490 | -408.21656  | -2507.78575 | 1855.42343  | 1 |
| 7822 | H | 71.30300 | 47.24080 | 62.77290 | 2314.20547  | -2085.90791 | 437.79846   | 1 |
| 7823 | C | 71.58800 | 50.28980 | 63.86990 | 223.43296   | -572.17464  | 673.90274   | 1 |
| 7824 | H | 71.84300 | 50.86080 | 62.98890 | 2443.94981  | -1878.97436 | 628.32388   | 1 |
| 7825 | C | 70.07700 | 50.06480 | 63.96190 | -439.81422  | -571.98101  | 557.54119   | 1 |
| 7826 | H | 69.46100 | 50.84980 | 63.47390 | -2705.05160 | 792.16700   | 1397.63854  | 1 |
| 7827 | H | 69.73700 | 49.93580 | 65.01190 | -1616.19085 | -411.24491  | -2667.77641 | 1 |
| 7828 | C | 69.87000 | 48.68880 | 63.34890 | -607.08387  | -680.02370  | 21.63219    | 1 |
| 7829 | H | 69.82900 | 48.81780 | 62.24590 | 2001.62042  | 2191.28034  | -1044.04615 | 1 |
| 7830 | H | 68.94600 | 48.19980 | 63.72390 | -1180.94778 | -2507.16573 | 1489.19729  | 1 |
| 7831 | C | 72.06400 | 51.10980 | 65.08690 | 418.51034   | -615.39546  | -526.86671  | 1 |
| 7832 | O | 72.36800 | 52.25980 | 64.91690 | -310.85032  | -687.91968  | 231.87457   | 1 |
| 7833 | N | 72.14200 | 50.58980 | 66.34490 | -289.32400  | -596.50411  | 522.63444   | 1 |
| 7834 | H | 71.85400 | 49.64680 | 66.48990 | 1363.66697  | 2593.04601  | -1146.62592 | 1 |
| 7835 | C | 72.81900 | 51.31980 | 67.35990 | 357.30677   | 628.45541   | 555.72176   | 1 |
| 7836 | H | 72.31400 | 52.25080 | 67.56990 | 2502.65950  | 1397.91440  | 1296.44011  | 1 |
| 7837 | C | 72.89600 | 50.49980 | 68.67390 | -257.51074  | -482.49481  | -729.61495  | 1 |
| 7838 | H | 73.60400 | 51.00680 | 69.36290 | -2483.46327 | 1672.50487  | 966.10759   | 1 |
| 7839 | H | 73.30500 | 49.50780 | 68.38590 | -1677.63239 | 2346.91290  | 1255.29902  | 1 |
| 7840 | C | 71.62900 | 50.31280 | 69.43890 | -163.66395  | -590.59331  | -675.17750  | 1 |
| 7841 | H | 70.76200 | 49.92680 | 68.86190 | -554.84535  | 2989.57813  | -807.95758  | 1 |
| 7842 | H | 71.29200 | 51.26680 | 69.89990 | 481.09859   | -1476.23941 | -2736.32739 | 1 |
| 7843 | C | 71.72500 | 49.24180 | 70.58390 | 446.76018   | -774.28284  | -179.84001  | 1 |
| 7844 | H | 70.75000 | 48.93880 | 71.02290 | 1486.63614  | -1571.06313 | 2284.71002  | 1 |
| 7845 | H | 72.23500 | 48.32680 | 70.21490 | -1807.91618 | 1953.25876  | 1677.63092  | 1 |
| 7846 | N | 72.53600 | 49.96180 | 71.58390 | -293.05361  | 786.60279   | -89.71019   | 1 |
| 7847 | H | 72.73100 | 50.93480 | 71.46790 | -1194.06061 | 2648.21785  | -1208.05119 | 1 |
| 7848 | C | 73.24800 | 49.36280 | 72.44790 | 810.67973   | -416.96001  | 19.84276    | 1 |
| 7849 | N | 73.02000 | 48.12780 | 72.87290 | -787.41695  | -159.99390  | 258.93781   | 1 |
| 7850 | H | 72.19900 | 47.67380 | 72.52690 | -2513.64235 | -426.69839  | 1843.30052  | 1 |
| 7851 | H | 73.73800 | 47.68480 | 73.40890 | 1844.99598  | 1762.05733  | 1841.02417  | 1 |
| 7852 | N | 74.05500 | 50.13280 | 73.16390 | -11.35797   | 841.95718   | 60.42671    | 1 |
| 7853 | H | 74.03900 | 51.12880 | 73.07790 | -990.59967  | -2636.73108 | 1401.63752  | 1 |
| 7854 | H | 74.58500 | 49.72780 | 73.90890 | -1576.76848 | 1001.33361  | 2531.67106  | 1 |
| 7855 | C | 74.26400 | 51.75680 | 67.03390 | 490.81175   | -88.58160   | -763.35321  | 1 |
| 7856 | O | 74.70400 | 52.87880 | 67.34290 | -97.63868   | -781.84572  | 53.02065    | 1 |
| 7857 | N | 74.99000 | 50.84080 | 66.43790 | 391.45388   | -416.25300  | -621.42545  | 1 |
| 7858 | H | 74.53700 | 50.00780 | 66.12990 | -2434.88356 | 1263.10961  | -1540.81873 | 1 |
| 7859 | C | 76.32900 | 51.05180 | 65.91890 | 755.75258   | 424.99039   | 282.26265   | 1 |
| 7860 | H | 76.92000 | 51.30980 | 66.78590 | 2383.14925  | 975.35757   | 1807.62371  | 1 |
| 7861 | C | 76.94900 | 49.70280 | 65.47390 | -127.10057  | 449.84396   | -782.90284  | 1 |
| 7862 | H | 76.30500 | 49.24080 | 64.69590 | -1462.01769 | -776.97564  | 2675.26435  | 1 |
| 7863 | H | 76.96900 | 49.10280 | 66.40990 | 2351.35848  | 2038.64845  | -461.79218  | 1 |
| 7864 | C | 78.38400 | 49.85180 | 64.90690 | 507.13821   | 429.47325   | 624.35131   | 1 |
| 7865 | H | 78.99800 | 50.42380 | 65.63490 | 1539.25316  | 2178.00992  | -1668.89147 | 1 |
| 7866 | H | 78.48000 | 50.46080 | 63.98190 | 497.81871   | 1585.92457  | -2671.18813 | 1 |
| 7867 | C | 79.08600 | 48.50880 | 64.76090 | -465.49210  | -579.50324  | -528.15158  | 1 |

|      |   |          |          |          |             |             |             |   |
|------|---|----------|----------|----------|-------------|-------------|-------------|---|
| 7868 | H | 80.13800 | 48.65880 | 64.43590 | -1798.56283 | 2098.41842  | -1503.34231 | 1 |
| 7869 | H | 79.13800 | 48.00180 | 65.74790 | -1712.44281 | 2016.17196  | 1703.17835  | 1 |
| 7870 | C | 78.42400 | 47.54480 | 63.73590 | -276.83746  | -461.54264  | 736.06414   | 1 |
| 7871 | H | 77.43900 | 47.19580 | 64.11290 | 2062.78229  | -900.72626  | 2198.14641  | 1 |
| 7872 | H | 78.43800 | 48.07180 | 62.75690 | -581.77017  | -1296.54614 | 2806.90894  | 1 |
| 7873 | N | 79.19100 | 46.31480 | 63.58490 | 668.80042   | -48.88060   | 512.82451   | 1 |
| 7874 | H | 79.15700 | 45.54480 | 64.28290 | -1455.35871 | 2733.96206  | -552.81890  | 1 |
| 7875 | H | 78.84600 | 45.88880 | 62.70090 | 2802.27857  | 696.03767   | -1249.39690 | 1 |
| 7876 | H | 80.20700 | 46.41180 | 63.38790 | -1395.14776 | 167.54165   | -2814.91008 | 1 |
| 7877 | C | 76.45600 | 52.09780 | 64.76190 | -340.64362  | 379.01610   | -756.14795  | 1 |
| 7878 | O | 77.33400 | 53.00380 | 64.73790 | 480.83886   | 274.14261   | -563.26464  | 1 |
| 7879 | N | 75.49900 | 52.07180 | 63.80890 | 474.66355   | 163.46394   | -678.70932  | 1 |
| 7880 | H | 74.82500 | 51.33980 | 63.87890 | -1343.72188 | -1828.90196 | -2178.93446 | 1 |
| 7881 | C | 75.37200 | 53.05880 | 62.72290 | 505.86493   | -644.58825  | -400.07208  | 1 |
| 7882 | H | 76.24900 | 53.07880 | 62.09390 | 1996.30797  | -1795.19527 | 1640.19958  | 1 |
| 7883 | C | 74.08200 | 52.69580 | 61.93290 | 467.02505   | -635.74028  | -457.35423  | 1 |
| 7884 | H | 73.19500 | 52.54980 | 62.58490 | 2992.05203  | -698.08008  | 677.15216   | 1 |
| 7885 | H | 74.18000 | 51.73280 | 61.38690 | -2643.66720 | -1378.09349 | 1005.04144  | 1 |
| 7886 | C | 73.59900 | 53.60380 | 60.75090 | 746.41321   | -148.09729  | 502.37985   | 1 |
| 7887 | H | 73.51200 | 54.61580 | 61.20090 | -2259.59392 | 2000.75123  | 888.51342   | 1 |
| 7888 | C | 74.75200 | 53.70080 | 59.70190 | 392.86651   | 818.16838   | -87.79179   | 1 |
| 7889 | H | 75.73100 | 53.99880 | 60.13390 | 973.97142   | -2231.00409 | -1993.04456 | 1 |
| 7890 | H | 74.40100 | 54.35980 | 58.87990 | -2807.57231 | -610.77700  | -1281.68460 | 1 |
| 7891 | H | 74.77600 | 52.72380 | 59.17190 | 461.01885   | -2966.66190 | 940.53442   | 1 |
| 7892 | C | 72.26900 | 52.99980 | 60.24790 | 145.82257   | -611.60754  | -660.39609  | 1 |
| 7893 | H | 72.31900 | 51.91280 | 60.01990 | -2677.86183 | 717.21180   | -1487.57839 | 1 |
| 7894 | H | 71.53100 | 53.17380 | 61.05890 | 2811.05797  | 716.38731   | -1217.77196 | 1 |
| 7895 | H | 71.90400 | 53.53280 | 59.34390 | -582.05890  | 1814.68262  | -2503.26999 | 1 |
| 7896 | C | 75.26700 | 54.48680 | 63.29190 | 864.36087   | -210.32899  | -200.23236  | 1 |
| 7897 | O | 75.99400 | 55.39780 | 62.81990 | -722.97101  | -65.10869   | -310.96785  | 1 |
| 7898 | N | 74.42500 | 54.77980 | 64.32690 | 56.26413    | 662.10682   | -520.69299  | 1 |
| 7899 | H | 73.71000 | 54.13580 | 64.58490 | 1481.70092  | 2723.79880  | -532.64312  | 1 |
| 7900 | C | 74.40000 | 55.99780 | 65.09690 | 135.32019   | 888.85078   | 151.93334   | 1 |
| 7901 | H | 74.15100 | 56.75380 | 64.36690 | 1816.38195  | -1659.32307 | 1961.02774  | 1 |
| 7902 | C | 73.31000 | 55.86980 | 66.17990 | 147.39433   | 803.00974   | -406.08038  | 1 |
| 7903 | H | 73.30000 | 56.73880 | 66.87090 | -1879.52770 | 558.27214   | 2460.47436  | 1 |
| 7904 | H | 73.61800 | 54.94780 | 66.71790 | -124.36038  | 1122.47502  | 2936.46225  | 1 |
| 7905 | C | 71.87600 | 55.65080 | 65.62390 | -292.57289  | -459.05976  | -731.51640  | 1 |
| 7906 | H | 71.83700 | 54.60480 | 65.25090 | 853.61981   | -51.96252   | -3027.68217 | 1 |
| 7907 | C | 70.97400 | 55.48080 | 66.86590 | -262.24589  | 276.38742   | -828.42506  | 1 |
| 7908 | H | 71.23100 | 54.55980 | 67.43290 | -35.86831   | 1339.43061  | -2846.55324 | 1 |
| 7909 | H | 71.08600 | 56.36480 | 67.52890 | 690.15356   | -2302.03786 | 2030.40291  | 1 |
| 7910 | H | 69.94100 | 55.32880 | 66.48690 | 789.05455   | -2499.06386 | 1740.77540  | 1 |
| 7911 | C | 71.25800 | 56.61480 | 64.56090 | 507.07240   | 560.70252   | -509.84435  | 1 |
| 7912 | H | 70.17700 | 56.37880 | 64.46190 | -1746.50458 | -1860.64461 | 1840.09500  | 1 |
| 7913 | H | 71.83700 | 56.72880 | 63.61990 | 1435.80627  | 2799.35657  | 17.01108    | 1 |
| 7914 | H | 71.32500 | 57.64680 | 64.96790 | -602.34540  | -2187.68669 | -2179.31943 | 1 |
| 7915 | C | 75.73500 | 56.27280 | 65.77590 | 449.23342   | 690.57438   | -390.82908  | 1 |
| 7916 | O | 76.34600 | 57.33580 | 65.63190 | 98.01944    | -737.45968  | -264.90119  | 1 |
| 7917 | N | 76.31200 | 55.24680 | 66.49890 | 474.00165   | 695.72037   | 62.99122    | 1 |
| 7918 | H | 75.88100 | 54.35180 | 66.58390 | -2128.34693 | 2169.62168  | 813.08508   | 1 |
| 7919 | C | 77.48200 | 55.40080 | 67.33590 | -188.92237  | 684.46151   | -572.07673  | 1 |
| 7920 | H | 77.32600 | 56.29280 | 67.92390 | -2248.40509 | 1524.77759  | -1586.80624 | 1 |
| 7921 | C | 77.62100 | 54.17580 | 68.29490 | 656.69761   | -251.44449  | 580.49541   | 1 |
| 7922 | H | 78.49700 | 54.34580 | 68.95590 | -1355.25345 | 2557.13823  | 1233.91994  | 1 |
| 7923 | H | 76.75900 | 54.12480 | 68.99390 | -186.38175  | -699.89618  | -3061.63901 | 1 |
| 7924 | H | 77.70900 | 53.20180 | 67.76690 | 763.93062   | -1527.50127 | 2642.22938  | 1 |
| 7925 | C | 78.78300 | 55.65680 | 66.64290 | -504.56942  | 517.63806   | 555.79811   | 1 |
| 7926 | O | 79.62000 | 56.37780 | 67.15490 | -520.37260  | -556.13294  | 208.70012   | 1 |
| 7927 | N | 78.96700 | 55.15180 | 65.41590 | -170.22067  | 783.12437   | -265.35529  | 1 |
| 7928 | H | 78.26300 | 54.58880 | 64.98890 | -2830.38522 | 295.52187   | -1341.57092 | 1 |
| 7929 | C | 80.24300 | 55.01480 | 64.81890 | -742.71501  | -319.79120  | -421.37752  | 1 |

|      |   |          |          |          |             |             |             |   |
|------|---|----------|----------|----------|-------------|-------------|-------------|---|
| 7930 | H | 80.93500 | 55.54480 | 65.45490 | -1284.08264 | 1406.65318  | 2504.13355  | 1 |
| 7931 | C | 80.74100 | 53.60680 | 64.68090 | 369.62887   | -790.28411  | -265.09721  | 1 |
| 7932 | H | 81.54200 | 53.50280 | 63.91790 | 1367.07050  | 2829.87709  | -145.39652  | 1 |
| 7933 | H | 79.93900 | 52.99380 | 64.21490 | -1230.72456 | -447.92394  | -2860.57817 | 1 |
| 7934 | C | 81.19200 | 53.07180 | 66.00590 | -439.81834  | 431.09233   | 672.43604   | 1 |
| 7935 | H | 80.21400 | 52.97080 | 66.52290 | 822.31980   | -2077.29909 | 2215.13992  | 1 |
| 7936 | H | 81.98500 | 53.67880 | 66.49090 | 2425.71536  | 1965.56947  | -388.15957  | 1 |
| 7937 | C | 81.80000 | 51.67080 | 65.81990 | -194.87544  | 641.85926   | -617.64978  | 1 |
| 7938 | O | 82.54700 | 51.38680 | 64.86090 | 490.51294   | 511.21769   | 348.82770   | 1 |
| 7939 | O | 81.46400 | 50.77080 | 66.62690 | 586.86452   | 97.56209    | 519.32543   | 1 |
| 7940 | C | 80.24800 | 55.64180 | 63.46990 | -393.60719  | -299.78151  | 765.93435   | 1 |
| 7941 | O | 81.28400 | 56.18180 | 63.05390 | 185.46925   | -763.79646  | -76.44188   | 1 |
| 7942 | N | 79.10300 | 55.73680 | 62.73990 | 1.18328     | 620.27752   | -572.64884  | 1 |
| 7943 | H | 78.21300 | 55.39680 | 63.03490 | -2991.28572 | -323.39887  | 919.70058   | 1 |
| 7944 | C | 79.08500 | 56.37380 | 61.44790 | 456.82388   | -551.93061  | 564.03506   | 1 |
| 7945 | H | 80.07800 | 56.57180 | 61.07090 | 2080.94848  | -158.14349  | 2354.33011  | 1 |
| 7946 | C | 78.41800 | 55.43180 | 60.43790 | 595.38611   | -262.83251  | -638.65911  | 1 |
| 7947 | H | 77.80000 | 55.86380 | 59.62190 | -1201.22448 | 1916.78934  | -2186.59658 | 1 |
| 7948 | H | 77.61800 | 54.90880 | 61.00490 | -2339.72894 | 2080.30056  | -310.23263  | 1 |
| 7949 | C | 79.39200 | 54.30580 | 59.96390 | 523.91545   | 550.26969   | -504.14965  | 1 |
| 7950 | H | 80.20100 | 54.78780 | 59.37390 | 1632.38826  | 612.06032   | 2618.95341  | 1 |
| 7951 | H | 79.81400 | 53.79280 | 60.85490 | 3082.36072  | -630.18896  | -11.85261   | 1 |
| 7952 | C | 78.69400 | 53.25980 | 59.05890 | 535.32051   | -553.97053  | -487.85204  | 1 |
| 7953 | H | 78.18300 | 53.69880 | 58.17490 | -2896.45892 | -1228.09288 | -23.23467   | 1 |
| 7954 | H | 77.89200 | 52.86580 | 59.71890 | 574.79550   | -3068.48749 | -390.15494  | 1 |
| 7955 | C | 79.52300 | 52.08780 | 58.64990 | 119.91645   | -217.39813  | -877.38766  | 1 |
| 7956 | H | 78.88900 | 51.18480 | 58.52290 | 1550.97321  | -136.94496  | 2733.85340  | 1 |
| 7957 | H | 80.17100 | 51.87080 | 59.52690 | -1835.80481 | 76.09568    | -2553.87086 | 1 |
| 7958 | N | 80.41500 | 52.29680 | 57.45590 | -340.75312  | -238.62309  | 734.58738   | 1 |
| 7959 | H | 81.01600 | 53.14280 | 57.39090 | 2077.51361  | 1710.64734  | 1629.67761  | 1 |
| 7960 | H | 80.99800 | 51.45480 | 57.27390 | 2036.95678  | -1679.36001 | -1711.36882 | 1 |
| 7961 | H | 79.79000 | 52.30380 | 56.62490 | -136.84474  | -2232.74320 | 2212.31949  | 1 |
| 7962 | C | 78.36900 | 57.66680 | 61.44790 | -436.04995  | 495.04796   | -629.47515  | 1 |
| 7963 | O | 78.89200 | 58.71780 | 61.08490 | -87.52700   | -612.14327  | 491.16888   | 1 |
| 7964 | N | 77.09500 | 57.58980 | 61.86190 | 607.50853   | 527.28763   | -256.07310  | 1 |
| 7965 | H | 76.77100 | 56.72180 | 62.22990 | 1458.51518  | -1997.19696 | -1944.77865 | 1 |
| 7966 | C | 76.09900 | 58.66480 | 61.66090 | 133.28248   | -784.46330  | 445.31350   | 1 |
| 7967 | H | 76.35500 | 59.15680 | 60.73390 | -2975.33665 | -993.06191  | 243.77466   | 1 |
| 7968 | C | 74.63500 | 58.10880 | 61.42090 | -235.67123  | 686.81576   | -551.53802  | 1 |
| 7969 | H | 74.40700 | 57.32080 | 62.17090 | -2592.77985 | 286.31803   | -1758.90331 | 1 |
| 7970 | C | 73.63900 | 59.25180 | 61.53490 | 412.54753   | 67.66444    | 810.35613   | 1 |
| 7971 | H | 73.66300 | 59.64980 | 62.57190 | 1124.66712  | 1030.89139  | -2751.47470 | 1 |
| 7972 | H | 72.61900 | 58.85480 | 61.34290 | -2442.61912 | -1685.69764 | 1044.15588  | 1 |
| 7973 | H | 73.85800 | 60.07080 | 60.81690 | 1055.85425  | -1531.17459 | 2537.49924  | 1 |
| 7974 | C | 74.54200 | 57.54180 | 59.97590 | -322.67470  | 385.89947   | 760.53510   | 1 |
| 7975 | H | 75.40900 | 56.88280 | 59.75790 | 1220.58053  | -2103.52528 | 1995.89348  | 1 |
| 7976 | H | 73.71200 | 56.81880 | 59.81990 | 2015.11253  | 1366.60431  | 1992.47093  | 1 |
| 7977 | H | 74.61300 | 58.32480 | 59.19190 | 301.43086   | -2515.68369 | 1865.12768  | 1 |
| 7978 | C | 76.21100 | 59.84480 | 62.65990 | -12.43828   | 6.78298     | -911.72928  | 1 |
| 7979 | O | 75.93300 | 60.98580 | 62.30390 | 576.43795   | 213.03201   | -495.94745  | 1 |
| 7980 | N | 76.85000 | 59.71980 | 63.88290 | -395.10264  | 459.78809   | -587.50414  | 1 |
| 7981 | H | 76.85700 | 58.81880 | 64.30890 | -1745.59768 | -2615.25319 | -107.54412  | 1 |
| 7982 | C | 77.20900 | 60.88380 | 64.76190 | 682.57926   | -366.07454  | 481.17147   | 1 |
| 7983 | H | 76.28000 | 61.42980 | 64.83790 | -1968.94770 | 1636.93714  | 1828.08861  | 1 |
| 7984 | C | 77.73400 | 60.39280 | 66.08790 | -528.03511  | -107.94521  | -735.51190  | 1 |
| 7985 | H | 77.00500 | 59.71580 | 66.58190 | 2074.08785  | 1543.57762  | 1792.69461  | 1 |
| 7986 | C | 79.03700 | 59.53180 | 65.95890 | -159.07311  | -559.93267  | -701.87047  | 1 |
| 7987 | H | 79.91700 | 60.21080 | 65.96790 | 3081.88190  | -14.18254   | 632.47849   | 1 |
| 7988 | H | 79.30200 | 58.94780 | 65.05190 | -1119.62649 | -2552.41944 | -1459.38951 | 1 |
| 7989 | H | 79.18400 | 58.75480 | 66.73890 | -2398.91850 | 585.98352   | -1949.36902 | 1 |
| 7990 | C | 77.96200 | 61.63780 | 66.98490 | 237.71013   | -728.35172  | 494.41751   | 1 |
| 7991 | H | 78.82900 | 62.29580 | 66.75890 | 2530.62891  | 1755.47006  | -642.23704  | 1 |

|      |   |          |          |          |             |             |             |   |
|------|---|----------|----------|----------|-------------|-------------|-------------|---|
| 7992 | H | 78.00300 | 61.31880 | 68.04790 | -1566.25258 | 1835.16075  | 2019.22364  | 1 |
| 7993 | H | 77.05900 | 62.28480 | 66.98290 | -1195.10023 | 2422.04621  | -1613.58416 | 1 |
| 7994 | C | 78.17500 | 61.78680 | 63.99590 | 591.43949   | 297.00416   | -627.24705  | 1 |
| 7995 | O | 78.09900 | 62.98780 | 64.12390 | -680.00288  | 401.52001   | -2.23548    | 1 |
| 7996 | N | 79.04000 | 61.27880 | 63.15690 | 461.53381   | 222.71467   | -670.86288  | 1 |
| 7997 | H | 79.21600 | 60.30180 | 63.07090 | -351.47570  | 1952.59601  | 2441.73297  | 1 |
| 7998 | C | 79.83300 | 62.16880 | 62.23990 | -743.29342  | -451.56983  | 273.95362   | 1 |
| 7999 | H | 80.38500 | 62.91080 | 62.79690 | -567.46054  | 2257.40796  | 2116.67760  | 1 |
| 8000 | C | 80.87800 | 61.35180 | 61.53590 | 247.62975   | 876.88086   | -34.79164   | 1 |
| 8001 | H | 81.46900 | 62.00780 | 60.86190 | 1668.15668  | -2662.34459 | 165.53182   | 1 |
| 8002 | H | 80.48200 | 60.49880 | 60.94490 | 3032.26998  | 320.36756   | 775.19650   | 1 |
| 8003 | C | 81.78800 | 60.76180 | 62.55890 | -542.31176  | 452.41814   | -576.77273  | 1 |
| 8004 | C | 81.47900 | 59.48980 | 63.13990 | 610.43304   | 80.23188    | -672.59598  | 1 |
| 8005 | H | 80.54500 | 58.99280 | 62.92390 | 2094.09441  | -2307.64190 | -433.34013  | 1 |
| 8006 | C | 82.33100 | 58.99680 | 64.14690 | -627.84855  | -285.72860  | 596.33579   | 1 |
| 8007 | H | 82.11600 | 58.00880 | 64.52490 | 1288.86116  | -2499.37535 | -1410.73952 | 1 |
| 8008 | C | 83.50600 | 59.67180 | 64.52090 | 597.32487   | 558.50971   | -403.38680  | 1 |
| 8009 | O | 84.34300 | 59.10380 | 65.48790 | 784.82525   | -16.16578   | -86.11168   | 1 |
| 8010 | H | 85.16400 | 59.59980 | 65.50190 | 1989.31837  | 2340.00078  | -682.08136  | 1 |
| 8011 | C | 82.96400 | 61.42180 | 62.94590 | -743.72146  | -227.65914  | -475.92091  | 1 |
| 8012 | H | 83.22800 | 62.37680 | 62.51590 | -1601.44261 | -1953.72382 | -1875.25225 | 1 |
| 8013 | C | 83.79600 | 60.81880 | 63.85490 | -646.60004  | 642.81176   | -12.34635   | 1 |
| 8014 | H | 84.68400 | 61.36680 | 64.13590 | -1077.47896 | 1761.32941  | 2373.81213  | 1 |
| 8015 | C | 79.07200 | 63.01480 | 61.18490 | 755.97992   | -504.10201  | 76.33172    | 1 |
| 8016 | O | 79.35300 | 64.19780 | 61.05590 | 305.27495   | 532.93805   | 496.39850   | 1 |
| 8017 | N | 78.11400 | 62.42880 | 60.51990 | -330.48286  | 752.95759   | -191.07130  | 1 |
| 8018 | H | 77.89300 | 61.46280 | 60.63090 | -1800.74236 | -2418.28065 | -898.59439  | 1 |
| 8019 | C | 77.45200 | 63.00280 | 59.37490 | -171.02718  | 887.28241   | 122.19095   | 1 |
| 8020 | H | 77.88600 | 63.93180 | 59.03590 | 1745.28610  | -293.13041  | -2601.20688 | 1 |
| 8021 | C | 77.51400 | 62.02580 | 58.15990 | 496.29923   | 423.73091   | -636.85963  | 1 |
| 8022 | H | 78.58700 | 61.74980 | 58.07590 | -1987.58359 | 1594.16214  | 1845.63940  | 1 |
| 8023 | C | 76.64800 | 60.74380 | 58.20490 | -838.08345  | 59.05954    | 354.37142   | 1 |
| 8024 | H | 76.89000 | 60.04880 | 57.37290 | 1950.03968  | -933.72632  | -2285.54733 | 1 |
| 8025 | H | 75.57900 | 61.03780 | 58.26890 | -1395.33314 | 2687.81368  | 852.60148   | 1 |
| 8026 | H | 76.88300 | 60.24480 | 59.16990 | -855.71685  | 683.96007   | 2949.26661  | 1 |
| 8027 | C | 77.07000 | 62.83080 | 56.90790 | -570.77126  | -609.60883  | 366.12599   | 1 |
| 8028 | H | 77.53500 | 63.83980 | 56.88090 | 476.65632   | -683.53386  | 3033.77759  | 1 |
| 8029 | H | 77.24600 | 62.12980 | 56.06390 | -2189.15145 | -1811.11047 | 1351.19245  | 1 |
| 8030 | H | 75.98500 | 63.07180 | 56.90790 | -1330.65511 | -1417.88160 | 2473.29638  | 1 |
| 8031 | C | 75.96700 | 63.43180 | 59.71690 | -272.22670  | -592.10152  | -637.77693  | 1 |
| 8032 | O | 75.23100 | 63.95280 | 58.88690 | -83.50511   | 410.59184   | -669.37917  | 1 |
| 8033 | N | 75.55600 | 63.14580 | 60.96990 | -150.57332  | 825.49864   | 92.47680    | 1 |
| 8034 | H | 76.07500 | 62.48980 | 61.51290 | 504.16011   | 2415.79102  | 1951.41040  | 1 |
| 8035 | C | 74.24300 | 63.52480 | 61.53090 | -523.91201  | 361.70244   | -652.79288  | 1 |
| 8036 | H | 73.64800 | 62.66780 | 61.80990 | -1282.59050 | 2670.70883  | 1058.53775  | 1 |
| 8037 | H | 73.74100 | 64.17580 | 60.82990 | -2164.17609 | -669.96139  | -2183.05287 | 1 |
| 8038 | C | 74.39400 | 64.47380 | 62.76890 | 667.40836   | -593.81190  | -182.76899  | 1 |
| 8039 | O | 73.38900 | 65.08080 | 63.16490 | 213.44088   | 492.89450   | 578.90002   | 1 |
| 8040 | N | 75.62000 | 64.65580 | 63.34290 | 407.76159   | -528.08353  | 517.23356   | 1 |
| 8041 | H | 76.40600 | 64.05980 | 63.19790 | -1565.45391 | -724.90537  | 2630.98698  | 1 |
| 8042 | C | 75.80700 | 65.65780 | 64.37690 | 248.54503   | 560.24445   | 675.13149   | 1 |
| 8043 | H | 74.96800 | 66.32780 | 64.49790 | -134.98160  | 2855.56669  | -1313.67617 | 1 |
| 8044 | C | 76.01200 | 64.93380 | 65.67590 | 278.61279   | -370.56758  | 785.17870   | 1 |
| 8045 | H | 76.89500 | 64.26080 | 65.65490 | 2093.60022  | -2303.69237 | -456.14232  | 1 |
| 8046 | C | 76.30800 | 65.94080 | 66.83790 | 659.81054   | -153.30146  | -610.40947  | 1 |
| 8047 | H | 77.32300 | 66.35880 | 66.66890 | 2604.30123  | 1417.98064  | -1051.27172 | 1 |
| 8048 | H | 76.23100 | 65.35680 | 67.77990 | 1842.88595  | 1275.58512  | 2207.91308  | 1 |
| 8049 | H | 75.48500 | 66.68680 | 66.80890 | 2557.02413  | -1828.61020 | -126.64340  | 1 |
| 8050 | C | 74.73100 | 64.15080 | 66.04990 | -260.84914  | 590.19267   | -644.26807  | 1 |
| 8051 | H | 73.85200 | 64.82480 | 66.13390 | -1559.89301 | -2590.09786 | -869.68563  | 1 |
| 8052 | H | 74.86500 | 63.63880 | 67.02690 | -1583.21081 | 890.33354   | -2568.84720 | 1 |
| 8053 | H | 74.49800 | 63.28680 | 65.39090 | -1477.86579 | -1563.69327 | -2295.43074 | 1 |

|      |   |          |          |          |             |             |             |   |
|------|---|----------|----------|----------|-------------|-------------|-------------|---|
| 8054 | C | 76.98200 | 66.54980 | 64.00090 | -311.36156  | -663.92101  | 541.95376   | 1 |
| 8055 | O | 76.81300 | 67.75280 | 63.82890 | 493.09283   | -568.06205  | 240.40009   | 1 |
| 8056 | N | 78.17500 | 65.95380 | 63.88490 | 669.45657   | 322.63646   | -400.50705  | 1 |
| 8057 | H | 78.34800 | 64.98480 | 64.04090 | -1952.26483 | -1901.95370 | 1571.45169  | 1 |
| 8058 | C | 79.38000 | 66.79380 | 63.80390 | 275.33721   | 269.64065   | -826.39842  | 1 |
| 8059 | H | 79.33300 | 67.52180 | 64.60090 | 435.59070   | -1565.41234 | -2694.06221 | 1 |
| 8060 | C | 80.72500 | 65.95580 | 63.88190 | 783.96094   | -408.45164  | -223.65934  | 1 |
| 8061 | H | 81.57500 | 66.47980 | 63.39390 | 952.56650   | 2545.70453  | 1584.37108  | 1 |
| 8062 | H | 80.62700 | 65.05980 | 63.23190 | -935.60924  | -1361.43225 | -2677.56677 | 1 |
| 8063 | C | 81.07600 | 65.46380 | 65.23690 | 756.59391   | -502.07413  | -83.29604   | 1 |
| 8064 | C | 81.17800 | 64.13780 | 65.68490 | -792.75719  | -351.50764  | -281.83227  | 1 |
| 8065 | H | 81.15400 | 63.23580 | 65.09090 | 409.44274   | 1620.97532  | -2665.14950 | 1 |
| 8066 | N | 81.54500 | 64.11680 | 67.03990 | -628.07833  | 249.30732   | -505.99977  | 1 |
| 8067 | H | 81.89000 | 63.41080 | 67.61890 | -799.53679  | 1852.52640  | -2413.94140 | 1 |
| 8068 | C | 81.67300 | 65.44380 | 67.41590 | 799.83290   | -399.14944  | -179.99461  | 1 |
| 8069 | C | 81.36600 | 66.28480 | 66.35090 | -261.53011  | -603.09923  | 631.92114   | 1 |
| 8070 | C | 81.43800 | 67.69780 | 66.49390 | 449.92375   | -625.12954  | -488.09085  | 1 |
| 8071 | H | 81.35400 | 68.36680 | 65.64990 | 2137.35506  | 1826.49301  | 1412.04209  | 1 |
| 8072 | C | 81.95200 | 68.19480 | 67.67890 | 795.64160   | -402.47773  | 190.83272   | 1 |
| 8073 | H | 82.20600 | 69.23880 | 67.78590 | -1100.00132 | 2894.86718  | 554.94806   | 1 |
| 8074 | C | 81.95100 | 65.96580 | 68.65390 | -476.80441  | 764.53960   | 139.95628   | 1 |
| 8075 | H | 82.12500 | 65.34080 | 69.51690 | 2152.14988  | 774.02491   | 2160.40796  | 1 |
| 8076 | C | 82.16800 | 67.36880 | 68.71590 | 112.25910   | -691.74216  | -583.38811  | 1 |
| 8077 | H | 82.68500 | 67.67280 | 69.61390 | -1251.40173 | -1419.70961 | 2513.29357  | 1 |
| 8078 | C | 79.54100 | 67.60780 | 62.56990 | -662.04951  | -398.77358  | -483.86060  | 1 |
| 8079 | O | 79.68900 | 68.83180 | 62.62190 | -72.69763   | 683.15442   | 389.41279   | 1 |
| 8080 | N | 79.43900 | 66.98780 | 61.39490 | 234.11088   | -475.89358  | -656.80263  | 1 |
| 8081 | H | 79.52900 | 65.99580 | 61.36090 | -1658.50736 | -143.70214  | 2669.63092  | 1 |
| 8082 | C | 79.40100 | 67.72880 | 60.09790 | 664.72391   | -587.29714  | 211.36507   | 1 |
| 8083 | H | 80.27400 | 68.36380 | 60.06790 | 816.95783   | 600.97156   | -2978.19397 | 1 |
| 8084 | C | 79.57800 | 66.71580 | 58.97690 | -89.51908   | 129.76712   | 898.10792   | 1 |
| 8085 | H | 79.06400 | 65.76680 | 59.23990 | 1520.52353  | 1979.92785  | 1914.71150  | 1 |
| 8086 | C | 79.02300 | 67.18080 | 57.59490 | -566.26586  | 586.52737   | 408.38661   | 1 |
| 8087 | H | 79.08700 | 66.33780 | 56.87390 | -745.45430  | -1568.61513 | 2623.35104  | 1 |
| 8088 | H | 77.97200 | 67.53780 | 57.64990 | 2928.32411  | 1084.36958  | -383.77957  | 1 |
| 8089 | H | 79.57700 | 68.09680 | 57.29790 | 2043.77050  | -2084.93708 | -1172.29081 | 1 |
| 8090 | C | 81.08100 | 66.50980 | 58.92390 | 388.43729   | 695.20120   | 444.14273   | 1 |
| 8091 | H | 81.56100 | 66.51280 | 59.92590 | 2721.90919  | -1233.68186 | 983.59831   | 1 |
| 8092 | H | 81.53800 | 67.31980 | 58.31590 | 1799.36522  | 2401.52655  | 945.08269   | 1 |
| 8093 | C | 81.48100 | 65.22680 | 58.17990 | 554.61258   | -314.94345  | -651.66442  | 1 |
| 8094 | H | 82.58100 | 65.23080 | 58.01990 | -548.99997  | -2333.92582 | -2037.06051 | 1 |
| 8095 | H | 81.14600 | 64.38880 | 58.82690 | -1062.72655 | 1845.77819  | 2315.58662  | 1 |
| 8096 | H | 81.07500 | 65.34680 | 57.15190 | -2526.76737 | -1845.25930 | -329.68320  | 1 |
| 8097 | C | 78.20300 | 68.68480 | 59.97390 | -169.06395  | 509.15556   | 737.31201   | 1 |
| 8098 | O | 78.39300 | 69.81780 | 59.50690 | -730.96421  | -163.19824  | 250.36949   | 1 |
| 8099 | N | 76.94300 | 68.38580 | 60.25590 | 382.34420   | -450.46081  | 602.96788   | 1 |
| 8100 | C | 76.40600 | 67.04980 | 60.23790 | 101.55111   | 39.63848    | -905.29949  | 1 |
| 8101 | H | 76.84500 | 66.50280 | 61.09990 | -35.26389   | -2364.76667 | -2074.81596 | 1 |
| 8102 | H | 76.61900 | 66.55080 | 59.26890 | -2215.49163 | 1831.81047  | -1278.39488 | 1 |
| 8103 | C | 75.89100 | 69.36780 | 60.47890 | -503.71622  | -382.96712  | -656.54944  | 1 |
| 8104 | H | 75.63800 | 69.83980 | 59.54090 | 2410.32531  | 1718.91546  | -1064.84167 | 1 |
| 8105 | C | 74.79500 | 68.58480 | 61.07990 | 322.65296   | -422.80851  | 740.66121   | 1 |
| 8106 | H | 74.84900 | 68.53780 | 62.18890 | -1040.70574 | -1901.65108 | -2280.10547 | 1 |
| 8107 | H | 73.81200 | 69.09380 | 60.98690 | 2242.03676  | -2148.05451 | -507.30583  | 1 |
| 8108 | C | 74.91000 | 67.23780 | 60.38990 | -325.40783  | -656.23778  | -543.05867  | 1 |
| 8109 | H | 74.48000 | 66.36180 | 60.92190 | 2405.11862  | 197.92356   | 2018.52840  | 1 |
| 8110 | H | 74.36300 | 67.34880 | 59.42990 | -56.49788   | 846.00936   | 3029.73636  | 1 |
| 8111 | C | 76.27700 | 70.60180 | 61.32290 | 703.01954   | -46.61631   | -578.82766  | 1 |
| 8112 | O | 75.93900 | 71.65980 | 60.85690 | -723.71387  | -201.97021  | -243.05039  | 1 |
| 8113 | N | 76.98300 | 70.49280 | 62.53090 | 441.73769   | 351.29978   | 627.79660   | 1 |
| 8114 | H | 77.22900 | 69.59880 | 62.89790 | -998.57522  | -2127.28062 | 2091.82956  | 1 |
| 8115 | C | 77.34300 | 71.60280 | 63.34590 | 51.77988    | 707.65465   | -572.70825  | 1 |

|      |   |          |          |          |             |             |             |   |
|------|---|----------|----------|----------|-------------|-------------|-------------|---|
| 8116 | H | 76.43300 | 72.10680 | 63.63490 | 2898.13603  | -1172.21801 | -353.46674  | 1 |
| 8117 | C | 78.07100 | 71.11780 | 64.56590 | -253.11347  | 659.10138   | -577.03548  | 1 |
| 8118 | H | 77.40400 | 70.42680 | 65.12390 | -1411.15697 | -2314.43961 | -1596.94444 | 1 |
| 8119 | H | 78.32800 | 71.98480 | 65.21090 | -2709.75096 | 367.84358   | 1555.68861  | 1 |
| 8120 | H | 79.06500 | 70.67980 | 64.33290 | -3067.13397 | 137.45548   | -687.03816  | 1 |
| 8121 | C | 78.26200 | 72.58380 | 62.57290 | 682.49780   | 447.18425   | 407.03071   | 1 |
| 8122 | O | 77.99600 | 73.79480 | 62.52490 | -478.25785  | 550.39124   | 303.25920   | 1 |
| 8123 | N | 79.28600 | 72.04380 | 61.88190 | -190.06427  | -631.23312  | -527.34487  | 1 |
| 8124 | H | 79.45000 | 71.06180 | 61.82190 | 1714.14310  | 1948.78440  | -1778.25167 | 1 |
| 8125 | C | 80.16600 | 72.83480 | 60.97290 | -481.45767  | -367.76633  | 681.46712   | 1 |
| 8126 | H | 80.56600 | 73.62780 | 61.58790 | 1.92333     | 3141.55384  | -169.88815  | 1 |
| 8127 | C | 81.26100 | 71.99780 | 60.26490 | -642.24492  | -600.79952  | 240.85763   | 1 |
| 8128 | H | 80.87300 | 71.21680 | 59.57690 | 1253.90065  | -2877.67719 | -211.97497  | 1 |
| 8129 | H | 81.86300 | 72.79880 | 59.78490 | 1351.93614  | -2410.42112 | -1503.45100 | 1 |
| 8130 | C | 82.21600 | 71.17680 | 61.14290 | 37.20441    | 698.82925   | 584.55497   | 1 |
| 8131 | H | 81.67600 | 70.33280 | 61.62390 | -1335.69003 | -1079.49409 | -2636.06731 | 1 |
| 8132 | C | 83.30900 | 70.67280 | 60.22790 | -647.67314  | -293.02833  | 571.05596   | 1 |
| 8133 | H | 82.82200 | 70.02180 | 59.46990 | -334.40520  | 1911.46601  | 2476.42829  | 1 |
| 8134 | H | 83.81700 | 71.51980 | 59.71990 | -1094.50796 | 2151.03179  | 2018.25192  | 1 |
| 8135 | H | 84.03400 | 70.09680 | 60.84190 | 2169.42575  | -2232.25064 | -457.02871  | 1 |
| 8136 | C | 82.83200 | 72.00880 | 62.34890 | -734.31262  | -29.66428   | -539.77404  | 1 |
| 8137 | H | 81.97800 | 72.18080 | 63.03890 | 1618.46271  | 2641.76034  | 547.63768   | 1 |
| 8138 | H | 83.61500 | 71.40980 | 62.85990 | 1034.92887  | 1218.91969  | -2709.49871 | 1 |
| 8139 | H | 83.28400 | 72.93580 | 61.93590 | 904.06768   | 2719.56616  | 1298.01685  | 1 |
| 8140 | C | 79.39800 | 73.56380 | 59.85490 | -412.89558  | 811.61597   | -47.41066   | 1 |
| 8141 | O | 79.60700 | 74.74080 | 59.58190 | -265.26780  | 686.81507   | 285.56135   | 1 |
| 8142 | N | 78.44400 | 72.86480 | 59.19490 | 630.45625   | 456.03448   | -327.45955  | 1 |
| 8143 | H | 78.25100 | 71.91980 | 59.44990 | -2228.30596 | 1238.06642  | 1843.92796  | 1 |
| 8144 | C | 77.51900 | 73.42580 | 58.26290 | 466.52900   | -601.72352  | 501.72752   | 1 |
| 8145 | H | 78.15500 | 73.93980 | 57.55690 | 1337.24937  | -2722.63665 | -835.00899  | 1 |
| 8146 | C | 76.60000 | 72.37380 | 57.56490 | 309.95694   | 430.93829   | -741.39725  | 1 |
| 8147 | H | 75.90000 | 72.97980 | 56.94990 | 342.40933   | -2245.93785 | 2176.40650  | 1 |
| 8148 | H | 76.05600 | 71.96080 | 58.44090 | 1084.66154  | 928.89903   | -2803.36979 | 1 |
| 8149 | C | 77.41200 | 71.39580 | 56.68990 | 866.46906   | 252.80207   | 129.51252   | 1 |
| 8150 | H | 78.23700 | 70.92380 | 57.26490 | -1870.34412 | -1592.98019 | 1965.31250  | 1 |
| 8151 | C | 76.51500 | 70.32580 | 56.03890 | -579.50716  | -525.10325  | 468.92328   | 1 |
| 8152 | H | 75.79800 | 70.79480 | 55.33190 | 1948.98959  | -2450.34638 | 308.97967   | 1 |
| 8153 | H | 77.06300 | 69.52180 | 55.50390 | 935.83366   | -2836.40874 | 988.54796   | 1 |
| 8154 | H | 76.02800 | 69.82180 | 56.90090 | -2204.04567 | 997.94039   | -2011.10017 | 1 |
| 8155 | C | 78.08700 | 72.20080 | 55.55590 | -548.67517  | -215.89980  | 695.55290   | 1 |
| 8156 | H | 78.93000 | 72.84180 | 55.89090 | 2446.53965  | -890.45067  | -1766.28638 | 1 |
| 8157 | H | 77.35600 | 72.90380 | 55.10290 | -19.42709   | -3080.31590 | -639.92405  | 1 |
| 8158 | H | 78.47800 | 71.55980 | 54.73690 | -1972.30071 | -1450.31055 | 1976.07071  | 1 |
| 8159 | C | 76.65800 | 74.51080 | 58.81890 | 231.98561   | 562.33357   | -679.27508  | 1 |
| 8160 | O | 76.44500 | 75.53780 | 58.13990 | 714.06837   | -40.17815   | -334.84222  | 1 |
| 8161 | N | 76.13800 | 74.39180 | 60.04090 | 617.36970   | 286.62132   | -499.37476  | 1 |
| 8162 | H | 76.10800 | 73.55980 | 60.58990 | 2165.59712  | -1853.48418 | -1331.54487 | 1 |
| 8163 | C | 75.18900 | 75.41980 | 60.53390 | 701.13198   | -525.05250  | 253.34724   | 1 |
| 8164 | H | 74.52600 | 75.63580 | 59.70990 | 942.78482   | -2944.10920 | 584.46903   | 1 |
| 8165 | C | 74.32700 | 74.98880 | 61.72290 | -449.78881  | -343.47278  | -714.95978  | 1 |
| 8166 | H | 73.68700 | 75.85480 | 61.99690 | 2635.01368  | 188.31622   | 1708.64454  | 1 |
| 8167 | H | 75.08200 | 74.73680 | 62.49790 | -2836.22068 | 1121.91519  | 771.61179   | 1 |
| 8168 | C | 73.43400 | 73.79580 | 61.37990 | -400.29774  | 366.91327   | 732.52125   | 1 |
| 8169 | H | 73.87200 | 73.05280 | 60.67990 | -2481.98041 | -1112.62012 | 1581.16285  | 1 |
| 8170 | C | 73.20600 | 72.96180 | 62.64590 | 524.56692   | 373.61649   | -645.51628  | 1 |
| 8171 | H | 72.47500 | 72.15780 | 62.41390 | -135.19921  | 1449.58460  | -2789.02347 | 1 |
| 8172 | H | 72.89900 | 73.58880 | 63.51090 | -219.67440  | -1200.96979 | 2899.59324  | 1 |
| 8173 | H | 74.09900 | 72.35780 | 62.91390 | 1564.87649  | 1580.78756  | -2224.97157 | 1 |
| 8174 | C | 72.04600 | 74.18280 | 60.80190 | -273.69235  | 416.04256   | 763.84036   | 1 |
| 8175 | H | 71.38500 | 73.30880 | 60.62390 | 749.99034   | -2806.24561 | 1208.60509  | 1 |
| 8176 | H | 71.56400 | 75.00680 | 61.36990 | 1626.87072  | -1973.16836 | -1832.51863 | 1 |
| 8177 | H | 72.15400 | 74.59180 | 59.77490 | -2157.38483 | -596.93883  | -2210.78741 | 1 |



|      |   |          |          |          |             |             |             |   |
|------|---|----------|----------|----------|-------------|-------------|-------------|---|
| 8178 | C | 75.85100 | 76.71480 | 60.91390 | 422.05272   | -388.77636  | -708.64338  | 1 |
| 8179 | O | 75.24100 | 77.76980 | 61.06290 | -536.29828  | 147.64734   | 560.54585   | 1 |
| 8180 | N | 77.17700 | 76.61080 | 61.06990 | 435.26067   | 426.40441   | -584.29420  | 1 |
| 8181 | H | 77.61500 | 75.74080 | 60.85690 | 3076.65370  | -173.31295  | 634.34286   | 1 |
| 8182 | C | 78.06900 | 77.62580 | 61.56690 | -385.31104  | 623.44216   | -542.50003  | 1 |
| 8183 | H | 77.44900 | 78.34180 | 62.08490 | 1219.20639  | 2253.68843  | 1825.55484  | 1 |
| 8184 | C | 79.05700 | 77.17280 | 62.62790 | -209.66098  | -676.59296  | 574.20837   | 1 |
| 8185 | H | 79.78300 | 77.96780 | 62.90290 | -2046.86423 | 791.12563   | 2254.48293  | 1 |
| 8186 | O | 79.81600 | 75.99880 | 62.30490 | -537.29814  | 487.37630   | -312.09339  | 1 |
| 8187 | H | 79.18000 | 75.28680 | 62.20490 | 1726.20155  | -1706.24308 | 2001.79644  | 1 |
| 8188 | C | 78.13500 | 76.76780 | 63.83490 | 244.30263   | -860.47520  | 177.05836   | 1 |
| 8189 | H | 77.36500 | 77.55080 | 64.00490 | -1786.84574 | -1433.28235 | -2156.64328 | 1 |
| 8190 | H | 78.74600 | 76.71880 | 64.76190 | -1218.63170 | 2026.93918  | 2074.77241  | 1 |
| 8191 | H | 77.51500 | 75.84680 | 63.79690 | -466.71224  | -692.76123  | 3033.23059  | 1 |
| 8192 | C | 78.80100 | 78.28280 | 60.43990 | -665.85034  | 456.81807   | -423.57004  | 1 |
| 8193 | O | 79.82000 | 78.91780 | 60.65690 | -552.27533  | 557.56958   | 87.95085    | 1 |
| 8194 | N | 78.35900 | 78.17880 | 59.20190 | -162.28026  | -574.47720  | 596.91989   | 1 |
| 8195 | H | 77.57900 | 77.59780 | 58.98190 | -367.52315  | -1901.80390 | -2479.17222 | 1 |
| 8196 | C | 78.86300 | 79.05080 | 58.16390 | -14.04506   | -447.73381  | -794.22174  | 1 |
| 8197 | H | 79.93700 | 78.96980 | 58.24790 | -1992.67779 | -1609.82420 | 1826.45216  | 1 |
| 8198 | C | 78.55500 | 78.55580 | 56.73090 | 655.95336   | -529.40855  | -347.71078  | 1 |
| 8199 | H | 77.45400 | 78.54380 | 56.58590 | -2215.42451 | 2227.87174  | -163.42572  | 1 |
| 8200 | C | 79.23400 | 79.47680 | 55.69190 | -159.48417  | 502.42681   | 744.03166   | 1 |
| 8201 | H | 79.23300 | 79.06580 | 54.66090 | 2879.15674  | -1266.80384 | 62.37558    | 1 |
| 8202 | H | 78.67300 | 80.41380 | 55.48890 | 3132.71444  | -55.29409   | -285.07721  | 1 |
| 8203 | H | 80.26600 | 79.78080 | 55.97290 | -366.21256  | -1156.54205 | -2902.84775 | 1 |
| 8204 | C | 79.06900 | 77.10780 | 56.54390 | -394.22383  | 621.10379   | -538.76587  | 1 |
| 8205 | H | 79.00500 | 76.45980 | 57.44390 | -2499.35262 | -1550.88304 | 1116.34425  | 1 |
| 8206 | H | 80.15200 | 77.14780 | 56.29690 | 700.62728   | 2262.72359  | -2070.61093 | 1 |
| 8207 | C | 78.26600 | 76.33080 | 55.51690 | -565.96897  | -633.65471  | -331.07678  | 1 |
| 8208 | H | 78.23500 | 76.94280 | 54.59090 | -1800.90823 | -2245.03912 | -1270.73015 | 1 |
| 8209 | H | 77.16900 | 76.27180 | 55.68190 | 2418.72941  | -1963.84501 | 437.36376   | 1 |
| 8210 | H | 78.74700 | 75.33680 | 55.39290 | 667.24415   | -2148.85118 | 2198.96568  | 1 |
| 8211 | C | 78.55300 | 80.52180 | 58.35990 | 641.49862   | -13.07469   | -647.88856  | 1 |
| 8212 | O | 79.45400 | 81.34280 | 58.28290 | 429.95962   | -391.11820  | -534.59191  | 1 |
| 8213 | N | 77.30800 | 80.94280 | 58.79090 | -701.89462  | 110.25088   | 455.91773   | 1 |
| 8214 | C | 76.06600 | 80.31780 | 58.47990 | -458.25423  | 444.20150   | -651.25962  | 1 |
| 8215 | H | 75.80500 | 79.49080 | 59.17390 | 1834.49021  | 2545.03429  | 235.94993   | 1 |
| 8216 | H | 76.09400 | 79.92480 | 57.44090 | -2289.01874 | 1680.45934  | 1354.50206  | 1 |
| 8217 | C | 77.11200 | 82.34380 | 59.28390 | 685.39954   | 588.08551   | 125.83284   | 1 |
| 8218 | H | 77.25900 | 83.06080 | 58.48990 | -2803.66106 | -1131.60613 | -870.16002  | 1 |
| 8219 | C | 75.62100 | 82.35380 | 59.68890 | 265.07419   | 809.50247   | -325.41118  | 1 |
| 8220 | H | 75.54600 | 82.00980 | 60.74290 | -1970.85200 | 2004.33411  | -1413.01571 | 1 |
| 8221 | H | 75.08500 | 83.32580 | 59.65190 | -1975.54576 | 246.85397   | 2436.08462  | 1 |
| 8222 | C | 75.00600 | 81.34580 | 58.64290 | -729.52436  | 511.26967   | -194.54699  | 1 |
| 8223 | H | 74.62200 | 81.75380 | 57.68290 | 27.38355    | 2677.86276  | 1651.21997  | 1 |
| 8224 | H | 74.09500 | 80.94680 | 59.13790 | -1442.41782 | -2487.04692 | -1277.59722 | 1 |
| 8225 | C | 78.03700 | 82.78180 | 60.40490 | -288.39612  | -864.61200  | -26.92155   | 1 |
| 8226 | O | 78.48700 | 83.90380 | 60.44290 | 71.24541    | -687.37751  | -382.18253  | 1 |
| 8227 | N | 78.30300 | 81.91980 | 61.40090 | 198.69635   | 742.53901   | 349.03850   | 1 |
| 8228 | H | 77.87300 | 81.02280 | 61.32790 | -2899.48114 | 1090.08704  | 550.40495   | 1 |
| 8229 | C | 79.25100 | 82.16380 | 62.47790 | -722.98745  | 417.40509   | -366.76032  | 1 |
| 8230 | H | 78.89200 | 83.09180 | 62.89790 | 1628.09794  | -2323.51493 | -1359.70648 | 1 |
| 8231 | C | 79.28600 | 81.04580 | 63.50590 | 819.55453   | 342.94851   | 205.34772   | 1 |
| 8232 | H | 80.16800 | 81.03780 | 64.18090 | -2671.41909 | 1114.04009  | -1233.15082 | 1 |
| 8233 | H | 79.41000 | 80.13580 | 62.87990 | -1620.82808 | -1182.19392 | 2423.54288  | 1 |
| 8234 | C | 78.00000 | 80.97680 | 64.30490 | 482.25145   | 637.00377   | -439.44368  | 1 |
| 8235 | O | 77.75200 | 81.96580 | 65.02190 | -547.32903  | 563.75195   | 79.00572    | 1 |
| 8236 | O | 77.25500 | 79.98480 | 64.24790 | 471.88587   | -373.17630  | 511.55685   | 1 |
| 8237 | C | 80.65900 | 82.48880 | 61.91190 | -606.37378  | -460.62791  | 501.58127   | 1 |
| 8238 | O | 81.35100 | 83.42380 | 62.34390 | 426.03667   | -539.98626  | 387.98817   | 1 |
| 8239 | N | 81.09300 | 81.65880 | 60.95190 | 222.40387   | 228.73368   | 781.59434   | 1 |

|      |   |          |          |          |             |             |             |   |
|------|---|----------|----------|----------|-------------|-------------|-------------|---|
| 8240 | H | 80.60900 | 80.81980 | 60.71590 | 878.16134   | -204.40596  | -3014.17934 | 1 |
| 8241 | C | 82.35100 | 81.84880 | 60.18090 | -65.79329   | -908.34534  | 45.06656    | 1 |
| 8242 | H | 83.14500 | 81.81080 | 60.91190 | 960.33334   | -2233.31578 | -1997.06954 | 1 |
| 8243 | C | 82.61200 | 80.57680 | 59.36790 | 656.24266   | -411.00044  | -481.53422  | 1 |
| 8244 | H | 81.68500 | 80.38480 | 58.78690 | 2137.83445  | 256.08662   | -2293.97248 | 1 |
| 8245 | H | 82.65500 | 79.66680 | 60.00390 | 1811.37974  | 2258.80147  | 1230.83126  | 1 |
| 8246 | C | 83.86900 | 80.51280 | 58.43890 | 592.11703   | -547.29352  | -425.81478  | 1 |
| 8247 | C | 85.11900 | 81.10280 | 58.74990 | 458.80924   | -635.21661  | -466.30992  | 1 |
| 8248 | H | 85.29600 | 81.67880 | 59.64590 | -1969.18704 | -1703.49115 | 1765.96900  | 1 |
| 8249 | C | 86.16200 | 81.10780 | 57.83790 | -577.35659  | -705.72029  | -8.32061    | 1 |
| 8250 | H | 87.06200 | 81.63480 | 58.11890 | 917.19045   | 2209.95698  | -2042.81131 | 1 |
| 8251 | C | 85.98200 | 80.43580 | 56.65890 | -883.29316  | 208.07235   | 89.16331    | 1 |
| 8252 | H | 86.69700 | 80.46980 | 55.84990 | -1065.22346 | -984.63313  | -2791.77772 | 1 |
| 8253 | C | 83.79600 | 79.72480 | 57.31990 | 462.88303   | 622.13985   | -479.72107  | 1 |
| 8254 | H | 82.86100 | 79.25980 | 57.04390 | -888.21074  | 1701.64388  | -2492.73264 | 1 |
| 8255 | C | 84.80600 | 79.76980 | 56.36290 | 531.78267   | -487.63267  | -557.55948  | 1 |
| 8256 | H | 84.81800 | 79.17080 | 55.46490 | -2241.90357 | -1139.90078 | -1890.16423 | 1 |
| 8257 | C | 82.49700 | 83.11280 | 59.39990 | -4.58079    | -673.93494  | -614.20006  | 1 |
| 8258 | O | 83.51000 | 83.80280 | 59.50090 | 289.26115   | -607.22467  | 413.80360   | 1 |
| 8259 | N | 81.49500 | 83.40680 | 58.56490 | -483.96202  | -633.02836  | -278.79768  | 1 |
| 8260 | H | 80.75700 | 82.74780 | 58.43890 | -2093.70205 | -2006.71631 | 1219.72440  | 1 |
| 8261 | C | 81.46900 | 84.64280 | 57.71890 | 451.47373   | -784.39792  | 111.09623   | 1 |
| 8262 | H | 82.41100 | 84.77380 | 57.20590 | -1818.09101 | -1530.39103 | -2061.71642 | 1 |
| 8263 | C | 80.38000 | 84.70980 | 56.67890 | 591.42356   | -262.21945  | -642.58084  | 1 |
| 8264 | H | 79.41800 | 84.79380 | 57.22890 | -1933.84250 | -1014.42248 | -2264.82372 | 1 |
| 8265 | C | 80.45686 | 85.88293 | 55.79994 | 413.04579   | 141.05967   | -645.30895  | 1 |
| 8266 | H | 80.68751 | 86.80430 | 56.45108 | -931.50006  | 1914.90435  | 325.54677   | 1 |
| 8267 | H | 79.55866 | 86.14063 | 55.22972 | 2176.19515  | 2042.98896  | -4003.35956 | 1 |
| 8268 | H | 81.28014 | 85.80988 | 55.08561 | -173.47066  | -802.50749  | 1787.08957  | 1 |
| 8269 | C | 80.27800 | 83.41680 | 55.77490 | 71.22585    | -730.26392  | 541.38017   | 1 |
| 8270 | H | 80.08400 | 82.53880 | 56.42690 | 1881.30631  | 2002.94117  | -1532.03769 | 1 |
| 8271 | H | 81.26700 | 83.29280 | 55.28390 | 586.69067   | 2093.17112  | 2274.34715  | 1 |
| 8272 | C | 79.15000 | 83.46480 | 54.79990 | 521.37426   | -376.54092  | -646.40298  | 1 |
| 8273 | H | 79.31000 | 82.70080 | 54.00990 | -857.53232  | 1957.92398  | 2308.54895  | 1 |
| 8274 | H | 79.14200 | 84.43280 | 54.25390 | 1805.22892  | -574.56076  | -2511.82299 | 1 |
| 8275 | H | 78.13300 | 83.27280 | 55.20590 | 1499.02114  | -2753.28145 | -265.71247  | 1 |
| 8276 | C | 81.38667 | 85.93525 | 58.68576 | -475.58116  | -254.48192  | -487.36571  | 1 |
| 8277 | O | 81.97184 | 86.98951 | 58.42863 | -351.06907  | 716.89081   | 1217.01555  | 1 |
| 8278 | N | 80.63890 | 85.80162 | 59.82376 | 9.51262     | 467.27370   | -128.09444  | 1 |
| 8279 | H | 80.02851 | 85.02462 | 60.05358 | -14.41479   | -1372.21897 | -532.25364  | 1 |
| 8280 | C | 80.33376 | 87.11158 | 60.27496 | -422.47009  | -495.31332  | 232.28871   | 1 |
| 8281 | H | 80.76132 | 87.91241 | 59.53880 | -70.04854   | 2162.44828  | 1003.53519  | 1 |
| 8282 | C | 78.74030 | 87.29488 | 60.37232 | -241.24973  | 166.09362   | 230.35635   | 1 |
| 8283 | H | 78.28586 | 86.58599 | 61.06598 | 1095.78749  | 789.36063   | -1226.43986 | 1 |
| 8284 | H | 78.47875 | 88.29338 | 60.75210 | -243.40348  | -886.45688  | 75.49631    | 1 |
| 8285 | C | 78.07715 | 87.18127 | 58.98954 | 193.24388   | 464.59047   | 821.11010   | 1 |
| 8286 | C | 77.99095 | 88.32427 | 58.07941 | -483.53674  | 723.55425   | -312.72950  | 1 |
| 8287 | H | 78.44477 | 89.27134 | 58.35781 | -298.71723  | 427.96880   | 1880.68178  | 1 |
| 8288 | C | 77.61558 | 88.18080 | 56.74189 | 316.16586   | 148.20284   | -173.20898  | 1 |
| 8289 | H | 77.85181 | 88.98145 | 56.02474 | -2617.48983 | 1836.44737  | 3331.77924  | 1 |
| 8290 | C | 77.14616 | 86.88906 | 56.31924 | -444.80536  | 190.24870   | -87.46002   | 1 |
| 8291 | H | 76.74979 | 86.88161 | 55.20684 | 125.19324   | 1541.01590  | 819.77797   | 1 |
| 8292 | C | 77.49418 | 85.96407 | 58.59942 | -390.31865  | -250.14350  | 270.59737   | 1 |
| 8293 | H | 77.34229 | 85.11443 | 59.31524 | -231.21311  | -215.66281  | -1582.92903 | 1 |
| 8294 | C | 77.12350 | 85.80126 | 57.19613 | 749.52960   | -1028.16510 | 462.24438   | 1 |
| 8295 | H | 76.57401 | 84.90397 | 56.87830 | 263.06003   | -2326.48142 | -908.55069  | 1 |
| 8296 | C | 80.82092 | 87.27440 | 61.83894 | -141.65363  | -501.28005  | -304.43783  | 1 |
| 8297 | O | 80.30564 | 88.14267 | 62.49908 | 707.78839   | 77.40343    | 758.48117   | 1 |
| 8298 | N | 81.85324 | 86.51339 | 62.15908 | -35.87483   | 832.22019   | 21.49138    | 1 |
| 8299 | H | 82.24734 | 85.92183 | 61.41448 | 938.37710   | -819.27174  | 2590.91883  | 1 |
| 8300 | C | 82.60536 | 86.81547 | 63.34131 | 294.70287   | -234.19260  | -703.22315  | 1 |
| 8301 | H | 81.95926 | 87.29646 | 64.14949 | -3407.26324 | -654.61196  | -2487.01207 | 1 |

|      |   |          |           |          |             |             |             |   |
|------|---|----------|-----------|----------|-------------|-------------|-------------|---|
| 8302 | C | 83.25771 | 85.43093  | 63.73554 | 614.65099   | 796.93054   | 228.21695   | 1 |
| 8303 | H | 84.05400 | 85.51755  | 64.54360 | -51.44944   | 2750.95283  | -147.92748  | 1 |
| 8304 | H | 83.68000 | 84.87680  | 62.92990 | -2797.18605 | -1173.47946 | 834.81879   | 1 |
| 8305 | H | 82.44800 | 84.78880  | 64.16490 | 741.18275   | 1458.74523  | -2687.18007 | 1 |
| 8306 | C | 83.74932 | 87.80119  | 62.72744 | 975.72568   | 527.25563   | 114.50578   | 1 |
| 8307 | O | 84.43103 | 87.54542  | 61.68632 | -551.33096  | 742.22006   | 61.15466    | 1 |
| 8308 | N | 83.86412 | 88.82423  | 63.49933 | 82.63079    | 5.84391     | -32.23886   | 1 |
| 8309 | H | 83.34657 | 88.92537  | 64.37052 | 521.01442   | 3826.39061  | -470.05453  | 1 |
| 8310 | C | 84.66968 | 89.93853  | 63.10244 | -989.12613  | -579.69111  | 18.27059    | 1 |
| 8311 | H | 85.23576 | 89.56734  | 62.22574 | 2514.30643  | -457.84553  | 2482.50536  | 1 |
| 8312 | C | 83.62089 | 91.12787  | 62.81422 | 116.00373   | 58.61662    | 453.80894   | 1 |
| 8313 | H | 82.98174 | 90.84031  | 61.92566 | 1010.45014  | 3606.86006  | -1439.55050 | 1 |
| 8314 | H | 84.26569 | 91.98904  | 62.62340 | -937.49838  | 699.75035   | 551.04376   | 1 |
| 8315 | C | 82.51980 | 91.59240  | 63.83254 | 272.42179   | 613.82162   | -504.93275  | 1 |
| 8316 | O | 82.62591 | 92.57319  | 64.52464 | -438.28667  | -475.76738  | 3.20152     | 1 |
| 8317 | N | 81.39390 | 90.78449  | 63.76465 | -378.61342  | -337.11005  | 272.29801   | 1 |
| 8318 | H | 81.48813 | 89.91236  | 63.17041 | -155.35808  | 198.24426   | -2180.59128 | 1 |
| 8319 | H | 81.08326 | 90.46871  | 64.68746 | -1743.33838 | 904.24840   | 5276.01707  | 1 |
| 8320 | C | 85.67646 | 90.36592  | 64.30829 | 475.33637   | -159.60417  | 183.10774   | 1 |
| 8321 | O | 85.25979 | 90.28544  | 65.44358 | 647.12791   | 76.60527    | 113.23229   | 1 |
| 8322 | N | 86.86691 | 90.75119  | 63.87660 | -443.98815  | 935.47706   | 308.10848   | 1 |
| 8323 | H | 87.01282 | 90.75094  | 62.87830 | -2182.22477 | -1999.66522 | -620.26786  | 1 |
| 8324 | C | 87.62619 | 91.74852  | 64.61301 | 447.26403   | -518.21727  | -206.06407  | 1 |
| 8325 | H | 87.56915 | 91.28356  | 65.66179 | 391.87631   | 601.02803   | 172.10359   | 1 |
| 8326 | C | 89.10173 | 91.65341  | 64.18704 | 857.41899   | 40.23868    | -260.40795  | 1 |
| 8327 | H | 89.26266 | 90.59120  | 63.90645 | 1737.18446  | -1246.06655 | -1043.44175 | 1 |
| 8328 | C | 89.35880 | 92.52449  | 62.99770 | -237.21556  | 354.76581   | -599.25918  | 1 |
| 8329 | H | 89.84387 | 93.50932  | 63.44540 | 1460.50915  | -780.45079  | -194.61286  | 1 |
| 8330 | H | 88.46013 | 92.71952  | 62.42951 | -2708.13910 | 815.73151   | -62.70498   | 1 |
| 8331 | H | 90.06178 | 92.07318  | 62.22331 | 2795.54626  | 466.12536   | 1843.40910  | 1 |
| 8332 | C | 90.00252 | 91.95926  | 65.33841 | 108.75261   | -803.27256  | -382.11586  | 1 |
| 8333 | H | 89.69255 | 92.86882  | 65.87063 | 1643.64777  | -43.23614   | -718.73441  | 1 |
| 8334 | H | 89.92489 | 91.14459  | 66.12001 | 3084.87723  | -1769.95916 | -1351.19340 | 1 |
| 8335 | H | 91.07827 | 92.13416  | 65.07974 | 127.39898   | -2993.19454 | -1340.39978 | 1 |
| 8336 | C | 86.99011 | 93.29315  | 64.50166 | 271.57999   | -163.85338  | 664.03473   | 1 |
| 8337 | O | 86.70968 | 93.85606  | 63.46306 | -407.92164  | -536.13715  | 238.32188   | 1 |
| 8338 | N | 87.20999 | 93.93451  | 65.67052 | 25.69568    | 333.69893   | 563.45035   | 1 |
| 8339 | H | 87.47886 | 93.17402  | 66.33185 | -2010.11008 | -1676.22003 | 837.29704   | 1 |
| 8340 | C | 86.14516 | 94.93079  | 65.83724 | 426.11849   | -551.12093  | -768.73063  | 1 |
| 8341 | H | 86.21907 | 95.53550  | 64.88032 | -1101.53068 | 635.51119   | 1693.57634  | 1 |
| 8342 | C | 84.79652 | 94.15612  | 65.85904 | 281.43076   | -121.24254  | 1314.10285  | 1 |
| 8343 | H | 84.99626 | 93.20944  | 66.37933 | -1007.27599 | -946.78283  | 1470.78178  | 1 |
| 8344 | H | 84.37228 | 93.92033  | 64.85651 | 4162.58653  | 3819.75298  | -1138.45243 | 1 |
| 8345 | O | 83.46979 | 94.97094  | 66.22639 | 38.05995    | -522.70423  | 702.40690   | 1 |
| 8346 | H | 82.90378 | 94.18564  | 66.15491 | 770.92107   | -1198.18178 | 823.14265   | 1 |
| 8347 | C | 86.50039 | 95.69179  | 67.22580 | 29.92230    | -621.63284  | 546.71296   | 1 |
| 8348 | O | 87.64609 | 95.95988  | 67.52200 | 384.37102   | -57.99822   | -469.93178  | 1 |
| 8349 | N | 85.39360 | 95.81692  | 67.94694 | -484.70859  | 59.76843    | -155.37227  | 1 |
| 8350 | H | 84.41343 | 95.63681  | 67.59731 | -1292.33810 | -501.23832  | -609.03395  | 1 |
| 8351 | C | 85.61236 | 96.28502  | 69.29573 | -595.50292  | 896.45011   | 1088.53855  | 1 |
| 8352 | H | 86.59937 | 95.80408  | 69.62881 | -518.17295  | 2491.58506  | 56.83088    | 1 |
| 8353 | C | 85.63485 | 97.85631  | 69.13991 | -160.76880  | -89.36055   | 215.16332   | 1 |
| 8354 | H | 84.90252 | 98.24357  | 69.89678 | -928.62455  | 1072.92023  | -216.49209  | 1 |
| 8355 | H | 85.34127 | 98.09892  | 68.09854 | -1929.67108 | 446.02703   | 3929.48446  | 1 |
| 8356 | C | 87.04016 | 98.45753  | 69.17387 | 36.99528    | -0.41535    | -65.72457   | 1 |
| 8357 | H | 87.48509 | 98.30408  | 70.15874 | 1371.38950  | -129.69585  | -0.95491    | 1 |
| 8358 | H | 87.68772 | 97.96097  | 68.37528 | 1342.92802  | 406.66728   | 2318.26168  | 1 |
| 8359 | C | 86.99091 | 100.05146 | 68.94509 | 426.64957   | 778.26126   | -255.43428  | 1 |
| 8360 | O | 88.10852 | 100.54829 | 68.74980 | -410.56447  | 231.29216   | -669.94526  | 1 |
| 8361 | O | 85.93472 | 100.67784 | 69.00671 | -265.04733  | 683.72904   | -819.25098  | 1 |
| 8362 | C | 84.32975 | 95.99414  | 70.26331 | 465.84884   | -239.58224  | 53.14136    | 1 |
| 8363 | O | 83.16903 | 95.70512  | 69.97979 | -619.69794  | -236.20082  | 228.70104   | 1 |

|      |   |          |           |          |             |             |             |   |
|------|---|----------|-----------|----------|-------------|-------------|-------------|---|
| 8364 | N | 84.87334 | 95.93255  | 71.50998 | 44.95605    | -1087.72783 | 910.20387   | 1 |
| 8365 | H | 85.79426 | 96.33745  | 71.45691 | -383.12752  | 1596.17933  | 355.83587   | 1 |
| 8366 | C | 83.95832 | 96.18800  | 72.58071 | 21.16823    | 586.78791   | -287.80267  | 1 |
| 8367 | H | 82.98109 | 96.54699  | 72.28155 | 191.18863   | -2668.85495 | 1682.41540  | 1 |
| 8368 | C | 83.78786 | 94.89043  | 73.47929 | 702.31363   | -544.45829  | -806.43504  | 1 |
| 8369 | H | 82.97714 | 95.07777  | 74.24571 | 720.10593   | -1443.15323 | 3277.05570  | 1 |
| 8370 | H | 84.80083 | 94.71510  | 73.94383 | 3040.24938  | -1046.20419 | 2745.60251  | 1 |
| 8371 | H | 83.53851 | 94.00234  | 72.87606 | 514.25029   | 181.93329   | -545.96032  | 1 |
| 8372 | C | 84.78295 | 97.28986  | 73.44111 | -448.71127  | -101.19640  | -57.87145   | 1 |
| 8373 | O | 86.01181 | 97.35468  | 73.31323 | 865.61573   | 43.19804    | -110.12352  | 1 |
| 8374 | N | 84.09935 | 98.04601  | 74.28230 | -1123.92728 | -310.20480  | -361.64510  | 1 |
| 8375 | H | 83.14214 | 97.58813  | 74.49825 | 33.66125    | -245.49355  | -327.72936  | 1 |
| 8376 | C | 84.84389 | 98.59528  | 75.40689 | 452.87195   | -329.96150  | -246.43860  | 1 |
| 8377 | H | 84.01651 | 99.14127  | 76.01016 | -2411.57216 | 1656.62518  | 854.34896   | 1 |
| 8378 | C | 85.72169 | 97.59514  | 76.29611 | -869.61517  | 571.02633   | 131.32169   | 1 |
| 8379 | H | 86.41827 | 96.97769  | 75.61140 | 482.36421   | -1850.17661 | 1367.81530  | 1 |
| 8380 | H | 86.45491 | 98.13553  | 76.96107 | 3125.42981  | 2324.94928  | 180.32540   | 1 |
| 8381 | C | 84.90688 | 96.54865  | 77.10342 | 99.63753    | 557.72629   | -129.94243  | 1 |
| 8382 | O | 83.70543 | 96.49892  | 77.17789 | -289.29289  | -381.61815  | 509.17930   | 1 |
| 8383 | O | 85.59701 | 95.56523  | 77.80676 | 882.40183   | 185.60464   | 1.21402     | 1 |
| 8384 | C | 85.86036 | 99.62183  | 74.69244 | 173.88814   | 281.26081   | 37.50868    | 1 |
| 8385 | O | 86.84256 | 100.01648 | 75.31337 | 278.46326   | 74.92960    | 475.61248   | 1 |
| 8386 | N | 85.44080 | 100.21620 | 73.54816 | 521.35975   | -223.89592  | -692.51473  | 1 |
| 8387 | H | 84.52535 | 99.79622  | 73.29341 | 1124.74761  | 782.43681   | 1105.80377  | 1 |
| 8388 | C | 86.29580 | 100.87519 | 72.60988 | 469.95105   | -216.42265  | 556.39649   | 1 |
| 8389 | H | 85.72842 | 100.76638 | 71.64521 | 1615.57653  | 1850.41641  | 642.90871   | 1 |
| 8390 | C | 86.33311 | 102.36203 | 73.09961 | -284.72611  | 636.50845   | 148.19692   | 1 |
| 8391 | H | 86.93820 | 102.81460 | 72.22359 | 4946.79778  | -1425.47675 | -905.09515  | 1 |
| 8392 | H | 86.93067 | 102.57855 | 74.11646 | -519.08385  | 1090.80958  | -959.35539  | 1 |
| 8393 | C | 84.91240 | 103.03265 | 73.20799 | 189.38283   | -178.81596  | -135.09836  | 1 |
| 8394 | O | 84.90637 | 104.13337 | 73.83363 | -531.29117  | -477.53355  | -567.83585  | 1 |
| 8395 | O | 83.83215 | 102.51801 | 72.71427 | 91.49310    | -348.99294  | -6.61733    | 1 |
| 8396 | C | 87.88112 | 100.41803 | 72.56776 | 78.03473    | -14.15609   | -528.50321  | 1 |
| 8397 | O | 88.76009 | 101.22903 | 72.54309 | -425.03561  | 57.32298    | -630.18618  | 1 |
| 8398 | N | 87.92252 | 99.10091  | 72.27554 | -206.34314  | 236.89178   | -138.57500  | 1 |
| 8399 | H | 87.18766 | 98.38085  | 72.45236 | 1590.46478  | 987.20913   | 2685.99503  | 1 |
| 8400 | C | 89.30859 | 98.63303  | 72.14959 | 1331.85475  | 193.89408   | 145.34070   | 1 |
| 8401 | H | 89.87029 | 99.61766  | 72.06763 | -1352.94568 | -1698.54797 | -3386.26569 | 1 |
| 8402 | C | 89.75520 | 97.70348  | 73.35192 | 768.72735   | 413.74473   | -756.37924  | 1 |
| 8403 | H | 89.63037 | 96.66563  | 72.96672 | -852.74182  | -123.84866  | 23.70901    | 1 |
| 8404 | H | 90.83610 | 97.84431  | 73.59529 | -1929.11605 | -748.92233  | 4135.94110  | 1 |
| 8405 | C | 88.94989 | 97.74278  | 74.67609 | 197.44886   | 469.45063   | 1201.65313  | 1 |
| 8406 | H | 87.96279 | 98.18975  | 74.38574 | 1093.43699  | 6710.82575  | -2643.20797 | 1 |
| 8407 | H | 89.26660 | 98.58368  | 75.27135 | -3309.36834 | 375.55837   | -1151.84802 | 1 |
| 8408 | C | 88.87726 | 96.39703  | 75.53600 | 190.80271   | 588.11670   | 716.80120   | 1 |
| 8409 | H | 88.28268 | 96.53624  | 76.50773 | -3164.76811 | -865.70071  | -2567.46435 | 1 |
| 8410 | H | 89.88896 | 95.92934  | 75.84819 | -354.33983  | 847.37022   | 1835.08818  | 1 |
| 8411 | N | 88.16046 | 95.51430  | 74.64918 | 249.01627   | -668.97081  | -40.15919   | 1 |
| 8412 | H | 87.83008 | 95.83828  | 73.74050 | 663.02271   | 3289.91120  | 210.90721   | 1 |
| 8413 | C | 87.75936 | 94.32475  | 74.90116 | -328.02999  | -727.28151  | -456.97049  | 1 |
| 8414 | N | 86.99382 | 93.56190  | 74.00399 | 246.50669   | 115.84984   | 1048.90536  | 1 |
| 8415 | H | 86.81622 | 93.78188  | 72.96768 | -1286.71124 | -1002.07078 | 1334.73951  | 1 |
| 8416 | H | 86.88097 | 92.52394  | 74.26961 | 1432.13413  | 1816.21356  | -2262.70483 | 1 |
| 8417 | N | 88.09499 | 93.72645  | 76.14292 | -401.43757  | -252.64164  | 1021.47138  | 1 |
| 8418 | H | 88.55775 | 94.29058  | 76.87854 | 1267.46391  | -584.54587  | 544.52163   | 1 |
| 8419 | H | 87.70038 | 92.89699  | 76.61748 | 1351.94164  | -976.95011  | -2353.35122 | 1 |
| 8420 | C | 89.59333 | 97.69828  | 70.82188 | -402.66099  | 375.27984   | -650.85956  | 1 |
| 8421 | O | 90.41053 | 98.05150  | 70.01046 | -242.83182  | -430.37827  | 237.91031   | 1 |
| 8422 | N | 88.85565 | 96.55629  | 70.86489 | 203.81714   | 326.68702   | 41.12683    | 1 |
| 8423 | H | 88.31556 | 96.46754  | 71.70502 | 1401.02113  | -1499.64576 | -2196.11543 | 1 |
| 8424 | C | 89.10879 | 95.46779  | 70.03204 | -611.91592  | -72.02405   | 421.51517   | 1 |
| 8425 | H | 88.96693 | 95.99514  | 69.05341 | 310.29661   | 3117.20018  | -147.87687  | 1 |

|      |   |          |          |          |             |             |             |   |
|------|---|----------|----------|----------|-------------|-------------|-------------|---|
| 8426 | C | 90.61179 | 94.95915 | 70.33775 | 157.04107   | -985.24914  | 60.08874    | 1 |
| 8427 | H | 90.64238 | 94.24109 | 71.25842 | 1740.41356  | -882.21108  | 1582.18156  | 1 |
| 8428 | H | 91.23480 | 95.89280 | 70.66017 | 1082.28205  | 135.89736   | -2177.42203 | 1 |
| 8429 | C | 91.24467 | 94.23278 | 69.14184 | 238.55351   | 243.50472   | -836.75391  | 1 |
| 8430 | C | 91.30391 | 94.88903 | 67.87709 | 22.94787    | -545.14234  | -411.15703  | 1 |
| 8431 | H | 90.93018 | 95.90329 | 67.67878 | 991.28731   | -3423.48930 | -71.33105   | 1 |
| 8432 | C | 91.92991 | 94.26433 | 66.78971 | -652.04214  | -329.86708  | 655.01854   | 1 |
| 8433 | H | 91.97422 | 94.83127 | 65.81837 | -1064.49394 | 1847.15292  | 1233.78730  | 1 |
| 8434 | C | 92.56561 | 92.98961 | 66.89573 | 110.51012   | 626.13696   | 168.06784   | 1 |
| 8435 | O | 93.24368 | 92.54663 | 65.75727 | 163.72355   | 704.99895   | 635.68365   | 1 |
| 8436 | H | 93.86912 | 91.88788 | 66.28952 | -272.04675  | -1296.77604 | -577.90210  | 1 |
| 8437 | C | 91.77573 | 92.91637 | 69.22392 | 334.06746   | -74.23468   | 449.99155   | 1 |
| 8438 | H | 91.86739 | 92.39441 | 70.24168 | 3084.01870  | 922.58004   | 1922.52707  | 1 |
| 8439 | C | 92.34590 | 92.29140 | 68.11159 | -20.73098   | 17.03181    | -965.28096  | 1 |
| 8440 | H | 92.66514 | 91.19085 | 68.20700 | 1033.18511  | -1497.57256 | 7.86549     | 1 |
| 8441 | C | 87.99807 | 94.39828 | 70.47175 | 821.81982   | -429.41061  | 185.03542   | 1 |
| 8442 | O | 87.52949 | 94.53929 | 71.60068 | 1137.25568  | 567.60905   | -69.52345   | 1 |
| 8443 | N | 87.74036 | 93.48879 | 69.56661 | 317.53991   | -39.25316   | 461.96714   | 1 |
| 8444 | H | 88.14724 | 93.44628 | 68.62384 | 3744.28559  | 1938.99611  | 2713.29174  | 1 |
| 8445 | C | 87.05411 | 92.28142 | 69.95388 | 205.10897   | 547.82132   | 144.64496   | 1 |
| 8446 | H | 87.67711 | 91.92004 | 70.75507 | 918.25984   | 640.54383   | -1345.70670 | 1 |
| 8447 | C | 85.54080 | 92.65570 | 70.41136 | -93.86961   | -1062.94366 | 911.64402   | 1 |
| 8448 | H | 85.50382 | 93.45663 | 71.16972 | 176.74912   | -1349.02710 | 4031.65579  | 1 |
| 8449 | C | 84.62262 | 93.08869 | 69.23366 | -327.31710  | 210.07669   | -402.29823  | 1 |
| 8450 | H | 85.02145 | 94.04347 | 68.87500 | -73.76985   | 1814.61743  | 3133.41058  | 1 |
| 8451 | H | 84.53937 | 92.32085 | 68.39976 | 1673.76856  | -3008.73850 | -1341.60774 | 1 |
| 8452 | H | 83.57142 | 93.30722 | 69.55672 | 149.25374   | -692.87439  | 1764.87814  | 1 |
| 8453 | C | 84.65498 | 91.53467 | 70.96466 | 229.60999   | -1202.82854 | 73.69921    | 1 |
| 8454 | H | 84.62756 | 90.70580 | 70.20807 | -269.54342  | 607.69568   | -663.88000  | 1 |
| 8455 | H | 83.61588 | 91.89345 | 71.34739 | 1958.55351  | 2379.30098  | -505.93744  | 1 |
| 8456 | C | 85.12001 | 90.96964 | 72.37209 | -584.26990  | 140.72841   | -691.78487  | 1 |
| 8457 | H | 85.15574 | 91.84274 | 73.05726 | -1435.94424 | -2426.97662 | -1230.90230 | 1 |
| 8458 | H | 84.31746 | 90.24719 | 72.77304 | -1783.37649 | 2181.44730  | -924.67841  | 1 |
| 8459 | H | 86.09584 | 90.36286 | 72.25727 | -546.70416  | -1781.73665 | -2960.41459 | 1 |
| 8460 | C | 87.06675 | 91.30836 | 68.68534 | -173.30124  | -401.51626  | 38.31902    | 1 |
| 8461 | O | 87.26229 | 91.58788 | 67.52331 | -41.61573   | 261.43029   | 184.35275   | 1 |
| 8462 | N | 86.66564 | 90.05696 | 69.20281 | -363.97297  | -497.36444  | -850.78330  | 1 |
| 8463 | H | 86.48258 | 90.18673 | 70.21861 | 291.94896   | -2870.71598 | -1943.85253 | 1 |
| 8464 | C | 85.93942 | 89.17816 | 68.31673 | -161.62691  | -31.62881   | -917.41295  | 1 |
| 8465 | H | 86.12756 | 89.38051 | 67.20591 | 1270.67244  | 1831.18362  | 268.68240   | 1 |
| 8466 | C | 86.37075 | 87.79563 | 68.89158 | -52.17779   | -699.10388  | 0.18130     | 1 |
| 8467 | H | 87.50993 | 87.76152 | 68.81205 | 1750.80543  | 235.58722   | -2680.11286 | 1 |
| 8468 | H | 86.19936 | 87.84577 | 70.03451 | -4174.67728 | -641.85866  | -494.29405  | 1 |
| 8469 | S | 85.52198 | 86.47885 | 67.99002 | -152.26887  | -315.19606  | 570.85935   | 1 |
| 8470 | C | 84.33855 | 89.25035 | 68.63877 | 594.25454   | -310.58746  | -63.28855   | 1 |
| 8471 | O | 83.79438 | 88.82945 | 69.66138 | 390.78948   | -403.76587  | 478.98870   | 1 |
| 8472 | N | 83.75475 | 89.91598 | 67.63585 | 411.57465   | -888.00620  | -315.13954  | 1 |
| 8473 | H | 84.26691 | 90.21625 | 66.73195 | 897.26896   | 897.32465   | -3241.95973 | 1 |
| 8474 | C | 82.33880 | 90.00496 | 67.74562 | 883.01211   | -509.18621  | -898.03276  | 1 |
| 8475 | H | 82.16647 | 89.61768 | 68.86146 | 942.21023   | 934.38584   | -336.85352  | 1 |
| 8476 | C | 82.06719 | 91.51655 | 67.45227 | 27.72311    | 625.89689   | 716.94826   | 1 |
| 8477 | H | 81.64441 | 91.73781 | 66.43074 | -1518.30221 | 1868.59148  | -740.90090  | 1 |
| 8478 | H | 83.02716 | 92.11828 | 67.70811 | -2170.42145 | 2049.41541  | -61.64802   | 1 |
| 8479 | C | 80.85722 | 91.93117 | 68.41600 | 255.05738   | 417.44246   | 18.49926    | 1 |
| 8480 | O | 80.33548 | 93.01724 | 68.16721 | -288.01202  | -825.38452  | -104.70897  | 1 |
| 8481 | O | 80.59761 | 91.22076 | 69.41109 | -548.13783  | -256.34180  | 762.55758   | 1 |
| 8482 | C | 81.60201 | 89.14690 | 66.51551 | -695.71261  | -592.16265  | 286.98363   | 1 |
| 8483 | O | 82.29234 | 88.50517 | 65.72455 | -210.60036  | -164.12211  | -237.86310  | 1 |
| 8484 | N | 80.32666 | 89.20755 | 66.62524 | -960.26116  | -121.94665  | -561.70695  | 1 |
| 8485 | H | 80.06168 | 89.78987 | 67.34272 | -1834.46459 | -3400.64120 | -2256.84906 | 1 |
| 8486 | C | 79.38100 | 88.42660 | 65.90610 | 514.16505   | 402.94169   | 265.19326   | 1 |
| 8487 | H | 80.02413 | 87.81546 | 65.12885 | 2482.85572  | 627.97064   | -715.51614  | 1 |

|      |   |          |          |          |             |             |             |   |
|------|---|----------|----------|----------|-------------|-------------|-------------|---|
| 8488 | C | 78.53719 | 87.55818 | 66.90744 | -634.42496  | -758.12191  | -183.74631  | 1 |
| 8489 | H | 77.66401 | 88.25053 | 67.11056 | 2052.89449  | -1260.65560 | 1071.84502  | 1 |
| 8490 | H | 79.04433 | 87.41031 | 67.95595 | -1156.81808 | 1565.16366  | -2527.88623 | 1 |
| 8491 | C | 77.97176 | 86.17876 | 66.38003 | -97.06497   | 493.79047   | -348.46209  | 1 |
| 8492 | H | 77.48333 | 86.33262 | 65.42276 | -1024.80386 | 1937.54332  | -734.22248  | 1 |
| 8493 | H | 77.22944 | 85.76523 | 67.05409 | 602.31916   | 2867.51790  | -2929.39279 | 1 |
| 8494 | C | 79.26617 | 85.23981 | 66.51095 | -254.28397  | 471.20277   | 663.58840   | 1 |
| 8495 | H | 79.85145 | 85.33841 | 65.56722 | -872.45319  | 3374.17164  | 3315.06032  | 1 |
| 8496 | H | 79.75061 | 85.27246 | 67.55093 | -310.13598  | 2286.52919  | -2394.75943 | 1 |
| 8497 | N | 78.71300 | 83.93980 | 66.64390 | 139.49274   | 632.25749   | 541.72366   | 1 |
| 8498 | H | 78.51800 | 83.39480 | 65.82790 | 1546.00063  | 1711.60222  | -2139.74908 | 1 |
| 8499 | C | 78.40500 | 83.36480 | 67.75690 | -660.28185  | 376.69649   | -503.56592  | 1 |
| 8500 | N | 78.10900 | 83.97080 | 68.86490 | 784.59473   | 306.33082   | -56.96336   | 1 |
| 8501 | H | 78.26600 | 84.95480 | 68.95690 | -1717.42843 | 1638.68264  | -2064.79661 | 1 |
| 8502 | H | 77.74400 | 83.35480 | 69.56290 | -1352.92526 | 1935.42880  | -2078.92637 | 1 |
| 8503 | N | 78.05200 | 82.10080 | 67.70790 | -565.40399  | 528.41277   | -337.29892  | 1 |
| 8504 | H | 78.04200 | 81.66580 | 66.80690 | -1268.65259 | 2583.95523  | 1269.61498  | 1 |
| 8505 | H | 77.44800 | 81.87880 | 68.47390 | -1851.91353 | 1823.05462  | -1773.44702 | 1 |
| 8506 | C | 78.34279 | 89.50023 | 65.24000 | -191.25708  | -1039.67988 | -4.51786    | 1 |
| 8507 | O | 77.40088 | 89.92593 | 65.88281 | 205.62635   | -843.73815  | -300.52034  | 1 |
| 8508 | N | 78.59988 | 89.72579 | 63.92814 | 123.74416   | -697.30614  | -703.64508  | 1 |
| 8509 | H | 79.34752 | 89.28495 | 63.38726 | 816.07096   | 1822.74750  | 3512.33770  | 1 |
| 8510 | C | 77.90748 | 90.87888 | 63.53040 | -266.69644  | 535.32696   | -262.26583  | 1 |
| 8511 | H | 77.02182 | 91.05692 | 64.20936 | 1229.50607  | -165.07414  | -521.61279  | 1 |
| 8512 | C | 78.94977 | 92.06080 | 63.36749 | -161.38504  | 740.20551   | -645.11979  | 1 |
| 8513 | H | 79.91181 | 91.77736 | 63.84447 | -567.52078  | 1237.76002  | -865.34918  | 1 |
| 8514 | H | 79.14045 | 92.23226 | 62.26723 | 774.76254   | 1203.32556  | 1804.72387  | 1 |
| 8515 | C | 78.16366 | 93.17623 | 64.08690 | -292.79067  | -553.42921  | 958.38816   | 1 |
| 8516 | C | 78.62580 | 93.50177 | 65.42399 | 569.45677   | 184.11784   | -807.08269  | 1 |
| 8517 | H | 79.59967 | 93.11406 | 65.79759 | 4.37172     | -2950.76658 | 2306.07561  | 1 |
| 8518 | C | 77.86761 | 94.45844 | 66.13678 | -165.90192  | 362.11525   | 295.76908   | 1 |
| 8519 | H | 78.14767 | 94.79861 | 67.14296 | 181.45528   | 2561.75492  | 1186.55822  | 1 |
| 8520 | C | 76.75534 | 95.08153 | 65.54370 | -1102.73419 | 264.29587   | -880.45640  | 1 |
| 8521 | H | 76.24733 | 95.81462 | 66.13869 | 1719.28294  | -3381.42627 | 137.14102   | 1 |
| 8522 | C | 77.01203 | 93.78840 | 63.46830 | 95.94991    | -13.53041   | -37.86002   | 1 |
| 8523 | H | 76.70369 | 93.46401 | 62.44131 | 1086.27478  | -640.09281  | 483.27030   | 1 |
| 8524 | C | 76.37158 | 94.81268 | 64.17437 | -379.58367  | 512.37327   | -248.19777  | 1 |
| 8525 | H | 75.57291 | 95.37816 | 63.69630 | -538.88203  | -1600.68762 | 2394.88455  | 1 |
| 8526 | C | 77.55927 | 90.68009 | 61.84060 | -342.65700  | -103.30159  | -29.75598   | 1 |
| 8527 | O | 78.42946 | 90.40879 | 61.04597 | 121.51745   | -872.84101  | 339.81987   | 1 |
| 8528 | N | 76.26200 | 90.83308 | 61.62183 | -189.25414  | 536.19588   | -95.33472   | 1 |
| 8529 | H | 75.88456 | 91.29651 | 62.44060 | 2346.07495  | 1739.53608  | -1310.65771 | 1 |
| 8530 | C | 75.58244 | 90.08459 | 60.63529 | 847.59650   | -1023.28119 | 408.22562   | 1 |
| 8531 | H | 76.36961 | 89.37183 | 60.27086 | -88.40027   | -1977.44808 | -2065.50964 | 1 |
| 8532 | C | 74.25477 | 89.44268 | 61.28631 | -396.51718  | 782.85084   | -54.87195   | 1 |
| 8533 | H | 73.56909 | 89.04327 | 60.44308 | 3035.60702  | 2925.97863  | -17.21000   | 1 |
| 8534 | H | 73.61440 | 90.27775 | 61.75645 | 1113.14905  | 149.91595   | -805.45529  | 1 |
| 8535 | C | 74.66093 | 88.39196 | 62.29082 | 364.69064   | -1123.95807 | -1085.40206 | 1 |
| 8536 | C | 74.60115 | 87.00481 | 61.99636 | -111.62325  | -1428.14211 | 869.67407   | 1 |
| 8537 | H | 74.28990 | 86.75491 | 60.98287 | 2018.51260  | 334.61020   | 1530.78645  | 1 |
| 8538 | C | 74.74421 | 86.07201 | 63.02420 | 128.16864   | 689.69721   | -189.91480  | 1 |
| 8539 | H | 74.54097 | 85.00905 | 62.87764 | -2321.86884 | 2801.39844  | 2788.85245  | 1 |
| 8540 | C | 75.10321 | 86.50787 | 64.37151 | 480.39580   | 722.08477   | -130.32975  | 1 |
| 8541 | O | 75.14942 | 85.61968 | 65.49835 | 629.02520   | 36.01810    | 482.09053   | 1 |
| 8542 | H | 75.54600 | 84.77580 | 64.99090 | 11.90255    | -1173.96099 | 2918.88680  | 1 |
| 8543 | C | 75.10862 | 88.81402 | 63.58283 | 105.00368   | -597.45474  | -941.34327  | 1 |
| 8544 | H | 75.06815 | 89.89916 | 63.66145 | -1102.98005 | 1424.53467  | -161.05614  | 1 |
| 8545 | C | 75.34079 | 87.91139 | 64.57813 | -505.14311  | 316.32548   | -121.24479  | 1 |
| 8546 | H | 75.63179 | 88.27337 | 65.51127 | -4536.32195 | 1541.88568  | -725.03867  | 1 |
| 8547 | C | 75.12145 | 91.16183 | 59.53191 | -509.98152  | -264.36111  | -499.80016  | 1 |
| 8548 | O | 75.07478 | 92.35135 | 59.70311 | 214.88198   | 689.79362   | 606.39100   | 1 |
| 8549 | N | 74.74806 | 90.47668 | 58.41013 | 261.23665   | -12.39625   | -53.04116   | 1 |

|      |   |          |          |          |             |             |             |   |
|------|---|----------|----------|----------|-------------|-------------|-------------|---|
| 8550 | C | 74.82651 | 89.03707 | 58.16562 | -346.92214  | -733.51151  | -1396.34786 | 1 |
| 8551 | H | 75.95626 | 88.88009 | 58.40549 | 1411.64871  | -288.38954  | -624.97035  | 1 |
| 8552 | H | 74.19013 | 88.35062 | 58.83906 | -3331.88841 | -1821.22496 | 474.01606   | 1 |
| 8553 | C | 74.33257 | 91.23085 | 57.27112 | -10.70823   | 140.94064   | 1224.72303  | 1 |
| 8554 | H | 75.06617 | 92.05785 | 57.36728 | 1347.43548  | 2692.72690  | -1552.40375 | 1 |
| 8555 | C | 74.55985 | 90.28829 | 56.01126 | -337.03700  | 87.87420    | -448.47510  | 1 |
| 8556 | H | 73.84786 | 90.58072 | 55.17741 | 1544.15993  | 100.21795   | 1090.17920  | 1 |
| 8557 | H | 75.57390 | 90.44031 | 55.56715 | 304.96446   | -1024.40247 | -3836.87817 | 1 |
| 8558 | C | 74.35674 | 88.86791 | 56.67221 | -179.82550  | -121.14797  | 229.88742   | 1 |
| 8559 | H | 73.26232 | 88.58556 | 56.70524 | -1685.27734 | 206.38499   | 1259.68566  | 1 |
| 8560 | H | 74.91544 | 88.03421 | 56.14796 | -1312.34708 | -3111.58912 | -1423.76312 | 1 |
| 8561 | C | 72.74583 | 91.62525 | 57.39506 | -327.59201  | 924.10172   | -50.61677   | 1 |
| 8562 | O | 72.30489 | 91.96786 | 56.29595 | 198.13508   | 140.14038   | 412.66154   | 1 |
| 8563 | N | 72.06013 | 91.34973 | 58.51355 | 247.02958   | -31.26979   | 653.12705   | 1 |
| 8564 | H | 72.71849 | 91.03481 | 59.23472 | 1548.12177  | 1687.14880  | 1678.93535  | 1 |
| 8565 | C | 71.02944 | 92.26972 | 58.84489 | -18.13075   | 307.45909   | 84.64113    | 1 |
| 8566 | H | 71.23684 | 93.36043 | 58.65575 | 1005.79743  | 2242.58546  | -900.18756  | 1 |
| 8567 | C | 69.69350 | 91.86795 | 58.02159 | -1627.55963 | 715.65000   | 162.61593   | 1 |
| 8568 | H | 70.07347 | 91.83412 | 56.97951 | 1325.67518  | 1977.16375  | 589.75238   | 1 |
| 8569 | H | 69.39628 | 90.80132 | 58.19583 | 861.21924   | 1534.89122  | 2584.56452  | 1 |
| 8570 | C | 68.56694 | 92.86501 | 58.14519 | -83.25220   | 265.08301   | -1131.10710 | 1 |
| 8571 | O | 68.29446 | 93.52825 | 59.18127 | -203.18636  | -904.62676  | -59.17760   | 1 |
| 8572 | N | 67.69850 | 92.87748 | 57.08720 | 58.07429    | -426.57066  | -243.39960  | 1 |
| 8573 | H | 67.80770 | 92.39020 | 56.23546 | 127.86355   | -26.86467   | -2735.03710 | 1 |
| 8574 | H | 66.89117 | 93.46899 | 56.90958 | 3065.09629  | 4006.10451  | -2711.80618 | 1 |
| 8575 | C | 70.93794 | 92.02598 | 60.44617 | 136.43046   | -265.18471  | 194.71657   | 1 |
| 8576 | O | 71.78731 | 91.28792 | 60.87099 | -146.67900  | -231.36474  | 103.71072   | 1 |
| 8577 | N | 70.00733 | 92.74920 | 61.09012 | 128.88462   | -1211.04541 | -448.81245  | 1 |
| 8578 | H | 69.40334 | 93.42421 | 60.54600 | -3376.42146 | 1757.71697  | 1642.98666  | 1 |
| 8579 | C | 69.40375 | 92.05552 | 62.24249 | 476.45665   | 82.68046    | -385.50914  | 1 |
| 8580 | H | 70.20781 | 91.40998 | 62.57494 | 1533.58734  | 3898.89455  | 1006.13894  | 1 |
| 8581 | C | 69.09859 | 93.21509 | 63.22059 | 826.96726   | 50.16857    | 213.48069   | 1 |
| 8582 | H | 69.68257 | 94.07966 | 62.87519 | -1501.14003 | 259.10799   | 702.79399   | 1 |
| 8583 | H | 68.05119 | 93.63565 | 63.03541 | -2051.78226 | -1392.61638 | 2215.99302  | 1 |
| 8584 | C | 69.42888 | 92.86430 | 64.77427 | 404.84303   | -177.03687  | -173.48959  | 1 |
| 8585 | O | 70.63244 | 92.87685 | 65.12411 | 941.36320   | 575.88919   | -161.49260  | 1 |
| 8586 | O | 68.50008 | 92.70126 | 65.53971 | -6.31688    | 3.83150     | 70.74667    | 1 |
| 8587 | C | 68.08195 | 91.24012 | 61.95098 | -757.84099  | -361.48897  | -58.29884   | 1 |
| 8588 | O | 67.83260 | 90.33279 | 62.79404 | -384.77348  | 640.95519   | 224.11388   | 1 |
| 8589 | N | 67.33010 | 91.60427 | 60.92187 | 658.56521   | -124.87636  | -323.10465  | 1 |
| 8590 | H | 67.78417 | 92.34544 | 60.29101 | 437.50617   | 1095.20958  | 3631.18879  | 1 |
| 8591 | C | 66.39450 | 90.59976 | 60.44194 | 277.32871   | -1497.86424 | 142.73669   | 1 |
| 8592 | H | 65.65851 | 90.33412 | 61.20267 | -2013.95744 | -5313.78910 | -761.90668  | 1 |
| 8593 | C | 65.73686 | 91.46568 | 59.33226 | -708.83939  | 1049.40941  | 4.28744     | 1 |
| 8594 | H | 65.53062 | 92.47544 | 59.86914 | 607.14654   | -394.82866  | 108.54781   | 1 |
| 8595 | H | 66.45571 | 91.76415 | 58.55384 | 2761.21269  | -1102.24158 | 223.63392   | 1 |
| 8596 | C | 64.36890 | 91.07435 | 58.62186 | -4.33159    | -79.65384   | 152.46880   | 1 |
| 8597 | H | 64.52000 | 90.61587 | 57.62024 | 232.08933   | -1231.78483 | 816.99141   | 1 |
| 8598 | C | 63.65948 | 90.04772 | 59.59402 | 465.14261   | 1435.00403  | 480.40771   | 1 |
| 8599 | H | 62.57107 | 89.99000 | 59.43559 | -12.37848   | -1979.21354 | -1520.40345 | 1 |
| 8600 | H | 63.88195 | 90.28650 | 60.67806 | 42.89221    | -1439.31324 | 13.80832    | 1 |
| 8601 | H | 64.06729 | 89.00302 | 59.50323 | 3597.47181  | -2464.70211 | 42.83711    | 1 |
| 8602 | C | 63.45985 | 92.33902 | 58.41477 | 669.38693   | -828.26492  | -365.14642  | 1 |
| 8603 | H | 63.15022 | 92.80920 | 59.38854 | 4132.34464  | 1254.46036  | 1639.10680  | 1 |
| 8604 | H | 64.08264 | 93.18965 | 57.87451 | -1183.17018 | -142.97664  | -1890.53710 | 1 |
| 8605 | H | 62.52703 | 92.14150 | 57.79681 | -960.94612  | -1880.41294 | 2918.58900  | 1 |
| 8606 | C | 67.04694 | 89.15639 | 59.89211 | -255.49137  | 558.54667   | -496.74140  | 1 |
| 8607 | O | 66.28911 | 88.25489 | 59.58738 | -198.01649  | 173.84875   | -211.00871  | 1 |
| 8608 | N | 68.32203 | 89.27286 | 59.53649 | 459.56268   | 785.84383   | -202.18951  | 1 |
| 8609 | H | 68.68951 | 90.16414 | 59.93156 | 566.67136   | 1209.45612  | -1959.15099 | 1 |
| 8610 | C | 69.10042 | 88.05948 | 59.54321 | -11.27255   | 1049.40155  | -5.10863    | 1 |
| 8611 | H | 68.42172 | 87.31174 | 58.99034 | -1464.58541 | -683.40745  | -1861.80656 | 1 |

|      |   |          |          |          |             |             |             |   |
|------|---|----------|----------|----------|-------------|-------------|-------------|---|
| 8612 | C | 70.50758 | 88.22242 | 58.78752 | -586.57922  | -13.52443   | 742.78871   | 1 |
| 8613 | H | 71.17267 | 87.36405 | 59.08454 | -1366.75587 | -2741.64145 | 598.33531   | 1 |
| 8614 | H | 71.13247 | 89.16327 | 59.07799 | -2042.15676 | -422.87675  | -3650.57818 | 1 |
| 8615 | C | 70.19853 | 88.07343 | 57.31521 | 122.44735   | 4.80143     | 684.50254   | 1 |
| 8616 | C | 70.16255 | 88.94954 | 56.22180 | -308.92772  | -535.50068  | 878.62335   | 1 |
| 8617 | H | 70.41706 | 90.02973 | 56.03913 | -2089.08558 | 1161.38969  | 70.89811    | 1 |
| 8618 | N | 69.81196 | 88.26556 | 55.13061 | 70.85981    | -798.62983  | -190.08134  | 1 |
| 8619 | H | 69.72795 | 88.80513 | 54.27325 | 2470.01953  | 3277.87806  | -2190.83209 | 1 |
| 8620 | C | 69.67467 | 86.91792 | 55.36204 | -141.80605  | 1096.82488  | -178.68544  | 1 |
| 8621 | C | 69.81067 | 86.76110 | 56.82302 | 270.36541   | -612.75657  | -236.20599  | 1 |
| 8622 | C | 69.73458 | 85.46024 | 57.44397 | 391.72418   | 39.15720    | -174.16530  | 1 |
| 8623 | H | 69.98933 | 85.24480 | 58.49650 | -287.67505  | 1064.80955  | -1022.78410 | 1 |
| 8624 | C | 69.68000 | 84.43180 | 56.55090 | -249.17678  | 520.15760   | 706.25633   | 1 |
| 8625 | H | 69.73600 | 83.43380 | 56.95890 | 1509.78763  | 463.94103   | 2720.94217  | 1 |
| 8626 | C | 69.50253 | 85.79179 | 54.45120 | 355.40396   | -183.56537  | 848.15577   | 1 |
| 8627 | H | 69.57747 | 85.93799 | 53.29714 | -3883.37732 | 1197.37838  | 3543.29291  | 1 |
| 8628 | C | 69.46400 | 84.55980 | 55.13790 | -726.02323  | -516.91701  | 192.71243   | 1 |
| 8629 | H | 69.43900 | 83.61780 | 54.60990 | -1237.27372 | 2881.62697  | 252.20224   | 1 |
| 8630 | C | 69.47100 | 87.55630 | 61.01389 | 1189.32426  | -1.43135    | 146.37640   | 1 |
| 8631 | O | 69.72955 | 86.35006 | 61.14604 | 96.28068    | 143.89352   | -13.94453   | 1 |
| 8632 | N | 69.76165 | 88.51866 | 61.91656 | -405.89630  | 83.40689    | 804.74064   | 1 |
| 8633 | H | 69.29572 | 89.48289 | 61.87342 | -304.00188  | -2049.22001 | 3022.10860  | 1 |
| 8634 | C | 70.34804 | 87.87839 | 63.04713 | -995.75521  | -465.59528  | -5.24245    | 1 |
| 8635 | H | 70.82373 | 86.93485 | 62.54570 | -2070.47575 | -832.82444  | -504.57853  | 1 |
| 8636 | C | 71.17063 | 89.00348 | 63.83931 | -441.76086  | -443.82271  | 749.68964   | 1 |
| 8637 | H | 71.75312 | 89.68551 | 63.23884 | -0.13437    | 3804.29348  | -511.50439  | 1 |
| 8638 | C | 70.20934 | 89.71795 | 64.82896 | 134.09339   | -33.44080   | 118.75907   | 1 |
| 8639 | H | 70.69892 | 90.63156 | 65.31818 | -246.45870  | -851.91970  | 2501.11950  | 1 |
| 8640 | H | 69.72914 | 89.03978 | 65.60124 | -941.04791  | 150.48609   | -1700.43279 | 1 |
| 8641 | H | 69.31912 | 90.10589 | 64.32232 | 3344.56695  | -3223.60841 | 92.80256    | 1 |
| 8642 | C | 72.16645 | 88.21939 | 64.80788 | 335.80531   | -611.07563  | -572.18354  | 1 |
| 8643 | H | 72.82519 | 88.92494 | 65.31903 | -3896.11705 | -964.20812  | -3387.43823 | 1 |
| 8644 | H | 71.64885 | 87.55812 | 65.57695 | -1322.46287 | -2838.90877 | -2153.59406 | 1 |
| 8645 | H | 72.75039 | 87.45031 | 64.23638 | 2139.32188  | 1177.92032  | 548.25017   | 1 |
| 8646 | C | 69.25023 | 87.13708 | 64.02112 | -681.94624  | -959.79326  | 1106.38991  | 1 |
| 8647 | O | 69.74266 | 86.37588 | 64.80397 | -195.58547  | 240.64682   | -632.55509  | 1 |
| 8648 | N | 67.98314 | 87.50178 | 63.80797 | 372.73326   | 1009.15852  | 96.23802    | 1 |
| 8649 | H | 67.90002 | 88.27644 | 63.09022 | 4725.48392  | -2226.46633 | -996.64424  | 1 |
| 8650 | C | 66.78716 | 86.82731 | 64.36574 | -210.36934  | 277.80558   | 19.38505    | 1 |
| 8651 | H | 67.09761 | 86.75058 | 65.46807 | 238.46928   | -1062.61929 | 1314.39536  | 1 |
| 8652 | C | 65.57246 | 87.67641 | 64.06059 | 1043.45787  | -908.68795  | -317.26741  | 1 |
| 8653 | H | 65.34624 | 87.63394 | 62.95754 | 1390.48587  | -2320.71210 | -890.31477  | 1 |
| 8654 | C | 64.34091 | 87.16410 | 64.79271 | -599.17299  | 411.41307   | 554.40357   | 1 |
| 8655 | H | 64.42514 | 87.20857 | 65.90634 | 1686.69841  | 3864.05234  | -1552.03256 | 1 |
| 8656 | H | 63.43032 | 87.76474 | 64.44402 | -3346.54231 | -1469.93888 | 1533.45066  | 1 |
| 8657 | H | 64.07224 | 86.10348 | 64.52940 | 1624.95591  | -239.93553  | -4756.78740 | 1 |
| 8658 | C | 65.68840 | 89.15051 | 64.41279 | -60.15871   | -496.20239  | 317.57854   | 1 |
| 8659 | H | 66.24401 | 89.76317 | 63.54555 | 77.33987    | -2576.30109 | -392.44928  | 1 |
| 8660 | H | 64.69921 | 89.53793 | 64.68495 | -2550.41425 | -423.54708  | 2110.37332  | 1 |
| 8661 | H | 66.32712 | 89.17093 | 65.29590 | -1574.74609 | -307.98106  | 307.54121   | 1 |
| 8662 | C | 66.68231 | 85.40858 | 63.56945 | -179.21973  | -276.90879  | -14.01820   | 1 |
| 8663 | O | 66.19800 | 84.42780 | 64.14390 | -482.57715  | 592.64948   | 198.77909   | 1 |
| 8664 | N | 67.14638 | 85.35183 | 62.28202 | -343.53351  | 68.89488    | 265.30728   | 1 |
| 8665 | H | 67.80594 | 86.09439 | 62.12500 | -302.50677  | -1679.67942 | -2923.53546 | 1 |
| 8666 | C | 67.17300 | 83.92780 | 61.67790 | 685.68798   | 321.67274   | 507.74959   | 1 |
| 8667 | H | 66.24200 | 83.39480 | 61.79890 | 1649.61620  | 2256.69318  | 1443.72038  | 1 |
| 8668 | C | 67.57000 | 83.97580 | 60.15290 | 605.11168   | -412.29603  | 543.41774   | 1 |
| 8669 | H | 68.48300 | 84.59580 | 60.02690 | 2104.62655  | 2018.10975  | -1181.52712 | 1 |
| 8670 | C | 67.61400 | 82.57980 | 59.52390 | -543.91757  | 453.41528   | 574.47303   | 1 |
| 8671 | H | 66.79600 | 81.88480 | 59.80990 | 1862.33532  | -1444.02710 | -2084.39898 | 1 |
| 8672 | H | 68.52000 | 82.02080 | 59.84090 | 2864.49075  | 1300.75818  | -30.77500   | 1 |
| 8673 | H | 67.66500 | 82.68580 | 58.41990 | -2611.94440 | -1738.28447 | -233.10893  | 1 |



|      |   |          |          |          |             |             |             |   |
|------|---|----------|----------|----------|-------------|-------------|-------------|---|
| 8674 | C | 66.50700 | 84.79580 | 59.46790 | 834.42392   | 349.32340   | -114.72088  | 1 |
| 8675 | H | 66.63300 | 84.77480 | 58.36390 | -2506.74778 | -471.96867  | -1841.65343 | 1 |
| 8676 | H | 66.40800 | 85.88182 | 59.84108 | 2303.07971  | -956.95724  | -1769.23769 | 1 |
| 8677 | H | 65.54000 | 84.29880 | 59.69790 | -1698.05578 | -2195.07427 | -1482.05322 | 1 |
| 8678 | C | 68.20200 | 83.10680 | 62.39890 | 550.50155   | 589.32564   | -425.55181  | 1 |
| 8679 | O | 68.02100 | 81.91380 | 62.76490 | 265.05037   | -645.49038  | -369.75357  | 1 |
| 8680 | N | 69.35700 | 83.66280 | 62.70190 | 611.51693   | -452.93843  | -365.46698  | 1 |
| 8681 | H | 69.64500 | 84.55180 | 62.35490 | -1783.86180 | -1016.25432 | -2383.96528 | 1 |
| 8682 | C | 70.38900 | 83.01780 | 63.55090 | -417.00848  | 393.99101   | 708.74961   | 1 |
| 8683 | H | 70.48900 | 81.98180 | 63.26390 | -1071.58594 | 2667.34841  | -1278.74246 | 1 |
| 8684 | C | 71.76000 | 83.63580 | 63.31290 | -484.47360  | 707.47680   | 310.18206   | 1 |
| 8685 | H | 72.58800 | 82.97480 | 63.64590 | -2638.63833 | 1671.58017  | 376.34261   | 1 |
| 8686 | H | 71.82400 | 84.63980 | 63.78390 | -798.91887  | 3040.56766  | 122.07846   | 1 |
| 8687 | C | 72.03300 | 83.72280 | 61.79390 | -215.29745  | -521.99840  | 715.97184   | 1 |
| 8688 | C | 71.81600 | 82.59080 | 60.95990 | 279.85305   | -717.87178  | -487.64063  | 1 |
| 8689 | H | 71.47000 | 81.69580 | 61.45590 | -2316.48263 | 1909.86806  | 940.49903   | 1 |
| 8690 | C | 72.08100 | 82.67680 | 59.54890 | 606.64568   | 99.14528    | 673.49999   | 1 |
| 8691 | H | 71.79200 | 81.91980 | 58.83390 | -2128.87791 | 1667.81113  | -1607.64148 | 1 |
| 8692 | C | 72.48800 | 83.89180 | 59.02390 | 195.93976   | 854.07363   | -252.22381  | 1 |
| 8693 | H | 72.66000 | 83.92580 | 57.95890 | -2538.06704 | 1495.79316  | 1104.10359  | 1 |
| 8694 | C | 72.42300 | 84.92880 | 61.19290 | -50.29512   | 126.63266   | -901.60167  | 1 |
| 8695 | H | 72.50395 | 85.89272 | 61.76713 | -1321.70914 | -2082.90148 | -1461.37561 | 1 |
| 8696 | C | 72.70238 | 84.99223 | 59.85766 | -432.98429  | -490.83777  | -145.38737  | 1 |
| 8697 | H | 73.01897 | 85.89278 | 59.38421 | -1895.56371 | -1702.47407 | -3038.91836 | 1 |
| 8698 | C | 70.05300 | 82.90880 | 64.99590 | -703.64877  | 567.76549   | 118.20222   | 1 |
| 8699 | O | 70.29400 | 81.84380 | 65.59190 | 582.21902   | -257.82227  | -467.09306  | 1 |
| 8700 | N | 69.42700 | 83.89580 | 65.60790 | -669.99197  | -228.23948  | -460.09759  | 1 |
| 8701 | H | 69.17200 | 84.72080 | 65.10890 | -2598.22064 | 1215.83658  | 1291.98188  | 1 |
| 8702 | C | 68.97800 | 83.85380 | 67.00790 | -783.83523  | -179.54670  | 429.90268   | 1 |
| 8703 | H | 69.89000 | 83.70380 | 67.56490 | 346.22594   | -2277.71589 | -2142.51351 | 1 |
| 8704 | C | 68.19903 | 85.20585 | 67.46090 | 681.87297   | 51.56031    | -152.30225  | 1 |
| 8705 | H | 67.22631 | 85.38521 | 66.95033 | 1389.28469  | -574.96040  | -1987.67425 | 1 |
| 8706 | H | 68.84072 | 86.08474 | 67.21789 | 338.23433   | 1053.83825  | -238.65874  | 1 |
| 8707 | C | 67.99918 | 85.33896 | 69.00421 | 1257.63042  | -271.50135  | 169.52143   | 1 |
| 8708 | H | 67.37700 | 84.47980 | 69.36990 | -251.79211  | 455.35365   | -3102.81808 | 1 |
| 8709 | H | 67.35645 | 86.18124 | 69.17199 | 645.54680   | -152.24946  | -693.25948  | 1 |
| 8710 | C | 69.36679 | 85.60018 | 69.80215 | 711.40873   | 319.18884   | 86.19525    | 1 |
| 8711 | O | 69.86384 | 86.67645 | 70.06156 | 325.14627   | -345.90372  | -415.02769  | 1 |
| 8712 | N | 70.01700 | 84.39780 | 70.10590 | 430.88271   | -474.21138  | -549.66895  | 1 |
| 8713 | H | 69.81800 | 83.47480 | 69.77790 | 1631.46249  | 1462.02418  | -2258.10577 | 1 |
| 8714 | H | 70.95200 | 84.61280 | 70.38790 | -1617.99244 | -2635.09471 | 580.17461   | 1 |
| 8715 | C | 68.01400 | 82.64180 | 67.17590 | -681.98160  | -75.25730   | -600.57343  | 1 |
| 8716 | O | 68.15500 | 81.79780 | 68.04290 | 503.60685   | 290.79634   | 534.27039   | 1 |
| 8717 | N | 67.09000 | 82.50080 | 66.23490 | -542.00045  | 99.79091    | -639.49165  | 1 |
| 8718 | H | 67.03700 | 83.21580 | 65.54290 | -1827.24928 | 1527.47529  | 2055.77371  | 1 |
| 8719 | C | 66.19800 | 81.42780 | 66.04390 | -649.22657  | 631.11082   | 107.95832   | 1 |
| 8720 | H | 65.61500 | 81.36480 | 66.95090 | -749.82018  | 2991.41556  | 622.43786   | 1 |
| 8721 | C | 65.20800 | 81.57280 | 64.87290 | 376.31415   | -425.96708  | -713.01523  | 1 |
| 8722 | H | 64.70000 | 82.55680 | 64.95890 | 712.68056   | -2278.81910 | -2048.73038 | 1 |
| 8723 | H | 65.78400 | 81.60080 | 63.92390 | -2781.34911 | 1454.07416  | -219.07002  | 1 |
| 8724 | C | 64.14300 | 80.54880 | 64.85190 | 197.69820   | -878.72599  | 142.15153   | 1 |
| 8725 | C | 64.10100 | 79.51580 | 63.85590 | -289.94759  | -542.79390  | 672.87159   | 1 |
| 8726 | H | 64.80100 | 79.56380 | 63.03490 | 2747.58171  | 331.57114   | 1496.35610  | 1 |
| 8727 | C | 63.15900 | 78.47080 | 63.93090 | 616.79588   | 321.75980   | 589.47814   | 1 |
| 8728 | H | 63.17600 | 77.65880 | 63.21990 | 2085.84444  | 1593.50673  | -1734.42080 | 1 |
| 8729 | C | 62.29400 | 78.35380 | 65.04990 | 334.18835   | -806.48764  | 263.33788   | 1 |
| 8730 | H | 61.65200 | 77.48780 | 65.10490 | -1195.28903 | -2707.66152 | 1066.80806  | 1 |
| 8731 | C | 63.23200 | 80.41480 | 65.92290 | 655.30633   | -207.67647  | 599.07854   | 1 |
| 8732 | H | 63.26300 | 81.05080 | 66.79490 | -1807.55544 | 938.41900   | 2397.98652  | 1 |
| 8733 | C | 62.34100 | 79.34080 | 66.02690 | -637.91715  | 628.11748   | -173.15066  | 1 |
| 8734 | H | 61.57100 | 79.40480 | 66.78190 | -2428.13455 | 820.79013   | 1824.47044  | 1 |
| 8735 | C | 66.93500 | 80.04880 | 65.78090 | 195.05360   | -792.53318  | -406.56642  | 1 |

|      |   |          |          |          |             |             |             |   |
|------|---|----------|----------|----------|-------------|-------------|-------------|---|
| 8736 | O | 66.63200 | 79.06580 | 66.49690 | 52.23850    | 680.28599   | -397.62964  | 1 |
| 8737 | N | 67.94200 | 79.96780 | 64.95690 | -147.37618  | -825.15603  | 100.34977   | 1 |
| 8738 | H | 68.28900 | 80.79880 | 64.52890 | 641.78635   | -2949.29133 | 887.70332   | 1 |
| 8739 | C | 68.76200 | 78.73780 | 64.76490 | -283.59104  | 413.20314   | 761.76787   | 1 |
| 8740 | H | 68.18600 | 77.88280 | 64.44390 | 893.12959   | -331.38519  | -2998.45454 | 1 |
| 8741 | C | 69.92700 | 79.06480 | 63.73590 | -20.02066   | 736.77696   | -536.85183  | 1 |
| 8742 | H | 70.79800 | 79.64880 | 64.10390 | 720.16800   | -286.26712  | -3049.20242 | 1 |
| 8743 | H | 69.47600 | 79.59580 | 62.87090 | -1766.34439 | 2477.45026  | 800.30865   | 1 |
| 8744 | C | 70.63800 | 77.74080 | 63.25190 | -567.84164  | -695.72988  | -158.00889  | 1 |
| 8745 | H | 69.81100 | 77.09780 | 62.88090 | 1469.65111  | 2639.96115  | -876.90192  | 1 |
| 8746 | H | 71.15600 | 77.18480 | 64.06190 | 1330.39681  | 2323.18840  | 1652.59379  | 1 |
| 8747 | C | 71.61500 | 77.98280 | 62.06390 | -173.31241  | 676.02989   | -586.85382  | 1 |
| 8748 | O | 71.30400 | 77.62580 | 60.88590 | 253.19284   | 748.00484   | -3.06174    | 1 |
| 8749 | N | 72.76000 | 78.65180 | 62.30290 | -756.73621  | 248.18430   | 280.04847   | 1 |
| 8750 | H | 73.02500 | 78.74080 | 63.26290 | -76.03550   | 1762.26803  | 2605.15954  | 1 |
| 8751 | H | 73.53400 | 78.74680 | 61.67590 | -1129.91214 | 2023.67923  | -2127.49787 | 1 |
| 8752 | C | 69.42700 | 78.31480 | 66.03490 | -551.28833  | -311.69731  | 656.03123   | 1 |
| 8753 | O | 69.49300 | 77.10380 | 66.30090 | 607.35783   | 152.72270   | 481.06078   | 1 |
| 8754 | N | 69.91900 | 79.24580 | 66.90290 | 444.31337   | -385.07350  | -605.78570  | 1 |
| 8755 | H | 69.86900 | 80.20080 | 66.61990 | 2595.52861  | 35.76156    | -1777.68910 | 1 |
| 8756 | C | 70.55000 | 78.86580 | 68.12590 | -784.14317  | -52.59372   | 462.38987   | 1 |
| 8757 | H | 71.32000 | 78.13480 | 67.92590 | -462.13645  | -2699.23387 | 1548.80362  | 1 |
| 8758 | C | 71.25000 | 80.09480 | 68.80590 | 197.12909   | 890.15955   | 14.39087    | 1 |
| 8759 | H | 71.58700 | 79.73080 | 69.79990 | 2746.32061  | 303.57606   | -1504.58994 | 1 |
| 8760 | H | 70.61000 | 80.97980 | 69.01290 | -3097.61543 | -546.90067  | -62.48631   | 1 |
| 8761 | N | 73.40700 | 81.20880 | 68.59690 | -209.07347  | 622.14253   | 530.94185   | 1 |
| 8762 | H | 73.43300 | 81.28880 | 69.59390 | -2040.68413 | 1011.31339  | 2170.50219  | 1 |
| 8763 | C | 72.35200 | 80.62980 | 68.01290 | -248.12391  | 564.18458   | -671.99799  | 1 |
| 8764 | C | 74.26900 | 81.55580 | 67.58590 | -155.31937  | -898.50238  | -4.51232    | 1 |
| 8765 | H | 75.19500 | 82.08080 | 67.81790 | 973.62003   | -220.44013  | 2983.57108  | 1 |
| 8766 | N | 73.76200 | 81.31280 | 66.40590 | 163.43278   | -152.13122  | 814.13642   | 1 |
| 8767 | C | 72.56300 | 80.67780 | 66.66290 | 684.80954   | 300.46282   | -521.73651  | 1 |
| 8768 | H | 72.02400 | 80.25780 | 65.82290 | 1199.36856  | -2026.37391 | -2086.51625 | 1 |
| 8769 | C | 69.64000 | 78.25780 | 69.17190 | -747.16856  | 355.58843   | 383.07573   | 1 |
| 8770 | O | 70.02400 | 77.39280 | 69.98090 | -534.25265  | -579.67242  | 46.70353    | 1 |
| 8771 | N | 68.39300 | 78.68480 | 69.17490 | 45.48387    | -842.94896  | 6.36779     | 1 |
| 8772 | H | 68.03400 | 79.38880 | 68.56790 | -2083.58571 | 1357.88664  | -1926.92519 | 1 |
| 8773 | C | 67.34400 | 78.10680 | 69.99190 | -486.39842  | 359.06583   | 682.59747   | 1 |
| 8774 | H | 67.88300 | 77.80780 | 70.87890 | 1823.64178  | -2248.54392 | -1231.50603 | 1 |
| 8775 | C | 66.26800 | 79.14380 | 70.38190 | 354.39673   | -755.01887  | -368.51114  | 1 |
| 8776 | H | 65.65100 | 79.44880 | 69.50990 | -1685.12818 | 2208.34413  | 1477.08682  | 1 |
| 8777 | C | 65.27500 | 78.49980 | 71.45990 | 818.16250   | 369.91638   | 158.81751   | 1 |
| 8778 | H | 65.85400 | 78.09680 | 72.31790 | -704.60158  | 2358.52233  | 1959.37114  | 1 |
| 8779 | H | 64.71300 | 77.63880 | 71.03790 | -1922.40656 | 1060.30325  | -2253.51642 | 1 |
| 8780 | H | 64.49100 | 79.19980 | 71.82090 | 966.05373   | 2011.63690  | 2217.72032  | 1 |
| 8781 | C | 66.88300 | 80.46080 | 70.88990 | 578.45802   | -638.70251  | 298.15505   | 1 |
| 8782 | H | 67.63100 | 80.93980 | 70.22190 | 1961.27994  | -586.94183  | -2388.95511 | 1 |
| 8783 | H | 67.49200 | 80.42380 | 71.81890 | -2311.42056 | 1813.39268  | 1125.68567  | 1 |
| 8784 | C | 65.83800 | 81.51180 | 71.27090 | -829.22184  | -344.94732  | -157.64989  | 1 |
| 8785 | H | 65.02200 | 81.53180 | 70.51890 | 1146.57994  | 789.58334   | -2821.37180 | 1 |
| 8786 | H | 65.46700 | 81.24480 | 72.28390 | 429.82659   | -2165.50649 | -2241.44083 | 1 |
| 8787 | H | 66.38100 | 82.47880 | 71.20490 | -2331.25248 | -1872.54511 | -978.29592  | 1 |
| 8788 | C | 66.76900 | 76.84280 | 69.45490 | -340.18826  | 610.30084   | -585.88040  | 1 |
| 8789 | O | 66.63400 | 75.81380 | 70.12590 | 101.89568   | -622.84987  | 474.66044   | 1 |
| 8790 | N | 66.31500 | 76.98580 | 68.18590 | 158.99257   | 828.45462   | 32.50530    | 1 |
| 8791 | H | 66.41500 | 77.87280 | 67.74190 | -2616.55087 | -325.30913  | -1716.40955 | 1 |
| 8792 | C | 65.74200 | 75.94280 | 67.37790 | 151.60799   | -222.65958  | -871.14220  | 1 |
| 8793 | H | 64.79300 | 75.72480 | 67.84490 | 332.72533   | 2444.91621  | 1951.89775  | 1 |
| 8794 | C | 65.55500 | 76.47180 | 65.99690 | 516.47904   | 744.65398   | 100.94974   | 1 |
| 8795 | H | 65.01800 | 77.43680 | 65.87590 | -2309.33922 | -1649.80974 | 1357.68420  | 1 |
| 8796 | H | 66.57200 | 76.68280 | 65.60290 | -2378.86400 | 1325.20877  | 1575.77093  | 1 |
| 8797 | C | 64.89500 | 75.49180 | 64.95890 | 699.04891   | -87.30804   | 578.92913   | 1 |

|      |   |          |          |          |             |             |             |   |
|------|---|----------|----------|----------|-------------|-------------|-------------|---|
| 8798 | H | 65.50600 | 74.59380 | 64.72490 | 1876.96401  | -2499.29325 | 358.83921   | 1 |
| 8799 | H | 64.58300 | 76.09980 | 64.08290 | -1213.58057 | 2898.57565  | 153.97275   | 1 |
| 8800 | S | 63.30800 | 74.83580 | 65.62490 | 416.23263   | -317.43383  | 192.86463   | 1 |
| 8801 | C | 62.41500 | 74.52080 | 64.05090 | -723.11660  | 534.39399   | 151.57985   | 1 |
| 8802 | H | 61.57500 | 73.84080 | 64.30990 | 1894.43547  | -1399.81738 | -2085.62983 | 1 |
| 8803 | H | 63.09600 | 74.03980 | 63.31690 | 1019.44980  | 2208.15760  | 1995.74255  | 1 |
| 8804 | H | 62.01300 | 75.46580 | 63.62590 | -1982.24411 | 1150.22911  | 2155.43673  | 1 |
| 8805 | C | 66.62700 | 74.71180 | 67.33690 | 574.44850   | -552.29807  | -443.20059  | 1 |
| 8806 | O | 66.22400 | 73.62780 | 67.63590 | 488.90100   | -608.17075  | 121.37288   | 1 |
| 8807 | N | 67.94400 | 74.80680 | 67.04190 | 412.83426   | 217.61314   | 703.48041   | 1 |
| 8808 | H | 68.38100 | 75.69680 | 66.93390 | -1566.75032 | 1034.45141  | 2524.56529  | 1 |
| 8809 | C | 68.78100 | 73.65580 | 66.86890 | -596.84400  | 82.97288    | 684.35644   | 1 |
| 8810 | H | 68.16600 | 72.78480 | 66.69290 | 1497.15614  | 726.10748   | 2670.11566  | 1 |
| 8811 | C | 69.72500 | 73.87980 | 65.70990 | -175.62620  | -821.42401  | -354.78026  | 1 |
| 8812 | H | 70.51200 | 74.64080 | 65.89490 | 2171.35181  | 2255.82464  | -307.75434  | 1 |
| 8813 | C | 70.49500 | 72.60180 | 65.37190 | 378.51733   | 52.02063    | -827.93085  | 1 |
| 8814 | H | 71.16400 | 72.77680 | 64.50290 | -1830.41880 | -1926.89381 | 1683.70826  | 1 |
| 8815 | H | 71.16100 | 72.19280 | 66.16290 | -1694.63056 | -1036.21179 | -2439.81938 | 1 |
| 8816 | H | 69.76400 | 71.82480 | 65.06090 | 1340.02925  | 2669.43549  | -988.26212  | 1 |
| 8817 | C | 69.01400 | 74.34080 | 64.41390 | -814.01391  | -209.93561  | -353.21297  | 1 |
| 8818 | H | 68.75000 | 75.40280 | 64.60590 | -2507.13629 | 1875.32597  | 309.26749   | 1 |
| 8819 | H | 69.68600 | 74.31480 | 63.52990 | -1945.45291 | -2290.22985 | -931.81889  | 1 |
| 8820 | H | 68.06000 | 73.80680 | 64.21390 | 2327.78054  | 2116.14265  | 40.05353    | 1 |
| 8821 | C | 69.60800 | 73.28180 | 68.10590 | 732.54018   | -357.93091  | 408.31525   | 1 |
| 8822 | O | 69.97600 | 72.13480 | 68.30190 | 1.35383     | -550.82225  | -565.88006  | 1 |
| 8823 | N | 69.88600 | 74.25980 | 68.99390 | 363.03646   | -731.62391  | 213.54921   | 1 |
| 8824 | H | 69.62600 | 75.21180 | 68.84890 | 1755.34152  | -2608.48845 | -113.09448  | 1 |
| 8825 | C | 70.53000 | 73.95480 | 70.25190 | 897.70081   | -103.05256  | -122.32915  | 1 |
| 8826 | H | 70.92300 | 74.92080 | 70.53490 | -36.69836   | -2570.59466 | -1813.53869 | 1 |
| 8827 | H | 71.34000 | 73.25280 | 70.12490 | 2707.14142  | 1502.01009  | 559.97968   | 1 |
| 8828 | C | 69.62700 | 73.38380 | 71.24690 | -455.10011  | 563.46771   | 553.93053   | 1 |
| 8829 | O | 70.00600 | 72.62580 | 72.09890 | -186.37563  | -688.24524  | 339.42575   | 1 |
| 8830 | N | 68.35400 | 73.82580 | 71.22490 | 311.11183   | 604.43295   | 500.54223   | 1 |
| 8831 | H | 67.99000 | 74.44980 | 70.53890 | 1526.07374  | 630.11928   | -2678.11031 | 1 |
| 8832 | C | 67.42000 | 73.44580 | 72.28490 | 488.89665   | -662.84659  | -391.23583  | 1 |
| 8833 | H | 67.91200 | 72.76780 | 72.96590 | -202.70806  | -176.52103  | -3134.64129 | 1 |
| 8834 | C | 66.91300 | 74.68680 | 73.11490 | 284.28868   | 637.56471   | 586.63634   | 1 |
| 8835 | H | 66.12200 | 75.16780 | 72.50090 | 636.15078   | 1541.45354  | -2667.85671 | 1 |
| 8836 | H | 67.73000 | 75.39380 | 73.37290 | -1152.87383 | -1009.69575 | -2747.65767 | 1 |
| 8837 | C | 66.30000 | 74.35180 | 74.45690 | 529.35420   | 598.48763   | -439.37193  | 1 |
| 8838 | H | 65.60900 | 73.48980 | 74.34190 | -1404.50143 | 1893.60025  | 2083.23788  | 1 |
| 8839 | C | 67.30900 | 73.99080 | 75.58390 | -356.46527  | 191.87426   | -817.04821  | 1 |
| 8840 | H | 67.94500 | 74.88180 | 75.77790 | -2886.42813 | -572.73393  | 1112.98460  | 1 |
| 8841 | H | 67.87700 | 73.11080 | 75.21290 | 1554.72610  | 1907.30855  | 1960.41503  | 1 |
| 8842 | H | 66.84500 | 73.70680 | 76.55190 | 1700.32173  | -1757.92658 | 1979.09737  | 1 |
| 8843 | C | 65.46100 | 75.57580 | 74.92890 | -556.85359  | -709.22100  | 135.53838   | 1 |
| 8844 | H | 66.10500 | 76.45080 | 75.16190 | 2764.59040  | 962.11966   | 1153.07932  | 1 |
| 8845 | H | 64.93300 | 75.42080 | 75.89390 | -647.66229  | -1903.03744 | -2420.16700 | 1 |
| 8846 | H | 64.70300 | 75.83080 | 74.15790 | -726.31647  | 962.86753   | -2905.78333 | 1 |
| 8847 | C | 66.18200 | 72.68480 | 71.76890 | -551.55292  | 145.25812   | -711.43549  | 1 |
| 8848 | O | 65.92800 | 71.57280 | 72.17990 | 660.67273   | -87.87243   | 423.57669   | 1 |
| 8849 | N | 65.43300 | 73.25880 | 70.81490 | 350.86310   | -95.77548   | -761.83622  | 1 |
| 8850 | H | 65.71600 | 74.14280 | 70.44990 | -1155.90570 | 2419.27216  | 1645.97402  | 1 |
| 8851 | C | 64.18200 | 72.72380 | 70.30190 | -367.08880  | -590.07583  | 590.34509   | 1 |
| 8852 | H | 63.58800 | 72.69080 | 71.20390 | -2345.06017 | 1344.25605  | -1609.93625 | 1 |
| 8853 | C | 63.33000 | 73.64380 | 69.47090 | -881.45777  | -148.18660  | -180.34394  | 1 |
| 8854 | H | 63.72500 | 73.82480 | 68.44790 | -1263.21552 | -2863.19262 | -323.48226  | 1 |
| 8855 | C | 61.92300 | 73.14780 | 69.18390 | -162.98024  | 889.47281   | -117.16040  | 1 |
| 8856 | H | 61.36800 | 72.94880 | 70.12590 | 1868.77692  | 2273.08058  | 1113.10544  | 1 |
| 8857 | H | 61.30500 | 73.85280 | 68.58890 | -2062.91018 | 1098.60995  | -2106.10635 | 1 |
| 8858 | H | 61.96700 | 72.21880 | 68.57590 | 2163.49839  | -1231.78059 | -1923.59494 | 1 |
| 8859 | C | 63.22400 | 75.10980 | 70.05690 | -710.87993  | -201.85737  | 534.18567   | 1 |

|      |   |          |          |          |             |             |             |   |
|------|---|----------|----------|----------|-------------|-------------|-------------|---|
| 8860 | H | 62.72800 | 74.93580 | 71.03590 | -1722.85908 | -2220.69218 | -1413.68633 | 1 |
| 8861 | H | 64.20300 | 75.58080 | 70.29190 | 74.49284    | -2991.69774 | -970.78406  | 1 |
| 8862 | C | 62.38800 | 76.05980 | 69.16990 | -901.93412  | -89.79683   | -99.51065   | 1 |
| 8863 | H | 62.69600 | 75.86280 | 68.12090 | -2194.98692 | -1319.68458 | -1827.20860 | 1 |
| 8864 | H | 62.61200 | 77.12580 | 69.38790 | -2958.87587 | 943.55482   | 502.97527   | 1 |
| 8865 | H | 61.29600 | 75.86780 | 69.23290 | 615.59011   | 228.60696   | -3076.85130 | 1 |
| 8866 | C | 64.17900 | 71.32780 | 69.69790 | 615.77418   | -500.64708  | 449.02746   | 1 |
| 8867 | O | 63.61300 | 70.39280 | 70.22690 | 672.86755   | 410.51495   | -48.51765   | 1 |
| 8868 | N | 64.84000 | 71.21580 | 68.46890 | 30.93819    | -690.30030  | -484.97486  | 1 |
| 8869 | H | 65.25800 | 71.95580 | 67.94690 | 2834.41771  | -1125.42655 | 773.12196   | 1 |
| 8870 | C | 64.86800 | 69.95580 | 67.69390 | 598.91025   | -664.56113  | 176.39734   | 1 |
| 8871 | H | 63.81200 | 69.72680 | 67.68790 | -2265.49285 | -1205.97625 | 1819.72241  | 1 |
| 8872 | C | 65.36600 | 70.19380 | 66.22890 | -475.69890  | 749.97196   | 206.64852   | 1 |
| 8873 | H | 66.39600 | 70.60980 | 66.18990 | 1947.96506  | -2077.23152 | 1337.44816  | 1 |
| 8874 | H | 65.22500 | 69.21180 | 65.72890 | -1103.00333 | -1704.59296 | 2403.32535  | 1 |
| 8875 | C | 64.53200 | 71.18780 | 65.44590 | 645.79796   | -525.54372  | -371.75234  | 1 |
| 8876 | H | 64.74800 | 72.23680 | 65.73890 | 1034.52187  | -432.58778  | -2939.53373 | 1 |
| 8877 | C | 64.82900 | 71.16480 | 63.94490 | -193.44510  | 495.40262   | 740.67958   | 1 |
| 8878 | H | 64.37600 | 72.06480 | 63.47790 | 1030.41163  | -2830.14617 | -909.25835  | 1 |
| 8879 | H | 64.51100 | 70.21780 | 63.45690 | -1788.09069 | 1872.10513  | -1787.78642 | 1 |
| 8880 | H | 65.92000 | 71.13280 | 63.73590 | -2319.69691 | 430.01972   | 2081.42152  | 1 |
| 8881 | C | 63.01800 | 70.99680 | 65.50990 | 337.28319   | 463.18300   | -709.33247  | 1 |
| 8882 | H | 62.67500 | 69.94880 | 65.36790 | -2169.81831 | -2099.82564 | 883.65550   | 1 |
| 8883 | H | 62.52000 | 71.27080 | 66.46390 | 1287.11327  | -1973.07056 | 2085.31969  | 1 |
| 8884 | H | 62.58300 | 71.55980 | 64.65590 | 933.05301   | 2308.53467  | -1923.09802 | 1 |
| 8885 | C | 65.59900 | 68.81180 | 68.33190 | -487.30356  | 405.89265   | -655.16212  | 1 |
| 8886 | O | 65.01500 | 67.77580 | 68.08990 | 51.76259    | 752.96699   | -232.35441  | 1 |
| 8887 | N | 66.67700 | 68.82680 | 69.08290 | 716.34479   | -416.55290  | 161.26411   | 1 |
| 8888 | C | 67.51000 | 69.99280 | 69.37990 | -313.75432  | -698.84754  | 494.59211   | 1 |
| 8889 | H | 67.00000 | 70.92280 | 69.70990 | -1118.00607 | 2940.43275  | 46.30239    | 1 |
| 8890 | H | 68.07300 | 70.27080 | 68.46290 | 344.03567   | 2906.48788  | -1154.20703 | 1 |
| 8891 | C | 67.20100 | 67.63480 | 69.73590 | -534.45817  | 709.77158   | 205.01164   | 1 |
| 8892 | H | 67.07000 | 66.78880 | 69.07690 | -857.55567  | 3023.80252  | 139.43755   | 1 |
| 8893 | C | 68.66500 | 68.04580 | 70.17490 | 481.33696   | 391.24665   | 668.35005   | 1 |
| 8894 | H | 69.12400 | 67.49880 | 71.02590 | -2140.94963 | -2003.45149 | 1140.50123  | 1 |
| 8895 | H | 69.38400 | 67.82280 | 69.35690 | 672.80993   | 2140.77173  | 2205.14159  | 1 |
| 8896 | C | 68.55100 | 69.51580 | 70.42490 | -696.14943  | -406.90384  | -425.74198  | 1 |
| 8897 | H | 69.49600 | 70.06980 | 70.24090 | -962.55716  | 2608.97393  | 1471.38199  | 1 |
| 8898 | H | 68.18300 | 69.79180 | 71.43690 | -2261.40855 | -1927.18248 | -1034.51694 | 1 |
| 8899 | C | 66.39300 | 67.26680 | 71.00390 | -453.74341  | 739.56402   | 280.38006   | 1 |
| 8900 | O | 66.32900 | 66.10480 | 71.31490 | -137.54694  | 639.53244   | 442.38708   | 1 |
| 8901 | N | 65.84600 | 68.26680 | 71.68190 | 525.19233   | 644.56059   | -146.24280  | 1 |
| 8902 | H | 65.99600 | 69.19580 | 71.35290 | 2330.43331  | 683.90243   | -1999.89607 | 1 |
| 8903 | C | 64.95700 | 68.17180 | 72.79490 | 399.79504   | -677.76227  | 460.70949   | 1 |
| 8904 | H | 64.63100 | 69.17880 | 73.00590 | 2056.58315  | 1120.06637  | 2100.98627  | 1 |
| 8905 | H | 65.55800 | 67.86280 | 73.63690 | 1733.48591  | 94.92812    | -2623.78381 | 1 |
| 8906 | C | 63.76000 | 67.32980 | 72.57190 | -10.08677   | -839.03243  | -356.89472  | 1 |
| 8907 | O | 63.42600 | 66.47880 | 73.44190 | -437.01769  | -217.15932  | -620.87406  | 1 |
| 8908 | N | 63.06200 | 67.53680 | 71.42990 | 766.41190   | 160.47857   | 315.48648   | 1 |
| 8909 | H | 63.28600 | 68.31780 | 70.85290 | -1861.68302 | 1369.43190  | 2134.71751  | 1 |
| 8910 | C | 61.89500 | 66.79280 | 71.11990 | 134.00087   | -583.58071  | 687.69784   | 1 |
| 8911 | H | 61.24900 | 66.80980 | 71.98490 | -1363.52244 | -2722.36357 | -792.31898  | 1 |
| 8912 | C | 61.08100 | 67.31480 | 69.93990 | 593.24576   | -688.29568  | -75.89158   | 1 |
| 8913 | H | 60.31700 | 66.55780 | 69.66190 | 1194.47358  | 2577.93466  | -1351.18910 | 1 |
| 8914 | C | 60.20100 | 68.50380 | 70.43690 | -62.19399   | -708.20101  | 570.99408   | 1 |
| 8915 | H | 59.64400 | 68.05180 | 71.28490 | 1664.45034  | 1183.95113  | 2392.92520  | 1 |
| 8916 | H | 59.37700 | 68.71880 | 69.72290 | -665.70437  | 3054.70418  | -351.91805  | 1 |
| 8917 | H | 60.89200 | 69.32080 | 70.73390 | 1496.61065  | -1903.13702 | -2009.09239 | 1 |
| 8918 | C | 61.97000 | 67.64580 | 68.73790 | -4.01097    | 820.47718   | -397.80915  | 1 |
| 8919 | H | 62.59600 | 68.53580 | 68.96190 | -5.14008    | -236.63247  | 3137.22885  | 1 |
| 8920 | H | 62.67200 | 66.81080 | 68.52690 | 1511.82584  | -448.24004  | 2722.44187  | 1 |
| 8921 | C | 61.18200 | 67.81180 | 67.43490 | -828.62534  | -319.95147  | -206.06334  | 1 |

|      |   |          |          |          |             |             |             |   |
|------|---|----------|----------|----------|-------------|-------------|-------------|---|
| 8922 | H | 61.83300 | 68.03080 | 66.56190 | 2986.70743  | -737.51338  | -658.69488  | 1 |
| 8923 | H | 60.42100 | 68.61980 | 67.48290 | 1471.44982  | 615.18607   | 2711.93800  | 1 |
| 8924 | H | 60.54100 | 66.91780 | 67.27590 | 1969.38797  | -2313.68546 | 816.45382   | 1 |
| 8925 | C | 62.10100 | 65.27780 | 70.85890 | 542.50498   | -411.58330  | 606.41449   | 1 |
| 8926 | O | 61.32600 | 64.41780 | 71.31790 | -90.26999   | -196.22098  | -759.58929  | 1 |
| 8927 | N | 63.17400 | 64.90480 | 70.18990 | -117.44128  | 375.04606   | 747.14141   | 1 |
| 8928 | H | 63.73500 | 65.66780 | 69.88090 | 734.43151   | -2823.65248 | -1177.20995 | 1 |
| 8929 | C | 63.66700 | 63.56780 | 70.06490 | -589.92492  | 639.39638   | -273.15172  | 1 |
| 8930 | H | 62.88200 | 62.91180 | 69.71890 | 1868.20173  | 2187.26408  | -1274.33290 | 1 |
| 8931 | C | 64.85000 | 63.46980 | 69.11790 | 73.22357    | -747.66018  | 516.81095   | 1 |
| 8932 | H | 65.76400 | 63.92480 | 69.55590 | -60.91869   | -1130.28062 | -2935.46945 | 1 |
| 8933 | C | 65.11100 | 61.98380 | 68.79790 | 588.28790   | -568.72396  | -402.39460  | 1 |
| 8934 | H | 65.53400 | 61.39180 | 69.63790 | 2129.49122  | 1687.30096  | 1586.35080  | 1 |
| 8935 | H | 65.93800 | 61.98080 | 68.05590 | 869.28117   | -2724.29525 | 1311.78956  | 1 |
| 8936 | H | 64.16200 | 61.56580 | 68.39990 | -1383.60622 | -1787.62488 | -2188.20871 | 1 |
| 8937 | C | 64.66600 | 64.18280 | 67.82090 | -511.99294  | 745.72906   | 114.90170   | 1 |
| 8938 | H | 64.71900 | 65.29080 | 67.87690 | 1588.00486  | -188.69905  | -2709.40205 | 1 |
| 8939 | H | 65.40800 | 63.84580 | 67.06590 | 1800.67259  | -1935.62399 | 1705.62723  | 1 |
| 8940 | H | 63.66800 | 64.06080 | 67.34590 | 1347.81269  | 2032.19053  | -1987.92073 | 1 |
| 8941 | C | 64.06000 | 63.02280 | 71.47490 | -1.70514    | 752.11570   | -515.52892  | 1 |
| 8942 | O | 63.68600 | 61.86980 | 71.71690 | 714.84410   | -93.59885   | -322.27999  | 1 |
| 8943 | N | 64.69800 | 63.81880 | 72.35490 | 551.30940   | -398.39206  | 500.01400   | 1 |
| 8944 | H | 64.92200 | 64.75380 | 72.09190 | 1065.39191  | 2431.51348  | -1688.46336 | 1 |
| 8945 | C | 64.99500 | 63.39580 | 73.70990 | 84.22080    | 855.54583   | -303.97236  | 1 |
| 8946 | H | 65.58600 | 62.49180 | 73.72390 | -1378.58275 | -2174.01324 | -1808.70182 | 1 |
| 8947 | C | 65.90700 | 64.41680 | 74.47290 | -548.75752  | -723.60389  | 81.93657    | 1 |
| 8948 | H | 65.40800 | 65.40280 | 74.35890 | -798.90751  | -3003.86307 | 486.60013   | 1 |
| 8949 | C | 65.96600 | 64.10380 | 75.97690 | 121.52595   | 468.18448   | 772.97202   | 1 |
| 8950 | H | 64.99500 | 64.04380 | 76.51390 | 1064.66948  | 1358.25911  | -2630.55837 | 1 |
| 8951 | H | 66.52400 | 63.15380 | 76.11390 | 728.27879   | -2508.23114 | 1754.02759  | 1 |
| 8952 | H | 66.62700 | 64.80880 | 76.52590 | -2157.82906 | 216.12575   | 2279.31780  | 1 |
| 8953 | C | 67.28900 | 64.30380 | 73.77390 | 749.51981   | -457.40855  | -245.86273  | 1 |
| 8954 | H | 67.15200 | 64.24880 | 72.67190 | -420.13663  | -1908.78261 | -2465.41282 | 1 |
| 8955 | H | 67.80800 | 63.36280 | 74.05590 | 1292.12572  | -2513.34894 | -1382.64763 | 1 |
| 8956 | C | 68.16400 | 65.49680 | 74.02690 | -394.49375  | 463.21539   | -679.15918  | 1 |
| 8957 | H | 67.70100 | 66.33980 | 73.47090 | 2086.51082  | 1736.69889  | -1590.14961 | 1 |
| 8958 | H | 68.23500 | 65.67980 | 75.11990 | 2822.74157  | -548.77616  | 1276.40157  | 1 |
| 8959 | H | 69.22100 | 65.29580 | 73.74790 | 1926.09764  | -1485.74778 | 1995.22621  | 1 |
| 8960 | C | 63.73700 | 63.05580 | 74.48490 | 493.45836   | -499.32038  | -581.91839  | 1 |
| 8961 | O | 63.59500 | 61.94380 | 75.01890 | -732.30512  | 90.81087    | 281.26470   | 1 |
| 8962 | N | 62.71100 | 63.97680 | 74.42690 | -388.37517  | -500.86328  | -557.64953  | 1 |
| 8963 | H | 62.97700 | 64.85880 | 74.04390 | 1950.96197  | -1152.01113 | -2182.85226 | 1 |
| 8964 | C | 61.40000 | 63.89880 | 75.00690 | -65.73122   | 687.61042   | 595.24979   | 1 |
| 8965 | H | 61.51400 | 63.67880 | 76.05790 | -1951.21468 | 1538.10409  | -1930.08375 | 1 |
| 8966 | C | 60.66100 | 65.21180 | 74.74190 | 522.64942   | 726.40915   | -174.98094  | 1 |
| 8967 | H | 60.92700 | 65.60280 | 73.73690 | -1874.72242 | 1772.08866  | -1800.92861 | 1 |
| 8968 | H | 59.56300 | 65.07380 | 74.83190 | -3107.24857 | 303.11924   | -389.03888  | 1 |
| 8969 | C | 61.13800 | 66.33980 | 75.75290 | -526.39631  | -297.91956  | 682.35025   | 1 |
| 8970 | H | 62.24600 | 66.39680 | 75.69090 | -1296.29539 | 1075.82747  | -2657.14880 | 1 |
| 8971 | C | 60.60400 | 67.72780 | 75.32790 | 559.65290   | 571.52751   | -437.71674  | 1 |
| 8972 | H | 60.92600 | 68.06380 | 74.31990 | 2176.88016  | 889.15141   | 2090.17434  | 1 |
| 8973 | H | 59.49500 | 67.79180 | 75.33190 | -1717.87920 | -2187.24171 | -1470.74505 | 1 |
| 8974 | H | 60.93400 | 68.51280 | 76.04190 | 939.06574   | 2087.33093  | -2158.57160 | 1 |
| 8975 | C | 60.79400 | 66.15080 | 77.20290 | 793.52293   | -219.55549  | -391.87721  | 1 |
| 8976 | H | 61.31900 | 65.24480 | 77.57390 | -581.17914  | 1168.77396  | -2862.59051 | 1 |
| 8977 | H | 60.95400 | 67.10180 | 77.75390 | -2954.60589 | 506.49745   | 954.98199   | 1 |
| 8978 | H | 59.72800 | 65.90580 | 77.39990 | 1752.84334  | 232.71534   | 2602.23174  | 1 |
| 8979 | C | 60.68300 | 62.63780 | 74.55090 | -422.82354  | 680.47202   | 435.46422   | 1 |
| 8980 | O | 60.15800 | 61.87580 | 75.38690 | 507.75188   | 597.42849   | -94.31041   | 1 |
| 8981 | N | 60.66600 | 62.35580 | 73.27790 | -572.47222  | 389.58514   | 482.87811   | 1 |
| 8982 | H | 61.20100 | 62.96480 | 72.69590 | 1749.94152  | -2014.18665 | -1667.02820 | 1 |
| 8983 | C | 60.10100 | 61.11180 | 72.65490 | 146.14881   | 299.24040   | -848.85023  | 1 |

|      |   |          |          |          |             |             |             |   |
|------|---|----------|----------|----------|-------------|-------------|-------------|---|
| 8984 | H | 59.04500 | 61.08180 | 72.87990 | 778.60536   | -2130.16337 | 2180.45957  | 1 |
| 8985 | C | 60.12500 | 61.11180 | 71.07890 | -81.54435   | 640.83186   | 643.53403   | 1 |
| 8986 | H | 59.92400 | 60.10280 | 70.65790 | 2240.83455  | -2098.16604 | 688.90203   | 1 |
| 8987 | H | 61.15700 | 61.42380 | 70.81190 | 1734.81488  | -2487.23910 | -838.02460  | 1 |
| 8988 | O | 59.30200 | 62.05380 | 70.45490 | -354.37435  | -48.53850   | 704.05260   | 1 |
| 8989 | H | 58.40200 | 61.85880 | 70.72590 | -972.02832  | 2985.12033  | -206.01886  | 1 |
| 8990 | C | 60.70300 | 59.78680 | 73.11590 | 596.28258   | -631.56435  | 277.53299   | 1 |
| 8991 | O | 59.91400 | 58.83680 | 73.29290 | -337.54624  | -10.70752   | 713.84530   | 1 |
| 8992 | N | 62.04400 | 59.67780 | 73.24190 | 215.16837   | -355.06463  | -735.05372  | 1 |
| 8993 | H | 62.55400 | 60.48180 | 72.94690 | -1113.47260 | -2283.51931 | -1855.78678 | 1 |
| 8994 | C | 62.74300 | 58.45280 | 73.65390 | -412.71609  | -249.10353  | 773.99216   | 1 |
| 8995 | H | 62.41300 | 57.69680 | 72.95690 | -618.05730  | 2898.96796  | -1054.61660 | 1 |
| 8996 | C | 64.26900 | 58.73380 | 73.87290 | -728.96113  | 259.56186   | 482.38398   | 1 |
| 8997 | H | 64.76100 | 57.78280 | 74.17290 | 901.55280   | 931.36218   | -2866.70425 | 1 |
| 8998 | H | 64.35500 | 59.49580 | 74.67690 | -1452.49062 | -2621.83855 | 956.27393   | 1 |
| 8999 | S | 64.98900 | 59.21680 | 72.26490 | -194.13488  | -76.32355   | 517.39441   | 1 |
| 9000 | H | 64.69800 | 60.50780 | 72.31790 | -681.37477  | -1452.89683 | 2706.11261  | 1 |
| 9001 | C | 62.19100 | 57.92080 | 74.99590 | 116.85271   | 739.49730   | -520.51915  | 1 |
| 9002 | O | 61.86400 | 56.75380 | 75.16990 | 182.68119   | 593.14954   | 488.29135   | 1 |
| 9003 | N | 62.14600 | 58.80680 | 76.01990 | 45.70287    | 804.95113   | -250.27427  | 1 |
| 9004 | H | 62.48500 | 59.73680 | 75.89890 | -674.89009  | -2327.51731 | -2006.34313 | 1 |
| 9005 | C | 61.69700 | 58.38880 | 77.38590 | -740.98950  | -479.25022  | -229.57526  | 1 |
| 9006 | H | 62.07100 | 57.41880 | 77.67990 | -2645.96527 | 1517.62944  | 770.64577   | 1 |
| 9007 | C | 62.30100 | 59.29480 | 78.44190 | 757.50892   | 468.49620   | -195.30118  | 1 |
| 9008 | H | 61.96400 | 58.85080 | 79.40290 | 2406.12827  | 1321.26137  | -1537.21872 | 1 |
| 9009 | H | 61.85500 | 60.29480 | 78.25690 | 2782.91557  | 1102.01246  | 969.11076   | 1 |
| 9010 | C | 63.83700 | 59.35180 | 78.28390 | -803.14102  | 140.99230   | 408.08906   | 1 |
| 9011 | C | 64.38900 | 60.56680 | 77.83490 | 569.90361   | 535.86548   | -468.51795  | 1 |
| 9012 | H | 63.80300 | 61.43580 | 77.57490 | 901.26748   | 2307.51083  | 1939.41664  | 1 |
| 9013 | C | 65.78200 | 60.60780 | 77.65190 | -37.77197   | -597.50180  | -687.76150  | 1 |
| 9014 | H | 66.16600 | 61.51380 | 77.20790 | -904.88168  | 1353.36004  | 2692.17978  | 1 |
| 9015 | C | 66.60500 | 59.53580 | 77.92290 | -817.15962  | -16.96333   | -404.24424  | 1 |
| 9016 | O | 67.97300 | 59.58680 | 77.66090 | -653.44068  | -391.55089  | 208.15958   | 1 |
| 9017 | H | 68.15200 | 60.22280 | 76.96390 | 1760.09192  | -2576.95817 | -399.48619  | 1 |
| 9018 | C | 64.61200 | 58.27280 | 78.57190 | -385.75690  | 437.13966   | 701.10737   | 1 |
| 9019 | H | 64.11800 | 57.43480 | 79.04090 | 2260.45440  | -996.47659  | 1948.23164  | 1 |
| 9020 | C | 66.01500 | 58.33080 | 78.34490 | -476.74657  | -368.24947  | 684.51153   | 1 |
| 9021 | H | 66.62900 | 57.44280 | 78.37690 | 958.68698   | -2912.64048 | -704.03901  | 1 |
| 9022 | C | 60.22600 | 58.36380 | 77.44290 | 40.66128    | 834.47524   | -365.30637  | 1 |
| 9023 | O | 59.63100 | 57.65280 | 78.25890 | -322.55860  | 526.28303   | -492.55391  | 1 |
| 9024 | N | 59.50100 | 59.13780 | 76.59090 | 188.73066   | -563.22900  | -599.85508  | 1 |
| 9025 | H | 59.91300 | 59.78880 | 75.95890 | -2203.55087 | 1691.57533  | 1476.87599  | 1 |
| 9026 | C | 58.09000 | 58.99580 | 76.38390 | -901.54697  | -95.99147   | 97.20962    | 1 |
| 9027 | H | 57.66200 | 59.15280 | 77.36290 | 1913.20878  | -2197.06582 | 1187.75425  | 1 |
| 9028 | C | 57.49900 | 60.00280 | 75.39790 | -3.91098    | -816.22786  | 406.45762   | 1 |
| 9029 | H | 57.89000 | 60.99280 | 75.71490 | -1932.81911 | -1896.28298 | -1602.04474 | 1 |
| 9030 | H | 57.90100 | 59.81880 | 74.37790 | 730.76234   | -3020.63486 | 489.87516   | 1 |
| 9031 | S | 55.72300 | 60.08580 | 75.22290 | -8.62032    | -298.44196  | 471.24165   | 1 |
| 9032 | H | 55.62900 | 59.09380 | 74.34990 | -2337.76039 | 1913.19876  | 879.07513   | 1 |
| 9033 | C | 57.68600 | 57.57480 | 75.97290 | -725.82512  | 212.06652   | -509.56519  | 1 |
| 9034 | O | 56.79800 | 56.98380 | 76.56690 | -675.41180  | -371.42640  | -171.72231  | 1 |
| 9035 | N | 58.36000 | 56.95880 | 75.04090 | 12.16073    | -815.10765  | -219.37167  | 1 |
| 9036 | H | 58.91300 | 57.53180 | 74.44090 | -727.88212  | 2445.23033  | 1840.99497  | 1 |
| 9037 | C | 58.10400 | 55.59180 | 74.61790 | -590.94656  | 130.60970   | 682.03685   | 1 |
| 9038 | H | 57.05600 | 55.50580 | 74.37190 | 1979.92371  | -2441.04385 | -139.40326  | 1 |
| 9039 | C | 58.88400 | 55.19280 | 73.32890 | 626.26332   | -583.85032  | -313.63045  | 1 |
| 9040 | H | 59.96700 | 55.39580 | 73.47690 | -2093.11751 | 1786.25521  | -1525.24674 | 1 |
| 9041 | C | 58.75700 | 53.70380 | 73.07890 | -704.92997  | 108.48903   | 568.11519   | 1 |
| 9042 | H | 59.12800 | 53.48880 | 72.05390 | 2482.17114  | 1404.67173  | -1328.13778 | 1 |
| 9043 | H | 59.29400 | 53.04680 | 73.79590 | 2783.72384  | -1395.70830 | -448.44861  | 1 |
| 9044 | H | 57.68400 | 53.41180 | 73.07590 | 2819.67443  | 1395.41107  | 22.14147    | 1 |
| 9045 | C | 58.35700 | 55.95380 | 72.10590 | 625.30349   | -64.59327   | -660.51060  | 1 |

|      |   |          |          |          |             |             |             |   |
|------|---|----------|----------|----------|-------------|-------------|-------------|---|
| 9046 | H | 57.42400 | 55.51380 | 71.69390 | 1383.39231  | 2825.00579  | -61.59749   | 1 |
| 9047 | H | 58.03500 | 56.99480 | 72.32590 | 2392.04041  | 2043.19427  | 41.54653    | 1 |
| 9048 | C | 59.39500 | 56.11680 | 70.97890 | 697.09019   | -527.59108  | -259.16004  | 1 |
| 9049 | H | 59.93700 | 55.16780 | 70.78090 | 1909.84300  | -1424.44627 | 2054.67242  | 1 |
| 9050 | H | 59.03200 | 56.60880 | 70.05190 | 1920.85389  | 178.12630   | 2485.32042  | 1 |
| 9051 | H | 60.04100 | 56.97780 | 71.25290 | 2526.20734  | 1579.75436  | 1010.38550  | 1 |
| 9052 | C | 58.48800 | 54.59080 | 75.69290 | -672.90234  | 35.56105    | -614.31983  | 1 |
| 9053 | O | 57.74000 | 53.60180 | 75.90990 | -478.48117  | -400.52770  | -484.00470  | 1 |
| 9054 | N | 59.64700 | 54.78980 | 76.37390 | -594.65392  | -518.80353  | -299.83646  | 1 |
| 9055 | H | 59.99800 | 55.71780 | 76.27190 | -2801.41960 | -1160.56416 | 838.66875   | 1 |
| 9056 | C | 60.34200 | 53.84080 | 77.29690 | -465.92880  | -632.01678  | -463.59049  | 1 |
| 9057 | H | 60.57700 | 52.90980 | 76.80290 | 2104.64880  | -1398.78162 | -1874.05700 | 1 |
| 9058 | C | 61.81500 | 54.30380 | 77.78890 | 563.73452   | -478.79226  | 533.30326   | 1 |
| 9059 | H | 61.72400 | 55.38780 | 78.01790 | -180.62567  | 2661.80876  | -1667.44557 | 1 |
| 9060 | C | 62.20200 | 53.43880 | 79.01190 | -735.72828  | 495.54516   | 211.16321   | 1 |
| 9061 | H | 62.13300 | 52.35980 | 78.75490 | 1744.68210  | 1919.39457  | 1780.51539  | 1 |
| 9062 | H | 63.25500 | 53.63080 | 79.30990 | -2455.01550 | -1863.10778 | -632.41956  | 1 |
| 9063 | H | 61.54700 | 53.49980 | 79.90690 | -3074.15489 | 510.41792   | -432.74879  | 1 |
| 9064 | C | 62.82100 | 54.15980 | 76.66190 | -535.57079  | 392.91337   | -624.68714  | 1 |
| 9065 | H | 62.32800 | 54.42880 | 75.70290 | 2535.16225  | -1816.52634 | -414.01766  | 1 |
| 9066 | H | 63.23200 | 53.13380 | 76.55490 | 637.95677   | -2996.20685 | -716.92531  | 1 |
| 9067 | C | 64.08400 | 54.91880 | 76.90390 | -180.83755  | 852.62476   | 267.91753   | 1 |
| 9068 | H | 63.83200 | 55.97580 | 77.13390 | -2162.95064 | -237.77774  | -2272.29675 | 1 |
| 9069 | H | 64.72100 | 54.56480 | 77.74290 | -681.95603  | -2936.95997 | -898.57017  | 1 |
| 9070 | H | 64.80100 | 54.81880 | 76.06190 | -102.88974  | -380.35460  | -3121.37314 | 1 |
| 9071 | C | 59.39500 | 53.38480 | 78.45890 | 365.42209   | -771.75666  | 319.85834   | 1 |
| 9072 | O | 59.23700 | 52.19880 | 78.85690 | -130.96376  | -582.10112  | -517.33356  | 1 |
| 9073 | N | 58.74100 | 54.39080 | 79.02790 | -580.04826  | -497.83537  | 358.29632   | 1 |
| 9074 | H | 58.82900 | 55.33080 | 78.70690 | -2465.17050 | 1949.98831  | 136.77065   | 1 |
| 9075 | C | 57.95400 | 54.24980 | 80.20890 | 552.93237   | -538.66922  | 485.33727   | 1 |
| 9076 | H | 58.55600 | 53.66780 | 80.89190 | -1936.24275 | 1681.77355  | 1822.31390  | 1 |
| 9077 | C | 57.67700 | 55.58980 | 80.88790 | -544.96510  | 524.50920   | -509.26825  | 1 |
| 9078 | H | 57.07200 | 55.33580 | 81.78590 | 2316.46170  | -1887.20468 | -985.23598  | 1 |
| 9079 | C | 58.98100 | 56.16480 | 81.44990 | 634.75023   | 581.47036   | 300.72474   | 1 |
| 9080 | H | 58.79600 | 57.04280 | 82.10490 | 2074.77167  | -1603.44444 | 1738.53809  | 1 |
| 9081 | H | 59.55900 | 55.40180 | 82.01390 | -3027.53279 | 730.20764   | -446.17064  | 1 |
| 9082 | H | 59.56000 | 56.60080 | 80.60790 | 492.25962   | -3013.89594 | 756.53021   | 1 |
| 9083 | C | 56.89100 | 56.57580 | 80.03690 | -735.50513  | -67.82815   | -534.67985  | 1 |
| 9084 | H | 57.59600 | 57.08480 | 79.34490 | -2011.17990 | 2111.92388  | 1180.32164  | 1 |
| 9085 | H | 56.23000 | 55.99780 | 79.35490 | -1755.26170 | 1810.64938  | 1881.17820  | 1 |
| 9086 | C | 56.10400 | 57.58680 | 80.84990 | 614.68626   | 74.55363    | 669.36803   | 1 |
| 9087 | H | 55.43400 | 57.04080 | 81.54790 | 2510.66828  | 1886.50010  | 189.44233   | 1 |
| 9088 | H | 55.39900 | 58.12580 | 80.18290 | -12.55402   | 61.42276    | -3145.51997 | 1 |
| 9089 | H | 56.80600 | 58.30380 | 81.32690 | 2078.87938  | -1735.19968 | 1601.73931  | 1 |
| 9090 | C | 56.78400 | 53.35880 | 80.02290 | -743.53414  | 511.49723   | -130.30185  | 1 |
| 9091 | O | 56.23600 | 52.76380 | 80.96890 | 588.39911   | 524.92125   | 43.25962    | 1 |
| 9092 | N | 56.27700 | 53.27880 | 78.79190 | 13.28607    | 588.62638   | 604.99153   | 1 |
| 9093 | H | 56.73500 | 53.86180 | 78.12490 | 946.06818   | -1978.89572 | 2255.47178  | 1 |
| 9094 | C | 55.13000 | 52.49880 | 78.47790 | -295.89285  | 791.67877   | -342.26182  | 1 |
| 9095 | H | 54.47900 | 52.42980 | 79.33690 | 843.43458   | 1701.42202  | 2508.38742  | 1 |
| 9096 | C | 54.26500 | 53.22480 | 77.40490 | 754.02901   | 511.08116   | -41.07688   | 1 |
| 9097 | H | 53.70300 | 54.02080 | 77.93790 | -1909.60232 | -2485.84722 | 268.71691   | 1 |
| 9098 | H | 53.51500 | 52.55080 | 76.93890 | -2511.76953 | -1578.68953 | 1047.36786  | 1 |
| 9099 | O | 55.06400 | 53.77880 | 76.36790 | -400.51945  | 635.55216   | -243.48482  | 1 |
| 9100 | H | 55.77900 | 53.17280 | 76.16290 | 126.75732   | 3123.91475  | 351.16297   | 1 |
| 9101 | C | 55.34500 | 51.08080 | 78.13790 | 729.63697   | -446.46594  | 315.83076   | 1 |
| 9102 | O | 54.38400 | 50.33480 | 77.74290 | 442.93773   | -651.90520  | -49.52781   | 1 |
| 9103 | N | 56.56600 | 50.60580 | 78.30390 | -107.75884  | -765.91461  | 338.28262   | 1 |
| 9104 | H | 57.18900 | 51.23380 | 78.76590 | -203.77245  | 1794.70073  | -2575.99540 | 1 |
| 9105 | C | 56.93000 | 49.22180 | 78.07690 | 649.67172   | -639.82059  | 2.69468     | 1 |
| 9106 | H | 56.17700 | 48.60980 | 78.54990 | -1683.53299 | -2008.38757 | 1740.78209  | 1 |
| 9107 | C | 56.90500 | 48.80080 | 76.58590 | 550.37529   | 503.16102   | 524.75426   | 1 |

|      |   |          |          |          |             |             |             |   |
|------|---|----------|----------|----------|-------------|-------------|-------------|---|
| 9108 | H | 55.84500 | 48.89880 | 76.26890 | -1913.41416 | 2467.82422  | 383.29633   | 1 |
| 9109 | H | 57.16400 | 47.73180 | 76.43290 | 1246.14911  | 2688.02245  | 1058.24095  | 1 |
| 9110 | C | 57.61500 | 49.74880 | 75.55590 | -524.85807  | 656.88756   | 352.80837   | 1 |
| 9111 | H | 58.66700 | 49.92380 | 75.86590 | 53.68440    | -3097.36282 | -549.26111  | 1 |
| 9112 | H | 57.07500 | 50.71580 | 75.64090 | 813.94205   | 1730.01573  | -2498.55361 | 1 |
| 9113 | C | 57.50000 | 49.15880 | 74.14190 | -220.05618  | 494.47871   | 733.83724   | 1 |
| 9114 | H | 58.09000 | 49.79580 | 73.44890 | -2571.25717 | -1811.98947 | 59.64017    | 1 |
| 9115 | H | 58.01800 | 48.17680 | 74.12790 | 2258.20433  | 443.46897   | -2145.24468 | 1 |
| 9116 | C | 56.08000 | 49.16180 | 73.63190 | 570.19697   | -673.94438  | 228.30983   | 1 |
| 9117 | H | 55.39300 | 48.50380 | 74.20690 | 1472.61415  | -1731.58635 | -2175.14195 | 1 |
| 9118 | H | 55.70700 | 50.20880 | 73.64390 | 2314.10831  | 134.62230   | -2127.20610 | 1 |
| 9119 | N | 56.00100 | 48.71280 | 72.26790 | -364.77716  | -342.77374  | -679.79120  | 1 |
| 9120 | H | 56.26500 | 49.45680 | 71.59090 | 165.10505   | -2618.56232 | 1736.11575  | 1 |
| 9121 | H | 55.01000 | 48.47780 | 72.05990 | 1485.64317  | 2105.19406  | 1805.33891  | 1 |
| 9122 | H | 56.61600 | 47.89280 | 72.09290 | 2555.77940  | -661.07959  | -1711.48814 | 1 |
| 9123 | C | 58.25800 | 48.62980 | 78.70690 | 530.68986   | 545.42282   | 502.32780   | 1 |
| 9124 | O | 58.67000 | 47.50480 | 78.41790 | -483.71484  | -550.91079  | 293.50382   | 1 |
| 9125 | N | 58.87400 | 49.39780 | 79.67090 | -9.30974    | -840.03168  | 83.26103    | 1 |
| 9126 | H | 58.55300 | 50.33080 | 79.81490 | 2297.01815  | 2051.55425  | -642.69667  | 1 |
| 9127 | C | 60.05300 | 49.01480 | 80.43090 | -738.17546  | 52.50969    | 532.72011   | 1 |
| 9128 | H | 60.85900 | 48.83280 | 79.73490 | -210.22144  | 1446.03697  | 2786.21791  | 1 |
| 9129 | C | 60.48400 | 50.11080 | 81.40890 | -591.45373  | 419.26880   | -553.03451  | 1 |
| 9130 | H | 60.55300 | 51.07380 | 80.85790 | -1981.72135 | -900.86016  | 2271.44396  | 1 |
| 9131 | H | 59.62900 | 50.22680 | 82.10890 | -1607.70201 | -1667.68815 | -2128.92854 | 1 |
| 9132 | C | 61.81200 | 49.86180 | 82.09690 | -16.13933   | 55.14233    | 910.02739   | 1 |
| 9133 | H | 61.77700 | 48.88480 | 82.62590 | 487.95653   | 2621.51135  | 1669.67149  | 1 |
| 9134 | C | 62.94700 | 50.01980 | 81.06690 | 705.18292   | -576.44655  | -43.32926   | 1 |
| 9135 | H | 62.97300 | 51.01480 | 80.57190 | -2305.40820 | 1828.95797  | 1112.75874  | 1 |
| 9136 | H | 62.94200 | 49.14980 | 80.37590 | -378.26055  | -366.92465  | -3101.69494 | 1 |
| 9137 | H | 63.86500 | 49.83680 | 81.66490 | 2805.76968  | 1332.24762  | -500.99800  | 1 |
| 9138 | C | 61.98100 | 50.95380 | 83.20990 | -529.26154  | -527.10529  | -522.96582  | 1 |
| 9139 | H | 61.11500 | 50.89480 | 83.90290 | -2600.06500 | -10.89578   | 1771.37503  | 1 |
| 9140 | H | 62.95000 | 50.78680 | 83.72690 | -2857.22398 | -1163.83868 | -616.42263  | 1 |
| 9141 | H | 62.00600 | 51.98380 | 82.79390 | -1978.21852 | -1094.01348 | 2188.15270  | 1 |
| 9142 | C | 59.83400 | 47.69080 | 81.19690 | 29.37427    | 590.26214   | -694.39093  | 1 |
| 9143 | O | 60.73700 | 46.80980 | 81.21890 | -395.33304  | -155.10882  | 665.79296   | 1 |
| 9144 | N | 58.64700 | 47.46780 | 81.86090 | 190.50952   | -793.34384  | -216.75786  | 1 |
| 9145 | H | 57.93700 | 48.16280 | 81.93990 | -2342.89876 | -2093.71748 | 159.36980   | 1 |
| 9146 | C | 58.32400 | 46.20480 | 82.43990 | -697.54255  | 580.86657   | -86.48359   | 1 |
| 9147 | H | 59.16000 | 45.72380 | 82.92390 | -135.59744  | -1219.89506 | 2896.84235  | 1 |
| 9148 | C | 57.25300 | 46.40580 | 83.55490 | 439.01971   | -366.94824  | 709.97302   | 1 |
| 9149 | H | 56.46500 | 47.09480 | 83.18390 | -2983.55025 | -793.80366  | -605.41709  | 1 |
| 9150 | H | 56.84700 | 45.42880 | 83.89290 | -1528.44556 | 2391.22976  | -1357.97666 | 1 |
| 9151 | O | 57.79400 | 47.05480 | 84.72390 | -58.33021   | -271.59339  | -739.23058  | 1 |
| 9152 | H | 58.33600 | 46.39680 | 85.16390 | -3067.75475 | -104.94495  | 689.99534   | 1 |
| 9153 | C | 57.74300 | 45.15880 | 81.47690 | -760.62354  | 368.20265   | -342.53415  | 1 |
| 9154 | O | 57.44700 | 44.02980 | 81.86390 | 658.98494   | -55.19269   | -431.64782  | 1 |
| 9155 | N | 57.64000 | 45.44880 | 80.18090 | -27.63665   | -200.09890  | -819.67612  | 1 |
| 9156 | H | 57.87600 | 46.33480 | 79.79090 | -2405.58554 | 1968.51410  | 486.14470   | 1 |
| 9157 | C | 57.07300 | 44.51080 | 79.22090 | 223.58277   | 529.74666   | -707.69359  | 1 |
| 9158 | H | 56.64100 | 43.64980 | 79.70890 | -2194.21227 | 2069.53962  | 894.79860   | 1 |
| 9159 | C | 55.93600 | 45.12680 | 78.34290 | -518.88023  | -145.33223  | 735.59014   | 1 |
| 9160 | H | 56.29600 | 45.99180 | 77.74590 | 2184.72905  | 100.66614   | 2261.64797  | 1 |
| 9161 | H | 55.54800 | 44.49680 | 77.51490 | 1248.43424  | -602.57619  | -2824.27692 | 1 |
| 9162 | N | 53.71900 | 46.31980 | 78.70290 | -450.62011  | 535.76950   | -471.76779  | 1 |
| 9163 | H | 53.67500 | 46.71180 | 77.78490 | 2145.22324  | 692.26068   | -2194.77074 | 1 |
| 9164 | C | 54.76900 | 45.59380 | 79.19390 | 747.60014   | 320.33242   | 412.22830   | 1 |
| 9165 | C | 52.84700 | 46.50780 | 79.73890 | -653.78111  | 361.98540   | 522.48238   | 1 |
| 9166 | H | 51.89400 | 47.02380 | 79.61890 | 821.71042   | -3004.28058 | -444.20312  | 1 |
| 9167 | N | 53.29900 | 45.96080 | 80.86590 | -521.14493  | -363.93868  | 555.54378   | 1 |
| 9168 | C | 54.52600 | 45.35480 | 80.48390 | 151.03952   | 173.87420   | 882.27310   | 1 |
| 9169 | H | 55.14700 | 44.83680 | 81.20490 | -1933.72550 | 1915.08321  | 1578.41320  | 1 |



|      |   |          |          |          |             |             |             |   |
|------|---|----------|----------|----------|-------------|-------------|-------------|---|
| 9170 | C | 58.04800 | 44.00880 | 78.19490 | 737.17950   | 260.16697   | 469.39380   | 1 |
| 9171 | O | 57.88200 | 42.94680 | 77.55890 | 260.74621   | -502.24469  | 550.80751   | 1 |
| 9172 | N | 59.14200 | 44.76280 | 78.02990 | -229.19614  | -767.26064  | -267.30605  | 1 |
| 9173 | H | 59.21600 | 45.65280 | 78.47390 | 2722.75767  | -1531.41429 | -373.61368  | 1 |
| 9174 | C | 60.37000 | 44.45780 | 77.32690 | 475.53858   | -634.38824  | 450.40607   | 1 |
| 9175 | H | 60.06600 | 43.86780 | 76.47490 | 1926.73388  | -1447.61399 | -2022.45804 | 1 |
| 9176 | C | 61.19700 | 45.73880 | 76.87590 | -753.09062  | -29.10756   | 513.28186   | 1 |
| 9177 | H | 62.10800 | 45.47580 | 76.29590 | -203.08343  | -2886.69370 | 1234.49700  | 1 |
| 9178 | H | 61.43300 | 46.19080 | 77.86290 | -2217.83936 | 860.91246   | -2058.69972 | 1 |
| 9179 | O | 60.39300 | 46.65880 | 76.10090 | 299.48177   | 657.88616   | 317.99952   | 1 |
| 9180 | H | 59.93500 | 47.30180 | 76.64590 | -931.22968  | 1921.92466  | 2310.24742  | 1 |
| 9181 | C | 61.25600 | 43.57680 | 78.15690 | -178.70763  | -160.85079  | 879.56899   | 1 |
| 9182 | O | 61.74400 | 44.02380 | 79.23190 | 668.96290   | 409.43745   | 92.06977    | 1 |
| 9183 | O | 61.55900 | 42.43480 | 77.70390 | 607.49542   | -496.86289  | -87.77135   | 1 |
| 9184 | N | 68.09800 | 39.69880 | 83.86190 | 571.61285   | 349.91433   | 513.31374   | 1 |
| 9185 | H | 68.31400 | 38.85080 | 84.42290 | 910.08563   | 2169.10908  | 2089.24296  | 1 |
| 9186 | H | 68.24600 | 39.59180 | 82.83790 | 1776.01328  | -2241.62595 | 1311.15071  | 1 |
| 9187 | H | 67.12500 | 40.02180 | 84.03590 | 1021.37160  | 1012.12330  | -2798.32677 | 1 |
| 9188 | C | 68.95200 | 40.75780 | 84.30590 | 777.55891   | 146.67247   | 453.14493   | 1 |
| 9189 | H | 68.94300 | 40.82480 | 85.38390 | 1946.09249  | 226.04804   | 2461.67677  | 1 |
| 9190 | C | 70.47100 | 40.56280 | 83.91090 | -111.61165  | 613.31428   | 665.46182   | 1 |
| 9191 | H | 70.98000 | 41.53880 | 84.06090 | 2031.28577  | 2399.19909  | -126.28571  | 1 |
| 9192 | H | 70.47900 | 40.45980 | 82.80490 | 230.72473   | -2499.99811 | -1896.04900 | 1 |
| 9193 | C | 71.15500 | 39.33080 | 84.51890 | -126.72152  | -755.37306  | 494.77692   | 1 |
| 9194 | H | 72.17500 | 39.10180 | 84.14190 | 2817.21167  | -1316.06727 | 479.07368   | 1 |
| 9195 | H | 70.62200 | 38.43880 | 84.12690 | 2586.76849  | 178.09807   | -1781.89115 | 1 |
| 9196 | C | 71.32300 | 39.38980 | 86.03290 | 463.17499   | 681.60177   | -390.30625  | 1 |
| 9197 | H | 70.30800 | 39.45380 | 86.48090 | 140.17274   | -556.15974  | -3093.42273 | 1 |
| 9198 | H | 71.82700 | 40.34380 | 86.29990 | -1194.98471 | 1307.19899  | 2600.28240  | 1 |
| 9199 | C | 71.99000 | 38.13380 | 86.56490 | 192.57395   | -856.97157  | 244.87956   | 1 |
| 9200 | H | 71.54000 | 37.18180 | 86.20890 | 2223.30287  | -2111.73266 | 704.08501   | 1 |
| 9201 | H | 73.02200 | 38.05280 | 86.16090 | -2223.17803 | -1828.22959 | 1270.15048  | 1 |
| 9202 | N | 72.01700 | 38.08680 | 88.06190 | -231.46637  | 312.51116   | 749.28792   | 1 |
| 9203 | H | 72.40100 | 38.94980 | 88.49690 | -1219.09390 | 2187.79300  | -1904.10033 | 1 |
| 9204 | H | 71.06600 | 37.95380 | 88.46190 | -1435.97863 | -1999.74162 | -1958.88362 | 1 |
| 9205 | H | 72.60700 | 37.30680 | 88.41590 | 2885.33725  | 1136.02598  | -531.50744  | 1 |
| 9206 | C | 68.42100 | 42.10180 | 83.76190 | -828.88752  | -98.95561   | 366.88455   | 1 |
| 9207 | O | 67.82500 | 42.17680 | 82.71690 | -522.37256  | -577.22668  | -132.52735  | 1 |
| 9208 | N | 68.61900 | 43.27580 | 84.43490 | -646.96390  | 541.01008   | -37.65773   | 1 |
| 9209 | H | 69.20800 | 43.27780 | 85.23890 | 2269.17026  | 2048.11863  | 744.51504   | 1 |
| 9210 | C | 67.99400 | 44.54780 | 83.99690 | 242.27881   | 241.13978   | -845.34229  | 1 |
| 9211 | H | 68.34000 | 44.71780 | 82.98890 | 859.63306   | -1423.90944 | -2670.53162 | 1 |
| 9212 | H | 66.91700 | 44.46680 | 83.96490 | -771.66451  | -605.82432  | -2989.27031 | 1 |
| 9213 | C | 68.37200 | 45.68480 | 84.92590 | 184.66813   | -321.36860  | 833.10918   | 1 |
| 9214 | O | 68.20000 | 46.83880 | 84.64490 | -682.82653  | -368.19143  | 147.68288   | 1 |
| 9215 | N | 68.83800 | 45.43480 | 86.17690 | -151.80695  | 593.35009   | -581.00139  | 1 |
| 9216 | H | 69.14100 | 44.52880 | 86.46290 | 2037.25410  | 2010.44992  | 1306.10606  | 1 |
| 9217 | C | 69.04600 | 46.53980 | 87.06590 | -543.62316  | -345.00075  | -645.67743  | 1 |
| 9218 | H | 68.12300 | 47.09580 | 87.14390 | 66.33524    | -2802.41070 | 1428.39775  | 1 |
| 9219 | C | 69.42500 | 45.95680 | 88.48290 | -272.01223  | -709.62501  | -503.87766  | 1 |
| 9220 | H | 69.61000 | 46.79780 | 89.18490 | -409.90894  | 2764.32361  | -1445.23903 | 1 |
| 9221 | H | 70.26400 | 45.23680 | 88.37490 | 2379.73334  | 927.90655   | 1836.86822  | 1 |
| 9222 | N | 68.12900 | 45.25980 | 90.58990 | 460.74564   | 311.05029   | -635.32154  | 1 |
| 9223 | H | 68.44200 | 46.05880 | 91.10290 | -330.13030  | 2963.30336  | 1004.02859  | 1 |
| 9224 | C | 68.28000 | 45.18480 | 89.23290 | 519.54692   | 329.33351   | -673.09839  | 1 |
| 9225 | C | 67.11100 | 44.45380 | 90.92790 | 644.40650   | -337.95750  | 549.52342   | 1 |
| 9226 | H | 66.88800 | 44.18780 | 91.96090 | 1809.78404  | 2565.69366  | -200.30982  | 1 |
| 9227 | N | 66.50500 | 43.97780 | 89.88790 | -540.84101  | 466.07973   | -450.48082  | 1 |
| 9228 | C | 67.24500 | 44.40280 | 88.80090 | 233.82681   | 632.05969   | 614.22844   | 1 |
| 9229 | H | 67.06100 | 44.12980 | 87.76890 | 2200.32966  | 771.33471   | -2112.30168 | 1 |
| 9230 | C | 70.13100 | 47.50080 | 86.71590 | 173.45819   | 439.65766   | -779.78484  | 1 |
| 9231 | O | 69.95600 | 48.68880 | 86.84090 | 222.39656   | -627.13672  | 425.28406   | 1 |

|      |   |          |          |          |             |             |             |   |
|------|---|----------|----------|----------|-------------|-------------|-------------|---|
| 9232 | N | 71.22300 | 46.97380 | 86.14590 | 204.60913   | 810.01953   | 121.14355   | 1 |
| 9233 | H | 71.30800 | 45.98380 | 86.05590 | 1395.58742  | -1035.56346 | 2622.62660  | 1 |
| 9234 | C | 72.34500 | 47.79380 | 85.73390 | 660.80815   | 628.31392   | 2.28335     | 1 |
| 9235 | H | 72.45100 | 48.61880 | 86.42290 | -1545.53051 | 576.21836   | -2679.09202 | 1 |
| 9236 | C | 73.65200 | 47.05680 | 85.70090 | -425.79057  | 48.13732    | 804.88272   | 1 |
| 9237 | H | 73.55600 | 46.00080 | 85.36790 | 3039.25537  | 630.53926   | -513.39387  | 1 |
| 9238 | H | 74.35000 | 47.50180 | 84.95990 | -1972.72698 | 1038.17948  | -2220.08060 | 1 |
| 9239 | C | 74.30700 | 47.04680 | 87.09390 | 480.53013   | 151.83766   | 759.92574   | 1 |
| 9240 | H | 74.48500 | 48.04780 | 87.54190 | 2370.68197  | 2029.45804  | -399.24092  | 1 |
| 9241 | H | 75.34400 | 46.64680 | 87.06490 | 1467.22559  | -1259.41518 | 2481.80352  | 1 |
| 9242 | C | 73.53900 | 46.29480 | 88.22990 | 58.71735    | 865.85843   | 279.80790   | 1 |
| 9243 | O | 73.14300 | 46.94180 | 89.21590 | 700.56881   | -336.87543  | -139.08814  | 1 |
| 9244 | N | 73.26100 | 44.98580 | 88.05190 | -505.79474  | 159.24044   | -656.87629  | 1 |
| 9245 | H | 73.59700 | 44.45680 | 87.27190 | 3144.97068  | 8.48997     | -85.51932   | 1 |
| 9246 | H | 72.71800 | 44.56680 | 88.77890 | 2893.42752  | 214.46368   | -1216.67940 | 1 |
| 9247 | C | 72.00600 | 48.49580 | 84.37690 | -652.05618  | 177.10620   | -612.29661  | 1 |
| 9248 | O | 72.38900 | 49.64980 | 84.14890 | 350.99120   | 170.81571   | -686.47971  | 1 |
| 9249 | N | 71.16500 | 47.88080 | 83.49290 | -302.53106  | -766.33903  | -184.04277  | 1 |
| 9250 | H | 70.90700 | 46.92780 | 83.63290 | 364.44118   | -1764.43515 | 2579.18155  | 1 |
| 9251 | C | 70.59400 | 48.62080 | 82.36290 | -862.50171  | -289.28886  | -62.07866   | 1 |
| 9252 | H | 71.41900 | 49.01280 | 81.78590 | 1036.01167  | 2208.48577  | -1986.83081 | 1 |
| 9253 | C | 69.70100 | 47.63480 | 81.51590 | -164.55527  | -344.16843  | -828.20327  | 1 |
| 9254 | H | 69.09700 | 47.05380 | 82.24590 | 658.45871   | -2145.97582 | 2204.41515  | 1 |
| 9255 | H | 69.01800 | 48.11480 | 80.78390 | 2985.10277  | -664.84523  | 738.49069   | 1 |
| 9256 | C | 70.56200 | 46.67680 | 80.62690 | 283.54917   | 211.53191   | 840.41961   | 1 |
| 9257 | H | 71.33500 | 46.24680 | 81.29890 | -1916.84059 | 822.55660   | -2355.28109 | 1 |
| 9258 | H | 71.11300 | 47.16180 | 79.79190 | -944.70943  | -446.17113  | 2967.60537  | 1 |
| 9259 | C | 69.74500 | 45.52780 | 80.02090 | 524.29088   | -391.76342  | 634.89487   | 1 |
| 9260 | H | 69.31500 | 44.92580 | 80.84990 | -1229.57383 | 1844.48205  | 2232.54572  | 1 |
| 9261 | H | 70.38800 | 44.89380 | 79.37490 | 1015.63131  | -780.23833  | -2873.66446 | 1 |
| 9262 | C | 68.59400 | 45.99380 | 79.11190 | -663.46686  | -12.73768   | -625.38027  | 1 |
| 9263 | H | 67.85700 | 46.48980 | 79.77890 | 2253.08905  | -497.15486  | -2138.84385 | 1 |
| 9264 | H | 68.97400 | 46.63180 | 78.28490 | 916.62625   | -2520.24030 | 1645.11743  | 1 |
| 9265 | N | 68.02900 | 44.78280 | 78.47990 | -646.67135  | 411.61989   | 353.63473   | 1 |
| 9266 | H | 67.98800 | 44.08980 | 79.25490 | 456.55696   | -1691.11499 | 2613.41005  | 1 |
| 9267 | H | 67.10500 | 44.86980 | 78.00990 | 1932.75723  | 1360.21106  | 2076.65635  | 1 |
| 9268 | H | 68.67200 | 44.54580 | 77.69790 | 417.66651   | 2948.47236  | 1015.03285  | 1 |
| 9269 | C | 69.71700 | 49.79980 | 82.79390 | -617.67290  | -324.69073  | 586.94729   | 1 |
| 9270 | O | 69.79800 | 50.86580 | 82.22390 | 540.16093   | 474.80293   | -326.21401  | 1 |
| 9271 | N | 68.85600 | 49.66080 | 83.84290 | 594.48378   | 432.66991   | -414.79883  | 1 |
| 9272 | H | 68.79800 | 48.77280 | 84.29290 | -978.53363  | 2663.26302  | -1359.31167 | 1 |
| 9273 | C | 68.00000 | 50.77580 | 84.28590 | 715.14807   | -556.17579  | 103.35727   | 1 |
| 9274 | H | 67.57400 | 51.25780 | 83.41790 | 2428.98298  | 1120.09530  | 1656.39803  | 1 |
| 9275 | C | 66.81200 | 50.11480 | 85.12790 | -332.12868  | -304.81920  | 792.60759   | 1 |
| 9276 | H | 67.22400 | 49.50880 | 85.96190 | -139.30877  | 1651.25559  | -2674.35493 | 1 |
| 9277 | H | 66.27300 | 50.96480 | 85.59790 | -1694.81756 | 919.65983   | 2485.96972  | 1 |
| 9278 | C | 65.87200 | 49.30880 | 84.17590 | 395.52658   | 651.74012   | -500.24449  | 1 |
| 9279 | H | 66.45800 | 48.61780 | 83.53290 | -1809.92321 | 376.01599   | 2545.78400  | 1 |
| 9280 | H | 65.40700 | 50.13980 | 83.60490 | -2338.21175 | -441.51441  | -2058.16838 | 1 |
| 9281 | C | 64.58100 | 48.69080 | 84.76490 | 226.48407   | 674.72310   | 570.00413   | 1 |
| 9282 | H | 63.91200 | 48.26980 | 83.98490 | -2066.60647 | -2145.83371 | -1011.31678 | 1 |
| 9283 | H | 64.00700 | 49.44380 | 85.34690 | 2912.66198  | 1184.58333  | 106.71804   | 1 |
| 9284 | N | 64.98200 | 47.51680 | 85.61290 | -664.91099  | 244.64166   | -459.03826  | 1 |
| 9285 | H | 64.97100 | 46.61780 | 85.17490 | -2236.99295 | 368.58991   | 2181.33680  | 1 |
| 9286 | C | 64.91300 | 47.44980 | 86.91190 | 515.92537   | 620.47959   | -424.59050  | 1 |
| 9287 | N | 65.22000 | 46.31280 | 87.50190 | 290.27672   | -635.12157  | -474.37570  | 1 |
| 9288 | H | 65.23700 | 45.48880 | 86.93590 | -2931.03971 | -12.51396   | 1143.27417  | 1 |
| 9289 | H | 64.79200 | 46.14780 | 88.39090 | -219.68945  | 1131.84790  | 2927.26546  | 1 |
| 9290 | N | 64.55700 | 48.39180 | 87.74590 | 366.70747   | 732.70913   | 203.31074   | 1 |
| 9291 | H | 64.32200 | 49.30080 | 87.40390 | 1717.53574  | -1465.36163 | 2191.12129  | 1 |
| 9292 | H | 64.48300 | 48.15980 | 88.71590 | 896.89385   | 606.79751   | 2953.91341  | 1 |
| 9293 | C | 68.76300 | 51.77380 | 85.17190 | -285.50188  | 631.16787   | -592.93069  | 1 |

|      |   |          |          |          |             |             |             |   |
|------|---|----------|----------|----------|-------------|-------------|-------------|---|
| 9294 | O | 68.31700 | 52.89480 | 85.38790 | 455.07951   | -469.12633  | -443.22720  | 1 |
| 9295 | N | 69.99200 | 51.44480 | 85.66490 | 3.21938     | -338.54617  | 773.33590   | 1 |
| 9296 | H | 70.22400 | 50.48180 | 85.78290 | -2461.25588 | 946.01213   | -1716.24788 | 1 |
| 9297 | C | 71.03900 | 52.33780 | 86.14090 | -581.44329  | 507.81909   | 485.27773   | 1 |
| 9298 | H | 70.60600 | 52.99280 | 86.88290 | -1990.57360 | -1242.27221 | -2095.85370 | 1 |
| 9299 | C | 72.06500 | 51.49980 | 86.96290 | 573.91930   | -554.52735  | 441.09757   | 1 |
| 9300 | H | 72.56500 | 50.79680 | 86.26290 | -1932.81945 | 2229.60763  | -1091.46003 | 1 |
| 9301 | H | 71.46100 | 50.99980 | 87.75090 | 560.37078   | 3084.03253  | -270.10028  | 1 |
| 9302 | C | 73.17300 | 52.34480 | 87.63990 | 60.06995    | 701.82141   | -579.04172  | 1 |
| 9303 | H | 73.64300 | 52.97080 | 86.85090 | 1255.68737  | -183.46375  | 2878.85681  | 1 |
| 9304 | H | 74.04000 | 51.75980 | 88.01390 | 319.95097   | 2014.62973  | 2395.22956  | 1 |
| 9305 | C | 72.66500 | 53.24480 | 88.79790 | -478.15527  | 563.67583   | 533.93642   | 1 |
| 9306 | H | 72.29600 | 54.16380 | 88.29490 | -1899.60117 | -2176.04413 | 1246.82540  | 1 |
| 9307 | H | 71.81600 | 52.78380 | 89.34490 | -611.93222  | 2480.08668  | -1836.55526 | 1 |
| 9308 | C | 73.72900 | 53.65480 | 89.76990 | 779.41680   | -154.22984  | 447.40765   | 1 |
| 9309 | H | 74.54200 | 54.24280 | 89.29390 | -2182.45431 | -1070.66177 | 1997.19874  | 1 |
| 9310 | H | 74.15700 | 52.71680 | 90.18490 | -258.53165  | 184.47061   | 3130.07319  | 1 |
| 9311 | N | 73.08500 | 54.51480 | 90.80690 | -312.61414  | -447.45925  | 643.99139   | 1 |
| 9312 | H | 72.42900 | 53.95380 | 91.38690 | 1690.89145  | -1863.86110 | -1888.15628 | 1 |
| 9313 | H | 72.53100 | 55.23180 | 90.29690 | 245.16499   | 3099.80847  | 478.86093   | 1 |
| 9314 | H | 73.73600 | 55.06480 | 91.40390 | 2155.19886  | -2109.17509 | 897.06441   | 1 |
| 9315 | C | 71.68500 | 53.15880 | 85.00390 | 623.75668   | -425.37872  | -511.30378  | 1 |
| 9316 | O | 71.94000 | 54.39380 | 85.13790 | 210.32796   | -64.02608   | 758.47877   | 1 |
| 9317 | N | 72.06400 | 52.55680 | 83.85790 | -512.68802  | -561.07426  | 367.44925   | 1 |
| 9318 | H | 72.02800 | 51.56080 | 83.83890 | -1340.09802 | -2231.07034 | -1767.67889 | 1 |
| 9319 | C | 72.45900 | 53.18580 | 82.59290 | 272.44450   | 717.63508   | 492.16348   | 1 |
| 9320 | H | 73.31700 | 53.82280 | 82.75190 | -2566.36552 | 740.82608   | -1662.27885 | 1 |
| 9321 | C | 72.73700 | 52.17980 | 81.49090 | -525.34461  | -458.00046  | 587.96226   | 1 |
| 9322 | H | 73.16400 | 52.69180 | 80.60190 | -869.76759  | -2305.19100 | -1956.48282 | 1 |
| 9323 | H | 73.43100 | 51.39180 | 81.85490 | 1353.06864  | 498.04678   | -2796.31559 | 1 |
| 9324 | H | 71.81100 | 51.66480 | 81.15690 | -241.38724  | 2448.10649  | -1961.30901 | 1 |
| 9325 | C | 71.42300 | 54.10280 | 82.09390 | -689.97708  | -585.91715  | 109.92600   | 1 |
| 9326 | O | 71.72400 | 55.20980 | 81.62890 | -552.83839  | -246.67264  | 507.09915   | 1 |
| 9327 | N | 70.15100 | 53.68580 | 82.18190 | -342.29331  | 458.75259   | -620.52691  | 1 |
| 9328 | H | 69.93300 | 52.74080 | 82.41190 | -2053.05600 | -911.11173  | 2202.96680  | 1 |
| 9329 | C | 69.05200 | 54.61880 | 81.81290 | -661.84217  | 377.23300   | 501.10998   | 1 |
| 9330 | H | 69.27300 | 54.93580 | 80.80490 | 2243.27517  | 930.64832   | -1999.95911 | 1 |
| 9331 | C | 67.72000 | 53.76380 | 81.88590 | 639.20273   | -551.70776  | 344.22291   | 1 |
| 9332 | H | 67.86000 | 52.87180 | 81.23890 | -2063.73426 | -2288.81104 | 632.90689   | 1 |
| 9333 | H | 67.52600 | 53.54180 | 82.95690 | -1559.68592 | -2705.88566 | 379.19502   | 1 |
| 9334 | C | 66.42000 | 54.44080 | 81.37090 | 430.20625   | -46.35091   | -802.63639  | 1 |
| 9335 | H | 66.26400 | 55.30580 | 82.05090 | -681.97645  | -583.37952  | 3015.42744  | 1 |
| 9336 | C | 66.51600 | 54.88780 | 79.91790 | -173.14037  | -434.96732  | 782.48121   | 1 |
| 9337 | H | 67.34800 | 55.61980 | 79.84090 | -803.72996  | -2374.21637 | -1901.40501 | 1 |
| 9338 | H | 66.83700 | 54.05780 | 79.25390 | 1898.90846  | 2069.68757  | -1417.30952 | 1 |
| 9339 | H | 65.61300 | 55.35880 | 79.47290 | -1667.41036 | -79.12497   | 2666.77861  | 1 |
| 9340 | C | 65.08700 | 53.64980 | 81.60090 | -731.35607  | 301.24535   | -453.67448  | 1 |
| 9341 | H | 64.19400 | 54.26480 | 81.35690 | -2511.54906 | 1572.20663  | 1057.59817  | 1 |
| 9342 | H | 65.13500 | 52.68680 | 81.04990 | -595.74175  | -3073.77495 | -308.58642  | 1 |
| 9343 | H | 65.04700 | 53.31080 | 82.65790 | -2822.71283 | -1352.70024 | 317.36508   | 1 |
| 9344 | C | 68.94000 | 55.86580 | 82.65390 | -70.47272   | -828.70885  | 373.79973   | 1 |
| 9345 | O | 68.94800 | 56.97480 | 82.06590 | -446.80757  | 137.32904   | 636.49899   | 1 |
| 9346 | N | 68.95500 | 55.70480 | 84.03490 | 279.57794   | -554.94538  | 571.44036   | 1 |
| 9347 | H | 68.90000 | 54.78480 | 84.41390 | 1046.08587  | -532.20686  | 2919.02149  | 1 |
| 9348 | C | 69.01700 | 56.76980 | 84.97390 | -534.55167  | -434.10288  | 597.71247   | 1 |
| 9349 | H | 68.18000 | 57.41880 | 84.76190 | -1645.94003 | -1799.36271 | -1987.81324 | 1 |
| 9350 | C | 68.98700 | 56.10080 | 86.37390 | 385.92827   | 769.98546   | -299.38731  | 1 |
| 9351 | H | 67.97000 | 55.65380 | 86.34790 | 1889.06635  | 1409.96097  | 2083.66615  | 1 |
| 9352 | H | 69.84200 | 55.41280 | 86.55090 | -1619.21534 | 815.70040   | 2571.18664  | 1 |
| 9353 | C | 69.01600 | 57.12980 | 87.55390 | -623.59984  | 585.04799   | 316.69085   | 1 |
| 9354 | H | 68.64300 | 58.10980 | 87.18590 | 2090.21703  | -1164.78809 | -2042.66681 | 1 |
| 9355 | H | 70.04000 | 57.51080 | 87.75690 | 2155.28233  | 1395.29939  | -1818.27499 | 1 |

|      |   |          |          |          |             |             |             |   |
|------|---|----------|----------|----------|-------------|-------------|-------------|---|
| 9356 | C | 68.28500 | 56.64680 | 88.80690 | -56.65648   | -649.82734  | -637.15420  | 1 |
| 9357 | H | 67.27800 | 56.32580 | 88.46590 | -516.46076  | -2477.12087 | -1869.58998 | 1 |
| 9358 | H | 68.78000 | 55.77180 | 89.27990 | -2708.29037 | -130.47564  | 1595.73357  | 1 |
| 9359 | C | 68.18300 | 57.76180 | 89.88990 | -301.37460  | -720.47852  | 470.67511   | 1 |
| 9360 | H | 67.70500 | 58.60680 | 89.34890 | -1411.07974 | -1846.54891 | 2120.69265  | 1 |
| 9361 | H | 69.18300 | 58.07080 | 90.26390 | 2505.33603  | -21.34407   | 1902.90884  | 1 |
| 9362 | N | 67.28600 | 57.24180 | 90.94090 | -427.52308  | -725.09425  | -64.30115   | 1 |
| 9363 | H | 67.23400 | 57.85680 | 91.77790 | -2217.36352 | 404.32433   | -2195.00503 | 1 |
| 9364 | H | 66.34800 | 56.94180 | 90.60490 | 2024.90662  | 1892.46171  | -1488.81432 | 1 |
| 9365 | H | 67.76700 | 56.37380 | 91.25190 | 2451.35277  | -664.42586  | 1856.78058  | 1 |
| 9366 | C | 70.26400 | 57.65280 | 84.87290 | 243.27956   | -474.74816  | -739.51352  | 1 |
| 9367 | O | 70.14300 | 58.87780 | 84.98790 | -350.36558  | 642.74227   | -296.23228  | 1 |
| 9368 | N | 71.49100 | 57.15780 | 84.71690 | 525.38516   | -576.92895  | 322.17342   | 1 |
| 9369 | H | 71.63100 | 56.17080 | 84.69590 | 192.96560   | -1746.91109 | -2609.46204 | 1 |
| 9370 | C | 72.71900 | 57.94580 | 84.52690 | -330.22362  | 621.77168   | 579.48541   | 1 |
| 9371 | H | 72.79500 | 58.56780 | 85.40690 | -1952.93453 | 2422.54589  | -464.26757  | 1 |
| 9372 | C | 74.01800 | 57.10780 | 84.51390 | -88.98608   | 856.89754   | 298.76258   | 1 |
| 9373 | H | 74.13900 | 56.57280 | 83.54790 | 1097.55944  | -2284.88143 | -1863.57355 | 1 |
| 9374 | O | 74.08600 | 56.29880 | 85.65490 | -367.30544  | -694.24777  | 82.06081    | 1 |
| 9375 | H | 73.52300 | 55.52680 | 85.55590 | 2455.66144  | -868.21927  | -1764.69500 | 1 |
| 9376 | C | 75.19200 | 58.07780 | 84.76890 | 20.29836    | -909.46653  | -62.52683   | 1 |
| 9377 | H | 75.21200 | 58.81580 | 83.93790 | 3118.96169  | 66.95838    | -407.21098  | 1 |
| 9378 | H | 76.17100 | 57.55180 | 84.75690 | 2081.85373  | -2327.17554 | -385.18214  | 1 |
| 9379 | H | 75.14700 | 58.74180 | 85.65790 | 1243.13381  | 322.57344   | -2872.07085 | 1 |
| 9380 | C | 72.59200 | 58.81480 | 83.22690 | -330.46249  | 261.44679   | -808.63534  | 1 |
| 9381 | O | 73.01500 | 59.98280 | 83.18890 | -340.56796  | -20.52919   | -712.19326  | 1 |
| 9382 | N | 72.00200 | 58.27580 | 82.17390 | 268.31858   | -474.22387  | -644.81715  | 1 |
| 9383 | H | 71.78800 | 57.30480 | 82.23390 | 1714.59334  | 745.53730   | -2530.33002 | 1 |
| 9384 | C | 71.67800 | 58.96180 | 80.92490 | 197.77714   | -849.81669  | -264.85240  | 1 |
| 9385 | H | 72.62500 | 59.27280 | 80.50790 | 164.43913   | 870.78194   | 3018.76213  | 1 |
| 9386 | C | 71.09500 | 58.12480 | 79.80190 | -407.85511  | -507.48595  | -638.40678  | 1 |
| 9387 | H | 70.05700 | 57.80880 | 80.03990 | -2605.82938 | 1041.61792  | 1422.29096  | 1 |
| 9388 | O | 71.89200 | 56.91180 | 79.71290 | 480.89195   | 457.24105   | 428.13641   | 1 |
| 9389 | H | 71.56000 | 56.30780 | 80.38190 | -2278.15747 | 2128.42482  | -421.93905  | 1 |
| 9390 | C | 71.17200 | 58.81080 | 78.46790 | 509.30657   | 20.67635    | 756.06237   | 1 |
| 9391 | H | 72.19700 | 59.09080 | 78.14290 | 1932.07419  | 920.80895   | 2305.95456  | 1 |
| 9392 | H | 70.51100 | 59.70180 | 78.53390 | -407.85607  | 3061.21716  | 600.69058   | 1 |
| 9393 | H | 70.87600 | 58.20880 | 77.58290 | 637.30372   | -1572.87634 | -2649.17538 | 1 |
| 9394 | C | 70.83300 | 60.20580 | 81.08790 | -909.86007  | -35.78903   | -48.21613   | 1 |
| 9395 | O | 71.24500 | 61.35880 | 80.80990 | 298.18598   | -476.17007  | 554.95443   | 1 |
| 9396 | N | 69.70300 | 59.95480 | 81.76090 | -226.13355  | -415.64329  | 699.12557   | 1 |
| 9397 | H | 69.43500 | 59.01180 | 81.94290 | -1315.49295 | 1570.02918  | 2388.03537  | 1 |
| 9398 | C | 68.79200 | 60.93480 | 82.26090 | -456.02518  | 37.45616    | -788.72624  | 1 |
| 9399 | H | 68.27700 | 61.41580 | 81.44290 | -286.12146  | 1164.47398  | 2908.66999  | 1 |
| 9400 | C | 67.64800 | 60.18880 | 82.90290 | 570.37181   | -682.81244  | -199.73525  | 1 |
| 9401 | H | 68.05500 | 59.43180 | 83.60690 | -1276.19407 | 2174.53921  | 1881.73700  | 1 |
| 9402 | C | 66.77000 | 61.10180 | 83.78390 | 326.57539   | 660.06675   | -537.69081  | 1 |
| 9403 | H | 65.86900 | 60.56480 | 84.14890 | 2409.09134  | 642.70293   | 1918.70740  | 1 |
| 9404 | H | 66.36600 | 61.97780 | 83.23390 | -1844.74327 | 2366.54682  | -945.83543  | 1 |
| 9405 | H | 67.30500 | 61.44380 | 84.69590 | -2707.66627 | 1602.04970  | -14.36530   | 1 |
| 9406 | C | 66.87700 | 59.43380 | 81.79990 | -552.19502  | -579.97955  | -436.06809  | 1 |
| 9407 | H | 65.98800 | 58.91880 | 82.22390 | 1821.96405  | -2564.38861 | 50.83576    | 1 |
| 9408 | H | 67.56900 | 58.76680 | 81.24290 | 2706.18772  | -1097.80482 | -1170.29860 | 1 |
| 9409 | H | 66.48400 | 60.21480 | 81.11490 | 1610.79832  | -15.96195   | -2702.46188 | 1 |
| 9410 | C | 69.33700 | 61.96280 | 83.14390 | 171.94929   | 749.49115   | -490.04842  | 1 |
| 9411 | O | 69.12900 | 63.14880 | 82.91090 | -217.41480  | -646.23898  | 398.41338   | 1 |
| 9412 | N | 70.16800 | 61.60980 | 84.15190 | 639.72837   | -179.72673  | 520.69012   | 1 |
| 9413 | H | 70.42600 | 60.68180 | 84.41090 | 574.47676   | -1720.67927 | 2570.49908  | 1 |
| 9414 | C | 70.81100 | 62.52780 | 85.05990 | 765.64765   | -88.77459   | 487.18964   | 1 |
| 9415 | H | 70.02500 | 63.10980 | 85.51790 | -1690.19238 | -1785.53545 | -1962.99238 | 1 |
| 9416 | C | 71.57800 | 61.78180 | 86.15290 | -646.68575  | 67.45467    | 639.29524   | 1 |
| 9417 | H | 72.12500 | 60.95180 | 85.65690 | -2582.64648 | 1101.73039  | -1419.27923 | 1 |

|      |   |          |          |          |             |             |             |   |
|------|---|----------|----------|----------|-------------|-------------|-------------|---|
| 9418 | C | 72.63700 | 62.69880 | 86.91090 | 509.85807   | 454.90297   | -603.78725  | 1 |
| 9419 | H | 73.14200 | 62.11380 | 87.70790 | -1397.43705 | -1333.21994 | 2483.52985  | 1 |
| 9420 | H | 72.14800 | 63.58180 | 87.37590 | -35.65275   | 3117.99305  | -418.41898  | 1 |
| 9421 | H | 73.44600 | 62.89480 | 86.17490 | -1420.38108 | -1983.24603 | -1986.82636 | 1 |
| 9422 | C | 70.63500 | 61.17080 | 87.20590 | 553.34893   | 534.02336   | 489.97451   | 1 |
| 9423 | H | 69.64800 | 60.89180 | 86.77890 | -1578.04832 | 140.24373   | 2718.14669  | 1 |
| 9424 | H | 70.45800 | 61.96580 | 87.96190 | 2868.32007  | 896.40040   | 931.36058   | 1 |
| 9425 | C | 71.26700 | 59.95680 | 87.91890 | 85.39618    | -811.05417  | -407.85981  | 1 |
| 9426 | H | 70.48700 | 59.54080 | 88.59190 | -1870.51271 | -1676.22946 | -1894.64066 | 1 |
| 9427 | H | 71.59500 | 59.21580 | 87.15890 | -1924.64270 | -1979.66680 | 1508.27586  | 1 |
| 9428 | H | 72.13800 | 60.22880 | 88.55390 | -2473.46250 | -76.71059   | 1942.76220  | 1 |
| 9429 | C | 71.66200 | 63.52580 | 84.35490 | 438.07441   | 633.69871   | -487.81940  | 1 |
| 9430 | O | 71.52800 | 64.71780 | 84.59990 | -443.34025  | -349.46283  | 552.22494   | 1 |
| 9431 | N | 72.44000 | 63.06280 | 83.35390 | -624.40211  | 557.05801   | -111.71691  | 1 |
| 9432 | H | 72.41000 | 62.08380 | 83.16990 | 386.38993   | -135.32627  | 3119.39351  | 1 |
| 9433 | C | 73.23300 | 63.90780 | 82.52590 | 365.35043   | -426.39720  | 718.43962   | 1 |
| 9434 | H | 73.88400 | 64.42880 | 83.21190 | 550.96647   | 1392.34146  | 2766.95635  | 1 |
| 9435 | C | 74.22100 | 63.07780 | 81.65290 | -146.04760  | 808.90844   | -394.70019  | 1 |
| 9436 | H | 73.76600 | 62.28180 | 81.02690 | -2505.44589 | -11.68796   | 1902.84800  | 1 |
| 9437 | H | 74.79000 | 62.50380 | 82.41590 | 2273.04631  | -1218.22742 | 1802.05678  | 1 |
| 9438 | C | 75.19500 | 63.90380 | 80.72890 | -542.81902  | 264.10424   | 683.40871   | 1 |
| 9439 | H | 74.55500 | 64.48980 | 80.03390 | -767.21379  | 2580.81773  | 1627.57152  | 1 |
| 9440 | C | 76.09000 | 64.93880 | 81.32490 | 14.20169    | -878.17541  | -245.06582  | 1 |
| 9441 | H | 76.90300 | 64.44380 | 81.89790 | 1439.76558  | -2322.83709 | 1558.75886  | 1 |
| 9442 | H | 75.62900 | 65.65480 | 82.03890 | -739.09741  | 2217.17861  | 2106.20043  | 1 |
| 9443 | H | 76.67100 | 65.48180 | 80.54890 | -1948.68896 | -2390.62720 | 621.07902   | 1 |
| 9444 | C | 76.03300 | 62.90280 | 79.89590 | -458.99115  | -255.15187  | 745.43655   | 1 |
| 9445 | H | 76.48300 | 62.22980 | 80.65690 | 2600.30754  | 1525.48479  | -899.73501  | 1 |
| 9446 | H | 76.84200 | 63.38880 | 79.30890 | 1497.07460  | -1397.33276 | 2388.40010  | 1 |
| 9447 | H | 75.43400 | 62.30680 | 79.17490 | 2301.56355  | -2144.06834 | -63.26486   | 1 |
| 9448 | C | 72.43700 | 64.90980 | 81.66490 | -222.19629  | 779.00499   | 418.60606   | 1 |
| 9449 | O | 72.81300 | 66.08780 | 81.57690 | -433.56174  | -600.34748  | -274.28881  | 1 |
| 9450 | N | 71.36300 | 64.44380 | 80.99590 | -324.41239  | 573.49571   | 527.76089   | 1 |
| 9451 | H | 71.19000 | 63.46780 | 81.10790 | 1198.28039  | 1442.96826  | 2525.90438  | 1 |
| 9452 | C | 70.42600 | 65.14580 | 80.24290 | -623.76666  | 556.66821   | 363.98716   | 1 |
| 9453 | H | 71.03900 | 65.71780 | 79.56190 | -2613.07726 | -1465.26358 | -960.75809  | 1 |
| 9454 | C | 69.50000 | 64.18580 | 79.47790 | 248.39544   | -8.29385    | 877.31518   | 1 |
| 9455 | H | 69.27400 | 63.33580 | 80.15590 | 17.57965    | 1064.64299  | -2960.48180 | 1 |
| 9456 | C | 68.14600 | 64.84580 | 79.02290 | 719.99373   | -206.78992  | -519.90188  | 1 |
| 9457 | H | 67.51200 | 65.16380 | 79.87790 | 860.76847   | -3026.02063 | 22.42768    | 1 |
| 9458 | H | 67.58600 | 64.15180 | 78.35890 | -522.75864  | 2584.60160  | -1716.03735 | 1 |
| 9459 | H | 68.45800 | 65.75480 | 78.46590 | -660.30959  | -2856.39409 | 1141.59112  | 1 |
| 9460 | C | 70.28000 | 63.43880 | 78.39190 | -471.10765  | -680.19178  | 383.20717   | 1 |
| 9461 | H | 70.44600 | 64.25280 | 77.65390 | -148.63059  | 2023.65396  | -2404.36266 | 1 |
| 9462 | H | 71.27200 | 63.03780 | 78.69290 | -1939.54892 | 2067.38678  | -1364.65679 | 1 |
| 9463 | C | 69.41000 | 62.39680 | 77.58790 | 27.87344    | 617.60138   | 670.25563   | 1 |
| 9464 | H | 68.96100 | 61.73580 | 78.35990 | -2867.19630 | 554.91047   | -1170.25039 | 1 |
| 9465 | H | 68.57700 | 62.83380 | 76.99690 | 977.52840   | -2604.20158 | 1469.96550  | 1 |
| 9466 | H | 70.16900 | 61.86880 | 76.97190 | -1503.18671 | -2078.04153 | -1822.19629 | 1 |
| 9467 | C | 69.70600 | 66.19980 | 80.98090 | 615.56666   | -32.45129   | -671.91935  | 1 |
| 9468 | O | 69.55800 | 67.36380 | 80.51690 | 444.73037   | 316.86583   | 570.47189   | 1 |
| 9469 | N | 69.14000 | 65.92480 | 82.22190 | -560.34921  | 575.99168   | 258.67863   | 1 |
| 9470 | H | 69.22700 | 64.99080 | 82.55990 | -2543.67384 | -1684.65722 | -768.03624  | 1 |
| 9471 | C | 68.75000 | 66.92180 | 83.19690 | -549.25090  | -557.48047  | 467.96364   | 1 |
| 9472 | H | 67.89500 | 67.41080 | 82.75390 | -1202.66214 | 2108.85369  | 2001.14120  | 1 |
| 9473 | C | 68.34200 | 66.10180 | 84.47590 | 406.38210   | -489.19738  | 653.44511   | 1 |
| 9474 | H | 68.06800 | 66.67780 | 85.38590 | 743.46099   | -750.85036  | -2963.39598 | 1 |
| 9475 | H | 69.24300 | 65.50480 | 84.73090 | -2010.00971 | -2073.72596 | -1248.09769 | 1 |
| 9476 | C | 67.11800 | 65.15880 | 84.29590 | -81.02934   | -73.17877   | -905.27903  | 1 |
| 9477 | H | 67.27600 | 64.54180 | 83.38490 | -1070.74360 | -2563.83302 | -1475.97244 | 1 |
| 9478 | C | 67.17400 | 64.17980 | 85.52090 | 463.14448   | -513.33840  | -594.50137  | 1 |
| 9479 | H | 66.20600 | 63.64480 | 85.41390 | 2399.23451  | 1929.74753  | -646.50944  | 1 |

|      |   |          |          |          |             |             |             |   |
|------|---|----------|----------|----------|-------------|-------------|-------------|---|
| 9480 | H | 67.27400 | 64.75380 | 86.46590 | -2867.84577 | 1245.42519  | -350.14706  | 1 |
| 9481 | H | 68.06800 | 63.52580 | 85.43190 | 1296.50617  | -786.12915  | -2756.68260 | 1 |
| 9482 | C | 65.84000 | 65.91780 | 84.21390 | 870.64524   | 268.71178   | -34.95503   | 1 |
| 9483 | H | 65.86700 | 66.56680 | 83.31290 | 2138.08734  | -2069.27399 | -1022.21029 | 1 |
| 9484 | H | 64.97100 | 65.22780 | 84.18490 | 2231.15667  | -824.78726  | -2059.09983 | 1 |
| 9485 | H | 65.68500 | 66.60280 | 85.07490 | -1727.56287 | -1803.47867 | -1913.43080 | 1 |
| 9486 | C | 69.78900 | 67.93480 | 83.58990 | -666.59651  | 591.10016   | -194.16668  | 1 |
| 9487 | O | 69.52000 | 69.15080 | 83.59590 | -327.14884  | -500.18694  | 516.15297   | 1 |
| 9488 | N | 71.02500 | 67.45980 | 83.92190 | -668.40418  | 452.16205   | -247.90648  | 1 |
| 9489 | H | 71.29900 | 66.50280 | 83.86090 | 1266.76997  | 2405.96981  | 1582.66527  | 1 |
| 9490 | C | 72.04000 | 68.25880 | 84.44690 | 15.43303    | 422.10510   | 808.10897   | 1 |
| 9491 | H | 71.72900 | 68.65180 | 85.40390 | -1702.36420 | 688.91380   | 2554.52151  | 1 |
| 9492 | C | 73.35000 | 67.44380 | 84.73490 | -744.59771  | -367.26277  | 377.01897   | 1 |
| 9493 | H | 74.10400 | 68.14980 | 85.14490 | 2988.90615  | -697.01464  | -691.98039  | 1 |
| 9494 | H | 73.20500 | 66.70780 | 85.55390 | -703.87624  | -2780.78880 | 1292.28406  | 1 |
| 9495 | H | 73.77200 | 66.98480 | 83.81490 | 2028.40491  | -2216.74908 | 932.64316   | 1 |
| 9496 | C | 72.37500 | 69.33780 | 83.44090 | -762.43527  | -335.32620  | -371.07923  | 1 |
| 9497 | O | 72.35400 | 70.52480 | 83.71590 | 535.09965   | 467.64694   | 344.38631   | 1 |
| 9498 | N | 72.52600 | 68.93380 | 82.15690 | 567.82762   | -253.64860  | 570.88218   | 1 |
| 9499 | H | 72.48400 | 67.96680 | 81.91890 | -311.17023  | 2478.09920  | -1913.22338 | 1 |
| 9500 | C | 72.88600 | 69.73780 | 81.06290 | 281.76155   | 528.84857   | -687.29951  | 1 |
| 9501 | H | 73.82700 | 70.20980 | 81.30690 | -2876.31137 | 100.50283   | -1270.81010 | 1 |
| 9502 | C | 73.15900 | 68.74380 | 79.88290 | 38.65303    | 903.87174   | -113.89831  | 1 |
| 9503 | H | 72.24600 | 68.13780 | 79.70290 | 2003.80494  | -786.29881  | -2294.49911 | 1 |
| 9504 | H | 74.00200 | 68.08380 | 80.18090 | -1457.38086 | 2589.07619  | -1034.86797 | 1 |
| 9505 | C | 73.42400 | 69.35880 | 78.57890 | 807.67268   | -421.78101  | -34.88021   | 1 |
| 9506 | C | 74.73300 | 69.62180 | 78.20490 | -887.19590  | -172.55521  | 120.66125   | 1 |
| 9507 | H | 75.61300 | 69.41980 | 78.79790 | 514.38192   | -2657.95822 | 1602.77746  | 1 |
| 9508 | C | 74.94800 | 70.16980 | 76.88990 | 506.85242   | -148.00777  | 743.40119   | 1 |
| 9509 | H | 75.94500 | 70.40780 | 76.54990 | -2057.27705 | -762.85986  | -2254.74659 | 1 |
| 9510 | C | 73.86900 | 70.43680 | 76.05490 | -115.11739  | -903.73521  | -38.23159   | 1 |
| 9511 | H | 74.11800 | 70.79380 | 75.06590 | -810.10216  | 2960.38401  | -691.43851  | 1 |
| 9512 | C | 72.34100 | 69.62080 | 77.69590 | -637.40370  | -2.52272    | -652.04384  | 1 |
| 9513 | H | 71.31700 | 69.47980 | 78.01090 | -913.71889  | 1686.08332  | 2494.08641  | 1 |
| 9514 | C | 72.56000 | 70.16080 | 76.43590 | -547.91257  | -660.70685  | -307.74874  | 1 |
| 9515 | H | 71.70500 | 70.39580 | 75.81990 | -2798.21263 | 423.81403   | 1374.26851  | 1 |
| 9516 | C | 71.85900 | 70.76280 | 80.73490 | 361.91530   | -606.37613  | -576.86767  | 1 |
| 9517 | O | 72.02600 | 71.98080 | 80.52490 | 251.12941   | 291.83528   | 689.48779   | 1 |
| 9518 | N | 70.56600 | 70.38080 | 80.67190 | -574.94779  | 539.68619   | -301.40694  | 1 |
| 9519 | H | 70.32800 | 69.41380 | 80.71090 | 1729.56689  | 2048.77939  | -1646.00352 | 1 |
| 9520 | C | 69.44000 | 71.27380 | 80.50690 | -831.09200  | 347.37310   | -141.66520  | 1 |
| 9521 | H | 69.51600 | 71.89380 | 79.62590 | -663.10323  | -2419.00002 | -1899.19963 | 1 |
| 9522 | C | 68.15900 | 70.43480 | 80.33790 | 507.21461   | -180.16149  | 736.02051   | 1 |
| 9523 | H | 67.91400 | 69.83780 | 81.24290 | -1462.49686 | 1425.98534  | 2392.88424  | 1 |
| 9524 | H | 68.37400 | 69.74180 | 79.49790 | 1822.66047  | 2229.26481  | -1267.48312 | 1 |
| 9525 | C | 66.92100 | 71.17580 | 80.05790 | -383.58289  | -227.95308  | -795.20599  | 1 |
| 9526 | C | 66.57200 | 71.44880 | 78.74590 | -795.50275  | 442.43117   | -53.67529   | 1 |
| 9527 | H | 67.31800 | 71.24980 | 77.98990 | 982.27208   | 1484.92119  | 2593.91150  | 1 |
| 9528 | C | 65.36200 | 72.05980 | 78.40290 | -424.62679  | 560.01409   | -580.97100  | 1 |
| 9529 | H | 65.06300 | 72.19480 | 77.37390 | 2881.47047  | 177.74285   | 1250.50455  | 1 |
| 9530 | C | 64.52500 | 72.43380 | 79.47390 | 287.06335   | -522.43045  | 690.00874   | 1 |
| 9531 | H | 63.62600 | 73.01480 | 79.32790 | -1612.45005 | 2071.34543  | 1734.28924  | 1 |
| 9532 | C | 66.02700 | 71.52980 | 81.08290 | -416.92943  | -447.70391  | 676.15239   | 1 |
| 9533 | H | 66.30100 | 71.35380 | 82.11290 | -3035.20177 | -817.83505  | -130.08575  | 1 |
| 9534 | C | 64.89600 | 72.27080 | 80.79890 | 306.78485   | 561.44746   | -649.70055  | 1 |
| 9535 | H | 64.14400 | 72.56780 | 81.51590 | 2267.31498  | -343.02556  | -2154.02936 | 1 |
| 9536 | C | 69.33500 | 72.26180 | 81.71990 | 787.55063   | -102.23205  | -448.06654  | 1 |
| 9537 | O | 69.08000 | 73.41680 | 81.52690 | -372.56696  | 694.58838   | 48.66286    | 1 |
| 9538 | N | 69.63000 | 71.85980 | 82.96790 | 433.03109   | -325.42850  | 647.49722   | 1 |
| 9539 | H | 69.70200 | 70.91080 | 83.26390 | -1650.72846 | -2672.16063 | -181.32662  | 1 |
| 9540 | C | 69.74000 | 72.75980 | 84.02890 | -875.54912  | -117.10418  | -226.16667  | 1 |
| 9541 | H | 68.80600 | 73.27580 | 84.19490 | 2218.07323  | -1064.37813 | 1960.98867  | 1 |

|      |   |          |          |          |             |             |             |   |
|------|---|----------|----------|----------|-------------|-------------|-------------|---|
| 9542 | C | 69.97200 | 71.99480 | 85.34890 | -255.79290  | 521.70126   | 702.74376   | 1 |
| 9543 | H | 69.16700 | 71.24180 | 85.48590 | 1967.09899  | 1790.97782  | -1679.62681 | 1 |
| 9544 | H | 70.95100 | 71.47480 | 85.41890 | -258.16526  | -3132.40923 | -139.96202  | 1 |
| 9545 | H | 69.93600 | 72.73580 | 86.17590 | -1650.24808 | 1788.44499  | 1994.08426  | 1 |
| 9546 | C | 70.81600 | 73.85580 | 83.78590 | 299.93807   | 614.64045   | 603.07982   | 1 |
| 9547 | O | 70.62400 | 75.02280 | 84.15090 | -635.12172  | -331.96871  | -331.72942  | 1 |
| 9548 | N | 71.92800 | 73.46580 | 83.15890 | 219.79269   | 688.33212   | -436.53449  | 1 |
| 9549 | H | 71.88900 | 72.59580 | 82.67490 | -2318.58861 | -1320.12745 | -1667.22423 | 1 |
| 9550 | C | 73.00100 | 74.43080 | 82.80690 | -56.28492   | 505.89737   | -756.53874  | 1 |
| 9551 | H | 73.28100 | 74.87180 | 83.75190 | 560.35807   | -260.08162  | 3084.89588  | 1 |
| 9552 | C | 74.19600 | 73.61780 | 82.23390 | -178.32623  | -426.60590  | -785.91231  | 1 |
| 9553 | H | 74.96200 | 74.36980 | 81.94790 | -90.42995   | 2301.01560  | -2143.68278 | 1 |
| 9554 | H | 73.88900 | 73.19180 | 81.25490 | -2496.61376 | 281.72810   | -1893.61433 | 1 |
| 9555 | S | 74.87400 | 72.35080 | 83.38990 | -391.10506  | 304.14548   | -256.40390  | 1 |
| 9556 | H | 73.67600 | 71.91480 | 83.75190 | 2085.04461  | -1803.58698 | 1515.87902  | 1 |
| 9557 | C | 72.62400 | 75.52980 | 81.86190 | -616.08198  | 158.70291   | 653.22843   | 1 |
| 9558 | O | 72.81800 | 76.70480 | 82.13490 | 782.67298   | -104.30276  | 13.08299    | 1 |
| 9559 | N | 71.91800 | 75.07780 | 80.72890 | -223.12259  | -529.41462  | -618.55376  | 1 |
| 9560 | H | 71.92300 | 74.09580 | 80.55290 | -2078.71397 | -2344.42619 | -284.32429  | 1 |
| 9561 | C | 71.54200 | 75.91280 | 79.63390 | 160.71277   | 284.92917   | -851.13911  | 1 |
| 9562 | H | 72.31800 | 76.64380 | 79.46390 | 687.85511   | 2637.49308  | 1571.21349  | 1 |
| 9563 | C | 71.62200 | 74.98880 | 78.37290 | -14.87462   | -544.45953  | -731.29581  | 1 |
| 9564 | H | 71.04500 | 75.42080 | 77.52690 | 546.99020   | 792.51684   | 2995.15359  | 1 |
| 9565 | H | 71.17500 | 73.99780 | 78.60090 | 1747.68890  | -1667.58371 | -2015.68209 | 1 |
| 9566 | C | 73.02200 | 74.78780 | 77.81290 | 67.32814    | 600.59950   | 682.78706   | 1 |
| 9567 | C | 73.70700 | 73.56580 | 77.87990 | 108.14474   | 662.31673   | -617.32671  | 1 |
| 9568 | H | 73.23900 | 72.61380 | 78.08190 | 2252.51218  | 599.02628   | 2113.19251  | 1 |
| 9569 | N | 74.94100 | 73.72080 | 77.23790 | 664.40130   | -435.37845  | -285.81253  | 1 |
| 9570 | H | 75.57100 | 73.04880 | 76.91690 | -2958.82831 | -154.63791  | -1058.13439 | 1 |
| 9571 | C | 75.03800 | 74.99780 | 76.86390 | 318.30645   | -448.54322  | 727.28329   | 1 |
| 9572 | C | 73.88500 | 75.72880 | 77.20590 | 101.30690   | -666.07712  | -614.43403  | 1 |
| 9573 | C | 73.84600 | 77.15180 | 77.05090 | 602.07279   | -458.97011  | 508.23793   | 1 |
| 9574 | H | 72.96800 | 77.73480 | 77.28890 | -102.26161  | 3138.63819  | 191.62225   | 1 |
| 9575 | C | 74.99200 | 77.74080 | 76.45190 | -384.88471  | -657.20590  | -501.39323  | 1 |
| 9576 | H | 74.97600 | 78.77380 | 76.13690 | 2077.72398  | 2362.45752  | -9.15197    | 1 |
| 9577 | C | 76.13500 | 75.64780 | 76.26290 | 273.95214   | 365.00384   | -789.41334  | 1 |
| 9578 | H | 77.00800 | 75.08280 | 75.96990 | -1844.42720 | -2080.93541 | -1471.74127 | 1 |
| 9579 | C | 76.07400 | 77.02980 | 76.04390 | 265.68115   | 714.65104   | 500.13841   | 1 |
| 9580 | H | 76.95300 | 77.55880 | 75.70590 | -2227.71763 | 1240.99214  | -1842.67167 | 1 |
| 9581 | C | 70.21200 | 76.64580 | 79.76090 | -791.09693  | 346.49207   | 292.50624   | 1 |
| 9582 | O | 70.11700 | 77.79280 | 79.22390 | -397.74122  | -250.32718  | 634.63805   | 1 |
| 9583 | N | 69.22300 | 76.15280 | 80.47990 | -738.81374  | 392.55939   | 112.79924   | 1 |
| 9584 | H | 69.32500 | 75.27080 | 80.93290 | -2383.06337 | 1963.14052  | 604.41252   | 1 |
| 9585 | C | 67.91700 | 76.79680 | 80.50690 | -228.98232  | -612.60296  | 635.40201   | 1 |
| 9586 | H | 67.50100 | 76.72480 | 79.51290 | -2652.48398 | 586.45764   | 1587.01682  | 1 |
| 9587 | C | 67.04200 | 75.89380 | 81.32190 | 253.12686   | -868.38801  | -115.23913  | 1 |
| 9588 | H | 67.50300 | 75.63980 | 82.29990 | 1794.50829  | -2443.81903 | -840.06832  | 1 |
| 9589 | H | 67.00500 | 74.91080 | 80.80590 | 2392.61939  | 1490.38827  | 1397.26214  | 1 |
| 9590 | C | 65.64000 | 76.49380 | 81.61290 | -712.02831  | -496.01506  | 280.06384   | 1 |
| 9591 | H | 65.63400 | 77.50380 | 82.07590 | -2855.05416 | -392.98280  | 1261.92571  | 1 |
| 9592 | C | 64.73900 | 76.55180 | 80.32490 | -185.66717  | -392.15166  | 801.99488   | 1 |
| 9593 | H | 64.91700 | 75.65380 | 79.69490 | 2031.57726  | -631.98670  | 2317.65245  | 1 |
| 9594 | H | 63.67100 | 76.57880 | 80.62790 | -3050.89579 | -760.90833  | -106.20553  | 1 |
| 9595 | H | 64.89500 | 77.50380 | 79.77390 | 1268.44632  | 2145.45816  | 1919.96860  | 1 |
| 9596 | C | 64.90600 | 75.60280 | 82.61490 | 217.91727   | 481.57359   | -743.00063  | 1 |
| 9597 | H | 65.60700 | 75.23780 | 83.39590 | -1776.92534 | 1897.96495  | 1771.57885  | 1 |
| 9598 | H | 64.05500 | 76.15680 | 83.06690 | 1742.36489  | -1253.92117 | -2300.01577 | 1 |
| 9599 | H | 64.60100 | 74.61180 | 82.21590 | 1329.07292  | -1922.97514 | 2105.69656  | 1 |
| 9600 | C | 67.88300 | 78.25880 | 80.97990 | -721.79164  | -420.42846  | -365.66070  | 1 |
| 9601 | O | 67.19700 | 79.02380 | 80.29190 | 491.88635   | 473.02935   | 397.38934   | 1 |
| 9602 | N | 68.52100 | 78.78280 | 82.02490 | -50.66107   | 833.81815   | -121.87301  | 1 |
| 9603 | C | 69.31500 | 77.97980 | 82.97190 | -774.94738  | 288.15534   | 384.54396   | 1 |

|      |   |          |          |          |             |             |             |   |
|------|---|----------|----------|----------|-------------|-------------|-------------|---|
| 9604 | H | 68.96900 | 76.92580 | 83.03290 | -430.51626  | 2323.24255  | -2077.36036 | 1 |
| 9605 | H | 70.36000 | 78.03480 | 82.59890 | -123.70575  | -1711.17270 | 2637.19759  | 1 |
| 9606 | C | 68.47200 | 80.19080 | 82.39590 | 123.65519   | -846.88794  | -314.54923  | 1 |
| 9607 | H | 67.44000 | 80.42380 | 82.61490 | -718.05829  | -2317.42853 | -2003.03358 | 1 |
| 9608 | C | 69.25900 | 80.17180 | 83.75390 | -400.17499  | 590.16441   | -568.34580  | 1 |
| 9609 | H | 68.88300 | 80.87580 | 84.52690 | 2876.13069  | 1213.09254  | 393.07118   | 1 |
| 9610 | H | 70.32300 | 80.40280 | 83.53390 | 1018.20321  | 2831.75888  | -917.94886  | 1 |
| 9611 | C | 69.11600 | 78.74880 | 84.28590 | 826.15565   | 200.65177   | 329.63118   | 1 |
| 9612 | H | 69.94800 | 78.54280 | 84.99390 | 2720.23055  | 1575.50067  | -127.94379  | 1 |
| 9613 | H | 68.10900 | 78.61380 | 84.73490 | 1975.53506  | -1680.30383 | 1781.02962  | 1 |
| 9614 | C | 69.05500 | 81.12380 | 81.23090 | 627.27813   | 121.76532   | 650.49701   | 1 |
| 9615 | O | 68.57200 | 82.24780 | 81.04590 | 358.18926   | 669.48263   | 217.07301   | 1 |
| 9616 | N | 70.09900 | 80.67380 | 80.54090 | -757.99160  | -237.76688  | 285.63601   | 1 |
| 9617 | H | 70.39500 | 79.77580 | 80.85690 | 1831.42459  | -1978.30896 | -1621.85199 | 1 |
| 9618 | C | 70.60700 | 81.42980 | 79.40390 | -215.14607  | 876.68391   | 128.79633   | 1 |
| 9619 | H | 70.77000 | 82.44380 | 79.73990 | -1946.65767 | -2362.23219 | 727.05515   | 1 |
| 9620 | C | 71.94100 | 80.76680 | 78.92290 | 439.12220   | -738.99675  | -304.14882  | 1 |
| 9621 | H | 71.86800 | 79.65880 | 78.87490 | 1433.13192  | 865.53009   | -2663.68481 | 1 |
| 9622 | H | 72.71000 | 80.96280 | 79.70090 | 2497.91656  | -1128.30750 | 1544.52622  | 1 |
| 9623 | C | 72.44600 | 81.21980 | 77.54890 | 551.45682   | 363.65370   | -628.57169  | 1 |
| 9624 | C | 73.03200 | 82.49780 | 77.40790 | 126.03326   | 887.00283   | -169.68381  | 1 |
| 9625 | H | 73.19700 | 83.12680 | 78.26990 | 2997.77976  | -929.91023  | -216.35544  | 1 |
| 9626 | C | 73.38000 | 82.91680 | 76.12890 | -268.62169  | 687.00284   | 536.02284   | 1 |
| 9627 | H | 73.80300 | 83.90780 | 76.04790 | 286.85084   | 3044.91548  | 737.85674   | 1 |
| 9628 | C | 73.21100 | 82.08580 | 74.99290 | -484.43244  | -749.27995  | 188.03130   | 1 |
| 9629 | O | 73.66500 | 82.54480 | 73.75290 | 658.54087   | -314.36535  | -301.87013  | 1 |
| 9630 | H | 74.19700 | 83.33680 | 73.85990 | -741.21548  | 2282.44509  | 2034.51966  | 1 |
| 9631 | C | 72.14500 | 80.45680 | 76.39290 | -380.39147  | -828.65090  | -9.54060    | 1 |
| 9632 | H | 71.53000 | 79.57280 | 76.46990 | -237.42891  | -3112.42521 | -393.27223  | 1 |
| 9633 | C | 72.59800 | 80.86680 | 75.14790 | 360.82114   | -783.09724  | -296.67797  | 1 |
| 9634 | H | 72.46700 | 80.20280 | 74.30690 | 2569.56100  | -1632.10586 | -794.86662  | 1 |
| 9635 | C | 69.60500 | 81.53480 | 78.26890 | -278.55029  | -734.90649  | 462.35613   | 1 |
| 9636 | O | 69.34000 | 82.63880 | 77.79490 | 698.00129   | -336.44272  | 152.40644   | 1 |
| 9637 | N | 68.89900 | 80.39980 | 77.87590 | 717.85149   | 441.77882   | 46.82945    | 1 |
| 9638 | H | 69.15900 | 79.51980 | 78.26490 | -1642.63553 | -2014.54850 | -1772.44720 | 1 |
| 9639 | C | 67.79400 | 80.35980 | 76.99690 | 794.35812   | -98.70473   | -436.69619  | 1 |
| 9640 | H | 68.02800 | 80.90180 | 76.09190 | -809.75792  | -1680.34789 | -2533.56455 | 1 |
| 9641 | C | 67.37900 | 78.88380 | 76.66290 | 784.30748   | 152.04994   | -439.53793  | 1 |
| 9642 | H | 67.35800 | 78.20080 | 77.53890 | 2473.25549  | 1467.80879  | 1275.44927  | 1 |
| 9643 | H | 66.31400 | 78.74980 | 76.37590 | 1805.91656  | -974.83447  | -2384.65707 | 1 |
| 9644 | C | 68.31100 | 78.32080 | 75.65290 | -698.59298  | 500.17537   | -305.35791  | 1 |
| 9645 | C | 68.11000 | 78.68280 | 74.28590 | 540.67500   | 540.67818   | -496.77827  | 1 |
| 9646 | H | 67.23800 | 79.29980 | 74.12290 | 1016.32147  | 2082.23211  | 2128.29188  | 1 |
| 9647 | C | 68.99100 | 78.15880 | 73.25190 | 212.00214   | -690.14627  | 556.95980   | 1 |
| 9648 | H | 68.92600 | 78.57780 | 72.25790 | -1771.57840 | -172.91884  | 2594.19260  | 1 |
| 9649 | C | 69.92600 | 77.15880 | 73.58790 | -488.10877  | 111.40820   | 762.09517   | 1 |
| 9650 | O | 70.77300 | 76.70680 | 72.57590 | 624.88106   | 256.11046   | -409.33888  | 1 |
| 9651 | H | 70.57700 | 77.24380 | 71.80390 | -2369.74769 | -1734.43725 | 1128.82661  | 1 |
| 9652 | C | 69.24800 | 77.30080 | 75.92290 | 399.94764   | -446.97378  | 686.80953   | 1 |
| 9653 | H | 69.32500 | 76.81380 | 76.88390 | 2438.68726  | 1984.75587  | -108.51194  | 1 |
| 9654 | C | 70.03300 | 76.73280 | 74.90990 | 274.87732   | 481.77146   | -723.73318  | 1 |
| 9655 | H | 70.81500 | 76.02580 | 75.14390 | 1698.21567  | 2136.86009  | 1564.64652  | 1 |
| 9656 | C | 66.60900 | 81.16880 | 77.39390 | -503.59349  | 535.04360   | 539.97494   | 1 |
| 9657 | O | 66.03000 | 81.91280 | 76.59390 | -555.71653  | -31.06093   | -560.21566  | 1 |
| 9658 | N | 66.26200 | 81.14380 | 78.69490 | -423.91051  | 460.76442   | -566.27583  | 1 |
| 9659 | H | 66.72900 | 80.59280 | 79.38290 | 231.56496   | -420.20322  | -3109.34610 | 1 |
| 9660 | C | 65.22400 | 82.07880 | 79.20490 | 673.00490   | -614.10019  | -37.36801   | 1 |
| 9661 | H | 64.38800 | 81.88480 | 78.54990 | -2063.42445 | -1517.23627 | -1827.15623 | 1 |
| 9662 | C | 64.68300 | 81.72780 | 80.60790 | -832.15514  | -43.89968   | -370.19135  | 1 |
| 9663 | H | 65.60700 | 81.77480 | 81.22190 | -1925.12662 | 1278.53341  | 2134.82225  | 1 |
| 9664 | C | 63.60600 | 82.80080 | 81.01090 | 505.36527   | -397.43725  | 646.60697   | 1 |
| 9665 | H | 62.70300 | 82.86080 | 80.36690 | -2007.05635 | 1127.90983  | 2144.24123  | 1 |



|      |   |          |          |          |             |             |             |   |
|------|---|----------|----------|----------|-------------|-------------|-------------|---|
| 9666 | H | 63.25600 | 82.57980 | 82.04190 | -2206.49127 | -827.25388  | 2084.53196  | 1 |
| 9667 | H | 64.00900 | 83.83280 | 81.09290 | -2810.47507 | -735.62911  | -1207.60337 | 1 |
| 9668 | C | 64.11400 | 80.29080 | 80.63890 | 612.56915   | -593.56585  | 322.31913   | 1 |
| 9669 | H | 63.25500 | 80.13980 | 79.95190 | 2849.58568  | 596.58090   | -1192.55142 | 1 |
| 9670 | H | 64.84000 | 79.61680 | 80.13490 | -1849.77837 | -2543.24136 | -92.03029   | 1 |
| 9671 | C | 63.65900 | 79.83980 | 81.99690 | 532.32684   | 449.11009   | -588.53994  | 1 |
| 9672 | H | 64.50200 | 79.89380 | 82.71890 | 2476.88810  | -656.72205  | -1825.36783 | 1 |
| 9673 | H | 63.43900 | 78.75180 | 81.95090 | 2383.43696  | -183.50493  | 2045.42916  | 1 |
| 9674 | H | 62.80200 | 80.44580 | 82.35890 | -734.01996  | 2926.88786  | 890.37542   | 1 |
| 9675 | C | 65.58000 | 83.61280 | 79.03390 | -662.43462  | -189.91493  | 597.12955   | 1 |
| 9676 | O | 64.77400 | 84.26080 | 78.37690 | -448.56273  | -99.99674   | 642.19884   | 1 |
| 9677 | N | 66.82900 | 84.06580 | 79.36490 | -665.14497  | 222.68035   | -469.75304  | 1 |
| 9678 | H | 67.45400 | 83.43180 | 79.81190 | -2950.53399 | -175.34435  | 1077.88206  | 1 |
| 9679 | C | 67.13807 | 85.37603 | 79.01349 | -145.16289  | 748.18281   | 975.57355   | 1 |
| 9680 | H | 66.30427 | 86.08032 | 79.35173 | 4025.27172  | -1397.97570 | 198.41499   | 1 |
| 9681 | H | 68.12015 | 85.42546 | 79.52849 | 2332.84745  | 1845.68102  | 475.26894   | 1 |
| 9682 | C | 67.20112 | 85.68521 | 77.40237 | -582.54134  | 485.37805   | 205.31967   | 1 |
| 9683 | O | 66.77357 | 86.78251 | 77.06833 | -160.76338  | -234.36112  | 228.58727   | 1 |
| 9684 | N | 67.89100 | 84.89680 | 76.61290 | 356.73523   | -663.28731  | 381.39508   | 1 |
| 9685 | H | 68.32900 | 84.14080 | 77.09390 | 888.15468   | 2662.37180  | 1421.68347  | 1 |
| 9686 | C | 67.92599 | 85.12474 | 75.16463 | 76.61114    | -973.33100  | -168.67840  | 1 |
| 9687 | H | 68.44977 | 86.09948 | 75.15724 | 2540.35559  | -51.91251   | 2952.87404  | 1 |
| 9688 | C | 68.53600 | 83.92580 | 74.53290 | -676.89647  | -545.29416  | -275.52940  | 1 |
| 9689 | H | 68.10500 | 82.98380 | 74.93690 | -1566.49989 | 1817.76903  | -2034.70393 | 1 |
| 9690 | C | 68.34900 | 83.93880 | 73.05490 | -859.83284  | 287.47088   | 97.46273    | 1 |
| 9691 | H | 67.38300 | 83.53880 | 72.67890 | 559.45597   | -3034.42126 | 614.42889   | 1 |
| 9692 | H | 68.68700 | 84.91880 | 72.65490 | -2379.23533 | 1914.79470  | 755.66312   | 1 |
| 9693 | H | 69.02400 | 83.17980 | 72.60690 | 2573.12642  | -623.55059  | -1699.53856 | 1 |
| 9694 | C | 70.05800 | 83.94780 | 74.75490 | -859.47197  | 15.31935    | 304.17799   | 1 |
| 9695 | H | 70.56200 | 83.01280 | 74.42890 | -557.06634  | 2791.46622  | 1340.00734  | 1 |
| 9696 | H | 70.17300 | 83.76380 | 75.84390 | 1858.38971  | 1313.36782  | -2172.48219 | 1 |
| 9697 | C | 70.97024 | 85.17591 | 74.37880 | 761.68664   | 527.09125   | -432.72830  | 1 |
| 9698 | H | 70.49517 | 86.03336 | 74.79007 | -1435.08936 | -647.68095  | 329.40645   | 1 |
| 9699 | H | 72.05058 | 85.08970 | 74.67081 | 1093.48795  | 209.70895   | 269.01653   | 1 |
| 9700 | H | 70.99847 | 85.38734 | 73.26199 | -1793.80546 | 927.45615   | 989.55924   | 1 |
| 9701 | C | 66.28413 | 85.23771 | 74.63271 | -159.88434  | 1510.72331  | -442.89339  | 1 |
| 9702 | O | 66.06694 | 86.07690 | 73.80062 | 1005.83234  | -986.34171  | 254.76712   | 1 |
| 9703 | N | 65.47600 | 84.30180 | 75.09290 | -415.11655  | 435.25446   | -592.37158  | 1 |
| 9704 | H | 65.70400 | 83.60980 | 75.77290 | -77.01283   | -2431.77744 | 1994.68136  | 1 |
| 9705 | C | 64.05600 | 84.33580 | 74.67990 | -310.60242  | 222.51014   | -827.92897  | 1 |
| 9706 | H | 64.10600 | 84.16680 | 73.61490 | -2580.20351 | -1213.99403 | -1329.28347 | 1 |
| 9707 | C | 63.18100 | 83.19080 | 75.19690 | 304.73127   | -482.89879  | 710.91393   | 1 |
| 9708 | H | 62.22600 | 83.07180 | 74.64190 | 2747.40308  | 654.17390   | 1386.38344  | 1 |
| 9709 | H | 63.77500 | 82.27180 | 75.00590 | 524.28411   | -1982.39564 | -2386.09722 | 1 |
| 9710 | O | 62.80900 | 83.14980 | 76.55590 | 289.23783   | 159.36988   | 717.33531   | 1 |
| 9711 | H | 63.47300 | 83.61580 | 77.06990 | 2995.73456  | 32.18442    | -960.60649  | 1 |
| 9712 | C | 63.41789 | 85.77856 | 75.07775 | -37.02953   | 357.67220   | -406.15693  | 1 |
| 9713 | O | 62.75386 | 86.39214 | 74.28077 | 276.67969   | 115.20960   | 139.45494   | 1 |
| 9714 | N | 63.74022 | 86.10250 | 76.34170 | 351.99098   | -141.11059  | -477.43725  | 1 |
| 9715 | H | 64.37467 | 85.37819 | 76.87004 | -643.70623  | -493.26336  | -1251.03018 | 1 |
| 9716 | C | 63.29891 | 87.38045 | 76.84813 | -209.81531  | 304.84739   | -416.09804  | 1 |
| 9717 | H | 62.16935 | 87.38724 | 76.71596 | 2022.38225  | -695.05992  | -873.32911  | 1 |
| 9718 | C | 63.67626 | 87.42624 | 78.35543 | -1465.27561 | 656.90762   | 748.17226   | 1 |
| 9719 | H | 64.41447 | 86.55667 | 78.41150 | 66.39797    | 1045.43419  | -3249.44613 | 1 |
| 9720 | C | 64.40250 | 88.67339 | 78.65424 | -35.04159   | 159.65254   | 260.10558   | 1 |
| 9721 | H | 65.03135 | 88.98374 | 77.76207 | 657.77752   | -596.04961  | 1281.35102  | 1 |
| 9722 | H | 64.98852 | 88.48801 | 79.57987 | -3638.57596 | 319.95908   | 1987.35030  | 1 |
| 9723 | H | 63.72601 | 89.54204 | 78.80433 | -1080.78520 | 1648.13621  | 73.94533    | 1 |
| 9724 | C | 62.48818 | 87.22482 | 79.29149 | -736.96122  | -786.29087  | -459.17666  | 1 |
| 9725 | H | 61.86889 | 88.14460 | 79.35243 | -1529.01402 | -219.25327  | 2112.90188  | 1 |
| 9726 | H | 62.82459 | 87.03401 | 80.30079 | 523.04493   | 854.40546   | 91.72906    | 1 |
| 9727 | C | 61.63049 | 85.98136 | 78.78236 | -733.83151  | 342.62272   | 67.69959    | 1 |

|      |   |          |          |          |             |             |             |   |
|------|---|----------|----------|----------|-------------|-------------|-------------|---|
| 9728 | H | 62.02004 | 85.03657 | 79.19996 | -1321.73762 | 957.54379   | 1315.02670  | 1 |
| 9729 | H | 60.52716 | 86.05181 | 79.01161 | -1174.28326 | 191.20071   | 1563.13050  | 1 |
| 9730 | H | 61.64467 | 85.76539 | 77.71167 | 863.77335   | 4679.72460  | -302.73039  | 1 |
| 9731 | C | 63.85224 | 88.55864 | 75.83177 | 485.08124   | 254.65374   | -236.17860  | 1 |
| 9732 | O | 63.21389 | 89.56170 | 75.63380 | 57.38119    | 357.67811   | -591.90075  | 1 |
| 9733 | N | 65.09138 | 88.31881 | 75.34339 | 514.24866   | -603.21481  | -1246.78729 | 1 |
| 9734 | H | 65.56809 | 87.45035 | 75.65693 | -1348.94711 | -2484.95825 | -2831.20384 | 1 |
| 9735 | C | 65.81708 | 89.14912 | 74.49147 | 234.35969   | 119.82682   | -377.60953  | 1 |
| 9736 | H | 65.49124 | 90.13369 | 74.91595 | -202.00921  | -1467.13838 | -827.35639  | 1 |
| 9737 | C | 67.32865 | 88.72980 | 74.61218 | 337.19381   | 740.56566   | 333.78828   | 1 |
| 9738 | H | 67.47344 | 87.76215 | 74.09087 | -479.54416  | 2774.05527  | -1167.42475 | 1 |
| 9739 | H | 67.60901 | 88.49528 | 75.63449 | 1763.75535  | 496.74803   | -382.28551  | 1 |
| 9740 | C | 68.35586 | 89.75592 | 73.90606 | -141.10611  | 305.19398   | -86.59275   | 1 |
| 9741 | O | 69.53983 | 89.25793 | 73.86973 | 47.19698    | -55.15700   | -108.08150  | 1 |
| 9742 | O | 68.15997 | 90.98714 | 73.69724 | -390.66956  | 231.00651   | -384.65926  | 1 |
| 9743 | C | 65.45128 | 88.76560 | 72.91395 | 265.75831   | 407.16911   | 330.07622   | 1 |
| 9744 | O | 66.09327 | 89.41925 | 72.09730 | 382.97414   | 90.70325    | 513.88163   | 1 |
| 9745 | N | 64.59051 | 87.79263 | 72.73147 | 594.89187   | 59.65662    | 362.85871   | 1 |
| 9746 | H | 64.25127 | 87.22258 | 73.52866 | -2218.21229 | 545.65859   | -1246.59406 | 1 |
| 9747 | C | 64.09058 | 87.63544 | 71.39389 | 562.78958   | 233.84269   | -182.50600  | 1 |
| 9748 | H | 64.84270 | 87.95652 | 70.63243 | 2718.37688  | -761.72524  | 887.22843   | 1 |
| 9749 | C | 63.89785 | 86.02855 | 71.22189 | 869.63114   | -245.38233  | -465.39967  | 1 |
| 9750 | H | 63.35997 | 85.82217 | 72.18420 | -777.22885  | -1902.55231 | 1174.93062  | 1 |
| 9751 | H | 63.15553 | 85.80828 | 70.40289 | -1924.82706 | -416.41039  | -2388.02584 | 1 |
| 9752 | O | 65.06158 | 85.27787 | 70.82229 | -298.14420  | 361.58504   | 391.45734   | 1 |
| 9753 | H | 65.50923 | 85.25251 | 71.74329 | 541.61830   | -1445.28577 | 332.13362   | 1 |
| 9754 | C | 62.65094 | 88.32956 | 71.35360 | 147.97608   | -948.12547  | 1008.74046  | 1 |
| 9755 | O | 62.18257 | 88.63823 | 70.26708 | 304.03513   | -921.04026  | -284.38693  | 1 |
| 9756 | N | 61.99790 | 88.26780 | 72.52193 | -364.21661  | 246.32173   | -203.87587  | 1 |
| 9757 | H | 62.42815 | 87.79650 | 73.34892 | -1925.27246 | -905.22466  | -1163.69422 | 1 |
| 9758 | C | 60.82873 | 89.03797 | 72.70381 | 346.35445   | -241.88210  | -361.96002  | 1 |
| 9759 | H | 60.13354 | 88.74160 | 71.82312 | 96.86448    | -2536.91141 | -524.12372  | 1 |
| 9760 | C | 60.21517 | 88.56592 | 74.07243 | 223.36283   | -184.40945  | -271.62387  | 1 |
| 9761 | H | 59.28275 | 89.05645 | 74.23705 | 1717.24492  | -1310.49104 | 1016.10539  | 1 |
| 9762 | H | 60.82341 | 88.73746 | 74.90173 | -98.29847   | 649.65087   | -704.04383  | 1 |
| 9763 | C | 59.93268 | 86.98761 | 74.05330 | 719.32016   | -222.66040  | -931.48472  | 1 |
| 9764 | C | 59.64322 | 86.22067 | 72.88988 | 211.54056   | 184.20985   | 4.06718     | 1 |
| 9765 | H | 59.72782 | 86.58949 | 71.82073 | 636.32109   | -327.31585  | 1543.80549  | 1 |
| 9766 | C | 59.30100 | 84.85880 | 73.12290 | 25.30453    | -618.46486  | 669.56098   | 1 |
| 9767 | H | 59.12100 | 84.20580 | 72.28090 | 1154.23989  | 2424.67675  | 1639.17636  | 1 |
| 9768 | C | 59.18800 | 84.30980 | 74.35190 | 550.80277   | -533.65806  | 493.23056   | 1 |
| 9769 | H | 59.20900 | 83.23180 | 74.40590 | -120.72906  | -1414.18726 | -2807.79720 | 1 |
| 9770 | C | 59.88705 | 86.43922 | 75.32462 | -320.63477  | 558.04307   | -222.27591  | 1 |
| 9771 | H | 60.33016 | 86.96588 | 76.14573 | 3520.67086  | 953.23777   | -4008.12697 | 1 |
| 9772 | C | 59.40636 | 85.11008 | 75.50301 | -521.98044  | -721.83692  | -220.74932  | 1 |
| 9773 | H | 59.40800 | 84.60080 | 76.43090 | 499.78648   | 3074.09538  | 445.39565   | 1 |
| 9774 | C | 61.23538 | 90.63985 | 72.52264 | -986.45445  | 515.03105   | 522.72210   | 1 |
| 9775 | O | 60.29713 | 91.41348 | 72.47531 | -103.58257  | -514.62661  | 847.19247   | 1 |
| 9776 | N | 62.53706 | 90.79413 | 72.48841 | 348.42162   | 59.50774    | -375.00233  | 1 |
| 9777 | H | 63.05203 | 89.95387 | 72.69410 | 1012.57794  | -658.24410  | -2328.66676 | 1 |
| 9778 | C | 63.12423 | 92.02100 | 72.06402 | -451.04346  | -603.54150  | -145.43760  | 1 |
| 9779 | H | 62.13654 | 92.54610 | 71.98878 | 1763.82467  | 321.91835   | -237.57450  | 1 |
| 9780 | C | 64.02722 | 92.55750 | 73.28806 | 405.50878   | -414.70406  | 575.28475   | 1 |
| 9781 | H | 63.59059 | 92.24823 | 74.28967 | 3809.35317  | -1257.68097 | -278.82120  | 1 |
| 9782 | C | 65.57427 | 92.13381 | 73.32592 | -390.74006  | -570.78715  | 149.54890   | 1 |
| 9783 | H | 66.21358 | 92.59478 | 72.53781 | 1553.03618  | -4089.22502 | -1938.51013 | 1 |
| 9784 | H | 66.07477 | 92.34832 | 74.27803 | -526.90687  | 4165.98304  | 2378.27717  | 1 |
| 9785 | H | 65.63201 | 91.00895 | 73.16707 | 4305.26599  | -732.92882  | 206.78830   | 1 |
| 9786 | C | 64.16059 | 94.09245 | 73.05477 | -695.25206  | -947.51702  | 798.41248   | 1 |
| 9787 | H | 63.24044 | 94.61921 | 72.70955 | 3750.07462  | 5809.04974  | -496.69218  | 1 |
| 9788 | H | 64.97480 | 94.37185 | 72.40678 | 548.47303   | -72.55208   | 690.92797   | 1 |
| 9789 | C | 64.46027 | 94.60422 | 74.54250 | 687.27026   | -864.37035  | 317.17314   | 1 |

|      |   |          |          |          |             |             |             |   |
|------|---|----------|----------|----------|-------------|-------------|-------------|---|
| 9790 | H | 63.71236 | 94.44247 | 75.38065 | -3234.98094 | -72.63199   | 1599.61320  | 1 |
| 9791 | H | 64.55619 | 95.69763 | 74.55247 | 78.56136    | -655.51675  | 2940.37802  | 1 |
| 9792 | H | 65.37249 | 94.11496 | 74.84845 | 626.61540   | -714.31574  | -2685.05947 | 1 |
| 9793 | C | 64.22793 | 91.96591 | 70.84920 | -320.95819  | -1168.67827 | 294.96096   | 1 |
| 9794 | O | 64.94483 | 92.92792 | 70.66441 | -128.56324  | -116.02316  | 216.46314   | 1 |
| 9795 | N | 64.18892 | 90.83324 | 70.17779 | -231.88388  | 716.03453   | 292.24796   | 1 |
| 9796 | H | 63.47877 | 90.11102 | 70.39524 | 177.36323   | -432.52144  | -5526.70670 | 1 |
| 9797 | C | 65.03159 | 90.77575 | 69.00045 | 228.09582   | -562.36408  | -1183.76956 | 1 |
| 9798 | H | 65.40974 | 91.80397 | 68.87249 | -2274.91165 | 5068.70767  | 1153.08431  | 1 |
| 9799 | C | 66.15556 | 89.65385 | 69.26705 | 48.71869    | -415.49540  | 669.80509   | 1 |
| 9800 | H | 65.63432 | 88.69442 | 69.10626 | 955.00711   | 1310.76044  | 250.43060   | 1 |
| 9801 | H | 66.41036 | 89.44346 | 70.37168 | 1795.79057  | -1484.78343 | 47.11881    | 1 |
| 9802 | C | 67.42210 | 89.72350 | 68.46238 | 1134.53145  | -105.96650  | 418.20001   | 1 |
| 9803 | H | 67.47273 | 90.66674 | 67.86005 | 1516.26425  | 2315.12213  | -567.84850  | 1 |
| 9804 | C | 68.60486 | 89.83611 | 69.41656 | 115.57490   | -617.80950  | -80.77482   | 1 |
| 9805 | H | 68.61053 | 90.81298 | 69.95965 | -1793.68961 | 1944.91970  | 4507.90449  | 1 |
| 9806 | H | 69.55186 | 89.73516 | 68.87339 | -3122.33335 | 1464.62980  | -411.66400  | 1 |
| 9807 | H | 68.59185 | 89.07360 | 70.22700 | 941.23375   | -975.75450  | -1013.46899 | 1 |
| 9808 | C | 67.57531 | 88.44674 | 67.62620 | 344.24517   | -244.45227  | 111.72822   | 1 |
| 9809 | H | 68.43572 | 88.39465 | 66.93954 | 391.94103   | -668.56059  | 2221.92373  | 1 |
| 9810 | H | 67.62287 | 87.55836 | 68.29162 | 404.67180   | 1217.50658  | 1054.89916  | 1 |
| 9811 | H | 66.63269 | 88.33839 | 67.02236 | 2330.74642  | 2293.24011  | -854.15303  | 1 |
| 9812 | C | 64.13459 | 90.37992 | 67.74764 | 571.02208   | 195.19476   | 21.68154    | 1 |
| 9813 | O | 64.37291 | 91.03606 | 66.75512 | -113.66400  | -207.52953  | -200.30929  | 1 |
| 9814 | N | 63.35050 | 89.28533 | 67.93583 | -600.18841  | 199.35312   | 11.37239    | 1 |
| 9815 | H | 63.25304 | 88.72200 | 68.80774 | -1789.09723 | 483.46980   | 235.63464   | 1 |
| 9816 | C | 62.11616 | 89.37645 | 67.24508 | 483.54063   | -317.37824  | -62.70057   | 1 |
| 9817 | H | 62.42813 | 89.44045 | 66.15221 | 2679.90086  | -90.82520   | -652.19242  | 1 |
| 9818 | C | 61.15253 | 88.11988 | 67.71737 | 115.45424   | -319.17787  | 514.41803   | 1 |
| 9819 | H | 60.72597 | 88.43242 | 68.68745 | -77.58130   | 490.00161   | 1504.06313  | 1 |
| 9820 | H | 61.79733 | 87.24232 | 67.94087 | 1292.42454  | -133.07468  | -2203.84493 | 1 |
| 9821 | C | 60.07377 | 87.79175 | 66.74725 | 306.21110   | 411.02618   | 234.37817   | 1 |
| 9822 | H | 59.40265 | 88.63586 | 66.72003 | 88.81591    | 1213.20938  | -126.47820  | 1 |
| 9823 | C | 60.59093 | 87.32465 | 65.39974 | 362.30700   | -456.99037  | 424.10211   | 1 |
| 9824 | H | 61.38696 | 88.01930 | 65.02002 | -1903.82099 | 3881.42382  | 259.21223   | 1 |
| 9825 | H | 59.67322 | 87.27311 | 64.70556 | 532.19668   | -1014.81457 | 748.60574   | 1 |
| 9826 | H | 61.03585 | 86.34611 | 65.51773 | 1671.69261  | 657.86432   | -351.90016  | 1 |
| 9827 | C | 59.23704 | 86.61309 | 67.26162 | 887.64891   | 139.65467   | 277.73760   | 1 |
| 9828 | H | 59.63428 | 85.60376 | 67.00081 | -2180.29460 | -1499.47873 | 871.96541   | 1 |
| 9829 | H | 58.99066 | 86.68193 | 68.39686 | -215.66185  | -253.07333  | -2049.21248 | 1 |
| 9830 | H | 58.21262 | 86.76957 | 66.82979 | 510.38671   | -632.98503  | 1428.11057  | 1 |
| 9831 | C | 61.31674 | 90.76998 | 67.55378 | -758.91755  | -216.29404  | -711.18781  | 1 |
| 9832 | O | 60.44397 | 91.06778 | 66.72595 | 510.40957   | 1017.28348  | 306.81837   | 1 |
| 9833 | N | 61.49132 | 91.31726 | 68.77344 | 326.77270   | 971.87749   | -885.31510  | 1 |
| 9834 | H | 62.03531 | 90.71465 | 69.31937 | 548.88185   | 1419.44796  | 2838.07652  | 1 |
| 9835 | C | 61.35892 | 92.67586 | 68.98393 | -604.58472  | -385.49053  | 401.38489   | 1 |
| 9836 | H | 61.94610 | 92.63358 | 69.99956 | 1409.08709  | -2012.99696 | -56.32654   | 1 |
| 9837 | C | 62.00603 | 93.55333 | 67.86916 | -711.11655  | -97.98535   | -227.29602  | 1 |
| 9838 | H | 62.22162 | 92.88282 | 67.00098 | 2076.93127  | -1711.47439 | -405.18808  | 1 |
| 9839 | H | 61.35078 | 94.39402 | 67.43804 | -1979.92397 | 1701.72476  | 2710.27250  | 1 |
| 9840 | C | 63.23701 | 94.15686 | 68.58959 | -277.36563  | -484.54081  | 72.45925    | 1 |
| 9841 | H | 63.76352 | 93.20948 | 68.97709 | -3806.08153 | 1393.56596  | 1248.12340  | 1 |
| 9842 | H | 62.90673 | 94.74931 | 69.50685 | -159.09579  | -1212.10593 | 1747.03665  | 1 |
| 9843 | C | 64.15747 | 95.06567 | 67.67124 | 397.64876   | 482.04976   | -56.08122   | 1 |
| 9844 | O | 64.42873 | 94.54482 | 66.39365 | -903.45219  | -415.34398  | 320.07636   | 1 |
| 9845 | O | 64.65091 | 96.06402 | 68.11123 | -303.99946  | 588.58407   | -231.39307  | 1 |
| 9846 | C | 59.77233 | 93.19039 | 69.09418 | 1032.54786  | -1022.91936 | -646.79863  | 1 |
| 9847 | O | 59.42802 | 93.99359 | 68.27679 | -833.16977  | 544.42067   | 704.12390   | 1 |
| 9848 | N | 59.12297 | 92.70077 | 70.11217 | 535.27025   | -119.28431  | -246.10206  | 1 |
| 9849 | H | 59.62100 | 91.98649 | 70.68464 | -824.97425  | 2054.75152  | -1368.81545 | 1 |
| 9850 | C | 57.86975 | 93.15156 | 70.63129 | 418.59829   | -807.17651  | -458.47624  | 1 |
| 9851 | H | 57.21387 | 93.67205 | 69.86412 | 2019.35565  | -2570.27052 | -1988.48432 | 1 |

|      |   |          |          |          |             |             |             |   |
|------|---|----------|----------|----------|-------------|-------------|-------------|---|
| 9852 | C | 57.14173 | 91.96092 | 71.27752 | -902.00020  | 177.86152   | 34.85372    | 1 |
| 9853 | H | 57.69452 | 91.52233 | 72.17658 | -1913.05360 | -2831.08048 | -257.96470  | 1 |
| 9854 | C | 55.86697 | 92.44183 | 71.87277 | -361.94258  | -158.31817  | -826.23386  | 1 |
| 9855 | H | 55.59766 | 93.47604 | 71.37518 | -567.92893  | -261.83381  | 2069.16425  | 1 |
| 9856 | H | 54.95080 | 91.79685 | 71.99245 | -1331.79305 | -3804.74487 | 229.91937   | 1 |
| 9857 | H | 56.13379 | 92.81749 | 72.92223 | 158.18612   | 2029.54822  | 682.58865   | 1 |
| 9858 | C | 56.94545 | 90.85965 | 70.23753 | 372.28374   | -7.34158    | -83.95498   | 1 |
| 9859 | H | 56.99054 | 91.34543 | 69.22426 | 1076.38010  | -1163.27875 | -1483.71971 | 1 |
| 9860 | H | 55.90776 | 90.47159 | 70.36346 | 1164.57174  | -730.47923  | -1315.98868 | 1 |
| 9861 | C | 58.05329 | 89.74193 | 70.39136 | 356.75657   | -118.86218  | 742.60126   | 1 |
| 9862 | H | 58.03996 | 89.17331 | 71.38066 | 9.31454     | -525.14709  | 1694.00181  | 1 |
| 9863 | H | 58.11630 | 88.98685 | 69.53461 | -2168.15811 | 524.02121   | -1204.45935 | 1 |
| 9864 | H | 58.93696 | 90.35361 | 70.29380 | 2241.29756  | 1326.12738  | -255.26516  | 1 |
| 9865 | C | 58.08763 | 94.40689 | 71.72449 | 604.62233   | 47.57693    | 324.63428   | 1 |
| 9866 | O | 57.12443 | 94.87542 | 72.26776 | 30.46376    | -750.62364  | -93.95145   | 1 |
| 9867 | N | 59.36933 | 94.45872 | 72.11488 | -747.85266  | -485.98463  | 257.58212   | 1 |
| 9868 | H | 59.91690 | 93.84244 | 71.50386 | 1089.90441  | -870.17558  | 499.61839   | 1 |
| 9869 | C | 60.01439 | 95.67587 | 72.55358 | 48.69392    | 600.23365   | 123.03204   | 1 |
| 9870 | H | 59.32671 | 96.50082 | 72.70160 | -1462.99490 | 736.93476   | -2058.40037 | 1 |
| 9871 | C | 60.69194 | 95.42670 | 73.88898 | 118.52449   | -633.04241  | 89.10250    | 1 |
| 9872 | H | 61.48864 | 94.70816 | 73.70519 | 2303.31175  | -1463.41492 | 1180.93043  | 1 |
| 9873 | C | 61.30006 | 96.63908 | 74.52696 | 484.35049   | -551.12141  | 169.65275   | 1 |
| 9874 | H | 60.52860 | 97.34850 | 75.02686 | 3187.80144  | -1787.97707 | -1448.69028 | 1 |
| 9875 | H | 61.97965 | 96.27565 | 75.31816 | -1356.76092 | -2854.68769 | 1325.84251  | 1 |
| 9876 | H | 61.81517 | 97.13931 | 73.74501 | 618.44371   | -1894.32154 | 2395.47721  | 1 |
| 9877 | C | 59.89388 | 94.69230 | 74.93545 | 346.13949   | 101.08204   | 1139.48084  | 1 |
| 9878 | H | 58.97280 | 95.34884 | 75.00518 | -3472.54180 | -985.34811  | -898.51779  | 1 |
| 9879 | H | 60.35542 | 94.76251 | 75.93379 | -719.45876  | -3236.52044 | -478.96876  | 1 |
| 9880 | C | 59.80859 | 93.18495 | 74.43774 | 116.21627   | 985.02463   | 612.93833   | 1 |
| 9881 | H | 59.52119 | 92.92690 | 73.44831 | -742.00135  | 2469.26437  | -299.64254  | 1 |
| 9882 | H | 59.07830 | 92.59446 | 75.00843 | 1215.06940  | -410.66089  | -3025.04585 | 1 |
| 9883 | H | 60.80280 | 92.60232 | 74.59436 | -360.05226  | -842.83632  | 966.48273   | 1 |
| 9884 | C | 61.32219 | 95.77639 | 71.48897 | 112.72394   | 58.59136    | 410.68333   | 1 |
| 9885 | O | 61.72237 | 94.76428 | 70.96773 | -215.73413  | 571.03565   | 543.78808   | 1 |
| 9886 | N | 61.88157 | 96.99414 | 71.45030 | 126.69569   | 435.35844   | -270.80720  | 1 |
| 9887 | H | 61.33511 | 97.64960 | 72.00637 | -1214.95321 | -1744.58214 | -293.19743  | 1 |
| 9888 | C | 62.89815 | 97.27585 | 70.50671 | -193.61601  | -1055.02075 | 470.16962   | 1 |
| 9889 | H | 63.21730 | 96.25753 | 70.01322 | 4132.86307  | -972.18964  | 2308.40050  | 1 |
| 9890 | C | 62.14869 | 98.26975 | 69.53946 | 152.38444   | -394.85333  | 13.93860    | 1 |
| 9891 | H | 62.71841 | 98.38626 | 68.56954 | 806.37853   | -299.52493  | -4418.01670 | 1 |
| 9892 | H | 62.35466 | 99.25356 | 70.04467 | -3661.35480 | -1766.31108 | -328.85221  | 1 |
| 9893 | C | 60.65851 | 97.91613 | 69.18296 | 904.67663   | 876.38801   | -136.27097  | 1 |
| 9894 | H | 59.99104 | 97.72849 | 70.05533 | 399.57143   | 1829.62954  | 2022.38961  | 1 |
| 9895 | H | 60.20574 | 98.79670 | 68.67974 | -303.73371  | 5297.21280  | 128.23457   | 1 |
| 9896 | C | 60.87072 | 96.65449 | 68.28698 | 98.78659    | -105.59070  | -966.17177  | 1 |
| 9897 | H | 59.86310 | 96.33170 | 67.83147 | 497.37643   | -835.07542  | -414.08552  | 1 |
| 9898 | H | 61.14948 | 95.75482 | 68.90497 | 1878.17343  | 1907.92208  | 149.47909   | 1 |
| 9899 | C | 61.74070 | 96.80486 | 66.98781 | -556.84854  | 256.24391   | 131.38427   | 1 |
| 9900 | H | 62.85198 | 96.94782 | 67.15463 | 500.59234   | 3767.83219  | -102.90506  | 1 |
| 9901 | H | 61.56118 | 97.70848 | 66.34683 | -3060.79338 | 604.18465   | 671.64300   | 1 |
| 9902 | N | 61.50682 | 95.59490 | 66.22128 | 234.07694   | 852.01966   | 581.27639   | 1 |
| 9903 | H | 65.25373 | 95.00038 | 66.05408 | 375.55070   | -1054.42186 | 287.08960   | 1 |
| 9904 | H | 62.23838 | 95.14376 | 65.69984 | -930.53513  | 2495.64234  | 320.33443   | 1 |
| 9905 | H | 60.95507 | 95.90964 | 65.42150 | -3321.66590 | 2171.52042  | 934.71093   | 1 |
| 9906 | C | 64.14095 | 98.06059 | 71.31299 | -297.47754  | -6.26424    | -130.55523  | 1 |
| 9907 | O | 63.81536 | 98.78262 | 72.27944 | -660.21812  | 673.21761   | 2.09021     | 1 |
| 9908 | N | 65.27490 | 97.88169 | 70.68713 | 860.03506   | -1387.47584 | 23.83353    | 1 |
| 9909 | H | 65.29215 | 97.40757 | 69.76977 | -1178.44959 | -574.86707  | -2535.89735 | 1 |
| 9910 | C | 66.43858 | 98.63246 | 71.07537 | -13.96787   | -803.69793  | 247.84556   | 1 |
| 9911 | H | 66.27253 | 99.73481 | 70.83453 | 1543.37411  | -960.69912  | 1638.97174  | 1 |
| 9912 | C | 66.57075 | 98.19154 | 72.57335 | 669.16095   | -251.12629  | 224.47952   | 1 |
| 9913 | H | 66.39613 | 97.08203 | 72.71958 | 1265.68671  | -228.81686  | -1204.49055 | 1 |

|      |   |          |           |          |             |             |             |   |
|------|---|----------|-----------|----------|-------------|-------------|-------------|---|
| 9914 | H | 65.69087 | 98.52691  | 73.16911 | -242.12068  | -690.49952  | -1536.19908 | 1 |
| 9915 | C | 67.86603 | 98.53255  | 73.37085 | -292.07218  | -298.52361  | 161.93862   | 1 |
| 9916 | H | 67.79200 | 98.10709  | 74.40223 | -1310.16054 | 1173.25061  | -2378.55467 | 1 |
| 9917 | H | 68.77794 | 98.16432  | 72.87449 | -389.11007  | 1354.24309  | 1313.82201  | 1 |
| 9918 | C | 67.97478 | 100.09999 | 73.40663 | -567.00123  | 638.76378   | 392.71990   | 1 |
| 9919 | O | 67.45511 | 100.73455 | 72.53175 | 80.67964    | -316.55334  | 32.93704    | 1 |
| 9920 | N | 68.55415 | 100.49938 | 74.57313 | 231.98878   | -445.79302  | -199.03204  | 1 |
| 9921 | H | 68.96020 | 99.80218  | 75.20934 | -1.01304    | -3244.72167 | -747.83586  | 1 |
| 9922 | H | 68.92957 | 101.43503 | 74.78781 | 1216.85490  | 1624.11566  | -642.90536  | 1 |
| 9923 | C | 67.69249 | 98.02281  | 70.22566 | -155.54066  | 1145.98434  | -1197.10991 | 1 |
| 9924 | O | 67.65028 | 96.95487  | 69.55674 | 425.65436   | -800.01944  | 230.76179   | 1 |
| 9925 | N | 68.74812 | 98.79614  | 70.33765 | 1353.71810  | -477.38105  | -214.30757  | 1 |
| 9926 | H | 68.63290 | 99.69033  | 70.72568 | 516.35340   | -379.51149  | -44.47599   | 1 |
| 9927 | C | 69.97330 | 98.26259  | 69.80589 | -240.72456  | 380.21236   | 961.98917   | 1 |
| 9928 | H | 70.62884 | 99.12448  | 69.60864 | -2695.81817 | 3456.88578  | 2151.96436  | 1 |
| 9929 | H | 69.54764 | 97.63026  | 68.95981 | -1851.11482 | -1324.90581 | -961.19888  | 1 |
| 9930 | C | 70.69635 | 97.40518  | 70.95156 | 494.49416   | 196.13111   | -26.44998   | 1 |
| 9931 | O | 70.68594 | 97.58152  | 72.19700 | -41.13427   | 242.66362   | -626.58813  | 1 |
| 9932 | N | 71.54707 | 96.58189  | 70.34821 | 350.60011   | -80.59609   | -24.14305   | 1 |
| 9933 | H | 71.54740 | 96.53959  | 69.20457 | -1370.98996 | -1245.23123 | -1023.20584 | 1 |
| 9934 | C | 71.94079 | 95.38617  | 71.09614 | -919.05640  | -482.40096  | -138.94817  | 1 |
| 9935 | H | 71.04930 | 95.14403  | 71.67508 | 733.60444   | 2889.43833  | -3392.02220 | 1 |
| 9936 | C | 72.40987 | 94.14277  | 70.27090 | -320.70375  | -1043.48215 | -203.90122  | 1 |
| 9937 | H | 72.51444 | 93.25873  | 70.93239 | 869.56417   | 1671.40700  | -233.22339  | 1 |
| 9938 | H | 73.45431 | 94.59975  | 70.04990 | 2932.29892  | 2034.10289  | -3455.41203 | 1 |
| 9939 | S | 71.44622 | 93.68142  | 68.76806 | 318.80910   | 527.23757   | 238.69761   | 1 |
| 9940 | C | 73.28337 | 95.75294  | 71.95541 | -1070.66068 | -264.72799  | 920.31830   | 1 |
| 9941 | O | 73.62406 | 94.88239  | 72.77194 | 63.11268    | 500.66760   | -494.71587  | 1 |
| 9942 | N | 73.91630 | 96.84176  | 71.54564 | -4.21475    | -133.56001  | -138.60011  | 1 |
| 9943 | H | 73.33909 | 97.31238  | 70.82594 | 524.64017   | 485.92635   | -428.40466  | 1 |
| 9944 | C | 74.97925 | 97.52741  | 72.30079 | -137.05313  | 1376.43974  | -468.20252  | 1 |
| 9945 | H | 75.50559 | 96.74727  | 72.73910 | -1400.56638 | 921.12450   | -1062.62998 | 1 |
| 9946 | C | 75.76436 | 98.33396  | 71.20638 | -601.98744  | 630.46797   | 364.85837   | 1 |
| 9947 | H | 75.18844 | 99.08341  | 70.54477 | 61.07108    | 2545.44834  | 2859.04655  | 1 |
| 9948 | H | 76.28562 | 97.55329  | 70.62165 | -2590.71635 | 375.37052   | -1760.87508 | 1 |
| 9949 | C | 76.94195 | 99.05765  | 71.90440 | -528.41260  | -159.99751  | 104.81608   | 1 |
| 9950 | H | 76.57042 | 99.75652  | 72.72641 | 3242.63204  | -2561.24374 | -3111.15653 | 1 |
| 9951 | H | 77.70068 | 98.33860  | 72.48097 | -2425.57339 | 2288.92010  | 1509.60605  | 1 |
| 9952 | C | 77.75788 | 99.96386  | 70.88807 | 1030.14550  | -656.14241  | -340.15491  | 1 |
| 9953 | O | 78.44377 | 100.80396 | 71.53527 | 360.16900   | -56.84818   | -1082.17803 | 1 |
| 9954 | O | 77.68656 | 99.83240  | 69.64135 | 951.69989   | 835.58919   | 543.96979   | 1 |
| 9955 | C | 74.43347 | 98.52172  | 73.46029 | 609.20291   | -436.52936  | -602.63452  | 1 |
| 9956 | O | 75.14903 | 98.94235  | 74.33442 | 99.28608    | -179.43249  | 298.99500   | 1 |
| 9957 | N | 73.17307 | 98.89239  | 73.25040 | 856.39143   | 164.07836   | 79.50453    | 1 |
| 9958 | H | 72.63140 | 98.46977  | 72.46743 | 3169.74915  | -2797.64493 | 1836.14063  | 1 |
| 9959 | C | 72.53149 | 99.60331  | 74.31006 | -71.81494   | 194.03836   | 296.18491   | 1 |
| 9960 | H | 73.33184 | 100.15483 | 74.84687 | 2259.20478  | 2150.33507  | -1360.29179 | 1 |
| 9961 | C | 71.43727 | 100.50522 | 73.65552 | -1280.03412 | 390.05268   | -266.59308  | 1 |
| 9962 | H | 70.62490 | 99.99200  | 73.10723 | 1848.80090  | 1673.43931  | 1049.15964  | 1 |
| 9963 | H | 70.94236 | 101.08249 | 74.45181 | -2165.97658 | -1671.47354 | -14.79403   | 1 |
| 9964 | C | 71.93868 | 101.48007 | 72.55415 | 703.21830   | 274.84375   | -90.08745   | 1 |
| 9965 | C | 70.91269 | 102.26547 | 72.04327 | 485.97957   | -346.76991  | 494.20007   | 1 |
| 9966 | H | 69.85818 | 102.18918 | 72.46294 | -3167.25672 | 767.14248   | 1051.93869  | 1 |
| 9967 | C | 71.28707 | 103.05806 | 70.88184 | -165.61662  | -221.00323  | 100.75159   | 1 |
| 9968 | H | 70.52333 | 103.60394 | 70.24985 | -1329.05462 | 2288.98636  | 409.90141   | 1 |
| 9969 | C | 72.56309 | 102.95566 | 70.31512 | 971.09963   | 477.44492   | -371.05631  | 1 |
| 9970 | H | 72.73813 | 103.60983 | 69.43864 | -2669.76795 | 474.45120   | 68.64315    | 1 |
| 9971 | C | 73.25280 | 101.30134 | 72.01204 | 819.35413   | -546.78554  | -195.77998  | 1 |
| 9972 | H | 73.99654 | 100.53112 | 72.33057 | 1909.48786  | -130.62959  | -1010.81112 | 1 |
| 9973 | C | 73.58596 | 102.14207 | 70.97728 | -206.14305  | -636.28364  | 10.58559    | 1 |
| 9974 | H | 74.67555 | 102.11568 | 70.60792 | 3558.95520  | -1474.92325 | 1363.96967  | 1 |
| 9975 | C | 71.79154 | 98.43878  | 75.27135 | -398.34888  | -273.58293  | 537.53229   | 1 |

|       |   |          |          |          |             |             |             |   |
|-------|---|----------|----------|----------|-------------|-------------|-------------|---|
| 9976  | O | 71.03303 | 98.84582 | 76.14250 | -107.52158  | -33.66238   | -149.62687  | 1 |
| 9977  | N | 72.21789 | 97.18368 | 75.04484 | 180.72904   | 385.78730   | -741.15441  | 1 |
| 9978  | H | 72.95992 | 97.04829 | 74.29390 | -474.68504  | -2043.04418 | 1373.29608  | 1 |
| 9979  | C | 71.48633 | 96.09191 | 75.51456 | 663.98374   | 255.90921   | -549.81777  | 1 |
| 9980  | H | 70.93535 | 96.59728 | 76.33317 | 443.83790   | 1497.78863  | 4203.80457  | 1 |
| 9981  | C | 70.49994 | 95.62364 | 74.33342 | -759.07324  | 593.56999   | -631.74854  | 1 |
| 9982  | H | 70.43993 | 96.39021 | 73.49679 | -704.20522  | -2776.84228 | -843.64346  | 1 |
| 9983  | H | 70.94309 | 94.68776 | 73.91257 | -118.30465  | 931.32963   | 466.76216   | 1 |
| 9984  | C | 69.13804 | 95.44186 | 74.98080 | -293.52531  | -143.36955  | 66.68041    | 1 |
| 9985  | H | 68.90033 | 96.43074 | 75.37183 | 2664.74230  | 994.05036   | -2649.80926 | 1 |
| 9986  | H | 69.10970 | 94.86113 | 75.88097 | -799.70671  | -1401.03272 | 689.18493   | 1 |
| 9987  | C | 68.08763 | 94.98994 | 73.82394 | 326.41536   | -270.04349  | -88.07534   | 1 |
| 9988  | O | 66.98473 | 95.46469 | 73.98881 | 113.16828   | 59.40745    | 529.28644   | 1 |
| 9989  | O | 68.55415 | 94.48592 | 72.74064 | 210.85808   | -127.65623  | 662.35524   | 1 |
| 9990  | C | 72.47357 | 94.89030 | 76.00047 | -77.93688   | -510.50852  | -519.84728  | 1 |
| 9991  | O | 71.97198 | 93.78276 | 76.16446 | -72.11583   | 86.74543    | -561.08604  | 1 |
| 9992  | N | 73.68704 | 95.31956 | 76.32994 | 989.51925   | -387.01803  | 184.41745   | 1 |
| 9993  | H | 73.91750 | 96.32965 | 76.21428 | -1031.84881 | 682.27823   | 1169.37947  | 1 |
| 9994  | C | 74.31641 | 94.76273 | 77.50518 | 70.12308    | 1121.63507  | 1340.29377  | 1 |
| 9995  | H | 74.28533 | 93.65020 | 77.30646 | -239.48857  | 582.09073   | 1346.52144  | 1 |
| 9996  | C | 75.67434 | 95.49884 | 77.63771 | -859.09035  | -724.62495  | 52.63778    | 1 |
| 9997  | H | 75.48029 | 96.45346 | 78.19150 | -63.34558   | -1336.00087 | 310.57625   | 1 |
| 9998  | H | 76.02558 | 95.78788 | 76.65673 | -3003.38651 | -1496.14878 | 3774.27811  | 1 |
| 9999  | C | 76.68915 | 94.56981 | 78.45936 | 73.08675    | -485.32222  | 563.87031   | 1 |
| 10000 | O | 76.79796 | 94.45963 | 79.66761 | 217.60098   | -844.26943  | -49.96385   | 1 |
| 10001 | N | 77.38601 | 93.86645 | 77.53490 | -648.62752  | -38.68335   | -659.46535  | 1 |
| 10002 | H | 77.12859 | 93.87793 | 76.46610 | -177.37408  | 149.05705   | -1881.16967 | 1 |
| 10003 | H | 78.13352 | 93.17685 | 77.70036 | 1565.66922  | 2672.06589  | -1309.16192 | 1 |
| 10004 | C | 73.32186 | 94.85450 | 78.82812 | -147.90512  | 88.81739    | 623.67386   | 1 |
| 10005 | O | 73.68659 | 94.15882 | 79.81005 | 440.46313   | -124.15006  | -358.77213  | 1 |
| 10006 | N | 72.37142 | 95.71814 | 78.68600 | 512.93203   | -113.79004  | 87.93041    | 1 |
| 10007 | H | 72.57850 | 96.25935 | 77.83925 | 293.65865   | -1022.55157 | 507.60021   | 1 |
| 10008 | C | 71.25861 | 95.85237 | 79.60744 | -422.18093  | 492.80856   | -152.67275  | 1 |
| 10009 | H | 71.80490 | 96.24015 | 80.41229 | 3310.03925  | 2621.72084  | -241.27921  | 1 |
| 10010 | C | 70.22369 | 96.93283 | 79.16584 | 296.88890   | -52.48756   | -486.31045  | 1 |
| 10011 | H | 69.96420 | 96.91667 | 78.08811 | -2462.51949 | -1265.29572 | 2330.94017  | 1 |
| 10012 | O | 70.71988 | 98.65659 | 79.06951 | 414.57147   | 246.84402   | -413.82545  | 1 |
| 10013 | H | 70.68333 | 98.79334 | 78.06380 | 499.80539   | -331.08964  | 341.02393   | 1 |
| 10014 | C | 68.93989 | 96.98414 | 79.96566 | -217.21508  | 157.75152   | -60.76841   | 1 |
| 10015 | H | 68.97927 | 97.16283 | 81.07886 | -258.10750  | -1094.51101 | 2466.78661  | 1 |
| 10016 | H | 68.34336 | 96.10792 | 79.58913 | 735.19760   | -1244.29217 | -3073.74201 | 1 |
| 10017 | H | 68.46587 | 97.88935 | 79.59498 | 1934.42255  | 2878.04240  | 3960.96038  | 1 |
| 10018 | C | 70.54556 | 94.39206 | 79.84041 | 248.70050   | 336.49201   | 251.73759   | 1 |
| 10019 | O | 70.01025 | 94.24577 | 80.92715 | 252.78980   | 413.80624   | -168.19478  | 1 |
| 10020 | N | 70.19143 | 93.81138 | 78.66492 | -53.71518   | -380.34790  | 138.14796   | 1 |
| 10021 | H | 70.77904 | 94.21204 | 77.92824 | 2481.81472  | -2427.77006 | 41.46128    | 1 |
| 10022 | C | 69.68061 | 92.51108 | 78.86156 | -506.16848  | 243.64948   | -438.74344  | 1 |
| 10023 | H | 69.09760 | 92.57062 | 79.78844 | 424.19732   | 300.55754   | -985.46694  | 1 |
| 10024 | C | 68.61395 | 92.17789 | 77.70943 | 551.44821   | 669.61619   | 177.92436   | 1 |
| 10025 | H | 67.96735 | 93.05432 | 77.84155 | 2188.31683  | -1342.41076 | 1807.88263  | 1 |
| 10026 | C | 69.17858 | 92.31466 | 76.23895 | 14.48752    | 1123.09166  | -618.40457  | 1 |
| 10027 | H | 69.76833 | 93.25289 | 76.09736 | 1082.61464  | -93.44337   | -2469.61315 | 1 |
| 10028 | H | 69.82658 | 91.46315 | 75.92951 | -582.45539  | 3044.23458  | -4122.78788 | 1 |
| 10029 | H | 68.37367 | 92.39334 | 75.50506 | -2133.38739 | -543.81992  | 3918.50888  | 1 |
| 10030 | C | 67.84052 | 90.80769 | 77.91591 | -251.88644  | -303.59140  | -71.49415   | 1 |
| 10031 | H | 68.26280 | 90.23025 | 78.75797 | -3735.74222 | 1080.39412  | 2036.56083  | 1 |
| 10032 | H | 66.75658 | 90.86379 | 78.01981 | -2098.21349 | 846.16282   | -2307.36378 | 1 |
| 10033 | H | 68.11500 | 90.17805 | 77.02592 | 1805.78157  | -1395.77645 | 1464.69016  | 1 |
| 10034 | C | 71.07270 | 91.62558 | 79.08055 | -68.43727   | 508.95749   | 401.90213   | 1 |
| 10035 | O | 71.08281 | 90.78508 | 79.96737 | -115.35187  | 548.14984   | 350.39374   | 1 |
| 10036 | N | 71.96785 | 91.88318 | 78.19242 | -310.72095  | 183.47830   | 440.23673   | 1 |
| 10037 | H | 71.86391 | 92.67171 | 77.49824 | -2035.20177 | -1202.80300 | 2243.27304  | 1 |

|       |   |          |          |          |             |             |             |   |
|-------|---|----------|----------|----------|-------------|-------------|-------------|---|
| 10038 | C | 72.83805 | 90.81592 | 77.72205 | -607.77111  | 546.51520   | -14.95702   | 1 |
| 10039 | H | 72.18879 | 89.98764 | 77.32138 | -440.79057  | 1350.32800  | -1462.07315 | 1 |
| 10040 | C | 73.58756 | 91.30982 | 76.42693 | -781.00549  | -172.10699  | 992.63788   | 1 |
| 10041 | H | 74.05874 | 92.25103 | 76.71115 | 811.83320   | -2618.49257 | 392.71405   | 1 |
| 10042 | H | 72.82870 | 91.62271 | 75.61487 | 2184.94135  | -392.61170  | -2570.86849 | 1 |
| 10043 | N | 74.31026 | 89.16955 | 75.22369 | -668.17235  | -176.19505  | 379.16912   | 1 |
| 10044 | C | 74.60536 | 90.25935 | 75.93331 | -886.50459  | -617.77793  | 300.20998   | 1 |
| 10045 | C | 75.45640 | 88.51335 | 74.99371 | -435.04340  | 474.53371   | -919.71923  | 1 |
| 10046 | H | 75.62975 | 87.55118 | 74.36536 | 281.30114   | 1272.93224  | 103.08550   | 1 |
| 10047 | N | 76.44086 | 89.19396 | 75.60870 | 292.66494   | 1213.88294  | 413.60258   | 1 |
| 10048 | H | 77.42719 | 88.95289 | 75.64782 | -212.16053  | 1110.03407  | -2191.94327 | 1 |
| 10049 | C | 76.02797 | 90.25271 | 76.21654 | -48.74832   | 1281.48332  | -159.18407  | 1 |
| 10050 | H | 76.65324 | 90.90680 | 76.80259 | 512.40585   | 887.96780   | 205.10528   | 1 |
| 10051 | C | 73.75236 | 90.32455 | 78.96270 | 261.16174   | -820.85552  | -595.45704  | 1 |
| 10052 | O | 74.07106 | 89.13718 | 79.15441 | -249.60399  | -41.13591   | 486.49510   | 1 |
| 10053 | N | 74.09786 | 91.40494 | 79.72276 | -978.08913  | 418.50211   | -731.45134  | 1 |
| 10054 | H | 73.73408 | 92.33285 | 79.40125 | -1735.66425 | 551.74896   | 1015.50160  | 1 |
| 10055 | C | 75.01830 | 91.10332 | 80.89680 | 952.69769   | 845.84917   | 163.21656   | 1 |
| 10056 | H | 76.06991 | 91.04482 | 80.44727 | -32.31767   | 933.31010   | 3411.09613  | 1 |
| 10057 | C | 75.23677 | 92.36315 | 81.78342 | -102.59628  | 303.36276   | -25.59182   | 1 |
| 10058 | H | 75.48047 | 93.25126 | 81.16575 | 180.05457   | -1526.41776 | 397.72645   | 1 |
| 10059 | H | 76.10866 | 92.10283 | 82.42688 | 2736.75837  | 2023.91290  | -2383.18922 | 1 |
| 10060 | C | 74.01038 | 93.03868 | 82.58337 | 1309.02406  | -287.19164  | -203.48326  | 1 |
| 10061 | H | 73.29836 | 93.32365 | 81.76387 | 1678.02529  | -1543.18412 | 69.64231    | 1 |
| 10062 | H | 73.50934 | 92.25268 | 83.12308 | -596.53667  | 3866.17659  | 907.51634   | 1 |
| 10063 | C | 74.23874 | 94.06745 | 83.73161 | -890.22308  | 553.68793   | -41.35986   | 1 |
| 10064 | H | 75.02746 | 93.83398 | 84.52924 | -2338.92533 | -1601.70774 | -312.41162  | 1 |
| 10065 | H | 73.22229 | 94.18168 | 84.17854 | 3078.22622  | 900.68237   | 1149.33746  | 1 |
| 10066 | C | 74.68309 | 95.39858 | 82.95663 | 153.73651   | -319.55946  | -655.39007  | 1 |
| 10067 | H | 75.64285 | 95.31126 | 82.38993 | 1964.55502  | -491.22489  | -1172.18308 | 1 |
| 10068 | H | 73.88564 | 95.82873 | 82.22556 | -645.93408  | 1496.27794  | -3388.20742 | 1 |
| 10069 | N | 74.97505 | 96.35099 | 83.97358 | 108.86118   | 529.86728   | -214.52370  | 1 |
| 10070 | H | 71.67773 | 98.33897 | 79.25112 | 1341.98329  | -1449.11221 | 880.65007   | 1 |
| 10071 | H | 76.00008 | 96.40753 | 84.33096 | -2600.14453 | -1422.43327 | -3821.37410 | 1 |
| 10072 | H | 74.83166 | 97.27434 | 83.58403 | -238.63527  | -217.70600  | 1541.45590  | 1 |
| 10073 | C | 74.61329 | 89.80638 | 81.72016 | -808.37130  | -464.39677  | 482.94124   | 1 |
| 10074 | O | 75.41903 | 89.03210 | 82.31397 | 403.22398   | -599.70681  | -161.87689  | 1 |
| 10075 | N | 73.27065 | 89.79276 | 81.84805 | 485.02297   | -239.01016  | 227.43622   | 1 |
| 10076 | H | 72.60473 | 90.39317 | 81.33970 | -1306.60131 | 1767.54474  | -2039.13431 | 1 |
| 10077 | C | 72.68767 | 88.80869 | 82.67790 | 35.31011    | -284.37965  | 371.12589   | 1 |
| 10078 | H | 73.30950 | 88.85657 | 83.53654 | -1151.42648 | -1015.69098 | 1303.81933  | 1 |
| 10079 | C | 71.11630 | 89.14214 | 82.88691 | -209.78735  | 199.12675   | 141.45485   | 1 |
| 10080 | H | 70.63131 | 88.31238 | 83.53087 | -455.74384  | -1381.97126 | 1519.79200  | 1 |
| 10081 | H | 70.61079 | 89.20514 | 81.85150 | 667.78168   | -2330.25998 | -993.28299  | 1 |
| 10082 | C | 71.09430 | 90.50190 | 83.60445 | 502.78738   | 878.71077   | -287.95863  | 1 |
| 10083 | C | 71.16161 | 91.71619 | 82.89868 | -74.83655   | -105.73975  | -174.36674  | 1 |
| 10084 | H | 71.27761 | 91.94668 | 81.82277 | 53.34608    | -1653.97686 | -1355.76328 | 1 |
| 10085 | N | 71.03744 | 92.73761 | 83.76379 | 148.97665   | 412.60054   | -345.06205  | 1 |
| 10086 | H | 70.78043 | 93.64487 | 83.39837 | -3446.15726 | 1565.71782  | -2182.15891 | 1 |
| 10087 | C | 70.89852 | 92.39654 | 85.09651 | 283.92582   | 663.98126   | 367.14658   | 1 |
| 10088 | C | 70.82066 | 90.89109 | 84.98244 | -195.77891  | -745.93078  | -844.89218  | 1 |
| 10089 | C | 70.75346 | 90.21359 | 86.27718 | -791.31439  | -290.90686  | 470.26880   | 1 |
| 10090 | H | 70.49850 | 89.14488 | 86.36874 | 534.43351   | -275.68153  | 288.50112   | 1 |
| 10091 | C | 70.83137 | 91.06239 | 87.39620 | 339.57979   | -342.47404  | -516.48886  | 1 |
| 10092 | H | 70.77259 | 90.49185 | 88.29094 | 1530.65103  | 957.57408   | -244.87734  | 1 |
| 10093 | C | 70.82011 | 93.25193 | 86.21534 | 433.75305   | 43.94395    | -195.98890  | 1 |
| 10094 | H | 70.74342 | 94.36949 | 86.11664 | -314.34117  | -165.07496  | -3885.16509 | 1 |
| 10095 | C | 70.93027 | 92.48550 | 87.44564 | -48.93512   | 200.94220   | 237.26997   | 1 |
| 10096 | H | 70.96505 | 93.01689 | 88.37645 | -1433.99429 | -229.88895  | 1630.77583  | 1 |
| 10097 | C | 72.71202 | 87.28086 | 82.07536 | -212.75393  | -495.57790  | 313.72865   | 1 |
| 10098 | O | 72.81066 | 86.33673 | 82.87698 | 144.65193   | -428.47920  | 64.35651    | 1 |
| 10099 | N | 72.54635 | 87.34063 | 80.78247 | -394.90825  | -541.40479  | 278.69029   | 1 |

|       |   |          |          |          |             |             |             |   |
|-------|---|----------|----------|----------|-------------|-------------|-------------|---|
| 10100 | H | 72.42301 | 88.33353 | 80.53972 | -278.33121  | -531.54260  | 303.52228   | 1 |
| 10101 | C | 72.73300 | 86.30149 | 79.77878 | -233.92911  | -177.14281  | 109.24532   | 1 |
| 10102 | H | 72.20621 | 85.35367 | 80.13902 | 525.70929   | 1066.03925  | 1648.45311  | 1 |
| 10103 | C | 71.97447 | 86.77100 | 78.53151 | 717.59227   | -15.12702   | -483.57714  | 1 |
| 10104 | H | 72.20133 | 87.83800 | 78.35019 | -554.44231  | 1599.50206  | 2813.46788  | 1 |
| 10105 | C | 72.50364 | 86.05697 | 77.32311 | -65.21880   | 258.02027   | -1103.21566 | 1 |
| 10106 | H | 72.35166 | 84.94608 | 77.35115 | -734.66701  | -801.34230  | 871.54667   | 1 |
| 10107 | H | 73.62062 | 86.12922 | 77.04715 | -1940.07946 | 2388.08039  | -2109.78893 | 1 |
| 10108 | H | 71.91582 | 86.45492 | 76.40465 | 981.14673   | 3718.32329  | -1806.10460 | 1 |
| 10109 | C | 70.49452 | 86.58241 | 78.75624 | -265.03888  | -18.94700   | 76.64556    | 1 |
| 10110 | H | 70.19869 | 86.95565 | 79.78250 | -433.27957  | 2832.83897  | 885.32865   | 1 |
| 10111 | H | 70.22309 | 85.49811 | 78.59594 | 2651.42653  | -1943.82524 | 2195.07024  | 1 |
| 10112 | C | 69.84878 | 87.55586 | 77.66871 | 351.71781   | 622.36750   | -937.77993  | 1 |
| 10113 | H | 70.48173 | 88.48771 | 77.55751 | 2716.02403  | 1619.70664  | 1169.84938  | 1 |
| 10114 | H | 69.71735 | 87.08447 | 76.63670 | 752.16414   | 273.55038   | 18.77905    | 1 |
| 10115 | H | 68.82668 | 87.83534 | 77.97423 | -781.66124  | 1035.88973  | 3383.76025  | 1 |
| 10116 | C | 74.33736 | 85.94036 | 79.64042 | 386.60010   | 535.11501   | -344.63536  | 1 |
| 10117 | O | 74.59756 | 84.77530 | 79.35306 | -823.78752  | 523.85983   | -8.43557    | 1 |
| 10118 | N | 75.13213 | 86.96005 | 79.92987 | -609.89381  | -8.23272    | -215.55303  | 1 |
| 10119 | H | 74.79146 | 87.88298 | 80.15060 | 35.04609    | -2700.55186 | 917.46703   | 1 |
| 10120 | C | 76.50541 | 86.76085 | 80.07400 | 689.03548   | 94.63375    | 92.83832    | 1 |
| 10121 | H | 76.70564 | 86.02579 | 79.24811 | 1375.61145  | -2028.32092 | -1274.08124 | 1 |
| 10122 | C | 77.29548 | 88.15509 | 79.86829 | 90.46501    | -71.65253   | -401.03512  | 1 |
| 10123 | H | 76.87266 | 88.51470 | 78.93285 | 566.08714   | 2816.29975  | -451.33514  | 1 |
| 10124 | H | 76.97576 | 88.89494 | 80.66192 | -962.59119  | 1357.50600  | 233.74271   | 1 |
| 10125 | O | 78.79659 | 88.07624 | 79.86640 | 160.35459   | -19.40604   | 249.87168   | 1 |
| 10126 | H | 79.02681 | 87.98059 | 78.95051 | 1453.90615  | -990.61654  | 1903.20650  | 1 |
| 10127 | C | 76.78641 | 85.91902 | 81.48766 | -67.44770   | -327.39450  | 24.01874    | 1 |
| 10128 | O | 77.43417 | 84.88620 | 81.41477 | 306.33380   | -512.27228  | -550.30985  | 1 |
| 10129 | N | 76.30325 | 86.46737 | 82.59958 | -554.18276  | 184.67916   | -101.58002  | 1 |
| 10130 | H | 75.56927 | 87.22615 | 82.40961 | -22.50058   | 355.87641   | -1725.42667 | 1 |
| 10131 | C | 76.52118 | 85.65070 | 83.78095 | -563.51053  | -124.09815  | -269.14511  | 1 |
| 10132 | H | 77.57811 | 85.57124 | 83.60259 | 3697.66994  | 526.09950   | -2511.98191 | 1 |
| 10133 | C | 76.14330 | 86.53417 | 85.04671 | 1109.38245  | 254.90959   | 642.15319   | 1 |
| 10134 | H | 75.16786 | 87.04117 | 84.93913 | 1901.94974  | -319.38326  | 1129.15073  | 1 |
| 10135 | C | 76.20943 | 85.55094 | 86.28163 | 38.38924    | 8.03827     | 870.10261   | 1 |
| 10136 | H | 76.14139 | 86.05800 | 87.27010 | 209.08342   | 3067.17723  | 648.64037   | 1 |
| 10137 | H | 75.51400 | 84.69780 | 86.20590 | -1205.53578 | -2376.94491 | 1671.83810  | 1 |
| 10138 | H | 77.24434 | 85.09025 | 86.17427 | 2677.06579  | -909.89260  | 602.30615   | 1 |
| 10139 | C | 77.16679 | 87.67978 | 85.36549 | -170.85863  | -550.82497  | 239.49524   | 1 |
| 10140 | H | 76.55183 | 88.53986 | 85.78446 | -2005.98925 | -1101.64423 | 2587.48865  | 1 |
| 10141 | H | 77.77239 | 87.34233 | 86.20456 | 1044.26193  | 593.86091   | 1081.15150  | 1 |
| 10142 | C | 78.10665 | 88.12310 | 84.16422 | 607.61427   | 147.74255   | 699.08388   | 1 |
| 10143 | H | 77.48841 | 88.34443 | 83.26781 | 1440.70146  | -2321.39830 | -797.18665  | 1 |
| 10144 | H | 78.87519 | 87.32013 | 83.85906 | -435.46422  | -417.59811  | -3204.16467 | 1 |
| 10145 | H | 78.66620 | 89.11181 | 84.35780 | -1479.97154 | 1066.49847  | -3668.37496 | 1 |
| 10146 | C | 75.78700 | 84.21280 | 83.67290 | 785.59210   | -41.69588   | -461.03959  | 1 |
| 10147 | O | 76.22800 | 83.19180 | 84.17690 | -760.26374  | -47.55351   | 208.24251   | 1 |
| 10148 | N | 74.61500 | 84.11980 | 83.04490 | 568.63411   | -188.08241  | -594.93911  | 1 |
| 10149 | H | 74.13500 | 84.95480 | 82.78790 | -339.13717  | 2869.24803  | -1245.24213 | 1 |
| 10150 | C | 73.91400 | 82.81280 | 82.88690 | -714.12081  | 390.46939   | 411.11572   | 1 |
| 10151 | H | 74.00400 | 82.22380 | 83.78790 | 627.52040   | 2153.46706  | -2206.13327 | 1 |
| 10152 | C | 72.40500 | 82.98880 | 82.63790 | 728.78165   | -305.49799  | -454.97175  | 1 |
| 10153 | H | 71.80800 | 82.06780 | 82.46190 | -1939.59620 | -1719.67361 | 1782.95134  | 1 |
| 10154 | O | 72.05500 | 83.93480 | 81.60190 | -711.95499  | -76.44498   | 333.02175   | 1 |
| 10155 | H | 72.41500 | 84.72780 | 82.00590 | 2028.88158  | -1577.80108 | -1814.49979 | 1 |
| 10156 | C | 71.88900 | 83.50080 | 83.95390 | 610.30246   | -359.87625  | 573.99564   | 1 |
| 10157 | H | 72.21200 | 84.53380 | 84.20790 | 2197.15808  | -1938.77183 | -1145.37609 | 1 |
| 10158 | H | 72.03100 | 82.81280 | 84.81390 | 1808.91683  | 84.80891    | -2572.71327 | 1 |
| 10159 | H | 70.78500 | 83.62080 | 83.92590 | -1622.85904 | -2138.11175 | -1641.04629 | 1 |
| 10160 | C | 74.57400 | 81.90580 | 81.81590 | 620.58496   | -666.18084  | 50.28313    | 1 |
| 10161 | O | 74.51000 | 80.70880 | 81.83790 | -641.08760  | 129.02499   | 442.70360   | 1 |



|       |   |          |          |          |             |             |             |   |
|-------|---|----------|----------|----------|-------------|-------------|-------------|---|
| 10162 | N | 75.20800 | 82.54480 | 80.80190 | 479.05021   | 677.55215   | 155.26194   | 1 |
| 10163 | H | 75.17800 | 83.52780 | 80.63590 | -837.16039  | -1004.73959 | 2861.44842  | 1 |
| 10164 | C | 76.14000 | 81.91880 | 79.89590 | 163.53308   | 867.18234   | 229.57076   | 1 |
| 10165 | H | 75.54400 | 81.19980 | 79.35290 | 2581.68508  | 1356.24594  | -1180.56144 | 1 |
| 10166 | C | 76.52300 | 82.92480 | 78.72290 | 281.23824   | 729.14528   | -469.79061  | 1 |
| 10167 | H | 75.62500 | 83.11680 | 78.09690 | 2071.08828  | -1560.73574 | -1781.27019 | 1 |
| 10168 | H | 76.66500 | 83.94280 | 79.14390 | 2175.09361  | -2265.87376 | -181.68689  | 1 |
| 10169 | C | 77.84600 | 82.66780 | 77.99590 | -611.28743  | 136.94309   | 662.58982   | 1 |
| 10170 | H | 77.88700 | 81.63180 | 77.59590 | -1864.58453 | 2010.47920  | -1542.57063 | 1 |
| 10171 | H | 78.72200 | 82.60580 | 78.67690 | 3008.43310  | -858.42995  | 332.64770   | 1 |
| 10172 | C | 78.18500 | 83.71880 | 76.95690 | -100.08441  | -888.55719  | 178.60636   | 1 |
| 10173 | O | 77.71100 | 83.55580 | 75.80090 | 695.97028   | 2.01554     | 373.16019   | 1 |
| 10174 | O | 78.82900 | 84.76080 | 77.27790 | 526.81165   | 293.53919   | 509.83473   | 1 |
| 10175 | C | 77.35300 | 81.31380 | 80.52590 | 123.66998   | 725.30763   | 538.59594   | 1 |
| 10176 | O | 77.70100 | 80.15980 | 80.26390 | -47.60118   | 737.08425   | -279.40682  | 1 |
| 10177 | N | 77.95800 | 82.09480 | 81.38790 | 501.09383   | 643.90192   | -216.72006  | 1 |
| 10178 | H | 77.75900 | 83.05180 | 81.58290 | -1879.33957 | -2215.99323 | -1206.51688 | 1 |
| 10179 | C | 79.11300 | 81.64780 | 82.15290 | -452.63025  | 499.63369   | -613.95687  | 1 |
| 10180 | H | 79.84000 | 81.34180 | 81.41590 | 786.17076   | -2556.41567 | -1656.77418 | 1 |
| 10181 | C | 79.73600 | 82.80780 | 82.92590 | 554.46504   | -703.14981  | 172.04613   | 1 |
| 10182 | H | 79.00500 | 83.27380 | 83.62090 | 2004.73176  | -30.22616   | 2424.53360  | 1 |
| 10183 | H | 80.07200 | 83.58180 | 82.20390 | 1772.73343  | -1970.85715 | 1694.51011  | 1 |
| 10184 | H | 80.64900 | 82.46280 | 83.45690 | 2.80618     | 2331.74634  | -2112.14993 | 1 |
| 10185 | C | 78.82700 | 80.48580 | 83.13890 | -364.78748  | -599.64303  | -582.07331  | 1 |
| 10186 | O | 79.55900 | 79.51980 | 83.22390 | 155.80951   | 287.15421   | 718.95277   | 1 |
| 10187 | N | 77.64800 | 80.51980 | 83.78290 | 449.33258   | 348.72806   | 623.82791   | 1 |
| 10188 | H | 77.05800 | 81.29980 | 83.58990 | 1784.10871  | 2072.15124  | -1556.07570 | 1 |
| 10189 | C | 77.12500 | 79.38880 | 84.44290 | -295.09981  | -726.39276  | 465.53266   | 1 |
| 10190 | H | 77.86300 | 79.04080 | 85.15090 | -2727.53363 | -1206.29691 | -1001.81550 | 1 |
| 10191 | C | 75.91800 | 79.80180 | 85.39390 | -757.97348  | -220.69563  | -456.31201  | 1 |
| 10192 | H | 75.08100 | 80.21480 | 84.79090 | 1548.95543  | -1156.06598 | 2482.43323  | 1 |
| 10193 | H | 75.49200 | 78.90680 | 85.89490 | 1945.07207  | 1925.55312  | -1551.50444 | 1 |
| 10194 | C | 76.28200 | 80.82580 | 86.48490 | -429.60876  | 81.85717    | 800.11669   | 1 |
| 10195 | H | 76.98000 | 81.55880 | 86.02790 | 3043.05091  | 527.76234   | -599.61179  | 1 |
| 10196 | C | 74.98200 | 81.56780 | 86.85190 | -739.86855  | -312.57104  | -431.67682  | 1 |
| 10197 | H | 75.18900 | 82.57080 | 87.28190 | -2660.18509 | -1222.97732 | -1151.50683 | 1 |
| 10198 | H | 74.37200 | 80.96780 | 87.56090 | 447.33926   | -2204.42072 | 2199.69159  | 1 |
| 10199 | H | 74.21300 | 81.76580 | 86.07590 | -2694.53847 | -1171.12975 | -1125.23053 | 1 |
| 10200 | C | 77.11200 | 80.14080 | 87.64290 | 469.81814   | -361.58067  | -692.80686  | 1 |
| 10201 | H | 78.19900 | 80.15580 | 87.41590 | -732.39479  | -2433.87245 | -1854.20845 | 1 |
| 10202 | H | 76.72400 | 79.10680 | 87.76490 | 765.36022   | -721.81661  | -2965.03469 | 1 |
| 10203 | H | 77.02300 | 80.76480 | 88.55790 | -1923.97086 | -2479.18462 | 224.06694   | 1 |
| 10204 | C | 76.81200 | 78.16480 | 83.60190 | -22.31535   | 583.42087   | 700.40925   | 1 |
| 10205 | O | 76.88800 | 77.02780 | 84.09590 | 685.45654   | -368.42810  | -134.30301  | 1 |
| 10206 | N | 76.40900 | 78.34580 | 82.33290 | 119.54106   | -327.95053  | -768.65511  | 1 |
| 10207 | H | 76.25200 | 79.28280 | 82.02990 | -478.66696  | 1307.72408  | -2821.16322 | 1 |
| 10208 | C | 76.00000 | 77.24280 | 81.44990 | 226.40760   | -710.74026  | 524.44150   | 1 |
| 10209 | H | 75.30300 | 76.60780 | 81.97590 | -1972.63729 | 1232.05443  | 2118.71901  | 1 |
| 10210 | C | 75.34000 | 77.71080 | 80.16190 | -746.49746  | 356.20258   | -383.81280  | 1 |
| 10211 | H | 74.36600 | 78.17280 | 80.43090 | -560.59934  | 2524.15006  | -1792.37861 | 1 |
| 10212 | H | 76.02600 | 78.35680 | 79.57290 | 2904.65159  | -1130.66475 | 427.57756   | 1 |
| 10213 | H | 75.07000 | 76.89780 | 79.45490 | -1751.90925 | -2497.87211 | 767.90308   | 1 |
| 10214 | C | 77.21500 | 76.45580 | 81.18090 | 254.29364   | 646.04355   | 591.11207   | 1 |
| 10215 | O | 77.05800 | 75.22780 | 81.01690 | 85.78053    | 472.65664   | 626.78914   | 1 |
| 10216 | N | 78.42600 | 76.99280 | 81.18490 | 358.51261   | -73.79128   | 760.72061   | 1 |
| 10217 | H | 78.51000 | 77.98480 | 81.24190 | 2131.35755  | -951.09259  | 2109.73081  | 1 |
| 10218 | C | 79.72500 | 76.37280 | 80.94990 | 790.95648   | -213.49684  | 400.32231   | 1 |
| 10219 | H | 79.67100 | 75.84580 | 80.00890 | -2579.11328 | -1694.61832 | -612.10266  | 1 |
| 10220 | C | 80.84500 | 77.40480 | 80.87490 | -626.90113  | 612.71879   | -251.04114  | 1 |
| 10221 | H | 81.81300 | 76.89780 | 80.67290 | 1830.89959  | -2197.76584 | -1309.90773 | 1 |
| 10222 | H | 80.83100 | 77.90280 | 81.86790 | -790.79718  | 1507.55025  | 2645.78122  | 1 |
| 10223 | C | 80.72800 | 78.48680 | 79.85590 | 479.70328   | 135.08583   | -763.60172  | 1 |

|       |   |          |          |          |             |             |             |   |
|-------|---|----------|----------|----------|-------------|-------------|-------------|---|
| 10224 | C | 79.79900 | 78.45180 | 78.78390 | -183.74456  | -156.55681  | -879.30592  | 1 |
| 10225 | H | 79.19800 | 77.57480 | 78.59390 | 1926.01378  | 2015.95197  | 1457.61271  | 1 |
| 10226 | C | 79.71500 | 79.51180 | 77.92990 | -489.63198  | -675.39204  | 368.18083   | 1 |
| 10227 | H | 78.93100 | 79.51880 | 77.18690 | -2290.19744 | 314.94731   | 2134.01736  | 1 |
| 10228 | C | 80.60300 | 80.61280 | 78.00890 | -880.95828  | 130.84427   | 195.55891   | 1 |
| 10229 | H | 80.63700 | 81.41480 | 77.28690 | -1401.23023 | -534.01084  | -2765.79328 | 1 |
| 10230 | C | 81.56500 | 79.61080 | 80.03390 | -30.08665   | 719.81308   | 558.94089   | 1 |
| 10231 | H | 82.29100 | 79.66680 | 80.83190 | -3115.34577 | 373.38735   | 231.14680   | 1 |
| 10232 | C | 81.49000 | 80.62980 | 79.09190 | -431.76577  | -325.69810  | -734.13219  | 1 |
| 10233 | H | 82.21500 | 81.42980 | 79.14390 | 989.86037   | 1265.28560  | -2705.07949 | 1 |
| 10234 | C | 80.06500 | 75.30780 | 81.89290 | 31.90069    | -619.47539  | -668.34391  | 1 |
| 10235 | O | 80.91900 | 74.45080 | 81.59690 | 674.12057   | 393.73415   | 119.00462   | 1 |
| 10236 | N | 79.44000 | 75.24380 | 83.07190 | 604.30545   | -486.62010  | -332.69820  | 1 |
| 10237 | H | 78.65900 | 75.82680 | 83.28190 | 105.38128   | 2691.56887  | 1625.60081  | 1 |
| 10238 | C | 79.63100 | 74.13880 | 83.98890 | -66.99465   | 63.58043    | 907.14952   | 1 |
| 10239 | H | 80.68900 | 74.07380 | 84.19190 | 2817.10129  | -1089.75806 | 880.11018   | 1 |
| 10240 | C | 78.87000 | 74.41180 | 85.37190 | -411.44980  | -610.69340  | -537.78586  | 1 |
| 10241 | H | 78.83600 | 73.47280 | 85.96590 | -1799.52483 | -1148.24537 | -2311.16187 | 1 |
| 10242 | H | 77.82200 | 74.75780 | 85.24390 | 738.91547   | 2930.71442  | 873.58066   | 1 |
| 10243 | C | 79.70500 | 75.33080 | 86.30090 | 16.30274    | 410.88287   | 813.85533   | 1 |
| 10244 | C | 79.44800 | 76.73280 | 86.29990 | 328.68061   | -573.89021  | -627.75002  | 1 |
| 10245 | H | 78.60500 | 77.12880 | 85.75290 | 2073.69103  | 1839.07786  | 1488.56453  | 1 |
| 10246 | C | 80.18400 | 77.60480 | 87.17890 | -239.16738  | 833.38714   | -282.33993  | 1 |
| 10247 | H | 79.91800 | 78.64980 | 87.23690 | -69.32709   | 882.12279   | -3019.15209 | 1 |
| 10248 | C | 81.22300 | 77.03480 | 87.99790 | -586.87850  | 17.73531    | -697.64610  | 1 |
| 10249 | H | 81.76900 | 77.73080 | 88.61790 | 22.20190    | -2098.03390 | 2344.35216  | 1 |
| 10250 | C | 80.73400 | 74.83380 | 87.05290 | -299.66440  | 445.90339   | -736.76483  | 1 |
| 10251 | H | 80.89600 | 73.77180 | 87.15890 | -2127.09584 | -1154.87293 | -2009.96469 | 1 |
| 10252 | C | 81.50200 | 75.61880 | 87.92690 | -213.40335  | 885.98350   | 30.71242    | 1 |
| 10253 | H | 82.33500 | 75.21480 | 88.48390 | -441.49341  | 2000.91161  | -2387.39660 | 1 |
| 10254 | C | 79.16300 | 72.79280 | 83.47990 | -512.18341  | 551.44290   | -514.81054  | 1 |
| 10255 | O | 79.55200 | 71.72080 | 84.04290 | 546.98955   | -434.99900  | -367.70305  | 1 |
| 10256 | N | 78.30700 | 72.68380 | 82.44790 | -838.63012  | 80.80121    | 53.31956    | 1 |
| 10257 | H | 77.94400 | 73.50180 | 82.00890 | 1039.05760  | -615.25822  | 2905.17518  | 1 |
| 10258 | C | 78.01100 | 71.39980 | 81.79690 | -309.55387  | 391.59378   | -763.07386  | 1 |
| 10259 | H | 77.51000 | 70.87580 | 82.59890 | 1354.97506  | 1384.02390  | -2479.26333 | 1 |
| 10260 | C | 77.14300 | 71.47680 | 80.57290 | -596.12525  | -477.18205  | 498.38036   | 1 |
| 10261 | H | 76.78100 | 70.46380 | 80.29490 | -985.45094  | -236.74442  | -2978.43327 | 1 |
| 10262 | H | 76.21100 | 71.97380 | 80.91690 | -387.48183  | -1088.87301 | 2926.16466  | 1 |
| 10263 | N | 77.72300 | 73.44280 | 79.04490 | 341.93191   | -771.55333  | -21.45493   | 1 |
| 10264 | H | 77.43600 | 74.19280 | 79.63990 | -1938.80414 | -1989.10208 | -1477.40910 | 1 |
| 10265 | C | 77.73900 | 72.10080 | 79.28290 | 344.02764   | 657.14981   | 530.33019   | 1 |
| 10266 | C | 78.21500 | 73.63280 | 77.79190 | -501.13935  | -650.85986  | -395.84316  | 1 |
| 10267 | H | 78.09200 | 74.62580 | 77.35890 | 2928.43007  | -608.88172  | 975.59552   | 1 |
| 10268 | N | 78.44100 | 72.46680 | 77.21390 | 490.42239   | -384.41680  | -569.54534  | 1 |
| 10269 | C | 78.16100 | 71.51680 | 78.14890 | -688.54299  | -588.20201  | 106.66745   | 1 |
| 10270 | H | 78.36500 | 70.47680 | 77.92590 | 1216.27355  | 1923.67520  | -2172.18291 | 1 |
| 10271 | C | 79.20000 | 70.61280 | 81.39290 | 735.05954   | 475.77954   | 254.50403   | 1 |
| 10272 | O | 79.29400 | 69.44680 | 81.75690 | -83.43832   | 41.34332    | -784.19131  | 1 |
| 10273 | N | 80.23700 | 71.24080 | 80.70990 | 572.91786   | 430.53569   | -446.17982  | 1 |
| 10274 | H | 80.12400 | 72.15080 | 80.31990 | -1145.03920 | -2406.47985 | -1672.11428 | 1 |
| 10275 | C | 81.53600 | 70.68980 | 80.37790 | 262.62537   | -782.51813  | -387.48458  | 1 |
| 10276 | H | 81.30400 | 69.88380 | 79.69790 | 319.28447   | -2656.90068 | -1654.43720 | 1 |
| 10277 | C | 82.43700 | 71.71380 | 79.66390 | 595.61793   | 253.45936   | -642.22165  | 1 |
| 10278 | H | 82.58700 | 72.59480 | 80.32390 | 637.66042   | 936.40154   | 2935.09243  | 1 |
| 10279 | H | 83.49300 | 71.39880 | 79.52090 | 1359.47320  | -2172.67367 | -1824.70490 | 1 |
| 10280 | S | 81.70000 | 72.38080 | 78.16590 | 99.41861    | -448.52625  | 316.46604   | 1 |
| 10281 | H | 80.97600 | 71.33580 | 77.79290 | 1224.90468  | -1566.27297 | 2438.15991  | 1 |
| 10282 | C | 82.28600 | 70.13480 | 81.59390 | -536.82951  | 549.70559   | 491.00799   | 1 |
| 10283 | O | 82.97200 | 69.12480 | 81.49390 | -432.37493  | 390.92855   | 532.77952   | 1 |
| 10284 | N | 82.03700 | 70.65580 | 82.81090 | 10.04037    | -152.43001  | 830.26295   | 1 |
| 10285 | H | 81.50900 | 71.49380 | 82.92690 | -1332.28925 | 1918.42969  | 2107.80908  | 1 |

|       |   |          |          |          |             |             |             |   |
|-------|---|----------|----------|----------|-------------|-------------|-------------|---|
| 10286 | C | 82.76200 | 70.16280 | 84.01490 | -508.81131  | 510.36718   | -558.64783  | 1 |
| 10287 | H | 83.68700 | 69.72280 | 83.67190 | 2442.91795  | 1691.13637  | -1034.61871 | 1 |
| 10288 | C | 82.99500 | 71.37380 | 84.95390 | 747.48769   | -516.64910  | 76.07140    | 1 |
| 10289 | H | 83.61300 | 70.98680 | 85.79290 | -2661.14238 | 1489.24911  | 773.74709   | 1 |
| 10290 | H | 82.07200 | 71.89880 | 85.27890 | -560.36490  | -2073.15394 | -2299.18467 | 1 |
| 10291 | S | 83.97900 | 72.63280 | 84.11290 | -393.35366  | 170.28612   | 357.05201   | 1 |
| 10292 | H | 85.18200 | 72.12980 | 84.34390 | -934.84142  | 706.51112   | -2919.78420 | 1 |
| 10293 | C | 81.93800 | 69.10780 | 84.71990 | -663.17384  | 500.13723   | 376.18375   | 1 |
| 10294 | O | 82.51800 | 68.29280 | 85.42290 | -489.82023  | -377.73486  | -490.93762  | 1 |
| 10295 | N | 80.65300 | 69.10580 | 84.45990 | 620.55471   | -132.67695  | 556.75935   | 1 |
| 10296 | H | 80.19800 | 69.73580 | 83.83490 | -2555.32480 | -1828.15402 | -162.46305  | 1 |
| 10297 | C | 79.68700 | 68.14480 | 85.04490 | -411.87352  | 253.31633   | -773.07312  | 1 |
| 10298 | H | 80.05800 | 67.92580 | 86.03490 | -1436.50210 | -2775.98866 | -358.57345  | 1 |
| 10299 | C | 78.28300 | 68.75380 | 85.06290 | -345.68825  | 763.58357   | 359.01361   | 1 |
| 10300 | H | 77.45500 | 68.03180 | 85.23190 | 2182.10346  | 2181.03833  | 616.21628   | 1 |
| 10301 | H | 78.09100 | 69.16680 | 84.04990 | 1968.74098  | -958.03083  | -2259.30567 | 1 |
| 10302 | C | 78.00400 | 69.82480 | 86.20890 | 21.66441    | 198.75540   | 889.65046   | 1 |
| 10303 | H | 78.90500 | 70.47180 | 86.14290 | -1124.67544 | 653.13390   | -2864.74213 | 1 |
| 10304 | C | 76.81100 | 70.73680 | 85.85990 | -442.51807  | 603.47208   | 521.00884   | 1 |
| 10305 | H | 76.67900 | 71.41480 | 86.72990 | -1424.58125 | 2302.51876  | -1602.24900 | 1 |
| 10306 | H | 77.14500 | 71.31780 | 84.97290 | -1675.25388 | 735.45172   | -2559.46507 | 1 |
| 10307 | H | 75.93600 | 70.06580 | 85.72890 | 2457.59394  | 1188.55643  | 1563.90277  | 1 |
| 10308 | C | 77.83700 | 69.07980 | 87.51390 | 259.07306   | 560.55749   | 670.90048   | 1 |
| 10309 | H | 76.86500 | 68.54180 | 87.53190 | 2630.65550  | 885.60610   | 1481.07384  | 1 |
| 10310 | H | 77.89600 | 69.81380 | 88.34590 | 1042.12469  | -1661.88916 | -2459.74120 | 1 |
| 10311 | H | 78.56200 | 68.26680 | 87.73190 | 100.03453   | 2293.77046  | 2151.00823  | 1 |
| 10312 | C | 79.65200 | 66.80780 | 84.29190 | -497.04322  | -497.78045  | 580.18417   | 1 |
| 10313 | O | 79.37600 | 65.74280 | 84.89590 | 483.03343   | -539.98788  | -314.19584  | 1 |
| 10314 | N | 79.98800 | 66.80280 | 82.99990 | 630.53445   | -66.55911   | 557.37642   | 1 |
| 10315 | H | 80.13000 | 67.65680 | 82.50490 | 1403.00927  | -2147.30901 | -1821.77255 | 1 |
| 10316 | C | 80.27200 | 65.57980 | 82.21990 | 348.30010   | -448.08950  | -713.69030  | 1 |
| 10317 | H | 79.38000 | 64.97580 | 82.30090 | 1653.53871  | 1518.54351  | -2204.10108 | 1 |
| 10318 | C | 80.25600 | 65.98080 | 80.69390 | -330.36906  | 570.92528   | 629.56462   | 1 |
| 10319 | H | 80.91000 | 66.86380 | 80.53090 | 2649.74001  | -536.50494  | 1609.11980  | 1 |
| 10320 | H | 79.24200 | 66.28180 | 80.35290 | 28.02504    | -800.85526  | -3042.37928 | 1 |
| 10321 | C | 80.67100 | 64.84780 | 79.76590 | 95.16582    | 863.10047   | 278.30207   | 1 |
| 10322 | O | 80.29900 | 63.70080 | 79.96890 | 494.90230   | 508.91229   | 345.98732   | 1 |
| 10323 | N | 81.33000 | 65.20580 | 78.66090 | 438.82548   | -590.04873  | -414.66491  | 1 |
| 10324 | H | 81.30100 | 66.17680 | 78.42390 | -88.44591   | 2770.89819  | -1487.45648 | 1 |
| 10325 | H | 81.92300 | 64.53680 | 78.21290 | -1620.76387 | -664.79494  | 2613.31177  | 1 |
| 10326 | C | 81.38000 | 64.62380 | 82.85090 | 827.58549   | -12.68046   | 382.61268   | 1 |
| 10327 | O | 81.10700 | 63.45380 | 83.05790 | -128.54851  | 778.97455   | -17.35391   | 1 |
| 10328 | N | 82.53700 | 65.11480 | 83.31390 | -336.41963  | -722.01654  | 279.61803   | 1 |
| 10329 | C | 83.22100 | 66.26080 | 82.69590 | 545.21241   | -111.42309  | 722.34294   | 1 |
| 10330 | H | 82.94100 | 67.16080 | 83.28390 | 1549.02701  | -2008.63643 | 1861.21499  | 1 |
| 10331 | H | 82.92800 | 66.49280 | 81.64990 | 909.45614   | -1204.18131 | -2760.62730 | 1 |
| 10332 | C | 83.43800 | 64.25680 | 84.07790 | -238.07708  | -339.70476  | -812.01661  | 1 |
| 10333 | H | 83.55400 | 63.29780 | 83.59490 | 2126.73239  | -1230.34476 | 1965.06675  | 1 |
| 10334 | C | 84.69700 | 65.12580 | 84.13990 | -794.25120  | -125.86467  | 429.85360   | 1 |
| 10335 | H | 85.61200 | 64.50480 | 84.24490 | 2282.02598  | 693.88454   | 2051.61105  | 1 |
| 10336 | H | 84.61000 | 65.77680 | 85.03590 | -1598.53836 | -1253.88925 | 2402.22045  | 1 |
| 10337 | C | 84.69800 | 65.91280 | 82.85790 | -745.90164  | -524.29326  | -14.08283   | 1 |
| 10338 | H | 85.34200 | 66.81680 | 82.82290 | 1915.70789  | -1911.19203 | -1604.87836 | 1 |
| 10339 | H | 85.02000 | 65.31480 | 81.97890 | 2196.43781  | -1270.72493 | 1859.87777  | 1 |
| 10340 | C | 82.95000 | 63.89680 | 85.48290 | 699.85510   | -16.64032   | -584.27471  | 1 |
| 10341 | O | 83.29800 | 62.85680 | 86.07890 | 430.43769   | -589.05475  | -302.26665  | 1 |
| 10342 | N | 82.18500 | 64.85480 | 86.18890 | 647.91516   | -462.28353  | 281.37551   | 1 |
| 10343 | H | 82.04200 | 65.79680 | 85.89690 | -1847.35312 | -2155.36681 | -1356.43157 | 1 |
| 10344 | C | 81.67900 | 64.58180 | 87.53990 | 887.62622   | 204.82628   | 40.21058    | 1 |
| 10345 | H | 82.46700 | 64.31080 | 88.22590 | 1310.86746  | 1453.57780  | -2463.12085 | 1 |
| 10346 | C | 80.99100 | 65.83580 | 88.13590 | -474.95018  | 757.05842   | -180.93058  | 1 |
| 10347 | H | 80.39700 | 66.35780 | 87.35590 | 2521.47463  | 1877.07192  | 130.35679   | 1 |

|       |   |          |          |          |             |             |             |   |
|-------|---|----------|----------|----------|-------------|-------------|-------------|---|
| 10348 | C | 80.07500 | 65.51980 | 89.33090 | -484.17800  | 742.03202   | 215.43246   | 1 |
| 10349 | H | 79.23600 | 64.80180 | 89.20790 | -1420.43333 | -679.00593  | 2723.88442  | 1 |
| 10350 | H | 79.60200 | 66.50280 | 89.53890 | -348.43063  | 1610.18341  | -2680.32306 | 1 |
| 10351 | H | 80.59200 | 65.06380 | 90.20190 | -2652.82464 | 1246.87961  | 1142.82060  | 1 |
| 10352 | C | 82.10400 | 66.82480 | 88.54790 | 342.79674   | 752.15329   | 384.97640   | 1 |
| 10353 | H | 82.94700 | 66.77280 | 87.82690 | 1060.16392  | 253.18339   | 2951.30088  | 1 |
| 10354 | H | 82.54800 | 66.39380 | 89.46990 | 211.16541   | -1465.18218 | 2776.12618  | 1 |
| 10355 | C | 81.75600 | 68.27980 | 88.67090 | 768.55745   | 474.63903   | -124.45175  | 1 |
| 10356 | H | 81.18400 | 68.37880 | 89.61690 | -1083.06842 | -2623.20134 | 1357.94100  | 1 |
| 10357 | H | 82.69900 | 68.86180 | 88.75190 | -1627.98157 | -1946.31068 | 1860.04758  | 1 |
| 10358 | H | 81.16100 | 68.59880 | 87.78890 | -1718.41937 | -506.04212  | 2586.34539  | 1 |
| 10359 | C | 80.71800 | 63.40580 | 87.53890 | 685.09411   | 526.56062   | 291.25758   | 1 |
| 10360 | O | 80.75900 | 62.52280 | 88.33690 | -297.37391  | 285.74901   | -673.45637  | 1 |
| 10361 | N | 79.82600 | 63.35580 | 86.53090 | -564.81906  | 398.55425   | -484.56808  | 1 |
| 10362 | H | 79.63700 | 64.12880 | 85.92890 | 1420.45157  | -2166.26829 | -1785.44820 | 1 |
| 10363 | C | 78.94800 | 62.20480 | 86.22690 | 3.46571     | 435.45703   | -801.13430  | 1 |
| 10364 | H | 78.49300 | 61.75780 | 87.09790 | 1788.16026  | -1479.33231 | 2124.21398  | 1 |
| 10365 | C | 77.77100 | 62.67180 | 85.34990 | -247.32046  | -653.19514  | -586.19084  | 1 |
| 10366 | H | 78.14500 | 63.09380 | 84.39290 | -1169.14294 | 2061.70156  | 2068.98953  | 1 |
| 10367 | H | 77.13300 | 61.79380 | 85.11490 | 2696.87489  | 115.39037   | 1616.09935  | 1 |
| 10368 | C | 76.80000 | 63.71180 | 86.07290 | -89.35583   | -902.76136  | 92.13284    | 1 |
| 10369 | H | 77.33300 | 64.63980 | 86.37290 | 241.23475   | 258.76471   | -3126.19143 | 1 |
| 10370 | C | 75.74100 | 64.25280 | 85.11390 | 508.89365   | -686.87176  | -317.30970  | 1 |
| 10371 | H | 76.09600 | 64.59780 | 84.11990 | 1290.22365  | -2286.51655 | -1733.60642 | 1 |
| 10372 | H | 74.99800 | 63.47780 | 84.82990 | -1470.30461 | 176.98919   | -2775.80717 | 1 |
| 10373 | H | 75.09800 | 65.00780 | 85.61490 | 2434.08427  | -1731.40928 | 987.76611   | 1 |
| 10374 | C | 76.08600 | 63.16980 | 87.28090 | -698.92658  | -473.00164  | -345.28551  | 1 |
| 10375 | H | 75.75700 | 62.14180 | 87.01690 | -444.39435  | -2545.30035 | 1795.04485  | 1 |
| 10376 | H | 76.70900 | 63.27280 | 88.19590 | 1112.26189  | 2060.49673  | 2101.29792  | 1 |
| 10377 | H | 75.17000 | 63.75080 | 87.51990 | -1081.19711 | -1744.84542 | 2384.27211  | 1 |
| 10378 | C | 79.71000 | 61.03980 | 85.48290 | 407.63862   | 567.41295   | -585.93883  | 1 |
| 10379 | O | 79.10700 | 60.24680 | 84.78490 | -160.11677  | 548.56613   | 545.03674   | 1 |
| 10380 | N | 81.05000 | 60.89580 | 85.67690 | 535.16889   | -564.79892  | -327.51905  | 1 |
| 10381 | H | 81.56300 | 61.63580 | 86.10390 | 1084.70637  | -1558.34142 | 2508.62718  | 1 |
| 10382 | C | 81.67900 | 59.58380 | 85.48290 | 568.02070   | -235.90330  | 673.16649   | 1 |
| 10383 | H | 80.94000 | 58.86180 | 85.16790 | -1777.96583 | 935.53677   | 2421.12261  | 1 |
| 10384 | C | 82.84300 | 59.77880 | 84.44790 | 539.89634   | -555.84947  | 480.61868   | 1 |
| 10385 | H | 83.72900 | 59.14880 | 84.67490 | 1893.32725  | 1319.30710  | 2138.44966  | 1 |
| 10386 | H | 83.19000 | 60.83380 | 84.42090 | 1060.88305  | 2829.74290  | 874.81911   | 1 |
| 10387 | C | 82.46800 | 59.21580 | 83.06090 | 638.82962   | -68.15783   | -647.07204  | 1 |
| 10388 | C | 82.09700 | 57.87180 | 82.98090 | -614.41689  | 664.29035   | -112.52206  | 1 |
| 10389 | H | 82.06500 | 57.29180 | 83.89090 | -1039.31101 | 257.72386   | -2958.31663 | 1 |
| 10390 | C | 81.76000 | 57.32380 | 81.74990 | -200.07316  | -400.13889  | 794.55057   | 1 |
| 10391 | H | 81.57400 | 56.26280 | 81.67190 | 1132.54480  | 2819.76813  | -815.15411  | 1 |
| 10392 | C | 81.73300 | 58.12080 | 80.62590 | 794.88340   | -446.15328  | -23.63556   | 1 |
| 10393 | O | 81.35100 | 57.56780 | 79.39290 | 474.27188   | 613.47937   | -149.45392  | 1 |
| 10394 | H | 80.98200 | 56.68280 | 79.44890 | -2193.12138 | -319.55392  | -2233.00921 | 1 |
| 10395 | C | 82.57200 | 59.98580 | 81.93490 | 662.44523   | -600.59580  | -178.61133  | 1 |
| 10396 | H | 82.88300 | 61.01080 | 82.07090 | 2145.09316  | -1742.62567 | -1503.34871 | 1 |
| 10397 | C | 82.18800 | 59.43480 | 80.71690 | -585.85399  | -486.28005  | -501.75474  | 1 |
| 10398 | H | 82.27300 | 60.00980 | 79.80690 | -2931.97802 | -993.46169  | 561.03920   | 1 |
| 10399 | C | 82.20300 | 59.06980 | 86.83590 | 541.32979   | 112.43807   | 725.10050   | 1 |
| 10400 | O | 82.67700 | 57.91880 | 86.94890 | 332.09874   | 31.53896    | 715.78136   | 1 |
| 10401 | N | 82.03300 | 59.88880 | 87.89690 | -705.35059  | -270.74143  | -376.63232  | 1 |
| 10402 | H | 81.63800 | 60.79980 | 87.80690 | -2286.10306 | 230.95421   | 2149.09730  | 1 |
| 10403 | C | 82.49000 | 59.51680 | 89.18790 | -428.60429  | -658.60830  | -462.58456  | 1 |
| 10404 | H | 83.47100 | 59.07480 | 89.09290 | -656.54819  | -2944.77325 | 891.89752   | 1 |
| 10405 | C | 82.64400 | 60.75380 | 90.06890 | 594.76028   | 562.03824   | -402.27382  | 1 |
| 10406 | H | 83.36700 | 60.50080 | 90.87390 | 1955.73995  | -1226.39319 | 2137.58443  | 1 |
| 10407 | H | 81.69200 | 61.08180 | 90.53790 | 2705.22946  | -863.29827  | 1354.50209  | 1 |
| 10408 | H | 83.13700 | 61.58380 | 89.51890 | -2831.04941 | -1372.20502 | -20.94952   | 1 |
| 10409 | C | 81.62000 | 58.45680 | 89.91790 | 690.61544   | 503.73551   | 317.41432   | 1 |

|       |   |          |          |           |             |             |             |   |
|-------|---|----------|----------|-----------|-------------|-------------|-------------|---|
| 10410 | O | 80.36400 | 58.52880 | 89.88090  | 473.31981   | 534.42028   | -337.62487  | 1 |
| 10411 | N | 82.22900 | 57.62180 | 90.79390  | -74.95390   | -710.43364  | 449.82023   | 1 |
| 10412 | H | 83.21700 | 57.48780 | 90.80390  | -2531.29487 | 1335.52380  | 1306.57900  | 1 |
| 10413 | C | 81.49200 | 56.95580 | 91.86190  | -485.07052  | 583.70129   | 505.42101   | 1 |
| 10414 | H | 82.21900 | 56.51580 | 92.52890  | 415.96401   | -2019.59418 | -2376.22379 | 1 |
| 10415 | C | 80.59000 | 57.87080 | 92.75390  | -491.30625  | -658.90044  | 394.86630   | 1 |
| 10416 | H | 79.86600 | 58.38380 | 92.08590  | 1816.04908  | 1152.37066  | 2296.13454  | 1 |
| 10417 | H | 80.09300 | 57.24080 | 93.52290  | 2201.76944  | -1700.96961 | -1468.72051 | 1 |
| 10418 | C | 81.46100 | 58.86380 | 93.52190  | -583.73211  | 606.76237   | -350.06750  | 1 |
| 10419 | C | 82.52500 | 58.47380 | 94.32090  | -97.74378   | -758.65384  | 496.32802   | 1 |
| 10420 | H | 82.86400 | 57.44780 | 94.30990  | 2840.28852  | -959.12381  | 954.49927   | 1 |
| 10421 | C | 83.30600 | 59.40880 | 95.01490  | 402.20585   | 465.13548   | 673.29818   | 1 |
| 10422 | H | 84.13400 | 59.10480 | 95.63690  | 2263.76029  | -1687.84156 | -1387.37393 | 1 |
| 10423 | C | 82.96400 | 60.78380 | 94.84590  | 562.69367   | 510.87950   | 503.81442   | 1 |
| 10424 | H | 83.47000 | 61.57380 | 95.38290  | 2290.66345  | 1104.58151  | 1852.29232  | 1 |
| 10425 | C | 81.16500 | 60.24680 | 93.35090  | 630.27321   | 595.89160   | 281.28258   | 1 |
| 10426 | H | 80.29800 | 60.48480 | 92.75290  | -1224.04756 | 2160.53694  | -1931.84211 | 1 |
| 10427 | C | 81.88600 | 61.18680 | 94.02290  | -516.25570  | 734.96358   | 157.35180   | 1 |
| 10428 | H | 81.69100 | 62.24580 | 93.93990  | -141.20022  | -1686.02368 | 2652.47297  | 1 |
| 10429 | C | 80.76400 | 55.70980 | 91.43490  | -500.67091  | 191.22002   | -737.70899  | 1 |
| 10430 | O | 79.70800 | 55.31080 | 91.95290  | -20.76668   | 609.16259   | 502.11245   | 1 |
| 10431 | N | 81.30300 | 54.90280 | 90.49790  | -613.53821  | 139.25076   | -562.89642  | 1 |
| 10432 | H | 82.18100 | 55.22180 | 90.14890  | -1239.73952 | 2117.27393  | 1969.37129  | 1 |
| 10433 | C | 80.71900 | 53.68480 | 89.94390  | 612.00407   | 597.23992   | -316.55411  | 1 |
| 10434 | H | 79.65100 | 53.83680 | 89.97990  | 2833.75944  | -1174.44528 | -699.07934  | 1 |
| 10435 | C | 81.27100 | 53.31280 | 88.53290  | -560.37603  | 454.47798   | -557.56567  | 1 |
| 10436 | H | 80.83700 | 52.33080 | 88.24890  | 1578.57404  | -2692.15327 | 398.29759   | 1 |
| 10437 | H | 82.36400 | 53.11580 | 88.57390  | 1257.69372  | -2241.60671 | -1814.28556 | 1 |
| 10438 | C | 80.98500 | 54.38180 | 87.51690  | -841.99760  | 349.42617   | 19.80891    | 1 |
| 10439 | H | 81.51500 | 55.32680 | 87.76390  | 2395.44139  | -729.31323  | -1904.78056 | 1 |
| 10440 | C | 81.53700 | 54.10480 | 86.08490  | 671.95339   | -472.07004  | 396.33259   | 1 |
| 10441 | H | 81.59600 | 55.10380 | 85.60390  | -965.80976  | 2726.10573  | 1238.46084  | 1 |
| 10442 | H | 82.55700 | 53.69280 | 86.23790  | -2210.97216 | -2224.80784 | -245.06818  | 1 |
| 10443 | H | 81.03200 | 53.33780 | 85.45890  | -1644.81482 | -2509.38904 | 946.45502   | 1 |
| 10444 | C | 79.54200 | 54.65580 | 87.23390  | -438.41855  | 552.71613   | -577.70672  | 1 |
| 10445 | H | 79.04100 | 54.79480 | 88.21590  | -1489.29346 | -1960.43075 | -1958.81150 | 1 |
| 10446 | H | 79.34300 | 55.38180 | 86.41690  | -2620.30005 | 1269.85404  | 1191.52198  | 1 |
| 10447 | H | 79.14800 | 53.69780 | 86.83090  | -875.74175  | -2192.85269 | 2079.11032  | 1 |
| 10448 | C | 80.97300 | 52.63780 | 90.95190  | -295.42717  | 226.19485   | 832.47203   | 1 |
| 10449 | O | 82.06500 | 52.10580 | 91.11790  | -627.35600  | 133.17096   | 460.77888   | 1 |
| 10450 | N | 79.89800 | 52.16980 | 91.66690  | 699.98022   | -390.63673  | 264.76956   | 1 |
| 10451 | H | 78.97800 | 52.45280 | 91.40590  | -682.54242  | 2389.00221  | -1930.03381 | 1 |
| 10452 | C | 80.08900 | 51.23780 | 92.72590  | -238.89617  | 603.03427   | 640.88165   | 1 |
| 10453 | H | 79.15000 | 50.75680 | 92.95390  | 2214.23644  | -2229.66527 | -154.84179  | 1 |
| 10454 | H | 80.83200 | 50.52280 | 92.40490  | -1666.71564 | 2604.77001  | -579.18770  | 1 |
| 10455 | C | 80.71500 | 51.67880 | 93.95290  | 774.96208   | -244.92028  | -413.39912  | 1 |
| 10456 | O | 81.35700 | 50.96780 | 94.71090  | 241.13544   | -647.48386  | 382.42068   | 1 |
| 10457 | N | 80.54900 | 52.96080 | 94.25390  | 210.37923   | -723.05530  | 381.58078   | 1 |
| 10458 | H | 80.17900 | 53.60180 | 93.58590  | 2801.91022  | 231.30967   | 1412.09814  | 1 |
| 10459 | C | 81.11800 | 53.58680 | 95.39990  | -687.52660  | 598.73800   | 16.46173    | 1 |
| 10460 | H | 82.06300 | 53.10980 | 95.61590  | -2114.34932 | -2272.06003 | 515.26344   | 1 |
| 10461 | C | 81.44900 | 55.05980 | 95.20090  | 14.46586    | -473.49130  | 779.13268   | 1 |
| 10462 | H | 82.12800 | 55.25980 | 94.34390  | -3143.66611 | 68.32620    | 104.50435   | 1 |
| 10463 | H | 80.47800 | 55.52680 | 94.93090  | 1235.10165  | -2883.76761 | 237.98003   | 1 |
| 10464 | H | 81.73900 | 55.58780 | 96.13490  | -2909.47399 | -1185.33090 | -167.86302  | 1 |
| 10465 | C | 80.21700 | 53.42580 | 96.59890  | 723.55233   | -554.90228  | -2.54632    | 1 |
| 10466 | O | 79.01700 | 53.23880 | 96.46890  | 631.29480   | -307.86580  | 360.98858   | 1 |
| 10467 | N | 80.81200 | 53.47280 | 97.79790  | -256.05364  | 543.33727   | 593.20607   | 1 |
| 10468 | H | 81.79700 | 53.59180 | 97.89590  | -556.24216  | 1897.09413  | 2447.41798  | 1 |
| 10469 | C | 80.10400 | 53.53380 | 99.00590  | -86.72511   | 664.13658   | 618.75064   | 1 |
| 10470 | H | 79.05200 | 53.39680 | 98.80390  | -475.19793  | 2330.06184  | -2059.90897 | 1 |
| 10471 | C | 80.72100 | 52.50880 | 100.05290 | 230.36682   | -429.05876  | -770.90253  | 1 |

|       |   |          |          |           |             |             |             |   |
|-------|---|----------|----------|-----------|-------------|-------------|-------------|---|
| 10472 | H | 81.81400 | 52.47280 | 99.85790  | 1869.39229  | -1429.11700 | -2088.35420 | 1 |
| 10473 | H | 80.40300 | 52.62580 | 101.11090 | 2229.68911  | -1199.15006 | 1867.82008  | 1 |
| 10474 | C | 80.28200 | 51.06780 | 99.72490  | 737.32720   | 385.05736   | 373.53773   | 1 |
| 10475 | H | 80.89900 | 50.69980 | 98.87790  | -910.52263  | -2102.76751 | -2155.81621 | 1 |
| 10476 | H | 80.52600 | 50.40280 | 100.58090 | 1206.09344  | -2445.06171 | 1570.10765  | 1 |
| 10477 | C | 78.78400 | 50.94080 | 99.35690  | -220.94944  | -409.60827  | -784.12589  | 1 |
| 10478 | H | 78.65100 | 51.25080 | 98.29890  | 592.24843   | 643.37699   | -3022.17373 | 1 |
| 10479 | H | 78.23800 | 51.66280 | 100.00090 | -865.79467  | 1998.83832  | 2270.08175  | 1 |
| 10480 | C | 78.18400 | 49.58980 | 99.52590  | 655.94020   | 477.55902   | -416.08993  | 1 |
| 10481 | H | 78.30600 | 49.19080 | 100.55490 | 2211.02539  | 2206.23220  | -377.00458  | 1 |
| 10482 | H | 78.65300 | 48.87980 | 98.81090  | 2548.99670  | -723.66099  | 1696.21839  | 1 |
| 10483 | N | 76.74200 | 49.65680 | 99.25790  | 416.26646   | 494.79098   | 542.74894   | 1 |
| 10484 | H | 76.66100 | 49.91580 | 98.25390  | -1361.29987 | 743.28023   | 2737.26568  | 1 |
| 10485 | H | 76.41300 | 50.36980 | 99.93990  | 2244.37531  | -1615.88694 | 1499.97171  | 1 |
| 10486 | H | 76.27200 | 48.73580 | 99.36890  | -544.92497  | 471.79777   | 3062.46467  | 1 |
| 10487 | C | 80.22600 | 54.95980 | 99.62690  | -378.19203  | -96.29545   | -824.10495  | 1 |
| 10488 | O | 81.26600 | 55.62880 | 99.55690  | -515.08317  | -299.62246  | -518.21129  | 1 |
| 10489 | N | 79.06500 | 55.53180 | 100.15290 | 70.80141    | -566.95695  | -621.46542  | 1 |
| 10490 | H | 78.24600 | 54.96680 | 100.20890 | 2164.26931  | 2075.14709  | 952.85317   | 1 |
| 10491 | C | 78.96600 | 56.92180 | 100.51590 | -589.40826  | -553.58529  | -421.41694  | 1 |
| 10492 | H | 79.79100 | 57.47180 | 100.08790 | -1675.87924 | -833.15247  | -2528.93495 | 1 |
| 10493 | C | 77.72400 | 57.53680 | 99.83390  | 623.27081   | 199.74475   | -634.89096  | 1 |
| 10494 | H | 76.80700 | 57.08980 | 100.27490 | 1411.86485  | -2624.29912 | -1008.91922 | 1 |
| 10495 | H | 77.67100 | 58.59880 | 100.15690 | -2148.84816 | 713.62940   | -2184.35595 | 1 |
| 10496 | C | 77.84300 | 57.42380 | 98.31090  | -242.60111  | -876.89297  | 60.45187    | 1 |
| 10497 | C | 78.61700 | 58.35580 | 97.58790  | 105.34580   | -787.70608  | 447.07090   | 1 |
| 10498 | H | 79.29400 | 59.02580 | 98.09690  | -525.39720  | 2291.80635  | -2090.40849 | 1 |
| 10499 | C | 78.64100 | 58.25080 | 96.16690  | 851.10042   | -138.40312  | -296.51924  | 1 |
| 10500 | H | 79.20400 | 58.96380 | 95.58290  | -2920.42460 | 1090.93755  | 423.32218   | 1 |
| 10501 | C | 77.93600 | 57.23580 | 95.50590  | -630.03242  | -493.47572  | 437.02616   | 1 |
| 10502 | H | 78.04600 | 57.12480 | 94.43790  | 1998.86955  | 251.13034   | -2416.54305 | 1 |
| 10503 | C | 77.15700 | 56.45480 | 97.64590  | 577.85381   | -618.90545  | 338.36670   | 1 |
| 10504 | H | 76.68800 | 55.65580 | 98.20190  | -267.36934  | -1292.25015 | 2856.01635  | 1 |
| 10505 | C | 77.20800 | 56.31680 | 96.28190  | 561.30100   | 446.83096   | -562.79151  | 1 |
| 10506 | H | 76.74300 | 55.47580 | 95.78890  | -2001.23461 | 2387.81635  | 437.74347   | 1 |
| 10507 | C | 78.97800 | 57.25380 | 102.00090 | -768.63764  | 349.27438   | 344.46275   | 1 |
| 10508 | O | 79.06900 | 58.41480 | 102.47090 | 125.32698   | 449.02694   | 637.41289   | 1 |
| 10509 | N | 78.95100 | 56.16180 | 102.83090 | 540.14932   | -557.66368  | -331.54521  | 1 |
| 10510 | H | 78.58300 | 55.30280 | 102.48390 | -2360.81145 | 1736.90962  | -1143.65227 | 1 |
| 10511 | C | 78.88800 | 56.33080 | 104.26790 | 675.31176   | -597.84226  | -134.12552  | 1 |
| 10512 | H | 78.72600 | 57.37580 | 104.48790 | 2697.96271  | 376.01024   | 1574.11554  | 1 |
| 10513 | C | 77.73800 | 55.52780 | 104.91990 | 583.94266   | -608.02770  | -347.51156  | 1 |
| 10514 | H | 77.73700 | 55.67180 | 106.02190 | -2152.12641 | 2287.11714  | 188.87393   | 1 |
| 10515 | H | 78.02200 | 54.47280 | 104.71790 | 854.06480   | -2371.74791 | -1882.44824 | 1 |
| 10516 | C | 76.39500 | 56.07880 | 104.37490 | -387.71609  | -456.11444  | -687.81310  | 1 |
| 10517 | H | 76.33400 | 56.03080 | 103.26590 | 2421.74602  | -1977.78675 | -348.90118  | 1 |
| 10518 | H | 76.43600 | 57.17880 | 104.52490 | 2443.08952  | 841.08750   | 1795.02413  | 1 |
| 10519 | C | 75.12500 | 55.41780 | 105.00790 | 97.14733    | -453.00127  | -785.36823  | 1 |
| 10520 | H | 74.21200 | 55.89580 | 104.59090 | -829.78562  | -2235.84412 | -2051.99492 | 1 |
| 10521 | H | 75.24900 | 55.59280 | 106.09790 | -2546.31834 | -786.16770  | -1672.25282 | 1 |
| 10522 | C | 75.05000 | 53.89580 | 104.84890 | -167.98973  | -550.29803  | -707.39136  | 1 |
| 10523 | H | 75.91600 | 53.36880 | 105.30390 | 2465.04029  | -386.94185  | -1916.26684 | 1 |
| 10524 | H | 74.88900 | 53.64780 | 103.77790 | -1773.59602 | 2596.47137  | 104.49781   | 1 |
| 10525 | N | 73.87300 | 53.41980 | 105.56690 | -551.26435  | 350.18367   | -534.93112  | 1 |
| 10526 | H | 74.07600 | 53.58480 | 106.57290 | 2814.68176  | -460.90583  | -1327.91516 | 1 |
| 10527 | H | 73.01100 | 53.99980 | 105.60990 | -241.20627  | 2579.86855  | -1784.46744 | 1 |
| 10528 | H | 73.73800 | 52.42180 | 105.30890 | 1431.47478  | 1835.82938  | 2116.32622  | 1 |
| 10529 | C | 80.16700 | 55.94380 | 104.98190 | -566.28741  | -635.08442  | 327.77637   | 1 |
| 10530 | O | 80.39300 | 56.21780 | 106.18890 | -474.92593  | -350.84747  | -524.38406  | 1 |
| 10531 | N | 81.09000 | 55.32780 | 104.18990 | -623.65888  | 50.73588    | 566.69900   | 1 |
| 10532 | H | 80.83000 | 54.95680 | 103.30190 | -1478.77195 | 1668.88869  | 2219.52028  | 1 |
| 10533 | C | 82.53200 | 55.16980 | 104.40690 | 222.09073   | 827.13953   | 312.99667   | 1 |

|       |   |          |          |           |             |             |             |   |
|-------|---|----------|----------|-----------|-------------|-------------|-------------|---|
| 10534 | H | 82.59600 | 54.28380 | 105.02190 | -3144.52774 | -72.28619   | 70.32920    | 1 |
| 10535 | C | 83.29300 | 54.91580 | 103.09090 | 63.11093    | 744.29227   | -522.96944  | 1 |
| 10536 | H | 82.81500 | 54.08480 | 102.53090 | -1224.14638 | -2204.00011 | 1882.04021  | 1 |
| 10537 | O | 84.67700 | 54.54080 | 103.24590 | -725.06844  | -109.93823  | -292.94466  | 1 |
| 10538 | H | 84.78500 | 53.96080 | 104.00290 | -304.29553  | -2261.69628 | -2165.72399 | 1 |
| 10539 | C | 83.23200 | 56.06680 | 102.10790 | -556.50453  | -374.31243  | 617.77335   | 1 |
| 10540 | H | 83.45200 | 55.63380 | 101.10790 | -1792.42401 | -2551.05235 | 421.39563   | 1 |
| 10541 | H | 83.82700 | 56.93980 | 102.45090 | -1821.08005 | -628.06650  | 2487.45375  | 1 |
| 10542 | H | 82.23100 | 56.54280 | 102.03790 | 1180.34726  | 2425.35769  | -1619.45875 | 1 |
| 10543 | C | 83.20700 | 56.25880 | 105.24790 | -485.58654  | 578.43675   | -510.94779  | 1 |
| 10544 | O | 83.00500 | 57.44880 | 105.00190 | 547.13124   | -567.29965  | -49.45441   | 1 |
| 10545 | N | 83.99000 | 55.88980 | 106.24490 | 529.58547   | 240.29309   | -611.94015  | 1 |
| 10546 | H | 84.16600 | 54.94980 | 106.52790 | 88.04386    | -84.20542   | 3143.78497  | 1 |
| 10547 | C | 84.73700 | 56.88680 | 106.99290 | 821.10572   | -384.26135  | -97.87550   | 1 |
| 10548 | H | 84.96900 | 57.66880 | 106.28490 | -2004.76628 | 1616.49215  | -1807.23311 | 1 |
| 10549 | C | 83.91500 | 57.42980 | 108.20490 | 901.59265   | 121.77557   | -61.25690   | 1 |
| 10550 | H | 84.21500 | 58.48080 | 108.40390 | 58.48733    | -2968.54791 | 1040.44643  | 1 |
| 10551 | H | 82.85200 | 57.49980 | 107.89190 | 1198.21386  | 1397.51495  | 2551.36468  | 1 |
| 10552 | O | 83.89700 | 56.69080 | 109.40790 | -31.33697   | 777.03860   | 137.31799   | 1 |
| 10553 | H | 83.44200 | 57.18580 | 110.09290 | 1292.49466  | 1810.80216  | 2224.56272  | 1 |
| 10554 | C | 86.04500 | 56.31880 | 107.48390 | 910.25559   | -53.67074   | 2.28316     | 1 |
| 10555 | O | 86.23700 | 55.11080 | 107.49890 | 224.73168   | 386.38818   | -651.02003  | 1 |
| 10556 | N | 86.96200 | 57.19680 | 107.92490 | 592.41732   | -115.38395  | -590.25465  | 1 |
| 10557 | H | 86.55800 | 58.10780 | 107.88190 | -196.95547  | -3017.49164 | 868.43480   | 1 |
| 10558 | C | 88.24100 | 56.92680 | 108.44490 | -44.60705   | 39.58217    | -909.88706  | 1 |
| 10559 | H | 88.79900 | 56.31480 | 107.75190 | -2313.53670 | -391.48440  | 2095.83257  | 1 |
| 10560 | C | 88.99900 | 58.27680 | 108.62790 | 528.28372   | 275.33553   | -690.33156  | 1 |
| 10561 | H | 88.48300 | 58.99280 | 109.30190 | 1616.71985  | 2514.68091  | 980.21583   | 1 |
| 10562 | H | 90.03800 | 57.98680 | 108.89590 | 2278.22391  | -1515.91739 | -1552.39059 | 1 |
| 10563 | H | 89.10200 | 58.71980 | 107.61390 | -2193.15855 | -1988.53404 | 1064.90103  | 1 |
| 10564 | C | 88.23700 | 56.08880 | 109.70490 | 636.87901   | 275.86417   | 591.38404   | 1 |
| 10565 | O | 89.01500 | 55.11480 | 109.84290 | 668.78163   | -409.00382  | 95.25881    | 1 |
| 10566 | N | 87.28400 | 56.41280 | 110.61790 | 542.61366   | 463.04814   | -451.47439  | 1 |
| 10567 | H | 86.91200 | 57.33580 | 110.56290 | 2022.12249  | -1412.01961 | 1953.31705  | 1 |
| 10568 | C | 86.97200 | 55.47480 | 111.74990 | -589.19915  | -411.36289  | -561.31626  | 1 |
| 10569 | H | 87.90700 | 55.26180 | 112.24790 | 2295.20594  | 491.90314   | -2094.82391 | 1 |
| 10570 | C | 85.97400 | 56.15380 | 112.70390 | -440.56961  | 335.32811   | 724.50292   | 1 |
| 10571 | H | 85.55200 | 55.42080 | 113.42490 | -2658.59194 | -436.23655  | 1624.75006  | 1 |
| 10572 | H | 85.16200 | 56.58080 | 112.07790 | 1386.42037  | -1331.91514 | 2490.39492  | 1 |
| 10573 | C | 86.51500 | 57.41880 | 113.51390 | -524.96174  | 589.96805   | 455.85510   | 1 |
| 10574 | H | 85.63700 | 57.75580 | 114.10590 | -403.58530  | -2866.71174 | -1231.79094 | 1 |
| 10575 | H | 86.86800 | 58.20880 | 112.81690 | 3080.02555  | 295.04673   | 569.75107   | 1 |
| 10576 | C | 87.65700 | 56.97980 | 114.46190 | -379.69386  | 543.51629   | -625.99810  | 1 |
| 10577 | O | 87.51800 | 56.06080 | 115.23690 | -568.76345  | -231.43650  | -496.56068  | 1 |
| 10578 | N | 88.78900 | 57.67580 | 114.32290 | 105.92758   | 837.51450   | -4.59422    | 1 |
| 10579 | H | 88.76800 | 58.52780 | 113.79990 | -1547.03354 | -1699.33908 | 2148.75782  | 1 |
| 10580 | H | 89.56800 | 57.40480 | 114.88790 | 25.26782    | -2350.18093 | -2091.46775 | 1 |
| 10581 | C | 86.38100 | 54.13380 | 111.32290 | 180.00555   | 27.32998    | -893.47752  | 1 |
| 10582 | O | 86.84900 | 53.05580 | 111.69790 | -204.81051  | -507.76855  | 569.07907   | 1 |
| 10583 | N | 85.41700 | 54.13580 | 110.31590 | -576.83895  | -497.44063  | -363.98067  | 1 |
| 10584 | H | 85.05700 | 54.93680 | 109.84490 | 1266.94635  | -2491.28727 | 1444.49330  | 1 |
| 10585 | C | 84.85500 | 52.81180 | 109.85490 | 416.52979   | 487.10829   | -648.59807  | 1 |
| 10586 | H | 84.53200 | 52.34680 | 110.77490 | 299.29514   | -727.32019  | -3046.25245 | 1 |
| 10587 | C | 83.70500 | 53.01180 | 108.93090 | -15.29436   | -675.26288  | -612.56601  | 1 |
| 10588 | H | 84.01300 | 53.65080 | 108.07590 | 1428.91896  | -2800.76377 | -110.17758  | 1 |
| 10589 | H | 83.34100 | 52.09480 | 108.41990 | 2239.82015  | -1322.46097 | -1769.89517 | 1 |
| 10590 | N | 82.20500 | 53.38680 | 110.95190 | -135.16195  | -113.48893  | -825.54455  | 1 |
| 10591 | H | 82.76300 | 52.85980 | 111.59290 | 2109.15876  | 335.39947   | -2310.23435 | 1 |
| 10592 | C | 82.52300 | 53.64980 | 109.61990 | -546.29797  | -362.55731  | 633.68899   | 1 |
| 10593 | C | 81.11100 | 54.09780 | 111.23090 | -452.77879  | 119.68693   | 782.37932   | 1 |
| 10594 | H | 80.61100 | 53.96480 | 112.18990 | 515.65026   | -1085.65638 | -2907.52150 | 1 |
| 10595 | N | 80.67200 | 54.79180 | 110.20390 | -672.10464  | -496.37782  | 120.65113   | 1 |

|       |   |          |           |           |             |             |             |   |
|-------|---|----------|-----------|-----------|-------------|-------------|-------------|---|
| 10596 | C | 81.57800 | 54.50080  | 109.14890 | -415.10380  | 170.73927   | 793.71780   | 1 |
| 10597 | H | 81.39700 | 54.85780  | 108.14190 | -2409.73621 | -1633.57327 | 1192.82690  | 1 |
| 10598 | C | 85.90800 | 51.89980  | 109.19590 | -57.11934   | 500.76370   | 759.88427   | 1 |
| 10599 | O | 85.88900 | 50.70180  | 109.38790 | 747.08667   | -254.89254  | -22.77120   | 1 |
| 10600 | N | 86.82900 | 52.50780  | 108.42890 | 434.81749   | -696.92036  | 194.69990   | 1 |
| 10601 | H | 86.68300 | 53.45680  | 108.15990 | 2062.99251  | -2373.89735 | -83.06334   | 1 |
| 10602 | C | 88.02200 | 51.87180  | 107.84890 | 682.44651   | 538.86219   | -274.49097  | 1 |
| 10603 | H | 87.57200 | 51.13580  | 107.19990 | -1843.79418 | -2538.43053 | 234.56273   | 1 |
| 10604 | C | 88.70700 | 52.92580  | 106.97790 | -743.15574  | -519.11314  | 98.44841    | 1 |
| 10605 | H | 89.07900 | 53.71380  | 107.66690 | 1482.52963  | -2243.39052 | -1633.25781 | 1 |
| 10606 | H | 88.02500 | 53.45380  | 106.27890 | 1598.24750  | -2654.66864 | 544.57836   | 1 |
| 10607 | H | 89.64100 | 52.60980  | 106.46590 | -670.78534  | 1167.49753  | 2843.45262  | 1 |
| 10608 | C | 88.99100 | 51.29980  | 108.85590 | 656.08552   | -500.36518  | -388.12045  | 1 |
| 10609 | O | 89.45100 | 50.19180  | 108.67390 | -267.34786  | -76.77617   | -739.09253  | 1 |
| 10610 | N | 89.27600 | 51.98380  | 109.97890 | -430.61950  | -549.47687  | 474.67284   | 1 |
| 10611 | H | 88.76800 | 52.80380  | 110.22890 | -911.04899  | -2824.16187 | 1045.14387  | 1 |
| 10612 | C | 90.10100 | 51.42580  | 111.06990 | -685.54544  | 552.14713   | 237.93275   | 1 |
| 10613 | H | 91.01100 | 51.07180  | 110.60790 | -937.79610  | 2652.29756  | -1408.57459 | 1 |
| 10614 | C | 90.26000 | 52.46080  | 112.19890 | -150.36184  | -552.95767  | -709.28142  | 1 |
| 10615 | H | 90.54900 | 51.99480  | 113.16490 | -2813.47406 | 1355.73689  | 380.22020   | 1 |
| 10616 | H | 89.29800 | 53.00080  | 112.32690 | -1967.51298 | 1885.96383  | 1571.70587  | 1 |
| 10617 | C | 91.46800 | 53.42280  | 111.91590 | 547.78928   | -534.48686  | 495.68306   | 1 |
| 10618 | H | 91.24700 | 53.92980  | 110.95190 | 945.15212   | -928.87648  | 2853.43690  | 1 |
| 10619 | C | 91.52600 | 54.66780  | 112.80790 | -324.36065  | -543.92493  | 656.03875   | 1 |
| 10620 | H | 91.94300 | 54.47580  | 113.81990 | -1370.29770 | -1637.02729 | -2310.98510 | 1 |
| 10621 | H | 92.19500 | 55.45480  | 112.39790 | -1482.15837 | 2656.29835  | -803.43753  | 1 |
| 10622 | H | 90.49100 | 55.02780  | 112.99190 | -1680.46250 | 1661.10919  | -2077.25499 | 1 |
| 10623 | C | 92.83900 | 52.70780  | 111.87190 | -401.11306  | 622.08389   | -532.51380  | 1 |
| 10624 | H | 92.94400 | 52.02380  | 111.00290 | -152.06164  | -2008.65723 | 2416.69188  | 1 |
| 10625 | H | 93.60500 | 53.51180  | 111.82990 | 2247.42890  | 2158.53128  | 433.62692   | 1 |
| 10626 | H | 93.04000 | 52.07480  | 112.76290 | 1888.77528  | 1844.73379  | -1711.05564 | 1 |
| 10627 | C | 89.46100 | 50.19980  | 111.71690 | -554.61851  | 177.36824   | 701.70494   | 1 |
| 10628 | O | 90.15700 | 49.23380  | 112.03990 | -668.38767  | 417.15757   | -53.52294   | 1 |
| 10629 | N | 88.19500 | 50.21680  | 112.07190 | 504.38531   | -570.37054  | 364.61650   | 1 |
| 10630 | H | 87.72300 | 51.07580  | 111.88590 | -1725.82391 | 1957.80252  | -1756.91984 | 1 |
| 10631 | C | 87.47100 | 49.11180  | 112.69890 | 394.57747   | 402.03212   | 717.02845   | 1 |
| 10632 | H | 88.04300 | 48.79080  | 113.55590 | -2404.20558 | -1920.06895 | 656.77771   | 1 |
| 10633 | C | 86.10000 | 49.48680  | 113.13590 | 601.96840   | -204.01925  | -653.80516  | 1 |
| 10634 | H | 85.43700 | 48.61080  | 113.30090 | -2440.18554 | -196.75757  | -1976.10911 | 1 |
| 10635 | O | 85.50100 | 50.38680  | 112.30590 | 203.56133   | 657.91341   | 386.44529   | 1 |
| 10636 | H | 85.67800 | 50.08280  | 111.41290 | -2043.42410 | 390.47843   | -2360.12092 | 1 |
| 10637 | C | 86.15600 | 50.20880  | 114.52090 | -427.06329  | 239.43245   | -769.24642  | 1 |
| 10638 | H | 85.14000 | 50.56980  | 114.78890 | -2914.04759 | 63.16303    | -1184.29867 | 1 |
| 10639 | H | 86.84200 | 51.06980  | 114.37390 | -874.83740  | -2997.72464 | 382.79595   | 1 |
| 10640 | H | 86.58700 | 49.54880  | 115.30390 | -2521.49096 | -1567.58855 | -1040.66119 | 1 |
| 10641 | C | 87.33200 | 47.86380  | 111.81290 | 737.98452   | -530.38323  | 74.32013    | 1 |
| 10642 | O | 87.28100 | 47.98280  | 110.59890 | 396.32778   | -502.71341  | 462.41837   | 1 |
| 10643 | N | 87.22900 | 46.69980  | 112.39890 | -249.40738  | 613.04579   | -524.06403  | 1 |
| 10644 | H | 87.31500 | 46.64780  | 113.38990 | 1722.25761  | -1493.91079 | -2168.01418 | 1 |
| 10645 | C | 87.00800 | 45.43480  | 111.73590 | 786.20236   | -460.38551  | 37.17575    | 1 |
| 10646 | H | 87.60700 | 45.49580  | 110.83890 | 767.49152   | 2902.13019  | -941.71299  | 1 |
| 10647 | C | 87.63800 | 44.22280  | 112.49690 | -387.94917  | -654.79188  | 502.18925   | 1 |
| 10648 | H | 87.57500 | 43.32580  | 111.84390 | -1412.57714 | -1579.46339 | -2325.54240 | 1 |
| 10649 | H | 88.73700 | 44.38180  | 112.50190 | -2510.80954 | -1313.94657 | 1366.60385  | 1 |
| 10650 | O | 87.05400 | 43.98480  | 113.80390 | 453.46026   | 474.88097   | 438.73578   | 1 |
| 10651 | H | 87.22400 | 44.78680  | 114.30390 | -843.74822  | -2911.98385 | -840.63382  | 1 |
| 10652 | C | 85.56100 | 45.12680  | 111.38790 | -851.26790  | -304.48452  | -118.67241  | 1 |
| 10653 | O | 84.61300 | 45.60580  | 112.09190 | 45.16908    | 705.48613   | -351.96066  | 1 |
| 10654 | O | 85.32200 | 44.42480  | 110.35290 | -400.57190  | 247.81106   | 633.84467   | 1 |
| 10655 | H | 79.58954 | 101.42979 | 67.58421  | -2496.28827 | -3262.86163 | -2665.72730 | 2 |
| 10656 | N | 79.69233 | 100.51405 | 68.01112  | -52.32726   | 418.35346   | -462.87799  | 2 |
| 10657 | H | 78.70544 | 100.20935 | 68.19616  | -1273.10898 | 124.90999   | 3.04791     | 2 |



|       |   |          |           |          |             |             |             |   |
|-------|---|----------|-----------|----------|-------------|-------------|-------------|---|
| 10658 | C | 80.56233 | 100.47808 | 69.12095 | 454.87276   | -284.58528  | -532.26195  | 2 |
| 10659 | H | 79.96132 | 100.30827 | 70.10411 | -1245.48904 | 832.80644   | -2158.71392 | 2 |
| 10660 | C | 81.71383 | 99.37350  | 68.92360 | 588.15512   | -238.27061  | 29.76604    | 2 |
| 10661 | H | 81.34239 | 98.37458  | 68.57855 | 3839.67046  | 203.97736   | -155.16574  | 2 |
| 10662 | H | 82.50144 | 99.50552  | 68.16530 | -303.39311  | -3033.71494 | 890.82898   | 2 |
| 10663 | C | 82.38890 | 99.16062  | 70.26506 | 752.28396   | -410.25994  | 168.64501   | 2 |
| 10664 | H | 82.98060 | 98.24185  | 70.08739 | -823.71335  | 590.68020   | 3035.10143  | 2 |
| 10665 | C | 83.30406 | 100.34791 | 70.51796 | 5.60788     | -74.31843   | 122.28784   | 2 |
| 10666 | H | 84.03746 | 100.21114 | 71.35435 | -1992.59065 | -350.65737  | 1532.88338  | 2 |
| 10667 | H | 83.82912 | 100.49426 | 69.57012 | 599.29607   | -434.87408  | 205.30089   | 2 |
| 10668 | H | 82.66362 | 101.24377 | 70.78005 | -2069.08580 | 2336.22262  | 2874.53184  | 2 |
| 10669 | C | 81.49275 | 99.04405  | 71.47541 | -1062.64556 | 895.27456   | -429.83120  | 2 |
| 10670 | H | 80.51004 | 98.64587  | 71.24759 | -1039.04036 | 2528.11849  | -3856.68027 | 2 |
| 10671 | H | 81.91587 | 98.23908  | 72.15882 | 2224.62914  | -271.73813  | -1889.99945 | 2 |
| 10672 | H | 81.23684 | 99.95808  | 72.09129 | 2176.90260  | 2081.56040  | -3120.80292 | 2 |
| 10673 | C | 81.15883 | 102.00772 | 69.04612 | 253.54715   | 1088.69676  | -370.58867  | 2 |
| 10674 | O | 81.67510 | 102.52154 | 67.96965 | 667.77442   | 106.03980   | 163.51217   | 2 |
| 10675 | N | 81.16309 | 102.49616 | 70.23225 | -351.43250  | 358.98434   | 148.56166   | 2 |
| 10676 | H | 80.67627 | 102.02803 | 71.00014 | -624.79657  | 1794.67560  | -2456.33964 | 2 |
| 10677 | C | 81.34031 | 103.92332 | 70.03394 | -941.59473  | -128.22282  | -917.59403  | 2 |
| 10678 | H | 80.29709 | 104.38630 | 69.91107 | -26.96243   | -848.86006  | 962.74728   | 2 |
| 10679 | C | 82.02863 | 104.36623 | 71.44321 | 357.62842   | -316.20201  | 486.85213   | 2 |
| 10680 | H | 83.13262 | 104.07588 | 71.37153 | -3331.91024 | -1884.34581 | 42.95890    | 2 |
| 10681 | O | 81.52714 | 103.70365 | 72.60434 | 282.50228   | 206.78430   | 120.76655   | 2 |
| 10682 | H | 82.32865 | 103.21096 | 72.86125 | 1324.60997  | -34.65537   | -1592.71660 | 2 |
| 10683 | C | 81.88472 | 105.95335 | 71.36746 | -9.46046    | -1110.11653 | -10.30381   | 2 |
| 10684 | H | 82.19634 | 106.30384 | 70.36169 | 639.97045   | 2347.82096  | -1171.31089 | 2 |
| 10685 | H | 80.87404 | 106.30597 | 71.37936 | -4507.93131 | -804.21909  | 647.65740   | 2 |
| 10686 | H | 82.49855 | 106.43977 | 72.09257 | -1666.64274 | 1619.47865  | -3195.81422 | 2 |
| 10687 | C | 82.37712 | 104.18575 | 68.75854 | 1106.01473  | -438.92102  | -315.71700  | 2 |
| 10688 | O | 83.56424 | 103.78892 | 68.80508 | 213.56340   | 606.22716   | 47.88998    | 2 |
| 10689 | N | 82.02640 | 105.33786 | 68.08018 | 69.30679    | -116.34906  | -926.61365  | 2 |
| 10690 | C | 82.99260 | 105.95955 | 67.21878 | -425.89412  | -2.27420    | 901.10930   | 2 |
| 10691 | H | 83.59817 | 105.16094 | 66.73576 | 2141.21467  | 827.54339   | -1134.58527 | 2 |
| 10692 | C | 82.08672 | 106.85276 | 66.27693 | 119.33836   | 639.17597   | 297.31301   | 2 |
| 10693 | H | 82.42846 | 107.97968 | 66.30691 | 2324.81153  | 4556.79855  | -1741.97157 | 2 |
| 10694 | H | 82.34664 | 106.64172 | 65.22217 | -93.92332   | 453.35858   | -2372.03657 | 2 |
| 10695 | C | 80.63746 | 106.52736 | 66.77336 | 237.29199   | 698.50742   | -580.46493  | 2 |
| 10696 | H | 79.98121 | 107.48021 | 66.73181 | -27.52302   | 2483.32866  | -1138.49456 | 2 |
| 10697 | H | 80.24667 | 105.69764 | 66.07552 | 370.92551   | 2267.57725  | 2994.10684  | 2 |
| 10698 | C | 80.79443 | 106.00644 | 68.29925 | -600.61172  | -365.65138  | -38.96437   | 2 |
| 10699 | H | 80.87839 | 106.82728 | 69.02844 | -2350.55964 | -2382.90785 | 2671.28958  | 2 |
| 10700 | H | 79.97646 | 105.31451 | 68.56812 | -978.74851  | 1168.53283  | -1449.66498 | 2 |
| 10701 | C | 83.99601 | 106.87747 | 68.11612 | 591.91776   | -259.22019  | 291.23345   | 2 |
| 10702 | O | 83.98289 | 108.04570 | 67.75257 | 648.12929   | 131.13487   | -135.02818  | 2 |
| 10703 | N | 84.65001 | 106.28566 | 69.08831 | 852.92223   | -880.45871  | 160.39182   | 2 |
| 10704 | H | 84.56401 | 105.22590 | 69.05080 | 719.82571   | 1763.50837  | -860.84398  | 2 |
| 10705 | C | 86.06859 | 106.63744 | 69.25219 | 101.95499   | -386.17907  | -847.65193  | 2 |
| 10706 | H | 86.16420 | 107.30869 | 68.36526 | -1448.26558 | 4290.98257  | 1803.45728  | 2 |
| 10707 | C | 86.41750 | 107.22060 | 70.68335 | -55.22091   | 508.81522   | 230.60215   | 2 |
| 10708 | H | 85.72400 | 108.07148 | 70.77033 | -404.32648  | -1000.19550 | 3296.53319  | 2 |
| 10709 | O | 87.77687 | 107.72589 | 70.91226 | 979.11726   | 277.36434   | 14.82630    | 2 |
| 10710 | H | 87.65005 | 108.74254 | 70.89711 | -5.67523    | 924.20985   | -859.27091  | 2 |
| 10711 | C | 86.03774 | 106.06966 | 71.68885 | 155.13902   | -113.35968  | -223.10816  | 2 |
| 10712 | H | 85.12963 | 105.49539 | 71.39878 | 1841.44240  | 3366.88484  | -2572.45244 | 2 |
| 10713 | H | 86.97854 | 105.40637 | 71.91984 | 1188.09090  | 773.25141   | -284.63878  | 2 |
| 10714 | H | 85.69704 | 106.47929 | 72.64988 | -739.37709  | -2077.93891 | 1074.19111  | 2 |
| 10715 | C | 87.05328 | 105.33826 | 69.01805 | 799.10243   | -255.42652  | -299.77926  | 2 |
| 10716 | O | 87.00203 | 104.33762 | 69.68873 | -82.50793   | 164.21234   | -68.68794   | 2 |
| 10717 | N | 87.86025 | 105.67658 | 68.05696 | 398.38915   | -28.11871   | -699.20258  | 2 |
| 10718 | H | 87.77559 | 106.61829 | 67.57017 | -1355.47229 | 275.09042   | 568.31956   | 2 |
| 10719 | C | 88.77715 | 104.75614 | 67.45260 | -317.06275  | 788.75231   | 51.44608    | 2 |

|       |   |          |           |          |             |             |             |   |
|-------|---|----------|-----------|----------|-------------|-------------|-------------|---|
| 10720 | H | 89.62698 | 105.37305 | 67.35200 | 2755.92518  | 867.09469   | 2005.18892  | 2 |
| 10721 | C | 88.86423 | 103.45887 | 68.37204 | -784.95946  | 168.24209   | -100.67092  | 2 |
| 10722 | H | 88.94059 | 103.73715 | 69.43351 | 988.49117   | -2584.23998 | 83.94230    | 2 |
| 10723 | H | 87.89138 | 102.89133 | 68.29448 | -2951.28135 | 162.66371   | -856.38972  | 2 |
| 10724 | O | 89.75018 | 102.49829 | 67.78133 | 80.32295    | 183.46113   | -459.66164  | 2 |
| 10725 | H | 89.37130 | 101.68898 | 68.17962 | -1061.78196 | -2221.72424 | 1812.98490  | 2 |
| 10726 | C | 88.06777 | 104.35826 | 66.02174 | -241.20155  | 680.19958   | -403.56350  | 2 |
| 10727 | O | 88.73695 | 104.65595 | 65.02796 | 351.09525   | -434.16686  | 375.23239   | 2 |
| 10728 | N | 86.82757 | 103.90235 | 66.19003 | -623.03778  | 573.19708   | -1086.81089 | 2 |
| 10729 | H | 86.48502 | 103.72429 | 67.16177 | 2005.06146  | 1424.40409  | -2728.50769 | 2 |
| 10730 | C | 86.10861 | 103.39844 | 65.06093 | 883.79048   | 539.39113   | 148.50614   | 2 |
| 10731 | H | 86.83281 | 103.29667 | 64.28173 | 1482.66768  | 1738.05117  | -1077.94063 | 2 |
| 10732 | C | 85.51951 | 101.98647 | 65.59995 | 463.29720   | 310.72414   | 281.15287   | 2 |
| 10733 | H | 84.93634 | 101.55916 | 64.77754 | 40.30321    | 3517.33252  | -587.62956  | 2 |
| 10734 | C | 86.65109 | 100.99173 | 65.97296 | 885.19535   | 445.08432   | -79.28977   | 2 |
| 10735 | H | 86.31203 | 99.93495  | 66.13065 | -415.12264  | 802.19705   | 1066.65259  | 2 |
| 10736 | H | 87.35890 | 100.99761 | 65.13098 | 47.44325    | -1861.11623 | -1494.82979 | 2 |
| 10737 | H | 87.02344 | 101.27227 | 66.97478 | -1833.42430 | -1474.86425 | -1160.65909 | 2 |
| 10738 | C | 84.55084 | 102.26781 | 66.84392 | -222.92196  | -260.17442  | -953.20450  | 2 |
| 10739 | H | 83.60837 | 101.65231 | 66.82883 | 586.16672   | 341.63770   | -930.17085  | 2 |
| 10740 | H | 85.11427 | 102.25300 | 67.83080 | 2237.36077  | -2956.16963 | 709.88851   | 2 |
| 10741 | H | 84.07472 | 103.18976 | 66.63019 | -2483.40560 | 934.37387   | 1422.76781  | 2 |
| 10742 | C | 84.93586 | 104.34228 | 64.58684 | 403.18200   | 701.21708   | 114.58441   | 2 |
| 10743 | O | 83.85289 | 103.89482 | 64.14315 | 222.94454   | 357.50458   | -382.38165  | 2 |
| 10744 | N | 85.25346 | 105.67178 | 64.75209 | 504.08732   | 670.23594   | -351.02981  | 2 |
| 10745 | H | 86.19702 | 105.83750 | 65.17958 | -967.64766  | -2430.42602 | -198.15885  | 2 |
| 10746 | C | 84.82927 | 106.62874 | 63.78711 | 43.77185    | -1202.96926 | 556.99067   | 2 |
| 10747 | H | 83.97469 | 106.26464 | 63.24001 | -2014.25422 | -2003.16968 | -905.15392  | 2 |
| 10748 | C | 84.73792 | 108.04915 | 64.48865 | 952.67338   | 168.04692   | 59.58108    | 2 |
| 10749 | H | 84.24905 | 107.85339 | 65.50943 | 2398.36156  | -2093.60601 | 878.31520   | 2 |
| 10750 | H | 85.76025 | 108.41797 | 64.72774 | 192.64787   | 1421.84279  | 1251.99622  | 2 |
| 10751 | C | 83.83300 | 109.10773 | 63.66941 | -753.53117  | 161.30559   | 393.83135   | 2 |
| 10752 | H | 84.44645 | 109.71964 | 62.99696 | -3131.18770 | 1352.92427  | 1107.43856  | 2 |
| 10753 | H | 83.16094 | 108.48748 | 63.00268 | 111.70039   | 2371.65159  | -3557.31204 | 2 |
| 10754 | C | 82.99691 | 110.00461 | 64.63366 | 868.08490   | 97.01679    | 85.32002    | 2 |
| 10755 | O | 82.13888 | 110.72235 | 64.14349 | 421.48925   | -481.99928  | 563.42685   | 2 |
| 10756 | N | 83.27010 | 109.86338 | 65.97312 | -501.92731  | -32.93925   | 511.76157   | 2 |
| 10757 | H | 83.86304 | 109.36205 | 66.62320 | -2632.99338 | -229.33211  | 970.22956   | 2 |
| 10758 | H | 82.55747 | 110.41693 | 66.42825 | 952.47130   | 1045.65846  | -235.16989  | 2 |
| 10759 | C | 86.05003 | 106.97845 | 62.77667 | 324.70284   | -905.59524  | 174.46503   | 2 |
| 10760 | O | 86.94115 | 107.79292 | 63.04272 | 188.06380   | -227.36457  | -129.78146  | 2 |
| 10761 | N | 86.03254 | 106.07659 | 61.78223 | -417.21037  | 1155.73585  | -270.88890  | 2 |
| 10762 | C | 86.23818 | 106.61683 | 60.46881 | 840.87414   | 113.46289   | -333.75295  | 2 |
| 10763 | H | 86.82803 | 107.56382 | 60.60440 | 3946.26537  | 1538.50372  | -2279.39731 | 2 |
| 10764 | C | 87.05941 | 105.43767 | 59.80122 | 587.85225   | -236.90786  | -243.76386  | 2 |
| 10765 | H | 86.79453 | 105.23530 | 58.77776 | -2521.56474 | -1975.66178 | -492.08249  | 2 |
| 10766 | H | 88.19757 | 105.54851 | 59.93093 | -3040.27069 | 1144.34145  | 2118.52260  | 2 |
| 10767 | C | 86.54310 | 104.12500 | 60.43044 | 742.93346   | 417.95988   | -16.72355   | 2 |
| 10768 | H | 85.61670 | 103.77719 | 59.93800 | -789.63466  | 642.34666   | 4124.51042  | 2 |
| 10769 | H | 87.27147 | 103.22483 | 60.38578 | -2132.58144 | -3276.45948 | -2234.67842 | 2 |
| 10770 | C | 86.34715 | 104.66864 | 61.94512 | -14.47960   | -644.58617  | -494.80778  | 2 |
| 10771 | H | 85.44470 | 104.25443 | 62.59123 | -1998.70033 | -1275.11831 | 1870.99163  | 2 |
| 10772 | H | 87.26639 | 104.69042 | 62.57870 | -211.92854  | 829.19463   | -260.88335  | 2 |
| 10773 | C | 84.81931 | 106.90015 | 59.74369 | -915.28494  | 86.83637    | -158.41065  | 2 |
| 10774 | O | 84.66935 | 107.86166 | 58.96564 | 467.57135   | -30.70242   | -210.88720  | 2 |
| 10775 | N | 83.82648 | 106.18334 | 60.28022 | 677.84787   | 220.89574   | -236.63463  | 2 |
| 10776 | H | 84.23880 | 105.55270 | 60.99989 | 3386.53993  | 814.27333   | -518.25369  | 2 |
| 10777 | C | 82.50324 | 106.68434 | 60.10246 | -1039.23280 | 1522.48158  | -462.50195  | 2 |
| 10778 | H | 82.53833 | 107.28816 | 59.15681 | 1017.28889  | 31.86483    | -919.98334  | 2 |
| 10779 | C | 81.46553 | 105.44174 | 60.20605 | 1004.43928  | 186.62576   | -724.84596  | 2 |
| 10780 | H | 81.18715 | 105.18940 | 61.23806 | -1379.78208 | -326.46769  | 455.55576   | 2 |
| 10781 | C | 80.21216 | 105.96228 | 59.43689 | 30.87619    | -100.59611  | -149.75588  | 2 |

|       |   |          |           |          |             |             |             |   |
|-------|---|----------|-----------|----------|-------------|-------------|-------------|---|
| 10782 | H | 79.47824 | 105.12361 | 59.26298 | -1970.60548 | -2787.52719 | 1264.65637  | 2 |
| 10783 | H | 79.72099 | 106.77929 | 60.00204 | 510.71797   | -1252.12063 | -2770.53432 | 2 |
| 10784 | H | 80.49393 | 106.28612 | 58.39799 | 1535.39109  | -1833.62605 | 791.85698   | 2 |
| 10785 | C | 82.11973 | 104.23061 | 59.40012 | -756.35139  | 324.99703   | -968.33747  | 2 |
| 10786 | H | 81.36360 | 103.40120 | 59.69398 | 4737.67544  | 2541.34233  | -743.05426  | 2 |
| 10787 | H | 82.18360 | 104.27590 | 58.34686 | 498.83564   | -1985.25744 | 626.71094   | 2 |
| 10788 | H | 83.15692 | 103.98949 | 59.81724 | -524.92250  | -1549.81983 | 3253.45122  | 2 |
| 10789 | C | 82.22864 | 107.71883 | 61.34240 | -460.13293  | -895.24345  | 293.33585   | 2 |
| 10790 | O | 81.58669 | 107.50520 | 62.36007 | 374.43925   | 644.28150   | 90.59479    | 2 |
| 10791 | N | 82.81262 | 108.86034 | 61.04649 | -451.53624  | -818.71388  | 759.84226   | 2 |
| 10792 | H | 83.40188 | 108.89088 | 60.21302 | -225.90521  | -50.60305   | -1589.33061 | 2 |
| 10793 | C | 81.89609 | 110.01075 | 61.02880 | 459.97703   | -197.97207  | -971.59717  | 2 |
| 10794 | H | 81.59140 | 109.91625 | 62.07768 | 2708.32810  | 1385.51073  | -2680.78119 | 2 |
| 10795 | C | 82.68922 | 111.34860 | 60.66249 | -1024.35013 | -271.84887  | -862.38937  | 2 |
| 10796 | H | 82.02639 | 112.19312 | 60.99879 | -284.75229  | 2320.26831  | 1451.63062  | 2 |
| 10797 | H | 83.67415 | 111.42488 | 61.20560 | 88.21527    | 2442.21651  | -2716.72515 | 2 |
| 10798 | C | 83.05449 | 111.74830 | 59.18864 | 204.81734   | -26.91273   | 1065.71251  | 2 |
| 10799 | H | 82.12465 | 111.69653 | 58.49826 | -1870.87529 | -801.02292  | -4880.29888 | 2 |
| 10800 | H | 83.35913 | 112.81759 | 59.09168 | -3305.75854 | -430.82649  | 2168.35714  | 2 |
| 10801 | C | 84.20555 | 110.86866 | 58.58146 | 99.19433    | 665.96560   | 389.49757   | 2 |
| 10802 | H | 85.18511 | 111.40087 | 58.61001 | -2862.34106 | -1735.09558 | -1546.65872 | 2 |
| 10803 | H | 84.43956 | 109.84152 | 59.07160 | 1549.10297  | 300.49147   | -1154.33628 | 2 |
| 10804 | C | 83.74940 | 110.43797 | 57.17787 | -788.53896  | -358.53723  | -290.39857  | 2 |
| 10805 | H | 83.03654 | 111.13116 | 56.65027 | -1077.38660 | -1925.27639 | 634.97682   | 2 |
| 10806 | H | 84.55752 | 109.99765 | 56.56878 | -388.43611  | -1024.65513 | 299.01179   | 2 |
| 10807 | N | 83.07562 | 109.03390 | 57.25884 | 1052.22812  | 918.66922   | 377.20712   | 2 |
| 10808 | H | 82.38111 | 108.99588 | 58.13585 | 3013.83136  | -1293.00422 | -5048.16560 | 2 |
| 10809 | H | 82.40019 | 108.72879 | 56.38560 | 1222.45926  | 389.11289   | -1478.41655 | 2 |
| 10810 | H | 83.73441 | 108.19744 | 57.41914 | -1406.61344 | -5016.99386 | -3939.81108 | 2 |
| 10811 | C | 80.76733 | 109.74764 | 59.91122 | -526.71687  | 121.28673   | -93.67753   | 2 |
| 10812 | O | 80.95969 | 108.83199 | 59.03577 | -318.44715  | 270.35058   | 340.88596   | 2 |
| 10813 | N | 80.03662 | 110.84462 | 59.83916 | -246.54667  | 516.06620   | -355.35773  | 2 |
| 10814 | H | 80.30830 | 111.49356 | 60.59734 | -44.90944   | -2096.54303 | -1041.08456 | 2 |
| 10815 | C | 78.71171 | 110.95271 | 59.35171 | 69.74307    | 478.90671   | -200.76798  | 2 |
| 10816 | H | 78.45019 | 109.95595 | 59.87527 | 644.83638   | -4506.32062 | -1852.54622 | 2 |
| 10817 | C | 77.69937 | 112.07976 | 59.87221 | 155.00125   | -12.35416   | 93.35071    | 2 |
| 10818 | H | 78.00557 | 112.50566 | 60.90461 | -2545.55659 | 585.69072   | -832.78139  | 2 |
| 10819 | H | 77.74852 | 113.00532 | 59.19738 | -948.88519  | -1663.98451 | -505.87371  | 2 |
| 10820 | C | 76.30150 | 111.41735 | 59.90110 | 519.12576   | -397.96880  | -442.24346  | 2 |
| 10821 | H | 76.28053 | 110.60409 | 59.15210 | 2455.16716  | -967.64668  | -2722.06528 | 2 |
| 10822 | H | 76.18403 | 110.85370 | 60.82843 | -232.81993  | -48.27987   | 890.09800   | 2 |
| 10823 | C | 75.09589 | 112.46010 | 59.85900 | 1360.28532  | -469.92695  | 279.09350   | 2 |
| 10824 | H | 75.09201 | 113.00287 | 58.90693 | -1230.91740 | -2167.03357 | 3170.36135  | 2 |
| 10825 | H | 74.23297 | 111.73860 | 59.92725 | 1383.35014  | -3737.14861 | 530.93089   | 2 |
| 10826 | C | 74.97993 | 113.63748 | 60.89700 | -302.18067  | -200.03851  | 286.32551   | 2 |
| 10827 | H | 75.90104 | 114.16966 | 61.08113 | 1403.34636  | 208.65345   | 2077.09092  | 2 |
| 10828 | H | 74.11730 | 114.30047 | 60.66665 | -878.67047  | -4189.93751 | -21.67519   | 2 |
| 10829 | N | 74.66391 | 113.14868 | 62.30860 | 361.65228   | -315.06461  | 212.73497   | 2 |
| 10830 | H | 75.43419 | 112.38860 | 62.73664 | -1298.60371 | -629.08150  | -3918.03166 | 2 |
| 10831 | H | 74.54810 | 113.98817 | 62.99047 | -1000.40360 | -2412.71261 | -1316.72047 | 2 |
| 10832 | H | 73.73634 | 112.69181 | 62.47908 | 616.02925   | -1298.59838 | -1111.26149 | 2 |
| 10833 | C | 78.47196 | 110.87183 | 57.73382 | 481.10654   | -567.64340  | 370.55881   | 2 |
| 10834 | O | 77.56469 | 111.47650 | 57.18918 | 458.27799   | -127.40671  | 485.88132   | 2 |
| 10835 | N | 79.30958 | 110.00246 | 57.17720 | 623.93250   | -301.65042  | 334.73863   | 2 |
| 10836 | H | 79.86417 | 109.45712 | 57.86562 | -936.09591  | 924.85834   | -1286.38147 | 2 |
| 10837 | C | 78.69948 | 109.23829 | 56.07053 | 333.64883   | 119.41135   | 745.17911   | 2 |
| 10838 | H | 78.44448 | 109.94106 | 55.29233 | -1712.72191 | 4547.57679  | 1043.18188  | 2 |
| 10839 | C | 79.70959 | 108.20379 | 55.60964 | -401.39665  | -696.13142  | 610.63263   | 2 |
| 10840 | H | 80.07718 | 107.73967 | 56.57926 | 144.85283   | 1560.49549  | 1084.58304  | 2 |
| 10841 | O | 81.20649 | 108.80656 | 55.42836 | -594.22340  | 141.14332   | 410.20769   | 2 |
| 10842 | H | 80.97343 | 109.74024 | 55.42859 | 542.75236   | 949.15645   | 2204.53463  | 2 |
| 10843 | C | 79.01232 | 107.25156 | 54.54437 | 157.42321   | -31.94533   | -716.68284  | 2 |

|       |   |          |           |          |             |             |             |   |
|-------|---|----------|-----------|----------|-------------|-------------|-------------|---|
| 10844 | H | 79.79861 | 106.61273 | 54.07679 | -418.01649  | -362.24765  | -1769.83376 | 2 |
| 10845 | H | 78.10862 | 106.70971 | 54.93641 | -1691.45543 | -332.07491  | -642.97719  | 2 |
| 10846 | H | 78.66844 | 107.88187 | 53.67625 | -1585.48923 | -24.65045   | 396.77936   | 2 |
| 10847 | C | 77.30028 | 108.48986 | 56.61180 | 857.84733   | 140.66127   | 113.59050   | 2 |
| 10848 | O | 76.51787 | 108.04058 | 55.80374 | -584.37197  | 81.12620    | 430.74283   | 2 |
| 10849 | N | 77.45613 | 108.07795 | 57.86553 | -873.85359  | -322.49386  | -32.39729   | 2 |
| 10850 | H | 78.24931 | 108.58231 | 58.24523 | 2366.49990  | -1032.48472 | 453.61784   | 2 |
| 10851 | C | 76.29555 | 107.60166 | 58.62204 | -515.99304  | 65.80282    | 100.26119   | 2 |
| 10852 | H | 75.55076 | 108.40993 | 58.44773 | -485.51679  | -357.39715  | -1200.53405 | 2 |
| 10853 | C | 75.83035 | 106.25148 | 57.96872 | -599.58085  | -58.61843   | 203.26454   | 2 |
| 10854 | H | 74.82008 | 106.03741 | 58.39572 | -2523.01704 | -132.80739  | 2605.37529  | 2 |
| 10855 | H | 75.60794 | 106.44406 | 56.84468 | -2686.83382 | -61.74908   | 403.03195   | 2 |
| 10856 | C | 76.89606 | 105.12390 | 58.13402 | 574.07733   | -1524.68724 | -812.11113  | 2 |
| 10857 | C | 76.61900 | 104.14274 | 59.10716 | -222.20788  | -228.07018  | -229.22299  | 2 |
| 10858 | H | 75.67167 | 104.20741 | 59.77576 | -709.70211  | 282.26165   | 1421.79702  | 2 |
| 10859 | C | 77.97729 | 105.06181 | 57.26297 | -853.79805  | 790.81218   | 334.89628   | 2 |
| 10860 | H | 78.18485 | 105.81300 | 56.41986 | 265.63289   | 1283.14081  | -2587.84580 | 2 |
| 10861 | C | 77.46064 | 103.06766 | 59.14940 | 846.30113   | 395.97138   | 84.28470    | 2 |
| 10862 | H | 77.29068 | 102.30515 | 59.95447 | -2249.19646 | 956.15650   | -2832.34903 | 2 |
| 10863 | C | 78.86629 | 104.00866 | 57.38575 | -376.55660  | -120.66762  | 307.38791   | 2 |
| 10864 | H | 79.76178 | 103.97912 | 56.82987 | -2135.16909 | 2051.23717  | 3569.87235  | 2 |
| 10865 | C | 78.59832 | 102.96227 | 58.31695 | -574.87913  | 445.35567   | 892.66725   | 2 |
| 10866 | O | 79.39918 | 101.75154 | 58.47343 | 628.81582   | -146.74007  | -717.14497  | 2 |
| 10867 | H | 79.00786 | 101.43212 | 59.32107 | 2193.45459  | 380.24907   | -1108.75141 | 2 |
| 10868 | C | 76.68938 | 107.62905 | 60.13334 | 375.25194   | 767.45094   | 40.15299    | 2 |
| 10869 | O | 77.50946 | 108.41463 | 60.62355 | -413.28357  | 292.21494   | -525.30169  | 2 |
| 10870 | N | 75.78406 | 106.84757 | 60.81646 | -198.10865  | 131.20007   | -387.67542  | 2 |
| 10871 | H | 75.13225 | 106.28962 | 60.27572 | -2289.40196 | -2141.15940 | -1877.06226 | 2 |
| 10872 | C | 76.37605 | 105.93799 | 61.81672 | -592.81439  | -258.84353  | 535.59121   | 2 |
| 10873 | H | 75.71854 | 105.05973 | 61.63991 | 790.24514   | 449.00446   | 399.85247   | 2 |
| 10874 | C | 77.86600 | 105.58920 | 61.42082 | 1062.66927  | -426.83938  | 384.93024   | 2 |
| 10875 | H | 77.86057 | 105.24461 | 60.34867 | -2159.84157 | 859.71242   | -2980.94007 | 2 |
| 10876 | H | 78.43800 | 106.54646 | 61.39438 | -608.12565  | 1225.66092  | 287.46876   | 2 |
| 10877 | C | 78.63432 | 104.56224 | 62.29280 | -56.15533   | -379.02494  | 439.26480   | 2 |
| 10878 | H | 78.09785 | 103.65623 | 62.18740 | -1303.13412 | -328.68632  | -269.08631  | 2 |
| 10879 | H | 79.65379 | 104.38737 | 61.81015 | -1261.69630 | -921.26353  | 1291.11624  | 2 |
| 10880 | C | 78.79567 | 105.22264 | 63.74449 | -9.77619    | -401.67667  | -54.94178   | 2 |
| 10881 | H | 79.40651 | 106.13970 | 63.73968 | -716.13907  | 2320.68627  | -909.91067  | 2 |
| 10882 | H | 77.86121 | 105.48461 | 64.28366 | -1573.25786 | -2109.52029 | 2456.43510  | 2 |
| 10883 | N | 79.54288 | 104.24497 | 64.34160 | -373.76937  | 9.12800     | 672.01433   | 2 |
| 10884 | H | 79.07625 | 103.49267 | 64.84553 | -1775.88509 | 497.38486   | -2476.94488 | 2 |
| 10885 | C | 80.82161 | 104.15887 | 64.28018 | -40.20393   | 179.10722   | 7.91627     | 2 |
| 10886 | N | 81.56989 | 105.04839 | 63.58788 | 655.72366   | -404.12660  | 131.95413   | 2 |
| 10887 | H | 81.17889 | 105.80413 | 63.00427 | 1478.73385  | 470.26559   | -192.73552  | 2 |
| 10888 | H | 82.60691 | 104.92116 | 63.39886 | -2045.80144 | -1849.38829 | 655.78014   | 2 |
| 10889 | N | 81.46226 | 103.05879 | 64.98007 | -583.94551  | 312.23903   | 361.81406   | 2 |
| 10890 | H | 81.23322 | 102.80914 | 65.95426 | -120.60626  | 609.60899   | 1346.15396  | 2 |
| 10891 | H | 82.48827 | 103.08905 | 64.88772 | -1201.87647 | 2038.48312  | -1541.13447 | 2 |
| 10892 | C | 76.20130 | 106.66559 | 63.28419 | -770.89880  | -1271.69071 | 289.92910   | 2 |
| 10893 | O | 75.51430 | 106.26942 | 64.21576 | -663.40620  | -650.96259  | -289.97042  | 2 |
| 10894 | N | 76.93209 | 107.78327 | 63.19303 | -267.41305  | -966.08845  | -997.18205  | 2 |
| 10895 | H | 77.34692 | 107.99223 | 62.19171 | 2384.94080  | -1503.43171 | -1301.95226 | 2 |
| 10896 | C | 76.91640 | 108.90725 | 64.15039 | -1294.87273 | 83.11625    | -301.60080  | 2 |
| 10897 | H | 76.77323 | 108.42351 | 65.12825 | -950.66071  | -932.68839  | -1794.57879 | 2 |
| 10898 | C | 78.25163 | 109.63299 | 63.99937 | -8.97036    | -439.23588  | 2.66250     | 2 |
| 10899 | H | 78.22625 | 110.04424 | 62.95957 | 2411.08041  | 813.06992   | -1102.26435 | 2 |
| 10900 | C | 78.43184 | 110.74379 | 65.01113 | -105.26314  | -32.36699   | -202.64522  | 2 |
| 10901 | H | 79.23812 | 111.51710 | 64.74220 | -798.49351  | -2227.03905 | 3000.18782  | 2 |
| 10902 | H | 77.50932 | 111.27043 | 65.08883 | 1285.16937  | -2582.93354 | 460.30457   | 2 |
| 10903 | H | 78.71547 | 110.39469 | 66.07165 | -331.78837  | -1788.18710 | -1110.37497 | 2 |
| 10904 | C | 79.51429 | 108.78505 | 64.12203 | 89.12398    | -68.61876   | 583.11055   | 2 |
| 10905 | H | 80.42869 | 109.47146 | 63.86661 | 892.64338   | -103.10350  | 1401.77051  | 2 |

|       |   |          |           |          |             |             |             |          |
|-------|---|----------|-----------|----------|-------------|-------------|-------------|----------|
| 10906 | H | 79.76744 | 108.28277 | 65.08205 | 1605.90389  | -381.01476  | 913.21594   | 2        |
| 10907 | H | 79.54506 | 107.97872 | 63.42207 | -1297.05441 | 628.55882   | 2443.37655  | 2        |
| 10908 | C | 75.78132 | 109.87798 | 63.53646 | 455.06992   | -180.03557  | -906.90460  | 2        |
| 10909 | O | 76.05228 | 110.99204 | 63.09381 | -529.16267  | 464.36373   | -514.11895  | 2        |
| 10910 | N | 74.61157 | 109.28827 | 63.83137 | 837.09097   | 661.59368   | 524.61088   | 2        |
| 10911 | H | 74.75886 | 108.39908 | 64.23382 | -1138.37324 | 288.17119   | 649.34556   | 2        |
| 10912 | C | 73.44284 | 109.77978 | 63.09934 | 42.41044    | 404.67463   | -146.52260  | 2        |
| 10913 | H | 74.02066 | 110.32717 | 62.31489 | 3492.29066  | -294.40002  | 1918.81303  | 2        |
| 10914 | C | 72.85704 | 108.41514 | 62.50142 | 174.01261   | 47.38403    | 317.76066   | 2        |
| 10915 | H | 73.57481 | 107.58299 | 62.31127 | 2204.39700  | -2895.49138 | -4032.70138 | 2        |
| 10916 | H | 72.10620 | 108.00856 | 63.24607 | -1898.50407 | 1888.05880  | -465.08418  | 2        |
| 10917 | C | 72.28644 | 108.64181 | 61.02840 | 44.09309    | 426.44280   | 860.11377   | 2        |
| 10918 | H | 71.95372 | 107.64793 | 60.68380 | -204.89114  | -925.40929  | 2027.88812  | 2        |
| 10919 | C | 71.05711 | 109.67338 | 61.02054 | 1411.54186  | -615.93598  | -174.08317  | 2        |
| 10920 | H | 71.56032 | 110.65165 | 60.78253 | 1605.62344  | -93.73957   | -323.81072  | 2        |
| 10921 | H | 70.35286 | 109.52381 | 60.18786 | -2207.65513 | 537.20766   | -1142.07517 | 2        |
| 10922 | H | 70.52446 | 109.71711 | 61.97396 | -1890.94888 | -2065.41845 | 96.96562    | 2        |
| 10923 | C | 73.39305 | 109.13565 | 60.05296 | 446.18004   | -686.60803  | 95.44946    | 2        |
| 10924 | H | 74.28749 | 108.49099 | 60.06035 | -94.40249   | 2492.46936  | 849.07351   | 2        |
| 10925 | H | 73.03350 | 109.18070 | 58.98907 | -1112.49154 | 187.31933   | 2892.11745  | 2        |
| 10926 | H | 73.78460 | 110.19219 | 60.28705 | 249.87943   | 561.07887   | 2240.94895  | 2        |
| 10927 | C | 72.54555 | 110.63938 | 64.08714 | 770.82701   | -146.02497  | 954.33255   | 2        |
| 10928 | O | 71.36000 | 110.52571 | 64.19777 | -379.88746  | -663.61775  | 87.61600    | 2        |
| 10929 | O | 73.24738 | 111.72764 | 64.69585 | -613.85959  | -50.64132   | -253.35743  | 2        |
| 10930 | H | 74.14436 | 111.57440 | 64.48835 | 2882.55303  | -1822.60767 | -849.48474  | 2        |
| 10931 |   | 5463     |           |          |             |             |             |          |
| 10932 |   | 150.0000 | 150.0000  | 150.0000 | 0.0000      | 0.0000      | 0.0000***** | 100.0000 |
|       |   | 0.2500   | 400.00    | 0.00     | 0.00        | -25967.2204 | 0.2251      | 400.0000 |
| 10933 | N | 58.16043 | 94.53138  | 59.17425 | -156.39663  | -72.22775   | -71.80474   | 1        |
| 10934 | H | 57.95312 | 95.20225  | 59.92568 | -797.00916  | -2728.56626 | -1827.92286 | 1        |
| 10935 | H | 57.74924 | 95.05926  | 58.34712 | -1892.90999 | -109.62552  | 2072.50020  | 1        |
| 10936 | H | 63.01319 | 101.73785 | 57.12985 | -3156.30573 | 1256.50677  | 389.41765   | 1        |
| 10937 | C | 59.49958 | 94.34519  | 58.79374 | -346.94382  | 443.68482   | 284.84162   | 1        |
| 10938 | H | 60.08457 | 94.67946  | 59.67287 | 3521.71160  | 3067.24489  | -1487.01854 | 1        |
| 10939 | C | 59.72162 | 92.75225  | 58.45927 | -171.45862  | -233.27461  | 112.56741   | 1        |
| 10940 | H | 60.68387 | 92.58329  | 57.95797 | 2470.26020  | -2571.23592 | 2704.12685  | 1        |
| 10941 | H | 59.05095 | 92.50518  | 57.60511 | 539.66327   | 1217.65780  | 517.11301   | 1        |
| 10942 | C | 59.48950 | 91.85361  | 59.70227 | -176.92257  | 353.62024   | -744.20013  | 1        |
| 10943 | H | 58.53080 | 92.08216  | 60.21175 | -245.73982  | -1168.71000 | -240.90072  | 1        |
| 10944 | H | 60.15599 | 92.18627  | 60.55457 | 1826.38436  | 753.66219   | 2824.51893  | 1        |
| 10945 | S | 59.83754 | 90.21987  | 59.07100 | -451.85990  | 442.40451   | -13.87442   | 1        |
| 10946 | C | 60.25912 | 89.45409  | 60.69386 | 84.37838    | -29.38509   | 309.19986   | 1        |
| 10947 | H | 60.92096 | 90.06490  | 61.40634 | -210.35460  | -6.51890    | -525.58504  | 1        |
| 10948 | H | 59.41954 | 89.43553  | 61.46632 | -790.58890  | 1390.90566  | -14.93259   | 1        |
| 10949 | H | 60.65255 | 88.42320  | 60.68592 | -3081.96520 | 1050.83680  | -1676.72995 | 1        |
| 10950 | C | 59.75184 | 95.12526  | 57.36857 | -567.71060  | 593.91430   | 672.01689   | 1        |
| 10951 | O | 59.21520 | 94.86369  | 56.30226 | 2.69965     | -143.58828  | -309.16520  | 1        |
| 10952 | N | 60.67992 | 96.08068  | 57.55617 | 1352.80810  | 52.36705    | -71.36855   | 1        |
| 10953 | H | 61.05102 | 96.42677  | 58.52144 | -1017.24422 | -197.67348  | -1151.23689 | 1        |
| 10954 | C | 61.47727 | 96.35365  | 56.34318 | -289.89867  | -446.24647  | 1044.60613  | 1        |
| 10955 | H | 60.98707 | 95.80553  | 55.51548 | -1232.95701 | 821.13584   | 130.12214   | 1        |
| 10956 | C | 61.26351 | 97.87634  | 56.10791 | 475.50521   | 155.83808   | 190.05055   | 1        |
| 10957 | H | 61.08399 | 98.19100  | 55.02348 | 1838.73243  | -3756.29542 | -1183.84708 | 1        |
| 10958 | H | 60.38179 | 98.29397  | 56.62158 | -442.11279  | -691.87708  | -1946.70058 | 1        |
| 10959 | C | 62.53727 | 98.52096  | 56.76295 | 662.40337   | -237.06835  | 78.77729    | 1        |
| 10960 | H | 63.54913 | 98.19974  | 56.31459 | -357.18865  | 34.47350    | 844.63114   | 1        |
| 10961 | H | 62.53290 | 98.18478  | 57.81596 | -2663.10972 | -1750.95030 | -873.15478  | 1        |
| 10962 | C | 62.37370 | 100.07448 | 56.61850 | -475.45541  | 323.24989   | -219.95652  | 1        |
| 10963 | O | 61.55423 | 100.69342 | 55.95894 | -594.83152  | 7.77067     | 537.73660   | 1        |
| 10964 | O | 63.35378 | 100.79002 | 57.38658 | -156.07391  | -298.95515  | 422.81224   | 1        |
| 10965 | C | 63.01484 | 95.92205  | 56.54718 | -1169.89672 | -232.96887  | 365.94463   | 1        |
| 10966 | O | 63.97446 | 96.49602  | 55.94091 | -1035.42237 | 328.67086   | 1142.90262  | 1        |

|       |   |          |           |          |             |             |             |   |
|-------|---|----------|-----------|----------|-------------|-------------|-------------|---|
| 10967 | N | 63.13837 | 95.06107  | 57.54224 | 186.23473   | -278.22763  | -46.52723   | 1 |
| 10968 | H | 62.27809 | 94.69329  | 57.95342 | 630.67997   | -2083.36788 | 2300.43816  | 1 |
| 10969 | C | 64.25224 | 94.15676  | 57.43295 | -12.31584   | 163.86153   | -309.21754  | 1 |
| 10970 | H | 64.29198 | 93.85677  | 56.34519 | -611.45451  | 2052.12083  | -3495.04809 | 1 |
| 10971 | H | 63.87034 | 93.20420  | 57.87857 | 2748.02657  | -805.69292  | -1179.30127 | 1 |
| 10972 | C | 65.75164 | 94.64245  | 57.96003 | 654.42535   | -261.73918  | 252.92292   | 1 |
| 10973 | O | 66.23858 | 93.84771  | 58.72658 | -911.87538  | -318.29616  | 228.00144   | 1 |
| 10974 | N | 66.07397 | 95.79612  | 57.42973 | 419.05104   | -547.80496  | 805.47731   | 1 |
| 10975 | H | 65.43857 | 96.27466  | 56.72471 | 1387.87194  | 1716.71901  | -853.98759  | 1 |
| 10976 | C | 66.79601 | 96.69029  | 58.31322 | 314.36854   | 437.18363   | -71.75947   | 1 |
| 10977 | H | 67.62897 | 95.98798  | 58.57776 | -1043.43944 | 1961.15016  | -897.92192  | 1 |
| 10978 | C | 67.26919 | 98.05746  | 57.65957 | -197.78152  | 20.37831    | 263.01072   | 1 |
| 10979 | H | 67.51257 | 97.91397  | 56.63084 | -324.13093  | -1244.59757 | 2564.89403  | 1 |
| 10980 | C | 66.01988 | 99.01397  | 57.59478 | 515.27438   | -91.93528   | 100.79705   | 1 |
| 10981 | H | 66.07009 | 100.00747 | 57.11079 | 281.93211   | 21.77721    | 744.95134   | 1 |
| 10982 | H | 65.77436 | 99.29721  | 58.65101 | -2387.13613 | -1349.01058 | -719.38373  | 1 |
| 10983 | H | 65.16163 | 98.35347  | 57.19284 | 2672.19666  | -801.31379  | -345.52991  | 1 |
| 10984 | C | 68.60562 | 98.53901  | 58.41617 | -382.08456  | -597.51520  | -88.14755   | 1 |
| 10985 | H | 69.32801 | 97.71412  | 58.42856 | -536.71928  | -281.24734  | 1349.59213  | 1 |
| 10986 | H | 68.42364 | 98.72053  | 59.44598 | -437.77383  | -401.50131  | -786.73556  | 1 |
| 10987 | C | 69.08727 | 99.86928  | 57.74615 | 405.91255   | 658.43392   | -848.68748  | 1 |
| 10988 | H | 68.21776 | 100.57460 | 57.61691 | 1951.70162  | 1369.62460  | 1257.78539  | 1 |
| 10989 | H | 69.61257 | 99.69974  | 56.76191 | 1101.60201  | -1128.10933 | 2417.48021  | 1 |
| 10990 | H | 69.80177 | 100.35470 | 58.35155 | 1900.95282  | 1739.30517  | 1134.04575  | 1 |
| 10991 | C | 66.11269 | 97.12480  | 59.68843 | -176.25244  | 182.44215   | -95.95372   | 1 |
| 10992 | O | 66.77388 | 97.58175  | 60.63090 | -468.24096  | 379.91793   | -690.29471  | 1 |
| 10993 | N | 64.79372 | 97.01794  | 59.70987 | -419.14937  | 345.76278   | 558.80681   | 1 |
| 10994 | H | 64.24890 | 96.72701  | 58.91317 | 623.75228   | 1079.05974  | 2763.07311  | 1 |
| 10995 | C | 64.03459 | 97.57163  | 60.81630 | 726.19065   | -272.20695  | 642.11805   | 1 |
| 10996 | H | 64.77342 | 98.28940  | 61.36223 | -792.11180  | 1809.99777  | -1901.74733 | 1 |
| 10997 | C | 62.80948 | 98.30329  | 60.24820 | 460.28213   | -102.05800  | 483.31403   | 1 |
| 10998 | H | 62.40947 | 99.15239  | 60.83872 | -1574.11198 | 1086.81408  | -755.98353  | 1 |
| 10999 | H | 63.14111 | 98.68011  | 59.26832 | -711.84642  | 635.49414   | -1171.69198 | 1 |
| 11000 | O | 61.49609 | 97.41352  | 59.71803 | -141.36330  | -404.91390  | 301.34429   | 1 |
| 11001 | H | 61.15885 | 97.19870  | 60.57552 | 239.91218   | 487.87188   | -1006.40776 | 1 |
| 11002 | C | 63.48520 | 96.34615  | 61.80070 | 848.67756   | 824.41376   | -0.89799    | 1 |
| 11003 | O | 62.93411 | 96.69945  | 62.82546 | 1013.95733  | -164.31053  | -277.44203  | 1 |
| 11004 | N | 63.68555 | 95.17158  | 61.24116 | 199.24408   | -103.33131  | 93.63151    | 1 |
| 11005 | H | 64.19563 | 95.32509  | 60.36848 | -798.36688  | 727.84230   | -4024.24212 | 1 |
| 11006 | C | 63.53258 | 93.86286  | 61.80589 | 1021.01121  | 332.94942   | -628.86071  | 1 |
| 11007 | H | 63.78749 | 93.19529  | 60.95840 | 2169.12266  | -118.03273  | 1796.48722  | 1 |
| 11008 | C | 64.65410 | 93.79221  | 62.99035 | -160.28198  | -483.92503  | 122.91378   | 1 |
| 11009 | H | 64.39834 | 94.56585  | 63.76281 | -3988.71750 | 5383.07655  | 330.86470   | 1 |
| 11010 | C | 64.71959 | 92.29292  | 63.47320 | 475.35789   | 1047.33037  | -312.81245  | 1 |
| 11011 | H | 65.40726 | 92.16803  | 64.34812 | 3289.23102  | -3324.58332 | -237.73729  | 1 |
| 11012 | H | 63.67690 | 91.88153  | 63.66756 | -2759.78662 | 504.91483   | -2192.04574 | 1 |
| 11013 | H | 65.26838 | 91.64298  | 62.70001 | -94.53429   | -1147.86506 | -528.83022  | 1 |
| 11014 | C | 66.09994 | 94.01275  | 62.43473 | -410.35410  | 12.51151    | 257.59936   | 1 |
| 11015 | H | 66.20534 | 93.73098  | 61.36093 | -894.64027  | -345.69515  | 1181.80094  | 1 |
| 11016 | H | 66.76783 | 93.36558  | 62.99645 | -467.77738  | 1207.17499  | 1003.74060  | 1 |
| 11017 | C | 66.56830 | 95.51390  | 62.65662 | -908.22021  | -249.60988  | -606.53789  | 1 |
| 11018 | H | 67.64908 | 95.63936  | 62.38069 | 578.16447   | -1115.75474 | 574.68683   | 1 |
| 11019 | H | 65.97646 | 96.27615  | 62.09082 | -185.62122  | 776.91407   | 1361.71517  | 1 |
| 11020 | H | 66.38284 | 95.82951  | 63.74940 | -2576.06338 | 1420.30889  | 131.25801   | 1 |
| 11021 | C | 62.05862 | 93.58051  | 62.37173 | -242.78269  | -6.28080    | -281.68844  | 1 |
| 11022 | O | 61.52164 | 92.53185  | 61.94332 | 489.66945   | -76.34530   | 510.90051   | 1 |
| 11023 | N | 61.51696 | 94.48627  | 63.20827 | -295.14348  | -165.58572  | 85.43876    | 1 |
| 11024 | H | 62.02985 | 95.33206  | 63.50966 | 234.93892   | 1628.24441  | 1968.30012  | 1 |
| 11025 | C | 60.05034 | 94.38349  | 63.24912 | 740.87084   | 397.38608   | -303.48704  | 1 |
| 11026 | H | 59.85008 | 93.43114  | 62.72876 | -2254.95576 | 3207.58001  | -3152.36758 | 1 |
| 11027 | C | 59.70098 | 94.46680  | 64.77886 | 265.96245   | -107.17317  | -345.85454  | 1 |
| 11028 | H | 59.78050 | 95.51468  | 65.12806 | -2992.81083 | 1387.15692  | -1386.14991 | 1 |

|       |   |          |           |          |             |             |             |   |
|-------|---|----------|-----------|----------|-------------|-------------|-------------|---|
| 11029 | H | 60.39520 | 93.87982  | 65.45208 | 773.46291   | -2864.08685 | -2191.64828 | 1 |
| 11030 | C | 58.25697 | 93.91049  | 64.87388 | 93.91225    | 213.75026   | 252.69791   | 1 |
| 11031 | C | 58.01697 | 92.52082  | 64.89467 | 307.85125   | -381.51808  | 38.30586    | 1 |
| 11032 | H | 58.89064 | 91.81631  | 64.70514 | 2177.07880  | 1050.63759  | 1766.37330  | 1 |
| 11033 | C | 56.68054 | 92.08120  | 65.10555 | 325.31073   | 473.37486   | -966.95754  | 1 |
| 11034 | H | 56.47886 | 91.08049  | 65.14152 | -5853.99443 | 1334.15144  | 1422.25526  | 1 |
| 11035 | C | 55.61131 | 93.03075  | 65.18412 | -42.93830   | -259.57219  | -525.04028  | 1 |
| 11036 | O | 54.24254 | 92.58934  | 65.19868 | -8.97560    | -363.99506  | 15.01135    | 1 |
| 11037 | H | 53.80718 | 93.45934  | 65.25008 | -37.75048   | -1258.39414 | 6055.49289  | 1 |
| 11038 | C | 57.20503 | 94.92393  | 65.11868 | 681.12944   | -347.41848  | 636.84165   | 1 |
| 11039 | H | 57.39155 | 96.02102  | 65.09479 | -3612.35146 | -794.11389  | -487.36644  | 1 |
| 11040 | C | 55.93755 | 94.42577  | 65.31080 | -214.71130  | 116.78192   | 885.93510   | 1 |
| 11041 | H | 55.10354 | 95.08805  | 65.33926 | -822.91914  | -2188.34689 | -279.34936  | 1 |
| 11042 | C | 59.20714 | 95.59445  | 62.61516 | -301.27078  | -232.36283  | 591.47100   | 1 |
| 11043 | O | 57.99354 | 95.56346  | 62.49953 | 884.14248   | 535.63794   | -159.48387  | 1 |
| 11044 | N | 60.03370 | 96.63166  | 62.42705 | 246.74863   | 270.18808   | -74.01686   | 1 |
| 11045 | H | 61.01732 | 96.31920  | 62.41711 | 1919.73741  | 38.00158    | -1534.07541 | 1 |
| 11046 | C | 59.60173 | 97.99552  | 62.31106 | 630.63578   | -679.26591  | -878.54468  | 1 |
| 11047 | H | 60.56507 | 98.53030  | 61.98903 | 3653.47627  | 1244.83822  | -1561.18142 | 1 |
| 11048 | C | 58.37655 | 98.25356  | 61.31634 | -77.12390   | 624.34038   | 912.70820   | 1 |
| 11049 | H | 58.46092 | 99.36250  | 61.27500 | 95.27370    | 2481.50067  | 1235.47830  | 1 |
| 11050 | O | 57.06368 | 97.79383  | 61.48203 | 150.32224   | 386.78898   | -1.91882    | 1 |
| 11051 | H | 57.22025 | 96.84401  | 61.93178 | -139.76533  | -533.73871  | 2489.85035  | 1 |
| 11052 | C | 59.01444 | 98.25437  | 59.85876 | -294.33264  | 176.49738   | -676.01205  | 1 |
| 11053 | H | 60.06569 | 98.64599  | 59.85564 | -2070.74348 | -2556.39960 | 1532.35949  | 1 |
| 11054 | H | 59.00735 | 97.21636  | 59.53614 | 623.84751   | 1671.83231  | 2021.69577  | 1 |
| 11055 | H | 58.48455 | 98.80007  | 59.10807 | 702.23365   | -6493.63139 | -648.56493  | 1 |
| 11056 | C | 59.15928 | 98.62790  | 63.71270 | 80.23402    | -352.36945  | -396.49801  | 1 |
| 11057 | O | 58.64548 | 97.96416  | 64.63944 | -439.40010  | 320.79190   | -743.96661  | 1 |
| 11058 | N | 59.31975 | 99.92186  | 63.66404 | -868.39077  | 311.37765   | 456.38930   | 1 |
| 11059 | H | 59.74527 | 100.33170 | 62.82617 | 925.13336   | -390.31174  | -1210.97078 | 1 |
| 11060 | C | 58.99561 | 100.72919 | 64.82472 | -407.58364  | -847.52909  | -260.21228  | 1 |
| 11061 | H | 57.93871 | 100.43509 | 65.15246 | -1126.88035 | 527.22360   | -1070.00906 | 1 |
| 11062 | C | 59.98771 | 100.56367 | 66.03554 | 106.70779   | -141.62223  | -198.69183  | 1 |
| 11063 | H | 59.65399 | 101.20294 | 66.84339 | 1852.20808  | -1211.76849 | 711.56378   | 1 |
| 11064 | H | 59.85848 | 99.46839  | 66.45839 | -726.25611  | 2023.21172  | 1829.68880  | 1 |
| 11065 | O | 61.46372 | 100.47095 | 66.05519 | -262.70949  | -426.16194  | 391.04369   | 1 |
| 11066 | H | 61.71813 | 101.34096 | 66.37737 | -1964.91892 | 2937.76241  | 1490.16390  | 1 |
| 11067 | C | 59.07397 | 102.29238 | 64.52414 | -141.02831  | 60.71605    | 195.55828   | 1 |
| 11068 | O | 59.68580 | 102.81051 | 63.58827 | -664.02621  | -382.47330  | 142.40621   | 1 |
| 11069 | N | 58.58312 | 102.93519 | 65.58839 | 38.62437    | 490.88921   | 252.20002   | 1 |
| 11070 | H | 57.95678 | 102.38278 | 66.27601 | 1525.70027  | -1220.07226 | 27.35274    | 1 |
| 11071 | C | 58.35764 | 104.33843 | 65.46290 | -37.48681   | -39.26400   | -376.82815  | 1 |
| 11072 | H | 57.83060 | 104.23668 | 64.44176 | 582.62924   | 2209.50926  | 700.82479   | 1 |
| 11073 | C | 57.31118 | 104.91487 | 66.45811 | -512.85730  | -633.41145  | -170.54155  | 1 |
| 11074 | H | 56.35800 | 105.24601 | 65.93256 | 2066.12221  | 1688.91905  | -99.81639   | 1 |
| 11075 | H | 57.71068 | 105.83611 | 66.90430 | -86.12253   | 1100.82793  | 546.74648   | 1 |
| 11076 | C | 57.01195 | 103.97354 | 67.69776 | 114.40177   | -395.62179  | 374.14413   | 1 |
| 11077 | O | 57.04437 | 102.72931 | 67.62698 | -258.57246  | 61.30788    | -449.06914  | 1 |
| 11078 | O | 56.55720 | 104.61043 | 68.68456 | 208.28632   | 401.94260   | 15.81898    | 1 |
| 11079 | C | 59.72969 | 105.28526 | 65.47728 | -4.56373    | -260.92987  | 107.07326   | 1 |
| 11080 | O | 59.61741 | 106.38138 | 65.01887 | 190.68022   | 463.24006   | 426.38984   | 1 |
| 11081 | N | 60.80900 | 104.78046 | 66.07544 | 923.32918   | 739.15570   | 368.69361   | 1 |
| 11082 | H | 60.62543 | 103.85164 | 66.49948 | 215.52941   | 968.91746   | -3013.98555 | 1 |
| 11083 | C | 62.04290 | 105.41845 | 66.18036 | 53.08488    | 583.86293   | -1321.51143 | 1 |
| 11084 | H | 61.77969 | 106.51061 | 66.09926 | -1562.78633 | -982.54085  | -750.94095  | 1 |
| 11085 | C | 62.63031 | 104.99976 | 67.62785 | 753.35890   | -528.25821  | -395.05766  | 1 |
| 11086 | H | 61.93899 | 105.61756 | 68.26830 | -1803.50834 | -1328.18188 | -1594.59560 | 1 |
| 11087 | H | 63.68802 | 105.27289 | 67.73160 | -1055.73521 | -3293.52658 | -3300.34837 | 1 |
| 11088 | C | 62.54754 | 103.46648 | 67.83976 | 37.87181    | -143.63910  | 58.99704    | 1 |
| 11089 | O | 61.47006 | 102.85763 | 67.65427 | 20.15494    | 252.96067   | 674.75402   | 1 |
| 11090 | N | 63.70610 | 102.93739 | 68.17832 | 15.99073    | 808.19549   | 776.52983   | 1 |

|       |   |          |           |          |             |             |             |   |
|-------|---|----------|-----------|----------|-------------|-------------|-------------|---|
| 11091 | H | 63.85078 | 101.90115 | 68.42651 | -1681.50953 | -4070.00030 | 9.98836     | 1 |
| 11092 | H | 64.60439 | 103.45694 | 68.38335 | 593.74513   | 5023.28625  | 2362.95729  | 1 |
| 11093 | C | 63.02870 | 104.92234 | 64.94154 | -1113.08371 | -551.69396  | -114.53660  | 1 |
| 11094 | O | 64.19557 | 105.26538 | 64.85588 | 231.18288   | 283.84603   | -302.08764  | 1 |
| 11095 | N | 62.38217 | 104.24329 | 63.97971 | -947.16064  | -163.18817  | -240.28713  | 1 |
| 11096 | H | 61.42724 | 103.94021 | 64.01502 | -124.32753  | 1941.75380  | -1824.00279 | 1 |
| 11097 | C | 63.11755 | 103.24182 | 63.28802 | -211.33508  | 812.22395   | -318.47940  | 1 |
| 11098 | H | 64.15879 | 103.36012 | 63.44980 | -351.23737  | 44.64401    | -1507.00669 | 1 |
| 11099 | C | 62.65429 | 101.75579 | 63.60962 | -223.25237  | 246.37891   | -648.05729  | 1 |
| 11100 | H | 62.39279 | 101.71956 | 64.67154 | -2285.35201 | -16.03896   | -1956.23031 | 1 |
| 11101 | H | 61.78773 | 101.56505 | 62.98659 | 3108.53887  | 2371.49077  | 1630.07466  | 1 |
| 11102 | C | 63.81606 | 100.76872 | 63.28128 | 860.19452   | -1029.55108 | -1031.78584 | 1 |
| 11103 | C | 64.75748 | 100.94499 | 62.24941 | -35.48074   | -240.67963  | -212.66728  | 1 |
| 11104 | H | 64.76209 | 101.79223 | 61.54518 | 3135.51994  | 1663.86651  | -3722.34557 | 1 |
| 11105 | C | 65.87447 | 100.07335 | 62.28640 | 367.91119   | 699.63192   | 622.91969   | 1 |
| 11106 | H | 66.55274 | 100.44585 | 61.54299 | 1381.53458  | -2581.49246 | 770.75236   | 1 |
| 11107 | C | 66.13252 | 99.13198  | 63.24972 | -295.46006  | 58.10350    | -570.92727  | 1 |
| 11108 | O | 67.31466 | 98.35760  | 63.24524 | 155.94314   | -487.77632  | 414.78632   | 1 |
| 11109 | H | 67.44121 | 98.06852  | 62.27149 | 1477.38790  | -1002.85619 | 3587.70584  | 1 |
| 11110 | C | 64.01778 | 99.85910  | 64.37946 | 188.38748   | -789.08027  | 955.99833   | 1 |
| 11111 | H | 63.27486 | 99.79989  | 65.17366 | 1424.95271  | 1338.62574  | 1889.81701  | 1 |
| 11112 | C | 65.15127 | 99.05143  | 64.29726 | 449.55541   | 3.77414     | 396.85749   | 1 |
| 11113 | H | 65.46982 | 98.34451  | 65.13137 | -2725.52549 | -1925.82065 | -289.58965  | 1 |
| 11114 | C | 62.80944 | 103.53901 | 61.67296 | 514.77564   | 558.04820   | 445.68621   | 1 |
| 11115 | O | 63.67492 | 104.01856 | 60.96332 | 428.13545   | 348.82321   | -102.75920  | 1 |
| 11116 | N | 61.51832 | 103.32887 | 61.43574 | -51.24309   | 776.68118   | 374.31197   | 1 |
| 11117 | H | 60.83766 | 102.91422 | 62.10552 | -691.17508  | 746.99056   | 292.13966   | 1 |
| 11118 | C | 61.04354 | 103.49699 | 60.11057 | 267.23162   | 868.19760   | -91.73922   | 1 |
| 11119 | H | 61.94739 | 103.18589 | 59.52076 | -2170.96296 | 1689.80148  | -3510.06995 | 1 |
| 11120 | C | 59.62039 | 102.76758 | 59.90675 | 413.52361   | 124.48386   | -54.49285   | 1 |
| 11121 | H | 58.93260 | 103.46420 | 60.42271 | -2951.88448 | 2097.30721  | 60.09608    | 1 |
| 11122 | O | 59.60684 | 101.54450 | 60.64423 | 210.82411   | 423.54190   | -91.62728   | 1 |
| 11123 | H | 59.42804 | 101.89278 | 61.55348 | 936.04003   | -1061.39995 | -2545.85953 | 1 |
| 11124 | C | 59.43044 | 102.84164 | 58.34058 | -174.68895  | 157.22758   | 672.16252   | 1 |
| 11125 | H | 58.47877 | 102.52081 | 57.93813 | -1162.28084 | 3230.74108  | 2249.34241  | 1 |
| 11126 | H | 60.08821 | 102.18789 | 57.81610 | -751.46382  | 3029.05168  | 751.68371   | 1 |
| 11127 | H | 59.57132 | 103.90916 | 57.89876 | -758.31645  | -565.93566  | -3005.79959 | 1 |
| 11128 | C | 60.64193 | 105.08696 | 60.15795 | 204.28305   | -325.20123  | 340.12916   | 1 |
| 11129 | O | 59.53986 | 105.46471 | 59.84136 | 144.55543   | -112.79043  | 126.88916   | 1 |
| 11130 | N | 61.73614 | 105.89431 | 60.20437 | 890.30116   | -431.21185  | 357.39776   | 1 |
| 11131 | H | 62.74937 | 105.57860 | 60.29292 | -1299.54456 | -1521.56650 | -1800.50783 | 1 |
| 11132 | C | 61.55551 | 107.22336 | 60.72905 | 428.36088   | -350.02521  | -710.77998  | 1 |
| 11133 | H | 60.81266 | 107.76589 | 60.17832 | 632.29094   | 2307.64477  | 3841.34305  | 1 |
| 11134 | C | 60.88709 | 106.96321 | 62.20172 | 606.23961   | -35.24950   | -699.84304  | 1 |
| 11135 | H | 61.07831 | 105.93236 | 62.61677 | 1905.48418  | 1056.09185  | 2029.40090  | 1 |
| 11136 | H | 61.31812 | 107.58869 | 63.05323 | 2451.49126  | 612.85789   | -938.45737  | 1 |
| 11137 | C | 59.42774 | 107.36363 | 62.17581 | 124.17860   | 1151.32878  | 265.75585   | 1 |
| 11138 | H | 58.91755 | 106.95431 | 61.28744 | 2040.58174  | -755.30713  | 971.26373   | 1 |
| 11139 | H | 58.94913 | 107.03719 | 63.14855 | -1054.20832 | -428.99845  | -2260.28306 | 1 |
| 11140 | C | 59.02873 | 108.94312 | 61.98732 | 352.55903   | -428.69889  | 300.37233   | 1 |
| 11141 | O | 57.89530 | 109.33673 | 62.32709 | 397.01454   | -589.68386  | 420.80850   | 1 |
| 11142 | O | 59.90425 | 109.65515 | 61.48713 | 61.65027    | 226.85593   | 381.10453   | 1 |
| 11143 | C | 62.94939 | 107.97763 | 60.73569 | 502.98499   | -54.02938   | -77.09174   | 1 |
| 11144 | O | 64.08413 | 107.57074 | 60.48221 | -363.56042  | 323.11782   | -497.73454  | 1 |
| 11145 | N | 62.55209 | 109.16864 | 61.31105 | 678.68854   | 932.59153   | -378.43437  | 1 |
| 11146 | H | 61.57279 | 109.13090 | 61.72444 | 1334.48772  | 173.01289   | 1575.76267  | 1 |
| 11147 | C | 63.63325 | 109.80085 | 62.02465 | -827.35378  | -73.56550   | -467.92244  | 1 |
| 11148 | H | 64.51336 | 109.61606 | 61.40195 | 491.63715   | -2699.44547 | -3568.66855 | 1 |
| 11149 | C | 63.27367 | 111.31393 | 62.16935 | 732.72268   | 344.01473   | -211.78310  | 1 |
| 11150 | H | 63.96184 | 111.86744 | 62.90968 | 2949.72344  | 788.65084   | -1464.19379 | 1 |
| 11151 | H | 62.24083 | 111.40782 | 62.53153 | -810.39613  | -1100.72112 | 1409.25586  | 1 |
| 11152 | C | 63.64258 | 112.17985 | 60.90019 | 80.92316    | -1023.00586 | -475.86970  | 1 |



|       |   |          |           |          |             |             |             |   |
|-------|---|----------|-----------|----------|-------------|-------------|-------------|---|
| 11153 | H | 63.20284 | 111.79131 | 59.97962 | 391.22140   | 1102.37084  | -2619.28236 | 1 |
| 11154 | H | 63.29633 | 113.23326 | 61.03109 | -613.71168  | 840.87620   | -3430.85526 | 1 |
| 11155 | C | 65.28594 | 112.23295 | 60.62369 | 808.84398   | 303.83824   | 988.38937   | 1 |
| 11156 | O | 65.63951 | 113.16692 | 59.92292 | -581.17834  | 554.26975   | -495.54508  | 1 |
| 11157 | O | 66.03489 | 111.31440 | 60.93844 | 131.48717   | -225.00337  | -269.50426  | 1 |
| 11158 | C | 63.95371 | 109.08637 | 63.48557 | 247.20240   | -431.21688  | 38.59615    | 1 |
| 11159 | O | 63.09802 | 108.77629 | 64.24979 | 164.17168   | -42.07442   | -155.88497  | 1 |
| 11160 | N | 65.28217 | 109.36218 | 63.68259 | 106.91530   | 75.70519    | -592.50668  | 1 |
| 11161 | H | 65.76602 | 109.82036 | 62.87560 | 2887.13733  | -1366.94440 | -2667.81325 | 1 |
| 11162 | C | 66.07973 | 108.29419 | 64.34007 | -189.82371  | 23.53692    | -453.43481  | 1 |
| 11163 | H | 65.33549 | 107.90235 | 65.04248 | 427.37409   | 3784.79439  | 196.59716   | 1 |
| 11164 | C | 66.31038 | 107.28446 | 63.15976 | 470.27620   | -884.01850  | -1147.71114 | 1 |
| 11165 | H | 65.37174 | 107.23452 | 62.63415 | -2349.26054 | 1408.77902  | 2260.33801  | 1 |
| 11166 | H | 67.02343 | 107.88343 | 62.44661 | 699.79860   | 1035.50091  | -138.12947  | 1 |
| 11167 | C | 66.78780 | 105.86551 | 63.59701 | 13.94616    | 101.28548   | -178.73128  | 1 |
| 11168 | H | 65.96701 | 105.19452 | 63.92317 | -490.85749  | 275.73456   | 398.38031   | 1 |
| 11169 | H | 67.49548 | 105.91456 | 64.44161 | 2376.03408  | 1523.87803  | 692.93109   | 1 |
| 11170 | S | 67.58522 | 105.25970 | 62.00698 | -310.92447  | 353.72983   | 260.35443   | 1 |
| 11171 | C | 66.29875 | 105.78773 | 60.80891 | 584.05443   | -655.75859  | 168.31595   | 1 |
| 11172 | H | 65.24554 | 105.42126 | 60.99702 | -64.49375   | 1358.74540  | -545.09661  | 1 |
| 11173 | H | 66.39682 | 105.30264 | 59.79649 | 715.37746   | 1899.88409  | 3684.30489  | 1 |
| 11174 | H | 66.26519 | 106.93660 | 60.58952 | 462.92215   | 323.01778   | -2030.36109 | 1 |
| 11175 | C | 67.51069 | 108.83987 | 64.87765 | -50.45770   | -148.52743  | -496.74390  | 1 |
| 11176 | O | 68.17743 | 109.68376 | 64.33386 | -111.78553  | -239.63483  | -135.45025  | 1 |
| 11177 | N | 67.83716 | 107.99639 | 65.85650 | -314.41201  | 11.87640    | 223.94481   | 1 |
| 11178 | H | 67.25303 | 107.23335 | 66.17321 | 2456.45333  | -70.93931   | -106.97024  | 1 |
| 11179 | C | 69.06862 | 108.26654 | 66.55862 | -620.75323  | 51.30698    | 90.32566    | 1 |
| 11180 | H | 69.04411 | 109.35314 | 66.44481 | 118.35733   | -2860.11758 | -943.61925  | 1 |
| 11181 | H | 68.92008 | 107.89839 | 67.62911 | 288.06842   | -463.89794  | 71.22159    | 1 |
| 11182 | C | 70.13040 | 107.39098 | 65.73223 | 134.41312   | 742.27315   | -51.83872   | 1 |
| 11183 | O | 70.34364 | 106.24151 | 66.06017 | 555.41416   | -30.57911   | -189.68535  | 1 |
| 11184 | N | 70.74235 | 108.13849 | 64.74768 | 349.02444   | -0.79902    | -351.32120  | 1 |
| 11185 | H | 70.14897 | 108.99964 | 64.65151 | 654.49338   | 822.76792   | 1297.44170  | 1 |
| 11186 | C | 70.76794 | 107.29642 | 63.53774 | -281.36860  | -82.13553   | 857.97007   | 1 |
| 11187 | H | 69.91966 | 106.54143 | 63.78304 | -1253.92820 | 2224.86621  | 1904.30450  | 1 |
| 11188 | C | 70.19145 | 108.14460 | 62.35806 | 182.41299   | -152.66610  | -899.53346  | 1 |
| 11189 | H | 69.17303 | 108.52340 | 62.64822 | -569.78634  | 1797.42665  | -1288.97007 | 1 |
| 11190 | H | 70.84286 | 109.02572 | 62.19314 | -1281.85121 | 108.62635   | -4251.36325 | 1 |
| 11191 | O | 69.85423 | 107.40081 | 61.13836 | 493.41561   | 19.04452    | -604.10443  | 1 |
| 11192 | H | 69.11721 | 106.73968 | 61.51875 | -553.61406  | 1525.50276  | 2706.93129  | 1 |
| 11193 | C | 72.22166 | 106.58528 | 63.32815 | -391.50050  | 126.41683   | -320.03716  | 1 |
| 11194 | O | 73.01903 | 106.91541 | 62.41679 | 488.00182   | 828.35011   | -156.81582  | 1 |
| 11195 | N | 72.23459 | 105.66034 | 64.22370 | 882.70265   | -235.09174  | -757.93151  | 1 |
| 11196 | H | 71.44086 | 105.54535 | 64.83944 | -1025.93405 | -1043.40405 | 190.59989   | 1 |
| 11197 | C | 73.37929 | 104.75056 | 64.18004 | 143.93387   | -199.22632  | 380.41416   | 1 |
| 11198 | H | 73.23563 | 104.42112 | 63.13351 | -1712.35828 | -356.51973  | -1772.23857 | 1 |
| 11199 | H | 74.28840 | 105.35372 | 64.28916 | 3754.01110  | -1394.16163 | 153.22813   | 1 |
| 11200 | C | 73.09972 | 103.60827 | 65.26525 | -201.10451  | -152.34894  | -527.42847  | 1 |
| 11201 | O | 72.02840 | 102.99606 | 65.21989 | -47.06171   | 26.44443    | 79.10360    | 1 |
| 11202 | N | 74.16807 | 103.30531 | 65.99753 | 427.91866   | -87.51899   | -399.97403  | 1 |
| 11203 | H | 74.96411 | 103.94607 | 66.01817 | -432.44016  | 1113.97898  | 1145.90603  | 1 |
| 11204 | C | 73.76727 | 102.83794 | 67.33038 | -229.79980  | -32.77877   | 445.86577   | 1 |
| 11205 | H | 72.74978 | 102.36428 | 67.10848 | 2614.22543  | 1714.33716  | -2000.35153 | 1 |
| 11206 | C | 74.94424 | 101.89957 | 67.69541 | 434.83143   | 424.05840   | 564.64060   | 1 |
| 11207 | H | 74.57644 | 101.16468 | 68.47657 | 268.11154   | 2116.31864  | 655.45205   | 1 |
| 11208 | H | 75.79831 | 102.43551 | 68.14942 | 828.99482   | -1508.21808 | -411.39966  | 1 |
| 11209 | C | 75.63544 | 101.03519 | 66.40974 | 350.34096   | -95.39365   | -239.19871  | 1 |
| 11210 | O | 76.87638 | 101.24361 | 66.43193 | 638.73423   | -541.66347  | 600.35399   | 1 |
| 11211 | O | 74.98167 | 100.35225 | 65.64339 | -450.27898  | 397.13232   | -117.71534  | 1 |
| 11212 | C | 73.63056 | 104.00366 | 68.44834 | -268.18714  | 736.47906   | 33.87035    | 1 |
| 11213 | O | 74.17498 | 103.92513 | 69.51924 | -1371.64737 | -350.62952  | 413.08887   | 1 |
| 11214 | N | 72.76267 | 104.88411 | 67.92287 | -282.93065  | 524.19815   | -634.79208  | 1 |

|       |   |          |           |          |             |             |             |   |
|-------|---|----------|-----------|----------|-------------|-------------|-------------|---|
| 11215 | H | 72.33453 | 104.71188 | 67.00539 | -897.48876  | 3514.36989  | 277.74120   | 1 |
| 11216 | C | 72.41281 | 106.02586 | 68.72693 | 517.36805   | -991.48291  | -539.17884  | 1 |
| 11217 | H | 73.09290 | 106.04871 | 69.56047 | -1537.74226 | -480.32414  | 3207.13188  | 1 |
| 11218 | C | 72.70430 | 107.32393 | 67.83459 | 353.64624   | -340.71642  | -294.04379  | 1 |
| 11219 | H | 72.13574 | 108.22231 | 68.09624 | 452.70376   | -450.69735  | 3585.50234  | 1 |
| 11220 | H | 72.46637 | 107.15850 | 66.72420 | 23.22476    | 951.71328   | 1392.39576  | 1 |
| 11221 | C | 74.19723 | 107.63864 | 68.02934 | 613.23938   | 583.10188   | 143.74862   | 1 |
| 11222 | C | 75.27182 | 106.90277 | 67.43285 | 751.95634   | -295.07013  | 307.13935   | 1 |
| 11223 | H | 75.14895 | 106.19035 | 66.66201 | 1142.85713  | 2504.04283  | 2050.14484  | 1 |
| 11224 | C | 76.52376 | 106.92914 | 68.02091 | 109.49306   | -77.39139   | 305.64294   | 1 |
| 11225 | H | 77.44803 | 106.33575 | 67.65336 | 1230.29923  | -102.24661  | 1289.03881  | 1 |
| 11226 | C | 76.76920 | 107.69322 | 69.19466 | 641.52273   | 319.80942   | 255.95251   | 1 |
| 11227 | O | 78.15399 | 107.78843 | 69.63017 | -24.15643   | -479.55967  | 1000.96270  | 1 |
| 11228 | H | 78.47595 | 106.96281 | 69.31598 | 927.23231   | -974.09399  | 497.07067   | 1 |
| 11229 | C | 74.41895 | 108.40583 | 69.22701 | 117.04403   | -960.95032  | 601.80689   | 1 |
| 11230 | H | 73.62302 | 108.96338 | 69.62120 | 125.52484   | -2079.98127 | -2891.42308 | 1 |
| 11231 | C | 75.67404 | 108.40569 | 69.80481 | 848.15901   | 125.37063   | 301.85225   | 1 |
| 11232 | H | 75.84697 | 108.90832 | 70.75393 | 1238.03444  | 1026.65926  | -650.84250  | 1 |
| 11233 | C | 70.84363 | 105.83231 | 69.14363 | 1246.21488  | -324.55033  | 231.60689   | 1 |
| 11234 | O | 70.35511 | 106.77954 | 69.74485 | 314.82764   | -888.34747  | 894.84399   | 1 |
| 11235 | N | 70.32520 | 104.62703 | 68.92026 | 925.25489   | -1476.49988 | 229.10498   | 1 |
| 11236 | H | 70.86460 | 103.87856 | 68.44862 | 134.55406   | 1996.93474  | 1810.17334  | 1 |
| 11237 | C | 68.91772 | 104.35292 | 69.09103 | -357.93938  | 85.55586    | -54.96057   | 1 |
| 11238 | H | 68.46239 | 104.99885 | 69.88411 | -2074.25025 | 444.27978   | -327.55321  | 1 |
| 11239 | C | 68.56679 | 104.74862 | 67.62645 | -613.06506  | -862.98718  | -766.75482  | 1 |
| 11240 | H | 69.13612 | 105.65673 | 67.27780 | 4281.62785  | 2033.90823  | -1075.41760 | 1 |
| 11241 | H | 68.92997 | 103.91045 | 66.99055 | 1692.03310  | 2684.63519  | 1773.61381  | 1 |
| 11242 | C | 66.95477 | 104.86529 | 67.50216 | -394.81754  | -454.91760  | -169.98286  | 1 |
| 11243 | O | 66.51626 | 105.96492 | 67.05635 | 903.37883   | 135.62580   | -516.05756  | 1 |
| 11244 | O | 66.15551 | 104.01331 | 67.94720 | 124.73162   | -599.68039  | 130.37371   | 1 |
| 11245 | C | 68.66492 | 102.74585 | 69.24550 | 68.53825    | 433.61574   | 70.88525    | 1 |
| 11246 | O | 69.41347 | 101.89461 | 68.72533 | 1336.51884  | 239.87426   | -164.86074  | 1 |
| 11247 | N | 67.53202 | 102.54680 | 69.88722 | -355.88764  | 50.42948    | -188.06551  | 1 |
| 11248 | H | 67.31110 | 103.38335 | 70.40858 | 2597.87780  | 3681.47007  | -3510.81325 | 1 |
| 11249 | C | 67.02081 | 101.24792 | 70.23352 | -289.52377  | -714.24095  | 34.71553    | 1 |
| 11250 | H | 67.86083 | 100.60114 | 70.47117 | 151.68883   | 2212.10900  | -83.86733   | 1 |
| 11251 | C | 66.02655 | 101.65979 | 71.41761 | -9.46592    | 555.45590   | 1136.46264  | 1 |
| 11252 | H | 66.52851 | 102.26635 | 72.16628 | 2690.63739  | -2512.72398 | -2044.44482 | 1 |
| 11253 | H | 65.79558 | 100.69054 | 71.93172 | -108.30834  | 805.79104   | 691.98488   | 1 |
| 11254 | O | 64.77839 | 102.42420 | 71.33780 | -43.37523   | -37.70625   | -24.82557   | 1 |
| 11255 | H | 64.30413 | 101.87632 | 70.69978 | 1184.99759  | -729.72001  | -60.83379   | 1 |
| 11256 | C | 66.14553 | 100.67065 | 69.03041 | 92.54136    | 766.81032   | 618.15959   | 1 |
| 11257 | O | 64.91528 | 100.54362 | 68.92943 | -838.58278  | 81.22085    | 516.79002   | 1 |
| 11258 | N | 67.05129 | 100.41546 | 68.12748 | -252.38262  | -741.61952  | 277.97045   | 1 |
| 11259 | H | 68.07923 | 100.67745 | 68.34061 | 3839.67493  | 1501.27973  | -1717.78142 | 1 |
| 11260 | C | 66.83293 | 99.54039  | 67.04729 | 251.29085   | 31.74792    | -238.50630  | 1 |
| 11261 | H | 65.73162 | 99.26425  | 67.07822 | -1580.75676 | 1787.90157  | 2357.78623  | 1 |
| 11262 | C | 67.28141 | 100.35985 | 65.70253 | 393.14486   | -135.96802  | 449.22077   | 1 |
| 11263 | H | 68.36742 | 100.45320 | 65.67047 | 408.54924   | -196.69125  | -1241.45080 | 1 |
| 11264 | H | 67.12310 | 99.76102  | 64.76062 | -313.87888  | -1090.05390 | -764.64669  | 1 |
| 11265 | C | 66.59946 | 101.75610 | 65.62345 | 280.17497   | -1401.21201 | -77.40187   | 1 |
| 11266 | H | 65.51149 | 101.73589 | 65.81381 | -2689.85901 | -1469.51149 | 420.84990   | 1 |
| 11267 | H | 66.96482 | 102.15780 | 66.59509 | 599.08910   | -152.87685  | -1144.26058 | 1 |
| 11268 | S | 67.15497 | 102.52605 | 64.05992 | -218.62356  | -66.06186   | -166.58232  | 1 |
| 11269 | C | 68.92249 | 102.16217 | 63.91773 | 46.70486    | -394.45125  | -98.84073   | 1 |
| 11270 | H | 69.20302 | 101.12467 | 63.77294 | 14.53957    | 1644.09218  | 30.74574    | 1 |
| 11271 | H | 69.40781 | 102.50678 | 63.00117 | -252.53873  | -1666.32713 | 1708.40360  | 1 |
| 11272 | H | 69.59393 | 102.45442 | 64.72459 | 369.38470   | -104.21060  | 2282.85777  | 1 |
| 11273 | C | 67.82540 | 98.26321  | 66.95846 | 233.99919   | 634.35048   | -143.72653  | 1 |
| 11274 | O | 69.03724 | 98.41170  | 67.16851 | -30.79338   | -7.99306    | -23.90546   | 1 |
| 11275 | N | 67.15503 | 97.21565  | 66.49559 | 1048.84349  | 375.55164   | -443.54356  | 1 |
| 11276 | H | 66.14422 | 97.26541  | 66.35083 | 3106.92371  | -1453.11594 | -1677.36650 | 1 |

|       |   |          |           |          |             |             |             |   |
|-------|---|----------|-----------|----------|-------------|-------------|-------------|---|
| 11277 | C | 67.86614 | 95.98881  | 66.63024 | 161.67721   | -435.89911  | 1263.04488  | 1 |
| 11278 | H | 68.44611 | 96.00743  | 67.53331 | 1239.56547  | 399.62995   | 3090.17357  | 1 |
| 11279 | C | 66.62745 | 94.97933  | 66.56833 | -22.80054   | 92.70211    | 451.64518   | 1 |
| 11280 | H | 65.71999 | 95.29891  | 66.04500 | 468.05641   | 963.00803   | -595.11784  | 1 |
| 11281 | H | 66.91235 | 94.11534  | 65.89597 | -790.23620  | 51.39172    | 253.32676   | 1 |
| 11282 | C | 66.32728 | 94.58814  | 68.05974 | -921.58687  | 32.72127    | -152.90848  | 1 |
| 11283 | H | 65.30003 | 94.14983  | 68.19590 | -1830.07493 | 3299.40627  | 2001.80795  | 1 |
| 11284 | H | 66.31594 | 95.48493  | 68.72842 | -1703.99975 | -2188.74565 | 58.45502    | 1 |
| 11285 | C | 67.27256 | 93.39899  | 68.50984 | 415.87422   | 394.48054   | 451.61632   | 1 |
| 11286 | H | 68.29487 | 93.57836  | 68.21212 | -517.94278  | 2843.59263  | 1620.38701  | 1 |
| 11287 | H | 66.98738 | 92.43749  | 68.05680 | -1926.41545 | -734.41503  | 242.85655   | 1 |
| 11288 | C | 67.26154 | 93.27874  | 70.07948 | -315.76774  | -344.83956  | -410.33961  | 1 |
| 11289 | H | 67.66023 | 92.26693  | 70.40717 | 2146.14349  | 2648.62169  | 475.40115   | 1 |
| 11290 | H | 66.25078 | 93.42775  | 70.57397 | 43.84899    | 1406.69041  | -560.66045  | 1 |
| 11291 | N | 68.12615 | 94.34746  | 70.64732 | -357.45933  | 736.85635   | -26.25432   | 1 |
| 11292 | H | 68.15130 | 94.34349  | 71.70228 | -959.42785  | -1312.74203 | 3890.04788  | 1 |
| 11293 | H | 69.32194 | 94.17276  | 70.41352 | 64.08081    | -1238.44023 | 177.82887   | 1 |
| 11294 | H | 67.88021 | 95.39016  | 70.41054 | 2026.92808  | 653.96691   | 819.40095   | 1 |
| 11295 | C | 68.77974 | 95.80567  | 65.30545 | -68.43240   | -282.12631  | 29.69206    | 1 |
| 11296 | O | 68.43682 | 94.91988  | 64.54145 | -661.50531  | -44.12424   | 380.17086   | 1 |
| 11297 | N | 69.69114 | 96.77802  | 65.25534 | -139.75103  | -14.30604   | 362.34367   | 1 |
| 11298 | H | 69.92088 | 97.42801  | 65.96206 | -884.17647  | 1730.95089  | -2079.61381 | 1 |
| 11299 | C | 70.74081 | 96.57353  | 64.28069 | 230.66091   | -508.47265  | -62.68953   | 1 |
| 11300 | H | 70.80931 | 95.49264  | 64.11806 | 1779.40337  | 275.37781   | 1862.28894  | 1 |
| 11301 | C | 70.10298 | 97.23460  | 62.98608 | -84.60383   | -646.29580  | 219.44332   | 1 |
| 11302 | H | 69.03825 | 96.89064  | 62.89464 | -4305.66583 | 1213.04793  | -280.54886  | 1 |
| 11303 | H | 70.16914 | 98.32631  | 63.19315 | 423.16561   | -1781.98860 | -234.46853  | 1 |
| 11304 | C | 70.92904 | 96.75308  | 61.75900 | -263.73439  | 404.16497   | 544.05469   | 1 |
| 11305 | H | 70.28460 | 95.95446  | 61.33359 | 1010.79569  | -4087.27651 | -2617.12887 | 1 |
| 11306 | H | 71.89886 | 96.35153  | 61.96373 | 2139.91577  | -1138.32203 | 812.55705   | 1 |
| 11307 | C | 70.88284 | 98.14992  | 60.91580 | 83.25741    | -130.43483  | -62.86435   | 1 |
| 11308 | O | 71.22611 | 97.98068  | 59.71860 | 229.99123   | 152.63466   | 263.04383   | 1 |
| 11309 | O | 70.46836 | 99.20481  | 61.41362 | -250.11485  | -103.93697  | 689.77311   | 1 |
| 11310 | C | 72.04007 | 97.41959  | 64.82450 | 502.82035   | -402.58522  | 194.94022   | 1 |
| 11311 | O | 73.09675 | 97.05417  | 64.31491 | -958.76038  | -162.61653  | -595.52374  | 1 |
| 11312 | N | 71.78383 | 98.45540  | 65.60489 | 372.01245   | 14.11304    | -334.79264  | 1 |
| 11313 | C | 70.90442 | 99.58339  | 65.23804 | 257.65951   | 184.13489   | -202.85616  | 1 |
| 11314 | H | 69.84263 | 99.23321  | 65.03439 | -739.18443  | 3741.28380  | -432.68576  | 1 |
| 11315 | H | 71.16419 | 99.97566  | 64.22983 | 626.97979   | -2982.76850 | 4033.10978  | 1 |
| 11316 | C | 72.71304 | 98.74872  | 66.67588 | -353.53637  | 405.52377   | -404.97551  | 1 |
| 11317 | H | 73.63063 | 98.53413  | 66.12374 | 352.29602   | 161.68376   | -2480.28466 | 1 |
| 11318 | C | 72.45631 | 100.28478 | 67.05442 | -224.32335  | -502.44172  | -567.76142  | 1 |
| 11319 | H | 73.13823 | 101.01363 | 66.50255 | 2811.50815  | -925.63415  | 446.99879   | 1 |
| 11320 | H | 72.42195 | 100.37083 | 68.14386 | -3155.22934 | -1754.36859 | -156.66152  | 1 |
| 11321 | C | 71.00278 | 100.53088 | 66.49564 | 199.39940   | -822.80520  | -4.85614    | 1 |
| 11322 | H | 70.74465 | 101.60972 | 66.26808 | 2159.86850  | -1173.27392 | 1502.99619  | 1 |
| 11323 | H | 70.35177 | 100.12555 | 67.32751 | -3457.70599 | -1682.23505 | 41.94081    | 1 |
| 11324 | C | 72.84686 | 97.59318  | 67.85654 | 677.73157   | 712.68530   | 38.46164    | 1 |
| 11325 | O | 72.37887 | 97.89508  | 68.90687 | 169.86118   | 421.82225   | 835.67013   | 1 |
| 11326 | N | 73.74846 | 96.67941  | 67.53024 | 101.43347   | -290.29677  | -623.65850  | 1 |
| 11327 | H | 74.10369 | 96.66328  | 66.50598 | 1363.39340  | -2165.54807 | -1840.48451 | 1 |
| 11328 | C | 73.52464 | 95.35712  | 68.12944 | -295.72298  | 898.08525   | -298.68095  | 1 |
| 11329 | H | 73.23876 | 95.62027  | 69.21155 | 1378.28976  | 3012.40034  | -1202.48673 | 1 |
| 11330 | C | 72.63584 | 94.41979  | 67.30026 | -230.24819  | -225.95993  | 918.20035   | 1 |
| 11331 | H | 72.63344 | 94.72466  | 66.17112 | -1442.28104 | -2695.04920 | 487.90383   | 1 |
| 11332 | H | 73.07467 | 93.34841  | 67.28221 | 2071.90603  | 1520.76862  | -1950.99572 | 1 |
| 11333 | S | 71.01080 | 94.62013  | 68.07644 | -328.27363  | 177.70906   | -86.57197   | 1 |
| 11334 | C | 75.02284 | 94.58822  | 68.21039 | 534.94857   | -446.13637  | 34.97189    | 1 |
| 11335 | O | 75.15297 | 93.52080  | 67.65379 | 99.60239    | -268.08605  | -360.24208  | 1 |
| 11336 | N | 76.04303 | 95.30371  | 68.71406 | 53.04421    | -160.74423  | 910.97413   | 1 |
| 11337 | H | 75.68649 | 96.23074  | 68.99587 | 3352.50010  | 45.34741    | -2702.06897 | 1 |
| 11338 | C | 77.26189 | 94.69038  | 69.10898 | 436.83570   | -296.42516  | -796.34515  | 1 |

|       |   |          |          |          |             |             |             |   |
|-------|---|----------|----------|----------|-------------|-------------|-------------|---|
| 11339 | H | 77.23403 | 93.61961 | 68.82971 | 1000.42378  | -1639.82358 | -1897.64634 | 1 |
| 11340 | C | 78.49906 | 95.45921 | 68.45472 | -320.67938  | 420.00699   | 570.22313   | 1 |
| 11341 | H | 79.44574 | 94.95672 | 68.51681 | 1143.12573  | 608.20009   | -1391.44073 | 1 |
| 11342 | H | 78.54609 | 96.31958 | 69.17440 | 2333.81558  | -1839.33523 | -1065.51832 | 1 |
| 11343 | C | 78.17579 | 95.84504 | 67.00851 | -83.39429   | -133.51862  | 493.90657   | 1 |
| 11344 | C | 79.10889 | 95.36106 | 66.00767 | -868.18030  | 550.61057   | 424.39634   | 1 |
| 11345 | H | 79.97637 | 94.73310 | 66.38056 | -1771.68444 | 2598.98699  | 1387.99276  | 1 |
| 11346 | C | 79.02932 | 96.03083 | 64.78161 | 362.00835   | -972.49609  | 822.55677   | 1 |
| 11347 | H | 79.83499 | 95.70499 | 64.09403 | 2303.87754  | 1843.38201  | 1133.80563  | 1 |
| 11348 | C | 78.07012 | 97.02229 | 64.45891 | 76.29605    | -832.94021  | 646.71875   | 1 |
| 11349 | H | 77.99201 | 97.35335 | 63.41028 | -3861.54253 | 1767.07693  | 751.63010   | 1 |
| 11350 | C | 77.31420 | 96.99232 | 66.78515 | 685.81525   | 539.33723   | -91.87864   | 1 |
| 11351 | H | 76.70479 | 97.40657 | 67.55700 | 1320.53512  | -910.57421  | -665.32631  | 1 |
| 11352 | C | 77.22953 | 97.57242 | 65.47036 | -273.29685  | -466.38828  | 564.89622   | 1 |
| 11353 | H | 76.50788 | 98.31646 | 65.22122 | -888.67334  | 2707.24612  | 2044.03437  | 1 |
| 11354 | C | 77.29327 | 94.84498 | 70.70580 | -10.84967   | 834.19885   | -239.60633  | 1 |
| 11355 | O | 77.65111 | 95.92240 | 71.20957 | 356.94753   | 70.76114    | -138.78146  | 1 |
| 11356 | N | 77.13245 | 93.68021 | 71.34718 | -388.84723  | -870.35964  | -41.07583   | 1 |
| 11357 | H | 76.91396 | 93.01979 | 70.60891 | 1331.86455  | 1219.35968  | 2583.12181  | 1 |
| 11358 | C | 76.42655 | 93.65284 | 72.60333 | 481.51325   | 68.76401    | 88.85280    | 1 |
| 11359 | H | 75.52338 | 94.34970 | 72.40318 | 1508.65913  | 943.86221   | 2640.27256  | 1 |
| 11360 | C | 76.06786 | 92.10470 | 72.82220 | 275.73804   | -392.60452  | 432.86011   | 1 |
| 11361 | H | 76.54351 | 91.83017 | 73.81599 | 599.10260   | -1646.82527 | -2478.77429 | 1 |
| 11362 | H | 76.65660 | 91.52418 | 72.04400 | -2492.41754 | -621.35266  | -1041.32385 | 1 |
| 11363 | C | 74.56110 | 91.78880 | 72.79106 | 393.98922   | -710.13741  | -219.79879  | 1 |
| 11364 | H | 73.99570 | 92.51368 | 72.20639 | 662.96904   | -3619.65712 | -1604.36106 | 1 |
| 11365 | H | 74.43564 | 90.71188 | 72.42748 | -676.42934  | -476.96797  | 1751.73158  | 1 |
| 11366 | C | 74.13549 | 92.12913 | 74.32510 | -273.50151  | 351.56797   | 765.69232   | 1 |
| 11367 | H | 74.54607 | 93.11611 | 74.66390 | 216.69680   | 316.45294   | -2057.09060 | 1 |
| 11368 | H | 74.23014 | 91.25377 | 75.04143 | 2673.50917  | -809.49044  | -1860.03011 | 1 |
| 11369 | N | 72.79061 | 92.29889 | 74.05164 | 578.76202   | -141.84791  | 873.34805   | 1 |
| 11370 | H | 72.58989 | 93.31629 | 73.93334 | -1563.28473 | -32.77979   | 756.19429   | 1 |
| 11371 | C | 71.79685 | 91.47911 | 73.93251 | 365.42825   | -563.34365  | -315.46510  | 1 |
| 11372 | N | 72.09286 | 90.16789 | 74.03933 | 299.47555   | -499.05273  | 95.60688    | 1 |
| 11373 | H | 73.08322 | 89.82147 | 74.14030 | 4536.90019  | -1644.92287 | -2091.14595 | 1 |
| 11374 | H | 71.42044 | 89.32770 | 73.91754 | -408.98225  | -1305.96704 | -296.01883  | 1 |
| 11375 | N | 70.56546 | 92.14338 | 73.69237 | -908.19951  | -54.02008   | -628.54682  | 1 |
| 11376 | H | 70.30127 | 93.14818 | 73.85028 | -308.46517  | 1458.06751  | -287.14190  | 1 |
| 11377 | H | 69.74097 | 91.57950 | 73.39945 | 1726.89836  | 250.08968   | 956.28171   | 1 |
| 11378 | C | 77.24245 | 94.29572 | 73.79936 | 468.48499   | 114.14667   | -432.57972  | 1 |
| 11379 | O | 76.93592 | 94.11984 | 74.99707 | -597.47414  | -8.33621    | 358.31735   | 1 |
| 11380 | N | 78.33717 | 94.86267 | 73.36601 | 494.09257   | -240.61375  | 705.83507   | 1 |
| 11381 | H | 78.59841 | 94.92796 | 72.33805 | 1085.70782  | 1513.90196  | -446.32169  | 1 |
| 11382 | C | 79.09552 | 95.65578 | 74.25406 | 274.65487   | 600.21377   | 941.94363   | 1 |
| 11383 | H | 79.79482 | 96.09394 | 73.60659 | -2962.69170 | -1015.73164 | -2221.57572 | 1 |
| 11384 | C | 78.05908 | 96.72921 | 74.88136 | -513.98327  | 82.86138    | -225.51852  | 1 |
| 11385 | H | 77.01687 | 96.30629 | 74.91963 | 2277.77546  | -1752.62787 | 569.20428   | 1 |
| 11386 | H | 78.29863 | 97.08584 | 75.87556 | -2195.98452 | -1578.69190 | 1658.79225  | 1 |
| 11387 | C | 78.23229 | 97.93276 | 73.90111 | 970.08894   | -480.64912  | 752.38164   | 1 |
| 11388 | H | 77.49603 | 98.73525 | 74.05717 | 254.07479   | 108.78987   | -853.56107  | 1 |
| 11389 | H | 78.02191 | 97.68394 | 72.82268 | 969.10678   | 37.65380    | 1.18004     | 1 |
| 11390 | C | 79.77194 | 98.45722 | 74.25103 | -74.43353   | -447.99158  | -189.55178  | 1 |
| 11391 | O | 80.41880 | 97.84684 | 75.12125 | 288.66704   | 421.00229   | -201.64734  | 1 |
| 11392 | O | 80.06800 | 99.39882 | 73.52676 | -456.46626  | -1146.49405 | -152.42248  | 1 |
| 11393 | C | 79.74226 | 94.60515 | 75.29595 | 288.20682   | -29.03680   | -519.58203  | 1 |
| 11394 | O | 79.77528 | 93.41151 | 75.20986 | 890.68934   | -879.89428  | -137.05639  | 1 |
| 11395 | N | 80.41559 | 95.36526 | 76.17821 | -393.51440  | 241.48654   | -1282.77550 | 1 |
| 11396 | H | 80.18919 | 96.41357 | 76.17162 | -2243.37318 | 795.58576   | -1458.04252 | 1 |
| 11397 | C | 80.71059 | 94.71703 | 77.42307 | 844.93414   | -33.88872   | -817.00611  | 1 |
| 11398 | H | 80.27895 | 93.67328 | 77.55180 | -1209.81864 | -11.89462   | 1381.02741  | 1 |
| 11399 | C | 82.33699 | 94.84849 | 77.51916 | 297.75473   | 1192.88296  | 500.07913   | 1 |
| 11400 | H | 82.71053 | 95.01951 | 78.49902 | 619.56678   | 3109.70055  | 229.52586   | 1 |

|       |   |          |          |          |             |             |             |   |
|-------|---|----------|----------|----------|-------------|-------------|-------------|---|
| 11401 | H | 82.75533 | 95.71274 | 76.90872 | 64.44594    | 961.99456   | -3241.13612 | 1 |
| 11402 | C | 82.67408 | 93.43985 | 76.93440 | -673.92328  | 772.25234   | 423.17725   | 1 |
| 11403 | H | 83.74576 | 93.36391 | 76.56226 | -213.74939  | -634.98583  | 1384.03033  | 1 |
| 11404 | H | 81.98536 | 93.20657 | 76.05656 | -144.38205  | -303.78358  | -921.25032  | 1 |
| 11405 | C | 82.41254 | 92.35248 | 78.14345 | 830.78303   | 394.75272   | -22.42168   | 1 |
| 11406 | O | 83.35955 | 91.78444 | 78.66391 | -197.25227  | -508.00322  | -272.75463  | 1 |
| 11407 | O | 81.21649 | 92.09634 | 78.55454 | 208.20973   | -497.81389  | 713.58826   | 1 |
| 11408 | C | 80.21698 | 95.68750 | 78.60109 | 303.10548   | 17.84436    | -743.03084  | 1 |
| 11409 | O | 80.42598 | 96.86050 | 78.57732 | 59.27966    | 66.00758    | -409.10113  | 1 |
| 11410 | N | 79.85514 | 94.92939 | 79.69217 | -670.55085  | -846.99243  | 291.41002   | 1 |
| 11411 | H | 79.93079 | 93.93675 | 79.56463 | -3436.54819 | 806.11043   | 2954.16571  | 1 |
| 11412 | C | 79.53670 | 95.59449 | 80.88683 | -614.02787  | 612.90552   | 441.72139   | 1 |
| 11413 | H | 79.22368 | 96.63102 | 80.59859 | 1184.89186  | -3115.39747 | 1552.85648  | 1 |
| 11414 | C | 78.46623 | 94.61226 | 81.48924 | 232.44503   | -286.03837  | 466.25942   | 1 |
| 11415 | H | 78.92357 | 93.57927 | 81.34688 | -848.24764  | -454.05197  | -2245.88323 | 1 |
| 11416 | H | 77.49694 | 94.63965 | 80.90213 | 294.87859   | -685.80184  | 82.10260    | 1 |
| 11417 | C | 78.03874 | 94.78117 | 83.00671 | 736.09837   | -372.89636  | 251.89513   | 1 |
| 11418 | O | 78.00270 | 95.95865 | 83.37221 | 918.79314   | 567.47417   | 194.32690   | 1 |
| 11419 | N | 77.83682 | 93.63774 | 83.60683 | -525.80527  | 259.15303   | 75.14851    | 1 |
| 11420 | H | 77.98011 | 92.71117 | 83.17349 | -1757.52290 | -2527.87859 | 832.01751   | 1 |
| 11421 | H | 77.79821 | 93.57329 | 84.63501 | 431.62780   | 1547.68321  | -2232.98641 | 1 |
| 11422 | C | 80.85251 | 95.44245 | 81.88383 | 307.13946   | 459.76288   | 1212.31759  | 1 |
| 11423 | O | 81.30990 | 94.35107 | 82.27328 | -486.45472  | 327.39260   | 837.58809   | 1 |
| 11424 | N | 81.36480 | 96.62149 | 82.09259 | 557.14458   | 15.96389    | 519.64719   | 1 |
| 11425 | H | 80.88634 | 97.43063 | 81.70130 | -770.27641  | 863.93471   | -2246.74092 | 1 |
| 11426 | C | 82.64851 | 96.67114 | 82.76415 | -1190.70117 | 389.60163   | 157.78664   | 1 |
| 11427 | H | 83.11140 | 95.67521 | 82.47865 | -2444.13731 | -249.25234  | -723.13339  | 1 |
| 11428 | C | 83.37546 | 98.01988 | 82.46011 | -46.25847   | -328.47089  | -28.90800   | 1 |
| 11429 | H | 83.45512 | 98.06683 | 81.35225 | -553.61455  | 545.14948   | 1672.53127  | 1 |
| 11430 | H | 82.83506 | 98.89740 | 82.90733 | 1405.98320  | 455.28287   | 1315.49029  | 1 |
| 11431 | H | 84.40937 | 98.07867 | 82.78246 | 83.27796    | -2573.33601 | 5126.59496  | 1 |
| 11432 | C | 82.42284 | 96.65625 | 84.37860 | -573.72812  | 1523.82412  | -29.61310   | 1 |
| 11433 | O | 82.58524 | 97.56734 | 85.17034 | 70.66431    | -262.52996  | 337.12420   | 1 |
| 11434 | N | 82.11326 | 95.41220 | 84.72066 | 535.43481   | -292.96572  | -706.53520  | 1 |
| 11435 | H | 81.96991 | 94.68081 | 83.99833 | 2095.27727  | 280.55157   | 414.99762   | 1 |
| 11436 | C | 81.31326 | 95.36593 | 85.93960 | 819.45862   | 184.17419   | -67.87842   | 1 |
| 11437 | H | 81.95424 | 96.08358 | 86.47464 | 1139.44780  | -542.49873  | 2716.23890  | 1 |
| 11438 | C | 79.90518 | 95.93529 | 85.45179 | 1541.76247  | -1114.84779 | 263.09155   | 1 |
| 11439 | H | 79.41238 | 95.17328 | 84.69315 | -1769.30675 | 660.00079   | 2700.10018  | 1 |
| 11440 | H | 80.16191 | 96.81967 | 84.80175 | 87.26739    | -1245.81385 | -375.66445  | 1 |
| 11441 | C | 79.02647 | 96.24642 | 86.69185 | 543.23257   | 1133.51821  | -1374.50448 | 1 |
| 11442 | O | 79.26443 | 96.17264 | 87.86898 | 794.97601   | -47.76832   | 229.19705   | 1 |
| 11443 | N | 77.82197 | 96.50472 | 86.10983 | 366.42941   | -304.03278  | 1051.43166  | 1 |
| 11444 | H | 77.67628 | 96.44916 | 85.06150 | 1672.77739  | 2169.37344  | 2509.43802  | 1 |
| 11445 | H | 76.99669 | 96.94537 | 86.49000 | 1091.04405  | 696.18253   | 996.36093   | 1 |
| 11446 | C | 81.37512 | 93.82256 | 86.46255 | 50.74411    | -720.58329  | 40.35588    | 1 |
| 11447 | O | 82.01148 | 93.40347 | 87.38380 | -317.51175  | -500.24867  | -31.13496   | 1 |
| 11448 | N | 80.52868 | 93.07061 | 85.67567 | 296.27155   | 529.80057   | 318.07118   | 1 |
| 11449 | H | 79.91851 | 93.46344 | 84.92181 | -344.75220  | -1874.06393 | -2056.24145 | 1 |
| 11450 | C | 80.48620 | 91.71550 | 86.08841 | -304.82927  | 688.56816   | 993.09886   | 1 |
| 11451 | H | 80.77324 | 91.53789 | 87.11840 | 2164.08262  | 5574.24335  | 78.75699    | 1 |
| 11452 | C | 79.11593 | 91.03322 | 85.65839 | 634.76314   | 246.06392   | 1067.36430  | 1 |
| 11453 | H | 79.25605 | 89.94521 | 85.71328 | -536.85069  | -40.65094   | -2150.91411 | 1 |
| 11454 | H | 78.95628 | 91.19233 | 84.59339 | 1224.01963  | -1954.96470 | -3145.00098 | 1 |
| 11455 | C | 77.82072 | 91.54644 | 86.41048 | 695.37517   | 393.69065   | -311.61478  | 1 |
| 11456 | C | 76.57207 | 91.31724 | 85.70441 | 541.00234   | -271.92095  | 42.27348    | 1 |
| 11457 | H | 76.59075 | 90.75875 | 84.72240 | -5003.01819 | 1913.01303  | -3565.51650 | 1 |
| 11458 | C | 75.42721 | 91.76552 | 86.32107 | 102.27512   | 327.17349   | -393.90421  | 1 |
| 11459 | H | 74.48701 | 91.42158 | 85.90779 | 553.23530   | -1477.46684 | -665.91928  | 1 |
| 11460 | C | 75.51560 | 92.50256 | 87.55649 | 432.96990   | 848.60269   | -416.31617  | 1 |
| 11461 | H | 74.58202 | 92.92256 | 88.00801 | -3392.08628 | 2971.84169  | 2185.76719  | 1 |
| 11462 | C | 77.94612 | 92.25476 | 87.61706 | 515.29408   | -455.65852  | -333.67203  | 1 |

|       |   |          |          |          |             |             |             |   |
|-------|---|----------|----------|----------|-------------|-------------|-------------|---|
| 11463 | H | 78.93278 | 92.49136 | 87.90969 | 1587.82556  | 806.62594   | -622.21915  | 1 |
| 11464 | C | 76.72443 | 92.77268 | 88.19256 | 1474.26888  | -1118.31851 | 541.13537   | 1 |
| 11465 | H | 76.67939 | 93.30798 | 89.17986 | 593.66685   | -1375.44247 | 954.86653   | 1 |
| 11466 | C | 81.44235 | 90.73996 | 85.13067 | 164.23022   | -565.82092  | -403.02775  | 1 |
| 11467 | O | 81.81828 | 89.60468 | 85.40251 | -419.45843  | -103.60391  | -436.16583  | 1 |
| 11468 | N | 81.56585 | 91.40209 | 84.01124 | -352.36359  | 220.65365   | 632.85928   | 1 |
| 11469 | H | 81.10019 | 92.29300 | 83.96610 | 3478.39316  | 770.37576   | 829.22093   | 1 |
| 11470 | C | 81.81026 | 90.70659 | 82.77971 | -609.31726  | -120.33158  | -243.50671  | 1 |
| 11471 | H | 81.37410 | 89.74252 | 83.12468 | -2294.20912 | 2117.07118  | -710.07520  | 1 |
| 11472 | C | 81.17882 | 91.45579 | 81.51895 | 221.94831   | -230.95294  | -338.97845  | 1 |
| 11473 | H | 81.54716 | 91.01722 | 80.56320 | 330.93681   | 2825.56823  | -3472.16174 | 1 |
| 11474 | H | 81.60495 | 92.49981 | 81.65592 | -321.48524  | 1595.97642  | -2905.60177 | 1 |
| 11475 | C | 79.62744 | 91.33323 | 81.50901 | -199.75125  | 845.20715   | -70.29301   | 1 |
| 11476 | O | 78.81381 | 91.46075 | 82.44563 | -131.24983  | -243.87615  | 231.77711   | 1 |
| 11477 | N | 79.16142 | 91.23619 | 80.22541 | -292.53363  | -214.84751  | -91.84691   | 1 |
| 11478 | H | 79.85582 | 91.51892 | 79.50121 | 2365.79957  | -1078.63719 | -1808.33385 | 1 |
| 11479 | H | 78.26068 | 91.71462 | 79.98303 | 767.53665   | -335.33227  | -775.30272  | 1 |
| 11480 | C | 83.42360 | 90.55036 | 82.62484 | -245.32590  | 213.11428   | 336.09328   | 1 |
| 11481 | O | 83.82206 | 89.81004 | 81.74894 | 219.53648   | 537.45653   | 164.89408   | 1 |
| 11482 | N | 84.06511 | 91.41981 | 83.39191 | 523.78021   | -72.56380   | -314.89073  | 1 |
| 11483 | H | 83.45657 | 91.97448 | 84.01527 | 915.23011   | -3003.29133 | -152.41858  | 1 |
| 11484 | C | 85.47987 | 91.40157 | 83.41841 | 514.57968   | 353.26018   | -382.13814  | 1 |
| 11485 | H | 85.69835 | 90.41124 | 82.87607 | -3221.82827 | -1149.33658 | 311.86338   | 1 |
| 11486 | C | 86.08262 | 92.71603 | 82.78334 | -169.17693  | -51.15067   | 422.72072   | 1 |
| 11487 | H | 87.20801 | 92.68992 | 82.62164 | 2227.31746  | 5049.70118  | 886.53879   | 1 |
| 11488 | H | 85.76935 | 93.65377 | 83.34811 | 2254.51980  | 2371.27650  | -225.21125  | 1 |
| 11489 | C | 85.56141 | 92.84518 | 81.33311 | -427.03376  | 561.99834   | -244.26773  | 1 |
| 11490 | H | 84.47330 | 92.69958 | 81.27427 | -2477.72595 | 495.34039   | 2196.13846  | 1 |
| 11491 | H | 85.91792 | 91.94058 | 80.85249 | 1522.44215  | 1319.51912  | -280.79977  | 1 |
| 11492 | C | 85.75983 | 94.13169 | 80.58304 | 234.57821   | -340.23329  | 525.37574   | 1 |
| 11493 | H | 86.70746 | 94.70413 | 81.00787 | 2058.14685  | -1230.19905 | -1630.84457 | 1 |
| 11494 | H | 84.85565 | 94.76322 | 80.77732 | -1322.84966 | 432.93313   | -2681.38487 | 1 |
| 11495 | C | 85.78762 | 93.66259 | 79.07108 | -502.41544  | 61.13171    | 22.72944    | 1 |
| 11496 | H | 86.71050 | 93.06289 | 78.84900 | 538.21076   | -506.19232  | -1076.68167 | 1 |
| 11497 | H | 84.87628 | 93.10857 | 78.66411 | -1387.39874 | -2294.76672 | 2499.73969  | 1 |
| 11498 | N | 85.85856 | 94.92234 | 78.31017 | -400.59203  | -243.89856  | -631.84479  | 1 |
| 11499 | H | 85.15746 | 95.61010 | 78.57185 | -1225.31757 | 1011.38627  | 223.96607   | 1 |
| 11500 | H | 85.83336 | 94.80048 | 77.34178 | -26.79458   | 3429.39720  | -3462.54216 | 1 |
| 11501 | H | 82.52832 | 98.60599 | 79.44460 | 1957.35547  | -1696.37778 | -1580.80164 | 1 |
| 11502 | C | 85.87667 | 91.29917 | 85.00630 | -656.68327  | -48.69138   | 131.04006   | 1 |
| 11503 | O | 86.99952 | 91.64269 | 85.34082 | -642.20030  | -113.48988  | 912.98838   | 1 |
| 11504 | N | 84.95950 | 90.63355 | 85.70741 | -184.66276  | -434.99060  | -8.78085    | 1 |
| 11505 | H | 84.02987 | 90.39349 | 85.34613 | 812.62458   | -1875.22501 | 242.32648   | 1 |
| 11506 | C | 85.26202 | 90.53420 | 87.12363 | 46.96894    | 724.27998   | -526.86571  | 1 |
| 11507 | H | 86.32679 | 90.84437 | 86.97658 | -1430.14349 | -593.86160  | -5083.72372 | 1 |
| 11508 | C | 84.56963 | 91.79369 | 87.80059 | 740.23894   | -151.02669  | -326.15397  | 1 |
| 11509 | H | 83.57611 | 92.09905 | 87.25581 | -1370.69885 | -2226.76296 | -1885.89679 | 1 |
| 11510 | C | 84.22835 | 91.45222 | 89.28757 | -319.46729  | 77.27926    | 112.53531   | 1 |
| 11511 | H | 83.88787 | 92.39998 | 89.88720 | 385.97517   | 860.08743   | -83.23172   | 1 |
| 11512 | H | 85.07438 | 90.93345 | 89.79410 | -296.00780  | -643.01675  | -469.96926  | 1 |
| 11513 | H | 83.36760 | 90.73779 | 89.36864 | -1667.57712 | 1976.64421  | -353.60463  | 1 |
| 11514 | C | 85.53997 | 93.02897 | 87.79376 | 560.64661   | -225.04601  | -335.55743  | 1 |
| 11515 | H | 85.56293 | 93.58543 | 86.86012 | -322.95342  | 2807.53814  | -1195.51979 | 1 |
| 11516 | H | 85.03118 | 93.74704 | 88.45226 | -241.63079  | -2366.06491 | -3499.93880 | 1 |
| 11517 | C | 86.99509 | 92.62230 | 88.21889 | 875.54247   | -723.98438  | -157.82176  | 1 |
| 11518 | H | 87.64584 | 93.48823 | 88.57830 | -235.86492  | 1762.40204  | -3648.97080 | 1 |
| 11519 | H | 87.06131 | 91.86842 | 89.01157 | -325.72652  | -1252.04540 | -419.95834  | 1 |
| 11520 | H | 87.47249 | 92.25320 | 87.29700 | -183.13591  | -2275.02910 | -304.62135  | 1 |
| 11521 | C | 84.94275 | 89.00052 | 87.53926 | -349.15418  | 113.14135   | 879.21519   | 1 |
| 11522 | O | 85.81082 | 88.30177 | 88.03899 | 142.56165   | -310.17138  | 58.25017    | 1 |
| 11523 | N | 83.61761 | 88.79366 | 87.36803 | 477.96514   | -495.26630  | -283.28837  | 1 |
| 11524 | H | 83.07515 | 89.46669 | 86.82290 | 347.27302   | 2052.50466  | -1008.18793 | 1 |

|       |   |          |          |          |             |             |             |   |
|-------|---|----------|----------|----------|-------------|-------------|-------------|---|
| 11525 | C | 83.25766 | 87.45041 | 87.77656 | -272.16292  | 157.92721   | 346.74175   | 1 |
| 11526 | H | 83.85433 | 87.28529 | 88.70338 | 560.80942   | 2994.74999  | -1586.58857 | 1 |
| 11527 | C | 81.69224 | 87.48938 | 88.04553 | 76.54641    | 613.82393   | 838.77748   | 1 |
| 11528 | H | 81.24740 | 87.84680 | 87.05602 | -334.21064  | -2651.98282 | -1881.97423 | 1 |
| 11529 | H | 81.56540 | 88.25446 | 88.81850 | -416.92601  | 646.55158   | 1204.96891  | 1 |
| 11530 | C | 80.91902 | 86.19862 | 88.51144 | 82.38758    | -1347.30315 | -805.11703  | 1 |
| 11531 | C | 80.17175 | 85.46432 | 87.54707 | -113.83590  | 49.33001    | 153.63423   | 1 |
| 11532 | H | 80.19341 | 85.71766 | 86.44265 | 939.31247   | -547.10901  | 2976.22042  | 1 |
| 11533 | C | 79.40000 | 84.34180 | 88.00890 | 148.59986   | -886.08935  | -155.61086  | 1 |
| 11534 | H | 78.84100 | 83.76780 | 87.28590 | -323.95670  | -2958.00140 | 1021.52142  | 1 |
| 11535 | C | 79.47800 | 83.93480 | 89.35490 | -638.99266  | 453.47035   | -466.37326  | 1 |
| 11536 | H | 78.96900 | 83.02580 | 89.64090 | -632.11128  | -440.06841  | 3050.41003  | 1 |
| 11537 | C | 80.97371 | 85.85117 | 89.88926 | -173.47880  | 345.64588   | -682.26845  | 1 |
| 11538 | H | 81.55404 | 86.41607 | 90.58274 | 267.47433   | 1683.48618  | -338.60285  | 1 |
| 11539 | C | 80.30600 | 84.65280 | 90.26790 | 24.69251    | -623.90608  | -664.51674  | 1 |
| 11540 | H | 80.48200 | 84.28180 | 91.26690 | -2373.94869 | -1191.52542 | -1686.07859 | 1 |
| 11541 | C | 83.56912 | 86.43630 | 86.54827 | 19.36746    | 100.17810   | 307.82461   | 1 |
| 11542 | O | 83.88045 | 85.26363 | 86.74237 | -348.09155  | 384.44185   | 312.08642   | 1 |
| 11543 | N | 83.43273 | 87.00649 | 85.34615 | -408.16943  | 291.97699   | -998.55355  | 1 |
| 11544 | H | 82.97337 | 87.92924 | 85.35862 | -1332.49050 | -260.88052  | -317.83713  | 1 |
| 11545 | C | 83.56022 | 86.27484 | 84.14466 | -52.85214   | -129.96311  | 93.85344    | 1 |
| 11546 | H | 82.75486 | 85.53600 | 84.33125 | -1818.03325 | -259.64653  | 1163.27761  | 1 |
| 11547 | C | 83.25325 | 87.23799 | 82.87141 | 599.31846   | -124.21472  | 54.72017    | 1 |
| 11548 | H | 83.78308 | 86.86058 | 81.99439 | 4674.33787  | 794.17026   | -1864.50793 | 1 |
| 11549 | H | 83.54699 | 88.29774 | 82.94201 | -1434.66954 | -34.61166   | 62.95397    | 1 |
| 11550 | C | 81.72290 | 87.20036 | 82.69007 | -276.39415  | -68.94024   | 464.91942   | 1 |
| 11551 | H | 81.39023 | 87.77140 | 83.60534 | -1175.96624 | 250.08768   | 1079.20566  | 1 |
| 11552 | C | 81.57286 | 87.82507 | 81.24730 | 23.54488    | -795.09570  | 126.64712   | 1 |
| 11553 | H | 82.15525 | 88.71242 | 80.97738 | 13.53142    | -2785.62643 | 1889.97494  | 1 |
| 11554 | H | 80.54511 | 88.11782 | 81.09534 | -1282.73676 | -581.17038  | 1779.09678  | 1 |
| 11555 | H | 81.75408 | 87.05863 | 80.52671 | -3273.40711 | -1099.98688 | 2822.25289  | 1 |
| 11556 | C | 80.99207 | 85.81358 | 82.80247 | -189.45726  | 668.54278   | -62.46674   | 1 |
| 11557 | H | 80.96473 | 85.45148 | 83.82326 | -2704.52722 | 2012.00317  | 3145.66827  | 1 |
| 11558 | H | 81.43856 | 85.04401 | 82.09515 | 2067.04558  | -1799.38696 | -1735.58538 | 1 |
| 11559 | H | 79.90353 | 85.98227 | 82.60372 | -1639.25749 | -3159.47536 | 89.09852    | 1 |
| 11560 | C | 84.92835 | 85.42613 | 84.07887 | -40.76890   | 41.52512    | 82.86406    | 1 |
| 11561 | O | 84.87300 | 84.21580 | 83.92590 | 489.99464   | -232.86132  | 573.85372   | 1 |
| 11562 | N | 86.09207 | 86.11645 | 84.20324 | -132.65740  | 207.63224   | 837.82017   | 1 |
| 11563 | C | 86.06566 | 87.56451 | 84.16637 | -156.54843  | 1354.77790  | -457.40520  | 1 |
| 11564 | H | 86.14646 | 87.97179 | 85.17901 | -296.54852  | 1272.20169  | 3933.27423  | 1 |
| 11565 | H | 85.21197 | 87.88444 | 83.55031 | -1809.75797 | -2306.79602 | -3504.86744 | 1 |
| 11566 | C | 87.37242 | 85.51127 | 84.20600 | -462.93494  | -69.57352   | 97.50193    | 1 |
| 11567 | H | 87.36000 | 84.75980 | 83.39390 | -1951.11782 | -1726.41590 | -1763.76122 | 1 |
| 11568 | C | 88.32645 | 86.78670 | 84.28881 | 151.98228   | -69.36847   | 154.99286   | 1 |
| 11569 | H | 89.26953 | 86.53875 | 83.74327 | -227.96448  | -1480.07404 | -2379.92353 | 1 |
| 11570 | H | 88.62532 | 87.10834 | 85.26540 | 3235.93536  | 365.23257   | 1639.91630  | 1 |
| 11571 | C | 87.48501 | 87.84048 | 83.50907 | -398.36289  | -1333.53834 | 123.11891   | 1 |
| 11572 | H | 87.77977 | 88.94664 | 83.56465 | 1702.08954  | -1131.35377 | 235.73713   | 1 |
| 11573 | H | 87.50351 | 87.73811 | 82.41152 | 1121.44379  | -3901.50156 | -65.63749   | 1 |
| 11574 | C | 87.49300 | 84.44880 | 85.47990 | 485.99674   | -771.15644  | -23.99827   | 1 |
| 11575 | O | 88.17500 | 83.43780 | 85.31690 | 667.02038   | 338.23839   | -253.58595  | 1 |
| 11576 | N | 86.94800 | 84.79480 | 86.61690 | -351.21097  | 360.46375   | -677.78243  | 1 |
| 11577 | H | 86.39371 | 85.66439 | 86.57860 | -451.18448  | 1965.92666  | -1546.28294 | 1 |
| 11578 | C | 86.99100 | 84.05980 | 87.81290 | 752.58343   | 418.51104   | -299.86278  | 1 |
| 11579 | H | 88.04200 | 83.90580 | 88.00490 | -1282.28310 | 1354.76212  | -2533.49480 | 1 |
| 11580 | C | 86.54200 | 84.90880 | 89.03390 | 422.30738   | 559.35235   | -583.29447  | 1 |
| 11581 | H | 85.43503 | 85.11032 | 88.93690 | 1269.65617  | 439.94997   | 2564.40618  | 1 |
| 11582 | O | 87.33741 | 86.12270 | 89.01471 | 343.51056   | 248.19543   | -74.92673   | 1 |
| 11583 | H | 86.77832 | 86.88118 | 88.75541 | 273.23515   | -394.72913  | 38.29735    | 1 |
| 11584 | C | 86.58800 | 84.13880 | 90.31390 | -280.22500  | 861.65118   | 102.38256   | 1 |
| 11585 | H | 86.42200 | 84.88380 | 91.12190 | -1792.57882 | 1437.36362  | 2149.15640  | 1 |
| 11586 | H | 87.58000 | 83.65880 | 90.45790 | -432.47922  | 1218.71390  | 2868.08723  | 1 |

|       |   |          |          |          |             |             |             |   |
|-------|---|----------|----------|----------|-------------|-------------|-------------|---|
| 11587 | H | 85.87300 | 83.28880 | 90.33790 | 850.54544   | -2923.52327 | 792.34485   | 1 |
| 11588 | C | 86.28000 | 82.71080 | 87.71290 | 352.70556   | -609.86529  | -578.89043  | 1 |
| 11589 | O | 86.82200 | 81.66680 | 88.07090 | 491.28648   | -367.68551  | -497.06357  | 1 |
| 11590 | N | 85.01900 | 82.70380 | 87.12790 | 152.03866   | 116.75225   | -822.14685  | 1 |
| 11591 | H | 84.59100 | 83.60380 | 87.13890 | -2670.47446 | 1533.40975  | -644.55172  | 1 |
| 11592 | C | 84.34600 | 81.49680 | 86.73990 | -169.54950  | 895.80157   | -15.60477   | 1 |
| 11593 | H | 84.30700 | 80.75780 | 87.52590 | 2630.13013  | 725.45100   | -1566.64054 | 1 |
| 11594 | C | 82.88500 | 81.78680 | 86.44690 | 476.61807   | 489.67358   | 603.74332   | 1 |
| 11595 | H | 82.91900 | 82.67580 | 85.78090 | -1563.19923 | -1396.76035 | 2345.99551  | 1 |
| 11596 | C | 82.17700 | 80.62380 | 85.67890 | -681.83180  | -555.91392  | -239.82518  | 1 |
| 11597 | H | 81.07800 | 80.71880 | 85.54690 | 602.73017   | -2089.52721 | -2273.50360 | 1 |
| 11598 | H | 82.70400 | 80.35880 | 84.73790 | 465.57596   | 2498.61775  | -1854.28546 | 1 |
| 11599 | H | 82.32100 | 79.72080 | 86.31090 | 1408.56024  | -2171.16793 | 1788.91422  | 1 |
| 11600 | C | 82.07000 | 82.12980 | 87.72690 | 833.83245   | -259.28105  | 262.57912   | 1 |
| 11601 | H | 81.10200 | 82.37580 | 87.23990 | 2009.33983  | -1845.03907 | -1567.35782 | 1 |
| 11602 | H | 82.53400 | 83.06080 | 88.11890 | 2001.44440  | -772.01096  | 2301.40079  | 1 |
| 11603 | C | 81.94500 | 81.05480 | 88.81990 | -711.29367  | 296.77117   | -487.27733  | 1 |
| 11604 | H | 82.88100 | 80.59980 | 89.20790 | -587.70429  | 3052.00527  | -487.94852  | 1 |
| 11605 | H | 81.31400 | 80.20680 | 88.47790 | 2819.11105  | -507.83191  | 1301.13253  | 1 |
| 11606 | H | 81.40000 | 81.55980 | 89.64590 | -694.54622  | -1642.16649 | 2592.12673  | 1 |
| 11607 | C | 85.05200 | 80.71580 | 85.59890 | -4.22895    | 117.73405   | -904.19678  | 1 |
| 11608 | O | 85.24900 | 79.52680 | 85.71490 | 33.01373    | 785.75877   | 71.55753    | 1 |
| 11609 | N | 85.49400 | 81.43280 | 84.53190 | -389.96503  | -638.06614  | -391.75397  | 1 |
| 11610 | H | 85.40200 | 82.42480 | 84.48490 | -912.91230  | -3006.00745 | -169.51857  | 1 |
| 11611 | C | 86.03100 | 80.79380 | 83.32290 | -680.12736  | -510.63371  | 328.83277   | 1 |
| 11612 | H | 85.31500 | 80.12480 | 82.86790 | 2092.89870  | -1750.34149 | 1566.62246  | 1 |
| 11613 | C | 86.55300 | 81.83280 | 82.24690 | -280.07891  | 679.12645   | -540.17967  | 1 |
| 11614 | H | 87.16500 | 81.34780 | 81.45690 | -401.43550  | 1247.37788  | 2860.26646  | 1 |
| 11615 | H | 87.19100 | 82.46680 | 82.89890 | -1414.90619 | -2747.45996 | 589.68677   | 1 |
| 11616 | C | 85.50700 | 82.73980 | 81.58390 | -381.73017  | -518.08598  | -646.00309  | 1 |
| 11617 | C | 84.15500 | 82.39380 | 81.53690 | 13.98738    | 736.61994   | 537.25824   | 1 |
| 11618 | H | 83.79200 | 81.55280 | 82.10890 | -1971.37046 | -504.49935  | -2399.45934 | 1 |
| 11619 | C | 83.21100 | 83.32080 | 80.93390 | -807.86256  | 349.76018   | -237.64869  | 1 |
| 11620 | H | 82.15600 | 83.09880 | 80.98090 | 2041.51106  | 1767.43141  | -1614.51077 | 1 |
| 11621 | C | 83.64600 | 84.52480 | 80.37890 | 778.54054   | -29.86410   | 473.74442   | 1 |
| 11622 | O | 82.57912 | 85.38324 | 79.71476 | 235.28962   | -26.04621   | 310.29669   | 1 |
| 11623 | H | 81.83700 | 84.81180 | 79.82390 | -1073.70180 | -2324.00967 | 1828.76181  | 1 |
| 11624 | C | 85.92600 | 83.94280 | 80.96390 | 12.02304    | -905.25558  | -108.71426  | 1 |
| 11625 | H | 86.96400 | 84.21780 | 81.07890 | 2835.24504  | -600.94536  | -1224.12273 | 1 |
| 11626 | C | 84.98800 | 84.82180 | 80.36790 | -671.76561  | 494.51852   | -368.28440  | 1 |
| 11627 | H | 85.17180 | 85.83155 | 79.96900 | 414.17976   | -554.22592  | -3026.33487 | 1 |
| 11628 | C | 87.28100 | 79.90080 | 83.70090 | -597.77310  | 657.57265   | -204.24626  | 1 |
| 11629 | O | 87.52500 | 78.85780 | 83.08590 | -544.70164  | 560.35624   | 113.70242   | 1 |
| 11630 | N | 88.11400 | 80.46780 | 84.61090 | 647.50288   | 512.31416   | -175.91620  | 1 |
| 11631 | H | 87.81200 | 81.38580 | 84.85490 | 559.06666   | 2850.33201  | 1208.83337  | 1 |
| 11632 | C | 89.22100 | 79.75680 | 85.24590 | -797.62956  | 436.77539   | 66.82327    | 1 |
| 11633 | H | 89.95300 | 79.50280 | 84.49390 | -1460.06880 | -2547.55562 | 1129.77241  | 1 |
| 11634 | C | 89.96200 | 80.65580 | 86.28690 | -454.18283  | -344.00928  | 711.91753   | 1 |
| 11635 | H | 90.83200 | 80.05380 | 86.62590 | 2287.01729  | -336.87369  | -2134.07926 | 1 |
| 11636 | H | 89.32800 | 80.96580 | 87.14490 | 935.25630   | 2256.94615  | -1982.35111 | 1 |
| 11637 | O | 90.43900 | 81.84080 | 85.66990 | 614.75734   | 91.34602    | 487.19252   | 1 |
| 11638 | H | 89.67500 | 82.42080 | 85.62090 | 2373.53990  | -1179.91475 | 1694.79668  | 1 |
| 11639 | C | 88.73400 | 78.47380 | 85.93690 | -905.12227  | 101.27148   | 44.14489    | 1 |
| 11640 | O | 89.25800 | 77.41880 | 85.68690 | 455.97762   | 479.88502   | 430.60655   | 1 |
| 11641 | N | 87.62200 | 78.53080 | 86.72490 | -698.23013  | 282.60942   | -381.15468  | 1 |
| 11642 | H | 87.11900 | 79.38180 | 86.85290 | 1749.77418  | 2397.46164  | -1043.40512 | 1 |
| 11643 | C | 87.01300 | 77.34680 | 87.36090 | -109.87209  | 694.32003   | 580.77433   | 1 |
| 11644 | H | 87.78600 | 76.78980 | 87.87090 | 2154.73553  | 2267.17444  | 339.50120   | 1 |
| 11645 | C | 85.83700 | 77.64780 | 88.31690 | -570.15198  | -362.84637  | -612.14396  | 1 |
| 11646 | H | 85.15200 | 78.26580 | 87.69790 | 2173.88273  | 954.33054   | 2064.39176  | 1 |
| 11647 | C | 85.23200 | 76.35180 | 88.91690 | -581.57871  | 629.52021   | -311.32219  | 1 |
| 11648 | H | 84.85900 | 75.70780 | 88.09290 | 1916.25287  | 867.57994   | -2339.55257 | 1 |



|       |   |          |          |          |             |             |             |   |
|-------|---|----------|----------|----------|-------------|-------------|-------------|---|
| 11649 | H | 85.99500 | 75.79680 | 89.50290 | -1845.52259 | -1492.04024 | 2065.45117  | 1 |
| 11650 | H | 84.35600 | 76.61180 | 89.54990 | -672.14676  | 3070.81391  | 128.63473   | 1 |
| 11651 | C | 86.39100 | 78.49780 | 89.48490 | 356.99775   | 773.14505   | -325.96063  | 1 |
| 11652 | H | 87.06500 | 79.27980 | 89.07290 | 1431.02713  | -2197.52367 | -1738.18218 | 1 |
| 11653 | H | 87.08200 | 77.89680 | 90.11390 | -988.36040  | -1147.52745 | 2757.63498  | 1 |
| 11654 | C | 85.32100 | 79.24980 | 90.26490 | 550.97854   | -644.36010  | -335.66904  | 1 |
| 11655 | H | 85.66100 | 79.80480 | 91.16590 | -1836.89018 | -1093.54418 | 2308.29413  | 1 |
| 11656 | H | 84.50800 | 78.55480 | 90.56390 | 2591.63684  | 369.16478   | -1745.09658 | 1 |
| 11657 | H | 84.81600 | 79.99880 | 89.61990 | 946.08171   | -1654.16507 | -2503.37643 | 1 |
| 11658 | C | 86.59100 | 76.33380 | 86.29590 | 40.75260    | 705.04492   | -576.80317  | 1 |
| 11659 | O | 86.87600 | 75.13580 | 86.32990 | 266.79178   | -247.24634  | -700.94124  | 1 |
| 11660 | N | 85.94400 | 76.86980 | 85.20790 | -711.83126  | -4.55967    | 453.81467   | 1 |
| 11661 | H | 85.63800 | 77.81680 | 85.14890 | 842.37471   | 1784.07581  | -2450.65391 | 1 |
| 11662 | C | 85.54400 | 75.97380 | 84.09090 | -585.75515  | 55.87593    | -696.57719  | 1 |
| 11663 | H | 84.97100 | 75.16780 | 84.52390 | -586.97010  | -2292.83159 | -2072.82793 | 1 |
| 11664 | C | 84.70500 | 76.68680 | 83.02590 | 816.47427   | -154.59043  | -375.39655  | 1 |
| 11665 | H | 85.34800 | 77.43880 | 82.51990 | -2027.81144 | -1170.43123 | -2101.49893 | 1 |
| 11666 | C | 84.27500 | 75.71480 | 81.91990 | 390.62822   | -9.12547    | 823.87943   | 1 |
| 11667 | H | 85.09700 | 75.06980 | 81.54390 | -1043.18891 | 1845.65843  | -2324.54901 | 1 |
| 11668 | H | 83.47900 | 75.04880 | 82.31590 | -1130.74826 | 2166.20224  | 1981.71705  | 1 |
| 11669 | H | 83.83700 | 76.40380 | 81.16690 | -1216.70776 | -1778.85079 | -2292.05984 | 1 |
| 11670 | C | 83.45000 | 77.48980 | 83.55590 | 419.46463   | 384.39946   | 712.55700   | 1 |
| 11671 | H | 82.97200 | 77.88180 | 82.63290 | 2756.57425  | 499.32282   | 1431.85241  | 1 |
| 11672 | H | 83.89400 | 78.25780 | 84.22490 | -2550.79173 | -1013.73960 | -1537.53692 | 1 |
| 11673 | C | 82.33100 | 76.72480 | 84.30590 | -569.19555  | -645.58374  | -301.14624  | 1 |
| 11674 | H | 81.47300 | 77.36780 | 84.59690 | 625.84537   | 408.42952   | 3056.09704  | 1 |
| 11675 | H | 82.01000 | 75.87880 | 83.66190 | -2554.73294 | -333.43172  | 1805.65477  | 1 |
| 11676 | H | 82.78500 | 76.35380 | 85.24990 | 1986.33564  | 2424.54117  | -272.57487  | 1 |
| 11677 | C | 86.82000 | 75.33080 | 83.39190 | 637.84342   | 6.19652     | 651.58912   | 1 |
| 11678 | O | 86.93000 | 74.10180 | 83.14490 | -599.14387  | 513.65301   | 28.53841    | 1 |
| 11679 | N | 87.87300 | 76.12580 | 83.05390 | -663.86913  | 290.65683   | -432.97653  | 1 |
| 11680 | H | 87.78700 | 77.10580 | 83.21590 | 969.26659   | 2388.87271  | 1803.34014  | 1 |
| 11681 | C | 89.14600 | 75.69580 | 82.51290 | 630.94474   | 149.00597   | -641.21522  | 1 |
| 11682 | H | 88.77200 | 75.17380 | 81.64490 | 1623.04462  | -2062.26052 | -1735.23311 | 1 |
| 11683 | C | 89.90200 | 76.92480 | 82.03590 | 429.36837   | 562.65273   | -574.90495  | 1 |
| 11684 | H | 89.27500 | 77.50780 | 81.32890 | -1806.21469 | 1033.38445  | 2359.64643  | 1 |
| 11685 | H | 90.24800 | 77.70980 | 82.74190 | 968.87177   | -2107.61869 | 2125.43106  | 1 |
| 11686 | C | 91.23100 | 76.59480 | 81.38190 | 335.66772   | -777.81997  | 337.30443   | 1 |
| 11687 | C | 91.21500 | 76.27080 | 80.01490 | -23.36967   | 907.47043   | 86.03647    | 1 |
| 11688 | H | 90.34000 | 76.17680 | 79.38890 | -467.53920  | -1960.65393 | -2415.67164 | 1 |
| 11689 | C | 92.38300 | 75.83580 | 79.33690 | 124.29451   | 103.54849   | 897.37372   | 1 |
| 11690 | H | 92.23500 | 75.47680 | 78.32890 | 1781.61946  | -2563.46973 | -390.74451  | 1 |
| 11691 | C | 93.59700 | 75.74780 | 79.99190 | 629.41964   | -214.97680  | -623.75227  | 1 |
| 11692 | H | 94.46100 | 75.44580 | 79.41890 | -281.46604  | 2946.36560  | 1066.73935  | 1 |
| 11693 | C | 92.48600 | 76.63880 | 82.03490 | 851.84921   | 315.37290   | -79.64839   | 1 |
| 11694 | H | 92.45700 | 76.91580 | 83.07890 | 1218.97345  | -2335.50035 | 1719.81629  | 1 |
| 11695 | C | 93.65300 | 76.24480 | 81.37190 | 120.85959   | 619.33722   | 658.22896   | 1 |
| 11696 | H | 94.58100 | 76.33180 | 81.91690 | 2968.31632  | -683.86815  | 787.17776   | 1 |
| 11697 | C | 89.91100 | 74.63880 | 83.25790 | -899.20530  | -97.73742   | 115.44797   | 1 |
| 11698 | O | 90.31700 | 73.58680 | 82.77890 | 113.37404   | 592.87936   | -509.18329  | 1 |
| 11699 | N | 90.07200 | 74.84380 | 84.60690 | -64.86282   | 763.94033   | -353.35574  | 1 |
| 11700 | H | 89.75100 | 75.72580 | 84.94490 | -1902.98710 | 2503.37145  | 99.98835    | 1 |
| 11701 | C | 90.99200 | 74.14780 | 85.47890 | 176.20601   | 833.55186   | 324.95190   | 1 |
| 11702 | H | 91.87600 | 73.95580 | 84.88990 | -1938.84985 | 1230.85296  | 2150.36938  | 1 |
| 11703 | C | 91.44100 | 74.96580 | 86.68890 | 173.02299   | 894.91988   | -25.14875   | 1 |
| 11704 | H | 90.54900 | 75.39680 | 87.18990 | 1719.42224  | -1244.72462 | -2322.17011 | 1 |
| 11705 | H | 91.98500 | 74.47680 | 87.52490 | -140.95733  | 3113.86396  | -426.85887  | 1 |
| 11706 | C | 92.29500 | 76.20180 | 86.29890 | -749.23088  | -254.34103  | 453.22702   | 1 |
| 11707 | H | 91.81200 | 76.81980 | 85.51190 | 2493.22330  | 789.70012   | -1748.83891 | 1 |
| 11708 | C | 92.49600 | 77.08680 | 87.49090 | 615.93485   | -41.19508   | 671.10225   | 1 |
| 11709 | H | 93.34000 | 76.67480 | 88.08490 | -644.39557  | 2184.95975  | -2170.00725 | 1 |
| 11710 | H | 92.75900 | 78.11980 | 87.17690 | -2280.25586 | -592.01586  | -2085.22821 | 1 |

|       |   |          |          |          |             |             |             |   |
|-------|---|----------|----------|----------|-------------|-------------|-------------|---|
| 11711 | H | 91.62000 | 77.10680 | 88.17290 | -2013.59702 | 1687.69269  | 1730.70698  | 1 |
| 11712 | C | 93.63900 | 75.80880 | 85.71290 | -662.53911  | -597.98125  | 186.84578   | 1 |
| 11713 | H | 94.39500 | 76.62280 | 85.73390 | 2425.53471  | -1273.93938 | -1546.63701 | 1 |
| 11714 | H | 94.08800 | 74.94380 | 86.24590 | 218.14437   | -1964.51532 | 2447.71706  | 1 |
| 11715 | H | 93.51200 | 75.52980 | 84.64590 | 2280.59240  | 1358.96732  | -1688.29274 | 1 |
| 11716 | C | 90.49500 | 72.83780 | 85.92890 | -810.95123  | -84.95218   | 408.15712   | 1 |
| 11717 | O | 91.27500 | 71.96380 | 86.38890 | -129.50298  | -269.20414  | 731.01665   | 1 |
| 11718 | N | 89.19100 | 72.60280 | 85.69690 | -251.93515  | 121.47951   | 796.51974   | 1 |
| 11719 | H | 88.59100 | 73.30280 | 85.31790 | 43.31501    | -3145.28314 | -59.53133   | 1 |
| 11720 | C | 88.45900 | 71.35680 | 85.94490 | 726.48390   | -372.36520  | 406.22199   | 1 |
| 11721 | H | 89.12800 | 70.64180 | 86.40090 | 2333.32560  | -2080.92148 | 351.54472   | 1 |
| 11722 | C | 87.22600 | 71.64880 | 86.78490 | 631.74897   | 106.00902   | 648.92706   | 1 |
| 11723 | H | 86.71000 | 70.67580 | 86.92890 | -1829.54859 | 1647.60973  | 1958.66290  | 1 |
| 11724 | O | 86.29500 | 72.52080 | 86.19690 | 722.07675   | -294.97409  | 123.38023   | 1 |
| 11725 | H | 86.60700 | 73.42780 | 86.23990 | 272.75475   | 493.84464   | -3095.14920 | 1 |
| 11726 | C | 87.61600 | 72.22880 | 88.17090 | -735.97154  | -495.50351  | -210.41188  | 1 |
| 11727 | H | 86.73200 | 72.42180 | 88.81590 | -1085.15946 | 2935.96839  | 317.40318   | 1 |
| 11728 | H | 88.12700 | 73.21380 | 88.10690 | -35.06783   | -1908.79420 | 2500.70014  | 1 |
| 11729 | H | 88.25200 | 71.51380 | 88.73390 | 1027.51984  | 2137.29586  | -2067.46115 | 1 |
| 11730 | C | 88.17800 | 70.69480 | 84.65590 | -47.19641   | 571.30404   | -709.10874  | 1 |
| 11731 | O | 88.41700 | 69.53780 | 84.41390 | 235.50712   | -361.22663  | -661.57309  | 1 |
| 11732 | N | 87.69700 | 71.45480 | 83.66790 | -641.78769  | 345.94488   | -425.56196  | 1 |
| 11733 | H | 87.49600 | 72.42580 | 83.77290 | 2623.53799  | 492.24444   | 1665.22373  | 1 |
| 11734 | C | 87.33000 | 70.99180 | 82.32790 | -514.93006  | -529.73946  | -534.48494  | 1 |
| 11735 | H | 86.87200 | 71.79880 | 81.77690 | -1048.08217 | -1588.60383 | 2505.21214  | 1 |
| 11736 | H | 86.53900 | 70.25880 | 82.39390 | 3137.72187  | -193.95131  | 123.73591   | 1 |
| 11737 | C | 88.38800 | 70.38780 | 81.46990 | -130.35224  | -889.90919  | -150.06972  | 1 |
| 11738 | O | 88.07800 | 69.34780 | 80.89690 | -369.07184  | -568.54953  | 405.17236   | 1 |
| 11739 | N | 89.50700 | 71.10180 | 81.21690 | -378.33265  | -574.17396  | 489.75602   | 1 |
| 11740 | H | 89.71200 | 71.85980 | 81.82990 | -620.69684  | -1577.17562 | 2650.56197  | 1 |
| 11741 | C | 90.54000 | 70.62380 | 80.30890 | -321.64006  | 682.06396   | 512.62797   | 1 |
| 11742 | H | 90.04700 | 70.37080 | 79.38190 | 2550.62627  | -1531.66824 | 1022.99769  | 1 |
| 11743 | C | 91.49700 | 71.77680 | 80.00190 | -684.88866  | -170.05872  | 577.45871   | 1 |
| 11744 | H | 90.87200 | 72.69580 | 80.01990 | -275.26504  | 2904.80995  | -1176.66246 | 1 |
| 11745 | C | 92.63800 | 71.97780 | 81.09890 | 362.06379   | 824.28792   | 144.60375   | 1 |
| 11746 | H | 93.11400 | 72.96780 | 80.93290 | -1446.05167 | -651.16070  | 2717.19534  | 1 |
| 11747 | H | 93.41500 | 71.18380 | 81.09390 | -1775.22326 | -144.94800  | -2593.41448 | 1 |
| 11748 | H | 92.18000 | 72.00080 | 82.11090 | 2936.47914  | -377.82875  | 1064.21893  | 1 |
| 11749 | C | 92.06200 | 71.74980 | 78.55590 | 282.82799   | -290.71302  | 816.66717   | 1 |
| 11750 | H | 91.23500 | 71.68480 | 77.81690 | -1767.79188 | 2090.98319  | 1549.49263  | 1 |
| 11751 | H | 92.43600 | 72.79180 | 78.45790 | -1695.32947 | 2126.98507  | 1581.14475  | 1 |
| 11752 | C | 93.19900 | 70.75380 | 78.20890 | 626.50407   | -561.61670  | -351.46882  | 1 |
| 11753 | H | 94.09500 | 70.93880 | 78.83990 | -2524.82516 | 385.19354   | -1837.14727 | 1 |
| 11754 | H | 93.64100 | 70.73480 | 77.18990 | 902.56296   | -2279.38943 | 1971.79871  | 1 |
| 11755 | H | 92.87200 | 69.72480 | 78.47090 | -2537.52079 | 633.89517   | 1748.53978  | 1 |
| 11756 | C | 91.19200 | 69.33780 | 80.85890 | -845.85400  | 40.75214    | 338.11430   | 1 |
| 11757 | O | 91.46200 | 68.34780 | 80.13890 | -212.93731  | 675.59238   | -349.08432  | 1 |
| 11758 | N | 91.48600 | 69.32480 | 82.18790 | -413.14054  | 594.69609   | -433.96284  | 1 |
| 11759 | H | 91.23100 | 70.17480 | 82.64090 | 2768.65843  | -1191.23536 | 902.06154   | 1 |
| 11760 | C | 91.91500 | 68.12480 | 82.90290 | 674.76662   | -4.89852    | -613.28380  | 1 |
| 11761 | H | 92.79300 | 67.74880 | 82.39990 | 1137.05328  | 2474.96393  | 1574.76652  | 1 |
| 11762 | C | 92.25100 | 68.54980 | 84.34890 | -623.70194  | -217.42377  | 628.62850   | 1 |
| 11763 | H | 91.36300 | 68.83680 | 84.95190 | 2031.03728  | -2134.16384 | -1103.83808 | 1 |
| 11764 | C | 92.93000 | 67.35280 | 85.13090 | -38.21424   | 545.58213   | 729.61004   | 1 |
| 11765 | H | 93.39500 | 67.66780 | 86.08990 | 2816.88312  | 785.42742   | -1160.38765 | 1 |
| 11766 | H | 93.59900 | 66.86780 | 84.38790 | 683.50592   | 2165.82641  | 2177.20965  | 1 |
| 11767 | H | 92.08600 | 66.72380 | 85.48590 | -1297.42712 | -2085.69786 | -1965.90273 | 1 |
| 11768 | C | 93.12200 | 69.81780 | 84.36490 | -82.64499   | -713.48418  | -561.74829  | 1 |
| 11769 | H | 92.59100 | 70.79080 | 84.28690 | 418.05189   | -1824.98671 | -2528.41499 | 1 |
| 11770 | H | 93.47800 | 69.79780 | 85.41690 | -1799.71518 | 611.07834   | -2507.15671 | 1 |
| 11771 | H | 93.92400 | 69.74080 | 83.59990 | -2110.06411 | -1558.22569 | -1737.17828 | 1 |
| 11772 | C | 90.88500 | 67.01480 | 82.85490 | -556.90750  | 641.70428   | -330.93904  | 1 |

|       |   |          |          |          |             |             |             |   |
|-------|---|----------|----------|----------|-------------|-------------|-------------|---|
| 11773 | O | 91.19100 | 65.97680 | 82.31990 | 578.50465   | 275.09237   | -461.82658  | 1 |
| 11774 | N | 89.59800 | 67.27880 | 83.21290 | 527.47058   | 507.40287   | 420.70109   | 1 |
| 11775 | H | 89.33800 | 68.17280 | 83.56890 | -3101.06471 | -449.88638  | 281.47141   | 1 |
| 11776 | C | 88.50800 | 66.28280 | 83.31090 | -543.31176  | 554.50542   | 478.31693   | 1 |
| 11777 | H | 87.63400 | 66.81180 | 83.66190 | -1058.56279 | -2935.79372 | 398.47993   | 1 |
| 11778 | H | 88.77800 | 65.52880 | 84.03490 | 13.31072    | 2345.67527  | 2096.62981  | 1 |
| 11779 | C | 88.13700 | 65.55880 | 82.06790 | 314.14467   | -561.63813  | -646.00831  | 1 |
| 11780 | O | 88.04400 | 64.34280 | 82.03790 | 301.13903   | -577.45636  | 446.63929   | 1 |
| 11781 | N | 87.94300 | 66.29480 | 80.94490 | -133.31966  | 640.18901   | -533.90653  | 1 |
| 11782 | H | 88.08700 | 67.28080 | 80.99990 | -2812.65001 | 978.91141   | -1014.37598 | 1 |
| 11783 | C | 87.72000 | 65.63780 | 79.67190 | 413.69976   | -526.35060  | -619.07879  | 1 |
| 11784 | H | 87.02600 | 64.82080 | 79.79990 | 1059.06714  | 206.50054   | 2955.32748  | 1 |
| 11785 | C | 86.96700 | 66.60780 | 78.71390 | -92.17659   | 171.75748   | -890.76026  | 1 |
| 11786 | H | 87.46400 | 67.58080 | 78.50890 | 3104.91925  | 80.66297    | 501.19475   | 1 |
| 11787 | H | 86.78100 | 66.01880 | 77.79090 | 2249.29314  | 359.21715   | -2170.22340 | 1 |
| 11788 | C | 85.61000 | 66.79680 | 79.39290 | 257.20112   | 777.19145   | -401.58690  | 1 |
| 11789 | O | 84.83300 | 65.81480 | 79.48890 | 41.48806    | 742.67780   | 265.20870   | 1 |
| 11790 | N | 85.34400 | 67.99780 | 79.87490 | 293.16062   | 776.53241   | 154.03428   | 1 |
| 11791 | H | 86.08300 | 68.66580 | 79.96190 | -2086.18902 | -1479.44611 | 1832.28840  | 1 |
| 11792 | H | 84.39500 | 68.15680 | 80.14790 | -3074.19845 | 130.00965   | 656.22221   | 1 |
| 11793 | C | 88.89800 | 64.98780 | 79.03490 | 729.59863   | 376.10731   | -397.08957  | 1 |
| 11794 | O | 88.72200 | 64.04280 | 78.34190 | -693.58536  | 354.52459   | -129.91881  | 1 |
| 11795 | N | 90.14400 | 65.40080 | 79.46790 | 210.13862   | -791.79120  | -203.91357  | 1 |
| 11796 | H | 90.25700 | 66.25580 | 79.96790 | -1062.04363 | 2020.92879  | -2164.74858 | 1 |
| 11797 | C | 91.31700 | 64.73480 | 79.05890 | 97.70485    | 515.88956   | 745.49495   | 1 |
| 11798 | H | 91.30700 | 64.62180 | 77.98490 | -2927.03199 | 1151.10278  | -75.31504   | 1 |
| 11799 | H | 92.21500 | 65.29480 | 79.27790 | 1062.09970  | -1925.40192 | 2250.11064  | 1 |
| 11800 | C | 91.40100 | 63.43180 | 79.75790 | 310.82975   | -796.83060  | -316.06465  | 1 |
| 11801 | O | 91.82500 | 62.42080 | 79.26990 | -577.07887  | 332.13922   | 424.60658   | 1 |
| 11802 | N | 91.02800 | 63.38680 | 81.05790 | 661.05041   | 154.45958   | -501.82356  | 1 |
| 11803 | H | 90.80500 | 64.21680 | 81.56290 | -2517.52490 | 1601.70543  | -997.41382  | 1 |
| 11804 | C | 90.91800 | 62.15580 | 81.79590 | 275.37986   | -734.86526  | -464.31669  | 1 |
| 11805 | H | 91.86200 | 61.64080 | 81.70190 | -1066.15996 | 2389.99152  | 1746.27308  | 1 |
| 11806 | C | 90.82800 | 62.40680 | 83.27890 | 331.56885   | -794.75202  | 299.80382   | 1 |
| 11807 | H | 90.54300 | 61.55180 | 83.92790 | 1677.69666  | 2644.70176  | 298.51762   | 1 |
| 11808 | H | 89.92600 | 63.04680 | 83.38890 | -2285.97755 | -1673.79653 | 1367.82238  | 1 |
| 11809 | C | 92.01900 | 63.17780 | 83.96190 | -507.29365  | -341.32403  | -676.46291  | 1 |
| 11810 | H | 92.39400 | 64.07880 | 83.43090 | 2371.87763  | 457.82649   | 2015.64324  | 1 |
| 11811 | C | 91.67700 | 63.61180 | 85.38990 | -427.74577  | 655.48410   | 467.78751   | 1 |
| 11812 | H | 91.21000 | 62.80180 | 85.98990 | -2952.71904 | -361.96864  | -1024.03866 | 1 |
| 11813 | H | 92.58900 | 63.86880 | 85.96890 | 1883.89389  | -747.97171  | -2406.18128 | 1 |
| 11814 | H | 90.99500 | 64.48680 | 85.45990 | -1863.27798 | 1324.56257  | -2161.47065 | 1 |
| 11815 | C | 93.24800 | 62.26580 | 83.90690 | 395.64209   | 142.65578   | 809.05356   | 1 |
| 11816 | H | 93.04800 | 61.32980 | 84.47190 | 2319.96381  | -1501.10801 | 1504.21703  | 1 |
| 11817 | H | 94.12500 | 62.84280 | 84.26990 | -1438.91126 | 1875.01864  | -2076.55140 | 1 |
| 11818 | H | 93.55700 | 61.98580 | 82.87690 | 1529.33518  | 1892.55504  | 1994.39103  | 1 |
| 11819 | C | 89.83700 | 61.22880 | 81.39190 | -670.64914  | 389.97123   | -479.16926  | 1 |
| 11820 | O | 90.05200 | 60.01880 | 81.38790 | 781.35197   | -104.16432  | 47.60376    | 1 |
| 11821 | N | 88.67800 | 61.73480 | 81.04490 | 330.59139   | -215.15975  | 746.38322   | 1 |
| 11822 | H | 88.46700 | 62.70780 | 81.09490 | -1221.30094 | -2124.56655 | 1973.03503  | 1 |
| 11823 | C | 87.67100 | 60.85880 | 80.39390 | 540.49009   | 460.58516   | 571.99894   | 1 |
| 11824 | H | 87.32000 | 60.08580 | 81.06090 | -2109.82119 | 420.31282   | -2295.69552 | 1 |
| 11825 | C | 86.36900 | 61.62080 | 80.15290 | 437.16704   | 378.29483   | 705.14467   | 1 |
| 11826 | H | 86.66700 | 62.53680 | 79.59990 | -931.64399  | -1905.93439 | 2323.29073  | 1 |
| 11827 | C | 85.41000 | 60.79180 | 79.24990 | -40.18690   | 139.68571   | -900.17994  | 1 |
| 11828 | H | 85.78800 | 60.71980 | 78.20790 | -337.71721  | 2233.51169  | 2189.88558  | 1 |
| 11829 | H | 84.42100 | 61.27980 | 79.11590 | -2232.42026 | 1456.66377  | 1671.12438  | 1 |
| 11830 | H | 85.21300 | 59.82180 | 79.75490 | -1555.71342 | -964.44593  | -2558.87202 | 1 |
| 11831 | C | 85.66900 | 62.05280 | 81.46790 | 59.94967    | 164.68914   | 894.83771   | 1 |
| 11832 | H | 84.86800 | 62.78280 | 81.22090 | 2288.98316  | -975.36532  | -1925.47262 | 1 |
| 11833 | H | 85.26400 | 61.20280 | 82.05790 | 1418.49257  | -211.68327  | -2800.23128 | 1 |
| 11834 | H | 86.41700 | 62.61580 | 82.06690 | 1686.79616  | 1795.69322  | -1956.63763 | 1 |

|       |   |          |          |          |             |             |             |   |
|-------|---|----------|----------|----------|-------------|-------------|-------------|---|
| 11835 | C | 88.14800 | 60.21080 | 79.10090 | -460.61643  | 407.85428   | 673.00698   | 1 |
| 11836 | O | 87.98300 | 59.02080 | 78.84890 | -678.66037  | 361.86766   | -179.16229  | 1 |
| 11837 | N | 88.93200 | 60.97080 | 78.26790 | 603.21865   | -484.47884  | -337.75701  | 1 |
| 11838 | H | 88.88200 | 61.95180 | 78.43890 | 950.00296   | -2010.56634 | -2225.61084 | 1 |
| 11839 | C | 89.63900 | 60.42180 | 77.09990 | 725.26411   | 366.18609   | 413.94532   | 1 |
| 11840 | H | 88.99200 | 59.82980 | 76.46890 | -2637.04200 | -778.25505  | -1529.23341 | 1 |
| 11841 | C | 90.13200 | 61.55680 | 76.21090 | -245.39354  | 328.56694   | -814.41806  | 1 |
| 11842 | H | 90.77500 | 62.20780 | 76.84090 | 2388.04920  | 1975.44820  | -541.34249  | 1 |
| 11843 | C | 91.04800 | 61.07380 | 75.04890 | -454.31315  | -405.65078  | -678.60004  | 1 |
| 11844 | H | 91.94600 | 60.50580 | 75.37390 | -1639.17125 | -2672.23587 | 265.51703   | 1 |
| 11845 | H | 91.50200 | 61.91580 | 74.48490 | 2378.32481  | 2035.61491  | 313.16012   | 1 |
| 11846 | H | 90.55600 | 60.35680 | 74.35590 | -884.49316  | -328.70926  | -3001.30776 | 1 |
| 11847 | C | 89.00800 | 62.48180 | 75.66090 | 7.02713     | 567.02539   | 714.06151   | 1 |
| 11848 | H | 88.47400 | 61.93980 | 74.85190 | 2612.78447  | -1684.72838 | -482.98432  | 1 |
| 11849 | H | 88.14100 | 62.60780 | 76.34490 | -2631.13738 | -1490.45271 | -868.27012  | 1 |
| 11850 | C | 89.53000 | 63.78780 | 75.11390 | -553.20240  | -415.10246  | 594.22895   | 1 |
| 11851 | H | 90.19400 | 63.52080 | 74.26490 | 942.90686   | -3000.78915 | 66.46305    | 1 |
| 11852 | H | 88.68400 | 64.35180 | 74.66590 | -2106.33165 | 2266.34950  | -570.30969  | 1 |
| 11853 | H | 89.97900 | 64.42080 | 75.90890 | -2572.36207 | 1655.35637  | -735.50996  | 1 |
| 11854 | C | 90.77300 | 59.45680 | 77.46190 | 332.79423   | -609.46388  | -590.97613  | 1 |
| 11855 | O | 90.96700 | 58.38780 | 76.89490 | -33.13991   | 738.45028   | 277.88517   | 1 |
| 11856 | N | 91.47500 | 59.73380 | 78.58890 | -205.99053  | -461.63039  | 676.11949   | 1 |
| 11857 | H | 91.42900 | 60.64380 | 78.99590 | 1676.62045  | 1711.55738  | 2039.05405  | 1 |
| 11858 | C | 92.46700 | 58.82380 | 79.17890 | -724.88543  | -475.55518  | -282.55864  | 1 |
| 11859 | H | 93.13400 | 58.59180 | 78.36190 | -2154.49200 | 2198.57070  | -650.13636  | 1 |
| 11860 | C | 93.39400 | 59.54580 | 80.25190 | -727.45292  | -66.62977   | 545.73229   | 1 |
| 11861 | H | 93.67500 | 58.93680 | 81.13790 | -477.43093  | 1900.27554  | 2461.55211  | 1 |
| 11862 | H | 92.68800 | 60.32980 | 80.60090 | -1885.56164 | 2439.64756  | -625.30258  | 1 |
| 11863 | C | 94.60100 | 60.20980 | 79.64990 | 0.07779     | 136.16699   | -901.61497  | 1 |
| 11864 | H | 94.23900 | 60.46180 | 78.62990 | -1494.27344 | 2209.19348  | -1668.78317 | 1 |
| 11865 | C | 95.06300 | 61.43480 | 80.47190 | 181.28753   | 817.11273   | -361.81848  | 1 |
| 11866 | H | 95.28300 | 61.04180 | 81.48790 | -1711.81780 | -2403.28153 | 1091.85344  | 1 |
| 11867 | H | 94.26400 | 62.20680 | 80.47790 | -1638.91079 | -1988.92275 | -1804.54535 | 1 |
| 11868 | H | 96.00300 | 61.82780 | 80.02690 | 789.63194   | -1754.67722 | 2489.13951  | 1 |
| 11869 | C | 95.76500 | 59.20580 | 79.52190 | -723.88704  | 514.99269   | 205.47768   | 1 |
| 11870 | H | 96.08900 | 58.91780 | 80.54590 | -2579.66576 | 1679.81506  | 649.43986   | 1 |
| 11871 | H | 95.53700 | 58.21280 | 79.07790 | 1397.94009  | -2453.65391 | 1386.92906  | 1 |
| 11872 | H | 96.53300 | 59.68580 | 78.87890 | 591.89494   | -2907.09292 | 1047.23319  | 1 |
| 11873 | C | 91.86500 | 57.57880 | 79.69390 | -582.56779  | -303.19306  | -632.56600  | 1 |
| 11874 | O | 92.42900 | 56.49880 | 79.48290 | 535.77260   | -24.90168   | -579.61613  | 1 |
| 11875 | N | 90.65400 | 57.56080 | 80.28190 | -381.42184  | -696.43704  | 286.64460   | 1 |
| 11876 | H | 90.21300 | 58.42780 | 80.50190 | -2074.13190 | 2027.32988  | -1219.07205 | 1 |
| 11877 | C | 89.92200 | 56.39580 | 80.60690 | -269.30077  | -32.73197   | -870.54966  | 1 |
| 11878 | H | 90.56100 | 55.73180 | 81.16890 | 2609.90647  | -683.93234  | -1618.28644 | 1 |
| 11879 | C | 88.72200 | 56.64380 | 81.52490 | -255.95642  | 818.20196   | -310.61692  | 1 |
| 11880 | H | 88.11700 | 57.51680 | 81.19890 | -2200.53987 | -872.08249  | 2072.51602  | 1 |
| 11881 | C | 87.81900 | 55.37180 | 81.65790 | -270.06871  | 308.71118   | -814.37786  | 1 |
| 11882 | H | 87.24900 | 55.30580 | 80.70590 | -1679.32935 | 2605.55697  | 537.72862   | 1 |
| 11883 | H | 88.39100 | 54.44580 | 81.87890 | 2325.06348  | 1309.71624  | -1666.41814 | 1 |
| 11884 | H | 87.10100 | 55.43280 | 82.50390 | 1541.58712  | -1896.34312 | -1981.31727 | 1 |
| 11885 | C | 89.30500 | 57.08480 | 82.90890 | -335.17659  | 787.08053   | -315.61352  | 1 |
| 11886 | H | 89.91800 | 58.00280 | 82.78290 | 2332.24242  | 609.63530   | -2021.68651 | 1 |
| 11887 | H | 89.92900 | 56.23680 | 83.26390 | -1968.73005 | 1708.57905  | 1761.55779  | 1 |
| 11888 | H | 88.39800 | 57.27180 | 83.52290 | -1980.23295 | -1726.76671 | -1730.65895 | 1 |
| 11889 | C | 89.44700 | 55.63980 | 79.32990 | -359.27848  | 576.33568   | 608.44652   | 1 |
| 11890 | O | 89.89800 | 54.49180 | 79.18290 | -449.67866  | 648.30608   | 33.39991    | 1 |
| 11891 | N | 88.71500 | 56.24380 | 78.37590 | -687.55598  | 361.92186   | -330.07821  | 1 |
| 11892 | H | 88.39800 | 57.18380 | 78.48190 | -1682.32476 | -210.17816  | -2650.25183 | 1 |
| 11893 | C | 88.13600 | 55.43780 | 77.35890 | 481.60797   | -515.20904  | -577.98305  | 1 |
| 11894 | H | 87.98700 | 54.42380 | 77.69790 | 2167.44450  | 1544.81508  | -1677.48530 | 1 |
| 11895 | C | 86.80000 | 55.99480 | 76.89190 | 518.43415   | -69.51995   | 746.88955   | 1 |
| 11896 | H | 86.79700 | 57.04880 | 76.53890 | -1143.95498 | 2795.22945  | -881.07069  | 1 |

|       |   |          |          |          |             |             |             |   |
|-------|---|----------|----------|----------|-------------|-------------|-------------|---|
| 11897 | H | 86.30400 | 55.48680 | 76.03690 | 1254.94298  | 2533.45344  | -1380.20217 | 1 |
| 11898 | C | 85.67600 | 55.90280 | 77.97190 | -484.48634  | -150.54762  | 757.66708   | 1 |
| 11899 | H | 86.01400 | 56.61080 | 78.75890 | 1871.95387  | 1227.76250  | 2210.56875  | 1 |
| 11900 | H | 85.62800 | 54.90080 | 78.44890 | -2218.83620 | 1002.44526  | 1992.50988  | 1 |
| 11901 | S | 83.95900 | 56.24880 | 77.57990 | -404.97605  | -144.73323  | 355.32703   | 1 |
| 11902 | C | 84.12800 | 58.00880 | 77.20090 | -197.22130  | -509.73989  | -729.87671  | 1 |
| 11903 | H | 83.24300 | 58.67880 | 77.24590 | -414.07682  | -2980.23816 | 919.21005   | 1 |
| 11904 | H | 84.54900 | 58.20380 | 76.19090 | 411.47298   | 2082.84638  | -2321.78103 | 1 |
| 11905 | H | 84.85200 | 58.45580 | 77.91490 | 2087.45348  | 1033.17280  | -2115.02202 | 1 |
| 11906 | C | 89.02800 | 55.25480 | 76.12090 | 452.00509   | -403.62784  | -681.34204  | 1 |
| 11907 | O | 88.67300 | 54.33880 | 75.34490 | -482.40885  | 216.79530   | -586.43732  | 1 |
| 11908 | N | 90.17100 | 55.99680 | 75.92590 | -667.46038  | -222.59038  | 466.50022   | 1 |
| 11909 | H | 90.45000 | 56.78180 | 76.47390 | 1347.87838  | 2726.98930  | -803.10612  | 1 |
| 11910 | C | 91.03600 | 55.84080 | 74.74190 | -889.83329  | 191.54029   | -54.40627   | 1 |
| 11911 | H | 91.33000 | 56.77180 | 74.28090 | -1586.87762 | 296.94965   | -2700.34564 | 1 |
| 11912 | H | 90.59400 | 55.18780 | 74.00390 | -572.29216  | 2941.77648  | 957.42313   | 1 |
| 11913 | C | 92.32500 | 55.26980 | 75.05690 | 636.94938   | -640.72478  | 123.36225   | 1 |
| 11914 | O | 92.92800 | 54.78180 | 74.07790 | -199.28590  | -698.80068  | 309.17628   | 1 |
| 11915 | N | 92.85900 | 55.28180 | 76.31390 | -420.26493  | -726.64527  | 89.64558    | 1 |
| 11916 | H | 92.39700 | 55.80080 | 77.02990 | -2179.54868 | -321.32446  | 2246.00632  | 1 |
| 11917 | C | 94.18600 | 54.76780 | 76.54990 | -516.28029  | 736.80378   | -148.41107  | 1 |
| 11918 | H | 94.42000 | 54.19980 | 75.66190 | 2046.46465  | 2181.63635  | -975.02384  | 1 |
| 11919 | C | 95.24000 | 55.87480 | 76.84190 | -403.38982  | 768.94288   | -278.30649  | 1 |
| 11920 | H | 96.23400 | 55.39980 | 76.97990 | 1643.87484  | 994.04106   | -2491.54252 | 1 |
| 11921 | H | 94.96800 | 56.43880 | 77.75990 | 1807.35693  | -538.28990  | -2518.31911 | 1 |
| 11922 | C | 95.32500 | 56.83880 | 75.67490 | 658.83343   | 599.46334   | -195.02109  | 1 |
| 11923 | C | 94.57400 | 58.04680 | 75.56990 | 735.77653   | -405.26549  | 354.74468   | 1 |
| 11924 | H | 93.81100 | 58.35680 | 76.26890 | 1625.72964  | -2631.85930 | 573.18932   | 1 |
| 11925 | C | 94.76300 | 58.89280 | 74.47790 | -420.74497  | -268.55247  | -763.08862  | 1 |
| 11926 | H | 94.19800 | 59.78980 | 74.27190 | -2210.21796 | 872.57426   | 2061.98374  | 1 |
| 11927 | C | 95.64700 | 58.60780 | 73.44990 | 417.26536   | 581.36110   | 565.11937   | 1 |
| 11928 | O | 95.87200 | 59.44180 | 72.41690 | -555.02119  | -364.40461  | 427.53712   | 1 |
| 11929 | H | 96.32200 | 59.00280 | 71.69190 | 1960.54608  | -1695.32460 | 1783.35632  | 1 |
| 11930 | C | 96.26800 | 56.58880 | 74.66090 | -707.17336  | -527.74710  | -229.86917  | 1 |
| 11931 | H | 96.92000 | 55.72780 | 74.64290 | -1392.07536 | 228.65270   | -2812.12915 | 1 |
| 11932 | C | 96.40200 | 57.42980 | 73.55890 | 243.88306   | -863.32614  | -163.21773  | 1 |
| 11933 | H | 97.07000 | 57.15380 | 72.75690 | 1815.36562  | 1085.64151  | -2328.96037 | 1 |
| 11934 | C | 94.25100 | 53.70880 | 77.63690 | 517.31090   | 682.10256   | -313.96900  | 1 |
| 11935 | O | 94.75800 | 52.60880 | 77.40090 | -416.13956  | -623.25887  | -249.00497  | 1 |
| 11936 | N | 93.66100 | 53.96080 | 78.80590 | 256.79754   | -672.06997  | 441.64383   | 1 |
| 11937 | H | 93.27600 | 54.86780 | 78.95390 | -1234.01676 | -2604.29812 | 1262.16487  | 1 |
| 11938 | C | 93.44100 | 53.00680 | 79.89090 | -599.56266  | 600.82935   | -333.13618  | 1 |
| 11939 | H | 94.35700 | 52.47780 | 80.10790 | 1827.87857  | 1575.23439  | 2018.84194  | 1 |
| 11940 | C | 92.94400 | 53.62880 | 81.25290 | 445.77242   | -396.55549  | -689.55181  | 1 |
| 11941 | H | 92.05600 | 54.20480 | 80.91490 | 1528.57417  | 1902.28294  | 1985.70059  | 1 |
| 11942 | H | 92.64800 | 52.84180 | 81.97990 | 1217.80572  | 896.89466   | 2758.75976  | 1 |
| 11943 | C | 93.94700 | 54.46080 | 82.04690 | -393.38206  | 815.68796   | 106.55845   | 1 |
| 11944 | H | 94.47900 | 55.07880 | 81.29190 | -1516.57166 | -2750.17328 | 186.50351   | 1 |
| 11945 | H | 94.64500 | 53.84780 | 82.65590 | 2442.85213  | -1927.82729 | 462.79762   | 1 |
| 11946 | C | 93.27700 | 55.39580 | 83.02990 | -567.21803  | 42.86215    | 712.65528   | 1 |
| 11947 | O | 92.47900 | 54.97380 | 83.85390 | 278.53089   | -654.64459  | 342.76557   | 1 |
| 11948 | N | 93.52300 | 56.72180 | 82.88790 | -587.28231  | -86.24744   | 600.27756   | 1 |
| 11949 | H | 94.41900 | 57.02380 | 82.56290 | -2097.16996 | 45.48301    | -2344.78905 | 1 |
| 11950 | H | 92.86000 | 57.35880 | 83.28190 | 1729.79074  | 364.51200   | -2602.53362 | 1 |
| 11951 | C | 92.57700 | 51.86780 | 79.50590 | 309.23997   | 595.98626   | 616.94572   | 1 |
| 11952 | O | 92.78500 | 50.65780 | 79.79990 | -586.64018  | 395.11844   | -351.22919  | 1 |
| 11953 | N | 91.47300 | 52.18080 | 78.75590 | 361.09023   | 362.27129   | 671.59932   | 1 |
| 11954 | H | 91.20800 | 53.14080 | 78.70990 | 2028.97080  | 263.32461   | 2390.01337  | 1 |
| 11955 | C | 90.61600 | 51.17280 | 78.07990 | 625.30084   | -488.83724  | 448.87417   | 1 |
| 11956 | H | 90.80800 | 50.23680 | 78.58390 | -2144.40996 | -1361.23221 | -1856.55030 | 1 |
| 11957 | C | 89.08300 | 51.53180 | 78.20090 | 477.40451   | -650.07167  | 425.37367   | 1 |
| 11958 | H | 88.90900 | 52.51580 | 77.71390 | -2984.13350 | -814.07351  | 574.85456   | 1 |

|       |   |          |          |          |             |             |             |   |
|-------|---|----------|----------|----------|-------------|-------------|-------------|---|
| 11959 | H | 88.49600 | 50.75480 | 77.66490 | 387.63192   | 2809.97985  | 1360.87507  | 1 |
| 11960 | C | 88.66600 | 51.54680 | 79.65090 | -16.46731   | 727.72636   | 549.17591   | 1 |
| 11961 | H | 89.15400 | 52.39480 | 80.17690 | 1412.95289  | 2456.78161  | -1366.02141 | 1 |
| 11962 | H | 89.07300 | 50.61780 | 80.10390 | 2470.71274  | -1055.01199 | -1637.30098 | 1 |
| 11963 | C | 87.13900 | 51.48180 | 79.68990 | -432.57797  | -796.00644  | -103.44587  | 1 |
| 11964 | H | 86.76700 | 52.34880 | 79.10290 | 822.00885   | -1659.18601 | 2543.54663  | 1 |
| 11965 | H | 86.88900 | 50.48680 | 79.26190 | -2959.95700 | 805.02226   | 699.15660   | 1 |
| 11966 | C | 86.57500 | 51.74980 | 81.08890 | 626.28866   | 582.54457   | -315.99896  | 1 |
| 11967 | H | 86.92000 | 52.73180 | 81.47690 | -1470.60068 | 2538.39473  | -1136.71109 | 1 |
| 11968 | H | 86.98500 | 50.92780 | 81.71390 | 428.27849   | -2564.59065 | -1771.34937 | 1 |
| 11969 | N | 85.12500 | 51.68880 | 81.07790 | -325.89062  | 634.10551   | -452.08162  | 1 |
| 11970 | H | 84.77400 | 50.75480 | 80.78390 | 2061.34753  | 2252.62626  | -758.12104  | 1 |
| 11971 | H | 84.69900 | 52.02580 | 81.96490 | -2254.09242 | -2171.37274 | -320.05317  | 1 |
| 11972 | H | 84.83800 | 52.34680 | 80.32490 | 2702.72499  | 846.95956   | -1369.73113 | 1 |
| 11973 | C | 90.95300 | 50.94980 | 76.60790 | -791.95575  | 415.04482   | 178.87113   | 1 |
| 11974 | O | 90.98900 | 51.89480 | 75.82090 | -477.04654  | -343.75641  | -527.14833  | 1 |
| 11975 | N | 91.05100 | 49.72080 | 76.17790 | -649.59839  | 398.10287   | 363.60462   | 1 |
| 11976 | H | 90.96200 | 48.97080 | 76.82890 | 1458.14370  | 2348.37727  | -1502.38722 | 1 |
| 11977 | C | 91.29900 | 49.34780 | 74.85290 | -196.54250  | 852.49423   | 257.05181   | 1 |
| 11978 | H | 91.82800 | 50.10280 | 74.28990 | 810.25378   | -484.59869  | -3001.14631 | 1 |
| 11979 | C | 92.38200 | 48.18380 | 74.82990 | -232.57955  | 668.07899   | -575.35052  | 1 |
| 11980 | H | 92.07000 | 47.34480 | 75.48790 | 1997.64510  | 893.54082   | 2260.35950  | 1 |
| 11981 | H | 92.30400 | 47.74580 | 73.81190 | -1462.04695 | -2629.60319 | 919.69126   | 1 |
| 11982 | C | 93.85500 | 48.62380 | 74.83190 | -424.38912  | 617.07221   | 520.16032   | 1 |
| 11983 | H | 94.07900 | 49.05780 | 73.83490 | -1533.42661 | -1555.59845 | -2264.27527 | 1 |
| 11984 | H | 94.46100 | 47.69280 | 74.87390 | -1012.94100 | -909.17038  | -2836.47422 | 1 |
| 11985 | C | 94.33100 | 49.57380 | 75.99790 | -123.48169  | 749.27765   | 504.76358   | 1 |
| 11986 | H | 93.81300 | 50.55380 | 75.93290 | 2516.78984  | 1864.77128  | 294.31821   | 1 |
| 11987 | H | 94.18600 | 49.06480 | 76.97490 | -1086.76355 | 2939.52485  | -276.34191  | 1 |
| 11988 | C | 95.82100 | 49.84980 | 75.84490 | 662.05657   | 334.81084   | 530.12621   | 1 |
| 11989 | H | 96.00100 | 50.55280 | 75.00390 | 1609.52510  | -840.60521  | 2569.24854  | 1 |
| 11990 | H | 96.33200 | 48.90480 | 75.56290 | -1866.05211 | 2255.16258  | 1153.39391  | 1 |
| 11991 | N | 96.36400 | 50.35680 | 77.12790 | 83.85254    | -840.00723  | -5.37561    | 1 |
| 11992 | H | 95.93900 | 49.92380 | 77.97290 | 366.75803   | -1847.68540 | -2519.87568 | 1 |
| 11993 | H | 96.24700 | 51.38080 | 77.26290 | -212.69305  | -2418.09462 | -2001.45105 | 1 |
| 11994 | H | 97.39300 | 50.20580 | 77.11590 | 2220.86465  | 1037.98853  | 1971.94479  | 1 |
| 11995 | C | 90.00100 | 49.00580 | 74.10290 | -646.14395  | -433.52289  | 475.40183   | 1 |
| 11996 | O | 90.08300 | 48.49180 | 72.98190 | -109.13754  | 630.33862   | 463.02208   | 1 |
| 11997 | N | 88.81000 | 49.29580 | 74.67490 | 645.30425   | -291.62975  | 459.57241   | 1 |
| 11998 | H | 88.70200 | 49.78880 | 75.53390 | -1336.66204 | -690.57977  | 2763.08892  | 1 |
| 11999 | C | 87.55400 | 48.97680 | 74.08890 | 810.69662   | 332.42387   | 252.42102   | 1 |
| 12000 | H | 87.68600 | 49.00780 | 73.01690 | 1261.16373  | -2809.95431 | 641.75465   | 1 |
| 12001 | C | 87.15200 | 47.53380 | 74.50490 | 195.68149   | -372.14895  | -809.11366  | 1 |
| 12002 | H | 87.00100 | 47.55280 | 75.60590 | 627.64980   | -2730.86972 | 1430.60566  | 1 |
| 12003 | H | 88.03400 | 46.90580 | 74.25790 | -294.96673  | 1838.16130  | 2536.21448  | 1 |
| 12004 | C | 85.88800 | 46.98380 | 73.78190 | -514.60994  | -676.19537  | -330.73772  | 1 |
| 12005 | H | 85.04600 | 47.70380 | 73.87690 | 2159.55539  | 2127.79094  | 840.86413   | 1 |
| 12006 | C | 86.19700 | 46.73680 | 72.27590 | 513.37198   | -390.36037  | 644.60763   | 1 |
| 12007 | H | 86.97300 | 45.94380 | 72.21590 | 757.55728   | 1552.81916  | -2629.27478 | 1 |
| 12008 | H | 86.79000 | 47.58380 | 71.86990 | -2370.02827 | 2.51577     | 2069.10268  | 1 |
| 12009 | H | 85.32100 | 46.35980 | 71.70490 | 1419.99629  | 2200.09975  | -1743.96039 | 1 |
| 12010 | C | 85.44900 | 45.69380 | 74.43390 | -572.82536  | -688.13157  | 172.61823   | 1 |
| 12011 | H | 86.17400 | 44.86080 | 74.31090 | -2596.52346 | 1295.27064  | 1215.96304  | 1 |
| 12012 | H | 84.50200 | 45.40480 | 73.93090 | -2898.30672 | -262.72757  | -1195.41566 | 1 |
| 12013 | H | 85.30700 | 45.81980 | 75.52790 | -2858.06058 | -603.19043  | 1168.70751  | 1 |
| 12014 | C | 86.58300 | 49.95080 | 74.48290 | 470.41433   | 35.85679    | 780.30485   | 1 |
| 12015 | O | 86.54200 | 50.31480 | 75.64190 | -588.56167  | 469.27101   | -238.76160  | 1 |
| 12016 | N | 85.76300 | 50.38280 | 73.53390 | 74.47277    | -813.32802  | 213.59687   | 1 |
| 12017 | H | 85.97600 | 50.05580 | 72.61690 | 1805.71083  | 1545.11727  | 2061.61278  | 1 |
| 12018 | C | 84.62100 | 51.21080 | 73.67290 | -165.33727  | -443.14724  | -779.57367  | 1 |
| 12019 | H | 84.52300 | 51.36680 | 74.73690 | -1667.06575 | 2602.13103  | -589.94247  | 1 |
| 12020 | C | 84.88700 | 52.61880 | 73.07790 | 871.12257   | 223.68728   | -150.20145  | 1 |

|       |   |          |          |          |             |             |             |   |
|-------|---|----------|----------|----------|-------------|-------------|-------------|---|
| 12021 | H | 83.94100 | 53.16780 | 72.88390 | 1370.99310  | 582.96801   | 2771.05620  | 1 |
| 12022 | H | 85.25400 | 52.43280 | 72.04590 | -1938.95471 | -86.65666   | -2476.12025 | 1 |
| 12023 | C | 85.88700 | 53.42880 | 73.88690 | 645.13091   | -641.00778  | 66.07680    | 1 |
| 12024 | H | 86.80800 | 52.87480 | 74.16590 | -292.94778  | 2772.15421  | -1458.61881 | 1 |
| 12025 | H | 85.38700 | 53.70380 | 74.83990 | -220.80937  | 2915.27530  | -1162.17013 | 1 |
| 12026 | C | 86.28500 | 54.67180 | 73.14490 | -46.40004   | -652.09192  | -635.66828  | 1 |
| 12027 | H | 85.41500 | 55.31380 | 72.88890 | 972.19535   | 2320.72695  | -1888.72678 | 1 |
| 12028 | H | 86.96800 | 55.30180 | 73.75390 | 1566.75036  | 2000.37395  | 1855.26914  | 1 |
| 12029 | N | 87.02500 | 54.16280 | 71.89790 | -608.96999  | 352.30617   | 466.59212   | 1 |
| 12030 | H | 86.52100 | 54.27380 | 71.04090 | 2255.82456  | 2188.50576  | -141.15364  | 1 |
| 12031 | C | 88.26400 | 53.66480 | 71.80990 | -569.81877  | 363.39144   | -612.13090  | 1 |
| 12032 | N | 89.10000 | 53.50980 | 72.82190 | 577.68006   | 610.17971   | -81.47856   | 1 |
| 12033 | H | 88.79100 | 53.70980 | 73.75190 | -327.84551  | 2636.03825  | 1685.83686  | 1 |
| 12034 | H | 90.04200 | 53.23980 | 72.62390 | 2824.26856  | 630.69254   | 1234.48785  | 1 |
| 12035 | N | 88.74400 | 53.35480 | 70.59690 | 243.88392   | -464.76129  | 661.20335   | 1 |
| 12036 | H | 88.15000 | 53.32880 | 69.79290 | 593.76744   | -1077.70321 | -2895.55215 | 1 |
| 12037 | H | 89.71700 | 53.20780 | 70.42090 | 1555.41710  | 2697.84599  | 447.80674   | 1 |
| 12038 | C | 83.32200 | 50.61480 | 73.20590 | -627.51682  | -478.99942  | -456.32576  | 1 |
| 12039 | O | 83.24600 | 50.07780 | 72.10590 | 158.13124   | 76.39803    | 769.92537   | 1 |
| 12040 | N | 82.30300 | 50.67980 | 74.02090 | 288.65807   | -357.90700  | -707.99109  | 1 |
| 12041 | H | 82.47000 | 51.01780 | 74.94390 | -1317.19795 | 2080.32748  | 1958.43135  | 1 |
| 12042 | C | 80.90500 | 50.41080 | 73.69990 | 213.65388   | 861.83773   | 207.45781   | 1 |
| 12043 | H | 80.90700 | 49.61780 | 72.96590 | 2621.91957  | 1226.50582  | 1232.65870  | 1 |
| 12044 | C | 80.09800 | 49.91280 | 74.88890 | 891.07230   | 99.44429    | 165.98792   | 1 |
| 12045 | H | 80.65700 | 49.07480 | 75.35590 | -610.32980  | 2738.34949  | -1423.78574 | 1 |
| 12046 | H | 79.13500 | 49.50380 | 74.51390 | -1334.15046 | -2455.18096 | -1445.80609 | 1 |
| 12047 | O | 79.93000 | 50.94380 | 75.84990 | 404.99634   | 677.47108   | 25.26136    | 1 |
| 12048 | H | 80.78600 | 51.10580 | 76.25190 | 2045.17830  | -1934.17400 | 1405.14871  | 1 |
| 12049 | C | 80.20200 | 51.63780 | 73.09290 | -290.77136  | 460.76193   | 731.16446   | 1 |
| 12050 | O | 80.82500 | 52.67380 | 72.89290 | 6.22925     | -670.23758  | 417.57636   | 1 |
| 12051 | N | 78.90600 | 51.49280 | 72.63190 | 804.15742   | -245.13745  | 76.88145    | 1 |
| 12052 | H | 78.46200 | 50.61780 | 72.45690 | 1966.48604  | 2031.87133  | 1379.36862  | 1 |
| 12053 | C | 78.10900 | 52.61380 | 72.12490 | -38.80295   | -523.18019  | -745.80683  | 1 |
| 12054 | H | 78.62900 | 53.02480 | 71.27190 | 571.29205   | 3037.68164  | 586.80650   | 1 |
| 12055 | C | 76.74700 | 52.13880 | 71.62190 | -1.64929    | 686.49319   | 600.14613   | 1 |
| 12056 | H | 76.16900 | 52.99880 | 71.21990 | 960.73814   | -1454.63825 | 2619.01432  | 1 |
| 12057 | H | 76.18700 | 51.79780 | 72.51890 | -1762.84482 | -2491.16498 | -764.65771  | 1 |
| 12058 | C | 76.84800 | 51.01580 | 70.56590 | -675.82134  | 331.44193   | 514.64820   | 1 |
| 12059 | H | 75.93000 | 51.16180 | 69.95690 | 965.02650   | 1592.22819  | 2536.09138  | 1 |
| 12060 | H | 77.66100 | 51.23680 | 69.84290 | 2357.70359  | 464.66706   | 2030.65126  | 1 |
| 12061 | S | 76.94200 | 49.31380 | 71.19890 | 341.30531   | 408.22216   | 167.55883   | 1 |
| 12062 | C | 75.79700 | 48.59480 | 69.95690 | 827.16267   | 245.02624   | 295.32196   | 1 |
| 12063 | H | 75.35400 | 47.67380 | 70.39290 | 2064.85392  | -2370.72865 | -119.37418  | 1 |
| 12064 | H | 76.40800 | 48.33680 | 69.06590 | -360.06608  | -2325.14734 | 2088.60443  | 1 |
| 12065 | H | 75.08300 | 49.32480 | 69.51890 | 1737.04504  | 1346.82353  | -2250.99248 | 1 |
| 12066 | C | 77.92300 | 53.80080 | 73.01490 | -216.78428  | 637.19466   | 615.17358   | 1 |
| 12067 | O | 78.11000 | 54.94380 | 72.61990 | 511.66076   | -576.12974  | -172.93066  | 1 |
| 12068 | N | 77.71000 | 53.58280 | 74.34390 | 116.26666   | -800.05617  | 243.03183   | 1 |
| 12069 | H | 77.59800 | 52.67680 | 74.74290 | -1357.08445 | -1232.82351 | 2556.69596  | 1 |
| 12070 | C | 77.68700 | 54.67680 | 75.33990 | -678.35284  | -109.41542  | -599.43031  | 1 |
| 12071 | H | 76.94800 | 55.38980 | 75.00390 | -1206.66008 | 2905.34747  | 33.96701    | 1 |
| 12072 | C | 77.20500 | 54.32980 | 76.79390 | 472.54445   | 10.69847    | -779.76810  | 1 |
| 12073 | H | 77.72800 | 53.41580 | 77.14590 | 2373.67726  | -1298.61513 | -1605.45359 | 1 |
| 12074 | O | 75.76300 | 54.21780 | 76.78490 | 249.98320   | -474.61047  | -579.55201  | 1 |
| 12075 | H | 75.63300 | 53.42280 | 76.26290 | 3029.87441  | -803.06926  | -270.49405  | 1 |
| 12076 | C | 77.39900 | 55.42680 | 77.81890 | -565.84948  | 425.25063   | 574.82803   | 1 |
| 12077 | H | 76.81700 | 55.15480 | 78.72490 | 2380.54261  | 2038.40372  | 275.95904   | 1 |
| 12078 | H | 78.42900 | 55.46880 | 78.23490 | 223.84325   | 3107.75120  | -435.89326  | 1 |
| 12079 | H | 77.11100 | 56.36280 | 77.29590 | -8.05197    | -3029.05317 | 850.29306   | 1 |
| 12080 | C | 78.99300 | 55.41280 | 75.48290 | 701.70330   | -576.93621  | -78.79146   | 1 |
| 12081 | O | 79.01200 | 56.64380 | 75.52890 | -59.21911   | -775.59247  | -136.29617  | 1 |
| 12082 | N | 80.04200 | 54.60680 | 75.54790 | -398.63876  | 510.83580   | -541.11571  | 1 |

|       |   |          |          |          |             |             |             |   |
|-------|---|----------|----------|----------|-------------|-------------|-------------|---|
| 12083 | H | 79.91100 | 53.62580 | 75.42390 | -2349.11562 | 2066.51292  | 330.76636   | 1 |
| 12084 | C | 81.45000 | 55.05880 | 75.60490 | 206.95057   | 637.15206   | -618.59495  | 1 |
| 12085 | H | 81.54600 | 55.60980 | 76.52890 | 632.20188   | -642.48221  | -3014.26004 | 1 |
| 12086 | C | 82.49400 | 53.85080 | 75.62690 | 598.64805   | 397.00326   | -561.65820  | 1 |
| 12087 | H | 83.54200 | 54.17680 | 75.80090 | -2232.34802 | -1661.32334 | -1467.94186 | 1 |
| 12088 | H | 82.40300 | 53.30880 | 74.66190 | 676.89204   | 2401.68197  | -1916.23775 | 1 |
| 12089 | C | 82.13700 | 52.85880 | 76.75290 | -370.00610  | 37.83435    | -832.53531  | 1 |
| 12090 | O | 82.51800 | 51.66580 | 76.56390 | -351.41515  | 21.40122    | 706.87807   | 1 |
| 12091 | O | 81.53100 | 53.20380 | 77.76190 | 286.97340   | 74.62546    | 731.91840   | 1 |
| 12092 | C | 81.81100 | 55.96680 | 74.36290 | 205.71236   | 700.87909   | -545.80393  | 1 |
| 12093 | O | 82.31600 | 57.09180 | 74.51690 | 411.41298   | 417.00731   | 529.59560   | 1 |
| 12094 | N | 81.46000 | 55.58180 | 73.12090 | 230.67136   | -741.50725  | -331.10424  | 1 |
| 12095 | H | 80.97900 | 54.71980 | 72.97790 | 2577.54806  | 1047.01609  | 1469.09140  | 1 |
| 12096 | C | 81.68400 | 56.29980 | 71.95890 | 389.38357   | -169.83255  | -806.83848  | 1 |
| 12097 | H | 82.73300 | 56.54780 | 72.03390 | -1969.42367 | 1749.85328  | -1719.77037 | 1 |
| 12098 | C | 81.30300 | 55.39580 | 70.72990 | -581.59895  | 323.43404   | -623.36513  | 1 |
| 12099 | H | 81.29600 | 56.08680 | 69.85890 | -2342.50797 | -2032.69013 | 528.25512   | 1 |
| 12100 | H | 80.24900 | 55.09180 | 70.90490 | -2701.29281 | 1283.89242  | 976.14733   | 1 |
| 12101 | C | 82.34400 | 54.32980 | 70.40590 | 45.24449    | -679.72194  | 606.12047   | 1 |
| 12102 | H | 82.91800 | 54.03380 | 71.31090 | -1064.36985 | 1985.27929  | 2196.36272  | 1 |
| 12103 | H | 83.11200 | 54.74680 | 69.71990 | -611.85400  | -2639.79983 | 1598.53612  | 1 |
| 12104 | C | 81.85800 | 53.05580 | 69.67590 | 660.61407   | -567.71870  | 269.69526   | 1 |
| 12105 | H | 81.45300 | 53.35580 | 68.68590 | -2517.02422 | -608.94234  | 1786.61818  | 1 |
| 12106 | H | 81.02700 | 52.73880 | 70.34090 | -286.32125  | -1820.26254 | -2550.07660 | 1 |
| 12107 | C | 82.96900 | 51.98280 | 69.53090 | -514.95006  | -516.07252  | 547.67380   | 1 |
| 12108 | H | 83.51800 | 51.86480 | 70.48990 | 1856.94857  | 1393.62275  | 2123.15423  | 1 |
| 12109 | H | 83.71600 | 52.20480 | 68.73890 | 1301.85931  | -1533.97425 | 2418.74173  | 1 |
| 12110 | N | 82.51400 | 50.65680 | 69.16890 | 535.25158   | 528.00295   | 383.91525   | 1 |
| 12111 | H | 82.10400 | 50.74380 | 68.21690 | -169.33332  | 2201.55980  | -2241.13518 | 1 |
| 12112 | H | 83.32800 | 50.00980 | 69.15490 | -692.77952  | 2016.47948  | 2313.45916  | 1 |
| 12113 | H | 81.81100 | 50.26080 | 69.82490 | -1891.10716 | -2335.74071 | 930.72835   | 1 |
| 12114 | C | 80.96500 | 57.63780 | 71.82890 | 831.35342   | -336.52414  | 164.48099   | 1 |
| 12115 | O | 81.52700 | 58.63680 | 71.43890 | 528.41780   | 45.66680    | -585.07812  | 1 |
| 12116 | N | 79.66900 | 57.69580 | 72.21290 | 67.36990    | 405.06377   | -737.60215  | 1 |
| 12117 | H | 79.23700 | 56.80280 | 72.31390 | 1052.74506  | -1323.30612 | 2653.07651  | 1 |
| 12118 | C | 78.91900 | 58.95380 | 72.34290 | 673.98104   | 4.29476     | 614.15154   | 1 |
| 12119 | H | 79.04000 | 59.54580 | 71.44790 | -1796.10232 | 2269.58137  | 1233.38685  | 1 |
| 12120 | C | 77.45800 | 58.71880 | 72.77690 | 817.18460   | -349.45788  | -203.81249  | 1 |
| 12121 | H | 76.82600 | 59.62580 | 72.87990 | -1459.46663 | -662.24447  | 2707.32629  | 1 |
| 12122 | H | 77.44500 | 58.21880 | 73.76890 | -2750.54998 | 1059.53428  | 1100.04007  | 1 |
| 12123 | C | 76.64300 | 57.82380 | 71.87090 | 570.71445   | -85.92804   | 705.94079   | 1 |
| 12124 | C | 76.58300 | 58.10480 | 70.48090 | 196.61060   | -845.10815  | -280.33459  | 1 |
| 12125 | H | 77.12200 | 58.96280 | 70.10690 | -2022.26458 | 1442.80133  | -1930.54307 | 1 |
| 12126 | C | 75.81100 | 57.35880 | 69.59390 | -620.67473  | -144.62225  | 652.14898   | 1 |
| 12127 | H | 75.76500 | 57.60680 | 68.54390 | -1774.85020 | -1785.31973 | -1886.99933 | 1 |
| 12128 | C | 75.22600 | 56.17080 | 70.00690 | 507.99053   | -715.82818  | 246.95473   | 1 |
| 12129 | O | 74.53900 | 55.28780 | 69.16190 | 636.89690   | 24.24144    | 466.26378   | 1 |
| 12130 | H | 74.41500 | 54.44180 | 69.59890 | -1229.13574 | -2728.82755 | -970.02668  | 1 |
| 12131 | C | 75.90500 | 56.70580 | 72.30390 | -438.06824  | -219.52237  | 768.99750   | 1 |
| 12132 | H | 75.83900 | 56.41280 | 73.34090 | -1389.16845 | 2304.19206  | 1630.68580  | 1 |
| 12133 | C | 75.30900 | 55.81680 | 71.36490 | -138.47807  | 486.79549   | -758.48862  | 1 |
| 12134 | H | 74.94300 | 54.87280 | 71.74090 | 1875.29069  | 1905.15049  | -1658.88899 | 1 |
| 12135 | C | 79.49600 | 59.91880 | 73.36590 | 314.93220   | -626.23050  | 583.18443   | 1 |
| 12136 | O | 79.75100 | 61.08780 | 73.13790 | 166.40047   | 34.09026    | -771.21720  | 1 |
| 12137 | N | 79.82100 | 59.45580 | 74.55290 | -641.07289  | -340.81376  | -430.74798  | 1 |
| 12138 | H | 79.68400 | 58.49580 | 74.78390 | 2770.00984  | -1453.88336 | -333.90849  | 1 |
| 12139 | C | 80.44200 | 60.30880 | 75.56290 | -729.93127  | 358.94081   | -412.08353  | 1 |
| 12140 | H | 79.90500 | 61.24580 | 75.55490 | -2787.83190 | -900.98633  | -1146.49167 | 1 |
| 12141 | C | 80.24100 | 59.73180 | 76.98690 | 332.98027   | 551.74550   | -645.09848  | 1 |
| 12142 | H | 80.77400 | 60.48080 | 77.61190 | 2466.17135  | 124.53770   | 1949.54237  | 1 |
| 12143 | H | 80.74600 | 58.75980 | 77.17490 | -1127.69053 | 2483.20785  | -1568.50855 | 1 |
| 12144 | C | 78.72500 | 59.53680 | 77.40490 | -655.38688  | 470.08820   | -425.36587  | 1 |



|       |   |          |          |          |             |             |             |   |
|-------|---|----------|----------|----------|-------------|-------------|-------------|---|
| 12145 | H | 78.16700 | 60.42180 | 77.03090 | 2662.62756  | 1561.17670  | -609.39974  | 1 |
| 12146 | H | 78.24300 | 58.62080 | 77.00190 | -2099.73270 | -1947.48585 | 1302.55430  | 1 |
| 12147 | C | 78.50600 | 59.36680 | 78.91590 | 31.97752    | 198.73558   | 889.34392   | 1 |
| 12148 | H | 78.94700 | 58.43680 | 79.33590 | -74.44478   | 2293.05552  | 2152.80760  | 1 |
| 12149 | H | 77.42800 | 59.16480 | 79.09190 | -1970.42781 | -1072.69218 | 2205.66815  | 1 |
| 12150 | N | 79.05000 | 60.55680 | 79.71390 | -229.64616  | 496.03660   | 643.33710   | 1 |
| 12151 | H | 79.41200 | 61.35180 | 79.22890 | 833.13704   | -2924.64675 | -806.56697  | 1 |
| 12152 | C | 79.10800 | 60.62180 | 81.05290 | 124.60381   | -647.79417  | -629.51379  | 1 |
| 12153 | N | 78.65600 | 59.79180 | 81.93890 | -677.75721  | -278.89576  | 418.96851   | 1 |
| 12154 | H | 78.00100 | 59.08680 | 81.66790 | -1755.95806 | -2224.39321 | 1366.35001  | 1 |
| 12155 | H | 78.68000 | 60.11080 | 82.88590 | -1983.36234 | -1569.63800 | -1871.02555 | 1 |
| 12156 | N | 79.61200 | 61.72080 | 81.54490 | -334.65245  | -585.25440  | -508.09184  | 1 |
| 12157 | H | 79.92100 | 62.44280 | 80.92490 | -1562.22485 | 1491.63732  | 2287.50909  | 1 |
| 12158 | H | 79.73600 | 61.78780 | 82.53490 | -1795.71036 | 1793.17424  | -1859.61734 | 1 |
| 12159 | C | 81.91100 | 60.65180 | 75.26890 | 616.82672   | 440.14893   | -507.19298  | 1 |
| 12160 | O | 82.34700 | 61.74380 | 75.64890 | 408.96491   | 673.97556   | -46.17215   | 1 |
| 12161 | N | 82.63500 | 59.80580 | 74.56990 | -190.24542  | 70.08760    | -819.49173  | 1 |
| 12162 | H | 82.35300 | 58.85480 | 74.46790 | -2529.63481 | 1462.88648  | 1165.82036  | 1 |
| 12163 | C | 83.96700 | 60.27580 | 74.06590 | 580.48783   | -682.68440  | 168.60276   | 1 |
| 12164 | H | 84.51900 | 60.58080 | 74.94290 | -2015.52347 | -270.18547  | 2400.60225  | 1 |
| 12165 | C | 84.76500 | 59.15580 | 73.29790 | 807.44994   | -162.97781  | -391.04198  | 1 |
| 12166 | H | 84.27400 | 58.99080 | 72.31490 | -1304.61225 | 1425.38317  | -2482.84029 | 1 |
| 12167 | H | 84.62400 | 58.26080 | 73.94190 | -1610.06251 | 2701.87052  | 76.29298    | 1 |
| 12168 | C | 86.25700 | 59.33680 | 73.14890 | -736.82847  | 197.47386   | 499.53867   | 1 |
| 12169 | H | 86.42000 | 60.38280 | 72.81090 | 2282.69942  | -2080.27261 | -599.97954  | 1 |
| 12170 | C | 86.99400 | 59.10380 | 74.43890 | -132.79600  | 758.65012   | -488.12522  | 1 |
| 12171 | H | 88.03400 | 59.42780 | 74.21690 | 2316.28189  | 2059.60012  | 539.54772   | 1 |
| 12172 | H | 86.66200 | 59.73080 | 75.29390 | 1764.69691  | -1722.13532 | 1954.05245  | 1 |
| 12173 | H | 86.94000 | 58.03480 | 74.73590 | 1618.11774  | 1947.21808  | 1867.68921  | 1 |
| 12174 | C | 86.78800 | 58.36680 | 72.08090 | -33.05601   | 290.32281   | 863.75400   | 1 |
| 12175 | H | 86.63600 | 57.36080 | 72.52590 | -1363.19630 | 2394.79000  | -1518.19067 | 1 |
| 12176 | H | 87.88400 | 58.53880 | 72.02790 | -262.56333  | 2650.23136  | 1674.98074  | 1 |
| 12177 | H | 86.34700 | 58.51580 | 71.07190 | -2542.66483 | 1742.60188  | 629.61931   | 1 |
| 12178 | C | 83.83400 | 61.42680 | 73.15390 | -349.49611  | -412.57976  | -734.22164  | 1 |
| 12179 | O | 84.63000 | 62.37580 | 73.26490 | 653.38230   | 407.13363   | -175.95740  | 1 |
| 12180 | N | 82.85300 | 61.48880 | 72.22890 | -696.62291  | -443.72975  | -174.62165  | 1 |
| 12181 | H | 82.23800 | 60.70680 | 72.16490 | 2557.02351  | 1717.87314  | -639.35033  | 1 |
| 12182 | C | 82.51100 | 62.67080 | 71.40490 | -174.66495  | 893.03350   | -58.60317   | 1 |
| 12183 | H | 83.43700 | 63.02080 | 70.97290 | 2742.09203  | 936.70899   | 1225.45248  | 1 |
| 12184 | C | 81.45100 | 62.39580 | 70.30990 | 654.62704   | 631.74434   | 61.75378    | 1 |
| 12185 | H | 80.52300 | 61.97280 | 70.74890 | -1124.67376 | 1215.25919  | 2675.15986  | 1 |
| 12186 | H | 81.11100 | 63.34480 | 69.84290 | -1237.27166 | -1033.78453 | 2701.60593  | 1 |
| 12187 | N | 83.07400 | 62.04880 | 68.49190 | -65.61244   | -824.28130  | 170.08128   | 1 |
| 12188 | C | 81.94000 | 61.60380 | 69.18490 | 553.72523   | -722.80060  | 48.97612    | 1 |
| 12189 | C | 83.07900 | 61.30880 | 67.38090 | -156.05578  | 800.76146   | -407.28207  | 1 |
| 12190 | H | 83.93400 | 61.31080 | 66.70590 | 2707.28651  | 1600.97032  | 75.63083    | 1 |
| 12191 | N | 82.06700 | 60.43080 | 67.32990 | 27.73325    | 691.53841   | -483.40230  | 1 |
| 12192 | H | 81.96900 | 59.68080 | 66.67590 | 2123.25559  | 2320.04986  | -85.91020   | 1 |
| 12193 | C | 81.28500 | 60.67180 | 68.46190 | 751.95162   | 343.93963   | -384.35049  | 1 |
| 12194 | H | 80.30900 | 60.21780 | 68.57990 | 2039.24247  | 190.54477   | 2388.18112  | 1 |
| 12195 | C | 81.99700 | 63.82580 | 72.29390 | -160.21988  | -892.31250  | -97.77014   | 1 |
| 12196 | O | 82.45800 | 64.95180 | 72.13090 | -742.17490  | 52.02864    | -264.75775  | 1 |
| 12197 | N | 81.10700 | 63.58780 | 73.24290 | -506.89933  | -356.14508  | 573.48587   | 1 |
| 12198 | H | 80.64000 | 62.70880 | 73.29990 | 2261.43733  | 582.87510   | -2108.17079 | 1 |
| 12199 | C | 80.62600 | 64.63480 | 74.15290 | 540.92378   | 420.08690   | 601.97962   | 1 |
| 12200 | H | 80.25900 | 65.41980 | 73.50690 | 1104.64224  | 2675.80596  | -1232.09343 | 1 |
| 12201 | C | 79.51400 | 64.01580 | 75.02690 | 487.40404   | 679.16621   | 364.17243   | 1 |
| 12202 | H | 78.93200 | 63.32680 | 74.37890 | 1781.37923  | -1451.21758 | 2149.15839  | 1 |
| 12203 | H | 80.05900 | 63.34980 | 75.72990 | 2047.54260  | 2138.23628  | -1064.77281 | 1 |
| 12204 | C | 78.65200 | 64.92580 | 75.86790 | 150.99140   | 893.23266   | -103.86534  | 1 |
| 12205 | H | 79.32500 | 65.43280 | 76.59190 | 1577.40469  | -164.99908  | -2717.13010 | 1 |
| 12206 | C | 77.84300 | 65.91680 | 75.11090 | 402.88510   | 394.90242   | -716.37049  | 1 |

|       |   |          |          |          |             |             |             |   |
|-------|---|----------|----------|----------|-------------|-------------|-------------|---|
| 12207 | H | 78.40300 | 66.58380 | 74.41990 | -2081.17384 | -2130.37170 | -1014.12924 | 1 |
| 12208 | H | 77.04300 | 65.37980 | 74.55790 | 1427.12257  | -2280.78150 | 1630.82284  | 1 |
| 12209 | H | 77.34800 | 66.57180 | 75.85890 | 474.44067   | 676.84145   | -3035.62480 | 1 |
| 12210 | C | 77.73700 | 63.96780 | 76.62590 | 178.26637   | -636.12688  | -628.50194  | 1 |
| 12211 | H | 78.25600 | 63.31880 | 77.36390 | -2268.84858 | -1446.41660 | 1630.46968  | 1 |
| 12212 | H | 77.23500 | 63.24180 | 75.95090 | -2030.35526 | -471.07066  | -2356.68754 | 1 |
| 12213 | H | 77.01400 | 64.60180 | 77.18190 | 1036.87980  | 2968.51869  | -104.89656  | 1 |
| 12214 | C | 81.76100 | 65.29180 | 74.99290 | 343.66896   | 299.69006   | 789.63822   | 1 |
| 12215 | O | 81.80900 | 66.50180 | 75.10190 | 447.19691   | 528.48600   | 379.92722   | 1 |
| 12216 | N | 82.73700 | 64.49880 | 75.49490 | -433.79278  | 387.28297   | -611.97060  | 1 |
| 12217 | H | 82.74800 | 63.51180 | 75.35190 | 2667.48998  | -1434.27704 | -851.80562  | 1 |
| 12218 | C | 84.02000 | 64.94880 | 76.06590 | 574.89745   | -680.42524  | 194.84716   | 1 |
| 12219 | H | 83.77900 | 65.63080 | 76.86790 | -1563.71622 | 1465.41777  | 2303.38199  | 1 |
| 12220 | C | 84.77200 | 63.73480 | 76.76590 | 595.79640   | -682.68278  | -102.08756  | 1 |
| 12221 | H | 85.81700 | 64.05580 | 76.96690 | -1289.96943 | 2325.87140  | 1680.63301  | 1 |
| 12222 | H | 84.71000 | 62.84780 | 76.09990 | 2126.61121  | 2034.22205  | -1112.51591 | 1 |
| 12223 | O | 84.15300 | 63.55380 | 78.01490 | 486.11575   | -42.96009   | -620.86483  | 1 |
| 12224 | H | 84.37800 | 64.25280 | 78.63390 | -1787.26086 | 2063.96930  | 1563.31558  | 1 |
| 12225 | C | 84.93100 | 65.67980 | 75.13190 | -663.49168  | -288.52248  | 554.96358   | 1 |
| 12226 | O | 85.56500 | 66.64980 | 75.53790 | -588.04176  | -513.33378  | -119.67683  | 1 |
| 12227 | N | 85.05100 | 65.29680 | 73.86190 | -259.51888  | 742.08221   | 307.63002   | 1 |
| 12228 | H | 84.70800 | 64.42780 | 73.51290 | -2106.68035 | -139.62095  | 2332.51583  | 1 |
| 12229 | C | 85.69500 | 66.04380 | 72.82190 | 573.02431   | 366.65430   | -607.17277  | 1 |
| 12230 | H | 86.70800 | 66.33380 | 73.05990 | 2764.78709  | -1501.37226 | -7.74138    | 1 |
| 12231 | C | 85.74100 | 65.15480 | 71.54090 | -133.05896  | -869.20207  | -241.31740  | 1 |
| 12232 | H | 84.87900 | 64.46080 | 71.44990 | 148.62272   | 2088.94663  | -2347.85849 | 1 |
| 12233 | C | 85.79600 | 65.94080 | 70.19390 | 454.61833   | -363.57527  | 701.84486   | 1 |
| 12234 | H | 84.86900 | 66.50480 | 69.95490 | 2551.92878  | -1366.56206 | 1232.23125  | 1 |
| 12235 | H | 85.96200 | 65.21880 | 69.36590 | -1476.37308 | -34.90144   | -2778.00840 | 1 |
| 12236 | H | 86.63500 | 66.66980 | 70.17690 | -1292.00135 | 2545.19150  | 1323.23807  | 1 |
| 12237 | C | 87.01400 | 64.26180 | 71.59490 | -392.54470  | 622.82292   | 538.00676   | 1 |
| 12238 | H | 86.82200 | 63.39980 | 72.26990 | -891.72079  | -2485.89783 | 1709.78719  | 1 |
| 12239 | H | 87.92700 | 64.84480 | 71.84190 | 315.63313   | -2973.12995 | 979.33663   | 1 |
| 12240 | H | 87.23900 | 63.84180 | 70.59090 | -3023.59537 | -818.79082  | 292.70952   | 1 |
| 12241 | C | 84.98600 | 67.39680 | 72.55390 | -382.12363  | -807.35395  | -183.33613  | 1 |
| 12242 | O | 85.69000 | 68.41580 | 72.40690 | 210.25598   | -515.88228  | 559.71879   | 1 |
| 12243 | N | 83.64700 | 67.48780 | 72.47490 | 216.00212   | -314.44842  | -753.08536  | 1 |
| 12244 | H | 83.09500 | 66.66380 | 72.57690 | 1593.33848  | 328.35976   | 2692.89409  | 1 |
| 12245 | C | 82.92000 | 68.76280 | 72.32790 | -515.80784  | 257.10074   | -706.60632  | 1 |
| 12246 | H | 83.22900 | 69.31680 | 71.45390 | 2024.47698  | 1690.93538  | -1714.77600 | 1 |
| 12247 | C | 81.43200 | 68.40580 | 72.15790 | 648.50536   | -302.09253  | 565.35997   | 1 |
| 12248 | H | 80.91900 | 69.33580 | 71.83390 | -1725.51672 | 1315.79795  | -2278.04610 | 1 |
| 12249 | H | 80.92200 | 68.18880 | 73.12090 | -1757.06882 | -1744.11894 | 1941.38727  | 1 |
| 12250 | H | 81.28100 | 67.60480 | 71.40290 | -737.82683  | 1519.08542  | 2654.47119  | 1 |
| 12251 | C | 83.14400 | 69.72080 | 73.44490 | -395.42291  | 812.29268   | 123.58130   | 1 |
| 12252 | O | 83.43900 | 70.90080 | 73.25090 | 539.79206   | 559.36134   | -139.16412  | 1 |
| 12253 | N | 83.00700 | 69.24380 | 74.69190 | -34.22935   | 573.50717   | -618.53873  | 1 |
| 12254 | H | 82.62000 | 68.33680 | 74.84090 | 2966.83186  | 973.23497   | 385.93867   | 1 |
| 12255 | C | 83.27700 | 70.00580 | 75.90190 | 873.70478   | 24.39264    | 259.79983   | 1 |
| 12256 | H | 82.61000 | 70.85480 | 75.90990 | -2612.51722 | -285.31065  | 1729.61782  | 1 |
| 12257 | C | 83.12800 | 69.09680 | 77.13590 | -189.12856  | -631.34043  | 630.15130   | 1 |
| 12258 | H | 83.48300 | 69.52780 | 78.09690 | -429.88148  | 1737.22478  | 2587.56221  | 1 |
| 12259 | H | 83.61800 | 68.12180 | 76.92790 | 552.37381   | -3048.72003 | -546.27430  | 1 |
| 12260 | C | 81.58900 | 68.79880 | 77.42290 | 506.34032   | 746.12677   | -135.51871  | 1 |
| 12261 | O | 80.75700 | 69.59680 | 76.91990 | 634.58558   | 468.81093   | 33.83312    | 1 |
| 12262 | O | 81.33500 | 67.81580 | 78.15690 | -681.02272  | -129.27330  | -378.31692  | 1 |
| 12263 | C | 84.71100 | 70.58080 | 75.95190 | 717.95488   | 52.30739    | 559.69253   | 1 |
| 12264 | O | 84.86800 | 71.75680 | 76.30490 | -392.94383  | -427.35786  | 535.33880   | 1 |
| 12265 | N | 85.74100 | 69.79480 | 75.67590 | -415.04889  | 265.39372   | -685.54568  | 1 |
| 12266 | H | 85.60700 | 68.83480 | 75.43990 | 2137.04559  | -2200.43123 | 699.54610   | 1 |
| 12267 | C | 87.13300 | 70.09780 | 75.63590 | -188.65217  | -889.33474  | -70.32133   | 1 |
| 12268 | H | 87.32400 | 70.52680 | 76.60790 | 1091.87028  | -2116.68285 | 2055.65056  | 1 |

|       |   |          |          |          |             |             |             |   |
|-------|---|----------|----------|----------|-------------|-------------|-------------|---|
| 12269 | C | 87.91400 | 68.77880 | 75.41390 | 489.60820   | -592.84580  | 490.17207   | 1 |
| 12270 | H | 87.59900 | 68.21680 | 74.50790 | 700.09827   | 2650.52625  | 1543.63184  | 1 |
| 12271 | H | 87.63200 | 68.11480 | 76.25890 | -2482.03662 | 1382.94635  | 1350.99216  | 1 |
| 12272 | C | 89.44000 | 68.82480 | 75.48290 | 692.80416   | 570.40126   | -161.60383  | 1 |
| 12273 | H | 89.72900 | 69.58180 | 74.72290 | 298.18466   | -1746.60285 | 2599.74818  | 1 |
| 12274 | C | 89.94100 | 69.29480 | 76.88690 | 181.95516   | 681.49958   | 577.84223   | 1 |
| 12275 | H | 89.75800 | 68.53080 | 77.67190 | 2543.27422  | 1849.91670  | -88.26466   | 1 |
| 12276 | H | 91.05200 | 69.32680 | 76.88190 | 1546.58761  | 710.38340   | 2646.06281  | 1 |
| 12277 | H | 89.44900 | 70.26980 | 77.09490 | 2913.61036  | 807.48848   | 870.09380   | 1 |
| 12278 | C | 89.95100 | 67.43480 | 75.03090 | -434.95320  | -440.02011  | 669.81267   | 1 |
| 12279 | H | 89.65900 | 67.25180 | 73.97490 | -2229.65148 | -1205.77526 | 1863.59505  | 1 |
| 12280 | H | 91.05800 | 67.51580 | 75.08490 | -2346.62516 | 2037.49304  | -490.10068  | 1 |
| 12281 | H | 89.58900 | 66.62280 | 75.69590 | 2317.98498  | 2115.13878  | 226.62696   | 1 |
| 12282 | C | 87.46200 | 71.14180 | 74.60090 | 243.29597   | -515.30183  | 711.84416   | 1 |
| 12283 | O | 88.19800 | 72.07180 | 74.83790 | 242.16191   | -373.73155  | 652.15762   | 1 |
| 12284 | N | 86.84400 | 71.04980 | 73.39090 | -206.19084  | -790.70397  | 212.00203   | 1 |
| 12285 | H | 86.17000 | 70.32580 | 73.26190 | -2329.37301 | -1645.87292 | 1327.91187  | 1 |
| 12286 | C | 87.01800 | 71.85880 | 72.20590 | -797.26164  | -385.05976  | -218.06846  | 1 |
| 12287 | H | 88.03400 | 71.65880 | 71.90090 | -1368.50983 | -1180.41086 | -2575.27421 | 1 |
| 12288 | C | 86.05600 | 71.26180 | 71.07990 | -544.54715  | -641.45881  | 351.35453   | 1 |
| 12289 | H | 85.03600 | 71.30180 | 71.51890 | 1898.93754  | -2218.42496 | 1170.83439  | 1 |
| 12290 | H | 86.42000 | 70.23180 | 70.88090 | -1156.17871 | -2079.34627 | 2058.59080  | 1 |
| 12291 | C | 86.06000 | 71.96180 | 69.68690 | -557.49996  | 616.60391   | -374.75914  | 1 |
| 12292 | H | 85.52600 | 72.93580 | 69.71790 | 1897.10684  | -331.51851  | 2487.83186  | 1 |
| 12293 | C | 87.48200 | 72.28980 | 69.17990 | 222.43514   | -630.28591  | -620.25259  | 1 |
| 12294 | H | 88.21400 | 71.45680 | 69.22790 | 757.91180   | 3044.92607  | 228.51948   | 1 |
| 12295 | H | 87.92000 | 73.10780 | 69.79090 | -673.91154  | 2373.74099  | -1951.77436 | 1 |
| 12296 | H | 87.44600 | 72.71180 | 68.15290 | 1938.39703  | 1427.72827  | 2025.44691  | 1 |
| 12297 | C | 85.20100 | 71.16880 | 68.59090 | 73.40772    | -590.80600  | 690.65952   | 1 |
| 12298 | H | 85.60800 | 70.14180 | 68.47390 | 358.89761   | -2861.34974 | 1257.81414  | 1 |
| 12299 | H | 84.15200 | 71.20580 | 68.95590 | -2358.21230 | 2029.33669  | -467.81789  | 1 |
| 12300 | H | 85.20300 | 71.73380 | 67.63390 | 1743.93046  | -27.50855   | -2618.43007 | 1 |
| 12301 | C | 86.64900 | 73.30080 | 72.42790 | 172.18240   | -757.68989  | 477.18996   | 1 |
| 12302 | O | 87.45100 | 74.21280 | 72.17190 | 122.55922   | -369.80880  | -686.91187  | 1 |
| 12303 | N | 85.50800 | 73.52580 | 73.11090 | 162.34887   | -288.33841  | -776.64412  | 1 |
| 12304 | H | 84.97100 | 72.71180 | 73.31890 | 2621.72506  | -1513.35586 | -857.05191  | 1 |
| 12305 | C | 85.11500 | 74.80280 | 73.59690 | 627.09744   | -477.05513  | 458.93159   | 1 |
| 12306 | H | 85.32400 | 75.60080 | 72.90090 | 1530.70822  | 1534.00608  | -2280.78581 | 1 |
| 12307 | C | 83.55300 | 74.85180 | 73.84290 | 675.88439   | 204.91434   | 576.75073   | 1 |
| 12308 | H | 83.38800 | 74.05380 | 74.59790 | -1785.28981 | -1117.81202 | 2336.97728  | 1 |
| 12309 | H | 83.04800 | 74.70080 | 72.86490 | -1449.53844 | -2337.75312 | 1527.08051  | 1 |
| 12310 | C | 83.06600 | 76.20680 | 74.31390 | -316.55822  | 790.68701   | 325.66234   | 1 |
| 12311 | C | 83.49400 | 77.39480 | 73.61290 | -683.51343  | 354.64960   | 488.34830   | 1 |
| 12312 | H | 84.09300 | 77.25680 | 72.72490 | -727.13514  | 2292.88436  | -2027.85158 | 1 |
| 12313 | C | 83.02700 | 78.64780 | 74.04590 | 593.16071   | -653.76433  | -228.48102  | 1 |
| 12314 | H | 83.34500 | 79.53480 | 73.51790 | 2491.16766  | 408.28340   | 1877.66200  | 1 |
| 12315 | C | 82.11700 | 78.73280 | 75.12690 | -66.97421   | 795.26514   | -441.04288  | 1 |
| 12316 | H | 81.80600 | 79.73380 | 75.39090 | -2023.60898 | 283.96525   | 2392.19495  | 1 |
| 12317 | C | 82.25700 | 76.31380 | 75.36790 | 516.22629   | 691.61670   | -294.32595  | 1 |
| 12318 | H | 81.88900 | 75.42480 | 75.85690 | -283.41445  | 3128.62409  | -172.08652  | 1 |
| 12319 | C | 81.80600 | 77.52180 | 75.83390 | 161.00809   | -648.26628  | -620.70785  | 1 |
| 12320 | H | 81.02300 | 77.59480 | 76.57490 | 1616.68512  | 1950.46833  | 1865.53712  | 1 |
| 12321 | C | 85.85600 | 75.28680 | 74.89890 | 558.42224   | -319.32804  | 646.25476   | 1 |
| 12322 | O | 86.21200 | 76.46780 | 74.94090 | -617.03132  | -329.65839  | 366.36720   | 1 |
| 12323 | N | 86.17100 | 74.39980 | 75.83690 | 365.84895   | 181.75465   | 738.77743   | 1 |
| 12324 | H | 86.02200 | 73.41680 | 75.76590 | -963.78762  | 622.65670   | 2929.44334  | 1 |
| 12325 | C | 86.82000 | 74.75980 | 77.14490 | 92.88478    | -707.91608  | 567.16686   | 1 |
| 12326 | H | 86.15300 | 75.48880 | 77.57990 | -2690.93431 | 370.99464   | 1587.28125  | 1 |
| 12327 | C | 86.94000 | 73.58780 | 78.11590 | 410.88764   | 701.60620   | -412.76033  | 1 |
| 12328 | H | 87.14500 | 72.68280 | 77.50590 | 2428.38666  | 1806.31783  | 859.29061   | 1 |
| 12329 | C | 88.11000 | 73.73880 | 79.17790 | 432.87521   | -784.56392  | -168.90679  | 1 |
| 12330 | H | 89.11200 | 73.50380 | 78.75790 | -2802.28668 | 8.86839     | -1430.15277 | 1 |

|       |   |          |          |          |             |             |             |   |
|-------|---|----------|----------|----------|-------------|-------------|-------------|---|
| 12331 | H | 87.89000 | 73.00680 | 79.98390 | 1689.26299  | -2020.98145 | 1720.53793  | 1 |
| 12332 | H | 88.01200 | 74.79180 | 79.51590 | -2365.18424 | 1456.71194  | -1477.20008 | 1 |
| 12333 | C | 85.60400 | 73.41880 | 78.88190 | 489.21410   | 391.20761   | 662.62898   | 1 |
| 12334 | H | 85.67200 | 72.50580 | 79.51190 | 2305.33576  | 1919.54368  | -948.15892  | 1 |
| 12335 | H | 85.36200 | 74.27280 | 79.54890 | 1150.20989  | -2924.23098 | -155.29525  | 1 |
| 12336 | H | 84.74200 | 73.40480 | 78.18090 | 848.83691   | -2268.82709 | 2007.51732  | 1 |
| 12337 | C | 88.17300 | 75.40380 | 76.92690 | 269.85313   | -698.95484  | -519.70416  | 1 |
| 12338 | O | 88.54300 | 76.32780 | 77.61390 | 222.86699   | -474.16548  | -590.86769  | 1 |
| 12339 | N | 88.89700 | 74.85580 | 75.91890 | -237.45874  | -514.82712  | -625.49074  | 1 |
| 12340 | H | 88.53000 | 74.08180 | 75.40890 | -401.06002  | 2256.45471  | 2155.40930  | 1 |
| 12341 | C | 90.29200 | 75.32580 | 75.66290 | -228.46060  | -244.74551  | 848.14880   | 1 |
| 12342 | H | 90.89600 | 75.29980 | 76.55790 | 2246.14420  | 1860.68591  | -1179.36865 | 1 |
| 12343 | C | 90.95300 | 74.41080 | 74.56690 | 341.32691   | 764.75637   | 360.68634   | 1 |
| 12344 | H | 90.23300 | 74.14880 | 73.76190 | 2554.11733  | 1652.47885  | 802.51140   | 1 |
| 12345 | C | 92.24400 | 75.00980 | 73.95790 | -637.87628  | 639.76897   | 123.53346   | 1 |
| 12346 | H | 92.97600 | 75.11480 | 74.78690 | -1452.19126 | 1638.97488  | 2259.01043  | 1 |
| 12347 | H | 92.67300 | 74.27880 | 73.23890 | 1802.54928  | -2168.26235 | 1395.59331  | 1 |
| 12348 | H | 91.99400 | 75.90680 | 73.35290 | 2254.70122  | -2192.03053 | -97.72796   | 1 |
| 12349 | C | 91.30800 | 73.01580 | 75.20290 | 580.51474   | -213.05230  | -670.12115  | 1 |
| 12350 | H | 90.39500 | 72.66380 | 75.72790 | -1253.55495 | 2442.55631  | 1536.47157  | 1 |
| 12351 | H | 92.16300 | 73.06880 | 75.90890 | -2566.35490 | -1170.15823 | -1393.83589 | 1 |
| 12352 | C | 91.58000 | 71.93880 | 74.11790 | -544.80879  | 723.46474   | 105.98658   | 1 |
| 12353 | H | 92.58900 | 72.13780 | 73.69690 | -1849.55825 | 1926.39631  | 1663.23713  | 1 |
| 12354 | H | 90.83500 | 71.82580 | 73.30090 | 3081.44701  | 557.50540   | 303.47698   | 1 |
| 12355 | H | 91.68900 | 70.94580 | 74.60390 | 1172.41242  | 2849.92965  | -633.70050  | 1 |
| 12356 | C | 90.27000 | 76.76580 | 75.16090 | 43.99705    | 529.99175   | -740.69157  | 1 |
| 12357 | O | 91.26100 | 77.50980 | 75.35290 | -669.29467  | -418.02486  | -30.44806   | 1 |
| 12358 | N | 89.15800 | 77.21180 | 74.50990 | -185.76579  | -545.19233  | -617.19420  | 1 |
| 12359 | H | 88.43600 | 76.60280 | 74.19090 | 1200.96570  | 1543.34285  | 2464.54873  | 1 |
| 12360 | C | 89.12800 | 78.59280 | 74.10490 | 384.61821   | 503.00683   | 656.12801   | 1 |
| 12361 | H | 90.03400 | 78.84180 | 73.57190 | 1476.59375  | -1263.13412 | -2474.34624 | 1 |
| 12362 | C | 87.93400 | 78.86780 | 73.12990 | -21.66292   | -737.14628  | 536.28078   | 1 |
| 12363 | H | 88.03500 | 79.86580 | 72.65290 | 882.49886   | -2368.00120 | -1874.03103 | 1 |
| 12364 | O | 86.60800 | 78.75480 | 73.78290 | 501.75101   | -525.68570  | 309.07555   | 1 |
| 12365 | H | 86.49900 | 77.90180 | 74.21090 | 3140.14368  | 27.99916    | 192.19760   | 1 |
| 12366 | C | 87.97000 | 77.75680 | 72.01390 | -713.52948  | -542.73673  | -166.62390  | 1 |
| 12367 | H | 87.68400 | 76.74380 | 72.36890 | 1938.00761  | 2469.06701  | -214.61793  | 1 |
| 12368 | H | 87.16200 | 78.06680 | 71.31790 | 1565.64258  | -1314.16470 | -2391.64393 | 1 |
| 12369 | H | 88.96600 | 77.83780 | 71.52890 | 202.51630   | -1564.01020 | 2722.33089  | 1 |
| 12370 | C | 88.96700 | 79.58880 | 75.24390 | -546.08792  | -598.26994  | -418.70284  | 1 |
| 12371 | O | 89.33600 | 80.75080 | 75.13190 | -473.21638  | -515.99724  | -365.29486  | 1 |
| 12372 | N | 88.46200 | 79.15180 | 76.40990 | -43.52075   | -816.92906  | -208.33901  | 1 |
| 12373 | H | 88.27300 | 78.17780 | 76.50590 | -1752.13224 | -1467.47552 | -2162.12267 | 1 |
| 12374 | C | 88.07500 | 80.00680 | 77.54090 | -22.34412   | 188.91236   | 891.77568   | 1 |
| 12375 | H | 87.30100 | 80.66680 | 77.17790 | 2302.06814  | 330.51885   | -2118.83595 | 1 |
| 12376 | C | 87.30500 | 79.28680 | 78.65090 | -594.77166  | 183.24338   | -666.42294  | 1 |
| 12377 | H | 87.05400 | 79.85480 | 79.57290 | -1998.90857 | 1716.74723  | -1719.11887 | 1 |
| 12378 | H | 87.98500 | 78.45680 | 78.93890 | 48.26060    | -2588.39189 | 1787.77084  | 1 |
| 12379 | C | 85.94700 | 78.73980 | 78.20890 | -391.05240  | 313.85106   | 761.59473   | 1 |
| 12380 | H | 86.02600 | 78.13580 | 77.27990 | -2803.23397 | 1413.33989  | -206.33925  | 1 |
| 12381 | C | 85.44800 | 77.83980 | 79.37790 | -895.95207  | -10.76464   | -169.13015  | 1 |
| 12382 | H | 86.11200 | 76.94880 | 79.37190 | 227.33190   | -2794.30265 | -1427.73216 | 1 |
| 12383 | H | 85.48900 | 78.35180 | 80.36290 | -2610.76036 | 1750.12024  | -138.69293  | 1 |
| 12384 | H | 84.39600 | 77.56880 | 79.14390 | -3046.09747 | -127.33998  | 776.72450   | 1 |
| 12385 | C | 84.96300 | 79.87180 | 77.92290 | -896.33437  | 84.57238    | 144.51028   | 1 |
| 12386 | H | 85.05400 | 80.27480 | 76.89190 | 2459.16703  | 1961.86027  | 42.75521    | 1 |
| 12387 | H | 85.04300 | 80.76780 | 78.57490 | -1997.82917 | -1897.36799 | -1518.84809 | 1 |
| 12388 | H | 83.95600 | 79.43980 | 78.10290 | 832.03319   | -1456.25588 | -2661.81626 | 1 |
| 12389 | C | 89.17800 | 80.94580 | 78.08890 | -711.38404  | 491.58397   | 289.35955   | 1 |
| 12390 | O | 88.80600 | 82.04980 | 78.42590 | 650.20613   | 447.96805   | 13.55916    | 1 |
| 12391 | N | 90.47200 | 80.68380 | 78.13390 | -569.16004  | -19.26878   | 623.18364   | 1 |
| 12392 | C | 90.96500 | 79.30680 | 78.36890 | -409.24103  | -448.61170  | -680.23550  | 1 |

|       |   |          |          |          |             |             |             |   |
|-------|---|----------|----------|----------|-------------|-------------|-------------|---|
| 12393 | H | 91.18800 | 78.92780 | 77.34790 | -1619.60431 | 1655.05126  | 2129.76839  | 1 |
| 12394 | H | 90.26700 | 78.62680 | 78.90290 | -1439.77459 | -1857.19598 | -2091.91263 | 1 |
| 12395 | C | 91.54100 | 81.64680 | 78.45690 | -29.16890   | -449.96339  | -792.54850  | 1 |
| 12396 | H | 91.23900 | 81.98780 | 79.43590 | 1756.31519  | -1808.82317 | -1881.95163 | 1 |
| 12397 | C | 92.73700 | 80.82480 | 78.49790 | -842.40104  | 144.23372   | -317.81774  | 1 |
| 12398 | H | 93.63600 | 81.30280 | 78.94390 | 415.84241   | -1809.51773 | 2539.87143  | 1 |
| 12399 | H | 93.12400 | 80.48380 | 77.51490 | 16.29837    | -2368.52761 | -2070.75773 | 1 |
| 12400 | C | 92.24000 | 79.53580 | 79.14890 | -347.10386  | -211.95636  | 816.11544   | 1 |
| 12401 | H | 92.99800 | 78.74380 | 78.96890 | -2027.24786 | 2403.32760  | -111.84286  | 1 |
| 12402 | H | 92.10900 | 79.69280 | 80.24090 | 1908.09932  | 919.17948   | -2326.47637 | 1 |
| 12403 | C | 91.62700 | 82.88080 | 77.58990 | 248.42227   | 689.14329   | -542.97228  | 1 |
| 12404 | O | 92.02600 | 83.95080 | 78.05690 | 149.28934   | -171.04220  | 756.36267   | 1 |
| 12405 | N | 91.29900 | 82.78080 | 76.30590 | -331.25744  | 596.28516   | -497.37794  | 1 |
| 12406 | H | 91.10600 | 81.91780 | 75.84690 | 1445.82965  | 2792.18114  | -107.36550  | 1 |
| 12407 | C | 91.14300 | 83.99380 | 75.47590 | 612.29400   | -318.80955  | -595.74116  | 1 |
| 12408 | H | 92.02900 | 84.60980 | 75.52090 | 341.74386   | 2835.43554  | 1319.75097  | 1 |
| 12409 | C | 90.89300 | 83.53080 | 73.98690 | 517.51697   | -499.03601  | -560.88346  | 1 |
| 12410 | H | 89.88900 | 83.05780 | 73.93690 | 2128.87328  | 1637.00740  | 1639.00321  | 1 |
| 12411 | H | 90.85600 | 84.47980 | 73.41090 | -1256.47112 | 2228.18795  | -1831.57992 | 1 |
| 12412 | C | 92.01000 | 82.69580 | 73.39690 | -547.41416  | 493.30768   | 537.06264   | 1 |
| 12413 | C | 93.29400 | 83.19280 | 73.34590 | 786.37913   | -200.80348  | 415.61620   | 1 |
| 12414 | H | 93.55400 | 84.19180 | 73.66590 | 2082.03614  | 1130.29365  | -2070.21448 | 1 |
| 12415 | C | 94.39900 | 82.58680 | 72.68290 | -618.47257  | -290.02323  | 604.01093   | 1 |
| 12416 | H | 95.32400 | 83.13780 | 72.59590 | 655.95752   | 2022.12489  | 2319.25783  | 1 |
| 12417 | C | 94.10100 | 81.35380 | 72.07090 | 600.09640   | 408.89255   | 551.49089   | 1 |
| 12418 | H | 94.80900 | 80.81280 | 71.46190 | 2045.02833  | -1258.14154 | -2033.01875 | 1 |
| 12419 | C | 91.83500 | 81.41480 | 72.88390 | -370.64793  | -315.48317  | -771.06516  | 1 |
| 12420 | H | 90.85900 | 80.95880 | 72.95990 | 2820.84396  | 1337.61107  | -389.69505  | 1 |
| 12421 | C | 92.82900 | 80.73080 | 72.21990 | 278.11087   | 868.36814   | -6.49039    | 1 |
| 12422 | H | 92.53500 | 79.82280 | 71.71490 | 666.69203   | -2802.82065 | 1264.09824  | 1 |
| 12423 | C | 90.05300 | 84.85580 | 75.95490 | 652.77190   | 565.18946   | -293.08825  | 1 |
| 12424 | O | 90.04382 | 86.12708 | 75.80982 | 551.75189   | -751.08952  | -357.54008  | 1 |
| 12425 | N | 88.89800 | 84.23980 | 76.38290 | -68.55996   | -686.47804  | 486.53851   | 1 |
| 12426 | H | 88.83200 | 83.24980 | 76.48090 | 1531.30311  | 541.27594   | -2694.50503 | 1 |
| 12427 | C | 87.77100 | 84.95680 | 77.05290 | -791.18086  | 69.28925    | 447.97639   | 1 |
| 12428 | H | 87.68876 | 85.71860 | 76.22213 | -4.32545    | 2646.19084  | -211.75168  | 1 |
| 12429 | C | 86.55800 | 84.09580 | 77.20590 | 170.10671   | 496.42605   | 745.70496   | 1 |
| 12430 | H | 85.74200 | 84.75480 | 77.57290 | -13.09365   | 1988.53377  | 2437.98856  | 1 |
| 12431 | H | 86.63600 | 83.28580 | 77.96190 | -1439.65630 | -2248.20643 | 1664.68730  | 1 |
| 12432 | C | 85.94200 | 83.48480 | 75.94290 | -435.11005  | -533.77840  | -597.67121  | 1 |
| 12433 | C | 86.43200 | 82.68380 | 74.93490 | -338.30142  | 779.26114   | 331.29328   | 1 |
| 12434 | H | 87.49000 | 82.51880 | 74.79890 | 2684.63309  | -1076.73425 | 1237.58425  | 1 |
| 12435 | N | 85.42800 | 82.11980 | 74.20990 | -285.59101  | 719.79103   | 336.17099   | 1 |
| 12436 | H | 85.59200 | 81.26780 | 73.76190 | -655.80785  | 1782.74557  | -2507.97937 | 1 |
| 12437 | C | 84.25200 | 82.63580 | 74.59690 | 748.67870   | -449.43296  | -262.56661  | 1 |
| 12438 | C | 84.51500 | 83.48880 | 75.69290 | 567.91079   | 473.39531   | 533.69019   | 1 |
| 12439 | C | 83.41000 | 84.02980 | 76.41090 | -681.13713  | 147.45827   | 588.01299   | 1 |
| 12440 | H | 83.66700 | 84.57280 | 77.30890 | -3135.43706 | -243.59415  | -89.00881   | 1 |
| 12441 | C | 82.13800 | 83.76480 | 75.96090 | -655.08090  | -465.58235  | 430.75873   | 1 |
| 12442 | H | 81.32000 | 84.18880 | 76.52390 | 2399.43516  | -859.68149  | 1844.41993  | 1 |
| 12443 | C | 82.96000 | 82.40980 | 74.11690 | -616.67597  | -657.02197  | 139.58467   | 1 |
| 12444 | H | 82.82800 | 81.82880 | 73.21690 | 3104.40561  | -417.61983  | 294.08451   | 1 |
| 12445 | C | 81.86200 | 82.98280 | 74.83290 | -43.05539   | 653.94095   | 634.00195   | 1 |
| 12446 | H | 80.85600 | 82.74780 | 74.51690 | 1531.88442  | -1265.78041 | 2439.13024  | 1 |
| 12447 | C | 88.13266 | 85.68063 | 78.48468 | 421.46270   | 1341.89035  | -82.79167   | 1 |
| 12448 | O | 87.77254 | 86.84656 | 78.75851 | 96.64544    | -454.22717  | 308.63216   | 1 |
| 12449 | N | 88.88700 | 84.89880 | 79.22090 | -38.26233   | 140.60432   | -831.52794  | 1 |
| 12450 | H | 89.17100 | 83.95280 | 79.08290 | -2208.21740 | -2231.00887 | -211.19081  | 1 |
| 12451 | C | 89.39254 | 85.43960 | 80.41420 | 285.90960   | -650.72515  | -479.79882  | 1 |
| 12452 | H | 88.62010 | 86.00012 | 80.95697 | 2005.60584  | 1428.38417  | 239.39926   | 1 |
| 12453 | C | 90.14400 | 84.27080 | 81.25390 | 380.34768   | -503.85067  | 657.96744   | 1 |
| 12454 | H | 90.98300 | 83.74980 | 80.74590 | 2224.12780  | 1539.57874  | -1606.60483 | 1 |

|       |   |          |          |          |             |             |             |   |
|-------|---|----------|----------|----------|-------------|-------------|-------------|---|
| 12455 | H | 89.46800 | 83.42280 | 81.49390 | -1277.95220 | 882.25521   | -2736.18167 | 1 |
| 12456 | H | 90.53800 | 84.71780 | 82.19190 | -2540.64013 | -1854.78556 | -56.07572   | 1 |
| 12457 | C | 90.46454 | 86.67372 | 80.09553 | 612.86482   | 17.34437    | 321.95628   | 1 |
| 12458 | O | 91.01738 | 87.17700 | 81.04709 | -327.98072  | -38.68055   | -104.89974  | 1 |
| 12459 | N | 90.70918 | 86.94281 | 78.82301 | 602.17844   | 120.86078   | -396.98466  | 1 |
| 12460 | H | 90.20806 | 86.26402 | 78.24466 | -2872.89360 | -1690.14412 | 1046.74332  | 1 |
| 12461 | C | 91.31575 | 88.15698 | 78.32224 | -794.05089  | -239.06163  | 162.35325   | 1 |
| 12462 | H | 91.63957 | 88.55964 | 79.27610 | 1051.17072  | 548.45034   | -603.70724  | 1 |
| 12463 | C | 92.36897 | 87.76962 | 77.23097 | 281.78538   | 222.64818   | -16.40651   | 1 |
| 12464 | H | 91.80059 | 87.57079 | 76.34403 | 310.41360   | 2121.21580  | -1158.78356 | 1 |
| 12465 | C | 93.23977 | 89.03190 | 77.07087 | -881.96558  | -681.90610  | 848.47989   | 1 |
| 12466 | H | 93.74850 | 89.01220 | 76.07268 | -1004.31153 | -984.71042  | 2166.56403  | 1 |
| 12467 | H | 92.60733 | 89.90739 | 77.07508 | 987.99132   | -34.86022   | 55.86690    | 1 |
| 12468 | H | 94.04654 | 89.16440 | 77.88213 | 931.50072   | 2225.75660  | 1565.01330  | 1 |
| 12469 | C | 93.22427 | 86.64411 | 77.55332 | -602.49045  | -665.55288  | -305.15575  | 1 |
| 12470 | H | 93.85327 | 86.35892 | 76.67925 | -28.49928   | 1563.17898  | 585.41060   | 1 |
| 12471 | H | 92.63860 | 85.67831 | 77.88920 | 2308.46298  | 533.20900   | -2958.55561 | 1 |
| 12472 | H | 93.92428 | 86.94752 | 78.35276 | -3041.06815 | 2143.69431  | 2318.72415  | 1 |
| 12473 | C | 90.38324 | 89.15450 | 77.46361 | -309.13347  | 32.41411    | 583.12087   | 1 |
| 12474 | O | 90.39236 | 90.40464 | 77.68860 | 248.18783   | -57.67136   | -119.03124  | 1 |
| 12475 | N | 89.53347 | 88.58471 | 76.71000 | -113.88764  | 185.83193   | -5.43636    | 1 |
| 12476 | H | 89.53088 | 87.50031 | 76.45564 | -1344.85052 | 882.72869   | 49.91231    | 1 |
| 12477 | C | 88.58762 | 89.42839 | 75.96446 | 209.79288   | 318.61737   | 424.77592   | 1 |
| 12478 | H | 89.22909 | 90.24125 | 75.49579 | 398.54541   | -835.74506  | 208.02304   | 1 |
| 12479 | C | 87.92468 | 88.47275 | 74.94169 | 34.49022    | -44.90451   | 30.60544    | 1 |
| 12480 | H | 88.55343 | 87.57343 | 74.80284 | 211.12861   | -745.34354  | -584.21100  | 1 |
| 12481 | H | 86.93620 | 88.17367 | 75.28670 | -567.68853  | 353.77062   | -437.81733  | 1 |
| 12482 | C | 87.71140 | 89.25733 | 73.58730 | -615.02779  | -553.43110  | -808.75007  | 1 |
| 12483 | O | 87.35030 | 88.68992 | 72.51161 | 300.61252   | 319.43422   | -135.27365  | 1 |
| 12484 | O | 87.75379 | 90.48734 | 73.66575 | 261.96608   | -273.70168  | 324.16190   | 1 |
| 12485 | C | 87.50164 | 90.10364 | 77.03409 | -348.43488  | 320.35727   | 1226.11757  | 1 |
| 12486 | O | 86.98364 | 91.16796 | 76.76672 | -277.40784  | -1002.68758 | 132.78945   | 1 |
| 12487 | N | 87.28471 | 89.31552 | 78.02627 | -497.35492  | -1358.81001 | 829.36719   | 1 |
| 12488 | H | 87.64389 | 88.27674 | 78.12606 | 2151.23698  | 1527.11206  | -3150.50481 | 1 |
| 12489 | C | 86.37797 | 89.67550 | 79.06429 | 832.41363   | 512.83438   | -1.95082    | 1 |
| 12490 | H | 85.69674 | 90.42552 | 78.69028 | -1044.24945 | -2184.56814 | 777.11029   | 1 |
| 12491 | C | 85.86526 | 88.47082 | 79.89938 | 575.65881   | 298.01353   | -155.91740  | 1 |
| 12492 | H | 85.21659 | 87.87507 | 79.20139 | -451.15760  | -608.26813  | 1458.14200  | 1 |
| 12493 | H | 86.65912 | 87.80939 | 80.31565 | 166.35726   | 1197.13600  | -795.04489  | 1 |
| 12494 | H | 85.19591 | 88.70979 | 80.79304 | 852.73562   | -3417.81344 | -1396.48802 | 1 |
| 12495 | C | 87.28267 | 90.36473 | 80.30419 | 1163.14708  | 304.80842   | -83.75883   | 1 |
| 12496 | O | 87.10485 | 90.09668 | 81.49681 | 197.86614   | 100.26025   | 59.12811    | 1 |
| 12497 | N | 88.32458 | 91.00807 | 79.79835 | 141.58408   | 751.12205   | 890.32881   | 1 |
| 12498 | H | 88.21487 | 91.13915 | 78.80227 | -1269.31468 | 794.52918   | -3242.10914 | 1 |
| 12499 | C | 89.04968 | 91.94052 | 80.61235 | -517.70292  | -95.58544   | -491.41363  | 1 |
| 12500 | H | 88.35831 | 92.19563 | 81.47857 | -108.18851  | 1282.25492  | -5508.22298 | 1 |
| 12501 | C | 90.26873 | 91.14750 | 81.15279 | -471.74405  | 481.41836   | 178.56037   | 1 |
| 12502 | H | 91.09055 | 90.89622 | 80.42707 | 1364.63360  | -1444.49244 | -2284.58820 | 1 |
| 12503 | C | 90.86576 | 92.09000 | 82.28638 | 348.20003   | -678.22616  | 574.87303   | 1 |
| 12504 | H | 89.95376 | 92.12889 | 82.97642 | -1236.18264 | 2110.71978  | 1624.06677  | 1 |
| 12505 | H | 91.79180 | 91.65227 | 82.74773 | -245.00381  | 1614.84158  | 1260.49763  | 1 |
| 12506 | H | 91.18867 | 93.09809 | 81.97738 | -1917.59713 | 2950.86957  | 258.95719   | 1 |
| 12507 | C | 89.98064 | 89.75175 | 81.78579 | -148.22393  | 329.79114   | 509.98611   | 1 |
| 12508 | H | 89.68477 | 88.95558 | 81.02536 | -1502.56943 | -4433.96826 | -148.72874  | 1 |
| 12509 | H | 89.33149 | 89.81477 | 82.66909 | -247.01519  | 527.46716   | -1892.37899 | 1 |
| 12510 | H | 90.87869 | 89.24852 | 82.21902 | 2204.35986  | 2367.17477  | 767.02874   | 1 |
| 12511 | C | 89.47309 | 93.27534 | 79.76155 | 767.97488   | -235.24695  | -11.47387   | 1 |
| 12512 | O | 89.19199 | 94.32653 | 80.23080 | 1050.03570  | 948.62731   | 484.40632   | 1 |
| 12513 | N | 90.13700 | 93.02546 | 78.61364 | -603.01862  | -186.15632  | -110.59265  | 1 |
| 12514 | H | 90.32077 | 92.02617 | 78.30345 | -1586.76166 | 477.02278   | 1935.43690  | 1 |
| 12515 | C | 91.26293 | 93.86673 | 78.24332 | -450.58533  | 311.44376   | -66.18155   | 1 |
| 12516 | H | 90.99153 | 94.88471 | 78.62982 | 1969.93169  | 516.90871   | 1630.18504  | 1 |

|       |   |          |          |          |             |             |             |   |
|-------|---|----------|----------|----------|-------------|-------------|-------------|---|
| 12517 | C | 92.58802 | 93.38522 | 78.92452 | 458.01359   | 399.42698   | -672.13354  | 1 |
| 12518 | H | 92.71009 | 92.28713 | 78.97380 | 2403.00023  | 3065.11097  | 352.80324   | 1 |
| 12519 | H | 93.45596 | 93.78907 | 78.33817 | -608.29842  | 691.08343   | 2431.40796  | 1 |
| 12520 | H | 92.66941 | 93.66304 | 80.02309 | -1699.67296 | -3118.08163 | 1112.12524  | 1 |
| 12521 | C | 91.34328 | 93.79923 | 76.61427 | -413.05745  | -454.81226  | 496.36330   | 1 |
| 12522 | O | 91.24849 | 94.84663 | 76.01471 | 1024.23715  | -576.80642  | -581.88173  | 1 |
| 12523 | N | 91.66990 | 92.56544 | 76.18710 | -233.43076  | 1134.70946  | -477.31872  | 1 |
| 12524 | H | 91.42421 | 91.71765 | 76.79243 | -3147.52323 | 1333.41025  | 517.81623   | 1 |
| 12525 | C | 91.64980 | 92.64362 | 74.69334 | -637.34104  | -206.49146  | 1.77623     | 1 |
| 12526 | H | 90.79713 | 93.30422 | 74.36173 | -2608.85078 | -2106.66949 | 291.22792   | 1 |
| 12527 | C | 92.89797 | 93.32723 | 74.05079 | 1011.75876  | 538.01215   | 753.89330   | 1 |
| 12528 | H | 93.52421 | 93.70575 | 74.90543 | 3043.49066  | -2191.28001 | 2859.97668  | 1 |
| 12529 | H | 93.63728 | 92.66922 | 73.51283 | -177.73269  | -871.86589  | 922.23930   | 1 |
| 12530 | C | 92.56818 | 94.45168 | 72.96500 | -82.47439   | -504.99276  | 553.70587   | 1 |
| 12531 | O | 93.05275 | 94.48140 | 71.85106 | 150.67444   | -282.17470  | -248.64851  | 1 |
| 12532 | N | 91.85445 | 95.45920 | 73.46136 | -716.01119  | -411.06180  | -274.10214  | 1 |
| 12533 | H | 91.54146 | 95.51184 | 74.54639 | 1920.17267  | 532.73068   | -1919.87964 | 1 |
| 12534 | H | 91.62417 | 96.33199 | 73.00580 | -656.75405  | 538.54257   | 1897.59526  | 1 |
| 12535 | C | 91.67350 | 91.14088 | 74.09348 | 670.12057   | -542.51203  | 251.95801   | 1 |
| 12536 | O | 92.43845 | 90.25722 | 74.44623 | 6.70823     | -435.90894  | -192.08873  | 1 |
| 12537 | N | 90.88309 | 91.14317 | 73.04314 | 162.19716   | 402.26487   | 76.61364    | 1 |
| 12538 | H | 90.51343 | 92.04993 | 72.65382 | -1868.14062 | 1443.06339  | 442.52027   | 1 |
| 12539 | C | 91.11414 | 90.06546 | 72.08031 | 255.81491   | -112.09453  | -111.94846  | 1 |
| 12540 | H | 91.13954 | 89.14907 | 72.77119 | -1830.92411 | -1632.76510 | -1689.52485 | 1 |
| 12541 | C | 89.89992 | 90.10770 | 71.09551 | 529.43339   | -220.55858  | -47.74944   | 1 |
| 12542 | H | 90.06124 | 91.03435 | 70.47465 | 433.55856   | 22.68571    | -1005.32180 | 1 |
| 12543 | H | 89.02533 | 90.32178 | 71.73019 | 562.07471   | -768.09041  | -853.31649  | 1 |
| 12544 | C | 89.84373 | 88.83129 | 70.27987 | 518.51061   | 538.39116   | -201.06466  | 1 |
| 12545 | C | 90.15786 | 88.70897 | 68.90808 | -500.78670  | -596.21107  | -447.40713  | 1 |
| 12546 | H | 90.34501 | 89.49046 | 68.18480 | 2254.50831  | 392.72548   | -318.78620  | 1 |
| 12547 | N | 90.09969 | 87.43655 | 68.56071 | -60.85773   | -137.27779  | 134.81394   | 1 |
| 12548 | H | 90.32745 | 87.11911 | 67.58799 | -1191.82052 | 1306.94709  | 950.44854   | 1 |
| 12549 | C | 89.72079 | 86.55118 | 69.54521 | 921.69465   | -88.49929   | 851.43658   | 1 |
| 12550 | C | 89.56900 | 87.46685 | 70.72332 | 412.96347   | -39.88077   | -173.17919  | 1 |
| 12551 | C | 89.17445 | 86.83452 | 71.91572 | 225.65137   | -1135.43694 | 10.35730    | 1 |
| 12552 | H | 89.01639 | 87.41870 | 72.87140 | -1690.18655 | -390.87836  | 2680.39243  | 1 |
| 12553 | C | 88.94516 | 85.44221 | 71.88758 | 164.65726   | -1171.02131 | 594.78334   | 1 |
| 12554 | H | 88.47080 | 84.98387 | 72.77437 | 2602.06236  | 642.74086   | -579.68113  | 1 |
| 12555 | C | 89.61569 | 85.12966 | 69.59094 | -447.23632  | -358.99968  | 304.08451   | 1 |
| 12556 | H | 89.82687 | 84.47483 | 68.74859 | -171.95710  | 367.60334   | 2427.97537  | 1 |
| 12557 | C | 89.24690 | 84.53029 | 70.81693 | -36.70114   | -1090.86763 | 1302.95909  | 1 |
| 12558 | H | 89.23293 | 83.41100 | 71.04404 | -386.46190  | -1282.54806 | -1537.23824 | 1 |
| 12559 | C | 92.45619 | 90.37953 | 71.25535 | 256.54290   | 55.78993    | -444.45318  | 1 |
| 12560 | O | 92.47882 | 90.96519 | 70.16968 | -124.02671  | -1239.89170 | -705.97119  | 1 |
| 12561 | N | 93.52852 | 89.88725 | 71.89082 | 351.44286   | -174.02105  | 717.69100   | 1 |
| 12562 | H | 93.45449 | 89.47740 | 72.83443 | -3653.47414 | -838.85217  | -2435.86648 | 1 |
| 12563 | C | 94.81113 | 90.08028 | 71.24636 | 502.69991   | -613.86400  | 384.62537   | 1 |
| 12564 | H | 94.69635 | 91.03827 | 70.73003 | -2049.59347 | 2515.49578  | -2351.64127 | 1 |
| 12565 | C | 95.90664 | 90.06849 | 72.37499 | -113.26726  | 617.97282   | -58.96522   | 1 |
| 12566 | H | 95.81203 | 89.06514 | 72.85308 | 1176.73468  | -772.50931  | 162.03391   | 1 |
| 12567 | H | 96.97580 | 90.07926 | 71.96592 | -1589.28478 | -786.56241  | 422.60522   | 1 |
| 12568 | C | 95.71106 | 91.11597 | 73.49787 | 644.12490   | -19.78680   | -668.91294  | 1 |
| 12569 | C | 95.24636 | 90.61712 | 74.77010 | -845.23297  | -368.93051  | -386.48019  | 1 |
| 12570 | H | 95.03971 | 89.56125 | 74.84575 | 854.43170   | -2949.35995 | 952.26328   | 1 |
| 12571 | C | 95.14648 | 91.30542 | 75.95395 | -474.85947  | -1039.97625 | -393.30737  | 1 |
| 12572 | H | 94.78615 | 90.88130 | 76.81261 | -1369.25283 | 2603.55152  | -2057.15845 | 1 |
| 12573 | C | 95.39465 | 92.70456 | 75.90139 | -227.54658  | -209.42683  | 190.00033   | 1 |
| 12574 | O | 95.23598 | 93.57865 | 77.00542 | 21.17430    | 269.33697   | -370.69615  | 1 |
| 12575 | H | 95.03342 | 92.89038 | 77.75671 | 227.12393   | -13.46272   | 3360.11173  | 1 |
| 12576 | C | 95.98648 | 92.48954 | 73.47444 | 79.34518    | 256.19032   | 572.66411   | 1 |
| 12577 | H | 96.37390 | 92.89194 | 72.55948 | -3172.32818 | 1032.21507  | -1743.48640 | 1 |
| 12578 | C | 95.82756 | 93.25418 | 74.63019 | 854.76292   | 59.11130    | 172.41260   | 1 |

|       |   |          |          |          |             |             |             |   |
|-------|---|----------|----------|----------|-------------|-------------|-------------|---|
| 12579 | H | 96.03239 | 94.31018 | 74.53813 | -1906.31357 | 1829.75420  | 5749.41613  | 1 |
| 12580 | C | 95.11166 | 88.91311 | 70.12279 | -710.60377  | -717.74138  | 108.52018   | 1 |
| 12581 | O | 96.24985 | 88.47240 | 69.95030 | -489.85232  | -221.86761  | -330.26894  | 1 |
| 12582 | N | 94.00103 | 88.54889 | 69.46827 | -11.60559   | 106.00108   | -5.13403    | 1 |
| 12583 | H | 93.13520 | 89.01531 | 69.77421 | 359.63336   | -991.20028  | -283.02095  | 1 |
| 12584 | C | 94.02730 | 87.27334 | 68.81768 | -201.54433  | 15.08555    | -76.79505   | 1 |
| 12585 | H | 95.09112 | 86.97346 | 68.71317 | -2274.39531 | -1340.28627 | -506.41260  | 1 |
| 12586 | C | 93.20986 | 86.36883 | 69.85741 | -449.97051  | -34.46278   | -604.84857  | 1 |
| 12587 | H | 93.42568 | 85.31213 | 69.45518 | 1084.49143  | -2385.97426 | 1463.22463  | 1 |
| 12588 | H | 92.14338 | 86.57139 | 69.80644 | 1434.55396  | -1509.29964 | 7.71956     | 1 |
| 12589 | C | 93.64910 | 86.62473 | 71.32894 | 440.15235   | -671.53924  | -323.86402  | 1 |
| 12590 | C | 94.95300 | 86.38388 | 71.80773 | 662.71857   | 533.89205   | -312.78732  | 1 |
| 12591 | H | 95.68749 | 86.17291 | 71.05038 | 2264.48181  | 831.91806   | 1557.67480  | 1 |
| 12592 | C | 95.27784 | 86.33051 | 73.17412 | -18.34491   | -587.06788  | -56.73498   | 1 |
| 12593 | H | 96.35128 | 86.16555 | 73.52664 | -1829.09043 | 1443.19809  | -2454.65017 | 1 |
| 12594 | C | 94.24044 | 86.64066 | 74.10226 | -295.02873  | -1354.29241 | -574.61833  | 1 |
| 12595 | H | 94.57891 | 86.53716 | 75.19064 | 656.95353   | -2916.45631 | 1619.33623  | 1 |
| 12596 | C | 92.59313 | 86.89360 | 72.26927 | 142.80740   | -541.77646  | 919.77600   | 1 |
| 12597 | H | 91.65328 | 87.18830 | 71.91038 | -1048.29000 | -905.18989  | 761.49741   | 1 |
| 12598 | C | 92.90539 | 86.87696 | 73.67243 | 836.21793   | -10.31151   | -828.75338  | 1 |
| 12599 | H | 92.16720 | 87.22557 | 74.41745 | 1646.13001  | 1364.47462  | -2638.09606 | 1 |
| 12600 | C | 93.43519 | 87.40013 | 67.30384 | 333.81899   | -13.90955   | 269.88038   | 1 |
| 12601 | O | 93.65225 | 86.55015 | 66.44853 | -27.53369   | 931.76958   | -613.84843  | 1 |
| 12602 | N | 92.60673 | 88.48535 | 67.17386 | 235.19937   | -379.40034  | 379.17849   | 1 |
| 12603 | H | 92.90905 | 89.11704 | 67.88538 | -2646.79917 | 732.02510   | 186.65101   | 1 |
| 12604 | C | 92.53545 | 88.77874 | 65.73162 | -913.14449  | -121.75942  | -543.52273  | 1 |
| 12605 | H | 93.51653 | 88.34516 | 65.28926 | 3556.23307  | -571.64783  | -2293.14962 | 1 |
| 12606 | H | 92.43069 | 89.88196 | 65.69639 | 604.01795   | 104.38601   | 876.83350   | 1 |
| 12607 | C | 91.20251 | 88.02317 | 65.18702 | 758.65501   | -131.27606  | -73.48614   | 1 |
| 12608 | O | 90.57745 | 87.11726 | 65.80473 | 343.83031   | 200.23829   | -495.24323  | 1 |
| 12609 | N | 91.02965 | 88.35823 | 63.95417 | -237.58746  | 109.48511   | -222.42412  | 1 |
| 12610 | H | 91.58258 | 89.20328 | 63.66267 | 958.24665   | -3105.04936 | 1057.04900  | 1 |
| 12611 | C | 89.86195 | 87.88868 | 63.26411 | -267.07206  | -165.33449  | -918.39408  | 1 |
| 12612 | H | 89.18782 | 87.80255 | 64.14503 | -1247.15819 | -824.28550  | -474.66386  | 1 |
| 12613 | C | 89.38507 | 88.97851 | 62.20763 | 171.53092   | 458.97911   | 90.27361    | 1 |
| 12614 | H | 89.96054 | 88.81582 | 61.23298 | -102.51011  | 134.96865   | -19.64861   | 1 |
| 12615 | H | 89.66777 | 89.97452 | 62.53465 | -1809.99482 | -950.43657  | 1843.76656  | 1 |
| 12616 | C | 87.85521 | 88.95548 | 61.91316 | -17.63690   | -344.32024  | -241.94738  | 1 |
| 12617 | O | 87.33727 | 90.01403 | 61.65441 | 814.96813   | 108.58959   | -302.32235  | 1 |
| 12618 | N | 87.21168 | 87.72811 | 62.03912 | 199.00551   | -860.12615  | 638.51575   | 1 |
| 12619 | H | 87.74643 | 86.84140 | 62.21998 | 2185.93741  | -21.47679   | 1290.96292  | 1 |
| 12620 | H | 86.21974 | 87.53586 | 62.14080 | 258.98090   | -2266.00480 | -842.91740  | 1 |
| 12621 | C | 90.01296 | 86.38243 | 62.77242 | -621.10325  | -470.15213  | -252.73879  | 1 |
| 12622 | O | 89.05210 | 85.67993 | 62.45872 | 1166.06602  | -986.62732  | -372.94953  | 1 |
| 12623 | N | 91.27850 | 85.98782 | 62.63810 | -847.10457  | -217.20434  | -1034.89522 | 1 |
| 12624 | H | 92.01247 | 86.66062 | 62.95909 | -6806.40419 | 207.02964   | -1013.01983 | 1 |
| 12625 | C | 91.51800 | 84.51480 | 62.52590 | -303.85369  | 327.99406   | -794.69732  | 1 |
| 12626 | H | 90.87200 | 84.13680 | 61.74790 | 653.10532   | 1475.78820  | -2700.69044 | 1 |
| 12627 | C | 92.98800 | 84.28580 | 62.01190 | -238.70131  | 369.43906   | 798.74118   | 1 |
| 12628 | H | 93.08100 | 84.82880 | 61.04690 | 1085.24458  | -2922.78161 | -421.68479  | 1 |
| 12629 | H | 93.75600 | 84.78580 | 62.63890 | 1128.55225  | -2204.32737 | 1940.49914  | 1 |
| 12630 | C | 93.37900 | 82.83780 | 61.76390 | 608.72225   | -553.81916  | -392.67362  | 1 |
| 12631 | C | 93.09300 | 82.24380 | 60.53090 | -468.98586  | -656.18359  | -425.35439  | 1 |
| 12632 | H | 92.55800 | 82.73080 | 59.72890 | -1607.52473 | -1776.61513 | -2039.05104 | 1 |
| 12633 | C | 93.42400 | 80.89180 | 60.32490 | -625.83448  | -653.59781  | 112.21452   | 1 |
| 12634 | H | 93.07600 | 80.44380 | 59.40590 | -1045.66976 | 1143.19553  | 2738.23026  | 1 |
| 12635 | C | 94.15700 | 80.14080 | 61.27890 | 579.68301   | 666.09819   | -227.44627  | 1 |
| 12636 | H | 94.35300 | 79.09980 | 61.07090 | 1124.86553  | -373.46759  | 2914.34825  | 1 |
| 12637 | C | 94.09900 | 82.07280 | 62.66490 | 462.54836   | -777.13699  | -116.43932  | 1 |
| 12638 | H | 94.24300 | 82.65980 | 63.55990 | -85.87457   | -3127.46285 | 331.40295   | 1 |
| 12639 | C | 94.50800 | 80.76380 | 62.47290 | 675.66046   | 106.19139   | -603.04007  | 1 |
| 12640 | H | 94.97700 | 80.15980 | 63.23490 | 1560.44302  | -1618.92325 | -2200.52978 | 1 |



|       |   |          |          |          |             |             |             |   |
|-------|---|----------|----------|----------|-------------|-------------|-------------|---|
| 12641 | C | 91.15900 | 83.68080 | 63.73290 | -511.73531  | 21.65640    | 754.39312   | 1 |
| 12642 | O | 90.49700 | 82.62580 | 63.60990 | 165.21243   | 358.61325   | -683.90688  | 1 |
| 12643 | N | 91.54500 | 84.08880 | 64.97890 | 410.80864   | -705.33174  | 215.44300   | 1 |
| 12644 | H | 92.25500 | 84.78180 | 65.07190 | 2449.11558  | -1691.15549 | 1019.82949  | 1 |
| 12645 | C | 91.05900 | 83.46380 | 66.12890 | -632.30974  | 219.01402   | -619.40960  | 1 |
| 12646 | H | 90.97300 | 82.39880 | 65.96990 | -1278.42454 | -1123.25045 | -2646.16049 | 1 |
| 12647 | C | 91.97900 | 83.68480 | 67.32190 | 679.12662   | 291.88879   | 533.89041   | 1 |
| 12648 | H | 92.00800 | 84.76880 | 67.56390 | 105.77246   | 2278.40069  | 2167.00916  | 1 |
| 12649 | H | 91.54900 | 83.17080 | 68.20790 | 2791.06047  | 1226.09723  | -777.74883  | 1 |
| 12650 | C | 93.41300 | 83.09980 | 67.07090 | 463.97143   | 782.73025   | 59.28629    | 1 |
| 12651 | H | 93.86800 | 83.56380 | 66.16990 | 36.40771    | 2133.23610  | 2312.18607  | 1 |
| 12652 | C | 94.41000 | 83.62580 | 68.14990 | -600.67703  | -670.61488  | -144.61603  | 1 |
| 12653 | H | 94.13600 | 83.23380 | 69.15290 | 1342.01646  | -1105.45353 | -2622.05846 | 1 |
| 12654 | H | 94.50000 | 84.72780 | 68.25790 | -2084.70444 | 2346.69202  | -212.76793  | 1 |
| 12655 | H | 95.41400 | 83.22980 | 67.88390 | -2814.07102 | -49.33852   | -1405.98586 | 1 |
| 12656 | C | 93.41700 | 81.60480 | 66.91190 | -587.30337  | -417.38709  | 558.85040   | 1 |
| 12657 | H | 92.78300 | 81.17580 | 66.10690 | 69.58549    | -2208.91414 | 2239.21469  | 1 |
| 12658 | H | 93.12900 | 81.18280 | 67.89790 | -687.56433  | 1506.23164  | -2675.20985 | 1 |
| 12659 | H | 94.45700 | 81.21880 | 66.84390 | -1156.29635 | -2827.12469 | 754.03643   | 1 |
| 12660 | C | 89.61400 | 83.83780 | 66.42890 | -551.54040  | -574.51235  | -444.06052  | 1 |
| 12661 | O | 88.85000 | 83.03980 | 67.01290 | 275.76398   | -630.50100  | 387.36281   | 1 |
| 12662 | N | 89.15164 | 84.99011 | 65.84850 | 345.49780   | -97.67189   | 106.96102   | 1 |
| 12663 | H | 89.81756 | 85.61661 | 65.38019 | -1092.90566 | -2219.97629 | -2342.34352 | 1 |
| 12664 | C | 87.80790 | 85.41022 | 66.27951 | 78.55208    | -327.43768  | 20.68235    | 1 |
| 12665 | H | 87.80867 | 85.08995 | 67.37411 | 395.45919   | 289.98732   | -1053.08973 | 1 |
| 12666 | C | 87.71714 | 86.97478 | 66.08506 | 510.41089   | -362.10339  | -121.76844  | 1 |
| 12667 | H | 88.17140 | 87.19061 | 65.08050 | 288.87275   | -1324.45838 | -1380.49219 | 1 |
| 12668 | H | 88.42512 | 87.46978 | 66.77608 | 1229.38135  | 1627.68022  | -377.87877  | 1 |
| 12669 | S | 85.90407 | 87.19245 | 66.39982 | -293.42244  | -443.17490  | 224.89229   | 1 |
| 12670 | C | 86.67300 | 84.54580 | 65.53490 | 468.55176   | -778.06349  | -80.79270   | 1 |
| 12671 | O | 85.70400 | 84.06480 | 66.09490 | -54.92999   | -671.22255  | 412.39570   | 1 |
| 12672 | N | 86.85900 | 84.23180 | 64.25690 | 66.16328    | -769.66710  | 340.45157   | 1 |
| 12673 | H | 87.68800 | 84.53680 | 63.79390 | -135.63952  | 1068.33728  | -2956.09263 | 1 |
| 12674 | C | 86.09400 | 83.32380 | 63.49490 | 130.49446   | -830.37783  | -353.40467  | 1 |
| 12675 | H | 85.03600 | 83.53880 | 63.49790 | 2368.38846  | -1149.97036 | -1722.36190 | 1 |
| 12676 | C | 86.54900 | 83.31080 | 62.03090 | 112.81255   | 636.57212   | -643.03987  | 1 |
| 12677 | H | 86.13700 | 82.48080 | 61.41790 | -304.47146  | -3122.02448 | -241.83976  | 1 |
| 12678 | H | 87.65600 | 83.22380 | 61.99490 | 2937.06650  | -918.11379  | 654.93028   | 1 |
| 12679 | C | 86.19500 | 84.62180 | 61.36690 | -497.36283  | -287.74757  | -708.01311  | 1 |
| 12680 | H | 86.48533 | 85.55400 | 61.93498 | 2056.79922  | 227.80555   | -1680.52580 | 1 |
| 12681 | H | 85.09100 | 84.55380 | 61.26190 | -2298.96645 | -1784.27605 | 1195.54945  | 1 |
| 12682 | C | 86.79500 | 84.65480 | 59.96290 | 660.26666   | 303.50348   | -550.80358  | 1 |
| 12683 | H | 86.34400 | 83.82380 | 59.38090 | 2426.74497  | -1992.59634 | -196.71027  | 1 |
| 12684 | H | 87.86800 | 84.41480 | 60.12190 | -1387.40064 | -1541.07747 | -2366.09931 | 1 |
| 12685 | C | 86.56896 | 86.04165 | 59.28023 | -663.38212  | -525.34130  | 212.69577   | 1 |
| 12686 | H | 86.96342 | 86.12551 | 58.31606 | -4057.26787 | 1088.14778  | -97.38623   | 1 |
| 12687 | H | 87.01609 | 86.81301 | 59.90644 | 1049.55862  | 1651.50254  | -1604.09127 | 1 |
| 12688 | N | 84.98345 | 86.18479 | 59.20537 | -117.69659  | -852.44247  | 242.69111   | 1 |
| 12689 | H | 84.43266 | 86.79026 | 58.45771 | -7.81523    | -1251.78969 | 2611.10668  | 1 |
| 12690 | H | 84.61953 | 86.54459 | 60.18057 | 2559.67463  | 2160.55178  | -2797.24499 | 1 |
| 12691 | H | 84.42936 | 85.21555 | 59.05079 | 327.27439   | 4120.70905  | -1660.44421 | 1 |
| 12692 | C | 86.02200 | 81.92880 | 64.05690 | -25.20875   | -730.95805  | 544.53269   | 1 |
| 12693 | O | 84.99900 | 81.30480 | 64.09590 | -669.60571  | -145.24746  | 392.63036   | 1 |
| 12694 | N | 87.20100 | 81.39480 | 64.42590 | 664.46358   | 323.69454   | -407.89985  | 1 |
| 12695 | H | 88.05400 | 81.83980 | 64.16690 | 1874.68390  | 1570.92865  | -1978.88092 | 1 |
| 12696 | C | 87.36500 | 80.09380 | 65.00890 | -806.66962  | 406.06459   | -125.88355  | 1 |
| 12697 | H | 86.88200 | 79.29380 | 64.46790 | -840.29316  | 742.92660   | -2939.42064 | 1 |
| 12698 | C | 88.86800 | 79.76980 | 65.00690 | 384.14217   | 412.45196   | 716.77694   | 1 |
| 12699 | H | 89.28500 | 79.59280 | 63.99190 | 242.40516   | 2840.98077  | -1329.77225 | 1 |
| 12700 | H | 88.98400 | 78.87080 | 65.64790 | -2622.91723 | 1509.52797  | 860.14927   | 1 |
| 12701 | H | 89.43500 | 80.62280 | 65.43790 | -671.05250  | 313.67905   | -3057.69852 | 1 |
| 12702 | C | 86.72700 | 79.92780 | 66.35090 | 447.81818   | -666.23100  | 432.48831   | 1 |

|       |   |          |          |          |             |             |             |   |
|-------|---|----------|----------|----------|-------------|-------------|-------------|---|
| 12703 | O | 85.95200 | 79.01880 | 66.54290 | 18.07445    | -533.90771  | 581.58671   | 1 |
| 12704 | N | 86.90000 | 80.80780 | 67.33590 | 52.24553    | -1.42966    | -842.57976  | 1 |
| 12705 | H | 87.40500 | 81.66380 | 67.25290 | -635.55545  | 3074.58441  | -203.04230  | 1 |
| 12706 | C | 86.19000 | 80.52680 | 68.62890 | -45.17959   | -746.01266  | 522.37431   | 1 |
| 12707 | H | 86.32400 | 79.48480 | 68.87990 | 2489.32848  | -1413.08181 | -1305.63002 | 1 |
| 12708 | C | 86.84000 | 81.26180 | 69.83390 | 897.64650   | -110.01010  | -116.53127  | 1 |
| 12709 | H | 86.44200 | 80.90480 | 70.80790 | 1408.17935  | 2475.00587  | 1337.76048  | 1 |
| 12710 | C | 88.33400 | 81.07680 | 69.72290 | -582.43885  | 632.82097   | -302.90858  | 1 |
| 12711 | H | 88.48300 | 79.98080 | 69.82890 | -1210.19525 | 2649.47509  | 1189.09016  | 1 |
| 12712 | H | 88.82500 | 81.27280 | 68.74590 | -2159.66932 | -2208.90610 | 595.64124   | 1 |
| 12713 | H | 88.77100 | 81.69980 | 70.53290 | -2075.46351 | -2104.57188 | 1077.70805  | 1 |
| 12714 | C | 86.58200 | 82.78080 | 69.82590 | -583.50057  | -481.36666  | 509.17996   | 1 |
| 12715 | H | 86.96400 | 83.25980 | 70.75290 | 2213.50099  | -179.52086  | -2228.54478 | 1 |
| 12716 | H | 85.55100 | 83.08380 | 69.54390 | 624.68477   | 2755.71629  | 1383.48217  | 1 |
| 12717 | H | 87.13100 | 83.11580 | 68.91990 | -244.60913  | 3125.03068  | -269.39903  | 1 |
| 12718 | C | 84.70900 | 80.73080 | 68.63990 | -624.07646  | -121.06114  | 653.70006   | 1 |
| 12719 | O | 84.02200 | 80.17280 | 69.49290 | -238.44104  | 571.68688   | 489.84406   | 1 |
| 12720 | N | 84.24600 | 81.55880 | 67.65790 | -151.63758  | -810.04598  | 183.04056   | 1 |
| 12721 | H | 84.91200 | 81.97480 | 67.04290 | 1977.50723  | 1873.26611  | 1574.34604  | 1 |
| 12722 | C | 82.80800 | 81.69580 | 67.40890 | 499.75622   | -247.95496  | 721.25797   | 1 |
| 12723 | H | 82.37200 | 81.78180 | 68.39290 | -348.33637  | -218.96637  | -3119.12515 | 1 |
| 12724 | C | 82.41500 | 82.92780 | 66.52990 | 742.69846   | -31.02271   | 528.09810   | 1 |
| 12725 | H | 81.41600 | 82.87480 | 66.04590 | 896.14559   | -2284.10859 | -1969.26312 | 1 |
| 12726 | H | 83.13300 | 83.04280 | 65.69090 | -1146.78510 | 1807.43618  | 2305.70697  | 1 |
| 12727 | N | 83.05488 | 85.39562 | 67.42495 | -758.86066  | -363.66507  | -575.09653  | 1 |
| 12728 | H | 83.82195 | 85.64829 | 66.78882 | -2352.77402 | 647.38171   | -14.21466   | 1 |
| 12729 | C | 82.39900 | 84.15480 | 67.43290 | 902.00239   | -124.80661  | -47.60248   | 1 |
| 12730 | C | 82.67891 | 86.33990 | 68.24494 | 164.51503   | -254.15872  | 297.22412   | 1 |
| 12731 | H | 82.97405 | 87.37578 | 68.26264 | 869.53167   | -4281.94418 | 3174.36846  | 1 |
| 12732 | N | 81.79687 | 85.69668 | 69.03402 | -402.81311  | 1028.23774  | 710.44540   | 1 |
| 12733 | C | 81.65600 | 84.41580 | 68.51590 | 145.69151   | -483.20267  | -759.43411  | 1 |
| 12734 | H | 80.87200 | 83.84280 | 68.99590 | -3021.51565 | 347.01583   | -805.13936  | 1 |
| 12735 | C | 82.16700 | 80.46780 | 66.77990 | 725.62175   | 110.67695   | -540.99418  | 1 |
| 12736 | O | 81.09700 | 80.01880 | 67.19390 | 479.04239   | -454.87964  | 432.70097   | 1 |
| 12737 | N | 82.89000 | 79.89280 | 65.78590 | 188.12333   | 734.94736   | -370.31646  | 1 |
| 12738 | H | 83.69400 | 80.36680 | 65.43590 | 1914.81718  | -549.16846  | 2435.18283  | 1 |
| 12739 | C | 82.59700 | 78.59880 | 65.20790 | 54.12027    | 769.66613   | -485.93832  | 1 |
| 12740 | H | 81.57800 | 78.58580 | 64.84890 | -1049.03304 | 2426.50211  | 1705.82632  | 1 |
| 12741 | C | 83.57500 | 78.33080 | 64.01290 | 596.97102   | -687.01777  | 55.52647    | 1 |
| 12742 | H | 84.59400 | 78.72480 | 64.21390 | -496.89337  | 2038.51344  | -2344.30931 | 1 |
| 12743 | C | 83.59900 | 76.78780 | 63.77490 | 232.22169   | -880.38005  | -49.54850   | 1 |
| 12744 | H | 84.31500 | 76.28780 | 64.46290 | 246.70180   | 201.97220   | -3129.94755 | 1 |
| 12745 | H | 83.98300 | 76.51480 | 62.76890 | -2337.88053 | 281.78683   | 2086.41728  | 1 |
| 12746 | H | 82.64600 | 76.27180 | 64.01990 | -2667.66253 | 262.47740   | -1647.09090 | 1 |
| 12747 | C | 83.00400 | 79.04680 | 62.75690 | -678.67608  | 258.77949   | 551.25580   | 1 |
| 12748 | H | 81.91100 | 78.88580 | 62.63890 | 3119.82534  | -308.84410  | -263.68804  | 1 |
| 12749 | H | 83.47200 | 78.73680 | 61.79890 | -191.64151  | 3022.17448  | -853.20641  | 1 |
| 12750 | H | 83.14800 | 80.14080 | 62.88390 | 1772.08540  | -2410.22431 | -974.04228  | 1 |
| 12751 | C | 82.54300 | 77.54080 | 66.30590 | -631.12913  | 145.22344   | 641.90122   | 1 |
| 12752 | O | 81.51500 | 76.91780 | 66.54690 | -130.07486  | 580.52320   | 519.32704   | 1 |
| 12753 | N | 83.59100 | 77.46180 | 67.16990 | 126.88737   | -117.38196  | 826.31311   | 1 |
| 12754 | H | 84.39600 | 78.01380 | 66.96890 | 1956.94730  | -1116.92560 | -2195.69140 | 1 |
| 12755 | C | 83.61000 | 76.47880 | 68.21290 | 172.84335   | -885.22278  | -134.00303  | 1 |
| 12756 | H | 83.48300 | 75.48980 | 67.79590 | 2001.37120  | -2191.18902 | -1044.71538 | 1 |
| 12757 | C | 85.03500 | 76.38780 | 68.80890 | -548.43571  | -706.59961  | -177.16170  | 1 |
| 12758 | H | 85.44800 | 77.41780 | 68.87090 | -1703.84352 | 1680.71119  | 2042.14431  | 1 |
| 12759 | C | 85.07400 | 75.72080 | 70.18590 | -539.66435  | -539.81379  | 498.81306   | 1 |
| 12760 | H | 86.10000 | 75.62280 | 70.60190 | -2611.82489 | 1740.15603  | -220.12259  | 1 |
| 12761 | H | 84.55100 | 76.30080 | 70.97590 | -496.85295  | -1171.17159 | 2877.45034  | 1 |
| 12762 | H | 84.66100 | 74.69080 | 70.12890 | 2368.40023  | -2056.67944 | 242.85024   | 1 |
| 12763 | C | 85.97700 | 75.72480 | 67.76590 | -89.73891   | -245.42260  | 873.59354   | 1 |
| 12764 | H | 85.69100 | 74.65480 | 67.67490 | -1508.14052 | 2268.84120  | -1573.56220 | 1 |

|       |   |          |          |          |             |             |             |   |
|-------|---|----------|----------|----------|-------------|-------------|-------------|---|
| 12765 | H | 85.74100 | 76.16480 | 66.77290 | 1471.34731  | 1867.64784  | 2060.40163  | 1 |
| 12766 | C | 87.47200 | 75.97180 | 67.95890 | 398.49030   | 399.48319   | 716.28881   | 1 |
| 12767 | H | 88.05300 | 75.45780 | 67.16290 | 1584.70168  | -2599.63602 | -792.99393  | 1 |
| 12768 | H | 87.73000 | 75.66880 | 68.99590 | 1408.83570  | -3.37167    | 2813.07605  | 1 |
| 12769 | H | 87.69600 | 77.04780 | 67.79490 | 1761.32265  | -1730.37664 | -1949.81164 | 1 |
| 12770 | C | 82.51700 | 76.61280 | 69.28290 | -612.13101  | 80.81315    | -670.98127  | 1 |
| 12771 | O | 81.96700 | 75.61980 | 69.76790 | -700.48536  | 235.55583   | 278.31806   | 1 |
| 12772 | N | 82.13600 | 77.82380 | 69.67790 | -397.17551  | -497.81979  | 554.16546   | 1 |
| 12773 | H | 82.59400 | 78.62980 | 69.31090 | 651.88955   | 2517.34254  | 1770.94686  | 1 |
| 12774 | C | 81.05000 | 78.07380 | 70.56590 | 654.19916   | -590.42628  | -234.24616  | 1 |
| 12775 | H | 81.27600 | 77.50580 | 71.45590 | -377.49390  | -3116.51217 | -207.54877  | 1 |
| 12776 | C | 81.05200 | 79.58980 | 71.00790 | -114.37893  | 862.88896   | 271.64518   | 1 |
| 12777 | H | 80.98000 | 80.15680 | 70.05590 | 943.25906   | -572.63602  | -2946.28182 | 1 |
| 12778 | H | 82.02300 | 79.80180 | 71.50490 | -1748.26127 | 656.72251   | -2531.90132 | 1 |
| 12779 | C | 79.92200 | 80.03280 | 71.97990 | 452.51212   | 528.19214   | 589.65825   | 1 |
| 12780 | C | 79.38500 | 79.12780 | 72.88490 | 754.59482   | 199.91169   | -471.24620  | 1 |
| 12781 | H | 79.82100 | 78.13980 | 72.84190 | 2344.68839  | -2090.15074 | 178.69654   | 1 |
| 12782 | C | 78.46300 | 79.55580 | 73.85390 | -193.29632  | 798.69741   | -395.18348  | 1 |
| 12783 | H | 78.13700 | 78.88380 | 74.63390 | 509.82928   | 2843.38580  | 1246.37776  | 1 |
| 12784 | C | 77.98700 | 80.85580 | 73.88990 | 709.78619   | 190.32186   | -539.84457  | 1 |
| 12785 | O | 76.96700 | 81.12580 | 74.81990 | 334.16104   | -638.41461  | -323.09504  | 1 |
| 12786 | H | 77.08100 | 82.02380 | 75.14090 | 1606.67949  | -1710.99670 | 2095.06505  | 1 |
| 12787 | C | 79.47200 | 81.38480 | 72.01490 | -504.04825  | 738.87999   | 177.32097   | 1 |
| 12788 | H | 79.94600 | 82.09480 | 71.35290 | 2005.67626  | -799.99938  | 2288.11931  | 1 |
| 12789 | C | 78.48900 | 81.79280 | 72.93090 | 691.47901   | 405.71107   | -434.40339  | 1 |
| 12790 | H | 78.06400 | 82.77980 | 73.03490 | 51.16103    | 757.40718   | -3053.18574 | 1 |
| 12791 | C | 79.67300 | 77.54080 | 70.07190 | -591.54483  | -271.63962  | -638.54337  | 1 |
| 12792 | O | 78.96500 | 76.79380 | 70.76590 | 480.63820   | -472.80926  | -411.17582  | 1 |
| 12793 | N | 79.39400 | 77.68380 | 68.75890 | -742.13666  | -402.33044  | 5.97397     | 1 |
| 12794 | H | 79.95300 | 78.19680 | 68.11190 | -1152.78188 | -985.56835  | 2756.44249  | 1 |
| 12795 | C | 78.20500 | 77.02080 | 68.19390 | 61.86485    | 795.84696   | 440.73955   | 1 |
| 12796 | H | 77.43900 | 76.92980 | 68.94890 | 2957.23336  | 311.72141   | 1027.53435  | 1 |
| 12797 | C | 77.48800 | 77.80880 | 67.07390 | 365.22154   | -641.60525  | -535.17000  | 1 |
| 12798 | H | 76.97700 | 77.12180 | 66.36490 | 1489.23193  | -2376.00632 | 1426.53721  | 1 |
| 12799 | O | 78.48200 | 78.54080 | 66.33890 | -429.72842  | -403.07271  | -525.82612  | 1 |
| 12800 | H | 77.96600 | 79.06380 | 65.71990 | -574.08783  | 2164.89805  | 2209.49448  | 1 |
| 12801 | C | 76.51200 | 78.84980 | 67.67590 | 697.50266   | 558.61072   | 181.37007   | 1 |
| 12802 | H | 76.14500 | 79.53180 | 66.87990 | 2249.53106  | -1717.20658 | -1374.42272 | 1 |
| 12803 | H | 77.06600 | 79.47580 | 68.40790 | 2634.55936  | -1601.01892 | 627.74326   | 1 |
| 12804 | H | 75.64300 | 78.39980 | 68.20290 | -713.51949  | 1849.88532  | 2442.75264  | 1 |
| 12805 | C | 78.36700 | 75.56380 | 67.75190 | -7.02825    | -797.23219  | 442.51829   | 1 |
| 12806 | O | 77.49200 | 74.70580 | 67.73790 | 240.06474   | 726.04181   | -197.12798  | 1 |
| 12807 | N | 79.64800 | 75.13880 | 67.41590 | -408.58583  | 723.26836   | 150.37549   | 1 |
| 12808 | H | 80.37000 | 75.81880 | 67.31490 | 490.41974   | -2731.32403 | -1482.42496 | 1 |
| 12809 | C | 79.99100 | 73.68980 | 67.21490 | 96.94854    | 903.87318   | -71.17058   | 1 |
| 12810 | H | 79.38000 | 73.32380 | 66.40290 | 1636.03180  | 79.93332    | 2686.11929  | 1 |
| 12811 | C | 81.38900 | 73.44280 | 66.61790 | 753.31258   | -143.30555  | 493.39100   | 1 |
| 12812 | H | 82.10200 | 74.18380 | 67.03690 | 1.26167     | -3129.15480 | 326.51929   | 1 |
| 12813 | C | 81.96200 | 72.04380 | 66.97190 | 590.03942   | 163.45730   | 675.71162   | 1 |
| 12814 | H | 82.88300 | 71.83080 | 66.38890 | 1734.49980  | -1908.04658 | -1802.52460 | 1 |
| 12815 | H | 81.18600 | 71.31880 | 66.64490 | 2503.40734  | -883.74296  | -1688.24652 | 1 |
| 12816 | H | 82.34400 | 71.99180 | 68.01390 | 424.99352   | -1858.61728 | -2502.62833 | 1 |
| 12817 | C | 81.32400 | 73.80080 | 65.10990 | 471.76441   | 434.85651   | 647.91139   | 1 |
| 12818 | H | 80.97800 | 74.84980 | 64.98990 | 2747.00389  | -1517.00860 | -225.56764  | 1 |
| 12819 | H | 82.37400 | 73.66580 | 64.77390 | -1751.98534 | 1436.13269  | -2183.18495 | 1 |
| 12820 | H | 80.63300 | 73.08980 | 64.60990 | 682.85022   | -2983.27233 | 729.40251   | 1 |
| 12821 | C | 79.75400 | 72.79980 | 68.47990 | -611.60228  | 619.69360   | -270.87543  | 1 |
| 12822 | O | 79.20000 | 71.70380 | 68.33390 | 539.82664   | 389.62199   | 424.74596   | 1 |
| 12823 | N | 80.08100 | 73.22380 | 69.70090 | 180.51449   | -501.80127  | 654.43280   | 1 |
| 12824 | H | 80.50800 | 74.12280 | 69.76890 | -623.22305  | -2689.20612 | -1509.30106 | 1 |
| 12825 | C | 79.61600 | 72.58280 | 70.91190 | -758.21121  | 77.84343    | -500.50691  | 1 |
| 12826 | H | 79.83700 | 71.53080 | 70.80090 | -2388.70021 | -667.93170  | 1935.51150  | 1 |

|       |   |          |          |          |             |             |             |   |
|-------|---|----------|----------|----------|-------------|-------------|-------------|---|
| 12827 | C | 80.32000 | 73.15880 | 72.15090 | 173.62257   | 886.27264   | 125.80548   | 1 |
| 12828 | H | 80.52000 | 74.24680 | 72.04990 | -487.35254  | 2917.52556  | -1071.80145 | 1 |
| 12829 | H | 81.33400 | 72.70680 | 72.18690 | -1942.63109 | -1104.31059 | -2214.70287 | 1 |
| 12830 | C | 79.57500 | 73.06880 | 73.50490 | 0.53602     | -710.39638  | 571.65348   | 1 |
| 12831 | O | 78.59100 | 73.73680 | 73.79790 | 503.15830   | -70.38296   | -604.57025  | 1 |
| 12832 | N | 80.05400 | 72.13480 | 74.36090 | 397.13462   | -702.76268  | 247.14571   | 1 |
| 12833 | H | 80.91400 | 71.64380 | 74.22290 | 2443.43042  | 1919.69813  | -492.57803  | 1 |
| 12834 | H | 79.62900 | 72.06180 | 75.26290 | -1603.97196 | -1825.56446 | 1998.20284  | 1 |
| 12835 | C | 78.06400 | 72.62880 | 71.06090 | -123.19949  | 902.26504   | -46.80486   | 1 |
| 12836 | O | 77.44500 | 71.63380 | 71.38190 | -387.17212  | 282.86592   | 627.46462   | 1 |
| 12837 | N | 77.42000 | 73.74480 | 70.75490 | -507.13097  | -667.59190  | -99.05314   | 1 |
| 12838 | H | 77.98600 | 74.52280 | 70.49790 | -2034.56775 | -2307.93209 | 657.42663   | 1 |
| 12839 | C | 76.00300 | 73.97580 | 70.88590 | -846.11252  | 99.95548    | -324.88999  | 1 |
| 12840 | H | 75.75900 | 73.92180 | 71.93690 | 1782.92205  | -2460.45939 | 815.81541   | 1 |
| 12841 | C | 75.56400 | 75.38480 | 70.54190 | -253.18701  | -871.19825  | 91.43828    | 1 |
| 12842 | H | 75.41200 | 75.53680 | 69.45190 | 2147.36810  | 1424.51941  | 1804.93239  | 1 |
| 12843 | H | 76.35700 | 76.10880 | 70.82590 | 2127.62731  | -2289.29574 | -361.32158  | 1 |
| 12844 | C | 74.25900 | 75.91580 | 71.28290 | -525.10873  | 544.33656   | 509.32263   | 1 |
| 12845 | H | 73.50300 | 75.10180 | 71.26190 | -1666.29387 | -2300.37864 | 1352.75610  | 1 |
| 12846 | C | 74.54200 | 76.24980 | 72.74990 | -617.90918  | -485.30478  | 462.72943   | 1 |
| 12847 | H | 74.82100 | 75.38380 | 73.38690 | -351.36839  | 2865.56617  | -1250.31876 | 1 |
| 12848 | H | 73.69400 | 76.78080 | 73.23390 | -1920.77585 | 2242.40229  | 1086.49821  | 1 |
| 12849 | H | 75.40100 | 76.95280 | 72.71390 | -589.63127  | -2948.43239 | 925.90908   | 1 |
| 12850 | C | 73.71700 | 77.15380 | 70.58690 | -87.72335   | 480.98790   | 769.67932   | 1 |
| 12851 | H | 72.74800 | 77.35680 | 71.09090 | -1276.29460 | 2225.82568  | 1820.71370  | 1 |
| 12852 | H | 73.66100 | 76.90080 | 69.50690 | -2203.76964 | 934.25333   | 2041.76304  | 1 |
| 12853 | H | 74.31300 | 78.05480 | 70.84590 | -1234.75030 | -2563.91468 | 1341.62567  | 1 |
| 12854 | C | 75.09600 | 73.04480 | 70.08690 | -823.19531  | 386.69312   | -65.33692   | 1 |
| 12855 | O | 74.19500 | 72.43780 | 70.57690 | 526.45364   | 454.78628   | -373.68869  | 1 |
| 12856 | N | 75.58000 | 72.79280 | 68.84390 | 443.93448   | -712.83705  | -86.35858   | 1 |
| 12857 | H | 76.37800 | 73.29880 | 68.52390 | 601.87010   | 1445.94777  | -2728.59188 | 1 |
| 12858 | C | 75.03800 | 71.79380 | 67.92590 | 40.82754    | -550.16236  | -726.02031  | 1 |
| 12859 | H | 73.97500 | 71.68380 | 68.08490 | -943.64116  | 2265.16292  | 1968.96027  | 1 |
| 12860 | C | 75.21300 | 72.27780 | 66.44590 | 0.42648     | -911.21787  | -33.65742   | 1 |
| 12861 | H | 74.68000 | 71.57580 | 65.76990 | -390.88671  | 2219.09751  | 2195.68669  | 1 |
| 12862 | H | 76.30400 | 72.25780 | 66.23490 | 1252.60414  | 1664.08903  | -2357.96879 | 1 |
| 12863 | C | 74.58800 | 73.64280 | 66.30190 | 26.48589    | 860.96915   | 299.13478   | 1 |
| 12864 | C | 73.40500 | 74.05580 | 66.90090 | -621.48891  | 167.06086   | -645.98236  | 1 |
| 12865 | H | 72.87400 | 73.31580 | 67.48090 | 2145.74123  | 2086.75121  | -969.27303  | 1 |
| 12866 | C | 72.89700 | 75.36980 | 66.79290 | -857.74780  | 244.13350   | -190.04880  | 1 |
| 12867 | H | 72.03100 | 75.61380 | 67.39190 | 1603.14685  | 2173.95579  | 1613.09101  | 1 |
| 12868 | C | 73.59500 | 76.30480 | 66.07290 | -539.21799  | 452.23959   | -579.80541  | 1 |
| 12869 | O | 73.11000 | 77.58880 | 66.04690 | 460.31102   | -255.30135  | 588.69535   | 1 |
| 12870 | H | 73.77800 | 78.08480 | 65.56790 | 2107.07791  | -2267.33556 | 563.59415   | 1 |
| 12871 | C | 75.25300 | 74.59480 | 65.48390 | -684.91077  | 80.98427    | -596.48118  | 1 |
| 12872 | H | 76.17700 | 74.26580 | 65.03190 | 52.89202    | -2929.72220 | 1145.49398  | 1 |
| 12873 | C | 74.76400 | 75.91180 | 65.39090 | 335.61882   | 465.96907   | 708.29643   | 1 |
| 12874 | H | 75.26000 | 76.67480 | 64.80990 | 2047.39318  | -735.56354  | -2272.74144 | 1 |
| 12875 | C | 75.55000 | 70.36280 | 68.08790 | -730.70072  | 225.96520   | -496.45462  | 1 |
| 12876 | O | 74.98700 | 69.48580 | 67.47890 | 492.52319   | -467.35595  | -403.26983  | 1 |
| 12877 | N | 76.64500 | 70.10980 | 68.85690 | 332.02813   | -574.83824  | -521.52719  | 1 |
| 12878 | H | 77.20900 | 70.81580 | 69.27890 | -332.30311  | -1613.18258 | 2680.56763  | 1 |
| 12879 | C | 77.21400 | 68.74780 | 68.93090 | -683.50515  | -67.23577   | -599.79252  | 1 |
| 12880 | H | 76.76200 | 68.11280 | 68.18290 | -2599.98571 | 1610.27686  | 738.45040   | 1 |
| 12881 | C | 78.76800 | 68.59680 | 68.72990 | 603.28981   | 448.25783   | 516.29190   | 1 |
| 12882 | H | 78.91700 | 68.76980 | 67.64290 | 2145.86021  | -2299.79467 | 66.74314    | 1 |
| 12883 | H | 79.12100 | 67.55780 | 68.90390 | -2639.78228 | -698.79261  | 1562.51867  | 1 |
| 12884 | O | 79.43400 | 69.45380 | 69.61290 | 760.86385   | 211.04121   | 13.23026    | 1 |
| 12885 | H | 79.36600 | 70.29480 | 69.15390 | -3047.61140 | -664.88082  | 410.15176   | 1 |
| 12886 | C | 76.83600 | 68.12980 | 70.21990 | 505.51926   | 593.75309   | -472.60824  | 1 |
| 12887 | O | 76.31600 | 67.01880 | 70.22490 | -305.41886  | 529.60808   | -499.86181  | 1 |
| 12888 | N | 76.90800 | 68.88580 | 71.39690 | 82.91860    | 470.09816   | -696.27905  | 1 |

|       |   |          |          |          |             |             |             |   |
|-------|---|----------|----------|----------|-------------|-------------|-------------|---|
| 12889 | H | 77.09200 | 69.86380 | 71.34290 | -1866.32202 | 2134.50234  | 1363.43982  | 1 |
| 12890 | C | 76.65900 | 68.29280 | 72.72790 | 499.97309   | 463.04944   | -605.85735  | 1 |
| 12891 | H | 77.37300 | 67.49480 | 72.86990 | -351.75708  | -47.79780   | -3126.05319 | 1 |
| 12892 | C | 76.99100 | 69.27280 | 73.89690 | 725.69444   | 72.90043    | -547.26969  | 1 |
| 12893 | H | 78.08900 | 69.43780 | 73.90890 | 367.04990   | 3123.02768  | -100.98865  | 1 |
| 12894 | H | 76.72300 | 68.86880 | 74.89590 | 2930.09636  | 78.26983    | 1143.08153  | 1 |
| 12895 | O | 76.37400 | 70.60180 | 73.75590 | 279.79270   | 520.02189   | -524.32862  | 1 |
| 12896 | H | 76.99100 | 71.20580 | 73.33690 | 534.48385   | 2596.34613  | -1694.56189 | 1 |
| 12897 | C | 75.22200 | 67.71180 | 72.98090 | 202.29665   | -549.82311  | 698.72857   | 1 |
| 12898 | O | 75.04700 | 66.54180 | 73.22690 | 544.77936   | -309.00250  | -480.99910  | 1 |
| 12899 | N | 74.23400 | 68.54880 | 72.77190 | -752.15878  | -381.67568  | -35.39965   | 1 |
| 12900 | H | 74.49300 | 69.49780 | 72.60890 | 1268.04132  | 2607.15182  | 1221.90704  | 1 |
| 12901 | C | 72.81700 | 68.20780 | 72.84690 | 710.04538   | -428.18661  | -379.39792  | 1 |
| 12902 | H | 72.69700 | 67.79180 | 73.83690 | -686.59231  | -1500.55204 | -2678.64907 | 1 |
| 12903 | C | 71.92400 | 69.42580 | 72.75590 | 209.06955   | -36.19039   | 886.80955   | 1 |
| 12904 | H | 72.28100 | 70.22380 | 73.44090 | -2085.32984 | 2284.08993  | 576.67919   | 1 |
| 12905 | C | 71.88500 | 70.06880 | 71.32090 | 499.76581   | -492.78721  | -582.10471  | 1 |
| 12906 | H | 72.95400 | 70.30580 | 71.12690 | 2779.33005  | 739.84867   | 1275.21553  | 1 |
| 12907 | H | 71.46800 | 69.35080 | 70.58190 | 1524.64378  | -1888.52651 | -2001.78800 | 1 |
| 12908 | H | 71.31100 | 71.01980 | 71.33190 | 2637.64247  | -1630.49978 | -531.54386  | 1 |
| 12909 | C | 70.59100 | 69.04780 | 73.37790 | -372.81460  | -735.77503  | 388.70989   | 1 |
| 12910 | H | 69.91400 | 69.92780 | 73.42990 | 1625.06971  | 2261.93045  | 1463.23112  | 1 |
| 12911 | H | 70.01500 | 68.20180 | 72.94690 | -864.21140  | -2007.22371 | 2263.27592  | 1 |
| 12912 | H | 70.85600 | 68.68180 | 74.39290 | -469.47901  | 2020.33590  | 2365.59898  | 1 |
| 12913 | C | 72.36900 | 67.11980 | 71.85690 | 629.43342   | 358.41755   | -553.89659  | 1 |
| 12914 | O | 71.52900 | 66.26080 | 72.13090 | -589.69875  | 363.08965   | -379.53724  | 1 |
| 12915 | N | 72.91100 | 67.09180 | 70.61690 | -449.40910  | 168.04409   | -694.59696  | 1 |
| 12916 | H | 73.50900 | 67.85780 | 70.39290 | 1964.75811  | -654.85447  | -2368.35754 | 1 |
| 12917 | C | 72.45400 | 66.06380 | 69.71790 | 468.66728   | -462.33048  | 630.91402   | 1 |
| 12918 | H | 71.39000 | 65.90280 | 69.80790 | 2191.61940  | 1245.69789  | -1882.35688 | 1 |
| 12919 | C | 72.66000 | 66.54280 | 68.23090 | -170.29364  | -613.54213  | 652.69988   | 1 |
| 12920 | H | 72.52100 | 65.61380 | 67.63890 | -2061.86786 | -957.50340  | 2174.88261  | 1 |
| 12921 | H | 73.68700 | 66.96680 | 68.24990 | 2005.53283  | 408.55536   | -2389.38210 | 1 |
| 12922 | C | 71.72500 | 67.59780 | 67.72090 | 128.59630   | -727.81848  | 534.03582   | 1 |
| 12923 | C | 71.74100 | 68.95780 | 67.92090 | 894.52228   | -29.63960   | 174.36279   | 1 |
| 12924 | H | 72.58600 | 69.44280 | 68.38690 | 2030.21511  | 2058.12856  | 1241.19285  | 1 |
| 12925 | N | 70.70500 | 69.55680 | 67.31790 | 727.30233   | 420.89478   | -80.93944   | 1 |
| 12926 | H | 70.35400 | 70.42880 | 67.57890 | -1973.75192 | -1651.95424 | 1809.30284  | 1 |
| 12927 | C | 69.94900 | 68.58180 | 66.73890 | 243.32934   | -63.35365   | -876.48625  | 1 |
| 12928 | C | 70.55000 | 67.30580 | 66.99790 | -190.94289  | 172.77976   | 874.72223   | 1 |
| 12929 | C | 69.90800 | 66.17080 | 66.61990 | -93.85484   | -660.48461  | 621.61271   | 1 |
| 12930 | H | 70.39900 | 65.26380 | 66.93990 | 2048.96375  | -2016.74493 | 1277.77684  | 1 |
| 12931 | C | 68.76100 | 66.27480 | 65.85090 | -377.12460  | -617.76491  | 554.61208   | 1 |
| 12932 | H | 68.26800 | 65.37480 | 65.51390 | 1730.73166  | -2328.72526 | 1216.48379  | 1 |
| 12933 | C | 68.83000 | 68.69180 | 65.97190 | 730.54797   | -304.43379  | -452.84736  | 1 |
| 12934 | H | 68.33200 | 69.62280 | 65.74690 | -2320.43694 | 1339.02085  | 1649.49137  | 1 |
| 12935 | C | 68.20200 | 67.49880 | 65.54590 | -244.50619  | -641.80439  | 599.79567   | 1 |
| 12936 | H | 67.29300 | 67.52580 | 64.96390 | -1265.65520 | 2117.35612  | -1952.72789 | 1 |
| 12937 | C | 73.19300 | 64.74780 | 69.88990 | -482.85355  | -411.10843  | -655.20478  | 1 |
| 12938 | O | 72.67800 | 63.69780 | 69.58190 | -227.20677  | 516.73750   | -552.25598  | 1 |
| 12939 | N | 74.40600 | 64.73880 | 70.51790 | 306.62036   | 443.17883   | -649.80671  | 1 |
| 12940 | H | 74.96100 | 65.55880 | 70.63090 | 541.35490   | -2263.20012 | -2117.33000 | 1 |
| 12941 | C | 74.94700 | 63.53980 | 71.09390 | 211.47599   | 668.35783   | 583.11810   | 1 |
| 12942 | H | 75.05800 | 62.74180 | 70.37490 | 1193.44186  | -1526.63374 | 2478.57059  | 1 |
| 12943 | C | 76.44200 | 63.74480 | 71.56290 | -164.41428  | -877.45988  | -185.69629  | 1 |
| 12944 | H | 76.37000 | 64.76080 | 72.00790 | -1630.38460 | 2144.49160  | 1625.18554  | 1 |
| 12945 | C | 76.85300 | 62.73380 | 72.62490 | -608.62513  | -648.12263  | 202.39444   | 1 |
| 12946 | H | 77.96400 | 62.74180 | 72.63890 | 2696.28003  | -1620.77259 | -37.36905   | 1 |
| 12947 | H | 76.59800 | 61.68380 | 72.36590 | 1179.64944  | 2730.85172  | 1024.25695  | 1 |
| 12948 | H | 76.41300 | 62.97180 | 73.61690 | -1478.26273 | 1604.74732  | -2266.66089 | 1 |
| 12949 | C | 77.39100 | 63.63880 | 70.36590 | 8.20750     | 265.60563   | 872.25987   | 1 |
| 12950 | H | 76.79400 | 64.06380 | 69.53090 | 462.68468   | -2934.50414 | -1035.77727 | 1 |

|       |   |          |          |          |             |             |             |   |
|-------|---|----------|----------|----------|-------------|-------------|-------------|---|
| 12951 | H | 77.58600 | 62.57880 | 70.09590 | -1516.21961 | 1468.85257  | 2332.76155  | 1 |
| 12952 | C | 78.55700 | 64.57680 | 70.48490 | 839.58786   | -355.09175  | -21.28559   | 1 |
| 12953 | H | 79.21500 | 64.35480 | 71.35190 | -436.62506  | -2985.91408 | -889.88870  | 1 |
| 12954 | H | 78.21700 | 65.63480 | 70.49190 | 2176.02064  | -1949.66633 | 1167.03110  | 1 |
| 12955 | H | 79.23400 | 64.48180 | 69.60890 | -331.58476  | 2196.46751  | 2227.96055  | 1 |
| 12956 | C | 74.09700 | 62.96180 | 72.24090 | 649.57505   | 638.24844   | 46.28366    | 1 |
| 12957 | O | 73.82900 | 61.77480 | 72.30290 | -138.42758  | 177.31496   | -756.98378  | 1 |
| 12958 | N | 73.51000 | 63.84680 | 73.06590 | 356.39596   | -536.86647  | 545.37015   | 1 |
| 12959 | H | 73.79600 | 64.80180 | 73.04790 | 604.44629   | 2816.39918  | 1265.21403  | 1 |
| 12960 | C | 72.53000 | 63.56280 | 74.09690 | -367.57465  | 819.53089   | 157.19097   | 1 |
| 12961 | H | 72.92800 | 62.80480 | 74.75590 | -2230.80755 | -2203.91626 | -253.92325  | 1 |
| 12962 | C | 72.31300 | 64.68880 | 75.09590 | -713.56169  | 533.97940   | -192.73483  | 1 |
| 12963 | H | 71.43000 | 64.41080 | 75.70990 | 737.94673   | -1447.00282 | 2694.40971  | 1 |
| 12964 | H | 71.98400 | 65.56780 | 74.50090 | 988.30864   | -2623.77034 | 1427.34070  | 1 |
| 12965 | C | 73.46500 | 64.97780 | 76.06990 | 315.59796   | 810.29507   | -274.35532  | 1 |
| 12966 | H | 74.37300 | 65.14780 | 75.45290 | -1407.76648 | -148.86095  | 2809.67261  | 1 |
| 12967 | C | 73.19900 | 66.08480 | 77.11390 | -686.19111  | -497.15689  | -336.79043  | 1 |
| 12968 | H | 74.07700 | 66.31080 | 77.75590 | 175.12160   | -2544.02273 | -1842.69015 | 1 |
| 12969 | H | 72.87400 | 67.00380 | 76.57990 | -2609.81228 | -1501.90045 | 911.81200   | 1 |
| 12970 | H | 72.38300 | 65.70780 | 77.76590 | 1615.89084  | -2455.22836 | -1122.04132 | 1 |
| 12971 | C | 73.79100 | 63.67480 | 76.88490 | 651.44052   | 173.93095   | -613.86015  | 1 |
| 12972 | H | 74.66400 | 63.90280 | 77.53190 | 1930.19295  | -2010.98147 | 1458.94995  | 1 |
| 12973 | H | 72.87900 | 63.35080 | 77.43090 | -537.77902  | 2884.37451  | 1135.51911  | 1 |
| 12974 | H | 74.16100 | 62.87780 | 76.20390 | 843.70987   | -2804.94804 | -1148.32328 | 1 |
| 12975 | C | 71.22700 | 62.91880 | 73.51690 | 187.75238   | -389.88903  | -802.61235  | 1 |
| 12976 | O | 70.71800 | 61.98380 | 74.14690 | 577.28224   | -43.37584   | 537.11357   | 1 |
| 12977 | N | 70.70300 | 63.40180 | 72.34790 | 128.20291   | 632.22047   | 544.54896   | 1 |
| 12978 | H | 71.10300 | 64.26580 | 72.05290 | 186.89101   | 98.28880    | -3139.05038 | 1 |
| 12979 | C | 69.73400 | 62.58180 | 71.58590 | 654.06218   | -578.57456  | -262.49789  | 1 |
| 12980 | H | 68.87900 | 62.38480 | 72.21590 | 1298.20440  | -2813.05665 | -547.36078  | 1 |
| 12981 | C | 69.26800 | 63.38280 | 70.33890 | -409.82423  | 454.41187   | 676.02141   | 1 |
| 12982 | H | 68.28800 | 62.96680 | 70.02090 | 2106.20782  | -2278.35270 | 520.79157   | 1 |
| 12983 | H | 69.96100 | 63.29480 | 69.47590 | -2163.36909 | 25.16517    | -2284.16881 | 1 |
| 12984 | H | 69.03900 | 64.45180 | 70.53990 | 1007.43167  | 948.51124   | -2825.53253 | 1 |
| 12985 | C | 70.21000 | 61.21680 | 71.12590 | 491.19168   | 598.24155   | -481.96346  | 1 |
| 12986 | O | 69.50700 | 60.27980 | 71.39790 | -532.73410  | -403.46037  | -420.76280  | 1 |
| 12987 | N | 71.39700 | 61.10080 | 70.48690 | -225.28400  | -777.07639  | 240.98069   | 1 |
| 12988 | H | 71.96500 | 61.91780 | 70.43290 | 2166.94562  | 691.93797   | -2173.42926 | 1 |
| 12989 | C | 71.91600 | 59.80780 | 70.10590 | -126.00536  | 575.75589   | 695.75772   | 1 |
| 12990 | H | 71.21400 | 59.26580 | 69.48990 | -690.27769  | -1789.79050 | -2493.67057 | 1 |
| 12991 | C | 73.26300 | 60.01580 | 69.27590 | 224.21008   | 184.41705   | -864.39065  | 1 |
| 12992 | H | 73.86400 | 59.08180 | 69.30890 | -1619.40231 | -2123.66932 | -1663.06675 | 1 |
| 12993 | H | 73.85400 | 60.81780 | 69.76790 | 1913.52656  | -1741.36255 | -1790.05552 | 1 |
| 12994 | C | 73.07700 | 60.37180 | 67.86290 | -622.17021  | -263.70164  | 612.22274   | 1 |
| 12995 | C | 71.99300 | 61.12680 | 67.38390 | -153.95335  | -692.81968  | -572.49477  | 1 |
| 12996 | H | 71.19200 | 61.52980 | 67.98490 | -1051.61428 | -1867.79130 | 2302.97401  | 1 |
| 12997 | C | 71.80300 | 61.37380 | 66.02090 | -108.51949  | -460.74910  | -779.34895  | 1 |
| 12998 | H | 70.93800 | 61.91180 | 65.66190 | -2696.83752 | 568.12273   | -1517.40904 | 1 |
| 12999 | C | 72.70500 | 60.88880 | 65.10690 | 558.68542   | -586.75041  | 418.38447   | 1 |
| 13000 | H | 72.48900 | 61.01780 | 64.05590 | -1393.58512 | 1798.98202  | -2172.51247 | 1 |
| 13001 | C | 73.97600 | 59.87980 | 66.90290 | -668.38031  | -292.36310  | -547.03070  | 1 |
| 13002 | H | 74.74700 | 59.17780 | 67.18090 | -519.74511  | -1949.36202 | -2414.14145 | 1 |
| 13003 | C | 73.75000 | 60.08480 | 65.52790 | 345.24016   | -765.15780  | 356.08113   | 1 |
| 13004 | H | 74.35200 | 59.44180 | 64.90390 | 1616.51876  | -2429.04107 | 1176.79770  | 1 |
| 13005 | C | 72.12500 | 58.72180 | 71.18490 | -303.75585  | 855.95742   | -80.74823   | 1 |
| 13006 | O | 71.74000 | 57.56280 | 70.96290 | -445.51117  | 517.35292   | -396.85386  | 1 |
| 13007 | N | 72.61100 | 59.07480 | 72.37390 | 624.43315   | -41.74067   | 566.58030   | 1 |
| 13008 | H | 72.89000 | 60.02280 | 72.50490 | -2034.23856 | -302.64010  | -2380.86301 | 1 |
| 13009 | C | 72.68100 | 58.14080 | 73.49390 | 713.61045   | -433.99477  | 365.86837   | 1 |
| 13010 | H | 73.09600 | 57.19180 | 73.18990 | -1633.72734 | 654.31360   | -2607.87939 | 1 |
| 13011 | C | 73.64600 | 58.74880 | 74.51190 | 260.21211   | -18.29780   | 873.73100   | 1 |
| 13012 | H | 74.62300 | 58.87080 | 73.99490 | -2067.64718 | -1943.85280 | -1358.12284 | 1 |

|       |   |          |          |          |             |             |             |   |
|-------|---|----------|----------|----------|-------------|-------------|-------------|---|
| 13013 | C | 73.16700 | 60.07580 | 75.15390 | 440.04924   | -542.59235  | -586.00444  | 1 |
| 13014 | H | 72.36900 | 59.90880 | 75.90790 | -1735.24072 | -1838.97854 | -1872.25100 | 1 |
| 13015 | H | 72.74200 | 60.71680 | 74.35090 | 2076.29169  | 1145.42748  | -2067.66413 | 1 |
| 13016 | H | 73.98700 | 60.55380 | 75.73090 | 61.29541    | -2003.23385 | -2425.18520 | 1 |
| 13017 | C | 74.00800 | 57.66680 | 75.58290 | -407.78799  | 564.90514   | -588.25347  | 1 |
| 13018 | H | 74.22300 | 56.72280 | 75.03790 | -1794.03469 | 1567.45159  | -2054.93583 | 1 |
| 13019 | H | 73.10600 | 57.48480 | 76.20490 | -1525.73716 | 1839.86572  | -2045.78750 | 1 |
| 13020 | C | 75.17000 | 58.18180 | 76.40990 | 765.16157   | 229.69992   | -439.56423  | 1 |
| 13021 | H | 76.07100 | 58.47080 | 75.82890 | 2386.89484  | -203.53102  | 2039.49366  | 1 |
| 13022 | H | 74.83000 | 59.07680 | 76.97390 | -1837.93490 | 2218.18707  | -1264.85874 | 1 |
| 13023 | H | 75.49500 | 57.43180 | 77.16290 | 2558.80596  | 729.98521   | 1678.64822  | 1 |
| 13024 | C | 71.27200 | 57.86480 | 74.12990 | -473.64884  | 546.29694   | -555.57847  | 1 |
| 13025 | O | 71.00500 | 56.75880 | 74.66690 | -269.51525  | 338.64344   | 660.53719   | 1 |
| 13026 | N | 70.33700 | 58.79980 | 73.99790 | 646.29447   | 534.45494   | 96.61090    | 1 |
| 13027 | H | 70.55600 | 59.61580 | 73.46790 | 781.07339   | -2098.00231 | -2210.55127 | 1 |
| 13028 | C | 68.93700 | 58.59380 | 74.35490 | 593.35796   | 568.41995   | -395.31771  | 1 |
| 13029 | H | 68.88800 | 58.26980 | 75.38390 | 207.37911   | 2077.34144  | -2353.69341 | 1 |
| 13030 | C | 68.03700 | 59.88580 | 74.21290 | -217.45794  | -817.13132  | 341.26157   | 1 |
| 13031 | H | 66.94500 | 59.71580 | 74.32590 | -659.08708  | -2535.99944 | 1741.41819  | 1 |
| 13032 | H | 68.26200 | 60.32580 | 73.21790 | -1033.35935 | -2156.23168 | -2044.76396 | 1 |
| 13033 | O | 68.38100 | 60.83480 | 75.21390 | -253.99409  | 745.99177   | 51.09315    | 1 |
| 13034 | H | 69.14200 | 61.29780 | 74.85590 | 803.33209   | 3021.09575  | -354.77355  | 1 |
| 13035 | C | 68.26600 | 57.55280 | 73.49690 | -30.08678   | -625.98435  | -662.33630  | 1 |
| 13036 | O | 67.62400 | 56.66180 | 74.00890 | -147.26451  | 764.27598   | -133.50141  | 1 |
| 13037 | N | 68.41900 | 57.71580 | 72.14690 | -287.87827  | -29.02419   | -793.06745  | 1 |
| 13038 | H | 68.91000 | 58.48880 | 71.75390 | 1145.58148  | -2423.08517 | 1647.58234  | 1 |
| 13039 | C | 68.00800 | 56.73880 | 71.10290 | 159.68382   | -403.84943  | -801.78409  | 1 |
| 13040 | H | 66.93000 | 56.69380 | 71.05990 | -2629.37076 | 1715.92865  | -200.56050  | 1 |
| 13041 | C | 68.42200 | 57.32980 | 69.74790 | -560.24413  | -688.18695  | -209.70514  | 1 |
| 13042 | H | 68.40100 | 56.60980 | 68.90190 | 705.45967   | 2170.66254  | -2165.35841 | 1 |
| 13043 | H | 69.46400 | 57.71380 | 69.75790 | -2176.69301 | 979.14654   | 2049.75751  | 1 |
| 13044 | C | 67.53700 | 58.48480 | 69.21390 | -503.21823  | 77.51028    | 756.44866   | 1 |
| 13045 | H | 67.35400 | 59.16180 | 70.07590 | 1502.90016  | -2763.10212 | 69.16678    | 1 |
| 13046 | C | 68.30300 | 59.44180 | 68.21290 | -889.39703  | 87.46079    | -181.03738  | 1 |
| 13047 | H | 67.50000 | 60.12880 | 67.86990 | -467.28716  | 2715.87637  | -1517.85523 | 1 |
| 13048 | H | 68.58400 | 58.83980 | 67.32290 | 3139.17701  | -199.59344  | -62.89984   | 1 |
| 13049 | H | 69.13000 | 60.00380 | 68.69590 | -2149.99199 | 625.97437   | -2209.95854 | 1 |
| 13050 | C | 66.27600 | 58.00980 | 68.50990 | -855.61590  | 268.32927   | -165.44437  | 1 |
| 13051 | H | 66.46300 | 57.26280 | 67.70990 | -2981.96851 | -570.26593  | 825.15865   | 1 |
| 13052 | H | 65.65900 | 58.82780 | 68.07890 | 802.82144   | -1280.83377 | -2759.19713 | 1 |
| 13053 | H | 65.59800 | 57.65380 | 69.31590 | 1210.31431  | 2486.21506  | -1500.69990 | 1 |
| 13054 | C | 68.65300 | 55.42080 | 71.41890 | 391.22034   | -381.16090  | -730.14657  | 1 |
| 13055 | O | 67.96100 | 54.39280 | 71.36790 | 455.71177   | 545.16498   | -344.59999  | 1 |
| 13056 | N | 69.99700 | 55.34680 | 71.65690 | 351.48327   | 563.15960   | 521.51995   | 1 |
| 13057 | H | 70.50300 | 56.19780 | 71.54090 | -1979.51661 | -2341.54775 | 704.90735   | 1 |
| 13058 | C | 70.66600 | 54.11680 | 71.95390 | 435.66842   | 173.61348   | -781.98618  | 1 |
| 13059 | H | 70.37400 | 53.43580 | 71.16790 | 863.62376   | 2358.74427  | -1894.38795 | 1 |
| 13060 | C | 72.21100 | 54.42880 | 71.99990 | 391.20592   | 677.24236   | -468.77683  | 1 |
| 13061 | H | 72.41300 | 55.16980 | 72.80390 | 351.82945   | -486.90668  | -3088.26232 | 1 |
| 13062 | H | 72.52700 | 54.79380 | 70.99990 | -2874.21529 | -490.39723  | -1181.78815 | 1 |
| 13063 | C | 72.99600 | 53.16680 | 72.28990 | -158.05239  | 897.39430   | 33.96919    | 1 |
| 13064 | O | 73.09800 | 52.74080 | 73.45190 | -319.86522  | -36.92665   | 721.07551   | 1 |
| 13065 | O | 73.42800 | 52.48280 | 71.30890 | 21.67933    | -572.38710  | 543.62693   | 1 |
| 13066 | C | 70.16900 | 53.41580 | 73.19190 | 746.88087   | 11.67975    | 522.95655   | 1 |
| 13067 | O | 70.09800 | 52.19680 | 73.28190 | -322.11435  | -301.26398  | 655.06457   | 1 |
| 13068 | N | 69.80300 | 54.19280 | 74.24790 | -534.60853  | -443.75660  | 479.52694   | 1 |
| 13069 | H | 69.85400 | 55.18780 | 74.23790 | -98.47031   | 2179.77530  | 2266.51924  | 1 |
| 13070 | C | 69.17300 | 53.66180 | 75.45390 | 489.20023   | 634.45007   | 435.43913   | 1 |
| 13071 | H | 69.73600 | 52.83980 | 75.86990 | -2529.30393 | -1780.19729 | -575.97347  | 1 |
| 13072 | C | 69.09800 | 54.71380 | 76.61790 | -508.57795  | 603.74851   | -456.38494  | 1 |
| 13073 | H | 69.19700 | 55.75280 | 76.23590 | -2706.36543 | 520.13211   | -1517.65444 | 1 |
| 13074 | H | 68.12200 | 54.60580 | 77.13890 | 1669.27123  | 1344.82401  | -2302.86955 | 1 |

|       |   |          |          |          |             |             |             |   |
|-------|---|----------|----------|----------|-------------|-------------|-------------|---|
| 13075 | C | 70.26100 | 54.47080 | 77.66490 | 628.80261   | -236.01511  | 616.72940   | 1 |
| 13076 | H | 70.11000 | 55.20080 | 78.48890 | -1946.14455 | 1913.91686  | 1564.50308  | 1 |
| 13077 | H | 70.18700 | 53.40880 | 77.98390 | -1769.25170 | -2205.48983 | 1379.77870  | 1 |
| 13078 | C | 71.68300 | 54.73580 | 77.10590 | 323.18171   | 728.31266   | 443.35680   | 1 |
| 13079 | H | 72.30700 | 54.92680 | 78.00490 | 1725.79829  | 1879.44631  | 1840.52385  | 1 |
| 13080 | H | 71.52300 | 55.67780 | 76.53890 | 1230.80889  | -706.21838  | 2807.95144  | 1 |
| 13081 | N | 72.29500 | 53.58780 | 76.26790 | -646.18371  | -481.90583  | 250.77015   | 1 |
| 13082 | H | 72.33300 | 53.71780 | 75.27790 | -2297.33232 | 1210.76458  | -1776.10235 | 1 |
| 13083 | C | 72.51900 | 52.36480 | 76.67390 | 661.82706   | 237.93006   | 580.36647   | 1 |
| 13084 | N | 72.45100 | 51.90980 | 77.92390 | 523.04594   | 587.03562   | 307.38317   | 1 |
| 13085 | H | 72.43900 | 52.51280 | 78.72190 | -1787.39077 | 2469.37472  | 778.23451   | 1 |
| 13086 | H | 72.53400 | 50.92280 | 78.06190 | 619.34052   | 36.08832    | 3084.37047  | 1 |
| 13087 | N | 72.86300 | 51.48580 | 75.77490 | -499.76751  | 365.50436   | 573.85650   | 1 |
| 13088 | H | 72.93300 | 51.87680 | 74.85690 | 428.56464   | -2759.31526 | -1449.39224 | 1 |
| 13089 | H | 73.24600 | 50.61580 | 76.08390 | 2888.30830  | 25.41442    | -1247.09883 | 1 |
| 13090 | C | 67.78400 | 53.02580 | 75.23090 | 419.40290   | -701.88434  | 403.62183   | 1 |
| 13091 | O | 67.57600 | 51.90080 | 75.66890 | 739.58384   | -7.74335    | -276.73636  | 1 |
| 13092 | N | 66.94800 | 53.66880 | 74.42790 | 272.18759   | -526.80115  | -600.88830  | 1 |
| 13093 | H | 67.26800 | 54.51680 | 74.01190 | -114.68577  | 570.29813   | 3091.89803  | 1 |
| 13094 | C | 65.70600 | 53.17180 | 73.94890 | 802.44318   | -342.17193  | -265.43233  | 1 |
| 13095 | H | 65.24000 | 52.91680 | 74.88890 | -773.61628  | 2935.24407  | 827.09510   | 1 |
| 13096 | C | 65.01600 | 54.39180 | 73.21590 | -514.19369  | -573.38898  | -488.14028  | 1 |
| 13097 | H | 65.75700 | 55.08780 | 72.76690 | 586.04189   | -1171.70827 | -2860.39872 | 1 |
| 13098 | H | 64.48300 | 54.96280 | 74.00590 | -1918.41273 | -1950.05892 | -1554.08784 | 1 |
| 13099 | C | 63.96000 | 54.00580 | 72.20890 | 589.46538   | -651.03714  | -245.21870  | 1 |
| 13100 | C | 62.81500 | 53.27380 | 72.56890 | 82.15858    | -902.01760  | 105.19132   | 1 |
| 13101 | H | 62.64500 | 52.99980 | 73.59990 | -1367.78945 | -1996.15587 | 2010.65660  | 1 |
| 13102 | C | 61.86200 | 53.00680 | 71.55590 | -399.62295  | 295.36783   | 764.53276   | 1 |
| 13103 | H | 60.98800 | 52.51080 | 71.95090 | -292.73603  | -3089.36869 | -518.00862  | 1 |
| 13104 | C | 62.07000 | 53.38380 | 70.23690 | -273.52043  | 79.29525    | 866.22736   | 1 |
| 13105 | O | 61.17200 | 53.02380 | 69.23190 | 495.62397   | -74.81991   | -610.23446  | 1 |
| 13106 | H | 61.57000 | 53.06280 | 68.35890 | 851.61547   | -2247.43352 | 2030.27581  | 1 |
| 13107 | C | 64.22300 | 54.25280 | 70.86090 | 650.27815   | -305.94784  | -561.23547  | 1 |
| 13108 | H | 65.19200 | 54.70680 | 70.71490 | 1349.63683  | 2773.39621  | -620.46766  | 1 |
| 13109 | C | 63.28000 | 53.95980 | 69.85490 | -277.81554  | 535.08939   | 684.06789   | 1 |
| 13110 | H | 63.50300 | 54.29180 | 68.85190 | 1275.25847  | -1228.78225 | -2600.39156 | 1 |
| 13111 | C | 65.83400 | 51.91380 | 73.11590 | 574.02176   | 142.30897   | -694.04480  | 1 |
| 13112 | O | 65.14200 | 50.94680 | 73.39390 | 552.31917   | 520.35186   | -218.64288  | 1 |
| 13113 | N | 66.72600 | 51.85580 | 72.13990 | 422.02364   | 574.53356   | -452.19411  | 1 |
| 13114 | H | 67.18100 | 52.70080 | 71.86790 | 1203.14880  | -1030.59614 | 2718.18520  | 1 |
| 13115 | C | 67.06100 | 50.73780 | 71.34590 | 790.22595   | 424.03887   | -164.87872  | 1 |
| 13116 | H | 66.18800 | 50.37980 | 70.82090 | -2262.06129 | -451.42444  | -2139.51418 | 1 |
| 13117 | C | 68.18900 | 50.95680 | 70.27890 | 613.00707   | 645.78500   | 196.55807   | 1 |
| 13118 | H | 68.49600 | 49.97580 | 69.85790 | 1447.96023  | 1574.31117  | 2307.20215  | 1 |
| 13119 | H | 69.07300 | 51.42780 | 70.75990 | -522.29934  | 3100.87838  | 99.91442    | 1 |
| 13120 | C | 67.74500 | 51.90280 | 69.18490 | -391.16536  | -815.71745  | 114.21783   | 1 |
| 13121 | H | 67.22000 | 52.78380 | 69.61290 | -1776.43918 | 1361.34034  | 2211.16316  | 1 |
| 13122 | C | 68.90400 | 52.46280 | 68.26490 | 510.25515   | 640.32723   | -401.33741  | 1 |
| 13123 | H | 69.21300 | 51.65180 | 67.57190 | -814.81842  | 2419.76861  | 1838.21028  | 1 |
| 13124 | H | 69.81900 | 52.69180 | 68.85290 | 2307.23219  | -1576.31507 | -1445.73049 | 1 |
| 13125 | H | 68.67000 | 53.44480 | 67.79890 | -512.84722  | 2259.63912  | 2128.20229  | 1 |
| 13126 | C | 66.79800 | 51.18780 | 68.16290 | 113.62520   | 245.58611   | -870.76276  | 1 |
| 13127 | H | 67.28100 | 50.33580 | 67.63890 | -1961.02823 | -2100.52277 | -1280.78047 | 1 |
| 13128 | H | 66.50300 | 51.92080 | 67.38290 | -1866.41494 | 477.41028   | -2487.32807 | 1 |
| 13129 | H | 65.90400 | 50.68680 | 68.59190 | -1249.88407 | 1244.38661  | -2605.28655 | 1 |
| 13130 | C | 67.57100 | 49.59980 | 72.22890 | -510.18512  | -755.64773  | 12.59556    | 1 |
| 13131 | O | 67.16500 | 48.45580 | 72.05690 | 170.02894   | -395.46220  | -662.06271  | 1 |
| 13132 | N | 68.39700 | 49.92080 | 73.24090 | 644.36919   | 409.26202   | -360.50692  | 1 |
| 13133 | H | 68.72700 | 50.85680 | 73.34190 | 1479.30347  | -47.64056   | 2776.25969  | 1 |
| 13134 | C | 69.08400 | 48.91580 | 74.02090 | -270.91730  | -767.29334  | 411.47996   | 1 |
| 13135 | H | 69.46000 | 48.13080 | 73.38090 | 1797.65204  | 435.01954   | 2545.07983  | 1 |
| 13136 | C | 70.26000 | 49.50580 | 74.88190 | 468.22097   | -770.57178  | 135.79122   | 1 |



|       |   |          |          |          |             |             |             |   |
|-------|---|----------|----------|----------|-------------|-------------|-------------|---|
| 13137 | H | 69.96200 | 50.21280 | 75.68490 | 2054.26700  | 1367.04935  | 1951.76572  | 1 |
| 13138 | H | 70.89000 | 50.10780 | 74.19090 | -2146.73375 | 1282.63419  | -1909.08616 | 1 |
| 13139 | H | 70.83600 | 48.64580 | 75.28590 | 1459.47504  | 2739.95025  | -510.71662  | 1 |
| 13140 | C | 68.12500 | 48.26380 | 75.04290 | 756.15586   | 506.05180   | -59.92406   | 1 |
| 13141 | O | 68.45400 | 47.23480 | 75.64590 | 296.21782   | -703.34129  | 202.96123   | 1 |
| 13142 | N | 66.89700 | 48.82080 | 75.37790 | 97.57007    | 399.55034   | 737.23259   | 1 |
| 13143 | H | 66.81100 | 49.74780 | 75.01990 | -1511.28522 | 28.39929    | -2759.24568 | 1 |
| 13144 | C | 65.93700 | 48.35880 | 76.39690 | -624.55313  | 501.03365   | -436.29082  | 1 |
| 13145 | H | 66.38800 | 47.45080 | 76.76890 | -1511.13383 | -1840.62939 | 2055.91445  | 1 |
| 13146 | C | 65.75500 | 49.42180 | 77.42890 | -341.69308  | -696.41013  | 479.28047   | 1 |
| 13147 | H | 65.76800 | 50.45180 | 77.01090 | -1462.77981 | 1153.28881  | 2535.43416  | 1 |
| 13148 | C | 64.37800 | 49.29580 | 78.19190 | -248.81438  | 762.72529   | -433.35037  | 1 |
| 13149 | H | 64.35700 | 50.15180 | 78.89890 | 1472.39796  | 2763.45699  | 305.90179   | 1 |
| 13150 | H | 63.54600 | 49.42280 | 77.46690 | 1387.58266  | -2563.18625 | -1184.44790 | 1 |
| 13151 | H | 64.34900 | 48.32980 | 78.73890 | 2105.62272  | -2040.34506 | 1140.86423  | 1 |
| 13152 | C | 66.94300 | 49.36980 | 78.37390 | 601.89979   | -537.61864  | 424.42177   | 1 |
| 13153 | H | 67.87300 | 49.13980 | 77.81290 | 1558.10070  | 2341.21922  | -1410.40454 | 1 |
| 13154 | H | 66.93800 | 48.50780 | 79.07490 | 1414.57683  | 694.44056   | -2723.04075 | 1 |
| 13155 | C | 67.20200 | 50.71380 | 79.14890 | -595.51929  | 367.18638   | 584.79222   | 1 |
| 13156 | H | 68.24400 | 50.65780 | 79.52990 | -1747.67030 | 852.83322   | -2473.16604 | 1 |
| 13157 | H | 66.39500 | 50.70680 | 79.91290 | 1661.18725  | -1989.41852 | 1783.50697  | 1 |
| 13158 | H | 67.23000 | 51.56080 | 78.43090 | 2692.93388  | -1447.99748 | 741.37483   | 1 |
| 13159 | C | 64.68400 | 47.94480 | 75.66090 | 12.54828    | -908.34415  | 78.76834    | 1 |
| 13160 | O | 64.12400 | 46.89680 | 75.93190 | -369.21429  | -539.63082  | -442.83926  | 1 |
| 13161 | N | 64.12500 | 48.67480 | 74.69190 | 88.43404    | 127.31748   | 829.84454   | 1 |
| 13162 | H | 64.58500 | 49.51780 | 74.42290 | 1222.07498  | 2313.77896  | -1746.76440 | 1 |
| 13163 | C | 62.87300 | 48.23880 | 73.93890 | 700.69683   | 574.78948   | -100.45899  | 1 |
| 13164 | H | 62.32800 | 47.76380 | 74.74190 | 1626.40524  | -736.02938  | 2590.61633  | 1 |
| 13165 | C | 62.19700 | 49.49980 | 73.38790 | -825.74470  | 64.46257    | 381.36763   | 1 |
| 13166 | H | 62.95800 | 50.04680 | 72.79190 | 30.59940    | 2226.53833  | 2222.56990  | 1 |
| 13167 | C | 61.03600 | 49.08980 | 72.50190 | -498.83728  | -243.21960  | -723.50301  | 1 |
| 13168 | H | 61.35600 | 48.76480 | 71.48890 | -2526.11441 | 1854.13627  | -281.33770  | 1 |
| 13169 | H | 60.40500 | 48.31080 | 72.98290 | -2242.58347 | -1795.54235 | 1282.60410  | 1 |
| 13170 | H | 60.31000 | 49.90180 | 72.28490 | 2313.48785  | -1447.36120 | -1565.61354 | 1 |
| 13171 | C | 61.82500 | 50.37880 | 74.60090 | -591.38656  | -661.95142  | 208.64624   | 1 |
| 13172 | H | 61.06500 | 51.09380 | 74.21890 | 1955.52936  | -432.03524  | 2426.41231  | 1 |
| 13173 | H | 62.72800 | 50.86480 | 75.02890 | 1190.10654  | -2493.82458 | 1504.23124  | 1 |
| 13174 | H | 61.21500 | 49.71080 | 75.24590 | -2259.28048 | 2110.24103  | -583.74717  | 1 |
| 13175 | C | 63.20100 | 47.23580 | 72.87290 | 417.80222   | 307.40444   | 749.92988   | 1 |
| 13176 | O | 62.38700 | 46.38080 | 72.49590 | -492.71843  | 595.46477   | -162.10330  | 1 |
| 13177 | N | 64.47400 | 47.13380 | 72.43890 | -193.69306  | 672.65699   | -471.89815  | 1 |
| 13178 | H | 65.23300 | 47.65180 | 72.82590 | 470.99995   | -1159.54275 | -2886.49370 | 1 |
| 13179 | C | 64.77200 | 46.31680 | 71.22390 | -609.91446  | 214.90419   | -642.86199  | 1 |
| 13180 | H | 64.08400 | 45.51580 | 70.99690 | -2480.15667 | 1231.58407  | -1493.40210 | 1 |
| 13181 | C | 64.96500 | 47.11680 | 69.95990 | -646.88090  | 640.06767   | 57.52811    | 1 |
| 13182 | H | 65.19000 | 46.42980 | 69.11690 | 790.08686   | -2387.03599 | -1891.04420 | 1 |
| 13183 | H | 65.80000 | 47.84180 | 70.06290 | -1996.62865 | -1793.95742 | -1641.16332 | 1 |
| 13184 | N | 62.80000 | 47.30780 | 68.67190 | 248.17708   | -160.52799  | -790.76620  | 1 |
| 13185 | H | 62.85700 | 46.39880 | 68.25890 | -1772.11809 | 2275.94912  | 1256.13665  | 1 |
| 13186 | C | 63.74700 | 47.92880 | 69.43990 | -677.71136  | 604.87165   | 79.30073    | 1 |
| 13187 | C | 61.90700 | 48.23880 | 68.29190 | 398.74466   | -522.32628  | 632.16213   | 1 |
| 13188 | H | 61.02100 | 47.93880 | 67.73390 | -685.14795  | 487.19339   | -3031.73896 | 1 |
| 13189 | N | 62.23400 | 49.43580 | 68.75890 | 414.44244   | -668.32608  | -307.00163  | 1 |
| 13190 | C | 63.35500 | 49.21480 | 69.53490 | -529.59590  | 698.22968   | -251.90175  | 1 |
| 13191 | H | 63.91700 | 50.02480 | 69.98390 | -1320.23936 | 1001.53031  | 2674.34689  | 1 |
| 13192 | C | 66.09300 | 45.60480 | 71.41390 | 748.32666   | -202.42896  | -480.08408  | 1 |
| 13193 | O | 67.00800 | 45.60980 | 70.60490 | 549.98168   | -566.01703  | 27.78668    | 1 |
| 13194 | N | 66.26200 | 44.96680 | 72.58690 | -401.93304  | -341.53202  | 659.14945   | 1 |
| 13195 | H | 65.54000 | 44.88280 | 73.26990 | -1650.61831 | 1008.01634  | 2481.44887  | 1 |
| 13196 | C | 67.55100 | 44.53680 | 72.97490 | -444.39073  | 536.63254   | -588.21204  | 1 |
| 13197 | H | 68.36100 | 45.24380 | 72.87890 | 2748.24951  | -1450.17862 | 492.27311   | 1 |
| 13198 | C | 67.54100 | 44.11380 | 74.52790 | 684.43262   | 130.49388   | -588.19583  | 1 |

|       |   |          |          |          |             |             |             |   |
|-------|---|----------|----------|----------|-------------|-------------|-------------|---|
| 13199 | H | 67.20500 | 45.01580 | 75.08290 | 1852.05488  | -1067.55999 | -2308.34023 | 1 |
| 13200 | H | 66.79700 | 43.31280 | 74.72290 | 2410.20495  | 595.60692   | -1932.45718 | 1 |
| 13201 | H | 68.52800 | 43.74880 | 74.88590 | -1383.08883 | -911.40774  | -2674.81353 | 1 |
| 13202 | C | 68.08100 | 43.25480 | 72.25790 | -398.17893  | 100.57878   | 814.11821   | 1 |
| 13203 | O | 69.24900 | 42.90780 | 72.37290 | 636.46954   | -463.33057  | -62.11712   | 1 |
| 13204 | N | 67.23100 | 42.50780 | 71.53190 | 4.30664     | 598.47252   | 595.38591   | 1 |
| 13205 | H | 66.32800 | 42.91980 | 71.44090 | 2912.59593  | -475.07240  | 1090.55829  | 1 |
| 13206 | C | 67.54800 | 41.26580 | 70.93090 | -335.31234  | 258.58779   | 807.55742   | 1 |
| 13207 | H | 68.32300 | 40.86780 | 71.56890 | -2010.33196 | 1752.49858  | -1668.99382 | 1 |
| 13208 | C | 66.43900 | 40.21380 | 70.95290 | 658.31779   | 513.60753   | -366.43690  | 1 |
| 13209 | H | 66.01200 | 40.24680 | 71.97790 | -1852.94001 | 1355.80876  | -2150.95843 | 1 |
| 13210 | O | 66.96200 | 38.92080 | 70.87490 | 550.85539   | 82.34729    | 559.82541   | 1 |
| 13211 | H | 67.72100 | 38.72880 | 71.43090 | -1576.56453 | -1211.14979 | 2438.39839  | 1 |
| 13212 | C | 65.34400 | 40.37980 | 69.88590 | 749.87638   | -35.58720   | -517.56156  | 1 |
| 13213 | H | 64.40400 | 39.92280 | 70.26290 | 1715.98814  | 2070.02727  | -1633.58441 | 1 |
| 13214 | H | 65.72800 | 39.97280 | 68.92590 | -218.60340  | -3067.59484 | 663.55156   | 1 |
| 13215 | H | 65.10900 | 41.45680 | 69.74290 | 1934.06509  | 1985.81936  | -1487.99863 | 1 |
| 13216 | C | 68.04700 | 41.39180 | 69.50990 | -678.69371  | -598.30908  | 113.36708   | 1 |
| 13217 | O | 68.49600 | 40.41480 | 68.88190 | 293.00025   | -344.02636  | -647.62948  | 1 |
| 13218 | N | 67.97800 | 42.58880 | 68.90590 | -98.72521   | -227.23125  | 807.02638   | 1 |
| 13219 | H | 67.40400 | 43.31080 | 69.28390 | 1231.01158  | 1517.88517  | 2465.53469  | 1 |
| 13220 | C | 68.25700 | 42.84080 | 67.50690 | -681.96376  | 472.33319   | 378.52053   | 1 |
| 13221 | H | 69.24300 | 42.47480 | 67.26390 | 1563.84161  | -1931.99102 | -1928.73957 | 1 |
| 13222 | C | 67.21300 | 42.10680 | 66.52190 | 757.31941   | 496.00431   | 109.07811   | 1 |
| 13223 | H | 67.50300 | 42.52180 | 65.53290 | -2122.92264 | 366.82424   | 2292.78557  | 1 |
| 13224 | H | 67.39400 | 41.01280 | 66.44490 | 1704.69488  | -133.87949  | -2640.89339 | 1 |
| 13225 | C | 65.73100 | 42.38580 | 66.82990 | -606.63431  | -671.11848  | -114.21820  | 1 |
| 13226 | O | 65.28300 | 43.17080 | 67.69590 | 700.57820   | 200.82518   | 304.11620   | 1 |
| 13227 | N | 64.85100 | 41.84280 | 65.95390 | -470.70949  | 144.07806   | 685.81803   | 1 |
| 13228 | H | 65.23300 | 41.18080 | 65.30890 | 1897.93127  | -1554.74088 | -1969.48317 | 1 |
| 13229 | H | 63.87600 | 42.02380 | 66.07990 | -976.37974  | -1779.46187 | -2403.83533 | 1 |
| 13230 | C | 68.28700 | 44.37280 | 67.28890 | 603.54252   | 251.75734   | 635.45705   | 1 |
| 13231 | O | 67.32600 | 45.05080 | 66.84790 | -283.11668  | 71.34098    | -733.74562  | 1 |
| 13232 | N | 69.42800 | 45.01480 | 67.51390 | -509.83989  | 439.26624   | 509.68691   | 1 |
| 13233 | H | 70.29900 | 44.54280 | 67.62790 | 3073.41697  | 96.42858    | 665.60942   | 1 |
| 13234 | C | 69.59800 | 46.39680 | 67.30590 | -250.56010  | -750.92999  | -452.52049  | 1 |
| 13235 | H | 69.34300 | 46.64780 | 66.28690 | 2380.22491  | 527.76585   | 1988.52176  | 1 |
| 13236 | C | 68.81800 | 47.28080 | 68.35890 | -751.25610  | 368.83109   | -361.97915  | 1 |
| 13237 | H | 67.74200 | 47.08880 | 68.15690 | -1135.32986 | 1162.85284  | 2693.88671  | 1 |
| 13238 | H | 68.95200 | 48.36380 | 68.15390 | 2621.79742  | 1598.95014  | 683.93200   | 1 |
| 13239 | O | 69.09100 | 46.87480 | 69.72790 | 82.97477    | 577.35857   | -532.35279  | 1 |
| 13240 | H | 68.34100 | 46.30280 | 69.90690 | -994.29190  | -1709.16046 | 2447.11674  | 1 |
| 13241 | C | 71.05900 | 46.81080 | 67.33990 | -598.58095  | -246.29948  | -642.25262  | 1 |
| 13242 | O | 71.31200 | 47.99080 | 67.04890 | -119.88413  | -416.63787  | 660.05144   | 1 |
| 13243 | N | 72.08300 | 46.00080 | 67.59690 | -235.47629  | 186.73699   | -788.89321  | 1 |
| 13244 | H | 71.88000 | 45.04780 | 67.80590 | -1941.52766 | 367.00668   | 2448.26523  | 1 |
| 13245 | C | 73.48600 | 46.44780 | 67.59790 | -117.31300  | 808.07841   | 405.82995   | 1 |
| 13246 | H | 73.52400 | 47.26880 | 68.29890 | -94.15309   | 555.56409   | -3095.27219 | 1 |
| 13247 | C | 74.37500 | 45.29980 | 68.15590 | 349.24143   | -694.52830  | 476.56255   | 1 |
| 13248 | H | 74.02300 | 44.33880 | 67.72490 | 2187.56157  | 1734.49200  | -1450.63369 | 1 |
| 13249 | H | 74.17000 | 45.24680 | 69.24690 | -462.21592  | -675.52413  | 3037.80345  | 1 |
| 13250 | C | 75.92100 | 45.26480 | 67.94090 | -688.34064  | -188.53166  | -567.53325  | 1 |
| 13251 | H | 76.30900 | 44.56380 | 68.70990 | 900.64859   | 2483.23659  | 1708.97465  | 1 |
| 13252 | H | 76.31100 | 46.28280 | 68.15790 | 2722.79775  | 917.21387   | 1281.91941  | 1 |
| 13253 | C | 76.47700 | 44.90180 | 66.52690 | -694.39980  | 62.00798    | 587.72011   | 1 |
| 13254 | O | 77.48800 | 45.40880 | 66.06490 | -583.38469  | -402.96791  | -347.71597  | 1 |
| 13255 | N | 75.84000 | 43.91380 | 65.89590 | 677.82138   | -414.44226  | -285.42615  | 1 |
| 13256 | H | 75.05300 | 43.46880 | 66.32490 | 1601.33989  | 2239.89573  | 1522.10510  | 1 |
| 13257 | H | 76.20200 | 43.57880 | 65.02690 | 1908.02434  | -180.88731  | -2494.98479 | 1 |
| 13258 | C | 74.06300 | 47.03080 | 66.32090 | 522.08630   | -575.61216  | -477.01944  | 1 |
| 13259 | O | 74.69700 | 48.06380 | 66.27790 | 244.51640   | -347.06706  | 665.87042   | 1 |
| 13260 | N | 73.75600 | 46.55480 | 65.10790 | -757.58830  | 144.48831   | -343.30071  | 1 |

|       |   |          |          |          |             |             |             |   |
|-------|---|----------|----------|----------|-------------|-------------|-------------|---|
| 13261 | H | 73.25200 | 45.70380 | 64.98290 | -484.25524  | 488.11033   | 3070.09306  | 1 |
| 13262 | C | 74.08400 | 47.23980 | 63.86290 | -161.53046  | -750.43013  | 492.15193   | 1 |
| 13263 | H | 75.12800 | 47.51180 | 63.92690 | -1065.13115 | -2932.33163 | 406.39032   | 1 |
| 13264 | C | 74.06800 | 46.20880 | 62.72890 | -731.28525  | -469.71222  | 275.75953   | 1 |
| 13265 | H | 73.13500 | 45.60880 | 62.79690 | -2009.06986 | -1599.06496 | 1817.92623  | 1 |
| 13266 | H | 74.85700 | 45.42680 | 62.72790 | -416.58161  | -528.78603  | 3073.28347  | 1 |
| 13267 | C | 74.06200 | 46.76480 | 61.27790 | -776.95958  | -436.42055  | 193.18882   | 1 |
| 13268 | H | 73.11700 | 47.30680 | 61.06290 | 1417.32230  | 2737.90974  | -627.11560  | 1 |
| 13269 | H | 74.90400 | 47.46680 | 61.10090 | -1647.08289 | 868.00982   | -2536.11970 | 1 |
| 13270 | C | 74.25100 | 45.71380 | 60.15490 | 787.69201   | -432.25438  | -155.39769  | 1 |
| 13271 | H | 75.13100 | 45.04580 | 60.27290 | -2340.97760 | 1034.54472  | 1829.69051  | 1 |
| 13272 | H | 73.41700 | 44.99080 | 60.02890 | -276.37492  | 2903.44781  | 1179.76013  | 1 |
| 13273 | N | 74.37500 | 46.45680 | 58.85890 | -541.96141  | -484.39141  | 429.31933   | 1 |
| 13274 | H | 73.83000 | 47.27780 | 58.68890 | 439.68406   | 2676.96414  | 1593.35092  | 1 |
| 13275 | C | 74.66200 | 45.80580 | 57.73890 | 412.49453   | 602.72693   | -545.91163  | 1 |
| 13276 | N | 75.21300 | 44.60980 | 57.67290 | 343.28745   | -484.01684  | 600.46125   | 1 |
| 13277 | H | 75.14000 | 43.94180 | 58.41390 | 1066.64886  | 1702.06179  | -2421.46073 | 1 |
| 13278 | H | 75.29600 | 44.15880 | 56.78390 | -2741.62249 | 591.53017   | -1425.42078 | 1 |
| 13279 | N | 74.43800 | 46.41980 | 56.59390 | -652.77470  | 441.51959   | -302.68453  | 1 |
| 13280 | H | 74.35200 | 47.41580 | 56.55990 | -366.14760  | -834.01819  | -3011.40761 | 1 |
| 13281 | H | 74.81700 | 46.00380 | 55.76690 | -2089.51111 | -2352.02812 | -11.54432   | 1 |
| 13282 | C | 73.45900 | 48.66280 | 63.65890 | 367.37472   | -648.97084  | 524.71294   | 1 |
| 13283 | O | 74.22500 | 49.62080 | 63.25590 | 591.72685   | -305.57477  | -424.39443  | 1 |
| 13284 | N | 72.19600 | 48.93680 | 63.88290 | -569.87937  | 557.90511   | -276.86041  | 1 |
| 13285 | C | 71.15200 | 47.91380 | 63.64390 | 554.89815   | 314.54020   | 651.61607   | 1 |
| 13286 | H | 71.01200 | 47.26380 | 64.53490 | -408.21656  | -2507.78575 | 1855.42343  | 1 |
| 13287 | H | 71.30300 | 47.24080 | 62.77290 | 2314.20547  | -2085.90791 | 437.79846   | 1 |
| 13288 | C | 71.58800 | 50.28980 | 63.86990 | 223.43296   | -572.17464  | 673.90274   | 1 |
| 13289 | H | 71.84300 | 50.86080 | 62.98890 | 2443.94981  | -1878.97436 | 628.32388   | 1 |
| 13290 | C | 70.07700 | 50.06480 | 63.96190 | -439.81422  | -571.98101  | 557.54119   | 1 |
| 13291 | H | 69.46100 | 50.84980 | 63.47390 | -2705.05160 | 792.16700   | 1397.63854  | 1 |
| 13292 | H | 69.73700 | 49.93580 | 65.01190 | -1616.19085 | -411.24491  | -2667.77641 | 1 |
| 13293 | C | 69.87000 | 48.68880 | 63.34890 | -607.08387  | -680.02370  | 21.63219    | 1 |
| 13294 | H | 69.82900 | 48.81780 | 62.24590 | 2001.62042  | 2191.28034  | -1044.04615 | 1 |
| 13295 | H | 68.94600 | 48.19980 | 63.72390 | -1180.94778 | -2507.16573 | 1489.19729  | 1 |
| 13296 | C | 72.06400 | 51.10980 | 65.08690 | 418.51034   | -615.39546  | -526.86671  | 1 |
| 13297 | O | 72.36800 | 52.25980 | 64.91690 | -310.85032  | -687.91968  | 231.87457   | 1 |
| 13298 | N | 72.14200 | 50.58980 | 66.34490 | -289.32400  | -596.50411  | 522.63444   | 1 |
| 13299 | H | 71.85400 | 49.64680 | 66.48990 | 1363.66697  | 2593.04601  | -1146.62592 | 1 |
| 13300 | C | 72.81900 | 51.31980 | 67.35990 | 357.30677   | 628.45541   | 555.72176   | 1 |
| 13301 | H | 72.31400 | 52.25080 | 67.56990 | 2502.65950  | 1397.91440  | 1296.44011  | 1 |
| 13302 | C | 72.89600 | 50.49980 | 68.67390 | -257.51074  | -482.49481  | -729.61495  | 1 |
| 13303 | H | 73.60400 | 51.00680 | 69.36290 | -2483.46327 | 1672.50487  | 966.10759   | 1 |
| 13304 | H | 73.30500 | 49.50780 | 68.38590 | -1677.63239 | 2346.91290  | 1255.29902  | 1 |
| 13305 | C | 71.62900 | 50.31280 | 69.43890 | -163.66395  | -590.59331  | -675.17750  | 1 |
| 13306 | H | 70.76200 | 49.92680 | 68.86190 | -554.84535  | 2989.57813  | -807.95758  | 1 |
| 13307 | H | 71.29200 | 51.26680 | 69.89990 | 481.09859   | -1476.23941 | -2736.32739 | 1 |
| 13308 | C | 71.72500 | 49.24180 | 70.58390 | 446.76018   | -774.28284  | -179.84001  | 1 |
| 13309 | H | 70.75000 | 48.93880 | 71.02290 | 1486.63614  | -1571.06313 | 2284.71002  | 1 |
| 13310 | H | 72.23500 | 48.32680 | 70.21490 | -1807.91618 | 1953.25876  | 1677.63092  | 1 |
| 13311 | N | 72.53600 | 49.96180 | 71.58390 | -293.05361  | 786.60279   | -89.71019   | 1 |
| 13312 | H | 72.73100 | 50.93480 | 71.46790 | -1194.06061 | 2648.21785  | -1208.05119 | 1 |
| 13313 | C | 73.24800 | 49.36280 | 72.44790 | 810.67973   | -416.96001  | 19.84276    | 1 |
| 13314 | N | 73.02000 | 48.12780 | 72.87290 | -787.41695  | -159.99390  | 258.93781   | 1 |
| 13315 | H | 72.19900 | 47.67380 | 72.52690 | -2513.64235 | -426.69839  | 1843.30052  | 1 |
| 13316 | H | 73.73800 | 47.68480 | 73.40890 | 1844.99598  | 1762.05733  | 1841.02417  | 1 |
| 13317 | N | 74.05500 | 50.13280 | 73.16390 | -11.35797   | 841.95718   | 60.42671    | 1 |
| 13318 | H | 74.03900 | 51.12880 | 73.07790 | -990.59967  | -2636.73108 | 1401.63752  | 1 |
| 13319 | H | 74.58500 | 49.72780 | 73.90890 | -1576.76848 | 1001.33361  | 2531.67106  | 1 |
| 13320 | C | 74.26400 | 51.75680 | 67.03390 | 490.81175   | -88.58160   | -763.35321  | 1 |
| 13321 | O | 74.70400 | 52.87880 | 67.34290 | -97.63868   | -781.84572  | 53.02065    | 1 |
| 13322 | N | 74.99000 | 50.84080 | 66.43790 | 391.45388   | -416.25300  | -621.42545  | 1 |

|       |   |          |          |          |             |             |             |   |
|-------|---|----------|----------|----------|-------------|-------------|-------------|---|
| 13323 | H | 74.53700 | 50.00780 | 66.12990 | -2434.88356 | 1263.10961  | -1540.81873 | 1 |
| 13324 | C | 76.32900 | 51.05180 | 65.91890 | 755.75258   | 424.99039   | 282.26265   | 1 |
| 13325 | H | 76.92000 | 51.30980 | 66.78590 | 2383.14925  | 975.35757   | 1807.62371  | 1 |
| 13326 | C | 76.94900 | 49.70280 | 65.47390 | -127.10057  | 449.84396   | -782.90284  | 1 |
| 13327 | H | 76.30500 | 49.24080 | 64.69590 | -1462.01769 | -776.97564  | 2675.26435  | 1 |
| 13328 | H | 76.96900 | 49.10280 | 66.40990 | 2351.35848  | 2038.64845  | -461.79218  | 1 |
| 13329 | C | 78.38400 | 49.85180 | 64.90690 | 507.13821   | 429.47325   | 624.35131   | 1 |
| 13330 | H | 78.99800 | 50.42380 | 65.63490 | 1539.25316  | 2178.00992  | -1668.89147 | 1 |
| 13331 | H | 78.48000 | 50.46080 | 63.98190 | 497.81871   | 1585.92457  | -2671.18813 | 1 |
| 13332 | C | 79.08600 | 48.50880 | 64.76090 | -465.49210  | -579.50324  | -528.15158  | 1 |
| 13333 | H | 80.13800 | 48.65880 | 64.43590 | -1798.56283 | 2098.41842  | -1503.34231 | 1 |
| 13334 | H | 79.13800 | 48.00180 | 65.74790 | -1712.44281 | 2016.17196  | 1703.17835  | 1 |
| 13335 | C | 78.42400 | 47.54480 | 63.73590 | -276.83746  | -461.54264  | 736.06414   | 1 |
| 13336 | H | 77.43900 | 47.19580 | 64.11290 | 2062.78229  | -900.72626  | 2198.14641  | 1 |
| 13337 | H | 78.43800 | 48.07180 | 62.75690 | -581.77017  | -1296.54614 | 2806.90894  | 1 |
| 13338 | N | 79.19100 | 46.31480 | 63.58490 | 668.80042   | -48.88060   | 512.82451   | 1 |
| 13339 | H | 79.15700 | 45.54480 | 64.28290 | -1455.35871 | 2733.96206  | -552.81890  | 1 |
| 13340 | H | 78.84600 | 45.88880 | 62.70090 | 2802.27857  | 696.03767   | -1249.39690 | 1 |
| 13341 | H | 80.20700 | 46.41180 | 63.38790 | -1395.14776 | 167.54165   | -2814.91008 | 1 |
| 13342 | C | 76.45600 | 52.09780 | 64.76190 | -340.64362  | 379.01610   | -756.14795  | 1 |
| 13343 | O | 77.33400 | 53.00380 | 64.73790 | 480.83886   | 274.14261   | -563.26464  | 1 |
| 13344 | N | 75.49900 | 52.07180 | 63.80890 | 474.66355   | 163.46394   | -678.70932  | 1 |
| 13345 | H | 74.82500 | 51.33980 | 63.87890 | -1343.72188 | -1828.90196 | -2178.93446 | 1 |
| 13346 | C | 75.37200 | 53.05880 | 62.72290 | 505.86493   | -644.58825  | -400.07208  | 1 |
| 13347 | H | 76.24900 | 53.07880 | 62.09390 | 1996.30797  | -1795.19527 | 1640.19958  | 1 |
| 13348 | C | 74.08200 | 52.69580 | 61.93290 | 467.02505   | -635.74028  | -457.35423  | 1 |
| 13349 | H | 73.19500 | 52.54980 | 62.58490 | 2992.05203  | -698.08008  | 677.15216   | 1 |
| 13350 | H | 74.18000 | 51.73280 | 61.38690 | -2643.66720 | -1378.09349 | 1005.04144  | 1 |
| 13351 | C | 73.59900 | 53.60380 | 60.75090 | 746.41321   | -148.09729  | 502.37985   | 1 |
| 13352 | H | 73.51200 | 54.61580 | 61.20090 | -2259.59392 | 2000.75123  | 888.51342   | 1 |
| 13353 | C | 74.75200 | 53.70080 | 59.70190 | 392.86651   | 818.16838   | -87.79179   | 1 |
| 13354 | H | 75.73100 | 53.99880 | 60.13390 | 973.97142   | -2231.00409 | -1993.04456 | 1 |
| 13355 | H | 74.40100 | 54.35980 | 58.87990 | -2807.57231 | -610.77700  | -1281.68460 | 1 |
| 13356 | H | 74.77600 | 52.72380 | 59.17190 | 461.01885   | -2966.66190 | 940.53442   | 1 |
| 13357 | C | 72.26900 | 52.99980 | 60.24790 | 145.82257   | -611.60754  | -660.39609  | 1 |
| 13358 | H | 72.31900 | 51.91280 | 60.01990 | -2677.86183 | 717.21180   | -1487.57839 | 1 |
| 13359 | H | 71.53100 | 53.17380 | 61.05890 | 2811.05797  | 716.38731   | -1217.77196 | 1 |
| 13360 | H | 71.90400 | 53.53280 | 59.34390 | -582.05890  | 1814.68262  | -2503.26999 | 1 |
| 13361 | C | 75.26700 | 54.48680 | 63.29190 | 864.36087   | -210.32899  | -200.23236  | 1 |
| 13362 | O | 75.99400 | 55.39780 | 62.81990 | -722.97101  | -65.10869   | -310.96785  | 1 |
| 13363 | N | 74.42500 | 54.77980 | 64.32690 | 56.26413    | 662.10682   | -520.69299  | 1 |
| 13364 | H | 73.71000 | 54.13580 | 64.58490 | 1481.70092  | 2723.79880  | -532.64312  | 1 |
| 13365 | C | 74.40000 | 55.99780 | 65.09690 | 135.32019   | 888.85078   | 151.93334   | 1 |
| 13366 | H | 74.15100 | 56.75380 | 64.36690 | 1816.38195  | -1659.32307 | 1961.02774  | 1 |
| 13367 | C | 73.31000 | 55.86980 | 66.17990 | 147.39433   | 803.00974   | -406.08038  | 1 |
| 13368 | H | 73.30000 | 56.73880 | 66.87090 | -1879.52770 | 558.27214   | 2460.47436  | 1 |
| 13369 | H | 73.61800 | 54.94780 | 66.71790 | -124.36038  | 1122.47502  | 2936.46225  | 1 |
| 13370 | C | 71.87600 | 55.65080 | 65.62390 | -292.57289  | -459.05976  | -731.51640  | 1 |
| 13371 | H | 71.83700 | 54.60480 | 65.25090 | 853.61981   | -51.96252   | -3027.68217 | 1 |
| 13372 | C | 70.97400 | 55.48080 | 66.86590 | -262.24589  | 276.38742   | -828.42506  | 1 |
| 13373 | H | 71.23100 | 54.55980 | 67.43290 | -35.86831   | 1339.43061  | -2846.55324 | 1 |
| 13374 | H | 71.08600 | 56.36480 | 67.52890 | 690.15356   | -2302.03786 | 2030.40291  | 1 |
| 13375 | H | 69.94100 | 55.32880 | 66.48690 | 789.05455   | -2499.06386 | 1740.77540  | 1 |
| 13376 | C | 71.25800 | 56.61480 | 64.56090 | 507.07240   | 560.70252   | -509.84435  | 1 |
| 13377 | H | 70.17700 | 56.37880 | 64.46190 | -1746.50458 | -1860.64461 | 1840.09500  | 1 |
| 13378 | H | 71.83700 | 56.72880 | 63.61990 | 1435.80627  | 2799.35657  | 17.01108    | 1 |
| 13379 | H | 71.32500 | 57.64680 | 64.96790 | -602.34540  | -2187.68669 | -2179.31943 | 1 |
| 13380 | C | 75.73500 | 56.27280 | 65.77590 | 449.23342   | 690.57438   | -390.82908  | 1 |
| 13381 | O | 76.34600 | 57.33580 | 65.63190 | 98.01944    | -737.45968  | -264.90119  | 1 |
| 13382 | N | 76.31200 | 55.24680 | 66.49890 | 474.00165   | 695.72037   | 62.99122    | 1 |
| 13383 | H | 75.88100 | 54.35180 | 66.58390 | -2128.34693 | 2169.62168  | 813.08508   | 1 |
| 13384 | C | 77.48200 | 55.40080 | 67.33590 | -188.92237  | 684.46151   | -572.07673  | 1 |

|       |   |          |          |          |             |             |             |   |
|-------|---|----------|----------|----------|-------------|-------------|-------------|---|
| 13385 | H | 77.32600 | 56.29280 | 67.92390 | -2248.40509 | 1524.77759  | -1586.80624 | 1 |
| 13386 | C | 77.62100 | 54.17580 | 68.29490 | 656.69761   | -251.44449  | 580.49541   | 1 |
| 13387 | H | 78.49700 | 54.34580 | 68.95590 | -1355.25345 | 2557.13823  | 1233.91994  | 1 |
| 13388 | H | 76.75900 | 54.12480 | 68.99390 | -186.38175  | -699.89618  | -3061.63901 | 1 |
| 13389 | H | 77.70900 | 53.20180 | 67.76690 | 763.93062   | -1527.50127 | 2642.22938  | 1 |
| 13390 | C | 78.78300 | 55.65680 | 66.64290 | -504.56942  | 517.63806   | 555.79811   | 1 |
| 13391 | O | 79.62000 | 56.37780 | 67.15490 | -520.37260  | -556.13294  | 208.70012   | 1 |
| 13392 | N | 78.96700 | 55.15180 | 65.41590 | -170.22067  | 783.12437   | -265.35529  | 1 |
| 13393 | H | 78.26300 | 54.58880 | 64.98890 | -2830.38522 | 295.52187   | -1341.57092 | 1 |
| 13394 | C | 80.24300 | 55.01480 | 64.81890 | -742.71501  | -319.79120  | -421.37752  | 1 |
| 13395 | H | 80.93500 | 55.54480 | 65.45490 | -1284.08264 | 1406.65318  | 2504.13355  | 1 |
| 13396 | C | 80.74100 | 53.60680 | 64.68090 | 369.62887   | -790.28411  | -265.09721  | 1 |
| 13397 | H | 81.54200 | 53.50280 | 63.91790 | 1367.07050  | 2829.87709  | -145.39652  | 1 |
| 13398 | H | 79.93900 | 52.99380 | 64.21490 | -1230.72456 | -447.92394  | -2860.57817 | 1 |
| 13399 | C | 81.19200 | 53.07180 | 66.00590 | -439.81834  | 431.09233   | 672.43604   | 1 |
| 13400 | H | 80.21400 | 52.97080 | 66.52290 | 822.31980   | -2077.29909 | 2215.13992  | 1 |
| 13401 | H | 81.98500 | 53.67880 | 66.49090 | 2425.71536  | 1965.56947  | -388.15957  | 1 |
| 13402 | C | 81.80000 | 51.67080 | 65.81990 | -194.87544  | 641.85926   | -617.64978  | 1 |
| 13403 | O | 82.54700 | 51.38680 | 64.86090 | 490.51294   | 511.21769   | 348.82770   | 1 |
| 13404 | O | 81.46400 | 50.77080 | 66.62690 | 586.86452   | 97.56209    | 519.32543   | 1 |
| 13405 | C | 80.24800 | 55.64180 | 63.46990 | -393.60719  | -299.78151  | 765.93435   | 1 |
| 13406 | O | 81.28400 | 56.18180 | 63.05390 | 185.46925   | -763.79646  | -76.44188   | 1 |
| 13407 | N | 79.10300 | 55.73680 | 62.73990 | 1.18328     | 620.27752   | -572.64884  | 1 |
| 13408 | H | 78.21300 | 55.39680 | 63.03490 | -2991.28572 | -323.39887  | 919.70058   | 1 |
| 13409 | C | 79.08500 | 56.37380 | 61.44790 | 456.82388   | -551.93061  | 564.03506   | 1 |
| 13410 | H | 80.07800 | 56.57180 | 61.07090 | 2080.94848  | -158.14349  | 2354.33011  | 1 |
| 13411 | C | 78.41800 | 55.43180 | 60.43790 | 595.38611   | -262.83251  | -638.65911  | 1 |
| 13412 | H | 77.80000 | 55.86380 | 59.62190 | -1201.22448 | 1916.78934  | -2186.59658 | 1 |
| 13413 | H | 77.61800 | 54.90880 | 61.00490 | -2339.72894 | 2080.30056  | -310.23263  | 1 |
| 13414 | C | 79.39200 | 54.30580 | 59.96390 | 523.91545   | 550.26969   | -504.14965  | 1 |
| 13415 | H | 80.20100 | 54.78780 | 59.37390 | 1632.38826  | 612.06032   | 2618.95341  | 1 |
| 13416 | H | 79.81400 | 53.79280 | 60.85490 | 3082.36072  | -630.18896  | -11.85261   | 1 |
| 13417 | C | 78.69400 | 53.25980 | 59.05890 | 535.32051   | -553.97053  | -487.85204  | 1 |
| 13418 | H | 78.18300 | 53.69880 | 58.17490 | -2896.45892 | -1228.09288 | -23.23467   | 1 |
| 13419 | H | 77.89200 | 52.86580 | 59.71890 | 574.79550   | -3068.48749 | -390.15494  | 1 |
| 13420 | C | 79.52300 | 52.08780 | 58.64990 | 119.91645   | -217.39813  | -877.38766  | 1 |
| 13421 | H | 78.88900 | 51.18480 | 58.52290 | 1550.97321  | -136.94496  | 2733.85340  | 1 |
| 13422 | H | 80.17100 | 51.87080 | 59.52690 | -1835.80481 | 76.09568    | -2553.87086 | 1 |
| 13423 | N | 80.41500 | 52.29680 | 57.45590 | -340.75312  | -238.62309  | 734.58738   | 1 |
| 13424 | H | 81.01600 | 53.14280 | 57.39090 | 2077.51361  | 1710.64734  | 1629.67761  | 1 |
| 13425 | H | 80.99800 | 51.45480 | 57.27390 | 2036.95678  | -1679.36001 | -1711.36882 | 1 |
| 13426 | H | 79.79000 | 52.30380 | 56.62490 | -136.84474  | -2232.74320 | 2212.31949  | 1 |
| 13427 | C | 78.36900 | 57.66680 | 61.44790 | -436.04995  | 495.04796   | -629.47515  | 1 |
| 13428 | O | 78.89200 | 58.71780 | 61.08490 | -87.52700   | -612.14327  | 491.16888   | 1 |
| 13429 | N | 77.09500 | 57.58980 | 61.86190 | 607.50853   | 527.28763   | -256.07310  | 1 |
| 13430 | H | 76.77100 | 56.72180 | 62.22990 | 1458.51518  | -1997.19696 | -1944.77865 | 1 |
| 13431 | C | 76.09900 | 58.66480 | 61.66090 | 133.28248   | -784.46330  | 445.31350   | 1 |
| 13432 | H | 76.35500 | 59.15680 | 60.73390 | -2975.33665 | -993.06191  | 243.77466   | 1 |
| 13433 | C | 74.63500 | 58.10880 | 61.42090 | -235.67123  | 686.81576   | -551.53802  | 1 |
| 13434 | H | 74.40700 | 57.32080 | 62.17090 | -2592.77985 | 286.31803   | -1758.90331 | 1 |
| 13435 | C | 73.63900 | 59.25180 | 61.53490 | 412.54753   | 67.66444    | 810.35613   | 1 |
| 13436 | H | 73.66300 | 59.64980 | 62.57190 | 1124.66712  | 1030.89139  | -2751.47470 | 1 |
| 13437 | H | 72.61900 | 58.85480 | 61.34290 | -2442.61912 | -1685.69764 | 1044.15588  | 1 |
| 13438 | H | 73.85800 | 60.07080 | 60.81690 | 1055.85425  | -1531.17459 | 2537.49924  | 1 |
| 13439 | C | 74.54200 | 57.54180 | 59.97590 | -322.67470  | 385.89947   | 760.53510   | 1 |
| 13440 | H | 75.40900 | 56.88280 | 59.75790 | 1220.58053  | -2103.52528 | 1995.89348  | 1 |
| 13441 | H | 73.71200 | 56.81880 | 59.81990 | 2015.11253  | 1366.60431  | 1992.47093  | 1 |
| 13442 | H | 74.61300 | 58.32480 | 59.19190 | 301.43086   | -2515.68369 | 1865.12768  | 1 |
| 13443 | C | 76.21100 | 59.84480 | 62.65990 | -12.43828   | 6.78298     | -911.72928  | 1 |
| 13444 | O | 75.93300 | 60.98580 | 62.30390 | 576.43795   | 213.03201   | -495.94745  | 1 |
| 13445 | N | 76.85000 | 59.71980 | 63.88290 | -395.10264  | 459.78809   | -587.50414  | 1 |
| 13446 | H | 76.85700 | 58.81880 | 64.30890 | -1745.59768 | -2615.25319 | -107.54412  | 1 |

|       |   |          |          |          |             |             |             |   |
|-------|---|----------|----------|----------|-------------|-------------|-------------|---|
| 13447 | C | 77.20900 | 60.88380 | 64.76190 | 682.57926   | -366.07454  | 481.17147   | 1 |
| 13448 | H | 76.28000 | 61.42980 | 64.83790 | -1968.94770 | 1636.93714  | 1828.08861  | 1 |
| 13449 | C | 77.73400 | 60.39280 | 66.08790 | -528.03511  | -107.94521  | -735.51190  | 1 |
| 13450 | H | 77.00500 | 59.71580 | 66.58190 | 2074.08785  | 1543.57762  | 1792.69461  | 1 |
| 13451 | C | 79.03700 | 59.53180 | 65.95890 | -159.07311  | -559.93267  | -701.87047  | 1 |
| 13452 | H | 79.91700 | 60.21080 | 65.96790 | 3081.88190  | -14.18254   | 632.47849   | 1 |
| 13453 | H | 79.30200 | 58.94780 | 65.05190 | -1119.62649 | -2552.41944 | -1459.38951 | 1 |
| 13454 | H | 79.18400 | 58.75480 | 66.73890 | -2398.91850 | 585.98352   | -1949.36902 | 1 |
| 13455 | C | 77.96200 | 61.63780 | 66.98490 | 237.71013   | -728.35172  | 494.41751   | 1 |
| 13456 | H | 78.82900 | 62.29580 | 66.75890 | 2530.62891  | 1755.47006  | -642.23704  | 1 |
| 13457 | H | 78.00300 | 61.31880 | 68.04790 | -1566.25258 | 1835.16075  | 2019.22364  | 1 |
| 13458 | H | 77.05900 | 62.28480 | 66.98290 | -1195.10023 | 2422.04621  | -1613.58416 | 1 |
| 13459 | C | 78.17500 | 61.78680 | 63.99590 | 591.43949   | 297.00416   | -627.24705  | 1 |
| 13460 | O | 78.09900 | 62.98780 | 64.12390 | -680.00288  | 401.52001   | -2.23548    | 1 |
| 13461 | N | 79.04000 | 61.27880 | 63.15690 | 461.53381   | 222.71467   | -670.86288  | 1 |
| 13462 | H | 79.21600 | 60.30180 | 63.07090 | -351.47570  | 1952.59601  | 2441.73297  | 1 |
| 13463 | C | 79.83300 | 62.16880 | 62.23990 | -743.29342  | -451.56983  | 273.95362   | 1 |
| 13464 | H | 80.38500 | 62.91080 | 62.79690 | -567.46054  | 2257.40796  | 2116.67760  | 1 |
| 13465 | C | 80.87800 | 61.35180 | 61.53590 | 247.62975   | 876.88086   | -34.79164   | 1 |
| 13466 | H | 81.46900 | 62.00780 | 60.86190 | 1668.15668  | -2662.34459 | 165.53182   | 1 |
| 13467 | H | 80.48200 | 60.49880 | 60.94490 | 3032.26998  | 320.36756   | 775.19650   | 1 |
| 13468 | C | 81.78800 | 60.76180 | 62.55890 | -542.31176  | 452.41814   | -576.77273  | 1 |
| 13469 | C | 81.47900 | 59.48980 | 63.13990 | 610.43304   | 80.23188    | -672.59598  | 1 |
| 13470 | H | 80.54500 | 58.99280 | 62.92390 | 2094.09441  | -2307.64190 | -433.34013  | 1 |
| 13471 | C | 82.33100 | 58.99680 | 64.14690 | -627.84855  | -285.72860  | 596.33579   | 1 |
| 13472 | H | 82.11600 | 58.00880 | 64.52490 | 1288.86116  | -2499.37535 | -1410.73952 | 1 |
| 13473 | C | 83.50600 | 59.67180 | 64.52090 | 597.32487   | 558.50971   | -403.38680  | 1 |
| 13474 | O | 84.34300 | 59.10380 | 65.48790 | 784.82525   | -16.16578   | -86.11168   | 1 |
| 13475 | H | 85.16400 | 59.59980 | 65.50190 | 1989.31837  | 2340.00078  | -682.08136  | 1 |
| 13476 | C | 82.96400 | 61.42180 | 62.94590 | -743.72146  | -227.65914  | -475.92091  | 1 |
| 13477 | H | 83.22800 | 62.37680 | 62.51590 | -1601.44261 | -1953.72382 | -1875.25225 | 1 |
| 13478 | C | 83.79600 | 60.81880 | 63.85490 | -646.60004  | 642.81176   | -12.34635   | 1 |
| 13479 | H | 84.68400 | 61.36680 | 64.13590 | -1077.47896 | 1761.32941  | 2373.81213  | 1 |
| 13480 | C | 79.07200 | 63.01480 | 61.18490 | 755.97992   | -504.10201  | 76.33172    | 1 |
| 13481 | O | 79.35300 | 64.19780 | 61.05590 | 305.27495   | 532.93805   | 496.39850   | 1 |
| 13482 | N | 78.11400 | 62.42880 | 60.51990 | -330.48286  | 752.95759   | -191.07130  | 1 |
| 13483 | H | 77.89300 | 61.46280 | 60.63090 | -1800.74236 | -2418.28065 | -898.59439  | 1 |
| 13484 | C | 77.45200 | 63.00280 | 59.37490 | -171.02718  | 887.28241   | 122.19095   | 1 |
| 13485 | H | 77.88600 | 63.93180 | 59.03590 | 1745.28610  | -293.13041  | -2601.20688 | 1 |
| 13486 | C | 77.51400 | 62.02580 | 58.15990 | 496.29923   | 423.73091   | -636.85963  | 1 |
| 13487 | H | 78.58700 | 61.74980 | 58.07590 | -1987.58359 | 1594.16214  | 1845.63940  | 1 |
| 13488 | C | 76.64800 | 60.74380 | 58.20490 | -838.08345  | 59.05954    | 354.37142   | 1 |
| 13489 | H | 76.89000 | 60.04880 | 57.37290 | 1950.03968  | -933.72632  | -2285.54733 | 1 |
| 13490 | H | 75.57900 | 61.03780 | 58.26890 | -1395.33314 | 2687.81368  | 852.60148   | 1 |
| 13491 | H | 76.88300 | 60.24480 | 59.16990 | -855.71685  | 683.96007   | 2949.26661  | 1 |
| 13492 | C | 77.07000 | 62.83080 | 56.90790 | -570.77126  | -609.60883  | 366.12599   | 1 |
| 13493 | H | 77.53500 | 63.83980 | 56.88090 | 476.65632   | -683.53386  | 3033.77759  | 1 |
| 13494 | H | 77.24600 | 62.12980 | 56.06390 | -2189.15145 | -1811.11047 | 1351.19245  | 1 |
| 13495 | H | 75.98500 | 63.07180 | 56.90790 | -1330.65511 | -1417.88160 | 2473.29638  | 1 |
| 13496 | C | 75.96700 | 63.43180 | 59.71690 | -272.22670  | -592.10152  | -637.77693  | 1 |
| 13497 | O | 75.23100 | 63.95280 | 58.88690 | -83.50511   | 410.59184   | -669.37917  | 1 |
| 13498 | N | 75.55600 | 63.14580 | 60.96990 | -150.57332  | 825.49864   | 92.47680    | 1 |
| 13499 | H | 76.07500 | 62.48980 | 61.51290 | 504.16011   | 2415.79102  | 1951.41040  | 1 |
| 13500 | C | 74.24300 | 63.52480 | 61.53090 | -523.91201  | 361.70244   | -652.79288  | 1 |
| 13501 | H | 73.64800 | 62.66780 | 61.80990 | -1282.59050 | 2670.70883  | 1058.53775  | 1 |
| 13502 | H | 73.74100 | 64.17580 | 60.82990 | -2164.17609 | -669.96139  | -2183.05287 | 1 |
| 13503 | C | 74.39400 | 64.47380 | 62.76890 | 667.40836   | -593.81190  | -182.76899  | 1 |
| 13504 | O | 73.38900 | 65.08080 | 63.16490 | 213.44088   | 492.89450   | 578.90002   | 1 |
| 13505 | N | 75.62000 | 64.65580 | 63.34290 | 407.76159   | -528.08353  | 517.23356   | 1 |
| 13506 | H | 76.40600 | 64.05980 | 63.19790 | -1565.45391 | -724.90537  | 2630.98698  | 1 |
| 13507 | C | 75.80700 | 65.65780 | 64.37690 | 248.54503   | 560.24445   | 675.13149   | 1 |
| 13508 | H | 74.96800 | 66.32780 | 64.49790 | -134.98160  | 2855.56669  | -1313.67617 | 1 |

|       |   |          |          |          |             |             |             |   |
|-------|---|----------|----------|----------|-------------|-------------|-------------|---|
| 13509 | C | 76.01200 | 64.93380 | 65.67590 | 278.61279   | -370.56758  | 785.17870   | 1 |
| 13510 | H | 76.89500 | 64.26080 | 65.65490 | 2093.60022  | -2303.69237 | -456.14232  | 1 |
| 13511 | C | 76.30800 | 65.94080 | 66.83790 | 659.81054   | -153.30146  | -610.40947  | 1 |
| 13512 | H | 77.32300 | 66.35880 | 66.66890 | 2604.30123  | 1417.98064  | -1051.27172 | 1 |
| 13513 | H | 76.23100 | 65.35680 | 67.77990 | 1842.88595  | 1275.58512  | 2207.91308  | 1 |
| 13514 | H | 75.48500 | 66.68680 | 66.80890 | 2557.02413  | -1828.61020 | -126.64340  | 1 |
| 13515 | C | 74.73100 | 64.15080 | 66.04990 | -260.84914  | 590.19267   | -644.26807  | 1 |
| 13516 | H | 73.85200 | 64.82480 | 66.13390 | -1559.89301 | -2590.09786 | -869.68563  | 1 |
| 13517 | H | 74.86500 | 63.63880 | 67.02690 | -1583.21081 | 890.33354   | -2568.84720 | 1 |
| 13518 | H | 74.49800 | 63.28680 | 65.39090 | -1477.86579 | -1563.69327 | -2295.43074 | 1 |
| 13519 | C | 76.98200 | 66.54980 | 64.00090 | -311.36156  | -663.92101  | 541.95376   | 1 |
| 13520 | O | 76.81300 | 67.75280 | 63.82890 | 493.09283   | -568.06205  | 240.40009   | 1 |
| 13521 | N | 78.17500 | 65.95380 | 63.88490 | 669.45657   | 322.63646   | -400.50705  | 1 |
| 13522 | H | 78.34800 | 64.98480 | 64.04090 | -1952.26483 | -1901.95370 | 1571.45169  | 1 |
| 13523 | C | 79.38000 | 66.79380 | 63.80390 | 275.33721   | 269.64065   | -826.39842  | 1 |
| 13524 | H | 79.33300 | 67.52180 | 64.60090 | 435.59070   | -1565.41234 | -2694.06221 | 1 |
| 13525 | C | 80.72500 | 65.95580 | 63.88190 | 783.96094   | -408.45164  | -223.65934  | 1 |
| 13526 | H | 81.57500 | 66.47980 | 63.39390 | 952.56650   | 2545.70453  | 1584.37108  | 1 |
| 13527 | H | 80.62700 | 65.05980 | 63.23190 | -935.60924  | -1361.43225 | -2677.56677 | 1 |
| 13528 | C | 81.07600 | 65.46380 | 65.23690 | 756.59391   | -502.07413  | -83.29604   | 1 |
| 13529 | C | 81.17800 | 64.13780 | 65.68490 | -792.75719  | -351.50764  | -281.83227  | 1 |
| 13530 | H | 81.15400 | 63.23580 | 65.09090 | 409.44274   | 1620.97532  | -2665.14950 | 1 |
| 13531 | N | 81.54500 | 64.11680 | 67.03990 | -628.07833  | 249.30732   | -505.99977  | 1 |
| 13532 | H | 81.89000 | 63.41080 | 67.61890 | -799.53679  | 1852.52640  | -2413.94140 | 1 |
| 13533 | C | 81.67300 | 65.44380 | 67.41590 | 799.83290   | -399.14944  | -179.99461  | 1 |
| 13534 | C | 81.36600 | 66.28480 | 66.35090 | -261.53011  | -603.09923  | 631.92114   | 1 |
| 13535 | C | 81.43800 | 67.69780 | 66.49390 | 449.92375   | -625.12954  | -488.09085  | 1 |
| 13536 | H | 81.35400 | 68.36680 | 65.64990 | 2137.35506  | 1826.49301  | 1412.04209  | 1 |
| 13537 | C | 81.95200 | 68.19480 | 67.67890 | 795.64160   | -402.47773  | 190.83272   | 1 |
| 13538 | H | 82.20600 | 69.23880 | 67.78590 | -1100.00132 | 2894.86718  | 554.94806   | 1 |
| 13539 | C | 81.95100 | 65.96580 | 68.65390 | -476.80441  | 764.53960   | 139.95628   | 1 |
| 13540 | H | 82.12500 | 65.34080 | 69.51690 | 2152.14988  | 774.02491   | 2160.40796  | 1 |
| 13541 | C | 82.16800 | 67.36880 | 68.71590 | 112.25910   | -691.74216  | -583.38811  | 1 |
| 13542 | H | 82.68500 | 67.67280 | 69.61390 | -1251.40173 | -1419.70961 | 2513.29357  | 1 |
| 13543 | C | 79.54100 | 67.60780 | 62.56990 | -662.04951  | -398.77358  | -483.86060  | 1 |
| 13544 | O | 79.68900 | 68.83180 | 62.62190 | -72.69763   | 683.15442   | 389.41279   | 1 |
| 13545 | N | 79.43900 | 66.98780 | 61.39490 | 234.11088   | -475.89358  | -656.80263  | 1 |
| 13546 | H | 79.52900 | 65.99580 | 61.36090 | -1658.50736 | -143.70214  | 2669.63092  | 1 |
| 13547 | C | 79.40100 | 67.72880 | 60.09790 | 664.72391   | -587.29714  | 211.36507   | 1 |
| 13548 | H | 80.27400 | 68.36380 | 60.06790 | 816.95783   | 600.97156   | -2978.19397 | 1 |
| 13549 | C | 79.57800 | 66.71580 | 58.97690 | -89.51908   | 129.76712   | 898.10792   | 1 |
| 13550 | H | 79.06400 | 65.76680 | 59.23990 | 1520.52353  | 1979.92785  | 1914.71150  | 1 |
| 13551 | C | 79.02300 | 67.18080 | 57.59490 | -566.26586  | 586.52737   | 408.38661   | 1 |
| 13552 | H | 79.08700 | 66.33780 | 56.87390 | -745.45430  | -1568.61513 | 2623.35104  | 1 |
| 13553 | H | 77.97200 | 67.53780 | 57.64990 | 2928.32411  | 1084.36958  | -383.77957  | 1 |
| 13554 | H | 79.57700 | 68.09680 | 57.29790 | 2043.77050  | -2084.93708 | -1172.29081 | 1 |
| 13555 | C | 81.08100 | 66.50980 | 58.92390 | 388.43729   | 695.20120   | 444.14273   | 1 |
| 13556 | H | 81.56100 | 66.51280 | 59.92590 | 2721.90919  | -1233.68186 | 983.59831   | 1 |
| 13557 | H | 81.53800 | 67.31980 | 58.31590 | 1799.36522  | 2401.52655  | 945.08269   | 1 |
| 13558 | C | 81.48100 | 65.22680 | 58.17990 | 554.61258   | -314.94345  | -651.66442  | 1 |
| 13559 | H | 82.58100 | 65.23080 | 58.01990 | -548.99997  | -2333.92582 | -2037.06051 | 1 |
| 13560 | H | 81.14600 | 64.38880 | 58.82690 | -1062.72655 | 1845.77819  | 2315.58662  | 1 |
| 13561 | H | 81.07500 | 65.34680 | 57.15190 | -2526.76737 | -1845.25930 | -329.68320  | 1 |
| 13562 | C | 78.20300 | 68.68480 | 59.97390 | -169.06395  | 509.15556   | 737.31201   | 1 |
| 13563 | O | 78.39300 | 69.81780 | 59.50690 | -730.96421  | -163.19824  | 250.36949   | 1 |
| 13564 | N | 76.94300 | 68.38580 | 60.25590 | 382.34420   | -450.46081  | 602.96788   | 1 |
| 13565 | C | 76.40600 | 67.04980 | 60.23790 | 101.55111   | 39.63848    | -905.29949  | 1 |
| 13566 | H | 76.84500 | 66.50280 | 61.09990 | -35.26389   | -2364.76667 | -2074.81596 | 1 |
| 13567 | H | 76.61900 | 66.55080 | 59.26890 | -2215.49163 | 1831.81047  | -1278.39488 | 1 |
| 13568 | C | 75.89100 | 69.36780 | 60.47890 | -503.71622  | -382.96712  | -656.54944  | 1 |
| 13569 | H | 75.63800 | 69.83980 | 59.54090 | 2410.32531  | 1718.91546  | -1064.84167 | 1 |
| 13570 | C | 74.79500 | 68.58480 | 61.07990 | 322.65296   | -422.80851  | 740.66121   | 1 |

|       |   |          |          |          |             |             |             |   |
|-------|---|----------|----------|----------|-------------|-------------|-------------|---|
| 13571 | H | 74.84900 | 68.53780 | 62.18890 | -1040.70574 | -1901.65108 | -2280.10547 | 1 |
| 13572 | H | 73.81200 | 69.09380 | 60.98690 | 2242.03676  | -2148.05451 | -507.30583  | 1 |
| 13573 | C | 74.91000 | 67.23780 | 60.38990 | -325.40783  | -656.23778  | -543.05867  | 1 |
| 13574 | H | 74.48000 | 66.36180 | 60.92190 | 2405.11862  | 197.92356   | 2018.52840  | 1 |
| 13575 | H | 74.36300 | 67.34880 | 59.42990 | -56.49788   | 846.00936   | 3029.73636  | 1 |
| 13576 | C | 76.27700 | 70.60180 | 61.32290 | 703.01954   | -46.61631   | -578.82766  | 1 |
| 13577 | O | 75.93900 | 71.65980 | 60.85690 | -723.71387  | -201.97021  | -243.05039  | 1 |
| 13578 | N | 76.98300 | 70.49280 | 62.53090 | 441.73769   | 351.29978   | 627.79660   | 1 |
| 13579 | H | 77.22900 | 69.59880 | 62.89790 | -998.57522  | -2127.28062 | 2091.82956  | 1 |
| 13580 | C | 77.34300 | 71.60280 | 63.34590 | 51.77988    | 707.65465   | -572.70825  | 1 |
| 13581 | H | 76.43300 | 72.10680 | 63.63490 | 2898.13603  | -1172.21801 | -353.46674  | 1 |
| 13582 | C | 78.07100 | 71.11780 | 64.56590 | -253.11347  | 659.10138   | -577.03548  | 1 |
| 13583 | H | 77.40400 | 70.42680 | 65.12390 | -1411.15697 | -2314.43961 | -1596.94444 | 1 |
| 13584 | H | 78.32800 | 71.98480 | 65.21090 | -2709.75096 | 367.84358   | 1555.68861  | 1 |
| 13585 | H | 79.06500 | 70.67980 | 64.33290 | -3067.13397 | 137.45548   | -687.03816  | 1 |
| 13586 | C | 78.26200 | 72.58380 | 62.57290 | 682.49780   | 447.18425   | 407.03071   | 1 |
| 13587 | O | 77.99600 | 73.79480 | 62.52490 | -478.25785  | 550.39124   | 303.25920   | 1 |
| 13588 | N | 79.28600 | 72.04380 | 61.88190 | -190.06427  | -631.23312  | -527.34487  | 1 |
| 13589 | H | 79.45000 | 71.06180 | 61.82190 | 1714.14310  | 1948.78440  | -1778.25167 | 1 |
| 13590 | C | 80.16600 | 72.83480 | 60.97290 | -481.45767  | -367.76633  | 681.46712   | 1 |
| 13591 | H | 80.56600 | 73.62780 | 61.58790 | 1.92333     | 3141.55384  | -169.88815  | 1 |
| 13592 | C | 81.26100 | 71.99780 | 60.26490 | -642.24492  | -600.79952  | 240.85763   | 1 |
| 13593 | H | 80.87300 | 71.21680 | 59.57690 | 1253.90065  | -2877.67719 | -211.97497  | 1 |
| 13594 | H | 81.86300 | 72.79880 | 59.78490 | 1351.93614  | -2410.42112 | -1503.45100 | 1 |
| 13595 | C | 82.21600 | 71.17680 | 61.14290 | 37.20441    | 698.82925   | 584.55497   | 1 |
| 13596 | H | 81.67600 | 70.33280 | 61.62390 | -1335.69003 | -1079.49409 | -2636.06731 | 1 |
| 13597 | C | 83.30900 | 70.67280 | 60.22790 | -647.67314  | -293.02833  | 571.05596   | 1 |
| 13598 | H | 82.82200 | 70.02180 | 59.46990 | -334.40520  | 1911.46601  | 2476.42829  | 1 |
| 13599 | H | 83.81700 | 71.51980 | 59.71990 | -1094.50796 | 2151.03179  | 2018.25192  | 1 |
| 13600 | H | 84.03400 | 70.09680 | 60.84190 | 2169.42575  | -2232.25064 | -457.02871  | 1 |
| 13601 | C | 82.83200 | 72.00880 | 62.34890 | -734.31262  | -29.66428   | -539.77404  | 1 |
| 13602 | H | 81.97800 | 72.18080 | 63.03890 | 1618.46271  | 2641.76034  | 547.63768   | 1 |
| 13603 | H | 83.61500 | 71.40980 | 62.85990 | 1034.92887  | 1218.91969  | -2709.49871 | 1 |
| 13604 | H | 83.28400 | 72.93580 | 61.93590 | 904.06768   | 2719.56616  | 1298.01685  | 1 |
| 13605 | C | 79.39800 | 73.56380 | 59.85490 | -412.89558  | 811.61597   | -47.41066   | 1 |
| 13606 | O | 79.60700 | 74.74080 | 59.58190 | -265.26780  | 686.81507   | 285.56135   | 1 |
| 13607 | N | 78.44400 | 72.86480 | 59.19490 | 630.45625   | 456.03448   | -327.45955  | 1 |
| 13608 | H | 78.25100 | 71.91980 | 59.44990 | -2228.30596 | 1238.06642  | 1843.92796  | 1 |
| 13609 | C | 77.51900 | 73.42580 | 58.26290 | 466.52900   | -601.72352  | 501.72752   | 1 |
| 13610 | H | 78.15500 | 73.93980 | 57.55690 | 1337.24937  | -2722.63665 | -835.00899  | 1 |
| 13611 | C | 76.60000 | 72.37380 | 57.56490 | 309.95694   | 430.93829   | -741.39725  | 1 |
| 13612 | H | 75.90000 | 72.97980 | 56.94990 | 342.40933   | -2245.93785 | 2176.40650  | 1 |
| 13613 | H | 76.05600 | 71.96080 | 58.44090 | 1084.66154  | 928.89903   | -2803.36979 | 1 |
| 13614 | C | 77.41200 | 71.39580 | 56.68990 | 866.46906   | 252.80207   | 129.51252   | 1 |
| 13615 | H | 78.23700 | 70.92380 | 57.26490 | -1870.34412 | -1592.98019 | 1965.31250  | 1 |
| 13616 | C | 76.51500 | 70.32580 | 56.03890 | -579.50716  | -525.10325  | 468.92328   | 1 |
| 13617 | H | 75.79800 | 70.79480 | 55.33190 | 1948.98959  | -2450.34638 | 308.97967   | 1 |
| 13618 | H | 77.06300 | 69.52180 | 55.50390 | 935.83366   | -2836.40874 | 988.54796   | 1 |
| 13619 | H | 76.02800 | 69.82180 | 56.90090 | -2204.04567 | 997.94039   | -2011.10017 | 1 |
| 13620 | C | 78.08700 | 72.20080 | 55.55590 | -548.67517  | -215.89980  | 695.55290   | 1 |
| 13621 | H | 78.93000 | 72.84180 | 55.89090 | 2446.53965  | -890.45067  | -1766.28638 | 1 |
| 13622 | H | 77.35600 | 72.90380 | 55.10290 | -19.42709   | -3080.31590 | -639.92405  | 1 |
| 13623 | H | 78.47800 | 71.55980 | 54.73690 | -1972.30071 | -1450.31055 | 1976.07071  | 1 |
| 13624 | C | 76.65800 | 74.51080 | 58.81890 | 231.98561   | 562.33357   | -679.27508  | 1 |
| 13625 | O | 76.44500 | 75.53780 | 58.13990 | 714.06837   | -40.17815   | -334.84222  | 1 |
| 13626 | N | 76.13800 | 74.39180 | 60.04090 | 617.36970   | 286.62132   | -499.37476  | 1 |
| 13627 | H | 76.10800 | 73.55980 | 60.58990 | 2165.59712  | -1853.48418 | -1331.54487 | 1 |
| 13628 | C | 75.18900 | 75.41980 | 60.53390 | 701.13198   | -525.05250  | 253.34724   | 1 |
| 13629 | H | 74.52600 | 75.63580 | 59.70990 | 942.78482   | -2944.10920 | 584.46903   | 1 |
| 13630 | C | 74.32700 | 74.98880 | 61.72290 | -449.78881  | -343.47278  | -714.95978  | 1 |
| 13631 | H | 73.68700 | 75.85480 | 61.99690 | 2635.01368  | 188.31622   | 1708.64454  | 1 |
| 13632 | H | 75.08200 | 74.73680 | 62.49790 | -2836.22068 | 1121.91519  | 771.61179   | 1 |



|       |   |          |          |          |             |             |             |   |
|-------|---|----------|----------|----------|-------------|-------------|-------------|---|
| 13633 | C | 73.43400 | 73.79580 | 61.37990 | -400.29774  | 366.91327   | 732.52125   | 1 |
| 13634 | H | 73.87200 | 73.05280 | 60.67990 | -2481.98041 | -1112.62012 | 1581.16285  | 1 |
| 13635 | C | 73.20600 | 72.96180 | 62.64590 | 524.56692   | 373.61649   | -645.51628  | 1 |
| 13636 | H | 72.47500 | 72.15780 | 62.41390 | -135.19921  | 1449.58460  | -2789.02347 | 1 |
| 13637 | H | 72.89900 | 73.58880 | 63.51090 | -219.67440  | -1200.96979 | 2899.59324  | 1 |
| 13638 | H | 74.09900 | 72.35780 | 62.91390 | 1564.87649  | 1580.78756  | -2224.97157 | 1 |
| 13639 | C | 72.04600 | 74.18280 | 60.80190 | -273.69235  | 416.04256   | 763.84036   | 1 |
| 13640 | H | 71.38500 | 73.30880 | 60.62390 | 749.99034   | -2806.24561 | 1208.60509  | 1 |
| 13641 | H | 71.56400 | 75.00680 | 61.36990 | 1626.87072  | -1973.16836 | -1832.51863 | 1 |
| 13642 | H | 72.15400 | 74.59180 | 59.77490 | -2157.38483 | -596.93883  | -2210.78741 | 1 |
| 13643 | C | 75.85100 | 76.71480 | 60.91390 | 422.05272   | -388.77636  | -708.64338  | 1 |
| 13644 | O | 75.24100 | 77.76980 | 61.06290 | -536.29828  | 147.64734   | 560.54585   | 1 |
| 13645 | N | 77.17700 | 76.61080 | 61.06990 | 435.26067   | 426.40441   | -584.29420  | 1 |
| 13646 | H | 77.61500 | 75.74080 | 60.85690 | 3076.65370  | -173.31295  | 634.34286   | 1 |
| 13647 | C | 78.06900 | 77.62580 | 61.56690 | -385.31104  | 623.44216   | -542.50003  | 1 |
| 13648 | H | 77.44900 | 78.34180 | 62.08490 | 1219.20639  | 2253.68843  | 1825.55484  | 1 |
| 13649 | C | 79.05700 | 77.17280 | 62.62790 | -209.66098  | -676.59296  | 574.20837   | 1 |
| 13650 | H | 79.78300 | 77.96780 | 62.90290 | -2046.86423 | 791.12563   | 2254.48293  | 1 |
| 13651 | O | 79.81600 | 75.99880 | 62.30490 | -537.29814  | 487.37630   | -312.09339  | 1 |
| 13652 | H | 79.18000 | 75.28680 | 62.20490 | 1726.20155  | -1706.24308 | 2001.79644  | 1 |
| 13653 | C | 78.13500 | 76.76780 | 63.83490 | 244.30263   | -860.47520  | 177.05836   | 1 |
| 13654 | H | 77.36500 | 77.55080 | 64.00490 | -1786.84574 | -1433.28235 | -2156.64328 | 1 |
| 13655 | H | 78.74600 | 76.71880 | 64.76190 | -1218.63170 | 2026.93918  | 2074.77241  | 1 |
| 13656 | H | 77.51500 | 75.84680 | 63.79690 | -466.71224  | -692.76123  | 3033.23059  | 1 |
| 13657 | C | 78.80100 | 78.28280 | 60.43990 | -665.85034  | 456.81807   | -423.57004  | 1 |
| 13658 | O | 79.82000 | 78.91780 | 60.65690 | -552.27533  | 557.56958   | 87.95085    | 1 |
| 13659 | N | 78.35900 | 78.17880 | 59.20190 | -162.28026  | -574.47720  | 596.91989   | 1 |
| 13660 | H | 77.57900 | 77.59780 | 58.98190 | -367.52315  | -1901.80390 | -2479.17222 | 1 |
| 13661 | C | 78.86300 | 79.05080 | 58.16390 | -14.04506   | -447.73381  | -794.22174  | 1 |
| 13662 | H | 79.93700 | 78.96980 | 58.24790 | -1992.67779 | -1609.82420 | 1826.45216  | 1 |
| 13663 | C | 78.55500 | 78.55580 | 56.73090 | 655.95336   | -529.40855  | -347.71078  | 1 |
| 13664 | H | 77.45400 | 78.54380 | 56.58590 | -2215.42451 | 2227.87174  | -163.42572  | 1 |
| 13665 | C | 79.23400 | 79.47680 | 55.69190 | -159.48417  | 502.42681   | 744.03166   | 1 |
| 13666 | H | 79.23300 | 79.06580 | 54.66090 | 2879.15674  | -1266.80384 | 62.37558    | 1 |
| 13667 | H | 78.67300 | 80.41380 | 55.48890 | 3132.71444  | -55.29409   | -285.07721  | 1 |
| 13668 | H | 80.26600 | 79.78080 | 55.97290 | -366.21256  | -1156.54205 | -2902.84775 | 1 |
| 13669 | C | 79.06900 | 77.10780 | 56.54390 | -394.22383  | 621.10379   | -538.76587  | 1 |
| 13670 | H | 79.00500 | 76.45980 | 57.44390 | -2499.35262 | -1550.88304 | 1116.34425  | 1 |
| 13671 | H | 80.15200 | 77.14780 | 56.29690 | 700.62728   | 2262.72359  | -2070.61093 | 1 |
| 13672 | C | 78.26600 | 76.33080 | 55.51690 | -565.96897  | -633.65471  | -331.07678  | 1 |
| 13673 | H | 78.23500 | 76.94280 | 54.59090 | -1800.90823 | -2245.03912 | -1270.73015 | 1 |
| 13674 | H | 77.16900 | 76.27180 | 55.68190 | 2418.72941  | -1963.84501 | 437.36376   | 1 |
| 13675 | H | 78.74700 | 75.33680 | 55.39290 | 667.24415   | -2148.85118 | 2198.96568  | 1 |
| 13676 | C | 78.55300 | 80.52180 | 58.35990 | 641.49862   | -13.07469   | -647.88856  | 1 |
| 13677 | O | 79.45400 | 81.34280 | 58.28290 | 429.95962   | -391.11820  | -534.59191  | 1 |
| 13678 | N | 77.30800 | 80.94280 | 58.79090 | -701.89462  | 110.25088   | 455.91773   | 1 |
| 13679 | C | 76.06600 | 80.31780 | 58.47990 | -458.25423  | 444.20150   | -651.25962  | 1 |
| 13680 | H | 75.80500 | 79.49080 | 59.17390 | 1834.49021  | 2545.03429  | 235.94993   | 1 |
| 13681 | H | 76.09400 | 79.92480 | 57.44090 | -2289.01874 | 1680.45934  | 1354.50206  | 1 |
| 13682 | C | 77.11200 | 82.34380 | 59.28390 | 685.39954   | 588.08551   | 125.83284   | 1 |
| 13683 | H | 77.25900 | 83.06080 | 58.48990 | -2803.66106 | -1131.60613 | -870.16002  | 1 |
| 13684 | C | 75.62100 | 82.35380 | 59.68890 | 265.07419   | 809.50247   | -325.41118  | 1 |
| 13685 | H | 75.54600 | 82.00980 | 60.74290 | -1970.85200 | 2004.33411  | -1413.01571 | 1 |
| 13686 | H | 75.08500 | 83.32580 | 59.65190 | -1975.54576 | 246.85397   | 2436.08462  | 1 |
| 13687 | C | 75.00600 | 81.34580 | 58.64290 | -729.52436  | 511.26967   | -194.54699  | 1 |
| 13688 | H | 74.62200 | 81.75380 | 57.68290 | 27.38355    | 2677.86276  | 1651.21997  | 1 |
| 13689 | H | 74.09500 | 80.94680 | 59.13790 | -1442.41782 | -2487.04692 | -1277.59722 | 1 |
| 13690 | C | 78.03700 | 82.78180 | 60.40490 | -288.39612  | -864.61200  | -26.92155   | 1 |
| 13691 | O | 78.48700 | 83.90380 | 60.44290 | 71.24541    | -687.37751  | -382.18253  | 1 |
| 13692 | N | 78.30300 | 81.91980 | 61.40090 | 198.69635   | 742.53901   | 349.03850   | 1 |
| 13693 | H | 77.87300 | 81.02280 | 61.32790 | -2899.48114 | 1090.08704  | 550.40495   | 1 |
| 13694 | C | 79.25100 | 82.16380 | 62.47790 | -722.98745  | 417.40509   | -366.76032  | 1 |

|       |   |          |          |          |             |             |             |   |
|-------|---|----------|----------|----------|-------------|-------------|-------------|---|
| 13695 | H | 78.89200 | 83.09180 | 62.89790 | 1628.09794  | -2323.51493 | -1359.70648 | 1 |
| 13696 | C | 79.28600 | 81.04580 | 63.50590 | 819.55453   | 342.94851   | 205.34772   | 1 |
| 13697 | H | 80.16800 | 81.03780 | 64.18090 | -2671.41909 | 1114.04009  | -1233.15082 | 1 |
| 13698 | H | 79.41000 | 80.13580 | 62.87990 | -1620.82808 | -1182.19392 | 2423.54288  | 1 |
| 13699 | C | 78.00000 | 80.97680 | 64.30490 | 482.25145   | 637.00377   | -439.44368  | 1 |
| 13700 | O | 77.75200 | 81.96580 | 65.02190 | -547.32903  | 563.75195   | 79.00572    | 1 |
| 13701 | O | 77.25500 | 79.98480 | 64.24790 | 471.88587   | -373.17630  | 511.55685   | 1 |
| 13702 | C | 80.65900 | 82.48880 | 61.91190 | -606.37378  | -460.62791  | 501.58127   | 1 |
| 13703 | O | 81.35100 | 83.42380 | 62.34390 | 426.03667   | -539.98626  | 387.98817   | 1 |
| 13704 | N | 81.09300 | 81.65880 | 60.95190 | 222.40387   | 228.73368   | 781.59434   | 1 |
| 13705 | H | 80.60900 | 80.81980 | 60.71590 | 878.16134   | -204.40596  | -3014.17934 | 1 |
| 13706 | C | 82.35100 | 81.84880 | 60.18090 | -65.79329   | -908.34534  | 45.06656    | 1 |
| 13707 | H | 83.14500 | 81.81080 | 60.91190 | 960.33334   | -2233.31578 | -1997.06954 | 1 |
| 13708 | C | 82.61200 | 80.57680 | 59.36790 | 656.24266   | -411.00044  | -481.53422  | 1 |
| 13709 | H | 81.68500 | 80.38480 | 58.78690 | 2137.83445  | 256.08662   | -2293.97248 | 1 |
| 13710 | H | 82.65500 | 79.66680 | 60.00390 | 1811.37974  | 2258.80147  | 1230.83126  | 1 |
| 13711 | C | 83.86900 | 80.51280 | 58.43890 | 592.11703   | -547.29352  | -425.81478  | 1 |
| 13712 | C | 85.11900 | 81.10280 | 58.74990 | 458.80924   | -635.21661  | -466.30992  | 1 |
| 13713 | H | 85.29600 | 81.67880 | 59.64590 | -1969.18704 | -1703.49115 | 1765.96900  | 1 |
| 13714 | C | 86.16200 | 81.10780 | 57.83790 | -577.35659  | -705.72029  | -8.32061    | 1 |
| 13715 | H | 87.06200 | 81.63480 | 58.11890 | 917.19045   | 2209.95698  | -2042.81131 | 1 |
| 13716 | C | 85.98200 | 80.43580 | 56.65890 | -883.29316  | 208.07235   | 89.16331    | 1 |
| 13717 | H | 86.69700 | 80.46980 | 55.84990 | -1065.22346 | -984.63313  | -2791.77772 | 1 |
| 13718 | C | 83.79600 | 79.72480 | 57.31990 | 462.88303   | 622.13985   | -479.72107  | 1 |
| 13719 | H | 82.86100 | 79.25980 | 57.04390 | -888.21074  | 1701.64388  | -2492.73264 | 1 |
| 13720 | C | 84.80600 | 79.76980 | 56.36290 | 531.78267   | -487.63267  | -557.55948  | 1 |
| 13721 | H | 84.81800 | 79.17080 | 55.46490 | -2241.90357 | -1139.90078 | -1890.16423 | 1 |
| 13722 | C | 82.49700 | 83.11280 | 59.39990 | -4.58079    | -673.93494  | -614.20006  | 1 |
| 13723 | O | 83.51000 | 83.80280 | 59.50090 | 289.26115   | -607.22467  | 413.80360   | 1 |
| 13724 | N | 81.49500 | 83.40680 | 58.56490 | -483.96202  | -633.02836  | -278.79768  | 1 |
| 13725 | H | 80.75700 | 82.74780 | 58.43890 | -2093.70205 | -2006.71631 | 1219.72440  | 1 |
| 13726 | C | 81.46900 | 84.64280 | 57.71890 | 451.47373   | -784.39792  | 111.09623   | 1 |
| 13727 | H | 82.41100 | 84.77380 | 57.20590 | -1818.09101 | -1530.39103 | -2061.71642 | 1 |
| 13728 | C | 80.38000 | 84.70980 | 56.67890 | 591.42356   | -262.21945  | -642.58084  | 1 |
| 13729 | H | 79.41800 | 84.79380 | 57.22890 | -1933.84250 | -1014.42248 | -2264.82372 | 1 |
| 13730 | C | 80.25793 | 86.02367 | 55.81110 | 152.05830   | 286.49608   | 5.03143     | 1 |
| 13731 | H | 79.30471 | 86.07443 | 55.21362 | -2701.44667 | -3313.63133 | 973.14526   | 1 |
| 13732 | H | 81.10588 | 86.03791 | 55.08126 | 1804.05332  | 1807.51652  | -2381.84338 | 1 |
| 13733 | H | 80.40477 | 86.92900 | 56.47901 | 590.04437   | -2553.56804 | -2216.63615 | 1 |
| 13734 | C | 80.27800 | 83.41680 | 55.77490 | 71.22585    | -730.26392  | 541.38017   | 1 |
| 13735 | H | 80.08400 | 82.53880 | 56.42690 | 1881.30631  | 2002.94117  | -1532.03769 | 1 |
| 13736 | H | 81.26700 | 83.29280 | 55.28390 | 586.69067   | 2093.17112  | 2274.34715  | 1 |
| 13737 | C | 79.15000 | 83.46480 | 54.79990 | 521.37426   | -376.54092  | -646.40298  | 1 |
| 13738 | H | 79.31000 | 82.70080 | 54.00990 | -857.53232  | 1957.92398  | 2308.54895  | 1 |
| 13739 | H | 79.14200 | 84.43280 | 54.25390 | 1805.22892  | -574.56076  | -2511.82299 | 1 |
| 13740 | H | 78.13300 | 83.27280 | 55.20590 | 1499.02114  | -2753.28145 | -265.71247  | 1 |
| 13741 | C | 81.29435 | 85.95993 | 58.66052 | -390.22823  | -578.25712  | 299.80814   | 1 |
| 13742 | O | 81.89151 | 86.94172 | 58.29162 | -6.60191    | 449.95666   | -513.31653  | 1 |
| 13743 | N | 80.41537 | 85.80258 | 59.66654 | 364.71777   | -488.14600  | 287.00339   | 1 |
| 13744 | H | 79.83920 | 84.96741 | 59.94694 | -2753.72157 | -1335.81653 | 1386.98916  | 1 |
| 13745 | C | 79.97046 | 87.02145 | 60.34127 | 1214.40645  | -492.49888  | -160.94696  | 1 |
| 13746 | H | 80.32923 | 87.84327 | 59.63239 | -1237.54963 | 451.72784   | 764.24661   | 1 |
| 13747 | C | 78.35519 | 86.93138 | 60.43238 | -1146.07183 | 236.42253   | 340.45094   | 1 |
| 13748 | H | 77.91407 | 86.01865 | 60.90249 | -881.06880  | -1694.12530 | -616.81141  | 1 |
| 13749 | H | 77.95487 | 87.82723 | 61.03258 | -312.13728  | -970.42000  | -1300.71558 | 1 |
| 13750 | C | 77.79842 | 86.98275 | 59.00642 | 124.12464   | 331.04572   | -398.19970  | 1 |
| 13751 | C | 77.92140 | 88.13552 | 58.15426 | 279.58209   | -271.13171  | -279.05140  | 1 |
| 13752 | H | 78.62129 | 88.99292 | 58.30965 | 186.35609   | 340.40999   | -183.77102  | 1 |
| 13753 | C | 77.16761 | 88.12173 | 57.01139 | -272.25838  | 246.31376   | 888.09348   | 1 |
| 13754 | H | 77.30293 | 89.01223 | 56.34801 | -3861.05286 | 2241.08160  | 1098.58271  | 1 |
| 13755 | C | 76.28779 | 87.05424 | 56.56855 | -397.78120  | 425.90058   | -300.50926  | 1 |
| 13756 | H | 75.61827 | 87.11137 | 55.73109 | 4620.57658  | 2625.41654  | -800.62205  | 1 |

|       |   |          |          |          |             |             |             |   |
|-------|---|----------|----------|----------|-------------|-------------|-------------|---|
| 13757 | C | 76.98858 | 85.86382 | 58.67400 | -94.04236   | -860.37524  | -309.92622  | 1 |
| 13758 | H | 76.72968 | 85.00935 | 59.26013 | 945.61834   | -1090.94890 | 1755.48046  | 1 |
| 13759 | C | 76.37144 | 85.89302 | 57.38579 | -903.64696  | 56.38484    | -99.25184   | 1 |
| 13760 | H | 75.78178 | 85.04604 | 57.10891 | -3130.98711 | 2364.19423  | 1100.31398  | 1 |
| 13761 | C | 80.68025 | 87.14561 | 61.75012 | 206.31539   | 410.31805   | 178.03756   | 1 |
| 13762 | O | 80.28711 | 87.97060 | 62.60202 | 271.78208   | -583.03061  | -336.56969  | 1 |
| 13763 | N | 81.67938 | 86.28424 | 62.05618 | 128.40062   | -629.98501  | 577.96186   | 1 |
| 13764 | H | 82.08217 | 85.84994 | 61.19803 | -1110.78105 | 1889.71553  | 3708.19309  | 1 |
| 13765 | C | 82.47920 | 86.74128 | 63.15249 | -222.02422  | 629.66839   | 718.55145   | 1 |
| 13766 | H | 81.76878 | 87.20451 | 63.93093 | -2173.26376 | -1278.86691 | 2222.48081  | 1 |
| 13767 | C | 83.18066 | 85.43270 | 63.72016 | -618.94000  | 401.05419   | 10.38351    | 1 |
| 13768 | H | 83.99242 | 85.58321 | 64.45376 | 2371.72654  | 826.85817   | 340.83449   | 1 |
| 13769 | H | 83.68000 | 84.87680 | 62.92990 | -2797.18605 | -1173.47946 | 834.81879   | 1 |
| 13770 | H | 82.44800 | 84.78880 | 64.16490 | 741.18275   | 1458.74523  | -2687.18007 | 1 |
| 13771 | C | 83.76004 | 87.61644 | 62.65060 | -98.21619   | 1134.53698  | -889.64057  | 1 |
| 13772 | O | 84.35293 | 87.29911 | 61.60448 | -34.26165   | -754.21393  | 775.31920   | 1 |
| 13773 | N | 84.08339 | 88.59608 | 63.47357 | 164.17466   | -612.97198  | 545.79879   | 1 |
| 13774 | H | 83.66431 | 88.66293 | 64.38778 | 2004.50951  | -3477.41028 | -1842.50398 | 1 |
| 13775 | C | 84.63693 | 89.86638 | 63.11578 | -444.38399  | -473.46763  | 478.87003   | 1 |
| 13776 | H | 85.30494 | 89.68176 | 62.29422 | -1968.17386 | -1574.68950 | -507.83829  | 1 |
| 13777 | C | 83.59925 | 90.96228 | 62.61223 | -30.98287   | 93.12932    | -191.02613  | 1 |
| 13778 | H | 83.16035 | 90.52913 | 61.71960 | 1388.60028  | 1507.95988  | 54.92656    | 1 |
| 13779 | H | 84.24385 | 91.81706 | 62.31844 | -102.01177  | 20.07114    | -1692.39431 | 1 |
| 13780 | C | 82.53574 | 91.24399 | 63.73787 | 483.76293   | 416.75690   | -201.04841  | 1 |
| 13781 | O | 82.32141 | 92.35334 | 64.15342 | 11.57749    | 182.31595   | -294.95203  | 1 |
| 13782 | N | 81.75757 | 90.13219 | 64.02115 | 244.71723   | 114.28038   | 118.99073   | 1 |
| 13783 | H | 81.70092 | 89.31338 | 63.44789 | 518.41530   | 1560.74323  | -4433.04225 | 1 |
| 13784 | H | 80.92930 | 90.26089 | 64.57133 | 4083.31629  | -819.33372  | 40.44073    | 1 |
| 13785 | C | 85.10155 | 90.48922 | 64.54881 | -1204.20372 | -406.77630  | 440.81798   | 1 |
| 13786 | O | 84.43821 | 90.19666 | 65.57844 | 397.53133   | -294.81116  | -86.52722   | 1 |
| 13787 | N | 86.24913 | 91.08130 | 64.44759 | 501.53053   | 858.18479   | 317.67063   | 1 |
| 13788 | H | 86.85425 | 91.30843 | 63.63504 | 3786.20782  | 815.10454   | -1190.80684 | 1 |
| 13789 | C | 86.61197 | 91.75782 | 65.62988 | 210.56494   | -190.83085  | -48.34686   | 1 |
| 13790 | H | 85.79658 | 91.34270 | 66.32626 | -2584.28099 | -997.96794  | 237.38297   | 1 |
| 13791 | C | 88.15304 | 91.37745 | 65.91771 | -545.78515  | -226.05921  | 222.25244   | 1 |
| 13792 | H | 88.76741 | 91.87305 | 65.12183 | -3332.85581 | 4948.54741  | 1028.77705  | 1 |
| 13793 | C | 88.45888 | 91.78325 | 67.41398 | 588.25888   | 77.80743    | 57.29265    | 1 |
| 13794 | H | 89.44196 | 91.33868 | 67.78258 | 198.38172   | -3126.65912 | -361.37154  | 1 |
| 13795 | H | 87.64811 | 91.45676 | 68.14113 | 1478.55607  | -1201.50283 | 1961.85493  | 1 |
| 13796 | H | 88.56085 | 92.86583 | 67.66639 | -321.66120  | -2998.52293 | 2333.10099  | 1 |
| 13797 | C | 88.20650 | 89.83539 | 65.85210 | -1277.98494 | -512.49220  | -139.17996  | 1 |
| 13798 | H | 87.39790 | 89.41262 | 66.54247 | -335.37658  | 487.63297   | 1312.88896  | 1 |
| 13799 | H | 87.99500 | 89.43616 | 64.81481 | -3396.75012 | 1342.10122  | -1987.91895 | 1 |
| 13800 | H | 89.18269 | 89.44240 | 66.17054 | 1172.30064  | -1718.15149 | -3010.81853 | 1 |
| 13801 | C | 86.23052 | 93.39100 | 65.56741 | 1081.94507  | -624.56753  | -412.30269  | 1 |
| 13802 | O | 86.70543 | 94.22920 | 64.83266 | -313.63384  | 441.30314   | 425.29857   | 1 |
| 13803 | N | 85.26369 | 93.39286 | 66.50999 | 472.92943   | 70.40719    | -72.47908   | 1 |
| 13804 | H | 85.08038 | 92.55817 | 67.16013 | -2594.92729 | -2947.68339 | 936.16404   | 1 |
| 13805 | C | 84.63604 | 94.61790 | 66.76159 | 112.65458   | -420.50054  | -469.85325  | 1 |
| 13806 | H | 84.93359 | 95.16721 | 65.80356 | -58.26690   | 3842.82686  | -780.99220  | 1 |
| 13807 | C | 83.08769 | 94.33753 | 66.87164 | -411.31152  | -122.14401  | 447.83415   | 1 |
| 13808 | H | 83.06990 | 93.49416 | 67.62064 | -2136.91643 | 1529.88850  | 1468.94241  | 1 |
| 13809 | H | 82.68370 | 93.90251 | 65.92429 | 809.43220   | -3942.73502 | 2264.45261  | 1 |
| 13810 | O | 82.08013 | 95.48237 | 67.20170 | -784.78492  | 211.48561   | -189.93261  | 1 |
| 13811 | H | 81.66656 | 95.07434 | 67.95154 | -2088.78625 | 2771.13716  | 2261.35533  | 1 |
| 13812 | C | 85.27131 | 95.14918 | 68.21520 | -501.95710  | 102.88246   | 745.94236   | 1 |
| 13813 | O | 86.40385 | 94.85537 | 68.54619 | -0.30646    | -483.20548  | -672.20373  | 1 |
| 13814 | N | 84.32698 | 95.79688 | 68.92599 | -334.66801  | 80.17726    | -437.52633  | 1 |
| 13815 | H | 83.42916 | 96.05743 | 68.50606 | 1340.25544  | 1845.84127  | 752.57755   | 1 |
| 13816 | C | 84.85954 | 96.66255 | 69.90330 | 431.26815   | 1137.86817  | -400.53202  | 1 |
| 13817 | H | 85.66897 | 96.16383 | 70.38492 | -3081.00602 | -1336.20587 | -580.58205  | 1 |
| 13818 | C | 85.21801 | 98.11703 | 69.20364 | 214.16633   | 841.05239   | 62.51854    | 1 |

|       |   |          |           |          |             |             |             |   |
|-------|---|----------|-----------|----------|-------------|-------------|-------------|---|
| 13819 | H | 84.46664 | 98.88393  | 69.47873 | -1008.15524 | -1872.12058 | -907.57401  | 1 |
| 13820 | H | 85.12111 | 98.10544  | 68.09640 | -2309.92687 | -82.90843   | -1383.16708 | 1 |
| 13821 | C | 86.59361 | 98.69145  | 69.53667 | -881.67244  | -1080.44986 | -632.31648  | 1 |
| 13822 | H | 86.47466 | 99.76758  | 69.63215 | -676.11804  | -841.44896  | -2021.55685 | 1 |
| 13823 | H | 86.88485 | 98.34915  | 70.55372 | 4331.20222  | 1497.04376  | -1020.88408 | 1 |
| 13824 | C | 87.60506 | 98.19042  | 68.28484 | 101.36738   | 34.95869    | -238.65941  | 1 |
| 13825 | O | 88.72763 | 97.82844  | 68.61874 | -73.92511   | 366.33439   | -16.12614   | 1 |
| 13826 | O | 87.23475 | 98.25456  | 67.10765 | 320.99322   | -421.02995  | -325.03561  | 1 |
| 13827 | C | 83.57589 | 96.83848  | 70.83590 | 619.32610   | 206.10760   | -1346.72166 | 1 |
| 13828 | O | 82.47745 | 97.14854  | 70.47331 | -378.20383  | 330.56636   | 222.23510   | 1 |
| 13829 | N | 83.97472 | 96.62628  | 72.12168 | -327.08154  | 118.82115   | -338.85577  | 1 |
| 13830 | H | 84.97987 | 96.27628  | 72.41781 | -1256.70126 | -57.42501   | 72.19580    | 1 |
| 13831 | C | 82.95302 | 96.81220  | 73.14552 | 866.75144   | 291.80368   | 34.04728    | 1 |
| 13832 | H | 82.33766 | 97.70080  | 72.77315 | 1866.18357  | 53.91338    | 874.16402   | 1 |
| 13833 | C | 82.10956 | 95.55223  | 73.41097 | 439.38785   | 147.74684   | -426.24477  | 1 |
| 13834 | H | 81.56413 | 95.59773  | 74.37700 | 2188.26633  | -48.14329   | -1914.11467 | 1 |
| 13835 | H | 82.75591 | 94.63314  | 73.47517 | 630.85216   | 2598.32969  | 2683.39043  | 1 |
| 13836 | H | 81.42190 | 95.39235  | 72.63287 | -766.66350  | 2237.07381  | -2697.90445 | 1 |
| 13837 | C | 83.69938 | 96.97051  | 74.58027 | -330.18957  | -77.31721   | -437.62154  | 1 |
| 13838 | O | 84.63730 | 96.25694  | 74.78810 | 411.36312   | -383.38989  | 874.17113   | 1 |
| 13839 | N | 83.12476 | 97.81517  | 75.49926 | 152.58612   | -358.47878  | -762.18327  | 1 |
| 13840 | H | 82.15302 | 98.17070  | 75.35562 | 508.86774   | -2440.44904 | -418.23736  | 1 |
| 13841 | C | 84.00948 | 98.63231  | 76.25728 | 653.82990   | 2.66434     | 180.85428   | 1 |
| 13842 | H | 83.39411 | 99.35706  | 76.78559 | 5004.44898  | -217.72382  | -1173.26984 | 1 |
| 13843 | C | 84.82637 | 97.72259  | 77.28442 | 959.96019   | 2.21559     | 94.47996    | 1 |
| 13844 | H | 85.03756 | 96.76464  | 76.87409 | -410.37105  | -402.61115  | 1733.81981  | 1 |
| 13845 | H | 85.76942 | 98.31722  | 77.32357 | -90.07469   | 1349.66446  | 2367.11496  | 1 |
| 13846 | C | 83.94494 | 97.72346  | 78.62320 | -68.44274   | -340.31864  | -467.13575  | 1 |
| 13847 | O | 83.80673 | 96.78695  | 79.35507 | 539.37811   | -153.73789  | 37.43074    | 1 |
| 13848 | O | 83.30060 | 98.99011  | 78.95600 | -655.59873  | 81.13477    | -861.20575  | 1 |
| 13849 | C | 84.94886 | 99.46318  | 75.26400 | -760.51575  | 173.59273   | -271.85630  | 1 |
| 13850 | O | 86.08213 | 99.69553  | 75.70452 | 406.46738   | 1130.21747  | -776.48921  | 1 |
| 13851 | N | 84.50086 | 99.69667  | 74.03077 | 442.21739   | -751.87914  | -1307.29913 | 1 |
| 13852 | H | 83.48402 | 99.61419  | 73.75585 | 12.30853    | -1388.16587 | 477.71456   | 1 |
| 13853 | C | 85.34719 | 100.39754 | 73.11586 | -716.33433  | 786.75319   | -344.41980  | 1 |
| 13854 | H | 84.56615 | 100.65659 | 72.38967 | -321.26123  | 1509.88195  | 609.69574   | 1 |
| 13855 | C | 85.93221 | 101.60970 | 73.89625 | 411.16964   | -124.18927  | -399.20586  | 1 |
| 13856 | H | 86.67327 | 101.38821 | 74.66375 | -2050.10370 | -4650.28200 | -1477.15550 | 1 |
| 13857 | H | 85.08124 | 102.10855 | 74.38495 | -1081.92182 | 1489.70307  | -2459.80768 | 1 |
| 13858 | C | 86.48419 | 102.89989 | 73.09342 | -959.70328  | -108.61541  | -605.86053  | 1 |
| 13859 | O | 85.61176 | 103.67450 | 72.60272 | 495.66420   | -93.38016   | 166.48195   | 1 |
| 13860 | O | 87.68324 | 103.06755 | 73.00285 | 303.21840   | -495.80901  | -469.75606  | 1 |
| 13861 | C | 86.58548 | 99.69560  | 72.34855 | -454.93520  | 1185.24083  | 520.51014   | 1 |
| 13862 | O | 87.37085 | 100.32188 | 71.68344 | -225.50221  | -369.32503  | -507.96594  | 1 |
| 13863 | N | 86.57680 | 98.32367  | 72.48879 | -13.68555   | -572.88299  | 231.45362   | 1 |
| 13864 | H | 85.69066 | 98.14712  | 73.07271 | -2357.09550 | -1350.39284 | -3441.43993 | 1 |
| 13865 | C | 87.88097 | 97.70034  | 72.50469 | -496.31329  | 344.33225   | 583.42639   | 1 |
| 13866 | H | 88.27670 | 98.18646  | 71.59290 | -1353.70532 | -1796.64561 | 3559.74555  | 1 |
| 13867 | C | 88.65237 | 97.96703  | 73.87080 | -502.10001  | -785.79656  | 629.37919   | 1 |
| 13868 | H | 89.57763 | 97.40877  | 73.82796 | -574.62586  | 1109.30206  | 93.49506    | 1 |
| 13869 | H | 88.80266 | 99.02212  | 74.22599 | -1587.20925 | -1177.02545 | 373.23829   | 1 |
| 13870 | C | 87.69483 | 97.29434  | 74.94572 | 498.38319   | -668.11310  | 684.82398   | 1 |
| 13871 | H | 86.87348 | 96.76146  | 74.36787 | -2716.16265 | -1500.53377 | 1131.00619  | 1 |
| 13872 | H | 87.29206 | 98.09117  | 75.62804 | 4286.10869  | -2045.74677 | 1379.86050  | 1 |
| 13873 | C | 88.68418 | 96.32836  | 75.77004 | 116.02189   | 1116.43263  | -139.81510  | 1 |
| 13874 | H | 88.43124 | 96.08339  | 76.83194 | 2419.70832  | 2183.06291  | -47.96691   | 1 |
| 13875 | H | 89.72956 | 96.63097  | 75.60072 | -3112.59461 | -621.23437  | -1288.32281 | 1 |
| 13876 | N | 88.67617 | 95.22846  | 74.90769 | -310.11762  | 919.25012   | 73.28263    | 1 |
| 13877 | H | 88.84784 | 95.32374  | 73.86587 | 845.45189   | 126.65650   | 907.75531   | 1 |
| 13878 | C | 88.38669 | 94.03428  | 75.22549 | -927.12403  | -547.85440  | 324.33256   | 1 |
| 13879 | N | 88.46097 | 93.16146  | 74.07471 | -1026.16378 | -608.83530  | -1447.51037 | 1 |
| 13880 | H | 88.67699 | 93.44034  | 73.10545 | -263.78223  | 2773.62611  | 1512.72221  | 1 |

|       |   |          |          |          |             |             |             |   |
|-------|---|----------|----------|----------|-------------|-------------|-------------|---|
| 13881 | H | 88.02945 | 92.24967 | 74.10522 | 1861.31934  | 1903.43004  | -561.79253  | 1 |
| 13882 | N | 88.05736 | 93.74256 | 76.57720 | -194.67461  | -600.71995  | -1511.83616 | 1 |
| 13883 | H | 88.02449 | 94.51285 | 77.29563 | -836.24045  | 3938.34056  | 3301.00828  | 1 |
| 13884 | H | 87.40796 | 92.92061 | 76.71669 | -2031.34268 | -28.16775   | 1617.71950  | 1 |
| 13885 | C | 87.70738 | 96.16059 | 72.12662 | 401.76951   | 448.06707   | -384.30041  | 1 |
| 13886 | O | 86.70005 | 95.53423 | 72.27762 | -316.00537  | -596.66323  | 75.50397    | 1 |
| 13887 | N | 88.93420 | 95.65473 | 71.79711 | -600.37593  | -28.88860   | 77.14660    | 1 |
| 13888 | H | 89.67132 | 96.38106 | 71.63854 | -1919.25485 | 407.57311   | 618.75497   | 1 |
| 13889 | C | 88.93640 | 94.94791 | 70.51906 | -272.80274  | -420.68161  | -545.72759  | 1 |
| 13890 | H | 88.21178 | 95.37476 | 69.81381 | -414.91228  | 406.33785   | -815.88404  | 1 |
| 13891 | C | 90.47536 | 95.02250 | 70.00015 | -863.90342  | 250.30750   | -297.35425  | 1 |
| 13892 | H | 91.15388 | 94.45818 | 70.75276 | 2005.55337  | -1974.84724 | -151.82399  | 1 |
| 13893 | H | 90.86072 | 96.05327 | 69.92908 | 1391.84048  | 381.23818   | 1298.06500  | 1 |
| 13894 | C | 90.57496 | 94.33815 | 68.61678 | -1499.53570 | 696.22398   | -444.36374  | 1 |
| 13895 | C | 91.18904 | 93.04604 | 68.48084 | 100.08141   | -699.99235  | 351.55211   | 1 |
| 13896 | H | 91.67293 | 92.55069 | 69.29710 | 18.91776    | 583.73820   | -666.62404  | 1 |
| 13897 | C | 91.34854 | 92.71756 | 67.13198 | -223.87238  | 287.59402   | -353.33051  | 1 |
| 13898 | H | 92.01818 | 91.90202 | 67.01986 | 1485.95092  | 1671.66295  | -1025.05158 | 1 |
| 13899 | C | 90.80299 | 93.30546 | 65.94948 | -569.07238  | 564.84599   | 182.82441   | 1 |
| 13900 | O | 91.05951 | 92.76854 | 64.65174 | 283.29883   | 17.14560    | -525.14573  | 1 |
| 13901 | H | 91.18247 | 93.68492 | 64.13719 | -661.96878  | 373.80981   | -257.56897  | 1 |
| 13902 | C | 90.02156 | 95.03557 | 67.51856 | 54.94295    | -111.04484  | 264.06090   | 1 |
| 13903 | H | 89.57855 | 96.00174 | 67.59052 | 28.09133    | 445.09580   | -626.54392  | 1 |
| 13904 | C | 90.09709 | 94.52416 | 66.23953 | -377.05579  | -621.76598  | 299.12365   | 1 |
| 13905 | H | 89.61590 | 95.05674 | 65.44710 | 81.48547    | 803.64714   | -1382.53719 | 1 |
| 13906 | C | 88.60399 | 93.43672 | 70.90913 | 23.89656    | -470.64377  | 956.83059   | 1 |
| 13907 | O | 89.40775 | 92.79416 | 71.59711 | -547.69643  | -13.00531   | -229.03881  | 1 |
| 13908 | N | 87.43258 | 93.04269 | 70.42415 | 945.36093   | -328.12729  | 492.66798   | 1 |
| 13909 | H | 86.88892 | 93.73251 | 69.91833 | 546.98814   | 1069.32735  | -68.06762   | 1 |
| 13910 | C | 86.79860 | 91.92394 | 71.04922 | 45.70728    | 927.63975   | -242.75731  | 1 |
| 13911 | H | 87.54096 | 91.34198 | 71.69769 | 25.90074    | 1115.76036  | -1585.12590 | 1 |
| 13912 | C | 85.68809 | 92.59587 | 71.96640 | -435.58465  | 44.31811    | 380.34168   | 1 |
| 13913 | H | 86.24417 | 93.31999 | 72.68685 | 1616.68142  | -357.86455  | 258.86956   | 1 |
| 13914 | C | 84.62890 | 93.38046 | 71.13302 | 419.89237   | 278.90816   | -404.50939  | 1 |
| 13915 | H | 85.11957 | 94.08511 | 70.49336 | -2213.24333 | 324.45250   | 2350.34775  | 1 |
| 13916 | H | 83.92746 | 92.74832 | 70.45385 | 113.11504   | -3178.43949 | -3130.44738 | 1 |
| 13917 | H | 83.95649 | 93.92160 | 71.82699 | 2402.20294  | -2844.87350 | -961.61891  | 1 |
| 13918 | C | 84.89011 | 91.51747 | 72.86616 | -1.32535    | -366.87155  | 601.96392   | 1 |
| 13919 | H | 85.39433 | 90.54706 | 72.77432 | 1373.88061  | -4.78398    | -301.43636  | 1 |
| 13920 | H | 83.88845 | 91.37825 | 72.47040 | -571.04103  | -380.15567  | 451.26380   | 1 |
| 13921 | C | 84.84920 | 92.13690 | 74.29614 | 282.47733   | -781.41388  | -969.70246  | 1 |
| 13922 | H | 83.94052 | 91.74615 | 74.84687 | -629.73359  | 886.76447   | -2415.19054 | 1 |
| 13923 | H | 85.75783 | 91.90875 | 74.87440 | 1053.90242  | 155.20685   | 2408.25465  | 1 |
| 13924 | H | 84.71621 | 93.22006 | 74.23208 | 640.91256   | -3816.42151 | -909.36362  | 1 |
| 13925 | C | 86.24158 | 91.06899 | 69.77310 | -778.16312  | -975.72115  | -623.35126  | 1 |
| 13926 | O | 85.70473 | 91.57020 | 68.81357 | -931.39523  | -411.45015  | -60.09687   | 1 |
| 13927 | N | 86.33304 | 89.76469 | 70.10138 | -68.55402   | 290.51663   | -117.42854  | 1 |
| 13928 | H | 86.79272 | 89.40877 | 71.04978 | -1658.93993 | 3852.67520  | -3350.62536 | 1 |
| 13929 | C | 85.75082 | 88.90623 | 69.04051 | 160.72181   | -370.81040  | 101.30368   | 1 |
| 13930 | H | 85.92206 | 89.17277 | 68.05634 | -661.17454  | 349.85384   | -673.04815  | 1 |
| 13931 | C | 86.52262 | 87.57832 | 69.33640 | 230.86293   | 82.34845    | -189.58570  | 1 |
| 13932 | H | 87.61508 | 87.69893 | 69.08556 | -676.79378  | 5086.05869  | 1494.50617  | 1 |
| 13933 | H | 86.48323 | 87.41247 | 70.43421 | -2018.09246 | 2801.76106  | -348.80071  | 1 |
| 13934 | S | 85.67117 | 86.34068 | 68.28809 | 312.95724   | -453.72978  | -199.72691  | 1 |
| 13935 | C | 84.14240 | 89.00197 | 69.21804 | 459.28204   | 168.81372   | 121.92130   | 1 |
| 13936 | O | 83.56176 | 88.71894 | 70.22613 | 246.34708   | 245.34057   | 18.62210    | 1 |
| 13937 | N | 83.52166 | 89.26058 | 67.98026 | -253.61831  | 65.05695    | 15.64268    | 1 |
| 13938 | H | 83.97964 | 89.57280 | 67.06940 | 1219.60499  | 352.25740   | -1038.66016 | 1 |
| 13939 | C | 82.13472 | 89.69410 | 68.14434 | -876.05743  | -749.61842  | 117.24861   | 1 |
| 13940 | H | 81.70226 | 89.13154 | 69.02498 | -539.92743  | 243.28496   | -1194.92968 | 1 |
| 13941 | C | 82.35716 | 91.22581 | 68.32634 | 129.06750   | -40.53911   | 712.41951   | 1 |
| 13942 | H | 82.78988 | 91.62548 | 67.41035 | -857.85192  | 4876.06962  | -2934.47315 | 1 |

|       |   |          |          |          |             |             |             |   |
|-------|---|----------|----------|----------|-------------|-------------|-------------|---|
| 13943 | H | 83.19562 | 91.32435 | 69.10418 | -2615.08493 | 1860.51486  | -480.93573  | 1 |
| 13944 | C | 80.94164 | 91.89904 | 68.83685 | 826.68310   | 866.07857   | -334.51309  | 1 |
| 13945 | O | 79.83405 | 91.53720 | 68.37754 | -450.50408  | 690.49790   | -970.76118  | 1 |
| 13946 | O | 81.07240 | 92.69249 | 69.75181 | 431.36244   | -721.06697  | -210.52493  | 1 |
| 13947 | C | 81.43291 | 89.05558 | 66.80581 | 190.59663   | 415.43774   | 19.24115    | 1 |
| 13948 | O | 81.94768 | 88.19773 | 66.16393 | -435.74705  | -553.59519  | 174.10552   | 1 |
| 13949 | N | 80.17240 | 89.52918 | 66.65602 | 48.48485    | 435.14972   | -83.59656   | 1 |
| 13950 | H | 79.79021 | 90.22141 | 67.39136 | -1305.70347 | -1493.46367 | -1281.66318 | 1 |
| 13951 | C | 79.38487 | 88.74202 | 65.73086 | 484.66722   | -78.72887   | -89.06425   | 1 |
| 13952 | H | 80.06598 | 88.33724 | 64.93685 | -1752.45557 | -1548.91631 | 7.78866     | 1 |
| 13953 | C | 78.82358 | 87.61814 | 66.74712 | 253.13399   | 501.21655   | -516.08216  | 1 |
| 13954 | H | 77.99774 | 88.02670 | 67.46009 | 1082.85916  | -1664.18491 | -683.81075  | 1 |
| 13955 | H | 79.66883 | 87.32854 | 67.47812 | -407.31378  | -2332.32829 | 2673.06997  | 1 |
| 13956 | C | 78.36337 | 86.36580 | 66.00389 | 37.70900    | 1078.81614  | -750.36254  | 1 |
| 13957 | H | 78.38607 | 86.45437 | 64.89361 | 42.29258    | 2601.50001  | 156.81562   | 1 |
| 13958 | H | 77.28676 | 86.07211 | 66.21489 | 1439.47571  | -1579.07227 | 1441.17753  | 1 |
| 13959 | C | 79.38247 | 85.17999 | 66.45591 | 163.78601   | 172.35096   | -54.47748   | 1 |
| 13960 | H | 80.16137 | 84.93367 | 65.66073 | -805.19118  | -557.67664  | -789.73091  | 1 |
| 13961 | H | 79.76649 | 85.28940 | 67.49385 | -1980.57573 | 578.27411   | 219.54551   | 1 |
| 13962 | N | 78.71300 | 83.93980 | 66.64390 | 139.49274   | 632.25749   | 541.72366   | 1 |
| 13963 | H | 78.51800 | 83.39480 | 65.82790 | 1546.00063  | 1711.60222  | -2139.74908 | 1 |
| 13964 | C | 78.40500 | 83.36480 | 67.75690 | -660.28185  | 376.69649   | -503.56592  | 1 |
| 13965 | N | 78.10900 | 83.97080 | 68.86490 | 784.59473   | 306.33082   | -56.96336   | 1 |
| 13966 | H | 78.26600 | 84.95480 | 68.95690 | -1717.42843 | 1638.68264  | -2064.79661 | 1 |
| 13967 | H | 77.74400 | 83.35480 | 69.56290 | -1352.92526 | 1935.42880  | -2078.92637 | 1 |
| 13968 | N | 78.05200 | 82.10080 | 67.70790 | -565.40399  | 528.41277   | -337.29892  | 1 |
| 13969 | H | 78.04200 | 81.66580 | 66.80690 | -1268.65259 | 2583.95523  | 1269.61498  | 1 |
| 13970 | H | 77.44800 | 81.87880 | 68.47390 | -1851.91353 | 1823.05462  | -1773.44702 | 1 |
| 13971 | C | 78.16178 | 89.68052 | 65.18531 | -408.79671  | -583.76897  | -611.63275  | 1 |
| 13972 | O | 77.39907 | 90.27184 | 65.90131 | 435.50664   | 327.25821   | -253.02711  | 1 |
| 13973 | N | 78.09246 | 89.64981 | 63.80734 | 39.82565    | 75.19617    | 802.10226   | 1 |
| 13974 | H | 78.78988 | 89.03990 | 63.31835 | 78.60113    | -1059.68893 | -964.87466  | 1 |
| 13975 | C | 77.53751 | 90.76850 | 63.13660 | -180.10114  | -97.42520   | -493.52497  | 1 |
| 13976 | H | 76.78820 | 91.01785 | 63.92243 | 1971.33856  | -2059.42211 | 2612.32715  | 1 |
| 13977 | C | 78.43795 | 92.11741 | 63.13888 | -189.55747  | -581.20128  | -1008.44059 | 1 |
| 13978 | H | 79.25077 | 92.22569 | 63.90324 | 2657.43301  | 992.82722   | 1282.74026  | 1 |
| 13979 | H | 78.95990 | 92.07429 | 62.19045 | -1876.78807 | -2489.51632 | 111.86145   | 1 |
| 13980 | C | 77.46662 | 93.30423 | 63.29053 | 391.63366   | -276.48602  | 233.16243   | 1 |
| 13981 | C | 77.03929 | 93.51381 | 64.64162 | -847.49313  | 971.13181   | -342.44919  | 1 |
| 13982 | H | 77.49769 | 92.88228 | 65.44828 | 81.35612    | 28.29992    | -85.73287   | 1 |
| 13983 | C | 75.96549 | 94.43265 | 64.83004 | 233.00818   | -309.08721  | -161.85015  | 1 |
| 13984 | H | 75.69974 | 94.84966 | 65.83242 | 142.03968   | 2054.76708  | 672.30761   | 1 |
| 13985 | C | 75.30444 | 95.06668 | 63.75852 | 419.96716   | 19.14397    | 347.13331   | 1 |
| 13986 | H | 74.43592 | 95.61884 | 64.00364 | 589.23210   | 517.35577   | 2171.97151  | 1 |
| 13987 | C | 76.85517 | 93.87015 | 62.14846 | -538.62070  | 348.61843   | 637.52979   | 1 |
| 13988 | H | 77.12140 | 93.54894 | 61.17135 | 1711.26519  | 2354.46408  | 45.19968    | 1 |
| 13989 | C | 75.80561 | 94.74912 | 62.43572 | 638.11478   | 356.32972   | -329.44377  | 1 |
| 13990 | H | 75.33132 | 95.27556 | 61.58840 | -2148.63612 | 301.82023   | -2887.26722 | 1 |
| 13991 | C | 77.24374 | 90.29380 | 61.63510 | -374.13222  | -459.99714  | -563.86591  | 1 |
| 13992 | O | 78.13604 | 89.79364 | 60.96180 | 862.28553   | 611.62435   | -90.47274   | 1 |
| 13993 | N | 76.04837 | 90.76006 | 61.20383 | -275.83096  | 757.55934   | 558.36813   | 1 |
| 13994 | H | 75.62717 | 91.41065 | 61.82038 | 1785.73026  | 2430.20223  | -3416.16492 | 1 |
| 13995 | C | 75.26527 | 89.98134 | 60.30707 | -50.55588   | 639.51885   | 396.85819   | 1 |
| 13996 | H | 75.80826 | 89.06022 | 60.08106 | -1195.43381 | 962.17787   | 3418.74556  | 1 |
| 13997 | C | 74.02403 | 89.62450 | 61.29607 | 248.28846   | -351.38164  | 104.08048   | 1 |
| 13998 | H | 73.09139 | 89.25917 | 60.83176 | 2374.27984  | -69.20717   | 1126.27955  | 1 |
| 13999 | H | 73.72138 | 90.55411 | 61.78293 | 1850.47715  | 1631.99325  | -1856.75117 | 1 |
| 14000 | C | 74.58041 | 88.61192 | 62.30953 | -85.54345   | 401.85168   | 689.93699   | 1 |
| 14001 | C | 74.74223 | 87.21310 | 62.05831 | -263.20937  | 643.59442   | -693.25774  | 1 |
| 14002 | H | 74.54379 | 86.93804 | 61.01395 | 3678.85736  | -2835.37052 | -1258.92967 | 1 |
| 14003 | C | 74.99065 | 86.30691 | 63.03467 | 13.95167    | 99.99647    | -627.90731  | 1 |
| 14004 | H | 75.16492 | 85.28743 | 62.67876 | 7.17441     | 821.19348   | 1260.23579  | 1 |

|       |   |          |          |          |             |             |             |   |
|-------|---|----------|----------|----------|-------------|-------------|-------------|---|
| 14005 | C | 75.20200 | 86.59432 | 64.39091 | 487.48073   | 848.68338   | -63.98404   | 1 |
| 14006 | O | 75.51503 | 85.62287 | 65.44030 | 391.98589   | 1096.05662  | 664.21609   | 1 |
| 14007 | H | 75.54600 | 84.77580 | 64.99090 | 11.90255    | -1173.96099 | 2918.88680  | 1 |
| 14008 | C | 74.84338 | 88.96595 | 63.65584 | -577.21055  | -506.75654  | 171.78594   | 1 |
| 14009 | H | 74.89781 | 90.05825 | 63.77310 | -2111.17063 | -1359.00240 | -571.86904  | 1 |
| 14010 | C | 75.20052 | 87.98080 | 64.60002 | -690.05292  | 42.16870    | -53.07005   | 1 |
| 14011 | H | 75.44283 | 88.25573 | 65.66592 | -1369.95235 | 193.68095   | 642.99877   | 1 |
| 14012 | C | 74.74964 | 90.92617 | 59.11233 | -182.19769  | 354.85429   | -336.31221  | 1 |
| 14013 | O | 74.66135 | 92.10794 | 59.30672 | 488.70566   | 189.92761   | 481.24031   | 1 |
| 14014 | N | 74.27388 | 90.23559 | 58.05756 | 257.09348   | -924.58507  | -449.67404  | 1 |
| 14015 | C | 74.14569 | 88.77777 | 58.17785 | -1032.41590 | 479.05627   | -174.07575  | 1 |
| 14016 | H | 75.20560 | 88.47976 | 58.07490 | -1184.23622 | 444.65710   | -711.25046  | 1 |
| 14017 | H | 73.75294 | 88.51527 | 59.19826 | -415.56757  | -1370.38304 | 1031.97020  | 1 |
| 14018 | C | 73.74310 | 90.86257 | 56.90709 | 180.52976   | -181.25740  | 602.56904   | 1 |
| 14019 | H | 74.49028 | 91.60010 | 56.51483 | 523.34970   | 2153.78062  | 391.12519   | 1 |
| 14020 | C | 73.56668 | 89.66523 | 55.90845 | -362.55473  | 255.01935   | 347.58257   | 1 |
| 14021 | H | 72.63857 | 89.92243 | 55.35088 | 2698.32985  | -1948.93495 | 1115.03575  | 1 |
| 14022 | H | 74.41804 | 89.44218 | 55.30924 | 1862.36980  | -2826.00558 | 2215.80648  | 1 |
| 14023 | C | 73.31540 | 88.44003 | 56.89003 | 396.79335   | -956.31403  | 956.16276   | 1 |
| 14024 | H | 72.24735 | 88.27093 | 57.02854 | -1469.73174 | -690.43831  | 650.87693   | 1 |
| 14025 | H | 73.67303 | 87.47644 | 56.36447 | -668.52776  | 182.73151   | 5.27969     | 1 |
| 14026 | C | 72.24520 | 91.54862 | 57.17918 | -168.49310  | 182.32882   | 3.75861     | 1 |
| 14027 | O | 71.71603 | 92.15776 | 56.28914 | -601.39786  | -717.54229  | 153.48497   | 1 |
| 14028 | N | 71.67987 | 91.14826 | 58.34706 | -214.14881  | 558.62083   | -503.38954  | 1 |
| 14029 | H | 72.34730 | 90.46749 | 58.69433 | 4365.25968  | 474.55124   | -766.25779  | 1 |
| 14030 | C | 71.28833 | 92.22006 | 59.27791 | 121.57431   | -305.66526  | 147.78023   | 1 |
| 14031 | H | 72.25031 | 92.73103 | 59.31970 | -2802.48550 | -2123.60669 | 3784.91824  | 1 |
| 14032 | C | 70.21517 | 93.13362 | 58.54424 | 364.68363   | -456.15191  | 399.71780   | 1 |
| 14033 | H | 70.57783 | 93.30701 | 57.43790 | 542.31364   | 402.73093   | -2805.06701 | 1 |
| 14034 | H | 69.24172 | 92.67219 | 58.58107 | 861.97005   | -959.63480  | -2750.60334 | 1 |
| 14035 | C | 69.91060 | 94.50513 | 59.29432 | 802.27883   | 707.90941   | -588.42304  | 1 |
| 14036 | O | 69.12428 | 94.63193 | 60.20905 | -386.42188  | -418.07591  | 366.75864   | 1 |
| 14037 | N | 70.81485 | 95.37278 | 58.81857 | 636.30750   | -226.03511  | 399.65377   | 1 |
| 14038 | H | 71.56012 | 94.91675 | 58.20906 | 631.61411   | -186.98609  | 340.82060   | 1 |
| 14039 | H | 71.17507 | 96.33050 | 59.14258 | -16.95256   | -2554.63019 | -1898.98756 | 1 |
| 14040 | C | 70.79739 | 91.56565 | 60.62216 | -169.56745  | -23.07196   | 229.18709   | 1 |
| 14041 | O | 71.14036 | 90.41142 | 60.92792 | 375.47705   | -171.70011  | -11.35829   | 1 |
| 14042 | N | 69.87100 | 92.31498 | 61.27231 | 576.25861   | -870.24652  | 467.04367   | 1 |
| 14043 | H | 69.50670 | 93.31857 | 61.14202 | 1340.52577  | -56.61552   | -1014.37191 | 1 |
| 14044 | C | 69.56419 | 91.73799 | 62.56720 | 917.41719   | -302.86189  | -393.24583  | 1 |
| 14045 | H | 70.27377 | 90.93392 | 62.64823 | -1436.22803 | 455.96798   | 573.74853   | 1 |
| 14046 | C | 69.95867 | 92.89116 | 63.55788 | 1186.18925  | -788.03106  | 709.23420   | 1 |
| 14047 | H | 69.83769 | 93.90444 | 63.11767 | 1683.40553  | 5679.63519  | -3128.67563 | 1 |
| 14048 | H | 69.32302 | 92.90718 | 64.47457 | 2662.28085  | -3927.52739 | -1181.49027 | 1 |
| 14049 | C | 71.53237 | 92.68050 | 63.98434 | 785.53623   | -83.81291   | 370.77771   | 1 |
| 14050 | O | 72.20624 | 91.69765 | 63.57129 | -210.98842  | -662.65087  | 840.71784   | 1 |
| 14051 | O | 71.99749 | 93.58473 | 64.67684 | 183.32837   | 147.42686   | 390.17059   | 1 |
| 14052 | C | 67.95046 | 91.34012 | 62.60424 | -271.57057  | 392.74043   | -555.53965  | 1 |
| 14053 | O | 67.43069 | 91.05139 | 63.64606 | 56.24349    | 289.58403   | 134.45446   | 1 |
| 14054 | N | 67.36709 | 91.33103 | 61.40859 | 287.56015   | -471.29209  | -299.71061  | 1 |
| 14055 | H | 67.95703 | 91.75046 | 60.62256 | 469.92768   | 2529.81568  | -913.06289  | 1 |
| 14056 | C | 66.31934 | 90.41578 | 61.20445 | -302.04252  | 11.00499    | 286.59142   | 1 |
| 14057 | H | 65.78837 | 90.31663 | 62.23385 | 685.42608   | 3011.47063  | 794.17801   | 1 |
| 14058 | C | 65.34575 | 91.03669 | 60.07416 | 310.81221   | 496.25801   | -891.81213  | 1 |
| 14059 | H | 64.97170 | 92.07637 | 60.39493 | 1525.80228  | -393.20583  | 1968.40601  | 1 |
| 14060 | H | 65.90197 | 91.30211 | 59.14953 | -2808.97742 | -1391.60202 | 1829.70569  | 1 |
| 14061 | C | 64.19033 | 90.09560 | 59.85625 | -554.62368  | -88.26727   | 887.19054   | 1 |
| 14062 | H | 64.54779 | 89.12863 | 59.65681 | -392.38452  | 3149.35206  | -12.16608   | 1 |
| 14063 | C | 63.30014 | 90.06723 | 61.08698 | 124.36620   | -146.77964  | 365.42342   | 1 |
| 14064 | H | 62.69961 | 89.15272 | 61.08288 | 1510.34514  | 215.19984   | 3717.91580  | 1 |
| 14065 | H | 62.62819 | 91.02345 | 61.16328 | 1495.77102  | 1163.21751  | 1814.22002  | 1 |
| 14066 | H | 63.99004 | 89.95864 | 61.98295 | 409.47358   | 339.45447   | -653.97273  | 1 |

|       |   |          |          |          |             |             |             |   |
|-------|---|----------|----------|----------|-------------|-------------|-------------|---|
| 14067 | C | 63.34688 | 90.52361 | 58.64097 | 91.76991    | 874.12700   | 445.30672   | 1 |
| 14068 | H | 63.92327 | 90.30716 | 57.69875 | 48.74815    | 472.14338   | -915.74562  | 1 |
| 14069 | H | 62.43007 | 89.91836 | 58.36957 | -2433.56751 | -746.57861  | -1203.89242 | 1 |
| 14070 | H | 62.93857 | 91.57504 | 58.68282 | -138.96610  | -710.57094  | 443.35888   | 1 |
| 14071 | C | 66.89239 | 89.00440 | 60.62658 | 413.65970   | 1154.98388  | -256.27195  | 1 |
| 14072 | O | 66.12565 | 88.06851 | 60.30801 | 295.88352   | 195.29568   | -663.93966  | 1 |
| 14073 | N | 68.22470 | 89.05352 | 60.41407 | -679.08332  | 266.72424   | 149.89871   | 1 |
| 14074 | H | 68.51337 | 89.94540 | 60.86072 | -1040.92882 | 188.51639   | -238.64444  | 1 |
| 14075 | C | 68.97556 | 87.98522 | 59.90292 | -169.34417  | 388.01783   | 905.67004   | 1 |
| 14076 | H | 68.25475 | 87.33235 | 59.42611 | -831.75328  | 400.36129   | -2468.84425 | 1 |
| 14077 | C | 70.14952 | 88.48028 | 58.89020 | 776.37179   | 44.05328    | -233.28297  | 1 |
| 14078 | H | 71.10096 | 87.99123 | 59.19126 | -2205.26679 | 1309.19603  | -1110.70595 | 1 |
| 14079 | H | 70.37171 | 89.50593 | 59.00690 | 1614.42487  | 739.03914   | 32.66978    | 1 |
| 14080 | C | 69.95070 | 88.22034 | 57.43685 | -566.11007  | -142.05862  | 821.61992   | 1 |
| 14081 | C | 69.82151 | 89.03672 | 56.30152 | 391.66663   | 301.45252   | 738.43434   | 1 |
| 14082 | H | 70.05315 | 90.08301 | 56.20112 | -788.81485  | -2237.43777 | 2165.00990  | 1 |
| 14083 | N | 69.53598 | 88.29303 | 55.21088 | 116.09016   | 301.11147   | -67.10785   | 1 |
| 14084 | H | 69.39777 | 88.87459 | 54.34975 | 2843.04304  | -2739.68159 | 1614.25998  | 1 |
| 14085 | C | 69.56073 | 86.95395 | 55.43279 | -13.17607   | -613.20837  | 43.43489    | 1 |
| 14086 | C | 69.88804 | 86.85595 | 56.89548 | 223.80128   | 1226.42458  | -330.31272  | 1 |
| 14087 | C | 69.97267 | 85.55018 | 57.40095 | 593.94380   | 259.91232   | -171.05693  | 1 |
| 14088 | H | 70.05454 | 85.30758 | 58.46891 | 187.59258   | 744.13465   | 680.23551   | 1 |
| 14089 | C | 69.68000 | 84.43180 | 56.55090 | -249.17678  | 520.15760   | 706.25633   | 1 |
| 14090 | H | 69.73600 | 83.43380 | 56.95890 | 1509.78763  | 463.94103   | 2720.94217  | 1 |
| 14091 | C | 69.41924 | 85.85046 | 54.53743 | 255.20052   | 1475.00728  | 447.40393   | 1 |
| 14092 | H | 69.39528 | 86.04228 | 53.45878 | 517.28370   | -2030.79955 | 2627.55641  | 1 |
| 14093 | C | 69.46400 | 84.55980 | 55.13790 | -726.02323  | -516.91701  | 192.71243   | 1 |
| 14094 | H | 69.43900 | 83.61780 | 54.60990 | -1237.27372 | 2881.62697  | 252.20224   | 1 |
| 14095 | C | 69.70376 | 87.11172 | 61.01788 | -370.88860  | -364.43154  | 708.49524   | 1 |
| 14096 | O | 69.53443 | 85.88388 | 61.18224 | -222.52823  | -205.96057  | -17.33432   | 1 |
| 14097 | N | 70.38360 | 87.90454 | 61.83059 | 730.42373   | -254.48810  | 197.87973   | 1 |
| 14098 | H | 70.60358 | 88.85740 | 61.41650 | 2121.04765  | -1901.86087 | 18.47931    | 1 |
| 14099 | C | 70.43330 | 87.76247 | 63.22048 | -129.39239  | -81.67978   | -553.78176  | 1 |
| 14100 | H | 70.97345 | 86.78676 | 63.44706 | -975.29685  | 643.75869   | -2893.24297 | 1 |
| 14101 | C | 71.09529 | 89.06919 | 63.82369 | 392.01006   | -143.20793  | 0.36304     | 1 |
| 14102 | H | 71.45867 | 89.83372 | 63.08539 | -1490.01080 | 2452.63868  | 2589.13068  | 1 |
| 14103 | C | 70.25980 | 89.73078 | 64.97019 | 707.47100   | 1306.70138  | 151.49765   | 1 |
| 14104 | H | 70.56849 | 89.42351 | 65.98187 | -3178.03610 | -3596.25468 | 1020.55690  | 1 |
| 14105 | H | 69.11376 | 89.64867 | 64.82236 | -3045.09365 | -1832.07941 | -1757.64413 | 1 |
| 14106 | H | 70.36901 | 90.82693 | 65.08744 | 2867.16850  | 1861.76586  | 1517.56439  | 1 |
| 14107 | C | 72.32539 | 88.45993 | 64.55990 | 689.61169   | -446.52440  | 463.50726   | 1 |
| 14108 | H | 72.89319 | 89.29780 | 65.03973 | -1109.21805 | -2051.54454 | 1455.30382  | 1 |
| 14109 | H | 71.99861 | 87.74327 | 65.32995 | -3917.46447 | -1743.44734 | 2868.01900  | 1 |
| 14110 | H | 73.04110 | 87.86520 | 63.93786 | -682.23652  | 283.36395   | -794.91119  | 1 |
| 14111 | C | 68.96101 | 87.24255 | 63.86695 | -116.44350  | -230.69373  | -687.60400  | 1 |
| 14112 | O | 69.17820 | 86.59430 | 64.90934 | 1100.46677  | -362.73233  | -722.40992  | 1 |
| 14113 | N | 67.83301 | 87.64973 | 63.44045 | -16.66745   | -285.71353  | 122.58057   | 1 |
| 14114 | H | 67.96038 | 88.05796 | 62.47950 | -2571.54056 | 2975.40350  | 3047.41287  | 1 |
| 14115 | C | 66.66130 | 86.92684 | 63.89340 | -321.44217  | -297.08748  | 1082.49319  | 1 |
| 14116 | H | 66.85006 | 86.95062 | 65.02533 | 201.21966   | -1267.33614 | 308.23474   | 1 |
| 14117 | C | 65.34729 | 87.63173 | 63.34339 | 313.05436   | -343.76533  | -373.90061  | 1 |
| 14118 | H | 65.39247 | 87.96143 | 62.30595 | 3454.34323  | 1905.08844  | -320.74339  | 1 |
| 14119 | C | 64.05969 | 86.74937 | 63.65734 | -93.83819   | -36.52620   | 70.20924    | 1 |
| 14120 | H | 64.07744 | 85.78560 | 63.07443 | 2065.91999  | 5487.36447  | -553.57438  | 1 |
| 14121 | H | 64.00680 | 86.54498 | 64.76147 | -1064.24762 | -1240.95980 | -2068.36805 | 1 |
| 14122 | H | 63.12395 | 87.31056 | 63.40648 | -1723.26171 | -1691.26670 | 971.98353   | 1 |
| 14123 | C | 65.21191 | 88.94926 | 64.22575 | 20.74464    | 53.42926    | 22.15231    | 1 |
| 14124 | H | 65.28481 | 88.69125 | 65.34335 | 624.73886   | -1602.69254 | -2518.42020 | 1 |
| 14125 | H | 66.12111 | 89.52317 | 64.07296 | 2694.04171  | -2532.50793 | -1885.81452 | 1 |
| 14126 | H | 64.41904 | 89.63338 | 63.94465 | -986.68905  | 2101.57591  | -715.41478  | 1 |
| 14127 | C | 66.63323 | 85.33530 | 63.48996 | -647.47886  | -715.55436  | -225.69193  | 1 |
| 14128 | O | 66.19800 | 84.42780 | 64.14390 | -482.57715  | 592.64948   | 198.77909   | 1 |



|       |   |          |          |          |             |             |             |   |
|-------|---|----------|----------|----------|-------------|-------------|-------------|---|
| 14129 | N | 66.91828 | 85.39845 | 62.19879 | -279.77565  | 713.50686   | 1325.86870  | 1 |
| 14130 | H | 67.54504 | 86.09871 | 61.87911 | -771.51105  | -1259.00481 | -424.76199  | 1 |
| 14131 | C | 67.17300 | 83.92780 | 61.67790 | 685.68798   | 321.67274   | 507.74959   | 1 |
| 14132 | H | 66.24200 | 83.39480 | 61.79890 | 1649.61620  | 2256.69318  | 1443.72038  | 1 |
| 14133 | C | 67.57000 | 83.97580 | 60.15290 | 605.11168   | -412.29603  | 543.41774   | 1 |
| 14134 | H | 68.48300 | 84.59580 | 60.02690 | 2104.62655  | 2018.10975  | -1181.52712 | 1 |
| 14135 | C | 67.61400 | 82.57980 | 59.52390 | -543.91757  | 453.41528   | 574.47303   | 1 |
| 14136 | H | 66.79600 | 81.88480 | 59.80990 | 1862.33532  | -1444.02710 | -2084.39898 | 1 |
| 14137 | H | 68.52000 | 82.02080 | 59.84090 | 2864.49075  | 1300.75818  | -30.77500   | 1 |
| 14138 | H | 67.66500 | 82.68580 | 58.41990 | -2611.94440 | -1738.28447 | -233.10893  | 1 |
| 14139 | C | 66.50700 | 84.79580 | 59.46790 | 834.42392   | 349.32340   | -114.72088  | 1 |
| 14140 | H | 66.63300 | 84.77480 | 58.36390 | -2506.74778 | -471.96867  | -1841.65343 | 1 |
| 14141 | H | 66.60295 | 85.87860 | 59.83743 | 391.89101   | 516.01236   | -2132.33554 | 1 |
| 14142 | H | 65.54000 | 84.29880 | 59.69790 | -1698.05578 | -2195.07427 | -1482.05322 | 1 |
| 14143 | C | 68.20200 | 83.10680 | 62.39890 | 550.50155   | 589.32564   | -425.55181  | 1 |
| 14144 | O | 68.02100 | 81.91380 | 62.76490 | 265.05037   | -645.49038  | -369.75357  | 1 |
| 14145 | N | 69.35700 | 83.66280 | 62.70190 | 611.51693   | -452.93843  | -365.46698  | 1 |
| 14146 | H | 69.64500 | 84.55180 | 62.35490 | -1783.86180 | -1016.25432 | -2383.96528 | 1 |
| 14147 | C | 70.38900 | 83.01780 | 63.55090 | -417.00848  | 393.99101   | 708.74961   | 1 |
| 14148 | H | 70.48900 | 81.98180 | 63.26390 | -1071.58594 | 2667.34841  | -1278.74246 | 1 |
| 14149 | C | 71.76000 | 83.63580 | 63.31290 | -484.47360  | 707.47680   | 310.18206   | 1 |
| 14150 | H | 72.58800 | 82.97480 | 63.64590 | -2638.63833 | 1671.58017  | 376.34261   | 1 |
| 14151 | H | 71.82400 | 84.63980 | 63.78390 | -798.91887  | 3040.56766  | 122.07846   | 1 |
| 14152 | C | 72.03300 | 83.72280 | 61.79390 | -215.29745  | -521.99840  | 715.97184   | 1 |
| 14153 | C | 71.81600 | 82.59080 | 60.95990 | 279.85305   | -717.87178  | -487.64063  | 1 |
| 14154 | H | 71.47000 | 81.69580 | 61.45590 | -2316.48263 | 1909.86806  | 940.49903   | 1 |
| 14155 | C | 72.08100 | 82.67680 | 59.54890 | 606.64568   | 99.14528    | 673.49999   | 1 |
| 14156 | H | 71.79200 | 81.91980 | 58.83390 | -2128.87791 | 1667.81113  | -1607.64148 | 1 |
| 14157 | C | 72.48800 | 83.89180 | 59.02390 | 195.93976   | 854.07363   | -252.22381  | 1 |
| 14158 | H | 72.66000 | 83.92580 | 57.95890 | -2538.06704 | 1495.79316  | 1104.10359  | 1 |
| 14159 | C | 72.42300 | 84.92880 | 61.19290 | -50.29512   | 126.63266   | -901.60167  | 1 |
| 14160 | H | 72.55756 | 85.81529 | 61.80934 | 511.98814   | -3904.81753 | 450.05967   | 1 |
| 14161 | C | 72.64018 | 85.09469 | 59.80865 | 300.93074   | -737.87690  | 334.27548   | 1 |
| 14162 | H | 72.92094 | 86.03221 | 59.32295 | -974.94000  | 1867.87334  | 2476.95636  | 1 |
| 14163 | C | 70.05300 | 82.90880 | 64.99590 | -703.64877  | 567.76549   | 118.20222   | 1 |
| 14164 | O | 70.29400 | 81.84380 | 65.59190 | 582.21902   | -257.82227  | -467.09306  | 1 |
| 14165 | N | 69.42700 | 83.89580 | 65.60790 | -669.99197  | -228.23948  | -460.09759  | 1 |
| 14166 | H | 69.17200 | 84.72080 | 65.10890 | -2598.22064 | 1215.83658  | 1291.98188  | 1 |
| 14167 | C | 68.97800 | 83.85380 | 67.00790 | -783.83523  | -179.54670  | 429.90268   | 1 |
| 14168 | H | 69.89000 | 83.70380 | 67.56490 | 346.22594   | -2277.71589 | -2142.51351 | 1 |
| 14169 | C | 68.17700 | 85.17171 | 67.40846 | 180.49574   | -183.30667  | -1170.58875 | 1 |
| 14170 | H | 67.22764 | 85.17190 | 66.79017 | 2484.04289  | -1109.01840 | 3240.91712  | 1 |
| 14171 | H | 68.87797 | 86.04188 | 67.09398 | 1254.02814  | -2507.01037 | -120.57685  | 1 |
| 14172 | C | 67.94303 | 85.32891 | 68.95886 | 216.31558   | -569.55285  | -660.29215  | 1 |
| 14173 | H | 67.37700 | 84.47980 | 69.36990 | -251.79211  | 455.35365   | -3102.81808 | 1 |
| 14174 | H | 67.19733 | 86.23654 | 69.06552 | -180.16972  | 581.53068   | -285.70923  | 1 |
| 14175 | C | 69.32838 | 85.50546 | 69.65701 | 846.11513   | -38.88936   | -145.99056  | 1 |
| 14176 | O | 69.74393 | 86.67522 | 69.71577 | 881.52639   | -665.14517  | -593.87211  | 1 |
| 14177 | N | 70.01700 | 84.39780 | 70.10590 | 430.88271   | -474.21138  | -549.66895  | 1 |
| 14178 | H | 69.81800 | 83.47480 | 69.77790 | 1631.46249  | 1462.02418  | -2258.10577 | 1 |
| 14179 | H | 70.95200 | 84.61280 | 70.38790 | -1617.99244 | -2635.09471 | 580.17461   | 1 |
| 14180 | C | 68.01400 | 82.64180 | 67.17590 | -681.98160  | -75.25730   | -600.57343  | 1 |
| 14181 | O | 68.15500 | 81.79780 | 68.04290 | 503.60685   | 290.79634   | 534.27039   | 1 |
| 14182 | N | 67.09000 | 82.50080 | 66.23490 | -542.00045  | 99.79091    | -639.49165  | 1 |
| 14183 | H | 67.03700 | 83.21580 | 65.54290 | -1827.24928 | 1527.47529  | 2055.77371  | 1 |
| 14184 | C | 66.19800 | 81.42780 | 66.04390 | -649.22657  | 631.11082   | 107.95832   | 1 |
| 14185 | H | 65.61500 | 81.36480 | 66.95090 | -749.82018  | 2991.41556  | 622.43786   | 1 |
| 14186 | C | 65.20800 | 81.57280 | 64.87290 | 376.31415   | -425.96708  | -713.01523  | 1 |
| 14187 | H | 64.70000 | 82.55680 | 64.95890 | 712.68056   | -2278.81910 | -2048.73038 | 1 |
| 14188 | H | 65.78400 | 81.60080 | 63.92390 | -2781.34911 | 1454.07416  | -219.07002  | 1 |
| 14189 | C | 64.14300 | 80.54880 | 64.85190 | 197.69820   | -878.72599  | 142.15153   | 1 |
| 14190 | C | 64.10100 | 79.51580 | 63.85590 | -289.94759  | -542.79390  | 672.87159   | 1 |

|       |   |          |          |          |             |             |             |   |
|-------|---|----------|----------|----------|-------------|-------------|-------------|---|
| 14191 | H | 64.80100 | 79.56380 | 63.03490 | 2747.58171  | 331.57114   | 1496.35610  | 1 |
| 14192 | C | 63.15900 | 78.47080 | 63.93090 | 616.79588   | 321.75980   | 589.47814   | 1 |
| 14193 | H | 63.17600 | 77.65880 | 63.21990 | 2085.84444  | 1593.50673  | -1734.42080 | 1 |
| 14194 | C | 62.29400 | 78.35380 | 65.04990 | 334.18835   | -806.48764  | 263.33788   | 1 |
| 14195 | H | 61.65200 | 77.48780 | 65.10490 | -1195.28903 | -2707.66152 | 1066.80806  | 1 |
| 14196 | C | 63.23200 | 80.41480 | 65.92290 | 655.30633   | -207.67647  | 599.07854   | 1 |
| 14197 | H | 63.26300 | 81.05080 | 66.79490 | -1807.55544 | 938.41900   | 2397.98652  | 1 |
| 14198 | C | 62.34100 | 79.34080 | 66.02690 | -637.91715  | 628.11748   | -173.15066  | 1 |
| 14199 | H | 61.57100 | 79.40480 | 66.78190 | -2428.13455 | 820.79013   | 1824.47044  | 1 |
| 14200 | C | 66.93500 | 80.04880 | 65.78090 | 195.05360   | -792.53318  | -406.56642  | 1 |
| 14201 | O | 66.63200 | 79.06580 | 66.49690 | 52.23850    | 680.28599   | -397.62964  | 1 |
| 14202 | N | 67.94200 | 79.96780 | 64.95690 | -147.37618  | -825.15603  | 100.34977   | 1 |
| 14203 | H | 68.28900 | 80.79880 | 64.52890 | 641.78635   | -2949.29133 | 887.70332   | 1 |
| 14204 | C | 68.76200 | 78.73780 | 64.76490 | -283.59104  | 413.20314   | 761.76787   | 1 |
| 14205 | H | 68.18600 | 77.88280 | 64.44390 | 893.12959   | -331.38519  | -2998.45454 | 1 |
| 14206 | C | 69.92700 | 79.06480 | 63.73590 | -20.02066   | 736.77696   | -536.85183  | 1 |
| 14207 | H | 70.79800 | 79.64880 | 64.10390 | 720.16800   | -286.26712  | -3049.20242 | 1 |
| 14208 | H | 69.47600 | 79.59580 | 62.87090 | -1766.34439 | 2477.45026  | 800.30865   | 1 |
| 14209 | C | 70.63800 | 77.74080 | 63.25190 | -567.84164  | -695.72988  | -158.00889  | 1 |
| 14210 | H | 69.81100 | 77.09780 | 62.88090 | 1469.65111  | 2639.96115  | -876.90192  | 1 |
| 14211 | H | 71.15600 | 77.18480 | 64.06190 | 1330.39681  | 2323.18840  | 1652.59379  | 1 |
| 14212 | C | 71.61500 | 77.98280 | 62.06390 | -173.31241  | 676.02989   | -586.85382  | 1 |
| 14213 | O | 71.30400 | 77.62580 | 60.88590 | 253.19284   | 748.00484   | -3.06174    | 1 |
| 14214 | N | 72.76000 | 78.65180 | 62.30290 | -756.73621  | 248.18430   | 280.04847   | 1 |
| 14215 | H | 73.02500 | 78.74080 | 63.26290 | -76.03550   | 1762.26803  | 2605.15954  | 1 |
| 14216 | H | 73.53400 | 78.74680 | 61.67590 | -1129.91214 | 2023.67923  | -2127.49787 | 1 |
| 14217 | C | 69.42700 | 78.31480 | 66.03490 | -551.28833  | -311.69731  | 656.03123   | 1 |
| 14218 | O | 69.49300 | 77.10380 | 66.30090 | 607.35783   | 152.72270   | 481.06078   | 1 |
| 14219 | N | 69.91900 | 79.24580 | 66.90290 | 444.31337   | -385.07350  | -605.78570  | 1 |
| 14220 | H | 69.86900 | 80.20080 | 66.61990 | 2595.52861  | 35.76156    | -1777.68910 | 1 |
| 14221 | C | 70.55000 | 78.86580 | 68.12590 | -784.14317  | -52.59372   | 462.38987   | 1 |
| 14222 | H | 71.32000 | 78.13480 | 67.92590 | -462.13645  | -2699.23387 | 1548.80362  | 1 |
| 14223 | C | 71.25000 | 80.09480 | 68.80590 | 197.12909   | 890.15955   | 14.39087    | 1 |
| 14224 | H | 71.58700 | 79.73080 | 69.79990 | 2746.32061  | 303.57606   | -1504.58994 | 1 |
| 14225 | H | 70.61000 | 80.97980 | 69.01290 | -3097.61543 | -546.90067  | -62.48631   | 1 |
| 14226 | N | 73.40700 | 81.20880 | 68.59690 | -209.07347  | 622.14253   | 530.94185   | 1 |
| 14227 | H | 73.43300 | 81.28880 | 69.59390 | -2040.68413 | 1011.31339  | 2170.50219  | 1 |
| 14228 | C | 72.35200 | 80.62980 | 68.01290 | -248.12391  | 564.18458   | -671.99799  | 1 |
| 14229 | C | 74.26900 | 81.55580 | 67.58590 | -155.31937  | -898.50238  | -4.51232    | 1 |
| 14230 | H | 75.19500 | 82.08080 | 67.81790 | 973.62003   | -220.44013  | 2983.57108  | 1 |
| 14231 | N | 73.76200 | 81.31280 | 66.40590 | 163.43278   | -152.13122  | 814.13642   | 1 |
| 14232 | C | 72.56300 | 80.67780 | 66.66290 | 684.80954   | 300.46282   | -521.73651  | 1 |
| 14233 | H | 72.02400 | 80.25780 | 65.82290 | 1199.36856  | -2026.37391 | -2086.51625 | 1 |
| 14234 | C | 69.64000 | 78.25780 | 69.17190 | -747.16856  | 355.58843   | 383.07573   | 1 |
| 14235 | O | 70.02400 | 77.39280 | 69.98090 | -534.25265  | -579.67242  | 46.70353    | 1 |
| 14236 | N | 68.39300 | 78.68480 | 69.17490 | 45.48387    | -842.94896  | 6.36779     | 1 |
| 14237 | H | 68.03400 | 79.38880 | 68.56790 | -2083.58571 | 1357.88664  | -1926.92519 | 1 |
| 14238 | C | 67.34400 | 78.10680 | 69.99190 | -486.39842  | 359.06583   | 682.59747   | 1 |
| 14239 | H | 67.88300 | 77.80780 | 70.87890 | 1823.64178  | -2248.54392 | -1231.50603 | 1 |
| 14240 | C | 66.26800 | 79.14380 | 70.38190 | 354.39673   | -755.01887  | -368.51114  | 1 |
| 14241 | H | 65.65100 | 79.44880 | 69.50990 | -1685.12818 | 2208.34413  | 1477.08682  | 1 |
| 14242 | C | 65.27500 | 78.49980 | 71.45990 | 818.16250   | 369.91638   | 158.81751   | 1 |
| 14243 | H | 65.85400 | 78.09680 | 72.31790 | -704.60158  | 2358.52233  | 1959.37114  | 1 |
| 14244 | H | 64.71300 | 77.63880 | 71.03790 | -1922.40656 | 1060.30325  | -2253.51642 | 1 |
| 14245 | H | 64.49100 | 79.19980 | 71.82090 | 966.05373   | 2011.63690  | 2217.72032  | 1 |
| 14246 | C | 66.88300 | 80.46080 | 70.88990 | 578.45802   | -638.70251  | 298.15505   | 1 |
| 14247 | H | 67.63100 | 80.93980 | 70.22190 | 1961.27994  | -586.94183  | -2388.95511 | 1 |
| 14248 | H | 67.49200 | 80.42380 | 71.81890 | -2311.42056 | 1813.39268  | 1125.68567  | 1 |
| 14249 | C | 65.83800 | 81.51180 | 71.27090 | -829.22184  | -344.94732  | -157.64989  | 1 |
| 14250 | H | 65.02200 | 81.53180 | 70.51890 | 1146.57994  | 789.58334   | -2821.37180 | 1 |
| 14251 | H | 65.46700 | 81.24480 | 72.28390 | 429.82659   | -2165.50649 | -2241.44083 | 1 |
| 14252 | H | 66.38100 | 82.47880 | 71.20490 | -2331.25248 | -1872.54511 | -978.29592  | 1 |

|       |   |          |          |          |             |             |             |   |
|-------|---|----------|----------|----------|-------------|-------------|-------------|---|
| 14253 | C | 66.76900 | 76.84280 | 69.45490 | -340.18826  | 610.30084   | -585.88040  | 1 |
| 14254 | O | 66.63400 | 75.81380 | 70.12590 | 101.89568   | -622.84987  | 474.66044   | 1 |
| 14255 | N | 66.31500 | 76.98580 | 68.18590 | 158.99257   | 828.45462   | 32.50530    | 1 |
| 14256 | H | 66.41500 | 77.87280 | 67.74190 | -2616.55087 | -325.30913  | -1716.40955 | 1 |
| 14257 | C | 65.74200 | 75.94280 | 67.37790 | 151.60799   | -222.65958  | -871.14220  | 1 |
| 14258 | H | 64.79300 | 75.72480 | 67.84490 | 332.72533   | 2444.91621  | 1951.89775  | 1 |
| 14259 | C | 65.55500 | 76.47180 | 65.99690 | 516.47904   | 744.65398   | 100.94974   | 1 |
| 14260 | H | 65.01800 | 77.43680 | 65.87590 | -2309.33922 | -1649.80974 | 1357.68420  | 1 |
| 14261 | H | 66.57200 | 76.68280 | 65.60290 | -2378.86400 | 1325.20877  | 1575.77093  | 1 |
| 14262 | C | 64.89500 | 75.49180 | 64.95890 | 699.04891   | -87.30804   | 578.92913   | 1 |
| 14263 | H | 65.50600 | 74.59380 | 64.72490 | 1876.96401  | -2499.29325 | 358.83921   | 1 |
| 14264 | H | 64.58300 | 76.09980 | 64.08290 | -1213.58057 | 2898.57565  | 153.97275   | 1 |
| 14265 | S | 63.30800 | 74.83580 | 65.62490 | 416.23263   | -317.43383  | 192.86463   | 1 |
| 14266 | C | 62.41500 | 74.52080 | 64.05090 | -723.11660  | 534.39399   | 151.57985   | 1 |
| 14267 | H | 61.57500 | 73.84080 | 64.30990 | 1894.43547  | -1399.81738 | -2085.62983 | 1 |
| 14268 | H | 63.09600 | 74.03980 | 63.31690 | 1019.44980  | 2208.15760  | 1995.74255  | 1 |
| 14269 | H | 62.01300 | 75.46580 | 63.62590 | -1982.24411 | 1150.22911  | 2155.43673  | 1 |
| 14270 | C | 66.62700 | 74.71180 | 67.33690 | 574.44850   | -552.29807  | -443.20059  | 1 |
| 14271 | O | 66.22400 | 73.62780 | 67.63590 | 488.90100   | -608.17075  | 121.37288   | 1 |
| 14272 | N | 67.94400 | 74.80680 | 67.04190 | 412.83426   | 217.61314   | 703.48041   | 1 |
| 14273 | H | 68.38100 | 75.69680 | 66.93390 | -1566.75032 | 1034.45141  | 2524.56529  | 1 |
| 14274 | C | 68.78100 | 73.65580 | 66.86890 | -596.84400  | 82.97288    | 684.35644   | 1 |
| 14275 | H | 68.16600 | 72.78480 | 66.69290 | 1497.15614  | 726.10748   | 2670.11566  | 1 |
| 14276 | C | 69.72500 | 73.87980 | 65.70990 | -175.62620  | -821.42401  | -354.78026  | 1 |
| 14277 | H | 70.51200 | 74.64080 | 65.89490 | 2171.35181  | 2255.82464  | -307.75434  | 1 |
| 14278 | C | 70.49500 | 72.60180 | 65.37190 | 378.51733   | 52.02063    | -827.93085  | 1 |
| 14279 | H | 71.16400 | 72.77680 | 64.50290 | -1830.41880 | -1926.89381 | 1683.70826  | 1 |
| 14280 | H | 71.16100 | 72.19280 | 66.16290 | -1694.63056 | -1036.21179 | -2439.81938 | 1 |
| 14281 | H | 69.76400 | 71.82480 | 65.06090 | 1340.02925  | 2669.43549  | -988.26212  | 1 |
| 14282 | C | 69.01400 | 74.34080 | 64.41390 | -814.01391  | -209.93561  | -353.21297  | 1 |
| 14283 | H | 68.75000 | 75.40280 | 64.60590 | -2507.13629 | 1875.32597  | 309.26749   | 1 |
| 14284 | H | 69.68600 | 74.31480 | 63.52990 | -1945.45291 | -2290.22985 | -931.81889  | 1 |
| 14285 | H | 68.06000 | 73.80680 | 64.21390 | 2327.78054  | 2116.14265  | 40.05353    | 1 |
| 14286 | C | 69.60800 | 73.28180 | 68.10590 | 732.54018   | -357.93091  | 408.31525   | 1 |
| 14287 | O | 69.97600 | 72.13480 | 68.30190 | 1.35383     | -550.82225  | -565.88006  | 1 |
| 14288 | N | 69.88600 | 74.25980 | 68.99390 | 363.03646   | -731.62391  | 213.54921   | 1 |
| 14289 | H | 69.62600 | 75.21180 | 68.84890 | 1755.34152  | -2608.48845 | -113.09448  | 1 |
| 14290 | C | 70.53000 | 73.95480 | 70.25190 | 897.70081   | -103.05256  | -122.32915  | 1 |
| 14291 | H | 70.92300 | 74.92080 | 70.53490 | -36.69836   | -2570.59466 | -1813.53869 | 1 |
| 14292 | H | 71.34000 | 73.25280 | 70.12490 | 2707.14142  | 1502.01009  | 559.97968   | 1 |
| 14293 | C | 69.62700 | 73.38380 | 71.24690 | -455.10011  | 563.46771   | 553.93053   | 1 |
| 14294 | O | 70.00600 | 72.62580 | 72.09890 | -186.37563  | -688.24524  | 339.42575   | 1 |
| 14295 | N | 68.35400 | 73.82580 | 71.22490 | 311.11183   | 604.43295   | 500.54223   | 1 |
| 14296 | H | 67.99000 | 74.44980 | 70.53890 | 1526.07374  | 630.11928   | -2678.11031 | 1 |
| 14297 | C | 67.42000 | 73.44580 | 72.28490 | 488.89665   | -662.84659  | -391.23583  | 1 |
| 14298 | H | 67.91200 | 72.76780 | 72.96590 | -202.70806  | -176.52103  | -3134.64129 | 1 |
| 14299 | C | 66.91300 | 74.68680 | 73.11490 | 284.28868   | 637.56471   | 586.63634   | 1 |
| 14300 | H | 66.12200 | 75.16780 | 72.50090 | 636.15078   | 1541.45354  | -2667.85671 | 1 |
| 14301 | H | 67.73000 | 75.39380 | 73.37290 | -1152.87383 | -1009.69575 | -2747.65767 | 1 |
| 14302 | C | 66.30000 | 74.35180 | 74.45690 | 529.35420   | 598.48763   | -439.37193  | 1 |
| 14303 | H | 65.60900 | 73.48980 | 74.34190 | -1404.50143 | 1893.60025  | 2083.23788  | 1 |
| 14304 | C | 67.30900 | 73.99080 | 75.58390 | -356.46527  | 191.87426   | -817.04821  | 1 |
| 14305 | H | 67.94500 | 74.88180 | 75.77790 | -2886.42813 | -572.73393  | 1112.98460  | 1 |
| 14306 | H | 67.87700 | 73.11080 | 75.21290 | 1554.72610  | 1907.30855  | 1960.41503  | 1 |
| 14307 | H | 66.84500 | 73.70680 | 76.55190 | 1700.32173  | -1757.92658 | 1979.09737  | 1 |
| 14308 | C | 65.46100 | 75.57580 | 74.92890 | -556.85359  | -709.22100  | 135.53838   | 1 |
| 14309 | H | 66.10500 | 76.45080 | 75.16190 | 2764.59040  | 962.11966   | 1153.07932  | 1 |
| 14310 | H | 64.93300 | 75.42080 | 75.89390 | -647.66229  | -1903.03744 | -2420.16700 | 1 |
| 14311 | H | 64.70300 | 75.83080 | 74.15790 | -726.31647  | 962.86753   | -2905.78333 | 1 |
| 14312 | C | 66.18200 | 72.68480 | 71.76890 | -551.55292  | 145.25812   | -711.43549  | 1 |
| 14313 | O | 65.92800 | 71.57280 | 72.17990 | 660.67273   | -87.87243   | 423.57669   | 1 |
| 14314 | N | 65.43300 | 73.25880 | 70.81490 | 350.86310   | -95.77548   | -761.83622  | 1 |

|       |   |          |          |          |             |             |             |   |
|-------|---|----------|----------|----------|-------------|-------------|-------------|---|
| 14315 | H | 65.71600 | 74.14280 | 70.44990 | -1155.90570 | 2419.27216  | 1645.97402  | 1 |
| 14316 | C | 64.18200 | 72.72380 | 70.30190 | -367.08880  | -590.07583  | 590.34509   | 1 |
| 14317 | H | 63.58800 | 72.69080 | 71.20390 | -2345.06017 | 1344.25605  | -1609.93625 | 1 |
| 14318 | C | 63.33000 | 73.64380 | 69.47090 | -881.45777  | -148.18660  | -180.34394  | 1 |
| 14319 | H | 63.72500 | 73.82480 | 68.44790 | -1263.21552 | -2863.19262 | -323.48226  | 1 |
| 14320 | C | 61.92300 | 73.14780 | 69.18390 | -162.98024  | 889.47281   | -117.16040  | 1 |
| 14321 | H | 61.36800 | 72.94880 | 70.12590 | 1868.77692  | 2273.08058  | 1113.10544  | 1 |
| 14322 | H | 61.30500 | 73.85280 | 68.58890 | -2062.91018 | 1098.60995  | -2106.10635 | 1 |
| 14323 | H | 61.96700 | 72.21880 | 68.57590 | 2163.49839  | -1231.78059 | -1923.59494 | 1 |
| 14324 | C | 63.22400 | 75.10980 | 70.05690 | -710.87993  | -201.85737  | 534.18567   | 1 |
| 14325 | H | 62.72800 | 74.93580 | 71.03590 | -1722.85908 | -2220.69218 | -1413.68633 | 1 |
| 14326 | H | 64.20300 | 75.58080 | 70.29190 | 74.49284    | -2991.69774 | -970.78406  | 1 |
| 14327 | C | 62.38800 | 76.05980 | 69.16990 | -901.93412  | -89.79683   | -99.51065   | 1 |
| 14328 | H | 62.69600 | 75.86280 | 68.12090 | -2194.98692 | -1319.68458 | -1827.20860 | 1 |
| 14329 | H | 62.61200 | 77.12580 | 69.38790 | -2958.87587 | 943.55482   | 502.97527   | 1 |
| 14330 | H | 61.29600 | 75.86780 | 69.23290 | 615.59011   | 228.60696   | -3076.85130 | 1 |
| 14331 | C | 64.17900 | 71.32780 | 69.69790 | 615.77418   | -500.64708  | 449.02746   | 1 |
| 14332 | O | 63.61300 | 70.39280 | 70.22690 | 672.86755   | 410.51495   | -48.51765   | 1 |
| 14333 | N | 64.84000 | 71.21580 | 68.46890 | 30.93819    | -690.30030  | -484.97486  | 1 |
| 14334 | H | 65.25800 | 71.95580 | 67.94690 | 2834.41771  | -1125.42655 | 773.12196   | 1 |
| 14335 | C | 64.86800 | 69.95580 | 67.69390 | 598.91025   | -664.56113  | 176.39734   | 1 |
| 14336 | H | 63.81200 | 69.72680 | 67.68790 | -2265.49285 | -1205.97625 | 1819.72241  | 1 |
| 14337 | C | 65.36600 | 70.19380 | 66.22890 | -475.69890  | 749.97196   | 206.64852   | 1 |
| 14338 | H | 66.39600 | 70.60980 | 66.18990 | 1947.96506  | -2077.23152 | 1337.44816  | 1 |
| 14339 | H | 65.22500 | 69.21180 | 65.72890 | -1103.00333 | -1704.59296 | 2403.32535  | 1 |
| 14340 | C | 64.53200 | 71.18780 | 65.44590 | 645.79796   | -525.54372  | -371.75234  | 1 |
| 14341 | H | 64.74800 | 72.23680 | 65.73890 | 1034.52187  | -432.58778  | -2939.53373 | 1 |
| 14342 | C | 64.82900 | 71.16480 | 63.94490 | -193.44510  | 495.40262   | 740.67958   | 1 |
| 14343 | H | 64.37600 | 72.06480 | 63.47790 | 1030.41163  | -2830.14617 | -909.25835  | 1 |
| 14344 | H | 64.51100 | 70.21780 | 63.45690 | -1788.09069 | 1872.10513  | -1787.78642 | 1 |
| 14345 | H | 65.92000 | 71.13280 | 63.73590 | -2319.69691 | 430.01972   | 2081.42152  | 1 |
| 14346 | C | 63.01800 | 70.99680 | 65.50990 | 337.28319   | 463.18300   | -709.33247  | 1 |
| 14347 | H | 62.67500 | 69.94880 | 65.36790 | -2169.81831 | -2099.82564 | 883.65550   | 1 |
| 14348 | H | 62.52000 | 71.27080 | 66.46390 | 1287.11327  | -1973.07056 | 2085.31969  | 1 |
| 14349 | H | 62.58300 | 71.55980 | 64.65590 | 933.05301   | 2308.53467  | -1923.09802 | 1 |
| 14350 | C | 65.59900 | 68.81180 | 68.33190 | -487.30356  | 405.89265   | -655.16212  | 1 |
| 14351 | O | 65.01500 | 67.77580 | 68.08990 | 51.76259    | 752.96699   | -232.35441  | 1 |
| 14352 | N | 66.67700 | 68.82680 | 69.08290 | 716.34479   | -416.55290  | 161.26411   | 1 |
| 14353 | C | 67.51000 | 69.99280 | 69.37990 | -313.75432  | -698.84754  | 494.59211   | 1 |
| 14354 | H | 67.00000 | 70.92280 | 69.70990 | -1118.00607 | 2940.43275  | 46.30239    | 1 |
| 14355 | H | 68.07300 | 70.27080 | 68.46290 | 344.03567   | 2906.48788  | -1154.20703 | 1 |
| 14356 | C | 67.20100 | 67.63480 | 69.73590 | -534.45817  | 709.77158   | 205.01164   | 1 |
| 14357 | H | 67.07000 | 66.78880 | 69.07690 | -857.55567  | 3023.80252  | 139.43755   | 1 |
| 14358 | C | 68.66500 | 68.04580 | 70.17490 | 481.33696   | 391.24665   | 668.35005   | 1 |
| 14359 | H | 69.12400 | 67.49880 | 71.02590 | -2140.94963 | -2003.45149 | 1140.50123  | 1 |
| 14360 | H | 69.38400 | 67.82280 | 69.35690 | 672.80993   | 2140.77173  | 2205.14159  | 1 |
| 14361 | C | 68.55100 | 69.51580 | 70.42490 | -696.14943  | -406.90384  | -425.74198  | 1 |
| 14362 | H | 69.49600 | 70.06980 | 70.24090 | -962.55716  | 2608.97393  | 1471.38199  | 1 |
| 14363 | H | 68.18300 | 69.79180 | 71.43690 | -2261.40855 | -1927.18248 | -1034.51694 | 1 |
| 14364 | C | 66.39300 | 67.26680 | 71.00390 | -453.74341  | 739.56402   | 280.38006   | 1 |
| 14365 | O | 66.32900 | 66.10480 | 71.31490 | -137.54694  | 639.53244   | 442.38708   | 1 |
| 14366 | N | 65.84600 | 68.26680 | 71.68190 | 525.19233   | 644.56059   | -146.24280  | 1 |
| 14367 | H | 65.99600 | 69.19580 | 71.35290 | 2330.43331  | 683.90243   | -1999.89607 | 1 |
| 14368 | C | 64.95700 | 68.17180 | 72.79490 | 399.79504   | -677.76227  | 460.70949   | 1 |
| 14369 | H | 64.63100 | 69.17880 | 73.00590 | 2056.58315  | 1120.06637  | 2100.98627  | 1 |
| 14370 | H | 65.55800 | 67.86280 | 73.63690 | 1733.48591  | 94.92812    | -2623.78381 | 1 |
| 14371 | C | 63.76000 | 67.32980 | 72.57190 | -10.08677   | -839.03243  | -356.89472  | 1 |
| 14372 | O | 63.42600 | 66.47880 | 73.44190 | -437.01769  | -217.15932  | -620.87406  | 1 |
| 14373 | N | 63.06200 | 67.53680 | 71.42990 | 766.41190   | 160.47857   | 315.48648   | 1 |
| 14374 | H | 63.28600 | 68.31780 | 70.85290 | -1861.68302 | 1369.43190  | 2134.71751  | 1 |
| 14375 | C | 61.89500 | 66.79280 | 71.11990 | 134.00087   | -583.58071  | 687.69784   | 1 |
| 14376 | H | 61.24900 | 66.80980 | 71.98490 | -1363.52244 | -2722.36357 | -792.31898  | 1 |

|       |   |          |          |          |             |             |             |   |
|-------|---|----------|----------|----------|-------------|-------------|-------------|---|
| 14377 | C | 61.08100 | 67.31480 | 69.93990 | 593.24576   | -688.29568  | -75.89158   | 1 |
| 14378 | H | 60.31700 | 66.55780 | 69.66190 | 1194.47358  | 2577.93466  | -1351.18910 | 1 |
| 14379 | C | 60.20100 | 68.50380 | 70.43690 | -62.19399   | -708.20101  | 570.99408   | 1 |
| 14380 | H | 59.64400 | 68.05180 | 71.28490 | 1664.45034  | 1183.95113  | 2392.92520  | 1 |
| 14381 | H | 59.37700 | 68.71880 | 69.72290 | -665.70437  | 3054.70418  | -351.91805  | 1 |
| 14382 | H | 60.89200 | 69.32080 | 70.73390 | 1496.61065  | -1903.13702 | -2009.09239 | 1 |
| 14383 | C | 61.97000 | 67.64580 | 68.73790 | -4.01097    | 820.47718   | -397.80915  | 1 |
| 14384 | H | 62.59600 | 68.53580 | 68.96190 | -5.14008    | -236.63247  | 3137.22885  | 1 |
| 14385 | H | 62.67200 | 66.81080 | 68.52690 | 1511.82584  | -448.24004  | 2722.44187  | 1 |
| 14386 | C | 61.18200 | 67.81180 | 67.43490 | -828.62534  | -319.95147  | -206.06334  | 1 |
| 14387 | H | 61.83300 | 68.03080 | 66.56190 | 2986.70743  | -737.51338  | -658.69488  | 1 |
| 14388 | H | 60.42100 | 68.61980 | 67.48290 | 1471.44982  | 615.18607   | 2711.93800  | 1 |
| 14389 | H | 60.54100 | 66.91780 | 67.27590 | 1969.38797  | -2313.68546 | 816.45382   | 1 |
| 14390 | C | 62.10100 | 65.27780 | 70.85890 | 542.50498   | -411.58330  | 606.41449   | 1 |
| 14391 | O | 61.32600 | 64.41780 | 71.31790 | -90.26999   | -196.22098  | -759.58929  | 1 |
| 14392 | N | 63.17400 | 64.90480 | 70.18990 | -117.44128  | 375.04606   | 747.14141   | 1 |
| 14393 | H | 63.73500 | 65.66780 | 69.88090 | 734.43151   | -2823.65248 | -1177.20995 | 1 |
| 14394 | C | 63.66700 | 63.56780 | 70.06490 | -589.92492  | 639.39638   | -273.15172  | 1 |
| 14395 | H | 62.88200 | 62.91180 | 69.71890 | 1868.20173  | 2187.26408  | -1274.33290 | 1 |
| 14396 | C | 64.85000 | 63.46980 | 69.11790 | 73.22357    | -747.66018  | 516.81095   | 1 |
| 14397 | H | 65.76400 | 63.92480 | 69.55590 | -60.91869   | -1130.28062 | -2935.46945 | 1 |
| 14398 | C | 65.11100 | 61.98380 | 68.79790 | 588.28790   | -568.72396  | -402.39460  | 1 |
| 14399 | H | 65.53400 | 61.39180 | 69.63790 | 2129.49122  | 1687.30096  | 1586.35080  | 1 |
| 14400 | H | 65.93800 | 61.98080 | 68.05590 | 869.28117   | -2724.29525 | 1311.78956  | 1 |
| 14401 | H | 64.16200 | 61.56580 | 68.39990 | -1383.60622 | -1787.62488 | -2188.20871 | 1 |
| 14402 | C | 64.66600 | 64.18280 | 67.82090 | -511.99294  | 745.72906   | 114.90170   | 1 |
| 14403 | H | 64.71900 | 65.29080 | 67.87690 | 1588.00486  | -188.69905  | -2709.40205 | 1 |
| 14404 | H | 65.40800 | 63.84580 | 67.06590 | 1800.67259  | -1935.62399 | 1705.62723  | 1 |
| 14405 | H | 63.66800 | 64.06080 | 67.34590 | 1347.81269  | 2032.19053  | -1987.92073 | 1 |
| 14406 | C | 64.06000 | 63.02280 | 71.47490 | -1.70514    | 752.11570   | -515.52892  | 1 |
| 14407 | O | 63.68600 | 61.86980 | 71.71690 | 714.84410   | -93.59885   | -322.27999  | 1 |
| 14408 | N | 64.69800 | 63.81880 | 72.35490 | 551.30940   | -398.39206  | 500.01400   | 1 |
| 14409 | H | 64.92200 | 64.75380 | 72.09190 | 1065.39191  | 2431.51348  | -1688.46336 | 1 |
| 14410 | C | 64.99500 | 63.39580 | 73.70990 | 84.22080    | 855.54583   | -303.97236  | 1 |
| 14411 | H | 65.58600 | 62.49180 | 73.72390 | -1378.58275 | -2174.01324 | -1808.70182 | 1 |
| 14412 | C | 65.90700 | 64.41680 | 74.47290 | -548.75752  | -723.60389  | 81.93657    | 1 |
| 14413 | H | 65.40800 | 65.40280 | 74.35890 | -798.90751  | -3003.86307 | 486.60013   | 1 |
| 14414 | C | 65.96600 | 64.10380 | 75.97690 | 121.52595   | 468.18448   | 772.97202   | 1 |
| 14415 | H | 64.99500 | 64.04380 | 76.51390 | 1064.66948  | 1358.25911  | -2630.55837 | 1 |
| 14416 | H | 66.52400 | 63.15380 | 76.11390 | 728.27879   | -2508.23114 | 1754.02759  | 1 |
| 14417 | H | 66.62700 | 64.80880 | 76.52590 | -2157.82906 | 216.12575   | 2279.31780  | 1 |
| 14418 | C | 67.28900 | 64.30380 | 73.77390 | 749.51981   | -457.40855  | -245.86273  | 1 |
| 14419 | H | 67.15200 | 64.24880 | 72.67190 | -420.13663  | -1908.78261 | -2465.41282 | 1 |
| 14420 | H | 67.80800 | 63.36280 | 74.05590 | 1292.12572  | -2513.34894 | -1382.64763 | 1 |
| 14421 | C | 68.16400 | 65.49680 | 74.02690 | -394.49375  | 463.21539   | -679.15918  | 1 |
| 14422 | H | 67.70100 | 66.33980 | 73.47090 | 2086.51082  | 1736.69889  | -1590.14961 | 1 |
| 14423 | H | 68.23500 | 65.67980 | 75.11990 | 2822.74157  | -548.77616  | 1276.40157  | 1 |
| 14424 | H | 69.22100 | 65.29580 | 73.74790 | 1926.09764  | -1485.74778 | 1995.22621  | 1 |
| 14425 | C | 63.73700 | 63.05580 | 74.48490 | 493.45836   | -499.32038  | -581.91839  | 1 |
| 14426 | O | 63.59500 | 61.94380 | 75.01890 | -732.30512  | 90.81087    | 281.26470   | 1 |
| 14427 | N | 62.71100 | 63.97680 | 74.42690 | -388.37517  | -500.86328  | -557.64953  | 1 |
| 14428 | H | 62.97700 | 64.85880 | 74.04390 | 1950.96197  | -1152.01113 | -2182.85226 | 1 |
| 14429 | C | 61.40000 | 63.89880 | 75.00690 | -65.73122   | 687.61042   | 595.24979   | 1 |
| 14430 | H | 61.51400 | 63.67880 | 76.05790 | -1951.21468 | 1538.10409  | -1930.08375 | 1 |
| 14431 | C | 60.66100 | 65.21180 | 74.74190 | 522.64942   | 726.40915   | -174.98094  | 1 |
| 14432 | H | 60.92700 | 65.60280 | 73.73690 | -1874.72242 | 1772.08866  | -1800.92861 | 1 |
| 14433 | H | 59.56300 | 65.07380 | 74.83190 | -3107.24857 | 303.11924   | -389.03888  | 1 |
| 14434 | C | 61.13800 | 66.33980 | 75.75290 | -526.39631  | -297.91956  | 682.35025   | 1 |
| 14435 | H | 62.24600 | 66.39680 | 75.69090 | -1296.29539 | 1075.82747  | -2657.14880 | 1 |
| 14436 | C | 60.60400 | 67.72780 | 75.32790 | 559.65290   | 571.52751   | -437.71674  | 1 |
| 14437 | H | 60.92600 | 68.06380 | 74.31990 | 2176.88016  | 889.15141   | 2090.17434  | 1 |
| 14438 | H | 59.49500 | 67.79180 | 75.33190 | -1717.87920 | -2187.24171 | -1470.74505 | 1 |

|       |   |          |          |          |             |             |             |   |
|-------|---|----------|----------|----------|-------------|-------------|-------------|---|
| 14439 | H | 60.93400 | 68.51280 | 76.04190 | 939.06574   | 2087.33093  | -2158.57160 | 1 |
| 14440 | C | 60.79400 | 66.15080 | 77.20290 | 793.52293   | -219.55549  | -391.87721  | 1 |
| 14441 | H | 61.31900 | 65.24480 | 77.57390 | -581.17914  | 1168.77396  | -2862.59051 | 1 |
| 14442 | H | 60.95400 | 67.10180 | 77.75390 | -2954.60589 | 506.49745   | 954.98199   | 1 |
| 14443 | H | 59.72800 | 65.90580 | 77.39990 | 1752.84334  | 232.71534   | 2602.23174  | 1 |
| 14444 | C | 60.68300 | 62.63780 | 74.55090 | -422.82354  | 680.47202   | 435.46422   | 1 |
| 14445 | O | 60.15800 | 61.87580 | 75.38690 | 507.75188   | 597.42849   | -94.31041   | 1 |
| 14446 | N | 60.66600 | 62.35580 | 73.27790 | -572.47222  | 389.58514   | 482.87811   | 1 |
| 14447 | H | 61.20100 | 62.96480 | 72.69590 | 1749.94152  | -2014.18665 | -1667.02820 | 1 |
| 14448 | C | 60.10100 | 61.11180 | 72.65490 | 146.14881   | 299.24040   | -848.85023  | 1 |
| 14449 | H | 59.04500 | 61.08180 | 72.87990 | 778.60536   | -2130.16337 | 2180.45957  | 1 |
| 14450 | C | 60.12500 | 61.11180 | 71.07890 | -81.54435   | 640.83186   | 643.53403   | 1 |
| 14451 | H | 59.92400 | 60.10280 | 70.65790 | 2240.83455  | -2098.16604 | 688.90203   | 1 |
| 14452 | H | 61.15700 | 61.42380 | 70.81190 | 1734.81488  | -2487.23910 | -838.02460  | 1 |
| 14453 | O | 59.30200 | 62.05380 | 70.45490 | -354.37435  | -48.53850   | 704.05260   | 1 |
| 14454 | H | 58.40200 | 61.85880 | 70.72590 | -972.02832  | 2985.12033  | -206.01886  | 1 |
| 14455 | C | 60.70300 | 59.78680 | 73.11590 | 596.28258   | -631.56435  | 277.53299   | 1 |
| 14456 | O | 59.91400 | 58.83680 | 73.29290 | -337.54624  | -10.70752   | 713.84530   | 1 |
| 14457 | N | 62.04400 | 59.67780 | 73.24190 | 215.16837   | -355.06463  | -735.05372  | 1 |
| 14458 | H | 62.55400 | 60.48180 | 72.94690 | -1113.47260 | -2283.51931 | -1855.78678 | 1 |
| 14459 | C | 62.74300 | 58.45280 | 73.65390 | -412.71609  | -249.10353  | 773.99216   | 1 |
| 14460 | H | 62.41300 | 57.69680 | 72.95690 | -618.05730  | 2898.96796  | -1054.61660 | 1 |
| 14461 | C | 64.26900 | 58.73380 | 73.87290 | -728.96113  | 259.56186   | 482.38398   | 1 |
| 14462 | H | 64.76100 | 57.78280 | 74.17290 | 901.55280   | 931.36218   | -2866.70425 | 1 |
| 14463 | H | 64.35500 | 59.49580 | 74.67690 | -1452.49062 | -2621.83855 | 956.27393   | 1 |
| 14464 | S | 64.98900 | 59.21680 | 72.26490 | -194.13488  | -76.32355   | 517.39441   | 1 |
| 14465 | H | 64.69800 | 60.50780 | 72.31790 | -681.37477  | -1452.89683 | 2706.11261  | 1 |
| 14466 | C | 62.19100 | 57.92080 | 74.99590 | 116.85271   | 739.49730   | -520.51915  | 1 |
| 14467 | O | 61.86400 | 56.75380 | 75.16990 | 182.68119   | 593.14954   | 488.29135   | 1 |
| 14468 | N | 62.14600 | 58.80680 | 76.01990 | 45.70287    | 804.95113   | -250.27427  | 1 |
| 14469 | H | 62.48500 | 59.73680 | 75.89890 | -674.89009  | -2327.51731 | -2006.34313 | 1 |
| 14470 | C | 61.69700 | 58.38880 | 77.38590 | -740.98950  | -479.25022  | -229.57526  | 1 |
| 14471 | H | 62.07100 | 57.41880 | 77.67990 | -2645.96527 | 1517.62944  | 770.64577   | 1 |
| 14472 | C | 62.30100 | 59.29480 | 78.44190 | 757.50892   | 468.49620   | -195.30118  | 1 |
| 14473 | H | 61.96400 | 58.85080 | 79.40290 | 2406.12827  | 1321.26137  | -1537.21872 | 1 |
| 14474 | H | 61.85500 | 60.29480 | 78.25690 | 2782.91557  | 1102.01246  | 969.11076   | 1 |
| 14475 | C | 63.83700 | 59.35180 | 78.28390 | -803.14102  | 140.99230   | 408.08906   | 1 |
| 14476 | C | 64.38900 | 60.56680 | 77.83490 | 569.90361   | 535.86548   | -468.51795  | 1 |
| 14477 | H | 63.80300 | 61.43580 | 77.57490 | 901.26748   | 2307.51083  | 1939.41664  | 1 |
| 14478 | C | 65.78200 | 60.60780 | 77.65190 | -37.77197   | -597.50180  | -687.76150  | 1 |
| 14479 | H | 66.16600 | 61.51380 | 77.20790 | -904.88168  | 1353.36004  | 2692.17978  | 1 |
| 14480 | C | 66.60500 | 59.53580 | 77.92290 | -817.15962  | -16.96333   | -404.24424  | 1 |
| 14481 | O | 67.97300 | 59.58680 | 77.66090 | -653.44068  | -391.55089  | 208.15958   | 1 |
| 14482 | H | 68.15200 | 60.22280 | 76.96390 | 1760.09192  | -2576.95817 | -399.48619  | 1 |
| 14483 | C | 64.61200 | 58.27280 | 78.57190 | -385.75690  | 437.13966   | 701.10737   | 1 |
| 14484 | H | 64.11800 | 57.43480 | 79.04090 | 2260.45440  | -996.47659  | 1948.23164  | 1 |
| 14485 | C | 66.01500 | 58.33080 | 78.34490 | -476.74657  | -368.24947  | 684.51153   | 1 |
| 14486 | H | 66.62900 | 57.44280 | 78.37690 | 958.68698   | -2912.64048 | -704.03901  | 1 |
| 14487 | C | 60.22600 | 58.36380 | 77.44290 | 40.66128    | 834.47524   | -365.30637  | 1 |
| 14488 | O | 59.63100 | 57.65280 | 78.25890 | -322.55860  | 526.28303   | -492.55391  | 1 |
| 14489 | N | 59.50100 | 59.13780 | 76.59090 | 188.73066   | -563.22900  | -599.85508  | 1 |
| 14490 | H | 59.91300 | 59.78880 | 75.95890 | -2203.55087 | 1691.57533  | 1476.87599  | 1 |
| 14491 | C | 58.09000 | 58.99580 | 76.38390 | -901.54697  | -95.99147   | 97.20962    | 1 |
| 14492 | H | 57.66200 | 59.15280 | 77.36290 | 1913.20878  | -2197.06582 | 1187.75425  | 1 |
| 14493 | C | 57.49900 | 60.00280 | 75.39790 | -3.91098    | -816.22786  | 406.45762   | 1 |
| 14494 | H | 57.89000 | 60.99280 | 75.71490 | -1932.81911 | -1896.28298 | -1602.04474 | 1 |
| 14495 | H | 57.90100 | 59.81880 | 74.37790 | 730.76234   | -3020.63486 | 489.87516   | 1 |
| 14496 | S | 55.72300 | 60.08580 | 75.22290 | -8.62032    | -298.44196  | 471.24165   | 1 |
| 14497 | H | 55.62900 | 59.09380 | 74.34990 | -2337.76039 | 1913.19876  | 879.07513   | 1 |
| 14498 | C | 57.68600 | 57.57480 | 75.97290 | -725.82512  | 212.06652   | -509.56519  | 1 |
| 14499 | O | 56.79800 | 56.98380 | 76.56690 | -675.41180  | -371.42640  | -171.72231  | 1 |
| 14500 | N | 58.36000 | 56.95880 | 75.04090 | 12.16073    | -815.10765  | -219.37167  | 1 |

|       |   |          |          |          |             |             |             |   |
|-------|---|----------|----------|----------|-------------|-------------|-------------|---|
| 14501 | H | 58.91300 | 57.53180 | 74.44090 | -727.88212  | 2445.23033  | 1840.99497  | 1 |
| 14502 | C | 58.10400 | 55.59180 | 74.61790 | -590.94656  | 130.60970   | 682.03685   | 1 |
| 14503 | H | 57.05600 | 55.50580 | 74.37190 | 1979.92371  | -2441.04385 | -139.40326  | 1 |
| 14504 | C | 58.88400 | 55.19280 | 73.32890 | 626.26332   | -583.85032  | -313.63045  | 1 |
| 14505 | H | 59.96700 | 55.39580 | 73.47690 | -2093.11751 | 1786.25521  | -1525.24674 | 1 |
| 14506 | C | 58.75700 | 53.70380 | 73.07890 | -704.92997  | 108.48903   | 568.11519   | 1 |
| 14507 | H | 59.12800 | 53.48880 | 72.05390 | 2482.17114  | 1404.67173  | -1328.13778 | 1 |
| 14508 | H | 59.29400 | 53.04680 | 73.79590 | 2783.72384  | -1395.70830 | -448.44861  | 1 |
| 14509 | H | 57.68400 | 53.41180 | 73.07590 | 2819.67443  | 1395.41107  | 22.14147    | 1 |
| 14510 | C | 58.35700 | 55.95380 | 72.10590 | 625.30349   | -64.59327   | -660.51060  | 1 |
| 14511 | H | 57.42400 | 55.51380 | 71.69390 | 1383.39231  | 2825.00579  | -61.59749   | 1 |
| 14512 | H | 58.03500 | 56.99480 | 72.32590 | 2392.04041  | 2043.19427  | 41.54653    | 1 |
| 14513 | C | 59.39500 | 56.11680 | 70.97890 | 697.09019   | -527.59108  | -259.16004  | 1 |
| 14514 | H | 59.93700 | 55.16780 | 70.78090 | 1909.84300  | -1424.44627 | 2054.67242  | 1 |
| 14515 | H | 59.03200 | 56.60880 | 70.05190 | 1920.85389  | 178.12630   | 2485.32042  | 1 |
| 14516 | H | 60.04100 | 56.97780 | 71.25290 | 2526.20734  | 1579.75436  | 1010.38550  | 1 |
| 14517 | C | 58.48800 | 54.59080 | 75.69290 | -672.90234  | 35.56105    | -614.31983  | 1 |
| 14518 | O | 57.74000 | 53.60180 | 75.90990 | -478.48117  | -400.52770  | -484.00470  | 1 |
| 14519 | N | 59.64700 | 54.78980 | 76.37390 | -594.65392  | -518.80353  | -299.83646  | 1 |
| 14520 | H | 59.99800 | 55.71780 | 76.27190 | -2801.41960 | -1160.56416 | 838.66875   | 1 |
| 14521 | C | 60.34200 | 53.84080 | 77.29690 | -465.92880  | -632.01678  | -463.59049  | 1 |
| 14522 | H | 60.57700 | 52.90980 | 76.80290 | 2104.64880  | -1398.78162 | -1874.05700 | 1 |
| 14523 | C | 61.81500 | 54.30380 | 77.78890 | 563.73452   | -478.79226  | 533.30326   | 1 |
| 14524 | H | 61.72400 | 55.38780 | 78.01790 | -180.62567  | 2661.80876  | -1667.44557 | 1 |
| 14525 | C | 62.20200 | 53.43880 | 79.01190 | -735.72828  | 495.54516   | 211.16321   | 1 |
| 14526 | H | 62.13300 | 52.35980 | 78.75490 | 1744.68210  | 1919.39457  | 1780.51539  | 1 |
| 14527 | H | 63.25500 | 53.63080 | 79.30990 | -2455.01550 | -1863.10778 | -632.41956  | 1 |
| 14528 | H | 61.54700 | 53.49980 | 79.90690 | -3074.15489 | 510.41792   | -432.74879  | 1 |
| 14529 | C | 62.82100 | 54.15980 | 76.66190 | -535.57079  | 392.91337   | -624.68714  | 1 |
| 14530 | H | 62.32800 | 54.42880 | 75.70290 | 2535.16225  | -1816.52634 | -414.01766  | 1 |
| 14531 | H | 63.23200 | 53.13380 | 76.55490 | 637.95677   | -2996.20685 | -716.92531  | 1 |
| 14532 | C | 64.08400 | 54.91880 | 76.90390 | -180.83755  | 852.62476   | 267.91753   | 1 |
| 14533 | H | 63.83200 | 55.97580 | 77.13390 | -2162.95064 | -237.77774  | -2272.29675 | 1 |
| 14534 | H | 64.72100 | 54.56480 | 77.74290 | -681.95603  | -2936.95997 | -898.57017  | 1 |
| 14535 | H | 64.80100 | 54.81880 | 76.06190 | -102.88974  | -380.35460  | -3121.37314 | 1 |
| 14536 | C | 59.39500 | 53.38480 | 78.45890 | 365.42209   | -771.75666  | 319.85834   | 1 |
| 14537 | O | 59.23700 | 52.19880 | 78.85690 | -130.96376  | -582.10112  | -517.33356  | 1 |
| 14538 | N | 58.74100 | 54.39080 | 79.02790 | -580.04826  | -497.83537  | 358.29632   | 1 |
| 14539 | H | 58.82900 | 55.33080 | 78.70690 | -2465.17050 | 1949.98831  | 136.77065   | 1 |
| 14540 | C | 57.95400 | 54.24980 | 80.20890 | 552.93237   | -538.66922  | 485.33727   | 1 |
| 14541 | H | 58.55600 | 53.66780 | 80.89190 | -1936.24275 | 1681.77355  | 1822.31390  | 1 |
| 14542 | C | 57.67700 | 55.58980 | 80.88790 | -544.96510  | 524.50920   | -509.26825  | 1 |
| 14543 | H | 57.07200 | 55.33580 | 81.78590 | 2316.46170  | -1887.20468 | -985.23598  | 1 |
| 14544 | C | 58.98100 | 56.16480 | 81.44990 | 634.75023   | 581.47036   | 300.72474   | 1 |
| 14545 | H | 58.79600 | 57.04280 | 82.10490 | 2074.77167  | -1603.44444 | 1738.53809  | 1 |
| 14546 | H | 59.55900 | 55.40180 | 82.01390 | -3027.53279 | 730.20764   | -446.17064  | 1 |
| 14547 | H | 59.56000 | 56.60080 | 80.60790 | 492.25962   | -3013.89594 | 756.53021   | 1 |
| 14548 | C | 56.89100 | 56.57580 | 80.03690 | -735.50513  | -67.82815   | -534.67985  | 1 |
| 14549 | H | 57.59600 | 57.08480 | 79.34490 | -2011.17990 | 2111.92388  | 1180.32164  | 1 |
| 14550 | H | 56.23000 | 55.99780 | 79.35490 | -1755.26170 | 1810.64938  | 1881.17820  | 1 |
| 14551 | C | 56.10400 | 57.58680 | 80.84990 | 614.68626   | 74.55363    | 669.36803   | 1 |
| 14552 | H | 55.43400 | 57.04080 | 81.54790 | 2510.66828  | 1886.50010  | 189.44233   | 1 |
| 14553 | H | 55.39900 | 58.12580 | 80.18290 | -12.55402   | 61.42276    | -3145.51997 | 1 |
| 14554 | H | 56.80600 | 58.30380 | 81.32690 | 2078.87938  | -1735.19968 | 1601.73931  | 1 |
| 14555 | C | 56.78400 | 53.35880 | 80.02290 | -743.53414  | 511.49723   | -130.30185  | 1 |
| 14556 | O | 56.23600 | 52.76380 | 80.96890 | 588.39911   | 524.92125   | 43.25962    | 1 |
| 14557 | N | 56.27700 | 53.27880 | 78.79190 | 13.28607    | 588.62638   | 604.99153   | 1 |
| 14558 | H | 56.73500 | 53.86180 | 78.12490 | 946.06818   | -1978.89572 | 2255.47178  | 1 |
| 14559 | C | 55.13000 | 52.49880 | 78.47790 | -295.89285  | 791.67877   | -342.26182  | 1 |
| 14560 | H | 54.47900 | 52.42980 | 79.33690 | 843.43458   | 1701.42202  | 2508.38742  | 1 |
| 14561 | C | 54.26500 | 53.22480 | 77.40490 | 754.02901   | 511.08116   | -41.07688   | 1 |
| 14562 | H | 53.70300 | 54.02080 | 77.93790 | -1909.60232 | -2485.84722 | 268.71691   | 1 |

|       |   |          |          |          |             |             |             |   |
|-------|---|----------|----------|----------|-------------|-------------|-------------|---|
| 14563 | H | 53.51500 | 52.55080 | 76.93890 | -2511.76953 | -1578.68953 | 1047.36786  | 1 |
| 14564 | O | 55.06400 | 53.77880 | 76.36790 | -400.51945  | 635.55216   | -243.48482  | 1 |
| 14565 | H | 55.77900 | 53.17280 | 76.16290 | 126.75732   | 3123.91475  | 351.16297   | 1 |
| 14566 | C | 55.34500 | 51.08080 | 78.13790 | 729.63697   | -446.46594  | 315.83076   | 1 |
| 14567 | O | 54.38400 | 50.33480 | 77.74290 | 442.93773   | -651.90520  | -49.52781   | 1 |
| 14568 | N | 56.56600 | 50.60580 | 78.30390 | -107.75884  | -765.91461  | 338.28262   | 1 |
| 14569 | H | 57.18900 | 51.23380 | 78.76590 | -203.77245  | 1794.70073  | -2575.99540 | 1 |
| 14570 | C | 56.93000 | 49.22180 | 78.07690 | 649.67172   | -639.82059  | 2.69468     | 1 |
| 14571 | H | 56.17700 | 48.60980 | 78.54990 | -1683.53299 | -2008.38757 | 1740.78209  | 1 |
| 14572 | C | 56.90500 | 48.80080 | 76.58590 | 550.37529   | 503.16102   | 524.75426   | 1 |
| 14573 | H | 55.84500 | 48.89880 | 76.26890 | -1913.41416 | 2467.82422  | 383.29633   | 1 |
| 14574 | H | 57.16400 | 47.73180 | 76.43290 | 1246.14911  | 2688.02245  | 1058.24095  | 1 |
| 14575 | C | 57.61500 | 49.74880 | 75.55590 | -524.85807  | 656.88756   | 352.80837   | 1 |
| 14576 | H | 58.66700 | 49.92380 | 75.86590 | 53.68440    | -3097.36282 | -549.26111  | 1 |
| 14577 | H | 57.07500 | 50.71580 | 75.64090 | 813.94205   | 1730.01573  | -2498.55361 | 1 |
| 14578 | C | 57.50000 | 49.15880 | 74.14190 | -220.05618  | 494.47871   | 733.83724   | 1 |
| 14579 | H | 58.09000 | 49.79580 | 73.44890 | -2571.25717 | -1811.98947 | 59.64017    | 1 |
| 14580 | H | 58.01800 | 48.17680 | 74.12790 | 2258.20433  | 443.46897   | -2145.24468 | 1 |
| 14581 | C | 56.08000 | 49.16180 | 73.63190 | 570.19697   | -673.94438  | 228.30983   | 1 |
| 14582 | H | 55.39300 | 48.50380 | 74.20690 | 1472.61415  | -1731.58635 | -2175.14195 | 1 |
| 14583 | H | 55.70700 | 50.20880 | 73.64390 | 2314.10831  | 134.62230   | -2127.20610 | 1 |
| 14584 | N | 56.00100 | 48.71280 | 72.26790 | -364.77716  | -342.77374  | -679.79120  | 1 |
| 14585 | H | 56.26500 | 49.45680 | 71.59090 | 165.10505   | -2618.56232 | 1736.11575  | 1 |
| 14586 | H | 55.01000 | 48.47780 | 72.05990 | 1485.64317  | 2105.19406  | 1805.33891  | 1 |
| 14587 | H | 56.61600 | 47.89280 | 72.09290 | 2555.77940  | -661.07959  | -1711.48814 | 1 |
| 14588 | C | 58.25800 | 48.62980 | 78.70690 | 530.68986   | 545.42282   | 502.32780   | 1 |
| 14589 | O | 58.67000 | 47.50480 | 78.41790 | -483.71484  | -550.91079  | 293.50382   | 1 |
| 14590 | N | 58.87400 | 49.39780 | 79.67090 | -9.30974    | -840.03168  | 83.26103    | 1 |
| 14591 | H | 58.55300 | 50.33080 | 79.81490 | 2297.01815  | 2051.55425  | -642.69667  | 1 |
| 14592 | C | 60.05300 | 49.01480 | 80.43090 | -738.17546  | 52.50969    | 532.72011   | 1 |
| 14593 | H | 60.85900 | 48.83280 | 79.73490 | -210.22144  | 1446.03697  | 2786.21791  | 1 |
| 14594 | C | 60.48400 | 50.11080 | 81.40890 | -591.45373  | 419.26880   | -553.03451  | 1 |
| 14595 | H | 60.55300 | 51.07380 | 80.85790 | -1981.72135 | -900.86016  | 2271.44396  | 1 |
| 14596 | H | 59.62900 | 50.22680 | 82.10890 | -1607.70201 | -1667.68815 | -2128.92854 | 1 |
| 14597 | C | 61.81200 | 49.86180 | 82.09690 | -16.13933   | 55.14233    | 910.02739   | 1 |
| 14598 | H | 61.77700 | 48.88480 | 82.62590 | 487.95653   | 2621.51135  | 1669.67149  | 1 |
| 14599 | C | 62.94700 | 50.01980 | 81.06690 | 705.18292   | -576.44655  | -43.32926   | 1 |
| 14600 | H | 62.97300 | 51.01480 | 80.57190 | -2305.40820 | 1828.95797  | 1112.75874  | 1 |
| 14601 | H | 62.94200 | 49.14980 | 80.37590 | -378.26055  | -366.92465  | -3101.69494 | 1 |
| 14602 | H | 63.86500 | 49.83680 | 81.66490 | 2805.76968  | 1332.24762  | -500.99800  | 1 |
| 14603 | C | 61.98100 | 50.95380 | 83.20990 | -529.26154  | -527.10529  | -522.96582  | 1 |
| 14604 | H | 61.11500 | 50.89480 | 83.90290 | -2600.06500 | -10.89578   | 1771.37503  | 1 |
| 14605 | H | 62.95000 | 50.78680 | 83.72690 | -2857.22398 | -1163.83868 | -616.42263  | 1 |
| 14606 | H | 62.00600 | 51.98380 | 82.79390 | -1978.21852 | -1094.01348 | 2188.15270  | 1 |
| 14607 | C | 59.83400 | 47.69080 | 81.19690 | 29.37427    | 590.26214   | -694.39093  | 1 |
| 14608 | O | 60.73700 | 46.80980 | 81.21890 | -395.33304  | -155.10882  | 665.79296   | 1 |
| 14609 | N | 58.64700 | 47.46780 | 81.86090 | 190.50952   | -793.34384  | -216.75786  | 1 |
| 14610 | H | 57.93700 | 48.16280 | 81.93990 | -2342.89876 | -2093.71748 | 159.36980   | 1 |
| 14611 | C | 58.32400 | 46.20480 | 82.43990 | -697.54255  | 580.86657   | -86.48359   | 1 |
| 14612 | H | 59.16000 | 45.72380 | 82.92390 | -135.59744  | -1219.89506 | 2896.84235  | 1 |
| 14613 | C | 57.25300 | 46.40580 | 83.55490 | 439.01971   | -366.94824  | 709.97302   | 1 |
| 14614 | H | 56.46500 | 47.09480 | 83.18390 | -2983.55025 | -793.80366  | -605.41709  | 1 |
| 14615 | H | 56.84700 | 45.42880 | 83.89290 | -1528.44556 | 2391.22976  | -1357.97666 | 1 |
| 14616 | O | 57.79400 | 47.05480 | 84.72390 | -58.33021   | -271.59339  | -739.23058  | 1 |
| 14617 | H | 58.33600 | 46.39680 | 85.16390 | -3067.75475 | -104.94495  | 689.99534   | 1 |
| 14618 | C | 57.74300 | 45.15880 | 81.47690 | -760.62354  | 368.20265   | -342.53415  | 1 |
| 14619 | O | 57.44700 | 44.02980 | 81.86390 | 658.98494   | -55.19269   | -431.64782  | 1 |
| 14620 | N | 57.64000 | 45.44880 | 80.18090 | -27.63665   | -200.09890  | -819.67612  | 1 |
| 14621 | H | 57.87600 | 46.33480 | 79.79090 | -2405.58554 | 1968.51410  | 486.14470   | 1 |
| 14622 | C | 57.07300 | 44.51080 | 79.22090 | 223.58277   | 529.74666   | -707.69359  | 1 |
| 14623 | H | 56.64100 | 43.64980 | 79.70890 | -2194.21227 | 2069.53962  | 894.79860   | 1 |
| 14624 | C | 55.93600 | 45.12680 | 78.34290 | -518.88023  | -145.33223  | 735.59014   | 1 |



|       |   |          |          |          |             |             |             |   |
|-------|---|----------|----------|----------|-------------|-------------|-------------|---|
| 14625 | H | 56.29600 | 45.99180 | 77.74590 | 2184.72905  | 100.66614   | 2261.64797  | 1 |
| 14626 | H | 55.54800 | 44.49680 | 77.51490 | 1248.43424  | -602.57619  | -2824.27692 | 1 |
| 14627 | N | 53.71900 | 46.31980 | 78.70290 | -450.62011  | 535.76950   | -471.76779  | 1 |
| 14628 | H | 53.67500 | 46.71180 | 77.78490 | 2145.22324  | 692.26068   | -2194.77074 | 1 |
| 14629 | C | 54.76900 | 45.59380 | 79.19390 | 747.60014   | 320.33242   | 412.22830   | 1 |
| 14630 | C | 52.84700 | 46.50780 | 79.73890 | -653.78111  | 361.98540   | 522.48238   | 1 |
| 14631 | H | 51.89400 | 47.02380 | 79.61890 | 821.71042   | -3004.28058 | -444.20312  | 1 |
| 14632 | N | 53.29900 | 45.96080 | 80.86590 | -521.14493  | -363.93868  | 555.54378   | 1 |
| 14633 | C | 54.52600 | 45.35480 | 80.48390 | 151.03952   | 173.87420   | 882.27310   | 1 |
| 14634 | H | 55.14700 | 44.83680 | 81.20490 | -1933.72550 | 1915.08321  | 1578.41320  | 1 |
| 14635 | C | 58.04800 | 44.00880 | 78.19490 | 737.17950   | 260.16697   | 469.39380   | 1 |
| 14636 | O | 57.88200 | 42.94680 | 77.55890 | 260.74621   | -502.24469  | 550.80751   | 1 |
| 14637 | N | 59.14200 | 44.76280 | 78.02990 | -229.19614  | -767.26064  | -267.30605  | 1 |
| 14638 | H | 59.21600 | 45.65280 | 78.47390 | 2722.75767  | -1531.41429 | -373.61368  | 1 |
| 14639 | C | 60.37000 | 44.45780 | 77.32690 | 475.53858   | -634.38824  | 450.40607   | 1 |
| 14640 | H | 60.06600 | 43.86780 | 76.47490 | 1926.73388  | -1447.61399 | -2022.45804 | 1 |
| 14641 | C | 61.19700 | 45.73880 | 76.87590 | -753.09062  | -29.10756   | 513.28186   | 1 |
| 14642 | H | 62.10800 | 45.47580 | 76.29590 | -203.08343  | -2886.69370 | 1234.49700  | 1 |
| 14643 | H | 61.43300 | 46.19080 | 77.86290 | -2217.83936 | 860.91246   | -2058.69972 | 1 |
| 14644 | O | 60.39300 | 46.65880 | 76.10090 | 299.48177   | 657.88616   | 317.99952   | 1 |
| 14645 | H | 59.93500 | 47.30180 | 76.64590 | -931.22968  | 1921.92466  | 2310.24742  | 1 |
| 14646 | C | 61.25600 | 43.57680 | 78.15690 | -178.70763  | -160.85079  | 879.56899   | 1 |
| 14647 | O | 61.74400 | 44.02380 | 79.23190 | 668.96290   | 409.43745   | 92.06977    | 1 |
| 14648 | O | 61.55900 | 42.43480 | 77.70390 | 607.49542   | -496.86289  | -87.77135   | 1 |
| 14649 | N | 68.09800 | 39.69880 | 83.86190 | 571.61285   | 349.91433   | 513.31374   | 1 |
| 14650 | H | 68.31400 | 38.85080 | 84.42290 | 910.08563   | 2169.10908  | 2089.24296  | 1 |
| 14651 | H | 68.24600 | 39.59180 | 82.83790 | 1776.01328  | -2241.62595 | 1311.15071  | 1 |
| 14652 | H | 67.12500 | 40.02180 | 84.03590 | 1021.37160  | 1012.12330  | -2798.32677 | 1 |
| 14653 | C | 68.95200 | 40.75780 | 84.30590 | 777.55891   | 146.67247   | 453.14493   | 1 |
| 14654 | H | 68.94300 | 40.82480 | 85.38390 | 1946.09249  | 226.04804   | 2461.67677  | 1 |
| 14655 | C | 70.47100 | 40.56280 | 83.91090 | -111.61165  | 613.31428   | 665.46182   | 1 |
| 14656 | H | 70.98000 | 41.53880 | 84.06090 | 2031.28577  | 2399.19909  | -126.28571  | 1 |
| 14657 | H | 70.47900 | 40.45980 | 82.80490 | 230.72473   | -2499.99811 | -1896.04900 | 1 |
| 14658 | C | 71.15500 | 39.33080 | 84.51890 | -126.72152  | -755.37306  | 494.77692   | 1 |
| 14659 | H | 72.17500 | 39.10180 | 84.14190 | 2817.21167  | -1316.06727 | 479.07368   | 1 |
| 14660 | H | 70.62200 | 38.43880 | 84.12690 | 2586.76849  | 178.09807   | -1781.89115 | 1 |
| 14661 | C | 71.32300 | 39.38980 | 86.03290 | 463.17499   | 681.60177   | -390.30625  | 1 |
| 14662 | H | 70.30800 | 39.45380 | 86.48090 | 140.17274   | -556.15974  | -3093.42273 | 1 |
| 14663 | H | 71.82700 | 40.34380 | 86.29990 | -1194.98471 | 1307.19899  | 2600.28240  | 1 |
| 14664 | C | 71.99000 | 38.13380 | 86.56490 | 192.57395   | -856.97157  | 244.87956   | 1 |
| 14665 | H | 71.54000 | 37.18180 | 86.20890 | 2223.30287  | -2111.73266 | 704.08501   | 1 |
| 14666 | H | 73.02200 | 38.05280 | 86.16090 | -2223.17803 | -1828.22959 | 1270.15048  | 1 |
| 14667 | N | 72.01700 | 38.08680 | 88.06190 | -231.46637  | 312.51116   | 749.28792   | 1 |
| 14668 | H | 72.40100 | 38.94980 | 88.49690 | -1219.09390 | 2187.79300  | -1904.10033 | 1 |
| 14669 | H | 71.06600 | 37.95380 | 88.46190 | -1435.97863 | -1999.74162 | -1958.88362 | 1 |
| 14670 | H | 72.60700 | 37.30680 | 88.41590 | 2885.33725  | 1136.02598  | -531.50744  | 1 |
| 14671 | C | 68.42100 | 42.10180 | 83.76190 | -828.88752  | -98.95561   | 366.88455   | 1 |
| 14672 | O | 67.82500 | 42.17680 | 82.71690 | -522.37256  | -577.22668  | -132.52735  | 1 |
| 14673 | N | 68.61900 | 43.27580 | 84.43490 | -646.96390  | 541.01008   | -37.65773   | 1 |
| 14674 | H | 69.20800 | 43.27780 | 85.23890 | 2269.17026  | 2048.11863  | 744.51504   | 1 |
| 14675 | C | 67.99400 | 44.54780 | 83.99690 | 242.27881   | 241.13978   | -845.34229  | 1 |
| 14676 | H | 68.34000 | 44.71780 | 82.98890 | 859.63306   | -1423.90944 | -2670.53162 | 1 |
| 14677 | H | 66.91700 | 44.46680 | 83.96490 | -771.66451  | -605.82432  | -2989.27031 | 1 |
| 14678 | C | 68.37200 | 45.68480 | 84.92590 | 184.66813   | -321.36860  | 833.10918   | 1 |
| 14679 | O | 68.20000 | 46.83880 | 84.64490 | -682.82653  | -368.19143  | 147.68288   | 1 |
| 14680 | N | 68.83800 | 45.43480 | 86.17690 | -151.80695  | 593.35009   | -581.00139  | 1 |
| 14681 | H | 69.14100 | 44.52880 | 86.46290 | 2037.25410  | 2010.44992  | 1306.10606  | 1 |
| 14682 | C | 69.04600 | 46.53980 | 87.06590 | -543.62316  | -345.00075  | -645.67743  | 1 |
| 14683 | H | 68.12300 | 47.09580 | 87.14390 | 66.33524    | -2802.41070 | 1428.39775  | 1 |
| 14684 | C | 69.42500 | 45.95680 | 88.48290 | -272.01223  | -709.62501  | -503.87766  | 1 |
| 14685 | H | 69.61000 | 46.79780 | 89.18490 | -409.90894  | 2764.32361  | -1445.23903 | 1 |
| 14686 | H | 70.26400 | 45.23680 | 88.37490 | 2379.73334  | 927.90655   | 1836.86822  | 1 |

|       |   |          |          |          |             |             |             |   |
|-------|---|----------|----------|----------|-------------|-------------|-------------|---|
| 14687 | N | 68.12900 | 45.25980 | 90.58990 | 460.74564   | 311.05029   | -635.32154  | 1 |
| 14688 | H | 68.44200 | 46.05880 | 91.10290 | -330.13030  | 2963.30336  | 1004.02859  | 1 |
| 14689 | C | 68.28000 | 45.18480 | 89.23290 | 519.54692   | 329.33351   | -673.09839  | 1 |
| 14690 | C | 67.11100 | 44.45380 | 90.92790 | 644.40650   | -337.95750  | 549.52342   | 1 |
| 14691 | H | 66.88800 | 44.18780 | 91.96090 | 1809.78404  | 2565.69366  | -200.30982  | 1 |
| 14692 | N | 66.50500 | 43.97780 | 89.88790 | -540.84101  | 466.07973   | -450.48082  | 1 |
| 14693 | C | 67.24500 | 44.40280 | 88.80090 | 233.82681   | 632.05969   | 614.22844   | 1 |
| 14694 | H | 67.06100 | 44.12980 | 87.76890 | 2200.32966  | 771.33471   | -2112.30168 | 1 |
| 14695 | C | 70.13100 | 47.50080 | 86.71590 | 173.45819   | 439.65766   | -779.78484  | 1 |
| 14696 | O | 69.95600 | 48.68880 | 86.84090 | 222.39656   | -627.13672  | 425.28406   | 1 |
| 14697 | N | 71.22300 | 46.97380 | 86.14590 | 204.60913   | 810.01953   | 121.14355   | 1 |
| 14698 | H | 71.30800 | 45.98380 | 86.05590 | 1395.58742  | -1035.56346 | 2622.62660  | 1 |
| 14699 | C | 72.34500 | 47.79380 | 85.73390 | 660.80815   | 628.31392   | 2.28335     | 1 |
| 14700 | H | 72.45100 | 48.61880 | 86.42290 | -1545.53051 | 576.21836   | -2679.09202 | 1 |
| 14701 | C | 73.65200 | 47.05680 | 85.70090 | -425.79057  | 48.13732    | 804.88272   | 1 |
| 14702 | H | 73.55600 | 46.00080 | 85.36790 | 3039.25537  | 630.53926   | -513.39387  | 1 |
| 14703 | H | 74.35000 | 47.50180 | 84.95990 | -1972.72698 | 1038.17948  | -2220.08060 | 1 |
| 14704 | C | 74.30700 | 47.04680 | 87.09390 | 480.53013   | 151.83766   | 759.92574   | 1 |
| 14705 | H | 74.48500 | 48.04780 | 87.54190 | 2370.68197  | 2029.45804  | -399.24092  | 1 |
| 14706 | H | 75.34400 | 46.64680 | 87.06490 | 1467.22559  | -1259.41518 | 2481.80352  | 1 |
| 14707 | C | 73.53900 | 46.29480 | 88.22990 | 58.71735    | 865.85843   | 279.80790   | 1 |
| 14708 | O | 73.14300 | 46.94180 | 89.21590 | 700.56881   | -336.87543  | -139.08814  | 1 |
| 14709 | N | 73.26100 | 44.98580 | 88.05190 | -505.79474  | 159.24044   | -656.87629  | 1 |
| 14710 | H | 73.59700 | 44.45680 | 87.27190 | 3144.97068  | 8.48997     | -85.51932   | 1 |
| 14711 | H | 72.71800 | 44.56680 | 88.77890 | 2893.42752  | 214.46368   | -1216.67940 | 1 |
| 14712 | C | 72.00600 | 48.49580 | 84.37690 | -652.05618  | 177.10620   | -612.29661  | 1 |
| 14713 | O | 72.38900 | 49.64980 | 84.14890 | 350.99120   | 170.81571   | -686.47971  | 1 |
| 14714 | N | 71.16500 | 47.88080 | 83.49290 | -302.53106  | -766.33903  | -184.04277  | 1 |
| 14715 | H | 70.90700 | 46.92780 | 83.63290 | 364.44118   | -1764.43515 | 2579.18155  | 1 |
| 14716 | C | 70.59400 | 48.62080 | 82.36290 | -862.50171  | -289.28886  | -62.07866   | 1 |
| 14717 | H | 71.41900 | 49.01280 | 81.78590 | 1036.01167  | 2208.48577  | -1986.83081 | 1 |
| 14718 | C | 69.70100 | 47.63480 | 81.51590 | -164.55527  | -344.16843  | -828.20327  | 1 |
| 14719 | H | 69.09700 | 47.05380 | 82.24590 | 658.45871   | -2145.97582 | 2204.41515  | 1 |
| 14720 | H | 69.01800 | 48.11480 | 80.78390 | 2985.10277  | -664.84523  | 738.49069   | 1 |
| 14721 | C | 70.56200 | 46.67680 | 80.62690 | 283.54917   | 211.53191   | 840.41961   | 1 |
| 14722 | H | 71.33500 | 46.24680 | 81.29890 | -1916.84059 | 822.55660   | -2355.28109 | 1 |
| 14723 | H | 71.11300 | 47.16180 | 79.79190 | -944.70943  | -446.17113  | 2967.60537  | 1 |
| 14724 | C | 69.74500 | 45.52780 | 80.02090 | 524.29088   | -391.76342  | 634.89487   | 1 |
| 14725 | H | 69.31500 | 44.92580 | 80.84990 | -1229.57383 | 1844.48205  | 2232.54572  | 1 |
| 14726 | H | 70.38800 | 44.89380 | 79.37490 | 1015.63131  | -780.23833  | -2873.66446 | 1 |
| 14727 | C | 68.59400 | 45.99380 | 79.11190 | -663.46686  | -12.73768   | -625.38027  | 1 |
| 14728 | H | 67.85700 | 46.48980 | 79.77890 | 2253.08905  | -497.15486  | -2138.84385 | 1 |
| 14729 | H | 68.97400 | 46.63180 | 78.28490 | 916.62625   | -2520.24030 | 1645.11743  | 1 |
| 14730 | N | 68.02900 | 44.78280 | 78.47990 | -646.67135  | 411.61989   | 353.63473   | 1 |
| 14731 | H | 67.98800 | 44.08980 | 79.25490 | 456.55696   | -1691.11499 | 2613.41005  | 1 |
| 14732 | H | 67.10500 | 44.86980 | 78.00990 | 1932.75723  | 1360.21106  | 2076.65635  | 1 |
| 14733 | H | 68.67200 | 44.54580 | 77.69790 | 417.66651   | 2948.47236  | 1015.03285  | 1 |
| 14734 | C | 69.71700 | 49.79980 | 82.79390 | -617.67290  | -324.69073  | 586.94729   | 1 |
| 14735 | O | 69.79800 | 50.86580 | 82.22390 | 540.16093   | 474.80293   | -326.21401  | 1 |
| 14736 | N | 68.85600 | 49.66080 | 83.84290 | 594.48378   | 432.66991   | -414.79883  | 1 |
| 14737 | H | 68.79800 | 48.77280 | 84.29290 | -978.53363  | 2663.26302  | -1359.31167 | 1 |
| 14738 | C | 68.00000 | 50.77580 | 84.28590 | 715.14807   | -556.17579  | 103.35727   | 1 |
| 14739 | H | 67.57400 | 51.25780 | 83.41790 | 2428.98298  | 1120.09530  | 1656.39803  | 1 |
| 14740 | C | 66.81200 | 50.11480 | 85.12790 | -332.12868  | -304.81920  | 792.60759   | 1 |
| 14741 | H | 67.22400 | 49.50880 | 85.96190 | -139.30877  | 1651.25559  | -2674.35493 | 1 |
| 14742 | H | 66.27300 | 50.96480 | 85.59790 | -1694.81756 | 919.65983   | 2485.96972  | 1 |
| 14743 | C | 65.87200 | 49.30880 | 84.17590 | 395.52658   | 651.74012   | -500.24449  | 1 |
| 14744 | H | 66.45800 | 48.61780 | 83.53290 | -1809.92321 | 376.01599   | 2545.78400  | 1 |
| 14745 | H | 65.40700 | 50.13980 | 83.60490 | -2338.21175 | -441.51441  | -2058.16838 | 1 |
| 14746 | C | 64.58100 | 48.69080 | 84.76490 | 226.48407   | 674.72310   | 570.00413   | 1 |
| 14747 | H | 63.91200 | 48.26980 | 83.98490 | -2066.60647 | -2145.83371 | -1011.31678 | 1 |
| 14748 | H | 64.00700 | 49.44380 | 85.34690 | 2912.66198  | 1184.58333  | 106.71804   | 1 |

|       |   |          |          |          |             |             |             |   |
|-------|---|----------|----------|----------|-------------|-------------|-------------|---|
| 14749 | N | 64.98200 | 47.51680 | 85.61290 | -664.91099  | 244.64166   | -459.03826  | 1 |
| 14750 | H | 64.97100 | 46.61780 | 85.17490 | -2236.99295 | 368.58991   | 2181.33680  | 1 |
| 14751 | C | 64.91300 | 47.44980 | 86.91190 | 515.92537   | 620.47959   | -424.59050  | 1 |
| 14752 | N | 65.22000 | 46.31280 | 87.50190 | 290.27672   | -635.12157  | -474.37570  | 1 |
| 14753 | H | 65.23700 | 45.48880 | 86.93590 | -2931.03971 | -12.51396   | 1143.27417  | 1 |
| 14754 | H | 64.79200 | 46.14780 | 88.39090 | -219.68945  | 1131.84790  | 2927.26546  | 1 |
| 14755 | N | 64.55700 | 48.39180 | 87.74590 | 366.70747   | 732.70913   | 203.31074   | 1 |
| 14756 | H | 64.32200 | 49.30080 | 87.40390 | 1717.53574  | -1465.36163 | 2191.12129  | 1 |
| 14757 | H | 64.48300 | 48.15980 | 88.71590 | 896.89385   | 606.79751   | 2953.91341  | 1 |
| 14758 | C | 68.76300 | 51.77380 | 85.17190 | -285.50188  | 631.16787   | -592.93069  | 1 |
| 14759 | O | 68.31700 | 52.89480 | 85.38790 | 455.07951   | -469.12633  | -443.22720  | 1 |
| 14760 | N | 69.99200 | 51.44480 | 85.66490 | 3.21938     | -338.54617  | 773.33590   | 1 |
| 14761 | H | 70.22400 | 50.48180 | 85.78290 | -2461.25588 | 946.01213   | -1716.24788 | 1 |
| 14762 | C | 71.03900 | 52.33780 | 86.14090 | -581.44329  | 507.81909   | 485.27773   | 1 |
| 14763 | H | 70.60600 | 52.99280 | 86.88290 | -1990.57360 | -1242.27221 | -2095.85370 | 1 |
| 14764 | C | 72.06500 | 51.49980 | 86.96290 | 573.91930   | -554.52735  | 441.09757   | 1 |
| 14765 | H | 72.56500 | 50.79680 | 86.26290 | -1932.81945 | 2229.60763  | -1091.46003 | 1 |
| 14766 | H | 71.46100 | 50.99980 | 87.75090 | 560.37078   | 3084.03253  | -270.10028  | 1 |
| 14767 | C | 73.17300 | 52.34480 | 87.63990 | 60.06995    | 701.82141   | -579.04172  | 1 |
| 14768 | H | 73.64300 | 52.97080 | 86.85090 | 1255.68737  | -183.46375  | 2878.85681  | 1 |
| 14769 | H | 74.04000 | 51.75980 | 88.01390 | 319.95097   | 2014.62973  | 2395.22956  | 1 |
| 14770 | C | 72.66500 | 53.24480 | 88.79790 | -478.15527  | 563.67583   | 533.93642   | 1 |
| 14771 | H | 72.29600 | 54.16380 | 88.29490 | -1899.60117 | -2176.04413 | 1246.82540  | 1 |
| 14772 | H | 71.81600 | 52.78380 | 89.34490 | -611.93222  | 2480.08668  | -1836.55526 | 1 |
| 14773 | C | 73.72900 | 53.65480 | 89.76990 | 779.41680   | -154.22984  | 447.40765   | 1 |
| 14774 | H | 74.54200 | 54.24280 | 89.29390 | -2182.45431 | -1070.66177 | 1997.19874  | 1 |
| 14775 | H | 74.15700 | 52.71680 | 90.18490 | -258.53165  | 184.47061   | 3130.07319  | 1 |
| 14776 | N | 73.08500 | 54.51480 | 90.80690 | -312.61414  | -447.45925  | 643.99139   | 1 |
| 14777 | H | 72.42900 | 53.95380 | 91.38690 | 1690.89145  | -1863.86110 | -1888.15628 | 1 |
| 14778 | H | 72.53100 | 55.23180 | 90.29690 | 245.16499   | 3099.80847  | 478.86093   | 1 |
| 14779 | H | 73.73600 | 55.06480 | 91.40390 | 2155.19886  | -2109.17509 | 897.06441   | 1 |
| 14780 | C | 71.68500 | 53.15880 | 85.00390 | 623.75668   | -425.37872  | -511.30378  | 1 |
| 14781 | O | 71.94000 | 54.39380 | 85.13790 | 210.32796   | -64.02608   | 758.47877   | 1 |
| 14782 | N | 72.06400 | 52.55680 | 83.85790 | -512.68802  | -561.07426  | 367.44925   | 1 |
| 14783 | H | 72.02800 | 51.56080 | 83.83890 | -1340.09802 | -2231.07034 | -1767.67889 | 1 |
| 14784 | C | 72.45900 | 53.18580 | 82.59290 | 272.44450   | 717.63508   | 492.16348   | 1 |
| 14785 | H | 73.31700 | 53.82280 | 82.75190 | -2566.36552 | 740.82608   | -1662.27885 | 1 |
| 14786 | C | 72.73700 | 52.17980 | 81.49090 | -525.34461  | -458.00046  | 587.96226   | 1 |
| 14787 | H | 73.16400 | 52.69180 | 80.60190 | -869.76759  | -2305.19100 | -1956.48282 | 1 |
| 14788 | H | 73.43100 | 51.39180 | 81.85490 | 1353.06864  | 498.04678   | -2796.31559 | 1 |
| 14789 | H | 71.81100 | 51.66480 | 81.15690 | -241.38724  | 2448.10649  | -1961.30901 | 1 |
| 14790 | C | 71.42300 | 54.10280 | 82.09390 | -689.97708  | -585.91715  | 109.92600   | 1 |
| 14791 | O | 71.72400 | 55.20980 | 81.62890 | -552.83839  | -246.67264  | 507.09915   | 1 |
| 14792 | N | 70.15100 | 53.68580 | 82.18190 | -342.29331  | 458.75259   | -620.52691  | 1 |
| 14793 | H | 69.93300 | 52.74080 | 82.41190 | -2053.05600 | -911.11173  | 2202.96680  | 1 |
| 14794 | C | 69.05200 | 54.61880 | 81.81290 | -661.84217  | 377.23300   | 501.10998   | 1 |
| 14795 | H | 69.27300 | 54.93580 | 80.80490 | 2243.27517  | 930.64832   | -1999.95911 | 1 |
| 14796 | C | 67.72000 | 53.76380 | 81.88590 | 639.20273   | -551.70776  | 344.22291   | 1 |
| 14797 | H | 67.86000 | 52.87180 | 81.23890 | -2063.73426 | -2288.81104 | 632.90689   | 1 |
| 14798 | H | 67.52600 | 53.54180 | 82.95690 | -1559.68592 | -2705.88566 | 379.19502   | 1 |
| 14799 | C | 66.42000 | 54.44080 | 81.37090 | 430.20625   | -46.35091   | -802.63639  | 1 |
| 14800 | H | 66.26400 | 55.30580 | 82.05090 | -681.97645  | -583.37952  | 3015.42744  | 1 |
| 14801 | C | 66.51600 | 54.88780 | 79.91790 | -173.14037  | -434.96732  | 782.48121   | 1 |
| 14802 | H | 67.34800 | 55.61980 | 79.84090 | -803.72996  | -2374.21637 | -1901.40501 | 1 |
| 14803 | H | 66.83700 | 54.05780 | 79.25390 | 1898.90846  | 2069.68757  | -1417.30952 | 1 |
| 14804 | H | 65.61300 | 55.35880 | 79.47290 | -1667.41036 | -79.12497   | 2666.77861  | 1 |
| 14805 | C | 65.08700 | 53.64980 | 81.60090 | -731.35607  | 301.24535   | -453.67448  | 1 |
| 14806 | H | 64.19400 | 54.26480 | 81.35690 | -2511.54906 | 1572.20663  | 1057.59817  | 1 |
| 14807 | H | 65.13500 | 52.68680 | 81.04990 | -595.74175  | -3073.77495 | -308.58642  | 1 |
| 14808 | H | 65.04700 | 53.31080 | 82.65790 | -2822.71283 | -1352.70024 | 317.36508   | 1 |
| 14809 | C | 68.94000 | 55.86580 | 82.65390 | -70.47272   | -828.70885  | 373.79973   | 1 |
| 14810 | O | 68.94800 | 56.97480 | 82.06590 | -446.80757  | 137.32904   | 636.49899   | 1 |

|       |   |          |          |          |             |             |             |   |
|-------|---|----------|----------|----------|-------------|-------------|-------------|---|
| 14811 | N | 68.95500 | 55.70480 | 84.03490 | 279.57794   | -554.94538  | 571.44036   | 1 |
| 14812 | H | 68.90000 | 54.78480 | 84.41390 | 1046.08587  | -532.20686  | 2919.02149  | 1 |
| 14813 | C | 69.01700 | 56.76980 | 84.97390 | -534.55167  | -434.10288  | 597.71247   | 1 |
| 14814 | H | 68.18000 | 57.41880 | 84.76190 | -1645.94003 | -1799.36271 | -1987.81324 | 1 |
| 14815 | C | 68.98700 | 56.10080 | 86.37390 | 385.92827   | 769.98546   | -299.38731  | 1 |
| 14816 | H | 67.97000 | 55.65380 | 86.34790 | 1889.06635  | 1409.96097  | 2083.66615  | 1 |
| 14817 | H | 69.84200 | 55.41280 | 86.55090 | -1619.21534 | 815.70040   | 2571.18664  | 1 |
| 14818 | C | 69.01600 | 57.12980 | 87.55390 | -623.59984  | 585.04799   | 316.69085   | 1 |
| 14819 | H | 68.64300 | 58.10980 | 87.18590 | 2090.21703  | -1164.78809 | -2042.66681 | 1 |
| 14820 | H | 70.04000 | 57.51080 | 87.75690 | 2155.28233  | 1395.29939  | -1818.27499 | 1 |
| 14821 | C | 68.28500 | 56.64680 | 88.80690 | -56.65648   | -649.82734  | -637.15420  | 1 |
| 14822 | H | 67.27800 | 56.32580 | 88.46590 | -516.46076  | -2477.12087 | -1869.58998 | 1 |
| 14823 | H | 68.78000 | 55.77180 | 89.27990 | -2708.29037 | -130.47564  | 1595.73357  | 1 |
| 14824 | C | 68.18300 | 57.76180 | 89.88990 | -301.37460  | -720.47852  | 470.67511   | 1 |
| 14825 | H | 67.70500 | 58.60680 | 89.34890 | -1411.07974 | -1846.54891 | 2120.69265  | 1 |
| 14826 | H | 69.18300 | 58.07080 | 90.26390 | 2505.33603  | -21.34407   | 1902.90884  | 1 |
| 14827 | N | 67.28600 | 57.24180 | 90.94090 | -427.52308  | -725.09425  | -64.30115   | 1 |
| 14828 | H | 67.23400 | 57.85680 | 91.77790 | -2217.36352 | 404.32433   | -2195.00503 | 1 |
| 14829 | H | 66.34800 | 56.94180 | 90.60490 | 2024.90662  | 1892.46171  | -1488.81432 | 1 |
| 14830 | H | 67.76700 | 56.37380 | 91.25190 | 2451.35277  | -664.42586  | 1856.78058  | 1 |
| 14831 | C | 70.26400 | 57.65280 | 84.87290 | 243.27956   | -474.74816  | -739.51352  | 1 |
| 14832 | O | 70.14300 | 58.87780 | 84.98790 | -350.36558  | 642.74227   | -296.23228  | 1 |
| 14833 | N | 71.49100 | 57.15780 | 84.71690 | 525.38516   | -576.92895  | 322.17342   | 1 |
| 14834 | H | 71.63100 | 56.17080 | 84.69590 | 192.96560   | -1746.91109 | -2609.46204 | 1 |
| 14835 | C | 72.71900 | 57.94580 | 84.52690 | -330.22362  | 621.77168   | 579.48541   | 1 |
| 14836 | H | 72.79500 | 58.56780 | 85.40690 | -1952.93453 | 2422.54589  | -464.26757  | 1 |
| 14837 | C | 74.01800 | 57.10780 | 84.51390 | -88.98608   | 856.89754   | 298.76258   | 1 |
| 14838 | H | 74.13900 | 56.57280 | 83.54790 | 1097.55944  | -2284.88143 | -1863.57355 | 1 |
| 14839 | O | 74.08600 | 56.29880 | 85.65490 | -367.30544  | -694.24777  | 82.06081    | 1 |
| 14840 | H | 73.52300 | 55.52680 | 85.55590 | 2455.66144  | -868.21927  | -1764.69500 | 1 |
| 14841 | C | 75.19200 | 58.07780 | 84.76890 | 20.29836    | -909.46653  | -62.52683   | 1 |
| 14842 | H | 75.21200 | 58.81580 | 83.93790 | 3118.96169  | 66.95838    | -407.21098  | 1 |
| 14843 | H | 76.17100 | 57.55180 | 84.75690 | 2081.85373  | -2327.17554 | -385.18214  | 1 |
| 14844 | H | 75.14700 | 58.74180 | 85.65790 | 1243.13381  | 322.57344   | -2872.07085 | 1 |
| 14845 | C | 72.59200 | 58.81480 | 83.22690 | -330.46249  | 261.44679   | -808.63534  | 1 |
| 14846 | O | 73.01500 | 59.98280 | 83.18890 | -340.56796  | -20.52919   | -712.19326  | 1 |
| 14847 | N | 72.00200 | 58.27580 | 82.17390 | 268.31858   | -474.22387  | -644.81715  | 1 |
| 14848 | H | 71.78800 | 57.30480 | 82.23390 | 1714.59334  | 745.53730   | -2530.33002 | 1 |
| 14849 | C | 71.67800 | 58.96180 | 80.92490 | 197.77714   | -849.81669  | -264.85240  | 1 |
| 14850 | H | 72.62500 | 59.27280 | 80.50790 | 164.43913   | 870.78194   | 3018.76213  | 1 |
| 14851 | C | 71.09500 | 58.12480 | 79.80190 | -407.85511  | -507.48595  | -638.40678  | 1 |
| 14852 | H | 70.05700 | 57.80880 | 80.03990 | -2605.82938 | 1041.61792  | 1422.29096  | 1 |
| 14853 | O | 71.89200 | 56.91180 | 79.71290 | 480.89195   | 457.24105   | 428.13641   | 1 |
| 14854 | H | 71.56000 | 56.30780 | 80.38190 | -2278.15747 | 2128.42482  | -421.93905  | 1 |
| 14855 | C | 71.17200 | 58.81080 | 78.46790 | 509.30657   | 20.67635    | 756.06237   | 1 |
| 14856 | H | 72.19700 | 59.09080 | 78.14290 | 1932.07419  | 920.80895   | 2305.95456  | 1 |
| 14857 | H | 70.51100 | 59.70180 | 78.53390 | -407.85607  | 3061.21716  | 600.69058   | 1 |
| 14858 | H | 70.87600 | 58.20880 | 77.58290 | 637.30372   | -1572.87634 | -2649.17538 | 1 |
| 14859 | C | 70.83300 | 60.20580 | 81.08790 | -909.86007  | -35.78903   | -48.21613   | 1 |
| 14860 | O | 71.24500 | 61.35880 | 80.80990 | 298.18598   | -476.17007  | 554.95443   | 1 |
| 14861 | N | 69.70300 | 59.95480 | 81.76090 | -226.13355  | -415.64329  | 699.12557   | 1 |
| 14862 | H | 69.43500 | 59.01180 | 81.94290 | -1315.49295 | 1570.02918  | 2388.03537  | 1 |
| 14863 | C | 68.79200 | 60.93480 | 82.26090 | -456.02518  | 37.45616    | -788.72624  | 1 |
| 14864 | H | 68.27700 | 61.41580 | 81.44290 | -286.12146  | 1164.47398  | 2908.66999  | 1 |
| 14865 | C | 67.64800 | 60.18880 | 82.90290 | 570.37181   | -682.81244  | -199.73525  | 1 |
| 14866 | H | 68.05500 | 59.43180 | 83.60690 | -1276.19407 | 2174.53921  | 1881.73700  | 1 |
| 14867 | C | 66.77000 | 61.10180 | 83.78390 | 326.57539   | 660.06675   | -537.69081  | 1 |
| 14868 | H | 65.86900 | 60.56480 | 84.14890 | 2409.09134  | 642.70293   | 1918.70740  | 1 |
| 14869 | H | 66.36600 | 61.97780 | 83.23390 | -1844.74327 | 2366.54682  | -945.83543  | 1 |
| 14870 | H | 67.30500 | 61.44380 | 84.69590 | -2707.66627 | 1602.04970  | -14.36530   | 1 |
| 14871 | C | 66.87700 | 59.43380 | 81.79990 | -552.19502  | -579.97955  | -436.06809  | 1 |
| 14872 | H | 65.98800 | 58.91880 | 82.22390 | 1821.96405  | -2564.38861 | 50.83576    | 1 |

|       |   |          |          |          |             |             |             |   |
|-------|---|----------|----------|----------|-------------|-------------|-------------|---|
| 14873 | H | 67.56900 | 58.76680 | 81.24290 | 2706.18772  | -1097.80482 | -1170.29860 | 1 |
| 14874 | H | 66.48400 | 60.21480 | 81.11490 | 1610.79832  | -15.96195   | -2702.46188 | 1 |
| 14875 | C | 69.33700 | 61.96280 | 83.14390 | 171.94929   | 749.49115   | -490.04842  | 1 |
| 14876 | O | 69.12900 | 63.14880 | 82.91090 | -217.41480  | -646.23898  | 398.41338   | 1 |
| 14877 | N | 70.16800 | 61.60980 | 84.15190 | 639.72837   | -179.72673  | 520.69012   | 1 |
| 14878 | H | 70.42600 | 60.68180 | 84.41090 | 574.47676   | -1720.67927 | 2570.49908  | 1 |
| 14879 | C | 70.81100 | 62.52780 | 85.05990 | 765.64765   | -88.77459   | 487.18964   | 1 |
| 14880 | H | 70.02500 | 63.10980 | 85.51790 | -1690.19238 | -1785.53545 | -1962.99238 | 1 |
| 14881 | C | 71.57800 | 61.78180 | 86.15290 | -646.68575  | 67.45467    | 639.29524   | 1 |
| 14882 | H | 72.12500 | 60.95180 | 85.65690 | -2582.64648 | 1101.73039  | -1419.27923 | 1 |
| 14883 | C | 72.63700 | 62.69880 | 86.91090 | 509.85807   | 454.90297   | -603.78725  | 1 |
| 14884 | H | 73.14200 | 62.11380 | 87.70790 | -1397.43705 | -1333.21994 | 2483.52985  | 1 |
| 14885 | H | 72.14800 | 63.58180 | 87.37590 | -35.65275   | 3117.99305  | -418.41898  | 1 |
| 14886 | H | 73.44600 | 62.89480 | 86.17490 | -1420.38108 | -1983.24603 | -1986.82636 | 1 |
| 14887 | C | 70.63500 | 61.17080 | 87.20590 | 553.34893   | 534.02336   | 489.97451   | 1 |
| 14888 | H | 69.64800 | 60.89180 | 86.77890 | -1578.04832 | 140.24373   | 2718.14669  | 1 |
| 14889 | H | 70.45800 | 61.96580 | 87.96190 | 2868.32007  | 896.40040   | 931.36058   | 1 |
| 14890 | C | 71.26700 | 59.95680 | 87.91890 | 85.39618    | -811.05417  | -407.85981  | 1 |
| 14891 | H | 70.48700 | 59.54080 | 88.59190 | -1870.51271 | -1676.22946 | -1894.64066 | 1 |
| 14892 | H | 71.59500 | 59.21580 | 87.15890 | -1924.64270 | -1979.66680 | 1508.27586  | 1 |
| 14893 | H | 72.13800 | 60.22880 | 88.55390 | -2473.46250 | -76.71059   | 1942.76220  | 1 |
| 14894 | C | 71.66200 | 63.52580 | 84.35490 | 438.07441   | 633.69871   | -487.81940  | 1 |
| 14895 | O | 71.52800 | 64.71780 | 84.59990 | -443.34025  | -349.46283  | 552.22494   | 1 |
| 14896 | N | 72.44000 | 63.06280 | 83.35390 | -624.40211  | 557.05801   | -111.71691  | 1 |
| 14897 | H | 72.41000 | 62.08380 | 83.16990 | 386.38993   | -135.32627  | 3119.39351  | 1 |
| 14898 | C | 73.23300 | 63.90780 | 82.52590 | 365.35043   | -426.39720  | 718.43962   | 1 |
| 14899 | H | 73.88400 | 64.42880 | 83.21190 | 550.96647   | 1392.34146  | 2766.95635  | 1 |
| 14900 | C | 74.22100 | 63.07780 | 81.65290 | -146.04760  | 808.90844   | -394.70019  | 1 |
| 14901 | H | 73.76600 | 62.28180 | 81.02690 | -2505.44589 | -11.68796   | 1902.84800  | 1 |
| 14902 | H | 74.79000 | 62.50380 | 82.41590 | 2273.04631  | -1218.22742 | 1802.05678  | 1 |
| 14903 | C | 75.19500 | 63.90380 | 80.72890 | -542.81902  | 264.10424   | 683.40871   | 1 |
| 14904 | H | 74.55500 | 64.48980 | 80.03390 | -767.21379  | 2580.81773  | 1627.57152  | 1 |
| 14905 | C | 76.09000 | 64.93880 | 81.32490 | 14.20169    | -878.17541  | -245.06582  | 1 |
| 14906 | H | 76.90300 | 64.44380 | 81.89790 | 1439.76558  | -2322.83709 | 1558.75886  | 1 |
| 14907 | H | 75.62900 | 65.65480 | 82.03890 | -739.09741  | 2217.17861  | 2106.20043  | 1 |
| 14908 | H | 76.67100 | 65.48180 | 80.54890 | -1948.68896 | -2390.62720 | 621.07902   | 1 |
| 14909 | C | 76.03300 | 62.90280 | 79.89590 | -458.99115  | -255.15187  | 745.43655   | 1 |
| 14910 | H | 76.48300 | 62.22980 | 80.65690 | 2600.30754  | 1525.48479  | -899.73501  | 1 |
| 14911 | H | 76.84200 | 63.38880 | 79.30890 | 1497.07460  | -1397.33276 | 2388.40010  | 1 |
| 14912 | H | 75.43400 | 62.30680 | 79.17490 | 2301.56355  | -2144.06834 | -63.26486   | 1 |
| 14913 | C | 72.43700 | 64.90980 | 81.66490 | -222.19629  | 779.00499   | 418.60606   | 1 |
| 14914 | O | 72.81300 | 66.08780 | 81.57690 | -433.56174  | -600.34748  | -274.28881  | 1 |
| 14915 | N | 71.36300 | 64.44380 | 80.99590 | -324.41239  | 573.49571   | 527.76089   | 1 |
| 14916 | H | 71.19000 | 63.46780 | 81.10790 | 1198.28039  | 1442.96826  | 2525.90438  | 1 |
| 14917 | C | 70.42600 | 65.14580 | 80.24290 | -623.76666  | 556.66821   | 363.98716   | 1 |
| 14918 | H | 71.03900 | 65.71780 | 79.56190 | -2613.07726 | -1465.26358 | -960.75809  | 1 |
| 14919 | C | 69.50000 | 64.18580 | 79.47790 | 248.39544   | -8.29385    | 877.31518   | 1 |
| 14920 | H | 69.27400 | 63.33580 | 80.15590 | 17.57965    | 1064.64299  | -2960.48180 | 1 |
| 14921 | C | 68.14600 | 64.84580 | 79.02290 | 719.99373   | -206.78992  | -519.90188  | 1 |
| 14922 | H | 67.51200 | 65.16380 | 79.87790 | 860.76847   | -3026.02063 | 22.42768    | 1 |
| 14923 | H | 67.58600 | 64.15180 | 78.35890 | -522.75864  | 2584.60160  | -1716.03735 | 1 |
| 14924 | H | 68.45800 | 65.75480 | 78.46590 | -660.30959  | -2856.39409 | 1141.59112  | 1 |
| 14925 | C | 70.28000 | 63.43880 | 78.39190 | -471.10765  | -680.19178  | 383.20717   | 1 |
| 14926 | H | 70.44600 | 64.25280 | 77.65390 | -148.63059  | 2023.65396  | -2404.36266 | 1 |
| 14927 | H | 71.27200 | 63.03780 | 78.69290 | -1939.54892 | 2067.38678  | -1364.65679 | 1 |
| 14928 | C | 69.41000 | 62.39680 | 77.58790 | 27.87344    | 617.60138   | 670.25563   | 1 |
| 14929 | H | 68.96100 | 61.73580 | 78.35990 | -2867.19630 | 554.91047   | -1170.25039 | 1 |
| 14930 | H | 68.57700 | 62.83380 | 76.99690 | 977.52840   | -2604.20158 | 1469.96550  | 1 |
| 14931 | H | 70.16900 | 61.86880 | 76.97190 | -1503.18671 | -2078.04153 | -1822.19629 | 1 |
| 14932 | C | 69.70600 | 66.19980 | 80.98090 | 615.56666   | -32.45129   | -671.91935  | 1 |
| 14933 | O | 69.55800 | 67.36380 | 80.51690 | 444.73037   | 316.86583   | 570.47189   | 1 |
| 14934 | N | 69.14000 | 65.92480 | 82.22190 | -560.34921  | 575.99168   | 258.67863   | 1 |

|       |   |          |          |          |             |             |             |   |
|-------|---|----------|----------|----------|-------------|-------------|-------------|---|
| 14935 | H | 69.22700 | 64.99080 | 82.55990 | -2543.67384 | -1684.65722 | -768.03624  | 1 |
| 14936 | C | 68.75000 | 66.92180 | 83.19690 | -549.25090  | -557.48047  | 467.96364   | 1 |
| 14937 | H | 67.89500 | 67.41080 | 82.75390 | -1202.66214 | 2108.85369  | 2001.14120  | 1 |
| 14938 | C | 68.34200 | 66.10180 | 84.47590 | 406.38210   | -489.19738  | 653.44511   | 1 |
| 14939 | H | 68.06800 | 66.67780 | 85.38590 | 743.46099   | -750.85036  | -2963.39598 | 1 |
| 14940 | H | 69.24300 | 65.50480 | 84.73090 | -2010.00971 | -2073.72596 | -1248.09769 | 1 |
| 14941 | C | 67.11800 | 65.15880 | 84.29590 | -81.02934   | -73.17877   | -905.27903  | 1 |
| 14942 | H | 67.27600 | 64.54180 | 83.38490 | -1070.74360 | -2563.83302 | -1475.97244 | 1 |
| 14943 | C | 67.17400 | 64.17980 | 85.52090 | 463.14448   | -513.33840  | -594.50137  | 1 |
| 14944 | H | 66.20600 | 63.64480 | 85.41390 | 2399.23451  | 1929.74753  | -646.50944  | 1 |
| 14945 | H | 67.27400 | 64.75380 | 86.46590 | -2867.84577 | 1245.42519  | -350.14706  | 1 |
| 14946 | H | 68.06800 | 63.52580 | 85.43190 | 1296.50617  | -786.12915  | -2756.68260 | 1 |
| 14947 | C | 65.84000 | 65.91780 | 84.21390 | 870.64524   | 268.71178   | -34.95503   | 1 |
| 14948 | H | 65.86700 | 66.56680 | 83.31290 | 2138.08734  | -2069.27399 | -1022.21029 | 1 |
| 14949 | H | 64.97100 | 65.22780 | 84.18490 | 2231.15667  | -824.78726  | -2059.09983 | 1 |
| 14950 | H | 65.68500 | 66.60280 | 85.07490 | -1727.56287 | -1803.47867 | -1913.43080 | 1 |
| 14951 | C | 69.78900 | 67.93480 | 83.58990 | -666.59651  | 591.10016   | -194.16668  | 1 |
| 14952 | O | 69.52000 | 69.15080 | 83.59590 | -327.14884  | -500.18694  | 516.15297   | 1 |
| 14953 | N | 71.02500 | 67.45980 | 83.92190 | -668.40418  | 452.16205   | -247.90648  | 1 |
| 14954 | H | 71.29900 | 66.50280 | 83.86090 | 1266.76997  | 2405.96981  | 1582.66527  | 1 |
| 14955 | C | 72.04000 | 68.25880 | 84.44690 | 15.43303    | 422.10510   | 808.10897   | 1 |
| 14956 | H | 71.72900 | 68.65180 | 85.40390 | -1702.36420 | 688.91380   | 2554.52151  | 1 |
| 14957 | C | 73.35000 | 67.44380 | 84.73490 | -744.59771  | -367.26277  | 377.01897   | 1 |
| 14958 | H | 74.10400 | 68.14980 | 85.14490 | 2988.90615  | -697.01464  | -691.98039  | 1 |
| 14959 | H | 73.20500 | 66.70780 | 85.55390 | -703.87624  | -2780.78880 | 1292.28406  | 1 |
| 14960 | H | 73.77200 | 66.98480 | 83.81490 | 2028.40491  | -2216.74908 | 932.64316   | 1 |
| 14961 | C | 72.37500 | 69.33780 | 83.44090 | -762.43527  | -335.32620  | -371.07923  | 1 |
| 14962 | O | 72.35400 | 70.52480 | 83.71590 | 535.09965   | 467.64694   | 344.38631   | 1 |
| 14963 | N | 72.52600 | 68.93380 | 82.15690 | 567.82762   | -253.64860  | 570.88218   | 1 |
| 14964 | H | 72.48400 | 67.96680 | 81.91890 | -311.17023  | 2478.09920  | -1913.22338 | 1 |
| 14965 | C | 72.88600 | 69.73780 | 81.06290 | 281.76155   | 528.84857   | -687.29951  | 1 |
| 14966 | H | 73.82700 | 70.20980 | 81.30690 | -2876.31137 | 100.50283   | -1270.81010 | 1 |
| 14967 | C | 73.15900 | 68.74380 | 79.88290 | 38.65303    | 903.87174   | -113.89831  | 1 |
| 14968 | H | 72.24600 | 68.13780 | 79.70290 | 2003.80494  | -786.29881  | -2294.49911 | 1 |
| 14969 | H | 74.00200 | 68.08380 | 80.18090 | -1457.38086 | 2589.07619  | -1034.86797 | 1 |
| 14970 | C | 73.42400 | 69.35880 | 78.57890 | 807.67268   | -421.78101  | -34.88021   | 1 |
| 14971 | C | 74.73300 | 69.62180 | 78.20490 | -887.19590  | -172.55521  | 120.66125   | 1 |
| 14972 | H | 75.61300 | 69.41980 | 78.79790 | 514.38192   | -2657.95822 | 1602.77746  | 1 |
| 14973 | C | 74.94800 | 70.16980 | 76.88990 | 506.85242   | -148.00777  | 743.40119   | 1 |
| 14974 | H | 75.94500 | 70.40780 | 76.54990 | -2057.27705 | -762.85986  | -2254.74659 | 1 |
| 14975 | C | 73.86900 | 70.43680 | 76.05490 | -115.11739  | -903.73521  | -38.23159   | 1 |
| 14976 | H | 74.11800 | 70.79380 | 75.06590 | -810.10216  | 2960.38401  | -691.43851  | 1 |
| 14977 | C | 72.34100 | 69.62080 | 77.69590 | -637.40370  | -2.52272    | -652.04384  | 1 |
| 14978 | H | 71.31700 | 69.47980 | 78.01090 | -913.71889  | 1686.08332  | 2494.08641  | 1 |
| 14979 | C | 72.56000 | 70.16080 | 76.43590 | -547.91257  | -660.70685  | -307.74874  | 1 |
| 14980 | H | 71.70500 | 70.39580 | 75.81990 | -2798.21263 | 423.81403   | 1374.26851  | 1 |
| 14981 | C | 71.85900 | 70.76280 | 80.73490 | 361.91530   | -606.37613  | -576.86767  | 1 |
| 14982 | O | 72.02600 | 71.98080 | 80.52490 | 251.12941   | 291.83528   | 689.48779   | 1 |
| 14983 | N | 70.56600 | 70.38080 | 80.67190 | -574.94779  | 539.68619   | -301.40694  | 1 |
| 14984 | H | 70.32800 | 69.41380 | 80.71090 | 1729.56689  | 2048.77939  | -1646.00352 | 1 |
| 14985 | C | 69.44000 | 71.27380 | 80.50690 | -831.09200  | 347.37310   | -141.66520  | 1 |
| 14986 | H | 69.51600 | 71.89380 | 79.62590 | -663.10323  | -2419.00002 | -1899.19963 | 1 |
| 14987 | C | 68.15900 | 70.43480 | 80.33790 | 507.21461   | -180.16149  | 736.02051   | 1 |
| 14988 | H | 67.91400 | 69.83780 | 81.24290 | -1462.49686 | 1425.98534  | 2392.88424  | 1 |
| 14989 | H | 68.37400 | 69.74180 | 79.49790 | 1822.66047  | 2229.26481  | -1267.48312 | 1 |
| 14990 | C | 66.92100 | 71.17580 | 80.05790 | -383.58289  | -227.95308  | -795.20599  | 1 |
| 14991 | C | 66.57200 | 71.44880 | 78.74590 | -795.50275  | 442.43117   | -53.67529   | 1 |
| 14992 | H | 67.31800 | 71.24980 | 77.98990 | 982.27208   | 1484.92119  | 2593.91150  | 1 |
| 14993 | C | 65.36200 | 72.05980 | 78.40290 | -424.62679  | 560.01409   | -580.97100  | 1 |
| 14994 | H | 65.06300 | 72.19480 | 77.37390 | 2881.47047  | 177.74285   | 1250.50455  | 1 |
| 14995 | C | 64.52500 | 72.43380 | 79.47390 | 287.06335   | -522.43045  | 690.00874   | 1 |
| 14996 | H | 63.62600 | 73.01480 | 79.32790 | -1612.45005 | 2071.34543  | 1734.28924  | 1 |

|       |   |          |          |          |             |             |             |   |
|-------|---|----------|----------|----------|-------------|-------------|-------------|---|
| 14997 | C | 66.02700 | 71.52980 | 81.08290 | -416.92943  | -447.70391  | 676.15239   | 1 |
| 14998 | H | 66.30100 | 71.35380 | 82.11290 | -3035.20177 | -817.83505  | -130.08575  | 1 |
| 14999 | C | 64.89600 | 72.27080 | 80.79890 | 306.78485   | 561.44746   | -649.70055  | 1 |
| 15000 | H | 64.14400 | 72.56780 | 81.51590 | 2267.31498  | -343.02556  | -2154.02936 | 1 |
| 15001 | C | 69.33500 | 72.26180 | 81.71990 | 787.55063   | -102.23205  | -448.06654  | 1 |
| 15002 | O | 69.08000 | 73.41680 | 81.52690 | -372.56696  | 694.58838   | 48.66286    | 1 |
| 15003 | N | 69.63000 | 71.85980 | 82.96790 | 433.03109   | -325.42850  | 647.49722   | 1 |
| 15004 | H | 69.70200 | 70.91080 | 83.26390 | -1650.72846 | -2672.16063 | -181.32662  | 1 |
| 15005 | C | 69.74000 | 72.75980 | 84.02890 | -875.54912  | -117.10418  | -226.16667  | 1 |
| 15006 | H | 68.80600 | 73.27580 | 84.19490 | 2218.07323  | -1064.37813 | 1960.98867  | 1 |
| 15007 | C | 69.97200 | 71.99480 | 85.34890 | -255.79290  | 521.70126   | 702.74376   | 1 |
| 15008 | H | 69.16700 | 71.24180 | 85.48590 | 1967.09899  | 1790.97782  | -1679.62681 | 1 |
| 15009 | H | 70.95100 | 71.47480 | 85.41890 | -258.16526  | -3132.40923 | -139.96202  | 1 |
| 15010 | H | 69.93600 | 72.73580 | 86.17590 | -1650.24808 | 1788.44499  | 1994.08426  | 1 |
| 15011 | C | 70.81600 | 73.85580 | 83.78590 | 299.93807   | 614.64045   | 603.07982   | 1 |
| 15012 | O | 70.62400 | 75.02280 | 84.15090 | -635.12172  | -331.96871  | -331.72942  | 1 |
| 15013 | N | 71.92800 | 73.46580 | 83.15890 | 219.79269   | 688.33212   | -436.53449  | 1 |
| 15014 | H | 71.88900 | 72.59580 | 82.67490 | -2318.58861 | -1320.12745 | -1667.22423 | 1 |
| 15015 | C | 73.00100 | 74.43080 | 82.80690 | -56.28492   | 505.89737   | -756.53874  | 1 |
| 15016 | H | 73.28100 | 74.87180 | 83.75190 | 560.35807   | -260.08162  | 3084.89588  | 1 |
| 15017 | C | 74.19600 | 73.61780 | 82.23390 | -178.32623  | -426.60590  | -785.91231  | 1 |
| 15018 | H | 74.96200 | 74.36980 | 81.94790 | -90.42995   | 2301.01560  | -2143.68278 | 1 |
| 15019 | H | 73.88900 | 73.19180 | 81.25490 | -2496.61376 | 281.72810   | -1893.61433 | 1 |
| 15020 | S | 74.87400 | 72.35080 | 83.38990 | -391.10506  | 304.14548   | -256.40390  | 1 |
| 15021 | H | 73.67600 | 71.91480 | 83.75190 | 2085.04461  | -1803.58698 | 1515.87902  | 1 |
| 15022 | C | 72.62400 | 75.52980 | 81.86190 | -616.08198  | 158.70291   | 653.22843   | 1 |
| 15023 | O | 72.81800 | 76.70480 | 82.13490 | 782.67298   | -104.30276  | 13.08299    | 1 |
| 15024 | N | 71.91800 | 75.07780 | 80.72890 | -223.12259  | -529.41462  | -618.55376  | 1 |
| 15025 | H | 71.92300 | 74.09580 | 80.55290 | -2078.71397 | -2344.42619 | -284.32429  | 1 |
| 15026 | C | 71.54200 | 75.91280 | 79.63390 | 160.71277   | 284.92917   | -851.13911  | 1 |
| 15027 | H | 72.31800 | 76.64380 | 79.46390 | 687.85511   | 2637.49308  | 1571.21349  | 1 |
| 15028 | C | 71.62200 | 74.98880 | 78.37290 | -14.87462   | -544.45953  | -731.29581  | 1 |
| 15029 | H | 71.04500 | 75.42080 | 77.52690 | 546.99020   | 792.51684   | 2995.15359  | 1 |
| 15030 | H | 71.17500 | 73.99780 | 78.60090 | 1747.68890  | -1667.58371 | -2015.68209 | 1 |
| 15031 | C | 73.02200 | 74.78780 | 77.81290 | 67.32814    | 600.59950   | 682.78706   | 1 |
| 15032 | C | 73.70700 | 73.56580 | 77.87990 | 108.14474   | 662.31673   | -617.32671  | 1 |
| 15033 | H | 73.23900 | 72.61380 | 78.08190 | 2252.51218  | 599.02628   | 2113.19251  | 1 |
| 15034 | N | 74.94100 | 73.72080 | 77.23790 | 664.40130   | -435.37845  | -285.81253  | 1 |
| 15035 | H | 75.57100 | 73.04880 | 76.91690 | -2958.82831 | -154.63791  | -1058.13439 | 1 |
| 15036 | C | 75.03800 | 74.99780 | 76.86390 | 318.30645   | -448.54322  | 727.28329   | 1 |
| 15037 | C | 73.88500 | 75.72880 | 77.20590 | 101.30690   | -666.07712  | -614.43403  | 1 |
| 15038 | C | 73.84600 | 77.15180 | 77.05090 | 602.07279   | -458.97011  | 508.23793   | 1 |
| 15039 | H | 72.96800 | 77.73480 | 77.28890 | -102.26161  | 3138.63819  | 191.62225   | 1 |
| 15040 | C | 74.99200 | 77.74080 | 76.45190 | -384.88471  | -657.20590  | -501.39323  | 1 |
| 15041 | H | 74.97600 | 78.77380 | 76.13690 | 2077.72398  | 2362.45752  | -9.15197    | 1 |
| 15042 | C | 76.13500 | 75.64780 | 76.26290 | 273.95214   | 365.00384   | -789.41334  | 1 |
| 15043 | H | 77.00800 | 75.08280 | 75.96990 | -1844.42720 | -2080.93541 | -1471.74127 | 1 |
| 15044 | C | 76.07400 | 77.02980 | 76.04390 | 265.68115   | 714.65104   | 500.13841   | 1 |
| 15045 | H | 76.95300 | 77.55880 | 75.70590 | -2227.71763 | 1240.99214  | -1842.67167 | 1 |
| 15046 | C | 70.21200 | 76.64580 | 79.76090 | -791.09693  | 346.49207   | 292.50624   | 1 |
| 15047 | O | 70.11700 | 77.79280 | 79.22390 | -397.74122  | -250.32718  | 634.63805   | 1 |
| 15048 | N | 69.22300 | 76.15280 | 80.47990 | -738.81374  | 392.55939   | 112.79924   | 1 |
| 15049 | H | 69.32500 | 75.27080 | 80.93290 | -2383.06337 | 1963.14052  | 604.41252   | 1 |
| 15050 | C | 67.91700 | 76.79680 | 80.50690 | -228.98232  | -612.60296  | 635.40201   | 1 |
| 15051 | H | 67.50100 | 76.72480 | 79.51290 | -2652.48398 | 586.45764   | 1587.01682  | 1 |
| 15052 | C | 67.04200 | 75.89380 | 81.32190 | 253.12686   | -868.38801  | -115.23913  | 1 |
| 15053 | H | 67.50300 | 75.63980 | 82.29990 | 1794.50829  | -2443.81903 | -840.06832  | 1 |
| 15054 | H | 67.00500 | 74.91080 | 80.80590 | 2392.61939  | 1490.38827  | 1397.26214  | 1 |
| 15055 | C | 65.64000 | 76.49380 | 81.61290 | -712.02831  | -496.01506  | 280.06384   | 1 |
| 15056 | H | 65.63400 | 77.50380 | 82.07590 | -2855.05416 | -392.98280  | 1261.92571  | 1 |
| 15057 | C | 64.73900 | 76.55180 | 80.32490 | -185.66717  | -392.15166  | 801.99488   | 1 |
| 15058 | H | 64.91700 | 75.65380 | 79.69490 | 2031.57726  | -631.98670  | 2317.65245  | 1 |

|       |   |          |          |          |             |             |             |   |
|-------|---|----------|----------|----------|-------------|-------------|-------------|---|
| 15059 | H | 63.67100 | 76.57880 | 80.62790 | -3050.89579 | -760.90833  | -106.20553  | 1 |
| 15060 | H | 64.89500 | 77.50380 | 79.77390 | 1268.44632  | 2145.45816  | 1919.96860  | 1 |
| 15061 | C | 64.90600 | 75.60280 | 82.61490 | 217.91727   | 481.57359   | -743.00063  | 1 |
| 15062 | H | 65.60700 | 75.23780 | 83.39590 | -1776.92534 | 1897.96495  | 1771.57885  | 1 |
| 15063 | H | 64.05500 | 76.15680 | 83.06690 | 1742.36489  | -1253.92117 | -2300.01577 | 1 |
| 15064 | H | 64.60100 | 74.61180 | 82.21590 | 1329.07292  | -1922.97514 | 2105.69656  | 1 |
| 15065 | C | 67.88300 | 78.25880 | 80.97990 | -721.79164  | -420.42846  | -365.66070  | 1 |
| 15066 | O | 67.19700 | 79.02380 | 80.29190 | 491.88635   | 473.02935   | 397.38934   | 1 |
| 15067 | N | 68.52100 | 78.78280 | 82.02490 | -50.66107   | 833.81815   | -121.87301  | 1 |
| 15068 | C | 69.31500 | 77.97980 | 82.97190 | -774.94738  | 288.15534   | 384.54396   | 1 |
| 15069 | H | 68.96900 | 76.92580 | 83.03290 | -430.51626  | 2323.24255  | -2077.36036 | 1 |
| 15070 | H | 70.36000 | 78.03480 | 82.59890 | -123.70575  | -1711.17270 | 2637.19759  | 1 |
| 15071 | C | 68.47200 | 80.19080 | 82.39590 | 123.65519   | -846.88794  | -314.54923  | 1 |
| 15072 | H | 67.44000 | 80.42380 | 82.61490 | -718.05829  | -2317.42853 | -2003.03358 | 1 |
| 15073 | C | 69.25900 | 80.17180 | 83.75390 | -400.17499  | 590.16441   | -568.34580  | 1 |
| 15074 | H | 68.88300 | 80.87580 | 84.52690 | 2876.13069  | 1213.09254  | 393.07118   | 1 |
| 15075 | H | 70.32300 | 80.40280 | 83.53390 | 1018.20321  | 2831.75888  | -917.94886  | 1 |
| 15076 | C | 69.11600 | 78.74880 | 84.28590 | 826.15565   | 200.65177   | 329.63118   | 1 |
| 15077 | H | 69.94800 | 78.54280 | 84.99390 | 2720.23055  | 1575.50067  | -127.94379  | 1 |
| 15078 | H | 68.10900 | 78.61380 | 84.73490 | 1975.53506  | -1680.30383 | 1781.02962  | 1 |
| 15079 | C | 69.05500 | 81.12380 | 81.23090 | 627.27813   | 121.76532   | 650.49701   | 1 |
| 15080 | O | 68.57200 | 82.24780 | 81.04590 | 358.18926   | 669.48263   | 217.07301   | 1 |
| 15081 | N | 70.09900 | 80.67380 | 80.54090 | -757.99160  | -237.76688  | 285.63601   | 1 |
| 15082 | H | 70.39500 | 79.77580 | 80.85690 | 1831.42459  | -1978.30896 | -1621.85199 | 1 |
| 15083 | C | 70.60700 | 81.42980 | 79.40390 | -215.14607  | 876.68391   | 128.79633   | 1 |
| 15084 | H | 70.77000 | 82.44380 | 79.73990 | -1946.65767 | -2362.23219 | 727.05515   | 1 |
| 15085 | C | 71.94100 | 80.76680 | 78.92290 | 439.12220   | -738.99675  | -304.14882  | 1 |
| 15086 | H | 71.86800 | 79.65880 | 78.87490 | 1433.13192  | 865.53009   | -2663.68481 | 1 |
| 15087 | H | 72.71000 | 80.96280 | 79.70090 | 2497.91656  | -1128.30750 | 1544.52622  | 1 |
| 15088 | C | 72.44600 | 81.21980 | 77.54890 | 551.45682   | 363.65370   | -628.57169  | 1 |
| 15089 | C | 73.03200 | 82.49780 | 77.40790 | 126.03326   | 887.00283   | -169.68381  | 1 |
| 15090 | H | 73.19700 | 83.12680 | 78.26990 | 2997.77976  | -929.91023  | -216.35544  | 1 |
| 15091 | C | 73.38000 | 82.91680 | 76.12890 | -268.62169  | 687.00284   | 536.02284   | 1 |
| 15092 | H | 73.80300 | 83.90780 | 76.04790 | 286.85084   | 3044.91548  | 737.85674   | 1 |
| 15093 | C | 73.21100 | 82.08580 | 74.99290 | -484.43244  | -749.27995  | 188.03130   | 1 |
| 15094 | O | 73.66500 | 82.54480 | 73.75290 | 658.54087   | -314.36535  | -301.87013  | 1 |
| 15095 | H | 74.19700 | 83.33680 | 73.85990 | -741.21548  | 2282.44509  | 2034.51966  | 1 |
| 15096 | C | 72.14500 | 80.45680 | 76.39290 | -380.39147  | -828.65090  | -9.54060    | 1 |
| 15097 | H | 71.53000 | 79.57280 | 76.46990 | -237.42891  | -3112.42521 | -393.27223  | 1 |
| 15098 | C | 72.59800 | 80.86680 | 75.14790 | 360.82114   | -783.09724  | -296.67797  | 1 |
| 15099 | H | 72.46700 | 80.20280 | 74.30690 | 2569.56100  | -1632.10586 | -794.86662  | 1 |
| 15100 | C | 69.60500 | 81.53480 | 78.26890 | -278.55029  | -734.90649  | 462.35613   | 1 |
| 15101 | O | 69.34000 | 82.63880 | 77.79490 | 698.00129   | -336.44272  | 152.40644   | 1 |
| 15102 | N | 68.89900 | 80.39980 | 77.87590 | 717.85149   | 441.77882   | 46.82945    | 1 |
| 15103 | H | 69.15900 | 79.51980 | 78.26490 | -1642.63553 | -2014.54850 | -1772.44720 | 1 |
| 15104 | C | 67.79400 | 80.35980 | 76.99690 | 794.35812   | -98.70473   | -436.69619  | 1 |
| 15105 | H | 68.02800 | 80.90180 | 76.09190 | -809.75792  | -1680.34789 | -2533.56455 | 1 |
| 15106 | C | 67.37900 | 78.88380 | 76.66290 | 784.30748   | 152.04994   | -439.53793  | 1 |
| 15107 | H | 67.35800 | 78.20080 | 77.53890 | 2473.25549  | 1467.80879  | 1275.44927  | 1 |
| 15108 | H | 66.31400 | 78.74980 | 76.37590 | 1805.91656  | -974.83447  | -2384.65707 | 1 |
| 15109 | C | 68.31100 | 78.32080 | 75.65290 | -698.59298  | 500.17537   | -305.35791  | 1 |
| 15110 | C | 68.11000 | 78.68280 | 74.28590 | 540.67500   | 540.67818   | -496.77827  | 1 |
| 15111 | H | 67.23800 | 79.29980 | 74.12290 | 1016.32147  | 2082.23211  | 2128.29188  | 1 |
| 15112 | C | 68.99100 | 78.15880 | 73.25190 | 212.00214   | -690.14627  | 556.95980   | 1 |
| 15113 | H | 68.92600 | 78.57780 | 72.25790 | -1771.57840 | -172.91884  | 2594.19260  | 1 |
| 15114 | C | 69.92600 | 77.15880 | 73.58790 | -488.10877  | 111.40820   | 762.09517   | 1 |
| 15115 | O | 70.77300 | 76.70680 | 72.57590 | 624.88106   | 256.11046   | -409.33888  | 1 |
| 15116 | H | 70.57700 | 77.24380 | 71.80390 | -2369.74769 | -1734.43725 | 1128.82661  | 1 |
| 15117 | C | 69.24800 | 77.30080 | 75.92290 | 399.94764   | -446.97378  | 686.80953   | 1 |
| 15118 | H | 69.32500 | 76.81380 | 76.88390 | 2438.68726  | 1984.75587  | -108.51194  | 1 |
| 15119 | C | 70.03300 | 76.73280 | 74.90990 | 274.87732   | 481.77146   | -723.73318  | 1 |
| 15120 | H | 70.81500 | 76.02580 | 75.14390 | 1698.21567  | 2136.86009  | 1564.64652  | 1 |



|       |   |          |          |          |             |             |             |   |
|-------|---|----------|----------|----------|-------------|-------------|-------------|---|
| 15121 | C | 66.60900 | 81.16880 | 77.39390 | -503.59349  | 535.04360   | 539.97494   | 1 |
| 15122 | O | 66.03000 | 81.91280 | 76.59390 | -555.71653  | -31.06093   | -560.21566  | 1 |
| 15123 | N | 66.26200 | 81.14380 | 78.69490 | -423.91051  | 460.76442   | -566.27583  | 1 |
| 15124 | H | 66.72900 | 80.59280 | 79.38290 | 231.56496   | -420.20322  | -3109.34610 | 1 |
| 15125 | C | 65.22400 | 82.07880 | 79.20490 | 673.00490   | -614.10019  | -37.36801   | 1 |
| 15126 | H | 64.38800 | 81.88480 | 78.54990 | -2063.42445 | -1517.23627 | -1827.15623 | 1 |
| 15127 | C | 64.68300 | 81.72780 | 80.60790 | -832.15514  | -43.89968   | -370.19135  | 1 |
| 15128 | H | 65.60700 | 81.77480 | 81.22190 | -1925.12662 | 1278.53341  | 2134.82225  | 1 |
| 15129 | C | 63.60600 | 82.80080 | 81.01090 | 505.36527   | -397.43725  | 646.60697   | 1 |
| 15130 | H | 62.70300 | 82.86080 | 80.36690 | -2007.05635 | 1127.90983  | 2144.24123  | 1 |
| 15131 | H | 63.25600 | 82.57980 | 82.04190 | -2206.49127 | -827.25388  | 2084.53196  | 1 |
| 15132 | H | 64.00900 | 83.83280 | 81.09290 | -2810.47507 | -735.62911  | -1207.60337 | 1 |
| 15133 | C | 64.11400 | 80.29080 | 80.63890 | 612.56915   | -593.56585  | 322.31913   | 1 |
| 15134 | H | 63.25500 | 80.13980 | 79.95190 | 2849.58568  | 596.58090   | -1192.55142 | 1 |
| 15135 | H | 64.84000 | 79.61680 | 80.13490 | -1849.77837 | -2543.24136 | -92.03029   | 1 |
| 15136 | C | 63.65900 | 79.83980 | 81.99690 | 532.32684   | 449.11009   | -588.53994  | 1 |
| 15137 | H | 64.50200 | 79.89380 | 82.71890 | 2476.88810  | -656.72205  | -1825.36783 | 1 |
| 15138 | H | 63.43900 | 78.75180 | 81.95090 | 2383.43696  | -183.50493  | 2045.42916  | 1 |
| 15139 | H | 62.80200 | 80.44580 | 82.35890 | -734.01996  | 2926.88786  | 890.37542   | 1 |
| 15140 | C | 65.58000 | 83.61280 | 79.03390 | -662.43462  | -189.91493  | 597.12955   | 1 |
| 15141 | O | 64.77400 | 84.26080 | 78.37690 | -448.56273  | -99.99674   | 642.19884   | 1 |
| 15142 | N | 66.82900 | 84.06580 | 79.36490 | -665.14497  | 222.68035   | -469.75304  | 1 |
| 15143 | H | 67.45400 | 83.43180 | 79.81190 | -2950.53399 | -175.34435  | 1077.88206  | 1 |
| 15144 | C | 67.30383 | 85.37166 | 79.00321 | -70.28142   | 653.88680   | -269.41389  | 1 |
| 15145 | H | 66.76273 | 86.09454 | 79.63529 | -2143.42259 | 1.89083     | 1965.59452  | 1 |
| 15146 | H | 68.39850 | 85.39292 | 79.41026 | 27.86315    | -2851.45878 | 841.36129   | 1 |
| 15147 | C | 67.17405 | 85.77957 | 77.45987 | -177.94703  | -99.09072   | 287.17896   | 1 |
| 15148 | O | 66.81087 | 86.87901 | 77.18224 | -482.22246  | 578.01194   | 720.98514   | 1 |
| 15149 | N | 67.89100 | 84.89680 | 76.61290 | 356.73523   | -663.28731  | 381.39508   | 1 |
| 15150 | H | 68.32900 | 84.14080 | 77.09390 | 888.15468   | 2662.37180  | 1421.68347  | 1 |
| 15151 | C | 67.82524 | 85.10631 | 75.17263 | 506.91651   | 454.88670   | 204.47504   | 1 |
| 15152 | H | 68.20599 | 86.15258 | 74.95940 | 1866.42450  | 418.79333   | 123.18792   | 1 |
| 15153 | C | 68.53600 | 83.92580 | 74.53290 | -676.89647  | -545.29416  | -275.52940  | 1 |
| 15154 | H | 68.10500 | 82.98380 | 74.93690 | -1566.49989 | 1817.76903  | -2034.70393 | 1 |
| 15155 | C | 68.34900 | 83.93880 | 73.05490 | -859.83284  | 287.47088   | 97.46273    | 1 |
| 15156 | H | 67.38300 | 83.53880 | 72.67890 | 559.45597   | -3034.42126 | 614.42889   | 1 |
| 15157 | H | 68.68700 | 84.91880 | 72.65490 | -2379.23533 | 1914.79470  | 755.66312   | 1 |
| 15158 | H | 69.02400 | 83.17980 | 72.60690 | 2573.12642  | -623.55059  | -1699.53856 | 1 |
| 15159 | C | 70.05800 | 83.94780 | 74.75490 | -859.47197  | 15.31935    | 304.17799   | 1 |
| 15160 | H | 70.56200 | 83.01280 | 74.42890 | -557.06634  | 2791.46622  | 1340.00734  | 1 |
| 15161 | H | 70.17300 | 83.76380 | 75.84390 | 1858.38971  | 1313.36782  | -2172.48219 | 1 |
| 15162 | C | 70.72899 | 85.31468 | 74.33884 | 382.15411   | -205.37208  | -616.18146  | 1 |
| 15163 | H | 70.14094 | 86.09695 | 74.81557 | 1338.79562  | -895.23147  | 1034.17896  | 1 |
| 15164 | H | 71.74469 | 85.44374 | 74.76151 | -1230.30921 | -2208.92273 | -885.58789  | 1 |
| 15165 | H | 70.75153 | 85.50756 | 73.27866 | -1331.13081 | -1992.30762 | 1829.43167  | 1 |
| 15166 | C | 66.26897 | 85.22469 | 74.66566 | -231.61022  | -13.16659   | 59.68676    | 1 |
| 15167 | O | 66.07171 | 86.07418 | 73.77530 | 567.96435   | -10.10846   | -357.06394  | 1 |
| 15168 | N | 65.47600 | 84.30180 | 75.09290 | -415.11655  | 435.25446   | -592.37158  | 1 |
| 15169 | H | 65.70400 | 83.60980 | 75.77290 | -77.01283   | -2431.77744 | 1994.68136  | 1 |
| 15170 | C | 64.05600 | 84.33580 | 74.67990 | -310.60242  | 222.51014   | -827.92897  | 1 |
| 15171 | H | 64.10600 | 84.16680 | 73.61490 | -2580.20351 | -1213.99403 | -1329.28347 | 1 |
| 15172 | C | 63.18100 | 83.19080 | 75.19690 | 304.73127   | -482.89879  | 710.91393   | 1 |
| 15173 | H | 62.22600 | 83.07180 | 74.64190 | 2747.40308  | 654.17390   | 1386.38344  | 1 |
| 15174 | H | 63.77500 | 82.27180 | 75.00590 | 524.28411   | -1982.39564 | -2386.09722 | 1 |
| 15175 | O | 62.80900 | 83.14980 | 76.55590 | 289.23783   | 159.36988   | 717.33531   | 1 |
| 15176 | H | 63.47300 | 83.61580 | 77.06990 | 2995.73456  | 32.18442    | -960.60649  | 1 |
| 15177 | C | 63.32316 | 85.73722 | 75.10167 | -451.70506  | 598.13246   | -489.41847  | 1 |
| 15178 | O | 62.39570 | 86.08161 | 74.34486 | -1.13636    | -267.43065  | -234.90064  | 1 |
| 15179 | N | 63.79069 | 86.38467 | 76.13713 | -62.38843   | -81.57369   | 855.78473   | 1 |
| 15180 | H | 64.51948 | 85.97386 | 76.65445 | 647.01429   | 1592.66552  | -909.66416  | 1 |
| 15181 | C | 63.42492 | 87.70011 | 76.43223 | 376.88077   | -398.30170  | -147.66734  | 1 |
| 15182 | H | 62.35410 | 87.64803 | 76.13683 | 199.59375   | 1469.14172  | 3151.54694  | 1 |

|       |   |          |          |          |             |             |             |   |
|-------|---|----------|----------|----------|-------------|-------------|-------------|---|
| 15183 | C | 63.94576 | 87.95331 | 77.97285 | 226.52320   | 1824.87398  | 721.07949   | 1 |
| 15184 | H | 64.61269 | 87.11249 | 78.34924 | -870.22335  | -2485.20361 | -1739.20406 | 1 |
| 15185 | C | 65.02598 | 89.10684 | 78.17954 | 274.70409   | 37.23329    | -327.24181  | 1 |
| 15186 | H | 65.99987 | 88.91381 | 77.65083 | -1037.35946 | 939.45709   | -3126.03971 | 1 |
| 15187 | H | 65.28578 | 89.31312 | 79.28109 | -922.27808  | -3671.46271 | -824.96466  | 1 |
| 15188 | H | 64.55965 | 90.06420 | 77.75983 | 522.86165   | 1644.51195  | -1897.09334 | 1 |
| 15189 | C | 62.76613 | 88.20671 | 78.93606 | 197.99332   | 308.95583   | 207.86632   | 1 |
| 15190 | H | 61.78247 | 88.35910 | 78.46295 | 1440.60956  | 1283.49414  | 831.03810   | 1 |
| 15191 | H | 63.12047 | 88.97116 | 79.62045 | -160.39045  | -1123.57756 | -1097.39004 | 1 |
| 15192 | C | 62.73504 | 86.85039 | 79.69990 | 153.86989   | -344.80607  | 417.17489   | 1 |
| 15193 | H | 63.70480 | 86.34664 | 79.69268 | -3550.95509 | -1258.35936 | -718.17780  | 1 |
| 15194 | H | 62.40582 | 86.92622 | 80.76631 | -1564.58707 | 5116.84186  | 900.55802   | 1 |
| 15195 | H | 62.04047 | 86.16155 | 79.14593 | 56.10803    | 494.64655   | -2895.01910 | 1 |
| 15196 | C | 64.23291 | 88.70222 | 75.40989 | -790.19378  | 475.98117   | -236.60188  | 1 |
| 15197 | O | 63.81908 | 89.81273 | 75.19776 | -555.12160  | -49.72273   | -431.17487  | 1 |
| 15198 | N | 65.39731 | 88.20280 | 74.99301 | 892.52587   | 132.44543   | -39.38178   | 1 |
| 15199 | H | 65.72201 | 87.32529 | 75.39087 | -1196.83438 | 995.53673   | 1486.52419  | 1 |
| 15200 | C | 66.15048 | 88.72623 | 73.85193 | -123.61859  | 234.70199   | -756.33164  | 1 |
| 15201 | H | 66.20803 | 89.79415 | 74.20384 | 2732.59001  | -2396.24257 | -840.62635  | 1 |
| 15202 | C | 67.61236 | 88.11399 | 73.73548 | 523.64981   | 572.19577   | 932.40377   | 1 |
| 15203 | H | 67.73647 | 87.31746 | 72.92226 | -168.85797  | 565.08145   | -1757.86138 | 1 |
| 15204 | H | 67.79477 | 87.52232 | 74.64482 | -341.12011  | -2108.72751 | 2100.32358  | 1 |
| 15205 | C | 68.74333 | 89.22708 | 73.55406 | -203.36941  | -177.54824  | 36.54590    | 1 |
| 15206 | O | 69.87312 | 88.77760 | 73.95449 | 700.75900   | 928.05014   | -12.01109   | 1 |
| 15207 | O | 68.48226 | 90.42603 | 73.32495 | 812.33904   | -211.98573  | 181.29939   | 1 |
| 15208 | C | 65.18777 | 88.58645 | 72.57295 | 229.31073   | -876.60888  | -244.75422  | 1 |
| 15209 | O | 65.30030 | 89.45579 | 71.65655 | 301.56682   | -66.65163   | 264.00047   | 1 |
| 15210 | N | 64.50231 | 87.45900 | 72.54980 | -122.79536  | 164.36436   | 116.43581   | 1 |
| 15211 | H | 64.52175 | 86.80618 | 73.39020 | -1244.57844 | 722.86462   | 1507.97518  | 1 |
| 15212 | C | 63.96189 | 87.03817 | 71.30324 | -140.21598  | 244.77644   | 549.22460   | 1 |
| 15213 | H | 64.56463 | 87.32305 | 70.51375 | 585.18662   | -3290.37265 | -26.65414   | 1 |
| 15214 | C | 63.71535 | 85.48150 | 71.45673 | 375.76732   | 655.41396   | 72.32220    | 1 |
| 15215 | H | 62.91859 | 85.45195 | 72.22507 | -1265.84220 | 2854.86769  | 1959.05570  | 1 |
| 15216 | H | 63.15554 | 85.24151 | 70.52508 | 448.42476   | -357.94650  | 1582.37696  | 1 |
| 15217 | O | 64.86565 | 84.66944 | 71.69913 | -67.15522   | 940.95992   | 633.30689   | 1 |
| 15218 | H | 65.27264 | 85.17579 | 72.48313 | -2105.35522 | -2421.38806 | 1499.67618  | 1 |
| 15219 | C | 62.48725 | 87.83214 | 71.04823 | 0.67966     | -674.98743  | 582.94846   | 1 |
| 15220 | O | 62.30217 | 88.35339 | 69.98113 | 375.59391   | -295.31093  | -659.79508  | 1 |
| 15221 | N | 61.85239 | 87.89036 | 72.21792 | 79.37033    | -546.97609  | -556.71858  | 1 |
| 15222 | H | 62.25032 | 87.38953 | 73.00220 | -3388.12526 | 1242.75630  | -3129.71737 | 1 |
| 15223 | C | 60.80495 | 88.86185 | 72.42694 | 177.53649   | -12.99871   | -69.38844   | 1 |
| 15224 | H | 60.08442 | 88.79312 | 71.58891 | -778.45983  | 403.48158   | -3106.72230 | 1 |
| 15225 | C | 60.18730 | 88.58602 | 73.87045 | 390.84176   | -186.36632  | 545.85527   | 1 |
| 15226 | H | 59.22436 | 89.16554 | 74.11419 | -364.74975  | 390.18261   | -3784.25915 | 1 |
| 15227 | H | 61.02135 | 88.77451 | 74.61514 | 1135.03391  | 283.30534   | -25.00369   | 1 |
| 15228 | C | 59.75254 | 87.11705 | 73.95743 | 1163.74495  | -847.87624  | -895.97677  | 1 |
| 15229 | C | 59.42539 | 86.24229 | 72.86990 | 275.67872   | 615.23972   | 702.80102   | 1 |
| 15230 | H | 59.24527 | 86.71426 | 71.89717 | -1202.84870 | 414.30915   | -2933.23390 | 1 |
| 15231 | C | 59.30100 | 84.85880 | 73.12290 | 25.30453    | -618.46486  | 669.56098   | 1 |
| 15232 | H | 59.12100 | 84.20580 | 72.28090 | 1154.23989  | 2424.67675  | 1639.17636  | 1 |
| 15233 | C | 59.18800 | 84.30980 | 74.35190 | 550.80277   | -533.65806  | 493.23056   | 1 |
| 15234 | H | 59.20900 | 83.23180 | 74.40590 | -120.72906  | -1414.18726 | -2807.79720 | 1 |
| 15235 | C | 59.67731 | 86.50799 | 75.26283 | -230.44236  | 473.33810   | -483.25512  | 1 |
| 15236 | H | 59.98884 | 87.12939 | 76.08295 | -1997.33202 | -1305.34595 | 991.38052   | 1 |
| 15237 | C | 59.35132 | 85.16467 | 75.47891 | 3.98898     | -141.79039  | 67.57385    | 1 |
| 15238 | H | 59.40800 | 84.60080 | 76.43090 | 499.78648   | 3074.09538  | 445.39565   | 1 |
| 15239 | C | 61.34685 | 90.37344 | 72.17042 | -238.64635  | 859.21006   | 168.24069   | 1 |
| 15240 | O | 60.43496 | 91.14557 | 72.02575 | -624.61482  | 291.34737   | 329.11633   | 1 |
| 15241 | N | 62.65928 | 90.56553 | 72.02635 | 705.54738   | -147.60829  | -278.80955  | 1 |
| 15242 | H | 63.43113 | 89.88263 | 72.12892 | 914.77078   | -169.01913  | 2072.49917  | 1 |
| 15243 | C | 63.05873 | 91.84285 | 71.63178 | -25.65066   | 361.64814   | -121.25434  | 1 |
| 15244 | H | 62.10892 | 92.41060 | 71.42431 | -2633.97799 | -605.09869  | 705.94310   | 1 |

|       |   |          |          |          |             |             |             |   |
|-------|---|----------|----------|----------|-------------|-------------|-------------|---|
| 15245 | C | 63.86616 | 92.57961 | 72.86237 | 375.85575   | 852.94311   | -275.62944  | 1 |
| 15246 | H | 63.26944 | 92.26376 | 73.79115 | -656.57782  | -424.93800  | 2216.13817  | 1 |
| 15247 | C | 65.34337 | 92.16384 | 73.03165 | -24.90791   | -679.12779  | -1370.19484 | 1 |
| 15248 | H | 65.47540 | 91.03416 | 73.17544 | 747.46000   | -4176.03822 | 3035.10883  | 1 |
| 15249 | H | 65.91704 | 92.40008 | 72.09801 | -494.53273  | -589.06885  | -2004.50890 | 1 |
| 15250 | H | 65.84919 | 92.66959 | 73.83999 | -357.53892  | 1515.60522  | 641.82761   | 1 |
| 15251 | C | 63.80586 | 94.10435 | 72.55279 | 467.00744   | 868.88641   | -590.65371  | 1 |
| 15252 | H | 62.79826 | 94.29129 | 72.21787 | 3150.90270  | -1256.64606 | -280.71553  | 1 |
| 15253 | H | 64.44909 | 94.43357 | 71.73825 | 2099.69441  | -159.35703  | 388.80555   | 1 |
| 15254 | C | 64.10861 | 94.88583 | 73.89320 | 40.11293    | 1130.58150  | -124.78529  | 1 |
| 15255 | H | 63.92074 | 95.98854 | 73.60965 | 603.99964   | 472.67334   | -921.94340  | 1 |
| 15256 | H | 65.15283 | 94.76681 | 74.29328 | -2190.94268 | 406.40601   | 1778.45025  | 1 |
| 15257 | H | 63.41062 | 94.67084 | 74.72931 | 2672.86980  | 1272.47727  | 377.97710   | 1 |
| 15258 | C | 63.95040 | 91.95579 | 70.25713 | 661.62440   | -501.87121  | 437.21482   | 1 |
| 15259 | O | 64.05993 | 93.05081 | 69.76618 | -591.64845  | 112.72252   | -70.11802   | 1 |
| 15260 | N | 64.32047 | 90.76093 | 69.80071 | -823.58159  | 395.62994   | 191.79443   | 1 |
| 15261 | H | 64.29722 | 89.84594 | 70.31753 | 2067.11021  | -1149.88138 | 79.33277    | 1 |
| 15262 | C | 65.19816 | 90.80900 | 68.63250 | -366.38592  | -198.12727  | 355.38782   | 1 |
| 15263 | H | 65.54105 | 91.85214 | 68.71081 | -595.98143  | -2839.09654 | 1883.46004  | 1 |
| 15264 | C | 66.24033 | 89.64868 | 68.85400 | -202.28332  | -76.37071   | 1186.09177  | 1 |
| 15265 | H | 65.66283 | 88.67098 | 68.92420 | 111.33232   | -793.79812  | -246.97487  | 1 |
| 15266 | H | 66.68667 | 89.62149 | 69.85209 | -1015.86743 | -2322.85366 | -1459.99076 | 1 |
| 15267 | C | 67.29528 | 89.47441 | 67.74846 | -755.05347  | 541.38732   | 52.07694    | 1 |
| 15268 | H | 66.79811 | 89.77975 | 66.80855 | -3823.38804 | 2675.65750  | -594.86661  | 1 |
| 15269 | C | 68.43410 | 90.39341 | 68.10839 | -323.69565  | -418.26698  | 57.19173    | 1 |
| 15270 | H | 68.18612 | 91.46548 | 68.29788 | -1800.39179 | -1222.75952 | 840.74901   | 1 |
| 15271 | H | 69.18771 | 90.40731 | 67.28083 | 1866.88697  | 2216.40017  | 562.27767   | 1 |
| 15272 | H | 68.95354 | 89.92079 | 69.03659 | -160.80476  | -1316.49285 | -2353.85430 | 1 |
| 15273 | C | 67.72305 | 88.04835 | 67.61220 | -661.63843  | -57.21965   | -71.85084   | 1 |
| 15274 | H | 68.11625 | 87.84120 | 66.59322 | 1208.62024  | -433.65484  | 3868.74897  | 1 |
| 15275 | H | 68.43018 | 87.73949 | 68.41012 | 2727.32140  | 4638.09790  | -712.57171  | 1 |
| 15276 | H | 66.78529 | 87.34406 | 67.44049 | -839.94078  | 1613.35276  | 2126.73745  | 1 |
| 15277 | C | 64.37722 | 90.62744 | 67.26514 | 27.85055    | -482.33210  | -533.62167  | 1 |
| 15278 | O | 64.91399 | 90.84532 | 66.18527 | -593.22098  | -220.45777  | 642.19315   | 1 |
| 15279 | N | 63.20927 | 90.00006 | 67.50829 | 501.07332   | -738.86222  | 218.78855   | 1 |
| 15280 | H | 62.93054 | 90.07505 | 68.49669 | -966.25916  | 1244.99225  | -1481.74108 | 1 |
| 15281 | C | 62.26479 | 89.95469 | 66.48097 | -365.13832  | 120.93913   | -90.04256   | 1 |
| 15282 | H | 62.69978 | 89.89054 | 65.45059 | 4477.68727  | -1270.25121 | 565.69744   | 1 |
| 15283 | C | 61.28502 | 88.73467 | 66.89336 | 1040.19826  | -132.71503  | 691.51368   | 1 |
| 15284 | H | 60.24999 | 88.84218 | 66.39924 | 2129.72781  | 525.68794   | 2668.64361  | 1 |
| 15285 | H | 60.98812 | 88.71674 | 68.02238 | 3039.06931  | -1157.50798 | 620.67918   | 1 |
| 15286 | C | 61.85720 | 87.38654 | 66.56242 | -710.92708  | -123.53180  | 242.68256   | 1 |
| 15287 | H | 62.75936 | 87.46388 | 65.89027 | -1161.10410 | 2391.26515  | -11.35938   | 1 |
| 15288 | C | 62.58487 | 86.76078 | 67.74843 | -628.19777  | -42.02890   | 267.02491   | 1 |
| 15289 | H | 61.89455 | 86.50020 | 68.68310 | -282.88494  | -2494.92561 | -295.16411  | 1 |
| 15290 | H | 63.34366 | 87.37208 | 68.11540 | -154.22725  | 2862.12016  | 797.36263   | 1 |
| 15291 | H | 63.03073 | 85.81644 | 67.39869 | -983.15304  | -927.72257  | -1929.11452 | 1 |
| 15292 | C | 60.82074 | 86.56613 | 65.83436 | -258.32108  | 1215.37276  | 302.77209   | 1 |
| 15293 | H | 60.46891 | 87.17021 | 64.89731 | -2091.02823 | 25.91826    | -263.16297  | 1 |
| 15294 | H | 61.13167 | 85.58558 | 65.42589 | -1572.77739 | -2454.28727 | -1365.20732 | 1 |
| 15295 | H | 59.95596 | 86.39228 | 66.53420 | 1279.22321  | 455.59740   | 3227.59962  | 1 |
| 15296 | C | 61.41408 | 91.30640 | 66.61029 | 596.38786   | -264.64670  | -73.19584   | 1 |
| 15297 | O | 60.90624 | 91.73205 | 65.56772 | 534.71317   | 172.00504   | 493.66023   | 1 |
| 15298 | N | 61.22677 | 91.80521 | 67.84363 | -478.61880  | 569.46527   | -628.08186  | 1 |
| 15299 | H | 61.53785 | 91.11926 | 68.56715 | 2948.33544  | 476.75104   | -656.87760  | 1 |
| 15300 | C | 61.32232 | 93.24482 | 68.06557 | 273.76093   | 132.87554   | -241.45478  | 1 |
| 15301 | H | 61.59793 | 93.15774 | 69.13233 | 1025.35031  | 3636.75605  | -1133.90836 | 1 |
| 15302 | C | 62.56318 | 93.95023 | 67.44846 | -658.87353  | -279.45482  | -591.10951  | 1 |
| 15303 | H | 63.47146 | 93.26538 | 67.55789 | -1955.99575 | 675.47766   | 711.18197   | 1 |
| 15304 | H | 62.38583 | 93.88188 | 66.31898 | 2916.52340  | -849.97296  | 191.86112   | 1 |
| 15305 | C | 62.77511 | 95.46787 | 67.89510 | 112.07615   | -36.70493   | -178.97503  | 1 |
| 15306 | H | 63.23088 | 95.49104 | 68.89932 | 274.80740   | 2872.72713  | 1312.31242  | 1 |

|       |   |          |          |          |             |             |             |   |
|-------|---|----------|----------|----------|-------------|-------------|-------------|---|
| 15307 | H | 61.76375 | 95.84725 | 68.07459 | -53.26057   | 439.97854   | 2753.25417  | 1 |
| 15308 | C | 63.52762 | 96.22252 | 66.75794 | 1.13687     | -216.71453  | 130.15449   | 1 |
| 15309 | O | 63.66718 | 95.61882 | 65.46346 | -69.88385   | -193.85233  | -82.41457   | 1 |
| 15310 | O | 63.75858 | 97.41084 | 66.88612 | -301.77889  | -18.53751   | -2.11122    | 1 |
| 15311 | C | 59.88086 | 94.00042 | 67.89934 | 175.32035   | -528.85409  | 134.58230   | 1 |
| 15312 | O | 59.76774 | 95.08119 | 67.38451 | -299.65172  | 410.27045   | 621.56817   | 1 |
| 15313 | N | 58.96708 | 93.17488 | 68.41892 | 359.65107   | 174.06538   | -614.02362  | 1 |
| 15314 | H | 59.15768 | 92.16753 | 68.64457 | 4608.68962  | 3088.74624  | 1994.71346  | 1 |
| 15315 | C | 57.71188 | 93.76006 | 68.87766 | -298.83205  | -216.70503  | -526.91485  | 1 |
| 15316 | H | 57.54110 | 94.07522 | 67.86661 | -1812.64228 | -1512.43966 | 1182.23862  | 1 |
| 15317 | C | 56.64025 | 92.81421 | 69.40514 | -367.06225  | -73.50671   | -372.96862  | 1 |
| 15318 | H | 56.52339 | 92.01247 | 68.66552 | -1320.61529 | 435.77471   | -1216.33295 | 1 |
| 15319 | C | 57.21871 | 92.08179 | 70.61271 | -343.90261  | 182.16994   | -97.90838   | 1 |
| 15320 | H | 56.71335 | 92.44584 | 71.50743 | 3412.38877  | -2317.37919 | -3937.18902 | 1 |
| 15321 | H | 57.14702 | 90.92627 | 70.55602 | 1540.87822  | -528.00187  | -1191.24637 | 1 |
| 15322 | H | 58.30507 | 92.30220 | 70.76117 | -1568.97390 | -3015.20614 | 1600.27795  | 1 |
| 15323 | C | 55.26683 | 93.38978 | 69.60287 | -778.46744  | -753.27612  | 5.89143     | 1 |
| 15324 | H | 55.39174 | 94.29093 | 70.28960 | 636.20786   | -2255.95566 | -3264.70434 | 1 |
| 15325 | H | 54.63393 | 92.72992 | 70.21339 | -2535.79966 | 1702.85929  | 3341.66670  | 1 |
| 15326 | C | 54.53643 | 93.75495 | 68.21021 | 221.91748   | 383.10351   | 16.83158    | 1 |
| 15327 | H | 55.23539 | 94.10410 | 67.39009 | -2060.63221 | -692.02556  | -2864.30455 | 1 |
| 15328 | H | 53.99932 | 92.89418 | 67.78023 | 261.24360   | -1583.87238 | -249.02756  | 1 |
| 15329 | H | 53.88591 | 94.68319 | 68.28506 | -275.26764  | -1236.54666 | -214.94532  | 1 |
| 15330 | C | 57.93087 | 95.04374 | 69.92775 | -295.92174  | 128.91337   | 300.09960   | 1 |
| 15331 | O | 57.12646 | 95.96117 | 70.01805 | 680.43985   | -457.34205  | 394.50820   | 1 |
| 15332 | N | 59.03288 | 94.87998 | 70.66403 | 132.95087   | -628.15882  | 111.44540   | 1 |
| 15333 | H | 59.68174 | 94.09278 | 70.43292 | -2771.60961 | 10.51548    | 783.31148   | 1 |
| 15334 | C | 59.62274 | 95.91629 | 71.48509 | 346.92577   | 788.44306   | -234.91651  | 1 |
| 15335 | H | 59.00102 | 96.86906 | 71.52048 | -1615.86306 | 918.22583   | 2188.33614  | 1 |
| 15336 | C | 59.59717 | 95.17694 | 72.88150 | -301.06248  | 1228.40664  | 506.14066   | 1 |
| 15337 | H | 59.63068 | 94.05579 | 72.73508 | -749.94915  | 654.75412   | -126.37179  | 1 |
| 15338 | C | 60.88469 | 95.49250 | 73.75858 | 329.68144   | -479.73481  | -327.07799  | 1 |
| 15339 | H | 60.91403 | 94.85079 | 74.72708 | 982.14344   | -2375.86059 | 2152.88227  | 1 |
| 15340 | H | 61.79763 | 95.36242 | 73.15300 | 2087.21394  | -1289.29766 | -451.06201  | 1 |
| 15341 | H | 60.84723 | 96.55255 | 74.10987 | -151.01890  | 330.51056   | -1625.02011 | 1 |
| 15342 | C | 58.34915 | 95.50385 | 73.83276 | -248.17862  | 654.96176   | 42.85189    | 1 |
| 15343 | H | 58.42737 | 96.51685 | 74.18129 | 1724.54469  | -45.13287   | -210.13091  | 1 |
| 15344 | H | 58.29534 | 94.91437 | 74.77298 | 431.18468   | -888.54494  | -1249.21589 | 1 |
| 15345 | C | 57.06412 | 95.33779 | 72.94120 | 126.08300   | 164.92758   | -445.59721  | 1 |
| 15346 | H | 56.10856 | 95.36357 | 73.62175 | 2494.50901  | -256.96643  | -852.71034  | 1 |
| 15347 | H | 57.14778 | 94.55238 | 72.21396 | -1232.36920 | 3460.60142  | -478.01380  | 1 |
| 15348 | H | 57.00236 | 96.23405 | 72.28154 | 365.85214   | 1340.19782  | 886.06838   | 1 |
| 15349 | C | 61.20595 | 96.01601 | 71.14244 | -422.84889  | 986.31496   | 453.26068   | 1 |
| 15350 | O | 61.68460 | 95.07361 | 70.54986 | 877.25652   | 675.11725   | -452.80990  | 1 |
| 15351 | N | 61.84973 | 97.18017 | 71.48417 | 111.66443   | 690.50359   | -535.24613  | 1 |
| 15352 | H | 61.41690 | 98.00604 | 71.95491 | 51.78135    | -817.25006  | 509.61375   | 1 |
| 15353 | C | 62.88787 | 97.52216 | 70.57572 | -82.37810   | 256.73206   | -702.52370  | 1 |
| 15354 | H | 63.20009 | 96.63667 | 69.94415 | -2028.41715 | -915.26411  | 1292.42899  | 1 |
| 15355 | C | 62.43371 | 98.69360 | 69.57576 | 788.87135   | -162.11755  | -485.37720  | 1 |
| 15356 | H | 62.70807 | 98.41966 | 68.56512 | 2137.72358  | -1674.81349 | 1712.03709  | 1 |
| 15357 | H | 63.05973 | 99.61841 | 69.77082 | 210.83515   | -23.59414   | 426.94421   | 1 |
| 15358 | C | 60.88219 | 98.90602 | 69.56939 | 1073.27194  | 105.97282   | 101.97519   | 1 |
| 15359 | H | 60.44815 | 99.03042 | 70.65236 | -342.52858  | 1588.14003  | 1646.58543  | 1 |
| 15360 | H | 60.83431 | 99.91573 | 69.11525 | 74.94663    | 4189.98803  | -2018.87996 | 1 |
| 15361 | C | 60.18541 | 97.85828 | 68.68224 | 589.42160   | 747.18244   | 159.45214   | 1 |
| 15362 | H | 60.11276 | 96.88607 | 69.24068 | -1740.09050 | -1365.08980 | -291.55162  | 1 |
| 15363 | H | 60.70179 | 97.63154 | 67.75084 | 4469.67010  | -1819.24605 | 3974.74500  | 1 |
| 15364 | C | 58.65535 | 98.24570 | 68.23313 | -69.70563   | -931.14745  | 342.05409   | 1 |
| 15365 | H | 58.40549 | 99.25807 | 67.91678 | -1512.41571 | 550.51447   | -1820.15740 | 1 |
| 15366 | H | 57.93893 | 97.99336 | 69.04303 | 3261.74180  | -719.84923  | 495.49005   | 1 |
| 15367 | N | 58.28228 | 97.33485 | 67.21713 | -67.27505   | -337.49159  | 907.72510   | 1 |
| 15368 | H | 63.54047 | 96.41625 | 64.89881 | 974.65567   | -560.80854  | 2076.94504  | 1 |

|       |   |          |           |          |             |             |             |   |
|-------|---|----------|-----------|----------|-------------|-------------|-------------|---|
| 15369 | H | 58.57114 | 96.33375  | 67.19924 | 1034.68716  | 2725.88463  | -955.33925  | 1 |
| 15370 | H | 58.24577 | 97.59314  | 66.18801 | -1224.47904 | -2549.03456 | 462.09735   | 1 |
| 15371 | C | 64.12220 | 98.16853  | 71.41264 | 538.98420   | -238.84647  | 304.08219   | 1 |
| 15372 | O | 63.87959 | 99.00140  | 72.25464 | 694.26807   | 280.97715   | -835.21038  | 1 |
| 15373 | N | 65.31063 | 97.68184  | 70.91238 | -472.62619  | 518.38884   | -110.47612  | 1 |
| 15374 | H | 65.17778 | 96.88068  | 70.32241 | -684.19042  | 124.05293   | 864.47296   | 1 |
| 15375 | C | 66.48621 | 98.13135  | 71.61939 | -857.25945  | 800.71491   | 445.63752   | 1 |
| 15376 | H | 66.37034 | 99.23084  | 71.88941 | 1721.75091  | -723.40104  | -492.40349  | 1 |
| 15377 | C | 66.52660 | 97.24360  | 72.90917 | -625.04921  | 53.19170    | 236.88241   | 1 |
| 15378 | H | 66.34260 | 96.17431  | 72.74717 | 1089.97899  | 727.56789   | 2562.70932  | 1 |
| 15379 | H | 65.69975 | 97.39090  | 73.65084 | -1811.25203 | -1783.47251 | 2348.29452  | 1 |
| 15380 | C | 67.88845 | 97.47828  | 73.66334 | 1019.06647  | 144.09228   | 703.29654   | 1 |
| 15381 | H | 67.99023 | 96.64330  | 74.46357 | 1379.54199  | 1589.42127  | -3096.57772 | 1 |
| 15382 | H | 68.64856 | 97.22344  | 72.95533 | -1148.56000 | 5582.93993  | -2381.68739 | 1 |
| 15383 | C | 67.92480 | 98.90160  | 74.33749 | -9.84721    | -374.39953  | -141.55595  | 1 |
| 15384 | O | 67.64063 | 99.91838  | 73.67491 | 237.60735   | -149.42159  | 16.34471    | 1 |
| 15385 | N | 68.37644 | 98.91406  | 75.60484 | -41.26508   | -807.40664  | 42.31012    | 1 |
| 15386 | H | 68.85928 | 98.19006  | 76.15338 | -2606.97207 | 129.76568   | -1172.27639 | 1 |
| 15387 | H | 68.41488 | 99.75715  | 76.14257 | 1780.82199  | 1875.05752  | -202.19682  | 1 |
| 15388 | C | 67.78386 | 97.82221  | 70.69373 | 307.65652   | 894.93700   | 357.11379   | 1 |
| 15389 | O | 67.73929 | 96.89094  | 69.84355 | 1161.33625  | -409.59464  | 186.05514   | 1 |
| 15390 | N | 68.81373 | 98.59069  | 70.85508 | -349.49201  | 42.45555    | -162.14971  | 1 |
| 15391 | H | 68.82085 | 99.33351  | 71.53302 | -1999.15512 | 1423.64886  | 772.66714   | 1 |
| 15392 | C | 70.04459 | 98.03337  | 70.27912 | 71.98624    | -152.02902  | -240.90748  | 1 |
| 15393 | H | 70.62457 | 98.92657  | 69.98213 | 3434.88264  | -2976.56080 | -1919.31044 | 1 |
| 15394 | H | 69.57341 | 97.47753  | 69.47108 | 2066.25641  | 2428.04606  | 746.54205   | 1 |
| 15395 | C | 70.81625 | 97.14218  | 71.39419 | -443.17061  | 638.35511   | -289.19229  | 1 |
| 15396 | O | 70.97286 | 97.51172  | 72.56401 | 648.45567   | 221.00175   | 34.71793    | 1 |
| 15397 | N | 71.45732 | 96.17727  | 70.80951 | -104.01693  | 342.46081   | 322.69345   | 1 |
| 15398 | H | 71.34910 | 96.06112  | 69.69844 | 758.25654   | -2043.12597 | 797.14640   | 1 |
| 15399 | C | 71.89260 | 95.02769  | 71.55838 | 142.23614   | 860.34588   | -36.63600   | 1 |
| 15400 | H | 70.89482 | 94.93419  | 72.11226 | -1024.83579 | -1017.14694 | -1376.84879 | 1 |
| 15401 | C | 72.34951 | 93.75333  | 70.78050 | 441.61198   | -336.24322  | -741.48467  | 1 |
| 15402 | H | 72.59018 | 92.86829  | 71.44475 | 2566.58759  | -1583.50201 | 1990.94996  | 1 |
| 15403 | H | 73.28132 | 93.93026  | 70.17649 | -1911.06308 | 1229.47372  | 3095.89674  | 1 |
| 15404 | S | 70.95325 | 93.10530  | 69.58216 | 341.93313   | 46.24010    | -430.08840  | 1 |
| 15405 | C | 73.22717 | 95.34903  | 72.38959 | 707.59087   | 209.31745   | -790.46242  | 1 |
| 15406 | O | 73.54533 | 94.76351  | 73.39025 | 592.90518   | 180.04316   | 815.87865   | 1 |
| 15407 | N | 73.90360 | 96.39314  | 71.80307 | -30.08313   | -324.45835  | 262.67012   | 1 |
| 15408 | H | 73.34953 | 96.83757  | 71.10276 | 36.48052    | -2148.13149 | -918.25266  | 1 |
| 15409 | C | 75.06640 | 96.78571  | 72.46487 | 410.01736   | 187.56319   | 412.77389   | 1 |
| 15410 | H | 75.77327 | 95.98293  | 72.78177 | 1593.23479  | 773.94555   | -2058.87944 | 1 |
| 15411 | C | 75.75458 | 97.70646  | 71.37197 | 95.24971    | -418.19210  | 52.83758    | 1 |
| 15412 | H | 75.57407 | 97.17538  | 70.37757 | -590.53656  | 134.95210   | -1781.52678 | 1 |
| 15413 | H | 76.89201 | 97.83271  | 71.55410 | -11.64402   | 3869.12641  | 619.62049   | 1 |
| 15414 | C | 75.16684 | 99.14635  | 71.38260 | 805.97920   | -320.98034  | 675.55786   | 1 |
| 15415 | H | 74.07667 | 99.13885  | 71.40010 | 1282.24890  | -100.48360  | -1751.15115 | 1 |
| 15416 | H | 75.39611 | 99.62236  | 72.32374 | -1798.33324 | -593.59858  | 523.76456   | 1 |
| 15417 | C | 75.90616 | 99.94119  | 70.03709 | 148.81597   | 392.46245   | -717.51615  | 1 |
| 15418 | O | 75.77513 | 99.48423  | 68.91049 | 46.42234    | -1441.03484 | 689.33541   | 1 |
| 15419 | O | 76.41678 | 100.98534 | 70.40038 | -142.50271  | -256.16414  | -763.69726  | 1 |
| 15420 | C | 74.71617 | 97.81466  | 73.73854 | -795.82149  | -905.92391  | 192.59001   | 1 |
| 15421 | O | 75.54253 | 98.12169  | 74.58362 | -19.01240   | -326.90793  | 421.38874   | 1 |
| 15422 | N | 73.42158 | 98.15921  | 73.69890 | -1060.54108 | -74.46064   | -456.40544  | 1 |
| 15423 | H | 72.70886 | 97.91196  | 72.97308 | 1415.10278  | 312.45932   | -1094.51410 | 1 |
| 15424 | C | 73.04230 | 98.89968  | 74.85030 | 479.37258   | -334.83227  | -160.27547  | 1 |
| 15425 | H | 73.97505 | 99.56707  | 75.00624 | 329.55702   | -2084.04936 | -2258.63834 | 1 |
| 15426 | C | 71.77972 | 99.91911  | 74.63700 | -200.76243  | -291.81264  | -488.12614  | 1 |
| 15427 | H | 70.71534 | 99.56037  | 74.69601 | -2258.36684 | -2182.59662 | 2142.39567  | 1 |
| 15428 | H | 72.05263 | 100.67614 | 75.42464 | 1286.87863  | 709.88699   | -693.07166  | 1 |
| 15429 | C | 71.99488 | 100.63836 | 73.35059 | 366.78018   | 457.78836   | -416.99713  | 1 |
| 15430 | C | 73.20005 | 101.36339 | 73.12364 | -1033.27431 | 9.95270     | 667.17618   | 1 |

|       |   |          |           |          |             |             |             |   |
|-------|---|----------|-----------|----------|-------------|-------------|-------------|---|
| 15431 | H | 73.88615 | 101.40385 | 73.96090 | 503.80715   | 1726.16748  | 176.80990   | 1 |
| 15432 | C | 73.36298 | 102.02873 | 71.87077 | -1350.62058 | -7.09289    | -448.07585  | 1 |
| 15433 | H | 74.30449 | 102.58292 | 71.61037 | -112.17583  | 5320.13921  | -616.75997  | 1 |
| 15434 | C | 72.28126 | 102.02448 | 70.95406 | 444.88526   | 379.21438   | -981.63358  | 1 |
| 15435 | H | 72.36909 | 102.61909 | 70.05269 | -3049.60975 | 1385.30690  | 1965.97114  | 1 |
| 15436 | C | 70.94803 | 100.57165 | 72.37745 | -479.72436  | -675.07777  | -32.71266   | 1 |
| 15437 | H | 70.02350 | 100.01793 | 72.63039 | 1629.97845  | 1081.56632  | 2674.89099  | 1 |
| 15438 | C | 71.15554 | 101.14016 | 71.13038 | 98.63996    | -211.37749  | 725.53480   | 1 |
| 15439 | H | 70.31371 | 101.02910 | 70.41405 | 1152.54949  | 2213.82894  | 1405.37302  | 1 |
| 15440 | C | 72.51756 | 97.79243  | 75.89214 | 288.61758   | -336.67092  | -110.26151  | 1 |
| 15441 | O | 72.14018 | 98.26737  | 76.95288 | 15.20443    | -588.51129  | 192.75300   | 1 |
| 15442 | N | 72.62116 | 96.52043  | 75.55122 | 28.00707    | 9.27077     | 610.71436   | 1 |
| 15443 | H | 72.99830 | 96.21722  | 74.66391 | -2591.29510 | -4.70720    | -2453.64138 | 1 |
| 15444 | C | 71.77595 | 95.56772  | 76.13987 | 325.72275   | -318.44772  | -502.96299  | 1 |
| 15445 | H | 71.42742 | 96.15734  | 76.99179 | -1107.86168 | 819.89816   | -29.68886   | 1 |
| 15446 | C | 70.66514 | 95.16599  | 75.01601 | 438.64282   | -441.76148  | -343.06871  | 1 |
| 15447 | H | 70.41796 | 96.04999  | 74.35914 | -836.89287  | 2196.66127  | 206.44397   | 1 |
| 15448 | H | 71.23191 | 94.50707  | 74.29338 | -320.13793  | -125.80367  | 2652.75914  | 1 |
| 15449 | C | 69.48625 | 94.39071  | 75.56999 | 587.73722   | -630.63877  | 250.69947   | 1 |
| 15450 | H | 69.07949 | 94.82355  | 76.54315 | 3067.88335  | 2739.97183  | 256.43657   | 1 |
| 15451 | H | 69.92662 | 93.42942  | 75.91344 | -2664.64783 | -2330.53883 | -181.93698  | 1 |
| 15452 | C | 68.32447 | 94.25436  | 74.46670 | -310.86474  | -1436.52870 | 1075.20495  | 1 |
| 15453 | O | 67.16918 | 94.01099  | 74.84099 | -241.25164  | -181.96078  | -725.79434  | 1 |
| 15454 | O | 68.65280 | 94.33573  | 73.25473 | -363.26399  | -323.78586  | 286.84978   | 1 |
| 15455 | C | 72.51919 | 94.22428  | 76.59117 | -46.67506   | 83.13648    | -496.88817  | 1 |
| 15456 | O | 71.83548 | 93.20857  | 76.93112 | -400.07145  | 265.68782   | 339.27191   | 1 |
| 15457 | N | 73.81432 | 94.35244  | 76.73131 | -785.40742  | -332.36567  | -221.08491  | 1 |
| 15458 | H | 74.13296 | 95.24449  | 76.31063 | 24.90560    | 1436.46760  | 237.25869   | 1 |
| 15459 | C | 74.41881 | 93.91911  | 77.98700 | -483.19430  | 365.34481   | -678.85197  | 1 |
| 15460 | H | 74.21407 | 92.78199  | 78.04010 | 573.54537   | -852.38796  | 521.79853   | 1 |
| 15461 | C | 75.89705 | 94.45862  | 77.88066 | -535.48451  | -766.41771  | -213.91985  | 1 |
| 15462 | H | 75.95825 | 95.46640  | 78.45152 | -2628.26284 | -1537.69032 | 2132.85945  | 1 |
| 15463 | H | 76.23672 | 94.69395  | 76.81331 | 2046.32473  | -3233.88565 | -903.63245  | 1 |
| 15464 | C | 76.93397 | 93.34510  | 78.40022 | 87.46022    | -192.18277  | -4.21027    | 1 |
| 15465 | O | 77.08146 | 92.84261  | 79.52372 | 669.26361   | 176.91222   | -409.30700  | 1 |
| 15466 | N | 77.86957 | 93.22828  | 77.40358 | -390.16257  | -198.55351  | -645.36319  | 1 |
| 15467 | H | 77.64992 | 93.70268  | 76.49708 | 31.19499    | 334.24307   | 464.19481   | 1 |
| 15468 | H | 78.69401 | 92.56530  | 77.45342 | -1406.65031 | -97.08844   | 485.70252   | 1 |
| 15469 | C | 73.66287 | 94.64984  | 79.20304 | 952.28137   | -625.85422  | -53.76170   | 1 |
| 15470 | O | 73.94854 | 95.80330  | 79.48742 | 676.49025   | 441.47979   | 1328.62036  | 1 |
| 15471 | N | 72.67825 | 93.89389  | 79.76477 | -491.09310  | -115.70681  | 277.17306   | 1 |
| 15472 | H | 72.50502 | 93.03689  | 79.27537 | 3628.28025  | -873.02065  | 1405.23133  | 1 |
| 15473 | C | 71.43098 | 94.51538  | 80.29346 | 662.20126   | 17.80075    | -789.17671  | 1 |
| 15474 | H | 71.76899 | 94.86323  | 81.25036 | 1655.26361  | -749.88702  | -2417.11686 | 1 |
| 15475 | C | 70.97910 | 95.58523  | 79.30806 | 485.91317   | 821.44660   | -954.07657  | 1 |
| 15476 | H | 71.19521 | 95.41124  | 78.27925 | -962.10380  | 1405.77537  | 1676.73582  | 1 |
| 15477 | O | 71.62200 | 97.27799  | 79.42839 | -522.81621  | 204.63789   | 159.84971   | 1 |
| 15478 | H | 71.67733 | 97.60329  | 78.46833 | -2876.34173 | 918.28115   | -1940.84092 | 1 |
| 15479 | C | 69.49297 | 95.89105  | 79.51075 | -209.44910  | -1045.58611 | -1160.05803 | 1 |
| 15480 | H | 68.82790 | 94.93697  | 79.44662 | 903.93985   | 266.35122   | -117.29187  | 1 |
| 15481 | H | 69.09083 | 96.67634  | 78.82658 | 2874.43560  | -2818.24107 | -3925.78016 | 1 |
| 15482 | H | 69.55505 | 96.28865  | 80.51756 | 1975.78958  | -777.04284  | 565.51177   | 1 |
| 15483 | C | 70.26511 | 93.33255  | 80.28337 | 128.25373   | 408.98889   | 240.74032   | 1 |
| 15484 | O | 69.71709 | 92.97391  | 81.34142 | 125.75227   | -280.82765  | 743.40739   | 1 |
| 15485 | N | 69.97497 | 92.86619  | 79.09093 | 147.37929   | 748.01452   | -87.73618   | 1 |
| 15486 | H | 70.50157 | 93.19185  | 78.29735 | 3074.07278  | -4415.95923 | -385.16386  | 1 |
| 15487 | C | 69.72138 | 91.41460  | 79.20513 | 511.15677   | 818.33187   | 254.87897   | 1 |
| 15488 | H | 69.16639 | 91.34985  | 80.19563 | -1586.61013 | -1728.17014 | 1204.92493  | 1 |
| 15489 | C | 68.80686 | 90.79811  | 78.08637 | 883.44928   | -456.39808  | 48.87870    | 1 |
| 15490 | H | 68.57617 | 89.73284  | 78.30443 | -4030.21480 | 439.58977   | 129.77550   | 1 |
| 15491 | C | 67.54245 | 91.74750  | 77.96191 | -138.78842  | -511.66017  | -782.50069  | 1 |
| 15492 | H | 66.87957 | 91.27570  | 77.21427 | -165.57477  | 1051.07717  | 1663.14385  | 1 |

|       |   |          |          |          |             |             |             |   |
|-------|---|----------|----------|----------|-------------|-------------|-------------|---|
| 15493 | H | 66.99655 | 91.99979 | 78.90680 | 1227.44983  | -872.31288  | 703.48101   | 1 |
| 15494 | H | 67.84274 | 92.73727 | 77.46909 | 358.89959   | -370.37664  | 833.61184   | 1 |
| 15495 | C | 69.42393 | 90.96004 | 76.62253 | -989.67265  | -1099.20002 | 0.06158     | 1 |
| 15496 | H | 68.69872 | 90.88314 | 75.78211 | 1842.72040  | -4200.09196 | -3839.70569 | 1 |
| 15497 | H | 69.93563 | 91.96595 | 76.51795 | 358.03605   | 2169.75440  | 326.77910   | 1 |
| 15498 | H | 70.19433 | 90.14944 | 76.40231 | -1757.50618 | 468.96815   | 2549.62427  | 1 |
| 15499 | C | 71.09130 | 90.64682 | 79.41768 | 205.57678   | -1742.37217 | 10.52134    | 1 |
| 15500 | O | 71.05952 | 89.74497 | 80.22926 | 182.30213   | 382.45544   | 160.18202   | 1 |
| 15501 | N | 72.09024 | 91.03166 | 78.59819 | 953.40633   | 588.64825   | -803.22576  | 1 |
| 15502 | H | 71.88006 | 91.81124 | 77.91693 | -178.02738  | -1289.43638 | 2620.45857  | 1 |
| 15503 | C | 73.14113 | 90.09720 | 78.26001 | 744.37733   | 855.73895   | -62.02468   | 1 |
| 15504 | H | 72.65236 | 89.14744 | 78.60646 | -2321.35182 | 1651.45561  | 442.27964   | 1 |
| 15505 | C | 73.50623 | 90.03526 | 76.74699 | 70.16202    | -559.46439  | 523.84935   | 1 |
| 15506 | H | 74.33944 | 90.70622 | 76.66497 | -3237.61389 | 299.04436   | -812.27963  | 1 |
| 15507 | H | 72.71343 | 90.50822 | 76.15851 | -699.07459  | 1411.88185  | -278.53277  | 1 |
| 15508 | N | 73.28496 | 87.86853 | 75.30593 | 131.49927   | -36.27223   | 1042.72985  | 1 |
| 15509 | C | 73.83426 | 88.51989 | 76.31041 | -27.97684   | -465.59310  | 345.58950   | 1 |
| 15510 | C | 73.88370 | 86.64616 | 75.22914 | -133.82088  | -605.64960  | 12.14326    | 1 |
| 15511 | H | 73.65677 | 85.87499 | 74.45190 | 2869.35617  | -1639.12256 | 1090.81859  | 1 |
| 15512 | N | 74.80384 | 86.59978 | 76.23972 | 75.67363    | 306.99463   | 1163.74050  | 1 |
| 15513 | H | 75.26757 | 85.72144 | 76.25347 | -806.98475  | 1128.35480  | -1641.90659 | 1 |
| 15514 | C | 74.86527 | 87.73400 | 76.90346 | -360.61261  | 263.94586   | 133.02705   | 1 |
| 15515 | H | 75.44616 | 87.78432 | 77.83007 | -3057.03891 | -1194.99483 | 2209.73524  | 1 |
| 15516 | C | 74.45054 | 90.29692 | 79.23698 | -1139.15288 | 813.49952   | -33.86564   | 1 |
| 15517 | O | 75.55719 | 89.75463 | 79.07633 | -264.50849  | -102.29409  | -843.63678  | 1 |
| 15518 | N | 74.21803 | 91.07636 | 80.31521 | 140.29345   | 485.91382   | 427.99532   | 1 |
| 15519 | H | 73.25462 | 91.40085 | 80.35794 | -2092.12670 | -222.02906  | -1447.51944 | 1 |
| 15520 | C | 75.17598 | 91.02981 | 81.37680 | 1113.69752  | -123.95809  | -302.13598  | 1 |
| 15521 | H | 76.07528 | 90.89079 | 80.72734 | -5295.31814 | 179.47402   | 1310.14425  | 1 |
| 15522 | C | 75.24408 | 92.38842 | 82.20319 | -349.94803  | 708.31592   | -175.71460  | 1 |
| 15523 | H | 75.67402 | 93.20979 | 81.57151 | -294.14481  | -1432.11709 | 1975.24961  | 1 |
| 15524 | H | 75.95383 | 92.38022 | 83.03023 | 1015.77461  | 16.34705    | -5091.40279 | 1 |
| 15525 | C | 73.78883 | 92.70096 | 82.69215 | 375.73091   | 447.04760   | 603.04924   | 1 |
| 15526 | H | 73.35114 | 92.72322 | 81.62460 | 130.40576   | 392.93234   | -2802.24575 | 1 |
| 15527 | H | 73.36892 | 91.89918 | 83.30476 | 685.87675   | -98.38377   | -68.83296   | 1 |
| 15528 | C | 73.74208 | 94.13251 | 83.32841 | -395.75349  | 1011.02633  | 633.21987   | 1 |
| 15529 | H | 72.64712 | 94.41384 | 83.49491 | -1615.31670 | -823.57302  | 2132.43916  | 1 |
| 15530 | H | 74.21821 | 94.76898 | 82.59541 | 105.84074   | 1408.12863  | 1253.90275  | 1 |
| 15531 | C | 74.52563 | 94.31709 | 84.71443 | 504.54733   | 712.71906   | -49.36950   | 1 |
| 15532 | H | 73.84458 | 94.58103 | 85.63395 | -1088.95458 | 717.40954   | 3668.80119  | 1 |
| 15533 | H | 75.16224 | 93.41648 | 84.83780 | 2626.98682  | -3745.32306 | 812.99757   | 1 |
| 15534 | N | 75.41007 | 95.42735 | 84.55408 | 192.59368   | 43.90097    | -386.28417  | 1 |
| 15535 | H | 72.52936 | 96.88547 | 79.63656 | -747.32698  | -330.12402  | 3071.55512  | 1 |
| 15536 | H | 76.01970 | 95.62414 | 85.40739 | -904.13883  | 818.94024   | -1503.07648 | 1 |
| 15537 | H | 76.22032 | 95.19746 | 83.92744 | -677.77374  | -50.24416   | 491.66952   | 1 |
| 15538 | C | 74.66549 | 89.80062 | 82.31318 | -330.20137  | -120.75942  | -591.74798  | 1 |
| 15539 | O | 75.46300 | 89.10341 | 82.89739 | -555.54145  | 256.96947   | 45.86379    | 1 |
| 15540 | N | 73.33657 | 89.77545 | 82.47345 | -499.35729  | -473.91291  | 84.45842    | 1 |
| 15541 | H | 72.79873 | 90.50638 | 82.03155 | -1139.09309 | -216.34677  | -1345.36846 | 1 |
| 15542 | C | 72.74545 | 88.66228 | 83.13968 | 183.98902   | 289.67978   | 309.79566   | 1 |
| 15543 | H | 73.50394 | 88.61680 | 83.92862 | 4150.68562  | 1140.12866  | 904.50854   | 1 |
| 15544 | C | 71.22499 | 88.96786 | 83.58377 | -499.69978  | 441.48389   | 589.53177   | 1 |
| 15545 | H | 70.80910 | 88.20180 | 84.23862 | -358.56401  | 2463.61323  | 4880.96225  | 1 |
| 15546 | H | 70.46728 | 89.02764 | 82.73561 | -1168.71899 | 1447.22434  | -1576.12848 | 1 |
| 15547 | C | 71.18518 | 90.29282 | 84.38344 | -28.08646   | -979.58235  | -207.20371  | 1 |
| 15548 | C | 70.60672 | 91.50832 | 84.00865 | 17.84122    | 32.11432    | -177.24076  | 1 |
| 15549 | H | 70.02495 | 91.78846 | 83.03945 | 2189.04383  | -4575.93442 | 2263.88397  | 1 |
| 15550 | N | 70.62813 | 92.38050 | 85.02849 | -86.32567   | -333.10864  | -268.83012  | 1 |
| 15551 | H | 70.29983 | 93.37907 | 84.82086 | 1472.70520  | 236.40699   | -1671.79578 | 1 |
| 15552 | C | 71.35997 | 91.89873 | 86.06738 | -367.06463  | -137.74899  | 600.54473   | 1 |
| 15553 | C | 71.83769 | 90.51440 | 85.66819 | -791.20573  | -215.84613  | -298.94153  | 1 |
| 15554 | C | 72.60626 | 89.77051 | 86.57316 | -479.62369  | 79.95039    | -696.03308  | 1 |

|       |   |          |          |          |             |             |             |   |
|-------|---|----------|----------|----------|-------------|-------------|-------------|---|
| 15555 | H | 72.84644 | 88.72186 | 86.33694 | 642.84026   | -420.25939  | 3427.88371  | 1 |
| 15556 | C | 73.01826 | 90.41075 | 87.75979 | 81.05152    | 292.84959   | -38.08770   | 1 |
| 15557 | H | 73.69898 | 89.80935 | 88.37488 | -1144.23309 | -2516.71564 | -288.61441  | 1 |
| 15558 | C | 71.72602 | 92.52494 | 87.30931 | 191.31698   | 287.60276   | -205.11888  | 1 |
| 15559 | H | 71.38543 | 93.60343 | 87.59820 | -285.72871  | -3027.29088 | 427.72210   | 1 |
| 15560 | C | 72.57855 | 91.70810 | 88.13963 | 108.97761   | 252.79790   | -79.04524   | 1 |
| 15561 | H | 72.96552 | 92.18311 | 89.00329 | -781.53630  | -863.71709  | -1179.90392 | 1 |
| 15562 | C | 72.67888 | 87.37567 | 82.20243 | -442.32561  | -320.68088  | -930.52699  | 1 |
| 15563 | O | 72.90024 | 86.26157 | 82.68277 | 707.22721   | 967.60083   | 937.62896   | 1 |
| 15564 | N | 72.49154 | 87.63205 | 80.93160 | 913.01846   | 935.94865   | 253.91302   | 1 |
| 15565 | H | 72.34548 | 88.63876 | 80.54270 | -767.79865  | 156.21668   | -2806.18729 | 1 |
| 15566 | C | 72.74286 | 86.52956 | 79.96406 | 1038.85215  | 18.67060    | 646.08187   | 1 |
| 15567 | H | 72.27758 | 85.67643 | 80.47760 | 1137.31101  | -2737.90269 | 3303.43254  | 1 |
| 15568 | C | 72.11776 | 86.70672 | 78.59794 | 714.20786   | -268.74128  | 724.96724   | 1 |
| 15569 | H | 72.68430 | 87.54356 | 78.09370 | 2232.15199  | 3378.88818  | -1875.91434 | 1 |
| 15570 | C | 72.29386 | 85.47299 | 77.74513 | -527.98696  | -180.71922  | -905.04803  | 1 |
| 15571 | H | 71.74025 | 85.59064 | 76.74755 | 1191.19636  | 404.63554   | 728.34542   | 1 |
| 15572 | H | 71.89646 | 84.53354 | 78.21798 | -1452.68503 | 3569.74989  | -452.47094  | 1 |
| 15573 | H | 73.34468 | 85.25638 | 77.58038 | -3600.40007 | 2923.76153  | -426.56976  | 1 |
| 15574 | C | 70.65438 | 87.13154 | 78.63622 | 82.00521    | 168.63429   | 76.30563    | 1 |
| 15575 | H | 70.39825 | 87.86200 | 79.44066 | 491.77374   | -1025.78140 | 1146.12243  | 1 |
| 15576 | H | 70.04355 | 86.24483 | 78.92603 | -1394.98356 | -298.88991  | -1235.82530 | 1 |
| 15577 | C | 70.34330 | 87.67595 | 77.16772 | 243.05005   | 335.11986   | 331.54714   | 1 |
| 15578 | H | 71.07104 | 88.42899 | 76.73997 | 1327.98141  | -2124.28949 | -124.86026  | 1 |
| 15579 | H | 70.41189 | 86.64819 | 76.68806 | -783.55257  | 3027.41414  | 1354.95861  | 1 |
| 15580 | H | 69.31839 | 87.99138 | 77.01593 | 804.10061   | -2497.75860 | -1628.65138 | 1 |
| 15581 | C | 74.36720 | 86.23900 | 79.98313 | 891.28816   | 303.67135   | -120.05988  | 1 |
| 15582 | O | 74.66972 | 85.07914 | 79.70519 | -110.48328  | 942.59596   | 649.77164   | 1 |
| 15583 | N | 75.20601 | 87.24756 | 80.19133 | 233.09732   | 163.48002   | -234.61991  | 1 |
| 15584 | H | 74.78570 | 88.14337 | 80.30331 | -1836.11314 | -620.86259  | 710.89020   | 1 |
| 15585 | C | 76.58125 | 86.86845 | 80.23329 | 358.95844   | 78.44348    | 99.54568    | 1 |
| 15586 | H | 76.72653 | 86.33752 | 79.22344 | 913.31419   | -1725.44803 | -1533.99996 | 1 |
| 15587 | C | 77.41105 | 88.14334 | 80.44453 | 247.41546   | 629.88082   | 174.69311   | 1 |
| 15588 | H | 77.72054 | 88.65134 | 79.46571 | -47.53409   | 1287.74224  | 3886.72751  | 1 |
| 15589 | H | 76.72918 | 88.81520 | 81.12405 | 1796.09967  | -847.51292  | -2955.58182 | 1 |
| 15590 | O | 78.76534 | 88.37718 | 81.19986 | 568.40770   | -229.79357  | 1170.17199  | 1 |
| 15591 | H | 78.83230 | 89.33454 | 81.01625 | -2158.14266 | 249.66648   | -1398.29383 | 1 |
| 15592 | C | 76.92810 | 85.84871 | 81.48949 | -436.02499  | -1025.49826 | 179.28256   | 1 |
| 15593 | O | 77.48561 | 84.77179 | 81.29859 | -426.87432  | -181.34428  | -471.56886  | 1 |
| 15594 | N | 76.37821 | 86.30745 | 82.59408 | -342.31835  | 481.46371   | 629.05358   | 1 |
| 15595 | H | 75.90054 | 87.23154 | 82.55774 | 317.36629   | -677.42084  | 1394.44991  | 1 |
| 15596 | C | 76.62063 | 85.59652 | 83.84616 | 510.28627   | -210.02817  | -566.99057  | 1 |
| 15597 | H | 77.59401 | 85.02575 | 83.80178 | 2264.94724  | 1281.27831  | 2043.94047  | 1 |
| 15598 | C | 76.43653 | 86.54058 | 85.10842 | -1204.94122 | -47.24500   | -449.16635  | 1 |
| 15599 | H | 75.53136 | 87.03673 | 84.85320 | -206.25794  | 2604.99502  | -1353.58016 | 1 |
| 15600 | C | 76.20044 | 85.53477 | 86.33535 | 164.78554   | -417.46522  | 159.39995   | 1 |
| 15601 | H | 75.77646 | 86.02576 | 87.26069 | 2196.99945  | 214.76143   | -2287.21351 | 1 |
| 15602 | H | 75.51400 | 84.69780 | 86.20590 | -1205.53578 | -2376.94491 | 1671.83810  | 1 |
| 15603 | H | 77.16032 | 85.07737 | 86.68961 | 89.63678    | -773.99362  | 2560.17281  | 1 |
| 15604 | C | 77.69032 | 87.42927 | 85.36946 | 598.68747   | 597.52510   | -410.48287  | 1 |
| 15605 | H | 77.42619 | 88.17961 | 86.20242 | 2407.91974  | 1344.61488  | 1046.81711  | 1 |
| 15606 | H | 78.53138 | 86.87429 | 85.74241 | 385.81563   | -1815.97393 | -1014.23725 | 1 |
| 15607 | C | 78.06236 | 88.16270 | 84.01841 | 47.54144    | -218.95488  | -514.16101  | 1 |
| 15608 | H | 78.57524 | 89.09424 | 84.24209 | 463.01657   | -1087.78049 | 1733.02907  | 1 |
| 15609 | H | 77.06779 | 88.45572 | 83.51278 | -2759.98968 | 2101.89193  | 432.08612   | 1 |
| 15610 | H | 78.89896 | 87.64117 | 83.39693 | 1227.49870  | 455.79922   | -1657.26106 | 1 |
| 15611 | C | 75.78700 | 84.21280 | 83.67290 | 785.59210   | -41.69588   | -461.03959  | 1 |
| 15612 | O | 76.22800 | 83.19180 | 84.17690 | -760.26374  | -47.55351   | 208.24251   | 1 |
| 15613 | N | 74.61500 | 84.11980 | 83.04490 | 568.63411   | -188.08241  | -594.93911  | 1 |
| 15614 | H | 74.13500 | 84.95480 | 82.78790 | -339.13717  | 2869.24803  | -1245.24213 | 1 |
| 15615 | C | 73.91400 | 82.81280 | 82.88690 | -714.12081  | 390.46939   | 411.11572   | 1 |
| 15616 | H | 74.00400 | 82.22380 | 83.78790 | 627.52040   | 2153.46706  | -2206.13327 | 1 |



|       |   |          |          |          |             |             |             |   |
|-------|---|----------|----------|----------|-------------|-------------|-------------|---|
| 15617 | C | 72.40500 | 82.98880 | 82.63790 | 728.78165   | -305.49799  | -454.97175  | 1 |
| 15618 | H | 71.80800 | 82.06780 | 82.46190 | -1939.59620 | -1719.67361 | 1782.95134  | 1 |
| 15619 | O | 72.05500 | 83.93480 | 81.60190 | -711.95499  | -76.44498   | 333.02175   | 1 |
| 15620 | H | 72.41500 | 84.72780 | 82.00590 | 2028.88158  | -1577.80108 | -1814.49979 | 1 |
| 15621 | C | 71.88900 | 83.50080 | 83.95390 | 610.30246   | -359.87625  | 573.99564   | 1 |
| 15622 | H | 72.21200 | 84.53380 | 84.20790 | 2197.15808  | -1938.77183 | -1145.37609 | 1 |
| 15623 | H | 72.03100 | 82.81280 | 84.81390 | 1808.91683  | 84.80891    | -2572.71327 | 1 |
| 15624 | H | 70.78500 | 83.62080 | 83.92590 | -1622.85904 | -2138.11175 | -1641.04629 | 1 |
| 15625 | C | 74.57400 | 81.90580 | 81.81590 | 620.58496   | -666.18084  | 50.28313    | 1 |
| 15626 | O | 74.51000 | 80.70880 | 81.83790 | -641.08760  | 129.02499   | 442.70360   | 1 |
| 15627 | N | 75.20800 | 82.54480 | 80.80190 | 479.05021   | 677.55215   | 155.26194   | 1 |
| 15628 | H | 75.17800 | 83.52780 | 80.63590 | -837.16039  | -1004.73959 | 2861.44842  | 1 |
| 15629 | C | 76.14000 | 81.91880 | 79.89590 | 163.53308   | 867.18234   | 229.57076   | 1 |
| 15630 | H | 75.54400 | 81.19980 | 79.35290 | 2581.68508  | 1356.24594  | -1180.56144 | 1 |
| 15631 | C | 76.52300 | 82.92480 | 78.72290 | 281.23824   | 729.14528   | -469.79061  | 1 |
| 15632 | H | 75.62500 | 83.11680 | 78.09690 | 2071.08828  | -1560.73574 | -1781.27019 | 1 |
| 15633 | H | 76.66500 | 83.94280 | 79.14390 | 2175.09361  | -2265.87376 | -181.68689  | 1 |
| 15634 | C | 77.84600 | 82.66780 | 77.99590 | -611.28743  | 136.94309   | 662.58982   | 1 |
| 15635 | H | 77.88700 | 81.63180 | 77.59590 | -1864.58453 | 2010.47920  | -1542.57063 | 1 |
| 15636 | H | 78.72200 | 82.60580 | 78.67690 | 3008.43310  | -858.42995  | 332.64770   | 1 |
| 15637 | C | 78.18500 | 83.71880 | 76.95690 | -100.08441  | -888.55719  | 178.60636   | 1 |
| 15638 | O | 77.71100 | 83.55580 | 75.80090 | 695.97028   | 2.01554     | 373.16019   | 1 |
| 15639 | O | 78.82900 | 84.76080 | 77.27790 | 526.81165   | 293.53919   | 509.83473   | 1 |
| 15640 | C | 77.35300 | 81.31380 | 80.52590 | 123.66998   | 725.30763   | 538.59594   | 1 |
| 15641 | O | 77.70100 | 80.15980 | 80.26390 | -47.60118   | 737.08425   | -279.40682  | 1 |
| 15642 | N | 77.95800 | 82.09480 | 81.38790 | 501.09383   | 643.90192   | -216.72006  | 1 |
| 15643 | H | 77.75900 | 83.05180 | 81.58290 | -1879.33957 | -2215.99323 | -1206.51688 | 1 |
| 15644 | C | 79.11300 | 81.64780 | 82.15290 | -452.63025  | 499.63369   | -613.95687  | 1 |
| 15645 | H | 79.84000 | 81.34180 | 81.41590 | 786.17076   | -2556.41567 | -1656.77418 | 1 |
| 15646 | C | 79.73600 | 82.80780 | 82.92590 | 554.46504   | -703.14981  | 172.04613   | 1 |
| 15647 | H | 79.00500 | 83.27380 | 83.62090 | 2004.73176  | -30.22616   | 2424.53360  | 1 |
| 15648 | H | 80.07200 | 83.58180 | 82.20390 | 1772.73343  | -1970.85715 | 1694.51011  | 1 |
| 15649 | H | 80.64900 | 82.46280 | 83.45690 | 2.80618     | 2331.74634  | -2112.14993 | 1 |
| 15650 | C | 78.82700 | 80.48580 | 83.13890 | -364.78748  | -599.64303  | -582.07331  | 1 |
| 15651 | O | 79.55900 | 79.51980 | 83.22390 | 155.80951   | 287.15421   | 718.95277   | 1 |
| 15652 | N | 77.64800 | 80.51980 | 83.78290 | 449.33258   | 348.72806   | 623.82791   | 1 |
| 15653 | H | 77.05800 | 81.29980 | 83.58990 | 1784.10871  | 2072.15124  | -1556.07570 | 1 |
| 15654 | C | 77.12500 | 79.38880 | 84.44290 | -295.09981  | -726.39276  | 465.53266   | 1 |
| 15655 | H | 77.86300 | 79.04080 | 85.15090 | -2727.53363 | -1206.29691 | -1001.81550 | 1 |
| 15656 | C | 75.91800 | 79.80180 | 85.39390 | -757.97348  | -220.69563  | -456.31201  | 1 |
| 15657 | H | 75.08100 | 80.21480 | 84.79090 | 1548.95543  | -1156.06598 | 2482.43323  | 1 |
| 15658 | H | 75.49200 | 78.90680 | 85.89490 | 1945.07207  | 1925.55312  | -1551.50444 | 1 |
| 15659 | C | 76.28200 | 80.82580 | 86.48490 | -429.60876  | 81.85717    | 800.11669   | 1 |
| 15660 | H | 76.98000 | 81.55880 | 86.02790 | 3043.05091  | 527.76234   | -599.61179  | 1 |
| 15661 | C | 74.98200 | 81.56780 | 86.85190 | -739.86855  | -312.57104  | -431.67682  | 1 |
| 15662 | H | 75.18900 | 82.57080 | 87.28190 | -2660.18509 | -1222.97732 | -1151.50683 | 1 |
| 15663 | H | 74.37200 | 80.96780 | 87.56090 | 447.33926   | -2204.42072 | 2199.69159  | 1 |
| 15664 | H | 74.21300 | 81.76580 | 86.07590 | -2694.53847 | -1171.12975 | -1125.23053 | 1 |
| 15665 | C | 77.11200 | 80.14080 | 87.64290 | 469.81814   | -361.58067  | -692.80686  | 1 |
| 15666 | H | 78.19900 | 80.15580 | 87.41590 | -732.39479  | -2433.87245 | -1854.20845 | 1 |
| 15667 | H | 76.72400 | 79.10680 | 87.76490 | 765.36022   | -721.81661  | -2965.03469 | 1 |
| 15668 | H | 77.02300 | 80.76480 | 88.55790 | -1923.97086 | -2479.18462 | 224.06694   | 1 |
| 15669 | C | 76.81200 | 78.16480 | 83.60190 | -22.31535   | 583.42087   | 700.40925   | 1 |
| 15670 | O | 76.88800 | 77.02780 | 84.09590 | 685.45654   | -368.42810  | -134.30301  | 1 |
| 15671 | N | 76.40900 | 78.34580 | 82.33290 | 119.54106   | -327.95053  | -768.65511  | 1 |
| 15672 | H | 76.25200 | 79.28280 | 82.02990 | -478.66696  | 1307.72408  | -2821.16322 | 1 |
| 15673 | C | 76.00000 | 77.24280 | 81.44990 | 226.40760   | -710.74026  | 524.44150   | 1 |
| 15674 | H | 75.30300 | 76.60780 | 81.97590 | -1972.63729 | 1232.05443  | 2118.71901  | 1 |
| 15675 | C | 75.34000 | 77.71080 | 80.16190 | -746.49746  | 356.20258   | -383.81280  | 1 |
| 15676 | H | 74.36600 | 78.17280 | 80.43090 | -560.59934  | 2524.15006  | -1792.37861 | 1 |
| 15677 | H | 76.02600 | 78.35680 | 79.57290 | 2904.65159  | -1130.66475 | 427.57756   | 1 |
| 15678 | H | 75.07000 | 76.89780 | 79.45490 | -1751.90925 | -2497.87211 | 767.90308   | 1 |

|       |   |          |          |          |             |             |             |   |
|-------|---|----------|----------|----------|-------------|-------------|-------------|---|
| 15679 | C | 77.21500 | 76.45580 | 81.18090 | 254.29364   | 646.04355   | 591.11207   | 1 |
| 15680 | O | 77.05800 | 75.22780 | 81.01690 | 85.78053    | 472.65664   | 626.78914   | 1 |
| 15681 | N | 78.42600 | 76.99280 | 81.18490 | 358.51261   | -73.79128   | 760.72061   | 1 |
| 15682 | H | 78.51000 | 77.98480 | 81.24190 | 2131.35755  | -951.09259  | 2109.73081  | 1 |
| 15683 | C | 79.72500 | 76.37280 | 80.94990 | 790.95648   | -213.49684  | 400.32231   | 1 |
| 15684 | H | 79.67100 | 75.84580 | 80.00890 | -2579.11328 | -1694.61832 | -612.10266  | 1 |
| 15685 | C | 80.84500 | 77.40480 | 80.87490 | -626.90113  | 612.71879   | -251.04114  | 1 |
| 15686 | H | 81.81300 | 76.89780 | 80.67290 | 1830.89959  | -2197.76584 | -1309.90773 | 1 |
| 15687 | H | 80.83100 | 77.90280 | 81.86790 | -790.79718  | 1507.55025  | 2645.78122  | 1 |
| 15688 | C | 80.72800 | 78.48680 | 79.85590 | 479.70328   | 135.08583   | -763.60172  | 1 |
| 15689 | C | 79.79900 | 78.45180 | 78.78390 | -183.74456  | -156.55681  | -879.30592  | 1 |
| 15690 | H | 79.19800 | 77.57480 | 78.59390 | 1926.01378  | 2015.95197  | 1457.61271  | 1 |
| 15691 | C | 79.71500 | 79.51180 | 77.92990 | -489.63198  | -675.39204  | 368.18083   | 1 |
| 15692 | H | 78.93100 | 79.51880 | 77.18690 | -2290.19744 | 314.94731   | 2134.01736  | 1 |
| 15693 | C | 80.60300 | 80.61280 | 78.00890 | -880.95828  | 130.84427   | 195.55891   | 1 |
| 15694 | H | 80.63700 | 81.41480 | 77.28690 | -1401.23023 | -534.01084  | -2765.79328 | 1 |
| 15695 | C | 81.56500 | 79.61080 | 80.03390 | -30.08665   | 719.81308   | 558.94089   | 1 |
| 15696 | H | 82.29100 | 79.66680 | 80.83190 | -3115.34577 | 373.38735   | 231.14680   | 1 |
| 15697 | C | 81.49000 | 80.62980 | 79.09190 | -431.76577  | -325.69810  | -734.13219  | 1 |
| 15698 | H | 82.21500 | 81.42980 | 79.14390 | 989.86037   | 1265.28560  | -2705.07949 | 1 |
| 15699 | C | 80.06500 | 75.30780 | 81.89290 | 31.90069    | -619.47539  | -668.34391  | 1 |
| 15700 | O | 80.91900 | 74.45080 | 81.59690 | 674.12057   | 393.73415   | 119.00462   | 1 |
| 15701 | N | 79.44000 | 75.24380 | 83.07190 | 604.30545   | -486.62010  | -332.69820  | 1 |
| 15702 | H | 78.65900 | 75.82680 | 83.28190 | 105.38128   | 2691.56887  | 1625.60081  | 1 |
| 15703 | C | 79.63100 | 74.13880 | 83.98890 | -66.99465   | 63.58043    | 907.14952   | 1 |
| 15704 | H | 80.68900 | 74.07380 | 84.19190 | 2817.10129  | -1089.75806 | 880.11018   | 1 |
| 15705 | C | 78.87000 | 74.41180 | 85.37190 | -411.44980  | -610.69340  | -537.78586  | 1 |
| 15706 | H | 78.83600 | 73.47280 | 85.96590 | -1799.52483 | -1148.24537 | -2311.16187 | 1 |
| 15707 | H | 77.82200 | 74.75780 | 85.24390 | 738.91547   | 2930.71442  | 873.58066   | 1 |
| 15708 | C | 79.70500 | 75.33080 | 86.30090 | 16.30274    | 410.88287   | 813.85533   | 1 |
| 15709 | C | 79.44800 | 76.73280 | 86.29990 | 328.68061   | -573.89021  | -627.75002  | 1 |
| 15710 | H | 78.60500 | 77.12880 | 85.75290 | 2073.69103  | 1839.07786  | 1488.56453  | 1 |
| 15711 | C | 80.18400 | 77.60480 | 87.17890 | -239.16738  | 833.38714   | -282.33993  | 1 |
| 15712 | H | 79.91800 | 78.64980 | 87.23690 | -69.32709   | 882.12279   | -3019.15209 | 1 |
| 15713 | C | 81.22300 | 77.03480 | 87.99790 | -586.87850  | 17.73531    | -697.64610  | 1 |
| 15714 | H | 81.76900 | 77.73080 | 88.61790 | 22.20190    | -2098.03390 | 2344.35216  | 1 |
| 15715 | C | 80.73400 | 74.83380 | 87.05290 | -299.66440  | 445.90339   | -736.76483  | 1 |
| 15716 | H | 80.89600 | 73.77180 | 87.15890 | -2127.09584 | -1154.87293 | -2009.96469 | 1 |
| 15717 | C | 81.50200 | 75.61880 | 87.92690 | -213.40335  | 885.98350   | 30.71242    | 1 |
| 15718 | H | 82.33500 | 75.21480 | 88.48390 | -441.49341  | 2000.91161  | -2387.39660 | 1 |
| 15719 | C | 79.16300 | 72.79280 | 83.47990 | -512.18341  | 551.44290   | -514.81054  | 1 |
| 15720 | O | 79.55200 | 71.72080 | 84.04290 | 546.98955   | -434.99900  | -367.70305  | 1 |
| 15721 | N | 78.30700 | 72.68380 | 82.44790 | -838.63012  | 80.80121    | 53.31956    | 1 |
| 15722 | H | 77.94400 | 73.50180 | 82.00890 | 1039.05760  | -615.25822  | 2905.17518  | 1 |
| 15723 | C | 78.01100 | 71.39980 | 81.79690 | -309.55387  | 391.59378   | -763.07386  | 1 |
| 15724 | H | 77.51000 | 70.87580 | 82.59890 | 1354.97506  | 1384.02390  | -2479.26333 | 1 |
| 15725 | C | 77.14300 | 71.47680 | 80.57290 | -596.12525  | -477.18205  | 498.38036   | 1 |
| 15726 | H | 76.78100 | 70.46380 | 80.29490 | -985.45094  | -236.74442  | -2978.43327 | 1 |
| 15727 | H | 76.21100 | 71.97380 | 80.91690 | -387.48183  | -1088.87301 | 2926.16466  | 1 |
| 15728 | N | 77.72300 | 73.44280 | 79.04490 | 341.93191   | -771.55333  | -21.45493   | 1 |
| 15729 | H | 77.43600 | 74.19280 | 79.63990 | -1938.80414 | -1989.10208 | -1477.40910 | 1 |
| 15730 | C | 77.73900 | 72.10080 | 79.28290 | 344.02764   | 657.14981   | 530.33019   | 1 |
| 15731 | C | 78.21500 | 73.63280 | 77.79190 | -501.13935  | -650.85986  | -395.84316  | 1 |
| 15732 | H | 78.09200 | 74.62580 | 77.35890 | 2928.43007  | -608.88172  | 975.59552   | 1 |
| 15733 | N | 78.44100 | 72.46680 | 77.21390 | 490.42239   | -384.41680  | -569.54534  | 1 |
| 15734 | C | 78.16100 | 71.51680 | 78.14890 | -688.54299  | -588.20201  | 106.66745   | 1 |
| 15735 | H | 78.36500 | 70.47680 | 77.92590 | 1216.27355  | 1923.67520  | -2172.18291 | 1 |
| 15736 | C | 79.20000 | 70.61280 | 81.39290 | 735.05954   | 475.77954   | 254.50403   | 1 |
| 15737 | O | 79.29400 | 69.44680 | 81.75690 | -83.43832   | 41.34332    | -784.19131  | 1 |
| 15738 | N | 80.23700 | 71.24080 | 80.70990 | 572.91786   | 430.53569   | -446.17982  | 1 |
| 15739 | H | 80.12400 | 72.15080 | 80.31990 | -1145.03920 | -2406.47985 | -1672.11428 | 1 |
| 15740 | C | 81.53600 | 70.68980 | 80.37790 | 262.62537   | -782.51813  | -387.48458  | 1 |

|       |   |          |          |          |             |             |             |   |
|-------|---|----------|----------|----------|-------------|-------------|-------------|---|
| 15741 | H | 81.30400 | 69.88380 | 79.69790 | 319.28447   | -2656.90068 | -1654.43720 | 1 |
| 15742 | C | 82.43700 | 71.71380 | 79.66390 | 595.61793   | 253.45936   | -642.22165  | 1 |
| 15743 | H | 82.58700 | 72.59480 | 80.32390 | 637.66042   | 936.40154   | 2935.09243  | 1 |
| 15744 | H | 83.49300 | 71.39880 | 79.52090 | 1359.47320  | -2172.67367 | -1824.70490 | 1 |
| 15745 | S | 81.70000 | 72.38080 | 78.16590 | 99.41861    | -448.52625  | 316.46604   | 1 |
| 15746 | H | 80.97600 | 71.33580 | 77.79290 | 1224.90468  | -1566.27297 | 2438.15991  | 1 |
| 15747 | C | 82.28600 | 70.13480 | 81.59390 | -536.82951  | 549.70559   | 491.00799   | 1 |
| 15748 | O | 82.97200 | 69.12480 | 81.49390 | -432.37493  | 390.92855   | 532.77952   | 1 |
| 15749 | N | 82.03700 | 70.65580 | 82.81090 | 10.04037    | -152.43001  | 830.26295   | 1 |
| 15750 | H | 81.50900 | 71.49380 | 82.92690 | -1332.28925 | 1918.42969  | 2107.80908  | 1 |
| 15751 | C | 82.76200 | 70.16280 | 84.01490 | -508.81131  | 510.36718   | -558.64783  | 1 |
| 15752 | H | 83.68700 | 69.72280 | 83.67190 | 2442.91795  | 1691.13637  | -1034.61871 | 1 |
| 15753 | C | 82.99500 | 71.37380 | 84.95390 | 747.48769   | -516.64910  | 76.07140    | 1 |
| 15754 | H | 83.61300 | 70.98680 | 85.79290 | -2661.14238 | 1489.24911  | 773.74709   | 1 |
| 15755 | H | 82.07200 | 71.89880 | 85.27890 | -560.36490  | -2073.15394 | -2299.18467 | 1 |
| 15756 | S | 83.97900 | 72.63280 | 84.11290 | -393.35366  | 170.28612   | 357.05201   | 1 |
| 15757 | H | 85.18200 | 72.12980 | 84.34390 | -934.84142  | 706.51112   | -2919.78420 | 1 |
| 15758 | C | 81.93800 | 69.10780 | 84.71990 | -663.17384  | 500.13723   | 376.18375   | 1 |
| 15759 | O | 82.51800 | 68.29280 | 85.42290 | -489.82023  | -377.73486  | -490.93762  | 1 |
| 15760 | N | 80.65300 | 69.10580 | 84.45990 | 620.55471   | -132.67695  | 556.75935   | 1 |
| 15761 | H | 80.19800 | 69.73580 | 83.83490 | -2555.32480 | -1828.15402 | -162.46305  | 1 |
| 15762 | C | 79.68700 | 68.14480 | 85.04490 | -411.87352  | 253.31633   | -773.07312  | 1 |
| 15763 | H | 80.05800 | 67.92580 | 86.03490 | -1436.50210 | -2775.98866 | -358.57345  | 1 |
| 15764 | C | 78.28300 | 68.75380 | 85.06290 | -345.68825  | 763.58357   | 359.01361   | 1 |
| 15765 | H | 77.45500 | 68.03180 | 85.23190 | 2182.10346  | 2181.03833  | 616.21628   | 1 |
| 15766 | H | 78.09100 | 69.16680 | 84.04990 | 1968.74098  | -958.03083  | -2259.30567 | 1 |
| 15767 | C | 78.00400 | 69.82480 | 86.20890 | 21.66441    | 198.75540   | 889.65046   | 1 |
| 15768 | H | 78.90500 | 70.47180 | 86.14290 | -1124.67544 | 653.13390   | -2864.74213 | 1 |
| 15769 | C | 76.81100 | 70.73680 | 85.85990 | -442.51807  | 603.47208   | 521.00884   | 1 |
| 15770 | H | 76.67900 | 71.41480 | 86.72990 | -1424.58125 | 2302.51876  | -1602.24900 | 1 |
| 15771 | H | 77.14500 | 71.31780 | 84.97290 | -1675.25388 | 735.45172   | -2559.46507 | 1 |
| 15772 | H | 75.93600 | 70.06580 | 85.72890 | 2457.59394  | 1188.55643  | 1563.90277  | 1 |
| 15773 | C | 77.83700 | 69.07980 | 87.51390 | 259.07306   | 560.55749   | 670.90048   | 1 |
| 15774 | H | 76.86500 | 68.54180 | 87.53190 | 2630.65550  | 885.60610   | 1481.07384  | 1 |
| 15775 | H | 77.89600 | 69.81380 | 88.34590 | 1042.12469  | -1661.88916 | -2459.74120 | 1 |
| 15776 | H | 78.56200 | 68.26680 | 87.73190 | 100.03453   | 2293.77046  | 2151.00823  | 1 |
| 15777 | C | 79.65200 | 66.80780 | 84.29190 | -497.04322  | -497.78045  | 580.18417   | 1 |
| 15778 | O | 79.37600 | 65.74280 | 84.89590 | 483.03343   | -539.98788  | -314.19584  | 1 |
| 15779 | N | 79.98800 | 66.80280 | 82.99990 | 630.53445   | -66.55911   | 557.37642   | 1 |
| 15780 | H | 80.13000 | 67.65680 | 82.50490 | 1403.00927  | -2147.30901 | -1821.77255 | 1 |
| 15781 | C | 80.27200 | 65.57980 | 82.21990 | 348.30010   | -448.08950  | -713.69030  | 1 |
| 15782 | H | 79.38000 | 64.97580 | 82.30090 | 1653.53871  | 1518.54351  | -2204.10108 | 1 |
| 15783 | C | 80.25600 | 65.98080 | 80.69390 | -330.36906  | 570.92528   | 629.56462   | 1 |
| 15784 | H | 80.91000 | 66.86380 | 80.53090 | 2649.74001  | -536.50494  | 1609.11980  | 1 |
| 15785 | H | 79.24200 | 66.28180 | 80.35290 | 28.02504    | -800.85526  | -3042.37928 | 1 |
| 15786 | C | 80.67100 | 64.84780 | 79.76590 | 95.16582    | 863.10047   | 278.30207   | 1 |
| 15787 | O | 80.29900 | 63.70080 | 79.96890 | 494.90230   | 508.91229   | 345.98732   | 1 |
| 15788 | N | 81.33000 | 65.20580 | 78.66090 | 438.82548   | -590.04873  | -414.66491  | 1 |
| 15789 | H | 81.30100 | 66.17680 | 78.42390 | -88.44591   | 2770.89819  | -1487.45648 | 1 |
| 15790 | H | 81.92300 | 64.53680 | 78.21290 | -1620.76387 | -664.79494  | 2613.31177  | 1 |
| 15791 | C | 81.38000 | 64.62380 | 82.85090 | 827.58549   | -12.68046   | 382.61268   | 1 |
| 15792 | O | 81.10700 | 63.45380 | 83.05790 | -128.54851  | 778.97455   | -17.35391   | 1 |
| 15793 | N | 82.53700 | 65.11480 | 83.31390 | -336.41963  | -722.01654  | 279.61803   | 1 |
| 15794 | C | 83.22100 | 66.26080 | 82.69590 | 545.21241   | -111.42309  | 722.34294   | 1 |
| 15795 | H | 82.94100 | 67.16080 | 83.28390 | 1549.02701  | -2008.63643 | 1861.21499  | 1 |
| 15796 | H | 82.92800 | 66.49280 | 81.64990 | 909.45614   | -1204.18131 | -2760.62730 | 1 |
| 15797 | C | 83.43800 | 64.25680 | 84.07790 | -238.07708  | -339.70476  | -812.01661  | 1 |
| 15798 | H | 83.55400 | 63.29780 | 83.59490 | 2126.73239  | -1230.34476 | 1965.06675  | 1 |
| 15799 | C | 84.69700 | 65.12580 | 84.13990 | -794.25120  | -125.86467  | 429.85360   | 1 |
| 15800 | H | 85.61200 | 64.50480 | 84.24490 | 2282.02598  | 693.88454   | 2051.61105  | 1 |
| 15801 | H | 84.61000 | 65.77680 | 85.03590 | -1598.53836 | -1253.88925 | 2402.22045  | 1 |
| 15802 | C | 84.69800 | 65.91280 | 82.85790 | -745.90164  | -524.29326  | -14.08283   | 1 |

|       |   |          |          |          |             |             |             |   |
|-------|---|----------|----------|----------|-------------|-------------|-------------|---|
| 15803 | H | 85.34200 | 66.81680 | 82.82290 | 1915.70789  | -1911.19203 | -1604.87836 | 1 |
| 15804 | H | 85.02000 | 65.31480 | 81.97890 | 2196.43781  | -1270.72493 | 1859.87777  | 1 |
| 15805 | C | 82.95000 | 63.89680 | 85.48290 | 699.85510   | -16.64032   | -584.27471  | 1 |
| 15806 | O | 83.29800 | 62.85680 | 86.07890 | 430.43769   | -589.05475  | -302.26665  | 1 |
| 15807 | N | 82.18500 | 64.85480 | 86.18890 | 647.91516   | -462.28353  | 281.37551   | 1 |
| 15808 | H | 82.04200 | 65.79680 | 85.89690 | -1847.35312 | -2155.36681 | -1356.43157 | 1 |
| 15809 | C | 81.67900 | 64.58180 | 87.53990 | 887.62622   | 204.82628   | 40.21058    | 1 |
| 15810 | H | 82.46700 | 64.31080 | 88.22590 | 1310.86746  | 1453.57780  | -2463.12085 | 1 |
| 15811 | C | 80.99100 | 65.83580 | 88.13590 | -474.95018  | 757.05842   | -180.93058  | 1 |
| 15812 | H | 80.39700 | 66.35780 | 87.35590 | 2521.47463  | 1877.07192  | 130.35679   | 1 |
| 15813 | C | 80.07500 | 65.51980 | 89.33090 | -484.17800  | 742.03202   | 215.43246   | 1 |
| 15814 | H | 79.23600 | 64.80180 | 89.20790 | -1420.43333 | -679.00593  | 2723.88442  | 1 |
| 15815 | H | 79.60200 | 66.50280 | 89.53890 | -348.43063  | 1610.18341  | -2680.32306 | 1 |
| 15816 | H | 80.59200 | 65.06380 | 90.20190 | -2652.82464 | 1246.87961  | 1142.82060  | 1 |
| 15817 | C | 82.10400 | 66.82480 | 88.54790 | 342.79674   | 752.15329   | 384.97640   | 1 |
| 15818 | H | 82.94700 | 66.77280 | 87.82690 | 1060.16392  | 253.18339   | 2951.30088  | 1 |
| 15819 | H | 82.54800 | 66.39380 | 89.46990 | 211.16541   | -1465.18218 | 2776.12618  | 1 |
| 15820 | C | 81.75600 | 68.27980 | 88.67090 | 768.55745   | 474.63903   | -124.45175  | 1 |
| 15821 | H | 81.18400 | 68.37880 | 89.61690 | -1083.06842 | -2623.20134 | 1357.94100  | 1 |
| 15822 | H | 82.69900 | 68.86180 | 88.75190 | -1627.98157 | -1946.31068 | 1860.04758  | 1 |
| 15823 | H | 81.16100 | 68.59880 | 87.78890 | -1718.41937 | -506.04212  | 2586.34539  | 1 |
| 15824 | C | 80.71800 | 63.40580 | 87.53890 | 685.09411   | 526.56062   | 291.25758   | 1 |
| 15825 | O | 80.75900 | 62.52280 | 88.33690 | -297.37391  | 285.74901   | -673.45637  | 1 |
| 15826 | N | 79.82600 | 63.35580 | 86.53090 | -564.81906  | 398.55425   | -484.56808  | 1 |
| 15827 | H | 79.63700 | 64.12880 | 85.92890 | 1420.45157  | -2166.26829 | -1785.44820 | 1 |
| 15828 | C | 78.94800 | 62.20480 | 86.22690 | 3.46571     | 435.45703   | -801.13430  | 1 |
| 15829 | H | 78.49300 | 61.75780 | 87.09790 | 1788.16026  | -1479.33231 | 2124.21398  | 1 |
| 15830 | C | 77.77100 | 62.67180 | 85.34990 | -247.32046  | -653.19514  | -586.19084  | 1 |
| 15831 | H | 78.14500 | 63.09380 | 84.39290 | -1169.14294 | 2061.70156  | 2068.98953  | 1 |
| 15832 | H | 77.13300 | 61.79380 | 85.11490 | 2696.87489  | 115.39037   | 1616.09935  | 1 |
| 15833 | C | 76.80000 | 63.71180 | 86.07290 | -89.35583   | -902.76136  | 92.13284    | 1 |
| 15834 | H | 77.33300 | 64.63980 | 86.37290 | 241.23475   | 258.76471   | -3126.19143 | 1 |
| 15835 | C | 75.74100 | 64.25280 | 85.11390 | 508.89365   | -686.87176  | -317.30970  | 1 |
| 15836 | H | 76.09600 | 64.59780 | 84.11990 | 1290.22365  | -2286.51655 | -1733.60642 | 1 |
| 15837 | H | 74.99800 | 63.47780 | 84.82990 | -1470.30461 | 176.98919   | -2775.80717 | 1 |
| 15838 | H | 75.09800 | 65.00780 | 85.61490 | 2434.08427  | -1731.40928 | 987.76611   | 1 |
| 15839 | C | 76.08600 | 63.16980 | 87.28090 | -698.92658  | -473.00164  | -345.28551  | 1 |
| 15840 | H | 75.75700 | 62.14180 | 87.01690 | -444.39435  | -2545.30035 | 1795.04485  | 1 |
| 15841 | H | 76.70900 | 63.27280 | 88.19590 | 1112.26189  | 2060.49673  | 2101.29792  | 1 |
| 15842 | H | 75.17000 | 63.75080 | 87.51990 | -1081.19711 | -1744.84542 | 2384.27211  | 1 |
| 15843 | C | 79.71000 | 61.03980 | 85.48290 | 407.63862   | 567.41295   | -585.93883  | 1 |
| 15844 | O | 79.10700 | 60.24680 | 84.78490 | -160.11677  | 548.56613   | 545.03674   | 1 |
| 15845 | N | 81.05000 | 60.89580 | 85.67690 | 535.16889   | -564.79892  | -327.51905  | 1 |
| 15846 | H | 81.56300 | 61.63580 | 86.10390 | 1084.70637  | -1558.34142 | 2508.62718  | 1 |
| 15847 | C | 81.67900 | 59.58380 | 85.48290 | 568.02070   | -235.90330  | 673.16649   | 1 |
| 15848 | H | 80.94000 | 58.86180 | 85.16790 | -1777.96583 | 935.53677   | 2421.12261  | 1 |
| 15849 | C | 82.84300 | 59.77880 | 84.44790 | 539.89634   | -555.84947  | 480.61868   | 1 |
| 15850 | H | 83.72900 | 59.14880 | 84.67490 | 1893.32725  | 1319.30710  | 2138.44966  | 1 |
| 15851 | H | 83.19000 | 60.83380 | 84.42090 | 1060.88305  | 2829.74290  | 874.81911   | 1 |
| 15852 | C | 82.46800 | 59.21580 | 83.06090 | 638.82962   | -68.15783   | -647.07204  | 1 |
| 15853 | C | 82.09700 | 57.87180 | 82.98090 | -614.41689  | 664.29035   | -112.52206  | 1 |
| 15854 | H | 82.06500 | 57.29180 | 83.89090 | -1039.31101 | 257.72386   | -2958.31663 | 1 |
| 15855 | C | 81.76000 | 57.32380 | 81.74990 | -200.07316  | -400.13889  | 794.55057   | 1 |
| 15856 | H | 81.57400 | 56.26280 | 81.67190 | 1132.54480  | 2819.76813  | -815.15411  | 1 |
| 15857 | C | 81.73300 | 58.12080 | 80.62590 | 794.88340   | -446.15328  | -23.63556   | 1 |
| 15858 | O | 81.35100 | 57.56780 | 79.39290 | 474.27188   | 613.47937   | -149.45392  | 1 |
| 15859 | H | 80.98200 | 56.68280 | 79.44890 | -2193.12138 | -319.55392  | -2233.00921 | 1 |
| 15860 | C | 82.57200 | 59.98580 | 81.93490 | 662.44523   | -600.59580  | -178.61133  | 1 |
| 15861 | H | 82.88300 | 61.01080 | 82.07090 | 2145.09316  | -1742.62567 | -1503.34871 | 1 |
| 15862 | C | 82.18800 | 59.43480 | 80.71690 | -585.85399  | -486.28005  | -501.75474  | 1 |
| 15863 | H | 82.27300 | 60.00980 | 79.80690 | -2931.97802 | -993.46169  | 561.03920   | 1 |
| 15864 | C | 82.20300 | 59.06980 | 86.83590 | 541.32979   | 112.43807   | 725.10050   | 1 |

|       |   |          |          |          |             |             |             |   |
|-------|---|----------|----------|----------|-------------|-------------|-------------|---|
| 15865 | O | 82.67700 | 57.91880 | 86.94890 | 332.09874   | 31.53896    | 715.78136   | 1 |
| 15866 | N | 82.03300 | 59.88880 | 87.89690 | -705.35059  | -270.74143  | -376.63232  | 1 |
| 15867 | H | 81.63800 | 60.79980 | 87.80690 | -2286.10306 | 230.95421   | 2149.09730  | 1 |
| 15868 | C | 82.49000 | 59.51680 | 89.18790 | -428.60429  | -658.60830  | -462.58456  | 1 |
| 15869 | H | 83.47100 | 59.07480 | 89.09290 | -656.54819  | -2944.77325 | 891.89752   | 1 |
| 15870 | C | 82.64400 | 60.75380 | 90.06890 | 594.76028   | 562.03824   | -402.27382  | 1 |
| 15871 | H | 83.36700 | 60.50080 | 90.87390 | 1955.73995  | -1226.39319 | 2137.58443  | 1 |
| 15872 | H | 81.69200 | 61.08180 | 90.53790 | 2705.22946  | -863.29827  | 1354.50209  | 1 |
| 15873 | H | 83.13700 | 61.58380 | 89.51890 | -2831.04941 | -1372.20502 | -20.94952   | 1 |
| 15874 | C | 81.62000 | 58.45680 | 89.91790 | 690.61544   | 503.73551   | 317.41432   | 1 |
| 15875 | O | 80.36400 | 58.52880 | 89.88090 | 473.31981   | 534.42028   | -337.62487  | 1 |
| 15876 | N | 82.22900 | 57.62180 | 90.79390 | -74.95390   | -710.43364  | 449.82023   | 1 |
| 15877 | H | 83.21700 | 57.48780 | 90.80390 | -2531.29487 | 1335.52380  | 1306.57900  | 1 |
| 15878 | C | 81.49200 | 56.95580 | 91.86190 | -485.07052  | 583.70129   | 505.42101   | 1 |
| 15879 | H | 82.21900 | 56.51580 | 92.52890 | 415.96401   | -2019.59418 | -2376.22379 | 1 |
| 15880 | C | 80.59000 | 57.87080 | 92.75390 | -491.30625  | -658.90044  | 394.86630   | 1 |
| 15881 | H | 79.86600 | 58.38380 | 92.08590 | 1816.04908  | 1152.37066  | 2296.13454  | 1 |
| 15882 | H | 80.09300 | 57.24080 | 93.52290 | 2201.76944  | -1700.96961 | -1468.72051 | 1 |
| 15883 | C | 81.46100 | 58.86380 | 93.52190 | -583.73211  | 606.76237   | -350.06750  | 1 |
| 15884 | C | 82.52500 | 58.47380 | 94.32090 | -97.74378   | -758.65384  | 496.32802   | 1 |
| 15885 | H | 82.86400 | 57.44780 | 94.30990 | 2840.28852  | -959.12381  | 954.49927   | 1 |
| 15886 | C | 83.30600 | 59.40880 | 95.01490 | 402.20585   | 465.13548   | 673.29818   | 1 |
| 15887 | H | 84.13400 | 59.10480 | 95.63690 | 2263.76029  | -1687.84156 | -1387.37393 | 1 |
| 15888 | C | 82.96400 | 60.78380 | 94.84590 | 562.69367   | 510.87950   | 503.81442   | 1 |
| 15889 | H | 83.47000 | 61.57380 | 95.38290 | 2290.66345  | 1104.58151  | 1852.29232  | 1 |
| 15890 | C | 81.16500 | 60.24680 | 93.35090 | 630.27321   | 595.89160   | 281.28258   | 1 |
| 15891 | H | 80.29800 | 60.48480 | 92.75290 | -1224.04756 | 2160.53694  | -1931.84211 | 1 |
| 15892 | C | 81.88600 | 61.18680 | 94.02290 | -516.25570  | 734.96358   | 157.35180   | 1 |
| 15893 | H | 81.69100 | 62.24580 | 93.93990 | -141.20022  | -1686.02368 | 2652.47297  | 1 |
| 15894 | C | 80.76400 | 55.70980 | 91.43490 | -500.67091  | 191.22002   | -737.70899  | 1 |
| 15895 | O | 79.70800 | 55.31080 | 91.95290 | -20.76668   | 609.16259   | 502.11245   | 1 |
| 15896 | N | 81.30300 | 54.90280 | 90.49790 | -613.53821  | 139.25076   | -562.89642  | 1 |
| 15897 | H | 82.18100 | 55.22180 | 90.14890 | -1239.73952 | 2117.27393  | 1969.37129  | 1 |
| 15898 | C | 80.71900 | 53.68480 | 89.94390 | 612.00407   | 597.23992   | -316.55411  | 1 |
| 15899 | H | 79.65100 | 53.83680 | 89.97990 | 2833.75944  | -1174.44528 | -699.07934  | 1 |
| 15900 | C | 81.27100 | 53.31280 | 88.53290 | -560.37603  | 454.47798   | -557.56567  | 1 |
| 15901 | H | 80.83700 | 52.33080 | 88.24890 | 1578.57404  | -2692.15327 | 398.29759   | 1 |
| 15902 | H | 82.36400 | 53.11580 | 88.57390 | 1257.69372  | -2241.60671 | -1814.28556 | 1 |
| 15903 | C | 80.98500 | 54.38180 | 87.51690 | -841.99760  | 349.42617   | 19.80891    | 1 |
| 15904 | H | 81.51500 | 55.32680 | 87.76390 | 2395.44139  | -729.31323  | -1904.78056 | 1 |
| 15905 | C | 81.53700 | 54.10480 | 86.08490 | 671.95339   | -472.07004  | 396.33259   | 1 |
| 15906 | H | 81.59600 | 55.10380 | 85.60390 | -965.80976  | 2726.10573  | 1238.46084  | 1 |
| 15907 | H | 82.55700 | 53.69280 | 86.23790 | -2210.97216 | -2224.80784 | -245.06818  | 1 |
| 15908 | H | 81.03200 | 53.33780 | 85.45890 | -1644.81482 | -2509.38904 | 946.45502   | 1 |
| 15909 | C | 79.54200 | 54.65580 | 87.23390 | -438.41855  | 552.71613   | -577.70672  | 1 |
| 15910 | H | 79.04100 | 54.79480 | 88.21590 | -1489.29346 | -1960.43075 | -1958.81150 | 1 |
| 15911 | H | 79.34300 | 55.38180 | 86.41690 | -2620.30005 | 1269.85404  | 1191.52198  | 1 |
| 15912 | H | 79.14800 | 53.69780 | 86.83090 | -875.74175  | -2192.85269 | 2079.11032  | 1 |
| 15913 | C | 80.97300 | 52.63780 | 90.95190 | -295.42717  | 226.19485   | 832.47203   | 1 |
| 15914 | O | 82.06500 | 52.10580 | 91.11790 | -627.35600  | 133.17096   | 460.77888   | 1 |
| 15915 | N | 79.89800 | 52.16980 | 91.66690 | 699.98022   | -390.63673  | 264.76956   | 1 |
| 15916 | H | 78.97800 | 52.45280 | 91.40590 | -682.54242  | 2389.00221  | -1930.03381 | 1 |
| 15917 | C | 80.08900 | 51.23780 | 92.72590 | -238.89617  | 603.03427   | 640.88165   | 1 |
| 15918 | H | 79.15000 | 50.75680 | 92.95390 | 2214.23644  | -2229.66527 | -154.84179  | 1 |
| 15919 | H | 80.83200 | 50.52280 | 92.40490 | -1666.71564 | 2604.77001  | -579.18770  | 1 |
| 15920 | C | 80.71500 | 51.67880 | 93.95290 | 774.96208   | -244.92028  | -413.39912  | 1 |
| 15921 | O | 81.35700 | 50.96780 | 94.71090 | 241.13544   | -647.48386  | 382.42068   | 1 |
| 15922 | N | 80.54900 | 52.96080 | 94.25390 | 210.37923   | -723.05530  | 381.58078   | 1 |
| 15923 | H | 80.17900 | 53.60180 | 93.58590 | 2801.91022  | 231.30967   | 1412.09814  | 1 |
| 15924 | C | 81.11800 | 53.58680 | 95.39990 | -687.52660  | 598.73800   | 16.46173    | 1 |
| 15925 | H | 82.06300 | 53.10980 | 95.61590 | -2114.34932 | -2272.06003 | 515.26344   | 1 |
| 15926 | C | 81.44900 | 55.05980 | 95.20090 | 14.46586    | -473.49130  | 779.13268   | 1 |

|       |   |          |          |           |             |             |             |   |
|-------|---|----------|----------|-----------|-------------|-------------|-------------|---|
| 15927 | H | 82.12800 | 55.25980 | 94.34390  | -3143.66611 | 68.32620    | 104.50435   | 1 |
| 15928 | H | 80.47800 | 55.52680 | 94.93090  | 1235.10165  | -2883.76761 | 237.98003   | 1 |
| 15929 | H | 81.73900 | 55.58780 | 96.13490  | -2909.47399 | -1185.33090 | -167.86302  | 1 |
| 15930 | C | 80.21700 | 53.42580 | 96.59890  | 723.55233   | -554.90228  | -2.54632    | 1 |
| 15931 | O | 79.01700 | 53.23880 | 96.46890  | 631.29480   | -307.86580  | 360.98858   | 1 |
| 15932 | N | 80.81200 | 53.47280 | 97.79790  | -256.05364  | 543.33727   | 593.20607   | 1 |
| 15933 | H | 81.79700 | 53.59180 | 97.89590  | -556.24216  | 1897.09413  | 2447.41798  | 1 |
| 15934 | C | 80.10400 | 53.53380 | 99.00590  | -86.72511   | 664.13658   | 618.75064   | 1 |
| 15935 | H | 79.05200 | 53.39680 | 98.80390  | -475.19793  | 2330.06184  | -2059.90897 | 1 |
| 15936 | C | 80.72100 | 52.50880 | 100.05290 | 230.36682   | -429.05876  | -770.90253  | 1 |
| 15937 | H | 81.81400 | 52.47280 | 99.85790  | 1869.39229  | -1429.11700 | -2088.35420 | 1 |
| 15938 | H | 80.40300 | 52.62580 | 101.11090 | 2229.68911  | -1199.15006 | 1867.82008  | 1 |
| 15939 | C | 80.28200 | 51.06780 | 99.72490  | 737.32720   | 385.05736   | 373.53773   | 1 |
| 15940 | H | 80.89900 | 50.69980 | 98.87790  | -910.52263  | -2102.76751 | -2155.81621 | 1 |
| 15941 | H | 80.52600 | 50.40280 | 100.58090 | 1206.09344  | -2445.06171 | 1570.10765  | 1 |
| 15942 | C | 78.78400 | 50.94080 | 99.35690  | -220.94944  | -409.60827  | -784.12589  | 1 |
| 15943 | H | 78.65100 | 51.25080 | 98.29890  | 592.24843   | 643.37699   | -3022.17373 | 1 |
| 15944 | H | 78.23800 | 51.66280 | 100.00090 | -865.79467  | 1998.83832  | 2270.08175  | 1 |
| 15945 | C | 78.18400 | 49.58980 | 99.52590  | 655.94020   | 477.55902   | -416.08993  | 1 |
| 15946 | H | 78.30600 | 49.19080 | 100.55490 | 2211.02539  | 2206.23220  | -377.00458  | 1 |
| 15947 | H | 78.65300 | 48.87980 | 98.81090  | 2548.99670  | -723.66099  | 1696.21839  | 1 |
| 15948 | N | 76.74200 | 49.65680 | 99.25790  | 416.26646   | 494.79098   | 542.74894   | 1 |
| 15949 | H | 76.66100 | 49.91580 | 98.25390  | -1361.29987 | 743.28023   | 2737.26568  | 1 |
| 15950 | H | 76.41300 | 50.36980 | 99.93990  | 2244.37531  | -1615.88694 | 1499.97171  | 1 |
| 15951 | H | 76.27200 | 48.73580 | 99.36890  | -544.92497  | 471.79777   | 3062.46467  | 1 |
| 15952 | C | 80.22600 | 54.95980 | 99.62690  | -378.19203  | -96.29545   | -824.10495  | 1 |
| 15953 | O | 81.26600 | 55.62880 | 99.55690  | -515.08317  | -299.62246  | -518.21129  | 1 |
| 15954 | N | 79.06500 | 55.53180 | 100.15290 | 70.80141    | -566.95695  | -621.46542  | 1 |
| 15955 | H | 78.24600 | 54.96680 | 100.20890 | 2164.26931  | 2075.14709  | 952.85317   | 1 |
| 15956 | C | 78.96600 | 56.92180 | 100.51590 | -589.40826  | -553.58529  | -421.41694  | 1 |
| 15957 | H | 79.79100 | 57.47180 | 100.08790 | -1675.87924 | -833.15247  | -2528.93495 | 1 |
| 15958 | C | 77.72400 | 57.53680 | 99.83390  | 623.27081   | 199.74475   | -634.89096  | 1 |
| 15959 | H | 76.80700 | 57.08980 | 100.27490 | 1411.86485  | -2624.29912 | -1008.91922 | 1 |
| 15960 | H | 77.67100 | 58.59880 | 100.15690 | -2148.84816 | 713.62940   | -2184.35595 | 1 |
| 15961 | C | 77.84300 | 57.42380 | 98.31090  | -242.60111  | -876.89297  | 60.45187    | 1 |
| 15962 | C | 78.61700 | 58.35580 | 97.58790  | 105.34580   | -787.70608  | 447.07090   | 1 |
| 15963 | H | 79.29400 | 59.02580 | 98.09690  | -525.39720  | 2291.80635  | -2090.40849 | 1 |
| 15964 | C | 78.64100 | 58.25080 | 96.16690  | 851.10042   | -138.40312  | -296.51924  | 1 |
| 15965 | H | 79.20400 | 58.96380 | 95.58290  | -2920.42460 | 1090.93755  | 423.32218   | 1 |
| 15966 | C | 77.93600 | 57.23580 | 95.50590  | -630.03242  | -493.47572  | 437.02616   | 1 |
| 15967 | H | 78.04600 | 57.12480 | 94.43790  | 1998.86955  | 251.13034   | -2416.54305 | 1 |
| 15968 | C | 77.15700 | 56.45480 | 97.64590  | 577.85381   | -618.90545  | 338.36670   | 1 |
| 15969 | H | 76.68800 | 55.65580 | 98.20190  | -267.36934  | -1292.25015 | 2856.01635  | 1 |
| 15970 | C | 77.20800 | 56.31680 | 96.28190  | 561.30100   | 446.83096   | -562.79151  | 1 |
| 15971 | H | 76.74300 | 55.47580 | 95.78890  | -2001.23461 | 2387.81635  | 437.74347   | 1 |
| 15972 | C | 78.97800 | 57.25380 | 102.00090 | -768.63764  | 349.27438   | 344.46275   | 1 |
| 15973 | O | 79.06900 | 58.41480 | 102.47090 | 125.32698   | 449.02694   | 637.41289   | 1 |
| 15974 | N | 78.95100 | 56.16180 | 102.83090 | 540.14932   | -557.66368  | -331.54521  | 1 |
| 15975 | H | 78.58300 | 55.30280 | 102.48390 | -2360.81145 | 1736.90962  | -1143.65227 | 1 |
| 15976 | C | 78.88800 | 56.33080 | 104.26790 | 675.31176   | -597.84226  | -134.12552  | 1 |
| 15977 | H | 78.72600 | 57.37580 | 104.48790 | 2697.96271  | 376.01024   | 1574.11554  | 1 |
| 15978 | C | 77.73800 | 55.52780 | 104.91990 | 583.94266   | -608.02770  | -347.51156  | 1 |
| 15979 | H | 77.73700 | 55.67180 | 106.02190 | -2152.12641 | 2287.11714  | 188.87393   | 1 |
| 15980 | H | 78.02200 | 54.47280 | 104.71790 | 854.06480   | -2371.74791 | -1882.44824 | 1 |
| 15981 | C | 76.39500 | 56.07880 | 104.37490 | -387.71609  | -456.11444  | -687.81310  | 1 |
| 15982 | H | 76.33400 | 56.03080 | 103.26590 | 2421.74602  | -1977.78675 | -348.90118  | 1 |
| 15983 | H | 76.43600 | 57.17880 | 104.52490 | 2443.08952  | 841.08750   | 1795.02413  | 1 |
| 15984 | C | 75.12500 | 55.41780 | 105.00790 | 97.14733    | -453.00127  | -785.36823  | 1 |
| 15985 | H | 74.21200 | 55.89580 | 104.59090 | -829.78562  | -2235.84412 | -2051.99492 | 1 |
| 15986 | H | 75.24900 | 55.59280 | 106.09790 | -2546.31834 | -786.16770  | -1672.25282 | 1 |
| 15987 | C | 75.05000 | 53.89580 | 104.84890 | -167.98973  | -550.29803  | -707.39136  | 1 |
| 15988 | H | 75.91600 | 53.36880 | 105.30390 | 2465.04029  | -386.94185  | -1916.26684 | 1 |

|       |   |          |          |           |             |             |             |   |
|-------|---|----------|----------|-----------|-------------|-------------|-------------|---|
| 15989 | H | 74.88900 | 53.64780 | 103.77790 | -1773.59602 | 2596.47137  | 104.49781   | 1 |
| 15990 | N | 73.87300 | 53.41980 | 105.56690 | -551.26435  | 350.18367   | -534.93112  | 1 |
| 15991 | H | 74.07600 | 53.58480 | 106.57290 | 2814.68176  | -460.90583  | -1327.91516 | 1 |
| 15992 | H | 73.01100 | 53.99980 | 105.60990 | -241.20627  | 2579.86855  | -1784.46744 | 1 |
| 15993 | H | 73.73800 | 52.42180 | 105.30890 | 1431.47478  | 1835.82938  | 2116.32622  | 1 |
| 15994 | C | 80.16700 | 55.94380 | 104.98190 | -566.28741  | -635.08442  | 327.77637   | 1 |
| 15995 | O | 80.39300 | 56.21780 | 106.18890 | -474.92593  | -350.84747  | -524.38406  | 1 |
| 15996 | N | 81.09000 | 55.32780 | 104.18990 | -623.65888  | 50.73588    | 566.69900   | 1 |
| 15997 | H | 80.83000 | 54.95680 | 103.30190 | -1478.77195 | 1668.88869  | 2219.52028  | 1 |
| 15998 | C | 82.53200 | 55.16980 | 104.40690 | 222.09073   | 827.13953   | 312.99667   | 1 |
| 15999 | H | 82.59600 | 54.28380 | 105.02190 | -3144.52774 | -72.28619   | 70.32920    | 1 |
| 16000 | C | 83.29300 | 54.91580 | 103.09090 | 63.11093    | 744.29227   | -522.96944  | 1 |
| 16001 | H | 82.81500 | 54.08480 | 102.53090 | -1224.14638 | -2204.00011 | 1882.04021  | 1 |
| 16002 | O | 84.67700 | 54.54080 | 103.24590 | -725.06844  | -109.93823  | -292.94466  | 1 |
| 16003 | H | 84.78500 | 53.96080 | 104.00290 | -304.29553  | -2261.69628 | -2165.72399 | 1 |
| 16004 | C | 83.23200 | 56.06680 | 102.10790 | -556.50453  | -374.31243  | 617.77335   | 1 |
| 16005 | H | 83.45200 | 55.63380 | 101.10790 | -1792.42401 | -2551.05235 | 421.39563   | 1 |
| 16006 | H | 83.82700 | 56.93980 | 102.45090 | -1821.08005 | -628.06650  | 2487.45375  | 1 |
| 16007 | H | 82.23100 | 56.54280 | 102.03790 | 1180.34726  | 2425.35769  | -1619.45875 | 1 |
| 16008 | C | 83.20700 | 56.25880 | 105.24790 | -485.58654  | 578.43675   | -510.94779  | 1 |
| 16009 | O | 83.00500 | 57.44880 | 105.00190 | 547.13124   | -567.29965  | -49.45441   | 1 |
| 16010 | N | 83.99000 | 55.88980 | 106.24490 | 529.58547   | 240.29309   | -611.94015  | 1 |
| 16011 | H | 84.16600 | 54.94980 | 106.52790 | 88.04386    | -84.20542   | 3143.78497  | 1 |
| 16012 | C | 84.73700 | 56.88680 | 106.99290 | 821.10572   | -384.26135  | -97.87550   | 1 |
| 16013 | H | 84.96900 | 57.66880 | 106.28490 | -2004.76628 | 1616.49215  | -1807.23311 | 1 |
| 16014 | C | 83.91500 | 57.42980 | 108.20490 | 901.59265   | 121.77557   | -61.25690   | 1 |
| 16015 | H | 84.21500 | 58.48080 | 108.40390 | 58.48733    | -2968.54791 | 1040.44643  | 1 |
| 16016 | H | 82.85200 | 57.49980 | 107.89190 | 1198.21386  | 1397.51495  | 2551.36468  | 1 |
| 16017 | O | 83.89700 | 56.69080 | 109.40790 | -31.33697   | 777.03860   | 137.31799   | 1 |
| 16018 | H | 83.44200 | 57.18580 | 110.09290 | 1292.49466  | 1810.80216  | 2224.56272  | 1 |
| 16019 | C | 86.04500 | 56.31880 | 107.48390 | 910.25559   | -53.67074   | 2.28316     | 1 |
| 16020 | O | 86.23700 | 55.11080 | 107.49890 | 224.73168   | 386.38818   | -651.02003  | 1 |
| 16021 | N | 86.96200 | 57.19680 | 107.92490 | 592.41732   | -115.38395  | -590.25465  | 1 |
| 16022 | H | 86.55800 | 58.10780 | 107.88190 | -196.95547  | -3017.49164 | 868.43480   | 1 |
| 16023 | C | 88.24100 | 56.92680 | 108.44490 | -44.60705   | 39.58217    | -909.88706  | 1 |
| 16024 | H | 88.79900 | 56.31480 | 107.75190 | -2313.53670 | -391.48440  | 2095.83257  | 1 |
| 16025 | C | 88.99900 | 58.27680 | 108.62790 | 528.28372   | 275.33553   | -690.33156  | 1 |
| 16026 | H | 88.48300 | 58.99280 | 109.30190 | 1616.71985  | 2514.68091  | 980.21583   | 1 |
| 16027 | H | 90.03800 | 57.98680 | 108.89590 | 2278.22391  | -1515.91739 | -1552.39059 | 1 |
| 16028 | H | 89.10200 | 58.71980 | 107.61390 | -2193.15855 | -1988.53404 | 1064.90103  | 1 |
| 16029 | C | 88.23700 | 56.08880 | 109.70490 | 636.87901   | 275.86417   | 591.38404   | 1 |
| 16030 | O | 89.01500 | 55.11480 | 109.84290 | 668.78163   | -409.00382  | 95.25881    | 1 |
| 16031 | N | 87.28400 | 56.41280 | 110.61790 | 542.61366   | 463.04814   | -451.47439  | 1 |
| 16032 | H | 86.91200 | 57.33580 | 110.56290 | 2022.12249  | -1412.01961 | 1953.31705  | 1 |
| 16033 | C | 86.97200 | 55.47480 | 111.74990 | -589.19915  | -411.36289  | -561.31626  | 1 |
| 16034 | H | 87.90700 | 55.26180 | 112.24790 | 2295.20594  | 491.90314   | -2094.82391 | 1 |
| 16035 | C | 85.97400 | 56.15380 | 112.70390 | -440.56961  | 335.32811   | 724.50292   | 1 |
| 16036 | H | 85.55200 | 55.42080 | 113.42490 | -2658.59194 | -436.23655  | 1624.75006  | 1 |
| 16037 | H | 85.16200 | 56.58080 | 112.07790 | 1386.42037  | -1331.91514 | 2490.39492  | 1 |
| 16038 | C | 86.51500 | 57.41880 | 113.51390 | -524.96174  | 589.96805   | 455.85510   | 1 |
| 16039 | H | 85.63700 | 57.75580 | 114.10590 | -403.58530  | -2866.71174 | -1231.79094 | 1 |
| 16040 | H | 86.86800 | 58.20880 | 112.81690 | 3080.02555  | 295.04673   | 569.75107   | 1 |
| 16041 | C | 87.65700 | 56.97980 | 114.46190 | -379.69386  | 543.51629   | -625.99810  | 1 |
| 16042 | O | 87.51800 | 56.06080 | 115.23690 | -568.76345  | -231.43650  | -496.56068  | 1 |
| 16043 | N | 88.78900 | 57.67580 | 114.32290 | 105.92758   | 837.51450   | -4.59422    | 1 |
| 16044 | H | 88.76800 | 58.52780 | 113.79990 | -1547.03354 | -1699.33908 | 2148.75782  | 1 |
| 16045 | H | 89.56800 | 57.40480 | 114.88790 | 25.26782    | -2350.18093 | -2091.46775 | 1 |
| 16046 | C | 86.38100 | 54.13380 | 111.32290 | 180.00555   | 27.32998    | -893.47752  | 1 |
| 16047 | O | 86.84900 | 53.05580 | 111.69790 | -204.81051  | -507.76855  | 569.07907   | 1 |
| 16048 | N | 85.41700 | 54.13580 | 110.31590 | -576.83895  | -497.44063  | -363.98067  | 1 |
| 16049 | H | 85.05700 | 54.93680 | 109.84490 | 1266.94635  | -2491.28727 | 1444.49330  | 1 |
| 16050 | C | 84.85500 | 52.81180 | 109.85490 | 416.52979   | 487.10829   | -648.59807  | 1 |

|       |   |          |          |           |             |             |             |   |
|-------|---|----------|----------|-----------|-------------|-------------|-------------|---|
| 16051 | H | 84.53200 | 52.34680 | 110.77490 | 299.29514   | -727.32019  | -3046.25245 | 1 |
| 16052 | C | 83.70500 | 53.01180 | 108.93090 | -15.29436   | -675.26288  | -612.56601  | 1 |
| 16053 | H | 84.01300 | 53.65080 | 108.07590 | 1428.91896  | -2800.76377 | -110.17758  | 1 |
| 16054 | H | 83.34100 | 52.09480 | 108.41990 | 2239.82015  | -1322.46097 | -1769.89517 | 1 |
| 16055 | N | 82.20500 | 53.38680 | 110.95190 | -135.16195  | -113.48893  | -825.54455  | 1 |
| 16056 | H | 82.76300 | 52.85980 | 111.59290 | 2109.15876  | 335.39947   | -2310.23435 | 1 |
| 16057 | C | 82.52300 | 53.64980 | 109.61990 | -546.29797  | -362.55731  | 633.68899   | 1 |
| 16058 | C | 81.11100 | 54.09780 | 111.23090 | -452.77879  | 119.68693   | 782.37932   | 1 |
| 16059 | H | 80.61100 | 53.96480 | 112.18990 | 515.65026   | -1085.65638 | -2907.52150 | 1 |
| 16060 | N | 80.67200 | 54.79180 | 110.20390 | -672.10464  | -496.37782  | 120.65113   | 1 |
| 16061 | C | 81.57800 | 54.50080 | 109.14890 | -415.10380  | 170.73927   | 793.71780   | 1 |
| 16062 | H | 81.39700 | 54.85780 | 108.14190 | -2409.73621 | -1633.57327 | 1192.82690  | 1 |
| 16063 | C | 85.90800 | 51.89980 | 109.19590 | -57.11934   | 500.76370   | 759.88427   | 1 |
| 16064 | O | 85.88900 | 50.70180 | 109.38790 | 747.08667   | -254.89254  | -22.77120   | 1 |
| 16065 | N | 86.82900 | 52.50780 | 108.42890 | 434.81749   | -696.92036  | 194.69990   | 1 |
| 16066 | H | 86.68300 | 53.45680 | 108.15990 | 2062.99251  | -2373.89735 | -83.06334   | 1 |
| 16067 | C | 88.02200 | 51.87180 | 107.84890 | 682.44651   | 538.86219   | -274.49097  | 1 |
| 16068 | H | 87.57200 | 51.13580 | 107.19990 | -1843.79418 | -2538.43053 | 234.56273   | 1 |
| 16069 | C | 88.70700 | 52.92580 | 106.97790 | -743.15574  | -519.11314  | 98.44841    | 1 |
| 16070 | H | 89.07900 | 53.71380 | 107.66690 | 1482.52963  | -2243.39052 | -1633.25781 | 1 |
| 16071 | H | 88.02500 | 53.45380 | 106.27890 | 1598.24750  | -2654.66864 | 544.57836   | 1 |
| 16072 | H | 89.64100 | 52.60980 | 106.46590 | -670.78534  | 1167.49753  | 2843.45262  | 1 |
| 16073 | C | 88.99100 | 51.29980 | 108.85590 | 656.08552   | -500.36518  | -388.12045  | 1 |
| 16074 | O | 89.45100 | 50.19180 | 108.67390 | -267.34786  | -76.77617   | -739.09253  | 1 |
| 16075 | N | 89.27600 | 51.98380 | 109.97890 | -430.61950  | -549.47687  | 474.67284   | 1 |
| 16076 | H | 88.76800 | 52.80380 | 110.22890 | -911.04899  | -2824.16187 | 1045.14387  | 1 |
| 16077 | C | 90.10100 | 51.42580 | 111.06990 | -685.54544  | 552.14713   | 237.93275   | 1 |
| 16078 | H | 91.01100 | 51.07180 | 110.60790 | -937.79610  | 2652.29756  | -1408.57459 | 1 |
| 16079 | C | 90.26000 | 52.46080 | 112.19890 | -150.36184  | -552.95767  | -709.28142  | 1 |
| 16080 | H | 90.54900 | 51.99480 | 113.16490 | -2813.47406 | 1355.73689  | 380.22020   | 1 |
| 16081 | H | 89.29800 | 53.00080 | 112.32690 | -1967.51298 | 1885.96383  | 1571.70587  | 1 |
| 16082 | C | 91.46800 | 53.42280 | 111.91590 | 547.78928   | -534.48686  | 495.68306   | 1 |
| 16083 | H | 91.24700 | 53.92980 | 110.95190 | 945.15212   | -928.87648  | 2853.43690  | 1 |
| 16084 | C | 91.52600 | 54.66780 | 112.80790 | -324.36065  | -543.92493  | 656.03875   | 1 |
| 16085 | H | 91.94300 | 54.47580 | 113.81990 | -1370.29770 | -1637.02729 | -2310.98510 | 1 |
| 16086 | H | 92.19500 | 55.45480 | 112.39790 | -1482.15837 | 2656.29835  | -803.43753  | 1 |
| 16087 | H | 90.49100 | 55.02780 | 112.99190 | -1680.46250 | 1661.10919  | -2077.25499 | 1 |
| 16088 | C | 92.83900 | 52.70780 | 111.87190 | -401.11306  | 622.08389   | -532.51380  | 1 |
| 16089 | H | 92.94400 | 52.02380 | 111.00290 | -152.06164  | -2008.65723 | 2416.69188  | 1 |
| 16090 | H | 93.60500 | 53.51180 | 111.82990 | 2247.42890  | 2158.53128  | 433.62692   | 1 |
| 16091 | H | 93.04000 | 52.07480 | 112.76290 | 1888.77528  | 1844.73379  | -1711.05564 | 1 |
| 16092 | C | 89.46100 | 50.19980 | 111.71690 | -554.61851  | 177.36824   | 701.70494   | 1 |
| 16093 | O | 90.15700 | 49.23380 | 112.03990 | -668.38767  | 417.15757   | -53.52294   | 1 |
| 16094 | N | 88.19500 | 50.21680 | 112.07190 | 504.38531   | -570.37054  | 364.61650   | 1 |
| 16095 | H | 87.72300 | 51.07580 | 111.88590 | -1725.82391 | 1957.80252  | -1756.91984 | 1 |
| 16096 | C | 87.47100 | 49.11180 | 112.69890 | 394.57747   | 402.03212   | 717.02845   | 1 |
| 16097 | H | 88.04300 | 48.79080 | 113.55590 | -2404.20558 | -1920.06895 | 656.77771   | 1 |
| 16098 | C | 86.10000 | 49.48680 | 113.13590 | 601.96840   | -204.01925  | -653.80516  | 1 |
| 16099 | H | 85.43700 | 48.61080 | 113.30090 | -2440.18554 | -196.75757  | -1976.10911 | 1 |
| 16100 | O | 85.50100 | 50.38680 | 112.30590 | 203.56133   | 657.91341   | 386.44529   | 1 |
| 16101 | H | 85.67800 | 50.08280 | 111.41290 | -2043.42410 | 390.47843   | -2360.12092 | 1 |
| 16102 | C | 86.15600 | 50.20880 | 114.52090 | -427.06329  | 239.43245   | -769.24642  | 1 |
| 16103 | H | 85.14000 | 50.56980 | 114.78890 | -2914.04759 | 63.16303    | -1184.29867 | 1 |
| 16104 | H | 86.84200 | 51.06980 | 114.37390 | -874.83740  | -2997.72464 | 382.79595   | 1 |
| 16105 | H | 86.58700 | 49.54880 | 115.30390 | -2521.49096 | -1567.58855 | -1040.66119 | 1 |
| 16106 | C | 87.33200 | 47.86380 | 111.81290 | 737.98452   | -530.38323  | 74.32013    | 1 |
| 16107 | O | 87.28100 | 47.98280 | 110.59890 | 396.32778   | -502.71341  | 462.41837   | 1 |
| 16108 | N | 87.22900 | 46.69980 | 112.39890 | -249.40738  | 613.04579   | -524.06403  | 1 |
| 16109 | H | 87.31500 | 46.64780 | 113.38990 | 1722.25761  | -1493.91079 | -2168.01418 | 1 |
| 16110 | C | 87.00800 | 45.43480 | 111.73590 | 786.20236   | -460.38551  | 37.17575    | 1 |
| 16111 | H | 87.60700 | 45.49580 | 110.83890 | 767.49152   | 2902.13019  | -941.71299  | 1 |
| 16112 | C | 87.63800 | 44.22280 | 112.49690 | -387.94917  | -654.79188  | 502.18925   | 1 |



|       |   |          |           |           |             |             |             |   |
|-------|---|----------|-----------|-----------|-------------|-------------|-------------|---|
| 16113 | H | 87.57500 | 43.32580  | 111.84390 | -1412.57714 | -1579.46339 | -2325.54240 | 1 |
| 16114 | H | 88.73700 | 44.38180  | 112.50190 | -2510.80954 | -1313.94657 | 1366.60385  | 1 |
| 16115 | O | 87.05400 | 43.98480  | 113.80390 | 453.46026   | 474.88097   | 438.73578   | 1 |
| 16116 | H | 87.22400 | 44.78680  | 114.30390 | -843.74822  | -2911.98385 | -840.63382  | 1 |
| 16117 | C | 85.56100 | 45.12680  | 111.38790 | -851.26790  | -304.48452  | -118.67241  | 1 |
| 16118 | O | 84.61300 | 45.60580  | 112.09190 | 45.16908    | 705.48613   | -351.96066  | 1 |
| 16119 | O | 85.32200 | 44.42480  | 110.35290 | -400.57190  | 247.81106   | 633.84467   | 1 |
| 16120 | H | 78.81643 | 97.81752  | 70.47917  | -999.51011  | -1799.44688 | 34.70880    | 1 |
| 16121 | N | 79.00165 | 98.81334  | 70.30291  | 337.16018   | -408.64395  | 326.15397   | 1 |
| 16122 | H | 78.17767 | 99.23284  | 69.91062  | 651.27822   | -1981.11924 | 3655.34230  | 1 |
| 16123 | C | 80.21607 | 99.15755  | 69.65814  | -23.80751   | 382.25219   | 81.15436    | 1 |
| 16124 | H | 80.99903 | 98.51346  | 70.23415  | -922.71476  | -1953.95251 | -824.40764  | 1 |
| 16125 | C | 80.06015 | 98.81547  | 68.09730  | -863.79145  | 640.91630   | -868.40744  | 1 |
| 16126 | H | 79.91511 | 97.70714  | 68.00250  | 517.17908   | -1337.29804 | -613.52376  | 1 |
| 16127 | H | 79.13055 | 99.24670  | 67.70343  | -1483.08750 | -3339.35046 | 1699.72515  | 1 |
| 16128 | C | 81.26809 | 99.14127  | 67.24452  | 247.47063   | 394.38337   | -479.20139  | 1 |
| 16129 | H | 81.44003 | 100.24567 | 67.12204  | -1255.02474 | -1414.78800 | -4137.43763 | 1 |
| 16130 | C | 82.56952 | 98.52018  | 67.70410  | 442.04183   | 141.82847   | -580.36623  | 1 |
| 16131 | H | 82.66535 | 98.88469  | 68.77755  | 402.62583   | 699.56120   | -653.04030  | 1 |
| 16132 | H | 82.59802 | 97.38192  | 67.79985  | -1139.92931 | -755.52689  | -1015.78187 | 1 |
| 16133 | H | 83.43677 | 98.81884  | 67.11406  | 2569.24061  | 2319.36480  | -914.21328  | 1 |
| 16134 | C | 80.87975 | 98.72210  | 65.83409  | 669.17669   | 319.89136   | -470.11043  | 1 |
| 16135 | H | 80.64229 | 97.61961  | 65.82229  | -1482.17975 | 4195.27418  | -2765.59314 | 1 |
| 16136 | H | 79.99241 | 99.26787  | 65.42286  | 4580.60282  | -3701.15156 | 2745.61682  | 1 |
| 16137 | H | 81.71708 | 98.91770  | 65.17688  | 1349.68885  | -1682.52879 | -131.96712  | 1 |
| 16138 | C | 80.58365 | 100.72955 | 69.85347  | 446.79515   | 930.46142   | 263.20462   | 1 |
| 16139 | O | 81.17885 | 101.41174 | 68.98192  | 50.78799    | -191.59852  | 89.09510    | 1 |
| 16140 | N | 80.14298 | 101.27718 | 70.95075  | -223.50937  | 929.00465   | -636.16441  | 1 |
| 16141 | H | 79.57317 | 100.72903 | 71.55932  | -625.63369  | 3105.21123  | -3631.15209 | 1 |
| 16142 | C | 80.78666 | 102.51057 | 71.36576  | 548.79937   | -553.10755  | -1381.60845 | 1 |
| 16143 | H | 80.13700 | 102.98935 | 72.05469  | 1212.72743  | 1746.08307  | 2085.04076  | 1 |
| 16144 | C | 82.13014 | 102.13405 | 72.04989  | 14.01703    | 292.53845   | -174.00082  | 1 |
| 16145 | H | 82.84393 | 101.75532 | 71.20770  | -852.37603  | 1783.84516  | -929.91186  | 1 |
| 16146 | O | 82.38835 | 100.98285 | 73.08587  | -54.62125   | 88.78276    | -202.33989  | 1 |
| 16147 | H | 81.46150 | 100.75954 | 73.26198  | -2353.08810 | 1054.61044  | -1058.41922 | 1 |
| 16148 | C | 82.57972 | 103.36515 | 72.83639  | -1262.96121 | -143.60963  | -174.30725  | 1 |
| 16149 | H | 81.89587 | 103.58321 | 73.68326  | 2431.31280  | 1118.05497  | -136.55100  | 1 |
| 16150 | H | 83.64538 | 103.20654 | 73.27351  | 856.70041   | -175.03162  | 548.01490   | 1 |
| 16151 | H | 82.66831 | 104.29292 | 72.15255  | -1046.93994 | 1128.36850  | -1414.59087 | 1 |
| 16152 | C | 80.99493 | 103.20178 | 69.78402  | 474.00983   | -573.78425  | 749.54240   | 1 |
| 16153 | O | 82.06194 | 103.81877 | 69.54296  | -88.39270   | -206.52259  | 223.15221   | 1 |
| 16154 | N | 79.77454 | 103.66257 | 69.38360  | 629.72097   | -376.63546  | 221.63443   | 1 |
| 16155 | C | 79.63049 | 104.16432 | 68.08083  | 566.46921   | 256.75562   | -1.74071    | 1 |
| 16156 | H | 80.26918 | 103.50532 | 67.51102  | 360.75307   | 794.98255   | -788.78320  | 1 |
| 16157 | C | 78.06588 | 104.05402 | 67.73818  | 264.00246   | -356.71166  | -314.67800  | 1 |
| 16158 | H | 77.79897 | 104.72085 | 66.89304  | -873.92536  | 52.21787    | -999.81848  | 1 |
| 16159 | H | 77.72999 | 103.06776 | 67.43130  | -552.63295  | -207.31977  | -2706.58297 | 1 |
| 16160 | C | 77.46578 | 104.44484 | 69.11679  | 608.88859   | 259.15133   | -306.54949  | 1 |
| 16161 | H | 77.52019 | 105.51509 | 69.39763  | 1171.48463  | 2152.54114  | 2144.64581  | 1 |
| 16162 | H | 76.37773 | 104.17094 | 69.13944  | -665.46811  | -1229.12994 | 4001.12650  | 1 |
| 16163 | C | 78.47649 | 103.51709 | 70.01940  | -119.84923  | 616.81481   | -524.33483  | 1 |
| 16164 | H | 78.48150 | 103.93264 | 71.11042  | -3010.09312 | 474.61934   | 274.51003   | 1 |
| 16165 | H | 78.12640 | 102.42338 | 69.96373  | -1676.65395 | -1785.89799 | 1579.71180  | 1 |
| 16166 | C | 80.04571 | 105.74885 | 67.79942  | 188.34318   | -285.27973  | -376.09263  | 1 |
| 16167 | O | 79.81823 | 106.30934 | 66.72047  | -643.10040  | -532.19785  | -280.92653  | 1 |
| 16168 | N | 80.73247 | 106.28584 | 68.76836  | -109.01711  | 302.92440   | 582.37394   | 1 |
| 16169 | H | 80.98189 | 105.64576 | 69.49409  | -1025.71307 | 1061.37789  | -1386.00753 | 1 |
| 16170 | C | 81.40612 | 107.52797 | 68.61722  | 398.95572   | 602.40439   | -597.74884  | 1 |
| 16171 | H | 80.78877 | 108.18230 | 67.97375  | -488.09382  | 624.06608   | 1034.70554  | 1 |
| 16172 | C | 81.76437 | 108.03988 | 70.11599  | 662.13331   | -10.57934   | 406.39412   | 1 |
| 16173 | H | 82.53004 | 108.84277 | 69.85237  | -1343.78004 | -839.94613  | -3986.31806 | 1 |
| 16174 | O | 82.00178 | 107.07819 | 71.06907  | 68.78403    | 100.06306   | -190.82817  | 1 |

|       |   |          |           |          |             |             |             |   |
|-------|---|----------|-----------|----------|-------------|-------------|-------------|---|
| 16175 | H | 83.00832 | 106.99593 | 71.00948 | 1198.31506  | 1880.91982  | 232.21280   | 1 |
| 16176 | C | 80.64696 | 109.09548 | 70.48774 | -705.85551  | -845.65510  | -125.30275  | 1 |
| 16177 | H | 80.28449 | 109.65151 | 69.60178 | 836.30205   | -1055.18077 | -874.35338  | 1 |
| 16178 | H | 79.87565 | 108.49438 | 70.95657 | -2466.23678 | -1642.16647 | -152.89917  | 1 |
| 16179 | H | 80.93873 | 109.76771 | 71.36219 | 3042.16155  | 5494.83857  | 1888.85851  | 1 |
| 16180 | C | 82.81560 | 107.10475 | 67.93640 | 108.50921   | 94.97476    | 497.37001   | 1 |
| 16181 | O | 83.27248 | 107.71689 | 67.00827 | -160.30986  | -448.73739  | 268.91925   | 1 |
| 16182 | N | 83.41224 | 106.05884 | 68.54460 | -1124.24637 | 527.24885   | 890.26837   | 1 |
| 16183 | H | 82.87556 | 105.52703 | 69.29297 | 2315.44495  | -2228.88997 | 46.66726    | 1 |
| 16184 | C | 84.84242 | 106.15956 | 68.80933 | -341.27313  | -1186.01685 | 1066.65845  | 1 |
| 16185 | H | 85.20615 | 107.22837 | 68.58377 | 424.04812   | -2334.13306 | -1937.46184 | 1 |
| 16186 | C | 85.25840 | 105.72400 | 70.23621 | -622.05590  | -405.19453  | -1067.08740 | 1 |
| 16187 | H | 84.79752 | 104.67924 | 70.45932 | 690.66851   | -1607.79321 | 2399.21104  | 1 |
| 16188 | H | 86.34837 | 105.66528 | 70.36979 | -395.73179  | 518.89289   | 1479.19117  | 1 |
| 16189 | O | 84.56093 | 106.48557 | 71.47586 | 410.50586   | -41.39748   | 527.05891   | 1 |
| 16190 | H | 84.90752 | 105.83231 | 72.13281 | -1317.52630 | 2371.36568  | -2502.36310 | 1 |
| 16191 | C | 85.58203 | 105.07756 | 67.83067 | 422.42181   | 14.65291    | 877.15748   | 1 |
| 16192 | O | 86.78372 | 105.20760 | 67.64635 | -26.21095   | 533.79122   | 136.24525   | 1 |
| 16193 | N | 84.78811 | 104.05632 | 67.51595 | -180.90212  | -572.92373  | -243.81801  | 1 |
| 16194 | H | 83.81631 | 104.15170 | 67.76719 | -1885.20836 | -168.12144  | 221.11407   | 1 |
| 16195 | C | 85.48811 | 102.80095 | 67.40481 | 757.23803   | -106.62520  | 858.92752   | 1 |
| 16196 | H | 86.48622 | 103.13296 | 66.97376 | -1519.29301 | -2830.11975 | -2743.54905 | 1 |
| 16197 | C | 85.69168 | 101.92674 | 68.77008 | 308.24735   | 138.93284   | -760.32464  | 1 |
| 16198 | H | 86.14414 | 100.94316 | 68.56368 | -1371.70731 | -1619.37520 | -1386.13113 | 1 |
| 16199 | C | 86.71008 | 102.72395 | 69.68951 | -411.14673  | 189.43161   | 653.98101   | 1 |
| 16200 | H | 87.50483 | 103.11549 | 69.09358 | 2855.31881  | -1723.21245 | 2634.00219  | 1 |
| 16201 | H | 86.08267 | 103.42096 | 70.33152 | -247.25693  | -599.14370  | -967.72374  | 1 |
| 16202 | H | 87.14340 | 102.04998 | 70.45469 | -673.71846  | 1677.93500  | -908.28469  | 1 |
| 16203 | C | 84.47415 | 101.60543 | 69.64274 | -780.29660  | 186.35261   | -134.57120  | 1 |
| 16204 | H | 84.14843 | 102.59708 | 70.06077 | -825.65007  | 2222.92867  | -3764.45538 | 1 |
| 16205 | H | 83.55295 | 101.18921 | 69.06557 | -2651.72099 | -959.98354  | -2082.57130 | 1 |
| 16206 | H | 84.82867 | 100.83362 | 70.38190 | 2383.79157  | -836.73957  | 608.00349   | 1 |
| 16207 | C | 84.68232 | 101.96129 | 66.30334 | -220.88813  | 79.19548    | -690.35477  | 1 |
| 16208 | O | 83.57370 | 101.43756 | 66.55028 | 3.72257     | -149.92582  | 637.94252   | 1 |
| 16209 | N | 85.50532 | 101.72135 | 65.30565 | 634.97259   | 762.18039   | -140.35528  | 1 |
| 16210 | H | 86.39714 | 102.17521 | 65.01167 | 517.33697   | 1014.96359  | -349.52107  | 1 |
| 16211 | C | 84.72395 | 101.55564 | 64.05609 | 457.94100   | 144.17723   | -279.16583  | 1 |
| 16212 | H | 83.68489 | 101.20204 | 64.44771 | 1659.67928  | -2651.78719 | -1588.51139 | 1 |
| 16213 | C | 84.57997 | 102.95504 | 63.36832 | 483.26095   | -290.66437  | 902.63652   | 1 |
| 16214 | H | 85.57175 | 103.56767 | 63.10241 | -1569.31262 | -3514.63335 | 1930.98547  | 1 |
| 16215 | H | 83.98316 | 102.86769 | 62.42360 | 2999.77165  | -2208.74436 | 119.56005   | 1 |
| 16216 | C | 83.70815 | 103.90147 | 64.29458 | -375.22137  | -687.75099  | -285.16713  | 1 |
| 16217 | H | 82.62118 | 103.52786 | 64.34194 | -1302.36419 | 76.99594    | 1201.93953  | 1 |
| 16218 | H | 84.19000 | 103.90453 | 65.29293 | 1488.30005  | -185.23096  | -676.31672  | 1 |
| 16219 | C | 83.66838 | 105.34608 | 63.63999 | 210.71889   | -632.80866  | -1327.07244 | 1 |
| 16220 | O | 83.70620 | 105.61043 | 62.44510 | 166.83632   | 725.23499   | -186.39730  | 1 |
| 16221 | N | 83.55617 | 106.32063 | 64.63135 | -164.51462  | -462.66613  | -310.25881  | 1 |
| 16222 | H | 83.96658 | 106.05628 | 65.54106 | -3337.04781 | 1565.68847  | 3694.12840  | 1 |
| 16223 | H | 83.95341 | 107.23258 | 64.45939 | -2973.79203 | -1842.24137 | 1213.75636  | 1 |
| 16224 | C | 85.66592 | 100.48155 | 63.19900 | -348.33389  | -0.93382    | 304.62169   | 1 |
| 16225 | O | 86.62368 | 100.85428 | 62.56292 | -70.97983   | 428.43012   | 368.35427   | 1 |
| 16226 | N | 85.17010 | 99.23140  | 63.36153 | -71.02740   | -649.93505  | 408.37313   | 1 |
| 16227 | C | 85.42960 | 98.16014  | 62.47172 | 399.68426   | 931.46363   | 71.30137    | 1 |
| 16228 | H | 86.36759 | 98.28926  | 61.91032 | -964.57354  | -542.50956  | 1078.41402  | 1 |
| 16229 | C | 85.34478 | 96.93048  | 63.46426 | -944.30658  | -909.35079  | -756.16123  | 1 |
| 16230 | H | 85.02690 | 95.98226  | 63.00973 | -3048.23267 | 895.19565   | 166.19871   | 1 |
| 16231 | H | 86.30305 | 96.85875  | 64.07664 | 3700.65644  | 530.81647   | -1805.99885 | 1 |
| 16232 | C | 84.23244 | 97.35124  | 64.49167 | -271.53482  | 503.59047   | 816.49637   | 1 |
| 16233 | H | 83.17190 | 97.03033  | 64.37654 | 3441.93887  | 1781.56942  | -594.88815  | 1 |
| 16234 | H | 84.48031 | 97.02250  | 65.54901 | -1622.54300 | -566.46084  | -1331.66439 | 1 |
| 16235 | C | 84.27686 | 98.92129  | 64.44344 | -104.85739  | -578.83089  | -676.91193  | 1 |
| 16236 | H | 83.27526 | 99.49644  | 64.23579 | 3703.41745  | -349.62170  | -508.39186  | 1 |

|       |   |          |           |          |             |             |             |   |
|-------|---|----------|-----------|----------|-------------|-------------|-------------|---|
| 16237 | H | 84.71388 | 99.40033  | 65.32302 | -2714.62475 | -636.47951  | 980.62095   | 1 |
| 16238 | C | 84.39155 | 98.02767  | 61.23997 | -132.68913  | -1115.80213 | 364.77845   | 1 |
| 16239 | O | 84.71219 | 97.41437  | 60.24074 | 479.34350   | 225.67916   | 944.91152   | 1 |
| 16240 | N | 83.15213 | 98.51274  | 61.54876 | -14.51084   | 1401.69440  | -1086.68565 | 1 |
| 16241 | H | 83.21003 | 98.85622  | 62.46140 | -2476.37317 | -944.82614  | -2190.82464 | 1 |
| 16242 | C | 82.62499 | 99.37257  | 60.52574 | 900.95141   | -91.13820   | -143.62078  | 1 |
| 16243 | H | 83.31597 | 99.26189  | 59.69874 | 2878.78207  | 1203.01891  | -857.78112  | 1 |
| 16244 | C | 81.16397 | 98.73951  | 60.28284 | 739.16655   | 115.87692   | -345.53188  | 1 |
| 16245 | H | 80.64469 | 98.43669  | 61.23272 | 1022.96973  | -1813.60900 | -1525.63135 | 1 |
| 16246 | C | 80.26786 | 99.74295  | 59.51881 | 652.99705   | 159.43754   | -1037.68007 | 1 |
| 16247 | H | 80.25562 | 100.63931 | 60.20204 | -2149.01902 | -700.21344  | 686.38412   | 1 |
| 16248 | H | 80.82740 | 100.06782 | 58.62618 | -2049.26492 | 2672.83919  | -3935.26433 | 1 |
| 16249 | H | 79.28813 | 99.40184  | 59.18230 | 1246.83606  | 816.38070   | 1832.91890  | 1 |
| 16250 | C | 81.36593 | 97.38032  | 59.54744 | 985.21309   | 202.91567   | -796.39410  | 1 |
| 16251 | H | 82.25946 | 96.97668  | 60.03438 | 873.43640   | 1528.31591  | 1772.17710  | 1 |
| 16252 | H | 80.58391 | 96.63811  | 59.63123 | 2307.06406  | -1856.87196 | 334.36165   | 1 |
| 16253 | H | 81.60554 | 97.49601  | 58.46586 | 1204.66714  | -173.56820  | 2117.05120  | 1 |
| 16254 | C | 82.49666 | 100.90754 | 61.08048 | -438.71220  | -486.16424  | 53.82993    | 1 |
| 16255 | O | 82.14818 | 101.26422 | 62.21255 | -284.47101  | 226.70978   | -56.83954   | 1 |
| 16256 | N | 82.71244 | 101.68708 | 60.03912 | 356.63177   | 202.35523   | -9.66715    | 1 |
| 16257 | H | 82.98657 | 101.18761 | 59.21184 | 255.92252   | -58.10475   | 872.31484   | 1 |
| 16258 | C | 82.40743 | 103.07532 | 59.93161 | 698.71265   | 393.27417   | 194.00928   | 1 |
| 16259 | H | 83.06450 | 103.45541 | 60.81622 | -2886.32093 | -774.86186  | 2063.45776  | 1 |
| 16260 | C | 83.09140 | 103.60488 | 58.60288 | 756.14989   | -741.25162  | -126.57821  | 1 |
| 16261 | H | 82.66297 | 103.04606 | 57.72613 | 1037.33778  | -612.26769  | -820.80211  | 1 |
| 16262 | H | 82.86982 | 104.67937 | 58.35734 | 445.01166   | 608.26640   | -3573.10679 | 1 |
| 16263 | C | 84.65372 | 103.44211 | 58.51961 | 998.78616   | -223.54915  | 886.89878   | 1 |
| 16264 | H | 84.82500 | 102.38133 | 58.88818 | 2546.74227  | -1202.49577 | -2156.99882 | 1 |
| 16265 | H | 85.01088 | 103.49608 | 57.48392 | 1375.14418  | 749.49369   | 1473.86197  | 1 |
| 16266 | C | 85.32077 | 104.54558 | 59.39960 | -773.47803  | -377.68405  | 483.75225   | 1 |
| 16267 | H | 85.13790 | 104.31231 | 60.46320 | 332.85702   | 132.33576   | -212.65521  | 1 |
| 16268 | H | 86.42175 | 104.42657 | 59.40622 | 58.25927    | -817.51755  | -2474.75458 | 1 |
| 16269 | C | 85.05327 | 106.03308 | 58.94816 | -472.15507  | 80.96932    | -60.14614   | 1 |
| 16270 | H | 85.70907 | 106.89408 | 59.32206 | 423.01754   | 1399.37343  | 3446.44253  | 1 |
| 16271 | H | 84.90864 | 106.10003 | 57.86832 | -2827.02512 | 651.44645   | 1451.98619  | 1 |
| 16272 | N | 83.77322 | 106.40234 | 59.52386 | -79.51839   | 306.60609   | 456.62581   | 1 |
| 16273 | H | 83.75024 | 106.44449 | 60.51835 | -4251.96929 | -3441.77950 | 1029.55302  | 1 |
| 16274 | H | 80.38632 | 103.74416 | 56.73783 | 1536.92639  | -1616.42231 | -4415.77737 | 1 |
| 16275 | H | 83.25644 | 107.21215 | 59.33841 | 1819.02161  | -961.51295  | -2764.79432 | 1 |
| 16276 | C | 80.87349 | 103.59992 | 59.93232 | -387.72139  | -122.29879  | 404.20927   | 1 |
| 16277 | O | 80.03924 | 102.78412 | 60.26211 | 90.29187    | -397.28391  | 272.87209   | 1 |
| 16278 | N | 80.72459 | 104.92272 | 59.84944 | 681.79404   | -624.82963  | 464.58143   | 1 |
| 16279 | H | 81.55664 | 105.49159 | 59.87521 | -3127.83767 | 707.75097   | -760.80188  | 1 |
| 16280 | C | 79.46903 | 105.51923 | 59.47961 | 292.42201   | -574.77090  | 102.22778   | 1 |
| 16281 | H | 78.69529 | 105.01610 | 60.08234 | -2410.03615 | 253.97073   | 556.39856   | 1 |
| 16282 | C | 79.66712 | 107.06496 | 59.76608 | 236.16810   | -900.40155  | 95.74377    | 1 |
| 16283 | H | 80.55957 | 107.34083 | 60.37454 | -1761.18950 | 1119.89803  | -3035.74645 | 1 |
| 16284 | H | 79.71608 | 107.57973 | 58.75981 | -585.77745  | -344.55727  | 1259.26572  | 1 |
| 16285 | C | 78.36382 | 107.41578 | 60.50866 | 1553.12343  | 19.48528    | 512.25725   | 1 |
| 16286 | H | 78.26815 | 106.85485 | 61.47060 | 650.51850   | 341.37276   | 1108.91811  | 1 |
| 16287 | H | 78.36209 | 108.52622 | 60.75500 | 980.19195   | 2439.26019  | -853.41596  | 1 |
| 16288 | C | 77.16149 | 107.13280 | 59.52131 | -538.14053  | 230.49658   | -620.44816  | 1 |
| 16289 | H | 77.46749 | 107.47825 | 58.48610 | -1054.18199 | 1138.52679  | 1868.06819  | 1 |
| 16290 | H | 77.11936 | 105.99053 | 59.38985 | 3079.27981  | 669.97561   | 3165.86332  | 1 |
| 16291 | C | 75.83990 | 107.72422 | 60.10869 | 65.25852    | -1044.97190 | -257.63870  | 1 |
| 16292 | H | 75.88985 | 108.71192 | 60.62424 | -414.83167  | -2259.17487 | 835.71129   | 1 |
| 16293 | H | 75.02842 | 107.67533 | 59.38251 | 438.82153   | -821.13278  | -312.27419  | 1 |
| 16294 | N | 75.34379 | 106.71139 | 61.15472 | 606.70725   | 66.42431    | -103.51959  | 1 |
| 16295 | H | 75.98363 | 106.53931 | 61.98744 | 1999.33240  | -838.93814  | -2138.87202 | 1 |
| 16296 | H | 74.28543 | 106.86152 | 61.61324 | 163.71500   | 191.31831   | 2069.61450  | 1 |
| 16297 | H | 75.32317 | 105.70499 | 60.77602 | -437.88890  | -1337.80677 | 793.51988   | 1 |
| 16298 | C | 79.22183 | 105.21184 | 57.87946 | 334.66878   | 110.13205   | -193.01462  | 1 |

|       |   |          |           |          |             |             |             |   |
|-------|---|----------|-----------|----------|-------------|-------------|-------------|---|
| 16299 | O | 79.93154 | 105.73144 | 57.04817 | 270.82803   | 65.09019    | 190.53391   | 1 |
| 16300 | N | 78.06963 | 104.59027 | 57.77015 | -178.51499  | -309.68068  | 749.43481   | 1 |
| 16301 | H | 77.61667 | 104.39424 | 58.69712 | 1463.94583  | -287.84447  | 1676.20941  | 1 |
| 16302 | C | 77.86513 | 103.32094 | 57.04507 | -255.13356  | -375.92436  | -208.27489  | 1 |
| 16303 | H | 77.86436 | 103.52881 | 55.95509 | -661.12812  | -126.07949  | -2204.91199 | 1 |
| 16304 | C | 78.92771 | 102.20884 | 57.24699 | 250.51679   | 395.40838   | -644.03368  | 1 |
| 16305 | H | 79.08582 | 101.98660 | 58.28785 | 457.52531   | -426.62601  | -80.13490   | 1 |
| 16306 | O | 80.64470 | 102.76413 | 56.89944 | 421.72193   | -339.23833  | 0.86135     | 1 |
| 16307 | H | 80.82028 | 102.82089 | 57.87042 | 1782.73375  | 569.24372   | 4327.32478  | 1 |
| 16308 | C | 78.29843 | 101.00473 | 56.55693 | 597.76639   | -613.06814  | 100.78897   | 1 |
| 16309 | H | 78.71529 | 100.03894 | 56.87568 | -3941.00200 | 2201.07113  | 2928.27887  | 1 |
| 16310 | H | 77.17142 | 101.02185 | 56.84932 | -1270.18660 | 790.95516   | 1402.94930  | 1 |
| 16311 | H | 78.49040 | 101.17068 | 55.42540 | -93.88312   | 2473.40703  | 2847.16179  | 1 |
| 16312 | C | 76.37130 | 102.81137 | 57.56699 | 171.57418   | -124.50597  | -143.81606  | 1 |
| 16313 | O | 75.45645 | 102.76192 | 56.79728 | -793.32506  | 192.26880   | -498.03969  | 1 |
| 16314 | N | 76.43442 | 102.52576 | 58.89219 | 159.07721   | 405.89639   | -488.25838  | 1 |
| 16315 | H | 77.35845 | 102.73080 | 59.28421 | -938.68620  | 720.70179   | 517.29721   | 1 |
| 16316 | C | 75.26567 | 103.10523 | 59.54455 | -501.10703  | 757.45770   | -368.98481  | 1 |
| 16317 | H | 75.03257 | 103.87933 | 58.76162 | 455.24700   | -557.15030  | 1728.66878  | 1 |
| 16318 | C | 73.95273 | 102.13701 | 59.63776 | 1267.40284  | 200.04970   | -1024.67055 | 1 |
| 16319 | H | 73.14028 | 102.72891 | 60.15768 | 186.13320   | -1024.41966 | -1950.13102 | 1 |
| 16320 | H | 73.49278 | 102.05703 | 58.60276 | -383.88938  | 485.39237   | -1161.56783 | 1 |
| 16321 | C | 74.14005 | 100.80581 | 60.32741 | 660.73561   | -313.74477  | -9.76780    | 1 |
| 16322 | C | 73.31551 | 100.32408 | 61.38331 | 274.37329   | -228.70314  | -1088.09518 | 1 |
| 16323 | H | 72.41580 | 101.00463 | 61.66805 | 42.41140    | 342.95304   | -1226.06402 | 1 |
| 16324 | C | 75.43458 | 100.19786 | 60.12594 | -642.28612  | 318.18411   | 530.96068   | 1 |
| 16325 | H | 76.22523 | 100.66034 | 59.48011 | -2525.62334 | -1118.94463 | -624.87971  | 1 |
| 16326 | C | 73.69011 | 99.16674  | 62.10153 | 129.14073   | 435.27490   | 287.86645   | 1 |
| 16327 | H | 73.12514 | 98.79831  | 62.92295 | 938.39233   | 250.36455   | 2343.38297  | 1 |
| 16328 | C | 75.78543 | 99.11135  | 60.89559 | -164.22167  | 482.40975   | 1166.87996  | 1 |
| 16329 | H | 76.77522 | 98.57074  | 60.79038 | -159.44472  | -956.89329  | 1655.89719  | 1 |
| 16330 | C | 74.96544 | 98.62260  | 61.95322 | 762.81830   | 160.17438   | -974.64446  | 1 |
| 16331 | O | 75.46602 | 97.66862  | 62.78854 | -23.28898   | 226.94599   | 283.29923   | 1 |
| 16332 | H | 74.76404 | 97.62629  | 63.50063 | 2321.32759  | 301.83428   | -728.71568  | 1 |
| 16333 | C | 76.00388 | 103.71552 | 60.78114 | 908.85832   | 158.97098   | -366.67812  | 1 |
| 16334 | O | 77.09319 | 104.34290 | 60.73976 | 24.18303    | 200.34513   | 264.04992   | 1 |
| 16335 | N | 75.30117 | 103.73679 | 61.97408 | 106.55194   | 191.78883   | -25.46753   | 1 |
| 16336 | H | 74.46771 | 103.19717 | 61.66988 | 1023.36631  | -988.51537  | 593.01662   | 1 |
| 16337 | C | 75.88926 | 103.26582 | 63.17516 | 359.28280   | -1057.55800 | -754.49140  | 1 |
| 16338 | H | 74.96849 | 103.05507 | 63.78870 | -109.89070  | -806.89119  | -481.31643  | 1 |
| 16339 | C | 76.69812 | 101.91708 | 62.95659 | -11.09960   | 71.14552    | -895.71995  | 1 |
| 16340 | H | 76.44071 | 101.22907 | 63.81022 | 2263.00237  | -1609.62756 | 1282.26617  | 1 |
| 16341 | H | 76.21731 | 101.41589 | 62.10920 | -56.41862   | -2126.77042 | 1388.27625  | 1 |
| 16342 | C | 78.19002 | 102.20830 | 62.61459 | 719.01027   | -377.24419  | 88.40132    | 1 |
| 16343 | H | 78.40442 | 102.31785 | 61.54390 | -1591.52915 | -1349.40425 | -2823.18173 | 1 |
| 16344 | H | 78.65750 | 103.06601 | 63.02009 | 0.54174     | 2928.66524  | 1326.06467  | 1 |
| 16345 | C | 79.13066 | 101.02786 | 63.19751 | 261.52347   | 529.05501   | -275.91472  | 1 |
| 16346 | H | 78.72046 | 100.02493 | 62.97110 | 1188.09100  | -3551.51206 | -3351.97586 | 1 |
| 16347 | H | 80.21342 | 101.11870 | 62.82104 | 152.13412   | -1842.46282 | -870.45532  | 1 |
| 16348 | N | 79.06199 | 101.21192 | 64.57137 | -693.27974  | -332.99022  | -89.16227   | 1 |
| 16349 | H | 78.16284 | 101.22967 | 64.98367 | 1177.89284  | -679.59692  | -566.83198  | 1 |
| 16350 | C | 80.07668 | 101.49981 | 65.33371 | -406.45456  | 981.27672   | 1317.55777  | 1 |
| 16351 | N | 81.40311 | 101.46606 | 64.90682 | -1040.92044 | -223.67762  | 101.15722   | 1 |
| 16352 | H | 81.64556 | 101.19222 | 63.93488 | -2881.25519 | -2352.76302 | -4022.11905 | 1 |
| 16353 | H | 82.30954 | 101.48041 | 65.48771 | 947.64782   | 2745.64354  | -3085.86801 | 1 |
| 16354 | N | 79.51437 | 101.75431 | 66.59217 | -46.10065   | -297.34990  | 246.44718   | 1 |
| 16355 | H | 78.55988 | 101.44600 | 66.91816 | 1144.51031  | 1428.19015  | -578.47790  | 1 |
| 16356 | H | 80.21203 | 101.80292 | 67.36585 | -793.48504  | -2918.55154 | 581.37837   | 1 |
| 16357 | C | 76.74773 | 104.36398 | 64.00709 | -383.99807  | -211.32475  | -588.50364  | 1 |
| 16358 | O | 76.47900 | 104.49574 | 65.21943 | -338.77579  | -523.18577  | 224.56717   | 1 |
| 16359 | N | 77.49778 | 105.14206 | 63.29017 | -251.08213  | -774.26493  | -360.88647  | 1 |
| 16360 | H | 77.54738 | 104.97911 | 62.20180 | -273.33061  | 612.42307   | 318.83286   | 1 |

|       |   |          |           |          |             |             |                      |        |
|-------|---|----------|-----------|----------|-------------|-------------|----------------------|--------|
| 16361 | C | 78.43778 | 105.86468 | 64.05504 | -142.75694  | 13.63197    | 654.69188            | 1      |
| 16362 | H | 78.37047 | 105.38304 | 65.07818 | 467.21922   | -1963.42946 | 202.96931            | 1      |
| 16363 | C | 79.89132 | 105.71379 | 63.42271 | -139.36899  | -685.81380  | -681.52335           | 1      |
| 16364 | H | 79.90963 | 105.81995 | 62.32694 | 2087.71806  | -347.76096  | 191.19842            | 1      |
| 16365 | C | 80.67498 | 107.00450 | 63.95072 | -720.96469  | -901.68226  | -170.72225           | 1      |
| 16366 | H | 81.70322 | 107.24683 | 63.50544 | -1011.21434 | -1977.72466 | -360.06500           | 1      |
| 16367 | H | 80.03802 | 107.85373 | 63.81428 | 1472.90762  | 480.78872   | 1775.07659           | 1      |
| 16368 | H | 80.78881 | 106.87599 | 65.06319 | 870.75738   | -1379.52425 | 2162.94828           | 1      |
| 16369 | C | 80.60298 | 104.40481 | 63.87105 | 679.89594   | -374.52772  | -342.99011           | 1      |
| 16370 | H | 80.74631 | 104.25554 | 64.96436 | -1924.00216 | 571.90582   | -43.14740            | 1      |
| 16371 | H | 79.96838 | 103.48557 | 63.64758 | -789.36383  | -2302.39650 | 728.63817            | 1      |
| 16372 | H | 81.60020 | 104.27062 | 63.39638 | 1195.93750  | 534.62498   | 2117.46949           | 1      |
| 16373 | C | 77.81859 | 107.41232 | 64.02865 | -35.35368   | 36.89518    | 290.98737            | 1      |
| 16374 | O | 77.26530 | 107.93316 | 63.09479 | -393.96390  | 432.05117   | 443.09884            | 1      |
| 16375 | N | 78.05813 | 107.95425 | 65.25690 | -423.70687  | -805.19983  | -150.52447           | 1      |
| 16376 | H | 78.61584 | 107.47966 | 65.96336 | 1452.80897  | 387.90202   | -2933.16825          | 1      |
| 16377 | C | 77.30738 | 109.24080 | 65.30987 | -476.47555  | -539.60426  | -428.91969           | 1      |
| 16378 | H | 77.48980 | 109.77839 | 64.32884 | 717.38212   | -172.54951  | -2939.69383          | 1      |
| 16379 | C | 75.80319 | 108.93601 | 65.63904 | 147.94614   | 221.02709   | 106.72537            | 1      |
| 16380 | H | 75.48278 | 107.91874 | 65.39595 | 1519.24790  | -606.24593  | -252.63727           | 1      |
| 16381 | H | 75.77153 | 108.86133 | 66.74326 | 210.73079   | -2260.06422 | -2014.08383          | 1      |
| 16382 | C | 74.85161 | 110.06423 | 65.08175 | 1132.76005  | 719.19945   | 562.39199            | 1      |
| 16383 | H | 75.29278 | 111.03766 | 65.04397 | 335.90178   | -1466.17012 | -1592.58777          | 1      |
| 16384 | C | 74.62163 | 109.61522 | 63.59025 | 237.19811   | 1001.85028  | -150.70054           | 1      |
| 16385 | H | 74.18628 | 108.46039 | 63.41733 | 1919.75565  | -424.45483  | -1807.18785          | 1      |
| 16386 | H | 73.77566 | 110.19888 | 63.10277 | -967.89615  | 1528.23105  | -1380.19928          | 1      |
| 16387 | H | 75.54573 | 109.75644 | 62.92469 | -2532.90746 | 825.69813   | -1485.61024          | 1      |
| 16388 | C | 73.53105 | 110.12627 | 65.96867 | 476.91522   | -503.32664  | -146.02202           | 1      |
| 16389 | H | 72.94738 | 111.06301 | 65.89890 | -1493.92496 | -423.09094  | 833.97670            | 1      |
| 16390 | H | 72.80935 | 109.28293 | 65.76251 | -187.62506  | -4198.14817 | 216.81384            | 1      |
| 16391 | H | 73.88928 | 110.12289 | 67.02412 | -981.63032  | -1016.86802 | 2461.07099           | 1      |
| 16392 | C | 78.05917 | 110.03820 | 66.46014 | -245.53494  | -1190.76085 | 254.46138            | 1      |
| 16393 | O | 77.47913 | 110.82597 | 67.16261 | 210.73592   | 626.07478   | -115.04493           | 1      |
| 16394 | O | 79.43233 | 109.88032 | 66.63945 | 982.47930   | 137.08680   | -184.84980           | 1      |
| 16395 | H | 79.45779 | 108.86762 | 66.36124 | 1195.06599  | 1009.36810  | -1220.48611          | 1      |
| 16396 |   | 5463     |           |          |             |             |                      |        |
| 16397 |   | 150.0000 | 150.0000  | 150.0000 | 0.0000      | 0.0000      | 0.0000***** 150.0000 | 600000 |
|       |   | 0.2500   | 400.00    | 0.00     | 0.00        | 0.00        | -25968.6443          | 0.2260 |
|       |   |          |           |          |             |             | 400.0000             |        |
| 16398 | N | 56.89626 | 95.57464  | 59.13306 | -557.38581  | -17.49034   | -3.32113             | 1      |
| 16399 | H | 55.95529 | 95.45373  | 58.65470 | -146.20111  | 1246.10345  | 263.18944            | 1      |
| 16400 | H | 56.70089 | 95.33070  | 60.10419 | 69.15400    | -161.14811  | -690.99910           | 1      |
| 16401 | H | 65.70894 | 98.56003  | 55.89386 | -366.78221  | -752.48188  | -687.48827           | 1      |
| 16402 | C | 58.08326 | 95.13849  | 58.52436 | -654.10271  | -754.59577  | 1094.62111           | 1      |
| 16403 | H | 58.92011 | 95.33394  | 59.27374 | -1362.86718 | -1844.83096 | 1667.65027           | 1      |
| 16404 | C | 57.98420 | 93.56915  | 58.49874 | -241.50629  | 394.32326   | 662.42641            | 1      |
| 16405 | H | 58.72382 | 93.08548  | 57.80090 | 249.42288   | 737.94557   | -948.31717           | 1      |
| 16406 | H | 56.95155 | 93.21064  | 58.25692 | -685.66817  | -3376.46504 | 1035.60041           | 1      |
| 16407 | C | 58.28538 | 92.98844  | 59.89087 | -31.88408   | 412.79135   | -412.51421           | 1      |
| 16408 | H | 57.53428 | 93.35949  | 60.66932 | -2188.16566 | 1088.94687  | -170.29896           | 1      |
| 16409 | H | 59.25719 | 93.36643  | 60.28090 | -3047.62956 | -895.25311  | -3215.26811          | 1      |
| 16410 | S | 58.13802 | 91.17503  | 59.44883 | 290.64741   | -248.31217  | -459.58966           | 1      |
| 16411 | C | 58.82355 | 90.45308  | 60.88192 | -393.75621  | -388.14848  | 105.21194            | 1      |
| 16412 | H | 58.17716 | 90.27504  | 61.72139 | 4800.10782  | -2824.23901 | 95.88675             | 1      |
| 16413 | H | 59.30240 | 89.41666  | 60.80523 | -1452.86706 | -583.85290  | -534.84448           | 1      |
| 16414 | H | 59.61789 | 91.03770  | 61.38416 | 984.26251   | 194.48730   | 1089.22469           | 1      |
| 16415 | C | 58.27305 | 95.86314  | 57.02057 | 193.00798   | -291.54091  | -373.59479           | 1      |
| 16416 | O | 57.51962 | 95.77795  | 56.08748 | -376.88495  | -279.00221  | 118.97871            | 1      |
| 16417 | N | 59.31260 | 96.65183  | 57.17312 | 662.90771   | 565.00599   | -15.48908            | 1      |
| 16418 | H | 59.69455 | 96.65272  | 58.15725 | 1359.46583  | -2229.28723 | 1711.45600           | 1      |
| 16419 | C | 60.29342 | 96.70948  | 56.10103 | 833.79480   | -621.02986  | -3.78711             | 1      |
| 16420 | H | 59.56218 | 96.76183  | 55.23368 | -301.03378  | 1014.74819  | -845.35422           | 1      |
| 16421 | C | 61.35625 | 97.88696  | 56.34848 | -608.48857  | -24.53425   | 864.23220            | 1      |

|       |   |          |          |          |             |             |             |   |
|-------|---|----------|----------|----------|-------------|-------------|-------------|---|
| 16422 | H | 60.87803 | 98.85183 | 56.03750 | 3654.38166  | 2932.79240  | -1189.46892 | 1 |
| 16423 | H | 61.51266 | 97.97372 | 57.49309 | 643.41383   | -1993.63145 | -686.16087  | 1 |
| 16424 | C | 62.61736 | 97.70245 | 55.46988 | 156.09396   | 178.96371   | 409.32698   | 1 |
| 16425 | H | 62.45564 | 98.01693 | 54.41822 | 429.35024   | -895.18023  | -4579.62262 | 1 |
| 16426 | H | 62.80235 | 96.55503 | 55.39454 | 260.11825   | -710.04947  | -3163.14582 | 1 |
| 16427 | C | 63.86795 | 98.36565 | 56.10051 | -1089.40299 | 15.51936    | -224.30299  | 1 |
| 16428 | O | 63.98888 | 98.91531 | 57.16733 | -979.26821  | 487.63216   | -492.49436  | 1 |
| 16429 | O | 65.03539 | 98.21953 | 55.26191 | -257.52061  | 358.38389   | -1095.03913 | 1 |
| 16430 | C | 61.13174 | 95.27783 | 56.02276 | -16.95876   | -263.85879  | 580.31458   | 1 |
| 16431 | O | 61.41366 | 94.79700 | 54.95619 | 326.06071   | -124.78801  | 634.15389   | 1 |
| 16432 | N | 61.44948 | 94.79221 | 57.21306 | -629.52912  | 291.01851   | -645.42839  | 1 |
| 16433 | H | 61.21057 | 95.36614 | 58.02363 | -378.97591  | -1693.75629 | 1246.46013  | 1 |
| 16434 | C | 62.11249 | 93.54316 | 57.21950 | 651.72508   | 186.60636   | 977.96134   | 1 |
| 16435 | H | 61.83015 | 93.09263 | 56.19835 | -331.71106  | 572.35852   | -733.49360  | 1 |
| 16436 | H | 61.67153 | 92.90192 | 58.11012 | 1510.60550  | -593.27013  | 638.25601   | 1 |
| 16437 | C | 63.78806 | 93.55051 | 57.51426 | -29.08753   | -1086.40390 | -593.96101  | 1 |
| 16438 | O | 64.46930 | 92.49649 | 57.57900 | 78.10073    | -213.60748  | 121.81433   | 1 |
| 16439 | N | 64.19454 | 94.78596 | 57.45366 | -344.55385  | -624.17399  | 609.77162   | 1 |
| 16440 | H | 63.33575 | 95.39554 | 57.28402 | 1672.39210  | 2016.60782  | -618.37395  | 1 |
| 16441 | C | 65.38932 | 95.07138 | 58.22620 | 118.97607   | 176.82571   | 1370.27053  | 1 |
| 16442 | H | 65.86901 | 94.07013 | 58.44994 | -3061.20289 | -341.72622  | 52.28402    | 1 |
| 16443 | C | 66.21788 | 95.92828 | 57.17842 | 593.90667   | 259.90124   | 793.54276   | 1 |
| 16444 | H | 65.57858 | 96.71691 | 56.73356 | -1245.22357 | 2910.34222  | 2068.86632  | 1 |
| 16445 | C | 67.46840 | 96.69311 | 57.73480 | 68.29410    | -891.20749  | -218.09041  | 1 |
| 16446 | H | 67.94682 | 97.27233 | 56.90054 | -3753.86927 | 65.17796    | -691.05859  | 1 |
| 16447 | H | 68.25523 | 96.07886 | 58.22553 | -1852.38770 | -2471.37943 | 437.21459   | 1 |
| 16448 | H | 67.20833 | 97.49456 | 58.56706 | 462.83882   | -2.58878    | 1184.86043  | 1 |
| 16449 | C | 66.59676 | 94.89937 | 56.03279 | -51.77645   | 106.08887   | 515.43741   | 1 |
| 16450 | H | 65.92929 | 94.01590 | 55.89496 | -4056.03581 | 382.61553   | -357.23513  | 1 |
| 16451 | H | 67.55468 | 94.44229 | 56.33364 | -327.41633  | -3858.16680 | 1657.67516  | 1 |
| 16452 | C | 66.69684 | 95.62553 | 54.65098 | -3.06388    | -908.53502  | -361.11275  | 1 |
| 16453 | H | 67.12155 | 94.96182 | 53.81365 | -318.84372  | -1008.04752 | -864.71942  | 1 |
| 16454 | H | 67.28105 | 96.51574 | 54.78350 | -916.00877  | -2863.71984 | -1283.99434 | 1 |
| 16455 | H | 65.74519 | 95.88064 | 54.23519 | -922.54548  | 415.26980   | -867.98897  | 1 |
| 16456 | C | 65.00075 | 95.97386 | 59.51736 | -166.29284  | 174.85830   | -359.77360  | 1 |
| 16457 | O | 65.83501 | 95.97748 | 60.41501 | 105.96092   | -176.65221  | -35.06897   | 1 |
| 16458 | N | 63.90609 | 96.71650 | 59.35889 | 37.48310    | -509.10572  | 398.81244   | 1 |
| 16459 | H | 63.44249 | 96.76834 | 58.46132 | 3391.73442  | -129.97089  | -2118.98282 | 1 |
| 16460 | C | 63.27474 | 97.33331 | 60.50335 | -553.02484  | -289.33181  | -65.65625   | 1 |
| 16461 | H | 64.09714 | 97.95450 | 60.85020 | 2049.78438  | 1503.11183  | 778.14397   | 1 |
| 16462 | C | 61.92789 | 98.04658 | 60.18444 | 80.49973    | -364.90201  | 150.17084   | 1 |
| 16463 | H | 61.68648 | 98.53571 | 61.19595 | -1037.51804 | -3858.93338 | 1913.87132  | 1 |
| 16464 | H | 62.11789 | 98.87171 | 59.46173 | 1241.82000  | -5029.89393 | 3323.93650  | 1 |
| 16465 | O | 60.75923 | 97.29245 | 59.69007 | -443.10227  | 178.24016   | -23.82335   | 1 |
| 16466 | H | 60.57577 | 96.80947 | 60.49211 | 621.83666   | -1210.06585 | 2275.13106  | 1 |
| 16467 | C | 62.83938 | 96.25619 | 61.70446 | 71.79655    | 328.99300   | -590.55528  | 1 |
| 16468 | O | 62.41426 | 96.75161 | 62.72277 | 168.11353   | -179.41953  | 50.78405    | 1 |
| 16469 | N | 63.01838 | 95.01601 | 61.33196 | 188.54205   | 17.27262    | 468.38201   | 1 |
| 16470 | H | 63.45709 | 94.99004 | 60.40590 | 2588.03991  | 22.69720    | -792.36463  | 1 |
| 16471 | C | 62.77198 | 93.79968 | 62.04376 | -529.94925  | 568.60569   | -243.08362  | 1 |
| 16472 | H | 63.08591 | 93.04760 | 61.29460 | -16.61856   | -997.18520  | 1791.57536  | 1 |
| 16473 | C | 63.73671 | 93.69122 | 63.31849 | -575.41143  | 416.69731   | -103.41024  | 1 |
| 16474 | H | 64.04641 | 94.70957 | 63.63707 | -1791.19320 | 2271.94319  | -4799.50060 | 1 |
| 16475 | C | 63.04784 | 93.01048 | 64.52839 | -425.74708  | -115.96161  | -126.74967  | 1 |
| 16476 | H | 63.70124 | 93.08045 | 65.36668 | 159.14607   | -1283.94918 | 3434.03760  | 1 |
| 16477 | H | 62.13589 | 93.64311 | 64.76748 | -1727.62014 | -2021.28138 | 1903.08701  | 1 |
| 16478 | H | 62.70266 | 91.91672 | 64.38450 | 655.39312   | -1219.15873 | 106.04142   | 1 |
| 16479 | C | 65.08053 | 92.92714 | 62.98739 | 1194.54602  | 974.46518   | 426.24975   | 1 |
| 16480 | H | 64.95741 | 91.95356 | 62.43178 | 782.28758   | 2123.98221  | 1598.59525  | 1 |
| 16481 | H | 65.62412 | 92.48799 | 63.85449 | -403.60810  | 1912.30268  | 1176.77801  | 1 |
| 16482 | C | 65.96868 | 93.96894 | 62.20981 | 339.56276   | 679.30867   | 45.34317    | 1 |
| 16483 | H | 65.97731 | 95.06304 | 62.56603 | -164.82918  | 1678.56002  | -2379.58509 | 1 |

|       |   |          |           |          |             |             |             |   |
|-------|---|----------|-----------|----------|-------------|-------------|-------------|---|
| 16484 | H | 67.08861 | 93.71007  | 62.10315 | 1329.77106  | -1066.08884 | 1116.23293  | 1 |
| 16485 | H | 65.70598 | 93.90455  | 61.20521 | 607.86824   | -394.30130  | -1173.95814 | 1 |
| 16486 | C | 61.17291 | 93.48300  | 62.23056 | -781.95997  | -138.61592  | -338.97442  | 1 |
| 16487 | O | 60.85523 | 92.48541  | 61.55155 | 922.03039   | 179.49281   | -187.72580  | 1 |
| 16488 | N | 60.48536 | 94.26556  | 63.06147 | -424.97580  | -138.40748  | -28.61334   | 1 |
| 16489 | H | 61.24166 | 94.89395  | 63.41917 | -1803.30934 | -43.25018   | -1677.23502 | 1 |
| 16490 | C | 59.12283 | 94.21849  | 63.34944 | 42.50100    | -971.36810  | -11.22690   | 1 |
| 16491 | H | 58.80114 | 93.28219  | 62.91020 | -527.21475  | 999.33625   | 766.33253   | 1 |
| 16492 | C | 58.96768 | 94.54661  | 64.90798 | 186.30948   | -608.93374  | 318.36542   | 1 |
| 16493 | H | 59.46728 | 95.51859  | 65.09270 | -1311.48805 | -851.36288  | 225.45598   | 1 |
| 16494 | H | 59.49803 | 93.80541  | 65.54370 | 1104.18120  | 1347.87502  | -1483.93469 | 1 |
| 16495 | C | 57.50813 | 94.43788  | 65.40366 | 306.33990   | 589.66576   | 1887.23579  | 1 |
| 16496 | C | 56.97079 | 93.18904  | 65.85545 | 109.28414   | 580.19011   | 354.79690   | 1 |
| 16497 | H | 57.67115 | 92.30371  | 65.88040 | -1018.03512 | 1554.62367  | 1293.65093  | 1 |
| 16498 | C | 55.66613 | 93.03047  | 66.30485 | -751.66059  | 574.23223   | -11.96037   | 1 |
| 16499 | H | 55.32161 | 92.09617  | 66.67735 | -221.57487  | -649.36303  | -468.32154  | 1 |
| 16500 | C | 54.72082 | 94.07738  | 66.21333 | 23.72649    | -714.64850  | 345.29559   | 1 |
| 16501 | O | 53.34406 | 93.91314  | 66.50555 | -510.58495  | -438.20981  | -120.72704  | 1 |
| 16502 | H | 53.28143 | 92.93867  | 66.37791 | 2794.77724  | 2007.49370  | 456.44890   | 1 |
| 16503 | C | 56.59480 | 95.50882  | 65.35024 | 642.34445   | -585.49951  | -824.44448  | 1 |
| 16504 | H | 56.97830 | 96.49411  | 64.97891 | -1953.04931 | 2870.48959  | -2926.16010 | 1 |
| 16505 | C | 55.25963 | 95.24505  | 65.65170 | -275.92987  | 881.81542   | 158.66540   | 1 |
| 16506 | H | 54.49954 | 96.03492  | 65.56740 | 660.98908   | -712.05217  | -1723.89135 | 1 |
| 16507 | C | 58.37577 | 95.49918  | 62.65909 | 331.76398   | -852.12651  | 607.71508   | 1 |
| 16508 | O | 57.14916 | 95.49014  | 62.65290 | 636.67679   | -1168.74408 | -108.98532  | 1 |
| 16509 | N | 59.13559 | 96.31866  | 61.93493 | 210.22370   | -1021.03542 | -120.05921  | 1 |
| 16510 | H | 60.11017 | 96.00335  | 62.08676 | -47.88242   | 999.87442   | -367.46618  | 1 |
| 16511 | C | 59.02726 | 97.75681  | 62.09437 | 570.23184   | 957.34876   | 552.29950   | 1 |
| 16512 | H | 60.00614 | 98.05714  | 61.56558 | 528.19066   | -273.26409  | -2267.85386 | 1 |
| 16513 | C | 57.81291 | 98.43753  | 61.27173 | 245.87175   | -49.62034   | 1163.25852  | 1 |
| 16514 | H | 57.79923 | 99.54646  | 61.43618 | 1171.58520  | -2439.58390 | 2339.82547  | 1 |
| 16515 | O | 56.52979 | 97.93803  | 61.67237 | -971.76406  | -81.48787   | 189.79629   | 1 |
| 16516 | H | 56.88948 | 96.99548  | 61.93823 | 2135.38642  | 596.28314   | 592.72021   | 1 |
| 16517 | C | 58.31550 | 98.38677  | 59.79253 | -251.17435  | 185.35809   | -41.58013   | 1 |
| 16518 | H | 58.58111 | 97.35914  | 59.43042 | 1734.52235  | 3232.11245  | -1218.59791 | 1 |
| 16519 | H | 57.62311 | 98.88105  | 58.99315 | -566.23693  | -613.95212  | 2332.89938  | 1 |
| 16520 | H | 59.26988 | 98.99061  | 59.69638 | 1069.67356  | -1618.82928 | -1456.73176 | 1 |
| 16521 | C | 59.09542 | 98.13926  | 63.61792 | -247.47772  | -57.33670   | 245.15125   | 1 |
| 16522 | O | 58.65961 | 97.61904  | 64.63463 | -520.14465  | -246.90390  | -202.92270  | 1 |
| 16523 | N | 59.57371 | 99.44548  | 63.63793 | -29.48321   | -513.71126  | -225.83901  | 1 |
| 16524 | H | 59.89278 | 99.84107  | 62.72688 | 510.26256   | 2217.58330  | -1044.14314 | 1 |
| 16525 | C | 59.20306 | 100.20023 | 64.86200 | -65.69904   | 613.44497   | 110.49391   | 1 |
| 16526 | H | 58.17116 | 99.82395  | 65.05037 | 1249.17672  | 1877.16432  | -3146.66176 | 1 |
| 16527 | C | 60.23472 | 99.76721  | 66.00334 | -824.39443  | 546.62389   | 383.87379   | 1 |
| 16528 | H | 59.78775 | 99.87764  | 66.99687 | 679.35366   | -394.02229  | 1476.24180  | 1 |
| 16529 | H | 60.69295 | 98.70504  | 65.80746 | -2947.92249 | -1614.69293 | 383.68579   | 1 |
| 16530 | O | 61.56899 | 100.52672 | 65.96416 | -464.06718  | -42.95869   | -132.53108  | 1 |
| 16531 | H | 61.51186 | 101.18222 | 66.62178 | -269.96979  | 601.04082   | -414.99879  | 1 |
| 16532 | C | 59.23462 | 101.73879 | 64.65312 | -390.69855  | -501.69002  | -27.88811   | 1 |
| 16533 | O | 59.08345 | 102.24026 | 63.55017 | -226.64929  | 18.08224    | 558.30683   | 1 |
| 16534 | N | 59.17133 | 102.31435 | 65.88905 | -315.19664  | 346.74146   | 66.34025    | 1 |
| 16535 | H | 58.95416 | 101.69396 | 66.73979 | 1886.12640  | -210.98255  | -140.54997  | 1 |
| 16536 | C | 58.58884 | 103.67927 | 66.09805 | -613.55181  | 228.70427   | 278.66336   | 1 |
| 16537 | H | 57.77483 | 103.52687 | 65.32269 | 3595.06906  | -128.93330  | -3131.25114 | 1 |
| 16538 | C | 58.10475 | 103.83233 | 67.55952 | 236.09609   | 628.45527   | -11.06997   | 1 |
| 16539 | H | 57.33204 | 104.59712 | 67.68859 | -2643.30237 | 755.01883   | -1139.64075 | 1 |
| 16540 | H | 58.99680 | 104.22048 | 68.08087 | 2080.04272  | 896.29588   | 866.48085   | 1 |
| 16541 | C | 57.54230 | 102.56090 | 68.33374 | 165.68073   | -311.20192  | 276.09635   | 1 |
| 16542 | O | 56.81604 | 102.84324 | 69.29779 | 129.26629   | -62.72717   | 86.67639    | 1 |
| 16543 | O | 58.10827 | 101.46264 | 68.13969 | 529.18391   | 175.20875   | 763.09665   | 1 |
| 16544 | C | 59.72814 | 104.77525 | 65.67512 | -474.07139  | 381.48940   | 721.09064   | 1 |
| 16545 | O | 59.45515 | 105.85190 | 65.18831 | 482.04028   | 98.69285    | -477.42576  | 1 |

|       |   |          |           |          |             |             |             |   |
|-------|---|----------|-----------|----------|-------------|-------------|-------------|---|
| 16546 | N | 60.95729 | 104.32973 | 65.88797 | -30.44241   | 105.88609   | 232.21080   | 1 |
| 16547 | H | 61.08197 | 103.43322 | 66.35885 | 3248.54173  | 867.78993   | 2825.78755  | 1 |
| 16548 | C | 62.08697 | 105.07883 | 65.40505 | 795.56866   | -279.33570  | 438.35346   | 1 |
| 16549 | H | 61.79017 | 106.13841 | 65.22016 | 746.01988   | -1940.52881 | 2753.19986  | 1 |
| 16550 | C | 63.08601 | 105.04667 | 66.61158 | -69.56878   | -486.01718  | 1096.60308  | 1 |
| 16551 | H | 62.63820 | 106.03397 | 66.99448 | 1162.54389  | 1807.81905  | 2237.19975  | 1 |
| 16552 | H | 64.16124 | 105.20355 | 66.31807 | 1214.35334  | 1103.03010  | -1400.98035 | 1 |
| 16553 | C | 63.31626 | 103.82215 | 67.58153 | -296.84514  | -120.05084  | -368.71269  | 1 |
| 16554 | O | 62.38132 | 103.00704 | 67.69560 | 25.10274    | -179.02504  | -398.89381  | 1 |
| 16555 | N | 64.52648 | 103.73186 | 68.15055 | 584.61378   | -322.33789  | 1079.22486  | 1 |
| 16556 | H | 64.73340 | 103.01720 | 68.90022 | 927.47894   | 645.71800   | 1268.43735  | 1 |
| 16557 | H | 65.35785 | 104.41044 | 68.02367 | -594.88225  | 1713.35964  | -2825.93581 | 1 |
| 16558 | C | 62.70647 | 104.21330 | 64.14632 | -183.16356  | -464.47442  | -71.62656   | 1 |
| 16559 | O | 63.59845 | 104.74714 | 63.52497 | -298.06402  | -502.59831  | 310.70154   | 1 |
| 16560 | N | 62.17969 | 103.01969 | 63.88152 | 198.55506   | 853.35995   | 343.01036   | 1 |
| 16561 | H | 61.44245 | 102.69861 | 64.41452 | -47.02263   | 1605.52232  | -300.52299  | 1 |
| 16562 | C | 62.86303 | 102.28094 | 62.82017 | 386.89941   | -172.06084  | 290.60627   | 1 |
| 16563 | H | 63.85520 | 102.53194 | 63.08951 | 1396.72393  | 290.53568   | 2159.91053  | 1 |
| 16564 | C | 62.51919 | 100.76170 | 62.95441 | 41.35664    | -678.82057  | -294.65167  | 1 |
| 16565 | H | 62.05857 | 100.57267 | 63.96494 | -2413.27788 | -370.59393  | 2717.88941  | 1 |
| 16566 | H | 61.74077 | 100.50625 | 62.11580 | -1725.11490 | 714.90270   | -758.85754  | 1 |
| 16567 | C | 63.78296 | 99.85220  | 62.79269 | 542.15162   | -1103.40968 | -169.27587  | 1 |
| 16568 | C | 64.67636 | 100.01448 | 61.73208 | 718.57080   | 58.98288    | -36.44285   | 1 |
| 16569 | H | 64.44452 | 100.63827 | 60.83596 | -1593.48103 | 3310.78951  | 3773.16641  | 1 |
| 16570 | C | 65.95564 | 99.41805  | 61.87483 | -157.51055  | 845.09521   | -1287.59318 | 1 |
| 16571 | H | 66.72908 | 99.62818  | 61.16437 | 235.42468   | -4727.83420 | -1282.07996 | 1 |
| 16572 | C | 66.36714 | 98.54365  | 62.88632 | 280.89798   | -906.85531  | 842.29216   | 1 |
| 16573 | O | 67.71583 | 98.03439  | 62.87338 | 465.39596   | -250.13208  | -418.84928  | 1 |
| 16574 | H | 67.66597 | 97.29438  | 63.54336 | -244.88683  | 2051.76169  | 3339.01561  | 1 |
| 16575 | C | 64.09697 | 98.86988  | 63.79225 | -313.60670  | 306.87955   | -34.24641   | 1 |
| 16576 | H | 63.35909 | 98.44136  | 64.45869 | -85.39310   | -1306.68509 | -1471.42898 | 1 |
| 16577 | C | 65.31760 | 98.21473  | 63.80310 | 225.70677   | -453.81425  | 221.68643   | 1 |
| 16578 | H | 65.41669 | 97.53107  | 64.63707 | -886.13427  | 2072.31585  | 446.54929   | 1 |
| 16579 | C | 62.49387 | 102.77103 | 61.33118 | 286.27193   | -508.45038  | 367.06033   | 1 |
| 16580 | O | 63.25861 | 102.51197 | 60.41965 | 790.33428   | 36.46047    | 89.08264    | 1 |
| 16581 | N | 61.35311 | 103.50169 | 61.33802 | -684.13234  | 43.39255    | 265.45642   | 1 |
| 16582 | H | 60.76952 | 103.51685 | 62.20460 | 384.91371   | 722.49558   | -213.78469  | 1 |
| 16583 | C | 60.54294 | 103.30436 | 60.17669 | 36.39742    | 512.34345   | -72.56943   | 1 |
| 16584 | H | 61.27688 | 102.90410 | 59.43069 | 468.25769   | -1697.52301 | -1386.99801 | 1 |
| 16585 | C | 59.39141 | 102.24207 | 60.47984 | 1155.57635  | -123.83284  | 288.72658   | 1 |
| 16586 | H | 58.50612 | 102.70159 | 61.02655 | 178.60887   | 611.89961   | 1768.62433  | 1 |
| 16587 | O | 59.85098 | 101.05499 | 61.28502 | 631.39311   | 20.45591    | -220.21417  | 1 |
| 16588 | H | 59.37361 | 101.27631 | 62.13974 | -854.14314  | -261.02497  | -1561.46333 | 1 |
| 16589 | C | 58.94593 | 101.86827 | 59.03562 | 707.11500   | -178.00889  | -528.35737  | 1 |
| 16590 | H | 57.99645 | 101.19291 | 59.03344 | 1863.39157  | 1670.66300  | -362.74498  | 1 |
| 16591 | H | 59.76253 | 101.32665 | 58.44366 | 149.18707   | 396.87851   | 1282.33534  | 1 |
| 16592 | H | 58.65963 | 102.81006 | 58.61692 | 1725.84070  | -2032.47194 | 383.70354   | 1 |
| 16593 | C | 59.96064 | 104.75646 | 59.64314 | -451.30409  | 1218.30941  | 360.51511   | 1 |
| 16594 | O | 58.92584 | 104.81460 | 59.00140 | -442.35593  | 194.08466   | -122.33218  | 1 |
| 16595 | N | 60.86005 | 105.72467 | 59.92832 | 273.00644   | -548.23255  | -281.71778  | 1 |
| 16596 | H | 61.66555 | 105.15740 | 60.20269 | -398.84105  | -727.96690  | -2216.40724 | 1 |
| 16597 | C | 60.41956 | 106.87157 | 60.66418 | 194.75432   | 76.92231    | -453.87447  | 1 |
| 16598 | H | 59.54112 | 107.33357 | 60.05047 | 2837.26419  | -74.28541   | -244.62744  | 1 |
| 16599 | C | 59.93409 | 106.48274 | 62.13472 | -648.07942  | -613.29988  | 769.10644   | 1 |
| 16600 | H | 60.41221 | 105.54244 | 62.46289 | -158.49719  | 3684.67927  | 2513.61096  | 1 |
| 16601 | H | 60.20806 | 107.18280 | 62.91860 | 1013.67418  | -235.97280  | 1846.63097  | 1 |
| 16602 | C | 58.40886 | 106.28322 | 62.12032 | 45.95243    | -148.81200  | -606.09974  | 1 |
| 16603 | H | 58.05810 | 105.62497 | 61.29559 | 3711.75202  | 1243.48714  | 2260.31164  | 1 |
| 16604 | H | 58.06927 | 105.88637 | 63.12223 | -2096.95150 | 1630.74685  | -824.76154  | 1 |
| 16605 | C | 57.76639 | 107.74957 | 61.80835 | -384.75829  | -511.02353  | -387.98206  | 1 |
| 16606 | O | 56.54869 | 107.89125 | 61.83051 | 723.52213   | 906.69058   | -185.16217  | 1 |
| 16607 | O | 58.62880 | 108.67052 | 61.59338 | -412.99260  | 107.86462   | 67.85582    | 1 |



|       |   |          |           |          |             |             |             |   |
|-------|---|----------|-----------|----------|-------------|-------------|-------------|---|
| 16608 | C | 61.61269 | 107.92442 | 60.71468 | -1026.96221 | 116.28534   | -427.45210  | 1 |
| 16609 | O | 62.73893 | 107.63339 | 60.33844 | -28.85372   | -349.36452  | 365.21319   | 1 |
| 16610 | N | 61.25507 | 109.14033 | 61.23800 | 673.11493   | 411.70839   | 2.80171     | 1 |
| 16611 | H | 60.22776 | 109.30945 | 61.50240 | -50.87113   | 2465.27792  | 234.16696   | 1 |
| 16612 | C | 62.23055 | 109.84063 | 62.08174 | -183.23620  | 275.30334   | 116.08983   | 1 |
| 16613 | H | 63.07146 | 109.77687 | 61.35284 | 905.79173   | -792.75168  | -1864.33553 | 1 |
| 16614 | C | 61.55547 | 111.25345 | 62.32576 | 559.93901   | 9.06031     | 327.79254   | 1 |
| 16615 | H | 60.65449 | 111.12419 | 62.97028 | 1063.43765  | 2250.88313  | -1951.43458 | 1 |
| 16616 | H | 61.13258 | 111.70541 | 61.40014 | -256.16538  | 2217.70956  | -1015.11596 | 1 |
| 16617 | C | 62.58669 | 112.23221 | 62.97052 | -427.53567  | -690.01755  | -171.03273  | 1 |
| 16618 | H | 62.11309 | 113.23562 | 63.05806 | -465.40679  | -745.12553  | 1407.06903  | 1 |
| 16619 | H | 62.80044 | 111.88616 | 63.98009 | -2723.61116 | 974.33704   | -605.64258  | 1 |
| 16620 | C | 63.89707 | 112.30129 | 62.01719 | -685.35978  | -711.24551  | 109.12013   | 1 |
| 16621 | O | 64.62704 | 111.27808 | 62.20890 | -422.84843  | 211.03667   | -241.11091  | 1 |
| 16622 | O | 64.07759 | 113.26270 | 61.28506 | -372.32429  | 276.58662   | 657.79859   | 1 |
| 16623 | C | 62.52630 | 108.91204 | 63.38983 | -157.86663  | -65.26538   | 480.55360   | 1 |
| 16624 | O | 61.69612 | 108.14788 | 63.82764 | 97.12113    | -191.66313  | -480.77224  | 1 |
| 16625 | N | 63.82854 | 109.21074 | 63.67897 | -636.04777  | -72.51403   | -31.36939   | 1 |
| 16626 | H | 64.27027 | 110.00296 | 63.17830 | 1672.27955  | 1547.44331  | -778.48867  | 1 |
| 16627 | C | 64.51637 | 108.26150 | 64.39799 | 237.27335   | 625.88001   | -672.22773  | 1 |
| 16628 | H | 63.68872 | 107.84061 | 65.02468 | 184.72901   | -2757.60385 | 2117.88309  | 1 |
| 16629 | C | 65.18513 | 107.27856 | 63.33759 | -325.28459  | 1.91397     | -54.35058   | 1 |
| 16630 | H | 64.43112 | 106.81866 | 62.60371 | 19.78365    | -1814.64208 | -307.83021  | 1 |
| 16631 | H | 65.96860 | 107.77617 | 62.67376 | -399.10971  | 847.14873   | 290.50253   | 1 |
| 16632 | C | 66.00254 | 106.24358 | 64.17485 | -255.25949  | 898.91680   | -562.14318  | 1 |
| 16633 | H | 65.31932 | 105.73247 | 64.92674 | 1596.25355  | 1676.85188  | -954.13740  | 1 |
| 16634 | H | 66.80892 | 106.75835 | 64.82083 | -1626.12065 | 184.97367   | -100.16414  | 1 |
| 16635 | S | 66.64526 | 105.05340 | 62.87642 | 436.08190   | 421.41602   | 322.36505   | 1 |
| 16636 | C | 65.35153 | 105.14462 | 61.47679 | 362.39171   | -731.32999  | -233.84866  | 1 |
| 16637 | H | 64.41182 | 104.61104 | 61.77266 | -299.95608  | -315.13473  | 1344.65970  | 1 |
| 16638 | H | 65.71786 | 104.68335 | 60.52954 | 872.31149   | 711.14279   | -1761.27246 | 1 |
| 16639 | H | 65.00507 | 106.14420 | 61.11482 | -1451.26591 | 1596.58656  | -3318.00824 | 1 |
| 16640 | C | 65.60777 | 109.16729 | 65.23335 | 483.45020   | -719.78453  | 562.89594   | 1 |
| 16641 | O | 65.72385 | 109.07040 | 66.44881 | -890.29891  | -425.43599  | 380.42389   | 1 |
| 16642 | N | 66.36727 | 109.94816 | 64.47830 | -864.53237  | 453.45326   | -629.95754  | 1 |
| 16643 | H | 66.20283 | 109.88471 | 63.52077 | -605.29354  | -815.82930  | -416.42577  | 1 |
| 16644 | C | 67.44246 | 110.70171 | 65.09075 | -73.33987   | 703.95567   | -69.51546   | 1 |
| 16645 | H | 67.66473 | 111.61415 | 64.49436 | -787.09080  | 937.36539   | 755.55015   | 1 |
| 16646 | H | 67.09887 | 110.91717 | 66.21304 | -345.38764  | 508.96640   | -1614.67615 | 1 |
| 16647 | C | 68.87232 | 109.89183 | 65.10464 | 240.37238   | 261.78133   | 143.95915   | 1 |
| 16648 | O | 69.62386 | 109.98020 | 66.05622 | 147.35589   | 568.92508   | 0.74467     | 1 |
| 16649 | N | 69.01960 | 109.14329 | 63.99213 | 16.40628    | -604.89577  | 302.84493   | 1 |
| 16650 | H | 68.12652 | 109.08432 | 63.47050 | -2009.84128 | 1343.12054  | 723.55955   | 1 |
| 16651 | C | 69.69406 | 107.84966 | 64.06517 | -182.10891  | 565.81060   | 479.81406   | 1 |
| 16652 | H | 69.11638 | 107.27857 | 64.85712 | -1603.60586 | -1620.44133 | 7.28437     | 1 |
| 16653 | C | 69.60331 | 107.31293 | 62.58632 | 492.85999   | 873.53277   | -44.05171   | 1 |
| 16654 | H | 70.50458 | 107.94002 | 62.25013 | 1441.44207  | -703.60465  | 384.61702   | 1 |
| 16655 | H | 69.99625 | 106.28914 | 62.52515 | -1857.30759 | -361.86608  | 545.94786   | 1 |
| 16656 | O | 68.38369 | 107.53874 | 61.84634 | -688.56942  | 912.87822   | 155.06858   | 1 |
| 16657 | H | 67.93527 | 106.54976 | 61.95381 | -2592.71034 | -1804.59312 | 863.92345   | 1 |
| 16658 | C | 71.30075 | 107.95241 | 64.28042 | 218.06589   | 817.01461   | 391.04881   | 1 |
| 16659 | O | 72.14806 | 108.63812 | 63.73212 | 76.11425    | 23.91142    | -91.10208   | 1 |
| 16660 | N | 71.43085 | 106.99462 | 65.25626 | 238.05026   | -581.91770  | -261.12713  | 1 |
| 16661 | H | 70.54139 | 106.51776 | 65.35953 | -850.52128  | 225.69146   | 796.17120   | 1 |
| 16662 | C | 72.67147 | 106.22509 | 65.23595 | -403.00425  | 533.54432   | 17.35662    | 1 |
| 16663 | H | 72.85813 | 105.83235 | 64.20164 | 1748.94909  | 3801.35721  | 3522.06644  | 1 |
| 16664 | H | 73.32810 | 107.16513 | 65.47344 | 509.03081   | 1215.01461  | -1943.44860 | 1 |
| 16665 | C | 72.60771 | 105.03346 | 66.30335 | -275.47947  | -585.93710  | -325.58662  | 1 |
| 16666 | O | 71.85091 | 105.01854 | 67.25931 | -341.53526  | -15.65986   | -163.98051  | 1 |
| 16667 | N | 73.59024 | 104.10943 | 66.10654 | 755.11415   | -293.34566  | -171.85222  | 1 |
| 16668 | H | 73.90790 | 104.26529 | 65.13655 | 2060.94843  | -1907.55666 | 459.53756   | 1 |
| 16669 | C | 73.33812 | 102.76189 | 66.54801 | -458.78004  | 226.42119   | 508.25246   | 1 |

|       |   |          |           |          |             |             |             |   |
|-------|---|----------|-----------|----------|-------------|-------------|-------------|---|
| 16670 | H | 72.46930 | 102.57561 | 65.84694 | -1462.09813 | -1781.42662 | 3641.02449  | 1 |
| 16671 | C | 74.54185 | 101.81874 | 66.25274 | 304.86431   | -308.95630  | -204.67902  | 1 |
| 16672 | H | 74.47616 | 100.98878 | 66.98186 | -962.98759  | -2798.06623 | -2460.30570 | 1 |
| 16673 | H | 75.49229 | 102.37899 | 66.47806 | -1924.76730 | 1920.72906  | 987.02771   | 1 |
| 16674 | C | 74.34305 | 101.47728 | 64.70204 | 673.59892   | 469.97120   | 826.24340   | 1 |
| 16675 | O | 75.33659 | 100.95662 | 64.16978 | 406.83762   | -554.70371  | -333.80926  | 1 |
| 16676 | O | 73.24957 | 101.71473 | 64.15370 | 893.21325   | -344.68313  | 1042.21363  | 1 |
| 16677 | C | 73.31531 | 102.51887 | 68.19652 | -326.90180  | 21.64330    | -467.02801  | 1 |
| 16678 | O | 72.98561 | 101.44963 | 68.65510 | 873.32278   | -147.59107  | -302.06029  | 1 |
| 16679 | N | 73.54453 | 103.68340 | 68.80657 | 738.85130   | -34.94649   | 450.93424   | 1 |
| 16680 | H | 73.82096 | 104.47504 | 68.20601 | -458.04961  | 3199.76997  | -782.33598  | 1 |
| 16681 | C | 72.85828 | 103.93224 | 70.02254 | 635.70090   | 666.00437   | -374.22409  | 1 |
| 16682 | H | 72.77011 | 102.91553 | 70.50567 | 2056.44727  | -2730.11269 | 1715.44712  | 1 |
| 16683 | C | 73.46699 | 105.14225 | 70.89554 | 348.84064   | -864.30292  | -591.85766  | 1 |
| 16684 | H | 72.55793 | 105.81640 | 71.16286 | 1441.14775  | -70.12563   | -29.70861   | 1 |
| 16685 | H | 74.07702 | 105.74410 | 70.26842 | -277.14760  | -1031.24247 | 249.34743   | 1 |
| 16686 | C | 74.29466 | 104.67961 | 72.07851 | 1031.30416  | 520.63558   | -1392.81774 | 1 |
| 16687 | C | 73.63059 | 103.88534 | 73.05916 | 71.86088    | 314.97254   | 404.54180   | 1 |
| 16688 | H | 72.54749 | 103.71685 | 72.97334 | -2196.01784 | 1974.37984  | 2229.36948  | 1 |
| 16689 | C | 74.45950 | 103.31226 | 74.01672 | -1003.20569 | 304.91103   | 161.52920   | 1 |
| 16690 | H | 74.10322 | 102.73835 | 74.87105 | -1792.92099 | 430.48565   | -446.10504  | 1 |
| 16691 | C | 75.88105 | 103.39741 | 74.06823 | 223.11739   | -101.10478  | -83.42847   | 1 |
| 16692 | O | 76.62319 | 102.76500 | 75.06024 | -770.09972  | 207.34482   | 202.93646   | 1 |
| 16693 | H | 77.54736 | 102.99957 | 74.72307 | -2903.02119 | -838.97615  | 3956.03794  | 1 |
| 16694 | C | 75.69469 | 104.92985 | 72.24564 | 32.47228    | 88.88401    | -21.23463   | 1 |
| 16695 | H | 76.15896 | 105.72674 | 71.62544 | 414.75661   | -3352.04754 | 1588.76376  | 1 |
| 16696 | C | 76.51720 | 104.31961 | 73.20341 | 358.35540   | -468.56085  | -1028.15928 | 1 |
| 16697 | H | 77.58851 | 104.58357 | 73.36082 | -516.16350  | -460.17511  | 25.51905    | 1 |
| 16698 | C | 71.32889 | 104.38620 | 69.79759 | -729.22244  | -387.97292  | 71.95862    | 1 |
| 16699 | O | 70.82352 | 105.45812 | 70.11099 | -1093.81401 | -40.12395   | -101.01599  | 1 |
| 16700 | N | 70.62768 | 103.31817 | 69.34346 | 888.55092   | -483.51376  | 185.22862   | 1 |
| 16701 | H | 71.19526 | 102.56289 | 68.97631 | -195.05198  | -2476.20648 | 2516.97523  | 1 |
| 16702 | C | 69.25921 | 103.36844 | 69.01544 | -544.55136  | 209.81993   | 406.13405   | 1 |
| 16703 | H | 68.86897 | 104.22852 | 69.56921 | 1160.09036  | -2261.65819 | -700.01123  | 1 |
| 16704 | C | 69.25631 | 103.75429 | 67.51652 | 688.50672   | -522.65037  | 109.38825   | 1 |
| 16705 | H | 70.22316 | 104.33900 | 67.27313 | -2744.77715 | 1238.05916  | -1405.35445 | 1 |
| 16706 | H | 69.24705 | 102.85021 | 66.93004 | -816.44216  | 350.94358   | -2521.24543 | 1 |
| 16707 | C | 67.93713 | 104.54661 | 67.01644 | -325.26185  | 153.90186   | -582.74894  | 1 |
| 16708 | O | 67.92818 | 105.28054 | 66.03176 | 180.78169   | 373.50058   | 510.67464   | 1 |
| 16709 | O | 66.89848 | 104.32693 | 67.71336 | 515.80258   | 153.66876   | -596.61908  | 1 |
| 16710 | C | 68.69139 | 101.76596 | 69.25883 | -898.61557  | 91.15021    | -104.57001  | 1 |
| 16711 | O | 69.19643 | 100.70379 | 68.95766 | 675.30422   | 1201.38906  | -331.84701  | 1 |
| 16712 | N | 67.51796 | 102.02744 | 69.82771 | -847.80803  | -117.95212  | -48.63510   | 1 |
| 16713 | H | 67.46241 | 103.01970 | 70.12945 | -1557.80766 | -2636.37236 | 91.15102    | 1 |
| 16714 | C | 66.73540 | 101.05320 | 70.51826 | -346.24551  | 681.91437   | -23.63304   | 1 |
| 16715 | H | 67.45651 | 100.34225 | 71.04760 | -135.04215  | 2464.69057  | 131.80053   | 1 |
| 16716 | C | 65.74176 | 101.81832 | 71.48005 | 167.73009   | 205.52264   | -801.17616  | 1 |
| 16717 | H | 65.03469 | 100.94423 | 71.75973 | 377.98022   | 1603.89479  | 1272.63218  | 1 |
| 16718 | H | 65.08644 | 102.57083 | 70.85700 | 2678.14100  | 386.94081   | 1029.46649  | 1 |
| 16719 | O | 66.25912 | 102.46254 | 72.60259 | 152.04610   | -315.34439  | 592.60462   | 1 |
| 16720 | H | 66.76660 | 101.67299 | 73.04167 | 1135.92428  | -1976.27848 | 4.49808     | 1 |
| 16721 | C | 65.79645 | 100.34514 | 69.37586 | 163.38817   | -373.86424  | 430.21561   | 1 |
| 16722 | O | 64.59897 | 100.36693 | 69.45881 | -351.33404  | -876.67864  | 403.33032   | 1 |
| 16723 | N | 66.64338 | 99.86282  | 68.43561 | -753.79079  | -266.15095  | 24.85628    | 1 |
| 16724 | H | 67.62615 | 99.93380  | 68.61994 | -703.26672  | -1508.78987 | 1553.12352  | 1 |
| 16725 | C | 66.03893 | 98.84882  | 67.61195 | -229.25618  | 932.50221   | -347.64314  | 1 |
| 16726 | H | 65.16854 | 98.41359  | 68.23546 | -1658.51306 | 1417.28515  | 2261.10130  | 1 |
| 16727 | C | 65.56327 | 99.82478  | 66.39428 | -866.09485  | -543.60060  | -538.65386  | 1 |
| 16728 | H | 64.94747 | 99.24782  | 65.71149 | 1135.00287  | 569.06473   | -704.33726  | 1 |
| 16729 | H | 64.93109 | 100.65842 | 66.77367 | -82.06692   | 1120.75510  | -2111.42621 | 1 |
| 16730 | C | 66.89733 | 100.27844 | 65.73677 | 599.97698   | -434.34652  | 312.87396   | 1 |
| 16731 | H | 67.56229 | 100.76218 | 66.50054 | 208.56501   | -4494.40144 | -2155.68838 | 1 |

|       |   |          |           |          |             |             |             |   |
|-------|---|----------|-----------|----------|-------------|-------------|-------------|---|
| 16732 | H | 67.45856 | 99.37640  | 65.46747 | 379.80719   | 3187.13824  | -3171.21955 | 1 |
| 16733 | S | 66.29469 | 101.23518 | 64.33474 | 260.47920   | 763.82462   | 140.11302   | 1 |
| 16734 | C | 65.56029 | 102.76702 | 64.97845 | -284.62446  | -853.08178  | 14.58074    | 1 |
| 16735 | H | 65.00880 | 102.54702 | 65.87723 | -2.00341    | 176.35471   | 2372.24257  | 1 |
| 16736 | H | 66.20986 | 103.59189 | 65.24513 | -97.56901   | -2293.83517 | -1314.23393 | 1 |
| 16737 | H | 64.60290 | 103.05117 | 64.35758 | 315.42937   | -387.67694  | 1125.42171  | 1 |
| 16738 | C | 67.14002 | 97.83533  | 67.07508 | 19.37317    | -409.73532  | -299.16302  | 1 |
| 16739 | O | 68.35943 | 98.03768  | 67.11282 | 683.31704   | -391.54469  | 741.48423   | 1 |
| 16740 | N | 66.51202 | 96.79727  | 66.46310 | 280.69557   | -306.37998  | 6.89100     | 1 |
| 16741 | H | 65.53450 | 96.73442  | 66.71365 | 1571.81268  | -351.05677  | -1464.94975 | 1 |
| 16742 | C | 67.37249 | 95.61699  | 66.59696 | 643.15406   | 202.54511   | 1220.11452  | 1 |
| 16743 | H | 67.99797 | 95.84948  | 67.45285 | 1248.01172  | 340.86054   | -2927.74435 | 1 |
| 16744 | C | 66.56531 | 94.28243  | 66.77365 | 777.06781   | -23.62190   | 42.04573    | 1 |
| 16745 | H | 65.59489 | 94.35969  | 66.25190 | 1981.22227  | -1923.43748 | 1859.31317  | 1 |
| 16746 | H | 67.18975 | 93.47296  | 66.21032 | 696.58643   | 2284.36150  | 1155.12835  | 1 |
| 16747 | C | 66.07898 | 93.98976  | 68.23652 | 799.10070   | -429.61345  | 417.26542   | 1 |
| 16748 | H | 65.02842 | 93.73071  | 68.24747 | -761.86919  | -31.41097   | -3275.63971 | 1 |
| 16749 | H | 66.26195 | 94.93084  | 68.88983 | -322.75689  | 973.70774   | 2535.14284  | 1 |
| 16750 | C | 66.92688 | 92.77829  | 68.74952 | -681.88801  | 255.55644   | -77.86483   | 1 |
| 16751 | H | 68.04424 | 92.83320  | 68.56052 | 881.36423   | -809.12693  | -2057.59076 | 1 |
| 16752 | H | 66.51941 | 91.77655  | 68.46974 | -332.95090  | -1732.01473 | -1938.46496 | 1 |
| 16753 | C | 66.78920 | 92.99287  | 70.32440 | -1129.48412 | -797.76563  | 226.94999   | 1 |
| 16754 | H | 66.80257 | 92.03600  | 70.92848 | -1147.82593 | 5.24557     | -1506.47194 | 1 |
| 16755 | H | 65.83521 | 93.40147  | 70.43246 | 2920.31645  | 848.88754   | 891.74807   | 1 |
| 16756 | N | 67.75994 | 94.00305  | 70.77892 | -117.54733  | 358.38882   | -30.92568   | 1 |
| 16757 | H | 67.88999 | 94.12850  | 71.87707 | -1260.72612 | 340.42257   | 2633.63631  | 1 |
| 16758 | H | 68.93916 | 93.84114  | 70.49376 | -122.24195  | 4650.85899  | -2753.00281 | 1 |
| 16759 | H | 67.56313 | 94.98466  | 70.52752 | -659.86533  | -703.55130  | 148.15418   | 1 |
| 16760 | C | 68.13127 | 95.52504  | 65.15802 | 317.13222   | 135.58876   | -256.07916  | 1 |
| 16761 | O | 67.81125 | 94.68120  | 64.33766 | -853.70197  | 295.34277   | -818.12160  | 1 |
| 16762 | N | 69.07175 | 96.42744  | 65.09945 | 441.26937   | 401.18963   | -239.42523  | 1 |
| 16763 | H | 69.09297 | 97.18430  | 65.74422 | -1658.22273 | 3096.56425  | 3297.29939  | 1 |
| 16764 | C | 70.22985 | 96.25019  | 64.19874 | 262.94851   | 863.95445   | -914.12569  | 1 |
| 16765 | H | 70.38611 | 95.18111  | 64.33947 | -737.96263  | -967.61249  | -3087.52032 | 1 |
| 16766 | C | 70.00049 | 96.55368  | 62.67078 | -39.20471   | 657.00871   | -69.39166   | 1 |
| 16767 | H | 69.11821 | 95.93427  | 62.26851 | 2373.24614  | -1056.03702 | -1275.33307 | 1 |
| 16768 | H | 69.67879 | 97.60915  | 62.44553 | 2389.69104  | -2823.70844 | 1240.49616  | 1 |
| 16769 | C | 71.24581 | 96.04906  | 61.87748 | -270.66804  | 618.39761   | -234.15396  | 1 |
| 16770 | H | 71.59033 | 94.97936  | 62.21531 | -294.51202  | -2098.79398 | -2584.38108 | 1 |
| 16771 | H | 72.07123 | 96.73726  | 62.11329 | 3413.06976  | -342.66404  | 1503.88456  | 1 |
| 16772 | C | 70.88945 | 96.10666  | 60.28490 | -709.46429  | -115.20191  | -120.52643  | 1 |
| 16773 | O | 70.75104 | 95.11145  | 59.57535 | 118.51721   | 457.99255   | -486.18061  | 1 |
| 16774 | O | 70.54867 | 97.28084  | 59.98441 | -329.98966  | 657.76009   | -55.47746   | 1 |
| 16775 | C | 71.42925 | 97.22272  | 64.67402 | -1086.59584 | 135.81440   | 724.90375   | 1 |
| 16776 | O | 72.57630 | 96.95302  | 64.27750 | -148.33013  | 598.57568   | 215.58301   | 1 |
| 16777 | N | 71.02892 | 98.32238  | 65.35449 | 662.37351   | -261.99506  | 161.65860   | 1 |
| 16778 | C | 70.21780 | 99.33414  | 64.77800 | -277.01354  | 882.61318   | 601.26118   | 1 |
| 16779 | H | 69.16859 | 99.02650  | 65.00382 | -913.83871  | -2028.01705 | -2209.17383 | 1 |
| 16780 | H | 70.41992 | 99.46758  | 63.67101 | 793.19977   | -3094.28410 | 576.42107   | 1 |
| 16781 | C | 72.09020 | 98.75552  | 66.27449 | -303.48005  | -518.72467  | 317.28721   | 1 |
| 16782 | H | 73.02823 | 98.90988  | 65.59078 | -3040.51522 | 56.14189    | -453.67783  | 1 |
| 16783 | C | 71.35445 | 100.05533 | 66.77784 | -733.47038  | 294.73686   | -472.19175  | 1 |
| 16784 | H | 72.08049 | 100.67321 | 67.45333 | -68.67302   | 850.71078   | 213.17596   | 1 |
| 16785 | H | 70.50597 | 99.71744  | 67.53231 | 500.17572   | 186.28908   | 1174.19537  | 1 |
| 16786 | C | 70.65232 | 100.67673 | 65.55591 | 527.57469   | -24.05043   | -96.69770   | 1 |
| 16787 | H | 71.37937 | 101.32180 | 65.01004 | 853.74106   | -2854.39821 | -3000.44118 | 1 |
| 16788 | H | 69.82997 | 101.38760 | 65.79590 | 1311.33042  | -2464.18588 | 3148.18640  | 1 |
| 16789 | C | 72.38277 | 97.70768  | 67.43274 | -102.63284  | -800.84377  | 636.25749   | 1 |
| 16790 | O | 71.84687 | 97.84123  | 68.52788 | -297.91075  | -337.91877  | 599.04609   | 1 |
| 16791 | N | 73.29755 | 96.68790  | 67.07989 | 346.50561   | -13.41379   | -661.29797  | 1 |
| 16792 | H | 73.37967 | 96.64168  | 66.00972 | 271.21587   | -3183.03270 | -592.07820  | 1 |
| 16793 | C | 73.00173 | 95.47170  | 67.79635 | 1034.96316  | -349.72178  | 756.38592   | 1 |

|       |   |          |          |          |             |             |             |   |
|-------|---|----------|----------|----------|-------------|-------------|-------------|---|
| 16794 | H | 72.49863 | 95.76519 | 68.78233 | -1597.94001 | -1014.03773 | -2612.90953 | 1 |
| 16795 | C | 72.09999 | 94.41854 | 66.98326 | 1108.12509  | 375.96174   | 215.08300   | 1 |
| 16796 | H | 72.02869 | 94.87639 | 65.93242 | 3144.30016  | 1276.82178  | 2644.95802  | 1 |
| 16797 | H | 72.67190 | 93.47082 | 66.73595 | -964.84469  | 974.96671   | 518.66610   | 1 |
| 16798 | S | 70.47181 | 94.30773 | 67.77522 | 229.25065   | -340.66088  | 196.56034   | 1 |
| 16799 | C | 74.39364 | 94.66266 | 67.98736 | 580.46867   | -2.19579    | -277.37681  | 1 |
| 16800 | O | 74.38256 | 93.52629 | 68.39065 | -94.63681   | 745.59311   | 1112.32844  | 1 |
| 16801 | N | 75.51532 | 95.36869 | 67.64777 | 572.24330   | 44.22511    | 1133.48122  | 1 |
| 16802 | H | 75.54278 | 96.33463 | 67.25484 | 1614.90169  | -1356.43462 | 3923.57691  | 1 |
| 16803 | C | 76.73277 | 94.65529 | 68.10306 | -735.01300  | 202.73425   | 654.41566   | 1 |
| 16804 | H | 76.67087 | 93.62098 | 67.76543 | -2374.16193 | 2244.75140  | -436.23556  | 1 |
| 16805 | C | 77.93780 | 95.61419 | 67.65966 | -615.68889  | -165.98520  | -124.67952  | 1 |
| 16806 | H | 78.80331 | 95.19237 | 68.27708 | 2701.83340  | -335.59129  | -316.81301  | 1 |
| 16807 | H | 77.60378 | 96.60686 | 67.96078 | 924.14485   | 206.91243   | 3576.53807  | 1 |
| 16808 | C | 78.24107 | 95.64368 | 66.15797 | 457.72839   | -857.23951  | 1110.11248  | 1 |
| 16809 | C | 79.33973 | 94.89087 | 65.69840 | 475.55702   | -297.64372  | -938.38046  | 1 |
| 16810 | H | 80.00350 | 94.33356 | 66.44136 | 3185.81589  | 1520.05364  | -2974.14674 | 1 |
| 16811 | C | 79.65129 | 94.77727 | 64.35917 | -613.43882  | -397.71098  | 50.83852    | 1 |
| 16812 | H | 80.51514 | 94.19267 | 64.13211 | -105.26438  | 381.96035   | -166.21830  | 1 |
| 16813 | C | 79.04523 | 95.57129 | 63.32869 | 1012.28234  | 619.49351   | 265.84150   | 1 |
| 16814 | H | 79.39776 | 95.54748 | 62.29801 | 2439.98075  | -304.17379  | 1378.11498  | 1 |
| 16815 | C | 77.50249 | 96.25587 | 65.12686 | 385.50578   | 89.21093    | 28.34215    | 1 |
| 16816 | H | 76.50787 | 96.68745 | 65.31018 | 223.80593   | -286.42392  | -228.19483  | 1 |
| 16817 | C | 77.96926 | 96.31381 | 63.80737 | -574.45900  | 408.82585   | -730.22137  | 1 |
| 16818 | H | 77.44610 | 96.81531 | 63.03138 | 874.93887   | 1000.05752  | -2785.06360 | 1 |
| 16819 | C | 76.69396 | 94.61208 | 69.71908 | -112.60482  | 203.36115   | -873.24702  | 1 |
| 16820 | O | 76.64160 | 95.68359 | 70.33417 | 668.63633   | -435.75042  | 181.01347   | 1 |
| 16821 | N | 76.72384 | 93.39165 | 70.24285 | -264.74004  | -748.47989  | -155.18083  | 1 |
| 16822 | H | 76.67830 | 92.62767 | 69.58980 | 2466.92030  | 478.91409   | 162.67478   | 1 |
| 16823 | C | 76.15715 | 93.21567 | 71.58934 | -523.26034  | -414.28652  | -211.70066  | 1 |
| 16824 | H | 75.22065 | 93.81969 | 71.42773 | 631.45053   | 3871.90905  | -1998.62470 | 1 |
| 16825 | C | 75.84835 | 91.63583 | 71.41862 | 629.63086   | -153.03014  | 35.82514    | 1 |
| 16826 | H | 76.39036 | 90.89312 | 72.03561 | 2705.13761  | -968.85380  | 118.88824   | 1 |
| 16827 | H | 75.96662 | 91.26455 | 70.37459 | -476.58995  | -505.31292  | -433.55912  | 1 |
| 16828 | C | 74.46449 | 91.20580 | 71.97051 | -242.08674  | -76.43187   | 169.11688   | 1 |
| 16829 | H | 73.57920 | 91.74064 | 71.53172 | 2835.52438  | 1020.61886  | -228.87344  | 1 |
| 16830 | H | 74.32316 | 90.06989 | 71.71414 | -4.66392    | 1939.61174  | -216.69488  | 1 |
| 16831 | C | 74.46650 | 91.35134 | 73.58232 | 508.25822   | -17.60247   | 195.81692   | 1 |
| 16832 | H | 75.11841 | 92.17855 | 73.93163 | -2542.86554 | 454.30299   | 514.54105   | 1 |
| 16833 | H | 74.66671 | 90.27145 | 74.00135 | -154.36676  | -931.08177  | 1679.39836  | 1 |
| 16834 | N | 73.16639 | 91.69956 | 73.87231 | 129.23040   | -312.69450  | -588.19079  | 1 |
| 16835 | H | 73.14279 | 92.68940 | 74.22037 | -426.30683  | -2870.91805 | 2260.01716  | 1 |
| 16836 | C | 72.11006 | 91.00444 | 73.67444 | 195.44825   | 30.64325    | -594.03861  | 1 |
| 16837 | N | 72.12061 | 89.66294 | 73.33680 | -655.10545  | 40.19026    | -78.18207   | 1 |
| 16838 | H | 72.91676 | 89.09985 | 73.21252 | -2208.34155 | -1992.64353 | -588.12984  | 1 |
| 16839 | H | 71.22470 | 89.11898 | 73.31495 | -1605.53722 | -570.90944  | 1652.55954  | 1 |
| 16840 | N | 70.98800 | 91.79674 | 73.89560 | 367.92025   | -455.15043  | -1033.24919 | 1 |
| 16841 | H | 71.16604 | 92.74811 | 74.19489 | -533.57602  | 1761.72453  | 2184.84068  | 1 |
| 16842 | H | 69.95260 | 91.50616 | 73.91924 | -1354.15654 | 1581.50798  | -952.26891  | 1 |
| 16843 | C | 77.15778 | 93.66804 | 72.73597 | -312.86870  | 992.36347   | -669.07757  | 1 |
| 16844 | O | 76.87689 | 93.24924 | 73.89384 | 119.30897   | 74.22788    | 331.11539   | 1 |
| 16845 | N | 78.25172 | 94.33014 | 72.43631 | 53.79319    | 306.48171   | 264.82220   | 1 |
| 16846 | H | 78.29554 | 94.55120 | 71.45547 | -22.72617   | 1829.19197  | 889.88597   | 1 |
| 16847 | C | 78.73853 | 95.33374 | 73.43505 | -581.91295  | 693.29770   | -1114.79771 | 1 |
| 16848 | H | 79.45168 | 96.06514 | 72.87588 | 1191.73363  | -380.49558  | -969.04028  | 1 |
| 16849 | C | 77.49190 | 96.22917 | 73.96004 | 677.56417   | 288.85512   | 46.64060    | 1 |
| 16850 | H | 76.61086 | 95.63847 | 74.13376 | -89.55322   | 1101.03684  | 2473.80386  | 1 |
| 16851 | H | 77.65889 | 96.75614 | 74.91937 | -4298.17827 | 342.63115   | 1690.28803  | 1 |
| 16852 | C | 77.35260 | 97.28064 | 72.82598 | 628.34349   | 490.10926   | -64.91694   | 1 |
| 16853 | H | 76.67922 | 98.04741 | 73.12371 | 1047.36336  | 774.39414   | 2505.98537  | 1 |
| 16854 | H | 76.89661 | 96.77696 | 71.89798 | 1965.81370  | 1997.00564  | 2095.86484  | 1 |
| 16855 | C | 78.80842 | 97.87954 | 72.42271 | 186.56202   | 574.41528   | 286.26810   | 1 |

|       |   |          |          |          |             |             |             |   |
|-------|---|----------|----------|----------|-------------|-------------|-------------|---|
| 16856 | O | 79.25348 | 98.56476 | 73.34262 | -64.78327   | -134.15483  | -632.83149  | 1 |
| 16857 | O | 79.33772 | 97.74556 | 71.27429 | 6.62007     | -233.47997  | 64.55851    | 1 |
| 16858 | C | 79.47880 | 94.50657 | 74.56714 | 725.71238   | 947.93486   | -317.78230  | 1 |
| 16859 | O | 79.82965 | 93.37897 | 74.39132 | 204.03351   | -806.20766  | -274.41381  | 1 |
| 16860 | N | 79.80379 | 95.26800 | 75.65846 | 696.02311   | -182.60543  | 72.38528    | 1 |
| 16861 | H | 79.41562 | 96.20403 | 75.94799 | -1948.90667 | -1552.86390 | 1005.23863  | 1 |
| 16862 | C | 80.66838 | 94.57736 | 76.60456 | -570.78439  | -62.84086   | -512.70834  | 1 |
| 16863 | H | 80.39158 | 93.48543 | 76.60774 | -1322.55359 | 3749.75597  | -327.22643  | 1 |
| 16864 | C | 82.18783 | 94.57390 | 76.10206 | -694.52153  | -1039.35155 | -500.46993  | 1 |
| 16865 | H | 82.57012 | 95.57715 | 75.84802 | 474.72325   | -4312.30108 | -73.05685   | 1 |
| 16866 | H | 82.11944 | 93.91199 | 75.21482 | 365.26230   | 1283.07669  | -972.29176  | 1 |
| 16867 | C | 83.05290 | 93.97035 | 77.23277 | -90.47290   | 145.19916   | -752.06623  | 1 |
| 16868 | H | 82.88254 | 94.48507 | 78.20542 | 1184.61068  | 837.16479   | 1122.31580  | 1 |
| 16869 | H | 84.13898 | 94.12907 | 77.02320 | 2016.66958  | -2659.76404 | 107.39558   | 1 |
| 16870 | C | 82.84723 | 92.37489 | 77.22469 | -173.18454  | 301.56483   | -295.83004  | 1 |
| 16871 | O | 83.39321 | 91.68353 | 76.36442 | 141.78114   | 571.28069   | -416.70171  | 1 |
| 16872 | O | 81.89783 | 92.00586 | 77.91505 | -155.45550  | -442.15076  | 542.57905   | 1 |
| 16873 | C | 80.23993 | 95.29288 | 77.98790 | 188.85426   | -41.19961   | -199.21121  | 1 |
| 16874 | O | 79.68539 | 96.40618 | 77.97261 | -359.43197  | -266.26244  | 123.74395   | 1 |
| 16875 | N | 80.72011 | 94.71939 | 79.04641 | 253.76364   | -953.23669  | -519.81307  | 1 |
| 16876 | H | 81.27248 | 93.79901 | 78.94166 | 3435.38620  | -1525.22321 | 3901.72589  | 1 |
| 16877 | C | 80.49934 | 95.34091 | 80.32125 | 240.84720   | 280.56499   | -302.97509  | 1 |
| 16878 | H | 80.26197 | 96.49436 | 80.20493 | 459.63365   | -466.20654  | -2065.89516 | 1 |
| 16879 | C | 79.27620 | 94.46605 | 80.89796 | -634.49280  | 412.76792   | -123.03054  | 1 |
| 16880 | H | 79.47198 | 93.38563 | 80.87189 | 911.95721   | -1767.71123 | -635.48852  | 1 |
| 16881 | H | 78.44737 | 94.69559 | 80.12393 | -1814.26770 | -3825.75115 | 859.45341   | 1 |
| 16882 | C | 78.75871 | 94.89074 | 82.33001 | 860.24517   | -376.73690  | -286.55597  | 1 |
| 16883 | O | 78.64465 | 96.00510 | 82.78201 | -788.98952  | -77.70931   | -292.78749  | 1 |
| 16884 | N | 78.42073 | 93.68416 | 82.86263 | -398.33592  | -402.55200  | 39.11168    | 1 |
| 16885 | H | 78.55608 | 92.71525 | 82.48763 | -591.81176  | -986.84276  | -122.99786  | 1 |
| 16886 | H | 78.08500 | 93.63352 | 83.82563 | -293.21061  | 158.15056   | -1224.78519 | 1 |
| 16887 | C | 81.87452 | 95.14456 | 81.21943 | -797.42278  | -108.30001  | -87.87926   | 1 |
| 16888 | O | 82.66171 | 94.26414 | 81.04165 | 189.71623   | 328.24472   | 467.54530   | 1 |
| 16889 | N | 81.83460 | 96.15208 | 82.17348 | -112.85927  | -1056.88308 | -130.59809  | 1 |
| 16890 | H | 80.94275 | 96.74417 | 82.10163 | 1149.21866  | -1386.31832 | -4384.99016 | 1 |
| 16891 | C | 83.00366 | 96.37397 | 82.95118 | 34.38635    | 248.68124   | -211.28083  | 1 |
| 16892 | H | 83.83572 | 95.84213 | 82.35952 | -3346.08176 | 1261.50086  | -1801.80736 | 1 |
| 16893 | C | 83.13469 | 97.93596 | 83.16668 | 502.61969   | -674.04822  | -138.54659  | 1 |
| 16894 | H | 83.14034 | 98.47323 | 82.17270 | 1165.24698  | 2634.12989  | -218.95436  | 1 |
| 16895 | H | 82.38015 | 98.38629 | 83.82522 | -1069.96827 | 2381.02555  | 3307.41680  | 1 |
| 16896 | H | 84.12863 | 97.94422 | 83.72122 | -1241.14467 | 1138.86560  | -838.45291  | 1 |
| 16897 | C | 82.98580 | 95.36257 | 84.30585 | 1059.19409  | 578.49387   | -447.92562  | 1 |
| 16898 | O | 84.08137 | 94.97246 | 84.63114 | -506.50774  | 94.40387    | 21.98443    | 1 |
| 16899 | N | 81.79941 | 95.09358 | 84.75406 | -376.40977  | 39.65804    | -999.95278  | 1 |
| 16900 | H | 80.96760 | 95.58132 | 84.32650 | 919.08364   | 260.81981   | 2474.74462  | 1 |
| 16901 | C | 81.68715 | 94.79185 | 86.15871 | -10.63745   | 179.39547   | 683.61827   | 1 |
| 16902 | H | 82.77736 | 94.86851 | 86.32208 | -187.83313  | -706.77753  | 327.12621   | 1 |
| 16903 | C | 80.94906 | 95.87780 | 87.00263 | 125.20273   | -253.81698  | 55.78024    | 1 |
| 16904 | H | 81.35897 | 96.03702 | 88.03705 | 528.12333   | -445.24162  | 3245.58846  | 1 |
| 16905 | H | 79.89145 | 95.53450 | 87.21799 | -1242.35041 | 4723.94812  | 1550.77846  | 1 |
| 16906 | C | 80.75043 | 97.14153 | 86.06903 | 642.52764   | -369.96915  | -693.10819  | 1 |
| 16907 | O | 81.57036 | 98.01091 | 85.96251 | -2.16582    | 1.22737     | -76.57100   | 1 |
| 16908 | N | 79.53555 | 97.01197 | 85.48462 | -530.39240  | 541.53532   | 388.17157   | 1 |
| 16909 | H | 78.92631 | 96.17777 | 85.68345 | 1350.11478  | -292.25566  | -3135.26720 | 1 |
| 16910 | H | 79.27179 | 97.62761 | 84.70390 | 3691.52655  | -2520.19329 | -1178.13744 | 1 |
| 16911 | C | 81.11143 | 93.28641 | 86.45699 | -161.82070  | 140.84977   | -619.90457  | 1 |
| 16912 | O | 81.34500 | 92.92963 | 87.59301 | -388.93832  | 374.10864   | 310.17815   | 1 |
| 16913 | N | 80.77540 | 92.54022 | 85.41791 | -695.94677  | -20.07681   | 15.70625    | 1 |
| 16914 | H | 80.72051 | 93.03196 | 84.53569 | 1418.32714  | 3218.47433  | 836.95759   | 1 |
| 16915 | C | 80.31567 | 91.17247 | 85.64705 | 129.35103   | 322.50524   | -297.11911  | 1 |
| 16916 | H | 80.37487 | 90.86937 | 86.71921 | -293.46886  | -1207.40545 | -37.22426   | 1 |
| 16917 | C | 78.83190 | 90.96962 | 85.06141 | 39.07133    | -166.39333  | -246.33033  | 1 |

|       |   |          |          |          |             |             |             |   |
|-------|---|----------|----------|----------|-------------|-------------|-------------|---|
| 16918 | H | 78.49705 | 89.88676 | 85.10546 | 268.67776   | 293.53790   | 1720.88845  | 1 |
| 16919 | H | 78.86098 | 91.33855 | 84.03006 | -1129.91489 | -399.60933  | -1401.67032 | 1 |
| 16920 | C | 77.84192 | 91.85554 | 85.84388 | 1003.65486  | -514.35439  | -403.26797  | 1 |
| 16921 | C | 76.67408 | 91.91836 | 85.01878 | 165.38845   | -9.77294    | 23.69672    | 1 |
| 16922 | H | 76.65509 | 91.31722 | 84.04400 | -249.79440  | 2999.94573  | -1560.58362 | 1 |
| 16923 | C | 75.59691 | 92.55402 | 85.65983 | -797.42135  | 322.98265   | -1654.43742 | 1 |
| 16924 | H | 74.61344 | 92.57110 | 85.17663 | 1219.14366  | 2872.23763  | -3204.35282 | 1 |
| 16925 | C | 75.69441 | 93.33991 | 86.82584 | -508.14367  | -170.72283  | 127.82195   | 1 |
| 16926 | H | 74.82638 | 93.91406 | 87.17869 | 395.07247   | -1087.55211 | 606.22931   | 1 |
| 16927 | C | 77.99990 | 92.47316 | 87.12556 | -40.79024   | -115.32467  | -253.87383  | 1 |
| 16928 | H | 78.87744 | 92.39397 | 87.79223 | 200.56404   | 2309.99138  | 1445.72161  | 1 |
| 16929 | C | 76.96462 | 93.33181 | 87.50445 | 86.60067    | 36.43801    | -458.68773  | 1 |
| 16930 | H | 77.17166 | 94.03829 | 88.29759 | 591.46851   | 881.64280   | 544.58340   | 1 |
| 16931 | C | 81.31367 | 90.32947 | 84.71929 | -1382.36948 | 635.55991   | -508.58940  | 1 |
| 16932 | O | 81.94724 | 89.40075 | 85.23596 | -615.92089  | 72.31679    | -305.42133  | 1 |
| 16933 | N | 81.31582 | 90.79617 | 83.48844 | 795.60640   | -463.57689  | -468.01848  | 1 |
| 16934 | H | 80.69445 | 91.54535 | 83.24203 | -1703.17958 | -2731.33617 | -1078.08713 | 1 |
| 16935 | C | 81.89570 | 90.12390 | 82.36033 | 481.56398   | -164.71486  | -43.99374   | 1 |
| 16936 | H | 81.48277 | 89.09089 | 82.43146 | 2629.92851  | -3051.84728 | 215.99213   | 1 |
| 16937 | C | 81.70325 | 90.83800 | 80.92829 | 117.00335   | -189.53562  | -213.40400  | 1 |
| 16938 | H | 82.12552 | 90.20854 | 80.07476 | 1598.01465  | -1663.93969 | 76.55506    | 1 |
| 16939 | H | 82.37213 | 91.73581 | 80.97342 | 445.97396   | 651.39649   | -2726.05912 | 1 |
| 16940 | C | 80.22847 | 91.33147 | 80.75503 | 29.46073    | -115.82488  | -174.92437  | 1 |
| 16941 | O | 79.40769 | 91.36878 | 81.67751 | -157.60026  | -242.99053  | -584.81451  | 1 |
| 16942 | N | 79.99188 | 91.62187 | 79.47366 | 52.88030    | -166.09579  | -351.31180  | 1 |
| 16943 | H | 80.69525 | 91.35499 | 78.68891 | -806.84592  | 1296.95033  | 2467.06898  | 1 |
| 16944 | H | 79.11750 | 92.01659 | 79.10956 | 2279.12041  | -2082.33854 | 384.74379   | 1 |
| 16945 | C | 83.59660 | 90.05061 | 82.51533 | 509.41642   | -354.51492  | -153.84341  | 1 |
| 16946 | O | 84.23982 | 89.20577 | 81.86154 | -321.15852  | -510.03559  | -147.19596  | 1 |
| 16947 | N | 84.11971 | 91.11480 | 83.06551 | 522.34963   | 1319.53979  | 96.04218    | 1 |
| 16948 | H | 83.40127 | 91.66671 | 83.50342 | 706.76195   | -777.10404  | -1114.28245 | 1 |
| 16949 | C | 85.52749 | 91.22681 | 83.22069 | -154.53740  | -303.34839  | -285.76291  | 1 |
| 16950 | H | 85.96465 | 90.57116 | 82.42204 | -2088.68366 | -1383.41809 | 661.66520   | 1 |
| 16951 | C | 85.99320 | 92.73107 | 83.28296 | -280.12391  | 0.24295     | -531.36639  | 1 |
| 16952 | H | 87.08083 | 92.90596 | 83.17290 | -838.12057  | 2758.55045  | -1881.36974 | 1 |
| 16953 | H | 85.73025 | 93.04649 | 84.32555 | 2365.19144  | 817.62767   | 85.36814    | 1 |
| 16954 | C | 85.29488 | 93.59924 | 82.11730 | -518.18490  | 147.12674   | -389.83816  | 1 |
| 16955 | H | 84.22732 | 93.80828 | 82.31081 | 1910.80461  | 413.74630   | -302.25833  | 1 |
| 16956 | H | 85.36429 | 93.04860 | 81.13917 | 273.54861   | -761.33141  | 51.36207    | 1 |
| 16957 | C | 86.02498 | 94.97951 | 82.07608 | 594.86815   | 595.48664   | -472.00892  | 1 |
| 16958 | H | 87.13302 | 94.88674 | 82.25744 | 2816.61626  | -2285.41274 | -1173.84435 | 1 |
| 16959 | H | 85.84832 | 95.54696 | 83.01022 | 3615.54637  | -996.11535  | -2568.93890 | 1 |
| 16960 | C | 85.57763 | 95.55266 | 80.62846 | 1833.74784  | 129.68729   | -547.05505  | 1 |
| 16961 | H | 84.47595 | 95.71265 | 80.48702 | 1715.19390  | -516.48603  | 482.86096   | 1 |
| 16962 | H | 86.20306 | 96.47321 | 80.52656 | 941.62239   | -988.60080  | -3386.73549 | 1 |
| 16963 | N | 86.04292 | 94.73041 | 79.54110 | -30.79118   | 385.81792   | -193.72275  | 1 |
| 16964 | H | 86.92556 | 94.29391 | 79.64010 | -2283.64800 | -128.32525  | -2529.91277 | 1 |
| 16965 | H | 85.46275 | 93.89238 | 79.45707 | 1079.67963  | -798.82768  | -234.48174  | 1 |
| 16966 | H | 82.54069 | 96.74105 | 79.59778 | -867.32183  | 709.74612   | 1090.09172  | 1 |
| 16967 | C | 85.95286 | 90.82914 | 84.75554 | 539.03864   | -258.55540  | 140.51659   | 1 |
| 16968 | O | 87.09501 | 91.02687 | 85.10325 | 424.36737   | 384.43876   | 760.36527   | 1 |
| 16969 | N | 84.97625 | 90.35100 | 85.55486 | 82.01282    | -304.55593  | -501.23489  | 1 |
| 16970 | H | 84.05087 | 90.36461 | 85.21963 | -253.39154  | 1293.12727  | 90.88336    | 1 |
| 16971 | C | 85.15313 | 90.43464 | 86.95753 | 247.74787   | -66.57409   | -149.94006  | 1 |
| 16972 | H | 86.23124 | 90.79950 | 87.18240 | -280.51524  | -2398.10983 | 271.45374   | 1 |
| 16973 | C | 84.03903 | 91.41132 | 87.47070 | -1192.22377 | 632.25501   | -276.29587  | 1 |
| 16974 | H | 83.02874 | 91.31117 | 87.03496 | -2725.86540 | -548.28886  | 2221.33308  | 1 |
| 16975 | C | 83.88719 | 91.37403 | 89.01071 | -470.41032  | -177.92762  | 636.51081   | 1 |
| 16976 | H | 84.79983 | 91.64440 | 89.57912 | 1602.50438  | -171.56485  | 1768.99515  | 1 |
| 16977 | H | 83.66799 | 90.25275 | 89.18077 | -1984.07197 | 2286.57891  | 987.44897   | 1 |
| 16978 | H | 82.93023 | 91.87037 | 89.27530 | -76.81970   | -1103.49022 | 10.14613    | 1 |
| 16979 | C | 84.36510 | 92.88694 | 86.99128 | -492.15010  | 778.79830   | -211.71715  | 1 |

|       |   |          |          |          |             |             |             |   |
|-------|---|----------|----------|----------|-------------|-------------|-------------|---|
| 16980 | H | 84.28147 | 93.02374 | 85.89125 | 926.22788   | -2175.77855 | -3631.70776 | 1 |
| 16981 | H | 83.60169 | 93.49668 | 87.50617 | 557.87496   | -3066.91038 | 1242.77568  | 1 |
| 16982 | C | 85.80984 | 93.36487 | 87.42153 | -480.80550  | 33.04189    | -68.11889   | 1 |
| 16983 | H | 86.59396 | 92.86801 | 86.83881 | -960.79324  | 354.22997   | -1216.40844 | 1 |
| 16984 | H | 85.90540 | 94.46210 | 87.14999 | -1292.18258 | 980.53191   | 1088.26226  | 1 |
| 16985 | H | 85.96258 | 93.27439 | 88.53894 | 1455.10401  | 552.91977   | 1985.63330  | 1 |
| 16986 | C | 84.83719 | 88.91419 | 87.62546 | -306.04808  | 385.94429   | 219.69450   | 1 |
| 16987 | O | 85.73198 | 88.32499 | 88.18615 | 883.14849   | 561.74173   | 214.03561   | 1 |
| 16988 | N | 83.54256 | 88.67830 | 87.46423 | 8.74703     | 630.59512   | -522.92858  | 1 |
| 16989 | H | 82.92152 | 89.11440 | 86.74946 | -1590.70485 | 66.77681    | -429.45219  | 1 |
| 16990 | C | 83.04836 | 87.39748 | 87.83480 | 1160.20712  | 382.12223   | 75.83100    | 1 |
| 16991 | H | 83.51510 | 87.13156 | 88.85173 | 1309.73818  | -732.05341  | 5220.47295  | 1 |
| 16992 | C | 81.44589 | 87.51917 | 88.02698 | -381.43053  | -15.04779   | 480.51111   | 1 |
| 16993 | H | 80.94840 | 87.86543 | 87.10484 | -3020.45193 | -1484.83749 | 2084.51526  | 1 |
| 16994 | H | 81.36926 | 88.35861 | 88.80879 | 1676.76509  | -5264.19828 | 482.77079   | 1 |
| 16995 | C | 80.87769 | 86.18136 | 88.47620 | 977.89747   | -546.91621  | 46.99303    | 1 |
| 16996 | C | 80.04334 | 85.53342 | 87.57188 | -150.56583  | -542.57721  | -56.41739   | 1 |
| 16997 | H | 79.92040 | 85.98528 | 86.56192 | 1365.99711  | 428.19691   | -3693.73271 | 1 |
| 16998 | C | 79.40000 | 84.34180 | 88.00890 | 144.47270   | -887.62377  | -155.87244  | 1 |
| 16999 | H | 78.84100 | 83.76780 | 87.28590 | -328.20360  | -2959.33355 | 1021.19185  | 1 |
| 17000 | C | 79.47800 | 83.93480 | 89.35490 | -642.70599  | 451.43486   | -466.81034  | 1 |
| 17001 | H | 78.96900 | 83.02580 | 89.64090 | -635.63027  | -442.27836  | 3049.76432  | 1 |
| 17002 | C | 81.09330 | 85.72442 | 89.79197 | 596.26004   | 377.80357   | -274.59613  | 1 |
| 17003 | H | 81.87395 | 86.18361 | 90.43206 | -90.28449   | -2248.10444 | 936.93919   | 1 |
| 17004 | C | 80.30600 | 84.65280 | 90.26790 | 21.13127    | -626.18118  | -664.90332  | 1 |
| 17005 | H | 80.48200 | 84.28180 | 91.26690 | -2377.19387 | -1194.15714 | -1686.65329 | 1 |
| 17006 | C | 83.43773 | 86.37917 | 86.63979 | -13.36156   | -624.58042  | 241.96852   | 1 |
| 17007 | O | 83.89729 | 85.28819 | 86.84201 | 364.17403   | 242.96924   | -70.88379   | 1 |
| 17008 | N | 83.20828 | 86.98825 | 85.43837 | -411.97118  | -372.19449  | 579.13573   | 1 |
| 17009 | H | 82.57957 | 87.81226 | 85.28015 | 222.44419   | 1592.01624  | 784.46400   | 1 |
| 17010 | C | 83.37053 | 86.00024 | 84.43059 | 336.72533   | 451.72163   | 486.80248   | 1 |
| 17011 | H | 82.75595 | 85.21460 | 84.89847 | -2902.37568 | 61.13080    | 3341.78213  | 1 |
| 17012 | C | 82.79620 | 86.49903 | 82.97916 | 350.13491   | -246.86179  | 958.23443   | 1 |
| 17013 | H | 83.00858 | 85.78749 | 82.22097 | -960.09760  | 1043.95432  | 4208.47078  | 1 |
| 17014 | H | 83.46536 | 87.33653 | 82.60865 | -1910.97738 | -2591.35975 | -1584.49925 | 1 |
| 17015 | C | 81.35851 | 86.81659 | 83.10103 | 1344.99795  | 614.45109   | 44.08718    | 1 |
| 17016 | H | 81.34234 | 87.92376 | 83.43424 | 1420.11616  | -503.26292  | -2588.19946 | 1 |
| 17017 | C | 80.52409 | 86.73087 | 81.81508 | 274.55105   | 308.40224   | 521.50134   | 1 |
| 17018 | H | 80.85400 | 87.46680 | 81.00247 | 440.60867   | -1477.96874 | 432.12199   | 1 |
| 17019 | H | 79.44837 | 87.07428 | 82.12016 | 2427.09964  | 1076.78580  | -1315.34185 | 1 |
| 17020 | H | 80.45787 | 85.70909 | 81.39384 | 321.75356   | -1637.46334 | -311.77878  | 1 |
| 17021 | C | 80.70679 | 85.85372 | 84.11820 | -353.64791  | -344.88549  | 304.77696   | 1 |
| 17022 | H | 80.63688 | 84.85447 | 83.71867 | 1533.38465  | -751.89139  | 1820.61527  | 1 |
| 17023 | H | 79.68218 | 86.17213 | 84.31058 | -1173.40567 | 2087.21942  | -856.27582  | 1 |
| 17024 | H | 81.15334 | 85.87883 | 85.10105 | 2868.34488  | 4784.46044  | 389.54994   | 1 |
| 17025 | C | 84.89418 | 85.38544 | 84.27479 | -745.50358  | -41.64789   | -688.93231  | 1 |
| 17026 | O | 84.87300 | 84.21580 | 83.92590 | 484.78819   | -232.13709  | 572.07571   | 1 |
| 17027 | N | 85.96175 | 86.14178 | 84.36158 | 123.54411   | 53.25714    | -238.66256  | 1 |
| 17028 | C | 86.09988 | 87.50514 | 84.85773 | 365.47642   | 593.57332   | 586.00848   | 1 |
| 17029 | H | 85.49953 | 87.84010 | 85.73434 | -883.92831  | 130.04870   | -18.62159   | 1 |
| 17030 | H | 85.72043 | 88.20108 | 83.99343 | -2203.73739 | 291.38644   | -1986.45573 | 1 |
| 17031 | C | 87.26254 | 85.49221 | 84.26374 | -460.66260  | 338.36669   | -360.76761  | 1 |
| 17032 | H | 87.36000 | 84.75980 | 83.39390 | -1956.53740 | -1725.16788 | -1765.99997 | 1 |
| 17033 | C | 88.30247 | 86.65814 | 84.13280 | 532.55355   | 450.04133   | 218.11163   | 1 |
| 17034 | H | 88.29077 | 87.00633 | 83.12365 | 2175.17987  | -1680.77782 | 2307.72374  | 1 |
| 17035 | H | 89.29873 | 86.41391 | 84.56172 | 130.70397   | -1987.21918 | 1226.27880  | 1 |
| 17036 | C | 87.64629 | 87.67076 | 85.16553 | 902.10408   | -407.40678  | 402.26241   | 1 |
| 17037 | H | 87.87664 | 87.43805 | 86.21956 | -4113.62137 | -791.26557  | -354.04681  | 1 |
| 17038 | H | 87.97305 | 88.78875 | 85.04566 | 1246.10989  | 897.95928   | 63.92804    | 1 |
| 17039 | C | 87.49300 | 84.44880 | 85.47990 | 481.17713   | -770.68342  | -26.39082   | 1 |
| 17040 | O | 88.17500 | 83.43780 | 85.31690 | 662.28783   | 338.86154   | -256.54544  | 1 |
| 17041 | N | 86.94800 | 84.79480 | 86.61690 | -355.77024  | 360.43447   | -679.89734  | 1 |

|       |   |          |          |          |             |             |             |   |
|-------|---|----------|----------|----------|-------------|-------------|-------------|---|
| 17042 | H | 86.35221 | 85.65655 | 86.58018 | 6536.77701  | -59.93697   | 322.94936   | 1 |
| 17043 | C | 86.99100 | 84.05980 | 87.81290 | 748.44016   | 418.03311   | -302.26836  | 1 |
| 17044 | H | 88.04200 | 83.90580 | 88.00490 | -1286.35492 | 1354.34724  | -2536.24087 | 1 |
| 17045 | C | 86.54200 | 84.90880 | 89.03390 | 418.38191   | 558.35263   | -585.25714  | 1 |
| 17046 | H | 85.56812 | 85.48050 | 88.83566 | -2124.34058 | 3005.03087  | 1084.80342  | 1 |
| 17047 | O | 87.55116 | 86.19057 | 89.16198 | 166.15675   | -196.33519  | 148.69930   | 1 |
| 17048 | H | 87.00274 | 86.90875 | 88.79760 | -3785.59398 | -1206.29802 | -1757.64155 | 1 |
| 17049 | C | 86.58800 | 84.13880 | 90.31390 | -283.70739  | 860.17132   | 100.11513   | 1 |
| 17050 | H | 86.42200 | 84.88380 | 91.12190 | -1795.94078 | 1435.55542  | 2147.21644  | 1 |
| 17051 | H | 87.58000 | 83.65880 | 90.45790 | -435.86088  | 1217.30768  | 2865.37132  | 1 |
| 17052 | H | 85.87300 | 83.28880 | 90.33790 | 847.17946   | -2925.10475 | 789.94646   | 1 |
| 17053 | C | 86.28000 | 82.71080 | 87.71290 | 348.70998   | -610.39722  | -581.61753  | 1 |
| 17054 | O | 86.82200 | 81.66680 | 88.07090 | 487.52202   | -368.28329  | -500.33258  | 1 |
| 17055 | N | 85.01900 | 82.70380 | 87.12790 | 147.88702   | 116.27934   | -824.53825  | 1 |
| 17056 | H | 84.59100 | 83.60380 | 87.13890 | -2674.73959 | 1532.87730  | -646.48648  | 1 |
| 17057 | C | 84.34600 | 81.49680 | 86.73990 | -173.64911  | 895.38896   | -18.27396   | 1 |
| 17058 | H | 84.30700 | 80.75780 | 87.52590 | 2626.33703  | 724.73484   | -1569.57992 | 1 |
| 17059 | C | 82.88500 | 81.78680 | 86.44690 | 472.40232   | 489.18323   | 601.57630   | 1 |
| 17060 | H | 82.91900 | 82.67580 | 85.78090 | -1567.70870 | -1396.99338 | 2344.15697  | 1 |
| 17061 | C | 82.17700 | 80.62380 | 85.67890 | -686.10317  | -556.20421  | -242.24390  | 1 |
| 17062 | H | 81.07800 | 80.71880 | 85.54690 | 598.41109   | -2089.90955 | -2275.59134 | 1 |
| 17063 | H | 82.70400 | 80.35880 | 84.73790 | 461.08637   | 2498.75301  | -1856.94623 | 1 |
| 17064 | H | 82.32100 | 79.72080 | 86.31090 | 1404.57528  | -2171.67960 | 1786.11393  | 1 |
| 17065 | C | 82.07000 | 82.12980 | 87.72690 | 829.91579   | -260.36295  | 260.76104   | 1 |
| 17066 | H | 81.10200 | 82.37580 | 87.23990 | 2005.26066  | -1846.06125 | -1568.82272 | 1 |
| 17067 | H | 82.53400 | 83.06080 | 88.11890 | 1997.51249  | -773.18170  | 2299.81178  | 1 |
| 17068 | C | 81.94500 | 81.05480 | 88.81990 | -714.77797  | 295.25802   | -489.47011  | 1 |
| 17069 | H | 82.88100 | 80.59980 | 89.20790 | -591.02561  | 3050.46585  | -490.56526  | 1 |
| 17070 | H | 81.31400 | 80.20680 | 88.47790 | 2815.64469  | -509.29682  | 1298.78701  | 1 |
| 17071 | H | 81.40000 | 81.55980 | 89.64590 | -697.87421  | -1644.06384 | 2590.27197  | 1 |
| 17072 | C | 85.05200 | 80.71580 | 85.59890 | -8.53369    | 117.84609   | -907.35201  | 1 |
| 17073 | O | 85.24900 | 79.52680 | 85.71490 | 28.89394    | 785.85224   | 67.89789    | 1 |
| 17074 | N | 85.49400 | 81.43280 | 84.53190 | -394.64883  | -637.49170  | -394.75551  | 1 |
| 17075 | H | 85.40200 | 82.42480 | 84.48490 | -917.73706  | -3005.42708 | -172.11869  | 1 |
| 17076 | C | 86.03100 | 80.79380 | 83.32290 | -685.05291  | -509.53067  | 325.44447   | 1 |
| 17077 | H | 85.31500 | 80.12480 | 82.86790 | 2087.93761  | -1749.15828 | 1563.17221  | 1 |
| 17078 | C | 86.55300 | 81.83280 | 82.24690 | -285.42760  | 680.70566   | -543.31346  | 1 |
| 17079 | H | 87.16500 | 81.34780 | 81.45690 | -406.93343  | 1249.33627  | 2856.78426  | 1 |
| 17080 | H | 87.19100 | 82.46680 | 82.89890 | -1420.16195 | -2746.04582 | 586.62255   | 1 |
| 17081 | C | 85.50700 | 82.73980 | 81.58390 | -387.37410  | -516.39031  | -648.51176  | 1 |
| 17082 | C | 84.15500 | 82.39380 | 81.53690 | 8.37560     | 738.15855   | 534.98096   | 1 |
| 17083 | H | 83.79200 | 81.55280 | 82.10890 | -1976.71996 | -503.22493  | -2401.95861 | 1 |
| 17084 | C | 83.21100 | 83.32080 | 80.93390 | -813.75607  | 351.40567   | -239.32063  | 1 |
| 17085 | H | 82.15600 | 83.09880 | 80.98090 | 2035.65888  | 1768.92256  | -1615.98393 | 1 |
| 17086 | C | 83.64600 | 84.52480 | 80.37890 | 772.34234   | -27.95156   | 472.41300   | 1 |
| 17087 | O | 82.61489 | 85.32259 | 79.66166 | 185.06485   | 129.57855   | -573.92468  | 1 |
| 17088 | H | 81.83700 | 84.81180 | 79.82390 | -1080.08605 | -2322.12039 | 1828.02480  | 1 |
| 17089 | C | 85.92600 | 83.94280 | 80.96390 | 6.05711     | -903.27024  | -110.87849  | 1 |
| 17090 | H | 86.96400 | 84.21780 | 81.07890 | 2829.27439  | -598.86941  | -1226.46106 | 1 |
| 17091 | C | 84.98800 | 84.82180 | 80.36790 | -678.00518  | 496.60885   | -369.86313  | 1 |
| 17092 | H | 85.44105 | 85.66017 | 79.78998 | -2915.48703 | 244.22891   | -2438.63971 | 1 |
| 17093 | C | 87.28100 | 79.90080 | 83.70090 | -602.48169  | 658.69385   | -208.30911  | 1 |
| 17094 | O | 87.52500 | 78.85780 | 83.08590 | -549.44032  | 561.74256   | 109.17800   | 1 |
| 17095 | N | 88.11400 | 80.46780 | 84.61090 | 642.96512   | 513.19753   | -179.98725  | 1 |
| 17096 | H | 87.81200 | 81.38580 | 84.85490 | 554.47561   | 2851.08366  | 1205.19199  | 1 |
| 17097 | C | 89.22100 | 79.75680 | 85.24590 | -801.90495  | 437.56083   | 62.18517    | 1 |
| 17098 | H | 89.95300 | 79.50280 | 84.49390 | -1464.51312 | -2546.38990 | 1124.84143  | 1 |
| 17099 | C | 89.96200 | 80.65580 | 86.28690 | -458.29519  | -343.52332  | 707.42201   | 1 |
| 17100 | H | 90.83200 | 80.05380 | 86.62590 | 2283.07377  | -336.40392  | -2139.03685 | 1 |
| 17101 | H | 89.32800 | 80.96580 | 87.14490 | 931.33406   | 2257.02425  | -1986.55878 | 1 |
| 17102 | O | 90.43900 | 81.84080 | 85.66990 | 610.32611   | 92.12801    | 483.01903   | 1 |
| 17103 | H | 89.67500 | 82.42080 | 85.62090 | 2369.02049  | -1179.21299 | 1691.04846  | 1 |



|       |   |          |          |          |             |             |             |   |
|-------|---|----------|----------|----------|-------------|-------------|-------------|---|
| 17104 | C | 88.73400 | 78.47380 | 85.93690 | -909.04626  | 101.73149   | 39.15022    | 1 |
| 17105 | O | 89.25800 | 77.41880 | 85.68690 | 452.12303   | 480.50776   | 425.07062   | 1 |
| 17106 | N | 87.62200 | 78.53080 | 86.72490 | -701.95005  | 282.62632   | -385.82932  | 1 |
| 17107 | H | 87.11900 | 79.38180 | 86.85290 | 1745.97851  | 2397.36485  | -1047.62160 | 1 |
| 17108 | C | 87.01300 | 77.34680 | 87.36090 | -113.26819  | 694.01660   | 575.81346   | 1 |
| 17109 | H | 87.78600 | 76.78980 | 87.87090 | 2151.54835  | 2266.77734  | 334.12137   | 1 |
| 17110 | C | 85.83700 | 77.64780 | 88.31690 | -573.33049  | -363.66500  | -616.67497  | 1 |
| 17111 | H | 85.15200 | 78.26580 | 87.69790 | 2170.45817  | 953.65837   | 2060.27926  | 1 |
| 17112 | C | 85.23200 | 76.35180 | 88.91690 | -584.42856  | 628.39546   | -316.18304  | 1 |
| 17113 | H | 84.85900 | 75.70780 | 88.09290 | 1913.26524  | 866.71986   | -2344.55790 | 1 |
| 17114 | H | 85.99500 | 75.79680 | 89.50290 | -1848.14339 | -1493.28883 | 2060.17481  | 1 |
| 17115 | H | 84.35600 | 76.61180 | 89.54990 | -674.86039  | 3069.33543  | 124.10768   | 1 |
| 17116 | C | 86.39100 | 78.49780 | 89.48490 | 354.02269   | 771.95453   | -330.31748  | 1 |
| 17117 | H | 87.06500 | 79.27980 | 89.07290 | 1427.84035  | -2198.47053 | -1742.42291 | 1 |
| 17118 | H | 87.08200 | 77.89680 | 90.11390 | -991.08893  | -1148.86745 | 2752.86447  | 1 |
| 17119 | C | 85.32100 | 79.24980 | 90.26490 | 548.11549   | -645.98527  | -339.45320  | 1 |
| 17120 | H | 85.66100 | 79.80480 | 91.16590 | -1839.58327 | -1095.46754 | 2304.62952  | 1 |
| 17121 | H | 84.50800 | 78.55480 | 90.56390 | 2588.94393  | 367.32088   | -1748.92652 | 1 |
| 17122 | H | 84.81600 | 79.99880 | 89.61990 | 942.94869   | -1655.61062 | -2506.74063 | 1 |
| 17123 | C | 86.59100 | 76.33380 | 86.29590 | 37.20179    | 705.09135   | -582.03551  | 1 |
| 17124 | O | 86.87600 | 75.13580 | 86.32990 | 263.40507   | -247.17595  | -706.70502  | 1 |
| 17125 | N | 85.94400 | 76.86980 | 85.20790 | -715.74336  | -4.18375    | 448.95949   | 1 |
| 17126 | H | 85.63800 | 77.81680 | 85.14890 | 838.32427   | 1784.43455  | -2455.06733 | 1 |
| 17127 | C | 85.54400 | 75.97380 | 84.09090 | -589.85106  | 56.62431    | -701.66531  | 1 |
| 17128 | H | 84.97100 | 75.16780 | 84.52390 | -590.84555  | -2292.32178 | -2078.06839 | 1 |
| 17129 | C | 84.70500 | 76.68680 | 83.02590 | 812.00035   | -153.54614  | -379.98876  | 1 |
| 17130 | H | 85.34800 | 77.43880 | 82.51990 | -2032.51842 | -1169.11159 | -2105.97809 | 1 |
| 17131 | C | 84.27500 | 75.71480 | 81.91990 | 385.98328   | -7.71678    | 819.03347   | 1 |
| 17132 | H | 85.09700 | 75.06980 | 81.54390 | -1047.85130 | 1847.31625  | -2329.86050 | 1 |
| 17133 | H | 83.47900 | 75.04880 | 82.31590 | -1135.20078 | 2167.35756  | 1976.83175  | 1 |
| 17134 | H | 83.83700 | 76.40380 | 81.16690 | -1221.64390 | -1777.21280 | -2296.52661 | 1 |
| 17135 | C | 83.45000 | 77.48980 | 83.55590 | 415.02904   | 385.08012   | 708.60650   | 1 |
| 17136 | H | 82.97200 | 77.88180 | 82.63290 | 2751.84028  | 500.29216   | 1428.17904  | 1 |
| 17137 | H | 83.89400 | 78.25780 | 84.22490 | -2555.14716 | -1013.25557 | -1541.31490 | 1 |
| 17138 | C | 82.33100 | 76.72480 | 84.30590 | -573.33093  | -645.33268  | -305.08700  | 1 |
| 17139 | H | 81.47300 | 77.36780 | 84.59690 | 621.70489   | 408.45907   | 3052.63070  | 1 |
| 17140 | H | 82.01000 | 75.87880 | 83.66190 | -2558.93167 | -332.97762  | 1801.47885  | 1 |
| 17141 | H | 82.78500 | 76.35380 | 85.24990 | 1982.50157  | 2424.49246  | -276.77835  | 1 |
| 17142 | C | 86.82000 | 75.33080 | 83.39190 | 633.64313   | 7.37543     | 645.91442   | 1 |
| 17143 | O | 86.93000 | 74.10180 | 83.14490 | -603.25143  | 514.93996   | 22.36745    | 1 |
| 17144 | N | 87.87300 | 76.12580 | 83.05390 | -668.26296  | 292.10033   | -438.63187  | 1 |
| 17145 | H | 87.78700 | 77.10580 | 83.21590 | 964.78945   | 2390.24356  | 1798.08006  | 1 |
| 17146 | C | 89.14600 | 75.69580 | 82.51290 | 626.46137   | 150.81961   | -647.37545  | 1 |
| 17147 | H | 88.77200 | 75.17380 | 81.64490 | 1618.39587  | -2060.16562 | -1741.49121 | 1 |
| 17148 | C | 89.90200 | 76.92480 | 82.03590 | 424.59801   | 564.74533   | -580.80130  | 1 |
| 17149 | H | 89.27500 | 77.50780 | 81.32890 | -1811.25018 | 1035.66443  | 2354.13974  | 1 |
| 17150 | H | 90.24800 | 77.70980 | 82.74190 | 964.18930   | -2105.74945 | 2119.73999  | 1 |
| 17151 | C | 91.23100 | 76.59480 | 81.38190 | 330.76457   | -775.30707  | 330.92615   | 1 |
| 17152 | C | 91.21500 | 76.27080 | 80.01490 | -28.59772   | 910.50041   | 79.53944    | 1 |
| 17153 | H | 90.34000 | 76.17680 | 79.38890 | -472.92306  | -1957.49942 | -2421.96958 | 1 |
| 17154 | C | 92.38300 | 75.83580 | 79.33690 | 118.94082   | 106.98705   | 890.39808   | 1 |
| 17155 | H | 92.23500 | 75.47680 | 78.32890 | 1776.04172  | -2559.66751 | -397.81678  | 1 |
| 17156 | C | 93.59700 | 75.74780 | 79.99190 | 624.25308   | -211.62993  | -631.08708  | 1 |
| 17157 | H | 94.46100 | 75.44580 | 79.41890 | -286.74729  | 2950.04185  | 1059.05801  | 1 |
| 17158 | C | 92.48600 | 76.63880 | 82.03490 | 847.11558   | 317.80017   | -86.34671   | 1 |
| 17159 | H | 92.45700 | 76.91580 | 83.07890 | 1214.48412  | -2333.47331 | 1713.23095  | 1 |
| 17160 | C | 93.65300 | 76.24480 | 81.37190 | 115.99903   | 622.16726   | 651.06787   | 1 |
| 17161 | H | 94.58100 | 76.33180 | 81.91690 | 2963.59074  | -681.12503  | 779.80069   | 1 |
| 17162 | C | 89.91100 | 74.63880 | 83.25790 | -903.35201  | -96.10774   | 108.68106   | 1 |
| 17163 | O | 90.31700 | 73.58680 | 82.77890 | 109.23489   | 594.74348   | -516.45866  | 1 |
| 17164 | N | 90.07200 | 74.84380 | 84.60690 | -68.67408   | 765.07853   | -360.08800  | 1 |
| 17165 | H | 89.75100 | 75.72580 | 84.94490 | -1906.82177 | 2504.33977  | 93.67718    | 1 |

|       |   |          |          |          |             |             |             |   |
|-------|---|----------|----------|----------|-------------|-------------|-------------|---|
| 17166 | C | 90.99200 | 74.14780 | 85.47890 | 172.71877   | 834.47793   | 317.70845   | 1 |
| 17167 | H | 91.87600 | 73.95580 | 84.88990 | -1942.47029 | 1232.11708  | 2142.81582  | 1 |
| 17168 | C | 91.44100 | 74.96580 | 86.68890 | 169.75461   | 895.44451   | -32.20202   | 1 |
| 17169 | H | 90.54900 | 75.39680 | 87.18990 | 1716.23254  | -1244.50565 | -2328.82035 | 1 |
| 17170 | H | 91.98500 | 74.47680 | 87.52490 | -143.93812  | 3114.14148  | -434.24383  | 1 |
| 17171 | C | 92.29500 | 76.20180 | 86.29890 | -752.76381  | -253.55780  | 446.41399   | 1 |
| 17172 | H | 91.81200 | 76.81980 | 85.51190 | 2489.39924  | 790.71973   | -1755.28764 | 1 |
| 17173 | C | 92.49600 | 77.08680 | 87.49090 | 612.60728   | -40.83853   | 664.57138   | 1 |
| 17174 | H | 93.34000 | 76.67480 | 88.08490 | -647.51045  | 2185.19990  | -2176.92106 | 1 |
| 17175 | H | 92.75900 | 78.11980 | 87.17690 | -2283.80133 | -591.50604  | -2091.43735 | 1 |
| 17176 | H | 91.62000 | 77.10680 | 88.17290 | -2016.74418 | 1687.67690  | 1724.41877  | 1 |
| 17177 | C | 93.63900 | 75.80880 | 85.71290 | -666.17844  | -596.80161  | 179.52286   | 1 |
| 17178 | H | 94.39500 | 76.62280 | 85.73390 | 2421.79571  | -1272.66991 | -1553.85365 | 1 |
| 17179 | H | 94.08800 | 74.94380 | 86.24590 | 214.75996   | -1963.48001 | 2439.94516  | 1 |
| 17180 | H | 93.51200 | 75.52980 | 84.64590 | 2276.70286  | 1360.53574  | -1695.68753 | 1 |
| 17181 | C | 90.49500 | 72.83780 | 85.92890 | -814.14824  | -84.26131   | 400.54954   | 1 |
| 17182 | O | 91.27500 | 71.96380 | 86.38890 | -132.46349  | -268.58705  | 722.86785   | 1 |
| 17183 | N | 89.19100 | 72.60280 | 85.69690 | -255.16401  | 122.08979   | 789.17282   | 1 |
| 17184 | H | 88.59100 | 73.30280 | 85.31790 | 39.89389    | -3144.60655 | -66.45142   | 1 |
| 17185 | C | 88.45900 | 71.35680 | 85.94490 | 723.48278   | -371.94380  | 398.59829   | 1 |
| 17186 | H | 89.12800 | 70.64180 | 86.40090 | 2330.53934  | -2080.58670 | 343.46997   | 1 |
| 17187 | C | 87.22600 | 71.64880 | 86.78490 | 628.93547   | 105.95190   | 641.74511   | 1 |
| 17188 | H | 86.71000 | 70.67580 | 86.92890 | -1832.19757 | 1647.43117  | 1951.24989  | 1 |
| 17189 | O | 86.29500 | 72.52080 | 86.19690 | 718.99266   | -294.92835  | 116.77926   | 1 |
| 17190 | H | 86.60700 | 73.42780 | 86.23990 | 269.56486   | 493.91441   | -3101.48944 | 1 |
| 17191 | C | 87.61600 | 72.22880 | 88.17090 | -738.48817  | -496.03654  | -217.47822  | 1 |
| 17192 | H | 86.73200 | 72.42180 | 88.81590 | -1087.52799 | 2935.07605  | 310.64735   | 1 |
| 17193 | H | 88.12700 | 73.21380 | 88.10690 | -37.72906   | -1909.23681 | 2493.87076  | 1 |
| 17194 | H | 88.25200 | 71.51380 | 88.73390 | 1025.24679  | 2136.63130  | -2074.96968 | 1 |
| 17195 | C | 88.17800 | 70.69480 | 84.65590 | -50.45776   | 572.17860   | -716.90844  | 1 |
| 17196 | O | 88.41700 | 69.53780 | 84.41390 | 232.33051   | -360.22923  | -669.87632  | 1 |
| 17197 | N | 87.69700 | 71.45480 | 83.66790 | -645.41248  | 347.13244   | -432.94398  | 1 |
| 17198 | H | 87.49600 | 72.42580 | 83.77290 | 2619.81576  | 493.36611   | 1658.26441  | 1 |
| 17199 | C | 87.33000 | 70.99180 | 82.32790 | -518.85451  | -528.09049  | -541.94431  | 1 |
| 17200 | H | 86.87200 | 71.79880 | 81.77690 | -1052.25888 | -1586.80486 | 2498.18214  | 1 |
| 17201 | H | 86.53900 | 70.25880 | 82.39390 | 3133.90996  | -192.42974  | 116.21042   | 1 |
| 17202 | C | 88.38800 | 70.38780 | 81.46990 | -134.42879  | -887.79751  | -158.04236  | 1 |
| 17203 | O | 88.07800 | 69.34780 | 80.89690 | -373.16759  | -566.26035  | 396.88793   | 1 |
| 17204 | N | 89.50700 | 71.10180 | 81.21690 | -382.56945  | -571.82143  | 481.75427   | 1 |
| 17205 | H | 89.71200 | 71.85980 | 81.82990 | -624.86721  | -1575.02937 | 2642.79307  | 1 |
| 17206 | C | 90.54000 | 70.62380 | 80.30890 | -326.05866  | 684.89496   | 504.16750   | 1 |
| 17207 | H | 90.04700 | 70.37080 | 79.38190 | 2545.99165  | -1528.54897 | 1014.57343  | 1 |
| 17208 | C | 91.49700 | 71.77680 | 80.00190 | -689.53880  | -166.98733  | 569.17932   | 1 |
| 17209 | H | 90.87200 | 72.69580 | 80.01990 | -280.02924  | 2907.79365  | -1184.42513 | 1 |
| 17210 | C | 92.63800 | 71.97780 | 81.09890 | 357.68200   | 827.09032   | 136.09454   | 1 |
| 17211 | H | 93.11400 | 72.96780 | 80.93290 | -1450.60608 | -648.23368  | 2708.93437  | 1 |
| 17212 | H | 93.41500 | 71.18380 | 81.09390 | -1779.50368 | -142.04318  | -2602.43373 | 1 |
| 17213 | H | 92.18000 | 72.00080 | 82.11090 | 2932.36592  | -375.46993  | 1055.84134  | 1 |
| 17214 | C | 92.06200 | 71.74980 | 78.55590 | 277.79333   | -287.01938  | 808.22593   | 1 |
| 17215 | H | 91.23500 | 71.68480 | 77.81690 | -1773.01643 | 2094.85048  | 1541.24861  | 1 |
| 17216 | H | 92.43600 | 72.79180 | 78.45790 | -1700.52523 | 2130.76431  | 1572.99887  | 1 |
| 17217 | C | 93.19900 | 70.75380 | 78.20890 | 621.50515   | -557.64419  | -360.59341  | 1 |
| 17218 | H | 94.09500 | 70.93880 | 78.83990 | -2529.67869 | 389.04233   | -1846.44203 | 1 |
| 17219 | H | 93.64100 | 70.73480 | 77.18990 | 897.29307   | -2274.97275 | 1962.54830  | 1 |
| 17220 | H | 92.87200 | 69.72480 | 78.47090 | -2542.31628 | 637.72588   | 1739.11216  | 1 |
| 17221 | C | 91.19200 | 69.33780 | 80.85890 | -849.95865  | 43.45862    | 328.99050   | 1 |
| 17222 | O | 91.46200 | 68.34780 | 80.13890 | -217.10709  | 678.60722   | -358.65655  | 1 |
| 17223 | N | 91.48600 | 69.32480 | 82.18790 | -416.88690  | 596.93588   | -443.17047  | 1 |
| 17224 | H | 91.23100 | 70.17480 | 82.64090 | 2764.92366  | -1189.20059 | 893.24514   | 1 |
| 17225 | C | 91.91500 | 68.12480 | 82.90290 | 671.36736   | -2.87476    | -623.06226  | 1 |
| 17226 | H | 92.79300 | 67.74880 | 82.39990 | 1133.56769  | 2477.29230  | 1564.60967  | 1 |
| 17227 | C | 92.25100 | 68.54980 | 84.34890 | -626.76818  | -215.90569  | 618.92128   | 1 |

|       |   |          |          |          |             |             |             |   |
|-------|---|----------|----------|----------|-------------|-------------|-------------|---|
| 17228 | H | 91.36300 | 68.83680 | 84.95190 | 2028.09572  | -2132.98964 | -1113.19804 | 1 |
| 17229 | C | 92.93000 | 67.35280 | 85.13090 | -40.91579   | 546.89107   | 719.26604   | 1 |
| 17230 | H | 93.39500 | 67.66780 | 86.08990 | 2814.39815  | 786.43232   | -1170.73680 | 1 |
| 17231 | H | 93.59900 | 66.86780 | 84.38790 | 680.66775   | 2167.50407  | 2166.50194  | 1 |
| 17232 | H | 92.08600 | 66.72380 | 85.48590 | -1299.95203 | -2084.63292 | -1976.25914 | 1 |
| 17233 | C | 93.12200 | 69.81780 | 84.36490 | -85.87097   | -711.85949  | -571.20768  | 1 |
| 17234 | H | 92.59100 | 70.79080 | 84.28690 | 414.67910   | -1823.40109 | -2537.36238 | 1 |
| 17235 | H | 93.47800 | 69.79780 | 85.41690 | -1802.65629 | 612.34957   | -2516.71922 | 1 |
| 17236 | H | 93.92400 | 69.74080 | 83.59990 | -2113.48540 | -1556.20673 | -1746.88212 | 1 |
| 17237 | C | 90.88500 | 67.01480 | 82.85490 | -560.17604  | 643.61302   | -340.86267  | 1 |
| 17238 | O | 91.19100 | 65.97680 | 82.31990 | 575.22684   | 277.24387   | -472.22652  | 1 |
| 17239 | N | 89.59800 | 67.27880 | 83.21290 | 524.26395   | 509.00915   | 411.22306   | 1 |
| 17240 | H | 89.33800 | 68.17280 | 83.56890 | -3104.29147 | -448.44894  | 272.40266   | 1 |
| 17241 | C | 88.50800 | 66.28280 | 83.31090 | -546.36324  | 555.93347   | 468.75313   | 1 |
| 17242 | H | 87.63400 | 66.81180 | 83.66190 | -1061.58852 | -2934.61204 | 389.35155   | 1 |
| 17243 | H | 88.77800 | 65.52880 | 84.03490 | 10.55105    | 2346.86330  | 2086.70722  | 1 |
| 17244 | C | 88.13700 | 65.55880 | 82.06790 | 310.85332   | -559.78602  | -655.74751  | 1 |
| 17245 | O | 88.04400 | 64.34280 | 82.03790 | 297.99695   | -575.60490  | 436.46325   | 1 |
| 17246 | N | 87.94300 | 66.29480 | 80.94490 | -137.00757  | 642.44250   | -543.31416  | 1 |
| 17247 | H | 88.08700 | 67.28080 | 80.99990 | -2816.45071 | 981.16264   | -1023.44780 | 1 |
| 17248 | C | 87.72000 | 65.63780 | 79.67190 | 409.75527   | -523.64252  | -628.67610  | 1 |
| 17249 | H | 87.02600 | 64.82080 | 79.79990 | 1055.26269  | 209.07024   | 2945.60613  | 1 |
| 17250 | C | 86.96700 | 66.60780 | 78.71390 | -96.50363   | 174.73197   | -899.78714  | 1 |
| 17251 | H | 87.46400 | 67.58080 | 78.50890 | 3100.41132  | 83.77961    | 492.40403   | 1 |
| 17252 | H | 86.78100 | 66.01880 | 77.79090 | 2244.79463  | 362.51811   | -2179.42405 | 1 |
| 17253 | C | 85.61000 | 66.79680 | 79.39290 | 253.03182   | 779.73252   | -410.17787  | 1 |
| 17254 | O | 84.83300 | 65.81480 | 79.48890 | 37.47156    | 745.08190   | 256.45328   | 1 |
| 17255 | N | 85.34400 | 67.99780 | 79.87490 | 288.96529   | 778.85602   | 145.97078   | 1 |
| 17256 | H | 86.08300 | 68.66580 | 79.96190 | -2090.44743 | -1477.05993 | 1824.28030  | 1 |
| 17257 | H | 84.39500 | 68.15680 | 80.14790 | -3078.34110 | 132.10681   | 648.47374   | 1 |
| 17258 | C | 88.89800 | 64.98780 | 79.03490 | 725.56730   | 379.20971   | -407.24982  | 1 |
| 17259 | O | 88.72200 | 64.04280 | 78.34190 | -697.68038  | 357.86740   | -140.39072  | 1 |
| 17260 | N | 90.14400 | 65.40080 | 79.46790 | 206.17005   | -788.69204  | -214.25132  | 1 |
| 17261 | H | 90.25700 | 66.25580 | 79.96790 | -1065.98865 | 2023.85267  | -2174.79194 | 1 |
| 17262 | C | 91.31700 | 64.73480 | 79.05890 | 93.71269    | 519.29579   | 734.58953   | 1 |
| 17263 | H | 91.30700 | 64.62180 | 77.98490 | -2931.29772 | 1154.91559  | -86.26070   | 1 |
| 17264 | H | 92.21500 | 65.29480 | 79.27790 | 1058.09386  | -1921.96269 | 2239.17693  | 1 |
| 17265 | C | 91.40100 | 63.43180 | 79.75790 | 307.19372   | -793.67896  | -327.48745  | 1 |
| 17266 | O | 91.82500 | 62.42080 | 79.26990 | -580.71505  | 335.53104   | 412.68605   | 1 |
| 17267 | N | 91.02800 | 63.38680 | 81.05790 | 657.76904   | 157.06926   | -513.16336  | 1 |
| 17268 | H | 90.80500 | 64.21680 | 81.56290 | -2520.77814 | 1604.09448  | -1008.37858 | 1 |
| 17269 | C | 90.91800 | 62.15580 | 81.79590 | 272.45577   | -732.55007  | -476.09448  | 1 |
| 17270 | H | 91.86200 | 61.64080 | 81.70190 | -1069.04265 | 2392.46453  | 1734.04641  | 1 |
| 17271 | C | 90.82800 | 62.40680 | 83.27890 | 329.01022   | -793.01168  | 288.14551   | 1 |
| 17272 | H | 90.54300 | 61.55180 | 83.92790 | 1675.42279  | 2646.15876  | 286.61107   | 1 |
| 17273 | H | 89.92600 | 63.04680 | 83.38890 | -2288.58946 | -1672.21465 | 1356.64915  | 1 |
| 17274 | C | 92.01900 | 63.17780 | 83.96190 | -509.76875  | -339.68900  | -688.14800  | 1 |
| 17275 | H | 92.39400 | 64.07880 | 83.43090 | 2369.14348  | 459.71170   | 2004.19969  | 1 |
| 17276 | C | 91.67700 | 63.61180 | 85.38990 | -429.89384  | 656.53258   | 456.35901   | 1 |
| 17277 | H | 91.21000 | 62.80180 | 85.98990 | -2954.60133 | -361.20843  | -1035.64947 | 1 |
| 17278 | H | 92.58900 | 63.86880 | 85.96890 | 1881.86793  | -747.02512  | -2417.75690 | 1 |
| 17279 | H | 90.99500 | 64.48680 | 85.45990 | -1865.52047 | 1325.49624  | -2172.38385 | 1 |
| 17280 | C | 93.24800 | 62.26580 | 83.90690 | 393.27022   | 144.47070   | 796.69234   | 1 |
| 17281 | H | 93.04800 | 61.32980 | 84.47190 | 2317.86464  | -1499.53353 | 1491.55401  | 1 |
| 17282 | H | 94.12500 | 62.84280 | 84.26990 | -1441.26038 | 1876.80917  | -2088.92882 | 1 |
| 17283 | H | 93.55700 | 61.98580 | 82.87690 | 1526.72314  | 1894.80110  | 1981.84056  | 1 |
| 17284 | C | 89.83700 | 61.22880 | 81.39190 | -673.56171  | 392.29999   | -491.00902  | 1 |
| 17285 | O | 90.05200 | 60.01880 | 81.38790 | 778.59487   | -101.80623  | 35.24678    | 1 |
| 17286 | N | 88.67800 | 61.73480 | 81.04490 | 327.52024   | -212.84915  | 735.04661   | 1 |
| 17287 | H | 88.46700 | 62.70780 | 81.09490 | -1224.48454 | -2122.30223 | 1962.12456  | 1 |
| 17288 | C | 87.67100 | 60.85880 | 80.39390 | 537.35759   | 463.01271   | 560.59986   | 1 |
| 17289 | H | 87.32000 | 60.08580 | 81.06090 | -2112.67471 | 422.44166   | -2307.29397 | 1 |

|       |   |          |          |          |             |             |             |   |
|-------|---|----------|----------|----------|-------------|-------------|-------------|---|
| 17290 | C | 86.36900 | 61.62080 | 80.15290 | 433.87130   | 380.64547   | 694.38434   | 1 |
| 17291 | H | 86.66700 | 62.53680 | 79.59990 | -935.20663  | -1903.33518 | 2312.79831  | 1 |
| 17292 | C | 85.41000 | 60.79180 | 79.24990 | -43.61770   | 142.25521   | -910.99776  | 1 |
| 17293 | H | 85.78800 | 60.71980 | 78.20790 | -341.41829  | 2236.52582  | 2178.93898  | 1 |
| 17294 | H | 84.42100 | 61.27980 | 79.11590 | -2235.95014 | 1459.15621  | 1660.75727  | 1 |
| 17295 | H | 85.21300 | 59.82180 | 79.75490 | -1558.88322 | -962.09369  | -2570.00536 | 1 |
| 17296 | C | 85.66900 | 62.05280 | 81.46790 | 56.95089    | 166.44982   | 884.42928   | 1 |
| 17297 | H | 84.86800 | 62.78280 | 81.22090 | 2285.82367  | -973.61446  | -1935.38889 | 1 |
| 17298 | H | 85.26400 | 61.20280 | 82.05790 | 1415.76207  | -210.19905  | -2810.85385 | 1 |
| 17299 | H | 86.41700 | 62.61580 | 82.06690 | 1683.88527  | 1797.32319  | -1967.03297 | 1 |
| 17300 | C | 88.14800 | 60.21080 | 79.10090 | -464.01205  | 410.83459   | 661.23382   | 1 |
| 17301 | O | 87.98300 | 59.02080 | 78.84890 | -681.96966  | 364.92232   | -191.34311  | 1 |
| 17302 | N | 88.93200 | 60.97080 | 78.26790 | 599.50119   | -481.08076  | -349.45192  | 1 |
| 17303 | H | 88.88200 | 61.95180 | 78.43890 | 946.20447   | -2007.23967 | -2236.91977 | 1 |
| 17304 | C | 89.63900 | 60.42180 | 77.09990 | 721.30426   | 370.11921   | 401.85220   | 1 |
| 17305 | H | 88.99200 | 59.82980 | 76.46890 | -2641.09457 | -774.16600  | -1541.37773 | 1 |
| 17306 | C | 90.13200 | 61.55680 | 76.21090 | -249.73876  | 332.90145   | -826.21242  | 1 |
| 17307 | H | 90.77500 | 62.20780 | 76.84090 | 2383.78880  | 1979.62664  | -553.06215  | 1 |
| 17308 | C | 91.04800 | 61.07380 | 75.04890 | -458.90769  | -400.75647  | -690.82362  | 1 |
| 17309 | H | 91.94600 | 60.50580 | 75.37390 | -1643.60510 | -2667.34882 | 252.83678   | 1 |
| 17310 | H | 91.50200 | 61.91580 | 74.48490 | 2373.47000  | 2040.78215  | 301.13448   | 1 |
| 17311 | H | 90.55600 | 60.35680 | 74.35590 | -889.18090  | -323.61543  | -3013.67162 | 1 |
| 17312 | C | 89.00800 | 62.48180 | 75.66090 | 2.41465     | 571.42336   | 702.92004   | 1 |
| 17313 | H | 88.47400 | 61.93980 | 74.85190 | 2608.02503  | -1680.09225 | -494.18834  | 1 |
| 17314 | H | 88.14100 | 62.60780 | 76.34490 | -2635.58262 | -1486.42667 | -879.13109  | 1 |
| 17315 | C | 89.53000 | 63.78780 | 75.11390 | -558.13061  | -410.42923  | 583.44340   | 1 |
| 17316 | H | 90.19400 | 63.52080 | 74.26490 | 937.78538   | -2995.70759 | 55.39792    | 1 |
| 17317 | H | 88.68400 | 64.35180 | 74.66590 | -2111.45304 | 2271.08343  | -580.65405  | 1 |
| 17318 | H | 89.97900 | 64.42080 | 75.90890 | -2577.15885 | 1659.78578  | -746.17560  | 1 |
| 17319 | C | 90.77300 | 59.45680 | 77.46190 | 329.05637   | -605.52153  | -603.74000  | 1 |
| 17320 | O | 90.96700 | 58.38780 | 76.89490 | -36.89162   | 742.63305   | 264.66326   | 1 |
| 17321 | N | 91.47500 | 59.73380 | 78.58890 | -209.46183  | -458.02523  | 663.27245   | 1 |
| 17322 | H | 91.42900 | 60.64380 | 78.99590 | 1673.14064  | 1715.00203  | 2026.56494  | 1 |
| 17323 | C | 92.46700 | 58.82380 | 79.17890 | -728.08068  | -472.04575  | -296.01746  | 1 |
| 17324 | H | 93.13400 | 58.59180 | 78.36190 | -2157.87647 | 2202.47670  | -663.86227  | 1 |
| 17325 | C | 93.39400 | 59.54580 | 80.25190 | -730.45366  | -63.40790   | 532.29891   | 1 |
| 17326 | H | 93.67500 | 58.93680 | 81.13790 | -480.11514  | 1903.19728  | 2447.81206  | 1 |
| 17327 | H | 92.68800 | 60.32980 | 80.60090 | -1888.57015 | 2442.64555  | -638.24877  | 1 |
| 17328 | C | 94.60100 | 60.20980 | 79.64990 | -3.17038    | 139.77363   | -915.12005  | 1 |
| 17329 | H | 94.23900 | 60.46180 | 78.62990 | -1497.82791 | 2213.14065  | -1682.09542 | 1 |
| 17330 | C | 95.06300 | 61.43480 | 80.47190 | 178.10144   | 820.46697   | -374.98231  | 1 |
| 17331 | H | 95.28300 | 61.04180 | 81.48790 | -1714.68042 | -2400.28468 | 1078.48133  | 1 |
| 17332 | H | 94.26400 | 62.20680 | 80.47790 | -1642.19514 | -1985.67416 | -1817.20160 | 1 |
| 17333 | H | 96.00300 | 61.82780 | 80.02690 | 786.27561   | -1751.03237 | 2475.87270  | 1 |
| 17334 | C | 95.76500 | 59.20580 | 79.52190 | -727.03968  | 518.79853   | 191.27898   | 1 |
| 17335 | H | 96.08900 | 58.91780 | 80.54590 | -2582.50637 | 1683.27393  | 635.04484   | 1 |
| 17336 | H | 95.53700 | 58.21280 | 79.07790 | 1394.79679  | -2449.70895 | 1372.41442  | 1 |
| 17337 | H | 96.53300 | 59.68580 | 78.87890 | 588.50767   | -2902.94354 | 1033.01070  | 1 |
| 17338 | C | 91.86500 | 57.57880 | 79.69390 | -585.46378  | -299.95709  | -646.33610  | 1 |
| 17339 | O | 92.42900 | 56.49880 | 79.48290 | 532.95971   | -21.51262   | -593.94772  | 1 |
| 17340 | N | 90.65400 | 57.56080 | 80.28190 | -384.15772  | -693.58104  | 273.19261   | 1 |
| 17341 | H | 90.21300 | 58.42780 | 80.50190 | -2076.92091 | 2030.04528  | -1232.07644 | 1 |
| 17342 | C | 89.92200 | 56.39580 | 80.60690 | -271.79873  | -30.09409   | -884.24767  | 1 |
| 17343 | H | 90.56100 | 55.73180 | 81.16890 | 2607.64521  | -681.42523  | -1632.40807 | 1 |
| 17344 | C | 88.72200 | 56.64380 | 81.52490 | -258.24014  | 820.33596   | -323.89875  | 1 |
| 17345 | H | 88.11700 | 57.51680 | 81.19890 | -2203.02400 | -869.90295  | 2059.72808  | 1 |
| 17346 | C | 87.81900 | 55.37180 | 81.65790 | -272.15218  | 310.67785   | -827.90045  | 1 |
| 17347 | H | 87.24900 | 55.30580 | 80.70590 | -1681.65973 | 2607.81144  | 524.33392   | 1 |
| 17348 | H | 88.39100 | 54.44580 | 81.87890 | 2323.15910  | 1311.67298  | -1680.44588 | 1 |
| 17349 | H | 87.10100 | 55.43280 | 82.50390 | 1539.72277  | -1894.79062 | -1994.62403 | 1 |
| 17350 | C | 89.30500 | 57.08480 | 82.90890 | -337.14599  | 788.76436   | -328.88430  | 1 |
| 17351 | H | 89.91800 | 58.00280 | 82.78290 | 2330.12044  | 611.44628   | -2034.77314 | 1 |

|       |   |          |          |          |             |             |             |   |
|-------|---|----------|----------|----------|-------------|-------------|-------------|---|
| 17352 | H | 89.92900 | 56.23680 | 83.26390 | -1970.49449 | 1710.20878  | 1747.79753  | 1 |
| 17353 | H | 88.39800 | 57.27180 | 83.52290 | -1982.06179 | -1725.43340 | -1743.61534 | 1 |
| 17354 | C | 89.44700 | 55.63980 | 79.32990 | -362.02130  | 579.39707   | 594.58887   | 1 |
| 17355 | O | 89.89800 | 54.49180 | 79.18290 | -452.31241  | 651.48165   | 18.98527    | 1 |
| 17356 | N | 88.71500 | 56.24380 | 78.37590 | -690.63293  | 365.25085   | -343.51006  | 1 |
| 17357 | H | 88.39800 | 57.18380 | 78.48190 | -1685.49488 | -206.93043  | -2663.24163 | 1 |
| 17358 | C | 88.13600 | 55.43780 | 77.35890 | 478.36241   | -511.56873  | -591.56564  | 1 |
| 17359 | H | 87.98700 | 54.42380 | 77.69790 | 2164.42108  | 1548.30737  | -1691.41299 | 1 |
| 17360 | C | 86.80000 | 55.99480 | 76.89190 | 514.99122   | -65.87512   | 733.87699   | 1 |
| 17361 | H | 86.79700 | 57.04880 | 76.53890 | -1147.62899 | 2799.00795  | -893.68217  | 1 |
| 17362 | H | 86.30400 | 55.48680 | 76.03690 | 1251.33634  | 2537.35880  | -1393.27456 | 1 |
| 17363 | C | 85.67600 | 55.90280 | 77.97190 | -487.62758  | -147.45835  | 744.92118   | 1 |
| 17364 | H | 86.01400 | 56.61080 | 78.75890 | 1868.93221  | 1230.59661  | 2198.00104  | 1 |
| 17365 | H | 85.62800 | 54.90080 | 78.44890 | -2221.71982 | 1005.34716  | 1979.39634  | 1 |
| 17366 | S | 83.95900 | 56.24880 | 77.57990 | -408.26724  | -141.71723  | 343.17326   | 1 |
| 17367 | C | 84.12800 | 58.00880 | 77.20090 | -200.84187  | -506.55809  | -741.40743  | 1 |
| 17368 | H | 83.24300 | 58.67880 | 77.24590 | -417.77200  | -2977.18794 | 908.17125   | 1 |
| 17369 | H | 84.54900 | 58.20380 | 76.19090 | 407.55617   | 2086.46621  | -2333.35067 | 1 |
| 17370 | H | 84.85200 | 58.45580 | 77.91490 | 2083.96667  | 1036.17712  | -2126.57726 | 1 |
| 17371 | C | 89.02800 | 55.25480 | 76.12090 | 448.45100   | -399.40198  | -695.23347  | 1 |
| 17372 | O | 88.67300 | 54.33880 | 75.34490 | -486.05266  | 221.26994   | -600.58136  | 1 |
| 17373 | N | 90.17100 | 55.99680 | 75.92590 | -671.16278  | -218.14259  | 452.58388   | 1 |
| 17374 | H | 90.45000 | 56.78180 | 76.47390 | 1344.22147  | 2731.26508  | -816.79921  | 1 |
| 17375 | C | 91.03600 | 55.84080 | 74.74190 | -893.83321  | 196.54963   | -68.61397   | 1 |
| 17376 | H | 91.33000 | 56.77180 | 74.28090 | -1591.12168 | 302.17210   | -2714.27866 | 1 |
| 17377 | H | 90.59400 | 55.18780 | 74.00390 | -576.40564  | 2947.00891  | 943.08605   | 1 |
| 17378 | C | 92.32500 | 55.26980 | 75.05690 | 633.10786   | -635.66830  | 108.59183   | 1 |
| 17379 | O | 92.92800 | 54.78180 | 74.07790 | -203.32699  | -693.29440  | 294.05873   | 1 |
| 17380 | N | 92.85900 | 55.28180 | 76.31390 | -423.77072  | -721.99708  | 74.73643    | 1 |
| 17381 | H | 92.39700 | 55.80080 | 77.02990 | -2182.92949 | -317.00795  | 2231.41823  | 1 |
| 17382 | C | 94.18600 | 54.76780 | 76.54990 | -519.65626  | 741.53402   | -163.87150  | 1 |
| 17383 | H | 94.42000 | 54.19980 | 75.66190 | 2042.92389  | 2186.73409  | -990.76277  | 1 |
| 17384 | C | 95.24000 | 55.87480 | 76.84190 | -406.83065  | 773.69858   | -293.62934  | 1 |
| 17385 | H | 96.23400 | 55.39980 | 76.97990 | 1640.53249  | 998.87294   | -2507.31248 | 1 |
| 17386 | H | 94.96800 | 56.43880 | 77.75990 | 1804.08947  | -533.91802  | -2533.35478 | 1 |
| 17387 | C | 95.32500 | 56.83880 | 75.67490 | 654.95474   | 604.67323   | -210.00064  | 1 |
| 17388 | C | 94.57400 | 58.04680 | 75.56990 | 731.71339   | -400.11289  | 340.42540   | 1 |
| 17389 | H | 93.81100 | 58.35680 | 76.26890 | 1621.81396  | -2627.07086 | 559.19251   | 1 |
| 17390 | C | 94.76300 | 58.89280 | 74.47790 | -425.21057  | -262.96070  | -777.13733  | 1 |
| 17391 | H | 94.19800 | 59.78980 | 74.27190 | -2214.85488 | 878.17117   | 2048.42730  | 1 |
| 17392 | C | 95.64700 | 58.60780 | 73.44990 | 412.56078   | 587.45763   | 550.72522   | 1 |
| 17393 | O | 95.87200 | 59.44180 | 72.41690 | -560.11085  | -357.88667  | 413.39932   | 1 |
| 17394 | H | 96.32200 | 59.00280 | 71.69190 | 1955.31868  | -1688.47311 | 1768.93106  | 1 |
| 17395 | C | 96.26800 | 56.58880 | 74.66090 | -711.29179  | -522.03013  | -245.19670  | 1 |
| 17396 | H | 96.92000 | 55.72780 | 74.64290 | -1396.08723 | 234.46085   | -2827.95862 | 1 |
| 17397 | C | 96.40200 | 57.42980 | 73.55890 | 239.36014   | -857.17333  | -178.26183  | 1 |
| 17398 | H | 97.07000 | 57.15380 | 72.75690 | 1810.66320  | 1092.18531  | -2344.28853 | 1 |
| 17399 | C | 94.25100 | 53.70880 | 77.63690 | 514.36361   | 686.42840   | -329.84905  | 1 |
| 17400 | O | 94.75800 | 52.60880 | 77.40090 | -419.00787  | -618.77781  | -265.43881  | 1 |
| 17401 | N | 93.66100 | 53.96080 | 78.80590 | 254.13132   | -668.26441  | 426.01780   | 1 |
| 17402 | H | 93.27600 | 54.86780 | 78.95390 | -1236.76060 | -2600.59858 | 1246.98660  | 1 |
| 17403 | C | 93.44100 | 53.00680 | 79.89090 | -601.81432  | 604.19439   | -349.06548  | 1 |
| 17404 | H | 94.35700 | 52.47780 | 80.10790 | 1825.75358  | 1578.63553  | 2002.46595  | 1 |
| 17405 | C | 92.94400 | 53.62880 | 81.25290 | 443.80576   | -393.77199  | -705.11153  | 1 |
| 17406 | H | 92.05600 | 54.20480 | 80.91490 | 1526.44231  | 1905.07992  | 1970.59790  | 1 |
| 17407 | H | 92.64800 | 52.84180 | 81.97990 | 1216.13596  | 899.36378   | 2742.98059  | 1 |
| 17408 | C | 93.94700 | 54.46080 | 82.04690 | -395.24330  | 818.29969   | 91.04556    | 1 |
| 17409 | H | 94.47900 | 55.07880 | 81.29190 | -1518.71544 | -2747.20600 | 171.08257   | 1 |
| 17410 | H | 94.64500 | 53.84780 | 82.65590 | 2441.23361  | -1925.35655 | 446.86464   | 1 |
| 17411 | C | 93.27700 | 55.39580 | 83.02990 | -568.93645  | 45.01388    | 697.67726   | 1 |
| 17412 | O | 92.47900 | 54.97380 | 83.85390 | 277.08816   | -652.90903  | 327.84141   | 1 |
| 17413 | N | 93.52300 | 56.72180 | 82.88790 | -589.21039  | -84.00996   | 585.73711   | 1 |

|       |   |          |          |          |             |             |             |   |
|-------|---|----------|----------|----------|-------------|-------------|-------------|---|
| 17414 | H | 94.41900 | 57.02380 | 82.56290 | -2099.22431 | 47.95983    | -2359.45524 | 1 |
| 17415 | H | 92.86000 | 57.35880 | 83.28190 | 1727.88598  | 366.51408   | -2616.65426 | 1 |
| 17416 | C | 92.57700 | 51.86780 | 79.50590 | 307.03237   | 599.38574   | 600.81571   | 1 |
| 17417 | O | 92.78500 | 50.65780 | 79.79990 | -588.61236  | 398.43318   | -367.87454  | 1 |
| 17418 | N | 91.47300 | 52.18080 | 78.75590 | 358.64088   | 365.81277   | 655.88441   | 1 |
| 17419 | H | 91.20800 | 53.14080 | 78.70990 | 2026.38491  | 266.84928   | 2374.73414  | 1 |
| 17420 | C | 90.61600 | 51.17280 | 78.07990 | 622.80050   | -485.14990  | 433.00641   | 1 |
| 17421 | H | 90.80800 | 50.23680 | 78.58390 | -2146.65397 | -1357.71144 | -1872.82504 | 1 |
| 17422 | C | 89.08300 | 51.53180 | 78.20090 | 474.89020   | -646.62861  | 410.05360   | 1 |
| 17423 | H | 88.90900 | 52.51580 | 77.71390 | -2986.90579 | -810.46801  | 559.95488   | 1 |
| 17424 | H | 88.49600 | 50.75480 | 77.66490 | 385.07431   | 2813.55053  | 1345.41743  | 1 |
| 17425 | C | 88.66600 | 51.54680 | 79.65090 | -18.59448   | 730.56480   | 533.97343   | 1 |
| 17426 | H | 89.15400 | 52.39480 | 80.17690 | 1410.85715  | 2459.48343  | -1381.03279 | 1 |
| 17427 | H | 89.07300 | 50.61780 | 80.10390 | 2468.82731  | -1052.29292 | -1652.96547 | 1 |
| 17428 | C | 87.13900 | 51.48180 | 79.68990 | -434.68627  | -793.38035  | -118.26329  | 1 |
| 17429 | H | 86.76700 | 52.34880 | 79.10290 | 819.63088   | -1656.38513 | 2529.15828  | 1 |
| 17430 | H | 86.88900 | 50.48680 | 79.26190 | -2962.05142 | 807.77855   | 684.02838   | 1 |
| 17431 | C | 86.57500 | 51.74980 | 81.08890 | 624.52108   | 584.56640   | -330.56326  | 1 |
| 17432 | H | 86.92000 | 52.73180 | 81.47690 | -1472.39118 | 2540.31383  | -1150.99503 | 1 |
| 17433 | H | 86.98500 | 50.92780 | 81.71390 | 426.78497   | -2562.75313 | -1786.33586 | 1 |
| 17434 | N | 85.12500 | 51.68880 | 81.07790 | -327.65326  | 635.94393   | -466.28001  | 1 |
| 17435 | H | 84.77400 | 50.75480 | 80.78390 | 2059.62684  | 2254.53092  | -772.57995  | 1 |
| 17436 | H | 84.69900 | 52.02580 | 81.96490 | -2255.66064 | -2169.92629 | -334.00927  | 1 |
| 17437 | H | 84.83800 | 52.34680 | 80.32490 | 2700.67518  | 849.04682   | -1383.60262 | 1 |
| 17438 | C | 90.95300 | 50.94980 | 76.60790 | -794.82222  | 419.33478   | 162.82826   | 1 |
| 17439 | O | 90.98900 | 51.89480 | 75.82090 | -480.24644  | -339.16292  | -542.84198  | 1 |
| 17440 | N | 91.05100 | 49.72080 | 76.17790 | -652.42125  | 402.56880   | 347.06871   | 1 |
| 17441 | H | 90.96200 | 48.97080 | 76.82890 | 1455.59256  | 2352.58446  | -1519.18408 | 1 |
| 17442 | C | 91.29900 | 49.34780 | 74.85290 | -199.67264  | 857.49545   | 240.30770   | 1 |
| 17443 | H | 91.82800 | 50.10280 | 74.28990 | 806.87489   | -479.31523  | -3017.74564 | 1 |
| 17444 | C | 92.38200 | 48.18380 | 74.82990 | -235.56528  | 673.22905   | -592.82728  | 1 |
| 17445 | H | 92.07000 | 47.34480 | 75.48790 | 1994.94448  | 898.40063   | 2242.64783  | 1 |
| 17446 | H | 92.30400 | 47.74580 | 73.81190 | -1465.24917 | -2624.07662 | 902.06909   | 1 |
| 17447 | C | 93.85500 | 48.62380 | 74.83190 | -427.43123  | 622.41207   | 502.45541   | 1 |
| 17448 | H | 94.07900 | 49.05780 | 73.83490 | -1536.79240 | -1549.85098 | -2281.87548 | 1 |
| 17449 | H | 94.46100 | 47.69280 | 74.87390 | -1015.85140 | -903.76807  | -2854.69531 | 1 |
| 17450 | C | 94.33100 | 49.57380 | 75.99790 | -126.33383  | 754.23628   | 487.29172   | 1 |
| 17451 | H | 93.81300 | 50.55380 | 75.93290 | 2513.79348  | 1869.68758  | 277.35752   | 1 |
| 17452 | H | 94.18600 | 49.06480 | 76.97490 | -1089.28768 | 2944.09369  | -293.96816  | 1 |
| 17453 | C | 95.82100 | 49.84980 | 75.84490 | 659.12768   | 340.02034   | 512.35935   | 1 |
| 17454 | H | 96.00100 | 50.55280 | 75.00390 | 1606.27959  | -835.05304  | 2551.70036  | 1 |
| 17455 | H | 96.33200 | 48.90480 | 75.56290 | -1868.93442 | 2260.54528  | 1135.13105  | 1 |
| 17456 | N | 96.36400 | 50.35680 | 77.12790 | 81.20232    | -835.21473  | -23.09563   | 1 |
| 17457 | H | 95.93900 | 49.92380 | 77.97290 | 364.39057   | -1843.26879 | -2537.64610 | 1 |
| 17458 | H | 96.24700 | 51.38080 | 77.26290 | -215.43952  | -2413.36853 | -2018.75078 | 1 |
| 17459 | H | 97.39300 | 50.20580 | 77.11590 | 2218.23074  | 1042.91871  | 1953.89131  | 1 |
| 17460 | C | 90.00100 | 49.00580 | 74.10290 | -649.43109  | -428.40477  | 458.87613   | 1 |
| 17461 | O | 90.08300 | 48.49180 | 72.98190 | -112.65898  | 635.89307   | 446.27918   | 1 |
| 17462 | N | 88.81000 | 49.29580 | 74.67490 | 642.13307   | -286.88294  | 443.47643   | 1 |
| 17463 | H | 88.70200 | 49.78880 | 75.53390 | -1339.66650 | -686.17315  | 2747.20915  | 1 |
| 17464 | C | 87.55400 | 48.97680 | 74.08890 | 807.40947   | 337.23074   | 236.54092   | 1 |
| 17465 | H | 87.68600 | 49.00780 | 73.01690 | 1257.58492  | -2804.72326 | 625.85089   | 1 |
| 17466 | C | 87.15200 | 47.53380 | 74.50490 | 192.69265   | -367.55207  | -825.43390  | 1 |
| 17467 | H | 87.00100 | 47.55280 | 75.60590 | 624.95393   | -2726.71050 | 1414.33315  | 1 |
| 17468 | H | 88.03400 | 46.90580 | 74.25790 | -297.94061  | 1842.96608  | 2519.41907  | 1 |
| 17469 | C | 85.88800 | 46.98380 | 73.78190 | -517.72163  | -671.48744  | -346.92766  | 1 |
| 17470 | H | 85.04600 | 47.70380 | 73.87690 | 2156.37604  | 2132.35386  | 825.17355   | 1 |
| 17471 | C | 86.19700 | 46.73680 | 72.27590 | 509.88814   | -385.04054  | 628.24096   | 1 |
| 17472 | H | 86.97300 | 45.94380 | 72.21590 | 754.15993   | 1558.26217  | -2646.15083 | 1 |
| 17473 | H | 86.79000 | 47.58380 | 71.86990 | -2373.73063 | 8.06651     | 2052.89856  | 1 |
| 17474 | H | 85.32100 | 46.35980 | 71.70490 | 1416.40800  | 2205.52311  | -1760.23517 | 1 |
| 17475 | C | 85.44900 | 45.69380 | 74.43390 | -575.59521  | -683.72804  | 156.05618   | 1 |

|       |   |          |          |          |             |             |             |   |
|-------|---|----------|----------|----------|-------------|-------------|-------------|---|
| 17476 | H | 86.17400 | 44.86080 | 74.31090 | -2599.21855 | 1299.81467  | 1198.89010  | 1 |
| 17477 | H | 84.50200 | 45.40480 | 73.93090 | -2901.17415 | -258.25554  | -1211.83336 | 1 |
| 17478 | H | 85.30700 | 45.81980 | 75.52790 | -2860.55318 | -599.22074  | 1152.23141  | 1 |
| 17479 | C | 86.58300 | 49.95080 | 74.48290 | 467.10690   | 40.38841    | 765.05519   | 1 |
| 17480 | O | 86.54200 | 50.31480 | 75.64190 | -591.60520  | 473.35718   | -253.86202  | 1 |
| 17481 | N | 85.76300 | 50.38280 | 73.53390 | 70.85480    | -808.54208  | 198.73130   | 1 |
| 17482 | H | 85.97600 | 50.05580 | 72.61690 | 1801.88911  | 1550.27901  | 2046.56587  | 1 |
| 17483 | C | 84.62100 | 51.21080 | 73.67290 | -169.02506  | -438.56183  | -793.81836  | 1 |
| 17484 | H | 84.52300 | 51.36680 | 74.73690 | -1670.48822 | 2606.29968  | -604.10162  | 1 |
| 17485 | C | 84.88700 | 52.61880 | 73.07790 | 867.09297   | 228.53306   | -163.98279  | 1 |
| 17486 | H | 83.94100 | 53.16780 | 72.88390 | 1366.84042  | 587.76508   | 2757.73719  | 1 |
| 17487 | H | 85.25400 | 52.43280 | 72.04590 | -1943.23716 | -81.37147   | -2490.07071 | 1 |
| 17488 | C | 85.88700 | 53.42880 | 73.88690 | 641.21360   | -636.33986  | 52.33474    | 1 |
| 17489 | H | 86.80800 | 52.87480 | 74.16590 | -296.71855  | 2776.83533  | -1472.81840 | 1 |
| 17490 | H | 85.38700 | 53.70380 | 74.83990 | -224.50653  | 2919.51661  | -1175.67359 | 1 |
| 17491 | C | 86.28500 | 54.67180 | 73.14490 | -50.67725   | -647.09072  | -649.04509  | 1 |
| 17492 | H | 85.41500 | 55.31380 | 72.88890 | 967.76638   | 2325.71282  | -1901.62633 | 1 |
| 17493 | H | 86.96800 | 55.30180 | 73.75390 | 1562.55506  | 2005.23223  | 1841.94832  | 1 |
| 17494 | N | 87.02500 | 54.16280 | 71.89790 | -613.51596  | 357.87667   | 452.82345   | 1 |
| 17495 | H | 86.52100 | 54.27380 | 71.04090 | 2251.03426  | 2194.33652  | -154.74492  | 1 |
| 17496 | C | 88.26400 | 53.66480 | 71.80990 | -574.32393  | 369.15566   | -626.42116  | 1 |
| 17497 | N | 89.10000 | 53.50980 | 72.82190 | 573.46650   | 615.66775   | -96.05201   | 1 |
| 17498 | H | 88.79100 | 53.70980 | 73.75190 | -331.83540  | 2641.13313  | 1671.42228  | 1 |
| 17499 | H | 90.04200 | 53.23980 | 72.62390 | 2820.03680  | 636.37764   | 1219.55910  | 1 |
| 17500 | N | 88.74400 | 53.35480 | 70.59690 | 239.09338   | -458.47432  | 646.66656   | 1 |
| 17501 | H | 88.15000 | 53.32880 | 69.79290 | 588.76453   | -1071.18775 | -2909.93942 | 1 |
| 17502 | H | 89.71700 | 53.20780 | 70.42090 | 1550.59835  | 2704.32568  | 432.95304   | 1 |
| 17503 | C | 83.32200 | 50.61480 | 73.20590 | -631.25281  | -474.40471  | -470.44823  | 1 |
| 17504 | O | 83.24600 | 50.07780 | 72.10590 | 154.16955   | 81.40065    | 755.61937   | 1 |
| 17505 | N | 82.30300 | 50.67980 | 74.02090 | 285.13236   | -353.75363  | -721.81545  | 1 |
| 17506 | H | 82.47000 | 51.01780 | 74.94390 | -1320.51972 | 2084.15193  | 1944.69055  | 1 |
| 17507 | C | 80.90500 | 50.41080 | 73.69990 | 210.07684   | 865.93215   | 193.90642   | 1 |
| 17508 | H | 80.90700 | 49.61780 | 72.96590 | 2618.24816  | 1230.87924  | 1218.80562  | 1 |
| 17509 | C | 80.09800 | 49.91280 | 74.88890 | 887.87873   | 102.98276   | 152.46396   | 1 |
| 17510 | H | 80.65700 | 49.07480 | 75.35590 | -613.28966  | 2741.78292  | -1437.77795 | 1 |
| 17511 | H | 79.13500 | 49.50380 | 74.51390 | -1337.39175 | -2451.62466 | -1459.22698 | 1 |
| 17512 | O | 79.93000 | 50.94380 | 75.84990 | 401.92725   | 680.62285   | 12.17402    | 1 |
| 17513 | H | 80.78600 | 51.10580 | 76.25190 | 2042.19612  | -1931.06415 | 1391.89319  | 1 |
| 17514 | C | 80.20200 | 51.63780 | 73.09290 | -294.67002  | 464.99592   | 718.26769   | 1 |
| 17515 | O | 80.82500 | 52.67380 | 72.89290 | 2.14290     | -665.84704  | 404.90586   | 1 |
| 17516 | N | 78.90600 | 51.49280 | 72.63190 | 800.15382   | -240.89606  | 64.27737    | 1 |
| 17517 | H | 78.46200 | 50.61780 | 72.45690 | 1962.54868  | 2036.12175  | 1366.55138  | 1 |
| 17518 | C | 78.10900 | 52.61380 | 72.12490 | -43.08762   | -518.84935  | -757.77133  | 1 |
| 17519 | H | 78.62900 | 53.02480 | 71.27190 | 566.72532   | 3042.40369  | 574.85855   | 1 |
| 17520 | C | 76.74700 | 52.13880 | 71.62190 | -6.00748    | 690.83885   | 588.36671   | 1 |
| 17521 | H | 76.16900 | 52.99880 | 71.21990 | 956.16082   | -1450.21470 | 2607.71660  | 1 |
| 17522 | H | 76.18700 | 51.79780 | 72.51890 | -1766.91820 | -2487.23243 | -776.41636  | 1 |
| 17523 | C | 76.84800 | 51.01580 | 70.56590 | -680.31760  | 336.20169   | 502.41519   | 1 |
| 17524 | H | 75.93000 | 51.16180 | 69.95690 | 960.34794   | 1597.10047  | 2524.16015  | 1 |
| 17525 | H | 77.66100 | 51.23680 | 69.84290 | 2352.98473  | 469.80657   | 2018.28403  | 1 |
| 17526 | S | 76.94200 | 49.31380 | 71.19890 | 337.19909   | 412.75368   | 154.65424   | 1 |
| 17527 | C | 75.79700 | 48.59480 | 69.95690 | 822.81620   | 249.88131   | 282.45155   | 1 |
| 17528 | H | 75.35400 | 47.67380 | 70.39290 | 2060.74359  | -2366.09647 | -132.47549  | 1 |
| 17529 | H | 76.40800 | 48.33680 | 69.06590 | -364.61826  | -2319.87485 | 2075.47209  | 1 |
| 17530 | H | 75.08300 | 49.32480 | 69.51890 | 1732.48659  | 1351.75257  | -2263.39407 | 1 |
| 17531 | C | 77.92300 | 53.80080 | 73.01490 | -220.98370  | 641.16344   | 603.70978   | 1 |
| 17532 | O | 78.11000 | 54.94380 | 72.61990 | 507.20748   | -571.98677  | -184.01056  | 1 |
| 17533 | N | 77.71000 | 53.58280 | 74.34390 | 112.45206   | -796.61967  | 231.54239   | 1 |
| 17534 | H | 77.59800 | 52.67680 | 74.74290 | -1360.67478 | -1229.55302 | 2544.89250  | 1 |
| 17535 | C | 77.68700 | 54.67680 | 75.33990 | -682.04171  | -106.36014  | -610.49811  | 1 |
| 17536 | H | 76.94800 | 55.38980 | 75.00390 | -1210.53135 | 2908.43475  | 23.36828    | 1 |
| 17537 | C | 77.20500 | 54.32980 | 76.79390 | 469.29062   | 13.13921    | -790.83834  | 1 |

|       |   |          |          |          |             |             |             |   |
|-------|---|----------|----------|----------|-------------|-------------|-------------|---|
| 17538 | H | 77.72800 | 53.41580 | 77.14590 | 2370.63613  | -1296.24041 | -1617.01128 | 1 |
| 17539 | O | 75.76300 | 54.21780 | 76.78490 | 246.74145   | -472.35287  | -590.27785  | 1 |
| 17540 | H | 75.63300 | 53.42280 | 76.26290 | 3026.59544  | -800.63023  | -281.48693  | 1 |
| 17541 | C | 77.39900 | 55.42680 | 77.81890 | -568.97019  | 427.32721   | 564.12234   | 1 |
| 17542 | H | 76.81700 | 55.15480 | 78.72490 | 2377.70020  | 2040.06093  | 265.30622   | 1 |
| 17543 | H | 78.42900 | 55.46880 | 78.23490 | 220.82873   | 3109.80303  | -446.85938  | 1 |
| 17544 | H | 77.11100 | 56.36280 | 77.29590 | -11.43411   | -3026.81523 | 840.02012   | 1 |
| 17545 | C | 78.99300 | 55.41280 | 75.48290 | 697.95757   | -573.76628  | -89.93018   | 1 |
| 17546 | O | 79.01200 | 56.64380 | 75.52890 | -63.11175   | -772.43755  | -146.97250  | 1 |
| 17547 | N | 80.04200 | 54.60680 | 75.54790 | -402.26277  | 514.11675   | -552.84201  | 1 |
| 17548 | H | 79.91100 | 53.62580 | 75.42390 | -2352.64599 | 2069.82402  | 318.70266   | 1 |
| 17549 | C | 81.45000 | 55.05880 | 75.60490 | 203.28338   | 640.59352   | -630.52741  | 1 |
| 17550 | H | 81.54600 | 55.60980 | 76.52890 | 628.71135   | -639.37924  | -3026.00901 | 1 |
| 17551 | C | 82.49400 | 53.85080 | 75.62690 | 595.14304   | 400.57143   | -574.32955  | 1 |
| 17552 | H | 83.54200 | 54.17680 | 75.80090 | -2235.84851 | -1657.68567 | -1480.77062 | 1 |
| 17553 | H | 82.40300 | 53.30880 | 74.66190 | 673.19822   | 2405.60484  | -1929.09052 | 1 |
| 17554 | C | 82.13700 | 52.85880 | 76.75290 | -373.08063  | 40.92871    | -845.48761  | 1 |
| 17555 | O | 82.51800 | 51.66580 | 76.56390 | -354.38605  | 24.61665    | 693.37048   | 1 |
| 17556 | O | 81.53100 | 53.20380 | 77.76190 | 284.12498   | 77.25823    | 719.25973   | 1 |
| 17557 | C | 81.81100 | 55.96680 | 74.36290 | 201.59443   | 704.83893   | -557.48842  | 1 |
| 17558 | O | 82.31600 | 57.09180 | 74.51690 | 407.19084   | 420.97399   | 518.20284   | 1 |
| 17559 | N | 81.46000 | 55.58180 | 73.12090 | 226.26998   | -737.12114  | -342.84076  | 1 |
| 17560 | H | 80.97900 | 54.71980 | 72.97790 | 2573.21982  | 1051.39428  | 1457.15659  | 1 |
| 17561 | C | 81.68400 | 56.29980 | 71.95890 | 384.57750   | -164.97618  | -818.36243  | 1 |
| 17562 | H | 82.73300 | 56.54780 | 72.03390 | -1974.24170 | 1754.81688  | -1731.48162 | 1 |
| 17563 | C | 81.30300 | 55.39580 | 70.72990 | -586.61785  | 328.70786   | -635.13016  | 1 |
| 17564 | H | 81.29600 | 56.08680 | 69.85890 | -2347.84998 | -2027.08644 | 516.75439   | 1 |
| 17565 | H | 80.24900 | 55.09180 | 70.90490 | -2706.22542 | 1288.96343  | 964.54968   | 1 |
| 17566 | C | 82.34400 | 54.32980 | 70.40590 | 40.27656    | -674.19040  | 593.67127   | 1 |
| 17567 | H | 82.91800 | 54.03380 | 71.31090 | -1069.05665 | 1990.54140  | 2183.64709  | 1 |
| 17568 | H | 83.11200 | 54.74680 | 69.71990 | -617.05995  | -2633.90841 | 1586.03922  | 1 |
| 17569 | C | 81.85800 | 53.05580 | 69.67590 | 655.61508   | -561.97280  | 256.89264   | 1 |
| 17570 | H | 81.45300 | 53.35580 | 68.68590 | -2522.32768 | -602.87286  | 1774.03817  | 1 |
| 17571 | H | 81.02700 | 52.73880 | 70.34090 | -291.10079  | -1814.87670 | -2562.77661 | 1 |
| 17572 | C | 82.96900 | 51.98280 | 69.53090 | -519.84914  | -510.12782  | 534.16558   | 1 |
| 17573 | H | 83.51800 | 51.86480 | 70.48990 | 1852.32208  | 1399.27427  | 2109.45388  | 1 |
| 17574 | H | 83.71600 | 52.20480 | 68.73890 | 1296.71898  | -1527.63214 | 2405.11738  | 1 |
| 17575 | N | 82.51400 | 50.65680 | 69.16890 | 530.42691   | 534.02625   | 370.02555   | 1 |
| 17576 | H | 82.10400 | 50.74380 | 68.21690 | -174.42471  | 2207.89161  | -2254.88183 | 1 |
| 17577 | H | 83.32800 | 50.00980 | 69.15490 | -697.52425  | 2022.61341  | 2299.10532  | 1 |
| 17578 | H | 81.81100 | 50.26080 | 69.82490 | -1895.70458 | -2330.05748 | 916.87689   | 1 |
| 17579 | C | 80.96500 | 57.63780 | 71.82890 | 826.33937   | -331.71141  | 153.65811   | 1 |
| 17580 | O | 81.52700 | 58.63680 | 71.43890 | 523.16986   | 50.70035    | -595.67242  | 1 |
| 17581 | N | 79.66900 | 57.69580 | 72.21290 | 62.45139    | 409.56300   | -748.05525  | 1 |
| 17582 | H | 79.23700 | 56.80280 | 72.31390 | 1047.96918  | -1318.90113 | 2642.40019  | 1 |
| 17583 | C | 78.91900 | 58.95380 | 72.34290 | 668.93466   | 8.64760     | 604.37743   | 1 |
| 17584 | H | 79.04000 | 59.54580 | 71.44790 | -1801.46544 | 2274.28975  | 1223.80510  | 1 |
| 17585 | C | 77.45800 | 58.71880 | 72.77690 | 812.28507   | -345.45887  | -213.28381  | 1 |
| 17586 | H | 76.82600 | 59.62580 | 72.87990 | -1464.45585 | -658.36634  | 2698.36901  | 1 |
| 17587 | H | 77.44500 | 58.21880 | 73.76890 | -2755.11863 | 1063.15487  | 1090.38235  | 1 |
| 17588 | C | 76.64300 | 57.82380 | 71.87090 | 565.68760   | -81.69041   | 696.34826   | 1 |
| 17589 | C | 76.58300 | 58.10480 | 70.48090 | 191.17442   | -840.35040  | -289.80430  | 1 |
| 17590 | H | 77.12200 | 58.96280 | 70.10690 | -2027.91211 | 1447.77085  | -1939.83156 | 1 |
| 17591 | C | 75.81100 | 57.35880 | 69.59390 | -626.25240  | -139.62751  | 642.60311   | 1 |
| 17592 | H | 75.76500 | 57.60680 | 68.54390 | -1780.74170 | -1779.93218 | -1896.43867 | 1 |
| 17593 | C | 75.22600 | 56.17080 | 70.00690 | 502.67737   | -711.06597  | 237.11467   | 1 |
| 17594 | O | 74.53900 | 55.28780 | 69.16190 | 631.47124   | 29.23568    | 456.27273   | 1 |
| 17595 | H | 74.41500 | 54.44180 | 69.59890 | -1234.33470 | -2724.01531 | -980.30574  | 1 |
| 17596 | C | 75.90500 | 56.70580 | 72.30390 | -442.83426  | -215.54464  | 759.17842   | 1 |
| 17597 | H | 75.83900 | 56.41280 | 73.34090 | -1393.61831 | 2307.76743  | 1620.77316  | 1 |
| 17598 | C | 75.30900 | 55.81680 | 71.36490 | -143.38104  | 491.05271   | -768.48538  | 1 |
| 17599 | H | 74.94300 | 54.87280 | 71.74090 | 1870.61073  | 1909.21757  | -1669.14605 | 1 |



|       |   |          |          |          |             |             |             |   |
|-------|---|----------|----------|----------|-------------|-------------|-------------|---|
| 17600 | C | 79.49600 | 59.91880 | 73.36590 | 310.03549   | -622.19152  | 573.62197   | 1 |
| 17601 | O | 79.75100 | 61.08780 | 73.13790 | 161.29134   | 38.24882    | -780.40413  | 1 |
| 17602 | N | 79.82100 | 59.45580 | 74.55290 | -645.59120  | -337.18352  | -440.57348  | 1 |
| 17603 | H | 79.68400 | 58.49580 | 74.78390 | 2765.67771  | -1450.35858 | -344.06181  | 1 |
| 17604 | C | 80.44200 | 60.30880 | 75.56290 | -734.28892  | 362.26782   | -421.75171  | 1 |
| 17605 | H | 79.90500 | 61.24580 | 75.55490 | -2792.31292 | -897.72575  | -1155.65992 | 1 |
| 17606 | C | 80.24100 | 59.73180 | 76.98690 | 329.07937   | 554.50571   | -654.93185  | 1 |
| 17607 | H | 80.77400 | 60.48080 | 77.61190 | 2462.34126  | 127.12950   | 1939.85042  | 1 |
| 17608 | H | 80.74600 | 58.75980 | 77.17490 | -1131.41524 | 2485.96200  | -1578.84657 | 1 |
| 17609 | C | 78.72500 | 59.53680 | 77.40490 | -659.15040  | 472.49354   | -434.86651  | 1 |
| 17610 | H | 78.16700 | 60.42180 | 77.03090 | 2658.64920  | 1563.65188  | -618.41456  | 1 |
| 17611 | H | 78.24300 | 58.62080 | 77.00190 | -2103.48584 | -1944.98981 | 1292.83512  | 1 |
| 17612 | C | 78.50600 | 59.36680 | 78.91590 | 28.64145    | 200.53876   | 879.83748   | 1 |
| 17613 | H | 78.94700 | 58.43680 | 79.33590 | -77.54784   | 2294.75625  | 2142.82964  | 1 |
| 17614 | H | 77.42800 | 59.16480 | 79.09190 | -1973.69052 | -1071.09530 | 2196.37425  | 1 |
| 17615 | N | 79.05000 | 60.55680 | 79.71390 | -232.92205  | 497.60710   | 634.13661   | 1 |
| 17616 | H | 79.41200 | 61.35180 | 79.22890 | 829.62815   | -2922.84523 | -815.56267  | 1 |
| 17617 | C | 79.10800 | 60.62180 | 81.05290 | 121.67880   | -646.72468  | -638.70515  | 1 |
| 17618 | N | 78.65600 | 59.79180 | 81.93890 | -680.33710  | -278.22122  | 409.58322   | 1 |
| 17619 | H | 78.00100 | 59.08680 | 81.66790 | -1758.51946 | -2223.70049 | 1356.87274  | 1 |
| 17620 | H | 78.68000 | 60.11080 | 82.88590 | -1985.72939 | -1569.31999 | -1880.29613 | 1 |
| 17621 | N | 79.61200 | 61.72080 | 81.54490 | -337.58761  | -584.30655  | -517.00108  | 1 |
| 17622 | H | 79.92100 | 62.44280 | 80.92490 | -1565.41979 | 1492.86060  | 2278.79114  | 1 |
| 17623 | H | 79.73600 | 61.78780 | 82.53490 | -1798.38855 | 1793.76216  | -1868.53441 | 1 |
| 17624 | C | 81.91100 | 60.65180 | 75.26890 | 612.34580   | 443.77764   | -517.12508  | 1 |
| 17625 | O | 82.34700 | 61.74380 | 75.64890 | 404.44469   | 677.51636   | -55.80654   | 1 |
| 17626 | N | 82.63500 | 59.80580 | 74.56990 | -194.80445  | 74.07543    | -829.93939  | 1 |
| 17627 | H | 82.35300 | 58.85480 | 74.46790 | -2534.09818 | 1466.87656  | 1155.08720  | 1 |
| 17628 | C | 83.96700 | 60.27580 | 74.06590 | 575.73276   | -678.33284  | 157.97618   | 1 |
| 17629 | H | 84.51900 | 60.58080 | 74.94290 | -2020.08267 | -266.09556  | 2389.94338  | 1 |
| 17630 | C | 84.76500 | 59.15580 | 73.29790 | 802.63368   | -158.23136  | -402.30804  | 1 |
| 17631 | H | 84.27400 | 58.99080 | 72.31490 | -1309.67093 | 1430.43942  | -2494.03726 | 1 |
| 17632 | H | 84.62400 | 58.26080 | 73.94190 | -1614.59018 | 2706.35416  | 64.72486    | 1 |
| 17633 | C | 86.25700 | 59.33680 | 73.14890 | -741.70812  | 202.46992   | 487.94101   | 1 |
| 17634 | H | 86.42000 | 60.38280 | 72.81090 | 2277.59375  | -2075.12710 | -611.22370  | 1 |
| 17635 | C | 86.99400 | 59.10380 | 74.43890 | -137.29936  | 763.25162   | -500.00913  | 1 |
| 17636 | H | 88.03400 | 59.42780 | 74.21690 | 2311.67705  | 2064.42048  | 527.50779   | 1 |
| 17637 | H | 86.66200 | 59.73080 | 75.29390 | 1760.34186  | -1717.90148 | 1942.49574  | 1 |
| 17638 | H | 86.94000 | 58.03480 | 74.73590 | 1613.83236  | 1951.69980  | 1855.41381  | 1 |
| 17639 | C | 86.78800 | 58.36680 | 72.08090 | -38.09675   | 295.79315   | 851.64547   | 1 |
| 17640 | H | 86.63600 | 57.36080 | 72.52590 | -1367.98749 | 2400.07169  | -1530.64046 | 1 |
| 17641 | H | 87.88400 | 58.53880 | 72.02790 | -267.64055  | 2655.86362  | 1662.64344  | 1 |
| 17642 | H | 86.34700 | 58.51580 | 71.07190 | -2547.99560 | 1748.39836  | 617.68570   | 1 |
| 17643 | C | 83.83400 | 61.42680 | 73.15390 | -354.64480  | -407.89906  | -744.37542  | 1 |
| 17644 | O | 84.63000 | 62.37580 | 73.26490 | 648.14062   | 411.87515   | -185.96437  | 1 |
| 17645 | N | 82.85300 | 61.48880 | 72.22890 | -702.02783  | -438.82468  | -184.48865  | 1 |
| 17646 | H | 82.23800 | 60.70680 | 72.16490 | 2551.70259  | 1722.72296  | -649.34929  | 1 |
| 17647 | C | 82.51100 | 62.67080 | 71.40490 | -180.44389  | 898.20725   | -67.92951   | 1 |
| 17648 | H | 83.43700 | 63.02080 | 70.97290 | 2736.15189  | 942.16660   | 1216.01058  | 1 |
| 17649 | C | 81.45100 | 62.39580 | 70.30990 | 648.58985   | 637.19681   | 52.60743    | 1 |
| 17650 | H | 80.52300 | 61.97280 | 70.74890 | -1130.53842 | 1220.42489  | 2666.10188  | 1 |
| 17651 | H | 81.11100 | 63.34480 | 69.84290 | -1243.55693 | -1028.19869 | 2692.91121  | 1 |
| 17652 | N | 83.07400 | 62.04880 | 68.49190 | -72.09256   | -817.92844  | 160.36765   | 1 |
| 17653 | C | 81.94000 | 61.60380 | 69.18490 | 547.48863   | -716.85763  | 39.39778    | 1 |
| 17654 | C | 83.07900 | 61.30880 | 67.38090 | -162.73829  | 807.53689   | -417.27807  | 1 |
| 17655 | H | 83.93400 | 61.31080 | 66.70590 | 2700.42262  | 1608.11270  | 65.40617    | 1 |
| 17656 | N | 82.06700 | 60.43080 | 67.32990 | 21.15065    | 698.20229   | -493.46019  | 1 |
| 17657 | H | 81.96900 | 59.68080 | 66.67590 | 2116.59453  | 2326.94943  | -96.22663   | 1 |
| 17658 | C | 81.28500 | 60.67180 | 68.46190 | 745.64159   | 350.07244   | -394.10703  | 1 |
| 17659 | H | 80.30900 | 60.21780 | 68.57990 | 2033.02284  | 196.50651   | 2378.51407  | 1 |
| 17660 | C | 81.99700 | 63.82580 | 72.29390 | -165.90970  | -887.54285  | -106.51993  | 1 |
| 17661 | O | 82.45800 | 64.95180 | 72.13090 | -748.05413  | 56.91983    | -273.20362  | 1 |

|       |   |          |          |          |             |             |             |   |
|-------|---|----------|----------|----------|-------------|-------------|-------------|---|
| 17662 | N | 81.10700 | 63.58780 | 73.24290 | -512.30371  | -351.85098  | 564.88451   | 1 |
| 17663 | H | 80.64000 | 62.70880 | 73.29990 | 2256.16195  | 587.08714   | -2116.98066 | 1 |
| 17664 | C | 80.62600 | 64.63480 | 74.15290 | 535.62813   | 423.97319   | 593.90494   | 1 |
| 17665 | H | 80.25900 | 65.41980 | 73.50690 | 1099.07169  | 2679.89010  | -1239.77150 | 1 |
| 17666 | C | 79.51400 | 64.01580 | 75.02690 | 482.42299   | 682.57672   | 356.16106   | 1 |
| 17667 | H | 78.93200 | 63.32680 | 74.37890 | 1776.31344  | -1447.63628 | 2141.04153  | 1 |
| 17668 | H | 80.05900 | 63.34980 | 75.72990 | 2042.83635  | 2141.45031  | -1073.18334 | 1 |
| 17669 | C | 78.65200 | 64.92580 | 75.86790 | 146.11829   | 896.21227   | -111.29981  | 1 |
| 17670 | H | 79.32500 | 65.43280 | 76.59190 | 1572.66026  | -162.20736  | -2724.55262 | 1 |
| 17671 | C | 77.84300 | 65.91680 | 75.11090 | 397.68066   | 398.06485   | -723.21153  | 1 |
| 17672 | H | 78.40300 | 66.58380 | 74.41990 | -2086.64999 | -2126.87440 | -1020.86725 | 1 |
| 17673 | H | 77.04300 | 65.37980 | 74.55790 | 1421.83921  | -2277.51256 | 1623.99252  | 1 |
| 17674 | H | 77.34800 | 66.57180 | 75.85890 | 469.35220   | 679.65577   | -3042.08427 | 1 |
| 17675 | C | 77.73700 | 63.96780 | 76.62590 | 173.72059   | -633.55352  | -636.05472  | 1 |
| 17676 | H | 78.25600 | 63.31880 | 77.36390 | -2273.11237 | -1444.05636 | 1622.53117  | 1 |
| 17677 | H | 77.23500 | 63.24180 | 75.95090 | -2034.98824 | -468.30590  | -2364.38132 | 1 |
| 17678 | H | 77.01400 | 64.60180 | 77.18190 | 1032.40119  | 2970.78737  | -112.01456  | 1 |
| 17679 | C | 81.76100 | 65.29180 | 74.99290 | 338.51371   | 303.40417   | 781.50850   | 1 |
| 17680 | O | 81.80900 | 66.50180 | 75.10190 | 441.91437   | 532.16493   | 372.24414   | 1 |
| 17681 | N | 82.73700 | 64.49880 | 75.49490 | -438.71074  | 390.93270   | -620.66337  | 1 |
| 17682 | H | 82.74800 | 63.51180 | 75.35190 | 2662.66134  | -1430.57157 | -860.87617  | 1 |
| 17683 | C | 84.02000 | 64.94880 | 76.06590 | 570.07449   | -676.82637  | 185.98102   | 1 |
| 17684 | H | 83.77900 | 65.63080 | 76.86790 | -1568.41220 | 1468.68089  | 2294.83952  | 1 |
| 17685 | C | 84.77200 | 63.73480 | 76.76590 | 591.31833   | -679.25247  | -111.61653  | 1 |
| 17686 | H | 85.81700 | 64.05580 | 76.96690 | -1294.43509 | 2329.36057  | 1670.94555  | 1 |
| 17687 | H | 84.71000 | 62.84780 | 76.09990 | 2122.06918  | 2037.89727  | -1122.36510 | 1 |
| 17688 | O | 84.15300 | 63.55380 | 78.01490 | 481.99624   | -40.08419   | -630.29644  | 1 |
| 17689 | H | 84.37800 | 64.25280 | 78.63390 | -1791.30470 | 2066.63923  | 1554.08905  | 1 |
| 17690 | C | 84.93100 | 65.67980 | 75.13190 | -668.65983  | -284.45105  | 546.13060   | 1 |
| 17691 | O | 85.56500 | 66.64980 | 75.53790 | -593.22646  | -509.33452  | -128.31155  | 1 |
| 17692 | N | 85.05100 | 65.29680 | 73.86190 | -264.97826  | 746.65147   | 298.61939   | 1 |
| 17693 | H | 84.70800 | 64.42780 | 73.51290 | -2112.12096 | -134.96352  | 2323.26722  | 1 |
| 17694 | C | 85.69500 | 66.04380 | 72.82190 | 567.18923   | 371.70183   | -616.07252  | 1 |
| 17695 | H | 86.70800 | 66.33380 | 73.05990 | 2758.97835  | -1496.28405 | -16.80281   | 1 |
| 17696 | C | 85.74100 | 65.15480 | 71.54090 | -139.12277  | -863.66209  | -250.56710  | 1 |
| 17697 | H | 84.87900 | 64.46080 | 71.44990 | 142.62428   | 2094.40964  | -2357.14046 | 1 |
| 17698 | C | 85.79600 | 65.94080 | 70.19390 | 448.09140   | -357.51663  | 692.87889   | 1 |
| 17699 | H | 84.86900 | 66.50480 | 69.95490 | 2545.26475  | -1360.53258 | 1223.72822  | 1 |
| 17700 | H | 85.96200 | 65.21880 | 69.36590 | -1483.02878 | -28.50688   | -2787.29310 | 1 |
| 17701 | H | 86.63500 | 66.66980 | 70.17690 | -1298.62715 | 2551.36513  | 1314.32383  | 1 |
| 17702 | C | 87.01400 | 64.26180 | 71.59490 | -398.47848  | 628.50707   | 528.07633   | 1 |
| 17703 | H | 86.82200 | 63.39980 | 72.26990 | -897.36194  | -2480.49486 | 1699.58092  | 1 |
| 17704 | H | 87.92700 | 64.84480 | 71.84190 | 309.69020   | -2967.42149 | 969.38262   | 1 |
| 17705 | H | 87.23900 | 63.84180 | 70.59090 | -3029.74422 | -812.69627  | 282.55922   | 1 |
| 17706 | C | 84.98600 | 67.39680 | 72.55390 | -388.20567  | -802.29636  | -191.53180  | 1 |
| 17707 | O | 85.69000 | 68.41580 | 72.40690 | 204.00267   | -510.67779  | 551.72119   | 1 |
| 17708 | N | 83.64700 | 67.48780 | 72.47490 | 209.88712   | -309.53405  | -760.88718  | 1 |
| 17709 | H | 83.09500 | 66.66380 | 72.57690 | 1587.35745  | 333.16398   | 2684.92746  | 1 |
| 17710 | C | 82.92000 | 68.76280 | 72.32790 | -522.12723  | 261.97688   | -713.72885  | 1 |
| 17711 | H | 83.22900 | 69.31680 | 71.45390 | 2017.85139  | 1696.18342  | -1721.77106 | 1 |
| 17712 | C | 81.43200 | 68.40580 | 72.15790 | 642.18654   | -297.34433  | 558.50114   | 1 |
| 17713 | H | 80.91900 | 69.33580 | 71.83390 | -1732.04280 | 1320.60283  | -2284.41409 | 1 |
| 17714 | H | 80.92200 | 68.18880 | 73.12090 | -1763.10117 | -1739.80244 | 1934.58287  | 1 |
| 17715 | H | 81.28100 | 67.60480 | 71.40290 | -744.24462  | 1524.10081  | 2647.34867  | 1 |
| 17716 | C | 83.14400 | 69.72080 | 73.44490 | -401.56651  | 816.77359   | 116.76247   | 1 |
| 17717 | O | 83.43900 | 70.90080 | 73.25090 | 533.44374   | 563.95410   | -145.61397  | 1 |
| 17718 | N | 83.00700 | 69.24380 | 74.69190 | -39.97664   | 577.49679   | -625.50195  | 1 |
| 17719 | H | 82.62000 | 68.33680 | 74.84090 | 2961.24189  | 977.11794   | 378.73485   | 1 |
| 17720 | C | 83.27700 | 70.00580 | 75.90190 | 868.18360   | 27.95767    | 253.05356   | 1 |
| 17721 | H | 82.61000 | 70.85480 | 75.90990 | -2618.14610 | -281.83495  | 1723.37295  | 1 |
| 17722 | C | 83.12800 | 69.09680 | 77.13590 | -194.20103  | -628.26331  | 623.09979   | 1 |
| 17723 | H | 83.48300 | 69.52780 | 78.09690 | -434.75185  | 1739.98287  | 2580.57913  | 1 |

|       |   |          |          |          |             |             |             |   |
|-------|---|----------|----------|----------|-------------|-------------|-------------|---|
| 17724 | H | 83.61800 | 68.12180 | 76.92790 | 547.37166   | -3045.50053 | -553.82756  | 1 |
| 17725 | C | 81.58900 | 68.79880 | 77.42290 | 501.38341   | 748.89580   | -142.27043  | 1 |
| 17726 | O | 80.75700 | 69.59680 | 76.91990 | 629.39047   | 471.66334   | 27.60771    | 1 |
| 17727 | O | 81.33500 | 67.81580 | 78.15690 | -685.65551  | -126.81589  | -385.37380  | 1 |
| 17728 | C | 84.71100 | 70.58080 | 75.95190 | 712.37272   | 56.03895    | 552.77983   | 1 |
| 17729 | O | 84.86800 | 71.75680 | 76.30490 | -398.58340  | -423.74005  | 528.83059   | 1 |
| 17730 | N | 85.74100 | 69.79480 | 75.67590 | -420.60342  | 269.36334   | -693.03326  | 1 |
| 17731 | H | 85.60700 | 68.83480 | 75.43990 | 2131.55193  | -2196.38932 | 691.72991   | 1 |
| 17732 | C | 87.13300 | 70.09780 | 75.63590 | -194.25664  | -885.16984  | -78.06735   | 1 |
| 17733 | H | 87.32400 | 70.52680 | 76.60790 | 1086.47113  | -2112.86238 | 2048.01621  | 1 |
| 17734 | C | 87.91400 | 68.77880 | 75.41390 | 484.11481   | -588.49556  | 481.71557   | 1 |
| 17735 | H | 87.59900 | 68.21680 | 74.50790 | 694.43447   | 2655.17981  | 1535.04643  | 1 |
| 17736 | H | 87.63200 | 68.11480 | 76.25890 | -2487.21738 | 1386.93921  | 1342.35916  | 1 |
| 17737 | C | 89.44000 | 68.82480 | 75.48290 | 687.32333   | 574.92272   | -170.45234  | 1 |
| 17738 | H | 89.72900 | 69.58180 | 74.72290 | 292.40196   | -1741.75538 | 2591.10961  | 1 |
| 17739 | C | 89.94100 | 69.29480 | 76.88690 | 176.79026   | 685.55266   | 569.03778   | 1 |
| 17740 | H | 89.75800 | 68.53080 | 77.67190 | 2538.41880  | 1853.64798  | -97.31015   | 1 |
| 17741 | H | 91.05200 | 69.32680 | 76.88190 | 1541.41723  | 714.58211   | 2636.97240  | 1 |
| 17742 | H | 89.44900 | 70.26980 | 77.09490 | 2908.37514  | 811.39892   | 861.79164   | 1 |
| 17743 | C | 89.95100 | 67.43480 | 75.03090 | -440.37549  | -435.26089  | 660.29917   | 1 |
| 17744 | H | 89.65900 | 67.25180 | 73.97490 | -2235.33346 | -1200.65278 | 1854.09040  | 1 |
| 17745 | H | 91.05800 | 67.51580 | 75.08490 | -2352.04345 | 2042.37497  | -499.88046  | 1 |
| 17746 | H | 89.58900 | 66.62280 | 75.69590 | 2312.84618  | 2119.59863  | 216.90221   | 1 |
| 17747 | C | 87.46200 | 71.14180 | 74.60090 | 237.27872   | -510.70131  | 704.40633   | 1 |
| 17748 | O | 88.19800 | 72.07180 | 74.83790 | 236.08794   | -369.12582  | 644.87549   | 1 |
| 17749 | N | 86.84400 | 71.04980 | 73.39090 | -212.52087  | -785.72387  | 204.69509   | 1 |
| 17750 | H | 86.17000 | 70.32580 | 73.26190 | -2335.64399 | -1640.93104 | 1320.51084  | 1 |
| 17751 | C | 87.01800 | 71.85880 | 72.20590 | -804.01431  | -379.60713  | -225.11485  | 1 |
| 17752 | H | 88.03400 | 71.65880 | 71.90090 | -1375.31846 | -1174.71095 | -2582.66918 | 1 |
| 17753 | C | 86.05600 | 71.26180 | 71.07990 | -551.52472  | -635.70301  | 344.33956   | 1 |
| 17754 | H | 85.03600 | 71.30180 | 71.51890 | 1892.07259  | -2212.96784 | 1164.10830  | 1 |
| 17755 | H | 86.42000 | 70.23180 | 70.88090 | -1163.07643 | -2073.46781 | 2051.08699  | 1 |
| 17756 | C | 86.06000 | 71.96180 | 69.68690 | -564.94187  | 622.88925   | -381.50936  | 1 |
| 17757 | H | 85.52600 | 72.93580 | 69.71790 | 1889.54724  | -325.31404  | 2481.59483  | 1 |
| 17758 | C | 87.48200 | 72.28980 | 69.17990 | 214.81475   | -623.62407  | -627.25981  | 1 |
| 17759 | H | 88.21400 | 71.45680 | 69.22790 | 750.41205   | 3051.66438  | 220.99950   | 1 |
| 17760 | H | 87.92000 | 73.10780 | 69.79090 | -681.47380  | 2380.22746  | -1958.58845 | 1 |
| 17761 | H | 87.44600 | 72.71180 | 68.15290 | 1930.44647  | 1434.77548  | 2018.60962  | 1 |
| 17762 | C | 85.20100 | 71.16880 | 68.59090 | 65.77431    | -584.21557  | 683.83865   | 1 |
| 17763 | H | 85.60800 | 70.14180 | 68.47390 | 351.36567   | -2854.66222 | 1250.49403  | 1 |
| 17764 | H | 84.15200 | 71.20580 | 68.95590 | -2365.75256 | 2035.65280  | -474.34324  | 1 |
| 17765 | H | 85.20300 | 71.73380 | 67.63390 | 1735.96716  | -20.55441   | -2625.03691 | 1 |
| 17766 | C | 86.64900 | 73.30080 | 72.42790 | 165.30275   | -752.36931  | 470.79021   | 1 |
| 17767 | O | 87.45100 | 74.21280 | 72.17190 | 115.49290   | -364.28724  | -693.18047  | 1 |
| 17768 | N | 85.50800 | 73.52580 | 73.11090 | 155.62338   | -283.42482  | -782.65226  | 1 |
| 17769 | H | 84.97100 | 72.71180 | 73.31890 | 2615.16069  | -1508.59074 | -863.22509  | 1 |
| 17770 | C | 85.11500 | 74.80280 | 73.59690 | 620.33716   | -472.37695  | 453.51387   | 1 |
| 17771 | H | 85.32400 | 75.60080 | 72.90090 | 1523.65794  | 1538.97562  | -2285.95655 | 1 |
| 17772 | C | 83.55300 | 74.85180 | 73.84290 | 669.18378   | 209.29702   | 571.77076   | 1 |
| 17773 | H | 83.38800 | 74.05380 | 74.59790 | -1791.68459 | -1113.73741 | 2331.73852  | 1 |
| 17774 | H | 83.04800 | 74.70080 | 72.86490 | -1456.48194 | -2333.06436 | 1522.17870  | 1 |
| 17775 | C | 83.06600 | 76.20680 | 74.31390 | -323.30774  | 794.82781   | 321.32763   | 1 |
| 17776 | C | 83.49400 | 77.39480 | 73.61290 | -690.60474  | 359.11199   | 484.34991   | 1 |
| 17777 | H | 84.09300 | 77.25680 | 72.72490 | -734.44688  | 2297.76149  | -2032.06310 | 1 |
| 17778 | C | 83.02700 | 78.64780 | 74.04590 | 586.02348   | -649.52679  | -231.87825  | 1 |
| 17779 | H | 83.34500 | 79.53480 | 73.51790 | 2483.77400  | 412.76260   | 1874.51630  | 1 |
| 17780 | C | 82.11700 | 78.73280 | 75.12690 | -73.83237   | 798.97442   | -444.16364  | 1 |
| 17781 | H | 81.80600 | 79.73380 | 75.39090 | -2030.52580 | 287.53404   | 2389.53778  | 1 |
| 17782 | C | 82.25700 | 76.31380 | 75.36790 | 509.74574   | 695.25257   | -298.40294  | 1 |
| 17783 | H | 81.88900 | 75.42480 | 75.85690 | -289.64877  | 3132.02664  | -176.40238  | 1 |
| 17784 | C | 81.80600 | 77.52180 | 75.83390 | 154.49631   | -644.86573  | -624.20506  | 1 |
| 17785 | H | 81.02300 | 77.59480 | 76.57490 | 1610.36273  | 1953.48617  | 1862.27773  | 1 |

|       |   |          |          |          |             |             |             |   |
|-------|---|----------|----------|----------|-------------|-------------|-------------|---|
| 17786 | C | 85.85600 | 75.28680 | 74.89890 | 551.94871   | -315.04845  | 640.82202   | 1 |
| 17787 | O | 86.21200 | 76.46780 | 74.94090 | -623.64636  | -325.34870  | 361.28744   | 1 |
| 17788 | N | 86.17100 | 74.39980 | 75.83690 | 359.74186   | 185.71876   | 732.92331   | 1 |
| 17789 | H | 86.02200 | 73.41680 | 75.76590 | -969.78659  | 626.62849   | 2923.25589  | 1 |
| 17790 | C | 86.82000 | 74.75980 | 77.14490 | 87.08210    | -704.36475  | 561.27531   | 1 |
| 17791 | H | 86.15300 | 75.48880 | 77.57990 | -2696.71457 | 374.29449   | 1581.84553  | 1 |
| 17792 | C | 86.94000 | 73.58780 | 78.11590 | 405.49713   | 704.80430   | -419.12917  | 1 |
| 17793 | H | 87.14500 | 72.68280 | 77.50590 | 2422.94955  | 1809.77411  | 852.52307   | 1 |
| 17794 | C | 88.11000 | 73.73880 | 79.17790 | 427.75013   | -781.61778  | -175.53223  | 1 |
| 17795 | H | 89.11200 | 73.50380 | 78.75790 | -2807.49405 | 12.10367    | -1437.13632 | 1 |
| 17796 | H | 87.89000 | 73.00680 | 79.98390 | 1684.44889  | -2018.36985 | 1713.69353  | 1 |
| 17797 | H | 88.01200 | 74.79180 | 79.51590 | -2370.35484 | 1459.51705  | -1483.39932 | 1 |
| 17798 | C | 85.60400 | 73.41880 | 78.88190 | 484.05100   | 393.94197   | 656.55445   | 1 |
| 17799 | H | 85.67200 | 72.50580 | 79.51190 | 2300.45982  | 1922.04758  | -954.59843  | 1 |
| 17800 | H | 85.36200 | 74.27280 | 79.54890 | 1145.11528  | -2921.78123 | -160.98052  | 1 |
| 17801 | H | 84.74200 | 73.40480 | 78.18090 | 843.48751   | -2265.93803 | 2001.66877  | 1 |
| 17802 | C | 88.17300 | 75.40380 | 76.92690 | 263.90865   | -695.14568  | -525.71419  | 1 |
| 17803 | O | 88.54300 | 76.32780 | 77.61390 | 216.98731   | -470.56935  | -596.62610  | 1 |
| 17804 | N | 88.89700 | 74.85580 | 75.91890 | -243.60281  | -510.54149  | -631.90316  | 1 |
| 17805 | H | 88.53000 | 74.08180 | 75.40890 | -407.24081  | 2260.88654  | 2148.80142  | 1 |
| 17806 | C | 90.29200 | 75.32580 | 75.66290 | -234.73417  | -240.18219  | 841.54056   | 1 |
| 17807 | H | 90.89600 | 75.29980 | 76.55790 | 2240.11415  | 1864.98748  | -1186.14884 | 1 |
| 17808 | C | 90.95300 | 74.41080 | 74.56690 | 334.87763   | 769.82144   | 353.55324   | 1 |
| 17809 | H | 90.23300 | 74.14880 | 73.76190 | 2547.48593  | 1657.75648  | 795.47200   | 1 |
| 17810 | C | 92.24400 | 75.00980 | 73.95790 | -644.56647  | 645.23234   | 116.28143   | 1 |
| 17811 | H | 92.97600 | 75.11480 | 74.78690 | -1458.67259 | 1644.21811  | 2251.60185  | 1 |
| 17812 | H | 92.67300 | 74.27880 | 73.23890 | 1795.76073  | -2162.47044 | 1387.94855  | 1 |
| 17813 | H | 91.99400 | 75.90680 | 73.35290 | 2247.73265  | -2186.36975 | -104.57226  | 1 |
| 17814 | C | 91.30800 | 73.01580 | 75.20290 | 574.41658   | -208.18284  | -677.87929  | 1 |
| 17815 | H | 90.39500 | 72.66380 | 75.72790 | -1259.46669 | 2447.10828  | 1528.82474  | 1 |
| 17816 | H | 92.16300 | 73.06880 | 75.90890 | -2572.27047 | -1165.44627 | -1401.80332 | 1 |
| 17817 | C | 91.58000 | 71.93880 | 74.11790 | -551.05875  | 728.78144   | 97.74645    | 1 |
| 17818 | H | 92.58900 | 72.13780 | 73.69690 | -1855.94692 | 1932.00343  | 1654.80183  | 1 |
| 17819 | H | 90.83500 | 71.82580 | 73.30090 | 3074.99244  | 563.03598   | 295.39384   | 1 |
| 17820 | H | 91.68900 | 70.94580 | 74.60390 | 1166.42133  | 2855.07588  | -642.34699  | 1 |
| 17821 | C | 90.27000 | 76.76580 | 75.16090 | 37.40249    | 534.74287   | -746.74704  | 1 |
| 17822 | O | 91.26100 | 77.50980 | 75.35290 | -675.93397  | -413.21845  | -36.48690   | 1 |
| 17823 | N | 89.15800 | 77.21180 | 74.50990 | -192.59274  | -540.33783  | -622.78191  | 1 |
| 17824 | H | 88.43600 | 76.60280 | 74.19090 | 1194.13194  | 1548.22509  | 2458.92348  | 1 |
| 17825 | C | 89.12800 | 78.59280 | 74.10490 | 377.50393   | 508.01125   | 651.07281   | 1 |
| 17826 | H | 90.03400 | 78.84180 | 73.57190 | 1469.30424  | -1257.81007 | -2479.54999 | 1 |
| 17827 | C | 87.93400 | 78.86780 | 73.12990 | -29.07440   | -731.92606  | 531.65041   | 1 |
| 17828 | H | 88.03500 | 79.86580 | 72.65290 | 874.83027   | -2362.58676 | -1878.30949 | 1 |
| 17829 | O | 86.60800 | 78.75480 | 73.78290 | 494.52937   | -520.88501  | 304.75807   | 1 |
| 17830 | H | 86.49900 | 77.90180 | 74.21090 | 3133.14724  | 32.62321    | 187.58542   | 1 |
| 17831 | C | 87.97000 | 77.75680 | 72.01390 | -721.09669  | -537.08802  | -171.68586  | 1 |
| 17832 | H | 87.68400 | 76.74380 | 72.36890 | 1930.66671  | 2474.54389  | -219.98785  | 1 |
| 17833 | H | 87.16200 | 78.06680 | 71.31790 | 1557.84851  | -1308.35620 | -2396.37134 | 1 |
| 17834 | H | 88.96600 | 77.83780 | 71.52890 | 194.80847   | -1558.04845 | 2717.03243  | 1 |
| 17835 | C | 88.96700 | 79.58880 | 75.24390 | -553.02543  | -593.71890  | -423.33659  | 1 |
| 17836 | O | 89.33600 | 80.75080 | 75.13190 | -480.33427  | -511.35593  | -369.58633  | 1 |
| 17837 | N | 88.46200 | 79.15180 | 76.40990 | -50.08885   | -812.88617  | -213.00321  | 1 |
| 17838 | H | 88.27300 | 78.17780 | 76.50590 | -1758.54857 | -1463.49354 | -2167.10605 | 1 |
| 17839 | C | 88.07500 | 80.00680 | 77.54090 | -28.71935   | 192.47567   | 887.54003   | 1 |
| 17840 | H | 87.30100 | 80.66680 | 77.17790 | 2295.51013  | 334.11988   | -2122.61327 | 1 |
| 17841 | C | 87.30500 | 79.28680 | 78.65090 | -600.75589  | 186.28553   | -670.72541  | 1 |
| 17842 | H | 87.05400 | 79.85480 | 79.57290 | -2004.71889 | 1719.40676  | -1723.13828 | 1 |
| 17843 | H | 87.98500 | 78.45680 | 78.93890 | 42.46103    | -2585.37115 | 1782.97069  | 1 |
| 17844 | C | 85.94700 | 78.73980 | 78.20890 | -397.08447  | 316.88538   | 757.44892   | 1 |
| 17845 | H | 86.02600 | 78.13580 | 77.27990 | -2809.43718 | 1416.73723  | -210.73565  | 1 |
| 17846 | C | 85.44800 | 77.83980 | 79.37790 | -901.55403  | -8.23883    | -173.48386  | 1 |
| 17847 | H | 86.11200 | 76.94880 | 79.37190 | 221.84360   | -2791.68866 | -1432.60241 | 1 |

|       |   |          |          |          |             |             |             |   |
|-------|---|----------|----------|----------|-------------|-------------|-------------|---|
| 17848 | H | 85.48900 | 78.35180 | 80.36290 | -2616.16425 | 1752.27728  | -142.86320  | 1 |
| 17849 | H | 84.39600 | 77.56880 | 79.14390 | -3051.72716 | -124.86140  | 772.55016   | 1 |
| 17850 | C | 84.96300 | 79.87180 | 77.92290 | -902.58962  | 87.58801    | 141.05840   | 1 |
| 17851 | H | 85.05400 | 80.27480 | 76.89190 | 2452.58299  | 1965.27922  | 39.43196    | 1 |
| 17852 | H | 85.04300 | 80.76780 | 78.57490 | -2004.02539 | -1894.58962 | -1521.98116 | 1 |
| 17853 | H | 83.95600 | 79.43980 | 78.10290 | 825.88212   | -1453.43888 | -2665.16199 | 1 |
| 17854 | C | 89.17800 | 80.94580 | 78.08890 | -717.73370  | 495.08186   | 285.18454   | 1 |
| 17855 | O | 88.80600 | 82.04980 | 78.42590 | 643.80407   | 451.28983   | 9.90323     | 1 |
| 17856 | N | 90.47200 | 80.68380 | 78.13390 | -575.46373  | -15.62058   | 618.56191   | 1 |
| 17857 | C | 90.96500 | 79.30680 | 78.36890 | -415.30352  | -444.98896  | -685.51246  | 1 |
| 17858 | H | 91.18800 | 78.92780 | 77.34790 | -1625.89174 | 1659.09059  | 2124.28766  | 1 |
| 17859 | H | 90.26700 | 78.62680 | 78.90290 | -1445.60582 | -1853.86634 | -2097.26055 | 1 |
| 17860 | C | 91.54100 | 81.64680 | 78.45690 | -35.51050   | -446.29956  | -797.09137  | 1 |
| 17861 | H | 91.23900 | 81.98780 | 79.43590 | 1750.19217  | -1805.57020 | -1886.28395 | 1 |
| 17862 | C | 92.73700 | 80.82480 | 78.49790 | -848.62530  | 148.03671   | -322.99370  | 1 |
| 17863 | H | 93.63600 | 81.30280 | 78.94390 | 409.67599   | -1805.76782 | 2534.63577  | 1 |
| 17864 | H | 93.12400 | 80.48380 | 77.51490 | 9.85446     | -2364.30124 | -2076.16703 | 1 |
| 17865 | C | 92.24000 | 79.53580 | 79.14890 | -352.98667  | -208.46490  | 810.58332   | 1 |
| 17866 | H | 92.99800 | 78.74380 | 78.96890 | -2033.07651 | 2406.98548  | -117.87916  | 1 |
| 17867 | H | 92.10900 | 79.69280 | 80.24090 | 1902.48921  | 922.23929   | -2331.91371 | 1 |
| 17868 | C | 91.62700 | 82.88080 | 77.58990 | 241.68839   | 693.14751   | -547.06959  | 1 |
| 17869 | O | 92.02600 | 83.95080 | 78.05690 | 142.54234   | -167.16372  | 752.56465   | 1 |
| 17870 | N | 91.29900 | 82.78080 | 76.30590 | -338.32292  | 600.73457   | -501.42521  | 1 |
| 17871 | H | 91.10600 | 81.91780 | 75.84690 | 1438.75264  | 2796.77989  | -111.68873  | 1 |
| 17872 | C | 91.14300 | 83.99380 | 75.47590 | 604.84887   | -314.06511  | -599.28591  | 1 |
| 17873 | H | 92.02900 | 84.60980 | 75.52090 | 334.23111   | 2840.27751  | 1316.20242  | 1 |
| 17874 | C | 90.89300 | 83.53080 | 73.98690 | 509.73219   | -493.75844  | -564.53696  | 1 |
| 17875 | H | 89.88900 | 83.05780 | 73.93690 | 2121.13629  | 1642.17408  | 1635.43948  | 1 |
| 17876 | H | 90.85600 | 84.47980 | 73.41090 | -1264.53322 | 2233.67949  | -1834.86309 | 1 |
| 17877 | C | 92.01000 | 82.69580 | 73.39690 | -555.24922  | 498.95382   | 532.79230   | 1 |
| 17878 | C | 93.29400 | 83.19280 | 73.34590 | 778.46609   | -194.97186  | 411.19007   | 1 |
| 17879 | H | 93.55400 | 84.19180 | 73.66590 | 2074.07972  | 1136.03738  | -2074.33098 | 1 |
| 17880 | C | 94.39900 | 82.58680 | 72.68290 | -626.48512  | -283.79687  | 599.05816   | 1 |
| 17881 | H | 95.32400 | 83.13780 | 72.59590 | 647.85034   | 2028.50396  | 2314.26611  | 1 |
| 17882 | C | 94.10100 | 81.35380 | 72.07090 | 592.07914   | 415.31278   | 546.14982   | 1 |
| 17883 | H | 94.80900 | 80.81280 | 71.46190 | 2036.91765  | -1251.39844 | -2038.75525 | 1 |
| 17884 | C | 91.83500 | 81.41480 | 72.88390 | -378.45493  | -309.66484  | -775.77502  | 1 |
| 17885 | H | 90.85900 | 80.95880 | 72.95990 | 2813.11635  | 1343.27426  | -394.31620  | 1 |
| 17886 | C | 92.82900 | 80.73080 | 72.21990 | 270.21419   | 874.56722   | -11.72674   | 1 |
| 17887 | H | 92.53500 | 79.82280 | 71.71490 | 658.77731   | -2796.46782 | 1258.59595  | 1 |
| 17888 | C | 90.05300 | 84.85580 | 75.95490 | 645.34379   | 569.61098   | -296.01316  | 1 |
| 17889 | O | 90.18971 | 86.11386 | 75.79968 | 87.20267    | 16.85860    | 44.00216    | 1 |
| 17890 | N | 88.89800 | 84.23980 | 76.38290 | -75.79354   | -682.36849  | 483.68959   | 1 |
| 17891 | H | 88.83200 | 83.24980 | 76.48090 | 1524.22391  | 545.33974   | -2697.71222 | 1 |
| 17892 | C | 87.77100 | 84.95680 | 77.05290 | -798.32742  | 72.99855    | 445.70217   | 1 |
| 17893 | H | 87.74051 | 85.88426 | 76.40874 | -2740.25171 | -864.68190  | 2771.23806  | 1 |
| 17894 | C | 86.55800 | 84.09580 | 77.20590 | 163.11260   | 499.92033   | 743.42924   | 1 |
| 17895 | H | 85.74200 | 84.75480 | 77.57290 | -20.07454   | 1991.78310  | 2436.18207  | 1 |
| 17896 | H | 86.63600 | 83.28580 | 77.96190 | -1446.34277 | -2244.98917 | 1662.08304  | 1 |
| 17897 | C | 85.94200 | 83.48480 | 75.94290 | -442.36402  | -529.88417  | -600.01367  | 1 |
| 17898 | C | 86.43200 | 82.68380 | 74.93490 | -345.72223  | 783.60156   | 328.51514   | 1 |
| 17899 | H | 87.49000 | 82.51880 | 74.79890 | 2677.19712  | -1072.20530 | 1234.45955  | 1 |
| 17900 | N | 85.42800 | 82.11980 | 74.20990 | -293.13340  | 724.27691   | 333.44806   | 1 |
| 17901 | H | 85.59200 | 81.26780 | 73.76190 | -663.36023  | 1787.42280  | -2511.06987 | 1 |
| 17902 | C | 84.25200 | 82.63580 | 74.59690 | 741.17339   | -445.24619  | -264.77802  | 1 |
| 17903 | C | 84.51500 | 83.48880 | 75.69290 | 560.58922   | 477.19987   | 531.73216   | 1 |
| 17904 | C | 83.41000 | 84.02980 | 76.41090 | -688.33602  | 150.84721   | 586.55691   | 1 |
| 17905 | H | 83.66700 | 84.57280 | 77.30890 | -3142.46524 | -240.51300  | -90.32763   | 1 |
| 17906 | C | 82.13800 | 83.76480 | 75.96090 | -662.36626  | -462.18708  | 429.54334   | 1 |
| 17907 | H | 81.32000 | 84.18880 | 76.52390 | 2392.24601  | -856.60585  | 1843.58505  | 1 |
| 17908 | C | 82.96000 | 82.40980 | 74.11690 | -624.28084  | -652.82006  | 137.63412   | 1 |
| 17909 | H | 82.82800 | 81.82880 | 73.21690 | 3096.63441  | -413.09320  | 291.94873   | 1 |

|       |   |          |          |          |             |             |             |   |
|-------|---|----------|----------|----------|-------------|-------------|-------------|---|
| 17910 | C | 81.86200 | 82.98280 | 74.83290 | -50.54226   | 657.72889   | 632.56363   | 1 |
| 17911 | H | 80.85600 | 82.74780 | 74.51690 | 1524.34316  | -1262.00261 | 2437.87261  | 1 |
| 17912 | C | 88.11250 | 85.66270 | 78.46984 | 582.26307   | 474.47936   | -84.06955   | 1 |
| 17913 | O | 87.67886 | 86.81050 | 78.64750 | 155.80029   | 731.39524   | -1009.20929 | 1 |
| 17914 | N | 88.88700 | 84.89880 | 79.22090 | -44.81963   | 143.63465   | -834.12364  | 1 |
| 17915 | H | 89.17100 | 83.95280 | 79.08290 | -2214.68935 | -2227.88938 | -214.22198  | 1 |
| 17916 | C | 89.47333 | 85.42271 | 80.42356 | -76.49927   | -663.67168  | 132.22853   | 1 |
| 17917 | H | 88.51118 | 85.77588 | 80.96909 | -1226.14808 | -3715.29199 | -655.85850  | 1 |
| 17918 | C | 90.14400 | 84.27080 | 81.25390 | 374.41713   | -501.42978  | 654.79595   | 1 |
| 17919 | H | 90.98300 | 83.74980 | 80.74590 | 2218.12834  | 1542.30109  | -1610.19931 | 1 |
| 17920 | H | 89.46800 | 83.42280 | 81.49390 | -1283.70864 | 884.49750   | -2739.49382 | 1 |
| 17921 | H | 90.53800 | 84.71780 | 82.19190 | -2546.37681 | -1852.66993 | -59.18317   | 1 |
| 17922 | C | 90.60299 | 86.62356 | 80.23630 | -276.53911  | 810.39040   | 102.93082   | 1 |
| 17923 | O | 91.08639 | 87.26194 | 81.12492 | 500.31263   | 20.01386    | -113.11716  | 1 |
| 17924 | N | 90.82269 | 86.68932 | 78.93274 | 352.68819   | 725.10123   | 774.35486   | 1 |
| 17925 | H | 90.30551 | 86.06928 | 78.27972 | -3804.53132 | -1173.67588 | -293.57148  | 1 |
| 17926 | C | 91.31425 | 87.93990 | 78.44570 | -554.59652  | -611.26210  | -859.08885  | 1 |
| 17927 | H | 91.81120 | 88.33694 | 79.38672 | 1129.23516  | -234.03595  | -165.03939  | 1 |
| 17928 | C | 92.41879 | 87.55224 | 77.31777 | 411.84346   | -1238.10861 | -639.23156  | 1 |
| 17929 | H | 91.85881 | 87.43273 | 76.32478 | 2830.10716  | -1036.41439 | 1443.46981  | 1 |
| 17930 | C | 93.44375 | 88.71781 | 77.08244 | 250.31224   | -154.04295  | 458.10917   | 1 |
| 17931 | H | 92.96764 | 89.51323 | 76.36805 | 2377.39884  | -3649.44511 | 120.56463   | 1 |
| 17932 | H | 93.69336 | 89.23088 | 78.04923 | 1086.82116  | 1087.65259  | -1956.74787 | 1 |
| 17933 | H | 94.44577 | 88.35501 | 76.76008 | 1472.85105  | -36.61045   | 1971.51421  | 1 |
| 17934 | C | 93.45416 | 86.44893 | 77.66179 | 541.12950   | 913.94389   | 189.80458   | 1 |
| 17935 | H | 92.93028 | 85.45834 | 77.94442 | 1698.40023  | 2628.67304  | -1877.72477 | 1 |
| 17936 | H | 94.08614 | 86.62428 | 78.57419 | 1721.20497  | -2538.27093 | 3586.22592  | 1 |
| 17937 | H | 94.24449 | 86.24261 | 76.87185 | 463.04164   | -1770.38849 | -3449.77125 | 1 |
| 17938 | C | 90.19485 | 88.97011 | 77.87532 | -251.41248  | 701.76811   | -1450.53174 | 1 |
| 17939 | O | 90.20409 | 90.12313 | 78.27368 | -255.18881  | 531.38496   | 44.10961    | 1 |
| 17940 | N | 89.40360 | 88.48620 | 76.96130 | -282.08563  | -237.65783  | 748.70580   | 1 |
| 17941 | H | 89.46208 | 87.45447 | 76.67788 | 2132.06572  | 109.33989   | 694.82600   | 1 |
| 17942 | C | 88.63256 | 89.32498 | 76.02489 | 118.40067   | -496.17952  | -137.74701  | 1 |
| 17943 | H | 89.30719 | 90.13975 | 75.68985 | 2285.38587  | -1705.69828 | -572.68422  | 1 |
| 17944 | C | 88.04891 | 88.35949 | 74.99028 | -785.49517  | 308.05316   | -165.03608  | 1 |
| 17945 | H | 88.76175 | 87.59353 | 74.61801 | 1577.33077  | 1026.39116  | -145.10710  | 1 |
| 17946 | H | 87.19203 | 87.75888 | 75.34139 | 4777.89097  | 1777.04779  | -3513.34210 | 1 |
| 17947 | C | 87.55147 | 89.18666 | 73.68346 | 1309.11484  | -241.47284  | -821.51456  | 1 |
| 17948 | O | 87.01155 | 88.61836 | 72.68374 | 506.36076   | 532.97625   | -210.59339  | 1 |
| 17949 | O | 87.74370 | 90.41064 | 73.80315 | -805.67691  | 181.78340   | 143.62099   | 1 |
| 17950 | C | 87.36091 | 89.98913 | 76.81020 | -119.10251  | -359.56626  | -240.38877  | 1 |
| 17951 | O | 87.08342 | 91.13276 | 76.54992 | 540.41530   | 790.73321   | 148.34351   | 1 |
| 17952 | N | 86.67145 | 89.14055 | 77.60284 | 561.85243   | -93.18469   | 1071.43949  | 1 |
| 17953 | H | 86.97934 | 88.14052 | 77.80658 | 3839.90500  | -1552.90408 | -2806.16502 | 1 |
| 17954 | C | 85.62950 | 89.73777 | 78.40175 | 624.84515   | 526.69899   | 902.00348   | 1 |
| 17955 | H | 85.05687 | 90.21596 | 77.55453 | 3048.25692  | 1801.90274  | -3481.69612 | 1 |
| 17956 | C | 84.87421 | 88.55481 | 79.07437 | -307.46651  | -861.55997  | -184.11522  | 1 |
| 17957 | H | 85.52074 | 87.64470 | 79.10855 | -1490.06437 | -3178.88986 | 257.56470   | 1 |
| 17958 | H | 84.49023 | 88.85085 | 80.08226 | 436.60729   | 261.63669   | 721.05889   | 1 |
| 17959 | H | 84.00994 | 88.20106 | 78.45113 | 2713.45942  | -1307.04908 | -1194.84762 | 1 |
| 17960 | C | 86.10160 | 90.92122 | 79.45161 | 494.15709   | -214.94202  | -430.91429  | 1 |
| 17961 | O | 85.42697 | 91.88815 | 79.66492 | -522.22375  | -28.24627   | -760.86030  | 1 |
| 17962 | N | 87.31370 | 90.56944 | 79.95963 | -186.67514  | -171.07454  | -896.18461  | 1 |
| 17963 | H | 87.75484 | 89.86481 | 79.36262 | 2956.02156  | -1554.01934 | 3040.65651  | 1 |
| 17964 | C | 88.06027 | 91.40541 | 80.88622 | -861.81687  | 61.17332    | 332.84830   | 1 |
| 17965 | H | 87.10821 | 91.75460 | 81.42864 | 2370.94363  | 516.62894   | 4298.72041  | 1 |
| 17966 | C | 89.04048 | 90.50417 | 81.61332 | 863.06444   | -377.07995  | -411.67044  | 1 |
| 17967 | H | 89.95449 | 90.46614 | 80.96104 | -1574.30564 | 4361.59887  | 1727.11745  | 1 |
| 17968 | C | 89.34968 | 91.07914 | 82.97762 | -485.71802  | 386.74925   | -1083.56522 | 1 |
| 17969 | H | 90.18501 | 90.54247 | 83.45140 | -5164.31398 | -670.71499  | -4265.82021 | 1 |
| 17970 | H | 89.45919 | 92.17894 | 83.00721 | -1805.34345 | -315.20337  | 2235.66114  | 1 |
| 17971 | H | 88.49114 | 90.85598 | 83.68102 | 1039.96930  | 1374.74305  | 360.42401   | 1 |

|       |   |          |          |          |             |             |             |   |
|-------|---|----------|----------|----------|-------------|-------------|-------------|---|
| 17972 | C | 88.67029 | 89.03547 | 81.74174 | -222.03603  | 511.32919   | -687.95753  | 1 |
| 17973 | H | 87.59109 | 88.93463 | 82.03643 | 2928.77217  | 3080.07556  | 1324.23668  | 1 |
| 17974 | H | 89.29567 | 88.55904 | 82.52501 | 2632.84222  | 1037.35044  | -2715.54646 | 1 |
| 17975 | H | 88.86651 | 88.52085 | 80.77189 | 2929.71413  | -1133.75620 | -1177.17137 | 1 |
| 17976 | C | 88.64213 | 92.76926 | 80.17136 | 335.97808   | 1115.42169  | 26.44809    | 1 |
| 17977 | O | 88.63592 | 93.80969 | 80.82081 | -274.96523  | -59.48299   | 446.25934   | 1 |
| 17978 | N | 89.12386 | 92.60763 | 78.96261 | -102.62712  | -124.43859  | -525.51400  | 1 |
| 17979 | H | 89.03702 | 91.68339 | 78.45248 | -456.00798  | 2909.42236  | 1468.67570  | 1 |
| 17980 | C | 90.37083 | 93.32393 | 78.73995 | -262.76160  | 851.87737   | 454.36221   | 1 |
| 17981 | H | 90.02401 | 94.24269 | 79.23735 | 223.70114   | 1571.13346  | 2562.31304  | 1 |
| 17982 | C | 91.62580 | 92.56469 | 79.38020 | 97.58182    | -331.15501  | 821.65267   | 1 |
| 17983 | H | 91.36062 | 92.46294 | 80.42402 | -1991.63252 | 852.74927   | -2544.15598 | 1 |
| 17984 | H | 91.82174 | 91.52840 | 78.98462 | -4591.94654 | -861.78537  | -2347.17855 | 1 |
| 17985 | H | 92.51518 | 93.18243 | 79.37581 | 989.05529   | 32.26697    | 1978.65442  | 1 |
| 17986 | C | 90.80084 | 93.53644 | 77.16043 | 298.91361   | 521.48346   | -340.11987  | 1 |
| 17987 | O | 90.59829 | 94.68333 | 76.78456 | 313.30831   | -343.67448  | -65.35558   | 1 |
| 17988 | N | 91.25513 | 92.50216 | 76.49263 | -737.78265  | -469.34173  | -272.93866  | 1 |
| 17989 | H | 91.31101 | 91.62583 | 77.02865 | -189.23503  | 1204.60913  | 467.52256   | 1 |
| 17990 | C | 91.30201 | 92.70332 | 75.04963 | -316.22092  | 372.63960   | 393.40931   | 1 |
| 17991 | H | 90.46128 | 93.39691 | 74.90086 | 1667.06162  | -3506.03876 | 3268.09007  | 1 |
| 17992 | C | 92.61975 | 93.51797 | 74.75283 | 56.62442    | 407.79728   | 145.42060   | 1 |
| 17993 | H | 92.97039 | 94.09676 | 75.54198 | -1992.96812 | -1761.31849 | 897.64523   | 1 |
| 17994 | H | 93.48795 | 92.88058 | 74.45991 | -3718.89338 | -92.91065   | -1776.73602 | 1 |
| 17995 | C | 92.15221 | 94.47823 | 73.60693 | -1139.92933 | 604.07790   | 497.22900   | 1 |
| 17996 | O | 92.47565 | 94.21428 | 72.46828 | -106.52238  | -18.62015   | -697.30529  | 1 |
| 17997 | N | 91.23393 | 95.33905 | 74.10468 | -438.85728  | 14.45410    | 630.56758   | 1 |
| 17998 | H | 90.96231 | 95.54569 | 75.05172 | 597.24114   | 2521.37899  | -1125.64991 | 1 |
| 17999 | H | 90.46397 | 95.57327 | 73.49436 | -1211.66703 | 1117.19125  | -509.06964  | 1 |
| 18000 | C | 91.40230 | 91.24581 | 74.33410 | 37.02945    | -340.05139  | -1042.29606 | 1 |
| 18001 | O | 91.89065 | 90.29485 | 74.90999 | -93.36095   | -1342.71795 | -567.57186  | 1 |
| 18002 | N | 90.76745 | 91.20718 | 73.18845 | 301.21891   | -264.94518  | -176.46934  | 1 |
| 18003 | H | 90.29439 | 92.05762 | 72.80011 | -1024.92508 | 899.09098   | 3173.31003  | 1 |
| 18004 | C | 90.92062 | 89.97640 | 72.42169 | -376.91525  | 62.01310    | 279.16923   | 1 |
| 18005 | H | 90.91903 | 89.20708 | 73.21843 | 750.05842   | 2892.47388  | -1457.94475 | 1 |
| 18006 | C | 89.74197 | 89.89592 | 71.30692 | -1157.36053 | 583.35028   | 582.45485   | 1 |
| 18007 | H | 90.07140 | 90.69282 | 70.62371 | -3049.26554 | -763.63667  | 321.04291   | 1 |
| 18008 | H | 88.72509 | 90.19009 | 71.72715 | 1745.30556  | -1093.54994 | -2710.70985 | 1 |
| 18009 | C | 89.74872 | 88.57999 | 70.54116 | 13.31459    | -548.89763  | 16.55385    | 1 |
| 18010 | C | 90.13860 | 88.45427 | 69.19922 | 313.20633   | -414.11072  | 818.39424   | 1 |
| 18011 | H | 90.45278 | 89.25658 | 68.51117 | -1495.58719 | -607.74228  | 2321.39531  | 1 |
| 18012 | N | 90.17335 | 87.19110 | 68.85309 | 261.40195   | 141.78996   | 421.32328   | 1 |
| 18013 | H | 90.68231 | 86.97396 | 67.92879 | 1488.18454  | -206.97056  | -2508.61461 | 1 |
| 18014 | C | 89.77053 | 86.29948 | 69.85385 | -175.67600  | 160.73987   | 163.11679   | 1 |
| 18015 | C | 89.56696 | 87.19310 | 71.01339 | 447.60664   | -191.11620  | 241.81885   | 1 |
| 18016 | C | 89.20672 | 86.60372 | 72.26206 | -183.62999  | 858.51085   | -556.05804  | 1 |
| 18017 | H | 89.07512 | 87.25350 | 73.13576 | 265.60970   | 1209.89323  | -2722.19641 | 1 |
| 18018 | C | 89.16062 | 85.23995 | 72.35342 | 654.00769   | 459.43747   | -313.99074  | 1 |
| 18019 | H | 88.94841 | 84.74456 | 73.32390 | 86.13077    | -655.81280  | 3685.47197  | 1 |
| 18020 | C | 89.74253 | 84.88717 | 69.96105 | -91.81283   | 188.49878   | -687.86408  | 1 |
| 18021 | H | 89.86342 | 84.25688 | 69.02274 | -815.21786  | -3979.33666 | 3925.90066  | 1 |
| 18022 | C | 89.26927 | 84.37466 | 71.18709 | 284.44451   | 119.25482   | -1005.72142 | 1 |
| 18023 | H | 89.24362 | 83.29448 | 71.32175 | 688.60234   | 2232.57337  | -289.70970  | 1 |
| 18024 | C | 92.27097 | 90.07932 | 71.61238 | -338.29202  | 598.80974   | 418.13859   | 1 |
| 18025 | O | 92.21724 | 90.50484 | 70.44629 | 170.95617   | -479.02104  | 2.27993     | 1 |
| 18026 | N | 93.36456 | 89.70552 | 72.27728 | 288.27572   | 496.36594   | -321.39525  | 1 |
| 18027 | H | 93.27068 | 89.36506 | 73.23895 | 1509.86010  | -305.50853  | 1799.46499  | 1 |
| 18028 | C | 94.60911 | 90.21749 | 71.76312 | 1001.82537  | 1232.14595  | 232.20313   | 1 |
| 18029 | H | 94.25019 | 91.19654 | 71.48558 | 1997.60996  | 54.47020    | 375.80432   | 1 |
| 18030 | C | 95.76219 | 90.14945 | 72.84515 | 420.64309   | 312.21290   | -650.47958  | 1 |
| 18031 | H | 95.87642 | 89.17326 | 73.28077 | -3294.41492 | 238.06928   | -1225.70497 | 1 |
| 18032 | H | 96.72412 | 90.30968 | 72.32310 | 2496.36546  | -1565.26627 | 2433.77824  | 1 |
| 18033 | C | 95.55036 | 91.10360 | 74.03427 | 46.01947    | -384.30645  | -255.42013  | 1 |

|       |   |          |          |          |             |             |             |   |
|-------|---|----------|----------|----------|-------------|-------------|-------------|---|
| 18034 | C | 95.39456 | 90.80572 | 75.43017 | -294.47309  | 802.96321   | -4.75051    | 1 |
| 18035 | H | 95.33141 | 89.75108 | 75.75385 | -2330.60759 | -1442.57798 | -1138.38960 | 1 |
| 18036 | C | 95.22374 | 91.84853 | 76.37600 | -192.13453  | 658.60773   | -455.77219  | 1 |
| 18037 | H | 95.04491 | 91.55551 | 77.39766 | 270.28791   | -235.01327  | 427.64173   | 1 |
| 18038 | C | 95.34024 | 93.20257 | 76.05480 | -1044.38047 | 86.84071    | -289.91865  | 1 |
| 18039 | O | 95.19051 | 94.27369 | 77.01179 | -132.88024  | -305.56544  | -513.53433  | 1 |
| 18040 | H | 95.34829 | 93.73923 | 77.83995 | 1027.14660  | 125.72802   | -4292.82285 | 1 |
| 18041 | C | 95.44897 | 92.47991 | 73.66184 | 112.14144   | -833.65638  | -133.23029  | 1 |
| 18042 | H | 95.54923 | 92.83823 | 72.62222 | 1479.43320  | 1579.39548  | -572.21941  | 1 |
| 18043 | C | 95.45091 | 93.45561 | 74.65894 | -249.49110  | -174.74416  | 290.62970   | 1 |
| 18044 | H | 95.40913 | 94.49212 | 74.32573 | 223.71860   | 718.86918   | 1354.34349  | 1 |
| 18045 | C | 95.28640 | 89.37406 | 70.53056 | 418.89105   | 317.97813   | 280.71741   | 1 |
| 18046 | O | 96.50143 | 89.30653 | 70.46849 | -55.93856   | 263.84382   | 263.22765   | 1 |
| 18047 | N | 94.37760 | 88.86277 | 69.71408 | 936.21632   | -189.58625  | 268.52146   | 1 |
| 18048 | H | 93.41046 | 89.14802 | 69.97030 | 2166.45900  | 3346.10429  | -805.57009  | 1 |
| 18049 | C | 94.49691 | 87.51606 | 69.27684 | -362.02037  | 199.68345   | -1.51019    | 1 |
| 18050 | H | 95.53455 | 87.19084 | 69.40953 | 107.04505   | -4260.72909 | 1048.51292  | 1 |
| 18051 | C | 93.39729 | 86.63212 | 70.01050 | 916.78607   | -361.42323  | -424.73372  | 1 |
| 18052 | H | 93.41966 | 85.69110 | 69.44678 | -723.87842  | -3077.05927 | 1669.39023  | 1 |
| 18053 | H | 92.34008 | 86.94246 | 69.91034 | 2995.34903  | -2057.55411 | -460.44602  | 1 |
| 18054 | C | 93.61949 | 86.62497 | 71.53477 | -805.51805  | -485.64260  | -118.54092  | 1 |
| 18055 | C | 94.91250 | 86.45474 | 72.16995 | -177.63109  | 253.72530   | -224.32669  | 1 |
| 18056 | H | 95.73068 | 86.26055 | 71.51317 | 2477.00567  | -1289.75983 | -2546.13492 | 1 |
| 18057 | C | 95.02667 | 86.62197 | 73.59076 | 386.56126   | 783.39960   | -196.16647  | 1 |
| 18058 | H | 96.09415 | 86.54053 | 73.98259 | -2932.65016 | 716.25837   | 1005.60939  | 1 |
| 18059 | C | 93.85770 | 86.69309 | 74.32953 | -1117.64472 | 122.70128   | 138.08409   | 1 |
| 18060 | H | 93.96589 | 86.82871 | 75.41117 | 3559.06355  | 226.01377   | -1693.06671 | 1 |
| 18061 | C | 92.43707 | 86.59052 | 72.33759 | -346.08844  | -82.11274   | 485.57976   | 1 |
| 18062 | H | 91.42805 | 86.63742 | 71.90990 | 505.35088   | 2550.34356  | -1199.39227 | 1 |
| 18063 | C | 92.60297 | 86.65464 | 73.73177 | 514.32110   | -573.18643  | 66.85091    | 1 |
| 18064 | H | 91.65705 | 86.57445 | 74.40480 | 242.16337   | -1007.28692 | -112.32411  | 1 |
| 18065 | C | 94.07552 | 87.50547 | 67.64614 | -669.94807  | -42.02036   | -64.08778   | 1 |
| 18066 | O | 94.54582 | 86.56077 | 66.97918 | -1113.21630 | 111.61217   | 229.27369   | 1 |
| 18067 | N | 93.15273 | 88.37522 | 67.24272 | -554.49756  | 436.79579   | -173.84692  | 1 |
| 18068 | H | 92.96787 | 89.14824 | 67.92732 | 1610.93117  | -390.62184  | -1863.81443 | 1 |
| 18069 | C | 92.92197 | 88.41767 | 65.82713 | -376.39777  | -149.98905  | 139.26976   | 1 |
| 18070 | H | 93.70403 | 87.80310 | 65.31627 | -631.29747  | 1315.98078  | 1150.62256  | 1 |
| 18071 | H | 92.80261 | 89.46392 | 65.41529 | -1803.49254 | 2467.91967  | 1496.11085  | 1 |
| 18072 | C | 91.46998 | 87.79814 | 65.42655 | 658.10369   | -41.30199   | -446.79654  | 1 |
| 18073 | O | 90.81593 | 87.10000 | 66.23698 | -465.89095  | 361.60019   | 597.03513   | 1 |
| 18074 | N | 91.11963 | 88.25489 | 64.26631 | 682.00580   | -177.45275  | 352.87129   | 1 |
| 18075 | H | 91.76821 | 88.91001 | 63.73861 | 785.47875   | 3543.70146  | 1672.28080  | 1 |
| 18076 | C | 89.89326 | 87.76738 | 63.65997 | 2.25848     | 11.18585    | 233.32943   | 1 |
| 18077 | H | 89.19805 | 87.72160 | 64.56961 | 270.73955   | -2931.87266 | -1006.24857 | 1 |
| 18078 | C | 89.64704 | 88.98812 | 62.72291 | 620.01663   | -33.38814   | -350.14210  | 1 |
| 18079 | H | 90.42170 | 89.14613 | 61.94843 | -2126.41445 | 3302.00244  | 215.24808   | 1 |
| 18080 | H | 89.98385 | 89.83449 | 63.38424 | 169.91172   | 1024.38624  | 1139.83196  | 1 |
| 18081 | C | 88.23849 | 89.02236 | 62.05917 | 176.54730   | 579.85275   | 106.00525   | 1 |
| 18082 | O | 87.92249 | 89.95328 | 61.28985 | 317.12435   | -661.21520  | -319.96123  | 1 |
| 18083 | N | 87.41460 | 87.94505 | 62.34976 | -543.60703  | 311.30408   | -224.03429  | 1 |
| 18084 | H | 87.85558 | 87.02688 | 62.58636 | 849.23509   | -1379.10849 | -3110.85885 | 1 |
| 18085 | H | 86.58292 | 87.63197 | 61.74790 | -204.49259  | -519.60077  | 4113.89955  | 1 |
| 18086 | C | 90.02378 | 86.34454 | 62.89167 | -1036.52123 | -141.43324  | -137.23534  | 1 |
| 18087 | O | 89.04001 | 85.73499 | 62.54673 | 193.63073   | 8.13301     | 556.28008   | 1 |
| 18088 | N | 91.31507 | 86.05118 | 62.58371 | 503.83042   | -342.22445  | 366.28404   | 1 |
| 18089 | H | 91.93791 | 86.52382 | 63.22151 | -2064.13295 | -1522.16093 | 4032.97627  | 1 |
| 18090 | C | 91.51800 | 84.51480 | 62.52590 | -314.84111  | 337.70502   | -798.14484  | 1 |
| 18091 | H | 90.87200 | 84.13680 | 61.74790 | 641.95804   | 1485.71105  | -2704.10817 | 1 |
| 18092 | C | 92.98800 | 84.28580 | 62.01190 | -249.79702  | 379.53540   | 794.81225   | 1 |
| 18093 | H | 93.08100 | 84.82880 | 61.04690 | 1073.81968  | -2912.30676 | -425.43246  | 1 |
| 18094 | H | 93.75600 | 84.78580 | 62.63890 | 1117.56010  | -2194.36978 | 1936.55402  | 1 |
| 18095 | C | 93.37900 | 82.83780 | 61.76390 | 597.74732   | -543.57805  | -397.25737  | 1 |



|       |   |          |          |          |             |             |             |   |
|-------|---|----------|----------|----------|-------------|-------------|-------------|---|
| 18096 | C | 93.09300 | 82.24380 | 60.53090 | -480.21480  | -645.51123  | -430.08698  | 1 |
| 18097 | H | 92.55800 | 82.73080 | 59.72890 | -1619.03187 | -1765.70741 | -2043.45513 | 1 |
| 18098 | C | 93.42400 | 80.89180 | 60.32490 | -636.94378  | -642.80439  | 106.87966   | 1 |
| 18099 | H | 93.07600 | 80.44380 | 59.40590 | -1056.96770 | 1154.29294  | 2732.81864  | 1 |
| 18100 | C | 94.15700 | 80.14080 | 61.27890 | 568.92686   | 676.62414   | -233.26303  | 1 |
| 18101 | H | 94.35300 | 79.09980 | 61.07090 | 1114.18823  | -362.83730  | 2908.08357  | 1 |
| 18102 | C | 94.09900 | 82.07280 | 62.66490 | 451.91417   | -767.14491  | -121.50679  | 1 |
| 18103 | H | 94.24300 | 82.65980 | 63.55990 | -96.34455   | -3117.79203 | 326.51976   | 1 |
| 18104 | C | 94.50800 | 80.76380 | 62.47290 | 665.14410   | 116.30930   | -608.71441  | 1 |
| 18105 | H | 94.97700 | 80.15980 | 63.23490 | 1550.20926  | -1609.03405 | -2206.55935 | 1 |
| 18106 | C | 91.15900 | 83.68080 | 63.73290 | -522.29095  | 30.86254    | 750.72521   | 1 |
| 18107 | O | 90.49700 | 82.62580 | 63.60990 | 154.76027   | 367.78046   | -687.79781  | 1 |
| 18108 | N | 91.54500 | 84.08880 | 64.97890 | 400.53455   | -696.54886  | 211.82646   | 1 |
| 18109 | H | 92.25500 | 84.78180 | 65.07190 | 2438.77680  | -1682.31607 | 1016.28561  | 1 |
| 18110 | C | 91.05900 | 83.46380 | 66.12890 | -642.19439  | 227.29730   | -623.13309  | 1 |
| 18111 | H | 90.97300 | 82.39880 | 65.96990 | -1288.21407 | -1114.91791 | -2650.26536 | 1 |
| 18112 | C | 91.97900 | 83.68480 | 67.32190 | 669.53350   | 299.83802   | 530.00399   | 1 |
| 18113 | H | 92.00800 | 84.76880 | 67.56390 | 96.10404    | 2286.26177  | 2163.52663  | 1 |
| 18114 | H | 91.54900 | 83.17080 | 68.20790 | 2781.77159  | 1233.65436  | -781.71507  | 1 |
| 18115 | C | 93.41300 | 83.09980 | 67.07090 | 454.38664   | 790.96032   | 54.79291    | 1 |
| 18116 | H | 93.86800 | 83.56380 | 66.16990 | 26.52113    | 2141.86721  | 2307.74682  | 1 |
| 18117 | C | 94.41000 | 83.62580 | 68.14990 | -610.04034  | -662.66560  | -149.17717  | 1 |
| 18118 | H | 94.13600 | 83.23380 | 69.15290 | 1332.97300  | -1097.92060 | -2626.69494 | 1 |
| 18119 | H | 94.50000 | 84.72780 | 68.25790 | -2094.18134 | 2354.61193  | -216.93472  | 1 |
| 18120 | H | 95.41400 | 83.22980 | 67.88390 | -2823.45447 | -41.15834   | -1410.96679 | 1 |
| 18121 | C | 93.41700 | 81.60480 | 66.91190 | -596.73741  | -409.09612  | 553.78820   | 1 |
| 18122 | H | 92.78300 | 81.17580 | 66.10690 | 59.99094    | -2200.39947 | 2234.15968  | 1 |
| 18123 | H | 93.12900 | 81.18280 | 67.89790 | -696.67920  | 1514.11090  | -2680.35504 | 1 |
| 18124 | H | 94.45700 | 81.21880 | 66.84390 | -1165.69871 | -2818.67335 | 748.54857   | 1 |
| 18125 | C | 89.61400 | 83.83780 | 66.42890 | -561.39294  | -566.52995  | -447.25423  | 1 |
| 18126 | O | 88.85000 | 83.03980 | 67.01290 | 266.17139   | -622.83922  | 384.07104   | 1 |
| 18127 | N | 89.19563 | 85.06724 | 65.94532 | -329.04385  | -488.94074  | 57.21887    | 1 |
| 18128 | H | 89.85326 | 85.86580 | 65.66706 | -870.24643  | -1521.77448 | 1775.55210  | 1 |
| 18129 | C | 87.81232 | 85.33576 | 66.41155 | -379.00394  | -525.29042  | -1211.54020 | 1 |
| 18130 | H | 87.86683 | 85.04774 | 67.50340 | -1432.19517 | 458.22959   | -2404.08017 | 1 |
| 18131 | C | 87.29175 | 86.83143 | 66.15472 | -707.49946  | -439.51370  | 86.10100    | 1 |
| 18132 | H | 87.20104 | 86.73439 | 65.05843 | -2061.27572 | 304.79286   | -3710.45895 | 1 |
| 18133 | H | 88.14594 | 87.56688 | 66.34075 | -1720.55379 | 19.97106    | -4953.02530 | 1 |
| 18134 | S | 85.85502 | 86.94398 | 67.12648 | -177.08650  | -2.75656    | -28.64921   | 1 |
| 18135 | C | 86.67300 | 84.54580 | 65.53490 | 458.36775   | -770.12205  | -82.92837   | 1 |
| 18136 | O | 85.70400 | 84.06480 | 66.09490 | -64.90151   | -663.61914  | 410.33736   | 1 |
| 18137 | N | 86.85900 | 84.23180 | 64.25690 | 55.67696    | -761.21625  | 338.14673   | 1 |
| 18138 | H | 87.68800 | 84.53680 | 63.79390 | -146.28953  | 1077.07121  | -2958.50408 | 1 |
| 18139 | C | 86.09400 | 83.32380 | 63.49490 | 119.92114   | -821.73656  | -355.84907  | 1 |
| 18140 | H | 85.03600 | 83.53880 | 63.49790 | 2357.78813  | -1141.46710 | -1724.44075 | 1 |
| 18141 | C | 86.54900 | 83.31080 | 62.03090 | 101.84808   | 645.82823   | -645.61129  | 1 |
| 18142 | H | 86.13700 | 82.48080 | 61.41790 | -315.49305  | -3112.58887 | -244.61584  | 1 |
| 18143 | H | 87.65600 | 83.22380 | 61.99490 | 2926.10362  | -908.70079  | 652.02878   | 1 |
| 18144 | C | 86.19500 | 84.62180 | 61.36690 | -508.67508  | -278.28508  | -709.99166  | 1 |
| 18145 | H | 86.39491 | 85.46088 | 62.05793 | 1387.58023  | -1404.09537 | -2805.41873 | 1 |
| 18146 | H | 85.09100 | 84.55380 | 61.26190 | -2310.29808 | -1774.91651 | 1193.84131  | 1 |
| 18147 | C | 86.79500 | 84.65480 | 59.96290 | 648.57340   | 313.57678   | -552.93060  | 1 |
| 18148 | H | 86.34400 | 83.82380 | 59.38090 | 2415.00305  | -1982.36036 | -199.03186  | 1 |
| 18149 | H | 87.86800 | 84.41480 | 60.12190 | -1399.02018 | -1530.92573 | -2368.60539 | 1 |
| 18150 | C | 86.54036 | 85.98677 | 59.17721 | 556.62660   | 245.11807   | 538.88121   | 1 |
| 18151 | H | 86.90120 | 85.98490 | 58.13746 | -294.51088  | 1705.82467  | -1256.13577 | 1 |
| 18152 | H | 86.78984 | 86.90891 | 59.79590 | 2101.02953  | -1486.40310 | -1262.60518 | 1 |
| 18153 | N | 84.99480 | 86.20170 | 59.21150 | -785.32985  | -533.38209  | 133.29338   | 1 |
| 18154 | H | 84.50814 | 86.75773 | 58.45803 | 2483.79594  | -2106.09666 | -395.14558  | 1 |
| 18155 | H | 84.79740 | 86.77865 | 60.16536 | -919.90757  | -384.44068  | -1483.61167 | 1 |
| 18156 | H | 84.43942 | 85.27024 | 59.30386 | -917.82285  | 195.82838   | 2567.75055  | 1 |
| 18157 | C | 86.02200 | 81.92880 | 64.05690 | -35.45080   | -722.53953  | 541.57784   | 1 |

|       |   |          |          |          |             |             |             |   |
|-------|---|----------|----------|----------|-------------|-------------|-------------|---|
| 18158 | O | 84.99900 | 81.30480 | 64.09590 | -679.75656  | -136.97610  | 389.71304   | 1 |
| 18159 | N | 87.20100 | 81.39480 | 64.42590 | 654.38963   | 332.12546   | -411.37386  | 1 |
| 18160 | H | 88.05400 | 81.83980 | 64.16690 | 1864.48288  | 1579.56828  | -1982.41481 | 1 |
| 18161 | C | 87.36500 | 80.09380 | 65.00890 | -816.41882  | 414.29532   | -129.89564  | 1 |
| 18162 | H | 86.88200 | 79.29380 | 64.46790 | -850.08403  | 751.30029   | -2943.60695 | 1 |
| 18163 | C | 88.86800 | 79.76980 | 65.00690 | 374.43435   | 420.87789   | 712.23849   | 1 |
| 18164 | H | 89.28500 | 79.59280 | 63.99190 | 232.44788   | 2849.84611  | -1334.48981 | 1 |
| 18165 | H | 88.98400 | 78.87080 | 65.64790 | -2632.33675 | 1517.72547  | 855.23828   | 1 |
| 18166 | H | 89.43500 | 80.62280 | 65.43790 | -680.75503  | 322.01465   | -3062.06516 | 1 |
| 18167 | C | 86.72700 | 79.92780 | 66.35090 | 438.45055   | -658.59246  | 428.58437   | 1 |
| 18168 | O | 85.95200 | 79.01880 | 66.54290 | 8.87594     | -526.44235  | 577.54551   | 1 |
| 18169 | N | 86.90000 | 80.80780 | 67.33590 | 43.02836    | 5.85719     | -846.19593  | 1 |
| 18170 | H | 87.40500 | 81.66380 | 67.25290 | -644.90563  | 3081.96811  | -206.46889  | 1 |
| 18171 | C | 86.19000 | 80.52680 | 68.62890 | -54.01345   | -739.30871  | 518.84194   | 1 |
| 18172 | H | 86.32400 | 79.48480 | 68.87990 | 2480.69677  | -1406.45585 | -1309.59407 | 1 |
| 18173 | C | 86.84000 | 81.26180 | 69.83390 | 889.04089   | -103.67968  | -119.95892  | 1 |
| 18174 | H | 86.44200 | 80.90480 | 70.80790 | 1399.88128  | 2480.91490  | 1334.30405  | 1 |
| 18175 | C | 88.33400 | 81.07680 | 69.72290 | -591.05031  | 639.38682   | -306.80738  | 1 |
| 18176 | H | 88.48300 | 79.98080 | 69.82890 | -1218.63648 | 2656.01997  | 1184.73515  | 1 |
| 18177 | H | 88.82500 | 81.27280 | 68.74590 | -2168.56829 | -2201.90570 | 591.68513   | 1 |
| 18178 | H | 88.77100 | 81.69980 | 70.53290 | -2083.93822 | -2098.25710 | 1073.92859  | 1 |
| 18179 | C | 86.58200 | 82.78080 | 69.82590 | -592.30484  | -475.06658  | 506.39840   | 1 |
| 18180 | H | 86.96400 | 83.25980 | 70.75290 | 2204.88349  | -173.52341  | -2231.24693 | 1 |
| 18181 | H | 85.55100 | 83.08380 | 69.54390 | 615.76563   | 2761.99008  | 1381.09233  | 1 |
| 18182 | H | 87.13100 | 83.11580 | 68.91990 | -253.69985  | 3131.74586  | -272.20067  | 1 |
| 18183 | C | 84.70900 | 80.73080 | 68.63990 | -632.93376  | -114.55297  | 650.64257   | 1 |
| 18184 | O | 84.02200 | 80.17280 | 69.49290 | -246.99726  | 577.78224   | 486.75900   | 1 |
| 18185 | N | 84.24600 | 81.55880 | 67.65790 | -160.86550  | -803.22477  | 180.42175   | 1 |
| 18186 | H | 84.91200 | 81.97480 | 67.04290 | 1968.06047  | 1880.40704  | 1571.70651  | 1 |
| 18187 | C | 82.80800 | 81.69580 | 67.40890 | 490.44376   | -241.22522  | 719.07705   | 1 |
| 18188 | H | 82.37200 | 81.78180 | 68.39290 | -357.39592  | -212.66674  | -3121.15642 | 1 |
| 18189 | C | 82.41500 | 82.92780 | 66.52990 | 732.99075   | -24.01000   | 526.49050   | 1 |
| 18190 | H | 81.41600 | 82.87480 | 66.04590 | 886.31487   | -2277.04131 | -1970.62278 | 1 |
| 18191 | H | 83.13300 | 83.04280 | 65.69090 | -1156.73282 | 1814.86041  | 2303.95039  | 1 |
| 18192 | N | 83.09257 | 85.36004 | 67.44620 | -789.21115  | -813.88626  | -955.33760  | 1 |
| 18193 | H | 83.77200 | 85.76976 | 66.72670 | 1681.88614  | -180.51981  | -877.23354  | 1 |
| 18194 | C | 82.39900 | 84.15480 | 67.43290 | 892.37825   | -118.13890  | -48.73980   | 1 |
| 18195 | C | 82.80789 | 86.22734 | 68.36828 | 108.96633   | -454.19816  | -518.27704  | 1 |
| 18196 | H | 83.23171 | 87.28899 | 68.39648 | 1748.65740  | 1495.93687  | 3895.58814  | 1 |
| 18197 | N | 81.80824 | 85.63067 | 69.08945 | -579.99165  | -252.50955  | -577.32749  | 1 |
| 18198 | C | 81.65600 | 84.41580 | 68.51590 | 136.32421   | -477.04237  | -760.27294  | 1 |
| 18199 | H | 80.87200 | 83.84280 | 68.99590 | -3030.68003 | 352.89241   | -805.98543  | 1 |
| 18200 | C | 82.16700 | 80.46780 | 66.77990 | 716.29937   | 117.56263   | -543.46946  | 1 |
| 18201 | O | 81.09700 | 80.01880 | 67.19390 | 469.88919   | -448.28960  | 430.34229   | 1 |
| 18202 | N | 82.89000 | 79.89280 | 65.78590 | 178.60863   | 742.30407   | -373.20411  | 1 |
| 18203 | H | 83.69400 | 80.36680 | 65.43590 | 1905.14723  | -541.57481  | 2432.25945  | 1 |
| 18204 | C | 82.59700 | 78.59880 | 65.20790 | 44.61787    | 777.20444   | -489.23877  | 1 |
| 18205 | H | 81.57800 | 78.58580 | 64.84890 | -1058.63008 | 2434.04493  | 1702.79436  | 1 |
| 18206 | C | 83.57500 | 78.33080 | 64.01290 | 587.18264   | -678.89911  | 51.86181    | 1 |
| 18207 | H | 84.59400 | 78.72480 | 64.21390 | -506.67878  | 2046.68760  | -2348.09777 | 1 |
| 18208 | C | 83.59900 | 76.78780 | 63.77490 | 222.56906   | -872.16790  | -53.80558   | 1 |
| 18209 | H | 84.31500 | 76.28780 | 64.46290 | 237.29848   | 210.01570   | -3134.58664 | 1 |
| 18210 | H | 83.98300 | 76.51480 | 62.76890 | -2347.76777 | 290.43070   | 2081.95348  | 1 |
| 18211 | H | 82.64600 | 76.27180 | 64.01990 | -2677.18266 | 270.47322   | -1651.28823 | 1 |
| 18212 | C | 83.00400 | 79.04680 | 62.75690 | -688.89411  | 267.30127   | 548.01628   | 1 |
| 18213 | H | 81.91100 | 78.88580 | 62.63890 | 3109.59648  | -300.41890  | -266.69542  | 1 |
| 18214 | H | 83.47200 | 78.73680 | 61.79890 | -202.07650  | 3031.12063  | -856.68925  | 1 |
| 18215 | H | 83.14800 | 80.14080 | 62.88390 | 1761.75991  | -2401.73212 | -976.90497  | 1 |
| 18216 | C | 82.54300 | 77.54080 | 66.30590 | -640.20002  | 152.33778   | 638.21347   | 1 |
| 18217 | O | 81.51500 | 76.91780 | 66.54690 | -139.00049  | 587.41302   | 515.67853   | 1 |
| 18218 | N | 83.59100 | 77.46180 | 67.16990 | 118.05853   | -110.46016  | 822.31414   | 1 |
| 18219 | H | 84.39600 | 78.01380 | 66.96890 | 1947.99311  | -1109.82332 | -2199.69674 | 1 |

|       |   |          |          |          |             |             |             |   |
|-------|---|----------|----------|----------|-------------|-------------|-------------|---|
| 18220 | C | 83.61000 | 76.47880 | 68.21290 | 164.42156   | -878.69462  | -138.38041  | 1 |
| 18221 | H | 83.48300 | 75.48980 | 67.79590 | 1992.96545  | -2184.51893 | -1049.43428 | 1 |
| 18222 | C | 85.03500 | 76.38780 | 68.80890 | -556.68581  | -700.11344  | -181.95602  | 1 |
| 18223 | H | 85.44800 | 77.41780 | 68.87090 | -1712.21024 | 1687.22724  | 2037.63034  | 1 |
| 18224 | C | 85.07400 | 75.72080 | 70.18590 | -547.45866  | -533.84552  | 493.75497   | 1 |
| 18225 | H | 86.10000 | 75.62280 | 70.60190 | -2619.49490 | 1746.09905  | -225.49320  | 1 |
| 18226 | H | 84.55100 | 76.30080 | 70.97590 | -504.51032  | -1165.57100 | 2872.75286  | 1 |
| 18227 | H | 84.66100 | 74.69080 | 70.12890 | 2360.72387  | -2050.74295 | 237.51182   | 1 |
| 18228 | C | 85.97700 | 75.72480 | 67.76590 | -98.18311   | -238.41847  | 868.29468   | 1 |
| 18229 | H | 85.69100 | 74.65480 | 67.67490 | -1516.47071 | 2275.84290  | -1579.19068 | 1 |
| 18230 | H | 85.74100 | 76.16480 | 66.77290 | 1462.57973  | 1874.99856  | 2055.33318  | 1 |
| 18231 | C | 87.47200 | 75.97180 | 67.95890 | 390.06594   | 406.60744   | 710.68259   | 1 |
| 18232 | H | 88.05300 | 75.45780 | 67.16290 | 1576.13022  | -2592.13432 | -798.95125  | 1 |
| 18233 | H | 87.73000 | 75.66880 | 68.99590 | 1400.72879  | 3.39213     | 2807.28553  | 1 |
| 18234 | H | 87.69600 | 77.04780 | 67.79490 | 1752.71508  | -1723.16113 | -1955.06933 | 1 |
| 18235 | C | 82.51700 | 76.61280 | 69.28290 | -620.28303  | 86.79355    | -675.01447  | 1 |
| 18236 | O | 81.96700 | 75.61980 | 69.76790 | -708.37877  | 241.28089   | 274.05532   | 1 |
| 18237 | N | 82.13600 | 77.82380 | 69.67790 | -405.37820  | -492.03869  | 550.69439   | 1 |
| 18238 | H | 82.59400 | 78.62980 | 69.31090 | 643.48411   | 2523.32227  | 1767.65899  | 1 |
| 18239 | C | 81.05000 | 78.07380 | 70.56590 | 646.20240   | -585.12291  | -237.33088  | 1 |
| 18240 | H | 81.27600 | 77.50580 | 71.45590 | -385.17836  | -3111.51755 | -210.90985  | 1 |
| 18241 | C | 81.05200 | 79.58980 | 71.00790 | -122.45321  | 868.02473   | 269.13565   | 1 |
| 18242 | H | 80.98000 | 80.15680 | 70.05590 | 934.85597   | -567.14802  | -2948.55670 | 1 |
| 18243 | H | 82.02300 | 79.80180 | 71.50490 | -1756.22962 | 661.79516   | -2534.59089 | 1 |
| 18244 | C | 79.92200 | 80.03280 | 71.97990 | 444.64135   | 532.81259   | 587.62017   | 1 |
| 18245 | C | 79.38500 | 79.12780 | 72.88490 | 747.08396   | 204.11898   | -473.48387  | 1 |
| 18246 | H | 79.82100 | 78.13980 | 72.84190 | 2337.29381  | -2085.87072 | 175.96666   | 1 |
| 18247 | C | 78.46300 | 79.55580 | 73.85390 | -200.60253  | 802.41742   | -397.01121  | 1 |
| 18248 | H | 78.13700 | 78.88380 | 74.63390 | 502.81930   | 2846.76741  | 1244.38230  | 1 |
| 18249 | C | 77.98700 | 80.85580 | 73.88990 | 702.32145   | 193.96661   | -541.05088  | 1 |
| 18250 | O | 76.96700 | 81.12580 | 74.81990 | 326.91092   | -635.25500  | -323.92512  | 1 |
| 18251 | H | 77.08100 | 82.02380 | 75.14090 | 1599.39933  | -1707.94424 | 2094.54542  | 1 |
| 18252 | C | 79.47200 | 81.38480 | 72.01490 | -512.08454  | 743.42893   | 175.91709   | 1 |
| 18253 | H | 79.94600 | 82.09480 | 71.35290 | 1997.37048  | -795.13771  | 2286.85788  | 1 |
| 18254 | C | 78.48900 | 81.79280 | 72.93090 | 683.63573   | 409.78497   | -435.38856  | 1 |
| 18255 | H | 78.06400 | 82.77980 | 73.03490 | 43.21796    | 761.38660   | -3053.68203 | 1 |
| 18256 | C | 79.67300 | 77.54080 | 70.07190 | -599.60519  | -266.32678  | -641.46102  | 1 |
| 18257 | O | 78.96500 | 76.79380 | 70.76590 | 472.86070   | -467.85158  | -414.18717  | 1 |
| 18258 | N | 79.39400 | 77.68380 | 68.75890 | -750.56784  | -396.55506  | 3.18549     | 1 |
| 18259 | H | 79.95300 | 78.19680 | 68.11190 | -1161.45304 | -979.47494  | 2753.69883  | 1 |
| 18260 | C | 78.20500 | 77.02080 | 68.19390 | 53.36784    | 801.68309   | 438.01833   | 1 |
| 18261 | H | 77.43900 | 76.92980 | 68.94890 | 2948.95071  | 317.17172   | 1024.98411  | 1 |
| 18262 | C | 77.48800 | 77.80880 | 67.07390 | 356.32206   | -635.43654  | -537.39957  | 1 |
| 18263 | H | 76.97700 | 77.12180 | 66.36490 | 1480.23108  | -2369.63446 | 1424.18386  | 1 |
| 18264 | O | 78.48200 | 78.54080 | 66.33890 | -438.91983  | -396.49627  | -528.04442  | 1 |
| 18265 | H | 77.96600 | 79.06380 | 65.71990 | -583.51300  | 2171.64280  | 2207.61326  | 1 |
| 18266 | C | 76.51200 | 78.84980 | 67.67590 | 688.63003   | 564.42455   | 179.79774   | 1 |
| 18267 | H | 76.14500 | 79.53180 | 66.87990 | 2240.35661  | -1711.13794 | -1375.63757 | 1 |
| 18268 | H | 77.06600 | 79.47580 | 68.40790 | 2625.80217  | -1595.41141 | 626.26001   | 1 |
| 18269 | H | 75.64300 | 78.39980 | 68.20290 | -722.19249  | 1855.38658  | 2441.24259  | 1 |
| 18270 | C | 78.36700 | 75.56380 | 67.75190 | -15.45537   | -791.20725  | 439.20027   | 1 |
| 18271 | O | 77.49200 | 74.70580 | 67.73790 | 231.74486   | 731.95887   | -200.53705  | 1 |
| 18272 | N | 79.64800 | 75.13880 | 67.41590 | -417.04813  | 729.58663   | 146.55234   | 1 |
| 18273 | H | 80.37000 | 75.81880 | 67.31490 | 481.84237   | -2724.87400 | -1486.18360 | 1 |
| 18274 | C | 79.99100 | 73.68980 | 67.21490 | 88.61976    | 910.31216   | -75.63605   | 1 |
| 18275 | H | 79.38000 | 73.32380 | 66.40290 | 1627.53249  | 86.60163    | 2681.67877  | 1 |
| 18276 | C | 81.38900 | 73.44280 | 66.61790 | 744.85556   | -136.45899  | 488.45660   | 1 |
| 18277 | H | 82.10200 | 74.18380 | 67.03690 | -7.17878    | -3122.37513 | 321.67498   | 1 |
| 18278 | C | 81.96200 | 72.04380 | 66.97190 | 581.85838   | 170.24355   | 670.09217   | 1 |
| 18279 | H | 82.88300 | 71.83080 | 66.38890 | 1726.18988  | -1900.91977 | -1808.47207 | 1 |
| 18280 | H | 81.18600 | 71.31880 | 66.64490 | 2495.23235  | -876.93291  | -1693.93308 | 1 |
| 18281 | H | 82.34400 | 71.99180 | 68.01390 | 417.09881   | -1852.17733 | -2508.37003 | 1 |

|       |   |          |          |          |             |             |             |   |
|-------|---|----------|----------|----------|-------------|-------------|-------------|---|
| 18282 | C | 81.32400 | 73.80080 | 65.10990 | 462.85643   | 442.26735   | 643.13038   | 1 |
| 18283 | H | 80.97800 | 74.84980 | 64.98990 | 2737.92801  | -1509.59695 | -229.85742  | 1 |
| 18284 | H | 82.37400 | 73.66580 | 64.77390 | -1760.96601 | 1443.80697  | -2188.29896 | 1 |
| 18285 | H | 80.63300 | 73.08980 | 64.60990 | 673.90006   | -2975.76099 | 724.53691   | 1 |
| 18286 | C | 79.75400 | 72.79980 | 68.47990 | -619.47648  | 625.62151   | -275.61530  | 1 |
| 18287 | O | 79.20000 | 71.70380 | 68.33390 | 532.05505   | 395.53368   | 419.73852   | 1 |
| 18288 | N | 80.08100 | 73.22380 | 69.70090 | 172.91307   | -496.29476  | 649.76621   | 1 |
| 18289 | H | 80.50800 | 74.12280 | 69.76890 | -630.92253  | -2683.67019 | -1513.74082 | 1 |
| 18290 | C | 79.61600 | 72.58280 | 70.91190 | -765.40476  | 82.82988    | -505.29216  | 1 |
| 18291 | H | 79.83700 | 71.53080 | 70.80090 | -2395.78744 | -662.87450  | 1930.26743  | 1 |
| 18292 | C | 80.32000 | 73.15880 | 72.15090 | 166.68697   | 890.87963   | 121.05007   | 1 |
| 18293 | H | 80.52000 | 74.24680 | 72.04990 | -494.45600  | 2922.19678  | -1076.19734 | 1 |
| 18294 | H | 81.33400 | 72.70680 | 72.18690 | -1949.49855 | -1099.58608 | -2219.90203 | 1 |
| 18295 | C | 79.57500 | 73.06880 | 73.50490 | -6.02462    | -706.39997  | 567.06380   | 1 |
| 18296 | O | 78.59100 | 73.73680 | 73.79790 | 496.58987   | -66.62512   | -608.64221  | 1 |
| 18297 | N | 80.05400 | 72.13480 | 74.36090 | 390.92450   | -699.02938  | 242.07280   | 1 |
| 18298 | H | 80.91400 | 71.64380 | 74.22290 | 2437.24680  | 1923.59509  | -498.06818  | 1 |
| 18299 | H | 79.62900 | 72.06180 | 75.26290 | -1609.93060 | -1822.22870 | 1993.21624  | 1 |
| 18300 | C | 78.06400 | 72.62880 | 71.06090 | -130.35900  | 906.99412   | -51.15619   | 1 |
| 18301 | O | 77.44500 | 71.63380 | 71.38190 | -394.11678  | 287.39302   | 622.90152   | 1 |
| 18302 | N | 77.42000 | 73.74480 | 70.75490 | -514.51697  | -662.82992  | -102.80784  | 1 |
| 18303 | H | 77.98600 | 74.52280 | 70.49790 | -2042.12336 | -2302.99929 | 653.81551   | 1 |
| 18304 | C | 76.00300 | 73.97580 | 70.88590 | -853.49326  | 104.48439   | -328.17675  | 1 |
| 18305 | H | 75.75900 | 73.92180 | 71.93690 | 1775.83032  | -2456.36118 | 812.57362   | 1 |
| 18306 | C | 75.56400 | 75.38480 | 70.54190 | -260.84233  | -866.59548  | 88.80442    | 1 |
| 18307 | H | 75.41200 | 75.53680 | 69.45190 | 2139.40063  | 1429.51646  | 1802.39704  | 1 |
| 18308 | H | 76.35700 | 76.10880 | 70.82590 | 2119.95453  | -2284.69824 | -363.89328  | 1 |
| 18309 | C | 74.25900 | 75.91580 | 71.28290 | -532.63391  | 548.48908   | 507.24060   | 1 |
| 18310 | H | 73.50300 | 75.10180 | 71.26190 | -1673.71938 | -2296.31594 | 1350.56780  | 1 |
| 18311 | C | 74.54200 | 76.24980 | 72.74990 | -625.08393  | -481.67277  | 460.69830   | 1 |
| 18312 | H | 74.82100 | 75.38380 | 73.38690 | -358.26018  | 2868.99237  | -1252.75363 | 1 |
| 18313 | H | 73.69400 | 76.78080 | 73.23390 | -1927.88942 | 2245.74079  | 1084.89629  | 1 |
| 18314 | H | 75.40100 | 76.95280 | 72.71390 | -596.90663  | -2944.67558 | 923.91443   | 1 |
| 18315 | C | 73.71700 | 77.15380 | 70.58690 | -95.59545   | 485.33462   | 768.21288   | 1 |
| 18316 | H | 72.74800 | 77.35680 | 71.09090 | -1284.05773 | 2229.85564  | 1819.58436  | 1 |
| 18317 | H | 73.66100 | 76.90080 | 69.50690 | -2211.89881 | 939.00296   | 2040.21554  | 1 |
| 18318 | H | 74.31300 | 78.05480 | 70.84590 | -1242.66947 | -2559.58921 | 1340.34148  | 1 |
| 18319 | C | 75.09600 | 73.04480 | 70.08690 | -830.67000  | 391.40814   | -68.73387   | 1 |
| 18320 | O | 74.19500 | 72.43780 | 70.57690 | 519.18896   | 459.19864   | -377.07439  | 1 |
| 18321 | N | 75.58000 | 72.79280 | 68.84390 | 436.15886   | -707.58737  | -89.98110   | 1 |
| 18322 | H | 76.37800 | 73.29880 | 68.52390 | 593.94315   | 1451.42222  | -2732.23636 | 1 |
| 18323 | C | 75.03800 | 71.79380 | 67.92590 | 32.93483    | -544.63417  | -729.87678  | 1 |
| 18324 | H | 73.97500 | 71.68380 | 68.08490 | -951.47697  | 2270.49321  | 1965.34726  | 1 |
| 18325 | C | 75.21300 | 72.27780 | 66.44590 | -7.92597    | -905.10498  | -37.37704   | 1 |
| 18326 | H | 74.68000 | 71.57580 | 65.76990 | -399.32974  | 2225.39817  | 2191.84349  | 1 |
| 18327 | H | 76.30400 | 72.25780 | 66.23490 | 1244.19765  | 1670.42319  | -2361.98875 | 1 |
| 18328 | C | 74.58800 | 73.64280 | 66.30190 | 17.91820    | 867.05587   | 296.10125   | 1 |
| 18329 | C | 73.40500 | 74.05580 | 66.90090 | -629.94929  | 172.76706   | -648.54161  | 1 |
| 18330 | H | 72.87400 | 73.31580 | 67.48090 | 2137.53221  | 2092.16844  | -971.97083  | 1 |
| 18331 | C | 72.89700 | 75.36980 | 66.79290 | -866.40716  | 249.81499   | -191.97272  | 1 |
| 18332 | H | 72.03100 | 75.61380 | 67.39190 | 1594.61666  | 2179.29777  | 1611.49213  | 1 |
| 18333 | C | 73.59500 | 76.30480 | 66.07290 | -548.19151  | 458.28481   | -581.56154  | 1 |
| 18334 | O | 73.11000 | 77.58880 | 66.04690 | 451.16441   | -249.30900  | 587.55699   | 1 |
| 18335 | H | 73.77800 | 78.08480 | 65.56790 | 2097.73861  | -2261.07488 | 562.46490   | 1 |
| 18336 | C | 75.25300 | 74.59480 | 65.48390 | -693.82110  | 87.46767    | -599.33160  | 1 |
| 18337 | H | 76.17700 | 74.26580 | 65.03190 | 43.90296    | -2922.94761 | 1142.27067  | 1 |
| 18338 | C | 74.76400 | 75.91180 | 65.39090 | 326.51314   | 472.42453   | 706.07737   | 1 |
| 18339 | H | 75.26000 | 76.67480 | 64.80990 | 2038.03290  | -728.82327  | -2274.80383 | 1 |
| 18340 | C | 75.55000 | 70.36280 | 68.08790 | -738.36483  | 231.49811   | -500.99192  | 1 |
| 18341 | O | 74.98700 | 69.48580 | 67.47890 | 484.80912   | -461.66460  | -407.98912  | 1 |
| 18342 | N | 76.64500 | 70.10980 | 68.85690 | 324.60309   | -569.45571  | -526.45440  | 1 |
| 18343 | H | 77.20900 | 70.81580 | 69.27890 | -339.70625  | -1607.88736 | 2675.75720  | 1 |

|       |   |          |          |          |             |             |             |   |
|-------|---|----------|----------|----------|-------------|-------------|-------------|---|
| 18344 | C | 77.21400 | 68.74780 | 68.93090 | -690.73412  | -61.80774   | -605.38966  | 1 |
| 18345 | H | 76.76200 | 68.11280 | 68.18290 | -2607.33324 | 1615.93048  | 732.73339   | 1 |
| 18346 | C | 78.76800 | 68.59680 | 68.72990 | 596.02643   | 453.96324   | 510.22043   | 1 |
| 18347 | H | 78.91700 | 68.76980 | 67.64290 | 2138.28278  | -2293.65718 | 60.69739    | 1 |
| 18348 | H | 79.12100 | 67.55780 | 68.90390 | -2646.86455 | -693.10762  | 1555.95790  | 1 |
| 18349 | O | 79.43400 | 69.45380 | 69.61290 | 753.72654   | 216.49744   | 7.30554     | 1 |
| 18350 | H | 79.36600 | 70.29480 | 69.15390 | -3054.98067 | -659.25907  | 404.56468   | 1 |
| 18351 | C | 76.83600 | 68.12980 | 70.21990 | 498.71611   | 598.64270   | -478.33864  | 1 |
| 18352 | O | 76.31600 | 67.01880 | 70.22490 | -312.07694  | 534.42851   | -505.87461  | 1 |
| 18353 | N | 76.90800 | 68.88580 | 71.39690 | 76.33347    | 474.55010   | -701.74167  | 1 |
| 18354 | H | 77.09200 | 69.86380 | 71.34290 | -1873.04815 | 2138.99858  | 1358.29924  | 1 |
| 18355 | C | 76.65900 | 68.29280 | 72.72790 | 493.82183   | 466.96369   | -611.47836  | 1 |
| 18356 | H | 77.37300 | 67.49480 | 72.86990 | -357.76700  | -43.84511   | -3132.16884 | 1 |
| 18357 | C | 76.99100 | 69.27280 | 73.89690 | 719.73008   | 76.41368    | -552.60761  | 1 |
| 18358 | H | 78.08900 | 69.43780 | 73.90890 | 361.06741   | 3126.67842  | -106.55854  | 1 |
| 18359 | H | 76.72300 | 68.86880 | 74.89590 | 2924.45232  | 81.36901    | 1137.66210  | 1 |
| 18360 | O | 76.37400 | 70.60180 | 73.75590 | 273.61857   | 523.50887   | -528.99627  | 1 |
| 18361 | H | 76.99100 | 71.20580 | 73.33690 | 528.11915   | 2600.07205  | -1699.16572 | 1 |
| 18362 | C | 75.22200 | 67.71180 | 72.98090 | 196.28844   | -546.19085  | 693.27251   | 1 |
| 18363 | O | 75.04700 | 66.54180 | 73.22690 | 538.98853   | -305.48630  | -486.85253  | 1 |
| 18364 | N | 74.23400 | 68.54880 | 72.77190 | -758.33135  | -378.09186  | -40.27274   | 1 |
| 18365 | H | 74.49300 | 69.49780 | 72.60890 | 1261.70224  | 2610.83105  | 1217.32485  | 1 |
| 18366 | C | 72.81700 | 68.20780 | 72.84690 | 703.93705   | -424.81460  | -384.02028  | 1 |
| 18367 | H | 72.69700 | 67.79180 | 73.83690 | -692.38117  | -1497.57152 | -2683.39721 | 1 |
| 18368 | C | 71.92400 | 69.42580 | 72.75590 | 202.77923   | -32.89934   | 882.88937   | 1 |
| 18369 | H | 72.28100 | 70.22380 | 73.44090 | -2091.53959 | 2287.16702  | 572.96627   | 1 |
| 18370 | C | 71.88500 | 70.06880 | 71.32090 | 493.00725   | -488.95624  | -585.77024  | 1 |
| 18371 | H | 72.95400 | 70.30580 | 71.12690 | 2772.48877  | 743.89161   | 1271.35317  | 1 |
| 18372 | H | 71.46800 | 69.35080 | 70.58190 | 1517.77981  | -1884.46883 | -2005.61431 | 1 |
| 18373 | H | 71.31100 | 71.01980 | 71.33190 | 2630.76383  | -1626.74725 | -534.69420  | 1 |
| 18374 | C | 70.59100 | 69.04780 | 73.37790 | -378.88912  | -732.89266  | 385.00383   | 1 |
| 18375 | H | 69.91400 | 69.92780 | 73.42990 | 1618.89530  | 2264.70550  | 1460.04092  | 1 |
| 18376 | H | 70.01500 | 68.20180 | 72.94690 | -870.29212  | -2004.25216 | 2259.40314  | 1 |
| 18377 | H | 70.85600 | 68.68180 | 74.39290 | -475.23382  | 2022.86710  | 2361.68283  | 1 |
| 18378 | C | 72.36900 | 67.11980 | 71.85690 | 623.20020   | 362.10758   | -558.81193  | 1 |
| 18379 | O | 71.52900 | 66.26080 | 72.13090 | -595.74733  | 366.56695   | -384.55340  | 1 |
| 18380 | N | 72.91100 | 67.09180 | 70.61690 | -455.97143  | 172.27515   | -699.66837  | 1 |
| 18381 | H | 73.50900 | 67.85780 | 70.39290 | 1958.03657  | -650.46098  | -2373.29850 | 1 |
| 18382 | C | 72.45400 | 66.06380 | 69.71790 | 461.99671   | -457.81713  | 625.57484   | 1 |
| 18383 | H | 71.39000 | 65.90280 | 69.80790 | 2184.99381  | 1250.03941  | -1887.47170 | 1 |
| 18384 | C | 72.66000 | 66.54280 | 68.23090 | -177.42518  | -608.43741  | 647.48733   | 1 |
| 18385 | H | 72.52100 | 65.61380 | 67.63890 | -2069.03808 | -952.19184  | 2169.35455  | 1 |
| 18386 | H | 73.68700 | 66.96680 | 68.24990 | 1998.35153  | 413.78573   | -2394.70920 | 1 |
| 18387 | C | 71.72500 | 67.59780 | 67.72090 | 121.19142   | -722.64103  | 529.47482   | 1 |
| 18388 | C | 71.74100 | 68.95780 | 67.92090 | 886.99513   | -24.53604   | 170.31397   | 1 |
| 18389 | H | 72.58600 | 69.44280 | 68.38690 | 2022.75025  | 2063.16446  | 1237.10149  | 1 |
| 18390 | N | 70.70500 | 69.55680 | 67.31790 | 719.53588   | 426.09331   | -84.48278   | 1 |
| 18391 | H | 70.35400 | 70.42880 | 67.57890 | -1981.56115 | -1646.90024 | 1806.18484  | 1 |
| 18392 | C | 69.94900 | 68.58180 | 66.73890 | 235.53366   | -58.03303   | -880.19701  | 1 |
| 18393 | C | 70.55000 | 67.30580 | 66.99790 | -198.50399  | 178.07977   | 870.36562   | 1 |
| 18394 | C | 69.90800 | 66.17080 | 66.61990 | -101.37054  | -655.12410  | 616.99733   | 1 |
| 18395 | H | 70.39900 | 65.26380 | 66.93990 | 2041.65126  | -2011.44243 | 1272.68526  | 1 |
| 18396 | C | 68.76100 | 66.27480 | 65.85090 | -384.86010  | -612.26075  | 550.34397   | 1 |
| 18397 | H | 68.26800 | 65.37480 | 65.51390 | 1723.02216  | -2323.15690 | 1212.00617  | 1 |
| 18398 | C | 68.83000 | 68.69180 | 65.97190 | 722.53225   | -298.96665  | -456.21608  | 1 |
| 18399 | H | 68.33200 | 69.62280 | 65.74690 | -2328.63348 | 1344.50900  | 1646.60985  | 1 |
| 18400 | C | 68.20200 | 67.49880 | 65.54590 | -252.48188  | -636.25672  | 596.14240   | 1 |
| 18401 | H | 67.29300 | 67.52580 | 64.96390 | -1273.79055 | 2123.00722  | -1956.12699 | 1 |
| 18402 | C | 73.19300 | 64.74780 | 69.88990 | -489.30772  | -406.56480  | -661.24204  | 1 |
| 18403 | O | 72.67800 | 63.69780 | 69.58190 | -233.60774  | 521.33148   | -558.55381  | 1 |
| 18404 | N | 74.40600 | 64.73880 | 70.51790 | 300.33587   | 447.64090   | -656.17288  | 1 |
| 18405 | H | 74.96100 | 65.55880 | 70.63090 | 534.99465   | -2258.70916 | -2123.53367 | 1 |

|       |   |          |          |          |             |             |             |   |
|-------|---|----------|----------|----------|-------------|-------------|-------------|---|
| 18406 | C | 74.94700 | 63.53980 | 71.09390 | 205.50117   | 672.67114   | 576.15143   | 1 |
| 18407 | H | 75.05800 | 62.74180 | 70.37490 | 1187.37735  | -1522.03301 | 2471.27108  | 1 |
| 18408 | C | 76.44200 | 63.74480 | 71.56290 | -170.28977  | -873.13127  | -192.98627  | 1 |
| 18409 | H | 76.37000 | 64.76080 | 72.00790 | -1636.27212 | 2148.64190  | 1618.30073  | 1 |
| 18410 | C | 76.85300 | 62.73380 | 72.62490 | -614.08486  | -644.14417  | 194.61024   | 1 |
| 18411 | H | 77.96400 | 62.74180 | 72.63890 | 2690.82302  | -1616.65571 | -45.44834   | 1 |
| 18412 | H | 76.59800 | 61.68380 | 72.36590 | 1174.25606  | 2734.89555  | 1016.14241  | 1 |
| 18413 | H | 76.41300 | 62.97180 | 73.61690 | -1483.48706 | 1608.29212  | -2274.23664 | 1 |
| 18414 | C | 77.39100 | 63.63880 | 70.36590 | 2.02453     | 270.51159   | 864.67500   | 1 |
| 18415 | H | 76.79400 | 64.06380 | 69.53090 | 456.22267   | -2929.35831 | -1043.04055 | 1 |
| 18416 | H | 77.58600 | 62.57880 | 70.09590 | -1522.33790 | 1473.88629  | 2324.72180  | 1 |
| 18417 | C | 78.55700 | 64.57680 | 70.48490 | 833.31547   | -350.08014  | -28.82711   | 1 |
| 18418 | H | 79.21500 | 64.35480 | 71.35190 | -442.63608  | -2981.14660 | -897.69110  | 1 |
| 18419 | H | 78.21700 | 65.63480 | 70.49190 | 2169.61326  | -1944.70136 | 1159.98261  | 1 |
| 18420 | H | 79.23400 | 64.48180 | 69.60890 | -338.07991  | 2201.89939  | 2220.20129  | 1 |
| 18421 | C | 74.09700 | 62.96180 | 72.24090 | 643.98279   | 642.01619   | 39.32556    | 1 |
| 18422 | O | 73.82900 | 61.77480 | 72.30290 | -143.84965  | 181.02449   | -764.32075  | 1 |
| 18423 | N | 73.51000 | 63.84680 | 73.06590 | 350.91058   | -533.48797  | 538.90566   | 1 |
| 18424 | H | 73.79600 | 64.80180 | 73.04790 | 598.83253   | 2819.82152  | 1259.03548  | 1 |
| 18425 | C | 72.53000 | 63.56280 | 74.09690 | -372.74664  | 822.39106   | 150.88159   | 1 |
| 18426 | H | 72.92800 | 62.80480 | 74.75590 | -2235.70465 | -2201.25487 | -260.62730  | 1 |
| 18427 | C | 72.31300 | 64.68880 | 75.09590 | -718.61129  | 536.43211   | -198.55836  | 1 |
| 18428 | H | 71.43000 | 64.41080 | 75.70990 | 733.09784   | -1444.89752 | 2688.71754  | 1 |
| 18429 | H | 71.98400 | 65.56780 | 74.50090 | 982.98567   | -2621.13423 | 1421.93926  | 1 |
| 18430 | C | 73.46500 | 64.97780 | 76.06990 | 310.77232   | 812.52691   | -280.37822  | 1 |
| 18431 | H | 74.37300 | 65.14780 | 75.45290 | -1412.77966 | -146.27732  | 2803.47063  | 1 |
| 18432 | C | 73.19900 | 66.08480 | 77.11390 | -690.87982  | -495.35593  | -342.32155  | 1 |
| 18433 | H | 74.07700 | 66.31080 | 77.75590 | 170.57592   | -2542.35200 | -1848.37104 | 1 |
| 18434 | H | 72.87400 | 67.00380 | 76.57990 | -2614.76317 | -1499.93874 | 906.71710   | 1 |
| 18435 | H | 72.38300 | 65.70780 | 77.76590 | 1611.42585  | -2453.78058 | -1127.49665 | 1 |
| 18436 | C | 73.79100 | 63.67480 | 76.88490 | 647.00214   | 175.89547   | -620.46536  | 1 |
| 18437 | H | 74.66400 | 63.90280 | 77.53190 | 1925.89868  | -2009.14973 | 1452.19707  | 1 |
| 18438 | H | 72.87900 | 63.35080 | 77.43090 | -542.02898  | 2886.01368  | 1129.03557  | 1 |
| 18439 | H | 74.16100 | 62.87780 | 76.20390 | 839.19187   | -2802.67704 | -1155.33045 | 1 |
| 18440 | C | 71.22700 | 62.91880 | 73.51690 | 182.50807   | -386.97716  | -808.81667  | 1 |
| 18441 | O | 70.71800 | 61.98380 | 74.14690 | 572.32794   | -40.76907   | 530.69074   | 1 |
| 18442 | N | 70.70300 | 63.40180 | 72.34790 | 122.58244   | 635.50850   | 538.66868   | 1 |
| 18443 | H | 71.10300 | 64.26580 | 72.05290 | 181.07960   | 101.74061   | -3144.70988 | 1 |
| 18444 | C | 69.73400 | 62.58180 | 71.58590 | 648.34332   | -575.12251  | -268.42957  | 1 |
| 18445 | H | 68.87900 | 62.38480 | 72.21590 | 1292.68007  | -2809.95447 | -553.13786  | 1 |
| 18446 | C | 69.26800 | 63.38280 | 70.33890 | -415.98133  | 458.27721   | 670.51897   | 1 |
| 18447 | H | 68.28800 | 62.96680 | 70.02090 | 2100.01921  | -2274.49337 | 515.39410   | 1 |
| 18448 | H | 69.96100 | 63.29480 | 69.47590 | -2169.74637 | 29.44790    | -2289.89062 | 1 |
| 18449 | H | 69.03900 | 64.45180 | 70.53990 | 1001.19022  | 952.27062   | -2830.56755 | 1 |
| 18450 | C | 70.21000 | 61.21680 | 71.12590 | 485.52598   | 601.92988   | -488.54126  | 1 |
| 18451 | O | 69.50700 | 60.27980 | 71.39790 | -538.20560  | -399.96629  | -427.50780  | 1 |
| 18452 | N | 71.39700 | 61.10080 | 70.48690 | -231.10616  | -772.99183  | 234.04033   | 1 |
| 18453 | H | 71.96500 | 61.91780 | 70.43290 | 2161.00328  | 696.11652   | -2180.21176 | 1 |
| 18454 | C | 71.91600 | 59.80780 | 70.10590 | -131.76248  | 580.05229   | 688.18706   | 1 |
| 18455 | H | 71.21400 | 59.26580 | 69.48990 | -696.12998  | -1785.35097 | -2501.25870 | 1 |
| 18456 | C | 73.26300 | 60.01580 | 69.27590 | 218.20334   | 189.20292   | -872.24376  | 1 |
| 18457 | H | 73.86400 | 59.08180 | 69.30890 | -1625.27937 | -2118.81823 | -1671.43583 | 1 |
| 18458 | H | 73.85400 | 60.81780 | 69.76790 | 1907.54809  | -1736.68707 | -1797.76264 | 1 |
| 18459 | C | 73.07700 | 60.37180 | 67.86290 | -628.60216  | -258.40322  | 604.55473   | 1 |
| 18460 | C | 71.99300 | 61.12680 | 67.38390 | -160.61150  | -687.47958  | -579.58518  | 1 |
| 18461 | H | 71.19200 | 61.52980 | 67.98490 | -1058.16331 | -1862.78307 | 2296.25158  | 1 |
| 18462 | C | 71.80300 | 61.37380 | 66.02090 | -115.57533  | -454.91596  | -786.29457  | 1 |
| 18463 | H | 70.93800 | 61.91180 | 65.66190 | -2704.05929 | 573.98030   | -1523.91824 | 1 |
| 18464 | C | 72.70500 | 60.88880 | 65.10690 | 551.44707   | -580.45346  | 411.01262   | 1 |
| 18465 | H | 72.48900 | 61.01780 | 64.05590 | -1401.12217 | 1805.65015  | -2179.77737 | 1 |
| 18466 | C | 73.97600 | 59.87980 | 66.90290 | -675.00621  | -286.58379  | -555.12678  | 1 |
| 18467 | H | 74.74700 | 59.17780 | 67.18090 | -526.20559  | -1943.58855 | -2422.71101 | 1 |

|       |   |          |          |          |             |             |             |   |
|-------|---|----------|----------|----------|-------------|-------------|-------------|---|
| 18468 | C | 73.75000 | 60.08480 | 65.52790 | 338.21879   | -758.88555  | 348.12355   | 1 |
| 18469 | H | 74.35200 | 59.44180 | 64.90390 | 1609.41313  | -2422.45396 | 1168.43439  | 1 |
| 18470 | C | 72.12500 | 58.72180 | 71.18490 | -309.08295  | 859.87109   | -88.78740   | 1 |
| 18471 | O | 71.74000 | 57.56280 | 70.96290 | -450.74789  | 521.30109   | -405.22988  | 1 |
| 18472 | N | 72.61100 | 59.07480 | 72.37390 | 619.37944   | -38.21568   | 558.54478   | 1 |
| 18473 | H | 72.89000 | 60.02280 | 72.50490 | -2039.37977 | -299.12877  | -2388.61338 | 1 |
| 18474 | C | 72.68100 | 58.14080 | 73.49390 | 708.97810   | -430.88606  | 357.45936   | 1 |
| 18475 | H | 73.09600 | 57.19180 | 73.18990 | -1638.31849 | 657.59144   | -2616.76016 | 1 |
| 18476 | C | 73.64600 | 58.74880 | 74.51190 | 255.77426   | -15.45086   | 865.29395   | 1 |
| 18477 | H | 74.62300 | 58.87080 | 73.99490 | -2072.23954 | -1940.68312 | -1366.77572 | 1 |
| 18478 | C | 73.16700 | 60.07580 | 75.15390 | 435.61198   | -540.05119  | -593.80901  | 1 |
| 18479 | H | 72.36900 | 59.90880 | 75.90790 | -1739.45405 | -1836.82695 | -1879.90486 | 1 |
| 18480 | H | 72.74200 | 60.71680 | 74.35090 | 2071.55604  | 1148.21861  | -2075.11122 | 1 |
| 18481 | H | 73.98700 | 60.55380 | 75.73090 | 56.95115    | -2000.80573 | -2433.02826 | 1 |
| 18482 | C | 74.00800 | 57.66680 | 75.58290 | -411.79847  | 567.39218   | -597.19857  | 1 |
| 18483 | H | 74.22300 | 56.72280 | 75.03790 | -1798.06929 | 1570.17343  | -2064.29712 | 1 |
| 18484 | H | 73.10600 | 57.48480 | 76.20490 | -1529.55720 | 1841.99986  | -2054.55968 | 1 |
| 18485 | C | 75.17000 | 58.18180 | 76.40990 | 761.30637   | 232.02322   | -448.62555  | 1 |
| 18486 | H | 76.07100 | 58.47080 | 75.82890 | 2382.84635  | -200.87051  | 2030.30033  | 1 |
| 18487 | H | 74.83000 | 59.07680 | 76.97390 | -1841.75455 | 2220.25220  | -1273.48893 | 1 |
| 18488 | H | 75.49500 | 57.43180 | 77.16290 | 2555.24984  | 732.06459   | 1669.21487  | 1 |
| 18489 | C | 71.27200 | 57.86480 | 74.12990 | -478.07483  | 548.98183   | -563.71422  | 1 |
| 18490 | O | 71.00500 | 56.75880 | 74.66690 | -273.65406  | 341.08985   | 652.05306   | 1 |
| 18491 | N | 70.33700 | 58.79980 | 73.99790 | 641.71210   | 537.06900   | 89.08113    | 1 |
| 18492 | H | 70.55600 | 59.61580 | 73.46790 | 776.24324   | -2095.15863 | -2217.82991 | 1 |
| 18493 | C | 68.93700 | 58.59380 | 74.35490 | 588.89804   | 570.71732   | -402.55005  | 1 |
| 18494 | H | 68.88800 | 58.26980 | 75.38390 | 203.23721   | 2079.24169  | -2361.03565 | 1 |
| 18495 | C | 68.03700 | 59.88580 | 74.21290 | -222.12311  | -814.89646  | 334.76139   | 1 |
| 18496 | H | 66.94500 | 59.71580 | 74.32590 | -663.69994  | -2533.94876 | 1735.14646  | 1 |
| 18497 | H | 68.26200 | 60.32580 | 73.21790 | -1038.34843 | -2153.58984 | -2051.15742 | 1 |
| 18498 | O | 68.38100 | 60.83480 | 75.21390 | -258.51343  | 747.89098   | 44.86106    | 1 |
| 18499 | H | 69.14200 | 61.29780 | 74.85590 | 798.65678   | 3023.22937  | -361.03401  | 1 |
| 18500 | C | 68.26600 | 57.55280 | 73.49690 | -34.64225   | -623.44795  | -669.78394  | 1 |
| 18501 | O | 67.62400 | 56.66180 | 74.00890 | -151.56733  | 766.53488   | -141.11515  | 1 |
| 18502 | N | 68.41900 | 57.71580 | 72.14690 | -292.81708  | -25.95530   | -800.49424  | 1 |
| 18503 | H | 68.91000 | 58.48880 | 71.75390 | 1140.43721  | -2419.80352 | 1640.31736  | 1 |
| 18504 | C | 68.00800 | 56.73880 | 71.10290 | 154.59126   | -400.43724  | -809.47162  | 1 |
| 18505 | H | 66.93000 | 56.69380 | 71.05990 | -2634.46903 | 1719.21771  | -207.97587  | 1 |
| 18506 | C | 68.42200 | 57.32980 | 69.74790 | -565.77673  | -684.20661  | -217.27932  | 1 |
| 18507 | H | 68.40100 | 56.60980 | 68.90190 | 699.79321   | 2174.96144  | -2173.20039 | 1 |
| 18508 | H | 69.46400 | 57.71380 | 69.75790 | -2182.27260 | 983.25788   | 2042.04955  | 1 |
| 18509 | C | 67.53700 | 58.48480 | 69.21390 | -509.04354  | 81.57893    | 749.55058   | 1 |
| 18510 | H | 67.35400 | 59.16180 | 70.07590 | 1497.21856  | -2759.38451 | 62.57491    | 1 |
| 18511 | C | 68.30300 | 59.44180 | 68.21290 | -895.61475  | 92.00868    | -187.77756  | 1 |
| 18512 | H | 67.50000 | 60.12880 | 67.86990 | -473.68580  | 2720.45063  | -1524.11903 | 1 |
| 18513 | H | 68.58400 | 58.83980 | 67.32290 | 3132.79836  | -194.67120  | -69.94405   | 1 |
| 18514 | H | 69.13000 | 60.00380 | 68.69590 | -2156.15281 | 630.44582   | -2216.70720 | 1 |
| 18515 | C | 66.27600 | 58.00980 | 68.50990 | -861.56866  | 272.50213   | -172.18448  | 1 |
| 18516 | H | 66.46300 | 57.26280 | 67.70990 | -2988.03930 | -565.76506  | 818.08468   | 1 |
| 18517 | H | 65.65900 | 58.82780 | 68.07890 | 796.64720   | -1276.57705 | -2765.46102 | 1 |
| 18518 | H | 65.59800 | 57.65380 | 69.31590 | 1204.62388  | 2489.99411  | -1507.39327 | 1 |
| 18519 | C | 68.65300 | 55.42080 | 71.41890 | 386.38309   | -377.78527  | -738.50772  | 1 |
| 18520 | O | 67.96100 | 54.39280 | 71.36790 | 450.99383   | 548.47046   | -353.16586  | 1 |
| 18521 | N | 69.99700 | 55.34680 | 71.65690 | 346.71945   | 566.61872   | 512.77007   | 1 |
| 18522 | H | 70.50300 | 56.19780 | 71.54090 | -1984.42164 | -2337.97912 | 696.34487   | 1 |
| 18523 | C | 70.66600 | 54.11680 | 71.95390 | 431.14343   | 177.04636   | -791.38270  | 1 |
| 18524 | H | 70.37400 | 53.43580 | 71.16790 | 858.97596   | 2362.43786  | -1903.96474 | 1 |
| 18525 | C | 72.21100 | 54.42880 | 71.99990 | 386.65291   | 680.85764   | -478.46943  | 1 |
| 18526 | H | 72.41300 | 55.16980 | 72.80390 | 347.39631   | -483.57060  | -3097.72771 | 1 |
| 18527 | H | 72.52700 | 54.79380 | 70.99990 | -2879.08386 | -486.36130  | -1191.42693 | 1 |
| 18528 | C | 72.99600 | 53.16680 | 72.28990 | -162.36433  | 901.00101   | 23.58668    | 1 |
| 18529 | O | 73.09800 | 52.74080 | 73.45190 | -323.81024  | -33.74805   | 710.50385   | 1 |

|       |   |          |          |          |             |             |             |   |
|-------|---|----------|----------|----------|-------------|-------------|-------------|---|
| 18530 | O | 73.42800 | 52.48280 | 71.30890 | 17.19265    | -568.35196  | 532.86874   | 1 |
| 18531 | C | 70.16900 | 53.41580 | 73.19190 | 742.77876   | 14.57817    | 513.42717   | 1 |
| 18532 | O | 70.09800 | 52.19680 | 73.28190 | -326.03462  | -298.40892  | 645.09130   | 1 |
| 18533 | N | 69.80300 | 54.19280 | 74.24790 | -538.52781  | -441.30656  | 470.39086   | 1 |
| 18534 | H | 69.85400 | 55.18780 | 74.23790 | -102.52100  | 2182.23573  | 2257.74734  | 1 |
| 18535 | C | 69.17300 | 53.66180 | 75.45390 | 485.67326   | 636.36060   | 426.27044   | 1 |
| 18536 | H | 69.73600 | 52.83980 | 75.86990 | -2532.61294 | -1778.37191 | -585.60540  | 1 |
| 18537 | C | 69.09800 | 54.71380 | 76.61790 | -511.92869  | 605.20728   | -465.13399  | 1 |
| 18538 | H | 69.19700 | 55.75280 | 76.23590 | -2709.95308 | 521.74877   | -1526.03547 | 1 |
| 18539 | H | 68.12200 | 54.60580 | 77.13890 | 1666.07427  | 1345.95866  | -2311.39773 | 1 |
| 18540 | C | 70.26100 | 54.47080 | 77.66490 | 625.76425   | -234.80350  | 607.57599   | 1 |
| 18541 | H | 70.11000 | 55.20080 | 78.48890 | -1949.05624 | 1914.79601  | 1555.66742  | 1 |
| 18542 | H | 70.18700 | 53.40880 | 77.98390 | -1772.06706 | -2204.40894 | 1370.24183  | 1 |
| 18543 | C | 71.68300 | 54.73580 | 77.10590 | 319.95907   | 729.92053   | 433.92246   | 1 |
| 18544 | H | 72.30700 | 54.92680 | 78.00490 | 1722.79218  | 1880.79349  | 1830.99462  | 1 |
| 18545 | H | 71.52300 | 55.67780 | 76.53890 | 1227.31225  | -704.41588  | 2798.91778  | 1 |
| 18546 | N | 72.29500 | 53.58780 | 76.26790 | -649.48269  | -479.90054  | 240.73562   | 1 |
| 18547 | H | 72.33300 | 53.71780 | 75.27790 | -2300.91377 | 1213.15076  | -1786.09770 | 1 |
| 18548 | C | 72.51900 | 52.36480 | 76.67390 | 658.79524   | 239.81014   | 569.80737   | 1 |
| 18549 | N | 72.45100 | 51.90980 | 77.92390 | 520.40839   | 588.43220   | 296.66953   | 1 |
| 18550 | H | 72.43900 | 52.51280 | 78.72190 | -1789.89220 | 2470.46668  | 767.75309   | 1 |
| 18551 | H | 72.53400 | 50.92280 | 78.06190 | 616.86770   | 37.44322    | 3073.25972  | 1 |
| 18552 | N | 72.86300 | 51.48580 | 75.77490 | -502.92684  | 367.77036   | 562.87129   | 1 |
| 18553 | H | 72.93300 | 51.87680 | 74.85690 | 425.10840   | -2756.69158 | -1460.24775 | 1 |
| 18554 | H | 73.24600 | 50.61580 | 76.08390 | 2885.34443  | 27.61262    | -1258.51722 | 1 |
| 18555 | C | 67.78400 | 53.02580 | 75.23090 | 415.89836   | -700.06882  | 394.58431   | 1 |
| 18556 | O | 67.57600 | 51.90080 | 75.66890 | 736.34238   | -6.12107    | -286.14530  | 1 |
| 18557 | N | 66.94800 | 53.66880 | 74.42790 | 268.38440   | -524.78883  | -609.45730  | 1 |
| 18558 | H | 67.26800 | 54.51680 | 74.01190 | -118.71029  | 572.50983   | 3083.56521  | 1 |
| 18559 | C | 65.70600 | 53.17180 | 73.94890 | 798.57576   | -340.13837  | -273.85681  | 1 |
| 18560 | H | 65.24000 | 52.91680 | 74.88890 | -777.19848  | 2936.86036  | 818.69882   | 1 |
| 18561 | C | 65.01600 | 54.39180 | 73.21590 | -518.41563  | -571.16632  | -495.91629  | 1 |
| 18562 | H | 65.75700 | 55.08780 | 72.76690 | 581.60943   | -1169.21922 | -2868.10925 | 1 |
| 18563 | H | 64.48300 | 54.96280 | 74.00590 | -1922.49656 | -1948.20523 | -1561.50398 | 1 |
| 18564 | C | 63.96000 | 54.00580 | 72.20890 | 585.02317   | -648.56867  | -252.85794  | 1 |
| 18565 | C | 62.81500 | 53.27380 | 72.56890 | 77.90767    | -899.83397  | 97.58132    | 1 |
| 18566 | H | 62.64500 | 52.99980 | 73.59990 | -1371.72827 | -1994.38578 | 2002.98816  | 1 |
| 18567 | C | 61.86200 | 53.00680 | 71.55590 | -404.11114  | 297.81288   | 757.07708   | 1 |
| 18568 | H | 60.98800 | 52.51080 | 71.95090 | -297.05407  | -3087.18672 | -525.41814  | 1 |
| 18569 | C | 62.07000 | 53.38380 | 70.23690 | -278.41132  | 82.26813    | 858.85904   | 1 |
| 18570 | O | 61.17200 | 53.02380 | 69.23190 | 490.50998   | -71.58155   | -617.49853  | 1 |
| 18571 | H | 61.57000 | 53.06280 | 68.35890 | 846.26218   | -2243.81213 | 2022.91976  | 1 |
| 18572 | C | 64.22300 | 54.25280 | 70.86090 | 645.44227   | -302.93341  | -568.85148  | 1 |
| 18573 | H | 65.19200 | 54.70680 | 70.71490 | 1344.70304  | 2776.59144  | -628.17127  | 1 |
| 18574 | C | 63.28000 | 53.95980 | 69.85490 | -282.88346  | 538.36387   | 676.59364   | 1 |
| 18575 | H | 63.50300 | 54.29180 | 68.85190 | 1269.87847  | -1225.09801 | -2607.79956 | 1 |
| 18576 | C | 65.83400 | 51.91380 | 73.11590 | 570.09357   | 144.67543   | -702.98137  | 1 |
| 18577 | O | 65.14200 | 50.94680 | 73.39390 | 548.59067   | 522.52322   | -227.76100  | 1 |
| 18578 | N | 66.72600 | 51.85580 | 72.13990 | 417.84106   | 577.38608   | -461.39207  | 1 |
| 18579 | H | 67.18100 | 52.70080 | 71.86790 | 1198.78391  | -1027.58146 | 2709.18606  | 1 |
| 18580 | C | 67.06100 | 50.73780 | 71.34590 | 785.97495   | 427.23626   | -174.59115  | 1 |
| 18581 | H | 66.18800 | 50.37980 | 70.82090 | -2266.40685 | -448.14061  | -2149.12831 | 1 |
| 18582 | C | 68.18900 | 50.95680 | 70.27890 | 608.44143   | 649.53353   | 186.62614   | 1 |
| 18583 | H | 68.49600 | 49.97580 | 69.85790 | 1443.40853  | 1578.25930  | 2296.81528  | 1 |
| 18584 | H | 69.07300 | 51.42780 | 70.75990 | -526.79684  | 3104.55861  | 89.92415    | 1 |
| 18585 | C | 67.74500 | 51.90280 | 69.18490 | -396.14694  | -811.61088  | 104.76430   | 1 |
| 18586 | H | 67.22000 | 52.78380 | 69.61290 | -1781.41989 | 1365.21645  | 2202.18508  | 1 |
| 18587 | C | 68.90400 | 52.46280 | 68.26490 | 504.95426   | 644.93313   | -410.88927  | 1 |
| 18588 | H | 69.21300 | 51.65180 | 67.57190 | -820.20035  | 2424.67766  | 1828.26751  | 1 |
| 18589 | H | 69.81900 | 52.69180 | 68.85290 | 2302.05945  | -1571.81411 | -1455.44090 | 1 |
| 18590 | H | 68.67000 | 53.44480 | 67.79890 | -518.40019  | 2264.39172  | 2119.08616  | 1 |
| 18591 | C | 66.79800 | 51.18780 | 68.16290 | 108.46188   | 249.95829   | -880.23372  | 1 |



|       |   |          |          |          |             |             |             |   |
|-------|---|----------|----------|----------|-------------|-------------|-------------|---|
| 18592 | H | 67.28100 | 50.33580 | 67.63890 | -1966.22193 | -2095.88910 | -1290.70459 | 1 |
| 18593 | H | 66.50300 | 51.92080 | 67.38290 | -1871.88238 | 482.04052   | -2496.44150 | 1 |
| 18594 | H | 65.90400 | 50.68680 | 68.59190 | -1254.86745 | 1248.48020  | -2614.70789 | 1 |
| 18595 | C | 67.57100 | 49.59980 | 72.22890 | -514.05196  | -752.71970  | 2.31411     | 1 |
| 18596 | O | 67.16500 | 48.45580 | 72.05690 | 166.26395   | -392.52137  | -672.66968  | 1 |
| 18597 | N | 68.39700 | 49.92080 | 73.24090 | 640.73237   | 411.91259   | -370.88811  | 1 |
| 18598 | H | 68.72700 | 50.85680 | 73.34190 | 1475.57266  | -44.98565   | 2766.14541  | 1 |
| 18599 | C | 69.08400 | 48.91580 | 74.02090 | -274.21480  | -764.85011  | 400.53276   | 1 |
| 18600 | H | 69.46000 | 48.13080 | 73.38090 | 1794.28436  | 437.75446   | 2533.73362  | 1 |
| 18601 | C | 70.26000 | 49.50580 | 74.88190 | 465.07817   | -768.30340  | 124.75253   | 1 |
| 18602 | H | 69.96200 | 50.21280 | 75.68490 | 2051.24820  | 1368.97422  | 1941.07548  | 1 |
| 18603 | H | 70.89000 | 50.10780 | 74.19090 | -2150.13984 | 1285.24650  | -1920.06528 | 1 |
| 18604 | H | 70.83600 | 48.64580 | 75.28590 | 1456.55190  | 2742.13972  | -522.23648  | 1 |
| 18605 | C | 68.12500 | 48.26380 | 75.04290 | 753.21694   | 507.98283   | -70.86154   | 1 |
| 18606 | O | 68.45400 | 47.23480 | 75.64590 | 293.57383   | -701.59669  | 191.54468   | 1 |
| 18607 | N | 66.89700 | 48.82080 | 75.37790 | 94.64898    | 401.19529   | 726.83615   | 1 |
| 18608 | H | 66.81100 | 49.74780 | 75.01990 | -1514.42229 | 30.16907    | -2769.26699 | 1 |
| 18609 | C | 65.93700 | 48.35880 | 76.39690 | -627.14102  | 502.16741   | -446.60511  | 1 |
| 18610 | H | 66.38800 | 47.45080 | 76.76890 | -1513.50443 | -1839.57855 | 2045.13431  | 1 |
| 18611 | C | 65.75500 | 49.42180 | 77.42890 | -344.14157  | -695.69183  | 469.41871   | 1 |
| 18612 | H | 65.76800 | 50.45180 | 77.01090 | -1465.47371 | 1154.16753  | 2525.96007  | 1 |
| 18613 | C | 64.37800 | 49.29580 | 78.19190 | -251.04184  | 762.97568   | -442.89049  | 1 |
| 18614 | H | 64.35700 | 50.15180 | 78.89890 | 1470.24948  | 2763.43617  | 296.69239   | 1 |
| 18615 | H | 63.54600 | 49.42280 | 77.46690 | 1385.14424  | -2562.76816 | -1193.71654 | 1 |
| 18616 | H | 64.34900 | 48.32980 | 78.73890 | 2103.66702  | -2040.30616 | 1130.96503  | 1 |
| 18617 | C | 66.94300 | 49.36980 | 78.37390 | 599.71160   | -537.10553  | 414.22148   | 1 |
| 18618 | H | 67.87300 | 49.13980 | 77.81290 | 1555.79173  | 2342.06569  | -1420.94173 | 1 |
| 18619 | H | 66.93800 | 48.50780 | 79.07490 | 1412.68826  | 694.68681   | -2733.56706 | 1 |
| 18620 | C | 67.20200 | 50.71380 | 79.14890 | -597.67340  | 367.43867   | 575.03284   | 1 |
| 18621 | H | 68.24400 | 50.65780 | 79.52990 | -1749.71494 | 853.07562   | -2483.22628 | 1 |
| 18622 | H | 66.39500 | 50.70680 | 79.91290 | 1659.23905  | -1989.56077 | 1773.96148  | 1 |
| 18623 | H | 67.23000 | 51.56080 | 78.43090 | 2690.47753  | -1447.46889 | 731.92960   | 1 |
| 18624 | C | 64.68400 | 47.94480 | 75.66090 | 9.81646     | -907.09297  | 68.63304    | 1 |
| 18625 | O | 64.12400 | 46.89680 | 75.93190 | -371.73781  | -538.55501  | -453.22230  | 1 |
| 18626 | N | 64.12500 | 48.67480 | 74.69190 | 85.34776    | 128.86434   | 820.13647   | 1 |
| 18627 | H | 64.58500 | 49.51780 | 74.42290 | 1218.80747  | 2315.48748  | -1756.27576 | 1 |
| 18628 | C | 62.87300 | 48.23880 | 73.93890 | 697.46491   | 576.46033   | -109.99669  | 1 |
| 18629 | H | 62.32800 | 47.76380 | 74.74190 | 1623.45023  | -734.73399  | 2581.04448  | 1 |
| 18630 | C | 62.19700 | 49.49980 | 73.38790 | -829.28761  | 66.25522    | 372.49021   | 1 |
| 18631 | H | 62.95800 | 50.04680 | 72.79190 | 26.82580    | 2228.65577  | 2213.69601  | 1 |
| 18632 | C | 61.03600 | 49.08980 | 72.50190 | -502.56488  | -241.24068  | -732.22460  | 1 |
| 18633 | H | 61.35600 | 48.76480 | 71.48890 | -2530.07179 | 1856.54130  | -290.26858  | 1 |
| 18634 | H | 60.40500 | 48.31080 | 72.98290 | -2246.08123 | -1793.82772 | 1273.75598  | 1 |
| 18635 | H | 60.31000 | 49.90180 | 72.28490 | 2309.59696  | -1445.39379 | -1573.83196 | 1 |
| 18636 | C | 61.82500 | 50.37880 | 74.60090 | -594.71770  | -660.66756  | 200.20246   | 1 |
| 18637 | H | 61.06500 | 51.09380 | 74.21890 | 1952.00322  | -430.70463  | 2418.44399  | 1 |
| 18638 | H | 62.72800 | 50.86480 | 75.02890 | 1186.82737  | -2492.58644 | 1495.72972  | 1 |
| 18639 | H | 61.21500 | 49.71080 | 75.24590 | -2262.35212 | 2111.20102  | -592.28096  | 1 |
| 18640 | C | 63.20100 | 47.23580 | 72.87290 | 414.41401   | 309.52256   | 739.92325   | 1 |
| 18641 | O | 62.38700 | 46.38080 | 72.49590 | -496.09719  | 597.62076   | -172.21620  | 1 |
| 18642 | N | 64.47400 | 47.13380 | 72.43890 | -197.18453  | 675.10461   | -482.28510  | 1 |
| 18643 | H | 65.23300 | 47.65180 | 72.82590 | 467.54532   | -1157.14390 | -2896.88759 | 1 |
| 18644 | C | 64.77200 | 46.31680 | 71.22390 | -613.62625  | 217.85179   | -653.63917  | 1 |
| 18645 | H | 64.08400 | 45.51580 | 70.99690 | -2483.82574 | 1234.52887  | -1504.29886 | 1 |
| 18646 | C | 64.96500 | 47.11680 | 69.95990 | -651.03536  | 643.52027   | 47.00296    | 1 |
| 18647 | H | 65.19000 | 46.42980 | 69.11690 | 785.79507   | -2383.23414 | -1901.89063 | 1 |
| 18648 | H | 65.80000 | 47.84180 | 70.06290 | -2000.84926 | -1790.43591 | -1651.63719 | 1 |
| 18649 | N | 62.80000 | 47.30780 | 68.67190 | 243.65230   | -156.86633  | -800.63788  | 1 |
| 18650 | H | 62.85700 | 46.39880 | 68.25890 | -1776.63609 | 2279.77499  | 1245.90447  | 1 |
| 18651 | C | 63.74700 | 47.92880 | 69.43990 | -682.11039  | 608.36415   | 69.41078    | 1 |
| 18652 | C | 61.90700 | 48.23880 | 68.29190 | 393.99747   | -518.63584  | 622.88364   | 1 |
| 18653 | H | 61.02100 | 47.93880 | 67.73390 | -690.00605  | 490.98112   | -3040.89364 | 1 |

|       |   |          |          |          |             |             |             |   |
|-------|---|----------|----------|----------|-------------|-------------|-------------|---|
| 18654 | N | 62.23400 | 49.43580 | 68.75890 | 409.66570   | -664.77070  | -315.91329  | 1 |
| 18655 | C | 63.35500 | 49.21480 | 69.53490 | -534.13582  | 701.63540   | -261.19813  | 1 |
| 18656 | H | 63.91700 | 50.02480 | 69.98390 | -1324.76358 | 1004.83821  | 2665.20732  | 1 |
| 18657 | C | 66.09300 | 45.60480 | 71.41390 | 744.75796   | -199.38263  | -491.48612  | 1 |
| 18658 | O | 67.00800 | 45.60980 | 70.60490 | 546.19526   | -562.54509  | 16.14102    | 1 |
| 18659 | N | 66.26200 | 44.96680 | 72.58690 | -405.10445  | -338.90929  | 647.45977   | 1 |
| 18660 | H | 65.54000 | 44.88280 | 73.26990 | -1653.59558 | 1010.28629  | 2469.92102  | 1 |
| 18661 | C | 67.55100 | 44.53680 | 72.97490 | -447.40240  | 539.27468   | -600.41090  | 1 |
| 18662 | H | 68.36100 | 45.24380 | 72.87890 | 2745.12062  | -1447.39523 | 480.12539   | 1 |
| 18663 | C | 67.54100 | 44.11380 | 74.52790 | 681.89240   | 132.54495   | -600.55265  | 1 |
| 18664 | H | 67.20500 | 45.01580 | 75.08290 | 1849.54689  | -1065.76317 | -2320.26434 | 1 |
| 18665 | H | 66.79700 | 43.31280 | 74.72290 | 2407.82067  | 597.48768   | -1944.91855 | 1 |
| 18666 | H | 68.52800 | 43.74880 | 74.88590 | -1385.48577 | -909.36494  | -2687.57381 | 1 |
| 18667 | C | 68.08100 | 43.25480 | 72.25790 | -401.21713  | 103.56178   | 801.29027   | 1 |
| 18668 | O | 69.24900 | 42.90780 | 72.37290 | 633.50709   | -460.24013  | -75.39025   | 1 |
| 18669 | N | 67.23100 | 42.50780 | 71.53190 | 1.17026     | 601.62127   | 582.50236   | 1 |
| 18670 | H | 66.32800 | 42.91980 | 71.44090 | 2909.38184  | -472.00592  | 1078.07351  | 1 |
| 18671 | C | 67.54800 | 41.26580 | 70.93090 | -338.44930  | 262.00579   | 794.11714   | 1 |
| 18672 | H | 68.32300 | 40.86780 | 71.56890 | -2013.24624 | 1755.77455  | -1682.79321 | 1 |
| 18673 | C | 66.43900 | 40.21380 | 70.95290 | 655.32282   | 516.87371   | -379.97912  | 1 |
| 18674 | H | 66.01200 | 40.24680 | 71.97790 | -1855.66420 | 1358.63043  | -2164.37354 | 1 |
| 18675 | O | 66.96200 | 38.92080 | 70.87490 | 548.00677   | 85.71075    | 545.65181   | 1 |
| 18676 | H | 67.72100 | 38.72880 | 71.43090 | -1579.23912 | -1207.89929 | 2423.94821  | 1 |
| 18677 | C | 65.34400 | 40.37980 | 69.88590 | 746.57363   | -32.05747   | -530.74692  | 1 |
| 18678 | H | 64.40400 | 39.92280 | 70.26290 | 1712.84568  | 2073.29222  | -1646.69109 | 1 |
| 18679 | H | 65.72800 | 39.97280 | 68.92590 | -222.11109  | -3063.65086 | 650.10859   | 1 |
| 18680 | H | 65.10900 | 41.45680 | 69.74290 | 1930.58464  | 1989.37299  | -1500.71192 | 1 |
| 18681 | C | 68.04700 | 41.39180 | 69.50990 | -682.22827  | -594.28687  | 99.84075    | 1 |
| 18682 | O | 68.49600 | 40.41480 | 68.88190 | 289.42357   | -339.70757  | -661.64733  | 1 |
| 18683 | N | 67.97800 | 42.58880 | 68.90590 | -102.57670  | -222.98859  | 793.97315   | 1 |
| 18684 | H | 67.40400 | 43.31080 | 69.28390 | 1227.16811  | 1521.91003  | 2452.90968  | 1 |
| 18685 | C | 68.25700 | 42.84080 | 67.50690 | -686.22325  | 477.14325   | 365.48814   | 1 |
| 18686 | H | 69.24300 | 42.47480 | 67.26390 | 1559.56426  | -1926.96112 | -1942.17554 | 1 |
| 18687 | C | 67.21300 | 42.10680 | 66.52190 | 752.89058   | 501.05338   | 96.04710    | 1 |
| 18688 | H | 67.50300 | 42.52180 | 65.53290 | -2127.67054 | 372.28641   | 2279.83436  | 1 |
| 18689 | H | 67.39400 | 41.01280 | 66.44490 | 1700.38691  | -128.77776  | -2654.38843 | 1 |
| 18690 | C | 65.73100 | 42.38580 | 66.82990 | -611.01660  | -666.37811  | -126.74558  | 1 |
| 18691 | O | 65.28300 | 43.17080 | 67.69590 | 696.32674   | 205.17871   | 292.00715   | 1 |
| 18692 | N | 64.85100 | 41.84280 | 65.95390 | -475.25658  | 149.03727   | 673.32057   | 1 |
| 18693 | H | 65.23300 | 41.18080 | 65.30890 | 1893.29674  | -1549.48730 | -1982.33454 | 1 |
| 18694 | H | 63.87600 | 42.02380 | 66.07990 | -980.91644  | -1774.67666 | -2416.00243 | 1 |
| 18695 | C | 68.28700 | 44.37280 | 67.28890 | 599.02635   | 256.65407   | 622.99842   | 1 |
| 18696 | O | 67.32600 | 45.05080 | 66.84790 | -287.83890  | 76.28086    | -745.68891  | 1 |
| 18697 | N | 69.42800 | 45.01480 | 67.51390 | -514.37875  | 444.22513   | 497.16592   | 1 |
| 18698 | H | 70.29900 | 44.54280 | 67.62790 | 3068.96976  | 101.45686   | 652.67547   | 1 |
| 18699 | C | 69.59800 | 46.39680 | 67.30590 | -255.33356  | -745.87011  | -464.56225  | 1 |
| 18700 | H | 69.34300 | 46.64780 | 66.28690 | 2375.14555  | 533.17972   | 1976.64375  | 1 |
| 18701 | C | 68.81800 | 47.28080 | 68.35890 | -755.86137  | 373.39015   | -373.47589  | 1 |
| 18702 | H | 67.74200 | 47.08880 | 68.15690 | -1139.96449 | 1167.34942  | 2682.60577  | 1 |
| 18703 | H | 68.95200 | 48.36380 | 68.15390 | 2616.99703  | 1603.60439  | 672.81059   | 1 |
| 18704 | O | 69.09100 | 46.87480 | 69.72790 | 78.78937    | 581.43306   | -544.07698  | 1 |
| 18705 | H | 68.34100 | 46.30280 | 69.90690 | -998.35527  | -1705.25099 | 2435.37657  | 1 |
| 18706 | C | 71.05900 | 46.81080 | 67.33990 | -603.39884  | -241.06350  | -654.52919  | 1 |
| 18707 | O | 71.31200 | 47.99080 | 67.04890 | -124.93277  | -411.25865  | 648.15512   | 1 |
| 18708 | N | 72.08300 | 46.00080 | 67.59690 | -240.12044  | 192.00784   | -801.75217  | 1 |
| 18709 | H | 71.88000 | 45.04780 | 67.80590 | -1945.99244 | 372.17189   | 2435.09883  | 1 |
| 18710 | C | 73.48600 | 46.44780 | 67.59790 | -122.01471  | 813.53038   | 392.76429   | 1 |
| 18711 | H | 73.52400 | 47.26880 | 68.29890 | -98.77291   | 560.75476   | -3108.03626 | 1 |
| 18712 | C | 74.37500 | 45.29980 | 68.15590 | 344.83797   | -689.17323  | 462.82236   | 1 |
| 18713 | H | 74.02300 | 44.33880 | 67.72490 | 2183.16678  | 1739.96521  | -1464.64439 | 1 |
| 18714 | H | 74.17000 | 45.24680 | 69.24690 | -466.31978  | -670.60991  | 3024.09815  | 1 |
| 18715 | C | 75.92100 | 45.26480 | 67.94090 | -692.79726  | -182.89493  | -581.70156  | 1 |

|       |   |          |          |          |             |             |             |   |
|-------|---|----------|----------|----------|-------------|-------------|-------------|---|
| 18716 | H | 76.30900 | 44.56380 | 68.70990 | 896.48900   | 2488.63148  | 1694.43600  | 1 |
| 18717 | H | 76.31100 | 46.28280 | 68.15790 | 2718.26765  | 922.81864   | 1268.03305  | 1 |
| 18718 | C | 76.47700 | 44.90180 | 66.52690 | -699.18889  | 68.25363    | 573.26474   | 1 |
| 18719 | O | 77.48800 | 45.40880 | 66.06490 | -588.36333  | -396.41601  | -362.25008  | 1 |
| 18720 | N | 75.84000 | 43.91380 | 65.89590 | 672.99079   | -408.03938  | -300.08580  | 1 |
| 18721 | H | 75.05300 | 43.46880 | 66.32490 | 1596.68199  | 2246.03387  | 1507.48763  | 1 |
| 18722 | H | 76.20200 | 43.57880 | 65.02690 | 1903.00392  | -174.10758  | -2509.86880 | 1 |
| 18723 | C | 74.06300 | 47.03080 | 66.32090 | 516.96651   | -569.60057  | -490.01852  | 1 |
| 18724 | O | 74.69700 | 48.06380 | 66.27790 | 239.25143   | -340.95713  | 653.09351   | 1 |
| 18725 | N | 73.75600 | 46.55480 | 65.10790 | -762.97200  | 150.92084   | -356.39819  | 1 |
| 18726 | H | 73.25200 | 45.70380 | 64.98290 | -489.56238  | 494.52513   | 3056.80764  | 1 |
| 18727 | C | 74.08400 | 47.23980 | 63.86290 | -167.33684  | -743.48236  | 479.22659   | 1 |
| 18728 | H | 75.12800 | 47.51180 | 63.92690 | -1070.95554 | -2925.27309 | 393.28814   | 1 |
| 18729 | C | 74.06800 | 46.20880 | 62.72890 | -737.26254  | -462.33586  | 262.44693   | 1 |
| 18730 | H | 73.13500 | 45.60880 | 62.79690 | -2014.95128 | -1591.83512 | 1804.63613  | 1 |
| 18731 | H | 74.85700 | 45.42680 | 62.72790 | -422.45800  | -521.30722  | 3059.46218  | 1 |
| 18732 | C | 74.06200 | 46.76480 | 61.27790 | -783.39815  | -428.49391  | 180.08899   | 1 |
| 18733 | H | 73.11700 | 47.30680 | 61.06290 | 1410.75592  | 2745.79577  | -639.75603  | 1 |
| 18734 | H | 74.90400 | 47.46680 | 61.10090 | -1653.65977 | 876.11261   | -2549.17887 | 1 |
| 18735 | C | 74.25100 | 45.71380 | 60.15490 | 781.08808   | -423.87682  | -168.94738  | 1 |
| 18736 | H | 75.13100 | 45.04580 | 60.27290 | -2347.46345 | 1042.99132  | 1815.65100  | 1 |
| 18737 | H | 73.41700 | 44.99080 | 60.02890 | -282.91913  | 2911.76533  | 1166.15965  | 1 |
| 18738 | N | 74.37500 | 46.45680 | 58.85890 | -549.00922  | -475.50562  | 416.01853   | 1 |
| 18739 | H | 73.83000 | 47.27780 | 58.68890 | 432.48442   | 2685.84398  | 1580.50816  | 1 |
| 18740 | C | 74.66200 | 45.80580 | 57.73890 | 405.23041   | 612.07520   | -559.53666  | 1 |
| 18741 | N | 75.21300 | 44.60980 | 57.67290 | 336.16035   | -474.57223  | 586.23416   | 1 |
| 18742 | H | 75.14000 | 43.94180 | 58.41390 | 1059.80701  | 1711.21555  | -2435.92192 | 1 |
| 18743 | H | 75.29600 | 44.15880 | 56.78390 | -2748.92980 | 601.32314   | -1439.84142 | 1 |
| 18744 | N | 74.43800 | 46.41980 | 56.59390 | -660.42550  | 451.27371   | -316.01628  | 1 |
| 18745 | H | 74.35200 | 47.41580 | 56.55990 | -373.93637  | -824.26229  | -3024.33804 | 1 |
| 18746 | H | 74.81700 | 46.00380 | 55.76690 | -2097.32999 | -2341.91090 | -25.13575   | 1 |
| 18747 | C | 73.45900 | 48.66280 | 63.65890 | 361.32950   | -642.02644  | 512.49571   | 1 |
| 18748 | O | 74.22500 | 49.62080 | 63.25590 | 585.44956   | -298.37823  | -436.45338  | 1 |
| 18749 | N | 72.19600 | 48.93680 | 63.88290 | -575.89993  | 564.60104   | -288.63468  | 1 |
| 18750 | C | 71.15200 | 47.91380 | 63.64390 | 548.94581   | 321.19184   | 639.73344   | 1 |
| 18751 | H | 71.01200 | 47.26380 | 64.53490 | -413.84573  | -2501.49060 | 1843.33151  | 1 |
| 18752 | H | 71.30300 | 47.24080 | 62.77290 | 2308.10647  | -2078.90596 | 425.61972   | 1 |
| 18753 | C | 71.58800 | 50.28980 | 63.86990 | 217.23388   | -565.55243  | 662.80544   | 1 |
| 18754 | H | 71.84300 | 50.86080 | 62.98890 | 2437.44045  | -1871.98459 | 617.37501   | 1 |
| 18755 | C | 70.07700 | 50.06480 | 63.96190 | -445.95951  | -565.58922  | 546.76390   | 1 |
| 18756 | H | 69.46100 | 50.84980 | 63.47390 | -2711.42939 | 798.66443   | 1387.32466  | 1 |
| 18757 | H | 69.73700 | 49.93580 | 65.01190 | -1622.03770 | -405.29586  | -2678.51147 | 1 |
| 18758 | C | 69.87000 | 48.68880 | 63.34890 | -613.21563  | -673.42588  | 10.38788    | 1 |
| 18759 | H | 69.82900 | 48.81780 | 62.24590 | 1995.17600  | 2198.29174  | -1055.23047 | 1 |
| 18760 | H | 68.94600 | 48.19980 | 63.72390 | -1186.91566 | -2500.82987 | 1478.01520  | 1 |
| 18761 | C | 72.06400 | 51.10980 | 65.08690 | 412.53173   | -609.17385  | -537.78032  | 1 |
| 18762 | O | 72.36800 | 52.25980 | 64.91690 | -317.02332  | -681.59418  | 221.31612   | 1 |
| 18763 | N | 72.14200 | 50.58980 | 66.34490 | -294.89778  | -590.75016  | 511.50242   | 1 |
| 18764 | H | 71.85400 | 49.64680 | 66.48990 | 1358.25410  | 2598.70764  | -1158.03879 | 1 |
| 18765 | C | 72.81900 | 51.31980 | 67.35990 | 351.91091   | 633.91148   | 544.68531   | 1 |
| 18766 | H | 72.31400 | 52.25080 | 67.56990 | 2497.19955  | 1403.22538  | 1285.89274  | 1 |
| 18767 | C | 72.89600 | 50.49980 | 68.67390 | -262.44793  | -477.52780  | -740.98348  | 1 |
| 18768 | H | 73.60400 | 51.00680 | 69.36290 | -2488.28117 | 1677.30182  | 954.74163   | 1 |
| 18769 | H | 73.30500 | 49.50780 | 68.38590 | -1682.51852 | 2352.04220  | 1243.44402  | 1 |
| 18770 | C | 71.62900 | 50.31280 | 69.43890 | -168.37168  | -586.08073  | -686.27707  | 1 |
| 18771 | H | 70.76200 | 49.92680 | 68.86190 | -559.65797  | 2994.19767  | -818.97110  | 1 |
| 18772 | H | 71.29200 | 51.26680 | 69.89990 | 476.39114   | -1471.94550 | -2746.97423 | 1 |
| 18773 | C | 71.72500 | 49.24180 | 70.58390 | 442.49825   | -770.19268  | -191.37206  | 1 |
| 18774 | H | 70.75000 | 48.93880 | 71.02290 | 1482.53120  | -1567.26582 | 2273.32451  | 1 |
| 18775 | H | 72.23500 | 48.32680 | 70.21490 | -1812.15875 | 1957.55504  | 1665.61453  | 1 |
| 18776 | N | 72.53600 | 49.96180 | 71.58390 | -297.14036  | 790.41810   | -101.18643  | 1 |
| 18777 | H | 72.73100 | 50.93480 | 71.46790 | -1198.30436 | 2652.10244  | -1219.21024 | 1 |

|       |   |          |          |          |             |             |             |   |
|-------|---|----------|----------|----------|-------------|-------------|-------------|---|
| 18778 | C | 73.24800 | 49.36280 | 72.44790 | 806.90231   | -413.38071  | 7.94799     | 1 |
| 18779 | N | 73.02000 | 48.12780 | 72.87290 | -790.92055  | -156.60550  | 246.63520   | 1 |
| 18780 | H | 72.19900 | 47.67380 | 72.52690 | -2517.18007 | -423.28480  | 1831.04580  | 1 |
| 18781 | H | 73.73800 | 47.68480 | 73.40890 | 1841.69352  | 1765.33507  | 1828.36066  | 1 |
| 18782 | N | 74.05500 | 50.13280 | 73.16390 | -15.04288   | 845.36897   | 48.60781    | 1 |
| 18783 | H | 74.03900 | 51.12880 | 73.07790 | -994.43650  | -2633.28870 | 1390.20117  | 1 |
| 18784 | H | 74.58500 | 49.72780 | 73.90890 | -1580.20108 | 1004.53104  | 2519.55615  | 1 |
| 18785 | C | 74.26400 | 51.75680 | 67.03390 | 485.27188   | -82.81479   | -774.61144  | 1 |
| 18786 | O | 74.70400 | 52.87880 | 67.34290 | -103.24079  | -776.13933  | 42.07046    | 1 |
| 18787 | N | 74.99000 | 50.84080 | 66.43790 | 385.87259   | -410.16592  | -633.22636  | 1 |
| 18788 | H | 74.53700 | 50.00780 | 66.12990 | -2440.43973 | 1269.25506  | -1552.81444 | 1 |
| 18789 | C | 76.32900 | 51.05180 | 65.91890 | 750.00473   | 431.44780   | 270.18258   | 1 |
| 18790 | H | 76.92000 | 51.30980 | 66.78590 | 2377.60066  | 981.56217   | 1795.48304  | 1 |
| 18791 | C | 76.94900 | 49.70280 | 65.47390 | -132.79331  | 456.55058   | -795.66158  | 1 |
| 18792 | H | 76.30500 | 49.24080 | 64.69590 | -1467.85942 | -770.05688  | 2662.50296  | 1 |
| 18793 | H | 76.96900 | 49.10280 | 66.40990 | 2345.99452  | 2045.00219  | -474.78415  | 1 |
| 18794 | C | 78.38400 | 49.85180 | 64.90690 | 501.27405   | 436.58084   | 611.26410   | 1 |
| 18795 | H | 78.99800 | 50.42380 | 65.63490 | 1533.51034  | 2184.92047  | -1681.92621 | 1 |
| 18796 | H | 78.48000 | 50.46080 | 63.98190 | 491.62756   | 1593.39586  | -2684.06982 | 1 |
| 18797 | C | 79.08600 | 48.50880 | 64.76090 | -471.22170  | -572.24939  | -541.93719  | 1 |
| 18798 | H | 80.13800 | 48.65880 | 64.43590 | -1804.39904 | 2105.93179  | -1517.35324 | 1 |
| 18799 | H | 79.13800 | 48.00180 | 65.74790 | -1717.84197 | 2023.05771  | 1689.18624  | 1 |
| 18800 | C | 78.42400 | 47.54480 | 63.73590 | -282.71738  | -453.98516  | 722.09007   | 1 |
| 18801 | H | 77.43900 | 47.19580 | 64.11290 | 2057.04869  | -893.43939  | 2184.30410  | 1 |
| 18802 | H | 78.43800 | 48.07180 | 62.75690 | -587.98097  | -1288.61506 | 2793.13125  | 1 |
| 18803 | N | 79.19100 | 46.31480 | 63.58490 | 663.03911   | -41.16655   | 498.17751   | 1 |
| 18804 | H | 79.15700 | 45.54480 | 64.28290 | -1460.83311 | 2741.40663  | -567.74920  | 1 |
| 18805 | H | 78.84600 | 45.88880 | 62.70090 | 2796.33516  | 704.04280   | -1264.11311 | 1 |
| 18806 | H | 80.20700 | 46.41180 | 63.38790 | -1400.97448 | 175.46195   | -2829.79287 | 1 |
| 18807 | C | 76.45600 | 52.09780 | 64.76190 | -346.83726  | 385.92933   | -767.86486  | 1 |
| 18808 | O | 77.33400 | 53.00380 | 64.73790 | 474.52158   | 281.17854   | -574.87307  | 1 |
| 18809 | N | 75.49900 | 52.07180 | 63.80890 | 468.21756   | 170.61529   | -690.17931  | 1 |
| 18810 | H | 74.82500 | 51.33980 | 63.87890 | -1350.05438 | -1821.86440 | -2190.50158 | 1 |
| 18811 | C | 75.37200 | 53.05880 | 62.72290 | 498.99985   | -637.04090  | -411.13316  | 1 |
| 18812 | H | 76.24900 | 53.07880 | 62.09390 | 1989.27152  | -1787.29559 | 1628.91077  | 1 |
| 18813 | C | 74.08200 | 52.69580 | 61.93290 | 459.99495   | -628.05981  | -468.20702  | 1 |
| 18814 | H | 73.19500 | 52.54980 | 62.58490 | 2985.21577  | -690.76197  | 666.48193   | 1 |
| 18815 | H | 74.18000 | 51.73280 | 61.38690 | -2650.71923 | -1370.19298 | 993.79664   | 1 |
| 18816 | C | 73.59900 | 53.60380 | 60.75090 | 738.94847   | -140.03042  | 492.00150   | 1 |
| 18817 | H | 73.51200 | 54.61580 | 61.20090 | -2267.06883 | 2008.63595  | 878.54273   | 1 |
| 18818 | C | 74.75200 | 53.70080 | 59.70190 | 385.10775   | 826.78280   | -98.44269   | 1 |
| 18819 | H | 75.73100 | 53.99880 | 60.13390 | 966.29002   | -2222.42708 | -2003.84499 | 1 |
| 18820 | H | 74.40100 | 54.35980 | 58.87990 | -2815.63690 | -601.89582  | -1291.99105 | 1 |
| 18821 | H | 74.77600 | 52.72380 | 59.17190 | 453.24426   | -2957.84310 | 929.50604   | 1 |
| 18822 | C | 72.26900 | 52.99980 | 60.24790 | 138.30100   | -603.52171  | -670.64694  | 1 |
| 18823 | H | 72.31900 | 51.91280 | 60.01990 | -2685.30396 | 725.39069   | -1498.25548 | 1 |
| 18824 | H | 71.53100 | 53.17380 | 61.05890 | 2803.73150  | 724.06968   | -1227.75871 | 1 |
| 18825 | H | 71.90400 | 53.53280 | 59.34390 | -589.89200  | 1823.06455  | -2513.22049 | 1 |
| 18826 | C | 75.26700 | 54.48680 | 63.29190 | 857.46373   | -203.01132  | -210.72295  | 1 |
| 18827 | O | 75.99400 | 55.39780 | 62.81990 | -730.11267  | -57.51772   | -321.30755  | 1 |
| 18828 | N | 74.42500 | 54.77980 | 64.32690 | 49.60680    | 668.92250   | -530.84638  | 1 |
| 18829 | H | 73.71000 | 54.13580 | 64.58490 | 1475.19613  | 2730.42400  | -542.84923  | 1 |
| 18830 | C | 74.40000 | 55.99780 | 65.09690 | 128.71191   | 895.37080   | 142.24922   | 1 |
| 18831 | H | 74.15100 | 56.75380 | 64.36690 | 1809.47997  | -1652.55803 | 1951.69755  | 1 |
| 18832 | C | 73.31000 | 55.86980 | 66.17990 | 141.09321   | 808.97746   | -415.52063  | 1 |
| 18833 | H | 73.30000 | 56.73880 | 66.87090 | -1885.75583 | 563.97614   | 2451.36681  | 1 |
| 18834 | H | 73.61800 | 54.94780 | 66.71790 | -130.39787  | 1128.27826  | 2926.58921  | 1 |
| 18835 | C | 71.87600 | 55.65080 | 65.62390 | -298.99488  | -453.06640  | -740.65503  | 1 |
| 18836 | H | 71.83700 | 54.60480 | 65.25090 | 847.23306   | -45.83255   | -3037.20758 | 1 |
| 18837 | C | 70.97400 | 55.48080 | 66.86590 | -268.31261  | 281.79241   | -837.38622  | 1 |
| 18838 | H | 71.23100 | 54.55980 | 67.43290 | -41.66374   | 1344.65351  | -2855.93313 | 1 |
| 18839 | H | 71.08600 | 56.36480 | 67.52890 | 684.15038   | -2296.87017 | 2021.74742  | 1 |

|       |   |          |          |          |             |             |             |   |
|-------|---|----------|----------|----------|-------------|-------------|-------------|---|
| 18840 | H | 69.94100 | 55.32880 | 66.48690 | 782.90579   | -2493.64858 | 1732.03370  | 1 |
| 18841 | C | 71.25800 | 56.61480 | 64.56090 | 500.24046   | 567.01962   | -518.45106  | 1 |
| 18842 | H | 70.17700 | 56.37880 | 64.46190 | -1753.33254 | -1854.42977 | 1831.68873  | 1 |
| 18843 | H | 71.83700 | 56.72880 | 63.61990 | 1428.70709  | 2806.10593  | 8.29230     | 1 |
| 18844 | H | 71.32500 | 57.64680 | 64.96790 | -609.20163  | -2181.51549 | -2187.55219 | 1 |
| 18845 | C | 75.73500 | 56.27280 | 65.77590 | 442.77175   | 697.00924   | -400.76698  | 1 |
| 18846 | O | 76.34600 | 57.33580 | 65.63190 | 91.38162    | -730.89108  | -274.59935  | 1 |
| 18847 | N | 76.31200 | 55.24680 | 66.49890 | 467.86672   | 701.95531   | 52.50885    | 1 |
| 18848 | H | 75.88100 | 54.35180 | 66.58390 | -2134.34327 | 2175.76858  | 802.37847   | 1 |
| 18849 | C | 77.48200 | 55.40080 | 67.33590 | -194.85262  | 690.52994   | -582.81457  | 1 |
| 18850 | H | 77.32600 | 56.29280 | 67.92390 | -2254.29297 | 1530.60254  | -1597.16347 | 1 |
| 18851 | C | 77.62100 | 54.17580 | 68.29490 | 651.18316   | -245.72227  | 569.25506   | 1 |
| 18852 | H | 78.49700 | 54.34580 | 68.95590 | -1360.61252 | 2562.72275  | 1222.50909  | 1 |
| 18853 | H | 76.75900 | 54.12480 | 68.99390 | -191.70204  | -694.55094  | -3072.66743 | 1 |
| 18854 | H | 77.70900 | 53.20180 | 67.76690 | 758.40050   | -1521.56714 | 2630.59552  | 1 |
| 18855 | C | 78.78300 | 55.65680 | 66.64290 | -510.71876  | 524.13799   | 544.80839   | 1 |
| 18856 | O | 79.62000 | 56.37780 | 67.15490 | -526.47782  | -549.71917  | 197.75963   | 1 |
| 18857 | N | 78.96700 | 55.15180 | 65.41590 | -176.63391  | 790.11408   | -276.58616  | 1 |
| 18858 | H | 78.26300 | 54.58880 | 64.98890 | -2836.84021 | 302.58266   | -1352.82670 | 1 |
| 18859 | C | 80.24300 | 55.01480 | 64.81890 | -749.27072  | -312.40969  | -433.00281  | 1 |
| 18860 | H | 80.93500 | 55.54480 | 65.45490 | -1290.53626 | 1413.88268  | 2492.52386  | 1 |
| 18861 | C | 80.74100 | 53.60680 | 64.68090 | 363.21828   | -782.78577  | -277.39084  | 1 |
| 18862 | H | 81.54200 | 53.50280 | 63.91790 | 1360.46863  | 2837.76882  | -157.94459  | 1 |
| 18863 | H | 79.93900 | 52.99380 | 64.21490 | -1237.18088 | -440.35238  | -2872.88940 | 1 |
| 18864 | C | 81.19200 | 53.07180 | 66.00590 | -445.80418  | 438.14582   | 659.81821   | 1 |
| 18865 | H | 80.21400 | 52.97080 | 66.52290 | 816.48576   | -2070.56846 | 2202.74617  | 1 |
| 18866 | H | 81.98500 | 53.67880 | 66.49090 | 2419.78114  | 1972.54137  | -400.75966  | 1 |
| 18867 | C | 81.80000 | 51.67080 | 65.81990 | -200.72994  | 649.06205   | -630.96281  | 1 |
| 18868 | O | 82.54700 | 51.38680 | 64.86090 | 484.43785   | 518.88131   | 335.20637   | 1 |
| 18869 | O | 81.46400 | 50.77080 | 66.62690 | 581.34300   | 104.41494   | 505.76077   | 1 |
| 18870 | C | 80.24800 | 55.64180 | 63.46990 | -400.60600  | -291.88705  | 754.54583   | 1 |
| 18871 | O | 81.28400 | 56.18180 | 63.05390 | 178.28896   | -755.60998  | -87.90331   | 1 |
| 18872 | N | 79.10300 | 55.73680 | 62.73990 | -6.02370    | 628.30108   | -583.69403  | 1 |
| 18873 | H | 78.21300 | 55.39680 | 63.03490 | -2998.36955 | -315.60248  | 908.76507   | 1 |
| 18874 | C | 79.08500 | 56.37380 | 61.44790 | 449.18781   | -543.41871  | 553.23660   | 1 |
| 18875 | H | 80.07800 | 56.57180 | 61.07090 | 2073.18563  | -149.35995  | 2343.34040  | 1 |
| 18876 | C | 78.41800 | 55.43180 | 60.43790 | 587.60089   | -254.02333  | -649.63633  | 1 |
| 18877 | H | 77.80000 | 55.86380 | 59.62190 | -1209.28454 | 1925.82846  | -2197.24391 | 1 |
| 18878 | H | 77.61800 | 54.90880 | 61.00490 | -2347.29435 | 2088.79092  | -321.19380  | 1 |
| 18879 | C | 79.39200 | 54.30580 | 59.96390 | 516.14872   | 559.38488   | -515.81585  | 1 |
| 18880 | H | 80.20100 | 54.78780 | 59.37390 | 1624.40086  | 621.50424   | 2607.25318  | 1 |
| 18881 | H | 79.81400 | 53.79280 | 60.85490 | 3074.89944  | -621.35754  | -23.82686   | 1 |
| 18882 | C | 78.69400 | 53.25980 | 59.05890 | 527.44625   | -544.60194  | -499.72818  | 1 |
| 18883 | H | 78.18300 | 53.69880 | 58.17490 | -2904.62717 | -1218.45469 | -34.80698   | 1 |
| 18884 | H | 77.89200 | 52.86580 | 59.71890 | 567.14931   | -3059.47331 | -401.96550  | 1 |
| 18885 | C | 79.52300 | 52.08780 | 58.64990 | 112.08407   | -207.76697  | -889.93133  | 1 |
| 18886 | H | 78.88900 | 51.18480 | 58.52290 | 1543.22358  | -127.34759  | 2721.13691  | 1 |
| 18887 | H | 80.17100 | 51.87080 | 59.52690 | -1843.37379 | 85.47762    | -2566.67083 | 1 |
| 18888 | N | 80.41500 | 52.29680 | 57.45590 | -348.93292  | -228.42309  | 721.88373   | 1 |
| 18889 | H | 81.01600 | 53.14280 | 57.39090 | 2069.20691  | 1720.94978  | 1617.13397  | 1 |
| 18890 | H | 80.99800 | 51.45480 | 57.27390 | 2028.83707  | -1669.01547 | -1724.54868 | 1 |
| 18891 | H | 79.79000 | 52.30380 | 56.62490 | -145.24844  | -2222.30847 | 2199.78620  | 1 |
| 18892 | C | 78.36900 | 57.66680 | 61.44790 | -443.85329  | 503.46723   | -639.59044  | 1 |
| 18893 | O | 78.89200 | 58.71780 | 61.08490 | -95.56371   | -603.51848  | 481.31239   | 1 |
| 18894 | N | 77.09500 | 57.58980 | 61.86190 | 599.82624   | 535.38486   | -265.87578  | 1 |
| 18895 | H | 76.77100 | 56.72180 | 62.22990 | 1451.04393  | -1989.28140 | -1954.82403 | 1 |
| 18896 | C | 76.09900 | 58.66480 | 61.66090 | 125.40718   | -776.41859  | 436.18634   | 1 |
| 18897 | H | 76.35500 | 59.15680 | 60.73390 | -2983.52435 | -984.63203  | 234.76565   | 1 |
| 18898 | C | 74.63500 | 58.10880 | 61.42090 | -243.53900  | 694.76222   | -560.48350  | 1 |
| 18899 | H | 74.40700 | 57.32080 | 62.17090 | -2600.34443 | 293.95016   | -1768.08687 | 1 |
| 18900 | C | 73.63900 | 59.25180 | 61.53490 | 404.56248   | 75.43875    | 802.11199   | 1 |
| 18901 | H | 73.66300 | 59.64980 | 62.57190 | 1116.90884  | 1038.27498  | -2759.57414 | 1 |

|       |   |          |          |          |             |             |             |   |
|-------|---|----------|----------|----------|-------------|-------------|-------------|---|
| 18902 | H | 72.61900 | 58.85480 | 61.34290 | -2450.60433 | -1677.98237 | 1036.03466  | 1 |
| 18903 | H | 73.85800 | 60.07080 | 60.81690 | 1047.57058  | -1523.09928 | 2529.50736  | 1 |
| 18904 | C | 74.54200 | 57.54180 | 59.97590 | -330.85686  | 394.38267   | 751.39924   | 1 |
| 18905 | H | 75.40900 | 56.88280 | 59.75790 | 1212.42514  | -2094.84714 | 1986.27471  | 1 |
| 18906 | H | 73.71200 | 56.81880 | 59.81990 | 2006.98204  | 1375.03937  | 1983.28321  | 1 |
| 18907 | H | 74.61300 | 58.32480 | 59.19190 | 292.93704   | -2506.89357 | 1856.27013  | 1 |
| 18908 | C | 76.21100 | 59.84480 | 62.65990 | -20.19817   | 14.46279    | -920.43837  | 1 |
| 18909 | O | 75.93300 | 60.98580 | 62.30390 | 568.43492   | 220.81106   | -504.14863  | 1 |
| 18910 | N | 76.85000 | 59.71980 | 63.88290 | -402.51819  | 467.08611   | -596.43216  | 1 |
| 18911 | H | 76.85700 | 58.81880 | 64.30890 | -1752.78236 | -2608.11605 | -116.81619  | 1 |
| 18912 | C | 77.20900 | 60.88380 | 64.76190 | 675.24898   | -359.06390  | 472.58917   | 1 |
| 18913 | H | 76.28000 | 61.42980 | 64.83790 | -1976.32822 | 1643.79874  | 1819.96294  | 1 |
| 18914 | C | 77.73400 | 60.39280 | 66.08790 | -534.94606  | -101.37022  | -744.42155  | 1 |
| 18915 | H | 77.00500 | 59.71580 | 66.58190 | 2067.39703  | 1549.87069  | 1783.72348  | 1 |
| 18916 | C | 79.03700 | 59.53180 | 65.95890 | -165.90729  | -553.14012  | -711.45673  | 1 |
| 18917 | H | 79.91700 | 60.21080 | 65.96790 | 3074.96229  | -7.27957    | 622.91396   | 1 |
| 18918 | H | 79.30200 | 58.94780 | 65.05190 | -1126.62849 | -2545.24816 | -1469.26867 | 1 |
| 18919 | H | 79.18400 | 58.75480 | 66.73890 | -2405.44286 | 592.49887   | -1959.28981 | 1 |
| 18920 | C | 77.96200 | 61.63780 | 66.98490 | 230.87880   | -722.08789  | 485.91949   | 1 |
| 18921 | H | 78.82900 | 62.29580 | 66.75890 | 2523.65181  | 1761.93189  | -650.71781  | 1 |
| 18922 | H | 78.00300 | 61.31880 | 68.04790 | -1572.75740 | 1841.02619  | 2010.59348  | 1 |
| 18923 | H | 77.05900 | 62.28480 | 66.98290 | -1202.01580 | 2428.19398  | -1621.59416 | 1 |
| 18924 | C | 78.17500 | 61.78680 | 63.99590 | 583.78685   | 304.43068   | -635.74563  | 1 |
| 18925 | O | 78.09900 | 62.98780 | 64.12390 | -687.77655  | 408.88809   | -10.25757   | 1 |
| 18926 | N | 79.04000 | 61.27880 | 63.15690 | 453.72176   | 230.57172   | -679.78649  | 1 |
| 18927 | H | 79.21600 | 60.30180 | 63.07090 | -359.18443  | 1960.50849  | 2432.39110  | 1 |
| 18928 | C | 79.83300 | 62.16880 | 62.23990 | -751.46667  | -443.26194  | 265.15522   | 1 |
| 18929 | H | 80.38500 | 62.91080 | 62.79690 | -575.58032  | 2265.57573  | 2108.01287  | 1 |
| 18930 | C | 80.87800 | 61.35180 | 61.53590 | 239.37329   | 885.59131   | -44.18072   | 1 |
| 18931 | H | 81.46900 | 62.00780 | 60.86190 | 1659.63450  | -2653.30173 | 156.23329   | 1 |
| 18932 | H | 80.48200 | 60.49880 | 60.94490 | 3023.96529  | 329.25121   | 765.58974   | 1 |
| 18933 | C | 81.78800 | 60.76180 | 62.55890 | -550.21739  | 460.85781   | -586.63005  | 1 |
| 18934 | C | 81.47900 | 59.48980 | 63.13990 | 602.84787   | 88.41092    | -682.85346  | 1 |
| 18935 | H | 80.54500 | 58.99280 | 62.92390 | 2086.51558  | -2299.50166 | -443.53573  | 1 |
| 18936 | C | 82.33100 | 58.99680 | 64.14690 | -635.09973  | -277.82176  | 585.66247   | 1 |
| 18937 | H | 82.11600 | 58.00880 | 64.52490 | 1281.83923  | -2491.63988 | -1421.73036 | 1 |
| 18938 | C | 83.50600 | 59.67180 | 64.52090 | 590.08671   | 566.42652   | -414.11907  | 1 |
| 18939 | O | 84.34300 | 59.10380 | 65.48790 | 777.92006   | -8.50792    | -97.28425   | 1 |
| 18940 | H | 85.16400 | 59.59980 | 65.50190 | 1982.35277  | 2347.75954  | -693.28586  | 1 |
| 18941 | C | 82.96400 | 61.42180 | 62.94590 | -751.60863  | -219.21431  | -485.84314  | 1 |
| 18942 | H | 83.22800 | 62.37680 | 62.51590 | -1609.56871 | -1945.08154 | -1884.88264 | 1 |
| 18943 | C | 83.79600 | 60.81880 | 63.85490 | -654.16529  | 651.01902   | -22.72083   | 1 |
| 18944 | H | 84.68400 | 61.36680 | 64.13590 | -1085.03970 | 1769.54483  | 2363.40748  | 1 |
| 18945 | C | 79.07200 | 63.01480 | 61.18490 | 747.41413   | -495.49191  | 68.05880    | 1 |
| 18946 | O | 79.35300 | 64.19780 | 61.05590 | 296.52150   | 541.63349   | 488.49945   | 1 |
| 18947 | N | 78.11400 | 62.42880 | 60.51990 | -339.15127  | 761.69630   | -199.30970  | 1 |
| 18948 | H | 77.89300 | 61.46280 | 60.63090 | -1809.25602 | -2409.61269 | -907.14035  | 1 |
| 18949 | C | 77.45200 | 63.00280 | 59.37490 | -180.07709  | 896.37031   | 114.34817   | 1 |
| 18950 | H | 77.88600 | 63.93180 | 59.03590 | 1736.02504  | -283.85762  | -2608.81330 | 1 |
| 18951 | C | 77.51400 | 62.02580 | 58.15990 | 487.04969   | 433.28826   | -645.09008  | 1 |
| 18952 | H | 78.58700 | 61.74980 | 58.07590 | -1996.81996 | 1603.89019  | 1837.01622  | 1 |
| 18953 | C | 76.64800 | 60.74380 | 58.20490 | -847.15506  | 68.48776    | 345.88648   | 1 |
| 18954 | H | 76.89000 | 60.04880 | 57.37290 | 1940.83473  | -923.95083  | -2294.36115 | 1 |
| 18955 | H | 75.57900 | 61.03780 | 58.26890 | -1404.42562 | 2697.07929  | 844.51504   | 1 |
| 18956 | H | 76.88300 | 60.24480 | 59.16990 | -864.46497  | 693.05221   | 2940.52911  | 1 |
| 18957 | C | 77.07000 | 62.83080 | 56.90790 | -580.46090  | -599.63346  | 358.32039   | 1 |
| 18958 | H | 77.53500 | 63.83980 | 56.88090 | 466.82891   | -673.48808  | 3026.23040  | 1 |
| 18959 | H | 77.24600 | 62.12980 | 56.06390 | -2198.97686 | -1800.79180 | 1343.07341  | 1 |
| 18960 | H | 75.98500 | 63.07180 | 56.90790 | -1340.37592 | -1408.04660 | 2465.87345  | 1 |
| 18961 | C | 75.96700 | 63.43180 | 59.71690 | -281.24034  | -583.33562  | -645.05832  | 1 |
| 18962 | O | 75.23100 | 63.95280 | 58.88690 | -92.80887   | 419.57774   | -676.26520  | 1 |
| 18963 | N | 75.55600 | 63.14580 | 60.96990 | -159.21374  | 833.73552   | 85.19709    | 1 |

|       |   |          |          |          |             |             |             |   |
|-------|---|----------|----------|----------|-------------|-------------|-------------|---|
| 18964 | H | 76.07500 | 62.48980 | 61.51290 | 495.75025   | 2423.88883  | 1943.74229  | 1 |
| 18965 | C | 74.24300 | 63.52480 | 61.53090 | -532.45093  | 369.55641   | -659.57635  | 1 |
| 18966 | H | 73.64800 | 62.66780 | 61.80990 | -1290.94369 | 2678.37987  | 1051.58848  | 1 |
| 18967 | H | 73.74100 | 64.17580 | 60.82990 | -2172.98733 | -661.90614  | -2189.45440 | 1 |
| 18968 | C | 74.39400 | 64.47380 | 62.76890 | 659.07886   | -586.40855  | -189.23257  | 1 |
| 18969 | O | 73.38900 | 65.08080 | 63.16490 | 205.13911   | 500.01744   | 572.93663   | 1 |
| 18970 | N | 75.62000 | 64.65580 | 63.34290 | 399.56257   | -520.73957  | 510.51012   | 1 |
| 18971 | H | 76.40600 | 64.05980 | 63.19790 | -1573.61474 | -717.40465  | 2623.82629  | 1 |
| 18972 | C | 75.80700 | 65.65780 | 64.37690 | 240.49383   | 567.21993   | 668.73841   | 1 |
| 18973 | H | 74.96800 | 66.32780 | 64.49790 | -143.08701  | 2862.38767  | -1319.58968 | 1 |
| 18974 | C | 76.01200 | 64.93380 | 65.67590 | 271.00381   | -364.05890  | 778.45565   | 1 |
| 18975 | H | 76.89500 | 64.26080 | 65.65490 | 2086.07268  | -2297.06148 | -463.35788  | 1 |
| 18976 | C | 76.30800 | 65.94080 | 66.83790 | 652.38309   | -147.19577  | -616.82951  | 1 |
| 18977 | H | 77.32300 | 66.35880 | 66.66890 | 2596.77436  | 1424.28181  | -1057.80538 | 1 |
| 18978 | H | 76.23100 | 65.35680 | 67.77990 | 1835.78682  | 1281.32310  | 2201.29192  | 1 |
| 18979 | H | 75.48500 | 66.68680 | 66.80890 | 2549.49239  | -1822.59998 | -132.55930  | 1 |
| 18980 | C | 74.73100 | 64.15080 | 66.04990 | -268.25646  | 596.39359   | -650.94474  | 1 |
| 18981 | H | 73.85200 | 64.82480 | 66.13390 | -1567.36498 | -2584.04256 | -875.87048  | 1 |
| 18982 | H | 74.86500 | 63.63880 | 67.02690 | -1590.28974 | 896.18077   | -2575.75427 | 1 |
| 18983 | H | 74.49800 | 63.28680 | 65.39090 | -1485.33817 | -1557.27222 | -2302.37301 | 1 |
| 18984 | C | 76.98200 | 66.54980 | 64.00090 | -319.62905  | -656.65072  | 535.58414   | 1 |
| 18985 | O | 76.81300 | 67.75280 | 63.82890 | 484.62355   | -560.74831  | 234.53268   | 1 |
| 18986 | N | 78.17500 | 65.95380 | 63.88490 | 661.23506   | 330.10514   | -407.42313  | 1 |
| 18987 | H | 78.34800 | 64.98480 | 64.04090 | -1960.31912 | -1894.52189 | 1564.12119  | 1 |
| 18988 | C | 79.38000 | 66.79380 | 63.80390 | 266.98529   | 277.29598   | -833.31883  | 1 |
| 18989 | H | 79.33300 | 67.52180 | 64.60090 | 427.35846   | -1558.06577 | -2700.69354 | 1 |
| 18990 | C | 80.72500 | 65.95580 | 63.88190 | 775.73837   | -400.65193  | -231.25890  | 1 |
| 18991 | H | 81.57500 | 66.47980 | 63.39390 | 944.14519   | 2553.79953  | 1576.74243  | 1 |
| 18992 | H | 80.62700 | 65.05980 | 63.23190 | -943.89031  | -1353.39837 | -2685.48031 | 1 |
| 18993 | C | 81.07600 | 65.46380 | 65.23690 | 748.79857   | -494.74360  | -91.17663   | 1 |
| 18994 | C | 81.17800 | 64.13780 | 65.68490 | -800.26077  | -344.33405  | -290.24381  | 1 |
| 18995 | H | 81.15400 | 63.23580 | 65.09090 | 401.89647   | 1628.37139  | -2673.89716 | 1 |
| 18996 | N | 81.54500 | 64.11680 | 67.03990 | -635.21560  | 256.01380   | -514.51776  | 1 |
| 18997 | H | 81.89000 | 63.41080 | 67.61890 | -806.42737  | 1859.05762  | -2422.82009 | 1 |
| 18998 | C | 81.67300 | 65.44380 | 67.41590 | 792.62484   | -392.56919  | -188.04299  | 1 |
| 18999 | C | 81.36600 | 66.28480 | 66.35090 | -269.13274  | -596.15425  | 624.27452   | 1 |
| 19000 | C | 81.43800 | 67.69780 | 66.49390 | 442.17669   | -618.22955  | -495.22018  | 1 |
| 19001 | H | 81.35400 | 68.36680 | 65.64990 | 2129.29498  | 1833.70266  | 1405.18937  | 1 |
| 19002 | C | 81.95200 | 68.19480 | 67.67890 | 788.14822   | -395.96127  | 183.75422   | 1 |
| 19003 | H | 82.20600 | 69.23880 | 67.78590 | -1107.60105 | 2901.37586  | 548.19788   | 1 |
| 19004 | C | 81.95100 | 65.96580 | 68.65390 | -483.74781  | 770.68565   | 132.03154   | 1 |
| 19005 | H | 82.12500 | 65.34080 | 69.51690 | 2145.51891  | 779.86574   | 2152.19918  | 1 |
| 19006 | C | 82.16800 | 67.36880 | 68.71590 | 105.15084   | -685.59158  | -590.83826  | 1 |
| 19007 | H | 82.68500 | 67.67280 | 69.61390 | -1258.30837 | -1413.83318 | 2505.82014  | 1 |
| 19008 | C | 79.54100 | 67.60780 | 62.56990 | -670.83785  | -390.62879  | -490.51508  | 1 |
| 19009 | O | 79.68900 | 68.83180 | 62.62190 | -81.63037   | 691.29861   | 383.18344   | 1 |
| 19010 | N | 79.43900 | 66.98780 | 61.39490 | 225.08745   | -467.31575  | -663.66519  | 1 |
| 19011 | H | 79.52900 | 65.99580 | 61.36090 | -1667.41157 | -135.09976  | 2662.36747  | 1 |
| 19012 | C | 79.40100 | 67.72880 | 60.09790 | 655.25659   | -578.23167  | 204.79411   | 1 |
| 19013 | H | 80.27400 | 68.36380 | 60.06790 | 807.40031   | 610.16136   | -2984.75803 | 1 |
| 19014 | C | 79.57800 | 66.71580 | 58.97690 | -99.15614   | 139.28121   | 891.10475   | 1 |
| 19015 | H | 79.06400 | 65.76680 | 59.23990 | 1511.07981  | 1989.27557  | 1907.48586  | 1 |
| 19016 | C | 79.02300 | 67.18080 | 57.59490 | -576.33391  | 596.49450   | 401.70896   | 1 |
| 19017 | H | 79.08700 | 66.33780 | 56.87390 | -755.60676  | -1558.36590 | 2616.33608  | 1 |
| 19018 | H | 77.97200 | 67.53780 | 57.64990 | 2918.22463  | 1094.17986  | -390.03962  | 1 |
| 19019 | H | 79.57700 | 68.09680 | 57.29790 | 2033.50425  | -2074.78549 | -1178.76925 | 1 |
| 19020 | C | 81.08100 | 66.50980 | 58.92390 | 378.81266   | 704.92986   | 436.65804   | 1 |
| 19021 | H | 81.56100 | 66.51280 | 59.92590 | 2712.55304  | -1224.27163 | 975.98595   | 1 |
| 19022 | H | 81.53800 | 67.31980 | 58.31590 | 1789.47265  | 2411.54523  | 937.78298   | 1 |
| 19023 | C | 81.48100 | 65.22680 | 58.17990 | 544.95429   | -304.88049  | -659.74369  | 1 |
| 19024 | H | 82.58100 | 65.23080 | 58.01990 | -558.70171  | -2323.65979 | -2045.43343 | 1 |
| 19025 | H | 81.14600 | 64.38880 | 58.82690 | -1072.10281 | 1855.55210  | 2307.27899  | 1 |

|       |   |          |          |          |             |             |             |   |
|-------|---|----------|----------|----------|-------------|-------------|-------------|---|
| 19026 | H | 81.07500 | 65.34680 | 57.15190 | -2536.71703 | -1834.85846 | -337.60796  | 1 |
| 19027 | C | 78.20300 | 68.68480 | 59.97390 | -178.68822  | 518.11313   | 731.42557   | 1 |
| 19028 | O | 78.39300 | 69.81780 | 59.50690 | -740.86036  | -154.03873  | 244.86235   | 1 |
| 19029 | N | 76.94300 | 68.38580 | 60.25590 | 372.83429   | -441.77333  | 597.30598   | 1 |
| 19030 | C | 76.40600 | 67.04980 | 60.23790 | 92.20920    | 48.26332    | -911.32467  | 1 |
| 19031 | H | 76.84500 | 66.50280 | 61.09990 | -44.30372   | -2356.41240 | -2081.16667 | 1 |
| 19032 | H | 76.61900 | 66.55080 | 59.26890 | -2225.02899 | 1840.83087  | -1284.66671 | 1 |
| 19033 | C | 75.89100 | 69.36780 | 60.47890 | -513.29334  | -374.50043  | -661.55612  | 1 |
| 19034 | H | 75.63800 | 69.83980 | 59.54090 | 2400.43543  | 1727.70564  | -1069.60121 | 1 |
| 19035 | C | 74.79500 | 68.58480 | 61.07990 | 313.33841   | -414.71185  | 735.65127   | 1 |
| 19036 | H | 74.84900 | 68.53780 | 62.18890 | -1049.71664 | -1893.96860 | -2285.14776 | 1 |
| 19037 | H | 73.81200 | 69.09380 | 60.98690 | 2232.63141  | -2140.04970 | -511.85871  | 1 |
| 19038 | C | 74.91000 | 67.23780 | 60.38990 | -334.73327  | -647.86420  | -548.61103  | 1 |
| 19039 | H | 74.48000 | 66.36180 | 60.92190 | 2396.04926  | 206.03947   | 2012.75875  | 1 |
| 19040 | H | 74.36300 | 67.34880 | 59.42990 | -66.09527   | 854.67675   | 3024.37293  | 1 |
| 19041 | C | 76.27700 | 70.60180 | 61.32290 | 693.50925   | -38.42021   | -583.46927  | 1 |
| 19042 | O | 75.93900 | 71.65980 | 60.85690 | -733.48608  | -193.64087  | -247.19952  | 1 |
| 19043 | N | 76.98300 | 70.49280 | 62.53090 | 432.56564   | 359.12845   | 622.92414   | 1 |
| 19044 | H | 77.22900 | 69.59880 | 62.89790 | -1007.53313 | -2119.55950 | 2086.55158  | 1 |
| 19045 | C | 77.34300 | 71.60280 | 63.34590 | 42.68293    | 715.22039   | -577.25576  | 1 |
| 19046 | H | 76.43300 | 72.10680 | 63.63490 | 2889.05142  | -1164.87975 | -357.57866  | 1 |
| 19047 | C | 78.07100 | 71.11780 | 64.56590 | -261.82031  | 666.29798   | -581.96253  | 1 |
| 19048 | H | 77.40400 | 70.42680 | 65.12390 | -1419.62469 | -2307.54121 | -1601.95493 | 1 |
| 19049 | H | 78.32800 | 71.98480 | 65.21090 | -2718.39690 | 374.82847   | 1551.02186  | 1 |
| 19050 | H | 79.06500 | 70.67980 | 64.33290 | -3075.84667 | 144.86915   | -692.39826  | 1 |
| 19051 | C | 78.26200 | 72.58380 | 62.57290 | 673.06652   | 455.16243   | 402.60916   | 1 |
| 19052 | O | 77.99600 | 73.79480 | 62.52490 | -487.85868  | 558.35324   | 299.36893   | 1 |
| 19053 | N | 79.28600 | 72.04380 | 61.88190 | -199.61111  | -622.86003  | -532.24627  | 1 |
| 19054 | H | 79.45000 | 71.06180 | 61.82190 | 1704.70720  | 1957.20149  | -1783.57001 | 1 |
| 19055 | C | 80.16600 | 72.83480 | 60.97290 | -491.35076  | -358.93419  | 676.62999   | 1 |
| 19056 | H | 80.56600 | 73.62780 | 61.58790 | -7.90732    | 3150.20417  | -174.53145  | 1 |
| 19057 | C | 81.26100 | 71.99780 | 60.26490 | -652.21970  | -591.55684  | 235.40881   | 1 |
| 19058 | H | 80.87300 | 71.21680 | 59.57690 | 1243.84230  | -2868.22342 | -217.61628  | 1 |
| 19059 | H | 81.86300 | 72.79880 | 59.78490 | 1341.72893  | -2400.91828 | -1508.75716 | 1 |
| 19060 | C | 82.21600 | 71.17680 | 61.14290 | 27.57144    | 707.86204   | 578.53810   | 1 |
| 19061 | H | 81.67600 | 70.33280 | 61.62390 | -1345.08475 | -1070.71383 | -2642.25981 | 1 |
| 19062 | C | 83.30900 | 70.67280 | 60.22790 | -657.48643  | -283.50665  | 564.55440   | 1 |
| 19063 | H | 82.82200 | 70.02180 | 59.46990 | -344.33767  | 1921.21255  | 2469.81018  | 1 |
| 19064 | H | 83.81700 | 71.51980 | 59.71990 | -1104.56714 | 2160.81211  | 2011.93571  | 1 |
| 19065 | H | 84.03400 | 70.09680 | 60.84190 | 2159.85173  | -2222.86834 | -463.94355  | 1 |
| 19066 | C | 82.83200 | 72.00880 | 62.34890 | -743.72962  | -21.00980   | -545.64023  | 1 |
| 19067 | H | 81.97800 | 72.18080 | 63.03890 | 1609.20860  | 2650.04229  | 542.06596   | 1 |
| 19068 | H | 83.61500 | 71.40980 | 62.85990 | 1025.72647  | 1227.48140  | -2715.80249 | 1 |
| 19069 | H | 83.28400 | 72.93580 | 61.93590 | 894.41993   | 2728.43596  | 1292.38142  | 1 |
| 19070 | C | 79.39800 | 73.56380 | 59.85490 | -423.18297  | 820.77333   | -51.76486   | 1 |
| 19071 | O | 79.60700 | 74.74080 | 59.58190 | -275.78072  | 696.10315   | 281.59806   | 1 |
| 19072 | N | 78.44400 | 72.86480 | 59.19490 | 620.08219   | 465.31907   | -331.82323  | 1 |
| 19073 | H | 78.25100 | 71.91980 | 59.44990 | -2238.48934 | 1247.22921  | 1839.25719  | 1 |
| 19074 | C | 77.51900 | 73.42580 | 58.26290 | 455.83227   | -592.20465  | 497.82511   | 1 |
| 19075 | H | 78.15500 | 73.93980 | 57.55690 | 1326.29671  | -2712.76738 | -838.88686  | 1 |
| 19076 | C | 76.60000 | 72.37380 | 57.56490 | 299.20902   | 440.60336   | -745.45259  | 1 |
| 19077 | H | 75.90000 | 72.97980 | 56.94990 | 331.41798   | -2236.12979 | 2172.76913  | 1 |
| 19078 | H | 76.05600 | 71.96080 | 58.44090 | 1074.20211  | 938.16104   | -2807.43600 | 1 |
| 19079 | C | 77.41200 | 71.39580 | 56.68990 | 855.61287   | 262.90448   | 124.86789   | 1 |
| 19080 | H | 78.23700 | 70.92380 | 57.26490 | -1880.98495 | -1582.98942 | 1960.26724  | 1 |
| 19081 | C | 76.51500 | 70.32580 | 56.03890 | -590.39960  | -514.86965  | 464.11298   | 1 |
| 19082 | H | 75.79800 | 70.79480 | 55.33190 | 1937.84676  | -2439.93705 | 304.53988   | 1 |
| 19083 | H | 77.06300 | 69.52180 | 55.50390 | 924.90167   | -2825.90107 | 983.28528   | 1 |
| 19084 | H | 76.02800 | 69.82180 | 56.90090 | -2214.64161 | 1007.78362  | -2015.97120 | 1 |
| 19085 | C | 78.08700 | 72.20080 | 55.55590 | -559.93978  | -205.27941  | 691.03286   | 1 |
| 19086 | H | 78.93000 | 72.84180 | 55.89090 | 2435.28200  | -879.84844  | -1770.78919 | 1 |
| 19087 | H | 77.35600 | 72.90380 | 55.10290 | -30.90421   | -3069.61804 | -643.98096  | 1 |



|       |   |          |          |          |             |             |             |   |
|-------|---|----------|----------|----------|-------------|-------------|-------------|---|
| 19088 | H | 78.47800 | 71.55980 | 54.73690 | -1983.70216 | -1439.32854 | 1971.20232  | 1 |
| 19089 | C | 76.65800 | 74.51080 | 58.81890 | 221.29771   | 571.52990   | -682.53442  | 1 |
| 19090 | O | 76.44500 | 75.53780 | 58.13990 | 703.06541   | -30.75151   | -337.65438  | 1 |
| 19091 | N | 76.13800 | 74.39180 | 60.04090 | 607.02510   | 295.28631   | -502.53976  | 1 |
| 19092 | H | 76.10800 | 73.55980 | 60.58990 | 2155.50746  | -1845.03157 | -1335.01778 | 1 |
| 19093 | C | 75.18900 | 75.41980 | 60.53390 | 690.78667   | -516.69752  | 250.82729   | 1 |
| 19094 | H | 74.52600 | 75.63580 | 59.70990 | 932.19047   | -2935.52705 | 582.20902   | 1 |
| 19095 | C | 74.32700 | 74.98880 | 61.72290 | -459.75931  | -335.68086  | -717.41210  | 1 |
| 19096 | H | 73.68700 | 75.85480 | 61.99690 | 2625.00466  | 195.92129   | 1706.69283  | 1 |
| 19097 | H | 75.08200 | 74.73680 | 62.49790 | -2845.95063 | 1129.51046  | 768.86118   | 1 |
| 19098 | C | 73.43400 | 73.79580 | 61.37990 | -410.20594  | 374.71992   | 729.85548   | 1 |
| 19099 | H | 73.87200 | 73.05280 | 60.67990 | -2491.98032 | -1104.49096 | 1578.09738  | 1 |
| 19100 | C | 73.20600 | 72.96180 | 62.64590 | 515.10632   | 380.91286   | -648.43760  | 1 |
| 19101 | H | 72.47500 | 72.15780 | 62.41390 | -144.61805  | 1456.87451  | -2792.05397 | 1 |
| 19102 | H | 72.89900 | 73.58880 | 63.51090 | -228.98401  | -1194.04164 | 2896.99241  | 1 |
| 19103 | H | 74.09900 | 72.35780 | 62.91390 | 1555.56595  | 1588.09768  | -2228.36189 | 1 |
| 19104 | C | 72.04600 | 74.18280 | 60.80190 | -283.80572  | 423.88915   | 761.69400   | 1 |
| 19105 | H | 71.38500 | 73.30880 | 60.62390 | 739.94229   | -2798.41693 | 1206.30418  | 1 |
| 19106 | H | 71.56400 | 75.00680 | 61.36990 | 1616.80317  | -1965.59983 | -1834.22272 | 1 |
| 19107 | H | 72.15400 | 74.59180 | 59.77490 | -2167.82668 | -588.68824  | -2212.80742 | 1 |
| 19108 | C | 75.85100 | 76.71480 | 60.91390 | 411.64184   | -380.48005  | -710.84916  | 1 |
| 19109 | O | 75.24100 | 77.76980 | 61.06290 | -546.80566  | 155.80816   | 558.90441   | 1 |
| 19110 | N | 77.17700 | 76.61080 | 61.06990 | 424.90511   | 434.81303   | -586.89528  | 1 |
| 19111 | H | 77.61500 | 75.74080 | 60.85690 | 3066.35354  | -164.76678  | 631.29385   | 1 |
| 19112 | C | 78.06900 | 77.62580 | 61.56690 | -395.66455  | 631.77743   | -544.95499  | 1 |
| 19113 | H | 77.44900 | 78.34180 | 62.08490 | 1208.89925  | 2261.74677  | 1823.53816  | 1 |
| 19114 | C | 79.05700 | 77.17280 | 62.62790 | -219.67119  | -668.53281  | 571.31625   | 1 |
| 19115 | H | 79.78300 | 77.96780 | 62.90290 | -2056.90350 | 799.17527   | 2251.69792  | 1 |
| 19116 | O | 79.81600 | 75.99880 | 62.30490 | -547.24314  | 495.65730   | -315.63501  | 1 |
| 19117 | H | 79.18000 | 75.28680 | 62.20490 | 1716.32183  | -1698.00638 | 1998.15508  | 1 |
| 19118 | C | 78.13500 | 76.76780 | 63.83490 | 234.66870   | -852.99271  | 174.25984   | 1 |
| 19119 | H | 77.36500 | 77.55080 | 64.00490 | -1796.53536 | -1425.96404 | -2158.93782 | 1 |
| 19120 | H | 78.74600 | 76.71880 | 64.76190 | -1228.01056 | 2034.14866  | 2071.79134  | 1 |
| 19121 | H | 77.51500 | 75.84680 | 63.79690 | -476.23723  | -685.34452  | 3030.24867  | 1 |
| 19122 | C | 78.80100 | 78.28280 | 60.43990 | -676.59126  | 465.67604   | -425.97191  | 1 |
| 19123 | O | 79.82000 | 78.91780 | 60.65690 | -563.04016  | 566.47697   | 85.51670    | 1 |
| 19124 | N | 78.35900 | 78.17880 | 59.20190 | -173.33991  | -565.20626  | 594.59712   | 1 |
| 19125 | H | 77.57900 | 77.59780 | 58.98190 | -378.56668  | -1892.55032 | -2481.50634 | 1 |
| 19126 | C | 78.86300 | 79.05080 | 58.16390 | -25.49605   | -438.00347  | -796.34859  | 1 |
| 19127 | H | 79.93700 | 78.96980 | 58.24790 | -2004.09576 | -1599.98681 | 1824.00637  | 1 |
| 19128 | C | 78.55500 | 78.55580 | 56.73090 | 644.18188   | -519.17384  | -349.94297  | 1 |
| 19129 | H | 77.45400 | 78.54380 | 56.58590 | -2227.23334 | 2238.01908  | -165.36703  | 1 |
| 19130 | C | 79.23400 | 79.47680 | 55.69190 | -171.65359  | 513.14394   | 741.96704   | 1 |
| 19131 | H | 79.23300 | 79.06580 | 54.66090 | 2866.76385  | -1255.69529 | 60.15515    | 1 |
| 19132 | H | 78.67300 | 80.41380 | 55.48890 | 3120.36933  | -44.57245   | -286.63545  | 1 |
| 19133 | H | 80.26600 | 79.78080 | 55.97290 | -378.34591  | -1145.79812 | -2905.07384 | 1 |
| 19134 | C | 79.06900 | 77.10780 | 56.54390 | -405.85815  | 631.47601   | -541.68589  | 1 |
| 19135 | H | 79.00500 | 76.45980 | 57.44390 | -2510.66162 | -1540.86089 | 1113.19532  | 1 |
| 19136 | H | 80.15200 | 77.14780 | 56.29690 | 688.92150   | 2273.32972  | -2073.80635 | 1 |
| 19137 | C | 78.26600 | 76.33080 | 55.51690 | -577.77835  | -622.99635  | -334.07641  | 1 |
| 19138 | H | 78.23500 | 76.94280 | 54.59090 | -1813.04525 | -2234.03311 | -1273.48904 | 1 |
| 19139 | H | 77.16900 | 76.27180 | 55.68190 | 2406.97194  | -1953.39123 | 434.63609   | 1 |
| 19140 | H | 78.74700 | 75.33680 | 55.39290 | 655.53009   | -2138.08350 | 2195.45950  | 1 |
| 19141 | C | 78.55300 | 80.52180 | 58.35990 | 629.90991   | -3.45889    | -649.37358  | 1 |
| 19142 | O | 79.45400 | 81.34280 | 58.28290 | 418.24404   | -381.35659  | -536.00691  | 1 |
| 19143 | N | 77.30800 | 80.94280 | 58.79090 | -713.42213  | 119.54194   | 454.92666   | 1 |
| 19144 | C | 76.06600 | 80.31780 | 58.47990 | -469.78434  | 453.44999   | -652.15478  | 1 |
| 19145 | H | 75.80500 | 79.49080 | 59.17390 | 1823.25331  | 2553.98545  | 234.81074   | 1 |
| 19146 | H | 76.09400 | 79.92480 | 57.44090 | -2300.77681 | 1690.10603  | 1353.45014  | 1 |
| 19147 | C | 77.11200 | 82.34380 | 59.28390 | 673.82307   | 597.16398   | 125.42642   | 1 |
| 19148 | H | 77.25900 | 83.06080 | 58.48990 | -2815.54335 | -1122.20710 | -870.33359  | 1 |
| 19149 | C | 75.62100 | 82.35380 | 59.68890 | 253.60509   | 818.23424   | -325.41372  | 1 |

|       |   |          |          |          |             |             |             |   |
|-------|---|----------|----------|----------|-------------|-------------|-------------|---|
| 19150 | H | 75.54600 | 82.00980 | 60.74290 | -1981.99377 | 2012.65591  | -1413.12877 | 1 |
| 19151 | H | 75.08500 | 83.32580 | 59.65190 | -1987.15054 | 255.53046   | 2436.59504  | 1 |
| 19152 | C | 75.00600 | 81.34580 | 58.64290 | -741.14373  | 520.31913   | -194.76731  | 1 |
| 19153 | H | 74.62200 | 81.75380 | 57.68290 | 15.45380    | 2687.22712  | 1651.25763  | 1 |
| 19154 | H | 74.09500 | 80.94680 | 59.13790 | -1453.85275 | -2478.30331 | -1277.72462 | 1 |
| 19155 | C | 78.03700 | 82.78180 | 60.40490 | -299.72846  | -855.83958  | -27.40984   | 1 |
| 19156 | O | 78.48700 | 83.90380 | 60.44290 | 59.77811    | -678.56130  | -382.36546  | 1 |
| 19157 | N | 78.30300 | 81.91980 | 61.40090 | 187.74278   | 750.96759   | 348.15147   | 1 |
| 19158 | H | 77.87300 | 81.02280 | 61.32790 | -2910.33825 | 1098.48771  | 549.29266   | 1 |
| 19159 | C | 79.25100 | 82.16380 | 62.47790 | -733.68360  | 425.54731   | -367.80906  | 1 |
| 19160 | H | 78.89200 | 83.09180 | 62.89790 | 1617.39444  | -2315.57867 | -1360.30646 | 1 |
| 19161 | C | 79.28600 | 81.04580 | 63.50590 | 809.27887   | 350.70485   | 203.86501   | 1 |
| 19162 | H | 80.16800 | 81.03780 | 64.18090 | -2681.51260 | 1121.65418  | -1234.87323 | 1 |
| 19163 | H | 79.41000 | 80.13580 | 62.87990 | -1631.15399 | -1174.18381 | 2421.68131  | 1 |
| 19164 | C | 78.00000 | 80.97680 | 64.30490 | 472.19911   | 644.29030   | -440.60752  | 1 |
| 19165 | O | 77.75200 | 81.96580 | 65.02190 | -557.31693  | 570.73410   | 78.28402    | 1 |
| 19166 | O | 77.25500 | 79.98480 | 64.24790 | 461.94657   | -365.96450  | 510.21618   | 1 |
| 19167 | C | 80.65900 | 82.48880 | 61.91190 | -617.26384  | -452.08860  | 500.27815   | 1 |
| 19168 | O | 81.35100 | 83.42380 | 62.34390 | 415.14157   | -531.52148  | 386.85445   | 1 |
| 19169 | N | 81.09300 | 81.65880 | 60.95190 | 211.36359   | 237.69372   | 779.85955   | 1 |
| 19170 | H | 80.60900 | 80.81980 | 60.71590 | 867.16627   | -195.41891  | -3016.10288 | 1 |
| 19171 | C | 82.35100 | 81.84880 | 60.18090 | -77.06504   | -898.92975  | 43.06637    | 1 |
| 19172 | H | 83.14500 | 81.81080 | 60.91190 | 949.26265   | -2224.07508 | -1999.29721 | 1 |
| 19173 | C | 82.61200 | 80.57680 | 59.36790 | 644.91732   | -401.24233  | -484.08751  | 1 |
| 19174 | H | 81.68500 | 80.38480 | 58.78690 | 2126.37805  | 265.94545   | -2296.34994 | 1 |
| 19175 | H | 82.65500 | 79.66680 | 60.00390 | 1800.34278  | 2268.32361  | 1227.92084  | 1 |
| 19176 | C | 83.86900 | 80.51280 | 58.43890 | 580.55069   | -537.01999  | -428.72967  | 1 |
| 19177 | C | 85.11900 | 81.10280 | 58.74990 | 447.25002   | -624.89947  | -469.33615  | 1 |
| 19178 | H | 85.29600 | 81.67880 | 59.64590 | -1980.58035 | -1693.49139 | 1763.11402  | 1 |
| 19179 | C | 86.16200 | 81.10780 | 57.83790 | -589.16118  | -694.92187  | -11.62482   | 1 |
| 19180 | H | 87.06200 | 81.63480 | 58.11890 | 905.39309   | 2220.76512  | -2046.15688 | 1 |
| 19181 | C | 85.98200 | 80.43580 | 56.65890 | -895.32717  | 219.29523   | 85.65220    | 1 |
| 19182 | H | 86.69700 | 80.46980 | 55.84990 | -1077.47895 | -973.01051  | -2795.46777 | 1 |
| 19183 | C | 83.79600 | 79.72480 | 57.31990 | 451.11837   | 632.82890   | -482.91563  | 1 |
| 19184 | H | 82.86100 | 79.25980 | 57.04390 | -899.98930  | 1712.31678  | -2495.85290 | 1 |
| 19185 | C | 84.80600 | 79.76980 | 56.36290 | 519.75540   | -476.44951  | -561.00796  | 1 |
| 19186 | H | 84.81800 | 79.17080 | 55.46490 | -2254.09432 | -1128.37504 | -1893.84342 | 1 |
| 19187 | C | 82.49700 | 83.11280 | 59.39990 | -16.22563   | -664.20386  | -615.75940  | 1 |
| 19188 | O | 83.51000 | 83.80280 | 59.50090 | 277.55415   | -597.40090  | 412.23448   | 1 |
| 19189 | N | 81.49500 | 83.40680 | 58.56490 | -495.86895  | -623.10980  | -279.97650  | 1 |
| 19190 | H | 80.75700 | 82.74780 | 58.43890 | -2105.55753 | -1996.84538 | 1218.49334  | 1 |
| 19191 | C | 81.46900 | 84.64280 | 57.71890 | 439.17989   | -774.16144  | 110.39379   | 1 |
| 19192 | H | 82.41100 | 84.77380 | 57.20590 | -1830.53945 | -1519.83786 | -2062.62189 | 1 |
| 19193 | C | 80.38000 | 84.70980 | 56.67890 | 578.84199   | -251.72890  | -642.96563  | 1 |
| 19194 | H | 79.41800 | 84.79380 | 57.22890 | -1946.28735 | -1004.26525 | -2264.91847 | 1 |
| 19195 | C | 80.45145 | 85.95136 | 55.72399 | -313.80469  | -795.64793  | 730.48868   | 1 |
| 19196 | H | 80.36975 | 86.88843 | 56.29716 | -967.14708  | -123.62424  | 3104.04852  | 1 |
| 19197 | H | 79.58865 | 85.98491 | 54.99404 | 88.56156    | 1958.88884  | -74.61835   | 1 |
| 19198 | H | 81.39982 | 86.03778 | 55.12108 | -56.82881   | -1155.36573 | -962.66506  | 1 |
| 19199 | C | 80.27800 | 83.41680 | 55.77490 | 58.56899    | -719.44325  | 540.53171   | 1 |
| 19200 | H | 80.08400 | 82.53880 | 56.42690 | 1868.93798  | 2013.48913  | -1533.16754 | 1 |
| 19201 | H | 81.26700 | 83.29280 | 55.28390 | 573.91809   | 2104.30621  | 2273.18621  | 1 |
| 19202 | C | 79.15000 | 83.46480 | 54.79990 | 508.44956   | -365.49591  | -646.93054  | 1 |
| 19203 | H | 79.31000 | 82.70080 | 54.00990 | -870.57016  | 1969.28971  | 2307.68831  | 1 |
| 19204 | H | 79.14200 | 84.43280 | 54.25390 | 1792.03248  | -563.30942  | -2511.98078 | 1 |
| 19205 | H | 78.13300 | 83.27280 | 55.20590 | 1486.23023  | -2742.52218 | -266.04005  | 1 |
| 19206 | C | 81.43162 | 85.80453 | 58.90876 | 1326.81635  | -837.44069  | -282.09575  | 1 |
| 19207 | O | 82.20743 | 86.71869 | 58.74245 | -294.45750  | 684.73305   | -78.82367   | 1 |
| 19208 | N | 80.49185 | 85.60172 | 59.82656 | 47.66469    | 15.26297    | -342.26023  | 1 |
| 19209 | H | 80.01266 | 84.62550 | 59.81362 | -759.11078  | 314.58046   | -862.51522  | 1 |
| 19210 | C | 79.94267 | 86.70489 | 60.50067 | 122.01129   | 792.01683   | 1288.02345  | 1 |
| 19211 | H | 80.45133 | 87.55201 | 59.98463 | 3966.10799  | -2400.61080 | 277.85921   | 1 |

|       |   |          |          |          |             |             |             |   |
|-------|---|----------|----------|----------|-------------|-------------|-------------|---|
| 19212 | C | 78.34099 | 86.63951 | 60.63034 | -337.59966  | 196.27130   | 560.22733   | 1 |
| 19213 | H | 78.00663 | 85.80721 | 61.28084 | 176.24394   | 1769.84020  | 3325.04415  | 1 |
| 19214 | H | 78.05889 | 87.62595 | 61.18559 | -892.79870  | -2956.33023 | -433.42727  | 1 |
| 19215 | C | 77.62436 | 86.58520 | 59.23348 | -535.64993  | -15.32406   | 133.97790   | 1 |
| 19216 | C | 77.82797 | 87.68876 | 58.35356 | 306.51012   | -83.37272   | 361.34695   | 1 |
| 19217 | H | 78.30855 | 88.60254 | 58.68456 | -1147.98880 | -1394.80220 | 2201.18952  | 1 |
| 19218 | C | 77.17049 | 87.65068 | 57.08535 | -1206.63950 | -499.64873  | -244.40780  | 1 |
| 19219 | H | 77.20285 | 88.62227 | 56.44143 | 234.20499   | -1791.44656 | 1910.26198  | 1 |
| 19220 | C | 76.27090 | 86.60353 | 56.80044 | 200.12999   | 967.32229   | 192.72399   | 1 |
| 19221 | H | 75.66584 | 86.65113 | 55.94089 | -913.66361  | 1753.55336  | 1512.78296  | 1 |
| 19222 | C | 77.00622 | 85.39002 | 58.80890 | -556.13579  | 99.47718    | 1060.47155  | 1 |
| 19223 | H | 76.72596 | 84.56250 | 59.45149 | -341.62217  | -682.15109  | 3361.20543  | 1 |
| 19224 | C | 76.20193 | 85.51605 | 57.66210 | 55.09274    | 157.40276   | -950.31133  | 1 |
| 19225 | H | 75.46461 | 84.68799 | 57.35883 | 2731.10929  | 2065.95481  | -1926.28517 | 1 |
| 19226 | C | 80.57822 | 86.75892 | 62.06969 | 1279.33445  | -609.31409  | -951.03534  | 1 |
| 19227 | O | 79.80871 | 87.12915 | 62.94023 | 387.89013   | 179.13899   | -28.70507   | 1 |
| 19228 | N | 81.79993 | 86.30315 | 62.18145 | -116.13746  | -368.43262  | 933.57610   | 1 |
| 19229 | H | 82.20339 | 86.04287 | 61.30378 | -358.94859  | -240.27964  | -1127.43012 | 1 |
| 19230 | C | 82.53539 | 86.77232 | 63.32353 | -599.77562  | -461.48622  | -191.50172  | 1 |
| 19231 | H | 81.71356 | 87.24088 | 63.94643 | -1122.14017 | -1488.91100 | -918.66781  | 1 |
| 19232 | C | 83.25557 | 85.41886 | 63.77104 | 384.86423   | -483.23638  | 264.64790   | 1 |
| 19233 | H | 84.08932 | 85.61310 | 64.54784 | 65.34021    | 610.68347   | -1707.96706 | 1 |
| 19234 | H | 83.68000 | 84.87680 | 62.92990 | -2808.11188 | -1164.93592 | 833.61193   | 1 |
| 19235 | H | 82.44800 | 84.78880 | 64.16490 | 730.59968   | 1466.66037  | -2688.08976 | 1 |
| 19236 | C | 83.72152 | 87.65165 | 62.65200 | -149.67006  | -163.67911  | 182.70019   | 1 |
| 19237 | O | 84.33767 | 87.31136 | 61.60078 | -335.10554  | 154.40632   | 587.54103   | 1 |
| 19238 | N | 84.02764 | 88.60999 | 63.45788 | -409.45575  | 481.47790   | 323.84537   | 1 |
| 19239 | H | 83.49069 | 88.71175 | 64.33860 | -2223.12910 | 1072.90237  | 3075.35337  | 1 |
| 19240 | C | 84.99177 | 89.57070 | 63.09868 | -116.63019  | -774.70896  | -646.20402  | 1 |
| 19241 | H | 85.72575 | 89.00815 | 62.49734 | -1800.70074 | -899.43041  | -1947.03725 | 1 |
| 19242 | C | 84.33410 | 90.66860 | 62.21344 | -1052.17370 | -1038.86025 | 12.88850    | 1 |
| 19243 | H | 84.07450 | 90.25614 | 61.20166 | 2524.11441  | -301.30684  | -1550.24540 | 1 |
| 19244 | H | 85.10282 | 91.38214 | 61.93716 | -2333.95961 | -385.02911  | -1441.75363 | 1 |
| 19245 | C | 83.03877 | 91.42961 | 62.83931 | 50.28658    | 433.06136   | -536.67876  | 1 |
| 19246 | O | 81.96042 | 91.31577 | 62.28657 | -509.81158  | 313.20592   | 348.25378   | 1 |
| 19247 | N | 83.38556 | 92.28723 | 63.81282 | -130.11064  | -1013.66191 | 222.88996   | 1 |
| 19248 | H | 84.27100 | 92.44900 | 64.28621 | 1226.39438  | -1115.85631 | 1809.40497  | 1 |
| 19249 | H | 82.58515 | 92.90156 | 64.12488 | -200.34157  | -212.88036  | 151.76674   | 1 |
| 19250 | C | 85.55695 | 90.07143 | 64.60311 | -574.08931  | 379.67109   | -309.47145  | 1 |
| 19251 | O | 85.14340 | 89.50664 | 65.61121 | 413.27605   | 77.87923    | 703.68624   | 1 |
| 19252 | N | 86.51733 | 90.96307 | 64.45159 | 326.40973   | 116.11904   | -136.92971  | 1 |
| 19253 | H | 86.61552 | 91.38415 | 63.53998 | -356.27307  | 809.61170   | -1374.52684 | 1 |
| 19254 | C | 86.77973 | 91.70132 | 65.64924 | 763.09346   | 351.11667   | -224.77107  | 1 |
| 19255 | H | 86.26103 | 91.22441 | 66.51680 | -3306.16733 | -1690.20112 | -608.70506  | 1 |
| 19256 | C | 88.35184 | 91.81116 | 65.72423 | -997.09082  | -642.96573  | 276.53867   | 1 |
| 19257 | H | 88.75207 | 92.27137 | 64.81329 | 383.94613   | -1376.35127 | 3648.84676  | 1 |
| 19258 | C | 88.67026 | 92.68341 | 66.97217 | -251.60266  | -359.00156  | -889.79276  | 1 |
| 19259 | H | 88.26772 | 92.15414 | 67.96270 | 1006.65263  | 2998.77062  | 1003.68502  | 1 |
| 19260 | H | 88.19678 | 93.71498 | 66.90401 | -1609.94832 | 482.09131   | 2447.12788  | 1 |
| 19261 | H | 89.76620 | 92.78844 | 67.11885 | 1643.98059  | -444.49253  | 1255.33094  | 1 |
| 19262 | C | 89.01768 | 90.44183 | 66.06797 | 181.87788   | -398.15025  | 77.46257    | 1 |
| 19263 | H | 90.16583 | 90.45820 | 66.12145 | -1149.40152 | 1287.61963  | 1222.20579  | 1 |
| 19264 | H | 88.62019 | 90.13950 | 67.06128 | 1510.46813  | 2401.27247  | -637.91199  | 1 |
| 19265 | H | 88.82167 | 89.65816 | 65.27254 | -32.60689   | -271.33419  | -441.90137  | 1 |
| 19266 | C | 86.32878 | 93.28417 | 65.54669 | -176.40029  | -1016.79078 | -172.60485  | 1 |
| 19267 | O | 86.35345 | 93.85084 | 64.47569 | 46.14701    | 101.70127   | -551.08872  | 1 |
| 19268 | N | 85.98839 | 93.77706 | 66.71898 | 582.08267   | 879.01496   | 228.70266   | 1 |
| 19269 | H | 86.03704 | 93.18328 | 67.59913 | 1530.19630  | 107.78516   | -124.83629  | 1 |
| 19270 | C | 85.29808 | 95.07063 | 66.80649 | 221.72237   | 247.45700   | 1187.28008  | 1 |
| 19271 | H | 85.61156 | 95.55384 | 65.81375 | 1006.31839  | -704.67618  | 239.70229   | 1 |
| 19272 | C | 83.75554 | 94.85904 | 66.86216 | 439.17977   | 560.20623   | 138.62768   | 1 |
| 19273 | H | 83.40166 | 94.39456 | 67.84713 | 1406.12075  | -324.63577  | 699.20267   | 1 |

|       |   |          |           |          |             |             |             |   |
|-------|---|----------|-----------|----------|-------------|-------------|-------------|---|
| 19274 | H | 83.59716 | 94.21694  | 65.95215 | -2085.74471 | 1194.03554  | 1459.11513  | 1 |
| 19275 | O | 82.85547 | 96.01761  | 66.67846 | 289.61713   | -173.73050  | 57.70077    | 1 |
| 19276 | H | 82.26623 | 95.90548  | 67.50618 | -4312.47755 | 413.28369   | -2889.96736 | 1 |
| 19277 | C | 85.99966 | 95.82834  | 68.03598 | 419.49138   | -458.36602  | 317.52689   | 1 |
| 19278 | O | 87.13212 | 95.58834  | 68.40456 | 1102.34268  | -210.85619  | -52.25566   | 1 |
| 19279 | N | 85.14818 | 96.63987  | 68.64491 | -244.95068  | -105.20694  | 126.69639   | 1 |
| 19280 | H | 84.19726 | 96.78736  | 68.28393 | 391.96124   | 2476.53458  | -901.94263  | 1 |
| 19281 | C | 85.53884 | 97.54164  | 69.65792 | -864.85109  | -285.89849  | -1277.80362 | 1 |
| 19282 | H | 86.43500 | 97.20108  | 70.15365 | 4024.95702  | -2700.99937 | 3579.85657  | 1 |
| 19283 | C | 85.87757 | 98.97129  | 68.94561 | -73.48378   | -188.47613  | 474.26616   | 1 |
| 19284 | H | 85.96210 | 99.80632  | 69.69495 | 658.68111   | 73.83953    | -4953.54824 | 1 |
| 19285 | H | 85.13192 | 99.29793  | 68.28143 | 567.91870   | -2692.92539 | -1085.30535 | 1 |
| 19286 | C | 87.11583 | 98.90223  | 68.08217 | -902.41412  | 934.78247   | -683.89986  | 1 |
| 19287 | H | 87.85569 | 99.63003  | 68.43289 | -2401.18554 | 721.00136   | 3224.51268  | 1 |
| 19288 | H | 87.63446 | 97.93118  | 68.06333 | -2380.03384 | 1282.96672  | -627.75075  | 1 |
| 19289 | C | 86.37326 | 99.22471  | 66.55581 | 177.03268   | -221.79988  | 55.70290    | 1 |
| 19290 | O | 85.85247 | 98.35140  | 65.87003 | -1059.48033 | 630.34132   | 630.37529   | 1 |
| 19291 | O | 86.46844 | 100.37639 | 66.16511 | 496.60781   | 142.96899   | 790.08495   | 1 |
| 19292 | C | 84.20938 | 97.76942  | 70.61663 | -657.95963  | 101.57876   | 636.14654   | 1 |
| 19293 | O | 83.36077 | 98.53861  | 70.22143 | -243.30563  | -205.53501  | 260.97502   | 1 |
| 19294 | N | 84.21681 | 96.97536  | 71.67387 | -219.17387  | -338.53747  | -639.63633  | 1 |
| 19295 | H | 84.95988 | 96.30290  | 71.70660 | -2199.74230 | 931.86590   | 1474.68872  | 1 |
| 19296 | C | 83.18867 | 97.00451  | 72.69454 | -575.95374  | -206.85746  | -51.74779   | 1 |
| 19297 | H | 82.59634 | 97.82312  | 72.22276 | 1773.40169  | -2239.13113 | -1869.27611 | 1 |
| 19298 | C | 82.45049 | 95.58516  | 72.65969 | -357.58056  | -180.42349  | 1125.97241  | 1 |
| 19299 | H | 83.04228 | 94.73965  | 73.04297 | 401.51958   | 4103.15765  | -1199.61266 | 1 |
| 19300 | H | 82.11103 | 95.22543  | 71.66834 | 938.92636   | -206.53186  | -1379.38121 | 1 |
| 19301 | H | 81.49147 | 95.67036  | 73.24334 | 1572.89016  | 1164.21516  | 1448.42472  | 1 |
| 19302 | C | 83.76268 | 97.21449  | 74.17045 | 702.58132   | -353.02546  | -959.58106  | 1 |
| 19303 | O | 84.45290 | 96.37297  | 74.69478 | -372.66281  | -113.68728  | 1018.28249  | 1 |
| 19304 | N | 83.02275 | 98.17292  | 74.84077 | 9.46358     | 24.83220    | 390.20228   | 1 |
| 19305 | H | 82.32263 | 98.67561  | 74.22427 | -719.54082  | 1489.80857  | 1250.60157  | 1 |
| 19306 | C | 83.58235 | 99.00563  | 75.89534 | 366.27710   | -230.50759  | 284.96082   | 1 |
| 19307 | H | 82.85411 | 99.83139  | 76.06656 | -545.36525  | -1933.73173 | 320.12096   | 1 |
| 19308 | C | 84.17687 | 98.14778  | 77.06389 | -1126.28838 | -495.90301  | 745.01121   | 1 |
| 19309 | H | 84.52602 | 97.20822  | 76.58840 | 1053.41805  | 292.70797   | -2575.67013 | 1 |
| 19310 | H | 85.06500 | 98.69737  | 77.46005 | 595.20028   | -422.59728  | -647.77814  | 1 |
| 19311 | C | 83.12874 | 97.95838  | 78.21693 | -560.90390  | 22.06621    | 780.47190   | 1 |
| 19312 | O | 82.39650 | 98.84876  | 78.61336 | 413.08715   | -156.32122  | -143.89337  | 1 |
| 19313 | O | 83.14836 | 96.69955  | 78.78990 | -197.36119  | 211.15209   | 549.42685   | 1 |
| 19314 | C | 84.89225 | 99.76271  | 75.21358 | 378.62040   | 516.61336   | 212.35023   | 1 |
| 19315 | O | 85.75695 | 100.15812 | 75.94609 | 363.78775   | 839.06535   | 507.83787   | 1 |
| 19316 | N | 84.81265 | 99.76997  | 73.86672 | -243.31444  | 151.93520   | -478.93176  | 1 |
| 19317 | H | 83.86872 | 99.50636  | 73.58988 | 382.94525   | -2805.35330 | 2094.87512  | 1 |
| 19318 | C | 85.64794 | 100.66854 | 73.12346 | 115.53297   | -478.90974  | -936.92478  | 1 |
| 19319 | H | 84.92560 | 100.86366 | 72.35132 | -3283.08912 | -2767.68952 | -484.91267  | 1 |
| 19320 | C | 85.96784 | 102.02142 | 73.81087 | -115.45927  | 1319.87927  | -673.27307  | 1 |
| 19321 | H | 86.81690 | 102.46922 | 73.27679 | -2931.50804 | -1164.42497 | -1349.39856 | 1 |
| 19322 | H | 86.18318 | 101.88069 | 74.91015 | 3059.01738  | -1378.14602 | -2056.59152 | 1 |
| 19323 | C | 84.51685 | 102.83784 | 73.74938 | 34.54280    | -345.99891  | 302.76568   | 1 |
| 19324 | O | 84.17638 | 103.52399 | 74.71409 | -394.96250  | 719.75660   | 173.14243   | 1 |
| 19325 | O | 83.95815 | 102.63824 | 72.67217 | 341.24476   | -768.18772  | 7.60742     | 1 |
| 19326 | C | 86.99716 | 100.02307 | 72.40896 | -904.46889  | 41.51552    | 900.26840   | 1 |
| 19327 | O | 87.85272 | 100.75920 | 71.95741 | 225.65530   | 747.59625   | -321.85319  | 1 |
| 19328 | N | 86.92375 | 98.70838  | 72.14039 | -404.17937  | -15.76933   | -500.58597  | 1 |
| 19329 | H | 86.10194 | 98.34142  | 72.67536 | 1889.16380  | -502.01511  | -80.16761   | 1 |
| 19330 | C | 88.21578 | 98.04694  | 72.37371 | -266.00139  | 698.50150   | -439.01910  | 1 |
| 19331 | H | 88.98210 | 98.66839  | 71.81330 | 4.26696     | -1365.07216 | -2687.66862 | 1 |
| 19332 | C | 88.43086 | 97.91057  | 73.94471 | 1004.10732  | -680.66450  | -114.88311  | 1 |
| 19333 | H | 89.41662 | 97.39287  | 74.16451 | -1315.44851 | 187.28639   | -918.10526  | 1 |
| 19334 | H | 88.31243 | 98.97086  | 74.37913 | 262.98001   | 176.80911   | -416.79305  | 1 |
| 19335 | C | 87.28849 | 97.07688  | 74.61431 | 709.22699   | 649.77937   | -181.30773  | 1 |

|       |   |          |          |          |             |             |             |   |
|-------|---|----------|----------|----------|-------------|-------------|-------------|---|
| 19336 | H | 86.73950 | 96.37948 | 73.84378 | -773.60256  | 1138.68639  | -1523.71251 | 1 |
| 19337 | H | 86.50695 | 97.75958 | 74.99841 | -1404.68059 | 395.44482   | -1684.66264 | 1 |
| 19338 | C | 87.90468 | 96.30755 | 75.82744 | -94.31002   | 23.81508    | 265.61865   | 1 |
| 19339 | H | 87.10564 | 96.21342 | 76.67642 | -1031.05778 | -1261.55971 | -1324.27140 | 1 |
| 19340 | H | 88.90323 | 96.65412 | 76.22015 | -438.81002  | -1873.82796 | 1337.46272  | 1 |
| 19341 | N | 88.13534 | 95.16256 | 75.02691 | 175.88190   | -193.46939  | -372.16150  | 1 |
| 19342 | H | 88.74717 | 95.20646 | 74.23097 | -446.97337  | -403.80684  | 1418.52083  | 1 |
| 19343 | C | 87.65092 | 94.00286 | 75.32622 | -52.17754   | 203.46481   | -983.99773  | 1 |
| 19344 | N | 88.06919 | 92.95726 | 74.52522 | -1574.56160 | 71.65278    | 89.30253    | 1 |
| 19345 | H | 88.49019 | 93.00126 | 73.52651 | 300.22935   | -75.99800   | 220.45999   | 1 |
| 19346 | H | 87.95536 | 91.95845 | 74.74854 | -2247.09109 | 85.41403    | 2561.48089  | 1 |
| 19347 | N | 86.81825 | 93.75114 | 76.46785 | 380.42153   | -77.33650   | -329.87409  | 1 |
| 19348 | H | 86.98385 | 94.30328 | 77.32979 | -858.57728  | 247.46635   | -4093.18142 | 1 |
| 19349 | H | 86.39573 | 92.83765 | 76.76883 | -1102.36279 | 732.85474   | 275.51003   | 1 |
| 19350 | C | 88.01679 | 96.58103 | 71.77391 | -17.66527   | -10.38496   | 134.38288   | 1 |
| 19351 | O | 86.94180 | 95.95380 | 71.65692 | -184.83503  | -311.93770  | 125.65338   | 1 |
| 19352 | N | 89.20520 | 96.11828 | 71.45406 | 84.46737    | 56.81346    | -178.23726  | 1 |
| 19353 | H | 89.94139 | 96.78370 | 71.71997 | -589.05560  | 2221.45577  | -402.49431  | 1 |
| 19354 | C | 89.39114 | 95.15644 | 70.38088 | 517.56786   | 68.05355    | 1503.34134  | 1 |
| 19355 | H | 88.81628 | 95.51755 | 69.57867 | 3057.65502  | -2054.06371 | -2234.57984 | 1 |
| 19356 | C | 90.96347 | 95.23700 | 70.22792 | -271.08410  | 146.15156   | 899.92237   | 1 |
| 19357 | H | 91.27225 | 94.87159 | 71.27589 | 1668.20220  | 187.12519   | -1922.49047 | 1 |
| 19358 | H | 91.37193 | 96.22473 | 70.06667 | -2559.16056 | 3200.59746  | 418.98903   | 1 |
| 19359 | C | 91.41394 | 94.31170 | 69.09159 | -439.69149  | 259.92582   | -713.75530  | 1 |
| 19360 | C | 91.74395 | 92.96914 | 69.36633 | -515.93878  | -140.37897  | 249.15774   | 1 |
| 19361 | H | 91.77287 | 92.49397 | 70.37990 | -693.34723  | -1080.66252 | 2113.70226  | 1 |
| 19362 | C | 92.22374 | 92.19227 | 68.27141 | -781.14626  | 762.72164   | 253.32944   | 1 |
| 19363 | H | 92.66493 | 91.22554 | 68.60891 | 2238.27092  | -1381.04349 | -612.48830  | 1 |
| 19364 | C | 92.31928 | 92.63276 | 66.90710 | 394.56384   | -241.70936  | 638.58827   | 1 |
| 19365 | O | 92.86828 | 91.73222 | 65.90945 | 157.38211   | -461.89132  | 291.14840   | 1 |
| 19366 | H | 93.18455 | 91.02765 | 66.46712 | -2379.45279 | -2382.38085 | 1156.25376  | 1 |
| 19367 | C | 91.49854 | 94.81140 | 67.73943 | 185.49948   | 439.40145   | 113.48882   | 1 |
| 19368 | H | 91.10633 | 95.80609 | 67.53942 | 1055.78083  | 1501.90361  | 3543.78167  | 1 |
| 19369 | C | 91.94085 | 93.98837 | 66.67119 | -70.92795   | 64.28008    | -872.00527  | 1 |
| 19370 | H | 91.92572 | 94.46717 | 65.64808 | -491.29855  | 2050.52852  | 95.88616    | 1 |
| 19371 | C | 88.75569 | 93.80315 | 70.94135 | 583.54532   | 200.51347   | 427.67084   | 1 |
| 19372 | O | 89.26609 | 93.13954 | 71.87620 | -195.75010  | 483.26639   | 625.32030   | 1 |
| 19373 | N | 87.56893 | 93.58617 | 70.38059 | -60.31777   | 318.68003   | 206.22074   | 1 |
| 19374 | H | 87.23245 | 94.13499 | 69.66603 | 1447.04878  | -552.16904  | -688.64106  | 1 |
| 19375 | C | 86.82844 | 92.46992 | 70.91627 | -1386.40873 | 103.01639   | 809.24746   | 1 |
| 19376 | H | 87.60995 | 92.07168 | 71.68586 | -1086.13905 | -44.12157   | -1513.58397 | 1 |
| 19377 | C | 85.58753 | 93.16003 | 71.55135 | 142.01899   | 459.78775   | 237.02711   | 1 |
| 19378 | H | 85.90666 | 94.12738 | 72.08301 | 1913.85145  | 1848.95557  | 3158.04847  | 1 |
| 19379 | C | 84.54101 | 93.31048 | 70.35630 | 1628.98981  | 212.32109   | -297.37032  | 1 |
| 19380 | H | 83.64036 | 93.82113 | 70.72356 | -1438.20613 | 537.44134   | -1170.06453 | 1 |
| 19381 | H | 84.98894 | 93.88348 | 69.48666 | -338.46830  | -1306.26956 | 1254.61050  | 1 |
| 19382 | H | 84.26541 | 92.29757 | 69.87711 | 38.12850    | -362.77642  | 1328.25803  | 1 |
| 19383 | C | 84.78523 | 92.14460 | 72.49890 | -78.09829   | 124.93655   | -671.05694  | 1 |
| 19384 | H | 84.96630 | 91.05638 | 72.14945 | -814.54010  | 484.58832   | -564.59536  | 1 |
| 19385 | H | 83.72009 | 92.37083 | 72.36896 | 568.58119   | 2202.31812  | 2254.37908  | 1 |
| 19386 | C | 85.04709 | 92.34577 | 74.01907 | -732.47883  | 632.08153   | 730.40480   | 1 |
| 19387 | H | 85.01844 | 93.45970 | 74.32658 | -2304.44783 | -1865.53455 | 814.55219   | 1 |
| 19388 | H | 84.31113 | 91.72140 | 74.51815 | -1502.58916 | -132.00591  | 635.29705   | 1 |
| 19389 | H | 86.02275 | 91.93402 | 74.36797 | 1030.44628  | -1443.58215 | 62.51597    | 1 |
| 19390 | C | 86.48652 | 91.41306 | 69.68409 | -74.69995   | -672.78012  | 721.57706   | 1 |
| 19391 | O | 86.24001 | 91.88536 | 68.56082 | 244.19435   | -406.74222  | -39.09961   | 1 |
| 19392 | N | 86.31614 | 90.22061 | 70.13318 | -630.08624  | 288.07106   | -886.57760  | 1 |
| 19393 | H | 86.53158 | 89.98482 | 71.09685 | -645.89063  | -732.50064  | -1321.33180 | 1 |
| 19394 | C | 85.65350 | 89.20859 | 69.32686 | -866.42334  | -394.87180  | -682.34969  | 1 |
| 19395 | H | 86.24573 | 89.18618 | 68.34527 | -2675.93056 | 679.11773   | 2629.31080  | 1 |
| 19396 | C | 85.68083 | 87.83912 | 70.11357 | -358.16333  | 313.12281   | 925.34128   | 1 |
| 19397 | H | 86.23474 | 87.95868 | 71.13447 | -16.24114   | -103.25532  | 376.39771   | 1 |

|       |   |          |          |          |             |             |             |   |
|-------|---|----------|----------|----------|-------------|-------------|-------------|---|
| 19398 | H | 84.68576 | 87.54794 | 70.38962 | 1718.82246  | 1326.38695  | -630.55678  | 1 |
| 19399 | S | 86.61023 | 86.64469 | 69.06215 | -50.82005   | 101.37724   | 108.52684   | 1 |
| 19400 | C | 84.10099 | 89.64817 | 69.19973 | 250.28225   | 421.86916   | 421.67475   | 1 |
| 19401 | O | 83.47844 | 90.06724 | 70.14782 | 518.43160   | 658.49807   | 501.25809   | 1 |
| 19402 | N | 83.62418 | 89.26721 | 68.01808 | 388.36428   | -593.77937  | 3.36559     | 1 |
| 19403 | H | 84.30889 | 88.90981 | 67.27880 | 7.99775     | -517.41069  | 3082.36441  | 1 |
| 19404 | C | 82.40033 | 89.86957 | 67.54325 | 33.04059    | 395.74339   | 696.30494   | 1 |
| 19405 | H | 81.92367 | 90.20402 | 68.45631 | -1695.75470 | -1279.06619 | 1519.24325  | 1 |
| 19406 | C | 82.98938 | 91.06734 | 66.80358 | -97.03444   | 643.41197   | 462.01586   | 1 |
| 19407 | H | 83.06227 | 90.71667 | 65.73300 | 301.39525   | 667.39860   | 1197.64732  | 1 |
| 19408 | H | 84.01056 | 91.32885 | 67.20216 | -2717.24498 | 1403.26406  | 4554.72692  | 1 |
| 19409 | C | 81.86241 | 92.33144 | 66.83931 | -100.51346  | -355.94163  | 451.35959   | 1 |
| 19410 | O | 81.26444 | 92.49629 | 67.88133 | -123.49448  | 836.49012   | -423.84977  | 1 |
| 19411 | O | 81.73824 | 92.90212 | 65.73953 | 505.87243   | -49.16202   | -136.67580  | 1 |
| 19412 | C | 81.44699 | 88.95273 | 66.49321 | -697.74549  | -128.14395  | -396.21222  | 1 |
| 19413 | O | 81.94340 | 88.22000 | 65.64855 | -135.62184  | -202.50531  | 111.11008   | 1 |
| 19414 | N | 80.18566 | 89.19185 | 66.68201 | 822.78239   | 517.46133   | 19.22785    | 1 |
| 19415 | H | 79.99725 | 89.95430 | 67.34157 | -4216.95115 | -491.14391  | 2841.03205  | 1 |
| 19416 | C | 79.25950 | 88.39655 | 65.93604 | 443.32225   | -274.70689  | -250.75267  | 1 |
| 19417 | H | 79.84541 | 87.77789 | 65.22792 | -2063.19944 | 100.63986   | -2432.86572 | 1 |
| 19418 | C | 78.37578 | 87.50275 | 66.91723 | 331.70625   | 97.08802    | 18.52404    | 1 |
| 19419 | H | 77.46021 | 88.04328 | 67.20138 | -1853.06432 | -296.24531  | 303.25194   | 1 |
| 19420 | H | 79.08735 | 87.36853 | 67.75147 | 218.81671   | 395.32797   | 3882.92164  | 1 |
| 19421 | C | 77.86445 | 86.09505 | 66.48082 | -861.66110  | -393.03663  | 324.19958   | 1 |
| 19422 | H | 77.49317 | 86.19663 | 65.42070 | -609.89146  | -1110.45287 | 2388.08102  | 1 |
| 19423 | H | 77.06464 | 85.75577 | 67.14655 | 734.71172   | 1230.63013  | 1383.57171  | 1 |
| 19424 | C | 79.23914 | 85.17589 | 66.55653 | 13.54552    | -176.86676  | 601.56429   | 1 |
| 19425 | H | 79.81563 | 85.43332 | 65.65973 | -1742.89265 | -1996.79897 | -783.33539  | 1 |
| 19426 | H | 79.75020 | 85.58081 | 67.48286 | 1259.57953  | -1783.00874 | -775.02640  | 1 |
| 19427 | N | 78.71300 | 83.93980 | 66.64390 | 129.68470   | 638.74798   | 541.49376   | 1 |
| 19428 | H | 78.51800 | 83.39480 | 65.82790 | 1536.04414  | 1718.37737  | -2140.13364 | 1 |
| 19429 | C | 78.40500 | 83.36480 | 67.75690 | -669.71685  | 382.72445   | -503.93154  | 1 |
| 19430 | N | 78.10900 | 83.97080 | 68.86490 | 775.37864   | 311.89971   | -57.01942   | 1 |
| 19431 | H | 78.26600 | 84.95480 | 68.95690 | -1726.74713 | 1644.23690  | -2064.52110 | 1 |
| 19432 | H | 77.74400 | 83.35480 | 69.56290 | -1361.87435 | 1940.68538  | -2079.11843 | 1 |
| 19433 | N | 78.05200 | 82.10080 | 67.70790 | -574.68861  | 534.41367   | -338.04985  | 1 |
| 19434 | H | 78.04200 | 81.66580 | 66.80690 | -1278.12271 | 2590.29701  | 1268.70153  | 1 |
| 19435 | H | 77.44800 | 81.87880 | 68.47390 | -1860.96389 | 1828.68648  | -1774.12020 | 1 |
| 19436 | C | 78.18749 | 89.41033 | 65.27618 | 54.23989    | 450.25796   | -398.77136  | 1 |
| 19437 | O | 77.58516 | 90.09318 | 66.06454 | 97.39588    | 327.97479   | -462.24407  | 1 |
| 19438 | N | 77.97230 | 89.27335 | 63.89942 | 444.24809   | -848.81051  | 200.21653   | 1 |
| 19439 | H | 78.56204 | 88.63627 | 63.36686 | 1491.72204  | -1070.38255 | -1131.95692 | 1 |
| 19440 | C | 77.34463 | 90.46538 | 63.33059 | -186.11373  | 719.37517   | 621.55804   | 1 |
| 19441 | H | 76.52031 | 90.54675 | 64.07759 | 2479.72502  | -492.10809  | -247.93904  | 1 |
| 19442 | C | 78.10418 | 91.83296 | 63.36213 | 432.13280   | 40.09186    | -661.77841  | 1 |
| 19443 | H | 78.80808 | 91.96760 | 64.23468 | 249.16135   | 2339.24070  | 1689.01571  | 1 |
| 19444 | H | 78.59313 | 92.08194 | 62.39732 | -804.69176  | 984.95620   | 2451.58074  | 1 |
| 19445 | C | 76.93771 | 92.84413 | 63.51903 | 883.70022   | 108.99035   | -499.42560  | 1 |
| 19446 | C | 76.31184 | 93.11507 | 64.77101 | 375.62821   | 260.13413   | -265.29274  | 1 |
| 19447 | H | 76.67070 | 92.50892 | 65.62093 | 251.28372   | 2272.05111  | 3646.81408  | 1 |
| 19448 | C | 75.06274 | 93.77305 | 64.78640 | -1039.80341 | -483.95541  | -223.09308  | 1 |
| 19449 | H | 74.61781 | 93.92579 | 65.74902 | 609.06427   | 1627.16102  | -2294.24544 | 1 |
| 19450 | C | 74.56445 | 94.32082 | 63.63323 | -555.85474  | 1173.19664  | 410.61196   | 1 |
| 19451 | H | 73.66404 | 94.96001 | 63.74251 | -1892.15202 | -99.15710   | 1651.25894  | 1 |
| 19452 | C | 76.50489 | 93.48598 | 62.29256 | -800.23239  | 277.58418   | 367.48673   | 1 |
| 19453 | H | 77.02959 | 93.34363 | 61.40474 | 3888.79891  | -74.90274   | 634.54392   | 1 |
| 19454 | C | 75.32764 | 94.23569 | 62.41796 | -811.87674  | 648.73363   | 430.02642   | 1 |
| 19455 | H | 74.94333 | 94.74129 | 61.50952 | -189.21388  | 4005.88840  | 1716.38096  | 1 |
| 19456 | C | 76.91122 | 90.07453 | 61.80850 | 692.81359   | -767.31540  | 160.29140   | 1 |
| 19457 | O | 77.77899 | 89.68264 | 61.04103 | -250.47585  | -1381.68350 | 965.45360   | 1 |
| 19458 | N | 75.69633 | 90.44671 | 61.56273 | 873.02674   | 911.77347   | 128.26745   | 1 |
| 19459 | H | 74.95642 | 90.76769 | 62.24674 | -1268.02416 | 695.74117   | 307.31918   | 1 |

|       |   |          |          |          |             |             |             |   |
|-------|---|----------|----------|----------|-------------|-------------|-------------|---|
| 19460 | C | 75.10684 | 89.79408 | 60.41496 | 682.48534   | -581.01073  | 755.49108   | 1 |
| 19461 | H | 75.83452 | 89.08477 | 59.95318 | 717.71158   | -726.57847  | -1445.89999 | 1 |
| 19462 | C | 73.80415 | 89.19404 | 61.07405 | -253.54974  | -200.23671  | -231.60822  | 1 |
| 19463 | H | 73.18449 | 88.69099 | 60.32478 | -1816.42715 | 1932.31430  | -979.80437  | 1 |
| 19464 | H | 73.16839 | 89.97070 | 61.56040 | -224.31734  | -1193.32647 | -1173.96055 | 1 |
| 19465 | C | 74.22058 | 88.09670 | 62.09458 | 590.00212   | -315.84469  | -396.72286  | 1 |
| 19466 | C | 74.78829 | 86.83020 | 61.74759 | -39.72636   | -103.32033  | -147.74330  | 1 |
| 19467 | H | 74.80502 | 86.53663 | 60.70991 | 532.73761   | 835.94774   | 2012.99728  | 1 |
| 19468 | C | 75.21693 | 85.94472 | 62.76974 | -143.70030  | -7.92584    | 239.23695   | 1 |
| 19469 | H | 75.63354 | 84.95101 | 62.48320 | 2280.84454  | 1517.01068  | 1295.85349  | 1 |
| 19470 | C | 75.13551 | 86.32585 | 64.08954 | -98.95772   | 362.30450   | -582.98103  | 1 |
| 19471 | O | 75.51380 | 85.64882 | 65.28416 | -244.90161  | 799.44028   | -643.66805  | 1 |
| 19472 | H | 75.54600 | 84.77580 | 64.99090 | 1.54280     | -1167.25246 | 2919.82418  | 1 |
| 19473 | C | 74.42402 | 88.56586 | 63.42849 | 330.60110   | 21.29089    | 361.51161   | 1 |
| 19474 | H | 74.35145 | 89.66635 | 63.69364 | 1224.44501  | -355.79845  | -2316.81213 | 1 |
| 19475 | C | 74.74296 | 87.65016 | 64.41151 | -71.88011   | -510.35767  | -1189.66379 | 1 |
| 19476 | H | 74.71045 | 87.96104 | 65.46387 | 49.44394    | 1046.49665  | -3997.91403 | 1 |
| 19477 | C | 74.63764 | 90.99784 | 59.41960 | 645.43937   | -1004.78933 | -113.83676  | 1 |
| 19478 | O | 74.67270 | 92.13446 | 59.82094 | -516.89844  | 79.70442    | 401.04258   | 1 |
| 19479 | N | 74.17189 | 90.53887 | 58.23478 | 239.12225   | 235.41362   | 365.71322   | 1 |
| 19480 | C | 74.61516 | 89.27536 | 57.67748 | -49.97044   | 1188.40902  | -1032.71165 | 1 |
| 19481 | H | 75.71704 | 89.27899 | 57.72980 | 1150.78506  | -1173.49198 | 2040.99089  | 1 |
| 19482 | H | 74.16980 | 88.49123 | 58.36129 | 1143.08029  | -2543.09585 | 4438.59231  | 1 |
| 19483 | C | 73.84743 | 91.54492 | 57.26137 | 104.34994   | 312.86407   | 1050.61331  | 1 |
| 19484 | H | 74.61909 | 92.35368 | 57.27031 | -1890.81394 | -1101.27740 | -24.23334   | 1 |
| 19485 | C | 73.87500 | 90.81323 | 55.86168 | 67.06406    | 644.13764   | 511.97468   | 1 |
| 19486 | H | 72.94154 | 91.10455 | 55.24846 | -966.27173  | 1398.15772  | 35.46250    | 1 |
| 19487 | H | 74.74307 | 91.07685 | 55.29465 | -1763.64934 | 964.48530   | 1942.12307  | 1 |
| 19488 | C | 73.96588 | 89.30941 | 56.23797 | 327.92219   | 313.24712   | -498.31240  | 1 |
| 19489 | H | 72.97938 | 88.89459 | 56.31087 | -526.57899  | 295.26440   | -1281.11507 | 1 |
| 19490 | H | 74.57310 | 88.65982 | 55.49075 | -11.57043   | -1822.42607 | 3233.41165  | 1 |
| 19491 | C | 72.35163 | 92.17950 | 57.41610 | 505.73855   | 374.30391   | -62.04388   | 1 |
| 19492 | O | 71.98225 | 92.99767 | 56.62479 | 293.35885   | 450.17397   | 54.92198    | 1 |
| 19493 | N | 71.70800 | 91.47762 | 58.38820 | 200.44096   | 446.68373   | 455.38199   | 1 |
| 19494 | H | 72.13406 | 90.85945 | 59.13805 | 1490.53185  | -644.50962  | 983.16267   | 1 |
| 19495 | C | 70.58810 | 92.23568 | 58.96953 | 27.44304    | 502.04342   | 504.65477   | 1 |
| 19496 | H | 70.88398 | 93.37104 | 58.98650 | 1111.88311  | -1426.50171 | 389.36462   | 1 |
| 19497 | C | 69.40421 | 91.85527 | 58.07281 | 210.71359   | 98.46252    | 1016.05619  | 1 |
| 19498 | H | 69.70020 | 91.91930 | 57.00498 | -354.72891  | 1558.27058  | 1310.42428  | 1 |
| 19499 | H | 69.17260 | 90.73274 | 58.09640 | 2927.13254  | -122.69263  | 2293.88617  | 1 |
| 19500 | C | 68.00740 | 92.60354 | 58.42037 | 857.97505   | -793.36211  | -50.13130   | 1 |
| 19501 | O | 67.75071 | 93.40153 | 59.33187 | -768.25882  | 338.90199   | 326.31268   | 1 |
| 19502 | N | 67.13480 | 91.95400 | 57.66172 | 41.74500    | -1044.78947 | 197.69479   | 1 |
| 19503 | H | 67.60729 | 91.15650 | 57.17868 | 506.08343   | -2008.76223 | -3107.63087 | 1 |
| 19504 | H | 66.06408 | 91.99785 | 57.61407 | -654.91593  | -104.90745  | -1477.71600 | 1 |
| 19505 | C | 70.55654 | 91.44675 | 60.39288 | -786.90017  | 528.45783   | 476.52803   | 1 |
| 19506 | O | 71.20668 | 90.47442 | 60.72535 | -822.97524  | -681.85117  | -363.83931  | 1 |
| 19507 | N | 69.64252 | 92.10117 | 61.10124 | -289.94309  | -19.27188   | 277.28540   | 1 |
| 19508 | H | 69.02845 | 92.80890 | 60.56961 | -1659.39008 | -465.80113  | -1704.12861 | 1 |
| 19509 | C | 69.27308 | 91.63346 | 62.39704 | 497.86010   | -51.47180   | 491.51164   | 1 |
| 19510 | H | 69.97693 | 90.82876 | 62.49897 | 335.24338   | -2706.43653 | 360.15508   | 1 |
| 19511 | C | 69.61885 | 92.81130 | 63.39761 | -674.55896  | 1512.09179  | -75.46493   | 1 |
| 19512 | H | 69.54210 | 93.84160 | 62.92548 | 3770.27092  | 996.51408   | 447.25720   | 1 |
| 19513 | H | 68.85775 | 92.82902 | 64.22208 | 1464.76837  | 612.48018   | 2711.27262  | 1 |
| 19514 | C | 71.12694 | 92.75759 | 63.94777 | -324.37189  | -232.22168  | -505.57142  | 1 |
| 19515 | O | 71.44407 | 91.90625 | 64.82324 | -330.28277  | 261.22540   | -226.53969  | 1 |
| 19516 | O | 71.84414 | 93.65248 | 63.49228 | -33.12240   | -581.16667  | 326.81597   | 1 |
| 19517 | C | 67.72907 | 91.15092 | 62.46447 | -346.60001  | -517.92104  | -243.32046  | 1 |
| 19518 | O | 67.22326 | 90.83276 | 63.51633 | -230.93422  | 403.88923   | 794.64703   | 1 |
| 19519 | N | 67.11517 | 91.02385 | 61.30238 | 654.46879   | -429.34320  | 1036.77696  | 1 |
| 19520 | H | 67.68776 | 91.33533 | 60.49225 | -1144.45368 | -1402.34028 | 729.62035   | 1 |
| 19521 | C | 66.13250 | 90.03481 | 61.02655 | -82.27284   | 116.27101   | -111.90561  | 1 |

|       |   |          |          |          |             |             |             |   |
|-------|---|----------|----------|----------|-------------|-------------|-------------|---|
| 19522 | H | 65.59929 | 89.83524 | 61.96129 | 914.91672   | -2638.18675 | -1216.17878 | 1 |
| 19523 | C | 64.99391 | 90.53647 | 60.00452 | 796.05292   | 319.07999   | -79.33213   | 1 |
| 19524 | H | 64.77657 | 91.60281 | 60.26300 | 1190.50969  | 2327.08943  | -534.85023  | 1 |
| 19525 | H | 65.48384 | 90.79404 | 59.00012 | 1764.52536  | -1948.57536 | -1056.93357 | 1 |
| 19526 | C | 63.75366 | 89.73468 | 59.86033 | -167.34428  | 301.73079   | -235.14835  | 1 |
| 19527 | H | 64.03495 | 88.68055 | 59.68411 | 686.43430   | 271.06019   | -61.81419   | 1 |
| 19528 | C | 62.80505 | 89.84587 | 61.06504 | 613.39313   | -80.02355   | -345.99187  | 1 |
| 19529 | H | 61.86609 | 89.23605 | 60.90709 | -855.48305  | 1754.55356  | -723.40860  | 1 |
| 19530 | H | 62.31412 | 90.87194 | 61.35183 | -466.79812  | 2530.40366  | -435.45808  | 1 |
| 19531 | H | 63.26468 | 89.55406 | 62.01586 | 927.69308   | -1055.95336 | -1442.32973 | 1 |
| 19532 | C | 62.88471 | 90.19797 | 58.74330 | 871.61383   | 606.67437   | 388.64466   | 1 |
| 19533 | H | 63.46063 | 90.49862 | 57.82481 | 2651.64316  | 74.68060    | 1634.49088  | 1 |
| 19534 | H | 62.02559 | 89.48491 | 58.48438 | -1085.49424 | -1115.61647 | -911.74082  | 1 |
| 19535 | H | 62.35680 | 91.08480 | 59.14873 | 1810.63726  | 3641.62336  | 441.12054   | 1 |
| 19536 | C | 66.93284 | 88.75161 | 60.47991 | -602.53598  | 226.85941   | -982.83794  | 1 |
| 19537 | O | 66.42202 | 87.63191 | 60.66416 | -365.04610  | -105.76908  | -269.99700  | 1 |
| 19538 | N | 68.00865 | 88.97952 | 59.69989 | 775.16080   | 85.15073    | -761.48662  | 1 |
| 19539 | H | 68.36824 | 89.90230 | 59.78319 | 5643.73079  | 700.32236   | -3079.55840 | 1 |
| 19540 | C | 68.89919 | 87.87667 | 59.54001 | 14.87435    | 287.61631   | -442.15552  | 1 |
| 19541 | H | 68.28057 | 87.17717 | 58.97790 | 893.09574   | 734.01386   | 621.02204   | 1 |
| 19542 | C | 70.15894 | 88.39082 | 58.73071 | 487.80086   | -516.18902  | -57.46484   | 1 |
| 19543 | H | 70.86944 | 87.72850 | 59.23047 | -1160.17836 | 1893.40235  | 261.10157   | 1 |
| 19544 | H | 70.50019 | 89.44857 | 58.91634 | -1420.54571 | -1965.88950 | -11.84655   | 1 |
| 19545 | C | 69.90239 | 88.23424 | 57.24604 | 809.92307   | -434.56535  | 362.30267   | 1 |
| 19546 | C | 69.67396 | 89.09544 | 56.18202 | -148.47082  | 164.39923   | -253.11859  | 1 |
| 19547 | H | 69.71822 | 90.21811 | 56.12992 | 1636.60832  | -3986.68704 | -1704.50931 | 1 |
| 19548 | N | 69.34838 | 88.36538 | 55.10742 | -377.83795  | 252.91748   | -760.28776  | 1 |
| 19549 | H | 69.22169 | 88.79172 | 54.18761 | 35.32705    | -1321.45633 | -483.92943  | 1 |
| 19550 | C | 69.38045 | 87.02142 | 55.34425 | 298.23918   | 400.84461   | -716.85798  | 1 |
| 19551 | C | 69.76084 | 86.85032 | 56.76805 | -100.10357  | 533.86625   | 374.16985   | 1 |
| 19552 | C | 69.74657 | 85.57794 | 57.38896 | -513.48771  | 380.59575   | -150.16837  | 1 |
| 19553 | H | 70.08934 | 85.44094 | 58.47661 | 2863.10293  | -195.14269  | -853.70822  | 1 |
| 19554 | C | 69.68000 | 84.43180 | 56.55090 | -261.75673  | 529.31251   | 708.63711   | 1 |
| 19555 | H | 69.73600 | 83.43380 | 56.95890 | 1497.44626  | 472.94824   | 2722.92890  | 1 |
| 19556 | C | 69.18754 | 85.81288 | 54.55624 | -40.94057   | -686.72534  | 613.40267   | 1 |
| 19557 | H | 68.61766 | 85.75357 | 53.62452 | 59.80149    | 575.99326   | 751.89077   | 1 |
| 19558 | C | 69.46400 | 84.55980 | 55.13790 | -738.99889  | -507.25343  | 195.19978   | 1 |
| 19559 | H | 69.43900 | 83.61780 | 54.60990 | -1250.26919 | 2891.48783  | 254.33855   | 1 |
| 19560 | C | 69.44910 | 87.18086 | 60.94681 | -1170.34469 | 90.36302    | 642.18919   | 1 |
| 19561 | O | 69.88141 | 86.04319 | 60.95530 | 406.05595   | -351.89187  | 9.21031     | 1 |
| 19562 | N | 69.57229 | 88.14888 | 61.83459 | -18.73821   | 458.82937   | -104.76858  | 1 |
| 19563 | H | 69.16400 | 89.06385 | 61.56010 | -763.05138  | -90.10880   | -1261.58454 | 1 |
| 19564 | C | 69.84095 | 87.77082 | 63.22262 | 338.49306   | -670.37104  | 289.21627   | 1 |
| 19565 | H | 70.38442 | 86.82924 | 63.08864 | -1055.85625 | 2329.75192  | 833.14103   | 1 |
| 19566 | C | 70.56310 | 88.96396 | 63.97860 | -169.13952  | 104.20929   | 54.94118    | 1 |
| 19567 | H | 71.09183 | 89.77673 | 63.35304 | 88.75086    | -2.38056    | 488.71165   | 1 |
| 19568 | C | 69.58448 | 89.66496 | 64.97482 | 529.10244   | -206.63019  | 189.23429   | 1 |
| 19569 | H | 69.39341 | 88.93959 | 65.82638 | -3257.81036 | 133.47510   | -1547.95172 | 1 |
| 19570 | H | 68.63442 | 89.99187 | 64.40871 | 2773.38087  | 230.36602   | -1421.35943 | 1 |
| 19571 | H | 70.03147 | 90.61421 | 65.40769 | 1350.46725  | 1840.00804  | 119.43503   | 1 |
| 19572 | C | 71.71769 | 88.29011 | 64.79727 | -1069.34355 | -458.70308  | -24.95146   | 1 |
| 19573 | H | 72.38203 | 89.10235 | 65.18101 | 1393.56829  | 935.90725   | -899.19632  | 1 |
| 19574 | H | 71.29081 | 87.66824 | 65.60288 | 144.02910   | -1121.88419 | 2204.69673  | 1 |
| 19575 | H | 72.37987 | 87.55710 | 64.22189 | 2131.39101  | -889.69757  | 887.63281   | 1 |
| 19576 | C | 68.52421 | 87.34661 | 64.05306 | -331.85411  | -547.41812  | 612.97996   | 1 |
| 19577 | O | 68.69639 | 86.71690 | 65.09476 | -186.14819  | 434.09962   | -334.45584  | 1 |
| 19578 | N | 67.33713 | 87.68877 | 63.50892 | 369.77257   | -158.59307  | 498.41048   | 1 |
| 19579 | H | 67.43863 | 87.95768 | 62.50980 | 3642.11307  | 330.12935   | -2965.52310 | 1 |
| 19580 | C | 66.22124 | 86.89700 | 63.95606 | -262.30506  | -713.05130  | -246.12800  | 1 |
| 19581 | H | 66.52292 | 87.00553 | 65.03684 | -845.25102  | 2706.19875  | -1716.22839 | 1 |
| 19582 | C | 64.83624 | 87.61677 | 63.54502 | -67.53124   | -241.04251  | -385.25436  | 1 |
| 19583 | H | 65.03826 | 88.69492 | 63.37315 | -2058.72128 | -133.48622  | 466.97123   | 1 |



|       |   |          |          |          |             |             |             |   |
|-------|---|----------|----------|----------|-------------|-------------|-------------|---|
| 19584 | C | 63.98962 | 87.03997 | 62.35574 | 469.22553   | -101.07522  | -147.96311  | 1 |
| 19585 | H | 63.81657 | 85.88961 | 62.48976 | 1769.81522  | 117.32704   | 491.13250   | 1 |
| 19586 | H | 62.95572 | 87.54141 | 62.30421 | 69.90659    | 3727.86753  | -1310.36539 | 1 |
| 19587 | H | 64.45609 | 87.09748 | 61.37849 | 210.78386   | -3399.97836 | -3870.94070 | 1 |
| 19588 | C | 63.82093 | 87.53987 | 64.76007 | 224.65255   | -350.36708  | -640.28890  | 1 |
| 19589 | H | 62.84968 | 87.93923 | 64.43239 | 1731.28621  | -176.10338  | 1874.11508  | 1 |
| 19590 | H | 63.66077 | 86.47533 | 65.05344 | -3395.60855 | -2172.79601 | -1018.22669 | 1 |
| 19591 | H | 64.14573 | 88.21737 | 65.56670 | 1405.64664  | 2055.88077  | 2712.95669  | 1 |
| 19592 | C | 66.40608 | 85.38646 | 63.45800 | 394.70721   | 190.41470   | -112.23742  | 1 |
| 19593 | O | 66.19800 | 84.42780 | 64.14390 | -493.11914  | 598.47032   | 202.09267   | 1 |
| 19594 | N | 66.97967 | 85.36540 | 62.20224 | -338.75811  | -197.64111  | 780.10877   | 1 |
| 19595 | H | 66.93528 | 86.19950 | 61.61556 | 62.77103    | -2480.36867 | -242.26833  | 1 |
| 19596 | C | 67.17300 | 83.92780 | 61.67790 | 674.54896   | 328.55623   | 510.61167   | 1 |
| 19597 | H | 66.24200 | 83.39480 | 61.79890 | 1638.57860  | 2263.41028  | 1446.62985  | 1 |
| 19598 | C | 67.57000 | 83.97580 | 60.15290 | 593.55725   | -404.78203  | 546.19152   | 1 |
| 19599 | H | 68.48300 | 84.59580 | 60.02690 | 2092.95810  | 2025.78972  | -1178.76287 | 1 |
| 19600 | C | 67.61400 | 82.57980 | 59.52390 | -555.46018  | 461.17386   | 576.70484   | 1 |
| 19601 | H | 66.79600 | 81.88480 | 59.80990 | 1850.95937  | -1436.48296 | -2082.21162 | 1 |
| 19602 | H | 68.52000 | 82.02080 | 59.84090 | 2853.10552  | 1308.51358  | -28.99859   | 1 |
| 19603 | H | 67.66500 | 82.68580 | 58.41990 | -2623.79696 | -1730.10003 | -230.85054  | 1 |
| 19604 | C | 66.50700 | 84.79580 | 59.46790 | 822.57960   | 356.96003   | -111.35045  | 1 |
| 19605 | H | 66.63300 | 84.77480 | 58.36390 | -2518.88562 | -463.89648  | -1838.32479 | 1 |
| 19606 | H | 66.54812 | 85.88824 | 59.74779 | -363.92100  | -610.36256  | -1065.48989 | 1 |
| 19607 | H | 65.54000 | 84.29880 | 59.69790 | -1709.77409 | -2187.65009 | -1478.61206 | 1 |
| 19608 | C | 68.20200 | 83.10680 | 62.39890 | 539.66221   | 596.06844   | -423.27764  | 1 |
| 19609 | O | 68.02100 | 81.91380 | 62.76490 | 254.46358   | -638.90999  | -367.88389  | 1 |
| 19610 | N | 69.35700 | 83.66280 | 62.70190 | 600.68696   | -446.16128  | -363.29158  | 1 |
| 19611 | H | 69.64500 | 84.55180 | 62.35490 | -1794.89989 | -1009.30813 | -2381.52954 | 1 |
| 19612 | C | 70.38900 | 83.01780 | 63.55090 | -427.52719  | 400.57925   | 710.40315   | 1 |
| 19613 | H | 70.48900 | 81.98180 | 63.26390 | -1082.04763 | 2674.05858  | -1277.50920 | 1 |
| 19614 | C | 71.76000 | 83.63580 | 63.31290 | -495.13612  | 714.33280   | 311.70241   | 1 |
| 19615 | H | 72.58800 | 82.97480 | 63.64590 | -2649.12598 | 1678.41681  | 377.38975   | 1 |
| 19616 | H | 71.82400 | 84.63980 | 63.78390 | -809.58490  | 3047.25306  | 123.96293   | 1 |
| 19617 | C | 72.03300 | 83.72280 | 61.79390 | -226.37882  | -514.53022  | 717.45198   | 1 |
| 19618 | C | 71.81600 | 82.59080 | 60.95990 | 268.69434   | -710.11494  | -486.53216  | 1 |
| 19619 | H | 71.47000 | 81.69580 | 61.45590 | -2327.39246 | 1917.39177  | 941.36044   | 1 |
| 19620 | C | 72.08100 | 82.67680 | 59.54890 | 595.09723   | 107.47225   | 674.57000   | 1 |
| 19621 | H | 71.79200 | 81.91980 | 58.83390 | -2140.52028 | 1676.37226  | -1606.78140 | 1 |
| 19622 | C | 72.48800 | 83.89180 | 59.02390 | 184.09325   | 862.65264   | -250.80159  | 1 |
| 19623 | H | 72.66000 | 83.92580 | 57.95890 | -2550.20373 | 1504.79887  | 1105.49257  | 1 |
| 19624 | C | 72.42300 | 84.92880 | 61.19290 | -61.69377   | 134.37953   | -899.76818  | 1 |
| 19625 | H | 72.60212 | 85.79382 | 61.83553 | 286.60225   | 1115.18370  | 3011.02290  | 1 |
| 19626 | C | 72.64557 | 85.06358 | 59.78246 | -514.01070  | -363.62584  | -333.81257  | 1 |
| 19627 | H | 72.90056 | 86.07285 | 59.41189 | -1916.18500 | 1137.40556  | -4053.63405 | 1 |
| 19628 | C | 70.05300 | 82.90880 | 64.99590 | -713.76563  | 573.76150   | 119.90452   | 1 |
| 19629 | O | 70.29400 | 81.84380 | 65.59190 | 572.39985   | -252.02142  | -465.85988  | 1 |
| 19630 | N | 69.42700 | 83.89580 | 65.60790 | -680.07231  | -222.55687  | -457.85248  | 1 |
| 19631 | H | 69.17200 | 84.72080 | 65.10890 | -2608.54160 | 1221.67570  | 1294.60872  | 1 |
| 19632 | C | 68.97800 | 83.85380 | 67.00790 | -793.53447  | -174.45386  | 432.25232   | 1 |
| 19633 | H | 69.89000 | 83.70380 | 67.56490 | 336.69557   | -2272.71660 | -2140.46556 | 1 |
| 19634 | C | 68.19327 | 85.20238 | 67.38052 | 20.96052    | 396.91929   | 320.18631   | 1 |
| 19635 | H | 67.15103 | 85.17565 | 66.88814 | -2200.24288 | -1309.18315 | -1205.69578 | 1 |
| 19636 | H | 68.76227 | 86.12614 | 67.01445 | 1316.29897  | -2602.75607 | -963.48885  | 1 |
| 19637 | C | 67.94777 | 85.26782 | 68.92136 | -939.38271  | -300.42884  | -433.51516  | 1 |
| 19638 | H | 67.37700 | 84.47980 | 69.36990 | -260.93854  | 459.34235   | -3099.80111 | 1 |
| 19639 | H | 67.25253 | 86.15706 | 69.13509 | 3670.77444  | 485.60289   | -1509.75950 | 1 |
| 19640 | C | 69.32120 | 85.46765 | 69.61893 | -543.00283  | 73.27686    | 911.21640   | 1 |
| 19641 | O | 69.82172 | 86.61465 | 69.64047 | -327.08045  | -494.93437  | -375.20095  | 1 |
| 19642 | N | 70.01700 | 84.39780 | 70.10590 | 421.94438   | -470.16065  | -547.39151  | 1 |
| 19643 | H | 69.81800 | 83.47480 | 69.77790 | 1622.55556  | 1466.17372  | -2256.12547 | 1 |
| 19644 | H | 70.95200 | 84.61280 | 70.38790 | -1626.88291 | -2631.03011 | 582.28280   | 1 |
| 19645 | C | 68.01400 | 82.64180 | 67.17590 | -691.47896  | -70.35297   | -598.42540  | 1 |

|       |   |          |          |          |             |             |             |   |
|-------|---|----------|----------|----------|-------------|-------------|-------------|---|
| 19646 | O | 68.15500 | 81.79780 | 68.04290 | 494.45132   | 295.38965   | 536.06006   | 1 |
| 19647 | N | 67.09000 | 82.50080 | 66.23490 | -551.73207  | 104.93306   | -637.14924  | 1 |
| 19648 | H | 67.03700 | 83.21580 | 65.54290 | -1837.25908 | 1532.87338  | 2058.40188  | 1 |
| 19649 | C | 66.19800 | 81.42780 | 66.04390 | -658.87063  | 636.21011   | 110.13260   | 1 |
| 19650 | H | 65.61500 | 81.36480 | 66.95090 | -759.21271  | 2996.09497  | 624.74465   | 1 |
| 19651 | C | 65.20800 | 81.57280 | 64.87290 | 366.33712   | -420.55116  | -710.52024  | 1 |
| 19652 | H | 64.70000 | 82.55680 | 64.95890 | 702.59930   | -2273.50156 | -2045.72539 | 1 |
| 19653 | H | 65.78400 | 81.60080 | 63.92390 | -2791.58441 | 1459.92500  | -216.71896  | 1 |
| 19654 | C | 64.14300 | 80.54880 | 64.85190 | 187.84801   | -873.43987  | 144.54341   | 1 |
| 19655 | C | 64.10100 | 79.51580 | 63.85590 | -299.93141  | -537.13496  | 674.88244   | 1 |
| 19656 | H | 64.80100 | 79.56380 | 63.03490 | 2737.37139  | 337.63242   | 1498.19734  | 1 |
| 19657 | C | 63.15900 | 78.47080 | 63.93090 | 606.96738   | 327.26839   | 591.34489   | 1 |
| 19658 | H | 63.17600 | 77.65880 | 63.21990 | 2075.93021  | 1599.28753  | -1732.86698 | 1 |
| 19659 | C | 62.29400 | 78.35380 | 65.04990 | 324.67526   | -801.51592  | 265.39230   | 1 |
| 19660 | H | 61.65200 | 77.48780 | 65.10490 | -1204.67534 | -2702.79375 | 1068.70587  | 1 |
| 19661 | C | 63.23200 | 80.41480 | 65.92290 | 645.76086   | -202.91495  | 601.66398   | 1 |
| 19662 | H | 63.26300 | 81.05080 | 66.79490 | -1816.94921 | 942.85338   | 2400.80517  | 1 |
| 19663 | C | 62.34100 | 79.34080 | 66.02690 | -647.29577  | 632.72424   | -170.73402  | 1 |
| 19664 | H | 61.57100 | 79.40480 | 66.78190 | -2437.31887 | 825.01055   | 1827.11800  | 1 |
| 19665 | C | 66.93500 | 80.04880 | 65.78090 | 185.51737   | -787.23867  | -405.11360  | 1 |
| 19666 | O | 66.63200 | 79.06580 | 66.49690 | 43.02157    | 685.26939   | -396.46884  | 1 |
| 19667 | N | 67.94200 | 79.96780 | 64.95690 | -157.12304  | -819.41831  | 101.50161   | 1 |
| 19668 | H | 68.28900 | 80.79880 | 64.52890 | 631.81715   | -2943.34618 | 889.07764   | 1 |
| 19669 | C | 68.76200 | 78.73780 | 64.76490 | -293.23029  | 419.11986   | 762.23257   | 1 |
| 19670 | H | 68.18600 | 77.88280 | 64.44390 | 883.51482   | -325.42108  | -2998.15999 | 1 |
| 19671 | C | 69.92700 | 79.06480 | 63.73590 | -29.97833   | 743.23518   | -536.57555  | 1 |
| 19672 | H | 70.79800 | 79.64880 | 64.10390 | 710.23353   | -279.83598  | -3048.93808 | 1 |
| 19673 | H | 69.47600 | 79.59580 | 62.87090 | -1776.60285 | 2484.17863  | 800.90759   | 1 |
| 19674 | C | 70.63800 | 77.74080 | 63.25190 | -577.75789  | -688.99587  | -158.42621  | 1 |
| 19675 | H | 69.81100 | 77.09780 | 62.88090 | 1459.71849  | 2646.72906  | -877.34153  | 1 |
| 19676 | H | 71.15600 | 77.18480 | 64.06190 | 1320.76984  | 2329.68180  | 1651.82632  | 1 |
| 19677 | C | 71.61500 | 77.98280 | 62.06390 | -183.57874  | 683.34146   | -587.44140  | 1 |
| 19678 | O | 71.30400 | 77.62580 | 60.88590 | 242.65659   | 755.72354   | -3.70144    | 1 |
| 19679 | N | 72.76000 | 78.65180 | 62.30290 | -767.02497  | 255.55323   | 279.40772   | 1 |
| 19680 | H | 73.02500 | 78.74080 | 63.26290 | -86.07817   | 1769.30667  | 2604.48148  | 1 |
| 19681 | H | 73.53400 | 78.74680 | 61.67590 | -1140.38143 | 2031.38641  | -2128.31023 | 1 |
| 19682 | C | 69.42700 | 78.31480 | 66.03490 | -560.53207  | -306.17687  | 656.15684   | 1 |
| 19683 | O | 69.49300 | 77.10380 | 66.30090 | 598.34213   | 158.15066   | 480.70878   | 1 |
| 19684 | N | 69.91900 | 79.24580 | 66.90290 | 435.18209   | -379.81905  | -605.43855  | 1 |
| 19685 | H | 69.86900 | 80.20080 | 66.61990 | 2586.19785  | 41.11701    | -1776.96585 | 1 |
| 19686 | C | 70.55000 | 78.86580 | 68.12590 | -792.89712  | -47.72209   | 462.42339   | 1 |
| 19687 | H | 71.32000 | 78.13480 | 67.92590 | -470.84950  | -2694.18667 | 1548.35292  | 1 |
| 19688 | C | 71.25000 | 80.09480 | 68.80590 | 188.39862   | 894.86349   | 14.70330    | 1 |
| 19689 | H | 71.58700 | 79.73080 | 69.79990 | 2737.90395  | 307.94611   | -1504.50617 | 1 |
| 19690 | H | 70.61000 | 80.97980 | 69.01290 | -3106.40486 | -542.35814  | -61.66605   | 1 |
| 19691 | N | 73.40700 | 81.20880 | 68.59690 | -218.00415  | 627.20489   | 531.09856   | 1 |
| 19692 | H | 73.43300 | 81.28880 | 69.59390 | -2049.35763 | 1016.00048  | 2170.68230  | 1 |
| 19693 | C | 72.35200 | 80.62980 | 68.01290 | -257.13638  | 569.33224   | -671.77808  | 1 |
| 19694 | C | 74.26900 | 81.55580 | 67.58590 | -164.56622  | -892.94456  | -4.45513    | 1 |
| 19695 | H | 75.19500 | 82.08080 | 67.81790 | 964.36751   | -214.85061  | 2983.57918  | 1 |
| 19696 | N | 73.76200 | 81.31280 | 66.40590 | 153.90073   | -146.19086  | 814.23736   | 1 |
| 19697 | C | 72.56300 | 80.67780 | 66.66290 | 675.42861   | 306.15047   | -521.55498  | 1 |
| 19698 | H | 72.02400 | 80.25780 | 65.82290 | 1189.81656  | -2020.43699 | -2086.34960 | 1 |
| 19699 | C | 69.64000 | 78.25780 | 69.17190 | -755.56318  | 359.94509   | 383.12254   | 1 |
| 19700 | O | 70.02400 | 77.39280 | 69.98090 | -542.31828  | -575.57332  | 46.31880    | 1 |
| 19701 | N | 68.39300 | 78.68480 | 69.17490 | 37.03482    | -838.75477  | 6.91137     | 1 |
| 19702 | H | 68.03400 | 79.38880 | 68.56790 | -2092.28871 | 1362.26491  | -1926.01792 | 1 |
| 19703 | C | 67.34400 | 78.10680 | 69.99190 | -494.55348  | 362.81404   | 683.20302   | 1 |
| 19704 | H | 67.88300 | 77.80780 | 70.87890 | 1815.76342  | -2245.06283 | -1231.15866 | 1 |
| 19705 | C | 66.26800 | 79.14380 | 70.38190 | 346.21217   | -751.55797  | -367.22305  | 1 |
| 19706 | H | 65.65100 | 79.44880 | 69.50990 | -1693.58618 | 2212.05637  | 1478.65630  | 1 |
| 19707 | C | 65.27500 | 78.49980 | 71.45990 | 810.35051   | 372.83942   | 160.12749   | 1 |

|       |   |          |          |          |             |             |             |   |
|-------|---|----------|----------|----------|-------------|-------------|-------------|---|
| 19708 | H | 65.85400 | 78.09680 | 72.31790 | -712.13120  | 2361.19444  | 1960.37271  | 1 |
| 19709 | H | 64.71300 | 77.63880 | 71.03790 | -1930.22039 | 1063.31385  | -2252.38262 | 1 |
| 19710 | H | 64.49100 | 79.19980 | 71.82090 | 958.24805   | 2014.32142  | 2219.50651  | 1 |
| 19711 | C | 66.88300 | 80.46080 | 70.88990 | 570.23939   | -635.35497  | 299.77828   | 1 |
| 19712 | H | 67.63100 | 80.93980 | 70.22190 | 1952.82010  | -583.24383  | -2387.35068 | 1 |
| 19713 | H | 67.49200 | 80.42380 | 71.81890 | -2319.38512 | 1816.46620  | 1127.13144  | 1 |
| 19714 | C | 65.83800 | 81.51180 | 71.27090 | -837.47420  | -341.87966  | -155.34711  | 1 |
| 19715 | H | 65.02200 | 81.53180 | 70.51890 | 1138.12320  | 792.83102   | -2818.84247 | 1 |
| 19716 | H | 65.46700 | 81.24480 | 72.28390 | 421.88059   | -2162.87154 | -2239.13990 | 1 |
| 19717 | H | 66.38100 | 82.47880 | 71.20490 | -2339.64765 | -1869.38214 | -975.77161  | 1 |
| 19718 | C | 66.76900 | 76.84280 | 69.45490 | -348.32388  | 614.17860   | -585.60059  | 1 |
| 19719 | O | 66.63400 | 75.81380 | 70.12590 | 94.07323    | -619.24440  | 474.58570   | 1 |
| 19720 | N | 66.31500 | 76.98580 | 68.18590 | 150.49793   | 832.75558   | 32.96124    | 1 |
| 19721 | H | 66.41500 | 77.87280 | 67.74190 | -2625.27939 | -320.82662  | -1715.64358 | 1 |
| 19722 | C | 65.74200 | 75.94280 | 67.37790 | 143.03148   | -218.12590  | -870.92860  | 1 |
| 19723 | H | 64.79300 | 75.72480 | 67.84490 | 324.30234   | 2449.14976  | 1952.28320  | 1 |
| 19724 | C | 65.55500 | 76.47180 | 65.99690 | 507.46353   | 749.68793   | 101.41441   | 1 |
| 19725 | H | 65.01800 | 77.43680 | 65.87590 | -2318.51205 | -1644.79931 | 1358.65944  | 1 |
| 19726 | H | 66.57200 | 76.68280 | 65.60290 | -2388.01253 | 1330.52391  | 1576.04284  | 1 |
| 19727 | C | 64.89500 | 75.49180 | 64.95890 | 689.88165   | -81.96528   | 579.19872   | 1 |
| 19728 | H | 65.50600 | 74.59380 | 64.72490 | 1867.85014  | -2493.78257 | 358.60383   | 1 |
| 19729 | H | 64.58300 | 76.09980 | 64.08290 | -1223.06154 | 2904.21073  | 154.55697   | 1 |
| 19730 | S | 63.30800 | 74.83580 | 65.62490 | 407.32895   | -312.54930  | 193.31094   | 1 |
| 19731 | C | 62.41500 | 74.52080 | 64.05090 | -732.40188  | 539.76075   | 152.14615   | 1 |
| 19732 | H | 61.57500 | 73.84080 | 64.30990 | 1885.30766  | -1394.65765 | -2085.09637 | 1 |
| 19733 | H | 63.09600 | 74.03980 | 63.31690 | 1010.02979  | 2213.89121  | 1995.94345  | 1 |
| 19734 | H | 62.01300 | 75.46580 | 63.62590 | -1991.76569 | 1155.70527  | 2156.46978  | 1 |
| 19735 | C | 66.62700 | 74.71180 | 67.33690 | 566.02024   | -547.63433  | -443.69196  | 1 |
| 19736 | O | 66.22400 | 73.62780 | 67.63590 | 480.69322   | -603.67269  | 120.57797   | 1 |
| 19737 | N | 67.94400 | 74.80680 | 67.04190 | 404.31455   | 222.55930   | 702.67172   | 1 |
| 19738 | H | 68.38100 | 75.69680 | 66.93390 | -1575.41415 | 1039.49512  | 2523.97734  | 1 |
| 19739 | C | 68.78100 | 73.65580 | 66.86890 | -605.26123  | 88.09302    | 682.88605   | 1 |
| 19740 | H | 68.16600 | 72.78480 | 66.69290 | 1488.80437  | 731.21489   | 2668.47951  | 1 |
| 19741 | C | 69.72500 | 73.87980 | 65.70990 | -184.38339  | -815.74160  | -356.41889  | 1 |
| 19742 | H | 70.51200 | 74.64080 | 65.89490 | 2162.54580  | 2261.53862  | -309.31514  | 1 |
| 19743 | C | 70.49500 | 72.60180 | 65.37190 | 369.83477   | 57.93103    | -830.26144  | 1 |
| 19744 | H | 71.16400 | 72.77680 | 64.50290 | -1839.35718 | -1920.56684 | 1681.26462  | 1 |
| 19745 | H | 71.16100 | 72.19280 | 66.16290 | -1703.04796 | -1030.51563 | -2442.48400 | 1 |
| 19746 | H | 69.76400 | 71.82480 | 65.06090 | 1331.36376  | 2675.36942  | -990.69164  | 1 |
| 19747 | C | 69.01400 | 74.34080 | 64.41390 | -823.17850  | -203.85299  | -354.48575  | 1 |
| 19748 | H | 68.75000 | 75.40280 | 64.60590 | -2516.38675 | 1881.30151  | 308.46887   | 1 |
| 19749 | H | 69.68600 | 74.31480 | 63.52990 | -1954.85134 | -2283.72458 | -933.28185  | 1 |
| 19750 | H | 68.06000 | 73.80680 | 64.21390 | 2318.63136  | 2122.17780  | 38.83395    | 1 |
| 19751 | C | 69.60800 | 73.28180 | 68.10590 | 724.50327   | -353.17356  | 406.48092   | 1 |
| 19752 | O | 69.97600 | 72.13480 | 68.30190 | -6.48210    | -546.09172  | -568.24874  | 1 |
| 19753 | N | 69.88600 | 74.25980 | 68.99390 | 355.11130   | -727.16783  | 212.01169   | 1 |
| 19754 | H | 69.62600 | 75.21180 | 68.84890 | 1747.25429  | -2604.01094 | -114.20069  | 1 |
| 19755 | C | 70.53000 | 73.95480 | 70.25190 | 890.15267   | -98.99091   | -124.15531  | 1 |
| 19756 | H | 70.92300 | 74.92080 | 70.53490 | -44.29553   | -2566.58964 | -1815.10344 | 1 |
| 19757 | H | 71.34000 | 73.25280 | 70.12490 | 2699.65002  | 1506.22475  | 557.66958   | 1 |
| 19758 | C | 69.62700 | 73.38380 | 71.24690 | -462.30739  | 567.03467   | 552.12983   | 1 |
| 19759 | O | 70.00600 | 72.62580 | 72.09890 | -193.25623  | -684.95282  | 337.23549   | 1 |
| 19760 | N | 68.35400 | 73.82580 | 71.22490 | 303.84146   | 607.84358   | 499.25097   | 1 |
| 19761 | H | 67.99000 | 74.44980 | 70.53890 | 1518.53857  | 633.74333   | -2679.06692 | 1 |
| 19762 | C | 67.42000 | 73.44580 | 72.28490 | 481.95988   | -659.95935  | -392.42077  | 1 |
| 19763 | H | 67.91200 | 72.76780 | 72.96590 | -209.37439  | -173.82877  | -3136.21574 | 1 |
| 19764 | C | 66.91300 | 74.68680 | 73.11490 | 277.41407   | 640.07114   | 586.05873   | 1 |
| 19765 | H | 66.12200 | 75.16780 | 72.50090 | 629.04919   | 1544.09082  | -2668.03940 | 1 |
| 19766 | H | 67.73000 | 75.39380 | 73.37290 | -1159.77067 | -1007.18160 | -2748.18601 | 1 |
| 19767 | C | 66.30000 | 74.35180 | 74.45690 | 522.88303   | 600.40511   | -439.91228  | 1 |
| 19768 | H | 65.60900 | 73.48980 | 74.34190 | -1410.89194 | 1895.47200  | 2082.55559  | 1 |
| 19769 | C | 67.30900 | 73.99080 | 75.58390 | -362.58732  | 193.49428   | -817.99640  | 1 |

|       |   |          |          |          |             |             |             |   |
|-------|---|----------|----------|----------|-------------|-------------|-------------|---|
| 19770 | H | 67.94500 | 74.88180 | 75.77790 | -2892.61340 | -571.10531  | 1112.20412  | 1 |
| 19771 | H | 67.87700 | 73.11080 | 75.21290 | 1548.61834  | 1909.14294  | 1958.98023  | 1 |
| 19772 | H | 66.84500 | 73.70680 | 76.55190 | 1694.49616  | -1756.73421 | 1978.16583  | 1 |
| 19773 | C | 65.46100 | 75.57580 | 74.92890 | -563.35646  | -707.59131  | 135.68800   | 1 |
| 19774 | H | 66.10500 | 76.45080 | 75.16190 | 2758.03685  | 963.74418   | 1153.38843  | 1 |
| 19775 | H | 64.93300 | 75.42080 | 75.89390 | -653.88616  | -1901.84253 | -2419.93456 | 1 |
| 19776 | H | 64.70300 | 75.83080 | 74.15790 | -733.05921  | 964.69196   | -2905.33347 | 1 |
| 19777 | C | 66.18200 | 72.68480 | 71.76890 | -558.52970  | 148.18115   | -712.57725  | 1 |
| 19778 | O | 65.92800 | 71.57280 | 72.17990 | 653.95009   | -85.13834   | 422.08078   | 1 |
| 19779 | N | 65.43300 | 73.25880 | 70.81490 | 343.55608   | -92.58705   | -762.55901  | 1 |
| 19780 | H | 65.71600 | 74.14280 | 70.44990 | -1163.42503 | 2422.63582  | 1645.51100  | 1 |
| 19781 | C | 64.18200 | 72.72380 | 70.30190 | -374.46427  | -586.85441  | 589.75481   | 1 |
| 19782 | H | 63.58800 | 72.69080 | 71.20390 | -2352.18933 | 1347.05807  | -1610.37968 | 1 |
| 19783 | C | 63.33000 | 73.64380 | 69.47090 | -889.17524  | -144.75981  | -180.35622  | 1 |
| 19784 | H | 63.72500 | 73.82480 | 68.44790 | -1271.23091 | -2859.32624 | -323.53179  | 1 |
| 19785 | C | 61.92300 | 73.14780 | 69.18390 | -170.71055  | 892.82657   | -116.98351  | 1 |
| 19786 | H | 61.36800 | 72.94880 | 70.12590 | 1861.32511  | 2276.00479  | 1113.35569  | 1 |
| 19787 | H | 61.30500 | 73.85280 | 68.58890 | -2070.89136 | 1102.10971  | -2105.49589 | 1 |
| 19788 | H | 61.96700 | 72.21880 | 68.57590 | 2155.72512  | -1228.19024 | -1923.78266 | 1 |
| 19789 | C | 63.22400 | 75.10980 | 70.05690 | -718.62982  | -198.66685  | 534.75858   | 1 |
| 19790 | H | 62.72800 | 74.93580 | 71.03590 | -1730.32376 | -2217.93762 | -1413.04642 | 1 |
| 19791 | H | 64.20300 | 75.58080 | 70.29190 | 66.74507    | -2988.46981 | -970.29498  | 1 |
| 19792 | C | 62.38800 | 76.05980 | 69.16990 | -910.04492  | -86.37760   | -98.35264   | 1 |
| 19793 | H | 62.69600 | 75.86280 | 68.12090 | -2203.35371 | -1315.82713 | -1826.20805 | 1 |
| 19794 | H | 62.61200 | 77.12580 | 69.38790 | -2967.06608 | 946.92023   | 504.47801   | 1 |
| 19795 | H | 61.29600 | 75.86780 | 69.23290 | 607.52105   | 231.86098   | -3075.47318 | 1 |
| 19796 | C | 64.17900 | 71.32780 | 69.69790 | 608.41724   | -497.19667  | 447.90782   | 1 |
| 19797 | O | 63.61300 | 70.39280 | 70.22690 | 665.77352   | 413.69124   | -49.84050   | 1 |
| 19798 | N | 64.84000 | 71.21580 | 68.46890 | 23.26596    | -686.29764  | -486.31440  | 1 |
| 19799 | H | 65.25800 | 71.95580 | 67.94690 | 2826.50967  | -1121.17158 | 771.95129   | 1 |
| 19800 | C | 64.86800 | 69.95580 | 67.69390 | 591.19307   | -660.26052  | 174.57177   | 1 |
| 19801 | H | 63.81200 | 69.72680 | 67.68790 | -2273.18201 | -1201.80999 | 1818.09324  | 1 |
| 19802 | C | 65.36600 | 70.19380 | 66.22890 | -483.83997  | 754.89336   | 204.77972   | 1 |
| 19803 | H | 66.39600 | 70.60980 | 66.18990 | 1939.75970  | -2072.16207 | 1335.46095  | 1 |
| 19804 | H | 65.22500 | 69.21180 | 65.72890 | -1111.15153 | -1699.49992 | 2401.12144  | 1 |
| 19805 | C | 64.53200 | 71.18780 | 65.44590 | 637.31819   | -520.43286  | -373.01987  | 1 |
| 19806 | H | 64.74800 | 72.23680 | 65.73890 | 1025.98501  | -427.56025  | -2940.46084 | 1 |
| 19807 | C | 64.82900 | 71.16480 | 63.94490 | -202.32466  | 501.12193   | 739.32363   | 1 |
| 19808 | H | 64.37600 | 72.06480 | 63.47790 | 1021.29033  | -2824.30811 | -910.15096  | 1 |
| 19809 | H | 64.51100 | 70.21780 | 63.45690 | -1796.97869 | 1877.96864  | -1789.41669 | 1 |
| 19810 | H | 65.92000 | 71.13280 | 63.73590 | -2328.62841 | 435.95955   | 2079.76066  | 1 |
| 19811 | C | 63.01800 | 70.99680 | 65.50990 | 328.84530   | 468.07369   | -710.26629  | 1 |
| 19812 | H | 62.67500 | 69.94880 | 65.36790 | -2178.15872 | -2094.92540 | 882.41572   | 1 |
| 19813 | H | 62.52000 | 71.27080 | 66.46390 | 1278.89592  | -1968.60660 | 2084.62357  | 1 |
| 19814 | H | 62.58300 | 71.55980 | 64.65590 | 924.31313   | 2313.69340  | -1923.70129 | 1 |
| 19815 | C | 65.59900 | 68.81180 | 68.33190 | -494.70155  | 410.04553   | -657.61829  | 1 |
| 19816 | O | 65.01500 | 67.77580 | 68.08990 | 44.43369    | 757.13622   | -235.04732  | 1 |
| 19817 | N | 66.67700 | 68.82680 | 69.08290 | 709.14638   | -412.54576  | 158.52437   | 1 |
| 19818 | C | 67.51000 | 69.99280 | 69.37990 | -321.02388  | -694.84543  | 492.07167   | 1 |
| 19819 | H | 67.00000 | 70.92280 | 69.70990 | -1125.30740 | 2944.24355  | 44.27198    | 1 |
| 19820 | H | 68.07300 | 70.27080 | 68.46290 | 336.48408   | 2910.91108  | -1156.77297 | 1 |
| 19821 | C | 67.20100 | 67.63480 | 69.73590 | -541.32715  | 713.59851   | 201.67861   | 1 |
| 19822 | H | 67.07000 | 66.78880 | 69.07690 | -864.49203  | 3027.86277  | 135.81839   | 1 |
| 19823 | C | 68.66500 | 68.04580 | 70.17490 | 474.53261   | 395.09626   | 664.78028   | 1 |
| 19824 | H | 69.12400 | 67.49880 | 71.02590 | -2147.45487 | -1999.86567 | 1136.60055  | 1 |
| 19825 | H | 69.38400 | 67.82280 | 69.35690 | 665.81493   | 2145.02501  | 2201.29420  | 1 |
| 19826 | C | 68.55100 | 69.51580 | 70.42490 | -703.07688  | -403.16392  | -428.72291  | 1 |
| 19827 | H | 69.49600 | 70.06980 | 70.24090 | -969.60565  | 2612.90599  | 1468.35788  | 1 |
| 19828 | H | 68.18300 | 69.79180 | 71.43690 | -2268.10015 | -1923.87449 | -1037.29430 | 1 |
| 19829 | C | 66.39300 | 67.26680 | 71.00390 | -460.22454  | 742.80488   | 277.12409   | 1 |
| 19830 | O | 66.32900 | 66.10480 | 71.31490 | -143.79429  | 642.64690   | 438.70699   | 1 |
| 19831 | N | 65.84600 | 68.26680 | 71.68190 | 518.76376   | 647.47320   | -148.97223  | 1 |

|       |   |          |          |          |             |             |             |   |
|-------|---|----------|----------|----------|-------------|-------------|-------------|---|
| 19832 | H | 65.99600 | 69.19580 | 71.35290 | 2323.79627  | 686.95939   | -2002.31293 | 1 |
| 19833 | C | 64.95700 | 68.17180 | 72.79490 | 393.67741   | -675.38736  | 458.18254   | 1 |
| 19834 | H | 64.63100 | 69.17880 | 73.00590 | 2050.39186  | 1122.31898  | 2098.92922  | 1 |
| 19835 | H | 65.55800 | 67.86280 | 73.63690 | 1727.63420  | 97.06101    | -2626.58938 | 1 |
| 19836 | C | 63.76000 | 67.32980 | 72.57190 | -16.15531   | -836.72768  | -359.42025  | 1 |
| 19837 | O | 63.42600 | 66.47880 | 73.44190 | -442.74268  | -215.22819  | -623.63315  | 1 |
| 19838 | N | 63.06200 | 67.53680 | 71.42990 | 760.01015   | 163.12671   | 313.22686   | 1 |
| 19839 | H | 63.28600 | 68.31780 | 70.85290 | -1868.34063 | 1372.32815  | 2132.69438  | 1 |
| 19840 | C | 61.89500 | 66.79280 | 71.11990 | 127.61219   | -580.96582  | 685.46881   | 1 |
| 19841 | H | 61.24900 | 66.80980 | 71.98490 | -1369.68121 | -2720.16075 | -794.36821  | 1 |
| 19842 | C | 61.08100 | 67.31480 | 69.93990 | 586.47292   | -685.33796  | -77.70395   | 1 |
| 19843 | H | 60.31700 | 66.55780 | 69.66190 | 1187.72408  | 2580.89911  | -1353.08395 | 1 |
| 19844 | C | 60.20100 | 68.50380 | 70.43690 | -68.98729   | -705.54588  | 569.86940   | 1 |
| 19845 | H | 59.64400 | 68.05180 | 71.28490 | 1657.94306  | 1186.21215  | 2391.77831  | 1 |
| 19846 | H | 59.37700 | 68.71880 | 69.72290 | -672.71707  | 3057.52386  | -352.73998  | 1 |
| 19847 | H | 60.89200 | 69.32080 | 70.73390 | 1489.79135  | -1900.50530 | -2010.09223 | 1 |
| 19848 | C | 61.97000 | 67.64580 | 68.73790 | -11.14916   | 824.00639   | -399.73436  | 1 |
| 19849 | H | 62.59600 | 68.53580 | 68.96190 | -12.33331   | -233.10734  | 3135.47366  | 1 |
| 19850 | H | 62.67200 | 66.81080 | 68.52690 | 1504.73905  | -444.53988  | 2720.01118  | 1 |
| 19851 | C | 61.18200 | 67.81180 | 67.43490 | -836.13465  | -316.02936  | -207.71407  | 1 |
| 19852 | H | 61.83300 | 68.03080 | 66.56190 | 2978.93554  | -733.17551  | -660.43712  | 1 |
| 19853 | H | 60.42100 | 68.61980 | 67.48290 | 1463.84887  | 618.99150   | 2710.79834  | 1 |
| 19854 | H | 60.54100 | 66.91780 | 67.27590 | 1961.95166  | -2309.78589 | 814.63559   | 1 |
| 19855 | C | 62.10100 | 65.27780 | 70.85890 | 536.24226   | -408.84263  | 603.55484   | 1 |
| 19856 | O | 61.32600 | 64.41780 | 71.31790 | -96.29828   | -193.75489  | -762.56759  | 1 |
| 19857 | N | 63.17400 | 64.90480 | 70.18990 | -123.83526  | 378.17960   | 743.85218   | 1 |
| 19858 | H | 63.73500 | 65.66780 | 69.88090 | 727.85591   | -2820.32900 | -1180.35995 | 1 |
| 19859 | C | 63.66700 | 63.56780 | 70.06490 | -596.17947  | 642.64117   | -277.08099  | 1 |
| 19860 | H | 62.88200 | 62.91180 | 69.71890 | 1861.93921  | 2190.53873  | -1278.30066 | 1 |
| 19861 | C | 64.85000 | 63.46980 | 69.11790 | 66.72759    | -743.90270  | 512.52703   | 1 |
| 19862 | H | 65.76400 | 63.92480 | 69.55590 | -67.35601   | -1126.57123 | -2939.82582 | 1 |
| 19863 | C | 65.11100 | 61.98380 | 68.79790 | 581.89830   | -564.81118  | -407.31289  | 1 |
| 19864 | H | 65.53400 | 61.39180 | 69.63790 | 2123.40360  | 1690.94945  | 1581.09418  | 1 |
| 19865 | H | 65.93800 | 61.98080 | 68.05590 | 862.69286   | -2719.99370 | 1306.64822  | 1 |
| 19866 | H | 64.16200 | 61.56580 | 68.39990 | -1390.04854 | -1783.68373 | -2193.03110 | 1 |
| 19867 | C | 64.66600 | 64.18280 | 67.82090 | -518.92918  | 749.95530   | 110.93793   | 1 |
| 19868 | H | 64.71900 | 65.29080 | 67.87690 | 1580.94029  | -184.48722  | -2712.95926 | 1 |
| 19869 | H | 65.40800 | 63.84580 | 67.06590 | 1793.57735  | -1931.01503 | 1701.33638  | 1 |
| 19870 | H | 63.66800 | 64.06080 | 67.34590 | 1340.76477  | 2036.46805  | -1991.66304 | 1 |
| 19871 | C | 64.06000 | 63.02280 | 71.47490 | -7.51084    | 754.87586   | -519.77062  | 1 |
| 19872 | O | 63.68600 | 61.86980 | 71.71690 | 709.25250   | -90.97897   | -326.85921  | 1 |
| 19873 | N | 64.69800 | 63.81880 | 72.35490 | 545.63686   | -395.88356  | 495.90340   | 1 |
| 19874 | H | 64.92200 | 64.75380 | 72.09190 | 1059.52783  | 2434.15084  | -1692.27898 | 1 |
| 19875 | C | 64.99500 | 63.39580 | 73.70990 | 78.96657    | 857.57817   | -308.32330  | 1 |
| 19876 | H | 65.58600 | 62.49180 | 73.72390 | -1383.71628 | -2171.90976 | -1813.55464 | 1 |
| 19877 | C | 65.90700 | 64.41680 | 74.47290 | -553.93910  | -721.74333  | 77.72866    | 1 |
| 19878 | H | 65.40800 | 65.40280 | 74.35890 | -804.24724  | -3002.02377 | 482.90058   | 1 |
| 19879 | C | 65.96600 | 64.10380 | 75.97690 | 116.78843   | 469.48150   | 768.62941   | 1 |
| 19880 | H | 64.99500 | 64.04380 | 76.51390 | 1060.08381  | 1359.22657  | -2634.66321 | 1 |
| 19881 | H | 66.52400 | 63.15380 | 76.11390 | 723.70093   | -2506.91396 | 1749.17447  | 1 |
| 19882 | H | 66.62700 | 64.80880 | 76.52590 | -2162.51048 | 217.29979   | 2275.06557  | 1 |
| 19883 | C | 67.28900 | 64.30380 | 73.77390 | 744.16528   | -455.10374  | -250.48438  | 1 |
| 19884 | H | 67.15200 | 64.24880 | 72.67190 | -425.77974  | -1906.07702 | -2470.01860 | 1 |
| 19885 | H | 67.80800 | 63.36280 | 74.05590 | 1286.96860  | -2511.08408 | -1387.76591 | 1 |
| 19886 | C | 68.16400 | 65.49680 | 74.02690 | -399.93473  | 465.53731   | -683.56255  | 1 |
| 19887 | H | 67.70100 | 66.33980 | 73.47090 | 2080.81159  | 1739.17207  | -1594.10860 | 1 |
| 19888 | H | 68.23500 | 65.67980 | 75.11990 | 2817.57021  | -546.86014  | 1272.04864  | 1 |
| 19889 | H | 69.22100 | 65.29580 | 73.74790 | 1920.60780  | -1483.18315 | 1990.46288  | 1 |
| 19890 | C | 63.73700 | 63.05580 | 74.48490 | 488.45607   | -497.74511  | -586.06088  | 1 |
| 19891 | O | 63.59500 | 61.94380 | 75.01890 | -737.02026  | 92.16497    | 276.73800   | 1 |
| 19892 | N | 62.71100 | 63.97680 | 74.42690 | -393.51217  | -499.39871  | -561.16694  | 1 |
| 19893 | H | 62.97700 | 64.85880 | 74.04390 | 1945.60809  | -1150.36670 | -2186.10609 | 1 |

|       |   |          |          |          |             |             |             |   |
|-------|---|----------|----------|----------|-------------|-------------|-------------|---|
| 19894 | C | 61.40000 | 63.89880 | 75.00690 | -70.70251   | 688.68512   | 592.05453   | 1 |
| 19895 | H | 61.51400 | 63.67880 | 76.05790 | -1955.87549 | 1538.79440  | -1933.39315 | 1 |
| 19896 | C | 60.66100 | 65.21180 | 74.74190 | 517.43717   | 727.48888   | -177.47926  | 1 |
| 19897 | H | 60.92700 | 65.60280 | 73.73690 | -1880.25493 | 1773.58447  | -1803.34982 | 1 |
| 19898 | H | 59.56300 | 65.07380 | 74.83190 | -3112.41882 | 304.02274   | -391.29498  | 1 |
| 19899 | C | 61.13800 | 66.33980 | 75.75290 | -531.48320  | -297.16207  | 680.15232   | 1 |
| 19900 | H | 62.24600 | 66.39680 | 75.69090 | -1301.40630 | 1076.75184  | -2659.62240 | 1 |
| 19901 | C | 60.60400 | 67.72780 | 75.32790 | 554.27240   | 572.37731   | -439.24426  | 1 |
| 19902 | H | 60.92600 | 68.06380 | 74.31990 | 2171.18571  | 890.42568   | 2088.68801  | 1 |
| 19903 | H | 59.49500 | 67.79180 | 75.33190 | -1723.26691 | -2186.53689 | -1471.95069 | 1 |
| 19904 | H | 60.93400 | 68.51280 | 76.04190 | 933.77526   | 2087.95228  | -2159.88955 | 1 |
| 19905 | C | 60.79400 | 66.15080 | 77.20290 | 788.84956   | -219.39317  | -394.05462  | 1 |
| 19906 | H | 61.31900 | 65.24480 | 77.57390 | -585.63575  | 1168.86331  | -2865.25287 | 1 |
| 19907 | H | 60.95400 | 67.10180 | 77.75390 | -2959.25444 | 506.47122   | 953.12281   | 1 |
| 19908 | H | 59.72800 | 65.90580 | 77.39990 | 1748.25453  | 232.66494   | 2600.24733  | 1 |
| 19909 | C | 60.68300 | 62.63780 | 74.55090 | -427.75404  | 681.62713   | 431.98247   | 1 |
| 19910 | O | 60.15800 | 61.87580 | 75.38690 | 503.14428   | 598.19819   | -97.94068   | 1 |
| 19911 | N | 60.66600 | 62.35580 | 73.27790 | -577.70782  | 391.22150   | 479.29382   | 1 |
| 19912 | H | 61.20100 | 62.96480 | 72.69590 | 1744.47096  | -2012.26006 | -1670.52476 | 1 |
| 19913 | C | 60.10100 | 61.11180 | 72.65490 | 140.90697   | 301.04026   | -852.75534  | 1 |
| 19914 | H | 59.04500 | 61.08180 | 72.87990 | 773.42778   | -2128.58558 | 2176.82642  | 1 |
| 19915 | C | 60.12500 | 61.11180 | 71.07890 | -87.20908   | 643.23334   | 639.62247   | 1 |
| 19916 | H | 59.92400 | 60.10280 | 70.65790 | 2235.18739  | -2095.63068 | 684.66122   | 1 |
| 19917 | H | 61.15700 | 61.42380 | 70.81190 | 1729.03814  | -2484.60271 | -842.09458  | 1 |
| 19918 | O | 59.30200 | 62.05380 | 70.45490 | -360.32839  | -46.00652   | 700.71962   | 1 |
| 19919 | H | 58.40200 | 61.85880 | 70.72590 | -977.88441  | 2987.43297  | -209.18439  | 1 |
| 19920 | C | 60.70300 | 59.78680 | 73.11590 | 591.33585   | -629.86168  | 272.96314   | 1 |
| 19921 | O | 59.91400 | 58.83680 | 73.29290 | -342.32257  | -9.17415    | 709.12639   | 1 |
| 19922 | N | 62.04400 | 59.67780 | 73.24190 | 210.26956   | -353.23633  | -740.02479  | 1 |
| 19923 | H | 62.55400 | 60.48180 | 72.94690 | -1118.55459 | -2281.51299 | -1860.58936 | 1 |
| 19924 | C | 62.74300 | 58.45280 | 73.65390 | -417.34587  | -247.34127  | 768.36831   | 1 |
| 19925 | H | 62.41300 | 57.69680 | 72.95690 | -622.77630  | 2900.95223  | -1060.43901 | 1 |
| 19926 | C | 64.26900 | 58.73380 | 73.87290 | -733.56851  | 261.43838   | 476.45738   | 1 |
| 19927 | H | 64.76100 | 57.78280 | 74.17290 | 897.14896   | 933.18841   | -2873.12404 | 1 |
| 19928 | H | 64.35500 | 59.49580 | 74.67690 | -1456.98083 | -2620.25625 | 950.61363   | 1 |
| 19929 | S | 64.98900 | 59.21680 | 72.26490 | -199.23621  | -73.74322   | 511.45803   | 1 |
| 19930 | H | 64.69800 | 60.50780 | 72.31790 | -686.62890  | -1450.37428 | 2700.74460  | 1 |
| 19931 | C | 62.19100 | 57.92080 | 74.99590 | 112.65185   | 740.67851   | -526.19692  | 1 |
| 19932 | O | 61.86400 | 56.75380 | 75.16990 | 178.67799   | 594.22236   | 482.25813   | 1 |
| 19933 | N | 62.14600 | 58.80680 | 76.01990 | 41.66216    | 805.73763   | -255.60349  | 1 |
| 19934 | H | 62.48500 | 59.73680 | 75.89890 | -679.08358  | -2326.64101 | -2011.41013 | 1 |
| 19935 | C | 61.69700 | 58.38880 | 77.38590 | -744.60959  | -479.04057  | -234.94274  | 1 |
| 19936 | H | 62.07100 | 57.41880 | 77.67990 | -2649.38099 | 1517.77581  | 764.80955   | 1 |
| 19937 | C | 62.30100 | 59.29480 | 78.44190 | 754.05497   | 468.38295   | -200.48667  | 1 |
| 19938 | H | 61.96400 | 58.85080 | 79.40290 | 2402.98963  | 1320.73956  | -1542.48239 | 1 |
| 19939 | H | 61.85500 | 60.29480 | 78.25690 | 2779.28262  | 1101.91177  | 964.42472   | 1 |
| 19940 | C | 63.83700 | 59.35180 | 78.28390 | -806.64473  | 141.13776   | 402.51307   | 1 |
| 19941 | C | 64.38900 | 60.56680 | 77.83490 | 566.12223   | 536.25287   | -473.78064  | 1 |
| 19942 | H | 63.80300 | 61.43580 | 77.57490 | 897.30392   | 2307.92115  | 1934.64121  | 1 |
| 19943 | C | 65.78200 | 60.60780 | 77.65190 | -41.60776   | -596.86470  | -693.38240  | 1 |
| 19944 | H | 66.16600 | 61.51380 | 77.20790 | -908.95382  | 1354.21544  | 2686.79991  | 1 |
| 19945 | C | 66.60500 | 59.53580 | 77.92290 | -820.78401  | -16.32267   | -410.49309  | 1 |
| 19946 | O | 67.97300 | 59.58680 | 77.66090 | -657.14196  | -390.63375  | 201.56302   | 1 |
| 19947 | H | 68.15200 | 60.22280 | 76.96390 | 1756.12133  | -2575.75318 | -405.88925  | 1 |
| 19948 | C | 64.61200 | 58.27280 | 78.57190 | -389.04374  | 437.27601   | 694.91365   | 1 |
| 19949 | H | 64.11800 | 57.43480 | 79.04090 | 2257.40182  | -996.58226  | 1941.85223  | 1 |
| 19950 | C | 66.01500 | 58.33080 | 78.34490 | -480.10183  | -367.84540  | 677.96337   | 1 |
| 19951 | H | 66.62900 | 57.44280 | 78.37690 | 955.45519   | -2912.16914 | -711.08916  | 1 |
| 19952 | C | 60.22600 | 58.36380 | 77.44290 | 37.05971    | 834.47293   | -370.28863  | 1 |
| 19953 | O | 59.63100 | 57.65280 | 78.25890 | -325.84923  | 525.89385   | -497.64653  | 1 |
| 19954 | N | 59.50100 | 59.13780 | 76.59090 | 184.80035   | -563.00154  | -604.34886  | 1 |
| 19955 | H | 59.91300 | 59.78880 | 75.95890 | -2207.73499 | 1692.09611  | 1472.51889  | 1 |

|       |   |          |          |          |             |             |             |   |
|-------|---|----------|----------|----------|-------------|-------------|-------------|---|
| 19956 | C | 58.09000 | 58.99580 | 76.38390 | -905.51445  | -95.86793   | 93.04053    | 1 |
| 19957 | H | 57.66200 | 59.15280 | 77.36290 | 1909.48368  | -2197.36945 | 1183.75963  | 1 |
| 19958 | C | 57.49900 | 60.00280 | 75.39790 | -8.27331    | -815.80633  | 402.82954   | 1 |
| 19959 | H | 57.89000 | 60.99280 | 75.71490 | -1937.22446 | -1895.93125 | -1605.40177 | 1 |
| 19960 | H | 57.90100 | 59.81880 | 74.37790 | 726.15011   | -3019.77396 | 486.06933   | 1 |
| 19961 | S | 55.72300 | 60.08580 | 75.22290 | -13.04035   | -298.18373  | 468.12165   | 1 |
| 19962 | H | 55.62900 | 59.09380 | 74.34990 | -2342.28634 | 1913.77637  | 875.60362   | 1 |
| 19963 | C | 57.68600 | 57.57480 | 75.97290 | -729.71906  | 212.29388   | -514.16553  | 1 |
| 19964 | O | 56.79800 | 56.98380 | 76.56690 | -679.06989  | -371.53951  | -176.30881  | 1 |
| 19965 | N | 58.36000 | 56.95880 | 75.04090 | 8.09640     | -814.43915  | -224.38680  | 1 |
| 19966 | H | 58.91300 | 57.53180 | 74.44090 | -732.18158  | 2446.19823  | 1836.04905  | 1 |
| 19967 | C | 58.10400 | 55.59180 | 74.61790 | -594.94755  | 131.40572   | 676.57127   | 1 |
| 19968 | H | 57.05600 | 55.50580 | 74.37190 | 1975.86784  | -2440.28998 | -144.62029  | 1 |
| 19969 | C | 58.88400 | 55.19280 | 73.32890 | 621.96808   | -582.46387  | -319.45686  | 1 |
| 19970 | H | 59.96700 | 55.39580 | 73.47690 | -2097.39931 | 1787.72556  | -1531.28666 | 1 |
| 19971 | C | 58.75700 | 53.70380 | 73.07890 | -709.09967  | 109.95400   | 561.75738   | 1 |
| 19972 | H | 59.12800 | 53.48880 | 72.05390 | 2477.75423  | 1406.57395  | -1334.67679 | 1 |
| 19973 | H | 59.29400 | 53.04680 | 73.79590 | 2779.83153  | -1394.44616 | -455.20003  | 1 |
| 19974 | H | 57.68400 | 53.41180 | 73.07590 | 2815.54171  | 1396.73836  | 15.96069    | 1 |
| 19975 | C | 58.35700 | 55.95380 | 72.10590 | 620.58163   | -62.81054   | -665.90660  | 1 |
| 19976 | H | 57.42400 | 55.51380 | 71.69390 | 1378.61682  | 2826.82428  | -66.91023   | 1 |
| 19977 | H | 58.03500 | 56.99480 | 72.32590 | 2387.24290  | 2044.85179  | 36.63227    | 1 |
| 19978 | C | 59.39500 | 56.11680 | 70.97890 | 692.04483   | -525.24606  | -264.77266  | 1 |
| 19979 | H | 59.93700 | 55.16780 | 70.78090 | 1904.86729  | -1421.95594 | 2048.55396  | 1 |
| 19980 | H | 59.03200 | 56.60880 | 70.05190 | 1915.49614  | 180.77640   | 2479.99205  | 1 |
| 19981 | H | 60.04100 | 56.97780 | 71.25290 | 2521.12411  | 1582.07890  | 1004.92652  | 1 |
| 19982 | C | 58.48800 | 54.59080 | 75.69290 | -676.48537  | 35.99850    | -620.26861  | 1 |
| 19983 | O | 57.74000 | 53.60180 | 75.90990 | -481.87803  | -400.26944  | -490.12836  | 1 |
| 19984 | N | 59.64700 | 54.78980 | 76.37390 | -598.07996  | -518.47477  | -306.02065  | 1 |
| 19985 | H | 59.99800 | 55.71780 | 76.27190 | -2804.99307 | -1160.15125 | 832.74280   | 1 |
| 19986 | C | 60.34200 | 53.84080 | 77.29690 | -468.98440  | -631.94864  | -470.32158  | 1 |
| 19987 | H | 60.57700 | 52.90980 | 76.80290 | 2101.58109  | -1398.49546 | -1881.20471 | 1 |
| 19988 | C | 61.81500 | 54.30380 | 77.78890 | 560.75104   | -478.72040  | 526.35275   | 1 |
| 19989 | H | 61.72400 | 55.38780 | 78.01790 | -183.68794  | 2661.78188  | -1673.95999 | 1 |
| 19990 | C | 62.20200 | 53.43880 | 79.01190 | -738.27168  | 495.20263   | 203.78036   | 1 |
| 19991 | H | 62.13300 | 52.35980 | 78.75490 | 1742.20933  | 1919.14072  | 1772.74128  | 1 |
| 19992 | H | 63.25500 | 53.63080 | 79.30990 | -2457.50379 | -1863.42726 | -640.01204  | 1 |
| 19993 | H | 61.54700 | 53.49980 | 79.90690 | -3076.46603 | 509.65076   | -439.93271  | 1 |
| 19994 | C | 62.82100 | 54.15980 | 76.66190 | -538.83804  | 393.54338   | -631.96227  | 1 |
| 19995 | H | 62.32800 | 54.42880 | 75.70290 | 2531.60287  | -1815.59591 | -421.05835  | 1 |
| 19996 | H | 63.23200 | 53.13380 | 76.55490 | 634.79353   | -2995.48303 | -724.70037  | 1 |
| 19997 | C | 64.08400 | 54.91880 | 76.90390 | -184.13807  | 853.32626   | 260.59174   | 1 |
| 19998 | H | 63.83200 | 55.97580 | 77.13390 | -2166.32618 | -237.19619  | -2279.15350 | 1 |
| 19999 | H | 64.72100 | 54.56480 | 77.74290 | -684.98562  | -2936.49469 | -906.20132  | 1 |
| 20000 | H | 64.80100 | 54.81880 | 76.06190 | -106.40325  | -379.24058  | -3128.92930 | 1 |
| 20001 | C | 59.39500 | 53.38480 | 78.45890 | 362.73728   | -772.25232  | 313.20819   | 1 |
| 20002 | O | 59.23700 | 52.19880 | 78.85690 | -133.38834  | -582.76836  | -524.39172  | 1 |
| 20003 | N | 58.74100 | 54.39080 | 79.02790 | -582.71053  | -498.63172  | 352.20370   | 1 |
| 20004 | H | 58.82900 | 55.33080 | 78.70690 | -2468.04052 | 1949.32524  | 131.01141   | 1 |
| 20005 | C | 57.95400 | 54.24980 | 80.20890 | 550.60524   | -540.01590  | 479.40228   | 1 |
| 20006 | H | 58.55600 | 53.66780 | 80.89190 | -1938.31132 | 1680.24537  | 1815.99635  | 1 |
| 20007 | C | 57.67700 | 55.58980 | 80.88790 | -547.28339  | 522.86882   | -514.62002  | 1 |
| 20008 | H | 57.07200 | 55.33580 | 81.78590 | 2314.41723  | -1889.26436 | -990.52187  | 1 |
| 20009 | C | 58.98100 | 56.16480 | 81.44990 | 632.50835   | 579.78525   | 295.24144   | 1 |
| 20010 | H | 58.79600 | 57.04280 | 82.10490 | 2072.59196  | -1605.40223 | 1733.43787  | 1 |
| 20011 | H | 59.55900 | 55.40180 | 82.01390 | -3029.52462 | 728.38312   | -452.09881  | 1 |
| 20012 | H | 59.56000 | 56.60080 | 80.60790 | 489.73541   | -3015.18638 | 751.05713   | 1 |
| 20013 | C | 56.89100 | 56.57580 | 80.03690 | -738.17933  | -69.24703   | -539.44626  | 1 |
| 20014 | H | 57.59600 | 57.08480 | 79.34490 | -2014.10563 | 2110.85900  | 1175.55937  | 1 |
| 20015 | H | 56.23000 | 55.99780 | 79.35490 | -1758.04412 | 1809.40399  | 1876.36966  | 1 |
| 20016 | C | 56.10400 | 57.58680 | 80.84990 | 612.09942   | 72.72418    | 665.19675   | 1 |
| 20017 | H | 55.43400 | 57.04080 | 81.54790 | 2508.33937  | 1884.31890  | 185.24347   | 1 |

|       |   |          |          |          |             |             |             |   |
|-------|---|----------|----------|----------|-------------|-------------|-------------|---|
| 20018 | H | 55.39900 | 58.12580 | 80.18290 | -15.38957   | 59.75542    | -3149.29738 | 1 |
| 20019 | H | 56.80600 | 58.30380 | 81.32690 | 2076.32778  | -1737.11946 | 1597.65195  | 1 |
| 20020 | C | 56.78400 | 53.35880 | 80.02290 | -745.79591  | 510.06983   | -136.26126  | 1 |
| 20021 | O | 56.23600 | 52.76380 | 80.96890 | 586.46816   | 523.06369   | 37.22129    | 1 |
| 20022 | N | 56.27700 | 53.27880 | 78.79190 | 10.70433    | 587.60088   | 599.13778   | 1 |
| 20023 | H | 56.73500 | 53.86180 | 78.12490 | 943.23205   | -1979.60866 | 2249.71654  | 1 |
| 20024 | C | 55.13000 | 52.49880 | 78.47790 | -298.45793  | 790.62413   | -348.10402  | 1 |
| 20025 | H | 54.47900 | 52.42980 | 79.33690 | 841.10892   | 1699.95694  | 2502.69370  | 1 |
| 20026 | C | 54.26500 | 53.22480 | 77.40490 | 751.08208   | 510.32211   | -46.41126   | 1 |
| 20027 | H | 53.70300 | 54.02080 | 77.93790 | -1912.50921 | -2486.88140 | 263.83563   | 1 |
| 20028 | H | 53.51500 | 52.55080 | 76.93890 | -2514.75430 | -1579.36864 | 1041.97877  | 1 |
| 20029 | O | 55.06400 | 53.77880 | 76.36790 | -403.81631  | 635.29029   | -248.82320  | 1 |
| 20030 | H | 55.77900 | 53.17280 | 76.16290 | 123.48385   | 3123.82324  | 345.40259   | 1 |
| 20031 | C | 55.34500 | 51.08080 | 78.13790 | 727.16410   | -447.36364  | 309.39236   | 1 |
| 20032 | O | 54.38400 | 50.33480 | 77.74290 | 440.45538   | -652.77722  | -55.99166   | 1 |
| 20033 | N | 56.56600 | 50.60580 | 78.30390 | -110.12572  | -766.71739  | 331.33620   | 1 |
| 20034 | H | 57.18900 | 51.23380 | 78.76590 | -206.09660  | 1793.80309  | -2582.87050 | 1 |
| 20035 | C | 56.93000 | 49.22180 | 78.07690 | 647.42298   | -640.49008  | -4.87502    | 1 |
| 20036 | H | 56.17700 | 48.60980 | 78.54990 | -1685.57563 | -2009.33410 | 1733.18203  | 1 |
| 20037 | C | 56.90500 | 48.80080 | 76.58590 | 547.78093   | 503.05454   | 517.03139   | 1 |
| 20038 | H | 55.84500 | 48.89880 | 76.26890 | -1916.10626 | 2467.70100  | 375.89510   | 1 |
| 20039 | H | 57.16400 | 47.73180 | 76.43290 | 1243.65199  | 2688.00758  | 1050.04261  | 1 |
| 20040 | C | 57.61500 | 49.74880 | 75.55590 | -527.85145  | 657.26409   | 345.25500   | 1 |
| 20041 | H | 58.66700 | 49.92380 | 75.86590 | 50.75156    | -3096.96792 | -557.03030  | 1 |
| 20042 | H | 57.07500 | 50.71580 | 75.64090 | 810.84637   | 1730.29012  | -2505.59484 | 1 |
| 20043 | C | 57.50000 | 49.15880 | 74.14190 | -223.35265  | 495.37736   | 726.09066   | 1 |
| 20044 | H | 58.09000 | 49.79580 | 73.44890 | -2574.82200 | -1810.75131 | 51.97719    | 1 |
| 20045 | H | 58.01800 | 48.17680 | 74.12790 | 2255.03114  | 444.43995   | -2153.50318 | 1 |
| 20046 | C | 56.08000 | 49.16180 | 73.63190 | 566.76327   | -673.03576  | 220.94543   | 1 |
| 20047 | H | 55.39300 | 48.50380 | 74.20690 | 1469.41986  | -1730.98496 | -2182.57190 | 1 |
| 20048 | H | 55.70700 | 50.20880 | 73.64390 | 2310.54238  | 135.47811   | -2134.07279 | 1 |
| 20049 | N | 56.00100 | 48.71280 | 72.26790 | -368.51878  | -341.35732  | -687.30492  | 1 |
| 20050 | H | 56.26500 | 49.45680 | 71.59090 | 161.08552   | -2616.85465 | 1728.81374  | 1 |
| 20051 | H | 55.01000 | 48.47780 | 72.05990 | 1481.87613  | 2106.56126  | 1798.00185  | 1 |
| 20052 | H | 56.61600 | 47.89280 | 72.09290 | 2552.09690  | -659.51715  | -1719.47830 | 1 |
| 20053 | C | 58.25800 | 48.62980 | 78.70690 | 528.68676   | 544.68588   | 494.17694   | 1 |
| 20054 | O | 58.67000 | 47.50480 | 78.41790 | -485.64995  | -551.48467  | 284.81516   | 1 |
| 20055 | N | 58.87400 | 49.39780 | 79.67090 | -11.15353   | -841.05502  | 75.23653    | 1 |
| 20056 | H | 58.55300 | 50.33080 | 79.81490 | 2295.09230  | 2050.43469  | -650.28071  | 1 |
| 20057 | C | 60.05300 | 49.01480 | 80.43090 | -739.76577  | 51.35025    | 524.23380   | 1 |
| 20058 | H | 60.85900 | 48.83280 | 79.73490 | -211.97496  | 1445.24612  | 2777.44621  | 1 |
| 20059 | C | 60.48400 | 50.11080 | 81.40890 | -592.92340  | 417.79370   | -561.22024  | 1 |
| 20060 | H | 60.55300 | 51.07380 | 80.85790 | -1983.46346 | -902.11708  | 2263.60544  | 1 |
| 20061 | H | 59.62900 | 50.22680 | 82.10890 | -1608.99885 | -1669.53969 | -2136.84080 | 1 |
| 20062 | C | 61.81200 | 49.86180 | 82.09690 | -17.39217   | 53.57775    | 901.39075   | 1 |
| 20063 | H | 61.77700 | 48.88480 | 82.62590 | 486.97202   | 2619.74135  | 1660.67321  | 1 |
| 20064 | C | 62.94700 | 50.01980 | 81.06690 | 703.63325   | -577.47312  | -52.21045   | 1 |
| 20065 | H | 62.97300 | 51.01480 | 80.57190 | -2307.21941 | 1828.12275  | 1104.24845  | 1 |
| 20066 | H | 62.94200 | 49.14980 | 80.37590 | -379.88308  | -367.68946  | -3110.90518 | 1 |
| 20067 | H | 63.86500 | 49.83680 | 81.66490 | 2804.40415  | 1331.11270  | -510.19502  | 1 |
| 20068 | C | 61.98100 | 50.95380 | 83.20990 | -530.35700  | -529.07068  | -531.23309  | 1 |
| 20069 | H | 61.11500 | 50.89480 | 83.90290 | -2600.96689 | -13.23639   | 1763.31772  | 1 |
| 20070 | H | 62.95000 | 50.78680 | 83.72690 | -2858.15912 | -1165.87505 | -625.01334  | 1 |
| 20071 | H | 62.00600 | 51.98380 | 82.79390 | -1979.55886 | -1095.81766 | 2180.26988  | 1 |
| 20072 | C | 59.83400 | 47.69080 | 81.19690 | 28.16078    | 588.78346   | -703.32129  | 1 |
| 20073 | O | 60.73700 | 46.80980 | 81.21890 | -396.42664  | -156.47903  | 656.28573   | 1 |
| 20074 | N | 58.64700 | 47.46780 | 81.86090 | 189.50305   | -795.22824  | -225.45440  | 1 |
| 20075 | H | 57.93700 | 48.16280 | 81.93990 | -2343.97394 | -2095.72374 | 151.12772   | 1 |
| 20076 | C | 58.32400 | 46.20480 | 82.43990 | -698.23026  | 578.72050   | -95.57311   | 1 |
| 20077 | H | 59.16000 | 45.72380 | 82.92390 | -136.09305  | -1222.11680 | 2887.34584  | 1 |
| 20078 | C | 57.25300 | 46.40580 | 83.55490 | 438.60519   | -369.65632  | 701.24722   | 1 |
| 20079 | H | 56.46500 | 47.09480 | 83.18390 | -2984.15346 | -796.47279  | -613.66978  | 1 |



|       |   |          |          |          |             |             |             |   |
|-------|---|----------|----------|----------|-------------|-------------|-------------|---|
| 20080 | H | 56.84700 | 45.42880 | 83.89290 | -1528.64299 | 2388.34080  | -1366.96455 | 1 |
| 20081 | O | 57.79400 | 47.05480 | 84.72390 | -58.51501   | -274.67543  | -747.85507  | 1 |
| 20082 | H | 58.33600 | 46.39680 | 85.16390 | -3067.73636 | -108.12397  | 680.97552   | 1 |
| 20083 | C | 57.74300 | 45.15880 | 81.47690 | -761.43432  | 366.34712   | -351.86501  | 1 |
| 20084 | O | 57.44700 | 44.02980 | 81.86390 | 658.42406   | -57.23348   | -441.32801  | 1 |
| 20085 | N | 57.64000 | 45.44880 | 80.18090 | -28.83271   | -201.47557  | -828.86920  | 1 |
| 20086 | H | 57.87600 | 46.33480 | 79.79090 | -2407.00087 | 1967.31608  | 477.22477   | 1 |
| 20087 | C | 57.07300 | 44.51080 | 79.22090 | 222.25047   | 528.66122   | -717.09076  | 1 |
| 20088 | H | 56.64100 | 43.64980 | 79.70890 | -2195.30224 | 2068.21296  | 885.19037   | 1 |
| 20089 | C | 55.93600 | 45.12680 | 78.34290 | -520.52782  | -146.23133  | 726.73201   | 1 |
| 20090 | H | 56.29600 | 45.99180 | 77.74590 | 2182.80936  | 100.04034   | 2253.02174  | 1 |
| 20091 | H | 55.54800 | 44.49680 | 77.51490 | 1246.64597  | -603.21103  | -2833.27020 | 1 |
| 20092 | N | 53.71900 | 46.31980 | 78.70290 | -452.32544  | 534.44687   | -479.57797  | 1 |
| 20093 | H | 53.67500 | 46.71180 | 77.78490 | 2143.22087  | 691.28098   | -2202.42025 | 1 |
| 20094 | C | 54.76900 | 45.59380 | 79.19390 | 746.12048   | 318.95916   | 403.86066   | 1 |
| 20095 | C | 52.84700 | 46.50780 | 79.73890 | -655.23277  | 360.15652   | 514.97758   | 1 |
| 20096 | H | 51.89400 | 47.02380 | 79.61890 | 820.15980   | -3006.18718 | -451.25623  | 1 |
| 20097 | N | 53.29900 | 45.96080 | 80.86590 | -522.22342  | -366.13709  | 547.70996   | 1 |
| 20098 | C | 54.52600 | 45.35480 | 80.48390 | 149.93693   | 171.97960   | 873.87990   | 1 |
| 20099 | H | 55.14700 | 44.83680 | 81.20490 | -1934.56761 | 1912.99514  | 1569.65665  | 1 |
| 20100 | C | 58.04800 | 44.00880 | 78.19490 | 735.63683   | 259.59731   | 459.54437   | 1 |
| 20101 | O | 57.88200 | 42.94680 | 77.55890 | 259.17027   | -502.59429  | 540.59931   | 1 |
| 20102 | N | 59.14200 | 44.76280 | 78.02990 | -230.88063  | -767.62611  | -277.16269  | 1 |
| 20103 | H | 59.21600 | 45.65280 | 78.47390 | 2721.07718  | -1531.93880 | -383.15218  | 1 |
| 20104 | C | 60.37000 | 44.45780 | 77.32690 | 473.70491   | -634.32786  | 440.10410   | 1 |
| 20105 | H | 60.06600 | 43.86780 | 76.47490 | 1924.74792  | -1447.26938 | -2032.90251 | 1 |
| 20106 | C | 61.19700 | 45.73880 | 76.87590 | -755.21103  | -28.76892   | 503.24446   | 1 |
| 20107 | H | 62.10800 | 45.47580 | 76.29590 | -205.32545  | -2886.01693 | 1224.11527  | 1 |
| 20108 | H | 61.43300 | 46.19080 | 77.86290 | -2219.75341 | 860.90680   | -2068.62879 | 1 |
| 20109 | O | 60.39300 | 46.65880 | 76.10090 | 297.03439   | 658.41511   | 308.52724   | 1 |
| 20110 | H | 59.93500 | 47.30180 | 76.64590 | -933.61401  | 1922.18738  | 2301.14223  | 1 |
| 20111 | C | 61.25600 | 43.57680 | 78.15690 | -180.20461  | -160.99100  | 868.69469   | 1 |
| 20112 | O | 61.74400 | 44.02380 | 79.23190 | 667.69655   | 408.95211   | 81.23428    | 1 |
| 20113 | O | 61.55900 | 42.43480 | 77.70390 | 606.02463   | -496.79187  | -99.16065   | 1 |
| 20114 | N | 68.09800 | 39.69880 | 83.86190 | 572.14840   | 348.49268   | 499.13078   | 1 |
| 20115 | H | 68.31400 | 38.85080 | 84.42290 | 910.88142   | 2167.50233  | 2074.67999  | 1 |
| 20116 | H | 68.24600 | 39.59180 | 82.83790 | 1776.28789  | -2242.63956 | 1296.88740  | 1 |
| 20117 | H | 67.12500 | 40.02180 | 84.03590 | 1021.91205  | 1010.50969  | -2812.12598 | 1 |
| 20118 | C | 68.95200 | 40.75780 | 84.30590 | 778.07659   | 145.19269   | 439.13499   | 1 |
| 20119 | H | 68.94300 | 40.82480 | 85.38390 | 1946.89076  | 224.15770   | 2447.69469  | 1 |
| 20120 | C | 70.47100 | 40.56280 | 83.91090 | -111.17474  | 612.18102   | 650.97023   | 1 |
| 20121 | H | 70.98000 | 41.53880 | 84.06090 | 2031.63668  | 2398.07471  | -140.54322  | 1 |
| 20122 | H | 70.47900 | 40.45980 | 82.80490 | 230.87820   | -2500.71031 | -1910.58185 | 1 |
| 20123 | C | 71.15500 | 39.33080 | 84.51890 | -125.96207  | -756.64873  | 479.63392   | 1 |
| 20124 | H | 72.17500 | 39.10180 | 84.14190 | 2817.89958  | -1317.06781 | 463.57001   | 1 |
| 20125 | H | 70.62200 | 38.43880 | 84.12690 | 2587.53815  | 176.90232   | -1797.22989 | 1 |
| 20126 | C | 71.32300 | 39.38980 | 86.03290 | 464.33305   | 679.77286   | -405.47193  | 1 |
| 20127 | H | 70.30800 | 39.45380 | 86.48090 | 141.44274   | -558.29009  | -3108.29175 | 1 |
| 20128 | H | 71.82700 | 40.34380 | 86.29990 | -1193.87842 | 1305.33389  | 2585.34378  | 1 |
| 20129 | C | 71.99000 | 38.13380 | 86.56490 | 194.03726   | -858.91623  | 229.05791   | 1 |
| 20130 | H | 71.54000 | 37.18180 | 86.20890 | 2224.79382  | -2113.60034 | 688.02257   | 1 |
| 20131 | H | 73.02200 | 38.05280 | 86.16090 | -2221.81265 | -1829.88731 | 1254.02116  | 1 |
| 20132 | N | 72.01700 | 38.08680 | 88.06190 | -229.59529  | 310.00148   | 733.44118   | 1 |
| 20133 | H | 72.40100 | 38.94980 | 88.49690 | -1217.21774 | 2185.16780  | -1919.72237 | 1 |
| 20134 | H | 71.06600 | 37.95380 | 88.46190 | -1433.98301 | -2002.52624 | -1974.52569 | 1 |
| 20135 | H | 72.60700 | 37.30680 | 88.41590 | 2887.40422  | 1133.45820  | -547.80871  | 1 |
| 20136 | C | 68.42100 | 42.10180 | 83.76190 | -828.68968  | -100.29749  | 353.52751   | 1 |
| 20137 | O | 67.82500 | 42.17680 | 82.71690 | -522.46483  | -578.24881  | -145.69599  | 1 |
| 20138 | N | 68.61900 | 43.27580 | 84.43490 | -646.73735  | 539.43822   | -50.62206   | 1 |
| 20139 | H | 69.20800 | 43.27780 | 85.23890 | 2269.61228  | 2046.31764  | 731.39343   | 1 |
| 20140 | C | 67.99400 | 44.54780 | 83.99690 | 242.22327   | 239.65341   | -857.65584  | 1 |
| 20141 | H | 68.34000 | 44.71780 | 82.98890 | 859.28505   | -1424.96824 | -2682.87345 | 1 |

|       |   |          |          |          |             |             |             |   |
|-------|---|----------|----------|----------|-------------|-------------|-------------|---|
| 20142 | H | 66.91700 | 44.46680 | 83.96490 | -771.71817  | -607.43786  | -3001.32564 | 1 |
| 20143 | C | 68.37200 | 45.68480 | 84.92590 | 184.71477   | -323.15887  | 821.12600   | 1 |
| 20144 | O | 68.20000 | 46.83880 | 84.64490 | -683.00458  | -369.89724  | 136.18410   | 1 |
| 20145 | N | 68.83800 | 45.43480 | 86.17690 | -151.39229  | 591.14501   | -593.20456  | 1 |
| 20146 | H | 69.14100 | 44.52880 | 86.46290 | 2037.86272  | 2008.17543  | 1293.47752  | 1 |
| 20147 | C | 69.04600 | 46.53980 | 87.06590 | -543.11290  | -347.51654  | -657.51677  | 1 |
| 20148 | H | 68.12300 | 47.09580 | 87.14390 | 66.79450    | -2805.07552 | 1417.01724  | 1 |
| 20149 | C | 69.42500 | 45.95680 | 88.48290 | -271.04632  | -712.62990  | -516.04010  | 1 |
| 20150 | H | 69.61000 | 46.79780 | 89.18490 | -408.86347  | 2761.07606  | -1457.13173 | 1 |
| 20151 | H | 70.26400 | 45.23680 | 88.37490 | 2380.76341  | 925.05122   | 1824.20722  | 1 |
| 20152 | N | 68.12900 | 45.25980 | 90.58990 | 462.36708   | 307.07757   | -647.40092  | 1 |
| 20153 | H | 68.44200 | 46.05880 | 91.10290 | -328.47456  | 2959.17630  | 992.16865   | 1 |
| 20154 | C | 68.28000 | 45.18480 | 89.23290 | 520.81394   | 325.89567   | -685.24677  | 1 |
| 20155 | C | 67.11100 | 44.45380 | 90.92790 | 646.22292   | -342.19029  | 537.41111   | 1 |
| 20156 | H | 66.88800 | 44.18780 | 91.96090 | 1811.91205  | 2561.03972  | -212.46332  | 1 |
| 20157 | N | 66.50500 | 43.97780 | 89.88790 | -539.24208  | 462.16351   | -462.61130  | 1 |
| 20158 | C | 67.24500 | 44.40280 | 88.80090 | 235.07908   | 628.65201   | 602.06080   | 1 |
| 20159 | H | 67.06100 | 44.12980 | 87.76890 | 2201.34033  | 768.29515   | -2124.52362 | 1 |
| 20160 | C | 70.13100 | 47.50080 | 86.71590 | 173.75021   | 437.41516   | -791.55036  | 1 |
| 20161 | O | 69.95600 | 48.68880 | 86.84090 | 222.56843   | -629.44933  | 414.01667   | 1 |
| 20162 | N | 71.22300 | 46.97380 | 86.14590 | 204.81638   | 808.13477   | 108.88488   | 1 |
| 20163 | H | 71.30800 | 45.98380 | 86.05590 | 1395.89859  | -1037.40305 | 2609.96915  | 1 |
| 20164 | C | 72.34500 | 47.79380 | 85.73390 | 660.79876   | 626.73078   | -9.96498    | 1 |
| 20165 | H | 72.45100 | 48.61880 | 86.42290 | -1545.46175 | 574.38727   | -2691.05549 | 1 |
| 20166 | C | 73.65200 | 47.05680 | 85.70090 | -425.71347  | 46.73580    | 792.00379   | 1 |
| 20167 | H | 73.55600 | 46.00080 | 85.36790 | 3039.37973  | 629.25178   | -526.64808  | 1 |
| 20168 | H | 74.35000 | 47.50180 | 84.95990 | -1972.90628 | 1037.14966  | -2232.97782 | 1 |
| 20169 | C | 74.30700 | 47.04680 | 87.09390 | 480.98230   | 149.99186   | 746.86726   | 1 |
| 20170 | H | 74.48500 | 48.04780 | 87.54190 | 2371.12486  | 2027.46513  | -411.96702  | 1 |
| 20171 | H | 75.34400 | 46.64680 | 87.06490 | 1467.72174  | -1261.11581 | 2468.31487  | 1 |
| 20172 | C | 73.53900 | 46.29480 | 88.22990 | 59.57164    | 863.48185   | 266.66990   | 1 |
| 20173 | O | 73.14300 | 46.94180 | 89.21590 | 701.60397   | -339.67769  | -151.87416  | 1 |
| 20174 | N | 73.26100 | 44.98580 | 88.05190 | -504.81886  | 156.89550   | -670.43680  | 1 |
| 20175 | H | 73.59700 | 44.45680 | 87.27190 | 3145.80569  | 6.48472     | -99.37089   | 1 |
| 20176 | H | 72.71800 | 44.56680 | 88.77890 | 2894.65267  | 211.77240   | -1230.25333 | 1 |
| 20177 | C | 72.00600 | 48.49580 | 84.37690 | -652.52051  | 175.99455   | -624.18738  | 1 |
| 20178 | O | 72.38900 | 49.64980 | 84.14890 | 350.31640   | 169.84020   | -698.03500  | 1 |
| 20179 | N | 71.16500 | 47.88080 | 83.49290 | -303.15304  | -767.22376  | -195.94143  | 1 |
| 20180 | H | 70.90700 | 46.92780 | 83.63290 | 363.98006   | -1765.40643 | 2566.99020  | 1 |
| 20181 | C | 70.59400 | 48.62080 | 82.36290 | -863.52263  | -289.81833  | -73.54308   | 1 |
| 20182 | H | 71.41900 | 49.01280 | 81.78590 | 1034.78521  | 2208.28216  | -1998.36773 | 1 |
| 20183 | C | 69.70100 | 47.63480 | 81.51590 | -165.67591  | -344.49176  | -839.80251  | 1 |
| 20184 | H | 69.09700 | 47.05380 | 82.24590 | 657.60912   | -2146.65452 | 2192.75733  | 1 |
| 20185 | H | 69.01800 | 48.11480 | 80.78390 | 2983.72361  | -664.97893  | 727.25700   | 1 |
| 20186 | C | 70.56200 | 46.67680 | 80.62690 | 282.31392   | 211.65759   | 828.22551   | 1 |
| 20187 | H | 71.33500 | 46.24680 | 81.29890 | -1917.83989 | 822.52708   | -2367.84591 | 1 |
| 20188 | H | 71.11300 | 47.16180 | 79.79190 | -946.23148  | -445.65707  | 2955.44761  | 1 |
| 20189 | C | 69.74500 | 45.52780 | 80.02090 | 523.04167   | -391.51330  | 622.48364   | 1 |
| 20190 | H | 69.31500 | 44.92580 | 80.84990 | -1230.52272 | 1844.36171  | 2220.02125  | 1 |
| 20191 | H | 70.38800 | 44.89380 | 79.37490 | 1014.29078  | -779.65970  | -2886.48899 | 1 |
| 20192 | C | 68.59400 | 45.99380 | 79.11190 | -665.02027  | -12.29125   | -637.30567  | 1 |
| 20193 | H | 67.85700 | 46.48980 | 79.77890 | 2251.65045  | -497.05708  | -2150.38313 | 1 |
| 20194 | H | 68.97400 | 46.63180 | 78.28490 | 914.76839   | -2519.43065 | 1633.33235  | 1 |
| 20195 | N | 68.02900 | 44.78280 | 78.47990 | -648.23767  | 412.23324   | 341.40103   | 1 |
| 20196 | H | 67.98800 | 44.08980 | 79.25490 | 455.28824   | -1690.80126 | 2600.92417  | 1 |
| 20197 | H | 67.10500 | 44.86980 | 78.00990 | 1931.05353  | 1360.88336  | 2064.70363  | 1 |
| 20198 | H | 68.67200 | 44.54580 | 77.69790 | 415.92101   | 2949.46587  | 1002.53661  | 1 |
| 20199 | C | 69.71700 | 49.79980 | 82.79390 | -618.73070  | -325.49733  | 576.16595   | 1 |
| 20200 | O | 69.79800 | 50.86580 | 82.22390 | 538.81227   | 474.22327   | -336.61224  | 1 |
| 20201 | N | 68.85600 | 49.66080 | 83.84290 | 593.72544   | 431.35354   | -425.40192  | 1 |
| 20202 | H | 68.79800 | 48.77280 | 84.29290 | -979.05634  | 2661.76826  | -1370.23644 | 1 |
| 20203 | C | 68.00000 | 50.77580 | 84.28590 | 714.36436   | -557.77114  | 93.40731    | 1 |

|       |   |          |          |          |             |             |             |   |
|-------|---|----------|----------|----------|-------------|-------------|-------------|---|
| 20204 | H | 67.57400 | 51.25780 | 83.41790 | 2427.90400  | 1118.77448  | 1646.74543  | 1 |
| 20205 | C | 66.81200 | 50.11480 | 85.12790 | -332.60095  | -306.88801  | 782.72538   | 1 |
| 20206 | H | 67.22400 | 49.50880 | 85.96190 | -139.47885  | 1648.92335  | -2684.57783 | 1 |
| 20207 | H | 66.27300 | 50.96480 | 85.59790 | -1695.27368 | 917.34281   | 2476.55495  | 1 |
| 20208 | C | 65.87200 | 49.30880 | 84.17590 | 394.90314   | 649.91124   | -510.18056  | 1 |
| 20209 | H | 66.45800 | 48.61780 | 83.53290 | -1810.62980 | 374.50712   | 2535.42826  | 1 |
| 20210 | H | 65.40700 | 50.13980 | 83.60490 | -2339.09592 | -443.18660  | -2067.66409 | 1 |
| 20211 | C | 64.58100 | 48.69080 | 84.76490 | 226.09863   | 672.50352   | 560.17978   | 1 |
| 20212 | H | 63.91200 | 48.26980 | 83.98490 | -2067.14675 | -2147.84361 | -1021.12150 | 1 |
| 20213 | H | 64.00700 | 49.44380 | 85.34690 | 2912.33529  | 1182.06847  | 97.33367    | 1 |
| 20214 | N | 64.98200 | 47.51680 | 85.61290 | -664.91701  | 242.15192   | -469.41606  | 1 |
| 20215 | H | 64.97100 | 46.61780 | 85.17490 | -2237.00020 | 366.26508   | 2170.62053  | 1 |
| 20216 | C | 64.91300 | 47.44980 | 86.91190 | 516.27658   | 617.48760   | -434.97523  | 1 |
| 20217 | N | 65.22000 | 46.31280 | 87.50190 | 290.93333   | -638.29790  | -485.27461  | 1 |
| 20218 | H | 65.23700 | 45.48880 | 86.93590 | -2930.42837 | -15.47315   | 1132.05777  | 1 |
| 20219 | H | 64.79200 | 46.14780 | 88.39090 | -218.77295  | 1128.27858  | 2916.41874  | 1 |
| 20220 | N | 64.55700 | 48.39180 | 87.74590 | 367.16060   | 729.35435   | 193.37928   | 1 |
| 20221 | H | 64.32200 | 49.30080 | 87.40390 | 1717.77950  | -1468.61692 | 2181.59809  | 1 |
| 20222 | H | 64.48300 | 48.15980 | 88.71590 | 897.63727   | 603.06479   | 2943.91369  | 1 |
| 20223 | C | 68.76300 | 51.77380 | 85.17190 | -286.17697  | 629.33475   | -602.70637  | 1 |
| 20224 | O | 68.31700 | 52.89480 | 85.38790 | 454.31736   | -471.09918  | -452.45749  | 1 |
| 20225 | N | 69.99200 | 51.44480 | 85.66490 | 2.71915     | -340.40751  | 763.10549   | 1 |
| 20226 | H | 70.22400 | 50.48180 | 85.78290 | -2461.59986 | 944.13598   | -1726.90626 | 1 |
| 20227 | C | 71.03900 | 52.33780 | 86.14090 | -581.93133  | 505.91242   | 475.10551   | 1 |
| 20228 | H | 70.60600 | 52.99280 | 86.88290 | -1990.94727 | -1244.51668 | -2105.66098 | 1 |
| 20229 | C | 72.06500 | 51.49980 | 86.96290 | 573.76024   | -556.61345  | 430.33180   | 1 |
| 20230 | H | 72.56500 | 50.79680 | 86.26290 | -1933.07539 | 2227.85206  | -1102.62695 | 1 |
| 20231 | H | 71.46100 | 50.99980 | 87.75090 | 560.48785   | 3081.56903  | -280.89386  | 1 |
| 20232 | C | 73.17300 | 52.34480 | 87.63990 | 59.98324    | 699.62155   | -589.78389  | 1 |
| 20233 | H | 73.64300 | 52.97080 | 86.85090 | 1255.30795  | -185.30317  | 2868.22625  | 1 |
| 20234 | H | 74.04000 | 51.75980 | 88.01390 | 320.04030   | 2012.40000  | 2384.03258  | 1 |
| 20235 | C | 72.66500 | 53.24480 | 88.79790 | -478.04769  | 560.97048   | 523.67235   | 1 |
| 20236 | H | 72.29600 | 54.16380 | 88.29490 | -1899.74746 | -2178.60620 | 1237.00935  | 1 |
| 20237 | H | 71.81600 | 52.78380 | 89.34490 | -611.61823  | 2477.06376  | -1846.76659 | 1 |
| 20238 | C | 73.72900 | 53.65480 | 89.76990 | 779.73216   | -157.16668  | 437.01378   | 1 |
| 20239 | H | 74.54200 | 54.24280 | 89.29390 | -2182.34275 | -1073.31267 | 1986.81002  | 1 |
| 20240 | H | 74.15700 | 52.71680 | 90.18490 | -257.98359  | 181.43153   | 3119.20826  | 1 |
| 20241 | N | 73.08500 | 54.51480 | 90.80690 | -312.13178  | -450.87323  | 634.09692   | 1 |
| 20242 | H | 72.42900 | 53.95380 | 91.38690 | 1691.60202  | -1867.58021 | -1898.08776 | 1 |
| 20243 | H | 72.53100 | 55.23180 | 90.29690 | 245.41774   | 3096.51651  | 469.38741   | 1 |
| 20244 | H | 73.73600 | 55.06480 | 91.40390 | 2155.77025  | -2112.73157 | 887.20414   | 1 |
| 20245 | C | 71.68500 | 53.15880 | 85.00390 | 622.85733   | -426.77001  | -521.33755  | 1 |
| 20246 | O | 71.94000 | 54.39380 | 85.13790 | 209.30480   | -65.43527   | 748.84559   | 1 |
| 20247 | N | 72.06400 | 52.55680 | 83.85790 | -513.81699  | -561.98131  | 357.08517   | 1 |
| 20248 | H | 72.02800 | 51.56080 | 83.83890 | -1341.10324 | -2231.97483 | -1778.41156 | 1 |
| 20249 | C | 72.45900 | 53.18580 | 82.59290 | 270.89472   | 717.25955   | 481.93228   | 1 |
| 20250 | H | 73.31700 | 53.82280 | 82.75190 | -2567.95505 | 740.50116   | -1672.49836 | 1 |
| 20251 | C | 72.73700 | 52.17980 | 81.49090 | -527.05995  | -457.92153  | 577.27441   | 1 |
| 20252 | H | 73.16400 | 52.69180 | 80.60190 | -871.78771  | -2304.71920 | -1967.09080 | 1 |
| 20253 | H | 73.43100 | 51.39180 | 81.85490 | 1351.55292  | 498.07726   | -2807.48892 | 1 |
| 20254 | H | 71.81100 | 51.66480 | 81.15690 | -243.12557  | 2448.19247  | -1971.94397 | 1 |
| 20255 | C | 71.42300 | 54.10280 | 82.09390 | -691.77939  | -586.23721  | 100.32104   | 1 |
| 20256 | O | 71.72400 | 55.20980 | 81.62890 | -554.90869  | -246.77717  | 497.83383   | 1 |
| 20257 | N | 70.15100 | 53.68580 | 82.18190 | -344.01806  | 458.23455   | -629.94891  | 1 |
| 20258 | H | 69.93300 | 52.74080 | 82.41190 | -2054.59677 | -911.74532  | 2193.24440  | 1 |
| 20259 | C | 69.05200 | 54.61880 | 81.81290 | -663.78664  | 376.71292   | 492.33719   | 1 |
| 20260 | H | 69.27300 | 54.93580 | 80.80490 | 2241.01921  | 930.53964   | -2008.67081 | 1 |
| 20261 | C | 67.72000 | 53.76380 | 81.88590 | 637.38847   | -552.42789  | 335.48284   | 1 |
| 20262 | H | 67.86000 | 52.87180 | 81.23890 | -2065.60674 | -2289.26734 | 623.79050   | 1 |
| 20263 | H | 67.52600 | 53.54180 | 82.95690 | -1561.18409 | -2707.03761 | 370.42269   | 1 |
| 20264 | C | 66.42000 | 54.44080 | 81.37090 | 428.16621   | -47.04363   | -810.77053  | 1 |
| 20265 | H | 66.26400 | 55.30580 | 82.05090 | -683.94594  | -584.35067  | 3007.66367  | 1 |

|       |   |          |          |          |             |             |             |   |
|-------|---|----------|----------|----------|-------------|-------------|-------------|---|
| 20266 | C | 66.51600 | 54.88780 | 79.91790 | -175.62812  | -435.09582  | 774.49107   | 1 |
| 20267 | H | 67.34800 | 55.61980 | 79.84090 | -806.33307  | -2374.20799 | -1909.34041 | 1 |
| 20268 | H | 66.83700 | 54.05780 | 79.25390 | 1896.34991  | 2069.85276  | -1425.70100 | 1 |
| 20269 | H | 65.61300 | 55.35880 | 79.47290 | -1670.07846 | -79.20129   | 2659.20964  | 1 |
| 20270 | C | 65.08700 | 53.64980 | 81.60090 | -733.23207  | 300.29283   | -461.75133  | 1 |
| 20271 | H | 64.19400 | 54.26480 | 81.35690 | -2513.57008 | 1571.23124  | 1049.99450  | 1 |
| 20272 | H | 65.13500 | 52.68680 | 81.04990 | -597.64101  | -3074.51200 | -317.04187  | 1 |
| 20273 | H | 65.04700 | 53.31080 | 82.65790 | -2824.26134 | -1354.05935 | 309.17022   | 1 |
| 20274 | C | 68.94000 | 55.86580 | 82.65390 | -72.35284   | -829.56281  | 365.53057   | 1 |
| 20275 | O | 68.94800 | 56.97480 | 82.06590 | -448.98894  | 136.69942   | 628.64884   | 1 |
| 20276 | N | 68.95500 | 55.70480 | 84.03490 | 278.08921   | -556.32186  | 563.10603   | 1 |
| 20277 | H | 68.90000 | 54.78480 | 84.41390 | 1044.81786  | -533.73438  | 2910.35253  | 1 |
| 20278 | C | 69.01700 | 56.76980 | 84.97390 | -535.92622  | -435.82794  | 589.76596   | 1 |
| 20279 | H | 68.18000 | 57.41880 | 84.76190 | -1647.45543 | -1801.11554 | -1995.28869 | 1 |
| 20280 | C | 68.98700 | 56.10080 | 86.37390 | 385.01593   | 767.72484   | -307.57984  | 1 |
| 20281 | H | 67.97000 | 55.65380 | 86.34790 | 1888.20486  | 1407.57866  | 2075.57676  | 1 |
| 20282 | H | 69.84200 | 55.41280 | 86.55090 | -1619.99118 | 813.48318   | 2562.50341  | 1 |
| 20283 | C | 69.01600 | 57.12980 | 87.55390 | -624.32867  | 582.34300   | 308.88132   | 1 |
| 20284 | H | 68.64300 | 58.10980 | 87.18590 | 2089.26267  | -1167.40158 | -2050.00407 | 1 |
| 20285 | H | 70.04000 | 57.51080 | 87.75690 | 2154.55868  | 1392.64978  | -1826.21459 | 1 |
| 20286 | C | 68.28500 | 56.64680 | 88.80690 | -56.98660   | -653.10276  | -644.95100  | 1 |
| 20287 | H | 67.27800 | 56.32580 | 88.46590 | -516.84085  | -2480.39706 | -1877.23848 | 1 |
| 20288 | H | 68.78000 | 55.77180 | 89.27990 | -2708.38037 | -133.86664  | 1587.47164  | 1 |
| 20289 | C | 68.18300 | 57.76180 | 89.88990 | -301.55837  | -724.17842  | 463.32912   | 1 |
| 20290 | H | 67.70500 | 58.60680 | 89.34890 | -1411.51799 | -1850.10519 | 2113.79583  | 1 |
| 20291 | H | 69.18300 | 58.07080 | 90.26390 | 2505.21264  | -25.05664   | 1895.41186  | 1 |
| 20292 | N | 67.28600 | 57.24180 | 90.94090 | -427.35756  | -729.30933  | -71.60393   | 1 |
| 20293 | H | 67.23400 | 57.85680 | 91.77790 | -2217.05297 | 399.78465   | -2202.06030 | 1 |
| 20294 | H | 66.34800 | 56.94180 | 90.60490 | 2025.02079  | 1888.25288  | -1495.97933 | 1 |
| 20295 | H | 67.76700 | 56.37380 | 91.25190 | 2451.71403  | -668.69683  | 1849.01909  | 1 |
| 20296 | C | 70.26400 | 57.65280 | 84.87290 | 241.76368   | -476.27354  | -747.45930  | 1 |
| 20297 | O | 70.14300 | 58.87780 | 84.98790 | -352.00909  | 641.15756   | -303.68038  | 1 |
| 20298 | N | 71.49100 | 57.15780 | 84.71690 | 523.89146   | -578.23634  | 313.71041   | 1 |
| 20299 | H | 71.63100 | 56.17080 | 84.69590 | 191.59395   | -1748.19240 | -2618.33745 | 1 |
| 20300 | C | 72.71900 | 57.94580 | 84.52690 | -331.87025  | 620.69531   | 570.99214   | 1 |
| 20301 | H | 72.79500 | 58.56780 | 85.40690 | -1954.42550 | 2421.14515  | -472.54501  | 1 |
| 20302 | C | 74.01800 | 57.10780 | 84.51390 | -90.52778   | 855.99416   | 289.60251   | 1 |
| 20303 | H | 74.13900 | 56.57280 | 83.54790 | 1095.82774  | -2285.40230 | -1872.96926 | 1 |
| 20304 | O | 74.08600 | 56.29880 | 85.65490 | -368.43632  | -695.57568  | 72.57526    | 1 |
| 20305 | H | 73.52300 | 55.52680 | 85.55590 | 2454.60387  | -869.58241  | -1774.32266 | 1 |
| 20306 | C | 75.19200 | 58.07780 | 84.76890 | 18.69959    | -910.31488  | -71.63354   | 1 |
| 20307 | H | 75.21200 | 58.81580 | 83.93790 | 3117.04446  | 66.42821    | -416.04279  | 1 |
| 20308 | H | 76.17100 | 57.55180 | 84.75690 | 2080.31979  | -2327.89268 | -394.75131  | 1 |
| 20309 | H | 75.14700 | 58.74180 | 85.65790 | 1241.68768  | 321.38165   | -2880.91332 | 1 |
| 20310 | C | 72.59200 | 58.81480 | 83.22690 | -332.57037  | 260.84769   | -816.76451  | 1 |
| 20311 | O | 73.01500 | 59.98280 | 83.18890 | -342.83715  | -21.05914   | -719.99236  | 1 |
| 20312 | N | 72.00200 | 58.27580 | 82.17390 | 265.99787   | -474.49940  | -652.99269  | 1 |
| 20313 | H | 71.78800 | 57.30480 | 82.23390 | 1712.41435  | 745.21129   | -2538.81690 | 1 |
| 20314 | C | 71.67800 | 58.96180 | 80.92490 | 195.03254   | -849.65981  | -272.68048  | 1 |
| 20315 | H | 72.62500 | 59.27280 | 80.50790 | 161.54240   | 871.21970   | 3010.79805  | 1 |
| 20316 | C | 71.09500 | 58.12480 | 79.80190 | -410.79276  | -506.97801  | -646.39630  | 1 |
| 20317 | H | 70.05700 | 57.80880 | 80.03990 | -2608.66229 | 1041.90119  | 1414.45996  | 1 |
| 20318 | O | 71.89200 | 56.91180 | 79.71290 | 478.08734   | 457.88590   | 419.47237   | 1 |
| 20319 | H | 71.56000 | 56.30780 | 80.38190 | -2280.70442 | 2128.77265  | -430.74338  | 1 |
| 20320 | C | 71.17200 | 58.81080 | 78.46790 | 505.92222   | 21.70086    | 748.31272   | 1 |
| 20321 | H | 72.19700 | 59.09080 | 78.14290 | 1928.56641  | 922.08949   | 2298.03620  | 1 |
| 20322 | H | 70.51100 | 59.70180 | 78.53390 | -411.33798  | 3062.13109  | 593.45666   | 1 |
| 20323 | H | 70.87600 | 58.20880 | 77.58290 | 633.75977   | -1571.55403 | -2657.07423 | 1 |
| 20324 | C | 70.83300 | 60.20580 | 81.08790 | -912.72187  | -35.80337   | -55.34504   | 1 |
| 20325 | O | 71.24500 | 61.35880 | 80.80990 | 295.10042   | -476.02553  | 548.15284   | 1 |
| 20326 | N | 69.70300 | 59.95480 | 81.76090 | -228.78229  | -416.05940  | 692.20455   | 1 |
| 20327 | H | 69.43500 | 59.01180 | 81.94290 | -1317.97085 | 1569.50928  | 2380.82814  | 1 |

|       |   |          |          |          |             |             |             |   |
|-------|---|----------|----------|----------|-------------|-------------|-------------|---|
| 20328 | C | 68.79200 | 60.93480 | 82.26090 | -458.66653  | 36.73231    | -795.03063  | 1 |
| 20329 | H | 68.27700 | 61.41580 | 81.44290 | -289.04454  | 1163.99415  | 2902.68645  | 1 |
| 20330 | C | 67.64800 | 60.18880 | 82.90290 | 567.99923   | -683.92811  | -206.01598  | 1 |
| 20331 | H | 68.05500 | 59.43180 | 83.60690 | -1278.27981 | 2173.20884  | 1875.05957  | 1 |
| 20332 | C | 66.77000 | 61.10180 | 83.78390 | 324.32109   | 658.50292   | -543.38922  | 1 |
| 20333 | H | 65.86900 | 60.56480 | 84.14890 | 2407.00446  | 640.88392   | 1913.04682  | 1 |
| 20334 | H | 66.36600 | 61.97780 | 83.23390 | -1847.25847 | 2365.13960  | -951.09275  | 1 |
| 20335 | H | 67.30500 | 61.44380 | 84.69590 | -2709.72009 | 1600.20873  | -20.07739   | 1 |
| 20336 | C | 66.87700 | 59.43380 | 81.79990 | -554.76589  | -580.77607  | -442.42867  | 1 |
| 20337 | H | 65.98800 | 58.91880 | 82.22390 | 1819.57357  | -2565.46117 | 44.51815    | 1 |
| 20338 | H | 67.56900 | 58.76680 | 81.24290 | 2703.55368  | -1098.30029 | -1177.09817 | 1 |
| 20339 | H | 66.48400 | 60.21480 | 81.11490 | 1607.94260  | -16.54917   | -2708.42040 | 1 |
| 20340 | C | 69.33700 | 61.96280 | 83.14390 | 169.41188   | 748.50247   | -496.10866  | 1 |
| 20341 | O | 69.12900 | 63.14880 | 82.91090 | -220.16816  | -647.16608  | 392.85936   | 1 |
| 20342 | N | 70.16800 | 61.60980 | 84.15190 | 637.50710   | -180.99071  | 514.27285   | 1 |
| 20343 | H | 70.42600 | 60.68180 | 84.41090 | 572.44504   | -1722.00824 | 2563.66015  | 1 |
| 20344 | C | 70.81100 | 62.52780 | 85.05990 | 763.55127   | -90.30022   | 480.94846   | 1 |
| 20345 | H | 70.02500 | 63.10980 | 85.51790 | -1692.24116 | -1787.33670 | -1968.80163 | 1 |
| 20346 | C | 71.57800 | 61.78180 | 86.15290 | -648.39234  | 65.61318    | 632.56494   | 1 |
| 20347 | H | 72.12500 | 60.95180 | 85.65690 | -2584.37879 | 1100.14803  | -1426.47151 | 1 |
| 20348 | C | 72.63700 | 62.69880 | 86.91090 | 508.23624   | 452.91061   | -610.45347  | 1 |
| 20349 | H | 73.14200 | 62.11380 | 87.70790 | -1398.76934 | -1335.44963 | 2476.50596  | 1 |
| 20350 | H | 72.14800 | 63.58180 | 87.37590 | -37.26404   | 3115.76084  | -424.61865  | 1 |
| 20351 | H | 73.44600 | 62.89480 | 86.17490 | -1422.22576 | -1984.85421 | -1993.63522 | 1 |
| 20352 | C | 70.63500 | 61.17080 | 87.20590 | 552.00393   | 531.65998   | 483.26520   | 1 |
| 20353 | H | 69.64800 | 60.89180 | 86.77890 | -1579.47180 | 137.91482   | 2711.59627  | 1 |
| 20354 | H | 70.45800 | 61.96580 | 87.96190 | 2867.07509  | 893.72701   | 925.00068   | 1 |
| 20355 | C | 71.26700 | 59.95680 | 87.91890 | 84.39957    | -813.60657  | -415.19974  | 1 |
| 20356 | H | 70.48700 | 59.54080 | 88.59190 | -1871.27492 | -1679.13835 | -1901.92928 | 1 |
| 20357 | H | 71.59500 | 59.21580 | 87.15890 | -1925.74738 | -1981.88814 | 1500.56651  | 1 |
| 20358 | H | 72.13800 | 60.22880 | 88.55390 | -2474.32391 | -79.39147   | 1935.29185  | 1 |
| 20359 | C | 71.66200 | 63.52580 | 84.35490 | 435.65974   | 632.55091   | -493.90992  | 1 |
| 20360 | O | 71.52800 | 64.71780 | 84.59990 | -445.84338  | -350.72100  | 546.62306   | 1 |
| 20361 | N | 72.44000 | 63.06280 | 83.35390 | -627.02548  | 556.39101   | -118.19203  | 1 |
| 20362 | H | 72.41000 | 62.08380 | 83.16990 | 383.84384   | -135.92728  | 3112.55464  | 1 |
| 20363 | C | 73.23300 | 63.90780 | 82.52590 | 362.39557   | -426.64716  | 712.07262   | 1 |
| 20364 | H | 73.88400 | 64.42880 | 83.21190 | 548.12828   | 1391.91520  | 2760.61253  | 1 |
| 20365 | C | 74.22100 | 63.07780 | 81.65290 | -149.12935  | 809.11784   | -401.64750  | 1 |
| 20366 | H | 73.76600 | 62.28180 | 81.02690 | -2508.59263 | -11.29969   | 1895.72048  | 1 |
| 20367 | H | 74.79000 | 62.50380 | 82.41590 | 2270.24357  | -1218.23418 | 1794.73879  | 1 |
| 20368 | C | 75.19500 | 63.90380 | 80.72890 | -546.25556  | 264.79055   | 676.51373   | 1 |
| 20369 | H | 74.55500 | 64.48980 | 80.03390 | -770.91263  | 2581.68519  | 1621.07082  | 1 |
| 20370 | C | 76.09000 | 64.93880 | 81.32490 | 10.79118    | -877.59966  | -251.80790  | 1 |
| 20371 | H | 76.90300 | 64.44380 | 81.89790 | 1436.57286  | -2322.37376 | 1551.61064  | 1 |
| 20372 | H | 75.62900 | 65.65480 | 82.03890 | -742.40897  | 2217.42357  | 2099.85397  | 1 |
| 20373 | H | 76.67100 | 65.48180 | 80.54890 | -1952.37794 | -2389.68158 | 614.38726   | 1 |
| 20374 | C | 76.03300 | 62.90280 | 79.89590 | -462.52171  | -254.04080  | 737.93655   | 1 |
| 20375 | H | 76.48300 | 62.22980 | 80.65690 | 2597.06825  | 1526.36507  | -907.61133  | 1 |
| 20376 | H | 76.84200 | 63.38880 | 79.30890 | 1493.32365  | -1395.89410 | 2380.86759  | 1 |
| 20377 | H | 75.43400 | 62.30680 | 79.17490 | 2297.91662  | -2142.76094 | -70.83047   | 1 |
| 20378 | C | 72.43700 | 64.90980 | 81.66490 | -225.51182  | 778.97903   | 412.83319   | 1 |
| 20379 | O | 72.81300 | 66.08780 | 81.57690 | -437.05328  | -600.29137  | -279.71521  | 1 |
| 20380 | N | 71.36300 | 64.44380 | 80.99590 | -327.84715  | 573.58488   | 522.09923   | 1 |
| 20381 | H | 71.19000 | 63.46780 | 81.10790 | 1195.00195  | 1442.99251  | 2519.91848  | 1 |
| 20382 | C | 70.42600 | 65.14580 | 80.24290 | -627.49429  | 556.92213   | 358.84352   | 1 |
| 20383 | H | 71.03900 | 65.71780 | 79.56190 | -2617.06162 | -1464.67174 | -965.84898  | 1 |
| 20384 | C | 69.50000 | 64.18580 | 79.47790 | 244.58674   | -7.86921    | 872.05543   | 1 |
| 20385 | H | 69.27400 | 63.33580 | 80.15590 | 14.06284    | 1064.78090  | -2966.00371 | 1 |
| 20386 | C | 68.14600 | 64.84580 | 79.02290 | 715.97755   | -206.36765  | -524.54766  | 1 |
| 20387 | H | 67.51200 | 65.16380 | 79.87790 | 856.94058   | -3026.00509 | 18.07280    | 1 |
| 20388 | H | 67.58600 | 64.15180 | 78.35890 | -526.86321  | 2585.20359  | -1720.79642 | 1 |
| 20389 | H | 68.45800 | 65.75480 | 78.46590 | -664.59282  | -2855.71992 | 1137.20684  | 1 |

|       |   |          |          |          |             |             |             |   |
|-------|---|----------|----------|----------|-------------|-------------|-------------|---|
| 20390 | C | 70.28000 | 63.43880 | 78.39190 | -475.11112  | -679.25380  | 377.45444   | 1 |
| 20391 | H | 70.44600 | 64.25280 | 77.65390 | -152.93739  | 2024.89369  | -2409.85080 | 1 |
| 20392 | H | 71.27200 | 63.03780 | 78.69290 | -1943.41974 | 2068.33878  | -1370.82799 | 1 |
| 20393 | C | 69.41000 | 62.39680 | 77.58790 | 23.78904    | 618.73215   | 664.34063   | 1 |
| 20394 | H | 68.96100 | 61.73580 | 78.35990 | -2870.98804 | 555.68997   | -1176.29594 | 1 |
| 20395 | H | 68.57700 | 62.83380 | 76.99690 | 973.22887   | -2602.95414 | 1464.43998  | 1 |
| 20396 | H | 70.16900 | 61.86880 | 76.97190 | -1507.36810 | -2076.57864 | -1828.51547 | 1 |
| 20397 | C | 69.70600 | 66.19980 | 80.98090 | 611.90070   | -32.57079   | -676.46951  | 1 |
| 20398 | O | 69.55800 | 67.36380 | 80.51690 | 440.78933   | 316.90339   | 566.40349   | 1 |
| 20399 | N | 69.14000 | 65.92480 | 82.22190 | -563.64659  | 575.32766   | 254.17591   | 1 |
| 20400 | H | 69.22700 | 64.99080 | 82.55990 | -2546.75969 | -1685.43835 | -772.91701  | 1 |
| 20401 | C | 68.75000 | 66.92180 | 83.19690 | -552.41564  | -558.56522  | 463.94420   | 1 |
| 20402 | H | 67.89500 | 67.41080 | 82.75390 | -1206.00901 | 2107.82656  | 1997.53689  | 1 |
| 20403 | C | 68.34200 | 66.10180 | 84.47590 | 403.66664   | -490.82064  | 649.22373   | 1 |
| 20404 | H | 68.06800 | 66.67780 | 85.38590 | 740.91520   | -752.85466  | -2967.32508 | 1 |
| 20405 | H | 69.24300 | 65.50480 | 84.73090 | -2012.57951 | -2075.32950 | -1252.78755 | 1 |
| 20406 | C | 67.11800 | 65.15880 | 84.29590 | -83.67110   | -74.89202   | -909.53009  | 1 |
| 20407 | H | 67.27600 | 64.54180 | 83.38490 | -1073.54999 | -2565.17986 | -1480.50021 | 1 |
| 20408 | C | 67.17400 | 64.17980 | 85.52090 | 460.95808   | -515.50962  | -599.13926  | 1 |
| 20409 | H | 66.20600 | 63.64480 | 85.41390 | 2397.08861  | 1927.49171  | -651.09076  | 1 |
| 20410 | H | 67.27400 | 64.75380 | 86.46590 | -2869.85286 | 1242.90802  | -354.59379  | 1 |
| 20411 | H | 68.06800 | 63.52580 | 85.43190 | 1294.38050  | -788.15091  | -2761.80874 | 1 |
| 20412 | C | 65.84000 | 65.91780 | 84.21390 | 867.88328   | 266.86433   | -38.57492   | 1 |
| 20413 | H | 65.86700 | 66.56680 | 83.31290 | 2134.99966  | -2070.77577 | -1025.59095 | 1 |
| 20414 | H | 64.97100 | 65.22780 | 84.18490 | 2228.47620  | -826.73611  | -2062.74858 | 1 |
| 20415 | H | 65.68500 | 66.60280 | 85.07490 | -1730.18241 | -1805.67315 | -1916.74896 | 1 |
| 20416 | C | 69.78900 | 67.93480 | 83.58990 | -669.78685  | 590.00057   | -198.08022  | 1 |
| 20417 | O | 69.52000 | 69.15080 | 83.59590 | -330.49488  | -501.32361  | 512.77342   | 1 |
| 20418 | N | 71.02500 | 67.45980 | 83.92190 | -671.44398  | 451.09628   | -252.33206  | 1 |
| 20419 | H | 71.29900 | 66.50280 | 83.86090 | 1263.83761  | 2404.96265  | 1577.80273  | 1 |
| 20420 | C | 72.04000 | 68.25880 | 84.44690 | 12.43074    | 420.97127   | 803.71447   | 1 |
| 20421 | H | 71.72900 | 68.65180 | 85.40390 | -1705.16054 | 687.37629   | 2550.35971  | 1 |
| 20422 | C | 73.35000 | 67.44380 | 84.73490 | -747.41729  | -368.33650  | 371.96345   | 1 |
| 20423 | H | 74.10400 | 68.14980 | 85.14490 | 2986.10525  | -698.14654  | -696.97013  | 1 |
| 20424 | H | 73.20500 | 66.70780 | 85.55390 | -706.38084  | -2782.19233 | 1286.98793  | 1 |
| 20425 | H | 73.77200 | 66.98480 | 83.81490 | 2025.39785  | -2217.41883 | 927.30008   | 1 |
| 20426 | C | 72.37500 | 69.33780 | 83.44090 | -765.84709  | -336.03465  | -375.15385  | 1 |
| 20427 | O | 72.35400 | 70.52480 | 83.71590 | 531.60806   | 466.83134   | 340.76811   | 1 |
| 20428 | N | 72.52600 | 68.93380 | 82.15690 | 564.12353   | -253.84989  | 566.61362   | 1 |
| 20429 | H | 72.48400 | 67.96680 | 81.91890 | -314.81308  | 2477.98286  | -1917.84791 | 1 |
| 20430 | C | 72.88600 | 69.73780 | 81.06290 | 277.65989   | 529.10933   | -691.35934  | 1 |
| 20431 | H | 73.82700 | 70.20980 | 81.30690 | -2880.40862 | 100.79266   | -1274.94318 | 1 |
| 20432 | C | 73.15900 | 68.74380 | 79.88290 | 34.36333    | 904.61594   | -118.40888  | 1 |
| 20433 | H | 72.24600 | 68.13780 | 79.70290 | 1999.54534  | -785.60437  | -2298.99484 | 1 |
| 20434 | H | 74.00200 | 68.08380 | 80.18090 | -1461.50521 | 2589.81628  | -1039.85540 | 1 |
| 20435 | C | 73.42400 | 69.35880 | 78.57890 | 802.95351   | -420.50731  | -39.22834   | 1 |
| 20436 | C | 74.73300 | 69.62180 | 78.20490 | -892.04944  | -170.97013  | 116.06176   | 1 |
| 20437 | H | 75.61300 | 69.41980 | 78.79790 | 509.71363   | -2656.48449 | 1597.86512  | 1 |
| 20438 | C | 74.94800 | 70.16980 | 76.88990 | 501.57512   | -145.89548  | 738.95212   | 1 |
| 20439 | H | 75.94500 | 70.40780 | 76.54990 | -2062.67637 | -760.48947  | -2259.37280 | 1 |
| 20440 | C | 73.86900 | 70.43680 | 76.05490 | -120.65328  | -901.44540  | -42.28973   | 1 |
| 20441 | H | 74.11800 | 70.79380 | 75.06590 | -815.94961  | 2963.08163  | -695.42788  | 1 |
| 20442 | C | 72.34100 | 69.62080 | 77.69590 | -642.39369  | -1.05379    | -656.00186  | 1 |
| 20443 | H | 71.31700 | 69.47980 | 78.01090 | -918.60612  | 1687.30015  | 2490.34961  | 1 |
| 20444 | C | 72.56000 | 70.16080 | 76.43590 | -553.31052  | -658.73107  | -311.56045  | 1 |
| 20445 | H | 71.70500 | 70.39580 | 75.81990 | -2803.80628 | 425.91313   | 1370.77547  | 1 |
| 20446 | C | 71.85900 | 70.76280 | 80.73490 | 357.59302   | -606.12368  | -580.26266  | 1 |
| 20447 | O | 72.02600 | 71.98080 | 80.52490 | 246.59321   | 292.18909   | 686.51055   | 1 |
| 20448 | N | 70.56600 | 70.38080 | 80.67190 | -579.23755  | 539.79530   | -304.60005  | 1 |
| 20449 | H | 70.32800 | 69.41380 | 80.71090 | 1725.41270  | 2048.84289  | -1649.50001 | 1 |
| 20450 | C | 69.44000 | 71.27380 | 80.50690 | -835.54156  | 347.39919   | -144.21704  | 1 |
| 20451 | H | 69.51600 | 71.89380 | 79.62590 | -667.86940  | -2418.62952 | -1901.53640 | 1 |

|       |   |          |          |          |             |             |             |   |
|-------|---|----------|----------|----------|-------------|-------------|-------------|---|
| 20452 | C | 68.15900 | 70.43480 | 80.33790 | 502.82823   | -180.23693  | 733.49378   | 1 |
| 20453 | H | 67.91400 | 69.83780 | 81.24290 | -1466.56316 | 1425.53450  | 2390.19653  | 1 |
| 20454 | H | 68.37400 | 69.74180 | 79.49790 | 1818.13835  | 2229.53619  | -1270.33072 | 1 |
| 20455 | C | 66.92100 | 71.17580 | 80.05790 | -388.14025  | -228.08235  | -797.11912  | 1 |
| 20456 | C | 66.57200 | 71.44880 | 78.74590 | -800.44749  | 442.75501   | -55.39110   | 1 |
| 20457 | H | 67.31800 | 71.24980 | 77.98990 | 977.15023   | 1485.62864  | 2591.91995  | 1 |
| 20458 | C | 65.36200 | 72.05980 | 78.40290 | -429.74261  | 560.31165   | -582.13009  | 1 |
| 20459 | H | 65.06300 | 72.19480 | 77.37390 | 2876.06108  | 178.39252   | 1249.47696  | 1 |
| 20460 | C | 64.52500 | 72.43380 | 79.47390 | 282.18653   | -522.64791  | 689.21628   | 1 |
| 20461 | H | 63.62600 | 73.01480 | 79.32790 | -1617.44121 | 2071.06712  | 1733.95866  | 1 |
| 20462 | C | 66.02700 | 71.52980 | 81.08290 | -421.25756  | -448.33810  | 674.61359   | 1 |
| 20463 | H | 66.30100 | 71.35380 | 82.11290 | -3039.23074 | -818.82495  | -131.76491  | 1 |
| 20464 | C | 64.89600 | 72.27080 | 80.79890 | 302.28465   | 560.77481   | -650.65446  | 1 |
| 20465 | H | 64.14400 | 72.56780 | 81.51590 | 2262.96875  | -344.06780  | -2154.66870 | 1 |
| 20466 | C | 69.33500 | 72.26180 | 81.71990 | 783.29873   | -102.68020  | -450.21499  | 1 |
| 20467 | O | 69.08000 | 73.41680 | 81.52690 | -377.02007  | 694.18054   | 47.02147    | 1 |
| 20468 | N | 69.63000 | 71.85980 | 82.96790 | 429.16608   | -326.31243  | 645.11695   | 1 |
| 20469 | H | 69.70200 | 70.91080 | 83.26390 | -1654.39128 | -2673.14766 | -184.08662  | 1 |
| 20470 | C | 69.74000 | 72.75980 | 84.02890 | -879.24586  | -118.37682  | -228.23466  | 1 |
| 20471 | H | 68.80600 | 73.27580 | 84.19490 | 2214.35427  | -1065.83465 | 1959.36725  | 1 |
| 20472 | C | 69.97200 | 71.99480 | 85.34890 | -259.03649  | 519.95733   | 700.32299   | 1 |
| 20473 | H | 69.16700 | 71.24180 | 85.48590 | 1963.98958  | 1789.07772  | -1682.11755 | 1 |
| 20474 | H | 70.95100 | 71.47480 | 85.41890 | -261.32279  | -3134.05308 | -142.84297  | 1 |
| 20475 | H | 69.93600 | 72.73580 | 86.17590 | -1653.36562 | 1786.38234  | 1991.95455  | 1 |
| 20476 | C | 70.81600 | 73.85580 | 83.78590 | 296.03433   | 613.59929   | 601.13933   | 1 |
| 20477 | O | 70.62400 | 75.02280 | 84.15090 | -639.07849  | -333.17333  | -333.17520  | 1 |
| 20478 | N | 71.92800 | 73.46580 | 83.15890 | 215.77116   | 687.67294   | -438.92147  | 1 |
| 20479 | H | 71.88900 | 72.59580 | 82.67490 | -2322.62746 | -1320.60787 | -1669.93115 | 1 |
| 20480 | C | 73.00100 | 74.43080 | 82.80690 | -60.52574   | 505.51068   | -758.84717  | 1 |
| 20481 | H | 73.28100 | 74.87180 | 83.75190 | 556.31376   | -260.79097  | 3082.67980  | 1 |
| 20482 | C | 74.19600 | 73.61780 | 82.23390 | -182.61564  | -426.62038  | -788.85015  | 1 |
| 20483 | H | 74.96200 | 74.36980 | 81.94790 | -94.89338   | 2301.20883  | -2146.54057 | 1 |
| 20484 | H | 73.88900 | 73.19180 | 81.25490 | -2501.11075 | 282.04569   | -1896.63157 | 1 |
| 20485 | S | 74.87400 | 72.35080 | 83.38990 | -394.92036  | 303.77970   | -260.00484  | 1 |
| 20486 | H | 73.67600 | 71.91480 | 83.75190 | 2081.38285  | -1804.24523 | 1512.43397  | 1 |
| 20487 | C | 72.62400 | 75.52980 | 81.86190 | -620.71856  | 158.62633   | 651.43853   | 1 |
| 20488 | O | 72.81800 | 76.70480 | 82.13490 | 777.95765   | -104.45792  | 11.68727    | 1 |
| 20489 | N | 71.91800 | 75.07780 | 80.72890 | -228.00471  | -529.15225  | -620.32588  | 1 |
| 20490 | H | 71.92300 | 74.09580 | 80.55290 | -2083.51628 | -2344.09634 | -286.47068  | 1 |
| 20491 | C | 71.54200 | 75.91280 | 79.63390 | 155.42880   | 285.55874   | -852.49322  | 1 |
| 20492 | H | 72.31800 | 76.64380 | 79.46390 | 682.43095   | 2638.28760  | 1569.92876  | 1 |
| 20493 | C | 71.62200 | 74.98880 | 78.37290 | -20.37741   | -543.34072  | -733.02230  | 1 |
| 20494 | H | 71.04500 | 75.42080 | 77.52690 | 541.20451   | 793.88229   | 2993.74599  | 1 |
| 20495 | H | 71.17500 | 73.99780 | 78.60090 | 1742.37550  | -1666.60932 | -2017.66499 | 1 |
| 20496 | C | 73.02200 | 74.78780 | 77.81290 | 61.70109    | 602.11210   | 680.60857   | 1 |
| 20497 | C | 73.70700 | 73.56580 | 77.87990 | 102.69375   | 663.89250   | -620.15308  | 1 |
| 20498 | H | 73.23900 | 72.61380 | 78.08190 | 2247.23856  | 600.46480   | 2110.13018  | 1 |
| 20499 | N | 74.94100 | 73.72080 | 77.23790 | 658.75799   | -433.39922  | -288.91116  | 1 |
| 20500 | H | 75.57100 | 73.04880 | 76.91690 | -2964.47081 | -152.45527  | -1061.65727 | 1 |
| 20501 | C | 75.03800 | 74.99780 | 76.86390 | 312.39758   | -446.40941  | 724.64360   | 1 |
| 20502 | C | 73.88500 | 75.72880 | 77.20590 | 95.39523    | -664.22236  | -616.48672  | 1 |
| 20503 | C | 73.84600 | 77.15180 | 77.05090 | 595.93544   | -457.06153  | 506.73611   | 1 |
| 20504 | H | 72.96800 | 77.73480 | 77.28890 | -108.41052  | 3140.34280  | 190.57743   | 1 |
| 20505 | C | 74.99200 | 77.74080 | 76.45190 | -391.25899  | -654.92157  | -502.97887  | 1 |
| 20506 | H | 74.97600 | 78.77380 | 76.13690 | 2071.13153  | 2364.85940  | -10.34101   | 1 |
| 20507 | C | 76.13500 | 75.64780 | 76.26290 | 267.79791   | 367.50781   | -792.10054  | 1 |
| 20508 | H | 77.00800 | 75.08280 | 75.96990 | -1850.58696 | -2078.20722 | -1474.87729 | 1 |
| 20509 | C | 76.07400 | 77.02980 | 76.04390 | 259.28936   | 717.23029   | 497.99242   | 1 |
| 20510 | H | 76.95300 | 77.55880 | 75.70590 | -2234.26855 | 1243.81347  | -1844.85262 | 1 |
| 20511 | C | 70.21200 | 76.64580 | 79.76090 | -796.44164  | 346.90135   | 291.78737   | 1 |
| 20512 | O | 70.11700 | 77.79280 | 79.22390 | -403.37842  | -249.72626  | 634.38027   | 1 |
| 20513 | N | 69.22300 | 76.15280 | 80.47990 | -743.90175  | 392.56767   | 112.15853   | 1 |

|       |   |          |          |          |             |             |             |   |
|-------|---|----------|----------|----------|-------------|-------------|-------------|---|
| 20514 | H | 69.32500 | 75.27080 | 80.93290 | -2387.91572 | 1962.98996  | 603.40948   | 1 |
| 20515 | C | 67.91700 | 76.79680 | 80.50690 | -234.14640  | -612.77389  | 635.35631   | 1 |
| 20516 | H | 67.50100 | 76.72480 | 79.51290 | -2657.90546 | 586.61038   | 1587.05541  | 1 |
| 20517 | C | 67.04200 | 75.89380 | 81.32190 | 248.29829   | -868.98166  | -115.39297  | 1 |
| 20518 | H | 67.50300 | 75.63980 | 82.29990 | 1789.97501  | -2444.72445 | -840.44232  | 1 |
| 20519 | H | 67.00500 | 74.91080 | 80.80590 | 2387.77954  | 1489.98580  | 1396.74492  | 1 |
| 20520 | C | 65.64000 | 76.49380 | 81.61290 | -716.85641  | -496.90060  | 280.51405   | 1 |
| 20521 | H | 65.63400 | 77.50380 | 82.07590 | -2859.88869 | -394.04495  | 1262.76110  | 1 |
| 20522 | C | 64.73900 | 76.55180 | 80.32490 | -190.84838  | -392.66461  | 802.70889   | 1 |
| 20523 | H | 64.91700 | 75.65380 | 79.69490 | 2026.34317  | -632.23737  | 2317.97766  | 1 |
| 20524 | H | 63.67100 | 76.57880 | 80.62790 | -3055.99920 | -761.67452  | -105.19469  | 1 |
| 20525 | H | 64.89500 | 77.50380 | 79.77390 | 1262.99409  | 2145.17464  | 1921.00230  | 1 |
| 20526 | C | 64.90600 | 75.60280 | 82.61490 | 213.47330   | 480.21257   | -742.69183  | 1 |
| 20527 | H | 65.60700 | 75.23780 | 83.39590 | -1781.11252 | 1896.39801  | 1771.56094  | 1 |
| 20528 | H | 64.05500 | 76.15680 | 83.06690 | 1737.97054  | -1255.56394 | -2299.26822 | 1 |
| 20529 | H | 64.60100 | 74.61180 | 82.21590 | 1324.65009  | -1924.22409 | 2105.71085  | 1 |
| 20530 | C | 67.88300 | 78.25880 | 80.97990 | -727.01793  | -420.78343  | -365.14205  | 1 |
| 20531 | O | 67.19700 | 79.02380 | 80.29190 | 486.37647   | 472.84692   | 398.38258   | 1 |
| 20532 | N | 68.52100 | 78.78280 | 82.02490 | -55.67475   | 833.14887   | -121.32656  | 1 |
| 20533 | C | 69.31500 | 77.97980 | 82.97190 | -779.60307  | 287.22913   | 384.57240   | 1 |
| 20534 | H | 68.96900 | 76.92580 | 83.03290 | -435.01923  | 2322.24841  | -2077.63935 | 1 |
| 20535 | H | 70.36000 | 78.03480 | 82.59890 | -128.46864  | -1711.82206 | 2636.96651  | 1 |
| 20536 | C | 68.47200 | 80.19080 | 82.39590 | 118.55891   | -847.70446  | -313.45492  | 1 |
| 20537 | H | 67.44000 | 80.42380 | 82.61490 | -723.12595  | -2318.46173 | -2001.57386 | 1 |
| 20538 | C | 69.25900 | 80.17180 | 83.75390 | -404.90442  | 588.93397   | -567.46988  | 1 |
| 20539 | H | 68.88300 | 80.87580 | 84.52690 | 2871.51761  | 1211.51990  | 394.31535   | 1 |
| 20540 | H | 70.32300 | 80.40280 | 83.53390 | 1013.38486  | 2830.74964  | -917.27071  | 1 |
| 20541 | C | 69.11600 | 78.74880 | 84.28590 | 821.75306   | 199.20080   | 330.00506   | 1 |
| 20542 | H | 69.94800 | 78.54280 | 84.99390 | 2716.04460  | 1573.88846  | -127.87139  | 1 |
| 20543 | H | 68.10900 | 78.61380 | 84.73490 | 1971.27042  | -1682.05559 | 1781.62244  | 1 |
| 20544 | C | 69.05500 | 81.12380 | 81.23090 | 621.74854   | 121.46666   | 651.78921   | 1 |
| 20545 | O | 68.57200 | 82.24780 | 81.04590 | 352.46462   | 669.19174   | 218.92168   | 1 |
| 20546 | N | 70.09900 | 80.67380 | 80.54090 | -763.64812  | -237.66844  | 286.47718   | 1 |
| 20547 | H | 70.39500 | 79.77580 | 80.85690 | 1825.96903  | -1978.29223 | -1621.43128 | 1 |
| 20548 | C | 70.60700 | 81.42980 | 79.40390 | -221.20548  | 877.27987   | 129.78830   | 1 |
| 20549 | H | 70.77000 | 82.44380 | 79.73990 | -1952.75811 | -2361.74275 | 728.38846   | 1 |
| 20550 | C | 71.94100 | 80.76680 | 78.92290 | 433.01949   | -738.04554  | -303.76659  | 1 |
| 20551 | H | 71.86800 | 79.65880 | 78.87490 | 1427.15967  | 866.49008   | -2663.70379 | 1 |
| 20552 | H | 72.71000 | 80.96280 | 79.70090 | 2491.99726  | -1127.55227 | 1544.77654  | 1 |
| 20553 | C | 72.44600 | 81.21980 | 77.54890 | 544.92681   | 365.19204   | -628.15294  | 1 |
| 20554 | C | 73.03200 | 82.49780 | 77.40790 | 119.30009   | 888.67053   | -168.93695  | 1 |
| 20555 | H | 73.19700 | 83.12680 | 78.26990 | 2991.19652  | -928.54855  | -215.41398  | 1 |
| 20556 | C | 73.38000 | 82.91680 | 76.12890 | -275.75226  | 689.20129   | 536.83544   | 1 |
| 20557 | H | 73.80300 | 83.90780 | 76.04790 | 279.57033   | 3047.19941  | 738.93218   | 1 |
| 20558 | C | 73.21100 | 82.08580 | 74.99290 | -491.76033  | -746.67195  | 188.57366   | 1 |
| 20559 | O | 73.66500 | 82.54480 | 73.75290 | 650.82087   | -311.22770  | -301.27528  | 1 |
| 20560 | H | 74.19700 | 83.33680 | 73.85990 | -749.00924  | 2285.61093  | 2035.27253  | 1 |
| 20561 | C | 72.14500 | 80.45680 | 76.39290 | -387.13295  | -826.71248  | -9.33084    | 1 |
| 20562 | H | 71.53000 | 79.57280 | 76.46990 | -244.03537  | -3110.59560 | -393.23317  | 1 |
| 20563 | C | 72.59800 | 80.86680 | 75.14790 | 353.69255   | -780.62741  | -296.43406  | 1 |
| 20564 | H | 72.46700 | 80.20280 | 74.30690 | 2562.29264  | -1629.33359 | -794.83973  | 1 |
| 20565 | C | 69.60500 | 81.53480 | 78.26890 | -284.92785  | -734.00912  | 463.65683   | 1 |
| 20566 | O | 69.34000 | 82.63880 | 77.79490 | 691.35372   | -335.39963  | 154.19752   | 1 |
| 20567 | N | 68.89900 | 80.39980 | 77.87590 | 711.51531   | 442.73410   | 47.88856    | 1 |
| 20568 | H | 69.15900 | 79.51980 | 78.26490 | -1648.75348 | -2013.70731 | -1771.79205 | 1 |
| 20569 | C | 67.79400 | 80.35980 | 76.99690 | 787.79125   | -97.55859   | -435.35576  | 1 |
| 20570 | H | 68.02800 | 80.90180 | 76.09190 | -816.63774  | -1678.82778 | -2532.08108 | 1 |
| 20571 | C | 67.37900 | 78.88380 | 76.66290 | 777.84194   | 153.26924   | -438.64669  | 1 |
| 20572 | H | 67.35800 | 78.20080 | 77.53890 | 2467.11337  | 1468.69270  | 1276.08677  | 1 |
| 20573 | H | 66.31400 | 78.74980 | 76.37590 | 1799.39135  | -973.64395  | -2383.53095 | 1 |
| 20574 | C | 68.31100 | 78.32080 | 75.65290 | -705.25669  | 501.89880   | -304.93057  | 1 |
| 20575 | C | 68.11000 | 78.68280 | 74.28590 | 533.59764   | 542.89476   | -496.15951  | 1 |



|       |   |          |          |          |             |             |             |   |
|-------|---|----------|----------|----------|-------------|-------------|-------------|---|
| 20576 | H | 67.23800 | 79.29980 | 74.12290 | 1009.12056  | 2084.39778  | 2129.37894  | 1 |
| 20577 | C | 68.99100 | 78.15880 | 73.25190 | 204.71512   | -687.42304  | 557.14316   | 1 |
| 20578 | H | 68.92600 | 78.57780 | 72.25790 | -1779.18635 | -169.82652  | 2594.55253  | 1 |
| 20579 | C | 69.92600 | 77.15880 | 73.58790 | -495.17626  | 114.12480   | 761.64787   | 1 |
| 20580 | O | 70.77300 | 76.70680 | 72.57590 | 617.60050   | 259.32096   | -410.18511  | 1 |
| 20581 | H | 70.57700 | 77.24380 | 71.80390 | -2377.30488 | -1730.95893 | 1128.23690  | 1 |
| 20582 | C | 69.24800 | 77.30080 | 75.92290 | 393.48833   | -445.23166  | 686.59809   | 1 |
| 20583 | H | 69.32500 | 76.81380 | 76.88390 | 2432.54882  | 1986.14299  | -108.92899  | 1 |
| 20584 | C | 70.03300 | 76.73280 | 74.90990 | 268.21968   | 483.99985   | -724.37097  | 1 |
| 20585 | H | 70.81500 | 76.02580 | 75.14390 | 1691.71228  | 2139.10077  | 1563.53039  | 1 |
| 20586 | C | 66.60900 | 81.16880 | 77.39390 | -510.15849  | 535.88567   | 541.94057   | 1 |
| 20587 | O | 66.03000 | 81.91280 | 76.59390 | -562.59245  | -29.98994   | -557.81211  | 1 |
| 20588 | N | 66.26200 | 81.14380 | 78.69490 | -430.12318  | 461.06752   | -564.22658  | 1 |
| 20589 | H | 66.72900 | 80.59280 | 79.38290 | 225.60819   | -420.10098  | -3107.63141 | 1 |
| 20590 | C | 65.22400 | 82.07880 | 79.20490 | 666.80812   | -614.12506  | -34.68515   | 1 |
| 20591 | H | 64.38800 | 81.88480 | 78.54990 | -2069.77189 | -1517.12054 | -1824.32272 | 1 |
| 20592 | C | 64.68300 | 81.72780 | 80.60790 | -837.93004  | -44.52736   | -367.49663  | 1 |
| 20593 | H | 65.60700 | 81.77480 | 81.22190 | -1930.74285 | 1277.79209  | 2137.28689  | 1 |
| 20594 | C | 63.60600 | 82.80080 | 81.01090 | 499.55969   | -398.35731  | 649.99818   | 1 |
| 20595 | H | 62.70300 | 82.86080 | 80.36690 | -2013.04249 | 1127.11753  | 2147.89753  | 1 |
| 20596 | H | 63.25600 | 82.57980 | 82.04190 | -2211.99161 | -828.61076  | 2087.93316  | 1 |
| 20597 | H | 64.00900 | 83.83280 | 81.09290 | -2816.39215 | -736.52817  | -1203.92838 | 1 |
| 20598 | C | 64.11400 | 80.29080 | 80.63890 | 606.98847   | -594.27891  | 324.62081   | 1 |
| 20599 | H | 63.25500 | 80.13980 | 79.95190 | 2843.84020  | 596.01762   | -1190.07659 | 1 |
| 20600 | H | 64.84000 | 79.61680 | 80.13490 | -1855.40709 | -2543.66909 | -90.17938   | 1 |
| 20601 | C | 63.65900 | 79.83980 | 81.99690 | 527.16891   | 447.82244   | -586.28745  | 1 |
| 20602 | H | 64.50200 | 79.89380 | 82.71890 | 2471.91691  | -658.17484  | -1823.32103 | 1 |
| 20603 | H | 63.43900 | 78.75180 | 81.95090 | 2378.40743  | -184.80357  | 2047.32749  | 1 |
| 20604 | H | 62.80200 | 80.44580 | 82.35890 | -739.15916  | 2925.35186  | 893.08802   | 1 |
| 20605 | C | 65.58000 | 83.61280 | 79.03390 | -668.87574  | -189.82880  | 600.29945   | 1 |
| 20606 | O | 64.77400 | 84.26080 | 78.37690 | -455.26397  | -99.76538   | 645.83111   | 1 |
| 20607 | N | 66.82900 | 84.06580 | 79.36490 | -671.55587  | 222.80235   | -466.74625  | 1 |
| 20608 | H | 67.45400 | 83.43180 | 79.81190 | -2956.74293 | -175.31124  | 1080.48037  | 1 |
| 20609 | C | 67.14848 | 85.42555 | 79.01351 | -794.77172  | -346.48084  | -18.04269   | 1 |
| 20610 | H | 66.40017 | 86.12865 | 79.37831 | -163.15970  | -1338.42981 | 3408.28865  | 1 |
| 20611 | H | 68.12727 | 85.57651 | 79.50732 | -1908.94692 | -2891.00670 | -1632.64879 | 1 |
| 20612 | C | 67.22715 | 85.74941 | 77.41232 | -766.58746  | 638.11216   | -290.13945  | 1 |
| 20613 | O | 66.76040 | 86.84867 | 77.11799 | -153.91875  | -225.17470  | 66.30946    | 1 |
| 20614 | N | 67.89100 | 84.89680 | 76.61290 | 349.47837   | -661.98279  | 384.43249   | 1 |
| 20615 | H | 68.32900 | 84.14080 | 77.09390 | 881.12469   | 2663.55032  | 1424.31624  | 1 |
| 20616 | C | 67.91510 | 85.15220 | 75.17914 | 173.63576   | 927.79959   | -349.21030  | 1 |
| 20617 | H | 68.55113 | 86.10064 | 75.00991 | 1334.76171  | -1566.42064 | -2374.77745 | 1 |
| 20618 | C | 68.53600 | 83.92580 | 74.53290 | -684.58583  | -543.11628  | -273.03382  | 1 |
| 20619 | H | 68.10500 | 82.98380 | 74.93690 | -1573.95899 | 1819.73773  | -2032.45044 | 1 |
| 20620 | C | 68.34900 | 83.93880 | 73.05490 | -867.92048  | 290.18588   | 100.01343   | 1 |
| 20621 | H | 67.38300 | 83.53880 | 72.67890 | 551.31919   | -3031.68844 | 617.08689   | 1 |
| 20622 | H | 68.68700 | 84.91880 | 72.65490 | -2387.55708 | 1917.70533  | 758.49530   | 1 |
| 20623 | H | 69.02400 | 83.17980 | 72.60690 | 2565.01676  | -620.57813  | -1697.45723 | 1 |
| 20624 | C | 70.05800 | 83.94780 | 74.75490 | -867.10462  | 17.60983    | 306.27352   | 1 |
| 20625 | H | 70.56200 | 83.01280 | 74.42890 | -564.66550  | 2793.94571  | 1341.61255  | 1 |
| 20626 | H | 70.17300 | 83.76380 | 75.84390 | 1851.07309  | 1315.25961  | -2170.48739 | 1 |
| 20627 | C | 70.73964 | 85.25037 | 74.18339 | -96.47682   | 662.74969   | 24.18739    | 1 |
| 20628 | H | 70.51241 | 86.13298 | 74.81135 | 2895.62464  | -907.45558  | 161.75402   | 1 |
| 20629 | H | 71.84974 | 85.21415 | 74.25989 | -2243.08714 | 1142.33984  | 1408.27602  | 1 |
| 20630 | H | 70.50118 | 85.40081 | 73.07489 | -1416.37637 | -2431.22559 | -733.20556  | 1 |
| 20631 | C | 66.36120 | 85.12981 | 74.59090 | 711.89096   | 241.86490   | -120.03054  | 1 |
| 20632 | O | 66.21609 | 85.91526 | 73.66779 | 292.10910   | 120.99451   | 276.11465   | 1 |
| 20633 | N | 65.47600 | 84.30180 | 75.09290 | -422.70430  | 436.82380   | -588.91212  | 1 |
| 20634 | H | 65.70400 | 83.60980 | 75.77290 | -84.32858   | -2430.43684 | 1997.81685  | 1 |
| 20635 | C | 64.05600 | 84.33580 | 74.67990 | -318.30538  | 224.05262   | -824.07556  | 1 |
| 20636 | H | 64.10600 | 84.16680 | 73.61490 | -2588.17039 | -1212.04062 | -1325.50766 | 1 |
| 20637 | C | 63.18100 | 83.19080 | 75.19690 | 297.31517   | -481.66584  | 714.56729   | 1 |

|       |   |          |          |          |             |             |             |   |
|-------|---|----------|----------|----------|-------------|-------------|-------------|---|
| 20638 | H | 62.22600 | 83.07180 | 74.64190 | 2739.85345  | 655.49407   | 1390.24786  | 1 |
| 20639 | H | 63.77500 | 82.27180 | 75.00590 | 516.93564   | -1981.01331 | -2382.95225 | 1 |
| 20640 | O | 62.80900 | 83.14980 | 76.55590 | 282.19169   | 160.03859   | 721.07292   | 1 |
| 20641 | H | 63.47300 | 83.61580 | 77.06990 | 2988.76605  | 32.74383    | -956.87008  | 1 |
| 20642 | C | 63.39882 | 85.76613 | 75.12136 | -6.77955    | 31.62686    | -1127.85543 | 1 |
| 20643 | O | 62.45323 | 86.21008 | 74.50772 | -955.60722  | 83.22041    | -260.36816  | 1 |
| 20644 | N | 63.81075 | 86.17393 | 76.30550 | -441.97190  | -174.59081  | 61.21346    | 1 |
| 20645 | H | 64.48882 | 85.62521 | 76.83678 | 1033.71056  | -1531.43285 | 75.07215    | 1 |
| 20646 | C | 63.26928 | 87.54548 | 76.71632 | 911.89541   | 16.41080    | 68.87652    | 1 |
| 20647 | H | 62.18764 | 87.41175 | 76.53953 | -3730.67886 | 1790.16285  | 1227.45598  | 1 |
| 20648 | C | 63.39703 | 87.75025 | 78.19801 | 431.37768   | 165.30127   | 118.86775   | 1 |
| 20649 | H | 64.39430 | 87.77979 | 78.60741 | -109.99858  | -3272.92983 | 849.68098   | 1 |
| 20650 | C | 62.77283 | 89.09410 | 78.58793 | -1057.32240 | 46.68343    | -102.67734  | 1 |
| 20651 | H | 63.24739 | 89.78485 | 77.94422 | 2794.51861  | 1435.61421  | -3098.63029 | 1 |
| 20652 | H | 62.92250 | 89.40377 | 79.66545 | 758.63880   | -583.58687  | -926.19382  | 1 |
| 20653 | H | 61.67416 | 89.14574 | 78.42147 | 1894.22693  | 711.07586   | 366.48776   | 1 |
| 20654 | C | 62.63280 | 86.63714 | 78.84168 | -301.83138  | 460.68121   | 484.09322   | 1 |
| 20655 | H | 63.04221 | 85.65699 | 78.53859 | -874.14069  | 3226.63632  | 965.88136   | 1 |
| 20656 | H | 61.55063 | 86.65558 | 78.41271 | 2919.83058  | 751.94084   | 1840.42650  | 1 |
| 20657 | C | 62.57542 | 86.63160 | 80.43186 | -78.32382   | 535.64191   | 700.20883   | 1 |
| 20658 | H | 63.53130 | 86.40362 | 80.94340 | 713.54950   | -4970.64389 | -1310.56486 | 1 |
| 20659 | H | 62.24363 | 87.63826 | 80.85378 | 185.76313   | -1589.04562 | 650.43204   | 1 |
| 20660 | H | 61.86974 | 85.79770 | 80.62287 | 2534.43605  | -1031.54464 | -3956.96473 | 1 |
| 20661 | C | 64.05399 | 88.66726 | 75.80785 | 778.01641   | 228.99839   | -248.26628  | 1 |
| 20662 | O | 63.54467 | 89.74659 | 75.66206 | 549.51681   | -52.88836   | 50.70185    | 1 |
| 20663 | N | 65.22526 | 88.22826 | 75.32217 | -441.83013  | -535.34161  | -309.76692  | 1 |
| 20664 | H | 65.64559 | 87.33629 | 75.69675 | -457.32449  | 3269.29627  | -2005.25354 | 1 |
| 20665 | C | 65.90495 | 89.10965 | 74.34685 | -140.62402  | -319.84206  | -101.95537  | 1 |
| 20666 | H | 65.94048 | 90.17377 | 74.67793 | 1992.49752  | 2350.74141  | -36.30298   | 1 |
| 20667 | C | 67.34807 | 88.61200 | 74.59488 | -907.54566  | 89.50658    | -638.94327  | 1 |
| 20668 | H | 67.36305 | 87.51604 | 74.27806 | -2770.78561 | 2833.41341  | -21.01600   | 1 |
| 20669 | H | 67.47487 | 88.58597 | 75.74321 | 143.36577   | 872.13733   | -322.59842  | 1 |
| 20670 | C | 68.63614 | 89.36706 | 74.06655 | -179.91101  | -88.25166   | -30.08352   | 1 |
| 20671 | O | 68.60824 | 90.60045 | 74.18382 | -764.51079  | 819.79233   | 227.76724   | 1 |
| 20672 | O | 69.65000 | 88.75023 | 73.69993 | -336.25098  | -77.35147   | -684.34846  | 1 |
| 20673 | C | 65.24919 | 88.94903 | 72.87428 | -666.15538  | -412.21019  | -265.48488  | 1 |
| 20674 | O | 65.16715 | 89.89882 | 72.16671 | 86.32707    | 185.09641   | -646.73582  | 1 |
| 20675 | N | 64.63791 | 87.74476 | 72.76823 | -23.29870   | 292.12927   | -367.36265  | 1 |
| 20676 | H | 64.78025 | 87.06801 | 73.53009 | -2395.85199 | -936.48633  | -185.33349  | 1 |
| 20677 | C | 64.08304 | 87.33009 | 71.51575 | 463.22597   | 115.61467   | 22.90692    | 1 |
| 20678 | H | 64.81731 | 87.63611 | 70.72573 | 1539.48140  | 3738.56323  | 1265.64320  | 1 |
| 20679 | C | 63.62227 | 85.79749 | 71.50449 | 597.20545   | -227.31064  | 160.43669   | 1 |
| 20680 | H | 62.79968 | 85.84775 | 72.31251 | -891.15566  | 19.06727    | 152.27209   | 1 |
| 20681 | H | 63.02087 | 85.76927 | 70.60870 | 920.30092   | -785.21819  | 765.68050   | 1 |
| 20682 | O | 64.66356 | 84.85648 | 71.65456 | 587.64083   | -96.56647   | -318.91158  | 1 |
| 20683 | H | 65.05176 | 85.14983 | 72.52792 | -989.77908  | -477.01790  | -2358.37045 | 1 |
| 20684 | C | 62.63983 | 88.09711 | 71.23443 | 506.45265   | 755.85180   | 102.03834   | 1 |
| 20685 | O | 62.24525 | 88.26283 | 70.09351 | -288.74887  | -10.76247   | -440.20593  | 1 |
| 20686 | N | 61.91870 | 88.21976 | 72.34332 | 86.32084    | -147.04365  | 836.57647   | 1 |
| 20687 | H | 62.47027 | 88.08333 | 73.20161 | -1211.05199 | 1586.99523  | -1821.57843 | 1 |
| 20688 | C | 60.63285 | 88.89662 | 72.36240 | -31.71811   | -662.75474  | 689.75077   | 1 |
| 20689 | H | 60.03049 | 88.59730 | 71.48536 | -183.43472  | 12.33233    | 452.51386   | 1 |
| 20690 | C | 59.80350 | 88.65296 | 73.66233 | -341.34154  | -224.43220  | 602.50258   | 1 |
| 20691 | H | 58.73809 | 89.00100 | 73.61142 | -1434.09828 | -323.05204  | 268.96969   | 1 |
| 20692 | H | 60.24896 | 89.26089 | 74.48064 | 340.13330   | 2434.96628  | 2621.08530  | 1 |
| 20693 | C | 59.57950 | 87.12409 | 74.03554 | -578.66689  | -333.96247  | -353.72381  | 1 |
| 20694 | C | 59.46838 | 86.24581 | 72.92917 | 313.09481   | 878.86263   | -350.43956  | 1 |
| 20695 | H | 59.51824 | 86.62792 | 71.86149 | 546.64723   | 3736.06016  | -1060.34233 | 1 |
| 20696 | C | 59.30100 | 84.85880 | 73.12290 | 17.11612    | -616.94622  | 674.88892   | 1 |
| 20697 | H | 59.12100 | 84.20580 | 72.28090 | 1145.91002  | 2426.49186  | 1644.30462  | 1 |
| 20698 | C | 59.18800 | 84.30980 | 74.35190 | 543.01516   | -532.62079  | 498.38033   | 1 |
| 20699 | H | 59.20900 | 83.23180 | 74.40590 | -128.36272  | -1413.16777 | -2803.06246 | 1 |

|       |   |          |          |          |             |             |             |   |
|-------|---|----------|----------|----------|-------------|-------------|-------------|---|
| 20700 | C | 59.50121 | 86.54487 | 75.32936 | -311.45280  | -135.06315  | -610.90124  | 1 |
| 20701 | H | 59.72625 | 87.15742 | 76.23203 | -2951.83004 | 3717.90133  | 3843.85176  | 1 |
| 20702 | C | 59.42121 | 85.15857 | 75.47888 | 942.02043   | 200.93095   | -101.26944  | 1 |
| 20703 | H | 59.40800 | 84.60080 | 76.43090 | 492.51908   | 3074.37158  | 450.59690   | 1 |
| 20704 | C | 60.92212 | 90.44153 | 71.91903 | 451.88666   | -171.96767  | 650.38426   | 1 |
| 20705 | O | 59.95176 | 91.10825 | 71.54004 | 43.36330    | 63.49028    | 1790.15609  | 1 |
| 20706 | N | 62.11174 | 90.82882 | 72.25305 | -854.55586  | -1081.18359 | -559.12697  | 1 |
| 20707 | H | 62.84905 | 90.15627 | 72.59584 | 606.46427   | -4571.60585 | -503.54717  | 1 |
| 20708 | C | 62.66250 | 92.08922 | 71.76434 | -933.33559  | -109.93341  | 524.85724   | 1 |
| 20709 | H | 61.86500 | 92.87544 | 71.79206 | -989.96490  | 929.13854   | -1589.31678 | 1 |
| 20710 | C | 63.87579 | 92.46317 | 72.68348 | 144.05296   | 314.09551   | -109.88815  | 1 |
| 20711 | H | 64.86298 | 91.93500 | 72.32394 | 1328.83437  | 1013.84262  | 2179.82367  | 1 |
| 20712 | C | 64.12961 | 93.99038 | 72.43076 | 169.55312   | -105.32643  | 692.76932   | 1 |
| 20713 | H | 63.92397 | 94.31106 | 71.37416 | -1359.48952 | -117.49054  | 832.88348   | 1 |
| 20714 | H | 63.38665 | 94.64690 | 72.97127 | 426.70485   | -1404.61136 | 210.41090   | 1 |
| 20715 | H | 65.12907 | 94.21592 | 72.72167 | 2334.30877  | 3117.19741  | 802.41086   | 1 |
| 20716 | C | 63.57463 | 92.30867 | 74.20211 | -575.68509  | 193.17933   | 1556.56785  | 1 |
| 20717 | H | 63.57655 | 91.17042 | 74.49792 | 1960.40909  | 2181.91034  | 950.11531   | 1 |
| 20718 | H | 62.60309 | 92.74911 | 74.36024 | -240.29001  | -1428.34522 | 2855.15404  | 1 |
| 20719 | C | 64.51793 | 93.13227 | 75.19589 | -250.92737  | -19.04652   | 204.64724   | 1 |
| 20720 | H | 64.38877 | 94.22679 | 75.22366 | -1068.05531 | 92.62797    | -1311.77940 | 1 |
| 20721 | H | 65.63067 | 92.91294 | 74.93143 | -159.73932  | 2143.27033  | -3080.59715 | 1 |
| 20722 | H | 64.37970 | 92.72917 | 76.22494 | 3948.91834  | 1911.47754  | -53.74148   | 1 |
| 20723 | C | 63.29618 | 91.99050 | 70.25080 | 39.49362    | 562.93437   | 689.31337   | 1 |
| 20724 | O | 63.47979 | 93.08333 | 69.69355 | -532.76959  | 121.22827   | -189.13762  | 1 |
| 20725 | N | 63.61200 | 90.79427 | 69.77356 | -88.48815   | -563.37067  | -46.03139   | 1 |
| 20726 | H | 63.58552 | 90.00744 | 70.41473 | 941.10788   | 1891.71889  | -1607.55463 | 1 |
| 20727 | C | 64.44913 | 90.69105 | 68.60272 | 320.89657   | 365.29215   | 678.91877   | 1 |
| 20728 | H | 64.95837 | 91.69250 | 68.50078 | 3685.02740  | 715.71281   | -2000.82474 | 1 |
| 20729 | C | 65.40363 | 89.42600 | 68.86932 | 1.28222     | -709.95782  | -39.68383   | 1 |
| 20730 | H | 64.76265 | 88.56216 | 69.19349 | -879.80675  | 435.08942   | -1885.51649 | 1 |
| 20731 | H | 66.18910 | 89.64634 | 69.61255 | -2563.54288 | 1863.65931  | -1614.56234 | 1 |
| 20732 | C | 66.01490 | 89.03076 | 67.54627 | -156.42059  | 151.85300   | -303.24083  | 1 |
| 20733 | H | 65.54141 | 89.64897 | 66.72043 | 906.02218   | -1266.74668 | 1636.93785  | 1 |
| 20734 | C | 67.51273 | 89.26344 | 67.40941 | -391.19322  | 16.76328    | -834.71573  | 1 |
| 20735 | H | 67.86347 | 90.34614 | 67.34675 | -1344.17983 | 744.22167   | 1333.57510  | 1 |
| 20736 | H | 67.84750 | 88.80631 | 66.40361 | 1984.59000  | 542.22080   | -1756.27699 | 1 |
| 20737 | H | 68.11795 | 88.91299 | 68.17315 | 52.23918    | 440.79931   | 2352.40021  | 1 |
| 20738 | C | 65.70372 | 87.57820 | 67.22275 | -1419.32843 | 172.98325   | -730.96140  | 1 |
| 20739 | H | 66.58300 | 87.05756 | 66.65696 | 2481.80108  | -2561.91698 | 1190.28635  | 1 |
| 20740 | H | 65.54474 | 86.98243 | 68.11281 | -590.36462  | -2084.39707 | -435.51662  | 1 |
| 20741 | H | 64.68331 | 87.37119 | 66.79001 | 655.66664   | 1983.56946  | 2293.55723  | 1 |
| 20742 | C | 63.43773 | 90.41966 | 67.39155 | 900.15960   | 783.91466   | 718.23637   | 1 |
| 20743 | O | 63.66145 | 91.02601 | 66.38186 | 360.38103   | 1042.17163  | -533.17755  | 1 |
| 20744 | N | 62.33408 | 89.60282 | 67.69794 | -70.30861   | -685.42518  | 74.63749    | 1 |
| 20745 | H | 62.16779 | 88.95386 | 68.50842 | 2009.70470  | -147.89715  | 2163.47986  | 1 |
| 20746 | C | 61.16825 | 89.98125 | 66.92918 | 433.83382   | -64.63196   | 382.08399   | 1 |
| 20747 | H | 61.66002 | 89.95456 | 65.93871 | 3329.09899  | 1895.52477  | 1652.71623  | 1 |
| 20748 | C | 60.07266 | 88.82429 | 66.90143 | -303.47367  | -353.01591  | 447.18922   | 1 |
| 20749 | H | 60.62964 | 87.87350 | 66.62868 | 272.64933   | -281.53047  | 45.14171    | 1 |
| 20750 | H | 59.41029 | 88.94798 | 66.07779 | -397.42144  | -70.67103   | 328.73882   | 1 |
| 20751 | C | 59.33680 | 88.67185 | 68.21537 | -494.65047  | -106.96607  | 269.37410   | 1 |
| 20752 | H | 60.02302 | 88.28730 | 68.96448 | -2051.66561 | -780.04698  | 1441.79893  | 1 |
| 20753 | C | 58.68071 | 89.96325 | 68.74186 | -313.47884  | 545.48122   | -728.60532  | 1 |
| 20754 | H | 59.52247 | 90.66161 | 68.93834 | 609.70162   | 284.50469   | 1478.07458  | 1 |
| 20755 | H | 58.19860 | 89.74871 | 69.62551 | 496.69659   | -3321.83509 | 1960.10436  | 1 |
| 20756 | H | 57.98063 | 90.51973 | 68.09307 | 1325.14302  | -1657.75235 | 165.56909   | 1 |
| 20757 | C | 58.30945 | 87.55069 | 68.13400 | -474.80810  | -609.79142  | -763.64103  | 1 |
| 20758 | H | 57.47549 | 87.91708 | 67.48931 | 750.82613   | 1106.28442  | 3846.42778  | 1 |
| 20759 | H | 58.78954 | 86.65264 | 67.64366 | -590.07826  | -709.88431  | 520.44068   | 1 |
| 20760 | H | 57.71045 | 87.34422 | 69.03190 | 835.91366   | -3865.28425 | 685.99969   | 1 |
| 20761 | C | 60.64382 | 91.52442 | 67.08069 | 290.74491   | -140.06496  | -1234.69936 | 1 |

|       |   |          |          |          |             |             |             |   |
|-------|---|----------|----------|----------|-------------|-------------|-------------|---|
| 20762 | O | 59.80164 | 91.95351 | 66.30386 | 148.42403   | 350.74843   | -391.08482  | 1 |
| 20763 | N | 61.10948 | 92.09159 | 68.17279 | 473.79268   | 273.36833   | 683.86330   | 1 |
| 20764 | H | 61.77583 | 91.56829 | 68.74905 | 481.70661   | 516.81995   | 849.97120   | 1 |
| 20765 | C | 60.84673 | 93.43325 | 68.57630 | 983.47290   | 340.24692   | 1069.83651  | 1 |
| 20766 | H | 61.26062 | 93.66123 | 69.68195 | 2108.48704  | -230.03140  | 656.81551   | 1 |
| 20767 | C | 61.49706 | 94.31506 | 67.43901 | -628.68421  | -818.30687  | -735.81477  | 1 |
| 20768 | H | 62.22680 | 93.65470 | 66.90567 | -1616.20238 | -1228.48103 | -189.12222  | 1 |
| 20769 | H | 60.75666 | 94.63586 | 66.74264 | 2537.72308  | 3228.23615  | -1188.47918 | 1 |
| 20770 | C | 62.18607 | 95.71044 | 67.73748 | 135.62776   | 53.74188    | -261.74571  | 1 |
| 20771 | H | 63.05871 | 95.70276 | 68.49395 | -1484.20163 | 272.83703   | 827.16646   | 1 |
| 20772 | H | 61.45474 | 96.44351 | 68.20310 | -1127.23089 | -1152.42342 | 454.52404   | 1 |
| 20773 | C | 62.51925 | 96.32968 | 66.35890 | -510.50826  | -530.81570  | 391.01793   | 1 |
| 20774 | O | 61.73843 | 95.86788 | 65.27391 | 27.83198    | -221.81590  | -165.44816  | 1 |
| 20775 | O | 63.33848 | 97.24005 | 66.25969 | 89.16362    | -54.26436   | 99.54677    | 1 |
| 20776 | C | 59.29377 | 93.83407 | 68.75121 | -217.22905  | -818.88691  | 48.36759    | 1 |
| 20777 | O | 58.88270 | 94.89738 | 68.27945 | -139.18916  | -466.53739  | -628.88283  | 1 |
| 20778 | N | 58.65339 | 92.96625 | 69.50651 | -609.16534  | 280.33873   | 20.02385    | 1 |
| 20779 | H | 59.09364 | 92.12045 | 69.92666 | 1232.59148  | 954.74855   | 3651.92391  | 1 |
| 20780 | C | 57.41364 | 93.40144 | 70.09645 | 587.36353   | -1093.37260 | 415.88240   | 1 |
| 20781 | H | 56.91370 | 94.03813 | 69.28731 | -355.03709  | -4053.45219 | 3384.43901  | 1 |
| 20782 | C | 56.52710 | 92.08817 | 70.40261 | -661.38675  | -160.99611  | 555.34363   | 1 |
| 20783 | H | 56.94339 | 91.33920 | 69.67268 | -296.15161  | -1410.86496 | -2864.55681 | 1 |
| 20784 | C | 56.70396 | 91.52146 | 71.83580 | 647.70479   | -964.05184  | 377.06498   | 1 |
| 20785 | H | 57.76331 | 91.03694 | 72.04485 | 78.10573    | 3038.58880  | 2217.68576  | 1 |
| 20786 | H | 56.46218 | 92.37037 | 72.54768 | -1319.39460 | 581.40843   | 4026.12610  | 1 |
| 20787 | H | 56.01531 | 90.62595 | 72.02206 | 2702.26478  | 2092.00277  | 455.17128   | 1 |
| 20788 | C | 55.05862 | 92.61828 | 70.16028 | -604.13340  | 236.01807   | 155.66803   | 1 |
| 20789 | H | 54.33095 | 91.77790 | 69.85987 | 1356.51101  | 241.72217   | -527.78004  | 1 |
| 20790 | H | 54.88146 | 93.29457 | 69.33943 | -1076.96793 | 4705.09334  | -1626.34574 | 1 |
| 20791 | C | 54.70435 | 93.43753 | 71.45253 | -389.65374  | 41.80135    | 468.72976   | 1 |
| 20792 | H | 54.66432 | 92.78669 | 72.32767 | 1265.60301  | 1268.93134  | 1760.23586  | 1 |
| 20793 | H | 55.42442 | 94.26076 | 71.67409 | -1347.31139 | 52.24130    | -228.99649  | 1 |
| 20794 | H | 53.65345 | 93.82658 | 71.34305 | -4047.34037 | 1326.47463  | 555.66085   | 1 |
| 20795 | C | 57.84452 | 94.47422 | 71.20820 | -109.09715  | 64.95304    | -242.47597  | 1 |
| 20796 | O | 57.22732 | 95.45542 | 71.48064 | -103.51920  | 75.97231    | -34.65582   | 1 |
| 20797 | N | 58.84680 | 93.93680 | 72.02198 | -613.45837  | 281.89560   | 627.40327   | 1 |
| 20798 | H | 59.35203 | 93.25004 | 71.51769 | -1038.97063 | 1599.65189  | 2530.07999  | 1 |
| 20799 | C | 59.67167 | 94.96699 | 72.72148 | -697.02977  | 334.74991   | -581.90767  | 1 |
| 20800 | H | 58.84611 | 95.60997 | 73.11315 | -2074.04456 | -3091.02764 | 1203.70448  | 1 |
| 20801 | C | 60.45991 | 94.27352 | 73.86574 | 33.43247    | -161.41747  | 372.51727   | 1 |
| 20802 | H | 61.29160 | 93.75444 | 73.31125 | -87.62559   | 506.91422   | -1434.40559 | 1 |
| 20803 | C | 61.10030 | 95.15594 | 74.91902 | -417.67540  | 105.09633   | -321.96683  | 1 |
| 20804 | H | 61.61012 | 96.09705 | 74.54713 | 2608.70598  | -1965.09458 | -413.40015  | 1 |
| 20805 | H | 60.37455 | 95.49646 | 75.70843 | 926.67721   | -1198.88898 | 794.35440   | 1 |
| 20806 | H | 61.86988 | 94.50838 | 75.44023 | 696.63340   | -2039.93361 | 95.74319    | 1 |
| 20807 | C | 59.48413 | 93.30581 | 74.43927 | 461.67938   | 301.51946   | 426.72928   | 1 |
| 20808 | H | 58.93798 | 92.74502 | 73.59256 | 3430.00534  | -121.60401  | -2543.01325 | 1 |
| 20809 | H | 58.58881 | 93.72193 | 74.98679 | 4585.88091  | -2890.86732 | 4955.49765  | 1 |
| 20810 | C | 60.26996 | 92.09793 | 75.19864 | -156.01903  | -466.18748  | -330.11912  | 1 |
| 20811 | H | 60.87569 | 92.58296 | 75.94054 | 2216.61947  | 2993.68694  | 1123.13967  | 1 |
| 20812 | H | 61.00916 | 91.54847 | 74.58523 | 883.24853   | 1614.37196  | 3101.71036  | 1 |
| 20813 | H | 59.66621 | 91.36319 | 75.77756 | 1344.29036  | 2293.68399  | -630.76368  | 1 |
| 20814 | C | 60.68089 | 95.64318 | 71.65051 | -92.19728   | -191.57104  | -144.85895  | 1 |
| 20815 | O | 61.43631 | 95.05393 | 70.89973 | 50.52930    | -36.18163   | 118.34628   | 1 |
| 20816 | N | 60.65015 | 97.00072 | 71.84682 | 426.32938   | 503.30056   | 209.89030   | 1 |
| 20817 | H | 60.25207 | 97.28566 | 72.75589 | 1965.13298  | -2203.13261 | 779.83007   | 1 |
| 20818 | C | 61.67020 | 97.76632 | 71.23343 | -906.92786  | -392.70324  | 1026.27266  | 1 |
| 20819 | H | 61.86974 | 97.20241 | 70.27859 | 2078.65747  | -57.30094   | 1652.58255  | 1 |
| 20820 | C | 61.12566 | 99.17991 | 70.94835 | 347.37576   | 157.22103   | 586.86091   | 1 |
| 20821 | H | 61.88928 | 99.96347 | 70.77391 | 985.87424   | 252.57120   | -1615.35548 | 1 |
| 20822 | H | 60.58009 | 99.49375 | 71.92042 | 2490.41006  | -237.08974  | -290.91948  | 1 |
| 20823 | C | 60.19040 | 99.15267 | 69.62116 | 691.00587   | 646.41539   | 487.25911   | 1 |

|       |   |          |           |          |             |             |             |   |
|-------|---|----------|-----------|----------|-------------|-------------|-------------|---|
| 20824 | H | 59.81991 | 100.17563 | 69.33486 | 2445.46357  | -4085.91767 | -953.02297  | 1 |
| 20825 | H | 60.71175 | 98.73099  | 68.76276 | 2972.77761  | -3303.60330 | 622.75493   | 1 |
| 20826 | C | 58.93941 | 98.26556  | 69.84114 | 297.23554   | -392.98170  | 99.70051    | 1 |
| 20827 | H | 58.27606 | 98.75643  | 70.65500 | -2565.53963 | -121.27388  | -1205.41742 | 1 |
| 20828 | H | 59.21885 | 97.27445  | 70.24877 | -1722.32077 | 103.93117   | -2526.40233 | 1 |
| 20829 | C | 58.11597 | 98.12184  | 68.48819 | -53.22675   | 923.62030   | 454.11613   | 1 |
| 20830 | H | 57.67470 | 99.05185  | 68.14721 | -841.37150  | -750.24733  | 521.94047   | 1 |
| 20831 | H | 57.40070 | 97.26583  | 68.53484 | -1017.68230 | -1659.96045 | -4516.04402 | 1 |
| 20832 | N | 58.88711 | 97.46236  | 67.47186 | 73.88489    | 66.87273    | 262.28228   | 1 |
| 20833 | H | 62.14563 | 96.36880  | 64.51391 | 1633.73680  | -1652.37962 | -615.80054  | 1 |
| 20834 | H | 59.25150 | 96.53120  | 67.79575 | 2504.14793  | 517.72505   | 954.77360   | 1 |
| 20835 | H | 58.45068 | 97.54708  | 66.51754 | -819.33084  | 782.58123   | 700.48164   | 1 |
| 20836 | C | 63.11835 | 97.67256  | 72.12161 | 341.89986   | 246.47505   | -524.47879  | 1 |
| 20837 | O | 63.10630 | 97.87704  | 73.29410 | 486.18987   | 315.20212   | -464.12166  | 1 |
| 20838 | N | 64.18054 | 97.42186  | 71.29689 | -358.56566  | -85.82770   | 67.39036    | 1 |
| 20839 | H | 63.90483 | 97.65326  | 70.34887 | 412.13927   | -704.95614  | -1712.72860 | 1 |
| 20840 | C | 65.54439 | 97.81134  | 71.74247 | -813.15935  | -19.12025   | -387.40688  | 1 |
| 20841 | H | 65.46319 | 98.86654  | 71.80129 | -2188.01900 | -1021.48784 | 2446.90025  | 1 |
| 20842 | C | 65.89639 | 97.36260  | 73.18349 | -508.58815  | 192.95577   | -227.15957  | 1 |
| 20843 | H | 65.71662 | 96.22032  | 73.21090 | -1253.83666 | -2477.59342 | 226.15347   | 1 |
| 20844 | H | 65.13349 | 97.82140  | 73.93091 | 177.29783   | -246.89981  | 1991.86461  | 1 |
| 20845 | C | 67.36409 | 97.62575  | 73.63378 | 607.75517   | 808.20074   | 371.99366   | 1 |
| 20846 | H | 67.59028 | 97.11917  | 74.56877 | 1497.06418  | -875.29366  | -1359.32586 | 1 |
| 20847 | H | 68.10730 | 97.11870  | 72.90059 | 2158.67958  | 2087.98906  | 1735.34675  | 1 |
| 20848 | C | 67.62411 | 99.16708  | 73.92062 | 126.42186   | -690.14968  | -66.12072   | 1 |
| 20849 | O | 67.32920 | 100.08219 | 73.19267 | 599.18304   | 17.59393    | -165.70313  | 1 |
| 20850 | N | 68.19088 | 99.36746  | 75.11736 | 304.82005   | -633.10859  | 1354.97498  | 1 |
| 20851 | H | 68.58658 | 98.71834  | 75.80516 | 1650.78290  | -617.26942  | -494.69665  | 1 |
| 20852 | H | 68.33915 | 100.30490 | 75.52353 | 1384.41299  | -705.48794  | -822.42098  | 1 |
| 20853 | C | 66.67595 | 97.38988  | 70.68236 | -596.94645  | 269.85331   | 557.95842   | 1 |
| 20854 | O | 66.40525 | 96.40652  | 69.94218 | 373.54661   | 428.71106   | -6.67771    | 1 |
| 20855 | N | 67.87429 | 97.94437  | 70.77372 | 709.27166   | -7.26718    | 1092.43370  | 1 |
| 20856 | H | 67.87403 | 98.69255  | 71.48637 | -1309.76995 | -643.45348  | 910.73957   | 1 |
| 20857 | C | 69.01034 | 97.67068  | 69.95052 | -406.09713  | 249.77037   | 545.96078   | 1 |
| 20858 | H | 69.23480 | 98.68238  | 69.57368 | 1249.03470  | 2587.99183  | 44.18410    | 1 |
| 20859 | H | 68.74010 | 96.93158  | 69.16336 | -138.56796  | 1465.37732  | 754.22327   | 1 |
| 20860 | C | 70.05475 | 96.98765  | 71.01805 | 367.20158   | -453.64387  | 786.42818   | 1 |
| 20861 | O | 70.19922 | 97.38246  | 72.15238 | 265.83576   | 286.22052   | 461.28611   | 1 |
| 20862 | N | 70.62039 | 95.97781  | 70.41853 | 574.95477   | 251.71588   | 801.54237   | 1 |
| 20863 | H | 70.75207 | 95.85665  | 69.33380 | 4339.91282  | 680.09693   | -2345.17734 | 1 |
| 20864 | C | 71.42636 | 95.10795  | 71.19898 | -195.06759  | 377.44122   | 26.39350    | 1 |
| 20865 | H | 70.83924 | 94.96254  | 72.18774 | 3053.23275  | 1326.55067  | 213.90830   | 1 |
| 20866 | C | 71.85554 | 93.73685  | 70.55312 | 103.88330   | -542.38404  | -93.43065   | 1 |
| 20867 | H | 72.00328 | 93.15226  | 71.49624 | 1592.81573  | 942.21601   | 2817.37305  | 1 |
| 20868 | H | 72.86503 | 93.84220  | 69.99919 | -1511.92114 | -1231.91081 | -945.48833  | 1 |
| 20869 | S | 70.59298 | 92.95872  | 69.46464 | 192.53212   | 216.38942   | -28.68671   | 1 |
| 20870 | C | 72.86736 | 95.82891  | 71.54208 | -260.28447  | -170.57006  | -592.37729  | 1 |
| 20871 | O | 73.62793 | 95.17804  | 72.26161 | -144.05307  | 164.30134   | -479.46692  | 1 |
| 20872 | N | 73.08232 | 96.87712  | 70.82115 | 130.75313   | 373.30771   | 279.44408   | 1 |
| 20873 | H | 72.39715 | 97.31739  | 70.17080 | -2387.49474 | -2331.05349 | 465.77485   | 1 |
| 20874 | C | 74.24713 | 97.64880  | 71.02555 | -28.26349   | 187.18656   | 492.11771   | 1 |
| 20875 | H | 74.98334 | 96.78736  | 71.27075 | 1080.29349  | 1440.59911  | 211.08667   | 1 |
| 20876 | C | 74.48310 | 98.37389  | 69.63622 | 703.11390   | -404.93029  | -182.02902  | 1 |
| 20877 | H | 73.75914 | 99.24814  | 69.59709 | -2549.97668 | -198.53209  | 2391.64674  | 1 |
| 20878 | H | 74.22110 | 97.62196  | 68.79978 | 4593.03908  | -1455.18350 | 955.62399   | 1 |
| 20879 | C | 75.96397 | 98.80365  | 69.49397 | -639.82100  | -699.41277  | -1186.80543 | 1 |
| 20880 | H | 76.01707 | 99.78756  | 70.04931 | -405.98478  | -6.69998    | 2086.07340  | 1 |
| 20881 | H | 76.72853 | 98.04006  | 69.93090 | -3257.85719 | 2332.10860  | -1599.17155 | 1 |
| 20882 | C | 76.27357 | 99.04267  | 67.92451 | 436.05983   | -1595.97569 | 293.57837   | 1 |
| 20883 | O | 76.84549 | 100.10219 | 67.64426 | -784.45154  | 107.68426   | 242.78969   | 1 |
| 20884 | O | 76.12191 | 98.04522  | 67.19341 | -198.09927  | 744.69632   | -51.75807   | 1 |
| 20885 | C | 74.00559 | 98.73299  | 72.27758 | -28.49547   | 209.20073   | 916.60384   | 1 |

|       |   |          |           |          |             |             |             |   |
|-------|---|----------|-----------|----------|-------------|-------------|-------------|---|
| 20886 | O | 74.93331 | 99.47164  | 72.51726 | -435.98023  | -548.83251  | 144.12774   | 1 |
| 20887 | N | 72.87892 | 98.54724  | 72.92143 | -76.14261   | -227.92109  | 229.06778   | 1 |
| 20888 | H | 72.24439 | 97.87460  | 72.41317 | -664.69205  | -271.01429  | -1550.49655 | 1 |
| 20889 | C | 72.65266 | 99.09389  | 74.22390 | 681.96561   | 32.39299    | 258.58037   | 1 |
| 20890 | H | 73.37957 | 99.92496  | 74.55732 | 2075.64324  | -1705.96525 | 197.87369   | 1 |
| 20891 | C | 71.12513 | 99.50444  | 74.16747 | -712.18231  | 431.41737   | -319.67568  | 1 |
| 20892 | H | 70.54219 | 98.77784  | 73.48737 | -321.29101  | 340.78605   | -4762.14069 | 1 |
| 20893 | H | 70.68679 | 99.38624  | 75.21423 | 2042.87626  | 1915.46090  | -214.85886  | 1 |
| 20894 | C | 70.88388 | 100.94948 | 73.68944 | 302.72484   | -778.24582  | 84.48962    | 1 |
| 20895 | C | 71.16452 | 101.82303 | 74.78377 | -74.61931   | 8.75063     | 791.98426   | 1 |
| 20896 | H | 71.66945 | 101.41767 | 75.71723 | 2266.00169  | -2217.93323 | 261.48847   | 1 |
| 20897 | C | 70.79727 | 103.18265 | 74.56602 | -101.27143  | 1165.04115  | -584.27942  | 1 |
| 20898 | H | 71.13614 | 103.88172 | 75.36027 | -473.59631  | 420.38807   | 434.01809   | 1 |
| 20899 | C | 70.25753 | 103.67272 | 73.34650 | -489.38483  | 751.12994   | -241.52666  | 1 |
| 20900 | H | 69.81968 | 104.71509 | 73.23340 | 29.31921    | -1042.18600 | 780.73661   | 1 |
| 20901 | C | 70.36506 | 101.33729 | 72.40138 | 363.87362   | -546.31651  | 519.03662   | 1 |
| 20902 | H | 70.06115 | 100.62416 | 71.51428 | 1859.08177  | 396.00856   | -1776.53367 | 1 |
| 20903 | C | 70.11884 | 102.74714 | 72.27854 | -98.77227   | -225.90014  | -155.64021  | 1 |
| 20904 | H | 69.55666 | 102.97938 | 71.41239 | -279.17866  | -2631.18453 | 1401.36780  | 1 |
| 20905 | C | 72.62197 | 97.92846  | 75.32462 | -557.33298  | 696.94656   | 44.87413    | 1 |
| 20906 | O | 72.24544 | 98.27071  | 76.43308 | -68.60401   | -224.02481  | -817.59499  | 1 |
| 20907 | N | 72.86948 | 96.66472  | 74.91170 | 705.05117   | 83.85965    | -482.39463  | 1 |
| 20908 | H | 73.25966 | 96.44103  | 73.95577 | 1594.29193  | 2957.17645  | 1300.70329  | 1 |
| 20909 | C | 72.13257 | 95.66665  | 75.53365 | 86.66764    | -348.55915  | -479.24748  | 1 |
| 20910 | H | 71.66056 | 96.07494  | 76.51769 | 5456.61101  | -2889.69926 | 1670.03864  | 1 |
| 20911 | C | 70.97760 | 95.12531  | 74.52152 | -267.91574  | 47.33821    | -75.62639   | 1 |
| 20912 | H | 70.69707 | 95.90268  | 73.73125 | -1935.15715 | 231.69097   | 1062.12128  | 1 |
| 20913 | H | 71.43032 | 94.29920  | 73.92031 | 372.03700   | 1584.57047  | 2586.90891  | 1 |
| 20914 | C | 69.74121 | 94.76294  | 75.34056 | -556.81808  | -555.80046  | 787.11753   | 1 |
| 20915 | H | 69.50253 | 95.67329  | 75.94573 | -902.00261  | 1822.35505  | -2506.06889 | 1 |
| 20916 | H | 69.75625 | 93.91989  | 76.08406 | -1040.12070 | -1788.87255 | 358.96500   | 1 |
| 20917 | C | 68.50285 | 94.51580  | 74.31502 | -400.36537  | 1039.45306  | 1186.62801  | 1 |
| 20918 | O | 67.38599 | 94.57553  | 74.74382 | -295.11018  | 1143.89723  | -345.88938  | 1 |
| 20919 | O | 68.83854 | 94.17876  | 73.12906 | 444.48382   | -256.93228  | 205.23407   | 1 |
| 20920 | C | 73.04137 | 94.30074  | 75.72559 | 330.32919   | -224.49632  | -535.45281  | 1 |
| 20921 | O | 72.53807 | 93.17322  | 76.02312 | 311.22981   | 953.73629   | -732.81486  | 1 |
| 20922 | N | 74.33163 | 94.58241  | 75.64857 | 108.60199   | -202.65025  | -1079.36416 | 1 |
| 20923 | H | 74.43342 | 95.58558  | 75.31850 | -630.30345  | 539.52750   | 1740.28386  | 1 |
| 20924 | C | 74.96789 | 94.30062  | 76.92217 | 662.17353   | 1008.22837  | -418.40679  | 1 |
| 20925 | H | 74.58883 | 93.26366  | 77.11455 | -2347.95216 | -468.69727  | 277.67814   | 1 |
| 20926 | C | 76.53281 | 94.56801  | 76.91057 | -291.73144  | 353.28036   | -613.29899  | 1 |
| 20927 | H | 76.90146 | 95.45639  | 77.51200 | -952.42737  | -2557.16574 | -1548.49349 | 1 |
| 20928 | H | 76.81330 | 94.69041  | 75.85007 | -2555.88326 | -2136.69031 | -800.99234  | 1 |
| 20929 | C | 77.49353 | 93.39696  | 77.46362 | 547.10788   | -654.59877  | -600.73836  | 1 |
| 20930 | O | 77.77710 | 93.30813  | 78.65393 | 306.79911   | 82.35083    | -542.45473  | 1 |
| 20931 | N | 77.88803 | 92.66686  | 76.45025 | -126.62823  | 664.95240   | 783.27227   | 1 |
| 20932 | H | 77.80904 | 92.75975  | 75.44010 | -72.90627   | 424.53153   | -1880.39779 | 1 |
| 20933 | H | 78.67896 | 92.00101  | 76.61085 | -1348.93323 | -1661.31683 | 249.58963   | 1 |
| 20934 | C | 74.38297 | 95.40328  | 77.96848 | -15.87034   | 965.88360   | -469.86396  | 1 |
| 20935 | O | 74.97702 | 96.44580  | 78.33365 | -496.19679  | -112.53719  | 278.62222   | 1 |
| 20936 | N | 73.33418 | 94.81961  | 78.38337 | 1156.62031  | -107.42459  | -84.50496   | 1 |
| 20937 | H | 73.06962 | 93.86899  | 78.00439 | -341.59947  | 732.05063   | -1215.67662 | 1 |
| 20938 | C | 72.74657 | 95.33266  | 79.60211 | -1110.73402 | 664.30733   | -458.59644  | 1 |
| 20939 | H | 73.66445 | 95.50746  | 80.19648 | -1076.64471 | -633.46131  | 465.10900   | 1 |
| 20940 | C | 72.04072 | 96.71021  | 79.49473 | 122.10098   | -350.11233  | -805.60235  | 1 |
| 20941 | H | 71.63300 | 96.92083  | 78.46846 | -27.53485   | 1508.05839  | 1628.50867  | 1 |
| 20942 | O | 73.07797 | 98.15418  | 79.17332 | -33.62956   | 88.05845    | -563.27726  | 1 |
| 20943 | H | 72.73629 | 98.22453  | 78.16617 | 1335.33274  | 2913.55828  | -1453.03050 | 1 |
| 20944 | C | 70.99734 | 96.58970  | 80.61355 | 83.50705    | 347.14984   | 291.95878   | 1 |
| 20945 | H | 70.42671 | 95.60910  | 80.54868 | -2278.96505 | -221.97256  | -775.44808  | 1 |
| 20946 | H | 70.24582 | 97.38376  | 80.35804 | -387.76511  | 472.80796   | 4321.46073  | 1 |
| 20947 | H | 71.45010 | 96.65656  | 81.61830 | -1693.48307 | -1710.69015 | 884.30332   | 1 |

|       |   |          |          |          |             |             |             |   |
|-------|---|----------|----------|----------|-------------|-------------|-------------|---|
| 20948 | C | 71.85878 | 94.06592 | 80.17567 | -577.34202  | -272.59026  | 1.07324     | 1 |
| 20949 | O | 71.81296 | 93.76415 | 81.37931 | -849.63438  | -653.40741  | -810.57022  | 1 |
| 20950 | N | 71.17912 | 93.51856 | 79.20207 | -155.14765  | 743.12661   | -44.99191   | 1 |
| 20951 | H | 71.36099 | 93.94130 | 78.26468 | 2040.53517  | 12.67997    | 43.14337    | 1 |
| 20952 | C | 70.61621 | 92.23029 | 79.45340 | -243.91669  | 164.34283   | 66.17692    | 1 |
| 20953 | H | 70.12366 | 92.37277 | 80.33839 | -1095.60755 | -73.66456   | 4220.55435  | 1 |
| 20954 | C | 69.57135 | 92.07858 | 78.22632 | -1087.78798 | -73.29801   | 87.31568    | 1 |
| 20955 | H | 68.97388 | 93.06338 | 78.28411 | -3203.78959 | -104.40805  | -3207.35755 | 1 |
| 20956 | C | 69.90446 | 91.78733 | 76.72249 | -47.84361   | -41.22951   | -356.76750  | 1 |
| 20957 | H | 70.16418 | 90.71748 | 76.64043 | -1978.87174 | -609.27018  | -727.93079  | 1 |
| 20958 | H | 69.07646 | 91.97524 | 75.96228 | 2828.68013  | -682.41980  | 2583.78426  | 1 |
| 20959 | H | 70.80794 | 92.44820 | 76.45687 | 2930.63218  | -2731.73597 | 1053.12369  | 1 |
| 20960 | C | 68.63165 | 90.91600 | 78.55164 | 107.71971   | -553.69959  | -89.13821   | 1 |
| 20961 | H | 67.96714 | 90.76973 | 77.61265 | -27.87404   | -3445.54674 | -1418.03219 | 1 |
| 20962 | H | 69.22804 | 89.99763 | 78.87079 | 1763.91690  | 704.37935   | 2758.62421  | 1 |
| 20963 | H | 67.97369 | 91.25545 | 79.37490 | -75.62065   | -2214.46251 | 267.15019   | 1 |
| 20964 | C | 71.71886 | 91.07079 | 79.30639 | -133.11075  | 815.59069   | 323.86979   | 1 |
| 20965 | O | 71.84698 | 90.13138 | 80.09648 | 643.89968   | 221.31710   | -1288.75341 | 1 |
| 20966 | N | 72.50854 | 91.27178 | 78.23346 | 31.67551    | -225.01975  | 1117.89676  | 1 |
| 20967 | H | 72.47272 | 92.05100 | 77.60317 | -654.34958  | -240.98889  | -921.08071  | 1 |
| 20968 | C | 73.46106 | 90.25650 | 77.95692 | -531.23335  | 216.77553   | -632.67964  | 1 |
| 20969 | H | 73.00856 | 89.30756 | 78.30297 | 2990.79047  | -4267.27720 | 1269.90703  | 1 |
| 20970 | C | 74.01336 | 90.12952 | 76.49161 | 379.57868   | 369.57887   | -245.97469  | 1 |
| 20971 | H | 74.72965 | 91.02738 | 76.34760 | 924.36804   | -1354.64929 | 401.08506   | 1 |
| 20972 | H | 73.21244 | 90.22441 | 75.63468 | 141.51580   | 458.68272   | -4154.64668 | 1 |
| 20973 | N | 74.39903 | 87.63091 | 76.10633 | -373.58581  | 435.46764   | 847.04146   | 1 |
| 20974 | C | 74.87978 | 88.85053 | 76.42930 | 623.93018   | -912.77630  | 351.78253   | 1 |
| 20975 | C | 75.43034 | 86.78637 | 76.11837 | 76.39647    | 800.31794   | -618.72997  | 1 |
| 20976 | H | 75.37308 | 85.71473 | 75.84005 | -485.57304  | 142.86598   | 927.75641   | 1 |
| 20977 | N | 76.54119 | 87.44880 | 76.52436 | -680.40149  | 228.90438   | -54.81577   | 1 |
| 20978 | H | 77.45175 | 86.98225 | 76.69675 | 4939.24534  | 639.20546   | -3428.73062 | 1 |
| 20979 | C | 76.27872 | 88.73298 | 76.69604 | 26.52294    | -24.06631   | -1151.87002 | 1 |
| 20980 | H | 77.02163 | 89.51533 | 76.94540 | 925.20237   | -4671.88109 | -1783.14025 | 1 |
| 20981 | C | 74.72928 | 90.74907 | 78.92716 | 543.46042   | 301.67259   | 636.44519   | 1 |
| 20982 | O | 75.81476 | 90.29052 | 78.54173 | -1184.47426 | 122.64286   | 942.62739   | 1 |
| 20983 | N | 74.50446 | 91.53418 | 79.95507 | -165.46903  | 50.21125    | 346.89346   | 1 |
| 20984 | H | 73.51932 | 91.84208 | 80.14868 | -1277.16519 | 1896.35377  | 3334.02098  | 1 |
| 20985 | C | 75.50894 | 91.51649 | 80.97199 | -45.84794   | -275.02525  | 37.66263    | 1 |
| 20986 | H | 76.30443 | 91.38228 | 80.31568 | -221.88779  | -372.04614  | 1785.83186  | 1 |
| 20987 | C | 75.42461 | 92.84293 | 81.76614 | 361.43645   | -211.23778  | -102.97562  | 1 |
| 20988 | H | 76.26785 | 92.99211 | 82.46376 | 1143.69400  | 1238.13308  | 2896.93700  | 1 |
| 20989 | H | 74.52784 | 92.74592 | 82.35803 | 461.62018   | 3255.99608  | 173.78684   | 1 |
| 20990 | C | 75.30954 | 94.09816 | 80.77737 | 274.55983   | 262.25884   | -205.01155  | 1 |
| 20991 | H | 76.03266 | 94.07755 | 79.93510 | 3406.57046  | -280.18432  | 1061.05839  | 1 |
| 20992 | H | 74.28186 | 93.81076 | 80.39312 | -704.80203  | 139.45457   | 86.22779    | 1 |
| 20993 | C | 75.28094 | 95.44968 | 81.56430 | 220.68389   | -264.14760  | 442.88264   | 1 |
| 20994 | H | 74.68838 | 96.28605 | 81.14735 | 227.89688   | 3406.31296  | -981.91631  | 1 |
| 20995 | H | 76.28914 | 95.78006 | 81.61086 | 1066.50641  | 907.44019   | 1230.39212  | 1 |
| 20996 | C | 74.79559 | 95.28744 | 83.06171 | -90.26826   | 166.58309   | -188.09466  | 1 |
| 20997 | H | 74.67669 | 94.25939 | 83.39913 | -1566.12204 | 2469.90746  | -1862.19147 | 1 |
| 20998 | H | 75.32827 | 95.89935 | 83.74771 | 1833.22932  | -628.10653  | -773.61967  | 1 |
| 20999 | N | 73.48899 | 95.87016 | 83.04839 | 581.44656   | 163.51800   | -426.32214  | 1 |
| 21000 | H | 73.94640 | 97.51231 | 78.93811 | -541.15096  | -89.51436   | 1182.53559  | 1 |
| 21001 | H | 73.24897 | 96.12296 | 84.02731 | 813.63467   | -1339.72049 | 1898.77290  | 1 |
| 21002 | H | 72.74416 | 95.22909 | 82.77701 | 1047.80634  | -2122.74599 | -1584.71320 | 1 |
| 21003 | C | 75.27847 | 90.22621 | 82.05440 | 196.73300   | -483.71377  | -228.63497  | 1 |
| 21004 | O | 76.18672 | 89.76223 | 82.72320 | -241.83256  | 38.03908    | 264.04580   | 1 |
| 21005 | N | 73.98943 | 90.03151 | 82.14809 | -254.21192  | -12.45017   | 181.91901   | 1 |
| 21006 | H | 73.36594 | 90.63343 | 81.57196 | 1724.27286  | 3104.91187  | 2056.75229  | 1 |
| 21007 | C | 73.46663 | 88.99047 | 82.99382 | -869.19043  | 61.84031    | 15.17177    | 1 |
| 21008 | H | 74.20900 | 88.85362 | 83.81028 | 750.07545   | -1328.24847 | 816.14853   | 1 |
| 21009 | C | 71.98322 | 89.37329 | 83.43788 | -789.71079  | -379.51147  | -704.42209  | 1 |

|       |   |          |          |          |             |             |             |   |
|-------|---|----------|----------|----------|-------------|-------------|-------------|---|
| 21010 | H | 71.60803 | 88.52931 | 83.99321 | -2894.88079 | 3326.15250  | 593.16174   | 1 |
| 21011 | H | 71.54036 | 89.52709 | 82.40180 | -1209.72934 | 960.76041   | -1170.10180 | 1 |
| 21012 | C | 71.98872 | 90.63532 | 84.23523 | 276.87649   | -321.93364  | -70.81336   | 1 |
| 21013 | C | 72.10799 | 92.00057 | 83.84989 | 204.85753   | 27.51959    | 361.80196   | 1 |
| 21014 | H | 72.10834 | 92.48973 | 82.85873 | -713.80693  | -56.67575   | 810.48187   | 1 |
| 21015 | N | 72.31582 | 92.76453 | 84.93390 | 216.92581   | 366.65748   | 146.82913   | 1 |
| 21016 | H | 72.39484 | 93.75326 | 84.66678 | 290.33564   | 814.74102   | -1551.26547 | 1 |
| 21017 | C | 72.21545 | 92.07983 | 86.09753 | -509.08682  | 544.45690   | 376.33434   | 1 |
| 21018 | C | 72.05052 | 90.65271 | 85.69483 | -788.34141  | 522.92093   | 166.77033   | 1 |
| 21019 | C | 72.05331 | 89.56492 | 86.60223 | -466.14481  | -461.11891  | -1324.78157 | 1 |
| 21020 | H | 71.99437 | 88.54762 | 86.29637 | -928.62651  | -726.32368  | -811.68039  | 1 |
| 21021 | C | 72.06494 | 89.93332 | 87.97141 | 832.55921   | -182.30384  | 517.33201   | 1 |
| 21022 | H | 72.06015 | 89.14013 | 88.74779 | 180.79365   | 4168.00811  | 1254.44059  | 1 |
| 21023 | C | 72.10720 | 92.38798 | 87.51345 | -727.43855  | 139.37462   | 204.29897   | 1 |
| 21024 | H | 72.20086 | 93.42067 | 87.92669 | -2926.86439 | 1996.32646  | 784.89343   | 1 |
| 21025 | C | 72.07118 | 91.29911 | 88.38888 | -495.75627  | -78.14670   | 851.71249   | 1 |
| 21026 | H | 71.80577 | 91.56206 | 89.48241 | -3574.67360 | 1862.45922  | 1008.54916  | 1 |
| 21027 | C | 73.35168 | 87.60732 | 82.14512 | -511.26822  | 614.42856   | -82.98431   | 1 |
| 21028 | O | 73.40475 | 86.57227 | 82.79031 | -328.84017  | 425.75013   | -221.48060  | 1 |
| 21029 | N | 73.08143 | 87.79329 | 80.84585 | -150.24939  | 207.27220   | -334.33207  | 1 |
| 21030 | H | 72.83200 | 88.67415 | 80.36472 | 3747.60557  | 1689.31913  | 1390.74497  | 1 |
| 21031 | C | 73.17505 | 86.57041 | 80.03522 | 1128.29445  | 344.45568   | 70.05767    | 1 |
| 21032 | H | 72.66005 | 85.93973 | 80.80709 | -1300.01485 | -2747.88664 | 499.34180   | 1 |
| 21033 | C | 72.37699 | 86.70262 | 78.62212 | -231.70704  | 423.30558   | 221.20283   | 1 |
| 21034 | H | 73.04062 | 87.37753 | 78.01960 | -2039.79810 | 1738.12719  | -1081.85723 | 1 |
| 21035 | C | 72.30440 | 85.26702 | 77.94194 | 139.29899   | 32.35277    | -1232.32526 | 1 |
| 21036 | H | 73.25929 | 84.82877 | 77.79149 | 120.52842   | -1427.87290 | -1511.43729 | 1 |
| 21037 | H | 71.85123 | 85.33014 | 76.96682 | -2947.99130 | 289.99593   | 1945.68791  | 1 |
| 21038 | H | 71.66062 | 84.46109 | 78.38967 | 1351.38043  | 2649.88516  | -2855.63270 | 1 |
| 21039 | C | 70.92031 | 87.22516 | 78.58597 | -490.88423  | 36.69254    | 220.45777   | 1 |
| 21040 | H | 70.75853 | 87.85113 | 79.45805 | -1766.52533 | -119.72623  | -278.83406  | 1 |
| 21041 | H | 70.13507 | 86.48889 | 78.77704 | 2383.26872  | -1963.34743 | 1497.92010  | 1 |
| 21042 | C | 70.71682 | 88.03495 | 77.21626 | -948.17734  | 937.01205   | -25.60592   | 1 |
| 21043 | H | 69.63056 | 88.06163 | 76.85470 | -5201.73510 | -48.73285   | 4036.76454  | 1 |
| 21044 | H | 71.05922 | 89.07954 | 77.34113 | 1.08524     | 3631.40110  | -833.56271  | 1 |
| 21045 | H | 71.14522 | 87.54058 | 76.33491 | 639.32391   | 816.21591   | 556.61291   | 1 |
| 21046 | C | 74.71413 | 86.16601 | 79.75454 | -194.78666  | 530.33323   | -137.26991  | 1 |
| 21047 | O | 74.99637 | 85.06806 | 79.29356 | 1011.85391  | 788.47046   | -104.73474  | 1 |
| 21048 | N | 75.51107 | 87.20761 | 80.07493 | -726.01439  | 122.61300   | -582.44128  | 1 |
| 21049 | H | 75.04656 | 87.92726 | 80.64487 | 3069.90331  | -2512.57583 | -612.69633  | 1 |
| 21050 | C | 76.94680 | 86.92125 | 80.18743 | -547.20008  | 505.59034   | 350.15823   | 1 |
| 21051 | H | 77.17068 | 86.28806 | 79.33398 | -2065.37305 | -2043.17087 | -1372.08090 | 1 |
| 21052 | C | 77.56975 | 88.34777 | 80.21071 | 369.52018   | 1489.11131  | 10.45996    | 1 |
| 21053 | H | 77.26475 | 88.89667 | 79.31849 | 2337.49694  | 1028.77974  | 4393.52903  | 1 |
| 21054 | H | 77.11089 | 89.00780 | 81.01366 | -5005.32114 | -1958.41610 | 1190.19331  | 1 |
| 21055 | O | 79.04326 | 88.41906 | 80.58191 | 51.70522    | -153.17170  | 245.76829   | 1 |
| 21056 | H | 79.05557 | 89.37198 | 80.79648 | -2221.61517 | -1886.77099 | 658.03099   | 1 |
| 21057 | C | 77.10086 | 85.93554 | 81.50079 | -147.26520  | 944.61170   | -165.60912  | 1 |
| 21058 | O | 77.95475 | 85.08718 | 81.43609 | 588.32765   | -431.93685  | 8.43790     | 1 |
| 21059 | N | 76.34192 | 86.39729 | 82.49614 | -340.46190  | 220.16735   | 297.02352   | 1 |
| 21060 | H | 75.68522 | 87.14728 | 82.32044 | 1871.75094  | -1453.82035 | -1173.30244 | 1 |
| 21061 | C | 76.34418 | 85.73404 | 83.73886 | -49.08733   | 92.82177    | 106.55625   | 1 |
| 21062 | H | 77.35238 | 85.30372 | 83.97214 | -1040.18574 | -1042.40504 | -642.48087  | 1 |
| 21063 | C | 75.75111 | 86.60966 | 84.94099 | -248.97787  | -283.55425  | 225.61674   | 1 |
| 21064 | H | 74.68802 | 86.72033 | 84.70134 | -2277.97206 | -469.36109  | 2970.88624  | 1 |
| 21065 | C | 75.97114 | 85.77930 | 86.23017 | 541.74875   | -488.60013  | 439.88704   | 1 |
| 21066 | H | 75.52830 | 86.31245 | 87.10952 | 358.64977   | -1092.84756 | -2165.55339 | 1 |
| 21067 | H | 75.51400 | 84.69780 | 86.20590 | -1210.19279 | -2378.29733 | 1672.75445  | 1 |
| 21068 | H | 77.02782 | 85.71424 | 86.48012 | -1534.59198 | -2805.12695 | 217.72916   | 1 |
| 21069 | C | 76.53327 | 87.93833 | 85.10026 | 23.12725    | -1318.99118 | 729.78664   | 1 |
| 21070 | H | 77.65427 | 87.76720 | 85.25836 | 695.29236   | -382.45932  | -2029.39194 | 1 |
| 21071 | H | 76.38759 | 88.54890 | 84.11362 | -1287.67876 | 1259.73194  | 1551.00309  | 1 |



|       |   |          |          |          |             |             |             |   |
|-------|---|----------|----------|----------|-------------|-------------|-------------|---|
| 21072 | C | 75.91801 | 88.84977 | 86.21253 | 694.71201   | 912.22706   | -824.56526  | 1 |
| 21073 | H | 75.74092 | 88.37288 | 87.19396 | 2132.90899  | 237.03261   | 2187.18366  | 1 |
| 21074 | H | 74.79961 | 89.13278 | 86.06859 | 3005.27318  | -2404.57721 | -2398.36931 | 1 |
| 21075 | H | 76.51669 | 89.81144 | 86.32956 | 2996.35468  | -127.78489  | 1781.11738  | 1 |
| 21076 | C | 75.78700 | 84.21280 | 83.67290 | 780.31815   | -42.05103   | -460.38069  | 1 |
| 21077 | O | 76.22800 | 83.19180 | 84.17690 | -765.27036  | -48.04301   | 208.39534   | 1 |
| 21078 | N | 74.61500 | 84.11980 | 83.04490 | 563.20368   | -188.35068  | -594.00104  | 1 |
| 21079 | H | 74.13500 | 84.95480 | 82.78790 | -344.74458  | 2869.01526  | -1243.85815 | 1 |
| 21080 | C | 73.91400 | 82.81280 | 82.88690 | -719.42455  | 390.17044   | 411.74553   | 1 |
| 21081 | H | 74.00400 | 82.22380 | 83.78790 | 622.53462   | 2152.83758  | -2205.75129 | 1 |
| 21082 | C | 72.40500 | 82.98880 | 82.63790 | 723.38832   | -305.89760  | -453.87018  | 1 |
| 21083 | H | 71.80800 | 82.06780 | 82.46190 | -1944.91760 | -1720.08361 | 1783.86333  | 1 |
| 21084 | O | 72.05500 | 83.93480 | 81.60190 | -717.74869  | -76.49643   | 334.57649   | 1 |
| 21085 | H | 72.41500 | 84.72780 | 82.00590 | 2023.09370  | -1577.95939 | -1812.74049 | 1 |
| 21086 | C | 71.88900 | 83.50080 | 83.95390 | 605.19602   | -360.84239  | 575.43011   | 1 |
| 21087 | H | 72.21200 | 84.53380 | 84.20790 | 2191.98616  | -1939.79265 | -1143.63599 | 1 |
| 21088 | H | 72.03100 | 82.81280 | 84.81390 | 1804.13016  | 83.53454    | -2571.57819 | 1 |
| 21089 | H | 70.78500 | 83.62080 | 83.92590 | -1627.98852 | -2139.21008 | -1639.27001 | 1 |
| 21090 | C | 74.57400 | 81.90580 | 81.81590 | 615.11118   | -665.98768  | 50.39140    | 1 |
| 21091 | O | 74.51000 | 80.70880 | 81.83790 | -646.40062  | 129.20151   | 442.37445   | 1 |
| 21092 | N | 75.20800 | 82.54480 | 80.80190 | 473.22167   | 678.21242   | 155.44275   | 1 |
| 21093 | H | 75.17800 | 83.52780 | 80.63590 | -843.16064  | -1004.02016 | 2862.01060  | 1 |
| 21094 | C | 76.14000 | 81.91880 | 79.89590 | 157.54242   | 868.30725   | 229.26375   | 1 |
| 21095 | H | 75.54400 | 81.19980 | 79.35290 | 2575.64173  | 1357.49996  | -1180.98157 | 1 |
| 21096 | C | 76.52300 | 82.92480 | 78.72290 | 274.80268   | 730.76521   | -469.81833  | 1 |
| 21097 | H | 75.62500 | 83.11680 | 78.09690 | 2064.45991  | -1558.99425 | -1780.98404 | 1 |
| 21098 | H | 76.66500 | 83.94280 | 79.14390 | 2168.63932  | -2264.39534 | -181.36611  | 1 |
| 21099 | C | 77.84600 | 82.66780 | 77.99590 | -617.88482  | 139.01027   | 662.10949   | 1 |
| 21100 | H | 77.88700 | 81.63180 | 77.59590 | -1871.15522 | 2012.70360  | -1543.45540 | 1 |
| 21101 | H | 78.72200 | 82.60580 | 78.67690 | 3002.02647  | -856.50807  | 331.90877   | 1 |
| 21102 | C | 78.18500 | 83.71880 | 76.95690 | -107.09657  | -886.05157  | 178.43420   | 1 |
| 21103 | O | 77.71100 | 83.55580 | 75.80090 | 688.66903   | 4.89886     | 373.05333   | 1 |
| 21104 | O | 78.82900 | 84.76080 | 77.27790 | 519.75083   | 296.00622   | 509.88549   | 1 |
| 21105 | C | 77.35300 | 81.31380 | 80.52590 | 117.92664   | 726.35021   | 537.73369   | 1 |
| 21106 | O | 77.70100 | 80.15980 | 80.26390 | -53.26553   | 738.27135   | -280.80070  | 1 |
| 21107 | N | 77.95800 | 82.09480 | 81.38790 | 495.48075   | 644.69541   | -217.44805  | 1 |
| 21108 | H | 77.75900 | 83.05180 | 81.58290 | -1885.02414 | -2215.29954 | -1206.82803 | 1 |
| 21109 | C | 79.11300 | 81.64780 | 82.15290 | -457.98023  | 500.28608   | -615.16454  | 1 |
| 21110 | H | 79.84000 | 81.34180 | 81.41590 | 780.66261   | -2555.38934 | -1658.29313 | 1 |
| 21111 | C | 79.73600 | 82.80780 | 82.92590 | 549.17241   | -702.71038  | 171.11183   | 1 |
| 21112 | H | 79.00500 | 83.27380 | 83.62090 | 1999.56534  | -30.14525   | 2423.97242  | 1 |
| 21113 | H | 80.07200 | 83.58180 | 82.20390 | 1767.14693  | -1970.10006 | 1693.77958  | 1 |
| 21114 | H | 80.64900 | 82.46280 | 83.45690 | -2.29933    | 2332.10223  | -2113.46025 | 1 |
| 21115 | C | 78.82700 | 80.48580 | 83.13890 | -369.72256  | -599.40209  | -583.64553  | 1 |
| 21116 | O | 79.55900 | 79.51980 | 83.22390 | 151.02221   | 287.45757   | 716.81727   | 1 |
| 21117 | N | 77.64800 | 80.51980 | 83.78290 | 444.56591   | 348.57190   | 622.58497   | 1 |
| 21118 | H | 77.05800 | 81.29980 | 83.58990 | 1779.18934  | 2071.99204  | -1556.86411 | 1 |
| 21119 | C | 77.12500 | 79.38880 | 84.44290 | -299.54306  | -726.86723  | 464.00053   | 1 |
| 21120 | H | 77.86300 | 79.04080 | 85.15090 | -2731.74188 | -1206.94478 | -1003.67782 | 1 |
| 21121 | C | 75.91800 | 79.80180 | 85.39390 | -762.21498  | -221.68741  | -457.36341  | 1 |
| 21122 | H | 75.08100 | 80.21480 | 84.79090 | 1544.49869  | -1156.93705 | 2481.76326  | 1 |
| 21123 | H | 75.49200 | 78.90680 | 85.89490 | 1941.08079  | 1924.31596  | -1552.78144 | 1 |
| 21124 | C | 76.28200 | 80.82580 | 86.48490 | -433.68999  | 80.49815    | 799.35650   | 1 |
| 21125 | H | 76.98000 | 81.55880 | 86.02790 | 3038.75223  | 526.66718   | -600.28091  | 1 |
| 21126 | C | 74.98200 | 81.56780 | 86.85190 | -743.94729  | -314.23761  | -431.80640  | 1 |
| 21127 | H | 75.18900 | 82.57080 | 87.28190 | -2664.27821 | -1224.78041 | -1151.31104 | 1 |
| 21128 | H | 74.37200 | 80.96780 | 87.56090 | 443.52838   | -2206.43547 | 2199.49783  | 1 |
| 21129 | H | 74.21300 | 81.76580 | 86.07590 | -2698.85106 | -1172.60111 | -1125.07857 | 1 |
| 21130 | C | 77.11200 | 80.14080 | 87.64290 | 466.13626   | -363.27208  | -694.04991  | 1 |
| 21131 | H | 78.19900 | 80.15580 | 87.41590 | -736.13953  | -2435.33703 | -1855.73748 | 1 |
| 21132 | H | 76.72400 | 79.10680 | 87.76490 | 761.84484   | -723.60456  | -2966.56632 | 1 |
| 21133 | H | 77.02300 | 80.76480 | 88.55790 | -1927.48794 | -2481.23504 | 223.08475   | 1 |

|       |   |          |          |          |             |             |             |   |
|-------|---|----------|----------|----------|-------------|-------------|-------------|---|
| 21134 | C | 76.81200 | 78.16480 | 83.60190 | -26.82592   | 583.22529   | 698.49627   | 1 |
| 21135 | O | 76.88800 | 77.02780 | 84.09590 | 681.22562   | -368.80145  | -136.66817  | 1 |
| 21136 | N | 76.40900 | 78.34580 | 82.33290 | 114.66656   | -327.71632  | -770.39121  | 1 |
| 21137 | H | 76.25200 | 79.28280 | 82.02990 | -483.74399  | 1308.05306  | -2822.50135 | 1 |
| 21138 | C | 76.00000 | 77.24280 | 81.44990 | 221.43886   | -710.22362  | 522.39625   | 1 |
| 21139 | H | 75.30300 | 76.60780 | 81.97590 | -1977.38274 | 1232.28114  | 2116.61964  | 1 |
| 21140 | C | 75.34000 | 77.71080 | 80.16190 | -751.87236  | 357.12298   | -385.50321  | 1 |
| 21141 | H | 74.36600 | 78.17280 | 80.43090 | -565.96182  | 2524.84230  | -1793.63221 | 1 |
| 21142 | H | 76.02600 | 78.35680 | 79.57290 | 2899.03508  | -1129.43192 | 425.94841   | 1 |
| 21143 | H | 75.07000 | 76.89780 | 79.45490 | -1757.36868 | -2496.71814 | 765.97636   | 1 |
| 21144 | C | 77.21500 | 76.45580 | 81.18090 | 249.35453   | 646.81953   | 588.44193   | 1 |
| 21145 | O | 77.05800 | 75.22780 | 81.01690 | 80.95629    | 473.47460   | 623.69477   | 1 |
| 21146 | N | 78.42600 | 76.99280 | 81.18490 | 353.50510   | -72.86015   | 757.92946   | 1 |
| 21147 | H | 78.51000 | 77.98480 | 81.24190 | 2126.23700  | -950.17224  | 2107.29385  | 1 |
| 21148 | C | 79.72500 | 76.37280 | 80.94990 | 785.96613   | -212.30841  | 396.94714   | 1 |
| 21149 | H | 79.67100 | 75.84580 | 80.00890 | -2584.28796 | -1693.07951 | -615.66348  | 1 |
| 21150 | C | 80.84500 | 77.40480 | 80.87490 | -632.04512  | 614.08060   | -254.32493  | 1 |
| 21151 | H | 81.81300 | 76.89780 | 80.67290 | 1825.76699  | -2196.20209 | -1313.64380 | 1 |
| 21152 | H | 80.83100 | 77.90280 | 81.86790 | -795.73915  | 1508.53313  | 2642.69033  | 1 |
| 21153 | C | 80.72800 | 78.48680 | 79.85590 | 474.14589   | 136.81949   | -766.44319  | 1 |
| 21154 | C | 79.79900 | 78.45180 | 78.78390 | -189.58507  | -154.53623  | -881.91141  | 1 |
| 21155 | H | 79.19800 | 77.57480 | 78.59390 | 1920.23573  | 2017.96696  | 1454.83543  | 1 |
| 21156 | C | 79.71500 | 79.51180 | 77.92990 | -495.83879  | -673.05800  | 366.00043   | 1 |
| 21157 | H | 78.93100 | 79.51880 | 77.18690 | -2296.60452 | 317.46210   | 2132.05000  | 1 |
| 21158 | C | 80.60300 | 80.61280 | 78.00890 | -887.28632  | 133.26319   | 193.55837   | 1 |
| 21159 | H | 80.63700 | 81.41480 | 77.28690 | -1407.85576 | -531.31333  | -2767.49837 | 1 |
| 21160 | C | 81.56500 | 79.61080 | 80.03390 | -35.74170   | 721.58742   | 556.30169   | 1 |
| 21161 | H | 82.29100 | 79.66680 | 80.83190 | -3120.79393 | 374.95255   | 228.33405   | 1 |
| 21162 | C | 81.49000 | 80.62980 | 79.09190 | -437.80542  | -323.57572  | -736.36429  | 1 |
| 21163 | H | 82.21500 | 81.42980 | 79.14390 | 983.73118   | 1267.48202  | -2707.20231 | 1 |
| 21164 | C | 80.06500 | 75.30780 | 81.89290 | 27.30115    | -618.60110  | -672.21477  | 1 |
| 21165 | O | 80.91900 | 74.45080 | 81.59690 | 669.55248   | 394.83134   | 114.57914   | 1 |
| 21166 | N | 79.44000 | 75.24380 | 83.07190 | 600.03055   | -486.27441  | -336.42566  | 1 |
| 21167 | H | 78.65900 | 75.82680 | 83.28190 | 101.08731   | 2691.73377  | 1622.30433  | 1 |
| 21168 | C | 79.63100 | 74.13880 | 83.98890 | -70.88053   | 63.60258    | 902.95116   | 1 |
| 21169 | H | 80.68900 | 74.07380 | 84.19190 | 2813.27829  | -1089.67613 | 875.60325   | 1 |
| 21170 | C | 78.87000 | 74.41180 | 85.37190 | -414.99990  | -611.29493  | -541.67634  | 1 |
| 21171 | H | 78.83600 | 73.47280 | 85.96590 | -1802.79406 | -1149.07688 | -2315.39983 | 1 |
| 21172 | H | 77.82200 | 74.75780 | 85.24390 | 735.28626   | 2930.02592  | 870.10279   | 1 |
| 21173 | C | 79.70500 | 75.33080 | 86.30090 | 12.88302    | 410.03656   | 810.08980   | 1 |
| 21174 | C | 79.44800 | 76.73280 | 86.29990 | 325.07925   | -574.76938  | -630.91415  | 1 |
| 21175 | H | 78.60500 | 77.12880 | 85.75290 | 2069.89167  | 1838.29736  | 1485.77699  | 1 |
| 21176 | C | 80.18400 | 77.60480 | 87.17890 | -242.64569  | 832.26937   | -285.37039  | 1 |
| 21177 | H | 79.91800 | 78.64980 | 87.23690 | -72.92502   | 880.94857   | -3021.71432 | 1 |
| 21178 | C | 81.22300 | 77.03480 | 87.99790 | -590.06330  | 16.44092    | -701.17183  | 1 |
| 21179 | H | 81.76900 | 77.73080 | 88.61790 | 19.09342    | -2099.49312 | 2340.94424  | 1 |
| 21180 | C | 80.73400 | 74.83380 | 87.05290 | -302.81803  | 444.90462   | -740.99522  | 1 |
| 21181 | H | 80.89600 | 73.77180 | 87.15890 | -2130.08363 | -1155.89099 | -2014.64186 | 1 |
| 21182 | C | 81.50200 | 75.61880 | 87.92690 | -216.42402  | 884.75216   | 26.57408    | 1 |
| 21183 | H | 82.33500 | 75.21480 | 88.48390 | -444.31235  | 1999.57651  | -2391.91189 | 1 |
| 21184 | C | 79.16300 | 72.79280 | 83.47990 | -516.03174  | 551.59781   | -519.39448  | 1 |
| 21185 | O | 79.55200 | 71.72080 | 84.04290 | 543.43098   | -435.00758  | -372.79849  | 1 |
| 21186 | N | 78.30700 | 72.68380 | 82.44790 | -842.74127  | 81.23730    | 48.92391    | 1 |
| 21187 | H | 77.94400 | 73.50180 | 82.00890 | 1034.72283  | -614.70237  | 2901.18759  | 1 |
| 21188 | C | 78.01100 | 71.39980 | 81.79690 | -313.67359  | 392.23880   | -767.87771  | 1 |
| 21189 | H | 77.51000 | 70.87580 | 82.59890 | 1351.13833  | 1384.29953  | -2484.13175 | 1 |
| 21190 | C | 77.14300 | 71.47680 | 80.57290 | -600.58337  | -476.18448  | 493.83867   | 1 |
| 21191 | H | 76.78100 | 70.46380 | 80.29490 | -989.85260  | -235.68810  | -2983.26254 | 1 |
| 21192 | H | 76.21100 | 71.97380 | 80.91690 | -391.91194  | -1088.12666 | 2922.06180  | 1 |
| 21193 | N | 77.72300 | 73.44280 | 79.04490 | 336.80945   | -769.90044  | -25.40563   | 1 |
| 21194 | H | 77.43600 | 74.19280 | 79.63990 | -1943.86398 | -1987.71228 | -1480.99796 | 1 |
| 21195 | C | 77.73900 | 72.10080 | 79.28290 | 339.14265   | 658.71439   | 525.86555   | 1 |

|       |   |          |          |          |             |             |             |   |
|-------|---|----------|----------|----------|-------------|-------------|-------------|---|
| 21196 | C | 78.21500 | 73.63280 | 77.79190 | -506.62262  | -648.66746  | -399.85372  | 1 |
| 21197 | H | 78.09200 | 74.62580 | 77.35890 | 2922.70215  | -606.54080  | 971.99507   | 1 |
| 21198 | N | 78.44100 | 72.46680 | 77.21390 | 484.93487   | -381.97566  | -574.05936  | 1 |
| 21199 | C | 78.16100 | 71.51680 | 78.14890 | -693.65672  | -586.15218  | 101.86778   | 1 |
| 21200 | H | 78.36500 | 70.47680 | 77.92590 | 1211.23453  | 1925.83611  | -2177.43227 | 1 |
| 21201 | C | 79.20000 | 70.61280 | 81.39290 | 730.93323   | 476.73181   | 249.08226   | 1 |
| 21202 | O | 79.29400 | 69.44680 | 81.75690 | -87.31612   | 42.16951    | -790.08111  | 1 |
| 21203 | N | 80.23700 | 71.24080 | 80.70990 | 568.52704   | 431.88150   | -451.64135  | 1 |
| 21204 | H | 80.12400 | 72.15080 | 80.31990 | -1149.65240 | -2405.00055 | -1677.19991 | 1 |
| 21205 | C | 81.53600 | 70.68980 | 80.37790 | 258.21674   | -780.87818  | -393.50393  | 1 |
| 21206 | H | 81.30400 | 69.88380 | 79.69790 | 314.79765   | -2655.03250 | -1660.70039 | 1 |
| 21207 | C | 82.43700 | 71.71380 | 79.66390 | 590.88523   | 255.48703   | -648.09388  | 1 |
| 21208 | H | 82.58700 | 72.59480 | 80.32390 | 632.99086   | 938.19797   | 2929.51452  | 1 |
| 21209 | H | 83.49300 | 71.39880 | 79.52090 | 1354.74289  | -2170.45508 | -1830.98012 | 1 |
| 21210 | S | 81.70000 | 72.38080 | 78.16590 | 94.19767    | -446.02503  | 311.04487   | 1 |
| 21211 | H | 80.97600 | 71.33580 | 77.79290 | 1219.71884  | -1563.72376 | 2432.53615  | 1 |
| 21212 | C | 82.28600 | 70.13480 | 81.59390 | -540.84005  | 550.98076   | 484.57662   | 1 |
| 21213 | O | 82.97200 | 69.12480 | 81.49390 | -436.28164  | 392.33045   | 525.78051   | 1 |
| 21214 | N | 82.03700 | 70.65580 | 82.81090 | 6.28899     | -151.64923  | 824.09626   | 1 |
| 21215 | H | 81.50900 | 71.49380 | 82.92690 | -1336.11792 | 1919.09811  | 2102.10231  | 1 |
| 21216 | C | 82.76200 | 70.16280 | 84.01490 | -512.17584  | 510.78451   | -565.19630  | 1 |
| 21217 | H | 83.68700 | 69.72280 | 83.67190 | 2439.51831  | 1691.80363  | -1041.58248 | 1 |
| 21218 | C | 82.99500 | 71.37380 | 84.95390 | 744.21846   | -516.55823  | 69.92031    | 1 |
| 21219 | H | 83.61300 | 70.98680 | 85.79290 | -2664.13642 | 1489.10131  | 767.28321   | 1 |
| 21220 | H | 82.07200 | 71.89880 | 85.27890 | -563.61484  | -2073.30590 | -2304.88871 | 1 |
| 21221 | S | 83.97900 | 72.63280 | 84.11290 | -397.01144  | 170.82368   | 351.11502   | 1 |
| 21222 | H | 85.18200 | 72.12980 | 84.34390 | -938.37215  | 707.11658   | -2926.23502 | 1 |
| 21223 | C | 81.93800 | 69.10780 | 84.71990 | -666.21271  | 500.18023   | 369.45573   | 1 |
| 21224 | O | 82.51800 | 68.29280 | 85.42290 | -492.56503  | -377.88381  | -498.13078  | 1 |
| 21225 | N | 80.65300 | 69.10580 | 84.45990 | 617.44633   | -132.70146  | 550.37538   | 1 |
| 21226 | H | 80.19800 | 69.73580 | 83.83490 | -2558.68239 | -1828.00004 | -168.48568  | 1 |
| 21227 | C | 79.68700 | 68.14480 | 85.04490 | -414.70060  | 252.94468   | -779.56284  | 1 |
| 21228 | H | 80.05800 | 67.92580 | 86.03490 | -1439.03520 | -2776.68828 | -365.24589  | 1 |
| 21229 | C | 78.28300 | 68.75380 | 85.06290 | -348.58929  | 763.02345   | 353.13191   | 1 |
| 21230 | H | 77.45500 | 68.03180 | 85.23190 | 2179.34118  | 2180.30691  | 610.28256   | 1 |
| 21231 | H | 78.09100 | 69.16680 | 84.04990 | 1965.51469  | -958.23108  | -2264.97901 | 1 |
| 21232 | C | 78.00400 | 69.82480 | 86.20890 | 18.93232    | 197.72398   | 884.25036   | 1 |
| 21233 | H | 78.90500 | 70.47180 | 86.14290 | -1127.50894 | 652.24411   | -2870.13829 | 1 |
| 21234 | C | 76.81100 | 70.73680 | 85.85990 | -445.46179  | 602.41885   | 516.27520   | 1 |
| 21235 | H | 76.67900 | 71.41480 | 86.72990 | -1427.37923 | 2301.11806  | -1606.68973 | 1 |
| 21236 | H | 77.14500 | 71.31780 | 84.97290 | -1678.51077 | 734.77856   | -2564.06769 | 1 |
| 21237 | H | 75.93600 | 70.06580 | 85.72890 | 2454.70188  | 1187.43975  | 1559.14909  | 1 |
| 21238 | C | 77.83700 | 69.07980 | 87.51390 | 256.78752   | 559.00886   | 665.26225   | 1 |
| 21239 | H | 76.86500 | 68.54180 | 87.53190 | 2628.44439  | 883.92489   | 1475.49212  | 1 |
| 21240 | H | 77.89600 | 69.81380 | 88.34590 | 1039.96745  | -1663.74612 | -2465.11651 | 1 |
| 21241 | H | 78.56200 | 68.26680 | 87.73190 | 97.91267    | 2292.23283  | 2144.86671  | 1 |
| 21242 | C | 79.65200 | 66.80780 | 84.29190 | -499.89939  | -497.87065  | 573.19609   | 1 |
| 21243 | O | 79.37600 | 65.74280 | 84.89590 | 480.47712   | -540.34317  | -321.51431  | 1 |
| 21244 | N | 79.98800 | 66.80280 | 82.99990 | 627.33225   | -66.11519   | 550.29628   | 1 |
| 21245 | H | 80.13000 | 67.65680 | 82.50490 | 1399.56376  | -2146.65873 | -1828.56647 | 1 |
| 21246 | C | 80.27200 | 65.57980 | 82.21990 | 345.04682   | -447.31261  | -721.31110  | 1 |
| 21247 | H | 79.38000 | 64.97580 | 82.30090 | 1650.38530  | 1519.17424  | -2211.71191 | 1 |
| 21248 | C | 80.25600 | 65.98080 | 80.69390 | -334.08369  | 572.27963   | 622.10040   | 1 |
| 21249 | H | 80.91000 | 66.86380 | 80.53090 | 2645.86741  | -535.00409  | 1601.81543  | 1 |
| 21250 | H | 79.24200 | 66.28180 | 80.35290 | 24.17996    | -799.50259  | -3049.45710 | 1 |
| 21251 | C | 80.67100 | 64.84780 | 79.76590 | 91.34875    | 864.86093   | 270.29622   | 1 |
| 21252 | O | 80.29900 | 63.70080 | 79.96890 | 491.28809   | 510.54753   | 337.64568   | 1 |
| 21253 | N | 81.33000 | 65.20580 | 78.66090 | 434.66559   | -587.78336  | -422.71164  | 1 |
| 21254 | H | 81.30100 | 66.17680 | 78.42390 | -92.79501   | 2773.24980  | -1495.12667 | 1 |
| 21255 | H | 81.92300 | 64.53680 | 78.21290 | -1624.95742 | -662.28272  | 2604.85185  | 1 |
| 21256 | C | 81.38000 | 64.62380 | 82.85090 | 824.62520   | -11.99987   | 374.33151   | 1 |
| 21257 | O | 81.10700 | 63.45380 | 83.05790 | -131.30189  | 779.54121   | -26.00616   | 1 |

|       |   |          |          |          |             |             |             |   |
|-------|---|----------|----------|----------|-------------|-------------|-------------|---|
| 21258 | N | 82.53700 | 65.11480 | 83.31390 | -339.31920  | -721.36209  | 271.21287   | 1 |
| 21259 | C | 83.22100 | 66.26080 | 82.69590 | 541.99876   | -110.44546  | 714.18945   | 1 |
| 21260 | H | 82.94100 | 67.16080 | 83.28390 | 1545.85470  | -2007.91833 | 1853.47843  | 1 |
| 21261 | H | 82.92800 | 66.49280 | 81.64990 | 905.93180   | -1202.84435 | -2768.61406 | 1 |
| 21262 | C | 83.43800 | 64.25680 | 84.07790 | -240.66065  | -339.22390  | -820.98939  | 1 |
| 21263 | H | 83.55400 | 63.29780 | 83.59490 | 2124.14329  | -1229.66546 | 1955.69865  | 1 |
| 21264 | C | 84.69700 | 65.12580 | 84.13990 | -796.93056  | -125.24448  | 420.87301   | 1 |
| 21265 | H | 85.61200 | 64.50480 | 84.24490 | 2279.45514  | 694.58323   | 2042.14911  | 1 |
| 21266 | H | 84.61000 | 65.77680 | 85.03590 | -1601.06150 | -1253.62059 | 2393.51044  | 1 |
| 21267 | C | 84.69800 | 65.91280 | 82.85790 | -749.02680  | -523.18608  | -22.76480   | 1 |
| 21268 | H | 85.34200 | 66.81680 | 82.82290 | 1912.45638  | -1909.98823 | -1613.38983 | 1 |
| 21269 | H | 85.02000 | 65.31480 | 81.97890 | 2193.15415  | -1269.24227 | 1850.88229  | 1 |
| 21270 | C | 82.95000 | 63.89680 | 85.48290 | 697.69511   | -16.75617   | -593.25326  | 1 |
| 21271 | O | 83.29800 | 62.85680 | 86.07890 | 428.57217   | -589.35192  | -311.73354  | 1 |
| 21272 | N | 82.18500 | 64.85480 | 86.18890 | 645.82068   | -462.76646  | 272.96605   | 1 |
| 21273 | H | 82.04200 | 65.79680 | 85.89690 | -1849.64782 | -2155.75735 | -1364.44491 | 1 |
| 21274 | C | 81.67900 | 64.58180 | 87.53990 | 885.92957   | 203.76482   | 31.83323    | 1 |
| 21275 | H | 82.46700 | 64.31080 | 88.22590 | 1309.38994  | 1452.35775  | -2471.81257 | 1 |
| 21276 | C | 80.99100 | 65.83580 | 88.13590 | -476.64914  | 755.68161   | -188.64709  | 1 |
| 21277 | H | 80.39700 | 66.35780 | 87.35590 | 2519.49885  | 1875.91449  | 122.99791   | 1 |
| 21278 | C | 80.07500 | 65.51980 | 89.33090 | -485.51541  | 740.08288   | 207.84173   | 1 |
| 21279 | H | 79.23600 | 64.80180 | 89.20790 | -1421.71086 | -681.01690  | 2716.24615  | 1 |
| 21280 | H | 79.60200 | 66.50280 | 89.53890 | -349.83941  | 1608.09408  | -2687.41356 | 1 |
| 21281 | H | 80.59200 | 65.06380 | 90.20190 | -2653.86935 | 1244.66657  | 1134.91797  | 1 |
| 21282 | C | 82.10400 | 66.82480 | 88.54790 | 341.08039   | 750.76400   | 377.33682   | 1 |
| 21283 | H | 82.94700 | 66.77280 | 87.82690 | 1058.26083  | 252.17697   | 2943.41535  | 1 |
| 21284 | H | 82.54800 | 66.39380 | 89.46990 | 209.75222   | -1466.86417 | 2768.20379  | 1 |
| 21285 | C | 81.75600 | 68.27980 | 88.67090 | 766.68587   | 473.15800   | -131.44538  | 1 |
| 21286 | H | 81.18400 | 68.37880 | 89.61690 | -1084.69897 | -2625.11562 | 1351.13845  | 1 |
| 21287 | H | 82.69900 | 68.86180 | 88.75190 | -1629.90670 | -1947.70046 | 1853.02194  | 1 |
| 21288 | H | 81.16100 | 68.59880 | 87.78890 | -1720.56889 | -507.26516  | 2579.63256  | 1 |
| 21289 | C | 80.71800 | 63.40580 | 87.53890 | 683.54933   | 525.37521   | 282.69148   | 1 |
| 21290 | O | 80.75900 | 62.52280 | 88.33690 | -298.59033  | 284.26585   | -682.36881  | 1 |
| 21291 | N | 79.82600 | 63.35580 | 86.53090 | -566.62785  | 397.63625   | -492.91382  | 1 |
| 21292 | H | 79.63700 | 64.12880 | 85.92890 | 1418.38124  | -2166.98211 | -1793.44966 | 1 |
| 21293 | C | 78.94800 | 62.20480 | 86.22690 | 1.72425     | 434.54089   | -809.68156  | 1 |
| 21294 | H | 78.49300 | 61.75780 | 87.09790 | 1786.71034  | -1480.63809 | 2115.61906  | 1 |
| 21295 | C | 77.77100 | 62.67180 | 85.34990 | -249.35766  | -653.93048  | -594.24492  | 1 |
| 21296 | H | 78.14500 | 63.09380 | 84.39290 | -1171.49152 | 2061.37804  | 2060.99536  | 1 |
| 21297 | H | 77.13300 | 61.79380 | 85.11490 | 2694.88822  | 114.66173   | 1607.88303  | 1 |
| 21298 | C | 76.80000 | 63.71180 | 86.07290 | -91.33357   | -903.89690  | 84.73427    | 1 |
| 21299 | H | 77.33300 | 64.63980 | 86.37290 | 239.21745   | 257.58420   | -3133.38059 | 1 |
| 21300 | C | 75.74100 | 64.25280 | 85.11390 | 506.58859   | -687.78010  | -324.21865  | 1 |
| 21301 | H | 76.09600 | 64.59780 | 84.11990 | 1287.60724  | -2287.00147 | -1740.47961 | 1 |
| 21302 | H | 74.99800 | 63.47780 | 84.82990 | -1472.58561 | 176.09258   | -2782.81107 | 1 |
| 21303 | H | 75.09800 | 65.00780 | 85.61490 | 2431.81597  | -1732.59108 | 981.31642   | 1 |
| 21304 | C | 76.08600 | 63.16980 | 87.28090 | -700.51006  | -474.68831  | -352.69832  | 1 |
| 21305 | H | 75.75700 | 62.14180 | 87.01690 | -445.91568  | -2546.92932 | 1787.32991  | 1 |
| 21306 | H | 76.70900 | 63.27280 | 88.19590 | 1110.91061  | 2058.54317  | 2093.75705  | 1 |
| 21307 | H | 75.17000 | 63.75080 | 87.51990 | -1082.79162 | -1746.74136 | 2377.32573  | 1 |
| 21308 | C | 79.71000 | 61.03980 | 85.48290 | 405.84824   | 566.87794   | -595.13298  | 1 |
| 21309 | O | 79.10700 | 60.24680 | 84.78490 | -161.99185  | 548.21819   | 535.70323   | 1 |
| 21310 | N | 81.05000 | 60.89580 | 85.67690 | 533.44919   | -565.23425  | -337.12746  | 1 |
| 21311 | H | 81.56300 | 61.63580 | 86.10390 | 1083.00552  | -1558.87255 | 2499.16215  | 1 |
| 21312 | C | 81.67900 | 59.58380 | 85.48290 | 566.41868   | -236.18358  | 662.89105   | 1 |
| 21313 | H | 80.94000 | 58.86180 | 85.16790 | -1779.55896 | 935.28051   | 2410.77127  | 1 |
| 21314 | C | 82.84300 | 59.77880 | 84.44790 | 537.99138   | -555.58610  | 470.10495   | 1 |
| 21315 | H | 83.72900 | 59.14880 | 84.67490 | 1891.56470  | 1319.59888  | 2127.45893  | 1 |
| 21316 | H | 83.19000 | 60.83380 | 84.42090 | 1058.83435  | 2830.06142  | 864.61293   | 1 |
| 21317 | C | 82.46800 | 59.21580 | 83.06090 | 636.62532   | -67.41624   | -657.69896  | 1 |
| 21318 | C | 82.09700 | 57.87180 | 82.98090 | -616.46879  | 665.01433   | -123.55983  | 1 |
| 21319 | H | 82.06500 | 57.29180 | 83.89090 | -1041.04369 | 258.09811   | -2969.56608 | 1 |

|       |   |          |          |          |             |             |             |   |
|-------|---|----------|----------|----------|-------------|-------------|-------------|---|
| 21320 | C | 81.76000 | 57.32380 | 81.74990 | -202.38448  | -398.99101  | 783.39511   | 1 |
| 21321 | H | 81.57400 | 56.26280 | 81.67190 | 1130.34981  | 2820.92157  | -826.66260  | 1 |
| 21322 | C | 81.73300 | 58.12080 | 80.62590 | 792.16737   | -444.58203  | -34.48110   | 1 |
| 21323 | O | 81.35100 | 57.56780 | 79.39290 | 471.29654   | 615.46945   | -160.40697  | 1 |
| 21324 | H | 80.98200 | 56.68280 | 79.44890 | -2195.96720 | -317.63284  | -2244.19934 | 1 |
| 21325 | C | 82.57200 | 59.98580 | 81.93490 | 659.83917   | -599.41313  | -188.97373  | 1 |
| 21326 | H | 82.88300 | 61.01080 | 82.07090 | 2142.39099  | -1741.45441 | -1513.40529 | 1 |
| 21327 | C | 82.18800 | 59.43480 | 80.71690 | -588.71559  | -484.68450  | -512.22335  | 1 |
| 21328 | H | 82.27300 | 60.00980 | 79.80690 | -2935.15819 | -991.50955  | 550.76615   | 1 |
| 21329 | C | 82.20300 | 59.06980 | 86.83590 | 540.15733   | 111.71175   | 714.48925   | 1 |
| 21330 | O | 82.67700 | 57.91880 | 86.94890 | 331.10550   | 30.83105    | 704.60580   | 1 |
| 21331 | N | 82.03300 | 59.88880 | 87.89690 | -706.34432  | -271.89267  | -386.88693  | 1 |
| 21332 | H | 81.63800 | 60.79980 | 87.80690 | -2287.23878 | 229.78604   | 2139.29466  | 1 |
| 21333 | C | 82.49000 | 59.51680 | 89.18790 | -429.20347  | -660.19071  | -473.10306  | 1 |
| 21334 | H | 83.47100 | 59.07480 | 89.09290 | -657.11568  | -2946.19267 | 880.94793   | 1 |
| 21335 | C | 82.64400 | 60.75380 | 90.06890 | 594.23746   | 560.14118   | -412.36388  | 1 |
| 21336 | H | 83.36700 | 60.50080 | 90.87390 | 1955.46588  | -1228.50243 | 2127.20429  | 1 |
| 21337 | H | 81.69200 | 61.08180 | 90.53790 | 2704.79006  | -865.49660  | 1344.79205  | 1 |
| 21338 | H | 83.13700 | 61.58380 | 89.51890 | -2831.82718 | -1373.82942 | -30.85665   | 1 |
| 21339 | C | 81.62000 | 58.45680 | 89.91790 | 690.34928   | 501.76332   | 306.72671   | 1 |
| 21340 | O | 80.36400 | 58.52880 | 89.88090 | 473.03440   | 532.29965   | -347.94812  | 1 |
| 21341 | N | 82.22900 | 57.62180 | 90.79390 | -74.87698   | -712.65972  | 438.65210   | 1 |
| 21342 | H | 83.21700 | 57.48780 | 90.80390 | -2531.19794 | 1333.42174  | 1295.09487  | 1 |
| 21343 | C | 81.49200 | 56.95580 | 91.86190 | -484.62087  | 580.97427   | 494.19771   | 1 |
| 21344 | H | 82.21900 | 56.51580 | 92.52890 | 416.64956   | -2022.48046 | -2387.80927 | 1 |
| 21345 | C | 80.59000 | 57.87080 | 92.75390 | -490.73562  | -662.08290  | 384.23252   | 1 |
| 21346 | H | 79.86600 | 58.38380 | 92.08590 | 1816.37410  | 1149.34821  | 2285.88985  | 1 |
| 21347 | H | 80.09300 | 57.24080 | 93.52290 | 2202.62792  | -1704.50842 | -1479.46018 | 1 |
| 21348 | C | 81.46100 | 58.86380 | 93.52190 | -583.08386  | 603.40092   | -360.55788  | 1 |
| 21349 | C | 82.52500 | 58.47380 | 94.32090 | -96.83068   | -762.18108  | 485.40403   | 1 |
| 21350 | H | 82.86400 | 57.44780 | 94.30990 | 2841.33140  | -962.60301  | 943.09466   | 1 |
| 21351 | C | 83.30600 | 59.40880 | 95.01490 | 403.18420   | 461.44573   | 662.51970   | 1 |
| 21352 | H | 84.13400 | 59.10480 | 95.63690 | 2264.94488  | -1691.66042 | -1398.49004 | 1 |
| 21353 | C | 82.96400 | 60.78380 | 94.84590 | 563.44879   | 507.20968   | 493.64990   | 1 |
| 21354 | H | 83.47000 | 61.57380 | 95.38290 | 2291.46047  | 1100.77322  | 1842.29204  | 1 |
| 21355 | C | 81.16500 | 60.24680 | 93.35090 | 630.69665   | 592.55679   | 271.39685   | 1 |
| 21356 | H | 80.29800 | 60.48480 | 92.75290 | -1223.81537 | 2157.31707  | -1941.40482 | 1 |
| 21357 | C | 81.88600 | 61.18680 | 94.02290 | -515.77355  | 731.46685   | 147.62958   | 1 |
| 21358 | H | 81.69100 | 62.24580 | 93.93990 | -140.87734  | -1689.51412 | 2643.20526  | 1 |
| 21359 | C | 80.76400 | 55.70980 | 91.43490 | -500.17464  | 188.56098   | -749.21014  | 1 |
| 21360 | O | 79.70800 | 55.31080 | 91.95290 | -20.07980   | 606.17021   | 490.74313   | 1 |
| 21361 | N | 81.30300 | 54.90280 | 90.49790 | -613.18897  | 137.01729   | -574.84867  | 1 |
| 21362 | H | 82.18100 | 55.22180 | 90.14890 | -1239.52519 | 2115.28659  | 1957.30459  | 1 |
| 21363 | C | 80.71900 | 53.68480 | 89.94390 | 612.36223   | 595.14129   | -328.81222  | 1 |
| 21364 | H | 79.65100 | 53.83680 | 89.97990 | 2834.10760  | -1176.69575 | -710.99315  | 1 |
| 21365 | C | 81.27100 | 53.31280 | 88.53290 | -560.34836  | 452.98662   | -570.11317  | 1 |
| 21366 | H | 80.83700 | 52.33080 | 88.24890 | 1578.65255  | -2693.59292 | 385.49362   | 1 |
| 21367 | H | 82.36400 | 53.11580 | 88.57390 | 1257.75788  | -2242.97224 | -1827.20116 | 1 |
| 21368 | C | 80.98500 | 54.38180 | 87.51690 | -842.38085  | 348.28366   | 7.74413     | 1 |
| 21369 | H | 81.51500 | 55.32680 | 87.76390 | 2395.00217  | -730.48098  | -1916.62867 | 1 |
| 21370 | C | 81.53700 | 54.10480 | 86.08490 | 671.22173   | -472.59731  | 384.01449   | 1 |
| 21371 | H | 81.59600 | 55.10380 | 85.60390 | -966.79973  | 2725.76877  | 1226.50630  | 1 |
| 21372 | H | 82.55700 | 53.69280 | 86.23790 | -2211.60947 | -2225.26126 | -257.81645  | 1 |
| 21373 | H | 81.03200 | 53.33780 | 85.45890 | -1645.61523 | -2509.74390 | 933.98114   | 1 |
| 21374 | C | 79.54200 | 54.65580 | 87.23390 | -438.91318  | 551.49441   | -589.28025  | 1 |
| 21375 | H | 79.04100 | 54.79480 | 88.21590 | -1489.54258 | -1962.09022 | -1970.19780 | 1 |
| 21376 | H | 79.34300 | 55.38180 | 86.41690 | -2621.10783 | 1268.91685  | 1180.27756  | 1 |
| 21377 | H | 79.14800 | 53.69780 | 86.83090 | -876.22058  | -2193.97233 | 2067.27869  | 1 |
| 21378 | C | 80.97300 | 52.63780 | 90.95190 | -294.66308  | 223.74628   | 819.74815   | 1 |
| 21379 | O | 82.06500 | 52.10580 | 91.11790 | -626.47854  | 130.80062   | 447.55994   | 1 |
| 21380 | N | 79.89800 | 52.16980 | 91.66690 | 700.99672   | -393.49591  | 252.15640   | 1 |
| 21381 | H | 78.97800 | 52.45280 | 91.40590 | -681.63258  | 2386.12313  | -1942.29263 | 1 |

|       |   |          |          |           |             |             |             |   |
|-------|---|----------|----------|-----------|-------------|-------------|-------------|---|
| 21382 | C | 80.08900 | 51.23780 | 92.72590  | -237.47494  | 599.79763   | 627.86329   | 1 |
| 21383 | H | 79.15000 | 50.75680 | 92.95390  | 2215.78107  | -2233.10999 | -167.79085  | 1 |
| 21384 | H | 80.83200 | 50.52280 | 92.40490  | -1665.28805 | 2601.75139  | -592.67696  | 1 |
| 21385 | C | 80.71500 | 51.67880 | 93.95290  | 776.65550   | -248.54192  | -426.41797  | 1 |
| 21386 | O | 81.35700 | 50.96780 | 94.71090  | 243.12424   | -651.31031  | 368.95954   | 1 |
| 21387 | N | 80.54900 | 52.96080 | 94.25390  | 211.98757   | -726.81273  | 369.09334   | 1 |
| 21388 | H | 80.17900 | 53.60180 | 93.58590  | 2803.25639  | 227.75806   | 1399.95341  | 1 |
| 21389 | C | 81.11800 | 53.58680 | 95.39990  | -685.69174  | 594.61897   | 4.05934     | 1 |
| 21390 | H | 82.06300 | 53.10980 | 95.61590  | -2112.39479 | -2276.13884 | 502.42633   | 1 |
| 21391 | C | 81.44900 | 55.05980 | 95.20090  | 16.05675    | -477.49194  | 767.20087   | 1 |
| 21392 | H | 82.12800 | 55.25980 | 94.34390  | -3142.33105 | 64.73887    | 92.46630    | 1 |
| 21393 | H | 80.47800 | 55.52680 | 94.93090  | 1236.55968  | -2887.79133 | 226.48613   | 1 |
| 21394 | H | 81.73900 | 55.58780 | 96.13490  | -2907.70078 | -1189.64873 | -179.67213  | 1 |
| 21395 | C | 80.21700 | 53.42580 | 96.59890  | 725.72974   | -559.59322  | -14.76808   | 1 |
| 21396 | O | 79.01700 | 53.23880 | 96.46890  | 633.46152   | -312.66261  | 349.01780   | 1 |
| 21397 | N | 80.81200 | 53.47280 | 97.79790  | -253.56058  | 538.26796   | 580.84249   | 1 |
| 21398 | H | 81.79700 | 53.59180 | 97.89590  | -553.73820  | 1892.11503  | 2434.83529  | 1 |
| 21399 | C | 80.10400 | 53.53380 | 99.00590  | -83.91579   | 658.51692   | 606.60021   | 1 |
| 21400 | H | 79.05200 | 53.39680 | 98.80390  | -472.42510  | 2324.38280  | -2071.82914 | 1 |
| 21401 | C | 80.72100 | 52.50880 | 100.05290 | 233.58968   | -434.99622  | -783.60778  | 1 |
| 21402 | H | 81.81400 | 52.47280 | 99.85790  | 1872.56749  | -1434.83900 | -2101.36641 | 1 |
| 21403 | H | 80.40300 | 52.62580 | 101.11090 | 2233.18072  | -1205.53046 | 1855.24459  | 1 |
| 21404 | C | 80.28200 | 51.06780 | 99.72490  | 740.64847   | 379.18767   | 360.40302   | 1 |
| 21405 | H | 80.89900 | 50.69980 | 98.87790  | -907.38103  | -2108.23571 | -2169.25623 | 1 |
| 21406 | H | 80.52600 | 50.40280 | 100.58090 | 1209.73044  | -2451.22492 | 1556.65493  | 1 |
| 21407 | C | 78.78400 | 50.94080 | 99.35690  | -217.71049  | -415.53200  | -796.90687  | 1 |
| 21408 | H | 78.65100 | 51.25080 | 98.29890  | 595.16338   | 637.83785   | -3034.80129 | 1 |
| 21409 | H | 78.23800 | 51.66280 | 100.00090 | -862.47632  | 1992.59939  | 2257.72148  | 1 |
| 21410 | C | 78.18400 | 49.58980 | 99.52590  | 659.39928   | 471.49349   | -429.22298  | 1 |
| 21411 | H | 78.30600 | 49.19080 | 100.55490 | 2214.81220  | 2199.79166  | -390.32189  | 1 |
| 21412 | H | 78.65300 | 48.87980 | 98.81090  | 2552.35577  | -729.39431  | 1682.68986  | 1 |
| 21413 | N | 76.74200 | 49.65680 | 99.25790  | 419.64495   | 488.64067   | 530.02827   | 1 |
| 21414 | H | 76.66100 | 49.91580 | 98.25390  | -1358.22428 | 737.50074   | 2724.66510  | 1 |
| 21415 | H | 76.41300 | 50.36980 | 99.93990  | 2247.84457  | -1622.33881 | 1487.61010  | 1 |
| 21416 | H | 76.27200 | 48.73580 | 99.36890  | -541.39753  | 465.54450   | 3049.52035  | 1 |
| 21417 | C | 80.22600 | 54.95980 | 99.62690  | -375.40057  | -102.13516  | -835.74657  | 1 |
| 21418 | O | 81.26600 | 55.62880 | 99.55690  | -512.39704  | -305.30105  | -529.87790  | 1 |
| 21419 | N | 79.06500 | 55.53180 | 100.15290 | 73.66002    | -573.14662  | -632.57827  | 1 |
| 21420 | H | 78.24600 | 54.96680 | 100.20890 | 2167.21604  | 2068.83019  | 941.74550   | 1 |
| 21421 | C | 78.96600 | 56.92180 | 100.51590 | -586.63207  | -559.92563  | -431.97535  | 1 |
| 21422 | H | 79.79100 | 57.47180 | 100.08790 | -1673.28905 | -839.22354  | -2539.50586 | 1 |
| 21423 | C | 77.72400 | 57.53680 | 99.83390  | 625.78443   | 193.50274   | -644.88255  | 1 |
| 21424 | H | 76.80700 | 57.08980 | 100.27490 | 1414.55464  | -2630.82724 | -1018.83450 | 1 |
| 21425 | H | 77.67100 | 58.59880 | 100.15690 | -2146.38526 | 707.25787   | -2193.92999 | 1 |
| 21426 | C | 77.84300 | 57.42380 | 98.31090  | -240.48154  | -882.54119  | 50.38544    | 1 |
| 21427 | C | 78.61700 | 58.35580 | 97.58790  | 107.15079   | -792.97961  | 437.15073   | 1 |
| 21428 | H | 79.29400 | 59.02580 | 98.09690  | -523.54230  | 2286.42711  | -2100.25588 | 1 |
| 21429 | C | 78.64100 | 58.25080 | 96.16690  | 852.53770   | -143.13388  | -306.48573  | 1 |
| 21430 | H | 79.20400 | 58.96380 | 95.58290  | -2919.23626 | 1086.50141  | 413.47539   | 1 |
| 21431 | C | 77.93600 | 57.23580 | 95.50590  | -628.64119  | -498.04666  | 426.86338   | 1 |
| 21432 | H | 78.04600 | 57.12480 | 94.43790  | 1999.98856  | 246.97922   | -2426.77750 | 1 |
| 21433 | C | 77.15700 | 56.45480 | 97.64590  | 579.92030   | -624.38988  | 328.11635   | 1 |
| 21434 | H | 76.68800 | 55.65580 | 98.20190  | -265.05029  | -1298.00640 | 2845.58841  | 1 |
| 21435 | C | 77.20800 | 56.31680 | 96.28190  | 563.01934   | 441.87114   | -573.10795  | 1 |
| 21436 | H | 76.74300 | 55.47580 | 95.78890  | -1999.53975 | 2382.98360  | 427.23241   | 1 |
| 21437 | C | 78.97800 | 57.25380 | 102.00090 | -765.50594  | 342.37163   | 334.02720   | 1 |
| 21438 | O | 79.06900 | 58.41480 | 102.47090 | 128.43460   | 441.95748   | 627.39383   | 1 |
| 21439 | N | 78.95100 | 56.16180 | 102.83090 | 543.64501   | -564.88512  | -342.38822  | 1 |
| 21440 | H | 78.58300 | 55.30280 | 102.48390 | -2357.29774 | 1729.77235  | -1154.72275 | 1 |
| 21441 | C | 78.88800 | 56.33080 | 104.26790 | 679.17118   | -605.61759  | -144.88744  | 1 |
| 21442 | H | 78.72600 | 57.37580 | 104.48790 | 2701.74597  | 368.13041   | 1563.79394  | 1 |
| 21443 | C | 77.73800 | 55.52780 | 104.91990 | 588.08092   | -616.19941  | -358.26986  | 1 |

|       |   |          |          |           |             |             |             |   |
|-------|---|----------|----------|-----------|-------------|-------------|-------------|---|
| 21444 | H | 77.73700 | 55.67180 | 106.02190 | -2147.71108 | 2278.52679  | 178.17059   | 1 |
| 21445 | H | 78.02200 | 54.47280 | 104.71790 | 858.28534   | -2379.80617 | -1893.68340 | 1 |
| 21446 | C | 76.39500 | 56.07880 | 104.37490 | -383.79535  | -464.25291  | -698.00178  | 1 |
| 21447 | H | 76.33400 | 56.03080 | 103.26590 | 2425.37538  | -1985.51195 | -359.09172  | 1 |
| 21448 | H | 76.43600 | 57.17880 | 104.52490 | 2446.90820  | 832.89736   | 1785.24220  | 1 |
| 21449 | C | 75.12500 | 55.41780 | 105.00790 | 101.32343   | -461.54444  | -795.46715  | 1 |
| 21450 | H | 74.21200 | 55.89580 | 104.59090 | -825.78325  | -2244.34704 | -2061.66732 | 1 |
| 21451 | H | 75.24900 | 55.59280 | 106.09790 | -2541.87240 | -795.10878  | -1682.31856 | 1 |
| 21452 | C | 75.05000 | 53.89580 | 104.84890 | -163.65939  | -558.79052  | -718.04817  | 1 |
| 21453 | H | 75.91600 | 53.36880 | 105.30390 | 2469.56089  | -395.49511  | -1927.35616 | 1 |
| 21454 | H | 74.88900 | 53.64780 | 103.77790 | -1769.52098 | 2588.36478  | 93.79002    | 1 |
| 21455 | N | 73.87300 | 53.41980 | 105.56690 | -546.67977  | 341.26623   | -545.45288  | 1 |
| 21456 | H | 74.07600 | 53.58480 | 106.57290 | 2819.51493  | -470.17905  | -1338.42872 | 1 |
| 21457 | H | 73.01100 | 53.99980 | 105.60990 | -236.68518  | 2570.82327  | -1794.53762 | 1 |
| 21458 | H | 73.73800 | 52.42180 | 105.30890 | 1436.11924  | 1826.99246  | 2105.46168  | 1 |
| 21459 | C | 80.16700 | 55.94380 | 104.98190 | -562.18634  | -642.96543  | 316.52428   | 1 |
| 21460 | O | 80.39300 | 56.21780 | 106.18890 | -470.53643  | -359.15762  | -535.59274  | 1 |
| 21461 | N | 81.09000 | 55.32780 | 104.18990 | -619.69063  | 43.27505    | 554.96531   | 1 |
| 21462 | H | 80.83000 | 54.95680 | 103.30190 | -1474.99399 | 1661.73147  | 2207.71545  | 1 |
| 21463 | C | 82.53200 | 55.16980 | 104.40690 | 226.13765   | 819.78284   | 300.81604   | 1 |
| 21464 | H | 82.59600 | 54.28380 | 105.02190 | -3140.20118 | -79.86815   | 57.79492    | 1 |
| 21465 | C | 83.29300 | 54.91580 | 103.09090 | 66.83758    | 737.53381   | -535.45073  | 1 |
| 21466 | H | 82.81500 | 54.08480 | 102.53090 | -1220.46249 | -2210.60774 | 1869.37159  | 1 |
| 21467 | O | 84.67700 | 54.54080 | 103.24590 | -721.25168  | -116.57650  | -305.93974  | 1 |
| 21468 | H | 84.78500 | 53.96080 | 104.00290 | -300.20061  | -2268.60807 | -2178.96832 | 1 |
| 21469 | C | 83.23200 | 56.06680 | 102.10790 | -553.19055  | -380.70547  | 605.74554   | 1 |
| 21470 | H | 83.45200 | 55.63380 | 101.10790 | -1789.32235 | -2557.03716 | 409.14435   | 1 |
| 21471 | H | 83.82700 | 56.93980 | 102.45090 | -1817.78697 | -634.51282  | 2475.59782  | 1 |
| 21472 | H | 82.23100 | 56.54280 | 102.03790 | 1183.58087  | 2418.86174  | -1631.03719 | 1 |
| 21473 | C | 83.20700 | 56.25880 | 105.24790 | -481.45484  | 570.84800   | -522.89598  | 1 |
| 21474 | O | 83.00500 | 57.44880 | 105.00190 | 551.04298   | -574.82111  | -60.89647   | 1 |
| 21475 | N | 83.99000 | 55.88980 | 106.24490 | 534.03243   | 232.42701   | -624.23858  | 1 |
| 21476 | H | 84.16600 | 54.94980 | 106.52790 | 92.68837    | -92.15621   | 3131.08234  | 1 |
| 21477 | C | 84.73700 | 56.88680 | 106.99290 | 825.62441   | -392.31486  | -109.99574  | 1 |
| 21478 | H | 84.96900 | 57.66880 | 106.28490 | -2000.53873 | 1608.73753  | -1819.11862 | 1 |
| 21479 | C | 83.91500 | 57.42980 | 108.20490 | 906.36631   | 113.15543   | -72.95035   | 1 |
| 21480 | H | 84.21500 | 58.48080 | 108.40390 | 63.17842    | -2977.20480 | 1029.07161  | 1 |
| 21481 | H | 82.85200 | 57.49980 | 107.89190 | 1202.89448  | 1388.87616  | 2539.98305  | 1 |
| 21482 | O | 83.89700 | 56.69080 | 109.40790 | -26.14491   | 767.95928   | 125.34871   | 1 |
| 21483 | H | 83.44200 | 57.18580 | 110.09290 | 1297.80650  | 1801.40383  | 2212.90352  | 1 |
| 21484 | C | 86.04500 | 56.31880 | 107.48390 | 914.97952   | -61.74150   | -10.40376   | 1 |
| 21485 | O | 86.23700 | 55.11080 | 107.49890 | 229.61591   | 378.33656   | -664.21723  | 1 |
| 21486 | N | 86.96200 | 57.19680 | 107.92490 | 597.14599   | -123.50356  | -602.85420  | 1 |
| 21487 | H | 86.55800 | 58.10780 | 107.88190 | -192.35619  | -3025.64718 | 856.28963   | 1 |
| 21488 | C | 88.24100 | 56.92680 | 108.44490 | -39.70392   | 31.43055    | -922.93234  | 1 |
| 21489 | H | 88.79900 | 56.31480 | 107.75190 | -2308.74034 | -399.30065  | 2082.40514  | 1 |
| 21490 | C | 88.99900 | 58.27680 | 108.62790 | 533.06131   | 267.21247   | -703.06754  | 1 |
| 21491 | H | 88.48300 | 58.99280 | 109.30190 | 1621.58566  | 2506.23513  | 967.89022   | 1 |
| 21492 | H | 90.03800 | 57.98680 | 108.89590 | 2283.11093  | -1524.00781 | -1565.51550 | 1 |
| 21493 | H | 89.10200 | 58.71980 | 107.61390 | -2188.71036 | -1996.25869 | 1052.30564  | 1 |
| 21494 | C | 88.23700 | 56.08880 | 109.70490 | 642.22866   | 267.23352   | 578.02159   | 1 |
| 21495 | O | 89.01500 | 55.11480 | 109.84290 | 674.29431   | -417.58623  | 81.31770    | 1 |
| 21496 | N | 87.28400 | 56.41280 | 110.61790 | 548.16637   | 453.94747   | -464.45808  | 1 |
| 21497 | H | 86.91200 | 57.33580 | 110.56290 | 2027.54104  | -1421.14751 | 1940.78371  | 1 |
| 21498 | C | 86.97200 | 55.47480 | 111.74990 | -583.22133  | -420.93382  | -574.57245  | 1 |
| 21499 | H | 87.90700 | 55.26180 | 112.24790 | 2301.34493  | 482.26405   | -2108.41189 | 1 |
| 21500 | C | 85.97400 | 56.15380 | 112.70390 | -434.42365  | 325.26577   | 711.77238   | 1 |
| 21501 | H | 85.55200 | 55.42080 | 113.42490 | -2652.15769 | -446.62730  | 1611.85439  | 1 |
| 21502 | H | 85.16200 | 56.58080 | 112.07790 | 1392.34311  | -1341.84480 | 2478.04443  | 1 |
| 21503 | C | 86.51500 | 57.41880 | 113.51390 | -518.76209  | 579.66808   | 443.45980   | 1 |
| 21504 | H | 85.63700 | 57.75580 | 114.10590 | -397.27039  | -2877.35012 | -1243.82266 | 1 |
| 21505 | H | 86.86800 | 58.20880 | 112.81690 | 3085.93597  | 285.05713   | 557.56108   | 1 |

|       |   |          |          |           |             |             |             |   |
|-------|---|----------|----------|-----------|-------------|-------------|-------------|---|
| 21506 | C | 87.65700 | 56.97980 | 114.46190 | -373.18304  | 533.00404   | -638.86655  | 1 |
| 21507 | O | 87.51800 | 56.06080 | 115.23690 | -561.92578  | -242.26106  | -509.74084  | 1 |
| 21508 | N | 88.78900 | 57.67580 | 114.32290 | 112.31106   | 827.20148   | -17.50210   | 1 |
| 21509 | H | 88.76800 | 58.52780 | 113.79990 | -1540.90061 | -1709.45619 | 2136.17914  | 1 |
| 21510 | H | 89.56800 | 57.40480 | 114.88790 | 31.83797    | -2360.60773 | -2104.68758 | 1 |
| 21511 | C | 86.38100 | 54.13380 | 111.32290 | 186.04227   | 17.84476    | -907.08440  | 1 |
| 21512 | O | 86.84900 | 53.05580 | 111.69790 | -198.53370  | -517.33565  | 554.93721   | 1 |
| 21513 | N | 85.41700 | 54.13580 | 110.31590 | -571.07270  | -506.66814  | -377.32812  | 1 |
| 21514 | H | 85.05700 | 54.93680 | 109.84490 | 1272.48260  | -2500.38249 | 1431.54664  | 1 |
| 21515 | C | 84.85500 | 52.81180 | 109.85490 | 422.34363   | 477.98314   | -662.29753  | 1 |
| 21516 | H | 84.53200 | 52.34680 | 110.77490 | 305.41600   | -736.83651  | -3060.04183 | 1 |
| 21517 | C | 83.70500 | 53.01180 | 108.93090 | -9.75433    | -684.18590  | -625.88094  | 1 |
| 21518 | H | 84.01300 | 53.65080 | 108.07590 | 1434.14690  | -2809.32224 | -123.33248  | 1 |
| 21519 | H | 83.34100 | 52.09480 | 108.41990 | 2245.34169  | -1331.23701 | -1783.46068 | 1 |
| 21520 | N | 82.20500 | 53.38680 | 110.95190 | -129.12814  | -123.37351  | -838.31457  | 1 |
| 21521 | H | 82.76300 | 52.85980 | 111.59290 | 2115.43274  | 325.34364   | -2323.35424 | 1 |
| 21522 | C | 82.52300 | 53.64980 | 109.61990 | -540.65560  | -371.89490  | 620.93352   | 1 |
| 21523 | C | 81.11100 | 54.09780 | 111.23090 | -446.76210  | 109.55486   | 770.17287   | 1 |
| 21524 | H | 80.61100 | 53.96480 | 112.18990 | 521.94149   | -1096.21733 | -2919.64429 | 1 |
| 21525 | N | 80.67200 | 54.79180 | 110.20390 | -666.45331  | -506.17666  | 108.82604   | 1 |
| 21526 | C | 81.57800 | 54.50080 | 109.14890 | -409.69791  | 161.45830   | 781.53908   | 1 |
| 21527 | H | 81.39700 | 54.85780 | 108.14190 | -2404.64671 | -1642.49524 | 1180.83233  | 1 |
| 21528 | C | 85.90800 | 51.89980 | 109.19590 | -51.36434   | 492.02505   | 745.55590   | 1 |
| 21529 | O | 85.88900 | 50.70180 | 109.38790 | 753.04817   | -263.70656  | -37.54943   | 1 |
| 21530 | N | 86.82900 | 52.50780 | 108.42890 | 440.28802   | -705.24858  | 180.35530   | 1 |
| 21531 | H | 86.68300 | 53.45680 | 108.15990 | 2068.26808  | -2382.14230 | -97.00836   | 1 |
| 21532 | C | 88.02200 | 51.87180 | 107.84890 | 687.84369   | 530.90858   | -289.39722  | 1 |
| 21533 | H | 87.57200 | 51.13580 | 107.19990 | -1838.47594 | -2546.19589 | 219.49772   | 1 |
| 21534 | C | 88.70700 | 52.92580 | 106.97790 | -738.12864  | -526.64736  | 83.75863    | 1 |
| 21535 | H | 89.07900 | 53.71380 | 107.66690 | 1487.63967  | -2251.13827 | -1647.74815 | 1 |
| 21536 | H | 88.02500 | 53.45380 | 106.27890 | 1603.01873  | -2662.02562 | 530.27210   | 1 |
| 21537 | H | 89.64100 | 52.60980 | 106.46590 | -665.85474  | 1160.27859  | 2828.39221  | 1 |
| 21538 | C | 88.99100 | 51.29980 | 108.85590 | 661.82690   | -508.57586  | -403.50394  | 1 |
| 21539 | O | 89.45100 | 50.19180 | 108.67390 | -261.51197  | -84.85822   | -755.02024  | 1 |
| 21540 | N | 89.27600 | 51.98380 | 109.97890 | -424.66527  | -558.07716  | 459.47263   | 1 |
| 21541 | H | 88.76800 | 52.80380 | 110.22890 | -905.13376  | -2832.92282 | 1030.39139  | 1 |
| 21542 | C | 90.10100 | 51.42580 | 111.06990 | -679.22628  | 543.23924   | 222.29926   | 1 |
| 21543 | H | 91.01100 | 51.07180 | 110.60790 | -931.55511  | 2643.68285  | -1424.58670 | 1 |
| 21544 | C | 90.26000 | 52.46080 | 112.19890 | -143.87362  | -562.27375  | -724.56451  | 1 |
| 21545 | H | 90.54900 | 51.99480 | 113.16490 | -2806.66635 | 1346.09134  | 364.68259   | 1 |
| 21546 | H | 89.29800 | 53.00080 | 112.32690 | -1961.06028 | 1876.47468  | 1556.88599  | 1 |
| 21547 | C | 91.46800 | 53.42280 | 111.91590 | 554.07711   | -543.53918  | 480.44117   | 1 |
| 21548 | H | 91.24700 | 53.92980 | 110.95190 | 951.11569   | -937.59130  | 2838.44685  | 1 |
| 21549 | C | 91.52600 | 54.66780 | 112.80790 | -317.99455  | -553.30851  | 641.25410   | 1 |
| 21550 | H | 91.94300 | 54.47580 | 113.81990 | -1363.63520 | -1646.74124 | -2325.95455 | 1 |
| 21551 | H | 92.19500 | 55.45480 | 112.39790 | -1476.00409 | 2647.15703  | -818.10281  | 1 |
| 21552 | H | 90.49100 | 55.02780 | 112.99190 | -1674.09359 | 1651.52184  | -2091.62519 | 1 |
| 21553 | C | 92.83900 | 52.70780 | 111.87190 | -394.74455  | 613.22564   | -548.39512  | 1 |
| 21554 | H | 92.94400 | 52.02380 | 111.00290 | -145.83781  | -2017.17187 | 2400.52263  | 1 |
| 21555 | H | 93.60500 | 53.51180 | 111.82990 | 2253.68213  | 2149.78808  | 417.84540   | 1 |
| 21556 | H | 93.04000 | 52.07480 | 112.76290 | 1895.46477  | 1835.56317  | -1727.23128 | 1 |
| 21557 | C | 89.46100 | 50.19980 | 111.71690 | -547.96712  | 168.13184   | 685.77758   | 1 |
| 21558 | O | 90.15700 | 49.23380 | 112.03990 | -661.52465  | 407.88855   | -70.00391   | 1 |
| 21559 | N | 88.19500 | 50.21680 | 112.07190 | 511.12975   | -579.90554  | 349.03531   | 1 |
| 21560 | H | 87.72300 | 51.07580 | 111.88590 | -1719.24051 | 1948.27710  | -1772.04816 | 1 |
| 21561 | C | 87.47100 | 49.11180 | 112.69890 | 401.63311   | 392.16534   | 701.22189   | 1 |
| 21562 | H | 88.04300 | 48.79080 | 113.55590 | -2396.87845 | -1930.18719 | 640.69576   | 1 |
| 21563 | C | 86.10000 | 49.48680 | 113.13590 | 609.09279   | -214.22935  | -669.10143  | 1 |
| 21564 | H | 85.43700 | 48.61080 | 113.30090 | -2432.90355 | -207.11611  | -1991.56016 | 1 |
| 21565 | O | 85.50100 | 50.38680 | 112.30590 | 210.34657   | 647.94102   | 371.65154   | 1 |
| 21566 | H | 85.67800 | 50.08280 | 111.41290 | -2036.83915 | 380.86807   | -2375.07761 | 1 |
| 21567 | C | 86.15600 | 50.20880 | 114.52090 | -419.66067  | 228.70361   | -784.28352  | 1 |



|       |   |          |           |           |             |             |             |   |
|-------|---|----------|-----------|-----------|-------------|-------------|-------------|---|
| 21568 | H | 85.14000 | 50.56980  | 114.78890 | -2906.61975 | 52.20097    | -1198.92605 | 1 |
| 21569 | H | 86.84200 | 51.06980  | 114.37390 | -867.58561  | -3008.30891 | 367.90175   | 1 |
| 21570 | H | 86.58700 | 49.54880  | 115.30390 | -2513.79285 | -1578.55899 | -1056.06460 | 1 |
| 21571 | C | 87.33200 | 47.86380  | 111.81290 | 744.96388   | -539.93151  | 58.07691    | 1 |
| 21572 | O | 87.28100 | 47.98280  | 110.59890 | 402.96599   | -511.80725  | 446.23403   | 1 |
| 21573 | N | 87.22900 | 46.69980  | 112.39890 | -242.12019  | 603.26164   | -540.72166  | 1 |
| 21574 | H | 87.31500 | 46.64780  | 113.38990 | 1729.81744  | -1504.06017 | -2184.71464 | 1 |
| 21575 | C | 87.00800 | 45.43480  | 111.73590 | 793.47529   | -469.94647  | 20.09701    | 1 |
| 21576 | H | 87.60700 | 45.49580  | 110.83890 | 774.51587   | 2892.98738  | -958.92929  | 1 |
| 21577 | C | 87.63800 | 44.22280  | 112.49690 | -380.31524  | -664.56034  | 484.48118   | 1 |
| 21578 | H | 87.57500 | 43.32580  | 111.84390 | -1405.00239 | -1588.99201 | -2343.57422 | 1 |
| 21579 | H | 88.73700 | 44.38180  | 112.50190 | -2503.19484 | -1323.57475 | 1348.66127  | 1 |
| 21580 | O | 87.05400 | 43.98480  | 113.80390 | 461.47569   | 464.54060   | 421.09403   | 1 |
| 21581 | H | 87.22400 | 44.78680  | 114.30390 | -835.70238  | -2922.49211 | -858.01661  | 1 |
| 21582 | C | 85.56100 | 45.12680  | 111.38790 | -844.04850  | -314.10052  | -135.47984  | 1 |
| 21583 | O | 84.61300 | 45.60580  | 112.09190 | 52.51541    | 695.48013   | -368.33181  | 1 |
| 21584 | O | 85.32200 | 44.42480  | 110.35290 | -393.53940  | 238.55721   | 616.83476   | 1 |
| 21585 | H | 80.24552 | 97.51177  | 69.82170  | -2203.97439 | 2774.45925  | 219.49197   | 2 |
| 21586 | N | 81.08894 | 97.39216  | 69.17606  | 77.74064    | 373.01161   | 219.19944   | 2 |
| 21587 | H | 81.91105 | 97.10433  | 69.70674  | 984.03137   | 1350.93135  | 1179.33617  | 2 |
| 21588 | C | 81.12403 | 98.57265  | 68.38251  | -72.22577   | -1359.42070 | -232.72228  | 2 |
| 21589 | H | 82.20624 | 98.66155  | 68.18763  | -373.37624  | -430.24295  | 1627.35341  | 2 |
| 21590 | C | 80.26537 | 98.54011  | 67.03542  | 241.28132   | 834.25436   | 29.00395    | 2 |
| 21591 | H | 80.23761 | 97.48790  | 66.83010  | 22.12122    | 1571.01788  | 3765.50329  | 2 |
| 21592 | H | 79.24094 | 98.83010  | 67.21484  | 2454.96882  | -2275.04413 | -1913.64111 | 2 |
| 21593 | C | 80.83582 | 99.40257  | 65.90839  | 461.46119   | -589.66184  | 940.28250   | 2 |
| 21594 | H | 80.71285 | 100.42402 | 66.40951  | 1589.22644  | -2378.10319 | -965.16513  | 2 |
| 21595 | C | 82.28651 | 99.14451  | 65.67684  | -223.40295  | 601.40574   | -481.96221  | 2 |
| 21596 | H | 82.59211 | 99.82882  | 64.83465  | -3315.07151 | 2280.75681  | -632.51569  | 2 |
| 21597 | H | 83.03302 | 99.39790  | 66.52498  | -988.08833  | 1732.79088  | 1379.73612  | 2 |
| 21598 | H | 82.32003 | 97.96199  | 65.49377  | -1282.30310 | -1533.67285 | -1635.14912 | 2 |
| 21599 | C | 80.04675 | 99.28437  | 64.60501  | 294.00209   | -373.44555  | -14.22494   | 2 |
| 21600 | H | 78.88365 | 99.62041  | 64.63289  | 2132.47902  | 483.31960   | -1022.14719 | 2 |
| 21601 | H | 80.61499 | 99.96498  | 63.86268  | 2797.57120  | -4122.28627 | -270.78469  | 2 |
| 21602 | H | 80.00774 | 98.21915  | 64.25002  | -1009.18582 | -565.57420  | -4075.64879 | 2 |
| 21603 | C | 80.61261 | 99.86027  | 69.15614  | -779.82540  | -204.41118  | -363.39302  | 2 |
| 21604 | O | 79.90516 | 100.73543 | 68.60507  | 383.26827   | 590.54177   | -201.20594  | 2 |
| 21605 | N | 81.22223 | 100.03568 | 70.33779  | 947.42103   | -580.51925  | 1128.21349  | 2 |
| 21606 | H | 81.77931 | 99.34553  | 70.85069  | -1414.78665 | -961.67631  | 2469.61466  | 2 |
| 21607 | C | 80.25381 | 100.81338 | 71.15527  | 294.99018   | -278.10414  | 121.04827   | 2 |
| 21608 | H | 79.44613 | 100.04009 | 71.18911  | -375.61805  | 1268.06976  | 1151.45254  | 2 |
| 21609 | C | 80.94852 | 101.15916 | 72.42867  | -421.26118  | -957.73411  | 540.00001   | 2 |
| 21610 | H | 81.98051 | 101.60642 | 72.32048  | -385.53739  | 1978.70737  | 178.28549   | 2 |
| 21611 | O | 81.73006 | 99.81653  | 73.18388  | 329.00610   | -142.34246  | 645.24361   | 2 |
| 21612 | H | 80.99774 | 99.23978  | 73.11030  | 1674.53487  | -1776.00480 | 98.60665    | 2 |
| 21613 | C | 79.92431 | 101.86261 | 73.35512  | -548.08259  | 860.36794   | -392.34979  | 2 |
| 21614 | H | 80.37645 | 102.50261 | 74.17852  | 2557.54246  | 111.74924   | -750.61689  | 2 |
| 21615 | H | 79.32375 | 102.58595 | 72.81690  | 1513.70468  | -1500.01489 | 1573.49999  | 2 |
| 21616 | H | 79.34039 | 101.13525 | 73.94675  | 781.15107   | -145.50783  | -128.22883  | 2 |
| 21617 | C | 79.81682 | 102.14222 | 70.17618  | -611.67948  | 315.36945   | 929.65388   | 2 |
| 21618 | O | 80.67040 | 102.94302 | 69.82220  | 217.03584   | -320.70400  | -44.60890   | 2 |
| 21619 | N | 78.49275 | 102.34242 | 70.36210  | -90.08159   | -110.86820  | 564.95092   | 2 |
| 21620 | C | 77.71653 | 103.22009 | 69.53006  | 218.86649   | -332.46417  | -248.48957  | 2 |
| 21621 | H | 78.23652 | 102.98170 | 68.60931  | -2708.50686 | -1441.94494 | -3560.19883 | 2 |
| 21622 | C | 76.22148 | 102.71367 | 69.53965  | 338.05997   | 252.30797   | -772.43145  | 2 |
| 21623 | H | 75.52796 | 103.54347 | 69.31962  | -141.96968  | -3284.93544 | -4366.09237 | 2 |
| 21624 | H | 75.95826 | 102.00440 | 68.75258  | -1741.50464 | -145.90936  | -1521.09628 | 2 |
| 21625 | C | 76.18255 | 102.01892 | 70.93615  | 204.99968   | -262.56799  | 169.03427   | 2 |
| 21626 | H | 76.14274 | 102.71857 | 71.76649  | -2942.43973 | -2563.57922 | -676.72890  | 2 |
| 21627 | H | 75.32449 | 101.32082 | 71.04248  | 1380.37966  | -185.37434  | 1755.61461  | 2 |
| 21628 | C | 77.66132 | 101.34542 | 71.00700  | 168.16198   | 951.51245   | 1356.10383  | 2 |
| 21629 | H | 78.05632 | 101.15580 | 72.02553  | 2759.92067  | 2846.72771  | -2087.10469 | 2 |

|       |   |          |           |          |             |             |             |   |
|-------|---|----------|-----------|----------|-------------|-------------|-------------|---|
| 21630 | H | 77.71423 | 100.47901 | 70.39357 | -4209.11269 | 1956.94027  | -1448.48477 | 2 |
| 21631 | C | 77.74793 | 104.78003 | 70.06946 | -299.26008  | -10.39615   | 52.72829    | 2 |
| 21632 | O | 76.87718 | 105.55517 | 69.60878 | 103.19083   | 179.81900   | -408.96953  | 2 |
| 21633 | N | 78.72644 | 105.01053 | 70.90751 | 469.53877   | 1.72887     | -5.60344    | 2 |
| 21634 | H | 79.23685 | 104.14341 | 71.14987 | -743.33809  | 224.31407   | 570.09825   | 2 |
| 21635 | C | 79.05936 | 106.27441 | 71.46171 | -474.40220  | -1227.76910 | -14.99596   | 2 |
| 21636 | H | 78.11481 | 106.85661 | 71.27315 | 188.92374   | -115.23930  | -1331.69781 | 2 |
| 21637 | C | 79.43754 | 106.03223 | 72.99567 | 94.71279    | -760.20729  | -520.04122  | 2 |
| 21638 | H | 80.44722 | 106.53300 | 73.20214 | -4142.25380 | 1984.16703  | 1251.60105  | 2 |
| 21639 | O | 79.83378 | 104.71660 | 73.40144 | -260.36887  | -519.61452  | -314.03419  | 2 |
| 21640 | H | 80.81382 | 104.71535 | 73.30518 | 1133.75502  | 913.38419   | 1855.37470  | 2 |
| 21641 | C | 78.27805 | 106.73323 | 73.77234 | -788.79574  | 439.82313   | 16.83536    | 2 |
| 21642 | H | 77.37901 | 106.52573 | 73.22776 | 1331.45122  | 1003.94549  | -122.66841  | 2 |
| 21643 | H | 78.16106 | 106.27396 | 74.80531 | -421.42271  | 268.16918   | 868.47965   | 2 |
| 21644 | H | 78.37437 | 107.91050 | 73.76359 | 1274.31316  | 1101.26812  | 1333.45718  | 2 |
| 21645 | C | 80.40950 | 106.79956 | 70.68021 | -215.34192  | -1003.49298 | 661.52682   | 2 |
| 21646 | O | 80.58440 | 107.98268 | 70.72728 | 396.73997   | -515.97497  | 293.08026   | 2 |
| 21647 | N | 81.20574 | 105.86620 | 70.08264 | -52.47171   | -533.92230  | -399.04354  | 2 |
| 21648 | H | 80.89972 | 104.89692 | 70.18844 | 1709.01957  | -1976.05603 | 1189.98343  | 2 |
| 21649 | C | 82.61576 | 106.22868 | 70.24126 | 620.78639   | 100.51051   | 473.17000   | 2 |
| 21650 | H | 82.47794 | 107.29542 | 70.35573 | -1893.63240 | -4376.27007 | 296.37581   | 2 |
| 21651 | C | 83.30672 | 105.68127 | 71.54548 | -27.21096   | -481.06104  | -559.67919  | 2 |
| 21652 | H | 84.07458 | 104.82165 | 71.35549 | -3385.09745 | -2735.88470 | -115.84742  | 2 |
| 21653 | H | 84.18949 | 106.33584 | 71.85139 | -362.05123  | 727.95481   | 1356.33176  | 2 |
| 21654 | O | 82.45597 | 105.44924 | 72.76053 | -99.64758   | 296.28123   | 1090.81334  | 2 |
| 21655 | H | 82.80590 | 104.57887 | 73.03662 | 1317.80671  | -3309.92651 | -191.97023  | 2 |
| 21656 | C | 83.46052 | 105.77159 | 68.93377 | -385.67317  | 31.94080    | 312.71540   | 2 |
| 21657 | O | 83.91472 | 106.57203 | 68.14593 | 52.94135    | -169.48440  | -136.84643  | 2 |
| 21658 | N | 83.25264 | 104.41759 | 68.71525 | -138.79474  | -370.39548  | 463.14758   | 2 |
| 21659 | H | 82.64545 | 103.90216 | 69.32674 | -1308.76840 | 2745.58673  | 2866.21828  | 2 |
| 21660 | C | 84.23049 | 103.82432 | 67.84948 | -499.46842  | -152.90827  | -1211.00496 | 2 |
| 21661 | H | 84.98242 | 104.60081 | 67.67609 | -711.32045  | 2797.43865  | -946.92893  | 2 |
| 21662 | C | 84.74887 | 102.52000 | 68.55384 | 230.07871   | 699.40272   | -260.94523  | 2 |
| 21663 | H | 85.12989 | 101.91587 | 67.60429 | -1166.88035 | 151.91908   | 2080.12408  | 2 |
| 21664 | C | 85.92017 | 102.64539 | 69.58259 | 496.76204   | -288.08652  | -443.01305  | 2 |
| 21665 | H | 86.27342 | 101.69580 | 69.91422 | -2139.75638 | -1002.91727 | -4029.86329 | 2 |
| 21666 | H | 86.79787 | 103.21355 | 69.18312 | -1887.92627 | -1282.11423 | -747.08396  | 2 |
| 21667 | H | 85.68265 | 103.21974 | 70.56818 | -2023.23277 | 943.28476   | -4607.37468 | 2 |
| 21668 | C | 83.72560 | 101.57980 | 69.28144 | 387.58473   | 724.06362   | -506.49973  | 2 |
| 21669 | H | 84.09544 | 100.50607 | 69.25848 | -772.03475  | -70.05647   | 15.87574    | 2 |
| 21670 | H | 83.70180 | 101.83958 | 70.32070 | 2378.59972  | -989.60425  | -3522.43561 | 2 |
| 21671 | H | 82.71188 | 101.61927 | 68.81519 | 1864.31373  | -5896.23890 | 2347.96110  | 2 |
| 21672 | C | 83.52492 | 103.44562 | 66.40702 | 114.85637   | 347.38735   | -68.76641   | 2 |
| 21673 | O | 82.43615 | 102.90028 | 66.40025 | 61.62559    | 595.70270   | -137.66335  | 2 |
| 21674 | N | 84.39787 | 103.82406 | 65.46425 | -378.58418  | 206.38815   | -579.70658  | 2 |
| 21675 | H | 85.30474 | 104.16657 | 65.77624 | 1684.10996  | -3536.42158 | 1482.33997  | 2 |
| 21676 | C | 83.68035 | 104.10166 | 64.24912 | 439.76820   | 775.26420   | 1454.32723  | 2 |
| 21677 | H | 82.72175 | 103.57338 | 64.38247 | -3788.28219 | 1589.19077  | -666.24183  | 2 |
| 21678 | C | 83.58443 | 105.70640 | 64.26844 | 433.07503   | -117.33178  | -88.42648   | 2 |
| 21679 | H | 84.50065 | 106.06567 | 64.75058 | 1526.46179  | -3466.10481 | -491.32488  | 2 |
| 21680 | H | 83.55110 | 106.09296 | 63.22995 | 2137.70859  | -354.89833  | 1009.34825  | 2 |
| 21681 | C | 82.41694 | 106.32411 | 65.06287 | 499.25643   | -579.47694  | -469.02489  | 2 |
| 21682 | H | 81.43965 | 105.99099 | 64.62992 | 2062.03013  | -1307.39381 | -93.88431   | 2 |
| 21683 | H | 82.47508 | 106.08517 | 66.20283 | 749.37745   | 2427.26219  | 105.01043   | 2 |
| 21684 | C | 82.44439 | 107.90145 | 64.91728 | 25.30571    | -767.57936  | -52.50704   | 2 |
| 21685 | O | 81.72689 | 108.47753 | 64.08829 | -241.40710  | 378.11683   | -110.52896  | 2 |
| 21686 | N | 83.13667 | 108.44105 | 65.92645 | 43.61355    | -430.69152  | 73.68896    | 2 |
| 21687 | H | 83.70540 | 107.91138 | 66.60074 | 5.00312     | -294.61137  | -2399.86351 | 2 |
| 21688 | H | 83.26332 | 109.48118 | 66.25805 | 3573.15458  | -1250.49415 | -451.25549  | 2 |
| 21689 | C | 84.61754 | 103.62257 | 63.03003 | -369.60921  | -241.52835  | 148.69096   | 2 |
| 21690 | O | 85.28919 | 104.50896 | 62.50168 | 300.53955   | -96.93360   | 148.95780   | 2 |
| 21691 | N | 84.77207 | 102.30773 | 62.90429 | -315.66316  | -547.95222  | 1014.30955  | 2 |

|       |   |          |           |          |             |             |             |   |
|-------|---|----------|-----------|----------|-------------|-------------|-------------|---|
| 21692 | C | 85.35005 | 101.78056 | 61.70417 | 15.45555    | -469.77434  | -424.71292  | 2 |
| 21693 | H | 86.27713 | 102.41388 | 61.53255 | 1047.79943  | -32.42574   | -869.88280  | 2 |
| 21694 | C | 85.59344 | 100.22584 | 62.00529 | 496.65852   | 24.23655    | -478.14644  | 2 |
| 21695 | H | 84.80383 | 99.64742  | 61.43613 | 278.45829   | -925.68296  | 594.85982   | 2 |
| 21696 | H | 86.55586 | 99.81824  | 61.66812 | 40.30549    | -1895.41441 | 1875.95655  | 2 |
| 21697 | C | 85.59598 | 100.14569 | 63.52775 | -443.03406  | 363.03598   | -579.43865  | 2 |
| 21698 | H | 85.26933 | 99.10924  | 63.88119 | 1769.39024  | 121.48120   | -652.47291  | 2 |
| 21699 | H | 86.61826 | 100.29906 | 63.85108 | -2749.99635 | 1760.48637  | 1032.86904  | 2 |
| 21700 | C | 84.63004 | 101.31751 | 63.97393 | 781.83299   | -353.24011  | -312.97969  | 2 |
| 21701 | H | 83.54069 | 101.05816 | 63.98696 | 590.97142   | 2366.08972  | 2771.57754  | 2 |
| 21702 | H | 84.87413 | 101.91779 | 64.87313 | 321.17958   | -2754.35300 | 2991.57344  | 2 |
| 21703 | C | 84.29830 | 101.99238 | 60.41469 | -154.67549  | 549.43569   | 652.92656   | 2 |
| 21704 | O | 84.69470 | 102.26540 | 59.28510 | 157.93435   | -1077.01057 | 5.73542     | 2 |
| 21705 | N | 83.06167 | 101.79363 | 60.87124 | 339.58667   | 956.94148   | 89.76747    | 2 |
| 21706 | H | 83.03868 | 101.65036 | 61.90270 | 2054.94209  | -2005.35617 | 858.05633   | 2 |
| 21707 | C | 82.00435 | 102.55170 | 60.28225 | -1407.50344 | 1138.10303  | 89.50011    | 2 |
| 21708 | H | 82.33298 | 102.83201 | 59.28796 | 1145.63215  | 624.04297   | 1040.26377  | 2 |
| 21709 | C | 80.82419 | 101.43393 | 60.18152 | -99.50972   | -192.73972  | 194.86170   | 2 |
| 21710 | H | 80.21067 | 101.38236 | 61.19596 | -1260.07068 | -2136.73159 | -1090.91546 | 2 |
| 21711 | C | 80.00328 | 101.94646 | 59.00771 | 191.18885   | -558.17174  | 1297.62697  | 2 |
| 21712 | H | 80.61589 | 102.11602 | 58.10269 | -2859.64317 | 1408.64422  | -1326.07524 | 2 |
| 21713 | H | 79.23426 | 101.17121 | 58.75390 | 2850.61831  | -1229.39690 | -2478.54816 | 2 |
| 21714 | H | 79.51084 | 102.80919 | 59.27667 | 1411.97799  | 2599.35818  | -2226.32532 | 2 |
| 21715 | C | 81.40598 | 100.05194 | 59.70498 | 600.04941   | -345.59783  | 78.67295    | 2 |
| 21716 | H | 82.31793 | 99.91047  | 60.25151 | -3351.65435 | -929.51100  | 3746.62904  | 2 |
| 21717 | H | 80.71151 | 99.14313  | 59.88783 | -1297.42691 | -2381.48810 | 9.35107     | 2 |
| 21718 | H | 81.65265 | 99.82273  | 58.63769 | 90.34369    | -848.84375  | 760.66026   | 2 |
| 21719 | C | 81.49995 | 103.74805 | 61.21810 | 188.61380   | 28.51271    | 12.22192    | 2 |
| 21720 | O | 81.24930 | 103.48569 | 62.39129 | -109.76024  | 4.52660     | -105.30368  | 2 |
| 21721 | N | 81.12133 | 104.87919 | 60.51858 | 854.57121   | -952.82121  | -122.90232  | 2 |
| 21722 | H | 81.55394 | 104.81627 | 59.57498 | 84.07397    | 587.31680   | 603.18393   | 2 |
| 21723 | C | 81.29679 | 106.00230 | 61.40867 | -238.66819  | -102.20294  | -347.58697  | 2 |
| 21724 | H | 81.62112 | 105.67108 | 62.40488 | 1866.02732  | 1778.61932  | 1018.64353  | 2 |
| 21725 | C | 82.36015 | 106.96725 | 60.70610 | 232.99566   | -160.21715  | -713.18582  | 2 |
| 21726 | H | 81.81043 | 107.54756 | 59.94192 | 1149.71658  | 1214.27193  | 2947.11994  | 2 |
| 21727 | H | 82.62438 | 107.62904 | 61.55691 | -1832.62772 | 3442.37858  | -521.20039  | 2 |
| 21728 | C | 83.59149 | 106.19924 | 60.20698 | -365.45344  | -160.97216  | -188.80921  | 2 |
| 21729 | H | 83.75905 | 105.32717 | 60.85276 | 1419.55451  | 358.23656   | -830.65182  | 2 |
| 21730 | H | 83.55140 | 105.78517 | 59.25288 | 2729.78769  | 2723.89053  | 377.89352   | 2 |
| 21731 | C | 84.76411 | 107.21774 | 60.36722 | -44.44118   | -4.01048    | -7.71547    | 2 |
| 21732 | H | 84.54559 | 108.31482 | 60.12789 | -293.21521  | -1196.19452 | -467.25044  | 2 |
| 21733 | H | 84.98341 | 107.19580 | 61.43371 | -1771.00020 | 4724.82868  | 2366.49764  | 2 |
| 21734 | C | 85.83866 | 106.47363 | 59.46435 | -369.48070  | 0.58189     | -300.58162  | 2 |
| 21735 | H | 85.60861 | 106.45088 | 58.36654 | -1207.87450 | -277.71461  | 1009.57323  | 2 |
| 21736 | H | 86.78878 | 106.93955 | 59.76617 | -948.29425  | -1071.85936 | -2635.47538 | 2 |
| 21737 | N | 85.97818 | 105.08549 | 59.76186 | 591.82860   | 325.91893   | 315.40454   | 2 |
| 21738 | H | 85.66285 | 104.25380 | 59.20104 | -1549.13525 | -1274.72801 | -1898.26096 | 2 |
| 21739 | H | 78.91197 | 108.08145 | 58.25361 | 1733.06168  | -2934.29909 | -86.12859   | 2 |
| 21740 | H | 85.88937 | 104.81116 | 60.75115 | 1847.09234  | 2053.62650  | 1314.59220  | 2 |
| 21741 | C | 79.82328 | 106.69643 | 61.49318 | -136.24621  | -52.97902   | 126.23821   | 2 |
| 21742 | O | 78.84468 | 106.15697 | 60.95857 | -139.00596  | 920.66947   | -149.66407  | 2 |
| 21743 | N | 79.79846 | 107.66880 | 62.34422 | 751.08826   | -1.43123    | 602.55204   | 2 |
| 21744 | H | 80.72782 | 108.08654 | 62.66712 | 159.46601   | 3400.70675  | 548.64500   | 2 |
| 21745 | C | 78.62418 | 108.47299 | 62.43639 | -132.54356  | 84.74719    | -916.56254  | 2 |
| 21746 | H | 77.90394 | 107.71094 | 62.72058 | -5249.10243 | -903.97572  | -2953.89373 | 2 |
| 21747 | C | 78.85751 | 109.68551 | 63.44477 | -15.50277   | -25.69466   | -263.30141  | 2 |
| 21748 | H | 79.57440 | 109.38369 | 64.28105 | -1152.28826 | -665.93175  | -2111.98711 | 2 |
| 21749 | H | 79.37243 | 110.53346 | 62.89357 | 1633.35955  | 3217.30782  | -1809.60330 | 2 |
| 21750 | C | 77.38734 | 110.08708 | 63.94691 | 214.92183   | 1457.94987  | -1192.50663 | 2 |
| 21751 | H | 77.03643 | 109.07054 | 64.29302 | -957.76681  | 700.93638   | -2894.19502 | 2 |
| 21752 | H | 77.40973 | 110.85908 | 64.77059 | 4178.73996  | -899.20443  | -3356.54183 | 2 |
| 21753 | C | 76.50004 | 110.69959 | 62.82032 | -69.60484   | 643.23460   | 611.12794   | 2 |

|       |   |          |           |          |             |             |             |   |
|-------|---|----------|-----------|----------|-------------|-------------|-------------|---|
| 21754 | H | 76.89320 | 111.70194 | 62.54297 | -2080.18609 | -589.98569  | 3743.83500  | 2 |
| 21755 | H | 76.51451 | 110.12991 | 61.90666 | -469.12120  | 2246.86131  | -835.89204  | 2 |
| 21756 | C | 75.05003 | 110.82815 | 63.39037 | -969.14040  | 701.66014   | 23.17791    | 2 |
| 21757 | H | 74.96382 | 111.43823 | 64.36306 | 3180.50600  | -1860.98942 | -1459.59654 | 2 |
| 21758 | H | 74.28589 | 110.99526 | 62.57398 | -872.72662  | -936.82641  | -1407.10281 | 2 |
| 21759 | N | 74.76501 | 109.45453 | 63.89464 | 801.49651   | 984.41736   | 192.81445   | 2 |
| 21760 | H | 75.12467 | 108.56297 | 63.26580 | -3617.98283 | 470.15261   | -1756.98922 | 2 |
| 21761 | H | 75.00782 | 109.10425 | 64.88994 | 1197.13630  | 3862.73220  | -2719.38497 | 2 |
| 21762 | H | 73.66750 | 109.36073 | 63.95125 | 2374.70312  | -1515.44022 | 1297.81246  | 2 |
| 21763 | C | 78.18780 | 109.07086 | 60.93801 | -684.92341  | -326.31173  | 354.77080   | 2 |
| 21764 | O | 78.85514 | 109.85819 | 60.19060 | 187.39289   | 214.77912   | -349.50580  | 2 |
| 21765 | N | 76.99278 | 108.60252 | 60.69256 | 73.65445    | -336.88471  | -464.30443  | 2 |
| 21766 | H | 76.75117 | 107.91621 | 61.47005 | 2493.50609  | 1111.50848  | 892.80091   | 2 |
| 21767 | C | 76.21831 | 108.53155 | 59.50565 | -624.13201  | -284.06219  | -8.13794    | 2 |
| 21768 | H | 76.19724 | 109.68323 | 59.19975 | -1231.77315 | -1351.05609 | -366.52448  | 2 |
| 21769 | C | 76.94532 | 107.75263 | 58.41204 | 152.10135   | -335.73592  | 715.28365   | 2 |
| 21770 | H | 77.43350 | 106.84557 | 58.71894 | 1026.79589  | 1264.77692  | 826.72111   | 2 |
| 21771 | O | 78.26193 | 108.76723 | 57.83035 | -199.40088  | 800.24149   | -140.90224  | 2 |
| 21772 | H | 78.24595 | 109.57307 | 58.54812 | 1816.71793  | 61.22083    | -577.46959  | 2 |
| 21773 | C | 75.95079 | 107.44087 | 57.28591 | -325.55500  | -188.43985  | -244.18959  | 2 |
| 21774 | H | 75.65552 | 108.42320 | 56.78701 | 242.87445   | -843.57925  | -304.01251  | 2 |
| 21775 | H | 76.44114 | 106.92356 | 56.38774 | -771.77558  | 2147.79502  | -3309.14287 | 2 |
| 21776 | H | 75.03341 | 106.90488 | 57.51428 | 2594.88873  | 460.96907   | -137.27200  | 2 |
| 21777 | C | 74.79933 | 107.72187 | 59.86779 | -727.86366  | -178.54675  | 511.74652   | 2 |
| 21778 | O | 73.72277 | 108.14318 | 59.45068 | 124.92974   | 177.34795   | -321.07454  | 2 |
| 21779 | N | 75.11700 | 106.49861 | 60.30248 | 856.83435   | 504.04220   | -339.12310  | 2 |
| 21780 | H | 76.09421 | 106.48246 | 60.50401 | 643.73026   | -1779.41450 | 2297.63893  | 2 |
| 21781 | C | 74.14828 | 106.00731 | 61.27553 | -304.73602  | 500.28896   | -300.88846  | 2 |
| 21782 | H | 73.42862 | 106.76031 | 61.25391 | 2054.12405  | -1543.39285 | -356.26931  | 2 |
| 21783 | C | 73.51612 | 104.62862 | 60.75414 | -427.58728  | 904.73209   | 257.42240   | 2 |
| 21784 | H | 72.65011 | 104.47062 | 61.45164 | 702.70592   | 55.31423    | 1685.14919  | 2 |
| 21785 | H | 73.08664 | 104.72773 | 59.72339 | 413.83442   | -582.82955  | -2158.40248 | 2 |
| 21786 | C | 74.58876 | 103.53084 | 60.75008 | -256.60927  | -630.11284  | -767.77434  | 2 |
| 21787 | C | 74.50142 | 102.38884 | 61.55910 | 551.50747   | 266.00113   | -35.20438   | 2 |
| 21788 | H | 73.77897 | 102.18934 | 62.33123 | 695.52970   | 193.28671   | 1083.60363  | 2 |
| 21789 | C | 75.47382 | 103.49909 | 59.58632 | 148.08449   | -209.39054  | -886.18161  | 2 |
| 21790 | H | 75.46796 | 104.29663 | 58.87173 | 1502.56654  | 235.70157   | 107.19171   | 2 |
| 21791 | C | 75.53803 | 101.42001 | 61.36989 | 75.05288    | 1040.00387  | -291.94838  | 2 |
| 21792 | H | 75.66755 | 100.64214 | 62.15215 | 750.44565   | -1446.84455 | 218.13332   | 2 |
| 21793 | C | 76.34025 | 102.43999 | 59.37834 | -630.45829  | 1293.59043  | 50.65334    | 2 |
| 21794 | H | 76.89830 | 102.58243 | 58.42334 | -1102.54125 | 441.34802   | 592.96233   | 2 |
| 21795 | C | 76.53775 | 101.37090 | 60.37503 | -240.71636  | 660.29462   | -0.48801    | 2 |
| 21796 | O | 77.63059 | 100.43247 | 60.28727 | -309.48978  | 340.68932   | -67.82445   | 2 |
| 21797 | H | 77.37376 | 99.90891  | 61.11403 | -914.07113  | -2000.51422 | -2188.06526 | 2 |
| 21798 | C | 75.01534 | 105.93369 | 62.61038 | 26.86302    | 185.89720   | -276.22366  | 2 |
| 21799 | O | 75.53114 | 106.99751 | 63.05029 | 80.88209    | -479.32215  | -13.37626   | 2 |
| 21800 | N | 74.89570 | 104.80248 | 63.28306 | -294.71895  | -381.16766  | -324.93744  | 2 |
| 21801 | H | 74.27893 | 104.03907 | 62.93767 | 2772.08121  | -217.43009  | 314.62306   | 2 |
| 21802 | C | 76.07714 | 104.22610 | 63.80375 | -227.32104  | -158.08700  | 261.45666   | 2 |
| 21803 | H | 75.95488 | 103.11344 | 63.71316 | -1757.00306 | 2520.66370  | 3087.16693  | 2 |
| 21804 | C | 77.22793 | 104.74466 | 62.88718 | 137.18586   | 746.55686   | 3.64500     | 2 |
| 21805 | H | 76.89912 | 104.61163 | 61.79606 | 1805.77073  | -1367.78641 | -2307.59400 | 2 |
| 21806 | H | 77.43076 | 105.82062 | 63.05927 | -867.08452  | -625.92851  | 2668.02251  | 2 |
| 21807 | C | 78.59971 | 104.00887 | 63.08753 | -144.69407  | -102.83334  | 517.71744   | 2 |
| 21808 | H | 79.35871 | 104.49687 | 62.39930 | 1178.99954  | -1055.98462 | 3229.84243  | 2 |
| 21809 | H | 79.02129 | 104.13667 | 64.15583 | -1227.38457 | -996.52137  | 2230.60335  | 2 |
| 21810 | C | 78.49032 | 102.45836 | 62.73817 | 76.05927    | -615.05776  | 853.72358   | 2 |
| 21811 | H | 77.72881 | 102.25824 | 61.94487 | -492.24233  | -981.29261  | 188.67453   | 2 |
| 21812 | H | 79.41179 | 101.97698 | 62.49746 | -722.75471  | 1403.73039  | 2972.40730  | 2 |
| 21813 | N | 78.21795 | 101.91399 | 64.05533 | -704.25862  | -744.40629  | -183.05924  | 2 |
| 21814 | H | 77.34076 | 101.44247 | 64.29915 | -3093.28077 | 116.39910   | 194.59088   | 2 |
| 21815 | C | 79.09231 | 101.91379 | 65.00572 | 879.04327   | -511.34096  | 107.09507   | 2 |

|       |   |          |           |          |             |             |             |          |
|-------|---|----------|-----------|----------|-------------|-------------|-------------|----------|
| 21816 | N | 80.36482 | 102.46753 | 64.82808 | -422.40141  | -540.59316  | 150.32072   | 2        |
| 21817 | H | 80.73449 | 102.92293 | 63.95905 | 575.79135   | -4015.64010 | 674.88550   | 2        |
| 21818 | H | 80.97298 | 102.46015 | 65.68827 | -719.43781  | -4087.09863 | -1525.09451 | 2        |
| 21819 | N | 78.64385 | 101.43758 | 66.25903 | -243.10159  | 565.84870   | -214.81991  | 2        |
| 21820 | H | 77.68770 | 101.18648 | 66.57110 | -1547.62949 | -1244.58394 | -955.83166  | 2        |
| 21821 | H | 79.20504 | 101.59640 | 67.13922 | -2942.47557 | -1186.84422 | 208.43083   | 2        |
| 21822 | C | 76.50738 | 104.74412 | 65.33163 | -220.88440  | -124.25767  | -833.18194  | 2        |
| 21823 | O | 76.97968 | 103.90052 | 66.05001 | -43.83107   | 223.38683   | -278.36135  | 2        |
| 21824 | N | 76.42961 | 106.05081 | 65.50948 | 456.55674   | -616.92251  | 396.36681   | 2        |
| 21825 | H | 76.01603 | 106.71409 | 64.80246 | -2719.59469 | -628.00329  | 1539.20195  | 2        |
| 21826 | C | 76.84360 | 106.47347 | 66.81661 | 84.20867    | -747.53651  | -178.69462  | 2        |
| 21827 | H | 77.00395 | 105.60367 | 67.49914 | 163.82945   | -3118.10933 | 1116.20955  | 2        |
| 21828 | C | 78.12638 | 107.40005 | 66.53029 | -440.98171  | 157.81232   | -334.77727  | 2        |
| 21829 | H | 77.79722 | 108.33421 | 66.01852 | 1130.95269  | -97.59501   | -180.60977  | 2        |
| 21830 | C | 78.79613 | 107.67448 | 67.90196 | -670.55059  | -274.64745  | -62.13292   | 2        |
| 21831 | H | 78.92814 | 106.67020 | 68.39044 | 99.73801    | 379.97360   | 2199.60788  | 2        |
| 21832 | H | 79.78916 | 108.23452 | 67.91864 | -353.76031  | -228.27497  | -323.07610  | 2        |
| 21833 | H | 78.02452 | 108.05915 | 68.63103 | -2436.78027 | 233.11961   | 1549.84979  | 2        |
| 21834 | C | 79.15357 | 106.56355 | 65.71126 | 270.78616   | -619.53892  | -104.41874  | 2        |
| 21835 | H | 80.17951 | 107.01569 | 65.60460 | 1925.02792  | -1882.25887 | -875.82659  | 2        |
| 21836 | H | 79.34712 | 105.57998 | 66.25319 | 397.76113   | -904.82218  | 593.12539   | 2        |
| 21837 | H | 78.81300 | 106.32093 | 64.65182 | -1758.77944 | -3142.90831 | -1259.49944 | 2        |
| 21838 | C | 75.67808 | 107.54742 | 67.16856 | -55.80567   | 178.34451   | 357.38273   | 2        |
| 21839 | O | 75.27187 | 108.35443 | 66.33585 | -260.75776  | 226.98759   | 1011.05432  | 2        |
| 21840 | N | 75.23644 | 107.30073 | 68.37382 | 107.93642   | -256.29706  | -203.99331  | 2        |
| 21841 | H | 75.68800 | 106.62118 | 69.08632 | -2393.99853 | -213.66498  | -263.44137  | 2        |
| 21842 | C | 74.23367 | 108.15831 | 68.88881 | -248.98912  | -516.35190  | 663.20157   | 2        |
| 21843 | H | 74.16484 | 109.09205 | 68.21321 | -1788.86935 | -2335.56556 | -1261.98229 | 2        |
| 21844 | C | 72.75828 | 107.50770 | 68.87205 | 691.23808   | 389.03624   | -967.36718  | 2        |
| 21845 | H | 72.78348 | 106.45847 | 68.55390 | 2167.62109  | -242.22132  | 1628.87904  | 2        |
| 21846 | H | 72.41394 | 107.48224 | 69.91402 | 1913.67732  | -111.24210  | 129.41562   | 2        |
| 21847 | C | 71.70987 | 108.25705 | 68.08555 | 352.26680   | 241.58301   | 160.65104   | 2        |
| 21848 | H | 72.06727 | 108.12784 | 67.00257 | -2689.64675 | -2238.09014 | -484.99052  | 2        |
| 21849 | C | 70.41281 | 107.50486 | 68.36355 | 259.91785   | -650.98112  | 274.46142   | 2        |
| 21850 | H | 70.05204 | 107.53647 | 69.38839 | 1220.42018  | 2664.79482  | 1004.07270  | 2        |
| 21851 | H | 69.61838 | 107.98734 | 67.78719 | -3833.80112 | -2426.66885 | 1860.69338  | 2        |
| 21852 | H | 70.49106 | 106.37455 | 68.17832 | -2320.80691 | -2778.09004 | 1067.29826  | 2        |
| 21853 | C | 71.49426 | 109.72199 | 68.43723 | -1057.91891 | 819.66300   | 56.46605    | 2        |
| 21854 | H | 70.76520 | 110.27402 | 67.73989 | -826.27660  | 3177.14876  | -642.82403  | 2        |
| 21855 | H | 71.22479 | 109.88370 | 69.54376 | -932.07910  | -2357.22920 | 1198.00374  | 2        |
| 21856 | H | 72.45054 | 110.31162 | 68.37273 | -659.31199  | 57.59903    | -397.71354  | 2        |
| 21857 | C | 74.63462 | 108.36990 | 70.44772 | 766.07197   | -965.93206  | 629.07733   | 2        |
| 21858 | O | 73.81664 | 108.23649 | 71.32311 | -32.87966   | -978.49119  | 214.34394   | 2        |
| 21859 | O | 75.90122 | 108.89216 | 70.66376 | -460.13090  | 99.47927    | -316.14461  | 2        |
| 21860 | H | 76.28814 | 108.93123 | 69.73619 | -394.68518  | -1183.57053 | 405.19334   | 2        |
| 21861 |   | 5463     |           |          |             |             |             |          |
| 21862 |   | 150.0000 | 150.0000  | 150.0000 | 0.0000      | 0.0000      | 0.0000***** | 200.0000 |
|       |   | 0.2500   | 400.00    | 0.00     | 0.00        | 0.00        | -25972.6645 | 0.2229   |
|       |   |          |           |          |             |             |             | 400.0000 |
| 21863 | N | 57.56085 | 99.05441  | 60.57381 | 57.34284    | -315.42497  | -587.29842  | 1        |
| 21864 | H | 57.24857 | 99.20962  | 59.62543 | -1148.89054 | 1100.24794  | -3390.03508 | 1        |
| 21865 | H | 57.06960 | 99.73555  | 61.16763 | -364.24760  | 999.01903   | 207.62672   | 1        |
| 21866 | H | 64.95364 | 103.32901 | 61.47345 | 1247.91277  | 777.26153   | 1175.38599  | 1        |
| 21867 | C | 58.95443 | 98.75716  | 60.49356 | -301.10350  | 185.13323   | 125.31148   | 1        |
| 21868 | H | 59.51047 | 99.05793  | 61.40118 | 1438.94856  | 1500.88784  | -2587.83048 | 1        |
| 21869 | C | 58.91834 | 97.14122  | 60.40055 | -457.94128  | 95.29282    | 357.16291   | 1        |
| 21870 | H | 58.42631 | 96.82987  | 61.32562 | 1183.21921  | 310.25539   | 621.00530   | 1        |
| 21871 | H | 60.01766 | 96.87418  | 60.46310 | 375.57477   | -160.81765  | 217.20628   | 1        |
| 21872 | C | 58.23647 | 96.48596  | 59.18470 | -145.70061  | -200.77023  | 28.22940    | 1        |
| 21873 | H | 57.46280 | 97.15011  | 58.68643 | -2386.16942 | -441.76386  | -622.31942  | 1        |
| 21874 | H | 57.56280 | 95.62789  | 59.61132 | 1121.54147  | -1006.24513 | -2031.36628 | 1        |
| 21875 | S | 59.63255 | 95.79118  | 58.23193 | -595.52181  | -141.24332  | -348.13167  | 1        |
| 21876 | C | 59.99192 | 96.99096  | 56.83698 | 91.91193    | 1389.13184  | 474.65172   | 1        |

|       |   |          |           |          |             |             |             |   |
|-------|---|----------|-----------|----------|-------------|-------------|-------------|---|
| 21877 | H | 60.97523 | 96.81215  | 56.27331 | -5.22117    | 154.43821   | -1600.27930 | 1 |
| 21878 | H | 59.16743 | 96.85952  | 56.03506 | 30.03546    | 681.92642   | -868.94843  | 1 |
| 21879 | H | 60.00340 | 98.07603  | 57.09179 | 1606.62908  | 1287.16642  | -1818.96572 | 1 |
| 21880 | C | 59.49614 | 99.52930  | 59.20153 | -35.73165   | 85.85586    | -96.70860   | 1 |
| 21881 | O | 58.74632 | 99.59185  | 58.24833 | -97.11384   | 416.54923   | -1110.71437 | 1 |
| 21882 | N | 60.83036 | 99.82372  | 59.22608 | -463.62687  | -266.53621  | -103.75285  | 1 |
| 21883 | H | 61.27876 | 99.57120  | 60.12711 | 1018.78226  | 1807.58491  | 1641.59658  | 1 |
| 21884 | C | 61.64450 | 99.92398  | 58.09296 | -639.79867  | 461.52133   | 786.20804   | 1 |
| 21885 | H | 60.89701 | 100.20358 | 57.31144 | -660.90633  | -2567.05404 | 1039.67915  | 1 |
| 21886 | C | 62.71185 | 101.08919 | 58.33272 | -110.17299  | -520.92085  | 977.37822   | 1 |
| 21887 | H | 63.47663 | 101.08450 | 57.51050 | 844.42617   | -855.50915  | 961.80553   | 1 |
| 21888 | H | 62.17563 | 102.06731 | 58.21508 | -1244.70867 | -3311.96385 | 1140.08575  | 1 |
| 21889 | C | 63.30790 | 101.06109 | 59.79394 | -903.61808  | -501.21462  | -499.05552  | 1 |
| 21890 | H | 63.96612 | 100.21613 | 59.94944 | 137.97327   | 1079.31547  | 1547.75860  | 1 |
| 21891 | H | 62.50778 | 100.92262 | 60.51523 | -1638.53672 | -698.05346  | -722.09172  | 1 |
| 21892 | C | 63.96401 | 102.43380 | 60.17399 | 851.46804   | -148.90035  | -674.33269  | 1 |
| 21893 | O | 63.65321 | 103.44645 | 59.60484 | 634.28468   | 78.21967    | -282.07908  | 1 |
| 21894 | O | 64.91979 | 102.38110 | 61.20903 | 418.17781   | 920.90824   | 107.15285   | 1 |
| 21895 | C | 62.46705 | 98.55563  | 57.69930 | -108.33478  | -219.10130  | 22.09648    | 1 |
| 21896 | O | 63.00341 | 98.54841  | 56.61931 | -13.08612   | -151.96607  | 3.55377     | 1 |
| 21897 | N | 62.70063 | 97.77312  | 58.75193 | -885.79606  | 184.94109   | 219.14416   | 1 |
| 21898 | H | 62.10148 | 98.04945  | 59.55309 | -2361.75987 | 3041.42394  | -2820.54252 | 1 |
| 21899 | C | 62.93137 | 96.37787  | 58.41027 | -449.73065  | -46.18143   | 75.56008    | 1 |
| 21900 | H | 62.68931 | 96.46866  | 57.31316 | -2984.16940 | -600.09876  | 341.24292   | 1 |
| 21901 | H | 62.17271 | 95.75328  | 58.84005 | 575.60268   | -2871.39408 | 1233.60260  | 1 |
| 21902 | C | 64.42723 | 95.99923  | 58.84843 | 953.69859   | 749.37312   | -309.25148  | 1 |
| 21903 | O | 64.76862 | 94.85353  | 59.20987 | -513.89339  | 422.10940   | 337.42167   | 1 |
| 21904 | N | 65.17499 | 97.08964  | 58.85108 | -394.80830  | 365.28864   | -130.64361  | 1 |
| 21905 | H | 64.88762 | 97.90193  | 58.33529 | -5308.04094 | -1569.94467 | -1797.76754 | 1 |
| 21906 | C | 66.40044 | 97.10173  | 59.58623 | 134.21661   | 48.83579    | -409.04689  | 1 |
| 21907 | H | 66.61523 | 96.03967  | 59.83098 | -1494.37885 | -361.48849  | 427.18384   | 1 |
| 21908 | C | 67.53066 | 97.95417  | 58.86101 | 573.31141   | 571.69088   | 65.67233    | 1 |
| 21909 | H | 67.28651 | 99.02961  | 59.04429 | -303.84689  | 13.98837    | 983.63150   | 1 |
| 21910 | C | 68.85284 | 97.65262  | 59.62306 | 817.05679   | 218.13227   | -343.83476  | 1 |
| 21911 | H | 69.04477 | 96.50307  | 59.73307 | -211.16878  | 499.16219   | 1081.74599  | 1 |
| 21912 | H | 68.76761 | 98.14001  | 60.62609 | -1122.02126 | 876.45165   | -1096.99437 | 1 |
| 21913 | H | 69.71367 | 97.99543  | 59.08549 | -1228.92146 | -1143.69409 | -703.39035  | 1 |
| 21914 | C | 67.58050 | 97.46543  | 57.36977 | -179.50950  | -667.88067  | 110.09015   | 1 |
| 21915 | H | 68.31755 | 97.99257  | 56.77318 | -633.69056  | 514.64470   | 1969.99168  | 1 |
| 21916 | H | 66.58675 | 97.72310  | 56.92611 | 394.05354   | -934.11935  | -1673.86804 | 1 |
| 21917 | C | 67.78076 | 95.94986  | 57.07526 | -565.30494  | 910.09653   | -97.38579   | 1 |
| 21918 | H | 67.85172 | 95.58792  | 55.98046 | -2709.18297 | 3239.70917  | 2030.34056  | 1 |
| 21919 | H | 66.87895 | 95.44986  | 57.45867 | -589.45539  | 989.12203   | 248.62383   | 1 |
| 21920 | H | 68.67309 | 95.58039  | 57.65577 | 589.31803   | -1793.70141 | -2020.19026 | 1 |
| 21921 | C | 66.13717 | 97.82166  | 61.04289 | -267.63363  | -346.80667  | -218.74885  | 1 |
| 21922 | O | 67.07940 | 97.99041  | 61.82466 | -550.20639  | -497.60635  | -363.18828  | 1 |
| 21923 | N | 64.91550 | 98.34527  | 61.23240 | -615.82017  | -394.43867  | 8.03020     | 1 |
| 21924 | H | 64.35745 | 98.26410  | 60.38533 | -329.46709  | 265.73664   | 2085.84446  | 1 |
| 21925 | C | 64.43797 | 98.48912  | 62.56737 | -1.82412    | 585.29982   | 228.93636   | 1 |
| 21926 | H | 65.31502 | 98.86731  | 63.11382 | 908.24888   | 2050.80309  | -131.67477  | 1 |
| 21927 | C | 63.16065 | 99.44566  | 62.51146 | -306.31669  | -963.49874  | -134.57500  | 1 |
| 21928 | H | 62.77679 | 99.44107  | 63.58093 | 2313.91870  | 279.00387   | -902.58197  | 1 |
| 21929 | H | 63.60648 | 100.44726 | 62.32327 | -2626.58907 | 786.17904   | 2444.53702  | 1 |
| 21930 | O | 62.07184 | 99.13147  | 61.61588 | 1062.55339  | 538.34685   | -344.37657  | 1 |
| 21931 | H | 61.30374 | 99.67952  | 62.05394 | -4440.63076 | 789.47860   | 1246.29027  | 1 |
| 21932 | C | 63.90330 | 97.05194  | 63.17649 | -166.41643  | -445.99402  | 635.55228   | 1 |
| 21933 | O | 63.57558 | 97.03435  | 64.36985 | -131.55651  | 129.38237   | 352.15942   | 1 |
| 21934 | N | 63.98084 | 96.07567  | 62.27172 | -368.93842  | -1618.05957 | 682.93819   | 1 |
| 21935 | H | 64.23952 | 96.49984  | 61.39367 | 34.05215    | -645.60969  | -306.76206  | 1 |
| 21936 | C | 63.50994 | 94.75633  | 62.36057 | -471.87761  | 9.23484     | -78.90240   | 1 |
| 21937 | H | 63.68773 | 94.24378  | 61.41908 | -404.53701  | 2070.65987  | -3562.14310 | 1 |
| 21938 | C | 64.36159 | 94.18304  | 63.55770 | -292.18505  | -260.16697  | 1.92868     | 1 |

|       |   |          |           |          |             |             |             |   |
|-------|---|----------|-----------|----------|-------------|-------------|-------------|---|
| 21939 | H | 64.72585 | 95.01740  | 64.19795 | -883.40942  | -156.45043  | 2429.12451  | 1 |
| 21940 | C | 63.38857 | 93.38459  | 64.40888 | -566.53663  | -75.17095   | -537.74039  | 1 |
| 21941 | H | 62.81669 | 92.60291  | 63.83094 | -1714.47336 | 1598.94089  | 3813.25670  | 1 |
| 21942 | H | 63.85563 | 92.90278  | 65.29807 | 241.48616   | -2225.54765 | 3262.46397  | 1 |
| 21943 | H | 62.61281 | 94.04513  | 64.90872 | -372.37274  | 282.84918   | -22.61973   | 1 |
| 21944 | C | 65.59431 | 93.50828  | 63.18281 | -303.08560  | 192.12913   | -380.15490  | 1 |
| 21945 | H | 65.53312 | 92.57976  | 62.44784 | -4131.75415 | 531.27607   | -2282.91599 | 1 |
| 21946 | H | 66.00336 | 92.89196  | 63.99947 | 952.52916   | 802.89585   | -2130.70354 | 1 |
| 21947 | C | 66.79313 | 94.43273  | 62.58607 | -168.42184  | 122.31440   | -220.38546  | 1 |
| 21948 | H | 67.66663 | 93.80431  | 62.23917 | -2546.30628 | 4657.23807  | 2346.55317  | 1 |
| 21949 | H | 66.50051 | 95.09361  | 61.70304 | 771.30329   | -1989.49534 | 1214.79355  | 1 |
| 21950 | H | 67.16133 | 95.14877  | 63.48636 | -1302.87382 | 316.62806   | 426.94218   | 1 |
| 21951 | C | 61.83301 | 94.75402  | 62.50116 | -305.17161  | 529.47924   | -227.48131  | 1 |
| 21952 | O | 61.14134 | 94.12444  | 61.70910 | 481.36534   | 221.23263   | -761.10726  | 1 |
| 21953 | N | 61.39612 | 95.33974  | 63.61220 | -106.03222  | 290.96572   | 322.45764   | 1 |
| 21954 | H | 62.10225 | 95.71100  | 64.24059 | 307.47378   | -1519.01516 | -1438.34468 | 1 |
| 21955 | C | 59.99340 | 95.43390  | 63.79642 | 157.68208   | -260.10585  | -446.83240  | 1 |
| 21956 | H | 59.54776 | 94.79955  | 62.94667 | -777.85578  | 1429.36824  | -2424.38937 | 1 |
| 21957 | C | 59.88246 | 94.97340  | 65.31960 | 76.19818    | 421.76349   | 615.62096   | 1 |
| 21958 | H | 59.91900 | 95.87219  | 66.01233 | -1899.86632 | -125.37802  | 1221.99154  | 1 |
| 21959 | H | 60.67193 | 94.23487  | 65.63614 | 1356.95162  | 446.63451   | 4526.50851  | 1 |
| 21960 | C | 58.52660 | 94.22258  | 65.38322 | 339.10851   | 490.38316   | 352.86085   | 1 |
| 21961 | C | 58.56486 | 92.80983  | 65.17233 | -492.08131  | -271.02636  | 11.01408    | 1 |
| 21962 | H | 59.45817 | 92.22865  | 65.12406 | -419.33896  | 711.40606   | -6581.60999 | 1 |
| 21963 | C | 57.36769 | 92.18229  | 65.15215 | -234.56456  | -475.95586  | 960.91471   | 1 |
| 21964 | H | 57.28197 | 91.09259  | 65.05024 | -4.86399    | 396.50541   | 2625.05424  | 1 |
| 21965 | C | 56.04769 | 92.82696  | 65.24527 | 928.65956   | -326.59497  | -838.04850  | 1 |
| 21966 | O | 54.77732 | 92.17520  | 65.25506 | -51.50437   | 236.51205   | 826.63182   | 1 |
| 21967 | H | 54.23239 | 92.92475  | 65.48078 | 1711.14774  | 2328.45570  | 1151.18433  | 1 |
| 21968 | C | 57.38054 | 95.00816  | 65.48354 | -375.77258  | -326.55858  | -350.93357  | 1 |
| 21969 | H | 57.39123 | 96.15249  | 65.57659 | 2803.82386  | -3811.30509 | 231.78978   | 1 |
| 21970 | C | 56.18857 | 94.21480  | 65.40779 | 210.93913   | -191.69332  | -1127.52245 | 1 |
| 21971 | H | 55.14547 | 94.67760  | 65.45365 | -669.80040  | 3565.43772  | -1920.63241 | 1 |
| 21972 | C | 59.34606 | 96.94950  | 63.79391 | -390.35190  | -226.60681  | -1045.86776 | 1 |
| 21973 | O | 58.18387 | 96.92803  | 63.47399 | -545.31818  | -671.55643  | -375.67799  | 1 |
| 21974 | N | 60.12841 | 98.00579  | 63.95614 | 353.72146   | 450.79328   | -31.07254   | 1 |
| 21975 | H | 61.13665 | 97.84722  | 64.02520 | 1026.44762  | -1180.46470 | 283.88827   | 1 |
| 21976 | C | 59.76351 | 99.15255  | 64.71079 | 563.14239   | 79.14318    | 802.99532   | 1 |
| 21977 | H | 60.70267 | 99.78397  | 64.51419 | -2823.42924 | -1963.21182 | 634.93659   | 1 |
| 21978 | C | 58.32598 | 99.75633  | 64.38348 | 718.42735   | 102.44724   | -380.35832  | 1 |
| 21979 | H | 57.64373 | 98.89143  | 64.64717 | -302.29881  | -774.48774  | 2007.84842  | 1 |
| 21980 | O | 57.76525 | 99.89917  | 62.92737 | 112.60145   | 997.08971   | 132.45622   | 1 |
| 21981 | H | 57.51311 | 98.96230  | 62.87099 | 1175.04341  | 161.74755   | 96.47364    | 1 |
| 21982 | C | 58.10726 | 101.01321 | 65.26565 | -646.07692  | -190.39688  | 638.59039   | 1 |
| 21983 | H | 57.99401 | 100.66142 | 66.29921 | 543.06540   | -4163.57036 | -1755.42025 | 1 |
| 21984 | H | 59.00889 | 101.67231 | 65.28279 | -2807.24349 | 3566.70825  | -1094.28906 | 1 |
| 21985 | H | 57.21181 | 101.59753 | 64.93090 | 1587.09367  | -1227.39295 | 1214.01995  | 1 |
| 21986 | C | 59.59452 | 98.59919  | 66.23093 | 474.18474   | 195.66557   | -40.26284   | 1 |
| 21987 | O | 58.52849 | 98.18213  | 66.70739 | 224.59440   | -667.90784  | -24.19438   | 1 |
| 21988 | N | 60.76580 | 98.70776  | 66.85871 | -540.87526  | -319.56377  | 358.65230   | 1 |
| 21989 | H | 61.54605 | 99.01144  | 66.30664 | 278.07004   | 874.19435   | 2550.18010  | 1 |
| 21990 | C | 60.79905 | 99.56163  | 68.10373 | -798.23318  | 86.02139    | 682.24282   | 1 |
| 21991 | H | 60.01579 | 99.06006  | 68.72764 | -82.13483   | 1816.24158  | 2396.11761  | 1 |
| 21992 | C | 62.26098 | 99.46462  | 68.72887 | 391.59172   | 593.94854   | -556.95248  | 1 |
| 21993 | H | 62.01519 | 99.41567  | 69.79974 | -1156.52422 | 677.86569   | 677.39515   | 1 |
| 21994 | H | 62.64796 | 98.45834  | 68.41808 | -3331.22389 | 718.65205   | -477.18419  | 1 |
| 21995 | O | 63.08492 | 100.64625 | 68.50113 | 45.57348    | -1132.13575 | 920.03868   | 1 |
| 21996 | H | 63.39411 | 100.74601 | 69.48364 | -81.69500   | 1909.29679  | 460.85450   | 1 |
| 21997 | C | 60.46203 | 101.08639 | 67.89460 | 26.57256    | -492.86669  | -573.85400  | 1 |
| 21998 | O | 60.48086 | 101.67419 | 66.83189 | -40.07747   | 618.59622   | 19.51391    | 1 |
| 21999 | N | 60.05222 | 101.57700 | 69.11630 | 155.77479   | -15.58211   | -1088.18182 | 1 |
| 22000 | H | 59.85735 | 101.06887 | 70.02835 | 925.91029   | -1335.26188 | -413.31123  | 1 |

|       |   |          |           |          |             |             |             |   |
|-------|---|----------|-----------|----------|-------------|-------------|-------------|---|
| 22001 | C | 59.11290 | 102.67172 | 68.87677 | 206.96268   | 181.68255   | -93.94492   | 1 |
| 22002 | H | 58.65422 | 102.09169 | 67.96583 | -325.97779  | 700.36379   | 2461.23266  | 1 |
| 22003 | C | 58.28156 | 102.86224 | 70.15745 | -251.62041  | -523.53432  | -85.75765   | 1 |
| 22004 | H | 57.47915 | 103.60523 | 70.01084 | -553.80170  | -3374.59155 | -1182.20554 | 1 |
| 22005 | H | 58.89692 | 103.37827 | 70.97080 | -1397.71366 | 446.51559   | 154.79918   | 1 |
| 22006 | C | 57.70061 | 101.49677 | 70.73767 | -190.33977  | -102.98936  | -413.57810  | 1 |
| 22007 | O | 58.41537 | 100.49280 | 70.86159 | -631.84914  | -386.94435  | -71.67728   | 1 |
| 22008 | O | 56.48600 | 101.60113 | 71.04427 | 554.76333   | -40.29553   | -374.92178  | 1 |
| 22009 | C | 59.85273 | 104.06779 | 68.43981 | 1688.16749  | -201.34425  | -763.48326  | 1 |
| 22010 | O | 59.13540 | 104.67256 | 67.67550 | 314.05371   | 832.90285   | 257.35586   | 1 |
| 22011 | N | 61.03095 | 104.38745 | 68.92675 | 558.51506   | -34.79187   | -827.79436  | 1 |
| 22012 | H | 61.58093 | 103.67993 | 69.50945 | 2723.97930  | 2285.12172  | 409.89318   | 1 |
| 22013 | C | 61.70262 | 105.49893 | 68.41739 | 854.86987   | 490.38658   | 1322.62178  | 1 |
| 22014 | H | 60.91552 | 106.21568 | 68.01928 | 1194.86887  | -436.14414  | 1214.44342  | 1 |
| 22015 | C | 62.60827 | 106.04893 | 69.59037 | -220.05194  | -716.27737  | -788.42996  | 1 |
| 22016 | H | 61.76310 | 106.40453 | 70.27371 | -5194.07208 | 1083.46558  | 1790.16502  | 1 |
| 22017 | H | 63.25180 | 106.90920 | 69.29086 | -555.48417  | 1662.45884  | 1723.91029  | 1 |
| 22018 | C | 63.42144 | 104.91984 | 70.32145 | -1289.70812 | -888.51164  | -66.15047   | 1 |
| 22019 | O | 62.98118 | 103.83067 | 70.64262 | 149.69299   | 805.52978   | -96.07600   | 1 |
| 22020 | N | 64.64833 | 105.39380 | 70.45637 | -123.12112  | -39.34466   | -492.31273  | 1 |
| 22021 | H | 65.59742 | 104.84209 | 70.64027 | 820.36109   | 1621.77699  | -1217.22131 | 1 |
| 22022 | H | 64.95076 | 106.26172 | 70.02626 | -1964.73533 | 1178.91004  | -894.50132  | 1 |
| 22023 | C | 62.73618 | 104.97660 | 67.17822 | 312.87525   | 184.70711   | -32.91610   | 1 |
| 22024 | O | 63.61586 | 105.69062 | 66.81935 | -94.14423   | 58.58490    | -193.25433  | 1 |
| 22025 | N | 62.42365 | 103.80088 | 66.59799 | 599.20594   | -324.01247  | -749.35834  | 1 |
| 22026 | H | 61.82880 | 103.16708 | 67.18495 | 3406.18236  | 677.01032   | 2580.87615  | 1 |
| 22027 | C | 63.19179 | 103.33382 | 65.52289 | 367.66150   | 116.28444   | -270.91106  | 1 |
| 22028 | H | 64.16030 | 103.83916 | 65.69254 | 4317.67698  | 159.83552   | -717.66507  | 1 |
| 22029 | C | 63.05467 | 101.76234 | 65.54257 | -223.00650  | -307.64006  | -929.48445  | 1 |
| 22030 | H | 62.87792 | 101.45573 | 66.64731 | -543.18620  | 849.70043   | 1559.61878  | 1 |
| 22031 | H | 62.18455 | 101.35992 | 64.95581 | 585.71121   | -271.71199  | -1673.55202 | 1 |
| 22032 | C | 64.33949 | 101.09355 | 65.04809 | -84.65835   | -256.13608  | -89.99760   | 1 |
| 22033 | C | 65.26526 | 101.80567 | 64.20639 | -548.08846  | 86.14706    | -38.97318   | 1 |
| 22034 | H | 65.02259 | 102.87181 | 63.90673 | 69.35934    | -1666.74303 | -524.20432  | 1 |
| 22035 | C | 66.45848 | 101.18863 | 63.79447 | 407.70055   | 195.52419   | 1044.21502  | 1 |
| 22036 | H | 67.06874 | 101.59390 | 62.99730 | 2146.30768  | 1601.42077  | 587.55332   | 1 |
| 22037 | C | 66.94760 | 99.96411  | 64.34339 | 733.30886   | 582.02113   | -433.42347  | 1 |
| 22038 | O | 68.22318 | 99.42373  | 63.85717 | 260.04978   | -65.32227   | 559.72747   | 1 |
| 22039 | H | 67.90652 | 98.71626  | 63.28047 | 831.71290   | 219.37256   | 424.98094   | 1 |
| 22040 | C | 64.84140 | 99.88290  | 65.56761 | 438.18663   | 107.80646   | 295.43167   | 1 |
| 22041 | H | 64.18048 | 99.31221  | 66.21223 | 1499.24776  | 2129.85057  | -1819.24598 | 1 |
| 22042 | C | 66.10580 | 99.33619  | 65.23038 | -120.70242  | 1212.27733  | 1062.89076  | 1 |
| 22043 | H | 66.31553 | 98.36677  | 65.69238 | 2382.81594  | 1095.16104  | 3295.88462  | 1 |
| 22044 | C | 62.80522 | 103.90006 | 63.97958 | 132.16682   | -892.81170  | -149.37720  | 1 |
| 22045 | O | 63.61381 | 104.55357 | 63.31678 | -252.38778  | -117.78027  | 52.59551    | 1 |
| 22046 | N | 61.69943 | 103.30090 | 63.59225 | 54.38437    | 594.49308   | 844.62251   | 1 |
| 22047 | H | 61.23120 | 102.80388 | 64.37198 | -28.38374   | -1071.60284 | 1576.60330  | 1 |
| 22048 | C | 61.12892 | 103.57566 | 62.30694 | 555.01001   | 266.07192   | 558.74517   | 1 |
| 22049 | H | 62.02247 | 103.69597 | 61.68287 | -2803.79998 | 1025.90850  | 3692.68127  | 1 |
| 22050 | C | 60.03878 | 102.52139 | 61.95010 | -517.55631  | 29.01644    | -136.12894  | 1 |
| 22051 | H | 59.19044 | 102.58045 | 62.61927 | -2021.67704 | -1932.41657 | 1141.39247  | 1 |
| 22052 | O | 60.44123 | 101.01096 | 62.50953 | -143.52972  | 28.16152    | 42.03924    | 1 |
| 22053 | H | 59.59805 | 100.75592 | 62.88686 | -149.93372  | -125.70101  | -1360.17569 | 1 |
| 22054 | C | 59.59758 | 102.81196 | 60.49186 | -422.78291  | -353.67284  | 449.06370   | 1 |
| 22055 | H | 58.69025 | 102.13513 | 60.29664 | -2144.91502 | -83.85672   | -775.42995  | 1 |
| 22056 | H | 60.37311 | 102.54410 | 59.69980 | 223.31573   | -457.70638  | 696.57320   | 1 |
| 22057 | H | 59.31550 | 103.85731 | 60.25188 | 314.83574   | -4728.11698 | 1323.86287  | 1 |
| 22058 | C | 60.37257 | 105.02308 | 62.48837 | 170.59824   | 27.32143    | -135.40987  | 1 |
| 22059 | O | 59.17188 | 105.08821 | 62.58860 | 83.70533    | 365.64754   | -655.76141  | 1 |
| 22060 | N | 61.27582 | 106.02643 | 62.61758 | 321.89056   | -326.81145  | 92.14165    | 1 |
| 22061 | H | 62.25806 | 105.63106 | 62.83053 | -1396.78759 | -127.20385  | -26.39640   | 1 |
| 22062 | C | 60.90853 | 107.18199 | 63.35290 | 232.49396   | 160.76535   | 593.52678   | 1 |



|       |   |          |           |          |             |             |             |   |
|-------|---|----------|-----------|----------|-------------|-------------|-------------|---|
| 22063 | H | 59.83383 | 107.42936 | 63.11123 | -2208.32372 | -1836.65457 | -1041.05307 | 1 |
| 22064 | C | 60.92744 | 106.80040 | 64.89665 | -249.29852  | 436.98880   | -882.40256  | 1 |
| 22065 | H | 61.52397 | 105.89166 | 65.02092 | 218.51430   | 1113.52389  | 937.32150   | 1 |
| 22066 | H | 61.42082 | 107.55831 | 65.56320 | -524.67949  | 22.46374    | 1891.87311  | 1 |
| 22067 | C | 59.45348 | 106.69098 | 65.42804 | -207.40598  | 947.67055   | 443.85891   | 1 |
| 22068 | H | 58.90652 | 106.07127 | 64.65032 | 237.85490   | -404.22187  | -2960.71067 | 1 |
| 22069 | H | 59.60495 | 106.04780 | 66.40539 | -2667.04981 | 1346.46070  | 244.52389   | 1 |
| 22070 | C | 58.57617 | 108.04265 | 65.60731 | 430.33591   | 15.47678    | -26.42170   | 1 |
| 22071 | O | 57.38363 | 107.92829 | 65.89106 | 47.87287    | 352.74242   | -309.50983  | 1 |
| 22072 | O | 59.10211 | 109.14713 | 65.37222 | 380.94445   | 59.75560    | 62.68516    | 1 |
| 22073 | C | 61.99442 | 108.37636 | 63.31813 | 283.29060   | -634.37018  | -524.39502  | 1 |
| 22074 | O | 63.10939 | 108.30628 | 62.79399 | -298.96520  | 441.74052   | 658.13890   | 1 |
| 22075 | N | 61.50237 | 109.39142 | 64.04140 | -579.28815  | 895.38960   | -380.82435  | 1 |
| 22076 | H | 60.59907 | 109.44067 | 64.51564 | 1540.63622  | -328.45120  | 668.25041   | 1 |
| 22077 | C | 62.46712 | 110.32625 | 64.50043 | -305.17696  | 50.57354    | 20.75423    | 1 |
| 22078 | H | 63.22249 | 110.14189 | 63.75309 | -925.06371  | -3335.30257 | 1200.24962  | 1 |
| 22079 | C | 61.81792 | 111.76813 | 64.46973 | 521.00066   | -459.17665  | -448.08822  | 1 |
| 22080 | H | 60.90434 | 111.95411 | 65.11158 | 610.89759   | 3456.39626  | 1482.65813  | 1 |
| 22081 | H | 61.49004 | 111.86406 | 63.44464 | 264.35201   | 1535.83986  | 1047.47579  | 1 |
| 22082 | C | 62.86342 | 112.90861 | 64.67118 | 433.46112   | 897.34511   | -850.75930  | 1 |
| 22083 | H | 62.64729 | 113.78804 | 64.00231 | -137.47034  | -1945.04764 | 2326.42588  | 1 |
| 22084 | H | 62.83433 | 113.16071 | 65.72062 | -3416.23226 | 398.88294   | 2720.60805  | 1 |
| 22085 | C | 64.39284 | 112.60799 | 64.16466 | 369.49562   | 35.78809    | 308.72120   | 1 |
| 22086 | O | 65.01690 | 111.53750 | 64.37398 | 295.56518   | 864.14990   | -87.74129   | 1 |
| 22087 | O | 64.90478 | 113.66310 | 63.71300 | -211.36117  | -273.38789  | -622.54110  | 1 |
| 22088 | C | 62.82612 | 109.88815 | 66.00267 | 334.41136   | -520.58120  | -389.06275  | 1 |
| 22089 | O | 62.00746 | 109.66631 | 66.88899 | 378.04820   | 202.65923   | 737.28258   | 1 |
| 22090 | N | 64.19247 | 109.78619 | 66.09444 | -704.19558  | -621.86760  | 662.86798   | 1 |
| 22091 | H | 64.78348 | 110.17950 | 65.28549 | 423.02316   | -1514.87254 | -751.62497  | 1 |
| 22092 | C | 64.67405 | 108.46642 | 66.49177 | 317.80348   | -687.87234  | 116.44785   | 1 |
| 22093 | H | 63.68819 | 107.99658 | 66.61587 | -2995.70865 | -1184.99345 | -0.00231    | 1 |
| 22094 | C | 65.35817 | 108.05253 | 65.13679 | -815.06928  | 20.22811    | -163.44150  | 1 |
| 22095 | H | 64.89415 | 108.58705 | 64.29154 | 1126.59612  | 1575.22341  | 2075.96056  | 1 |
| 22096 | H | 66.44865 | 108.42903 | 65.07983 | -1600.82233 | 4964.40092  | -1378.24100 | 1 |
| 22097 | C | 65.44743 | 106.50869 | 64.97482 | -887.48532  | -102.19639  | -176.54671  | 1 |
| 22098 | H | 64.41147 | 106.04064 | 64.77693 | 1183.58086  | -1456.67413 | -807.53667  | 1 |
| 22099 | H | 65.80912 | 105.98933 | 65.94035 | 2383.34453  | -1350.44110 | 1810.54997  | 1 |
| 22100 | S | 66.61574 | 106.21565 | 63.58584 | 575.05665   | -384.48497  | -12.89023   | 1 |
| 22101 | C | 65.63879 | 106.87485 | 62.17593 | 578.82686   | 260.94281   | 197.02964   | 1 |
| 22102 | H | 64.81367 | 106.20252 | 61.77331 | -64.63850   | -1099.72138 | 668.58852   | 1 |
| 22103 | H | 66.23587 | 107.20380 | 61.29205 | 3001.48117  | 3236.21556  | -786.91977  | 1 |
| 22104 | H | 65.09690 | 107.77771 | 62.50570 | -1052.41447 | -1708.69519 | -1646.45472 | 1 |
| 22105 | C | 65.46395 | 108.53951 | 67.91903 | 432.51513   | 39.71933    | -383.54003  | 1 |
| 22106 | O | 65.32453 | 107.62681 | 68.72453 | -229.83387  | -277.09932  | -194.57876  | 1 |
| 22107 | N | 66.22751 | 109.59884 | 67.91036 | -302.42750  | -552.62239  | -1123.15358 | 1 |
| 22108 | H | 66.11927 | 110.31471 | 67.20235 | -62.19578   | -34.23159   | -887.42475  | 1 |
| 22109 | C | 67.25030 | 109.66114 | 68.95329 | -287.96168  | 227.84045   | -104.42813  | 1 |
| 22110 | H | 67.22060 | 110.71642 | 69.22254 | 2082.87037  | -3597.14120 | -684.37280  | 1 |
| 22111 | H | 66.94039 | 108.98027 | 69.77248 | -3006.16811 | -152.72866  | -871.79561  | 1 |
| 22112 | C | 68.76951 | 109.28350 | 68.58466 | 670.81136   | 739.29392   | 436.74982   | 1 |
| 22113 | O | 69.61833 | 109.19149 | 69.48163 | 1028.23078  | -217.72396  | -328.69887  | 1 |
| 22114 | N | 69.01863 | 109.17222 | 67.25652 | 436.86897   | -295.59906  | -736.69576  | 1 |
| 22115 | H | 68.12083 | 109.47129 | 66.83937 | 1354.07177  | -1146.79892 | 767.58296   | 1 |
| 22116 | C | 69.34439 | 107.79765 | 66.86984 | 203.80948   | 129.33601   | -177.32140  | 1 |
| 22117 | H | 68.60984 | 107.25558 | 67.55452 | -918.63973  | -3195.69156 | 174.02240   | 1 |
| 22118 | C | 69.09908 | 107.56082 | 65.28556 | 73.16724    | 83.22966    | 535.01252   | 1 |
| 22119 | H | 70.08143 | 107.45233 | 64.79072 | 239.26752   | 761.53459   | -204.69504  | 1 |
| 22120 | H | 68.75540 | 106.53556 | 65.39475 | -818.90948  | 1133.59541  | -1827.37366 | 1 |
| 22121 | O | 68.34512 | 108.59256 | 64.55470 | -771.02490  | 774.30886   | 407.72486   | 1 |
| 22122 | H | 67.82713 | 108.04315 | 63.86798 | -2251.42670 | 1206.96132  | -1726.36620 | 1 |
| 22123 | C | 70.87588 | 107.40341 | 67.12733 | 564.11015   | -371.07388  | -684.87586  | 1 |
| 22124 | O | 71.88568 | 107.96593 | 66.75404 | 345.52763   | -356.06108  | -152.39738  | 1 |

|       |   |          |           |          |             |             |             |   |
|-------|---|----------|-----------|----------|-------------|-------------|-------------|---|
| 22125 | N | 70.84487 | 106.23598 | 67.76796 | -666.68070  | 959.04401   | 898.24499   | 1 |
| 22126 | H | 69.90702 | 105.85897 | 67.98416 | -2006.01951 | 1567.04511  | -1780.69750 | 1 |
| 22127 | C | 72.08409 | 105.62066 | 68.18604 | -818.40655  | 157.89124   | -242.46497  | 1 |
| 22128 | H | 72.94749 | 106.13524 | 67.67094 | -1538.60738 | -2521.96388 | 563.65295   | 1 |
| 22129 | H | 71.99683 | 105.93742 | 69.23293 | -1882.74548 | 76.39789    | -124.13518  | 1 |
| 22130 | C | 72.17975 | 104.01576 | 67.89093 | -541.48327  | 117.48327   | -238.79478  | 1 |
| 22131 | O | 71.24811 | 103.34371 | 67.50639 | -152.70170  | 305.24034   | 76.74392    | 1 |
| 22132 | N | 73.43337 | 103.60962 | 68.05768 | -315.66478  | -237.45427  | -959.90342  | 1 |
| 22133 | H | 74.14961 | 104.34387 | 68.27095 | -1705.79479 | -2738.85773 | -1053.02069 | 1 |
| 22134 | C | 73.60038 | 102.21283 | 68.32268 | 642.34199   | -183.66641  | -640.15969  | 1 |
| 22135 | H | 72.73115 | 101.73899 | 67.90607 | 2337.73395  | 1263.95232  | 59.58690    | 1 |
| 22136 | C | 75.00402 | 101.85552 | 67.76262 | 583.03539   | 304.40756   | -293.68450  | 1 |
| 22137 | H | 75.43893 | 100.97769 | 68.37707 | -1278.39722 | -2946.05491 | 773.74978   | 1 |
| 22138 | H | 75.72706 | 102.67977 | 67.92636 | 4032.05859  | -1377.60030 | -1272.36814 | 1 |
| 22139 | C | 74.85492 | 101.46205 | 66.21325 | 422.18042   | 414.38818   | 991.06207   | 1 |
| 22140 | O | 75.88335 | 101.33054 | 65.42915 | -35.40940   | 541.36493   | -339.67257  | 1 |
| 22141 | O | 73.67553 | 101.32326 | 65.90475 | -42.02488   | -51.87526   | 109.96061   | 1 |
| 22142 | C | 73.75037 | 101.75699 | 69.94845 | 269.24423   | 664.18531   | 3.98801     | 1 |
| 22143 | O | 73.61120 | 100.58314 | 70.25210 | 605.87784   | -324.19208  | 286.73806   | 1 |
| 22144 | N | 73.99577 | 102.79789 | 70.78798 | 510.69900   | 73.90032    | -1700.36929 | 1 |
| 22145 | H | 73.85459 | 103.68920 | 70.23075 | -2274.39300 | -1772.71685 | -1442.25804 | 1 |
| 22146 | C | 73.17411 | 102.62671 | 71.94678 | 27.06762    | 561.99875   | 60.73680    | 1 |
| 22147 | H | 73.12867 | 101.49865 | 72.17196 | -3793.55628 | -3318.33753 | -1997.54004 | 1 |
| 22148 | C | 73.72954 | 103.59189 | 73.07794 | 328.31880   | 738.69506   | -72.15936   | 1 |
| 22149 | H | 73.11376 | 103.42692 | 73.96495 | 741.39865   | -859.63217  | -1572.80136 | 1 |
| 22150 | H | 73.62709 | 104.65789 | 72.71219 | 759.95958   | 2734.10669  | -138.41387  | 1 |
| 22151 | C | 75.21760 | 103.37297 | 73.41151 | -935.36980  | -112.86199  | -743.25883  | 1 |
| 22152 | C | 75.66126 | 102.09122 | 73.72311 | -293.47785  | -823.07987  | -1047.31791 | 1 |
| 22153 | H | 74.98934 | 101.17798 | 73.80731 | -3502.97707 | -1237.65862 | -1075.15378 | 1 |
| 22154 | C | 77.06091 | 101.95689 | 73.96773 | -987.62577  | -84.77008   | -850.11089  | 1 |
| 22155 | H | 77.35677 | 101.02755 | 74.41238 | -1933.89721 | -466.72379  | 5143.83709  | 1 |
| 22156 | C | 78.02426 | 102.93594 | 73.83244 | 1124.40862  | -1052.91291 | 272.59581   | 1 |
| 22157 | O | 79.42308 | 102.87297 | 74.15555 | 433.23045   | 23.47065    | -581.75558  | 1 |
| 22158 | H | 79.55875 | 101.85001 | 74.07740 | 1339.70971  | -1926.74231 | 2225.44076  | 1 |
| 22159 | C | 76.13049 | 104.42407 | 73.02799 | -524.05620  | 39.00998    | 696.47147   | 1 |
| 22160 | H | 75.77823 | 105.38790 | 72.59092 | 1184.45130  | -1074.43860 | 613.62343   | 1 |
| 22161 | C | 77.42854 | 104.16659 | 73.37267 | -116.72050  | 448.74569   | 295.42516   | 1 |
| 22162 | H | 78.15640 | 104.95709 | 73.19877 | 1000.96535  | 2185.52045  | 529.17790   | 1 |
| 22163 | C | 71.70144 | 103.34607 | 71.74663 | 807.35466   | 137.04324   | 108.32137   | 1 |
| 22164 | O | 71.69746 | 104.57276 | 71.79079 | -65.69585   | 724.21107   | 409.74300   | 1 |
| 22165 | N | 70.69285 | 102.54793 | 71.56612 | -10.48027   | 230.69615   | 776.33771   | 1 |
| 22166 | H | 70.72708 | 101.52171 | 71.59746 | 1918.57665  | 745.73427   | -841.33030  | 1 |
| 22167 | C | 69.39940 | 103.15912 | 71.35556 | 18.49385    | -265.71280  | -993.83772  | 1 |
| 22168 | H | 69.40593 | 104.08954 | 71.97155 | -394.51559  | -5801.85132 | -786.55979  | 1 |
| 22169 | C | 69.35764 | 103.78083 | 69.91748 | 675.84467   | -32.09421   | 19.47540    | 1 |
| 22170 | H | 70.31314 | 104.37965 | 69.72034 | 1884.31451  | -561.71472  | 2008.89712  | 1 |
| 22171 | H | 69.30420 | 102.94000 | 69.18788 | -683.76763  | 2971.10528  | -915.90702  | 1 |
| 22172 | C | 68.23658 | 104.92076 | 69.79147 | 257.62473   | -311.26782  | 54.33827    | 1 |
| 22173 | O | 68.35129 | 105.86114 | 69.02003 | -234.06252  | 490.97741   | 369.37383   | 1 |
| 22174 | O | 67.12372 | 104.53927 | 70.36634 | -585.33780  | -903.17293  | 13.15847    | 1 |
| 22175 | C | 68.44911 | 101.91526 | 71.77356 | 679.35642   | 73.79314    | 874.99629   | 1 |
| 22176 | O | 68.87493 | 100.80286 | 72.08673 | -346.52296  | 468.45283   | 802.94377   | 1 |
| 22177 | N | 67.14749 | 102.22888 | 71.63446 | 1029.91615  | -423.65449  | 249.50990   | 1 |
| 22178 | H | 66.85617 | 103.18012 | 71.27808 | 838.71923   | -2927.80737 | 3160.33567  | 1 |
| 22179 | C | 66.15216 | 101.32520 | 72.20423 | -541.87646  | -232.89443  | 103.20016   | 1 |
| 22180 | H | 66.92252 | 100.73207 | 72.83277 | 734.32116   | -702.99216  | -3764.04042 | 1 |
| 22181 | C | 65.15195 | 102.25523 | 72.92408 | 372.69701   | -1386.29624 | -639.15024  | 1 |
| 22182 | H | 64.17118 | 101.75601 | 73.11785 | -2294.36835 | -1063.00906 | 1152.38896  | 1 |
| 22183 | H | 64.71223 | 102.93130 | 72.13463 | 667.55278   | 2289.82023  | -562.64455  | 1 |
| 22184 | O | 65.77713 | 103.04504 | 74.18267 | -510.82446  | 322.54273   | -43.38158   | 1 |
| 22185 | H | 66.51887 | 103.42394 | 73.76711 | 444.29506   | 1581.01302  | -3659.82934 | 1 |
| 22186 | C | 65.35074 | 100.45401 | 71.06744 | 295.60149   | -602.06362  | 594.56423   | 1 |

|       |   |          |           |          |             |             |             |   |
|-------|---|----------|-----------|----------|-------------|-------------|-------------|---|
| 22187 | O | 64.12452 | 100.38951 | 71.04493 | 94.81367    | -418.13872  | -45.01091   | 1 |
| 22188 | N | 66.28683 | 99.87950  | 70.31497 | 101.10835   | 398.71307   | -302.95023  | 1 |
| 22189 | H | 67.21106 | 100.23823 | 70.61243 | -1432.92088 | -18.51670   | 39.83693    | 1 |
| 22190 | C | 66.07167 | 99.57705  | 68.93144 | 231.53330   | 278.76825   | 126.55839   | 1 |
| 22191 | H | 65.12023 | 98.99244  | 68.97769 | 192.07799   | 3308.74883  | 1100.02910  | 1 |
| 22192 | C | 66.09538 | 100.85906 | 67.96996 | -943.79788  | -273.82221  | 133.99487   | 1 |
| 22193 | H | 66.52106 | 100.65368 | 66.96676 | 1286.78899  | -747.86563  | 1498.35801  | 1 |
| 22194 | H | 65.09384 | 101.34328 | 67.85884 | 4691.71888  | -488.77599  | -1642.58811 | 1 |
| 22195 | C | 67.01694 | 101.85631 | 68.64930 | -482.82177  | 35.16122    | -221.00433  | 1 |
| 22196 | H | 66.57848 | 102.25075 | 69.57651 | 3133.49983  | 37.14727    | 292.31342   | 1 |
| 22197 | H | 67.91043 | 101.29977 | 68.92826 | -472.26726  | -334.13294  | -1842.11956 | 1 |
| 22198 | S | 67.38429 | 103.15262 | 67.36366 | -169.52065  | 96.26085    | 31.24742    | 1 |
| 22199 | C | 65.78629 | 103.99268 | 67.45970 | -78.79307   | -424.89202  | 581.60079   | 1 |
| 22200 | H | 65.19160 | 104.21566 | 68.36909 | -883.35244  | -133.06819  | 1371.66554  | 1 |
| 22201 | H | 65.88019 | 104.96549 | 66.92191 | -1468.46706 | -3627.69690 | 904.04642   | 1 |
| 22202 | H | 65.02651 | 103.48987 | 66.77909 | 4571.34052  | 69.74625    | 624.78981   | 1 |
| 22203 | C | 67.28016 | 98.54148  | 68.42746 | -167.57228  | -79.42715   | 101.76261   | 1 |
| 22204 | O | 68.41446 | 98.96230  | 68.39364 | -486.08646  | -39.10048   | -728.04952  | 1 |
| 22205 | N | 66.78702 | 97.39432  | 68.07244 | -535.85046  | 777.46295   | 523.10853   | 1 |
| 22206 | H | 65.75082 | 97.25672  | 68.12032 | 2680.27079  | -4926.63157 | 1414.36426  | 1 |
| 22207 | C | 67.51463 | 96.25078  | 67.63100 | 286.29917   | -5.23091    | -89.78558   | 1 |
| 22208 | H | 68.29380 | 96.33402  | 68.45397 | 1110.17002  | -1009.83651 | 234.83511   | 1 |
| 22209 | C | 66.68698 | 94.92428  | 67.56532 | -330.37064  | -62.51453   | -312.90950  | 1 |
| 22210 | H | 65.76462 | 94.89448  | 66.96645 | 946.06156   | 1651.23806  | -2482.43100 | 1 |
| 22211 | H | 67.27564 | 94.13947  | 66.98893 | -914.25033  | -1068.51035 | -614.66338  | 1 |
| 22212 | C | 66.40487 | 94.57060  | 69.06678 | 74.53343    | 682.80050   | -443.58725  | 1 |
| 22213 | H | 65.34892 | 94.18861  | 69.25340 | -1217.65805 | 520.93234   | -589.68958  | 1 |
| 22214 | H | 66.66428 | 95.45298  | 69.74368 | -4167.19910 | -2036.60924 | 126.85542   | 1 |
| 22215 | C | 67.31207 | 93.37383  | 69.45680 | 484.04439   | 25.42120    | -264.61531  | 1 |
| 22216 | H | 68.32231 | 93.50701  | 68.89119 | 1764.10561  | 2891.16111  | -28.77259   | 1 |
| 22217 | H | 66.88538 | 92.43540  | 69.03027 | 1270.70667  | 236.48394   | 5.17206     | 1 |
| 22218 | C | 67.43156 | 93.14210  | 71.02437 | 28.16155    | 247.78551   | 539.33889   | 1 |
| 22219 | H | 67.88975 | 92.13983  | 71.20864 | -819.86658  | -3975.65697 | 1989.40363  | 1 |
| 22220 | H | 66.52781 | 93.35690  | 71.65247 | -2232.67676 | -310.28050  | 2004.75233  | 1 |
| 22221 | N | 68.38169 | 94.14082  | 71.51884 | -992.84442  | 124.20623   | -447.31450  | 1 |
| 22222 | H | 68.70602 | 93.92885  | 72.55030 | 1660.58738  | -969.41679  | 1389.59814  | 1 |
| 22223 | H | 69.40263 | 93.95646  | 70.83838 | 736.76524   | -1868.07995 | -1776.45389 | 1 |
| 22224 | H | 68.00419 | 95.15276  | 71.47362 | 2563.15414  | -868.23989  | 866.97800   | 1 |
| 22225 | C | 68.16481 | 96.33464  | 66.10450 | -146.43097  | 493.27244   | -463.52894  | 1 |
| 22226 | O | 67.56995 | 95.87994  | 65.13835 | 539.92052   | -198.57125  | 10.27518    | 1 |
| 22227 | N | 69.24876 | 97.17800  | 66.03425 | 326.66953   | 309.34428   | 29.07119    | 1 |
| 22228 | H | 69.46737 | 97.46486  | 67.02479 | 16.60763    | 1875.63393  | 1190.20878  | 1 |
| 22229 | C | 70.40291 | 96.64849  | 65.31522 | 799.29664   | -61.86146   | -394.47617  | 1 |
| 22230 | H | 70.50312 | 95.58157  | 65.57770 | -3640.78174 | -145.27753  | -2092.48318 | 1 |
| 22231 | C | 70.14505 | 96.82395  | 63.77600 | 168.12200   | -1073.55474 | -111.51807  | 1 |
| 22232 | H | 69.15645 | 96.45680  | 63.55302 | -1642.23527 | 836.88757   | -2026.21559 | 1 |
| 22233 | H | 70.11119 | 97.90569  | 63.49105 | -31.94289   | 398.42254   | 2765.40740  | 1 |
| 22234 | C | 71.24318 | 96.10267  | 62.97075 | 453.15307   | -648.76162  | 614.63765   | 1 |
| 22235 | H | 70.89222 | 95.27574  | 62.36507 | 2013.98855  | -1784.99409 | 703.74698   | 1 |
| 22236 | H | 72.00407 | 95.65939  | 63.62140 | 1937.49803  | -1871.46429 | -822.87318  | 1 |
| 22237 | C | 71.85978 | 97.15564  | 61.90395 | -534.35377  | -408.00131  | -241.21357  | 1 |
| 22238 | O | 72.95972 | 96.79370  | 61.40674 | -311.61714  | 409.72966   | 115.30915   | 1 |
| 22239 | O | 71.16679 | 98.02796  | 61.40429 | 270.30539   | -676.92400  | -432.18561  | 1 |
| 22240 | C | 71.64975 | 97.57587  | 65.77987 | 182.63322   | 186.91580   | -198.01951  | 1 |
| 22241 | O | 72.77069 | 97.19936  | 65.43443 | 539.38666   | -165.87298  | -592.24091  | 1 |
| 22242 | N | 71.33807 | 98.71362  | 66.33783 | 292.48071   | -33.81876   | 625.25264   | 1 |
| 22243 | C | 70.61903 | 99.74160  | 65.58233 | -215.30874  | 219.84504   | -773.61298  | 1 |
| 22244 | H | 69.60730 | 99.32981  | 65.21889 | -548.77021  | 1039.60351  | -2363.61483 | 1 |
| 22245 | H | 71.24961 | 99.93933  | 64.65947 | 4676.08456  | -958.06282  | -2166.04140 | 1 |
| 22246 | C | 72.11081 | 99.19124  | 67.48047 | 94.22049    | 529.89222   | 882.84103   | 1 |
| 22247 | H | 72.93012 | 99.61307  | 66.92042 | 628.33704   | 1196.24977  | 3349.11657  | 1 |
| 22248 | C | 71.02690 | 100.27142 | 67.91187 | -92.20086   | 146.10766   | 137.13787   | 1 |

|       |   |          |           |          |             |             |             |   |
|-------|---|----------|-----------|----------|-------------|-------------|-------------|---|
| 22249 | H | 71.39632 | 101.04348 | 68.65427 | -1716.93128 | -1052.88945 | 1714.02260  | 1 |
| 22250 | H | 70.20973 | 99.87873  | 68.47607 | 2283.62708  | -813.09823  | 85.97251    | 1 |
| 22251 | C | 70.54888 | 100.96355 | 66.57546 | -600.16657  | -839.50224  | 120.45311   | 1 |
| 22252 | H | 71.24558 | 101.82692 | 66.34215 | -2997.04170 | -248.19097  | -23.35501   | 1 |
| 22253 | H | 69.59791 | 101.53376 | 66.61451 | 1928.81930  | 1510.05615  | -1296.16545 | 1 |
| 22254 | C | 72.51241 | 98.01635  | 68.50623 | -209.10243  | -148.06069  | 568.40513   | 1 |
| 22255 | O | 72.04185 | 98.09208  | 69.62245 | 59.03163    | 563.06569   | 166.29290   | 1 |
| 22256 | N | 73.33525 | 97.05618  | 67.99673 | -227.48849  | 524.78220   | -44.01293   | 1 |
| 22257 | H | 73.45768 | 97.06663  | 66.93414 | -1874.00439 | -2923.31436 | 189.07034   | 1 |
| 22258 | C | 73.13725 | 95.66976  | 68.47420 | 747.94010   | 620.91487   | 726.90196   | 1 |
| 22259 | H | 72.53488 | 95.83347  | 69.36323 | 2947.01929  | -3574.96871 | 2445.73734  | 1 |
| 22260 | C | 72.32061 | 94.83553  | 67.45012 | -468.56504  | 338.98483   | 45.44222    | 1 |
| 22261 | H | 72.33145 | 95.31449  | 66.46380 | -500.25505  | -269.02671  | -651.88689  | 1 |
| 22262 | H | 72.95488 | 93.96600  | 67.13831 | 2565.05168  | 656.88387   | -376.80190  | 1 |
| 22263 | S | 70.66143 | 94.44377  | 68.13218 | -282.09489  | -54.45617   | 105.31302   | 1 |
| 22264 | C | 74.59810 | 94.98370  | 68.60226 | 77.56685    | 855.11127   | -104.45170  | 1 |
| 22265 | O | 74.59285 | 93.81282  | 68.91736 | 107.37575   | -338.64561  | 51.24106    | 1 |
| 22266 | N | 75.65179 | 95.77290  | 68.34520 | -93.13121   | -870.00563  | 623.20201   | 1 |
| 22267 | H | 75.46018 | 96.82945  | 68.15728 | -142.49927  | -1672.88451 | 1275.03039  | 1 |
| 22268 | C | 76.93226 | 95.23783  | 68.74593 | 733.97847   | -315.23402  | -333.74696  | 1 |
| 22269 | H | 76.75807 | 94.21508  | 68.32334 | 300.85770   | 1758.50346  | 53.17546    | 1 |
| 22270 | C | 78.15201 | 96.01943  | 68.11890 | -541.99087  | 844.32294   | 330.01519   | 1 |
| 22271 | H | 79.13995 | 95.73967  | 68.57750 | -1416.78998 | 2801.44367  | 729.78335   | 1 |
| 22272 | H | 78.09607 | 97.04316  | 68.52598 | -3674.46407 | -3122.06972 | -171.79205  | 1 |
| 22273 | C | 78.34537 | 95.96099  | 66.59071 | -301.46825  | 1113.32919  | 172.52928   | 1 |
| 22274 | C | 79.43392 | 95.25568  | 65.98742 | 431.78039   | -201.38613  | 317.75306   | 1 |
| 22275 | H | 80.19440 | 94.74720  | 66.71907 | -3689.77943 | 1669.02700  | -579.43081  | 1 |
| 22276 | C | 79.53602 | 95.45012  | 64.57774 | -1225.51426 | -46.29287   | -518.41546  | 1 |
| 22277 | H | 80.38875 | 94.94894  | 64.09731 | -867.97499  | -1668.91172 | 3064.84441  | 1 |
| 22278 | C | 78.50047 | 96.12487  | 63.86114 | -1260.03735 | 646.64666   | -321.82665  | 1 |
| 22279 | H | 78.58546 | 96.19342  | 62.76252 | 1345.24987  | 1493.21095  | -318.98140  | 1 |
| 22280 | C | 77.25477 | 96.54754  | 65.85475 | -3.60502    | -135.76860  | 530.40874   | 1 |
| 22281 | H | 76.38020 | 96.95509  | 66.42850 | -148.50144  | -1049.48902 | 98.93838    | 1 |
| 22282 | C | 77.38065 | 96.68947  | 64.44534 | -721.87170  | -153.82688  | 210.83130   | 1 |
| 22283 | H | 76.68364 | 97.25626  | 63.79782 | 839.86685   | -1639.87470 | 428.92253   | 1 |
| 22284 | C | 76.98528 | 95.09370  | 70.36395 | 0.84441     | 558.93081   | -120.36275  | 1 |
| 22285 | O | 77.19785 | 96.15296  | 70.96578 | 4.10333     | -462.50164  | -415.24953  | 1 |
| 22286 | N | 76.98035 | 93.87593  | 70.92353 | -703.49448  | 618.00576   | 30.55308    | 1 |
| 22287 | H | 76.75809 | 93.11741  | 70.29817 | 470.34918   | 2201.92350  | -993.74504  | 1 |
| 22288 | C | 76.67904 | 93.91437  | 72.30005 | -19.93765   | 1035.89722  | -413.05866  | 1 |
| 22289 | H | 75.71446 | 94.48619  | 72.42833 | 891.60984   | -2319.08730 | 1076.51204  | 1 |
| 22290 | C | 76.50681 | 92.42695  | 72.80817 | -650.52924  | 490.18829   | 724.04291   | 1 |
| 22291 | H | 77.32364 | 92.13914  | 73.50288 | -1594.31311 | 2060.69668  | 2664.62397  | 1 |
| 22292 | H | 76.57909 | 91.63708  | 72.05040 | 148.09655   | 2713.63634  | 168.97060   | 1 |
| 22293 | C | 75.13963 | 92.34143  | 73.54730 | -203.80608  | 549.92198   | -447.13185  | 1 |
| 22294 | H | 75.20043 | 91.97860  | 74.58501 | -593.21431  | -9.02865    | -454.94197  | 1 |
| 22295 | H | 74.89675 | 93.46853  | 73.67475 | -419.78167  | 996.43328   | 255.39724   | 1 |
| 22296 | C | 74.16028 | 91.50244  | 72.60444 | -925.81314  | -522.99924  | 422.25431   | 1 |
| 22297 | H | 74.21645 | 90.40590  | 72.74155 | 1530.47555  | 4277.72363  | 1910.31438  | 1 |
| 22298 | H | 74.13747 | 91.84391  | 71.51065 | -814.29965  | -594.98533  | 2049.50397  | 1 |
| 22299 | N | 73.05113 | 91.87387  | 73.35230 | 27.78327    | -318.55262  | -783.46875  | 1 |
| 22300 | H | 73.01480 | 92.83566  | 73.73246 | 1874.75886  | 1272.77129  | 768.98630   | 1 |
| 22301 | C | 72.01390 | 91.12938  | 73.47915 | 93.87290    | -595.47716  | -1.00476    | 1 |
| 22302 | N | 71.98077 | 89.86554  | 72.92431 | 312.97585   | -582.54509  | -287.34985  | 1 |
| 22303 | H | 72.75519 | 89.48798  | 72.44665 | 3057.12186  | 1298.38810  | -913.28332  | 1 |
| 22304 | H | 71.13377 | 89.19329  | 72.89013 | -220.09355  | -3355.47125 | -212.23372  | 1 |
| 22305 | N | 71.01439 | 91.89743  | 74.14788 | 27.49430    | -495.39465  | -348.62908  | 1 |
| 22306 | H | 71.02448 | 92.85684  | 74.56465 | -2060.69446 | -1618.42460 | -1490.28413 | 1 |
| 22307 | H | 70.11082 | 91.42653  | 74.36856 | 3280.85096  | 1837.62953  | 3150.04506  | 1 |
| 22308 | C | 77.59418 | 94.71945  | 73.35142 | 471.99439   | -515.30421  | -807.65417  | 1 |
| 22309 | O | 77.10123 | 94.71283  | 74.47275 | -230.74872  | -594.55525  | 231.07873   | 1 |
| 22310 | N | 78.83655 | 95.12847  | 72.99814 | -393.21023  | -528.74412  | -282.88272  | 1 |

|       |   |          |          |          |             |             |             |   |
|-------|---|----------|----------|----------|-------------|-------------|-------------|---|
| 22311 | H | 78.85436 | 95.14303 | 71.97351 | -2779.42994 | -774.64615  | 3257.32704  | 1 |
| 22312 | C | 79.66390 | 95.79330 | 73.96430 | -845.18396  | -538.11611  | -800.46145  | 1 |
| 22313 | H | 80.38238 | 96.46957 | 73.38714 | -1749.61991 | 3209.73499  | -730.46853  | 1 |
| 22314 | C | 78.72155 | 96.66811 | 74.97967 | 638.51513   | -16.50620   | -287.42856  | 1 |
| 22315 | H | 77.93677 | 96.11971 | 75.58295 | 4336.30454  | -657.76058  | 1067.79718  | 1 |
| 22316 | H | 79.39651 | 97.19767 | 75.76507 | 1276.34625  | 719.66649   | 120.42520   | 1 |
| 22317 | C | 78.06392 | 97.74015 | 74.09812 | -22.64925   | -277.75671  | 501.57712   | 1 |
| 22318 | H | 77.15255 | 98.17695 | 74.54981 | -578.90694  | -2689.14706 | -984.05266  | 1 |
| 22319 | H | 77.70701 | 97.28366 | 73.17933 | 1232.55685  | 184.76087   | -541.08678  | 1 |
| 22320 | C | 79.13766 | 98.87502 | 73.76375 | -402.02409  | 140.27303   | 129.16378   | 1 |
| 22321 | O | 78.62597 | 99.64523 | 72.90678 | -15.09131   | -204.13398  | 9.78192     | 1 |
| 22322 | O | 80.27459 | 99.03123 | 74.19942 | 365.46832   | 289.58511   | 477.29733   | 1 |
| 22323 | C | 80.41789 | 94.64884 | 74.80311 | -782.87886  | 603.05048   | -491.13690  | 1 |
| 22324 | O | 80.23616 | 93.42620 | 74.62090 | -202.68241  | 145.81423   | 239.90962   | 1 |
| 22325 | N | 81.19903 | 95.18264 | 75.80637 | 132.41876   | 563.24695   | 761.95737   | 1 |
| 22326 | H | 80.93440 | 96.13014 | 75.96085 | 3061.32185  | 1571.02596  | -549.97797  | 1 |
| 22327 | C | 81.28799 | 94.36364 | 76.98271 | 245.27245   | -113.51313  | 334.57349   | 1 |
| 22328 | H | 81.01022 | 93.35306 | 76.79779 | 3385.66827  | 2761.68762  | -1226.44279 | 1 |
| 22329 | C | 82.71839 | 94.64609 | 77.66894 | 151.14313   | 1337.98551  | -193.29157  | 1 |
| 22330 | H | 82.75879 | 95.60566 | 78.29234 | -3.83268    | 3329.72928  | 1349.46261  | 1 |
| 22331 | H | 83.47574 | 94.76076 | 76.91985 | 1359.26143  | 463.76776   | 1414.31970  | 1 |
| 22332 | C | 83.09594 | 93.52595 | 78.62541 | -1000.73021 | -309.20613  | -27.88216   | 1 |
| 22333 | H | 82.44513 | 93.62126 | 79.52423 | 1206.64680  | -2238.75717 | -352.86769  | 1 |
| 22334 | H | 84.16959 | 93.41921 | 78.93948 | 857.65943   | 619.68765   | -575.38417  | 1 |
| 22335 | C | 82.78318 | 92.05651 | 77.98991 | -710.02551  | 1701.49459  | 53.91173    | 1 |
| 22336 | O | 83.47119 | 91.56254 | 77.04300 | 486.93265   | -112.06207  | 509.72799   | 1 |
| 22337 | O | 81.78888 | 91.50147 | 78.51323 | -673.38214  | 140.82539   | -12.44753   | 1 |
| 22338 | C | 80.25284 | 95.08831 | 77.99853 | 350.63382   | 316.19913   | -469.42710  | 1 |
| 22339 | O | 79.90177 | 96.22627 | 77.75764 | -199.16921  | -257.35412  | -665.06052  | 1 |
| 22340 | N | 79.96341 | 94.32098 | 79.05225 | 132.86537   | -164.19290  | 438.73745   | 1 |
| 22341 | H | 80.38680 | 93.41225 | 79.20324 | -1649.57367 | -690.57233  | 1323.23512  | 1 |
| 22342 | C | 79.53641 | 95.05183 | 80.17946 | 307.18794   | 84.83558    | 83.71776    | 1 |
| 22343 | H | 79.00059 | 95.95108 | 79.77374 | 321.49831   | 2594.88741  | 2892.63886  | 1 |
| 22344 | C | 78.72755 | 93.96290 | 80.99036 | 28.52114    | -610.20425  | 1133.02996  | 1 |
| 22345 | H | 79.42311 | 93.04090 | 80.92090 | -2597.10695 | -3489.32431 | 23.72008    | 1 |
| 22346 | H | 77.84715 | 93.74979 | 80.38666 | 265.30380   | -2972.42125 | 3180.04974  | 1 |
| 22347 | C | 78.26593 | 94.36099 | 82.41923 | 252.28895   | 323.78700   | 203.76654   | 1 |
| 22348 | O | 78.03875 | 95.50118 | 82.80531 | -221.05808  | -96.56461   | 572.88062   | 1 |
| 22349 | N | 78.30958 | 93.21969 | 83.17737 | -665.70313  | 303.89784   | 229.69144   | 1 |
| 22350 | H | 78.61398 | 92.33960 | 82.80526 | -894.64582  | 2830.40034  | -2384.97551 | 1 |
| 22351 | H | 78.45228 | 93.35825 | 84.22378 | -430.99430  | -2118.48981 | 984.16666   | 1 |
| 22352 | C | 80.91583 | 95.39803 | 81.05206 | -47.80238   | 296.83070   | 436.67230   | 1 |
| 22353 | O | 81.67000 | 94.47230 | 81.43349 | -22.36846   | -41.93419   | 586.86883   | 1 |
| 22354 | N | 80.99869 | 96.60277 | 81.46521 | -140.09218  | 204.57279   | -194.29044  | 1 |
| 22355 | H | 80.20872 | 97.22769 | 81.33754 | 1750.73054  | -771.00596  | -2117.36454 | 1 |
| 22356 | C | 82.22776 | 97.13981 | 81.88861 | 364.32280   | -143.04340  | 817.72445   | 1 |
| 22357 | H | 83.07895 | 96.60390 | 81.47703 | -1614.99963 | -1690.72510 | 5989.55769  | 1 |
| 22358 | C | 82.26496 | 98.68047 | 81.61036 | -1270.27788 | -1160.01515 | 284.65353   | 1 |
| 22359 | H | 83.24005 | 99.08983 | 81.85735 | -278.81825  | -2083.99091 | -1110.96058 | 1 |
| 22360 | H | 82.13510 | 98.93763 | 80.52186 | -671.94062  | 1491.78284  | -68.89966   | 1 |
| 22361 | H | 81.51238 | 99.13740 | 82.21780 | 1928.03804  | -356.85769  | 2982.90271  | 1 |
| 22362 | C | 82.23221 | 96.96219 | 83.53472 | -400.61903  | 457.87662   | 835.86616   | 1 |
| 22363 | O | 82.41952 | 97.95108 | 84.20573 | 407.09872   | 1063.19371  | -987.66173  | 1 |
| 22364 | N | 82.17112 | 95.62396 | 83.82587 | -424.74437  | 73.67053    | 199.61632   | 1 |
| 22365 | H | 82.06495 | 94.90531 | 83.00221 | 556.82153   | -892.07735  | 322.92928   | 1 |
| 22366 | C | 81.51571 | 95.27352 | 85.08439 | -30.03271   | -906.62545  | 655.12830   | 1 |
| 22367 | H | 81.78759 | 96.04643 | 85.86384 | -2161.00299 | 63.96754    | -1295.10103 | 1 |
| 22368 | C | 79.98951 | 95.43966 | 84.65963 | 321.79266   | -284.68887  | 1214.57119  | 1 |
| 22369 | H | 79.87853 | 94.76430 | 83.72306 | -508.21724  | -114.33590  | -87.42485   | 1 |
| 22370 | H | 79.69817 | 96.45203 | 84.26208 | -935.61930  | 491.65174   | 369.16449   | 1 |
| 22371 | C | 78.94609 | 95.18440 | 85.79767 | 389.55949   | 79.17918    | -718.68842  | 1 |
| 22372 | O | 79.35258 | 94.93363 | 86.95186 | -570.68977  | -603.14760  | 387.33071   | 1 |

|       |   |          |          |          |             |             |             |   |
|-------|---|----------|----------|----------|-------------|-------------|-------------|---|
| 22373 | N | 77.65814 | 95.34088 | 85.42976 | -833.21572  | 497.44495   | -228.19588  | 1 |
| 22374 | H | 77.40881 | 95.56742 | 84.47518 | -526.34698  | 4528.03031  | 2597.76878  | 1 |
| 22375 | H | 76.86538 | 95.29554 | 86.12672 | 673.16874   | 824.95754   | 1570.08820  | 1 |
| 22376 | C | 81.98558 | 93.73546 | 85.31437 | -807.20313  | -643.55209  | 970.28297   | 1 |
| 22377 | O | 83.04726 | 93.27017 | 84.93516 | -71.56021   | 651.11852   | -166.44697  | 1 |
| 22378 | N | 81.07890 | 93.04769 | 85.98814 | 801.81181   | 878.21457   | -193.50273  | 1 |
| 22379 | H | 80.32912 | 93.67067 | 86.50664 | 1372.97589  | -1177.71083 | -686.02769  | 1 |
| 22380 | C | 81.38607 | 91.66198 | 86.21177 | 159.72743   | 88.51635    | -765.70257  | 1 |
| 22381 | H | 82.31364 | 91.64726 | 86.82422 | 2329.24896  | -2175.06778 | 1397.38628  | 1 |
| 22382 | C | 80.13560 | 91.00711 | 87.02506 | -263.78843  | 105.11731   | 527.45722   | 1 |
| 22383 | H | 80.03762 | 91.53648 | 88.00393 | -2071.99346 | 424.95396   | -629.77990  | 1 |
| 22384 | H | 80.38062 | 89.91899 | 87.20763 | 1216.79654  | 586.20971   | 509.15200   | 1 |
| 22385 | C | 78.84776 | 91.17080 | 86.23028 | -68.30199   | -1065.83915 | 331.50352   | 1 |
| 22386 | C | 78.68650 | 90.50794 | 84.96005 | -320.30236  | -407.22916  | -396.21381  | 1 |
| 22387 | H | 79.54939 | 89.90549 | 84.47280 | -598.05135  | -3164.43161 | 140.89814   | 1 |
| 22388 | C | 77.42141 | 90.49932 | 84.34219 | 126.00204   | -468.30504  | -674.12423  | 1 |
| 22389 | H | 77.22443 | 89.84333 | 83.40669 | -603.87635  | -6286.16358 | 39.39800    | 1 |
| 22390 | C | 76.47285 | 91.27432 | 84.99969 | -1057.94698 | 101.30436   | -172.83106  | 1 |
| 22391 | H | 75.47210 | 91.31378 | 84.62659 | 77.11726    | -722.85971  | 315.06923   | 1 |
| 22392 | C | 77.87302 | 92.05167 | 86.81669 | 908.63810   | -319.88872  | 158.30874   | 1 |
| 22393 | H | 78.14229 | 92.59117 | 87.73974 | -2557.65290 | -1443.93564 | 388.04233   | 1 |
| 22394 | C | 76.63203 | 92.10608 | 86.15526 | -475.17737  | 404.24413   | 824.80646   | 1 |
| 22395 | H | 75.80817 | 92.82646 | 86.50446 | -1830.47193 | -987.15679  | -989.17989  | 1 |
| 22396 | C | 81.79936 | 90.68119 | 85.00536 | 530.57182   | -702.90118  | -541.94291  | 1 |
| 22397 | O | 82.42048 | 89.65151 | 85.38368 | 419.78408   | -3.17366    | -597.14936  | 1 |
| 22398 | N | 81.55677 | 91.07937 | 83.76087 | 761.87040   | 126.68849   | -102.32861  | 1 |
| 22399 | H | 81.22648 | 92.02664 | 83.84078 | -744.19106  | 1427.48292  | -400.58891  | 1 |
| 22400 | C | 82.09688 | 90.33689 | 82.68277 | -376.38397  | 363.20087   | -33.98443   | 1 |
| 22401 | H | 81.76671 | 89.25302 | 82.82425 | -3267.25094 | -1130.63361 | -2709.85688 | 1 |
| 22402 | C | 81.52070 | 90.90030 | 81.34256 | 359.64567   | -35.61022   | 1038.78083  | 1 |
| 22403 | H | 82.05452 | 90.34517 | 80.57221 | -240.23093  | 307.61934   | 287.99172   | 1 |
| 22404 | H | 81.69011 | 92.03277 | 81.23922 | -361.21610  | 1687.48344  | 1850.66505  | 1 |
| 22405 | C | 80.02565 | 90.54571 | 81.13150 | -12.20987   | 357.73852   | 71.07505    | 1 |
| 22406 | O | 79.26261 | 90.29352 | 82.05739 | -319.06452  | -395.45011  | 435.07794   | 1 |
| 22407 | N | 79.67985 | 90.64995 | 79.83618 | -329.23722  | 45.75163    | -338.27852  | 1 |
| 22408 | H | 80.53785 | 90.80758 | 79.19384 | 852.76983   | -820.80132  | 295.92445   | 1 |
| 22409 | H | 78.73382 | 90.91478 | 79.42440 | 2639.86734  | -2490.23626 | -1466.40782 | 1 |
| 22410 | C | 83.77264 | 90.42247 | 82.65837 | -741.53365  | -395.42518  | 179.75408   | 1 |
| 22411 | O | 84.39651 | 89.73581 | 81.90978 | -74.95642   | -261.62842  | 511.27501   | 1 |
| 22412 | N | 84.24303 | 91.46678 | 83.35653 | -406.91905  | 327.54190   | 300.21497   | 1 |
| 22413 | H | 83.59391 | 91.96731 | 83.97506 | 4590.27665  | 1010.95566  | -82.52750   | 1 |
| 22414 | C | 85.66528 | 91.49586 | 83.44545 | 93.65002    | 584.24736   | 280.71566   | 1 |
| 22415 | H | 86.26370 | 90.92929 | 82.58503 | 568.91685   | 352.68434   | 352.18378   | 1 |
| 22416 | C | 85.90824 | 93.06162 | 83.54150 | 671.19807   | -411.14144  | 206.31780   | 1 |
| 22417 | H | 86.99527 | 93.27906 | 83.57319 | -2393.23669 | -1381.37217 | 573.27916   | 1 |
| 22418 | H | 85.51110 | 93.43857 | 84.54969 | 120.63387   | -1865.66651 | 471.89646   | 1 |
| 22419 | C | 85.36653 | 93.84876 | 82.27641 | -51.98362   | 24.83280    | -429.33119  | 1 |
| 22420 | H | 84.27085 | 93.96659 | 82.37796 | 1351.13079  | -228.54760  | 746.22771   | 1 |
| 22421 | H | 85.67329 | 93.23069 | 81.38367 | 55.82468    | -1668.81841 | -499.54462  | 1 |
| 22422 | C | 85.87095 | 95.29053 | 82.02038 | 507.08760   | -1180.32107 | 141.12938   | 1 |
| 22423 | H | 86.99467 | 95.32951 | 82.09009 | 188.06961   | 1170.36096  | 1554.18115  | 1 |
| 22424 | H | 85.39006 | 96.04132 | 82.67977 | -2184.54855 | -2766.22374 | -1146.78317 | 1 |
| 22425 | C | 85.46264 | 95.65284 | 80.47265 | -470.09368  | 547.08354   | -138.25465  | 1 |
| 22426 | H | 84.43969 | 95.21124 | 80.24889 | 546.03886   | 1353.24138  | 2296.64612  | 1 |
| 22427 | H | 85.43756 | 96.75422 | 80.20742 | -1276.89031 | -787.70605  | -958.02587  | 1 |
| 22428 | N | 86.43741 | 95.12376 | 79.59301 | -66.35280   | 686.66940   | -994.19739  | 1 |
| 22429 | H | 87.41933 | 95.06166 | 79.75073 | 155.60772   | 1487.42556  | 1477.30016  | 1 |
| 22430 | H | 86.22885 | 94.14952 | 79.28000 | -471.10017  | -2520.32351 | 2413.25851  | 1 |
| 22431 | H | 82.33638 | 97.15049 | 79.75446 | 1180.23863  | 397.30015   | -541.72232  | 1 |
| 22432 | C | 86.21710 | 90.97046 | 84.89859 | -547.09997  | 31.62837    | 285.23759   | 1 |
| 22433 | O | 87.42689 | 90.92744 | 85.17758 | 880.09404   | -10.75917   | -22.50758   | 1 |
| 22434 | N | 85.23261 | 90.54869 | 85.73742 | -307.52004  | -47.66373   | 89.72077    | 1 |

|       |   |          |          |          |             |             |             |   |
|-------|---|----------|----------|----------|-------------|-------------|-------------|---|
| 22435 | H | 84.33354 | 90.59697 | 85.22443 | -3134.75807 | 3744.90075  | 384.93847   | 1 |
| 22436 | C | 85.46402 | 90.37400 | 87.19070 | 273.82240   | -30.23338   | -539.52154  | 1 |
| 22437 | H | 86.54333 | 90.40779 | 87.19448 | -963.23670  | 23.59350    | 590.70537   | 1 |
| 22438 | C | 84.90160 | 91.64905 | 87.80121 | -387.70205  | -142.30809  | 440.64591   | 1 |
| 22439 | H | 84.23833 | 92.03449 | 87.07059 | -1206.27676 | 2820.90470  | -1999.80496 | 1 |
| 22440 | C | 84.13390 | 91.48142 | 89.09493 | -661.78409  | -102.09969  | 659.57122   | 1 |
| 22441 | H | 84.13212 | 92.46606 | 89.67547 | 1915.99031  | -1927.46977 | -4033.81104 | 1 |
| 22442 | H | 84.47548 | 90.60888 | 89.75094 | 1062.79827  | -183.29642  | 2216.62970  | 1 |
| 22443 | H | 82.99372 | 91.22942 | 88.88161 | -394.52049  | 1623.68602  | -168.69235  | 1 |
| 22444 | C | 85.84509 | 92.79359 | 87.96260 | -385.57064  | -235.10417  | 663.83925   | 1 |
| 22445 | H | 86.56488 | 93.02472 | 87.03986 | 241.39968   | -1258.80969 | -275.27290  | 1 |
| 22446 | H | 85.19736 | 93.76116 | 88.02391 | -2195.24364 | 980.68477   | 1532.47116  | 1 |
| 22447 | C | 86.76719 | 92.53530 | 89.27960 | -207.69340  | -1330.67564 | 324.07684   | 1 |
| 22448 | H | 87.10120 | 93.45001 | 89.78720 | 421.98278   | 1786.38197  | 1072.15093  | 1 |
| 22449 | H | 86.31600 | 91.85913 | 90.07478 | -725.54306  | -5058.74660 | -1607.70255 | 1 |
| 22450 | H | 87.68663 | 91.93452 | 88.87668 | 1411.76495  | 1124.08944  | -2527.37077 | 1 |
| 22451 | C | 84.87118 | 88.94213 | 87.71093 | -896.51304  | -246.73407  | 382.23841   | 1 |
| 22452 | O | 85.65784 | 88.17975 | 88.32350 | 193.37737   | -894.78716  | -122.67415  | 1 |
| 22453 | N | 83.58619 | 88.77567 | 87.59792 | 1093.43966  | 553.36882   | -107.58249  | 1 |
| 22454 | H | 83.09825 | 89.47047 | 86.94994 | -64.17769   | 879.53991   | 797.02767   | 1 |
| 22455 | C | 83.07007 | 87.47407 | 87.80493 | -622.92479  | -807.60729  | 1011.55303  | 1 |
| 22456 | H | 83.64315 | 87.06201 | 88.75101 | -492.12987  | -1986.17219 | -182.20486  | 1 |
| 22457 | C | 81.46714 | 87.49078 | 87.83321 | -288.91300  | 583.92117   | -957.42825  | 1 |
| 22458 | H | 81.05347 | 87.70334 | 86.85512 | -2633.86706 | -1175.72458 | 3198.18215  | 1 |
| 22459 | H | 81.22925 | 88.36413 | 88.43554 | 105.63844   | -118.35809  | -821.74968  | 1 |
| 22460 | C | 80.87235 | 86.21378 | 88.43231 | 15.92383    | 275.06605   | -149.12959  | 1 |
| 22461 | C | 80.08906 | 85.45832 | 87.51308 | -366.79674  | -54.20568   | 144.96127   | 1 |
| 22462 | H | 80.15697 | 85.63583 | 86.43094 | 1529.33675  | 1170.75891  | 1719.60662  | 1 |
| 22463 | C | 79.40000 | 84.34180 | 88.00890 | 144.47270   | -887.62377  | -155.87244  | 1 |
| 22464 | H | 78.84100 | 83.76780 | 87.28590 | -328.20360  | -2959.33355 | 1021.19185  | 1 |
| 22465 | C | 79.47800 | 83.93480 | 89.35490 | -642.70599  | 451.43486   | -466.81034  | 1 |
| 22466 | H | 78.96900 | 83.02580 | 89.64090 | -635.63027  | -442.27836  | 3049.76432  | 1 |
| 22467 | C | 80.89855 | 85.83743 | 89.79786 | -319.02389  | 497.77724   | -89.36843   | 1 |
| 22468 | H | 81.49328 | 86.49872 | 90.45860 | 2493.60593  | -50.99685   | -1567.40258 | 1 |
| 22469 | C | 80.30600 | 84.65280 | 90.26790 | 21.13127    | -626.18118  | -664.90332  | 1 |
| 22470 | H | 80.48200 | 84.28180 | 91.26690 | -2377.19387 | -1194.15714 | -1686.65329 | 1 |
| 22471 | C | 83.60197 | 86.45064 | 86.63845 | -25.77900   | 838.22299   | -149.54524  | 1 |
| 22472 | O | 83.97917 | 85.31982 | 86.89383 | -220.54744  | 494.03394   | -217.86666  | 1 |
| 22473 | N | 83.51588 | 87.05347 | 85.44948 | -957.47487  | -435.22926  | 748.28055   | 1 |
| 22474 | H | 83.22605 | 88.04717 | 85.30736 | 1465.79316  | 807.63552   | 1049.39588  | 1 |
| 22475 | C | 83.56315 | 86.17126 | 84.34821 | 291.68538   | -773.96385  | 106.22598   | 1 |
| 22476 | H | 83.09334 | 85.22339 | 84.74479 | -685.17615  | 258.46170   | 1857.47454  | 1 |
| 22477 | C | 82.81127 | 86.86743 | 83.08177 | -10.73207   | 1076.77546  | -126.45154  | 1 |
| 22478 | H | 82.91985 | 86.28725 | 82.13169 | 358.26945   | 1506.66533  | 1182.35941  | 1 |
| 22479 | H | 83.25034 | 87.87231 | 82.95281 | -317.90326  | -1053.25903 | -620.00622  | 1 |
| 22480 | C | 81.39895 | 87.06507 | 83.49578 | -62.06920   | -473.53789  | -335.28456  | 1 |
| 22481 | H | 81.36392 | 87.78324 | 84.32997 | -647.83008  | -1119.75730 | -1765.66262 | 1 |
| 22482 | C | 80.49944 | 87.53490 | 82.33985 | 6.60934     | 360.03783   | -361.21402  | 1 |
| 22483 | H | 79.63077 | 88.06057 | 82.77632 | -2819.75041 | -2157.01096 | 861.67884   | 1 |
| 22484 | H | 80.12548 | 86.62192 | 81.72971 | -7.59899    | 46.03381    | -807.29065  | 1 |
| 22485 | H | 81.04179 | 88.19123 | 81.57115 | -1774.73727 | -27.37210   | 4128.31565  | 1 |
| 22486 | C | 80.73265 | 85.83593 | 84.02411 | -169.16290  | 284.12977   | -456.20011  | 1 |
| 22487 | H | 80.89050 | 84.96342 | 83.29340 | 286.52784   | 585.67608   | 209.20981   | 1 |
| 22488 | H | 79.63673 | 85.97120 | 84.28645 | -2332.99081 | -1367.29310 | -1473.82913 | 1 |
| 22489 | H | 81.21310 | 85.47940 | 85.01243 | 535.73665   | 1440.12412  | 2222.71504  | 1 |
| 22490 | C | 84.97050 | 85.42580 | 84.08910 | -618.42842  | 453.49170   | 354.66888   | 1 |
| 22491 | O | 84.87300 | 84.21580 | 83.92590 | 484.78819   | -232.13709  | 572.07571   | 1 |
| 22492 | N | 86.12930 | 86.17096 | 84.09543 | 153.90626   | 45.96841    | -849.03839  | 1 |
| 22493 | C | 86.12880 | 87.62375 | 84.01711 | 358.39009   | -117.03198  | -430.31917  | 1 |
| 22494 | H | 85.46759 | 88.00802 | 84.77338 | -1591.87877 | -343.94192  | -1019.99035 | 1 |
| 22495 | H | 85.84027 | 87.96422 | 82.96547 | -764.50073  | 733.71711   | 1325.72909  | 1 |
| 22496 | C | 87.36441 | 85.48325 | 84.17263 | -176.15204  | -357.14120  | 513.98821   | 1 |

|       |   |          |          |          |             |             |             |   |
|-------|---|----------|----------|----------|-------------|-------------|-------------|---|
| 22497 | H | 87.36000 | 84.75980 | 83.39390 | -1956.53740 | -1725.16788 | -1765.99997 | 1 |
| 22498 | C | 88.42126 | 86.67844 | 84.00957 | 91.13787    | -141.38902  | -436.60274  | 1 |
| 22499 | H | 88.47648 | 86.84181 | 82.84984 | -455.27567  | 598.16659   | 487.41328   | 1 |
| 22500 | H | 89.44501 | 86.60855 | 84.41165 | 755.09659   | 2723.08520  | 2954.96718  | 1 |
| 22501 | C | 87.65825 | 87.96618 | 84.43206 | 888.24717   | 93.88292    | 302.95916   | 1 |
| 22502 | H | 87.70869 | 88.16419 | 85.51434 | 517.63815   | -1823.36608 | -119.87270  | 1 |
| 22503 | H | 87.93646 | 88.96573 | 83.91536 | 1414.05268  | 2724.84233  | 2656.68488  | 1 |
| 22504 | C | 87.49300 | 84.44880 | 85.47990 | 481.17713   | -770.68342  | -26.39082   | 1 |
| 22505 | O | 88.17500 | 83.43780 | 85.31690 | 662.28783   | 338.86154   | -256.54544  | 1 |
| 22506 | N | 86.94800 | 84.79480 | 86.61690 | -355.77024  | 360.43447   | -679.89734  | 1 |
| 22507 | H | 86.39149 | 85.66438 | 86.55155 | 42.78695    | -57.62288   | 2525.52023  | 1 |
| 22508 | C | 86.99100 | 84.05980 | 87.81290 | 748.44016   | 418.03311   | -302.26836  | 1 |
| 22509 | H | 88.04200 | 83.90580 | 88.00490 | -1286.35492 | 1354.34724  | -2536.24087 | 1 |
| 22510 | C | 86.54200 | 84.90880 | 89.03390 | 418.38191   | 558.35263   | -585.25714  | 1 |
| 22511 | H | 85.52100 | 85.32684 | 88.81898 | 1615.25536  | -410.82888  | -1567.42418 | 1 |
| 22512 | O | 87.39151 | 86.34049 | 89.24641 | 755.00968   | -207.58450  | 15.02082    | 1 |
| 22513 | H | 86.61062 | 86.91452 | 89.07289 | -233.07622  | 1629.78125  | -375.47630  | 1 |
| 22514 | C | 86.58800 | 84.13880 | 90.31390 | -283.70739  | 860.17132   | 100.11513   | 1 |
| 22515 | H | 86.42200 | 84.88380 | 91.12190 | -1795.94078 | 1435.55542  | 2147.21644  | 1 |
| 22516 | H | 87.58000 | 83.65880 | 90.45790 | -435.86088  | 1217.30768  | 2865.37132  | 1 |
| 22517 | H | 85.87300 | 83.28880 | 90.33790 | 847.17946   | -2925.10475 | 789.94646   | 1 |
| 22518 | C | 86.28000 | 82.71080 | 87.71290 | 348.70998   | -610.39722  | -581.61753  | 1 |
| 22519 | O | 86.82200 | 81.66680 | 88.07090 | 487.52202   | -368.28329  | -500.33258  | 1 |
| 22520 | N | 85.01900 | 82.70380 | 87.12790 | 147.88702   | 116.27934   | -824.53825  | 1 |
| 22521 | H | 84.59100 | 83.60380 | 87.13890 | -2674.73959 | 1532.87730  | -646.48648  | 1 |
| 22522 | C | 84.34600 | 81.49680 | 86.73990 | -173.64911  | 895.38896   | -18.27396   | 1 |
| 22523 | H | 84.30700 | 80.75780 | 87.52590 | 2626.33703  | 724.73484   | -1569.57992 | 1 |
| 22524 | C | 82.88500 | 81.78680 | 86.44690 | 472.40232   | 489.18323   | 601.57630   | 1 |
| 22525 | H | 82.91900 | 82.67580 | 85.78090 | -1567.70870 | -1396.99338 | 2344.15697  | 1 |
| 22526 | C | 82.17700 | 80.62380 | 85.67890 | -686.10317  | -556.20421  | -242.24390  | 1 |
| 22527 | H | 81.07800 | 80.71880 | 85.54690 | 598.41109   | -2089.90955 | -2275.59134 | 1 |
| 22528 | H | 82.70400 | 80.35880 | 84.73790 | 461.08637   | 2498.75301  | -1856.94623 | 1 |
| 22529 | H | 82.32100 | 79.72080 | 86.31090 | 1404.57528  | -2171.67960 | 1786.11393  | 1 |
| 22530 | C | 82.07000 | 82.12980 | 87.72690 | 829.91579   | -260.36295  | 260.76104   | 1 |
| 22531 | H | 81.10200 | 82.37580 | 87.23990 | 2005.26066  | -1846.06125 | -1568.82272 | 1 |
| 22532 | H | 82.53400 | 83.06080 | 88.11890 | 1997.51249  | -773.18170  | 2299.81178  | 1 |
| 22533 | C | 81.94500 | 81.05480 | 88.81990 | -714.77797  | 295.25802   | -489.47011  | 1 |
| 22534 | H | 82.88100 | 80.59980 | 89.20790 | -591.02561  | 3050.46585  | -490.56526  | 1 |
| 22535 | H | 81.31400 | 80.20680 | 88.47790 | 2815.64469  | -509.29682  | 1298.78701  | 1 |
| 22536 | H | 81.40000 | 81.55980 | 89.64590 | -697.87421  | -1644.06384 | 2590.27197  | 1 |
| 22537 | C | 85.05200 | 80.71580 | 85.59890 | -8.53369    | 117.84609   | -907.35201  | 1 |
| 22538 | O | 85.24900 | 79.52680 | 85.71490 | 28.89394    | 785.85224   | 67.89789    | 1 |
| 22539 | N | 85.49400 | 81.43280 | 84.53190 | -394.64883  | -637.49170  | -394.75551  | 1 |
| 22540 | H | 85.40200 | 82.42480 | 84.48490 | -917.73706  | -3005.42708 | -172.11869  | 1 |
| 22541 | C | 86.03100 | 80.79380 | 83.32290 | -685.05291  | -509.53067  | 325.44447   | 1 |
| 22542 | H | 85.31500 | 80.12480 | 82.86790 | 2087.93761  | -1749.15828 | 1563.17221  | 1 |
| 22543 | C | 86.55300 | 81.83280 | 82.24690 | -285.42760  | 680.70566   | -543.31346  | 1 |
| 22544 | H | 87.16500 | 81.34780 | 81.45690 | -406.93343  | 1249.33627  | 2856.78426  | 1 |
| 22545 | H | 87.19100 | 82.46680 | 82.89890 | -1420.16195 | -2746.04582 | 586.62255   | 1 |
| 22546 | C | 85.50700 | 82.73980 | 81.58390 | -387.37410  | -516.39031  | -648.51176  | 1 |
| 22547 | C | 84.15500 | 82.39380 | 81.53690 | 8.37560     | 738.15855   | 534.98096   | 1 |
| 22548 | H | 83.79200 | 81.55280 | 82.10890 | -1976.71996 | -503.22493  | -2401.95861 | 1 |
| 22549 | C | 83.21100 | 83.32080 | 80.93390 | -813.75607  | 351.40567   | -239.32063  | 1 |
| 22550 | H | 82.15600 | 83.09880 | 80.98090 | 2035.65888  | 1768.92256  | -1615.98393 | 1 |
| 22551 | C | 83.64600 | 84.52480 | 80.37890 | 772.34234   | -27.95156   | 472.41300   | 1 |
| 22552 | O | 82.63286 | 85.38866 | 79.71513 | -72.91453   | -692.21879  | 794.11456   | 1 |
| 22553 | H | 81.83700 | 84.81180 | 79.82390 | -1080.08605 | -2322.12039 | 1828.02480  | 1 |
| 22554 | C | 85.92600 | 83.94280 | 80.96390 | 6.05711     | -903.27024  | -110.87849  | 1 |
| 22555 | H | 86.96400 | 84.21780 | 81.07890 | 2829.27439  | -598.86941  | -1226.46106 | 1 |
| 22556 | C | 84.98800 | 84.82180 | 80.36790 | -678.00518  | 496.60885   | -369.86313  | 1 |
| 22557 | H | 85.36288 | 85.72646 | 79.87650 | -3353.73306 | -584.27113  | -2761.13606 | 1 |
| 22558 | C | 87.28100 | 79.90080 | 83.70090 | -602.48169  | 658.69385   | -208.30911  | 1 |



|       |   |          |          |          |             |             |             |   |
|-------|---|----------|----------|----------|-------------|-------------|-------------|---|
| 22559 | O | 87.52500 | 78.85780 | 83.08590 | -549.44032  | 561.74256   | 109.17800   | 1 |
| 22560 | N | 88.11400 | 80.46780 | 84.61090 | 642.96512   | 513.19753   | -179.98725  | 1 |
| 22561 | H | 87.81200 | 81.38580 | 84.85490 | 554.47561   | 2851.08366  | 1205.19199  | 1 |
| 22562 | C | 89.22100 | 79.75680 | 85.24590 | -801.90495  | 437.56083   | 62.18517    | 1 |
| 22563 | H | 89.95300 | 79.50280 | 84.49390 | -1464.51312 | -2546.38990 | 1124.84143  | 1 |
| 22564 | C | 89.96200 | 80.65580 | 86.28690 | -458.29519  | -343.52332  | 707.42201   | 1 |
| 22565 | H | 90.83200 | 80.05380 | 86.62590 | 2283.07377  | -336.40392  | -2139.03685 | 1 |
| 22566 | H | 89.32800 | 80.96580 | 87.14490 | 931.33406   | 2257.02425  | -1986.55878 | 1 |
| 22567 | O | 90.43900 | 81.84080 | 85.66990 | 610.32611   | 92.12801    | 483.01903   | 1 |
| 22568 | H | 89.67500 | 82.42080 | 85.62090 | 2369.02049  | -1179.21299 | 1691.04846  | 1 |
| 22569 | C | 88.73400 | 78.47380 | 85.93690 | -909.04626  | 101.73149   | 39.15022    | 1 |
| 22570 | O | 89.25800 | 77.41880 | 85.68690 | 452.12303   | 480.50776   | 425.07062   | 1 |
| 22571 | N | 87.62200 | 78.53080 | 86.72490 | -701.95005  | 282.62632   | -385.82932  | 1 |
| 22572 | H | 87.11900 | 79.38180 | 86.85290 | 1745.97851  | 2397.36485  | -1047.62160 | 1 |
| 22573 | C | 87.01300 | 77.34680 | 87.36090 | -113.26819  | 694.01660   | 575.81346   | 1 |
| 22574 | H | 87.78600 | 76.78980 | 87.87090 | 2151.54835  | 2266.77734  | 334.12137   | 1 |
| 22575 | C | 85.83700 | 77.64780 | 88.31690 | -573.33049  | -363.66500  | -616.67497  | 1 |
| 22576 | H | 85.15200 | 78.26580 | 87.69790 | 2170.45817  | 953.65837   | 2060.27926  | 1 |
| 22577 | C | 85.23200 | 76.35180 | 88.91690 | -584.42856  | 628.39546   | -316.18304  | 1 |
| 22578 | H | 84.85900 | 75.70780 | 88.09290 | 1913.26524  | 866.71986   | -2344.55790 | 1 |
| 22579 | H | 85.99500 | 75.79680 | 89.50290 | -1848.14339 | -1493.28883 | 2060.17481  | 1 |
| 22580 | H | 84.35600 | 76.61180 | 89.54990 | -674.86039  | 3069.33543  | 124.10768   | 1 |
| 22581 | C | 86.39100 | 78.49780 | 89.48490 | 354.02269   | 771.95453   | -330.31748  | 1 |
| 22582 | H | 87.06500 | 79.27980 | 89.07290 | 1427.84035  | -2198.47053 | -1742.42291 | 1 |
| 22583 | H | 87.08200 | 77.89680 | 90.11390 | -991.08893  | -1148.86745 | 2752.86447  | 1 |
| 22584 | C | 85.32100 | 79.24980 | 90.26490 | 548.11549   | -645.98527  | -339.45320  | 1 |
| 22585 | H | 85.66100 | 79.80480 | 91.16590 | -1839.58327 | -1095.46754 | 2304.62952  | 1 |
| 22586 | H | 84.50800 | 78.55480 | 90.56390 | 2588.94393  | 367.32088   | -1748.92652 | 1 |
| 22587 | H | 84.81600 | 79.99880 | 89.61990 | 942.94869   | -1655.61062 | -2506.74063 | 1 |
| 22588 | C | 86.59100 | 76.33380 | 86.29590 | 37.20179    | 705.09135   | -582.03551  | 1 |
| 22589 | O | 86.87600 | 75.13580 | 86.32990 | 263.40507   | -247.17595  | -706.70502  | 1 |
| 22590 | N | 85.94400 | 76.86980 | 85.20790 | -715.74336  | -4.18375    | 448.95949   | 1 |
| 22591 | H | 85.63800 | 77.81680 | 85.14890 | 838.32427   | 1784.43455  | -2455.06733 | 1 |
| 22592 | C | 85.54400 | 75.97380 | 84.09090 | -589.85106  | 56.62431    | -701.66531  | 1 |
| 22593 | H | 84.97100 | 75.16780 | 84.52390 | -590.84555  | -2292.32178 | -2078.06839 | 1 |
| 22594 | C | 84.70500 | 76.68680 | 83.02590 | 812.00035   | -153.54614  | -379.98876  | 1 |
| 22595 | H | 85.34800 | 77.43880 | 82.51990 | -2032.51842 | -1169.11159 | -2105.97809 | 1 |
| 22596 | C | 84.27500 | 75.71480 | 81.91990 | 385.98328   | -7.71678    | 819.03347   | 1 |
| 22597 | H | 85.09700 | 75.06980 | 81.54390 | -1047.85130 | 1847.31625  | -2329.86050 | 1 |
| 22598 | H | 83.47900 | 75.04880 | 82.31590 | -1135.20078 | 2167.35756  | 1976.83175  | 1 |
| 22599 | H | 83.83700 | 76.40380 | 81.16690 | -1221.64390 | -1777.21280 | -2296.52661 | 1 |
| 22600 | C | 83.45000 | 77.48980 | 83.55590 | 415.02904   | 385.08012   | 708.60650   | 1 |
| 22601 | H | 82.97200 | 77.88180 | 82.63290 | 2751.84028  | 500.29216   | 1428.17904  | 1 |
| 22602 | H | 83.89400 | 78.25780 | 84.22490 | -2555.14716 | -1013.25557 | -1541.31490 | 1 |
| 22603 | C | 82.33100 | 76.72480 | 84.30590 | -573.33093  | -645.33268  | -305.08700  | 1 |
| 22604 | H | 81.47300 | 77.36780 | 84.59690 | 621.70489   | 408.45907   | 3052.63070  | 1 |
| 22605 | H | 82.01000 | 75.87880 | 83.66190 | -2558.93167 | -332.97762  | 1801.47885  | 1 |
| 22606 | H | 82.78500 | 76.35380 | 85.24990 | 1982.50157  | 2424.49246  | -276.77835  | 1 |
| 22607 | C | 86.82000 | 75.33080 | 83.39190 | 633.64313   | 7.37543     | 645.91442   | 1 |
| 22608 | O | 86.93000 | 74.10180 | 83.14490 | -603.25143  | 514.93996   | 22.36745    | 1 |
| 22609 | N | 87.87300 | 76.12580 | 83.05390 | -668.26296  | 292.10033   | -438.63187  | 1 |
| 22610 | H | 87.78700 | 77.10580 | 83.21590 | 964.78945   | 2390.24356  | 1798.08006  | 1 |
| 22611 | C | 89.14600 | 75.69580 | 82.51290 | 626.46137   | 150.81961   | -647.37545  | 1 |
| 22612 | H | 88.77200 | 75.17380 | 81.64490 | 1618.39587  | -2060.16562 | -1741.49121 | 1 |
| 22613 | C | 89.90200 | 76.92480 | 82.03590 | 424.59801   | 564.74533   | -580.80130  | 1 |
| 22614 | H | 89.27500 | 77.50780 | 81.32890 | -1811.25018 | 1035.66443  | 2354.13974  | 1 |
| 22615 | H | 90.24800 | 77.70980 | 82.74190 | 964.18930   | -2105.74945 | 2119.73999  | 1 |
| 22616 | C | 91.23100 | 76.59480 | 81.38190 | 330.76457   | -775.30707  | 330.92615   | 1 |
| 22617 | C | 91.21500 | 76.27080 | 80.01490 | -28.59772   | 910.50041   | 79.53944    | 1 |
| 22618 | H | 90.34000 | 76.17680 | 79.38890 | -472.92306  | -1957.49942 | -2421.96958 | 1 |
| 22619 | C | 92.38300 | 75.83580 | 79.33690 | 118.94082   | 106.98705   | 890.39808   | 1 |
| 22620 | H | 92.23500 | 75.47680 | 78.32890 | 1776.04172  | -2559.66751 | -397.81678  | 1 |

|       |   |          |          |          |             |             |             |   |
|-------|---|----------|----------|----------|-------------|-------------|-------------|---|
| 22621 | C | 93.59700 | 75.74780 | 79.99190 | 624.25308   | -211.62993  | -631.08708  | 1 |
| 22622 | H | 94.46100 | 75.44580 | 79.41890 | -286.74729  | 2950.04185  | 1059.05801  | 1 |
| 22623 | C | 92.48600 | 76.63880 | 82.03490 | 847.11558   | 317.80017   | -86.34671   | 1 |
| 22624 | H | 92.45700 | 76.91580 | 83.07890 | 1214.48412  | -2333.47331 | 1713.23095  | 1 |
| 22625 | C | 93.65300 | 76.24480 | 81.37190 | 115.99903   | 622.16726   | 651.06787   | 1 |
| 22626 | H | 94.58100 | 76.33180 | 81.91690 | 2963.59074  | -681.12503  | 779.80069   | 1 |
| 22627 | C | 89.91100 | 74.63880 | 83.25790 | -903.35201  | -96.10774   | 108.68106   | 1 |
| 22628 | O | 90.31700 | 73.58680 | 82.77890 | 109.23489   | 594.74348   | -516.45866  | 1 |
| 22629 | N | 90.07200 | 74.84380 | 84.60690 | -68.67408   | 765.07853   | -360.08800  | 1 |
| 22630 | H | 89.75100 | 75.72580 | 84.94490 | -1906.82177 | 2504.33977  | 93.67718    | 1 |
| 22631 | C | 90.99200 | 74.14780 | 85.47890 | 172.71877   | 834.47793   | 317.70845   | 1 |
| 22632 | H | 91.87600 | 73.95580 | 84.88990 | -1942.47029 | 1232.11708  | 2142.81582  | 1 |
| 22633 | C | 91.44100 | 74.96580 | 86.68890 | 169.75461   | 895.44451   | -32.20202   | 1 |
| 22634 | H | 90.54900 | 75.39680 | 87.18990 | 1716.23254  | -1244.50565 | -2328.82035 | 1 |
| 22635 | H | 91.98500 | 74.47680 | 87.52490 | -143.93812  | 3114.14148  | -434.24383  | 1 |
| 22636 | C | 92.29500 | 76.20180 | 86.29890 | -752.76381  | -253.55780  | 446.41399   | 1 |
| 22637 | H | 91.81200 | 76.81980 | 85.51190 | 2489.39924  | 790.71973   | -1755.28764 | 1 |
| 22638 | C | 92.49600 | 77.08680 | 87.49090 | 612.60728   | -40.83853   | 664.57138   | 1 |
| 22639 | H | 93.34000 | 76.67480 | 88.08490 | -647.51045  | 2185.19990  | -2176.92106 | 1 |
| 22640 | H | 92.75900 | 78.11980 | 87.17690 | -2283.80133 | -591.50604  | -2091.43735 | 1 |
| 22641 | H | 91.62000 | 77.10680 | 88.17290 | -2016.74418 | 1687.67690  | 1724.41877  | 1 |
| 22642 | C | 93.63900 | 75.80880 | 85.71290 | -666.17844  | -596.80161  | 179.52286   | 1 |
| 22643 | H | 94.39500 | 76.62280 | 85.73390 | 2421.79571  | -1272.66991 | -1553.85365 | 1 |
| 22644 | H | 94.08800 | 74.94380 | 86.24590 | 214.75996   | -1963.48001 | 2439.94516  | 1 |
| 22645 | H | 93.51200 | 75.52980 | 84.64590 | 2276.70286  | 1360.53574  | -1695.68753 | 1 |
| 22646 | C | 90.49500 | 72.83780 | 85.92890 | -814.14824  | -84.26131   | 400.54954   | 1 |
| 22647 | O | 91.27500 | 71.96380 | 86.38890 | -132.46349  | -268.58705  | 722.86785   | 1 |
| 22648 | N | 89.19100 | 72.60280 | 85.69690 | -255.16401  | 122.08979   | 789.17282   | 1 |
| 22649 | H | 88.59100 | 73.30280 | 85.31790 | 39.89389    | -3144.60655 | -66.45142   | 1 |
| 22650 | C | 88.45900 | 71.35680 | 85.94490 | 723.48278   | -371.94380  | 398.59829   | 1 |
| 22651 | H | 89.12800 | 70.64180 | 86.40090 | 2330.53934  | -2080.58670 | 343.46997   | 1 |
| 22652 | C | 87.22600 | 71.64880 | 86.78490 | 628.93547   | 105.95190   | 641.74511   | 1 |
| 22653 | H | 86.71000 | 70.67580 | 86.92890 | -1832.19757 | 1647.43117  | 1951.24989  | 1 |
| 22654 | O | 86.29500 | 72.52080 | 86.19690 | 718.99266   | -294.92835  | 116.77926   | 1 |
| 22655 | H | 86.60700 | 73.42780 | 86.23990 | 269.56486   | 493.91441   | -3101.48944 | 1 |
| 22656 | C | 87.61600 | 72.22880 | 88.17090 | -738.48817  | -496.03654  | -217.47822  | 1 |
| 22657 | H | 86.73200 | 72.42180 | 88.81590 | -1087.52799 | 2935.07605  | 310.64735   | 1 |
| 22658 | H | 88.12700 | 73.21380 | 88.10690 | -37.72906   | -1909.23681 | 2493.87076  | 1 |
| 22659 | H | 88.25200 | 71.51380 | 88.73390 | 1025.24679  | 2136.63130  | -2074.96968 | 1 |
| 22660 | C | 88.17800 | 70.69480 | 84.65590 | -50.45776   | 572.17860   | -716.90844  | 1 |
| 22661 | O | 88.41700 | 69.53780 | 84.41390 | 232.33051   | -360.22923  | -669.87632  | 1 |
| 22662 | N | 87.69700 | 71.45480 | 83.66790 | -645.41248  | 347.13244   | -432.94398  | 1 |
| 22663 | H | 87.49600 | 72.42580 | 83.77290 | 2619.81576  | 493.36611   | 1658.26441  | 1 |
| 22664 | C | 87.33000 | 70.99180 | 82.32790 | -518.85451  | -528.09049  | -541.94431  | 1 |
| 22665 | H | 86.87200 | 71.79880 | 81.77690 | -1052.25888 | -1586.80486 | 2498.18214  | 1 |
| 22666 | H | 86.53900 | 70.25880 | 82.39390 | 3133.90996  | -192.42974  | 116.21042   | 1 |
| 22667 | C | 88.38800 | 70.38780 | 81.46990 | -134.42879  | -887.79751  | -158.04236  | 1 |
| 22668 | O | 88.07800 | 69.34780 | 80.89690 | -373.16759  | -566.26035  | 396.88793   | 1 |
| 22669 | N | 89.50700 | 71.10180 | 81.21690 | -382.56945  | -571.82143  | 481.75427   | 1 |
| 22670 | H | 89.71200 | 71.85980 | 81.82990 | -624.86721  | -1575.02937 | 2642.79307  | 1 |
| 22671 | C | 90.54000 | 70.62380 | 80.30890 | -326.05866  | 684.89496   | 504.16750   | 1 |
| 22672 | H | 90.04700 | 70.37080 | 79.38190 | 2545.99165  | -1528.54897 | 1014.57343  | 1 |
| 22673 | C | 91.49700 | 71.77680 | 80.00190 | -689.53880  | -166.98733  | 569.17932   | 1 |
| 22674 | H | 90.87200 | 72.69580 | 80.01990 | -280.02924  | 2907.79365  | -1184.42513 | 1 |
| 22675 | C | 92.63800 | 71.97780 | 81.09890 | 357.68200   | 827.09032   | 136.09454   | 1 |
| 22676 | H | 93.11400 | 72.96780 | 80.93290 | -1450.60608 | -648.23368  | 2708.93437  | 1 |
| 22677 | H | 93.41500 | 71.18380 | 81.09390 | -1779.50368 | -142.04318  | -2602.43373 | 1 |
| 22678 | H | 92.18000 | 72.00080 | 82.11090 | 2932.36592  | -375.46993  | 1055.84134  | 1 |
| 22679 | C | 92.06200 | 71.74980 | 78.55590 | 277.79333   | -287.01938  | 808.22593   | 1 |
| 22680 | H | 91.23500 | 71.68480 | 77.81690 | -1773.01643 | 2094.85048  | 1541.24861  | 1 |
| 22681 | H | 92.43600 | 72.79180 | 78.45790 | -1700.52523 | 2130.76431  | 1572.99887  | 1 |
| 22682 | C | 93.19900 | 70.75380 | 78.20890 | 621.50515   | -557.64419  | -360.59341  | 1 |

|       |   |          |          |          |             |             |             |   |
|-------|---|----------|----------|----------|-------------|-------------|-------------|---|
| 22683 | H | 94.09500 | 70.93880 | 78.83990 | -2529.67869 | 389.04233   | -1846.44203 | 1 |
| 22684 | H | 93.64100 | 70.73480 | 77.18990 | 897.29307   | -2274.97275 | 1962.54830  | 1 |
| 22685 | H | 92.87200 | 69.72480 | 78.47090 | -2542.31628 | 637.72588   | 1739.11216  | 1 |
| 22686 | C | 91.19200 | 69.33780 | 80.85890 | -849.95865  | 43.45862    | 328.99050   | 1 |
| 22687 | O | 91.46200 | 68.34780 | 80.13890 | -217.10709  | 678.60722   | -358.65655  | 1 |
| 22688 | N | 91.48600 | 69.32480 | 82.18790 | -416.88690  | 596.93588   | -443.17047  | 1 |
| 22689 | H | 91.23100 | 70.17480 | 82.64090 | 2764.92366  | -1189.20059 | 893.24514   | 1 |
| 22690 | C | 91.91500 | 68.12480 | 82.90290 | 671.36736   | -2.87476    | -623.06226  | 1 |
| 22691 | H | 92.79300 | 67.74880 | 82.39990 | 1133.56769  | 2477.29230  | 1564.60967  | 1 |
| 22692 | C | 92.25100 | 68.54980 | 84.34890 | -626.76818  | -215.90569  | 618.92128   | 1 |
| 22693 | H | 91.36300 | 68.83680 | 84.95190 | 2028.09572  | -2132.98964 | -1113.19804 | 1 |
| 22694 | C | 92.93000 | 67.35280 | 85.13090 | -40.91579   | 546.89107   | 719.26604   | 1 |
| 22695 | H | 93.39500 | 67.66780 | 86.08990 | 2814.39815  | 786.43232   | -1170.73680 | 1 |
| 22696 | H | 93.59900 | 66.86780 | 84.38790 | 680.66775   | 2167.50407  | 2166.50194  | 1 |
| 22697 | H | 92.08600 | 66.72380 | 85.48590 | -1299.95203 | -2084.63292 | -1976.25914 | 1 |
| 22698 | C | 93.12200 | 69.81780 | 84.36490 | -85.87097   | -711.85949  | -571.20768  | 1 |
| 22699 | H | 92.59100 | 70.79080 | 84.28690 | 414.67910   | -1823.40109 | -2537.36238 | 1 |
| 22700 | H | 93.47800 | 69.79780 | 85.41690 | -1802.65629 | 612.34957   | -2516.71922 | 1 |
| 22701 | H | 93.92400 | 69.74080 | 83.59990 | -2113.48540 | -1556.20673 | -1746.88212 | 1 |
| 22702 | C | 90.88500 | 67.01480 | 82.85490 | -560.17604  | 643.61302   | -340.86267  | 1 |
| 22703 | O | 91.19100 | 65.97680 | 82.31990 | 575.22684   | 277.24387   | -472.22652  | 1 |
| 22704 | N | 89.59800 | 67.27880 | 83.21290 | 524.26395   | 509.00915   | 411.22306   | 1 |
| 22705 | H | 89.33800 | 68.17280 | 83.56890 | -3104.29147 | -448.44894  | 272.40266   | 1 |
| 22706 | C | 88.50800 | 66.28280 | 83.31090 | -546.36324  | 555.93347   | 468.75313   | 1 |
| 22707 | H | 87.63400 | 66.81180 | 83.66190 | -1061.58852 | -2934.61204 | 389.35155   | 1 |
| 22708 | H | 88.77800 | 65.52880 | 84.03490 | 10.55105    | 2346.86330  | 2086.70722  | 1 |
| 22709 | C | 88.13700 | 65.55880 | 82.06790 | 310.85332   | -559.78602  | -655.74751  | 1 |
| 22710 | O | 88.04400 | 64.34280 | 82.03790 | 297.99695   | -575.60490  | 436.46325   | 1 |
| 22711 | N | 87.94300 | 66.29480 | 80.94490 | -137.00757  | 642.44250   | -543.31416  | 1 |
| 22712 | H | 88.08700 | 67.28080 | 80.99990 | -2816.45071 | 981.16264   | -1023.44780 | 1 |
| 22713 | C | 87.72000 | 65.63780 | 79.67190 | 409.75527   | -523.64252  | -628.67610  | 1 |
| 22714 | H | 87.02600 | 64.82080 | 79.79990 | 1055.26269  | 209.07024   | 2945.60613  | 1 |
| 22715 | C | 86.96700 | 66.60780 | 78.71390 | -96.50363   | 174.73197   | -899.78714  | 1 |
| 22716 | H | 87.46400 | 67.58080 | 78.50890 | 3100.41132  | 83.77961    | 492.40403   | 1 |
| 22717 | H | 86.78100 | 66.01880 | 77.79090 | 2244.79463  | 362.51811   | -2179.42405 | 1 |
| 22718 | C | 85.61000 | 66.79680 | 79.39290 | 253.03182   | 779.73252   | -410.17787  | 1 |
| 22719 | O | 84.83300 | 65.81480 | 79.48890 | 37.47156    | 745.08190   | 256.45328   | 1 |
| 22720 | N | 85.34400 | 67.99780 | 79.87490 | 288.96529   | 778.85602   | 145.97078   | 1 |
| 22721 | H | 86.08300 | 68.66580 | 79.96190 | -2090.44743 | -1477.05993 | 1824.28030  | 1 |
| 22722 | H | 84.39500 | 68.15680 | 80.14790 | -3078.34110 | 132.10681   | 648.47374   | 1 |
| 22723 | C | 88.89800 | 64.98780 | 79.03490 | 725.56730   | 379.20971   | -407.24982  | 1 |
| 22724 | O | 88.72200 | 64.04280 | 78.34190 | -697.68038  | 357.86740   | -140.39072  | 1 |
| 22725 | N | 90.14400 | 65.40080 | 79.46790 | 206.17005   | -788.69204  | -214.25132  | 1 |
| 22726 | H | 90.25700 | 66.25580 | 79.96790 | -1065.98865 | 2023.85267  | -2174.79194 | 1 |
| 22727 | C | 91.31700 | 64.73480 | 79.05890 | 93.71269    | 519.29579   | 734.58953   | 1 |
| 22728 | H | 91.30700 | 64.62180 | 77.98490 | -2931.29772 | 1154.91559  | -86.26070   | 1 |
| 22729 | H | 92.21500 | 65.29480 | 79.27790 | 1058.09386  | -1921.96269 | 2239.17693  | 1 |
| 22730 | C | 91.40100 | 63.43180 | 79.75790 | 307.19372   | -793.67896  | -327.48745  | 1 |
| 22731 | O | 91.82500 | 62.42080 | 79.26990 | -580.71505  | 335.53104   | 412.68605   | 1 |
| 22732 | N | 91.02800 | 63.38680 | 81.05790 | 657.76904   | 157.06926   | -513.16336  | 1 |
| 22733 | H | 90.80500 | 64.21680 | 81.56290 | -2520.77814 | 1604.09448  | -1008.37858 | 1 |
| 22734 | C | 90.91800 | 62.15580 | 81.79590 | 272.45577   | -732.55007  | -476.09448  | 1 |
| 22735 | H | 91.86200 | 61.64080 | 81.70190 | -1069.04265 | 2392.46453  | 1734.04641  | 1 |
| 22736 | C | 90.82800 | 62.40680 | 83.27890 | 329.01022   | -793.01168  | 288.14551   | 1 |
| 22737 | H | 90.54300 | 61.55180 | 83.92790 | 1675.42279  | 2646.15876  | 286.61107   | 1 |
| 22738 | H | 89.92600 | 63.04680 | 83.38890 | -2288.58946 | -1672.21465 | 1356.64915  | 1 |
| 22739 | C | 92.01900 | 63.17780 | 83.96190 | -509.76875  | -339.68900  | -688.14800  | 1 |
| 22740 | H | 92.39400 | 64.07880 | 83.43090 | 2369.14348  | 459.71170   | 2004.19969  | 1 |
| 22741 | C | 91.67700 | 63.61180 | 85.38990 | -429.89384  | 656.53258   | 456.35901   | 1 |
| 22742 | H | 91.21000 | 62.80180 | 85.98990 | -2954.60133 | -361.20843  | -1035.64947 | 1 |
| 22743 | H | 92.58900 | 63.86880 | 85.96890 | 1881.86793  | -747.02512  | -2417.75690 | 1 |
| 22744 | H | 90.99500 | 64.48680 | 85.45990 | -1865.52047 | 1325.49624  | -2172.38385 | 1 |

|       |   |          |          |          |             |             |             |   |
|-------|---|----------|----------|----------|-------------|-------------|-------------|---|
| 22745 | C | 93.24800 | 62.26580 | 83.90690 | 393.27022   | 144.47070   | 796.69234   | 1 |
| 22746 | H | 93.04800 | 61.32980 | 84.47190 | 2317.86464  | -1499.53353 | 1491.55401  | 1 |
| 22747 | H | 94.12500 | 62.84280 | 84.26990 | -1441.26038 | 1876.80917  | -2088.92882 | 1 |
| 22748 | H | 93.55700 | 61.98580 | 82.87690 | 1526.72314  | 1894.80110  | 1981.84056  | 1 |
| 22749 | C | 89.83700 | 61.22880 | 81.39190 | -673.56171  | 392.29999   | -491.00902  | 1 |
| 22750 | O | 90.05200 | 60.01880 | 81.38790 | 778.59487   | -101.80623  | 35.24678    | 1 |
| 22751 | N | 88.67800 | 61.73480 | 81.04490 | 327.52024   | -212.84915  | 735.04661   | 1 |
| 22752 | H | 88.46700 | 62.70780 | 81.09490 | -1224.48454 | -2122.30223 | 1962.12456  | 1 |
| 22753 | C | 87.67100 | 60.85880 | 80.39390 | 537.35759   | 463.01271   | 560.59986   | 1 |
| 22754 | H | 87.32000 | 60.08580 | 81.06090 | -2112.67471 | 422.44166   | -2307.29397 | 1 |
| 22755 | C | 86.36900 | 61.62080 | 80.15290 | 433.87130   | 380.64547   | 694.38434   | 1 |
| 22756 | H | 86.66700 | 62.53680 | 79.59990 | -935.20663  | -1903.33518 | 2312.79831  | 1 |
| 22757 | C | 85.41000 | 60.79180 | 79.24990 | -43.61770   | 142.25521   | -910.99776  | 1 |
| 22758 | H | 85.78800 | 60.71980 | 78.20790 | -341.41829  | 2236.52582  | 2178.93898  | 1 |
| 22759 | H | 84.42100 | 61.27980 | 79.11590 | -2235.95014 | 1459.15621  | 1660.75727  | 1 |
| 22760 | H | 85.21300 | 59.82180 | 79.75490 | -1558.88322 | -962.09369  | -2570.00536 | 1 |
| 22761 | C | 85.66900 | 62.05280 | 81.46790 | 56.95089    | 166.44982   | 884.42928   | 1 |
| 22762 | H | 84.86800 | 62.78280 | 81.22090 | 2285.82367  | -973.61446  | -1935.38889 | 1 |
| 22763 | H | 85.26400 | 61.20280 | 82.05790 | 1415.76207  | -210.19905  | -2810.85385 | 1 |
| 22764 | H | 86.41700 | 62.61580 | 82.06690 | 1683.88527  | 1797.32319  | -1967.03297 | 1 |
| 22765 | C | 88.14800 | 60.21080 | 79.10090 | -464.01205  | 410.83459   | 661.23382   | 1 |
| 22766 | O | 87.98300 | 59.02080 | 78.84890 | -681.96966  | 364.92232   | -191.34311  | 1 |
| 22767 | N | 88.93200 | 60.97080 | 78.26790 | 599.50119   | -481.08076  | -349.45192  | 1 |
| 22768 | H | 88.88200 | 61.95180 | 78.43890 | 946.20447   | -2007.23967 | -2236.91977 | 1 |
| 22769 | C | 89.63900 | 60.42180 | 77.09990 | 721.30426   | 370.11921   | 401.85220   | 1 |
| 22770 | H | 88.99200 | 59.82980 | 76.46890 | -2641.09457 | -774.16600  | -1541.37773 | 1 |
| 22771 | C | 90.13200 | 61.55680 | 76.21090 | -249.73876  | 332.90145   | -826.21242  | 1 |
| 22772 | H | 90.77500 | 62.20780 | 76.84090 | 2383.78880  | 1979.62664  | -553.06215  | 1 |
| 22773 | C | 91.04800 | 61.07380 | 75.04890 | -458.90769  | -400.75647  | -690.82362  | 1 |
| 22774 | H | 91.94600 | 60.50580 | 75.37390 | -1643.60510 | -2667.34882 | 252.83678   | 1 |
| 22775 | H | 91.50200 | 61.91580 | 74.48490 | 2373.47000  | 2040.78215  | 301.13448   | 1 |
| 22776 | H | 90.55600 | 60.35680 | 74.35590 | -889.18090  | -323.61543  | -3013.67162 | 1 |
| 22777 | C | 89.00800 | 62.48180 | 75.66090 | 2.41465     | 571.42336   | 702.92004   | 1 |
| 22778 | H | 88.47400 | 61.93980 | 74.85190 | 2608.02503  | -1680.09225 | -494.18834  | 1 |
| 22779 | H | 88.14100 | 62.60780 | 76.34490 | -2635.58262 | -1486.42667 | -879.13109  | 1 |
| 22780 | C | 89.53000 | 63.78780 | 75.11390 | -558.13061  | -410.42923  | 583.44340   | 1 |
| 22781 | H | 90.19400 | 63.52080 | 74.26490 | 937.78538   | -2995.70759 | 55.39792    | 1 |
| 22782 | H | 88.68400 | 64.35180 | 74.66590 | -2111.45304 | 2271.08343  | -580.65405  | 1 |
| 22783 | H | 89.97900 | 64.42080 | 75.90890 | -2577.15885 | 1659.78578  | -746.17560  | 1 |
| 22784 | C | 90.77300 | 59.45680 | 77.46190 | 329.05637   | -605.52153  | -603.74000  | 1 |
| 22785 | O | 90.96700 | 58.38780 | 76.89490 | -36.89162   | 742.63305   | 264.66326   | 1 |
| 22786 | N | 91.47500 | 59.73380 | 78.58890 | -209.46183  | -458.02523  | 663.27245   | 1 |
| 22787 | H | 91.42900 | 60.64380 | 78.99590 | 1673.14064  | 1715.00203  | 2026.56494  | 1 |
| 22788 | C | 92.46700 | 58.82380 | 79.17890 | -728.08068  | -472.04575  | -296.01746  | 1 |
| 22789 | H | 93.13400 | 58.59180 | 78.36190 | -2157.87647 | 2202.47670  | -663.86227  | 1 |
| 22790 | C | 93.39400 | 59.54580 | 80.25190 | -730.45366  | -63.40790   | 532.29891   | 1 |
| 22791 | H | 93.67500 | 58.93680 | 81.13790 | -480.11514  | 1903.19728  | 2447.81206  | 1 |
| 22792 | H | 92.68800 | 60.32980 | 80.60090 | -1888.57015 | 2442.64555  | -638.24877  | 1 |
| 22793 | C | 94.60100 | 60.20980 | 79.64990 | -3.17038    | 139.77363   | -915.12005  | 1 |
| 22794 | H | 94.23900 | 60.46180 | 78.62990 | -1497.82791 | 2213.14065  | -1682.09542 | 1 |
| 22795 | C | 95.06300 | 61.43480 | 80.47190 | 178.10144   | 820.46697   | -374.98231  | 1 |
| 22796 | H | 95.28300 | 61.04180 | 81.48790 | -1714.68042 | -2400.28468 | 1078.48133  | 1 |
| 22797 | H | 94.26400 | 62.20680 | 80.47790 | -1642.19514 | -1985.67416 | -1817.20160 | 1 |
| 22798 | H | 96.00300 | 61.82780 | 80.02690 | 786.27561   | -1751.03237 | 2475.87270  | 1 |
| 22799 | C | 95.76500 | 59.20580 | 79.52190 | -727.03968  | 518.79853   | 191.27898   | 1 |
| 22800 | H | 96.08900 | 58.91780 | 80.54590 | -2582.50637 | 1683.27393  | 635.04484   | 1 |
| 22801 | H | 95.53700 | 58.21280 | 79.07790 | 1394.79679  | -2449.70895 | 1372.41442  | 1 |
| 22802 | H | 96.53300 | 59.68580 | 78.87890 | 588.50767   | -2902.94354 | 1033.01070  | 1 |
| 22803 | C | 91.86500 | 57.57880 | 79.69390 | -585.46378  | -299.95709  | -646.33610  | 1 |
| 22804 | O | 92.42900 | 56.49880 | 79.48290 | 532.95971   | -21.51262   | -593.94772  | 1 |
| 22805 | N | 90.65400 | 57.56080 | 80.28190 | -384.15772  | -693.58104  | 273.19261   | 1 |
| 22806 | H | 90.21300 | 58.42780 | 80.50190 | -2076.92091 | 2030.04528  | -1232.07644 | 1 |

|       |   |          |          |          |             |             |             |   |
|-------|---|----------|----------|----------|-------------|-------------|-------------|---|
| 22807 | C | 89.92200 | 56.39580 | 80.60690 | -271.79873  | -30.09409   | -884.24767  | 1 |
| 22808 | H | 90.56100 | 55.73180 | 81.16890 | 2607.64521  | -681.42523  | -1632.40807 | 1 |
| 22809 | C | 88.72200 | 56.64380 | 81.52490 | -258.24014  | 820.33596   | -323.89875  | 1 |
| 22810 | H | 88.11700 | 57.51680 | 81.19890 | -2203.02400 | -869.90295  | 2059.72808  | 1 |
| 22811 | C | 87.81900 | 55.37180 | 81.65790 | -272.15218  | 310.67785   | -827.90045  | 1 |
| 22812 | H | 87.24900 | 55.30580 | 80.70590 | -1681.65973 | 2607.81144  | 524.33392   | 1 |
| 22813 | H | 88.39100 | 54.44580 | 81.87890 | 2323.15910  | 1311.67298  | -1680.44588 | 1 |
| 22814 | H | 87.10100 | 55.43280 | 82.50390 | 1539.72277  | -1894.79062 | -1994.62403 | 1 |
| 22815 | C | 89.30500 | 57.08480 | 82.90890 | -337.14599  | 788.76436   | -328.88430  | 1 |
| 22816 | H | 89.91800 | 58.00280 | 82.78290 | 2330.12044  | 611.44628   | -2034.77314 | 1 |
| 22817 | H | 89.92900 | 56.23680 | 83.26390 | -1970.49449 | 1710.20878  | 1747.79753  | 1 |
| 22818 | H | 88.39800 | 57.27180 | 83.52290 | -1982.06179 | -1725.43340 | -1743.61534 | 1 |
| 22819 | C | 89.44700 | 55.63980 | 79.32990 | -362.02130  | 579.39707   | 594.58887   | 1 |
| 22820 | O | 89.89800 | 54.49180 | 79.18290 | -452.31241  | 651.48165   | 18.98527    | 1 |
| 22821 | N | 88.71500 | 56.24380 | 78.37590 | -690.63293  | 365.25085   | -343.51006  | 1 |
| 22822 | H | 88.39800 | 57.18380 | 78.48190 | -1685.49488 | -206.93043  | -2663.24163 | 1 |
| 22823 | C | 88.13600 | 55.43780 | 77.35890 | 478.36241   | -511.56873  | -591.56564  | 1 |
| 22824 | H | 87.98700 | 54.42380 | 77.69790 | 2164.42108  | 1548.30737  | -1691.41299 | 1 |
| 22825 | C | 86.80000 | 55.99480 | 76.89190 | 514.99122   | -65.87512   | 733.87699   | 1 |
| 22826 | H | 86.79700 | 57.04880 | 76.53890 | -1147.62899 | 2799.00795  | -893.68217  | 1 |
| 22827 | H | 86.30400 | 55.48680 | 76.03690 | 1251.33634  | 2537.35880  | -1393.27456 | 1 |
| 22828 | C | 85.67600 | 55.90280 | 77.97190 | -487.62758  | -147.45835  | 744.92118   | 1 |
| 22829 | H | 86.01400 | 56.61080 | 78.75890 | 1868.93221  | 1230.59661  | 2198.00104  | 1 |
| 22830 | H | 85.62800 | 54.90080 | 78.44890 | -2221.71982 | 1005.34716  | 1979.39634  | 1 |
| 22831 | S | 83.95900 | 56.24880 | 77.57990 | -408.26724  | -141.71723  | 343.17326   | 1 |
| 22832 | C | 84.12800 | 58.00880 | 77.20090 | -200.84187  | -506.55809  | -741.40743  | 1 |
| 22833 | H | 83.24300 | 58.67880 | 77.24590 | -417.77200  | -2977.18794 | 908.17125   | 1 |
| 22834 | H | 84.54900 | 58.20380 | 76.19090 | 407.55617   | 2086.46621  | -2333.35067 | 1 |
| 22835 | H | 84.85200 | 58.45580 | 77.91490 | 2083.96667  | 1036.17712  | -2126.57726 | 1 |
| 22836 | C | 89.02800 | 55.25480 | 76.12090 | 448.45100   | -399.40198  | -695.23347  | 1 |
| 22837 | O | 88.67300 | 54.33880 | 75.34490 | -486.05266  | 221.26994   | -600.58136  | 1 |
| 22838 | N | 90.17100 | 55.99680 | 75.92590 | -671.16278  | -218.14259  | 452.58388   | 1 |
| 22839 | H | 90.45000 | 56.78180 | 76.47390 | 1344.22147  | 2731.26508  | -816.79921  | 1 |
| 22840 | C | 91.03600 | 55.84080 | 74.74190 | -893.83321  | 196.54963   | -68.61397   | 1 |
| 22841 | H | 91.33000 | 56.77180 | 74.28090 | -1591.12168 | 302.17210   | -2714.27866 | 1 |
| 22842 | H | 90.59400 | 55.18780 | 74.00390 | -576.40564  | 2947.00891  | 943.08605   | 1 |
| 22843 | C | 92.32500 | 55.26980 | 75.05690 | 633.10786   | -635.66830  | 108.59183   | 1 |
| 22844 | O | 92.92800 | 54.78180 | 74.07790 | -203.32699  | -693.29440  | 294.05873   | 1 |
| 22845 | N | 92.85900 | 55.28180 | 76.31390 | -423.77072  | -721.99708  | 74.73643    | 1 |
| 22846 | H | 92.39700 | 55.80080 | 77.02990 | -2182.92949 | -317.00795  | 2231.41823  | 1 |
| 22847 | C | 94.18600 | 54.76780 | 76.54990 | -519.65626  | 741.53402   | -163.87150  | 1 |
| 22848 | H | 94.42000 | 54.19980 | 75.66190 | 2042.92389  | 2186.73409  | -990.76277  | 1 |
| 22849 | C | 95.24000 | 55.87480 | 76.84190 | -406.83065  | 773.69858   | -293.62934  | 1 |
| 22850 | H | 96.23400 | 55.39980 | 76.97990 | 1640.53249  | 998.87294   | -2507.31248 | 1 |
| 22851 | H | 94.96800 | 56.43880 | 77.75990 | 1804.08947  | -533.91802  | -2533.35478 | 1 |
| 22852 | C | 95.32500 | 56.83880 | 75.67490 | 654.95474   | 604.67323   | -210.00064  | 1 |
| 22853 | C | 94.57400 | 58.04680 | 75.56990 | 731.71339   | -400.11289  | 340.42540   | 1 |
| 22854 | H | 93.81100 | 58.35680 | 76.26890 | 1621.81396  | -2627.07086 | 559.19251   | 1 |
| 22855 | C | 94.76300 | 58.89280 | 74.47790 | -425.21057  | -262.96070  | -777.13733  | 1 |
| 22856 | H | 94.19800 | 59.78980 | 74.27190 | -2214.85488 | 878.17117   | 2048.42730  | 1 |
| 22857 | C | 95.64700 | 58.60780 | 73.44990 | 412.56078   | 587.45763   | 550.72522   | 1 |
| 22858 | O | 95.87200 | 59.44180 | 72.41690 | -560.11085  | -357.88667  | 413.39932   | 1 |
| 22859 | H | 96.32200 | 59.00280 | 71.69190 | 1955.31868  | -1688.47311 | 1768.93106  | 1 |
| 22860 | C | 96.26800 | 56.58880 | 74.66090 | -711.29179  | -522.03013  | -245.19670  | 1 |
| 22861 | H | 96.92000 | 55.72780 | 74.64290 | -1396.08723 | 234.46085   | -2827.95862 | 1 |
| 22862 | C | 96.40200 | 57.42980 | 73.55890 | 239.36014   | -857.17333  | -178.26183  | 1 |
| 22863 | H | 97.07000 | 57.15380 | 72.75690 | 1810.66320  | 1092.18531  | -2344.28853 | 1 |
| 22864 | C | 94.25100 | 53.70880 | 77.63690 | 514.36361   | 686.42840   | -329.84905  | 1 |
| 22865 | O | 94.75800 | 52.60880 | 77.40090 | -419.00787  | -618.77781  | -265.43881  | 1 |
| 22866 | N | 93.66100 | 53.96080 | 78.80590 | 254.13132   | -668.26441  | 426.01780   | 1 |
| 22867 | H | 93.27600 | 54.86780 | 78.95390 | -1236.76060 | -2600.59858 | 1246.98660  | 1 |
| 22868 | C | 93.44100 | 53.00680 | 79.89090 | -601.81432  | 604.19439   | -349.06548  | 1 |

|       |   |          |          |          |             |             |             |   |
|-------|---|----------|----------|----------|-------------|-------------|-------------|---|
| 22869 | H | 94.35700 | 52.47780 | 80.10790 | 1825.75358  | 1578.63553  | 2002.46595  | 1 |
| 22870 | C | 92.94400 | 53.62880 | 81.25290 | 443.80576   | -393.77199  | -705.11153  | 1 |
| 22871 | H | 92.05600 | 54.20480 | 80.91490 | 1526.44231  | 1905.07992  | 1970.59790  | 1 |
| 22872 | H | 92.64800 | 52.84180 | 81.97990 | 1216.13596  | 899.36378   | 2742.98059  | 1 |
| 22873 | C | 93.94700 | 54.46080 | 82.04690 | -395.24330  | 818.29969   | 91.04556    | 1 |
| 22874 | H | 94.47900 | 55.07880 | 81.29190 | -1518.71544 | -2747.20600 | 171.08257   | 1 |
| 22875 | H | 94.64500 | 53.84780 | 82.65590 | 2441.23361  | -1925.35655 | 446.86464   | 1 |
| 22876 | C | 93.27700 | 55.39580 | 83.02990 | -568.93645  | 45.01388    | 697.67726   | 1 |
| 22877 | O | 92.47900 | 54.97380 | 83.85390 | 277.08816   | -652.90903  | 327.84141   | 1 |
| 22878 | N | 93.52300 | 56.72180 | 82.88790 | -589.21039  | -84.00996   | 585.73711   | 1 |
| 22879 | H | 94.41900 | 57.02380 | 82.56290 | -2099.22431 | 47.95983    | -2359.45524 | 1 |
| 22880 | H | 92.86000 | 57.35880 | 83.28190 | 1727.88598  | 366.51408   | -2616.65426 | 1 |
| 22881 | C | 92.57700 | 51.86780 | 79.50590 | 307.03237   | 599.38574   | 600.81571   | 1 |
| 22882 | O | 92.78500 | 50.65780 | 79.79990 | -588.61236  | 398.43318   | -367.87454  | 1 |
| 22883 | N | 91.47300 | 52.18080 | 78.75590 | 358.64088   | 365.81277   | 655.88441   | 1 |
| 22884 | H | 91.20800 | 53.14080 | 78.70990 | 2026.38491  | 266.84928   | 2374.73414  | 1 |
| 22885 | C | 90.61600 | 51.17280 | 78.07990 | 622.80050   | -485.14990  | 433.00641   | 1 |
| 22886 | H | 90.80800 | 50.23680 | 78.58390 | -2146.65397 | -1357.71144 | -1872.82504 | 1 |
| 22887 | C | 89.08300 | 51.53180 | 78.20090 | 474.89020   | -646.62861  | 410.05360   | 1 |
| 22888 | H | 88.90900 | 52.51580 | 77.71390 | -2986.90579 | -810.46801  | 559.95488   | 1 |
| 22889 | H | 88.49600 | 50.75480 | 77.66490 | 385.07431   | 2813.55053  | 1345.41743  | 1 |
| 22890 | C | 88.66600 | 51.54680 | 79.65090 | -18.59448   | 730.56480   | 533.97343   | 1 |
| 22891 | H | 89.15400 | 52.39480 | 80.17690 | 1410.85715  | 2459.48343  | -1381.03279 | 1 |
| 22892 | H | 89.07300 | 50.61780 | 80.10390 | 2468.82731  | -1052.29292 | -1652.96547 | 1 |
| 22893 | C | 87.13900 | 51.48180 | 79.68990 | -434.68627  | -793.38035  | -118.26329  | 1 |
| 22894 | H | 86.76700 | 52.34880 | 79.10290 | 819.63088   | -1656.38513 | 2529.15828  | 1 |
| 22895 | H | 86.88900 | 50.48680 | 79.26190 | -2962.05142 | 807.77855   | 684.02838   | 1 |
| 22896 | C | 86.57500 | 51.74980 | 81.08890 | 624.52108   | 584.56640   | -330.56326  | 1 |
| 22897 | H | 86.92000 | 52.73180 | 81.47690 | -1472.39118 | 2540.31383  | -1150.99503 | 1 |
| 22898 | H | 86.98500 | 50.92780 | 81.71390 | 426.78497   | -2562.75313 | -1786.33586 | 1 |
| 22899 | N | 85.12500 | 51.68880 | 81.07790 | -327.65326  | 635.94393   | -466.28001  | 1 |
| 22900 | H | 84.77400 | 50.75480 | 80.78390 | 2059.62684  | 2254.53092  | -772.57995  | 1 |
| 22901 | H | 84.69900 | 52.02580 | 81.96490 | -2255.66064 | -2169.92629 | -334.00927  | 1 |
| 22902 | H | 84.83800 | 52.34680 | 80.32490 | 2700.67518  | 849.04682   | -1383.60262 | 1 |
| 22903 | C | 90.95300 | 50.94980 | 76.60790 | -794.82222  | 419.33478   | 162.82826   | 1 |
| 22904 | O | 90.98900 | 51.89480 | 75.82090 | -480.24644  | -339.16292  | -542.84198  | 1 |
| 22905 | N | 91.05100 | 49.72080 | 76.17790 | -652.42125  | 402.56880   | 347.06871   | 1 |
| 22906 | H | 90.96200 | 48.97080 | 76.82890 | 1455.59256  | 2352.58446  | -1519.18408 | 1 |
| 22907 | C | 91.29900 | 49.34780 | 74.85290 | -199.67264  | 857.49545   | 240.30770   | 1 |
| 22908 | H | 91.82800 | 50.10280 | 74.28990 | 806.87489   | -479.31523  | -3017.74564 | 1 |
| 22909 | C | 92.38200 | 48.18380 | 74.82990 | -235.56528  | 673.22905   | -592.82728  | 1 |
| 22910 | H | 92.07000 | 47.34480 | 75.48790 | 1994.94448  | 898.40063   | 2242.64783  | 1 |
| 22911 | H | 92.30400 | 47.74580 | 73.81190 | -1465.24917 | -2624.07662 | 902.06909   | 1 |
| 22912 | C | 93.85500 | 48.62380 | 74.83190 | -427.43123  | 622.41207   | 502.45541   | 1 |
| 22913 | H | 94.07900 | 49.05780 | 73.83490 | -1536.79240 | -1549.85098 | -2281.87548 | 1 |
| 22914 | H | 94.46100 | 47.69280 | 74.87390 | -1015.85140 | -903.76807  | -2854.69531 | 1 |
| 22915 | C | 94.33100 | 49.57380 | 75.99790 | -126.33383  | 754.23628   | 487.29172   | 1 |
| 22916 | H | 93.81300 | 50.55380 | 75.93290 | 2513.79348  | 1869.68758  | 277.35752   | 1 |
| 22917 | H | 94.18600 | 49.06480 | 76.97490 | -1089.28768 | 2944.09369  | -293.96816  | 1 |
| 22918 | C | 95.82100 | 49.84980 | 75.84490 | 659.12768   | 340.02034   | 512.35935   | 1 |
| 22919 | H | 96.00100 | 50.55280 | 75.00390 | 1606.27959  | -835.05304  | 2551.70036  | 1 |
| 22920 | H | 96.33200 | 48.90480 | 75.56290 | -1868.93442 | 2260.54528  | 1135.13105  | 1 |
| 22921 | N | 96.36400 | 50.35680 | 77.12790 | 81.20232    | -835.21473  | -23.09563   | 1 |
| 22922 | H | 95.93900 | 49.92380 | 77.97290 | 364.39057   | -1843.26879 | -2537.64610 | 1 |
| 22923 | H | 96.24700 | 51.38080 | 77.26290 | -215.43952  | -2413.36853 | -2018.75078 | 1 |
| 22924 | H | 97.39300 | 50.20580 | 77.11590 | 2218.23074  | 1042.91871  | 1953.89131  | 1 |
| 22925 | C | 90.00100 | 49.00580 | 74.10290 | -649.43109  | -428.40477  | 458.87613   | 1 |
| 22926 | O | 90.08300 | 48.49180 | 72.98190 | -112.65898  | 635.89307   | 446.27918   | 1 |
| 22927 | N | 88.81000 | 49.29580 | 74.67490 | 642.13307   | -286.88294  | 443.47643   | 1 |
| 22928 | H | 88.70200 | 49.78880 | 75.53390 | -1339.66650 | -686.17315  | 2747.20915  | 1 |
| 22929 | C | 87.55400 | 48.97680 | 74.08890 | 807.40947   | 337.23074   | 236.54092   | 1 |
| 22930 | H | 87.68600 | 49.00780 | 73.01690 | 1257.58492  | -2804.72326 | 625.85089   | 1 |

|       |   |          |          |          |             |             |             |   |
|-------|---|----------|----------|----------|-------------|-------------|-------------|---|
| 22931 | C | 87.15200 | 47.53380 | 74.50490 | 192.69265   | -367.55207  | -825.43390  | 1 |
| 22932 | H | 87.00100 | 47.55280 | 75.60590 | 624.95393   | -2726.71050 | 1414.33315  | 1 |
| 22933 | H | 88.03400 | 46.90580 | 74.25790 | -297.94061  | 1842.96608  | 2519.41907  | 1 |
| 22934 | C | 85.88800 | 46.98380 | 73.78190 | -517.72163  | -671.48744  | -346.92766  | 1 |
| 22935 | H | 85.04600 | 47.70380 | 73.87690 | 2156.37604  | 2132.35386  | 825.17355   | 1 |
| 22936 | C | 86.19700 | 46.73680 | 72.27590 | 509.88814   | -385.04054  | 628.24096   | 1 |
| 22937 | H | 86.97300 | 45.94380 | 72.21590 | 754.15993   | 1558.26217  | -2646.15083 | 1 |
| 22938 | H | 86.79000 | 47.58380 | 71.86990 | -2373.73063 | 8.06651     | 2052.89856  | 1 |
| 22939 | H | 85.32100 | 46.35980 | 71.70490 | 1416.40800  | 2205.52311  | -1760.23517 | 1 |
| 22940 | C | 85.44900 | 45.69380 | 74.43390 | -575.59521  | -683.72804  | 156.05618   | 1 |
| 22941 | H | 86.17400 | 44.86080 | 74.31090 | -2599.21855 | 1299.81467  | 1198.89010  | 1 |
| 22942 | H | 84.50200 | 45.40480 | 73.93090 | -2901.17415 | -258.25554  | -1211.83336 | 1 |
| 22943 | H | 85.30700 | 45.81980 | 75.52790 | -2860.55318 | -599.22074  | 1152.23141  | 1 |
| 22944 | C | 86.58300 | 49.95080 | 74.48290 | 467.10690   | 40.38841    | 765.05519   | 1 |
| 22945 | O | 86.54200 | 50.31480 | 75.64190 | -591.60520  | 473.35718   | -253.86202  | 1 |
| 22946 | N | 85.76300 | 50.38280 | 73.53390 | 70.85480    | -808.54208  | 198.73130   | 1 |
| 22947 | H | 85.97600 | 50.05580 | 72.61690 | 1801.88911  | 1550.27901  | 2046.56587  | 1 |
| 22948 | C | 84.62100 | 51.21080 | 73.67290 | -169.02506  | -438.56183  | -793.81836  | 1 |
| 22949 | H | 84.52300 | 51.36680 | 74.73690 | -1670.48822 | 2606.29968  | -604.10162  | 1 |
| 22950 | C | 84.88700 | 52.61880 | 73.07790 | 867.09297   | 228.53306   | -163.98279  | 1 |
| 22951 | H | 83.94100 | 53.16780 | 72.88390 | 1366.84042  | 587.76508   | 2757.73719  | 1 |
| 22952 | H | 85.25400 | 52.43280 | 72.04590 | -1943.23716 | -81.37147   | -2490.07071 | 1 |
| 22953 | C | 85.88700 | 53.42880 | 73.88690 | 641.21360   | -636.33986  | 52.33474    | 1 |
| 22954 | H | 86.80800 | 52.87480 | 74.16590 | -296.71855  | 2776.83533  | -1472.81840 | 1 |
| 22955 | H | 85.38700 | 53.70380 | 74.83990 | -224.50653  | 2919.51661  | -1175.67359 | 1 |
| 22956 | C | 86.28500 | 54.67180 | 73.14490 | -50.67725   | -647.09072  | -649.04509  | 1 |
| 22957 | H | 85.41500 | 55.31380 | 72.88890 | 967.76638   | 2325.71282  | -1901.62633 | 1 |
| 22958 | H | 86.96800 | 55.30180 | 73.75390 | 1562.55506  | 2005.23223  | 1841.94832  | 1 |
| 22959 | N | 87.02500 | 54.16280 | 71.89790 | -613.51596  | 357.87667   | 452.82345   | 1 |
| 22960 | H | 86.52100 | 54.27380 | 71.04090 | 2251.03426  | 2194.33652  | -154.74492  | 1 |
| 22961 | C | 88.26400 | 53.66480 | 71.80990 | -574.32393  | 369.15566   | -626.42116  | 1 |
| 22962 | N | 89.10000 | 53.50980 | 72.82190 | 573.46650   | 615.66775   | -96.05201   | 1 |
| 22963 | H | 88.79100 | 53.70980 | 73.75190 | -331.83540  | 2641.13313  | 1671.42228  | 1 |
| 22964 | H | 90.04200 | 53.23980 | 72.62390 | 2820.03680  | 636.37764   | 1219.55910  | 1 |
| 22965 | N | 88.74400 | 53.35480 | 70.59690 | 239.09338   | -458.47432  | 646.66656   | 1 |
| 22966 | H | 88.15000 | 53.32880 | 69.79290 | 588.76453   | -1071.18775 | -2909.93942 | 1 |
| 22967 | H | 89.71700 | 53.20780 | 70.42090 | 1550.59835  | 2704.32568  | 432.95304   | 1 |
| 22968 | C | 83.32200 | 50.61480 | 73.20590 | -631.25281  | -474.40471  | -470.44823  | 1 |
| 22969 | O | 83.24600 | 50.07780 | 72.10590 | 154.16955   | 81.40065    | 755.61937   | 1 |
| 22970 | N | 82.30300 | 50.67980 | 74.02090 | 285.13236   | -353.75363  | -721.81545  | 1 |
| 22971 | H | 82.47000 | 51.01780 | 74.94390 | -1320.51972 | 2084.15193  | 1944.69055  | 1 |
| 22972 | C | 80.90500 | 50.41080 | 73.69990 | 210.07684   | 865.93215   | 193.90642   | 1 |
| 22973 | H | 80.90700 | 49.61780 | 72.96590 | 2618.24816  | 1230.87924  | 1218.80562  | 1 |
| 22974 | C | 80.09800 | 49.91280 | 74.88890 | 887.87873   | 102.98276   | 152.46396   | 1 |
| 22975 | H | 80.65700 | 49.07480 | 75.35590 | -613.28966  | 2741.78292  | -1437.77795 | 1 |
| 22976 | H | 79.13500 | 49.50380 | 74.51390 | -1337.39175 | -2451.62466 | -1459.22698 | 1 |
| 22977 | O | 79.93000 | 50.94380 | 75.84990 | 401.92725   | 680.62285   | 12.17402    | 1 |
| 22978 | H | 80.78600 | 51.10580 | 76.25190 | 2042.19612  | -1931.06415 | 1391.89319  | 1 |
| 22979 | C | 80.20200 | 51.63780 | 73.09290 | -294.67002  | 464.99592   | 718.26769   | 1 |
| 22980 | O | 80.82500 | 52.67380 | 72.89290 | 2.14290     | -665.84704  | 404.90586   | 1 |
| 22981 | N | 78.90600 | 51.49280 | 72.63190 | 800.15382   | -240.89606  | 64.27737    | 1 |
| 22982 | H | 78.46200 | 50.61780 | 72.45690 | 1962.54868  | 2036.12175  | 1366.55138  | 1 |
| 22983 | C | 78.10900 | 52.61380 | 72.12490 | -43.08762   | -518.84935  | -757.77133  | 1 |
| 22984 | H | 78.62900 | 53.02480 | 71.27190 | 566.72532   | 3042.40369  | 574.85855   | 1 |
| 22985 | C | 76.74700 | 52.13880 | 71.62190 | -6.00748    | 690.83885   | 588.36671   | 1 |
| 22986 | H | 76.16900 | 52.99880 | 71.21990 | 956.16082   | -1450.21470 | 2607.71660  | 1 |
| 22987 | H | 76.18700 | 51.79780 | 72.51890 | -1766.91820 | -2487.23243 | -776.41636  | 1 |
| 22988 | C | 76.84800 | 51.01580 | 70.56590 | -680.31760  | 336.20169   | 502.41519   | 1 |
| 22989 | H | 75.93000 | 51.16180 | 69.95690 | 960.34794   | 1597.10047  | 2524.16015  | 1 |
| 22990 | H | 77.66100 | 51.23680 | 69.84290 | 2352.98473  | 469.80657   | 2018.28403  | 1 |
| 22991 | S | 76.94200 | 49.31380 | 71.19890 | 337.19909   | 412.75368   | 154.65424   | 1 |
| 22992 | C | 75.79700 | 48.59480 | 69.95690 | 822.81620   | 249.88131   | 282.45155   | 1 |

|       |   |          |          |          |             |             |             |   |
|-------|---|----------|----------|----------|-------------|-------------|-------------|---|
| 22993 | H | 75.35400 | 47.67380 | 70.39290 | 2060.74359  | -2366.09647 | -132.47549  | 1 |
| 22994 | H | 76.40800 | 48.33680 | 69.06590 | -364.61826  | -2319.87485 | 2075.47209  | 1 |
| 22995 | H | 75.08300 | 49.32480 | 69.51890 | 1732.48659  | 1351.75257  | -2263.39407 | 1 |
| 22996 | C | 77.92300 | 53.80080 | 73.01490 | -220.98370  | 641.16344   | 603.70978   | 1 |
| 22997 | O | 78.11000 | 54.94380 | 72.61990 | 507.20748   | -571.98677  | -184.01056  | 1 |
| 22998 | N | 77.71000 | 53.58280 | 74.34390 | 112.45206   | -796.61967  | 231.54239   | 1 |
| 22999 | H | 77.59800 | 52.67680 | 74.74290 | -1360.67478 | -1229.55302 | 2544.89250  | 1 |
| 23000 | C | 77.68700 | 54.67680 | 75.33990 | -682.04171  | -106.36014  | -610.49811  | 1 |
| 23001 | H | 76.94800 | 55.38980 | 75.00390 | -1210.53135 | 2908.43475  | 23.36828    | 1 |
| 23002 | C | 77.20500 | 54.32980 | 76.79390 | 469.29062   | 13.13921    | -790.83834  | 1 |
| 23003 | H | 77.72800 | 53.41580 | 77.14590 | 2370.63613  | -1296.24041 | -1617.01128 | 1 |
| 23004 | O | 75.76300 | 54.21780 | 76.78490 | 246.74145   | -472.35287  | -590.27785  | 1 |
| 23005 | H | 75.63300 | 53.42280 | 76.26290 | 3026.59544  | -800.63023  | -281.48693  | 1 |
| 23006 | C | 77.39900 | 55.42680 | 77.81890 | -568.97019  | 427.32721   | 564.12234   | 1 |
| 23007 | H | 76.81700 | 55.15480 | 78.72490 | 2377.70020  | 2040.06093  | 265.30622   | 1 |
| 23008 | H | 78.42900 | 55.46880 | 78.23490 | 220.82873   | 3109.80303  | -446.85938  | 1 |
| 23009 | H | 77.11100 | 56.36280 | 77.29590 | -11.43411   | -3026.81523 | 840.02012   | 1 |
| 23010 | C | 78.99300 | 55.41280 | 75.48290 | 697.95757   | -573.76628  | -89.93018   | 1 |
| 23011 | O | 79.01200 | 56.64380 | 75.52890 | -63.11175   | -772.43755  | -146.97250  | 1 |
| 23012 | N | 80.04200 | 54.60680 | 75.54790 | -402.26277  | 514.11675   | -552.84201  | 1 |
| 23013 | H | 79.91100 | 53.62580 | 75.42390 | -2352.64599 | 2069.82402  | 318.70266   | 1 |
| 23014 | C | 81.45000 | 55.05880 | 75.60490 | 203.28338   | 640.59352   | -630.52741  | 1 |
| 23015 | H | 81.54600 | 55.60980 | 76.52890 | 628.71135   | -639.37924  | -3026.00901 | 1 |
| 23016 | C | 82.49400 | 53.85080 | 75.62690 | 595.14304   | 400.57143   | -574.32955  | 1 |
| 23017 | H | 83.54200 | 54.17680 | 75.80090 | -2235.84851 | -1657.68567 | -1480.77062 | 1 |
| 23018 | H | 82.40300 | 53.30880 | 74.66190 | 673.19822   | 2405.60484  | -1929.09052 | 1 |
| 23019 | C | 82.13700 | 52.85880 | 76.75290 | -373.08063  | 40.92871    | -845.48761  | 1 |
| 23020 | O | 82.51800 | 51.66580 | 76.56390 | -354.38605  | 24.61665    | 693.37048   | 1 |
| 23021 | O | 81.53100 | 53.20380 | 77.76190 | 284.12498   | 77.25823    | 719.25973   | 1 |
| 23022 | C | 81.81100 | 55.96680 | 74.36290 | 201.59443   | 704.83893   | -557.48842  | 1 |
| 23023 | O | 82.31600 | 57.09180 | 74.51690 | 407.19084   | 420.97399   | 518.20284   | 1 |
| 23024 | N | 81.46000 | 55.58180 | 73.12090 | 226.26998   | -737.12114  | -342.84076  | 1 |
| 23025 | H | 80.97900 | 54.71980 | 72.97790 | 2573.21982  | 1051.39428  | 1457.15659  | 1 |
| 23026 | C | 81.68400 | 56.29980 | 71.95890 | 384.57750   | -164.97618  | -818.36243  | 1 |
| 23027 | H | 82.73300 | 56.54780 | 72.03390 | -1974.24170 | 1754.81688  | -1731.48162 | 1 |
| 23028 | C | 81.30300 | 55.39580 | 70.72990 | -586.61785  | 328.70786   | -635.13016  | 1 |
| 23029 | H | 81.29600 | 56.08680 | 69.85890 | -2347.84998 | -2027.08644 | 516.75439   | 1 |
| 23030 | H | 80.24900 | 55.09180 | 70.90490 | -2706.22542 | 1288.96343  | 964.54968   | 1 |
| 23031 | C | 82.34400 | 54.32980 | 70.40590 | 40.27656    | -674.19040  | 593.67127   | 1 |
| 23032 | H | 82.91800 | 54.03380 | 71.31090 | -1069.05665 | 1990.54140  | 2183.64709  | 1 |
| 23033 | H | 83.11200 | 54.74680 | 69.71990 | -617.05995  | -2633.90841 | 1586.03922  | 1 |
| 23034 | C | 81.85800 | 53.05580 | 69.67590 | 655.61508   | -561.97280  | 256.89264   | 1 |
| 23035 | H | 81.45300 | 53.35580 | 68.68590 | -2522.32768 | -602.87286  | 1774.03817  | 1 |
| 23036 | H | 81.02700 | 52.73880 | 70.34090 | -291.10079  | -1814.87670 | -2562.77661 | 1 |
| 23037 | C | 82.96900 | 51.98280 | 69.53090 | -519.84914  | -510.12782  | 534.16558   | 1 |
| 23038 | H | 83.51800 | 51.86480 | 70.48990 | 1852.32208  | 1399.27427  | 2109.45388  | 1 |
| 23039 | H | 83.71600 | 52.20480 | 68.73890 | 1296.71898  | -1527.63214 | 2405.11738  | 1 |
| 23040 | N | 82.51400 | 50.65680 | 69.16890 | 530.42691   | 534.02625   | 370.02555   | 1 |
| 23041 | H | 82.10400 | 50.74380 | 68.21690 | -174.42471  | 2207.89161  | -2254.88183 | 1 |
| 23042 | H | 83.32800 | 50.00980 | 69.15490 | -697.52425  | 2022.61341  | 2299.10532  | 1 |
| 23043 | H | 81.81100 | 50.26080 | 69.82490 | -1895.70458 | -2330.05748 | 916.87689   | 1 |
| 23044 | C | 80.96500 | 57.63780 | 71.82890 | 826.33937   | -331.71141  | 153.65811   | 1 |
| 23045 | O | 81.52700 | 58.63680 | 71.43890 | 523.16986   | 50.70035    | -595.67242  | 1 |
| 23046 | N | 79.66900 | 57.69580 | 72.21290 | 62.45139    | 409.56300   | -748.05525  | 1 |
| 23047 | H | 79.23700 | 56.80280 | 72.31390 | 1047.96918  | -1318.90113 | 2642.40019  | 1 |
| 23048 | C | 78.91900 | 58.95380 | 72.34290 | 668.93466   | 8.64760     | 604.37743   | 1 |
| 23049 | H | 79.04000 | 59.54580 | 71.44790 | -1801.46544 | 2274.28975  | 1223.80510  | 1 |
| 23050 | C | 77.45800 | 58.71880 | 72.77690 | 812.28507   | -345.45887  | -213.28381  | 1 |
| 23051 | H | 76.82600 | 59.62580 | 72.87990 | -1464.45585 | -658.36634  | 2698.36901  | 1 |
| 23052 | H | 77.44500 | 58.21880 | 73.76890 | -2755.11863 | 1063.15487  | 1090.38235  | 1 |
| 23053 | C | 76.64300 | 57.82380 | 71.87090 | 565.68760   | -81.69041   | 696.34826   | 1 |
| 23054 | C | 76.58300 | 58.10480 | 70.48090 | 191.17442   | -840.35040  | -289.80430  | 1 |



|       |   |          |          |          |             |             |             |   |
|-------|---|----------|----------|----------|-------------|-------------|-------------|---|
| 23055 | H | 77.12200 | 58.96280 | 70.10690 | -2027.91211 | 1447.77085  | -1939.83156 | 1 |
| 23056 | C | 75.81100 | 57.35880 | 69.59390 | -626.25240  | -139.62751  | 642.60311   | 1 |
| 23057 | H | 75.76500 | 57.60680 | 68.54390 | -1780.74170 | -1779.93218 | -1896.43867 | 1 |
| 23058 | C | 75.22600 | 56.17080 | 70.00690 | 502.67737   | -711.06597  | 237.11467   | 1 |
| 23059 | O | 74.53900 | 55.28780 | 69.16190 | 631.47124   | 29.23568    | 456.27273   | 1 |
| 23060 | H | 74.41500 | 54.44180 | 69.59890 | -1234.33470 | -2724.01531 | -980.30574  | 1 |
| 23061 | C | 75.90500 | 56.70580 | 72.30390 | -442.83426  | -215.54464  | 759.17842   | 1 |
| 23062 | H | 75.83900 | 56.41280 | 73.34090 | -1393.61831 | 2307.76743  | 1620.77316  | 1 |
| 23063 | C | 75.30900 | 55.81680 | 71.36490 | -143.38104  | 491.05271   | -768.48538  | 1 |
| 23064 | H | 74.94300 | 54.87280 | 71.74090 | 1870.61073  | 1909.21757  | -1669.14605 | 1 |
| 23065 | C | 79.49600 | 59.91880 | 73.36590 | 310.03549   | -622.19152  | 573.62197   | 1 |
| 23066 | O | 79.75100 | 61.08780 | 73.13790 | 161.29134   | 38.24882    | -780.40413  | 1 |
| 23067 | N | 79.82100 | 59.45580 | 74.55290 | -645.59120  | -337.18352  | -440.57348  | 1 |
| 23068 | H | 79.68400 | 58.49580 | 74.78390 | 2765.67771  | -1450.35858 | -344.06181  | 1 |
| 23069 | C | 80.44200 | 60.30880 | 75.56290 | -734.28892  | 362.26782   | -421.75171  | 1 |
| 23070 | H | 79.90500 | 61.24580 | 75.55490 | -2792.31292 | -897.72575  | -1155.65992 | 1 |
| 23071 | C | 80.24100 | 59.73180 | 76.98690 | 329.07937   | 554.50571   | -654.93185  | 1 |
| 23072 | H | 80.77400 | 60.48080 | 77.61190 | 2462.34126  | 127.12950   | 1939.85042  | 1 |
| 23073 | H | 80.74600 | 58.75980 | 77.17490 | -1131.41524 | 2485.96200  | -1578.84657 | 1 |
| 23074 | C | 78.72500 | 59.53680 | 77.40490 | -659.15040  | 472.49354   | -434.86651  | 1 |
| 23075 | H | 78.16700 | 60.42180 | 77.03090 | 2658.64920  | 1563.65188  | -618.41456  | 1 |
| 23076 | H | 78.24300 | 58.62080 | 77.00190 | -2103.48584 | -1944.98981 | 1292.83512  | 1 |
| 23077 | C | 78.50600 | 59.36680 | 78.91590 | 28.64145    | 200.53876   | 879.83748   | 1 |
| 23078 | H | 78.94700 | 58.43680 | 79.33590 | -77.54784   | 2294.75625  | 2142.82964  | 1 |
| 23079 | H | 77.42800 | 59.16480 | 79.09190 | -1973.69052 | -1071.09530 | 2196.37425  | 1 |
| 23080 | N | 79.05000 | 60.55680 | 79.71390 | -232.92205  | 497.60710   | 634.13661   | 1 |
| 23081 | H | 79.41200 | 61.35180 | 79.22890 | 829.62815   | -2922.84523 | -815.56267  | 1 |
| 23082 | C | 79.10800 | 60.62180 | 81.05290 | 121.67880   | -646.72468  | -638.70515  | 1 |
| 23083 | N | 78.65600 | 59.79180 | 81.93890 | -680.33710  | -278.22122  | 409.58322   | 1 |
| 23084 | H | 78.00100 | 59.08680 | 81.66790 | -1758.51946 | -2223.70049 | 1356.87274  | 1 |
| 23085 | H | 78.68000 | 60.11080 | 82.88590 | -1985.72939 | -1569.31999 | -1880.29613 | 1 |
| 23086 | N | 79.61200 | 61.72080 | 81.54490 | -337.58761  | -584.30655  | -517.00108  | 1 |
| 23087 | H | 79.92100 | 62.44280 | 80.92490 | -1565.41979 | 1492.86060  | 2278.79114  | 1 |
| 23088 | H | 79.73600 | 61.78780 | 82.53490 | -1798.38855 | 1793.76216  | -1868.53441 | 1 |
| 23089 | C | 81.91100 | 60.65180 | 75.26890 | 612.34580   | 443.77764   | -517.12508  | 1 |
| 23090 | O | 82.34700 | 61.74380 | 75.64890 | 404.44469   | 677.51636   | -55.80654   | 1 |
| 23091 | N | 82.63500 | 59.80580 | 74.56990 | -194.80445  | 74.07543    | -829.93939  | 1 |
| 23092 | H | 82.35300 | 58.85480 | 74.46790 | -2534.09818 | 1466.87656  | 1155.08720  | 1 |
| 23093 | C | 83.96700 | 60.27580 | 74.06590 | 575.73276   | -678.33284  | 157.97618   | 1 |
| 23094 | H | 84.51900 | 60.58080 | 74.94290 | -2020.08267 | -266.09556  | 2389.94338  | 1 |
| 23095 | C | 84.76500 | 59.15580 | 73.29790 | 802.63368   | -158.23136  | -402.30804  | 1 |
| 23096 | H | 84.27400 | 58.99080 | 72.31490 | -1309.67093 | 1430.43942  | -2494.03726 | 1 |
| 23097 | H | 84.62400 | 58.26080 | 73.94190 | -1614.59018 | 2706.35416  | 64.72486    | 1 |
| 23098 | C | 86.25700 | 59.33680 | 73.14890 | -741.70812  | 202.46992   | 487.94101   | 1 |
| 23099 | H | 86.42000 | 60.38280 | 72.81090 | 2277.59375  | -2075.12710 | -611.22370  | 1 |
| 23100 | C | 86.99400 | 59.10380 | 74.43890 | -137.29936  | 763.25162   | -500.00913  | 1 |
| 23101 | H | 88.03400 | 59.42780 | 74.21690 | 2311.67705  | 2064.42048  | 527.50779   | 1 |
| 23102 | H | 86.66200 | 59.73080 | 75.29390 | 1760.34186  | -1717.90148 | 1942.49574  | 1 |
| 23103 | H | 86.94000 | 58.03480 | 74.73590 | 1613.83236  | 1951.69980  | 1855.41381  | 1 |
| 23104 | C | 86.78800 | 58.36680 | 72.08090 | -38.09675   | 295.79315   | 851.64547   | 1 |
| 23105 | H | 86.63600 | 57.36080 | 72.52590 | -1367.98749 | 2400.07169  | -1530.64046 | 1 |
| 23106 | H | 87.88400 | 58.53880 | 72.02790 | -267.64055  | 2655.86362  | 1662.64344  | 1 |
| 23107 | H | 86.34700 | 58.51580 | 71.07190 | -2547.99560 | 1748.39836  | 617.68570   | 1 |
| 23108 | C | 83.83400 | 61.42680 | 73.15390 | -354.64480  | -407.89906  | -744.37542  | 1 |
| 23109 | O | 84.63000 | 62.37580 | 73.26490 | 648.14062   | 411.87515   | -185.96437  | 1 |
| 23110 | N | 82.85300 | 61.48880 | 72.22890 | -702.02783  | -438.82468  | -184.48865  | 1 |
| 23111 | H | 82.23800 | 60.70680 | 72.16490 | 2551.70259  | 1722.72296  | -649.34929  | 1 |
| 23112 | C | 82.51100 | 62.67080 | 71.40490 | -180.44389  | 898.20725   | -67.92951   | 1 |
| 23113 | H | 83.43700 | 63.02080 | 70.97290 | 2736.15189  | 942.16660   | 1216.01058  | 1 |
| 23114 | C | 81.45100 | 62.39580 | 70.30990 | 648.58985   | 637.19681   | 52.60743    | 1 |
| 23115 | H | 80.52300 | 61.97280 | 70.74890 | -1130.53842 | 1220.42489  | 2666.10188  | 1 |
| 23116 | H | 81.11100 | 63.34480 | 69.84290 | -1243.55693 | -1028.19869 | 2692.91121  | 1 |

|       |   |          |          |          |             |             |             |   |
|-------|---|----------|----------|----------|-------------|-------------|-------------|---|
| 23117 | N | 83.07400 | 62.04880 | 68.49190 | -72.09256   | -817.92844  | 160.36765   | 1 |
| 23118 | C | 81.94000 | 61.60380 | 69.18490 | 547.48863   | -716.85763  | 39.39778    | 1 |
| 23119 | C | 83.07900 | 61.30880 | 67.38090 | -162.73829  | 807.53689   | -417.27807  | 1 |
| 23120 | H | 83.93400 | 61.31080 | 66.70590 | 2700.42262  | 1608.11270  | 65.40617    | 1 |
| 23121 | N | 82.06700 | 60.43080 | 67.32990 | 21.15065    | 698.20229   | -493.46019  | 1 |
| 23122 | H | 81.96900 | 59.68080 | 66.67590 | 2116.59453  | 2326.94943  | -96.22663   | 1 |
| 23123 | C | 81.28500 | 60.67180 | 68.46190 | 745.64159   | 350.07244   | -394.10703  | 1 |
| 23124 | H | 80.30900 | 60.21780 | 68.57990 | 2033.02284  | 196.50651   | 2378.51407  | 1 |
| 23125 | C | 81.99700 | 63.82580 | 72.29390 | -165.90970  | -887.54285  | -106.51993  | 1 |
| 23126 | O | 82.45800 | 64.95180 | 72.13090 | -748.05413  | 56.91983    | -273.20362  | 1 |
| 23127 | N | 81.10700 | 63.58780 | 73.24290 | -512.30371  | -351.85098  | 564.88451   | 1 |
| 23128 | H | 80.64000 | 62.70880 | 73.29990 | 2256.16195  | 587.08714   | -2116.98066 | 1 |
| 23129 | C | 80.62600 | 64.63480 | 74.15290 | 535.62813   | 423.97319   | 593.90494   | 1 |
| 23130 | H | 80.25900 | 65.41980 | 73.50690 | 1099.07169  | 2679.89010  | -1239.77150 | 1 |
| 23131 | C | 79.51400 | 64.01580 | 75.02690 | 482.42299   | 682.57672   | 356.16106   | 1 |
| 23132 | H | 78.93200 | 63.32680 | 74.37890 | 1776.31344  | -1447.63628 | 2141.04153  | 1 |
| 23133 | H | 80.05900 | 63.34980 | 75.72990 | 2042.83635  | 2141.45031  | -1073.18334 | 1 |
| 23134 | C | 78.65200 | 64.92580 | 75.86790 | 146.11829   | 896.21227   | -111.29981  | 1 |
| 23135 | H | 79.32500 | 65.43280 | 76.59190 | 1572.66026  | -162.20736  | -2724.55262 | 1 |
| 23136 | C | 77.84300 | 65.91680 | 75.11090 | 397.68066   | 398.06485   | -723.21153  | 1 |
| 23137 | H | 78.40300 | 66.58380 | 74.41990 | -2086.64999 | -2126.87440 | -1020.86725 | 1 |
| 23138 | H | 77.04300 | 65.37980 | 74.55790 | 1421.83921  | -2277.51256 | 1623.99252  | 1 |
| 23139 | H | 77.34800 | 66.57180 | 75.85890 | 469.35220   | 679.65577   | -3042.08427 | 1 |
| 23140 | C | 77.73700 | 63.96780 | 76.62590 | 173.72059   | -633.55352  | -636.05472  | 1 |
| 23141 | H | 78.25600 | 63.31880 | 77.36390 | -2273.11237 | -1444.05636 | 1622.53117  | 1 |
| 23142 | H | 77.23500 | 63.24180 | 75.95090 | -2034.98824 | -468.30590  | -2364.38132 | 1 |
| 23143 | H | 77.01400 | 64.60180 | 77.18190 | 1032.40119  | 2970.78737  | -112.01456  | 1 |
| 23144 | C | 81.76100 | 65.29180 | 74.99290 | 338.51371   | 303.40417   | 781.50850   | 1 |
| 23145 | O | 81.80900 | 66.50180 | 75.10190 | 441.91437   | 532.16493   | 372.24414   | 1 |
| 23146 | N | 82.73700 | 64.49880 | 75.49490 | -438.71074  | 390.93270   | -620.66337  | 1 |
| 23147 | H | 82.74800 | 63.51180 | 75.35190 | 2662.66134  | -1430.57157 | -860.87617  | 1 |
| 23148 | C | 84.02000 | 64.94880 | 76.06590 | 570.07449   | -676.82637  | 185.98102   | 1 |
| 23149 | H | 83.77900 | 65.63080 | 76.86790 | -1568.41220 | 1468.68089  | 2294.83952  | 1 |
| 23150 | C | 84.77200 | 63.73480 | 76.76590 | 591.31833   | -679.25247  | -111.61653  | 1 |
| 23151 | H | 85.81700 | 64.05580 | 76.96690 | -1294.43509 | 2329.36057  | 1670.94555  | 1 |
| 23152 | H | 84.71000 | 62.84780 | 76.09990 | 2122.06918  | 2037.89727  | -1122.36510 | 1 |
| 23153 | O | 84.15300 | 63.55380 | 78.01490 | 481.99624   | -40.08419   | -630.29644  | 1 |
| 23154 | H | 84.37800 | 64.25280 | 78.63390 | -1791.30470 | 2066.63923  | 1554.08905  | 1 |
| 23155 | C | 84.93100 | 65.67980 | 75.13190 | -668.65983  | -284.45105  | 546.13060   | 1 |
| 23156 | O | 85.56500 | 66.64980 | 75.53790 | -593.22646  | -509.33452  | -128.31155  | 1 |
| 23157 | N | 85.05100 | 65.29680 | 73.86190 | -264.97826  | 746.65147   | 298.61939   | 1 |
| 23158 | H | 84.70800 | 64.42780 | 73.51290 | -2112.12096 | -134.96352  | 2323.26722  | 1 |
| 23159 | C | 85.69500 | 66.04380 | 72.82190 | 567.18923   | 371.70183   | -616.07252  | 1 |
| 23160 | H | 86.70800 | 66.33380 | 73.05990 | 2758.97835  | -1496.28405 | -16.80281   | 1 |
| 23161 | C | 85.74100 | 65.15480 | 71.54090 | -139.12277  | -863.66209  | -250.56710  | 1 |
| 23162 | H | 84.87900 | 64.46080 | 71.44990 | 142.62428   | 2094.40964  | -2357.14046 | 1 |
| 23163 | C | 85.79600 | 65.94080 | 70.19390 | 448.09140   | -357.51663  | 692.87889   | 1 |
| 23164 | H | 84.86900 | 66.50480 | 69.95490 | 2545.26475  | -1360.53258 | 1223.72822  | 1 |
| 23165 | H | 85.96200 | 65.21880 | 69.36590 | -1483.02878 | -28.50688   | -2787.29310 | 1 |
| 23166 | H | 86.63500 | 66.66980 | 70.17690 | -1298.62715 | 2551.36513  | 1314.32383  | 1 |
| 23167 | C | 87.01400 | 64.26180 | 71.59490 | -398.47848  | 628.50707   | 528.07633   | 1 |
| 23168 | H | 86.82200 | 63.39980 | 72.26990 | -897.36194  | -2480.49486 | 1699.58092  | 1 |
| 23169 | H | 87.92700 | 64.84480 | 71.84190 | 309.69020   | -2967.42149 | 969.38262   | 1 |
| 23170 | H | 87.23900 | 63.84180 | 70.59090 | -3029.74422 | -812.69627  | 282.55922   | 1 |
| 23171 | C | 84.98600 | 67.39680 | 72.55390 | -388.20567  | -802.29636  | -191.53180  | 1 |
| 23172 | O | 85.69000 | 68.41580 | 72.40690 | 204.00267   | -510.67779  | 551.72119   | 1 |
| 23173 | N | 83.64700 | 67.48780 | 72.47490 | 209.88712   | -309.53405  | -760.88718  | 1 |
| 23174 | H | 83.09500 | 66.66380 | 72.57690 | 1587.35745  | 333.16398   | 2684.92746  | 1 |
| 23175 | C | 82.92000 | 68.76280 | 72.32790 | -522.12723  | 261.97688   | -713.72885  | 1 |
| 23176 | H | 83.22900 | 69.31680 | 71.45390 | 2017.85139  | 1696.18342  | -1721.77106 | 1 |
| 23177 | C | 81.43200 | 68.40580 | 72.15790 | 642.18654   | -297.34433  | 558.50114   | 1 |
| 23178 | H | 80.91900 | 69.33580 | 71.83390 | -1732.04280 | 1320.60283  | -2284.41409 | 1 |

|       |   |          |          |          |             |             |             |   |
|-------|---|----------|----------|----------|-------------|-------------|-------------|---|
| 23179 | H | 80.92200 | 68.18880 | 73.12090 | -1763.10117 | -1739.80244 | 1934.58287  | 1 |
| 23180 | H | 81.28100 | 67.60480 | 71.40290 | -744.24462  | 1524.10081  | 2647.34867  | 1 |
| 23181 | C | 83.14400 | 69.72080 | 73.44490 | -401.56651  | 816.77359   | 116.76247   | 1 |
| 23182 | O | 83.43900 | 70.90080 | 73.25090 | 533.44374   | 563.95410   | -145.61397  | 1 |
| 23183 | N | 83.00700 | 69.24380 | 74.69190 | -39.97664   | 577.49679   | -625.50195  | 1 |
| 23184 | H | 82.62000 | 68.33680 | 74.84090 | 2961.24189  | 977.11794   | 378.73485   | 1 |
| 23185 | C | 83.27700 | 70.00580 | 75.90190 | 868.18360   | 27.95767    | 253.05356   | 1 |
| 23186 | H | 82.61000 | 70.85480 | 75.90990 | -2618.14610 | -281.83495  | 1723.37295  | 1 |
| 23187 | C | 83.12800 | 69.09680 | 77.13590 | -194.20103  | -628.26331  | 623.09979   | 1 |
| 23188 | H | 83.48300 | 69.52780 | 78.09690 | -434.75185  | 1739.98287  | 2580.57913  | 1 |
| 23189 | H | 83.61800 | 68.12180 | 76.92790 | 547.37166   | -3045.50053 | -553.82756  | 1 |
| 23190 | C | 81.58900 | 68.79880 | 77.42290 | 501.38341   | 748.89580   | -142.27043  | 1 |
| 23191 | O | 80.75700 | 69.59680 | 76.91990 | 629.39047   | 471.66334   | 27.60771    | 1 |
| 23192 | O | 81.33500 | 67.81580 | 78.15690 | -685.65551  | -126.81589  | -385.37380  | 1 |
| 23193 | C | 84.71100 | 70.58080 | 75.95190 | 712.37272   | 56.03895    | 552.77983   | 1 |
| 23194 | O | 84.86800 | 71.75680 | 76.30490 | -398.58340  | -423.74005  | 528.83059   | 1 |
| 23195 | N | 85.74100 | 69.79480 | 75.67590 | -420.60342  | 269.36334   | -693.03326  | 1 |
| 23196 | H | 85.60700 | 68.83480 | 75.43990 | 2131.55193  | -2196.38932 | 691.72991   | 1 |
| 23197 | C | 87.13300 | 70.09780 | 75.63590 | -194.25664  | -885.16984  | -78.06735   | 1 |
| 23198 | H | 87.32400 | 70.52680 | 76.60790 | 1086.47113  | -2112.86238 | 2048.01621  | 1 |
| 23199 | C | 87.91400 | 68.77880 | 75.41390 | 484.11481   | -588.49556  | 481.71557   | 1 |
| 23200 | H | 87.59900 | 68.21680 | 74.50790 | 694.43447   | 2655.17981  | 1535.04643  | 1 |
| 23201 | H | 87.63200 | 68.11480 | 76.25890 | -2487.21738 | 1386.93921  | 1342.35916  | 1 |
| 23202 | C | 89.44000 | 68.82480 | 75.48290 | 687.32333   | 574.92272   | -170.45234  | 1 |
| 23203 | H | 89.72900 | 69.58180 | 74.72290 | 292.40196   | -1741.75538 | 2591.10961  | 1 |
| 23204 | C | 89.94100 | 69.29480 | 76.88690 | 176.79026   | 685.55266   | 569.03778   | 1 |
| 23205 | H | 89.75800 | 68.53080 | 77.67190 | 2538.41880  | 1853.64798  | -97.31015   | 1 |
| 23206 | H | 91.05200 | 69.32680 | 76.88190 | 1541.41723  | 714.58211   | 2636.97240  | 1 |
| 23207 | H | 89.44900 | 70.26980 | 77.09490 | 2908.37514  | 811.39892   | 861.79164   | 1 |
| 23208 | C | 89.95100 | 67.43480 | 75.03090 | -440.37549  | -435.26089  | 660.29917   | 1 |
| 23209 | H | 89.65900 | 67.25180 | 73.97490 | -2235.33346 | -1200.65278 | 1854.09040  | 1 |
| 23210 | H | 91.05800 | 67.51580 | 75.08490 | -2352.04345 | 2042.37497  | -499.88046  | 1 |
| 23211 | H | 89.58900 | 66.62280 | 75.69590 | 2312.84618  | 2119.59863  | 216.90221   | 1 |
| 23212 | C | 87.46200 | 71.14180 | 74.60090 | 237.27872   | -510.70131  | 704.40633   | 1 |
| 23213 | O | 88.19800 | 72.07180 | 74.83790 | 236.08794   | -369.12582  | 644.87549   | 1 |
| 23214 | N | 86.84400 | 71.04980 | 73.39090 | -212.52087  | -785.72387  | 204.69509   | 1 |
| 23215 | H | 86.17000 | 70.32580 | 73.26190 | -2335.64399 | -1640.93104 | 1320.51084  | 1 |
| 23216 | C | 87.01800 | 71.85880 | 72.20590 | -804.01431  | -379.60713  | -225.11485  | 1 |
| 23217 | H | 88.03400 | 71.65880 | 71.90090 | -1375.31846 | -1174.71095 | -2582.66918 | 1 |
| 23218 | C | 86.05600 | 71.26180 | 71.07990 | -551.52472  | -635.70301  | 344.33956   | 1 |
| 23219 | H | 85.03600 | 71.30180 | 71.51890 | 1892.07259  | -2212.96784 | 1164.10830  | 1 |
| 23220 | H | 86.42000 | 70.23180 | 70.88090 | -1163.07643 | -2073.46781 | 2051.08699  | 1 |
| 23221 | C | 86.06000 | 71.96180 | 69.68690 | -564.94187  | 622.88925   | -381.50936  | 1 |
| 23222 | H | 85.52600 | 72.93580 | 69.71790 | 1889.54724  | -325.31404  | 2481.59483  | 1 |
| 23223 | C | 87.48200 | 72.28980 | 69.17990 | 214.81475   | -623.62407  | -627.25981  | 1 |
| 23224 | H | 88.21400 | 71.45680 | 69.22790 | 750.41205   | 3051.66438  | 220.99950   | 1 |
| 23225 | H | 87.92000 | 73.10780 | 69.79090 | -681.47380  | 2380.22746  | -1958.58845 | 1 |
| 23226 | H | 87.44600 | 72.71180 | 68.15290 | 1930.44647  | 1434.77548  | 2018.60962  | 1 |
| 23227 | C | 85.20100 | 71.16880 | 68.59090 | 65.77431    | -584.21557  | 683.83865   | 1 |
| 23228 | H | 85.60800 | 70.14180 | 68.47390 | 351.36567   | -2854.66222 | 1250.49403  | 1 |
| 23229 | H | 84.15200 | 71.20580 | 68.95590 | -2365.75256 | 2035.65280  | -474.34324  | 1 |
| 23230 | H | 85.20300 | 71.73380 | 67.63390 | 1735.96716  | -20.55441   | -2625.03691 | 1 |
| 23231 | C | 86.64900 | 73.30080 | 72.42790 | 165.30275   | -752.36931  | 470.79021   | 1 |
| 23232 | O | 87.45100 | 74.21280 | 72.17190 | 115.49290   | -364.28724  | -693.18047  | 1 |
| 23233 | N | 85.50800 | 73.52580 | 73.11090 | 155.62338   | -283.42482  | -782.65226  | 1 |
| 23234 | H | 84.97100 | 72.71180 | 73.31890 | 2615.16069  | -1508.59074 | -863.22509  | 1 |
| 23235 | C | 85.11500 | 74.80280 | 73.59690 | 620.33716   | -472.37695  | 453.51387   | 1 |
| 23236 | H | 85.32400 | 75.60080 | 72.90090 | 1523.65794  | 1538.97562  | -2285.95655 | 1 |
| 23237 | C | 83.55300 | 74.85180 | 73.84290 | 669.18378   | 209.29702   | 571.77076   | 1 |
| 23238 | H | 83.38800 | 74.05380 | 74.59790 | -1791.68459 | -1113.73741 | 2331.73852  | 1 |
| 23239 | H | 83.04800 | 74.70080 | 72.86490 | -1456.48194 | -2333.06436 | 1522.17870  | 1 |
| 23240 | C | 83.06600 | 76.20680 | 74.31390 | -323.30774  | 794.82781   | 321.32763   | 1 |

|       |   |          |          |          |             |             |             |   |
|-------|---|----------|----------|----------|-------------|-------------|-------------|---|
| 23241 | C | 83.49400 | 77.39480 | 73.61290 | -690.60474  | 359.11199   | 484.34991   | 1 |
| 23242 | H | 84.09300 | 77.25680 | 72.72490 | -734.44688  | 2297.76149  | -2032.06310 | 1 |
| 23243 | C | 83.02700 | 78.64780 | 74.04590 | 586.02348   | -649.52679  | -231.87825  | 1 |
| 23244 | H | 83.34500 | 79.53480 | 73.51790 | 2483.77400  | 412.76260   | 1874.51630  | 1 |
| 23245 | C | 82.11700 | 78.73280 | 75.12690 | -73.83237   | 798.97442   | -444.16364  | 1 |
| 23246 | H | 81.80600 | 79.73380 | 75.39090 | -2030.52580 | 287.53404   | 2389.53778  | 1 |
| 23247 | C | 82.25700 | 76.31380 | 75.36790 | 509.74574   | 695.25257   | -298.40294  | 1 |
| 23248 | H | 81.88900 | 75.42480 | 75.85690 | -289.64877  | 3132.02664  | -176.40238  | 1 |
| 23249 | C | 81.80600 | 77.52180 | 75.83390 | 154.49631   | -644.86573  | -624.20506  | 1 |
| 23250 | H | 81.02300 | 77.59480 | 76.57490 | 1610.36273  | 1953.48617  | 1862.27773  | 1 |
| 23251 | C | 85.85600 | 75.28680 | 74.89890 | 551.94871   | -315.04845  | 640.82202   | 1 |
| 23252 | O | 86.21200 | 76.46780 | 74.94090 | -623.64636  | -325.34870  | 361.28744   | 1 |
| 23253 | N | 86.17100 | 74.39980 | 75.83690 | 359.74186   | 185.71876   | 732.92331   | 1 |
| 23254 | H | 86.02200 | 73.41680 | 75.76590 | -969.78659  | 626.62849   | 2923.25589  | 1 |
| 23255 | C | 86.82000 | 74.75980 | 77.14490 | 87.08210    | -704.36475  | 561.27531   | 1 |
| 23256 | H | 86.15300 | 75.48880 | 77.57990 | -2696.71457 | 374.29449   | 1581.84553  | 1 |
| 23257 | C | 86.94000 | 73.58780 | 78.11590 | 405.49713   | 704.80430   | -419.12917  | 1 |
| 23258 | H | 87.14500 | 72.68280 | 77.50590 | 2422.94955  | 1809.77411  | 852.52307   | 1 |
| 23259 | C | 88.11000 | 73.73880 | 79.17790 | 427.75013   | -781.61778  | -175.53223  | 1 |
| 23260 | H | 89.11200 | 73.50380 | 78.75790 | -2807.49405 | 12.10367    | -1437.13632 | 1 |
| 23261 | H | 87.89000 | 73.00680 | 79.98390 | 1684.44889  | -2018.36985 | 1713.69353  | 1 |
| 23262 | H | 88.01200 | 74.79180 | 79.51590 | -2370.35484 | 1459.51705  | -1483.39932 | 1 |
| 23263 | C | 85.60400 | 73.41880 | 78.88190 | 484.05100   | 393.94197   | 656.55445   | 1 |
| 23264 | H | 85.67200 | 72.50580 | 79.51190 | 2300.45982  | 1922.04758  | -954.59843  | 1 |
| 23265 | H | 85.36200 | 74.27280 | 79.54890 | 1145.11528  | -2921.78123 | -160.98052  | 1 |
| 23266 | H | 84.74200 | 73.40480 | 78.18090 | 843.48751   | -2265.93803 | 2001.66877  | 1 |
| 23267 | C | 88.17300 | 75.40380 | 76.92690 | 263.90865   | -695.14568  | -525.71419  | 1 |
| 23268 | O | 88.54300 | 76.32780 | 77.61390 | 216.98731   | -470.56935  | -596.62610  | 1 |
| 23269 | N | 88.89700 | 74.85580 | 75.91890 | -243.60281  | -510.54149  | -631.90316  | 1 |
| 23270 | H | 88.53000 | 74.08180 | 75.40890 | -407.24081  | 2260.88654  | 2148.80142  | 1 |
| 23271 | C | 90.29200 | 75.32580 | 75.66290 | -234.73417  | -240.18219  | 841.54056   | 1 |
| 23272 | H | 90.89600 | 75.29980 | 76.55790 | 2240.11415  | 1864.98748  | -1186.14884 | 1 |
| 23273 | C | 90.95300 | 74.41080 | 74.56690 | 334.87763   | 769.82144   | 353.55324   | 1 |
| 23274 | H | 90.23300 | 74.14880 | 73.76190 | 2547.48593  | 1657.75648  | 795.47200   | 1 |
| 23275 | C | 92.24400 | 75.00980 | 73.95790 | -644.56647  | 645.23234   | 116.28143   | 1 |
| 23276 | H | 92.97600 | 75.11480 | 74.78690 | -1458.67259 | 1644.21811  | 2251.60185  | 1 |
| 23277 | H | 92.67300 | 74.27880 | 73.23890 | 1795.76073  | -2162.47044 | 1387.94855  | 1 |
| 23278 | H | 91.99400 | 75.90680 | 73.35290 | 2247.73265  | -2186.36975 | -104.57226  | 1 |
| 23279 | C | 91.30800 | 73.01580 | 75.20290 | 574.41658   | -208.18284  | -677.87929  | 1 |
| 23280 | H | 90.39500 | 72.66380 | 75.72790 | -1259.46669 | 2447.10828  | 1528.82474  | 1 |
| 23281 | H | 92.16300 | 73.06880 | 75.90890 | -2572.27047 | -1165.44627 | -1401.80332 | 1 |
| 23282 | C | 91.58000 | 71.93880 | 74.11790 | -551.05875  | 728.78144   | 97.74645    | 1 |
| 23283 | H | 92.58900 | 72.13780 | 73.69690 | -1855.94692 | 1932.00343  | 1654.80183  | 1 |
| 23284 | H | 90.83500 | 71.82580 | 73.30090 | 3074.99244  | 563.03598   | 295.39384   | 1 |
| 23285 | H | 91.68900 | 70.94580 | 74.60390 | 1166.42133  | 2855.07588  | -642.34699  | 1 |
| 23286 | C | 90.27000 | 76.76580 | 75.16090 | 37.40249    | 534.74287   | -746.74704  | 1 |
| 23287 | O | 91.26100 | 77.50980 | 75.35290 | -675.93397  | -413.21845  | -36.48690   | 1 |
| 23288 | N | 89.15800 | 77.21180 | 74.50990 | -192.59274  | -540.33783  | -622.78191  | 1 |
| 23289 | H | 88.43600 | 76.60280 | 74.19090 | 1194.13194  | 1548.22509  | 2458.92348  | 1 |
| 23290 | C | 89.12800 | 78.59280 | 74.10490 | 377.50393   | 508.01125   | 651.07281   | 1 |
| 23291 | H | 90.03400 | 78.84180 | 73.57190 | 1469.30424  | -1257.81007 | -2479.54999 | 1 |
| 23292 | C | 87.93400 | 78.86780 | 73.12990 | -29.07440   | -731.92606  | 531.65041   | 1 |
| 23293 | H | 88.03500 | 79.86580 | 72.65290 | 874.83027   | -2362.58676 | -1878.30949 | 1 |
| 23294 | O | 86.60800 | 78.75480 | 73.78290 | 494.52937   | -520.88501  | 304.75807   | 1 |
| 23295 | H | 86.49900 | 77.90180 | 74.21090 | 3133.14724  | 32.62321    | 187.58542   | 1 |
| 23296 | C | 87.97000 | 77.75680 | 72.01390 | -721.09669  | -537.08802  | -171.68586  | 1 |
| 23297 | H | 87.68400 | 76.74380 | 72.36890 | 1930.66671  | 2474.54389  | -219.98785  | 1 |
| 23298 | H | 87.16200 | 78.06680 | 71.31790 | 1557.84851  | -1308.35620 | -2396.37134 | 1 |
| 23299 | H | 88.96600 | 77.83780 | 71.52890 | 194.80847   | -1558.04845 | 2717.03243  | 1 |
| 23300 | C | 88.96700 | 79.58880 | 75.24390 | -553.02543  | -593.71890  | -423.33659  | 1 |
| 23301 | O | 89.33600 | 80.75080 | 75.13190 | -480.33427  | -511.35593  | -369.58633  | 1 |
| 23302 | N | 88.46200 | 79.15180 | 76.40990 | -50.08885   | -812.88617  | -213.00321  | 1 |

|       |   |          |          |          |             |             |             |   |
|-------|---|----------|----------|----------|-------------|-------------|-------------|---|
| 23303 | H | 88.27300 | 78.17780 | 76.50590 | -1758.54857 | -1463.49354 | -2167.10605 | 1 |
| 23304 | C | 88.07500 | 80.00680 | 77.54090 | -28.71935   | 192.47567   | 887.54003   | 1 |
| 23305 | H | 87.30100 | 80.66680 | 77.17790 | 2295.51013  | 334.11988   | -2122.61327 | 1 |
| 23306 | C | 87.30500 | 79.28680 | 78.65090 | -600.75589  | 186.28553   | -670.72541  | 1 |
| 23307 | H | 87.05400 | 79.85480 | 79.57290 | -2004.71889 | 1719.40676  | -1723.13828 | 1 |
| 23308 | H | 87.98500 | 78.45680 | 78.93890 | 42.46103    | -2585.37115 | 1782.97069  | 1 |
| 23309 | C | 85.94700 | 78.73980 | 78.20890 | -397.08447  | 316.88538   | 757.44892   | 1 |
| 23310 | H | 86.02600 | 78.13580 | 77.27990 | -2809.43718 | 1416.73723  | -210.73565  | 1 |
| 23311 | C | 85.44800 | 77.83980 | 79.37790 | -901.55403  | -8.23883    | -173.48386  | 1 |
| 23312 | H | 86.11200 | 76.94880 | 79.37190 | 221.84360   | -2791.68866 | -1432.60241 | 1 |
| 23313 | H | 85.48900 | 78.35180 | 80.36290 | -2616.16425 | 1752.27728  | -142.86320  | 1 |
| 23314 | H | 84.39600 | 77.56880 | 79.14390 | -3051.72716 | -124.86140  | 772.55016   | 1 |
| 23315 | C | 84.96300 | 79.87180 | 77.92290 | -902.58962  | 87.58801    | 141.05840   | 1 |
| 23316 | H | 85.05400 | 80.27480 | 76.89190 | 2452.58299  | 1965.27922  | 39.43196    | 1 |
| 23317 | H | 85.04300 | 80.76780 | 78.57490 | -2004.02539 | -1894.58962 | -1521.98116 | 1 |
| 23318 | H | 83.95600 | 79.43980 | 78.10290 | 825.88212   | -1453.43888 | -2665.16199 | 1 |
| 23319 | C | 89.17800 | 80.94580 | 78.08890 | -717.73370  | 495.08186   | 285.18454   | 1 |
| 23320 | O | 88.80600 | 82.04980 | 78.42590 | 643.80407   | 451.28983   | 9.90323     | 1 |
| 23321 | N | 90.47200 | 80.68380 | 78.13390 | -575.46373  | -15.62058   | 618.56191   | 1 |
| 23322 | C | 90.96500 | 79.30680 | 78.36890 | -415.30352  | -444.98896  | -685.51246  | 1 |
| 23323 | H | 91.18800 | 78.92780 | 77.34790 | -1625.89174 | 1659.09059  | 2124.28766  | 1 |
| 23324 | H | 90.26700 | 78.62680 | 78.90290 | -1445.60582 | -1853.86634 | -2097.26055 | 1 |
| 23325 | C | 91.54100 | 81.64680 | 78.45690 | -35.51050   | -446.29956  | -797.09137  | 1 |
| 23326 | H | 91.23900 | 81.98780 | 79.43590 | 1750.19217  | -1805.57020 | -1886.28395 | 1 |
| 23327 | C | 92.73700 | 80.82480 | 78.49790 | -848.62530  | 148.03671   | -322.99370  | 1 |
| 23328 | H | 93.63600 | 81.30280 | 78.94390 | 409.67599   | -1805.76782 | 2534.63577  | 1 |
| 23329 | H | 93.12400 | 80.48380 | 77.51490 | 9.85446     | -2364.30124 | -2076.16703 | 1 |
| 23330 | C | 92.24000 | 79.53580 | 79.14890 | -352.98667  | -208.46490  | 810.58332   | 1 |
| 23331 | H | 92.99800 | 78.74380 | 78.96890 | -2033.07651 | 2406.98548  | -117.87916  | 1 |
| 23332 | H | 92.10900 | 79.69280 | 80.24090 | 1902.48921  | 922.23929   | -2331.91371 | 1 |
| 23333 | C | 91.62700 | 82.88080 | 77.58990 | 241.68839   | 693.14751   | -547.06959  | 1 |
| 23334 | O | 92.02600 | 83.95080 | 78.05690 | 142.54234   | -167.16372  | 752.56465   | 1 |
| 23335 | N | 91.29900 | 82.78080 | 76.30590 | -338.32292  | 600.73457   | -501.42521  | 1 |
| 23336 | H | 91.10600 | 81.91780 | 75.84690 | 1438.75264  | 2796.77989  | -111.68873  | 1 |
| 23337 | C | 91.14300 | 83.99380 | 75.47590 | 604.84887   | -314.06511  | -599.28591  | 1 |
| 23338 | H | 92.02900 | 84.60980 | 75.52090 | 334.23111   | 2840.27751  | 1316.20242  | 1 |
| 23339 | C | 90.89300 | 83.53080 | 73.98690 | 509.73219   | -493.75844  | -564.53696  | 1 |
| 23340 | H | 89.88900 | 83.05780 | 73.93690 | 2121.13629  | 1642.17408  | 1635.43948  | 1 |
| 23341 | H | 90.85600 | 84.47980 | 73.41090 | -1264.53322 | 2233.67949  | -1834.86309 | 1 |
| 23342 | C | 92.01000 | 82.69580 | 73.39690 | -555.24922  | 498.95382   | 532.79230   | 1 |
| 23343 | C | 93.29400 | 83.19280 | 73.34590 | 778.46609   | -194.97186  | 411.19007   | 1 |
| 23344 | H | 93.55400 | 84.19180 | 73.66590 | 2074.07972  | 1136.03738  | -2074.33098 | 1 |
| 23345 | C | 94.39900 | 82.58680 | 72.68290 | -626.48512  | -283.79687  | 599.05816   | 1 |
| 23346 | H | 95.32400 | 83.13780 | 72.59590 | 647.85034   | 2028.50396  | 2314.26611  | 1 |
| 23347 | C | 94.10100 | 81.35380 | 72.07090 | 592.07914   | 415.31278   | 546.14982   | 1 |
| 23348 | H | 94.80900 | 80.81280 | 71.46190 | 2036.91765  | -1251.39844 | -2038.75525 | 1 |
| 23349 | C | 91.83500 | 81.41480 | 72.88390 | -378.45493  | -309.66484  | -775.77502  | 1 |
| 23350 | H | 90.85900 | 80.95880 | 72.95990 | 2813.11635  | 1343.27426  | -394.31620  | 1 |
| 23351 | C | 92.82900 | 80.73080 | 72.21990 | 270.21419   | 874.56722   | -11.72674   | 1 |
| 23352 | H | 92.53500 | 79.82280 | 71.71490 | 658.77731   | -2796.46782 | 1258.59595  | 1 |
| 23353 | C | 90.05300 | 84.85580 | 75.95490 | 645.34379   | 569.61098   | -296.01316  | 1 |
| 23354 | O | 90.00193 | 86.08866 | 75.60760 | 337.34823   | -129.52687  | 251.20160   | 1 |
| 23355 | N | 88.89800 | 84.23980 | 76.38290 | -75.79354   | -682.36849  | 483.68959   | 1 |
| 23356 | H | 88.83200 | 83.24980 | 76.48090 | 1524.22391  | 545.33974   | -2697.71222 | 1 |
| 23357 | C | 87.77100 | 84.95680 | 77.05290 | -798.32742  | 72.99855    | 445.70217   | 1 |
| 23358 | H | 87.71756 | 85.67552 | 76.22152 | -1060.27454 | 1262.66127  | -407.40534  | 1 |
| 23359 | C | 86.55800 | 84.09580 | 77.20590 | 163.11260   | 499.92033   | 743.42924   | 1 |
| 23360 | H | 85.74200 | 84.75480 | 77.57290 | -20.07454   | 1991.78310  | 2436.18207  | 1 |
| 23361 | H | 86.63600 | 83.28580 | 77.96190 | -1446.34277 | -2244.98917 | 1662.08304  | 1 |
| 23362 | C | 85.94200 | 83.48480 | 75.94290 | -442.36402  | -529.88417  | -600.01367  | 1 |
| 23363 | C | 86.43200 | 82.68380 | 74.93490 | -345.72223  | 783.60156   | 328.51514   | 1 |
| 23364 | H | 87.49000 | 82.51880 | 74.79890 | 2677.19712  | -1072.20530 | 1234.45955  | 1 |

|       |   |          |          |          |             |             |             |   |
|-------|---|----------|----------|----------|-------------|-------------|-------------|---|
| 23365 | N | 85.42800 | 82.11980 | 74.20990 | -293.13340  | 724.27691   | 333.44806   | 1 |
| 23366 | H | 85.59200 | 81.26780 | 73.76190 | -663.36023  | 1787.42280  | -2511.06987 | 1 |
| 23367 | C | 84.25200 | 82.63580 | 74.59690 | 741.17339   | -445.24619  | -264.77802  | 1 |
| 23368 | C | 84.51500 | 83.48880 | 75.69290 | 560.58922   | 477.19987   | 531.73216   | 1 |
| 23369 | C | 83.41000 | 84.02980 | 76.41090 | -688.33602  | 150.84721   | 586.55691   | 1 |
| 23370 | H | 83.66700 | 84.57280 | 77.30890 | -3142.46524 | -240.51300  | -90.32763   | 1 |
| 23371 | C | 82.13800 | 83.76480 | 75.96090 | -662.36626  | -462.18708  | 429.54334   | 1 |
| 23372 | H | 81.32000 | 84.18880 | 76.52390 | 2392.24601  | -856.60585  | 1843.58505  | 1 |
| 23373 | C | 82.96000 | 82.40980 | 74.11690 | -624.28084  | -652.82006  | 137.63412   | 1 |
| 23374 | H | 82.82800 | 81.82880 | 73.21690 | 3096.63441  | -413.09320  | 291.94873   | 1 |
| 23375 | C | 81.86200 | 82.98280 | 74.83290 | -50.54226   | 657.72889   | 632.56363   | 1 |
| 23376 | H | 80.85600 | 82.74780 | 74.51690 | 1524.34316  | -1262.00261 | 2437.87261  | 1 |
| 23377 | C | 88.12699 | 85.67412 | 78.49015 | -208.64380  | -101.52265  | -272.00850  | 1 |
| 23378 | O | 87.66764 | 86.76850 | 78.74311 | -578.34744  | 401.96513   | -286.06470  | 1 |
| 23379 | N | 88.88700 | 84.89880 | 79.22090 | -44.81963   | 143.63465   | -834.12364  | 1 |
| 23380 | H | 89.17100 | 83.95280 | 79.08290 | -2214.68935 | -2227.88938 | -214.22198  | 1 |
| 23381 | C | 89.50176 | 85.44813 | 80.39190 | -67.38272   | 228.71086   | -704.05245  | 1 |
| 23382 | H | 88.63617 | 85.88516 | 80.89334 | 2764.15157  | 65.26324    | 1615.71942  | 1 |
| 23383 | C | 90.14400 | 84.27080 | 81.25390 | 374.41713   | -501.42978  | 654.79595   | 1 |
| 23384 | H | 90.98300 | 83.74980 | 80.74590 | 2218.12834  | 1542.30109  | -1610.19931 | 1 |
| 23385 | H | 89.46800 | 83.42280 | 81.49390 | -1283.70864 | 884.49750   | -2739.49382 | 1 |
| 23386 | H | 90.53800 | 84.71780 | 82.19190 | -2546.37681 | -1852.66993 | -59.18317   | 1 |
| 23387 | C | 90.53947 | 86.70081 | 80.12791 | -82.06572   | -126.85675  | 244.75601   | 1 |
| 23388 | O | 90.90881 | 87.34953 | 81.08910 | -121.37559  | -189.59287  | -261.25433  | 1 |
| 23389 | N | 90.78390 | 86.82588 | 78.83762 | 176.43769   | 700.10779   | -261.95793  | 1 |
| 23390 | H | 90.36930 | 86.22902 | 78.13071 | 3286.55615  | -708.91395  | 2427.61056  | 1 |
| 23391 | C | 91.28825 | 88.13800 | 78.50455 | -706.65550  | -965.86474  | 488.71906   | 1 |
| 23392 | H | 91.63102 | 88.48688 | 79.50673 | 266.52264   | 2796.99745  | -1400.27475 | 1 |
| 23393 | C | 92.40557 | 87.88929 | 77.37398 | -20.06760   | -183.87894  | -235.77041  | 1 |
| 23394 | H | 91.82718 | 87.66977 | 76.47439 | -868.25630  | 3842.63729  | 80.28332    | 1 |
| 23395 | C | 93.29509 | 89.12236 | 76.95802 | 164.51971   | -125.15333  | 385.61966   | 1 |
| 23396 | H | 94.18660 | 88.86391 | 76.37494 | -844.23671  | 1765.88659  | 114.49386   | 1 |
| 23397 | H | 92.70566 | 89.89394 | 76.28295 | -157.26374  | -1505.91395 | -1933.64468 | 1 |
| 23398 | H | 93.64277 | 89.69874 | 77.80746 | -440.24576  | -4312.79007 | 1674.99986  | 1 |
| 23399 | C | 93.24625 | 86.67135 | 77.84851 | 1000.78128  | 362.60233   | -62.70973   | 1 |
| 23400 | H | 92.70926 | 85.72495 | 78.04577 | -1238.79795 | 1819.38255  | -1225.32931 | 1 |
| 23401 | H | 93.88709 | 86.80570 | 78.80846 | -95.16985   | -6.24474    | 929.32470   | 1 |
| 23402 | H | 94.11906 | 86.41710 | 77.14579 | 150.44420   | 2666.10970  | 2249.58614  | 1 |
| 23403 | C | 90.22325 | 89.21896 | 77.92990 | 267.09422   | -1062.71100 | -301.94898  | 1 |
| 23404 | O | 90.12713 | 90.34488 | 78.41136 | -269.29974  | -827.43290  | -453.50166  | 1 |
| 23405 | N | 89.42168 | 88.56868 | 77.02180 | -259.94389  | -481.51267  | -140.93322  | 1 |
| 23406 | H | 89.86256 | 87.67799 | 76.78170 | -1791.39483 | -2123.38730 | 993.01446   | 1 |
| 23407 | C | 88.62184 | 89.23356 | 76.00893 | -712.42923  | -285.68489  | 814.13643   | 1 |
| 23408 | H | 89.19406 | 89.77823 | 75.33328 | -218.61087  | 3788.19828  | -3699.33274 | 1 |
| 23409 | C | 87.79609 | 88.21148 | 75.18380 | -372.36208  | 1541.98924  | -185.45407  | 1 |
| 23410 | H | 88.51369 | 87.38086 | 75.08714 | -324.35869  | 249.26553   | -4648.56329 | 1 |
| 23411 | H | 86.94895 | 87.85277 | 75.80557 | 323.28492   | -971.37853  | 1511.88394  | 1 |
| 23412 | C | 87.16003 | 88.92555 | 73.87822 | 228.73336   | -20.42101   | -773.70147  | 1 |
| 23413 | O | 87.10401 | 88.23647 | 72.82810 | -83.70649   | 489.34000   | 473.44572   | 1 |
| 23414 | O | 86.72972 | 90.08170 | 73.95065 | -570.98471  | 543.76992   | 220.56079   | 1 |
| 23415 | C | 87.59098 | 90.16021 | 76.85722 | -240.73736  | 457.50960   | -391.32451  | 1 |
| 23416 | O | 87.44030 | 91.31511 | 76.57607 | -428.70658  | -797.78799  | -707.55054  | 1 |
| 23417 | N | 86.87346 | 89.45057 | 77.78753 | 73.30362    | -484.49802  | 178.30214   | 1 |
| 23418 | H | 87.36294 | 88.52825 | 77.97505 | 3342.03899  | -170.41063  | -465.99740  | 1 |
| 23419 | C | 85.84546 | 90.10617 | 78.48087 | -241.92387  | -70.56751   | -424.19917  | 1 |
| 23420 | H | 85.33722 | 90.57800 | 77.63433 | 889.92703   | -1645.25680 | 706.99993   | 1 |
| 23421 | C | 84.86212 | 89.20818 | 79.35912 | 1294.46035  | 141.33184   | 969.65779   | 1 |
| 23422 | H | 84.01519 | 89.81494 | 79.72169 | -1616.96449 | 1347.87514  | 970.13386   | 1 |
| 23423 | H | 84.40066 | 88.45927 | 78.71013 | 1335.62910  | -1380.02187 | -358.35365  | 1 |
| 23424 | H | 85.47720 | 88.74363 | 80.17845 | 1158.50600  | 2204.17768  | 295.18206   | 1 |
| 23425 | C | 86.41337 | 91.22817 | 79.52044 | -13.22771   | -629.42420  | -548.56344  | 1 |
| 23426 | O | 85.60034 | 92.06726 | 79.90354 | 273.47626   | -114.82161  | 85.83453    | 1 |

|       |   |          |          |          |             |             |             |   |
|-------|---|----------|----------|----------|-------------|-------------|-------------|---|
| 23427 | N | 87.70511 | 91.13769 | 79.82549 | -381.95942  | -332.01065  | -423.37521  | 1 |
| 23428 | H | 88.16557 | 90.37760 | 79.23035 | -3232.77983 | -2299.71305 | -1767.33678 | 1 |
| 23429 | C | 88.18446 | 91.66741 | 81.12689 | 427.20853   | -165.51392  | 988.51398   | 1 |
| 23430 | H | 87.39523 | 91.89679 | 81.83498 | -2812.42390 | 393.10582   | -1037.28220 | 1 |
| 23431 | C | 89.18174 | 90.72300 | 81.63779 | 559.14595   | -896.15431  | -505.05762  | 1 |
| 23432 | H | 89.98524 | 90.63796 | 80.87013 | 440.63774   | -2387.63200 | -1601.88730 | 1 |
| 23433 | C | 89.65741 | 91.22523 | 82.99341 | -544.90095  | -479.22659  | -506.63992  | 1 |
| 23434 | H | 90.54011 | 90.66028 | 83.32577 | 658.59058   | 2773.78161  | -778.55597  | 1 |
| 23435 | H | 89.80377 | 92.34368 | 82.97097 | -2337.85831 | 1538.77077  | 1499.56196  | 1 |
| 23436 | H | 88.88106 | 91.02055 | 83.71268 | 1835.48531  | -2319.56930 | -3703.87732 | 1 |
| 23437 | C | 88.84352 | 89.22020 | 81.76136 | 95.50460    | -429.70802  | -1126.31535 | 1 |
| 23438 | H | 88.67195 | 88.73867 | 80.78273 | 1149.73499  | 950.39969   | -471.79717  | 1 |
| 23439 | H | 87.86458 | 89.13160 | 82.35493 | 754.71885   | 310.62335   | 1119.32858  | 1 |
| 23440 | H | 89.60000 | 88.58012 | 82.30876 | -262.41822  | 2283.13169  | -866.21194  | 1 |
| 23441 | C | 88.97797 | 93.01546 | 80.57618 | -581.31368  | 682.35957   | 1042.15535  | 1 |
| 23442 | O | 89.00360 | 93.95903 | 81.31709 | -428.17351  | 83.13330    | 231.63147   | 1 |
| 23443 | N | 89.67882 | 92.88718 | 79.42968 | 244.72024   | 88.71871    | -882.18916  | 1 |
| 23444 | H | 89.59483 | 92.04534 | 78.86612 | -2767.57190 | 289.97427   | -609.72137  | 1 |
| 23445 | C | 90.82587 | 93.65488 | 79.08026 | -1091.96739 | -443.89634  | 232.92184   | 1 |
| 23446 | H | 90.70951 | 94.54511 | 79.76571 | 2313.67320  | 633.83049   | -1292.07503 | 1 |
| 23447 | C | 92.16610 | 92.83760 | 79.13988 | 281.96814   | -437.72066  | 859.54978   | 1 |
| 23448 | H | 92.86688 | 93.08186 | 78.24096 | -1434.71195 | -2012.58078 | 458.03448   | 1 |
| 23449 | H | 92.74227 | 93.13997 | 80.04301 | -1215.95728 | -1846.75414 | 987.59510   | 1 |
| 23450 | H | 91.94855 | 91.73617 | 79.05530 | 76.42483    | 2966.49272  | 364.11703   | 1 |
| 23451 | C | 90.65088 | 94.22089 | 77.51826 | -630.18266  | 309.64727   | -1069.98940 | 1 |
| 23452 | O | 90.14050 | 95.29667 | 77.34364 | 104.65630   | -284.92157  | 424.96611   | 1 |
| 23453 | N | 90.86088 | 93.29738 | 76.57945 | 752.77674   | -135.86827  | -110.38845  | 1 |
| 23454 | H | 91.07378 | 92.44260 | 77.09091 | -170.12559  | -3255.47857 | -737.55632  | 1 |
| 23455 | C | 90.84540 | 93.43008 | 75.16428 | -746.78582  | -587.69686  | -538.41940  | 1 |
| 23456 | H | 90.03466 | 94.03674 | 74.77690 | 4857.44944  | 2671.97180  | 1974.69535  | 1 |
| 23457 | C | 92.10920 | 94.19537 | 74.62622 | -29.03121   | -630.95288  | 477.62795   | 1 |
| 23458 | H | 92.82308 | 94.30534 | 75.55697 | 3239.92520  | 1471.06742  | -1234.42451 | 1 |
| 23459 | H | 92.67301 | 93.67292 | 73.75546 | -778.34267  | -939.28767  | 168.97337   | 1 |
| 23460 | C | 91.83816 | 95.64635 | 73.98993 | 584.28075   | 278.45369   | 454.43081   | 1 |
| 23461 | O | 91.42846 | 95.68826 | 72.84200 | -328.37220  | -175.56056  | 234.25936   | 1 |
| 23462 | N | 92.18112 | 96.68192 | 74.74818 | -337.57197  | -76.66999   | 742.01083   | 1 |
| 23463 | H | 92.45103 | 96.56193 | 75.73225 | 349.09609   | -2291.88638 | 614.35724   | 1 |
| 23464 | H | 92.28776 | 97.66597 | 74.51639 | 1676.13607  | 19.44101    | 2650.70800  | 1 |
| 23465 | C | 90.97936 | 91.88793 | 74.59546 | 913.55547   | -1203.46257 | -402.24008  | 1 |
| 23466 | O | 91.69158 | 91.10671 | 75.22201 | 702.03599   | -310.12349  | 595.45035   | 1 |
| 23467 | N | 90.40098 | 91.66312 | 73.41440 | 46.91848    | 123.70708   | 441.07978   | 1 |
| 23468 | H | 89.94461 | 92.41802 | 72.92030 | -881.68064  | -2406.97004 | -2605.38124 | 1 |
| 23469 | C | 90.94230 | 90.54189 | 72.72237 | -28.02226   | 239.63819   | -233.69184  | 1 |
| 23470 | H | 91.27269 | 89.83768 | 73.47312 | 1156.52609  | -1117.27577 | -1759.37587 | 1 |
| 23471 | C | 89.67579 | 89.80678 | 72.05468 | 214.04855   | -314.55163  | -489.67460  | 1 |
| 23472 | H | 89.06437 | 90.52134 | 71.51635 | -751.39072  | -2113.81405 | 221.15989   | 1 |
| 23473 | H | 89.02265 | 89.53453 | 72.93841 | 3123.31354  | -14.81066   | -675.83228  | 1 |
| 23474 | C | 89.97529 | 88.64906 | 71.15543 | -25.44129   | 849.83635   | 1008.06904  | 1 |
| 23475 | C | 90.36564 | 88.95311 | 69.77413 | 142.05167   | 211.26172   | 459.98111   | 1 |
| 23476 | H | 90.66111 | 89.90917 | 69.35463 | 3770.05526  | -2145.28146 | -932.85673  | 1 |
| 23477 | N | 90.46592 | 87.90879 | 68.99204 | -687.73520  | 246.81056   | -91.56040   | 1 |
| 23478 | H | 90.77090 | 87.78926 | 68.02033 | -4435.92910 | 466.00575   | -234.21996  | 1 |
| 23479 | C | 89.96257 | 86.81377 | 69.75477 | 113.82426   | 435.97361   | 1163.29358  | 1 |
| 23480 | C | 89.58182 | 87.26988 | 71.12886 | -45.31952   | 265.09193   | -251.85044  | 1 |
| 23481 | C | 88.99496 | 86.30347 | 72.02280 | 296.63585   | 616.43259   | 164.92201   | 1 |
| 23482 | H | 88.57361 | 86.48319 | 72.98724 | 201.93273   | 3089.87336  | -347.06161  | 1 |
| 23483 | C | 88.99296 | 85.00436 | 71.56484 | -697.46523  | 515.68177   | -602.54120  | 1 |
| 23484 | H | 88.61042 | 84.14475 | 72.19979 | -3443.38331 | -934.84468  | 1664.96782  | 1 |
| 23485 | C | 89.73728 | 85.47870 | 69.27203 | -837.50812  | 826.56766   | 95.08439    | 1 |
| 23486 | H | 89.92255 | 85.21171 | 68.23026 | -13.66327   | -588.60964  | 1249.56235  | 1 |
| 23487 | C | 89.32055 | 84.54624 | 70.21352 | -384.49973  | -1038.88386 | 40.32834    | 1 |
| 23488 | H | 89.15225 | 83.52049 | 69.88457 | -520.94292  | 2658.35434  | -1876.98236 | 1 |

|       |   |          |          |          |             |             |             |   |
|-------|---|----------|----------|----------|-------------|-------------|-------------|---|
| 23489 | C | 92.15317 | 91.11921 | 71.77012 | 77.64626    | -190.98720  | -736.80025  | 1 |
| 23490 | O | 91.96733 | 92.06135 | 71.02324 | 936.05994   | 590.13604   | 552.54770   | 1 |
| 23491 | N | 93.18235 | 90.29112 | 71.90356 | 432.64559   | 52.82990    | 513.74611   | 1 |
| 23492 | H | 92.98061 | 89.51467 | 72.49810 | 152.50950   | -2690.96932 | 831.21358   | 1 |
| 23493 | C | 94.51351 | 90.62335 | 71.59327 | -11.00214   | -550.79999  | 99.77932    | 1 |
| 23494 | H | 94.45743 | 91.63876 | 71.17838 | 4023.19617  | -883.69370  | 2696.85373  | 1 |
| 23495 | C | 95.56240 | 90.38682 | 72.77687 | -903.99337  | -299.55186  | 246.85214   | 1 |
| 23496 | H | 95.05905 | 89.44842 | 73.20763 | 418.82625   | 2105.16744  | -2604.86540 | 1 |
| 23497 | H | 96.54189 | 90.30633 | 72.46084 | 322.46716   | -2614.95262 | -290.30286  | 1 |
| 23498 | C | 95.38595 | 91.50816 | 73.80734 | -633.45659  | 256.86694   | 170.16637   | 1 |
| 23499 | C | 95.41737 | 91.20978 | 75.19109 | -232.78580  | 595.61205   | -40.22483   | 1 |
| 23500 | H | 95.63278 | 90.16557 | 75.49186 | -1007.21725 | -1976.49618 | -2203.96692 | 1 |
| 23501 | C | 95.19530 | 92.21158 | 76.14630 | -304.11881  | 1113.93860  | 1049.98503  | 1 |
| 23502 | H | 95.16170 | 91.83725 | 77.19438 | 117.14307   | 3762.64123  | -358.13858  | 1 |
| 23503 | C | 94.92404 | 93.59869 | 75.82726 | 570.67605   | 508.06664   | -431.13236  | 1 |
| 23504 | O | 94.56544 | 94.62562 | 76.76474 | 168.74434   | 219.37268   | 51.95342    | 1 |
| 23505 | H | 95.27216 | 94.54069 | 77.42407 | -3085.24401 | 1051.65233  | -1099.11056 | 1 |
| 23506 | C | 95.16528 | 92.83343 | 73.39727 | -996.84082  | -41.71472   | 438.62840   | 1 |
| 23507 | H | 95.14339 | 93.12665 | 72.34711 | 237.99315   | -1471.51389 | -1256.98805 | 1 |
| 23508 | C | 94.96775 | 93.75038 | 74.41095 | 1015.17465  | 120.80608   | 200.14562   | 1 |
| 23509 | H | 94.81208 | 94.80243 | 74.13567 | 1291.42493  | 350.67593   | -2450.75431 | 1 |
| 23510 | C | 95.04039 | 89.57439 | 70.43652 | -392.94485  | -490.92946  | -418.58436  | 1 |
| 23511 | O | 96.22321 | 89.47846 | 70.14062 | -18.43964   | 356.19119   | 223.55161   | 1 |
| 23512 | N | 94.05088 | 88.93508 | 69.77883 | -942.82487  | 539.02617   | -242.42519  | 1 |
| 23513 | H | 93.12296 | 89.23905 | 69.96061 | -284.48135  | 890.59405   | 2467.95621  | 1 |
| 23514 | C | 94.14858 | 87.61994 | 69.31933 | -641.98515  | -2.63238    | 219.09525   | 1 |
| 23515 | H | 95.19157 | 87.38449 | 69.61447 | 380.63000   | -1515.11188 | -3261.26246 | 1 |
| 23516 | C | 93.16010 | 86.64875 | 70.18353 | 550.89294   | -272.71642  | -844.46611  | 1 |
| 23517 | H | 93.38868 | 85.60484 | 69.83754 | 1087.21247  | 701.28098   | -2099.99613 | 1 |
| 23518 | H | 92.17067 | 86.83661 | 69.91214 | -1221.32844 | 81.73042    | -687.23027  | 1 |
| 23519 | C | 93.31501 | 86.63713 | 71.68570 | -688.29891  | -586.49175  | 112.63655   | 1 |
| 23520 | C | 94.48273 | 86.87592 | 72.39868 | 617.55706   | -187.95006  | -44.31132   | 1 |
| 23521 | H | 95.38899 | 87.14128 | 71.81840 | -2101.93159 | 364.60971   | -659.91911  | 1 |
| 23522 | C | 94.56539 | 86.79824 | 73.82378 | -390.73545  | -906.94489  | -822.23815  | 1 |
| 23523 | H | 95.53428 | 86.82857 | 74.33274 | 2436.72222  | 2306.16453  | 1821.96690  | 1 |
| 23524 | C | 93.34533 | 86.70927 | 74.50617 | -312.08853  | -596.14629  | 94.48858    | 1 |
| 23525 | H | 93.32606 | 86.57400 | 75.57474 | -105.24581  | -1472.26011 | -1012.37032 | 1 |
| 23526 | C | 92.08304 | 86.29937 | 72.38803 | 828.83907   | 555.05850   | -756.99720  | 1 |
| 23527 | H | 91.14236 | 86.02324 | 71.83925 | -2243.50576 | 1522.59101  | 58.11483    | 1 |
| 23528 | C | 92.18523 | 86.45058 | 73.76362 | 854.83406   | -183.70972  | 733.52167   | 1 |
| 23529 | H | 91.28022 | 86.34297 | 74.39087 | 2060.50125  | -1785.72503 | -482.47856  | 1 |
| 23530 | C | 93.77747 | 87.49479 | 67.68364 | -601.40407  | -442.21333  | -457.75572  | 1 |
| 23531 | O | 94.20445 | 86.47304 | 67.21173 | -965.11089  | -110.36346  | -476.72600  | 1 |
| 23532 | N | 92.97079 | 88.38958 | 67.20503 | -24.55287   | -505.82539  | 33.30133    | 1 |
| 23533 | H | 92.64997 | 89.11867 | 67.83213 | 703.13472   | 2245.16830  | 1863.06457  | 1 |
| 23534 | C | 92.76062 | 88.56096 | 65.79221 | 21.70476    | -477.08957  | 787.30791   | 1 |
| 23535 | H | 93.68427 | 88.07871 | 65.26392 | 4370.39724  | -1217.36335 | -654.71441  | 1 |
| 23536 | H | 92.72932 | 89.74140 | 65.73220 | -856.02817  | 3635.15941  | -882.42076  | 1 |
| 23537 | C | 91.44396 | 87.86683 | 65.19134 | 46.94521    | -586.89125  | 956.52637   | 1 |
| 23538 | O | 91.10842 | 86.80797 | 65.73350 | 108.54665   | -24.46720   | 62.04596    | 1 |
| 23539 | N | 91.16154 | 88.37901 | 64.02693 | -247.98547  | -174.49821  | 408.98837   | 1 |
| 23540 | H | 91.61435 | 89.27185 | 63.74389 | 2484.54846  | 150.30835   | -681.75130  | 1 |
| 23541 | C | 89.99845 | 87.97577 | 63.29645 | -21.03500   | 239.37149   | 615.85949   | 1 |
| 23542 | H | 89.37117 | 87.67893 | 64.15408 | -1168.55638 | 3566.64245  | 101.33557   | 1 |
| 23543 | C | 89.30669 | 89.16727 | 62.46225 | 126.60421   | 87.37702    | -124.64196  | 1 |
| 23544 | H | 89.64913 | 89.29715 | 61.40028 | 62.30466    | -432.27242  | -129.46042  | 1 |
| 23545 | H | 89.57112 | 90.11717 | 62.90934 | 1077.66609  | -809.31376  | -466.39438  | 1 |
| 23546 | C | 87.74885 | 89.12477 | 62.29148 | 469.82175   | -281.77130  | -76.44593   | 1 |
| 23547 | O | 87.07881 | 90.12346 | 62.08146 | 1334.43960  | -202.44487  | -499.17704  | 1 |
| 23548 | N | 87.30593 | 87.85525 | 62.38123 | 728.73417   | -193.95387  | -49.78392   | 1 |
| 23549 | H | 87.86640 | 86.98047 | 62.40729 | 2284.19035  | 2284.71477  | 938.15901   | 1 |
| 23550 | H | 86.30653 | 87.70402 | 62.30338 | 1452.22665  | 2237.80651  | -51.69253   | 1 |



|       |   |          |          |          |             |             |             |   |
|-------|---|----------|----------|----------|-------------|-------------|-------------|---|
| 23551 | C | 90.16057 | 86.56959 | 62.56523 | 278.19718   | 234.17339   | -315.13445  | 1 |
| 23552 | O | 89.28083 | 86.05934 | 61.88678 | -282.80650  | 227.20442   | 73.63119    | 1 |
| 23553 | N | 91.39087 | 86.02741 | 62.79273 | 697.98823   | -315.23181  | 708.41241   | 1 |
| 23554 | H | 91.79990 | 86.40279 | 63.64083 | -1021.53296 | -580.83372  | -50.32905   | 1 |
| 23555 | C | 91.51800 | 84.51480 | 62.52590 | -314.84111  | 337.70502   | -798.14484  | 1 |
| 23556 | H | 90.87200 | 84.13680 | 61.74790 | 641.95804   | 1485.71105  | -2704.10817 | 1 |
| 23557 | C | 92.98800 | 84.28580 | 62.01190 | -249.79702  | 379.53540   | 794.81225   | 1 |
| 23558 | H | 93.08100 | 84.82880 | 61.04690 | 1073.81968  | -2912.30676 | -425.43246  | 1 |
| 23559 | H | 93.75600 | 84.78580 | 62.63890 | 1117.56010  | -2194.36978 | 1936.55402  | 1 |
| 23560 | C | 93.37900 | 82.83780 | 61.76390 | 597.74732   | -543.57805  | -397.25737  | 1 |
| 23561 | C | 93.09300 | 82.24380 | 60.53090 | -480.21480  | -645.51123  | -430.08698  | 1 |
| 23562 | H | 92.55800 | 82.73080 | 59.72890 | -1619.03187 | -1765.70741 | -2043.45513 | 1 |
| 23563 | C | 93.42400 | 80.89180 | 60.32490 | -636.94378  | -642.80439  | 106.87966   | 1 |
| 23564 | H | 93.07600 | 80.44380 | 59.40590 | -1056.96770 | 1154.29294  | 2732.81864  | 1 |
| 23565 | C | 94.15700 | 80.14080 | 61.27890 | 568.92686   | 676.62414   | -233.26303  | 1 |
| 23566 | H | 94.35300 | 79.09980 | 61.07090 | 1114.18823  | -362.83730  | 2908.08357  | 1 |
| 23567 | C | 94.09900 | 82.07280 | 62.66490 | 451.91417   | -767.14491  | -121.50679  | 1 |
| 23568 | H | 94.24300 | 82.65980 | 63.55990 | -96.34455   | -3117.79203 | 326.51976   | 1 |
| 23569 | C | 94.50800 | 80.76380 | 62.47290 | 665.14410   | 116.30930   | -608.71441  | 1 |
| 23570 | H | 94.97700 | 80.15980 | 63.23490 | 1550.20926  | -1609.03405 | -2206.55935 | 1 |
| 23571 | C | 91.15900 | 83.68080 | 63.73290 | -522.29095  | 30.86254    | 750.72521   | 1 |
| 23572 | O | 90.49700 | 82.62580 | 63.60990 | 154.76027   | 367.78046   | -687.79781  | 1 |
| 23573 | N | 91.54500 | 84.08880 | 64.97890 | 400.53455   | -696.54886  | 211.82646   | 1 |
| 23574 | H | 92.25500 | 84.78180 | 65.07190 | 2438.77680  | -1682.31607 | 1016.28561  | 1 |
| 23575 | C | 91.05900 | 83.46380 | 66.12890 | -642.19439  | 227.29730   | -623.13309  | 1 |
| 23576 | H | 90.97300 | 82.39880 | 65.96990 | -1288.21407 | -1114.91791 | -2650.26536 | 1 |
| 23577 | C | 91.97900 | 83.68480 | 67.32190 | 669.53350   | 299.83802   | 530.00399   | 1 |
| 23578 | H | 92.00800 | 84.76880 | 67.56390 | 96.10404    | 2286.26177  | 2163.52663  | 1 |
| 23579 | H | 91.54900 | 83.17080 | 68.20790 | 2781.77159  | 1233.65436  | -781.71507  | 1 |
| 23580 | C | 93.41300 | 83.09980 | 67.07090 | 454.38664   | 790.96032   | 54.79291    | 1 |
| 23581 | H | 93.86800 | 83.56380 | 66.16990 | 26.52113    | 2141.86721  | 2307.74682  | 1 |
| 23582 | C | 94.41000 | 83.62580 | 68.14990 | -610.04034  | -662.66560  | -149.17717  | 1 |
| 23583 | H | 94.13600 | 83.23380 | 69.15290 | 1332.97300  | -1097.92060 | -2626.69494 | 1 |
| 23584 | H | 94.50000 | 84.72780 | 68.25790 | -2094.18134 | 2354.61193  | -216.93472  | 1 |
| 23585 | H | 95.41400 | 83.22980 | 67.88390 | -2823.45447 | -41.15834   | -1410.96679 | 1 |
| 23586 | C | 93.41700 | 81.60480 | 66.91190 | -596.73741  | -409.09612  | 553.78820   | 1 |
| 23587 | H | 92.78300 | 81.17580 | 66.10690 | 59.99094    | -2200.39947 | 2234.15968  | 1 |
| 23588 | H | 93.12900 | 81.18280 | 67.89790 | -696.67920  | 1514.11090  | -2680.35504 | 1 |
| 23589 | H | 94.45700 | 81.21880 | 66.84390 | -1165.69871 | -2818.67335 | 748.54857   | 1 |
| 23590 | C | 89.61400 | 83.83780 | 66.42890 | -561.39294  | -566.52995  | -447.25423  | 1 |
| 23591 | O | 88.85000 | 83.03980 | 67.01290 | 266.17139   | -622.83922  | 384.07104   | 1 |
| 23592 | N | 89.25001 | 85.05581 | 65.91918 | -106.25737  | -730.64882  | -114.21601  | 1 |
| 23593 | H | 89.91786 | 85.70923 | 65.42524 | 732.19118   | -2077.33553 | -1268.87134 | 1 |
| 23594 | C | 87.82832 | 85.43484 | 66.16757 | -357.92650  | -630.46570  | 500.59327   | 1 |
| 23595 | H | 87.91585 | 85.21197 | 67.26820 | 605.92261   | 2480.86372  | -1061.39250 | 1 |
| 23596 | C | 87.63834 | 86.98165 | 66.00021 | -283.44298  | 559.09090   | -826.81111  | 1 |
| 23597 | H | 87.32616 | 87.18130 | 64.89774 | -3494.38744 | -1351.27099 | -3093.99707 | 1 |
| 23598 | H | 88.55126 | 87.58384 | 66.32520 | -2532.63611 | 379.50443   | 1427.15616  | 1 |
| 23599 | S | 86.20541 | 87.25131 | 67.07443 | 226.20858   | 100.30766   | 41.54520    | 1 |
| 23600 | C | 86.67300 | 84.54580 | 65.53490 | 458.36775   | -770.12205  | -82.92837   | 1 |
| 23601 | O | 85.70400 | 84.06480 | 66.09490 | -64.90151   | -663.61914  | 410.33736   | 1 |
| 23602 | N | 86.85900 | 84.23180 | 64.25690 | 55.67696    | -761.21625  | 338.14673   | 1 |
| 23603 | H | 87.68800 | 84.53680 | 63.79390 | -146.28953  | 1077.07121  | -2958.50408 | 1 |
| 23604 | C | 86.09400 | 83.32380 | 63.49490 | 119.92114   | -821.73656  | -355.84907  | 1 |
| 23605 | H | 85.03600 | 83.53880 | 63.49790 | 2357.78813  | -1141.46710 | -1724.44075 | 1 |
| 23606 | C | 86.54900 | 83.31080 | 62.03090 | 101.84808   | 645.82823   | -645.61129  | 1 |
| 23607 | H | 86.13700 | 82.48080 | 61.41790 | -315.49305  | -3112.58887 | -244.61584  | 1 |
| 23608 | H | 87.65600 | 83.22380 | 61.99490 | 2926.10362  | -908.70079  | 652.02878   | 1 |
| 23609 | C | 86.19500 | 84.62180 | 61.36690 | -508.67508  | -278.28508  | -709.99166  | 1 |
| 23610 | H | 86.44753 | 85.58236 | 61.96966 | -1151.47896 | 3583.99607  | -1469.53297 | 1 |
| 23611 | H | 85.09100 | 84.55380 | 61.26190 | -2310.29808 | -1774.91651 | 1193.84131  | 1 |
| 23612 | C | 86.79500 | 84.65480 | 59.96290 | 648.57340   | 313.57678   | -552.93060  | 1 |

|       |   |          |          |          |             |             |             |   |
|-------|---|----------|----------|----------|-------------|-------------|-------------|---|
| 23613 | H | 86.34400 | 83.82380 | 59.38090 | 2415.00305  | -1982.36036 | -199.03186  | 1 |
| 23614 | H | 87.86800 | 84.41480 | 60.12190 | -1399.02018 | -1530.92573 | -2368.60539 | 1 |
| 23615 | C | 86.37858 | 85.99619 | 59.26612 | -366.00288  | -343.87065  | 79.62239    | 1 |
| 23616 | H | 86.74988 | 86.04445 | 58.24483 | -1192.71165 | -179.54523  | -3325.90490 | 1 |
| 23617 | H | 86.60041 | 86.91048 | 59.82654 | 1507.93265  | 1135.59571  | 1972.03219  | 1 |
| 23618 | N | 84.87434 | 86.09918 | 59.30726 | -15.88492   | -125.60069  | 398.23839   | 1 |
| 23619 | H | 84.49379 | 86.59132 | 58.41759 | -2442.32254 | -3372.26143 | 2714.47131  | 1 |
| 23620 | H | 84.53208 | 86.57728 | 60.23301 | 3832.45911  | -3649.11059 | 2418.97324  | 1 |
| 23621 | H | 84.33045 | 85.09830 | 59.38533 | -682.86993  | -711.19678  | 988.35204   | 1 |
| 23622 | C | 86.02200 | 81.92880 | 64.05690 | -35.45080   | -722.53953  | 541.57784   | 1 |
| 23623 | O | 84.99900 | 81.30480 | 64.09590 | -679.75656  | -136.97610  | 389.71304   | 1 |
| 23624 | N | 87.20100 | 81.39480 | 64.42590 | 654.38963   | 332.12546   | -411.37386  | 1 |
| 23625 | H | 88.05400 | 81.83980 | 64.16690 | 1864.48288  | 1579.56828  | -1982.41481 | 1 |
| 23626 | C | 87.36500 | 80.09380 | 65.00890 | -816.41882  | 414.29532   | -129.89564  | 1 |
| 23627 | H | 86.88200 | 79.29380 | 64.46790 | -850.08403  | 751.30029   | -2943.60695 | 1 |
| 23628 | C | 88.86800 | 79.76980 | 65.00690 | 374.43435   | 420.87789   | 712.23849   | 1 |
| 23629 | H | 89.28500 | 79.59280 | 63.99190 | 232.44788   | 2849.84611  | -1334.48981 | 1 |
| 23630 | H | 88.98400 | 78.87080 | 65.64790 | -2632.33675 | 1517.72547  | 855.23828   | 1 |
| 23631 | H | 89.43500 | 80.62280 | 65.43790 | -680.75503  | 322.01465   | -3062.06516 | 1 |
| 23632 | C | 86.72700 | 79.92780 | 66.35090 | 438.45055   | -658.59246  | 428.58437   | 1 |
| 23633 | O | 85.95200 | 79.01880 | 66.54290 | 8.87594     | -526.44235  | 577.54551   | 1 |
| 23634 | N | 86.90000 | 80.80780 | 67.33590 | 43.02836    | 5.85719     | -846.19593  | 1 |
| 23635 | H | 87.40500 | 81.66380 | 67.25290 | -644.90563  | 3081.96811  | -206.46889  | 1 |
| 23636 | C | 86.19000 | 80.52680 | 68.62890 | -54.01345   | -739.30871  | 518.84194   | 1 |
| 23637 | H | 86.32400 | 79.48480 | 68.87990 | 2480.69677  | -1406.45585 | -1309.59407 | 1 |
| 23638 | C | 86.84000 | 81.26180 | 69.83390 | 889.04089   | -103.67968  | -119.95892  | 1 |
| 23639 | H | 86.44200 | 80.90480 | 70.80790 | 1399.88128  | 2480.91490  | 1334.30405  | 1 |
| 23640 | C | 88.33400 | 81.07680 | 69.72290 | -591.05031  | 639.38682   | -306.80738  | 1 |
| 23641 | H | 88.48300 | 79.98080 | 69.82890 | -1218.63648 | 2656.01997  | 1184.73515  | 1 |
| 23642 | H | 88.82500 | 81.27280 | 68.74590 | -2168.56829 | -2201.90570 | 591.68513   | 1 |
| 23643 | H | 88.77100 | 81.69980 | 70.53290 | -2083.93822 | -2098.25710 | 1073.92859  | 1 |
| 23644 | C | 86.58200 | 82.78080 | 69.82590 | -592.30484  | -475.06658  | 506.39840   | 1 |
| 23645 | H | 86.96400 | 83.25980 | 70.75290 | 2204.88349  | -173.52341  | -2231.24693 | 1 |
| 23646 | H | 85.55100 | 83.08380 | 69.54390 | 615.76563   | 2761.99008  | 1381.09233  | 1 |
| 23647 | H | 87.13100 | 83.11580 | 68.91990 | -253.69985  | 3131.74586  | -272.20067  | 1 |
| 23648 | C | 84.70900 | 80.73080 | 68.63990 | -632.93376  | -114.55297  | 650.64257   | 1 |
| 23649 | O | 84.02200 | 80.17280 | 69.49290 | -246.99726  | 577.78224   | 486.75900   | 1 |
| 23650 | N | 84.24600 | 81.55880 | 67.65790 | -160.86550  | -803.22477  | 180.42175   | 1 |
| 23651 | H | 84.91200 | 81.97480 | 67.04290 | 1968.06047  | 1880.40704  | 1571.70651  | 1 |
| 23652 | C | 82.80800 | 81.69580 | 67.40890 | 490.44376   | -241.22522  | 719.07705   | 1 |
| 23653 | H | 82.37200 | 81.78180 | 68.39290 | -357.39592  | -212.66674  | -3121.15642 | 1 |
| 23654 | C | 82.41500 | 82.92780 | 66.52990 | 732.99075   | -24.01000   | 526.49050   | 1 |
| 23655 | H | 81.41600 | 82.87480 | 66.04590 | 886.31487   | -2277.04131 | -1970.62278 | 1 |
| 23656 | H | 83.13300 | 83.04280 | 65.69090 | -1156.73282 | 1814.86041  | 2303.95039  | 1 |
| 23657 | N | 82.99464 | 85.41785 | 67.33251 | -137.06055  | 167.54972   | -819.29057  | 1 |
| 23658 | H | 83.62783 | 85.85587 | 66.66844 | 45.51384    | -634.55461  | -1076.91690 | 1 |
| 23659 | C | 82.39900 | 84.15480 | 67.43290 | 892.37825   | -118.13890  | -48.73980   | 1 |
| 23660 | C | 82.63684 | 86.27936 | 68.29401 | 129.76532   | -668.58627  | -334.71898  | 1 |
| 23661 | H | 82.93134 | 87.37271 | 68.54639 | 864.61219   | -3143.44012 | 1415.54353  | 1 |
| 23662 | N | 81.76267 | 85.61744 | 69.11117 | -402.34330  | 802.57911   | -1.55330    | 1 |
| 23663 | C | 81.65600 | 84.41580 | 68.51590 | 136.32421   | -477.04237  | -760.27294  | 1 |
| 23664 | H | 80.87200 | 83.84280 | 68.99590 | -3030.68003 | 352.89241   | -805.98543  | 1 |
| 23665 | C | 82.16700 | 80.46780 | 66.77990 | 716.29937   | 117.56263   | -543.46946  | 1 |
| 23666 | O | 81.09700 | 80.01880 | 67.19390 | 469.88919   | -448.28960  | 430.34229   | 1 |
| 23667 | N | 82.89000 | 79.89280 | 65.78590 | 178.60863   | 742.30407   | -373.20411  | 1 |
| 23668 | H | 83.69400 | 80.36680 | 65.43590 | 1905.14723  | -541.57481  | 2432.25945  | 1 |
| 23669 | C | 82.59700 | 78.59880 | 65.20790 | 44.61787    | 777.20444   | -489.23877  | 1 |
| 23670 | H | 81.57800 | 78.58580 | 64.84890 | -1058.63008 | 2434.04493  | 1702.79436  | 1 |
| 23671 | C | 83.57500 | 78.33080 | 64.01290 | 587.18264   | -678.89911  | 51.86181    | 1 |
| 23672 | H | 84.59400 | 78.72480 | 64.21390 | -506.67878  | 2046.68760  | -2348.09777 | 1 |
| 23673 | C | 83.59900 | 76.78780 | 63.77490 | 222.56906   | -872.16790  | -53.80558   | 1 |
| 23674 | H | 84.31500 | 76.28780 | 64.46290 | 237.29848   | 210.01570   | -3134.58664 | 1 |

|       |   |          |          |          |             |             |             |   |
|-------|---|----------|----------|----------|-------------|-------------|-------------|---|
| 23675 | H | 83.98300 | 76.51480 | 62.76890 | -2347.76777 | 290.43070   | 2081.95348  | 1 |
| 23676 | H | 82.64600 | 76.27180 | 64.01990 | -2677.18266 | 270.47322   | -1651.28823 | 1 |
| 23677 | C | 83.00400 | 79.04680 | 62.75690 | -688.89411  | 267.30127   | 548.01628   | 1 |
| 23678 | H | 81.91100 | 78.88580 | 62.63890 | 3109.59648  | -300.41890  | -266.69542  | 1 |
| 23679 | H | 83.47200 | 78.73680 | 61.79890 | -202.07650  | 3031.12063  | -856.68925  | 1 |
| 23680 | H | 83.14800 | 80.14080 | 62.88390 | 1761.75991  | -2401.73212 | -976.90497  | 1 |
| 23681 | C | 82.54300 | 77.54080 | 66.30590 | -640.20002  | 152.33778   | 638.21347   | 1 |
| 23682 | O | 81.51500 | 76.91780 | 66.54690 | -139.00049  | 587.41302   | 515.67853   | 1 |
| 23683 | N | 83.59100 | 77.46180 | 67.16990 | 118.05853   | -110.46016  | 822.31414   | 1 |
| 23684 | H | 84.39600 | 78.01380 | 66.96890 | 1947.99311  | -1109.82332 | -2199.69674 | 1 |
| 23685 | C | 83.61000 | 76.47880 | 68.21290 | 164.42156   | -878.69462  | -138.38041  | 1 |
| 23686 | H | 83.48300 | 75.48980 | 67.79590 | 1992.96545  | -2184.51893 | -1049.43428 | 1 |
| 23687 | C | 85.03500 | 76.38780 | 68.80890 | -556.68581  | -700.11344  | -181.95602  | 1 |
| 23688 | H | 85.44800 | 77.41780 | 68.87090 | -1712.21024 | 1687.22724  | 2037.63034  | 1 |
| 23689 | C | 85.07400 | 75.72080 | 70.18590 | -547.45866  | -533.84552  | 493.75497   | 1 |
| 23690 | H | 86.10000 | 75.62280 | 70.60190 | -2619.49490 | 1746.09905  | -225.49320  | 1 |
| 23691 | H | 84.55100 | 76.30080 | 70.97590 | -504.51032  | -1165.57100 | 2872.75286  | 1 |
| 23692 | H | 84.66100 | 74.69080 | 70.12890 | 2360.72387  | -2050.74295 | 237.51182   | 1 |
| 23693 | C | 85.97700 | 75.72480 | 67.76590 | -98.18311   | -238.41847  | 868.29468   | 1 |
| 23694 | H | 85.69100 | 74.65480 | 67.67490 | -1516.47071 | 2275.84290  | -1579.19068 | 1 |
| 23695 | H | 85.74100 | 76.16480 | 66.77290 | 1462.57973  | 1874.99856  | 2055.33318  | 1 |
| 23696 | C | 87.47200 | 75.97180 | 67.95890 | 390.06594   | 406.60744   | 710.68259   | 1 |
| 23697 | H | 88.05300 | 75.45780 | 67.16290 | 1576.13022  | -2592.13432 | -798.95125  | 1 |
| 23698 | H | 87.73000 | 75.66880 | 68.99590 | 1400.72879  | 3.39213     | 2807.28553  | 1 |
| 23699 | H | 87.69600 | 77.04780 | 67.79490 | 1752.71508  | -1723.16113 | -1955.06933 | 1 |
| 23700 | C | 82.51700 | 76.61280 | 69.28290 | -620.28303  | 86.79355    | -675.01447  | 1 |
| 23701 | O | 81.96700 | 75.61980 | 69.76790 | -708.37877  | 241.28089   | 274.05532   | 1 |
| 23702 | N | 82.13600 | 77.82380 | 69.67790 | -405.37820  | -492.03869  | 550.69439   | 1 |
| 23703 | H | 82.59400 | 78.62980 | 69.31090 | 643.48411   | 2523.32227  | 1767.65899  | 1 |
| 23704 | C | 81.05000 | 78.07380 | 70.56590 | 646.20240   | -585.12291  | -237.33088  | 1 |
| 23705 | H | 81.27600 | 77.50580 | 71.45590 | -385.17836  | -3111.51755 | -210.90985  | 1 |
| 23706 | C | 81.05200 | 79.58980 | 71.00790 | -122.45321  | 868.02473   | 269.13565   | 1 |
| 23707 | H | 80.98000 | 80.15680 | 70.05590 | 934.85597   | -567.14802  | -2948.55670 | 1 |
| 23708 | H | 82.02300 | 79.80180 | 71.50490 | -1756.22962 | 661.79516   | -2534.59089 | 1 |
| 23709 | C | 79.92200 | 80.03280 | 71.97990 | 444.64135   | 532.81259   | 587.62017   | 1 |
| 23710 | C | 79.38500 | 79.12780 | 72.88490 | 747.08396   | 204.11898   | -473.48387  | 1 |
| 23711 | H | 79.82100 | 78.13980 | 72.84190 | 2337.29381  | -2085.87072 | 175.96666   | 1 |
| 23712 | C | 78.46300 | 79.55580 | 73.85390 | -200.60253  | 802.41742   | -397.01121  | 1 |
| 23713 | H | 78.13700 | 78.88380 | 74.63390 | 502.81930   | 2846.76741  | 1244.38230  | 1 |
| 23714 | C | 77.98700 | 80.85580 | 73.88990 | 702.32145   | 193.96661   | -541.05088  | 1 |
| 23715 | O | 76.96700 | 81.12580 | 74.81990 | 326.91092   | -635.25500  | -323.92512  | 1 |
| 23716 | H | 77.08100 | 82.02380 | 75.14090 | 1599.39933  | -1707.94424 | 2094.54542  | 1 |
| 23717 | C | 79.47200 | 81.38480 | 72.01490 | -512.08454  | 743.42893   | 175.91709   | 1 |
| 23718 | H | 79.94600 | 82.09480 | 71.35290 | 1997.37048  | -795.13771  | 2286.85788  | 1 |
| 23719 | C | 78.48900 | 81.79280 | 72.93090 | 683.63573   | 409.78497   | -435.38856  | 1 |
| 23720 | H | 78.06400 | 82.77980 | 73.03490 | 43.21796    | 761.38660   | -3053.68203 | 1 |
| 23721 | C | 79.67300 | 77.54080 | 70.07190 | -599.60519  | -266.32678  | -641.46102  | 1 |
| 23722 | O | 78.96500 | 76.79380 | 70.76590 | 472.86070   | -467.85158  | -414.18717  | 1 |
| 23723 | N | 79.39400 | 77.68380 | 68.75890 | -750.56784  | -396.55506  | 3.18549     | 1 |
| 23724 | H | 79.95300 | 78.19680 | 68.11190 | -1161.45304 | -979.47494  | 2753.69883  | 1 |
| 23725 | C | 78.20500 | 77.02080 | 68.19390 | 53.36784    | 801.68309   | 438.01833   | 1 |
| 23726 | H | 77.43900 | 76.92980 | 68.94890 | 2948.95071  | 317.17172   | 1024.98411  | 1 |
| 23727 | C | 77.48800 | 77.80880 | 67.07390 | 356.32206   | -635.43654  | -537.39957  | 1 |
| 23728 | H | 76.97700 | 77.12180 | 66.36490 | 1480.23108  | -2369.63446 | 1424.18386  | 1 |
| 23729 | O | 78.48200 | 78.54080 | 66.33890 | -438.91983  | -396.49627  | -528.04442  | 1 |
| 23730 | H | 77.96600 | 79.06380 | 65.71990 | -583.51300  | 2171.64280  | 2207.61326  | 1 |
| 23731 | C | 76.51200 | 78.84980 | 67.67590 | 688.63003   | 564.42455   | 179.79774   | 1 |
| 23732 | H | 76.14500 | 79.53180 | 66.87990 | 2240.35661  | -1711.13794 | -1375.63757 | 1 |
| 23733 | H | 77.06600 | 79.47580 | 68.40790 | 2625.80217  | -1595.41141 | 626.26001   | 1 |
| 23734 | H | 75.64300 | 78.39980 | 68.20290 | -722.19249  | 1855.38658  | 2441.24259  | 1 |
| 23735 | C | 78.36700 | 75.56380 | 67.75190 | -15.45537   | -791.20725  | 439.20027   | 1 |
| 23736 | O | 77.49200 | 74.70580 | 67.73790 | 231.74486   | 731.95887   | -200.53705  | 1 |

|       |   |          |          |          |             |             |             |   |
|-------|---|----------|----------|----------|-------------|-------------|-------------|---|
| 23737 | N | 79.64800 | 75.13880 | 67.41590 | -417.04813  | 729.58663   | 146.55234   | 1 |
| 23738 | H | 80.37000 | 75.81880 | 67.31490 | 481.84237   | -2724.87400 | -1486.18360 | 1 |
| 23739 | C | 79.99100 | 73.68980 | 67.21490 | 88.61976    | 910.31216   | -75.63605   | 1 |
| 23740 | H | 79.38000 | 73.32380 | 66.40290 | 1627.53249  | 86.60163    | 2681.67877  | 1 |
| 23741 | C | 81.38900 | 73.44280 | 66.61790 | 744.85556   | -136.45899  | 488.45660   | 1 |
| 23742 | H | 82.10200 | 74.18380 | 67.03690 | -7.17878    | -3122.37513 | 321.67498   | 1 |
| 23743 | C | 81.96200 | 72.04380 | 66.97190 | 581.85838   | 170.24355   | 670.09217   | 1 |
| 23744 | H | 82.88300 | 71.83080 | 66.38890 | 1726.18988  | -1900.91977 | -1808.47207 | 1 |
| 23745 | H | 81.18600 | 71.31880 | 66.64490 | 2495.23235  | -876.93291  | -1693.93308 | 1 |
| 23746 | H | 82.34400 | 71.99180 | 68.01390 | 417.09881   | -1852.17733 | -2508.37003 | 1 |
| 23747 | C | 81.32400 | 73.80080 | 65.10990 | 462.85643   | 442.26735   | 643.13038   | 1 |
| 23748 | H | 80.97800 | 74.84980 | 64.98990 | 2737.92801  | -1509.59695 | -229.85742  | 1 |
| 23749 | H | 82.37400 | 73.66580 | 64.77390 | -1760.96601 | 1443.80697  | -2188.29896 | 1 |
| 23750 | H | 80.63300 | 73.08980 | 64.60990 | 673.90006   | -2975.76099 | 724.53691   | 1 |
| 23751 | C | 79.75400 | 72.79980 | 68.47990 | -619.47648  | 625.62151   | -275.61530  | 1 |
| 23752 | O | 79.20000 | 71.70380 | 68.33390 | 532.05505   | 395.53368   | 419.73852   | 1 |
| 23753 | N | 80.08100 | 73.22380 | 69.70090 | 172.91307   | -496.29476  | 649.76621   | 1 |
| 23754 | H | 80.50800 | 74.12280 | 69.76890 | -630.92253  | -2683.67019 | -1513.74082 | 1 |
| 23755 | C | 79.61600 | 72.58280 | 70.91190 | -765.40476  | 82.82988    | -505.29216  | 1 |
| 23756 | H | 79.83700 | 71.53080 | 70.80090 | -2395.78744 | -662.87450  | 1930.26743  | 1 |
| 23757 | C | 80.32000 | 73.15880 | 72.15090 | 166.68697   | 890.87963   | 121.05007   | 1 |
| 23758 | H | 80.52000 | 74.24680 | 72.04990 | -494.45600  | 2922.19678  | -1076.19734 | 1 |
| 23759 | H | 81.33400 | 72.70680 | 72.18690 | -1949.49855 | -1099.58608 | -2219.90203 | 1 |
| 23760 | C | 79.57500 | 73.06880 | 73.50490 | -6.02462    | -706.39997  | 567.06380   | 1 |
| 23761 | O | 78.59100 | 73.73680 | 73.79790 | 496.58987   | -66.62512   | -608.64221  | 1 |
| 23762 | N | 80.05400 | 72.13480 | 74.36090 | 390.92450   | -699.02938  | 242.07280   | 1 |
| 23763 | H | 80.91400 | 71.64380 | 74.22290 | 2437.24680  | 1923.59509  | -498.06818  | 1 |
| 23764 | H | 79.62900 | 72.06180 | 75.26290 | -1609.93060 | -1822.22870 | 1993.21624  | 1 |
| 23765 | C | 78.06400 | 72.62880 | 71.06090 | -130.35900  | 906.99412   | -51.15619   | 1 |
| 23766 | O | 77.44500 | 71.63380 | 71.38190 | -394.11678  | 287.39302   | 622.90152   | 1 |
| 23767 | N | 77.42000 | 73.74480 | 70.75490 | -514.51697  | -662.82992  | -102.80784  | 1 |
| 23768 | H | 77.98600 | 74.52280 | 70.49790 | -2042.12336 | -2302.99929 | 653.81551   | 1 |
| 23769 | C | 76.00300 | 73.97580 | 70.88590 | -853.49326  | 104.48439   | -328.17675  | 1 |
| 23770 | H | 75.75900 | 73.92180 | 71.93690 | 1775.83032  | -2456.36118 | 812.57362   | 1 |
| 23771 | C | 75.56400 | 75.38480 | 70.54190 | -260.84233  | -866.59548  | 88.80442    | 1 |
| 23772 | H | 75.41200 | 75.53680 | 69.45190 | 2139.40063  | 1429.51646  | 1802.39704  | 1 |
| 23773 | H | 76.35700 | 76.10880 | 70.82590 | 2119.95453  | -2284.69824 | -363.89328  | 1 |
| 23774 | C | 74.25900 | 75.91580 | 71.28290 | -532.63391  | 548.48908   | 507.24060   | 1 |
| 23775 | H | 73.50300 | 75.10180 | 71.26190 | -1673.71938 | -2296.31594 | 1350.56780  | 1 |
| 23776 | C | 74.54200 | 76.24980 | 72.74990 | -625.08393  | -481.67277  | 460.69830   | 1 |
| 23777 | H | 74.82100 | 75.38380 | 73.38690 | -358.26018  | 2868.99237  | -1252.75363 | 1 |
| 23778 | H | 73.69400 | 76.78080 | 73.23390 | -1927.88942 | 2245.74079  | 1084.89629  | 1 |
| 23779 | H | 75.40100 | 76.95280 | 72.71390 | -596.90663  | -2944.67558 | 923.91443   | 1 |
| 23780 | C | 73.71700 | 77.15380 | 70.58690 | -95.59545   | 485.33462   | 768.21288   | 1 |
| 23781 | H | 72.74800 | 77.35680 | 71.09090 | -1284.05773 | 2229.85564  | 1819.58436  | 1 |
| 23782 | H | 73.66100 | 76.90080 | 69.50690 | -2211.89881 | 939.00296   | 2040.21554  | 1 |
| 23783 | H | 74.31300 | 78.05480 | 70.84590 | -1242.66947 | -2559.58921 | 1340.34148  | 1 |
| 23784 | C | 75.09600 | 73.04480 | 70.08690 | -830.67000  | 391.40814   | -68.73387   | 1 |
| 23785 | O | 74.19500 | 72.43780 | 70.57690 | 519.18896   | 459.19864   | -377.07439  | 1 |
| 23786 | N | 75.58000 | 72.79280 | 68.84390 | 436.15886   | -707.58737  | -89.98110   | 1 |
| 23787 | H | 76.37800 | 73.29880 | 68.52390 | 593.94315   | 1451.42222  | -2732.23636 | 1 |
| 23788 | C | 75.03800 | 71.79380 | 67.92590 | 32.93483    | -544.63417  | -729.87678  | 1 |
| 23789 | H | 73.97500 | 71.68380 | 68.08490 | -951.47697  | 2270.49321  | 1965.34726  | 1 |
| 23790 | C | 75.21300 | 72.27780 | 66.44590 | -7.92597    | -905.10498  | -37.37704   | 1 |
| 23791 | H | 74.68000 | 71.57580 | 65.76990 | -399.32974  | 2225.39817  | 2191.84349  | 1 |
| 23792 | H | 76.30400 | 72.25780 | 66.23490 | 1244.19765  | 1670.42319  | -2361.98875 | 1 |
| 23793 | C | 74.58800 | 73.64280 | 66.30190 | 17.91820    | 867.05587   | 296.10125   | 1 |
| 23794 | C | 73.40500 | 74.05580 | 66.90090 | -629.94929  | 172.76706   | -648.54161  | 1 |
| 23795 | H | 72.87400 | 73.31580 | 67.48090 | 2137.53221  | 2092.16844  | -971.97083  | 1 |
| 23796 | C | 72.89700 | 75.36980 | 66.79290 | -866.40716  | 249.81499   | -191.97272  | 1 |
| 23797 | H | 72.03100 | 75.61380 | 67.39190 | 1594.61666  | 2179.29777  | 1611.49213  | 1 |
| 23798 | C | 73.59500 | 76.30480 | 66.07290 | -548.19151  | 458.28481   | -581.56154  | 1 |

|       |   |          |          |          |             |             |             |   |
|-------|---|----------|----------|----------|-------------|-------------|-------------|---|
| 23799 | O | 73.11000 | 77.58880 | 66.04690 | 451.16441   | -249.30900  | 587.55699   | 1 |
| 23800 | H | 73.77800 | 78.08480 | 65.56790 | 2097.73861  | -2261.07488 | 562.46490   | 1 |
| 23801 | C | 75.25300 | 74.59480 | 65.48390 | -693.82110  | 87.46767    | -599.33160  | 1 |
| 23802 | H | 76.17700 | 74.26580 | 65.03190 | 43.90296    | -2922.94761 | 1142.27067  | 1 |
| 23803 | C | 74.76400 | 75.91180 | 65.39090 | 326.51314   | 472.42453   | 706.07737   | 1 |
| 23804 | H | 75.26000 | 76.67480 | 64.80990 | 2038.03290  | -728.82327  | -2274.80383 | 1 |
| 23805 | C | 75.55000 | 70.36280 | 68.08790 | -738.36483  | 231.49811   | -500.99192  | 1 |
| 23806 | O | 74.98700 | 69.48580 | 67.47890 | 484.80912   | -461.66460  | -407.98912  | 1 |
| 23807 | N | 76.64500 | 70.10980 | 68.85690 | 324.60309   | -569.45571  | -526.45440  | 1 |
| 23808 | H | 77.20900 | 70.81580 | 69.27890 | -339.70625  | -1607.88736 | 2675.75720  | 1 |
| 23809 | C | 77.21400 | 68.74780 | 68.93090 | -690.73412  | -61.80774   | -605.38966  | 1 |
| 23810 | H | 76.76200 | 68.11280 | 68.18290 | -2607.33324 | 1615.93048  | 732.73339   | 1 |
| 23811 | C | 78.76800 | 68.59680 | 68.72990 | 596.02643   | 453.96324   | 510.22043   | 1 |
| 23812 | H | 78.91700 | 68.76980 | 67.64290 | 2138.28278  | -2293.65718 | 60.69739    | 1 |
| 23813 | H | 79.12100 | 67.55780 | 68.90390 | -2646.86455 | -693.10762  | 1555.95790  | 1 |
| 23814 | O | 79.43400 | 69.45380 | 69.61290 | 753.72654   | 216.49744   | 7.30554     | 1 |
| 23815 | H | 79.36600 | 70.29480 | 69.15390 | -3054.98067 | -659.25907  | 404.56468   | 1 |
| 23816 | C | 76.83600 | 68.12980 | 70.21990 | 498.71611   | 598.64270   | -478.33864  | 1 |
| 23817 | O | 76.31600 | 67.01880 | 70.22490 | -312.07694  | 534.42851   | -505.87461  | 1 |
| 23818 | N | 76.90800 | 68.88580 | 71.39690 | 76.33347    | 474.55010   | -701.74167  | 1 |
| 23819 | H | 77.09200 | 69.86380 | 71.34290 | -1873.04815 | 2138.99858  | 1358.29924  | 1 |
| 23820 | C | 76.65900 | 68.29280 | 72.72790 | 493.82183   | 466.96369   | -611.47836  | 1 |
| 23821 | H | 77.37300 | 67.49480 | 72.86990 | -357.76700  | -43.84511   | -3132.16884 | 1 |
| 23822 | C | 76.99100 | 69.27280 | 73.89690 | 719.73008   | 76.41368    | -552.60761  | 1 |
| 23823 | H | 78.08900 | 69.43780 | 73.90890 | 361.06741   | 3126.67842  | -106.55854  | 1 |
| 23824 | H | 76.72300 | 68.86880 | 74.89590 | 2924.45232  | 81.36901    | 1137.66210  | 1 |
| 23825 | O | 76.37400 | 70.60180 | 73.75590 | 273.61857   | 523.50887   | -528.99627  | 1 |
| 23826 | H | 76.99100 | 71.20580 | 73.33690 | 528.11915   | 2600.07205  | -1699.16572 | 1 |
| 23827 | C | 75.22200 | 67.71180 | 72.98090 | 196.28844   | -546.19085  | 693.27251   | 1 |
| 23828 | O | 75.04700 | 66.54180 | 73.22690 | 538.98853   | -305.48630  | -486.85253  | 1 |
| 23829 | N | 74.23400 | 68.54880 | 72.77190 | -758.33135  | -378.09186  | -40.27274   | 1 |
| 23830 | H | 74.49300 | 69.49780 | 72.60890 | 1261.70224  | 2610.83105  | 1217.32485  | 1 |
| 23831 | C | 72.81700 | 68.20780 | 72.84690 | 703.93705   | -424.81460  | -384.02028  | 1 |
| 23832 | H | 72.69700 | 67.79180 | 73.83690 | -692.38117  | -1497.57152 | -2683.39721 | 1 |
| 23833 | C | 71.92400 | 69.42580 | 72.75590 | 202.77923   | -32.89934   | 882.88937   | 1 |
| 23834 | H | 72.28100 | 70.22380 | 73.44090 | -2091.53959 | 2287.16702  | 572.96627   | 1 |
| 23835 | C | 71.88500 | 70.06880 | 71.32090 | 493.00725   | -488.95624  | -585.77024  | 1 |
| 23836 | H | 72.95400 | 70.30580 | 71.12690 | 2772.48877  | 743.89161   | 1271.35317  | 1 |
| 23837 | H | 71.46800 | 69.35080 | 70.58190 | 1517.77981  | -1884.46883 | -2005.61431 | 1 |
| 23838 | H | 71.31100 | 71.01980 | 71.33190 | 2630.76383  | -1626.74725 | -534.69420  | 1 |
| 23839 | C | 70.59100 | 69.04780 | 73.37790 | -378.88912  | -732.89266  | 385.00383   | 1 |
| 23840 | H | 69.91400 | 69.92780 | 73.42990 | 1618.89530  | 2264.70550  | 1460.04092  | 1 |
| 23841 | H | 70.01500 | 68.20180 | 72.94690 | -870.29212  | -2004.25216 | 2259.40314  | 1 |
| 23842 | H | 70.85600 | 68.68180 | 74.39290 | -475.23382  | 2022.86710  | 2361.68283  | 1 |
| 23843 | C | 72.36900 | 67.11980 | 71.85690 | 623.20020   | 362.10758   | -558.81193  | 1 |
| 23844 | O | 71.52900 | 66.26080 | 72.13090 | -595.74733  | 366.56695   | -384.55340  | 1 |
| 23845 | N | 72.91100 | 67.09180 | 70.61690 | -455.97143  | 172.27515   | -699.66837  | 1 |
| 23846 | H | 73.50900 | 67.85780 | 70.39290 | 1958.03657  | -650.46098  | -2373.29850 | 1 |
| 23847 | C | 72.45400 | 66.06380 | 69.71790 | 461.99671   | -457.81713  | 625.57484   | 1 |
| 23848 | H | 71.39000 | 65.90280 | 69.80790 | 2184.99381  | 1250.03941  | -1887.47170 | 1 |
| 23849 | C | 72.66000 | 66.54280 | 68.23090 | -177.42518  | -608.43741  | 647.48733   | 1 |
| 23850 | H | 72.52100 | 65.61380 | 67.63890 | -2069.03808 | -952.19184  | 2169.35455  | 1 |
| 23851 | H | 73.68700 | 66.96680 | 68.24990 | 1998.35153  | 413.78573   | -2394.70920 | 1 |
| 23852 | C | 71.72500 | 67.59780 | 67.72090 | 121.19142   | -722.64103  | 529.47482   | 1 |
| 23853 | C | 71.74100 | 68.95780 | 67.92090 | 886.99513   | -24.53604   | 170.31397   | 1 |
| 23854 | H | 72.58600 | 69.44280 | 68.38690 | 2022.75025  | 2063.16446  | 1237.10149  | 1 |
| 23855 | N | 70.70500 | 69.55680 | 67.31790 | 719.53588   | 426.09331   | -84.48278   | 1 |
| 23856 | H | 70.35400 | 70.42880 | 67.57890 | -1981.56115 | -1646.90024 | 1806.18484  | 1 |
| 23857 | C | 69.94900 | 68.58180 | 66.73890 | 235.53366   | -58.03303   | -880.19701  | 1 |
| 23858 | C | 70.55000 | 67.30580 | 66.99790 | -198.50399  | 178.07977   | 870.36562   | 1 |
| 23859 | C | 69.90800 | 66.17080 | 66.61990 | -101.37054  | -655.12410  | 616.99733   | 1 |
| 23860 | H | 70.39900 | 65.26380 | 66.93990 | 2041.65126  | -2011.44243 | 1272.68526  | 1 |

|       |   |          |          |          |             |             |             |   |
|-------|---|----------|----------|----------|-------------|-------------|-------------|---|
| 23861 | C | 68.76100 | 66.27480 | 65.85090 | -384.86010  | -612.26075  | 550.34397   | 1 |
| 23862 | H | 68.26800 | 65.37480 | 65.51390 | 1723.02216  | -2323.15690 | 1212.00617  | 1 |
| 23863 | C | 68.83000 | 68.69180 | 65.97190 | 722.53225   | -298.96665  | -456.21608  | 1 |
| 23864 | H | 68.33200 | 69.62280 | 65.74690 | -2328.63348 | 1344.50900  | 1646.60985  | 1 |
| 23865 | C | 68.20200 | 67.49880 | 65.54590 | -252.48188  | -636.25672  | 596.14240   | 1 |
| 23866 | H | 67.29300 | 67.52580 | 64.96390 | -1273.79055 | 2123.00722  | -1956.12699 | 1 |
| 23867 | C | 73.19300 | 64.74780 | 69.88990 | -489.30772  | -406.56480  | -661.24204  | 1 |
| 23868 | O | 72.67800 | 63.69780 | 69.58190 | -233.60774  | 521.33148   | -558.55381  | 1 |
| 23869 | N | 74.40600 | 64.73880 | 70.51790 | 300.33587   | 447.64090   | -656.17288  | 1 |
| 23870 | H | 74.96100 | 65.55880 | 70.63090 | 534.99465   | -2258.70916 | -2123.53367 | 1 |
| 23871 | C | 74.94700 | 63.53980 | 71.09390 | 205.50117   | 672.67114   | 576.15143   | 1 |
| 23872 | H | 75.05800 | 62.74180 | 70.37490 | 1187.37735  | -1522.03301 | 2471.27108  | 1 |
| 23873 | C | 76.44200 | 63.74480 | 71.56290 | -170.28977  | -873.13127  | -192.98627  | 1 |
| 23874 | H | 76.37000 | 64.76080 | 72.00790 | -1636.27212 | 2148.64190  | 1618.30073  | 1 |
| 23875 | C | 76.85300 | 62.73380 | 72.62490 | -614.08486  | -644.14417  | 194.61024   | 1 |
| 23876 | H | 77.96400 | 62.74180 | 72.63890 | 2690.82302  | -1616.65571 | -45.44834   | 1 |
| 23877 | H | 76.59800 | 61.68380 | 72.36590 | 1174.25606  | 2734.89555  | 1016.14241  | 1 |
| 23878 | H | 76.41300 | 62.97180 | 73.61690 | -1483.48706 | 1608.29212  | -2274.23664 | 1 |
| 23879 | C | 77.39100 | 63.63880 | 70.36590 | 2.02453     | 270.51159   | 864.67500   | 1 |
| 23880 | H | 76.79400 | 64.06380 | 69.53090 | 456.22267   | -2929.35831 | -1043.04055 | 1 |
| 23881 | H | 77.58600 | 62.57880 | 70.09590 | -1522.33790 | 1473.88629  | 2324.72180  | 1 |
| 23882 | C | 78.55700 | 64.57680 | 70.48490 | 833.31547   | -350.08014  | -28.82711   | 1 |
| 23883 | H | 79.21500 | 64.35480 | 71.35190 | -442.63608  | -2981.14660 | -897.69110  | 1 |
| 23884 | H | 78.21700 | 65.63480 | 70.49190 | 2169.61326  | -1944.70136 | 1159.98261  | 1 |
| 23885 | H | 79.23400 | 64.48180 | 69.60890 | -338.07991  | 2201.89939  | 2220.20129  | 1 |
| 23886 | C | 74.09700 | 62.96180 | 72.24090 | 643.98279   | 642.01619   | 39.32556    | 1 |
| 23887 | O | 73.82900 | 61.77480 | 72.30290 | -143.84965  | 181.02449   | -764.32075  | 1 |
| 23888 | N | 73.51000 | 63.84680 | 73.06590 | 350.91058   | -533.48797  | 538.90566   | 1 |
| 23889 | H | 73.79600 | 64.80180 | 73.04790 | 598.83253   | 2819.82152  | 1259.03548  | 1 |
| 23890 | C | 72.53000 | 63.56280 | 74.09690 | -372.74664  | 822.39106   | 150.88159   | 1 |
| 23891 | H | 72.92800 | 62.80480 | 74.75590 | -2235.70465 | -2201.25487 | -260.62730  | 1 |
| 23892 | C | 72.31300 | 64.68880 | 75.09590 | -718.61129  | 536.43211   | -198.55836  | 1 |
| 23893 | H | 71.43000 | 64.41080 | 75.70990 | 733.09784   | -1444.89752 | 2688.71754  | 1 |
| 23894 | H | 71.98400 | 65.56780 | 74.50090 | 982.98567   | -2621.13423 | 1421.93926  | 1 |
| 23895 | C | 73.46500 | 64.97780 | 76.06990 | 310.77232   | 812.52691   | -280.37822  | 1 |
| 23896 | H | 74.37300 | 65.14780 | 75.45290 | -1412.77966 | -146.27732  | 2803.47063  | 1 |
| 23897 | C | 73.19900 | 66.08480 | 77.11390 | -690.87982  | -495.35593  | -342.32155  | 1 |
| 23898 | H | 74.07700 | 66.31080 | 77.75590 | 170.57592   | -2542.35200 | -1848.37104 | 1 |
| 23899 | H | 72.87400 | 67.00380 | 76.57990 | -2614.76317 | -1499.93874 | 906.71710   | 1 |
| 23900 | H | 72.38300 | 65.70780 | 77.76590 | 1611.42585  | -2453.78058 | -1127.49665 | 1 |
| 23901 | C | 73.79100 | 63.67480 | 76.88490 | 647.00214   | 175.89547   | -620.46536  | 1 |
| 23902 | H | 74.66400 | 63.90280 | 77.53190 | 1925.89868  | -2009.14973 | 1452.19707  | 1 |
| 23903 | H | 72.87900 | 63.35080 | 77.43090 | -542.02898  | 2886.01368  | 1129.03557  | 1 |
| 23904 | H | 74.16100 | 62.87780 | 76.20390 | 839.19187   | -2802.67704 | -1155.33045 | 1 |
| 23905 | C | 71.22700 | 62.91880 | 73.51690 | 182.50807   | -386.97716  | -808.81667  | 1 |
| 23906 | O | 70.71800 | 61.98380 | 74.14690 | 572.32794   | -40.76907   | 530.69074   | 1 |
| 23907 | N | 70.70300 | 63.40180 | 72.34790 | 122.58244   | 635.50850   | 538.66868   | 1 |
| 23908 | H | 71.10300 | 64.26580 | 72.05290 | 181.07960   | 101.74061   | -3144.70988 | 1 |
| 23909 | C | 69.73400 | 62.58180 | 71.58590 | 648.34332   | -575.12251  | -268.42957  | 1 |
| 23910 | H | 68.87900 | 62.38480 | 72.21590 | 1292.68007  | -2809.95447 | -553.13786  | 1 |
| 23911 | C | 69.26800 | 63.38280 | 70.33890 | -415.98133  | 458.27721   | 670.51897   | 1 |
| 23912 | H | 68.28800 | 62.96680 | 70.02090 | 2100.01921  | -2274.49337 | 515.39410   | 1 |
| 23913 | H | 69.96100 | 63.29480 | 69.47590 | -2169.74637 | 29.44790    | -2289.89062 | 1 |
| 23914 | H | 69.03900 | 64.45180 | 70.53990 | 1001.19022  | 952.27062   | -2830.56755 | 1 |
| 23915 | C | 70.21000 | 61.21680 | 71.12590 | 485.52598   | 601.92988   | -488.54126  | 1 |
| 23916 | O | 69.50700 | 60.27980 | 71.39790 | -538.20560  | -399.96629  | -427.50780  | 1 |
| 23917 | N | 71.39700 | 61.10080 | 70.48690 | -231.10616  | -772.99183  | 234.04033   | 1 |
| 23918 | H | 71.96500 | 61.91780 | 70.43290 | 2161.00328  | 696.11652   | -2180.21176 | 1 |
| 23919 | C | 71.91600 | 59.80780 | 70.10590 | -131.76248  | 580.05229   | 688.18706   | 1 |
| 23920 | H | 71.21400 | 59.26580 | 69.48990 | -696.12998  | -1785.35097 | -2501.25870 | 1 |
| 23921 | C | 73.26300 | 60.01580 | 69.27590 | 218.20334   | 189.20292   | -872.24376  | 1 |
| 23922 | H | 73.86400 | 59.08180 | 69.30890 | -1625.27937 | -2118.81823 | -1671.43583 | 1 |

|       |   |          |          |          |             |             |             |   |
|-------|---|----------|----------|----------|-------------|-------------|-------------|---|
| 23923 | H | 73.85400 | 60.81780 | 69.76790 | 1907.54809  | -1736.68707 | -1797.76264 | 1 |
| 23924 | C | 73.07700 | 60.37180 | 67.86290 | -628.60216  | -258.40322  | 604.55473   | 1 |
| 23925 | C | 71.99300 | 61.12680 | 67.38390 | -160.61150  | -687.47958  | -579.58518  | 1 |
| 23926 | H | 71.19200 | 61.52980 | 67.98490 | -1058.16331 | -1862.78307 | 2296.25158  | 1 |
| 23927 | C | 71.80300 | 61.37380 | 66.02090 | -115.57533  | -454.91596  | -786.29457  | 1 |
| 23928 | H | 70.93800 | 61.91180 | 65.66190 | -2704.05929 | 573.98030   | -1523.91824 | 1 |
| 23929 | C | 72.70500 | 60.88880 | 65.10690 | 551.44707   | -580.45346  | 411.01262   | 1 |
| 23930 | H | 72.48900 | 61.01780 | 64.05590 | -1401.12217 | 1805.65015  | -2179.77737 | 1 |
| 23931 | C | 73.97600 | 59.87980 | 66.90290 | -675.00621  | -286.58379  | -555.12678  | 1 |
| 23932 | H | 74.74700 | 59.17780 | 67.18090 | -526.20559  | -1943.58855 | -2422.71101 | 1 |
| 23933 | C | 73.75000 | 60.08480 | 65.52790 | 338.21879   | -758.88555  | 348.12355   | 1 |
| 23934 | H | 74.35200 | 59.44180 | 64.90390 | 1609.41313  | -2422.45396 | 1168.43439  | 1 |
| 23935 | C | 72.12500 | 58.72180 | 71.18490 | -309.08295  | 859.87109   | -88.78740   | 1 |
| 23936 | O | 71.74000 | 57.56280 | 70.96290 | -450.74789  | 521.30109   | -405.22988  | 1 |
| 23937 | N | 72.61100 | 59.07480 | 72.37390 | 619.37944   | -38.21568   | 558.54478   | 1 |
| 23938 | H | 72.89000 | 60.02280 | 72.50490 | -2039.37977 | -299.12877  | -2388.61338 | 1 |
| 23939 | C | 72.68100 | 58.14080 | 73.49390 | 708.97810   | -430.88606  | 357.45936   | 1 |
| 23940 | H | 73.09600 | 57.19180 | 73.18990 | -1638.31849 | 657.59144   | -2616.76016 | 1 |
| 23941 | C | 73.64600 | 58.74880 | 74.51190 | 255.77426   | -15.45086   | 865.29395   | 1 |
| 23942 | H | 74.62300 | 58.87080 | 73.99490 | -2072.23954 | -1940.68312 | -1366.77572 | 1 |
| 23943 | C | 73.16700 | 60.07580 | 75.15390 | 435.61198   | -540.05119  | -593.80901  | 1 |
| 23944 | H | 72.36900 | 59.90880 | 75.90790 | -1739.45405 | -1836.82695 | -1879.90486 | 1 |
| 23945 | H | 72.74200 | 60.71680 | 74.35090 | 2071.55604  | 1148.21861  | -2075.11122 | 1 |
| 23946 | H | 73.98700 | 60.55380 | 75.73090 | 56.95115    | -2000.80573 | -2433.02826 | 1 |
| 23947 | C | 74.00800 | 57.66680 | 75.58290 | -411.79847  | 567.39218   | -597.19857  | 1 |
| 23948 | H | 74.22300 | 56.72280 | 75.03790 | -1798.06929 | 1570.17343  | -2064.29712 | 1 |
| 23949 | H | 73.10600 | 57.48480 | 76.20490 | -1529.55720 | 1841.99986  | -2054.55968 | 1 |
| 23950 | C | 75.17000 | 58.18180 | 76.40990 | 761.30637   | 232.02322   | -448.62555  | 1 |
| 23951 | H | 76.07100 | 58.47080 | 75.82890 | 2382.84635  | -200.87051  | 2030.30033  | 1 |
| 23952 | H | 74.83000 | 59.07680 | 76.97390 | -1841.75455 | 2220.25220  | -1273.48893 | 1 |
| 23953 | H | 75.49500 | 57.43180 | 77.16290 | 2555.24984  | 732.06459   | 1669.21487  | 1 |
| 23954 | C | 71.27200 | 57.86480 | 74.12990 | -478.07483  | 548.98183   | -563.71422  | 1 |
| 23955 | O | 71.00500 | 56.75880 | 74.66690 | -273.65406  | 341.08985   | 652.05306   | 1 |
| 23956 | N | 70.33700 | 58.79980 | 73.99790 | 641.71210   | 537.06900   | 89.08113    | 1 |
| 23957 | H | 70.55600 | 59.61580 | 73.46790 | 776.24324   | -2095.15863 | -2217.82991 | 1 |
| 23958 | C | 68.93700 | 58.59380 | 74.35490 | 588.89804   | 570.71732   | -402.55005  | 1 |
| 23959 | H | 68.88800 | 58.26980 | 75.38390 | 203.23721   | 2079.24169  | -2361.03565 | 1 |
| 23960 | C | 68.03700 | 59.88580 | 74.21290 | -222.12311  | -814.89646  | 334.76139   | 1 |
| 23961 | H | 66.94500 | 59.71580 | 74.32590 | -663.69994  | -2533.94876 | 1735.14646  | 1 |
| 23962 | H | 68.26200 | 60.32580 | 73.21790 | -1038.34843 | -2153.58984 | -2051.15742 | 1 |
| 23963 | O | 68.38100 | 60.83480 | 75.21390 | -258.51343  | 747.89098   | 44.86106    | 1 |
| 23964 | H | 69.14200 | 61.29780 | 74.85590 | 798.65678   | 3023.22937  | -361.03401  | 1 |
| 23965 | C | 68.26600 | 57.55280 | 73.49690 | -34.64225   | -623.44795  | -669.78394  | 1 |
| 23966 | O | 67.62400 | 56.66180 | 74.00890 | -151.56733  | 766.53488   | -141.11515  | 1 |
| 23967 | N | 68.41900 | 57.71580 | 72.14690 | -292.81708  | -25.95530   | -800.49424  | 1 |
| 23968 | H | 68.91000 | 58.48880 | 71.75390 | 1140.43721  | -2419.80352 | 1640.31736  | 1 |
| 23969 | C | 68.00800 | 56.73880 | 71.10290 | 154.59126   | -400.43724  | -809.47162  | 1 |
| 23970 | H | 66.93000 | 56.69380 | 71.05990 | -2634.46903 | 1719.21771  | -207.97587  | 1 |
| 23971 | C | 68.42200 | 57.32980 | 69.74790 | -565.77673  | -684.20661  | -217.27932  | 1 |
| 23972 | H | 68.40100 | 56.60980 | 68.90190 | 699.79321   | 2174.96144  | -2173.20039 | 1 |
| 23973 | H | 69.46400 | 57.71380 | 69.75790 | -2182.27260 | 983.25788   | 2042.04955  | 1 |
| 23974 | C | 67.53700 | 58.48480 | 69.21390 | -509.04354  | 81.57893    | 749.55058   | 1 |
| 23975 | H | 67.35400 | 59.16180 | 70.07590 | 1497.21856  | -2759.38451 | 62.57491    | 1 |
| 23976 | C | 68.30300 | 59.44180 | 68.21290 | -895.61475  | 92.00868    | -187.77756  | 1 |
| 23977 | H | 67.50000 | 60.12880 | 67.86990 | -473.68580  | 2720.45063  | -1524.11903 | 1 |
| 23978 | H | 68.58400 | 58.83980 | 67.32290 | 3132.79836  | -194.67120  | -69.94405   | 1 |
| 23979 | H | 69.13000 | 60.00380 | 68.69590 | -2156.15281 | 630.44582   | -2216.70720 | 1 |
| 23980 | C | 66.27600 | 58.00980 | 68.50990 | -861.56866  | 272.50213   | -172.18448  | 1 |
| 23981 | H | 66.46300 | 57.26280 | 67.70990 | -2988.03930 | -565.76506  | 818.08468   | 1 |
| 23982 | H | 65.65900 | 58.82780 | 68.07890 | 796.64720   | -1276.57705 | -2765.46102 | 1 |
| 23983 | H | 65.59800 | 57.65380 | 69.31590 | 1204.62388  | 2489.99411  | -1507.39327 | 1 |
| 23984 | C | 68.65300 | 55.42080 | 71.41890 | 386.38309   | -377.78527  | -738.50772  | 1 |

|       |   |          |          |          |             |             |             |   |
|-------|---|----------|----------|----------|-------------|-------------|-------------|---|
| 23985 | O | 67.96100 | 54.39280 | 71.36790 | 450.99383   | 548.47046   | -353.16586  | 1 |
| 23986 | N | 69.99700 | 55.34680 | 71.65690 | 346.71945   | 566.61872   | 512.77007   | 1 |
| 23987 | H | 70.50300 | 56.19780 | 71.54090 | -1984.42164 | -2337.97912 | 696.34487   | 1 |
| 23988 | C | 70.66600 | 54.11680 | 71.95390 | 431.14343   | 177.04636   | -791.38270  | 1 |
| 23989 | H | 70.37400 | 53.43580 | 71.16790 | 858.97596   | 2362.43786  | -1903.96474 | 1 |
| 23990 | C | 72.21100 | 54.42880 | 71.99990 | 386.65291   | 680.85764   | -478.46943  | 1 |
| 23991 | H | 72.41300 | 55.16980 | 72.80390 | 347.39631   | -483.57060  | -3097.72771 | 1 |
| 23992 | H | 72.52700 | 54.79380 | 70.99990 | -2879.08386 | -486.36130  | -1191.42693 | 1 |
| 23993 | C | 72.99600 | 53.16680 | 72.28990 | -162.36433  | 901.00101   | 23.58668    | 1 |
| 23994 | O | 73.09800 | 52.74080 | 73.45190 | -323.81024  | -33.74805   | 710.50385   | 1 |
| 23995 | O | 73.42800 | 52.48280 | 71.30890 | 17.19265    | -568.35196  | 532.86874   | 1 |
| 23996 | C | 70.16900 | 53.41580 | 73.19190 | 742.77876   | 14.57817    | 513.42717   | 1 |
| 23997 | O | 70.09800 | 52.19680 | 73.28190 | -326.03462  | -298.40892  | 645.09130   | 1 |
| 23998 | N | 69.80300 | 54.19280 | 74.24790 | -538.52781  | -441.30656  | 470.39086   | 1 |
| 23999 | H | 69.85400 | 55.18780 | 74.23790 | -102.52100  | 2182.23573  | 2257.74734  | 1 |
| 24000 | C | 69.17300 | 53.66180 | 75.45390 | 485.67326   | 636.36060   | 426.27044   | 1 |
| 24001 | H | 69.73600 | 52.83980 | 75.86990 | -2532.61294 | -1778.37191 | -585.60540  | 1 |
| 24002 | C | 69.09800 | 54.71380 | 76.61790 | -511.92869  | 605.20728   | -465.13399  | 1 |
| 24003 | H | 69.19700 | 55.75280 | 76.23590 | -2709.95308 | 521.74877   | -1526.03547 | 1 |
| 24004 | H | 68.12200 | 54.60580 | 77.13890 | 1666.07427  | 1345.95866  | -2311.39773 | 1 |
| 24005 | C | 70.26100 | 54.47080 | 77.66490 | 625.76425   | -234.80350  | 607.57599   | 1 |
| 24006 | H | 70.11000 | 55.20080 | 78.48890 | -1949.05624 | 1914.79601  | 1555.66742  | 1 |
| 24007 | H | 70.18700 | 53.40880 | 77.98390 | -1772.06706 | -2204.40894 | 1370.24183  | 1 |
| 24008 | C | 71.68300 | 54.73580 | 77.10590 | 319.95907   | 729.92053   | 433.92246   | 1 |
| 24009 | H | 72.30700 | 54.92680 | 78.00490 | 1722.79218  | 1880.79349  | 1830.99462  | 1 |
| 24010 | H | 71.52300 | 55.67780 | 76.53890 | 1227.31225  | -704.41588  | 2798.91778  | 1 |
| 24011 | N | 72.29500 | 53.58780 | 76.26790 | -649.48269  | -479.90054  | 240.73562   | 1 |
| 24012 | H | 72.33300 | 53.71780 | 75.27790 | -2300.91377 | 1213.15076  | -1786.09770 | 1 |
| 24013 | C | 72.51900 | 52.36480 | 76.67390 | 658.79524   | 239.81014   | 569.80737   | 1 |
| 24014 | N | 72.45100 | 51.90980 | 77.92390 | 520.40839   | 588.43220   | 296.66953   | 1 |
| 24015 | H | 72.43900 | 52.51280 | 78.72190 | -1789.89220 | 2470.46668  | 767.75309   | 1 |
| 24016 | H | 72.53400 | 50.92280 | 78.06190 | 616.86770   | 37.44322    | 3073.25972  | 1 |
| 24017 | N | 72.86300 | 51.48580 | 75.77490 | -502.92684  | 367.77036   | 562.87129   | 1 |
| 24018 | H | 72.93300 | 51.87680 | 74.85690 | 425.10840   | -2756.69158 | -1460.24775 | 1 |
| 24019 | H | 73.24600 | 50.61580 | 76.08390 | 2885.34443  | 27.61262    | -1258.51722 | 1 |
| 24020 | C | 67.78400 | 53.02580 | 75.23090 | 415.89836   | -700.06882  | 394.58431   | 1 |
| 24021 | O | 67.57600 | 51.90080 | 75.66890 | 736.34238   | -6.12107    | -286.14530  | 1 |
| 24022 | N | 66.94800 | 53.66880 | 74.42790 | 268.38440   | -524.78883  | -609.45730  | 1 |
| 24023 | H | 67.26800 | 54.51680 | 74.01190 | -118.71029  | 572.50983   | 3083.56521  | 1 |
| 24024 | C | 65.70600 | 53.17180 | 73.94890 | 798.57576   | -340.13837  | -273.85681  | 1 |
| 24025 | H | 65.24000 | 52.91680 | 74.88890 | -777.19848  | 2936.86036  | 818.69882   | 1 |
| 24026 | C | 65.01600 | 54.39180 | 73.21590 | -518.41563  | -571.16632  | -495.91629  | 1 |
| 24027 | H | 65.75700 | 55.08780 | 72.76690 | 581.60943   | -1169.21922 | -2868.10925 | 1 |
| 24028 | H | 64.48300 | 54.96280 | 74.00590 | -1922.49656 | -1948.20523 | -1561.50398 | 1 |
| 24029 | C | 63.96000 | 54.00580 | 72.20890 | 585.02317   | -648.56867  | -252.85794  | 1 |
| 24030 | C | 62.81500 | 53.27380 | 72.56890 | 77.90767    | -899.83397  | 97.58132    | 1 |
| 24031 | H | 62.64500 | 52.99980 | 73.59990 | -1371.72827 | -1994.38578 | 2002.98816  | 1 |
| 24032 | C | 61.86200 | 53.00680 | 71.55590 | -404.11114  | 297.81288   | 757.07708   | 1 |
| 24033 | H | 60.98800 | 52.51080 | 71.95090 | -297.05407  | -3087.18672 | -525.41814  | 1 |
| 24034 | C | 62.07000 | 53.38380 | 70.23690 | -278.41132  | 82.26813    | 858.85904   | 1 |
| 24035 | O | 61.17200 | 53.02380 | 69.23190 | 490.50998   | -71.58155   | -617.49853  | 1 |
| 24036 | H | 61.57000 | 53.06280 | 68.35890 | 846.26218   | -2243.81213 | 2022.91976  | 1 |
| 24037 | C | 64.22300 | 54.25280 | 70.86090 | 645.44227   | -302.93341  | -568.85148  | 1 |
| 24038 | H | 65.19200 | 54.70680 | 70.71490 | 1344.70304  | 2776.59144  | -628.17127  | 1 |
| 24039 | C | 63.28000 | 53.95980 | 69.85490 | -282.88346  | 538.36387   | 676.59364   | 1 |
| 24040 | H | 63.50300 | 54.29180 | 68.85190 | 1269.87847  | -1225.09801 | -2607.79956 | 1 |
| 24041 | C | 65.83400 | 51.91380 | 73.11590 | 570.09357   | 144.67543   | -702.98137  | 1 |
| 24042 | O | 65.14200 | 50.94680 | 73.39390 | 548.59067   | 522.52322   | -227.76100  | 1 |
| 24043 | N | 66.72600 | 51.85580 | 72.13990 | 417.84106   | 577.38608   | -461.39207  | 1 |
| 24044 | H | 67.18100 | 52.70080 | 71.86790 | 1198.78391  | -1027.58146 | 2709.18606  | 1 |
| 24045 | C | 67.06100 | 50.73780 | 71.34590 | 785.97495   | 427.23626   | -174.59115  | 1 |
| 24046 | H | 66.18800 | 50.37980 | 70.82090 | -2266.40685 | -448.14061  | -2149.12831 | 1 |



|       |   |          |          |          |             |             |             |   |
|-------|---|----------|----------|----------|-------------|-------------|-------------|---|
| 24047 | C | 68.18900 | 50.95680 | 70.27890 | 608.44143   | 649.53353   | 186.62614   | 1 |
| 24048 | H | 68.49600 | 49.97580 | 69.85790 | 1443.40853  | 1578.25930  | 2296.81528  | 1 |
| 24049 | H | 69.07300 | 51.42780 | 70.75990 | -526.79684  | 3104.55861  | 89.92415    | 1 |
| 24050 | C | 67.74500 | 51.90280 | 69.18490 | -396.14694  | -811.61088  | 104.76430   | 1 |
| 24051 | H | 67.22000 | 52.78380 | 69.61290 | -1781.41989 | 1365.21645  | 2202.18508  | 1 |
| 24052 | C | 68.90400 | 52.46280 | 68.26490 | 504.95426   | 644.93313   | -410.88927  | 1 |
| 24053 | H | 69.21300 | 51.65180 | 67.57190 | -820.20035  | 2424.67766  | 1828.26751  | 1 |
| 24054 | H | 69.81900 | 52.69180 | 68.85290 | 2302.05945  | -1571.81411 | -1455.44090 | 1 |
| 24055 | H | 68.67000 | 53.44480 | 67.79890 | -518.40019  | 2264.39172  | 2119.08616  | 1 |
| 24056 | C | 66.79800 | 51.18780 | 68.16290 | 108.46188   | 249.95829   | -880.23372  | 1 |
| 24057 | H | 67.28100 | 50.33580 | 67.63890 | -1966.22193 | -2095.88910 | -1290.70459 | 1 |
| 24058 | H | 66.50300 | 51.92080 | 67.38290 | -1871.88238 | 482.04052   | -2496.44150 | 1 |
| 24059 | H | 65.90400 | 50.68680 | 68.59190 | -1254.86745 | 1248.48020  | -2614.70789 | 1 |
| 24060 | C | 67.57100 | 49.59980 | 72.22890 | -514.05196  | -752.71970  | 2.31411     | 1 |
| 24061 | O | 67.16500 | 48.45580 | 72.05690 | 166.26395   | -392.52137  | -672.66968  | 1 |
| 24062 | N | 68.39700 | 49.92080 | 73.24090 | 640.73237   | 411.91259   | -370.88811  | 1 |
| 24063 | H | 68.72700 | 50.85680 | 73.34190 | 1475.57266  | -44.98565   | 2766.14541  | 1 |
| 24064 | C | 69.08400 | 48.91580 | 74.02090 | -274.21480  | -764.85011  | 400.53276   | 1 |
| 24065 | H | 69.46000 | 48.13080 | 73.38090 | 1794.28436  | 437.75446   | 2533.73362  | 1 |
| 24066 | C | 70.26000 | 49.50580 | 74.88190 | 465.07817   | -768.30340  | 124.75253   | 1 |
| 24067 | H | 69.96200 | 50.21280 | 75.68490 | 2051.24820  | 1368.97422  | 1941.07548  | 1 |
| 24068 | H | 70.89000 | 50.10780 | 74.19090 | -2150.13984 | 1285.24650  | -1920.06528 | 1 |
| 24069 | H | 70.83600 | 48.64580 | 75.28590 | 1456.55190  | 2742.13972  | -522.23648  | 1 |
| 24070 | C | 68.12500 | 48.26380 | 75.04290 | 753.21694   | 507.98283   | -70.86154   | 1 |
| 24071 | O | 68.45400 | 47.23480 | 75.64590 | 293.57383   | -701.59669  | 191.54468   | 1 |
| 24072 | N | 66.89700 | 48.82080 | 75.37790 | 94.64898    | 401.19529   | 726.83615   | 1 |
| 24073 | H | 66.81100 | 49.74780 | 75.01990 | -1514.42229 | 30.16907    | -2769.26699 | 1 |
| 24074 | C | 65.93700 | 48.35880 | 76.39690 | -627.14102  | 502.16741   | -446.60511  | 1 |
| 24075 | H | 66.38800 | 47.45080 | 76.76890 | -1513.50443 | -1839.57855 | 2045.13431  | 1 |
| 24076 | C | 65.75500 | 49.42180 | 77.42890 | -344.14157  | -695.69183  | 469.41871   | 1 |
| 24077 | H | 65.76800 | 50.45180 | 77.01090 | -1465.47371 | 1154.16753  | 2525.96007  | 1 |
| 24078 | C | 64.37800 | 49.29580 | 78.19190 | -251.04184  | 762.97568   | -442.89049  | 1 |
| 24079 | H | 64.35700 | 50.15180 | 78.89890 | 1470.24948  | 2763.43617  | 296.69239   | 1 |
| 24080 | H | 63.54600 | 49.42280 | 77.46690 | 1385.14424  | -2562.76816 | -1193.71654 | 1 |
| 24081 | H | 64.34900 | 48.32980 | 78.73890 | 2103.66702  | -2040.30616 | 1130.96503  | 1 |
| 24082 | C | 66.94300 | 49.36980 | 78.37390 | 599.71160   | -537.10553  | 414.22148   | 1 |
| 24083 | H | 67.87300 | 49.13980 | 77.81290 | 1555.79173  | 2342.06569  | -1420.94173 | 1 |
| 24084 | H | 66.93800 | 48.50780 | 79.07490 | 1412.68826  | 694.68681   | -2733.56706 | 1 |
| 24085 | C | 67.20200 | 50.71380 | 79.14890 | -597.67340  | 367.43867   | 575.03284   | 1 |
| 24086 | H | 68.24400 | 50.65780 | 79.52990 | -1749.71494 | 853.07562   | -2483.22628 | 1 |
| 24087 | H | 66.39500 | 50.70680 | 79.91290 | 1659.23905  | -1989.56077 | 1773.96148  | 1 |
| 24088 | H | 67.23000 | 51.56080 | 78.43090 | 2690.47753  | -1447.46889 | 731.92960   | 1 |
| 24089 | C | 64.68400 | 47.94480 | 75.66090 | 9.81646     | -907.09297  | 68.63304    | 1 |
| 24090 | O | 64.12400 | 46.89680 | 75.93190 | -371.73781  | -538.55501  | -453.22230  | 1 |
| 24091 | N | 64.12500 | 48.67480 | 74.69190 | 85.34776    | 128.86434   | 820.13647   | 1 |
| 24092 | H | 64.58500 | 49.51780 | 74.42290 | 1218.80747  | 2315.48748  | -1756.27576 | 1 |
| 24093 | C | 62.87300 | 48.23880 | 73.93890 | 697.46491   | 576.46033   | -109.99669  | 1 |
| 24094 | H | 62.32800 | 47.76380 | 74.74190 | 1623.45023  | -734.73399  | 2581.04448  | 1 |
| 24095 | C | 62.19700 | 49.49980 | 73.38790 | -829.28761  | 66.25522    | 372.49021   | 1 |
| 24096 | H | 62.95800 | 50.04680 | 72.79190 | 26.82580    | 2228.65577  | 2213.69601  | 1 |
| 24097 | C | 61.03600 | 49.08980 | 72.50190 | -502.56488  | -241.24068  | -732.22460  | 1 |
| 24098 | H | 61.35600 | 48.76480 | 71.48890 | -2530.07179 | 1856.54130  | -290.26858  | 1 |
| 24099 | H | 60.40500 | 48.31080 | 72.98290 | -2246.08123 | -1793.82772 | 1273.75598  | 1 |
| 24100 | H | 60.31000 | 49.90180 | 72.28490 | 2309.59696  | -1445.39379 | -1573.83196 | 1 |
| 24101 | C | 61.82500 | 50.37880 | 74.60090 | -594.71770  | -660.66756  | 200.20246   | 1 |
| 24102 | H | 61.06500 | 51.09380 | 74.21890 | 1952.00322  | -430.70463  | 2418.44399  | 1 |
| 24103 | H | 62.72800 | 50.86480 | 75.02890 | 1186.82737  | -2492.58644 | 1495.72972  | 1 |
| 24104 | H | 61.21500 | 49.71080 | 75.24590 | -2262.35212 | 2111.20102  | -592.28096  | 1 |
| 24105 | C | 63.20100 | 47.23580 | 72.87290 | 414.41401   | 309.52256   | 739.92325   | 1 |
| 24106 | O | 62.38700 | 46.38080 | 72.49590 | -496.09719  | 597.62076   | -172.21620  | 1 |
| 24107 | N | 64.47400 | 47.13380 | 72.43890 | -197.18453  | 675.10461   | -482.28510  | 1 |
| 24108 | H | 65.23300 | 47.65180 | 72.82590 | 467.54532   | -1157.14390 | -2896.88759 | 1 |

|       |   |          |          |          |             |             |             |   |
|-------|---|----------|----------|----------|-------------|-------------|-------------|---|
| 24109 | C | 64.77200 | 46.31680 | 71.22390 | -613.62625  | 217.85179   | -653.63917  | 1 |
| 24110 | H | 64.08400 | 45.51580 | 70.99690 | -2483.82574 | 1234.52887  | -1504.29886 | 1 |
| 24111 | C | 64.96500 | 47.11680 | 69.95990 | -651.03536  | 643.52027   | 47.00296    | 1 |
| 24112 | H | 65.19000 | 46.42980 | 69.11690 | 785.79507   | -2383.23414 | -1901.89063 | 1 |
| 24113 | H | 65.80000 | 47.84180 | 70.06290 | -2000.84926 | -1790.43591 | -1651.63719 | 1 |
| 24114 | N | 62.80000 | 47.30780 | 68.67190 | 243.65230   | -156.86633  | -800.63788  | 1 |
| 24115 | H | 62.85700 | 46.39880 | 68.25890 | -1776.63609 | 2279.77499  | 1245.90447  | 1 |
| 24116 | C | 63.74700 | 47.92880 | 69.43990 | -682.11039  | 608.36415   | 69.41078    | 1 |
| 24117 | C | 61.90700 | 48.23880 | 68.29190 | 393.99747   | -518.63584  | 622.88364   | 1 |
| 24118 | H | 61.02100 | 47.93880 | 67.73390 | -690.00605  | 490.98112   | -3040.89364 | 1 |
| 24119 | N | 62.23400 | 49.43580 | 68.75890 | 409.66570   | -664.77070  | -315.91329  | 1 |
| 24120 | C | 63.35500 | 49.21480 | 69.53490 | -534.13582  | 701.63540   | -261.19813  | 1 |
| 24121 | H | 63.91700 | 50.02480 | 69.98390 | -1324.76358 | 1004.83821  | 2665.20732  | 1 |
| 24122 | C | 66.09300 | 45.60480 | 71.41390 | 744.75796   | -199.38263  | -491.48612  | 1 |
| 24123 | O | 67.00800 | 45.60980 | 70.60490 | 546.19526   | -562.54509  | 16.14102    | 1 |
| 24124 | N | 66.26200 | 44.96680 | 72.58690 | -405.10445  | -338.90929  | 647.45977   | 1 |
| 24125 | H | 65.54000 | 44.88280 | 73.26990 | -1653.59558 | 1010.28629  | 2469.92102  | 1 |
| 24126 | C | 67.55100 | 44.53680 | 72.97490 | -447.40240  | 539.27468   | -600.41090  | 1 |
| 24127 | H | 68.36100 | 45.24380 | 72.87890 | 2745.12062  | -1447.39523 | 480.12539   | 1 |
| 24128 | C | 67.54100 | 44.11380 | 74.52790 | 681.89240   | 132.54495   | -600.55265  | 1 |
| 24129 | H | 67.20500 | 45.01580 | 75.08290 | 1849.54689  | -1065.76317 | -2320.26434 | 1 |
| 24130 | H | 66.79700 | 43.31280 | 74.72290 | 2407.82067  | 597.48768   | -1944.91855 | 1 |
| 24131 | H | 68.52800 | 43.74880 | 74.88590 | -1385.48577 | -909.36494  | -2687.57381 | 1 |
| 24132 | C | 68.08100 | 43.25480 | 72.25790 | -401.21713  | 103.56178   | 801.29027   | 1 |
| 24133 | O | 69.24900 | 42.90780 | 72.37290 | 633.50709   | -460.24013  | -75.39025   | 1 |
| 24134 | N | 67.23100 | 42.50780 | 71.53190 | 1.17026     | 601.62127   | 582.50236   | 1 |
| 24135 | H | 66.32800 | 42.91980 | 71.44090 | 2909.38184  | -472.00592  | 1078.07351  | 1 |
| 24136 | C | 67.54800 | 41.26580 | 70.93090 | -338.44930  | 262.00579   | 794.11714   | 1 |
| 24137 | H | 68.32300 | 40.86780 | 71.56890 | -2013.24624 | 1755.77455  | -1682.79321 | 1 |
| 24138 | C | 66.43900 | 40.21380 | 70.95290 | 655.32282   | 516.87371   | -379.97912  | 1 |
| 24139 | H | 66.01200 | 40.24680 | 71.97790 | -1855.66420 | 1358.63043  | -2164.37354 | 1 |
| 24140 | O | 66.96200 | 38.92080 | 70.87490 | 548.00677   | 85.71075    | 545.65181   | 1 |
| 24141 | H | 67.72100 | 38.72880 | 71.43090 | -1579.23912 | -1207.89929 | 2423.94821  | 1 |
| 24142 | C | 65.34400 | 40.37980 | 69.88590 | 746.57363   | -32.05747   | -530.74692  | 1 |
| 24143 | H | 64.40400 | 39.92280 | 70.26290 | 1712.84568  | 2073.29222  | -1646.69109 | 1 |
| 24144 | H | 65.72800 | 39.97280 | 68.92590 | -222.11109  | -3063.65086 | 650.10859   | 1 |
| 24145 | H | 65.10900 | 41.45680 | 69.74290 | 1930.58464  | 1989.37299  | -1500.71192 | 1 |
| 24146 | C | 68.04700 | 41.39180 | 69.50990 | -682.22827  | -594.28687  | 99.84075    | 1 |
| 24147 | O | 68.49600 | 40.41480 | 68.88190 | 289.42357   | -339.70757  | -661.64733  | 1 |
| 24148 | N | 67.97800 | 42.58880 | 68.90590 | -102.57670  | -222.98859  | 793.97315   | 1 |
| 24149 | H | 67.40400 | 43.31080 | 69.28390 | 1227.16811  | 1521.91003  | 2452.90968  | 1 |
| 24150 | C | 68.25700 | 42.84080 | 67.50690 | -686.22325  | 477.14325   | 365.48814   | 1 |
| 24151 | H | 69.24300 | 42.47480 | 67.26390 | 1559.56426  | -1926.96112 | -1942.17554 | 1 |
| 24152 | C | 67.21300 | 42.10680 | 66.52190 | 752.89058   | 501.05338   | 96.04710    | 1 |
| 24153 | H | 67.50300 | 42.52180 | 65.53290 | -2127.67054 | 372.28641   | 2279.83436  | 1 |
| 24154 | H | 67.39400 | 41.01280 | 66.44490 | 1700.38691  | -128.77776  | -2654.38843 | 1 |
| 24155 | C | 65.73100 | 42.38580 | 66.82990 | -611.01660  | -666.37811  | -126.74558  | 1 |
| 24156 | O | 65.28300 | 43.17080 | 67.69590 | 696.32674   | 205.17871   | 292.00715   | 1 |
| 24157 | N | 64.85100 | 41.84280 | 65.95390 | -475.25658  | 149.03727   | 673.32057   | 1 |
| 24158 | H | 65.23300 | 41.18080 | 65.30890 | 1893.29674  | -1549.48730 | -1982.33454 | 1 |
| 24159 | H | 63.87600 | 42.02380 | 66.07990 | -980.91644  | -1774.67666 | -2416.00243 | 1 |
| 24160 | C | 68.28700 | 44.37280 | 67.28890 | 599.02635   | 256.65407   | 622.99842   | 1 |
| 24161 | O | 67.32600 | 45.05080 | 66.84790 | -287.83890  | 76.28086    | -745.68891  | 1 |
| 24162 | N | 69.42800 | 45.01480 | 67.51390 | -514.37875  | 444.22513   | 497.16592   | 1 |
| 24163 | H | 70.29900 | 44.54280 | 67.62790 | 3068.96976  | 101.45686   | 652.67547   | 1 |
| 24164 | C | 69.59800 | 46.39680 | 67.30590 | -255.33356  | -745.87011  | -464.56225  | 1 |
| 24165 | H | 69.34300 | 46.64780 | 66.28690 | 2375.14555  | 533.17972   | 1976.64375  | 1 |
| 24166 | C | 68.81800 | 47.28080 | 68.35890 | -755.86137  | 373.39015   | -373.47589  | 1 |
| 24167 | H | 67.74200 | 47.08880 | 68.15690 | -1139.96449 | 1167.34942  | 2682.60577  | 1 |
| 24168 | H | 68.95200 | 48.36380 | 68.15390 | 2616.99703  | 1603.60439  | 672.81059   | 1 |
| 24169 | O | 69.09100 | 46.87480 | 69.72790 | 78.78937    | 581.43306   | -544.07698  | 1 |
| 24170 | H | 68.34100 | 46.30280 | 69.90690 | -998.35527  | -1705.25099 | 2435.37657  | 1 |

|       |   |          |          |          |             |             |             |   |
|-------|---|----------|----------|----------|-------------|-------------|-------------|---|
| 24171 | C | 71.05900 | 46.81080 | 67.33990 | -603.39884  | -241.06350  | -654.52919  | 1 |
| 24172 | O | 71.31200 | 47.99080 | 67.04890 | -124.93277  | -411.25865  | 648.15512   | 1 |
| 24173 | N | 72.08300 | 46.00080 | 67.59690 | -240.12044  | 192.00784   | -801.75217  | 1 |
| 24174 | H | 71.88000 | 45.04780 | 67.80590 | -1945.99244 | 372.17189   | 2435.09883  | 1 |
| 24175 | C | 73.48600 | 46.44780 | 67.59790 | -122.01471  | 813.53038   | 392.76429   | 1 |
| 24176 | H | 73.52400 | 47.26880 | 68.29890 | -98.77291   | 560.75476   | -3108.03626 | 1 |
| 24177 | C | 74.37500 | 45.29980 | 68.15590 | 344.83797   | -689.17323  | 462.82236   | 1 |
| 24178 | H | 74.02300 | 44.33880 | 67.72490 | 2183.16678  | 1739.96521  | -1464.64439 | 1 |
| 24179 | H | 74.17000 | 45.24680 | 69.24690 | -466.31978  | -670.60991  | 3024.09815  | 1 |
| 24180 | C | 75.92100 | 45.26480 | 67.94090 | -692.79726  | -182.89493  | -581.70156  | 1 |
| 24181 | H | 76.30900 | 44.56380 | 68.70990 | 896.48900   | 2488.63148  | 1694.43600  | 1 |
| 24182 | H | 76.31100 | 46.28280 | 68.15790 | 2718.26765  | 922.81864   | 1268.03305  | 1 |
| 24183 | C | 76.47700 | 44.90180 | 66.52690 | -699.18889  | 68.25363    | 573.26474   | 1 |
| 24184 | O | 77.48800 | 45.40880 | 66.06490 | -588.36333  | -396.41601  | -362.25008  | 1 |
| 24185 | N | 75.84000 | 43.91380 | 65.89590 | 672.99079   | -408.03938  | -300.08580  | 1 |
| 24186 | H | 75.05300 | 43.46880 | 66.32490 | 1596.68199  | 2246.03387  | 1507.48763  | 1 |
| 24187 | H | 76.20200 | 43.57880 | 65.02690 | 1903.00392  | -174.10758  | -2509.86880 | 1 |
| 24188 | C | 74.06300 | 47.03080 | 66.32090 | 516.96651   | -569.60057  | -490.01852  | 1 |
| 24189 | O | 74.69700 | 48.06380 | 66.27790 | 239.25143   | -340.95713  | 653.09351   | 1 |
| 24190 | N | 73.75600 | 46.55480 | 65.10790 | -762.97200  | 150.92084   | -356.39819  | 1 |
| 24191 | H | 73.25200 | 45.70380 | 64.98290 | -489.56238  | 494.52513   | 3056.80764  | 1 |
| 24192 | C | 74.08400 | 47.23980 | 63.86290 | -167.33684  | -743.48236  | 479.22659   | 1 |
| 24193 | H | 75.12800 | 47.51180 | 63.92690 | -1070.95554 | -2925.27309 | 393.28814   | 1 |
| 24194 | C | 74.06800 | 46.20880 | 62.72890 | -737.26254  | -462.33586  | 262.44693   | 1 |
| 24195 | H | 73.13500 | 45.60880 | 62.79690 | -2014.95128 | -1591.83512 | 1804.63613  | 1 |
| 24196 | H | 74.85700 | 45.42680 | 62.72790 | -422.45800  | -521.30722  | 3059.46218  | 1 |
| 24197 | C | 74.06200 | 46.76480 | 61.27790 | -783.39815  | -428.49391  | 180.08899   | 1 |
| 24198 | H | 73.11700 | 47.30680 | 61.06290 | 1410.75592  | 2745.79577  | -639.75603  | 1 |
| 24199 | H | 74.90400 | 47.46680 | 61.10090 | -1653.65977 | 876.11261   | -2549.17887 | 1 |
| 24200 | C | 74.25100 | 45.71380 | 60.15490 | 781.08808   | -423.87682  | -168.94738  | 1 |
| 24201 | H | 75.13100 | 45.04580 | 60.27290 | -2347.46345 | 1042.99132  | 1815.65100  | 1 |
| 24202 | H | 73.41700 | 44.99080 | 60.02890 | -282.91913  | 2911.76533  | 1166.15965  | 1 |
| 24203 | N | 74.37500 | 46.45680 | 58.85890 | -549.00922  | -475.50562  | 416.01853   | 1 |
| 24204 | H | 73.83000 | 47.27780 | 58.68890 | 432.48442   | 2685.84398  | 1580.50816  | 1 |
| 24205 | C | 74.66200 | 45.80580 | 57.73890 | 405.23041   | 612.07520   | -559.53666  | 1 |
| 24206 | N | 75.21300 | 44.60980 | 57.67290 | 336.16035   | -474.57223  | 586.23416   | 1 |
| 24207 | H | 75.14000 | 43.94180 | 58.41390 | 1059.80701  | 1711.21555  | -2435.92192 | 1 |
| 24208 | H | 75.29600 | 44.15880 | 56.78390 | -2748.92980 | 601.32314   | -1439.84142 | 1 |
| 24209 | N | 74.43800 | 46.41980 | 56.59390 | -660.42550  | 451.27371   | -316.01628  | 1 |
| 24210 | H | 74.35200 | 47.41580 | 56.55990 | -373.93637  | -824.26229  | -3024.33804 | 1 |
| 24211 | H | 74.81700 | 46.00380 | 55.76690 | -2097.32999 | -2341.91090 | -25.13575   | 1 |
| 24212 | C | 73.45900 | 48.66280 | 63.65890 | 361.32950   | -642.02644  | 512.49571   | 1 |
| 24213 | O | 74.22500 | 49.62080 | 63.25590 | 585.44956   | -298.37823  | -436.45338  | 1 |
| 24214 | N | 72.19600 | 48.93680 | 63.88290 | -575.89993  | 564.60104   | -288.63468  | 1 |
| 24215 | C | 71.15200 | 47.91380 | 63.64390 | 548.94581   | 321.19184   | 639.73344   | 1 |
| 24216 | H | 71.01200 | 47.26380 | 64.53490 | -413.84573  | -2501.49060 | 1843.33151  | 1 |
| 24217 | H | 71.30300 | 47.24080 | 62.77290 | 2308.10647  | -2078.90596 | 425.61972   | 1 |
| 24218 | C | 71.58800 | 50.28980 | 63.86990 | 217.23388   | -565.55243  | 662.80544   | 1 |
| 24219 | H | 71.84300 | 50.86080 | 62.98890 | 2437.44045  | -1871.98459 | 617.37501   | 1 |
| 24220 | C | 70.07700 | 50.06480 | 63.96190 | -445.95951  | -565.58922  | 546.76390   | 1 |
| 24221 | H | 69.46100 | 50.84980 | 63.47390 | -2711.42939 | 798.66443   | 1387.32466  | 1 |
| 24222 | H | 69.73700 | 49.93580 | 65.01190 | -1622.03770 | -405.29586  | -2678.51147 | 1 |
| 24223 | C | 69.87000 | 48.68880 | 63.34890 | -613.21563  | -673.42588  | 10.38788    | 1 |
| 24224 | H | 69.82900 | 48.81780 | 62.24590 | 1995.17600  | 2198.29174  | -1055.23047 | 1 |
| 24225 | H | 68.94600 | 48.19980 | 63.72390 | -1186.91566 | -2500.82987 | 1478.01520  | 1 |
| 24226 | C | 72.06400 | 51.10980 | 65.08690 | 412.53173   | -609.17385  | -537.78032  | 1 |
| 24227 | O | 72.36800 | 52.25980 | 64.91690 | -317.02332  | -681.59418  | 221.31612   | 1 |
| 24228 | N | 72.14200 | 50.58980 | 66.34490 | -294.89778  | -590.75016  | 511.50242   | 1 |
| 24229 | H | 71.85400 | 49.64680 | 66.48990 | 1358.25410  | 2598.70764  | -1158.03879 | 1 |
| 24230 | C | 72.81900 | 51.31980 | 67.35990 | 351.91091   | 633.91148   | 544.68531   | 1 |
| 24231 | H | 72.31400 | 52.25080 | 67.56990 | 2497.19955  | 1403.22538  | 1285.89274  | 1 |
| 24232 | C | 72.89600 | 50.49980 | 68.67390 | -262.44793  | -477.52780  | -740.98348  | 1 |

|       |   |          |          |          |             |             |             |   |
|-------|---|----------|----------|----------|-------------|-------------|-------------|---|
| 24233 | H | 73.60400 | 51.00680 | 69.36290 | -2488.28117 | 1677.30182  | 954.74163   | 1 |
| 24234 | H | 73.30500 | 49.50780 | 68.38590 | -1682.51852 | 2352.04220  | 1243.44402  | 1 |
| 24235 | C | 71.62900 | 50.31280 | 69.43890 | -168.37168  | -586.08073  | -686.27707  | 1 |
| 24236 | H | 70.76200 | 49.92680 | 68.86190 | -559.65797  | 2994.19767  | -818.97110  | 1 |
| 24237 | H | 71.29200 | 51.26680 | 69.89990 | 476.39114   | -1471.94550 | -2746.97423 | 1 |
| 24238 | C | 71.72500 | 49.24180 | 70.58390 | 442.49825   | -770.19268  | -191.37206  | 1 |
| 24239 | H | 70.75000 | 48.93880 | 71.02290 | 1482.53120  | -1567.26582 | 2273.32451  | 1 |
| 24240 | H | 72.23500 | 48.32680 | 70.21490 | -1812.15875 | 1957.55504  | 1665.61453  | 1 |
| 24241 | N | 72.53600 | 49.96180 | 71.58390 | -297.14036  | 790.41810   | -101.18643  | 1 |
| 24242 | H | 72.73100 | 50.93480 | 71.46790 | -1198.30436 | 2652.10244  | -1219.21024 | 1 |
| 24243 | C | 73.24800 | 49.36280 | 72.44790 | 806.90231   | -413.38071  | 7.94799     | 1 |
| 24244 | N | 73.02000 | 48.12780 | 72.87290 | -790.92055  | -156.60550  | 246.63520   | 1 |
| 24245 | H | 72.19900 | 47.67380 | 72.52690 | -2517.18007 | -423.28480  | 1831.04580  | 1 |
| 24246 | H | 73.73800 | 47.68480 | 73.40890 | 1841.69352  | 1765.33507  | 1828.36066  | 1 |
| 24247 | N | 74.05500 | 50.13280 | 73.16390 | -15.04288   | 845.36897   | 48.60781    | 1 |
| 24248 | H | 74.03900 | 51.12880 | 73.07790 | -994.43650  | -2633.28870 | 1390.20117  | 1 |
| 24249 | H | 74.58500 | 49.72780 | 73.90890 | -1580.20108 | 1004.53104  | 2519.55615  | 1 |
| 24250 | C | 74.26400 | 51.75680 | 67.03390 | 485.27188   | -82.81479   | -774.61144  | 1 |
| 24251 | O | 74.70400 | 52.87880 | 67.34290 | -103.24079  | -776.13933  | 42.07046    | 1 |
| 24252 | N | 74.99000 | 50.84080 | 66.43790 | 385.87259   | -410.16592  | -633.22636  | 1 |
| 24253 | H | 74.53700 | 50.00780 | 66.12990 | -2440.43973 | 1269.25506  | -1552.81444 | 1 |
| 24254 | C | 76.32900 | 51.05180 | 65.91890 | 750.00473   | 431.44780   | 270.18258   | 1 |
| 24255 | H | 76.92000 | 51.30980 | 66.78590 | 2377.60066  | 981.56217   | 1795.48304  | 1 |
| 24256 | C | 76.94900 | 49.70280 | 65.47390 | -132.79331  | 456.55058   | -795.66158  | 1 |
| 24257 | H | 76.30500 | 49.24080 | 64.69590 | -1467.85942 | -770.05688  | 2662.50296  | 1 |
| 24258 | H | 76.96900 | 49.10280 | 66.40990 | 2345.99452  | 2045.00219  | -474.78415  | 1 |
| 24259 | C | 78.38400 | 49.85180 | 64.90690 | 501.27405   | 436.58084   | 611.26410   | 1 |
| 24260 | H | 78.99800 | 50.42380 | 65.63490 | 1533.51034  | 2184.92047  | -1681.92621 | 1 |
| 24261 | H | 78.48000 | 50.46080 | 63.98190 | 491.62756   | 1593.39586  | -2684.06982 | 1 |
| 24262 | C | 79.08600 | 48.50880 | 64.76090 | -471.22170  | -572.24939  | -541.93719  | 1 |
| 24263 | H | 80.13800 | 48.65880 | 64.43590 | -1804.39904 | 2105.93179  | -1517.35324 | 1 |
| 24264 | H | 79.13800 | 48.00180 | 65.74790 | -1717.84197 | 2023.05771  | 1689.18624  | 1 |
| 24265 | C | 78.42400 | 47.54480 | 63.73590 | -282.71738  | -453.98516  | 722.09007   | 1 |
| 24266 | H | 77.43900 | 47.19580 | 64.11290 | 2057.04869  | -893.43939  | 2184.30410  | 1 |
| 24267 | H | 78.43800 | 48.07180 | 62.75690 | -587.98097  | -1288.61506 | 2793.13125  | 1 |
| 24268 | N | 79.19100 | 46.31480 | 63.58490 | 663.03911   | -41.16655   | 498.17751   | 1 |
| 24269 | H | 79.15700 | 45.54480 | 64.28290 | -1460.83311 | 2741.40663  | -567.74920  | 1 |
| 24270 | H | 78.84600 | 45.88880 | 62.70090 | 2796.33516  | 704.04280   | -1264.11311 | 1 |
| 24271 | H | 80.20700 | 46.41180 | 63.38790 | -1400.97448 | 175.46195   | -2829.79287 | 1 |
| 24272 | C | 76.45600 | 52.09780 | 64.76190 | -346.83726  | 385.92933   | -767.86486  | 1 |
| 24273 | O | 77.33400 | 53.00380 | 64.73790 | 474.52158   | 281.17854   | -574.87307  | 1 |
| 24274 | N | 75.49900 | 52.07180 | 63.80890 | 468.21756   | 170.61529   | -690.17931  | 1 |
| 24275 | H | 74.82500 | 51.33980 | 63.87890 | -1350.05438 | -1821.86440 | -2190.50158 | 1 |
| 24276 | C | 75.37200 | 53.05880 | 62.72290 | 498.99985   | -637.04090  | -411.13316  | 1 |
| 24277 | H | 76.24900 | 53.07880 | 62.09390 | 1989.27152  | -1787.29559 | 1628.91077  | 1 |
| 24278 | C | 74.08200 | 52.69580 | 61.93290 | 459.99495   | -628.05981  | -468.20702  | 1 |
| 24279 | H | 73.19500 | 52.54980 | 62.58490 | 2985.21577  | -690.76197  | 666.48193   | 1 |
| 24280 | H | 74.18000 | 51.73280 | 61.38690 | -2650.71923 | -1370.19298 | 993.79664   | 1 |
| 24281 | C | 73.59900 | 53.60380 | 60.75090 | 738.94847   | -140.03042  | 492.00150   | 1 |
| 24282 | H | 73.51200 | 54.61580 | 61.20090 | -2267.06883 | 2008.63595  | 878.54273   | 1 |
| 24283 | C | 74.75200 | 53.70080 | 59.70190 | 385.10775   | 826.78280   | -98.44269   | 1 |
| 24284 | H | 75.73100 | 53.99880 | 60.13390 | 966.29002   | -2222.42708 | -2003.84499 | 1 |
| 24285 | H | 74.40100 | 54.35980 | 58.87990 | -2815.63690 | -601.89582  | -1291.99105 | 1 |
| 24286 | H | 74.77600 | 52.72380 | 59.17190 | 453.24426   | -2957.84310 | 929.50604   | 1 |
| 24287 | C | 72.26900 | 52.99980 | 60.24790 | 138.30100   | -603.52171  | -670.64694  | 1 |
| 24288 | H | 72.31900 | 51.91280 | 60.01990 | -2685.30396 | 725.39069   | -1498.25548 | 1 |
| 24289 | H | 71.53100 | 53.17380 | 61.05890 | 2803.73150  | 724.06968   | -1227.75871 | 1 |
| 24290 | H | 71.90400 | 53.53280 | 59.34390 | -589.89200  | 1823.06455  | -2513.22049 | 1 |
| 24291 | C | 75.26700 | 54.48680 | 63.29190 | 857.46373   | -203.01132  | -210.72295  | 1 |
| 24292 | O | 75.99400 | 55.39780 | 62.81990 | -730.11267  | -57.51772   | -321.30755  | 1 |
| 24293 | N | 74.42500 | 54.77980 | 64.32690 | 49.60680    | 668.92250   | -530.84638  | 1 |
| 24294 | H | 73.71000 | 54.13580 | 64.58490 | 1475.19613  | 2730.42400  | -542.84923  | 1 |

|       |   |          |          |          |             |             |             |   |
|-------|---|----------|----------|----------|-------------|-------------|-------------|---|
| 24295 | C | 74.40000 | 55.99780 | 65.09690 | 128.71191   | 895.37080   | 142.24922   | 1 |
| 24296 | H | 74.15100 | 56.75380 | 64.36690 | 1809.47997  | -1652.55803 | 1951.69755  | 1 |
| 24297 | C | 73.31000 | 55.86980 | 66.17990 | 141.09321   | 808.97746   | -415.52063  | 1 |
| 24298 | H | 73.30000 | 56.73880 | 66.87090 | -1885.75583 | 563.97614   | 2451.36681  | 1 |
| 24299 | H | 73.61800 | 54.94780 | 66.71790 | -130.39787  | 1128.27826  | 2926.58921  | 1 |
| 24300 | C | 71.87600 | 55.65080 | 65.62390 | -298.99488  | -453.06640  | -740.65503  | 1 |
| 24301 | H | 71.83700 | 54.60480 | 65.25090 | 847.23306   | -45.83255   | -3037.20758 | 1 |
| 24302 | C | 70.97400 | 55.48080 | 66.86590 | -268.31261  | 281.79241   | -837.38622  | 1 |
| 24303 | H | 71.23100 | 54.55980 | 67.43290 | -41.66374   | 1344.65351  | -2855.93313 | 1 |
| 24304 | H | 71.08600 | 56.36480 | 67.52890 | 684.15038   | -2296.87017 | 2021.74742  | 1 |
| 24305 | H | 69.94100 | 55.32880 | 66.48690 | 782.90579   | -2493.64858 | 1732.03370  | 1 |
| 24306 | C | 71.25800 | 56.61480 | 64.56090 | 500.24046   | 567.01962   | -518.45106  | 1 |
| 24307 | H | 70.17700 | 56.37880 | 64.46190 | -1753.33254 | -1854.42977 | 1831.68873  | 1 |
| 24308 | H | 71.83700 | 56.72880 | 63.61990 | 1428.70709  | 2806.10593  | 8.29230     | 1 |
| 24309 | H | 71.32500 | 57.64680 | 64.96790 | -609.20163  | -2181.51549 | -2187.55219 | 1 |
| 24310 | C | 75.73500 | 56.27280 | 65.77590 | 442.77175   | 697.00924   | -400.76698  | 1 |
| 24311 | O | 76.34600 | 57.33580 | 65.63190 | 91.38162    | -730.89108  | -274.59935  | 1 |
| 24312 | N | 76.31200 | 55.24680 | 66.49890 | 467.86672   | 701.95531   | 52.50885    | 1 |
| 24313 | H | 75.88100 | 54.35180 | 66.58390 | -2134.34327 | 2175.76858  | 802.37847   | 1 |
| 24314 | C | 77.48200 | 55.40080 | 67.33590 | -194.85262  | 690.52994   | -582.81457  | 1 |
| 24315 | H | 77.32600 | 56.29280 | 67.92390 | -2254.29297 | 1530.60254  | -1597.16347 | 1 |
| 24316 | C | 77.62100 | 54.17580 | 68.29490 | 651.18316   | -245.72227  | 569.25506   | 1 |
| 24317 | H | 78.49700 | 54.34580 | 68.95590 | -1360.61252 | 2562.72275  | 1222.50909  | 1 |
| 24318 | H | 76.75900 | 54.12480 | 68.99390 | -191.70204  | -694.55094  | -3072.66743 | 1 |
| 24319 | H | 77.70900 | 53.20180 | 67.76690 | 758.40050   | -1521.56714 | 2630.59552  | 1 |
| 24320 | C | 78.78300 | 55.65680 | 66.64290 | -510.71876  | 524.13799   | 544.80839   | 1 |
| 24321 | O | 79.62000 | 56.37780 | 67.15490 | -526.47782  | -549.71917  | 197.75963   | 1 |
| 24322 | N | 78.96700 | 55.15180 | 65.41590 | -176.63391  | 790.11408   | -276.58616  | 1 |
| 24323 | H | 78.26300 | 54.58880 | 64.98890 | -2836.84021 | 302.58266   | -1352.82670 | 1 |
| 24324 | C | 80.24300 | 55.01480 | 64.81890 | -749.27072  | -312.40969  | -433.00281  | 1 |
| 24325 | H | 80.93500 | 55.54480 | 65.45490 | -1290.53626 | 1413.88268  | 2492.52386  | 1 |
| 24326 | C | 80.74100 | 53.60680 | 64.68090 | 363.21828   | -782.78577  | -277.39084  | 1 |
| 24327 | H | 81.54200 | 53.50280 | 63.91790 | 1360.46863  | 2837.76882  | -157.94459  | 1 |
| 24328 | H | 79.93900 | 52.99380 | 64.21490 | -1237.18088 | -440.35238  | -2872.88940 | 1 |
| 24329 | C | 81.19200 | 53.07180 | 66.00590 | -445.80418  | 438.14582   | 659.81821   | 1 |
| 24330 | H | 80.21400 | 52.97080 | 66.52290 | 816.48576   | -2070.56846 | 2202.74617  | 1 |
| 24331 | H | 81.98500 | 53.67880 | 66.49090 | 2419.78114  | 1972.54137  | -400.75966  | 1 |
| 24332 | C | 81.80000 | 51.67080 | 65.81990 | -200.72994  | 649.06205   | -630.96281  | 1 |
| 24333 | O | 82.54700 | 51.38680 | 64.86090 | 484.43785   | 518.88131   | 335.20637   | 1 |
| 24334 | O | 81.46400 | 50.77080 | 66.62690 | 581.34300   | 104.41494   | 505.76077   | 1 |
| 24335 | C | 80.24800 | 55.64180 | 63.46990 | -400.60600  | -291.88705  | 754.54583   | 1 |
| 24336 | O | 81.28400 | 56.18180 | 63.05390 | 178.28896   | -755.60998  | -87.90331   | 1 |
| 24337 | N | 79.10300 | 55.73680 | 62.73990 | -6.02370    | 628.30108   | -583.69403  | 1 |
| 24338 | H | 78.21300 | 55.39680 | 63.03490 | -2998.36955 | -315.60248  | 908.76507   | 1 |
| 24339 | C | 79.08500 | 56.37380 | 61.44790 | 449.18781   | -543.41871  | 553.23660   | 1 |
| 24340 | H | 80.07800 | 56.57180 | 61.07090 | 2073.18563  | -149.35995  | 2343.34040  | 1 |
| 24341 | C | 78.41800 | 55.43180 | 60.43790 | 587.60089   | -254.02333  | -649.63633  | 1 |
| 24342 | H | 77.80000 | 55.86380 | 59.62190 | -1209.28454 | 1925.82846  | -2197.24391 | 1 |
| 24343 | H | 77.61800 | 54.90880 | 61.00490 | -2347.29435 | 2088.79092  | -321.19380  | 1 |
| 24344 | C | 79.39200 | 54.30580 | 59.96390 | 516.14872   | 559.38488   | -515.81585  | 1 |
| 24345 | H | 80.20100 | 54.78780 | 59.37390 | 1624.40086  | 621.50424   | 2607.25318  | 1 |
| 24346 | H | 79.81400 | 53.79280 | 60.85490 | 3074.89944  | -621.35754  | -23.82686   | 1 |
| 24347 | C | 78.69400 | 53.25980 | 59.05890 | 527.44625   | -544.60194  | -499.72818  | 1 |
| 24348 | H | 78.18300 | 53.69880 | 58.17490 | -2904.62717 | -1218.45469 | -34.80698   | 1 |
| 24349 | H | 77.89200 | 52.86580 | 59.71890 | 567.14931   | -3059.47331 | -401.96550  | 1 |
| 24350 | C | 79.52300 | 52.08780 | 58.64990 | 112.08407   | -207.76697  | -889.93133  | 1 |
| 24351 | H | 78.88900 | 51.18480 | 58.52290 | 1543.22358  | -127.34759  | 2721.13691  | 1 |
| 24352 | H | 80.17100 | 51.87080 | 59.52690 | -1843.37379 | 85.47762    | -2566.67083 | 1 |
| 24353 | N | 80.41500 | 52.29680 | 57.45590 | -348.93292  | -228.42309  | 721.88373   | 1 |
| 24354 | H | 81.01600 | 53.14280 | 57.39090 | 2069.20691  | 1720.94978  | 1617.13397  | 1 |
| 24355 | H | 80.99800 | 51.45480 | 57.27390 | 2028.83707  | -1669.01547 | -1724.54868 | 1 |
| 24356 | H | 79.79000 | 52.30380 | 56.62490 | -145.24844  | -2222.30847 | 2199.78620  | 1 |

|       |   |          |          |          |             |             |             |   |
|-------|---|----------|----------|----------|-------------|-------------|-------------|---|
| 24357 | C | 78.36900 | 57.66680 | 61.44790 | -443.85329  | 503.46723   | -639.59044  | 1 |
| 24358 | O | 78.89200 | 58.71780 | 61.08490 | -95.56371   | -603.51848  | 481.31239   | 1 |
| 24359 | N | 77.09500 | 57.58980 | 61.86190 | 599.82624   | 535.38486   | -265.87578  | 1 |
| 24360 | H | 76.77100 | 56.72180 | 62.22990 | 1451.04393  | -1989.28140 | -1954.82403 | 1 |
| 24361 | C | 76.09900 | 58.66480 | 61.66090 | 125.40718   | -776.41859  | 436.18634   | 1 |
| 24362 | H | 76.35500 | 59.15680 | 60.73390 | -2983.52435 | -984.63203  | 234.76565   | 1 |
| 24363 | C | 74.63500 | 58.10880 | 61.42090 | -243.53900  | 694.76222   | -560.48350  | 1 |
| 24364 | H | 74.40700 | 57.32080 | 62.17090 | -2600.34443 | 293.95016   | -1768.08687 | 1 |
| 24365 | C | 73.63900 | 59.25180 | 61.53490 | 404.56248   | 75.43875    | 802.11199   | 1 |
| 24366 | H | 73.66300 | 59.64980 | 62.57190 | 1116.90884  | 1038.27498  | -2759.57414 | 1 |
| 24367 | H | 72.61900 | 58.85480 | 61.34290 | -2450.60433 | -1677.98237 | 1036.03466  | 1 |
| 24368 | H | 73.85800 | 60.07080 | 60.81690 | 1047.57058  | -1523.09928 | 2529.50736  | 1 |
| 24369 | C | 74.54200 | 57.54180 | 59.97590 | -330.85686  | 394.38267   | 751.39924   | 1 |
| 24370 | H | 75.40900 | 56.88280 | 59.75790 | 1212.42514  | -2094.84714 | 1986.27471  | 1 |
| 24371 | H | 73.71200 | 56.81880 | 59.81990 | 2006.98204  | 1375.03937  | 1983.28321  | 1 |
| 24372 | H | 74.61300 | 58.32480 | 59.19190 | 292.93704   | -2506.89357 | 1856.27013  | 1 |
| 24373 | C | 76.21100 | 59.84480 | 62.65990 | -20.19817   | 14.46279    | -920.43837  | 1 |
| 24374 | O | 75.93300 | 60.98580 | 62.30390 | 568.43492   | 220.81106   | -504.14863  | 1 |
| 24375 | N | 76.85000 | 59.71980 | 63.88290 | -402.51819  | 467.08611   | -596.43216  | 1 |
| 24376 | H | 76.85700 | 58.81880 | 64.30890 | -1752.78236 | -2608.11605 | -116.81619  | 1 |
| 24377 | C | 77.20900 | 60.88380 | 64.76190 | 675.24898   | -359.06390  | 472.58917   | 1 |
| 24378 | H | 76.28000 | 61.42980 | 64.83790 | -1976.32822 | 1643.79874  | 1819.96294  | 1 |
| 24379 | C | 77.73400 | 60.39280 | 66.08790 | -534.94606  | -101.37022  | -744.42155  | 1 |
| 24380 | H | 77.00500 | 59.71580 | 66.58190 | 2067.39703  | 1549.87069  | 1783.72348  | 1 |
| 24381 | C | 79.03700 | 59.53180 | 65.95890 | -165.90729  | -553.14012  | -711.45673  | 1 |
| 24382 | H | 79.91700 | 60.21080 | 65.96790 | 3074.96229  | -7.27957    | 622.91396   | 1 |
| 24383 | H | 79.30200 | 58.94780 | 65.05190 | -1126.62849 | -2545.24816 | -1469.26867 | 1 |
| 24384 | H | 79.18400 | 58.75480 | 66.73890 | -2405.44286 | 592.49887   | -1959.28981 | 1 |
| 24385 | C | 77.96200 | 61.63780 | 66.98490 | 230.87880   | -722.08789  | 485.91949   | 1 |
| 24386 | H | 78.82900 | 62.29580 | 66.75890 | 2523.65181  | 1761.93189  | -650.71781  | 1 |
| 24387 | H | 78.00300 | 61.31880 | 68.04790 | -1572.75740 | 1841.02619  | 2010.59348  | 1 |
| 24388 | H | 77.05900 | 62.28480 | 66.98290 | -1202.01580 | 2428.19398  | -1621.59416 | 1 |
| 24389 | C | 78.17500 | 61.78680 | 63.99590 | 583.78685   | 304.43068   | -635.74563  | 1 |
| 24390 | O | 78.09900 | 62.98780 | 64.12390 | -687.77655  | 408.88809   | -10.25757   | 1 |
| 24391 | N | 79.04000 | 61.27880 | 63.15690 | 453.72176   | 230.57172   | -679.78649  | 1 |
| 24392 | H | 79.21600 | 60.30180 | 63.07090 | -359.18443  | 1960.50849  | 2432.39110  | 1 |
| 24393 | C | 79.83300 | 62.16880 | 62.23990 | -751.46667  | -443.26194  | 265.15522   | 1 |
| 24394 | H | 80.38500 | 62.91080 | 62.79690 | -575.58032  | 2265.57573  | 2108.01287  | 1 |
| 24395 | C | 80.87800 | 61.35180 | 61.53590 | 239.37329   | 885.59131   | -44.18072   | 1 |
| 24396 | H | 81.46900 | 62.00780 | 60.86190 | 1659.63450  | -2653.30173 | 156.23329   | 1 |
| 24397 | H | 80.48200 | 60.49880 | 60.94490 | 3023.96529  | 329.25121   | 765.58974   | 1 |
| 24398 | C | 81.78800 | 60.76180 | 62.55890 | -550.21739  | 460.85781   | -586.63005  | 1 |
| 24399 | C | 81.47900 | 59.48980 | 63.13990 | 602.84787   | 88.41092    | -682.85346  | 1 |
| 24400 | H | 80.54500 | 58.99280 | 62.92390 | 2086.51558  | -2299.50166 | -443.53573  | 1 |
| 24401 | C | 82.33100 | 58.99680 | 64.14690 | -635.09973  | -277.82176  | 585.66247   | 1 |
| 24402 | H | 82.11600 | 58.00880 | 64.52490 | 1281.83923  | -2491.63988 | -1421.73036 | 1 |
| 24403 | C | 83.50600 | 59.67180 | 64.52090 | 590.08671   | 566.42652   | -414.11907  | 1 |
| 24404 | O | 84.34300 | 59.10380 | 65.48790 | 777.92006   | -8.50792    | -97.28425   | 1 |
| 24405 | H | 85.16400 | 59.59980 | 65.50190 | 1982.35277  | 2347.75954  | -693.28586  | 1 |
| 24406 | C | 82.96400 | 61.42180 | 62.94590 | -751.60863  | -219.21431  | -485.84314  | 1 |
| 24407 | H | 83.22800 | 62.37680 | 62.51590 | -1609.56871 | -1945.08154 | -1884.88264 | 1 |
| 24408 | C | 83.79600 | 60.81880 | 63.85490 | -654.16529  | 651.01902   | -22.72083   | 1 |
| 24409 | H | 84.68400 | 61.36680 | 64.13590 | -1085.03970 | 1769.54483  | 2363.40748  | 1 |
| 24410 | C | 79.07200 | 63.01480 | 61.18490 | 747.41413   | -495.49191  | 68.05880    | 1 |
| 24411 | O | 79.35300 | 64.19780 | 61.05590 | 296.52150   | 541.63349   | 488.49945   | 1 |
| 24412 | N | 78.11400 | 62.42880 | 60.51990 | -339.15127  | 761.69630   | -199.30970  | 1 |
| 24413 | H | 77.89300 | 61.46280 | 60.63090 | -1809.25602 | -2409.61269 | -907.14035  | 1 |
| 24414 | C | 77.45200 | 63.00280 | 59.37490 | -180.07709  | 896.37031   | 114.34817   | 1 |
| 24415 | H | 77.88600 | 63.93180 | 59.03590 | 1736.02504  | -283.85762  | -2608.81330 | 1 |
| 24416 | C | 77.51400 | 62.02580 | 58.15990 | 487.04969   | 433.28826   | -645.09008  | 1 |
| 24417 | H | 78.58700 | 61.74980 | 58.07590 | -1996.81996 | 1603.89019  | 1837.01622  | 1 |
| 24418 | C | 76.64800 | 60.74380 | 58.20490 | -847.15506  | 68.48776    | 345.88648   | 1 |

|       |   |          |          |          |             |             |             |   |
|-------|---|----------|----------|----------|-------------|-------------|-------------|---|
| 24419 | H | 76.89000 | 60.04880 | 57.37290 | 1940.83473  | -923.95083  | -2294.36115 | 1 |
| 24420 | H | 75.57900 | 61.03780 | 58.26890 | -1404.42562 | 2697.07929  | 844.51504   | 1 |
| 24421 | H | 76.88300 | 60.24480 | 59.16990 | -864.46497  | 693.05221   | 2940.52911  | 1 |
| 24422 | C | 77.07000 | 62.83080 | 56.90790 | -580.46090  | -599.63346  | 358.32039   | 1 |
| 24423 | H | 77.53500 | 63.83980 | 56.88090 | 466.82891   | -673.48808  | 3026.23040  | 1 |
| 24424 | H | 77.24600 | 62.12980 | 56.06390 | -2198.97686 | -1800.79180 | 1343.07341  | 1 |
| 24425 | H | 75.98500 | 63.07180 | 56.90790 | -1340.37592 | -1408.04660 | 2465.87345  | 1 |
| 24426 | C | 75.96700 | 63.43180 | 59.71690 | -281.24034  | -583.33562  | -645.05832  | 1 |
| 24427 | O | 75.23100 | 63.95280 | 58.88690 | -92.80887   | 419.57774   | -676.26520  | 1 |
| 24428 | N | 75.55600 | 63.14580 | 60.96990 | -159.21374  | 833.73552   | 85.19709    | 1 |
| 24429 | H | 76.07500 | 62.48980 | 61.51290 | 495.75025   | 2423.88883  | 1943.74229  | 1 |
| 24430 | C | 74.24300 | 63.52480 | 61.53090 | -532.45093  | 369.55641   | -659.57635  | 1 |
| 24431 | H | 73.64800 | 62.66780 | 61.80990 | -1290.94369 | 2678.37987  | 1051.58848  | 1 |
| 24432 | H | 73.74100 | 64.17580 | 60.82990 | -2172.98733 | -661.90614  | -2189.45440 | 1 |
| 24433 | C | 74.39400 | 64.47380 | 62.76890 | 659.07886   | -586.40855  | -189.23257  | 1 |
| 24434 | O | 73.38900 | 65.08080 | 63.16490 | 205.13911   | 500.01744   | 572.93663   | 1 |
| 24435 | N | 75.62000 | 64.65580 | 63.34290 | 399.56257   | -520.73957  | 510.51012   | 1 |
| 24436 | H | 76.40600 | 64.05980 | 63.19790 | -1573.61474 | -717.40465  | 2623.82629  | 1 |
| 24437 | C | 75.80700 | 65.65780 | 64.37690 | 240.49383   | 567.21993   | 668.73841   | 1 |
| 24438 | H | 74.96800 | 66.32780 | 64.49790 | -143.08701  | 2862.38767  | -1319.58968 | 1 |
| 24439 | C | 76.01200 | 64.93380 | 65.67590 | 271.00381   | -364.05890  | 778.45565   | 1 |
| 24440 | H | 76.89500 | 64.26080 | 65.65490 | 2086.07268  | -2297.06148 | -463.35788  | 1 |
| 24441 | C | 76.30800 | 65.94080 | 66.83790 | 652.38309   | -147.19577  | -616.82951  | 1 |
| 24442 | H | 77.32300 | 66.35880 | 66.66890 | 2596.77436  | 1424.28181  | -1057.80538 | 1 |
| 24443 | H | 76.23100 | 65.35680 | 67.77990 | 1835.78682  | 1281.32310  | 2201.29192  | 1 |
| 24444 | H | 75.48500 | 66.68680 | 66.80890 | 2549.49239  | -1822.59998 | -132.55930  | 1 |
| 24445 | C | 74.73100 | 64.15080 | 66.04990 | -268.25646  | 596.39359   | -650.94474  | 1 |
| 24446 | H | 73.85200 | 64.82480 | 66.13390 | -1567.36498 | -2584.04256 | -875.87048  | 1 |
| 24447 | H | 74.86500 | 63.63880 | 67.02690 | -1590.28974 | 896.18077   | -2575.75427 | 1 |
| 24448 | H | 74.49800 | 63.28680 | 65.39090 | -1485.33817 | -1557.27222 | -2302.37301 | 1 |
| 24449 | C | 76.98200 | 66.54980 | 64.00090 | -319.62905  | -656.65072  | 535.58414   | 1 |
| 24450 | O | 76.81300 | 67.75280 | 63.82890 | 484.62355   | -560.74831  | 234.53268   | 1 |
| 24451 | N | 78.17500 | 65.95380 | 63.88490 | 661.23506   | 330.10514   | -407.42313  | 1 |
| 24452 | H | 78.34800 | 64.98480 | 64.04090 | -1960.31912 | -1894.52189 | 1564.12119  | 1 |
| 24453 | C | 79.38000 | 66.79380 | 63.80390 | 266.98529   | 277.29598   | -833.31883  | 1 |
| 24454 | H | 79.33300 | 67.52180 | 64.60090 | 427.35846   | -1558.06577 | -2700.69354 | 1 |
| 24455 | C | 80.72500 | 65.95580 | 63.88190 | 775.73837   | -400.65193  | -231.25890  | 1 |
| 24456 | H | 81.57500 | 66.47980 | 63.39390 | 944.14519   | 2553.79953  | 1576.74243  | 1 |
| 24457 | H | 80.62700 | 65.05980 | 63.23190 | -943.89031  | -1353.39837 | -2685.48031 | 1 |
| 24458 | C | 81.07600 | 65.46380 | 65.23690 | 748.79857   | -494.74360  | -91.17663   | 1 |
| 24459 | C | 81.17800 | 64.13780 | 65.68490 | -800.26077  | -344.33405  | -290.24381  | 1 |
| 24460 | H | 81.15400 | 63.23580 | 65.09090 | 401.89647   | 1628.37139  | -2673.89716 | 1 |
| 24461 | N | 81.54500 | 64.11680 | 67.03990 | -635.21560  | 256.01380   | -514.51776  | 1 |
| 24462 | H | 81.89000 | 63.41080 | 67.61890 | -806.42737  | 1859.05762  | -2422.82009 | 1 |
| 24463 | C | 81.67300 | 65.44380 | 67.41590 | 792.62484   | -392.56919  | -188.04299  | 1 |
| 24464 | C | 81.36600 | 66.28480 | 66.35090 | -269.13274  | -596.15425  | 624.27452   | 1 |
| 24465 | C | 81.43800 | 67.69780 | 66.49390 | 442.17669   | -618.22955  | -495.22018  | 1 |
| 24466 | H | 81.35400 | 68.36680 | 65.64990 | 2129.29498  | 1833.70266  | 1405.18937  | 1 |
| 24467 | C | 81.95200 | 68.19480 | 67.67890 | 788.14822   | -395.96127  | 183.75422   | 1 |
| 24468 | H | 82.20600 | 69.23880 | 67.78590 | -1107.60105 | 2901.37586  | 548.19788   | 1 |
| 24469 | C | 81.95100 | 65.96580 | 68.65390 | -483.74781  | 770.68565   | 132.03154   | 1 |
| 24470 | H | 82.12500 | 65.34080 | 69.51690 | 2145.51891  | 779.86574   | 2152.19918  | 1 |
| 24471 | C | 82.16800 | 67.36880 | 68.71590 | 105.15084   | -685.59158  | -590.83826  | 1 |
| 24472 | H | 82.68500 | 67.67280 | 69.61390 | -1258.30837 | -1413.83318 | 2505.82014  | 1 |
| 24473 | C | 79.54100 | 67.60780 | 62.56990 | -670.83785  | -390.62879  | -490.51508  | 1 |
| 24474 | O | 79.68900 | 68.83180 | 62.62190 | -81.63037   | 691.29861   | 383.18344   | 1 |
| 24475 | N | 79.43900 | 66.98780 | 61.39490 | 225.08745   | -467.31575  | -663.66519  | 1 |
| 24476 | H | 79.52900 | 65.99580 | 61.36090 | -1667.41157 | -135.09976  | 2662.36747  | 1 |
| 24477 | C | 79.40100 | 67.72880 | 60.09790 | 655.25659   | -578.23167  | 204.79411   | 1 |
| 24478 | H | 80.27400 | 68.36380 | 60.06790 | 807.40031   | 610.16136   | -2984.75803 | 1 |
| 24479 | C | 79.57800 | 66.71580 | 58.97690 | -99.15614   | 139.28121   | 891.10475   | 1 |
| 24480 | H | 79.06400 | 65.76680 | 59.23990 | 1511.07981  | 1989.27557  | 1907.48586  | 1 |

|       |   |          |          |          |             |             |             |   |
|-------|---|----------|----------|----------|-------------|-------------|-------------|---|
| 24481 | C | 79.02300 | 67.18080 | 57.59490 | -576.33391  | 596.49450   | 401.70896   | 1 |
| 24482 | H | 79.08700 | 66.33780 | 56.87390 | -755.60676  | -1558.36590 | 2616.33608  | 1 |
| 24483 | H | 77.97200 | 67.53780 | 57.64990 | 2918.22463  | 1094.17986  | -390.03962  | 1 |
| 24484 | H | 79.57700 | 68.09680 | 57.29790 | 2033.50425  | -2074.78549 | -1178.76925 | 1 |
| 24485 | C | 81.08100 | 66.50980 | 58.92390 | 378.81266   | 704.92986   | 436.65804   | 1 |
| 24486 | H | 81.56100 | 66.51280 | 59.92590 | 2712.55304  | -1224.27163 | 975.98595   | 1 |
| 24487 | H | 81.53800 | 67.31980 | 58.31590 | 1789.47265  | 2411.54523  | 937.78298   | 1 |
| 24488 | C | 81.48100 | 65.22680 | 58.17990 | 544.95429   | -304.88049  | -659.74369  | 1 |
| 24489 | H | 82.58100 | 65.23080 | 58.01990 | -558.70171  | -2323.65979 | -2045.43343 | 1 |
| 24490 | H | 81.14600 | 64.38880 | 58.82690 | -1072.10281 | 1855.55210  | 2307.27899  | 1 |
| 24491 | H | 81.07500 | 65.34680 | 57.15190 | -2536.71703 | -1834.85846 | -337.60796  | 1 |
| 24492 | C | 78.20300 | 68.68480 | 59.97390 | -178.68822  | 518.11313   | 731.42557   | 1 |
| 24493 | O | 78.39300 | 69.81780 | 59.50690 | -740.86036  | -154.03873  | 244.86235   | 1 |
| 24494 | N | 76.94300 | 68.38580 | 60.25590 | 372.83429   | -441.77333  | 597.30598   | 1 |
| 24495 | C | 76.40600 | 67.04980 | 60.23790 | 92.20920    | 48.26332    | -911.32467  | 1 |
| 24496 | H | 76.84500 | 66.50280 | 61.09990 | -44.30372   | -2356.41240 | -2081.16667 | 1 |
| 24497 | H | 76.61900 | 66.55080 | 59.26890 | -2225.02899 | 1840.83087  | -1284.66671 | 1 |
| 24498 | C | 75.89100 | 69.36780 | 60.47890 | -513.29334  | -374.50043  | -661.55612  | 1 |
| 24499 | H | 75.63800 | 69.83980 | 59.54090 | 2400.43543  | 1727.70564  | -1069.60121 | 1 |
| 24500 | C | 74.79500 | 68.58480 | 61.07990 | 313.33841   | -414.71185  | 735.65127   | 1 |
| 24501 | H | 74.84900 | 68.53780 | 62.18890 | -1049.71664 | -1893.96860 | -2285.14776 | 1 |
| 24502 | H | 73.81200 | 69.09380 | 60.98690 | 2232.63141  | -2140.04970 | -511.85871  | 1 |
| 24503 | C | 74.91000 | 67.23780 | 60.38990 | -334.73327  | -647.86420  | -548.61103  | 1 |
| 24504 | H | 74.48000 | 66.36180 | 60.92190 | 2396.04926  | 206.03947   | 2012.75875  | 1 |
| 24505 | H | 74.36300 | 67.34880 | 59.42990 | -66.09527   | 854.67675   | 3024.37293  | 1 |
| 24506 | C | 76.27700 | 70.60180 | 61.32290 | 693.50925   | -38.42021   | -583.46927  | 1 |
| 24507 | O | 75.93900 | 71.65980 | 60.85690 | -733.48608  | -193.64087  | -247.19952  | 1 |
| 24508 | N | 76.98300 | 70.49280 | 62.53090 | 432.56564   | 359.12845   | 622.92414   | 1 |
| 24509 | H | 77.22900 | 69.59880 | 62.89790 | -1007.53313 | -2119.55950 | 2086.55158  | 1 |
| 24510 | C | 77.34300 | 71.60280 | 63.34590 | 42.68293    | 715.22039   | -577.25576  | 1 |
| 24511 | H | 76.43300 | 72.10680 | 63.63490 | 2889.05142  | -1164.87975 | -357.57866  | 1 |
| 24512 | C | 78.07100 | 71.11780 | 64.56590 | -261.82031  | 666.29798   | -581.96253  | 1 |
| 24513 | H | 77.40400 | 70.42680 | 65.12390 | -1419.62469 | -2307.54121 | -1601.95493 | 1 |
| 24514 | H | 78.32800 | 71.98480 | 65.21090 | -2718.39690 | 374.82847   | 1551.02186  | 1 |
| 24515 | H | 79.06500 | 70.67980 | 64.33290 | -3075.84667 | 144.86915   | -692.39826  | 1 |
| 24516 | C | 78.26200 | 72.58380 | 62.57290 | 673.06652   | 455.16243   | 402.60916   | 1 |
| 24517 | O | 77.99600 | 73.79480 | 62.52490 | -487.85868  | 558.35324   | 299.36893   | 1 |
| 24518 | N | 79.28600 | 72.04380 | 61.88190 | -199.61111  | -622.86003  | -532.24627  | 1 |
| 24519 | H | 79.45000 | 71.06180 | 61.82190 | 1704.70720  | 1957.20149  | -1783.57001 | 1 |
| 24520 | C | 80.16600 | 72.83480 | 60.97290 | -491.35076  | -358.93419  | 676.62999   | 1 |
| 24521 | H | 80.56600 | 73.62780 | 61.58790 | -7.90732    | 3150.20417  | -174.53145  | 1 |
| 24522 | C | 81.26100 | 71.99780 | 60.26490 | -652.21970  | -591.55684  | 235.40881   | 1 |
| 24523 | H | 80.87300 | 71.21680 | 59.57690 | 1243.84230  | -2868.22342 | -217.61628  | 1 |
| 24524 | H | 81.86300 | 72.79880 | 59.78490 | 1341.72893  | -2400.91828 | -1508.75716 | 1 |
| 24525 | C | 82.21600 | 71.17680 | 61.14290 | 27.57144    | 707.86204   | 578.53810   | 1 |
| 24526 | H | 81.67600 | 70.33280 | 61.62390 | -1345.08475 | -1070.71383 | -2642.25981 | 1 |
| 24527 | C | 83.30900 | 70.67280 | 60.22790 | -657.48643  | -283.50665  | 564.55440   | 1 |
| 24528 | H | 82.82200 | 70.02180 | 59.46990 | -344.33767  | 1921.21255  | 2469.81018  | 1 |
| 24529 | H | 83.81700 | 71.51980 | 59.71990 | -1104.56714 | 2160.81211  | 2011.93571  | 1 |
| 24530 | H | 84.03400 | 70.09680 | 60.84190 | 2159.85173  | -2222.86834 | -463.94355  | 1 |
| 24531 | C | 82.83200 | 72.00880 | 62.34890 | -743.72962  | -21.00980   | -545.64023  | 1 |
| 24532 | H | 81.97800 | 72.18080 | 63.03890 | 1609.20860  | 2650.04229  | 542.06596   | 1 |
| 24533 | H | 83.61500 | 71.40980 | 62.85990 | 1025.72647  | 1227.48140  | -2715.80249 | 1 |
| 24534 | H | 83.28400 | 72.93580 | 61.93590 | 894.41993   | 2728.43596  | 1292.38142  | 1 |
| 24535 | C | 79.39800 | 73.56380 | 59.85490 | -423.18297  | 820.77333   | -51.76486   | 1 |
| 24536 | O | 79.60700 | 74.74080 | 59.58190 | -275.78072  | 696.10315   | 281.59806   | 1 |
| 24537 | N | 78.44400 | 72.86480 | 59.19490 | 620.08219   | 465.31907   | -331.82323  | 1 |
| 24538 | H | 78.25100 | 71.91980 | 59.44990 | -2238.48934 | 1247.22921  | 1839.25719  | 1 |
| 24539 | C | 77.51900 | 73.42580 | 58.26290 | 455.83227   | -592.20465  | 497.82511   | 1 |
| 24540 | H | 78.15500 | 73.93980 | 57.55690 | 1326.29671  | -2712.76738 | -838.88686  | 1 |
| 24541 | C | 76.60000 | 72.37380 | 57.56490 | 299.20902   | 440.60336   | -745.45259  | 1 |
| 24542 | H | 75.90000 | 72.97980 | 56.94990 | 331.41798   | -2236.12979 | 2172.76913  | 1 |



|       |   |          |          |          |             |             |             |   |
|-------|---|----------|----------|----------|-------------|-------------|-------------|---|
| 24543 | H | 76.05600 | 71.96080 | 58.44090 | 1074.20211  | 938.16104   | -2807.43600 | 1 |
| 24544 | C | 77.41200 | 71.39580 | 56.68990 | 855.61287   | 262.90448   | 124.86789   | 1 |
| 24545 | H | 78.23700 | 70.92380 | 57.26490 | -1880.98495 | -1582.98942 | 1960.26724  | 1 |
| 24546 | C | 76.51500 | 70.32580 | 56.03890 | -590.39960  | -514.86965  | 464.11298   | 1 |
| 24547 | H | 75.79800 | 70.79480 | 55.33190 | 1937.84676  | -2439.93705 | 304.53988   | 1 |
| 24548 | H | 77.06300 | 69.52180 | 55.50390 | 924.90167   | -2825.90107 | 983.28528   | 1 |
| 24549 | H | 76.02800 | 69.82180 | 56.90090 | -2214.64161 | 1007.78362  | -2015.97120 | 1 |
| 24550 | C | 78.08700 | 72.20080 | 55.55590 | -559.93978  | -205.27941  | 691.03286   | 1 |
| 24551 | H | 78.93000 | 72.84180 | 55.89090 | 2435.28200  | -879.84844  | -1770.78919 | 1 |
| 24552 | H | 77.35600 | 72.90380 | 55.10290 | -30.90421   | -3069.61804 | -643.98096  | 1 |
| 24553 | H | 78.47800 | 71.55980 | 54.73690 | -1983.70216 | -1439.32854 | 1971.20232  | 1 |
| 24554 | C | 76.65800 | 74.51080 | 58.81890 | 221.29771   | 571.52990   | -682.53442  | 1 |
| 24555 | O | 76.44500 | 75.53780 | 58.13990 | 703.06541   | -30.75151   | -337.65438  | 1 |
| 24556 | N | 76.13800 | 74.39180 | 60.04090 | 607.02510   | 295.28631   | -502.53976  | 1 |
| 24557 | H | 76.10800 | 73.55980 | 60.58990 | 2155.50746  | -1845.03157 | -1335.01778 | 1 |
| 24558 | C | 75.18900 | 75.41980 | 60.53390 | 690.78667   | -516.69752  | 250.82729   | 1 |
| 24559 | H | 74.52600 | 75.63580 | 59.70990 | 932.19047   | -2935.52705 | 582.20902   | 1 |
| 24560 | C | 74.32700 | 74.98880 | 61.72290 | -459.75931  | -335.68086  | -717.41210  | 1 |
| 24561 | H | 73.68700 | 75.85480 | 61.99690 | 2625.00466  | 195.92129   | 1706.69283  | 1 |
| 24562 | H | 75.08200 | 74.73680 | 62.49790 | -2845.95063 | 1129.51046  | 768.86118   | 1 |
| 24563 | C | 73.43400 | 73.79580 | 61.37990 | -410.20594  | 374.71992   | 729.85548   | 1 |
| 24564 | H | 73.87200 | 73.05280 | 60.67990 | -2491.98032 | -1104.49096 | 1578.09738  | 1 |
| 24565 | C | 73.20600 | 72.96180 | 62.64590 | 515.10632   | 380.91286   | -648.43760  | 1 |
| 24566 | H | 72.47500 | 72.15780 | 62.41390 | -144.61805  | 1456.87451  | -2792.05397 | 1 |
| 24567 | H | 72.89900 | 73.58880 | 63.51090 | -228.98401  | -1194.04164 | 2896.99241  | 1 |
| 24568 | H | 74.09900 | 72.35780 | 62.91390 | 1555.56595  | 1588.09768  | -2228.36189 | 1 |
| 24569 | C | 72.04600 | 74.18280 | 60.80190 | -283.80572  | 423.88915   | 761.69400   | 1 |
| 24570 | H | 71.38500 | 73.30880 | 60.62390 | 739.94229   | -2798.41693 | 1206.30418  | 1 |
| 24571 | H | 71.56400 | 75.00680 | 61.36990 | 1616.80317  | -1965.59983 | -1834.22272 | 1 |
| 24572 | H | 72.15400 | 74.59180 | 59.77490 | -2167.82668 | -588.68824  | -2212.80742 | 1 |
| 24573 | C | 75.85100 | 76.71480 | 60.91390 | 411.64184   | -380.48005  | -710.84916  | 1 |
| 24574 | O | 75.24100 | 77.76980 | 61.06290 | -546.80566  | 155.80816   | 558.90441   | 1 |
| 24575 | N | 77.17700 | 76.61080 | 61.06990 | 424.90511   | 434.81303   | -586.89528  | 1 |
| 24576 | H | 77.61500 | 75.74080 | 60.85690 | 3066.35354  | -164.76678  | 631.29385   | 1 |
| 24577 | C | 78.06900 | 77.62580 | 61.56690 | -395.66455  | 631.77743   | -544.95499  | 1 |
| 24578 | H | 77.44900 | 78.34180 | 62.08490 | 1208.89925  | 2261.74677  | 1823.53816  | 1 |
| 24579 | C | 79.05700 | 77.17280 | 62.62790 | -219.67119  | -668.53281  | 571.31625   | 1 |
| 24580 | H | 79.78300 | 77.96780 | 62.90290 | -2056.90350 | 799.17527   | 2251.69792  | 1 |
| 24581 | O | 79.81600 | 75.99880 | 62.30490 | -547.24314  | 495.65730   | -315.63501  | 1 |
| 24582 | H | 79.18000 | 75.28680 | 62.20490 | 1716.32183  | -1698.00638 | 1998.15508  | 1 |
| 24583 | C | 78.13500 | 76.76780 | 63.83490 | 234.66870   | -852.99271  | 174.25984   | 1 |
| 24584 | H | 77.36500 | 77.55080 | 64.00490 | -1796.53536 | -1425.96404 | -2158.93782 | 1 |
| 24585 | H | 78.74600 | 76.71880 | 64.76190 | -1228.01056 | 2034.14866  | 2071.79134  | 1 |
| 24586 | H | 77.51500 | 75.84680 | 63.79690 | -476.23723  | -685.34452  | 3030.24867  | 1 |
| 24587 | C | 78.80100 | 78.28280 | 60.43990 | -676.59126  | 465.67604   | -425.97191  | 1 |
| 24588 | O | 79.82000 | 78.91780 | 60.65690 | -563.04016  | 566.47697   | 85.51670    | 1 |
| 24589 | N | 78.35900 | 78.17880 | 59.20190 | -173.33991  | -565.20626  | 594.59712   | 1 |
| 24590 | H | 77.57900 | 77.59780 | 58.98190 | -378.56668  | -1892.55032 | -2481.50634 | 1 |
| 24591 | C | 78.86300 | 79.05080 | 58.16390 | -25.49605   | -438.00347  | -796.34859  | 1 |
| 24592 | H | 79.93700 | 78.96980 | 58.24790 | -2004.09576 | -1599.98681 | 1824.00637  | 1 |
| 24593 | C | 78.55500 | 78.55580 | 56.73090 | 644.18188   | -519.17384  | -349.94297  | 1 |
| 24594 | H | 77.45400 | 78.54380 | 56.58590 | -2227.23334 | 2238.01908  | -165.36703  | 1 |
| 24595 | C | 79.23400 | 79.47680 | 55.69190 | -171.65359  | 513.14394   | 741.96704   | 1 |
| 24596 | H | 79.23300 | 79.06580 | 54.66090 | 2866.76385  | -1255.69529 | 60.15515    | 1 |
| 24597 | H | 78.67300 | 80.41380 | 55.48890 | 3120.36933  | -44.57245   | -286.63545  | 1 |
| 24598 | H | 80.26600 | 79.78080 | 55.97290 | -378.34591  | -1145.79812 | -2905.07384 | 1 |
| 24599 | C | 79.06900 | 77.10780 | 56.54390 | -405.85815  | 631.47601   | -541.68589  | 1 |
| 24600 | H | 79.00500 | 76.45980 | 57.44390 | -2510.66162 | -1540.86089 | 1113.19532  | 1 |
| 24601 | H | 80.15200 | 77.14780 | 56.29690 | 688.92150   | 2273.32972  | -2073.80635 | 1 |
| 24602 | C | 78.26600 | 76.33080 | 55.51690 | -577.77835  | -622.99635  | -334.07641  | 1 |
| 24603 | H | 78.23500 | 76.94280 | 54.59090 | -1813.04525 | -2234.03311 | -1273.48904 | 1 |
| 24604 | H | 77.16900 | 76.27180 | 55.68190 | 2406.97194  | -1953.39123 | 434.63609   | 1 |

|       |   |          |          |          |             |             |             |   |
|-------|---|----------|----------|----------|-------------|-------------|-------------|---|
| 24605 | H | 78.74700 | 75.33680 | 55.39290 | 655.53009   | -2138.08350 | 2195.45950  | 1 |
| 24606 | C | 78.55300 | 80.52180 | 58.35990 | 629.90991   | -3.45889    | -649.37358  | 1 |
| 24607 | O | 79.45400 | 81.34280 | 58.28290 | 418.24404   | -381.35659  | -536.00691  | 1 |
| 24608 | N | 77.30800 | 80.94280 | 58.79090 | -713.42213  | 119.54194   | 454.92666   | 1 |
| 24609 | C | 76.06600 | 80.31780 | 58.47990 | -469.78434  | 453.44999   | -652.15478  | 1 |
| 24610 | H | 75.80500 | 79.49080 | 59.17390 | 1823.25331  | 2553.98545  | 234.81074   | 1 |
| 24611 | H | 76.09400 | 79.92480 | 57.44090 | -2300.77681 | 1690.10603  | 1353.45014  | 1 |
| 24612 | C | 77.11200 | 82.34380 | 59.28390 | 673.82307   | 597.16398   | 125.42642   | 1 |
| 24613 | H | 77.25900 | 83.06080 | 58.48990 | -2815.54335 | -1122.20710 | -870.33359  | 1 |
| 24614 | C | 75.62100 | 82.35380 | 59.68890 | 253.60509   | 818.23424   | -325.41372  | 1 |
| 24615 | H | 75.54600 | 82.00980 | 60.74290 | -1981.99377 | 2012.65591  | -1413.12877 | 1 |
| 24616 | H | 75.08500 | 83.32580 | 59.65190 | -1987.15054 | 255.53046   | 2436.59504  | 1 |
| 24617 | C | 75.00600 | 81.34580 | 58.64290 | -741.14373  | 520.31913   | -194.76731  | 1 |
| 24618 | H | 74.62200 | 81.75380 | 57.68290 | 15.45380    | 2687.22712  | 1651.25763  | 1 |
| 24619 | H | 74.09500 | 80.94680 | 59.13790 | -1453.85275 | -2478.30331 | -1277.72462 | 1 |
| 24620 | C | 78.03700 | 82.78180 | 60.40490 | -299.72846  | -855.83958  | -27.40984   | 1 |
| 24621 | O | 78.48700 | 83.90380 | 60.44290 | 59.77811    | -678.56130  | -382.36546  | 1 |
| 24622 | N | 78.30300 | 81.91980 | 61.40090 | 187.74278   | 750.96759   | 348.15147   | 1 |
| 24623 | H | 77.87300 | 81.02280 | 61.32790 | -2910.33825 | 1098.48771  | 549.29266   | 1 |
| 24624 | C | 79.25100 | 82.16380 | 62.47790 | -733.68360  | 425.54731   | -367.80906  | 1 |
| 24625 | H | 78.89200 | 83.09180 | 62.89790 | 1617.39444  | -2315.57867 | -1360.30646 | 1 |
| 24626 | C | 79.28600 | 81.04580 | 63.50590 | 809.27887   | 350.70485   | 203.86501   | 1 |
| 24627 | H | 80.16800 | 81.03780 | 64.18090 | -2681.51260 | 1121.65418  | -1234.87323 | 1 |
| 24628 | H | 79.41000 | 80.13580 | 62.87990 | -1631.15399 | -1174.18381 | 2421.68131  | 1 |
| 24629 | C | 78.00000 | 80.97680 | 64.30490 | 472.19911   | 644.29030   | -440.60752  | 1 |
| 24630 | O | 77.75200 | 81.96580 | 65.02190 | -557.31693  | 570.73410   | 78.28402    | 1 |
| 24631 | O | 77.25500 | 79.98480 | 64.24790 | 461.94657   | -365.96450  | 510.21618   | 1 |
| 24632 | C | 80.65900 | 82.48880 | 61.91190 | -617.26384  | -452.08860  | 500.27815   | 1 |
| 24633 | O | 81.35100 | 83.42380 | 62.34390 | 415.14157   | -531.52148  | 386.85445   | 1 |
| 24634 | N | 81.09300 | 81.65880 | 60.95190 | 211.36359   | 237.69372   | 779.85955   | 1 |
| 24635 | H | 80.60900 | 80.81980 | 60.71590 | 867.16627   | -195.41891  | -3016.10288 | 1 |
| 24636 | C | 82.35100 | 81.84880 | 60.18090 | -77.06504   | -898.92975  | 43.06637    | 1 |
| 24637 | H | 83.14500 | 81.81080 | 60.91190 | 949.26265   | -2224.07508 | -1999.29721 | 1 |
| 24638 | C | 82.61200 | 80.57680 | 59.36790 | 644.91732   | -401.24233  | -484.08751  | 1 |
| 24639 | H | 81.68500 | 80.38480 | 58.78690 | 2126.37805  | 265.94545   | -2296.34994 | 1 |
| 24640 | H | 82.65500 | 79.66680 | 60.00390 | 1800.34278  | 2268.32361  | 1227.92084  | 1 |
| 24641 | C | 83.86900 | 80.51280 | 58.43890 | 580.55069   | -537.01999  | -428.72967  | 1 |
| 24642 | C | 85.11900 | 81.10280 | 58.74990 | 447.25002   | -624.89947  | -469.33615  | 1 |
| 24643 | H | 85.29600 | 81.67880 | 59.64590 | -1980.58035 | -1693.49139 | 1763.11402  | 1 |
| 24644 | C | 86.16200 | 81.10780 | 57.83790 | -589.16118  | -694.92187  | -11.62482   | 1 |
| 24645 | H | 87.06200 | 81.63480 | 58.11890 | 905.39309   | 2220.76512  | -2046.15688 | 1 |
| 24646 | C | 85.98200 | 80.43580 | 56.65890 | -895.32717  | 219.29523   | 85.65220    | 1 |
| 24647 | H | 86.69700 | 80.46980 | 55.84990 | -1077.47895 | -973.01051  | -2795.46777 | 1 |
| 24648 | C | 83.79600 | 79.72480 | 57.31990 | 451.11837   | 632.82890   | -482.91563  | 1 |
| 24649 | H | 82.86100 | 79.25980 | 57.04390 | -899.98930  | 1712.31678  | -2495.85290 | 1 |
| 24650 | C | 84.80600 | 79.76980 | 56.36290 | 519.75540   | -476.44951  | -561.00796  | 1 |
| 24651 | H | 84.81800 | 79.17080 | 55.46490 | -2254.09432 | -1128.37504 | -1893.84342 | 1 |
| 24652 | C | 82.49700 | 83.11280 | 59.39990 | -16.22563   | -664.20386  | -615.75940  | 1 |
| 24653 | O | 83.51000 | 83.80280 | 59.50090 | 277.55415   | -597.40090  | 412.23448   | 1 |
| 24654 | N | 81.49500 | 83.40680 | 58.56490 | -495.86895  | -623.10980  | -279.97650  | 1 |
| 24655 | H | 80.75700 | 82.74780 | 58.43890 | -2105.55753 | -1996.84538 | 1218.49334  | 1 |
| 24656 | C | 81.46900 | 84.64280 | 57.71890 | 439.17989   | -774.16144  | 110.39379   | 1 |
| 24657 | H | 82.41100 | 84.77380 | 57.20590 | -1830.53945 | -1519.83786 | -2062.62189 | 1 |
| 24658 | C | 80.38000 | 84.70980 | 56.67890 | 578.84199   | -251.72890  | -642.96563  | 1 |
| 24659 | H | 79.41800 | 84.79380 | 57.22890 | -1946.28735 | -1004.26525 | -2264.91847 | 1 |
| 24660 | C | 80.21701 | 85.96634 | 55.74970 | -416.25983  | -507.20293  | -117.63548  | 1 |
| 24661 | H | 80.95553 | 85.95566 | 54.92777 | 3615.79431  | -1747.54314 | -871.99592  | 1 |
| 24662 | H | 80.30886 | 86.94940 | 56.26698 | 939.56182   | 1354.60270  | -2831.01888 | 1 |
| 24663 | H | 79.13772 | 86.01775 | 55.27761 | -2312.30406 | 435.33556   | 1701.23069  | 1 |
| 24664 | C | 80.27800 | 83.41680 | 55.77490 | 58.56899    | -719.44325  | 540.53171   | 1 |
| 24665 | H | 80.08400 | 82.53880 | 56.42690 | 1868.93798  | 2013.48913  | -1533.16754 | 1 |
| 24666 | H | 81.26700 | 83.29280 | 55.28390 | 573.91809   | 2104.30621  | 2273.18621  | 1 |

|       |   |          |          |          |             |             |             |   |
|-------|---|----------|----------|----------|-------------|-------------|-------------|---|
| 24667 | C | 79.15000 | 83.46480 | 54.79990 | 508.44956   | -365.49591  | -646.93054  | 1 |
| 24668 | H | 79.31000 | 82.70080 | 54.00990 | -870.57016  | 1969.28971  | 2307.68831  | 1 |
| 24669 | H | 79.14200 | 84.43280 | 54.25390 | 1792.03248  | -563.30942  | -2511.98078 | 1 |
| 24670 | H | 78.13300 | 83.27280 | 55.20590 | 1486.23023  | -2742.52218 | -266.04005  | 1 |
| 24671 | C | 81.33358 | 85.96500 | 58.64478 | 418.71692   | -143.96429  | -1095.58700 | 1 |
| 24672 | O | 81.88722 | 87.02494 | 58.40788 | -242.62750  | -178.88317  | 89.78963    | 1 |
| 24673 | N | 80.39863 | 85.75436 | 59.62373 | -189.63463  | -1075.22293 | -530.40353  | 1 |
| 24674 | H | 80.00489 | 84.80761 | 59.75935 | -1734.91638 | -2643.56824 | 1850.08596  | 1 |
| 24675 | C | 79.88575 | 86.91122 | 60.32627 | 324.14124   | -118.24001  | -1.71222    | 1 |
| 24676 | H | 80.31699 | 87.71263 | 59.77088 | 736.97878   | 1448.65622  | -2379.48863 | 1 |
| 24677 | C | 78.34094 | 86.87030 | 60.58956 | -128.95291  | 70.15703    | -226.94378  | 1 |
| 24678 | H | 78.21013 | 85.98678 | 61.29655 | 925.23560   | -2100.56014 | 965.96776   | 1 |
| 24679 | H | 77.98107 | 87.78624 | 61.04008 | -252.59531  | 2873.45330  | 678.88752   | 1 |
| 24680 | C | 77.60790 | 86.64222 | 59.21654 | 737.88759   | -834.78919  | 972.87875   | 1 |
| 24681 | C | 77.69454 | 87.53216 | 58.06730 | 578.01731   | -274.77038  | 94.13042    | 1 |
| 24682 | H | 78.50472 | 88.28050 | 57.93559 | -1861.49855 | 1102.96707  | -2365.83685 | 1 |
| 24683 | C | 76.86955 | 87.26671 | 56.95544 | 828.62240   | -202.47949  | 570.54389   | 1 |
| 24684 | H | 77.01038 | 87.91848 | 56.08992 | 1239.02468  | 4518.74316  | 1153.68789  | 1 |
| 24685 | C | 75.91072 | 86.23781 | 56.98281 | 1015.59924  | 43.00353    | 231.84692   | 1 |
| 24686 | H | 75.18135 | 86.13601 | 56.20488 | -1515.58467 | -1298.07997 | -2104.47195 | 1 |
| 24687 | C | 76.57320 | 85.67526 | 59.27882 | -309.62813  | -418.64821  | -1128.67631 | 1 |
| 24688 | H | 76.39214 | 85.11126 | 60.20651 | 833.22624   | -912.89594  | -2203.23163 | 1 |
| 24689 | C | 75.77952 | 85.42430 | 58.14542 | -1107.95202 | -401.83888  | -156.40087  | 1 |
| 24690 | H | 74.98261 | 84.68003 | 58.16935 | -386.83015  | 486.95893   | -1164.22925 | 1 |
| 24691 | C | 80.47728 | 86.63586 | 61.80423 | 601.89717   | 953.12483   | 100.35715   | 1 |
| 24692 | O | 79.75153 | 86.62143 | 62.77887 | 882.73506   | -589.36978  | -84.76549   | 1 |
| 24693 | N | 81.78203 | 86.31159 | 61.80992 | -259.82133  | 446.57546   | 262.00797   | 1 |
| 24694 | H | 82.21654 | 86.17379 | 60.92682 | -341.48977  | 2759.73224  | -735.93052  | 1 |
| 24695 | C | 82.47201 | 86.70255 | 63.01240 | 150.58090   | 7.20461     | 408.20393   | 1 |
| 24696 | H | 81.77102 | 87.19246 | 63.71355 | -2465.02487 | 839.13481   | 1598.65829  | 1 |
| 24697 | C | 83.16441 | 85.48172 | 63.71156 | -401.82932  | -770.23886  | 75.18201    | 1 |
| 24698 | H | 83.96699 | 85.79261 | 64.40489 | 861.31737   | -1710.97095 | 687.66988   | 1 |
| 24699 | H | 83.68000 | 84.87680 | 62.92990 | -2808.11188 | -1164.93592 | 833.61193   | 1 |
| 24700 | H | 82.44800 | 84.78880 | 64.16490 | 730.59968   | 1466.66037  | -2688.08976 | 1 |
| 24701 | C | 83.67620 | 87.69220 | 62.52886 | 740.88366   | -301.79003  | 856.35627   | 1 |
| 24702 | O | 84.59040 | 87.37034 | 61.72242 | 530.53651   | 546.72032   | -843.96843  | 1 |
| 24703 | N | 83.70023 | 88.68125 | 63.40796 | 452.07202   | 424.86364   | 204.48846   | 1 |
| 24704 | H | 82.96069 | 88.50488 | 64.08087 | -2084.02144 | -122.76630  | 598.32965   | 1 |
| 24705 | C | 84.40406 | 89.93631 | 63.35868 | -555.12253  | -132.90106  | -1172.22288 | 1 |
| 24706 | H | 85.34864 | 89.74474 | 62.70774 | 2946.37578  | -3599.36482 | 422.72825   | 1 |
| 24707 | C | 83.44713 | 91.06824 | 62.84248 | 188.80121   | 179.08652   | 82.38335    | 1 |
| 24708 | H | 83.16795 | 90.78242 | 61.82601 | -219.46276  | 2668.05719  | -2532.70810 | 1 |
| 24709 | H | 84.09699 | 91.96272 | 62.87857 | -4225.31399 | 2362.30352  | 575.48980   | 1 |
| 24710 | C | 82.17479 | 91.46776 | 63.69233 | 1229.08390  | 92.78318    | 742.91176   | 1 |
| 24711 | O | 81.24417 | 90.68049 | 63.77387 | 137.98383   | -225.14508  | -664.27149  | 1 |
| 24712 | N | 82.30314 | 92.63601 | 64.29081 | -78.27937   | -441.54725  | 418.10735   | 1 |
| 24713 | H | 83.11915 | 93.29233 | 64.27537 | 863.79206   | -893.94824  | -1656.97824 | 1 |
| 24714 | H | 81.72947 | 92.91315 | 65.12805 | 2313.44230  | -1402.46171 | 353.53993   | 1 |
| 24715 | C | 84.78515 | 90.38984 | 64.85924 | -530.16073  | 585.34745   | -566.32933  | 1 |
| 24716 | O | 84.30560 | 89.85023 | 65.85537 | -289.40495  | -863.89253  | -1124.21484 | 1 |
| 24717 | N | 85.81859 | 91.20458 | 64.70215 | -37.74993   | 688.79707   | 134.76417   | 1 |
| 24718 | H | 86.09604 | 91.37535 | 63.75118 | -1999.43726 | 1428.93402  | 255.06252   | 1 |
| 24719 | C | 86.19329 | 92.07477 | 65.80893 | -381.35990  | 335.66660   | -23.11330   | 1 |
| 24720 | H | 86.25891 | 91.33686 | 66.70988 | -223.81517  | 1176.13333  | -979.68310  | 1 |
| 24721 | C | 87.62873 | 92.69682 | 65.41440 | -89.94040   | -1543.75482 | 242.86150   | 1 |
| 24722 | H | 88.41327 | 91.87409 | 65.45912 | -3089.40536 | -1331.52464 | -624.68968  | 1 |
| 24723 | C | 87.65007 | 93.30123 | 63.96311 | -88.52127   | 937.11571   | 873.41216   | 1 |
| 24724 | H | 88.46996 | 94.05020 | 63.78019 | 375.56721   | 304.55938   | 409.19315   | 1 |
| 24725 | H | 86.77622 | 93.93872 | 63.66053 | -470.18230  | 97.91303    | 3905.27812  | 1 |
| 24726 | H | 87.68768 | 92.57635 | 63.08062 | -2453.85441 | -2435.68125 | 641.41042   | 1 |
| 24727 | C | 88.06232 | 93.79315 | 66.42635 | 493.88223   | 183.28078   | -343.98769  | 1 |
| 24728 | H | 89.12214 | 94.05681 | 66.30961 | -88.29946   | 2495.99346  | -1050.40380 | 1 |

|       |   |          |           |          |             |             |             |   |
|-------|---|----------|-----------|----------|-------------|-------------|-------------|---|
| 24729 | H | 87.50920 | 94.76081  | 66.22809 | 1245.28485  | -1553.99364 | -1319.20388 | 1 |
| 24730 | H | 87.84348 | 93.50036  | 67.48195 | 2.11125     | -78.68527   | 3432.90828  | 1 |
| 24731 | C | 85.18408 | 93.32138  | 65.81968 | -629.32416  | 170.15686   | 748.87282   | 1 |
| 24732 | O | 84.80376 | 93.80971  | 64.74789 | -386.40450  | 193.72746   | -291.43043  | 1 |
| 24733 | N | 84.98054 | 93.86134  | 66.99016 | -608.31249  | 582.41666   | 260.45104   | 1 |
| 24734 | H | 85.50299 | 93.41608  | 67.72923 | 202.13266   | -1115.54567 | 3948.43001  | 1 |
| 24735 | C | 84.41312 | 95.14409  | 67.27263 | 33.85007    | 12.19263    | -560.56819  | 1 |
| 24736 | H | 84.67775 | 95.81991  | 66.41563 | -936.02605  | 928.41815   | -1183.53665 | 1 |
| 24737 | C | 82.86753 | 94.90473  | 67.28369 | 313.94881   | 710.48814   | -269.10414  | 1 |
| 24738 | H | 82.60413 | 94.00599  | 67.84134 | -1601.35505 | -447.85051  | 829.78872   | 1 |
| 24739 | H | 82.50906 | 94.68519  | 66.25027 | 2320.75010  | 1253.16757  | 581.09430   | 1 |
| 24740 | O | 82.04062 | 96.11245  | 67.84646 | -108.49296  | 171.66894   | -444.70528  | 1 |
| 24741 | H | 81.31155 | 95.62585  | 68.19586 | 1054.64991  | -2410.81157 | 1696.29568  | 1 |
| 24742 | C | 85.05469 | 95.61994  | 68.72921 | -645.33500  | -164.30264  | -210.57281  | 1 |
| 24743 | O | 86.23650 | 95.34861  | 68.92262 | -16.79826   | -179.56913  | -160.36023  | 1 |
| 24744 | N | 84.25085 | 96.27377  | 69.48853 | -1232.38276 | -198.60885  | 69.19253    | 1 |
| 24745 | H | 83.28451 | 96.37821  | 69.10575 | -4611.85008 | 1094.62009  | -2032.51884 | 1 |
| 24746 | C | 84.65469 | 97.18815  | 70.53107 | -427.36063  | -50.63898   | -457.82534  | 1 |
| 24747 | H | 85.62764 | 96.71673  | 70.76522 | -556.52359  | 2270.27471  | -1062.97709 | 1 |
| 24748 | C | 84.69120 | 98.60408  | 69.92481 | 527.34513   | -271.06957  | -36.92734   | 1 |
| 24749 | H | 84.61205 | 99.27826  | 70.83854 | -907.21048  | -910.46232  | 257.10693   | 1 |
| 24750 | H | 83.84443 | 98.96163  | 69.32682 | 1098.20456  | -1872.64302 | 821.38095   | 1 |
| 24751 | C | 86.03992 | 98.89403  | 69.12064 | -168.36471  | -99.00088   | -643.80490  | 1 |
| 24752 | H | 86.34806 | 99.94418  | 69.21657 | 321.79129   | 282.60104   | 489.62699   | 1 |
| 24753 | H | 86.87213 | 98.28566  | 69.59099 | -837.08146  | 396.00491   | 617.27185   | 1 |
| 24754 | C | 85.82852 | 98.61851  | 67.54623 | -84.64175   | 162.04658   | -1431.14976 | 1 |
| 24755 | O | 84.67362 | 98.44199  | 67.14227 | 500.27622   | 866.57696   | 398.75339   | 1 |
| 24756 | O | 86.81648 | 98.66613  | 66.84552 | 136.97943   | 4.23255     | 70.65934    | 1 |
| 24757 | C | 83.55518 | 96.99048  | 71.76969 | -521.47886  | -167.56433  | 81.84468    | 1 |
| 24758 | O | 82.37615 | 96.97508  | 71.50816 | 521.18042   | 757.23057   | 178.65518   | 1 |
| 24759 | N | 84.15501 | 97.06842  | 72.95762 | -840.30955  | -360.46783  | -752.11325  | 1 |
| 24760 | H | 85.14667 | 96.97967  | 72.91395 | 871.26855   | -20.26995   | -4995.50230 | 1 |
| 24761 | C | 83.43815 | 96.57688  | 74.08350 | 493.88774   | -685.17096  | -311.22280  | 1 |
| 24762 | H | 82.33282 | 96.74553  | 74.00689 | -1049.36334 | -1614.76254 | 292.14549   | 1 |
| 24763 | C | 83.88989 | 95.06926  | 74.09294 | 248.88522   | -266.54356  | -469.46294  | 1 |
| 24764 | H | 84.89656 | 94.88718  | 74.49054 | 1881.38429  | 1084.62162  | -2652.29624 | 1 |
| 24765 | H | 83.85172 | 94.69527  | 73.00996 | 348.86629   | -678.25124  | 3008.89853  | 1 |
| 24766 | H | 83.07396 | 94.60426  | 74.78175 | -1588.53054 | 91.22863    | 1205.38619  | 1 |
| 24767 | C | 84.15856 | 97.23315  | 75.41722 | 746.58034   | 711.77777   | -477.26267  | 1 |
| 24768 | O | 84.72741 | 96.54519  | 76.24488 | -171.29950  | 716.16016   | -170.18677  | 1 |
| 24769 | N | 83.92550 | 98.54883  | 75.42594 | -279.05811  | -749.69199  | -285.25786  | 1 |
| 24770 | H | 83.15722 | 98.81577  | 74.78703 | -947.35179  | 1696.83059  | 1103.48279  | 1 |
| 24771 | C | 84.40592 | 99.42606  | 76.43526 | -252.25159  | -813.73440  | 396.88724   | 1 |
| 24772 | H | 83.66255 | 100.19428 | 76.34467 | -1758.16397 | 3465.90291  | -1258.76412 | 1 |
| 24773 | C | 84.56354 | 98.71516  | 77.84925 | 71.74695    | 133.46763   | 682.48311   | 1 |
| 24774 | H | 85.31441 | 97.89711  | 77.73900 | 965.35100   | 1137.63993  | -1090.91358 | 1 |
| 24775 | H | 84.96948 | 99.47144  | 78.52276 | 283.34773   | -4589.82884 | -1718.44803 | 1 |
| 24776 | C | 83.19105 | 98.18386  | 78.41165 | -209.84094  | -312.12072  | 1367.66511  | 1 |
| 24777 | O | 82.15172 | 98.84736  | 78.29498 | -473.34792  | -258.35673  | -8.89002    | 1 |
| 24778 | O | 83.30216 | 97.14676  | 79.45872 | 503.00323   | -312.10365  | -207.49937  | 1 |
| 24779 | C | 85.86282 | 99.98384  | 75.89949 | 809.36718   | -764.22699  | -419.71097  | 1 |
| 24780 | O | 86.79502 | 99.97292  | 76.65200 | -542.64274  | 444.73169   | -323.36679  | 1 |
| 24781 | N | 85.75921 | 100.28943 | 74.60915 | 43.90189    | -432.42764  | 390.67222   | 1 |
| 24782 | H | 84.77441 | 100.17322 | 74.25107 | 2673.68758  | 1110.76636  | 2170.07954  | 1 |
| 24783 | C | 86.76227 | 100.99277 | 73.89225 | 148.77352   | -1411.91075 | -27.03844   | 1 |
| 24784 | H | 86.34869 | 101.27028 | 72.91067 | 311.41124   | 43.39253    | 4823.57102  | 1 |
| 24785 | C | 86.98432 | 102.25435 | 74.74845 | 158.62151   | -27.06878   | -684.80702  | 1 |
| 24786 | H | 88.03873 | 102.63390 | 74.58910 | -205.64082  | -1930.91474 | 988.96253   | 1 |
| 24787 | H | 87.02375 | 101.99572 | 75.81669 | 4286.23361  | -2404.45640 | -1559.98546 | 1 |
| 24788 | C | 85.86435 | 103.38745 | 74.42991 | -421.47606  | 352.63485   | 52.79263    | 1 |
| 24789 | O | 85.22111 | 103.23311 | 73.37236 | 82.15850    | -759.38810  | -131.82605  | 1 |
| 24790 | O | 85.79828 | 104.47309 | 75.04631 | -510.28999  | 263.41815   | 311.23404   | 1 |

|       |   |          |           |          |             |             |             |   |
|-------|---|----------|-----------|----------|-------------|-------------|-------------|---|
| 24791 | C | 88.15808 | 100.07268 | 73.69498 | 89.09056    | -121.78424  | -110.83657  | 1 |
| 24792 | O | 89.25787 | 100.57245 | 73.60021 | -333.12111  | -435.73311  | 516.89615   | 1 |
| 24793 | N | 87.77097 | 98.85708  | 73.48207 | 82.78348    | 542.39992   | -292.60677  | 1 |
| 24794 | H | 86.75228 | 98.63664  | 73.47602 | -1075.93436 | -479.29434  | -3561.63795 | 1 |
| 24795 | C | 88.74734 | 97.80148  | 73.34193 | 602.44749   | -110.89379  | 10.37821    | 1 |
| 24796 | H | 89.70228 | 98.33051  | 73.03684 | 487.65978   | -1250.21305 | 1765.82563  | 1 |
| 24797 | C | 88.99426 | 97.04589  | 74.72343 | 316.15916   | -398.22236  | 116.85040   | 1 |
| 24798 | H | 89.40394 | 96.08270  | 74.40081 | -237.02614  | -1464.45746 | 2219.92948  | 1 |
| 24799 | H | 89.71586 | 97.60280  | 75.40968 | 2616.45976  | -1949.79833 | 3460.01437  | 1 |
| 24800 | C | 87.51979 | 96.93142  | 75.28285 | 460.11943   | 827.31252   | -162.50010  | 1 |
| 24801 | H | 86.79427 | 96.77286  | 74.44084 | -3735.67443 | 1319.99815  | 4278.03912  | 1 |
| 24802 | H | 87.17717 | 97.81883  | 75.79539 | -4176.58974 | -671.90900  | 203.78685   | 1 |
| 24803 | C | 87.30623 | 95.66868  | 76.26244 | -92.93629   | 90.67867    | 635.67549   | 1 |
| 24804 | H | 86.58674 | 95.75577  | 77.14511 | 217.48146   | -1518.43268 | 1121.26594  | 1 |
| 24805 | H | 88.31318 | 95.46001  | 76.73263 | -3222.46473 | -1873.15723 | 1279.91666  | 1 |
| 24806 | N | 87.13622 | 94.51270  | 75.51587 | -221.73454  | 152.22197   | -411.39370  | 1 |
| 24807 | H | 87.79395 | 94.52357  | 74.72758 | 1604.70540  | 2082.71997  | -541.84761  | 1 |
| 24808 | C | 86.34877 | 93.49729  | 75.63460 | 108.36620   | 234.65153   | -933.05800  | 1 |
| 24809 | N | 86.69817 | 92.68083  | 74.56098 | -20.84402   | 118.60348   | -38.89007   | 1 |
| 24810 | H | 87.41262 | 92.90332  | 73.79441 | -398.56872  | -636.97660  | 216.25130   | 1 |
| 24811 | H | 86.28243 | 91.78086  | 74.52561 | -1169.06704 | -221.40510  | 331.91791   | 1 |
| 24812 | N | 85.46761 | 93.43188  | 76.71195 | 469.55619   | 283.80525   | -591.78254  | 1 |
| 24813 | H | 85.39422 | 94.22220  | 77.36530 | -435.17992  | -341.28615  | -292.52098  | 1 |
| 24814 | H | 84.58154 | 92.78584  | 76.92598 | -2572.48991 | -703.80328  | 1170.66155  | 1 |
| 24815 | C | 88.04733 | 96.85020  | 72.24930 | -228.23382  | 622.03682   | -289.05255  | 1 |
| 24816 | O | 86.83586 | 96.68929  | 72.23181 | -1368.12803 | 864.20016   | 396.12230   | 1 |
| 24817 | N | 88.98119 | 96.27651  | 71.50619 | -536.34497  | -393.24340  | 495.95971   | 1 |
| 24818 | H | 89.97793 | 96.27203  | 71.83672 | -3102.14933 | 1376.17992  | -1370.98836 | 1 |
| 24819 | C | 88.58367 | 95.17665  | 70.66184 | -678.13886  | 286.22221   | -576.25203  | 1 |
| 24820 | H | 87.96120 | 95.58316  | 69.88220 | 1307.11131  | -2074.43049 | 75.60070    | 1 |
| 24821 | C | 90.01870 | 94.63661  | 70.12512 | 1510.29024  | 267.19132   | -499.75808  | 1 |
| 24822 | H | 90.60595 | 94.32915  | 71.04216 | -3126.26078 | -916.39570  | -2274.17649 | 1 |
| 24823 | H | 90.51680 | 95.52017  | 69.70989 | 757.33453   | 1611.53398  | 1969.57330  | 1 |
| 24824 | C | 90.05223 | 93.42235  | 69.19800 | -257.13430  | -910.79834  | 621.16340   | 1 |
| 24825 | C | 89.05725 | 92.46193  | 69.07815 | -8.75926    | 1074.11461  | -292.10620  | 1 |
| 24826 | H | 88.19279 | 92.52531  | 69.78230 | -255.21441  | -692.53476  | -1103.85088 | 1 |
| 24827 | C | 89.09550 | 91.45340  | 68.11256 | 787.63746   | 562.78230   | -1106.54480 | 1 |
| 24828 | H | 88.31777 | 90.62198  | 68.09939 | -1841.84155 | -1536.46118 | -1262.54535 | 1 |
| 24829 | C | 90.22602 | 91.36154  | 67.27258 | -369.98778  | -286.00612  | -771.69417  | 1 |
| 24830 | O | 90.29569 | 90.43537  | 66.17583 | 107.02634   | 611.23432   | -45.93095   | 1 |
| 24831 | H | 89.51517 | 89.94798  | 66.23430 | -64.29579   | 2716.76303  | -3170.25565 | 1 |
| 24832 | C | 91.25750 | 93.21663  | 68.45919 | 56.55276    | -134.01876  | -423.41002  | 1 |
| 24833 | H | 92.11068 | 93.93389  | 68.60321 | -2301.77590 | -282.77602  | -501.43270  | 1 |
| 24834 | C | 91.29755 | 92.24830  | 67.50379 | -124.88383  | 514.14400   | -152.38830  | 1 |
| 24835 | H | 92.11699 | 92.15327  | 66.76216 | 2932.99925  | -1011.12276 | 3391.54809  | 1 |
| 24836 | C | 87.89127 | 94.05817  | 71.51706 | -942.15908  | -528.75870  | -147.29812  | 1 |
| 24837 | O | 88.27528 | 93.64785  | 72.61566 | 610.55925   | 540.60171   | -862.93750  | 1 |
| 24838 | N | 86.85332 | 93.57529  | 70.81887 | -1008.29984 | 24.67063    | -177.66666  | 1 |
| 24839 | H | 86.60602 | 93.91982  | 69.91428 | 1708.62782  | -362.70588  | 356.26475   | 1 |
| 24840 | C | 86.12181 | 92.39083  | 71.21671 | -631.71180  | 357.74631   | 69.13962    | 1 |
| 24841 | H | 86.75704 | 91.83966  | 71.99087 | 1278.66596  | 166.79965   | 44.58386    | 1 |
| 24842 | C | 84.72349 | 92.77528  | 71.74802 | -894.95765  | -474.83470  | 466.72089   | 1 |
| 24843 | H | 84.88430 | 93.65001  | 72.41445 | 3260.69013  | 1900.69782  | 1892.43497  | 1 |
| 24844 | C | 83.74203 | 93.20352  | 70.68969 | -857.73216  | 138.78449   | 80.27747    | 1 |
| 24845 | H | 84.17908 | 94.02017  | 69.98878 | -1988.84056 | -610.57486  | -2152.45192 | 1 |
| 24846 | H | 83.35604 | 92.33528  | 70.08231 | -2236.59295 | 5087.53493  | 943.47194   | 1 |
| 24847 | H | 82.83519 | 93.69530  | 71.10554 | -577.17594  | -569.82099  | -395.51847  | 1 |
| 24848 | C | 84.17294 | 91.59975  | 72.55433 | -81.65261   | 52.49783    | 94.63702    | 1 |
| 24849 | H | 85.02901 | 90.99877  | 72.95356 | -477.16206  | -2888.04965 | -1650.23944 | 1 |
| 24850 | H | 83.62089 | 90.87049  | 71.83003 | -169.40613  | 1440.99130  | -106.60495  | 1 |
| 24851 | C | 83.19477 | 91.93012  | 73.73877 | 121.01447   | -291.40758  | 332.83578   | 1 |
| 24852 | H | 82.38767 | 92.70278  | 73.54954 | 1693.86897  | -872.63679  | -2285.24244 | 1 |

|       |   |          |          |          |             |             |             |   |
|-------|---|----------|----------|----------|-------------|-------------|-------------|---|
| 24853 | H | 82.60587 | 90.97986 | 74.09244 | -359.67066  | 546.62447   | -2170.36583 | 1 |
| 24854 | H | 83.61998 | 92.32603 | 74.71721 | 96.56686    | -63.08869   | 2103.63949  | 1 |
| 24855 | C | 85.98899 | 91.42228 | 69.89173 | 205.99228   | -179.41299  | 97.56169    | 1 |
| 24856 | O | 85.96684 | 91.89871 | 68.79223 | 283.80397   | -499.89350  | 63.00181    | 1 |
| 24857 | N | 85.94895 | 90.13457 | 70.32964 | 346.29173   | 80.76254    | 516.64040   | 1 |
| 24858 | H | 85.68919 | 90.01599 | 71.32033 | -1510.80850 | 1179.47391  | -2545.74571 | 1 |
| 24859 | C | 85.41269 | 89.11246 | 69.42629 | -203.13320  | 79.96849    | 351.86032   | 1 |
| 24860 | H | 85.88453 | 89.44973 | 68.49322 | -3387.75073 | 597.68117   | 3223.42729  | 1 |
| 24861 | C | 85.90492 | 87.74723 | 70.06796 | 108.26197   | -810.89440  | -94.44096   | 1 |
| 24862 | H | 86.35930 | 87.94483 | 71.09630 | 2493.69810  | 939.57964   | -1429.03522 | 1 |
| 24863 | H | 85.07293 | 86.99125 | 70.32318 | -648.86514  | 2495.19166  | 2551.33062  | 1 |
| 24864 | S | 87.17012 | 87.19982 | 68.93314 | 117.96865   | 457.98989   | 167.44470   | 1 |
| 24865 | C | 83.79631 | 89.24074 | 69.49339 | -92.92086   | -39.90106   | -46.30539   | 1 |
| 24866 | O | 83.27846 | 89.49741 | 70.57031 | -401.87244  | -509.47378  | -708.82703  | 1 |
| 24867 | N | 83.32714 | 89.33163 | 68.28765 | 924.85992   | 209.47457   | 139.40486   | 1 |
| 24868 | H | 83.92019 | 89.12328 | 67.41182 | 117.18413   | 211.36571   | 2004.72982  | 1 |
| 24869 | C | 81.96796 | 89.66228 | 68.04915 | -170.26851  | -893.10319  | 208.43721   | 1 |
| 24870 | H | 81.52188 | 89.85992 | 69.01679 | 657.12048   | -78.24069   | 1041.23588  | 1 |
| 24871 | C | 82.04730 | 90.87608 | 67.04298 | 37.52221    | 725.02053   | -36.57682   | 1 |
| 24872 | H | 81.98075 | 90.56794 | 65.93468 | -988.05057  | 903.58751   | 938.64864   | 1 |
| 24873 | H | 83.09831 | 91.29099 | 67.10469 | -1057.95758 | 238.97674   | 159.27193   | 1 |
| 24874 | C | 80.89040 | 91.92620 | 67.38178 | -13.59396   | 89.07677    | -261.89958  | 1 |
| 24875 | O | 80.15480 | 91.64512 | 68.34084 | -120.60503  | -293.66516  | -567.26410  | 1 |
| 24876 | O | 80.75444 | 92.91864 | 66.64431 | -625.39969  | -102.56892  | -592.66126  | 1 |
| 24877 | C | 81.16508 | 88.54538 | 67.14507 | -104.89364  | -433.83134  | -189.19768  | 1 |
| 24878 | O | 81.73566 | 87.84845 | 66.32872 | -0.63073    | -17.19566   | -142.58205  | 1 |
| 24879 | N | 79.88907 | 88.84947 | 67.35201 | -295.16308  | -736.55953  | 898.39510   | 1 |
| 24880 | H | 79.56502 | 89.48179 | 68.01672 | -1741.10497 | -10.44373   | -17.45581   | 1 |
| 24881 | C | 78.94553 | 88.47099 | 66.33971 | -276.65306  | 593.57902   | -197.15251  | 1 |
| 24882 | H | 79.48030 | 88.01683 | 65.46531 | -174.53325  | 98.43442    | -2171.27857 | 1 |
| 24883 | C | 78.10887 | 87.48533 | 67.26084 | 203.21389   | -56.70801   | -764.18351  | 1 |
| 24884 | H | 77.07957 | 87.89401 | 67.42720 | -1235.63476 | -3712.46267 | 1765.35248  | 1 |
| 24885 | H | 78.60711 | 87.27746 | 68.22404 | 772.30944   | 2577.58568  | -99.87484   | 1 |
| 24886 | C | 77.86499 | 86.07154 | 66.60319 | -38.84233   | 280.89735   | -429.38721  | 1 |
| 24887 | H | 77.45799 | 86.32368 | 65.63516 | -3204.56282 | 1832.21205  | 144.15469   | 1 |
| 24888 | H | 77.04006 | 85.52410 | 67.12221 | 328.13406   | 245.92892   | 2057.43479  | 1 |
| 24889 | C | 79.21530 | 85.26550 | 66.59098 | -628.21714  | 338.95696   | 420.08486   | 1 |
| 24890 | H | 79.86067 | 85.50393 | 65.67934 | 1372.95692  | -96.75933   | -1677.47540 | 1 |
| 24891 | H | 79.79509 | 85.49456 | 67.52432 | -983.87971  | 1214.41607  | -1451.92164 | 1 |
| 24892 | N | 78.71300 | 83.93980 | 66.64390 | 129.68470   | 638.74798   | 541.49376   | 1 |
| 24893 | H | 78.51800 | 83.39480 | 65.82790 | 1536.04414  | 1718.37737  | -2140.13364 | 1 |
| 24894 | C | 78.40500 | 83.36480 | 67.75690 | -669.71685  | 382.72445   | -503.93154  | 1 |
| 24895 | N | 78.10900 | 83.97080 | 68.86490 | 775.37864   | 311.89971   | -57.01942   | 1 |
| 24896 | H | 78.26600 | 84.95480 | 68.95690 | -1726.74713 | 1644.23690  | -2064.52110 | 1 |
| 24897 | H | 77.74400 | 83.35480 | 69.56290 | -1361.87435 | 1940.68538  | -2079.11843 | 1 |
| 24898 | N | 78.05200 | 82.10080 | 67.70790 | -574.68861  | 534.41367   | -338.04985  | 1 |
| 24899 | H | 78.04200 | 81.66580 | 66.80690 | -1278.12271 | 2590.29701  | 1268.70153  | 1 |
| 24900 | H | 77.44800 | 81.87880 | 68.47390 | -1860.96389 | 1828.68648  | -1774.12020 | 1 |
| 24901 | C | 77.90741 | 89.63669 | 65.81687 | -22.64975   | 38.39967    | 48.76358    | 1 |
| 24902 | O | 76.83790 | 89.86917 | 66.33817 | -543.93142  | 126.61625   | 578.52904   | 1 |
| 24903 | N | 78.28326 | 90.01851 | 64.60860 | 759.55782   | -59.01645   | 26.56256    | 1 |
| 24904 | H | 79.19123 | 89.63398 | 64.24030 | -1123.96743 | 168.20772   | -379.07684  | 1 |
| 24905 | C | 77.52988 | 90.99057 | 63.92146 | -29.90646   | 269.89363   | -854.79213  | 1 |
| 24906 | H | 76.60809 | 91.22685 | 64.59363 | -3576.18801 | -605.47142  | -636.74709  | 1 |
| 24907 | C | 78.28343 | 92.45899 | 63.96460 | -197.36090  | -107.95219  | -1068.64968 | 1 |
| 24908 | H | 78.84650 | 92.61685 | 64.90878 | -1053.21516 | -1901.87039 | 2411.14634  | 1 |
| 24909 | H | 78.95701 | 92.59082 | 63.08557 | 1458.82563  | 2103.75602  | -206.78166  | 1 |
| 24910 | C | 77.01756 | 93.32013 | 63.91868 | -618.48644  | 835.05600   | -235.72673  | 1 |
| 24911 | C | 76.39615 | 93.79631 | 65.09393 | 212.16276   | -1215.28310 | -775.37474  | 1 |
| 24912 | H | 76.88664 | 93.35101 | 65.97461 | 1390.67285  | 396.35844   | -146.50210  | 1 |
| 24913 | C | 75.30204 | 94.61152 | 65.12276 | 133.09450   | -449.97077  | 19.50977    | 1 |
| 24914 | H | 74.89906 | 94.90247 | 66.14756 | -1676.62523 | 122.84822   | -630.50711  | 1 |

|       |   |          |          |          |             |             |             |   |
|-------|---|----------|----------|----------|-------------|-------------|-------------|---|
| 24915 | C | 74.75321 | 95.17561 | 63.92627 | 353.88133   | -502.60696  | -297.66569  | 1 |
| 24916 | H | 73.84053 | 95.76523 | 63.90902 | 469.67793   | 924.19218   | -1582.83209 | 1 |
| 24917 | C | 76.49348 | 93.83583 | 62.68597 | -363.62327  | 447.07565   | -1363.91957 | 1 |
| 24918 | H | 77.03886 | 93.60965 | 61.76879 | -905.95842  | -1156.95261 | 1373.46410  | 1 |
| 24919 | C | 75.44111 | 94.79287 | 62.71855 | 288.11290   | 774.47463   | 512.45776   | 1 |
| 24920 | H | 75.16623 | 95.26046 | 61.75570 | -1012.98599 | 1216.91603  | 2211.85445  | 1 |
| 24921 | C | 77.07320 | 90.46224 | 62.40178 | 4.47677     | -462.28460  | 5.63949     | 1 |
| 24922 | O | 77.89569 | 89.92563 | 61.71106 | 220.79827   | -98.19612   | -413.18458  | 1 |
| 24923 | N | 75.88482 | 90.97073 | 62.09384 | 238.64885   | 211.57753   | 429.11073   | 1 |
| 24924 | H | 75.30449 | 91.44548 | 62.82889 | 856.16787   | -888.25974  | 811.86170   | 1 |
| 24925 | C | 75.13036 | 90.32063 | 61.07649 | 956.97583   | 540.25022   | 247.91791   | 1 |
| 24926 | H | 75.93893 | 89.72020 | 60.58693 | -1075.07462 | 574.34666   | 1818.16953  | 1 |
| 24927 | C | 73.89495 | 89.58225 | 61.74915 | -424.68422  | 200.86958   | 623.88891   | 1 |
| 24928 | H | 73.22315 | 89.14115 | 60.99164 | -2708.12384 | -3472.82567 | 101.28437   | 1 |
| 24929 | H | 73.27466 | 90.35686 | 62.26516 | -868.47459  | 651.89452   | 248.93421   | 1 |
| 24930 | C | 74.34503 | 88.53736 | 62.80534 | -153.21347  | 550.98992   | 225.42354   | 1 |
| 24931 | C | 74.84332 | 87.28491 | 62.37350 | 84.02194    | -225.69173  | -21.32003   | 1 |
| 24932 | H | 75.06127 | 87.05520 | 61.33614 | 822.22397   | 3314.48923  | -712.40352  | 1 |
| 24933 | C | 75.21416 | 86.30119 | 63.34284 | 545.93474   | 155.32222   | 25.83747    | 1 |
| 24934 | H | 75.55392 | 85.28085 | 63.02825 | -1659.78878 | -1068.30139 | 1731.91483  | 1 |
| 24935 | C | 75.05644 | 86.52182 | 64.77996 | 145.02516   | 904.61264   | -1310.31990 | 1 |
| 24936 | O | 75.17769 | 85.47251 | 65.66695 | -216.15581  | 18.86170    | -253.51124  | 1 |
| 24937 | H | 75.54600 | 84.77580 | 64.99090 | 1.54280     | -1167.25246 | 2919.82418  | 1 |
| 24938 | C | 74.46557 | 88.82343 | 64.20512 | -382.78791  | -39.77464   | -244.36681  | 1 |
| 24939 | H | 74.24859 | 89.86997 | 64.54938 | 706.91751   | -2701.41736 | -227.32824  | 1 |
| 24940 | C | 74.75814 | 87.88370 | 65.16045 | 442.93763   | -408.42667  | 896.87227   | 1 |
| 24941 | H | 74.85606 | 88.14868 | 66.25710 | -563.29031  | -1987.21027 | 922.91641   | 1 |
| 24942 | C | 74.40342 | 91.35609 | 60.08009 | -741.83322  | -599.34034  | 144.86183   | 1 |
| 24943 | O | 74.27800 | 92.58633 | 60.32979 | 116.69066   | -728.97668  | -281.43938  | 1 |
| 24944 | N | 73.98728 | 90.70386 | 58.98653 | -254.93064  | 269.60583   | 213.60746   | 1 |
| 24945 | C | 74.55838 | 89.46267 | 58.51879 | -257.15150  | -852.37281  | -131.53881  | 1 |
| 24946 | H | 75.66366 | 89.59399 | 58.23992 | -11.48849   | 261.58902   | 968.68897   | 1 |
| 24947 | H | 74.53868 | 88.69599 | 59.33547 | -2314.13929 | -668.32019  | -1394.00599 | 1 |
| 24948 | C | 73.45849 | 91.43252 | 57.84176 | -286.69749  | 932.16304   | -153.15244  | 1 |
| 24949 | H | 74.16201 | 92.24255 | 57.78401 | -1197.72678 | 1916.47722  | -1654.35031 | 1 |
| 24950 | C | 73.49675 | 90.47201 | 56.57855 | -389.18072  | -295.42545  | 152.07751   | 1 |
| 24951 | H | 72.56679 | 90.46774 | 55.95710 | -1061.19890 | -1105.41898 | 576.74431   | 1 |
| 24952 | H | 74.43713 | 90.87709 | 56.00172 | -1217.34623 | 330.14705   | 1720.13468  | 1 |
| 24953 | C | 73.69348 | 89.08388 | 57.22802 | -799.80882  | -135.86201  | 490.04944   | 1 |
| 24954 | H | 72.72218 | 88.62921 | 57.57541 | -2080.35406 | 390.60340   | -1591.53084 | 1 |
| 24955 | H | 74.28816 | 88.40282 | 56.50549 | 2969.83704  | -1211.39813 | -192.10441  | 1 |
| 24956 | C | 71.94843 | 91.97883 | 58.10879 | 555.73414   | 235.37406   | 499.59807   | 1 |
| 24957 | O | 71.01614 | 91.46600 | 57.55949 | 158.23757   | 42.54129    | -351.05321  | 1 |
| 24958 | N | 71.99290 | 93.00154 | 58.99612 | 31.02496    | -451.36954  | 244.13307   | 1 |
| 24959 | H | 72.96439 | 93.16593 | 59.50623 | -1517.01033 | 23.77152    | 3257.14375  | 1 |
| 24960 | C | 70.79864 | 93.19451 | 59.74431 | 158.88492   | 289.12183   | 822.95570   | 1 |
| 24961 | H | 71.16777 | 94.15143 | 60.17848 | -120.15839  | -4375.71760 | 1514.86001  | 1 |
| 24962 | C | 69.47950 | 93.19440 | 58.85618 | -102.66503  | -923.63658  | 306.70698   | 1 |
| 24963 | H | 69.76991 | 93.58811 | 57.85599 | 395.46871   | -2961.86399 | 2507.77216  | 1 |
| 24964 | H | 69.11822 | 92.10986 | 58.81459 | 1406.10915  | -362.18980  | 2284.49828  | 1 |
| 24965 | C | 68.37154 | 94.02992 | 59.59295 | -472.08985  | 1012.71329  | 901.19137   | 1 |
| 24966 | O | 68.51069 | 94.82481 | 60.49812 | 546.32712   | 247.62512   | 32.30230    | 1 |
| 24967 | N | 67.20710 | 93.66941 | 58.99527 | -31.79452   | -494.12193  | 907.93810   | 1 |
| 24968 | H | 67.27496 | 93.02744 | 58.19819 | -2251.97120 | 26.17991    | -318.85877  | 1 |
| 24969 | H | 66.22321 | 94.04634 | 59.10264 | -1495.30567 | -1455.00854 | -772.56149  | 1 |
| 24970 | C | 70.48608 | 92.02320 | 60.83088 | 544.00593   | -428.78371  | 764.21155   | 1 |
| 24971 | O | 70.75841 | 90.81840 | 60.78391 | 362.71145   | -285.80337  | 316.45532   | 1 |
| 24972 | N | 69.81047 | 92.58595 | 61.78556 | 560.06150   | -414.50119  | 814.35163   | 1 |
| 24973 | H | 69.67457 | 93.55996 | 61.65491 | 2071.93697  | 2779.26116  | -2380.92300 | 1 |
| 24974 | C | 69.37746 | 91.88135 | 62.98110 | -201.69313  | 12.29596    | 526.97930   | 1 |
| 24975 | H | 69.94151 | 90.84659 | 62.93994 | 1601.36279  | 1182.18586  | -685.02842  | 1 |
| 24976 | C | 69.39700 | 92.62181 | 64.34432 | -350.87790  | -596.92253  | -173.50194  | 1 |

|       |   |          |          |          |             |             |             |   |
|-------|---|----------|----------|----------|-------------|-------------|-------------|---|
| 24977 | H | 68.76749 | 93.50320 | 64.20424 | -894.48142  | 2464.12600  | -3357.37718 | 1 |
| 24978 | H | 68.92547 | 92.00550 | 65.16294 | 938.37585   | -328.62509  | 1736.04256  | 1 |
| 24979 | C | 70.98506 | 92.72885 | 64.56832 | -328.61723  | 708.93460   | 1011.01591  | 1 |
| 24980 | O | 71.43306 | 93.73962 | 65.17765 | -1142.64902 | -337.99689  | -249.75621  | 1 |
| 24981 | O | 71.72701 | 91.91172 | 63.95989 | 640.89935   | 699.58297   | -517.56135  | 1 |
| 24982 | C | 67.81876 | 91.37204 | 62.77115 | 45.15955    | 297.04689   | -553.49202  | 1 |
| 24983 | O | 67.16913 | 91.14925 | 63.74929 | 186.08900   | 154.05027   | 806.33324   | 1 |
| 24984 | N | 67.41404 | 91.34116 | 61.48969 | -125.71694  | -1020.36038 | -602.37640  | 1 |
| 24985 | H | 68.07665 | 91.68843 | 60.78348 | 767.36817   | 631.53303   | 1933.50975  | 1 |
| 24986 | C | 66.56527 | 90.28005 | 60.97191 | -672.87736  | -47.32190   | -1072.79479 | 1 |
| 24987 | H | 66.13890 | 90.08185 | 61.94698 | -3647.83187 | -1866.97648 | -1002.86329 | 1 |
| 24988 | C | 65.56884 | 90.93096 | 59.85275 | 510.31125   | 253.46156   | 481.72888   | 1 |
| 24989 | H | 65.70596 | 92.02115 | 59.85899 | 2239.56828  | 2181.06251  | -770.61962  | 1 |
| 24990 | H | 65.81867 | 90.59655 | 58.85176 | 1553.26143  | -925.62823  | 1105.39057  | 1 |
| 24991 | C | 64.10866 | 90.60517 | 60.03640 | 75.47211    | 38.47832    | -863.13199  | 1 |
| 24992 | H | 63.51132 | 91.08448 | 59.24884 | 5370.13521  | 2043.91012  | 1399.63160  | 1 |
| 24993 | C | 63.88070 | 89.12363 | 59.90666 | -236.33255  | -107.54915  | 60.33583    | 1 |
| 24994 | H | 64.48955 | 88.68111 | 59.10079 | -3799.16279 | -322.11829  | -192.21839  | 1 |
| 24995 | H | 62.77789 | 88.95429 | 59.73718 | -1664.56917 | -4537.27164 | -1484.04152 | 1 |
| 24996 | H | 64.14659 | 88.53610 | 60.80557 | -386.11545  | 2051.27834  | 979.37313   | 1 |
| 24997 | C | 63.58913 | 91.20535 | 61.33528 | 252.31630   | -688.55340  | 650.86519   | 1 |
| 24998 | H | 64.18660 | 90.84664 | 62.20446 | 2131.49483  | 3277.00631  | 1501.52347  | 1 |
| 24999 | H | 63.63100 | 92.35730 | 61.27490 | -3083.37919 | -1435.09954 | 1198.32659  | 1 |
| 25000 | H | 62.51213 | 90.95509 | 61.49804 | 2813.85152  | 97.47193    | -3809.18671 | 1 |
| 25001 | C | 67.38730 | 89.08524 | 60.27885 | 510.44828   | -781.49615  | 161.47800   | 1 |
| 25002 | O | 66.79171 | 88.06716 | 60.07357 | 131.63076   | 107.42844   | -376.01934  | 1 |
| 25003 | N | 68.70361 | 89.30037 | 60.05067 | -292.15711  | -209.41641  | 523.66505   | 1 |
| 25004 | H | 69.23147 | 90.13890 | 60.35954 | -758.05878  | -617.51050  | -340.59615  | 1 |
| 25005 | C | 69.40104 | 88.09212 | 59.76548 | 43.71413    | -145.97826  | -611.51831  | 1 |
| 25006 | H | 68.62155 | 87.51298 | 59.18324 | 944.79618   | 2048.53569  | 1606.15655  | 1 |
| 25007 | C | 70.73322 | 88.32977 | 58.85324 | -482.43798  | 1108.02869  | -66.61904   | 1 |
| 25008 | H | 71.46484 | 87.55475 | 59.14598 | -1221.30234 | -1716.44731 | 936.84183   | 1 |
| 25009 | H | 71.22327 | 89.28446 | 58.99755 | 1321.72676  | 1292.53116  | 4538.38354  | 1 |
| 25010 | C | 70.33843 | 88.11206 | 57.37072 | 880.93477   | -662.85268  | 371.51252   | 1 |
| 25011 | C | 70.14027 | 88.95859 | 56.26323 | 635.05348   | -278.25890  | -198.38195  | 1 |
| 25012 | H | 70.32935 | 89.96540 | 56.14708 | 2579.29139  | -347.52691  | -2738.77966 | 1 |
| 25013 | N | 69.86351 | 88.25895 | 55.14592 | -1008.84312 | -208.62489  | -680.01712  | 1 |
| 25014 | H | 69.79177 | 88.58138 | 54.15002 | -9.90166    | 797.11259   | 224.89129   | 1 |
| 25015 | C | 69.74756 | 86.94450 | 55.42224 | -820.90679  | -785.07021  | 1469.50988  | 1 |
| 25016 | C | 70.01154 | 86.77551 | 56.88807 | 302.14574   | -334.68803  | 355.75968   | 1 |
| 25017 | C | 69.96837 | 85.45161 | 57.41357 | -275.13761  | -613.41412  | -1153.27079 | 1 |
| 25018 | H | 70.22015 | 85.21232 | 58.46737 | -1075.31295 | -1065.64839 | -1434.59161 | 1 |
| 25019 | C | 69.68000 | 84.43180 | 56.55090 | -261.75673  | 529.31251   | 708.63711   | 1 |
| 25020 | H | 69.73600 | 83.43380 | 56.95890 | 1497.44626  | 472.94824   | 2722.92890  | 1 |
| 25021 | C | 69.46473 | 85.82520 | 54.51541 | 329.26743   | 221.40896   | -248.31267  | 1 |
| 25022 | H | 69.51892 | 85.79366 | 53.47496 | -794.56357  | 1391.97709  | 383.41179   | 1 |
| 25023 | C | 69.46400 | 84.55980 | 55.13790 | -738.99889  | -507.25343  | 195.19978   | 1 |
| 25024 | H | 69.43900 | 83.61780 | 54.60990 | -1250.26919 | 2891.48783  | 254.33855   | 1 |
| 25025 | C | 69.87819 | 87.38856 | 61.13867 | 455.99778   | 147.09879   | 47.91252    | 1 |
| 25026 | O | 69.79482 | 86.15934 | 61.30530 | 797.01102   | -151.01026  | 311.26086   | 1 |
| 25027 | N | 70.34353 | 88.28523 | 61.98507 | 375.80401   | -181.94776  | 130.83032   | 1 |
| 25028 | H | 70.46905 | 89.16974 | 61.58407 | 4486.79641  | 367.76602   | -806.65606  | 1 |
| 25029 | C | 70.61305 | 87.95393 | 63.34518 | 759.40095   | 429.07201   | 313.02681   | 1 |
| 25030 | H | 71.49148 | 87.25506 | 63.16213 | -3737.78759 | -2071.96153 | 1210.18860  | 1 |
| 25031 | C | 71.06128 | 89.17533 | 64.31113 | 334.72246   | 1175.32266  | 46.02971    | 1 |
| 25032 | H | 71.51747 | 89.88902 | 63.57799 | -1885.04848 | -206.33370  | 1151.13748  | 1 |
| 25033 | C | 69.80978 | 89.79036 | 65.02019 | -478.50638  | -732.99229  | -109.33139  | 1 |
| 25034 | H | 70.08321 | 90.61745 | 65.66954 | 303.26240   | 2280.69874  | -169.88001  | 1 |
| 25035 | H | 69.34227 | 88.97563 | 65.64844 | 2597.76738  | 969.68951   | -1927.79442 | 1 |
| 25036 | H | 69.01733 | 90.01854 | 64.23331 | 948.16402   | 2891.93415  | 2170.48414  | 1 |
| 25037 | C | 72.04731 | 88.75746 | 65.42813 | -314.00503  | -83.01808   | 182.17407   | 1 |
| 25038 | H | 71.58588 | 88.24874 | 66.32124 | -4106.43361 | -2260.56170 | -1289.63162 | 1 |



|       |   |          |          |          |             |             |             |   |
|-------|---|----------|----------|----------|-------------|-------------|-------------|---|
| 25039 | H | 72.68933 | 88.02266 | 65.03690 | -3252.16268 | -1829.32280 | 2545.62073  | 1 |
| 25040 | H | 72.65366 | 89.65417 | 65.78353 | -4421.96875 | -1026.75638 | -1747.09416 | 1 |
| 25041 | C | 69.36740 | 87.15281 | 64.05186 | 1068.40133  | -845.43991  | 954.81371   | 1 |
| 25042 | O | 69.76546 | 86.51727 | 65.01506 | 344.61441   | 548.94696   | -88.35861   | 1 |
| 25043 | N | 68.15259 | 87.43059 | 63.69198 | 169.86218   | -259.57756  | -93.65658   | 1 |
| 25044 | H | 67.87318 | 88.03273 | 62.91914 | 1488.47477  | -1685.29312 | -2197.60105 | 1 |
| 25045 | C | 67.05348 | 86.73960 | 64.29413 | -724.45246  | -365.84531  | 834.71454   | 1 |
| 25046 | H | 67.34979 | 86.45830 | 65.35273 | 3242.31978  | -414.44789  | 2379.37603  | 1 |
| 25047 | C | 65.70477 | 87.55615 | 64.13592 | -151.71993  | 994.53450   | 120.76950   | 1 |
| 25048 | H | 65.82516 | 88.64678 | 64.27146 | -798.53533  | -1197.96236 | 998.31384   | 1 |
| 25049 | C | 65.10843 | 87.34667 | 62.69676 | -125.01312  | 229.15212   | -80.98226   | 1 |
| 25050 | H | 64.00359 | 87.56166 | 62.57888 | 1176.46516  | -1835.52826 | -972.21654  | 1 |
| 25051 | H | 65.66192 | 87.88452 | 61.93153 | 824.94746   | -2557.45690 | -106.16972  | 1 |
| 25052 | H | 65.13783 | 86.22224 | 62.37060 | -1528.44046 | 235.60424   | 418.67425   | 1 |
| 25053 | C | 64.77625 | 86.86874 | 65.19463 | -358.93126  | -48.21872   | 661.46957   | 1 |
| 25054 | H | 63.90260 | 87.47986 | 65.44623 | 874.59531   | 2436.40528  | -726.09208  | 1 |
| 25055 | H | 64.19963 | 86.03606 | 64.71055 | 1139.60155  | 2274.14455  | -53.72044   | 1 |
| 25056 | H | 65.24467 | 86.55294 | 66.15623 | -1005.94824 | -623.01737  | 296.40487   | 1 |
| 25057 | C | 66.82691 | 85.27779 | 63.57024 | 272.34747   | 960.91660   | -1112.05843 | 1 |
| 25058 | O | 66.19800 | 84.42780 | 64.14390 | -493.11914  | 598.47032   | 202.09267   | 1 |
| 25059 | N | 67.10475 | 85.39384 | 62.26354 | 284.32373   | 513.05167   | 156.99665   | 1 |
| 25060 | H | 67.72636 | 86.18653 | 62.01089 | -2468.97986 | -2194.57246 | -1815.34076 | 1 |
| 25061 | C | 67.17300 | 83.92780 | 61.67790 | 674.54896   | 328.55623   | 510.61167   | 1 |
| 25062 | H | 66.24200 | 83.39480 | 61.79890 | 1638.57860  | 2263.41028  | 1446.62985  | 1 |
| 25063 | C | 67.57000 | 83.97580 | 60.15290 | 593.55725   | -404.78203  | 546.19152   | 1 |
| 25064 | H | 68.48300 | 84.59580 | 60.02690 | 2092.95810  | 2025.78972  | -1178.76287 | 1 |
| 25065 | C | 67.61400 | 82.57980 | 59.52390 | -555.46018  | 461.17386   | 576.70484   | 1 |
| 25066 | H | 66.79600 | 81.88480 | 59.80990 | 1850.95937  | -1436.48296 | -2082.21162 | 1 |
| 25067 | H | 68.52000 | 82.02080 | 59.84090 | 2853.10552  | 1308.51358  | -28.99859   | 1 |
| 25068 | H | 67.66500 | 82.68580 | 58.41990 | -2623.79696 | -1730.10003 | -230.85054  | 1 |
| 25069 | C | 66.50700 | 84.79580 | 59.46790 | 822.57960   | 356.96003   | -111.35045  | 1 |
| 25070 | H | 66.63300 | 84.77480 | 58.36390 | -2518.88562 | -463.89648  | -1838.32479 | 1 |
| 25071 | H | 66.46421 | 85.87822 | 59.89081 | 2181.89468  | 1049.55511  | -576.38688  | 1 |
| 25072 | H | 65.54000 | 84.29880 | 59.69790 | -1709.77409 | -2187.65009 | -1478.61206 | 1 |
| 25073 | C | 68.20200 | 83.10680 | 62.39890 | 539.66221   | 596.06844   | -423.27764  | 1 |
| 25074 | O | 68.02100 | 81.91380 | 62.76490 | 254.46358   | -638.90999  | -367.88389  | 1 |
| 25075 | N | 69.35700 | 83.66280 | 62.70190 | 600.68696   | -446.16128  | -363.29158  | 1 |
| 25076 | H | 69.64500 | 84.55180 | 62.35490 | -1794.89989 | -1009.30813 | -2381.52954 | 1 |
| 25077 | C | 70.38900 | 83.01780 | 63.55090 | -427.52719  | 400.57925   | 710.40315   | 1 |
| 25078 | H | 70.48900 | 81.98180 | 63.26390 | -1082.04763 | 2674.05858  | -1277.50920 | 1 |
| 25079 | C | 71.76000 | 83.63580 | 63.31290 | -495.13612  | 714.33280   | 311.70241   | 1 |
| 25080 | H | 72.58800 | 82.97480 | 63.64590 | -2649.12598 | 1678.41681  | 377.38975   | 1 |
| 25081 | H | 71.82400 | 84.63980 | 63.78390 | -809.58490  | 3047.25306  | 123.96293   | 1 |
| 25082 | C | 72.03300 | 83.72280 | 61.79390 | -226.37882  | -514.53022  | 717.45198   | 1 |
| 25083 | C | 71.81600 | 82.59080 | 60.95990 | 268.69434   | -710.11494  | -486.53216  | 1 |
| 25084 | H | 71.47000 | 81.69580 | 61.45590 | -2327.39246 | 1917.39177  | 941.36044   | 1 |
| 25085 | C | 72.08100 | 82.67680 | 59.54890 | 595.09723   | 107.47225   | 674.57000   | 1 |
| 25086 | H | 71.79200 | 81.91980 | 58.83390 | -2140.52028 | 1676.37226  | -1606.78140 | 1 |
| 25087 | C | 72.48800 | 83.89180 | 59.02390 | 184.09325   | 862.65264   | -250.80159  | 1 |
| 25088 | H | 72.66000 | 83.92580 | 57.95890 | -2550.20373 | 1504.79887  | 1105.49257  | 1 |
| 25089 | C | 72.42300 | 84.92880 | 61.19290 | -61.69377   | 134.37953   | -899.76818  | 1 |
| 25090 | H | 72.52969 | 85.84600 | 61.82238 | -4695.73605 | -408.38900  | 319.04503   | 1 |
| 25091 | C | 72.71085 | 85.04859 | 59.79912 | 441.31855   | -81.68309   | 110.29012   | 1 |
| 25092 | H | 72.93175 | 85.95841 | 59.32850 | -2933.65149 | 839.58364   | -1967.53325 | 1 |
| 25093 | C | 70.05300 | 82.90880 | 64.99590 | -713.76563  | 573.76150   | 119.90452   | 1 |
| 25094 | O | 70.29400 | 81.84380 | 65.59190 | 572.39985   | -252.02142  | -465.85988  | 1 |
| 25095 | N | 69.42700 | 83.89580 | 65.60790 | -680.07231  | -222.55687  | -457.85248  | 1 |
| 25096 | H | 69.17200 | 84.72080 | 65.10890 | -2608.54160 | 1221.67570  | 1294.60872  | 1 |
| 25097 | C | 68.97800 | 83.85380 | 67.00790 | -793.53447  | -174.45386  | 432.25232   | 1 |
| 25098 | H | 69.89000 | 83.70380 | 67.56490 | 336.69557   | -2272.71660 | -2140.46556 | 1 |
| 25099 | C | 68.23451 | 85.23710 | 67.35263 | 292.66140   | 108.89595   | 159.18020   | 1 |
| 25100 | H | 67.22545 | 85.14415 | 66.86510 | -1340.85613 | 140.78298   | -935.86479  | 1 |

|       |   |          |          |          |             |             |             |   |
|-------|---|----------|----------|----------|-------------|-------------|-------------|---|
| 25101 | H | 68.76238 | 86.10525 | 66.83338 | 2842.04627  | 112.91006   | -2245.53171 | 1 |
| 25102 | C | 67.94843 | 85.35279 | 68.88401 | 381.13596   | -457.09295  | 746.65493   | 1 |
| 25103 | H | 67.37700 | 84.47980 | 69.36990 | -260.93854  | 459.34235   | -3099.80111 | 1 |
| 25104 | H | 67.38887 | 86.23955 | 69.09882 | 1666.68923  | -652.22513  | 602.63840   | 1 |
| 25105 | C | 69.35329 | 85.54875 | 69.67978 | 426.51266   | -572.89895  | 662.14877   | 1 |
| 25106 | O | 69.85967 | 86.63124 | 69.64024 | 179.23493   | 89.93805    | 754.61947   | 1 |
| 25107 | N | 70.01700 | 84.39780 | 70.10590 | 421.94438   | -470.16065  | -547.39151  | 1 |
| 25108 | H | 69.81800 | 83.47480 | 69.77790 | 1622.55556  | 1466.17372  | -2256.12547 | 1 |
| 25109 | H | 70.95200 | 84.61280 | 70.38790 | -1626.88291 | -2631.03011 | 582.28280   | 1 |
| 25110 | C | 68.01400 | 82.64180 | 67.17590 | -691.47896  | -70.35297   | -598.42540  | 1 |
| 25111 | O | 68.15500 | 81.79780 | 68.04290 | 494.45132   | 295.38965   | 536.06006   | 1 |
| 25112 | N | 67.09000 | 82.50080 | 66.23490 | -551.73207  | 104.93306   | -637.14924  | 1 |
| 25113 | H | 67.03700 | 83.21580 | 65.54290 | -1837.25908 | 1532.87338  | 2058.40188  | 1 |
| 25114 | C | 66.19800 | 81.42780 | 66.04390 | -658.87063  | 636.21011   | 110.13260   | 1 |
| 25115 | H | 65.61500 | 81.36480 | 66.95090 | -759.21271  | 2996.09497  | 624.74465   | 1 |
| 25116 | C | 65.20800 | 81.57280 | 64.87290 | 366.33712   | -420.55116  | -710.52024  | 1 |
| 25117 | H | 64.70000 | 82.55680 | 64.95890 | 702.59930   | -2273.50156 | -2045.72539 | 1 |
| 25118 | H | 65.78400 | 81.60080 | 63.92390 | -2791.58441 | 1459.92500  | -216.71896  | 1 |
| 25119 | C | 64.14300 | 80.54880 | 64.85190 | 187.84801   | -873.43987  | 144.54341   | 1 |
| 25120 | C | 64.10100 | 79.51580 | 63.85590 | -299.93141  | -537.13496  | 674.88244   | 1 |
| 25121 | H | 64.80100 | 79.56380 | 63.03490 | 2737.37139  | 337.63242   | 1498.19734  | 1 |
| 25122 | C | 63.15900 | 78.47080 | 63.93090 | 606.96738   | 327.26839   | 591.34489   | 1 |
| 25123 | H | 63.17600 | 77.65880 | 63.21990 | 2075.93021  | 1599.28753  | -1732.86698 | 1 |
| 25124 | C | 62.29400 | 78.35380 | 65.04990 | 324.67526   | -801.51592  | 265.39230   | 1 |
| 25125 | H | 61.65200 | 77.48780 | 65.10490 | -1204.67534 | -2702.79375 | 1068.70587  | 1 |
| 25126 | C | 63.23200 | 80.41480 | 65.92290 | 645.76086   | -202.91495  | 601.66398   | 1 |
| 25127 | H | 63.26300 | 81.05080 | 66.79490 | -1816.94921 | 942.85338   | 2400.80517  | 1 |
| 25128 | C | 62.34100 | 79.34080 | 66.02690 | -647.29577  | 632.72424   | -170.73402  | 1 |
| 25129 | H | 61.57100 | 79.40480 | 66.78190 | -2437.31887 | 825.01055   | 1827.11800  | 1 |
| 25130 | C | 66.93500 | 80.04880 | 65.78090 | 185.51737   | -787.23867  | -405.11360  | 1 |
| 25131 | O | 66.63200 | 79.06580 | 66.49690 | 43.02157    | 685.26939   | -396.46884  | 1 |
| 25132 | N | 67.94200 | 79.96780 | 64.95690 | -157.12304  | -819.41831  | 101.50161   | 1 |
| 25133 | H | 68.28900 | 80.79880 | 64.52890 | 631.81715   | -2943.34618 | 889.07764   | 1 |
| 25134 | C | 68.76200 | 78.73780 | 64.76490 | -293.23029  | 419.11986   | 762.23257   | 1 |
| 25135 | H | 68.18600 | 77.88280 | 64.44390 | 883.51482   | -325.42108  | -2998.15999 | 1 |
| 25136 | C | 69.92700 | 79.06480 | 63.73590 | -29.97833   | 743.23518   | -536.57555  | 1 |
| 25137 | H | 70.79800 | 79.64880 | 64.10390 | 710.23353   | -279.83598  | -3048.93808 | 1 |
| 25138 | H | 69.47600 | 79.59580 | 62.87090 | -1776.60285 | 2484.17863  | 800.90759   | 1 |
| 25139 | C | 70.63800 | 77.74080 | 63.25190 | -577.75789  | -688.99587  | -158.42621  | 1 |
| 25140 | H | 69.81100 | 77.09780 | 62.88090 | 1459.71849  | 2646.72906  | -877.34153  | 1 |
| 25141 | H | 71.15600 | 77.18480 | 64.06190 | 1320.76984  | 2329.68180  | 1651.82632  | 1 |
| 25142 | C | 71.61500 | 77.98280 | 62.06390 | -183.57874  | 683.34146   | -587.44140  | 1 |
| 25143 | O | 71.30400 | 77.62580 | 60.88590 | 242.65659   | 755.72354   | -3.70144    | 1 |
| 25144 | N | 72.76000 | 78.65180 | 62.30290 | -767.02497  | 255.55323   | 279.40772   | 1 |
| 25145 | H | 73.02500 | 78.74080 | 63.26290 | -86.07817   | 1769.30667  | 2604.48148  | 1 |
| 25146 | H | 73.53400 | 78.74680 | 61.67590 | -1140.38143 | 2031.38641  | -2128.31023 | 1 |
| 25147 | C | 69.42700 | 78.31480 | 66.03490 | -560.53207  | -306.17687  | 656.15684   | 1 |
| 25148 | O | 69.49300 | 77.10380 | 66.30090 | 598.34213   | 158.15066   | 480.70878   | 1 |
| 25149 | N | 69.91900 | 79.24580 | 66.90290 | 435.18209   | -379.81905  | -605.43855  | 1 |
| 25150 | H | 69.86900 | 80.20080 | 66.61990 | 2586.19785  | 41.11701    | -1776.96585 | 1 |
| 25151 | C | 70.55000 | 78.86580 | 68.12590 | -792.89712  | -47.72209   | 462.42339   | 1 |
| 25152 | H | 71.32000 | 78.13480 | 67.92590 | -470.84950  | -2694.18667 | 1548.35292  | 1 |
| 25153 | C | 71.25000 | 80.09480 | 68.80590 | 188.39862   | 894.86349   | 14.70330    | 1 |
| 25154 | H | 71.58700 | 79.73080 | 69.79990 | 2737.90395  | 307.94611   | -1504.50617 | 1 |
| 25155 | H | 70.61000 | 80.97980 | 69.01290 | -3106.40486 | -542.35814  | -61.66605   | 1 |
| 25156 | N | 73.40700 | 81.20880 | 68.59690 | -218.00415  | 627.20489   | 531.09856   | 1 |
| 25157 | H | 73.43300 | 81.28880 | 69.59390 | -2049.35763 | 1016.00048  | 2170.68230  | 1 |
| 25158 | C | 72.35200 | 80.62980 | 68.01290 | -257.13638  | 569.33224   | -671.77808  | 1 |
| 25159 | C | 74.26900 | 81.55580 | 67.58590 | -164.56622  | -892.94456  | -4.45513    | 1 |
| 25160 | H | 75.19500 | 82.08080 | 67.81790 | 964.36751   | -214.85061  | 2983.57918  | 1 |
| 25161 | N | 73.76200 | 81.31280 | 66.40590 | 153.90073   | -146.19086  | 814.23736   | 1 |
| 25162 | C | 72.56300 | 80.67780 | 66.66290 | 675.42861   | 306.15047   | -521.55498  | 1 |

|       |   |          |          |          |             |             |             |   |
|-------|---|----------|----------|----------|-------------|-------------|-------------|---|
| 25163 | H | 72.02400 | 80.25780 | 65.82290 | 1189.81656  | -2020.43699 | -2086.34960 | 1 |
| 25164 | C | 69.64000 | 78.25780 | 69.17190 | -755.56318  | 359.94509   | 383.12254   | 1 |
| 25165 | O | 70.02400 | 77.39280 | 69.98090 | -542.31828  | -575.57332  | 46.31880    | 1 |
| 25166 | N | 68.39300 | 78.68480 | 69.17490 | 37.03482    | -838.75477  | 6.91137     | 1 |
| 25167 | H | 68.03400 | 79.38880 | 68.56790 | -2092.28871 | 1362.26491  | -1926.01792 | 1 |
| 25168 | C | 67.34400 | 78.10680 | 69.99190 | -494.55348  | 362.81404   | 683.20302   | 1 |
| 25169 | H | 67.88300 | 77.80780 | 70.87890 | 1815.76342  | -2245.06283 | -1231.15866 | 1 |
| 25170 | C | 66.26800 | 79.14380 | 70.38190 | 346.21217   | -751.55797  | -367.22305  | 1 |
| 25171 | H | 65.65100 | 79.44880 | 69.50990 | -1693.58618 | 2212.05637  | 1478.65630  | 1 |
| 25172 | C | 65.27500 | 78.49980 | 71.45990 | 810.35051   | 372.83942   | 160.12749   | 1 |
| 25173 | H | 65.85400 | 78.09680 | 72.31790 | -712.13120  | 2361.19444  | 1960.37271  | 1 |
| 25174 | H | 64.71300 | 77.63880 | 71.03790 | -1930.22039 | 1063.31385  | -2252.38262 | 1 |
| 25175 | H | 64.49100 | 79.19980 | 71.82090 | 958.24805   | 2014.32142  | 2219.50651  | 1 |
| 25176 | C | 66.88300 | 80.46080 | 70.88990 | 570.23939   | -635.35497  | 299.77828   | 1 |
| 25177 | H | 67.63100 | 80.93980 | 70.22190 | 1952.82010  | -583.24383  | -2387.35068 | 1 |
| 25178 | H | 67.49200 | 80.42380 | 71.81890 | -2319.38512 | 1816.46620  | 1127.13144  | 1 |
| 25179 | C | 65.83800 | 81.51180 | 71.27090 | -837.47420  | -341.87966  | -155.34711  | 1 |
| 25180 | H | 65.02200 | 81.53180 | 70.51890 | 1138.12320  | 792.83102   | -2818.84247 | 1 |
| 25181 | H | 65.46700 | 81.24480 | 72.28390 | 421.88059   | -2162.87154 | -2239.13990 | 1 |
| 25182 | H | 66.38100 | 82.47880 | 71.20490 | -2339.64765 | -1869.38214 | -975.77161  | 1 |
| 25183 | C | 66.76900 | 76.84280 | 69.45490 | -348.32388  | 614.17860   | -585.60059  | 1 |
| 25184 | O | 66.63400 | 75.81380 | 70.12590 | 94.07323    | -619.24440  | 474.58570   | 1 |
| 25185 | N | 66.31500 | 76.98580 | 68.18590 | 150.49793   | 832.75558   | 32.96124    | 1 |
| 25186 | H | 66.41500 | 77.87280 | 67.74190 | -2625.27939 | -320.82662  | -1715.64358 | 1 |
| 25187 | C | 65.74200 | 75.94280 | 67.37790 | 143.03148   | -218.12590  | -870.92860  | 1 |
| 25188 | H | 64.79300 | 75.72480 | 67.84490 | 324.30234   | 2449.14976  | 1952.28320  | 1 |
| 25189 | C | 65.55500 | 76.47180 | 65.99690 | 507.46353   | 749.68793   | 101.41441   | 1 |
| 25190 | H | 65.01800 | 77.43680 | 65.87590 | -2318.51205 | -1644.79931 | 1358.65944  | 1 |
| 25191 | H | 66.57200 | 76.68280 | 65.60290 | -2388.01253 | 1330.52391  | 1576.04284  | 1 |
| 25192 | C | 64.89500 | 75.49180 | 64.95890 | 689.88165   | -81.96528   | 579.19872   | 1 |
| 25193 | H | 65.50600 | 74.59380 | 64.72490 | 1867.85014  | -2493.78257 | 358.60383   | 1 |
| 25194 | H | 64.58300 | 76.09980 | 64.08290 | -1223.06154 | 2904.21073  | 154.55697   | 1 |
| 25195 | S | 63.30800 | 74.83580 | 65.62490 | 407.32895   | -312.54930  | 193.31094   | 1 |
| 25196 | C | 62.41500 | 74.52080 | 64.05090 | -732.40188  | 539.76075   | 152.14615   | 1 |
| 25197 | H | 61.57500 | 73.84080 | 64.30990 | 1885.30766  | -1394.65765 | -2085.09637 | 1 |
| 25198 | H | 63.09600 | 74.03980 | 63.31690 | 1010.02979  | 2213.89121  | 1995.94345  | 1 |
| 25199 | H | 62.01300 | 75.46580 | 63.62590 | -1991.76569 | 1155.70527  | 2156.46978  | 1 |
| 25200 | C | 66.62700 | 74.71180 | 67.33690 | 566.02024   | -547.63433  | -443.69196  | 1 |
| 25201 | O | 66.22400 | 73.62780 | 67.63590 | 480.69322   | -603.67269  | 120.57797   | 1 |
| 25202 | N | 67.94400 | 74.80680 | 67.04190 | 404.31455   | 222.55930   | 702.67172   | 1 |
| 25203 | H | 68.38100 | 75.69680 | 66.93390 | -1575.41415 | 1039.49512  | 2523.97734  | 1 |
| 25204 | C | 68.78100 | 73.65580 | 66.86890 | -605.26123  | 88.09302    | 682.88605   | 1 |
| 25205 | H | 68.16600 | 72.78480 | 66.69290 | 1488.80437  | 731.21489   | 2668.47951  | 1 |
| 25206 | C | 69.72500 | 73.87980 | 65.70990 | -184.38339  | -815.74160  | -356.41889  | 1 |
| 25207 | H | 70.51200 | 74.64080 | 65.89490 | 2162.54580  | 2261.53862  | -309.31514  | 1 |
| 25208 | C | 70.49500 | 72.60180 | 65.37190 | 369.83477   | 57.93103    | -830.26144  | 1 |
| 25209 | H | 71.16400 | 72.77680 | 64.50290 | -1839.35718 | -1920.56684 | 1681.26462  | 1 |
| 25210 | H | 71.16100 | 72.19280 | 66.16290 | -1703.04796 | -1030.51563 | -2442.48400 | 1 |
| 25211 | H | 69.76400 | 71.82480 | 65.06090 | 1331.36376  | 2675.36942  | -990.69164  | 1 |
| 25212 | C | 69.01400 | 74.34080 | 64.41390 | -823.17850  | -203.85299  | -354.48575  | 1 |
| 25213 | H | 68.75000 | 75.40280 | 64.60590 | -2516.38675 | 1881.30151  | 308.46887   | 1 |
| 25214 | H | 69.68600 | 74.31480 | 63.52990 | -1954.85134 | -2283.72458 | -933.28185  | 1 |
| 25215 | H | 68.06000 | 73.80680 | 64.21390 | 2318.63136  | 2122.17780  | 38.83395    | 1 |
| 25216 | C | 69.60800 | 73.28180 | 68.10590 | 724.50327   | -353.17356  | 406.48092   | 1 |
| 25217 | O | 69.97600 | 72.13480 | 68.30190 | -6.48210    | -546.09172  | -568.24874  | 1 |
| 25218 | N | 69.88600 | 74.25980 | 68.99390 | 355.11130   | -727.16783  | 212.01169   | 1 |
| 25219 | H | 69.62600 | 75.21180 | 68.84890 | 1747.25429  | -2604.01094 | -114.20069  | 1 |
| 25220 | C | 70.53000 | 73.95480 | 70.25190 | 890.15267   | -98.99091   | -124.15531  | 1 |
| 25221 | H | 70.92300 | 74.92080 | 70.53490 | -44.29553   | -2566.58964 | -1815.10344 | 1 |
| 25222 | H | 71.34000 | 73.25280 | 70.12490 | 2699.65002  | 1506.22475  | 557.66958   | 1 |
| 25223 | C | 69.62700 | 73.38380 | 71.24690 | -462.30739  | 567.03467   | 552.12983   | 1 |
| 25224 | O | 70.00600 | 72.62580 | 72.09890 | -193.25623  | -684.95282  | 337.23549   | 1 |

|       |   |          |          |          |             |             |             |   |
|-------|---|----------|----------|----------|-------------|-------------|-------------|---|
| 25225 | N | 68.35400 | 73.82580 | 71.22490 | 303.84146   | 607.84358   | 499.25097   | 1 |
| 25226 | H | 67.99000 | 74.44980 | 70.53890 | 1518.53857  | 633.74333   | -2679.06692 | 1 |
| 25227 | C | 67.42000 | 73.44580 | 72.28490 | 481.95988   | -659.95935  | -392.42077  | 1 |
| 25228 | H | 67.91200 | 72.76780 | 72.96590 | -209.37439  | -173.82877  | -3136.21574 | 1 |
| 25229 | C | 66.91300 | 74.68680 | 73.11490 | 277.41407   | 640.07114   | 586.05873   | 1 |
| 25230 | H | 66.12200 | 75.16780 | 72.50090 | 629.04919   | 1544.09082  | -2668.03940 | 1 |
| 25231 | H | 67.73000 | 75.39380 | 73.37290 | -1159.77067 | -1007.18160 | -2748.18601 | 1 |
| 25232 | C | 66.30000 | 74.35180 | 74.45690 | 522.88303   | 600.40511   | -439.91228  | 1 |
| 25233 | H | 65.60900 | 73.48980 | 74.34190 | -1410.89194 | 1895.47200  | 2082.55559  | 1 |
| 25234 | C | 67.30900 | 73.99080 | 75.58390 | -362.58732  | 193.49428   | -817.99640  | 1 |
| 25235 | H | 67.94500 | 74.88180 | 75.77790 | -2892.61340 | -571.10531  | 1112.20412  | 1 |
| 25236 | H | 67.87700 | 73.11080 | 75.21290 | 1548.61834  | 1909.14294  | 1958.98023  | 1 |
| 25237 | H | 66.84500 | 73.70680 | 76.55190 | 1694.49616  | -1756.73421 | 1978.16583  | 1 |
| 25238 | C | 65.46100 | 75.57580 | 74.92890 | -563.35646  | -707.59131  | 135.68800   | 1 |
| 25239 | H | 66.10500 | 76.45080 | 75.16190 | 2758.03685  | 963.74418   | 1153.38843  | 1 |
| 25240 | H | 64.93300 | 75.42080 | 75.89390 | -653.88616  | -1901.84253 | -2419.93456 | 1 |
| 25241 | H | 64.70300 | 75.83080 | 74.15790 | -733.05921  | 964.69196   | -2905.33347 | 1 |
| 25242 | C | 66.18200 | 72.68480 | 71.76890 | -558.52970  | 148.18115   | -712.57725  | 1 |
| 25243 | O | 65.92800 | 71.57280 | 72.17990 | 653.95009   | -85.13834   | 422.08078   | 1 |
| 25244 | N | 65.43300 | 73.25880 | 70.81490 | 343.55608   | -92.58705   | -762.55901  | 1 |
| 25245 | H | 65.71600 | 74.14280 | 70.44990 | -1163.42503 | 2422.63582  | 1645.51100  | 1 |
| 25246 | C | 64.18200 | 72.72380 | 70.30190 | -374.46427  | -586.85441  | 589.75481   | 1 |
| 25247 | H | 63.58800 | 72.69080 | 71.20390 | -2352.18933 | 1347.05807  | -1610.37968 | 1 |
| 25248 | C | 63.33000 | 73.64380 | 69.47090 | -889.17524  | -144.75981  | -180.35622  | 1 |
| 25249 | H | 63.72500 | 73.82480 | 68.44790 | -1271.23091 | -2859.32624 | -323.53179  | 1 |
| 25250 | C | 61.92300 | 73.14780 | 69.18390 | -170.71055  | 892.82657   | -116.98351  | 1 |
| 25251 | H | 61.36800 | 72.94880 | 70.12590 | 1861.32511  | 2276.00479  | 1113.35569  | 1 |
| 25252 | H | 61.30500 | 73.85280 | 68.58890 | -2070.89136 | 1102.10971  | -2105.49589 | 1 |
| 25253 | H | 61.96700 | 72.21880 | 68.57590 | 2155.72512  | -1228.19024 | -1923.78266 | 1 |
| 25254 | C | 63.22400 | 75.10980 | 70.05690 | -718.62982  | -198.66685  | 534.75858   | 1 |
| 25255 | H | 62.72800 | 74.93580 | 71.03590 | -1730.32376 | -2217.93762 | -1413.04642 | 1 |
| 25256 | H | 64.20300 | 75.58080 | 70.29190 | 66.74507    | -2988.46981 | -970.29498  | 1 |
| 25257 | C | 62.38800 | 76.05980 | 69.16990 | -910.04492  | -86.37760   | -98.35264   | 1 |
| 25258 | H | 62.69600 | 75.86280 | 68.12090 | -2203.35371 | -1315.82713 | -1826.20805 | 1 |
| 25259 | H | 62.61200 | 77.12580 | 69.38790 | -2967.06608 | 946.92023   | 504.47801   | 1 |
| 25260 | H | 61.29600 | 75.86780 | 69.23290 | 607.52105   | 231.86098   | -3075.47318 | 1 |
| 25261 | C | 64.17900 | 71.32780 | 69.69790 | 608.41724   | -497.19667  | 447.90782   | 1 |
| 25262 | O | 63.61300 | 70.39280 | 70.22690 | 665.77352   | 413.69124   | -49.84050   | 1 |
| 25263 | N | 64.84000 | 71.21580 | 68.46890 | 23.26596    | -686.29764  | -486.31440  | 1 |
| 25264 | H | 65.25800 | 71.95580 | 67.94690 | 2826.50967  | -1121.17158 | 771.95129   | 1 |
| 25265 | C | 64.86800 | 69.95580 | 67.69390 | 591.19307   | -660.26052  | 174.57177   | 1 |
| 25266 | H | 63.81200 | 69.72680 | 67.68790 | -2273.18201 | -1201.80999 | 1818.09324  | 1 |
| 25267 | C | 65.36600 | 70.19380 | 66.22890 | -483.83997  | 754.89336   | 204.77972   | 1 |
| 25268 | H | 66.39600 | 70.60980 | 66.18990 | 1939.75970  | -2072.16207 | 1335.46095  | 1 |
| 25269 | H | 65.22500 | 69.21180 | 65.72890 | -1111.15153 | -1699.49992 | 2401.12144  | 1 |
| 25270 | C | 64.53200 | 71.18780 | 65.44590 | 637.31819   | -520.43286  | -373.01987  | 1 |
| 25271 | H | 64.74800 | 72.23680 | 65.73890 | 1025.98501  | -427.56025  | -2940.46084 | 1 |
| 25272 | C | 64.82900 | 71.16480 | 63.94490 | -202.32466  | 501.12193   | 739.32363   | 1 |
| 25273 | H | 64.37600 | 72.06480 | 63.47790 | 1021.29033  | -2824.30811 | -910.15096  | 1 |
| 25274 | H | 64.51100 | 70.21780 | 63.45690 | -1796.97869 | 1877.96864  | -1789.41669 | 1 |
| 25275 | H | 65.92000 | 71.13280 | 63.73590 | -2328.62841 | 435.95955   | 2079.76066  | 1 |
| 25276 | C | 63.01800 | 70.99680 | 65.50990 | 328.84530   | 468.07369   | -710.26629  | 1 |
| 25277 | H | 62.67500 | 69.94880 | 65.36790 | -2178.15872 | -2094.92540 | 882.41572   | 1 |
| 25278 | H | 62.52000 | 71.27080 | 66.46390 | 1278.89592  | -1968.60660 | 2084.62357  | 1 |
| 25279 | H | 62.58300 | 71.55980 | 64.65590 | 924.31313   | 2313.69340  | -1923.70129 | 1 |
| 25280 | C | 65.59900 | 68.81180 | 68.33190 | -494.70155  | 410.04553   | -657.61829  | 1 |
| 25281 | O | 65.01500 | 67.77580 | 68.08990 | 44.43369    | 757.13622   | -235.04732  | 1 |
| 25282 | N | 66.67700 | 68.82680 | 69.08290 | 709.14638   | -412.54576  | 158.52437   | 1 |
| 25283 | C | 67.51000 | 69.99280 | 69.37990 | -321.02388  | -694.84543  | 492.07167   | 1 |
| 25284 | H | 67.00000 | 70.92280 | 69.70990 | -1125.30740 | 2944.24355  | 44.27198    | 1 |
| 25285 | H | 68.07300 | 70.27080 | 68.46290 | 336.48408   | 2910.91108  | -1156.77297 | 1 |
| 25286 | C | 67.20100 | 67.63480 | 69.73590 | -541.32715  | 713.59851   | 201.67861   | 1 |

|       |   |          |          |          |             |             |             |   |
|-------|---|----------|----------|----------|-------------|-------------|-------------|---|
| 25287 | H | 67.07000 | 66.78880 | 69.07690 | -864.49203  | 3027.86277  | 135.81839   | 1 |
| 25288 | C | 68.66500 | 68.04580 | 70.17490 | 474.53261   | 395.09626   | 664.78028   | 1 |
| 25289 | H | 69.12400 | 67.49880 | 71.02590 | -2147.45487 | -1999.86567 | 1136.60055  | 1 |
| 25290 | H | 69.38400 | 67.82280 | 69.35690 | 665.81493   | 2145.02501  | 2201.29420  | 1 |
| 25291 | C | 68.55100 | 69.51580 | 70.42490 | -703.07688  | -403.16392  | -428.72291  | 1 |
| 25292 | H | 69.49600 | 70.06980 | 70.24090 | -969.60565  | 2612.90599  | 1468.35788  | 1 |
| 25293 | H | 68.18300 | 69.79180 | 71.43690 | -2268.10015 | -1923.87449 | -1037.29430 | 1 |
| 25294 | C | 66.39300 | 67.26680 | 71.00390 | -460.22454  | 742.80488   | 277.12409   | 1 |
| 25295 | O | 66.32900 | 66.10480 | 71.31490 | -143.79429  | 642.64690   | 438.70699   | 1 |
| 25296 | N | 65.84600 | 68.26680 | 71.68190 | 518.76376   | 647.47320   | -148.97223  | 1 |
| 25297 | H | 65.99600 | 69.19580 | 71.35290 | 2323.79627  | 686.95939   | -2002.31293 | 1 |
| 25298 | C | 64.95700 | 68.17180 | 72.79490 | 393.67741   | -675.38736  | 458.18254   | 1 |
| 25299 | H | 64.63100 | 69.17880 | 73.00590 | 2050.39186  | 1122.31898  | 2098.92922  | 1 |
| 25300 | H | 65.55800 | 67.86280 | 73.63690 | 1727.63420  | 97.06101    | -2626.58938 | 1 |
| 25301 | C | 63.76000 | 67.32980 | 72.57190 | -16.15531   | -836.72768  | -359.42025  | 1 |
| 25302 | O | 63.42600 | 66.47880 | 73.44190 | -442.74268  | -215.22819  | -623.63315  | 1 |
| 25303 | N | 63.06200 | 67.53680 | 71.42990 | 760.01015   | 163.12671   | 313.22686   | 1 |
| 25304 | H | 63.28600 | 68.31780 | 70.85290 | -1868.34063 | 1372.32815  | 2132.69438  | 1 |
| 25305 | C | 61.89500 | 66.79280 | 71.11990 | 127.61219   | -580.96582  | 685.46881   | 1 |
| 25306 | H | 61.24900 | 66.80980 | 71.98490 | -1369.68121 | -2720.16075 | -794.36821  | 1 |
| 25307 | C | 61.08100 | 67.31480 | 69.93990 | 586.47292   | -685.33796  | -77.70395   | 1 |
| 25308 | H | 60.31700 | 66.55780 | 69.66190 | 1187.72408  | 2580.89911  | -1353.08395 | 1 |
| 25309 | C | 60.20100 | 68.50380 | 70.43690 | -68.98729   | -705.54588  | 569.86940   | 1 |
| 25310 | H | 59.64400 | 68.05180 | 71.28490 | 1657.94306  | 1186.21215  | 2391.77831  | 1 |
| 25311 | H | 59.37700 | 68.71880 | 69.72290 | -672.71707  | 3057.52386  | -352.73998  | 1 |
| 25312 | H | 60.89200 | 69.32080 | 70.73390 | 1489.79135  | -1900.50530 | -2010.09223 | 1 |
| 25313 | C | 61.97000 | 67.64580 | 68.73790 | -11.14916   | 824.00639   | -399.73436  | 1 |
| 25314 | H | 62.59600 | 68.53580 | 68.96190 | -12.33331   | -233.10734  | 3135.47366  | 1 |
| 25315 | H | 62.67200 | 66.81080 | 68.52690 | 1504.73905  | -444.53988  | 2720.01118  | 1 |
| 25316 | C | 61.18200 | 67.81180 | 67.43490 | -836.13465  | -316.02936  | -207.71407  | 1 |
| 25317 | H | 61.83300 | 68.03080 | 66.56190 | 2978.93554  | -733.17551  | -660.43712  | 1 |
| 25318 | H | 60.42100 | 68.61980 | 67.48290 | 1463.84887  | 618.99150   | 2710.79834  | 1 |
| 25319 | H | 60.54100 | 66.91780 | 67.27590 | 1961.95166  | -2309.78589 | 814.63559   | 1 |
| 25320 | C | 62.10100 | 65.27780 | 70.85890 | 536.24226   | -408.84263  | 603.55484   | 1 |
| 25321 | O | 61.32600 | 64.41780 | 71.31790 | -96.29828   | -193.75489  | -762.56759  | 1 |
| 25322 | N | 63.17400 | 64.90480 | 70.18990 | -123.83526  | 378.17960   | 743.85218   | 1 |
| 25323 | H | 63.73500 | 65.66780 | 69.88090 | 727.85591   | -2820.32900 | -1180.35995 | 1 |
| 25324 | C | 63.66700 | 63.56780 | 70.06490 | -596.17947  | 642.64117   | -277.08099  | 1 |
| 25325 | H | 62.88200 | 62.91180 | 69.71890 | 1861.93921  | 2190.53873  | -1278.30066 | 1 |
| 25326 | C | 64.85000 | 63.46980 | 69.11790 | 66.72759    | -743.90270  | 512.52703   | 1 |
| 25327 | H | 65.76400 | 63.92480 | 69.55590 | -67.35601   | -1126.57123 | -2939.82582 | 1 |
| 25328 | C | 65.11100 | 61.98380 | 68.79790 | 581.98930   | -564.81118  | -407.31289  | 1 |
| 25329 | H | 65.53400 | 61.39180 | 69.63790 | 2123.40360  | 1690.94945  | 1581.09418  | 1 |
| 25330 | H | 65.93800 | 61.98080 | 68.05590 | 862.69286   | -2719.99370 | 1306.64822  | 1 |
| 25331 | H | 64.16200 | 61.56580 | 68.39990 | -1390.04854 | -1783.68373 | -2193.03110 | 1 |
| 25332 | C | 64.66600 | 64.18280 | 67.82090 | -518.92918  | 749.95530   | 110.93793   | 1 |
| 25333 | H | 64.71900 | 65.29080 | 67.87690 | 1580.94029  | -184.48722  | -2712.95926 | 1 |
| 25334 | H | 65.40800 | 63.84580 | 67.06590 | 1793.57735  | -1931.01503 | 1701.33638  | 1 |
| 25335 | H | 63.66800 | 64.06080 | 67.34590 | 1340.76477  | 2036.46805  | -1991.66304 | 1 |
| 25336 | C | 64.06000 | 63.02280 | 71.47490 | -7.51084    | 754.87586   | -519.77062  | 1 |
| 25337 | O | 63.68600 | 61.86980 | 71.71690 | 709.25250   | -90.97897   | -326.85921  | 1 |
| 25338 | N | 64.69800 | 63.81880 | 72.35490 | 545.63686   | -395.88356  | 495.90340   | 1 |
| 25339 | H | 64.92200 | 64.75380 | 72.09190 | 1059.52783  | 2434.15084  | -1692.27898 | 1 |
| 25340 | C | 64.99500 | 63.39580 | 73.70990 | 78.96657    | 857.57817   | -308.32330  | 1 |
| 25341 | H | 65.58600 | 62.49180 | 73.72390 | -1383.71628 | -2171.90976 | -1813.55464 | 1 |
| 25342 | C | 65.90700 | 64.41680 | 74.47290 | -553.93910  | -721.74333  | 77.72866    | 1 |
| 25343 | H | 65.40800 | 65.40280 | 74.35890 | -804.24724  | -3002.02377 | 482.90058   | 1 |
| 25344 | C | 65.96600 | 64.10380 | 75.97690 | 116.78843   | 469.48150   | 768.62941   | 1 |
| 25345 | H | 64.99500 | 64.04380 | 76.51390 | 1060.08381  | 1359.22657  | -2634.66321 | 1 |
| 25346 | H | 66.52400 | 63.15380 | 76.11390 | 723.70093   | -2506.91396 | 1749.17447  | 1 |
| 25347 | H | 66.62700 | 64.80880 | 76.52590 | -2162.51048 | 217.29979   | 2275.06557  | 1 |
| 25348 | C | 67.28900 | 64.30380 | 73.77390 | 744.16528   | -455.10374  | -250.48438  | 1 |

|       |   |          |          |          |             |             |             |   |
|-------|---|----------|----------|----------|-------------|-------------|-------------|---|
| 25349 | H | 67.15200 | 64.24880 | 72.67190 | -425.77974  | -1906.07702 | -2470.01860 | 1 |
| 25350 | H | 67.80800 | 63.36280 | 74.05590 | 1286.96860  | -2511.08408 | -1387.76591 | 1 |
| 25351 | C | 68.16400 | 65.49680 | 74.02690 | -399.93473  | 465.53731   | -683.56255  | 1 |
| 25352 | H | 67.70100 | 66.33980 | 73.47090 | 2080.81159  | 1739.17207  | -1594.10860 | 1 |
| 25353 | H | 68.23500 | 65.67980 | 75.11990 | 2817.57021  | -546.86014  | 1272.04864  | 1 |
| 25354 | H | 69.22100 | 65.29580 | 73.74790 | 1920.60780  | -1483.18315 | 1990.46288  | 1 |
| 25355 | C | 63.73700 | 63.05580 | 74.48490 | 488.45607   | -497.74511  | -586.06088  | 1 |
| 25356 | O | 63.59500 | 61.94380 | 75.01890 | -737.02026  | 92.16497    | 276.73800   | 1 |
| 25357 | N | 62.71100 | 63.97680 | 74.42690 | -393.51217  | -499.39871  | -561.16694  | 1 |
| 25358 | H | 62.97700 | 64.85880 | 74.04390 | 1945.60809  | -1150.36670 | -2186.10609 | 1 |
| 25359 | C | 61.40000 | 63.89880 | 75.00690 | -70.70251   | 688.68512   | 592.05453   | 1 |
| 25360 | H | 61.51400 | 63.67880 | 76.05790 | -1955.87549 | 1538.79440  | -1933.39315 | 1 |
| 25361 | C | 60.66100 | 65.21180 | 74.74190 | 517.43717   | 727.48888   | -177.47926  | 1 |
| 25362 | H | 60.92700 | 65.60280 | 73.73690 | -1880.25493 | 1773.58447  | -1803.34982 | 1 |
| 25363 | H | 59.56300 | 65.07380 | 74.83190 | -3112.41882 | 304.02274   | -391.29498  | 1 |
| 25364 | C | 61.13800 | 66.33980 | 75.75290 | -531.48320  | -297.16207  | 680.15232   | 1 |
| 25365 | H | 62.24600 | 66.39680 | 75.69090 | -1301.40630 | 1076.75184  | -2659.62240 | 1 |
| 25366 | C | 60.60400 | 67.72780 | 75.32790 | 554.27240   | 572.37731   | -439.24426  | 1 |
| 25367 | H | 60.92600 | 68.06380 | 74.31990 | 2171.18571  | 890.42568   | 2088.68801  | 1 |
| 25368 | H | 59.49500 | 67.79180 | 75.33190 | -1723.26691 | -2186.53689 | -1471.95069 | 1 |
| 25369 | H | 60.93400 | 68.51280 | 76.04190 | 933.77526   | 2087.95228  | -2159.88955 | 1 |
| 25370 | C | 60.79400 | 66.15080 | 77.20290 | 788.84956   | -219.39317  | -394.05462  | 1 |
| 25371 | H | 61.31900 | 65.24480 | 77.57390 | -585.63575  | 1168.86331  | -2865.25287 | 1 |
| 25372 | H | 60.95400 | 67.10180 | 77.75390 | -2959.25444 | 506.47122   | 953.12281   | 1 |
| 25373 | H | 59.72800 | 65.90580 | 77.39990 | 1748.25453  | 232.66494   | 2600.24733  | 1 |
| 25374 | C | 60.68300 | 62.63780 | 74.55090 | -427.75404  | 681.62713   | 431.98247   | 1 |
| 25375 | O | 60.15800 | 61.87580 | 75.38690 | 503.14428   | 598.19819   | -97.94068   | 1 |
| 25376 | N | 60.66600 | 62.35580 | 73.27790 | -577.70782  | 391.22150   | 479.29382   | 1 |
| 25377 | H | 61.20100 | 62.96480 | 72.69590 | 1744.47096  | -2012.26006 | -1670.52476 | 1 |
| 25378 | C | 60.10100 | 61.11180 | 72.65490 | 140.90697   | 301.04026   | -852.75534  | 1 |
| 25379 | H | 59.04500 | 61.08180 | 72.87990 | 773.42778   | -2128.58558 | 2176.82642  | 1 |
| 25380 | C | 60.12500 | 61.11180 | 71.07890 | -87.20908   | 643.23334   | 639.62247   | 1 |
| 25381 | H | 59.92400 | 60.10280 | 70.65790 | 2235.18739  | -2095.63068 | 684.66122   | 1 |
| 25382 | H | 61.15700 | 61.42380 | 70.81190 | 1729.03814  | -2484.60271 | -842.09458  | 1 |
| 25383 | O | 59.30200 | 62.05380 | 70.45490 | -360.32839  | -46.00652   | 700.71962   | 1 |
| 25384 | H | 58.40200 | 61.85880 | 70.72590 | -977.88441  | 2987.43297  | -209.18439  | 1 |
| 25385 | C | 60.70300 | 59.78680 | 73.11590 | 591.33585   | -629.86168  | 272.96314   | 1 |
| 25386 | O | 59.91400 | 58.83680 | 73.29290 | -342.32257  | -9.17415    | 709.12639   | 1 |
| 25387 | N | 62.04400 | 59.67780 | 73.24190 | 210.26956   | -353.23633  | -740.02479  | 1 |
| 25388 | H | 62.55400 | 60.48180 | 72.94690 | -1118.55459 | -2281.51299 | -1860.58936 | 1 |
| 25389 | C | 62.74300 | 58.45280 | 73.65390 | -417.34587  | -247.34127  | 768.36831   | 1 |
| 25390 | H | 62.41300 | 57.69680 | 72.95690 | -622.77630  | 2900.95223  | -1060.43901 | 1 |
| 25391 | C | 64.26900 | 58.73380 | 73.87290 | -733.56851  | 261.43838   | 476.45738   | 1 |
| 25392 | H | 64.76100 | 57.78280 | 74.17290 | 897.14896   | 933.18841   | -2873.12404 | 1 |
| 25393 | H | 64.35500 | 59.49580 | 74.67690 | -1456.98083 | -2620.25625 | 950.61363   | 1 |
| 25394 | S | 64.98900 | 59.21680 | 72.26490 | -199.23621  | -73.74322   | 511.45803   | 1 |
| 25395 | H | 64.69800 | 60.50780 | 72.31790 | -686.62890  | -1450.37428 | 2700.74460  | 1 |
| 25396 | C | 62.19100 | 57.92080 | 74.99590 | 112.65185   | 740.67851   | -526.19692  | 1 |
| 25397 | O | 61.86400 | 56.75380 | 75.16990 | 178.67799   | 594.22236   | 482.25813   | 1 |
| 25398 | N | 62.14600 | 58.80680 | 76.01990 | 41.66216    | 805.73763   | -255.60349  | 1 |
| 25399 | H | 62.48500 | 59.73680 | 75.89890 | -679.08358  | -2326.64101 | -2011.41013 | 1 |
| 25400 | C | 61.69700 | 58.38880 | 77.38590 | -744.60959  | -479.04057  | -234.94274  | 1 |
| 25401 | H | 62.07100 | 57.41880 | 77.67990 | -2649.38099 | 1517.77581  | 764.80955   | 1 |
| 25402 | C | 62.30100 | 59.29480 | 78.44190 | 754.05497   | 468.38295   | -200.48667  | 1 |
| 25403 | H | 61.96400 | 58.85080 | 79.40290 | 2402.98963  | 1320.73956  | -1542.48239 | 1 |
| 25404 | H | 61.85500 | 60.29480 | 78.25690 | 2779.28262  | 1101.91177  | 964.42472   | 1 |
| 25405 | C | 63.83700 | 59.35180 | 78.28390 | -806.64473  | 141.13776   | 402.51307   | 1 |
| 25406 | C | 64.38900 | 60.56680 | 77.83490 | 566.12223   | 536.25287   | -473.78064  | 1 |
| 25407 | H | 63.80300 | 61.43580 | 77.57490 | 897.30392   | 2307.92115  | 1934.64121  | 1 |
| 25408 | C | 65.78200 | 60.60780 | 77.65190 | -41.60776   | -596.86470  | -693.38240  | 1 |
| 25409 | H | 66.16600 | 61.51380 | 77.20790 | -908.95382  | 1354.21544  | 2686.79991  | 1 |
| 25410 | C | 66.60500 | 59.53580 | 77.92290 | -820.78401  | -16.32267   | -410.49309  | 1 |

|       |   |          |          |          |             |             |             |   |
|-------|---|----------|----------|----------|-------------|-------------|-------------|---|
| 25411 | O | 67.97300 | 59.58680 | 77.66090 | -657.14196  | -390.63375  | 201.56302   | 1 |
| 25412 | H | 68.15200 | 60.22280 | 76.96390 | 1756.12133  | -2575.75318 | -405.88925  | 1 |
| 25413 | C | 64.61200 | 58.27280 | 78.57190 | -389.04374  | 437.27601   | 694.91365   | 1 |
| 25414 | H | 64.11800 | 57.43480 | 79.04090 | 2257.40182  | -996.58226  | 1941.85223  | 1 |
| 25415 | C | 66.01500 | 58.33080 | 78.34490 | -480.10183  | -367.84540  | 677.96337   | 1 |
| 25416 | H | 66.62900 | 57.44280 | 78.37690 | 955.45519   | -2912.16914 | -711.08916  | 1 |
| 25417 | C | 60.22600 | 58.36380 | 77.44290 | 37.05971    | 834.47293   | -370.28863  | 1 |
| 25418 | O | 59.63100 | 57.65280 | 78.25890 | -325.84923  | 525.89385   | -497.64653  | 1 |
| 25419 | N | 59.50100 | 59.13780 | 76.59090 | 184.80035   | -563.00154  | -604.34886  | 1 |
| 25420 | H | 59.91300 | 59.78880 | 75.95890 | -2207.73499 | 1692.09611  | 1472.51889  | 1 |
| 25421 | C | 58.09000 | 58.99580 | 76.38390 | -905.51445  | -95.86793   | 93.04053    | 1 |
| 25422 | H | 57.66200 | 59.15280 | 77.36290 | 1909.48368  | -2197.36945 | 1183.75963  | 1 |
| 25423 | C | 57.49900 | 60.00280 | 75.39790 | -8.27331    | -815.80633  | 402.82954   | 1 |
| 25424 | H | 57.89000 | 60.99280 | 75.71490 | -1937.22446 | -1895.93125 | -1605.40177 | 1 |
| 25425 | H | 57.90100 | 59.81880 | 74.37790 | 726.15011   | -3019.77396 | 486.06933   | 1 |
| 25426 | S | 55.72300 | 60.08580 | 75.22290 | -13.04035   | -298.18373  | 468.12165   | 1 |
| 25427 | H | 55.62900 | 59.09380 | 74.34990 | -2342.28634 | 1913.77637  | 875.60362   | 1 |
| 25428 | C | 57.68600 | 57.57480 | 75.97290 | -729.71906  | 212.29388   | -514.16553  | 1 |
| 25429 | O | 56.79800 | 56.98380 | 76.56690 | -679.06989  | -371.53951  | -176.30881  | 1 |
| 25430 | N | 58.36000 | 56.95880 | 75.04090 | 8.09640     | -814.43915  | -224.38680  | 1 |
| 25431 | H | 58.91300 | 57.53180 | 74.44090 | -732.18158  | 2446.19823  | 1836.04905  | 1 |
| 25432 | C | 58.10400 | 55.59180 | 74.61790 | -594.94755  | 131.40572   | 676.57127   | 1 |
| 25433 | H | 57.05600 | 55.50580 | 74.37190 | 1975.86784  | -2440.28998 | -144.62029  | 1 |
| 25434 | C | 58.88400 | 55.19280 | 73.32890 | 621.96808   | -582.46387  | -319.45686  | 1 |
| 25435 | H | 59.96700 | 55.39580 | 73.47690 | -2097.39931 | 1787.72556  | -1531.28666 | 1 |
| 25436 | C | 58.75700 | 53.70380 | 73.07890 | -709.09967  | 109.95400   | 561.75738   | 1 |
| 25437 | H | 59.12800 | 53.48880 | 72.05390 | 2477.75423  | 1406.57395  | -1334.67679 | 1 |
| 25438 | H | 59.29400 | 53.04680 | 73.79590 | 2779.83153  | -1394.44616 | -455.20003  | 1 |
| 25439 | H | 57.68400 | 53.41180 | 73.07590 | 2815.54171  | 1396.73836  | 15.96069    | 1 |
| 25440 | C | 58.35700 | 55.95380 | 72.10590 | 620.58163   | -62.81054   | -665.90660  | 1 |
| 25441 | H | 57.42400 | 55.51380 | 71.69390 | 1378.61682  | 2826.82428  | -66.91023   | 1 |
| 25442 | H | 58.03500 | 56.99480 | 72.32590 | 2387.24290  | 2044.85179  | 36.63227    | 1 |
| 25443 | C | 59.39500 | 56.11680 | 70.97890 | 692.04483   | -525.24606  | -264.77266  | 1 |
| 25444 | H | 59.93700 | 55.16780 | 70.78090 | 1904.86729  | -1421.95594 | 2048.55396  | 1 |
| 25445 | H | 59.03200 | 56.60880 | 70.05190 | 1915.49614  | 180.77640   | 2479.99205  | 1 |
| 25446 | H | 60.04100 | 56.97780 | 71.25290 | 2521.12411  | 1582.07890  | 1004.92652  | 1 |
| 25447 | C | 58.48800 | 54.59080 | 75.69290 | -676.48537  | 35.99850    | -620.26861  | 1 |
| 25448 | O | 57.74000 | 53.60180 | 75.90990 | -481.87803  | -400.26944  | -490.12836  | 1 |
| 25449 | N | 59.64700 | 54.78980 | 76.37390 | -598.07996  | -518.47477  | -306.02065  | 1 |
| 25450 | H | 59.99800 | 55.71780 | 76.27190 | -2804.99307 | -1160.15125 | 832.74280   | 1 |
| 25451 | C | 60.34200 | 53.84080 | 77.29690 | -468.98440  | -631.94864  | -470.32158  | 1 |
| 25452 | H | 60.57700 | 52.90980 | 76.80290 | 2101.58109  | -1398.49546 | -1881.20471 | 1 |
| 25453 | C | 61.81500 | 54.30380 | 77.78890 | 560.75104   | -478.72040  | 526.35275   | 1 |
| 25454 | H | 61.72400 | 55.38780 | 78.01790 | -183.68794  | 2661.78188  | -1673.95999 | 1 |
| 25455 | C | 62.20200 | 53.43880 | 79.01190 | -738.27168  | 495.20263   | 203.78036   | 1 |
| 25456 | H | 62.13300 | 52.35980 | 78.75490 | 1742.20933  | 1919.14072  | 1772.74128  | 1 |
| 25457 | H | 63.25500 | 53.63080 | 79.30990 | -2457.50379 | -1863.42726 | -640.01204  | 1 |
| 25458 | H | 61.54700 | 53.49980 | 79.90690 | -3076.46603 | 509.65076   | -439.93271  | 1 |
| 25459 | C | 62.82100 | 54.15980 | 76.66190 | -538.83804  | 393.54338   | -631.96227  | 1 |
| 25460 | H | 62.32800 | 54.42880 | 75.70290 | 2531.60287  | -1815.59591 | -421.05835  | 1 |
| 25461 | H | 63.23200 | 53.13380 | 76.55490 | 634.79353   | -2995.48303 | -724.70037  | 1 |
| 25462 | C | 64.08400 | 54.91880 | 76.90390 | -184.13807  | 853.32626   | 260.59174   | 1 |
| 25463 | H | 63.83200 | 55.97580 | 77.13390 | -2166.32618 | -237.19619  | -2279.15350 | 1 |
| 25464 | H | 64.72100 | 54.56480 | 77.74290 | -684.98562  | -2936.49469 | -906.20132  | 1 |
| 25465 | H | 64.80100 | 54.81880 | 76.06190 | -106.40325  | -379.24058  | -3128.92930 | 1 |
| 25466 | C | 59.39500 | 53.38480 | 78.45890 | 362.73728   | -772.25232  | 313.20819   | 1 |
| 25467 | O | 59.23700 | 52.19880 | 78.85690 | -133.38834  | -582.76836  | -524.39172  | 1 |
| 25468 | N | 58.74100 | 54.39080 | 79.02790 | -582.71053  | -498.63172  | 352.20370   | 1 |
| 25469 | H | 58.82900 | 55.33080 | 78.70690 | -2468.04052 | 1949.32524  | 131.01141   | 1 |
| 25470 | C | 57.95400 | 54.24980 | 80.20890 | 550.60524   | -540.01590  | 479.40228   | 1 |
| 25471 | H | 58.55600 | 53.66780 | 80.89190 | -1938.31132 | 1680.24537  | 1815.99635  | 1 |
| 25472 | C | 57.67700 | 55.58980 | 80.88790 | -547.28339  | 522.86882   | -514.62002  | 1 |

|       |   |          |          |          |             |             |             |   |
|-------|---|----------|----------|----------|-------------|-------------|-------------|---|
| 25473 | H | 57.07200 | 55.33580 | 81.78590 | 2314.41723  | -1889.26436 | -990.52187  | 1 |
| 25474 | C | 58.98100 | 56.16480 | 81.44990 | 632.50835   | 579.78525   | 295.24144   | 1 |
| 25475 | H | 58.79600 | 57.04280 | 82.10490 | 2072.59196  | -1605.40223 | 1733.43787  | 1 |
| 25476 | H | 59.55900 | 55.40180 | 82.01390 | -3029.52462 | 728.38312   | -452.09881  | 1 |
| 25477 | H | 59.56000 | 56.60080 | 80.60790 | 489.73541   | -3015.18638 | 751.05713   | 1 |
| 25478 | C | 56.89100 | 56.57580 | 80.03690 | -738.17933  | -69.24703   | -539.44626  | 1 |
| 25479 | H | 57.59600 | 57.08480 | 79.34490 | -2014.10563 | 2110.85900  | 1175.55937  | 1 |
| 25480 | H | 56.23000 | 55.99780 | 79.35490 | -1758.04412 | 1809.40399  | 1876.36966  | 1 |
| 25481 | C | 56.10400 | 57.58680 | 80.84990 | 612.09942   | 72.72418    | 665.19675   | 1 |
| 25482 | H | 55.43400 | 57.04080 | 81.54790 | 2508.33937  | 1884.31890  | 185.24347   | 1 |
| 25483 | H | 55.39900 | 58.12580 | 80.18290 | -15.38957   | 59.75542    | -3149.29738 | 1 |
| 25484 | H | 56.80600 | 58.30380 | 81.32690 | 2076.32778  | -1737.11946 | 1597.65195  | 1 |
| 25485 | C | 56.78400 | 53.35880 | 80.02290 | -745.79591  | 510.06983   | -136.26126  | 1 |
| 25486 | O | 56.23600 | 52.76380 | 80.96890 | 586.46816   | 523.06369   | 37.22129    | 1 |
| 25487 | N | 56.27700 | 53.27880 | 78.79190 | 10.70433    | 587.60088   | 599.13778   | 1 |
| 25488 | H | 56.73500 | 53.86180 | 78.12490 | 943.23205   | -1979.60866 | 2249.71654  | 1 |
| 25489 | C | 55.13000 | 52.49880 | 78.47790 | -298.45793  | 790.62413   | -348.10402  | 1 |
| 25490 | H | 54.47900 | 52.42980 | 79.33690 | 841.10892   | 1699.95694  | 2502.69370  | 1 |
| 25491 | C | 54.26500 | 53.22480 | 77.40490 | 751.08208   | 510.32211   | -46.41126   | 1 |
| 25492 | H | 53.70300 | 54.02080 | 77.93790 | -1912.50921 | -2486.88140 | 263.83563   | 1 |
| 25493 | H | 53.51500 | 52.55080 | 76.93890 | -2514.75430 | -1579.36864 | 1041.97877  | 1 |
| 25494 | O | 55.06400 | 53.77880 | 76.36790 | -403.81631  | 635.29029   | -248.82320  | 1 |
| 25495 | H | 55.77900 | 53.17280 | 76.16290 | 123.48385   | 3123.82324  | 345.40259   | 1 |
| 25496 | C | 55.34500 | 51.08080 | 78.13790 | 727.16410   | -447.36364  | 309.39236   | 1 |
| 25497 | O | 54.38400 | 50.33480 | 77.74290 | 440.45538   | -652.77722  | -55.99166   | 1 |
| 25498 | N | 56.56600 | 50.60580 | 78.30390 | -110.12572  | -766.71739  | 331.33620   | 1 |
| 25499 | H | 57.18900 | 51.23380 | 78.76590 | -206.09660  | 1793.80309  | -2582.87050 | 1 |
| 25500 | C | 56.93000 | 49.22180 | 78.07690 | 647.42298   | -640.49008  | -4.87502    | 1 |
| 25501 | H | 56.17700 | 48.60980 | 78.54990 | -1685.57563 | -2009.33410 | 1733.18203  | 1 |
| 25502 | C | 56.90500 | 48.80080 | 76.58590 | 547.78093   | 503.05454   | 517.03139   | 1 |
| 25503 | H | 55.84500 | 48.89880 | 76.26890 | -1916.10626 | 2467.70100  | 375.89510   | 1 |
| 25504 | H | 57.16400 | 47.73180 | 76.43290 | 1243.65199  | 2688.00758  | 1050.04261  | 1 |
| 25505 | C | 57.61500 | 49.74880 | 75.55590 | -527.85145  | 657.26409   | 345.25500   | 1 |
| 25506 | H | 58.66700 | 49.92380 | 75.86590 | 50.75156    | -3096.96792 | -557.03030  | 1 |
| 25507 | H | 57.07500 | 50.71580 | 75.64090 | 810.84637   | 1730.29012  | -2505.59484 | 1 |
| 25508 | C | 57.50000 | 49.15880 | 74.14190 | -223.35265  | 495.37736   | 726.09066   | 1 |
| 25509 | H | 58.09000 | 49.79580 | 73.44890 | -2574.82200 | -1810.75131 | 51.97719    | 1 |
| 25510 | H | 58.01800 | 48.17680 | 74.12790 | 2255.03114  | 444.43995   | -2153.50318 | 1 |
| 25511 | C | 56.08000 | 49.16180 | 73.63190 | 566.76327   | -673.03576  | 220.94543   | 1 |
| 25512 | H | 55.39300 | 48.50380 | 74.20690 | 1469.41986  | -1730.98496 | -2182.57190 | 1 |
| 25513 | H | 55.70700 | 50.20880 | 73.64390 | 2310.54238  | 135.47811   | -2134.07279 | 1 |
| 25514 | N | 56.00100 | 48.71280 | 72.26790 | -368.51878  | -341.35732  | -687.30492  | 1 |
| 25515 | H | 56.26500 | 49.45680 | 71.59090 | 161.08552   | -2616.85465 | 1728.81374  | 1 |
| 25516 | H | 55.01000 | 48.47780 | 72.05990 | 1481.87613  | 2106.56126  | 1798.00185  | 1 |
| 25517 | H | 56.61600 | 47.89280 | 72.09290 | 2552.09690  | -659.51715  | -1719.47830 | 1 |
| 25518 | C | 58.25800 | 48.62980 | 78.70690 | 528.68676   | 544.68588   | 494.17694   | 1 |
| 25519 | O | 58.67000 | 47.50480 | 78.41790 | -485.64995  | -551.48467  | 284.81516   | 1 |
| 25520 | N | 58.87400 | 49.39780 | 79.67090 | -11.15353   | -841.05502  | 75.23653    | 1 |
| 25521 | H | 58.55300 | 50.33080 | 79.81490 | 2295.09230  | 2050.43469  | -650.28071  | 1 |
| 25522 | C | 60.05300 | 49.01480 | 80.43090 | -739.76577  | 51.35025    | 524.23380   | 1 |
| 25523 | H | 60.85900 | 48.83280 | 79.73490 | -211.97496  | 1445.24612  | 2777.44621  | 1 |
| 25524 | C | 60.48400 | 50.11080 | 81.40890 | -592.92340  | 417.79370   | -561.22024  | 1 |
| 25525 | H | 60.55300 | 51.07380 | 80.85790 | -1983.46346 | -902.11708  | 2263.60544  | 1 |
| 25526 | H | 59.62900 | 50.22680 | 82.10890 | -1608.99885 | -1669.53969 | -2136.84080 | 1 |
| 25527 | C | 61.81200 | 49.86180 | 82.09690 | -17.39217   | 53.57775    | 901.39075   | 1 |
| 25528 | H | 61.77700 | 48.88480 | 82.62590 | 486.97202   | 2619.74135  | 1660.67321  | 1 |
| 25529 | C | 62.94700 | 50.01980 | 81.06690 | 703.63325   | -577.47312  | -52.21045   | 1 |
| 25530 | H | 62.97300 | 51.01480 | 80.57190 | -2307.21941 | 1828.12275  | 1104.24845  | 1 |
| 25531 | H | 62.94200 | 49.14980 | 80.37590 | -379.88308  | -367.68946  | -3110.90518 | 1 |
| 25532 | H | 63.86500 | 49.83680 | 81.66490 | 2804.40415  | 1331.11270  | -510.19502  | 1 |
| 25533 | C | 61.98100 | 50.95380 | 83.20990 | -530.35700  | -529.07068  | -531.23309  | 1 |
| 25534 | H | 61.11500 | 50.89480 | 83.90290 | -2600.96689 | -13.23639   | 1763.31772  | 1 |



|       |   |          |          |          |             |             |             |   |
|-------|---|----------|----------|----------|-------------|-------------|-------------|---|
| 25535 | H | 62.95000 | 50.78680 | 83.72690 | -2858.15912 | -1165.87505 | -625.01334  | 1 |
| 25536 | H | 62.00600 | 51.98380 | 82.79390 | -1979.55886 | -1095.81766 | 2180.26988  | 1 |
| 25537 | C | 59.83400 | 47.69080 | 81.19690 | 28.16078    | 588.78346   | -703.32129  | 1 |
| 25538 | O | 60.73700 | 46.80980 | 81.21890 | -396.42664  | -156.47903  | 656.28573   | 1 |
| 25539 | N | 58.64700 | 47.46780 | 81.86090 | 189.50305   | -795.22824  | -225.45440  | 1 |
| 25540 | H | 57.93700 | 48.16280 | 81.93990 | -2343.97394 | -2095.72374 | 151.12772   | 1 |
| 25541 | C | 58.32400 | 46.20480 | 82.43990 | -698.23026  | 578.72050   | -95.57311   | 1 |
| 25542 | H | 59.16000 | 45.72380 | 82.92390 | -136.09305  | -1222.11680 | 2887.34584  | 1 |
| 25543 | C | 57.25300 | 46.40580 | 83.55490 | 438.60519   | -369.65632  | 701.24722   | 1 |
| 25544 | H | 56.46500 | 47.09480 | 83.18390 | -2984.15346 | -796.47279  | -613.66978  | 1 |
| 25545 | H | 56.84700 | 45.42880 | 83.89290 | -1528.64299 | 2388.34080  | -1366.96455 | 1 |
| 25546 | O | 57.79400 | 47.05480 | 84.72390 | -58.51501   | -274.67543  | -747.85507  | 1 |
| 25547 | H | 58.33600 | 46.39680 | 85.16390 | -3067.73636 | -108.12397  | 680.97552   | 1 |
| 25548 | C | 57.74300 | 45.15880 | 81.47690 | -761.43432  | 366.34712   | -351.86501  | 1 |
| 25549 | O | 57.44700 | 44.02980 | 81.86390 | 658.42406   | -57.23348   | -441.32801  | 1 |
| 25550 | N | 57.64000 | 45.44880 | 80.18090 | -28.83271   | -201.47557  | -828.86920  | 1 |
| 25551 | H | 57.87600 | 46.33480 | 79.79090 | -2407.00087 | 1967.31608  | 477.22477   | 1 |
| 25552 | C | 57.07300 | 44.51080 | 79.22090 | 222.25047   | 528.66122   | -717.09076  | 1 |
| 25553 | H | 56.64100 | 43.64980 | 79.70890 | -2195.30224 | 2068.21296  | 885.19037   | 1 |
| 25554 | C | 55.93600 | 45.12680 | 78.34290 | -520.52782  | -146.23133  | 726.73201   | 1 |
| 25555 | H | 56.29600 | 45.99180 | 77.74590 | 2182.80936  | 100.04034   | 2253.02174  | 1 |
| 25556 | H | 55.54800 | 44.49680 | 77.51490 | 1246.64597  | -603.21103  | -2833.27020 | 1 |
| 25557 | N | 53.71900 | 46.31980 | 78.70290 | -452.32544  | 534.44687   | -479.57797  | 1 |
| 25558 | H | 53.67500 | 46.71180 | 77.78490 | 2143.22087  | 691.28098   | -2202.42025 | 1 |
| 25559 | C | 54.76900 | 45.59380 | 79.19390 | 746.12048   | 318.95916   | 403.86066   | 1 |
| 25560 | C | 52.84700 | 46.50780 | 79.73890 | -655.23277  | 360.15652   | 514.97758   | 1 |
| 25561 | H | 51.89400 | 47.02380 | 79.61890 | 820.15980   | -3006.18718 | -451.25623  | 1 |
| 25562 | N | 53.29900 | 45.96080 | 80.86590 | -522.22342  | -366.13709  | 547.70996   | 1 |
| 25563 | C | 54.52600 | 45.35480 | 80.48390 | 149.93693   | 171.97960   | 873.78990   | 1 |
| 25564 | H | 55.14700 | 44.83680 | 81.20490 | -1934.56761 | 1912.99514  | 1569.65665  | 1 |
| 25565 | C | 58.04800 | 44.00880 | 78.19490 | 735.63683   | 259.59731   | 459.54437   | 1 |
| 25566 | O | 57.88200 | 42.94680 | 77.55890 | 259.17027   | -502.59429  | 540.59931   | 1 |
| 25567 | N | 59.14200 | 44.76280 | 78.02990 | -230.88063  | -767.62611  | -277.16269  | 1 |
| 25568 | H | 59.21600 | 45.65280 | 78.47390 | 2721.07718  | -1531.93880 | -383.15218  | 1 |
| 25569 | C | 60.37000 | 44.45780 | 77.32690 | 473.70491   | -634.32786  | 440.10410   | 1 |
| 25570 | H | 60.06600 | 43.86780 | 76.47490 | 1924.74792  | -1447.26938 | -2032.90251 | 1 |
| 25571 | C | 61.19700 | 45.73880 | 76.87590 | -755.21103  | -28.76892   | 503.24446   | 1 |
| 25572 | H | 62.10800 | 45.47580 | 76.29590 | -205.32545  | -2886.01693 | 1224.11527  | 1 |
| 25573 | H | 61.43300 | 46.19080 | 77.86290 | -2219.75341 | 860.90680   | -2068.62879 | 1 |
| 25574 | O | 60.39300 | 46.65880 | 76.10090 | 297.03439   | 658.41511   | 308.52724   | 1 |
| 25575 | H | 59.93500 | 47.30180 | 76.64590 | -933.61401  | 1922.18738  | 2301.14223  | 1 |
| 25576 | C | 61.25600 | 43.57680 | 78.15690 | -180.20461  | -160.99100  | 868.69469   | 1 |
| 25577 | O | 61.74400 | 44.02380 | 79.23190 | 667.69655   | 408.95211   | 81.23428    | 1 |
| 25578 | O | 61.55900 | 42.43480 | 77.70390 | 606.02463   | -496.79187  | -99.16065   | 1 |
| 25579 | N | 68.09800 | 39.69880 | 83.86190 | 572.14840   | 348.49268   | 499.13078   | 1 |
| 25580 | H | 68.31400 | 38.85080 | 84.42290 | 910.88142   | 2167.50233  | 2074.67999  | 1 |
| 25581 | H | 68.24600 | 39.59180 | 82.83790 | 1776.28789  | -2242.63956 | 1296.88740  | 1 |
| 25582 | H | 67.12500 | 40.02180 | 84.03590 | 1021.91205  | 1010.50969  | -2812.12598 | 1 |
| 25583 | C | 68.95200 | 40.75780 | 84.30590 | 778.07659   | 145.19269   | 439.13499   | 1 |
| 25584 | H | 68.94300 | 40.82480 | 85.38390 | 1946.89076  | 224.15770   | 2447.69469  | 1 |
| 25585 | C | 70.47100 | 40.56280 | 83.91090 | -111.17474  | 612.18102   | 650.97023   | 1 |
| 25586 | H | 70.98000 | 41.53880 | 84.06090 | 2031.63668  | 2398.07471  | -140.54322  | 1 |
| 25587 | H | 70.47900 | 40.45980 | 82.80490 | 230.87820   | -2500.71031 | -1910.58185 | 1 |
| 25588 | C | 71.15500 | 39.33080 | 84.51890 | -125.96207  | -756.64873  | 479.63392   | 1 |
| 25589 | H | 72.17500 | 39.10180 | 84.14190 | 2817.89958  | -1317.06781 | 463.57001   | 1 |
| 25590 | H | 70.62200 | 38.43880 | 84.12690 | 2587.53815  | 176.90232   | -1797.22989 | 1 |
| 25591 | C | 71.32300 | 39.38980 | 86.03290 | 464.33305   | 679.77286   | -405.47193  | 1 |
| 25592 | H | 70.30800 | 39.45380 | 86.48090 | 141.44274   | -558.29009  | -3108.29175 | 1 |
| 25593 | H | 71.82700 | 40.34380 | 86.29990 | -1193.87842 | 1305.33389  | 2585.34378  | 1 |
| 25594 | C | 71.99000 | 38.13380 | 86.56490 | 194.03726   | -858.91623  | 229.05791   | 1 |
| 25595 | H | 71.54000 | 37.18180 | 86.20890 | 2224.79382  | -2113.60034 | 688.02257   | 1 |
| 25596 | H | 73.02200 | 38.05280 | 86.16090 | -2221.81265 | -1829.88731 | 1254.02116  | 1 |

|       |   |          |          |          |             |             |             |   |
|-------|---|----------|----------|----------|-------------|-------------|-------------|---|
| 25597 | N | 72.01700 | 38.08680 | 88.06190 | -229.59529  | 310.00148   | 733.44118   | 1 |
| 25598 | H | 72.40100 | 38.94980 | 88.49690 | -1217.21774 | 2185.16780  | -1919.72237 | 1 |
| 25599 | H | 71.06600 | 37.95380 | 88.46190 | -1433.98301 | -2002.52624 | -1974.52569 | 1 |
| 25600 | H | 72.60700 | 37.30680 | 88.41590 | 2887.40422  | 1133.45820  | -547.80871  | 1 |
| 25601 | C | 68.42100 | 42.10180 | 83.76190 | -828.68968  | -100.29749  | 353.52751   | 1 |
| 25602 | O | 67.82500 | 42.17680 | 82.71690 | -522.46483  | -578.24881  | -145.69599  | 1 |
| 25603 | N | 68.61900 | 43.27580 | 84.43490 | -646.73735  | 539.43822   | -50.62206   | 1 |
| 25604 | H | 69.20800 | 43.27780 | 85.23890 | 2269.61228  | 2046.31764  | 731.39343   | 1 |
| 25605 | C | 67.99400 | 44.54780 | 83.99690 | 242.22327   | 239.65341   | -857.65584  | 1 |
| 25606 | H | 68.34000 | 44.71780 | 82.98890 | 859.28505   | -1424.96824 | -2682.87345 | 1 |
| 25607 | H | 66.91700 | 44.46680 | 83.96490 | -771.71817  | -607.43786  | -3001.32564 | 1 |
| 25608 | C | 68.37200 | 45.68480 | 84.92590 | 184.71477   | -323.15887  | 821.12600   | 1 |
| 25609 | O | 68.20000 | 46.83880 | 84.64490 | -683.00458  | -369.89724  | 136.18410   | 1 |
| 25610 | N | 68.83800 | 45.43480 | 86.17690 | -151.39229  | 591.14501   | -593.20456  | 1 |
| 25611 | H | 69.14100 | 44.52880 | 86.46290 | 2037.86272  | 2008.17543  | 1293.47752  | 1 |
| 25612 | C | 69.04600 | 46.53980 | 87.06590 | -543.11290  | -347.51654  | -657.51677  | 1 |
| 25613 | H | 68.12300 | 47.09580 | 87.14390 | 66.79450    | -2805.07552 | 1417.01724  | 1 |
| 25614 | C | 69.42500 | 45.95680 | 88.48290 | -271.04632  | -712.62990  | -516.04010  | 1 |
| 25615 | H | 69.61000 | 46.79780 | 89.18490 | -408.86347  | 2761.07606  | -1457.13173 | 1 |
| 25616 | H | 70.26400 | 45.23680 | 88.37490 | 2380.76341  | 925.05122   | 1824.20722  | 1 |
| 25617 | N | 68.12900 | 45.25980 | 90.58990 | 462.36708   | 307.07757   | -647.40092  | 1 |
| 25618 | H | 68.44200 | 46.05880 | 91.10290 | -328.47456  | 2959.17630  | 992.16865   | 1 |
| 25619 | C | 68.28000 | 45.18480 | 89.23290 | 520.81394   | 325.89567   | -685.24677  | 1 |
| 25620 | C | 67.11100 | 44.45380 | 90.92790 | 646.22292   | -342.19029  | 537.41111   | 1 |
| 25621 | H | 66.88800 | 44.18780 | 91.96090 | 1811.91205  | 2561.03972  | -212.46332  | 1 |
| 25622 | N | 66.50500 | 43.97780 | 89.88790 | -539.24208  | 462.16351   | -462.61130  | 1 |
| 25623 | C | 67.24500 | 44.40280 | 88.80090 | 235.07908   | 628.65201   | 602.06080   | 1 |
| 25624 | H | 67.06100 | 44.12980 | 87.76890 | 2201.34033  | 768.29515   | -2124.52362 | 1 |
| 25625 | C | 70.13100 | 47.50080 | 86.71590 | 173.75021   | 437.41516   | -791.55036  | 1 |
| 25626 | O | 69.95600 | 48.68880 | 86.84090 | 222.56843   | -629.44933  | 414.01667   | 1 |
| 25627 | N | 71.22300 | 46.97380 | 86.14590 | 204.81638   | 808.13477   | 108.88488   | 1 |
| 25628 | H | 71.30800 | 45.98380 | 86.05590 | 1395.89859  | -1037.40305 | 2609.96915  | 1 |
| 25629 | C | 72.34500 | 47.79380 | 85.73390 | 660.79876   | 626.73078   | -9.96498    | 1 |
| 25630 | H | 72.45100 | 48.61880 | 86.42290 | -1545.46175 | 574.38727   | -2691.05549 | 1 |
| 25631 | C | 73.65200 | 47.05680 | 85.70090 | -425.71347  | 46.73580    | 792.00379   | 1 |
| 25632 | H | 73.55600 | 46.00080 | 85.36790 | 3039.37973  | 629.25178   | -526.64808  | 1 |
| 25633 | H | 74.35000 | 47.50180 | 84.95990 | -1972.90628 | 1037.14966  | -2232.97782 | 1 |
| 25634 | C | 74.30700 | 47.04680 | 87.09390 | 480.98230   | 149.99186   | 746.86726   | 1 |
| 25635 | H | 74.48500 | 48.04780 | 87.54190 | 2371.12486  | 2027.46513  | -411.96702  | 1 |
| 25636 | H | 75.34400 | 46.64680 | 87.06490 | 1467.72174  | -1261.11581 | 2468.31487  | 1 |
| 25637 | C | 73.53900 | 46.29480 | 88.22990 | 59.57164    | 863.48185   | 266.66990   | 1 |
| 25638 | O | 73.14300 | 46.94180 | 89.21590 | 701.60397   | -339.67769  | -151.87416  | 1 |
| 25639 | N | 73.26100 | 44.98580 | 88.05190 | -504.81886  | 156.89550   | -670.43680  | 1 |
| 25640 | H | 73.59700 | 44.45680 | 87.27190 | 3145.80569  | 6.48472     | -99.37089   | 1 |
| 25641 | H | 72.71800 | 44.56680 | 88.77890 | 2894.65267  | 211.77240   | -1230.25333 | 1 |
| 25642 | C | 72.00600 | 48.49580 | 84.37690 | -652.52051  | 175.99455   | -624.18738  | 1 |
| 25643 | O | 72.38900 | 49.64980 | 84.14890 | 350.31640   | 169.84020   | -698.03500  | 1 |
| 25644 | N | 71.16500 | 47.88080 | 83.49290 | -303.15304  | -767.22376  | -195.94143  | 1 |
| 25645 | H | 70.90700 | 46.92780 | 83.63290 | 363.98006   | -1765.40643 | 2566.99020  | 1 |
| 25646 | C | 70.59400 | 48.62080 | 82.36290 | -863.52263  | -289.81833  | -73.54308   | 1 |
| 25647 | H | 71.41900 | 49.01280 | 81.78590 | 1034.78521  | 2208.28216  | -1998.36773 | 1 |
| 25648 | C | 69.70100 | 47.63480 | 81.51590 | -165.67591  | -344.49176  | -839.80251  | 1 |
| 25649 | H | 69.09700 | 47.05380 | 82.24590 | 657.60912   | -2146.65452 | 2192.75733  | 1 |
| 25650 | H | 69.01800 | 48.11480 | 80.78390 | 2983.72361  | -664.97893  | 727.25700   | 1 |
| 25651 | C | 70.56200 | 46.67680 | 80.62690 | 282.31392   | 211.65759   | 828.22551   | 1 |
| 25652 | H | 71.33500 | 46.24680 | 81.29890 | -1917.83989 | 822.52708   | -2367.84591 | 1 |
| 25653 | H | 71.11300 | 47.16180 | 79.79190 | -946.23148  | -445.65707  | 2955.44761  | 1 |
| 25654 | C | 69.74500 | 45.52780 | 80.02090 | 523.04167   | -391.51330  | 622.48364   | 1 |
| 25655 | H | 69.31500 | 44.92580 | 80.84990 | -1230.52272 | 1844.36171  | 2220.02125  | 1 |
| 25656 | H | 70.38800 | 44.89380 | 79.37490 | 1014.29078  | -779.65970  | -2886.48899 | 1 |
| 25657 | C | 68.59400 | 45.99380 | 79.11190 | -665.02027  | -12.29125   | -637.30567  | 1 |
| 25658 | H | 67.85700 | 46.48980 | 79.77890 | 2251.65045  | -497.05708  | -2150.38313 | 1 |

|       |   |          |          |          |             |             |             |   |
|-------|---|----------|----------|----------|-------------|-------------|-------------|---|
| 25659 | H | 68.97400 | 46.63180 | 78.28490 | 914.76839   | -2519.43065 | 1633.33235  | 1 |
| 25660 | N | 68.02900 | 44.78280 | 78.47990 | -648.23767  | 412.23324   | 341.40103   | 1 |
| 25661 | H | 67.98800 | 44.08980 | 79.25490 | 455.28824   | -1690.80126 | 2600.92417  | 1 |
| 25662 | H | 67.10500 | 44.86980 | 78.00990 | 1931.05353  | 1360.88336  | 2064.70363  | 1 |
| 25663 | H | 68.67200 | 44.54580 | 77.69790 | 415.92101   | 2949.46587  | 1002.53661  | 1 |
| 25664 | C | 69.71700 | 49.79980 | 82.79390 | -618.73070  | -325.49733  | 576.16595   | 1 |
| 25665 | O | 69.79800 | 50.86580 | 82.22390 | 538.81227   | 474.22327   | -336.61224  | 1 |
| 25666 | N | 68.85600 | 49.66080 | 83.84290 | 593.72544   | 431.35354   | -425.40192  | 1 |
| 25667 | H | 68.79800 | 48.77280 | 84.29290 | -979.05634  | 2661.76826  | -1370.23644 | 1 |
| 25668 | C | 68.00000 | 50.77580 | 84.28590 | 714.36436   | -557.77114  | 93.40731    | 1 |
| 25669 | H | 67.57400 | 51.25780 | 83.41790 | 2427.90400  | 1118.77448  | 1646.74543  | 1 |
| 25670 | C | 66.81200 | 50.11480 | 85.12790 | -332.60095  | -306.88801  | 782.72538   | 1 |
| 25671 | H | 67.22400 | 49.50880 | 85.96190 | -139.47885  | 1648.92335  | -2684.57783 | 1 |
| 25672 | H | 66.27300 | 50.96480 | 85.59790 | -1695.27368 | 917.34281   | 2476.55495  | 1 |
| 25673 | C | 65.87200 | 49.30880 | 84.17590 | 394.90314   | 649.91124   | -510.18056  | 1 |
| 25674 | H | 66.45800 | 48.61780 | 83.53290 | -1810.62980 | 374.50712   | 2535.42826  | 1 |
| 25675 | H | 65.40700 | 50.13980 | 83.60490 | -2339.09592 | -443.18660  | -2067.66409 | 1 |
| 25676 | C | 64.58100 | 48.69080 | 84.76490 | 226.09863   | 672.50352   | 560.17978   | 1 |
| 25677 | H | 63.91200 | 48.26980 | 83.98490 | -2067.14675 | -2147.84361 | -1021.12150 | 1 |
| 25678 | H | 64.00700 | 49.44380 | 85.34690 | 2912.33529  | 1182.06847  | 97.33367    | 1 |
| 25679 | N | 64.98200 | 47.51680 | 85.61290 | -664.91701  | 242.15192   | -469.41606  | 1 |
| 25680 | H | 64.97100 | 46.61780 | 85.17490 | -2237.00020 | 366.26508   | 2170.62053  | 1 |
| 25681 | C | 64.91300 | 47.44980 | 86.91190 | 516.27658   | 617.48760   | -434.97523  | 1 |
| 25682 | N | 65.22000 | 46.31280 | 87.50190 | 290.93333   | -638.29790  | -485.27461  | 1 |
| 25683 | H | 65.23700 | 45.48880 | 86.93590 | -2930.42837 | -15.47315   | 1132.05777  | 1 |
| 25684 | H | 64.79200 | 46.14780 | 88.39090 | -218.77295  | 1128.27858  | 2916.41874  | 1 |
| 25685 | N | 64.55700 | 48.39180 | 87.74590 | 367.16060   | 729.35435   | 193.37928   | 1 |
| 25686 | H | 64.32200 | 49.30080 | 87.40390 | 1717.77950  | -1468.61692 | 2181.59809  | 1 |
| 25687 | H | 64.48300 | 48.15980 | 88.71590 | 897.63727   | 603.06479   | 2943.91369  | 1 |
| 25688 | C | 68.76300 | 51.77380 | 85.17190 | -286.17697  | 629.33475   | -602.70637  | 1 |
| 25689 | O | 68.31700 | 52.89480 | 85.38790 | 454.31736   | -471.09918  | -452.45749  | 1 |
| 25690 | N | 69.99200 | 51.44480 | 85.66490 | 2.71915     | -340.40751  | 763.10549   | 1 |
| 25691 | H | 70.22400 | 50.48180 | 85.78290 | -2461.59986 | 944.13598   | -1726.90626 | 1 |
| 25692 | C | 71.03900 | 52.33780 | 86.14090 | -581.93133  | 505.91242   | 475.10551   | 1 |
| 25693 | H | 70.60600 | 52.99280 | 86.88290 | -1990.94727 | -1244.51668 | -2105.66098 | 1 |
| 25694 | C | 72.06500 | 51.49980 | 86.96290 | 573.76024   | -556.61345  | 430.33180   | 1 |
| 25695 | H | 72.56500 | 50.79680 | 86.26290 | -1933.07539 | 2227.85206  | -1102.62695 | 1 |
| 25696 | H | 71.46100 | 50.99980 | 87.75090 | 560.48785   | 3081.56903  | -280.89386  | 1 |
| 25697 | C | 73.17300 | 52.34480 | 87.63990 | 59.98324    | 699.62155   | -589.78389  | 1 |
| 25698 | H | 73.64300 | 52.97080 | 86.85090 | 1255.30795  | -185.30317  | 2868.22625  | 1 |
| 25699 | H | 74.04000 | 51.75980 | 88.01390 | 320.04030   | 2012.40000  | 2384.03258  | 1 |
| 25700 | C | 72.66500 | 53.24480 | 88.79790 | -478.04769  | 560.97048   | 523.67235   | 1 |
| 25701 | H | 72.29600 | 54.16380 | 88.29490 | -1899.74746 | -2178.60620 | 1237.00935  | 1 |
| 25702 | H | 71.81600 | 52.78380 | 89.34490 | -611.61823  | 2477.06376  | -1846.76659 | 1 |
| 25703 | C | 73.72900 | 53.65480 | 89.76990 | 779.73216   | -157.16668  | 437.01378   | 1 |
| 25704 | H | 74.54200 | 54.24280 | 89.29390 | -2182.34275 | -1073.31267 | 1986.81002  | 1 |
| 25705 | H | 74.15700 | 52.71680 | 90.18490 | -257.98359  | 181.43153   | 3119.20826  | 1 |
| 25706 | N | 73.08500 | 54.51480 | 90.80690 | -312.13178  | -450.87323  | 634.09692   | 1 |
| 25707 | H | 72.42900 | 53.95380 | 91.38690 | 1691.60202  | -1867.58021 | -1898.08776 | 1 |
| 25708 | H | 72.53100 | 55.23180 | 90.29690 | 245.41774   | 3096.51651  | 469.38741   | 1 |
| 25709 | H | 73.73600 | 55.06480 | 91.40390 | 2155.77025  | -2112.73157 | 887.20414   | 1 |
| 25710 | C | 71.68500 | 53.15880 | 85.00390 | 622.85733   | -426.77001  | -521.33755  | 1 |
| 25711 | O | 71.94000 | 54.39380 | 85.13790 | 209.30480   | -65.43527   | 748.84559   | 1 |
| 25712 | N | 72.06400 | 52.55680 | 83.85790 | -513.81699  | -561.98131  | 357.08517   | 1 |
| 25713 | H | 72.02800 | 51.56080 | 83.83890 | -1341.10324 | -2231.97483 | -1778.41156 | 1 |
| 25714 | C | 72.45900 | 53.18580 | 82.59290 | 270.89472   | 717.25955   | 481.93228   | 1 |
| 25715 | H | 73.31700 | 53.82280 | 82.75190 | -2567.95505 | 740.50116   | -1672.49836 | 1 |
| 25716 | C | 72.73700 | 52.17980 | 81.49090 | -527.05995  | -457.92153  | 577.27441   | 1 |
| 25717 | H | 73.16400 | 52.69180 | 80.60190 | -871.78771  | -2304.71920 | -1967.09080 | 1 |
| 25718 | H | 73.43100 | 51.39180 | 81.85490 | 1351.55292  | 498.07726   | -2807.48892 | 1 |
| 25719 | H | 71.81100 | 51.66480 | 81.15690 | -243.12557  | 2448.19247  | -1971.94397 | 1 |
| 25720 | C | 71.42300 | 54.10280 | 82.09390 | -691.77939  | -586.23721  | 100.32104   | 1 |

|       |   |          |          |          |             |             |             |   |
|-------|---|----------|----------|----------|-------------|-------------|-------------|---|
| 25721 | O | 71.72400 | 55.20980 | 81.62890 | -554.90869  | -246.77717  | 497.83383   | 1 |
| 25722 | N | 70.15100 | 53.68580 | 82.18190 | -344.01806  | 458.23455   | -629.94891  | 1 |
| 25723 | H | 69.93300 | 52.74080 | 82.41190 | -2054.59677 | -911.74532  | 2193.24440  | 1 |
| 25724 | C | 69.05200 | 54.61880 | 81.81290 | -663.78664  | 376.71292   | 492.33719   | 1 |
| 25725 | H | 69.27300 | 54.93580 | 80.80490 | 2241.01921  | 930.53964   | -2008.67081 | 1 |
| 25726 | C | 67.72000 | 53.76380 | 81.88590 | 637.38847   | -552.42789  | 335.48284   | 1 |
| 25727 | H | 67.86000 | 52.87180 | 81.23890 | -2065.60674 | -2289.26734 | 623.79050   | 1 |
| 25728 | H | 67.52600 | 53.54180 | 82.95690 | -1561.18409 | -2707.03761 | 370.42269   | 1 |
| 25729 | C | 66.42000 | 54.44080 | 81.37090 | 428.16621   | -47.04363   | -810.77053  | 1 |
| 25730 | H | 66.26400 | 55.30580 | 82.05090 | -683.94594  | -584.35067  | 3007.66367  | 1 |
| 25731 | C | 66.51600 | 54.88780 | 79.91790 | -175.62812  | -435.09582  | 774.49107   | 1 |
| 25732 | H | 67.34800 | 55.61980 | 79.84090 | -806.33307  | -2374.20799 | -1909.34041 | 1 |
| 25733 | H | 66.83700 | 54.05780 | 79.25390 | 1896.34991  | 2069.85276  | -1425.70100 | 1 |
| 25734 | H | 65.61300 | 55.35880 | 79.47290 | -1670.07846 | -79.20129   | 2659.20964  | 1 |
| 25735 | C | 65.08700 | 53.64980 | 81.60090 | -733.23207  | 300.29283   | -461.75133  | 1 |
| 25736 | H | 64.19400 | 54.26480 | 81.35690 | -2513.57008 | 1571.23124  | 1049.99450  | 1 |
| 25737 | H | 65.13500 | 52.68680 | 81.04990 | -597.64101  | -3074.51200 | -317.04187  | 1 |
| 25738 | H | 65.04700 | 53.31080 | 82.65790 | -2824.26134 | -1354.05935 | 309.17022   | 1 |
| 25739 | C | 68.94000 | 55.86580 | 82.65390 | -72.35284   | -829.56281  | 365.53057   | 1 |
| 25740 | O | 68.94800 | 56.97480 | 82.06590 | -448.98894  | 136.69942   | 628.64884   | 1 |
| 25741 | N | 68.95500 | 55.70480 | 84.03490 | 278.08921   | -556.32186  | 563.10603   | 1 |
| 25742 | H | 68.90000 | 54.78480 | 84.41390 | 1044.81786  | -533.73438  | 2910.35253  | 1 |
| 25743 | C | 69.01700 | 56.76980 | 84.97390 | -535.92622  | -435.82794  | 589.76596   | 1 |
| 25744 | H | 68.18000 | 57.41880 | 84.76190 | -1647.45543 | -1801.11554 | -1995.28869 | 1 |
| 25745 | C | 68.98700 | 56.10080 | 86.37390 | 385.01593   | 767.72484   | -307.57984  | 1 |
| 25746 | H | 67.97000 | 55.65380 | 86.34790 | 1888.20486  | 1407.57866  | 2075.57676  | 1 |
| 25747 | H | 69.84200 | 55.41280 | 86.55090 | -1619.99118 | 813.48318   | 2562.50341  | 1 |
| 25748 | C | 69.01600 | 57.12980 | 87.55390 | -624.32867  | 582.34300   | 308.88132   | 1 |
| 25749 | H | 68.64300 | 58.10980 | 87.18590 | 2089.26267  | -1167.40158 | -2050.00407 | 1 |
| 25750 | H | 70.04000 | 57.51080 | 87.75690 | 2154.55868  | 1392.64978  | -1826.21459 | 1 |
| 25751 | C | 68.28500 | 56.64680 | 88.80690 | -56.98660   | -653.10276  | -644.95100  | 1 |
| 25752 | H | 67.27800 | 56.32580 | 88.46590 | -516.84085  | -2480.39706 | -1877.23848 | 1 |
| 25753 | H | 68.78000 | 55.77180 | 89.27990 | -2708.38037 | -133.86664  | 1587.47164  | 1 |
| 25754 | C | 68.18300 | 57.76180 | 89.88990 | -301.55837  | -724.17842  | 463.32912   | 1 |
| 25755 | H | 67.70500 | 58.60680 | 89.34890 | -1411.51799 | -1850.10519 | 2113.79583  | 1 |
| 25756 | H | 69.18300 | 58.07080 | 90.26390 | 2505.21264  | -25.05664   | 1895.41186  | 1 |
| 25757 | N | 67.28600 | 57.24180 | 90.94090 | -427.35756  | -729.30933  | -71.60393   | 1 |
| 25758 | H | 67.23400 | 57.85680 | 91.77790 | -2217.05297 | 399.78465   | -2202.06030 | 1 |
| 25759 | H | 66.34800 | 56.94180 | 90.60490 | 2025.02079  | 1888.25288  | -1495.97933 | 1 |
| 25760 | H | 67.76700 | 56.37380 | 91.25190 | 2451.71403  | -668.69683  | 1849.01909  | 1 |
| 25761 | C | 70.26400 | 57.65280 | 84.87290 | 241.76368   | -476.27354  | -747.45930  | 1 |
| 25762 | O | 70.14300 | 58.87780 | 84.98790 | -352.00909  | 641.15756   | -303.68038  | 1 |
| 25763 | N | 71.49100 | 57.15780 | 84.71690 | 523.89146   | -578.23634  | 313.71041   | 1 |
| 25764 | H | 71.63100 | 56.17080 | 84.69590 | 191.59395   | -1748.19240 | -2618.33745 | 1 |
| 25765 | C | 72.71900 | 57.94580 | 84.52690 | -331.87025  | 620.69531   | 570.99214   | 1 |
| 25766 | H | 72.79500 | 58.56780 | 85.40690 | -1954.42550 | 2421.14515  | -472.54501  | 1 |
| 25767 | C | 74.01800 | 57.10780 | 84.51390 | -90.52778   | 855.99416   | 289.60251   | 1 |
| 25768 | H | 74.13900 | 56.57280 | 83.54790 | 1095.82774  | -2285.40230 | -1872.96926 | 1 |
| 25769 | O | 74.08600 | 56.29880 | 85.65490 | -368.43632  | -695.57568  | 72.57526    | 1 |
| 25770 | H | 73.52300 | 55.52680 | 85.55590 | 2454.60387  | -869.58241  | -1774.32266 | 1 |
| 25771 | C | 75.19200 | 58.07780 | 84.76890 | 18.69959    | -910.31488  | -71.63354   | 1 |
| 25772 | H | 75.21200 | 58.81580 | 83.93790 | 3117.04446  | 66.42821    | -416.04279  | 1 |
| 25773 | H | 76.17100 | 57.55180 | 84.75690 | 2080.31979  | -2327.89268 | -394.75131  | 1 |
| 25774 | H | 75.14700 | 58.74180 | 85.65790 | 1241.68768  | 321.38165   | -2880.91332 | 1 |
| 25775 | C | 72.59200 | 58.81480 | 83.22690 | -332.57037  | 260.84769   | -816.76451  | 1 |
| 25776 | O | 73.01500 | 59.98280 | 83.18890 | -342.83715  | -21.05914   | -719.99236  | 1 |
| 25777 | N | 72.00200 | 58.27580 | 82.17390 | 265.99787   | -474.49940  | -652.99269  | 1 |
| 25778 | H | 71.78800 | 57.30480 | 82.23390 | 1712.41435  | 745.21129   | -2538.81690 | 1 |
| 25779 | C | 71.67800 | 58.96180 | 80.92490 | 195.03254   | -849.65981  | -272.68048  | 1 |
| 25780 | H | 72.62500 | 59.27280 | 80.50790 | 161.54240   | 871.21970   | 3010.79805  | 1 |
| 25781 | C | 71.09500 | 58.12480 | 79.80190 | -410.79276  | -506.97801  | -646.39630  | 1 |
| 25782 | H | 70.05700 | 57.80880 | 80.03990 | -2608.66229 | 1041.90119  | 1414.45996  | 1 |

|       |   |          |          |          |             |             |             |   |
|-------|---|----------|----------|----------|-------------|-------------|-------------|---|
| 25783 | O | 71.89200 | 56.91180 | 79.71290 | 478.08734   | 457.88590   | 419.47237   | 1 |
| 25784 | H | 71.56000 | 56.30780 | 80.38190 | -2280.70442 | 2128.77265  | -430.74338  | 1 |
| 25785 | C | 71.17200 | 58.81080 | 78.46790 | 505.92222   | 21.70086    | 748.31272   | 1 |
| 25786 | H | 72.19700 | 59.09080 | 78.14290 | 1928.56641  | 922.08949   | 2298.03620  | 1 |
| 25787 | H | 70.51100 | 59.70180 | 78.53390 | -411.33798  | 3062.13109  | 593.45666   | 1 |
| 25788 | H | 70.87600 | 58.20880 | 77.58290 | 633.75977   | -1571.55403 | -2657.07423 | 1 |
| 25789 | C | 70.83300 | 60.20580 | 81.08790 | -912.72187  | -35.80337   | -55.34504   | 1 |
| 25790 | O | 71.24500 | 61.35880 | 80.80990 | 295.10042   | -476.02553  | 548.15284   | 1 |
| 25791 | N | 69.70300 | 59.95480 | 81.76090 | -228.78229  | -416.05940  | 692.20455   | 1 |
| 25792 | H | 69.43500 | 59.01180 | 81.94290 | -1317.97085 | 1569.50928  | 2380.82814  | 1 |
| 25793 | C | 68.79200 | 60.93480 | 82.26090 | -458.66653  | 36.73231    | -795.03063  | 1 |
| 25794 | H | 68.27700 | 61.41580 | 81.44290 | -289.04454  | 1163.99415  | 2902.68645  | 1 |
| 25795 | C | 67.64800 | 60.18880 | 82.90290 | 567.99923   | -683.92811  | -206.01598  | 1 |
| 25796 | H | 68.05500 | 59.43180 | 83.60690 | -1278.27981 | 2173.20884  | 1875.05957  | 1 |
| 25797 | C | 66.77000 | 61.10180 | 83.78390 | 324.32109   | 658.50292   | -543.38922  | 1 |
| 25798 | H | 65.86900 | 60.56480 | 84.14890 | 2407.00446  | 640.88392   | 1913.04682  | 1 |
| 25799 | H | 66.36600 | 61.97780 | 83.23390 | -1847.25847 | 2365.13960  | -951.09275  | 1 |
| 25800 | H | 67.30500 | 61.44380 | 84.69590 | -2709.72009 | 1600.20873  | -20.07739   | 1 |
| 25801 | C | 66.87700 | 59.43380 | 81.79990 | -554.76589  | -580.77607  | -442.42867  | 1 |
| 25802 | H | 65.98800 | 58.91880 | 82.22390 | 1819.57357  | -2565.46117 | 44.51815    | 1 |
| 25803 | H | 67.56900 | 58.76680 | 81.24290 | 2703.55368  | -1098.30029 | -1177.09817 | 1 |
| 25804 | H | 66.48400 | 60.21480 | 81.11490 | 1607.94260  | -16.54917   | -2708.42040 | 1 |
| 25805 | C | 69.33700 | 61.96280 | 83.14390 | 169.41188   | 748.50247   | -496.10866  | 1 |
| 25806 | O | 69.12900 | 63.14880 | 82.91090 | -220.16816  | -647.16608  | 392.85936   | 1 |
| 25807 | N | 70.16800 | 61.60980 | 84.15190 | 637.50710   | -180.99071  | 514.27285   | 1 |
| 25808 | H | 70.42600 | 60.68180 | 84.41090 | 572.44504   | -1722.00824 | 2563.66015  | 1 |
| 25809 | C | 70.81100 | 62.52780 | 85.05990 | 763.55127   | -90.30022   | 480.94846   | 1 |
| 25810 | H | 70.02500 | 63.10980 | 85.51790 | -1692.24116 | -1787.33670 | -1968.80163 | 1 |
| 25811 | C | 71.57800 | 61.78180 | 86.15290 | -648.39234  | 65.61318    | 632.56494   | 1 |
| 25812 | H | 72.12500 | 60.95180 | 85.65690 | -2584.37879 | 1100.14803  | -1426.47151 | 1 |
| 25813 | C | 72.63700 | 62.69880 | 86.91090 | 508.23624   | 452.91061   | -610.45347  | 1 |
| 25814 | H | 73.14200 | 62.11380 | 87.70790 | -1398.76934 | -1335.44963 | 2476.50596  | 1 |
| 25815 | H | 72.14800 | 63.58180 | 87.37590 | -37.26404   | 3115.76084  | -424.61865  | 1 |
| 25816 | H | 73.44600 | 62.89480 | 86.17490 | -1422.22576 | -1984.85421 | -1993.63522 | 1 |
| 25817 | C | 70.63500 | 61.17080 | 87.20590 | 552.00393   | 531.65998   | 483.26520   | 1 |
| 25818 | H | 69.64800 | 60.89180 | 86.77890 | -1579.47180 | 137.91482   | 2711.59627  | 1 |
| 25819 | H | 70.45800 | 61.96580 | 87.96190 | 2867.07509  | 893.72701   | 925.00068   | 1 |
| 25820 | C | 71.26700 | 59.95680 | 87.91890 | 84.39957    | -813.60657  | -415.19974  | 1 |
| 25821 | H | 70.48700 | 59.54080 | 88.59190 | -1871.27492 | -1679.13835 | -1901.92928 | 1 |
| 25822 | H | 71.59500 | 59.21580 | 87.15890 | -1925.74738 | -1981.88814 | 1500.56651  | 1 |
| 25823 | H | 72.13800 | 60.22880 | 88.55390 | -2474.32391 | -79.39147   | 1935.29185  | 1 |
| 25824 | C | 71.66200 | 63.52580 | 84.35490 | 435.65974   | 632.55091   | -493.90992  | 1 |
| 25825 | O | 71.52800 | 64.71780 | 84.59990 | -445.84338  | -350.72100  | 546.62306   | 1 |
| 25826 | N | 72.44000 | 63.06280 | 83.35390 | -627.02548  | 556.39101   | -118.19203  | 1 |
| 25827 | H | 72.41000 | 62.08380 | 83.16990 | 383.84384   | -135.92728  | 3112.55464  | 1 |
| 25828 | C | 73.23300 | 63.90780 | 82.52590 | 362.39557   | -426.64716  | 712.07262   | 1 |
| 25829 | H | 73.88400 | 64.42880 | 83.21190 | 548.12828   | 1391.91520  | 2760.61253  | 1 |
| 25830 | C | 74.22100 | 63.07780 | 81.65290 | -149.12935  | 809.11784   | -401.64750  | 1 |
| 25831 | H | 73.76600 | 62.28180 | 81.02690 | -2508.59263 | -11.29969   | 1895.72048  | 1 |
| 25832 | H | 74.79000 | 62.50380 | 82.41590 | 2270.24357  | -1218.23418 | 1794.73879  | 1 |
| 25833 | C | 75.19500 | 63.90380 | 80.72890 | -546.25556  | 264.79055   | 676.51373   | 1 |
| 25834 | H | 74.55500 | 64.48980 | 80.03390 | -770.91263  | 2581.68519  | 1621.07082  | 1 |
| 25835 | C | 76.09000 | 64.93880 | 81.32490 | 10.79118    | -877.59966  | -251.80790  | 1 |
| 25836 | H | 76.90300 | 64.44380 | 81.89790 | 1436.57286  | -2322.37376 | 1551.61064  | 1 |
| 25837 | H | 75.62900 | 65.65480 | 82.03890 | -742.40897  | 2217.42357  | 2099.85397  | 1 |
| 25838 | H | 76.67100 | 65.48180 | 80.54890 | -1952.37794 | -2389.68158 | 614.38726   | 1 |
| 25839 | C | 76.03300 | 62.90280 | 79.89590 | -462.52171  | -254.04080  | 737.93655   | 1 |
| 25840 | H | 76.48300 | 62.22980 | 80.65690 | 2597.06825  | 1526.36507  | -907.61133  | 1 |
| 25841 | H | 76.84200 | 63.38880 | 79.30890 | 1493.32365  | -1395.89410 | 2380.86759  | 1 |
| 25842 | H | 75.43400 | 62.30680 | 79.17490 | 2297.91662  | -2142.76094 | -70.83047   | 1 |
| 25843 | C | 72.43700 | 64.90980 | 81.66490 | -225.51182  | 778.97903   | 412.83319   | 1 |
| 25844 | O | 72.81300 | 66.08780 | 81.57690 | -437.05328  | -600.29137  | -279.71521  | 1 |

|       |   |          |          |          |             |             |             |   |
|-------|---|----------|----------|----------|-------------|-------------|-------------|---|
| 25845 | N | 71.36300 | 64.44380 | 80.99590 | -327.84715  | 573.58488   | 522.09923   | 1 |
| 25846 | H | 71.19000 | 63.46780 | 81.10790 | 1195.00195  | 1442.99251  | 2519.91848  | 1 |
| 25847 | C | 70.42600 | 65.14580 | 80.24290 | -627.49429  | 556.92213   | 358.84352   | 1 |
| 25848 | H | 71.03900 | 65.71780 | 79.56190 | -2617.06162 | -1464.67174 | -965.84898  | 1 |
| 25849 | C | 69.50000 | 64.18580 | 79.47790 | 244.58674   | -7.86921    | 872.05543   | 1 |
| 25850 | H | 69.27400 | 63.33580 | 80.15590 | 14.06284    | 1064.78090  | -2966.00371 | 1 |
| 25851 | C | 68.14600 | 64.84580 | 79.02290 | 715.97755   | -206.36765  | -524.54766  | 1 |
| 25852 | H | 67.51200 | 65.16380 | 79.87790 | 856.94058   | -3026.00509 | 18.07280    | 1 |
| 25853 | H | 67.58600 | 64.15180 | 78.35890 | -526.86321  | 2585.20359  | -1720.79642 | 1 |
| 25854 | H | 68.45800 | 65.75480 | 78.46590 | -664.59282  | -2855.71992 | 1137.20684  | 1 |
| 25855 | C | 70.28000 | 63.43880 | 78.39190 | -475.11112  | -679.25380  | 377.45444   | 1 |
| 25856 | H | 70.44600 | 64.25280 | 77.65390 | -152.93739  | 2024.89369  | -2409.85080 | 1 |
| 25857 | H | 71.27200 | 63.03780 | 78.69290 | -1943.41974 | 2068.33878  | -1370.82799 | 1 |
| 25858 | C | 69.41000 | 62.39680 | 77.58790 | 23.78904    | 618.73215   | 664.34063   | 1 |
| 25859 | H | 68.96100 | 61.73580 | 78.35990 | -2870.98804 | 555.68997   | -1176.29594 | 1 |
| 25860 | H | 68.57700 | 62.83380 | 76.99690 | 973.22887   | -2602.95414 | 1464.43998  | 1 |
| 25861 | H | 70.16900 | 61.86880 | 76.97190 | -1507.36810 | -2076.57864 | -1828.51547 | 1 |
| 25862 | C | 69.70600 | 66.19980 | 80.98090 | 611.90070   | -32.57079   | -876.46951  | 1 |
| 25863 | O | 69.55800 | 67.36380 | 80.51690 | 440.78933   | 316.90339   | 566.40349   | 1 |
| 25864 | N | 69.14000 | 65.92480 | 82.22190 | -563.64659  | 575.32766   | 254.17591   | 1 |
| 25865 | H | 69.22700 | 64.99080 | 82.55990 | -2546.75969 | -1685.43835 | -772.91701  | 1 |
| 25866 | C | 68.75000 | 66.92180 | 83.19690 | -552.41564  | -558.56522  | 463.94420   | 1 |
| 25867 | H | 67.89500 | 67.41080 | 82.75390 | -1206.00901 | 2107.82656  | 1997.53689  | 1 |
| 25868 | C | 68.34200 | 66.10180 | 84.47590 | 403.66664   | -490.82064  | 649.22373   | 1 |
| 25869 | H | 68.06800 | 66.67780 | 85.38590 | 740.91520   | -752.85466  | -2967.32508 | 1 |
| 25870 | H | 69.24300 | 65.50480 | 84.73090 | -2012.57951 | -2075.32950 | -1252.78755 | 1 |
| 25871 | C | 67.11800 | 65.15880 | 84.29590 | -83.67110   | -74.89202   | -909.53009  | 1 |
| 25872 | H | 67.27600 | 64.54180 | 83.38490 | -1073.54999 | -2565.17986 | -1480.50021 | 1 |
| 25873 | C | 67.17400 | 64.17980 | 85.52090 | 460.95808   | -515.50962  | -599.13926  | 1 |
| 25874 | H | 66.20600 | 63.64480 | 85.41390 | 2397.08861  | 1927.49171  | -651.09076  | 1 |
| 25875 | H | 67.27400 | 64.75380 | 86.46590 | -2869.85286 | 1242.90802  | -354.59379  | 1 |
| 25876 | H | 68.06800 | 63.52580 | 85.43190 | 1294.38050  | -788.15091  | -2761.80874 | 1 |
| 25877 | C | 65.84000 | 65.91780 | 84.21390 | 867.88328   | 266.86433   | -38.57492   | 1 |
| 25878 | H | 65.86700 | 66.56680 | 83.31290 | 2134.99966  | -2070.77577 | -1025.59095 | 1 |
| 25879 | H | 64.97100 | 65.22780 | 84.18490 | 2228.47620  | -826.73611  | -2062.74858 | 1 |
| 25880 | H | 65.68500 | 66.60280 | 85.07490 | -1730.18241 | -1805.67315 | -1916.74896 | 1 |
| 25881 | C | 69.78900 | 67.93480 | 83.58990 | -669.78685  | 590.00057   | -198.08022  | 1 |
| 25882 | O | 69.52000 | 69.15080 | 83.59590 | -330.49488  | -501.32361  | 512.77342   | 1 |
| 25883 | N | 71.02500 | 67.45980 | 83.92190 | -671.44398  | 451.09628   | -252.33206  | 1 |
| 25884 | H | 71.29900 | 66.50280 | 83.86090 | 1263.83761  | 2404.96265  | 1577.80273  | 1 |
| 25885 | C | 72.04000 | 68.25880 | 84.44690 | 12.43074    | 420.97127   | 803.71447   | 1 |
| 25886 | H | 71.72900 | 68.65180 | 85.40390 | -1705.16054 | 687.37629   | 2550.35971  | 1 |
| 25887 | C | 73.35000 | 67.44380 | 84.73490 | -747.41729  | -368.33650  | 371.96345   | 1 |
| 25888 | H | 74.10400 | 68.14980 | 85.14490 | 2986.10525  | -698.14654  | -696.97013  | 1 |
| 25889 | H | 73.20500 | 66.70780 | 85.55390 | -706.38084  | -2782.19233 | 1286.98793  | 1 |
| 25890 | H | 73.77200 | 66.98480 | 83.81490 | 2025.39785  | -2217.41883 | 927.30008   | 1 |
| 25891 | C | 72.37500 | 69.33780 | 83.44090 | -765.84709  | -336.03465  | -375.15385  | 1 |
| 25892 | O | 72.35400 | 70.52480 | 83.71590 | 531.60806   | 466.83134   | 340.76811   | 1 |
| 25893 | N | 72.52600 | 68.93380 | 82.15690 | 564.12353   | -253.84989  | 566.61362   | 1 |
| 25894 | H | 72.48400 | 67.96680 | 81.91890 | -314.81308  | 2477.98286  | -1917.84791 | 1 |
| 25895 | C | 72.88600 | 69.73780 | 81.06290 | 277.65989   | 529.10933   | -691.35934  | 1 |
| 25896 | H | 73.82700 | 70.20980 | 81.30690 | -2880.40862 | 100.79266   | -1274.94318 | 1 |
| 25897 | C | 73.15900 | 68.74380 | 79.88290 | 34.36333    | 904.61594   | -118.40888  | 1 |
| 25898 | H | 72.24600 | 68.13780 | 79.70290 | 1999.54534  | -785.60437  | -2298.99484 | 1 |
| 25899 | H | 74.00200 | 68.08380 | 80.18090 | -1461.50521 | 2589.81628  | -1039.85540 | 1 |
| 25900 | C | 73.42400 | 69.35880 | 78.57890 | 802.95351   | -420.50731  | -39.22834   | 1 |
| 25901 | C | 74.73300 | 69.62180 | 78.20490 | -892.04944  | -170.97013  | 116.06176   | 1 |
| 25902 | H | 75.61300 | 69.41980 | 78.79790 | 509.71363   | -2656.48449 | 1597.86512  | 1 |
| 25903 | C | 74.94800 | 70.16980 | 76.88990 | 501.57512   | -145.89548  | 738.95212   | 1 |
| 25904 | H | 75.94500 | 70.40780 | 76.54990 | -2062.67637 | -760.48947  | -2259.37280 | 1 |
| 25905 | C | 73.86900 | 70.43680 | 76.05490 | -120.65328  | -901.44540  | -42.28973   | 1 |
| 25906 | H | 74.11800 | 70.79380 | 75.06590 | -815.94961  | 2963.08163  | -695.42788  | 1 |

|       |   |          |          |          |             |             |             |   |
|-------|---|----------|----------|----------|-------------|-------------|-------------|---|
| 25907 | C | 72.34100 | 69.62080 | 77.69590 | -642.39369  | -1.05379    | -656.00186  | 1 |
| 25908 | H | 71.31700 | 69.47980 | 78.01090 | -918.60612  | 1687.30015  | 2490.34961  | 1 |
| 25909 | C | 72.56000 | 70.16080 | 76.43590 | -553.31052  | -658.73107  | -311.56045  | 1 |
| 25910 | H | 71.70500 | 70.39580 | 75.81990 | -2803.80628 | 425.91313   | 1370.77547  | 1 |
| 25911 | C | 71.85900 | 70.76280 | 80.73490 | 357.59302   | -606.12368  | -580.26266  | 1 |
| 25912 | O | 72.02600 | 71.98080 | 80.52490 | 246.59321   | 292.18909   | 686.51055   | 1 |
| 25913 | N | 70.56600 | 70.38080 | 80.67190 | -579.23755  | 539.79530   | -304.60005  | 1 |
| 25914 | H | 70.32800 | 69.41380 | 80.71090 | 1725.41270  | 2048.84289  | -1649.50001 | 1 |
| 25915 | C | 69.44000 | 71.27380 | 80.50690 | -835.54156  | 347.39919   | -144.21704  | 1 |
| 25916 | H | 69.51600 | 71.89380 | 79.62590 | -667.86940  | -2418.62952 | -1901.53640 | 1 |
| 25917 | C | 68.15900 | 70.43480 | 80.33790 | 502.82823   | -180.23693  | 733.49378   | 1 |
| 25918 | H | 67.91400 | 69.83780 | 81.24290 | -1466.56316 | 1425.53450  | 2390.19653  | 1 |
| 25919 | H | 68.37400 | 69.74180 | 79.49790 | 1818.13835  | 2229.53619  | -1270.33072 | 1 |
| 25920 | C | 66.92100 | 71.17580 | 80.05790 | -388.14025  | -228.08235  | -797.11912  | 1 |
| 25921 | C | 66.57200 | 71.44880 | 78.74590 | -800.44749  | 442.75501   | -55.39110   | 1 |
| 25922 | H | 67.31800 | 71.24980 | 77.98990 | 977.15023   | 1485.62864  | 2591.91995  | 1 |
| 25923 | C | 65.36200 | 72.05980 | 78.40290 | -429.74261  | 560.31165   | -582.13009  | 1 |
| 25924 | H | 65.06300 | 72.19480 | 77.37390 | 2876.06108  | 178.39252   | 1249.47696  | 1 |
| 25925 | C | 64.52500 | 72.43380 | 79.47390 | 282.18653   | -522.64791  | 689.21628   | 1 |
| 25926 | H | 63.62600 | 73.01480 | 79.32790 | -1617.44121 | 2071.06712  | 1733.95866  | 1 |
| 25927 | C | 66.02700 | 71.52980 | 81.08290 | -421.25756  | -448.33810  | 674.61359   | 1 |
| 25928 | H | 66.30100 | 71.35380 | 82.11290 | -3039.23074 | -818.82495  | -131.76491  | 1 |
| 25929 | C | 64.89600 | 72.27080 | 80.79890 | 302.28465   | 560.77481   | -650.65446  | 1 |
| 25930 | H | 64.14400 | 72.56780 | 81.51590 | 2262.96875  | -344.06780  | -2154.66870 | 1 |
| 25931 | C | 69.33500 | 72.26180 | 81.71990 | 783.29873   | -102.68020  | -450.21499  | 1 |
| 25932 | O | 69.08000 | 73.41680 | 81.52690 | -377.02007  | 694.18054   | 47.02147    | 1 |
| 25933 | N | 69.63000 | 71.85980 | 82.96790 | 429.16608   | -326.31243  | 645.11695   | 1 |
| 25934 | H | 69.70200 | 70.91080 | 83.26390 | -1654.39128 | -2673.14766 | -184.08662  | 1 |
| 25935 | C | 69.74000 | 72.75980 | 84.02890 | -879.24586  | -118.37682  | -228.23466  | 1 |
| 25936 | H | 68.80600 | 73.27580 | 84.19490 | 2214.35427  | -1065.83465 | 1959.36725  | 1 |
| 25937 | C | 69.97200 | 71.99480 | 85.34890 | -259.03649  | 519.95733   | 700.32299   | 1 |
| 25938 | H | 69.16700 | 71.24180 | 85.48590 | 1963.98958  | 1789.07772  | -1682.11755 | 1 |
| 25939 | H | 70.95100 | 71.47480 | 85.41890 | -261.32279  | -3134.05308 | -142.84297  | 1 |
| 25940 | H | 69.93600 | 72.73580 | 86.17590 | -1653.36562 | 1786.38234  | 1991.95455  | 1 |
| 25941 | C | 70.81600 | 73.85580 | 83.78590 | 296.03433   | 613.59929   | 601.13933   | 1 |
| 25942 | O | 70.62400 | 75.02280 | 84.15090 | -639.07849  | -333.17333  | -333.17520  | 1 |
| 25943 | N | 71.92800 | 73.46580 | 83.15890 | 215.77116   | 687.67294   | -438.92147  | 1 |
| 25944 | H | 71.88900 | 72.59580 | 82.67490 | -2322.62746 | -1320.60787 | -1669.93115 | 1 |
| 25945 | C | 73.00100 | 74.43080 | 82.80690 | -60.52574   | 505.51068   | -758.84717  | 1 |
| 25946 | H | 73.28100 | 74.87180 | 83.75190 | 556.31376   | -260.79097  | 3082.67980  | 1 |
| 25947 | C | 74.19600 | 73.61780 | 82.23390 | -182.61564  | -426.62038  | -788.85015  | 1 |
| 25948 | H | 74.96200 | 74.36980 | 81.94790 | -94.89338   | 2301.20883  | -2146.54057 | 1 |
| 25949 | H | 73.88900 | 73.19180 | 81.25490 | -2501.11075 | 282.04569   | -1896.63157 | 1 |
| 25950 | S | 74.87400 | 72.35080 | 83.38990 | -394.92036  | 303.77970   | -260.00484  | 1 |
| 25951 | H | 73.67600 | 71.91480 | 83.75190 | 2081.38285  | -1804.24523 | 1512.43397  | 1 |
| 25952 | C | 72.62400 | 75.52980 | 81.86190 | -620.71856  | 158.62633   | 651.43853   | 1 |
| 25953 | O | 72.81800 | 76.70480 | 82.13490 | 777.95765   | -104.45792  | 11.68727    | 1 |
| 25954 | N | 71.91800 | 75.07780 | 80.72890 | -228.00471  | -529.15225  | -620.32588  | 1 |
| 25955 | H | 71.92300 | 74.09580 | 80.55290 | -2083.51628 | -2344.09634 | -286.47068  | 1 |
| 25956 | C | 71.54200 | 75.91280 | 79.63390 | 155.42880   | 285.55874   | -852.49322  | 1 |
| 25957 | H | 72.31800 | 76.64380 | 79.46390 | 682.43095   | 2638.28760  | 1569.92876  | 1 |
| 25958 | C | 71.62200 | 74.98880 | 78.37290 | -20.37741   | -543.34072  | -733.02230  | 1 |
| 25959 | H | 71.04500 | 75.42080 | 77.52690 | 541.20451   | 793.88229   | 2993.74599  | 1 |
| 25960 | H | 71.17500 | 73.99780 | 78.60090 | 1742.37550  | -1666.60932 | -2017.66499 | 1 |
| 25961 | C | 73.02200 | 74.78780 | 77.81290 | 61.70109    | 602.11210   | 680.60857   | 1 |
| 25962 | C | 73.70700 | 73.56580 | 77.87990 | 102.69375   | 663.89250   | -620.15308  | 1 |
| 25963 | H | 73.23900 | 72.61380 | 78.08190 | 2247.23856  | 600.46480   | 2110.13018  | 1 |
| 25964 | N | 74.94100 | 73.72080 | 77.23790 | 658.75799   | -433.39922  | -288.91116  | 1 |
| 25965 | H | 75.57100 | 73.04880 | 76.91690 | -2964.47081 | -152.45527  | -1061.65727 | 1 |
| 25966 | C | 75.03800 | 74.99780 | 76.86390 | 312.39758   | -446.40941  | 724.64360   | 1 |
| 25967 | C | 73.88500 | 75.72880 | 77.20590 | 95.39523    | -664.22236  | -616.48672  | 1 |
| 25968 | C | 73.84600 | 77.15180 | 77.05090 | 595.93544   | -457.06153  | 506.73611   | 1 |

|       |   |          |          |          |             |             |             |   |
|-------|---|----------|----------|----------|-------------|-------------|-------------|---|
| 25969 | H | 72.96800 | 77.73480 | 77.28890 | -108.41052  | 3140.34280  | 190.57743   | 1 |
| 25970 | C | 74.99200 | 77.74080 | 76.45190 | -391.25899  | -654.92157  | -502.97887  | 1 |
| 25971 | H | 74.97600 | 78.77380 | 76.13690 | 2071.13153  | 2364.85940  | -10.34101   | 1 |
| 25972 | C | 76.13500 | 75.64780 | 76.26290 | 267.79791   | 367.50781   | -792.10054  | 1 |
| 25973 | H | 77.00800 | 75.08280 | 75.96990 | -1850.58696 | -2078.20722 | -1474.87729 | 1 |
| 25974 | C | 76.07400 | 77.02980 | 76.04390 | 259.28936   | 717.23029   | 497.99242   | 1 |
| 25975 | H | 76.95300 | 77.55880 | 75.70590 | -2234.26855 | 1243.81347  | -1844.85262 | 1 |
| 25976 | C | 70.21200 | 76.64580 | 79.76090 | -796.44164  | 346.90135   | 291.78737   | 1 |
| 25977 | O | 70.11700 | 77.79280 | 79.22390 | -403.37842  | -249.72626  | 634.38027   | 1 |
| 25978 | N | 69.22300 | 76.15280 | 80.47990 | -743.90175  | 392.56767   | 112.15853   | 1 |
| 25979 | H | 69.32500 | 75.27080 | 80.93290 | -2387.91572 | 1962.98996  | 603.40948   | 1 |
| 25980 | C | 67.91700 | 76.79680 | 80.50690 | -234.14640  | -612.77389  | 635.35631   | 1 |
| 25981 | H | 67.50100 | 76.72480 | 79.51290 | -2657.90546 | 586.61038   | 1587.05541  | 1 |
| 25982 | C | 67.04200 | 75.89380 | 81.32190 | 248.29829   | -868.98166  | -115.39297  | 1 |
| 25983 | H | 67.50300 | 75.63980 | 82.29990 | 1789.97501  | -2444.72445 | -840.44232  | 1 |
| 25984 | H | 67.00500 | 74.91080 | 80.80590 | 2387.77954  | 1489.98580  | 1396.74492  | 1 |
| 25985 | C | 65.64000 | 76.49380 | 81.61290 | -716.85641  | -496.90060  | 280.51405   | 1 |
| 25986 | H | 65.63400 | 77.50380 | 82.07590 | -2859.88869 | -394.04495  | 1262.76110  | 1 |
| 25987 | C | 64.73900 | 76.55180 | 80.32490 | -190.84838  | -392.66461  | 802.70889   | 1 |
| 25988 | H | 64.91700 | 75.65380 | 79.69490 | 2026.34317  | -632.23737  | 2317.97766  | 1 |
| 25989 | H | 63.67100 | 76.57880 | 80.62790 | -3055.99920 | -761.67452  | -105.19469  | 1 |
| 25990 | H | 64.89500 | 77.50380 | 79.77390 | 1262.99409  | 2145.17464  | 1921.00230  | 1 |
| 25991 | C | 64.90600 | 75.60280 | 82.61490 | 213.47330   | 480.21257   | -742.69183  | 1 |
| 25992 | H | 65.60700 | 75.23780 | 83.39590 | -1781.11252 | 1896.39801  | 1771.56094  | 1 |
| 25993 | H | 64.05500 | 76.15680 | 83.06690 | 1737.97054  | -1255.56394 | -2299.26822 | 1 |
| 25994 | H | 64.60100 | 74.61180 | 82.21590 | 1324.65009  | -1924.22409 | 2105.71085  | 1 |
| 25995 | C | 67.88300 | 78.25880 | 80.97990 | -727.01793  | -420.78343  | -365.14205  | 1 |
| 25996 | O | 67.19700 | 79.02380 | 80.29190 | 486.37647   | 472.84692   | 398.38258   | 1 |
| 25997 | N | 68.52100 | 78.78280 | 82.02490 | -55.67475   | 833.14887   | -121.32656  | 1 |
| 25998 | C | 69.31500 | 77.97980 | 82.97190 | -779.60307  | 287.22913   | 384.57240   | 1 |
| 25999 | H | 68.96900 | 76.92580 | 83.03290 | -435.01923  | 2322.24841  | -2077.63935 | 1 |
| 26000 | H | 70.36000 | 78.03480 | 82.59890 | -128.46864  | -1711.82206 | 2636.96651  | 1 |
| 26001 | C | 68.47200 | 80.19080 | 82.39590 | 118.55891   | -847.70446  | -313.45492  | 1 |
| 26002 | H | 67.44000 | 80.42380 | 82.61490 | -723.12595  | -2318.46173 | -2001.57386 | 1 |
| 26003 | C | 69.25900 | 80.17180 | 83.75390 | -404.90442  | 588.93397   | -567.46988  | 1 |
| 26004 | H | 68.88300 | 80.87580 | 84.52690 | 2871.51761  | 1211.51990  | 394.31535   | 1 |
| 26005 | H | 70.32300 | 80.40280 | 83.53390 | 1013.38486  | 2830.74964  | -917.27071  | 1 |
| 26006 | C | 69.11600 | 78.74880 | 84.28590 | 821.75306   | 199.20080   | 330.00506   | 1 |
| 26007 | H | 69.94800 | 78.54280 | 84.99390 | 2716.04460  | 1573.88846  | -127.87139  | 1 |
| 26008 | H | 68.10900 | 78.61380 | 84.73490 | 1971.27042  | -1682.05559 | 1781.62244  | 1 |
| 26009 | C | 69.05500 | 81.12380 | 81.23090 | 621.74854   | 121.46666   | 651.78921   | 1 |
| 26010 | O | 68.57200 | 82.24780 | 81.04590 | 352.46462   | 669.19174   | 218.92168   | 1 |
| 26011 | N | 70.09900 | 80.67380 | 80.54090 | -763.64812  | -237.66844  | 286.47718   | 1 |
| 26012 | H | 70.39500 | 79.77580 | 80.85690 | 1825.96903  | -1978.29223 | -1621.43128 | 1 |
| 26013 | C | 70.60700 | 81.42980 | 79.40390 | -221.20548  | 877.27987   | 129.78830   | 1 |
| 26014 | H | 70.77000 | 82.44380 | 79.73990 | -1952.75811 | -2361.74275 | 728.38846   | 1 |
| 26015 | C | 71.94100 | 80.76680 | 78.92290 | 433.01949   | -738.04554  | -303.76659  | 1 |
| 26016 | H | 71.86800 | 79.65880 | 78.87490 | 1427.15967  | 866.49008   | -2663.70379 | 1 |
| 26017 | H | 72.71000 | 80.96280 | 79.70090 | 2491.99726  | -1127.55227 | 1544.77654  | 1 |
| 26018 | C | 72.44600 | 81.21980 | 77.54890 | 544.92681   | 365.19204   | -628.15294  | 1 |
| 26019 | C | 73.03200 | 82.49780 | 77.40790 | 119.30009   | 888.67053   | -168.93695  | 1 |
| 26020 | H | 73.19700 | 83.12680 | 78.26990 | 2991.19652  | -928.54855  | -215.41398  | 1 |
| 26021 | C | 73.38000 | 82.91680 | 76.12890 | -275.75226  | 689.20129   | 536.83544   | 1 |
| 26022 | H | 73.80300 | 83.90780 | 76.04790 | 279.57033   | 3047.19941  | 738.93218   | 1 |
| 26023 | C | 73.21100 | 82.08580 | 74.99290 | -491.76033  | -746.67195  | 188.57366   | 1 |
| 26024 | O | 73.66500 | 82.54480 | 73.75290 | 650.82087   | -311.22770  | -301.27528  | 1 |
| 26025 | H | 74.19700 | 83.33680 | 73.85990 | -749.00924  | 2285.61093  | 2035.27253  | 1 |
| 26026 | C | 72.14500 | 80.45680 | 76.39290 | -387.13295  | -826.71248  | -9.33084    | 1 |
| 26027 | H | 71.53000 | 79.57280 | 76.46990 | -244.03537  | -3110.59560 | -393.23317  | 1 |
| 26028 | C | 72.59800 | 80.86680 | 75.14790 | 353.69255   | -780.62741  | -296.43406  | 1 |
| 26029 | H | 72.46700 | 80.20280 | 74.30690 | 2562.29264  | -1629.33359 | -794.83973  | 1 |
| 26030 | C | 69.60500 | 81.53480 | 78.26890 | -284.92785  | -734.00912  | 463.65683   | 1 |



|       |   |          |          |          |             |             |             |   |
|-------|---|----------|----------|----------|-------------|-------------|-------------|---|
| 26031 | O | 69.34000 | 82.63880 | 77.79490 | 691.35372   | -335.39963  | 154.19752   | 1 |
| 26032 | N | 68.89900 | 80.39980 | 77.87590 | 711.51531   | 442.73410   | 47.88856    | 1 |
| 26033 | H | 69.15900 | 79.51980 | 78.26490 | -1648.75348 | -2013.70731 | -1771.79205 | 1 |
| 26034 | C | 67.79400 | 80.35980 | 76.99690 | 787.79125   | -97.55859   | -435.35576  | 1 |
| 26035 | H | 68.02800 | 80.90180 | 76.09190 | -816.63774  | -1678.82778 | -2532.08108 | 1 |
| 26036 | C | 67.37900 | 78.88380 | 76.66290 | 777.84194   | 153.26924   | -438.64669  | 1 |
| 26037 | H | 67.35800 | 78.20080 | 77.53890 | 2467.11337  | 1468.69270  | 1276.08677  | 1 |
| 26038 | H | 66.31400 | 78.74980 | 76.37590 | 1799.39135  | -973.64395  | -2383.53095 | 1 |
| 26039 | C | 68.31100 | 78.32080 | 75.65290 | -705.25669  | 501.89880   | -304.93057  | 1 |
| 26040 | C | 68.11000 | 78.68280 | 74.28590 | 533.59764   | 542.89476   | -496.15951  | 1 |
| 26041 | H | 67.23800 | 79.29980 | 74.12290 | 1009.12056  | 2084.39778  | 2129.37894  | 1 |
| 26042 | C | 68.99100 | 78.15880 | 73.25190 | 204.71512   | -687.42304  | 557.14316   | 1 |
| 26043 | H | 68.92600 | 78.57780 | 72.25790 | -1779.18635 | -169.82652  | 2594.55253  | 1 |
| 26044 | C | 69.92600 | 77.15880 | 73.58790 | -495.17626  | 114.12480   | 761.64787   | 1 |
| 26045 | O | 70.77300 | 76.70680 | 72.57590 | 617.60050   | 259.32096   | -410.18511  | 1 |
| 26046 | H | 70.57700 | 77.24380 | 71.80390 | -2377.30488 | -1730.95893 | 1128.23690  | 1 |
| 26047 | C | 69.24800 | 77.30080 | 75.92290 | 393.48833   | -445.23166  | 686.59809   | 1 |
| 26048 | H | 69.32500 | 76.81380 | 76.88390 | 2432.54882  | 1986.14299  | -108.92899  | 1 |
| 26049 | C | 70.03300 | 76.73280 | 74.90990 | 268.21968   | 483.99985   | -724.37097  | 1 |
| 26050 | H | 70.81500 | 76.02580 | 75.14390 | 1691.71228  | 2139.10077  | 1563.53039  | 1 |
| 26051 | C | 66.60900 | 81.16880 | 77.39390 | -510.15849  | 535.88567   | 541.94057   | 1 |
| 26052 | O | 66.03000 | 81.91280 | 76.59390 | -562.59245  | -29.98994   | -557.81211  | 1 |
| 26053 | N | 66.26200 | 81.14380 | 78.69490 | -430.12318  | 461.06752   | -564.22658  | 1 |
| 26054 | H | 66.72900 | 80.59280 | 79.38290 | 225.60819   | -420.10098  | -3107.63141 | 1 |
| 26055 | C | 65.22400 | 82.07880 | 79.20490 | 666.80812   | -614.12506  | -34.68515   | 1 |
| 26056 | H | 64.38800 | 81.88480 | 78.54990 | -2069.77189 | -1517.12054 | -1824.32272 | 1 |
| 26057 | C | 64.68300 | 81.72780 | 80.60790 | -837.93004  | -44.52736   | -367.49663  | 1 |
| 26058 | H | 65.60700 | 81.77480 | 81.22190 | -1930.74285 | 1277.79209  | 2137.28689  | 1 |
| 26059 | C | 63.60600 | 82.80080 | 81.01090 | 499.55969   | -398.35731  | 649.99818   | 1 |
| 26060 | H | 62.70300 | 82.86080 | 80.36690 | -2013.04249 | 1127.11753  | 2147.89753  | 1 |
| 26061 | H | 63.25600 | 82.57980 | 82.04190 | -2211.99161 | -828.61076  | 2087.93316  | 1 |
| 26062 | H | 64.00900 | 83.83280 | 81.09290 | -2816.39215 | -736.52817  | -1203.92838 | 1 |
| 26063 | C | 64.11400 | 80.29080 | 80.63890 | 606.98847   | -594.27891  | 324.62081   | 1 |
| 26064 | H | 63.25500 | 80.13980 | 79.95190 | 2843.84020  | 596.01762   | -1190.07659 | 1 |
| 26065 | H | 64.84000 | 79.61680 | 80.13490 | -1855.40709 | -2543.66909 | -90.17938   | 1 |
| 26066 | C | 63.65900 | 79.83980 | 81.99690 | 527.16891   | 447.82244   | -586.28745  | 1 |
| 26067 | H | 64.50200 | 79.89380 | 82.71890 | 2471.91691  | -658.17484  | -1823.32103 | 1 |
| 26068 | H | 63.43900 | 78.75180 | 81.95090 | 2378.40743  | -184.80357  | 2047.32749  | 1 |
| 26069 | H | 62.80200 | 80.44580 | 82.35890 | -739.15916  | 2925.35186  | 893.08802   | 1 |
| 26070 | C | 65.58000 | 83.61280 | 79.03390 | -668.87574  | -189.82880  | 600.29945   | 1 |
| 26071 | O | 64.77400 | 84.26080 | 78.37690 | -455.26397  | -99.76538   | 645.83111   | 1 |
| 26072 | N | 66.82900 | 84.06580 | 79.36490 | -671.55587  | 222.80235   | -466.74625  | 1 |
| 26073 | H | 67.45400 | 83.43180 | 79.81190 | -2956.74293 | -175.31124  | 1080.48037  | 1 |
| 26074 | C | 67.40078 | 85.35412 | 79.02015 | -223.21081  | -1124.75289 | -390.38535  | 1 |
| 26075 | H | 66.71715 | 86.02345 | 79.54725 | -3333.46391 | -1100.87742 | -224.88989  | 1 |
| 26076 | H | 68.38222 | 85.39700 | 79.47008 | 1333.06766  | 1208.35926  | -1917.99431 | 1 |
| 26077 | C | 67.40887 | 85.83971 | 77.46113 | 391.75730   | -14.17881   | -124.34231  | 1 |
| 26078 | O | 67.08620 | 86.97267 | 77.20170 | -201.29724  | -716.59464  | -233.88134  | 1 |
| 26079 | N | 67.89100 | 84.89680 | 76.61290 | 349.47837   | -661.98279  | 384.43249   | 1 |
| 26080 | H | 68.32900 | 84.14080 | 77.09390 | 881.12469   | 2663.55032  | 1424.31624  | 1 |
| 26081 | C | 67.81474 | 85.08916 | 75.15561 | 316.72632   | -381.29878  | 389.77317   | 1 |
| 26082 | H | 68.28067 | 86.10728 | 75.07271 | -227.02200  | -2682.08716 | 2721.63530  | 1 |
| 26083 | C | 68.53600 | 83.92580 | 74.53290 | -684.58583  | -543.11628  | -273.03382  | 1 |
| 26084 | H | 68.10500 | 82.98380 | 74.93690 | -1573.95899 | 1819.73773  | -2032.45044 | 1 |
| 26085 | C | 68.34900 | 83.93880 | 73.05490 | -867.92048  | 290.18588   | 100.01343   | 1 |
| 26086 | H | 67.38300 | 83.53880 | 72.67890 | 551.31919   | -3031.68844 | 617.08689   | 1 |
| 26087 | H | 68.68700 | 84.91880 | 72.65490 | -2387.55708 | 1917.70533  | 758.49530   | 1 |
| 26088 | H | 69.02400 | 83.17980 | 72.60690 | 2565.01676  | -620.57813  | -1697.45723 | 1 |
| 26089 | C | 70.05800 | 83.94780 | 74.75490 | -867.10462  | 17.60983    | 306.27352   | 1 |
| 26090 | H | 70.56200 | 83.01280 | 74.42890 | -564.66550  | 2793.94571  | 1341.61255  | 1 |
| 26091 | H | 70.17300 | 83.76380 | 75.84390 | 1851.07309  | 1315.25961  | -2170.48739 | 1 |
| 26092 | C | 71.00638 | 85.04773 | 74.12730 | 233.35418   | 130.29709   | -769.01397  | 1 |

|       |   |          |          |          |             |             |             |   |
|-------|---|----------|----------|----------|-------------|-------------|-------------|---|
| 26093 | H | 72.05045 | 84.73116 | 74.29290 | -2458.93437 | -561.74681  | 2342.08736  | 1 |
| 26094 | H | 70.79496 | 85.16983 | 73.04123 | -519.26625  | 713.06985   | 2149.31782  | 1 |
| 26095 | H | 70.89371 | 86.05715 | 74.56702 | 1279.21698  | -3681.65513 | 977.82901   | 1 |
| 26096 | C | 66.31158 | 85.12542 | 74.48889 | 67.58103    | 899.69603   | -649.11761  | 1 |
| 26097 | O | 66.12289 | 85.74582 | 73.44674 | -513.39466  | -298.60487  | 302.06003   | 1 |
| 26098 | N | 65.47600 | 84.30180 | 75.09290 | -422.70430  | 436.82380   | -588.91212  | 1 |
| 26099 | H | 65.70400 | 83.60980 | 75.77290 | -84.32858   | -2430.43684 | 1997.81685  | 1 |
| 26100 | C | 64.05600 | 84.33580 | 74.67990 | -318.30538  | 224.05262   | -824.07556  | 1 |
| 26101 | H | 64.10600 | 84.16680 | 73.61490 | -2588.17039 | -1212.04062 | -1325.50766 | 1 |
| 26102 | C | 63.18100 | 83.19080 | 75.19690 | 297.31517   | -481.66584  | 714.56729   | 1 |
| 26103 | H | 62.22600 | 83.07180 | 74.64190 | 2739.85345  | 655.49407   | 1390.24786  | 1 |
| 26104 | H | 63.77500 | 82.27180 | 75.00590 | 516.93564   | -1981.01331 | -2382.95225 | 1 |
| 26105 | O | 62.80900 | 83.14980 | 76.55590 | 282.19169   | 160.03859   | 721.07292   | 1 |
| 26106 | H | 63.47300 | 83.61580 | 77.06990 | 2988.76605  | 32.74383    | -956.87008  | 1 |
| 26107 | C | 63.42816 | 85.73776 | 75.19291 | -105.73316  | -181.78732  | -117.51521  | 1 |
| 26108 | O | 62.87711 | 86.46287 | 74.34640 | 836.22559   | -441.63126  | -782.55722  | 1 |
| 26109 | N | 63.78874 | 85.98793 | 76.39912 | -395.61382  | -196.40437  | -983.60238  | 1 |
| 26110 | H | 64.43593 | 85.39621 | 76.96558 | 904.41797   | 1308.84348  | -1083.54811 | 1 |
| 26111 | C | 63.39055 | 87.33266 | 76.87333 | 532.06221   | 114.76626   | 91.32150    | 1 |
| 26112 | H | 62.28456 | 87.44093 | 76.68986 | -123.19008  | -1610.89055 | 1749.35081  | 1 |
| 26113 | C | 63.63847 | 87.23550 | 78.43361 | 641.29091   | 1535.90231  | -295.80469  | 1 |
| 26114 | H | 63.90078 | 86.19740 | 78.78345 | 2136.87382  | -1941.39922 | -756.58838  | 1 |
| 26115 | C | 64.85234 | 88.19001 | 78.73966 | -393.71876  | 353.77115   | -388.51838  | 1 |
| 26116 | H | 65.74028 | 87.73053 | 78.17072 | 532.97029   | -899.74644  | -233.95129  | 1 |
| 26117 | H | 65.15773 | 88.34781 | 79.84242 | 1450.68392  | 1039.54496  | -2808.59620 | 1 |
| 26118 | H | 64.72237 | 89.20738 | 78.36431 | 191.00862   | 90.99088    | -2144.69751 | 1 |
| 26119 | C | 62.47247 | 87.82545 | 79.26909 | 182.36391   | 517.69630   | 1366.04128  | 1 |
| 26120 | H | 62.25632 | 88.85160 | 78.98895 | 1507.73590  | -1400.41718 | 1071.42106  | 1 |
| 26121 | H | 62.70346 | 87.88374 | 80.34061 | 370.52676   | -320.02052  | -2436.43442 | 1 |
| 26122 | C | 61.32281 | 86.79247 | 79.05237 | -171.46758  | 318.68023   | -911.07251  | 1 |
| 26123 | H | 61.29295 | 86.02270 | 79.87125 | 634.80908   | -2618.67143 | -113.65785  | 1 |
| 26124 | H | 60.30333 | 87.29116 | 79.11300 | -1581.31047 | -1031.83929 | -402.20416  | 1 |
| 26125 | H | 61.45562 | 86.27380 | 78.03817 | 5224.69184  | 2246.19457  | -968.76085  | 1 |
| 26126 | C | 64.23870 | 88.45857 | 76.14970 | 10.19393    | 355.46869   | -1094.43934 | 1 |
| 26127 | O | 63.73310 | 89.59123 | 76.19722 | 71.47336    | 104.57172   | 610.70114   | 1 |
| 26128 | N | 65.33681 | 88.07343 | 75.46835 | 920.79001   | -98.80601   | -547.80207  | 1 |
| 26129 | H | 65.44669 | 87.05880 | 75.51863 | 951.97749   | -326.01710  | 447.63485   | 1 |
| 26130 | C | 66.09565 | 88.89143 | 74.58444 | -9.30075    | -165.12219  | 235.12627   | 1 |
| 26131 | H | 65.98751 | 89.85242 | 75.12866 | 534.74015   | 1657.78500  | -2194.18131 | 1 |
| 26132 | C | 67.52405 | 88.26950 | 74.37304 | 322.09598   | 335.88707   | 322.41659   | 1 |
| 26133 | H | 67.41571 | 87.40049 | 73.63349 | 547.17046   | 1781.54348  | -3436.16214 | 1 |
| 26134 | H | 67.76088 | 87.82555 | 75.35699 | -2099.95854 | -2227.06190 | 2077.85740  | 1 |
| 26135 | C | 68.62464 | 89.37256 | 74.00782 | 19.48712    | 359.28300   | 507.98756   | 1 |
| 26136 | O | 68.64196 | 90.50173 | 74.54864 | -298.51968  | 161.60005   | 456.71935   | 1 |
| 26137 | O | 69.60751 | 88.90707 | 73.38148 | 11.87555    | -2.16048    | -713.97776  | 1 |
| 26138 | C | 65.49082 | 89.03089 | 73.09102 | -365.48193  | 143.25293   | -881.70112  | 1 |
| 26139 | O | 65.77197 | 90.05093 | 72.45394 | 261.10617   | 391.54111   | 5.59041     | 1 |
| 26140 | N | 64.83319 | 87.94755 | 72.68315 | -420.79377  | -961.46403  | 550.10938   | 1 |
| 26141 | H | 64.81067 | 87.17037 | 73.33052 | -128.83832  | -1723.99244 | 2045.15183  | 1 |
| 26142 | C | 64.20767 | 87.84646 | 71.38109 | -475.44721  | -211.18273  | 626.76679   | 1 |
| 26143 | H | 64.92377 | 88.40758 | 70.69154 | -814.05147  | -3190.70005 | -26.87409   | 1 |
| 26144 | C | 64.07103 | 86.33089 | 71.00141 | 127.34449   | -169.43598  | -481.58150  | 1 |
| 26145 | H | 63.27434 | 85.89678 | 71.63091 | -1635.40270 | 114.48509   | -1610.08087 | 1 |
| 26146 | H | 63.71775 | 86.14729 | 69.95701 | -2117.49956 | 495.33807   | 1544.36462  | 1 |
| 26147 | O | 65.34563 | 85.51732 | 70.87626 | -235.96592  | 608.34572   | -99.48785   | 1 |
| 26148 | H | 65.66658 | 85.67260 | 71.77968 | 5162.82502  | 1106.08350  | 2351.10222  | 1 |
| 26149 | C | 62.65207 | 88.29253 | 71.18469 | -467.25828  | -512.38651  | -240.78846  | 1 |
| 26150 | O | 62.20209 | 88.66368 | 70.10530 | -139.98576  | 395.56198   | 553.98488   | 1 |
| 26151 | N | 62.00778 | 88.08170 | 72.33541 | -203.40245  | 236.30986   | 352.05224   | 1 |
| 26152 | H | 62.50059 | 87.63126 | 73.11935 | 2857.17709  | 394.05425   | 2082.97252  | 1 |
| 26153 | C | 60.91711 | 88.99669 | 72.62379 | -690.35535  | 130.25855   | 416.36185   | 1 |
| 26154 | H | 60.28366 | 88.98871 | 71.68604 | 1426.35098  | -1589.17815 | 1324.39103  | 1 |

|       |   |          |          |          |             |             |             |   |
|-------|---|----------|----------|----------|-------------|-------------|-------------|---|
| 26155 | C | 60.05312 | 88.55581 | 73.84947 | -78.20829   | -571.23885  | -750.99863  | 1 |
| 26156 | H | 59.15358 | 89.18380 | 73.74755 | -3828.03485 | -323.96515  | -1078.32477 | 1 |
| 26157 | H | 60.43264 | 88.96890 | 74.78647 | 1020.12798  | -2730.15073 | -3085.04561 | 1 |
| 26158 | C | 59.77537 | 87.05741 | 74.02214 | -178.03286  | 37.94772    | 462.75133   | 1 |
| 26159 | C | 59.64820 | 86.23565 | 72.88012 | 61.09823    | -16.79619   | 159.60260   | 1 |
| 26160 | H | 59.96012 | 86.57703 | 71.89404 | -1393.57873 | 813.67080   | 143.42091   | 1 |
| 26161 | C | 59.30100 | 84.85880 | 73.12290 | 17.11612    | -616.94622  | 674.88892   | 1 |
| 26162 | H | 59.12100 | 84.20580 | 72.28090 | 1145.91002  | 2426.49186  | 1644.30462  | 1 |
| 26163 | C | 59.18800 | 84.30980 | 74.35190 | 543.01516   | -532.62079  | 498.38033   | 1 |
| 26164 | H | 59.20900 | 83.23180 | 74.40590 | -128.36272  | -1413.16777 | -2803.06246 | 1 |
| 26165 | C | 59.67756 | 86.54308 | 75.35385 | -275.16160  | -449.78105  | 972.95639   | 1 |
| 26166 | H | 60.00908 | 87.21656 | 76.16629 | -3886.05984 | 2006.99295  | 986.44231   | 1 |
| 26167 | C | 59.45112 | 85.18228 | 75.48423 | 1077.25571  | 435.46793   | 260.30406   | 1 |
| 26168 | H | 59.40800 | 84.60080 | 76.43090 | 492.51908   | 3074.37158  | 450.59690   | 1 |
| 26169 | C | 61.49539 | 90.49520 | 72.98846 | 42.08448    | -902.45893  | 197.39385   | 1 |
| 26170 | O | 60.68081 | 91.43321 | 73.16383 | 355.09419   | -112.31698  | -319.45728  | 1 |
| 26171 | N | 62.82640 | 90.59654 | 73.04309 | -287.01054  | -864.53581  | -207.02111  | 1 |
| 26172 | H | 63.19923 | 89.70841 | 72.67558 | -557.75726  | 3126.35636  | -1220.17128 | 1 |
| 26173 | C | 63.35846 | 91.91100 | 72.63797 | -1108.64419 | 532.64008   | 85.62423    | 1 |
| 26174 | H | 62.39285 | 92.41942 | 72.88480 | 118.58799   | -1982.62746 | -2303.27108 | 1 |
| 26175 | C | 64.58956 | 92.37258 | 73.46028 | 95.64733    | 548.66644   | -335.24311  | 1 |
| 26176 | H | 65.43662 | 91.97661 | 72.89517 | 1127.82182  | 1183.01578  | 1299.84149  | 1 |
| 26177 | C | 64.75361 | 93.88583 | 73.33656 | 813.42281   | 67.23960    | -24.55626   | 1 |
| 26178 | H | 64.50479 | 94.31332 | 72.32314 | -1406.44567 | -28.01055   | -1113.96697 | 1 |
| 26179 | H | 64.13704 | 94.43104 | 74.13355 | 160.05085   | 2004.78765  | 1226.04342  | 1 |
| 26180 | H | 65.85972 | 94.12950 | 73.52249 | 1055.65587  | 2830.50998  | 2183.31626  | 1 |
| 26181 | C | 64.69365 | 91.92535 | 74.87986 | -697.79056  | 40.07369    | -279.65570  | 1 |
| 26182 | H | 64.42258 | 90.81556 | 74.82926 | 3229.14121  | 310.13727   | -599.90452  | 1 |
| 26183 | H | 63.95923 | 92.36511 | 75.57237 | 1038.79755  | 796.03670   | -1864.26444 | 1 |
| 26184 | C | 66.14230 | 92.31338 | 75.44380 | 147.22975   | -233.18720  | -690.38729  | 1 |
| 26185 | H | 66.99227 | 91.86485 | 74.87587 | 1556.60762  | 165.12485   | 1570.51732  | 1 |
| 26186 | H | 66.30281 | 91.94110 | 76.47782 | -3447.68218 | -1174.20725 | -1966.75609 | 1 |
| 26187 | H | 66.42826 | 93.38346 | 75.33294 | 1782.86589  | 1513.01928  | -54.23125   | 1 |
| 26188 | C | 63.85875 | 92.19805 | 71.13555 | 405.72371   | -460.89309  | 76.08410    | 1 |
| 26189 | O | 63.75885 | 93.29205 | 70.66100 | -308.27525  | 291.74971   | 160.23549   | 1 |
| 26190 | N | 64.37419 | 91.11973 | 70.47018 | 344.87435   | -128.48304  | 14.53679    | 1 |
| 26191 | H | 64.62629 | 90.28571 | 71.08333 | 2536.78851  | -424.76992  | -4621.89963 | 1 |
| 26192 | C | 64.82153 | 91.26264 | 69.12854 | -521.65274  | 278.45660   | -180.63044  | 1 |
| 26193 | H | 65.32175 | 92.22861 | 69.03170 | 885.18517   | 18.30683    | 1260.26745  | 1 |
| 26194 | C | 65.81081 | 89.97499 | 68.91543 | 313.90853   | 858.97269   | -561.54879  | 1 |
| 26195 | H | 65.21119 | 89.06860 | 68.75432 | 4866.97346  | -2806.20745 | 2401.32630  | 1 |
| 26196 | H | 66.51135 | 89.74391 | 69.68647 | 2836.17440  | -2441.13143 | -2299.39087 | 1 |
| 26197 | C | 66.48131 | 90.25789 | 67.58719 | -44.58527   | -242.17585  | -398.07563  | 1 |
| 26198 | H | 65.89883 | 90.98391 | 67.02813 | 1217.14777  | -1132.53849 | -2732.43430 | 1 |
| 26199 | C | 67.87539 | 90.83819 | 67.71353 | -613.77310  | -265.72067  | -22.57068   | 1 |
| 26200 | H | 68.60602 | 89.96956 | 67.63942 | -2726.39390 | -1482.93927 | 2027.51905  | 1 |
| 26201 | H | 68.06975 | 91.38494 | 68.66784 | 1016.43832  | 2026.68898  | -1126.67986 | 1 |
| 26202 | H | 68.14819 | 91.46537 | 66.83089 | -2124.76667 | -1546.70339 | 306.32220   | 1 |
| 26203 | C | 66.64332 | 89.00122 | 66.71874 | -89.21730   | 12.22692    | -756.43836  | 1 |
| 26204 | H | 65.62421 | 88.50218 | 66.57331 | 478.01470   | 1101.56978  | -327.49544  | 1 |
| 26205 | H | 66.98728 | 89.32315 | 65.71417 | -409.25356  | -2725.70336 | -2073.52904 | 1 |
| 26206 | H | 67.35807 | 88.25599 | 67.19714 | 944.37158   | -1068.07855 | 716.17408   | 1 |
| 26207 | C | 63.69156 | 91.21638 | 67.95717 | -331.42678  | 443.17305   | 731.34985   | 1 |
| 26208 | O | 64.00980 | 91.83376 | 66.91957 | -16.25377   | 684.60676   | -30.83130   | 1 |
| 26209 | N | 62.59076 | 90.59016 | 68.19312 | 772.56699   | -61.98850   | 12.62729    | 1 |
| 26210 | H | 62.35509 | 90.10833 | 69.06691 | -3221.30305 | 1975.76295  | -87.31216   | 1 |
| 26211 | C | 61.43866 | 90.88581 | 67.44126 | 926.97153   | 72.84187    | -487.77884  | 1 |
| 26212 | H | 61.89625 | 91.30390 | 66.59343 | 1248.58450  | -2608.41487 | -3148.89987 | 1 |
| 26213 | C | 60.49931 | 89.58444 | 67.20379 | -439.85480  | 1080.97219  | -304.43148  | 1 |
| 26214 | H | 61.18696 | 88.70190 | 66.98503 | -2762.30384 | -3173.44284 | -1011.79568 | 1 |
| 26215 | H | 59.76695 | 89.66839 | 66.31200 | 2579.33064  | -1196.07620 | 950.28386   | 1 |
| 26216 | C | 59.69670 | 89.30012 | 68.44911 | 770.57327   | -177.28842  | -142.94917  | 1 |

|       |   |          |          |          |             |             |             |   |
|-------|---|----------|----------|----------|-------------|-------------|-------------|---|
| 26217 | H | 60.39453 | 89.50454 | 69.27502 | 492.34306   | 1975.26424  | 220.30444   | 1 |
| 26218 | C | 58.49165 | 90.24958 | 68.44575 | -422.38179  | -724.60506  | -496.07674  | 1 |
| 26219 | H | 58.80873 | 91.33605 | 68.80420 | 943.66489   | -607.43791  | -1081.20946 | 1 |
| 26220 | H | 57.75416 | 89.95454 | 69.19702 | 820.47747   | 914.01848   | 545.36953   | 1 |
| 26221 | H | 58.03829 | 90.35046 | 67.42243 | 2253.59685  | 70.39434    | 1534.01246  | 1 |
| 26222 | C | 59.26945 | 87.89155 | 68.59259 | -612.46483  | 371.52813   | -55.86090   | 1 |
| 26223 | H | 58.78004 | 87.49767 | 67.61825 | 298.46608   | 774.61087   | -3215.83891 | 1 |
| 26224 | H | 60.04788 | 87.17796 | 68.81685 | 446.36193   | -1576.12880 | -821.36977  | 1 |
| 26225 | H | 58.52397 | 87.79055 | 69.36320 | -968.75234  | -609.76074  | 179.33083   | 1 |
| 26226 | C | 60.63927 | 92.19905 | 68.15277 | 76.12491    | -382.59939  | -75.64455   | 1 |
| 26227 | O | 59.83907 | 92.71986 | 67.41279 | 337.76504   | 301.54228   | 8.04589     | 1 |
| 26228 | N | 60.85322 | 92.53387 | 69.43854 | -241.61369  | 316.97022   | 63.33964    | 1 |
| 26229 | H | 61.66256 | 92.01011 | 69.80848 | 1107.92842  | 366.90259   | 1214.05593  | 1 |
| 26230 | C | 60.51819 | 93.72357 | 70.09217 | 412.37519   | 1059.98754  | 343.41702   | 1 |
| 26231 | H | 61.17247 | 93.68332 | 70.98020 | 2280.43148  | 450.80588   | 153.66606   | 1 |
| 26232 | C | 60.80151 | 94.92176 | 69.02214 | 118.21557   | -399.85322  | 587.14757   | 1 |
| 26233 | H | 60.17996 | 94.79849 | 68.09779 | 17.70027    | -474.88715  | 459.83469   | 1 |
| 26234 | H | 60.50287 | 95.92646 | 69.42623 | -88.24799   | 592.81746   | -2289.86187 | 1 |
| 26235 | C | 62.35237 | 94.96268 | 68.84902 | 351.29532   | -349.33033  | 549.78522   | 1 |
| 26236 | H | 62.62317 | 93.92805 | 68.59010 | -1283.54499 | -231.02188  | -1241.65005 | 1 |
| 26237 | H | 62.87920 | 95.17889 | 69.77620 | 2585.90830  | -2156.13094 | 211.20691   | 1 |
| 26238 | C | 62.96955 | 95.82126 | 67.69450 | 232.92796   | -595.96978  | 1012.43179  | 1 |
| 26239 | O | 62.58275 | 95.76523 | 66.36278 | 190.94955   | 693.95188   | -273.34807  | 1 |
| 26240 | O | 63.80246 | 96.57681 | 68.15430 | -246.20492  | -701.83179  | -787.44610  | 1 |
| 26241 | C | 58.97013 | 93.64816 | 70.59635 | -158.09314  | 431.22841   | 151.08584   | 1 |
| 26242 | O | 58.09412 | 94.25863 | 70.02128 | 145.19636   | -67.15502   | 750.98462   | 1 |
| 26243 | N | 58.84099 | 92.86967 | 71.71728 | 1445.81910  | -210.32780  | -47.90628   | 1 |
| 26244 | H | 59.65331 | 92.42564 | 72.08913 | 938.25176   | -1954.49512 | 847.67636   | 1 |
| 26245 | C | 57.95491 | 93.39307 | 72.74013 | 711.61274   | 223.80041   | -27.68920   | 1 |
| 26246 | H | 57.16152 | 93.99283 | 72.21484 | 3681.78346  | 1800.10010  | 645.46875   | 1 |
| 26247 | C | 57.11403 | 92.24342 | 73.46418 | -66.69165   | -84.24614   | -1379.53620 | 1 |
| 26248 | H | 56.21869 | 92.69405 | 73.88674 | 618.22164   | 3481.23809  | -1940.66333 | 1 |
| 26249 | C | 56.58746 | 91.12869 | 72.47512 | -653.34390  | -154.45025  | 232.07451   | 1 |
| 26250 | H | 55.54775 | 90.80959 | 72.71783 | -1627.43194 | -907.95894  | 1082.12101  | 1 |
| 26251 | H | 56.64641 | 91.39427 | 71.40211 | -1310.25793 | -2782.57811 | -1985.23538 | 1 |
| 26252 | H | 57.20912 | 90.16980 | 72.52029 | 553.22697   | -608.64253  | -172.07013  | 1 |
| 26253 | C | 57.80815 | 91.42997 | 74.62387 | 1247.41801  | -299.35575  | -181.56560  | 1 |
| 26254 | H | 58.46878 | 92.01644 | 75.30018 | -2751.30086 | -538.82928  | 1224.89936  | 1 |
| 26255 | H | 58.56506 | 90.86928 | 73.97777 | -903.64895  | 285.24068   | 3427.28822  | 1 |
| 26256 | C | 56.96365 | 90.38820 | 75.41389 | -42.66666   | -375.81969  | -161.66796  | 1 |
| 26257 | H | 57.53179 | 89.49820 | 75.80348 | -1773.08063 | 9.78157     | 1756.45723  | 1 |
| 26258 | H | 56.67722 | 90.74969 | 76.46148 | 248.61059   | 1971.30371  | -750.96058  | 1 |
| 26259 | H | 56.02053 | 89.99623 | 74.94255 | 339.97995   | -2533.76794 | 1490.55134  | 1 |
| 26260 | C | 58.66241 | 94.33366 | 73.80061 | 366.65987   | -272.76666  | 215.04033   | 1 |
| 26261 | O | 58.13131 | 95.35215 | 74.13483 | 15.39616    | -277.64841  | 57.73420    | 1 |
| 26262 | N | 59.84209 | 93.86540 | 74.36582 | 146.43493   | -167.40049  | -81.07058   | 1 |
| 26263 | H | 60.25588 | 92.99137 | 73.93417 | 4609.95821  | 1521.70184  | 1569.89444  | 1 |
| 26264 | C | 60.83843 | 94.72891 | 74.96272 | -765.46809  | -1376.40536 | 47.59431    | 1 |
| 26265 | H | 60.46095 | 95.54895 | 75.54778 | -1621.49338 | -679.50519  | 1392.57319  | 1 |
| 26266 | C | 61.84069 | 93.78398 | 75.66688 | -706.23630  | 574.72999   | 985.99458   | 1 |
| 26267 | H | 62.12594 | 92.97045 | 74.99654 | -901.81883  | -995.11457  | -3686.14399 | 1 |
| 26268 | C | 62.90292 | 94.73924 | 76.32045 | -271.04482  | 433.29534   | 379.08255   | 1 |
| 26269 | H | 63.60114 | 94.18328 | 76.99980 | -1269.19692 | -1026.43743 | -3445.05014 | 1 |
| 26270 | H | 63.48816 | 95.23427 | 75.46587 | -2449.33665 | -1047.15680 | 1150.15126  | 1 |
| 26271 | H | 62.40588 | 95.50608 | 76.97491 | -1396.26967 | 1520.71536  | 1623.61158  | 1 |
| 26272 | C | 61.30975 | 93.10284 | 77.03341 | -1082.36532 | 118.40598   | -71.20131   | 1 |
| 26273 | H | 60.24540 | 93.20155 | 77.24089 | -149.49693  | 1892.41962  | 3366.43991  | 1 |
| 26274 | H | 61.81736 | 93.63396 | 77.89730 | -2065.03253 | -1753.91820 | 995.78033   | 1 |
| 26275 | C | 61.80602 | 91.61297 | 77.23291 | -848.10367  | 799.10460   | -193.58066  | 1 |
| 26276 | H | 61.29815 | 91.25452 | 78.19165 | 731.57766   | -625.28888  | -2030.60341 | 1 |
| 26277 | H | 62.87781 | 91.47325 | 77.27839 | 901.93823   | 2046.32506  | 2203.81021  | 1 |
| 26278 | H | 61.38955 | 91.00059 | 76.42649 | 259.00679   | 101.95593   | 399.94034   | 1 |

|       |   |          |           |          |             |             |             |   |
|-------|---|----------|-----------|----------|-------------|-------------|-------------|---|
| 26279 | C | 61.68636 | 95.32471  | 73.66313 | 94.44158    | -396.50568  | 142.57230   | 1 |
| 26280 | O | 61.85629 | 94.63363  | 72.63734 | -579.68634  | 324.50464   | -389.36649  | 1 |
| 26281 | N | 62.21132 | 96.46487  | 73.93212 | -17.61694   | -99.51575   | -234.76525  | 1 |
| 26282 | H | 61.83719 | 96.81919  | 74.81684 | 2078.94788  | 862.31458   | -3007.22006 | 1 |
| 26283 | C | 62.75886 | 97.31115  | 72.87472 | -66.92117   | -111.65298  | -136.78264  | 1 |
| 26284 | H | 62.92883 | 96.56965  | 72.02086 | -1002.67972 | -3735.80057 | -2115.06735 | 1 |
| 26285 | C | 61.77706 | 98.51027  | 72.62094 | 759.89808   | -240.22811  | -84.25543   | 1 |
| 26286 | H | 62.34059 | 99.52245  | 72.35778 | 4223.39334  | -2165.41534 | 5404.53568  | 1 |
| 26287 | H | 61.13968 | 98.72917  | 73.52046 | 2294.77519  | 3566.41871  | 730.26953   | 1 |
| 26288 | C | 60.74860 | 98.08598  | 71.50109 | -418.24205  | -386.73667  | 146.42344   | 1 |
| 26289 | H | 60.20421 | 98.98914  | 71.04935 | -2031.64626 | -734.07853  | 504.21615   | 1 |
| 26290 | H | 61.39200 | 97.72736  | 70.63088 | -2827.50516 | 1924.42467  | 3136.42575  | 1 |
| 26291 | C | 59.68819 | 97.04691  | 71.81127 | -501.99252  | -46.93214   | 516.77315   | 1 |
| 26292 | H | 59.33229 | 97.12683  | 72.85493 | 1385.22885  | 191.09645   | 775.17548   | 1 |
| 26293 | H | 60.13775 | 95.99468  | 71.72016 | 1047.98745  | -2277.98014 | 632.24598   | 1 |
| 26294 | C | 58.51612 | 97.35582  | 70.81296 | -427.34193  | 458.15224   | -871.21172  | 1 |
| 26295 | H | 58.17889 | 98.38253  | 70.78254 | -2841.98405 | 1313.97842  | 567.32959   | 1 |
| 26296 | H | 57.67493 | 96.66259  | 70.98488 | 672.44890   | 977.06196   | -3558.61982 | 1 |
| 26297 | N | 58.80683 | 96.95497  | 69.48036 | -814.72387  | 143.05937   | 313.25428   | 1 |
| 26298 | H | 63.29466 | 96.36679  | 65.93515 | 203.58522   | 819.21314   | 492.72393   | 1 |
| 26299 | H | 58.35555 | 96.11406  | 69.11259 | -1815.94645 | 204.37080   | -1864.27085 | 1 |
| 26300 | H | 58.60859 | 97.69916  | 68.78619 | 528.09392   | 2086.76085  | -1691.43011 | 1 |
| 26301 | C | 64.02990 | 98.06786  | 73.50597 | -6.40522    | 120.61723   | 1256.38043  | 1 |
| 26302 | O | 63.92476 | 98.98754  | 74.34412 | 290.36649   | -254.83969  | -31.14916   | 1 |
| 26303 | N | 65.14327 | 97.62891  | 72.93314 | -1026.77140 | -152.86479  | -160.84149  | 1 |
| 26304 | H | 65.04020 | 96.76330  | 72.38166 | 1195.58513  | -3501.33616 | 1185.84329  | 1 |
| 26305 | C | 66.47547 | 98.12535  | 73.21706 | -389.01507  | -438.01373  | 866.19752   | 1 |
| 26306 | H | 66.57249 | 99.29252  | 73.23279 | 2234.23851  | -1480.82772 | 1157.08637  | 1 |
| 26307 | C | 66.91320 | 97.36558  | 74.57653 | -259.74286  | -514.70272  | 435.33043   | 1 |
| 26308 | H | 68.00207 | 97.21832  | 74.71365 | 2490.15086  | 137.16427   | 978.30684   | 1 |
| 26309 | H | 66.48915 | 96.30122  | 74.60411 | 1006.35662  | -738.58260  | 1462.31408  | 1 |
| 26310 | C | 66.40008 | 98.26660  | 75.71775 | -89.50834   | 167.68473   | -503.61723  | 1 |
| 26311 | H | 65.34343 | 98.35391  | 75.69539 | -1374.63230 | -523.91457  | -3071.50512 | 1 |
| 26312 | H | 66.65252 | 97.87640  | 76.72695 | -1657.05165 | 4464.11739  | -1418.26066 | 1 |
| 26313 | C | 66.90369 | 99.77927  | 75.57627 | -333.72805  | -385.43136  | 186.94898   | 1 |
| 26314 | O | 68.01696 | 100.12734 | 75.84849 | 48.14766    | -1467.50099 | 310.68375   | 1 |
| 26315 | N | 65.91583 | 100.49239 | 74.99807 | 87.16794    | 115.04773   | 362.67302   | 1 |
| 26316 | H | 64.92239 | 100.18777 | 74.83526 | -757.01260  | 761.89600   | -387.25761  | 1 |
| 26317 | H | 66.15596 | 101.45438 | 74.53924 | 240.40426   | -3439.32142 | -2439.63484 | 1 |
| 26318 | C | 67.30322 | 97.52900  | 71.97233 | 15.90680    | 290.22721   | -154.69366  | 1 |
| 26319 | O | 66.91289 | 96.53514  | 71.36947 | -1113.64897 | 968.31676   | 59.15763    | 1 |
| 26320 | N | 68.41197 | 98.23926  | 71.79011 | -8.66012    | -192.61452  | 98.37745    | 1 |
| 26321 | H | 68.66329 | 99.10173  | 72.29002 | 838.14000   | 1596.66855  | 686.63678   | 1 |
| 26322 | C | 69.30258 | 97.79744  | 70.78729 | 419.18850   | 582.00923   | 149.09732   | 1 |
| 26323 | H | 69.70925 | 98.68787  | 70.26806 | 2863.06063  | -2329.78747 | 4052.19334  | 1 |
| 26324 | H | 68.57654 | 97.24568  | 70.12583 | -2694.03737 | 3210.27395  | -1038.23235 | 1 |
| 26325 | C | 70.40429 | 96.93164  | 71.66468 | 712.43247   | 418.51559   | -42.98648   | 1 |
| 26326 | O | 70.75192 | 97.32285  | 72.80301 | 136.40860   | 314.32996   | -105.66289  | 1 |
| 26327 | N | 71.03082 | 96.04140  | 70.98280 | 297.34679   | -418.80361  | 367.85631   | 1 |
| 26328 | H | 70.72537 | 95.68382  | 70.04331 | 2110.88390  | 526.31410   | -2804.64880 | 1 |
| 26329 | C | 71.65959 | 94.99082  | 71.74448 | 40.59260    | 33.88720    | -331.52779  | 1 |
| 26330 | H | 70.87292 | 94.76932  | 72.48349 | -933.71374  | 1898.67129  | -1321.68361 | 1 |
| 26331 | C | 72.19422 | 93.78898  | 70.83224 | 1235.25189  | 211.41764   | 789.83916   | 1 |
| 26332 | H | 72.66116 | 92.99109  | 71.48359 | 427.59256   | -256.42563  | -2226.95908 | 1 |
| 26333 | H | 73.06066 | 94.17848  | 70.27261 | 2567.90208  | -400.02588  | 473.74100   | 1 |
| 26334 | S | 70.88832 | 92.94050  | 69.74794 | -729.74287  | 417.29143   | 275.66357   | 1 |
| 26335 | C | 73.02070 | 95.54162  | 72.39733 | 359.10691   | 1395.54192  | -143.57333  | 1 |
| 26336 | O | 73.57856 | 94.91561  | 73.30554 | -214.26938  | 999.13785   | 187.68795   | 1 |
| 26337 | N | 73.50826 | 96.59140  | 71.69316 | 371.94996   | 22.24917    | -61.60296   | 1 |
| 26338 | H | 72.76802 | 97.04370  | 71.07488 | -2342.88018 | 1053.17085  | -3614.47281 | 1 |
| 26339 | C | 74.67467 | 97.39390  | 72.09786 | -514.64597  | 401.26303   | 815.98461   | 1 |
| 26340 | H | 75.38898 | 96.63609  | 72.36618 | 4252.57410  | -93.75927   | 856.25526   | 1 |

|       |   |          |           |          |             |             |             |   |
|-------|---|----------|-----------|----------|-------------|-------------|-------------|---|
| 26341 | C | 75.15254 | 98.04456  | 70.73303 | 102.66913   | -846.05079  | -1012.50748 | 1 |
| 26342 | H | 74.40512 | 98.74049  | 70.36623 | 426.21844   | -855.73619  | 864.11463   | 1 |
| 26343 | H | 75.15725 | 97.25843  | 69.95897 | 2142.60435  | 1776.42701  | 1526.10021  | 1 |
| 26344 | C | 76.51184 | 98.77497  | 70.62373 | 267.37893   | -243.10178  | -244.24267  | 1 |
| 26345 | H | 76.65333 | 99.63153  | 71.31136 | 1652.44031  | 430.08243   | 1662.67596  | 1 |
| 26346 | H | 77.31856 | 98.06769  | 70.97037 | -876.13340  | 37.75548    | 3459.70699  | 1 |
| 26347 | C | 76.70553 | 99.10998  | 68.99749 | 312.24545   | -329.85787  | 400.14049   | 1 |
| 26348 | O | 77.56519 | 99.93859  | 68.69872 | -1.81457    | 189.66540   | 201.05276   | 1 |
| 26349 | O | 76.17433 | 98.26581  | 68.23181 | -629.61490  | 308.86489   | 165.89593   | 1 |
| 26350 | C | 74.41724 | 98.47569  | 73.21490 | -737.98151  | 238.04123   | -126.44796  | 1 |
| 26351 | O | 75.29426 | 99.24068  | 73.56614 | 118.55719   | -118.28700  | -171.26768  | 1 |
| 26352 | N | 73.11141 | 98.46284  | 73.57409 | 1095.76313  | -703.57893  | 211.60404   | 1 |
| 26353 | H | 72.34991 | 97.77393  | 73.17853 | -3920.53488 | 2339.40134  | 606.88979   | 1 |
| 26354 | C | 72.94339 | 98.95364  | 74.91594 | -953.58433  | -168.55633  | -241.10395  | 1 |
| 26355 | H | 73.62685 | 99.84940  | 74.91423 | -289.45397  | -1230.29456 | 2431.24216  | 1 |
| 26356 | C | 71.36615 | 99.43940  | 74.99053 | 1098.07791  | 53.09732    | -176.41403  | 1 |
| 26357 | H | 70.92023 | 99.25563  | 73.98476 | -2878.95013 | -696.09876  | -60.06897   | 1 |
| 26358 | H | 70.85318 | 98.78404  | 75.64782 | -2717.44243 | -3542.74374 | 1681.91341  | 1 |
| 26359 | C | 71.26379 | 100.92313 | 75.34562 | -443.27852  | 685.88543   | -331.60867  | 1 |
| 26360 | C | 71.73681 | 101.04974 | 76.66189 | 312.16234   | -84.43572   | 699.96817   | 1 |
| 26361 | H | 72.18244 | 100.17444 | 77.13498 | -1404.66159 | 1430.18286  | 306.90305   | 1 |
| 26362 | C | 71.46201 | 102.28406 | 77.30295 | 594.53958   | -44.67000   | -268.28612  | 1 |
| 26363 | H | 71.67953 | 102.34801 | 78.34764 | 250.56678   | 489.20245   | -133.01696  | 1 |
| 26364 | C | 70.94506 | 103.39266 | 76.61886 | 335.29178   | -650.42116  | 30.98994    | 1 |
| 26365 | H | 70.73584 | 104.39077 | 77.14208 | -518.70862  | 1788.94679  | 1771.59508  | 1 |
| 26366 | C | 70.76749 | 102.04511 | 74.58775 | -83.39458   | 196.46581   | -94.93877   | 1 |
| 26367 | H | 70.41223 | 101.88351 | 73.52766 | 1493.48370  | -894.52116  | -575.97182  | 1 |
| 26368 | C | 70.67607 | 103.31347 | 75.22672 | 223.81114   | -219.40751  | -606.13881  | 1 |
| 26369 | H | 70.53092 | 104.22509 | 74.67042 | 1413.61237  | -2425.97005 | -1665.39234 | 1 |
| 26370 | C | 73.27432 | 97.98189  | 76.11877 | 493.47412   | 80.94648    | -494.58327  | 1 |
| 26371 | O | 73.12815 | 98.31243  | 77.30571 | 427.16915   | 397.12304   | -52.88220   | 1 |
| 26372 | N | 73.60973 | 96.77562  | 75.63406 | -1278.30153 | -85.63360   | -900.33297  | 1 |
| 26373 | H | 73.66490 | 96.62237  | 74.62287 | -186.24890  | 1753.05654  | 2504.17364  | 1 |
| 26374 | C | 72.79602 | 95.75399  | 76.26993 | 390.21731   | -587.54869  | -296.70785  | 1 |
| 26375 | H | 72.56748 | 96.22695  | 77.23916 | -424.62673  | 2976.19843  | -2778.82021 | 1 |
| 26376 | C | 71.48875 | 95.63441  | 75.31573 | 837.66077   | 268.51319   | -312.45318  | 1 |
| 26377 | H | 71.42477 | 96.47244  | 74.52908 | 3883.79841  | -2967.28623 | -1744.28345 | 1 |
| 26378 | H | 71.79537 | 94.69964  | 74.66753 | 2267.57648  | 206.86511   | -1030.75481 | 1 |
| 26379 | C | 70.18145 | 95.38167  | 76.07778 | 730.26418   | 596.96958   | 1580.06913  | 1 |
| 26380 | H | 69.77747 | 96.27921  | 76.64138 | -272.99692  | -898.04194  | -863.25979  | 1 |
| 26381 | H | 70.27893 | 94.72560  | 76.96536 | -2712.32239 | 687.45228   | 987.60355   | 1 |
| 26382 | C | 69.11170 | 94.83781  | 75.00403 | -77.02870   | -128.92451  | 1112.02307  | 1 |
| 26383 | O | 67.95366 | 94.80378  | 75.45125 | 639.39309   | 225.33357   | 33.41516    | 1 |
| 26384 | O | 69.50285 | 94.50835  | 73.88056 | 166.04799   | -175.38064  | -127.31985  | 1 |
| 26385 | C | 73.54575 | 94.35878  | 76.32979 | 452.76718   | 382.74074   | 410.89867   | 1 |
| 26386 | O | 72.91555 | 93.35238  | 76.54052 | -136.95494  | 178.99382   | 453.41926   | 1 |
| 26387 | N | 74.91473 | 94.47188  | 76.43134 | 283.08903   | -0.64068    | 1106.60702  | 1 |
| 26388 | H | 75.22291 | 95.39969  | 76.20255 | 287.48961   | -644.44174  | 1364.56035  | 1 |
| 26389 | C | 75.55146 | 93.93871  | 77.63178 | -160.32175  | 788.92707   | -65.26268   | 1 |
| 26390 | H | 75.20433 | 92.84738  | 77.63105 | -984.46211  | 2750.07433  | -118.87620  | 1 |
| 26391 | C | 77.08823 | 94.27967  | 77.42880 | -213.86053  | -1198.31943 | -97.43106   | 1 |
| 26392 | H | 77.54418 | 95.04443  | 78.09162 | -778.14937  | 280.56157   | 340.97320   | 1 |
| 26393 | H | 77.36695 | 94.62700  | 76.35331 | -1047.22632 | -763.46164  | 1883.97352  | 1 |
| 26394 | C | 77.77580 | 92.88082  | 77.65346 | 402.59357   | -296.57730  | -193.97073  | 1 |
| 26395 | O | 77.71002 | 92.20779  | 78.66854 | 618.83721   | 371.69275   | -35.39601   | 1 |
| 26396 | N | 78.17731 | 92.36407  | 76.41986 | 675.62341   | -401.54438  | -418.08252  | 1 |
| 26397 | H | 78.28738 | 92.80477  | 75.55371 | 3288.62889  | 1253.15188  | 2783.37418  | 1 |
| 26398 | H | 78.94854 | 91.71025  | 76.52297 | 2032.44890  | -2030.03956 | 2113.69471  | 1 |
| 26399 | C | 75.07004 | 94.79286  | 78.89371 | -223.11959  | 899.40939   | 1217.20500  | 1 |
| 26400 | O | 75.77846 | 95.68180  | 79.44403 | -459.51842  | 132.80903   | 30.72611    | 1 |
| 26401 | N | 73.91637 | 94.31902  | 79.22510 | 723.47068   | -416.86554  | -731.28419  | 1 |
| 26402 | H | 73.59837 | 93.45276  | 78.79372 | 502.46778   | -1040.67320 | -1561.02951 | 1 |

|       |   |          |          |          |             |             |             |   |
|-------|---|----------|----------|----------|-------------|-------------|-------------|---|
| 26403 | C | 73.09078 | 94.99581 | 80.17157 | 259.76785   | 447.90840   | -23.65653   | 1 |
| 26404 | H | 73.70095 | 95.01615 | 81.06097 | -1119.68495 | 321.23779   | 1898.68352  | 1 |
| 26405 | C | 72.70234 | 96.44703 | 79.80505 | -752.44848  | 707.06434   | 514.49026   | 1 |
| 26406 | H | 72.26608 | 96.57911 | 78.73561 | -316.29988  | -107.10392  | 398.06675   | 1 |
| 26407 | O | 74.04369 | 97.64558 | 79.69790 | -61.14743   | -1036.07269 | -194.13388  | 1 |
| 26408 | H | 73.61366 | 97.93224 | 78.76069 | -3057.50194 | 1340.46102  | 2578.62154  | 1 |
| 26409 | C | 71.77201 | 96.76217 | 80.99178 | -59.50778   | 399.37397   | 639.02946   | 1 |
| 26410 | H | 71.06403 | 95.97803 | 81.37900 | 3814.55725  | 1284.87167  | 1175.48754  | 1 |
| 26411 | H | 71.23150 | 97.72074 | 80.92736 | 2747.62284  | 2610.91809  | -1995.04514 | 1 |
| 26412 | H | 72.47046 | 96.91292 | 81.80692 | -2136.95123 | 2787.49259  | 1289.64156  | 1 |
| 26413 | C | 71.73692 | 93.93333 | 80.32849 | -425.26632  | -140.20707  | -783.45939  | 1 |
| 26414 | O | 71.38423 | 93.72748 | 81.46668 | 168.26075   | 767.79693   | -766.17591  | 1 |
| 26415 | N | 71.15351 | 93.56607 | 79.19083 | -430.90646  | 1011.63536  | 26.84908    | 1 |
| 26416 | H | 71.68308 | 94.03682 | 78.46186 | 1911.70247  | -976.13785  | -1200.60299 | 1 |
| 26417 | C | 70.36126 | 92.33572 | 79.27631 | -460.78098  | 845.60360   | -214.50704  | 1 |
| 26418 | H | 69.83881 | 92.51663 | 80.20590 | -699.09116  | 265.77888   | 809.03185   | 1 |
| 26419 | C | 69.55388 | 92.32631 | 77.91107 | 494.67628   | -410.31451  | -735.00239  | 1 |
| 26420 | H | 70.29360 | 92.54010 | 77.11581 | 331.23044   | -4985.72237 | 4.49030     | 1 |
| 26421 | C | 68.84589 | 90.96291 | 77.61614 | -102.23219  | -441.88230  | -70.93595   | 1 |
| 26422 | H | 68.26037 | 90.60628 | 78.46560 | -2216.59160 | -109.68567  | 159.96461   | 1 |
| 26423 | H | 68.15022 | 90.96024 | 76.75391 | -304.92166  | 134.54442   | -1260.10195 | 1 |
| 26424 | H | 69.59591 | 90.09490 | 77.43541 | -3240.75252 | 1189.88325  | -410.65386  | 1 |
| 26425 | C | 68.41122 | 93.36243 | 78.09859 | 369.85634   | 759.00737   | -196.67505  | 1 |
| 26426 | H | 67.70599 | 93.46045 | 77.21234 | -2867.42606 | -1287.19561 | -2396.25648 | 1 |
| 26427 | H | 67.78583 | 93.18935 | 79.05656 | 1798.45553  | 1078.46388  | -3022.08548 | 1 |
| 26428 | H | 68.91056 | 94.36999 | 78.16511 | -1624.65601 | 2006.83445  | -599.31804  | 1 |
| 26429 | C | 71.42493 | 91.15011 | 79.21620 | -198.95242  | -221.86083  | 373.47623   | 1 |
| 26430 | O | 71.40443 | 90.30422 | 80.09398 | 81.03610    | -21.81761   | -417.91380  | 1 |
| 26431 | N | 72.23854 | 91.23251 | 78.16158 | -20.58613   | 63.73459    | 454.15133   | 1 |
| 26432 | H | 72.21231 | 92.01727 | 77.50777 | 1060.53471  | 507.10811   | 2850.44066  | 1 |
| 26433 | C | 73.11616 | 90.15733 | 77.85584 | -350.00611  | 322.76177   | -214.84140  | 1 |
| 26434 | H | 72.40477 | 89.30939 | 78.11087 | -86.48972   | -992.99614  | -934.44964  | 1 |
| 26435 | C | 73.42844 | 90.24383 | 76.26887 | -728.26990  | -465.07383  | 615.40052   | 1 |
| 26436 | H | 74.20372 | 91.02815 | 76.17238 | -2979.34907 | -316.86726  | -2875.55593 | 1 |
| 26437 | H | 72.55322 | 90.59466 | 75.74608 | -614.30159  | 2855.29697  | -355.73661  | 1 |
| 26438 | N | 73.22125 | 88.01417 | 75.02132 | 110.67342   | -81.46461   | 599.43379   | 1 |
| 26439 | C | 73.90994 | 88.81521 | 75.85599 | 98.35831    | 1011.69437  | -195.19762  | 1 |
| 26440 | C | 73.95682 | 86.97575 | 74.75900 | -339.49284  | -428.97941  | 1004.57435  | 1 |
| 26441 | H | 73.63000 | 86.10828 | 74.08395 | -1410.37698 | -28.98829   | -790.28660  | 1 |
| 26442 | N | 75.17190 | 87.09319 | 75.42435 | -405.57113  | 26.28936    | -310.20670  | 1 |
| 26443 | H | 75.88148 | 86.39877 | 75.38402 | 1528.34604  | 1549.14898  | 2613.70858  | 1 |
| 26444 | C | 75.18794 | 88.18097 | 76.12324 | 98.90136    | 504.67260   | -323.48047  | 1 |
| 26445 | H | 75.98573 | 88.44367 | 76.81727 | 739.98150   | 2740.51425  | -2938.16620 | 1 |
| 26446 | C | 74.38070 | 90.19200 | 78.77559 | -39.24365   | 338.94694   | 484.13031   | 1 |
| 26447 | O | 75.22928 | 89.33635 | 78.57050 | -985.41832  | -128.67702  | -316.55324  | 1 |
| 26448 | N | 74.49408 | 91.22270 | 79.63873 | -695.33054  | -167.35818  | 594.68196   | 1 |
| 26449 | H | 73.71657 | 91.80270 | 79.85489 | 1091.94793  | -1035.50628 | 3799.09017  | 1 |
| 26450 | C | 75.38652 | 91.00062 | 80.75202 | -241.30880  | 57.46769    | -422.16192  | 1 |
| 26451 | H | 76.27142 | 90.70070 | 80.11063 | -1520.68688 | -855.24435  | -3012.81247 | 1 |
| 26452 | C | 75.55104 | 92.40586 | 81.42649 | 838.97830   | 659.67720   | -348.62373  | 1 |
| 26453 | H | 75.76321 | 93.16104 | 80.72305 | 1301.26080  | -3473.22327 | -1518.46133 | 1 |
| 26454 | H | 76.50540 | 92.42172 | 82.05783 | -984.83117  | -2413.27950 | -1056.97510 | 1 |
| 26455 | C | 74.42420 | 92.78124 | 82.43090 | -467.44354  | -155.37381  | -596.64001  | 1 |
| 26456 | H | 73.42282 | 93.06207 | 81.91068 | -1439.30214 | 1801.79267  | -1019.94306 | 1 |
| 26457 | H | 73.93201 | 91.98677 | 83.11592 | -1816.93807 | -983.60049  | -2408.20514 | 1 |
| 26458 | C | 74.98650 | 94.05347 | 83.23656 | -11.91106   | 199.70072   | 520.63316   | 1 |
| 26459 | H | 75.24872 | 94.88811 | 82.54751 | -2706.42692 | 295.25255   | -1097.34583 | 1 |
| 26460 | H | 75.93017 | 93.79874 | 83.75735 | -923.04998  | -590.70746  | -1247.34922 | 1 |
| 26461 | C | 73.95346 | 94.52049 | 84.35388 | -568.53662  | 637.20829   | -67.13207   | 1 |
| 26462 | H | 73.04969 | 95.01329 | 83.96359 | 1760.81918  | -2307.69627 | 341.91227   | 1 |
| 26463 | H | 73.57160 | 93.66704 | 85.03559 | -326.32920  | -1901.43256 | -906.94451  | 1 |
| 26464 | N | 74.70406 | 95.32386 | 85.29703 | 27.16745    | 247.90688   | -138.86168  | 1 |

|       |   |          |          |          |             |             |             |   |
|-------|---|----------|----------|----------|-------------|-------------|-------------|---|
| 26465 | H | 74.81232 | 96.90233 | 79.58416 | -690.40863  | 828.83434   | -1567.92245 | 1 |
| 26466 | H | 74.02763 | 95.75833 | 85.96860 | 3141.41497  | 2101.82021  | -444.97046  | 1 |
| 26467 | H | 75.11839 | 96.09906 | 84.80930 | 761.39311   | -2819.69798 | -1206.87044 | 1 |
| 26468 | C | 74.90833 | 89.76673 | 81.73888 | 212.19500   | -627.64802  | 210.43756   | 1 |
| 26469 | O | 75.74076 | 89.02242 | 82.29820 | -60.00488   | 413.59701   | 2.71099     | 1 |
| 26470 | N | 73.62149 | 89.73776 | 81.85724 | 621.53572   | -458.66224  | 652.50142   | 1 |
| 26471 | H | 73.10342 | 90.29482 | 81.16334 | 1152.78399  | 1734.69249  | 339.59457   | 1 |
| 26472 | C | 72.88390 | 88.97030 | 82.78158 | -297.78556  | -189.02406  | -84.15087   | 1 |
| 26473 | H | 73.51397 | 89.09134 | 83.71845 | -788.72446  | 37.65256    | -236.85020  | 1 |
| 26474 | C | 71.35588 | 89.54391 | 82.96473 | -794.64654  | 124.38731   | -600.14035  | 1 |
| 26475 | H | 70.67268 | 88.63810 | 83.04198 | 578.13713   | 90.66432    | 1345.02136  | 1 |
| 26476 | H | 70.95505 | 90.06325 | 82.02965 | 1147.11673  | 462.56177   | 2497.33530  | 1 |
| 26477 | C | 71.25524 | 90.47745 | 84.15519 | -101.80990  | -351.74049  | -74.53668   | 1 |
| 26478 | C | 71.40662 | 91.87298 | 84.19084 | -531.44570  | 463.73348   | -119.95143  | 1 |
| 26479 | H | 71.53190 | 92.55424 | 83.35244 | 3979.69522  | 2350.67742  | 1191.17184  | 1 |
| 26480 | N | 71.47686 | 92.32169 | 85.44258 | -332.22879  | -221.63165  | -374.87691  | 1 |
| 26481 | H | 71.64206 | 93.25727 | 85.78334 | -1307.27164 | -754.29541  | 1177.24397  | 1 |
| 26482 | C | 71.27656 | 91.24958 | 86.33788 | 80.29125    | 103.82601   | -598.69167  | 1 |
| 26483 | C | 71.14241 | 90.02343 | 85.57408 | 257.56206   | 438.02716   | -552.08036  | 1 |
| 26484 | C | 71.00955 | 88.73659 | 86.17362 | -102.91511  | -480.31198  | 549.00656   | 1 |
| 26485 | H | 71.02275 | 87.78923 | 85.67689 | -1558.38932 | 2109.09032  | 2235.26933  | 1 |
| 26486 | C | 70.78396 | 88.81533 | 87.57428 | -439.12104  | 639.34620   | 274.98789   | 1 |
| 26487 | H | 70.59346 | 87.81439 | 87.98433 | -515.25300  | 597.43414   | -549.05547  | 1 |
| 26488 | C | 70.98942 | 91.24005 | 87.74658 | -37.17764   | -55.99710   | -2.84805    | 1 |
| 26489 | H | 70.81732 | 92.17830 | 88.27348 | -2627.97466 | -4031.34069 | -1006.34290 | 1 |
| 26490 | C | 70.71204 | 89.99814 | 88.35154 | -472.41433  | -498.83077  | 663.40817   | 1 |
| 26491 | H | 70.27709 | 89.98094 | 89.40099 | 1136.85797  | 879.75084   | -2572.01461 | 1 |
| 26492 | C | 72.77024 | 87.47761 | 82.17959 | 691.25767   | -132.21748  | -264.63863  | 1 |
| 26493 | O | 73.08913 | 86.51448 | 82.85979 | 505.43520   | -5.65285    | -72.85124   | 1 |
| 26494 | N | 72.52931 | 87.47533 | 80.86759 | -544.67010  | 965.18622   | -392.05632  | 1 |
| 26495 | H | 71.99104 | 88.31842 | 80.64596 | -1328.40896 | 3818.78886  | -178.86468  | 1 |
| 26496 | C | 72.69701 | 86.34196 | 79.89221 | -431.25829  | -68.75649   | 477.49999   | 1 |
| 26497 | H | 71.90699 | 85.63540 | 80.20491 | 981.54481   | -1194.81100 | 1512.77445  | 1 |
| 26498 | C | 72.35605 | 86.92167 | 78.54319 | 461.40917   | 1110.03705  | -14.65166   | 1 |
| 26499 | H | 73.06665 | 87.72587 | 78.19757 | -2695.31221 | -5495.65476 | -2486.56738 | 1 |
| 26500 | C | 72.58189 | 85.80410 | 77.52087 | 369.64646   | -753.99313  | -892.31429  | 1 |
| 26501 | H | 73.43677 | 85.00790 | 77.86771 | -3629.60661 | -2860.02760 | 2040.00345  | 1 |
| 26502 | H | 72.86769 | 86.11845 | 76.49434 | -49.96206   | 2769.77061  | 830.14173   | 1 |
| 26503 | H | 71.54986 | 85.31150 | 77.34431 | 1673.88184  | -234.17643  | 2807.18701  | 1 |
| 26504 | C | 70.95533 | 87.39575 | 78.38233 | 634.16701   | -172.58628  | -647.18638  | 1 |
| 26505 | H | 70.91878 | 88.34638 | 78.98745 | -879.53625  | -435.80187  | 3248.69875  | 1 |
| 26506 | H | 70.15740 | 86.81713 | 78.93033 | -3768.51653 | 1361.14338  | -190.64108  | 1 |
| 26507 | C | 70.50806 | 87.80535 | 76.92337 | 70.63798    | 804.71539   | -85.80495   | 1 |
| 26508 | H | 70.62236 | 86.96469 | 76.24920 | -189.08086  | -2442.32605 | 2435.84595  | 1 |
| 26509 | H | 69.46674 | 88.18851 | 76.81782 | 335.72644   | -827.06515  | 2082.27210  | 1 |
| 26510 | H | 71.25204 | 88.49476 | 76.39379 | 747.17610   | -1392.46101 | 3316.37896  | 1 |
| 26511 | C | 74.21572 | 85.74486 | 79.92106 | -544.01421  | 159.80109   | 914.12804   | 1 |
| 26512 | O | 74.43095 | 84.58790 | 79.52982 | -57.34474   | 773.53321   | 261.44631   | 1 |
| 26513 | N | 75.04264 | 86.77093 | 80.02243 | 77.99243    | 139.76101   | 699.89106   | 1 |
| 26514 | H | 74.53685 | 87.61660 | 80.19378 | 2857.08941  | -2323.54242 | -393.70615  | 1 |
| 26515 | C | 76.44833 | 86.60871 | 80.11829 | 128.52567   | -249.30262  | -583.55013  | 1 |
| 26516 | H | 76.61717 | 85.84779 | 79.36498 | 318.92379   | 1257.42499  | 1178.62142  | 1 |
| 26517 | C | 77.28561 | 87.94743 | 79.84117 | 691.98208   | 631.58278   | -652.96099  | 1 |
| 26518 | H | 76.79274 | 88.12232 | 78.84842 | -3476.67039 | -1565.64703 | 1671.07063  | 1 |
| 26519 | H | 76.98342 | 88.78273 | 80.54624 | 2804.34738  | -1501.13447 | 571.74003   | 1 |
| 26520 | O | 78.74734 | 87.98496 | 79.92611 | 315.09460   | -178.51603  | -433.22117  | 1 |
| 26521 | H | 78.91346 | 88.82840 | 80.35787 | 786.41514   | 1874.65979  | 522.06428   | 1 |
| 26522 | C | 76.99194 | 85.74615 | 81.44299 | -263.27983  | 123.03977   | -357.44140  | 1 |
| 26523 | O | 77.93022 | 84.97492 | 81.37459 | 317.33843   | -785.70622  | 372.97394   | 1 |
| 26524 | N | 76.37786 | 86.30607 | 82.46720 | 594.46379   | -603.28187  | 250.99029   | 1 |
| 26525 | H | 75.70520 | 87.04050 | 82.37055 | 1457.42055  | 1610.12770  | 1936.29559  | 1 |
| 26526 | C | 76.42538 | 85.65838 | 83.83355 | 445.16203   | -448.12120  | -594.68822  | 1 |



|       |   |          |          |          |             |             |             |   |
|-------|---|----------|----------|----------|-------------|-------------|-------------|---|
| 26527 | H | 77.50666 | 85.69075 | 84.06313 | 939.50287   | -1349.65208 | 486.65194   | 1 |
| 26528 | C | 75.62352 | 86.43323 | 84.88591 | 327.58185   | 754.00069   | -1049.30762 | 1 |
| 26529 | H | 74.58706 | 86.36153 | 84.51337 | 450.27349   | 1507.24888  | -1701.07540 | 1 |
| 26530 | C | 75.78604 | 85.80468 | 86.20944 | 90.64619    | 934.54643   | 1261.62468  | 1 |
| 26531 | H | 75.08724 | 86.22366 | 86.98764 | 3836.65808  | 960.75086   | 3219.37313  | 1 |
| 26532 | H | 75.51400 | 84.69780 | 86.20590 | -1210.19279 | -2378.29733 | 1672.75445  | 1 |
| 26533 | H | 76.83669 | 85.85169 | 86.57747 | -1117.73716 | -1426.48507 | 913.61413   | 1 |
| 26534 | C | 76.17036 | 87.81689 | 85.11971 | 343.85216   | -664.62603  | 6.42475     | 1 |
| 26535 | H | 77.23306 | 87.77132 | 85.47567 | 2981.97791  | 965.69405   | -1031.90872 | 1 |
| 26536 | H | 76.17126 | 88.26046 | 84.05564 | -2821.88021 | -963.12667  | -219.03799  | 1 |
| 26537 | C | 75.45268 | 88.79831 | 86.14853 | 352.84020   | 423.62593   | -232.71522  | 1 |
| 26538 | H | 74.43302 | 89.17636 | 85.74751 | 101.93215   | -574.17761  | -997.22038  | 1 |
| 26539 | H | 76.15900 | 89.66156 | 86.46187 | -2080.80966 | 1610.23657  | -1148.60037 | 1 |
| 26540 | H | 75.15045 | 88.17383 | 87.02702 | 560.57650   | 2881.88908  | 245.78909   | 1 |
| 26541 | C | 75.78700 | 84.21280 | 83.67290 | 780.31815   | -42.05103   | -460.38069  | 1 |
| 26542 | O | 76.22800 | 83.19180 | 84.17690 | -765.27036  | -48.04301   | 208.39534   | 1 |
| 26543 | N | 74.61500 | 84.11980 | 83.04490 | 563.20368   | -188.35068  | -594.00104  | 1 |
| 26544 | H | 74.13500 | 84.95480 | 82.78790 | -344.74458  | 2869.01526  | -1243.85815 | 1 |
| 26545 | C | 73.91400 | 82.81280 | 82.88690 | -719.42455  | 390.17044   | 411.74553   | 1 |
| 26546 | H | 74.00400 | 82.22380 | 83.78790 | 622.53462   | 2152.83758  | -2205.75129 | 1 |
| 26547 | C | 72.40500 | 82.98880 | 82.63790 | 723.38832   | -305.89760  | -453.87018  | 1 |
| 26548 | H | 71.80800 | 82.06780 | 82.46190 | -1944.91760 | -1720.08361 | 1783.86333  | 1 |
| 26549 | O | 72.05500 | 83.93480 | 81.60190 | -717.74869  | -76.49643   | 334.57649   | 1 |
| 26550 | H | 72.41500 | 84.72780 | 82.00590 | 2023.09370  | -1577.95939 | -1812.74049 | 1 |
| 26551 | C | 71.88900 | 83.50080 | 83.95390 | 605.19602   | -360.84239  | 575.43011   | 1 |
| 26552 | H | 72.21200 | 84.53380 | 84.20790 | 2191.98616  | -1939.79265 | -1143.63599 | 1 |
| 26553 | H | 72.03100 | 82.81280 | 84.81390 | 1804.13016  | 83.53454    | -2571.57819 | 1 |
| 26554 | H | 70.78500 | 83.62080 | 83.92590 | -1627.98852 | -2139.21008 | -1639.27001 | 1 |
| 26555 | C | 74.57400 | 81.90580 | 81.81590 | 615.11118   | -665.98768  | 50.39140    | 1 |
| 26556 | O | 74.51000 | 80.70880 | 81.83790 | -646.40062  | 129.20151   | 442.37445   | 1 |
| 26557 | N | 75.20800 | 82.54480 | 80.80190 | 473.22167   | 678.21242   | 155.44275   | 1 |
| 26558 | H | 75.17800 | 83.52780 | 80.63590 | -843.16064  | -1004.02016 | 2862.01060  | 1 |
| 26559 | C | 76.14000 | 81.91880 | 79.89590 | 157.54242   | 868.30725   | 229.26375   | 1 |
| 26560 | H | 75.54400 | 81.19980 | 79.35290 | 2575.64173  | 1357.49996  | -1180.98157 | 1 |
| 26561 | C | 76.52300 | 82.92480 | 78.72290 | 274.80268   | 730.76521   | -469.81833  | 1 |
| 26562 | H | 75.62500 | 83.11680 | 78.09690 | 2064.45991  | -1558.99425 | -1780.98404 | 1 |
| 26563 | H | 76.66500 | 83.94280 | 79.14390 | 2168.63932  | -2264.39534 | -181.36611  | 1 |
| 26564 | C | 77.84600 | 82.66780 | 77.99590 | -617.88482  | 139.01027   | 662.10949   | 1 |
| 26565 | H | 77.88700 | 81.63180 | 77.59590 | -1871.15522 | 2012.70360  | -1543.45540 | 1 |
| 26566 | H | 78.72200 | 82.60580 | 78.67690 | 3002.02647  | -856.50807  | 331.90877   | 1 |
| 26567 | C | 78.18500 | 83.71880 | 76.95690 | -107.09657  | -886.05157  | 178.43420   | 1 |
| 26568 | O | 77.71100 | 83.55580 | 75.80090 | 688.66903   | 4.89886     | 373.05333   | 1 |
| 26569 | O | 78.82900 | 84.76080 | 77.27790 | 519.75083   | 296.00622   | 509.88549   | 1 |
| 26570 | C | 77.35300 | 81.31380 | 80.52590 | 117.92664   | 726.35021   | 537.73369   | 1 |
| 26571 | O | 77.70100 | 80.15980 | 80.26390 | -53.26553   | 738.27135   | -280.80070  | 1 |
| 26572 | N | 77.95800 | 82.09480 | 81.38790 | 495.48075   | 644.69541   | -217.44805  | 1 |
| 26573 | H | 77.75900 | 83.05180 | 81.58290 | -1885.02414 | -2215.29954 | -1206.82803 | 1 |
| 26574 | C | 79.11300 | 81.64780 | 82.15290 | -457.98023  | 500.28608   | -615.16454  | 1 |
| 26575 | H | 79.84000 | 81.34180 | 81.41590 | 780.66261   | -2555.38934 | -1658.29313 | 1 |
| 26576 | C | 79.73600 | 82.80780 | 82.92590 | 549.17241   | -702.71038  | 171.11183   | 1 |
| 26577 | H | 79.00500 | 83.27380 | 83.62090 | 1999.56534  | -30.14525   | 2423.97242  | 1 |
| 26578 | H | 80.07200 | 83.58180 | 82.20390 | 1767.14693  | -1970.10006 | 1693.77958  | 1 |
| 26579 | H | 80.64900 | 82.46280 | 83.45690 | -2.29933    | 2332.10223  | -2113.46025 | 1 |
| 26580 | C | 78.82700 | 80.48580 | 83.13890 | -369.72256  | -599.40209  | -583.64553  | 1 |
| 26581 | O | 79.55900 | 79.51980 | 83.22390 | 151.02221   | 287.45757   | 716.81727   | 1 |
| 26582 | N | 77.64800 | 80.51980 | 83.78290 | 444.56591   | 348.57190   | 622.58497   | 1 |
| 26583 | H | 77.05800 | 81.29980 | 83.58990 | 1779.18934  | 2071.99204  | -1556.86411 | 1 |
| 26584 | C | 77.12500 | 79.38880 | 84.44290 | -299.54306  | -726.86723  | 464.00053   | 1 |
| 26585 | H | 77.86300 | 79.04080 | 85.15090 | -2731.74188 | -1206.94478 | -1003.67782 | 1 |
| 26586 | C | 75.91800 | 79.80180 | 85.39390 | -762.21498  | -221.68741  | -457.36341  | 1 |
| 26587 | H | 75.08100 | 80.21480 | 84.79090 | 1544.49869  | -1156.93705 | 2481.76326  | 1 |
| 26588 | H | 75.49200 | 78.90680 | 85.89490 | 1941.08079  | 1924.31596  | -1552.78144 | 1 |

|       |   |          |          |          |             |             |             |   |
|-------|---|----------|----------|----------|-------------|-------------|-------------|---|
| 26589 | C | 76.28200 | 80.82580 | 86.48490 | -433.68999  | 80.49815    | 799.35650   | 1 |
| 26590 | H | 76.98000 | 81.55880 | 86.02790 | 3038.75223  | 526.66718   | -600.28091  | 1 |
| 26591 | C | 74.98200 | 81.56780 | 86.85190 | -743.94729  | -314.23761  | -431.80640  | 1 |
| 26592 | H | 75.18900 | 82.57080 | 87.28190 | -2664.27821 | -1224.78041 | -1151.31104 | 1 |
| 26593 | H | 74.37200 | 80.96780 | 87.56090 | 443.52838   | -2206.43547 | 2199.49783  | 1 |
| 26594 | H | 74.21300 | 81.76580 | 86.07590 | -2698.85106 | -1172.60111 | -1125.07857 | 1 |
| 26595 | C | 77.11200 | 80.14080 | 87.64290 | 466.13626   | -363.27208  | -694.04991  | 1 |
| 26596 | H | 78.19900 | 80.15580 | 87.41590 | -736.13953  | -2435.33703 | -1855.73748 | 1 |
| 26597 | H | 76.72400 | 79.10680 | 87.76490 | 761.84484   | -723.60456  | -2966.56632 | 1 |
| 26598 | H | 77.02300 | 80.76480 | 88.55790 | -1927.48794 | -2481.23504 | 223.08475   | 1 |
| 26599 | C | 76.81200 | 78.16480 | 83.60190 | -26.82592   | 583.22529   | 698.49627   | 1 |
| 26600 | O | 76.88800 | 77.02780 | 84.09590 | 681.22562   | -368.80145  | -136.66817  | 1 |
| 26601 | N | 76.40900 | 78.34580 | 82.33290 | 114.66656   | -327.71632  | -770.39121  | 1 |
| 26602 | H | 76.25200 | 79.28280 | 82.02990 | -483.74399  | 1308.05306  | -2822.50135 | 1 |
| 26603 | C | 76.00000 | 77.24280 | 81.44990 | 221.43886   | -710.22362  | 522.39625   | 1 |
| 26604 | H | 75.30300 | 76.60780 | 81.97590 | -1977.38274 | 1232.28114  | 2116.61964  | 1 |
| 26605 | C | 75.34000 | 77.71080 | 80.16190 | -751.87236  | 357.12298   | -385.50321  | 1 |
| 26606 | H | 74.36600 | 78.17280 | 80.43090 | -565.96182  | 2524.84230  | -1793.63221 | 1 |
| 26607 | H | 76.02600 | 78.35680 | 79.57290 | 2899.03508  | -1129.43192 | 425.94841   | 1 |
| 26608 | H | 75.07000 | 76.89780 | 79.45490 | -1757.36868 | -2496.71814 | 765.97636   | 1 |
| 26609 | C | 77.21500 | 76.45580 | 81.18090 | 249.35453   | 646.81953   | 588.44193   | 1 |
| 26610 | O | 77.05800 | 75.22780 | 81.01690 | 80.95629    | 473.47460   | 623.69477   | 1 |
| 26611 | N | 78.42600 | 76.99280 | 81.18490 | 353.50510   | -72.86015   | 757.92946   | 1 |
| 26612 | H | 78.51000 | 77.98480 | 81.24190 | 2126.23700  | -950.17224  | 2107.29385  | 1 |
| 26613 | C | 79.72500 | 76.37280 | 80.94990 | 785.96613   | -212.30841  | 396.94714   | 1 |
| 26614 | H | 79.67100 | 75.84580 | 80.00890 | -2584.28796 | -1693.07951 | -615.66348  | 1 |
| 26615 | C | 80.84500 | 77.40480 | 80.87490 | -632.04512  | 614.08060   | -254.32493  | 1 |
| 26616 | H | 81.81300 | 76.89780 | 80.67290 | 1825.76699  | -2196.20209 | -1313.64380 | 1 |
| 26617 | H | 80.83100 | 77.90280 | 81.86790 | -795.73915  | 1508.53313  | 2642.69033  | 1 |
| 26618 | C | 80.72800 | 78.48680 | 79.85590 | 474.14589   | 136.81949   | -766.44319  | 1 |
| 26619 | C | 79.79900 | 78.45180 | 78.78390 | -189.58507  | -154.53623  | -881.91141  | 1 |
| 26620 | H | 79.19800 | 77.57480 | 78.59390 | 1920.23573  | 2017.96696  | 1454.83543  | 1 |
| 26621 | C | 79.71500 | 79.51180 | 77.92990 | -495.83879  | -673.05800  | 366.00043   | 1 |
| 26622 | H | 78.93100 | 79.51880 | 77.18690 | -2296.60452 | 317.46210   | 2132.05000  | 1 |
| 26623 | C | 80.60300 | 80.61280 | 78.00890 | -887.28632  | 133.26319   | 193.55837   | 1 |
| 26624 | H | 80.63700 | 81.41480 | 77.28690 | -1407.85576 | -531.31333  | -2767.49837 | 1 |
| 26625 | C | 81.56500 | 79.61080 | 80.03390 | -35.74170   | 721.58742   | 556.30169   | 1 |
| 26626 | H | 82.29100 | 79.66680 | 80.83190 | -3120.79393 | 374.95255   | 228.33405   | 1 |
| 26627 | C | 81.49000 | 80.62980 | 79.09190 | -437.80542  | -323.57572  | -736.36429  | 1 |
| 26628 | H | 82.21500 | 81.42980 | 79.14390 | 983.73118   | 1267.48202  | -2707.20231 | 1 |
| 26629 | C | 80.06500 | 75.30780 | 81.89290 | 27.30115    | -618.60110  | -672.21477  | 1 |
| 26630 | O | 80.91900 | 74.45080 | 81.59690 | 669.55248   | 394.83134   | 114.57914   | 1 |
| 26631 | N | 79.44000 | 75.24380 | 83.07190 | 600.03055   | -486.27441  | -336.42566  | 1 |
| 26632 | H | 78.65900 | 75.82680 | 83.28190 | 101.08731   | 2691.73377  | 1622.30433  | 1 |
| 26633 | C | 79.63100 | 74.13880 | 83.98890 | -70.88053   | 63.60258    | 902.95116   | 1 |
| 26634 | H | 80.68900 | 74.07380 | 84.19190 | 2813.27829  | -1089.67613 | 875.60325   | 1 |
| 26635 | C | 78.87000 | 74.41180 | 85.37190 | -414.99990  | -611.29493  | -541.67634  | 1 |
| 26636 | H | 78.83600 | 73.47280 | 85.96590 | -1802.79406 | -1149.07688 | -2315.39983 | 1 |
| 26637 | H | 77.82200 | 74.75780 | 85.24390 | 735.28626   | 2930.02592  | 870.10279   | 1 |
| 26638 | C | 79.70500 | 75.33080 | 86.30090 | 12.88302    | 410.03656   | 810.08980   | 1 |
| 26639 | C | 79.44800 | 76.73280 | 86.29990 | 325.07925   | -574.76938  | -630.91415  | 1 |
| 26640 | H | 78.60500 | 77.12880 | 85.75290 | 2069.89167  | 1838.29736  | 1485.77699  | 1 |
| 26641 | C | 80.18400 | 77.60480 | 87.17890 | -242.64569  | 832.26937   | -285.37039  | 1 |
| 26642 | H | 79.91800 | 78.64980 | 87.23690 | -72.92502   | 880.94857   | -3021.71432 | 1 |
| 26643 | C | 81.22300 | 77.03480 | 87.99790 | -590.06330  | 16.44092    | -701.17183  | 1 |
| 26644 | H | 81.76900 | 77.73080 | 88.61790 | 19.09342    | -2099.49312 | 2340.94424  | 1 |
| 26645 | C | 80.73400 | 74.83380 | 87.05290 | -302.81803  | 444.90462   | -740.99522  | 1 |
| 26646 | H | 80.89600 | 73.77180 | 87.15890 | -2130.08363 | -1155.89099 | -2014.64186 | 1 |
| 26647 | C | 81.50200 | 75.61880 | 87.92690 | -216.42402  | 884.75216   | 26.57408    | 1 |
| 26648 | H | 82.33500 | 75.21480 | 88.48390 | -444.31235  | 1999.57651  | -2391.91189 | 1 |
| 26649 | C | 79.16300 | 72.79280 | 83.47990 | -516.03174  | 551.59781   | -519.39448  | 1 |
| 26650 | O | 79.55200 | 71.72080 | 84.04290 | 543.43098   | -435.00758  | -372.79849  | 1 |

|       |   |          |          |          |             |             |             |   |
|-------|---|----------|----------|----------|-------------|-------------|-------------|---|
| 26651 | N | 78.30700 | 72.68380 | 82.44790 | -842.74127  | 81.23730    | 48.92391    | 1 |
| 26652 | H | 77.94400 | 73.50180 | 82.00890 | 1034.72283  | -614.70237  | 2901.18759  | 1 |
| 26653 | C | 78.01100 | 71.39980 | 81.79690 | -313.67359  | 392.23880   | -767.87771  | 1 |
| 26654 | H | 77.51000 | 70.87580 | 82.59890 | 1351.13833  | 1384.29953  | -2484.13175 | 1 |
| 26655 | C | 77.14300 | 71.47680 | 80.57290 | -600.58337  | -476.18448  | 493.83867   | 1 |
| 26656 | H | 76.78100 | 70.46380 | 80.29490 | -989.85260  | -235.68810  | -2983.26254 | 1 |
| 26657 | H | 76.21100 | 71.97380 | 80.91690 | -391.91194  | -1088.12666 | 2922.06180  | 1 |
| 26658 | N | 77.72300 | 73.44280 | 79.04490 | 336.80945   | -769.90044  | -25.40563   | 1 |
| 26659 | H | 77.43600 | 74.19280 | 79.63990 | -1943.86398 | -1987.71228 | -1480.99796 | 1 |
| 26660 | C | 77.73900 | 72.10080 | 79.28290 | 339.14265   | 658.71439   | 525.86555   | 1 |
| 26661 | C | 78.21500 | 73.63280 | 77.79190 | -506.62262  | -648.66746  | -399.85372  | 1 |
| 26662 | H | 78.09200 | 74.62580 | 77.35890 | 2922.70215  | -606.54080  | 971.99507   | 1 |
| 26663 | N | 78.44100 | 72.46680 | 77.21390 | 484.93487   | -381.97566  | -574.05936  | 1 |
| 26664 | C | 78.16100 | 71.51680 | 78.14890 | -693.65672  | -586.15218  | 101.86778   | 1 |
| 26665 | H | 78.36500 | 70.47680 | 77.92590 | 1211.23453  | 1925.83611  | -2177.43227 | 1 |
| 26666 | C | 79.20000 | 70.61280 | 81.39290 | 730.93323   | 476.73181   | 249.08226   | 1 |
| 26667 | O | 79.29400 | 69.44680 | 81.75690 | -87.31612   | 42.16951    | -790.08111  | 1 |
| 26668 | N | 80.23700 | 71.24080 | 80.70990 | 568.52704   | 431.88150   | -451.64135  | 1 |
| 26669 | H | 80.12400 | 72.15080 | 80.31990 | -1149.65240 | -2405.00055 | -1677.19991 | 1 |
| 26670 | C | 81.53600 | 70.68980 | 80.37790 | 258.21674   | -780.87818  | -393.50393  | 1 |
| 26671 | H | 81.30400 | 69.88380 | 79.69790 | 314.79765   | -2655.03250 | -1660.70039 | 1 |
| 26672 | C | 82.43700 | 71.71380 | 79.66390 | 590.88523   | 255.48703   | -648.09388  | 1 |
| 26673 | H | 82.58700 | 72.59480 | 80.32390 | 632.99086   | 938.19797   | 2929.51452  | 1 |
| 26674 | H | 83.49300 | 71.39880 | 79.52090 | 1354.74289  | -2170.45508 | -1830.98012 | 1 |
| 26675 | S | 81.70000 | 72.38080 | 78.16590 | 94.19767    | -446.02503  | 311.04487   | 1 |
| 26676 | H | 80.97600 | 71.33580 | 77.79290 | 1219.71884  | -1563.72376 | 2432.53615  | 1 |
| 26677 | C | 82.28600 | 70.13480 | 81.59390 | -540.84005  | 550.98076   | 484.57662   | 1 |
| 26678 | O | 82.97200 | 69.12480 | 81.49390 | -436.28164  | 392.33045   | 525.78051   | 1 |
| 26679 | N | 82.03700 | 70.65580 | 82.81090 | 6.28899     | -151.64923  | 824.09626   | 1 |
| 26680 | H | 81.50900 | 71.49380 | 82.92690 | -1336.11792 | 1919.09811  | 2102.10231  | 1 |
| 26681 | C | 82.76200 | 70.16280 | 84.01490 | -512.17584  | 510.78451   | -565.19630  | 1 |
| 26682 | H | 83.68700 | 69.72280 | 83.67190 | 2439.51831  | 1691.80363  | -1041.58248 | 1 |
| 26683 | C | 82.99500 | 71.37380 | 84.95390 | 744.21846   | -516.55823  | 69.92031    | 1 |
| 26684 | H | 83.61300 | 70.98680 | 85.79290 | -2664.13642 | 1489.10131  | 767.28321   | 1 |
| 26685 | H | 82.07200 | 71.89880 | 85.27890 | -563.61484  | -2073.30590 | -2304.88871 | 1 |
| 26686 | S | 83.97900 | 72.63280 | 84.11290 | -397.01144  | 170.82368   | 351.11502   | 1 |
| 26687 | H | 85.18200 | 72.12980 | 84.34390 | -938.37215  | 707.11658   | -2926.23502 | 1 |
| 26688 | C | 81.93800 | 69.10780 | 84.71990 | -666.21271  | 500.18023   | 369.45573   | 1 |
| 26689 | O | 82.51800 | 68.29280 | 85.42290 | -492.56503  | -377.88381  | -498.13078  | 1 |
| 26690 | N | 80.65300 | 69.10580 | 84.45990 | 617.44633   | -132.70146  | 550.37538   | 1 |
| 26691 | H | 80.19800 | 69.73580 | 83.83490 | -2558.68239 | -1828.00004 | -168.48568  | 1 |
| 26692 | C | 79.68700 | 68.14480 | 85.04490 | -414.70060  | 252.94468   | -779.56284  | 1 |
| 26693 | H | 80.05800 | 67.92580 | 86.03490 | -1439.03520 | -2776.68828 | -365.24589  | 1 |
| 26694 | C | 78.28300 | 68.75380 | 85.06290 | -348.58929  | 763.02345   | 353.13191   | 1 |
| 26695 | H | 77.45500 | 68.03180 | 85.23190 | 2179.34118  | 2180.30691  | 610.28256   | 1 |
| 26696 | H | 78.09100 | 69.16680 | 84.04990 | 1965.51469  | -958.23108  | -2264.97901 | 1 |
| 26697 | C | 78.00400 | 69.82480 | 86.20890 | 18.93232    | 197.72398   | 884.25036   | 1 |
| 26698 | H | 78.90500 | 70.47180 | 86.14290 | -1127.50894 | 652.24411   | -2870.13829 | 1 |
| 26699 | C | 76.81100 | 70.73680 | 85.85990 | -445.46179  | 602.41885   | 516.27520   | 1 |
| 26700 | H | 76.67900 | 71.41480 | 86.72990 | -1427.37923 | 2301.11806  | -1606.68973 | 1 |
| 26701 | H | 77.14500 | 71.31780 | 84.97290 | -1678.51077 | 734.77856   | -2564.06769 | 1 |
| 26702 | H | 75.93600 | 70.06580 | 85.72890 | 2454.70188  | 1187.43975  | 1559.14909  | 1 |
| 26703 | C | 77.83700 | 69.07980 | 87.51390 | 256.78752   | 559.00886   | 665.26225   | 1 |
| 26704 | H | 76.86500 | 68.54180 | 87.53190 | 2628.44439  | 883.92489   | 1475.49212  | 1 |
| 26705 | H | 77.89600 | 69.81380 | 88.34590 | 1039.96745  | -1663.74612 | -2465.11651 | 1 |
| 26706 | H | 78.56200 | 68.26680 | 87.73190 | 97.91267    | 2292.23283  | 2144.86671  | 1 |
| 26707 | C | 79.65200 | 66.80780 | 84.29190 | -499.89939  | -497.87065  | 573.19609   | 1 |
| 26708 | O | 79.37600 | 65.74280 | 84.89590 | 480.47712   | -540.34317  | -321.51431  | 1 |
| 26709 | N | 79.98800 | 66.80280 | 82.99990 | 627.33225   | -66.11519   | 550.29628   | 1 |
| 26710 | H | 80.13000 | 67.65680 | 82.50490 | 1399.56376  | -2146.65873 | -1828.56647 | 1 |
| 26711 | C | 80.27200 | 65.57980 | 82.21990 | 345.04682   | -447.31261  | -721.31110  | 1 |
| 26712 | H | 79.38000 | 64.97580 | 82.30090 | 1650.38530  | 1519.17424  | -2211.71191 | 1 |

|       |   |          |          |          |             |             |             |   |
|-------|---|----------|----------|----------|-------------|-------------|-------------|---|
| 26713 | C | 80.25600 | 65.98080 | 80.69390 | -334.08369  | 572.27963   | 622.10040   | 1 |
| 26714 | H | 80.91000 | 66.86380 | 80.53090 | 2645.86741  | -535.00409  | 1601.81543  | 1 |
| 26715 | H | 79.24200 | 66.28180 | 80.35290 | 24.17996    | -799.50259  | -3049.45710 | 1 |
| 26716 | C | 80.67100 | 64.84780 | 79.76590 | 91.34875    | 864.86093   | 270.29622   | 1 |
| 26717 | O | 80.29900 | 63.70080 | 79.96890 | 491.28809   | 510.54753   | 337.64568   | 1 |
| 26718 | N | 81.33000 | 65.20580 | 78.66090 | 434.66559   | -587.78336  | -422.71164  | 1 |
| 26719 | H | 81.30100 | 66.17680 | 78.42390 | -92.79501   | 2773.24980  | -1495.12667 | 1 |
| 26720 | H | 81.92300 | 64.53680 | 78.21290 | -1624.95742 | -662.28272  | 2604.85185  | 1 |
| 26721 | C | 81.38000 | 64.62380 | 82.85090 | 824.62520   | -11.99987   | 374.33151   | 1 |
| 26722 | O | 81.10700 | 63.45380 | 83.05790 | -131.30189  | 779.54121   | -26.00616   | 1 |
| 26723 | N | 82.53700 | 65.11480 | 83.31390 | -339.31920  | -721.36209  | 271.21287   | 1 |
| 26724 | C | 83.22100 | 66.26080 | 82.69590 | 541.99876   | -110.44546  | 714.18945   | 1 |
| 26725 | H | 82.94100 | 67.16080 | 83.28390 | 1545.85470  | -2007.91833 | 1853.47843  | 1 |
| 26726 | H | 82.92800 | 66.49280 | 81.64990 | 905.93180   | -1202.84435 | -2768.61406 | 1 |
| 26727 | C | 83.43800 | 64.25680 | 84.07790 | -240.66065  | -339.22390  | -820.98939  | 1 |
| 26728 | H | 83.55400 | 63.29780 | 83.59490 | 2124.14329  | -1229.66546 | 1955.69865  | 1 |
| 26729 | C | 84.69700 | 65.12580 | 84.13990 | -796.93056  | -125.24448  | 420.87301   | 1 |
| 26730 | H | 85.61200 | 64.50480 | 84.24490 | 2279.45514  | 694.58323   | 2042.14911  | 1 |
| 26731 | H | 84.61000 | 65.77680 | 85.03590 | -1601.06150 | -1253.62059 | 2393.51044  | 1 |
| 26732 | C | 84.69800 | 65.91280 | 82.85790 | -749.02680  | -523.18608  | -22.76480   | 1 |
| 26733 | H | 85.34200 | 66.81680 | 82.82290 | 1912.45638  | -1909.98823 | -1613.38983 | 1 |
| 26734 | H | 85.02000 | 65.31480 | 81.97890 | 2193.15415  | -1269.24227 | 1850.88229  | 1 |
| 26735 | C | 82.95000 | 63.89680 | 85.48290 | 697.69511   | -16.75617   | -593.25326  | 1 |
| 26736 | O | 83.29800 | 62.85680 | 86.07890 | 428.57217   | -589.35192  | -311.73354  | 1 |
| 26737 | N | 82.18500 | 64.85480 | 86.18890 | 645.82068   | -462.76646  | 272.96605   | 1 |
| 26738 | H | 82.04200 | 65.79680 | 85.89690 | -1849.64782 | -2155.75735 | -1364.44491 | 1 |
| 26739 | C | 81.67900 | 64.58180 | 87.53990 | 885.92957   | 203.76482   | 31.83323    | 1 |
| 26740 | H | 82.46700 | 64.31080 | 88.22590 | 1309.38994  | 1452.35775  | -2471.81257 | 1 |
| 26741 | C | 80.99100 | 65.83580 | 88.13590 | -476.64914  | 755.68161   | -188.64709  | 1 |
| 26742 | H | 80.39700 | 66.35780 | 87.35590 | 2519.49885  | 1875.91449  | 122.99791   | 1 |
| 26743 | C | 80.07500 | 65.51980 | 89.33090 | -485.51541  | 740.08288   | 207.84173   | 1 |
| 26744 | H | 79.23600 | 64.80180 | 89.20790 | -1421.71086 | -681.01690  | 2716.24615  | 1 |
| 26745 | H | 79.60200 | 66.50280 | 89.53890 | -349.83941  | 1608.09408  | -2687.41356 | 1 |
| 26746 | H | 80.59200 | 65.06380 | 90.20190 | -2653.86935 | 1244.66657  | 1134.91797  | 1 |
| 26747 | C | 82.10400 | 66.82480 | 88.54790 | 341.08039   | 750.76400   | 377.33682   | 1 |
| 26748 | H | 82.94700 | 66.77280 | 87.82690 | 1058.26083  | 252.17697   | 2943.41535  | 1 |
| 26749 | H | 82.54800 | 66.39380 | 89.46990 | 209.75222   | -1466.86417 | 2768.20379  | 1 |
| 26750 | C | 81.75600 | 68.27980 | 88.67090 | 766.68587   | 473.15800   | -131.44538  | 1 |
| 26751 | H | 81.18400 | 68.37880 | 89.61690 | -1084.69897 | -2625.11562 | 1351.13845  | 1 |
| 26752 | H | 82.69900 | 68.86180 | 88.75190 | -1629.90670 | -1947.70046 | 1853.02194  | 1 |
| 26753 | H | 81.16100 | 68.59880 | 87.78890 | -1720.56889 | -507.26516  | 2579.63256  | 1 |
| 26754 | C | 80.71800 | 63.40580 | 87.53890 | 683.54933   | 525.37521   | 282.69148   | 1 |
| 26755 | O | 80.75900 | 62.52280 | 88.33690 | -298.59033  | 284.26585   | -682.36881  | 1 |
| 26756 | N | 79.82600 | 63.35580 | 86.53090 | -566.62785  | 397.63625   | -492.91382  | 1 |
| 26757 | H | 79.63700 | 64.12880 | 85.92890 | 1418.38124  | -2166.98211 | -1793.44966 | 1 |
| 26758 | C | 78.94800 | 62.20480 | 86.22690 | 1.72425     | 434.54089   | -809.68156  | 1 |
| 26759 | H | 78.49300 | 61.75780 | 87.09790 | 1786.71034  | -1480.63809 | 2115.61906  | 1 |
| 26760 | C | 77.77100 | 62.67180 | 85.34990 | -249.35766  | -653.93048  | -594.24492  | 1 |
| 26761 | H | 78.14500 | 63.09380 | 84.39290 | -1171.49152 | 2061.37804  | 2060.99536  | 1 |
| 26762 | H | 77.13300 | 61.79380 | 85.11490 | 2694.88822  | 114.66173   | 1607.88303  | 1 |
| 26763 | C | 76.80000 | 63.71180 | 86.07290 | -91.33357   | -903.89690  | 84.73427    | 1 |
| 26764 | H | 77.33300 | 64.63980 | 86.37290 | 239.21745   | 257.58420   | -3133.38059 | 1 |
| 26765 | C | 75.74100 | 64.25280 | 85.11390 | 506.58859   | -687.78010  | -324.21865  | 1 |
| 26766 | H | 76.09600 | 64.59780 | 84.11990 | 1287.60724  | -2287.00147 | -1740.47961 | 1 |
| 26767 | H | 74.99800 | 63.47780 | 84.82990 | -1472.58561 | 176.09258   | -2782.81107 | 1 |
| 26768 | H | 75.09800 | 65.00780 | 85.61490 | 2431.81597  | -1732.59108 | 981.31642   | 1 |
| 26769 | C | 76.08600 | 63.16980 | 87.28090 | -700.51006  | -474.68831  | -352.69832  | 1 |
| 26770 | H | 75.75700 | 62.14180 | 87.01690 | -445.91568  | -2546.92932 | 1787.32991  | 1 |
| 26771 | H | 76.70900 | 63.27280 | 88.19590 | 1110.91061  | 2058.54317  | 2093.75705  | 1 |
| 26772 | H | 75.17000 | 63.75080 | 87.51990 | -1082.79162 | -1746.74136 | 2377.32573  | 1 |
| 26773 | C | 79.71000 | 61.03980 | 85.48290 | 405.84824   | 566.87794   | -595.13298  | 1 |
| 26774 | O | 79.10700 | 60.24680 | 84.78490 | -161.99185  | 548.21819   | 535.70323   | 1 |

|       |   |          |          |          |             |             |             |   |
|-------|---|----------|----------|----------|-------------|-------------|-------------|---|
| 26775 | N | 81.05000 | 60.89580 | 85.67690 | 533.44919   | -565.23425  | -337.12746  | 1 |
| 26776 | H | 81.56300 | 61.63580 | 86.10390 | 1083.00552  | -1558.87255 | 2499.16215  | 1 |
| 26777 | C | 81.67900 | 59.58380 | 85.48290 | 566.41868   | -236.18358  | 662.89105   | 1 |
| 26778 | H | 80.94000 | 58.86180 | 85.16790 | -1779.55896 | 935.28051   | 2410.77127  | 1 |
| 26779 | C | 82.84300 | 59.77880 | 84.44790 | 537.99138   | -555.58610  | 470.10495   | 1 |
| 26780 | H | 83.72900 | 59.14880 | 84.67490 | 1891.56470  | 1319.59888  | 2127.45893  | 1 |
| 26781 | H | 83.19000 | 60.83380 | 84.42090 | 1058.83435  | 2830.06142  | 864.61293   | 1 |
| 26782 | C | 82.46800 | 59.21580 | 83.06090 | 636.62532   | -67.41624   | -657.69896  | 1 |
| 26783 | C | 82.09700 | 57.87180 | 82.98090 | -616.46879  | 665.01433   | -123.55983  | 1 |
| 26784 | H | 82.06500 | 57.29180 | 83.89090 | -1041.04369 | 258.09811   | -2969.56608 | 1 |
| 26785 | C | 81.76000 | 57.32380 | 81.74990 | -202.38448  | -398.99101  | 783.39511   | 1 |
| 26786 | H | 81.57400 | 56.26280 | 81.67190 | 1130.34981  | 2820.92157  | -826.66260  | 1 |
| 26787 | C | 81.73300 | 58.12080 | 80.62590 | 792.16737   | -444.58203  | -34.48110   | 1 |
| 26788 | O | 81.35100 | 57.56780 | 79.39290 | 471.29654   | 615.46945   | -160.40697  | 1 |
| 26789 | H | 80.98200 | 56.68280 | 79.44890 | -2195.96720 | -317.63284  | -2244.19934 | 1 |
| 26790 | C | 82.57200 | 59.98580 | 81.93490 | 659.83917   | -599.41313  | -188.97373  | 1 |
| 26791 | H | 82.88300 | 61.01080 | 82.07090 | 2142.39099  | -1741.45441 | -1513.40529 | 1 |
| 26792 | C | 82.18800 | 59.43480 | 80.71690 | -588.71559  | -484.68450  | -512.22335  | 1 |
| 26793 | H | 82.27300 | 60.00980 | 79.80690 | -2935.15819 | -991.50955  | 550.76615   | 1 |
| 26794 | C | 82.20300 | 59.06980 | 86.83590 | 540.15733   | 111.71175   | 714.48925   | 1 |
| 26795 | O | 82.67700 | 57.91880 | 86.94890 | 331.10550   | 30.83105    | 704.60580   | 1 |
| 26796 | N | 82.03300 | 59.88880 | 87.89690 | -706.34432  | -271.89267  | -386.88693  | 1 |
| 26797 | H | 81.63800 | 60.79980 | 87.80690 | -2287.23878 | 229.78604   | 2139.29466  | 1 |
| 26798 | C | 82.49000 | 59.51680 | 89.18790 | -429.20347  | -660.19071  | -473.10306  | 1 |
| 26799 | H | 83.47100 | 59.07480 | 89.09290 | -657.11568  | -2946.19267 | 880.94793   | 1 |
| 26800 | C | 82.64400 | 60.75380 | 90.06890 | 594.23746   | 560.14118   | -412.36388  | 1 |
| 26801 | H | 83.36700 | 60.50080 | 90.87390 | 1955.46588  | -1228.50243 | 2127.20429  | 1 |
| 26802 | H | 81.69200 | 61.08180 | 90.53790 | 2704.79006  | -865.49660  | 1344.79205  | 1 |
| 26803 | H | 83.13700 | 61.58380 | 89.51890 | -2831.82718 | -1373.82942 | -30.85665   | 1 |
| 26804 | C | 81.62000 | 58.45680 | 89.91790 | 690.34928   | 501.76332   | 306.72671   | 1 |
| 26805 | O | 80.36400 | 58.52880 | 89.88090 | 473.03440   | 532.29965   | -347.94812  | 1 |
| 26806 | N | 82.22900 | 57.62180 | 90.79390 | -74.87698   | -712.65972  | 438.65210   | 1 |
| 26807 | H | 83.21700 | 57.48780 | 90.80390 | -2531.19794 | 1333.42174  | 1295.09487  | 1 |
| 26808 | C | 81.49200 | 56.95580 | 91.86190 | -484.62087  | 580.97427   | 494.19771   | 1 |
| 26809 | H | 82.21900 | 56.51580 | 92.52890 | 416.64956   | -2022.48046 | -2387.80927 | 1 |
| 26810 | C | 80.59000 | 57.87080 | 92.75390 | -490.73562  | -662.08290  | 384.23252   | 1 |
| 26811 | H | 79.86600 | 58.38380 | 92.08590 | 1816.37410  | 1149.34821  | 2285.88985  | 1 |
| 26812 | H | 80.09300 | 57.24080 | 93.52290 | 2202.62792  | -1704.50842 | -1479.46018 | 1 |
| 26813 | C | 81.46100 | 58.86380 | 93.52190 | -583.08386  | 603.40092   | -360.55788  | 1 |
| 26814 | C | 82.52500 | 58.47380 | 94.32090 | -96.83068   | -762.18108  | 485.40403   | 1 |
| 26815 | H | 82.86400 | 57.44780 | 94.30990 | 2841.33140  | -962.60301  | 943.09466   | 1 |
| 26816 | C | 83.30600 | 59.40880 | 95.01490 | 403.18420   | 461.44573   | 662.51970   | 1 |
| 26817 | H | 84.13400 | 59.10480 | 95.63690 | 2264.94488  | -1691.66042 | -1398.49004 | 1 |
| 26818 | C | 82.96400 | 60.78380 | 94.84590 | 563.44879   | 507.20968   | 493.64990   | 1 |
| 26819 | H | 83.47000 | 61.57380 | 95.38290 | 2291.46047  | 1100.77322  | 1842.29204  | 1 |
| 26820 | C | 81.16500 | 60.24680 | 93.35090 | 630.69665   | 592.55679   | 271.39685   | 1 |
| 26821 | H | 80.29800 | 60.48480 | 92.75290 | -1223.81537 | 2157.31707  | -1941.40482 | 1 |
| 26822 | C | 81.88600 | 61.18680 | 94.02290 | -515.77355  | 731.46685   | 147.62958   | 1 |
| 26823 | H | 81.69100 | 62.24580 | 93.93990 | -140.87734  | -1689.51412 | 2643.20526  | 1 |
| 26824 | C | 80.76400 | 55.70980 | 91.43490 | -500.17464  | 188.56098   | -749.21014  | 1 |
| 26825 | O | 79.70800 | 55.31080 | 91.95290 | -20.07980   | 606.17021   | 490.74313   | 1 |
| 26826 | N | 81.30300 | 54.90280 | 90.49790 | -613.18897  | 137.01729   | -574.84867  | 1 |
| 26827 | H | 82.18100 | 55.22180 | 90.14890 | -1239.52519 | 2115.28659  | 1957.30459  | 1 |
| 26828 | C | 80.71900 | 53.68480 | 89.94390 | 612.36223   | 595.14129   | -328.81222  | 1 |
| 26829 | H | 79.65100 | 53.83680 | 89.97990 | 2834.10760  | -1176.69575 | -710.99315  | 1 |
| 26830 | C | 81.27100 | 53.31280 | 88.53290 | -560.34836  | 452.98662   | -570.11317  | 1 |
| 26831 | H | 80.83700 | 52.33080 | 88.24890 | 1578.65255  | -2693.59292 | 385.49362   | 1 |
| 26832 | H | 82.36400 | 53.11580 | 88.57390 | 1257.75788  | -2242.97224 | -1827.20116 | 1 |
| 26833 | C | 80.98500 | 54.38180 | 87.51690 | -842.38085  | 348.28366   | 7.74413     | 1 |
| 26834 | H | 81.51500 | 55.32680 | 87.76390 | 2395.00217  | -730.48098  | -1916.62867 | 1 |
| 26835 | C | 81.53700 | 54.10480 | 86.08490 | 671.22173   | -472.59731  | 384.01449   | 1 |
| 26836 | H | 81.59600 | 55.10380 | 85.60390 | -966.79973  | 2725.76877  | 1226.50630  | 1 |

|       |   |          |          |           |             |             |             |   |
|-------|---|----------|----------|-----------|-------------|-------------|-------------|---|
| 26837 | H | 82.55700 | 53.69280 | 86.23790  | -2211.60947 | -2225.26126 | -257.81645  | 1 |
| 26838 | H | 81.03200 | 53.33780 | 85.45890  | -1645.61523 | -2509.74390 | 933.98114   | 1 |
| 26839 | C | 79.54200 | 54.65580 | 87.23390  | -438.91318  | 551.49441   | -589.28025  | 1 |
| 26840 | H | 79.04100 | 54.79480 | 88.21590  | -1489.54258 | -1962.09022 | -1970.19780 | 1 |
| 26841 | H | 79.34300 | 55.38180 | 86.41690  | -2621.10783 | 1268.91685  | 1180.27756  | 1 |
| 26842 | H | 79.14800 | 53.69780 | 86.83090  | -876.22058  | -2193.97233 | 2067.27869  | 1 |
| 26843 | C | 80.97300 | 52.63780 | 90.95190  | -294.66308  | 223.74628   | 819.74815   | 1 |
| 26844 | O | 82.06500 | 52.10580 | 91.11790  | -626.47854  | 130.80062   | 447.55994   | 1 |
| 26845 | N | 79.89800 | 52.16980 | 91.66690  | 700.99672   | -393.49591  | 252.15640   | 1 |
| 26846 | H | 78.97800 | 52.45280 | 91.40590  | -681.63258  | 2386.12313  | -1942.29263 | 1 |
| 26847 | C | 80.08900 | 51.23780 | 92.72590  | -237.47494  | 599.79763   | 627.86329   | 1 |
| 26848 | H | 79.15000 | 50.75680 | 92.95390  | 2215.78107  | -2233.10999 | -167.79085  | 1 |
| 26849 | H | 80.83200 | 50.52280 | 92.40490  | -1665.28805 | 2601.75139  | -592.67696  | 1 |
| 26850 | C | 80.71500 | 51.67880 | 93.95290  | 776.65550   | -248.54192  | -426.41797  | 1 |
| 26851 | O | 81.35700 | 50.96780 | 94.71090  | 243.12424   | -651.31031  | 368.95954   | 1 |
| 26852 | N | 80.54900 | 52.96080 | 94.25390  | 211.98757   | -726.81273  | 369.09334   | 1 |
| 26853 | H | 80.17900 | 53.60180 | 93.58590  | 2803.25639  | 227.75806   | 1399.95341  | 1 |
| 26854 | C | 81.11800 | 53.58680 | 95.39990  | -685.69174  | 594.61897   | 4.05934     | 1 |
| 26855 | H | 82.06300 | 53.10980 | 95.61590  | -2112.39479 | -2276.13884 | 502.42633   | 1 |
| 26856 | C | 81.44900 | 55.05980 | 95.20090  | 16.05675    | -477.49194  | 767.20087   | 1 |
| 26857 | H | 82.12800 | 55.25980 | 94.34390  | -3142.33105 | 64.73887    | 92.46630    | 1 |
| 26858 | H | 80.47800 | 55.52680 | 94.93090  | 1236.55968  | -2887.79133 | 226.48613   | 1 |
| 26859 | H | 81.73900 | 55.58780 | 96.13490  | -2907.70078 | -1189.64873 | -179.67213  | 1 |
| 26860 | C | 80.21700 | 53.42580 | 96.59890  | 725.72974   | -559.59322  | -14.76808   | 1 |
| 26861 | O | 79.01700 | 53.23880 | 96.46890  | 633.46152   | -312.66261  | 349.01780   | 1 |
| 26862 | N | 80.81200 | 53.47280 | 97.79790  | -253.56058  | 538.26796   | 580.84249   | 1 |
| 26863 | H | 81.79700 | 53.59180 | 97.89590  | -553.73820  | 1892.11503  | 2434.83529  | 1 |
| 26864 | C | 80.10400 | 53.53380 | 99.00590  | -83.91579   | 658.51692   | 606.60021   | 1 |
| 26865 | H | 79.05200 | 53.39680 | 98.80390  | -472.42510  | 2324.38280  | -2071.82914 | 1 |
| 26866 | C | 80.72100 | 52.50880 | 100.05290 | 233.58968   | -434.99622  | -783.60778  | 1 |
| 26867 | H | 81.81400 | 52.47280 | 99.85790  | 1872.56749  | -1434.83900 | -2101.36641 | 1 |
| 26868 | H | 80.40300 | 52.62580 | 101.11090 | 2233.18072  | -1205.53046 | 1855.24459  | 1 |
| 26869 | C | 80.28200 | 51.06780 | 99.72490  | 740.64847   | 379.18767   | 360.40302   | 1 |
| 26870 | H | 80.89900 | 50.69980 | 98.87790  | -907.38103  | -2108.23571 | -2169.25623 | 1 |
| 26871 | H | 80.52600 | 50.40280 | 100.58090 | 1209.73044  | -2451.22492 | 1556.65493  | 1 |
| 26872 | C | 78.78400 | 50.94080 | 99.35690  | -217.71049  | -415.53200  | -796.90687  | 1 |
| 26873 | H | 78.65100 | 51.25080 | 98.29890  | 595.16338   | 637.83785   | -3034.80129 | 1 |
| 26874 | H | 78.23800 | 51.66280 | 100.00090 | -862.47632  | 1992.59939  | 2257.72148  | 1 |
| 26875 | C | 78.18400 | 49.58980 | 99.52590  | 659.39928   | 471.49349   | -429.22298  | 1 |
| 26876 | H | 78.30600 | 49.19080 | 100.55490 | 2214.81220  | 2199.79166  | -390.32189  | 1 |
| 26877 | H | 78.65300 | 48.87980 | 98.81090  | 2552.35577  | -729.39431  | 1682.68986  | 1 |
| 26878 | N | 76.74200 | 49.65680 | 99.25790  | 419.64495   | 488.64067   | 530.02827   | 1 |
| 26879 | H | 76.66100 | 49.91580 | 98.25390  | -1358.22428 | 737.50074   | 2724.66510  | 1 |
| 26880 | H | 76.41300 | 50.36980 | 99.93990  | 2247.84457  | -1622.33881 | 1487.61010  | 1 |
| 26881 | H | 76.27200 | 48.73580 | 99.36890  | -541.39753  | 465.54450   | 3049.52035  | 1 |
| 26882 | C | 80.22600 | 54.95980 | 99.62690  | -375.40057  | -102.13516  | -835.74657  | 1 |
| 26883 | O | 81.26600 | 55.62880 | 99.55690  | -512.39704  | -305.30105  | -529.87790  | 1 |
| 26884 | N | 79.06500 | 55.53180 | 100.15290 | 73.66002    | -573.14662  | -632.57827  | 1 |
| 26885 | H | 78.24600 | 54.96680 | 100.20890 | 2167.21604  | 2068.83019  | 941.74550   | 1 |
| 26886 | C | 78.96600 | 56.92180 | 100.51590 | -586.63207  | -559.92563  | -431.97535  | 1 |
| 26887 | H | 79.79100 | 57.47180 | 100.08790 | -1673.28905 | -839.22354  | -2539.50586 | 1 |
| 26888 | C | 77.72400 | 57.53680 | 99.83390  | 625.78443   | 193.50274   | -644.88255  | 1 |
| 26889 | H | 76.80700 | 57.08980 | 100.27490 | 1414.55464  | -2630.82724 | -1018.83450 | 1 |
| 26890 | H | 77.67100 | 58.59880 | 100.15690 | -2146.38526 | 707.25787   | -2193.92999 | 1 |
| 26891 | C | 77.84300 | 57.42380 | 98.31090  | -240.48154  | -882.54119  | 50.38544    | 1 |
| 26892 | C | 78.61700 | 58.35580 | 97.58790  | 107.15079   | -792.97961  | 437.15073   | 1 |
| 26893 | H | 79.29400 | 59.02580 | 98.09690  | -523.54230  | 2286.42711  | -2100.25588 | 1 |
| 26894 | C | 78.64100 | 58.25080 | 96.16690  | 852.53770   | -143.13388  | -306.48573  | 1 |
| 26895 | H | 79.20400 | 58.96380 | 95.58290  | -2919.23626 | 1086.50141  | 413.47539   | 1 |
| 26896 | C | 77.93600 | 57.23580 | 95.50590  | -628.64119  | -498.04666  | 426.86338   | 1 |
| 26897 | H | 78.04600 | 57.12480 | 94.43790  | 1999.98856  | 246.97922   | -2426.77750 | 1 |
| 26898 | C | 77.15700 | 56.45480 | 97.64590  | 579.92030   | -624.38988  | 328.11635   | 1 |

|       |   |          |          |           |             |             |             |   |
|-------|---|----------|----------|-----------|-------------|-------------|-------------|---|
| 26899 | H | 76.68800 | 55.65580 | 98.20190  | -265.05029  | -1298.00640 | 2845.58841  | 1 |
| 26900 | C | 77.20800 | 56.31680 | 96.28190  | 563.01934   | 441.87114   | -573.10795  | 1 |
| 26901 | H | 76.74300 | 55.47580 | 95.78890  | -1999.53975 | 2382.98360  | 427.23241   | 1 |
| 26902 | C | 78.97800 | 57.25380 | 102.00090 | -765.50594  | 342.37163   | 334.02720   | 1 |
| 26903 | O | 79.06900 | 58.41480 | 102.47090 | 128.43460   | 441.95748   | 627.39383   | 1 |
| 26904 | N | 78.95100 | 56.16180 | 102.83090 | 543.64501   | -564.88512  | -342.38822  | 1 |
| 26905 | H | 78.58300 | 55.30280 | 102.48390 | -2357.29774 | 1729.77235  | -1154.72275 | 1 |
| 26906 | C | 78.88800 | 56.33080 | 104.26790 | 679.17118   | -605.61759  | -144.88744  | 1 |
| 26907 | H | 78.72600 | 57.37580 | 104.48790 | 2701.74597  | 368.13041   | 1563.79394  | 1 |
| 26908 | C | 77.73800 | 55.52780 | 104.91990 | 588.08092   | -616.19941  | -358.26986  | 1 |
| 26909 | H | 77.73700 | 55.67180 | 106.02190 | -2147.71108 | 2278.52679  | 178.17059   | 1 |
| 26910 | H | 78.02200 | 54.47280 | 104.71790 | 858.28534   | -2379.80617 | -1893.68340 | 1 |
| 26911 | C | 76.39500 | 56.07880 | 104.37490 | -383.79535  | -464.25291  | -698.00178  | 1 |
| 26912 | H | 76.33400 | 56.03080 | 103.26590 | 2425.37538  | -1985.51195 | -359.09172  | 1 |
| 26913 | H | 76.43600 | 57.17880 | 104.52490 | 2446.90820  | 832.89736   | 1785.24220  | 1 |
| 26914 | C | 75.12500 | 55.41780 | 105.00790 | 101.32343   | -461.54444  | -795.46715  | 1 |
| 26915 | H | 74.21200 | 55.89580 | 104.59090 | -825.78325  | -2244.34704 | -2061.66732 | 1 |
| 26916 | H | 75.24900 | 55.59280 | 106.09790 | -2541.87240 | -795.10878  | -1682.31856 | 1 |
| 26917 | C | 75.05000 | 53.89580 | 104.84890 | -163.65939  | -558.79052  | -718.04817  | 1 |
| 26918 | H | 75.91600 | 53.36880 | 105.30390 | 2469.56089  | -395.49511  | -1927.35616 | 1 |
| 26919 | H | 74.88900 | 53.64780 | 103.77790 | -1769.52098 | 2588.36478  | 93.79002    | 1 |
| 26920 | N | 73.87300 | 53.41980 | 105.56690 | -546.67977  | 341.26623   | -545.45288  | 1 |
| 26921 | H | 74.07600 | 53.58480 | 106.57290 | 2819.51493  | -470.17905  | -1338.42872 | 1 |
| 26922 | H | 73.01100 | 53.99980 | 105.60990 | -236.68518  | 2570.82327  | -1794.53762 | 1 |
| 26923 | H | 73.73800 | 52.42180 | 105.30890 | 1436.11924  | 1826.99246  | 2105.46168  | 1 |
| 26924 | C | 80.16700 | 55.94380 | 104.98190 | -562.18634  | -642.96543  | 316.52428   | 1 |
| 26925 | O | 80.39300 | 56.21780 | 106.18890 | -470.53643  | -359.15762  | -535.59274  | 1 |
| 26926 | N | 81.09000 | 55.32780 | 104.18990 | -619.69063  | 43.27505    | 554.96531   | 1 |
| 26927 | H | 80.83000 | 54.95680 | 103.30190 | -1474.99399 | 1661.73147  | 2207.71545  | 1 |
| 26928 | C | 82.53200 | 55.16980 | 104.40690 | 226.13765   | 819.78284   | 300.81604   | 1 |
| 26929 | H | 82.59600 | 54.28380 | 105.02190 | -3140.20118 | -79.86815   | 57.79492    | 1 |
| 26930 | C | 83.29300 | 54.91580 | 103.09090 | 66.83758    | 737.53381   | -535.45073  | 1 |
| 26931 | H | 82.81500 | 54.08480 | 102.53090 | -1220.46249 | -2210.60774 | 1869.37159  | 1 |
| 26932 | O | 84.67700 | 54.54080 | 103.24590 | -721.25168  | -116.57650  | -305.93974  | 1 |
| 26933 | H | 84.78500 | 53.96080 | 104.00290 | -300.20061  | -2268.60807 | -2178.96832 | 1 |
| 26934 | C | 83.23200 | 56.06680 | 102.10790 | -553.19055  | -380.70547  | 605.74554   | 1 |
| 26935 | H | 83.45200 | 55.63380 | 101.10790 | -1789.32235 | -2557.03716 | 409.14435   | 1 |
| 26936 | H | 83.82700 | 56.93980 | 102.45090 | -1817.78697 | -634.51282  | 2475.59782  | 1 |
| 26937 | H | 82.23100 | 56.54280 | 102.03790 | 1183.58087  | 2418.86174  | -1631.03719 | 1 |
| 26938 | C | 83.20700 | 56.25880 | 105.24790 | -481.45484  | 570.84800   | -522.89598  | 1 |
| 26939 | O | 83.00500 | 57.44880 | 105.00190 | 551.04298   | -574.82111  | -60.89647   | 1 |
| 26940 | N | 83.99000 | 55.88980 | 106.24490 | 534.03243   | 232.42701   | -624.23858  | 1 |
| 26941 | H | 84.16600 | 54.94980 | 106.52790 | 92.68837    | -92.15621   | 3131.08234  | 1 |
| 26942 | C | 84.73700 | 56.88680 | 106.99290 | 825.62441   | -392.31486  | -109.99574  | 1 |
| 26943 | H | 84.96900 | 57.66880 | 106.28490 | -2000.53873 | 1608.73753  | -1819.11862 | 1 |
| 26944 | C | 83.91500 | 57.42980 | 108.20490 | 906.36631   | 113.15543   | -72.95035   | 1 |
| 26945 | H | 84.21500 | 58.48080 | 108.40390 | 63.17842    | -2977.20480 | 1029.07161  | 1 |
| 26946 | H | 82.85200 | 57.49980 | 107.89190 | 1202.89448  | 1388.87616  | 2539.98305  | 1 |
| 26947 | O | 83.89700 | 56.69080 | 109.40790 | -26.14491   | 767.95928   | 125.34871   | 1 |
| 26948 | H | 83.44200 | 57.18580 | 110.09290 | 1297.80650  | 1801.40383  | 2212.90352  | 1 |
| 26949 | C | 86.04500 | 56.31880 | 107.48390 | 914.97952   | -61.74150   | -10.40376   | 1 |
| 26950 | O | 86.23700 | 55.11080 | 107.49890 | 229.61591   | 378.33656   | -664.21723  | 1 |
| 26951 | N | 86.96200 | 57.19680 | 107.92490 | 597.14599   | -123.50356  | -602.85420  | 1 |
| 26952 | H | 86.55800 | 58.10780 | 107.88190 | -192.35619  | -3025.64718 | 856.28963   | 1 |
| 26953 | C | 88.24100 | 56.92680 | 108.44490 | -39.70392   | 31.43055    | -922.93234  | 1 |
| 26954 | H | 88.79900 | 56.31480 | 107.75190 | -2308.74034 | -399.30065  | 2082.40514  | 1 |
| 26955 | C | 88.99900 | 58.27680 | 108.62790 | 533.06131   | 267.21247   | -703.06754  | 1 |
| 26956 | H | 88.48300 | 58.99280 | 109.30190 | 1621.58566  | 2506.23513  | 967.89022   | 1 |
| 26957 | H | 90.03800 | 57.98680 | 108.89590 | 2283.11093  | -1524.00781 | -1565.51550 | 1 |
| 26958 | H | 89.10200 | 58.71980 | 107.61390 | -2188.71036 | -1996.25869 | 1052.30564  | 1 |
| 26959 | C | 88.23700 | 56.08880 | 109.70490 | 642.22866   | 267.23352   | 578.02159   | 1 |
| 26960 | O | 89.01500 | 55.11480 | 109.84290 | 674.29431   | -417.58623  | 81.31770    | 1 |

|       |   |          |          |           |             |             |             |   |
|-------|---|----------|----------|-----------|-------------|-------------|-------------|---|
| 26961 | N | 87.28400 | 56.41280 | 110.61790 | 548.16637   | 453.94747   | -464.45808  | 1 |
| 26962 | H | 86.91200 | 57.33580 | 110.56290 | 2027.54104  | -1421.14751 | 1940.78371  | 1 |
| 26963 | C | 86.97200 | 55.47480 | 111.74990 | -583.22133  | -420.93382  | -574.57245  | 1 |
| 26964 | H | 87.90700 | 55.26180 | 112.24790 | 2301.34493  | 482.26405   | -2108.41189 | 1 |
| 26965 | C | 85.97400 | 56.15380 | 112.70390 | -434.42365  | 325.26577   | 711.77238   | 1 |
| 26966 | H | 85.55200 | 55.42080 | 113.42490 | -2652.15769 | -446.62730  | 1611.85439  | 1 |
| 26967 | H | 85.16200 | 56.58080 | 112.07790 | 1392.34311  | -1341.84480 | 2478.04443  | 1 |
| 26968 | C | 86.51500 | 57.41880 | 113.51390 | -518.76209  | 579.66808   | 443.45980   | 1 |
| 26969 | H | 85.63700 | 57.75580 | 114.10590 | -397.27039  | -2877.35012 | -1243.82266 | 1 |
| 26970 | H | 86.86800 | 58.20880 | 112.81690 | 3085.93597  | 285.05713   | 557.56108   | 1 |
| 26971 | C | 87.65700 | 56.97980 | 114.46190 | -373.18304  | 533.00404   | -638.86655  | 1 |
| 26972 | O | 87.51800 | 56.06080 | 115.23690 | -561.92578  | -242.26106  | -509.74084  | 1 |
| 26973 | N | 88.78900 | 57.67580 | 114.32290 | 112.31106   | 827.20148   | -17.50210   | 1 |
| 26974 | H | 88.76800 | 58.52780 | 113.79990 | -1540.90061 | -1709.45619 | 2136.17914  | 1 |
| 26975 | H | 89.56800 | 57.40480 | 114.88790 | 31.83797    | -2360.60773 | -2104.68758 | 1 |
| 26976 | C | 86.38100 | 54.13380 | 111.32290 | 186.04227   | 17.84476    | -907.08440  | 1 |
| 26977 | O | 86.84900 | 53.05580 | 111.69790 | -198.53370  | -517.33565  | 554.93721   | 1 |
| 26978 | N | 85.41700 | 54.13580 | 110.31590 | -571.07270  | -506.66814  | -377.32812  | 1 |
| 26979 | H | 85.05700 | 54.93680 | 109.84490 | 1272.48260  | -2500.38249 | 1431.54664  | 1 |
| 26980 | C | 84.85500 | 52.81180 | 109.85490 | 422.34363   | 477.98314   | -662.29753  | 1 |
| 26981 | H | 84.53200 | 52.34680 | 110.77490 | 305.41600   | -736.83651  | -3060.04183 | 1 |
| 26982 | C | 83.70500 | 53.01180 | 108.93090 | -9.75433    | -684.18590  | -625.88094  | 1 |
| 26983 | H | 84.01300 | 53.65080 | 108.07590 | 1434.14690  | -2809.32224 | -123.33248  | 1 |
| 26984 | H | 83.34100 | 52.09480 | 108.41990 | 2245.34169  | -1331.23701 | -1783.46068 | 1 |
| 26985 | N | 82.20500 | 53.38680 | 110.95190 | -129.12814  | -123.37351  | -838.31457  | 1 |
| 26986 | H | 82.76300 | 52.85980 | 111.59290 | 2115.43274  | 325.34364   | -2323.35424 | 1 |
| 26987 | C | 82.52300 | 53.64980 | 109.61990 | -540.65560  | -371.89490  | 620.93352   | 1 |
| 26988 | C | 81.11100 | 54.09780 | 111.23090 | -446.76210  | 109.55486   | 770.17287   | 1 |
| 26989 | H | 80.61100 | 53.96480 | 112.18990 | 521.94149   | -1096.21733 | -2919.64429 | 1 |
| 26990 | N | 80.67200 | 54.79180 | 110.20390 | -666.45331  | -506.17666  | 108.82604   | 1 |
| 26991 | C | 81.57800 | 54.50080 | 109.14890 | -409.69791  | 161.45830   | 781.53908   | 1 |
| 26992 | H | 81.39700 | 54.85780 | 108.14190 | -2404.64671 | -1642.49524 | 1180.83233  | 1 |
| 26993 | C | 85.90800 | 51.89980 | 109.19590 | -51.36434   | 492.02505   | 745.55590   | 1 |
| 26994 | O | 85.88900 | 50.70180 | 109.38790 | 753.04817   | -263.70656  | -37.54943   | 1 |
| 26995 | N | 86.82900 | 52.50780 | 108.42890 | 440.28802   | -705.24858  | 180.35530   | 1 |
| 26996 | H | 86.68300 | 53.45680 | 108.15990 | 2068.26808  | -2382.14230 | -97.00836   | 1 |
| 26997 | C | 88.02200 | 51.87180 | 107.84890 | 687.84369   | 530.90858   | -289.39722  | 1 |
| 26998 | H | 87.57200 | 51.13580 | 107.19990 | -1838.47594 | -2546.19589 | 219.49772   | 1 |
| 26999 | C | 88.70700 | 52.92580 | 106.97790 | -738.12864  | -526.64736  | 83.75863    | 1 |
| 27000 | H | 89.07900 | 53.71380 | 107.66690 | 1487.63967  | -2251.13827 | -1647.74815 | 1 |
| 27001 | H | 88.02500 | 53.45380 | 106.27890 | 1603.01873  | -2662.02562 | 530.27210   | 1 |
| 27002 | H | 89.64100 | 52.60980 | 106.46590 | -665.85474  | 1160.27859  | 2828.39221  | 1 |
| 27003 | C | 88.99100 | 51.29980 | 108.85590 | 661.82690   | -508.57586  | -403.50394  | 1 |
| 27004 | O | 89.45100 | 50.19180 | 108.67390 | -261.51197  | -84.85822   | -755.02024  | 1 |
| 27005 | N | 89.27600 | 51.98380 | 109.97890 | -424.66527  | -558.07716  | 459.47263   | 1 |
| 27006 | H | 88.76800 | 52.80380 | 110.22890 | -905.13376  | -2832.92282 | 1030.39139  | 1 |
| 27007 | C | 90.10100 | 51.42580 | 111.06990 | -679.22628  | 543.23924   | 222.29926   | 1 |
| 27008 | H | 91.01100 | 51.07180 | 110.60790 | -931.55511  | 2643.68285  | -1424.58670 | 1 |
| 27009 | C | 90.26000 | 52.46080 | 112.19890 | -143.87362  | -562.27375  | -724.56451  | 1 |
| 27010 | H | 90.54900 | 51.99480 | 113.16490 | -2806.66635 | 1346.09134  | 364.68259   | 1 |
| 27011 | H | 89.29800 | 53.00080 | 112.32690 | -1961.06028 | 1876.47468  | 1556.88599  | 1 |
| 27012 | C | 91.46800 | 53.42280 | 111.91590 | 554.07711   | -543.53918  | 480.44117   | 1 |
| 27013 | H | 91.24700 | 53.92980 | 110.95190 | 951.11569   | -937.59130  | 2838.44685  | 1 |
| 27014 | C | 91.52600 | 54.66780 | 112.80790 | -317.99455  | -553.30851  | 641.25410   | 1 |
| 27015 | H | 91.94300 | 54.47580 | 113.81990 | -1363.63520 | -1646.74124 | -2325.95455 | 1 |
| 27016 | H | 92.19500 | 55.45480 | 112.39790 | -1476.00409 | 2647.15703  | -818.10281  | 1 |
| 27017 | H | 90.49100 | 55.02780 | 112.99190 | -1674.09359 | 1651.52184  | -2091.62519 | 1 |
| 27018 | C | 92.83900 | 52.70780 | 111.87190 | -394.74455  | 613.22564   | -548.39512  | 1 |
| 27019 | H | 92.94400 | 52.02380 | 111.00290 | -145.83781  | -2017.17187 | 2400.52263  | 1 |
| 27020 | H | 93.60500 | 53.51180 | 111.82990 | 2253.68213  | 2149.78808  | 417.84540   | 1 |
| 27021 | H | 93.04000 | 52.07480 | 112.76290 | 1895.46477  | 1835.56317  | -1727.23128 | 1 |
| 27022 | C | 89.46100 | 50.19980 | 111.71690 | -547.96712  | 168.13184   | 685.77758   | 1 |



|       |   |          |           |           |             |             |             |   |
|-------|---|----------|-----------|-----------|-------------|-------------|-------------|---|
| 27023 | O | 90.15700 | 49.23380  | 112.03990 | -661.52465  | 407.88855   | -70.00391   | 1 |
| 27024 | N | 88.19500 | 50.21680  | 112.07190 | 511.12975   | -579.90554  | 349.03531   | 1 |
| 27025 | H | 87.72300 | 51.07580  | 111.88590 | -1719.24051 | 1948.27710  | -1772.04816 | 1 |
| 27026 | C | 87.47100 | 49.11180  | 112.69890 | 401.63311   | 392.16534   | 701.22189   | 1 |
| 27027 | H | 88.04300 | 48.79080  | 113.55590 | -2396.87845 | -1930.18719 | 640.69576   | 1 |
| 27028 | C | 86.10000 | 49.48680  | 113.13590 | 609.09279   | -214.22935  | -669.10143  | 1 |
| 27029 | H | 85.43700 | 48.61080  | 113.30090 | -2432.90355 | -207.11611  | -1991.56016 | 1 |
| 27030 | O | 85.50100 | 50.38680  | 112.30590 | 210.34657   | 647.94102   | 371.65154   | 1 |
| 27031 | H | 85.67800 | 50.08280  | 111.41290 | -2036.83915 | 380.86807   | -2375.07761 | 1 |
| 27032 | C | 86.15600 | 50.20880  | 114.52090 | -419.66067  | 228.70361   | -784.28352  | 1 |
| 27033 | H | 85.14000 | 50.56980  | 114.78890 | -2906.61975 | 52.20097    | -1198.92605 | 1 |
| 27034 | H | 86.84200 | 51.06980  | 114.37390 | -867.58561  | -3008.30891 | 367.90175   | 1 |
| 27035 | H | 86.58700 | 49.54880  | 115.30390 | -2513.79285 | -1578.55899 | -1056.06460 | 1 |
| 27036 | C | 87.33200 | 47.86380  | 111.81290 | 744.96388   | -539.93151  | 58.07691    | 1 |
| 27037 | O | 87.28100 | 47.98280  | 110.59890 | 402.96599   | -511.80725  | 446.23403   | 1 |
| 27038 | N | 87.22900 | 46.69980  | 112.39890 | -242.12019  | 603.26164   | -540.72166  | 1 |
| 27039 | H | 87.31500 | 46.64780  | 113.38990 | 1729.81744  | -1504.06017 | -2184.71464 | 1 |
| 27040 | C | 87.00800 | 45.43480  | 111.73590 | 793.47529   | -469.94647  | 20.09701    | 1 |
| 27041 | H | 87.60700 | 45.49580  | 110.83890 | 774.51587   | 2892.98738  | -958.92929  | 1 |
| 27042 | C | 87.63800 | 44.22280  | 112.49690 | -380.31524  | -664.56034  | 484.48118   | 1 |
| 27043 | H | 87.57500 | 43.32580  | 111.84390 | -1405.00239 | -1588.99201 | -2343.57422 | 1 |
| 27044 | H | 88.73700 | 44.38180  | 112.50190 | -2503.19484 | -1323.57475 | 1348.66127  | 1 |
| 27045 | O | 87.05400 | 43.98480  | 113.80390 | 461.47569   | 464.54060   | 421.09403   | 1 |
| 27046 | H | 87.22400 | 44.78680  | 114.30390 | -835.70238  | -2922.49211 | -858.01661  | 1 |
| 27047 | C | 85.56100 | 45.12680  | 111.38790 | -844.04850  | -314.10052  | -135.47984  | 1 |
| 27048 | O | 84.61300 | 45.60580  | 112.09190 | 52.51541    | 695.48013   | -368.33181  | 1 |
| 27049 | O | 85.32200 | 44.42480  | 110.35290 | -393.53940  | 238.55721   | 616.83476   | 1 |
| 27050 | H | 80.70072 | 97.72288  | 71.05723  | -28.75021   | 1354.14069  | 2313.32998  | 2 |
| 27051 | N | 80.25309 | 98.01071  | 70.15004  | 360.98639   | -362.65453  | 477.77466   | 2 |
| 27052 | H | 79.63085 | 98.74526  | 70.44620  | 1370.84166  | -4683.21762 | -2759.38871 | 2 |
| 27053 | C | 81.18283 | 98.64816  | 69.20254  | -504.76223  | 78.29735    | -855.48651  | 2 |
| 27054 | H | 82.08899 | 98.00168  | 69.21014  | 2483.91312  | 207.59651   | -616.85338  | 2 |
| 27055 | C | 80.34442 | 98.48705  | 67.85642  | -496.13976  | 17.93884    | 531.59301   | 2 |
| 27056 | H | 80.22673 | 97.40890  | 67.62391  | -1071.71275 | 401.29279   | -720.38173  | 2 |
| 27057 | H | 79.28467 | 98.86237  | 67.94548  | 2732.78852  | -2326.65779 | 23.62752    | 2 |
| 27058 | C | 80.83949 | 99.15104  | 66.57334  | 260.08705   | -266.37593  | -540.53333  | 2 |
| 27059 | H | 81.06594 | 100.25370 | 66.81422  | 1.35464     | -1073.68480 | 1006.70541  | 2 |
| 27060 | C | 82.09017 | 98.38608  | 66.15167  | 64.65722    | -113.46308  | 280.71794   | 2 |
| 27061 | H | 81.78491 | 97.31899  | 65.86563  | 1336.99985  | 2395.70981  | -674.63175  | 2 |
| 27062 | H | 82.56385 | 98.73833  | 65.27371  | -1959.19126 | -1145.00055 | -2083.89292 | 2 |
| 27063 | H | 82.97735 | 98.25060  | 66.95839  | 124.34951   | -4140.80952 | 984.51144   | 2 |
| 27064 | C | 79.72187 | 99.02509  | 65.58252  | -208.83081  | -772.89618  | -724.28084  | 2 |
| 27065 | H | 79.88684 | 99.65297  | 64.63588  | 942.67767   | -69.65364   | 2683.59115  | 2 |
| 27066 | H | 79.47806 | 97.90343  | 65.25993  | 2141.46893  | 1361.99553  | 1389.73637  | 2 |
| 27067 | H | 78.76500 | 99.45812  | 66.06836  | -1231.88962 | 1380.81974  | -1007.73671 | 2 |
| 27068 | C | 81.52052 | 100.17235 | 69.64400  | 48.92880    | -75.89637   | -528.98638  | 2 |
| 27069 | O | 81.42633 | 101.09678 | 68.78902  | -512.04881  | -347.44463  | -74.67701   | 2 |
| 27070 | N | 81.94757 | 100.22398 | 70.85722  | 35.97771    | 273.20649   | 0.08554     | 2 |
| 27071 | H | 82.05459 | 99.27935  | 71.30377  | 4053.81932  | 825.83713   | -599.26871  | 2 |
| 27072 | C | 81.34035 | 101.24950 | 71.70099  | -10.84229   | 270.08836   | 599.69294   | 2 |
| 27073 | H | 80.31679 | 100.76345 | 71.94554  | -532.92365  | 1244.71796  | 2811.43163  | 2 |
| 27074 | C | 82.40567 | 101.37639 | 72.88842  | 514.59915   | -843.49857  | 540.88512   | 2 |
| 27075 | H | 83.46291 | 101.26230 | 72.41166  | -784.43090  | -1729.14143 | -1018.79247 | 2 |
| 27076 | O | 82.73903 | 100.19363 | 73.72821  | -188.41785  | 64.13248    | -589.59926  | 2 |
| 27077 | H | 81.75728 | 99.87772  | 73.83543  | -726.95990  | 2331.52832  | 190.53821   | 2 |
| 27078 | C | 82.22223 | 102.84793 | 73.41833  | 362.06353   | -340.36570  | 553.01129   | 2 |
| 27079 | H | 82.98327 | 103.56890 | 73.00792  | -12.09749   | 642.93273   | 734.51267   | 2 |
| 27080 | H | 81.23480 | 103.27067 | 73.18715  | 2345.32475  | -40.50010   | 747.43973   | 2 |
| 27081 | H | 82.21168 | 102.87070 | 74.52741  | 2381.10464  | 1198.40850  | -2291.90661 | 2 |
| 27082 | C | 81.09391 | 102.65997 | 70.99113  | 819.14438   | 594.88011   | -283.15446  | 2 |
| 27083 | O | 82.09519 | 103.38029 | 70.85309  | 69.96079    | -103.82350  | 90.58532    | 2 |
| 27084 | N | 79.86447 | 102.81358 | 70.56383  | 230.14922   | -481.43646  | 322.01977   | 2 |

|       |   |          |           |          |             |             |             |   |
|-------|---|----------|-----------|----------|-------------|-------------|-------------|---|
| 27085 | C | 79.46004 | 104.05112 | 69.93795 | -968.65900  | -216.01707  | -101.92498  | 2 |
| 27086 | H | 80.29721 | 104.29833 | 69.19042 | 1453.75334  | -1158.12107 | 860.72431   | 2 |
| 27087 | C | 78.02469 | 103.65530 | 69.40417 | 163.98244   | -12.42136   | 83.06769    | 2 |
| 27088 | H | 77.32316 | 104.51946 | 69.17819 | 1652.18405  | 1291.46670  | 2492.28156  | 2 |
| 27089 | H | 78.13076 | 103.20105 | 68.32778 | 2328.02755  | -1404.76033 | 1028.46884  | 2 |
| 27090 | C | 77.41006 | 102.59413 | 70.36588 | -387.04026  | 681.81602   | -583.65057  | 2 |
| 27091 | H | 76.90299 | 103.03788 | 71.21996 | 2150.25629  | -745.10984  | -956.29671  | 2 |
| 27092 | H | 76.54840 | 101.92809 | 69.93064 | 1290.52388  | 1970.79120  | 398.00284   | 2 |
| 27093 | C | 78.74925 | 101.85446 | 70.73505 | 616.42056   | 326.87515   | 35.53862    | 2 |
| 27094 | H | 78.74544 | 101.41527 | 71.75547 | -947.33490  | -3711.95528 | 726.08716   | 2 |
| 27095 | H | 78.79510 | 101.02609 | 69.96673 | 1010.93024  | 1466.47691  | -1467.92604 | 2 |
| 27096 | C | 79.22506 | 105.18089 | 71.08956 | -227.22892  | -515.80612  | 836.78668   | 2 |
| 27097 | O | 78.15523 | 105.76156 | 71.06658 | -653.55050  | 230.73929   | -862.68968  | 2 |
| 27098 | N | 80.23089 | 105.31173 | 71.94965 | 20.07116    | -310.61109  | 350.92518   | 2 |
| 27099 | H | 81.05466 | 104.68564 | 71.84908 | 1023.75924  | -706.45054  | -3080.09039 | 2 |
| 27100 | C | 80.48262 | 106.60322 | 72.49351 | 226.36416   | -489.93454  | 83.46435    | 2 |
| 27101 | H | 79.47437 | 107.16002 | 72.36903 | 228.97534   | 3774.11449  | 2215.24514  | 2 |
| 27102 | C | 81.01452 | 106.30707 | 74.00354 | -667.90851  | -906.54075  | -124.83595  | 2 |
| 27103 | H | 81.31103 | 107.38128 | 74.21714 | 512.61221   | -1574.96934 | 2.52164     | 2 |
| 27104 | O | 82.21016 | 105.43763 | 74.24249 | -38.55283   | 664.20327   | 591.31246   | 2 |
| 27105 | H | 82.81520 | 106.11226 | 74.60988 | 334.52575   | 984.22406   | 1338.98634  | 2 |
| 27106 | C | 79.73801 | 105.90790 | 74.74431 | 221.26345   | 37.20300    | 266.26847   | 2 |
| 27107 | H | 79.50631 | 104.81954 | 74.62950 | -3.04439    | -651.00758  | 2110.69912  | 2 |
| 27108 | H | 79.89006 | 106.09522 | 75.84231 | -1102.24234 | -2033.17735 | 2820.29737  | 2 |
| 27109 | H | 78.79541 | 106.45735 | 74.43899 | 3741.64350  | -317.71822  | 1824.13154  | 2 |
| 27110 | C | 81.70727 | 107.08528 | 71.57265 | -272.13185  | 229.43416   | 90.21554    | 2 |
| 27111 | O | 81.53716 | 107.95622 | 70.70360 | -695.51261  | -111.64484  | -1203.44307 | 2 |
| 27112 | N | 82.78823 | 106.37242 | 71.81168 | 82.00173    | -435.66041  | 325.80728   | 2 |
| 27113 | H | 82.80152 | 105.84248 | 72.75829 | 368.55647   | -1680.43771 | 2903.07882  | 2 |
| 27114 | C | 84.05344 | 106.84502 | 71.32684 | -475.57109  | -956.75740  | 359.77281   | 2 |
| 27115 | H | 83.81356 | 107.95881 | 71.16997 | -1103.18334 | 4619.81417  | -1149.04781 | 2 |
| 27116 | C | 85.11214 | 106.42072 | 72.41527 | 722.49972   | -307.02261  | 867.27107   | 2 |
| 27117 | H | 85.16981 | 105.32086 | 72.56457 | 926.83144   | -278.11890  | -1439.95530 | 2 |
| 27118 | H | 86.08905 | 106.80776 | 71.99199 | 631.03610   | 4822.16619  | 1337.86680  | 2 |
| 27119 | O | 84.78452 | 107.06802 | 73.77877 | 942.84355   | -177.78089  | 352.63188   | 2 |
| 27120 | H | 85.22554 | 106.38663 | 74.33981 | 2215.64715  | 4200.69675  | 1538.87461  | 2 |
| 27121 | C | 84.57491 | 106.15317 | 69.95461 | 1130.03065  | 34.81480    | -817.46462  | 2 |
| 27122 | O | 85.32747 | 106.69191 | 69.15609 | -201.99061  | 228.22805   | 54.70781    | 2 |
| 27123 | N | 83.95677 | 105.01604 | 69.65963 | 391.00108   | -28.32421   | -320.29611  | 2 |
| 27124 | H | 83.13860 | 104.71402 | 70.17018 | -1650.75143 | -583.11808  | -2520.26056 | 2 |
| 27125 | C | 84.10970 | 104.40414 | 68.32401 | 945.60334   | -224.24374  | -208.33368  | 2 |
| 27126 | H | 85.12174 | 104.64983 | 67.94729 | 807.29532   | 2547.70367  | -1101.12701 | 2 |
| 27127 | C | 83.99888 | 102.80107 | 68.63324 | 165.51385   | -816.30458  | -416.99695  | 2 |
| 27128 | H | 82.97390 | 102.38268 | 68.96164 | -1224.77387 | 243.01590   | 2231.15141  | 2 |
| 27129 | C | 84.54631 | 102.10652 | 67.33949 | 702.88601   | 159.31653   | 318.18348   | 2 |
| 27130 | H | 85.08692 | 101.13518 | 67.52843 | -2653.59665 | 923.99692   | -2434.04962 | 2 |
| 27131 | H | 83.70762 | 101.71411 | 66.71119 | -161.98272  | 752.74553   | -1071.58427 | 2 |
| 27132 | H | 85.27496 | 102.75705 | 66.76774 | 170.49722   | 137.87745   | -602.88810  | 2 |
| 27133 | C | 84.91306 | 102.63955 | 69.87381 | -994.09105  | -191.88038  | 389.31686   | 2 |
| 27134 | H | 85.07422 | 101.57146 | 70.15131 | 2067.60197  | -1129.25701 | -53.36024   | 2 |
| 27135 | H | 85.98061 | 103.02728 | 69.66201 | 626.94480   | 2499.40609  | -2638.54559 | 2 |
| 27136 | H | 84.44734 | 103.24516 | 70.68908 | -1102.23125 | -120.98075  | -3088.28412 | 2 |
| 27137 | C | 82.92983 | 104.94425 | 67.42262 | 937.53311   | 601.45755   | 175.38210   | 2 |
| 27138 | O | 81.73403 | 105.05155 | 67.76640 | -6.07773    | 547.81531   | 60.25378    | 2 |
| 27139 | N | 83.42042 | 105.06930 | 66.17314 | -410.63743  | -702.40132  | 191.48497   | 2 |
| 27140 | H | 84.39321 | 104.81853 | 66.04426 | -1877.19658 | 1961.52001  | 2416.08248  | 2 |
| 27141 | C | 82.70581 | 105.77887 | 65.16266 | 249.53592   | -517.80599  | -365.52789  | 2 |
| 27142 | H | 81.60640 | 105.86996 | 65.54425 | 2636.95057  | -3667.40529 | 195.68022   | 2 |
| 27143 | C | 83.47374 | 107.18566 | 65.09598 | -23.34043   | 736.90690   | 401.40617   | 2 |
| 27144 | H | 84.38209 | 107.03106 | 64.48461 | 2743.79978  | 335.34493   | 534.04956   | 2 |
| 27145 | H | 82.69706 | 107.74414 | 64.50162 | -1999.73130 | 607.41408   | 239.35026   | 2 |
| 27146 | C | 83.94030 | 108.03077 | 66.27807 | -887.19363  | -317.46497  | 467.34939   | 2 |

|       |   |          |           |          |             |             |             |   |
|-------|---|----------|-----------|----------|-------------|-------------|-------------|---|
| 27147 | H | 84.62711 | 107.36938 | 66.89084 | -5189.09204 | 1608.40716  | -1608.98085 | 2 |
| 27148 | H | 84.63754 | 108.85750 | 65.88087 | 1622.91834  | 786.98681   | -1173.60313 | 2 |
| 27149 | C | 82.67261 | 108.60229 | 67.08727 | 72.19562    | -472.03962  | 123.48414   | 2 |
| 27150 | O | 81.83443 | 109.22076 | 66.45535 | 452.36222   | 106.68792   | 79.18109    | 2 |
| 27151 | N | 82.75666 | 108.30650 | 68.38605 | 253.98509   | 570.73130   | -18.78595   | 2 |
| 27152 | H | 83.53223 | 107.74326 | 68.93972 | -4570.31399 | -2332.45216 | -2484.42597 | 2 |
| 27153 | H | 81.99730 | 108.39167 | 69.15386 | -19.48640   | -2484.14906 | 41.34676    | 2 |
| 27154 | C | 82.88509 | 105.05527 | 63.69913 | -320.88763  | -198.49436  | 521.01958   | 2 |
| 27155 | O | 83.50551 | 105.67199 | 62.82958 | 62.71213    | 59.60043    | 891.55807   | 2 |
| 27156 | N | 82.38218 | 103.80466 | 63.71882 | -416.66466  | 173.91593   | 926.26397   | 2 |
| 27157 | C | 81.96407 | 103.16193 | 62.49537 | -952.55485  | 573.20652   | 232.95923   | 2 |
| 27158 | H | 82.82995 | 103.32902 | 61.79658 | 886.67306   | -3336.00857 | -1684.50430 | 2 |
| 27159 | C | 81.48933 | 101.67820 | 62.83429 | -525.29811  | 645.87965   | -240.86441  | 2 |
| 27160 | H | 80.38423 | 101.52297 | 62.76824 | 502.92008   | -919.59243  | -362.52581  | 2 |
| 27161 | H | 81.92784 | 100.93271 | 62.14044 | 1005.54312  | 1654.01060  | 1281.84787  | 2 |
| 27162 | C | 81.87252 | 101.53411 | 64.33711 | 555.76398   | 130.13216   | -163.68436  | 2 |
| 27163 | H | 80.93416 | 101.25494 | 64.90575 | -403.79991  | -895.95840  | 3093.90531  | 2 |
| 27164 | H | 82.51203 | 100.70033 | 64.48434 | -1715.42086 | 415.17553   | 78.91519    | 2 |
| 27165 | C | 82.62930 | 102.86250 | 64.79063 | 1057.52223  | -366.75064  | 323.07254   | 2 |
| 27166 | H | 82.20891 | 103.21670 | 65.78886 | -3504.01772 | -727.36832  | 1121.38089  | 2 |
| 27167 | H | 83.75827 | 102.83506 | 64.86690 | -956.25622  | -283.49698  | -1777.92764 | 2 |
| 27168 | C | 80.86952 | 104.06113 | 61.62955 | -61.11325   | -583.30037  | 680.02075   | 2 |
| 27169 | O | 80.76433 | 103.98371 | 60.42084 | 132.47571   | -315.63984  | -76.22998   | 2 |
| 27170 | N | 80.00048 | 104.51809 | 62.51960 | -77.73079   | 629.80830   | 267.82809   | 2 |
| 27171 | H | 80.38289 | 104.37699 | 63.45582 | 3129.16004  | 1331.18029  | 4128.61955  | 2 |
| 27172 | C | 79.26082 | 105.77992 | 62.26628 | 314.30949   | 500.90384   | 679.73404   | 2 |
| 27173 | H | 79.70943 | 106.23590 | 61.35714 | 753.93467   | -3505.47991 | -5172.10618 | 2 |
| 27174 | C | 77.81871 | 105.36191 | 62.03958 | -191.62711  | 293.44951   | 237.58129   | 2 |
| 27175 | H | 77.38262 | 105.08444 | 63.03704 | -1114.90838 | 2958.55707  | -475.93595  | 2 |
| 27176 | C | 76.99286 | 106.56765 | 61.61491 | -232.54886  | 168.49871   | 416.51443   | 2 |
| 27177 | H | 77.25083 | 107.41750 | 62.30186 | -1472.99464 | -1574.74892 | 227.39517   | 2 |
| 27178 | H | 77.18943 | 106.90716 | 60.56696 | 5077.31293  | -2285.40903 | 1255.19862  | 2 |
| 27179 | H | 75.81659 | 106.37092 | 61.60056 | -1695.21235 | -1404.35268 | 1513.12560  | 2 |
| 27180 | C | 77.57665 | 104.09417 | 61.23167 | 1660.51300  | 647.68457   | 453.64498   | 2 |
| 27181 | H | 77.95120 | 103.26413 | 61.80660 | 65.69729    | 749.99564   | -3697.68522 | 2 |
| 27182 | H | 76.45209 | 104.05706 | 60.98651 | -3513.91482 | -4609.69178 | 1368.60254  | 2 |
| 27183 | H | 78.23509 | 104.21555 | 60.30728 | -1118.21582 | -399.18199  | 1753.36931  | 2 |
| 27184 | C | 79.52697 | 106.66811 | 63.63172 | 148.25055   | 552.00386   | 560.53938   | 2 |
| 27185 | O | 79.59130 | 106.29354 | 64.82185 | -88.84061   | 158.68919   | -304.87079  | 2 |
| 27186 | N | 79.80651 | 107.85375 | 63.18848 | 301.72485   | 749.47134   | 179.11913   | 2 |
| 27187 | H | 79.67276 | 107.94177 | 62.12123 | -1013.97595 | 1432.73274  | -716.27723  | 2 |
| 27188 | C | 79.80176 | 109.06574 | 63.98195 | 172.15695   | -198.95290  | 139.30126   | 2 |
| 27189 | H | 80.24251 | 108.85318 | 64.95734 | 37.60281    | -1785.42374 | -2616.62926 | 2 |
| 27190 | C | 80.48445 | 110.22863 | 63.15429 | 174.63251   | 484.38678   | -482.67134  | 2 |
| 27191 | H | 79.88578 | 110.58134 | 62.26612 | 615.99999   | -1011.12308 | -166.31671  | 2 |
| 27192 | H | 80.47998 | 110.90437 | 64.00936 | 1469.67704  | -2499.71533 | -1231.98514 | 2 |
| 27193 | C | 81.95532 | 109.83293 | 62.82341 | 49.54531    | 566.73334   | 204.44089   | 2 |
| 27194 | H | 82.23203 | 108.93711 | 63.38482 | -178.92641  | 119.54585   | -1317.38683 | 2 |
| 27195 | H | 82.19638 | 109.69941 | 61.71786 | 1461.20904  | -1576.96142 | -913.53117  | 2 |
| 27196 | C | 82.80403 | 110.99933 | 63.47244 | -957.59101  | -1400.74985 | -592.04217  | 2 |
| 27197 | H | 82.35079 | 111.44199 | 64.41116 | 821.07748   | 2754.41192  | -2554.36023 | 2 |
| 27198 | H | 83.74997 | 110.63909 | 63.74058 | 3173.29254  | -504.01636  | -840.22361  | 2 |
| 27199 | C | 83.10659 | 112.24784 | 62.53870 | -206.26892  | 401.06198   | 193.96222   | 2 |
| 27200 | H | 83.69334 | 113.10070 | 63.00258 | 252.99661   | 807.00934   | -851.79697  | 2 |
| 27201 | H | 83.71191 | 111.79430 | 61.68030 | -943.39907  | 671.53689   | 3896.28578  | 2 |
| 27202 | N | 81.95848 | 112.68883 | 61.86361 | 108.56539   | 199.35058   | -98.31947   | 2 |
| 27203 | H | 81.53355 | 113.56398 | 62.03426 | -866.02593  | 874.53063   | -906.98038  | 2 |
| 27204 | H | 76.54034 | 113.16297 | 61.56230 | -2352.01525 | -90.87398   | -1320.78321 | 2 |
| 27205 | H | 81.87893 | 112.49704 | 60.82699 | -130.07029  | 247.99392   | -332.20978  | 2 |
| 27206 | C | 78.28610 | 109.68460 | 64.05720 | -456.81791  | -424.87041  | 360.50883   | 2 |
| 27207 | O | 77.56972 | 109.52427 | 63.08260 | -105.88395  | 248.75307   | 370.13465   | 2 |
| 27208 | N | 78.15239 | 110.73326 | 64.91522 | -663.32108  | 516.49087   | -354.22193  | 2 |

|       |   |          |           |          |             |             |             |   |
|-------|---|----------|-----------|----------|-------------|-------------|-------------|---|
| 27209 | H | 78.83708 | 110.57111 | 65.64296 | 461.21945   | -1620.19000 | -842.04772  | 2 |
| 27210 | C | 76.74440 | 110.97115 | 65.38367 | -501.30686  | 677.84830   | 635.21172   | 2 |
| 27211 | H | 76.42264 | 109.89442 | 65.07946 | -1663.84502 | -424.49928  | -1057.84904 | 2 |
| 27212 | C | 76.74389 | 111.40742 | 66.85730 | -47.37151   | -5.64595    | -100.41544  | 2 |
| 27213 | H | 77.04138 | 110.61303 | 67.63383 | 1135.40097  | -2620.51262 | -2003.69202 | 2 |
| 27214 | H | 77.40823 | 112.30130 | 67.08304 | 1354.84551  | -742.28870  | -3029.38312 | 2 |
| 27215 | C | 75.27807 | 111.94702 | 67.23313 | -1282.13054 | 945.08159   | -1453.24139 | 2 |
| 27216 | H | 75.16015 | 112.14443 | 68.32273 | 739.84922   | 1265.28435  | 1561.37836  | 2 |
| 27217 | H | 75.31583 | 112.98267 | 66.89797 | -3556.78700 | -1230.75417 | 494.05768   | 2 |
| 27218 | C | 74.16746 | 110.94039 | 66.76650 | 345.71343   | 158.73572   | -282.85375  | 2 |
| 27219 | H | 74.19997 | 110.91926 | 65.63089 | -397.07820  | -164.97582  | -1314.77090 | 2 |
| 27220 | H | 74.42798 | 109.91480 | 67.14040 | -801.23129  | 3145.04019  | 1622.32353  | 2 |
| 27221 | C | 72.76812 | 111.43532 | 67.28085 | 104.17644   | -551.90025  | -30.46575   | 2 |
| 27222 | H | 72.49227 | 110.99831 | 68.27413 | 1928.41828  | -1313.00660 | 74.59029    | 2 |
| 27223 | H | 72.67112 | 112.52892 | 67.28507 | 1350.27284  | 3222.60664  | -4083.30941 | 2 |
| 27224 | N | 71.60913 | 110.86897 | 66.37917 | -114.51997  | -62.88541   | -383.23871  | 2 |
| 27225 | H | 71.67708 | 111.17190 | 65.32816 | 315.36821   | 879.02963   | -405.86485  | 2 |
| 27226 | H | 71.41041 | 109.82585 | 66.28244 | 1131.35423  | 612.98728   | -202.25555  | 2 |
| 27227 | H | 70.68981 | 111.19293 | 66.66749 | 2715.95336  | 1317.95196  | 732.71932   | 2 |
| 27228 | C | 76.08708 | 112.19766 | 64.61926 | 541.87455   | -94.41914   | -426.12797  | 2 |
| 27229 | O | 75.94391 | 113.36319 | 64.86706 | -31.20100   | -517.14259  | -515.71617  | 2 |
| 27230 | N | 75.91043 | 111.67145 | 63.35779 | -20.66778   | -175.10698  | 406.91899   | 2 |
| 27231 | H | 76.25649 | 110.71296 | 63.23939 | -1848.16589 | -313.59347  | -2411.00000 | 2 |
| 27232 | C | 74.65594 | 112.14655 | 62.69790 | 977.68676   | 459.24225   | 194.01762   | 2 |
| 27233 | H | 74.59552 | 113.19278 | 63.04936 | -2264.59134 | -10.81969   | 1005.01083  | 2 |
| 27234 | C | 74.85871 | 112.00080 | 61.21131 | 190.45219   | -112.56114  | -158.15616  | 2 |
| 27235 | H | 75.20321 | 111.00993 | 60.82709 | -2080.35985 | 1610.39122  | 658.81965   | 2 |
| 27236 | O | 76.18887 | 113.13576 | 60.60366 | 325.50167   | 133.33409   | 412.00458   | 2 |
| 27237 | H | 76.76371 | 112.37323 | 60.25221 | 1618.61717  | 972.00502   | -3590.42268 | 2 |
| 27238 | C | 73.47909 | 112.45021 | 60.65632 | 53.99568    | -72.63180   | -408.22027  | 2 |
| 27239 | H | 73.31227 | 112.44371 | 59.51451 | -1009.79518 | -2045.99359 | -2775.22030 | 2 |
| 27240 | H | 72.57339 | 112.05458 | 61.23668 | -2252.04137 | -3905.98031 | -2036.16445 | 2 |
| 27241 | H | 73.40456 | 113.56292 | 60.81981 | 611.46636   | -2279.73633 | -2383.79908 | 2 |
| 27242 | C | 73.52546 | 111.16309 | 63.41096 | -509.83330  | 88.89100    | -534.78720  | 2 |
| 27243 | O | 72.57872 | 111.69264 | 64.02130 | -710.83571  | -753.22309  | -31.13778   | 2 |
| 27244 | N | 73.78575 | 109.91972 | 63.16308 | 241.02248   | -843.72505  | 433.88144   | 2 |
| 27245 | H | 74.66596 | 109.83614 | 62.60800 | 4454.22132  | 153.88356   | -1398.69913 | 2 |
| 27246 | C | 73.19131 | 108.73898 | 63.71681 | 230.02788   | 44.61916    | -857.47522  | 2 |
| 27247 | H | 72.62967 | 109.12089 | 64.57794 | -662.92852  | 3030.09898  | 599.95960   | 2 |
| 27248 | C | 72.42344 | 108.19360 | 62.45202 | -410.78279  | 763.15558   | 230.67138   | 2 |
| 27249 | H | 72.05136 | 109.01651 | 61.77029 | -2034.27236 | 3501.52928  | -2268.65805 | 2 |
| 27250 | H | 73.10915 | 107.72464 | 61.74418 | -3255.63919 | 44.56585    | -545.18471  | 2 |
| 27251 | C | 71.45471 | 107.04242 | 62.87397 | 5.77863     | -843.05347  | -521.93677  | 2 |
| 27252 | C | 71.70646 | 105.98961 | 63.81050 | 302.11008   | 101.04057   | -131.45881  | 2 |
| 27253 | H | 72.38859 | 106.11220 | 64.70400 | 723.87970   | -195.78880  | -2064.53807 | 2 |
| 27254 | C | 70.50373 | 106.76188 | 61.87151 | 547.02862   | -706.29920  | 370.32408   | 2 |
| 27255 | H | 70.29827 | 107.48600 | 61.14708 | 1315.06357  | 2225.91966  | 2373.74863  | 2 |
| 27256 | C | 70.87053 | 104.90919 | 63.81792 | -702.86456  | -971.81020  | -435.15572  | 2 |
| 27257 | H | 71.13884 | 104.26782 | 64.67019 | -724.65286  | -1216.21186 | 1461.17808  | 2 |
| 27258 | C | 69.70635 | 105.57041 | 61.94359 | 811.80398   | -652.43382  | 299.78567   | 2 |
| 27259 | H | 69.06635 | 105.34523 | 61.07324 | -2168.39937 | 1224.33611  | -148.41596  | 2 |
| 27260 | C | 69.80057 | 104.55963 | 62.93906 | -21.44231   | -325.84247  | 424.32441   | 2 |
| 27261 | O | 68.99041 | 103.38306 | 63.22096 | -325.54213  | -315.93557  | -488.78698  | 2 |
| 27262 | H | 69.57389 | 102.95867 | 63.92118 | -1205.99506 | 4334.93225  | -1281.95080 | 2 |
| 27263 | C | 74.24030 | 107.56281 | 64.13015 | -446.11705  | 25.60516    | -570.14706  | 2 |
| 27264 | O | 74.95605 | 107.02284 | 63.33322 | -847.51149  | 3.67111     | 86.25363    | 2 |
| 27265 | N | 74.45907 | 107.49333 | 65.48522 | 365.05105   | 194.35332   | -391.98237  | 2 |
| 27266 | H | 73.83338 | 108.10178 | 66.07118 | -2851.96396 | -872.27866  | -1161.65454 | 2 |
| 27267 | C | 74.82217 | 106.17315 | 66.00113 | 855.88610   | 445.99586   | -992.33811  | 2 |
| 27268 | H | 73.87617 | 105.65658 | 65.94025 | 4815.31547  | -3350.73326 | 4449.73285  | 2 |
| 27269 | C | 75.75663 | 105.41078 | 65.01359 | 867.94395   | -961.33992  | 301.99752   | 2 |
| 27270 | H | 75.17060 | 104.88874 | 64.22747 | 126.67348   | 782.80221   | -78.11920   | 2 |

|       |   |          |           |          |             |             |                      |         |          |
|-------|---|----------|-----------|----------|-------------|-------------|----------------------|---------|----------|
| 27271 | H | 76.36698 | 106.19127 | 64.54225 | -255.34691  | 103.76659   | 2029.55993           | 2       |          |
| 27272 | C | 76.66308 | 104.36416 | 65.71521 | -104.88923  | 137.21335   | 328.41458            | 2       |          |
| 27273 | H | 77.27543 | 104.87487 | 66.52144 | 1283.63213  | 813.75921   | -1598.74943          | 2       |          |
| 27274 | H | 75.96439 | 103.62732 | 66.22487 | -563.54187  | 1215.86375  | -57.77553            | 2       |          |
| 27275 | C | 77.64796 | 103.60226 | 64.65470 | -1279.60015 | 1134.06096  | 669.83822            | 2       |          |
| 27276 | H | 77.21144 | 102.94706 | 63.81800 | 1260.03019  | -768.24037  | 4645.96856           | 2       |          |
| 27277 | H | 78.58435 | 104.16136 | 64.26796 | 1581.36774  | 1418.52550  | -91.87554            | 2       |          |
| 27278 | N | 78.00348 | 102.69619 | 65.61681 | 61.54134    | -473.45915  | -219.31027           | 2       |          |
| 27279 | H | 77.47927 | 101.84681 | 65.63845 | -4162.54141 | 1591.26466  | 427.47039            | 2       |          |
| 27280 | C | 78.97437 | 102.84388 | 66.46261 | 1086.67877  | 380.70695   | 179.25455            | 2       |          |
| 27281 | N | 79.69049 | 104.06845 | 66.30687 | 27.46201    | 374.11419   | -279.10761           | 2       |          |
| 27282 | H | 79.48775 | 104.86535 | 65.66734 | 618.39204   | -422.78355  | -1281.15099          | 2       |          |
| 27283 | H | 80.51319 | 104.29669 | 66.89179 | -817.39436  | -724.79210  | 1238.99969           | 2       |          |
| 27284 | N | 79.07014 | 101.75899 | 67.27036 | 67.38315    | -284.13118  | 725.14269            | 2       |          |
| 27285 | H | 78.42414 | 100.99745 | 67.38123 | 979.78749   | 2523.54919  | -295.89263           | 2       |          |
| 27286 | H | 79.82922 | 101.65914 | 67.98652 | -1999.64371 | -2107.43231 | 626.48061            | 2       |          |
| 27287 | C | 75.40804 | 106.43981 | 67.50324 | 181.37567   | 448.09956   | 328.68016            | 2       |          |
| 27288 | O | 75.18509 | 105.68362 | 68.46805 | -109.86441  | -792.42009  | -472.65058           | 2       |          |
| 27289 | N | 76.36102 | 107.32742 | 67.39396 | 301.23228   | 222.77616   | -219.65122           | 2       |          |
| 27290 | H | 76.54843 | 107.79810 | 66.47181 | 2840.46534  | 4091.49967  | 776.90159            | 2       |          |
| 27291 | C | 77.12856 | 107.53295 | 68.59424 | -383.83246  | -168.56348  | 113.52110            | 2       |          |
| 27292 | H | 77.38891 | 106.50844 | 68.96381 | -500.83316  | 1691.07902  | 743.18886            | 2       |          |
| 27293 | C | 78.32726 | 108.42172 | 68.05609 | 357.47706   | -596.51459  | -202.73486           | 2       |          |
| 27294 | H | 78.02693 | 109.25043 | 67.36413 | 2428.95716  | 939.76298   | -395.51823           | 2       |          |
| 27295 | C | 79.03796 | 109.12951 | 69.30543 | -444.06139  | 181.18198   | 57.27239             | 2       |          |
| 27296 | H | 78.31606 | 109.68061 | 69.92451 | -914.28044  | -261.97256  | 449.75099            | 2       |          |
| 27297 | H | 79.56909 | 108.38852 | 69.97309 | -2543.37545 | 3190.65011  | 945.52461            | 2       |          |
| 27298 | H | 79.85210 | 109.84823 | 68.95233 | -907.34543  | -2046.71310 | 279.33543            | 2       |          |
| 27299 | C | 79.46030 | 107.48394 | 67.59606 | 255.89646   | -186.60740  | -434.05043           | 2       |          |
| 27300 | H | 80.28610 | 108.10416 | 67.17568 | -1607.40923 | -593.51045  | -1179.49456          | 2       |          |
| 27301 | H | 79.79267 | 106.92844 | 68.43102 | 329.43263   | 413.28972   | -145.97563           | 2       |          |
| 27302 | H | 79.13438 | 106.80944 | 66.68833 | 3647.26968  | -470.70318  | -3702.50779          | 2       |          |
| 27303 | C | 76.28265 | 108.31173 | 69.75116 | -504.80690  | -736.05669  | -186.85475           | 2       |          |
| 27304 | O | 75.72904 | 109.36051 | 69.48966 | 346.12675   | 851.98860   | 176.30697            | 2       |          |
| 27305 | N | 76.26287 | 107.66395 | 70.96586 | 499.27987   | -483.43183  | 84.76302             | 2       |          |
| 27306 | H | 76.70336 | 106.78004 | 71.01413 | -1268.39408 | -864.34584  | 618.97866            | 2       |          |
| 27307 | C | 75.06086 | 107.93333 | 71.72532 | -63.05321   | -11.30148   | 212.75295            | 2       |          |
| 27308 | H | 74.81740 | 109.01072 | 71.61861 | 449.34344   | -787.95242  | -1160.36341          | 2       |          |
| 27309 | C | 73.87265 | 107.07910 | 71.06104 | -176.70843  | 519.02450   | 982.30082            | 2       |          |
| 27310 | H | 74.16842 | 106.60642 | 70.05229 | 201.72207   | 993.21356   | 90.97991             | 2       |          |
| 27311 | H | 73.77946 | 106.25640 | 71.76303 | -1797.23387 | 574.81436   | -64.27406            | 2       |          |
| 27312 | C | 72.54880 | 107.80344 | 70.94382 | -723.58339  | -195.46982  | -1123.63805          | 2       |          |
| 27313 | H | 71.67011 | 107.18606 | 70.68307 | 1411.11843  | -1062.43026 | 572.14153            | 2       |          |
| 27314 | C | 72.26057 | 108.34254 | 72.33362 | -349.40568  | -1075.98414 | 223.61543            | 2       |          |
| 27315 | H | 71.21653 | 108.70124 | 72.34070 | -1689.42356 | -3142.59478 | -1158.65053          | 2       |          |
| 27316 | H | 72.41664 | 107.48883 | 73.08034 | 466.54713   | -657.47916  | 620.71876            | 2       |          |
| 27317 | H | 72.99581 | 109.17687 | 72.65656 | 1409.00882  | 86.94478    | 401.89744            | 2       |          |
| 27318 | C | 72.63325 | 108.85200 | 69.87054 | 646.14090   | 625.34829   | -607.34174           | 2       |          |
| 27319 | H | 71.54677 | 109.20160 | 69.79892 | 1785.41700  | -1926.17410 | -568.32983           | 2       |          |
| 27320 | H | 73.33173 | 109.71197 | 70.02023 | -3851.70880 | -919.36960  | 2413.82570           | 2       |          |
| 27321 | H | 72.78068 | 108.38462 | 68.82226 | -3330.93433 | -1944.60454 | 1484.89263           | 2       |          |
| 27322 | C | 75.34524 | 107.45679 | 73.20304 | 255.14128   | 43.74177    | -488.52876           | 2       |          |
| 27323 | O | 74.51288 | 106.87049 | 73.81250 | -96.30975   | 386.76015   | -186.32589           | 2       |          |
| 27324 | O | 76.65263 | 107.65704 | 73.75665 | -358.63377  | 702.42604   | 738.89109            | 2       |          |
| 27325 | H | 77.10372 | 108.07894 | 73.01183 | -822.68361  | 1343.08897  | 139.40547            | 2       |          |
| 27326 |   | 5463     |           |          |             |             |                      |         |          |
| 27327 |   | 150.0000 | 150.0000  | 150.0000 | 0.0000      | 0.0000      | 0.0000***** 250.0000 | 1000000 |          |
|       |   | 0.2500   | 400.00    | 0.00     | 0.00        | 0.00        | -25973.0287          | 0.2268  | 400.0000 |
| 27328 | N | 57.27141 | 97.55846  | 58.87991 | 223.83994   | -101.90287  | 372.66777            | 1       |          |
| 27329 | H | 57.37328 | 98.10578  | 59.71824 | -2142.52195 | -1037.52776 | 145.71361            | 1       |          |
| 27330 | H | 56.80967 | 98.14250  | 58.17978 | -1590.79522 | -2082.55268 | 192.18837            | 1       |          |
| 27331 | H | 65.45529 | 101.45577 | 56.80579 | 784.43016   | 2140.69514  | 1972.07577           | 1       |          |

|       |   |          |           |          |             |             |             |   |
|-------|---|----------|-----------|----------|-------------|-------------|-------------|---|
| 27332 | C | 58.44549 | 96.93641  | 58.34561 | -3.96221    | -856.97858  | 91.29554    | 1 |
| 27333 | H | 59.25530 | 96.92875  | 59.16285 | 1496.06083  | 2074.90424  | -3435.44620 | 1 |
| 27334 | C | 58.05548 | 95.53718  | 57.74697 | -496.34520  | -675.23278  | 451.50467   | 1 |
| 27335 | H | 58.76931 | 95.18203  | 56.94870 | -274.64575  | 1276.00949  | -4171.97117 | 1 |
| 27336 | H | 57.14719 | 95.51357  | 57.18299 | -549.47739  | -7.93573    | -144.35018  | 1 |
| 27337 | C | 58.07278 | 94.50658  | 58.93098 | 598.10324   | 171.20862   | -72.22022   | 1 |
| 27338 | H | 57.37847 | 94.77166  | 59.82103 | 859.17111   | -1975.42267 | 1326.78250  | 1 |
| 27339 | H | 58.88442 | 94.78751  | 59.68251 | -2898.37212 | 3322.79497  | -2983.15550 | 1 |
| 27340 | S | 58.05033 | 92.90700  | 58.20049 | 399.30544   | 636.60173   | -473.57315  | 1 |
| 27341 | C | 58.16626 | 91.96574  | 59.80195 | -337.87428  | 154.14824   | -357.08131  | 1 |
| 27342 | H | 58.00723 | 90.84317  | 59.63181 | -2682.83358 | 202.87996   | 193.88211   | 1 |
| 27343 | H | 59.21888 | 92.06566  | 60.26749 | -2916.74131 | -277.61173  | 1745.14866  | 1 |
| 27344 | H | 57.50550 | 92.34045  | 60.65112 | -522.81693  | 5019.59325  | -170.42904  | 1 |
| 27345 | C | 58.99618 | 97.78526  | 57.08010 | 177.87656   | 526.61997   | -675.33308  | 1 |
| 27346 | O | 58.37746 | 97.98938  | 56.04116 | -462.95898  | -74.28650   | -372.85397  | 1 |
| 27347 | N | 60.16293 | 98.33924  | 57.48667 | 1086.22787  | -475.82708  | 427.91659   | 1 |
| 27348 | H | 60.36103 | 98.26374  | 58.48269 | -1671.05218 | 527.14628   | -1257.58353 | 1 |
| 27349 | C | 61.12427 | 98.35589  | 56.39938 | -158.85132  | 282.38350   | -915.48546  | 1 |
| 27350 | H | 60.42127 | 98.30181  | 55.54044 | -2122.32369 | 3021.50215  | 309.51748   | 1 |
| 27351 | C | 62.00579 | 99.63329  | 56.55342 | 788.34156   | 373.73982   | 474.63822   | 1 |
| 27352 | H | 62.47129 | 99.89742  | 55.56791 | 1407.57195  | -229.43230  | -88.13700   | 1 |
| 27353 | H | 61.28790 | 100.52349 | 56.77039 | 2128.35497  | -2342.21224 | -207.33603  | 1 |
| 27354 | C | 63.03488 | 99.44501  | 57.70349 | -95.44621   | 1307.00313  | 1137.73544  | 1 |
| 27355 | H | 63.44935 | 98.45511  | 57.68587 | 997.09550   | -799.02037  | -466.98014  | 1 |
| 27356 | H | 62.53671 | 99.70639  | 58.67345 | -1629.93621 | -1901.32039 | 1350.30907  | 1 |
| 27357 | C | 64.44239 | 100.20423 | 57.75271 | -576.61342  | -329.78069  | -463.01011  | 1 |
| 27358 | O | 65.24214 | 100.08361 | 58.67294 | -238.96285  | 209.77551   | 495.53168   | 1 |
| 27359 | O | 64.63407 | 100.93426 | 56.57114 | 232.21765   | 197.70878   | 419.22716   | 1 |
| 27360 | C | 61.94899 | 96.95590  | 56.32181 | 339.05332   | -307.62035  | -103.07817  | 1 |
| 27361 | O | 62.58192 | 96.68879  | 55.30839 | -65.11166   | 242.54330   | 343.94936   | 1 |
| 27362 | N | 61.98365 | 96.25821  | 57.47532 | -385.04173  | 54.68295    | 477.76583   | 1 |
| 27363 | H | 61.27292 | 96.59870  | 58.13923 | 272.27842   | 771.72105   | 1377.58006  | 1 |
| 27364 | C | 62.30478 | 94.84205  | 57.29295 | -256.36276  | 150.25203   | 162.81083   | 1 |
| 27365 | H | 62.11466 | 94.57963  | 56.21530 | -1291.04698 | 415.16344   | -1233.71910 | 1 |
| 27366 | H | 61.61493 | 94.27141  | 57.95005 | 380.90484   | -1834.61783 | 1364.06344  | 1 |
| 27367 | C | 63.85174 | 94.64847  | 57.54530 | 665.67957   | 671.50643   | -228.24625  | 1 |
| 27368 | O | 64.20696 | 93.49086  | 57.91644 | 557.38900   | -35.98427   | 415.55234   | 1 |
| 27369 | N | 64.69034 | 95.71555  | 57.38763 | -943.50101  | -164.26427  | 536.84470   | 1 |
| 27370 | H | 64.12446 | 96.44875  | 56.90953 | 888.03099   | 2257.73858  | 1995.48658  | 1 |
| 27371 | C | 65.78903 | 95.89646  | 58.33909 | 838.98336   | -236.75818  | 504.51230   | 1 |
| 27372 | H | 66.14827 | 94.82601  | 58.57252 | -1407.71303 | 649.82461   | -2371.37603 | 1 |
| 27373 | C | 66.91952 | 96.70886  | 57.78221 | -124.15470  | -96.86912   | -498.65822  | 1 |
| 27374 | H | 66.46157 | 97.69089  | 57.51162 | -563.93077  | -2437.25687 | -604.22076  | 1 |
| 27375 | C | 68.01097 | 97.24908  | 58.71656 | 67.61415    | 137.30774   | 54.26577    | 1 |
| 27376 | H | 67.67942 | 98.17765  | 59.32974 | 1137.79354  | 565.06887   | 1321.39728  | 1 |
| 27377 | H | 68.98466 | 97.41271  | 58.16588 | 816.47410   | 1192.08505  | 232.55993   | 1 |
| 27378 | H | 68.26596 | 96.53791  | 59.53464 | -1996.86414 | -716.65410  | 136.88505   | 1 |
| 27379 | C | 67.67264 | 96.01671  | 56.66362 | 856.69011   | 35.33764    | -60.97192   | 1 |
| 27380 | H | 67.80382 | 94.89918  | 56.88595 | 927.68628   | -2297.06562 | 1297.24378  | 1 |
| 27381 | H | 68.71848 | 96.37010  | 56.50394 | 1958.41266  | 50.27662    | -1840.57427 | 1 |
| 27382 | C | 66.84519 | 96.35829  | 55.34179 | 413.51732   | 305.03268   | -205.93044  | 1 |
| 27383 | H | 67.16934 | 95.68980  | 54.45469 | -752.67458  | -2028.42053 | 829.57944   | 1 |
| 27384 | H | 67.04320 | 97.45887  | 55.13384 | -876.13005  | -3055.43762 | 660.85391   | 1 |
| 27385 | H | 65.70197 | 96.16617  | 55.39397 | 778.95555   | -2348.47632 | 1933.45130  | 1 |
| 27386 | C | 65.40638 | 96.52613  | 59.84019 | 432.90416   | -117.39365  | 195.48026   | 1 |
| 27387 | O | 66.23465 | 96.66902  | 60.71128 | 439.06534   | 162.80042   | -165.65715  | 1 |
| 27388 | N | 64.09046 | 96.85281  | 59.82858 | 973.96130   | -854.07216  | -548.98415  | 1 |
| 27389 | H | 63.56412 | 96.58449  | 59.00860 | 45.73217    | -790.14428  | 1251.14235  | 1 |
| 27390 | C | 63.52261 | 97.25889  | 61.11781 | -975.81455  | 107.98848   | -149.24664  | 1 |
| 27391 | H | 64.30663 | 97.93822  | 61.50817 | 695.09684   | -1643.30687 | 382.44087   | 1 |
| 27392 | C | 62.20131 | 98.05061  | 60.85604 | 512.40910   | 760.99619   | 874.80041   | 1 |
| 27393 | H | 61.89491 | 98.41784  | 61.83295 | -298.57684  | -3015.13255 | -1204.04103 | 1 |

|       |   |          |           |          |             |             |             |   |
|-------|---|----------|-----------|----------|-------------|-------------|-------------|---|
| 27394 | H | 62.40206 | 98.97093  | 60.26926 | 367.64825   | 1893.75731  | 511.59865   | 1 |
| 27395 | O | 60.97327 | 97.37909  | 60.16409 | -269.88069  | -267.64247  | 609.84134   | 1 |
| 27396 | H | 60.31939 | 97.49498  | 60.85303 | -414.02405  | -2203.22157 | 1950.22292  | 1 |
| 27397 | C | 63.33525 | 96.04773  | 62.16936 | -107.55504  | 704.87887   | -1248.35683 | 1 |
| 27398 | O | 63.21031 | 96.11896  | 63.39932 | 173.42926   | -140.14576  | 195.93924   | 1 |
| 27399 | N | 63.07982 | 94.96328  | 61.41718 | -386.99728  | 6.14206     | 711.85412   | 1 |
| 27400 | H | 63.66037 | 95.10062  | 60.56890 | -2513.59844 | 262.93059   | -571.74591  | 1 |
| 27401 | C | 62.80869 | 93.63339  | 61.79551 | 730.29051   | -425.67784  | -375.75323  | 1 |
| 27402 | H | 63.19098 | 92.90241  | 60.97935 | 581.98120   | 917.63575   | -1485.37579 | 1 |
| 27403 | C | 63.58033 | 93.34189  | 63.17015 | 199.29655   | 377.44038   | 113.34335   | 1 |
| 27404 | H | 63.42889 | 94.16397  | 63.89169 | 676.35224   | 1432.55759  | 688.85595   | 1 |
| 27405 | C | 63.13159 | 91.97888  | 63.83415 | 142.03138   | -685.25507  | 798.22513   | 1 |
| 27406 | H | 63.55846 | 91.83413  | 64.91846 | -1852.30099 | -491.14193  | -731.46553  | 1 |
| 27407 | H | 62.03722 | 91.94034  | 63.93890 | 2223.81520  | 989.22035   | -1022.13541 | 1 |
| 27408 | H | 63.36792 | 91.11021  | 63.25466 | 272.31634   | -2703.95446 | 2484.24909  | 1 |
| 27409 | C | 65.11510 | 92.93565  | 62.96667 | -838.85351  | -536.69233  | 712.54879   | 1 |
| 27410 | H | 65.14505 | 92.29262  | 62.08373 | 2785.14254  | 1582.16731  | 181.98432   | 1 |
| 27411 | H | 65.52593 | 92.42422  | 63.86412 | 727.21214   | 1658.05388  | 2488.50096  | 1 |
| 27412 | C | 65.82959 | 94.20935  | 62.44835 | 1762.36466  | -391.85899  | -1030.94925 | 1 |
| 27413 | H | 65.40474 | 94.60197  | 61.41247 | -1281.04059 | -2588.49885 | 1950.91718  | 1 |
| 27414 | H | 65.57122 | 94.94447  | 63.27601 | 2480.19761  | 826.07261   | 1043.37373  | 1 |
| 27415 | H | 66.96319 | 94.24281  | 62.27586 | -222.06256  | 1941.64329  | 39.77507    | 1 |
| 27416 | C | 61.20197 | 93.46798  | 62.12841 | 352.63826   | 444.68963   | 44.76667    | 1 |
| 27417 | O | 60.48140 | 92.82851  | 61.37652 | 3.17021     | -692.61759  | -169.28677  | 1 |
| 27418 | N | 60.84617 | 94.02153  | 63.30736 | -158.44428  | -310.27800  | 8.82672     | 1 |
| 27419 | H | 61.51682 | 94.65739  | 63.76297 | 0.06581     | 3521.40151  | -17.62877   | 1 |
| 27420 | C | 59.47213 | 94.24582  | 63.53146 | -134.90599  | -532.27502  | 353.25048   | 1 |
| 27421 | H | 58.89411 | 93.36886  | 63.11649 | 1314.01374  | -2883.07375 | 138.18612   | 1 |
| 27422 | C | 59.15659 | 94.63796  | 65.06681 | -722.55980  | -332.86256  | 1434.85925  | 1 |
| 27423 | H | 59.11228 | 95.77718  | 65.05600 | -238.17492  | -759.25451  | 1426.60252  | 1 |
| 27424 | H | 60.03686 | 94.21445  | 65.67039 | 2451.89923  | 1578.39567  | 1299.06414  | 1 |
| 27425 | C | 57.84287 | 94.31614  | 65.76442 | -48.94270   | -238.58598  | 421.40903   | 1 |
| 27426 | C | 57.33096 | 92.96164  | 65.88581 | 920.62983   | 11.61425    | 369.99068   | 1 |
| 27427 | H | 57.94619 | 92.15364  | 65.44052 | -896.43915  | -2394.36749 | -589.10971  | 1 |
| 27428 | C | 55.95009 | 92.76528  | 66.18955 | -973.74614  | 150.53031   | -900.44944  | 1 |
| 27429 | H | 55.55349 | 91.74136  | 66.10587 | -969.01815  | -233.17376  | 350.91611   | 1 |
| 27430 | C | 55.18102 | 93.85784  | 66.63208 | 1302.73046  | -801.68459  | -79.60416   | 1 |
| 27431 | O | 53.84822 | 93.68527  | 67.01986 | 513.74526   | 810.36864   | -479.38343  | 1 |
| 27432 | H | 53.73845 | 92.72991  | 67.14139 | 2389.20555  | -580.45487  | -2059.82187 | 1 |
| 27433 | C | 57.00500 | 95.40132  | 66.19430 | -1157.90132 | -130.96347  | -466.50571  | 1 |
| 27434 | H | 57.47406 | 96.37937  | 66.10587 | -863.81718  | 1638.80912  | 1172.70623  | 1 |
| 27435 | C | 55.73725 | 95.17354  | 66.65823 | -601.19008  | 235.49415   | -1134.82887 | 1 |
| 27436 | H | 55.14206 | 96.04131  | 66.99146 | -749.77417  | 1581.78423  | -1908.76264 | 1 |
| 27437 | C | 59.15787 | 95.63096  | 62.75896 | -338.48172  | 1036.85071  | 530.45681   | 1 |
| 27438 | O | 58.16072 | 95.74896  | 62.05686 | 121.94000   | 465.36202   | 936.49152   | 1 |
| 27439 | N | 60.00201 | 96.62075  | 63.04480 | 725.17539   | -955.29523  | 448.94573   | 1 |
| 27440 | H | 60.82281 | 96.27008  | 63.58040 | 967.92479   | -718.84485  | 1701.73994  | 1 |
| 27441 | C | 59.72624 | 98.03147  | 63.22581 | -556.42046  | -602.21134  | -537.17850  | 1 |
| 27442 | H | 60.59033 | 98.62857  | 62.85763 | 851.22731   | -6.73694    | 1020.00079  | 1 |
| 27443 | C | 58.29354 | 98.47697  | 62.90838 | 182.97329   | -660.58202  | -22.67783   | 1 |
| 27444 | H | 57.46436 | 97.85563  | 63.36532 | -2096.65786 | 737.97975   | 1074.05465  | 1 |
| 27445 | O | 57.88567 | 98.21359  | 61.40446 | -323.80136  | 747.97949   | 318.03008   | 1 |
| 27446 | H | 58.19839 | 97.31225  | 61.29527 | 1923.96986  | 2292.04882  | -2524.03878 | 1 |
| 27447 | C | 58.12106 | 99.97444  | 63.17638 | 1026.09326  | 510.25566   | -1101.74271 | 1 |
| 27448 | H | 58.37274 | 100.18363 | 64.29834 | 2800.01145  | 32.07560    | 3029.35397  | 1 |
| 27449 | H | 58.88264 | 100.56665 | 62.62921 | 662.92992   | -2103.04040 | 2674.30133  | 1 |
| 27450 | H | 57.05444 | 100.33753 | 62.97694 | 964.24341   | -278.05074  | 3334.01694  | 1 |
| 27451 | C | 59.82819 | 98.20092  | 64.92355 | -360.94615  | -369.33659  | 277.60833   | 1 |
| 27452 | O | 58.74855 | 98.02904  | 65.52113 | -285.53464  | -159.50482  | -326.98798  | 1 |
| 27453 | N | 60.95879 | 98.69166  | 65.30960 | -395.04506  | 208.17867   | 649.44863   | 1 |
| 27454 | H | 61.64016 | 98.80913  | 64.58553 | 993.63212   | 2031.55949  | 72.00047    | 1 |
| 27455 | C | 61.12637 | 99.45292  | 66.52560 | 1156.11402  | -420.46343  | 826.98264   | 1 |

|       |   |          |           |          |             |             |             |   |
|-------|---|----------|-----------|----------|-------------|-------------|-------------|---|
| 27456 | H | 60.55617 | 98.91145  | 67.23971 | -1943.89326 | -750.32719  | 208.68890   | 1 |
| 27457 | C | 62.69823 | 99.71819  | 66.95796 | -95.92796   | -148.06102  | -258.94289  | 1 |
| 27458 | H | 62.78108 | 100.07676 | 68.04910 | 1083.22949  | 205.12219   | -1763.63080 | 1 |
| 27459 | H | 63.20130 | 98.66439  | 66.85665 | 3339.08538  | 1186.79885  | -2285.15101 | 1 |
| 27460 | O | 63.32629 | 100.91922 | 66.35275 | -125.39473  | -539.02174  | -250.30686  | 1 |
| 27461 | H | 63.17854 | 101.54025 | 67.07231 | 675.98476   | 1696.18494  | -2596.35745 | 1 |
| 27462 | C | 60.54720 | 100.89199 | 66.20759 | -303.67101  | 644.20945   | 10.93313    | 1 |
| 27463 | O | 60.33098 | 101.34683 | 65.10532 | -467.79830  | 93.24809    | 231.35954   | 1 |
| 27464 | N | 60.34794 | 101.46474 | 67.42058 | -538.92228  | 344.19105   | -726.49763  | 1 |
| 27465 | H | 60.19592 | 100.77685 | 68.21864 | -4658.96832 | -1196.15326 | 41.74528    | 1 |
| 27466 | C | 59.54137 | 102.70384 | 67.57628 | 453.44347   | 580.42898   | -1669.14722 | 1 |
| 27467 | H | 58.61156 | 102.27703 | 67.14358 | -2275.26415 | -3504.36177 | -443.83204  | 1 |
| 27468 | C | 59.44491 | 102.99145 | 69.07875 | -391.92154  | 865.27714   | -250.26989  | 1 |
| 27469 | H | 58.79767 | 103.86594 | 69.24009 | 91.75915    | 202.90248   | 1268.48113  | 1 |
| 27470 | H | 60.42053 | 103.40000 | 69.47141 | -2338.72835 | -465.48887  | -949.43949  | 1 |
| 27471 | C | 58.86104 | 101.73783 | 69.88902 | 67.10442    | 172.57570   | -37.83967   | 1 |
| 27472 | O | 58.17434 | 101.96849 | 70.86663 | -69.89069   | 188.38432   | 261.50696   | 1 |
| 27473 | O | 59.08854 | 100.54463 | 69.46715 | -42.03242   | 553.28577   | -398.00371  | 1 |
| 27474 | C | 60.02548 | 103.99483 | 66.65291 | 95.24854    | -913.35529  | -520.00746  | 1 |
| 27475 | O | 59.27603 | 104.87406 | 66.31047 | -890.10473  | 75.58527    | -147.88990  | 1 |
| 27476 | N | 61.36334 | 103.96581 | 66.60447 | 501.01913   | 279.14011   | -15.08164   | 1 |
| 27477 | H | 61.92868 | 103.19109 | 67.03619 | 2645.87577  | -3282.07524 | 943.43993   | 1 |
| 27478 | C | 62.01001 | 104.89051 | 65.76488 | 139.57832   | -18.19336   | -273.23789  | 1 |
| 27479 | H | 61.20239 | 105.52655 | 65.30494 | 1216.97260  | 723.79783   | -528.05763  | 1 |
| 27480 | C | 63.01924 | 105.73504 | 66.68287 | 790.47951   | 229.35307   | -452.61236  | 1 |
| 27481 | H | 62.47392 | 106.43959 | 67.30339 | -1638.63748 | 40.33434    | 89.77868    | 1 |
| 27482 | H | 63.54936 | 106.30615 | 65.90177 | 838.11398   | -1622.70994 | 192.03501   | 1 |
| 27483 | C | 63.96795 | 104.84607 | 67.50350 | 94.69847    | 323.66110   | -224.89426  | 1 |
| 27484 | O | 63.73450 | 103.64002 | 67.69048 | 258.79406   | 493.49716   | -53.01587   | 1 |
| 27485 | N | 65.21103 | 105.48981 | 67.64683 | 686.95071   | -238.45382  | 498.90890   | 1 |
| 27486 | H | 66.06175 | 104.99088 | 67.97616 | 3498.52040  | 1772.14804  | -433.48655  | 1 |
| 27487 | H | 65.40824 | 106.49849 | 67.65375 | 913.82090   | -1268.60799 | -1941.74576 | 1 |
| 27488 | C | 62.87061 | 104.17582 | 64.58239 | -1190.54851 | -570.44258  | -503.11954  | 1 |
| 27489 | O | 63.75974 | 104.90296 | 64.11691 | 381.19051   | 29.10440    | -458.14414  | 1 |
| 27490 | N | 62.43362 | 103.01770 | 64.19387 | 251.26802   | 285.20818   | -939.49094  | 1 |
| 27491 | H | 61.73849 | 102.46318 | 64.72860 | -2733.27123 | -231.53084  | 53.54857    | 1 |
| 27492 | C | 63.30348 | 102.38619 | 63.24091 | -584.32311  | -176.71679  | -251.36220  | 1 |
| 27493 | H | 64.30060 | 102.66509 | 63.53554 | -37.25588   | 109.60759   | 1252.67964  | 1 |
| 27494 | C | 62.98548 | 100.85529 | 63.31372 | 618.07649   | 20.82617    | 21.65291    | 1 |
| 27495 | H | 62.80290 | 100.54767 | 64.40505 | -1085.77292 | 1271.20730  | 2788.01866  | 1 |
| 27496 | H | 62.08262 | 100.52217 | 62.74538 | 1190.37143  | 373.79723   | 5292.72956  | 1 |
| 27497 | C | 64.22192 | 100.12631 | 62.72657 | 132.98820   | -86.02102   | 156.11491   | 1 |
| 27498 | C | 65.08799 | 100.52648 | 61.64749 | -892.70284  | 187.38838   | 14.55031    | 1 |
| 27499 | H | 64.80260 | 101.27769 | 60.88643 | -3533.58294 | 2961.81080  | 1439.97501  | 1 |
| 27500 | C | 66.40730 | 99.98161  | 61.65642 | -37.37695   | 421.47089   | -110.51479  | 1 |
| 27501 | H | 67.04196 | 100.29402 | 60.84541 | 425.63478   | -1249.35562 | -786.93588  | 1 |
| 27502 | C | 66.87486 | 99.00874  | 62.57008 | -636.50803  | 154.03008   | -354.45449  | 1 |
| 27503 | O | 68.23472 | 98.55244  | 62.57669 | -703.34731  | 20.08629    | -444.35482  | 1 |
| 27504 | H | 68.81869 | 99.35069  | 62.59707 | -3193.98058 | -827.14245  | 1432.18976  | 1 |
| 27505 | C | 64.67695 | 98.98018  | 63.44026 | 360.34557   | -10.78063   | 440.62829   | 1 |
| 27506 | H | 63.98305 | 98.49074  | 64.17301 | 1634.51905  | -698.36153  | 1823.20161  | 1 |
| 27507 | C | 65.92398 | 98.39216  | 63.37728 | -140.56791  | 507.71861   | 33.60724    | 1 |
| 27508 | H | 66.28020 | 97.52171  | 64.01249 | 1087.86601  | -931.37523  | -2083.43329 | 1 |
| 27509 | C | 62.98793 | 102.98559 | 61.74260 | -450.12780  | 830.88066   | 674.00304   | 1 |
| 27510 | O | 63.85544 | 103.17805 | 60.92300 | -310.71077  | -139.14906  | 131.48981   | 1 |
| 27511 | N | 61.68659 | 103.15770 | 61.61471 | 83.40986    | -328.48047  | 863.97421   | 1 |
| 27512 | H | 61.07738 | 103.05367 | 62.43835 | 1812.04954  | -1946.54652 | -2683.18687 | 1 |
| 27513 | C | 61.07029 | 103.54653 | 60.39261 | -715.62265  | -225.53368  | 290.10262   | 1 |
| 27514 | H | 61.99266 | 103.59427 | 59.83342 | -1177.51190 | 1999.17862  | 4190.33347  | 1 |
| 27515 | C | 60.09939 | 102.41002 | 59.84414 | 373.51195   | 276.45041   | 889.08190   | 1 |
| 27516 | H | 59.42876 | 102.45865 | 60.74371 | 3296.90272  | 321.74699   | 356.00724   | 1 |
| 27517 | O | 60.62611 | 101.13805 | 59.48124 | 8.81012     | 242.36330   | -99.51536   | 1 |



|       |   |          |           |          |             |             |             |   |
|-------|---|----------|-----------|----------|-------------|-------------|-------------|---|
| 27518 | H | 60.32639 | 100.59307 | 60.25654 | 2221.77736  | 1537.60090  | -60.95838   | 1 |
| 27519 | C | 59.38923 | 103.15418 | 58.65809 | -189.01865  | 448.53529   | 951.02184   | 1 |
| 27520 | H | 60.09093 | 103.68146 | 57.89833 | 110.84116   | 1862.17306  | -554.59230  | 1 |
| 27521 | H | 58.67504 | 103.92069 | 59.11233 | -2338.87366 | 2290.50079  | 1558.66994  | 1 |
| 27522 | H | 58.84994 | 102.37111 | 58.05762 | 1480.25065  | 5444.98257  | 1960.16341  | 1 |
| 27523 | C | 60.38859 | 104.99348 | 60.79791 | 477.35664   | -507.14817  | 388.39016   | 1 |
| 27524 | O | 59.19705 | 105.15127 | 60.78780 | 352.90294   | 70.91248    | -103.20221  | 1 |
| 27525 | N | 61.42208 | 105.83830 | 60.98393 | -780.40559  | 28.76172    | 319.76036   | 1 |
| 27526 | H | 62.33393 | 105.40240 | 61.01486 | -410.01932  | -1931.83804 | 2909.46328  | 1 |
| 27527 | C | 61.33505 | 107.13295 | 61.58598 | -621.09049  | -87.74697   | 567.56631   | 1 |
| 27528 | H | 60.61132 | 107.82918 | 61.09880 | -1594.03434 | 295.09401   | -1006.46991 | 1 |
| 27529 | C | 60.85407 | 106.89689 | 63.08004 | -40.31486   | 485.05383   | 200.88366   | 1 |
| 27530 | H | 60.94432 | 105.87095 | 63.47235 | -3860.15489 | 3600.49066  | -627.75077  | 1 |
| 27531 | H | 61.35165 | 107.63818 | 63.73524 | 3605.86055  | -1736.08610 | 111.53335   | 1 |
| 27532 | C | 59.34731 | 107.23636 | 62.90082 | 217.15978   | 341.43735   | -765.93324  | 1 |
| 27533 | H | 58.88791 | 106.71262 | 61.99355 | -2130.71131 | -2243.13424 | 672.01326   | 1 |
| 27534 | H | 58.83335 | 106.74300 | 63.73416 | 749.31484   | 82.13135    | -829.90380  | 1 |
| 27535 | C | 58.90229 | 108.82747 | 62.81468 | -689.64429  | 725.77995   | 378.79114   | 1 |
| 27536 | O | 57.72648 | 109.08058 | 62.90729 | 121.38360   | -425.43291  | 395.58262   | 1 |
| 27537 | O | 59.83867 | 109.56342 | 62.43930 | -159.68404  | 570.20102   | 554.10430   | 1 |
| 27538 | C | 62.78729 | 107.89315 | 61.73675 | -626.60334  | -81.90946   | -70.02929   | 1 |
| 27539 | O | 63.84278 | 107.37083 | 61.55272 | 293.36709   | 374.82498   | -659.78524  | 1 |
| 27540 | N | 62.49480 | 109.12676 | 62.15069 | 134.83385   | 485.73266   | 499.65953   | 1 |
| 27541 | H | 61.54348 | 109.46140 | 61.88923 | 774.93538   | -1031.23249 | 1462.87748  | 1 |
| 27542 | C | 63.52176 | 109.70845 | 63.02394 | -414.30374  | 143.07157   | -797.90657  | 1 |
| 27543 | H | 64.47941 | 109.71073 | 62.48620 | 2577.19530  | -817.92377  | 1683.69584  | 1 |
| 27544 | C | 63.04676 | 111.21351 | 63.23136 | -352.40122  | -217.04860  | -206.96424  | 1 |
| 27545 | H | 61.92200 | 111.13070 | 63.24400 | -3936.71469 | -434.67940  | -540.42601  | 1 |
| 27546 | H | 63.25745 | 111.85491 | 62.28265 | 1480.76594  | -2397.33392 | -893.52785  | 1 |
| 27547 | C | 63.62421 | 111.85566 | 64.50171 | 584.27051   | 16.87414    | -9.58048    | 1 |
| 27548 | H | 63.07732 | 112.70064 | 65.01548 | 1873.19125  | 444.18595   | 330.28681   | 1 |
| 27549 | H | 63.61327 | 111.01529 | 65.25717 | -1266.49352 | -314.96222  | -2844.17439 | 1 |
| 27550 | C | 65.21118 | 112.42110 | 64.09968 | 649.83735   | 258.34675   | 346.47738   | 1 |
| 27551 | O | 65.30432 | 113.66057 | 63.88836 | 888.77942   | -788.13281  | -59.55699   | 1 |
| 27552 | O | 66.08286 | 111.57721 | 63.92659 | -354.93047  | -256.74499  | -568.52097  | 1 |
| 27553 | C | 63.81718 | 108.87925 | 64.37061 | 503.34361   | 160.39647   | -101.01292  | 1 |
| 27554 | O | 62.88673 | 108.31053 | 64.91747 | -152.00592  | -312.08504  | 478.23051   | 1 |
| 27555 | N | 65.03478 | 109.20567 | 64.86718 | 291.49763   | -776.01023  | -102.85939  | 1 |
| 27556 | H | 65.59001 | 109.81467 | 64.26869 | 1469.88412  | -1284.81542 | -84.31721   | 1 |
| 27557 | C | 65.78046 | 108.12335 | 65.46294 | -214.64465  | 56.09512    | 140.88516   | 1 |
| 27558 | H | 65.02788 | 107.52435 | 65.94286 | -1357.46492 | 299.63849   | 1513.23903  | 1 |
| 27559 | C | 66.38254 | 107.26399 | 64.26858 | -205.17874  | -1141.12594 | 20.90700    | 1 |
| 27560 | H | 65.65918 | 107.21641 | 63.40578 | 683.32875   | 920.95889   | 4630.76559  | 1 |
| 27561 | H | 67.27180 | 107.78093 | 63.82479 | -1448.25347 | -426.77856  | 4495.70038  | 1 |
| 27562 | C | 66.69950 | 105.79570 | 64.61248 | -314.88156  | 444.22323   | -591.87029  | 1 |
| 27563 | H | 65.80086 | 105.31174 | 65.06752 | 1228.43055  | -4542.02615 | 2246.60399  | 1 |
| 27564 | H | 67.51310 | 105.80009 | 65.44473 | -725.06547  | -2837.91594 | -7.42884    | 1 |
| 27565 | S | 67.29137 | 105.24996 | 62.94487 | -231.26847  | 196.84101   | -362.73500  | 1 |
| 27566 | C | 65.69167 | 105.42657 | 61.91040 | 79.09870    | 32.27219    | 301.56426   | 1 |
| 27567 | H | 65.64290 | 106.39274 | 61.25873 | 1557.54404  | 921.18119   | -935.17262  | 1 |
| 27568 | H | 64.75731 | 105.48085 | 62.57678 | -391.45313  | 1267.95927  | -1211.14256 | 1 |
| 27569 | H | 65.52925 | 104.77673 | 61.05814 | 1627.62937  | 368.11406   | 178.75154   | 1 |
| 27570 | C | 67.04703 | 108.67498 | 66.33997 | 273.03484   | 484.13819   | -401.21201  | 1 |
| 27571 | O | 67.00876 | 108.36322 | 67.51118 | 97.35977    | -98.97455   | -267.36347  | 1 |
| 27572 | N | 67.89128 | 109.50376 | 65.72092 | 148.70620   | -471.13182  | 380.52334   | 1 |
| 27573 | H | 67.63665 | 109.85521 | 64.78940 | -230.44712  | -823.06740  | 749.44765   | 1 |
| 27574 | C | 68.93010 | 110.14013 | 66.47588 | -50.38600   | 1090.82217  | 955.34078   | 1 |
| 27575 | H | 68.85571 | 111.26717 | 66.34672 | -486.94086  | 3223.52077  | -694.02976  | 1 |
| 27576 | H | 68.64501 | 109.88327 | 67.50625 | -373.63719  | -223.73014  | 3053.95904  | 1 |
| 27577 | C | 70.43341 | 109.66198 | 65.98486 | -130.51819  | 1.98520     | 595.89741   | 1 |
| 27578 | O | 71.41591 | 109.95805 | 66.62177 | 218.49804   | -339.43749  | 112.49189   | 1 |
| 27579 | N | 70.38921 | 109.08106 | 64.74005 | 386.30944   | -200.40190  | -419.52899  | 1 |

|       |   |          |           |          |             |             |             |   |
|-------|---|----------|-----------|----------|-------------|-------------|-------------|---|
| 27580 | H | 69.46931 | 109.43979 | 64.38708 | 2365.24080  | -1794.95550 | -2190.17364 | 1 |
| 27581 | C | 70.39730 | 107.61342 | 64.70388 | 888.82692   | -302.38806  | 127.27122   | 1 |
| 27582 | H | 69.62275 | 107.31782 | 65.42144 | 1945.48970  | -823.24380  | 248.18720   | 1 |
| 27583 | C | 69.97281 | 107.20003 | 63.23152 | -220.97712  | 530.26802   | 255.66956   | 1 |
| 27584 | H | 70.74593 | 107.53996 | 62.51368 | 2481.86928  | -3570.12615 | 2553.53076  | 1 |
| 27585 | H | 69.95592 | 106.10516 | 63.11556 | 1388.23535  | 286.72610   | -1260.53443 | 1 |
| 27586 | O | 68.88460 | 107.89964 | 62.52020 | 698.55035   | 744.68494   | -159.90132  | 1 |
| 27587 | H | 68.29905 | 107.02116 | 62.33051 | -868.76946  | -2914.32541 | -2135.14203 | 1 |
| 27588 | C | 71.84638 | 107.15161 | 65.14041 | -362.93014  | 294.64800   | -212.38341  | 1 |
| 27589 | O | 72.85823 | 107.70524 | 64.79197 | 226.56449   | -56.13430   | 107.16415   | 1 |
| 27590 | N | 71.73378 | 105.93276 | 65.74629 | 72.23076    | 19.89212    | 877.88286   | 1 |
| 27591 | H | 70.83260 | 105.38329 | 65.91480 | 208.20998   | 2067.65387  | 779.53096   | 1 |
| 27592 | C | 73.03296 | 105.24379 | 65.94802 | 264.47329   | -927.62190  | 118.41536   | 1 |
| 27593 | H | 73.72378 | 105.56776 | 65.14338 | -1908.78538 | -619.21173  | -1023.88199 | 1 |
| 27594 | H | 73.36745 | 105.88288 | 66.83123 | 2100.95959  | 2403.37726  | 2513.86677  | 1 |
| 27595 | C | 72.80362 | 103.70915 | 66.12909 | -480.39063  | 206.76901   | 403.40399   | 1 |
| 27596 | O | 71.71975 | 103.19626 | 66.15360 | -776.11277  | -168.22527  | 118.20391   | 1 |
| 27597 | N | 74.06756 | 103.14816 | 66.09391 | 328.03071   | 187.34677   | -856.65269  | 1 |
| 27598 | H | 74.91306 | 103.75802 | 66.30106 | 96.48166    | 512.61071   | 1603.66050  | 1 |
| 27599 | C | 74.12172 | 101.78401 | 66.59805 | 218.49075   | -571.99521  | -668.34127  | 1 |
| 27600 | H | 73.17550 | 101.25533 | 66.25073 | 1927.18911  | 2662.00909  | -1443.15836 | 1 |
| 27601 | C | 75.35905 | 101.06274 | 66.05433 | -284.16525  | -526.17303  | 119.58866   | 1 |
| 27602 | H | 75.51687 | 100.17416 | 66.68470 | 668.49145   | -2247.84057 | -360.85955  | 1 |
| 27603 | H | 76.32860 | 101.66235 | 66.20348 | -778.99395  | 348.42006   | 324.10695   | 1 |
| 27604 | C | 75.06374 | 100.77460 | 64.47101 | -614.05674  | 55.44362    | 633.42619   | 1 |
| 27605 | O | 76.00907 | 100.57883 | 63.69379 | -274.65411  | 493.82418   | 413.13508   | 1 |
| 27606 | O | 73.89453 | 100.66342 | 64.18494 | -76.44283   | -199.33552  | -304.40710  | 1 |
| 27607 | C | 74.13424 | 101.63093 | 68.25534 | -32.01186   | 608.74474   | -555.31373  | 1 |
| 27608 | O | 74.09199 | 100.52061 | 68.74017 | 379.08146   | -35.01971   | -360.89033  | 1 |
| 27609 | N | 74.53262 | 102.71392 | 68.93643 | -88.69881   | -539.27301  | -231.13332  | 1 |
| 27610 | H | 74.56860 | 103.48247 | 68.24418 | -4226.71136 | 2046.21713  | -930.72712  | 1 |
| 27611 | C | 73.87585 | 102.92861 | 70.20251 | -288.33496  | -186.96562  | -94.03623   | 1 |
| 27612 | H | 73.86034 | 101.85936 | 70.53595 | -2285.88611 | 600.28537   | 660.65464   | 1 |
| 27613 | C | 74.64320 | 103.98812 | 71.11459 | 706.31911   | -441.36690  | -422.20644  | 1 |
| 27614 | H | 74.13956 | 104.18490 | 72.04517 | -1134.71888 | -1743.28699 | -1618.29108 | 1 |
| 27615 | H | 74.83322 | 104.90198 | 70.56436 | -1129.31256 | 1859.44426  | -3723.21672 | 1 |
| 27616 | C | 75.99203 | 103.40244 | 71.68236 | -200.84019  | -146.17280  | -616.13866  | 1 |
| 27617 | C | 76.07984 | 101.99309 | 71.87695 | -87.53135   | -513.56102  | -764.07994  | 1 |
| 27618 | H | 75.29962 | 101.20009 | 71.62510 | 2050.18526  | 1777.68349  | -4258.01178 | 1 |
| 27619 | C | 77.26188 | 101.60088 | 72.50850 | 682.88568   | -85.31812   | 76.69527    | 1 |
| 27620 | H | 77.31927 | 100.51703 | 72.83062 | 670.96256   | -3223.45233 | 47.92951    | 1 |
| 27621 | C | 78.31619 | 102.47831 | 72.86029 | 250.66719   | -171.83556  | 880.25141   | 1 |
| 27622 | O | 79.43364 | 101.94048 | 73.55728 | 56.66098    | 178.47414   | -1090.19632 | 1 |
| 27623 | H | 79.30450 | 100.89191 | 73.36909 | -2412.15863 | -193.41422  | -1115.86199 | 1 |
| 27624 | C | 77.10303 | 104.28495 | 71.82871 | -267.08562  | -409.54277  | -397.39178  | 1 |
| 27625 | H | 77.01909 | 105.39620 | 71.54749 | -102.16545  | 350.29973   | -1820.36300 | 1 |
| 27626 | C | 78.32953 | 103.77604 | 72.30199 | -140.32924  | 227.69004   | -206.33790  | 1 |
| 27627 | H | 79.18437 | 104.40559 | 72.49534 | 1117.56587  | 2553.39295  | -1655.89301 | 1 |
| 27628 | C | 72.38887 | 103.52532 | 69.86608 | -586.83371  | -557.53834  | -256.71338  | 1 |
| 27629 | O | 72.31022 | 104.77237 | 69.83914 | 457.25002   | 303.96276   | 611.99810   | 1 |
| 27630 | N | 71.42576 | 102.69672 | 69.64309 | -185.68759  | -473.62676  | -657.45568  | 1 |
| 27631 | H | 71.67212 | 101.68671 | 69.53899 | 523.29513   | 287.96655   | -533.86281  | 1 |
| 27632 | C | 70.07614 | 103.11636 | 69.52109 | 19.98506    | 70.15222    | -12.71929   | 1 |
| 27633 | H | 69.91606 | 103.83246 | 70.34466 | -986.96593  | 2041.50974  | -1107.34422 | 1 |
| 27634 | C | 70.05163 | 103.70117 | 68.06738 | -175.02775  | -871.87974  | 105.14660   | 1 |
| 27635 | H | 70.89348 | 104.40890 | 67.99166 | -784.31735  | 637.90294   | 1116.35198  | 1 |
| 27636 | H | 70.18199 | 102.83513 | 67.31010 | -120.66136  | -1169.53511 | 2425.44861  | 1 |
| 27637 | C | 68.75119 | 104.47008 | 67.66167 | -185.18033  | 217.64341   | -836.50951  | 1 |
| 27638 | O | 68.87751 | 105.20574 | 66.62363 | 379.64504   | 13.47381    | 2.29914     | 1 |
| 27639 | O | 67.61678 | 104.15904 | 68.08395 | -1337.02779 | 546.66957   | -767.11372  | 1 |
| 27640 | C | 69.26427 | 101.70360 | 69.81551 | 892.42279   | 767.39754   | 672.39013   | 1 |
| 27641 | O | 69.74031 | 100.60689 | 69.69243 | 512.45784   | -683.85143  | 333.88159   | 1 |

|       |   |          |           |          |             |             |             |   |
|-------|---|----------|-----------|----------|-------------|-------------|-------------|---|
| 27642 | N | 68.00711 | 102.01560 | 70.05620 | 433.85611   | -1051.68528 | 562.14622   | 1 |
| 27643 | H | 67.80913 | 103.00788 | 69.90693 | -340.41634  | 1363.77327  | 251.01077   | 1 |
| 27644 | C | 67.04710 | 101.19661 | 70.73761 | -1252.13700 | 553.34480   | 802.23831   | 1 |
| 27645 | H | 67.66988 | 100.68320 | 71.52461 | 3124.35099  | -1053.98323 | -1685.71850 | 1 |
| 27646 | C | 65.89558 | 102.07649 | 71.27538 | -402.69073  | -183.36714  | -239.01036  | 1 |
| 27647 | H | 65.51877 | 102.64844 | 70.45610 | -1029.35888 | -214.02369  | 2371.22842  | 1 |
| 27648 | H | 66.34210 | 102.85741 | 71.89127 | 1897.58146  | -2742.86283 | -3282.72814 | 1 |
| 27649 | O | 64.77695 | 101.35692 | 71.99035 | -101.81684  | 399.70746   | 199.25586   | 1 |
| 27650 | H | 64.63290 | 100.62749 | 71.25053 | -832.98419  | 1974.85276  | 792.47988   | 1 |
| 27651 | C | 66.32907 | 100.11639 | 69.74980 | -138.83876  | 328.14624   | 109.11219   | 1 |
| 27652 | O | 65.12563 | 99.78206  | 69.86645 | 292.89187   | 317.90996   | 646.47527   | 1 |
| 27653 | N | 67.19877 | 99.62486  | 68.90001 | 527.97704   | 771.38349   | -359.86606  | 1 |
| 27654 | H | 68.17925 | 99.90749  | 68.73205 | -706.06908  | -283.96809  | -742.32701  | 1 |
| 27655 | C | 66.61494 | 98.71610  | 67.93810 | 382.68449   | -130.60548  | -731.77460  | 1 |
| 27656 | H | 65.61886 | 98.31512  | 68.24538 | -638.37300  | 223.68465   | 1408.89791  | 1 |
| 27657 | C | 66.20927 | 99.50721  | 66.55274 | -296.64027  | 661.42514   | 27.71497    | 1 |
| 27658 | H | 65.80885 | 98.75588  | 65.80492 | -2538.51987 | -1847.47989 | -2032.46209 | 1 |
| 27659 | H | 65.44550 | 100.34970 | 66.72082 | -1103.30489 | -93.63865   | -507.96715  | 1 |
| 27660 | C | 67.49611 | 100.11850 | 65.98003 | 86.50458    | -1416.38965 | 50.83517    | 1 |
| 27661 | H | 67.98406 | 100.65828 | 66.86865 | -1000.25118 | -1814.66652 | 1108.30599  | 1 |
| 27662 | H | 68.30654 | 99.37115  | 65.68741 | 582.49469   | 3372.41900  | -206.87016  | 1 |
| 27663 | S | 66.80207 | 101.07338 | 64.56511 | 223.20621   | -170.74110  | -273.51996  | 1 |
| 27664 | C | 66.22978 | 102.69758 | 65.36095 | 440.48687   | -563.35539  | -528.29040  | 1 |
| 27665 | H | 66.13052 | 103.54150 | 64.59308 | -655.11317  | 2091.04234  | 2923.25903  | 1 |
| 27666 | H | 65.31101 | 102.68604 | 65.99605 | 1879.16581  | -1132.79672 | -1339.19170 | 1 |
| 27667 | H | 66.93059 | 103.03584 | 66.10183 | -929.45657  | 800.71780   | -3213.68109 | 1 |
| 27668 | C | 67.70262 | 97.65452  | 67.41647 | -811.79940  | -121.38767  | -1032.62036 | 1 |
| 27669 | O | 68.93488 | 97.84738  | 67.37281 | -50.02103   | 218.53927   | 107.02050   | 1 |
| 27670 | N | 67.01960 | 96.63738  | 66.98501 | 958.00426   | 113.70032   | -452.31529  | 1 |
| 27671 | H | 66.01752 | 96.69937  | 67.11121 | 1012.81653  | 779.45055   | -103.98149  | 1 |
| 27672 | C | 67.70375 | 95.35885  | 66.74478 | 321.51590   | -20.85527   | 155.06359   | 1 |
| 27673 | H | 68.51263 | 95.30597  | 67.47827 | 1227.42758  | -134.04882  | -1417.67526 | 1 |
| 27674 | C | 66.58909 | 94.25105  | 66.80500 | -397.12270  | 207.77095   | 553.27305   | 1 |
| 27675 | H | 65.69237 | 94.60869  | 66.21805 | -134.76771  | -388.54196  | 1890.39088  | 1 |
| 27676 | H | 66.91301 | 93.35210  | 66.26347 | 1693.50830  | 2008.29503  | 853.09863   | 1 |
| 27677 | C | 66.32341 | 93.98561  | 68.33802 | 850.81681   | -774.22865  | 198.11195   | 1 |
| 27678 | H | 65.34422 | 93.44477  | 68.55589 | -2261.44108 | -3013.38021 | -1404.49237 | 1 |
| 27679 | H | 66.39113 | 94.95734  | 68.94488 | 722.00825   | 1378.89471  | -3716.34540 | 1 |
| 27680 | C | 67.51649 | 92.98932  | 68.70434 | 164.51443   | -261.27940  | -31.16714   | 1 |
| 27681 | H | 68.51659 | 93.36422  | 68.44542 | 1068.50648  | -655.19001  | -1772.56852 | 1 |
| 27682 | H | 67.41286 | 92.01687  | 68.11932 | 894.74682   | -4011.99179 | 2056.76416  | 1 |
| 27683 | C | 67.61449 | 92.82741  | 70.26287 | 245.81773   | 168.38060   | 726.01760   | 1 |
| 27684 | H | 68.13397 | 91.92959  | 70.67381 | 856.25981   | 1067.74741  | -2008.35420 | 1 |
| 27685 | H | 66.64268 | 93.00259  | 70.83361 | -677.52176  | -741.39795  | -1658.16526 | 1 |
| 27686 | N | 68.63327 | 93.84394  | 70.77127 | 91.36634    | -193.75125  | 84.21187    | 1 |
| 27687 | H | 68.86485 | 93.79166  | 71.80876 | -1294.96255 | -2444.03791 | 2634.65693  | 1 |
| 27688 | H | 69.71043 | 93.81487  | 70.25559 | 864.26321   | 5.01119     | -1820.40307 | 1 |
| 27689 | H | 68.32566 | 94.92366  | 70.66707 | 670.41849   | -909.44157  | 663.54086   | 1 |
| 27690 | C | 68.05109 | 95.52278  | 65.17227 | 440.60197   | 67.55067    | 429.70480   | 1 |
| 27691 | O | 67.44836 | 94.97888  | 64.30612 | -173.44064  | 129.77826   | 333.58281   | 1 |
| 27692 | N | 69.19689 | 96.29555  | 65.15792 | 184.07508   | 662.43505   | 279.18571   | 1 |
| 27693 | H | 69.44004 | 96.89880  | 65.98848 | -274.40895  | -1276.26445 | 902.92225   | 1 |
| 27694 | C | 70.24240 | 95.93739  | 64.25560 | 237.20385   | -487.23353  | -472.46221  | 1 |
| 27695 | H | 70.44631 | 94.85855  | 64.33193 | -2404.80900 | 1777.68893  | -958.90601  | 1 |
| 27696 | C | 69.82448 | 96.30984  | 62.76939 | 272.73107   | -284.96042  | 131.30754   | 1 |
| 27697 | H | 68.72733 | 96.13609  | 62.57509 | 1816.94507  | 1018.75519  | 761.49759   | 1 |
| 27698 | H | 69.91438 | 97.44876  | 62.55637 | 2272.32151  | -1243.74826 | -3870.00143 | 1 |
| 27699 | C | 70.73092 | 95.43596  | 61.90065 | 338.24360   | 128.72607   | 61.11215    | 1 |
| 27700 | H | 70.58829 | 94.31981  | 62.07847 | -2572.21172 | 2500.68716  | -337.84238  | 1 |
| 27701 | H | 71.78902 | 95.54632  | 62.14779 | 1088.95089  | -479.23816  | 2557.13880  | 1 |
| 27702 | C | 70.41667 | 95.94673  | 60.35037 | -11.95395   | 183.59999   | -451.39570  | 1 |
| 27703 | O | 70.36445 | 95.18677  | 59.37231 | 523.55684   | -392.98853  | -113.46025  | 1 |

|       |   |          |           |          |             |             |             |   |
|-------|---|----------|-----------|----------|-------------|-------------|-------------|---|
| 27704 | O | 70.44258 | 97.18043  | 60.19760 | -357.31826  | 170.97641   | 560.50672   | 1 |
| 27705 | C | 71.57042 | 96.70814  | 64.80777 | -653.81217  | 545.26736   | -47.87465   | 1 |
| 27706 | O | 72.59817 | 96.11320  | 64.50389 | -933.51113  | 282.95239   | -635.98504  | 1 |
| 27707 | N | 71.45843 | 97.91236  | 65.32339 | -57.15767   | -731.57857  | -289.19932  | 1 |
| 27708 | C | 70.61719 | 98.93555  | 64.69489 | -838.05530  | 588.62086   | 653.24954   | 1 |
| 27709 | H | 69.63826 | 98.57264  | 64.69577 | 1938.47552  | -1174.66204 | 2937.83007  | 1 |
| 27710 | H | 71.12097 | 98.97510  | 63.67066 | 754.19052   | -1990.14706 | 2964.88929  | 1 |
| 27711 | C | 72.30135 | 98.42885  | 66.39025 | 201.40073   | -643.40929  | -212.33105  | 1 |
| 27712 | H | 73.20433 | 98.69957  | 65.75475 | -522.36792  | -1898.49963 | -3654.97285 | 1 |
| 27713 | C | 71.38126 | 99.58638  | 66.99202 | 1139.59188  | 392.00219   | -72.92185   | 1 |
| 27714 | H | 71.91198 | 100.19313 | 67.73862 | 330.33922   | 3733.79181  | -702.85687  | 1 |
| 27715 | H | 70.52614 | 99.09229  | 67.53890 | 621.14474   | -1605.02238 | 704.43964   | 1 |
| 27716 | C | 70.82133 | 100.18851 | 65.64633 | -587.69556  | -350.19185  | -642.80369  | 1 |
| 27717 | H | 71.58476 | 100.82669 | 65.13040 | 2040.59791  | -3119.15418 | -358.89247  | 1 |
| 27718 | H | 69.93454 | 100.83076 | 65.75166 | -775.33639  | 1168.08454  | -1602.76520 | 1 |
| 27719 | C | 72.69337 | 97.33417  | 67.49268 | -863.69338  | 369.88324   | 432.80122   | 1 |
| 27720 | O | 72.40877 | 97.56413  | 68.65935 | 54.84429    | 284.37558   | 628.11059   | 1 |
| 27721 | N | 73.53575 | 96.40604  | 67.04953 | 643.14977   | 515.27925   | -142.58087  | 1 |
| 27722 | H | 73.62213 | 96.28807  | 66.03708 | -2134.90327 | 1788.18594  | -819.45980  | 1 |
| 27723 | C | 73.63499 | 95.17073  | 67.78692 | -336.55657  | -144.37719  | -51.31331   | 1 |
| 27724 | H | 73.23056 | 95.41984  | 68.83784 | -1771.61452 | 2821.32808  | 1733.80958  | 1 |
| 27725 | C | 72.79779 | 94.09237  | 67.01734 | 806.72652   | -227.84483  | -625.76875  | 1 |
| 27726 | H | 73.01532 | 94.13230  | 65.93050 | 432.77214   | 3224.05684  | -4237.12525 | 1 |
| 27727 | H | 73.21492 | 93.10737  | 66.95472 | -331.61758  | 172.34994   | 1064.01991  | 1 |
| 27728 | S | 71.07545 | 94.12620  | 67.56200 | -147.43729  | 248.76325   | -34.67316   | 1 |
| 27729 | C | 75.10935 | 94.48327  | 67.80117 | 781.26618   | -166.42667  | 840.08210   | 1 |
| 27730 | O | 75.09829 | 93.31966  | 68.15023 | -155.96390  | -735.70107  | 304.84913   | 1 |
| 27731 | N | 76.14795 | 95.26980  | 67.43980 | -59.88296   | 1226.32200  | 862.36476   | 1 |
| 27732 | H | 76.08639 | 96.27877  | 67.26447 | 52.00144    | -373.06200  | -2487.70932 | 1 |
| 27733 | C | 77.39129 | 94.79208  | 67.95508 | -100.80205  | -487.86537  | 640.51235   | 1 |
| 27734 | H | 77.48347 | 93.67675  | 67.66605 | 603.43968   | -690.10476  | -2051.05076 | 1 |
| 27735 | C | 78.52600 | 95.78193  | 67.45638 | -142.41422  | -430.62401  | -833.88794  | 1 |
| 27736 | H | 79.55299 | 95.46953  | 67.76515 | 1258.52569  | -1824.33337 | 1835.35782  | 1 |
| 27737 | H | 78.46417 | 96.85336  | 67.86575 | -535.95345  | -224.17568  | 4099.39870  | 1 |
| 27738 | C | 78.83703 | 95.83408  | 65.92973 | -180.60528  | -618.35993  | -527.93225  | 1 |
| 27739 | C | 79.34909 | 94.76803  | 65.17347 | -1109.10605 | 866.80233   | -859.99417  | 1 |
| 27740 | H | 79.74901 | 93.89457  | 65.63810 | -1408.11142 | -3002.50407 | 2225.05034  | 1 |
| 27741 | C | 79.53174 | 94.96803  | 63.74226 | 467.14897   | -166.75109  | 27.60598    | 1 |
| 27742 | H | 79.90735 | 94.12334  | 63.12493 | -4618.33396 | -2625.63671 | 2670.28756  | 1 |
| 27743 | C | 79.16430 | 96.20959  | 63.15229 | 644.46876   | -173.62118  | -321.19488  | 1 |
| 27744 | H | 79.35444 | 96.30842  | 62.07927 | 1198.21706  | 866.67432   | 2512.29350  | 1 |
| 27745 | C | 78.36625 | 97.00707  | 65.28022 | 3.29699     | -157.41499  | -336.33865  | 1 |
| 27746 | H | 77.81011 | 97.75056  | 65.93684 | -91.81161   | -118.65545  | -744.01480  | 1 |
| 27747 | C | 78.61900 | 97.28428  | 63.91473 | 744.10312   | 573.14988   | -676.73983  | 1 |
| 27748 | H | 78.26461 | 98.20970  | 63.41709 | -1732.02786 | -4112.84275 | -42.85322   | 1 |
| 27749 | C | 77.37170 | 94.98509  | 69.62186 | 434.19397   | 462.17277   | -627.56704  | 1 |
| 27750 | O | 77.25099 | 96.10464  | 70.10644 | -1.27586    | -399.28840  | -535.57170  | 1 |
| 27751 | N | 77.66755 | 93.89550  | 70.28477 | -309.72671  | -49.02226   | 534.90503   | 1 |
| 27752 | H | 77.69643 | 93.12668  | 69.61112 | 2221.85827  | 1271.74432  | 1214.29882  | 1 |
| 27753 | C | 77.26318 | 93.75701  | 71.66453 | 427.60906   | -414.20201  | -607.45976  | 1 |
| 27754 | H | 76.54755 | 94.57806  | 71.77969 | 552.45828   | 4220.11714  | -1580.46366 | 1 |
| 27755 | C | 76.58031 | 92.28980  | 71.84728 | 170.32943   | 333.92606   | 973.80602   | 1 |
| 27756 | H | 77.29952 | 91.51595  | 71.94213 | -2977.97108 | 1793.65702  | 451.37123   | 1 |
| 27757 | H | 76.06151 | 92.02138  | 70.97104 | 671.15601   | -1435.58213 | -1689.01131 | 1 |
| 27758 | C | 75.72325 | 92.46418  | 73.11821 | -697.49370  | -524.06698  | -357.10651  | 1 |
| 27759 | H | 76.32744 | 92.34976  | 74.01537 | 768.73194   | 1732.48949  | 457.59123   | 1 |
| 27760 | H | 75.41396 | 93.48952  | 73.26796 | 2652.92247  | -1458.71520 | -2668.46111 | 1 |
| 27761 | C | 74.42755 | 91.48726  | 72.92468 | 167.61277   | 228.27256   | -493.48676  | 1 |
| 27762 | H | 74.65839 | 90.33396  | 72.93512 | -2650.05357 | 2264.00922  | 2957.24902  | 1 |
| 27763 | H | 74.04408 | 91.74369  | 71.91862 | 3252.96295  | -1363.42946 | 209.13287   | 1 |
| 27764 | N | 73.36596 | 91.90762  | 73.82418 | -255.26887  | -483.75342  | -105.36239  | 1 |
| 27765 | H | 73.56098 | 92.54774  | 74.55473 | -2345.04220 | 1100.74730  | 2588.42451  | 1 |

|       |   |          |          |          |             |             |             |   |
|-------|---|----------|----------|----------|-------------|-------------|-------------|---|
| 27766 | C | 72.12432 | 91.50145 | 73.78486 | -9.57763    | -193.95218  | 1258.51635  | 1 |
| 27767 | N | 71.61138 | 90.60692 | 72.81306 | -887.79015  | -330.23152  | 292.48400   | 1 |
| 27768 | H | 72.21967 | 90.39779 | 72.00961 | -1140.19612 | -1002.87676 | -1549.89702 | 1 |
| 27769 | H | 70.61036 | 90.24869 | 72.69433 | -3016.21990 | -1071.27735 | -58.55007   | 1 |
| 27770 | N | 71.28915 | 92.05837 | 74.78694 | 372.58092   | 647.21404   | -275.40421  | 1 |
| 27771 | H | 71.67923 | 92.44906 | 75.66335 | -1298.62020 | 911.32007   | 1655.55456  | 1 |
| 27772 | H | 70.38531 | 91.61024 | 75.03361 | 2475.73454  | -1857.27760 | 1756.53534  | 1 |
| 27773 | C | 78.48054 | 93.86318 | 72.67045 | 524.09933   | 1007.27951  | -561.25486  | 1 |
| 27774 | O | 78.27891 | 93.41916 | 73.82263 | 192.47672   | 153.80353   | -375.99725  | 1 |
| 27775 | N | 79.62156 | 94.33812 | 72.20554 | -560.16719  | -323.87715  | -333.09320  | 1 |
| 27776 | H | 79.57432 | 94.72260 | 71.24160 | -387.23516  | -3908.01421 | 48.64927    | 1 |
| 27777 | C | 80.41340 | 95.30294 | 73.00573 | 637.83199   | -495.79331  | 250.62969   | 1 |
| 27778 | H | 81.18957 | 95.52398 | 72.25527 | -1304.39284 | -197.38083  | -2772.51504 | 1 |
| 27779 | C | 79.53887 | 96.61078 | 73.20941 | -423.54517  | -696.08744  | 279.18072   | 1 |
| 27780 | H | 78.57289 | 96.41489 | 73.71120 | 3104.02381  | -886.49988  | -5845.83176 | 1 |
| 27781 | H | 80.12694 | 97.36441 | 73.79607 | -1180.58524 | -2057.31619 | -1533.62050 | 1 |
| 27782 | C | 79.48213 | 97.27577 | 71.81063 | 545.55346   | 882.22770   | -285.76376  | 1 |
| 27783 | H | 78.65389 | 96.81996 | 71.24148 | -1366.07730 | -632.44699  | 1162.64634  | 1 |
| 27784 | H | 80.44268 | 96.97052 | 71.33030 | -3544.39242 | 477.30363   | -2026.37262 | 1 |
| 27785 | C | 79.27912 | 98.85859 | 71.97293 | -74.88382   | 440.02832   | 742.39353   | 1 |
| 27786 | O | 79.23831 | 99.29871 | 73.16340 | -749.31250  | 214.15836   | 1128.80730  | 1 |
| 27787 | O | 79.11515 | 99.53886 | 71.00504 | 246.11651   | -658.16201  | -451.96685  | 1 |
| 27788 | C | 80.95157 | 94.70686 | 74.34695 | -379.81965  | 214.65152   | 14.67682    | 1 |
| 27789 | O | 81.66461 | 93.71910 | 74.27767 | 519.09017   | -372.57892  | -1044.22852 | 1 |
| 27790 | N | 80.42519 | 95.23791 | 75.49071 | 453.83738   | 410.51854   | 331.76282   | 1 |
| 27791 | H | 79.79394 | 96.06477 | 75.47629 | 665.55012   | -356.99481  | -571.18453  | 1 |
| 27792 | C | 80.86827 | 94.64540 | 76.69654 | 251.17637   | 434.54833   | -739.63878  | 1 |
| 27793 | H | 80.66976 | 93.56317 | 76.35319 | -3497.52727 | -3742.42001 | 2677.35003  | 1 |
| 27794 | C | 82.40686 | 95.02248 | 76.89963 | -36.77292   | -63.19661   | -81.19314   | 1 |
| 27795 | H | 82.54727 | 96.07704 | 77.25257 | 1466.01514  | 1179.36940  | 3447.52834  | 1 |
| 27796 | H | 82.91565 | 94.94071 | 75.92066 | -1371.11904 | 3736.74913  | 1881.73080  | 1 |
| 27797 | C | 83.12480 | 93.98022 | 77.82072 | 82.87924    | -782.54457  | 217.21377   | 1 |
| 27798 | H | 82.85105 | 94.14172 | 78.86953 | -634.83073  | -491.85147  | 1919.37466  | 1 |
| 27799 | H | 84.23346 | 94.05418 | 77.88253 | -609.22713  | -2316.06221 | -1577.05972 | 1 |
| 27800 | C | 82.80258 | 92.40679 | 77.59800 | -417.70427  | 51.58739    | 189.23698   | 1 |
| 27801 | O | 83.47994 | 91.65887 | 76.90255 | -707.87454  | 459.78499   | 151.07140   | 1 |
| 27802 | O | 81.75979 | 92.07256 | 78.19406 | -362.66504  | 758.42600   | -622.03507  | 1 |
| 27803 | C | 80.00366 | 95.29321 | 77.91571 | -9.29101    | 70.26927    | 211.91904   | 1 |
| 27804 | O | 79.50342 | 96.39585 | 77.87500 | -109.51075  | -202.80190  | 134.82831   | 1 |
| 27805 | N | 80.05913 | 94.47220 | 78.98763 | 232.58050   | -353.47772  | -703.04832  | 1 |
| 27806 | H | 80.66888 | 93.65729 | 78.95487 | -368.09452  | 1350.20709  | -1197.21130 | 1 |
| 27807 | C | 79.61589 | 95.11820 | 80.17734 | -226.96979  | 354.98569   | -103.62332  | 1 |
| 27808 | H | 79.18964 | 96.05899 | 79.82646 | -2817.55579 | -1484.87926 | 3257.41800  | 1 |
| 27809 | C | 78.63226 | 94.12093 | 80.92211 | -119.43236  | -577.82408  | 13.64252    | 1 |
| 27810 | H | 78.95285 | 93.01925 | 80.82739 | -312.52733  | -2459.65930 | 1089.77081  | 1 |
| 27811 | H | 77.73553 | 94.18815 | 80.30161 | -338.52104  | -2435.24486 | 666.19838   | 1 |
| 27812 | C | 78.49870 | 94.36794 | 82.45309 | -395.62755  | 1788.54028  | 406.45213   | 1 |
| 27813 | O | 78.07277 | 95.45092 | 82.89476 | 66.77105    | -176.26598  | 266.63016   | 1 |
| 27814 | N | 78.70334 | 93.24237 | 83.18479 | -237.62452  | -520.19294  | 53.84649    | 1 |
| 27815 | H | 79.05618 | 92.27903 | 82.91021 | -524.17950  | -2897.83708 | 787.41856   | 1 |
| 27816 | H | 78.45644 | 93.30851 | 84.16760 | 1263.68600  | -161.56889  | -5.35389    | 1 |
| 27817 | C | 80.98389 | 95.19341 | 81.12386 | -703.84443  | -182.34947  | 31.33135    | 1 |
| 27818 | O | 81.75447 | 94.27360 | 81.44492 | -295.77536  | -582.83805  | -18.14091   | 1 |
| 27819 | N | 81.32140 | 96.46084 | 81.25421 | -367.00141  | 847.79726   | 51.00482    | 1 |
| 27820 | H | 80.48539 | 97.01179 | 80.98379 | -1192.79630 | 78.80588    | -564.18844  | 1 |
| 27821 | C | 82.60421 | 96.91430 | 81.67937 | -754.63222  | -105.57831  | 146.55241   | 1 |
| 27822 | H | 83.20810 | 96.04645 | 81.29594 | 937.61976   | 281.57393   | 731.15612   | 1 |
| 27823 | C | 82.67708 | 98.34299 | 81.09329 | -241.23195  | 796.13730   | -535.86804  | 1 |
| 27824 | H | 83.44886 | 98.99827 | 81.54726 | -3497.33186 | -967.63374  | 2722.37833  | 1 |
| 27825 | H | 82.87237 | 98.24835 | 79.96626 | 1074.25019  | 3687.06865  | -1067.79673 | 1 |
| 27826 | H | 81.69501 | 98.92646 | 81.27963 | -134.15954  | 398.94477   | 2195.51618  | 1 |
| 27827 | C | 82.42702 | 97.03505 | 83.39403 | -132.51321  | -776.97113  | 273.21176   | 1 |

|       |   |          |          |          |             |             |             |   |
|-------|---|----------|----------|----------|-------------|-------------|-------------|---|
| 27828 | O | 82.12762 | 98.09624 | 83.85170 | 706.84514   | -76.64471   | -294.51432  | 1 |
| 27829 | N | 82.74945 | 95.86428 | 83.93527 | -3.61627    | -314.79326  | 142.27717   | 1 |
| 27830 | H | 83.08875 | 95.19452 | 83.24964 | 2652.59298  | 564.11216   | 4250.51626  | 1 |
| 27831 | C | 81.90005 | 95.28926 | 84.95089 | 178.97056   | -105.87566  | -86.85472   | 1 |
| 27832 | H | 82.29902 | 95.73503 | 85.90338 | -3104.58645 | -1606.51107 | 3520.95918  | 1 |
| 27833 | C | 80.38323 | 95.58498 | 84.62967 | -77.60620   | 116.60192   | 589.03584   | 1 |
| 27834 | H | 80.11358 | 95.09603 | 83.67964 | 1526.97971  | -594.32882  | -2578.23717 | 1 |
| 27835 | H | 80.33572 | 96.71769 | 84.32579 | -1404.11865 | 974.15723   | 3171.83738  | 1 |
| 27836 | C | 79.49708 | 95.37421 | 85.87127 | -724.86430  | -200.16255  | -414.05277  | 1 |
| 27837 | O | 79.84739 | 95.22546 | 87.05143 | -200.25081  | -401.42985  | -533.96151  | 1 |
| 27838 | N | 78.19772 | 95.53272 | 85.47365 | 372.58514   | -130.77679  | 351.18487   | 1 |
| 27839 | H | 77.70362 | 95.72674 | 84.56343 | 817.77657   | 2138.10611  | 1722.14726  | 1 |
| 27840 | H | 77.52381 | 95.23008 | 86.18470 | 2815.08061  | -1175.83794 | 2139.04455  | 1 |
| 27841 | C | 82.09206 | 93.68300 | 84.85931 | -48.15743   | -565.98055  | 852.84132   | 1 |
| 27842 | O | 83.10998 | 93.27957 | 84.27914 | 1245.17389  | 408.40938   | -634.16525  | 1 |
| 27843 | N | 81.23622 | 92.95830 | 85.54240 | -757.30558  | 150.14221   | -471.23446  | 1 |
| 27844 | H | 80.57014 | 93.55691 | 85.95543 | 794.69920   | -1586.55147 | 196.87521   | 1 |
| 27845 | C | 81.59561 | 91.66893 | 86.05933 | 99.50776    | 275.49749   | 383.65107   | 1 |
| 27846 | H | 82.62099 | 91.82795 | 86.55978 | 317.83085   | -2551.96813 | -399.42931  | 1 |
| 27847 | C | 80.50641 | 91.19067 | 87.11018 | 152.33992   | -20.42896   | 305.26671   | 1 |
| 27848 | H | 80.53121 | 91.87506 | 88.00435 | -2856.98169 | 1166.84736  | -740.77467  | 1 |
| 27849 | H | 80.84042 | 90.22114 | 87.49108 | -266.17213  | 1216.31723  | -1399.77209 | 1 |
| 27850 | C | 79.09613 | 91.01249 | 86.54863 | 35.27235    | -423.99642  | 636.96138   | 1 |
| 27851 | C | 78.77236 | 90.83230 | 85.21379 | -633.77465  | -502.10302  | -55.64670   | 1 |
| 27852 | H | 79.58915 | 90.53644 | 84.45733 | -937.98640  | 3578.08109  | -3.24519    | 1 |
| 27853 | C | 77.42876 | 90.77413 | 84.79624 | -313.56653  | -530.56022  | -39.55433   | 1 |
| 27854 | H | 77.31762 | 90.65983 | 83.71552 | 199.35926   | -1525.07609 | 970.15301   | 1 |
| 27855 | C | 76.30575 | 90.89276 | 85.68093 | -145.44032  | 75.01651    | 623.95320   | 1 |
| 27856 | H | 75.29522 | 90.84269 | 85.38578 | -2681.80244 | -844.66685  | 166.33049   | 1 |
| 27857 | C | 78.02319 | 91.22277 | 87.47523 | 513.09401   | -531.35980  | 528.84884   | 1 |
| 27858 | H | 78.24267 | 91.45560 | 88.57192 | 34.52267    | -4350.85485 | -1057.00841 | 1 |
| 27859 | C | 76.66657 | 91.05192 | 87.06248 | -484.11432  | 34.24063    | 169.69292   | 1 |
| 27860 | H | 75.90192 | 91.18625 | 87.82803 | 162.83011   | 2336.74567  | -1924.43500 | 1 |
| 27861 | C | 81.88007 | 90.52254 | 84.95769 | 560.90834   | -53.64512   | -357.05097  | 1 |
| 27862 | O | 82.23374 | 89.42009 | 85.37143 | 5.37113     | 96.04657    | -561.77725  | 1 |
| 27863 | N | 81.60139 | 90.90178 | 83.67839 | 517.16545   | 64.53347    | -91.05953   | 1 |
| 27864 | H | 81.52542 | 91.92612 | 83.77097 | 610.41127   | -2235.89516 | 187.71822   | 1 |
| 27865 | C | 82.28425 | 90.20308 | 82.62599 | -308.09170  | -1313.51506 | 621.38960   | 1 |
| 27866 | H | 81.82024 | 89.21449 | 82.88396 | -247.17268  | -2900.32776 | -3380.51957 | 1 |
| 27867 | C | 81.87475 | 90.79383 | 81.23050 | -163.05613  | 84.84402    | 125.76588   | 1 |
| 27868 | H | 82.42629 | 90.31748 | 80.30935 | 371.94406   | -3234.47474 | 2612.83152  | 1 |
| 27869 | H | 82.28487 | 91.85576 | 81.23469 | -1008.15864 | -3111.99153 | -1270.41009 | 1 |
| 27870 | C | 80.35115 | 90.88524 | 80.96742 | -257.84171  | -601.72431  | -1103.89911 | 1 |
| 27871 | O | 79.61242 | 91.08487 | 81.90555 | -71.17593   | -1379.49356 | 160.26937   | 1 |
| 27872 | N | 79.91492 | 90.80217 | 79.67960 | -280.85323  | -931.91862  | -781.34849  | 1 |
| 27873 | H | 80.59859 | 90.95821 | 78.86281 | -509.89069  | 3163.29697  | 1529.25767  | 1 |
| 27874 | H | 78.94091 | 91.09545 | 79.38745 | -2125.19000 | -792.61914  | -2968.26137 | 1 |
| 27875 | C | 83.96120 | 90.21221 | 82.76626 | 596.87912   | -19.01176   | 511.29717   | 1 |
| 27876 | O | 84.52420 | 89.30887 | 82.17248 | -560.50798  | -434.44677  | -890.70729  | 1 |
| 27877 | N | 84.42227 | 91.09523 | 83.62220 | -415.76605  | -1008.44860 | 261.70297   | 1 |
| 27878 | H | 83.65893 | 91.73276 | 84.08419 | 2857.88464  | 45.98811    | -59.61674   | 1 |
| 27879 | C | 85.86654 | 91.17845 | 83.85720 | 111.39564   | 89.06619    | 59.69723    | 1 |
| 27880 | H | 86.35394 | 90.57203 | 83.10043 | -646.85839  | 2236.25588  | 3203.03332  | 1 |
| 27881 | C | 86.16612 | 92.69651 | 83.68239 | -1694.38996 | 61.87300    | -361.86219  | 1 |
| 27882 | H | 87.28304 | 92.84281 | 83.73498 | -1512.42043 | -2274.88065 | 1302.03247  | 1 |
| 27883 | H | 85.72878 | 93.25441 | 84.46722 | -1073.03181 | 792.82656   | 1740.82632  | 1 |
| 27884 | C | 85.53818 | 93.28561 | 82.35216 | -57.37471   | 53.98902    | 599.87314   | 1 |
| 27885 | H | 84.46818 | 93.40537 | 82.48246 | 1219.91838  | 4504.12427  | 3438.69631  | 1 |
| 27886 | H | 85.55351 | 92.49810 | 81.55568 | 896.67402   | 1211.40495  | -807.13386  | 1 |
| 27887 | C | 85.99590 | 94.66559 | 81.81441 | 26.53420    | -881.27369  | -404.56340  | 1 |
| 27888 | H | 87.07406 | 94.75382 | 81.61798 | -4775.26757 | -560.76265  | -905.29727  | 1 |
| 27889 | H | 85.72855 | 95.52811 | 82.54673 | 3526.66465  | 399.16757   | 631.82199   | 1 |

|       |   |          |           |          |             |             |             |   |
|-------|---|----------|-----------|----------|-------------|-------------|-------------|---|
| 27890 | C | 85.25012 | 94.80502  | 80.38865 | 435.94916   | -584.62334  | 496.76699   | 1 |
| 27891 | H | 85.77223 | 94.14859  | 79.61337 | -241.53383  | -1419.75881 | -1693.91256 | 1 |
| 27892 | H | 84.17720 | 94.47970  | 80.40604 | 1101.33961  | -90.55727   | -1004.83268 | 1 |
| 27893 | N | 85.11623 | 96.15242  | 79.87709 | 457.78345   | -42.60522   | 243.30071   | 1 |
| 27894 | H | 84.65154 | 96.38512  | 78.98972 | 1940.29293  | 646.91474   | 3514.54056  | 1 |
| 27895 | H | 86.00157 | 96.64705  | 79.79334 | 1787.85642  | -1503.17419 | -2687.49875 | 1 |
| 27896 | H | 82.14931 | 100.46160 | 79.07780 | 166.36720   | 1182.47200  | 1144.86071  | 1 |
| 27897 | C | 86.33523 | 90.74100  | 85.38394 | -293.40600  | 409.32021   | 409.98541   | 1 |
| 27898 | O | 87.50310 | 90.99016  | 85.56846 | 341.02619   | -656.09526  | -662.00354  | 1 |
| 27899 | N | 85.33807 | 90.25681  | 86.12939 | 206.58323   | -871.98542  | 734.19152   | 1 |
| 27900 | H | 84.40218 | 90.35947  | 85.70700 | 567.27487   | -3242.51964 | 1214.34186  | 1 |
| 27901 | C | 85.53124 | 90.21997  | 87.52530 | -439.25728  | 659.25069   | -313.58975  | 1 |
| 27902 | H | 86.64502 | 90.27557  | 87.64742 | 1109.65689  | 170.52133   | -702.63790  | 1 |
| 27903 | C | 84.76171 | 91.55092  | 88.05850 | -190.27169  | 103.39809   | -553.61123  | 1 |
| 27904 | H | 83.69006 | 91.55100  | 87.96509 | -4321.52336 | 1014.64712  | 1282.38544  | 1 |
| 27905 | C | 84.84599 | 91.61060  | 89.62732 | -1172.02914 | -644.26190  | -271.06653  | 1 |
| 27906 | H | 84.10260 | 92.38355  | 89.97462 | 754.70539   | -2407.98759 | 331.95959   | 1 |
| 27907 | H | 85.82529 | 91.98526  | 89.96845 | -164.04906  | 1133.19301  | 3065.65914  | 1 |
| 27908 | H | 84.62518 | 90.65347  | 90.10047 | 823.52918   | -5058.10159 | -589.37352  | 1 |
| 27909 | C | 85.49402 | 92.79703  | 87.52747 | -61.08433   | -418.53637  | -458.97869  | 1 |
| 27910 | H | 86.33141 | 93.12295  | 88.18532 | -3305.62237 | 1672.47093  | 2638.05354  | 1 |
| 27911 | H | 85.92215 | 92.62067  | 86.53998 | -2143.86849 | -161.27229  | 734.71165   | 1 |
| 27912 | C | 84.46051 | 93.98568  | 87.41303 | -223.84969  | -516.84925  | 544.00110   | 1 |
| 27913 | H | 83.59390 | 93.75486  | 86.76267 | 2598.49385  | -4717.11650 | 460.18362   | 1 |
| 27914 | H | 84.06910 | 94.18108  | 88.47575 | 1870.57950  | 792.15935   | -805.27474  | 1 |
| 27915 | H | 84.90820 | 94.96713  | 87.01982 | 229.74432   | 1151.46800  | 21.85222    | 1 |
| 27916 | C | 84.78377 | 88.95391  | 88.21514 | -680.19064  | -6.74133    | 736.09120   | 1 |
| 27917 | O | 85.27664 | 88.45111  | 89.24783 | 518.19642   | 874.40586   | -411.65928  | 1 |
| 27918 | N | 83.49518 | 88.87208  | 87.90450 | 246.21192   | -277.56790  | 101.90071   | 1 |
| 27919 | H | 83.20508 | 89.19550  | 86.94788 | -1132.47449 | -3194.01171 | 366.59404   | 1 |
| 27920 | C | 82.99007 | 87.54926  | 88.15613 | 529.79798   | 837.74656   | 230.42404   | 1 |
| 27921 | H | 83.44342 | 87.31176  | 89.11931 | 1814.03827  | 1939.42369  | 1369.51596  | 1 |
| 27922 | C | 81.40571 | 87.60354  | 88.10241 | -524.90278  | -1023.93560 | 310.26867   | 1 |
| 27923 | H | 81.00381 | 87.94441  | 87.13352 | -2317.97700 | -1371.43791 | -438.14416  | 1 |
| 27924 | H | 81.04330 | 88.35025  | 88.81548 | 934.81243   | -1367.27715 | 787.88444   | 1 |
| 27925 | C | 80.86272 | 86.19557  | 88.53589 | -695.19811  | -286.02746  | -498.38975  | 1 |
| 27926 | C | 80.10256 | 85.50546  | 87.51193 | 18.76369    | 65.30462    | -5.00926    | 1 |
| 27927 | H | 79.86901 | 85.87331  | 86.49616 | 946.81419   | 92.21565    | 832.25071   | 1 |
| 27928 | C | 79.40000 | 84.34180  | 88.00890 | 154.45790   | -874.49142  | -165.83350  | 1 |
| 27929 | H | 78.84100 | 83.76780  | 87.28590 | -318.80834  | -2946.15376 | 1011.64924  | 1 |
| 27930 | C | 79.47800 | 83.93480  | 89.35490 | -632.41041  | 464.99289   | -476.66066  | 1 |
| 27931 | H | 78.96900 | 83.02580  | 89.64090 | -625.70790  | -428.34926  | 3040.42916  | 1 |
| 27932 | C | 80.96312 | 85.85069  | 89.91547 | -605.82934  | 599.61515   | 40.18883    | 1 |
| 27933 | H | 81.58735 | 86.49602  | 90.52873 | -452.87996  | -2851.72363 | 1301.71152  | 1 |
| 27934 | C | 80.30600 | 84.65280  | 90.26790 | 32.16816    | -612.74824  | -675.32755  | 1 |
| 27935 | H | 80.48200 | 84.28180  | 91.26690 | -2365.96340 | -1180.47132 | -1697.01771 | 1 |
| 27936 | C | 83.56318 | 86.51864  | 87.01375 | 89.54771    | 971.84644   | 466.87680   | 1 |
| 27937 | O | 84.00451 | 85.44501  | 87.27949 | 125.10692   | 21.97534    | 201.66111   | 1 |
| 27938 | N | 83.54513 | 87.01467  | 85.71690 | 323.21954   | -258.61779  | 1072.86374  | 1 |
| 27939 | H | 83.14982 | 87.95571  | 85.50399 | 931.31664   | -39.43724   | -3850.05213 | 1 |
| 27940 | C | 83.49683 | 86.02614  | 84.62068 | -557.39378  | 814.15402   | -264.78715  | 1 |
| 27941 | H | 83.02672 | 85.24698  | 85.28531 | 2524.82696  | -425.67833  | -3036.60245 | 1 |
| 27942 | C | 82.74093 | 86.53422  | 83.32124 | -582.07465  | 160.62755   | -224.73465  | 1 |
| 27943 | H | 82.94339 | 85.80275  | 82.54990 | 1466.04631  | -794.43370  | 4666.02220  | 1 |
| 27944 | H | 83.17774 | 87.55897  | 83.03986 | 843.90596   | -2917.71421 | -1673.54465 | 1 |
| 27945 | C | 81.29611 | 86.85048  | 83.59531 | 465.62431   | -131.54952  | 123.42351   | 1 |
| 27946 | H | 81.19449 | 87.82344  | 84.12121 | 410.44750   | -1698.43534 | -4389.43321 | 1 |
| 27947 | C | 80.63782 | 86.98350  | 82.23363 | -371.83021  | 1290.75473  | 509.02535   | 1 |
| 27948 | H | 81.02537 | 87.80791  | 81.62379 | 1196.84677  | -1404.28761 | 2742.16576  | 1 |
| 27949 | H | 79.48359 | 87.03989  | 82.33328 | 1243.88613  | -478.00782  | -2228.40578 | 1 |
| 27950 | H | 80.76355 | 85.99952  | 81.66193 | 1652.83243  | -1387.35830 | -3380.91725 | 1 |
| 27951 | C | 80.74804 | 85.68520  | 84.40285 | -230.56388  | -182.82457  | -874.80699  | 1 |

|       |   |          |          |          |             |             |             |   |
|-------|---|----------|----------|----------|-------------|-------------|-------------|---|
| 27952 | H | 81.15100 | 85.62531 | 85.45374 | -1922.65838 | -216.55588  | -2950.12611 | 1 |
| 27953 | H | 81.06767 | 84.69488 | 83.95823 | -678.62841  | 290.91886   | 625.00448   | 1 |
| 27954 | H | 79.61721 | 85.72076 | 84.47489 | 1857.19402  | -1483.12761 | 2446.10297  | 1 |
| 27955 | C | 84.93188 | 85.38774 | 84.29241 | 466.15084   | 341.65313   | -114.29554  | 1 |
| 27956 | O | 84.87300 | 84.21580 | 83.92590 | 493.10536   | -223.34454  | 560.01270   | 1 |
| 27957 | N | 86.01494 | 86.16923 | 84.25175 | 173.77894   | -310.72454  | 526.64488   | 1 |
| 27958 | C | 85.91486 | 87.59870 | 83.97835 | 719.75410   | -85.65731   | 96.46453    | 1 |
| 27959 | H | 85.61978 | 88.14213 | 84.89580 | 418.76820   | -1132.47342 | -1197.77892 | 1 |
| 27960 | H | 85.21427 | 87.72847 | 83.09723 | -108.88844  | 401.73877   | 1163.71130  | 1 |
| 27961 | C | 87.27050 | 85.48903 | 84.24188 | 25.00915    | -775.46986  | 14.41750    | 1 |
| 27962 | H | 87.36000 | 84.75980 | 83.39390 | -1948.13834 | -1717.88792 | -1779.22688 | 1 |
| 27963 | C | 88.26182 | 86.72993 | 84.22287 | -246.90369  | 750.51736   | 769.26946   | 1 |
| 27964 | H | 89.22017 | 86.56251 | 83.67500 | -1762.71422 | -2187.01932 | -4157.00698 | 1 |
| 27965 | H | 88.43538 | 87.00925 | 85.28011 | -604.59955  | 455.24299   | 505.03734   | 1 |
| 27966 | C | 87.41287 | 87.82755 | 83.51907 | -489.96848  | 219.93887   | -310.56103  | 1 |
| 27967 | H | 87.79305 | 88.80943 | 83.78194 | -510.19672  | -236.48497  | -2238.46628 | 1 |
| 27968 | H | 87.61929 | 87.68063 | 82.49169 | -458.41145  | -1315.27456 | -1308.92582 | 1 |
| 27969 | C | 87.49300 | 84.44880 | 85.47990 | 490.22796   | -762.75021  | -39.56190   | 1 |
| 27970 | O | 88.17500 | 83.43780 | 85.31690 | 670.73495   | 346.37402   | -269.63289  | 1 |
| 27971 | N | 86.94800 | 84.79480 | 86.61690 | -346.08892  | 369.05343   | -692.97488  | 1 |
| 27972 | H | 86.29388 | 85.61054 | 86.50646 | -1561.52745 | -1313.26191 | 670.46364   | 1 |
| 27973 | C | 86.99100 | 84.05980 | 87.81290 | 758.19795   | 427.04437   | -315.10757  | 1 |
| 27974 | H | 88.04200 | 83.90580 | 88.00490 | -1276.60409 | 1362.86400  | -2549.43866 | 1 |
| 27975 | C | 86.54200 | 84.90880 | 89.03390 | 429.07169   | 568.02755   | -598.21509  | 1 |
| 27976 | H | 85.54368 | 85.46765 | 88.86106 | 903.53675   | 2552.88944  | -3296.86263 | 1 |
| 27977 | O | 87.25871 | 86.29743 | 89.34913 | 714.11200   | -26.70134   | -264.90625  | 1 |
| 27978 | H | 86.58594 | 86.91033 | 89.59908 | 1361.35960  | -2464.15186 | 714.11716   | 1 |
| 27979 | C | 86.58800 | 84.13880 | 90.31390 | -272.92691  | 870.26609   | 87.40648    | 1 |
| 27980 | H | 86.42200 | 84.88380 | 91.12190 | -1784.44574 | 1446.01936  | 2134.31421  | 1 |
| 27981 | H | 87.58000 | 83.65880 | 90.45790 | -425.28022  | 1226.92280  | 2852.44042  | 1 |
| 27982 | H | 85.87300 | 83.28880 | 90.33790 | 857.51551   | -2914.61989 | 777.81326   | 1 |
| 27983 | C | 86.28000 | 82.71080 | 87.71290 | 357.70829   | -601.04106  | -593.70962  | 1 |
| 27984 | O | 86.82200 | 81.66680 | 88.07090 | 496.10327   | -359.09222  | -512.27469  | 1 |
| 27985 | N | 85.01900 | 82.70380 | 87.12790 | 156.65224   | 126.10567   | -836.13353  | 1 |
| 27986 | H | 84.59100 | 83.60380 | 87.13890 | -2665.48952 | 1542.93597  | -658.22644  | 1 |
| 27987 | C | 84.34600 | 81.49680 | 86.73990 | -165.68046  | 905.43990   | -29.18632   | 1 |
| 27988 | H | 84.30700 | 80.75780 | 87.52590 | 2634.21926  | 735.07951   | -1580.22041 | 1 |
| 27989 | C | 82.88500 | 81.78680 | 86.44690 | 480.41095   | 499.91251   | 591.13603   | 1 |
| 27990 | H | 82.91900 | 82.67580 | 85.78090 | -1559.48652 | -1386.51348 | 2333.39472  | 1 |
| 27991 | C | 82.17700 | 80.62380 | 85.67890 | -679.01659  | -545.36355  | -252.00280  | 1 |
| 27992 | H | 81.07800 | 80.71880 | 85.54690 | 605.49663   | -2078.52793 | -2284.95236 | 1 |
| 27993 | H | 82.70400 | 80.35880 | 84.73790 | 467.66253   | 2508.98557  | -1866.81973 | 1 |
| 27994 | H | 82.32100 | 79.72080 | 86.31090 | 1411.42749  | -2160.69640 | 1776.61210  | 1 |
| 27995 | C | 82.07000 | 82.12980 | 87.72690 | 838.60937   | -248.75409  | 250.52121   | 1 |
| 27996 | H | 81.10200 | 82.37580 | 87.23990 | 2013.89467  | -1834.10464 | -1578.76846 | 1 |
| 27997 | H | 82.53400 | 83.06080 | 88.11890 | 2006.85685  | -761.68449  | 2289.06679  | 1 |
| 27998 | C | 81.94500 | 81.05480 | 88.81990 | -706.22984  | 307.31310   | -499.28770  | 1 |
| 27999 | H | 82.88100 | 80.59980 | 89.20790 | -582.56830  | 3062.15589  | -500.59183  | 1 |
| 28000 | H | 81.31400 | 80.20680 | 88.47790 | 2823.60596  | -497.02357  | 1289.51124  | 1 |
| 28001 | H | 81.40000 | 81.55980 | 89.64590 | -688.73261  | -1631.43098 | 2580.49272  | 1 |
| 28002 | C | 85.05200 | 80.71580 | 85.59890 | -1.42936    | 127.12393   | -918.27000  | 1 |
| 28003 | O | 85.24900 | 79.52680 | 85.71490 | 35.40890    | 795.06517   | 57.31549    | 1 |
| 28004 | N | 85.49400 | 81.43280 | 84.53190 | -387.58000  | -628.82032  | -406.09573  | 1 |
| 28005 | H | 85.40200 | 82.42480 | 84.48490 | -910.15699  | -2996.72289 | -183.76726  | 1 |
| 28006 | C | 86.03100 | 80.79380 | 83.32290 | -678.79924  | -501.56577  | 314.11558   | 1 |
| 28007 | H | 85.31500 | 80.12480 | 82.86790 | 2093.65569  | -1740.96906 | 1552.35631  | 1 |
| 28008 | C | 86.55300 | 81.83280 | 82.24690 | -279.04103  | 688.01826   | -555.20774  | 1 |
| 28009 | H | 87.16500 | 81.34780 | 81.45690 | -401.11554  | 1256.04783  | 2844.81843  | 1 |
| 28010 | H | 87.19100 | 82.46680 | 82.89890 | -1413.18126 | -2738.84749 | 574.25802   | 1 |
| 28011 | C | 85.50700 | 82.73980 | 81.58390 | -380.76319  | -508.74940  | -660.31087  | 1 |
| 28012 | C | 84.15500 | 82.39380 | 81.53690 | 14.78335    | 746.50501   | 523.83204   | 1 |
| 28013 | H | 83.79200 | 81.55280 | 82.10890 | -1970.53699 | -494.48606  | -2412.67322 | 1 |



|       |   |          |          |          |             |             |             |   |
|-------|---|----------|----------|----------|-------------|-------------|-------------|---|
| 28014 | C | 83.21100 | 83.32080 | 80.93390 | -807.08979  | 360.04679   | -250.42130  | 1 |
| 28015 | H | 82.15600 | 83.09880 | 80.98090 | 2042.22507  | 1778.14329  | -1626.59391 | 1 |
| 28016 | C | 83.64600 | 84.52480 | 80.37890 | 779.43389   | -19.73540   | 460.72376   | 1 |
| 28017 | O | 82.59601 | 85.41716 | 79.85340 | -363.67648  | -615.84005  | -54.75398   | 1 |
| 28018 | H | 81.83700 | 84.81180 | 79.82390 | -1073.05885 | -2313.13104 | 1816.94513  | 1 |
| 28019 | C | 85.92600 | 83.94280 | 80.96390 | 13.06727    | -896.06832  | -123.25955  | 1 |
| 28020 | H | 86.96400 | 84.21780 | 81.07890 | 2836.47646  | -592.18178  | -1239.34454 | 1 |
| 28021 | C | 84.98800 | 84.82180 | 80.36790 | -670.75937  | 504.10466   | -382.18162  | 1 |
| 28022 | H | 85.30312 | 85.85768 | 80.09602 | -28.55071   | -1911.03383 | 1574.72173  | 1 |
| 28023 | C | 87.28100 | 79.90080 | 83.70090 | -596.55663  | 666.12259   | -219.81802  | 1 |
| 28024 | O | 87.52500 | 78.85780 | 83.08590 | -544.31326  | 568.82749   | 97.93556    | 1 |
| 28025 | N | 88.11400 | 80.46780 | 84.61090 | 649.54969   | 520.49746   | -192.01959  | 1 |
| 28026 | H | 87.81200 | 81.38580 | 84.85490 | 561.64598   | 2858.62954  | 1192.95931  | 1 |
| 28027 | C | 89.22100 | 79.75680 | 85.24590 | -795.45105  | 444.49017   | 49.96568    | 1 |
| 28028 | H | 89.95300 | 79.50280 | 84.49390 | -1458.48966 | -2540.11249 | 1112.42314  | 1 |
| 28029 | C | 89.96200 | 80.65580 | 86.28690 | -450.95317  | -336.62819  | 694.59988   | 1 |
| 28030 | H | 90.83200 | 80.05380 | 86.62590 | 2290.22727  | -329.85560  | -2151.99105 | 1 |
| 28031 | H | 89.32800 | 80.96580 | 87.14490 | 939.17798   | 2264.55579  | -1999.23999 | 1 |
| 28032 | O | 90.43900 | 81.84080 | 85.66990 | 618.05894   | 98.55423    | 469.59846   | 1 |
| 28033 | H | 89.67500 | 82.42080 | 85.62090 | 2377.04379  | -1172.39585 | 1677.72604  | 1 |
| 28034 | C | 88.73400 | 78.47380 | 85.93690 | -903.00649  | 109.16076   | 27.56711    | 1 |
| 28035 | O | 89.25800 | 77.41880 | 85.68690 | 457.50150   | 487.57046   | 413.64838   | 1 |
| 28036 | N | 87.62200 | 78.53080 | 86.72490 | -695.57091  | 290.92291   | -396.99625  | 1 |
| 28037 | H | 87.11900 | 79.38180 | 86.85290 | 1752.86221  | 2405.97445  | -1058.88680 | 1 |
| 28038 | C | 87.01300 | 77.34680 | 87.36090 | -107.27186  | 702.85918   | 565.29637   | 1 |
| 28039 | H | 87.78600 | 76.78980 | 87.87090 | 2157.44722  | 2275.38426  | 323.49462   | 1 |
| 28040 | C | 85.83700 | 77.64780 | 88.31690 | -566.79865  | -353.86260  | -626.83551  | 1 |
| 28041 | H | 85.15200 | 78.26580 | 87.69790 | 2177.07729  | 963.61159   | 2050.17270  | 1 |
| 28042 | C | 85.23200 | 76.35180 | 88.91690 | -578.35346  | 638.72920   | -325.65642  | 1 |
| 28043 | H | 84.85900 | 75.70780 | 88.09290 | 1918.67343  | 876.96667   | -2353.66145 | 1 |
| 28044 | H | 85.99500 | 75.79680 | 89.50290 | -1842.13488 | -1483.15902 | 2050.59499  | 1 |
| 28045 | H | 84.35600 | 76.61180 | 89.54990 | -668.39830  | 3080.35667  | 114.88746   | 1 |
| 28046 | C | 86.39100 | 78.49780 | 89.48490 | 361.46628   | 781.86666   | -340.99034  | 1 |
| 28047 | H | 87.06500 | 79.27980 | 89.07290 | 1435.53995  | -2189.06132 | -1753.63153 | 1 |
| 28048 | H | 87.08200 | 77.89680 | 90.11390 | -983.71963  | -1139.10588 | 2742.12937  | 1 |
| 28049 | C | 85.32100 | 79.24980 | 90.26490 | 556.26640   | -635.23103  | -349.96766  | 1 |
| 28050 | H | 85.66100 | 79.80480 | 91.16590 | -1830.78279 | -1084.58200 | 2293.78907  | 1 |
| 28051 | H | 84.50800 | 78.55480 | 90.56390 | 2596.84098  | 378.61303   | -1758.88094 | 1 |
| 28052 | H | 84.81600 | 79.99880 | 89.61990 | 951.24663   | -1644.81068 | -2517.31716 | 1 |
| 28053 | C | 86.59100 | 76.33380 | 86.29590 | 42.23971    | 713.78948   | -592.03544  | 1 |
| 28054 | O | 86.87600 | 75.13580 | 86.32990 | 267.81668   | -238.61819  | -716.40075  | 1 |
| 28055 | N | 85.94400 | 76.86980 | 85.20790 | -710.84581  | 4.48208     | 439.02712   | 1 |
| 28056 | H | 85.63800 | 77.81680 | 85.14890 | 843.70432   | 1793.24327  | -2465.20853 | 1 |
| 28057 | C | 85.54400 | 75.97380 | 84.09090 | -585.86983  | 65.11588    | -711.12977  | 1 |
| 28058 | H | 84.97100 | 75.16780 | 84.52390 | -587.12490  | -2283.37393 | -2087.02836 | 1 |
| 28059 | C | 84.70500 | 76.68680 | 83.02590 | 815.94473   | -144.97637  | -389.37185  | 1 |
| 28060 | H | 85.34800 | 77.43880 | 82.51990 | -2028.37090 | -1161.06082 | -2115.87436 | 1 |
| 28061 | C | 84.27500 | 75.71480 | 81.91990 | 388.97508   | 0.69857     | 810.15644   | 1 |
| 28062 | H | 85.09700 | 75.06980 | 81.54390 | -1045.35130 | 1855.16217  | -2338.83585 | 1 |
| 28063 | H | 83.47900 | 75.04880 | 82.31590 | -1132.40933 | 2176.33542  | 1968.49803  | 1 |
| 28064 | H | 83.83700 | 76.40380 | 81.16690 | -1218.57944 | -1768.82503 | -2305.47114 | 1 |
| 28065 | C | 83.45000 | 77.48980 | 83.55590 | 419.60996   | 394.50398   | 699.43664   | 1 |
| 28066 | H | 82.97200 | 77.88180 | 82.63290 | 2756.26863  | 509.65078   | 1419.06048  | 1 |
| 28067 | H | 83.89400 | 78.25780 | 84.22490 | -2549.89391 | -1003.83650 | -1550.92548 | 1 |
| 28068 | C | 82.33100 | 76.72480 | 84.30590 | -568.86443  | -635.05095  | -313.55255  | 1 |
| 28069 | H | 81.47300 | 77.36780 | 84.59690 | 626.62880   | 419.29995   | 3044.27828  | 1 |
| 28070 | H | 82.01000 | 75.87880 | 83.66190 | -2555.16935 | -322.74809  | 1793.43288  | 1 |
| 28071 | H | 82.78500 | 76.35380 | 85.24990 | 1987.14008  | 2434.85955  | -285.29308  | 1 |
| 28072 | C | 86.82000 | 75.33080 | 83.39190 | 637.00700   | 14.94302    | 636.17295   | 1 |
| 28073 | O | 86.93000 | 74.10180 | 83.14490 | -600.64060  | 522.36306   | 13.00956    | 1 |
| 28074 | N | 87.87300 | 76.12580 | 83.05390 | -664.60713  | 298.98835   | -449.06219  | 1 |
| 28075 | H | 87.78700 | 77.10580 | 83.21590 | 969.03204   | 2397.23374  | 1787.34319  | 1 |

|       |   |          |          |          |             |             |             |   |
|-------|---|----------|----------|----------|-------------|-------------|-------------|---|
| 28076 | C | 89.14600 | 75.69580 | 82.51290 | 629.67551   | 156.84010   | -658.15556  | 1 |
| 28077 | H | 88.77200 | 75.17380 | 81.64490 | 1620.99100  | -2054.24682 | -1751.94346 | 1 |
| 28078 | C | 89.90200 | 76.92480 | 82.03590 | 428.28134   | 570.19656   | -592.30451  | 1 |
| 28079 | H | 89.27500 | 77.50780 | 81.32890 | -1807.53275 | 1041.20496  | 2342.67993  | 1 |
| 28080 | H | 90.24800 | 77.70980 | 82.74190 | 968.56855   | -2100.23784 | 2107.82858  | 1 |
| 28081 | C | 91.23100 | 76.59480 | 81.38190 | 334.01530   | -770.79250  | 319.01648   | 1 |
| 28082 | C | 91.21500 | 76.27080 | 80.01490 | -26.05592   | 914.54890   | 67.74854    | 1 |
| 28083 | H | 90.34000 | 76.17680 | 79.38890 | -470.67687  | -1953.20109 | -2433.38480 | 1 |
| 28084 | C | 92.38300 | 75.83580 | 79.33690 | 120.98455   | 110.17651   | 878.30028   | 1 |
| 28085 | H | 92.23500 | 75.47680 | 78.32890 | 1777.49859  | -2556.74900 | -409.73190  | 1 |
| 28086 | C | 93.59700 | 75.74780 | 79.99190 | 626.50663   | -208.86124  | -643.63027  | 1 |
| 28087 | H | 94.46100 | 75.44580 | 79.41890 | -284.87963  | 2952.15028  | 1046.28094  | 1 |
| 28088 | C | 92.48600 | 76.63880 | 82.03490 | 850.64581   | 321.87138   | -98.76369   | 1 |
| 28089 | H | 92.45700 | 76.91580 | 83.07890 | 1218.57156  | -2329.02414 | 1700.72917  | 1 |
| 28090 | C | 93.65300 | 76.24480 | 81.37190 | 119.05896   | 625.38518   | 638.33017   | 1 |
| 28091 | H | 94.58100 | 76.33180 | 81.91690 | 2966.91080  | -678.21337  | 766.66896   | 1 |
| 28092 | C | 89.91100 | 74.63880 | 83.25790 | -900.41016  | -90.23704   | 97.96802    | 1 |
| 28093 | O | 90.31700 | 73.58680 | 82.77890 | 111.42726   | 600.23109   | -526.96562  | 1 |
| 28094 | N | 90.07200 | 74.84380 | 84.60690 | -65.09389   | 771.33164   | -370.93533  | 1 |
| 28095 | H | 89.75100 | 75.72580 | 84.94490 | -1902.63814 | 2510.88162  | 82.64946    | 1 |
| 28096 | C | 90.99200 | 74.14780 | 85.47890 | 176.26922   | 840.54258   | 306.74208   | 1 |
| 28097 | H | 91.87600 | 73.95580 | 84.88990 | -1939.25327 | 1237.50523  | 2131.56953  | 1 |
| 28098 | C | 91.44100 | 74.96580 | 86.68890 | 174.21619   | 901.68954   | -43.62844   | 1 |
| 28099 | H | 90.54900 | 75.39680 | 87.18990 | 1721.12066  | -1237.61042 | -2340.04669 | 1 |
| 28100 | H | 91.98500 | 74.47680 | 87.52490 | -139.40987  | 3120.38631  | -445.71374  | 1 |
| 28101 | C | 92.29500 | 76.20180 | 86.29890 | -747.79519  | -247.90416  | 434.22363   | 1 |
| 28102 | H | 91.81200 | 76.81980 | 85.51190 | 2494.38928  | 796.35802   | -1767.50321 | 1 |
| 28103 | C | 92.49600 | 77.08680 | 87.49090 | 618.51575   | -34.87835   | 651.99494   | 1 |
| 28104 | H | 93.34000 | 76.67480 | 88.08490 | -641.58908  | 2190.91568  | -2189.68534 | 1 |
| 28105 | H | 92.75900 | 78.11980 | 87.17690 | -2277.46442 | -585.79530  | -2104.47555 | 1 |
| 28106 | H | 91.62000 | 77.10680 | 88.17290 | -2010.55765 | 1694.34159  | 1712.17882  | 1 |
| 28107 | C | 93.63900 | 75.80880 | 85.71290 | -661.64940  | -592.06903  | 166.94203   | 1 |
| 28108 | H | 94.39500 | 76.62280 | 85.73390 | 2426.76760  | -1268.33368 | -1567.01350 | 1 |
| 28109 | H | 94.08800 | 74.94380 | 86.24590 | 219.03612   | -1958.80210 | 2427.48862  | 1 |
| 28110 | H | 93.51200 | 75.52980 | 84.64590 | 2280.66461  | 1364.96568  | -1708.12171 | 1 |
| 28111 | C | 90.49500 | 72.83780 | 85.92890 | -811.12081  | -77.77506   | 390.23284   | 1 |
| 28112 | O | 91.27500 | 71.96380 | 86.38890 | -129.72237  | -262.35755  | 712.54881   | 1 |
| 28113 | N | 89.19100 | 72.60280 | 85.69690 | -252.35301  | 129.19173   | 779.44895   | 1 |
| 28114 | H | 88.59100 | 73.30280 | 85.31790 | 42.93005    | -3137.31584 | -76.18310   | 1 |
| 28115 | C | 88.45900 | 71.35680 | 85.94490 | 725.72573   | -364.36492  | 389.59401   | 1 |
| 28116 | H | 89.12800 | 70.64180 | 86.40090 | 2332.57931  | -2073.20670 | 334.45166   | 1 |
| 28117 | C | 87.22600 | 71.64880 | 86.78490 | 631.66365   | 114.48076   | 633.12285   | 1 |
| 28118 | H | 86.71000 | 70.67580 | 86.92890 | -1829.93245 | 1656.28553  | 1943.16775  | 1 |
| 28119 | O | 86.29500 | 72.52080 | 86.19690 | 721.95590   | -286.10656  | 108.21924   | 1 |
| 28120 | H | 86.60700 | 73.42780 | 86.23990 | 273.02923   | 502.58455   | -3110.48669 | 1 |
| 28121 | C | 87.61600 | 72.22880 | 88.17090 | -734.90693  | -487.23469  | -226.45475  | 1 |
| 28122 | H | 86.73200 | 72.42180 | 88.81590 | -1083.59082 | 2944.57383  | 301.95038   | 1 |
| 28123 | H | 88.12700 | 73.21380 | 88.10690 | -33.64699   | -1900.73002 | 2484.35189  | 1 |
| 28124 | H | 88.25200 | 71.51380 | 88.73390 | 1028.66700  | 2145.28904  | -2083.94732 | 1 |
| 28125 | C | 88.17800 | 70.69480 | 84.65590 | -49.07363   | 579.45998   | -725.57271  | 1 |
| 28126 | O | 88.41700 | 69.53780 | 84.41390 | 233.00202   | -353.15949  | -678.23257  | 1 |
| 28127 | N | 87.69700 | 71.45480 | 83.66790 | -644.00990  | 354.32760   | -441.68354  | 1 |
| 28128 | H | 87.49600 | 72.42580 | 83.77290 | 2621.77794  | 500.70505   | 1649.26652  | 1 |
| 28129 | C | 87.33000 | 70.99180 | 82.32790 | -518.22449  | -521.16462  | -550.37923  | 1 |
| 28130 | H | 86.87200 | 71.79880 | 81.77690 | -1051.41400 | -1579.82576 | 2489.64659  | 1 |
| 28131 | H | 86.53900 | 70.25880 | 82.39390 | 3134.17448  | -185.05862  | 108.34011   | 1 |
| 28132 | C | 88.38800 | 70.38780 | 81.46990 | -134.45764  | -881.73444  | -166.68237  | 1 |
| 28133 | O | 88.07800 | 69.34780 | 80.89690 | -373.97637  | -560.23070  | 388.73055   | 1 |
| 28134 | N | 89.50700 | 71.10180 | 81.21690 | -382.31627  | -566.44366  | 472.42766   | 1 |
| 28135 | H | 89.71200 | 71.85980 | 81.82990 | -623.96899  | -1569.54822 | 2633.12291  | 1 |
| 28136 | C | 90.54000 | 70.62380 | 80.30890 | -326.41668  | 689.40592   | 494.60186   | 1 |
| 28137 | H | 90.04700 | 70.37080 | 79.38190 | 2545.13511  | -1524.09663 | 1005.28892  | 1 |

|       |   |          |          |          |             |             |             |   |
|-------|---|----------|----------|----------|-------------|-------------|-------------|---|
| 28138 | C | 91.49700 | 71.77680 | 80.00190 | -689.40157  | -163.09392  | 558.83817   | 1 |
| 28139 | H | 90.87200 | 72.69580 | 80.01990 | -279.39427  | 2912.02702  | -1194.84033 | 1 |
| 28140 | C | 92.63800 | 71.97780 | 81.09890 | 358.35663   | 830.75539   | 125.23627   | 1 |
| 28141 | H | 93.11400 | 72.96780 | 80.93290 | -1449.46793 | -644.88039  | 2697.54576  | 1 |
| 28142 | H | 93.41500 | 71.18380 | 81.09390 | -1779.25494 | -138.79471  | -2613.32095 | 1 |
| 28143 | H | 92.18000 | 72.00080 | 82.11090 | 2933.44960  | -371.20895  | 1045.15464  | 1 |
| 28144 | C | 92.06200 | 71.74980 | 78.55590 | 277.34925   | -283.92969  | 797.67264   | 1 |
| 28145 | H | 91.23500 | 71.68480 | 77.81690 | -1773.78494 | 2098.12515  | 1531.04211  | 1 |
| 28146 | H | 92.43600 | 72.79180 | 78.45790 | -1700.45139 | 2133.62028  | 1561.93717  | 1 |
| 28147 | C | 93.19900 | 70.75380 | 78.20890 | 620.39323   | -555.28205  | -371.24665  | 1 |
| 28148 | H | 94.09500 | 70.93880 | 78.83990 | -2530.44445 | 391.14515   | -1857.51078 | 1 |
| 28149 | H | 93.64100 | 70.73480 | 77.18990 | 895.77150   | -2273.20041 | 1951.72837  | 1 |
| 28150 | H | 92.87200 | 69.72480 | 78.47090 | -2543.87490 | 640.35358   | 1728.94438  | 1 |
| 28151 | C | 91.19200 | 69.33780 | 80.85890 | -850.78767  | 47.81242    | 319.61574   | 1 |
| 28152 | O | 91.46200 | 68.34780 | 80.13890 | -218.74698  | 682.56688   | -367.79343  | 1 |
| 28153 | N | 91.48600 | 69.32480 | 82.18790 | -417.20182  | 601.59414   | -452.65598  | 1 |
| 28154 | H | 91.23100 | 70.17480 | 82.64090 | 2765.24017  | -1184.24890 | 883.56449   | 1 |
| 28155 | C | 91.91500 | 68.12480 | 82.90290 | 670.69204   | 1.80269     | -632.29933  | 1 |
| 28156 | H | 92.79300 | 67.74880 | 82.39990 | 1132.49441  | 2481.32632  | 1555.15893  | 1 |
| 28157 | C | 92.25100 | 68.54980 | 84.34890 | -626.64967  | -210.90559  | 609.40493   | 1 |
| 28158 | H | 91.36300 | 68.83680 | 84.95190 | 2028.60386  | -2127.30605 | -1122.46589 | 1 |
| 28159 | C | 92.93000 | 67.35280 | 85.13090 | -41.12981   | 551.80014   | 709.89908   | 1 |
| 28160 | H | 93.39500 | 67.66780 | 86.08990 | 2814.72829  | 791.42608   | -1180.39543 | 1 |
| 28161 | H | 93.59900 | 66.86780 | 84.38790 | 679.90348   | 2171.79798  | 2157.04109  | 1 |
| 28162 | H | 92.08600 | 66.72380 | 85.48590 | -1300.36271 | -2079.14996 | -1985.07681 | 1 |
| 28163 | C | 93.12200 | 69.81780 | 84.36490 | -85.06918   | -707.31889  | -581.50575  | 1 |
| 28164 | H | 92.59100 | 70.79080 | 84.28690 | 415.96983   | -1818.60405 | -2547.79010 | 1 |
| 28165 | H | 93.47800 | 69.79780 | 85.41690 | -1801.45273 | 617.06534   | -2527.14992 | 1 |
| 28166 | H | 93.92400 | 69.74080 | 83.59990 | -2113.02464 | -1552.35994 | -1757.46789 | 1 |
| 28167 | C | 90.88500 | 67.01480 | 82.85490 | -561.46284  | 648.82375   | -349.31053  | 1 |
| 28168 | O | 91.19100 | 65.97680 | 82.31990 | 573.17608   | 282.10547   | -480.43395  | 1 |
| 28169 | N | 89.59800 | 67.27880 | 83.21290 | 523.25846   | 515.03134   | 403.18812   | 1 |
| 28170 | H | 89.33800 | 68.17280 | 83.56890 | -3104.68005 | -442.16432  | 264.15926   | 1 |
| 28171 | C | 88.50800 | 66.28280 | 83.31090 | -547.86210  | 562.57166   | 461.49133   | 1 |
| 28172 | H | 87.63400 | 66.81180 | 83.66190 | -1062.66732 | -2927.38533 | 382.24874   | 1 |
| 28173 | H | 88.77800 | 65.52880 | 84.03490 | 8.93346     | 2353.60871  | 2079.60135  | 1 |
| 28174 | C | 88.13700 | 65.55880 | 82.06790 | 308.48057   | -553.38131  | -662.61249  | 1 |
| 28175 | O | 88.04400 | 64.34280 | 82.03790 | 294.96319   | -569.16094  | 430.05692   | 1 |
| 28176 | N | 87.94300 | 66.29480 | 80.94490 | -139.42761  | 648.56090   | -550.35862  | 1 |
| 28177 | H | 88.08700 | 67.28080 | 80.99990 | -2818.32274 | 987.22325   | -1030.89105 | 1 |
| 28178 | C | 87.72000 | 65.63780 | 79.67190 | 406.48535   | -517.84704  | -635.40502  | 1 |
| 28179 | H | 87.02600 | 64.82080 | 79.79990 | 1051.60674  | 215.28070   | 2939.43295  | 1 |
| 28180 | C | 86.96700 | 66.60780 | 78.71390 | -99.63122   | 180.59688   | -906.55763  | 1 |
| 28181 | H | 87.46400 | 67.58080 | 78.50890 | 3097.72287  | 89.30798    | 485.10087   | 1 |
| 28182 | H | 86.78100 | 66.01880 | 77.79090 | 2240.99069  | 368.16186   | -2185.91712 | 1 |
| 28183 | C | 85.61000 | 66.79680 | 79.39290 | 250.27134   | 786.55772   | -416.48197  | 1 |
| 28184 | O | 84.83300 | 65.81480 | 79.48890 | 34.22440    | 752.35528   | 250.79476   | 1 |
| 28185 | N | 85.34400 | 67.99780 | 79.87490 | 287.03502   | 785.99059   | 139.35399   | 1 |
| 28186 | H | 86.08300 | 68.66580 | 79.96190 | -2091.98692 | -1470.28973 | 1817.14185  | 1 |
| 28187 | H | 84.39500 | 68.15680 | 80.14790 | -3080.07944 | 139.84286   | 642.17380   | 1 |
| 28188 | C | 88.89800 | 64.98780 | 79.03490 | 721.70059   | 384.15505   | -414.21490  | 1 |
| 28189 | O | 88.72200 | 64.04280 | 78.34190 | -702.32334  | 362.66611   | -146.95869  | 1 |
| 28190 | N | 90.14400 | 65.40080 | 79.46790 | 202.69361   | -784.26164  | -221.84828  | 1 |
| 28191 | H | 90.25700 | 66.25580 | 79.96790 | -1068.81255 | 2028.39635  | -2182.73006 | 1 |
| 28192 | C | 91.31700 | 64.73480 | 79.05890 | 89.72030    | 522.95790   | 726.76392   | 1 |
| 28193 | H | 91.30700 | 64.62180 | 77.98490 | -2935.77150 | 1158.21014  | -94.04315   | 1 |
| 28194 | H | 92.21500 | 65.29480 | 79.27790 | 1054.48633  | -1918.70401 | 2230.80482  | 1 |
| 28195 | C | 91.40100 | 63.43180 | 79.75790 | 302.77967   | -789.81901  | -334.89360  | 1 |
| 28196 | O | 91.82500 | 62.42080 | 79.26990 | -585.86022  | 338.99517   | 405.46470   | 1 |
| 28197 | N | 91.02800 | 63.38680 | 81.05790 | 653.84063   | 161.57973   | -520.40764  | 1 |
| 28198 | H | 90.80500 | 64.21680 | 81.56290 | -2524.06541 | 1608.89934  | -1015.82361 | 1 |
| 28199 | C | 90.91800 | 62.15580 | 81.79590 | 268.15943   | -727.72465  | -482.86823  | 1 |

|       |   |          |          |          |             |             |             |   |
|-------|---|----------|----------|----------|-------------|-------------|-------------|---|
| 28200 | H | 91.86200 | 61.64080 | 81.70190 | -1073.65081 | 2396.75329  | 1727.08137  | 1 |
| 28201 | C | 90.82800 | 62.40680 | 83.27890 | 325.42931   | -787.62330  | 281.31989   | 1 |
| 28202 | H | 90.54300 | 61.55180 | 83.92790 | 1671.63982  | 2651.92463  | 280.19405   | 1 |
| 28203 | H | 89.92600 | 63.04680 | 83.38890 | -2291.78553 | -1666.30648 | 1349.95496  | 1 |
| 28204 | C | 92.01900 | 63.17780 | 83.96190 | -512.67023  | -334.69939  | -695.70824  | 1 |
| 28205 | H | 92.39400 | 64.07880 | 83.43090 | 2366.51489  | 464.31672   | 1996.17961  | 1 |
| 28206 | C | 91.67700 | 63.61180 | 85.38990 | -432.00375  | 662.20059   | 448.78216   | 1 |
| 28207 | H | 91.21000 | 62.80180 | 85.98990 | -2956.90848 | -355.08276  | -1042.76200 | 1 |
| 28208 | H | 92.58900 | 63.86880 | 85.96890 | 1880.12225  | -741.64303  | -2425.78053 | 1 |
| 28209 | H | 90.99500 | 64.48680 | 85.45990 | -1867.13575 | 1331.55269  | -2179.99712 | 1 |
| 28210 | C | 93.24800 | 62.26580 | 83.90690 | 389.86023   | 148.78501   | 788.96691   | 1 |
| 28211 | H | 93.04800 | 61.32980 | 84.47190 | 2314.17641  | -1494.91627 | 1484.23197  | 1 |
| 28212 | H | 94.12500 | 62.84280 | 84.26990 | -1444.21997 | 1880.78126  | -2097.19841 | 1 |
| 28213 | H | 93.55700 | 61.98580 | 82.87690 | 1522.75985  | 1898.59281  | 1974.09120  | 1 |
| 28214 | C | 89.83700 | 61.22880 | 81.39190 | -678.51139  | 397.56232   | -497.03712  | 1 |
| 28215 | O | 90.05200 | 60.01880 | 81.38790 | 772.99757   | -96.66008   | 29.55451    | 1 |
| 28216 | N | 88.67800 | 61.73480 | 81.04490 | 322.70469   | -207.08847  | 729.29722   | 1 |
| 28217 | H | 88.46700 | 62.70780 | 81.09490 | -1228.76098 | -2116.41153 | 1956.12007  | 1 |
| 28218 | C | 87.67100 | 60.85880 | 80.39390 | 531.81909   | 469.08503   | 555.54941   | 1 |
| 28219 | H | 87.32000 | 60.08580 | 81.06090 | -2118.36443 | 428.93297   | -2311.93842 | 1 |
| 28220 | C | 86.36900 | 61.62080 | 80.15290 | 428.64517   | 387.32928   | 689.57978   | 1 |
| 28221 | H | 86.66700 | 62.53680 | 79.59990 | -940.16048  | -1897.00248 | 2307.55889  | 1 |
| 28222 | C | 85.41000 | 60.79180 | 79.24990 | -49.64048   | 149.13754   | -915.13852  | 1 |
| 28223 | H | 85.78800 | 60.71980 | 78.20790 | -347.88803  | 2242.84454  | 2174.67503  | 1 |
| 28224 | H | 84.42100 | 61.27980 | 79.11590 | -2241.76490 | 1466.52007  | 1656.83482  | 1 |
| 28225 | H | 85.21300 | 59.82180 | 79.75490 | -1565.22592 | -954.93084  | -2573.73210 | 1 |
| 28226 | C | 85.66900 | 62.05280 | 81.46790 | 52.47096    | 173.96395   | 879.74916   | 1 |
| 28227 | H | 84.86800 | 62.78280 | 81.22090 | 2281.63667  | -965.75841  | -1940.00842 | 1 |
| 28228 | H | 85.26400 | 61.20280 | 82.05790 | 1411.05962  | -202.26383  | -2815.08006 | 1 |
| 28229 | H | 86.41700 | 62.61580 | 82.06690 | 1679.94079  | 1804.64591  | -1972.20181 | 1 |
| 28230 | C | 88.14800 | 60.21080 | 79.10090 | -470.40345  | 416.20329   | 656.22135   | 1 |
| 28231 | O | 87.98300 | 59.02080 | 78.84890 | -689.09523  | 370.29163   | -195.87772  | 1 |
| 28232 | N | 88.93200 | 60.97080 | 78.26790 | 593.18899   | -476.41987  | -355.03563  | 1 |
| 28233 | H | 88.88200 | 61.95180 | 78.43890 | 940.48310   | -2002.49271 | -2242.82448 | 1 |
| 28234 | C | 89.63900 | 60.42180 | 77.09990 | 714.24102   | 373.99708   | 396.18193   | 1 |
| 28235 | H | 88.99200 | 59.82980 | 76.46890 | -2648.72128 | -770.16176  | -1546.58881 | 1 |
| 28236 | C | 90.13200 | 61.55680 | 76.21090 | -256.54453  | 336.20744   | -832.47005  | 1 |
| 28237 | H | 90.77500 | 62.20780 | 76.84090 | 2377.57761  | 1982.80805  | -559.79790  | 1 |
| 28238 | C | 91.04800 | 61.07380 | 75.04890 | -466.42691  | -398.34301  | -697.27267  | 1 |
| 28239 | H | 91.94600 | 60.50580 | 75.37390 | -1651.30017 | -2665.30198 | 246.23287   | 1 |
| 28240 | H | 91.50200 | 61.91580 | 74.48490 | 2366.17923  | 2042.75739  | 294.21510   | 1 |
| 28241 | H | 90.55600 | 60.35680 | 74.35590 | -897.35464  | -321.17988  | -3019.67884 | 1 |
| 28242 | C | 89.00800 | 62.48180 | 75.66090 | -4.11286    | 575.13852   | 696.78191   | 1 |
| 28243 | H | 88.47400 | 61.93980 | 74.85190 | 2600.89096  | -1676.37286 | -499.92892  | 1 |
| 28244 | H | 88.14100 | 62.60780 | 76.34490 | -2641.77470 | -1482.01111 | -884.97305  | 1 |
| 28245 | C | 89.53000 | 63.78780 | 75.11390 | -564.17527  | -407.18269  | 576.64718   | 1 |
| 28246 | H | 90.19400 | 63.52080 | 74.26490 | 931.26531   | -2993.11035 | 48.43409    | 1 |
| 28247 | H | 88.68400 | 64.35180 | 74.66590 | -2117.37220 | 2274.62612  | -587.31441  | 1 |
| 28248 | H | 89.97900 | 64.42080 | 75.90890 | -2582.55385 | 1663.06860  | -753.36763  | 1 |
| 28249 | C | 90.77300 | 59.45680 | 77.46190 | 321.61981   | -602.12345  | -609.51982  | 1 |
| 28250 | O | 90.96700 | 58.38780 | 76.89490 | -45.12124   | 745.73069   | 259.17854   | 1 |
| 28251 | N | 91.47500 | 59.73380 | 78.58890 | -216.30865  | -454.61066  | 657.12123   | 1 |
| 28252 | H | 91.42900 | 60.64380 | 78.99590 | 1666.93926  | 1718.58246  | 2020.11581  | 1 |
| 28253 | C | 92.46700 | 58.82380 | 79.17890 | -735.18206  | -468.95599  | -302.24164  | 1 |
| 28254 | H | 93.13400 | 58.59180 | 78.36190 | -2165.42203 | 2204.92666  | -670.26739  | 1 |
| 28255 | C | 93.39400 | 59.54580 | 80.25190 | -736.74887  | -60.44056   | 525.46063   | 1 |
| 28256 | H | 93.67500 | 58.93680 | 81.13790 | -486.38816  | 1906.32222  | 2441.07505  | 1 |
| 28257 | H | 92.68800 | 60.32980 | 80.60090 | -1894.30994 | 2446.11103  | -645.08247  | 1 |
| 28258 | C | 94.60100 | 60.20980 | 79.64990 | -9.34708    | 141.88751   | -922.66208  | 1 |
| 28259 | H | 94.23900 | 60.46180 | 78.62990 | -1504.26995 | 2215.09368  | -1689.58302 | 1 |
| 28260 | C | 95.06300 | 61.43480 | 80.47190 | 172.90107   | 822.61958   | -383.13079  | 1 |
| 28261 | H | 95.28300 | 61.04180 | 81.48790 | -1719.69230 | -2397.89678 | 1070.38304  | 1 |

|       |   |          |          |          |             |             |             |   |
|-------|---|----------|----------|----------|-------------|-------------|-------------|---|
| 28262 | H | 94.26400 | 62.20680 | 80.47790 | -1646.98097 | -1983.09286 | -1825.30487 | 1 |
| 28263 | H | 96.00300 | 61.82780 | 80.02690 | 781.11060   | -1749.53616 | 2467.21924  | 1 |
| 28264 | C | 95.76500 | 59.20580 | 79.52190 | -733.80263  | 520.24648   | 183.62918   | 1 |
| 28265 | H | 96.08900 | 58.91780 | 80.54590 | -2589.02162 | 1684.90442  | 627.36802   | 1 |
| 28266 | H | 95.53700 | 58.21280 | 79.07790 | 1387.32958  | -2448.29342 | 1365.19879  | 1 |
| 28267 | H | 96.53300 | 59.68580 | 78.87890 | 581.74892   | -2902.12889 | 1024.89315  | 1 |
| 28268 | C | 91.86500 | 57.57880 | 79.69390 | -593.02800  | -296.36710  | -651.89200  | 1 |
| 28269 | O | 92.42900 | 56.49880 | 79.48290 | 524.73613   | -18.29702   | -599.34976  | 1 |
| 28270 | N | 90.65400 | 57.56080 | 80.28190 | -391.50102  | -689.14031  | 268.11773   | 1 |
| 28271 | H | 90.21300 | 58.42780 | 80.50190 | -2083.71505 | 2034.79785  | -1237.27944 | 1 |
| 28272 | C | 89.92200 | 56.39580 | 80.60690 | -279.63664  | -25.14970   | -888.63107  | 1 |
| 28273 | H | 90.56100 | 55.73180 | 81.16890 | 2599.67311  | -676.62688  | -1636.81146 | 1 |
| 28274 | C | 88.72200 | 56.64380 | 81.52490 | -265.58573  | 826.23980   | -327.89780  | 1 |
| 28275 | H | 88.11700 | 57.51680 | 81.19890 | -2210.03128 | -863.78927  | 2055.66312  | 1 |
| 28276 | C | 87.81900 | 55.37180 | 81.65790 | -280.12478  | 317.11001   | -831.10384  | 1 |
| 28277 | H | 87.24900 | 55.30580 | 80.70590 | -1690.04081 | 2614.21740  | 521.37691   | 1 |
| 28278 | H | 88.39100 | 54.44580 | 81.87890 | 2314.77873  | 1317.87646  | -1683.55201 | 1 |
| 28279 | H | 87.10100 | 55.43280 | 82.50390 | 1532.11441  | -1887.68138 | -1997.56711 | 1 |
| 28280 | C | 89.30500 | 57.08480 | 82.90890 | -343.71352  | 794.83744   | -333.26503  | 1 |
| 28281 | H | 89.91800 | 58.00280 | 82.78290 | 2323.99366  | 617.14832   | -2039.71293 | 1 |
| 28282 | H | 89.92900 | 56.23680 | 83.26390 | -1977.37561 | 1716.07195  | 1743.46658  | 1 |
| 28283 | H | 88.39800 | 57.27180 | 83.52290 | -1988.28875 | -1718.66287 | -1747.70541 | 1 |
| 28284 | C | 89.44700 | 55.63980 | 79.32990 | -370.76351  | 584.15171   | 590.65417   | 1 |
| 28285 | O | 89.89800 | 54.49180 | 79.18290 | -461.72519  | 655.94445   | 15.27234    | 1 |
| 28286 | N | 88.71500 | 56.24380 | 78.37590 | -699.42666  | 370.06510   | -347.36749  | 1 |
| 28287 | H | 88.39800 | 57.18380 | 78.48190 | -1693.74516 | -201.91012  | -2667.30115 | 1 |
| 28288 | C | 88.13600 | 55.43780 | 77.35890 | 468.73961   | -506.79843  | -594.91622  | 1 |
| 28289 | H | 87.98700 | 54.42380 | 77.69790 | 2154.38979  | 1553.27492  | -1694.35310 | 1 |
| 28290 | C | 86.80000 | 55.99480 | 76.89190 | 505.48273   | -60.55365   | 730.85680   | 1 |
| 28291 | H | 86.79700 | 57.04880 | 76.53890 | -1156.71311 | 2804.20846  | -897.06713  | 1 |
| 28292 | H | 86.30400 | 55.48680 | 76.03690 | 1241.22141  | 2542.64825  | -1395.92392 | 1 |
| 28293 | C | 85.67600 | 55.90280 | 77.97190 | -496.76177  | -141.16177  | 742.37360   | 1 |
| 28294 | H | 86.01400 | 56.61080 | 78.75890 | 1860.48459  | 1236.98597  | 2195.07512  | 1 |
| 28295 | H | 85.62800 | 54.90080 | 78.44890 | -2231.20200 | 1011.83499  | 1977.21546  | 1 |
| 28296 | S | 83.95900 | 56.24880 | 77.57990 | -417.37037  | -134.63999  | 341.17869   | 1 |
| 28297 | C | 84.12800 | 58.00880 | 77.20090 | -209.15388  | -499.70267  | -744.07932  | 1 |
| 28298 | H | 83.24300 | 58.67880 | 77.24590 | -425.70864  | -2969.84438 | 905.61370   | 1 |
| 28299 | H | 84.54900 | 58.20380 | 76.19090 | 398.95230   | 2092.74618  | -2336.25532 | 1 |
| 28300 | H | 84.85200 | 58.45580 | 77.91490 | 2076.17325  | 1042.89387  | -2129.68819 | 1 |
| 28301 | C | 89.02800 | 55.25480 | 76.12090 | 438.24514   | -395.53778  | -698.87022  | 1 |
| 28302 | O | 88.67300 | 54.33880 | 75.34490 | -497.05183  | 225.05426   | -603.76090  | 1 |
| 28303 | N | 90.17100 | 55.99680 | 75.92590 | -681.04892  | -214.95638  | 448.24138   | 1 |
| 28304 | H | 90.45000 | 56.78180 | 76.47390 | 1334.96930  | 2734.49259  | -821.52364  | 1 |
| 28305 | C | 91.03600 | 55.84080 | 74.74190 | -904.26683  | 198.86292   | -73.24142   | 1 |
| 28306 | H | 91.33000 | 56.77180 | 74.28090 | -1601.23895 | 304.16835   | -2719.34462 | 1 |
| 28307 | H | 90.59400 | 55.18780 | 74.00390 | -587.47725  | 2949.30196  | 938.85860   | 1 |
| 28308 | C | 92.32500 | 55.26980 | 75.05690 | 622.49286   | -633.93388  | 103.65726   | 1 |
| 28309 | O | 92.92800 | 54.78180 | 74.07790 | -214.58636  | -692.22184  | 289.05720   | 1 |
| 28310 | N | 92.85900 | 55.28180 | 76.31390 | -433.88650  | -720.11135  | 69.58835    | 1 |
| 28311 | H | 92.39700 | 55.80080 | 77.02990 | -2192.48745 | -314.62696  | 2226.27108  | 1 |
| 28312 | C | 94.18600 | 54.76780 | 76.54990 | -529.95396  | 742.79317   | -169.36137  | 1 |
| 28313 | H | 94.42000 | 54.19980 | 75.66190 | 2031.97478  | 2187.55999  | -996.14718  | 1 |
| 28314 | C | 95.24000 | 55.87480 | 76.84190 | -416.42281  | 774.49635   | -299.91679  | 1 |
| 28315 | H | 96.23400 | 55.39980 | 76.97990 | 1630.74082  | 999.18790   | -2513.82470 | 1 |
| 28316 | H | 94.96800 | 56.43880 | 77.75990 | 1795.15835  | -532.65629  | -2539.73141 | 1 |
| 28317 | C | 95.32500 | 56.83880 | 75.67490 | 645.41977   | 605.02043   | -216.65612  | 1 |
| 28318 | C | 94.57400 | 58.04680 | 75.56990 | 722.78223   | -399.40116  | 333.64495   | 1 |
| 28319 | H | 93.81100 | 58.35680 | 76.26890 | 1613.32237  | -2625.70905 | 552.60356   | 1 |
| 28320 | C | 94.76300 | 58.89280 | 74.47790 | -434.11815  | -262.72903  | -784.28561  | 1 |
| 28321 | H | 94.19800 | 59.78980 | 74.27190 | -2223.36429 | 878.63299   | 2041.18908  | 1 |
| 28322 | C | 95.64700 | 58.60780 | 73.44990 | 403.09801   | 586.86039   | 543.32932   | 1 |
| 28323 | O | 95.87200 | 59.44180 | 72.41690 | -569.53331  | -358.96270  | 405.62564   | 1 |

|       |   |          |          |          |             |             |             |   |
|-------|---|----------|----------|----------|-------------|-------------|-------------|---|
| 28324 | H | 96.32200 | 59.00280 | 71.69190 | 1945.37758  | -1690.04113 | 1761.13338  | 1 |
| 28325 | C | 96.26800 | 56.58880 | 74.66090 | -721.35779  | -522.53848  | -252.13508  | 1 |
| 28326 | H | 96.92000 | 55.72780 | 74.64290 | -1406.62000 | 233.59813   | -2834.85367 | 1 |
| 28327 | C | 96.40200 | 57.42980 | 73.55890 | 229.31113   | -858.13584  | -185.54474  | 1 |
| 28328 | H | 97.07000 | 57.15380 | 72.75690 | 1800.15240  | 1090.58769  | -2351.73750 | 1 |
| 28329 | C | 94.25100 | 53.70880 | 77.63690 | 503.92665   | 688.03024   | -334.99672  | 1 |
| 28330 | O | 94.75800 | 52.60880 | 77.40090 | -430.12468  | -617.52861  | -270.40334  | 1 |
| 28331 | N | 93.66100 | 53.96080 | 78.80590 | 244.28722   | -665.94167  | 421.01394   | 1 |
| 28332 | H | 93.27600 | 54.86780 | 78.95390 | -1246.06241 | -2598.01889 | 1241.81877  | 1 |
| 28333 | C | 93.44100 | 53.00680 | 79.89090 | -611.74241  | 607.01131   | -353.65185  | 1 |
| 28334 | H | 94.35700 | 52.47780 | 80.10790 | 1815.62811  | 1581.03871  | 1997.70412  | 1 |
| 28335 | C | 92.94400 | 53.62880 | 81.25290 | 434.74374   | -390.21683  | -709.71902  | 1 |
| 28336 | H | 92.05600 | 54.20480 | 80.91490 | 1517.55532  | 1908.99186  | 1966.13856  | 1 |
| 28337 | H | 92.64800 | 52.84180 | 81.97990 | 1206.93876  | 903.32940   | 2738.76239  | 1 |
| 28338 | C | 93.94700 | 54.46080 | 82.04690 | -403.54980  | 821.59500   | 85.75598    | 1 |
| 28339 | H | 94.47900 | 55.07880 | 81.29190 | -1526.98798 | -2744.45688 | 165.36984   | 1 |
| 28340 | H | 94.64500 | 53.84780 | 82.65590 | 2432.83857  | -1922.22247 | 441.51423   | 1 |
| 28341 | C | 93.27700 | 55.39580 | 83.02990 | -576.35835  | 49.00822    | 692.32572   | 1 |
| 28342 | O | 92.47900 | 54.97380 | 83.85390 | 269.76400   | -648.20252  | 322.94924   | 1 |
| 28343 | N | 93.52300 | 56.72180 | 82.88790 | -595.97997  | -80.19627   | 579.82874   | 1 |
| 28344 | H | 94.41900 | 57.02380 | 82.56290 | -2105.96006 | 51.18228    | -2365.81974 | 1 |
| 28345 | H | 92.86000 | 57.35880 | 83.28190 | 1721.61098  | 370.81856   | -2622.52386 | 1 |
| 28346 | C | 92.57700 | 51.86780 | 79.50590 | 296.34519   | 602.53029   | 596.96352   | 1 |
| 28347 | O | 92.78500 | 50.65780 | 79.79990 | -599.83033  | 401.56875   | -371.38816  | 1 |
| 28348 | N | 91.47300 | 52.18080 | 78.75590 | 347.82678   | 369.28638   | 652.35637   | 1 |
| 28349 | H | 91.20800 | 53.14080 | 78.70990 | 2016.06534  | 270.44841   | 2370.97669  | 1 |
| 28350 | C | 90.61600 | 51.17280 | 78.07990 | 611.18318   | -481.45342  | 430.16434   | 1 |
| 28351 | H | 90.80800 | 50.23680 | 78.58390 | -2158.57346 | -1353.94248 | -1875.41741 | 1 |
| 28352 | C | 89.08300 | 51.53180 | 78.20090 | 463.51199   | -642.07161  | 407.68790   | 1 |
| 28353 | H | 88.90900 | 52.51580 | 77.71390 | -2997.94955 | -805.98719  | 557.31575   | 1 |
| 28354 | H | 88.49600 | 50.75480 | 77.66490 | 373.07110   | 2818.23485  | 1343.55164  | 1 |
| 28355 | C | 88.66600 | 51.54680 | 79.65090 | -29.39620   | 735.84789   | 531.76601   | 1 |
| 28356 | H | 89.15400 | 52.39480 | 80.17690 | 1400.71442  | 2464.68859  | -1383.72596 | 1 |
| 28357 | H | 89.07300 | 50.61780 | 80.10390 | 2457.70716  | -1047.06986 | -1655.00991 | 1 |
| 28358 | C | 87.13900 | 51.48180 | 79.68990 | -445.50741  | -787.26841  | -119.84949  | 1 |
| 28359 | H | 86.76700 | 52.34880 | 79.10290 | 809.04252   | -1650.27837 | 2527.41691  | 1 |
| 28360 | H | 86.88900 | 50.48680 | 79.26190 | -2973.57162 | 813.87537   | 682.88567   | 1 |
| 28361 | C | 86.57500 | 51.74980 | 81.08890 | 614.39152   | 591.46520   | -332.02139  | 1 |
| 28362 | H | 86.92000 | 52.73180 | 81.47690 | -1481.84431 | 2547.16315  | -1152.92936 | 1 |
| 28363 | H | 86.98500 | 50.92780 | 81.71390 | 416.46154   | -2555.85624 | -1787.66933 | 1 |
| 28364 | N | 85.12500 | 51.68880 | 81.07790 | -337.81971  | 643.61311   | -467.14848  | 1 |
| 28365 | H | 84.77400 | 50.75480 | 80.78390 | 2048.84644  | 2262.28543  | -772.98653  | 1 |
| 28366 | H | 84.69900 | 52.02580 | 81.96490 | -2265.29941 | -2161.72169 | -334.82773  | 1 |
| 28367 | H | 84.83800 | 52.34680 | 80.32490 | 2690.56484  | 856.60779   | -1384.58703 | 1 |
| 28368 | C | 90.95300 | 50.94980 | 76.60790 | -807.13571  | 422.34025   | 159.93149   | 1 |
| 28369 | O | 90.98900 | 51.89480 | 75.82090 | -492.36392  | -336.44991  | -546.08096  | 1 |
| 28370 | N | 91.05100 | 49.72080 | 76.17790 | -665.55952  | 405.37265   | 344.56023   | 1 |
| 28371 | H | 90.96200 | 48.97080 | 76.82890 | 1442.30907  | 2355.66186  | -1521.39727 | 1 |
| 28372 | C | 91.29900 | 49.34780 | 74.85290 | -213.52954  | 859.70684   | 237.83150   | 1 |
| 28373 | H | 91.82800 | 50.10280 | 74.28990 | 793.20039   | -477.58175  | -3020.69137 | 1 |
| 28374 | C | 92.38200 | 48.18380 | 74.82990 | -250.05268  | 674.85422   | -595.32394  | 1 |
| 28375 | H | 92.07000 | 47.34480 | 75.48790 | 1980.26708  | 900.42084   | 2240.56480  | 1 |
| 28376 | H | 92.30400 | 47.74580 | 73.81190 | -1480.36954 | -2622.76325 | 899.75509   | 1 |
| 28377 | C | 93.85500 | 48.62380 | 74.83190 | -441.68292  | 623.25146   | 499.22849   | 1 |
| 28378 | H | 94.07900 | 49.05780 | 73.83490 | -1551.20324 | -1549.47734 | -2285.34090 | 1 |
| 28379 | H | 94.46100 | 47.69280 | 74.87390 | -1030.58371 | -903.23766  | -2857.83656 | 1 |
| 28380 | C | 94.33100 | 49.57380 | 75.99790 | -139.62115  | 755.22636   | 483.54835   | 1 |
| 28381 | H | 93.81300 | 50.55380 | 75.93290 | 2501.00392  | 1870.93166  | 273.47697   | 1 |
| 28382 | H | 94.18600 | 49.06480 | 76.97490 | -1102.46374 | 2945.50039  | -297.47796  | 1 |
| 28383 | C | 95.82100 | 49.84980 | 75.84490 | 645.92773   | 340.16174   | 507.93599   | 1 |
| 28384 | H | 96.00100 | 50.55280 | 75.00390 | 1593.12527  | -835.29974  | 2546.96236  | 1 |
| 28385 | H | 96.33200 | 48.90480 | 75.56290 | -1882.74949 | 2260.31593  | 1130.83546  | 1 |

|       |   |          |          |          |             |             |             |   |
|-------|---|----------|----------|----------|-------------|-------------|-------------|---|
| 28386 | N | 96.36400 | 50.35680 | 77.12790 | 68.77608    | -834.91780  | -27.90790   | 1 |
| 28387 | H | 95.93900 | 49.92380 | 77.97290 | 352.06442   | -1842.45155 | -2542.14141 | 1 |
| 28388 | H | 96.24700 | 51.38080 | 77.26290 | -227.26609  | -2412.96226 | -2023.87272 | 1 |
| 28389 | H | 97.39300 | 50.20580 | 77.11590 | 2205.71917  | 1042.66206  | 1948.72805  | 1 |
| 28390 | C | 90.00100 | 49.00580 | 74.10290 | -663.76463  | -425.76074  | 457.02755   | 1 |
| 28391 | O | 90.08300 | 48.49180 | 72.98190 | -127.70645  | 638.10412   | 444.57691   | 1 |
| 28392 | N | 88.81000 | 49.29580 | 74.67490 | 628.17863   | -283.40440  | 441.99410   | 1 |
| 28393 | H | 88.70200 | 49.78880 | 75.53390 | -1353.02095 | -682.33870  | 2745.59799  | 1 |
| 28394 | C | 87.55400 | 48.97680 | 74.08890 | 793.05496   | 341.17643   | 235.66176   | 1 |
| 28395 | H | 87.68600 | 49.00780 | 73.01690 | 1242.82668  | -2801.22024 | 624.90922   | 1 |
| 28396 | C | 87.15200 | 47.53380 | 74.50490 | 177.73078   | -363.24730  | -825.65445  | 1 |
| 28397 | H | 87.00100 | 47.55280 | 75.60590 | 610.43385   | -2721.94284 | 1414.16521  | 1 |
| 28398 | H | 88.03400 | 46.90580 | 74.25790 | -313.33462  | 1846.71417  | 2519.07078  | 1 |
| 28399 | C | 85.88800 | 46.98380 | 73.78190 | -533.26062  | -666.75881  | -346.46170  | 1 |
| 28400 | H | 85.04600 | 47.70380 | 73.87690 | 2141.25873  | 2137.56504  | 825.71964   | 1 |
| 28401 | C | 86.19700 | 46.73680 | 72.27590 | 493.62684   | -380.99977  | 628.67154   | 1 |
| 28402 | H | 86.97300 | 45.94380 | 72.21590 | 737.45170   | 1561.86777  | -2645.74915 | 1 |
| 28403 | H | 86.79000 | 47.58380 | 71.86990 | -2389.69886 | 11.64969    | 2052.80258  | 1 |
| 28404 | H | 85.32100 | 46.35980 | 71.70490 | 1399.72155  | 2209.83334  | -1759.33026 | 1 |
| 28405 | C | 85.44900 | 45.69380 | 74.43390 | -591.56735  | -678.53865  | 157.14214   | 1 |
| 28406 | H | 86.17400 | 44.86080 | 74.31090 | -2615.68367 | 1304.57427  | 1199.98104  | 1 |
| 28407 | H | 84.50200 | 45.40480 | 73.93090 | -2917.49780 | -252.73516  | -1210.27578 | 1 |
| 28408 | H | 85.30700 | 45.81980 | 75.52790 | -2876.02913 | -593.57569  | 1153.32930  | 1 |
| 28409 | C | 86.58300 | 49.95080 | 74.48290 | 453.42690   | 44.98935    | 764.21854   | 1 |
| 28410 | O | 86.54200 | 50.31480 | 75.64190 | -604.63646  | 478.38241   | -254.80898  | 1 |
| 28411 | N | 85.76300 | 50.38280 | 73.53390 | 57.03341    | -803.83282  | 198.06615   | 1 |
| 28412 | H | 85.97600 | 50.05580 | 72.61690 | 1787.53361  | 1554.55617  | 2045.93074  | 1 |
| 28413 | C | 84.62100 | 51.21080 | 73.67290 | -182.34987  | -433.19456  | -794.32327  | 1 |
| 28414 | H | 84.52300 | 51.36680 | 74.73690 | -1683.31259 | 2612.08870  | -604.62227  | 1 |
| 28415 | C | 84.88700 | 52.61880 | 73.07790 | 854.28666   | 233.55172   | -165.08085  | 1 |
| 28416 | H | 83.94100 | 53.16780 | 72.88390 | 1354.25118  | 593.22148   | 2756.81940  | 1 |
| 28417 | H | 85.25400 | 52.43280 | 72.04590 | -1956.54738 | -76.90707   | -2491.24807 | 1 |
| 28418 | C | 85.88700 | 53.42880 | 73.88690 | 629.15694   | -631.57424  | 50.56340    | 1 |
| 28419 | H | 86.80800 | 52.87480 | 74.16590 | -308.96163  | 2781.20607  | -1474.75847 | 1 |
| 28420 | H | 85.38700 | 53.70380 | 74.83990 | -236.04273  | 2924.88007  | -1177.34438 | 1 |
| 28421 | C | 86.28500 | 54.67180 | 73.14490 | -62.36114   | -642.79523  | -651.40403  | 1 |
| 28422 | H | 85.41500 | 55.31380 | 72.88890 | 956.32491   | 2330.38395  | -1903.86709 | 1 |
| 28423 | H | 86.96800 | 55.30180 | 73.75390 | 1551.44630  | 2009.37450  | 1839.10287  | 1 |
| 28424 | N | 87.02500 | 54.16280 | 71.89790 | -625.96051  | 361.34410   | 450.35111   | 1 |
| 28425 | H | 86.52100 | 54.27380 | 71.04090 | 2238.31299  | 2197.77550  | -157.05820  | 1 |
| 28426 | C | 88.26400 | 53.66480 | 71.80990 | -587.06887  | 371.93100   | -629.20634  | 1 |
| 28427 | N | 89.10000 | 53.50980 | 72.82190 | 561.03556   | 618.34810   | -99.11113   | 1 |
| 28428 | H | 88.79100 | 53.70980 | 73.75190 | -343.79495  | 2644.30135  | 1668.41486  | 1 |
| 28429 | H | 90.04200 | 53.23980 | 72.62390 | 2807.38407  | 638.48628   | 1216.22440  | 1 |
| 28430 | N | 88.74400 | 53.35480 | 70.59690 | 225.70736   | -456.37641  | 643.80082   | 1 |
| 28431 | H | 88.15000 | 53.32880 | 69.79290 | 575.04941   | -1069.05184 | -2912.56325 | 1 |
| 28432 | H | 89.71700 | 53.20780 | 70.42090 | 1537.06485  | 2705.84297  | 429.75688   | 1 |
| 28433 | C | 83.32200 | 50.61480 | 73.20590 | -645.07893  | -468.50601  | -470.23693  | 1 |
| 28434 | O | 83.24600 | 50.07780 | 72.10590 | 139.62546   | 86.95801    | 756.04690   | 1 |
| 28435 | N | 82.30300 | 50.67980 | 74.02090 | 271.66047   | -347.02789  | -721.22722  | 1 |
| 28436 | H | 82.47000 | 51.01780 | 74.94390 | -1333.44928 | 2091.10896  | 1945.09595  | 1 |
| 28437 | C | 80.90500 | 50.41080 | 73.69990 | 196.33547   | 873.29287   | 195.13613   | 1 |
| 28438 | H | 80.90700 | 49.61780 | 72.96590 | 2603.79563  | 1237.98405  | 1220.30987  | 1 |
| 28439 | C | 80.09800 | 49.91280 | 74.88890 | 874.33762   | 111.18718   | 154.18296   | 1 |
| 28440 | H | 80.65700 | 49.07480 | 75.35590 | -627.09511  | 2749.85102  | -1435.98716 | 1 |
| 28441 | H | 79.13500 | 49.50380 | 74.51390 | -1351.29826 | -2443.03627 | -1456.98842 | 1 |
| 28442 | O | 79.93000 | 50.94380 | 75.84990 | 389.31338   | 689.25063   | 13.60092    | 1 |
| 28443 | H | 80.78600 | 51.10580 | 76.25190 | 2029.82635  | -1922.75384 | 1392.92826  | 1 |
| 28444 | C | 80.20200 | 51.63780 | 73.09290 | -307.99423  | 472.52124   | 719.34700   | 1 |
| 28445 | O | 80.82500 | 52.67380 | 72.89290 | -10.70658   | -658.72379  | 405.38123   | 1 |
| 28446 | N | 78.90600 | 51.49280 | 72.63190 | 786.57145   | -232.83882  | 65.91513    | 1 |
| 28447 | H | 78.46200 | 50.61780 | 72.45690 | 1948.43052  | 2044.35528  | 1368.66700  | 1 |

|       |   |          |          |          |             |             |             |   |
|-------|---|----------|----------|----------|-------------|-------------|-------------|---|
| 28448 | C | 78.10900 | 52.61380 | 72.12490 | -56.27022   | -510.54261  | -756.21032  | 1 |
| 28449 | H | 78.62900 | 53.02480 | 71.27190 | 553.42774   | 3050.13663  | 576.07300   | 1 |
| 28450 | C | 76.74700 | 52.13880 | 71.62190 | -19.64090   | 699.69816   | 590.62661   | 1 |
| 28451 | H | 76.16900 | 52.99880 | 71.21990 | 942.82897   | -1441.18635 | 2609.90452  | 1 |
| 28452 | H | 76.18700 | 51.79780 | 72.51890 | -1780.38202 | -2477.76268 | -773.81852  | 1 |
| 28453 | C | 76.84800 | 51.01580 | 70.56590 | -694.96463  | 344.64043   | 505.02540   | 1 |
| 28454 | H | 75.93000 | 51.16180 | 69.95690 | 945.54010   | 1605.81791  | 2527.07957  | 1 |
| 28455 | H | 77.66100 | 51.23680 | 69.84290 | 2338.17225  | 477.56021   | 2020.49877  | 1 |
| 28456 | S | 76.94200 | 49.31380 | 71.19890 | 321.89148   | 421.36201   | 157.81853   | 1 |
| 28457 | C | 75.79700 | 48.59480 | 69.95690 | 806.63777   | 258.66977   | 286.31438   | 1 |
| 28458 | H | 75.35400 | 47.67380 | 70.39290 | 2044.24435  | -2356.92010 | -128.11922  | 1 |
| 28459 | H | 76.40800 | 48.33680 | 69.06590 | -381.28376  | -2311.72198 | 2079.18495  | 1 |
| 28460 | H | 75.08300 | 49.32480 | 69.51890 | 1716.52622  | 1360.77018  | -2259.50478 | 1 |
| 28461 | C | 77.92300 | 53.80080 | 73.01490 | -233.18361  | 649.87850   | 604.93159   | 1 |
| 28462 | O | 78.11000 | 54.94380 | 72.61990 | 495.46300   | -563.50869  | -183.25892  | 1 |
| 28463 | N | 77.71000 | 53.58280 | 74.34390 | 100.65679   | -787.32945  | 232.92340   | 1 |
| 28464 | H | 77.59800 | 52.67680 | 74.74290 | -1372.79735 | -1220.06447 | 2546.63198  | 1 |
| 28465 | C | 77.68700 | 54.67680 | 75.33990 | -692.86238  | -96.71184   | -609.48792  | 1 |
| 28466 | H | 76.94800 | 55.38980 | 75.00390 | -1221.10306 | 2918.36097  | 24.42064    | 1 |
| 28467 | C | 77.20500 | 54.32980 | 76.79390 | 458.85473   | 23.54970    | -789.51871  | 1 |
| 28468 | H | 77.72800 | 53.41580 | 77.14590 | 2359.85022  | -1285.98696 | -1615.57935 | 1 |
| 28469 | O | 75.76300 | 54.21780 | 76.78490 | 236.24222   | -461.17558  | -588.35400  | 1 |
| 28470 | H | 75.63300 | 53.42280 | 76.26290 | 3015.46709  | -789.56478  | -279.23609  | 1 |
| 28471 | C | 77.39900 | 55.42680 | 77.81890 | -578.41851  | 437.98999   | 564.98504   | 1 |
| 28472 | H | 76.81700 | 55.15480 | 78.72490 | 2368.46184  | 2051.34901  | 266.49152   | 1 |
| 28473 | H | 78.42900 | 55.46880 | 78.23490 | 211.56592   | 3120.06031  | -446.41509  | 1 |
| 28474 | H | 77.11100 | 56.36280 | 77.29590 | -20.58772   | -3016.18027 | 840.67074   | 1 |
| 28475 | C | 78.99300 | 55.41280 | 75.48290 | 687.58594   | -564.76564  | -89.68756   | 1 |
| 28476 | O | 79.01200 | 56.64380 | 75.52890 | -72.80808   | -763.43108  | -147.16472  | 1 |
| 28477 | N | 80.04200 | 54.60680 | 75.54790 | -413.03926  | 522.57987   | -552.73081  | 1 |
| 28478 | H | 79.91100 | 53.62580 | 75.42390 | -2363.99488 | 2078.31403  | 319.20582   | 1 |
| 28479 | C | 81.45000 | 55.05880 | 75.60490 | 192.77057   | 648.32466   | -631.12515  | 1 |
| 28480 | H | 81.54600 | 55.60980 | 76.52890 | 618.85499   | -631.37854  | -3026.83569 | 1 |
| 28481 | C | 82.49400 | 53.85080 | 75.62690 | 583.99387   | 407.75279   | -574.91718  | 1 |
| 28482 | H | 83.54200 | 54.17680 | 75.80090 | -2246.75540 | -1651.00346 | -1481.88230 | 1 |
| 28483 | H | 82.40300 | 53.30880 | 74.66190 | 661.38133   | 2412.49974  | -1929.45429 | 1 |
| 28484 | C | 82.13700 | 52.85880 | 76.75290 | -384.31801  | 48.69163    | -845.59085  | 1 |
| 28485 | O | 82.51800 | 51.66580 | 76.56390 | -366.33450  | 32.11052    | 693.53208   | 1 |
| 28486 | O | 81.53100 | 53.20380 | 77.76190 | 273.46739   | 85.69504    | 719.27429   | 1 |
| 28487 | C | 81.81100 | 55.96680 | 74.36290 | 191.07950   | 711.94610   | -558.54295  | 1 |
| 28488 | O | 82.31600 | 57.09180 | 74.51690 | 397.33695   | 427.86500   | 516.55973   | 1 |
| 28489 | N | 81.46000 | 55.58180 | 73.12090 | 215.06256   | -730.25778  | -343.62400  | 1 |
| 28490 | H | 80.97900 | 54.71980 | 72.97790 | 2561.49609  | 1058.46481  | 1456.86121  | 1 |
| 28491 | C | 81.68400 | 56.29980 | 71.95890 | 373.29787   | -158.63586  | -819.48279  | 1 |
| 28492 | H | 82.73300 | 56.54780 | 72.03390 | -1985.35951 | 1760.62315  | -1733.09934 | 1 |
| 28493 | C | 81.30300 | 55.39580 | 70.72990 | -598.86198  | 334.82489   | -635.78727  | 1 |
| 28494 | H | 81.29600 | 56.08680 | 69.85890 | -2360.06664 | -2021.26807 | 515.86011   | 1 |
| 28495 | H | 80.24900 | 55.09180 | 70.90490 | -2718.56326 | 1295.70398  | 964.41133   | 1 |
| 28496 | C | 82.34400 | 54.32980 | 70.40590 | 27.33623    | -668.74167  | 592.97615   | 1 |
| 28497 | H | 82.91800 | 54.03380 | 71.31090 | -1081.80021 | 1995.99786  | 2182.82970  | 1 |
| 28498 | H | 83.11200 | 54.74680 | 69.71990 | -630.04658  | -2629.10792 | 1584.89821  | 1 |
| 28499 | C | 81.85800 | 53.05580 | 69.67590 | 641.70834   | -556.51804  | 256.83039   | 1 |
| 28500 | H | 81.45300 | 53.35580 | 68.68590 | -2536.46237 | -597.54559  | 1774.03053  | 1 |
| 28501 | H | 81.02700 | 52.73880 | 70.34090 | -304.91608  | -1808.74736 | -2562.40301 | 1 |
| 28502 | C | 82.96900 | 51.98280 | 69.53090 | -534.38564  | -505.31660  | 534.04030   | 1 |
| 28503 | H | 83.51800 | 51.86480 | 70.48990 | 1838.09856  | 1404.12533  | 2109.15433  | 1 |
| 28504 | H | 83.71600 | 52.20480 | 68.73890 | 1281.99051  | -1523.49474 | 2404.62216  | 1 |
| 28505 | N | 82.51400 | 50.65680 | 69.16890 | 515.04050   | 538.95473   | 370.53903   | 1 |
| 28506 | H | 82.10400 | 50.74380 | 68.21690 | -190.13789  | 2212.70846  | -2254.23781 | 1 |
| 28507 | H | 83.32800 | 50.00980 | 69.15490 | -713.26160  | 2027.10241  | 2299.52432  | 1 |
| 28508 | H | 81.81100 | 50.26080 | 69.82490 | -1911.04524 | -2324.52589 | 917.80348   | 1 |
| 28509 | C | 80.96500 | 57.63780 | 71.82890 | 815.72317   | -325.03234  | 152.35509   | 1 |



|       |   |          |          |          |             |             |             |   |
|-------|---|----------|----------|----------|-------------|-------------|-------------|---|
| 28510 | O | 81.52700 | 58.63680 | 71.43890 | 512.93415   | 56.94395    | -597.54262  | 1 |
| 28511 | N | 79.66900 | 57.69580 | 72.21290 | 52.01670    | 417.06737   | -748.87031  | 1 |
| 28512 | H | 79.23700 | 56.80280 | 72.31390 | 1037.09729  | -1311.13104 | 2642.06455  | 1 |
| 28513 | C | 78.91900 | 58.95380 | 72.34290 | 659.22263   | 16.59755    | 603.41964   | 1 |
| 28514 | H | 79.04000 | 59.54580 | 71.44790 | -1811.21228 | 2281.86435  | 1222.59432  | 1 |
| 28515 | C | 77.45800 | 58.71880 | 72.77690 | 802.61771   | -336.57817  | -213.58723  | 1 |
| 28516 | H | 76.82600 | 59.62580 | 72.87990 | -1473.59856 | -649.11244  | 2697.99846  | 1 |
| 28517 | H | 77.44500 | 58.21880 | 73.76890 | -2764.66404 | 1072.38694  | 1090.25763  | 1 |
| 28518 | C | 76.64300 | 57.82380 | 71.87090 | 555.18718   | -72.68911   | 696.67511   | 1 |
| 28519 | C | 76.58300 | 58.10480 | 70.48090 | 180.27908   | -831.79968  | -289.55149  | 1 |
| 28520 | H | 77.12200 | 58.96280 | 70.10690 | -2038.49597 | 1455.90393  | -1940.08797 | 1 |
| 28521 | C | 75.81100 | 57.35880 | 69.59390 | -637.89380  | -130.97257  | 643.41760   | 1 |
| 28522 | H | 75.76500 | 57.60680 | 68.54390 | -1792.66235 | -1771.61723 | -1895.69226 | 1 |
| 28523 | C | 75.22600 | 56.17080 | 70.00690 | 490.56358   | -701.95528  | 238.57098   | 1 |
| 28524 | O | 74.53900 | 55.28780 | 69.16190 | 618.55470   | 38.41979    | 458.30495   | 1 |
| 28525 | H | 74.41500 | 54.44180 | 69.59890 | -1247.53161 | -2714.61327 | -977.93117  | 1 |
| 28526 | C | 75.90500 | 56.70580 | 72.30390 | -453.76185  | -205.99898  | 760.18277   | 1 |
| 28527 | H | 75.83900 | 56.41280 | 73.34090 | -1404.29579 | 2317.70838  | 1621.90511  | 1 |
| 28528 | C | 75.30900 | 55.81680 | 71.36490 | -155.15144  | 500.59058   | -766.93871  | 1 |
| 28529 | H | 74.94300 | 54.87280 | 71.74090 | 1858.48372  | 1919.08140  | -1667.12813 | 1 |
| 28530 | C | 79.49600 | 59.91880 | 73.36590 | 301.23976   | -614.19446  | 572.10292   | 1 |
| 28531 | O | 79.75100 | 61.08780 | 73.13790 | 153.03038   | 46.03056    | -782.42903  | 1 |
| 28532 | N | 79.82100 | 59.45580 | 74.55290 | -654.16877  | -328.94787  | -442.05920  | 1 |
| 28533 | H | 79.68400 | 58.49580 | 74.78390 | 2756.67813  | -1441.96957 | -345.16050  | 1 |
| 28534 | C | 80.44200 | 60.30880 | 75.56290 | -742.01508  | 370.52257   | -423.77706  | 1 |
| 28535 | H | 79.90500 | 61.24580 | 75.55490 | -2799.54192 | -889.18705  | -1157.80006 | 1 |
| 28536 | C | 80.24100 | 59.73180 | 76.98690 | 321.60341   | 563.36220   | -656.67806  | 1 |
| 28537 | H | 80.77400 | 60.48080 | 77.61190 | 2455.51025  | 135.91841   | 1937.63519  | 1 |
| 28538 | H | 80.74600 | 58.75980 | 77.17490 | -1139.33646 | 2494.61413  | -1580.45329 | 1 |
| 28539 | C | 78.72500 | 59.53680 | 77.40490 | -666.56659  | 482.30459   | -435.95067  | 1 |
| 28540 | H | 78.16700 | 60.42180 | 77.03090 | 2651.55890  | 1573.63102  | -619.58722  | 1 |
| 28541 | H | 78.24300 | 58.62080 | 77.00190 | -2111.54911 | -1935.06133 | 1292.25797  | 1 |
| 28542 | C | 78.50600 | 59.36680 | 78.91590 | 21.72689    | 210.99136   | 878.89821   | 1 |
| 28543 | H | 78.94700 | 58.43680 | 79.33590 | -84.79430   | 2305.11921  | 2142.04037  | 1 |
| 28544 | H | 77.42800 | 59.16480 | 79.09190 | -1980.64394 | -1060.00602 | 2195.92775  | 1 |
| 28545 | N | 79.05000 | 60.55680 | 79.71390 | -238.88839  | 508.04631   | 632.57090   | 1 |
| 28546 | H | 79.41200 | 61.35180 | 79.22890 | 823.89614   | -2912.76770 | -817.54633  | 1 |
| 28547 | C | 79.10800 | 60.62180 | 81.05290 | 116.27213   | -635.85154  | -640.31617  | 1 |
| 28548 | N | 78.65600 | 59.79180 | 81.93890 | -685.83957  | -266.79913  | 408.43758   | 1 |
| 28549 | H | 78.00100 | 59.08680 | 81.66790 | -1764.50460 | -2212.02277 | 1356.22867  | 1 |
| 28550 | H | 78.68000 | 60.11080 | 82.88590 | -1990.69027 | -1557.58192 | -1881.56193 | 1 |
| 28551 | N | 79.61200 | 61.72080 | 81.54490 | -342.21461  | -573.53169  | -519.19126  | 1 |
| 28552 | H | 79.92100 | 62.44280 | 80.92490 | -1569.90436 | 1503.25521  | 2276.22913  | 1 |
| 28553 | H | 79.73600 | 61.78780 | 82.53490 | -1802.59164 | 1804.81454  | -1870.79647 | 1 |
| 28554 | C | 81.91100 | 60.65180 | 75.26890 | 604.68752   | 451.14598   | -519.84544  | 1 |
| 28555 | O | 82.34700 | 61.74380 | 75.64890 | 397.51844   | 684.78385   | -59.07697   | 1 |
| 28556 | N | 82.63500 | 59.80580 | 74.56990 | -203.18848  | 80.81452    | -832.64986  | 1 |
| 28557 | H | 82.35300 | 58.85480 | 74.46790 | -2543.02997 | 1473.73080  | 1152.81748  | 1 |
| 28558 | C | 83.96700 | 60.27580 | 74.06590 | 567.40208   | -672.47994  | 154.58031   | 1 |
| 28559 | H | 84.51900 | 60.58080 | 74.94290 | -2027.90668 | -260.23289  | 2386.22520  | 1 |
| 28560 | C | 84.76500 | 59.15580 | 73.29790 | 793.40391   | -153.07117  | -405.62790  | 1 |
| 28561 | H | 84.27400 | 58.99080 | 72.31490 | -1319.37419 | 1435.52047  | -2497.10734 | 1 |
| 28562 | H | 84.62400 | 58.26080 | 73.94190 | -1624.04533 | 2711.81323  | 61.77102    | 1 |
| 28563 | C | 86.25700 | 59.33680 | 73.14890 | -750.89967  | 206.78175   | 483.97336   | 1 |
| 28564 | H | 86.42000 | 60.38280 | 72.81090 | 2268.82818  | -2071.01965 | -615.61842  | 1 |
| 28565 | C | 86.99400 | 59.10380 | 74.43890 | -146.10957  | 767.61783   | -504.18482  | 1 |
| 28566 | H | 88.03400 | 59.42780 | 74.21690 | 2302.95279  | 2068.15433  | 522.81187   | 1 |
| 28567 | H | 86.66200 | 59.73080 | 75.29390 | 1752.20163  | -1713.06114 | 1938.23251  | 1 |
| 28568 | H | 86.94000 | 58.03480 | 74.73590 | 1604.56783  | 1956.19797  | 1851.63044  | 1 |
| 28569 | C | 86.78800 | 58.36680 | 72.08090 | -48.22492   | 299.45066   | 847.80643   | 1 |
| 28570 | H | 86.63600 | 57.36080 | 72.52590 | -1378.47833 | 2403.96486  | -1534.07063 | 1 |
| 28571 | H | 87.88400 | 58.53880 | 72.02790 | -277.69766  | 2658.91755  | 1658.31499  | 1 |

|       |   |          |          |          |             |             |             |   |
|-------|---|----------|----------|----------|-------------|-------------|-------------|---|
| 28572 | H | 86.34700 | 58.51580 | 71.07190 | -2558.43979 | 1751.94101  | 613.96782   | 1 |
| 28573 | C | 83.83400 | 61.42680 | 73.15390 | -362.71848  | -402.29179  | -748.11878  | 1 |
| 28574 | O | 84.63000 | 62.37580 | 73.26490 | 640.61715   | 417.09596   | -190.34929  | 1 |
| 28575 | N | 82.85300 | 61.48880 | 72.22890 | -710.43106  | -433.01478  | -187.86893  | 1 |
| 28576 | H | 82.23800 | 60.70680 | 72.16490 | 2542.85674  | 1728.83900  | -652.21695  | 1 |
| 28577 | C | 82.51100 | 62.67080 | 71.40490 | -188.53906  | 903.91366   | -71.58609   | 1 |
| 28578 | H | 83.43700 | 63.02080 | 70.97290 | 2728.07422  | 947.22861   | 1211.86944  | 1 |
| 28579 | C | 81.45100 | 62.39580 | 70.30990 | 639.91855   | 643.08901   | 49.46190    | 1 |
| 28580 | H | 80.52300 | 61.97280 | 70.74890 | -1139.26346 | 1226.96498  | 2663.46704  | 1 |
| 28581 | H | 81.11100 | 63.34480 | 69.84290 | -1251.90463 | -1022.28711 | 2689.56949  | 1 |
| 28582 | N | 83.07400 | 62.04880 | 68.49190 | -81.66189   | -813.53402  | 156.70630   | 1 |
| 28583 | C | 81.94000 | 61.60380 | 69.18490 | 537.95340   | -711.61713  | 36.33552    | 1 |
| 28584 | C | 83.07900 | 61.30880 | 67.38090 | -173.13829  | 811.54290   | -420.68446  | 1 |
| 28585 | H | 83.93400 | 61.31080 | 66.70590 | 2689.75906  | 1611.42785  | 61.66388    | 1 |
| 28586 | N | 82.06700 | 60.43080 | 67.32990 | 10.26186    | 702.73093   | -496.16498  | 1 |
| 28587 | H | 81.96900 | 59.68080 | 66.67590 | 2105.04890  | 2331.30333  | -98.63259   | 1 |
| 28588 | C | 81.28500 | 60.67180 | 68.46190 | 735.32528   | 355.41164   | -396.58890  | 1 |
| 28589 | H | 80.30900 | 60.21780 | 68.57990 | 2022.51039  | 202.40779   | 2376.57246  | 1 |
| 28590 | C | 81.99700 | 63.82580 | 72.29390 | -173.03965  | -881.25334  | -110.37601  | 1 |
| 28591 | O | 82.45800 | 64.95180 | 72.13090 | -754.64678  | 62.90660    | -277.63139  | 1 |
| 28592 | N | 81.10700 | 63.58780 | 73.24290 | -519.18868  | -344.75678  | 561.45998   | 1 |
| 28593 | H | 80.64000 | 62.70880 | 73.29990 | 2248.83001  | 594.45047   | -2119.91690 | 1 |
| 28594 | C | 80.62600 | 64.63480 | 74.15290 | 529.65895   | 431.64015   | 590.30548   | 1 |
| 28595 | H | 80.25900 | 65.41980 | 73.50690 | 1093.26837  | 2687.52873  | -1243.49964 | 1 |
| 28596 | C | 79.51400 | 64.01580 | 75.02690 | 476.46596   | 691.14087   | 353.21247   | 1 |
| 28597 | H | 78.93200 | 63.32680 | 74.37890 | 1769.73449  | -1438.98637 | 2138.56033  | 1 |
| 28598 | H | 80.05900 | 63.34980 | 75.72990 | 2036.79934  | 2149.96755  | -1076.11436 | 1 |
| 28599 | C | 78.65200 | 64.92580 | 75.86790 | 140.97685   | 905.52865   | -114.22640  | 1 |
| 28600 | H | 79.32500 | 65.43280 | 76.59190 | 1568.07336  | -152.99894  | -2727.91909 | 1 |
| 28601 | C | 77.84300 | 65.91680 | 75.11090 | 392.77156   | 407.55035   | -726.16503  | 1 |
| 28602 | H | 78.40300 | 66.58380 | 74.41990 | -2091.47387 | -2117.92781 | -1024.27187 | 1 |
| 28603 | H | 77.04300 | 65.37980 | 74.55790 | 1416.42658  | -2267.79191 | 1621.53912  | 1 |
| 28604 | H | 77.34800 | 66.57180 | 75.85890 | 465.08608   | 689.66527   | -3045.07112 | 1 |
| 28605 | C | 77.73700 | 63.96780 | 76.62590 | 168.36482   | -623.48541  | -638.28996  | 1 |
| 28606 | H | 78.25600 | 63.31880 | 77.36390 | -2278.52532 | -1434.00913 | 1620.31779  | 1 |
| 28607 | H | 77.23500 | 63.24180 | 75.95090 | -2040.99628 | -458.20412  | -2366.16769 | 1 |
| 28608 | H | 77.01400 | 64.60180 | 77.18190 | 1027.60192  | 2981.43455  | -114.18648  | 1 |
| 28609 | C | 81.76100 | 65.29180 | 74.99290 | 333.22464   | 310.75678   | 777.23595   | 1 |
| 28610 | O | 81.80900 | 66.50180 | 75.10190 | 437.31409   | 539.52976   | 367.53266   | 1 |
| 28611 | N | 82.73700 | 64.49880 | 75.49490 | -444.22640  | 397.93849   | -625.04323  | 1 |
| 28612 | H | 82.74800 | 63.51180 | 75.35190 | 2656.56263  | -1423.62131 | -864.91767  | 1 |
| 28613 | C | 84.02000 | 64.94880 | 76.06590 | 565.02296   | -670.30737  | 180.94191   | 1 |
| 28614 | H | 83.77900 | 65.63080 | 76.86790 | -1572.78517 | 1475.60702  | 2289.65810  | 1 |
| 28615 | C | 84.77200 | 63.73480 | 76.76590 | 585.89305   | -672.89193  | -116.52896  | 1 |
| 28616 | H | 85.81700 | 64.05580 | 76.96690 | -1299.61019 | 2335.23294  | 1665.51197  | 1 |
| 28617 | H | 84.71000 | 62.84780 | 76.09990 | 2115.90920  | 2044.05967  | -1126.94525 | 1 |
| 28618 | O | 84.15300 | 63.55380 | 78.01490 | 476.96398   | -32.95950   | -634.90335  | 1 |
| 28619 | H | 84.37800 | 64.25280 | 78.63390 | -1795.72106 | 2073.85870  | 1549.15124  | 1 |
| 28620 | C | 84.93100 | 65.67980 | 75.13190 | -673.68724  | -278.74273  | 540.48053   | 1 |
| 28621 | O | 85.56500 | 66.64980 | 75.53790 | -597.57678  | -503.82375  | -134.54697  | 1 |
| 28622 | N | 85.05100 | 65.29680 | 73.86190 | -270.70807  | 751.85478   | 293.05525   | 1 |
| 28623 | H | 84.70800 | 64.42780 | 73.51290 | -2118.45158 | -129.69826  | 2318.13927  | 1 |
| 28624 | C | 85.69500 | 66.04380 | 72.82190 | 561.45053   | 376.20020   | -622.14849  | 1 |
| 28625 | H | 86.70800 | 66.33380 | 73.05990 | 2753.48780  | -1492.24392 | -23.37662   | 1 |
| 28626 | C | 85.74100 | 65.15480 | 71.54090 | -145.83835  | -859.63305  | -256.35246  | 1 |
| 28627 | H | 84.87900 | 64.46080 | 71.44990 | 135.50247   | 2098.86734  | -2362.34690 | 1 |
| 28628 | C | 85.79600 | 65.94080 | 70.19390 | 441.26739   | -353.98463  | 686.79908   | 1 |
| 28629 | H | 84.86900 | 66.50480 | 69.95490 | 2538.64818  | -1356.58861 | 1217.81602  | 1 |
| 28630 | H | 85.96200 | 65.21880 | 69.36590 | -1490.56290 | -25.35099   | -2793.18732 | 1 |
| 28631 | H | 86.63500 | 66.66980 | 70.17690 | -1305.06859 | 2554.44327  | 1307.66197  | 1 |
| 28632 | C | 87.01400 | 64.26180 | 71.59490 | -405.64969  | 631.87518   | 522.10195   | 1 |
| 28633 | H | 86.82200 | 63.39980 | 72.26990 | -904.72875  | -2476.78989 | 1693.98109  | 1 |

|       |   |          |          |          |             |             |             |   |
|-------|---|----------|----------|----------|-------------|-------------|-------------|---|
| 28634 | H | 87.92700 | 64.84480 | 71.84190 | 302.92711   | -2964.45510 | 962.84788   | 1 |
| 28635 | H | 87.23900 | 63.84180 | 70.59090 | -3037.53330 | -809.79689  | 276.64244   | 1 |
| 28636 | C | 84.98600 | 67.39680 | 72.55390 | -393.32703  | -797.51248  | -197.79958  | 1 |
| 28637 | O | 85.69000 | 68.41580 | 72.40690 | 199.36775   | -506.32084  | 544.82362   | 1 |
| 28638 | N | 83.64700 | 67.48780 | 72.47490 | 204.78337   | -304.06268  | -766.66159  | 1 |
| 28639 | H | 83.09500 | 66.66380 | 72.57690 | 1581.85373  | 338.96549   | 2679.65555  | 1 |
| 28640 | C | 82.92000 | 68.76280 | 72.32790 | -526.60786  | 267.78538   | -719.66092  | 1 |
| 28641 | H | 83.22900 | 69.31680 | 71.45390 | 2013.32391  | 1701.52348  | -1728.01662 | 1 |
| 28642 | C | 81.43200 | 68.40580 | 72.15790 | 637.44865   | -290.80037  | 553.27639   | 1 |
| 28643 | H | 80.91900 | 69.33580 | 71.83390 | -1736.41116 | 1327.30820  | -2289.76061 | 1 |
| 28644 | H | 80.92200 | 68.18880 | 73.12090 | -1767.57737 | -1732.65182 | 1929.63341  | 1 |
| 28645 | H | 81.28100 | 67.60480 | 71.40290 | -749.70618  | 1530.46326  | 2642.46123  | 1 |
| 28646 | C | 83.14400 | 69.72080 | 73.44490 | -405.09772  | 822.85031   | 110.40997   | 1 |
| 28647 | O | 83.43900 | 70.90080 | 73.25090 | 530.46652   | 569.80595   | -152.49182  | 1 |
| 28648 | N | 83.00700 | 69.24380 | 74.69190 | -43.27364   | 584.07962   | -631.63512  | 1 |
| 28649 | H | 82.62000 | 68.33680 | 74.84090 | 2957.51904  | 983.95912   | 373.06830   | 1 |
| 28650 | C | 83.27700 | 70.00580 | 75.90190 | 865.76783   | 34.81644    | 246.54996   | 1 |
| 28651 | H | 82.61000 | 70.85480 | 75.90990 | -2620.10542 | -274.61727  | 1716.83608  | 1 |
| 28652 | C | 83.12800 | 69.09680 | 77.13590 | -196.61834  | -620.89654  | 616.97021   | 1 |
| 28653 | H | 83.48300 | 69.52780 | 78.09690 | -436.56227  | 1747.49376  | 2574.16073  | 1 |
| 28654 | H | 83.61800 | 68.12180 | 76.92790 | 544.35223   | -3038.46759 | -559.81073  | 1 |
| 28655 | C | 81.58900 | 68.79880 | 77.42290 | 498.91951   | 757.18393   | -147.69318  | 1 |
| 28656 | O | 80.75700 | 69.59680 | 76.91990 | 627.15544   | 480.22106   | 22.23409    | 1 |
| 28657 | O | 81.33500 | 67.81580 | 78.15690 | -688.35649  | -118.13729  | -390.35566  | 1 |
| 28658 | C | 84.71100 | 70.58080 | 75.95190 | 710.28357   | 62.14943    | 545.51439   | 1 |
| 28659 | O | 84.86800 | 71.75680 | 76.30490 | -399.90626  | -417.59084  | 521.09529   | 1 |
| 28660 | N | 85.74100 | 69.79480 | 75.67590 | -423.22044  | 274.82805   | -700.42962  | 1 |
| 28661 | H | 85.60700 | 68.83480 | 75.43990 | 2128.32981  | -2190.93500 | 684.71940   | 1 |
| 28662 | C | 87.13300 | 70.09780 | 75.63590 | -196.72757  | -880.46224  | -86.11464   | 1 |
| 28663 | H | 87.32400 | 70.52680 | 76.60790 | 1084.61033  | -2107.91929 | 2039.74509  | 1 |
| 28664 | C | 87.91400 | 68.77880 | 75.41390 | 480.85260   | -584.28204  | 473.82004   | 1 |
| 28665 | H | 87.59900 | 68.21680 | 74.50790 | 690.51699   | 2659.24696  | 1527.46952  | 1 |
| 28666 | H | 87.63200 | 68.11480 | 76.25890 | -2490.50283 | 1391.59668  | 1334.80473  | 1 |
| 28667 | C | 89.44000 | 68.82480 | 75.48290 | 684.11273   | 578.34543   | -178.96211  | 1 |
| 28668 | H | 89.72900 | 69.58180 | 74.72290 | 289.29758   | -1738.75085 | 2582.22371  | 1 |
| 28669 | C | 89.94100 | 69.29480 | 76.88690 | 174.38105   | 689.19533   | 560.16841   | 1 |
| 28670 | H | 89.75800 | 68.53080 | 77.67190 | 2535.90943  | 1857.66092  | -105.84251  | 1 |
| 28671 | H | 91.05200 | 69.32680 | 76.88190 | 1539.02314  | 717.62985   | 2627.65635  | 1 |
| 28672 | H | 89.44900 | 70.26980 | 77.09490 | 2906.56806  | 815.37650   | 852.77664   | 1 |
| 28673 | C | 89.95100 | 67.43480 | 75.03090 | -444.50546  | -432.26796  | 652.07167   | 1 |
| 28674 | H | 89.65900 | 67.25180 | 73.97490 | -2239.97514 | -1197.87058 | 1846.04092  | 1 |
| 28675 | H | 91.05800 | 67.51580 | 75.08490 | -2356.10899 | 2044.79560  | -508.57009  | 1 |
| 28676 | H | 89.58900 | 66.62280 | 75.69590 | 2308.54338  | 2123.01573  | 209.09856   | 1 |
| 28677 | C | 87.46200 | 71.14180 | 74.60090 | 234.95944   | -506.52872  | 695.86758   | 1 |
| 28678 | O | 88.19800 | 72.07180 | 74.83790 | 234.35813   | -365.26392  | 635.72529   | 1 |
| 28679 | N | 86.84400 | 71.04980 | 73.39090 | -215.36365  | -781.64143  | 196.43057   | 1 |
| 28680 | H | 86.17000 | 70.32580 | 73.26190 | -2338.92391 | -1636.53352 | 1312.76193  | 1 |
| 28681 | C | 87.01800 | 71.85880 | 72.20590 | -806.88972  | -376.02903  | -233.72847  | 1 |
| 28682 | H | 88.03400 | 71.65880 | 71.90090 | -1378.42024 | -1171.78121 | -2591.61169 | 1 |
| 28683 | C | 86.05600 | 71.26180 | 71.07990 | -555.16034  | -632.00221  | 336.31036   | 1 |
| 28684 | H | 85.03600 | 71.30180 | 71.51890 | 1888.63044  | -2208.57001 | 1156.46511  | 1 |
| 28685 | H | 86.42000 | 70.23180 | 70.88090 | -1167.34001 | -2070.03045 | 2043.27270  | 1 |
| 28686 | C | 86.06000 | 71.96180 | 69.68690 | -568.74987  | 626.10426   | -389.78315  | 1 |
| 28687 | H | 85.52600 | 72.93580 | 69.71790 | 1886.27144  | -321.80314  | 2473.19221  | 1 |
| 28688 | C | 87.48200 | 72.28980 | 69.17990 | 210.98311   | -621.34433  | -636.20499  | 1 |
| 28689 | H | 88.21400 | 71.45680 | 69.22790 | 746.15447   | 3053.56996  | 212.05655   | 1 |
| 28690 | H | 87.92000 | 73.10780 | 69.79090 | -684.62915  | 2382.48548  | -1967.98936 | 1 |
| 28691 | H | 87.44600 | 72.71180 | 68.15290 | 1926.43750  | 1436.71787  | 2009.53204  | 1 |
| 28692 | C | 85.20100 | 71.16880 | 68.59090 | 61.11321    | -580.92244  | 676.17695   | 1 |
| 28693 | H | 85.60800 | 70.14180 | 68.47390 | 346.11036   | -2851.62702 | 1243.02934  | 1 |
| 28694 | H | 84.15200 | 71.20580 | 68.95590 | -2370.25080 | 2039.63274  | -481.60652  | 1 |
| 28695 | H | 85.20300 | 71.73380 | 67.63390 | 1731.23255  | -17.59462   | -2632.89556 | 1 |

|       |   |          |          |          |             |             |             |   |
|-------|---|----------|----------|----------|-------------|-------------|-------------|---|
| 28696 | C | 86.64900 | 73.30080 | 72.42790 | 163.28429   | -748.51710  | 461.82059   | 1 |
| 28697 | O | 87.45100 | 74.21280 | 72.17190 | 113.86102   | -360.95213  | -702.78116  | 1 |
| 28698 | N | 85.50800 | 73.52580 | 73.11090 | 153.99283   | -278.72627  | -791.25266  | 1 |
| 28699 | H | 84.97100 | 72.71180 | 73.31890 | 2613.17707  | -1503.53325 | -871.33234  | 1 |
| 28700 | C | 85.11500 | 74.80280 | 73.59690 | 619.57897   | -467.29983  | 444.62417   | 1 |
| 28701 | H | 85.32400 | 75.60080 | 72.90090 | 1523.05296  | 1543.69951  | -2295.20525 | 1 |
| 28702 | C | 83.55300 | 74.85180 | 73.84290 | 668.54820   | 215.29355   | 563.47643   | 1 |
| 28703 | H | 83.38800 | 74.05380 | 74.59790 | -1792.45025 | -1107.39065 | 2323.78595  | 1 |
| 28704 | H | 83.04800 | 74.70080 | 72.86490 | -1457.58158 | -2327.13776 | 1514.13478  | 1 |
| 28705 | C | 83.06600 | 76.20680 | 74.31390 | -323.03519  | 801.24789   | 312.75377   | 1 |
| 28706 | C | 83.49400 | 77.39480 | 73.61290 | -689.97272  | 365.06017   | 475.19578   | 1 |
| 28707 | H | 84.09300 | 77.25680 | 72.72490 | -734.23668  | 2303.08153  | -2041.40415 | 1 |
| 28708 | C | 83.02700 | 78.64780 | 74.04590 | 587.49427   | -643.17893  | -241.28433  | 1 |
| 28709 | H | 83.34500 | 79.53480 | 73.51790 | 2485.51139  | 418.75734   | 1864.67758  | 1 |
| 28710 | C | 82.11700 | 78.73280 | 75.12690 | -71.89238   | 806.18347   | -453.24246  | 1 |
| 28711 | H | 81.80600 | 79.73380 | 75.39090 | -2027.94785 | 295.00080   | 2380.23334  | 1 |
| 28712 | C | 82.25700 | 76.31380 | 75.36790 | 510.48864   | 702.47055   | -306.69678  | 1 |
| 28713 | H | 81.88900 | 75.42480 | 75.85690 | -289.18882  | 3139.61089  | -184.24328  | 1 |
| 28714 | C | 81.80600 | 77.52180 | 75.83390 | 156.06689   | -637.24516  | -632.74150  | 1 |
| 28715 | H | 81.02300 | 77.59480 | 76.57490 | 1612.26280  | 1961.78209  | 1854.02292  | 1 |
| 28716 | C | 85.85600 | 75.28680 | 74.89890 | 551.95939   | -309.91492  | 631.47376   | 1 |
| 28717 | O | 86.21200 | 76.46780 | 74.94090 | -622.98865  | -320.39066  | 351.38957   | 1 |
| 28718 | N | 86.17100 | 74.39980 | 75.83690 | 359.64670   | 191.00978   | 723.75952   | 1 |
| 28719 | H | 86.02200 | 73.41680 | 75.76590 | -970.43444  | 631.97442   | 2914.49181  | 1 |
| 28720 | C | 86.82000 | 74.75980 | 77.14490 | 87.69195    | -698.96611  | 551.73209   | 1 |
| 28721 | H | 86.15300 | 75.48880 | 77.57990 | -2695.54495 | 380.20029   | 1572.31070  | 1 |
| 28722 | C | 86.94000 | 73.58780 | 78.11590 | 405.86190   | 710.47600   | -428.31252  | 1 |
| 28723 | H | 87.14500 | 72.68280 | 77.50590 | 2422.59196  | 1815.12457  | 843.57357   | 1 |
| 28724 | C | 88.11000 | 73.73880 | 79.17790 | 428.61189   | -776.20205  | -185.22671  | 1 |
| 28725 | H | 89.11200 | 73.50380 | 78.75790 | -2806.92243 | 16.83858    | -1447.14204 | 1 |
| 28726 | H | 87.89000 | 73.00680 | 79.98390 | 1685.23580  | -2012.55682 | 1704.33945  | 1 |
| 28727 | H | 88.01200 | 74.79180 | 79.51590 | -2368.79835 | 1465.10246  | -1493.42098 | 1 |
| 28728 | C | 85.60400 | 73.41880 | 78.88190 | 484.62585   | 400.59295   | 647.95356   | 1 |
| 28729 | H | 85.67200 | 72.50580 | 79.51190 | 2300.79418  | 1928.88099  | -962.90899  | 1 |
| 28730 | H | 85.36200 | 74.27280 | 79.54890 | 1146.40760  | -2914.76946 | -169.78304  | 1 |
| 28731 | H | 84.74200 | 73.40480 | 78.18090 | 843.78006   | -2259.07019 | 1993.41069  | 1 |
| 28732 | C | 88.17300 | 75.40380 | 76.92690 | 264.77688   | -690.54514  | -536.01145  | 1 |
| 28733 | O | 88.54300 | 76.32780 | 77.61390 | 218.61823   | -465.92783  | -607.38923  | 1 |
| 28734 | N | 88.89700 | 74.85580 | 75.91890 | -243.42236  | -506.67748  | -642.29400  | 1 |
| 28735 | H | 88.53000 | 74.08180 | 75.40890 | -407.67356  | 2264.76943  | 2138.82319  | 1 |
| 28736 | C | 90.29200 | 75.32580 | 75.66290 | -234.40314  | -237.15189  | 830.43962   | 1 |
| 28737 | H | 90.89600 | 75.29980 | 76.55790 | 2240.78219  | 1868.00603  | -1197.47755 | 1 |
| 28738 | C | 90.95300 | 74.41080 | 74.56690 | 334.29043   | 772.11828   | 342.51084   | 1 |
| 28739 | H | 90.23300 | 74.14880 | 73.76190 | 2546.44324  | 1660.15825  | 784.80284   | 1 |
| 28740 | C | 92.24400 | 75.00980 | 73.95790 | -645.07261  | 646.62843   | 104.52492   | 1 |
| 28741 | H | 92.97600 | 75.11480 | 74.78690 | -1458.79765 | 1645.51120  | 2239.52190  | 1 |
| 28742 | H | 92.67300 | 74.27880 | 73.23890 | 1794.58241  | -2161.55303 | 1376.27765  | 1 |
| 28743 | H | 91.99400 | 75.90680 | 73.35290 | 2247.46825  | -2185.05023 | -116.54220  | 1 |
| 28744 | C | 91.30800 | 73.01580 | 75.20290 | 573.33390   | -205.85473  | -688.57652  | 1 |
| 28745 | H | 90.39500 | 72.66380 | 75.72790 | -1260.53149 | 2450.10615  | 1518.60766  | 1 |
| 28746 | H | 92.16300 | 73.06880 | 75.90890 | -2573.04807 | -1163.32955 | -1412.85416 | 1 |
| 28747 | C | 91.58000 | 71.93880 | 74.11790 | -553.14185  | 730.58761   | 87.31651    | 1 |
| 28748 | H | 92.58900 | 72.13780 | 73.69690 | -1858.08883 | 1933.12470  | 1643.90721  | 1 |
| 28749 | H | 90.83500 | 71.82580 | 73.30090 | 3072.52870  | 564.95627   | 285.29521   | 1 |
| 28750 | H | 91.68900 | 70.94580 | 74.60390 | 1163.99858  | 2856.99260  | -652.47489  | 1 |
| 28751 | C | 90.27000 | 76.76580 | 75.16090 | 38.30557    | 537.61062   | -758.33933  | 1 |
| 28752 | O | 91.26100 | 77.50980 | 75.35290 | -674.55837  | -410.81316  | -48.72602   | 1 |
| 28753 | N | 89.15800 | 77.21180 | 74.50990 | -191.70675  | -537.10239  | -634.09308  | 1 |
| 28754 | H | 88.43600 | 76.60280 | 74.19090 | 1194.56770  | 1551.73528  | 2448.10681  | 1 |
| 28755 | C | 89.12800 | 78.59280 | 74.10490 | 378.96849   | 511.12210   | 639.29392   | 1 |
| 28756 | H | 90.03400 | 78.84180 | 73.57190 | 1470.69278  | -1255.36802 | -2491.77053 | 1 |
| 28757 | C | 87.93400 | 78.86780 | 73.12990 | -27.84526   | -728.51622  | 520.24415   | 1 |

|       |   |          |          |          |             |             |             |   |
|-------|---|----------|----------|----------|-------------|-------------|-------------|---|
| 28758 | H | 88.03500 | 79.86580 | 72.65290 | 876.40526   | -2359.39646 | -1890.10186 | 1 |
| 28759 | O | 86.60800 | 78.75480 | 73.78290 | 495.95419   | -516.54046  | 293.91090   | 1 |
| 28760 | H | 86.49900 | 77.90180 | 74.21090 | 3134.28441  | 37.17456    | 177.07715   | 1 |
| 28761 | C | 87.97000 | 77.75680 | 72.01390 | -720.89828  | -534.08487  | -182.72049  | 1 |
| 28762 | H | 87.68400 | 76.74380 | 72.36890 | 1930.46344  | 2477.82300  | -230.55865  | 1 |
| 28763 | H | 87.16200 | 78.06680 | 71.31790 | 1557.93958  | -1305.16330 | -2407.19683 | 1 |
| 28764 | H | 88.96600 | 77.83780 | 71.52890 | 194.85999   | -1555.74549 | 2705.57919  | 1 |
| 28765 | C | 88.96700 | 79.58880 | 75.24390 | -550.58253  | -590.12663  | -435.39817  | 1 |
| 28766 | O | 89.33600 | 80.75080 | 75.13190 | -477.31486  | -507.99957  | -382.19602  | 1 |
| 28767 | N | 88.46200 | 79.15180 | 76.40990 | -47.42215   | -808.61943  | -224.71508  | 1 |
| 28768 | H | 88.27300 | 78.17780 | 76.50590 | -1756.36428 | -1459.09255 | -2178.40565 | 1 |
| 28769 | C | 88.07500 | 80.00680 | 77.54090 | -25.15273   | 197.34172   | 875.68303   | 1 |
| 28770 | H | 87.30100 | 80.66680 | 77.17790 | 2299.28682  | 339.27316   | -2134.39597 | 1 |
| 28771 | C | 87.30500 | 79.28680 | 78.65090 | -597.13852  | 191.94809   | -682.03055  | 1 |
| 28772 | H | 87.05400 | 79.85480 | 79.57290 | -2000.43677 | 1725.52346  | -1734.54222 | 1 |
| 28773 | H | 87.98500 | 78.45680 | 78.93890 | 45.74815    | -2579.97166 | 1771.68714  | 1 |
| 28774 | C | 85.94700 | 78.73980 | 78.20890 | -393.93245  | 323.11955   | 746.86611   | 1 |
| 28775 | H | 86.02600 | 78.13580 | 77.27990 | -2806.97186 | 1422.60668  | -221.13972  | 1 |
| 28776 | C | 85.44800 | 77.83980 | 79.37790 | -898.42423  | -1.33234    | -183.55856  | 1 |
| 28777 | H | 86.11200 | 76.94880 | 79.37190 | 224.49532   | -2785.13879 | -1442.62808 | 1 |
| 28778 | H | 85.48900 | 78.35180 | 80.36290 | -2612.37491 | 1759.50386  | -153.13173  | 1 |
| 28779 | H | 84.39600 | 77.56880 | 79.14390 | -3048.83379 | -117.47447  | 762.98199   | 1 |
| 28780 | C | 84.96300 | 79.87180 | 77.92290 | -898.94532  | 94.24828    | 130.46834   | 1 |
| 28781 | H | 85.05400 | 80.27480 | 76.89190 | 2456.03826  | 1971.53293  | 28.66630    | 1 |
| 28782 | H | 85.04300 | 80.76780 | 78.57490 | -1999.64707 | -1887.74570 | -1532.91368 | 1 |
| 28783 | H | 83.95600 | 79.43980 | 78.10290 | 829.36633   | -1446.17845 | -2675.20727 | 1 |
| 28784 | C | 89.17800 | 80.94580 | 78.08890 | -713.45087  | 499.54925   | 272.56908   | 1 |
| 28785 | O | 88.80600 | 82.04980 | 78.42590 | 648.80847   | 456.07285   | -2.94969    | 1 |
| 28786 | N | 90.47200 | 80.68380 | 78.13390 | -571.30315  | -11.82846   | 605.53011   | 1 |
| 28787 | C | 90.96500 | 79.30680 | 78.36890 | -411.78602  | -441.37848  | -698.25945  | 1 |
| 28788 | H | 91.18800 | 78.92780 | 77.34790 | -1622.97689 | 1662.22752  | 2111.58483  | 1 |
| 28789 | H | 90.26700 | 78.62680 | 78.90290 | -1442.24204 | -1849.69777 | -2109.49779 | 1 |
| 28790 | C | 91.54100 | 81.64680 | 78.45690 | -30.70912   | -442.96606  | -810.87662  | 1 |
| 28791 | H | 91.23900 | 81.98780 | 79.43590 | 1755.55944  | -1801.73556 | -1900.06920 | 1 |
| 28792 | C | 92.73700 | 80.82480 | 78.49790 | -844.24673  | 150.74586   | -336.96245  | 1 |
| 28793 | H | 93.63600 | 81.30280 | 78.94390 | 414.48463   | -1803.38382 | 2520.14860  | 1 |
| 28794 | H | 93.12400 | 80.48380 | 77.51490 | 13.66557    | -2362.14001 | -2090.16911 | 1 |
| 28795 | C | 92.24000 | 79.53580 | 79.14890 | -349.04111  | -205.26436  | 797.25696   | 1 |
| 28796 | H | 92.99800 | 78.74380 | 78.96890 | -2029.62439 | 2409.71880  | -131.22772  | 1 |
| 28797 | H | 92.10900 | 79.69280 | 80.24090 | 1906.94672  | 925.88891   | -2345.24323 | 1 |
| 28798 | C | 91.62700 | 82.88080 | 77.58990 | 246.80872   | 696.13406   | -561.31701  | 1 |
| 28799 | O | 92.02600 | 83.95080 | 78.05690 | 148.41707   | -164.22806  | 737.78931   | 1 |
| 28800 | N | 91.29900 | 82.78080 | 76.30590 | -333.75937  | 603.45044   | -515.50931  | 1 |
| 28801 | H | 91.10600 | 81.91780 | 75.84690 | 1442.67546  | 2799.43946  | -125.39753  | 1 |
| 28802 | C | 91.14300 | 83.99380 | 75.47590 | 609.73468   | -311.55412  | -613.73001  | 1 |
| 28803 | H | 92.02900 | 84.60980 | 75.52090 | 339.46346   | 2842.33107  | 1301.19709  | 1 |
| 28804 | C | 90.89300 | 83.53080 | 73.98690 | 513.78702   | -491.63094  | -578.72229  | 1 |
| 28805 | H | 89.88900 | 83.05780 | 73.93690 | 2124.91896  | 1644.82028  | 1621.81200  | 1 |
| 28806 | H | 90.85600 | 84.47980 | 73.41090 | -1260.19752 | 2235.62675  | -1849.36340 | 1 |
| 28807 | C | 92.01000 | 82.69580 | 73.39690 | -551.87153  | 500.28007   | 518.45896   | 1 |
| 28808 | C | 93.29400 | 83.19280 | 73.34590 | 782.08915   | -194.34887  | 396.18078   | 1 |
| 28809 | H | 93.55400 | 84.19180 | 73.66590 | 2078.36162  | 1136.63265  | -2089.78906 | 1 |
| 28810 | C | 94.39900 | 82.58680 | 72.68290 | -623.44556  | -283.99407  | 583.82605   | 1 |
| 28811 | H | 95.32400 | 83.13780 | 72.59590 | 651.14999   | 2027.78267  | 2298.48005  | 1 |
| 28812 | C | 94.10100 | 81.35380 | 72.07090 | 594.22044   | 415.06221   | 531.46264   | 1 |
| 28813 | H | 94.80900 | 80.81280 | 71.46190 | 2038.53133  | -1252.23848 | -2053.53216 | 1 |
| 28814 | C | 91.83500 | 81.41480 | 72.88390 | -375.96232  | -308.42326  | -789.59499  | 1 |
| 28815 | H | 90.85900 | 80.95880 | 72.95990 | 2815.39528  | 1345.06334  | -407.59520  | 1 |
| 28816 | C | 92.82900 | 80.73080 | 72.21990 | 272.08127   | 875.04754   | -25.69892   | 1 |
| 28817 | H | 92.53500 | 79.82280 | 71.71490 | 659.96160   | -2796.00586 | 1245.05429  | 1 |
| 28818 | C | 90.05300 | 84.85580 | 75.95490 | 650.87763   | 572.87026   | -310.32920  | 1 |
| 28819 | O | 90.14587 | 86.11234 | 75.77375 | -124.01111  | -678.17334  | 177.28012   | 1 |

|       |   |          |          |          |             |             |             |   |
|-------|---|----------|----------|----------|-------------|-------------|-------------|---|
| 28820 | N | 88.89800 | 84.23980 | 76.38290 | -70.42080   | -678.34391  | 470.04024   | 1 |
| 28821 | H | 88.83200 | 83.24980 | 76.48090 | 1529.10648  | 549.43358   | -2710.99196 | 1 |
| 28822 | C | 87.77100 | 84.95680 | 77.05290 | -792.30918  | 77.85748    | 432.24572   | 1 |
| 28823 | H | 87.51159 | 85.75114 | 76.30439 | 148.08212   | 1495.59116  | -2578.30328 | 1 |
| 28824 | C | 86.55800 | 84.09580 | 77.20590 | 168.73112   | 505.48003   | 730.74729   | 1 |
| 28825 | H | 85.74200 | 84.75480 | 77.57290 | -13.96029   | 1997.90591  | 2423.59123  | 1 |
| 28826 | H | 86.63600 | 83.28580 | 77.96190 | -1440.86034 | -2239.20863 | 1649.65174  | 1 |
| 28827 | C | 85.94200 | 83.48480 | 75.94290 | -437.56689  | -524.43407  | -612.24198  | 1 |
| 28828 | C | 86.43200 | 82.68380 | 74.93490 | -341.74798  | 788.44006   | 316.37283   | 1 |
| 28829 | H | 87.49000 | 82.51880 | 74.79890 | 2681.02996  | -1067.97892 | 1221.95974  | 1 |
| 28830 | N | 85.42800 | 82.11980 | 74.20990 | -289.74452  | 729.39974   | 321.89520   | 1 |
| 28831 | H | 85.59200 | 81.26780 | 73.76190 | -660.60189  | 1792.30253  | -2522.39122 | 1 |
| 28832 | C | 84.25200 | 82.63580 | 74.59690 | 744.98951   | -439.36109  | -276.04899  | 1 |
| 28833 | C | 84.51500 | 83.48880 | 75.69290 | 565.29046   | 483.32508   | 520.06192   | 1 |
| 28834 | C | 83.41000 | 84.02980 | 76.41090 | -683.06443  | 157.81169   | 575.13206   | 1 |
| 28835 | H | 83.66700 | 84.57280 | 77.30890 | -3136.55166 | -233.37395  | -102.04177  | 1 |
| 28836 | C | 82.13800 | 83.76480 | 75.96090 | -657.41259  | -454.69968  | 418.70917   | 1 |
| 28837 | H | 81.32000 | 84.18880 | 76.52390 | 2397.64680  | -848.48622  | 1832.92438  | 1 |
| 28838 | C | 82.96000 | 82.40980 | 74.11690 | -620.77357  | -646.41178  | 126.94814   | 1 |
| 28839 | H | 82.82800 | 81.82880 | 73.21690 | 3099.47862  | -406.92692  | 281.51623   | 1 |
| 28840 | C | 81.86200 | 82.98280 | 74.83290 | -46.44835   | 664.97202   | 622.10919   | 1 |
| 28841 | H | 80.85600 | 82.74780 | 74.51690 | 1528.18771  | -1254.33206 | 2427.89416  | 1 |
| 28842 | C | 88.13183 | 85.68674 | 78.46632 | 49.40242    | -77.90216   | 694.16675   | 1 |
| 28843 | O | 87.66123 | 86.74919 | 78.77297 | 117.15638   | -349.01017  | -538.65717  | 1 |
| 28844 | N | 88.88700 | 84.89880 | 79.22090 | -37.98239   | 148.65045   | -847.99748  | 1 |
| 28845 | H | 89.17100 | 83.95280 | 79.08290 | -2208.41131 | -2223.07313 | -227.87872  | 1 |
| 28846 | C | 89.46148 | 85.47798 | 80.41173 | -317.03098  | -1168.30876 | 363.86974   | 1 |
| 28847 | H | 88.57344 | 85.88963 | 80.95953 | 2237.08556  | 337.44443   | -1611.39337 | 1 |
| 28848 | C | 90.14400 | 84.27080 | 81.25390 | 381.71611   | -496.37928  | 640.64734   | 1 |
| 28849 | H | 90.98300 | 83.74980 | 80.74590 | 2224.94998  | 1546.72725  | -1624.49596 | 1 |
| 28850 | H | 89.46800 | 83.42280 | 81.49390 | -1276.76834 | 889.99227   | -2753.08297 | 1 |
| 28851 | H | 90.53800 | 84.71780 | 82.19190 | -2538.47142 | -1847.50412 | -73.64145   | 1 |
| 28852 | C | 90.49868 | 86.71988 | 80.13821 | -535.35754  | 413.05951   | -20.10553   | 1 |
| 28853 | O | 90.96327 | 87.37099 | 81.06055 | -1011.31959 | 721.22617   | -15.35339   | 1 |
| 28854 | N | 90.85491 | 86.89254 | 78.81553 | -128.02360  | -542.94757  | 56.72784    | 1 |
| 28855 | H | 90.33414 | 86.16697 | 78.32807 | 1689.44873  | -1299.50938 | 1486.46512  | 1 |
| 28856 | C | 91.33968 | 88.10425 | 78.28857 | 461.60987   | 86.82200    | 305.51018   | 1 |
| 28857 | H | 91.76726 | 88.57189 | 79.16613 | 1415.61853  | -3690.52459 | -174.15243  | 1 |
| 28858 | C | 92.56679 | 87.76788 | 77.30550 | -846.97015  | 666.31839   | -290.36652  | 1 |
| 28859 | H | 92.07037 | 87.25587 | 76.41631 | -3972.95428 | -1124.50905 | -610.37065  | 1 |
| 28860 | C | 93.53013 | 88.94203 | 76.97683 | -452.39175  | 405.43898   | -303.38794  | 1 |
| 28861 | H | 92.96278 | 89.57347 | 76.28521 | 388.39493   | -650.28449  | -395.58364  | 1 |
| 28862 | H | 93.85319 | 89.55619 | 77.85998 | -1542.06265 | -2158.54899 | -2547.38201 | 1 |
| 28863 | H | 94.39399 | 88.55149 | 76.39124 | 867.08179   | -39.24035   | -611.54887  | 1 |
| 28864 | C | 93.41216 | 86.63382 | 77.97906 | -8.66450    | 466.34136   | -431.67196  | 1 |
| 28865 | H | 93.61607 | 86.86424 | 79.11007 | 2861.30695  | -195.51492  | 3641.46853  | 1 |
| 28866 | H | 94.43994 | 86.60557 | 77.50552 | 1230.03216  | 6306.08375  | -2627.79040 | 1 |
| 28867 | H | 92.93367 | 85.64948 | 77.96022 | 542.15539   | 2176.78359  | 2106.78364  | 1 |
| 28868 | C | 90.10889 | 88.97329 | 77.67209 | -325.80993  | -168.63665  | 641.52630   | 1 |
| 28869 | O | 90.11072 | 90.19216 | 77.91799 | -81.49334   | -960.18814  | -55.62084   | 1 |
| 28870 | N | 89.44859 | 88.35777 | 76.73412 | 147.17131   | 506.67903   | -110.25850  | 1 |
| 28871 | H | 89.40664 | 87.31824 | 76.48855 | -1494.37267 | 2590.88491  | 645.97974   | 1 |
| 28872 | C | 88.80090 | 89.30996 | 75.79381 | 1322.72369  | -143.46107  | 558.77570   | 1 |
| 28873 | H | 89.46044 | 90.15183 | 75.55005 | -2533.40774 | 3672.50099  | -2409.23530 | 1 |
| 28874 | C | 88.68132 | 88.45355 | 74.50127 | 820.37772   | 957.42621   | 98.91166    | 1 |
| 28875 | H | 88.79861 | 89.06256 | 73.52193 | 3297.53790  | -7903.70120 | 1464.28512  | 1 |
| 28876 | H | 89.46465 | 87.65417 | 74.42804 | 1047.41645  | -298.62993  | 192.76730   | 1 |
| 28877 | C | 87.15237 | 87.88955 | 74.28574 | -1055.62731 | -1033.51998 | 212.08451   | 1 |
| 28878 | O | 86.68699 | 87.11148 | 75.11816 | 245.18416   | 797.79711   | -84.85104   | 1 |
| 28879 | O | 86.44709 | 88.23890 | 73.34106 | 4.73418     | -878.04030  | -506.09658  | 1 |
| 28880 | C | 87.41919 | 89.76281 | 76.46129 | -683.07293  | 268.50895   | -345.94626  | 1 |
| 28881 | O | 86.81258 | 90.61201 | 75.83591 | 429.37569   | 143.57949   | 217.79148   | 1 |

|       |   |          |          |          |             |             |             |   |
|-------|---|----------|----------|----------|-------------|-------------|-------------|---|
| 28882 | N | 87.07499 | 89.33629 | 77.69339 | 517.76150   | -606.73502  | -10.85161   | 1 |
| 28883 | H | 87.39113 | 88.39721 | 78.03735 | -27.96393   | -977.73105  | 3421.55378  | 1 |
| 28884 | C | 85.94777 | 90.07455 | 78.26343 | 1254.59867  | -846.85207  | -170.50525  | 1 |
| 28885 | H | 85.25159 | 90.42395 | 77.51018 | -315.68510  | 1054.61233  | -2782.10345 | 1 |
| 28886 | C | 85.00133 | 89.11373 | 79.15231 | -150.12034  | 83.98725    | 262.62385   | 1 |
| 28887 | H | 84.80008 | 88.12390 | 78.65622 | -3816.77343 | -4347.05648 | 1278.58686  | 1 |
| 28888 | H | 85.38240 | 89.00095 | 80.19943 | -1060.65748 | 873.86640   | -1567.94131 | 1 |
| 28889 | H | 84.04627 | 89.60471 | 79.10180 | 1475.64127  | -1639.27964 | 2233.98856  | 1 |
| 28890 | C | 86.43752 | 91.20155 | 79.24224 | 640.23304   | -111.89438  | -17.39216   | 1 |
| 28891 | O | 85.58033 | 91.96011 | 79.67544 | -12.31455   | -389.15858  | -38.74513   | 1 |
| 28892 | N | 87.79422 | 91.26841 | 79.42741 | 282.44975   | -476.98450  | 82.02895    | 1 |
| 28893 | H | 88.16277 | 90.39364 | 79.01841 | -3773.19350 | -1465.95608 | -919.59129  | 1 |
| 28894 | C | 88.47139 | 92.02150 | 80.37842 | 366.49475   | -339.06382  | -4.34869    | 1 |
| 28895 | H | 87.71656 | 92.37914 | 81.08372 | -1362.75270 | 2100.87273  | 1024.28263  | 1 |
| 28896 | C | 89.61944 | 91.15635 | 81.08322 | -107.66655  | 683.06735   | -74.03182   | 1 |
| 28897 | H | 90.50511 | 91.17384 | 80.46147 | -111.54739  | 878.25100   | -346.32535  | 1 |
| 28898 | C | 89.93229 | 91.86475 | 82.44857 | -1.51201    | 825.02303   | -464.06746  | 1 |
| 28899 | H | 90.79273 | 91.32720 | 82.94174 | -291.03755  | 602.75534   | -1312.24292 | 1 |
| 28900 | H | 90.15482 | 92.92155 | 82.45320 | 972.70399   | 645.74753   | -1835.93164 | 1 |
| 28901 | H | 89.05585 | 91.72040 | 83.16753 | 3594.93929  | 2013.34574  | 2734.12274  | 1 |
| 28902 | C | 89.11917 | 89.72147 | 81.41996 | 407.65526   | -337.78766  | -616.29882  | 1 |
| 28903 | H | 89.36560 | 89.06382 | 80.53510 | -1444.54670 | 1696.77040  | 1167.17274  | 1 |
| 28904 | H | 88.05048 | 89.65295 | 81.65799 | -96.84439   | 803.46974   | -1361.19199 | 1 |
| 28905 | H | 89.67341 | 89.22839 | 82.21828 | -2910.81457 | -1001.04651 | -2040.28499 | 1 |
| 28906 | C | 89.36106 | 93.27167 | 79.76389 | 193.25270   | -715.56775  | -281.86899  | 1 |
| 28907 | O | 89.59381 | 94.27509 | 80.42027 | -217.05435  | 14.06951    | -254.14269  | 1 |
| 28908 | N | 89.93174 | 92.84992 | 78.65053 | -340.66212  | -33.23452   | 465.63413   | 1 |
| 28909 | H | 89.77462 | 91.88859 | 78.22966 | -6.52526    | -3345.91301 | 1110.94243  | 1 |
| 28910 | C | 90.83209 | 93.81514 | 78.07052 | 240.73886   | -181.34341  | -102.69880  | 1 |
| 28911 | H | 90.54583 | 94.80283 | 78.57064 | 1307.70249  | -366.25459  | -1386.92901 | 1 |
| 28912 | C | 92.32290 | 93.43797 | 78.53502 | 81.40172    | 632.23073   | 261.97246   | 1 |
| 28913 | H | 93.03410 | 94.22024 | 78.34472 | -3486.02716 | -476.28150  | -291.86938  | 1 |
| 28914 | H | 92.43540 | 93.21727 | 79.60639 | 2620.16881  | -1283.42464 | -2300.97693 | 1 |
| 28915 | H | 92.67178 | 92.54840 | 77.95497 | 1959.01740  | 2722.46436  | 238.30055   | 1 |
| 28916 | C | 90.65856 | 93.68129 | 76.48594 | 678.99435   | -458.77553  | -557.09987  | 1 |
| 28917 | O | 90.33703 | 94.66655 | 75.85942 | -242.49030  | -518.90281  | -388.44051  | 1 |
| 28918 | N | 91.04615 | 92.47166 | 75.99842 | -87.95934   | -540.82073  | 50.29642    | 1 |
| 28919 | H | 91.38700 | 91.63425 | 76.43590 | -3281.49823 | 487.57229   | 2332.81096  | 1 |
| 28920 | C | 90.88459 | 92.39731 | 74.57105 | 1073.33079  | -135.69870  | 432.99716   | 1 |
| 28921 | H | 89.96109 | 92.94356 | 74.19138 | -416.19946  | -80.51822   | -2151.60272 | 1 |
| 28922 | C | 92.19623 | 92.98623 | 73.91618 | 697.59800   | 657.98233   | 313.08226   | 1 |
| 28923 | H | 92.61472 | 93.73072 | 74.67121 | 1138.71912  | 2153.92655  | 2351.45543  | 1 |
| 28924 | H | 92.98062 | 92.27789 | 73.81917 | 1498.40849  | -915.80176  | 2985.15101  | 1 |
| 28925 | C | 91.85987 | 93.72634 | 72.54063 | -325.92402  | 280.03593   | -246.03307  | 1 |
| 28926 | O | 91.06057 | 94.66237 | 72.45364 | 456.61969   | -115.89507  | -86.52346   | 1 |
| 28927 | N | 92.59710 | 93.25536 | 71.54385 | 323.19387   | -145.80454  | -156.63710  | 1 |
| 28928 | H | 93.22224 | 92.40673 | 71.54337 | -1526.05140 | 631.47524   | -1209.51931 | 1 |
| 28929 | H | 92.49249 | 93.52496 | 70.52840 | 118.94815   | -2977.50971 | -1547.28359 | 1 |
| 28930 | C | 90.92524 | 90.82607 | 74.09069 | -120.20309  | 154.71057   | 944.73911   | 1 |
| 28931 | O | 91.70063 | 90.00086 | 74.59177 | -439.68880  | -684.73590  | 598.63062   | 1 |
| 28932 | N | 90.18239 | 90.59986 | 72.98729 | 263.86901   | 422.76992   | 182.59628   | 1 |
| 28933 | H | 89.72733 | 91.50180 | 72.72269 | 373.21992   | 1852.29787  | 2282.18100  | 1 |
| 28934 | C | 90.53883 | 89.60885 | 72.05512 | 31.49920    | -593.69435  | -181.03769  | 1 |
| 28935 | H | 90.62401 | 88.65650 | 72.69490 | 2473.10538  | -833.07884  | 1123.06119  | 1 |
| 28936 | C | 89.42084 | 89.52841 | 70.91958 | -369.34327  | 328.71634   | -272.28899  | 1 |
| 28937 | H | 89.51655 | 90.43882 | 70.31795 | -1823.35073 | -1842.89762 | -1222.44939 | 1 |
| 28938 | H | 88.36775 | 89.68230 | 71.34899 | 1476.63657  | -2646.61166 | 1788.74932  | 1 |
| 28939 | C | 89.53066 | 88.24351 | 70.15264 | -514.91291  | -929.33763  | -235.40536  | 1 |
| 28940 | C | 89.91359 | 88.10962 | 68.79490 | -156.51342  | -368.68042  | -194.47824  | 1 |
| 28941 | H | 90.02132 | 88.90453 | 68.03621 | -1528.56275 | 1951.34516  | 804.63982   | 1 |
| 28942 | N | 90.09364 | 86.82751 | 68.50868 | -108.35168  | 472.93793   | -561.37635  | 1 |
| 28943 | H | 90.41690 | 86.44013 | 67.60413 | 1976.62297  | 269.47734   | -50.69802   | 1 |

|       |   |          |          |          |             |             |             |   |
|-------|---|----------|----------|----------|-------------|-------------|-------------|---|
| 28944 | C | 89.71442 | 86.00322 | 69.52674 | 559.05985   | -287.90164  | 389.66464   | 1 |
| 28945 | C | 89.25296 | 86.89295 | 70.64898 | 2043.21790  | 270.24624   | 151.46571   | 1 |
| 28946 | C | 88.62511 | 86.42724 | 71.84784 | 994.44930   | -89.95925   | 151.02129   | 1 |
| 28947 | H | 88.39955 | 87.07983 | 72.70796 | 0.25085     | 2932.00147  | -827.87079  | 1 |
| 28948 | C | 88.64077 | 85.05455 | 71.95907 | 315.26452   | 184.26450   | 71.55458    | 1 |
| 28949 | H | 88.40421 | 84.63172 | 72.98212 | 2526.10569  | 165.48025   | -46.02765   | 1 |
| 28950 | C | 89.56154 | 84.59272 | 69.68460 | 213.78325   | 575.26256   | -127.30969  | 1 |
| 28951 | H | 89.64257 | 83.77791 | 68.82792 | 2714.69233  | 705.39367   | -3576.68223 | 1 |
| 28952 | C | 89.08951 | 84.16888 | 70.96388 | 212.26509   | -1010.61453 | 490.07193   | 1 |
| 28953 | H | 89.06416 | 83.07005 | 71.22607 | 747.27133   | -560.26087  | -1622.09449 | 1 |
| 28954 | C | 91.93294 | 90.01785 | 71.27680 | 781.60877   | -690.88617  | 487.79152   | 1 |
| 28955 | O | 92.04327 | 90.38689 | 70.12776 | 101.85503   | -153.72926  | 153.44150   | 1 |
| 28956 | N | 92.93788 | 89.75375 | 72.08268 | -31.77593   | 284.45256   | 549.10246   | 1 |
| 28957 | H | 92.80637 | 89.46907 | 73.06335 | 498.11512   | -1569.62860 | 1413.78792  | 1 |
| 28958 | C | 94.30640 | 89.90973 | 71.71775 | -557.46125  | 90.40278    | 248.36040   | 1 |
| 28959 | H | 94.40319 | 90.96987 | 71.30364 | 3163.78892  | 1496.24239  | -18.47989   | 1 |
| 28960 | C | 95.23468 | 89.74664 | 73.02474 | -274.89317  | 447.90848   | 486.74031   | 1 |
| 28961 | H | 94.77435 | 89.00068 | 73.65269 | -2762.38708 | 1115.50245  | -1286.17637 | 1 |
| 28962 | H | 96.27005 | 89.38712 | 72.79891 | -2999.30461 | -1307.19516 | 2126.26936  | 1 |
| 28963 | C | 95.09920 | 91.11478 | 73.71906 | 376.16264   | 38.59088    | -325.19978  | 1 |
| 28964 | C | 94.72344 | 91.10860 | 75.06422 | -411.49544  | -614.21531  | -882.95761  | 1 |
| 28965 | H | 94.50442 | 90.19156 | 75.64790 | -792.46997  | -2161.43418 | 1233.61950  | 1 |
| 28966 | C | 94.69386 | 92.25321 | 75.85655 | 387.73033   | 6.97664     | 149.47668   | 1 |
| 28967 | H | 94.42507 | 92.18915 | 76.93324 | 3157.70139  | 613.20761   | -3264.94224 | 1 |
| 28968 | C | 95.02121 | 93.48279 | 75.30595 | -503.68092  | -298.60371  | 194.30885   | 1 |
| 28969 | O | 94.72603 | 94.61953 | 76.05328 | -52.85764   | 395.79874   | -348.10853  | 1 |
| 28970 | H | 95.28935 | 95.33052 | 75.74470 | 690.54064   | 107.33970   | 342.45579   | 1 |
| 28971 | C | 95.49654 | 92.37099 | 73.16133 | -75.73926   | -610.30284  | 31.25134    | 1 |
| 28972 | H | 95.90702 | 92.38319 | 72.11495 | -449.02884  | -4870.14775 | -2616.14663 | 1 |
| 28973 | C | 95.49994 | 93.49854 | 73.96097 | -5.02199    | -631.34047  | -288.94796  | 1 |
| 28974 | H | 95.70404 | 94.45550 | 73.48926 | -2699.66230 | 303.92906   | -763.35834  | 1 |
| 28975 | C | 94.84457 | 88.83353 | 70.68633 | -1216.41435 | -399.93626  | -2.86929    | 1 |
| 28976 | O | 96.04285 | 88.52234 | 70.68193 | 361.30888   | -768.92458  | -573.69949  | 1 |
| 28977 | N | 93.93267 | 88.48496 | 69.72418 | -481.97883  | -130.44523  | 165.82859   | 1 |
| 28978 | H | 92.98169 | 88.80193 | 69.84150 | 1525.29923  | 469.67075   | -539.63687  | 1 |
| 28979 | C | 94.16742 | 87.17142 | 69.21015 | 290.05868   | 322.54179   | 24.13828    | 1 |
| 28980 | H | 95.21603 | 87.05475 | 69.54349 | 1739.52437  | -2331.90194 | 468.67234   | 1 |
| 28981 | C | 93.09422 | 86.11525 | 69.74355 | 312.53194   | 54.89978    | 471.01334   | 1 |
| 28982 | H | 93.40670 | 85.07158 | 69.31530 | -208.04149  | -2270.33312 | -3377.63179 | 1 |
| 28983 | H | 92.03511 | 86.23770 | 69.44603 | -314.06818  | -472.10723  | 1459.81006  | 1 |
| 28984 | C | 93.12343 | 86.13735 | 71.25187 | -80.64746   | 451.52072   | -364.65939  | 1 |
| 28985 | C | 94.41764 | 85.85822 | 71.87858 | 548.57958   | 2095.13644  | 30.40132    | 1 |
| 28986 | H | 95.22776 | 85.55837 | 71.21149 | -812.40673  | 1669.75846  | 2309.16165  | 1 |
| 28987 | C | 94.48283 | 86.03169 | 73.28716 | -389.24080  | -8.51887    | 1.53072     | 1 |
| 28988 | H | 95.52029 | 85.84208 | 73.66275 | 1931.74895  | 2434.39196  | -1669.36677 | 1 |
| 28989 | C | 93.31885 | 86.41368 | 74.08191 | 152.42183   | -746.07415  | -258.16258  | 1 |
| 28990 | H | 93.34994 | 86.44573 | 75.18101 | 1423.47101  | -1849.85235 | -829.01987  | 1 |
| 28991 | C | 92.03070 | 86.62014 | 72.01794 | -60.57382   | -180.12718  | -51.17209   | 1 |
| 28992 | H | 91.11035 | 87.04208 | 71.59235 | -64.02363   | -4590.98466 | 1393.53831  | 1 |
| 28993 | C | 92.12652 | 86.76631 | 73.42653 | -44.61035   | -151.51755  | -250.20162  | 1 |
| 28994 | H | 91.15381 | 87.12645 | 73.97415 | -2092.84634 | -156.54250  | -3188.12668 | 1 |
| 28995 | C | 94.15208 | 87.26211 | 67.58189 | -1130.27475 | 28.40839    | 471.82855   | 1 |
| 28996 | O | 95.04368 | 86.75294 | 66.91716 | 26.73706    | 804.73707   | 449.72717   | 1 |
| 28997 | N | 92.94461 | 87.66614 | 67.15117 | -256.55254  | 815.55847   | -1409.29794 | 1 |
| 28998 | H | 92.25425 | 88.02373 | 67.87551 | -1737.34688 | -4426.08681 | -3348.54008 | 1 |
| 28999 | C | 92.85370 | 88.24074 | 65.79729 | -726.78838  | 569.59501   | 1206.89922  | 1 |
| 29000 | H | 93.77368 | 87.85581 | 65.22280 | -1231.72200 | -192.70816  | 4306.29850  | 1 |
| 29001 | H | 92.89099 | 89.32761 | 65.87339 | -1627.56348 | 376.45135   | 1663.07800  | 1 |
| 29002 | C | 91.47359 | 87.80621 | 65.20106 | -7.75062    | 298.17957   | 250.47851   | 1 |
| 29003 | O | 90.61298 | 87.06424 | 65.80272 | -324.48108  | 561.68809   | -320.09661  | 1 |
| 29004 | N | 91.26064 | 88.32305 | 64.03173 | 110.99306   | 672.83240   | 331.30264   | 1 |
| 29005 | H | 91.94660 | 88.86887 | 63.53401 | -2993.89870 | -1023.53465 | 2729.97631  | 1 |



|       |   |          |          |          |             |             |             |   |
|-------|---|----------|----------|----------|-------------|-------------|-------------|---|
| 29006 | C | 89.99508 | 87.99373 | 63.41090 | 177.71408   | -412.89825  | -144.04033  | 1 |
| 29007 | H | 89.26792 | 88.03753 | 64.26705 | 2322.49325  | 2189.22769  | 251.54913   | 1 |
| 29008 | C | 89.65327 | 89.13627 | 62.40960 | 948.62122   | 210.29686   | -785.54391  | 1 |
| 29009 | H | 89.99091 | 88.86949 | 61.38575 | -2293.88296 | -227.42527  | -1315.54158 | 1 |
| 29010 | H | 90.23761 | 90.10777 | 62.61768 | 1471.17024  | 1378.67618  | 1691.36655  | 1 |
| 29011 | C | 88.09746 | 89.34212 | 62.35416 | 700.36725   | 394.31858   | -236.71873  | 1 |
| 29012 | O | 87.61504 | 90.42761 | 62.13086 | 146.54938   | 734.94310   | 116.98537   | 1 |
| 29013 | N | 87.43318 | 88.17441 | 62.68370 | -52.25101   | 131.22670   | 341.61422   | 1 |
| 29014 | H | 87.82138 | 87.27419 | 62.50499 | -1833.99093 | -732.62543  | 1094.61289  | 1 |
| 29015 | H | 86.38002 | 88.14646 | 62.55205 | -455.56918  | -1252.79543 | -826.57095  | 1 |
| 29016 | C | 90.12268 | 86.47329 | 62.74320 | -110.11522  | 32.16948    | 315.79286   | 1 |
| 29017 | O | 89.09477 | 85.95561 | 62.32991 | -425.37835  | -132.00356  | 218.94896   | 1 |
| 29018 | N | 91.35009 | 86.02762 | 62.69250 | 141.50596   | -437.39453  | 284.65114   | 1 |
| 29019 | H | 91.99963 | 86.61442 | 63.22634 | 3.29442     | 1772.74554  | -1989.29057 | 1 |
| 29020 | C | 91.51800 | 84.51480 | 62.52590 | -314.75420  | 335.51957   | -812.91684  | 1 |
| 29021 | H | 90.87200 | 84.13680 | 61.74790 | 641.53811   | 1483.60040  | -2718.49567 | 1 |
| 29022 | C | 92.98800 | 84.28580 | 62.01190 | -250.03390  | 376.38662   | 779.54344   | 1 |
| 29023 | H | 93.08100 | 84.82880 | 61.04690 | 1073.49440  | -2915.84025 | -440.92626  | 1 |
| 29024 | H | 93.75600 | 84.78580 | 62.63890 | 1117.83600  | -2197.71093 | 1920.81051  | 1 |
| 29025 | C | 93.37900 | 82.83780 | 61.76390 | 596.64009   | -547.02170  | -412.17673  | 1 |
| 29026 | C | 93.09300 | 82.24380 | 60.53090 | -482.12258  | -649.23028  | -444.68798  | 1 |
| 29027 | H | 92.55800 | 82.73080 | 59.72890 | -1620.99405 | -1769.41926 | -2058.01546 | 1 |
| 29028 | C | 93.42400 | 80.89180 | 60.32490 | -639.65420  | -646.77170  | 92.61830    | 1 |
| 29029 | H | 93.07600 | 80.44380 | 59.40590 | -1060.27761 | 1150.19237  | 2718.84927  | 1 |
| 29030 | C | 94.15700 | 80.14080 | 61.27890 | 566.18948   | 672.59670   | -247.55101  | 1 |
| 29031 | H | 94.35300 | 79.09980 | 61.07090 | 1110.81349  | -367.04161  | 2894.08018  | 1 |
| 29032 | C | 94.09900 | 82.07280 | 62.66490 | 450.75172   | -770.66016  | -136.44283  | 1 |
| 29033 | H | 94.24300 | 82.65980 | 63.55990 | -96.84269   | -3121.07343 | 311.32347   | 1 |
| 29034 | C | 94.50800 | 80.76380 | 62.47290 | 663.20746   | 112.50901   | -623.35631  | 1 |
| 29035 | H | 94.97700 | 80.15980 | 63.23490 | 1548.24887  | -1612.82019 | -2221.17541 | 1 |
| 29036 | C | 91.15900 | 83.68080 | 63.73290 | -522.17613  | 29.28783    | 736.38351   | 1 |
| 29037 | O | 90.49700 | 82.62580 | 63.60990 | 154.26357   | 366.51651   | -701.51367  | 1 |
| 29038 | N | 91.54500 | 84.08880 | 64.97890 | 401.35571   | -697.89705  | 197.19177   | 1 |
| 29039 | H | 92.25500 | 84.78180 | 65.07190 | 2440.00443  | -1684.01106 | 1001.13196  | 1 |
| 29040 | C | 91.05900 | 83.46380 | 66.12890 | -641.25608  | 226.60788   | -637.36024  | 1 |
| 29041 | H | 90.97300 | 82.39880 | 65.96990 | -1287.90673 | -1115.61662 | -2664.08902 | 1 |
| 29042 | C | 91.97900 | 83.68480 | 67.32190 | 671.05753   | 299.07159   | 515.33943   | 1 |
| 29043 | H | 92.00800 | 84.76880 | 67.56390 | 98.30172    | 2285.56388  | 2148.47433  | 1 |
| 29044 | H | 91.54900 | 83.17080 | 68.20790 | 2783.36854  | 1233.42514  | -796.03260  | 1 |
| 29045 | C | 93.41300 | 83.09980 | 67.07090 | 455.49992   | 789.34110   | 39.76926    | 1 |
| 29046 | H | 93.86800 | 83.56380 | 66.16990 | 27.52891    | 2139.69222  | 2292.38368  | 1 |
| 29047 | C | 94.41000 | 83.62580 | 68.14990 | -608.22320  | -664.44252  | -164.77433  | 1 |
| 29048 | H | 94.13600 | 83.23380 | 69.15290 | 1334.97407  | -1099.20299 | -2642.04858 | 1 |
| 29049 | H | 94.50000 | 84.72780 | 68.25790 | -2091.73346 | 2352.82445  | -232.94978  | 1 |
| 29050 | H | 95.41400 | 83.22980 | 67.88390 | -2821.95305 | -43.56368   | -1426.82008 | 1 |
| 29051 | C | 93.41700 | 81.60480 | 66.91190 | -596.48470  | -410.77268  | 539.28204   | 1 |
| 29052 | H | 92.78300 | 81.17580 | 66.10690 | 59.69900    | -2202.01703 | 2220.05103  | 1 |
| 29053 | H | 93.12900 | 81.18280 | 67.89790 | -696.26524  | 1512.93045  | -2694.60177 | 1 |
| 29054 | H | 94.45700 | 81.21880 | 66.84390 | -1165.67874 | -2820.92881 | 733.76870   | 1 |
| 29055 | C | 89.61400 | 83.83780 | 66.42890 | -560.13732  | -566.34368  | -461.04472  | 1 |
| 29056 | O | 88.85000 | 83.03980 | 67.01290 | 267.22989   | -622.04227  | 370.85715   | 1 |
| 29057 | N | 89.10548 | 85.03432 | 66.01109 | -951.77683  | -32.71581   | 100.81715   | 1 |
| 29058 | H | 89.87497 | 85.68501 | 65.50203 | -872.94364  | -892.82159  | 3377.37636  | 1 |
| 29059 | C | 87.73388 | 85.46142 | 66.34729 | 615.66477   | -1411.99228 | 91.42702    | 1 |
| 29060 | H | 87.65604 | 85.32950 | 67.45758 | -2555.75568 | -1088.89413 | -156.44518  | 1 |
| 29061 | C | 87.61209 | 86.96068 | 66.00400 | -196.99878  | 238.28476   | 442.27302   | 1 |
| 29062 | H | 87.44109 | 86.97043 | 64.93867 | 990.64507   | 4087.40527  | 586.92624   | 1 |
| 29063 | H | 88.57123 | 87.57638 | 66.23238 | -877.45165  | 121.79335   | -1938.15756 | 1 |
| 29064 | S | 86.13029 | 87.46331 | 66.98106 | 200.45651   | -45.14521   | 185.91083   | 1 |
| 29065 | C | 86.67300 | 84.54580 | 65.53490 | 459.65089   | -768.67590  | -95.81165   | 1 |
| 29066 | O | 85.70400 | 84.06480 | 66.09490 | -63.65564   | -661.46119  | 398.00099   | 1 |
| 29067 | N | 86.85900 | 84.23180 | 64.25690 | 56.29141    | -760.31313  | 325.29955   | 1 |

|       |   |          |          |          |             |             |             |   |
|-------|---|----------|----------|----------|-------------|-------------|-------------|---|
| 29068 | H | 87.68800 | 84.53680 | 63.79390 | -145.69376  | 1077.37095  | -2971.78216 | 1 |
| 29069 | C | 86.09400 | 83.32380 | 63.49490 | 119.75204   | -820.68955  | -368.08107  | 1 |
| 29070 | H | 85.03600 | 83.53880 | 63.49790 | 2357.73500  | -1139.85416 | -1736.33261 | 1 |
| 29071 | C | 86.54900 | 83.31080 | 62.03090 | 101.09807   | 646.12400   | -658.01716  | 1 |
| 29072 | H | 86.13700 | 82.48080 | 61.41790 | -316.92654  | -3112.28596 | -256.57201  | 1 |
| 29073 | H | 87.65600 | 83.22380 | 61.99490 | 2925.29305  | -909.00857  | 639.21911   | 1 |
| 29074 | C | 86.19500 | 84.62180 | 61.36690 | -508.98543  | -278.03084  | -722.71392  | 1 |
| 29075 | H | 86.48957 | 85.53124 | 61.90275 | -1034.14997 | -1269.71604 | -418.70581  | 1 |
| 29076 | H | 85.09100 | 84.55380 | 61.26190 | -2310.68590 | -1774.10927 | 1181.57548  | 1 |
| 29077 | C | 86.79500 | 84.65480 | 59.96290 | 647.73023   | 313.02320   | -565.89955  | 1 |
| 29078 | H | 86.34400 | 83.82380 | 59.38090 | 2413.48801  | -1982.87521 | -211.53547  | 1 |
| 29079 | H | 87.86800 | 84.41480 | 60.12190 | -1399.92916 | -1531.99702 | -2381.91169 | 1 |
| 29080 | C | 86.42062 | 86.05862 | 59.30259 | 970.86058   | 487.80615   | 360.59085   | 1 |
| 29081 | H | 86.43847 | 85.95832 | 58.17197 | -1570.30679 | -68.89051   | -2076.31971 | 1 |
| 29082 | H | 87.05905 | 86.92060 | 59.63359 | 3092.75375  | 1933.25699  | -2021.07004 | 1 |
| 29083 | N | 84.90022 | 86.35130 | 59.73542 | -438.46896  | 253.43058   | 282.80383   | 1 |
| 29084 | H | 84.50115 | 87.02390 | 59.00454 | -1747.51197 | 715.73154   | -1906.96210 | 1 |
| 29085 | H | 84.81849 | 86.74455 | 60.70017 | -1499.41882 | 673.04767   | -115.94933  | 1 |
| 29086 | H | 84.29122 | 85.49169 | 59.68122 | 1036.05386  | -71.66730   | 1356.01706  | 1 |
| 29087 | C | 86.02200 | 81.92880 | 64.05690 | -36.14440   | -721.25895  | 529.85840   | 1 |
| 29088 | O | 84.99900 | 81.30480 | 64.09590 | -680.76804  | -135.13578  | 378.61133   | 1 |
| 29089 | N | 87.20100 | 81.39480 | 64.42590 | 653.55558   | 332.90465   | -423.37012  | 1 |
| 29090 | H | 88.05400 | 81.83980 | 64.16690 | 1863.78489  | 1579.80210  | -1994.90000 | 1 |
| 29091 | C | 87.36500 | 80.09380 | 65.00890 | -817.71895  | 415.18936   | -141.50449  | 1 |
| 29092 | H | 86.88200 | 79.29380 | 64.46790 | -852.02340  | 752.26439   | -2954.74868 | 1 |
| 29093 | C | 88.86800 | 79.76980 | 65.00690 | 372.96045   | 420.96874   | 700.15288   | 1 |
| 29094 | H | 89.28500 | 79.59280 | 63.99190 | 230.48155   | 2849.36191  | -1346.67745 | 1 |
| 29095 | H | 88.98400 | 78.87080 | 65.64790 | -2634.03934 | 1517.97694  | 843.41933   | 1 |
| 29096 | H | 89.43500 | 80.62280 | 65.43790 | -681.60451  | 321.95242   | -3074.66922 | 1 |
| 29097 | C | 86.72700 | 79.92780 | 66.35090 | 437.58794   | -656.89183  | 417.28328   | 1 |
| 29098 | O | 85.95200 | 79.01880 | 66.54290 | 7.60325     | -524.26126  | 566.86387   | 1 |
| 29099 | N | 86.90000 | 80.80780 | 67.33590 | 43.02177    | 7.80744     | -857.87037  | 1 |
| 29100 | H | 87.40500 | 81.66380 | 67.25290 | -644.48772  | 3083.61991  | -218.63852  | 1 |
| 29101 | C | 86.19000 | 80.52680 | 68.62890 | -53.66316   | -736.53044  | 507.54342   | 1 |
| 29102 | H | 86.32400 | 79.48480 | 68.87990 | 2480.58912  | -1403.66198 | -1320.58335 | 1 |
| 29103 | C | 86.84000 | 81.26180 | 69.83390 | 890.25605   | -100.83009  | -131.76747  | 1 |
| 29104 | H | 86.44200 | 80.90480 | 70.80790 | 1401.28768  | 2484.31516  | 1322.77548  | 1 |
| 29105 | C | 88.33400 | 81.07680 | 69.72290 | -589.97745  | 641.40019   | -319.13742  | 1 |
| 29106 | H | 88.48300 | 79.98080 | 69.82890 | -1218.10724 | 2657.99058  | 1172.72723  | 1 |
| 29107 | H | 88.82500 | 81.27280 | 68.74590 | -2167.77382 | -2200.49371 | 579.09454   | 1 |
| 29108 | H | 88.77100 | 81.69980 | 70.53290 | -2082.21516 | -2096.19584 | 1061.21092  | 1 |
| 29109 | C | 86.58200 | 82.78080 | 69.82590 | -590.28178  | -472.08202  | 494.16361   | 1 |
| 29110 | H | 86.96400 | 83.25980 | 70.75290 | 2207.52573  | -170.42095  | -2243.79780 | 1 |
| 29111 | H | 85.55100 | 83.08380 | 69.54390 | 617.83991   | 2765.42721  | 1369.15654  | 1 |
| 29112 | H | 87.13100 | 83.11580 | 68.91990 | -251.85312  | 3134.12273  | -284.76701  | 1 |
| 29113 | C | 84.70900 | 80.73080 | 68.63990 | -632.47023  | -110.98013  | 639.85384   | 1 |
| 29114 | O | 84.02200 | 80.17280 | 69.49290 | -246.49725  | 582.01804   | 476.43335   | 1 |
| 29115 | N | 84.24600 | 81.55880 | 67.65790 | -160.34488  | -799.74567  | 169.52707   | 1 |
| 29116 | H | 84.91200 | 81.97480 | 67.04290 | 1968.56210  | 1883.31701  | 1560.40628  | 1 |
| 29117 | C | 82.80800 | 81.69580 | 67.40890 | 490.93992   | -237.06480  | 708.69857   | 1 |
| 29118 | H | 82.37200 | 81.78180 | 68.39290 | -356.46806  | -207.93187  | -3131.39383 | 1 |
| 29119 | C | 82.41500 | 82.92780 | 66.52990 | 733.80009   | -19.94493   | 515.83835   | 1 |
| 29120 | H | 81.41600 | 82.87480 | 66.04590 | 886.90616   | -2272.61089 | -1980.86487 | 1 |
| 29121 | H | 83.13300 | 83.04280 | 65.69090 | -1156.19101 | 1818.25082  | 2292.97681  | 1 |
| 29122 | N | 83.14181 | 85.32901 | 67.40120 | -974.69353  | 211.50290   | -336.03231  | 1 |
| 29123 | H | 83.79970 | 85.62706 | 66.73885 | -1150.21840 | 2545.05699  | -2327.20345 | 1 |
| 29124 | C | 82.39900 | 84.15480 | 67.43290 | 894.19674   | -113.75176  | -59.81169   | 1 |
| 29125 | C | 82.96860 | 86.19465 | 68.38132 | -205.47965  | -238.10845  | 124.77750   | 1 |
| 29126 | H | 83.39460 | 87.27011 | 68.43688 | -2184.12388 | 3667.59010  | -402.69914  | 1 |
| 29127 | N | 82.00719 | 85.60206 | 69.12905 | -119.62659  | 300.17744   | -677.23057  | 1 |
| 29128 | C | 81.65600 | 84.41580 | 68.51590 | 138.70665   | -471.88251  | -771.14416  | 1 |
| 29129 | H | 80.87200 | 83.84280 | 68.99590 | -3028.41535 | 358.63753   | -816.35034  | 1 |

|       |   |          |          |          |             |             |             |   |
|-------|---|----------|----------|----------|-------------|-------------|-------------|---|
| 29130 | C | 82.16700 | 80.46780 | 66.77990 | 715.89326   | 121.84692   | -553.17027  | 1 |
| 29131 | O | 81.09700 | 80.01880 | 67.19390 | 469.40566   | -443.29027  | 421.21686   | 1 |
| 29132 | N | 82.89000 | 79.89280 | 65.78590 | 177.50581   | 745.85722   | -382.98874  | 1 |
| 29133 | H | 83.69400 | 80.36680 | 65.43590 | 1904.16028  | -538.57247  | 2421.99504  | 1 |
| 29134 | C | 82.59700 | 78.59880 | 65.20790 | 42.59755    | 780.71335   | -498.45925  | 1 |
| 29135 | H | 81.57800 | 78.58580 | 64.84890 | -1060.79809 | 2437.97326  | 1693.97790  | 1 |
| 29136 | C | 83.57500 | 78.33080 | 64.01290 | 584.55072   | -676.32729  | 42.35095    | 1 |
| 29137 | H | 84.59400 | 78.72480 | 64.21390 | -509.02153  | 2048.78513  | -2358.14493 | 1 |
| 29138 | C | 83.59900 | 76.78780 | 63.77490 | 219.01998   | -869.69153  | -62.79012   | 1 |
| 29139 | H | 84.31500 | 76.28780 | 64.46290 | 233.75217   | 212.34865   | -3143.67829 | 1 |
| 29140 | H | 83.98300 | 76.51480 | 62.76890 | -2351.85702 | 292.35276   | 2072.91317  | 1 |
| 29141 | H | 82.64600 | 76.27180 | 64.01990 | -2680.91119 | 273.54349   | -1659.71999 | 1 |
| 29142 | C | 83.00400 | 79.04680 | 62.75690 | -691.63615  | 269.74188   | 538.48069   | 1 |
| 29143 | H | 81.91100 | 78.88580 | 62.63890 | 3106.72221  | -297.43568  | -275.74660  | 1 |
| 29144 | H | 83.47200 | 78.73680 | 61.79890 | -205.35964  | 3032.97874  | -866.30069  | 1 |
| 29145 | H | 83.14800 | 80.14080 | 62.88390 | 1759.65178  | -2399.32431 | -986.87686  | 1 |
| 29146 | C | 82.54300 | 77.54080 | 66.30590 | -642.35477  | 156.25674   | 629.38149   | 1 |
| 29147 | O | 81.51500 | 76.91780 | 66.54690 | -141.39339  | 591.96453   | 507.46589   | 1 |
| 29148 | N | 83.59100 | 77.46180 | 67.16990 | 116.20034   | -106.80078  | 813.09872   | 1 |
| 29149 | H | 84.39600 | 78.01380 | 66.96890 | 1946.35085  | -1106.66354 | -2209.41941 | 1 |
| 29150 | C | 83.61000 | 76.47880 | 68.21290 | 162.44742   | -874.68325  | -147.26198  | 1 |
| 29151 | H | 83.48300 | 75.48980 | 67.79590 | 1990.29978  | -2180.58454 | -1057.92268 | 1 |
| 29152 | C | 85.03500 | 76.38780 | 68.80890 | -558.47487  | -696.65599  | -191.36467  | 1 |
| 29153 | H | 85.44800 | 77.41780 | 68.87090 | -1713.42504 | 1690.48571  | 2027.70215  | 1 |
| 29154 | C | 85.07400 | 75.72080 | 70.18590 | -549.06400  | -529.93080  | 484.56262   | 1 |
| 29155 | H | 86.10000 | 75.62280 | 70.60190 | -2620.98947 | 1749.61040  | -235.05377  | 1 |
| 29156 | H | 84.55100 | 76.30080 | 70.97590 | -505.49626  | -1161.10275 | 2863.56417  | 1 |
| 29157 | H | 84.66100 | 74.69080 | 70.12890 | 2358.54625  | -2046.62751 | 228.83899   | 1 |
| 29158 | C | 85.97700 | 75.72480 | 67.76590 | -100.73507  | -235.82610  | 858.74691   | 1 |
| 29159 | H | 85.69100 | 74.65480 | 67.67490 | -1519.62965 | 2278.55637  | -1588.25482 | 1 |
| 29160 | H | 85.74100 | 76.16480 | 66.77290 | 1459.87339  | 1877.37216  | 2045.72517  | 1 |
| 29161 | C | 87.47200 | 75.97180 | 67.95890 | 387.72153   | 408.46859   | 700.46295   | 1 |
| 29162 | H | 88.05300 | 75.45780 | 67.16290 | 1573.19929  | -2590.85975 | -809.22022  | 1 |
| 29163 | H | 87.73000 | 75.66880 | 68.99590 | 1398.62915  | 5.47557     | 2797.06993  | 1 |
| 29164 | H | 87.69600 | 77.04780 | 67.79490 | 1750.88087  | -1721.47652 | -1965.75038 | 1 |
| 29165 | C | 82.51700 | 76.61280 | 69.28290 | -621.76613  | 91.76000    | -683.51406  | 1 |
| 29166 | O | 81.96700 | 75.61980 | 69.76790 | -710.20191  | 246.70939   | 266.11614   | 1 |
| 29167 | N | 82.13600 | 77.82380 | 69.67790 | -406.05985  | -486.73167  | 541.92372   | 1 |
| 29168 | H | 82.59400 | 78.62980 | 69.31090 | 643.08892   | 2528.25733  | 1758.42892  | 1 |
| 29169 | C | 81.05000 | 78.07380 | 70.56590 | 646.00238   | -578.92773  | -245.76258  | 1 |
| 29170 | H | 81.27600 | 77.50580 | 71.45590 | -385.33273  | -3105.13403 | -219.23294  | 1 |
| 29171 | C | 81.05200 | 79.58980 | 71.00790 | -121.67052  | 874.37231   | 260.17681   | 1 |
| 29172 | H | 80.98000 | 80.15680 | 70.05590 | 935.56818   | -561.09253  | -2957.68417 | 1 |
| 29173 | H | 82.02300 | 79.80180 | 71.50490 | -1755.13888 | 667.79685   | -2544.00401 | 1 |
| 29174 | C | 79.92200 | 80.03280 | 71.97990 | 446.04165   | 540.10097   | 578.95054   | 1 |
| 29175 | C | 79.38500 | 79.12780 | 72.88490 | 748.35587   | 212.00830   | -481.62875  | 1 |
| 29176 | H | 79.82100 | 78.13980 | 72.84190 | 2338.02134  | -2078.22912 | 167.99388   | 1 |
| 29177 | C | 78.46300 | 79.55580 | 73.85390 | -198.72221  | 811.13546   | -404.94322  | 1 |
| 29178 | H | 78.13700 | 78.88380 | 74.63390 | 504.64662   | 2855.93033  | 1236.81142  | 1 |
| 29179 | C | 77.98700 | 80.85580 | 73.88990 | 704.91000   | 202.95130   | -549.24763  | 1 |
| 29180 | O | 76.96700 | 81.12580 | 74.81990 | 330.00824   | -625.40281  | -331.81572  | 1 |
| 29181 | H | 77.08100 | 82.02380 | 75.14090 | 1603.10196  | -1698.04147 | 2086.29834  | 1 |
| 29182 | C | 79.47200 | 81.38480 | 72.01490 | -509.94864  | 750.96974   | 166.95448   | 1 |
| 29183 | H | 79.94600 | 82.09480 | 71.35290 | 1999.62592  | -788.07983  | 2277.46291  | 1 |
| 29184 | C | 78.48900 | 81.79280 | 72.93090 | 686.34858   | 418.16866   | -444.10744  | 1 |
| 29185 | H | 78.06400 | 82.77980 | 73.03490 | 46.49858    | 770.03332   | -3062.57698 | 1 |
| 29186 | C | 79.67300 | 77.54080 | 70.07190 | -600.28347  | -259.56790  | -649.16781  | 1 |
| 29187 | O | 78.96500 | 76.79380 | 70.76590 | 472.05566   | -460.47372  | -421.35703  | 1 |
| 29188 | N | 79.39400 | 77.68380 | 68.75890 | -751.68453  | -390.10308  | -4.46157    | 1 |
| 29189 | H | 79.95300 | 78.19680 | 68.11190 | -1162.54948 | -973.54607  | 2745.65451  | 1 |
| 29190 | C | 78.20500 | 77.02080 | 68.19390 | 51.67565    | 808.57374   | 431.06762   | 1 |
| 29191 | H | 77.43900 | 76.92980 | 68.94890 | 2947.50593  | 324.73349   | 1018.36531  | 1 |

|       |   |          |          |          |             |             |             |   |
|-------|---|----------|----------|----------|-------------|-------------|-------------|---|
| 29192 | C | 77.48800 | 77.80880 | 67.07390 | 354.61150   | -628.55193  | -544.34277  | 1 |
| 29193 | H | 76.97700 | 77.12180 | 66.36490 | 1477.87575  | -2362.72318 | 1417.67952  | 1 |
| 29194 | O | 78.48200 | 78.54080 | 66.33890 | -440.52771  | -390.39757  | -535.63147  | 1 |
| 29195 | H | 77.96600 | 79.06380 | 65.71990 | -585.08432  | 2177.80209  | 2200.04692  | 1 |
| 29196 | C | 76.51200 | 78.84980 | 67.67590 | 687.71131   | 572.03929   | 172.87574   | 1 |
| 29197 | H | 76.14500 | 79.53180 | 66.87990 | 2239.48995  | -1703.60362 | -1382.65247 | 1 |
| 29198 | H | 77.06600 | 79.47580 | 68.40790 | 2625.50466  | -1587.83832 | 618.90347   | 1 |
| 29199 | H | 75.64300 | 78.39980 | 68.20290 | -723.14487  | 1863.64828  | 2434.81753  | 1 |
| 29200 | C | 78.36700 | 75.56380 | 67.75190 | -18.09878   | -784.55656  | 432.69192   | 1 |
| 29201 | O | 77.49200 | 74.70580 | 67.73790 | 228.63785   | 739.07188   | -206.40446  | 1 |
| 29202 | N | 79.64800 | 75.13880 | 67.41590 | -420.05019  | 735.43670   | 139.68933   | 1 |
| 29203 | H | 80.37000 | 75.81880 | 67.31490 | 479.16378   | -2719.44449 | -1493.56577 | 1 |
| 29204 | C | 79.99100 | 73.68980 | 67.21490 | 84.76523    | 915.90931   | -82.13045   | 1 |
| 29205 | H | 79.38000 | 73.32380 | 66.40290 | 1623.16420  | 92.24308    | 2675.55099  | 1 |
| 29206 | C | 81.38900 | 73.44280 | 66.61790 | 740.63510   | -131.81556  | 481.49987   | 1 |
| 29207 | H | 82.10200 | 74.18380 | 67.03690 | -10.83933   | -3117.96690 | 314.18145   | 1 |
| 29208 | C | 81.96200 | 72.04380 | 66.97190 | 577.02974   | 174.70395   | 663.39653   | 1 |
| 29209 | H | 82.88300 | 71.83080 | 66.38890 | 1721.01895  | -1897.15353 | -1815.45484 | 1 |
| 29210 | H | 81.18600 | 71.31880 | 66.64490 | 2489.88841  | -872.17172  | -1700.07277 | 1 |
| 29211 | H | 82.34400 | 71.99180 | 68.01390 | 412.65092   | -1847.55910 | -2515.19738 | 1 |
| 29212 | C | 81.32400 | 73.80080 | 65.10990 | 458.23590   | 446.42192   | 636.07484   | 1 |
| 29213 | H | 80.97800 | 74.84980 | 64.98990 | 2733.82052  | -1505.29931 | -237.14152  | 1 |
| 29214 | H | 82.37400 | 73.66580 | 64.77390 | -1765.79034 | 1447.28425  | -2195.71929 | 1 |
| 29215 | H | 80.63300 | 73.08980 | 64.60990 | 668.70388   | -2971.41108 | 717.99914   | 1 |
| 29216 | C | 79.75400 | 72.79980 | 68.47990 | -623.31026  | 631.78440   | -281.70777  | 1 |
| 29217 | O | 79.20000 | 71.70380 | 68.33390 | 527.57885   | 401.94167   | 414.24377   | 1 |
| 29218 | N | 80.08100 | 73.22380 | 69.70090 | 169.78437   | -489.88253  | 643.39832   | 1 |
| 29219 | H | 80.50800 | 74.12280 | 69.76890 | -633.54456  | -2677.46234 | -1520.58824 | 1 |
| 29220 | C | 79.61600 | 72.58280 | 70.91190 | -768.40093  | 89.91084    | -511.25518  | 1 |
| 29221 | H | 79.83700 | 71.53080 | 70.80090 | -2399.38882 | -655.95008  | 1924.58301  | 1 |
| 29222 | C | 80.32000 | 73.15880 | 72.15090 | 164.48410   | 898.01489   | 114.61105   | 1 |
| 29223 | H | 80.52000 | 74.24680 | 72.04990 | -496.11756  | 2929.19019  | -1083.09252 | 1 |
| 29224 | H | 81.33400 | 72.70680 | 72.18690 | -1951.92865 | -1092.97973 | -2226.58165 | 1 |
| 29225 | C | 79.57500 | 73.06880 | 73.50490 | -7.74470    | -698.39683  | 560.94810   | 1 |
| 29226 | O | 78.59100 | 73.73680 | 73.79790 | 495.34131   | -57.99487   | -614.60405  | 1 |
| 29227 | N | 80.05400 | 72.13480 | 74.36090 | 389.04132   | -690.98479  | 236.09360   | 1 |
| 29228 | H | 80.91400 | 71.64380 | 74.22290 | 2435.04735  | 1931.13259  | -504.21407  | 1 |
| 29229 | H | 79.62900 | 72.06180 | 75.26290 | -1611.49912 | -1813.64402 | 1987.42900  | 1 |
| 29230 | C | 78.06400 | 72.62880 | 71.06090 | -133.27219  | 914.95547   | -56.52673   | 1 |
| 29231 | O | 77.44500 | 71.63380 | 71.38190 | -397.43538  | 295.79632   | 618.11912   | 1 |
| 29232 | N | 77.42000 | 73.74480 | 70.75490 | -516.95427  | -654.63096  | -108.31337  | 1 |
| 29233 | H | 77.98600 | 74.52280 | 70.49790 | -2044.24602 | -2295.19176 | 647.81796   | 1 |
| 29234 | C | 76.00300 | 73.97580 | 70.88590 | -855.75586  | 113.48541   | -333.20694  | 1 |
| 29235 | H | 75.75900 | 73.92180 | 71.93690 | 1773.95093  | -2446.86498 | 807.65784   | 1 |
| 29236 | C | 75.56400 | 75.38480 | 70.54190 | -262.48749  | -857.47951  | 83.45713    | 1 |
| 29237 | H | 75.41200 | 75.53680 | 69.45190 | 2137.40929  | 1438.33514  | 1797.05657  | 1 |
| 29238 | H | 76.35700 | 76.10880 | 70.82590 | 2118.80727  | -2275.90707 | -369.80283  | 1 |
| 29239 | C | 74.25900 | 75.91580 | 71.28290 | -533.70505  | 558.55911   | 502.22058   | 1 |
| 29240 | H | 73.50300 | 75.10180 | 71.26190 | -1675.23337 | -2285.84956 | 1346.12679  | 1 |
| 29241 | C | 74.54200 | 76.24980 | 72.74990 | -625.40159  | -471.24451  | 455.45137   | 1 |
| 29242 | H | 74.82100 | 75.38380 | 73.38690 | -358.79049  | 2879.49283  | -1257.80928 | 1 |
| 29243 | H | 73.69400 | 76.78080 | 73.23390 | -1927.73382 | 2256.78986  | 1079.79745  | 1 |
| 29244 | H | 75.40100 | 76.95280 | 72.71390 | -596.86305  | -2934.71846 | 918.08664   | 1 |
| 29245 | C | 73.71700 | 77.15380 | 70.58690 | -96.27846   | 495.45238   | 762.97552   | 1 |
| 29246 | H | 72.74800 | 77.35680 | 71.09090 | -1284.43475 | 2240.66576  | 1814.65642  | 1 |
| 29247 | H | 73.66100 | 76.90080 | 69.50690 | -2213.14032 | 948.77564   | 2035.08798  | 1 |
| 29248 | H | 74.31300 | 78.05480 | 70.84590 | -1242.76986 | -2549.69975 | 1334.55763  | 1 |
| 29249 | C | 75.09600 | 73.04480 | 70.08690 | -833.74293  | 400.61601   | -73.08523   | 1 |
| 29250 | O | 74.19500 | 72.43780 | 70.57690 | 515.98404   | 469.05771   | -380.86176  | 1 |
| 29251 | N | 75.58000 | 72.79280 | 68.84390 | 432.46405   | -699.06949  | -94.43471   | 1 |
| 29252 | H | 76.37800 | 73.29880 | 68.52390 | 590.39305   | 1459.40292  | -2737.17852 | 1 |
| 29253 | C | 75.03800 | 71.79380 | 67.92590 | 28.34672    | -536.14562  | -733.77106  | 1 |

|       |   |          |          |          |             |             |             |   |
|-------|---|----------|----------|----------|-------------|-------------|-------------|---|
| 29254 | H | 73.97500 | 71.68380 | 68.08490 | -956.06147  | 2279.60452  | 1961.90793  | 1 |
| 29255 | C | 75.21300 | 72.27780 | 66.44590 | -12.83589   | -897.22372  | -41.50797   | 1 |
| 29256 | H | 74.68000 | 71.57580 | 65.76990 | -404.87950  | 2233.32930  | 2188.16526  | 1 |
| 29257 | H | 76.30400 | 72.25780 | 66.23490 | 1239.19433  | 1677.64867  | -2366.54047 | 1 |
| 29258 | C | 74.58800 | 73.64280 | 66.30190 | 13.68064    | 875.22084   | 291.74143   | 1 |
| 29259 | C | 73.40500 | 74.05580 | 66.90090 | -633.73150  | 181.77163   | -652.58102  | 1 |
| 29260 | H | 72.87400 | 73.31580 | 67.48090 | 2133.58228  | 2101.65790  | -975.54514  | 1 |
| 29261 | C | 72.89700 | 75.36980 | 66.79290 | -869.53013  | 259.05330   | -196.26919  | 1 |
| 29262 | H | 72.03100 | 75.61380 | 67.39190 | 1591.85880  | 2189.20643  | 1607.45046  | 1 |
| 29263 | C | 73.59500 | 76.30480 | 66.07290 | -551.09754  | 466.90045   | -586.45630  | 1 |
| 29264 | O | 73.11000 | 77.58880 | 66.04690 | 448.93375   | -240.44343  | 582.40657   | 1 |
| 29265 | H | 73.77800 | 78.08480 | 65.56790 | 2095.58498  | -2252.73228 | 556.88039   | 1 |
| 29266 | C | 75.25300 | 74.59480 | 65.48390 | -697.87107  | 94.99356    | -604.28267  | 1 |
| 29267 | H | 76.17700 | 74.26580 | 65.03190 | 39.50013    | -2916.07200 | 1137.07158  | 1 |
| 29268 | C | 74.76400 | 75.91180 | 65.39090 | 323.12990   | 480.17923   | 700.86076   | 1 |
| 29269 | H | 75.26000 | 76.67480 | 64.80990 | 2034.82926  | -721.53513  | -2280.47982 | 1 |
| 29270 | C | 75.55000 | 70.36280 | 68.08790 | -743.65347  | 239.76953   | -504.59009  | 1 |
| 29271 | O | 74.98700 | 69.48580 | 67.47890 | 478.81347   | -453.30402  | -411.06207  | 1 |
| 29272 | N | 76.64500 | 70.10980 | 68.85690 | 319.48086   | -561.50195  | -530.39402  | 1 |
| 29273 | H | 77.20900 | 70.81580 | 69.27890 | -344.28608  | -1600.08821 | 2671.35134  | 1 |
| 29274 | C | 77.21400 | 68.74780 | 68.93090 | -696.55456  | -54.13208   | -609.07947  | 1 |
| 29275 | H | 76.76200 | 68.11280 | 68.18290 | -2613.78597 | 1623.58777  | 729.44126   | 1 |
| 29276 | C | 78.76800 | 68.59680 | 68.72990 | 590.04657   | 460.73938   | 505.97380   | 1 |
| 29277 | H | 78.91700 | 68.76980 | 67.64290 | 2131.96913  | -2287.33800 | 56.33228    | 1 |
| 29278 | H | 79.12100 | 67.55780 | 68.90390 | -2653.33095 | -686.45954  | 1551.93362  | 1 |
| 29279 | O | 79.43400 | 69.45380 | 69.61290 | 748.55044   | 223.22457   | 2.50025     | 1 |
| 29280 | H | 79.36600 | 70.29480 | 69.15390 | -3059.88770 | -652.65500  | 399.49406   | 1 |
| 29281 | C | 76.83600 | 68.12980 | 70.21990 | 493.07107   | 606.96772   | -481.66569  | 1 |
| 29282 | O | 76.31600 | 67.01880 | 70.22490 | -318.31322  | 543.03291   | -508.61205  | 1 |
| 29283 | N | 76.90800 | 68.88580 | 71.39690 | 71.55352    | 483.24532   | -705.35942  | 1 |
| 29284 | H | 77.09200 | 69.86380 | 71.34290 | -1877.32710 | 2147.57682  | 1354.26978  | 1 |
| 29285 | C | 76.65900 | 68.29280 | 72.72790 | 489.24708   | 476.25399   | -614.79260  | 1 |
| 29286 | H | 77.37300 | 67.49480 | 72.86990 | -362.71215  | -34.88673   | -3135.48595 | 1 |
| 29287 | C | 76.99100 | 69.27280 | 73.89690 | 716.13688   | 85.93258    | -556.39227  | 1 |
| 29288 | H | 78.08900 | 69.43780 | 73.90890 | 357.56702   | 3135.61524  | -110.83097  | 1 |
| 29289 | H | 76.72300 | 68.86880 | 74.89590 | 2921.03508  | 91.37787    | 1134.12277  | 1 |
| 29290 | O | 76.37400 | 70.60180 | 73.75590 | 270.67969   | 533.30825   | -533.00046  | 1 |
| 29291 | H | 76.99100 | 71.20580 | 73.33690 | 525.33849   | 2609.39653  | -1703.62152 | 1 |
| 29292 | C | 75.22200 | 67.71180 | 72.98090 | 191.50267   | -536.04545  | 690.72336   | 1 |
| 29293 | O | 75.04700 | 66.54180 | 73.22690 | 533.67450   | -295.16206  | -488.92685  | 1 |
| 29294 | N | 74.23400 | 68.54880 | 72.77190 | -762.75217  | -367.49152  | -42.72514   | 1 |
| 29295 | H | 74.49300 | 69.49780 | 72.60890 | 1257.72421  | 2621.23652  | 1214.44142  | 1 |
| 29296 | C | 72.81700 | 68.20780 | 72.84690 | 699.36357   | -413.43164  | -385.79876  | 1 |
| 29297 | H | 72.69700 | 67.79180 | 73.83690 | -696.78864  | -1485.78076 | -2684.98420 | 1 |
| 29298 | C | 71.92400 | 69.42580 | 72.75590 | 198.82039   | -21.07117   | 881.03811   | 1 |
| 29299 | H | 72.28100 | 70.22380 | 73.44090 | -2094.80380 | 2299.04240  | 570.69798   | 1 |
| 29300 | C | 71.88500 | 70.06880 | 71.32090 | 488.82914   | -477.60549  | -587.82946  | 1 |
| 29301 | H | 72.95400 | 70.30580 | 71.12690 | 2768.36114  | 754.60424   | 1268.79256  | 1 |
| 29302 | H | 71.46800 | 69.35080 | 70.58190 | 1512.92861  | -1873.15201 | -2007.26076 | 1 |
| 29303 | H | 71.31100 | 71.01980 | 71.33190 | 2627.09780  | -1615.08620 | -536.85857  | 1 |
| 29304 | C | 70.59100 | 69.04780 | 73.37790 | -382.80592  | -720.13681  | 383.80642   | 1 |
| 29305 | H | 69.91400 | 69.92780 | 73.42990 | 1615.46874  | 2277.84087  | 1458.80339  | 1 |
| 29306 | H | 70.01500 | 68.20180 | 72.94690 | -874.82960  | -1991.33842 | 2258.72528  | 1 |
| 29307 | H | 70.85600 | 68.68180 | 74.39290 | -478.94811  | 2035.83386  | 2360.50859  | 1 |
| 29308 | C | 72.36900 | 67.11980 | 71.85690 | 617.65767   | 373.38601   | -560.03701  | 1 |
| 29309 | O | 71.52900 | 66.26080 | 72.13090 | -601.64107  | 378.38902   | -385.15092  | 1 |
| 29310 | N | 72.91100 | 67.09180 | 70.61690 | -462.01505  | 182.83367   | -701.09622  | 1 |
| 29311 | H | 73.50900 | 67.85780 | 70.39290 | 1952.31412  | -640.29952  | -2375.22676 | 1 |
| 29312 | C | 72.45400 | 66.06380 | 69.71790 | 455.05176   | -447.32674  | 624.68307   | 1 |
| 29313 | H | 71.39000 | 65.90280 | 69.80790 | 2177.99818  | 1261.12915  | -1887.89042 | 1 |
| 29314 | C | 72.66000 | 66.54280 | 68.23090 | -184.69736  | -598.57329  | 646.34850   | 1 |
| 29315 | H | 72.52100 | 65.61380 | 67.63890 | -2077.03837 | -942.45905  | 2168.59276  | 1 |

|       |   |          |          |          |             |             |             |   |
|-------|---|----------|----------|----------|-------------|-------------|-------------|---|
| 29316 | H | 73.68700 | 66.96680 | 68.24990 | 1991.31318  | 423.10810   | -2396.39789 | 1 |
| 29317 | C | 71.72500 | 67.59780 | 67.72090 | 114.28259   | -712.45476  | 528.33626   | 1 |
| 29318 | C | 71.74100 | 68.95780 | 67.92090 | 880.89085   | -14.28887   | 168.69695   | 1 |
| 29319 | H | 72.58600 | 69.44280 | 68.38690 | 2017.08762  | 2073.12225  | 1234.98479  | 1 |
| 29320 | N | 70.70500 | 69.55680 | 67.31790 | 713.51501   | 436.68426   | -85.90161   | 1 |
| 29321 | H | 70.35400 | 70.42880 | 67.57890 | -1987.01410 | -1636.03126 | 1804.60087  | 1 |
| 29322 | C | 69.94900 | 68.58180 | 66.73890 | 228.76522   | -47.23946   | -880.98093  | 1 |
| 29323 | C | 70.55000 | 67.30580 | 66.99790 | -205.85219  | 188.64238   | 869.78910   | 1 |
| 29324 | C | 69.90800 | 66.17080 | 66.61990 | -109.47294  | -644.34995  | 617.06658   | 1 |
| 29325 | H | 70.39900 | 65.26380 | 66.93990 | 2033.19004  | -2000.81934 | 1272.87692  | 1 |
| 29326 | C | 68.76100 | 66.27480 | 65.85090 | -393.20845  | -601.14118  | 550.82680   | 1 |
| 29327 | H | 68.26800 | 65.37480 | 65.51390 | 1714.06115  | -2311.89111 | 1212.99476  | 1 |
| 29328 | C | 68.83000 | 68.69180 | 65.97190 | 715.52184   | -287.84191  | -456.59949  | 1 |
| 29329 | H | 68.33200 | 69.62280 | 65.74690 | -2335.23502 | 1355.82151  | 1646.09844  | 1 |
| 29330 | C | 68.20200 | 67.49880 | 65.54590 | -260.29628  | -624.94458  | 596.41941   | 1 |
| 29331 | H | 67.29300 | 67.52580 | 64.96390 | -1281.81872 | 2134.60263  | -1955.50298 | 1 |
| 29332 | C | 73.19300 | 64.74780 | 69.88990 | -496.88788  | -396.40926  | -661.96662  | 1 |
| 29333 | O | 72.67800 | 63.69780 | 69.58190 | -241.86928  | 531.65506   | -558.71192  | 1 |
| 29334 | N | 74.40600 | 64.73880 | 70.51790 | 292.99711   | 457.36682   | -657.36989  | 1 |
| 29335 | H | 74.96100 | 65.55880 | 70.63090 | 528.13801   | -2249.24033 | -2125.23298 | 1 |
| 29336 | C | 74.94700 | 63.53980 | 71.09390 | 197.74805   | 682.30820   | 575.15861   | 1 |
| 29337 | H | 75.05800 | 62.74180 | 70.37490 | 1178.91628  | -1512.70486 | 2470.51181  | 1 |
| 29338 | C | 76.44200 | 63.74480 | 71.56290 | -177.74957  | -864.12960  | -194.63638  | 1 |
| 29339 | H | 76.37000 | 64.76080 | 72.00790 | -1643.01498 | 2157.83651  | 1616.32610  | 1 |
| 29340 | C | 76.85300 | 62.73380 | 72.62490 | -621.66809  | -634.99322  | 193.15001   | 1 |
| 29341 | H | 77.96400 | 62.74180 | 72.63890 | 2683.24955  | -1608.09309 | -47.34691   | 1 |
| 29342 | H | 76.59800 | 61.68380 | 72.36590 | 1166.01066  | 2744.09273  | 1015.14671  | 1 |
| 29343 | H | 76.41300 | 62.97180 | 73.61690 | -1490.55430 | 1618.02243  | -2275.60700 | 1 |
| 29344 | C | 77.39100 | 63.63880 | 70.36590 | -5.96114    | 278.59097   | 862.68963   | 1 |
| 29345 | H | 76.79400 | 64.06380 | 69.53090 | 448.13655   | -2921.25008 | -1044.93942 | 1 |
| 29346 | H | 77.58600 | 62.57880 | 70.09590 | -1530.99539 | 1481.76781  | 2323.02801  | 1 |
| 29347 | C | 78.55700 | 64.57680 | 70.48490 | 825.87728   | -342.58200  | -31.59529   | 1 |
| 29348 | H | 79.21500 | 64.35480 | 71.35190 | -449.85290  | -2973.69877 | -900.64016  | 1 |
| 29349 | H | 78.21700 | 65.63480 | 70.49190 | 2162.74271  | -1937.01925 | 1156.98040  | 1 |
| 29350 | H | 79.23400 | 64.48180 | 69.60890 | -345.91227  | 2208.73191  | 2217.20068  | 1 |
| 29351 | C | 74.09700 | 62.96180 | 72.24090 | 636.37074   | 652.50533   | 38.86666    | 1 |
| 29352 | O | 73.82900 | 61.77480 | 72.30290 | -152.07116  | 191.67824   | -764.26245  | 1 |
| 29353 | N | 73.51000 | 63.84680 | 73.06590 | 344.09450   | -522.39898  | 538.36963   | 1 |
| 29354 | H | 73.79600 | 64.80180 | 73.04790 | 592.51929   | 2830.75155  | 1258.05575  | 1 |
| 29355 | C | 72.53000 | 63.56280 | 74.09690 | -379.31015  | 834.36126   | 150.82837   | 1 |
| 29356 | H | 72.92800 | 62.80480 | 74.75590 | -2242.41451 | -2189.26837 | -260.57337  | 1 |
| 29357 | C | 72.31300 | 64.68880 | 75.09590 | -724.18194  | 548.86503   | -198.91745  | 1 |
| 29358 | H | 71.43000 | 64.41080 | 75.70990 | 727.61949   | -1431.77997 | 2688.80116  | 1 |
| 29359 | H | 71.98400 | 65.56780 | 74.50090 | 977.65107   | -2608.73224 | 1421.40397  | 1 |
| 29360 | C | 73.46500 | 64.97780 | 76.06990 | 305.73784   | 824.68291   | -281.28929  | 1 |
| 29361 | H | 74.37300 | 65.14780 | 75.45290 | -1417.96528 | -134.82035  | 2802.14456  | 1 |
| 29362 | C | 73.19900 | 66.08480 | 77.11390 | -694.91394  | -482.69543  | -343.51268  | 1 |
| 29363 | H | 74.07700 | 66.31080 | 77.75590 | 166.91416   | -2529.93738 | -1849.98486 | 1 |
| 29364 | H | 72.87400 | 67.00380 | 76.57990 | -2618.51597 | -1487.29011 | 905.33431   | 1 |
| 29365 | H | 72.38300 | 65.70780 | 77.76590 | 1607.44606  | -2440.45802 | -1128.23698 | 1 |
| 29366 | C | 73.79100 | 63.67480 | 76.88490 | 641.59147   | 188.16037   | -621.05184  | 1 |
| 29367 | H | 74.66400 | 63.90280 | 77.53190 | 1920.86341  | -1997.12630 | 1451.18917  | 1 |
| 29368 | H | 72.87900 | 63.35080 | 77.43090 | -547.39857  | 2898.95510  | 1128.91913  | 1 |
| 29369 | H | 74.16100 | 62.87780 | 76.20390 | 833.08868   | -2790.84613 | -1155.78527 | 1 |
| 29370 | C | 71.22700 | 62.91880 | 73.51690 | 175.37332   | -374.51263  | -808.13545  | 1 |
| 29371 | O | 70.71800 | 61.98380 | 74.14690 | 564.94096   | -27.81404   | 531.89615   | 1 |
| 29372 | N | 70.70300 | 63.40180 | 72.34790 | 115.24727   | 647.84694   | 539.38764   | 1 |
| 29373 | H | 71.10300 | 64.26580 | 72.05290 | 174.09009   | 113.76305   | -3144.44771 | 1 |
| 29374 | C | 69.73400 | 62.58180 | 71.58590 | 640.27159   | -562.53126  | -267.04601  | 1 |
| 29375 | H | 68.87900 | 62.38480 | 72.21590 | 1284.75015  | -2796.68798 | -551.35069  | 1 |
| 29376 | C | 69.26800 | 63.38280 | 70.33890 | -424.11427  | 470.68431   | 671.80712   | 1 |
| 29377 | H | 68.28800 | 62.96680 | 70.02090 | 2091.53948  | -2261.67343 | 517.21090   | 1 |

|       |   |          |          |          |             |             |             |   |
|-------|---|----------|----------|----------|-------------|-------------|-------------|---|
| 29378 | H | 69.96100 | 63.29480 | 69.47590 | -2178.26464 | 41.18536    | -2288.84361 | 1 |
| 29379 | H | 69.03900 | 64.45180 | 70.53990 | 993.70684   | 964.86977   | -2829.56078 | 1 |
| 29380 | C | 70.21000 | 61.21680 | 71.12590 | 476.54509   | 614.10727   | -486.87038  | 1 |
| 29381 | O | 69.50700 | 60.27980 | 71.39790 | -547.58014  | -387.31911  | -425.23599  | 1 |
| 29382 | N | 71.39700 | 61.10080 | 70.48690 | -240.39950  | -761.67007  | 235.28611   | 1 |
| 29383 | H | 71.96500 | 61.91780 | 70.43290 | 2152.12498  | 707.11625   | -2179.47232 | 1 |
| 29384 | C | 71.91600 | 59.80780 | 70.10590 | -141.89557  | 590.96465   | 689.67830   | 1 |
| 29385 | H | 71.21400 | 59.26580 | 69.48990 | -706.79395  | -1774.27767 | -2499.30406 | 1 |
| 29386 | C | 73.26300 | 60.01580 | 69.27590 | 207.85591   | 199.10790   | -871.35284  | 1 |
| 29387 | H | 73.86400 | 59.08180 | 69.30890 | -1636.11255 | -2109.22268 | -1670.45624 | 1 |
| 29388 | H | 73.85400 | 60.81780 | 69.76790 | 1897.82176  | -1726.92681 | -1797.38188 | 1 |
| 29389 | C | 73.07700 | 60.37180 | 67.86290 | -639.31348  | -248.88951  | 605.39498   | 1 |
| 29390 | C | 71.99300 | 61.12680 | 67.38390 | -171.10750  | -677.55341  | -578.58208  | 1 |
| 29391 | H | 71.19200 | 61.52980 | 67.98490 | -1068.20851 | -1852.22056 | 2297.42879  | 1 |
| 29392 | C | 71.80300 | 61.37380 | 66.02090 | -126.47382  | -445.36158  | -785.30275  | 1 |
| 29393 | H | 70.93800 | 61.91180 | 65.66190 | -2714.81127 | 583.87189   | -1522.77408 | 1 |
| 29394 | C | 72.70500 | 60.88880 | 65.10690 | 539.93130   | -571.69802  | 411.81921   | 1 |
| 29395 | H | 72.48900 | 61.01780 | 64.05590 | -1412.98112 | 1814.15602  | -2178.93089 | 1 |
| 29396 | C | 73.97600 | 59.87980 | 66.90290 | -686.35659  | -277.88340  | -554.46816  | 1 |
| 29397 | H | 74.74700 | 59.17780 | 67.18090 | -537.82180  | -1935.20329 | -2422.11094 | 1 |
| 29398 | C | 73.75000 | 60.08480 | 65.52790 | 326.43879   | -750.54189  | 348.79959   | 1 |
| 29399 | H | 74.35200 | 59.44180 | 64.90390 | 1597.04518  | -2414.64838 | 1169.09766  | 1 |
| 29400 | C | 72.12500 | 58.72180 | 71.18490 | -319.37285  | 871.04649   | -87.00105   | 1 |
| 29401 | O | 71.74000 | 57.56280 | 70.96290 | -461.74365  | 532.60497   | -402.89018  | 1 |
| 29402 | N | 72.61100 | 59.07480 | 72.37390 | 609.74416   | -26.88695   | 560.01804   | 1 |
| 29403 | H | 72.89000 | 60.02280 | 72.50490 | -2048.45752 | -287.90352  | -2387.57865 | 1 |
| 29404 | C | 72.68100 | 58.14080 | 73.49390 | 699.28323   | -419.20585  | 359.22946   | 1 |
| 29405 | H | 73.09600 | 57.19180 | 73.18990 | -1648.63924 | 668.94453   | -2614.82328 | 1 |
| 29406 | C | 73.64600 | 58.74880 | 74.51190 | 246.80312   | -3.93243    | 866.47462   | 1 |
| 29407 | H | 74.62300 | 58.87080 | 73.99490 | -2081.34823 | -1929.86584 | -1366.02044 | 1 |
| 29408 | C | 73.16700 | 60.07580 | 75.15390 | 427.60107   | -528.05411  | -592.90128  | 1 |
| 29409 | H | 72.36900 | 59.90880 | 75.90790 | -1747.25852 | -1824.14202 | -1878.62629 | 1 |
| 29410 | H | 72.74200 | 60.71680 | 74.35090 | 2063.57255  | 1160.16381  | -2074.25942 | 1 |
| 29411 | H | 73.98700 | 60.55380 | 75.73090 | 49.42166    | -1989.04614 | -2432.60798 | 1 |
| 29412 | C | 74.00800 | 57.66680 | 75.58290 | -420.92743  | 579.08917   | -595.78415  | 1 |
| 29413 | H | 74.22300 | 56.72280 | 75.03790 | -1807.91594 | 1581.56640  | -2062.63924 | 1 |
| 29414 | H | 73.10600 | 57.48480 | 76.20490 | -1538.53947 | 1854.39441  | -2052.72844 | 1 |
| 29415 | C | 75.17000 | 58.18180 | 76.40990 | 752.77662   | 243.38693   | -447.84550  | 1 |
| 29416 | H | 76.07100 | 58.47080 | 75.82890 | 2374.24312  | -190.18960  | 2030.62679  | 1 |
| 29417 | H | 74.83000 | 59.07680 | 76.97390 | -1849.58533 | 2231.99326  | -1272.88633 | 1 |
| 29418 | H | 75.49500 | 57.43180 | 77.16290 | 2546.61485  | 743.51621   | 1670.12790  | 1 |
| 29419 | C | 71.27200 | 57.86480 | 74.12990 | -487.66772  | 561.63517   | -561.29589  | 1 |
| 29420 | O | 71.00500 | 56.75880 | 74.66690 | -283.62694  | 354.07219   | 654.96007   | 1 |
| 29421 | N | 70.33700 | 58.79980 | 73.99790 | 632.56668   | 550.17573   | 91.54139    | 1 |
| 29422 | H | 70.55600 | 59.61580 | 73.46790 | 767.32572   | -2082.35285 | -2215.73883 | 1 |
| 29423 | C | 68.93700 | 58.59380 | 74.35490 | 579.78259   | 584.69550   | -399.46939  | 1 |
| 29424 | H | 68.88800 | 58.26980 | 75.38390 | 194.35220   | 2093.60329  | -2357.82329 | 1 |
| 29425 | C | 68.03700 | 59.88580 | 74.21290 | -230.60440  | -800.48705  | 337.74631   | 1 |
| 29426 | H | 66.94500 | 59.71580 | 74.32590 | -672.22769  | -2518.91707 | 1738.61853  | 1 |
| 29427 | H | 68.26200 | 60.32580 | 73.21790 | -1046.98488 | -2139.64603 | -2048.41347 | 1 |
| 29428 | O | 68.38100 | 60.83480 | 75.21390 | -266.09557  | 762.46427   | 47.38163    | 1 |
| 29429 | H | 69.14200 | 61.29780 | 74.85590 | 791.18150   | 3037.27204  | -358.97255  | 1 |
| 29430 | C | 68.26600 | 57.55280 | 73.49690 | -44.64990   | -609.40941  | -666.07878  | 1 |
| 29431 | O | 67.62400 | 56.66180 | 74.00890 | -161.84997  | 781.09397   | -136.84894  | 1 |
| 29432 | N | 68.41900 | 57.71580 | 72.14690 | -303.26697  | -12.46717   | -796.90566  | 1 |
| 29433 | H | 68.91000 | 58.48880 | 71.75390 | 1130.24598  | -2406.71399 | 1643.44506  | 1 |
| 29434 | C | 68.00800 | 56.73880 | 71.10290 | 143.21043   | -387.09213  | -805.38270  | 1 |
| 29435 | H | 66.93000 | 56.69380 | 71.05990 | -2645.89074 | 1733.12346  | -203.44868  | 1 |
| 29436 | C | 68.42200 | 57.32980 | 69.74790 | -577.37324  | -671.55300  | -213.55790  | 1 |
| 29437 | H | 68.40100 | 56.60980 | 68.90190 | 687.48060   | 2187.33253  | -2169.22075 | 1 |
| 29438 | H | 69.46400 | 57.71380 | 69.75790 | -2193.66017 | 995.35861   | 2045.22913  | 1 |
| 29439 | C | 67.53700 | 58.48480 | 69.21390 | -520.23272  | 94.51965    | 753.21796   | 1 |

|       |   |          |          |          |             |             |             |   |
|-------|---|----------|----------|----------|-------------|-------------|-------------|---|
| 29440 | H | 67.35400 | 59.16180 | 70.07590 | 1486.72880  | -2746.04679 | 66.07898    | 1 |
| 29441 | C | 68.30300 | 59.44180 | 68.21290 | -906.68541  | 104.19287   | -184.74276  | 1 |
| 29442 | H | 67.50000 | 60.12880 | 67.86990 | -484.52412  | 2732.94448  | -1521.00795 | 1 |
| 29443 | H | 68.58400 | 58.83980 | 67.32290 | 3121.05735  | -182.94605  | -66.81040   | 1 |
| 29444 | H | 69.13000 | 60.00380 | 68.69590 | -2166.73404 | 642.35615   | -2214.19176 | 1 |
| 29445 | C | 66.27600 | 58.00980 | 68.50990 | -873.28746  | 285.87171   | -167.85780  | 1 |
| 29446 | H | 66.46300 | 57.26280 | 67.70990 | -3000.47059 | -552.77308  | 822.59740   | 1 |
| 29447 | H | 65.65900 | 58.82780 | 68.07890 | 785.19618   | -1263.02768 | -2761.17646 | 1 |
| 29448 | H | 65.59800 | 57.65380 | 69.31590 | 1193.03099  | 2504.00554  | -1502.67718 | 1 |
| 29449 | C | 68.65300 | 55.42080 | 71.41890 | 374.42243   | -364.67484  | -734.21406  | 1 |
| 29450 | O | 67.96100 | 54.39280 | 71.36790 | 438.46429   | 561.93266   | -348.24397  | 1 |
| 29451 | N | 69.99700 | 55.34680 | 71.65690 | 334.81259   | 579.09419   | 516.56250   | 1 |
| 29452 | H | 70.50300 | 56.19780 | 71.54090 | -1995.91961 | -2325.81409 | 699.64347   | 1 |
| 29453 | C | 70.66600 | 54.11680 | 71.95390 | 418.69627   | 189.26775   | -787.42549  | 1 |
| 29454 | H | 70.37400 | 53.43580 | 71.16790 | 845.85705   | 2374.54226  | -1899.65661 | 1 |
| 29455 | C | 72.21100 | 54.42880 | 71.99990 | 374.39037   | 692.27009   | -475.22627  | 1 |
| 29456 | H | 72.41300 | 55.16980 | 72.80390 | 335.84462   | -471.98686  | -3094.82102 | 1 |
| 29457 | H | 72.52700 | 54.79380 | 70.99990 | -2891.54356 | -475.46478  | -1188.43438 | 1 |
| 29458 | C | 72.99600 | 53.16680 | 72.28990 | -175.18698  | 912.09501   | 26.96025    | 1 |
| 29459 | O | 73.09800 | 52.74080 | 73.45190 | -336.40478  | -22.30506   | 713.98534   | 1 |
| 29460 | O | 73.42800 | 52.48280 | 71.30890 | 3.62019     | -557.82922  | 536.31042   | 1 |
| 29461 | C | 70.16900 | 53.41580 | 73.19190 | 730.44268   | 27.49475    | 517.82262   | 1 |
| 29462 | O | 70.09800 | 52.19680 | 73.28190 | -338.98626  | -285.42318  | 649.93782   | 1 |
| 29463 | N | 69.80300 | 54.19280 | 74.24790 | -550.03502  | -427.82792  | 474.66002   | 1 |
| 29464 | H | 69.85400 | 55.18780 | 74.23790 | -113.50087  | 2195.68367  | 2261.65105  | 1 |
| 29465 | C | 69.17300 | 53.66180 | 75.45390 | 474.35535   | 650.59435   | 430.97096   | 1 |
| 29466 | H | 69.73600 | 52.83980 | 75.86990 | -2544.20665 | -1764.29433 | -580.84021  | 1 |
| 29467 | C | 69.09800 | 54.71380 | 76.61790 | -522.22856  | 619.88521   | -460.76932  | 1 |
| 29468 | H | 69.19700 | 55.75280 | 76.23590 | -2719.84796 | 536.24120   | -1522.07036 | 1 |
| 29469 | H | 68.12200 | 54.60580 | 77.13890 | 1655.92099  | 1361.33859  | -2306.61292 | 1 |
| 29470 | C | 70.26100 | 54.47080 | 77.66490 | 615.74512   | -220.38302  | 611.56908   | 1 |
| 29471 | H | 70.11000 | 55.20080 | 78.48890 | -1958.36255 | 1929.58321  | 1559.46625  | 1 |
| 29472 | H | 70.18700 | 53.40880 | 77.98390 | -1782.52816 | -2189.83819 | 1374.63265  | 1 |
| 29473 | C | 71.68300 | 54.73580 | 77.10590 | 309.86227   | 743.38769   | 437.26604   | 1 |
| 29474 | H | 72.30700 | 54.92680 | 78.00490 | 1713.14981  | 1894.23961  | 1834.02724  | 1 |
| 29475 | H | 71.52300 | 55.67780 | 76.53890 | 1217.49611  | -691.06016  | 2801.99703  | 1 |
| 29476 | N | 72.29500 | 53.58780 | 76.26790 | -660.52098  | -467.05110  | 244.23785   | 1 |
| 29477 | H | 72.33300 | 53.71780 | 75.27790 | -2312.27078 | 1225.63618  | -1782.65551 | 1 |
| 29478 | C | 72.51900 | 52.36480 | 76.67390 | 647.26313   | 252.68095   | 573.64640   | 1 |
| 29479 | N | 72.45100 | 51.90980 | 77.92390 | 509.12341   | 601.77331   | 300.69319   | 1 |
| 29480 | H | 72.43900 | 52.51280 | 78.72190 | -1800.54236 | 2484.09126  | 771.57210   | 1 |
| 29481 | H | 72.53400 | 50.92280 | 78.06190 | 605.10983   | 50.78793    | 3077.59353  | 1 |
| 29482 | N | 72.86300 | 51.48580 | 75.77490 | -515.28073  | 380.14536   | 566.88064   | 1 |
| 29483 | H | 72.93300 | 51.87680 | 74.85690 | 412.60337   | -2744.67268 | -1456.40159 | 1 |
| 29484 | H | 73.24600 | 50.61580 | 76.08390 | 2872.64718  | 39.89041    | -1254.35596 | 1 |
| 29485 | C | 67.78400 | 53.02580 | 75.23090 | 404.15345   | -685.17088  | 400.05021   | 1 |
| 29486 | O | 67.57600 | 51.90080 | 75.66890 | 724.16851   | 9.04000     | -280.20726  | 1 |
| 29487 | N | 66.94800 | 53.66880 | 74.42790 | 256.66799   | -509.72332  | -603.88690  | 1 |
| 29488 | H | 67.26800 | 54.51680 | 74.01190 | -130.13703  | 587.26005   | 3088.71573  | 1 |
| 29489 | C | 65.70600 | 53.17180 | 73.94890 | 786.40618   | -324.57604  | -267.62692  | 1 |
| 29490 | H | 65.24000 | 52.91680 | 74.88890 | -789.13568  | 2952.99787  | 825.19994   | 1 |
| 29491 | C | 65.01600 | 54.39180 | 73.21590 | -530.22118  | -555.49007  | -489.83947  | 1 |
| 29492 | H | 65.75700 | 55.08780 | 72.76690 | 569.99946   | -1154.09451 | -2862.56459 | 1 |
| 29493 | H | 64.48300 | 54.96280 | 74.00590 | -1933.68752 | -1931.97011 | -1555.41645 | 1 |
| 29494 | C | 63.96000 | 54.00580 | 72.20890 | 572.61672   | -632.67822  | -246.23310  | 1 |
| 29495 | C | 62.81500 | 53.27380 | 72.56890 | 65.25153    | -883.20719  | 104.90922   | 1 |
| 29496 | H | 62.64500 | 52.99980 | 73.59990 | -1384.12650 | -1977.31026 | 2010.47784  | 1 |
| 29497 | C | 61.86200 | 53.00680 | 71.55590 | -417.30699  | 314.59678   | 764.87131   | 1 |
| 29498 | H | 60.98800 | 52.51080 | 71.95090 | -310.35988  | -3069.79902 | -517.10905  | 1 |
| 29499 | C | 62.07000 | 53.38380 | 70.23690 | -291.92299  | 98.48302    | 866.44083   | 1 |
| 29500 | O | 61.17200 | 53.02380 | 69.23190 | 476.41208   | -55.23612   | -609.43969  | 1 |
| 29501 | H | 61.57000 | 53.06280 | 68.35890 | 831.84284   | -2227.98231 | 2030.80902  | 1 |



|       |   |          |          |          |             |             |             |   |
|-------|---|----------|----------|----------|-------------|-------------|-------------|---|
| 29502 | C | 64.22300 | 54.25280 | 70.86090 | 632.63922   | -287.65141  | -562.41550  | 1 |
| 29503 | H | 65.19200 | 54.70680 | 70.71490 | 1332.08516  | 2791.30538  | -622.27282  | 1 |
| 29504 | C | 63.28000 | 53.95980 | 69.85490 | -296.23735  | 553.80008   | 683.50105   | 1 |
| 29505 | H | 63.50300 | 54.29180 | 68.85190 | 1256.30861  | -1210.12910 | -2601.09485 | 1 |
| 29506 | C | 65.83400 | 51.91380 | 73.11590 | 556.92574   | 159.88021   | -696.36489  | 1 |
| 29507 | O | 65.14200 | 50.94680 | 73.39390 | 535.01553   | 538.19400   | -220.53748  | 1 |
| 29508 | N | 66.72600 | 51.85580 | 72.13990 | 404.25962   | 591.77573   | -455.10516  | 1 |
| 29509 | H | 67.18100 | 52.70080 | 71.86790 | 1185.54700  | -1013.52919 | 2715.00121  | 1 |
| 29510 | C | 67.06100 | 50.73780 | 71.34590 | 771.48529   | 441.17136   | -168.04741  | 1 |
| 29511 | H | 66.18800 | 50.37980 | 70.82090 | -2281.29349 | -433.92167  | -2142.11801 | 1 |
| 29512 | C | 68.18900 | 50.95680 | 70.27890 | 593.65038   | 662.49591   | 192.65161   | 1 |
| 29513 | H | 68.49600 | 49.97580 | 69.85790 | 1427.92864  | 1590.91159  | 2303.06100  | 1 |
| 29514 | H | 69.07300 | 51.42780 | 70.75990 | -541.14784  | 3117.21600  | 95.43952    | 1 |
| 29515 | C | 67.74500 | 51.90280 | 69.18490 | -410.86180  | -798.79128  | 110.63539   | 1 |
| 29516 | H | 67.22000 | 52.78380 | 69.61290 | -1795.49656 | 1378.46496  | 2207.95612  | 1 |
| 29517 | C | 68.90400 | 52.46280 | 68.26490 | 490.17772   | 656.81448   | -405.66699  | 1 |
| 29518 | H | 69.21300 | 51.65180 | 67.57190 | -835.68160  | 2436.15343  | 1833.65022  | 1 |
| 29519 | H | 69.81900 | 52.69180 | 68.85290 | 2287.63570  | -1560.21714 | -1450.65686 | 1 |
| 29520 | H | 68.67000 | 53.44480 | 67.79890 | -532.83512  | 2276.23622  | 2124.05922  | 1 |
| 29521 | C | 66.79800 | 51.18780 | 68.16290 | 92.96459    | 262.92868   | -873.74311  | 1 |
| 29522 | H | 67.28100 | 50.33580 | 67.63890 | -1982.37956 | -2083.35853 | -1284.10753 | 1 |
| 29523 | H | 66.50300 | 51.92080 | 67.38290 | -1887.29411 | 494.89760   | -2490.08973 | 1 |
| 29524 | H | 65.90400 | 50.68680 | 68.59190 | -1270.46405 | 1262.07688  | -2607.69284 | 1 |
| 29525 | C | 67.57100 | 49.59980 | 72.22890 | -528.80305  | -738.75032  | 9.05302     | 1 |
| 29526 | O | 67.16500 | 48.45580 | 72.05690 | 150.83461   | -378.39494  | -665.37440  | 1 |
| 29527 | N | 68.39700 | 49.92080 | 73.24090 | 626.54943   | 425.79231   | -364.58448  | 1 |
| 29528 | H | 68.72700 | 50.85680 | 73.34190 | 1461.92908  | -31.24706   | 2771.99468  | 1 |
| 29529 | C | 69.08400 | 48.91580 | 74.02090 | -288.62854  | -751.06639  | 406.91597   | 1 |
| 29530 | H | 69.46000 | 48.13080 | 73.38090 | 1779.20058  | 451.11523   | 2540.24198  | 1 |
| 29531 | C | 70.26000 | 49.50580 | 74.88190 | 451.31701   | -754.84863  | 130.46984   | 1 |
| 29532 | H | 69.96200 | 50.21280 | 75.68490 | 2038.17934  | 1382.86690  | 1946.66416  | 1 |
| 29533 | H | 70.89000 | 50.10780 | 74.19090 | -2163.85049 | 1298.12498  | -1914.80397 | 1 |
| 29534 | H | 70.83600 | 48.64580 | 75.28590 | 1442.48995  | 2755.42722  | -516.44639  | 1 |
| 29535 | C | 68.12500 | 48.26380 | 75.04290 | 738.85576   | 522.63343   | -63.87598   | 1 |
| 29536 | O | 68.45400 | 47.23480 | 75.64590 | 278.89964   | -686.91240  | 198.75853   | 1 |
| 29537 | N | 66.89700 | 48.82080 | 75.37790 | 80.71654    | 416.61786   | 734.10977   | 1 |
| 29538 | H | 66.81100 | 49.74780 | 75.01990 | -1528.00014 | 45.51326    | -2762.28151 | 1 |
| 29539 | C | 65.93700 | 48.35880 | 76.39690 | -640.92064  | 518.45635   | -438.79472  | 1 |
| 29540 | H | 66.38800 | 47.45080 | 76.76890 | -1527.62301 | -1823.40126 | 2053.08314  | 1 |
| 29541 | C | 65.75500 | 49.42180 | 77.42890 | -356.94903  | -678.94741  | 476.93139   | 1 |
| 29542 | H | 65.76800 | 50.45180 | 77.01090 | -1477.89510 | 1170.75989  | 2533.11004  | 1 |
| 29543 | C | 64.37800 | 49.29580 | 78.19190 | -263.61743  | 780.72023   | -434.79422  | 1 |
| 29544 | H | 64.35700 | 50.15180 | 78.89890 | 1458.40810  | 2781.43741  | 304.49970   | 1 |
| 29545 | H | 63.54600 | 49.42280 | 77.46690 | 1372.35221  | -2544.83110 | -1185.33817 | 1 |
| 29546 | H | 64.34900 | 48.32980 | 78.73890 | 2090.79010  | -2022.35620 | 1139.40808  | 1 |
| 29547 | C | 66.94300 | 49.36980 | 78.37390 | 587.24687   | -520.66731  | 421.28645   | 1 |
| 29548 | H | 67.87300 | 49.13980 | 77.81290 | 1542.98426  | 2357.81258  | -1414.16151 | 1 |
| 29549 | H | 66.93800 | 48.50780 | 79.07490 | 1400.03810  | 711.37108   | -2726.20084 | 1 |
| 29550 | C | 67.20200 | 50.71380 | 79.14890 | -609.11670  | 384.00768   | 581.52964   | 1 |
| 29551 | H | 68.24400 | 50.65780 | 79.52990 | -1761.03876 | 869.22056   | -2477.11856 | 1 |
| 29552 | H | 66.39500 | 50.70680 | 79.91290 | 1648.09154  | -1972.29562 | 1780.77709  | 1 |
| 29553 | H | 67.23000 | 51.56080 | 78.43090 | 2679.20498  | -1431.16412 | 738.12134   | 1 |
| 29554 | C | 64.68400 | 47.94480 | 75.66090 | -4.47276    | -890.39056  | 77.07841    | 1 |
| 29555 | O | 64.12400 | 46.89680 | 75.93190 | -386.48034  | -521.45951  | -444.19351  | 1 |
| 29556 | N | 64.12500 | 48.67480 | 74.69190 | 71.06841    | 145.52878   | 828.54755   | 1 |
| 29557 | H | 64.58500 | 49.51780 | 74.42290 | 1204.87276  | 2331.81292  | -1748.33772 | 1 |
| 29558 | C | 62.87300 | 48.23880 | 73.93890 | 682.65756   | 593.53180   | -100.94339  | 1 |
| 29559 | H | 62.32800 | 47.76380 | 74.74190 | 1608.70408  | -717.09272  | 2590.47637  | 1 |
| 29560 | C | 62.19700 | 49.49980 | 73.38790 | -843.63770  | 83.49633    | 381.37072   | 1 |
| 29561 | H | 62.95800 | 50.04680 | 72.79190 | 12.53410    | 2245.28363  | 2222.08826  | 1 |
| 29562 | C | 61.03600 | 49.08980 | 72.50190 | -517.48125  | -223.68730  | -722.74656  | 1 |
| 29563 | H | 61.35600 | 48.76480 | 71.48890 | -2545.55883 | 1873.57211  | -280.80316  | 1 |

|       |   |          |          |          |             |             |             |   |
|-------|---|----------|----------|----------|-------------|-------------|-------------|---|
| 29564 | H | 60.40500 | 48.31080 | 72.98290 | -2261.22495 | -1775.77043 | 1283.75187  | 1 |
| 29565 | H | 60.31000 | 49.90180 | 72.28490 | 2295.02908  | -1427.52812 | -1564.35121 | 1 |
| 29566 | C | 61.82500 | 50.37880 | 74.60090 | -608.12291  | -642.80668  | 208.92363   | 1 |
| 29567 | H | 61.06500 | 51.09380 | 74.21890 | 1938.83000  | -412.57060  | 2427.21487  | 1 |
| 29568 | H | 62.72800 | 50.86480 | 75.02890 | 1173.84945  | -2475.05909 | 1503.92813  | 1 |
| 29569 | H | 61.21500 | 49.71080 | 75.24590 | -2275.86113 | 2129.61154  | -583.08871  | 1 |
| 29570 | C | 63.20100 | 47.23580 | 72.87290 | 398.65320   | 326.04880   | 749.19620   | 1 |
| 29571 | O | 62.38700 | 46.38080 | 72.49590 | -512.46231  | 614.45072   | -162.32727  | 1 |
| 29572 | N | 64.47400 | 47.13380 | 72.43890 | -213.16995  | 690.80047   | -473.47581  | 1 |
| 29573 | H | 65.23300 | 47.65180 | 72.82590 | 451.98819   | -1141.71893 | -2888.55572 | 1 |
| 29574 | C | 64.77200 | 46.31680 | 71.22390 | -630.52424  | 232.96669   | -644.66306  | 1 |
| 29575 | H | 64.08400 | 45.51580 | 70.99690 | -2501.24040 | 1249.93230  | -1494.77491 | 1 |
| 29576 | C | 64.96500 | 47.11680 | 69.95990 | -668.00175  | 658.09326   | 55.62564    | 1 |
| 29577 | H | 65.19000 | 46.42980 | 69.11690 | 768.13137   | -2369.07397 | -1893.11762 | 1 |
| 29578 | H | 65.80000 | 47.84180 | 70.06290 | -2017.38818 | -1776.27298 | -1643.59359 | 1 |
| 29579 | N | 62.80000 | 47.30780 | 68.67190 | 226.28293   | -141.58457  | -791.23272  | 1 |
| 29580 | H | 62.85700 | 46.39880 | 68.25890 | -1794.65273 | 2294.88292  | 1255.60289  | 1 |
| 29581 | C | 63.74700 | 47.92880 | 69.43990 | -698.84711  | 623.40693   | 78.22906    | 1 |
| 29582 | C | 61.90700 | 48.23880 | 68.29190 | 376.97620   | -503.00922  | 632.31567   | 1 |
| 29583 | H | 61.02100 | 47.93880 | 67.73390 | -707.40627  | 506.88706   | -3031.01010 | 1 |
| 29584 | N | 62.23400 | 49.43580 | 68.75890 | 393.46663   | -649.15653  | -307.02506  | 1 |
| 29585 | C | 63.35500 | 49.21480 | 69.53490 | -550.14866  | 716.92046   | -252.67266  | 1 |
| 29586 | H | 63.91700 | 50.02480 | 69.98390 | -1340.16791 | 1019.97910  | 2673.23123  | 1 |
| 29587 | C | 66.09300 | 45.60480 | 71.41390 | 727.55431   | -184.90707  | -482.78070  | 1 |
| 29588 | O | 67.00800 | 45.60980 | 70.60490 | 528.67711   | -548.83896  | 24.48597    | 1 |
| 29589 | N | 66.26200 | 44.96680 | 72.58690 | -422.18887  | -324.11670  | 656.32044   | 1 |
| 29590 | H | 65.54000 | 44.88280 | 73.26990 | -1670.45708 | 1025.70151  | 2479.09392  | 1 |
| 29591 | C | 67.55100 | 44.53680 | 72.97490 | -464.56429  | 553.51374   | -591.90628  | 1 |
| 29592 | H | 68.36100 | 45.24380 | 72.87890 | 2728.29858  | -1433.62198 | 488.06698   | 1 |
| 29593 | C | 67.54100 | 44.11380 | 74.52790 | 665.11351   | 147.32855   | -591.89725  | 1 |
| 29594 | H | 67.20500 | 45.01580 | 75.08290 | 1833.46719  | -1050.60746 | -2311.79038 | 1 |
| 29595 | H | 66.79700 | 43.31280 | 74.72290 | 2390.69056  | 612.73623   | -1935.69336 | 1 |
| 29596 | H | 68.52800 | 43.74880 | 74.88590 | -1402.31919 | -894.98403  | -2679.17864 | 1 |
| 29597 | C | 68.08100 | 43.25480 | 72.25790 | -419.34462  | 117.26893   | 810.03220   | 1 |
| 29598 | O | 69.24900 | 42.90780 | 72.37290 | 615.23941   | -447.11669  | -66.98575   | 1 |
| 29599 | N | 67.23100 | 42.50780 | 71.53190 | -17.64070   | 615.53019   | 591.83690   | 1 |
| 29600 | H | 66.32800 | 42.91980 | 71.44090 | 2890.75518  | -457.64646  | 1087.61903  | 1 |
| 29601 | C | 67.54800 | 41.26580 | 70.93090 | -358.15902  | 275.53679   | 803.75862   | 1 |
| 29602 | H | 68.32300 | 40.86780 | 71.56890 | -2032.91833 | 1769.11326  | -1673.31738 | 1 |
| 29603 | C | 66.43900 | 40.21380 | 70.95290 | 635.06003   | 531.00446   | -369.53760  | 1 |
| 29604 | H | 66.01200 | 40.24680 | 71.97790 | -1875.50752 | 1373.34505  | -2153.77607 | 1 |
| 29605 | O | 66.96200 | 38.92080 | 70.87490 | 527.02303   | 99.53518    | 556.33722   | 1 |
| 29606 | H | 67.72100 | 38.72880 | 71.43090 | -1600.10739 | -1194.28707 | 2434.40270  | 1 |
| 29607 | C | 65.34400 | 40.37980 | 69.88590 | 725.98116   | -17.71252   | -519.93374  | 1 |
| 29608 | H | 64.40400 | 39.92280 | 70.26290 | 1692.15700  | 2088.26995  | -1635.35071 | 1 |
| 29609 | H | 65.72800 | 39.97280 | 68.92590 | -243.29724  | -3049.84425 | 660.91254   | 1 |
| 29610 | H | 65.10900 | 41.45680 | 69.74290 | 1910.51114  | 2003.79376  | -1490.18054 | 1 |
| 29611 | C | 68.04700 | 41.39180 | 69.50990 | -702.42783  | -581.51568  | 109.24285   | 1 |
| 29612 | O | 68.49600 | 40.41480 | 68.88190 | 268.45616   | -327.39415  | -652.08204  | 1 |
| 29613 | N | 67.97800 | 42.58880 | 68.90590 | -122.37394  | -210.39026  | 802.98671   | 1 |
| 29614 | H | 67.40400 | 43.31080 | 69.28390 | 1207.90456  | 1534.94607  | 2461.89759  | 1 |
| 29615 | C | 68.25700 | 42.84080 | 67.50690 | -706.43442  | 489.10688   | 374.30481   | 1 |
| 29616 | H | 69.24300 | 42.47480 | 67.26390 | 1539.06241  | -1915.60832 | -1933.61835 | 1 |
| 29617 | C | 67.21300 | 42.10680 | 66.52190 | 731.90133   | 513.23244   | 105.52792   | 1 |
| 29618 | H | 67.50300 | 42.52180 | 65.53290 | -2148.82595 | 383.96726   | 2289.05740  | 1 |
| 29619 | H | 67.39400 | 41.01280 | 66.44490 | 1678.78336  | -116.72208  | -2644.59873 | 1 |
| 29620 | C | 65.73100 | 42.38580 | 66.82990 | -631.73612  | -653.30083  | -116.78060  | 1 |
| 29621 | O | 65.28300 | 43.17080 | 67.69590 | 676.36586   | 218.79586   | 301.87521   | 1 |
| 29622 | N | 64.85100 | 41.84280 | 65.95390 | -496.60947  | 162.28026   | 683.81908   | 1 |
| 29623 | H | 65.23300 | 41.18080 | 65.30890 | 1871.33752  | -1536.67222 | -1971.75595 | 1 |
| 29624 | H | 63.87600 | 42.02380 | 66.07990 | -1002.12328 | -1760.86934 | -2405.18452 | 1 |
| 29625 | C | 68.28700 | 44.37280 | 67.28890 | 579.54768   | 268.52599   | 631.27142   | 1 |

|       |   |          |          |          |             |             |             |   |
|-------|---|----------|----------|----------|-------------|-------------|-------------|---|
| 29626 | O | 67.32600 | 45.05080 | 66.84790 | -307.12846  | 88.51277    | -737.27454  | 1 |
| 29627 | N | 69.42800 | 45.01480 | 67.51390 | -533.42642  | 455.56596   | 504.76870   | 1 |
| 29628 | H | 70.29900 | 44.54280 | 67.62790 | 3049.71477  | 112.37222   | 660.10064   | 1 |
| 29629 | C | 69.59800 | 46.39680 | 67.30590 | -273.72489  | -734.69227  | -457.50595  | 1 |
| 29630 | H | 69.34300 | 46.64780 | 66.28690 | 2356.48873  | 544.13992   | 1983.71287  | 1 |
| 29631 | C | 68.81800 | 47.28080 | 68.35890 | -773.36788  | 385.35006   | -366.42072  | 1 |
| 29632 | H | 67.74200 | 47.08880 | 68.15690 | -1157.65271 | 1179.81371  | 2690.14945  | 1 |
| 29633 | H | 68.95200 | 48.36380 | 68.15390 | 2599.98840  | 1615.42158  | 679.43721   | 1 |
| 29634 | O | 69.09100 | 46.87480 | 69.72790 | 61.60281    | 593.72252   | -536.98787  | 1 |
| 29635 | H | 68.34100 | 46.30280 | 69.90690 | -1015.77706 | -1692.49893 | 2442.95832  | 1 |
| 29636 | C | 71.05900 | 46.81080 | 67.33990 | -621.55580  | -230.65392  | -648.18942  | 1 |
| 29637 | O | 71.31200 | 47.99080 | 67.04890 | -142.57377  | -401.08519  | 653.98600   | 1 |
| 29638 | N | 72.08300 | 46.00080 | 67.59690 | -258.60912  | 201.95991   | -795.53263  | 1 |
| 29639 | H | 71.88000 | 45.04780 | 67.80590 | -1964.90801 | 382.30492   | 2441.72884  | 1 |
| 29640 | C | 73.48600 | 46.44780 | 67.59790 | -140.26433  | 822.73370   | 398.27858   | 1 |
| 29641 | H | 73.52400 | 47.26880 | 68.29890 | -116.30935  | 570.18118   | -3102.82192 | 1 |
| 29642 | C | 74.37500 | 45.29980 | 68.15590 | 326.19417   | -680.25084  | 468.38670   | 1 |
| 29643 | H | 74.02300 | 44.33880 | 67.72490 | 2163.84090  | 1748.92591  | -1458.60838 | 1 |
| 29644 | H | 74.17000 | 45.24680 | 69.24690 | -484.56415  | -661.19926  | 3029.76126  | 1 |
| 29645 | C | 75.92100 | 45.26480 | 67.94090 | -711.54404  | -174.87263  | -576.73118  | 1 |
| 29646 | H | 76.30900 | 44.56380 | 68.70990 | 877.66942   | 2496.71360  | 1699.49766  | 1 |
| 29647 | H | 76.31100 | 46.28280 | 68.15790 | 2700.14948  | 930.70805   | 1272.49708  | 1 |
| 29648 | C | 76.47700 | 44.90180 | 66.52690 | -718.68384  | 75.48813    | 578.14318   | 1 |
| 29649 | O | 77.48800 | 45.40880 | 66.06490 | -607.76872  | -389.88172  | -357.94404  | 1 |
| 29650 | N | 75.84000 | 43.91380 | 65.89590 | 652.72093   | -400.68386  | -294.61459  | 1 |
| 29651 | H | 75.05300 | 43.46880 | 66.32490 | 1576.34272  | 2253.95854  | 1513.42188  | 1 |
| 29652 | H | 76.20200 | 43.57880 | 65.02690 | 1882.21450  | -167.24706  | -2504.42321 | 1 |
| 29653 | C | 74.06300 | 47.03080 | 66.32090 | 498.52752   | -561.14870  | -484.93286  | 1 |
| 29654 | O | 74.69700 | 48.06380 | 66.27790 | 221.34713   | -332.85870  | 657.57196   | 1 |
| 29655 | N | 73.75600 | 46.55480 | 65.10790 | -782.14070  | 159.11547   | -351.02690  | 1 |
| 29656 | H | 73.25200 | 45.70380 | 64.98290 | -509.23446  | 502.94546   | 3062.67198  | 1 |
| 29657 | C | 74.08400 | 47.23980 | 63.86290 | -186.62791  | -735.89511  | 484.23145   | 1 |
| 29658 | H | 75.12800 | 47.51180 | 63.92690 | -1090.07629 | -2918.22105 | 397.78926   | 1 |
| 29659 | C | 74.06800 | 46.20880 | 62.72890 | -757.54866  | -455.13379  | 267.81603   | 1 |
| 29660 | H | 73.13500 | 45.60880 | 62.79690 | -2035.53110 | -1584.11130 | 1810.57933  | 1 |
| 29661 | H | 74.85700 | 45.42680 | 62.72790 | -443.16206  | -514.52677  | 3064.79346  | 1 |
| 29662 | C | 74.06200 | 46.76480 | 61.27790 | -803.95628  | -421.79243  | 185.26739   | 1 |
| 29663 | H | 73.11700 | 47.30680 | 61.06290 | 1390.40288  | 2752.92717  | -634.39532  | 1 |
| 29664 | H | 74.90400 | 47.46680 | 61.10090 | -1673.91248 | 882.30307   | -2544.57431 | 1 |
| 29665 | C | 74.25100 | 45.71380 | 60.15490 | 759.52852   | -417.66615  | -163.47816  | 1 |
| 29666 | H | 75.13100 | 45.04580 | 60.27290 | -2369.33341 | 1048.77310  | 1821.00714  | 1 |
| 29667 | H | 73.41700 | 44.99080 | 60.02890 | -304.91412  | 2918.37754  | 1172.20687  | 1 |
| 29668 | N | 74.37500 | 46.45680 | 58.85890 | -570.68018  | -469.81113  | 421.18117   | 1 |
| 29669 | H | 73.83000 | 47.27780 | 58.68890 | 411.18517   | 2691.77044  | 1585.59941  | 1 |
| 29670 | C | 74.66200 | 45.80580 | 57.73890 | 382.77277   | 617.22758   | -554.26052  | 1 |
| 29671 | N | 75.21300 | 44.60980 | 57.67290 | 313.03825   | -469.73695  | 591.70953   | 1 |
| 29672 | H | 75.14000 | 43.94180 | 58.41390 | 1036.61876  | 1716.34708  | -2430.18600 | 1 |
| 29673 | H | 75.29600 | 44.15880 | 56.78390 | -2772.64122 | 605.80544   | -1434.24200 | 1 |
| 29674 | N | 74.43800 | 46.41980 | 56.59390 | -683.00421  | 456.14816   | -310.86550  | 1 |
| 29675 | H | 74.35200 | 47.41580 | 56.55990 | -395.99661  | -819.35373  | -3019.49935 | 1 |
| 29676 | H | 74.81700 | 46.00380 | 55.76690 | -2120.45504 | -2337.52595 | -19.98912   | 1 |
| 29677 | C | 73.45900 | 48.66280 | 63.65890 | 342.71824   | -634.17633  | 517.25154   | 1 |
| 29678 | O | 74.22500 | 49.62080 | 63.25590 | 567.19180   | -291.07702  | -432.33047  | 1 |
| 29679 | N | 72.19600 | 48.93680 | 63.88290 | -594.27707  | 573.20328   | -283.47882  | 1 |
| 29680 | C | 71.15200 | 47.91380 | 63.64390 | 529.92875   | 330.26852   | 645.65378   | 1 |
| 29681 | H | 71.01200 | 47.26380 | 64.53490 | -432.86052  | -2492.02982 | 1849.53242  | 1 |
| 29682 | H | 71.30300 | 47.24080 | 62.77290 | 2288.38861  | -2070.21231 | 431.71453   | 1 |
| 29683 | C | 71.58800 | 50.28980 | 63.86990 | 199.57404   | -556.63007  | 667.72991   | 1 |
| 29684 | H | 71.84300 | 50.86080 | 62.98890 | 2419.74009  | -1863.50427 | 622.00125   | 1 |
| 29685 | C | 70.07700 | 50.06480 | 63.96190 | -463.70341  | -555.82815  | 552.35887   | 1 |
| 29686 | H | 69.46100 | 50.84980 | 63.47390 | -2728.94549 | 808.58495   | 1392.88859  | 1 |
| 29687 | H | 69.73700 | 49.93580 | 65.01190 | -1639.43883 | -394.98870  | -2672.73840 | 1 |

|       |   |          |          |          |             |             |             |   |
|-------|---|----------|----------|----------|-------------|-------------|-------------|---|
| 29688 | C | 69.87000 | 48.68880 | 63.34890 | -631.93455  | -663.76713  | 16.54176    | 1 |
| 29689 | H | 69.82900 | 48.81780 | 62.24590 | 1976.09353  | 2207.58942  | -1049.10531 | 1 |
| 29690 | H | 68.94600 | 48.19980 | 63.72390 | -1205.74864 | -2490.54757 | 1484.70112  | 1 |
| 29691 | C | 72.06400 | 51.10980 | 65.08690 | 395.78683   | -600.08310  | -533.32717  | 1 |
| 29692 | O | 72.36800 | 52.25980 | 64.91690 | -333.22085  | -672.72477  | 225.25080   | 1 |
| 29693 | N | 72.14200 | 50.58980 | 66.34490 | -311.42711  | -581.26428  | 516.10553   | 1 |
| 29694 | H | 71.85400 | 49.64680 | 66.48990 | 1341.27812  | 2608.39763  | -1152.99536 | 1 |
| 29695 | C | 72.81900 | 51.31980 | 67.35990 | 336.16928   | 643.38829   | 548.76954   | 1 |
| 29696 | H | 72.31400 | 52.25080 | 67.56990 | 2482.03733  | 1413.04474  | 1289.85172  | 1 |
| 29697 | C | 72.89600 | 50.49980 | 68.67390 | -278.11223  | -467.63588  | -736.64472  | 1 |
| 29698 | H | 73.60400 | 51.00680 | 69.36290 | -2503.40464 | 1687.05494  | 958.62678   | 1 |
| 29699 | H | 73.30500 | 49.50780 | 68.38590 | -1698.82538 | 2361.61575  | 1247.96685  | 1 |
| 29700 | C | 71.62900 | 50.31280 | 69.43890 | -183.83590  | -575.24672  | -681.37666  | 1 |
| 29701 | H | 70.76200 | 49.92680 | 68.86190 | -575.55450  | 3005.29427  | -813.59676  | 1 |
| 29702 | H | 71.29200 | 51.26680 | 69.89990 | 461.61702   | -1460.77149 | -2742.27293 | 1 |
| 29703 | C | 71.72500 | 49.24180 | 70.58390 | 426.91109   | -759.01238  | -186.13744  | 1 |
| 29704 | H | 70.75000 | 48.93880 | 71.02290 | 1466.95438  | -1555.41252 | 2279.04658  | 1 |
| 29705 | H | 72.23500 | 48.32680 | 70.21490 | -1828.37912 | 1968.33492  | 1670.96689  | 1 |
| 29706 | N | 72.53600 | 49.96180 | 71.58390 | -311.95104  | 801.51258   | -96.51975   | 1 |
| 29707 | H | 72.73100 | 50.93480 | 71.46790 | -1212.64101 | 2663.05254  | -1214.95783 | 1 |
| 29708 | C | 73.24800 | 49.36280 | 72.44790 | 792.11054   | -402.36640  | 12.54351    | 1 |
| 29709 | N | 73.02000 | 48.12780 | 72.87290 | -806.20510  | -145.32190  | 251.74889   | 1 |
| 29710 | H | 72.19900 | 47.67380 | 72.52690 | -2532.84267 | -411.68297  | 1836.63900  | 1 |
| 29711 | H | 73.73800 | 47.68480 | 73.40890 | 1826.38258  | 1776.42141  | 1833.34667  | 1 |
| 29712 | N | 74.05500 | 50.13280 | 73.16390 | -29.14281   | 856.20099   | 52.61960    | 1 |
| 29713 | H | 74.03900 | 51.12880 | 73.07790 | -1008.03837 | -2622.47800 | 1393.87342  | 1 |
| 29714 | H | 74.58500 | 49.72780 | 73.90890 | -1594.22518 | 1015.33874  | 2523.50076  | 1 |
| 29715 | C | 74.26400 | 51.75680 | 67.03390 | 469.63576   | -74.22269   | -771.24544  | 1 |
| 29716 | O | 74.70400 | 52.87880 | 67.34290 | -118.15669  | -767.67487  | 44.87440    | 1 |
| 29717 | N | 74.99000 | 50.84080 | 66.43790 | 369.51373   | -402.16838  | -629.82696  | 1 |
| 29718 | H | 74.53700 | 50.00780 | 66.12990 | -2457.36411 | 1277.38753  | -1548.94822 | 1 |
| 29719 | C | 76.32900 | 51.05180 | 65.91890 | 733.55505   | 438.55022   | 272.98377   | 1 |
| 29720 | H | 76.92000 | 51.30980 | 66.78590 | 2361.62865  | 988.65006   | 1797.96295  | 1 |
| 29721 | C | 76.94900 | 49.70280 | 65.47390 | -150.13772  | 463.16745   | -792.63510  | 1 |
| 29722 | H | 76.30500 | 49.24080 | 64.69590 | -1485.75552 | -763.36627  | 2665.94233  | 1 |
| 29723 | H | 76.96900 | 49.10280 | 66.40990 | 2328.69672  | 2051.93337  | -471.55719  | 1 |
| 29724 | C | 78.38400 | 49.85180 | 64.90690 | 483.78691   | 442.23467   | 613.67626   | 1 |
| 29725 | H | 78.99800 | 50.42380 | 65.63490 | 1516.61402  | 2190.49923  | -1679.95338 | 1 |
| 29726 | H | 78.48000 | 50.46080 | 63.98190 | 474.10293   | 1598.67728  | -2681.90675 | 1 |
| 29727 | C | 79.08600 | 48.50880 | 64.76090 | -489.48314  | -567.02107  | -539.33397  | 1 |
| 29728 | H | 80.13800 | 48.65880 | 64.43590 | -1822.70781 | 2110.48558  | -1515.21454 | 1 |
| 29729 | H | 79.13800 | 48.00180 | 65.74790 | -1735.98716 | 2028.60095  | 1691.94511  | 1 |
| 29730 | C | 78.42400 | 47.54480 | 63.73590 | -301.89539  | -448.75926  | 725.28753   | 1 |
| 29731 | H | 77.43900 | 47.19580 | 64.11290 | 2037.83214  | -887.55667  | 2188.00891  | 1 |
| 29732 | H | 78.43800 | 48.07180 | 62.75690 | -607.26141  | -1283.73654 | 2796.14025  | 1 |
| 29733 | N | 79.19100 | 46.31480 | 63.58490 | 643.14517   | -36.40260   | 501.50132   | 1 |
| 29734 | H | 79.15700 | 45.54480 | 64.28290 | -1480.86452 | 2746.43108  | -564.14471  | 1 |
| 29735 | H | 78.84600 | 45.88880 | 62.70090 | 2775.86720  | 708.68404   | -1260.50613 | 1 |
| 29736 | H | 80.20700 | 46.41180 | 63.38790 | -1420.89386 | 179.61503   | -2826.90106 | 1 |
| 29737 | C | 76.45600 | 52.09780 | 64.76190 | -363.18204  | 392.56223   | -765.47663  | 1 |
| 29738 | O | 77.33400 | 53.00380 | 64.73790 | 458.65112   | 287.33432   | -573.14363  | 1 |
| 29739 | N | 75.49900 | 52.07180 | 63.80890 | 451.48526   | 177.42827   | -687.40687  | 1 |
| 29740 | H | 74.82500 | 51.33980 | 63.87890 | -1367.15007 | -1814.66724 | -2187.21074 | 1 |
| 29741 | C | 75.37200 | 53.05880 | 62.72290 | 482.36877   | -630.53717  | -408.65361  | 1 |
| 29742 | H | 76.24900 | 53.07880 | 62.09390 | 1972.40452  | -1781.47850 | 1631.03955  | 1 |
| 29743 | C | 74.08200 | 52.69580 | 61.93290 | 442.86034   | -621.14159  | -465.09569  | 1 |
| 29744 | H | 73.19500 | 52.54980 | 62.58490 | 2968.25882  | -683.14379  | 669.99170   | 1 |
| 29745 | H | 74.18000 | 51.73280 | 61.38690 | -2668.58208 | -1363.51666 | 997.20390   | 1 |
| 29746 | C | 73.59900 | 53.60380 | 60.75090 | 721.83525   | -133.26470  | 494.98694   | 1 |
| 29747 | H | 73.51200 | 54.61580 | 61.20090 | -2283.46529 | 2015.60436  | 881.21091   | 1 |
| 29748 | C | 74.75200 | 53.70080 | 59.70190 | 367.63506   | 832.56869   | -95.94297   | 1 |
| 29749 | H | 75.73100 | 53.99880 | 60.13390 | 949.14581   | -2217.01392 | -2001.83255 | 1 |

|       |   |          |          |          |             |             |             |   |
|-------|---|----------|----------|----------|-------------|-------------|-------------|---|
| 29750 | H | 74.40100 | 54.35980 | 58.87990 | -2833.07999 | -596.20793  | -1289.58252 | 1 |
| 29751 | H | 74.77600 | 52.72380 | 59.17190 | 435.04214   | -2952.25405 | 932.33557   | 1 |
| 29752 | C | 72.26900 | 52.99980 | 60.24790 | 120.66809   | -596.22051  | -666.93037  | 1 |
| 29753 | H | 72.31900 | 51.91280 | 60.01990 | -2703.60663 | 732.58603   | -1494.18110 | 1 |
| 29754 | H | 71.53100 | 53.17380 | 61.05890 | 2786.50945  | 732.04649   | -1223.81321 | 1 |
| 29755 | H | 71.90400 | 53.53280 | 59.34390 | -607.59474  | 1830.24676  | -2509.54587 | 1 |
| 29756 | C | 75.26700 | 54.48680 | 63.29190 | 841.81818   | -196.25397  | -208.69804  | 1 |
| 29757 | O | 75.99400 | 55.39780 | 62.81990 | -745.45686  | -51.31241   | -319.88395  | 1 |
| 29758 | N | 74.42500 | 54.77980 | 64.32690 | 34.52346    | 676.48878   | -528.59308  | 1 |
| 29759 | H | 73.71000 | 54.13580 | 64.58490 | 1459.87010  | 2738.46161  | -540.09202  | 1 |
| 29760 | C | 74.40000 | 55.99780 | 65.09690 | 114.58077   | 903.21777   | 144.08943   | 1 |
| 29761 | H | 74.15100 | 56.75380 | 64.36690 | 1795.46629  | -1644.83157 | 1953.37289  | 1 |
| 29762 | C | 73.31000 | 55.86980 | 66.17990 | 127.31832   | 817.78242   | -413.20864  | 1 |
| 29763 | H | 73.30000 | 56.73880 | 66.87090 | -1898.79583 | 573.02636   | 2453.38100  | 1 |
| 29764 | H | 73.61800 | 54.94780 | 66.71790 | -144.45411  | 1137.10557  | 2929.10056  | 1 |
| 29765 | C | 71.87600 | 55.65080 | 65.62390 | -313.10467  | -443.68883  | -737.70481  | 1 |
| 29766 | H | 71.83700 | 54.60480 | 65.25090 | 832.41854   | -36.56366   | -3033.87889 | 1 |
| 29767 | C | 70.97400 | 55.48080 | 66.86590 | -282.02625  | 292.08281   | -834.02334  | 1 |
| 29768 | H | 71.23100 | 54.55980 | 67.43290 | -55.64683   | 1355.00355  | -2852.35123 | 1 |
| 29769 | H | 71.08600 | 56.36480 | 67.52890 | 671.16866   | -2286.40938 | 2024.75947  | 1 |
| 29770 | H | 69.94100 | 55.32880 | 66.48690 | 768.96241   | -2482.93822 | 1735.85434  | 1 |
| 29771 | C | 71.25800 | 56.61480 | 64.56090 | 486.22862   | 576.35809   | -515.59325  | 1 |
| 29772 | H | 70.17700 | 56.37880 | 64.46190 | -1767.50921 | -1844.54850 | 1835.05229  | 1 |
| 29773 | H | 71.83700 | 56.72880 | 63.61990 | 1414.38720  | 2814.80854  | 10.88353    | 1 |
| 29774 | H | 71.32500 | 57.64680 | 64.96790 | -622.50290  | -2172.07149 | -2185.07896 | 1 |
| 29775 | C | 75.73500 | 56.27280 | 65.77590 | 429.05365   | 704.37917   | -399.54564  | 1 |
| 29776 | O | 76.34600 | 57.33580 | 65.63190 | 78.17463    | -723.89738  | -273.98663  | 1 |
| 29777 | N | 76.31200 | 55.24680 | 66.49890 | 453.88427   | 709.26817   | 53.86020    | 1 |
| 29778 | H | 75.88100 | 54.35180 | 66.58390 | -2148.77026 | 2183.34108  | 804.20953   | 1 |
| 29779 | C | 77.48200 | 55.40080 | 67.33590 | -208.42471  | 697.50872   | -581.97539  | 1 |
| 29780 | H | 77.32600 | 56.29280 | 67.92390 | -2267.15827 | 1537.86877  | -1596.57283 | 1 |
| 29781 | C | 77.62100 | 54.17580 | 68.29490 | 637.33299   | -238.48474  | 570.46506   | 1 |
| 29782 | H | 78.49700 | 54.34580 | 68.95590 | -1374.11278 | 2569.72205  | 1223.31663  | 1 |
| 29783 | H | 76.75900 | 54.12480 | 68.99390 | -205.30539  | -686.61047  | -3071.10177 | 1 |
| 29784 | H | 77.70900 | 53.20180 | 67.76690 | 743.82328   | -1514.55992 | 2632.10920  | 1 |
| 29785 | C | 78.78300 | 55.65680 | 66.64290 | -524.42585  | 530.18152   | 545.04863   | 1 |
| 29786 | O | 79.62000 | 56.37780 | 67.15490 | -539.59922  | -543.94477  | 197.42139   | 1 |
| 29787 | N | 78.96700 | 55.15180 | 65.41590 | -191.09168  | 795.63336   | -276.24272  | 1 |
| 29788 | H | 78.26300 | 54.58880 | 64.98890 | -2851.76599 | 308.32957   | -1352.01178 | 1 |
| 29789 | C | 80.24300 | 55.01480 | 64.81890 | -764.03569  | -307.77898  | -433.11206  | 1 |
| 29790 | H | 80.93500 | 55.54480 | 65.45490 | -1304.76890 | 1418.36472  | 2491.95929  | 1 |
| 29791 | C | 80.74100 | 53.60680 | 64.68090 | 347.64743   | -778.46887  | -277.20648  | 1 |
| 29792 | H | 81.54200 | 53.50280 | 63.91790 | 1344.54311  | 2841.39313  | -158.03815  | 1 |
| 29793 | H | 79.93900 | 52.99380 | 64.21490 | -1253.26172 | -435.76906  | -2872.17778 | 1 |
| 29794 | C | 81.19200 | 53.07180 | 66.00590 | -461.14121  | 442.68196   | 660.01151   | 1 |
| 29795 | H | 80.21400 | 52.97080 | 66.52290 | 801.29749   | -2065.33064 | 2203.35796  | 1 |
| 29796 | H | 81.98500 | 53.67880 | 66.49090 | 2404.95835  | 1976.82249  | -401.08802  | 1 |
| 29797 | C | 81.80000 | 51.67080 | 65.81990 | -216.88792  | 653.20898   | -630.52146  | 1 |
| 29798 | O | 82.54700 | 51.38680 | 64.86090 | 467.75225   | 522.29643   | 335.45347   | 1 |
| 29799 | O | 81.46400 | 50.77080 | 66.62690 | 565.02086   | 109.02146   | 506.64633   | 1 |
| 29800 | C | 80.24800 | 55.64180 | 63.46990 | -415.56508  | -287.72738  | 754.21692   | 1 |
| 29801 | O | 81.28400 | 56.18180 | 63.05390 | 163.45510   | -752.14790  | -88.82587   | 1 |
| 29802 | N | 79.10300 | 55.73680 | 62.73990 | -21.21825   | 632.81864   | -583.60703  | 1 |
| 29803 | H | 78.21300 | 55.39680 | 63.03490 | -3013.62999 | -310.50730  | 909.31905   | 1 |
| 29804 | C | 79.08500 | 56.37380 | 61.44790 | 433.82684   | -539.34013  | 553.10950   | 1 |
| 29805 | H | 80.07800 | 56.57180 | 61.07090 | 2057.78257  | -145.94245  | 2342.75525  | 1 |
| 29806 | C | 78.41800 | 55.43180 | 60.43790 | 571.34098   | -249.93928  | -649.17488  | 1 |
| 29807 | H | 77.80000 | 55.86380 | 59.62190 | -1225.63371 | 1929.95916  | -2196.69015 | 1 |
| 29808 | H | 77.61800 | 54.90880 | 61.00490 | -2363.61121 | 2093.49897  | -320.23712  | 1 |
| 29809 | C | 79.39200 | 54.30580 | 59.96390 | 499.10178   | 562.78431   | -515.34531  | 1 |
| 29810 | H | 80.20100 | 54.78780 | 59.37390 | 1607.37996  | 624.26687   | 2607.23921  | 1 |
| 29811 | H | 79.81400 | 53.79280 | 60.85490 | 3057.92791  | -617.87408  | -23.34365   | 1 |

|       |   |          |          |          |             |             |             |   |
|-------|---|----------|----------|----------|-------------|-------------|-------------|---|
| 29812 | C | 78.69400 | 53.25980 | 59.05890 | 509.48602   | -541.14404  | -498.62082  | 1 |
| 29813 | H | 78.18300 | 53.69880 | 58.17490 | -2922.69958 | -1215.03088 | -33.65169   | 1 |
| 29814 | H | 77.89200 | 52.86580 | 59.71890 | 549.23746   | -3055.35805 | -400.40692  | 1 |
| 29815 | C | 79.52300 | 52.08780 | 58.64990 | 93.33772    | -204.89371  | -888.74206  | 1 |
| 29816 | H | 78.88900 | 51.18480 | 58.52290 | 1523.94530  | -124.17991  | 2722.88827  | 1 |
| 29817 | H | 80.17100 | 51.87080 | 59.52690 | -1861.89217 | 88.30939    | -2565.66026 | 1 |
| 29818 | N | 80.41500 | 52.29680 | 57.45590 | -368.03579  | -226.44064  | 722.65073   | 1 |
| 29819 | H | 81.01600 | 53.14280 | 57.39090 | 2050.53027  | 1722.58877  | 1617.37162  | 1 |
| 29820 | H | 80.99800 | 51.45480 | 57.27390 | 2009.21329  | -1667.40749 | -1723.71791 | 1 |
| 29821 | H | 79.79000 | 52.30380 | 56.62490 | -164.67336  | -2220.28084 | 2200.79580  | 1 |
| 29822 | C | 78.36900 | 57.66680 | 61.44790 | -458.52390  | 507.92811   | -639.88576  | 1 |
| 29823 | O | 78.89200 | 58.71780 | 61.08490 | -109.81548  | -599.46288  | 480.44712   | 1 |
| 29824 | N | 77.09500 | 57.58980 | 61.86190 | 585.27683   | 540.66970   | -265.64489  | 1 |
| 29825 | H | 76.77100 | 56.72180 | 62.22990 | 1436.17534  | -1983.69580 | -1954.16475 | 1 |
| 29826 | C | 76.09900 | 58.66480 | 61.66090 | 111.35294   | -770.67174  | 436.43447   | 1 |
| 29827 | H | 76.35500 | 59.15680 | 60.73390 | -2997.67933 | -979.34372  | 234.74259   | 1 |
| 29828 | C | 74.63500 | 58.10880 | 61.42090 | -257.98420  | 701.20741   | -559.46836  | 1 |
| 29829 | H | 74.40700 | 57.32080 | 62.17090 | -2614.91633 | 300.77749   | -1766.70875 | 1 |
| 29830 | C | 73.63900 | 59.25180 | 61.53490 | 390.77225   | 82.45531    | 803.12076   | 1 |
| 29831 | H | 73.66300 | 59.64980 | 62.57190 | 1103.73768  | 1045.63878  | -2758.71296 | 1 |
| 29832 | H | 72.61900 | 58.85480 | 61.34290 | -2464.68180 | -1670.48787 | 1037.58116  | 1 |
| 29833 | H | 73.85800 | 60.07080 | 60.81690 | 1033.93615  | -1516.44893 | 2530.14592  | 1 |
| 29834 | C | 74.54200 | 57.54180 | 59.97590 | -346.17131  | 400.37581   | 752.64770   | 1 |
| 29835 | H | 75.40900 | 56.88280 | 59.75790 | 1196.67336  | -2089.39260 | 1987.41206  | 1 |
| 29836 | H | 73.71200 | 56.81880 | 59.81990 | 1991.22041  | 1381.42151  | 1985.10810  | 1 |
| 29837 | H | 74.61300 | 58.32480 | 59.19190 | 277.73328   | -2501.21054 | 1857.21890  | 1 |
| 29838 | C | 76.21100 | 59.84480 | 62.65990 | -33.23072   | 20.49669    | -920.64385  | 1 |
| 29839 | O | 75.93300 | 60.98580 | 62.30390 | 555.87201   | 226.86979   | -504.64127  | 1 |
| 29840 | N | 76.85000 | 59.71980 | 63.88290 | -415.13800  | 473.20345   | -596.84476  | 1 |
| 29841 | H | 76.85700 | 58.81880 | 64.30890 | -1765.71622 | -2601.85453 | -116.91871  | 1 |
| 29842 | C | 77.20900 | 60.88380 | 64.76190 | 663.59528   | -352.83305  | 471.63169   | 1 |
| 29843 | H | 76.28000 | 61.42980 | 64.83790 | -1987.66060 | 1650.55200  | 1819.18011  | 1 |
| 29844 | C | 77.73400 | 60.39280 | 66.08790 | -546.34206  | -94.95929   | -745.41438  | 1 |
| 29845 | H | 77.00500 | 59.71580 | 66.58190 | 2055.83324  | 1556.84236  | 1783.25150  | 1 |
| 29846 | C | 79.03700 | 59.53180 | 65.95890 | -177.81357  | -547.46969  | -712.66147  | 1 |
| 29847 | H | 79.91700 | 60.21080 | 65.96790 | 3063.42207  | -2.07587    | 621.12846   | 1 |
| 29848 | H | 79.30200 | 58.94780 | 65.05190 | -1139.20218 | -2540.03413 | -1470.37454 | 1 |
| 29849 | H | 79.18400 | 58.75480 | 66.73890 | -2417.45821 | 598.36163   | -1960.28240 | 1 |
| 29850 | C | 77.96200 | 61.63780 | 66.98490 | 220.49921   | -715.48726  | 484.40501   | 1 |
| 29851 | H | 78.82900 | 62.29580 | 66.75890 | 2513.53494  | 1767.99113  | -652.80066  | 1 |
| 29852 | H | 78.00300 | 61.31880 | 68.04790 | -1582.89057 | 1847.97400  | 2009.17368  | 1 |
| 29853 | H | 77.05900 | 62.28480 | 66.98290 | -1212.05072 | 2435.27605  | -1622.97925 | 1 |
| 29854 | C | 78.17500 | 61.78680 | 63.99590 | 572.31497   | 309.87981   | -637.39535  | 1 |
| 29855 | O | 78.09900 | 62.98780 | 64.12390 | -698.55700  | 414.42223   | -12.29448   | 1 |
| 29856 | N | 79.04000 | 61.27880 | 63.15690 | 441.64972   | 235.26770   | -681.59896  | 1 |
| 29857 | H | 79.21600 | 60.30180 | 63.07090 | -371.81184  | 1965.08064  | 2430.84884  | 1 |
| 29858 | C | 79.83300 | 62.16880 | 62.23990 | -763.42303  | -439.30775  | 262.72285   | 1 |
| 29859 | H | 80.38500 | 62.91080 | 62.79690 | -586.92214  | 2269.42859  | 2105.10646  | 1 |
| 29860 | C | 80.87800 | 61.35180 | 61.53590 | 226.70471   | 888.74311   | -46.73912   | 1 |
| 29861 | H | 81.46900 | 62.00780 | 60.86190 | 1647.05193  | -2650.69948 | 153.21541   | 1 |
| 29862 | H | 80.48200 | 60.49880 | 60.94490 | 3010.60956  | 332.40926   | 763.48274   | 1 |
| 29863 | C | 81.78800 | 60.76180 | 62.55890 | -562.79992  | 463.87893   | -589.34038  | 1 |
| 29864 | C | 81.47900 | 59.48980 | 63.13990 | 589.81396   | 91.79874    | -685.00101  | 1 |
| 29865 | H | 80.54500 | 58.99280 | 62.92390 | 2073.13163  | -2295.69014 | -445.14454  | 1 |
| 29866 | C | 82.33100 | 58.99680 | 64.14690 | -648.00206  | -274.53922  | 583.35206   | 1 |
| 29867 | H | 82.11600 | 58.00880 | 64.52490 | 1268.55757  | -2488.11130 | -1423.61344 | 1 |
| 29868 | C | 83.50600 | 59.67180 | 64.52090 | 577.69141   | 569.21156   | -417.12450  | 1 |
| 29869 | O | 84.34300 | 59.10380 | 65.48790 | 765.60059   | -5.83404    | -100.42061  | 1 |
| 29870 | H | 85.16400 | 59.59980 | 65.50190 | 1970.30362  | 2349.99992  | -696.91631  | 1 |
| 29871 | C | 82.96400 | 61.42180 | 62.94590 | -763.68705  | -216.68672  | -489.24367  | 1 |
| 29872 | H | 83.22800 | 62.37680 | 62.51590 | -1621.30581 | -1942.84420 | -1888.71825 | 1 |
| 29873 | C | 83.79600 | 60.81880 | 63.85490 | -666.20929  | 653.41798   | -26.23819   | 1 |

|       |   |          |          |          |             |             |             |   |
|-------|---|----------|----------|----------|-------------|-------------|-------------|---|
| 29874 | H | 84.68400 | 61.36680 | 64.13590 | -1096.68094 | 1771.56723  | 2359.35172  | 1 |
| 29875 | C | 79.07200 | 63.01480 | 61.18490 | 735.49586   | -491.49769  | 65.63105    | 1 |
| 29876 | O | 79.35300 | 64.19780 | 61.05590 | 285.18429   | 545.43288   | 485.55080   | 1 |
| 29877 | N | 78.11400 | 62.42880 | 60.51990 | -351.64314  | 765.97113   | -201.15841  | 1 |
| 29878 | H | 77.89300 | 61.46280 | 60.63090 | -1822.22015 | -2405.18132 | -908.56702  | 1 |
| 29879 | C | 77.45200 | 63.00280 | 59.37490 | -192.71139  | 900.60106   | 112.55971   | 1 |
| 29880 | H | 77.88600 | 63.93180 | 59.03590 | 1723.75386  | -279.97630  | -2611.09447 | 1 |
| 29881 | C | 77.51400 | 62.02580 | 58.15990 | 473.41740   | 437.06405   | -646.56364  | 1 |
| 29882 | H | 78.58700 | 61.74980 | 58.07590 | -2010.63254 | 1607.06392  | 1835.21782  | 1 |
| 29883 | C | 76.64800 | 60.74380 | 58.20490 | -861.45420  | 72.74156    | 345.19755   | 1 |
| 29884 | H | 76.89000 | 60.04880 | 57.37290 | 1925.83833  | -920.11511  | -2294.90365 | 1 |
| 29885 | H | 75.57900 | 61.03780 | 58.26890 | -1418.54269 | 2701.92608  | 844.14314   | 1 |
| 29886 | H | 76.88300 | 60.24480 | 59.16990 | -878.65220  | 697.51559   | 2939.92129  | 1 |
| 29887 | C | 77.07000 | 62.83080 | 56.90790 | -594.15422  | -596.05529  | 356.74141   | 1 |
| 29888 | H | 77.53500 | 63.83980 | 56.88090 | 453.66373   | -670.16756  | 3024.11880  | 1 |
| 29889 | H | 77.24600 | 62.12980 | 56.06390 | -2213.37536 | -1797.60064 | 1341.66881  | 1 |
| 29890 | H | 75.98500 | 63.07180 | 56.90790 | -1353.94056 | -1403.88912 | 2464.63617  | 1 |
| 29891 | C | 75.96700 | 63.43180 | 59.71690 | -293.51150  | -578.19325  | -646.41353  | 1 |
| 29892 | O | 75.23100 | 63.95280 | 58.88690 | -105.12726  | 424.82490   | -677.51275  | 1 |
| 29893 | N | 75.55600 | 63.14580 | 60.96990 | -171.14636  | 839.53238   | 84.10231    | 1 |
| 29894 | H | 76.07500 | 62.48980 | 61.51290 | 483.68026   | 2429.59711  | 1942.67180  | 1 |
| 29895 | C | 74.24300 | 63.52480 | 61.53090 | -543.96125  | 376.24909   | -660.28795  | 1 |
| 29896 | H | 73.64800 | 62.66780 | 61.80990 | -1302.80220 | 2685.48711  | 1051.40769  | 1 |
| 29897 | H | 73.74100 | 64.17580 | 60.82990 | -2184.42489 | -655.18881  | -2190.19523 | 1 |
| 29898 | C | 74.39400 | 64.47380 | 62.76890 | 648.56060   | -579.36666  | -190.33287  | 1 |
| 29899 | O | 73.38900 | 65.08080 | 63.16490 | 195.10019   | 507.73342   | 572.01960   | 1 |
| 29900 | N | 75.62000 | 64.65580 | 63.34290 | 389.36652   | -514.15298  | 508.86598   | 1 |
| 29901 | H | 76.40600 | 64.05980 | 63.19790 | -1584.18586 | -711.28807  | 2622.08093  | 1 |
| 29902 | C | 75.80700 | 65.65780 | 64.37690 | 231.23815   | 574.06568   | 666.67305   | 1 |
| 29903 | H | 74.96800 | 66.32780 | 64.49790 | -151.93751  | 2869.72340  | -1321.55872 | 1 |
| 29904 | C | 76.01200 | 64.93380 | 65.67590 | 261.87085   | -356.87160  | 776.56130   | 1 |
| 29905 | H | 76.89500 | 64.26080 | 65.65490 | 2076.57215  | -2290.35292 | -465.36475  | 1 |
| 29906 | C | 76.30800 | 65.94080 | 66.83790 | 644.24336   | -139.76307  | -619.18954  | 1 |
| 29907 | H | 77.32300 | 66.35880 | 66.66890 | 2588.79155  | 1431.11390  | -1060.70847 | 1 |
| 29908 | H | 76.23100 | 65.35680 | 67.77990 | 1827.70459  | 1289.12398  | 2199.16484  | 1 |
| 29909 | H | 75.48500 | 66.68680 | 66.80890 | 2541.73960  | -1814.73792 | -134.85568  | 1 |
| 29910 | C | 74.73100 | 64.15080 | 66.04990 | -277.66086  | 604.39471   | -652.06502  | 1 |
| 29911 | H | 73.85200 | 64.82480 | 66.13390 | -1576.37658 | -2575.54295 | -876.88015  | 1 |
| 29912 | H | 74.86500 | 63.63880 | 67.02690 | -1599.58447 | 904.44955   | -2576.74932 | 1 |
| 29913 | H | 74.49800 | 63.28680 | 65.39090 | -1495.46225 | -1549.37550 | -2303.10196 | 1 |
| 29914 | C | 76.98200 | 66.54980 | 64.00090 | -328.55588  | -650.56289  | 532.74843   | 1 |
| 29915 | O | 76.81300 | 67.75280 | 63.82890 | 476.27161   | -554.62996  | 231.34555   | 1 |
| 29916 | N | 78.17500 | 65.95380 | 63.88490 | 651.94454   | 335.51572   | -410.51963  | 1 |
| 29917 | H | 78.34800 | 64.98480 | 64.04090 | -1970.06585 | -1889.14951 | 1561.29330  | 1 |
| 29918 | C | 79.38000 | 66.79380 | 63.80390 | 258.11152   | 282.03506   | -837.17940  | 1 |
| 29919 | H | 79.33300 | 67.52180 | 64.60090 | 419.18585   | -1553.02487 | -2704.78844 | 1 |
| 29920 | C | 80.72500 | 65.95580 | 63.88190 | 766.44774   | -396.60390  | -235.35583  | 1 |
| 29921 | H | 81.57500 | 66.47980 | 63.39390 | 934.94302   | 2557.22429  | 1572.13033  | 1 |
| 29922 | H | 80.62700 | 65.05980 | 63.23190 | -953.91417  | -1349.52370 | -2689.22773 | 1 |
| 29923 | C | 81.07600 | 65.46380 | 65.23690 | 739.77648   | -490.41253  | -95.24035   | 1 |
| 29924 | C | 81.17800 | 64.13780 | 65.68490 | -809.81521  | -339.90189  | -293.88712  | 1 |
| 29925 | H | 81.15400 | 63.23580 | 65.09090 | 391.62755   | 1632.61012  | -2677.21789 | 1 |
| 29926 | N | 81.54500 | 64.11680 | 67.03990 | -644.25002  | 260.72046   | -518.29767  | 1 |
| 29927 | H | 81.89000 | 63.41080 | 67.61890 | -815.61175  | 1863.78110  | -2426.49013 | 1 |
| 29928 | C | 81.67300 | 65.44380 | 67.41590 | 784.44636   | -387.80033  | -192.33382  | 1 |
| 29929 | C | 81.36600 | 66.28480 | 66.35090 | -277.27973  | -591.59123  | 619.81206   | 1 |
| 29930 | C | 81.43800 | 67.69780 | 66.49390 | 434.84020   | -613.65533  | -500.20146  | 1 |
| 29931 | H | 81.35400 | 68.36680 | 65.64990 | 2121.98480  | 1838.02869  | 1400.00875  | 1 |
| 29932 | C | 81.95200 | 68.19480 | 67.67890 | 781.54167   | -391.25005  | 178.39887   | 1 |
| 29933 | H | 82.20600 | 69.23880 | 67.78590 | -1113.60822 | 2905.98861  | 542.38047   | 1 |
| 29934 | C | 81.95100 | 65.96580 | 68.65390 | -491.16223  | 775.73592   | 127.45049   | 1 |
| 29935 | H | 82.12500 | 65.34080 | 69.51690 | 2138.10913  | 785.12273   | 2147.76691  | 1 |

|       |   |          |          |          |             |             |             |   |
|-------|---|----------|----------|----------|-------------|-------------|-------------|---|
| 29936 | C | 82.16800 | 67.36880 | 68.71590 | 98.50983    | -680.63564  | -595.99151  | 1 |
| 29937 | H | 82.68500 | 67.67280 | 69.61390 | -1264.43500 | -1408.84150 | 2500.35865  | 1 |
| 29938 | C | 79.54100 | 67.60780 | 62.56990 | -679.76081  | -386.40412  | -494.72139  | 1 |
| 29939 | O | 79.68900 | 68.83180 | 62.62190 | -89.87941   | 695.46232   | 378.49413   | 1 |
| 29940 | N | 79.43900 | 66.98780 | 61.39490 | 215.37280   | -463.44457  | -667.61625  | 1 |
| 29941 | H | 79.52900 | 65.99580 | 61.36090 | -1677.66921 | -131.28844  | 2658.72555  | 1 |
| 29942 | C | 79.40100 | 67.72880 | 60.09790 | 645.42909   | -574.79053  | 200.60068   | 1 |
| 29943 | H | 80.27400 | 68.36380 | 60.06790 | 797.90010   | 613.12597   | -2989.51420 | 1 |
| 29944 | C | 79.57800 | 66.71580 | 58.97690 | -109.96400  | 142.23864   | 887.19364   | 1 |
| 29945 | H | 79.06400 | 65.76680 | 59.23990 | 1499.86836  | 1992.59875  | 1904.10575  | 1 |
| 29946 | C | 79.02300 | 67.18080 | 57.59490 | -587.43531  | 599.26844   | 397.85399   | 1 |
| 29947 | H | 79.08700 | 66.33780 | 56.87390 | -767.44093  | -1555.87647 | 2612.74870  | 1 |
| 29948 | H | 77.97200 | 67.53780 | 57.64990 | 2907.33541  | 1097.53405  | -393.60650  | 1 |
| 29949 | H | 79.57700 | 68.09680 | 57.29790 | 2022.77549  | -2072.41047 | -1183.15945 | 1 |
| 29950 | C | 81.08100 | 66.50980 | 58.92390 | 367.87403   | 707.06640   | 432.22919   | 1 |
| 29951 | H | 81.56100 | 66.51280 | 59.92590 | 2702.00885  | -1222.04349 | 971.36788   | 1 |
| 29952 | H | 81.53800 | 67.31980 | 58.31590 | 1778.72814  | 2413.22667  | 932.89374   | 1 |
| 29953 | C | 81.48100 | 65.22680 | 58.17990 | 533.03895   | -303.21584  | -663.88390  | 1 |
| 29954 | H | 82.58100 | 65.23080 | 58.01990 | -570.67765  | -2322.63801 | -2050.00629 | 1 |
| 29955 | H | 81.14600 | 64.38880 | 58.82690 | -1084.21193 | 1857.62025  | 2303.56107  | 1 |
| 29956 | H | 81.07500 | 65.34680 | 57.15190 | -2548.97133 | -1833.33395 | -341.63066  | 1 |
| 29957 | C | 78.20300 | 68.68480 | 59.97390 | -188.05390  | 522.15087   | 727.36989   | 1 |
| 29958 | O | 78.39300 | 69.81780 | 59.50690 | -749.80419  | -150.26458  | 240.33880   | 1 |
| 29959 | N | 76.94300 | 68.38580 | 60.25590 | 363.41952   | -436.96493  | 593.84810   | 1 |
| 29960 | C | 76.40600 | 67.04980 | 60.23790 | 82.07405    | 53.35219    | -914.10816  | 1 |
| 29961 | H | 76.84500 | 66.50280 | 61.09990 | -54.39298   | -2351.25864 | -2083.93235 | 1 |
| 29962 | H | 76.61900 | 66.55080 | 59.26890 | -2235.81047 | 1845.46957  | -1287.36046 | 1 |
| 29963 | C | 75.89100 | 69.36780 | 60.47890 | -522.09636  | -369.05291  | -664.94251  | 1 |
| 29964 | H | 75.63800 | 69.83980 | 59.54090 | 2391.51668  | 1732.96257  | -1073.05229 | 1 |
| 29965 | C | 74.79500 | 68.58480 | 61.07990 | 304.35295   | -408.47049  | 732.96642   | 1 |
| 29966 | H | 74.84900 | 68.53780 | 62.18890 | -1058.29241 | -1887.37103 | -2287.83745 | 1 |
| 29967 | H | 73.81200 | 69.09380 | 60.98690 | 2223.88125  | -2133.31577 | -514.33489  | 1 |
| 29968 | C | 74.91000 | 67.23780 | 60.38990 | -344.70845  | -641.92381  | -550.87328  | 1 |
| 29969 | H | 74.48000 | 66.36180 | 60.92190 | 2385.81493  | 212.39416   | 2010.96923  | 1 |
| 29970 | H | 74.36300 | 67.34880 | 59.42990 | -76.38756   | 860.57589   | 3022.28659  | 1 |
| 29971 | C | 76.27700 | 70.60180 | 61.32290 | 685.69598   | -32.88575   | -587.43544  | 1 |
| 29972 | O | 75.93900 | 71.65980 | 60.85690 | -740.91714  | -188.08774  | -251.40051  | 1 |
| 29973 | N | 76.98300 | 70.49280 | 62.53090 | 425.16778   | 364.70537   | 618.71903   | 1 |
| 29974 | H | 77.22900 | 69.59880 | 62.89790 | -1015.26444 | -2113.98651 | 2082.56042  | 1 |
| 29975 | C | 77.34300 | 71.60280 | 63.34590 | 36.19724    | 720.88806   | -581.98740  | 1 |
| 29976 | H | 76.43300 | 72.10680 | 63.63490 | 2882.94814  | -1158.62587 | -362.12852  | 1 |
| 29977 | C | 78.07100 | 71.11780 | 64.56590 | -268.08664  | 672.00053   | -586.81119  | 1 |
| 29978 | H | 77.40400 | 70.42680 | 65.12390 | -1426.04120 | -2301.28879 | -1606.30218 | 1 |
| 29979 | H | 78.32800 | 71.98480 | 65.21090 | -2723.94744 | 380.61775   | 1545.77142  | 1 |
| 29980 | H | 79.06500 | 70.67980 | 64.33290 | -3082.43821 | 149.96009   | -697.48455  | 1 |
| 29981 | C | 78.26200 | 72.58380 | 62.57290 | 666.80156   | 460.07104   | 397.17663   | 1 |
| 29982 | O | 77.99600 | 73.79480 | 62.52490 | -493.49587  | 563.38721   | 293.62022   | 1 |
| 29983 | N | 79.28600 | 72.04380 | 61.88190 | -206.43529  | -618.73808  | -537.89278  | 1 |
| 29984 | H | 79.45000 | 71.06180 | 61.82190 | 1697.33518  | 1961.21505  | -1788.93987 | 1 |
| 29985 | C | 80.16600 | 72.83480 | 60.97290 | -498.10898  | -355.59770  | 670.36384   | 1 |
| 29986 | H | 80.56600 | 73.62780 | 61.58790 | -14.00103   | 3153.54062  | -181.22975  | 1 |
| 29987 | C | 81.26100 | 71.99780 | 60.26490 | -659.70240  | -589.05082  | 229.00397   | 1 |
| 29988 | H | 80.87300 | 71.21680 | 59.57690 | 1235.67288  | -2865.74911 | -223.59785  | 1 |
| 29989 | H | 81.86300 | 72.79880 | 59.78490 | 1334.48573  | -2398.90033 | -1515.67612 | 1 |
| 29990 | C | 82.21600 | 71.17680 | 61.14290 | 19.99461    | 710.16300   | 572.04390   | 1 |
| 29991 | H | 81.67600 | 70.33280 | 61.62390 | -1352.92363 | -1067.95755 | -2648.24927 | 1 |
| 29992 | C | 83.30900 | 70.67280 | 60.22790 | -665.69108  | -282.10696  | 557.80668   | 1 |
| 29993 | H | 82.82200 | 70.02180 | 59.46990 | -353.18708  | 1922.60909  | 2463.47941  | 1 |
| 29994 | H | 83.81700 | 71.51980 | 59.71990 | -1112.51872 | 2161.76419  | 2004.69475  | 1 |
| 29995 | H | 84.03400 | 70.09680 | 60.84190 | 2151.58025  | -2221.64256 | -470.77553  | 1 |
| 29996 | C | 82.83200 | 72.00880 | 62.34890 | -750.38940  | -18.61901   | -552.66480  | 1 |
| 29997 | H | 81.97800 | 72.18080 | 63.03890 | 1602.91117  | 2653.12862  | 535.31648   | 1 |



|       |   |          |          |          |             |             |             |   |
|-------|---|----------|----------|----------|-------------|-------------|-------------|---|
| 29998 | H | 83.61500 | 71.40980 | 62.85990 | 1018.94721  | 1229.63154  | -2722.92607 | 1 |
| 29999 | H | 83.28400 | 72.93580 | 61.93590 | 888.09318   | 2730.44202  | 1284.85778  | 1 |
| 30000 | C | 79.39800 | 73.56380 | 59.85490 | -429.99027  | 824.13171   | -57.98303   | 1 |
| 30001 | O | 79.60700 | 74.74080 | 59.58190 | -282.06662  | 699.25515   | 274.88930   | 1 |
| 30002 | N | 78.44400 | 72.86480 | 59.19490 | 612.64292   | 468.95767   | -337.42468  | 1 |
| 30003 | H | 78.25100 | 71.91980 | 59.44990 | -2246.33320 | 1251.05939  | 1834.05951  | 1 |
| 30004 | C | 77.51900 | 73.42580 | 58.26290 | 448.32714   | -588.39576  | 492.39152   | 1 |
| 30005 | H | 78.15500 | 73.93980 | 57.55690 | 1318.78923  | -2709.54319 | -844.74825  | 1 |
| 30006 | C | 76.60000 | 72.37380 | 57.56490 | 290.86854   | 444.66058   | -750.16063  | 1 |
| 30007 | H | 75.90000 | 72.97980 | 56.94990 | 323.15996   | -2231.91234 | 2168.12513  | 1 |
| 30008 | H | 76.05600 | 71.96080 | 58.44090 | 1065.98456  | 942.81287   | -2811.78736 | 1 |
| 30009 | C | 77.41200 | 71.39580 | 56.68990 | 846.40717   | 266.22435   | 120.18107   | 1 |
| 30010 | H | 78.23700 | 70.92380 | 57.26490 | -1890.21724 | -1579.91039 | 1955.42085  | 1 |
| 30011 | C | 76.51500 | 70.32580 | 56.03890 | -600.43183  | -511.29687  | 460.14933   | 1 |
| 30012 | H | 75.79800 | 70.79480 | 55.33190 | 1927.78776  | -2436.22691 | 300.69450   | 1 |
| 30013 | H | 77.06300 | 69.52180 | 55.50390 | 914.23042   | -2822.80664 | 979.38593   | 1 |
| 30014 | H | 76.02800 | 69.82180 | 56.90090 | -2224.60498 | 1011.91571  | -2019.56893 | 1 |
| 30015 | C | 78.08700 | 72.20080 | 55.55590 | -569.16026  | -202.71366  | 685.80191   | 1 |
| 30016 | H | 78.93000 | 72.84180 | 55.89090 | 2426.53511  | -877.61648  | -1776.57320 | 1 |
| 30017 | H | 77.35600 | 72.90380 | 55.10290 | -39.92693   | -3066.81927 | -649.16940  | 1 |
| 30018 | H | 78.47800 | 71.55980 | 54.73690 | -1993.58597 | -1437.25591 | 1966.04063  | 1 |
| 30019 | C | 76.65800 | 74.51080 | 58.81890 | 214.58987   | 575.99155   | -688.00716  | 1 |
| 30020 | O | 76.44500 | 75.53780 | 58.13990 | 696.63971   | -26.41188   | -343.40018  | 1 |
| 30021 | N | 76.13800 | 74.39180 | 60.04090 | 600.73281   | 300.44987   | -507.76731  | 1 |
| 30022 | H | 76.10800 | 73.55980 | 60.58990 | 2148.98618  | -1839.66138 | -1339.94471 | 1 |
| 30023 | C | 75.18900 | 75.41980 | 60.53390 | 685.23654   | -510.85609  | 245.61488   | 1 |
| 30024 | H | 74.52600 | 75.63580 | 59.70990 | 926.43261   | -2929.61772 | 577.18154   | 1 |
| 30025 | C | 74.32700 | 74.98880 | 61.72290 | -465.07341  | -328.96637  | -722.13693  | 1 |
| 30026 | H | 73.68700 | 75.85480 | 61.99690 | 2620.26036  | 203.07263   | 1701.91824  | 1 |
| 30027 | H | 75.08200 | 74.73680 | 62.49790 | -2851.09544 | 1136.09092  | 763.92785   | 1 |
| 30028 | C | 73.43400 | 73.79580 | 61.37990 | -416.29149  | 381.79212   | 725.89496   | 1 |
| 30029 | H | 73.87200 | 73.05280 | 60.67990 | -2498.73701 | -1097.89566 | 1574.22312  | 1 |
| 30030 | C | 73.20600 | 72.96180 | 62.64590 | 509.07181   | 388.54635   | -652.01916  | 1 |
| 30031 | H | 72.47500 | 72.15780 | 62.41390 | -151.17279  | 1464.81775  | -2795.06980 | 1 |
| 30032 | H | 72.89900 | 73.58880 | 63.51090 | -234.34462  | -1185.94391 | 2893.31351  | 1 |
| 30033 | H | 74.09900 | 72.35780 | 62.91390 | 1549.31401  | 1595.34742  | -2232.08385 | 1 |
| 30034 | C | 72.04600 | 74.18280 | 60.80190 | -289.91124  | 431.50176   | 758.14329   | 1 |
| 30035 | H | 71.38500 | 73.30880 | 60.62390 | 733.30032   | -2790.51320 | 1203.31607  | 1 |
| 30036 | H | 71.56400 | 75.00680 | 61.36990 | 1611.36028  | -1957.53265 | -1837.87055 | 1 |
| 30037 | H | 72.15400 | 74.59180 | 59.77490 | -2174.11647 | -581.48986  | -2216.54248 | 1 |
| 30038 | C | 75.85100 | 76.71480 | 60.91390 | 406.93213   | -374.86015  | -716.77074  | 1 |
| 30039 | O | 75.24100 | 77.76980 | 61.06290 | -550.89367  | 161.80549   | 552.85568   | 1 |
| 30040 | N | 77.17700 | 76.61080 | 61.06990 | 420.20103   | 439.77911   | -593.30061  | 1 |
| 30041 | H | 77.61500 | 75.74080 | 60.85690 | 3061.10143  | -160.10851  | 625.01887   | 1 |
| 30042 | C | 78.06900 | 77.62580 | 61.56690 | -399.63185  | 636.43980   | -552.06244  | 1 |
| 30043 | H | 77.44900 | 78.34180 | 62.08490 | 1205.51732  | 2266.92002  | 1816.42519  | 1 |
| 30044 | C | 79.05700 | 77.17280 | 62.62790 | -223.46438  | -664.02958  | 563.97874   | 1 |
| 30045 | H | 79.78300 | 77.96780 | 62.90290 | -2060.16441 | 803.38635   | 2243.79976  | 1 |
| 30046 | O | 79.81600 | 75.99880 | 62.30490 | -551.78980  | 499.64314   | -322.86248  | 1 |
| 30047 | H | 79.18000 | 75.28680 | 62.20490 | 1711.35581  | -1693.71569 | 1991.42416  | 1 |
| 30048 | C | 78.13500 | 76.76780 | 63.83490 | 231.13246   | -847.57813  | 167.42441   | 1 |
| 30049 | H | 77.36500 | 77.55080 | 64.00490 | -1799.58688 | -1420.07931 | -2165.74323 | 1 |
| 30050 | H | 78.74600 | 76.71880 | 64.76190 | -1231.20952 | 2039.55887  | 2064.73338  | 1 |
| 30051 | H | 77.51500 | 75.84680 | 63.79690 | -480.28011  | -679.61210  | 3023.97608  | 1 |
| 30052 | C | 78.80100 | 78.28280 | 60.43990 | -680.64961  | 469.55628   | -433.59445  | 1 |
| 30053 | O | 79.82000 | 78.91780 | 60.65690 | -566.67439  | 569.88849   | 77.27419    | 1 |
| 30054 | N | 78.35900 | 78.17880 | 59.20190 | -177.93915  | -561.51985  | 587.18398   | 1 |
| 30055 | H | 77.57900 | 77.59780 | 58.98190 | -383.56238  | -1888.52383 | -2488.41196 | 1 |
| 30056 | C | 78.86300 | 79.05080 | 58.16390 | -30.03666   | -434.94655  | -804.26209  | 1 |
| 30057 | H | 79.93700 | 78.96980 | 58.24790 | -2008.64668 | -1597.47417 | 1815.69993  | 1 |
| 30058 | C | 78.55500 | 78.55580 | 56.73090 | 638.81518   | -516.45001  | -357.56385  | 1 |
| 30059 | H | 77.45400 | 78.54380 | 56.58590 | -2232.66330 | 2241.28042  | -172.55210  | 1 |

|       |   |          |          |          |             |             |             |   |
|-------|---|----------|----------|----------|-------------|-------------|-------------|---|
| 30060 | C | 79.23400 | 79.47680 | 55.69190 | -176.93589  | 515.14449   | 733.76019   | 1 |
| 30061 | H | 79.23300 | 79.06580 | 54.66090 | 2860.85790  | -1254.05216 | 52.09138    | 1 |
| 30062 | H | 78.67300 | 80.41380 | 55.48890 | 3115.50773  | -42.34284   | -294.94769  | 1 |
| 30063 | H | 80.26600 | 79.78080 | 55.97290 | -383.35573  | -1144.25102 | -2913.79084 | 1 |
| 30064 | C | 79.06900 | 77.10780 | 56.54390 | -412.07130  | 633.86047   | -549.00554  | 1 |
| 30065 | H | 79.00500 | 76.45980 | 57.44390 | -2516.86790 | -1538.12978 | 1106.12574  | 1 |
| 30066 | H | 80.15200 | 77.14780 | 56.29690 | 682.63287   | 2275.05019  | -2081.56448 | 1 |
| 30067 | C | 78.26600 | 76.33080 | 55.51690 | -584.80899  | -620.53972  | -340.81147  | 1 |
| 30068 | H | 78.23500 | 76.94280 | 54.59090 | -1820.11218 | -2231.88142 | -1280.42444 | 1 |
| 30069 | H | 77.16900 | 76.27180 | 55.68190 | 2399.97448  | -1950.29159 | 428.35159   | 1 |
| 30070 | H | 78.74700 | 75.33680 | 55.39290 | 647.92010   | -2135.92674 | 2188.88098  | 1 |
| 30071 | C | 78.55300 | 80.52180 | 58.35990 | 626.23156   | -0.16840    | -657.67627  | 1 |
| 30072 | O | 79.45400 | 81.34280 | 58.28290 | 414.97386   | -378.57390  | -544.94789  | 1 |
| 30073 | N | 77.30800 | 80.94280 | 58.79090 | -716.70673  | 123.64681   | 446.96591   | 1 |
| 30074 | C | 76.06600 | 80.31780 | 58.47990 | -473.52457  | 458.11001   | -659.41161  | 1 |
| 30075 | H | 75.80500 | 79.49080 | 59.17390 | 1819.34360  | 2559.02579  | 227.94337   | 1 |
| 30076 | H | 76.09400 | 79.92480 | 57.44090 | -2305.13421 | 1694.39037  | 1346.31879  | 1 |
| 30077 | C | 77.11200 | 82.34380 | 59.28390 | 671.47978   | 601.54467   | 117.05608   | 1 |
| 30078 | H | 77.25900 | 83.06080 | 58.48990 | -2817.81509 | -1118.18058 | -879.01050  | 1 |
| 30079 | C | 75.62100 | 82.35380 | 59.68890 | 251.42593   | 823.55163   | -333.20298  | 1 |
| 30080 | H | 75.54600 | 82.00980 | 60.74290 | -1983.94338 | 2018.37929  | -1420.76919 | 1 |
| 30081 | H | 75.08500 | 83.32580 | 59.65190 | -1988.82522 | 261.12119   | 2428.67845  | 1 |
| 30082 | C | 75.00600 | 81.34580 | 58.64290 | -744.27117  | 525.60171   | -201.96549  | 1 |
| 30083 | H | 74.62200 | 81.75380 | 57.68290 | 12.16783    | 2692.38142  | 1644.06835  | 1 |
| 30084 | H | 74.09500 | 80.94680 | 59.13790 | -1456.99917 | -2472.36246 | -1284.42710 | 1 |
| 30085 | C | 78.03700 | 82.78180 | 60.40490 | -301.39839  | -851.56357  | -36.29490   | 1 |
| 30086 | O | 78.48700 | 83.90380 | 60.44290 | 58.72214    | -674.51236  | -391.81650  | 1 |
| 30087 | N | 78.30300 | 81.91980 | 61.40090 | 186.00309   | 755.44739   | 339.46141   | 1 |
| 30088 | H | 77.87300 | 81.02280 | 61.32790 | -2912.58550 | 1103.17175  | 541.08261   | 1 |
| 30089 | C | 79.25100 | 82.16380 | 62.47790 | -734.87077  | 429.89488   | -376.95550  | 1 |
| 30090 | H | 78.89200 | 83.09180 | 62.89790 | 1616.86741  | -2310.89359 | -1369.63435 | 1 |
| 30091 | C | 79.28600 | 81.04580 | 63.50590 | 807.89779   | 355.39066   | 195.09301   | 1 |
| 30092 | H | 80.16800 | 81.03780 | 64.18090 | -2682.63331 | 1126.10342  | -1243.98824 | 1 |
| 30093 | H | 79.41000 | 80.13580 | 62.87990 | -1633.26636 | -1169.78156 | 2413.17665  | 1 |
| 30094 | C | 78.00000 | 80.97680 | 64.30490 | 471.09444   | 649.94014   | -448.85138  | 1 |
| 30095 | O | 77.75200 | 81.96580 | 65.02190 | -557.61244  | 576.76530   | 69.79401    | 1 |
| 30096 | O | 77.25500 | 79.98480 | 64.24790 | 460.28990   | -359.93667  | 502.60882   | 1 |
| 30097 | C | 80.65900 | 82.48880 | 61.91190 | -618.49939  | -448.68931  | 490.46686   | 1 |
| 30098 | O | 81.35100 | 83.42380 | 62.34390 | 414.57460   | -528.34168  | 376.44723   | 1 |
| 30099 | N | 81.09300 | 81.65880 | 60.95190 | 209.30851   | 240.52797   | 770.16629   | 1 |
| 30100 | H | 80.60900 | 80.81980 | 60.71590 | 864.57071   | -192.40818  | -3025.31509 | 1 |
| 30101 | C | 82.35100 | 81.84880 | 60.18090 | -79.32094   | -897.03487  | 32.81394    | 1 |
| 30102 | H | 83.14500 | 81.81080 | 60.91190 | 947.27305   | -2222.35034 | -2009.84774 | 1 |
| 30103 | C | 82.61200 | 80.57680 | 59.36790 | 641.66352   | -399.76908  | -494.00064  | 1 |
| 30104 | H | 81.68500 | 80.38480 | 58.78690 | 2122.79395  | 267.71193   | -2305.83297 | 1 |
| 30105 | H | 82.65500 | 79.66680 | 60.00390 | 1796.85245  | 2269.99472  | 1218.30681  | 1 |
| 30106 | C | 83.86900 | 80.51280 | 58.43890 | 576.89851   | -536.54043  | -439.11338  | 1 |
| 30107 | C | 85.11900 | 81.10280 | 58.74990 | 444.03478   | -624.97935  | -480.41478  | 1 |
| 30108 | H | 85.29600 | 81.67880 | 59.64590 | -1983.13677 | -1693.35468 | 1751.76602  | 1 |
| 30109 | C | 86.16200 | 81.10780 | 57.83790 | -592.73130  | -695.87528  | -23.11409   | 1 |
| 30110 | H | 87.06200 | 81.63480 | 58.11890 | 902.21451   | 2219.42874  | -2058.18197 | 1 |
| 30111 | C | 85.98200 | 80.43580 | 56.65890 | -899.71832  | 218.02858   | 74.46682    | 1 |
| 30112 | H | 86.69700 | 80.46980 | 55.84990 | -1082.16911 | -974.93980  | -2806.94528 | 1 |
| 30113 | C | 83.79600 | 79.72480 | 57.31990 | 446.60675   | 632.95892   | -492.99713  | 1 |
| 30114 | H | 82.86100 | 79.25980 | 57.04390 | -904.85741  | 1712.85020  | -2505.40639 | 1 |
| 30115 | C | 84.80600 | 79.76980 | 56.36290 | 514.89261   | -477.19103  | -571.50106  | 1 |
| 30116 | H | 84.81800 | 79.17080 | 55.46490 | -2259.62899 | -1129.43474 | -1904.13324 | 1 |
| 30117 | C | 82.49700 | 83.11280 | 59.39990 | -18.11284   | -662.65810  | -626.50793  | 1 |
| 30118 | O | 83.51000 | 83.80280 | 59.50090 | 276.07494   | -596.36093  | 400.84923   | 1 |
| 30119 | N | 81.49500 | 83.40680 | 58.56490 | -497.92656  | -621.31895  | -290.43427  | 1 |
| 30120 | H | 80.75700 | 82.74780 | 58.43890 | -2108.01639 | -1994.70424 | 1208.55370  | 1 |
| 30121 | C | 81.46900 | 84.64280 | 57.71890 | 437.45055   | -772.65044  | 99.51707    | 1 |

|       |   |          |          |          |             |             |             |   |
|-------|---|----------|----------|----------|-------------|-------------|-------------|---|
| 30122 | H | 82.41100 | 84.77380 | 57.20590 | -1832.39997 | -1519.00794 | -2073.91340 | 1 |
| 30123 | C | 80.38000 | 84.70980 | 56.67890 | 576.74069   | -249.99754  | -653.43866  | 1 |
| 30124 | H | 79.41800 | 84.79380 | 57.22890 | -1948.12818 | -1001.82929 | -2275.04352 | 1 |
| 30125 | C | 80.47683 | 85.97837 | 55.70362 | -703.79114  | 595.67061   | -288.69444  | 1 |
| 30126 | H | 79.61928 | 86.04323 | 54.97975 | 2341.07209  | 1220.05751  | 438.43773   | 1 |
| 30127 | H | 81.42431 | 86.03348 | 55.13243 | 1883.75914  | 2133.50799  | 1233.36194  | 1 |
| 30128 | H | 80.39979 | 86.90340 | 56.34521 | -2454.08342 | -3456.59586 | -333.74109  | 1 |
| 30129 | C | 80.27800 | 83.41680 | 55.77490 | 55.42290    | -717.97129  | 530.54759   | 1 |
| 30130 | H | 80.08400 | 82.53880 | 56.42690 | 1865.57872  | 2015.29104  | -1542.77076 | 1 |
| 30131 | H | 81.26700 | 83.29280 | 55.28390 | 570.51330   | 2105.07963  | 2262.85741  | 1 |
| 30132 | C | 79.15000 | 83.46480 | 54.79990 | 504.94686   | -363.76020  | -656.48909  | 1 |
| 30133 | H | 79.31000 | 82.70080 | 54.00990 | -874.79052  | 1970.66570  | 2298.33230  | 1 |
| 30134 | H | 79.14200 | 84.43280 | 54.25390 | 1788.83255  | -561.75902  | -2521.87228 | 1 |
| 30135 | H | 78.13300 | 83.27280 | 55.20590 | 1482.78418  | -2740.10251 | -275.13322  | 1 |
| 30136 | C | 81.42059 | 85.89459 | 58.74064 | -514.18691  | -340.64829  | -1074.78351 | 1 |
| 30137 | O | 82.07638 | 86.90052 | 58.47108 | 656.82591   | 29.13312    | -475.42463  | 1 |
| 30138 | N | 80.54554 | 85.81155 | 59.73531 | -465.34940  | -23.37629   | -521.34176  | 1 |
| 30139 | H | 79.86570 | 85.05386 | 59.77324 | -1937.03742 | 353.32026   | 2080.41318  | 1 |
| 30140 | C | 80.19030 | 86.94752 | 60.49885 | 98.55395    | -220.11172  | -678.59585  | 1 |
| 30141 | H | 80.74984 | 87.81433 | 60.08673 | 1165.94902  | 899.73661   | 920.82934   | 1 |
| 30142 | C | 78.61023 | 87.06498 | 60.49199 | -938.54261  | -440.17168  | 377.79823   | 1 |
| 30143 | H | 78.12344 | 86.24121 | 60.93168 | 107.27140   | -1028.99871 | 821.99070   | 1 |
| 30144 | H | 78.26642 | 87.94752 | 61.12483 | -1464.89936 | -436.47475  | -564.69195  | 1 |
| 30145 | C | 77.80727 | 87.22341 | 59.14869 | 54.05274    | -378.71793  | -146.77966  | 1 |
| 30146 | C | 78.41250 | 88.21657 | 58.36071 | 244.18555   | 398.27660   | 694.37925   | 1 |
| 30147 | H | 79.21035 | 88.86033 | 58.74675 | -868.62913  | 762.47366   | -313.10527  | 1 |
| 30148 | C | 77.73214 | 88.53103 | 57.15959 | -176.09438  | 327.24821   | 1013.11527  | 1 |
| 30149 | H | 78.20060 | 89.39229 | 56.61115 | 4253.39456  | -572.30744  | 472.84910   | 1 |
| 30150 | C | 76.50690 | 87.87764 | 56.84739 | 438.61791   | -120.01391  | 553.55460   | 1 |
| 30151 | H | 75.95184 | 87.98888 | 55.92824 | -900.36536  | 3824.51079  | 562.72588   | 1 |
| 30152 | C | 76.65774 | 86.48660 | 58.78912 | 782.08020   | 251.24793   | 478.27003   | 1 |
| 30153 | H | 76.41370 | 85.55919 | 59.43838 | -1351.53618 | -242.74789  | -834.04315  | 1 |
| 30154 | C | 75.94003 | 86.82724 | 57.58901 | -375.07905  | -249.94955  | 458.80266   | 1 |
| 30155 | H | 75.00959 | 86.28261 | 57.30608 | 713.46414   | -564.17265  | -1308.34626 | 1 |
| 30156 | C | 80.64013 | 86.85941 | 62.09582 | 53.00488    | 178.01059   | -220.99039  | 1 |
| 30157 | O | 79.84784 | 87.01716 | 62.98349 | -15.99988   | -147.61668  | 437.75314   | 1 |
| 30158 | N | 81.97457 | 86.76707 | 62.13932 | 123.20123   | -157.85537  | 437.06348   | 1 |
| 30159 | H | 82.51071 | 86.70754 | 61.26513 | -569.95393  | 351.98862   | 282.58630   | 1 |
| 30160 | C | 82.55216 | 86.90633 | 63.43283 | -153.64106  | 880.38772   | -676.93311  | 1 |
| 30161 | H | 81.75070 | 87.27297 | 64.10051 | -459.30868  | 1044.97309  | 537.86467   | 1 |
| 30162 | C | 83.24003 | 85.50266 | 63.78869 | 499.54079   | -866.93705  | 637.94127   | 1 |
| 30163 | H | 84.03624 | 85.63599 | 64.49984 | 582.13883   | 952.25808   | 1643.75037  | 1 |
| 30164 | H | 83.68000 | 84.87680 | 62.92990 | -2807.67331 | -1162.79618 | 821.78714   | 1 |
| 30165 | H | 82.44800 | 84.78880 | 64.16490 | 731.47546   | 1469.88670  | -2699.40099 | 1 |
| 30166 | C | 83.81528 | 87.86092 | 63.14953 | 92.54969    | -541.73297  | 414.69824   | 1 |
| 30167 | O | 84.63158 | 87.73085 | 62.21433 | -112.60947  | -509.29203  | -281.17496  | 1 |
| 30168 | N | 83.84015 | 88.72605 | 64.15243 | 382.98188   | 566.91091   | 171.32197   | 1 |
| 30169 | H | 83.12239 | 88.60129 | 64.84533 | 171.28083   | 2474.97533  | -3821.88207 | 1 |
| 30170 | C | 84.36588 | 90.04642 | 63.96926 | 226.58211   | -379.38364  | -9.69986    | 1 |
| 30171 | H | 85.25602 | 90.01436 | 63.25130 | 2637.12229  | 2623.28535  | -3101.64622 | 1 |
| 30172 | C | 83.37562 | 90.95392 | 63.12810 | 305.67440   | 255.98792   | -1162.13303 | 1 |
| 30173 | H | 83.36985 | 90.48975 | 62.12758 | 2476.76574  | -853.99312  | -1172.46234 | 1 |
| 30174 | H | 83.84609 | 91.95297 | 63.08972 | 1028.14277  | 1025.10284  | 672.54916   | 1 |
| 30175 | C | 81.86411 | 90.80387 | 63.58933 | -12.04988   | -377.63287  | -332.65587  | 1 |
| 30176 | O | 81.13556 | 89.83748 | 63.34793 | -180.70843  | -402.86238  | 1170.82642  | 1 |
| 30177 | N | 81.57755 | 91.88567 | 64.29951 | -524.33051  | -316.30682  | 118.12987   | 1 |
| 30178 | H | 82.26296 | 92.71168 | 64.56355 | -744.98755  | 1188.22892  | -298.73397  | 1 |
| 30179 | H | 80.64220 | 92.13391 | 64.72880 | 380.67419   | 2067.64519  | -1755.15952 | 1 |
| 30180 | C | 84.74700 | 90.60508 | 65.42512 | -745.39905  | -79.19080   | 289.92033   | 1 |
| 30181 | O | 84.25178 | 90.15738 | 66.50859 | 268.80317   | 811.94653   | 115.04554   | 1 |
| 30182 | N | 85.41486 | 91.74982 | 65.35465 | 267.44027   | 510.79061   | -208.80849  | 1 |
| 30183 | H | 85.69738 | 91.77410 | 64.33483 | -702.70020  | -421.06228  | 2537.69064  | 1 |

|       |   |          |           |          |             |             |             |   |
|-------|---|----------|-----------|----------|-------------|-------------|-------------|---|
| 30184 | C | 85.30871 | 92.78819  | 66.42263 | 73.68057    | 778.58470   | 119.94354   | 1 |
| 30185 | H | 85.37999 | 92.21315  | 67.40094 | 2769.16653  | -210.38552  | -437.10021  | 1 |
| 30186 | C | 86.44274 | 93.74571  | 66.21085 | 157.55446   | -597.64538  | 264.58455   | 1 |
| 30187 | H | 87.41526 | 93.20915  | 66.28526 | -519.10966  | 3542.92382  | 1497.07954  | 1 |
| 30188 | C | 86.44136 | 94.41292  | 64.84726 | -98.51070   | -73.78093   | 733.97991   | 1 |
| 30189 | H | 85.60744 | 95.14338  | 64.66169 | -437.05115  | 1477.86999  | -293.60710  | 1 |
| 30190 | H | 86.29294 | 93.62609  | 64.04697 | 1620.67050  | 587.69437   | -1015.17060 | 1 |
| 30191 | H | 87.40066 | 94.95318  | 64.57078 | -42.62374   | -620.49757  | 1731.93113  | 1 |
| 30192 | C | 86.54008 | 94.78485  | 67.29763 | -612.23252  | 340.44081   | 1331.38905  | 1 |
| 30193 | H | 86.54234 | 94.46378  | 68.39056 | -920.09496  | 1192.21540  | 677.94611   | 1 |
| 30194 | H | 87.38975 | 95.57425  | 67.15823 | -54.86380   | 1893.86724  | 4529.80341  | 1 |
| 30195 | H | 85.61506 | 95.39914  | 67.28407 | -797.26851  | -390.35185  | 2726.61436  | 1 |
| 30196 | C | 83.81611 | 93.43934  | 66.30190 | -55.52113   | -477.01001  | 144.70479   | 1 |
| 30197 | O | 83.20934 | 93.82288  | 65.26507 | -795.38846  | 355.51303   | -42.97888   | 1 |
| 30198 | N | 83.38018 | 93.49465  | 67.52969 | -1020.40667 | 36.30082    | 757.33321   | 1 |
| 30199 | H | 84.01571 | 93.06881  | 68.22832 | 3846.94032  | -1094.37517 | 2021.92498  | 1 |
| 30200 | C | 82.73384 | 94.66642  | 68.07260 | 233.85361   | -3.88793    | 166.38336   | 1 |
| 30201 | H | 82.43331 | 95.29535  | 67.19452 | -1819.26227 | -1182.01000 | -1474.91639 | 1 |
| 30202 | C | 81.53968 | 94.24804  | 69.04532 | -237.25321  | 920.55485   | -138.31514  | 1 |
| 30203 | H | 81.71425 | 93.35476  | 69.67511 | 3011.82694  | -4051.82870 | 357.30786   | 1 |
| 30204 | H | 80.73234 | 93.75845  | 68.38895 | 1409.32497  | -674.48264  | -1625.35075 | 1 |
| 30205 | O | 80.89262 | 95.34230  | 69.65549 | 830.34426   | 69.02248    | 85.83901    | 1 |
| 30206 | H | 81.59597 | 95.76503  | 70.17465 | -1904.89237 | 883.03791   | -2191.99193 | 1 |
| 30207 | C | 83.78379 | 95.24820  | 69.14104 | -735.55082  | 183.59647   | -98.73376   | 1 |
| 30208 | O | 84.53795 | 94.63500  | 69.86552 | 532.91260   | 725.99886   | 153.82513   | 1 |
| 30209 | N | 83.91692 | 96.47926  | 68.74047 | -72.60095   | 37.99988    | -767.98180  | 1 |
| 30210 | H | 83.19855 | 96.92874  | 68.13270 | 2230.34747  | 2258.05141  | 2541.15291  | 1 |
| 30211 | C | 84.57894 | 97.39950  | 69.62811 | 1171.56960  | -691.18588  | -148.18285  | 1 |
| 30212 | H | 85.54219 | 96.98443  | 70.00537 | -31.49419   | -2030.97488 | 1185.79145  | 1 |
| 30213 | C | 84.67177 | 98.89863  | 68.98977 | 242.77304   | 157.76868   | -20.82341   | 1 |
| 30214 | H | 84.81390 | 99.70409  | 69.73309 | -3160.94654 | -2643.41459 | -64.08104   | 1 |
| 30215 | H | 83.83683 | 99.24224  | 68.28179 | -180.19457  | 791.93143   | -747.39929  | 1 |
| 30216 | C | 85.97519 | 98.75210  | 68.17252 | 704.20667   | 207.28352   | -551.56756  | 1 |
| 30217 | H | 86.45778 | 99.82745  | 68.03814 | 2124.12683  | 397.15477   | -2281.46638 | 1 |
| 30218 | H | 86.75786 | 98.21867  | 68.72081 | -1673.42691 | 1656.84148  | 2595.06140  | 1 |
| 30219 | C | 85.78243 | 98.01149  | 66.70373 | 453.67097   | 682.94736   | 62.68246    | 1 |
| 30220 | O | 84.66609 | 98.23935  | 66.08475 | 454.49637   | -328.68308  | -56.94637   | 1 |
| 30221 | O | 86.72586 | 97.46533  | 66.15970 | -646.27954  | 303.29008   | -573.46006  | 1 |
| 30222 | C | 83.45242 | 97.58823  | 70.78956 | 618.84715   | 115.61295   | 613.25040   | 1 |
| 30223 | O | 82.25436 | 97.57902  | 70.50249 | -924.59786  | 769.13473   | 16.39390    | 1 |
| 30224 | N | 84.01831 | 97.70280  | 71.98147 | 420.76195   | -276.25440  | 290.90358   | 1 |
| 30225 | H | 85.00721 | 97.55689  | 72.02532 | 1766.12698  | 804.01076   | -4530.64389 | 1 |
| 30226 | C | 83.33862 | 97.09466  | 73.11195 | 212.67835   | -378.02357  | 995.13434   | 1 |
| 30227 | H | 82.31343 | 97.27797  | 72.70933 | -865.66433  | 2226.11845  | 2002.28887  | 1 |
| 30228 | C | 83.75520 | 95.58636  | 73.14053 | -797.33519  | -367.20507  | 215.68386   | 1 |
| 30229 | H | 83.18094 | 94.98421  | 73.86242 | 500.65973   | 4852.11033  | -904.38909  | 1 |
| 30230 | H | 84.82778 | 95.51275  | 73.44238 | -365.44102  | -2141.88859 | -837.29252  | 1 |
| 30231 | H | 83.67884 | 95.05215  | 72.14343 | -2046.81911 | -938.41403  | -701.45519  | 1 |
| 30232 | C | 83.81285 | 97.94904  | 74.44285 | -614.52294  | -73.87793   | -224.36432  | 1 |
| 30233 | O | 84.41239 | 97.39602  | 75.36448 | -285.96958  | -367.60405  | -89.87654   | 1 |
| 30234 | N | 83.27223 | 99.18057  | 74.37931 | 690.59934   | -834.21082  | -540.89012  | 1 |
| 30235 | H | 83.00499 | 99.21480  | 73.35291 | 1129.05192  | 414.44320   | 245.97407   | 1 |
| 30236 | C | 84.05913 | 100.21763 | 74.97781 | -50.04160   | -271.59019  | 205.31356   | 1 |
| 30237 | H | 83.48217 | 101.09870 | 74.59632 | -2119.36191 | 5.65664     | 2229.56297  | 1 |
| 30238 | C | 84.15852 | 100.19070 | 76.55476 | -532.79041  | 576.66351   | 549.07713   | 1 |
| 30239 | H | 84.33829 | 99.10350  | 76.80884 | -360.18677  | 1474.23949  | -456.85509  | 1 |
| 30240 | H | 85.09392 | 100.69517 | 76.89064 | 1053.49071  | 1184.36146  | 3143.72736  | 1 |
| 30241 | C | 82.92786 | 100.67231 | 77.31255 | -16.13978   | 345.80554   | 447.13643   | 1 |
| 30242 | O | 82.15203 | 101.54320 | 76.99357 | -258.99089  | 394.45491   | 193.80587   | 1 |
| 30243 | O | 82.95473 | 100.13952 | 78.60342 | 328.44727   | 540.25844   | 1002.06257  | 1 |
| 30244 | C | 85.57080 | 100.33024 | 74.44560 | 569.97634   | 926.53021   | -333.30281  | 1 |
| 30245 | O | 86.51886 | 100.53630 | 75.25072 | -653.60451  | -90.62342   | 1378.90835  | 1 |

|       |   |          |           |          |             |             |             |   |
|-------|---|----------|-----------|----------|-------------|-------------|-------------|---|
| 30246 | N | 85.68786 | 100.08781 | 73.15053 | -45.39022   | 1014.44972  | 312.61559   | 1 |
| 30247 | H | 84.72701 | 99.85496  | 72.78120 | -3587.40958 | -2711.78095 | -360.12356  | 1 |
| 30248 | C | 86.67191 | 100.80185 | 72.40277 | 767.15485   | -422.90994  | 783.58241   | 1 |
| 30249 | H | 86.26285 | 100.67756 | 71.36296 | -1030.80786 | 328.24959   | -2633.01068 | 1 |
| 30250 | C | 86.90259 | 102.29453 | 72.78168 | -143.74359  | 359.72436   | 148.52605   | 1 |
| 30251 | H | 87.89580 | 102.57605 | 72.44234 | -801.88309  | 310.85844   | -474.09557  | 1 |
| 30252 | H | 86.78483 | 102.48961 | 73.87143 | 781.18796   | 210.88148   | 82.70113    | 1 |
| 30253 | C | 85.82146 | 103.28096 | 71.96966 | 461.06397   | -197.32860  | -662.36013  | 1 |
| 30254 | O | 85.70222 | 103.07465 | 70.77320 | -373.40144  | -557.92033  | 37.77295    | 1 |
| 30255 | O | 85.32838 | 104.23791 | 72.61684 | 805.03428   | -150.12960  | 307.09052   | 1 |
| 30256 | C | 88.15405 | 100.04066 | 72.73931 | -140.74083  | 671.05006   | 102.29808   | 1 |
| 30257 | O | 89.20692 | 100.59150 | 72.99647 | 1333.91816  | -288.96087  | 46.61890    | 1 |
| 30258 | N | 87.93897 | 98.75828  | 72.63058 | 225.37036   | -30.16267   | 655.24008   | 1 |
| 30259 | H | 86.97219 | 98.67962  | 72.20285 | -2144.02957 | -440.40252  | -2705.69115 | 1 |
| 30260 | C | 88.74158 | 97.57314  | 72.72636 | 890.97265   | -630.41464  | -699.38849  | 1 |
| 30261 | H | 89.78902 | 97.84487  | 72.40154 | -629.30657  | -2540.67675 | 399.43886   | 1 |
| 30262 | C | 88.65641 | 97.11041  | 74.21844 | 128.90217   | -64.84743   | -758.59751  | 1 |
| 30263 | H | 88.89938 | 96.02268  | 74.27711 | 1090.32432  | -86.28821   | -1354.84444 | 1 |
| 30264 | H | 89.44539 | 97.63100  | 74.83392 | 1346.90677  | 1558.45444  | 1325.95381  | 1 |
| 30265 | C | 87.19510 | 97.35947  | 74.79905 | -196.31169  | 342.61028   | -118.70056  | 1 |
| 30266 | H | 86.56075 | 96.84413  | 74.07838 | 1228.18088  | 701.78807   | 545.36249   | 1 |
| 30267 | H | 86.94586 | 98.46429  | 74.76374 | -453.94878  | -151.28055  | -1324.78526 | 1 |
| 30268 | C | 87.12015 | 96.87453  | 76.33875 | -489.65916  | -312.29805  | -292.15086  | 1 |
| 30269 | H | 86.11652 | 97.18007  | 76.65892 | -3303.34895 | -2726.09163 | -515.30427  | 1 |
| 30270 | H | 87.89205 | 97.41130  | 76.91733 | 1979.20104  | -413.27556  | -130.46082  | 1 |
| 30271 | N | 87.32566 | 95.50866  | 76.41517 | 648.22809   | 258.56909   | -147.33141  | 1 |
| 30272 | H | 88.23770 | 95.13463  | 76.66303 | -531.40252  | 625.74272   | -1905.30322 | 1 |
| 30273 | C | 86.55688 | 94.55816  | 76.02567 | 0.00430     | 69.54331    | -234.69833  | 1 |
| 30274 | N | 87.09592 | 93.24249  | 76.04834 | 159.39855   | -390.34963  | 208.13587   | 1 |
| 30275 | H | 87.96099 | 93.10759  | 76.57664 | -3411.59888 | 1900.56538  | -2594.64166 | 1 |
| 30276 | H | 86.65120 | 92.32339  | 75.97418 | 1747.67366  | -3981.68104 | 698.23661   | 1 |
| 30277 | N | 85.24256 | 94.83610  | 75.67520 | 424.09658   | -151.95183  | -214.51192  | 1 |
| 30278 | H | 84.77835 | 95.79118  | 75.63663 | -3684.06714 | -4201.72154 | -603.73567  | 1 |
| 30279 | H | 84.55573 | 94.13283  | 75.54791 | 1188.89703  | -3554.81605 | -1097.04706 | 1 |
| 30280 | C | 87.71199 | 96.55865  | 71.90123 | -585.42648  | 422.32098   | 18.79562    | 1 |
| 30281 | O | 86.50499 | 96.71662  | 71.67560 | -1417.18628 | 972.36171   | 653.73584   | 1 |
| 30282 | N | 88.48151 | 95.56203  | 71.61639 | -350.47356  | 694.10384   | -251.97022  | 1 |
| 30283 | H | 89.47796 | 95.51563  | 71.96204 | 726.03082   | 1907.89984  | -469.79565  | 1 |
| 30284 | C | 87.92032 | 94.50415  | 70.82242 | 51.19309    | -24.48687   | 306.25645   | 1 |
| 30285 | H | 87.04836 | 94.83972  | 70.31714 | 47.27682    | -2487.59697 | -2400.15924 | 1 |
| 30286 | C | 89.22808 | 94.11408  | 69.92656 | -367.16356  | -465.21973  | -221.41672  | 1 |
| 30287 | H | 90.08048 | 93.86368  | 70.56904 | 3448.06250  | -2623.43417 | 1729.39774  | 1 |
| 30288 | H | 89.65433 | 95.01758  | 69.48200 | -2056.54111 | -76.57194   | 41.91124    | 1 |
| 30289 | C | 88.87129 | 93.01626  | 68.93510 | 387.95123   | 705.38382   | 380.97483   | 1 |
| 30290 | C | 87.94390 | 91.96725  | 69.30351 | 190.12946   | -785.25578  | 255.58734   | 1 |
| 30291 | H | 87.57912 | 92.06220  | 70.38900 | 4229.32779  | -2960.12350 | -1519.40610 | 1 |
| 30292 | C | 87.64810 | 90.92654  | 68.46118 | 261.25880   | -881.75671  | -480.13420  | 1 |
| 30293 | H | 87.02570 | 90.15997  | 68.97138 | -429.64587  | -448.14870  | -2243.21418 | 1 |
| 30294 | C | 88.12365 | 90.74754  | 67.11301 | 1345.69405  | -813.54708  | -102.99921  | 1 |
| 30295 | O | 87.70762 | 89.76756  | 66.30187 | 316.05343   | 16.82633    | 113.41299   | 1 |
| 30296 | H | 86.68460 | 89.42797  | 66.91378 | -541.27315  | -3430.31145 | 4298.94579  | 1 |
| 30297 | C | 89.58772 | 92.85216  | 67.69319 | 35.65618    | 32.99318    | -367.43615  | 1 |
| 30298 | H | 90.24756 | 93.64329  | 67.37987 | -625.00183  | 2516.53930  | 924.26750   | 1 |
| 30299 | C | 89.14911 | 91.79393  | 66.88299 | -7.10129    | 138.33613   | 14.59496    | 1 |
| 30300 | H | 89.55955 | 91.45430  | 65.95013 | -576.02908  | 971.58659   | 789.51241   | 1 |
| 30301 | C | 87.38905 | 93.43862  | 71.86420 | -597.90210  | -901.25416  | -577.62565  | 1 |
| 30302 | O | 88.09719 | 92.92500  | 72.68931 | -687.66136  | -217.30835  | -1185.24454 | 1 |
| 30303 | N | 86.01665 | 93.29518  | 71.67930 | -313.79176  | 184.07639   | 752.21597   | 1 |
| 30304 | H | 85.54655 | 93.65986  | 70.85402 | -2171.19258 | -288.63814  | 289.16691   | 1 |
| 30305 | C | 85.50061 | 92.04344  | 72.13699 | 1385.87397  | -15.38912   | -500.21827  | 1 |
| 30306 | H | 86.30443 | 91.70902  | 72.90379 | 2021.33643  | -630.51575  | 1138.67940  | 1 |
| 30307 | C | 84.14315 | 92.43371  | 72.84638 | 619.82400   | 15.56190    | 686.53669   | 1 |

|       |   |          |          |          |             |             |             |   |
|-------|---|----------|----------|----------|-------------|-------------|-------------|---|
| 30308 | H | 84.11633 | 93.46684 | 73.20113 | -1549.93260 | -223.88269  | -1964.74517 | 1 |
| 30309 | C | 82.97489 | 92.54241 | 71.79812 | 574.72916   | 333.75339   | -628.97379  | 1 |
| 30310 | H | 83.36377 | 93.04086 | 70.84586 | 1633.31257  | -2125.86724 | 239.89891   | 1 |
| 30311 | H | 82.67746 | 91.51695 | 71.46413 | 4220.99352  | 885.50828   | 1083.36576  | 1 |
| 30312 | H | 82.07516 | 93.04283 | 72.14673 | 811.76503   | -3483.40276 | 466.99273   | 1 |
| 30313 | C | 83.74383 | 91.48443 | 74.00573 | 298.16131   | 157.56659   | -93.67994   | 1 |
| 30314 | H | 82.85979 | 91.88257 | 74.59995 | -657.90864  | 3953.75975  | -885.05250  | 1 |
| 30315 | H | 84.54520 | 91.60518 | 74.75670 | 1469.96151  | 2363.57298  | 996.32605   | 1 |
| 30316 | C | 83.42685 | 90.00848 | 73.60048 | -294.80864  | -822.94993  | 250.71187   | 1 |
| 30317 | H | 84.18288 | 89.65843 | 72.88530 | 4835.89470  | -1960.02263 | -2483.69559 | 1 |
| 30318 | H | 83.31628 | 89.33029 | 74.48299 | 1615.50503  | 6154.84860  | -1447.43823 | 1 |
| 30319 | H | 82.51550 | 89.98856 | 72.93222 | -2681.75316 | 619.45331   | -1351.58345 | 1 |
| 30320 | C | 85.28900 | 91.05959 | 70.84734 | 196.25888   | 247.95397   | 527.39060   | 1 |
| 30321 | O | 84.87741 | 91.55543 | 69.81426 | 291.10696   | -415.31239  | -406.88262  | 1 |
| 30322 | N | 85.51885 | 89.76003 | 71.03358 | -88.68282   | -371.08810  | 683.38889   | 1 |
| 30323 | H | 85.85958 | 89.21469 | 71.84392 | -933.97232  | -598.61417  | 1913.06016  | 1 |
| 30324 | C | 84.97954 | 88.93327 | 69.93838 | -443.60967  | -143.67415  | 24.85504    | 1 |
| 30325 | H | 85.42860 | 89.35334 | 69.04459 | -374.91694  | -143.87599  | -1666.60235 | 1 |
| 30326 | C | 85.51462 | 87.51042 | 70.25342 | -131.16960  | -752.65825  | 428.23582   | 1 |
| 30327 | H | 85.88655 | 87.47589 | 71.34312 | 952.19972   | 2510.96459  | -1174.17059 | 1 |
| 30328 | H | 84.68721 | 86.78861 | 70.20322 | -198.72154  | 1769.06977  | -3881.59733 | 1 |
| 30329 | S | 86.85300 | 87.24335 | 69.03811 | 572.96822   | -477.25246  | 248.95255   | 1 |
| 30330 | C | 83.34648 | 88.94516 | 69.99750 | -69.29720   | -54.13213   | -444.09007  | 1 |
| 30331 | O | 82.73012 | 88.74771 | 71.01631 | -362.86021  | -303.11046  | -465.08192  | 1 |
| 30332 | N | 82.87870 | 89.29972 | 68.80721 | 429.15052   | 1394.12498  | -250.54940  | 1 |
| 30333 | H | 83.52911 | 89.37045 | 67.97613 | -698.22156  | -581.15427  | 86.74328    | 1 |
| 30334 | C | 81.46815 | 89.44363 | 68.50769 | 807.45754   | 1278.25277  | -364.23095  | 1 |
| 30335 | H | 80.82447 | 89.16831 | 69.43425 | 3722.30954  | -21.28077   | 530.04130   | 1 |
| 30336 | C | 81.50716 | 90.96035 | 68.20581 | -251.94074  | 436.76373   | 578.40836   | 1 |
| 30337 | H | 82.33679 | 91.12875 | 67.39746 | 71.71854    | -98.59837   | 2088.23342  | 1 |
| 30338 | H | 81.85701 | 91.48636 | 69.13797 | -1399.09949 | 852.06812   | 528.67426   | 1 |
| 30339 | C | 80.16123 | 91.67290 | 67.56129 | 171.24363   | 341.17953   | -530.17606  | 1 |
| 30340 | O | 79.27940 | 91.89452 | 68.36478 | -268.12860  | -339.30711  | -4.72740    | 1 |
| 30341 | O | 80.10987 | 91.89093 | 66.31924 | -73.21932   | 35.08541    | -508.19800  | 1 |
| 30342 | C | 81.06442 | 88.76613 | 67.04841 | -804.19678  | 309.63534   | -558.41072  | 1 |
| 30343 | O | 81.83862 | 88.46353 | 66.19851 | 1385.30507  | -203.94595  | 57.96185    | 1 |
| 30344 | N | 79.69121 | 88.75596 | 66.87189 | -183.72066  | -301.91170  | -384.91634  | 1 |
| 30345 | H | 79.17570 | 89.00414 | 67.72680 | 2152.64265  | 356.47470   | -4033.51455 | 1 |
| 30346 | C | 79.21442 | 88.76380 | 65.54315 | -649.87953  | 392.03780   | 150.03627   | 1 |
| 30347 | H | 80.09346 | 88.79864 | 64.89808 | -2071.55816 | 257.16324   | 10.65568    | 1 |
| 30348 | C | 78.40176 | 87.42217 | 65.25262 | -731.60608  | 892.93887   | -882.70538  | 1 |
| 30349 | H | 78.02309 | 87.43731 | 64.23204 | 1427.37221  | 1798.21918  | -895.69218  | 1 |
| 30350 | H | 77.57605 | 87.40577 | 66.02977 | -1826.93178 | -484.30571  | -554.01790  | 1 |
| 30351 | C | 79.12705 | 86.01602 | 65.29912 | 58.40184    | 14.68499    | 521.51957   | 1 |
| 30352 | H | 80.19170 | 86.24149 | 65.12218 | 450.70271   | 558.73194   | 270.40834   | 1 |
| 30353 | H | 78.81269 | 85.29824 | 64.40474 | 2237.81410  | -1404.50400 | -620.31268  | 1 |
| 30354 | C | 78.82711 | 85.46873 | 66.72363 | -35.70388   | 392.67116   | 900.49952   | 1 |
| 30355 | H | 79.37436 | 85.95212 | 67.58108 | 823.79734   | 1406.56444  | 1033.04459  | 1 |
| 30356 | H | 77.86388 | 85.76031 | 67.01201 | -1926.80480 | -632.07130  | -51.79034   | 1 |
| 30357 | N | 78.71300 | 83.93980 | 66.64390 | 131.07907   | 644.82924   | 531.94161   | 1 |
| 30358 | H | 78.51800 | 83.39480 | 65.82790 | 1536.82760  | 1724.27943  | -2149.42011 | 1 |
| 30359 | C | 78.40500 | 83.36480 | 67.75690 | -668.19313  | 389.35659   | -513.16330  | 1 |
| 30360 | N | 78.10900 | 83.97080 | 68.86490 | 777.66031   | 319.07458   | -66.34553   | 1 |
| 30361 | H | 78.26600 | 84.95480 | 68.95690 | -1723.90401 | 1651.35989  | -2074.25040 | 1 |
| 30362 | H | 77.74400 | 83.35480 | 69.56290 | -1359.64793 | 1948.29748  | -2088.08756 | 1 |
| 30363 | N | 78.05200 | 82.10080 | 67.70790 | -573.85900  | 541.21727   | -346.70435  | 1 |
| 30364 | H | 78.04200 | 81.66580 | 66.80690 | -1277.87858 | 2596.79312  | 1260.20199  | 1 |
| 30365 | H | 77.44800 | 81.87880 | 68.47390 | -1859.95249 | 1836.07853  | -1782.46082 | 1 |
| 30366 | C | 78.12383 | 90.03695 | 65.47186 | 272.77306   | 132.64390   | 702.29637   | 1 |
| 30367 | O | 77.31964 | 90.30691 | 66.33009 | 371.38480   | 269.06276   | -755.34579  | 1 |
| 30368 | N | 78.20061 | 90.29753 | 64.16525 | -100.53996  | 212.53917   | 349.50678   | 1 |
| 30369 | H | 79.09886 | 89.92582 | 63.85709 | -3424.85991 | 2010.05828  | 249.82724   | 1 |

|       |   |          |          |          |             |             |             |   |
|-------|---|----------|----------|----------|-------------|-------------|-------------|---|
| 30370 | C | 77.33951 | 91.07412 | 63.35627 | 483.70698   | 148.54106   | 690.89781   | 1 |
| 30371 | H | 76.41204 | 91.18682 | 63.90951 | -184.70728  | -1679.96693 | 962.85785   | 1 |
| 30372 | C | 78.00964 | 92.50005 | 63.22066 | -768.23780  | 837.85982   | 52.50038    | 1 |
| 30373 | H | 78.64815 | 92.65774 | 64.08627 | 1757.06791  | -537.45871  | -323.09082  | 1 |
| 30374 | H | 78.57971 | 92.64758 | 62.28230 | 1464.31967  | -2920.25581 | 2541.15739  | 1 |
| 30375 | C | 76.89889 | 93.59121 | 63.16773 | 354.09057   | -39.22979   | -1005.41057 | 1 |
| 30376 | C | 76.47129 | 94.25751 | 64.34687 | -362.46203  | 35.91224    | -311.28738  | 1 |
| 30377 | H | 76.67785 | 93.89107 | 65.41013 | -198.78444  | -1244.17353 | 1790.23957  | 1 |
| 30378 | C | 75.58355 | 95.34240 | 64.16722 | -518.47051  | 476.58586   | -135.40313  | 1 |
| 30379 | H | 75.10254 | 95.86461 | 65.07891 | -269.26495  | 34.78924    | 1925.73448  | 1 |
| 30380 | C | 75.35916 | 95.93319 | 62.91270 | 49.82272    | -62.85638   | -578.57098  | 1 |
| 30381 | H | 74.84202 | 96.91163 | 62.76603 | -2279.31115 | -2419.52334 | 2615.73023  | 1 |
| 30382 | C | 76.68262 | 94.10087 | 61.85259 | 233.25997   | -315.40626  | -83.12488   | 1 |
| 30383 | H | 77.04205 | 93.56255 | 60.95090 | -1040.57395 | -1002.87310 | 247.62766   | 1 |
| 30384 | C | 75.90133 | 95.28087 | 61.81181 | 802.50113   | 197.31549   | -203.05392  | 1 |
| 30385 | H | 75.71963 | 95.79958 | 60.85634 | 278.20930   | -326.78012  | 1381.94065  | 1 |
| 30386 | C | 77.00179 | 90.51287 | 61.79475 | -481.75213  | 71.49283    | -647.99754  | 1 |
| 30387 | O | 77.82635 | 90.18738 | 60.95066 | 653.14193   | 173.55545   | -188.57204  | 1 |
| 30388 | N | 75.71591 | 90.71395 | 61.56931 | -40.31913   | -194.94136  | 323.99754   | 1 |
| 30389 | H | 75.12050 | 91.10876 | 62.32082 | 3088.09160  | -2763.26340 | -2765.36512 | 1 |
| 30390 | C | 75.06846 | 89.91038 | 60.56128 | -159.47435  | -240.09769  | 642.31766   | 1 |
| 30391 | H | 75.93743 | 89.27622 | 60.19512 | 2331.41681  | 754.70932   | -474.56491  | 1 |
| 30392 | C | 73.78303 | 89.26971 | 61.28025 | -236.37034  | 208.42012   | 239.32390   | 1 |
| 30393 | H | 73.09797 | 88.72572 | 60.58923 | -2195.92112 | 2250.61869  | 768.26510   | 1 |
| 30394 | H | 73.03254 | 89.98994 | 61.78674 | 411.18843   | 1632.25099  | 1369.45714  | 1 |
| 30395 | C | 74.40472 | 88.33972 | 62.34069 | -48.81680   | 26.45901    | 1159.92790  | 1 |
| 30396 | C | 74.63225 | 86.94339 | 62.13089 | -418.89623  | -545.52092  | -624.96104  | 1 |
| 30397 | H | 74.53894 | 86.56096 | 61.06375 | 87.97756    | 2746.44045  | -245.57840  | 1 |
| 30398 | C | 74.99213 | 86.06903 | 63.13369 | 520.96507   | -350.81085  | 1058.02947  | 1 |
| 30399 | H | 75.08561 | 85.04976 | 62.96150 | -747.98739  | -1288.90998 | -215.78277  | 1 |
| 30400 | C | 75.17357 | 86.54658 | 64.46203 | -216.28543  | -166.10557  | -170.62484  | 1 |
| 30401 | O | 75.59473 | 85.62333 | 65.46114 | 768.28100   | -658.64502  | -364.13818  | 1 |
| 30402 | H | 75.54600 | 84.77580 | 64.99090 | 2.73547     | -1160.05418 | 2911.22341  | 1 |
| 30403 | C | 74.66310 | 88.80738 | 63.62669 | -216.88524  | 519.20853   | -625.06643  | 1 |
| 30404 | H | 74.53289 | 89.92178 | 63.79289 | -452.41101  | 1757.61260  | 949.16367   | 1 |
| 30405 | C | 75.01948 | 87.93577 | 64.69080 | 300.54865   | -54.78962   | -10.58659   | 1 |
| 30406 | H | 75.22733 | 88.28940 | 65.78166 | 1244.65561  | 903.43238   | 3771.50992  | 1 |
| 30407 | C | 74.65188 | 90.99008 | 59.44877 | -964.09938  | 184.67953   | 1301.47773  | 1 |
| 30408 | O | 74.96368 | 92.13373 | 59.61429 | -12.85589   | -408.16926  | 36.02575    | 1 |
| 30409 | N | 73.82118 | 90.43504 | 58.50346 | 758.67273   | 233.06147   | -87.28040   | 1 |
| 30410 | C | 74.00465 | 89.02160 | 58.22035 | -229.82152  | -372.68909  | -96.43630   | 1 |
| 30411 | H | 75.08465 | 88.79674 | 58.21650 | -692.17292  | -2431.64971 | -4353.02671 | 1 |
| 30412 | H | 73.47133 | 88.45851 | 59.03139 | 420.36888   | 1695.80998  | 2627.08065  | 1 |
| 30413 | C | 73.23181 | 91.18155 | 57.44180 | -1290.78319 | -246.97199  | 912.31853   | 1 |
| 30414 | H | 73.90159 | 92.05037 | 57.22721 | 1969.62882  | -1577.40778 | -797.27482  | 1 |
| 30415 | C | 73.06595 | 90.18006 | 56.21347 | 315.97490   | -8.53362    | 393.81665   | 1 |
| 30416 | H | 72.10498 | 90.24979 | 55.75401 | -2044.66241 | 205.63720   | 1648.60875  | 1 |
| 30417 | H | 73.75246 | 90.30007 | 55.42363 | 250.15247   | 194.73430   | 224.39988   | 1 |
| 30418 | C | 73.27550 | 88.77527 | 56.81784 | -151.13798  | -77.23034   | -569.67884  | 1 |
| 30419 | H | 72.31310 | 88.21688 | 56.86442 | 1801.97900  | 337.64873   | -842.37538  | 1 |
| 30420 | H | 73.93667 | 88.21547 | 56.10126 | 1576.13120  | 1178.79669  | 26.90772    | 1 |
| 30421 | C | 71.74711 | 91.82622 | 57.80127 | -781.22953  | -113.72034  | 189.02232   | 1 |
| 30422 | O | 71.27528 | 92.56576 | 56.93927 | -204.49936  | 126.87129   | -207.82032  | 1 |
| 30423 | N | 71.40213 | 91.58189 | 59.02957 | -203.93111  | -365.06867  | -401.16394  | 1 |
| 30424 | H | 72.12059 | 91.04402 | 59.46834 | 977.70379   | -520.79416  | -1436.23121 | 1 |
| 30425 | C | 70.16603 | 92.14951 | 59.60142 | 627.60338   | 285.70790   | 532.67175   | 1 |
| 30426 | H | 70.44051 | 93.23296 | 59.62433 | 1369.23280  | 1166.02451  | -1707.61792 | 1 |
| 30427 | C | 68.98160 | 91.97786 | 58.61304 | 695.99051   | -335.41280  | 645.11988   | 1 |
| 30428 | H | 69.33708 | 92.47232 | 57.64583 | 1325.41429  | 2183.83391  | -363.94136  | 1 |
| 30429 | H | 68.85783 | 90.91150 | 58.32931 | 1682.26146  | -18.70764   | -1246.45737 | 1 |
| 30430 | C | 67.58972 | 92.68643 | 58.88147 | -807.46977  | 831.64266   | 134.47166   | 1 |
| 30431 | O | 67.32170 | 93.42211 | 59.79619 | -663.10368  | -266.85087  | 804.86681   | 1 |

|       |   |          |          |          |             |             |             |   |
|-------|---|----------|----------|----------|-------------|-------------|-------------|---|
| 30432 | N | 66.83233 | 92.50310 | 57.76861 | -96.17016   | -244.00984  | -483.04887  | 1 |
| 30433 | H | 67.04389 | 91.67826 | 57.16950 | 1741.55410  | -494.57070  | -887.45851  | 1 |
| 30434 | H | 65.77522 | 92.74767 | 57.90727 | -1397.03093 | 1694.03984  | -1114.93438 | 1 |
| 30435 | C | 70.05996 | 91.47641 | 61.00443 | 966.44926   | 579.21657   | 1329.40184  | 1 |
| 30436 | O | 70.67037 | 90.48523 | 61.41794 | 258.26805   | -317.25049  | -85.89824   | 1 |
| 30437 | N | 69.03723 | 92.08171 | 61.64042 | 169.97077   | -62.59030   | -325.23486  | 1 |
| 30438 | H | 68.56411 | 92.90662 | 61.23453 | -824.66778  | -1221.07696 | -294.59481  | 1 |
| 30439 | C | 68.63646 | 91.42352 | 62.86453 | -40.46531   | 315.11968   | -82.68223   | 1 |
| 30440 | H | 69.49448 | 90.65446 | 63.09095 | 281.87536   | 642.48100   | -3034.20804 | 1 |
| 30441 | C | 68.60309 | 92.53991 | 63.94911 | 305.60554   | 120.88744   | -223.26283  | 1 |
| 30442 | H | 68.63675 | 93.55383 | 63.50554 | 2002.67384  | -1271.80389 | 653.23948   | 1 |
| 30443 | H | 67.75238 | 92.53684 | 64.65716 | 681.54013   | 315.84832   | 2600.06363  | 1 |
| 30444 | C | 70.06352 | 92.37356 | 64.77502 | 1009.79617  | -221.89824  | 680.48286   | 1 |
| 30445 | O | 71.07112 | 92.86482 | 64.33582 | 170.65007   | -243.73971  | -23.49670   | 1 |
| 30446 | O | 69.99399 | 91.75195 | 65.84337 | -274.85295  | 414.78624   | 63.42477    | 1 |
| 30447 | C | 67.11675 | 90.81542 | 62.75024 | 441.98042   | 200.56510   | -585.81022  | 1 |
| 30448 | O | 66.61012 | 90.34171 | 63.73683 | -117.43608  | 296.76653   | 160.50648   | 1 |
| 30449 | N | 66.58777 | 90.95971 | 61.49847 | -365.78962  | -376.12804  | -53.68624   | 1 |
| 30450 | H | 67.15645 | 91.42363 | 60.82986 | 379.04734   | 359.06706   | 1024.26128  | 1 |
| 30451 | C | 65.74809 | 89.91972 | 60.99323 | -950.10465  | -297.08321  | 16.24047    | 1 |
| 30452 | H | 65.25965 | 89.50892 | 61.86367 | 2479.36898  | 3452.98167  | 4.05636     | 1 |
| 30453 | C | 64.80677 | 90.59415 | 59.85227 | 274.69367   | 370.49204   | 89.32658    | 1 |
| 30454 | H | 64.68581 | 91.68111 | 60.05770 | 30.91077    | -2668.33473 | 2222.70823  | 1 |
| 30455 | H | 65.36930 | 90.50862 | 58.91181 | -3048.84217 | -2001.13742 | -85.35277   | 1 |
| 30456 | C | 63.45124 | 89.96298 | 59.74678 | -332.39468  | 348.89767   | -983.81391  | 1 |
| 30457 | H | 63.66691 | 88.85460 | 59.57369 | 260.01759   | -1571.57224 | -674.26283  | 1 |
| 30458 | C | 62.65053 | 90.01329 | 61.03052 | 145.23052   | -348.40296  | -276.89220  | 1 |
| 30459 | H | 62.51525 | 91.04038 | 61.44631 | -2241.50128 | -2009.10954 | -1444.02548 | 1 |
| 30460 | H | 63.16679 | 89.42797 | 61.84739 | 2463.44628  | -230.03327  | 2719.85813  | 1 |
| 30461 | H | 61.57762 | 89.68662 | 60.87481 | 2227.18983  | 2058.26152  | 3273.15366  | 1 |
| 30462 | C | 62.59632 | 90.40787 | 58.56386 | 533.86995   | -243.18750  | 876.45367   | 1 |
| 30463 | H | 62.18518 | 89.61298 | 57.94186 | -2108.70762 | -1537.55910 | 263.78508   | 1 |
| 30464 | H | 61.71740 | 90.88402 | 59.08810 | -2655.09516 | -1468.70712 | 75.39894    | 1 |
| 30465 | H | 63.07579 | 91.13817 | 57.90218 | -752.03917  | 2006.38447  | 137.82888   | 1 |
| 30466 | C | 66.68801 | 88.75347 | 60.38391 | 280.46525   | -565.75100  | 861.43566   | 1 |
| 30467 | O | 66.08139 | 87.75863 | 60.00888 | -57.20047   | 218.66044   | -616.79259  | 1 |
| 30468 | N | 67.98889 | 88.96805 | 60.26023 | -990.69257  | -82.84231   | 135.69706   | 1 |
| 30469 | H | 68.46692 | 89.85402 | 60.45107 | 1624.25726  | -1730.80904 | -445.42970  | 1 |
| 30470 | C | 68.76061 | 87.92337 | 59.76644 | 299.00506   | 572.40290   | -79.34437   | 1 |
| 30471 | H | 67.96269 | 87.27673 | 59.23695 | 2870.05027  | -2253.87842 | -1162.42543 | 1 |
| 30472 | C | 69.95356 | 88.48398 | 58.83458 | -31.92092   | 281.23575   | -597.81469  | 1 |
| 30473 | H | 70.91582 | 88.03180 | 59.16470 | -1654.88344 | -1263.55298 | -2932.22082 | 1 |
| 30474 | H | 70.04747 | 89.62694 | 58.94755 | -25.92705   | 907.57112   | 1156.42810  | 1 |
| 30475 | C | 69.78364 | 88.15097 | 57.36455 | 691.56615   | -216.54935  | 735.53168   | 1 |
| 30476 | C | 69.53603 | 89.00937 | 56.25942 | -352.22028  | -980.00286  | 110.79769   | 1 |
| 30477 | H | 69.47018 | 90.12579 | 56.14522 | 2825.29431  | 1774.15770  | 996.12649   | 1 |
| 30478 | N | 69.38015 | 88.31169 | 55.13687 | -463.27348  | -521.70571  | 232.20814   | 1 |
| 30479 | H | 69.19937 | 88.85800 | 54.24073 | -3796.58039 | -1447.13146 | 530.26322   | 1 |
| 30480 | C | 69.46853 | 86.96353 | 55.39930 | 21.38250    | -825.39006  | -387.05234  | 1 |
| 30481 | C | 69.72681 | 86.79486 | 56.85377 | -294.09557  | 275.52774   | 258.99487   | 1 |
| 30482 | C | 69.85326 | 85.50164 | 57.43480 | 1104.16052  | -100.55312  | 175.93375   | 1 |
| 30483 | H | 69.89024 | 85.35587 | 58.55405 | -2054.86933 | 594.32101   | -1083.33156 | 1 |
| 30484 | C | 69.68000 | 84.43180 | 56.55090 | -264.05665  | 536.71245   | 702.45555   | 1 |
| 30485 | H | 69.73600 | 83.43380 | 56.95890 | 1494.77344  | 480.45994   | 2717.07189  | 1 |
| 30486 | C | 69.38005 | 85.81075 | 54.52786 | -222.40167  | -957.56036  | -492.37930  | 1 |
| 30487 | H | 69.30457 | 85.93970 | 53.42264 | 1720.27688  | -450.40851  | -1678.53370 | 1 |
| 30488 | C | 69.46400 | 84.55980 | 55.13790 | -741.78443  | -500.22876  | 189.05846   | 1 |
| 30489 | H | 69.43900 | 83.61780 | 54.60990 | -1253.76470 | 2898.34254  | 248.53410   | 1 |
| 30490 | C | 69.45913 | 87.20572 | 61.01354 | -207.50965  | -1380.29753 | -640.55232  | 1 |
| 30491 | O | 69.51017 | 85.97497 | 60.86759 | 284.30404   | -169.11655  | 769.75645   | 1 |
| 30492 | N | 69.98828 | 87.93254 | 62.00923 | -769.79026  | -457.93906  | 421.55579   | 1 |
| 30493 | H | 69.84598 | 88.96037 | 62.03931 | -88.56550   | 112.49659   | -4935.56296 | 1 |



|       |   |          |          |          |             |             |             |   |
|-------|---|----------|----------|----------|-------------|-------------|-------------|---|
| 30494 | C | 70.40994 | 87.22823 | 63.12434 | -664.03232  | 1028.00984  | -578.34455  | 1 |
| 30495 | H | 70.77781 | 86.28808 | 62.68505 | 1034.43856  | 4242.85049  | -206.07179  | 1 |
| 30496 | C | 71.66926 | 87.74951 | 63.91508 | -513.63420  | 629.27629   | -120.08702  | 1 |
| 30497 | H | 72.48777 | 87.84736 | 63.14651 | -1499.20868 | 1594.06362  | 608.66501   | 1 |
| 30498 | C | 71.32951 | 89.17537 | 64.47648 | 31.20621    | -179.35170  | 171.83421   | 1 |
| 30499 | H | 72.25492 | 89.59833 | 65.04068 | 1198.75426  | 1381.53612  | -1396.63097 | 1 |
| 30500 | H | 70.43643 | 89.03872 | 65.17818 | 2399.13818  | 1922.19012  | -499.94306  | 1 |
| 30501 | H | 70.96241 | 89.92302 | 63.72358 | -3978.93620 | -2503.37028 | 1805.80199  | 1 |
| 30502 | C | 72.13145 | 86.69806 | 64.97343 | -388.23797  | -504.16893  | -392.25451  | 1 |
| 30503 | H | 71.72374 | 85.63016 | 64.90487 | -2097.74344 | -2374.17237 | 2874.88869  | 1 |
| 30504 | H | 73.24130 | 86.70909 | 64.94301 | -3463.18789 | -1076.57518 | 1056.04299  | 1 |
| 30505 | H | 71.89099 | 86.93062 | 66.04394 | -387.65126  | 2664.03812  | 1618.31372  | 1 |
| 30506 | C | 69.19896 | 87.18595 | 64.30541 | -143.60581  | -554.88626  | -423.89308  | 1 |
| 30507 | O | 69.55304 | 86.93165 | 65.43642 | 399.03647   | 292.55939   | 661.09378   | 1 |
| 30508 | N | 68.00591 | 87.49230 | 63.85625 | -364.89084  | 620.22533   | -131.25815  | 1 |
| 30509 | H | 67.94591 | 87.71204 | 62.87635 | 99.23339    | -288.77039  | -1599.43783 | 1 |
| 30510 | C | 66.88932 | 86.74278 | 64.37415 | 312.12900   | 130.96618   | 40.01779    | 1 |
| 30511 | H | 67.27332 | 86.71844 | 65.41006 | 1500.12764  | -3561.51007 | -13.39094   | 1 |
| 30512 | C | 65.53846 | 87.54356 | 64.19256 | 351.10597   | -31.59207   | 1076.80707  | 1 |
| 30513 | H | 65.76531 | 88.64600 | 64.06616 | -974.57516  | -2774.95832 | 533.23266   | 1 |
| 30514 | C | 64.84327 | 87.10543 | 62.83495 | -936.83633  | -934.69760  | 162.06682   | 1 |
| 30515 | H | 65.44813 | 87.37725 | 61.92677 | -1251.61681 | -654.28164  | 4447.53157  | 1 |
| 30516 | H | 64.66107 | 86.04110 | 62.78069 | 2372.10597  | 1111.52223  | -510.09842  | 1 |
| 30517 | H | 63.82928 | 87.56324 | 62.76920 | -1029.54496 | 523.96428   | -397.61235  | 1 |
| 30518 | C | 64.78405 | 87.59294 | 65.57530 | 154.10226   | -260.43810  | 874.77060   | 1 |
| 30519 | H | 63.71226 | 87.78991 | 65.40316 | 519.33962   | 980.79216   | -680.93995  | 1 |
| 30520 | H | 64.93701 | 86.65745 | 66.11423 | 1043.75644  | -967.74860  | 274.42558   | 1 |
| 30521 | H | 65.23802 | 88.37895 | 66.27067 | -2831.42741 | 468.78313   | -624.20898  | 1 |
| 30522 | C | 66.79822 | 85.33010 | 63.56005 | 302.30528   | 1527.35249  | 580.84159   | 1 |
| 30523 | O | 66.19800 | 84.42780 | 64.14390 | -492.44435  | 610.36568   | 197.27762   | 1 |
| 30524 | N | 67.13750 | 85.40193 | 62.27642 | 915.47631   | 65.14025    | -394.28044  | 1 |
| 30525 | H | 67.79969 | 86.06775 | 61.95761 | -1479.40913 | -387.42340  | -1196.87262 | 1 |
| 30526 | C | 67.17300 | 83.92780 | 61.67790 | 673.99000   | 339.07482   | 505.58797   | 1 |
| 30527 | H | 66.24200 | 83.39480 | 61.79890 | 1637.78249  | 2274.46796  | 1442.15621  | 1 |
| 30528 | C | 67.57000 | 83.97580 | 60.15290 | 592.42603   | -395.00489  | 540.99551   | 1 |
| 30529 | H | 68.48300 | 84.59580 | 60.02690 | 2092.10852  | 2035.03564  | -1184.53209 | 1 |
| 30530 | C | 67.61400 | 82.57980 | 59.52390 | -557.58336  | 470.70911   | 571.97627   | 1 |
| 30531 | H | 66.79600 | 81.88480 | 59.80990 | 1848.57723  | -1426.41165 | -2086.37818 | 1 |
| 30532 | H | 68.52000 | 82.02080 | 59.84090 | 2850.80815  | 1317.67516  | -33.88827   | 1 |
| 30533 | H | 67.66500 | 82.68580 | 58.41990 | -2626.29637 | -1720.97531 | -235.63591  | 1 |
| 30534 | C | 66.50700 | 84.79580 | 59.46790 | 821.61765   | 367.06690   | -116.41441  | 1 |
| 30535 | H | 66.63300 | 84.77480 | 58.36390 | -2520.29162 | -454.24019  | -1843.43086 | 1 |
| 30536 | H | 66.38145 | 85.86428 | 59.69765 | 193.22165   | 1987.29409  | -902.99702  | 1 |
| 30537 | H | 65.54000 | 84.29880 | 59.69790 | -1710.91123 | -2176.94706 | -1483.12435 | 1 |
| 30538 | C | 68.20200 | 83.10680 | 62.39890 | 538.94756   | 606.28795   | -428.41971  | 1 |
| 30539 | O | 68.02100 | 81.91380 | 62.76490 | 253.25544   | -628.46677  | -372.54079  | 1 |
| 30540 | N | 69.35700 | 83.66280 | 62.70190 | 600.38797   | -436.45326  | -369.07951  | 1 |
| 30541 | H | 69.64500 | 84.55180 | 62.35490 | -1794.86027 | -999.87435  | -2387.73904 | 1 |
| 30542 | C | 70.38900 | 83.01780 | 63.55090 | -427.83772  | 410.03103   | 704.43456   | 1 |
| 30543 | H | 70.48900 | 81.98180 | 63.26390 | -1083.02382 | 2683.35732  | -1283.15729 | 1 |
| 30544 | C | 71.76000 | 83.63580 | 63.31290 | -495.20999  | 722.96993   | 304.98175   | 1 |
| 30545 | H | 72.58800 | 82.97480 | 63.64590 | -2649.42222 | 1686.72747  | 370.57397   | 1 |
| 30546 | H | 71.82400 | 84.63980 | 63.78390 | -808.93805  | 3056.01955  | 116.86859   | 1 |
| 30547 | C | 72.03300 | 83.72280 | 61.79390 | -227.00176  | -506.56625  | 710.59408   | 1 |
| 30548 | C | 71.81600 | 82.59080 | 60.95990 | 267.14002   | -702.32467  | -492.91195  | 1 |
| 30549 | H | 71.47000 | 81.69580 | 61.45590 | -2329.23019 | 1925.53899  | 935.42704   | 1 |
| 30550 | C | 72.08100 | 82.67680 | 59.54890 | 593.03564   | 114.63114   | 668.05646   | 1 |
| 30551 | H | 71.79200 | 81.91980 | 58.83390 | -2143.26637 | 1683.43720  | -1612.91881 | 1 |
| 30552 | C | 72.48800 | 83.89180 | 59.02390 | 182.47455   | 869.41193   | -257.89654  | 1 |
| 30553 | H | 72.66000 | 83.92580 | 57.95890 | -2552.22180 | 1511.09657  | 1098.31838  | 1 |
| 30554 | C | 72.42300 | 84.92880 | 61.19290 | -61.90843   | 141.92661   | -907.19770  | 1 |
| 30555 | H | 72.46324 | 85.82922 | 61.91847 | -109.70341  | 1659.83123  | -2818.08329 | 1 |

|       |   |          |          |          |             |             |             |   |
|-------|---|----------|----------|----------|-------------|-------------|-------------|---|
| 30556 | C | 72.70509 | 85.04124 | 59.80621 | 216.41624   | -340.22511  | -11.64643   | 1 |
| 30557 | H | 73.09769 | 85.97979 | 59.30009 | 2029.06782  | -1269.48167 | -2036.14259 | 1 |
| 30558 | C | 70.05300 | 82.90880 | 64.99590 | -713.56785  | 583.89438   | 114.10551   | 1 |
| 30559 | O | 70.29400 | 81.84380 | 65.59190 | 572.26267   | -241.81029  | -471.38361  | 1 |
| 30560 | N | 69.42700 | 83.89580 | 65.60790 | -679.10760  | -211.87727  | -463.74875  | 1 |
| 30561 | H | 69.17200 | 84.72080 | 65.10890 | -2607.33203 | 1232.31820  | 1288.52598  | 1 |
| 30562 | C | 68.97800 | 83.85380 | 67.00790 | -792.04331  | -163.04844  | 426.54666   | 1 |
| 30563 | H | 69.89000 | 83.70380 | 67.56490 | 338.32501   | -2261.60473 | -2146.47669 | 1 |
| 30564 | C | 68.27752 | 85.22580 | 67.46525 | -223.14274  | -867.54878  | -599.46261  | 1 |
| 30565 | H | 67.36151 | 85.33434 | 66.88752 | -189.76783  | -724.76364  | -394.71734  | 1 |
| 30566 | H | 68.93627 | 86.05814 | 67.07592 | -481.10032  | -1101.99763 | 2200.70138  | 1 |
| 30567 | C | 67.92033 | 85.33979 | 68.96555 | -506.89171  | -428.81704  | -485.48277  | 1 |
| 30568 | H | 67.37700 | 84.47980 | 69.36990 | -258.18711  | 472.42267   | -3105.09644 | 1 |
| 30569 | H | 67.36839 | 86.29201 | 69.16471 | -1030.08063 | -936.13509  | -816.60280  | 1 |
| 30570 | C | 69.47388 | 85.51463 | 69.54677 | 428.78155   | -112.13439  | 657.74661   | 1 |
| 30571 | O | 69.92846 | 86.63348 | 69.49432 | -435.57565  | -154.34032  | 87.65603    | 1 |
| 30572 | N | 70.01700 | 84.39780 | 70.10590 | 424.94057   | -458.23436  | -553.69339  | 1 |
| 30573 | H | 69.81800 | 83.47480 | 69.77790 | 1624.93034  | 1478.09238  | -2262.02886 | 1 |
| 30574 | H | 70.95200 | 84.61280 | 70.38790 | -1623.66137 | -2619.50514 | 575.53971   | 1 |
| 30575 | C | 68.01400 | 82.64180 | 67.17590 | -690.56906  | -58.37452   | -603.33232  | 1 |
| 30576 | O | 68.15500 | 81.79780 | 68.04290 | 495.25050   | 307.59384   | 531.39090   | 1 |
| 30577 | N | 67.09000 | 82.50080 | 66.23490 | -551.26637  | 117.07815   | -641.64494  | 1 |
| 30578 | H | 67.03700 | 83.21580 | 65.54290 | -1836.68293 | 1544.80651  | 2053.67871  | 1 |
| 30579 | C | 66.19800 | 81.42780 | 66.04390 | -659.05272  | 648.76514   | 106.35915   | 1 |
| 30580 | H | 65.61500 | 81.36480 | 66.95090 | -759.07284  | 3009.27619  | 621.22164   | 1 |
| 30581 | C | 65.20800 | 81.57280 | 64.87290 | 365.77335   | -407.87410  | -713.95590  | 1 |
| 30582 | H | 64.70000 | 82.55680 | 64.95890 | 702.59464   | -2260.52341 | -2049.30353 | 1 |
| 30583 | H | 65.78400 | 81.60080 | 63.92390 | -2792.50528 | 1471.96502  | -220.39016  | 1 |
| 30584 | C | 64.14300 | 80.54880 | 64.85190 | 186.72927   | -860.20148  | 141.88081   | 1 |
| 30585 | C | 64.10100 | 79.51580 | 63.85590 | -301.99217  | -524.21995  | 672.59496   | 1 |
| 30586 | H | 64.80100 | 79.56380 | 63.03490 | 2735.01437  | 349.88863   | 1495.61877  | 1 |
| 30587 | C | 63.15900 | 78.47080 | 63.93090 | 604.37807   | 340.71240   | 589.78955   | 1 |
| 30588 | H | 63.17600 | 77.65880 | 63.21990 | 2072.62860  | 1612.47560  | -1734.14706 | 1 |
| 30589 | C | 62.29400 | 78.35380 | 65.04990 | 322.46218   | -787.22155  | 264.21671   | 1 |
| 30590 | H | 61.65200 | 77.48780 | 65.10490 | -1207.32924 | -2688.13750 | 1068.08265  | 1 |
| 30591 | C | 63.23200 | 80.41480 | 65.92290 | 644.99046   | -188.81829  | 599.40506   | 1 |
| 30592 | H | 63.26300 | 81.05080 | 66.79490 | -1817.03816 | 957.23624   | 2398.31328  | 1 |
| 30593 | C | 62.34100 | 79.34080 | 66.02690 | -648.59883  | 647.33273   | -172.27072  | 1 |
| 30594 | H | 61.57100 | 79.40480 | 66.78190 | -2438.29176 | 840.29230   | 1825.86096  | 1 |
| 30595 | C | 66.93500 | 80.04880 | 65.78090 | 184.49588   | -775.16845  | -408.69721  | 1 |
| 30596 | O | 66.63200 | 79.06580 | 66.49690 | 41.75594    | 697.74998   | -399.59236  | 1 |
| 30597 | N | 67.94200 | 79.96780 | 64.95690 | -158.51082  | -808.17185  | 97.55133    | 1 |
| 30598 | H | 68.28900 | 80.79880 | 64.52890 | 630.70526   | -2932.43359 | 884.70279   | 1 |
| 30599 | C | 68.76200 | 78.73780 | 64.76490 | -295.35007  | 429.86184   | 758.38786   | 1 |
| 30600 | H | 68.18600 | 77.88280 | 64.44390 | 880.81267   | -314.48301  | -3001.48202 | 1 |
| 30601 | C | 69.92700 | 79.06480 | 63.73590 | -32.32694   | 752.99786   | -540.99053  | 1 |
| 30602 | H | 70.79800 | 79.64880 | 64.10390 | 708.34100   | -270.41057  | -3053.89730 | 1 |
| 30603 | H | 69.47600 | 79.59580 | 62.87090 | -1779.00708 | 2493.88179  | 796.48507   | 1 |
| 30604 | C | 70.63800 | 77.74080 | 63.25190 | -581.00318  | -679.78086  | -162.66025  | 1 |
| 30605 | H | 69.81100 | 77.09780 | 62.88090 | 1455.98444  | 2656.25683  | -881.02809  | 1 |
| 30606 | H | 71.15600 | 77.18480 | 64.06190 | 1317.54525  | 2338.90148  | 1647.58224  | 1 |
| 30607 | C | 71.61500 | 77.98280 | 62.06390 | -187.16058  | 691.62235   | -592.14249  | 1 |
| 30608 | O | 71.30400 | 77.62580 | 60.88590 | 238.42231   | 763.76149   | -8.15666    | 1 |
| 30609 | N | 72.76000 | 78.65180 | 62.30290 | -770.15590  | 263.30576   | 274.02545   | 1 |
| 30610 | H | 73.02500 | 78.74080 | 63.26290 | -88.78522   | 1777.25102  | 2598.96441  | 1 |
| 30611 | H | 73.53400 | 78.74680 | 61.67590 | -1143.70746 | 2038.50799  | -2134.02893 | 1 |
| 30612 | C | 69.42700 | 78.31480 | 66.03490 | -562.37980  | -295.34901  | 652.19828   | 1 |
| 30613 | O | 69.49300 | 77.10380 | 66.30090 | 595.95210   | 169.03563   | 477.14480   | 1 |
| 30614 | N | 69.91900 | 79.24580 | 66.90290 | 434.17175   | -368.95251  | -609.91323  | 1 |
| 30615 | H | 69.86900 | 80.20080 | 66.61990 | 2585.58646  | 51.91199    | -1781.75251 | 1 |
| 30616 | C | 70.55000 | 78.86580 | 68.12590 | -793.63088  | -36.76784   | 457.83326   | 1 |
| 30617 | H | 71.32000 | 78.13480 | 67.92590 | -472.05197  | -2683.71299 | 1543.71471  | 1 |

|       |   |          |          |          |             |             |             |   |
|-------|---|----------|----------|----------|-------------|-------------|-------------|---|
| 30618 | C | 71.25000 | 80.09480 | 68.80590 | 188.58765   | 905.68009   | 9.41202     | 1 |
| 30619 | H | 71.58700 | 79.73080 | 69.79990 | 2738.28833  | 318.92789   | -1509.80319 | 1 |
| 30620 | H | 70.61000 | 80.97980 | 69.01290 | -3105.66214 | -531.12796  | -67.01369   | 1 |
| 30621 | N | 73.40700 | 81.20880 | 68.59690 | -217.30226  | 636.79724   | 524.57484   | 1 |
| 30622 | H | 73.43300 | 81.28880 | 69.59390 | -2048.22215 | 1025.92511  | 2164.12062  | 1 |
| 30623 | C | 72.35200 | 80.62980 | 68.01290 | -256.97260  | 579.28512   | -677.68715  | 1 |
| 30624 | C | 74.26900 | 81.55580 | 67.58590 | -164.07542  | -884.16347  | -11.43727   | 1 |
| 30625 | H | 75.19500 | 82.08080 | 67.81790 | 965.22958   | -206.48339  | 2976.05171  | 1 |
| 30626 | N | 73.76200 | 81.31280 | 66.40590 | 153.79916   | -137.54876  | 807.53836   | 1 |
| 30627 | C | 72.56300 | 80.67780 | 66.66290 | 675.08876   | 315.52198   | -527.56345  | 1 |
| 30628 | H | 72.02400 | 80.25780 | 65.82290 | 1188.92313  | -2011.06934 | -2092.00092 | 1 |
| 30629 | C | 69.64000 | 78.25780 | 69.17190 | -756.21148  | 371.74839   | 379.10027   | 1 |
| 30630 | O | 70.02400 | 77.39280 | 69.98090 | -543.11126  | -563.69417  | 42.44631    | 1 |
| 30631 | N | 68.39300 | 78.68480 | 69.17490 | 36.61568    | -826.28463  | 3.22973     | 1 |
| 30632 | H | 68.03400 | 79.38880 | 68.56790 | -2092.56994 | 1374.71599  | -1929.80324 | 1 |
| 30633 | C | 67.34400 | 78.10680 | 69.99190 | -494.96092  | 376.12794   | 680.13333   | 1 |
| 30634 | H | 67.88300 | 77.80780 | 70.87890 | 1815.54409  | -2231.72876 | -1234.33586 | 1 |
| 30635 | C | 66.26800 | 79.14380 | 70.38190 | 346.51131   | -737.53416  | -370.23094  | 1 |
| 30636 | H | 65.65100 | 79.44880 | 69.50990 | -1693.46606 | 2226.10685  | 1475.78441  | 1 |
| 30637 | C | 65.27500 | 78.49980 | 71.45990 | 810.72844   | 387.76770   | 157.73250   | 1 |
| 30638 | H | 65.85400 | 78.09680 | 72.31790 | -711.63206  | 2376.11147  | 1957.89064  | 1 |
| 30639 | H | 64.71300 | 77.63880 | 71.03790 | -1930.46762 | 1078.39568  | -2254.25834 | 1 |
| 30640 | H | 64.49100 | 79.19980 | 71.82090 | 959.14126   | 2029.79364  | 2217.17585  | 1 |
| 30641 | C | 66.88300 | 80.46080 | 70.88990 | 571.44088   | -621.48315  | 296.07201   | 1 |
| 30642 | H | 67.63100 | 80.93980 | 70.22190 | 1954.01545  | -570.00332  | -2391.51651 | 1 |
| 30643 | H | 67.49200 | 80.42380 | 71.81890 | -2317.83917 | 1830.33541  | 1123.19926  | 1 |
| 30644 | C | 65.83800 | 81.51180 | 71.27090 | -835.56219  | -327.31760  | -159.00859  | 1 |
| 30645 | H | 65.02200 | 81.53180 | 70.51890 | 1139.75108  | 807.56767   | -2822.19098 | 1 |
| 30646 | H | 65.46700 | 81.24480 | 72.28390 | 424.04720   | -2147.75968 | -2242.56322 | 1 |
| 30647 | H | 66.38100 | 82.47880 | 71.20490 | -2337.24520 | -1855.13292 | -979.98171  | 1 |
| 30648 | C | 66.76900 | 76.84280 | 69.45490 | -349.61673  | 627.61306   | -588.00599  | 1 |
| 30649 | O | 66.63400 | 75.81380 | 70.12590 | 92.49403    | -605.50489  | 472.59048   | 1 |
| 30650 | N | 66.31500 | 76.98580 | 68.18590 | 148.78392   | 845.99184   | 30.68418    | 1 |
| 30651 | H | 66.41500 | 77.87280 | 67.74190 | -2626.69389 | -307.79790  | -1718.26782 | 1 |
| 30652 | C | 65.74200 | 75.94280 | 67.37790 | 140.44380   | -204.86423  | -872.61889  | 1 |
| 30653 | H | 64.79300 | 75.72480 | 67.84490 | 321.78134   | 2463.08027  | 1951.04066  | 1 |
| 30654 | C | 65.55500 | 76.47180 | 65.99690 | 504.61687   | 762.56996   | 99.61377    | 1 |
| 30655 | H | 65.01800 | 77.43680 | 65.87590 | -2320.89090 | -1631.67257 | 1356.73428  | 1 |
| 30656 | H | 66.57200 | 76.68280 | 65.60290 | -2390.90100 | 1342.72615  | 1573.77022  | 1 |
| 30657 | C | 64.89500 | 75.49180 | 64.95890 | 686.10479   | -69.09125   | 577.99709   | 1 |
| 30658 | H | 65.50600 | 74.59380 | 64.72490 | 1863.50208  | -2481.31601 | 357.47443   | 1 |
| 30659 | H | 64.58300 | 76.09980 | 64.08290 | -1226.85721 | 2916.94721  | 153.26655   | 1 |
| 30660 | S | 63.30800 | 74.83580 | 65.62490 | 403.46294   | -298.59669  | 192.95926   | 1 |
| 30661 | C | 62.41500 | 74.52080 | 64.05090 | -737.05317  | 553.64367   | 152.25393   | 1 |
| 30662 | H | 61.57500 | 73.84080 | 64.30990 | 1880.39484  | -1380.23631 | -2084.42317 | 1 |
| 30663 | H | 63.09600 | 74.03980 | 63.31690 | 1004.83392  | 2227.15568  | 1995.95125  | 1 |
| 30664 | H | 62.01300 | 75.46580 | 63.62590 | -1996.07904 | 1169.65526  | 2156.40707  | 1 |
| 30665 | C | 66.62700 | 74.71180 | 67.33690 | 562.75922   | -534.85942  | -445.30181  | 1 |
| 30666 | O | 66.22400 | 73.62780 | 67.63590 | 476.97064   | -590.57880  | 119.50248   | 1 |
| 30667 | N | 67.94400 | 74.80680 | 67.04190 | 400.98860   | 234.52860   | 700.51255   | 1 |
| 30668 | H | 68.38100 | 75.69680 | 66.93390 | -1578.30725 | 1051.19360  | 2521.33784  | 1 |
| 30669 | C | 68.78100 | 73.65580 | 66.86890 | -609.26956  | 99.55536    | 680.79836   | 1 |
| 30670 | H | 68.16600 | 72.78480 | 66.69290 | 1484.26199  | 742.94449   | 2666.93534  | 1 |
| 30671 | C | 69.72500 | 73.87980 | 65.70990 | -188.72651  | -805.18569  | -358.95445  | 1 |
| 30672 | H | 70.51200 | 74.64080 | 65.89490 | 2158.68153  | 2271.73856  | -312.42347  | 1 |
| 30673 | C | 70.49500 | 72.60180 | 65.37190 | 364.67678   | 67.95846    | -832.65516  | 1 |
| 30674 | H | 71.16400 | 72.77680 | 64.50290 | -1844.76242 | -1911.19832 | 1678.54785  | 1 |
| 30675 | H | 71.16100 | 72.19280 | 66.16290 | -1708.11421 | -1020.56916 | -2444.99682 | 1 |
| 30676 | H | 69.76400 | 71.82480 | 65.06090 | 1325.66898  | 2685.67917  | -992.52900  | 1 |
| 30677 | C | 69.01400 | 74.34080 | 64.41390 | -827.78357  | -193.36743  | -356.90262  | 1 |
| 30678 | H | 68.75000 | 75.40280 | 64.60590 | -2520.34952 | 1891.99469  | 305.78678   | 1 |
| 30679 | H | 69.68600 | 74.31480 | 63.52990 | -1959.81687 | -2273.90474 | -935.95316  | 1 |

|       |   |          |          |          |             |             |             |   |
|-------|---|----------|----------|----------|-------------|-------------|-------------|---|
| 30680 | H | 68.06000 | 73.80680 | 64.21390 | 2313.66276  | 2133.10329  | 36.97650    | 1 |
| 30681 | C | 69.60800 | 73.28180 | 68.10590 | 720.78022   | -341.72329  | 404.19885   | 1 |
| 30682 | O | 69.97600 | 72.13480 | 68.30190 | -10.74072   | -534.76989  | -570.27685  | 1 |
| 30683 | N | 69.88600 | 74.25980 | 68.99390 | 352.25858   | -715.55768  | 209.28108   | 1 |
| 30684 | H | 69.62600 | 75.21180 | 68.84890 | 1744.85302  | -2592.31232 | -117.15991  | 1 |
| 30685 | C | 70.53000 | 73.95480 | 70.25190 | 887.63030   | -87.28784   | -127.03251  | 1 |
| 30686 | H | 70.92300 | 74.92080 | 70.53490 | -46.19118   | -2554.99814 | -1818.47011 | 1 |
| 30687 | H | 71.34000 | 73.25280 | 70.12490 | 2696.70304  | 1517.45125  | 554.71855   | 1 |
| 30688 | C | 69.62700 | 73.38380 | 71.24690 | -464.74455  | 579.56534   | 549.80490   | 1 |
| 30689 | O | 70.00600 | 72.62580 | 72.09890 | -195.76408  | -672.32869  | 335.02515   | 1 |
| 30690 | N | 68.35400 | 73.82580 | 71.22490 | 301.63168   | 621.04630   | 497.27166   | 1 |
| 30691 | H | 67.99000 | 74.44980 | 70.53890 | 1516.39301  | 646.90223   | -2681.12018 | 1 |
| 30692 | C | 67.42000 | 73.44580 | 72.28490 | 479.96277   | -645.88991  | -393.90197  | 1 |
| 30693 | H | 67.91200 | 72.76780 | 72.96590 | -211.46650  | -159.78558  | -3137.65442 | 1 |
| 30694 | C | 66.91300 | 74.68680 | 73.11490 | 276.40498   | 654.69946   | 584.34543   | 1 |
| 30695 | H | 66.12200 | 75.16780 | 72.50090 | 628.05619   | 1558.92830  | -2669.60959 | 1 |
| 30696 | H | 67.73000 | 75.39380 | 73.37290 | -1160.30113 | -992.89992  | -2750.46508 | 1 |
| 30697 | C | 66.30000 | 74.35180 | 74.45690 | 522.22120   | 615.82667   | -441.26894  | 1 |
| 30698 | H | 65.60900 | 73.48980 | 74.34190 | -1412.05910 | 1911.22258  | 2081.76912  | 1 |
| 30699 | C | 67.30900 | 73.99080 | 75.58390 | -363.00005  | 208.76840   | -819.62331  | 1 |
| 30700 | H | 67.94500 | 74.88180 | 75.77790 | -2892.47435 | -556.10341  | 1110.01852  | 1 |
| 30701 | H | 67.87700 | 73.11080 | 75.21290 | 1547.59030  | 1923.98497  | 1957.43618  | 1 |
| 30702 | H | 66.84500 | 73.70680 | 76.55190 | 1694.31130  | -1740.87626 | 1976.81944  | 1 |
| 30703 | C | 65.46100 | 75.57580 | 74.92890 | -563.17971  | -691.55791  | 134.23530   | 1 |
| 30704 | H | 66.10500 | 76.45080 | 75.16190 | 2758.77214  | 979.51463   | 1151.37945  | 1 |
| 30705 | H | 64.93300 | 75.42080 | 75.89390 | -653.41384  | -1885.19217 | -2421.12644 | 1 |
| 30706 | H | 64.70300 | 75.83080 | 74.15790 | -733.04858  | 980.86238   | -2906.57753 | 1 |
| 30707 | C | 66.18200 | 72.68480 | 71.76890 | -561.13542  | 162.73244   | -713.30887  | 1 |
| 30708 | O | 65.92800 | 71.57280 | 72.17990 | 650.91178   | -70.30873   | 421.83483   | 1 |
| 30709 | N | 65.43300 | 73.25880 | 70.81490 | 340.88281   | -77.96707   | 763.19628   | 1 |
| 30710 | H | 65.71600 | 74.14280 | 70.44990 | -1165.76940 | 2436.97797  | 1644.45587  | 1 |
| 30711 | C | 64.18200 | 72.72380 | 70.30190 | -377.62431  | -571.74461  | 589.79375   | 1 |
| 30712 | H | 63.58800 | 72.69080 | 71.20390 | -2355.01336 | 1362.79820  | -1610.09640 | 1 |
| 30713 | C | 63.33000 | 73.64380 | 69.47090 | -892.16986  | -129.48362  | -180.30267  | 1 |
| 30714 | H | 63.72500 | 73.82480 | 68.44790 | -1274.52996 | -2844.61613 | -323.69594  | 1 |
| 30715 | C | 61.92300 | 73.14780 | 69.18390 | -174.08252  | 908.75434   | -116.20613  | 1 |
| 30716 | H | 61.36800 | 72.94880 | 70.12590 | 1858.21621  | 2292.55596  | 1114.41975  | 1 |
| 30717 | H | 61.30500 | 73.85280 | 68.58890 | -2074.12018 | 1118.16088  | -2104.72100 | 1 |
| 30718 | H | 61.96700 | 72.21880 | 68.57590 | 2151.61877  | -1212.49705 | -1922.69999 | 1 |
| 30719 | C | 63.22400 | 75.10980 | 70.05690 | -720.61195  | -183.13061  | 534.34469   | 1 |
| 30720 | H | 62.72800 | 74.93580 | 71.03590 | -1732.01498 | -2201.79664 | -1413.20543 | 1 |
| 30721 | H | 64.20300 | 75.58080 | 70.29190 | 65.10655    | -2973.37469 | -971.25621  | 1 |
| 30722 | C | 62.38800 | 76.05980 | 69.16990 | -911.86758  | -70.70296   | -98.76861   | 1 |
| 30723 | H | 62.69600 | 75.86280 | 68.12090 | -2205.69281 | -1300.68114 | -1826.67637 | 1 |
| 30724 | H | 62.61200 | 77.12580 | 69.38790 | -2968.23410 | 962.55096   | 503.60411   | 1 |
| 30725 | H | 61.29600 | 75.86780 | 69.23290 | 605.62058   | 248.14055   | -3075.39437 | 1 |
| 30726 | C | 64.17900 | 71.32780 | 69.69790 | 604.27505   | -482.29497  | 448.43263   | 1 |
| 30727 | O | 63.61300 | 70.39280 | 70.22690 | 661.33949   | 429.07881   | -48.76916   | 1 |
| 30728 | N | 64.84000 | 71.21580 | 68.46890 | 18.58213    | -672.17557  | -486.00985  | 1 |
| 30729 | H | 65.25800 | 71.95580 | 67.94690 | 2822.01630  | -1107.45393 | 771.83503   | 1 |
| 30730 | C | 64.86800 | 69.95580 | 67.69390 | 585.53266   | -646.42249  | 175.30282   | 1 |
| 30731 | H | 63.81200 | 69.72680 | 67.68790 | -2278.96705 | -1187.41021 | 1819.31780  | 1 |
| 30732 | C | 65.36600 | 70.19380 | 66.22890 | -489.94767  | 767.95685   | 205.23288   | 1 |
| 30733 | H | 66.39600 | 70.60980 | 66.18990 | 1933.85882  | -2059.66206 | 1335.36587  | 1 |
| 30734 | H | 65.22500 | 69.21180 | 65.72890 | -1117.97957 | -1686.53474 | 2401.97084  | 1 |
| 30735 | C | 64.53200 | 71.18780 | 65.44590 | 631.43424   | -507.19592  | -372.58484  | 1 |
| 30736 | H | 64.74800 | 72.23680 | 65.73890 | 1020.77602  | -414.33692  | -2940.47471 | 1 |
| 30737 | C | 64.82900 | 71.16480 | 63.94490 | -208.80936  | 513.67914   | 739.65020   | 1 |
| 30738 | H | 64.37600 | 72.06480 | 63.47790 | 1015.10307  | -2811.67117 | -909.95927  | 1 |
| 30739 | H | 64.51100 | 70.21780 | 63.45690 | -1804.16034 | 1890.52620  | -1788.63665 | 1 |
| 30740 | H | 65.92000 | 71.13280 | 63.73590 | -2335.21213 | 447.86168   | 2079.67061  | 1 |
| 30741 | C | 63.01800 | 70.99680 | 65.50990 | 322.88446   | 482.14121   | -709.17138  | 1 |

|       |   |          |          |          |             |             |             |   |
|-------|---|----------|----------|----------|-------------|-------------|-------------|---|
| 30742 | H | 62.67500 | 69.94880 | 65.36790 | -2184.73479 | -2080.72404 | 884.00897   | 1 |
| 30743 | H | 62.52000 | 71.27080 | 66.46390 | 1273.45540  | -1953.94195 | 2085.81858  | 1 |
| 30744 | H | 62.58300 | 71.55980 | 64.65590 | 918.31808   | 2327.69667  | -1922.63132 | 1 |
| 30745 | C | 65.59900 | 68.81180 | 68.33190 | -500.72265  | 423.71478   | -656.77664  | 1 |
| 30746 | O | 65.01500 | 67.77580 | 68.08990 | 37.76457    | 771.03326   | -233.61701  | 1 |
| 30747 | N | 66.67700 | 68.82680 | 69.08290 | 703.42772   | -399.19134  | 158.93818   | 1 |
| 30748 | C | 67.51000 | 69.99280 | 69.37990 | -326.00354  | -681.83265  | 491.75406   | 1 |
| 30749 | H | 67.00000 | 70.92280 | 69.70990 | -1129.66113 | 2957.64321  | 43.83143    | 1 |
| 30750 | H | 68.07300 | 70.27080 | 68.46290 | 331.29334   | 2923.30487  | -1157.40782 | 1 |
| 30751 | C | 67.20100 | 67.63480 | 69.73590 | -547.42624  | 726.89988   | 202.30085   | 1 |
| 30752 | H | 67.07000 | 66.78880 | 69.07690 | -871.30119  | 3041.00528  | 136.78571   | 1 |
| 30753 | C | 68.66500 | 68.04580 | 70.17490 | 468.82507   | 407.76838   | 664.68585   | 1 |
| 30754 | H | 69.12400 | 67.49880 | 71.02590 | -2153.12083 | -1987.14317 | 1136.51609  | 1 |
| 30755 | H | 69.38400 | 67.82280 | 69.35690 | 659.66763   | 2157.02922  | 2200.99531  | 1 |
| 30756 | C | 68.55100 | 69.51580 | 70.42490 | -707.90153  | -390.34414  | -429.28302  | 1 |
| 30757 | H | 69.49600 | 70.06980 | 70.24090 | -974.20664  | 2625.15733  | 1467.23493  | 1 |
| 30758 | H | 68.18300 | 69.79180 | 71.43690 | -2272.38068 | -1910.50686 | -1037.80597 | 1 |
| 30759 | C | 66.39300 | 67.26680 | 71.00390 | -466.02299  | 756.97790   | 278.19088   | 1 |
| 30760 | O | 66.32900 | 66.10480 | 71.31490 | -150.09125  | 656.96208   | 440.20231   | 1 |
| 30761 | N | 65.84600 | 68.26680 | 71.68190 | 513.76504   | 662.17368   | -148.03819  | 1 |
| 30762 | H | 65.99600 | 69.19580 | 71.35290 | 2319.16459  | 701.46555   | -2001.76025 | 1 |
| 30763 | C | 64.95700 | 68.17180 | 72.79490 | 389.06432   | -659.82578  | 459.49809   | 1 |
| 30764 | H | 64.63100 | 69.17880 | 73.00590 | 2046.39916  | 1138.12788  | 2100.02295  | 1 |
| 30765 | H | 65.55800 | 67.86280 | 73.63690 | 1723.18623  | 112.59404   | -2625.40216 | 1 |
| 30766 | C | 63.76000 | 67.32980 | 72.57190 | -21.30539   | -820.60442  | -357.34307  | 1 |
| 30767 | O | 63.42600 | 66.47880 | 73.44190 | -448.00605  | -198.62453  | -621.12956  | 1 |
| 30768 | N | 63.06200 | 67.53680 | 71.42990 | 754.52286   | 179.22616   | 315.50583   | 1 |
| 30769 | H | 63.28600 | 68.31780 | 70.85290 | -1873.63713 | 1388.10766  | 2134.61436  | 1 |
| 30770 | C | 61.89500 | 66.79280 | 71.11990 | 121.60613   | -564.35091  | 688.46362   | 1 |
| 30771 | H | 61.24900 | 66.80980 | 71.98490 | -1375.33907 | -2702.90060 | -791.12605  | 1 |
| 30772 | C | 61.08100 | 67.31480 | 69.93990 | 580.28294   | -668.69814  | -74.57125   | 1 |
| 30773 | H | 60.31700 | 66.55780 | 69.66190 | 1181.02093  | 2597.85034  | -1349.38890 | 1 |
| 30774 | C | 60.20100 | 68.50380 | 70.43690 | -74.34757   | -688.26364  | 572.93428   | 1 |
| 30775 | H | 59.64400 | 68.05180 | 71.28490 | 1652.67390  | 1204.08622  | 2395.21850  | 1 |
| 30776 | H | 59.37700 | 68.71880 | 69.72290 | -678.24249  | 3074.99816  | -349.42670  | 1 |
| 30777 | H | 60.89200 | 69.32080 | 70.73390 | 1484.98373  | -1883.48888 | -2007.58191 | 1 |
| 30778 | C | 61.97000 | 67.64580 | 68.73790 | -17.63365   | 839.75422   | -397.06512  | 1 |
| 30779 | H | 62.59600 | 68.53580 | 68.96190 | -18.25479   | -217.61598  | 3137.58847  | 1 |
| 30780 | H | 62.67200 | 66.81080 | 68.52690 | 1497.72601  | -429.24012  | 2722.69511  | 1 |
| 30781 | C | 61.18200 | 67.81180 | 67.43490 | -843.04135  | -300.31320  | -204.79352  | 1 |
| 30782 | H | 61.83300 | 68.03080 | 66.56190 | 2971.80351  | -718.11003  | -657.84784  | 1 |
| 30783 | H | 60.42100 | 68.61980 | 67.48290 | 1457.39240  | 635.13065   | 2713.73669  | 1 |
| 30784 | H | 60.54100 | 66.91780 | 67.27590 | 1954.50529  | -2293.78268 | 818.11783   | 1 |
| 30785 | C | 62.10100 | 65.27780 | 70.85890 | 529.32498   | -392.42834  | 606.99488   | 1 |
| 30786 | O | 61.32600 | 64.41780 | 71.31790 | -103.49480  | -176.76743  | -758.52511  | 1 |
| 30787 | N | 63.17400 | 64.90480 | 70.18990 | -131.21398  | 393.78872   | 747.00106   | 1 |
| 30788 | H | 63.73500 | 65.66780 | 69.88090 | 720.76343   | -2805.12670 | -1177.69592 | 1 |
| 30789 | C | 63.66700 | 63.56780 | 70.06490 | -604.32106  | 657.94367   | -273.66119  | 1 |
| 30790 | H | 62.88200 | 62.91180 | 69.71890 | 1853.31171  | 2206.14022  | -1274.34533 | 1 |
| 30791 | C | 64.85000 | 63.46980 | 69.11790 | 58.16240    | -729.56064  | 515.51707   | 1 |
| 30792 | H | 65.76400 | 63.92480 | 69.55590 | -75.50654   | -1112.56511 | -2937.35210 | 1 |
| 30793 | C | 65.11100 | 61.98380 | 68.79790 | 572.41423   | -550.71958  | -403.90924  | 1 |
| 30794 | H | 65.53400 | 61.39180 | 69.63790 | 2113.93278  | 1705.10685  | 1584.53752  | 1 |
| 30795 | H | 65.93800 | 61.98080 | 68.05590 | 852.91629   | -2706.60128 | 1309.72868  | 1 |
| 30796 | H | 64.16200 | 61.56580 | 68.39990 | -1399.91182 | -1769.22361 | -2189.11027 | 1 |
| 30797 | C | 64.66600 | 64.18280 | 67.82090 | -527.62217  | 763.94529   | 113.75255   | 1 |
| 30798 | H | 64.71900 | 65.29080 | 67.87690 | 1572.86085  | -170.50609  | -2710.55012 | 1 |
| 30799 | H | 65.40800 | 63.84580 | 67.06590 | 1784.40842  | -1917.68335 | 1703.97710  | 1 |
| 30800 | H | 63.66800 | 64.06080 | 67.34590 | 1331.82042  | 2050.82597  | -1988.41479 | 1 |
| 30801 | C | 64.06000 | 63.02280 | 71.47490 | -15.39063   | 770.45807   | -516.31567  | 1 |
| 30802 | O | 63.68600 | 61.86980 | 71.71690 | 700.85197   | -75.11305   | -322.85731  | 1 |
| 30803 | N | 64.69800 | 63.81880 | 72.35490 | 538.52708   | -380.33646  | 498.83185   | 1 |

|       |   |          |          |          |             |             |             |   |
|-------|---|----------|----------|----------|-------------|-------------|-------------|---|
| 30804 | H | 64.92200 | 64.75380 | 72.09190 | 1052.81417  | 2449.48702  | -1689.76298 | 1 |
| 30805 | C | 64.99500 | 63.39580 | 73.70990 | 72.16217    | 873.43714   | -305.36442  | 1 |
| 30806 | H | 65.58600 | 62.49180 | 73.72390 | -1390.99786 | -2156.36147 | -1810.51360 | 1 |
| 30807 | C | 65.90700 | 64.41680 | 74.47290 | -559.89923  | -706.10638  | 79.97550    | 1 |
| 30808 | H | 65.40800 | 65.40280 | 74.35890 | -809.72560  | -2986.15997 | 485.00071   | 1 |
| 30809 | C | 65.96600 | 64.10380 | 75.97690 | 111.25084   | 485.60913   | 770.96179   | 1 |
| 30810 | H | 64.99500 | 64.04380 | 76.51390 | 1054.72471  | 1376.05910  | -2631.92931 | 1 |
| 30811 | H | 66.52400 | 63.15380 | 76.11390 | 717.70981   | -2491.03669 | 1751.61793  | 1 |
| 30812 | H | 66.62700 | 64.80880 | 76.52590 | -2167.45642 | 233.26511   | 2276.89402  | 1 |
| 30813 | C | 67.28900 | 64.30380 | 73.77390 | 737.87078   | -440.44737  | -248.74013  | 1 |
| 30814 | H | 67.15200 | 64.24880 | 72.67190 | -432.53565  | -1891.73011 | -2468.20154 | 1 |
| 30815 | H | 67.80800 | 63.36280 | 74.05590 | 1280.28223  | -2496.60691 | -1385.89842 | 1 |
| 30816 | C | 68.16400 | 65.49680 | 74.02690 | -405.49306  | 479.81434   | -682.57555  | 1 |
| 30817 | H | 67.70100 | 66.33980 | 73.47090 | 2075.48538  | 1753.50326  | -1593.23277 | 1 |
| 30818 | H | 68.23500 | 65.67980 | 75.11990 | 2812.53809  | -532.24153  | 1272.94427  | 1 |
| 30819 | H | 69.22100 | 65.29580 | 73.74790 | 1914.83276  | -1469.56736 | 1991.10527  | 1 |
| 30820 | C | 63.73700 | 63.05580 | 74.48490 | 481.77398   | -480.94537  | -582.49075  | 1 |
| 30821 | O | 63.59500 | 61.94380 | 75.01890 | -744.08672  | 109.22593   | 280.74989   | 1 |
| 30822 | N | 62.71100 | 63.97680 | 74.42690 | -399.72526  | -482.07131  | -557.51434  | 1 |
| 30823 | H | 62.97700 | 64.85880 | 74.04390 | 1939.71577  | -1133.31430 | -2182.86401 | 1 |
| 30824 | C | 61.40000 | 63.89880 | 75.00690 | -76.72985   | 706.91388   | 596.24820   | 1 |
| 30825 | H | 61.51400 | 63.67880 | 76.05790 | -1961.60824 | 1557.32720  | -1929.16780 | 1 |
| 30826 | C | 60.66100 | 65.21180 | 74.74190 | 512.00698   | 746.02020   | -173.45174  | 1 |
| 30827 | H | 60.92700 | 65.60280 | 73.73690 | -1885.87036 | 1791.62483  | -1799.56234 | 1 |
| 30828 | H | 59.56300 | 65.07380 | 74.83190 | -3117.88741 | 323.17157   | -386.78908  | 1 |
| 30829 | C | 61.13800 | 66.33980 | 75.75290 | -535.91476  | -278.53441  | 683.60118   | 1 |
| 30830 | H | 62.24600 | 66.39680 | 75.69090 | -1305.83172 | 1094.76639  | -2656.62772 | 1 |
| 30831 | C | 60.60400 | 67.72780 | 75.32790 | 550.41532   | 591.14253   | -436.06795  | 1 |
| 30832 | H | 60.92600 | 68.06380 | 74.31990 | 2167.11284  | 908.66900   | 2091.62142  | 1 |
| 30833 | H | 59.49500 | 67.79180 | 75.33190 | -1727.08826 | -2167.17815 | -1468.36182 | 1 |
| 30834 | H | 60.93400 | 68.51280 | 76.04190 | 930.61724   | 2106.78920  | -2157.11517 | 1 |
| 30835 | C | 60.79400 | 66.15080 | 77.20290 | 784.88557   | -200.07839  | -390.40527  | 1 |
| 30836 | H | 61.31900 | 65.24480 | 77.57390 | -589.93803  | 1188.02658  | -2861.49478 | 1 |
| 30837 | H | 60.95400 | 67.10180 | 77.75390 | -2962.49464 | 525.89187   | 956.37925   | 1 |
| 30838 | H | 59.72800 | 65.90580 | 77.39990 | 1744.23696  | 252.61727   | 2604.39967  | 1 |
| 30839 | C | 60.68300 | 62.63780 | 74.55090 | -434.63344  | 700.08040   | 436.89505   | 1 |
| 30840 | O | 60.15800 | 61.87580 | 75.38690 | 496.18579   | 617.22203   | -92.55770   | 1 |
| 30841 | N | 60.66600 | 62.35580 | 73.27790 | -585.23687  | 409.24186   | 484.31097   | 1 |
| 30842 | H | 61.20100 | 62.96480 | 72.69590 | 1737.03890  | -1994.72742 | -1665.92880 | 1 |
| 30843 | C | 60.10100 | 61.11180 | 72.65490 | 132.46947   | 319.14598   | -847.08476  | 1 |
| 30844 | H | 59.04500 | 61.08180 | 72.87990 | 765.06247   | -2109.83791 | 2182.92142  | 1 |
| 30845 | C | 60.12500 | 61.11180 | 71.07890 | -96.26446   | 660.77907   | 645.28365   | 1 |
| 30846 | H | 59.92400 | 60.10280 | 70.65790 | 2225.42823  | -2078.12381 | 690.75152   | 1 |
| 30847 | H | 61.15700 | 61.42380 | 70.81190 | 1720.04467  | -2467.70070 | -836.94633  | 1 |
| 30848 | O | 59.30200 | 62.05380 | 70.45490 | -369.12544  | -28.23802   | 706.37639   | 1 |
| 30849 | H | 58.40200 | 61.85880 | 70.72590 | -986.67934  | 3005.77609  | -203.10707  | 1 |
| 30850 | C | 60.70300 | 59.78680 | 73.11590 | 582.37163   | -611.91733  | 278.85775   | 1 |
| 30851 | O | 59.91400 | 58.83680 | 73.29290 | -351.72463  | 9.25293     | 715.66016   | 1 |
| 30852 | N | 62.04400 | 59.67780 | 73.24190 | 201.29654   | -335.96422  | -734.61808  | 1 |
| 30853 | H | 62.55400 | 60.48180 | 72.94690 | -1127.21398 | -2264.61561 | -1855.66175 | 1 |
| 30854 | C | 62.74300 | 58.45280 | 73.65390 | -426.81143  | -230.29933  | 773.92629   | 1 |
| 30855 | H | 62.41300 | 57.69680 | 72.95690 | -632.91877  | 2917.92837  | -1054.48916 | 1 |
| 30856 | C | 64.26900 | 58.73380 | 73.87290 | -742.79817  | 277.74158   | 481.31952   | 1 |
| 30857 | H | 64.76100 | 57.78280 | 74.17290 | 887.52915   | 949.33308   | -2868.12459 | 1 |
| 30858 | H | 64.35500 | 59.49580 | 74.67690 | -1465.48843 | -2603.71982 | 955.17750   | 1 |
| 30859 | S | 64.98900 | 59.21680 | 72.26490 | -208.83841  | -58.38274   | 515.87020   | 1 |
| 30860 | H | 64.69800 | 60.50780 | 72.31790 | -695.52101  | -1434.84002 | 2704.82262  | 1 |
| 30861 | C | 62.19100 | 57.92080 | 74.99590 | 103.42838   | 758.48111   | -520.23781  | 1 |
| 30862 | O | 61.86400 | 56.75380 | 75.16990 | 168.89964   | 612.25997   | 488.75061   | 1 |
| 30863 | N | 62.14600 | 58.80680 | 76.01990 | 33.31321    | 823.91979   | -249.93436  | 1 |
| 30864 | H | 62.48500 | 59.73680 | 75.89890 | -686.98342  | -2308.68185 | -2006.19680 | 1 |
| 30865 | C | 61.69700 | 58.38880 | 77.38590 | -752.64618  | -460.14440  | -228.95245  | 1 |

|       |   |          |          |          |             |             |             |   |
|-------|---|----------|----------|----------|-------------|-------------|-------------|---|
| 30866 | H | 62.07100 | 57.41880 | 77.67990 | -2657.82022 | 1536.57437  | 770.99000   | 1 |
| 30867 | C | 62.30100 | 59.29480 | 78.44190 | 746.91613   | 487.32327   | -195.04774  | 1 |
| 30868 | H | 61.96400 | 58.85080 | 79.40290 | 2395.99048  | 1340.19347  | -1536.75719 | 1 |
| 30869 | H | 61.85500 | 60.29480 | 78.25690 | 2772.60517  | 1121.02599  | 969.69131   | 1 |
| 30870 | C | 63.83700 | 59.35180 | 78.28390 | -813.81509  | 159.20311   | 407.33001   | 1 |
| 30871 | C | 64.38900 | 60.56680 | 77.83490 | 559.42456   | 553.86760   | -469.60196  | 1 |
| 30872 | H | 63.80300 | 61.43580 | 77.57490 | 890.96830   | 2325.75849  | 1938.74793  | 1 |
| 30873 | C | 65.78200 | 60.60780 | 77.65190 | -48.35528   | -580.05727  | -689.76408  | 1 |
| 30874 | H | 66.16600 | 61.51380 | 77.20790 | -915.39167  | 1370.66368  | 2689.95312  | 1 |
| 30875 | C | 66.60500 | 59.53580 | 77.92290 | -827.99765  | 0.13943     | -406.82523  | 1 |
| 30876 | O | 67.97300 | 59.58680 | 77.66090 | -664.43109  | -374.99303  | 204.67685   | 1 |
| 30877 | H | 68.15200 | 60.22280 | 76.96390 | 1748.89852  | -2560.45003 | -403.06642  | 1 |
| 30878 | C | 64.61200 | 58.27280 | 78.57190 | -396.67729  | 455.02756   | 699.80138   | 1 |
| 30879 | H | 64.11800 | 57.43480 | 79.04090 | 2249.50471  | -978.40411  | 1947.22459  | 1 |
| 30880 | C | 66.01500 | 58.33080 | 78.34490 | -487.79341  | -350.92177  | 682.28092   | 1 |
| 30881 | H | 66.62900 | 57.44280 | 78.37690 | 947.30203   | -2895.56222 | -706.70402  | 1 |
| 30882 | C | 60.22600 | 58.36380 | 77.44290 | 29.03212    | 854.17430   | -363.71295  | 1 |
| 30883 | O | 59.63100 | 57.65280 | 78.25890 | -333.93653  | 546.19622   | -490.59072  | 1 |
| 30884 | N | 59.50100 | 59.13780 | 76.59090 | 176.85199   | -543.20888  | -597.75768  | 1 |
| 30885 | H | 59.91300 | 59.78880 | 75.95890 | -2215.58354 | 1711.44935  | 1478.72252  | 1 |
| 30886 | C | 58.09000 | 58.99580 | 76.38390 | -913.61978  | -75.39378   | 100.23420   | 1 |
| 30887 | H | 57.66200 | 59.15280 | 77.36290 | 1901.84599  | -2176.32686 | 1191.06659  | 1 |
| 30888 | C | 57.49900 | 60.00280 | 75.39790 | -16.22754   | -795.35896  | 409.90528   | 1 |
| 30889 | H | 57.89000 | 60.99280 | 75.71490 | -1944.52583 | -1875.58259 | -1598.82305 | 1 |
| 30890 | H | 57.90100 | 59.81880 | 74.37790 | 717.69775   | -2999.89537 | 493.05135   | 1 |
| 30891 | S | 55.72300 | 60.08580 | 75.22290 | -21.01888   | -276.84887  | 475.86486   | 1 |
| 30892 | H | 55.62900 | 59.09380 | 74.34990 | -2351.13678 | 1934.85832  | 883.72810   | 1 |
| 30893 | C | 57.68600 | 57.57480 | 75.97290 | -738.74424  | 232.84104   | -506.32010  | 1 |
| 30894 | O | 56.79800 | 56.98380 | 76.56690 | -688.17774  | -350.31199  | -167.91005  | 1 |
| 30895 | N | 58.36000 | 56.95880 | 75.04090 | -1.62307    | -794.57545  | -216.59174  | 1 |
| 30896 | H | 58.91300 | 57.53180 | 74.44090 | -741.83034  | 2465.55836  | 1843.42837  | 1 |
| 30897 | C | 58.10400 | 55.59180 | 74.61790 | -605.56273  | 151.25925   | 684.94131   | 1 |
| 30898 | H | 57.05600 | 55.50580 | 74.37190 | 1965.11030  | -2419.96231 | -135.80952  | 1 |
| 30899 | C | 58.88400 | 55.19280 | 73.32890 | 610.63450   | -563.47435  | -311.25408  | 1 |
| 30900 | H | 59.96700 | 55.39580 | 73.47690 | -2108.56647 | 1806.18823  | -1523.57896 | 1 |
| 30901 | C | 58.75700 | 53.70380 | 73.07890 | -721.32627  | 128.92453   | 570.52693   | 1 |
| 30902 | H | 59.12800 | 53.48880 | 72.05390 | 2465.01097  | 1424.99052  | -1325.97805 | 1 |
| 30903 | H | 59.29400 | 53.04680 | 73.79590 | 2767.53524  | -1375.51341 | -446.41290  | 1 |
| 30904 | H | 57.68400 | 53.41180 | 73.07590 | 2803.15802  | 1416.28076  | 25.25229    | 1 |
| 30905 | C | 58.35700 | 55.95380 | 72.10590 | 609.17489   | -43.96426   | -657.76143  | 1 |
| 30906 | H | 57.42400 | 55.51380 | 71.69390 | 1366.81363  | 2846.02567  | -58.24651   | 1 |
| 30907 | H | 58.03500 | 56.99480 | 72.32590 | 2376.47824  | 2063.94638  | 44.54225    | 1 |
| 30908 | C | 59.39500 | 56.11680 | 70.97890 | 680.28328   | -507.34529  | -257.09103  | 1 |
| 30909 | H | 59.93700 | 55.16780 | 70.78090 | 1892.52141  | -1404.41330 | 2056.35259  | 1 |
| 30910 | H | 59.03200 | 56.60880 | 70.05190 | 1903.63385  | 198.54913   | 2487.64517  | 1 |
| 30911 | H | 60.04100 | 56.97780 | 71.25290 | 2509.92970  | 1599.72988  | 1012.05594  | 1 |
| 30912 | C | 58.48800 | 54.59080 | 75.69290 | -687.21356  | 56.02023    | -611.70156  | 1 |
| 30913 | O | 57.74000 | 53.60180 | 75.90990 | -493.04920  | -379.77298  | -480.92468  | 1 |
| 30914 | N | 59.64700 | 54.78980 | 76.37390 | -608.43491  | -498.83541  | -297.97709  | 1 |
| 30915 | H | 59.99800 | 55.71780 | 76.27190 | -2814.89252 | -1140.73472 | 840.32655   | 1 |
| 30916 | C | 60.34200 | 53.84080 | 77.29690 | -479.48418  | -612.35989  | -462.22100  | 1 |
| 30917 | H | 60.57700 | 52.90980 | 76.80290 | 2090.39055  | -1379.20371 | -1872.87302 | 1 |
| 30918 | C | 61.81500 | 54.30380 | 77.78890 | 550.69135   | -459.74731  | 533.71509   | 1 |
| 30919 | H | 61.72400 | 55.38780 | 78.01790 | -193.07907  | 2680.88306  | -1666.93834 | 1 |
| 30920 | C | 62.20200 | 53.43880 | 79.01190 | -748.31374  | 514.39371   | 211.29130   | 1 |
| 30921 | H | 62.13300 | 52.35980 | 78.75490 | 1731.49041  | 1938.27941  | 1780.65390  | 1 |
| 30922 | H | 63.25500 | 53.63080 | 79.30990 | -2467.32649 | -1844.69493 | -632.98060  | 1 |
| 30923 | H | 61.54700 | 53.49980 | 79.90690 | -3086.12462 | 529.50231   | -432.18616  | 1 |
| 30924 | C | 62.82100 | 54.15980 | 76.66190 | -549.41646  | 411.58805   | -624.94434  | 1 |
| 30925 | H | 62.32800 | 54.42880 | 75.70290 | 2520.79210  | -1797.62098 | -413.94054  | 1 |
| 30926 | H | 63.23200 | 53.13380 | 76.55490 | 623.62536   | -2977.69496 | -717.48735  | 1 |
| 30927 | C | 64.08400 | 54.91880 | 76.90390 | -194.21635  | 870.78060   | 266.85098   | 1 |

|       |   |          |          |          |             |             |             |   |
|-------|---|----------|----------|----------|-------------|-------------|-------------|---|
| 30928 | H | 63.83200 | 55.97580 | 77.13390 | -2175.74993 | -219.52744  | -2273.16245 | 1 |
| 30929 | H | 64.72100 | 54.56480 | 77.74290 | -694.92398  | -2919.08916 | -900.06891  | 1 |
| 30930 | H | 64.80100 | 54.81880 | 76.06190 | -116.86504  | -362.46141  | -3122.91644 | 1 |
| 30931 | C | 59.39500 | 53.38480 | 78.45890 | 352.44959   | -751.75450  | 321.83837   | 1 |
| 30932 | O | 59.23700 | 52.19880 | 78.85690 | -144.15323  | -562.04800  | -515.28783  | 1 |
| 30933 | N | 58.74100 | 54.39080 | 79.02790 | -592.23801  | -477.58716  | 360.74100   | 1 |
| 30934 | H | 58.82900 | 55.33080 | 78.70690 | -2477.19196 | 1970.21137  | 139.18783   | 1 |
| 30935 | C | 57.95400 | 54.24980 | 80.20890 | 541.46549   | -518.14109  | 488.29708   | 1 |
| 30936 | H | 58.55600 | 53.66780 | 80.89190 | -1947.49405 | 1702.03589  | 1824.85720  | 1 |
| 30937 | C | 57.67700 | 55.58980 | 80.88790 | -555.44147  | 545.12727   | -506.08187  | 1 |
| 30938 | H | 57.07200 | 55.33580 | 81.78590 | 2306.47559  | -1866.37110 | -981.65834  | 1 |
| 30939 | C | 58.98100 | 56.16480 | 81.44990 | 624.87760   | 601.54259   | 303.06871   | 1 |
| 30940 | H | 58.79600 | 57.04280 | 82.10490 | 2065.68679  | -1583.31870 | 1741.03283  | 1 |
| 30941 | H | 59.55900 | 55.40180 | 82.01390 | -3037.34163 | 750.02766   | -444.23323  | 1 |
| 30942 | H | 59.56000 | 56.60080 | 80.60790 | 482.00735   | -2994.03053 | 758.50602   | 1 |
| 30943 | C | 56.89100 | 56.57580 | 80.03690 | -746.14461  | -46.86438   | -530.94229  | 1 |
| 30944 | H | 57.59600 | 57.08480 | 79.34490 | -2022.07043 | 2132.62497  | 1183.61021  | 1 |
| 30945 | H | 56.23000 | 55.99780 | 79.35490 | -1766.58538 | 1831.90277  | 1885.33344  | 1 |
| 30946 | C | 56.10400 | 57.58680 | 80.84990 | 604.99269   | 95.80931    | 673.65824   | 1 |
| 30947 | H | 55.43400 | 57.04080 | 81.54790 | 2501.21476  | 1908.00410  | 194.15721   | 1 |
| 30948 | H | 55.39900 | 58.12580 | 80.18290 | -22.47001   | 82.98538    | -3140.74664 | 1 |
| 30949 | H | 56.80600 | 58.30380 | 81.32690 | 2069.79088  | -1714.24354 | 1605.58928  | 1 |
| 30950 | C | 56.78400 | 53.35880 | 80.02290 | -755.48431  | 532.50475   | -126.59841  | 1 |
| 30951 | O | 56.23600 | 52.76380 | 80.96890 | 576.83295   | 546.11965   | 47.30556    | 1 |
| 30952 | N | 56.27700 | 53.27880 | 78.79190 | 0.49060     | 609.87910   | 609.02717   | 1 |
| 30953 | H | 56.73500 | 53.86180 | 78.12490 | 933.06809   | -1957.80656 | 2259.22396  | 1 |
| 30954 | C | 55.13000 | 52.49880 | 78.47790 | -309.21123  | 813.40574   | -337.49412  | 1 |
| 30955 | H | 54.47900 | 52.42980 | 79.33690 | 830.65555   | 1723.38438  | 2513.58278  | 1 |
| 30956 | C | 54.26500 | 53.22480 | 77.40490 | 740.29574   | 533.19302   | -35.71430   | 1 |
| 30957 | H | 53.70300 | 54.02080 | 77.93790 | -1922.66158 | -2463.52536 | 274.47655   | 1 |
| 30958 | H | 53.51500 | 52.55080 | 76.93890 | -2526.08321 | -1556.25907 | 1053.20377  | 1 |
| 30959 | O | 55.06400 | 53.77880 | 76.36790 | -414.71341  | 657.37456   | -238.63184  | 1 |
| 30960 | H | 55.77900 | 53.17280 | 76.16290 | 112.18282   | 3145.45457  | 355.52403   | 1 |
| 30961 | C | 55.34500 | 51.08080 | 78.13790 | 715.52039   | -424.81487  | 320.41029   | 1 |
| 30962 | O | 54.38400 | 50.33480 | 77.74290 | 428.25850   | -629.85248  | -44.33796   | 1 |
| 30963 | N | 56.56600 | 50.60580 | 78.30390 | -121.95796  | -744.76291  | 342.04035   | 1 |
| 30964 | H | 57.18900 | 51.23380 | 78.76590 | -217.41241  | 1815.58534  | -2572.62864 | 1 |
| 30965 | C | 56.93000 | 49.22180 | 78.07690 | 634.76279   | -618.80876  | 6.16695     | 1 |
| 30966 | H | 56.17700 | 48.60980 | 78.54990 | -1698.37715 | -1987.08651 | 1744.73170  | 1 |
| 30967 | C | 56.90500 | 48.80080 | 76.58590 | 534.31140   | 524.23153   | 528.22933   | 1 |
| 30968 | H | 55.84500 | 48.89880 | 76.26890 | -1929.64774 | 2489.33389  | 387.47459   | 1 |
| 30969 | H | 57.16400 | 47.73180 | 76.43290 | 1229.55171  | 2708.99317  | 1061.51016  | 1 |
| 30970 | C | 57.61500 | 49.74880 | 75.55590 | -541.21863  | 677.70438   | 355.84544   | 1 |
| 30971 | H | 58.66700 | 49.92380 | 75.86590 | 37.59936    | -3076.98169 | -546.91306  | 1 |
| 30972 | H | 57.07500 | 50.71580 | 75.64090 | 798.02883   | 1751.04824  | -2495.12843 | 1 |
| 30973 | C | 57.50000 | 49.15880 | 74.14190 | -237.58920  | 515.38811   | 736.93104   | 1 |
| 30974 | H | 58.09000 | 49.79580 | 73.44890 | -2588.99014 | -1791.29619 | 62.36509    | 1 |
| 30975 | H | 58.01800 | 48.17680 | 74.12790 | 2240.26478  | 464.16927   | -2142.52494 | 1 |
| 30976 | C | 56.08000 | 49.16180 | 73.63190 | 552.32837   | -652.44390  | 232.34148   | 1 |
| 30977 | H | 55.39300 | 48.50380 | 74.20690 | 1454.85906  | -1709.82666 | -2170.67806 | 1 |
| 30978 | H | 55.70700 | 50.20880 | 73.64390 | 2296.67120  | 156.27329   | -2122.89403 | 1 |
| 30979 | N | 56.00100 | 48.71280 | 72.26790 | -383.72817  | -321.19687  | -675.72201  | 1 |
| 30980 | H | 56.26500 | 49.45680 | 71.59090 | 146.00795   | -2597.07021 | 1740.03483  | 1 |
| 30981 | H | 55.01000 | 48.47780 | 72.05990 | 1466.45972  | 2127.17862  | 1810.05488  | 1 |
| 30982 | H | 56.61600 | 47.89280 | 72.09290 | 2536.38108  | -639.74582  | -1707.85180 | 1 |
| 30983 | C | 58.25800 | 48.62980 | 78.70690 | 515.95747   | 565.87688   | 504.90381   | 1 |
| 30984 | O | 58.67000 | 47.50480 | 78.41790 | -499.09320  | -530.61399  | 295.77110   | 1 |
| 30985 | N | 58.87400 | 49.39780 | 79.67090 | -23.09482   | -819.85822  | 85.45525    | 1 |
| 30986 | H | 58.55300 | 50.33080 | 79.81490 | 2283.70561  | 2071.85288  | -640.26008  | 1 |
| 30987 | C | 60.05300 | 49.01480 | 80.43090 | -751.61360  | 72.18142    | 534.12327   | 1 |
| 30988 | H | 60.85900 | 48.83280 | 79.73490 | -224.19283  | 1465.40529  | 2787.08287  | 1 |
| 30989 | C | 60.48400 | 50.11080 | 81.40890 | -603.80262  | 438.73431   | -551.88028  | 1 |



|       |   |          |          |          |             |             |             |   |
|-------|---|----------|----------|----------|-------------|-------------|-------------|---|
| 30990 | H | 60.55300 | 51.07380 | 80.85790 | -1994.04452 | -881.40462  | 2272.58399  | 1 |
| 30991 | H | 59.62900 | 50.22680 | 82.10890 | -1619.54170 | -1647.89954 | -2127.20591 | 1 |
| 30992 | C | 61.81200 | 49.86180 | 82.09690 | -28.13460   | 74.04818    | 910.29652   | 1 |
| 30993 | H | 61.77700 | 48.88480 | 82.62590 | 475.91534   | 2640.41413  | 1669.93191  | 1 |
| 30994 | C | 62.94700 | 50.01980 | 81.06690 | 692.57137   | -557.96632  | -43.80452   | 1 |
| 30995 | H | 62.97300 | 51.01480 | 80.57190 | -2317.94410 | 1847.44380  | 1112.29872  | 1 |
| 30996 | H | 62.94200 | 49.14980 | 80.37590 | -391.68039  | -348.41990  | -3102.19523 | 1 |
| 30997 | H | 63.86500 | 49.83680 | 81.66490 | 2793.47900  | 1350.33698  | -502.08545  | 1 |
| 30998 | C | 61.98100 | 50.95380 | 83.20990 | -540.08003  | -508.30406  | -522.77272  | 1 |
| 30999 | H | 61.11500 | 50.89480 | 83.90290 | -2610.44973 | 8.23323     | 1772.13809  | 1 |
| 31000 | H | 62.95000 | 50.78680 | 83.72690 | -2867.76862 | -1145.44631 | -616.87489  | 1 |
| 31001 | H | 62.00600 | 51.98380 | 82.79390 | -1988.89504 | -1075.20882 | 2188.36283  | 1 |
| 31002 | C | 59.83400 | 47.69080 | 81.19690 | 15.90635    | 609.99751   | -692.88628  | 1 |
| 31003 | O | 60.73700 | 46.80980 | 81.21890 | -409.14284  | -135.73948  | 666.67260   | 1 |
| 31004 | N | 58.64700 | 47.46780 | 81.86090 | 177.38988   | -773.14988  | -214.47660  | 1 |
| 31005 | H | 57.93700 | 48.16280 | 81.93990 | -2355.68506 | -2073.23886 | 162.14257   | 1 |
| 31006 | C | 58.32400 | 46.20480 | 82.43990 | -710.79079  | 601.17235   | -84.03016   | 1 |
| 31007 | H | 59.16000 | 45.72380 | 82.92390 | -148.72064  | -1199.94326 | 2898.72804  | 1 |
| 31008 | C | 57.25300 | 46.40580 | 83.55490 | 426.58912   | -346.24550  | 713.14027   | 1 |
| 31009 | H | 56.46500 | 47.09480 | 83.18390 | -2995.94711 | -772.77005  | -601.70701  | 1 |
| 31010 | H | 56.84700 | 45.42880 | 83.89290 | -1541.04820 | 2412.08574  | -1354.57311 | 1 |
| 31011 | O | 57.79400 | 47.05480 | 84.72390 | -69.72626   | -251.14759  | -736.39945  | 1 |
| 31012 | H | 58.33600 | 46.39680 | 85.16390 | -3079.12643 | -84.73276   | 692.44711   | 1 |
| 31013 | C | 57.74300 | 45.15880 | 81.47690 | -774.93089  | 388.77484   | -339.73110  | 1 |
| 31014 | O | 57.44700 | 44.02980 | 81.86390 | 644.47641   | -34.51336   | -428.68608  | 1 |
| 31015 | N | 57.64000 | 45.44880 | 80.18090 | -42.68253   | -179.44283  | -816.79560  | 1 |
| 31016 | H | 57.87600 | 46.33480 | 79.79090 | -2420.53053 | 1989.08740  | 488.89822   | 1 |
| 31017 | C | 57.07300 | 44.51080 | 79.22090 | 207.52345   | 550.66338   | -704.46919  | 1 |
| 31018 | H | 56.64100 | 43.64980 | 79.70890 | -2210.29765 | 2090.61521  | 898.28024   | 1 |
| 31019 | C | 55.93600 | 45.12680 | 78.34290 | -535.27016  | -123.92693  | 739.58546   | 1 |
| 31020 | H | 56.29600 | 45.99180 | 77.74590 | 2168.29481  | 121.94524   | 2265.43372  | 1 |
| 31021 | H | 55.54800 | 44.49680 | 77.51490 | 1231.24263  | -580.98695  | -2820.04590 | 1 |
| 31022 | N | 53.71900 | 46.31980 | 78.70290 | -466.28967  | 558.05998   | -466.26954  | 1 |
| 31023 | H | 53.67500 | 46.71180 | 77.78490 | 2129.10604  | 714.59885   | -2189.23068 | 1 |
| 31024 | C | 54.76900 | 45.59380 | 79.19390 | 731.96112   | 342.18212   | 417.00950   | 1 |
| 31025 | C | 52.84700 | 46.50780 | 79.73890 | -668.69046  | 384.59491   | 528.56259   | 1 |
| 31026 | H | 51.89400 | 47.02380 | 79.61890 | 806.93058   | -2981.28162 | -437.47675  | 1 |
| 31027 | N | 53.29900 | 45.96080 | 80.86590 | -535.53131  | -341.54874  | 561.30769   | 1 |
| 31028 | C | 54.52600 | 45.35480 | 80.48390 | 136.15571   | 195.78019   | 887.20699   | 1 |
| 31029 | H | 55.14700 | 44.83680 | 81.20490 | -1948.34274 | 1936.71448  | 1582.92011  | 1 |
| 31030 | C | 58.04800 | 44.00880 | 78.19490 | 720.23953   | 280.72267   | 471.95797   | 1 |
| 31031 | O | 57.88200 | 42.94680 | 77.55890 | 242.95660   | -481.60112  | 553.44672   | 1 |
| 31032 | N | 59.14200 | 44.76280 | 78.02990 | -245.94003  | -747.14216  | -265.43977  | 1 |
| 31033 | H | 59.21600 | 45.65280 | 78.47390 | 2706.66704  | -1511.34020 | -371.76729  | 1 |
| 31034 | C | 60.37000 | 44.45780 | 77.32690 | 458.20704   | -614.74365  | 451.45146   | 1 |
| 31035 | H | 60.06600 | 43.86780 | 76.47490 | 1908.60101  | -1427.81867 | -2021.23111 | 1 |
| 31036 | C | 61.19700 | 45.73880 | 76.87590 | -770.20175  | -9.78285    | 513.82284   | 1 |
| 31037 | H | 62.10800 | 45.47580 | 76.29590 | -220.68398  | -2867.71865 | 1234.42780  | 1 |
| 31038 | H | 61.43300 | 46.19080 | 77.86290 | -2234.11583 | 880.10954   | -2058.29987 | 1 |
| 31039 | O | 60.39300 | 46.65880 | 76.10090 | 282.23104   | 677.56138   | 319.10140   | 1 |
| 31040 | H | 59.93500 | 47.30180 | 76.64590 | -947.86037  | 1941.76740  | 2311.67270  | 1 |
| 31041 | C | 61.25600 | 43.57680 | 78.15690 | -195.84746  | -141.59167  | 880.00059   | 1 |
| 31042 | O | 61.74400 | 44.02380 | 79.23190 | 652.71382   | 428.46412   | 92.19366    | 1 |
| 31043 | O | 61.55900 | 42.43480 | 77.70390 | 589.59443   | -477.71161  | -87.57705   | 1 |
| 31044 | N | 68.09800 | 39.69880 | 83.86190 | 556.67163   | 366.21965   | 509.10069   | 1 |
| 31045 | H | 68.31400 | 38.85080 | 84.42290 | 895.17183   | 2185.30874  | 2084.85965  | 1 |
| 31046 | H | 68.24600 | 39.59180 | 82.83790 | 1760.35254  | -2225.34715 | 1306.83644  | 1 |
| 31047 | H | 67.12500 | 40.02180 | 84.03590 | 1006.67596  | 1028.81658  | -2801.88675 | 1 |
| 31048 | C | 68.95200 | 40.75780 | 84.30590 | 763.33933   | 162.61783   | 448.40240   | 1 |
| 31049 | H | 68.94300 | 40.82480 | 85.38390 | 1932.61191  | 241.96193   | 2456.94237  | 1 |
| 31050 | C | 70.47100 | 40.56280 | 83.91090 | -126.17098  | 628.65798   | 659.70982   | 1 |
| 31051 | H | 70.98000 | 41.53880 | 84.06090 | 2017.22036  | 2414.33199  | -132.34205  | 1 |

|       |   |          |          |          |             |             |             |   |
|-------|---|----------|----------|----------|-------------|-------------|-------------|---|
| 31052 | H | 70.47900 | 40.45980 | 82.80490 | 215.39335   | -2484.62161 | -1901.80963 | 1 |
| 31053 | C | 71.15500 | 39.33080 | 84.51890 | -141.37774  | -740.32587  | 488.53310   | 1 |
| 31054 | H | 72.17500 | 39.10180 | 84.14190 | 2802.21383  | -1301.42045 | 472.14880   | 1 |
| 31055 | H | 70.62200 | 38.43880 | 84.12690 | 2571.49253  | 193.37365   | -1787.81205 | 1 |
| 31056 | C | 71.32300 | 39.38980 | 86.03290 | 449.54245   | 696.53167   | -396.65910  | 1 |
| 31057 | H | 70.30800 | 39.45380 | 86.48090 | 126.86194   | -540.83380  | -3099.10321 | 1 |
| 31058 | H | 71.82700 | 40.34380 | 86.29990 | -1208.05498 | 1321.91630  | 2593.62779  | 1 |
| 31059 | C | 71.99000 | 38.13380 | 86.56490 | 178.78461   | -842.32884  | 238.04532   | 1 |
| 31060 | H | 71.54000 | 37.18180 | 86.20890 | 2208.89330  | -2096.89628 | 697.51694   | 1 |
| 31061 | H | 73.02200 | 38.05280 | 86.16090 | -2237.26693 | -1813.99119 | 1262.63210  | 1 |
| 31062 | N | 72.01700 | 38.08680 | 88.06190 | -244.28613  | 327.09421   | 742.43432   | 1 |
| 31063 | H | 72.40100 | 38.94980 | 88.49690 | -1231.27725 | 2202.20654  | -1911.17941 | 1 |
| 31064 | H | 71.06600 | 37.95380 | 88.46190 | -1448.58804 | -1984.78686 | -1965.11353 | 1 |
| 31065 | H | 72.60700 | 37.30680 | 88.41590 | 2872.43571  | 1150.35882  | -538.77606  | 1 |
| 31066 | C | 68.42100 | 42.10180 | 83.76190 | -842.92262  | -82.77771   | 362.53647   | 1 |
| 31067 | O | 67.82500 | 42.17680 | 82.71690 | -537.06743  | -560.77362  | -136.47941  | 1 |
| 31068 | N | 68.61900 | 43.27580 | 84.43490 | -660.07961  | 557.08595   | -42.09834   | 1 |
| 31069 | H | 69.20800 | 43.27780 | 85.23890 | 2256.58630  | 2063.93003  | 739.68554   | 1 |
| 31070 | C | 67.99400 | 44.54780 | 83.99690 | 229.38844   | 257.48278   | -849.32872  | 1 |
| 31071 | H | 68.34000 | 44.71780 | 82.98890 | 846.14580   | -1407.67360 | -2674.74101 | 1 |
| 31072 | H | 66.91700 | 44.46680 | 83.96490 | -784.60878  | -589.04457  | -2992.54816 | 1 |
| 31073 | C | 68.37200 | 45.68480 | 84.92590 | 172.85123   | -305.20879  | 828.91015   | 1 |
| 31074 | O | 68.20000 | 46.83880 | 84.64490 | -694.36213  | -351.95288  | 143.63503   | 1 |
| 31075 | N | 68.83800 | 45.43480 | 86.17690 | -162.89885  | 609.28063   | -585.51629  | 1 |
| 31076 | H | 69.14100 | 44.52880 | 86.46290 | 2025.98455  | 2026.24857  | 1301.36155  | 1 |
| 31077 | C | 69.04600 | 46.53980 | 87.06590 | -553.68093  | -329.18332  | -650.29371  | 1 |
| 31078 | H | 68.12300 | 47.09580 | 87.14390 | 56.55391    | -2786.22240 | 1424.40912  | 1 |
| 31079 | C | 69.42500 | 45.95680 | 88.48290 | -281.37010  | -694.00705  | -508.76321  | 1 |
| 31080 | H | 69.61000 | 46.79780 | 89.18490 | -418.46299  | 2779.84386  | -1450.21936 | 1 |
| 31081 | H | 70.26400 | 45.23680 | 88.37490 | 2370.01287  | 943.18860   | 1831.40516  | 1 |
| 31082 | N | 68.12900 | 45.25980 | 90.58990 | 452.49721   | 327.12393   | -639.37394  | 1 |
| 31083 | H | 68.44200 | 46.05880 | 91.10290 | -337.71670  | 2979.23366  | 999.79552   | 1 |
| 31084 | C | 68.28000 | 45.18480 | 89.23290 | 510.37201   | 345.39026   | -677.25295  | 1 |
| 31085 | C | 67.11100 | 44.45380 | 90.92790 | 636.05522   | -321.48304  | 546.11704   | 1 |
| 31086 | H | 66.88800 | 44.18780 | 91.96090 | 1802.00731  | 2582.22470  | -203.57760  | 1 |
| 31087 | N | 66.50500 | 43.97780 | 89.88790 | -550.07167  | 482.83324   | -453.50251  | 1 |
| 31088 | C | 67.24500 | 44.40280 | 88.80090 | 224.05025   | 648.54922   | 610.73191   | 1 |
| 31089 | H | 67.06100 | 44.12980 | 87.76890 | 2189.76115  | 787.93230   | -2115.68559 | 1 |
| 31090 | C | 70.13100 | 47.50080 | 86.71590 | 163.55806   | 455.04756   | -785.08633  | 1 |
| 31091 | O | 69.95600 | 48.68880 | 86.84090 | 213.05959   | -611.68010  | 420.13683   | 1 |
| 31092 | N | 71.22300 | 46.97380 | 86.14590 | 194.11938   | 824.98621   | 115.10375   | 1 |
| 31093 | H | 71.30800 | 45.98380 | 86.05590 | 1384.63772  | -1020.62824 | 2616.49843  | 1 |
| 31094 | C | 72.34500 | 47.79380 | 85.73390 | 650.37805   | 642.84011   | -4.47069    | 1 |
| 31095 | H | 72.45100 | 48.61880 | 86.42290 | -1555.17184 | 590.67923   | -2685.88919 | 1 |
| 31096 | C | 73.65200 | 47.05680 | 85.70090 | -436.54061  | 62.13583    | 797.24156   | 1 |
| 31097 | H | 73.55600 | 46.00080 | 85.36790 | 3027.85821  | 644.58745   | -521.00603  | 1 |
| 31098 | H | 74.35000 | 47.50180 | 84.95990 | -1983.78634 | 1051.91974  | -2228.16821 | 1 |
| 31099 | C | 74.30700 | 47.04680 | 87.09390 | 470.69595   | 165.52581   | 751.85170   | 1 |
| 31100 | H | 74.48500 | 48.04780 | 87.54190 | 2361.54860  | 2043.05959  | -407.39991  | 1 |
| 31101 | H | 75.34400 | 46.64680 | 87.06490 | 1457.21044  | -1246.14561 | 2473.03163  | 1 |
| 31102 | C | 73.53900 | 46.29480 | 88.22990 | 49.32915    | 879.82028   | 272.21654   | 1 |
| 31103 | O | 73.14300 | 46.94180 | 89.21590 | 692.09349   | -322.78549  | -146.39691  | 1 |
| 31104 | N | 73.26100 | 44.98580 | 88.05190 | -515.83006  | 173.32056   | -664.32669  | 1 |
| 31105 | H | 73.59700 | 44.45680 | 87.27190 | 3134.20625  | 22.45956    | -93.20885   | 1 |
| 31106 | H | 72.71800 | 44.56680 | 88.77890 | 2883.70278  | 228.73979   | -1223.78486 | 1 |
| 31107 | C | 72.00600 | 48.49580 | 84.37690 | -663.09841  | 191.81373   | -618.80391  | 1 |
| 31108 | O | 72.38900 | 49.64980 | 84.14890 | 340.26526   | 185.37572   | -693.20236  | 1 |
| 31109 | N | 71.16500 | 47.88080 | 83.49290 | -314.40587  | -751.26247  | -190.01472  | 1 |
| 31110 | H | 70.90700 | 46.92780 | 83.63290 | 352.27328   | -1749.25878 | 2573.34893  | 1 |
| 31111 | C | 70.59400 | 48.62080 | 82.36290 | -874.82338  | -273.94450  | -67.64943   | 1 |
| 31112 | H | 71.41900 | 49.01280 | 81.78590 | 1023.46754  | 2223.51516  | -1992.93363 | 1 |
| 31113 | C | 69.70100 | 47.63480 | 81.51590 | -177.83518  | -328.43521  | -833.21643  | 1 |

|       |   |          |          |          |             |             |             |   |
|-------|---|----------|----------|----------|-------------|-------------|-------------|---|
| 31114 | H | 69.09700 | 47.05380 | 82.24590 | 645.42583   | -2130.02202 | 2199.78193  | 1 |
| 31115 | H | 69.01800 | 48.11480 | 80.78390 | 2971.53365  | -648.81186  | 733.94420   | 1 |
| 31116 | C | 70.56200 | 46.67680 | 80.62690 | 269.29461   | 226.94576   | 834.80666   | 1 |
| 31117 | H | 71.33500 | 46.24680 | 81.29890 | -1930.82533 | 837.63585   | -2361.41853 | 1 |
| 31118 | H | 71.11300 | 47.16180 | 79.79190 | -959.31920  | -430.95299  | 2961.64434  | 1 |
| 31119 | C | 69.74500 | 45.52780 | 80.02090 | 509.17130   | -375.99930  | 629.78403   | 1 |
| 31120 | H | 69.31500 | 44.92580 | 80.84990 | -1244.38950 | 1860.39312  | 2227.69923  | 1 |
| 31121 | H | 70.38800 | 44.89380 | 79.37490 | 999.82863   | -764.71331  | -2879.22058 | 1 |
| 31122 | C | 68.59400 | 45.99380 | 79.11190 | -678.99821  | 3.52169     | -629.71583  | 1 |
| 31123 | H | 67.85700 | 46.48980 | 79.77890 | 2238.19884  | -480.61906  | -2142.67656 | 1 |
| 31124 | H | 68.97400 | 46.63180 | 78.28490 | 900.80687   | -2504.10773 | 1640.55170  | 1 |
| 31125 | N | 68.02900 | 44.78280 | 78.47990 | -663.10998  | 428.12842   | 349.63284   | 1 |
| 31126 | H | 67.98800 | 44.08980 | 79.25490 | 440.34977   | -1674.61512 | 2609.41266  | 1 |
| 31127 | H | 67.10500 | 44.86980 | 78.00990 | 1916.04341  | 1377.10870  | 2073.26748  | 1 |
| 31128 | H | 68.67200 | 44.54580 | 77.69790 | 400.61558   | 2964.74622  | 1010.59861  | 1 |
| 31129 | C | 69.71700 | 49.79980 | 82.79390 | -629.23298  | -309.00560  | 581.99408   | 1 |
| 31130 | O | 69.79800 | 50.86580 | 82.22390 | 528.65569   | 490.47385   | -331.18599  | 1 |
| 31131 | N | 68.85600 | 49.66080 | 83.84290 | 583.56021   | 448.66919   | -419.18798  | 1 |
| 31132 | H | 68.79800 | 48.77280 | 84.29290 | -989.51927  | 2679.27111  | -1363.69145 | 1 |
| 31133 | C | 68.00000 | 50.77580 | 84.28590 | 704.96814   | -539.84464  | 99.56972    | 1 |
| 31134 | H | 67.57400 | 51.25780 | 83.41790 | 2418.42483  | 1136.62707  | 1652.90750  | 1 |
| 31135 | C | 66.81200 | 50.11480 | 85.12790 | -342.01999  | -288.03486  | 789.58305   | 1 |
| 31136 | H | 67.22400 | 49.50880 | 85.96190 | -148.89448  | 1667.84609  | -2677.67129 | 1 |
| 31137 | H | 66.27300 | 50.96480 | 85.59790 | -1704.05461 | 936.64692   | 2483.32881  | 1 |
| 31138 | C | 65.87200 | 49.30880 | 84.17590 | 384.68052   | 668.93575   | -502.67452  | 1 |
| 31139 | H | 66.45800 | 48.61780 | 83.53290 | -1821.47345 | 392.99549   | 2542.94447  | 1 |
| 31140 | H | 65.40700 | 50.13980 | 83.60490 | -2349.09870 | -424.11206  | -2060.26427 | 1 |
| 31141 | C | 64.58100 | 48.69080 | 84.76490 | 215.77696   | 692.42183   | 568.40652   | 1 |
| 31142 | H | 63.91200 | 48.26980 | 83.98490 | -2077.99900 | -2127.83892 | -1012.48630 | 1 |
| 31143 | H | 64.00700 | 49.44380 | 85.34690 | 2902.64384  | 1202.49532  | 105.52401   | 1 |
| 31144 | N | 64.98200 | 47.51680 | 85.61290 | -675.53305  | 262.15055   | -460.93892  | 1 |
| 31145 | H | 64.97100 | 46.61780 | 85.17490 | -2248.26796 | 386.11751   | 2179.41412  | 1 |
| 31146 | C | 64.91300 | 47.44980 | 86.91190 | 506.13405   | 637.97408   | -426.44777  | 1 |
| 31147 | N | 65.22000 | 46.31280 | 87.50190 | 280.41503   | -617.77050  | -476.47275  | 1 |
| 31148 | H | 65.23700 | 45.48880 | 86.93590 | -2941.60853 | 4.84867     | 1141.13906  | 1 |
| 31149 | H | 64.79200 | 46.14780 | 88.39090 | -229.03081  | 1149.34317  | 2925.44569  | 1 |
| 31150 | N | 64.55700 | 48.39180 | 87.74590 | 357.84799   | 750.32047   | 201.71925   | 1 |
| 31151 | H | 64.32200 | 49.30080 | 87.40390 | 1708.81816  | -1447.64407 | 2189.71459  | 1 |
| 31152 | H | 64.48300 | 48.15980 | 88.71590 | 888.58109   | 624.40720   | 2952.36322  | 1 |
| 31153 | C | 68.76300 | 51.77380 | 85.17190 | -294.69297  | 647.16149   | -597.18960  | 1 |
| 31154 | O | 68.31700 | 52.89480 | 85.38790 | 446.48457   | -452.95932  | -447.15507  | 1 |
| 31155 | N | 69.99200 | 51.44480 | 85.66490 | -5.77924    | -323.06581  | 768.25466   | 1 |
| 31156 | H | 70.22400 | 50.48180 | 85.78290 | -2470.56616 | 961.39478   | -1721.51370 | 1 |
| 31157 | C | 71.03900 | 52.33780 | 86.14090 | -589.76630  | 522.86037   | 479.53416   | 1 |
| 31158 | H | 70.60600 | 52.99280 | 86.88290 | -1998.14161 | -1227.07992 | -2101.29000 | 1 |
| 31159 | C | 72.06500 | 51.49980 | 86.96290 | 565.80011   | -539.92791  | 434.64915   | 1 |
| 31160 | H | 72.56500 | 50.79680 | 86.26290 | -1941.68531 | 2244.02759  | -1098.26154 | 1 |
| 31161 | H | 71.46100 | 50.99980 | 87.75090 | 552.56969   | 3098.85065  | -276.16611  | 1 |
| 31162 | C | 73.17300 | 52.34480 | 87.63990 | 52.73969    | 715.95054   | -586.19432  | 1 |
| 31163 | H | 73.64300 | 52.97080 | 86.85090 | 1248.08932  | -169.49906  | 2871.41421  | 1 |
| 31164 | H | 74.04000 | 51.75980 | 88.01390 | 312.63103   | 2028.39593  | 2387.48535  | 1 |
| 31165 | C | 72.66500 | 53.24480 | 88.79790 | -484.35671  | 577.97277   | 527.14860   | 1 |
| 31166 | H | 72.29600 | 54.16380 | 88.29490 | -1905.76300 | -2161.58153 | 1240.31119  | 1 |
| 31167 | H | 71.81600 | 52.78380 | 89.34490 | -617.95893  | 2494.70927  | -1842.79743 | 1 |
| 31168 | C | 73.72900 | 53.65480 | 89.76990 | 774.02313   | -140.39501  | 439.93054   | 1 |
| 31169 | H | 74.54200 | 54.24280 | 89.29390 | -2187.92445 | -1057.14035 | 1989.20389  | 1 |
| 31170 | H | 74.15700 | 52.71680 | 90.18490 | -264.03075  | 198.11877   | 3122.28289  | 1 |
| 31171 | N | 73.08500 | 54.51480 | 90.80690 | -316.97508  | -433.39767  | 636.96758   | 1 |
| 31172 | H | 72.42900 | 53.95380 | 91.38690 | 1686.68658  | -1849.55302 | -1894.76515 | 1 |
| 31173 | H | 72.53100 | 55.23180 | 90.29690 | 240.75732   | 3114.11079  | 472.22632   | 1 |
| 31174 | H | 73.73600 | 55.06480 | 91.40390 | 2151.45467  | -2095.39632 | 889.62861   | 1 |
| 31175 | C | 71.68500 | 53.15880 | 85.00390 | 615.01496   | -410.56175  | -517.44722  | 1 |

|       |   |          |          |          |             |             |             |   |
|-------|---|----------|----------|----------|-------------|-------------|-------------|---|
| 31176 | O | 71.94000 | 54.39380 | 85.13790 | 202.17436   | -49.31663   | 752.20715   | 1 |
| 31177 | N | 72.06400 | 52.55680 | 83.85790 | -522.43009  | -546.37329  | 361.03592   | 1 |
| 31178 | H | 72.02800 | 51.56080 | 83.83890 | -1350.25557 | -2216.35419 | -1774.10089 | 1 |
| 31179 | C | 72.45900 | 53.18580 | 82.59290 | 262.12152   | 732.21746   | 485.50978   | 1 |
| 31180 | H | 73.31700 | 53.82280 | 82.75190 | -2576.32580 | 755.05617   | -1669.47840 | 1 |
| 31181 | C | 72.73700 | 52.17980 | 81.49090 | -536.80232  | -443.49466  | 581.09221   | 1 |
| 31182 | H | 73.16400 | 52.69180 | 80.60190 | -881.60524  | -2290.82899 | -1963.61818 | 1 |
| 31183 | H | 73.43100 | 51.39180 | 81.85490 | 1341.53252  | 512.25996   | -2803.66961 | 1 |
| 31184 | H | 71.81100 | 51.66480 | 81.15690 | -253.27386  | 2462.99779  | -1967.58432 | 1 |
| 31185 | C | 71.42300 | 54.10280 | 82.09390 | -700.25861  | -570.89941  | 103.98633   | 1 |
| 31186 | O | 71.72400 | 55.20980 | 81.62890 | -562.97916  | -231.76152  | 500.99676   | 1 |
| 31187 | N | 70.15100 | 53.68580 | 82.18190 | -352.68543  | 474.28207   | -625.64016  | 1 |
| 31188 | H | 69.93300 | 52.74080 | 82.41190 | -2063.67853 | -895.50155  | 2197.96673  | 1 |
| 31189 | C | 69.05200 | 54.61880 | 81.81290 | -672.10052  | 393.21910   | 496.75288   | 1 |
| 31190 | H | 69.27300 | 54.93580 | 80.80490 | 2232.47940  | 946.57785   | -2004.45183 | 1 |
| 31191 | C | 67.72000 | 53.76380 | 81.88590 | 628.64670   | -535.18516  | 340.71760   | 1 |
| 31192 | H | 67.86000 | 52.87180 | 81.23890 | -2075.07843 | -2272.32401 | 629.28007   | 1 |
| 31193 | H | 67.52600 | 53.54180 | 82.95690 | -1569.62450 | -2689.31946 | 375.81058   | 1 |
| 31194 | C | 66.42000 | 54.44080 | 81.37090 | 419.58400   | -29.28561   | -805.26116  | 1 |
| 31195 | H | 66.26400 | 55.30580 | 82.05090 | -691.79970  | -566.27326  | 3012.93387  | 1 |
| 31196 | C | 66.51600 | 54.88780 | 79.91790 | -184.54132  | -417.89353  | 779.80760   | 1 |
| 31197 | H | 67.34800 | 55.61980 | 79.84090 | -814.88562  | -2357.47667 | -1904.60422 | 1 |
| 31198 | H | 66.83700 | 54.05780 | 79.25390 | 1886.73324  | 2086.65311  | -1420.22214 | 1 |
| 31199 | H | 65.61300 | 55.35880 | 79.47290 | -1678.91463 | -61.67137   | 2664.71667  | 1 |
| 31200 | C | 65.08700 | 53.64980 | 81.60090 | -742.14644  | 318.84243   | -455.44473  | 1 |
| 31201 | H | 64.19400 | 54.26480 | 81.35690 | -2522.25175 | 1590.17292  | 1056.43768  | 1 |
| 31202 | H | 65.13500 | 52.68680 | 81.04990 | -607.28557  | -3056.17934 | -310.41973  | 1 |
| 31203 | H | 65.04700 | 53.31080 | 82.65790 | -2832.94231 | -1335.12140 | 315.61021   | 1 |
| 31204 | C | 68.94000 | 55.86580 | 82.65390 | -79.67120   | -812.70483  | 369.55721   | 1 |
| 31205 | O | 68.94800 | 56.97480 | 82.06590 | -455.94571  | 153.34897   | 632.28730   | 1 |
| 31206 | N | 68.95500 | 55.70480 | 84.03490 | 271.22631   | -538.99241  | 567.18269   | 1 |
| 31207 | H | 68.90000 | 54.78480 | 84.41390 | 1037.61234  | -516.24397  | 2914.77017  | 1 |
| 31208 | C | 69.01700 | 56.76980 | 84.97390 | -541.85235  | -418.20557  | 593.44855   | 1 |
| 31209 | H | 68.18000 | 57.41880 | 84.76190 | -1653.11815 | -1783.11988 | -1991.50329 | 1 |
| 31210 | C | 68.98700 | 56.10080 | 86.37390 | 379.28148   | 785.84931   | -303.65322  | 1 |
| 31211 | H | 67.97000 | 55.65380 | 86.34790 | 1882.22155  | 1426.23710  | 2080.05729  | 1 |
| 31212 | H | 69.84200 | 55.41280 | 86.55090 | -1626.02358 | 831.21259   | 2566.33370  | 1 |
| 31213 | C | 69.01600 | 57.12980 | 87.55390 | -629.05109  | 600.86167   | 312.43931   | 1 |
| 31214 | H | 68.64300 | 58.10980 | 87.18590 | 2084.91923  | -1148.81152 | -2046.64011 | 1 |
| 31215 | H | 70.04000 | 57.51080 | 87.75690 | 2150.11927  | 1410.69219  | -1823.19035 | 1 |
| 31216 | C | 68.28500 | 56.64680 | 88.80690 | -61.47567   | -633.75874  | -640.93873  | 1 |
| 31217 | H | 67.27800 | 56.32580 | 88.46590 | -521.63500  | -2460.63378 | -1872.71996 | 1 |
| 31218 | H | 68.78000 | 55.77180 | 89.27990 | -2713.15118 | -114.62270  | 1591.59365  | 1 |
| 31219 | C | 68.18300 | 57.76180 | 89.88990 | -305.02751  | -704.40393  | 466.99425   | 1 |
| 31220 | H | 67.70500 | 58.60680 | 89.34890 | -1414.74807 | -1830.26332 | 2117.35498  | 1 |
| 31221 | H | 69.18300 | 58.07080 | 90.26390 | 2502.05510  | -5.68622    | 1898.57766  | 1 |
| 31222 | N | 67.28600 | 57.24180 | 90.94090 | -430.69230  | -708.69100  | -67.40659   | 1 |
| 31223 | H | 67.23400 | 57.85680 | 91.77790 | -2219.73120 | 420.72136   | -2198.05609 | 1 |
| 31224 | H | 66.34800 | 56.94180 | 90.60490 | 2021.39414  | 1909.25538  | -1491.31008 | 1 |
| 31225 | H | 67.76700 | 56.37380 | 91.25190 | 2448.03777  | -648.22734  | 1853.32923  | 1 |
| 31226 | C | 70.26400 | 57.65280 | 84.87290 | 236.26941   | -459.35204  | -744.57218  | 1 |
| 31227 | O | 70.14300 | 58.87780 | 84.98790 | -356.80421  | 658.18359   | -301.17114  | 1 |
| 31228 | N | 71.49100 | 57.15780 | 84.71690 | 518.07174   | -562.02414  | 316.28834   | 1 |
| 31229 | H | 71.63100 | 56.17080 | 84.69590 | 185.23901   | -1732.06224 | -2615.47172 | 1 |
| 31230 | C | 72.71900 | 57.94580 | 84.52690 | -337.34373  | 636.18588   | 572.81505   | 1 |
| 31231 | H | 72.79500 | 58.56780 | 85.40690 | -1959.22187 | 2436.90067  | -470.96786  | 1 |
| 31232 | C | 74.01800 | 57.10780 | 84.51390 | -96.45379   | 870.78664   | 291.20709   | 1 |
| 31233 | H | 74.13900 | 56.57280 | 83.54790 | 1089.23736  | -2271.00981 | -1871.22637 | 1 |
| 31234 | O | 74.08600 | 56.29880 | 85.65490 | -374.34694  | -680.42335  | 74.43406    | 1 |
| 31235 | H | 73.52300 | 55.52680 | 85.55590 | 2448.24224  | -854.16385  | -1771.97509 | 1 |
| 31236 | C | 75.19200 | 58.07780 | 84.76890 | 13.39147    | -896.06069  | -70.82601   | 1 |
| 31237 | H | 75.21200 | 58.81580 | 83.93790 | 3111.80458  | 80.38320    | -415.49933  | 1 |

|       |   |          |          |          |             |             |             |   |
|-------|---|----------|----------|----------|-------------|-------------|-------------|---|
| 31238 | H | 76.17100 | 57.55180 | 84.75690 | 2074.72611  | -2314.16537 | -394.14497  | 1 |
| 31239 | H | 75.14700 | 58.74180 | 85.65790 | 1237.08262  | 335.96853   | -2880.31869 | 1 |
| 31240 | C | 72.59200 | 58.81480 | 83.22690 | -338.08954  | 275.95471   | -815.19353  | 1 |
| 31241 | O | 73.01500 | 59.98280 | 83.18890 | -347.74758  | -6.19117    | -718.99275  | 1 |
| 31242 | N | 72.00200 | 58.27580 | 82.17390 | 259.77809   | -459.44296  | -651.00326  | 1 |
| 31243 | H | 71.78800 | 57.30480 | 82.23390 | 1705.69965  | 760.40282   | -2536.40645 | 1 |
| 31244 | C | 71.67800 | 58.96180 | 80.92490 | 188.68936   | -834.86403  | -270.80221  | 1 |
| 31245 | H | 72.62500 | 59.27280 | 80.50790 | 155.20179   | 885.36507   | 3012.19707  | 1 |
| 31246 | C | 71.09500 | 58.12480 | 79.80190 | -418.02311  | -492.26086  | -643.99885  | 1 |
| 31247 | H | 70.05700 | 57.80880 | 80.03990 | -2615.96805 | 1057.25520  | 1417.37407  | 1 |
| 31248 | O | 71.89200 | 56.91180 | 79.71290 | 470.17444   | 472.14661   | 421.97851   | 1 |
| 31249 | H | 71.56000 | 56.30780 | 80.38190 | -2288.67753 | 2143.44290  | -427.89738  | 1 |
| 31250 | C | 71.17200 | 58.81080 | 78.46790 | 498.53515   | 35.91374    | 750.44180   | 1 |
| 31251 | H | 72.19700 | 59.09080 | 78.14290 | 1921.20142  | 935.64225   | 2299.66621  | 1 |
| 31252 | H | 70.51100 | 59.70180 | 78.53390 | -418.22345  | 3076.71981  | 595.53554   | 1 |
| 31253 | H | 70.87600 | 58.20880 | 77.58290 | 625.70431   | -1557.49038 | -2654.62009 | 1 |
| 31254 | C | 70.83300 | 60.20580 | 81.08790 | -918.33694  | -20.49983   | -53.56739   | 1 |
| 31255 | O | 71.24500 | 61.35880 | 80.80990 | 289.99198   | -461.03849  | 549.36864   | 1 |
| 31256 | N | 69.70300 | 59.95480 | 81.76090 | -234.26752  | -399.91886  | 694.51236   | 1 |
| 31257 | H | 69.43500 | 59.01180 | 81.94290 | -1323.88823 | 1585.85610  | 2383.56843  | 1 |
| 31258 | C | 68.79200 | 60.93480 | 82.26090 | -463.43249  | 53.53286    | -792.70592  | 1 |
| 31259 | H | 68.27700 | 61.41580 | 81.44290 | -293.87437  | 1180.78567  | 2905.04607  | 1 |
| 31260 | C | 67.64800 | 60.18880 | 82.90290 | 563.08666   | -666.29384  | -202.98375  | 1 |
| 31261 | H | 68.05500 | 59.43180 | 83.60690 | -1283.32056 | 2190.87023  | 1878.19507  | 1 |
| 31262 | C | 66.77000 | 61.10180 | 83.78390 | 320.24140   | 676.91186   | -540.32976  | 1 |
| 31263 | H | 65.86900 | 60.56480 | 84.14890 | 2402.78114  | 659.90066   | 1916.64597  | 1 |
| 31264 | H | 66.36600 | 61.97780 | 83.23390 | -1851.08608 | 2383.57328  | -948.17905  | 1 |
| 31265 | H | 67.30500 | 61.44380 | 84.69590 | -2713.25963 | 1618.64866  | -17.34642   | 1 |
| 31266 | C | 66.87700 | 59.43380 | 81.79990 | -560.51401  | -563.11311  | -438.83203  | 1 |
| 31267 | H | 65.98800 | 58.91880 | 82.22390 | 1813.71671  | -2547.17633 | 48.64213    | 1 |
| 31268 | H | 67.56900 | 58.76680 | 81.24290 | 2697.23106  | -1081.20019 | -1173.54125 | 1 |
| 31269 | H | 66.48400 | 60.21480 | 81.11490 | 1602.34292  | 1.08580     | -2704.94085 | 1 |
| 31270 | C | 69.33700 | 61.96280 | 83.14390 | 165.54098   | 765.31861   | -494.35453  | 1 |
| 31271 | O | 69.12900 | 63.14880 | 82.91090 | -223.49717  | -630.31979  | 394.28326   | 1 |
| 31272 | N | 70.16800 | 61.60980 | 84.15190 | 633.84292   | -164.26829  | 515.82374   | 1 |
| 31273 | H | 70.42600 | 60.68180 | 84.41090 | 568.38691   | -1705.33365 | 2565.43209  | 1 |
| 31274 | C | 70.81100 | 62.52780 | 85.05990 | 760.73321   | -73.60586   | 481.92853   | 1 |
| 31275 | H | 70.02500 | 63.10980 | 85.51790 | -1694.56892 | -1770.06366 | -1967.71547 | 1 |
| 31276 | C | 71.57800 | 61.78180 | 86.15290 | -651.18020  | 82.27751    | 633.50332   | 1 |
| 31277 | H | 72.12500 | 60.95180 | 85.65690 | -2587.80426 | 1116.34809  | -1425.45941 | 1 |
| 31278 | C | 72.63700 | 62.69880 | 86.91090 | 506.23517   | 469.27269   | -610.24865  | 1 |
| 31279 | H | 73.14200 | 62.11380 | 87.70790 | -1400.77029 | -1319.08048 | 2476.71590  | 1 |
| 31280 | H | 72.14800 | 63.58180 | 87.37590 | -38.61135   | 3132.54546  | -424.52869  | 1 |
| 31281 | H | 73.44600 | 62.89480 | 86.17490 | -1424.41073 | -1969.17962 | -1993.81563 | 1 |
| 31282 | C | 70.63500 | 61.17080 | 87.20590 | 549.30268   | 549.19340   | 484.78542   | 1 |
| 31283 | H | 69.64800 | 60.89180 | 86.77890 | -1582.48943 | 155.82697   | 2713.60032  | 1 |
| 31284 | H | 70.45800 | 61.96580 | 87.96190 | 2865.09470  | 911.61742   | 926.31428   | 1 |
| 31285 | C | 71.26700 | 59.95680 | 87.91890 | 81.32966    | -796.16304  | -413.50580  | 1 |
| 31286 | H | 70.48700 | 59.54080 | 88.59190 | -1874.30310 | -1661.04469 | -1899.78510 | 1 |
| 31287 | H | 71.59500 | 59.21580 | 87.15890 | -1929.51089 | -1964.88361 | 1502.38913  | 1 |
| 31288 | H | 72.13800 | 60.22880 | 88.55390 | -2476.99964 | -62.19251   | 1936.54988  | 1 |
| 31289 | C | 71.66200 | 63.52580 | 84.35490 | 433.09815   | 648.54612   | -493.60999  | 1 |
| 31290 | O | 71.52800 | 64.71780 | 84.59990 | -447.67249  | -334.56918  | 546.56167   | 1 |
| 31291 | N | 72.44000 | 63.06280 | 83.35390 | -630.22673  | 571.62328   | -118.03636  | 1 |
| 31292 | H | 72.41000 | 62.08380 | 83.16990 | 380.04774   | -120.74287  | 3113.06198  | 1 |
| 31293 | C | 73.23300 | 63.90780 | 82.52590 | 359.32087   | -412.12577  | 711.62401   | 1 |
| 31294 | H | 73.88400 | 64.42880 | 83.21190 | 545.60071   | 1406.32718  | 2759.72780  | 1 |
| 31295 | C | 74.22100 | 63.07780 | 81.65290 | -152.98946  | 822.80860   | -402.19529  | 1 |
| 31296 | H | 73.76600 | 62.28180 | 81.02690 | -2513.12318 | 2.41667     | 1895.62745  | 1 |
| 31297 | H | 74.79000 | 62.50380 | 82.41590 | 2266.37611  | -1204.58231 | 1794.16722  | 1 |
| 31298 | C | 75.19500 | 63.90380 | 80.72890 | -550.03691  | 277.64046   | 675.29730   | 1 |
| 31299 | H | 74.55500 | 64.48980 | 80.03390 | -774.65357  | 2594.63550  | 1619.90184  | 1 |

|       |   |          |          |          |             |             |             |   |
|-------|---|----------|----------|----------|-------------|-------------|-------------|---|
| 31300 | C | 76.09000 | 64.93880 | 81.32490 | 7.79610     | -865.02069  | -253.73457  | 1 |
| 31301 | H | 76.90300 | 64.44380 | 81.89790 | 1433.53814  | -2310.02993 | 1549.53710  | 1 |
| 31302 | H | 75.62900 | 65.65480 | 82.03890 | -744.74182  | 2230.49658  | 2097.85945  | 1 |
| 31303 | H | 76.67100 | 65.48180 | 80.54890 | -1955.38732 | -2377.68225 | 612.04428   | 1 |
| 31304 | C | 76.03300 | 62.90280 | 79.89590 | -467.16410  | -241.92754  | 736.73913   | 1 |
| 31305 | H | 76.48300 | 62.22980 | 80.65690 | 2592.36487  | 1538.50228  | -908.75151  | 1 |
| 31306 | H | 76.84200 | 63.38880 | 79.30890 | 1488.71062  | -1384.41660 | 2379.18426  | 1 |
| 31307 | H | 75.43400 | 62.30680 | 79.17490 | 2292.67334  | -2130.57819 | -71.58612   | 1 |
| 31308 | C | 72.43700 | 64.90980 | 81.66490 | -228.38908  | 793.62649   | 412.34875   | 1 |
| 31309 | O | 72.81300 | 66.08780 | 81.57690 | -439.33607  | -585.87523  | -280.75605  | 1 |
| 31310 | N | 71.36300 | 64.44380 | 80.99590 | -331.23550  | 588.57350   | 522.19765   | 1 |
| 31311 | H | 71.19000 | 63.46780 | 81.10790 | 1191.13640  | 1458.11238  | 2520.42360  | 1 |
| 31312 | C | 70.42600 | 65.14580 | 80.24290 | -630.80304  | 572.14959   | 359.06557   | 1 |
| 31313 | H | 71.03900 | 65.71780 | 79.56190 | -2620.33195 | -1450.00801 | -966.06586  | 1 |
| 31314 | C | 69.50000 | 64.18580 | 79.47790 | 240.46550   | 7.58707     | 872.97383   | 1 |
| 31315 | H | 69.27400 | 63.33580 | 80.15590 | 9.75357     | 1080.59325  | -2964.70159 | 1 |
| 31316 | C | 68.14600 | 64.84580 | 79.02290 | 712.03032   | -190.34641  | -523.32757  | 1 |
| 31317 | H | 67.51200 | 65.16380 | 79.87790 | 853.49834   | -3009.34848 | 19.43103    | 1 |
| 31318 | H | 67.58600 | 64.15180 | 78.35890 | -531.44131  | 2601.29329  | -1719.11584 | 1 |
| 31319 | H | 68.45800 | 65.75480 | 78.46590 | -668.27309  | -2840.05866 | 1137.98900  | 1 |
| 31320 | C | 70.28000 | 63.43880 | 78.39190 | -480.05697  | -664.59104  | 378.32640   | 1 |
| 31321 | H | 70.44600 | 64.25280 | 77.65390 | -157.73796  | 2039.21158  | -2409.32655 | 1 |
| 31322 | H | 71.27200 | 63.03780 | 78.69290 | -1948.46169 | 2082.57639  | -1370.20572 | 1 |
| 31323 | C | 69.41000 | 62.39680 | 77.58790 | 17.97162    | 633.58027   | 665.91545   | 1 |
| 31324 | H | 68.96100 | 61.73580 | 78.35990 | -2876.85571 | 571.04586   | -1174.31559 | 1 |
| 31325 | H | 68.57700 | 62.83380 | 76.99690 | 967.41308   | -2587.86645 | 1466.18965  | 1 |
| 31326 | H | 70.16900 | 61.86880 | 76.97190 | -1513.70893 | -2062.34964 | -1827.05490 | 1 |
| 31327 | C | 69.70600 | 66.19980 | 80.98090 | 609.44405   | -16.70266   | -676.33114  | 1 |
| 31328 | O | 69.55800 | 67.36380 | 80.51690 | 438.77225   | 332.68944   | 566.19575   | 1 |
| 31329 | N | 69.14000 | 65.92480 | 82.22190 | -565.76354  | 591.92886   | 254.63166   | 1 |
| 31330 | H | 69.22700 | 64.99080 | 82.55990 | -2549.24282 | -1668.76624 | -772.17108  | 1 |
| 31331 | C | 68.75000 | 66.92180 | 83.19690 | -553.61802  | -541.41727  | 464.20669   | 1 |
| 31332 | H | 67.89500 | 67.41080 | 82.75390 | -1207.12397 | 2125.27722  | 1997.96481  | 1 |
| 31333 | C | 68.34200 | 66.10180 | 84.47590 | 402.52788   | -473.01077  | 649.93089   | 1 |
| 31334 | H | 68.06800 | 66.67780 | 85.38590 | 740.44075   | -734.58255  | -2966.71049 | 1 |
| 31335 | H | 69.24300 | 65.50480 | 84.73090 | -2013.93705 | -2057.91216 | -1252.22635 | 1 |
| 31336 | C | 67.11800 | 65.15880 | 84.29590 | -85.38393   | -56.49113   | -908.01565  | 1 |
| 31337 | H | 67.27600 | 64.54180 | 83.38490 | -1075.94941 | -2547.17962 | -1478.83350 | 1 |
| 31338 | C | 67.17400 | 64.17980 | 85.52090 | 459.20280   | -496.71331  | -597.30686  | 1 |
| 31339 | H | 66.20600 | 63.64480 | 85.41390 | 2395.00573  | 1946.76772  | -648.69311  | 1 |
| 31340 | H | 67.27400 | 64.75380 | 86.46590 | -2870.93117 | 1261.97904  | -352.99990  | 1 |
| 31341 | H | 68.06800 | 63.52580 | 85.43190 | 1292.24114  | -769.86283  | -2760.09977 | 1 |
| 31342 | C | 65.84000 | 65.91780 | 84.21390 | 866.54356   | 285.91912   | -36.82296   | 1 |
| 31343 | H | 65.86700 | 66.56680 | 83.31290 | 2133.65322  | -2052.04823 | -1024.07491 | 1 |
| 31344 | H | 64.97100 | 65.22780 | 84.18490 | 2226.75670  | -807.22742  | -2060.41636 | 1 |
| 31345 | H | 65.68500 | 66.60280 | 85.07490 | -1730.81883 | -1786.23667 | -1915.17407 | 1 |
| 31346 | C | 69.78900 | 67.93480 | 83.58990 | -670.29428  | 606.73022   | -198.57677  | 1 |
| 31347 | O | 69.52000 | 69.15080 | 83.59590 | -330.35070  | -484.44824  | 511.96013   | 1 |
| 31348 | N | 71.02500 | 67.45980 | 83.92190 | -672.07486  | 467.28127   | -253.14828  | 1 |
| 31349 | H | 71.29900 | 66.50280 | 83.86090 | 1262.67184  | 2420.98017  | 1577.21136  | 1 |
| 31350 | C | 72.04000 | 68.25880 | 84.44690 | 12.43229    | 436.79660   | 802.22291   | 1 |
| 31351 | H | 71.72900 | 68.65180 | 85.40390 | -1704.57396 | 703.69995   | 2548.85363  | 1 |
| 31352 | C | 73.35000 | 67.44380 | 84.73490 | -747.73798  | -353.11062  | 370.24127   | 1 |
| 31353 | H | 74.10400 | 68.14980 | 85.14490 | 2986.32226  | -683.18089  | -699.23303  | 1 |
| 31354 | H | 73.20500 | 66.70780 | 85.55390 | -706.77341  | -2766.60467 | 1285.57814  | 1 |
| 31355 | H | 73.77200 | 66.98480 | 83.81490 | 2024.47140  | -2202.73769 | 925.57183   | 1 |
| 31356 | C | 72.37500 | 69.33780 | 83.44090 | -765.66384  | -320.73747  | -377.15137  | 1 |
| 31357 | O | 72.35400 | 70.52480 | 83.71590 | 532.53290   | 482.23522   | 338.36670   | 1 |
| 31358 | N | 72.52600 | 68.93380 | 82.15690 | 563.58768   | -239.07913  | 564.69716   | 1 |
| 31359 | H | 72.48400 | 67.96680 | 81.91890 | -315.95855  | 2492.69341  | -1919.41216 | 1 |
| 31360 | C | 72.88600 | 69.73780 | 81.06290 | 277.12442   | 543.30803   | -693.69608  | 1 |
| 31361 | H | 73.82700 | 70.20980 | 81.30690 | -2880.59642 | 114.57366   | -1277.81272 | 1 |

|       |   |          |          |          |             |             |             |   |
|-------|---|----------|----------|----------|-------------|-------------|-------------|---|
| 31362 | C | 73.15900 | 68.74380 | 79.88290 | 32.83451    | 918.25919   | -120.50754  | 1 |
| 31363 | H | 72.24600 | 68.13780 | 79.70290 | 1997.62239  | -771.53614  | -2300.52515 | 1 |
| 31364 | H | 74.00200 | 68.08380 | 80.18090 | -1463.26959 | 2603.11290  | -1042.05540 | 1 |
| 31365 | C | 73.42400 | 69.35880 | 78.57890 | 801.24182   | -407.45830  | -41.64441   | 1 |
| 31366 | C | 74.73300 | 69.62180 | 78.20490 | -893.76734  | -158.74988  | 113.04118   | 1 |
| 31367 | H | 75.61300 | 69.41980 | 78.79790 | 508.12037   | -2644.52821 | 1594.56967  | 1 |
| 31368 | C | 74.94800 | 70.16980 | 76.88990 | 499.63427   | -134.24659  | 735.65698   | 1 |
| 31369 | H | 75.94500 | 70.40780 | 76.54990 | -2064.62344 | -749.49095  | -2263.14144 | 1 |
| 31370 | C | 73.86900 | 70.43680 | 76.05490 | -122.77894  | -889.51032  | -45.25455   | 1 |
| 31371 | H | 74.11800 | 70.79380 | 75.06590 | -818.27239  | 2974.54039  | -698.61427  | 1 |
| 31372 | C | 72.34100 | 69.62080 | 77.69590 | -644.31167  | 12.26689    | -658.08431  | 1 |
| 31373 | H | 71.31700 | 69.47980 | 78.01090 | -920.47589  | 1701.27694  | 2488.71758  | 1 |
| 31374 | C | 72.56000 | 70.16080 | 76.43590 | -555.43417  | -645.96479  | -313.91624  | 1 |
| 31375 | H | 71.70500 | 70.39580 | 75.81990 | -2806.04596 | 438.92204   | 1368.67329  | 1 |
| 31376 | C | 71.85900 | 70.76280 | 80.73490 | 357.47623   | -591.49051  | -582.55264  | 1 |
| 31377 | O | 72.02600 | 71.98080 | 80.52490 | 247.04441   | 306.66018   | 683.73221   | 1 |
| 31378 | N | 70.56600 | 70.38080 | 80.67190 | -579.58300  | 555.09696   | -306.25047  | 1 |
| 31379 | H | 70.32800 | 69.41380 | 80.71090 | 1724.56623  | 2064.28517  | -1650.72139 | 1 |
| 31380 | C | 69.44000 | 71.27380 | 80.50690 | -835.47490  | 363.24477   | -145.73606  | 1 |
| 31381 | H | 69.51600 | 71.89380 | 79.62590 | -667.81711  | -2403.13040 | -1903.30049 | 1 |
| 31382 | C | 68.15900 | 70.43480 | 80.33790 | 502.38067   | -163.76607  | 732.76827   | 1 |
| 31383 | H | 67.91400 | 69.83780 | 81.24290 | -1466.97467 | 1442.45039  | 2389.77435  | 1 |
| 31384 | H | 68.37400 | 69.74180 | 79.49790 | 1816.99145  | 2245.60061  | -1270.89991 | 1 |
| 31385 | C | 66.92100 | 71.17580 | 80.05790 | -388.30195  | -211.04770  | -797.61654  | 1 |
| 31386 | C | 66.57200 | 71.44880 | 78.74590 | -800.97779  | 459.52047   | -55.84648   | 1 |
| 31387 | H | 67.31800 | 71.24980 | 77.98990 | 976.21728   | 1501.73331  | 2591.24119  | 1 |
| 31388 | C | 65.36200 | 72.05980 | 78.40290 | -430.08116  | 577.60408   | -582.32322  | 1 |
| 31389 | H | 65.06300 | 72.19480 | 77.37390 | 2875.39118  | 195.48732   | 1249.35418  | 1 |
| 31390 | C | 64.52500 | 72.43380 | 79.47390 | 282.46755   | -504.53673  | 689.22144   | 1 |
| 31391 | H | 63.62600 | 73.01480 | 79.32790 | -1616.90722 | 2089.60760  | 1734.11455  | 1 |
| 31392 | C | 66.02700 | 71.52980 | 81.08290 | -420.82839  | -430.47024  | 674.34376   | 1 |
| 31393 | H | 66.30100 | 71.35380 | 82.11290 | -3038.49173 | -800.74578  | -132.08106  | 1 |
| 31394 | C | 64.89600 | 72.27080 | 80.79890 | 302.99812   | 579.14794   | -650.73816  | 1 |
| 31395 | H | 64.14400 | 72.56780 | 81.51590 | 2264.12189  | -325.04421  | -2154.56069 | 1 |
| 31396 | C | 69.33500 | 72.26180 | 81.71990 | 784.36846   | -86.35741   | -452.03588  | 1 |
| 31397 | O | 69.08000 | 73.41680 | 81.52690 | -375.40931  | 710.57247   | 44.89953    | 1 |
| 31398 | N | 69.63000 | 71.85980 | 82.96790 | 430.51046   | -309.71384  | 643.31998   | 1 |
| 31399 | H | 69.70200 | 70.91080 | 83.26390 | -1653.43755 | -2656.48475 | -185.58233  | 1 |
| 31400 | C | 69.74000 | 72.75980 | 84.02890 | -877.00498  | -101.46859  | -230.38724  | 1 |
| 31401 | H | 68.80600 | 73.27580 | 84.19490 | 2216.93574  | -1048.37009 | 1957.40170  | 1 |
| 31402 | C | 69.97200 | 71.99480 | 85.34890 | -256.68655  | 537.20000   | 698.34506   | 1 |
| 31403 | H | 69.16700 | 71.24180 | 85.48590 | 1965.99118  | 1806.79777  | -1683.51843 | 1 |
| 31404 | H | 70.95100 | 71.47480 | 85.41890 | -259.22305  | -3117.30883 | -145.02417  | 1 |
| 31405 | H | 69.93600 | 72.73580 | 86.17590 | -1650.29581 | 1803.93136  | 1989.73347  | 1 |
| 31406 | C | 70.81600 | 73.85580 | 83.78590 | 298.76513   | 629.84865   | 598.18438   | 1 |
| 31407 | O | 70.62400 | 75.02280 | 84.15090 | -635.58151  | -316.69472  | -336.46006  | 1 |
| 31408 | N | 71.92800 | 73.46580 | 83.15890 | 218.04791   | 703.11088   | -442.17699  | 1 |
| 31409 | H | 71.88900 | 72.59580 | 82.67490 | -2321.00498 | -1305.31715 | -1672.86931 | 1 |
| 31410 | C | 73.00100 | 74.43080 | 82.80690 | -57.87176   | 520.25350   | -762.85840  | 1 |
| 31411 | H | 73.28100 | 74.87180 | 83.75190 | 559.57370   | -245.86955  | 3078.40568  | 1 |
| 31412 | C | 74.19600 | 73.61780 | 82.23390 | -180.62038  | -412.71455  | -793.04761  | 1 |
| 31413 | H | 74.96200 | 74.36980 | 81.94790 | -92.60874   | 2314.60638  | -2151.29943 | 1 |
| 31414 | H | 73.88900 | 73.19180 | 81.25490 | -2499.72676 | 295.77553   | -1900.56076 | 1 |
| 31415 | S | 74.87400 | 72.35080 | 83.38990 | -393.14838  | 317.72489   | -264.02820  | 1 |
| 31416 | H | 73.67600 | 71.91480 | 83.75190 | 2083.06396  | -1789.53470 | 1509.03166  | 1 |
| 31417 | C | 72.62400 | 75.52980 | 81.86190 | -617.84828  | 173.24234   | 647.19353   | 1 |
| 31418 | O | 72.81800 | 76.70480 | 82.13490 | 781.56233   | -89.85070   | 6.95825     | 1 |
| 31419 | N | 71.91800 | 75.07780 | 80.72890 | -225.81996  | -514.55267  | -624.13715  | 1 |
| 31420 | H | 71.92300 | 74.09580 | 80.55290 | -2081.92484 | -2329.56053 | -289.94296  | 1 |
| 31421 | C | 71.54200 | 75.91280 | 79.63390 | 157.63009   | 299.97890   | -856.44699  | 1 |
| 31422 | H | 72.31800 | 76.64380 | 79.46390 | 684.95589   | 2652.23441  | 1565.41695  | 1 |
| 31423 | C | 71.62200 | 74.98880 | 78.37290 | -19.16385   | -529.40110  | -736.68663  | 1 |

|       |   |          |          |          |             |             |             |   |
|-------|---|----------|----------|----------|-------------|-------------|-------------|---|
| 31424 | H | 71.04500 | 75.42080 | 77.52690 | 542.31705   | 807.83626   | 2990.15788  | 1 |
| 31425 | H | 71.17500 | 73.99780 | 78.60090 | 1743.14932  | -1652.35186 | -2020.80999 | 1 |
| 31426 | C | 73.02200 | 74.78780 | 77.81290 | 62.58778    | 615.10980   | 676.46516   | 1 |
| 31427 | C | 73.70700 | 73.56580 | 77.87990 | 102.95425   | 676.54772   | -624.14077  | 1 |
| 31428 | H | 73.23900 | 72.61380 | 78.08190 | 2247.06995  | 613.44003   | 2106.65650  | 1 |
| 31429 | N | 74.94100 | 73.72080 | 77.23790 | 658.84956   | -421.62577  | -293.43646  | 1 |
| 31430 | H | 75.57100 | 73.04880 | 76.91690 | -2964.86390 | -141.12964  | -1066.19624 | 1 |
| 31431 | C | 75.03800 | 74.99780 | 76.86390 | 313.02434   | -434.81760  | 719.63690   | 1 |
| 31432 | C | 73.88500 | 75.72880 | 77.20590 | 96.54637    | -651.89619  | -621.29519  | 1 |
| 31433 | C | 73.84600 | 77.15180 | 77.05090 | 597.78559   | -444.76835  | 501.44887   | 1 |
| 31434 | H | 72.96800 | 77.73480 | 77.28890 | -106.15578  | 3153.18740  | 185.43200   | 1 |
| 31435 | C | 74.99200 | 77.74080 | 76.45190 | -389.32920  | -643.44825  | -508.91990  | 1 |
| 31436 | H | 74.97600 | 78.77380 | 76.13690 | 2073.48938  | 2376.23190  | -16.63443   | 1 |
| 31437 | C | 76.13500 | 75.64780 | 76.26290 | 268.53610   | 378.30524   | -797.76300  | 1 |
| 31438 | H | 77.00800 | 75.08280 | 75.96990 | -1850.26531 | -2067.97765 | -1480.68584 | 1 |
| 31439 | C | 76.07400 | 77.02980 | 76.04390 | 260.67958   | 727.98424   | 491.87405   | 1 |
| 31440 | H | 76.95300 | 77.55880 | 75.70590 | -2232.72839 | 1253.98075  | -1851.49928 | 1 |
| 31441 | C | 70.21200 | 76.64580 | 79.76090 | -793.79920  | 362.07573   | 288.10053   | 1 |
| 31442 | O | 70.11700 | 77.79280 | 79.22390 | -400.33409  | -234.68761  | 630.33244   | 1 |
| 31443 | N | 69.22300 | 76.15280 | 80.47990 | -741.24064  | 408.51973   | 109.03059   | 1 |
| 31444 | H | 69.32500 | 75.27080 | 80.93290 | -2385.54794 | 1979.04484  | 600.54779   | 1 |
| 31445 | C | 67.91700 | 76.79680 | 80.50690 | -231.13086  | -596.11514  | 632.51680   | 1 |
| 31446 | H | 67.50100 | 76.72480 | 79.51290 | -2655.31807 | 603.14613   | 1584.40399  | 1 |
| 31447 | C | 67.04200 | 75.89380 | 81.32190 | 251.15121   | -851.57276  | -117.57591  | 1 |
| 31448 | H | 67.50300 | 75.63980 | 82.29990 | 1793.07574  | -2427.22213 | -842.71781  | 1 |
| 31449 | H | 67.00500 | 74.91080 | 80.80590 | 2389.90531  | 1507.23530  | 1394.91777  | 1 |
| 31450 | C | 65.64000 | 76.49380 | 81.61290 | -713.56904  | -478.64209  | 278.67245   | 1 |
| 31451 | H | 65.63400 | 77.50380 | 82.07590 | -2855.88053 | -375.62249  | 1260.57118  | 1 |
| 31452 | C | 64.73900 | 76.55180 | 80.32490 | -188.03501  | -374.37223  | 801.20039   | 1 |
| 31453 | H | 64.91700 | 75.65380 | 79.69490 | 2028.43009  | -614.25876  | 2316.71116  | 1 |
| 31454 | H | 63.67100 | 76.57880 | 80.62790 | -3053.05262 | -742.70670  | -106.29386  | 1 |
| 31455 | H | 64.89500 | 77.50380 | 79.77390 | 1266.09974  | 2163.19243  | 1919.10210  | 1 |
| 31456 | C | 64.90600 | 75.60280 | 82.61490 | 216.67778   | 499.21087   | -743.93632  | 1 |
| 31457 | H | 65.60700 | 75.23780 | 83.39590 | -1777.79673 | 1915.29319  | 1770.16835  | 1 |
| 31458 | H | 64.05500 | 76.15680 | 83.06690 | 1741.64802  | -1235.95433 | -2300.37142 | 1 |
| 31459 | H | 64.60100 | 74.61180 | 82.21590 | 1327.16901  | -1905.20148 | 2104.93001  | 1 |
| 31460 | C | 67.88300 | 78.25880 | 80.97990 | -723.03635  | -403.94230  | -368.47583  | 1 |
| 31461 | O | 67.19700 | 79.02380 | 80.29190 | 490.49678   | 489.81545   | 395.05214   | 1 |
| 31462 | N | 68.52100 | 78.78280 | 82.02490 | -51.00370   | 850.01217   | -125.09241  | 1 |
| 31463 | C | 69.31500 | 77.97980 | 82.97190 | -774.98949  | 303.99729   | 380.77407   | 1 |
| 31464 | H | 68.96900 | 76.92580 | 83.03290 | -430.94449  | 2339.22249  | -2080.93609 | 1 |
| 31465 | H | 70.36000 | 78.03480 | 82.59890 | -123.97192  | -1695.74135 | 2632.73939  | 1 |
| 31466 | C | 68.47200 | 80.19080 | 82.39590 | 124.12718   | -830.68618  | -317.69041  | 1 |
| 31467 | H | 67.44000 | 80.42380 | 82.61490 | -717.34741  | -2300.81640 | -2005.48565 | 1 |
| 31468 | C | 69.25900 | 80.17180 | 83.75390 | -398.81389  | 606.00355   | -572.00732  | 1 |
| 31469 | H | 68.88300 | 80.87580 | 84.52690 | 2878.28708  | 1229.05862  | 389.68089   | 1 |
| 31470 | H | 70.32300 | 80.40280 | 83.53390 | 1019.51249  | 2847.17474  | -922.30550  | 1 |
| 31471 | C | 69.11600 | 78.74880 | 84.28590 | 827.29239   | 216.53143   | 326.01775   | 1 |
| 31472 | H | 69.94800 | 78.54280 | 84.99390 | 2721.75151  | 1591.02068  | -132.11337  | 1 |
| 31473 | H | 68.10900 | 78.61380 | 84.73490 | 1976.91370  | -1664.03139 | 1778.07679  | 1 |
| 31474 | C | 69.05500 | 81.12380 | 81.23090 | 627.35823   | 137.76917   | 647.00122   | 1 |
| 31475 | O | 68.57200 | 82.24780 | 81.04590 | 358.60191   | 685.68790   | 213.93279   | 1 |
| 31476 | N | 70.09900 | 80.67380 | 80.54090 | -758.54922  | -222.16292  | 281.43613   | 1 |
| 31477 | H | 70.39500 | 79.77580 | 80.85690 | 1830.71236  | -1962.83504 | -1626.27660 | 1 |
| 31478 | C | 70.60700 | 81.42980 | 79.40390 | -216.14869  | 892.11939   | 124.28559   | 1 |
| 31479 | H | 70.77000 | 82.44380 | 79.73990 | -1947.02819 | -2346.87360 | 722.46979   | 1 |
| 31480 | C | 71.94100 | 80.76680 | 78.92290 | 437.53371   | -724.08528  | -309.56210  | 1 |
| 31481 | H | 71.86800 | 79.65880 | 78.87490 | 1431.06348  | 880.47266   | -2669.08597 | 1 |
| 31482 | H | 72.71000 | 80.96280 | 79.70090 | 2496.92114  | -1113.73247 | 1538.61149  | 1 |
| 31483 | C | 72.44600 | 81.21980 | 77.54890 | 549.14423   | 378.40562   | -634.30371  | 1 |
| 31484 | C | 73.03200 | 82.49780 | 77.40790 | 124.14458   | 901.52227   | -175.76119  | 1 |
| 31485 | H | 73.19700 | 83.12680 | 78.26990 | 2996.71480  | -915.48562  | -222.52130  | 1 |



|       |   |          |          |          |             |             |             |   |
|-------|---|----------|----------|----------|-------------|-------------|-------------|---|
| 31486 | C | 73.38000 | 82.91680 | 76.12890 | -271.18549  | 701.42316   | 529.72930   | 1 |
| 31487 | H | 73.80300 | 83.90780 | 76.04790 | 284.63446   | 3059.16730  | 731.31612   | 1 |
| 31488 | C | 73.21100 | 82.08580 | 74.99290 | -488.08263  | -734.75426  | 181.82229   | 1 |
| 31489 | O | 73.66500 | 82.54480 | 73.75290 | 654.25750   | -299.98294  | -308.36401  | 1 |
| 31490 | H | 74.19700 | 83.33680 | 73.85990 | -745.10778  | 2296.60879  | 2027.70026  | 1 |
| 31491 | C | 72.14500 | 80.45680 | 76.39290 | -383.77614  | -813.73955  | -15.09869   | 1 |
| 31492 | H | 71.53000 | 79.57280 | 76.46990 | -241.12036  | -3097.26757 | -398.45299  | 1 |
| 31493 | C | 72.59800 | 80.86680 | 75.14790 | 356.78016   | -768.32861  | -302.52187  | 1 |
| 31494 | H | 72.46700 | 80.20280 | 74.30690 | 2564.69602  | -1617.25684 | -800.64563  | 1 |
| 31495 | C | 69.60500 | 81.53480 | 78.26890 | -280.25997  | -719.02867  | 458.51051   | 1 |
| 31496 | O | 69.34000 | 82.63880 | 77.79490 | 696.42522   | -320.44226  | 148.77178   | 1 |
| 31497 | N | 68.89900 | 80.39980 | 77.87590 | 715.42311   | 457.95506   | 43.41310    | 1 |
| 31498 | H | 69.15900 | 79.51980 | 78.26490 | -1645.16304 | -1998.49012 | -1776.06391 | 1 |
| 31499 | C | 67.79400 | 80.35980 | 76.99690 | 791.33307   | -82.05283   | -439.38412  | 1 |
| 31500 | H | 68.02800 | 80.90180 | 76.09190 | -813.16134  | -1663.76118 | -2536.38936 | 1 |
| 31501 | C | 67.37900 | 78.88380 | 76.66290 | 780.46474   | 168.88061   | -441.99988  | 1 |
| 31502 | H | 67.35800 | 78.20080 | 77.53890 | 2469.71493  | 1484.61943  | 1272.97895  | 1 |
| 31503 | H | 66.31400 | 78.74980 | 76.37590 | 1801.83009  | -957.56360  | -2386.42008 | 1 |
| 31504 | C | 68.31100 | 78.32080 | 75.65290 | -703.33047  | 516.66188   | -308.45368  | 1 |
| 31505 | C | 68.11000 | 78.68280 | 74.28590 | 535.18122   | 557.29054   | -499.72951  | 1 |
| 31506 | H | 67.23800 | 79.29980 | 74.12290 | 1010.96966  | 2099.20255  | 2125.93660  | 1 |
| 31507 | C | 68.99100 | 78.15880 | 73.25190 | 205.61353   | -673.85665  | 553.40970   | 1 |
| 31508 | H | 68.92600 | 78.57780 | 72.25790 | -1778.45392 | -156.57054  | 2590.69908  | 1 |
| 31509 | C | 69.92600 | 77.15880 | 73.58790 | -494.68005  | 127.30862   | 757.89504   | 1 |
| 31510 | O | 70.77300 | 76.70680 | 72.57590 | 617.45862   | 271.70118   | -414.11308  | 1 |
| 31511 | H | 70.57700 | 77.24380 | 71.80390 | -2377.46271 | -1718.74210 | 1124.19934  | 1 |
| 31512 | C | 69.24800 | 77.30080 | 75.92290 | 394.97580   | -430.87512  | 683.06177   | 1 |
| 31513 | H | 69.32500 | 76.81380 | 76.88390 | 2434.15303  | 2000.79207  | -112.32641  | 1 |
| 31514 | C | 70.03300 | 76.73280 | 74.90990 | 269.00673   | 497.58553   | -728.01785  | 1 |
| 31515 | H | 70.81500 | 76.02580 | 75.14390 | 1692.21359  | 2152.35017  | 1559.82241  | 1 |
| 31516 | C | 66.60900 | 81.16880 | 77.39390 | -506.02908  | 552.16197   | 538.09591   | 1 |
| 31517 | O | 66.03000 | 81.91280 | 76.59390 | -558.37943  | -13.68226   | -561.68809  | 1 |
| 31518 | N | 66.26200 | 81.14380 | 78.69490 | -425.49705  | 477.98080   | -567.92652  | 1 |
| 31519 | H | 66.72900 | 80.59280 | 79.38290 | 230.20985   | -403.19818  | -3111.32313 | 1 |
| 31520 | C | 65.22400 | 82.07880 | 79.20490 | 672.13341   | -596.48050  | -38.30277   | 1 |
| 31521 | H | 64.38800 | 81.88480 | 78.54990 | -2064.80697 | -1499.25703 | -1827.54522 | 1 |
| 31522 | C | 64.68300 | 81.72780 | 80.60790 | -832.24211  | -26.10682   | -370.78028  | 1 |
| 31523 | H | 65.60700 | 81.77480 | 81.22190 | -1924.78910 | 1295.93246  | 2133.62466  | 1 |
| 31524 | C | 63.60600 | 82.80080 | 81.01090 | 505.97853   | -379.22181  | 646.76423   | 1 |
| 31525 | H | 62.70300 | 82.86080 | 80.36690 | -2006.84411 | 1146.51157  | 2144.99676  | 1 |
| 31526 | H | 63.25600 | 82.57980 | 82.04190 | -2205.28657 | -808.93042  | 2084.91315  | 1 |
| 31527 | H | 64.00900 | 83.83280 | 81.09290 | -2809.39016 | -717.57938  | -1207.67864 | 1 |
| 31528 | C | 64.11400 | 80.29080 | 80.63890 | 611.92131   | -575.54380  | 322.05916   | 1 |
| 31529 | H | 63.25500 | 80.13980 | 79.95190 | 2848.42307  | 614.97284   | -1192.24904 | 1 |
| 31530 | H | 64.84000 | 79.61680 | 80.13490 | -1851.03172 | -2525.49661 | -92.79165   | 1 |
| 31531 | C | 63.65900 | 79.83980 | 81.99690 | 532.39334   | 467.27198   | -588.51413  | 1 |
| 31532 | H | 64.50200 | 79.89380 | 82.71890 | 2477.45324  | -638.92472  | -1825.89696 | 1 |
| 31533 | H | 63.43900 | 78.75180 | 81.95090 | 2383.03292  | -165.25254  | 2045.56481  | 1 |
| 31534 | H | 62.80200 | 80.44580 | 82.35890 | -733.46924  | 2945.38466  | 890.98692   | 1 |
| 31535 | C | 65.58000 | 83.61280 | 79.03390 | -662.79844  | -172.43368  | 596.00965   | 1 |
| 31536 | O | 64.77400 | 84.26080 | 78.37690 | -449.09827  | -82.16803   | 641.63233   | 1 |
| 31537 | N | 66.82900 | 84.06580 | 79.36490 | -665.10694  | 239.64552   | -471.68300  | 1 |
| 31538 | H | 67.45400 | 83.43180 | 79.81190 | -2950.45726 | -158.64659  | 1075.51871  | 1 |
| 31539 | C | 67.35028 | 85.39288 | 78.99975 | 259.20971   | -642.76209  | -282.71824  | 1 |
| 31540 | H | 66.77772 | 86.09561 | 79.60210 | -1145.66105 | -2906.75558 | 430.55774   | 1 |
| 31541 | H | 68.32927 | 85.16951 | 79.41645 | -4440.90256 | 1430.59232  | 17.61092    | 1 |
| 31542 | C | 67.17880 | 85.63700 | 77.39992 | -559.77246  | -75.08083   | 611.46897   | 1 |
| 31543 | O | 66.42490 | 86.55492 | 77.03091 | -13.08464   | -528.00028  | 15.41130    | 1 |
| 31544 | N | 67.89100 | 84.89680 | 76.61290 | 355.29207   | -646.66215  | 378.79087   | 1 |
| 31545 | H | 68.32900 | 84.14080 | 77.09390 | 886.72332   | 2678.80411  | 1418.76538  | 1 |
| 31546 | C | 67.85906 | 85.11249 | 75.16956 | -563.73661  | -459.73046  | -35.26336   | 1 |
| 31547 | H | 68.33463 | 86.09061 | 75.01846 | 2896.54751  | 771.48897   | -294.96595  | 1 |

|       |   |          |          |          |             |             |             |   |
|-------|---|----------|----------|----------|-------------|-------------|-------------|---|
| 31548 | C | 68.53600 | 83.92580 | 74.53290 | -680.10604  | -528.86219  | -278.59119  | 1 |
| 31549 | H | 68.10500 | 82.98380 | 74.93690 | -1569.82377 | 1834.36220  | -2037.51178 | 1 |
| 31550 | C | 68.34900 | 83.93880 | 73.05490 | -864.01320  | 304.02665   | 94.52486    | 1 |
| 31551 | H | 67.38300 | 83.53880 | 72.67890 | 554.86548   | -3017.46245 | 612.11592   | 1 |
| 31552 | H | 68.68700 | 84.91880 | 72.65490 | -2383.28337 | 1931.22675  | 752.53396   | 1 |
| 31553 | H | 69.02400 | 83.17980 | 72.60690 | 2568.34315  | -607.25331  | -1702.94691 | 1 |
| 31554 | C | 70.05800 | 83.94780 | 74.75490 | -862.52604  | 31.12835    | 300.11181   | 1 |
| 31555 | H | 70.56200 | 83.01280 | 74.42890 | -560.71396  | 2807.08195  | 1335.57787  | 1 |
| 31556 | H | 70.17300 | 83.76380 | 75.84390 | 1855.98036  | 1329.09483  | -2176.63031 | 1 |
| 31557 | C | 70.86484 | 85.26118 | 74.39269 | 72.40894    | 503.49921   | 299.52093   | 1 |
| 31558 | H | 71.89487 | 85.30510 | 74.82148 | -3303.78711 | -608.71499  | -3240.51170 | 1 |
| 31559 | H | 71.03246 | 85.39880 | 73.28193 | 1811.51702  | -859.75277  | 3074.98940  | 1 |
| 31560 | H | 70.31850 | 86.20381 | 74.65225 | 34.79385    | -57.99502   | 1007.48822  | 1 |
| 31561 | C | 66.28702 | 85.17255 | 74.58047 | 126.40894   | 1044.49645  | -390.12336  | 1 |
| 31562 | O | 66.14558 | 85.83309 | 73.56797 | 165.07395   | -101.90621  | -9.64118    | 1 |
| 31563 | N | 65.47600 | 84.30180 | 75.09290 | -417.80420  | 452.90614   | -593.40036  | 1 |
| 31564 | H | 65.70400 | 83.60980 | 75.77290 | -79.53137   | -2414.24015 | 1993.47948  | 1 |
| 31565 | C | 64.05600 | 84.33580 | 74.67990 | -313.54905  | 240.74974   | -828.01889  | 1 |
| 31566 | H | 64.10600 | 84.16680 | 73.61490 | -2583.92182 | -1195.73997 | -1329.41192 | 1 |
| 31567 | C | 63.18100 | 83.19080 | 75.19690 | 301.66284   | -464.32204  | 711.36455   | 1 |
| 31568 | H | 62.22600 | 83.07180 | 74.64190 | 2743.92000  | 673.15508   | 1387.46085  | 1 |
| 31569 | H | 63.77500 | 82.27180 | 75.00590 | 520.71776   | -1964.05298 | -2386.06880 | 1 |
| 31570 | O | 62.80900 | 83.14980 | 76.55590 | 287.05027   | 178.05286   | 718.03026   | 1 |
| 31571 | H | 63.47300 | 83.61580 | 77.06990 | 2994.07496  | 50.58203    | -960.33486  | 1 |
| 31572 | C | 63.31365 | 85.70988 | 75.19063 | 636.41923   | 225.63096   | -712.60210  | 1 |
| 31573 | O | 62.32744 | 86.05758 | 74.58666 | 520.22286   | 170.11512   | 554.08920   | 1 |
| 31574 | N | 63.75120 | 86.06094 | 76.37257 | -331.25846  | 669.18827   | 1040.01239  | 1 |
| 31575 | H | 64.55552 | 85.70538 | 76.92189 | -1154.00041 | -2200.40268 | 1245.14875  | 1 |
| 31576 | C | 63.38499 | 87.40821 | 76.78136 | -278.36167  | -23.91564   | 136.51349   | 1 |
| 31577 | H | 62.25573 | 87.35633 | 76.62901 | 996.56771   | -256.30247  | 1729.12423  | 1 |
| 31578 | C | 63.92628 | 87.86305 | 78.18424 | 304.66963   | -78.17432   | -423.04538  | 1 |
| 31579 | H | 64.80036 | 87.29168 | 78.48415 | 3066.99945  | -1191.81624 | 2321.62682  | 1 |
| 31580 | C | 64.11317 | 89.39956 | 78.42001 | -12.47377   | 884.65162   | 497.66199   | 1 |
| 31581 | H | 64.49017 | 89.53435 | 79.46032 | -101.88112  | -1926.81792 | 886.87980   | 1 |
| 31582 | H | 63.18934 | 90.01294 | 78.35143 | 3259.19906  | 2132.14930  | 1232.76810  | 1 |
| 31583 | H | 64.88240 | 89.82599 | 77.72918 | 1457.52903  | 1349.79803  | -666.15191  | 1 |
| 31584 | C | 62.75039 | 87.52143 | 79.24090 | 74.03162    | 60.41693    | -805.83190  | 1 |
| 31585 | H | 61.87676 | 88.12716 | 79.00066 | 2167.20043  | -974.60335  | 337.13197   | 1 |
| 31586 | H | 63.17596 | 87.79666 | 80.23874 | -1180.49980 | -165.25884  | 2015.24196  | 1 |
| 31587 | C | 62.44673 | 85.99018 | 79.14696 | -144.68837  | -798.79927  | 345.02784   | 1 |
| 31588 | H | 62.85170 | 85.55041 | 78.20294 | 2366.99118  | 3.26062     | -1229.27061 | 1 |
| 31589 | H | 62.84107 | 85.45865 | 80.02264 | 1168.00212  | -2540.41097 | 4774.61604  | 1 |
| 31590 | H | 61.35255 | 85.85505 | 78.92380 | 137.72247   | -338.86348  | 249.93499   | 1 |
| 31591 | C | 63.91985 | 88.45525 | 75.66477 | 422.03400   | -417.95057  | 464.63180   | 1 |
| 31592 | O | 63.25585 | 89.43078 | 75.41870 | 270.24386   | 1354.53565  | -803.73223  | 1 |
| 31593 | N | 65.18352 | 88.19035 | 75.34546 | 383.36850   | -533.35927  | -242.76121  | 1 |
| 31594 | H | 65.69234 | 87.32942 | 75.73968 | -1534.44320 | -846.14643  | -1224.64053 | 1 |
| 31595 | C | 65.90496 | 89.02341 | 74.41060 | 193.31727   | -874.99058  | -438.54441  | 1 |
| 31596 | H | 65.79992 | 90.08294 | 74.68576 | -3290.57352 | -1816.96472 | 1402.08841  | 1 |
| 31597 | C | 67.36743 | 88.55004 | 74.57693 | 677.56103   | 886.80517   | 369.63244   | 1 |
| 31598 | H | 67.60727 | 87.57846 | 74.02054 | 2144.75953  | -1890.60809 | 527.69188   | 1 |
| 31599 | H | 67.49592 | 88.35087 | 75.67447 | -390.87266  | -4108.00079 | -3098.87739 | 1 |
| 31600 | C | 68.56509 | 89.60491 | 74.19674 | 1123.55094  | -436.48860  | -79.77485   | 1 |
| 31601 | O | 69.00614 | 90.34926 | 75.13138 | -272.89366  | -432.82910  | -528.90535  | 1 |
| 31602 | O | 69.08956 | 89.57797 | 73.05589 | -393.15353  | -516.17632  | 729.40503   | 1 |
| 31603 | C | 65.42558 | 88.90846 | 72.87046 | -90.17122   | -1260.60797 | -21.98268   | 1 |
| 31604 | O | 65.70062 | 89.79728 | 72.04464 | -725.71047  | 47.23064    | 64.42990    | 1 |
| 31605 | N | 64.85673 | 87.75816 | 72.56593 | 303.06223   | -1125.78335 | -306.46914  | 1 |
| 31606 | H | 64.79768 | 86.97118 | 73.22603 | 1669.96395  | -2275.21755 | -24.27306   | 1 |
| 31607 | C | 64.23810 | 87.76581 | 71.30825 | -15.33425   | -384.13754  | 493.62324   | 1 |
| 31608 | H | 64.74802 | 88.54828 | 70.70285 | 2512.97515  | 1619.59956  | -2305.62682 | 1 |
| 31609 | C | 64.45328 | 86.30629 | 70.71298 | -217.30989  | -284.32519  | -499.16699  | 1 |

|       |   |          |          |          |             |             |             |   |
|-------|---|----------|----------|----------|-------------|-------------|-------------|---|
| 31610 | H | 64.16654 | 85.53689 | 71.48312 | 108.98209   | 380.21548   | 482.28804   | 1 |
| 31611 | H | 63.80393 | 86.11353 | 69.80306 | -1885.02464 | 520.35203   | 2704.24978  | 1 |
| 31612 | O | 65.92711 | 85.86875 | 70.64688 | -203.16297  | -980.59448  | -107.43401  | 1 |
| 31613 | H | 66.13658 | 86.04259 | 71.59922 | -3394.35511 | -1063.90782 | 479.71471   | 1 |
| 31614 | C | 62.65047 | 88.14880 | 71.32520 | 215.57942   | 1020.27344  | -477.41140  | 1 |
| 31615 | O | 62.08148 | 88.53732 | 70.32745 | 49.08693    | 313.88435   | 9.01721     | 1 |
| 31616 | N | 62.12919 | 88.09645 | 72.53803 | 595.25938   | 55.33551    | -197.30929  | 1 |
| 31617 | H | 62.70860 | 87.66916 | 73.29659 | -79.53403   | -2137.63292 | 247.67776   | 1 |
| 31618 | C | 60.99300 | 88.97827 | 72.80795 | -858.42677  | -433.51551  | -12.48697   | 1 |
| 31619 | H | 60.56228 | 88.61775 | 71.78299 | -37.37306   | -4251.48901 | 166.00852   | 1 |
| 31620 | C | 60.07945 | 88.52991 | 73.99627 | 637.43992   | 913.07155   | 344.46439   | 1 |
| 31621 | H | 59.08867 | 89.00618 | 73.81295 | 3515.88102  | -616.83262  | -1307.13838 | 1 |
| 31622 | H | 60.40331 | 88.97578 | 75.00209 | -2769.44495 | 448.89870   | -2929.35048 | 1 |
| 31623 | C | 59.80520 | 87.02140 | 74.04454 | 591.10317   | 489.54993   | 594.88080   | 1 |
| 31624 | C | 59.53191 | 86.24798 | 72.93565 | -806.27782  | 478.58030   | -1250.79810 | 1 |
| 31625 | H | 59.54106 | 86.70471 | 71.91584 | -1169.23165 | 2357.37624  | -1360.25097 | 1 |
| 31626 | C | 59.30100 | 84.85880 | 73.12290 | 21.54127    | -598.25087  | 672.62821   | 1 |
| 31627 | H | 59.12100 | 84.20580 | 72.28090 | 1149.65641  | 2444.99098  | 1642.34120  | 1 |
| 31628 | C | 59.18800 | 84.30980 | 74.35190 | 547.62902   | -513.43839  | 496.35454   | 1 |
| 31629 | H | 59.20900 | 83.23180 | 74.40590 | -124.30327  | -1393.97784 | -2804.72221 | 1 |
| 31630 | C | 59.72903 | 86.47369 | 75.35581 | 517.06002   | -376.43567  | -627.79132  | 1 |
| 31631 | H | 59.97548 | 87.13537 | 76.20894 | 12.87989    | 776.82504   | 794.32489   | 1 |
| 31632 | C | 59.37000 | 85.13050 | 75.50108 | 104.41893   | 1037.27002  | 755.41193   | 1 |
| 31633 | H | 59.40800 | 84.60080 | 76.43090 | 498.10339   | 3094.15833  | 448.38382   | 1 |
| 31634 | C | 61.26294 | 90.52947 | 72.54647 | 22.60353    | -292.12320  | 246.74294   | 1 |
| 31635 | O | 60.40898 | 91.43826 | 72.46970 | -81.28272   | 534.84324   | 264.98421   | 1 |
| 31636 | N | 62.56698 | 90.74744 | 72.45073 | -635.76453  | 190.56514   | 438.41106   | 1 |
| 31637 | H | 63.12452 | 89.91855 | 72.57686 | -1954.76634 | -1237.96537 | 1596.49702  | 1 |
| 31638 | C | 63.17045 | 91.97482 | 72.10388 | 218.83385   | -274.04772  | 372.11157   | 1 |
| 31639 | H | 62.33615 | 92.72415 | 72.16788 | -2798.41208 | -2660.55969 | -2609.08507 | 1 |
| 31640 | C | 64.33506 | 92.39762 | 73.08343 | 7.75344     | -572.07179  | -11.09079   | 1 |
| 31641 | H | 65.26187 | 91.97641 | 72.74510 | -3140.57843 | 2528.14984  | 63.34382    | 1 |
| 31642 | C | 64.34487 | 93.99806 | 72.94220 | 356.60840   | -316.13878  | 48.68205    | 1 |
| 31643 | H | 65.29222 | 94.46286 | 73.41059 | 1894.65113  | -585.20359  | -2318.16978 | 1 |
| 31644 | H | 64.26475 | 94.17630 | 71.88670 | -192.70209  | 216.43808   | -4486.40382 | 1 |
| 31645 | H | 63.51507 | 94.53959 | 73.45999 | -2474.18383 | -669.48739  | -131.07898  | 1 |
| 31646 | C | 64.18884 | 91.99713 | 74.54338 | 1411.15931  | 150.89091   | -186.58589  | 1 |
| 31647 | H | 64.23508 | 90.89610 | 74.71966 | 1175.82315  | -58.47602   | -1595.34535 | 1 |
| 31648 | H | 63.17518 | 92.34803 | 74.97427 | -1595.04566 | -741.45477  | -471.57558  | 1 |
| 31649 | C | 65.37377 | 92.55723 | 75.39536 | -442.89323  | -442.65557  | 262.34232   | 1 |
| 31650 | H | 65.17488 | 92.48438 | 76.50839 | 2004.66736  | -2284.97097 | 809.65113   | 1 |
| 31651 | H | 65.51346 | 93.68880 | 75.17294 | -4.21681    | 3061.06483  | 3952.42087  | 1 |
| 31652 | H | 66.30495 | 92.00452 | 75.14545 | -722.35907  | -1359.35502 | -2426.55308 | 1 |
| 31653 | C | 63.98325 | 92.01945 | 70.64308 | -695.01178  | -71.93545   | -318.27274  | 1 |
| 31654 | O | 64.24358 | 93.11437 | 70.21238 | 973.58341   | -128.48499  | 173.30730   | 1 |
| 31655 | N | 64.26577 | 90.81221 | 70.16434 | -26.77037   | 80.78728    | -550.40893  | 1 |
| 31656 | H | 64.09213 | 90.03879 | 70.78291 | -2022.07043 | 458.34416   | 714.02263   | 1 |
| 31657 | C | 65.00578 | 90.78460 | 68.96435 | 178.90929   | -35.45480   | -153.19219  | 1 |
| 31658 | H | 65.45449 | 91.78757 | 69.03074 | 4834.00885  | -94.84376   | 120.51295   | 1 |
| 31659 | C | 66.01031 | 89.53032 | 68.89951 | -243.22064  | 890.39910   | -518.57064  | 1 |
| 31660 | H | 65.49993 | 88.63416 | 68.45239 | 456.03286   | 47.63017    | -3353.48534 | 1 |
| 31661 | H | 66.37855 | 89.20078 | 69.94249 | 2014.24530  | 2715.53811  | 485.53052   | 1 |
| 31662 | C | 67.18461 | 89.74020 | 67.99786 | -468.41156  | 25.87698    | -210.08086  | 1 |
| 31663 | H | 67.86993 | 90.47659 | 68.53077 | 957.17265   | -1394.76118 | -609.55881  | 1 |
| 31664 | C | 67.91479 | 88.43822 | 67.67358 | -12.99497   | -994.28457  | 416.23709   | 1 |
| 31665 | H | 68.63650 | 88.17521 | 68.57099 | -2622.16488 | -1740.97250 | 772.28123   | 1 |
| 31666 | H | 68.52783 | 88.41760 | 66.79088 | -894.66762  | -551.90688  | 1454.72965  | 1 |
| 31667 | H | 67.23412 | 87.60363 | 67.56874 | -2641.62086 | -1604.81414 | 974.49845   | 1 |
| 31668 | C | 66.74629 | 90.39935 | 66.69630 | -199.41051  | 338.66657   | 150.11782   | 1 |
| 31669 | H | 66.18390 | 91.41634 | 66.72902 | 2339.21238  | 1283.40021  | 1996.88156  | 1 |
| 31670 | H | 67.64784 | 90.61119 | 66.21159 | 595.42049   | -3160.76188 | -112.58906  | 1 |
| 31671 | H | 66.15122 | 89.66405 | 66.01836 | 499.75933   | 4137.94545  | -2761.94937 | 1 |

|       |   |          |          |          |             |             |             |   |
|-------|---|----------|----------|----------|-------------|-------------|-------------|---|
| 31672 | C | 63.86432 | 90.69255 | 67.80072 | 109.95291   | -243.52605  | 239.60321   | 1 |
| 31673 | O | 63.96447 | 91.45239 | 66.85430 | -347.90203  | -662.10801  | 590.24893   | 1 |
| 31674 | N | 62.87761 | 89.84307 | 68.03317 | 114.29220   | -227.44340  | -458.89327  | 1 |
| 31675 | H | 62.64252 | 89.25650 | 68.84570 | -1155.03863 | -983.34974  | 644.92149   | 1 |
| 31676 | C | 61.82833 | 89.98457 | 67.02507 | 58.78319    | 312.26360   | -566.56609  | 1 |
| 31677 | H | 62.36924 | 90.17120 | 66.05038 | 1353.04465  | 255.37544   | 1281.71865  | 1 |
| 31678 | C | 61.09980 | 88.56602 | 67.07241 | 208.72210   | 76.76030    | -763.89428  | 1 |
| 31679 | H | 60.60793 | 88.48454 | 68.07742 | -2317.86438 | -261.37283  | 1228.87585  | 1 |
| 31680 | H | 61.88897 | 87.76594 | 67.02650 | -37.48394   | -979.11177  | -1455.11873 | 1 |
| 31681 | C | 60.13386 | 88.23175 | 65.95114 | -120.36327  | -304.82985  | 384.98780   | 1 |
| 31682 | H | 60.66071 | 88.40843 | 64.97740 | 799.03338   | -295.95692  | -539.28412  | 1 |
| 31683 | C | 59.71619 | 86.77289 | 66.00256 | 1100.27025  | 707.04488   | 19.59146    | 1 |
| 31684 | H | 59.35941 | 86.45102 | 67.01401 | -2402.68129 | -231.95073  | -1277.72158 | 1 |
| 31685 | H | 60.59765 | 86.05617 | 65.72905 | -691.12313  | -1723.13317 | 2100.41084  | 1 |
| 31686 | H | 58.98783 | 86.64220 | 65.26931 | 582.52860   | -1315.35065 | 101.73990   | 1 |
| 31687 | C | 58.87488 | 89.06661 | 66.10870 | -68.37617   | -301.73411  | -300.73235  | 1 |
| 31688 | H | 59.00912 | 90.12422 | 65.81222 | -1024.29083 | 1108.52651  | 1695.88936  | 1 |
| 31689 | H | 58.01647 | 88.67888 | 65.48013 | 2276.79130  | -1999.70726 | -1431.16709 | 1 |
| 31690 | H | 58.57500 | 89.04804 | 67.22311 | -779.65128  | 6.28594     | 582.07706   | 1 |
| 31691 | C | 60.89839 | 91.22236 | 67.39314 | 480.64314   | 858.42280   | -468.39178  | 1 |
| 31692 | O | 60.15719 | 91.67618 | 66.54646 | 284.31400   | -694.46904  | 702.24976   | 1 |
| 31693 | N | 61.10528 | 91.70190 | 68.64121 | -418.03036  | 1074.17805  | -314.35729  | 1 |
| 31694 | H | 61.80563 | 91.16771 | 69.09353 | -428.95732  | 879.43722   | -1019.52478 | 1 |
| 31695 | C | 61.23501 | 93.11801 | 68.89403 | -1352.65635 | -414.55781  | 833.47803   | 1 |
| 31696 | H | 61.90364 | 93.12008 | 69.76239 | -185.26446  | -1723.00729 | 515.44149   | 1 |
| 31697 | C | 61.78020 | 93.81238 | 67.61063 | 519.69290   | -36.02981   | -477.10368  | 1 |
| 31698 | H | 62.35264 | 93.07851 | 66.98272 | -996.70680  | 498.43075   | -2070.64331 | 1 |
| 31699 | H | 60.88214 | 94.06817 | 66.94340 | -1400.77745 | 874.72162   | -347.86397  | 1 |
| 31700 | C | 62.65985 | 95.02064 | 68.14391 | -837.71447  | 236.71694   | 97.59893    | 1 |
| 31701 | H | 63.46533 | 94.59084 | 68.75861 | -919.57894  | 499.29983   | 164.69748   | 1 |
| 31702 | H | 62.05903 | 95.80318 | 68.60093 | 3550.17842  | 1263.81311  | -993.55236  | 1 |
| 31703 | C | 63.16478 | 95.74832 | 66.87895 | 394.63976   | 75.60415    | 503.28705   | 1 |
| 31704 | O | 62.31644 | 95.67266 | 65.77683 | 542.75419   | -50.48204   | -412.25143  | 1 |
| 31705 | O | 64.26992 | 96.25399 | 66.79930 | 300.01695   | 671.11713   | -819.23067  | 1 |
| 31706 | C | 59.72286 | 93.68254 | 69.22343 | 141.02486   | -438.21293  | -1175.18830 | 1 |
| 31707 | O | 59.03792 | 94.27500 | 68.36901 | 222.87867   | 72.88133    | 309.23327   | 1 |
| 31708 | N | 59.32852 | 93.33975 | 70.43663 | -285.70092  | 414.97017   | -372.71210  | 1 |
| 31709 | H | 60.07260 | 92.89939 | 70.99237 | 492.50486   | -2272.75291 | 656.65898   | 1 |
| 31710 | C | 58.03981 | 93.79089 | 70.85300 | -273.05913  | 182.49901   | -629.48639  | 1 |
| 31711 | H | 57.55441 | 94.38308 | 70.08783 | 4323.57141  | 2926.27380  | 934.60345   | 1 |
| 31712 | C | 57.04612 | 92.63245 | 71.30789 | -33.28341   | -641.27390  | 140.25604   | 1 |
| 31713 | H | 57.25443 | 92.50243 | 72.37684 | -2813.70140 | 637.63799   | 595.64364   | 1 |
| 31714 | C | 55.53604 | 92.98087 | 71.11954 | -304.29479  | -22.54452   | 43.63330    | 1 |
| 31715 | H | 55.25488 | 93.84370 | 71.71986 | -1278.31929 | 1713.86127  | 1505.82324  | 1 |
| 31716 | H | 55.26910 | 93.10996 | 70.08636 | -1258.18942 | -648.15622  | 1400.73926  | 1 |
| 31717 | H | 54.93777 | 92.09951 | 71.50691 | -1042.92365 | 1015.77572  | 2793.84068  | 1 |
| 31718 | C | 57.48400 | 91.29418 | 70.64348 | 258.13039   | 451.19319   | -92.48488   | 1 |
| 31719 | H | 56.95068 | 90.38405 | 71.00825 | -636.11186  | -877.23009  | 421.49436   | 1 |
| 31720 | H | 58.54256 | 91.19251 | 70.88732 | -532.05696  | -1602.72209 | -2341.57509 | 1 |
| 31721 | C | 57.42295 | 91.44506 | 69.04063 | 758.07798   | 42.74056    | 320.75485   | 1 |
| 31722 | H | 57.97280 | 92.30099 | 68.61381 | 1059.54562  | -2164.77165 | 1650.42433  | 1 |
| 31723 | H | 57.95757 | 90.58413 | 68.47954 | 3917.74453  | -513.37794  | -29.63070   | 1 |
| 31724 | H | 56.35511 | 91.46600 | 68.73274 | 1955.95247  | -2814.38554 | -2937.46900 | 1 |
| 31725 | C | 58.38686 | 94.64356 | 72.20456 | -311.32354  | -264.19517  | -311.54628  | 1 |
| 31726 | O | 57.89853 | 95.73216 | 72.46825 | -242.23382  | 497.93882   | 334.08852   | 1 |
| 31727 | N | 59.24623 | 94.04035 | 73.00431 | 370.19502   | -43.95361   | -370.05757  | 1 |
| 31728 | H | 59.62072 | 93.08237 | 72.91774 | 319.01422   | 3372.13725  | 213.09045   | 1 |
| 31729 | C | 60.37657 | 94.86641 | 73.51625 | 837.21770   | -328.59592  | 456.41928   | 1 |
| 31730 | H | 59.92982 | 95.70421 | 74.12941 | 1115.49178  | -3705.71975 | 302.94877   | 1 |
| 31731 | C | 61.24143 | 93.96420 | 74.42279 | -103.58927  | -423.32699  | -276.39286  | 1 |
| 31732 | H | 61.96959 | 93.35508 | 73.82879 | -206.79956  | -872.43989  | 1568.11675  | 1 |
| 31733 | C | 61.96285 | 95.01162 | 75.32125 | 358.96263   | -386.01415  | -376.28016  | 1 |

|       |   |          |           |          |             |             |             |   |
|-------|---|----------|-----------|----------|-------------|-------------|-------------|---|
| 31734 | H | 61.20582 | 95.59422  | 75.87747 | -1437.93976 | 4706.52049  | 1536.67830  | 1 |
| 31735 | H | 62.55778 | 94.41420  | 76.06466 | -669.94421  | -1638.89293 | 759.80675   | 1 |
| 31736 | H | 62.82959 | 95.55581  | 74.76642 | -2074.13761 | 934.61928   | -1240.52315 | 1 |
| 31737 | C | 60.35661 | 92.98848  | 75.31496 | -310.46252  | -127.76958  | -107.24427  | 1 |
| 31738 | H | 59.46679 | 92.67017  | 74.73473 | -398.89485  | -1409.96996 | -2273.32184 | 1 |
| 31739 | H | 59.98468 | 93.58050  | 76.13249 | -251.34703  | -1687.75724 | 659.31152   | 1 |
| 31740 | C | 61.22997 | 91.77333  | 75.84869 | 1295.73570  | 365.74447   | 291.85903   | 1 |
| 31741 | H | 60.72813 | 91.03744  | 76.49319 | -1054.97668 | 1163.59034  | 879.67261   | 1 |
| 31742 | H | 62.02388 | 92.19673  | 76.47513 | -251.21439  | 2428.96325  | -1336.03380 | 1 |
| 31743 | H | 61.68460 | 91.08494  | 75.07243 | 221.36072   | -1040.61558 | -2146.08975 | 1 |
| 31744 | C | 61.36513 | 95.31091  | 72.30212 | 820.69433   | -605.78449  | -773.03505  | 1 |
| 31745 | O | 61.74173 | 94.49788  | 71.46135 | -389.33153  | 474.51938   | 189.37893   | 1 |
| 31746 | N | 61.70981 | 96.60064  | 72.37718 | -185.97961  | 12.13205    | 218.30756   | 1 |
| 31747 | H | 61.44748 | 96.95763  | 73.21528 | 1837.23607  | 1239.62286  | -1022.45403 | 1 |
| 31748 | C | 62.79787 | 97.02979  | 71.60633 | 57.62032    | -180.29997  | 388.18373   | 1 |
| 31749 | H | 62.98510 | 96.21743  | 70.87505 | -593.42177  | 309.63364   | -1077.63074 | 1 |
| 31750 | C | 62.40802 | 98.43418  | 70.95660 | 91.71440    | -486.18380  | -82.12170   | 1 |
| 31751 | H | 63.34487 | 98.78058  | 70.40483 | 2476.67814  | -1224.70120 | -1231.15485 | 1 |
| 31752 | H | 62.13341 | 99.19957  | 71.78464 | -2425.35846 | 1749.97406  | 571.05128   | 1 |
| 31753 | C | 61.32064 | 98.31647  | 69.88982 | -374.79566  | 202.32272   | 707.10299   | 1 |
| 31754 | H | 60.81662 | 99.34007  | 69.75251 | -2361.62100 | -69.64523   | -1710.92524 | 1 |
| 31755 | H | 61.77927 | 97.90556  | 68.89914 | 995.30591   | 2390.06976  | -2245.85995 | 1 |
| 31756 | C | 60.13705 | 97.34092  | 70.38410 | -523.90757  | -38.96849   | -792.82118  | 1 |
| 31757 | H | 59.87979 | 97.58030  | 71.42863 | -474.78422  | -6129.58756 | 326.94571   | 1 |
| 31758 | H | 60.52329 | 96.36481  | 70.29704 | -223.48738  | -373.51057  | 1762.11690  | 1 |
| 31759 | C | 58.91067 | 97.53812  | 69.40250 | -711.65295  | 504.52543   | 578.49978   | 1 |
| 31760 | H | 58.83764 | 98.61591  | 69.29835 | -3968.25484 | -2668.57853 | 3731.28936  | 1 |
| 31761 | H | 57.96632 | 97.04113  | 69.73099 | -2295.30060 | 561.20268   | -3045.02074 | 1 |
| 31762 | N | 59.24660 | 97.03097  | 68.11157 | -377.16150  | 461.47379   | -39.12087   | 1 |
| 31763 | H | 62.89016 | 96.06045  | 65.00155 | -1857.66472 | 2664.93784  | 1772.57708  | 1 |
| 31764 | H | 59.02331 | 96.01919  | 67.89392 | -1035.92952 | -2317.57691 | 1857.62228  | 1 |
| 31765 | H | 59.00666 | 97.57551  | 67.25984 | -454.52173  | -453.39168  | 1436.84556  | 1 |
| 31766 | C | 64.00854 | 97.36349  | 72.68564 | 283.56764   | -379.54168  | -256.30222  | 1 |
| 31767 | O | 63.78110 | 98.14762  | 73.57028 | 56.47926    | -673.42456  | -632.49450  | 1 |
| 31768 | N | 65.14061 | 96.72379  | 72.31878 | -127.55499  | -243.49196  | -47.32239   | 1 |
| 31769 | H | 64.85775 | 96.07884  | 71.55655 | -426.80007  | -531.55025  | -1591.27818 | 1 |
| 31770 | C | 66.38740 | 97.35422  | 72.61119 | 102.53849   | -5.31452    | -853.00016  | 1 |
| 31771 | H | 66.13425 | 98.37207  | 72.50725 | -171.34118  | 1776.84173  | -897.28037  | 1 |
| 31772 | C | 66.67179 | 96.90682  | 74.11297 | 531.79519   | -1322.47561 | -580.96002  | 1 |
| 31773 | H | 67.20221 | 95.94629  | 74.11355 | -545.81719  | 1688.39989  | 949.88875   | 1 |
| 31774 | H | 65.75793 | 96.64403  | 74.71665 | 1232.28009  | -528.54122  | -278.17707  | 1 |
| 31775 | C | 67.56526 | 98.01543  | 74.72844 | 139.02470   | -99.07839   | -678.28044  | 1 |
| 31776 | H | 67.29779 | 98.20883  | 75.82925 | 730.14361   | -274.92381  | -3259.67352 | 1 |
| 31777 | H | 68.64587 | 97.74168  | 74.64605 | 1348.70046  | 92.03012    | 1416.69246  | 1 |
| 31778 | C | 67.50496 | 99.42921  | 73.92208 | -289.44742  | -141.02394  | -159.14477  | 1 |
| 31779 | O | 68.38558 | 99.82198  | 73.20599 | -213.28093  | -398.55950  | -538.52427  | 1 |
| 31780 | N | 66.25412 | 99.97947  | 74.04784 | 281.08008   | -225.41462  | -176.88430  | 1 |
| 31781 | H | 65.50490 | 99.34805  | 74.51162 | -3066.42409 | 951.99732   | -403.71574  | 1 |
| 31782 | H | 65.78451 | 100.57259 | 73.34888 | 2342.27137  | -377.41480  | -604.05010  | 1 |
| 31783 | C | 67.45673 | 96.84742  | 71.51001 | 142.52626   | 332.62826   | -196.25048  | 1 |
| 31784 | O | 67.09440 | 95.87401  | 70.81927 | 275.81310   | -24.26822   | 36.03707    | 1 |
| 31785 | N | 68.55316 | 97.57193  | 71.40717 | -313.65089  | 581.73384   | 466.07373   | 1 |
| 31786 | H | 68.55614 | 98.43470  | 71.97707 | -485.30328  | -537.53526  | -1238.88250 | 1 |
| 31787 | C | 69.48260 | 97.12493  | 70.36802 | -542.63099  | -459.39581  | 445.58644   | 1 |
| 31788 | H | 69.48650 | 98.05971  | 69.79235 | 1042.74778  | 1953.28140  | -1325.56231 | 1 |
| 31789 | H | 68.95510 | 96.38205  | 69.62584 | -228.48601  | -2286.16545 | 3631.61124  | 1 |
| 31790 | C | 70.86229 | 96.72115  | 71.05922 | -373.83913  | 656.41538   | 262.22079   | 1 |
| 31791 | O | 71.32272 | 97.27724  | 72.04693 | 202.98715   | 304.70047   | -337.76162  | 1 |
| 31792 | N | 71.37085 | 95.67113  | 70.39314 | 82.44336    | -61.55986   | 367.81464   | 1 |
| 31793 | H | 70.87501 | 95.29711  | 69.48907 | 324.91462   | 18.14171    | 1881.74124  | 1 |
| 31794 | C | 72.08688 | 94.63849  | 71.11333 | 253.88051   | 879.70506   | 146.42539   | 1 |
| 31795 | H | 71.42646 | 94.37959  | 72.04104 | -3637.44076 | -910.64565  | -71.37864   | 1 |

|       |   |          |           |          |             |             |             |   |
|-------|---|----------|-----------|----------|-------------|-------------|-------------|---|
| 31796 | C | 72.63859 | 93.40765  | 70.33111 | 197.34036   | 91.19336    | 361.02836   | 1 |
| 31797 | H | 73.00564 | 92.53647  | 70.88965 | -682.80943  | 2372.63803  | 1259.17683  | 1 |
| 31798 | H | 73.54110 | 93.59650  | 69.66758 | -1777.85440 | -1332.26004 | 1648.45107  | 1 |
| 31799 | S | 71.21384 | 92.69129  | 69.21600 | 258.28826   | -132.08136  | 68.30943    | 1 |
| 31800 | C | 73.41262 | 95.47106  | 71.64268 | 30.72375    | 145.79929   | -355.93040  | 1 |
| 31801 | O | 74.01116 | 94.98845  | 72.57902 | -937.30017  | 576.51062   | 1006.19232  | 1 |
| 31802 | N | 73.77530 | 96.54206  | 70.91459 | -308.34098  | -143.38976  | 56.05030    | 1 |
| 31803 | H | 73.13263 | 96.83460  | 70.14181 | -5141.30794 | 2595.25499  | 453.74562   | 1 |
| 31804 | C | 74.95998 | 97.28686  | 71.18166 | 143.87585   | 513.62380   | -377.72367  | 1 |
| 31805 | H | 75.75967 | 96.50985  | 71.49605 | -10.53265   | -1661.46358 | 2873.83015  | 1 |
| 31806 | C | 75.27033 | 97.97450  | 69.79960 | -586.58174  | -46.33716   | 210.47459   | 1 |
| 31807 | H | 74.49436 | 98.67473  | 69.46847 | -1368.80538 | -2143.18369 | -1274.37184 | 1 |
| 31808 | H | 75.36063 | 97.15836  | 69.06615 | 690.33111   | -726.65770  | 398.63057   | 1 |
| 31809 | C | 76.60637 | 98.73285  | 69.62837 | 802.30430   | -540.38346  | -1412.46149 | 1 |
| 31810 | H | 76.60329 | 99.81662  | 69.88039 | 1974.09799  | 285.28909   | 401.57035   | 1 |
| 31811 | H | 77.39046 | 98.29022  | 70.20193 | -874.49758  | 165.65157   | 1149.52412  | 1 |
| 31812 | C | 76.87414 | 98.82058  | 68.04162 | -169.66679  | -320.43213  | 468.52164   | 1 |
| 31813 | O | 77.74443 | 99.65168  | 67.66963 | 50.81527    | 122.66693   | -14.78509   | 1 |
| 31814 | O | 76.30773 | 97.99979  | 67.27245 | 25.95532    | -92.34727   | -175.28766  | 1 |
| 31815 | C | 74.81638 | 98.44944  | 72.27159 | -136.44282  | -260.67323  | -168.20778  | 1 |
| 31816 | O | 75.71540 | 99.27062  | 72.46265 | -171.57741  | -684.57765  | 217.48997   | 1 |
| 31817 | N | 73.65399 | 98.49362  | 72.90835 | -664.71502  | 169.73086   | -172.33519  | 1 |
| 31818 | H | 72.86410 | 97.80186  | 72.73936 | 64.93634    | 1889.60674  | 944.07322   | 1 |
| 31819 | C | 73.77965 | 99.05473  | 74.24536 | 1161.00597  | 747.37563   | 775.52323   | 1 |
| 31820 | H | 74.67212 | 99.73846  | 74.28671 | -116.27744  | 1166.01735  | -1162.18758 | 1 |
| 31821 | C | 72.33627 | 99.68544  | 74.56502 | -215.96704  | -490.35807  | 12.99873    | 1 |
| 31822 | H | 71.50680 | 99.24432  | 73.92655 | -1017.12025 | 21.57995    | -422.24684  | 1 |
| 31823 | H | 72.10788 | 99.71145  | 75.66585 | -1379.06376 | -724.56760  | 1940.85291  | 1 |
| 31824 | C | 72.35919 | 101.17044 | 74.08485 | -894.75836  | 159.00006   | -867.43649  | 1 |
| 31825 | C | 71.24323 | 101.62901 | 73.38979 | 838.98586   | 683.20231   | 734.81902   | 1 |
| 31826 | H | 70.41794 | 101.00591 | 73.12259 | 881.05830   | 3277.50699  | 1802.92206  | 1 |
| 31827 | C | 71.24150 | 103.01099 | 73.06258 | 878.88851   | -361.46341  | 194.45252   | 1 |
| 31828 | H | 70.45482 | 103.38828 | 72.40113 | 3116.22531  | 333.33093   | -267.81212  | 1 |
| 31829 | C | 72.20632 | 103.89294 | 73.54963 | 178.13650   | 566.53874   | -109.55858  | 1 |
| 31830 | H | 72.08646 | 104.97233 | 73.35091 | -2246.01707 | -3768.06117 | 2494.50745  | 1 |
| 31831 | C | 73.51618 | 102.00773 | 74.37854 | 283.19665   | -241.33075  | 439.75346   | 1 |
| 31832 | H | 74.50282 | 101.65345 | 74.74930 | -1547.79090 | 2832.48770  | -227.43683  | 1 |
| 31833 | C | 73.34104 | 103.39013 | 74.26303 | 158.35412   | -239.59130  | 261.54207   | 1 |
| 31834 | H | 74.17074 | 104.06480 | 74.45110 | -1311.32847 | 7.37711     | -1275.87987 | 1 |
| 31835 | C | 73.77914 | 97.89053  | 75.30971 | -85.93793   | -178.39923  | -121.11204  | 1 |
| 31836 | O | 73.73880 | 98.24045  | 76.49818 | -615.10321  | -456.59132  | 614.21991   | 1 |
| 31837 | N | 73.78647 | 96.61334  | 74.92230 | 55.68682    | 185.81420   | 435.00344   | 1 |
| 31838 | H | 73.92977 | 96.38895  | 73.90962 | 2056.92508  | 2481.41061  | 4029.48314  | 1 |
| 31839 | C | 72.83828 | 95.77797  | 75.64072 | -493.00319  | -44.83442   | 110.41073   | 1 |
| 31840 | H | 72.37900 | 96.38316  | 76.44159 | 1813.40743  | -944.63440  | -2117.23638 | 1 |
| 31841 | C | 71.71945 | 95.39550  | 74.58701 | -383.45554  | 339.31101   | 86.33041    | 1 |
| 31842 | H | 71.48376 | 96.31734  | 73.97432 | 568.40804   | -2352.86765 | -914.40117  | 1 |
| 31843 | H | 72.06034 | 94.57840  | 73.91612 | 494.41173   | 555.09355   | 2518.95584  | 1 |
| 31844 | C | 70.43090 | 94.93122  | 75.36220 | 446.10240   | 687.33399   | -370.24251  | 1 |
| 31845 | H | 69.98195 | 95.81924  | 75.93636 | 3623.53583  | 506.47771   | 994.85858   | 1 |
| 31846 | H | 70.72842 | 94.16255  | 76.11116 | 634.47457   | 3134.12153  | 3387.46279  | 1 |
| 31847 | C | 69.39693 | 94.31247  | 74.31714 | 4.57325     | -191.39315  | 831.96710   | 1 |
| 31848 | O | 68.24931 | 94.00412  | 74.56472 | -222.82789  | -800.83610  | 505.96161   | 1 |
| 31849 | O | 69.80200 | 94.18531  | 73.08335 | 94.46577    | 46.69691    | -115.85655  | 1 |
| 31850 | C | 73.57183 | 94.46496  | 76.24687 | -656.76431  | -350.77684  | 301.90146   | 1 |
| 31851 | O | 72.99507 | 93.41319  | 76.64080 | 205.75415   | -401.11114  | 429.08132   | 1 |
| 31852 | N | 74.88038 | 94.59034  | 76.21851 | -152.87223  | 760.93919   | 46.65001    | 1 |
| 31853 | H | 75.10709 | 95.50931  | 75.89053 | -1122.96151 | -2234.81656 | 3269.24376  | 1 |
| 31854 | C | 75.60728 | 93.89065  | 77.23894 | 588.56361   | -618.20111  | -731.94640  | 1 |
| 31855 | H | 75.21976 | 92.83435  | 77.28996 | 531.78697   | 46.62915    | 789.45211   | 1 |
| 31856 | C | 77.11868 | 94.14826  | 76.90887 | 584.97133   | -575.12453  | 604.68056   | 1 |
| 31857 | H | 77.50003 | 95.04313  | 77.36767 | -3124.54131 | -3266.39220 | -1057.20523 | 1 |

|       |   |          |          |          |             |             |             |   |
|-------|---|----------|----------|----------|-------------|-------------|-------------|---|
| 31858 | H | 77.30569 | 94.36178 | 75.78322 | 2356.65786  | 885.96891   | -721.68461  | 1 |
| 31859 | C | 77.97491 | 92.87012 | 77.35798 | -127.10963  | 336.00849   | -402.50898  | 1 |
| 31860 | O | 77.89583 | 92.25396 | 78.38867 | -19.28456   | -265.58399  | 413.46727   | 1 |
| 31861 | N | 78.90582 | 92.65876 | 76.34309 | 85.11352    | -1130.28590 | 237.44596   | 1 |
| 31862 | H | 79.00811 | 93.03328 | 75.36135 | 2823.41417  | -2734.84965 | -1011.76675 | 1 |
| 31863 | H | 79.48126 | 91.81268 | 76.37125 | -2738.87371 | 100.30051   | 640.22174   | 1 |
| 31864 | C | 75.23841 | 94.81580 | 78.56345 | -1285.67683 | -903.25114  | -373.06961  | 1 |
| 31865 | O | 75.92662 | 95.76594 | 78.87538 | 86.34430    | -634.28339  | -871.58513  | 1 |
| 31866 | N | 74.11895 | 94.32531 | 79.09783 | -10.26002   | -38.14051   | -34.50799   | 1 |
| 31867 | H | 73.62394 | 93.57443 | 78.59946 | 2603.66486  | -271.14365  | -2872.31652 | 1 |
| 31868 | C | 73.26063 | 95.09358 | 79.96175 | 325.26341   | 230.64200   | 68.72719    | 1 |
| 31869 | H | 73.90824 | 95.45983 | 80.82179 | 2579.01296  | 1033.72703  | 204.56603   | 1 |
| 31870 | C | 72.73907 | 96.28992 | 79.16382 | -270.01410  | -302.34508  | -225.64305  | 1 |
| 31871 | H | 72.68926 | 96.09818 | 78.07250 | -1114.71495 | 2361.64904  | -178.57519  | 1 |
| 31872 | O | 73.84601 | 97.79644 | 79.07770 | -151.39056  | -826.93737  | -985.67739  | 1 |
| 31873 | H | 73.81565 | 97.94730 | 77.99745 | -1647.66836 | 4384.35586  | -2142.88243 | 1 |
| 31874 | C | 71.35881 | 96.58558 | 79.71328 | -1206.21182 | -650.68738  | 840.41325   | 1 |
| 31875 | H | 70.75716 | 95.66376 | 79.71637 | -815.33728  | 656.22312   | -1663.70842 | 1 |
| 31876 | H | 70.82575 | 97.38060 | 79.09226 | 508.90887   | 2730.40274  | 3675.53137  | 1 |
| 31877 | H | 71.48408 | 96.91323 | 80.76882 | -3877.13174 | -556.56523  | 360.45437   | 1 |
| 31878 | C | 72.08657 | 93.94800 | 80.25044 | -353.78796  | -255.38235  | -768.67508  | 1 |
| 31879 | O | 71.91370 | 93.57750 | 81.41821 | 76.94271    | -147.82630  | 329.05676   | 1 |
| 31880 | N | 71.50399 | 93.57689 | 79.14174 | -308.40928  | -47.19138   | -29.60974   | 1 |
| 31881 | H | 71.80242 | 93.93768 | 78.19988 | 705.37159   | 3091.16799  | -769.63006  | 1 |
| 31882 | C | 70.62202 | 92.43406 | 79.28864 | -155.58023  | 798.51274   | 184.63848   | 1 |
| 31883 | H | 70.24903 | 92.43037 | 80.38377 | 167.87405   | -2458.63624 | 39.55667    | 1 |
| 31884 | C | 69.51154 | 92.23876 | 78.20879 | 535.61327   | 177.27989   | -162.05933  | 1 |
| 31885 | H | 69.99214 | 91.80667 | 77.30740 | 1041.89278  | -2310.90769 | 80.26781    | 1 |
| 31886 | C | 68.53854 | 91.08814 | 78.60611 | 122.74671   | -329.06475  | 782.41668   | 1 |
| 31887 | H | 67.88853 | 90.83743 | 77.76730 | -3171.19300 | 69.06663    | -149.78031  | 1 |
| 31888 | H | 69.15754 | 90.15835 | 78.82731 | 2385.77719  | 2818.25187  | 1147.30000  | 1 |
| 31889 | H | 67.90425 | 91.37357 | 79.47656 | 1217.49617  | -1689.75552 | -1032.28431 | 1 |
| 31890 | C | 68.61776 | 93.54575 | 78.05267 | 355.94155   | -78.38245   | -1345.80386 | 1 |
| 31891 | H | 69.20560 | 94.40423 | 77.77613 | -915.64322  | 952.11624   | -674.62697  | 1 |
| 31892 | H | 67.88583 | 93.44099 | 77.20815 | -615.76770  | -2338.62315 | -1522.91684 | 1 |
| 31893 | H | 67.97268 | 93.65140 | 78.92872 | -777.92336  | -2177.22810 | -2226.08346 | 1 |
| 31894 | C | 71.41160 | 91.01023 | 79.12790 | -373.40000  | -177.16770  | -304.63909  | 1 |
| 31895 | O | 71.17928 | 90.05844 | 79.84624 | 449.97338   | -319.08345  | -328.22405  | 1 |
| 31896 | N | 72.28085 | 91.13401 | 78.09175 | -260.58395  | 231.42803   | -480.60152  | 1 |
| 31897 | H | 72.39128 | 92.07331 | 77.69874 | -1560.74515 | 1199.79651  | 635.49042   | 1 |
| 31898 | C | 73.15380 | 90.06471 | 77.83259 | 738.26734   | 170.25433   | -421.93723  | 1 |
| 31899 | H | 72.41265 | 89.21544 | 78.08078 | 796.34900   | -1159.12676 | 1975.67905  | 1 |
| 31900 | C | 73.70026 | 90.18369 | 76.32687 | -868.49877  | -1136.96565 | -246.43941  | 1 |
| 31901 | H | 74.50091 | 90.89224 | 76.44531 | 4178.21107  | -324.03005  | 637.58277   | 1 |
| 31902 | H | 72.93506 | 90.69489 | 75.66299 | -757.42678  | 3619.03752  | -3181.36364 | 1 |
| 31903 | N | 73.49920 | 88.30028 | 74.61820 | 372.21211   | -339.17327  | -399.88420  | 1 |
| 31904 | C | 74.14644 | 88.90611 | 75.64078 | 546.96166   | 427.76266   | 1186.51625  | 1 |
| 31905 | C | 74.01189 | 87.03227 | 74.51041 | -187.09766  | 335.60945   | -350.79668  | 1 |
| 31906 | H | 73.69088 | 86.25165 | 73.82777 | 562.95997   | -1275.08952 | -972.44838  | 1 |
| 31907 | N | 75.05588 | 86.96353 | 75.35652 | 325.23934   | -599.63419  | -479.72042  | 1 |
| 31908 | H | 75.55951 | 86.06595 | 75.40261 | 3356.02080  | -2159.15350 | -1190.44514 | 1 |
| 31909 | C | 75.17326 | 88.03172 | 76.12605 | 315.68667   | 40.72319    | 414.11553   | 1 |
| 31910 | H | 75.86924 | 88.00760 | 76.96261 | -1875.68991 | -1883.38428 | -1381.25958 | 1 |
| 31911 | C | 74.44263 | 90.14502 | 78.82444 | 31.50150    | 1295.92445  | -391.62421  | 1 |
| 31912 | O | 75.22482 | 89.22625 | 78.66560 | -535.26266  | -226.96915  | -810.69402  | 1 |
| 31913 | N | 74.47407 | 91.16737 | 79.67256 | 184.00440   | 522.90376   | -133.55142  | 1 |
| 31914 | H | 73.71011 | 91.92628 | 79.69020 | -2916.21278 | -830.60317  | 2327.91004  | 1 |
| 31915 | C | 75.36835 | 91.11327 | 80.76218 | 695.82324   | -60.76217   | -682.23971  | 1 |
| 31916 | H | 76.22190 | 90.87962 | 80.11202 | -1323.78410 | -471.22023  | -418.52708  | 1 |
| 31917 | C | 75.75983 | 92.56176 | 81.41332 | -478.17601  | 905.84007   | 281.59036   | 1 |
| 31918 | H | 75.77621 | 93.42621 | 80.67512 | -759.86193  | 1050.25949  | 1518.82825  | 1 |
| 31919 | H | 76.84213 | 92.43413 | 81.67505 | -467.21293  | -1854.03328 | -3333.60798 | 1 |

|       |   |          |          |          |             |             |             |   |
|-------|---|----------|----------|----------|-------------|-------------|-------------|---|
| 31920 | C | 74.76132 | 92.74607 | 82.62448 | 209.51832   | 171.79727   | -349.52371  | 1 |
| 31921 | H | 73.81226 | 93.12445 | 82.18917 | 1718.06304  | -2929.13636 | -686.30224  | 1 |
| 31922 | H | 74.70383 | 91.79857 | 83.17447 | -1264.04392 | 628.65473   | -717.38070  | 1 |
| 31923 | C | 75.25177 | 93.85183 | 83.62851 | 615.05156   | 356.93183   | 655.05082   | 1 |
| 31924 | H | 76.36514 | 93.82316 | 83.68245 | 1842.54381  | 1550.21470  | -2569.78742 | 1 |
| 31925 | H | 74.94657 | 93.56861 | 84.62414 | -3245.27419 | 497.98919   | -1703.68534 | 1 |
| 31926 | C | 74.69159 | 95.25236 | 83.17777 | -750.78828  | 154.11450   | -668.37142  | 1 |
| 31927 | H | 75.16346 | 96.10833 | 83.89142 | -1691.44826 | -867.88145  | -1441.72556 | 1 |
| 31928 | H | 74.94895 | 95.36365 | 82.11855 | -1479.93921 | 2312.75371  | 1506.58835  | 1 |
| 31929 | N | 73.27974 | 95.20993 | 83.20941 | -875.32490  | -311.26067  | 30.88866    | 1 |
| 31930 | H | 74.59103 | 97.14164 | 79.07823 | -363.83088  | 1097.55898  | 1131.23163  | 1 |
| 31931 | H | 72.74628 | 94.73501 | 82.41515 | -1876.92429 | -64.03194   | 612.95983   | 1 |
| 31932 | H | 72.75966 | 94.93971 | 84.01908 | -105.79757  | 2283.23631  | 1198.62913  | 1 |
| 31933 | C | 75.01043 | 90.03439 | 81.88402 | 494.11254   | -215.74977  | 200.27307   | 1 |
| 31934 | O | 75.91820 | 89.59817 | 82.60653 | -416.46862  | -421.99504  | -545.14865  | 1 |
| 31935 | N | 73.70278 | 89.85640 | 82.11745 | 328.10269   | 423.81097   | 86.31158    | 1 |
| 31936 | H | 73.04415 | 90.27982 | 81.40344 | 1451.58761  | -4708.40550 | 1318.23460  | 1 |
| 31937 | C | 73.29256 | 88.78553 | 82.96994 | -249.24731  | -294.40611  | -603.47033  | 1 |
| 31938 | H | 74.17190 | 88.60540 | 83.62719 | 3374.08418  | 1478.24308  | -1288.46313 | 1 |
| 31939 | C | 72.03153 | 89.32596 | 83.76110 | -371.20752  | -292.20336  | 88.07879    | 1 |
| 31940 | H | 71.47438 | 88.49630 | 84.27337 | 695.29269   | 164.64411   | 1312.08770  | 1 |
| 31941 | H | 71.34109 | 89.93705 | 83.10799 | 2921.68852  | 4224.10333  | 987.27180   | 1 |
| 31942 | C | 72.72128 | 90.18275 | 84.83025 | -732.84616  | 735.59404   | 103.36094   | 1 |
| 31943 | C | 73.21559 | 91.53354 | 84.70276 | 3.88306     | 492.88406   | -104.98504  | 1 |
| 31944 | H | 73.08789 | 92.20695 | 83.86076 | -2347.81419 | 1353.89625  | -1157.33508 | 1 |
| 31945 | N | 73.67476 | 91.99685 | 85.86505 | -982.48139  | -889.25394  | 339.92215   | 1 |
| 31946 | H | 73.94672 | 93.00884 | 85.99228 | 928.58913   | -338.97795  | 406.74865   | 1 |
| 31947 | C | 73.50601 | 91.07767 | 86.84340 | 557.45744   | 254.23056   | -140.27046  | 1 |
| 31948 | C | 73.00170 | 89.81891 | 86.17742 | -61.69165   | -312.26200  | -352.90585  | 1 |
| 31949 | C | 72.77171 | 88.64440 | 86.98916 | 767.21993   | -1198.60660 | 272.10984   | 1 |
| 31950 | H | 72.54607 | 87.58689 | 86.56964 | 314.60631   | -1110.38796 | 270.80666   | 1 |
| 31951 | C | 73.04445 | 88.80309 | 88.36424 | -517.86379  | -700.17753  | 412.00754   | 1 |
| 31952 | H | 72.94852 | 87.94195 | 89.01702 | 1022.63078  | 2527.85805  | 389.68150   | 1 |
| 31953 | C | 73.82958 | 91.06446 | 88.26480 | 504.20208   | 54.93273    | -359.13994  | 1 |
| 31954 | H | 74.12173 | 92.03693 | 88.68627 | -120.42950  | -931.88370  | -341.55282  | 1 |
| 31955 | C | 73.65670 | 89.92796 | 89.05295 | -118.92140  | -450.62725  | 1502.37669  | 1 |
| 31956 | H | 73.80556 | 89.87097 | 90.16866 | 789.65711   | 1651.13456  | 2378.24555  | 1 |
| 31957 | C | 73.07257 | 87.49181 | 82.06175 | 159.20747   | 51.76876    | -179.77433  | 1 |
| 31958 | O | 72.91608 | 86.38140 | 82.61233 | -38.28038   | 42.15966    | 390.05839   | 1 |
| 31959 | N | 72.87494 | 87.69231 | 80.74879 | -171.52311  | -174.23434  | 22.14837    | 1 |
| 31960 | H | 72.90920 | 88.64378 | 80.23392 | -1459.63405 | -556.91906  | -1577.88250 | 1 |
| 31961 | C | 73.01776 | 86.54270 | 79.84626 | 20.84769    | 258.42549   | -769.01025  | 1 |
| 31962 | H | 72.30207 | 85.79278 | 80.21784 | 333.75395   | 1490.78288  | 3247.21109  | 1 |
| 31963 | C | 72.48756 | 86.84847 | 78.42059 | -70.18045   | 270.43638   | 28.37296    | 1 |
| 31964 | H | 73.19034 | 87.59183 | 77.98637 | -2463.80550 | -430.74215  | -179.19044  | 1 |
| 31965 | C | 72.70929 | 85.63661 | 77.43286 | 257.20145   | 419.93148   | -784.30999  | 1 |
| 31966 | H | 73.80065 | 85.37265 | 77.48083 | -514.26138  | -1887.86375 | 1361.14778  | 1 |
| 31967 | H | 72.46596 | 85.89941 | 76.41621 | 73.31204    | 2893.75565  | 702.24895   | 1 |
| 31968 | H | 72.24536 | 84.61226 | 77.62453 | 837.22991   | -229.14934  | 104.07973   | 1 |
| 31969 | C | 70.95176 | 87.23079 | 78.56897 | -512.74904  | 1438.02066  | 872.05429   | 1 |
| 31970 | H | 70.76244 | 88.16530 | 79.08735 | -223.23662  | -28.01260   | -893.98251  | 1 |
| 31971 | H | 70.50227 | 86.54709 | 79.26871 | -1946.98424 | 2033.22501  | -635.06683  | 1 |
| 31972 | C | 70.25425 | 87.16961 | 77.17740 | -105.93737  | 335.38717   | 135.50245   | 1 |
| 31973 | H | 69.14431 | 87.32761 | 77.32768 | -2030.38659 | -2611.13349 | -2265.47232 | 1 |
| 31974 | H | 70.66177 | 87.98843 | 76.50250 | 244.09736   | -5389.73490 | 2470.77988  | 1 |
| 31975 | H | 70.42162 | 86.10168 | 76.79615 | -239.14761  | -1474.25023 | 479.62032   | 1 |
| 31976 | C | 74.57601 | 86.00367 | 79.84154 | 691.61007   | -355.98759  | 376.42376   | 1 |
| 31977 | O | 74.69720 | 84.81589 | 79.41228 | -80.45605   | -10.88249   | -230.81472  | 1 |
| 31978 | N | 75.45131 | 86.87523 | 80.15273 | 228.01103   | -582.17423  | -757.00346  | 1 |
| 31979 | H | 75.15279 | 87.84443 | 80.29685 | 2255.53673  | -1129.33427 | 1585.80288  | 1 |
| 31980 | C | 76.85247 | 86.52311 | 80.10244 | 317.98408   | -160.20196  | 623.86652   | 1 |
| 31981 | H | 76.93072 | 85.75771 | 79.29357 | 2779.58868  | -2379.28594 | -1626.71919 | 1 |



|       |   |          |          |          |             |             |             |   |
|-------|---|----------|----------|----------|-------------|-------------|-------------|---|
| 31982 | C | 77.58702 | 87.88576 | 79.86311 | -432.04021  | -808.57855  | -328.70974  | 1 |
| 31983 | H | 76.99462 | 88.44822 | 79.00800 | 1251.77819  | -7.88728    | 156.40611   | 1 |
| 31984 | H | 77.48734 | 88.55109 | 80.78628 | 2080.39771  | -2172.53655 | 93.26160    | 1 |
| 31985 | O | 79.04959 | 87.86697 | 79.64297 | 84.57059    | 288.57683   | -23.78734   | 1 |
| 31986 | H | 79.08145 | 88.65338 | 79.09663 | -610.60829  | -1288.24916 | -2076.02414 | 1 |
| 31987 | C | 77.24700 | 85.83816 | 81.58395 | 845.89122   | 163.82733   | 957.95371   | 1 |
| 31988 | O | 78.12970 | 84.97851 | 81.68414 | 456.30412   | 457.09585   | -6.10522    | 1 |
| 31989 | N | 76.57705 | 86.37956 | 82.55747 | -933.48075  | 37.24618    | 471.81041   | 1 |
| 31990 | H | 75.88897 | 87.06677 | 82.25134 | -1790.10412 | -139.44205  | -86.77606   | 1 |
| 31991 | C | 76.50112 | 85.69650 | 83.83114 | -780.63011  | 17.23448    | 250.33605   | 1 |
| 31992 | H | 77.58910 | 85.69476 | 84.11866 | -468.53838  | 577.03759   | -1748.47041 | 1 |
| 31993 | C | 75.67265 | 86.49720 | 84.88520 | 905.71200   | -316.75861  | 206.66092   | 1 |
| 31994 | H | 74.61422 | 86.50090 | 84.48371 | 840.36576   | -351.51489  | -1664.46484 | 1 |
| 31995 | C | 75.59482 | 85.77076 | 86.28744 | 389.39583   | 172.99162   | -476.05636  | 1 |
| 31996 | H | 74.79641 | 86.11451 | 87.02278 | 1993.53637  | 4.16961     | 635.72847   | 1 |
| 31997 | H | 75.51400 | 84.69780 | 86.20590 | -1200.72439 | -2363.71614 | 1664.19330  | 1 |
| 31998 | H | 76.59900 | 85.88452 | 86.78583 | 624.17545   | 281.43632   | -122.75893  | 1 |
| 31999 | C | 76.21308 | 87.93173 | 85.20413 | -467.42293  | -230.43110  | 150.98491   | 1 |
| 32000 | H | 75.95709 | 88.59818 | 84.30851 | 8.59954     | 1539.59438  | 1498.76344  | 1 |
| 32001 | H | 75.69040 | 88.39776 | 86.05906 | 3480.94827  | -3919.97123 | -3150.80596 | 1 |
| 32002 | C | 77.77772 | 87.88812 | 85.38707 | -160.96281  | 631.49502   | 91.43877    | 1 |
| 32003 | H | 78.19944 | 87.65822 | 84.38426 | -562.41980  | 294.81435   | 3915.25566  | 1 |
| 32004 | H | 78.07738 | 87.16004 | 86.18527 | -1576.99604 | -602.73447  | 638.87565   | 1 |
| 32005 | H | 78.09869 | 88.91300 | 85.78785 | 1405.72694  | -1619.17105 | 827.56117   | 1 |
| 32006 | C | 75.78700 | 84.21280 | 83.67290 | 788.53453   | -28.49505   | -468.88047  | 1 |
| 32007 | O | 76.22800 | 83.19180 | 84.17690 | -757.40153  | -34.54751   | 200.07716   | 1 |
| 32008 | N | 74.61500 | 84.11980 | 83.04490 | 571.12420   | -174.38698  | -602.00905  | 1 |
| 32009 | H | 74.13500 | 84.95480 | 82.78790 | -336.47900  | 2883.14601  | -1251.96788 | 1 |
| 32010 | C | 73.91400 | 82.81280 | 82.88690 | -712.26382  | 404.45356   | 404.46614   | 1 |
| 32011 | H | 74.00400 | 82.22380 | 83.78790 | 629.73411   | 2167.38547  | -2212.86146 | 1 |
| 32012 | C | 72.40500 | 82.98880 | 82.63790 | 730.54540   | -290.89524  | -460.61907  | 1 |
| 32013 | H | 71.80800 | 82.06780 | 82.46190 | -1938.32127 | -1704.82360 | 1777.66826  | 1 |
| 32014 | O | 72.05500 | 83.93480 | 81.60190 | -710.49268  | -61.66689   | 327.63637   | 1 |
| 32015 | H | 72.41500 | 84.72780 | 82.00590 | 2030.93150  | -1563.18179 | -1820.09708 | 1 |
| 32016 | C | 71.88900 | 83.50080 | 83.95390 | 613.14241   | -345.10761  | 568.70575   | 1 |
| 32017 | H | 72.21200 | 84.53380 | 84.20790 | 2200.58367  | -1924.14214 | -1150.84564 | 1 |
| 32018 | H | 72.03100 | 82.81280 | 84.81390 | 1812.04637  | 99.49209    | -2578.11935 | 1 |
| 32019 | H | 70.78500 | 83.62080 | 83.92590 | -1619.98904 | -2122.89556 | -1645.60321 | 1 |
| 32020 | C | 74.57400 | 81.90580 | 81.81590 | 621.36775   | -652.42880  | 43.16816    | 1 |
| 32021 | O | 74.51000 | 80.70880 | 81.83790 | -640.77454  | 142.80220   | 435.59190   | 1 |
| 32022 | N | 75.20800 | 82.54480 | 80.80190 | 479.42188   | 691.08073   | 147.74909   | 1 |
| 32023 | H | 75.17800 | 83.52780 | 80.63590 | -836.50066  | -991.19347  | 2853.98741  | 1 |
| 32024 | C | 76.14000 | 81.91880 | 79.89590 | 163.05319   | 880.36338   | 221.42205   | 1 |
| 32025 | H | 75.54400 | 81.19980 | 79.35290 | 2580.55573  | 1369.68578  | -1188.33998 | 1 |
| 32026 | C | 76.52300 | 82.92480 | 78.72290 | 280.39071   | 742.20958   | -478.15948  | 1 |
| 32027 | H | 75.62500 | 83.11680 | 78.09690 | 2069.90502  | -1547.28776 | -1789.03978 | 1 |
| 32028 | H | 76.66500 | 83.94280 | 79.14390 | 2174.93594  | -2252.88062 | -190.11638  | 1 |
| 32029 | C | 77.84600 | 82.66780 | 77.99590 | -612.71903  | 149.49584   | 653.33890   | 1 |
| 32030 | H | 77.88700 | 81.63180 | 77.59590 | -1866.69941 | 2023.02840  | -1551.88237 | 1 |
| 32031 | H | 78.72200 | 82.60580 | 78.67690 | 3007.42614  | -846.25378  | 322.81626   | 1 |
| 32032 | C | 78.18500 | 83.71880 | 76.95690 | -101.77697  | -876.10774  | 169.16580   | 1 |
| 32033 | O | 77.71100 | 83.55580 | 75.80090 | 693.44839   | 14.69440    | 364.02734   | 1 |
| 32034 | O | 78.82900 | 84.76080 | 77.27790 | 525.75263   | 305.71765   | 500.00282   | 1 |
| 32035 | C | 77.35300 | 81.31380 | 80.52590 | 123.36138   | 737.97742   | 529.62648   | 1 |
| 32036 | O | 77.70100 | 80.15980 | 80.26390 | -48.54966   | 749.62179   | -288.64368  | 1 |
| 32037 | N | 77.95800 | 82.09480 | 81.38790 | 501.67043   | 656.29888   | -226.06362  | 1 |
| 32038 | H | 77.75900 | 83.05180 | 81.58290 | -1878.24704 | -2203.52212 | -1215.69784 | 1 |
| 32039 | C | 79.11300 | 81.64780 | 82.15290 | -451.72930  | 511.53847   | -624.07772  | 1 |
| 32040 | H | 79.84000 | 81.34180 | 81.41590 | 786.46122   | -2544.78100 | -1667.38510 | 1 |
| 32041 | C | 79.73600 | 82.80780 | 82.92590 | 556.34576   | -691.52224  | 161.55164   | 1 |
| 32042 | H | 79.00500 | 83.27380 | 83.62090 | 2007.25997  | -18.32550   | 2414.53703  | 1 |
| 32043 | H | 80.07200 | 83.58180 | 82.20390 | 1774.45048  | -1959.34200 | 1683.81894  | 1 |

|       |   |          |          |          |             |             |             |   |
|-------|---|----------|----------|----------|-------------|-------------|-------------|---|
| 32044 | H | 80.64900 | 82.46280 | 83.45690 | 4.89799     | 2342.98725  | -2123.25859 | 1 |
| 32045 | C | 78.82700 | 80.48580 | 83.13890 | -363.70548  | -587.65466  | -592.04314  | 1 |
| 32046 | O | 79.55900 | 79.51980 | 83.22390 | 156.55684   | 298.84368   | 708.46807   | 1 |
| 32047 | N | 77.64800 | 80.51980 | 83.78290 | 450.85362   | 361.17242   | 614.63778   | 1 |
| 32048 | H | 77.05800 | 81.29980 | 83.58990 | 1785.81785  | 2084.84058  | -1564.85080 | 1 |
| 32049 | C | 77.12500 | 79.38880 | 84.44290 | -293.60047  | -713.75831  | 456.65107   | 1 |
| 32050 | H | 77.86300 | 79.04080 | 85.15090 | -2725.70752 | -1193.98408 | -1011.19579 | 1 |
| 32051 | C | 75.91800 | 79.80180 | 85.39390 | -755.67903  | -207.60385  | -464.38306  | 1 |
| 32052 | H | 75.08100 | 80.21480 | 84.79090 | 1551.01874  | -1142.61595 | 2474.92837  | 1 |
| 32053 | H | 75.49200 | 78.90680 | 85.89490 | 1947.33529  | 1938.80092  | -1559.32333 | 1 |
| 32054 | C | 76.28200 | 80.82580 | 86.48490 | -426.17957  | 94.76615    | 791.83861   | 1 |
| 32055 | H | 76.98000 | 81.55880 | 86.02790 | 3046.47485  | 540.40383   | -608.32694  | 1 |
| 32056 | C | 74.98200 | 81.56780 | 86.85190 | -735.89682  | -299.14808  | -439.07224  | 1 |
| 32057 | H | 75.18900 | 82.57080 | 87.28190 | -2655.52362 | -1209.65211 | -1159.00628 | 1 |
| 32058 | H | 74.37200 | 80.96780 | 87.56090 | 451.53647   | -2190.77408 | 2192.67946  | 1 |
| 32059 | H | 74.21300 | 81.76580 | 86.07590 | -2690.99909 | -1157.37042 | -1132.11167 | 1 |
| 32060 | C | 77.11200 | 80.14080 | 87.64290 | 473.73493   | -349.04518  | -701.65537  | 1 |
| 32061 | H | 78.19900 | 80.15580 | 87.41590 | -728.62184  | -2421.76933 | -1863.77431 | 1 |
| 32062 | H | 76.72400 | 79.10680 | 87.76490 | 768.93926   | -709.12813  | -2973.66066 | 1 |
| 32063 | H | 77.02300 | 80.76480 | 88.55790 | -1919.19737 | -2466.64293 | 215.29753   | 1 |
| 32064 | C | 76.81200 | 78.16480 | 83.60190 | -21.86657   | 596.20934   | 691.69449   | 1 |
| 32065 | O | 76.88800 | 77.02780 | 84.09590 | 685.77157   | -355.68646  | -143.10498  | 1 |
| 32066 | N | 76.40900 | 78.34580 | 82.33290 | 119.22504   | -314.95769  | -777.09783  | 1 |
| 32067 | H | 76.25200 | 79.28280 | 82.02990 | -478.80401  | 1320.79031  | -2829.47174 | 1 |
| 32068 | C | 76.00000 | 77.24280 | 81.44990 | 225.06223   | -697.55320  | 516.23294   | 1 |
| 32069 | H | 75.30300 | 76.60780 | 81.97590 | -1973.89218 | 1245.50634  | 2110.95006  | 1 |
| 32070 | C | 75.34000 | 77.71080 | 80.16190 | -748.50407  | 369.69860   | -391.57026  | 1 |
| 32071 | H | 74.36600 | 78.17280 | 80.43090 | -562.24139  | 2538.03136  | -1799.47781 | 1 |
| 32072 | H | 76.02600 | 78.35680 | 79.57290 | 2902.51737  | -1117.42707 | 419.38812   | 1 |
| 32073 | H | 75.07000 | 76.89780 | 79.45490 | -1754.71165 | -2484.24383 | 760.29744   | 1 |
| 32074 | C | 77.21500 | 76.45580 | 81.18090 | 252.45224   | 658.74784   | 582.07552   | 1 |
| 32075 | O | 77.05800 | 75.22780 | 81.01690 | 83.33404    | 485.42979   | 617.81627   | 1 |
| 32076 | N | 78.42600 | 76.99280 | 81.18490 | 356.89110   | -61.57704   | 750.90182   | 1 |
| 32077 | H | 78.51000 | 77.98480 | 81.24190 | 2130.17501  | -938.91419  | 2099.88886  | 1 |
| 32078 | C | 79.72500 | 76.37280 | 80.94990 | 788.92896   | -201.80046  | 389.62549   | 1 |
| 32079 | H | 79.67100 | 75.84580 | 80.00890 | -2581.97542 | -1682.86945 | -622.78098  | 1 |
| 32080 | C | 80.84500 | 77.40480 | 80.87490 | -628.56068  | 623.96451   | -262.44398  | 1 |
| 32081 | H | 81.81300 | 76.89780 | 80.67290 | 1828.90153  | -2186.90516 | -1321.96633 | 1 |
| 32082 | H | 80.83100 | 77.90280 | 81.86790 | -791.59950  | 1518.76928  | 2634.40386  | 1 |
| 32083 | C | 80.72800 | 78.48680 | 79.85590 | 477.80854   | 146.41207   | -774.89204  | 1 |
| 32084 | C | 79.79900 | 78.45180 | 78.78390 | -186.36139  | -144.81983  | -889.98389  | 1 |
| 32085 | H | 79.19800 | 77.57480 | 78.59390 | 1922.91667  | 2027.93828  | 1447.30307  | 1 |
| 32086 | C | 79.71500 | 79.51180 | 77.92990 | -492.38396  | -663.59325  | 357.59285   | 1 |
| 32087 | H | 78.93100 | 79.51880 | 77.18690 | -2293.43724 | 327.08747   | 2123.94736  | 1 |
| 32088 | C | 80.60300 | 80.61280 | 78.00890 | -883.21266  | 142.28124   | 184.42038   | 1 |
| 32089 | H | 80.63700 | 81.41480 | 77.28690 | -1403.63696 | -522.56412  | -2776.92815 | 1 |
| 32090 | C | 81.56500 | 79.61080 | 80.03390 | -31.40913   | 730.79491   | 547.13444   | 1 |
| 32091 | H | 82.29100 | 79.66680 | 80.83190 | -3116.11861 | 384.04947   | 218.86273   | 1 |
| 32092 | C | 81.49000 | 80.62980 | 79.09190 | -433.29809  | -314.65525  | -745.85593  | 1 |
| 32093 | H | 82.21500 | 81.42980 | 79.14390 | 988.68604   | 1276.03345  | -2717.25595 | 1 |
| 32094 | C | 80.06500 | 75.30780 | 81.89290 | 30.06506    | -607.94728  | -679.29995  | 1 |
| 32095 | O | 80.91900 | 74.45080 | 81.59690 | 671.74276   | 404.92641   | 107.45670   | 1 |
| 32096 | N | 79.44000 | 75.24380 | 83.07190 | 603.22251   | -474.87754  | -343.24358  | 1 |
| 32097 | H | 78.65900 | 75.82680 | 83.28190 | 104.67288   | 2703.62055  | 1615.59018  | 1 |
| 32098 | C | 79.63100 | 74.13880 | 83.98890 | -67.91905   | 75.21585    | 896.44201   | 1 |
| 32099 | H | 80.68900 | 74.07380 | 84.19190 | 2816.28465  | -1078.55727 | 868.70188   | 1 |
| 32100 | C | 78.87000 | 74.41180 | 85.37190 | -411.35045  | -598.79516  | -547.98192  | 1 |
| 32101 | H | 78.83600 | 73.47280 | 85.96590 | -1799.41308 | -1136.35272 | -2321.36606 | 1 |
| 32102 | H | 77.82200 | 74.75780 | 85.24390 | 739.07027   | 2943.04081  | 864.08794   | 1 |
| 32103 | C | 79.70500 | 75.33080 | 86.30090 | 17.38737    | 422.41305   | 803.13778   | 1 |
| 32104 | C | 79.44800 | 76.73280 | 86.29990 | 330.33177   | -562.25603  | -638.25219  | 1 |
| 32105 | H | 78.60500 | 77.12880 | 85.75290 | 2075.14118  | 1851.07090  | 1478.63196  | 1 |

|       |   |          |          |          |             |             |             |   |
|-------|---|----------|----------|----------|-------------|-------------|-------------|---|
| 32106 | C | 80.18400 | 77.60480 | 87.17890 | -236.58297  | 844.69494   | -293.29973  | 1 |
| 32107 | H | 79.91800 | 78.64980 | 87.23690 | -66.28161   | 893.53631   | -3029.90220 | 1 |
| 32108 | C | 81.22300 | 77.03480 | 87.99790 | -583.98383  | 28.59610    | -709.31061  | 1 |
| 32109 | H | 81.76900 | 77.73080 | 88.61790 | 25.78758    | -2087.41420 | 2332.34975  | 1 |
| 32110 | C | 80.73400 | 74.83380 | 87.05290 | -298.28421  | 456.99279   | -748.17810  | 1 |
| 32111 | H | 80.89600 | 73.77180 | 87.15890 | -2126.07529 | -1143.85252 | -2021.51953 | 1 |
| 32112 | C | 81.50200 | 75.61880 | 87.92690 | -211.12842  | 896.73373   | 18.81755    | 1 |
| 32113 | H | 82.33500 | 75.21480 | 88.48390 | -439.01408  | 2011.30671  | -2399.85473 | 1 |
| 32114 | C | 79.16300 | 72.79280 | 83.47990 | -513.98847  | 563.28423   | -525.25282  | 1 |
| 32115 | O | 79.55200 | 71.72080 | 84.04290 | 545.12259   | -423.33338  | -378.43714  | 1 |
| 32116 | N | 78.30700 | 72.68380 | 82.44790 | -841.16080  | 93.02246    | 43.43901    | 1 |
| 32117 | H | 77.94400 | 73.50180 | 82.00890 | 1036.56795  | -602.87582  | 2895.56100  | 1 |
| 32118 | C | 78.01100 | 71.39980 | 81.79690 | -313.03391  | 403.95598   | -772.80076  | 1 |
| 32119 | H | 77.51000 | 70.87580 | 82.59890 | 1351.81266  | 1396.56266  | -2488.67644 | 1 |
| 32120 | C | 77.14300 | 71.47680 | 80.57290 | -600.38244  | -464.42883  | 489.22919   | 1 |
| 32121 | H | 76.78100 | 70.46380 | 80.29490 | -990.30154  | -223.83569  | -2987.37839 | 1 |
| 32122 | H | 76.21100 | 71.97380 | 80.91690 | -391.31079  | -1075.75395 | 2917.64515  | 1 |
| 32123 | N | 77.72300 | 73.44280 | 79.04490 | 337.46101   | -758.98498  | -30.92509   | 1 |
| 32124 | H | 77.43600 | 74.19280 | 79.63990 | -1942.57870 | -1976.43701 | -1486.66530 | 1 |
| 32125 | C | 77.73900 | 72.10080 | 79.28290 | 339.17099   | 669.70393   | 520.80575   | 1 |
| 32126 | C | 78.21500 | 73.63280 | 77.79190 | -506.36084  | -638.44974  | -405.63204  | 1 |
| 32127 | H | 78.09200 | 74.62580 | 77.35890 | 2923.32435  | -596.40774  | 965.92021   | 1 |
| 32128 | N | 78.44100 | 72.46680 | 77.21390 | 484.34748   | -372.07929  | -579.52145  | 1 |
| 32129 | C | 78.16100 | 71.51680 | 78.14890 | -694.38478  | -575.78168  | 96.84530    | 1 |
| 32130 | H | 78.36500 | 70.47680 | 77.92590 | 1209.86376  | 1936.02027  | -2182.17364 | 1 |
| 32131 | C | 79.20000 | 70.61280 | 81.39290 | 730.99432   | 487.67388   | 243.96631   | 1 |
| 32132 | O | 79.29400 | 69.44680 | 81.75690 | -87.73488   | 53.18777    | -794.82909  | 1 |
| 32133 | N | 80.23700 | 71.24080 | 80.70990 | 568.65566   | 442.03275   | -457.38191  | 1 |
| 32134 | H | 80.12400 | 72.15080 | 80.31990 | -1149.19080 | -2394.92438 | -1683.21211 | 1 |
| 32135 | C | 81.53600 | 70.68980 | 80.37790 | 257.92101   | -771.53577  | -399.56245  | 1 |
| 32136 | H | 81.30400 | 69.88380 | 79.69790 | 313.80498   | -2645.80232 | -1666.38811 | 1 |
| 32137 | C | 82.43700 | 71.71380 | 79.66390 | 590.85632   | 264.10046   | -654.86117  | 1 |
| 32138 | H | 82.58700 | 72.59480 | 80.32390 | 633.69109   | 946.96046   | 2922.38254  | 1 |
| 32139 | H | 83.49300 | 71.39880 | 79.52090 | 1354.48972  | -2162.45512 | -1838.05205 | 1 |
| 32140 | S | 81.70000 | 72.38080 | 78.16590 | 93.93759    | -437.53820  | 304.33494   | 1 |
| 32141 | H | 80.97600 | 71.33580 | 77.79290 | 1218.75458  | -1554.97987 | 2426.47289  | 1 |
| 32142 | C | 82.28600 | 70.13480 | 81.59390 | -540.95537  | 560.34492   | 478.41676   | 1 |
| 32143 | O | 82.97200 | 69.12480 | 81.49390 | -436.97544  | 401.29361   | 519.70237   | 1 |
| 32144 | N | 82.03700 | 70.65580 | 82.81090 | 6.92897     | -141.72959  | 817.85312   | 1 |
| 32145 | H | 81.50900 | 71.49380 | 82.92690 | -1334.98503 | 1929.33994  | 2095.77522  | 1 |
| 32146 | C | 82.76200 | 70.16280 | 84.01490 | -511.32706  | 520.73508   | -571.55250  | 1 |
| 32147 | H | 83.68700 | 69.72280 | 83.67190 | 2439.99769  | 1701.14123  | -1048.14856 | 1 |
| 32148 | C | 82.99500 | 71.37380 | 84.95390 | 746.08196   | -506.40605  | 63.05231    | 1 |
| 32149 | H | 83.61300 | 70.98680 | 85.79290 | -2662.15061 | 1499.21483  | 760.30728   | 1 |
| 32150 | H | 82.07200 | 71.89880 | 85.27890 | -561.34361  | -2062.54806 | -2311.57713 | 1 |
| 32151 | S | 83.97900 | 72.63280 | 84.11290 | -394.80544  | 180.15849   | 343.42411   | 1 |
| 32152 | H | 85.18200 | 72.12980 | 84.34390 | -936.34414  | 715.88928   | -2934.22292 | 1 |
| 32153 | C | 81.93800 | 69.10780 | 84.71990 | -665.65083  | 510.81553   | 363.78887   | 1 |
| 32154 | O | 82.51800 | 68.29280 | 85.42290 | -492.16268  | -367.31411  | -503.74206  | 1 |
| 32155 | N | 80.65300 | 69.10580 | 84.45990 | 617.90521   | -121.47033  | 545.21300   | 1 |
| 32156 | H | 80.19800 | 69.73580 | 83.83490 | -2558.13217 | -1816.74297 | -173.68841  | 1 |
| 32157 | C | 79.68700 | 68.14480 | 85.04490 | -414.52547  | 264.89470   | -784.01284  | 1 |
| 32158 | H | 80.05800 | 67.92580 | 86.03490 | -1438.58887 | -2764.59263 | -369.76530  | 1 |
| 32159 | C | 78.28300 | 68.75380 | 85.06290 | -348.08194  | 775.72935   | 349.02091   | 1 |
| 32160 | H | 77.45500 | 68.03180 | 85.23190 | 2179.52929  | 2193.51358  | 606.74686   | 1 |
| 32161 | H | 78.09100 | 69.16680 | 84.04990 | 1965.84540  | -945.77438  | -2269.15813 | 1 |
| 32162 | C | 78.00400 | 69.82480 | 86.20890 | 20.46080    | 210.97673   | 879.87689   | 1 |
| 32163 | H | 78.90500 | 70.47180 | 86.14290 | -1125.66089 | 664.99288   | -2875.08964 | 1 |
| 32164 | C | 76.81100 | 70.73680 | 85.85990 | -443.58320  | 616.18741   | 512.05281   | 1 |
| 32165 | H | 76.67900 | 71.41480 | 86.72990 | -1424.79755 | 2315.25916  | -1611.09577 | 1 |
| 32166 | H | 77.14500 | 71.31780 | 84.97290 | -1676.66972 | 748.06082   | -2568.62275 | 1 |
| 32167 | H | 75.93600 | 70.06580 | 85.72890 | 2456.17085  | 1201.63001  | 1555.50272  | 1 |

|       |   |          |          |          |             |             |             |   |
|-------|---|----------|----------|----------|-------------|-------------|-------------|---|
| 32168 | C | 77.83700 | 69.07980 | 87.51390 | 258.42985   | 572.80388   | 661.21292   | 1 |
| 32169 | H | 76.86500 | 68.54180 | 87.53190 | 2629.80653  | 898.24513   | 1472.01065  | 1 |
| 32170 | H | 77.89600 | 69.81380 | 88.34590 | 1042.32787  | -1649.69374 | -2469.44381 | 1 |
| 32171 | H | 78.56200 | 68.26680 | 87.73190 | 99.20638    | 2305.71644  | 2140.81542  | 1 |
| 32172 | C | 79.65200 | 66.80780 | 84.29190 | -500.73333  | -486.16339  | 569.22402   | 1 |
| 32173 | O | 79.37600 | 65.74280 | 84.89590 | 479.31134   | -528.27884  | -325.00841  | 1 |
| 32174 | N | 79.98800 | 66.80280 | 82.99990 | 625.98910   | -55.03591   | 546.19422   | 1 |
| 32175 | H | 80.13000 | 67.65680 | 82.50490 | 1398.48252  | -2135.82713 | -1833.02071 | 1 |
| 32176 | C | 80.27200 | 65.57980 | 82.21990 | 342.74488   | -436.65578  | -725.09988  | 1 |
| 32177 | H | 79.38000 | 64.97580 | 82.30090 | 1647.79262  | 1530.33545  | -2214.94128 | 1 |
| 32178 | C | 80.25600 | 65.98080 | 80.69390 | -336.76980  | 582.41517   | 618.17866   | 1 |
| 32179 | H | 80.91000 | 66.86380 | 80.53090 | 2643.58886  | -525.27432  | 1597.33071  | 1 |
| 32180 | H | 79.24200 | 66.28180 | 80.35290 | 21.52088    | -788.94404  | -3053.08581 | 1 |
| 32181 | C | 80.67100 | 64.84780 | 79.76590 | 87.69388    | 874.45270   | 266.60516   | 1 |
| 32182 | O | 80.29900 | 63.70080 | 79.96890 | 487.10039   | 520.40840   | 334.49870   | 1 |
| 32183 | N | 81.33000 | 65.20580 | 78.66090 | 430.76865   | -578.92711  | -426.78536  | 1 |
| 32184 | H | 81.30100 | 66.17680 | 78.42390 | -96.26643   | 2782.03926  | -1499.52615 | 1 |
| 32185 | H | 81.92300 | 64.53680 | 78.21290 | -1629.38720 | -653.89863  | 2600.77792  | 1 |
| 32186 | C | 81.38000 | 64.62380 | 82.85090 | 822.06021   | -1.71555    | 370.44026   | 1 |
| 32187 | O | 81.10700 | 63.45380 | 83.05790 | -134.41042  | 790.04317   | -29.38416   | 1 |
| 32188 | N | 82.53700 | 65.11480 | 83.31390 | -341.44051  | -711.53477  | 266.69754   | 1 |
| 32189 | C | 83.22100 | 66.26080 | 82.69590 | 540.24704   | -101.19792  | 709.00807   | 1 |
| 32190 | H | 82.94100 | 67.16080 | 83.28390 | 1544.81404  | -1998.31714 | 1848.09434  | 1 |
| 32191 | H | 82.92800 | 66.49280 | 81.64990 | 903.89387   | -1193.80354 | -2773.76113 | 1 |
| 32192 | C | 83.43800 | 64.25680 | 84.07790 | -242.94054  | -329.61239  | -825.56006  | 1 |
| 32193 | H | 83.55400 | 63.29780 | 83.59490 | 2121.16200  | -1220.28358 | 1951.41546  | 1 |
| 32194 | C | 84.69700 | 65.12580 | 84.13990 | -798.72216  | -116.28366  | 415.50703   | 1 |
| 32195 | H | 85.61200 | 64.50480 | 84.24490 | 2277.37313  | 703.09197   | 2036.64001  | 1 |
| 32196 | H | 84.61000 | 65.77680 | 85.03590 | -1602.15424 | -1244.30222 | 2387.95254  | 1 |
| 32197 | C | 84.69800 | 65.91280 | 82.85790 | -750.90081  | -514.67090  | -28.40442   | 1 |
| 32198 | H | 85.34200 | 66.81680 | 82.82290 | 1911.05131  | -1901.82905 | -1619.59580 | 1 |
| 32199 | H | 85.02000 | 65.31480 | 81.97890 | 2190.61623  | -1261.20420 | 1845.32405  | 1 |
| 32200 | C | 82.95000 | 63.89680 | 85.48290 | 695.77384   | -6.39629    | -597.50762  | 1 |
| 32201 | O | 83.29800 | 62.85680 | 86.07890 | 426.32927   | -578.97091  | -315.76325  | 1 |
| 32202 | N | 82.18500 | 64.85480 | 86.18890 | 644.68769   | -451.75300  | 268.67899   | 1 |
| 32203 | H | 82.04200 | 65.79680 | 85.89690 | -1850.39233 | -2144.76892 | -1369.00297 | 1 |
| 32204 | C | 81.67900 | 64.58180 | 87.53990 | 885.18049   | 215.51751   | 27.83933    | 1 |
| 32205 | H | 82.46700 | 64.31080 | 88.22590 | 1308.76511  | 1463.92789  | -2476.02131 | 1 |
| 32206 | C | 80.99100 | 65.83580 | 88.13590 | -476.49501  | 768.00857   | -192.80664  | 1 |
| 32207 | H | 80.39700 | 66.35780 | 87.35590 | 2519.62588  | 1888.28779  | 118.89000   | 1 |
| 32208 | C | 80.07500 | 65.51980 | 89.33090 | -485.06151  | 753.31383   | 204.15102   | 1 |
| 32209 | H | 79.23600 | 64.80180 | 89.20790 | -1421.68854 | -667.38069  | 2713.13365  | 1 |
| 32210 | H | 79.60200 | 66.50280 | 89.53890 | -348.77910  | 1621.64979  | -2691.26013 | 1 |
| 32211 | H | 80.59200 | 65.06380 | 90.20190 | -2653.31743 | 1257.92388  | 1131.18289  | 1 |
| 32212 | C | 82.10400 | 66.82480 | 88.54790 | 341.92409   | 762.63975   | 372.39754   | 1 |
| 32213 | H | 82.94700 | 66.77280 | 87.82690 | 1058.79410  | 263.35229   | 2938.16362  | 1 |
| 32214 | H | 82.54800 | 66.39380 | 89.46990 | 210.72728   | -1454.90537 | 2763.24008  | 1 |
| 32215 | C | 81.75600 | 68.27980 | 88.67090 | 768.35466   | 485.26227   | -136.75340  | 1 |
| 32216 | H | 81.18400 | 68.37880 | 89.61690 | -1082.60644 | -2612.37751 | 1346.02031  | 1 |
| 32217 | H | 82.69900 | 68.86180 | 88.75190 | -1627.89541 | -1936.07157 | 1847.14214  | 1 |
| 32218 | H | 81.16100 | 68.59880 | 87.78890 | -1719.07556 | -495.14944  | 2574.44705  | 1 |
| 32219 | C | 80.71800 | 63.40580 | 87.53890 | 682.17196   | 537.64066   | 279.48266   | 1 |
| 32220 | O | 80.75900 | 62.52280 | 88.33690 | -300.12631  | 296.78647   | -685.28713  | 1 |
| 32221 | N | 79.82600 | 63.35580 | 86.53090 | -568.42711  | 410.02799   | -495.75557  | 1 |
| 32222 | H | 79.63700 | 64.12880 | 85.92890 | 1416.75869  | -2154.69848 | -1796.48571 | 1 |
| 32223 | C | 78.94800 | 62.20480 | 86.22690 | -0.80874    | 447.29586   | -811.77947  | 1 |
| 32224 | H | 78.49300 | 61.75780 | 87.09790 | 1784.28016  | -1467.33777 | 2113.85473  | 1 |
| 32225 | C | 77.77100 | 62.67180 | 85.34990 | -251.98514  | -640.85157  | -596.04353  | 1 |
| 32226 | H | 78.14500 | 63.09380 | 84.39290 | -1174.26888 | 2073.92500  | 2058.90361  | 1 |
| 32227 | H | 77.13300 | 61.79380 | 85.11490 | 2691.69983  | 127.99970   | 1606.63939  | 1 |
| 32228 | C | 76.80000 | 63.71180 | 86.07290 | -93.12231   | -890.04852  | 82.95526    | 1 |
| 32229 | H | 77.33300 | 64.63980 | 86.37290 | 238.04181   | 271.25216   | -3135.69076 | 1 |

|       |   |          |          |          |             |             |             |   |
|-------|---|----------|----------|----------|-------------|-------------|-------------|---|
| 32230 | C | 75.74100 | 64.25280 | 85.11390 | 504.71272   | -673.69926  | -325.77031  | 1 |
| 32231 | H | 76.09600 | 64.59780 | 84.11990 | 1285.52588  | -2273.45529 | -1742.29023 | 1 |
| 32232 | H | 74.99800 | 63.47780 | 84.82990 | -1474.98661 | 190.47153   | -2783.80236 | 1 |
| 32233 | H | 75.09800 | 65.00780 | 85.61490 | 2430.53964  | -1717.99297 | 979.75472   | 1 |
| 32234 | C | 76.08600 | 63.16980 | 87.28090 | -702.11459  | -460.03929  | -354.00922  | 1 |
| 32235 | H | 75.75700 | 62.14180 | 87.01690 | -448.17259  | -2532.19630 | 1786.50492  | 1 |
| 32236 | H | 76.70900 | 63.27280 | 88.19590 | 1109.71980  | 2073.17724  | 2092.16613  | 1 |
| 32237 | H | 75.17000 | 63.75080 | 87.51990 | -1083.99224 | -1731.52028 | 2376.17222  | 1 |
| 32238 | C | 79.71000 | 61.03980 | 85.48290 | 402.40153   | 578.96775   | -597.12515  | 1 |
| 32239 | O | 79.10700 | 60.24680 | 84.78490 | -166.13562  | 560.38761   | 534.22280   | 1 |
| 32240 | N | 81.05000 | 60.89580 | 85.67690 | 530.00166   | -553.79255  | -339.59497  | 1 |
| 32241 | H | 81.56300 | 61.63580 | 86.10390 | 1080.12050  | -1547.55650 | 2496.23658  | 1 |
| 32242 | C | 81.67900 | 59.58380 | 85.48290 | 562.19458   | -225.14508  | 660.63245   | 1 |
| 32243 | H | 80.94000 | 58.86180 | 85.16790 | -1784.29206 | 946.60422   | 2409.05308  | 1 |
| 32244 | C | 82.84300 | 59.77880 | 84.44790 | 533.46562   | -545.52844  | 467.32231   | 1 |
| 32245 | H | 83.72900 | 59.14880 | 84.67490 | 1886.79156  | 1329.26230  | 2124.54767  | 1 |
| 32246 | H | 83.19000 | 60.83380 | 84.42090 | 1054.86130  | 2839.92443  | 861.32795   | 1 |
| 32247 | C | 82.46800 | 59.21580 | 83.06090 | 631.25518   | -57.63992   | -660.13911  | 1 |
| 32248 | C | 82.09700 | 57.87180 | 82.98090 | -622.58789  | 674.96096   | -125.38789  | 1 |
| 32249 | H | 82.06500 | 57.29180 | 83.89090 | -1047.11570 | 268.37778   | -2971.18022 | 1 |
| 32250 | C | 81.76000 | 57.32380 | 81.74990 | -209.27878  | -389.29185  | 781.88943   | 1 |
| 32251 | H | 81.57400 | 56.26280 | 81.67190 | 1122.85843  | 2830.69296  | -827.72698  | 1 |
| 32252 | C | 81.73300 | 58.12080 | 80.62590 | 785.25793   | -435.25870  | -36.25291   | 1 |
| 32253 | O | 81.35100 | 57.56780 | 79.39290 | 463.60845   | 624.56864   | -161.83702  | 1 |
| 32254 | H | 80.98200 | 56.68280 | 79.44890 | -2204.10587 | -308.31719  | -2245.17744 | 1 |
| 32255 | C | 82.57200 | 59.98580 | 81.93490 | 654.43870   | -590.08328  | -191.72200  | 1 |
| 32256 | H | 82.88300 | 61.01080 | 82.07090 | 2137.59112  | -1732.24340 | -1516.63137 | 1 |
| 32257 | C | 82.18800 | 59.43480 | 80.71690 | -594.88777  | -475.57251  | -514.62977  | 1 |
| 32258 | H | 82.27300 | 60.00980 | 79.80690 | -2941.38013 | -982.75890  | 548.12677   | 1 |
| 32259 | C | 82.20300 | 59.06980 | 86.83590 | 536.18923   | 122.94024   | 712.20368   | 1 |
| 32260 | O | 82.67700 | 57.91880 | 86.94890 | 326.56715   | 41.84569    | 702.53403   | 1 |
| 32261 | N | 82.03300 | 59.88880 | 87.89690 | -709.45916  | -260.20504  | -389.39020  | 1 |
| 32262 | H | 81.63800 | 60.79980 | 87.80690 | -2289.90250 | 241.65332   | 2136.62994  | 1 |
| 32263 | C | 82.49000 | 59.51680 | 89.18790 | -432.01079  | -648.29885  | -475.65635  | 1 |
| 32264 | H | 83.47100 | 59.07480 | 89.09290 | -660.19624  | -2934.85757 | 878.16350   | 1 |
| 32265 | C | 82.64400 | 60.75380 | 90.06890 | 592.43601   | 572.25670   | -415.40702  | 1 |
| 32266 | H | 83.36700 | 60.50080 | 90.87390 | 1953.84494  | -1216.49344 | 2123.96554  | 1 |
| 32267 | H | 81.69200 | 61.08180 | 90.53790 | 2703.34760  | -852.70995  | 1342.00826  | 1 |
| 32268 | H | 83.13700 | 61.58380 | 89.51890 | -2833.40110 | -1362.16809 | -34.38125   | 1 |
| 32269 | C | 81.62000 | 58.45680 | 89.91790 | 687.26219   | 514.37315   | 304.88254   | 1 |
| 32270 | O | 80.36400 | 58.52880 | 89.88090 | 469.97125   | 545.56725   | -349.32487  | 1 |
| 32271 | N | 82.22900 | 57.62180 | 90.79390 | -78.06647   | -700.07091  | 436.85908   | 1 |
| 32272 | H | 83.21700 | 57.48780 | 90.80390 | -2534.45505 | 1345.48651  | 1292.96103  | 1 |
| 32273 | C | 81.49200 | 56.95580 | 91.86190 | -487.74723  | 594.32740   | 492.92487   | 1 |
| 32274 | H | 82.21900 | 56.51580 | 92.52890 | 413.54977   | -2009.28391 | -2389.21436 | 1 |
| 32275 | C | 80.59000 | 57.87080 | 92.75390 | -493.02373  | -647.93847  | 382.99562   | 1 |
| 32276 | H | 79.86600 | 58.38380 | 92.08590 | 1814.09800  | 1163.64728  | 2284.75869  | 1 |
| 32277 | H | 80.09300 | 57.24080 | 93.52290 | 2200.30492  | -1689.83163 | -1480.28349 | 1 |
| 32278 | C | 81.46100 | 58.86380 | 93.52190 | -584.54069  | 617.34695   | -362.48102  | 1 |
| 32279 | C | 82.52500 | 58.47380 | 94.32090 | -98.18249   | -748.52573  | 483.19915   | 1 |
| 32280 | H | 82.86400 | 57.44780 | 94.30990 | 2839.42747  | -949.13249  | 941.11310   | 1 |
| 32281 | C | 83.30600 | 59.40880 | 95.01490 | 402.60370   | 474.92503   | 659.68400   | 1 |
| 32282 | H | 84.13400 | 59.10480 | 95.63690 | 2264.44592  | -1678.40725 | -1401.54481 | 1 |
| 32283 | C | 82.96400 | 60.78380 | 94.84590 | 563.53618   | 520.81291   | 490.47088   | 1 |
| 32284 | H | 83.47000 | 61.57380 | 95.38290 | 2292.18019  | 1114.29273  | 1838.64036  | 1 |
| 32285 | C | 81.16500 | 60.24680 | 93.35090 | 629.91120   | 606.60150   | 269.10958   | 1 |
| 32286 | H | 80.29800 | 60.48480 | 92.75290 | -1224.70819 | 2171.61707  | -1943.43482 | 1 |
| 32287 | C | 81.88600 | 61.18680 | 94.02290 | -515.79364  | 745.35991   | 144.73327   | 1 |
| 32288 | H | 81.69100 | 62.24580 | 93.93990 | -140.36455  | -1675.54576 | 2640.01771  | 1 |
| 32289 | C | 80.76400 | 55.70980 | 91.43490 | -504.13368  | 202.15456   | -749.76495  | 1 |
| 32290 | O | 79.70800 | 55.31080 | 91.95290 | -24.04880   | 620.50746   | 490.74085   | 1 |
| 32291 | N | 81.30300 | 54.90280 | 90.49790 | -617.94624  | 149.99776   | -575.33461  | 1 |

|       |   |          |          |           |             |             |             |   |
|-------|---|----------|----------|-----------|-------------|-------------|-------------|---|
| 32292 | H | 82.18100 | 55.22180 | 90.14890  | -1244.24897 | 2127.67709  | 1956.36366  | 1 |
| 32293 | C | 80.71900 | 53.68480 | 89.94390  | 606.73743   | 608.24122   | -328.64632  | 1 |
| 32294 | H | 79.65100 | 53.83680 | 89.97990  | 2828.57808  | -1163.01308 | -710.46131  | 1 |
| 32295 | C | 81.27100 | 53.31280 | 88.53290  | -566.72496  | 465.30192   | -570.03452  | 1 |
| 32296 | H | 80.83700 | 52.33080 | 88.24890  | 1571.64029  | -2681.14450 | 386.08336   | 1 |
| 32297 | H | 82.36400 | 53.11580 | 88.57390  | 1251.29217  | -2231.22628 | -1827.48263 | 1 |
| 32298 | C | 80.98500 | 54.38180 | 87.51690  | -848.58501  | 360.39891   | 7.56375     | 1 |
| 32299 | H | 81.51500 | 55.32680 | 87.76390  | 2389.39941  | -718.56295  | -1917.34494 | 1 |
| 32300 | C | 81.53700 | 54.10480 | 86.08490  | 664.30825   | -461.27398  | 383.71387   | 1 |
| 32301 | H | 81.59600 | 55.10380 | 85.60390  | -973.36839  | 2736.89360  | 1225.83570  | 1 |
| 32302 | H | 82.55700 | 53.69280 | 86.23790  | -2218.68294 | -2214.42940 | -258.37391  | 1 |
| 32303 | H | 81.03200 | 53.33780 | 85.45890  | -1653.18365 | -2498.36828 | 934.14481   | 1 |
| 32304 | C | 79.54200 | 54.65580 | 87.23390  | -445.08200  | 564.28187   | -588.99003  | 1 |
| 32305 | H | 79.04100 | 54.79480 | 88.21590  | -1495.25218 | -1948.69432 | -1969.75943 | 1 |
| 32306 | H | 79.34300 | 55.38180 | 86.41690  | -2627.20932 | 1281.52689  | 1180.39373  | 1 |
| 32307 | H | 79.14800 | 53.69780 | 86.83090  | -883.05889  | -2181.11443 | 2068.05600  | 1 |
| 32308 | C | 80.97300 | 52.63780 | 90.95190  | -300.45171  | 237.06057   | 820.17798   | 1 |
| 32309 | O | 82.06500 | 52.10580 | 91.11790  | -632.48614  | 143.58949   | 447.74637   | 1 |
| 32310 | N | 79.89800 | 52.16980 | 91.66690  | 695.23852   | -379.35941  | 253.17018   | 1 |
| 32311 | H | 78.97800 | 52.45280 | 91.40590  | -687.34199  | 2400.66023  | -1941.01641 | 1 |
| 32312 | C | 80.08900 | 51.23780 | 92.72590  | -243.31557  | 614.19983   | 629.12578   | 1 |
| 32313 | H | 79.15000 | 50.75680 | 92.95390  | 2209.77301  | -2218.12726 | -165.99322  | 1 |
| 32314 | H | 80.83200 | 50.52280 | 92.40490  | -1671.63628 | 2615.64544  | -591.45752  | 1 |
| 32315 | C | 80.71500 | 51.67880 | 93.95290  | 771.53138   | -234.04793  | -425.55402  | 1 |
| 32316 | O | 81.35700 | 50.96780 | 94.71090  | 237.91767   | -636.89593  | 369.81865   | 1 |
| 32317 | N | 80.54900 | 52.96080 | 94.25390  | 207.66595   | -712.12561  | 369.57726   | 1 |
| 32318 | H | 80.17900 | 53.60180 | 93.58590  | 2799.01513  | 242.41081   | 1400.35984  | 1 |
| 32319 | C | 81.11800 | 53.58680 | 95.39990  | -689.22983  | 609.40018   | 4.10284     | 1 |
| 32320 | H | 82.06300 | 53.10980 | 95.61590  | -2116.10288 | -2261.78720 | 502.26495   | 1 |
| 32321 | C | 81.44900 | 55.05980 | 95.20090  | 13.22712    | -462.95655  | 766.60318   | 1 |
| 32322 | H | 82.12800 | 55.25980 | 94.34390  | -3145.38988 | 78.61417    | 91.53296    | 1 |
| 32323 | H | 80.47800 | 55.52680 | 94.93090  | 1233.87354  | -2872.83124 | 226.10698   | 1 |
| 32324 | H | 81.73900 | 55.58780 | 96.13490  | -2909.88232 | -1174.94390 | -180.56684  | 1 |
| 32325 | C | 80.21700 | 53.42580 | 96.59890  | 722.57576   | -543.91465  | -14.31545   | 1 |
| 32326 | O | 79.01700 | 53.23880 | 96.46890  | 630.15673   | -296.38846  | 350.00582   | 1 |
| 32327 | N | 80.81200 | 53.47280 | 97.79790  | -256.21939  | 554.04513   | 581.04554   | 1 |
| 32328 | H | 81.79700 | 53.59180 | 97.89590  | -556.29506  | 1907.40031  | 2434.61085  | 1 |
| 32329 | C | 80.10400 | 53.53380 | 99.00590  | -86.06844   | 675.09153   | 607.05965   | 1 |
| 32330 | H | 79.05200 | 53.39680 | 98.80390  | -474.73009  | 2341.44897  | -2070.90970 | 1 |
| 32331 | C | 80.72100 | 52.50880 | 100.05290 | 231.30024   | -418.38753  | -783.03436  | 1 |
| 32332 | H | 81.81400 | 52.47280 | 99.85790  | 1870.18237  | -1418.88159 | -2101.20900 | 1 |
| 32333 | H | 80.40300 | 52.62580 | 101.11090 | 2231.36854  | -1188.38464 | 1855.90206  | 1 |
| 32334 | C | 80.28200 | 51.06780 | 99.72490  | 737.46104   | 395.91688   | 361.64887   | 1 |
| 32335 | H | 80.89900 | 50.69980 | 98.87790  | -911.09701  | -2092.13002 | -2168.12451 | 1 |
| 32336 | H | 80.52600 | 50.40280 | 100.58090 | 1206.52354  | -2434.32879 | 1558.03600  | 1 |
| 32337 | C | 78.78400 | 50.94080 | 99.35690  | -221.11000  | -398.13074  | -795.02963  | 1 |
| 32338 | H | 78.65100 | 51.25080 | 98.29890  | 591.51460   | 654.94278   | -3032.97955 | 1 |
| 32339 | H | 78.23800 | 51.66280 | 100.00090 | -865.23786  | 2010.51577  | 2259.56210  | 1 |
| 32340 | C | 78.18400 | 49.58980 | 99.52590  | 655.34469   | 489.27378   | -426.64145  | 1 |
| 32341 | H | 78.30600 | 49.19080 | 100.55490 | 2210.94800  | 2217.86409  | -387.64965  | 1 |
| 32342 | H | 78.65300 | 48.87980 | 98.81090  | 2547.64178  | -712.11268  | 1685.33403  | 1 |
| 32343 | N | 76.74200 | 49.65680 | 99.25790  | 415.52107   | 507.09784   | 533.15188   | 1 |
| 32344 | H | 76.66100 | 49.91580 | 98.25390  | -1362.60350 | 755.65257   | 2727.73054  | 1 |
| 32345 | H | 76.41300 | 50.36980 | 99.93990  | 2244.36875  | -1603.46919 | 1490.61514  | 1 |
| 32346 | H | 76.27200 | 48.73580 | 99.36890  | -545.96965  | 484.29116   | 3053.14800  | 1 |
| 32347 | C | 80.22600 | 54.95980 | 99.62690  | -376.54837  | -85.41008   | -835.83006  | 1 |
| 32348 | O | 81.26600 | 55.62880 | 99.55690  | -513.21508  | -289.15555  | -530.60141  | 1 |
| 32349 | N | 79.06500 | 55.53180 | 100.15290 | 73.02384    | -555.61903  | -632.40519  | 1 |
| 32350 | H | 78.24600 | 54.96680 | 100.20890 | 2166.30014  | 2086.81452  | 942.43584   | 1 |
| 32351 | C | 78.96600 | 56.92180 | 100.51590 | -586.38377  | -542.21914  | -432.24606  | 1 |
| 32352 | H | 79.79100 | 57.47180 | 100.08790 | -1672.91489 | -822.10614  | -2540.29097 | 1 |
| 32353 | C | 77.72400 | 57.53680 | 99.83390  | 626.09372   | 211.63557   | -644.87986  | 1 |

|       |   |          |          |           |             |             |             |   |
|-------|---|----------|----------|-----------|-------------|-------------|-------------|---|
| 32354 | H | 76.80700 | 57.08980 | 100.27490 | 1414.79815  | -2612.05168 | -1018.31711 | 1 |
| 32355 | H | 77.67100 | 58.59880 | 100.15690 | -2145.38231 | 725.53115   | -2194.27525 | 1 |
| 32356 | C | 77.84300 | 57.42380 | 98.31090  | -240.82968  | -865.00068  | 50.38071    | 1 |
| 32357 | C | 78.61700 | 58.35580 | 97.58790  | 107.01682   | -776.10337  | 436.51896   | 1 |
| 32358 | H | 79.29400 | 59.02580 | 98.09690  | -523.11899  | 2303.11860  | -2101.38569 | 1 |
| 32359 | C | 78.64100 | 58.25080 | 96.16690  | 851.79055   | -126.76383  | -307.09045  | 1 |
| 32360 | H | 79.20400 | 58.96380 | 95.58290  | -2919.83167 | 1102.36809  | 412.40239   | 1 |
| 32361 | C | 77.93600 | 57.23580 | 95.50590  | -630.18942  | -481.52969  | 426.88746   | 1 |
| 32362 | H | 78.04600 | 57.12480 | 94.43790  | 1997.96235  | 263.06665   | -2426.75801 | 1 |
| 32363 | C | 77.15700 | 56.45480 | 97.64590  | 578.79407   | -606.71398  | 328.71700   | 1 |
| 32364 | H | 76.68800 | 55.65580 | 98.20190  | -266.38515  | -1279.88705 | 2846.65035  | 1 |
| 32365 | C | 77.20800 | 56.31680 | 96.28190  | 561.28466   | 459.04623   | -572.47939  | 1 |
| 32366 | H | 76.74300 | 55.47580 | 95.78890  | -2001.91674 | 2400.23580  | 428.33528   | 1 |
| 32367 | C | 78.97800 | 57.25380 | 102.00090 | -764.49818  | 360.58731   | 333.63651   | 1 |
| 32368 | O | 79.06900 | 58.41480 | 102.47090 | 130.24651   | 460.28775   | 626.56437   | 1 |
| 32369 | N | 78.95100 | 56.16180 | 102.83090 | 544.39513   | -546.36686  | -342.38918  | 1 |
| 32370 | H | 78.58300 | 55.30280 | 102.48390 | -2357.14231 | 1748.36662  | -1154.28120 | 1 |
| 32371 | C | 78.88800 | 56.33080 | 104.26790 | 680.57491   | -586.56676  | -144.92238  | 1 |
| 32372 | H | 78.72600 | 57.37580 | 104.48790 | 2703.79390  | 387.34412   | 1563.45970  | 1 |
| 32373 | C | 77.73800 | 55.52780 | 104.91990 | 589.31152   | -596.30820  | -357.57514  | 1 |
| 32374 | H | 77.73700 | 55.67180 | 106.02190 | -2145.97155 | 2298.80116  | 178.81571   | 1 |
| 32375 | H | 78.02200 | 54.47280 | 104.71790 | 858.87345   | -2360.13672 | -1892.73373 | 1 |
| 32376 | C | 76.39500 | 56.07880 | 104.37490 | -382.48423  | -443.83386  | -696.97184  | 1 |
| 32377 | H | 76.33400 | 56.03080 | 103.26590 | 2426.22609  | -1965.44537 | -358.02120  | 1 |
| 32378 | H | 76.43600 | 57.17880 | 104.52490 | 2448.86545  | 853.34661   | 1785.87415  | 1 |
| 32379 | C | 75.12500 | 55.41780 | 105.00790 | 102.52979   | -440.22752  | -793.70981  | 1 |
| 32380 | H | 74.21200 | 55.89580 | 104.59090 | -824.48515  | -2222.68743 | -2059.71800 | 1 |
| 32381 | H | 75.24900 | 55.59280 | 106.09790 | -2540.14525 | -773.47962  | -1680.67059 | 1 |
| 32382 | C | 75.05000 | 53.89580 | 104.84890 | -163.32800  | -537.48876  | -715.73298  | 1 |
| 32383 | H | 75.91600 | 53.36880 | 105.30390 | 2469.78929  | -374.49775  | -1925.19752 | 1 |
| 32384 | H | 74.88900 | 53.64780 | 103.77790 | -1769.74189 | 2609.38066  | 96.25443    | 1 |
| 32385 | N | 73.87300 | 53.41980 | 105.56690 | -546.32103  | 363.44572   | -542.51098  | 1 |
| 32386 | H | 74.07600 | 53.58480 | 106.57290 | 2820.35617  | -447.75867  | -1335.62370 | 1 |
| 32387 | H | 73.01100 | 53.99980 | 105.60990 | -235.99991  | 2593.47792  | -1791.45915 | 1 |
| 32388 | H | 73.73800 | 52.42180 | 105.30890 | 1435.84397  | 1849.15444  | 2108.80301  | 1 |
| 32389 | C | 80.16700 | 55.94380 | 104.98190 | -560.70932  | -624.34960  | 316.12228   | 1 |
| 32390 | O | 80.39300 | 56.21780 | 106.18890 | -468.43990  | -340.24339  | -536.17848  | 1 |
| 32391 | N | 81.09000 | 55.32780 | 104.18990 | -618.85302  | 61.12308    | 554.41531   | 1 |
| 32392 | H | 80.83000 | 54.95680 | 103.30190 | -1474.70260 | 1679.41001  | 2207.39620  | 1 |
| 32393 | C | 82.53200 | 55.16980 | 104.40690 | 226.97598   | 836.93629   | 299.75556   | 1 |
| 32394 | H | 82.59600 | 54.28380 | 105.02190 | -3139.59480 | -62.53534   | 57.01697    | 1 |
| 32395 | C | 83.29300 | 54.91580 | 103.09090 | 67.02435    | 753.82403   | -536.72137  | 1 |
| 32396 | H | 82.81500 | 54.08480 | 102.53090 | -1220.93896 | -2194.25673 | 1868.57687  | 1 |
| 32397 | O | 84.67700 | 54.54080 | 103.24590 | -721.20436  | -100.97142  | -307.62278  | 1 |
| 32398 | H | 84.78500 | 53.96080 | 104.00290 | -300.16618  | -2252.79782 | -2180.49232 | 1 |
| 32399 | C | 83.23200 | 56.06680 | 102.10790 | -552.77462  | -364.72397  | 604.09919   | 1 |
| 32400 | H | 83.45200 | 55.63380 | 101.10790 | -1789.52965 | -2541.52033 | 407.56208   | 1 |
| 32401 | H | 83.82700 | 56.93980 | 102.45090 | -1816.77045 | -618.72992  | 2473.41509  | 1 |
| 32402 | H | 82.23100 | 56.54280 | 102.03790 | 1184.22351  | 2435.35339  | -1632.45637 | 1 |
| 32403 | C | 83.20700 | 56.25880 | 105.24790 | -479.70534  | 587.93305   | -524.59919  | 1 |
| 32404 | O | 83.00500 | 57.44880 | 105.00190 | 553.33140   | -557.71362  | -62.93366   | 1 |
| 32405 | N | 83.99000 | 55.88980 | 106.24490 | 535.97578   | 249.44015   | -626.12065  | 1 |
| 32406 | H | 84.16600 | 54.94980 | 106.52790 | 94.24078    | -75.13878   | 3129.45763  | 1 |
| 32407 | C | 84.73700 | 56.88680 | 106.99290 | 828.39334   | -375.44086  | -112.51683  | 1 |
| 32408 | H | 84.96900 | 57.66880 | 106.28490 | -1997.62984 | 1625.24185  | -1822.00218 | 1 |
| 32409 | C | 83.91500 | 57.42980 | 108.20490 | 909.90033   | 130.88913   | -75.33771   | 1 |
| 32410 | H | 84.21500 | 58.48080 | 108.40390 | 67.35161    | -2959.56220 | 1026.20174  | 1 |
| 32411 | H | 82.85200 | 57.49980 | 107.89190 | 1206.34316  | 1407.06875  | 2537.98814  | 1 |
| 32412 | O | 83.89700 | 56.69080 | 109.40790 | -22.53382   | 786.12027   | 123.22499   | 1 |
| 32413 | H | 83.44200 | 57.18580 | 110.09290 | 1301.95044  | 1820.04558  | 2210.78632  | 1 |
| 32414 | C | 86.04500 | 56.31880 | 107.48390 | 917.63767   | -45.39540   | -13.24045   | 1 |
| 32415 | O | 86.23700 | 55.11080 | 107.49890 | 231.63496   | 394.58535   | -666.70978  | 1 |

|       |   |          |          |           |             |             |             |   |
|-------|---|----------|----------|-----------|-------------|-------------|-------------|---|
| 32416 | N | 86.96200 | 57.19680 | 107.92490 | 600.44583   | -107.49396  | -606.35524  | 1 |
| 32417 | H | 86.55800 | 58.10780 | 107.88190 | -188.58680  | -3009.43680 | 852.63068   | 1 |
| 32418 | C | 88.24100 | 56.92680 | 108.44490 | -36.34437   | 46.93780    | -926.84107  | 1 |
| 32419 | H | 88.79900 | 56.31480 | 107.75190 | -2305.97925 | -384.33194  | 2078.49013  | 1 |
| 32420 | C | 88.99900 | 58.27680 | 108.62790 | 537.21340   | 282.37855   | -707.74217  | 1 |
| 32421 | H | 88.48300 | 58.99280 | 109.30190 | 1626.38429  | 2521.91073  | 963.16930   | 1 |
| 32422 | H | 90.03800 | 57.98680 | 108.89590 | 2287.21325  | -1509.30344 | -1570.49678 | 1 |
| 32423 | H | 89.10200 | 58.71980 | 107.61390 | -2184.71927 | -1981.49967 | 1047.43683  | 1 |
| 32424 | C | 88.23700 | 56.08880 | 109.70490 | 645.63476   | 283.18038   | 574.40538   | 1 |
| 32425 | O | 89.01500 | 55.11480 | 109.84290 | 677.23446   | -402.00685  | 77.73465    | 1 |
| 32426 | N | 87.28400 | 56.41280 | 110.61790 | 552.10341   | 470.72015   | -467.81316  | 1 |
| 32427 | H | 86.91200 | 57.33580 | 110.56290 | 2031.94932  | -1404.19530 | 1937.25401  | 1 |
| 32428 | C | 86.97200 | 55.47480 | 111.74990 | -579.34132  | -403.60153  | -577.47953  | 1 |
| 32429 | H | 87.90700 | 55.26180 | 112.24790 | 2305.30646  | 499.27003   | -2111.61159 | 1 |
| 32430 | C | 85.97400 | 56.15380 | 112.70390 | -429.80708  | 343.46215   | 709.02082   | 1 |
| 32431 | H | 85.55200 | 55.42080 | 113.42490 | -2647.64982 | -427.95527  | 1609.52277  | 1 |
| 32432 | H | 85.16200 | 56.58080 | 112.07790 | 1396.94224  | -1323.43221 | 2475.46296  | 1 |
| 32433 | C | 86.51500 | 57.41880 | 113.51390 | -513.15254  | 597.85685   | 440.05693   | 1 |
| 32434 | H | 85.63700 | 57.75580 | 114.10590 | -391.24881  | -2858.48703 | -1246.99831 | 1 |
| 32435 | H | 86.86800 | 58.20880 | 112.81690 | 3091.69406  | 302.81542   | 553.74552   | 1 |
| 32436 | C | 87.65700 | 56.97980 | 114.46190 | -367.43622  | 550.91220   | -642.56472  | 1 |
| 32437 | O | 87.51800 | 56.06080 | 115.23690 | -556.36580  | -224.00960  | -513.06544  | 1 |
| 32438 | N | 88.78900 | 57.67580 | 114.32290 | 118.37500   | 844.45698   | -21.88573   | 1 |
| 32439 | H | 88.76800 | 58.52780 | 113.79990 | -1534.58681 | -1692.37107 | 2131.50793  | 1 |
| 32440 | H | 89.56800 | 57.40480 | 114.88790 | 37.97872    | -2343.57200 | -2109.28252 | 1 |
| 32441 | C | 86.38100 | 54.13380 | 111.32290 | 189.03888   | 35.34435    | -909.29419  | 1 |
| 32442 | O | 86.84900 | 53.05580 | 111.69790 | -195.96565  | -499.95573  | 552.91823   | 1 |
| 32443 | N | 85.41700 | 54.13580 | 110.31590 | -568.46982  | -489.00347  | -379.16066  | 1 |
| 32444 | H | 85.05700 | 54.93680 | 109.84490 | 1275.32850  | -2482.68913 | 1429.57713  | 1 |
| 32445 | C | 84.85500 | 52.81180 | 109.85490 | 424.05886   | 495.78782   | -663.45005  | 1 |
| 32446 | H | 84.53200 | 52.34680 | 110.77490 | 307.24364   | -718.53995  | -3060.90627 | 1 |
| 32447 | C | 83.70500 | 53.01180 | 108.93090 | -8.29458    | -666.08801  | -626.65204  | 1 |
| 32448 | H | 84.01300 | 53.65080 | 108.07590 | 1435.61263  | -2791.68566 | -124.44619  | 1 |
| 32449 | H | 83.34100 | 52.09480 | 108.41990 | 2246.11150  | -1313.12220 | -1783.77069 | 1 |
| 32450 | N | 82.20500 | 53.38680 | 110.95190 | -126.67582  | -103.77305  | -838.62779  | 1 |
| 32451 | H | 82.76300 | 52.85980 | 111.59290 | 2117.85499  | 344.86873   | -2323.70325 | 1 |
| 32452 | C | 82.52300 | 53.64980 | 109.61990 | -538.58507  | -352.92670  | 620.40431   | 1 |
| 32453 | C | 81.11100 | 54.09780 | 111.23090 | -443.82078  | 129.83631   | 770.04170   | 1 |
| 32454 | H | 80.61100 | 53.96480 | 112.18990 | 525.18778   | -1075.33595 | -2919.53326 | 1 |
| 32455 | N | 80.67200 | 54.79180 | 110.20390 | -663.54408  | -486.01739  | 108.62602   | 1 |
| 32456 | C | 81.57800 | 54.50080 | 109.14890 | -407.35767  | 180.76753   | 781.08490   | 1 |
| 32457 | H | 81.39700 | 54.85780 | 108.14190 | -2402.51065 | -1623.43899 | 1180.32516  | 1 |
| 32458 | C | 85.90800 | 51.89980 | 109.19590 | -50.39442   | 509.03870   | 744.30720   | 1 |
| 32459 | O | 85.88900 | 50.70180 | 109.38790 | 753.45372   | -246.61610  | -38.37474   | 1 |
| 32460 | N | 86.82900 | 52.50780 | 108.42890 | 441.28187   | -688.99297  | 178.53442   | 1 |
| 32461 | H | 86.68300 | 53.45680 | 108.15990 | 2069.66316  | -2365.90214 | -99.10149   | 1 |
| 32462 | C | 88.02200 | 51.87180 | 107.84890 | 688.27057   | 546.32583   | -291.46500  | 1 |
| 32463 | H | 87.57200 | 51.13580 | 107.19990 | -1838.69647 | -2530.76370 | 217.86190   | 1 |
| 32464 | C | 88.70700 | 52.92580 | 106.97790 | -737.48048  | -511.89825  | 81.05634    | 1 |
| 32465 | H | 89.07900 | 53.71380 | 107.66690 | 1488.97869  | -2236.34857 | -1650.86987 | 1 |
| 32466 | H | 88.02500 | 53.45380 | 106.27890 | 1603.67476  | -2647.15507 | 527.65388   | 1 |
| 32467 | H | 89.64100 | 52.60980 | 106.46590 | -665.57603  | 1174.35123  | 2825.43346  | 1 |
| 32468 | C | 88.99100 | 51.29980 | 108.85590 | 662.34317   | -493.32636  | -405.75302  | 1 |
| 32469 | O | 89.45100 | 50.19180 | 108.67390 | -261.65864  | -69.91751   | -757.06497  | 1 |
| 32470 | N | 89.27600 | 51.98380 | 109.97890 | -423.34352  | -542.58992  | 456.87433   | 1 |
| 32471 | H | 88.76800 | 52.80380 | 110.22890 | -903.27617  | -2817.07755 | 1027.70755  | 1 |
| 32472 | C | 90.10100 | 51.42580 | 111.06990 | -677.77473  | 558.66479   | 219.57126   | 1 |
| 32473 | H | 91.01100 | 51.07180 | 110.60790 | -930.47370  | 2658.46211  | -1427.54856 | 1 |
| 32474 | C | 90.26000 | 52.46080 | 112.19890 | -141.42683  | -546.54111  | -727.71421  | 1 |
| 32475 | H | 90.54900 | 51.99480 | 113.16490 | -2804.08965 | 1362.00507  | 361.58139   | 1 |
| 32476 | H | 89.29800 | 53.00080 | 112.32690 | -1958.27499 | 1892.76540  | 1553.92597  | 1 |
| 32477 | C | 91.46800 | 53.42280 | 111.91590 | 556.92658   | -528.54979  | 476.48387   | 1 |



|       |   |          |           |           |             |             |             |   |
|-------|---|----------|-----------|-----------|-------------|-------------|-------------|---|
| 32478 | H | 91.24700 | 53.92980  | 110.95190 | 953.85793   | -922.81861  | 2834.40017  | 1 |
| 32479 | C | 91.52600 | 54.66780  | 112.80790 | -314.13062  | -538.04038  | 636.84180   | 1 |
| 32480 | H | 91.94300 | 54.47580  | 113.81990 | -1359.47703 | -1631.34440 | -2330.46367 | 1 |
| 32481 | H | 92.19500 | 55.45480  | 112.39790 | -1471.88071 | 2661.92561  | -823.05063  | 1 |
| 32482 | H | 90.49100 | 55.02780  | 112.99190 | -1669.96531 | 1667.40647  | -2095.75671 | 1 |
| 32483 | C | 92.83900 | 52.70780  | 111.87190 | -392.29408  | 627.46774   | -552.64167  | 1 |
| 32484 | H | 92.94400 | 52.02380  | 111.00290 | -144.09324  | -2003.28755 | 2396.47239  | 1 |
| 32485 | H | 93.60500 | 53.51180  | 111.82990 | 2256.54541  | 2163.60661  | 413.01939   | 1 |
| 32486 | H | 93.04000 | 52.07480  | 112.76290 | 1897.92658  | 1850.00731  | -1731.33686 | 1 |
| 32487 | C | 89.46100 | 50.19980  | 111.71690 | -546.91651  | 184.12374   | 683.72616   | 1 |
| 32488 | O | 90.15700 | 49.23380  | 112.03990 | -660.86318  | 423.62098   | -71.99281   | 1 |
| 32489 | N | 88.19500 | 50.21680  | 112.07190 | 512.32861   | -563.11444  | 347.47432   | 1 |
| 32490 | H | 87.72300 | 51.07580  | 111.88590 | -1717.65592 | 1965.25564  | -1773.72234 | 1 |
| 32491 | C | 87.47100 | 49.11180  | 112.69890 | 402.48780   | 409.56070   | 700.32840   | 1 |
| 32492 | H | 88.04300 | 48.79080  | 113.55590 | -2395.85916 | -1912.79969 | 639.68946   | 1 |
| 32493 | C | 86.10000 | 49.48680  | 113.13590 | 610.31903   | -195.95025  | -669.58762  | 1 |
| 32494 | H | 85.43700 | 48.61080  | 113.30090 | -2432.08034 | -188.42573  | -1991.48227 | 1 |
| 32495 | O | 85.50100 | 50.38680  | 112.30590 | 211.72794   | 666.25177   | 371.08771   | 1 |
| 32496 | H | 85.67800 | 50.08280  | 111.41290 | -2035.97019 | 398.77427   | -2375.60529 | 1 |
| 32497 | C | 86.15600 | 50.20880  | 114.52090 | -417.50594  | 247.43368   | -785.04234  | 1 |
| 32498 | H | 85.14000 | 50.56980  | 114.78890 | -2904.16721 | 71.56657    | -1199.41188 | 1 |
| 32499 | H | 86.84200 | 51.06980  | 114.37390 | -865.02880  | -2989.99615 | 366.57505   | 1 |
| 32500 | H | 86.58700 | 49.54880  | 115.30390 | -2511.68353 | -1559.78719 | -1056.76324 | 1 |
| 32501 | C | 87.33200 | 47.86380  | 111.81290 | 744.80487   | -522.76955  | 57.67122    | 1 |
| 32502 | O | 87.28100 | 47.98280  | 110.59890 | 402.39456   | -495.03956  | 445.80702   | 1 |
| 32503 | N | 87.22900 | 46.69980  | 112.39890 | -242.67095  | 620.68205   | -540.68283  | 1 |
| 32504 | H | 87.31500 | 46.64780  | 113.38990 | 1729.62744  | -1486.34161 | -2184.69147 | 1 |
| 32505 | C | 87.00800 | 45.43480  | 111.73590 | 791.98919   | -452.63825  | 20.66169    | 1 |
| 32506 | H | 87.60700 | 45.49580  | 110.83890 | 772.71066   | 2909.66433  | -958.62063  | 1 |
| 32507 | C | 87.63800 | 44.22280  | 112.49690 | -382.15012  | -647.32428  | 485.21967   | 1 |
| 32508 | H | 87.57500 | 43.32580  | 111.84390 | -1407.57220 | -1571.94903 | -2342.49959 | 1 |
| 32509 | H | 88.73700 | 44.38180  | 112.50190 | -2504.94286 | -1306.92374 | 1348.91369  | 1 |
| 32510 | O | 87.05400 | 43.98480  | 113.80390 | 460.02615   | 482.54226   | 422.14411   | 1 |
| 32511 | H | 87.22400 | 44.78680  | 114.30390 | -836.52768  | -2904.40762 | -857.31163  | 1 |
| 32512 | C | 85.56100 | 45.12680  | 111.38790 | -845.83549  | -296.14054  | -134.24093  | 1 |
| 32513 | O | 84.61300 | 45.60580  | 112.09190 | 51.26018    | 714.19071   | -366.88753  | 1 |
| 32514 | O | 85.32200 | 44.42480  | 110.35290 | -396.10698  | 256.28545   | 618.41111   | 1 |
| 32515 | H | 80.82215 | 98.05265  | 69.46570  | -1722.80870 | 2452.96674  | -1684.87021 | 2 |
| 32516 | N | 80.36465 | 98.52010  | 68.68823  | -362.10539  | -216.96359  | -939.05573  | 2 |
| 32517 | H | 79.70288 | 99.08717  | 69.24899  | 793.58777   | -572.78644  | -678.75801  | 2 |
| 32518 | C | 81.37995 | 99.17447  | 67.92789  | -247.41922  | -586.37737  | 762.26364   | 2 |
| 32519 | H | 82.22606 | 98.47990  | 68.20366  | -792.18825  | -1465.38338 | -1102.96003 | 2 |
| 32520 | C | 80.91617 | 99.26779  | 66.40562  | -1446.47398 | 297.46796   | 413.82015   | 2 |
| 32521 | H | 79.81838 | 98.94535  | 66.42829  | 933.16259   | 1674.03979  | -1699.15474 | 2 |
| 32522 | H | 80.82128 | 100.33868 | 66.23560  | 2559.92530  | -1725.53957 | -3090.14481 | 2 |
| 32523 | C | 81.89686 | 98.63764  | 65.42543  | 204.04462   | -127.42867  | -779.55184  | 2 |
| 32524 | H | 82.82619 | 99.20376  | 65.77706  | -1023.56979 | 2490.45965  | -697.12994  | 2 |
| 32525 | C | 81.99932 | 97.13863  | 65.63662  | 1328.18948  | -19.92412   | -110.78277  | 2 |
| 32526 | H | 82.98851 | 96.88823  | 65.19630  | 575.37954   | -86.76769   | 594.43652   | 2 |
| 32527 | H | 82.00447 | 96.87207  | 66.72210  | -4986.08861 | 875.61138   | -177.77865  | 2 |
| 32528 | H | 81.22985 | 96.59493  | 65.01567  | 3284.46324  | 900.96957   | 471.67839   | 2 |
| 32529 | C | 81.67317 | 98.98721  | 63.95615  | 1443.09491  | -251.67019  | -1395.51788 | 2 |
| 32530 | H | 80.80320 | 98.43554  | 63.59032  | -2188.07081 | -994.37641  | 329.66289   | 2 |
| 32531 | H | 81.47005 | 100.13261 | 63.87146  | 1796.03379  | -489.19527  | -3889.84459 | 2 |
| 32532 | H | 82.54923 | 98.74141  | 63.28172  | 938.78437   | 1163.80595  | -2139.71128 | 2 |
| 32533 | C | 81.36720 | 100.61475 | 68.64249  | -568.39754  | 719.50790   | -152.88643  | 2 |
| 32534 | O | 81.18925 | 101.71016 | 67.92438  | -211.17050  | 578.47103   | 579.79453   | 2 |
| 32535 | N | 81.57417 | 100.60193 | 69.92777  | -495.56841  | -140.34125  | 360.58702   | 2 |
| 32536 | H | 81.74876 | 99.73052  | 70.37248  | 1585.51105  | -2403.85695 | 1589.43725  | 2 |
| 32537 | C | 81.34943 | 101.86023 | 70.60495  | -222.44344  | 180.56490   | -834.46550  | 2 |
| 32538 | H | 80.49972 | 101.46272 | 71.20769  | 2274.24879  | 1423.83956  | -2626.39297 | 2 |
| 32539 | C | 82.68625 | 102.23167 | 71.31382  | -72.63979   | 288.66493   | -31.98550   | 2 |

|       |   |          |           |          |             |             |             |   |
|-------|---|----------|-----------|----------|-------------|-------------|-------------|---|
| 32540 | H | 83.45919 | 102.57313 | 70.58538 | -993.03836  | 193.50043   | 691.66317   | 2 |
| 32541 | O | 83.31097 | 101.01211 | 71.96987 | -651.55815  | -213.83574  | -136.12784  | 2 |
| 32542 | H | 84.21622 | 101.35098 | 71.99311 | -97.20366   | -1785.33276 | -4312.75785 | 2 |
| 32543 | C | 82.16323 | 103.41307 | 72.20701 | -190.18460  | 35.33660    | 132.54657   | 2 |
| 32544 | H | 81.44615 | 103.12806 | 73.06553 | 18.30012    | 294.59348   | -637.80918  | 2 |
| 32545 | H | 83.02790 | 103.85200 | 72.71153 | -483.48557  | 953.56155   | -634.93430  | 2 |
| 32546 | H | 81.59398 | 104.20972 | 71.51267 | -2699.48767 | 1983.42087  | 3014.69743  | 2 |
| 32547 | C | 80.92413 | 103.02302 | 69.44393 | 230.24359   | -637.18080  | -204.53045  | 2 |
| 32548 | O | 81.81256 | 103.94785 | 69.27852 | 393.37713   | -170.71972  | -110.09570  | 2 |
| 32549 | N | 79.61324 | 103.24130 | 69.55948 | 168.21611   | -713.07586  | -807.46838  | 2 |
| 32550 | C | 79.11014 | 104.36616 | 68.76986 | 239.77204   | -199.65950  | -800.84308  | 2 |
| 32551 | H | 79.59994 | 104.24805 | 67.82133 | -1227.65396 | -824.86734  | -2016.77797 | 2 |
| 32552 | C | 77.56079 | 104.02099 | 68.77710 | -494.27190  | -559.92730  | -454.26074  | 2 |
| 32553 | H | 77.06729 | 104.39698 | 69.64664 | 500.48235   | 346.73829   | 2546.55610  | 2 |
| 32554 | H | 77.11472 | 104.54293 | 67.97400 | 453.97900   | 811.93413   | -3687.81404 | 2 |
| 32555 | C | 77.39436 | 102.47170 | 68.76093 | -564.74566  | -181.00082  | 1811.69772  | 2 |
| 32556 | H | 76.39729 | 102.10372 | 69.19543 | -2723.17737 | 1024.80989  | -2060.20368 | 2 |
| 32557 | H | 77.50159 | 101.99427 | 67.79109 | 401.01597   | 1003.54666  | 643.75039   | 2 |
| 32558 | C | 78.66566 | 102.13565 | 69.67556 | 55.38086    | -150.25104  | 622.47815   | 2 |
| 32559 | H | 78.53834 | 102.08092 | 70.79047 | -3772.05203 | -3225.87574 | 533.23633   | 2 |
| 32560 | H | 79.23220 | 101.14256 | 69.40381 | 1978.96279  | -1139.30071 | 1025.27563  | 2 |
| 32561 | C | 79.25617 | 105.81515 | 69.45009 | -88.00949   | -511.99841  | -389.83817  | 2 |
| 32562 | O | 78.45850 | 106.65411 | 69.01811 | 579.26157   | -682.93442  | 885.41586   | 2 |
| 32563 | N | 80.06917 | 105.94384 | 70.46710 | -689.48689  | -62.67373   | 240.71906   | 2 |
| 32564 | H | 80.49615 | 105.17939 | 70.98673 | -244.53944  | 2993.47241  | -1262.01247 | 2 |
| 32565 | C | 80.43575 | 107.24319 | 70.82954 | -1615.67464 | 278.14047   | 318.83721   | 2 |
| 32566 | H | 79.62159 | 107.96036 | 70.65371 | -385.64829  | -1368.17626 | 151.00516   | 2 |
| 32567 | C | 81.02339 | 107.36820 | 72.34252 | 642.92233   | 1305.91022  | 129.05681   | 2 |
| 32568 | H | 81.69356 | 108.25622 | 72.16707 | 1701.65117  | -1259.70170 | -249.88813  | 2 |
| 32569 | O | 81.78311 | 106.25559 | 72.76033 | 1124.04312  | 119.15940   | -738.92509  | 2 |
| 32570 | H | 82.75898 | 106.55532 | 72.63165 | -2293.42208 | -2897.66960 | 1653.37734  | 2 |
| 32571 | C | 79.80785 | 107.90939 | 73.13747 | 40.97404    | 275.30296   | -315.41867  | 2 |
| 32572 | H | 78.95358 | 107.24088 | 72.87836 | 1058.86596  | 2189.41298  | 1434.79342  | 2 |
| 32573 | H | 80.01630 | 107.93807 | 74.30057 | 1826.93297  | 771.24140   | 1770.31698  | 2 |
| 32574 | H | 79.44226 | 108.95372 | 72.84265 | 904.07462   | -369.26115  | 495.55603   | 2 |
| 32575 | C | 81.79909 | 107.61533 | 70.02913 | -357.61219  | -332.17751  | -277.47885  | 2 |
| 32576 | O | 82.07780 | 108.80225 | 69.94427 | 592.78335   | 514.40552   | -33.62968   | 2 |
| 32577 | N | 82.40289 | 106.60482 | 69.33947 | -814.66403  | 142.49613   | 467.99801   | 2 |
| 32578 | H | 82.00819 | 105.66157 | 69.45346 | -1114.30401 | -633.12305  | 1457.93000  | 2 |
| 32579 | C | 83.82973 | 106.74723 | 69.30825 | -760.71563  | 105.88001   | -320.81898  | 2 |
| 32580 | H | 83.93605 | 107.92264 | 69.26814 | 2293.96351  | 710.66957   | 1571.93963  | 2 |
| 32581 | C | 84.51109 | 106.09508 | 70.48841 | -259.52267  | -277.23987  | 179.82183   | 2 |
| 32582 | H | 84.35139 | 105.02546 | 70.79433 | -1509.95676 | -2252.38337 | -2581.51618 | 2 |
| 32583 | H | 85.57009 | 106.12045 | 70.31305 | 2152.29124  | 344.74115   | 43.40142    | 2 |
| 32584 | O | 84.21755 | 106.69329 | 72.09154 | -229.43411  | -242.12849  | -43.06365   | 2 |
| 32585 | H | 84.45631 | 105.91246 | 72.56651 | 2104.79626  | 2180.70200  | 1353.67139  | 2 |
| 32586 | C | 84.48661 | 106.10285 | 67.93905 | 323.71157   | -53.52646   | 344.63696   | 2 |
| 32587 | O | 85.42047 | 106.62991 | 67.38038 | 261.78404   | 133.27977   | 1098.16953  | 2 |
| 32588 | N | 83.88525 | 104.90646 | 67.78284 | 1046.68270  | -26.56105   | 108.50046   | 2 |
| 32589 | H | 83.06874 | 104.69491 | 68.42264 | 976.17577   | -370.94322  | -1184.11672 | 2 |
| 32590 | C | 84.29941 | 104.17974 | 66.62140 | -653.40921  | 55.02580    | 245.24670   | 2 |
| 32591 | H | 85.31623 | 104.52126 | 66.23102 | 1562.21855  | -287.56173  | -2298.48661 | 2 |
| 32592 | C | 84.23210 | 102.67315 | 67.10136 | -235.65654  | -223.03054  | 479.79405   | 2 |
| 32593 | H | 83.45891 | 102.44416 | 67.84449 | 923.54081   | 826.40461   | 2022.83954  | 2 |
| 32594 | C | 84.21435 | 101.56927 | 65.96810 | -751.70911  | 353.61277   | 569.31867   | 2 |
| 32595 | H | 84.84425 | 101.92683 | 65.13039 | 3763.44150  | 803.38613   | 1037.97040  | 2 |
| 32596 | H | 84.58267 | 100.55869 | 66.34350 | -2759.76564 | -762.20860  | 666.54728   | 2 |
| 32597 | H | 83.19776 | 101.46065 | 65.49992 | 1291.06420  | 1789.94700  | -1771.28515 | 2 |
| 32598 | C | 85.56259 | 102.42684 | 67.89431 | -399.80690  | -55.59636   | -42.12613   | 2 |
| 32599 | H | 86.37703 | 102.42118 | 67.11878 | 116.10226   | 3550.84552  | 2519.27005  | 2 |
| 32600 | H | 85.70872 | 103.22670 | 68.66271 | 1130.14515  | -312.84297  | -918.65095  | 2 |
| 32601 | H | 85.59950 | 101.46935 | 68.46029 | -323.85397  | -1871.73780 | -3988.71149 | 2 |

|       |   |          |           |          |             |             |             |   |
|-------|---|----------|-----------|----------|-------------|-------------|-------------|---|
| 32602 | C | 83.00080 | 104.47872 | 65.61780 | -1142.08583 | 364.90442   | 1753.85233  | 2 |
| 32603 | O | 81.85783 | 104.82239 | 65.95744 | 771.92526   | -77.52817   | -276.20418  | 2 |
| 32604 | N | 83.49704 | 104.35560 | 64.36052 | -87.46003   | -124.96520  | -4.50417    | 2 |
| 32605 | H | 84.47428 | 104.16343 | 64.40215 | 1133.84163  | 1656.52833  | -2654.62031 | 2 |
| 32606 | C | 82.99471 | 105.23329 | 63.37837 | 42.09818    | 331.40654   | 593.66963   | 2 |
| 32607 | H | 81.89612 | 105.08026 | 63.60421 | -413.56921  | 1909.01411  | 1161.10416  | 2 |
| 32608 | C | 83.36047 | 106.78491 | 63.59483 | -821.53400  | -555.06023  | -222.82849  | 2 |
| 32609 | H | 84.43178 | 106.88573 | 63.35042 | -185.09017  | 1386.25234  | -1070.63459 | 2 |
| 32610 | H | 82.74520 | 107.38578 | 62.88644 | 1934.56010  | 1217.63163  | 1995.40380  | 2 |
| 32611 | C | 83.15478 | 107.18230 | 65.09179 | -72.98875   | 1007.10969  | -1022.08812 | 2 |
| 32612 | H | 82.13801 | 106.77431 | 65.39837 | -2334.25761 | 2217.41653  | -4593.18065 | 2 |
| 32613 | H | 83.88882 | 106.62449 | 65.70713 | 2557.64583  | 1707.73928  | 369.87527   | 2 |
| 32614 | C | 83.37536 | 108.75597 | 65.27136 | 424.12674   | -81.33255   | -83.27374   | 2 |
| 32615 | O | 82.68451 | 109.55471 | 64.68191 | -398.24704  | -139.76508  | 609.65246   | 2 |
| 32616 | N | 84.30769 | 109.14695 | 66.21889 | -252.41521  | 478.92912   | 604.72119   | 2 |
| 32617 | H | 84.77621 | 108.45025 | 66.87334 | -1237.74354 | -304.06024  | -384.81466  | 2 |
| 32618 | H | 84.38156 | 110.12849 | 66.36659 | -4561.04276 | 1185.85213  | 1255.40731  | 2 |
| 32619 | C | 83.35456 | 104.90578 | 61.81964 | 261.68233   | -827.32746  | 84.77432    | 2 |
| 32620 | O | 83.82762 | 105.71189 | 61.03600 | 257.28369   | -167.23181  | -16.52289   | 2 |
| 32621 | N | 82.99958 | 103.64526 | 61.59715 | -328.33042  | -153.45361  | -566.14718  | 2 |
| 32622 | C | 83.02846 | 103.11120 | 60.24967 | 259.97891   | -927.04375  | 356.45171   | 2 |
| 32623 | H | 84.00787 | 103.44067 | 59.78909 | -1940.63466 | 272.45527   | -3246.17264 | 2 |
| 32624 | C | 83.02962 | 101.55640 | 60.42674 | 166.16917   | -43.04040   | 378.33286   | 2 |
| 32625 | H | 82.47867 | 101.24737 | 59.52897 | -2.16145    | 3171.53329  | -4548.51945 | 2 |
| 32626 | H | 84.07371 | 101.13149 | 60.37172 | -76.81197   | 3504.52170  | 2378.83500  | 2 |
| 32627 | C | 82.31278 | 101.28836 | 61.80873 | 93.97130    | 310.60895   | 464.40221   | 2 |
| 32628 | H | 81.24702 | 101.20655 | 61.69370 | 520.63330   | -1032.32572 | 10.74193    | 2 |
| 32629 | H | 82.50196 | 100.30409 | 62.22660 | -1674.83005 | 1801.50204  | 1326.99758  | 2 |
| 32630 | C | 82.81775 | 102.58699 | 62.57812 | 112.17731   | 446.56470   | -190.58200  | 2 |
| 32631 | H | 82.11303 | 102.94583 | 63.40878 | 430.61373   | 2099.68538  | -1749.35786 | 2 |
| 32632 | H | 83.81301 | 102.54015 | 63.03563 | 703.58234   | -342.75310  | 3692.76274  | 2 |
| 32633 | C | 81.76623 | 103.49065 | 59.26706 | 101.88861   | -141.27321  | -834.01307  | 2 |
| 32634 | O | 81.75589 | 103.68648 | 58.07426 | -805.25184  | -279.38208  | -71.86663   | 2 |
| 32635 | N | 80.65706 | 103.46888 | 60.01745 | -111.48782  | -158.69762  | -103.55293  | 2 |
| 32636 | H | 80.80634 | 103.24214 | 60.98193 | -116.69406  | 320.28076   | -5658.83667 | 2 |
| 32637 | C | 79.74138 | 104.60697 | 59.84332 | -207.49935  | 399.80654   | -943.48097  | 2 |
| 32638 | H | 80.18810 | 105.12481 | 58.97738 | -692.75824  | 3185.11890  | -1020.17880 | 2 |
| 32639 | C | 78.24472 | 104.17416 | 59.65955 | 119.40178   | 583.22459   | 233.47652   | 2 |
| 32640 | H | 77.86968 | 103.38793 | 60.38468 | 2790.28611  | -1235.93734 | -436.82161  | 2 |
| 32641 | C | 77.40568 | 105.47151 | 59.48217 | 192.33257   | 163.96249   | 856.16500   | 2 |
| 32642 | H | 76.35298 | 105.14503 | 59.27617 | -1378.88970 | 4362.91328  | -1289.77859 | 2 |
| 32643 | H | 77.46832 | 106.05380 | 60.43836 | -920.02341  | -3166.45322 | 1359.63902  | 2 |
| 32644 | H | 77.78904 | 106.13238 | 58.66968 | 873.58158   | -0.53138    | 2176.58568  | 2 |
| 32645 | C | 78.21873 | 103.64099 | 58.17629 | -481.92560  | 103.80138   | 69.50683    | 2 |
| 32646 | H | 77.26911 | 103.32302 | 57.83571 | -1386.00575 | -76.80329   | -81.77763   | 2 |
| 32647 | H | 78.51440 | 104.43226 | 57.43523 | -441.44576  | 120.39197   | -1374.47699 | 2 |
| 32648 | H | 78.92034 | 102.76973 | 58.20636 | 632.68587   | -2796.69591 | -1598.17214 | 2 |
| 32649 | C | 79.95384 | 105.42767 | 61.22926 | 106.21536   | 206.32759   | 768.73877   | 2 |
| 32650 | O | 79.96559 | 104.97916 | 62.36583 | 28.71869    | -389.11397  | -357.93512  | 2 |
| 32651 | N | 79.97371 | 106.69002 | 60.81335 | -327.29353  | -450.31307  | -547.65144  | 2 |
| 32652 | H | 80.28518 | 106.86426 | 59.84295 | -1002.26390 | 284.09907   | 43.35368    | 2 |
| 32653 | C | 80.13735 | 107.77186 | 61.70709 | 572.11748   | 290.39355   | -248.31784  | 2 |
| 32654 | H | 80.54746 | 107.14966 | 62.53153 | -1790.19070 | 412.38101   | 2272.99909  | 2 |
| 32655 | C | 81.19650 | 108.81595 | 61.01164 | -44.78165   | 85.99515    | -324.94739  | 2 |
| 32656 | H | 81.37373 | 109.56973 | 61.81921 | 424.74761   | 2108.23265  | -441.90162  | 2 |
| 32657 | H | 82.09081 | 108.22494 | 60.87149 | 720.04050   | -2428.86923 | -224.80960  | 2 |
| 32658 | C | 80.77571 | 109.66301 | 59.79630 | 1316.38518  | 294.38043   | -1098.76047 | 2 |
| 32659 | H | 79.73512 | 109.98855 | 60.02284 | -5560.84232 | -2626.15249 | -781.87239  | 2 |
| 32660 | H | 81.33477 | 110.62977 | 59.78319 | 383.78834   | -161.19252  | -1981.20107 | 2 |
| 32661 | C | 80.72165 | 108.88736 | 58.42023 | -4.64935    | 112.57809   | 194.91871   | 2 |
| 32662 | H | 79.97819 | 108.02160 | 58.48764 | -2791.30064 | -2255.02493 | -2189.95102 | 2 |
| 32663 | H | 80.29496 | 109.46454 | 57.58257 | 2112.56239  | -2405.04947 | 465.42201   | 2 |

|       |   |          |           |          |             |             |             |   |
|-------|---|----------|-----------|----------|-------------|-------------|-------------|---|
| 32664 | C | 82.12616 | 108.27147 | 57.97407 | -193.96844  | -670.62433  | 311.32578   | 2 |
| 32665 | H | 82.32728 | 108.31660 | 56.79662 | 1411.98200  | -633.37159  | 1467.66748  | 2 |
| 32666 | H | 82.88722 | 108.77950 | 58.53761 | 1823.64782  | 2127.01899  | -1331.60367 | 2 |
| 32667 | N | 81.91714 | 106.92913 | 58.46632 | -221.56041  | -460.27877  | 88.28827    | 2 |
| 32668 | H | 82.15860 | 106.19806 | 57.85459 | 112.88911   | 179.13741   | -1666.61003 | 2 |
| 32669 | H | 76.73171 | 108.28985 | 58.15167 | 1703.22780  | -1487.75943 | -46.40517   | 2 |
| 32670 | H | 82.49667 | 106.60055 | 59.23268 | 1218.92618  | 626.11583   | -1083.73460 | 2 |
| 32671 | C | 78.69778 | 108.33260 | 62.12692 | -324.13154  | -37.65883   | -309.96996  | 2 |
| 32672 | O | 77.68697 | 107.59007 | 62.17517 | -339.38433  | -32.63882   | 178.39908   | 2 |
| 32673 | N | 78.75699 | 109.66182 | 62.21439 | -291.37413  | -133.32833  | -39.33079   | 2 |
| 32674 | H | 79.61043 | 110.18933 | 62.08505 | 1718.47239  | -37.95484   | -1947.96525 | 2 |
| 32675 | C | 77.54936 | 110.25146 | 62.69155 | 601.48599   | 846.25465   | 608.70721   | 2 |
| 32676 | H | 76.99627 | 109.37542 | 63.29197 | -1032.46796 | -2150.51828 | -1912.79926 | 2 |
| 32677 | C | 77.70835 | 111.57753 | 63.59729 | 130.58678   | 298.43566   | 431.26394   | 2 |
| 32678 | H | 78.54257 | 111.37126 | 64.35523 | -1010.65324 | -1361.87726 | -474.27170  | 2 |
| 32679 | H | 78.18755 | 112.37495 | 62.93687 | -398.69490  | 1499.18089  | 2511.10270  | 2 |
| 32680 | C | 76.35979 | 112.00872 | 64.26304 | 412.28499   | 257.52543   | 193.95855   | 2 |
| 32681 | H | 76.41625 | 111.24477 | 65.12723 | -160.89585  | -1548.76795 | 69.43531    | 2 |
| 32682 | H | 76.47927 | 112.93264 | 64.88905 | -553.63910  | 626.51950   | 945.67730   | 2 |
| 32683 | C | 75.05642 | 112.03213 | 63.37507 | -103.44680  | 93.93538    | 130.58324   | 2 |
| 32684 | H | 74.97541 | 112.88164 | 62.67769 | 489.97984   | 3033.61726  | -914.44519  | 2 |
| 32685 | H | 74.99108 | 111.17019 | 62.68706 | -488.32046  | -1224.53196 | 1946.72478  | 2 |
| 32686 | C | 73.84509 | 112.05100 | 64.38282 | -163.57920  | -1247.54711 | -494.87443  | 2 |
| 32687 | H | 73.87035 | 112.75105 | 65.24217 | 306.78583   | 488.45920   | -2091.65456 | 2 |
| 32688 | H | 72.85420 | 112.25465 | 63.84985 | 920.38046   | 1833.83538  | -208.74551  | 2 |
| 32689 | N | 73.85578 | 110.60975 | 64.90083 | 717.05145   | -31.56555   | 314.75999   | 2 |
| 32690 | H | 74.55328 | 110.06699 | 65.50119 | -329.57964  | 719.69917   | 1787.41788  | 2 |
| 32691 | H | 72.95732 | 110.49969 | 65.47422 | 421.01128   | 1781.92838  | -846.51534  | 2 |
| 32692 | H | 73.67780 | 109.94187 | 64.00525 | 956.37744   | 71.70507    | -3634.90758 | 2 |
| 32693 | C | 76.74312 | 110.46523 | 61.32540 | -648.38703  | -119.86110  | -441.12770  | 2 |
| 32694 | O | 76.84675 | 111.44923 | 60.59872 | -18.65939   | -541.64020  | -427.58682  | 2 |
| 32695 | N | 76.21453 | 109.26360 | 60.89048 | -56.49688   | 381.87614   | -137.23701  | 2 |
| 32696 | H | 76.21555 | 108.50810 | 61.66153 | -210.22255  | -3150.88112 | 1739.11990  | 2 |
| 32697 | C | 74.89665 | 109.49768 | 60.23084 | -68.56014   | 703.26449   | -408.19563  | 2 |
| 32698 | H | 74.85703 | 110.58596 | 60.02827 | -331.07078  | 1765.42448  | 42.37446    | 2 |
| 32699 | C | 74.93771 | 108.74021 | 58.89815 | 267.87650   | 111.23751   | -1296.83700 | 2 |
| 32700 | H | 74.99922 | 107.65901 | 59.07129 | -1073.13854 | -4912.93823 | 615.71867   | 2 |
| 32701 | O | 76.42902 | 109.23614 | 58.04165 | -347.17158  | -124.09891  | 64.85074    | 2 |
| 32702 | H | 76.79209 | 109.67062 | 58.86915 | -167.86846  | -673.85787  | -3097.66766 | 2 |
| 32703 | C | 73.72359 | 109.22538 | 58.11811 | -219.64396  | 211.48239   | 435.96944   | 2 |
| 32704 | H | 73.67209 | 108.61046 | 57.16347 | 1438.98244  | 1558.46560  | -666.48312  | 2 |
| 32705 | H | 72.72332 | 109.13647 | 58.71531 | -1333.57173 | -2445.60160 | -188.14793  | 2 |
| 32706 | H | 73.71606 | 110.32958 | 57.89242 | -2327.61301 | 3480.28895  | -1166.12419 | 2 |
| 32707 | C | 73.81870 | 109.05266 | 61.34045 | -957.86091  | 725.35972   | -249.80515  | 2 |
| 32708 | O | 73.84988 | 109.47415 | 62.48890 | -694.16353  | 285.50630   | 599.63370   | 2 |
| 32709 | N | 73.07674 | 108.04871 | 60.85402 | -623.07067  | 77.49988    | 4.64075     | 2 |
| 32710 | H | 73.24653 | 107.90223 | 59.81490 | -3233.60423 | -2716.36180 | 2501.49206  | 2 |
| 32711 | C | 72.85289 | 106.85050 | 61.63235 | -97.91918   | -117.38421  | 656.56389   | 2 |
| 32712 | H | 72.59265 | 107.23812 | 62.58988 | 550.81812   | 820.65804   | 1429.08376  | 2 |
| 32713 | C | 71.70905 | 106.18540 | 60.81379 | 294.97571   | 353.67349   | 249.84318   | 2 |
| 32714 | H | 70.88699 | 106.89762 | 60.58533 | -1302.42048 | 1721.97937  | 2852.03260  | 2 |
| 32715 | H | 72.15525 | 105.92317 | 59.80707 | 1343.20437  | 849.56190   | 437.75662   | 2 |
| 32716 | C | 71.17787 | 104.98632 | 61.63634 | 1188.04146  | -388.28108  | 372.20414   | 2 |
| 32717 | C | 69.85215 | 104.54478 | 61.46440 | -640.87025  | -809.93665  | 350.92364   | 2 |
| 32718 | H | 69.16442 | 105.03124 | 60.73553 | -1712.67339 | -109.88558  | -799.97681  | 2 |
| 32719 | C | 72.00598 | 104.18710 | 62.53181 | 856.49879   | 735.12272   | 384.34779   | 2 |
| 32720 | H | 73.02974 | 104.53555 | 62.58530 | -1006.96105 | -1424.90921 | 852.77113   | 2 |
| 32721 | C | 69.45846 | 103.33838 | 62.08041 | 1697.46814  | 423.97032   | 86.83519    | 2 |
| 32722 | H | 68.42922 | 102.98258 | 61.83923 | 363.43309   | 744.74858   | -625.57009  | 2 |
| 32723 | C | 71.62927 | 103.02014 | 63.18053 | -872.33096  | 1019.39745  | 467.72340   | 2 |
| 32724 | H | 72.34154 | 102.53409 | 63.87596 | 1651.20755  | 982.44947   | 3759.68045  | 2 |
| 32725 | C | 70.27406 | 102.59525 | 63.02256 | 692.13691   | -180.37761  | 435.72034   | 2 |

|       |   |          |           |          |             |             |             |   |
|-------|---|----------|-----------|----------|-------------|-------------|-------------|---|
| 32726 | O | 69.80279 | 101.42353 | 63.55399 | 12.71728    | 375.23242   | 244.42712   | 2 |
| 32727 | H | 68.74319 | 101.67797 | 63.86070 | 590.40140   | 378.68277   | 2243.78418  | 2 |
| 32728 | C | 74.28951 | 106.01969 | 61.70900 | -66.11665   | -596.12993  | -583.41315  | 2 |
| 32729 | O | 74.70947 | 105.26776 | 60.85837 | -167.71200  | 342.91977   | -278.24590  | 2 |
| 32730 | N | 74.97533 | 106.41744 | 62.82892 | 374.74238   | -49.25944   | -277.66275  | 2 |
| 32731 | H | 74.36793 | 107.04587 | 63.33683 | 1852.15925  | 721.56201   | 2504.77141  | 2 |
| 32732 | C | 75.54913 | 105.24437 | 63.52058 | -514.46145  | -97.22408   | -359.52164  | 2 |
| 32733 | H | 74.67112 | 104.58968 | 63.81890 | -575.59940  | -285.03260  | -2869.58998 | 2 |
| 32734 | C | 76.71835 | 104.70921 | 62.68871 | 302.54447   | 881.88048   | 426.12846   | 2 |
| 32735 | H | 76.40486 | 104.39868 | 61.66796 | 424.37839   | 2415.17530  | -2939.09658 | 2 |
| 32736 | H | 77.55494 | 105.42452 | 62.58106 | 1159.34383  | -2539.20383 | 261.03256   | 2 |
| 32737 | C | 77.11613 | 103.44564 | 63.57641 | -426.83460  | -189.70790  | -284.58570  | 2 |
| 32738 | H | 77.68881 | 103.75440 | 64.51064 | 1039.51070  | 1388.30078  | 1234.69286  | 2 |
| 32739 | H | 76.20391 | 102.90905 | 63.95770 | 1919.85507  | -293.75634  | 1555.60421  | 2 |
| 32740 | C | 78.13498 | 102.46758 | 62.84872 | 171.21741   | 50.77475    | -543.30707  | 2 |
| 32741 | H | 77.62312 | 101.77560 | 62.09768 | -1529.53774 | -1855.36815 | -1123.34697 | 2 |
| 32742 | H | 79.07909 | 102.94113 | 62.41158 | 4717.06897  | -2704.93813 | 21.52905    | 2 |
| 32743 | N | 78.27212 | 101.81142 | 64.11049 | 298.18470   | 553.47645   | 896.18646   | 2 |
| 32744 | H | 77.57032 | 101.11341 | 64.23703 | -859.25753  | 110.68558   | 3642.49857  | 2 |
| 32745 | C | 79.15489 | 102.15063 | 64.95534 | -357.88198  | 901.31862   | 889.69542   | 2 |
| 32746 | N | 80.06741 | 103.14150 | 64.58634 | -512.50367  | -495.10753  | 19.34060    | 2 |
| 32747 | H | 79.95935 | 103.71128 | 63.69596 | 1997.08118  | 2526.08655  | 2923.47569  | 2 |
| 32748 | H | 80.77394 | 103.54132 | 65.17231 | -994.04408  | 449.97619   | -1969.52393 | 2 |
| 32749 | N | 79.11999 | 101.40611 | 66.13500 | 301.52636   | -210.71778  | -19.19699   | 2 |
| 32750 | H | 78.46103 | 100.60188 | 66.37910 | 3320.14592  | -751.92475  | 1222.02221  | 2 |
| 32751 | H | 79.68750 | 101.64367 | 66.95438 | 164.10125   | -782.11155  | -906.28227  | 2 |
| 32752 | C | 76.09950 | 105.85388 | 65.00835 | -298.72548  | 265.91294   | -531.69628  | 2 |
| 32753 | O | 75.95521 | 105.13422 | 65.98003 | -434.64710  | -96.07774   | 159.54846   | 2 |
| 32754 | N | 76.93562 | 106.81573 | 64.88364 | -243.87339  | 100.61097   | -241.22865  | 2 |
| 32755 | H | 77.19060 | 107.19074 | 63.93462 | 1213.67290  | 2200.92692  | -360.40496  | 2 |
| 32756 | C | 77.59061 | 107.37970 | 66.02849 | 69.89259    | 426.38634   | 153.76746   | 2 |
| 32757 | H | 77.53178 | 106.59702 | 66.74705 | -2669.48639 | 517.52929   | -58.88960   | 2 |
| 32758 | C | 79.02240 | 107.76764 | 65.44469 | 193.60668   | -74.25999   | 738.52014   | 2 |
| 32759 | H | 78.94835 | 108.10465 | 64.42965 | 784.78485   | 4319.67770  | -2020.19232 | 2 |
| 32760 | C | 79.71310 | 108.80897 | 66.41911 | 100.05027   | -128.92068  | -514.93474  | 2 |
| 32761 | H | 80.84298 | 108.65775 | 66.40530 | -3304.48276 | -1357.25270 | 484.63195   | 2 |
| 32762 | H | 79.50024 | 109.82871 | 66.19099 | -1861.47189 | 334.25911   | -2228.51195 | 2 |
| 32763 | H | 79.40649 | 108.62677 | 67.52017 | 3208.74646  | 242.91313   | 1753.49153  | 2 |
| 32764 | C | 79.71434 | 106.37438 | 65.45317 | -397.95732  | -690.17645  | -83.46030   | 2 |
| 32765 | H | 79.19619 | 105.57736 | 64.79178 | -1290.20540 | -813.66840  | 537.58206   | 2 |
| 32766 | H | 80.70854 | 106.55088 | 64.97732 | 530.60170   | -505.91681  | 1440.10567  | 2 |
| 32767 | H | 80.01992 | 106.05525 | 66.46537 | -1353.78699 | -638.27320  | -638.07928  | 2 |
| 32768 | C | 76.64901 | 108.49764 | 66.69080 | -800.09975  | 621.46328   | -355.73009  | 2 |
| 32769 | O | 76.13449 | 109.39548 | 66.04364 | 238.83799   | 371.67426   | -14.66455   | 2 |
| 32770 | N | 76.32054 | 108.17953 | 67.98375 | -273.74490  | -102.86358  | -315.07790  | 2 |
| 32771 | H | 77.03990 | 107.47625 | 68.38302 | 773.68378   | -71.07982   | -173.92481  | 2 |
| 32772 | C | 75.78271 | 109.30754 | 68.73386 | 551.68812   | 452.95268   | -215.05779  | 2 |
| 32773 | H | 75.16064 | 109.86053 | 68.02716 | -3049.79366 | -4211.34487 | 267.95301   | 2 |
| 32774 | C | 74.82339 | 108.64971 | 69.86353 | -157.06009  | 180.66977   | 290.00359   | 2 |
| 32775 | H | 75.45621 | 108.00969 | 70.59655 | 1618.80402  | -193.92917  | -1557.70278 | 2 |
| 32776 | H | 74.33943 | 109.43876 | 70.52176 | 648.80358   | 154.81119   | 1463.66343  | 2 |
| 32777 | C | 73.62176 | 107.90724 | 69.36977 | -616.27396  | 559.67943   | 1093.28200  | 2 |
| 32778 | H | 74.10765 | 106.92689 | 68.97334 | 1174.79681  | -2469.85111 | -738.41432  | 2 |
| 32779 | C | 72.46942 | 107.56082 | 70.32885 | 673.14909   | -209.04313  | -79.14929   | 2 |
| 32780 | H | 72.64787 | 106.60185 | 70.91711 | -2144.26675 | -1469.64673 | 253.17676   | 2 |
| 32781 | H | 72.17408 | 108.35553 | 71.07835 | 1906.47272  | 574.74690   | -1346.21634 | 2 |
| 32782 | H | 71.56343 | 107.25366 | 69.79214 | -71.37993   | 539.90747   | 2621.78151  | 2 |
| 32783 | C | 73.07118 | 108.66467 | 68.16297 | -962.64665  | -299.93624  | -766.39534  | 2 |
| 32784 | H | 73.73295 | 108.51165 | 67.25032 | -370.60976  | -984.44500  | -1946.91248 | 2 |
| 32785 | H | 72.12260 | 108.24181 | 67.75175 | 1418.00086  | -2267.32226 | -366.72047  | 2 |
| 32786 | H | 72.99787 | 109.76613 | 68.30534 | 152.40516   | -1886.31741 | -4963.28247 | 2 |
| 32787 | C | 76.98729 | 109.98392 | 69.48658 | 188.11000   | 178.55317   | 263.82267   | 2 |

|       |   |          |           |          |            |            |            |   |
|-------|---|----------|-----------|----------|------------|------------|------------|---|
| 32788 | O | 77.27079 | 110.07328 | 70.65321 | 564.15732  | -722.51131 | 122.82518  | 2 |
| 32789 | O | 77.90566 | 110.37859 | 68.49286 | 192.88755  | -41.69767  | 406.59763  | 2 |
| 32790 | H | 77.34710 | 110.11440 | 67.69072 | -904.69670 | -572.46502 | -176.23615 | 2 |
